# Supplementary material for: Genome-wide classification, evolutionary analysis and gene expression patterns of the kinome in Gossypium
Source: PubMed Central journal article supplement (PMC5955557; doi:10.1371/journal.pone.0197392), 2018-05-16

# G.ra AGC\_MAST domain diagram (all)

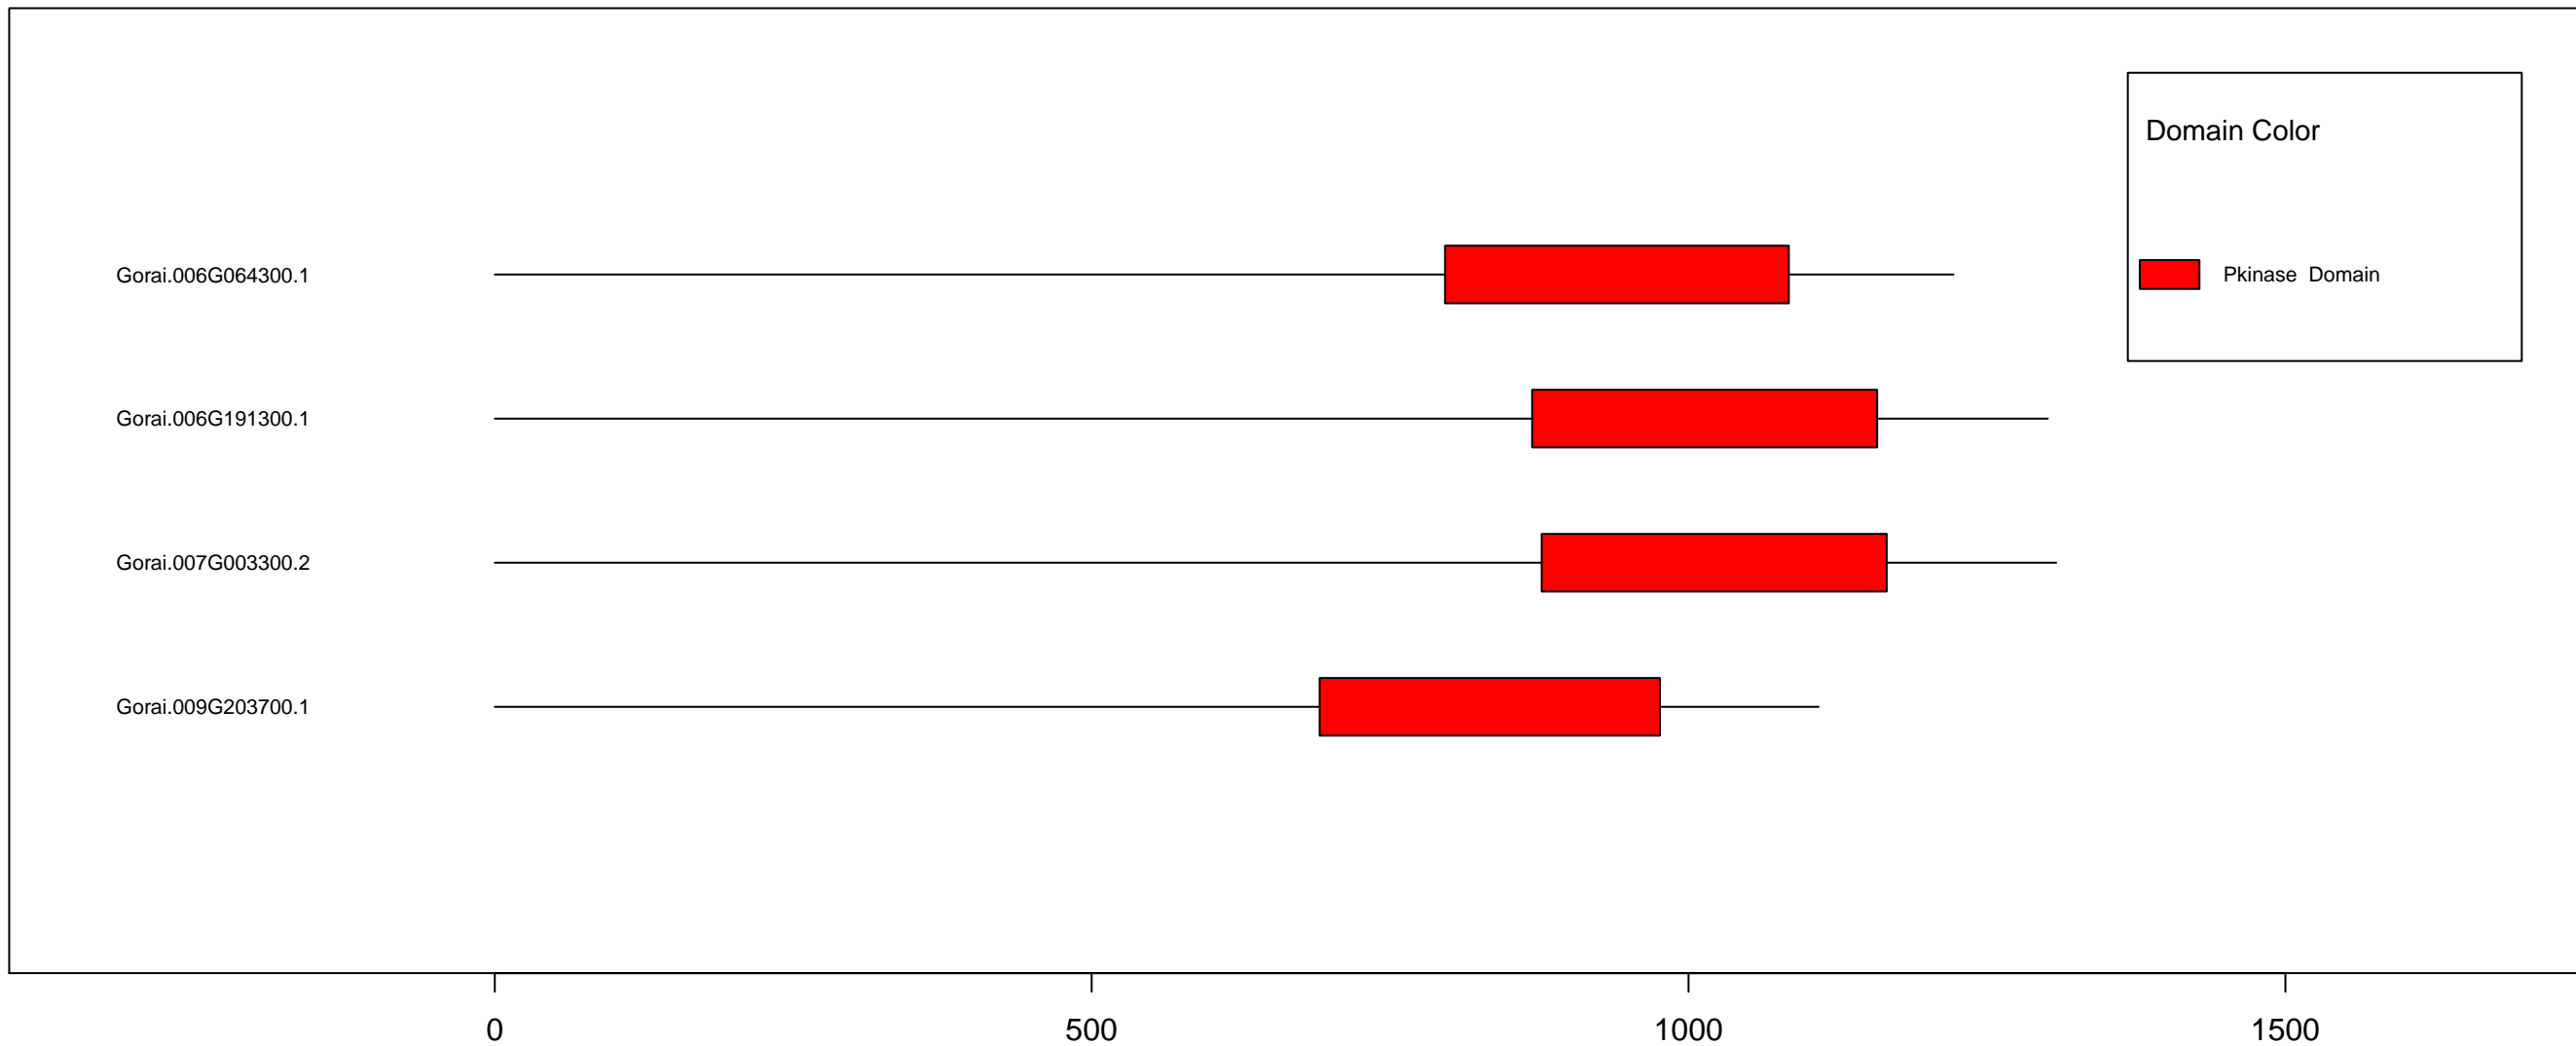

# G.ra AGC\_NDR domain diagram (all)

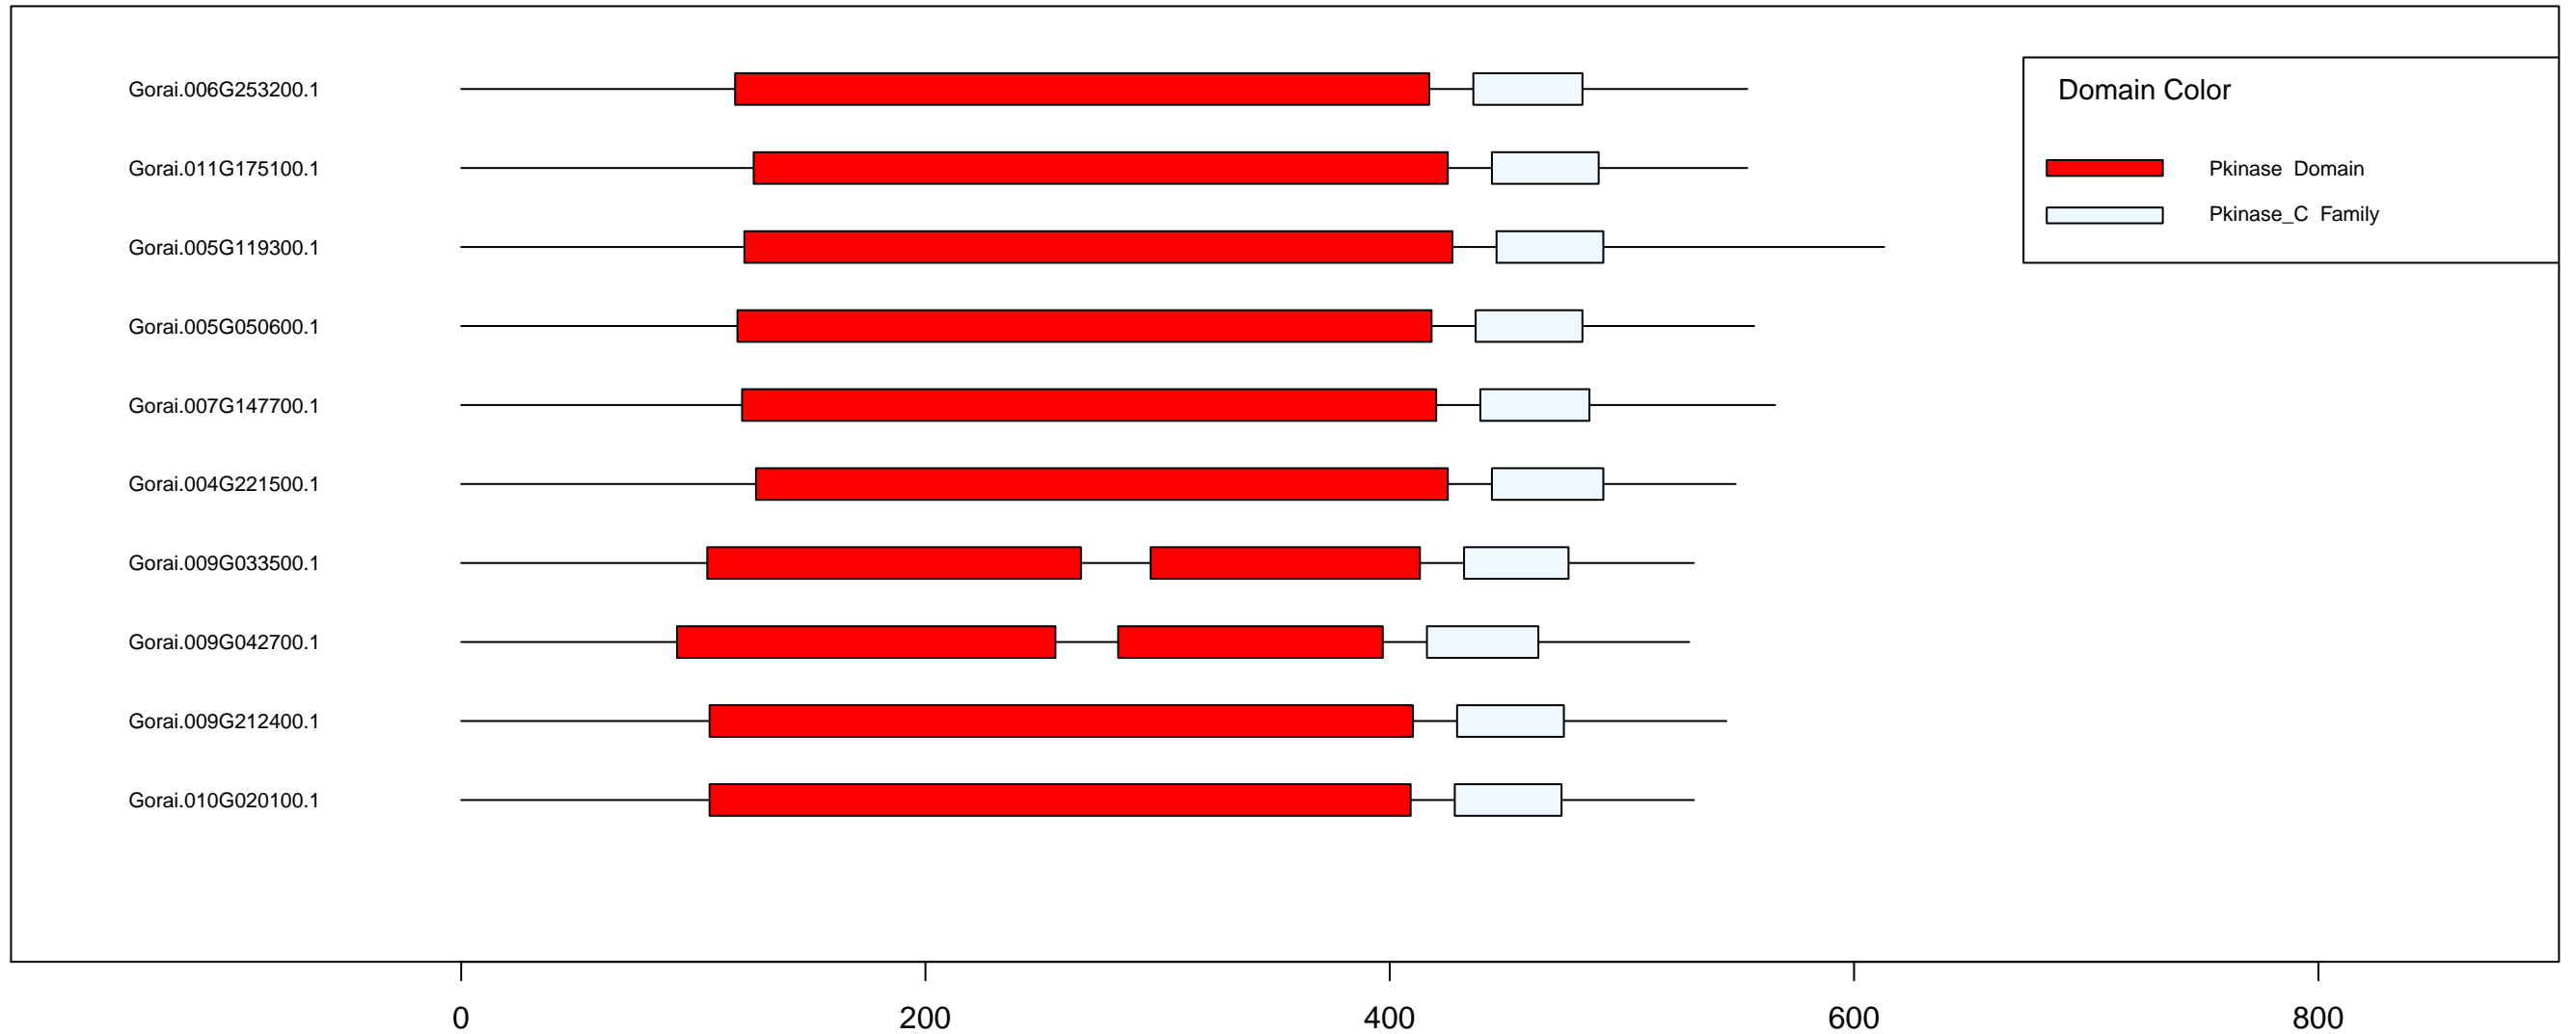

# G.ra AGC\_PDK1 domain diagram (all)

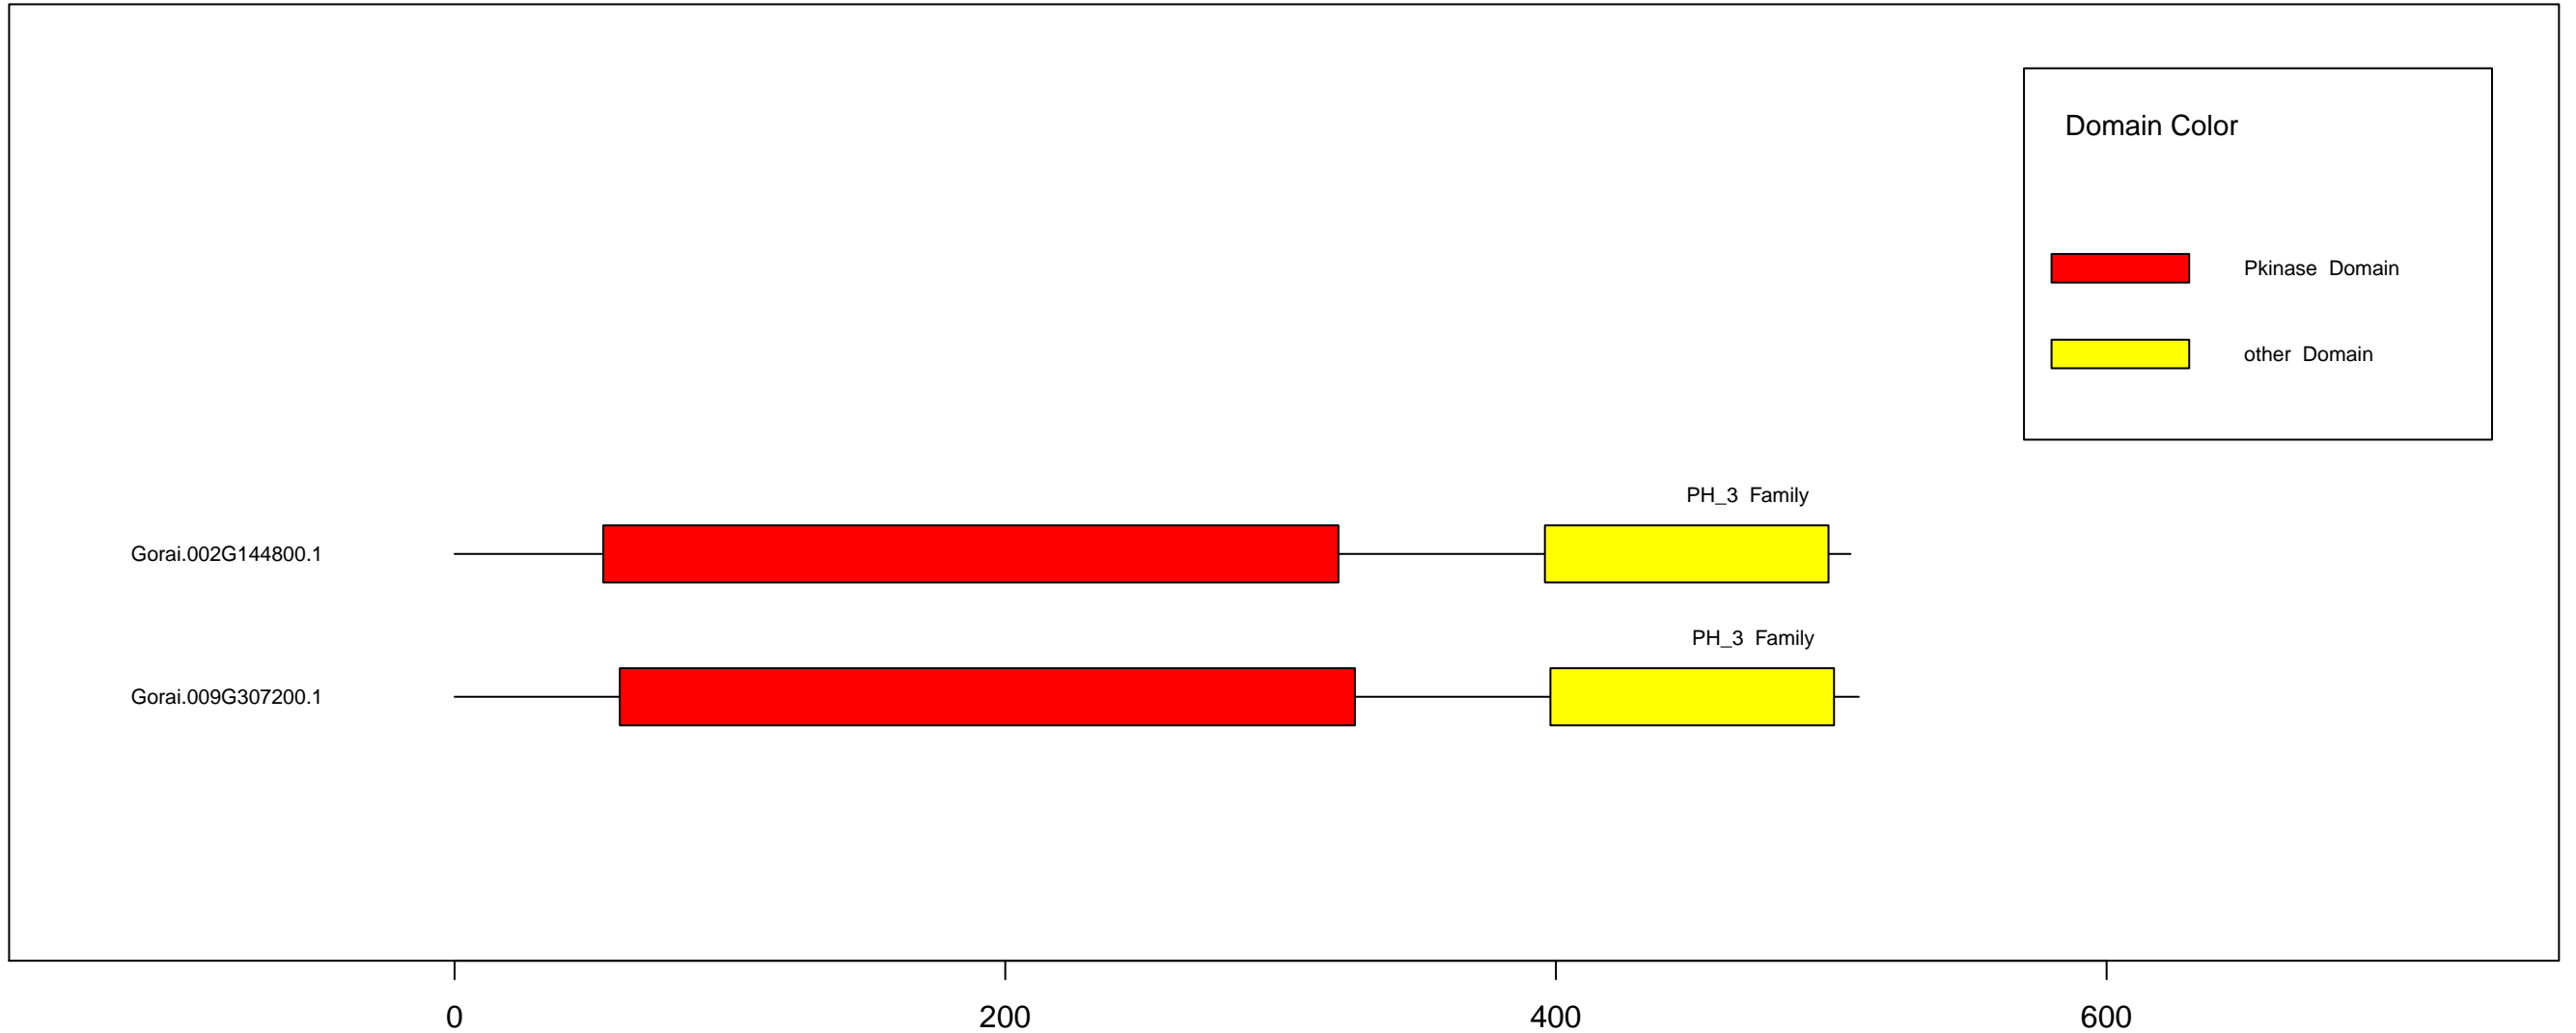

# G.ra AGC\_PKA-PKG domain diagram (all)

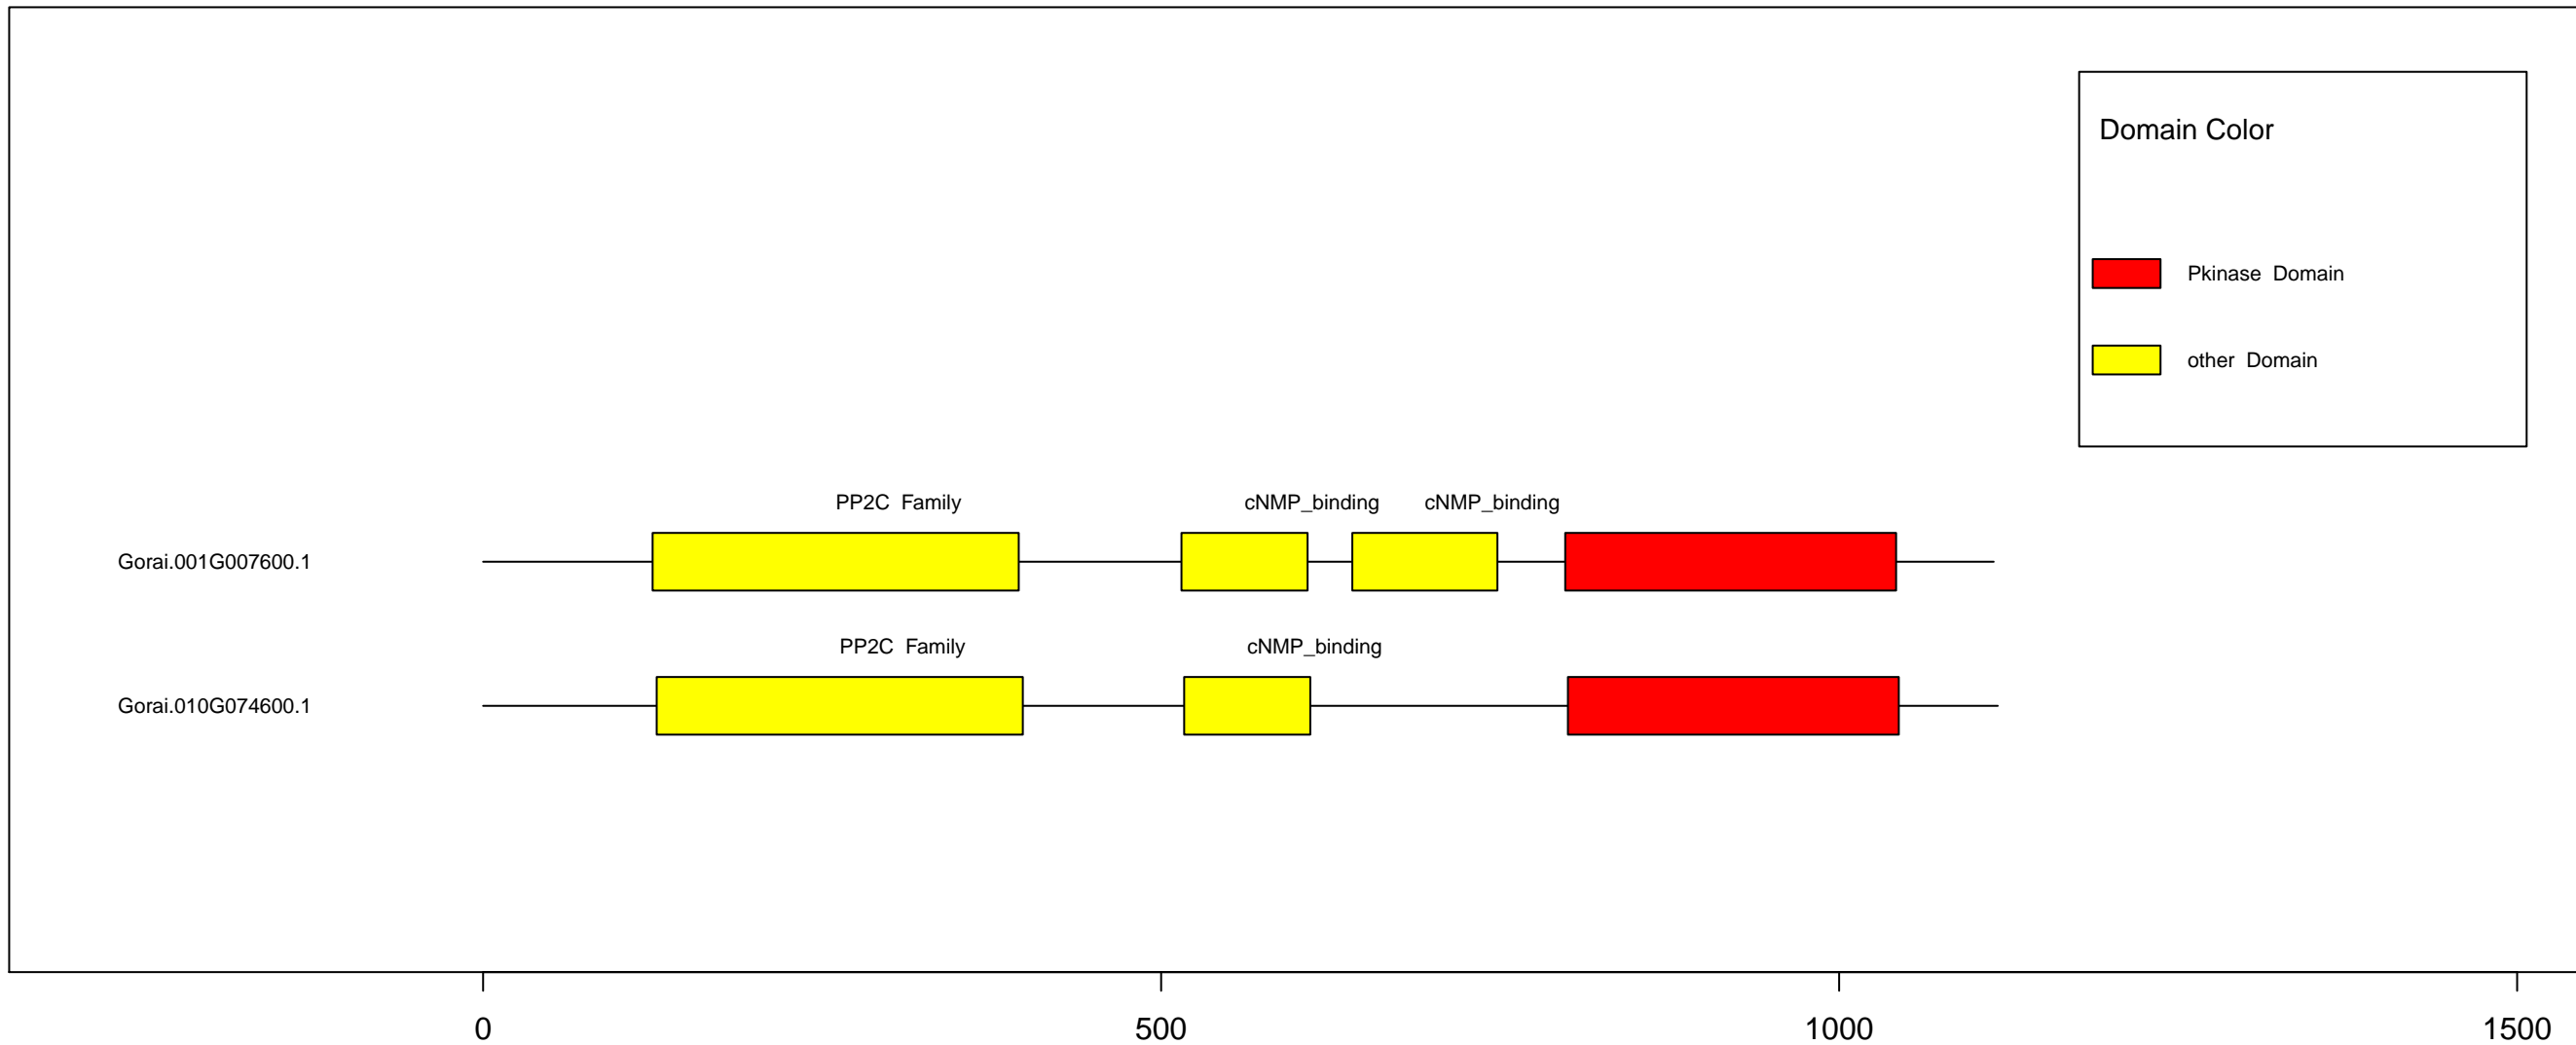

### G.ra AGC\_RSK-2 domain diagram (part 1)

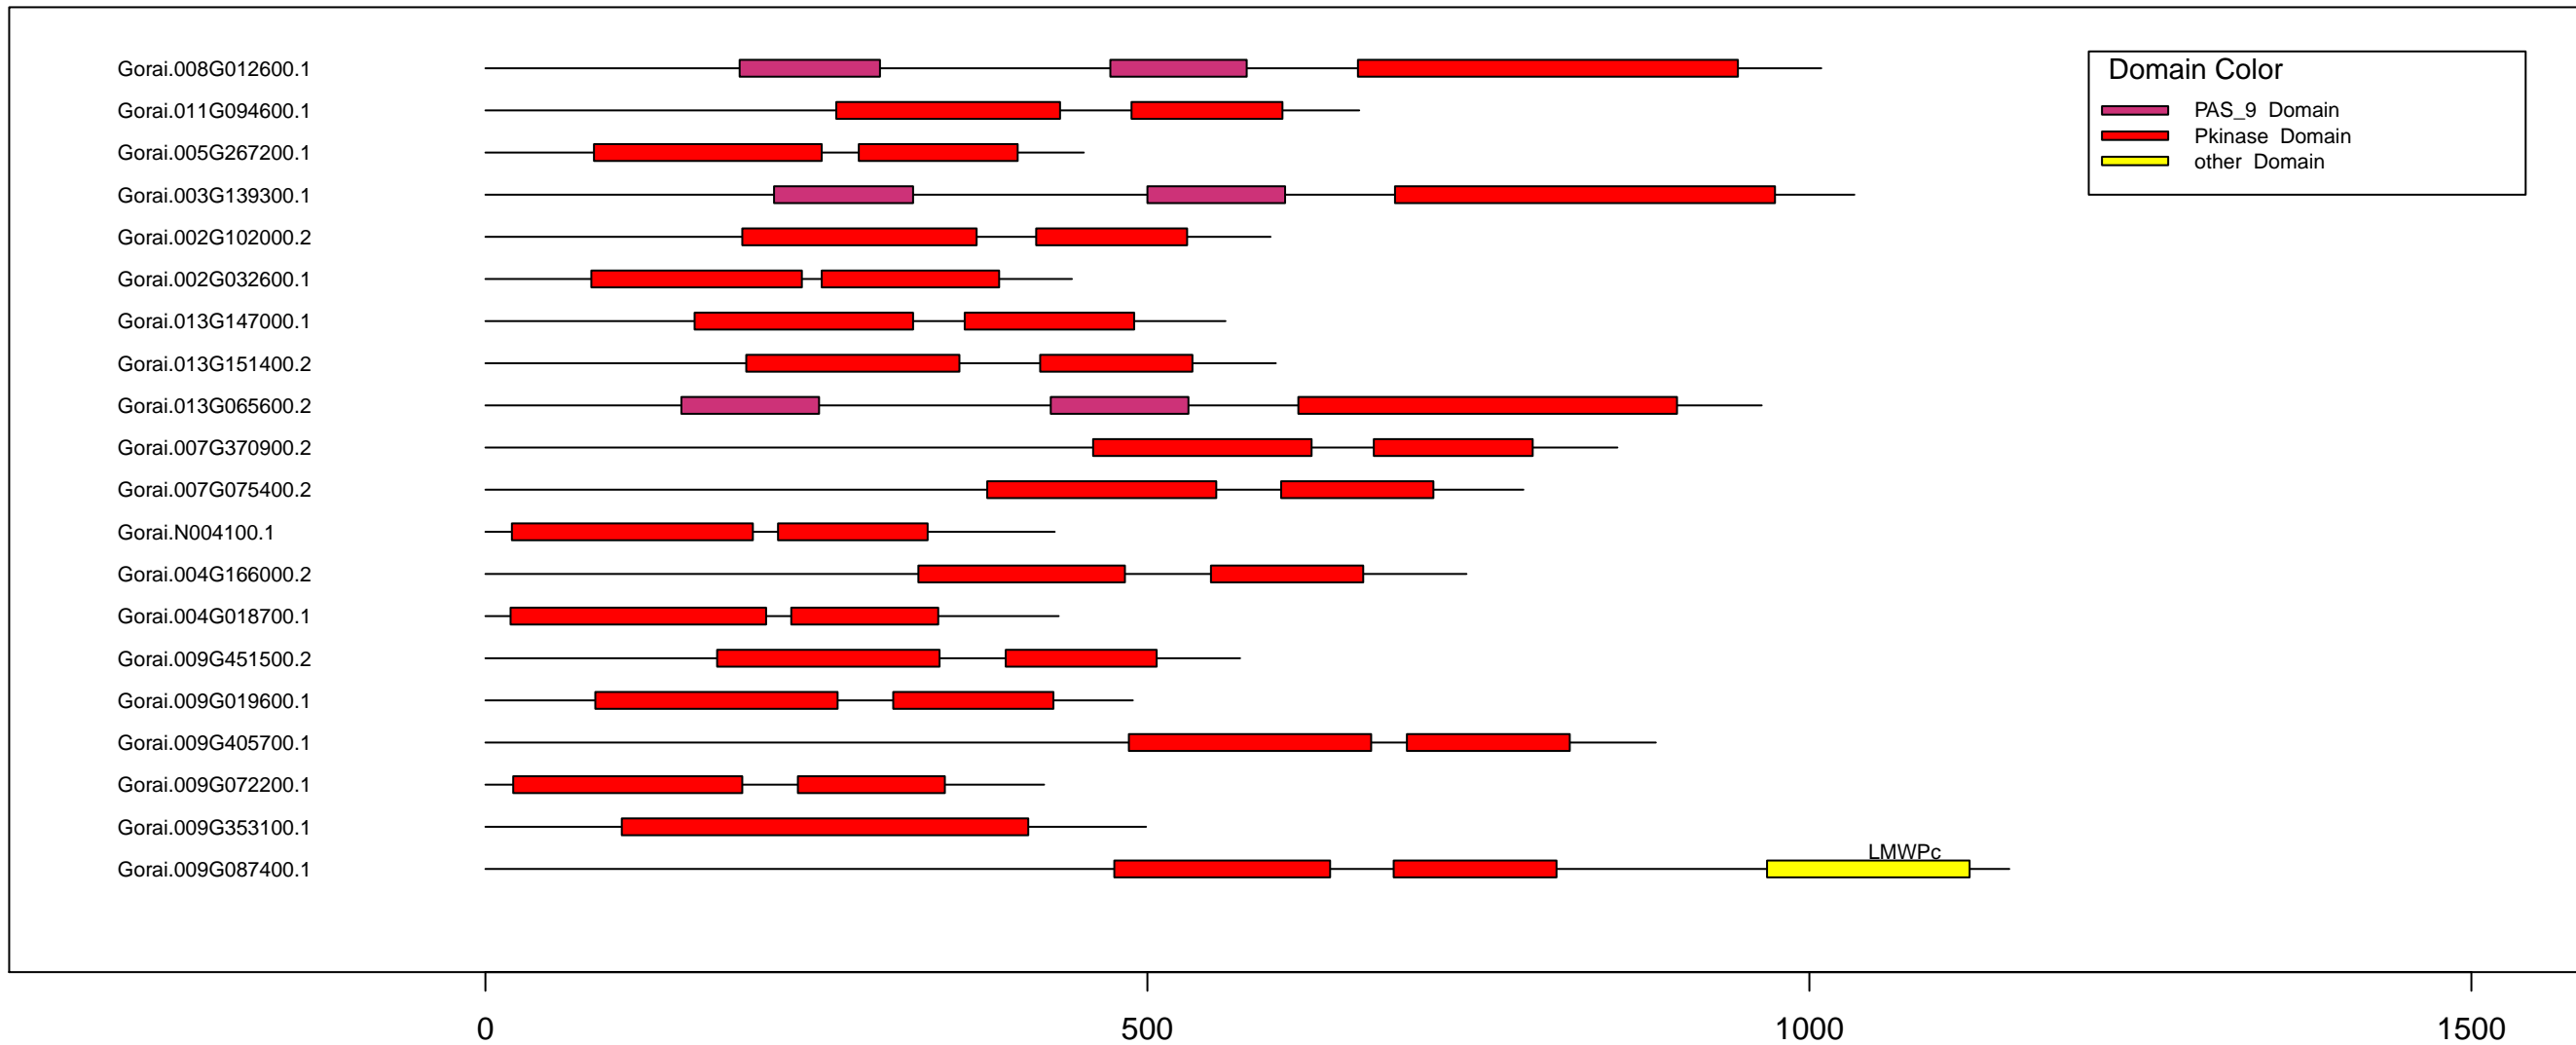

### G.ra AGC\_RSK-2 domain diagram (part 2)

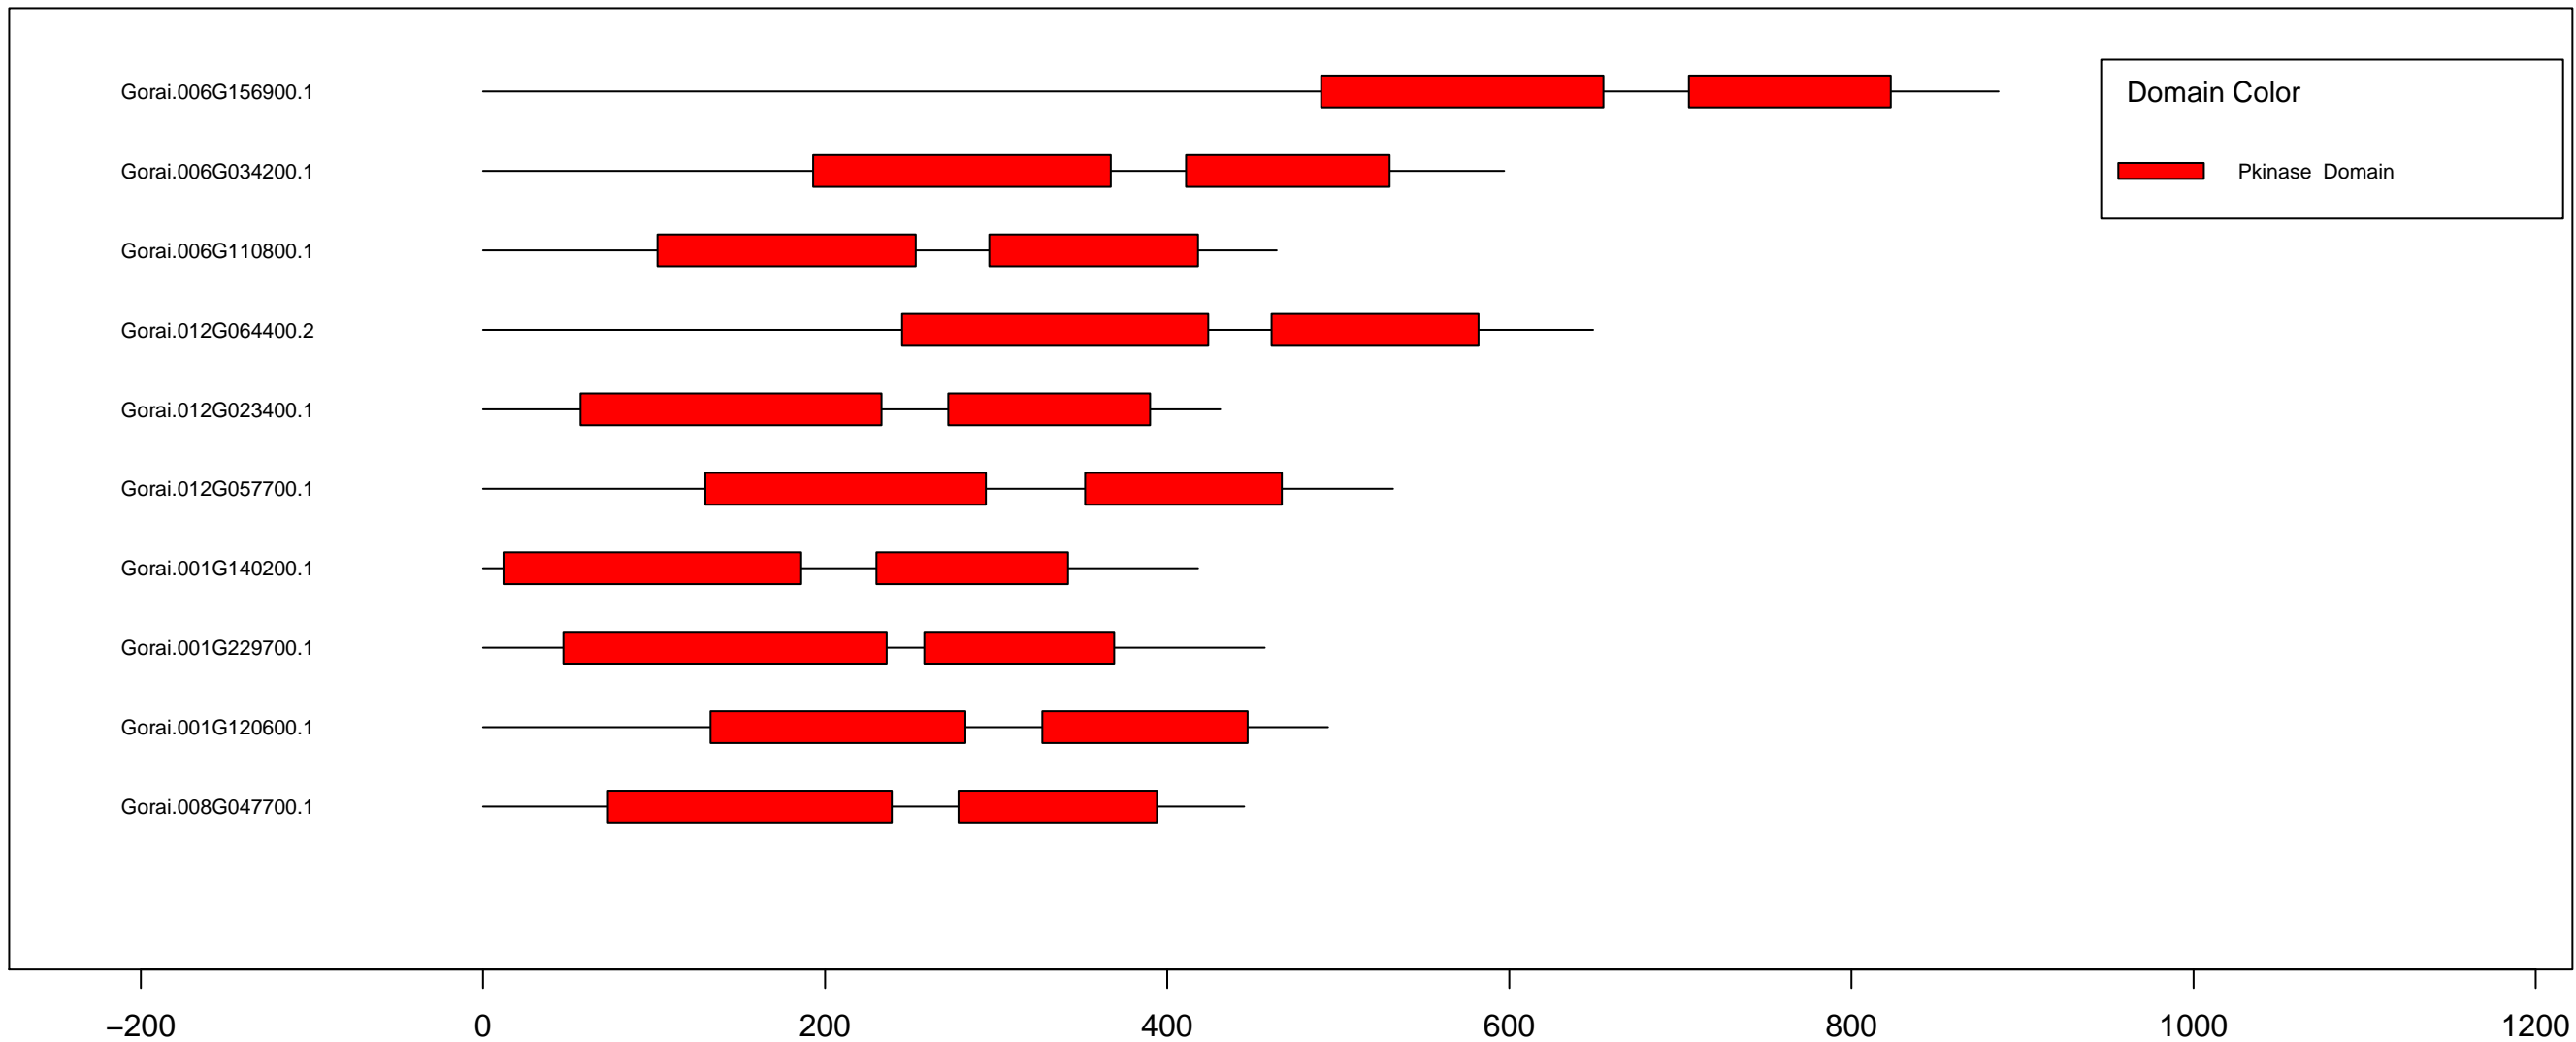

# G.ra AGC-PI domain diagram (all)

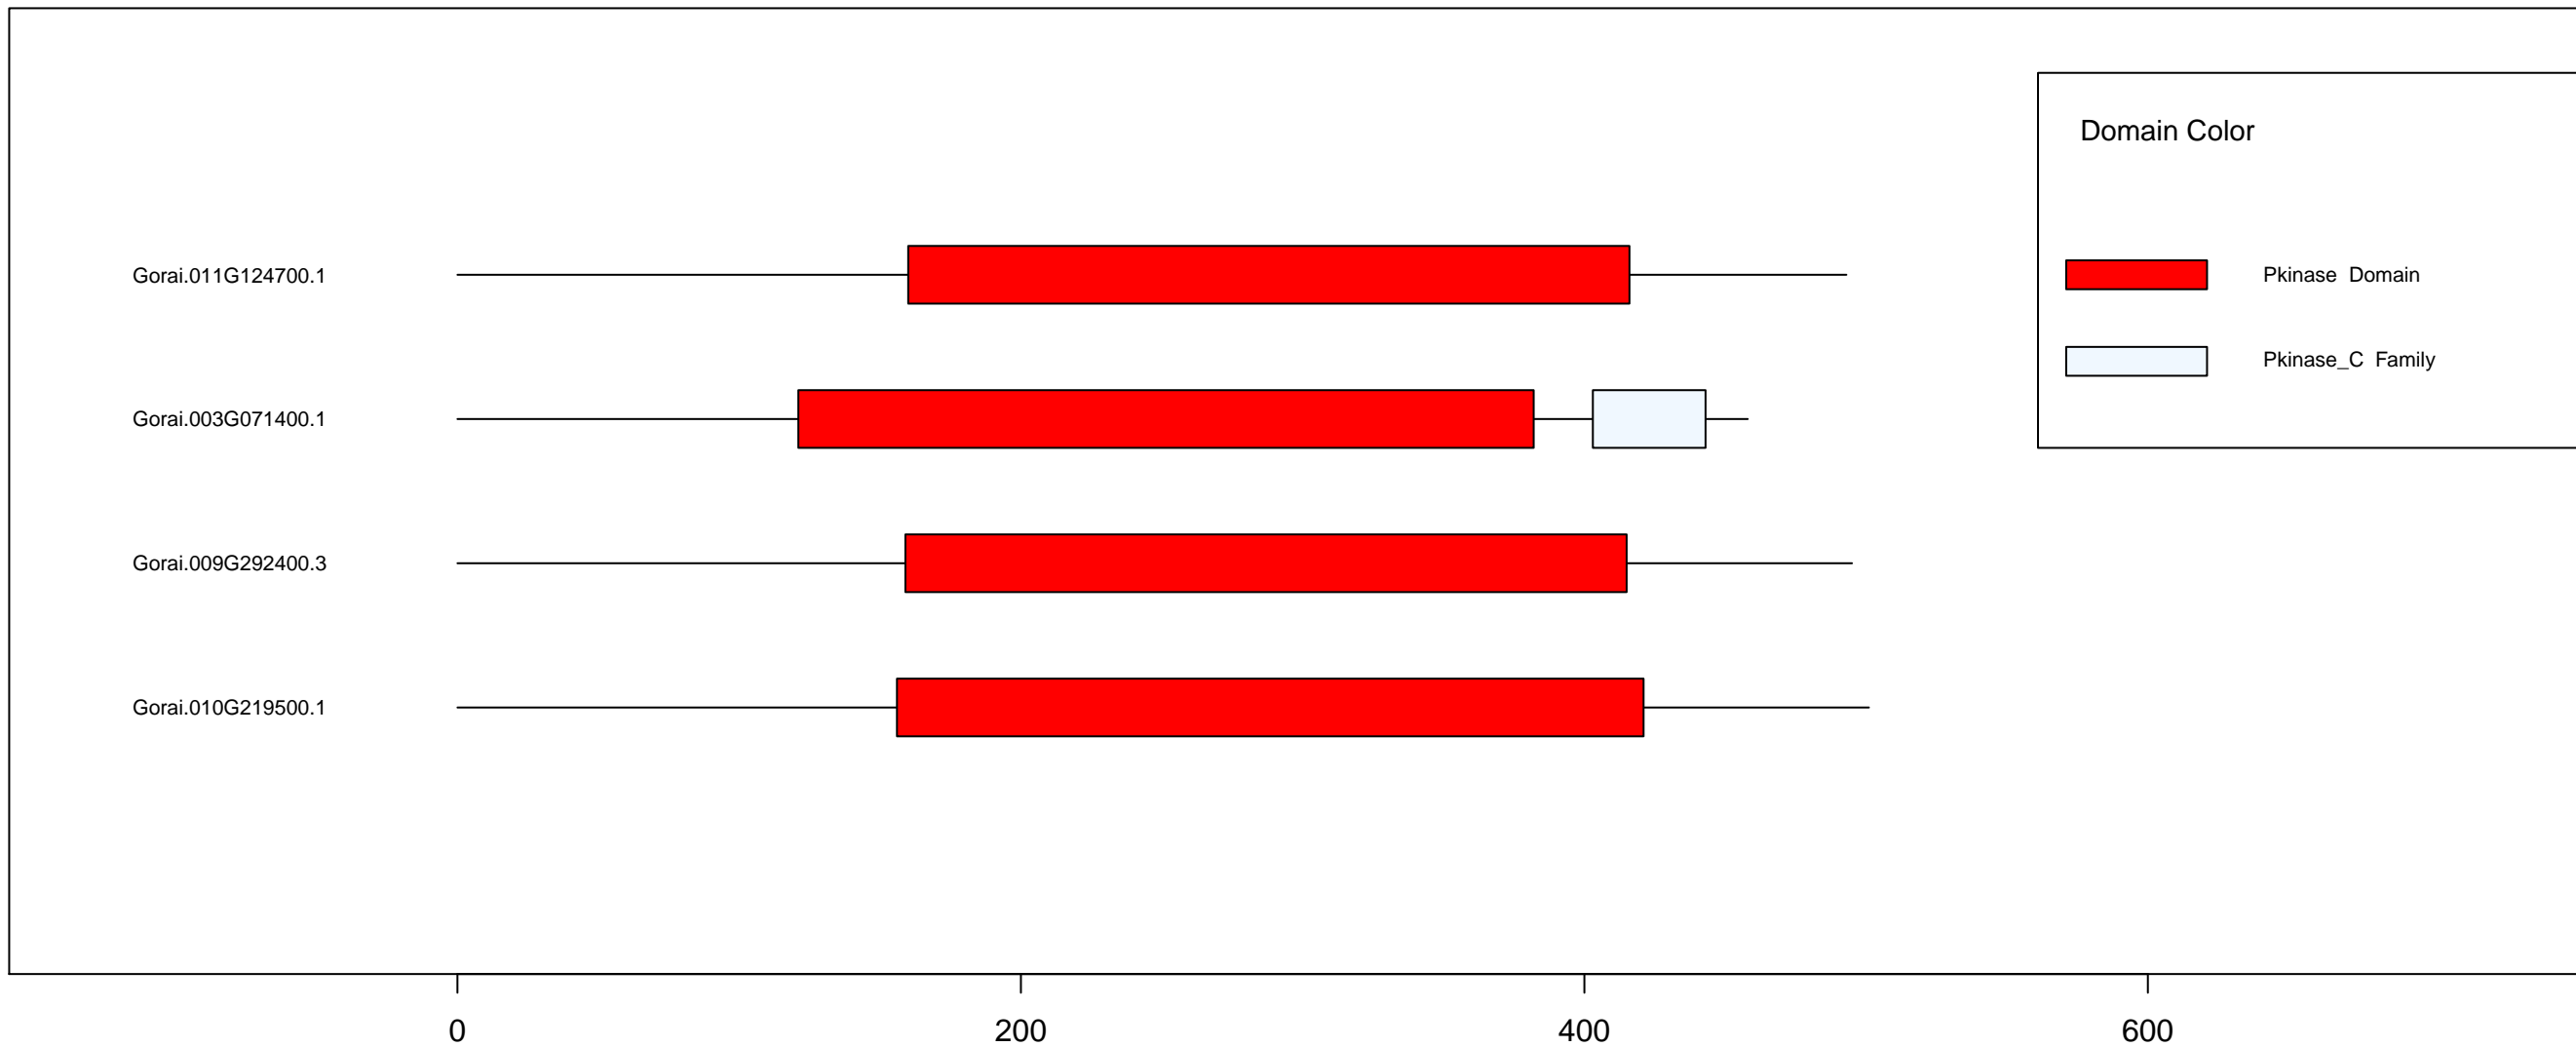

# G.ra Aur domain diagram (all)

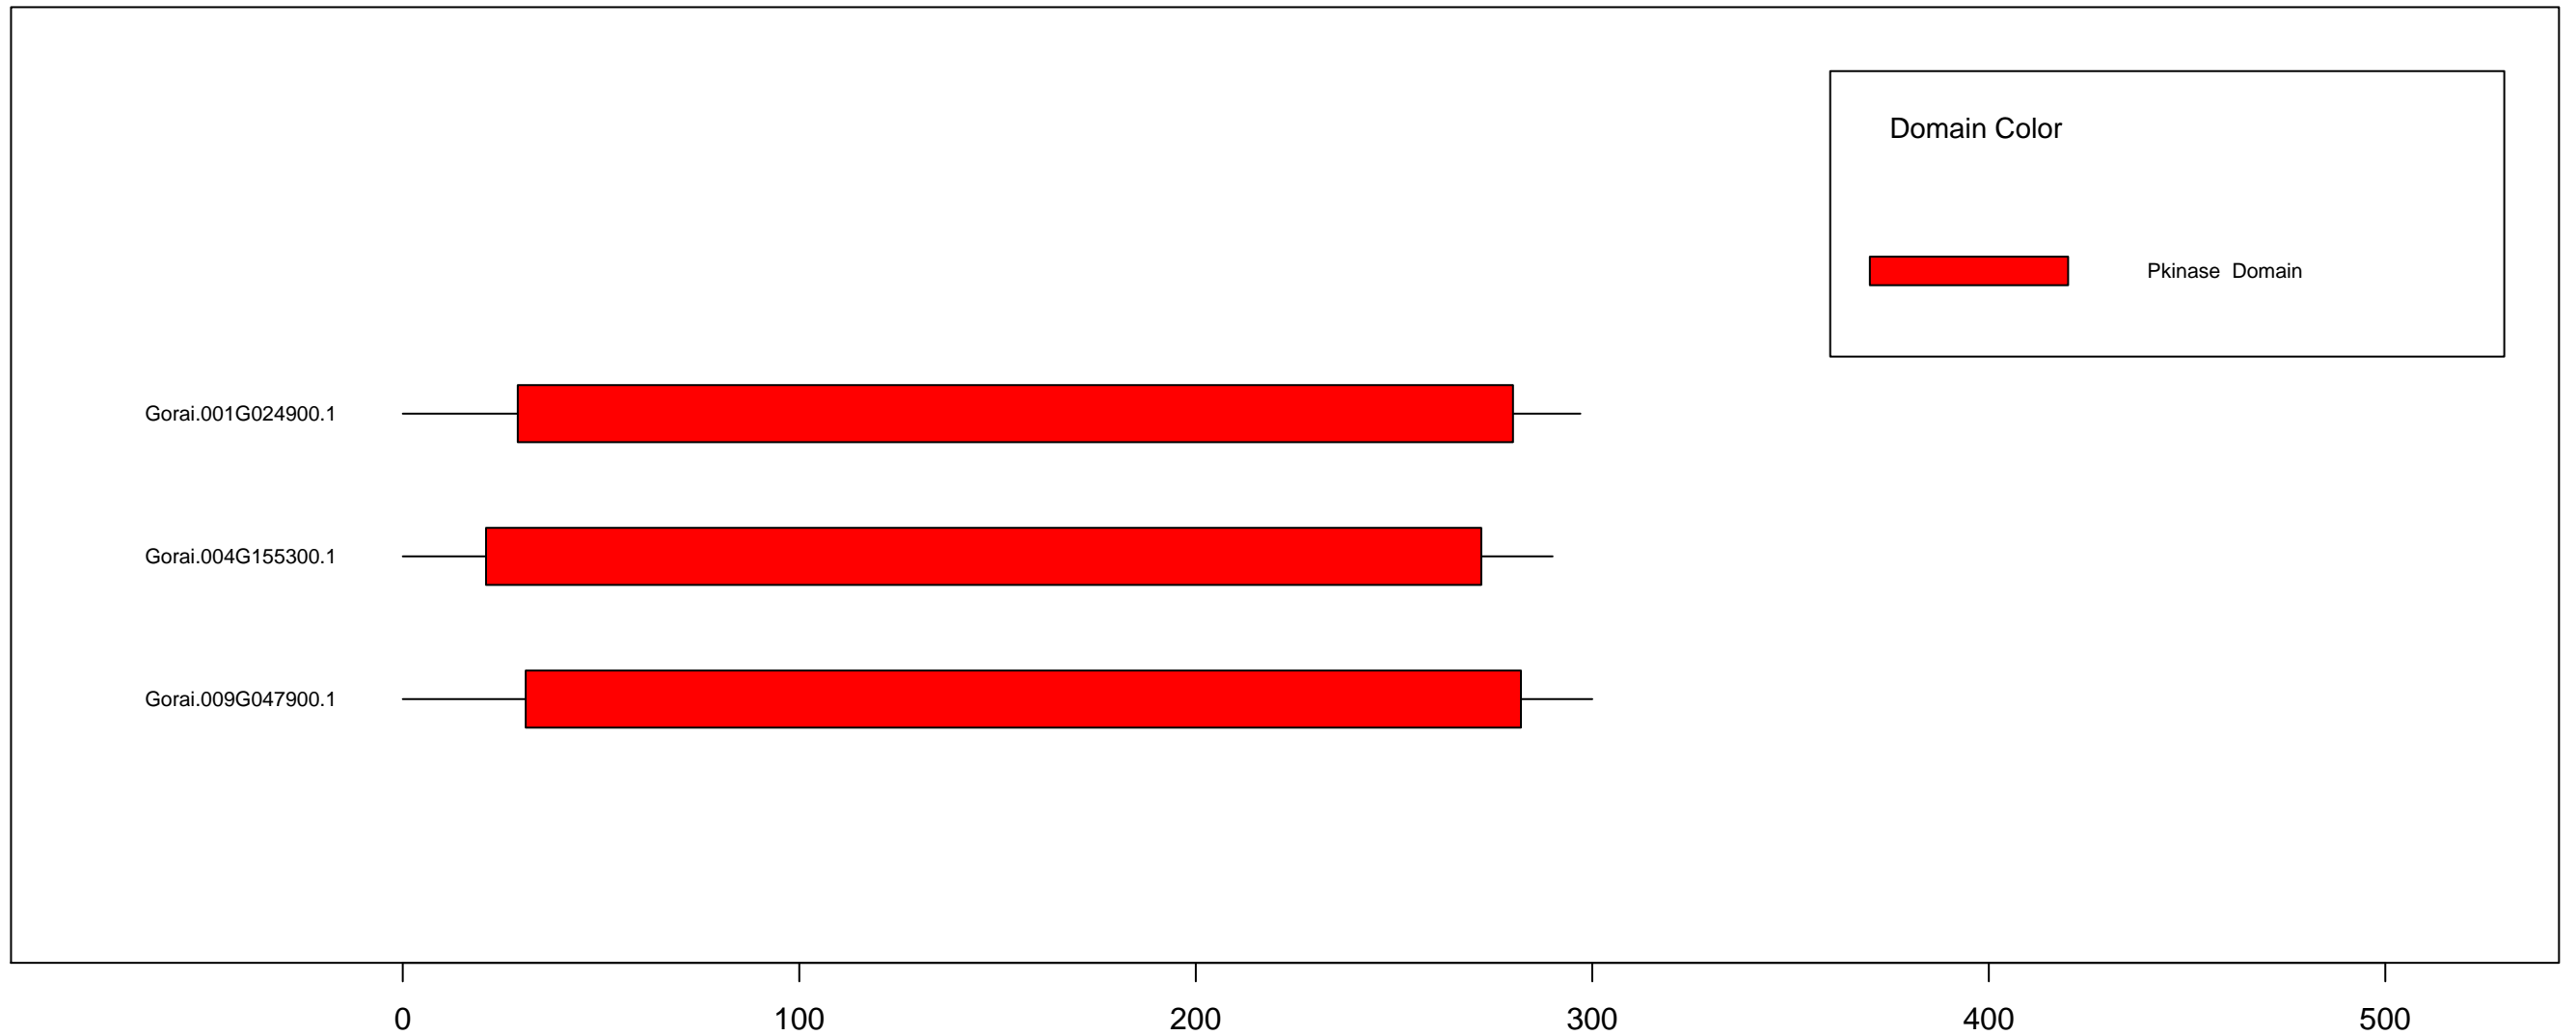



# G.ra BUB domain diagram (all)

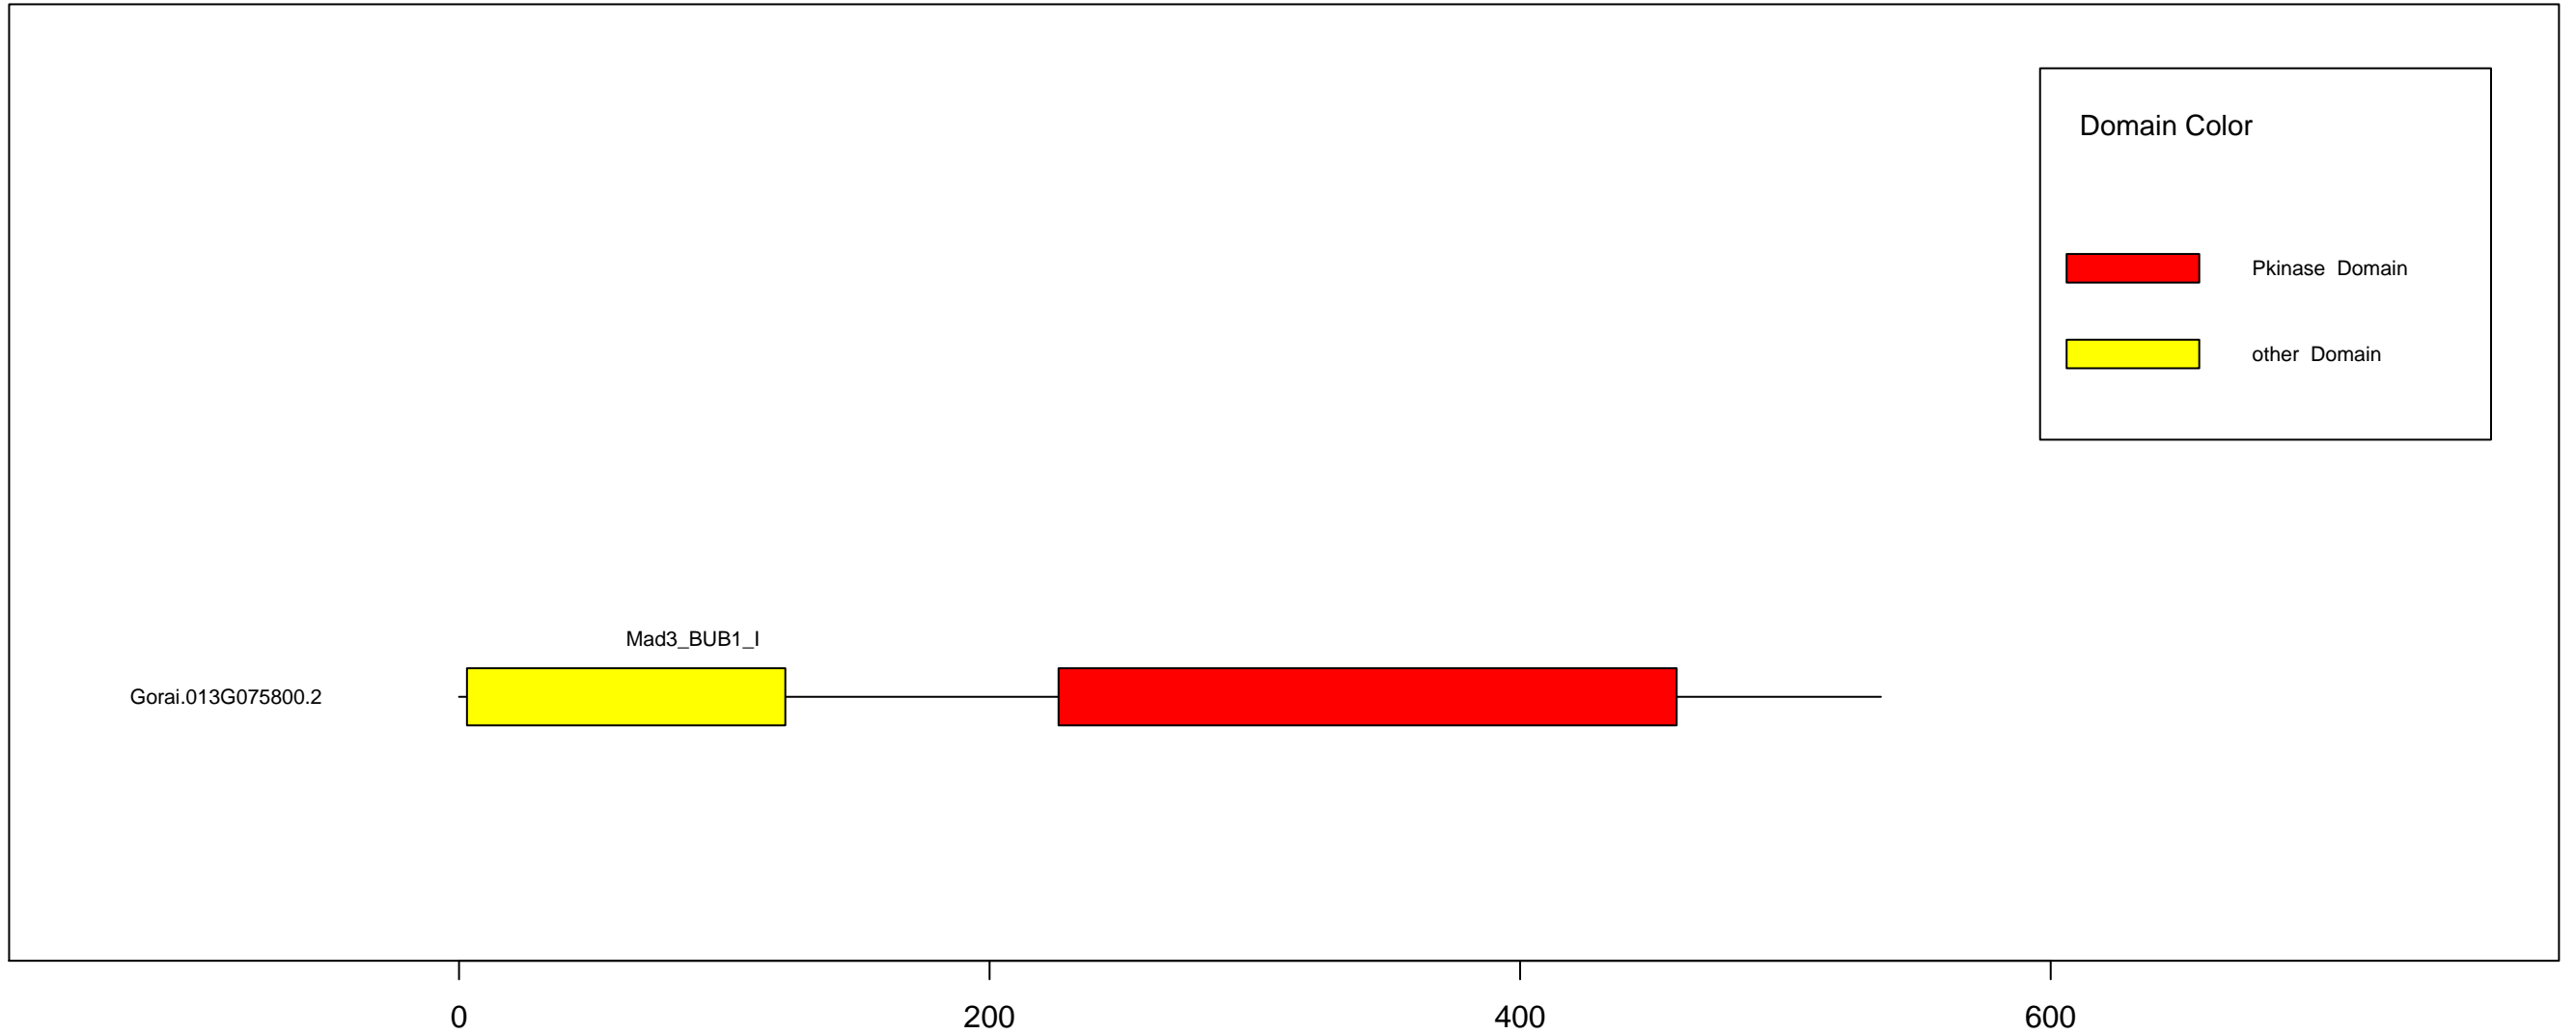

# G.ra CAMK\_AMPK domain diagram (all)

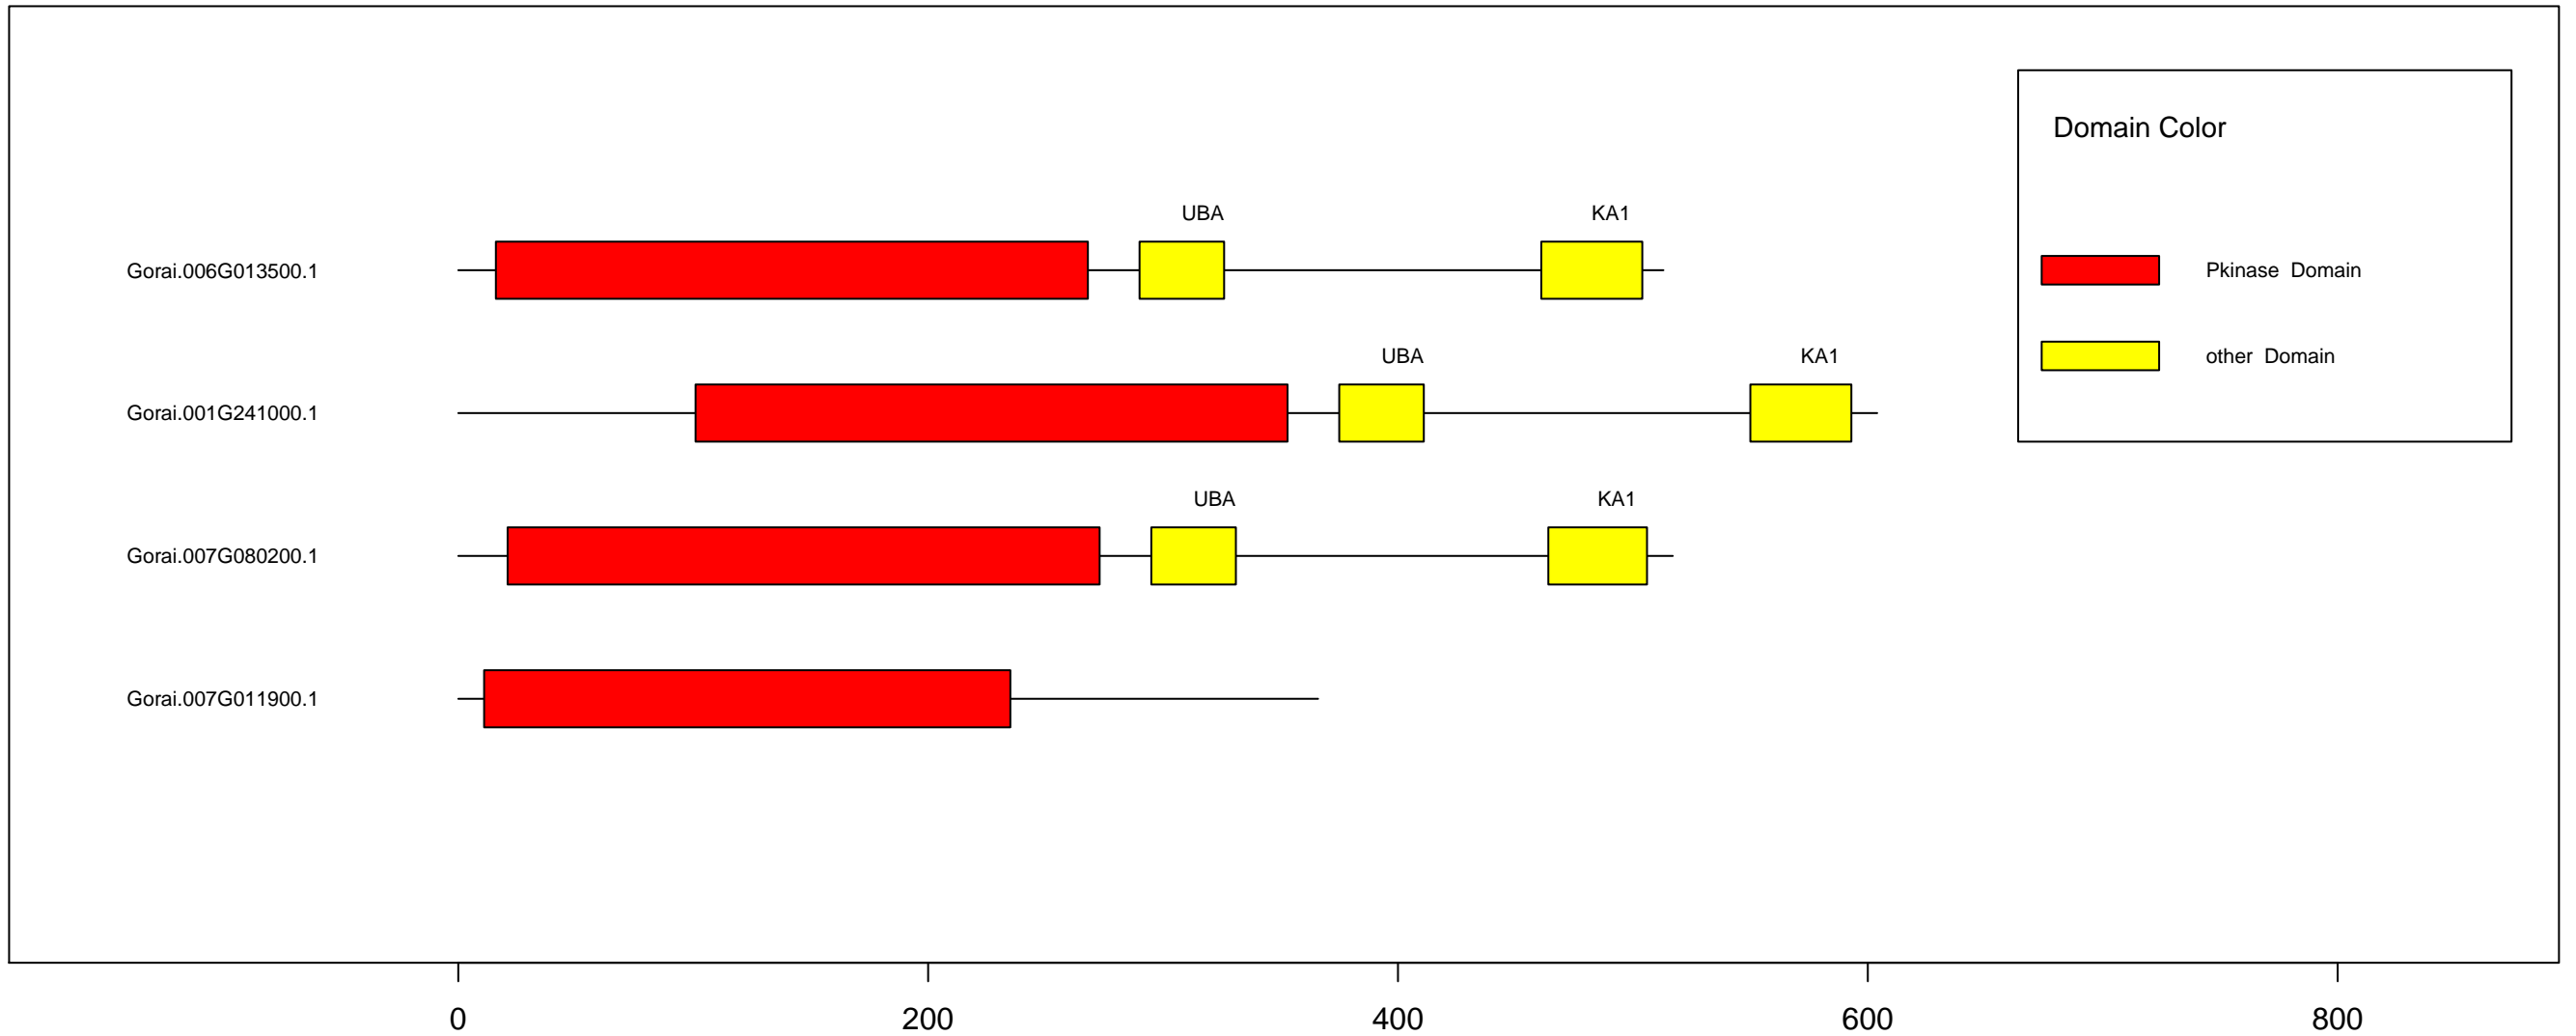

# G.ra CAMK\_CAMK1-DCAMKL domain diagram (all)

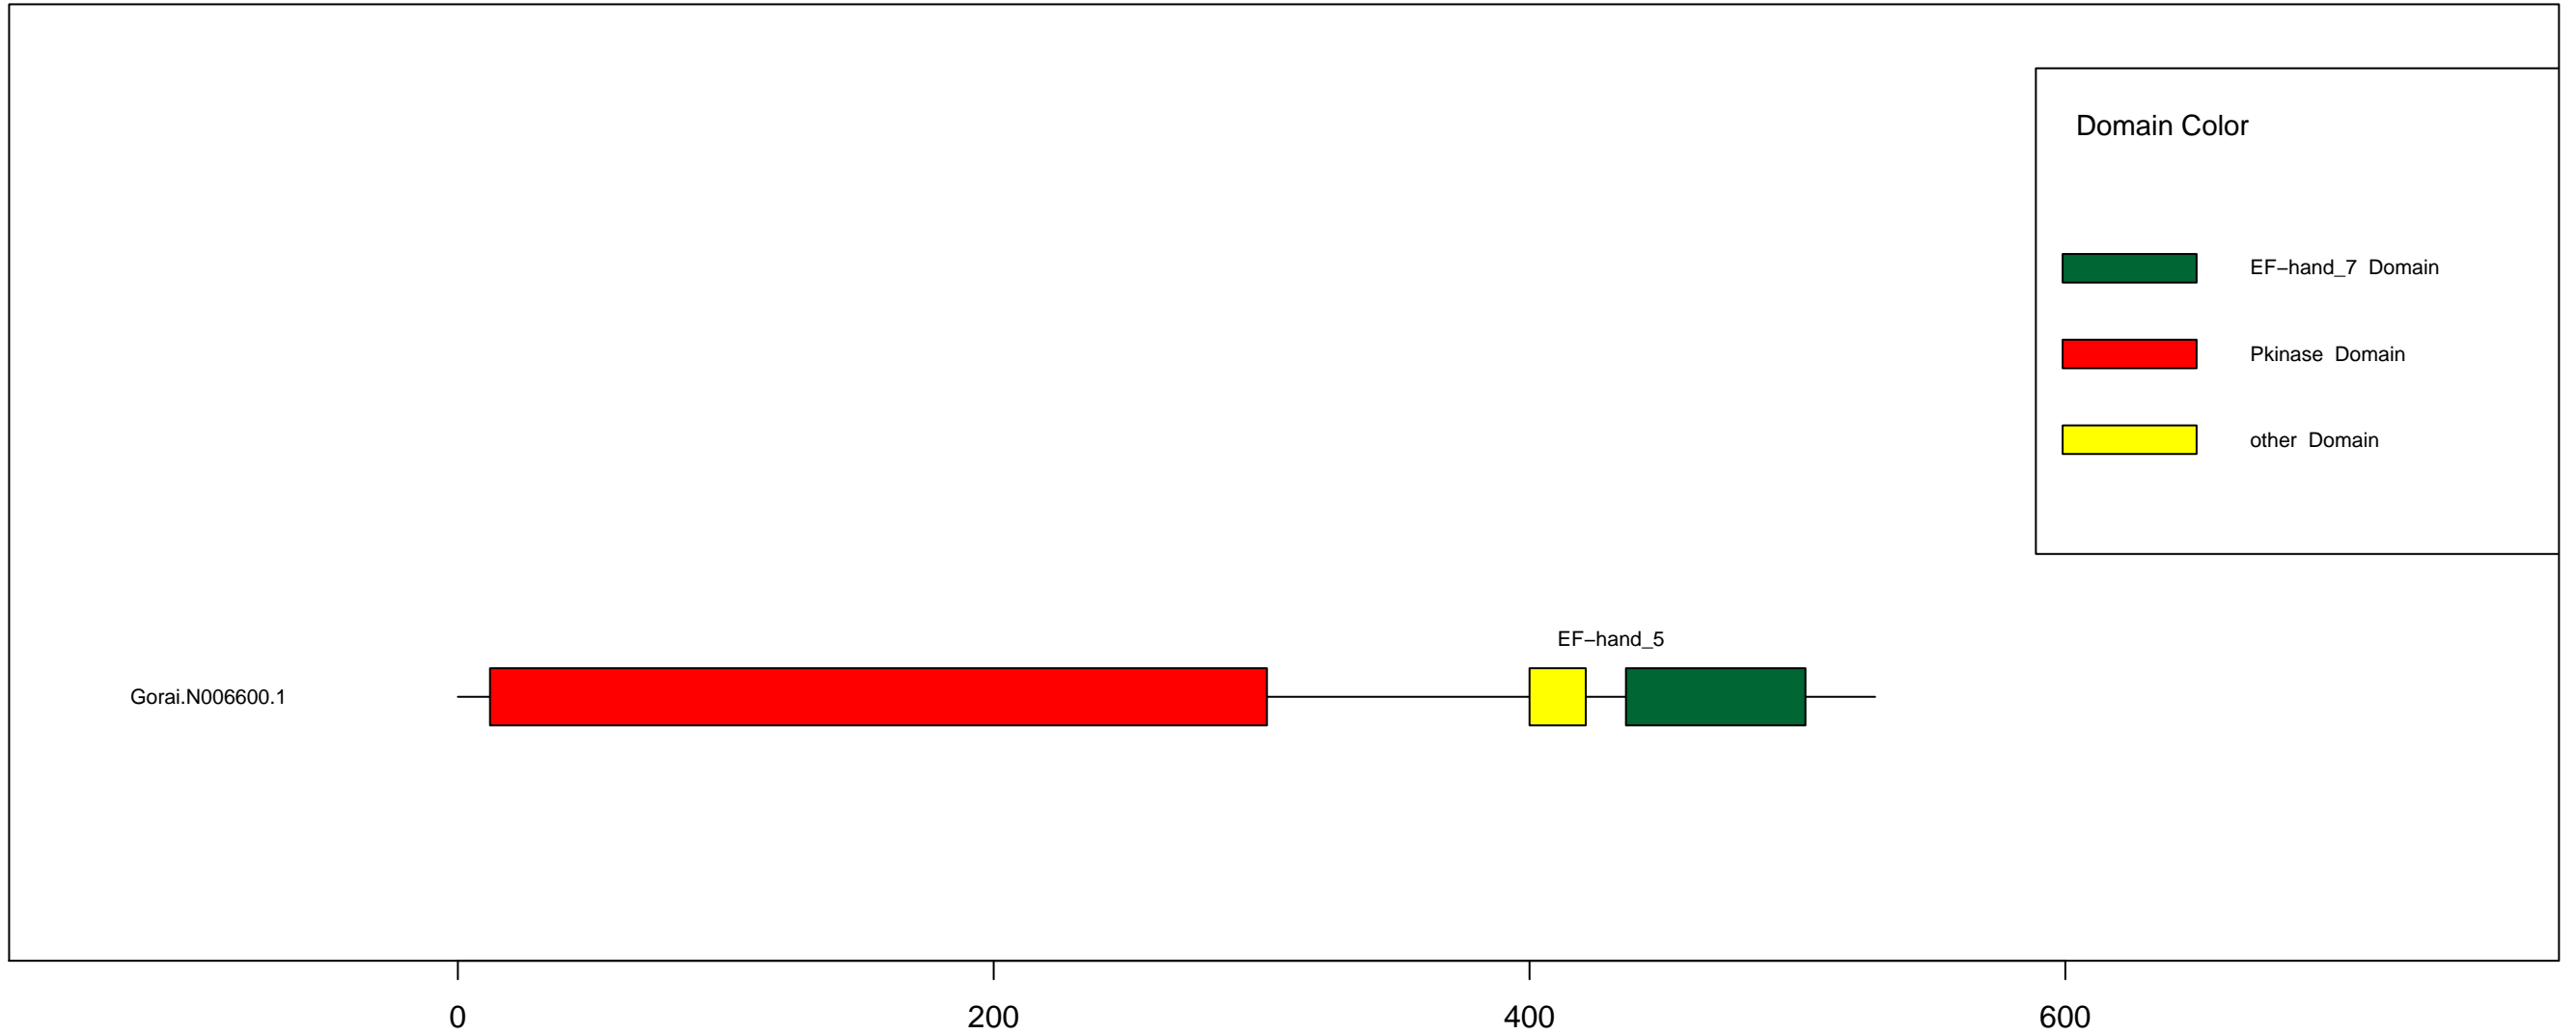

# G.ra CAMK\_CAMKL-CHK1 domain diagram (part 1)

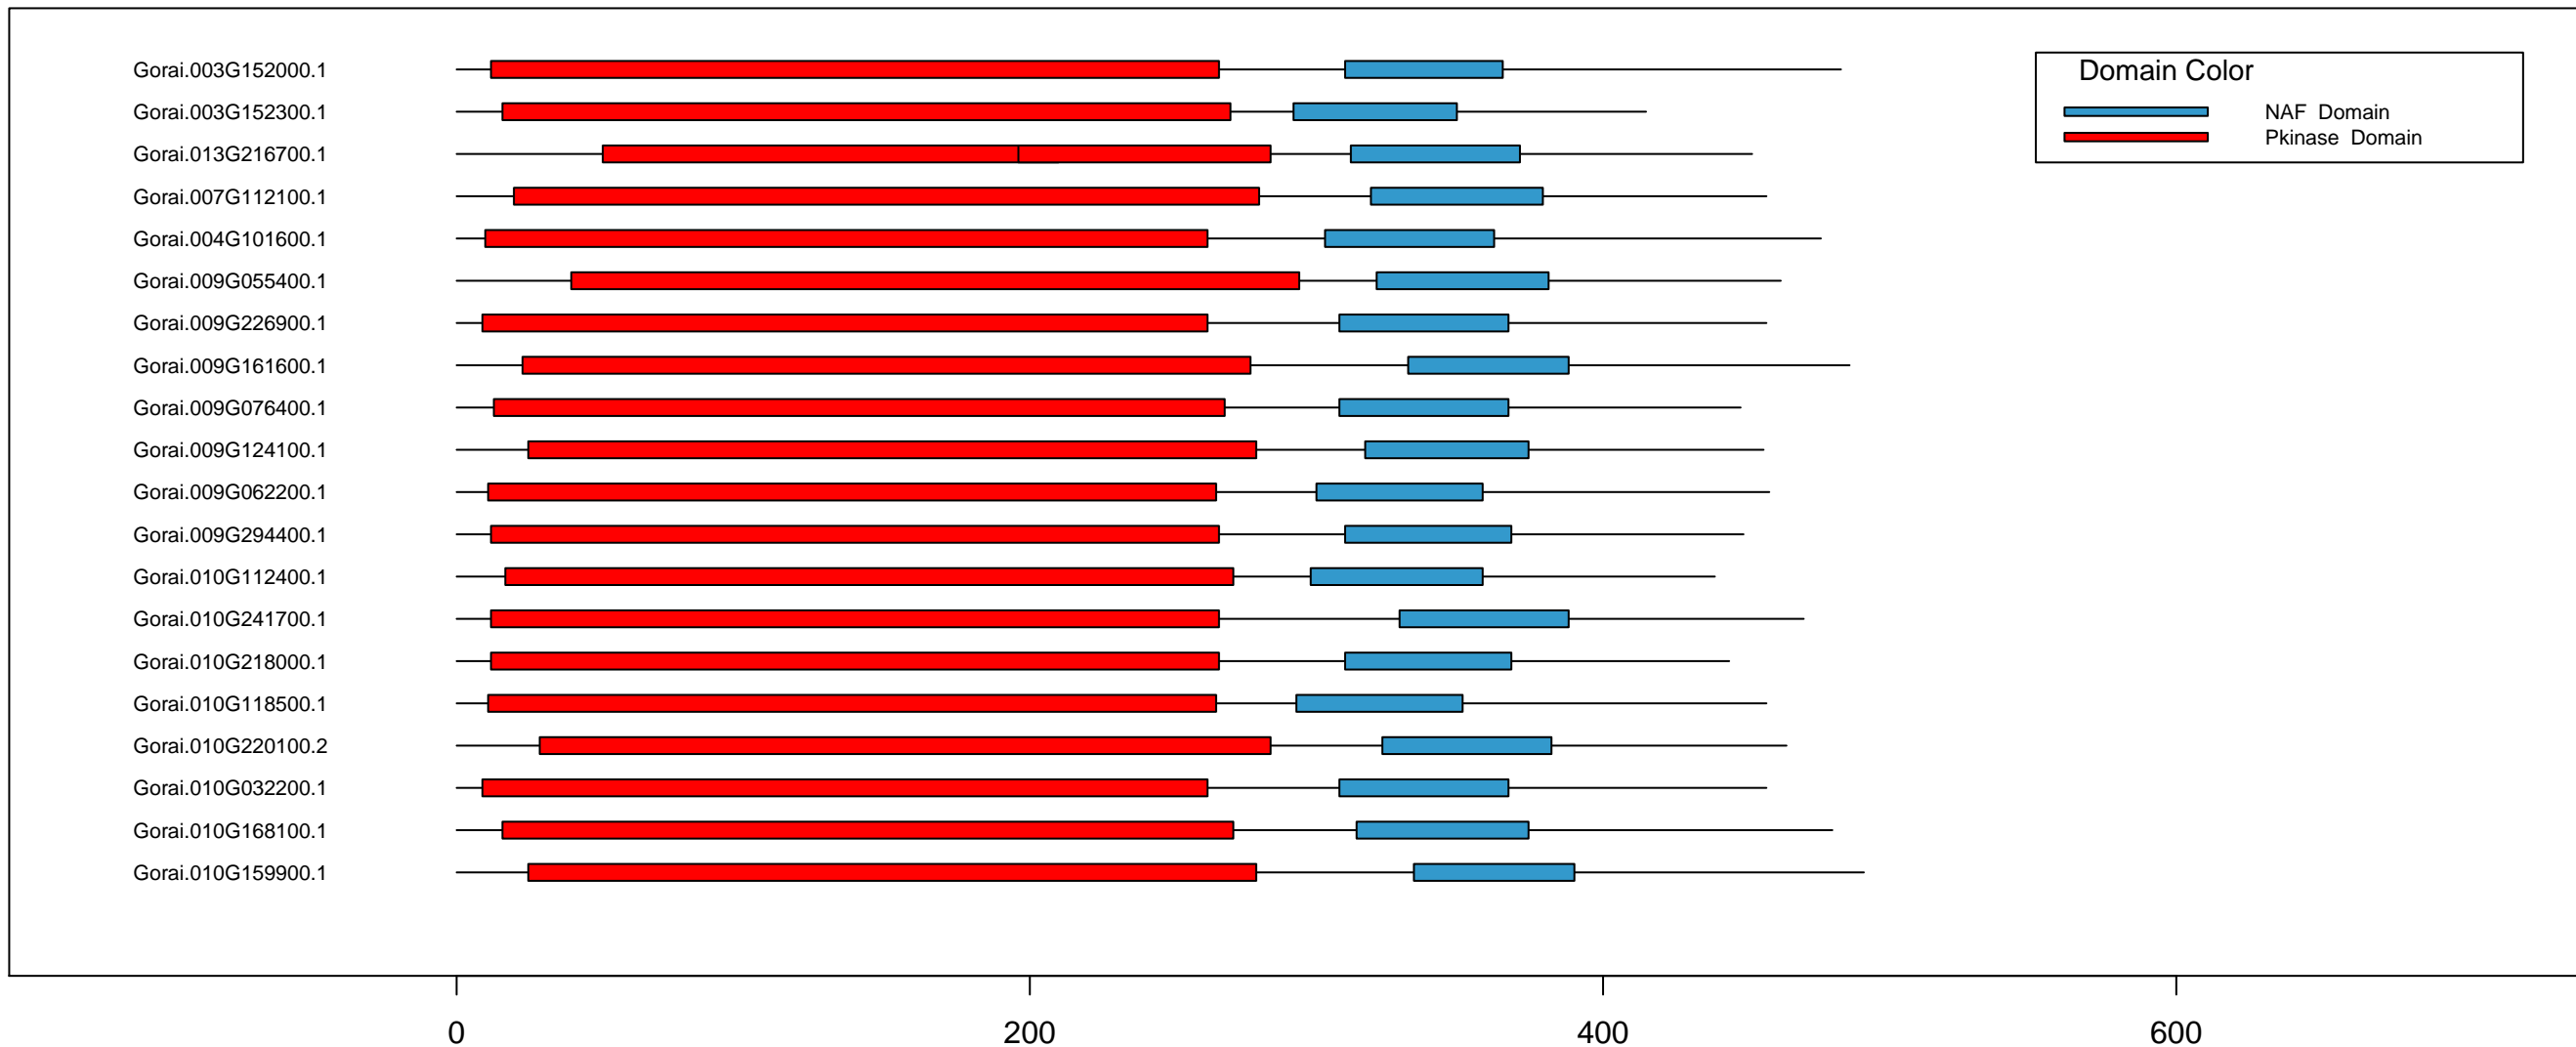

### G.ra CAMK\_CAMKL-CHK1 domain diagram (part 2)

Gorai.006G081600.1  
Gorai.006G245200.1  
Gorai.006G089200.1  
Gorai.006G234300.1  
Gorai.006G092100.1  
Gorai.006G121600.1  
Gorai.001G037600.1  
Gorai.001G032000.1  
Gorai.001G151000.1  
Gorai.001G132200.1  
Gorai.008G129500.1  
Gorai.011G038800.1  
Gorai.011G129300.1  
Gorai.011G164800.1  
Gorai.011G210500.1  
Gorai.011G047700.1  
Gorai.005G005400.1  
Gorai.005G005600.1  
Gorai.005G046300.1

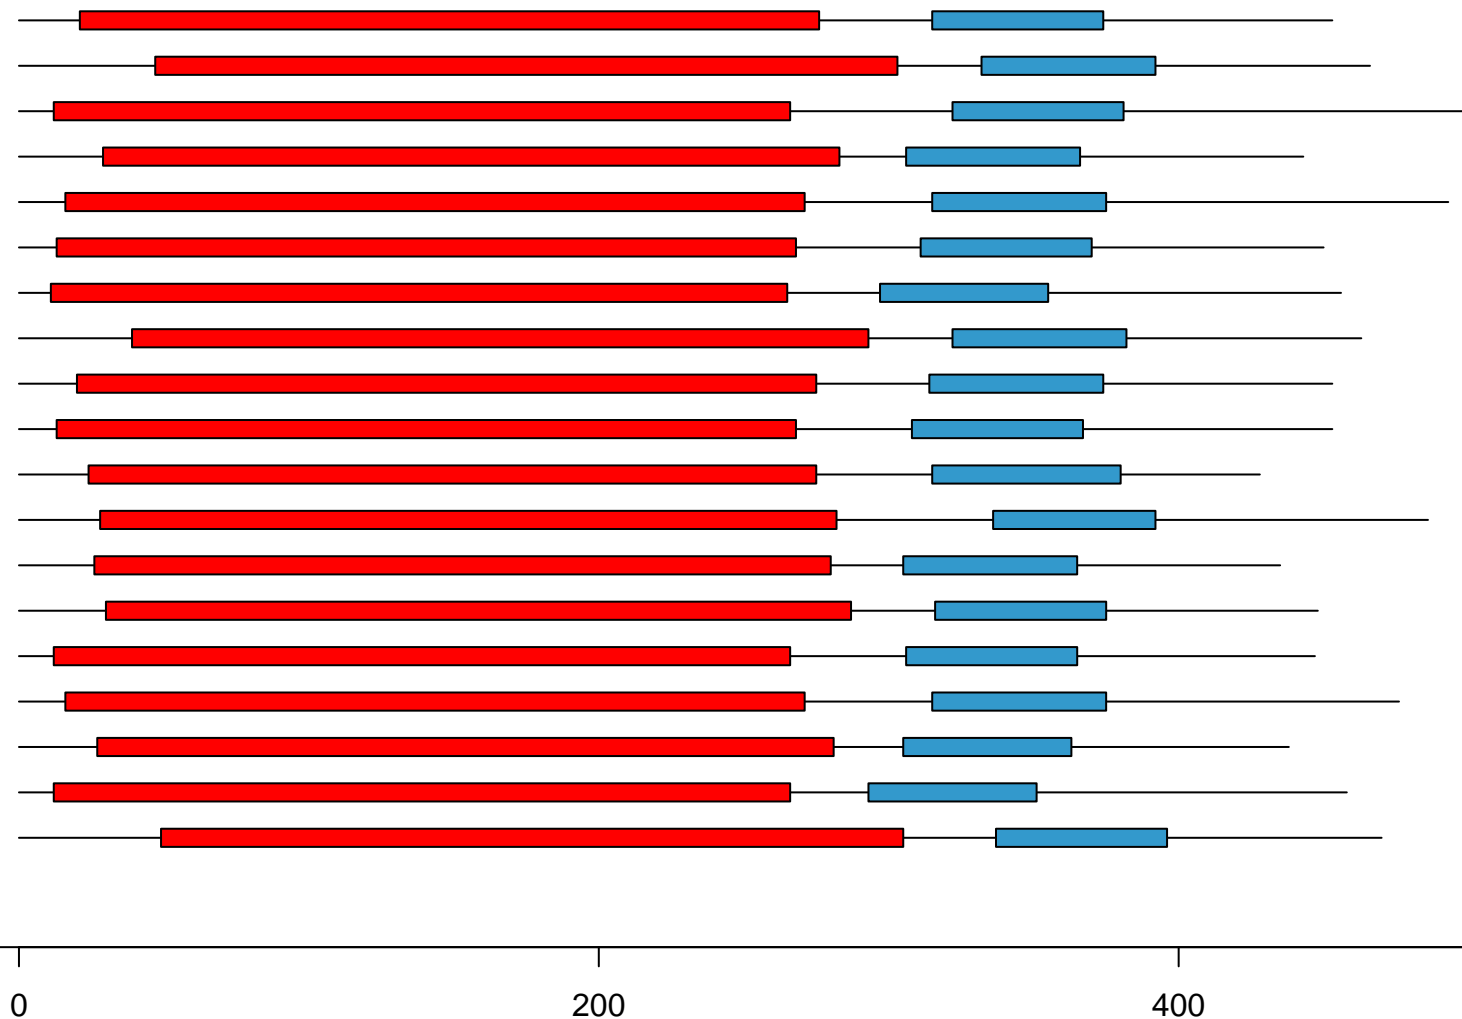

Domain Color

- NAF Domain
- Pkinase Domain

# G.ra CAMK\_CAMKL-LKB domain diagram (all)

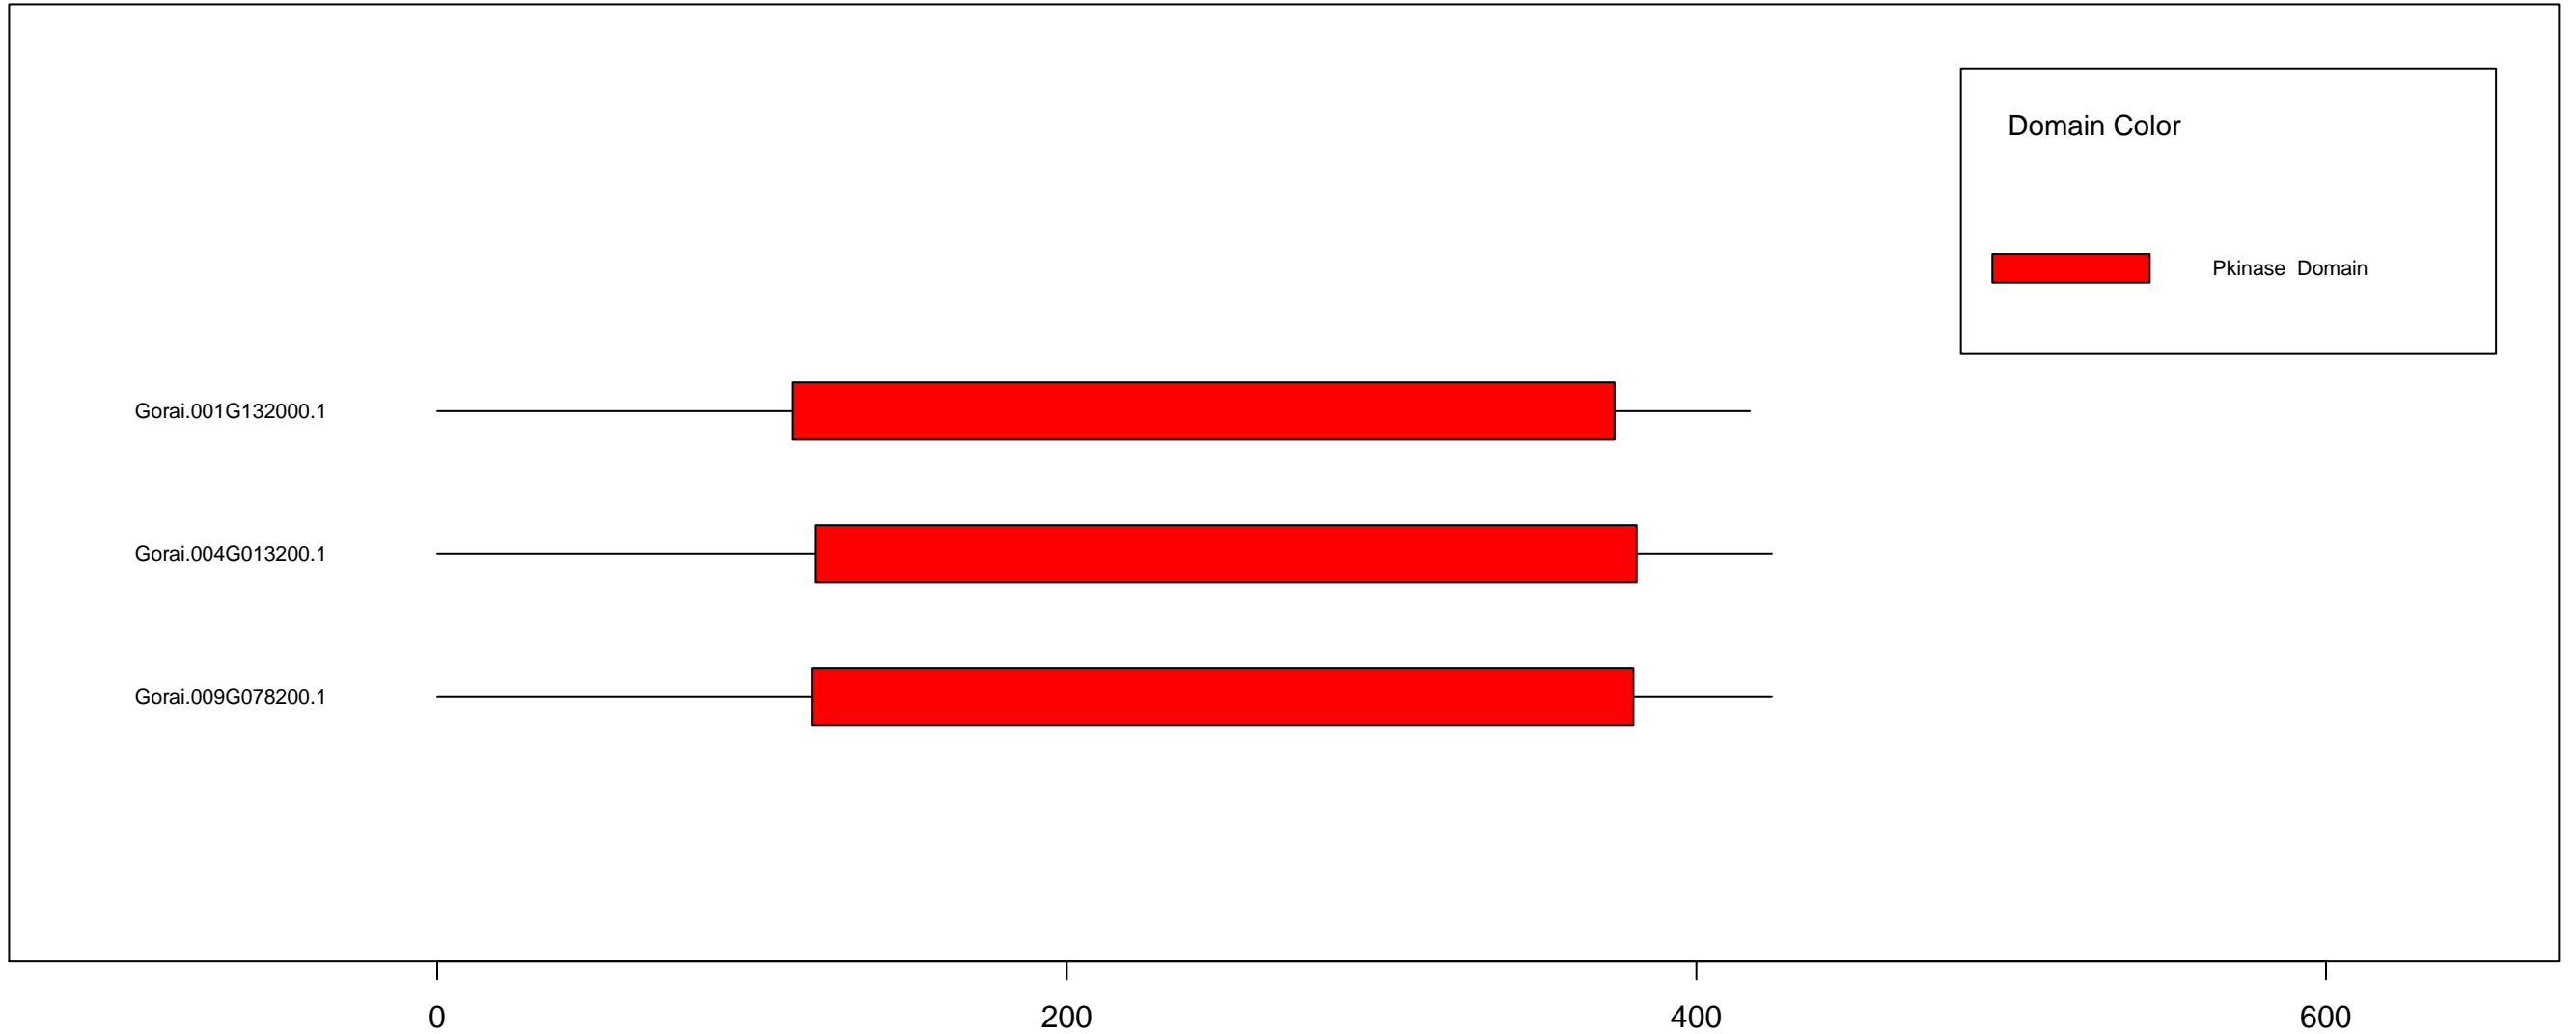

### G.ra CAMK\_CDPK domain diagram (part 1)

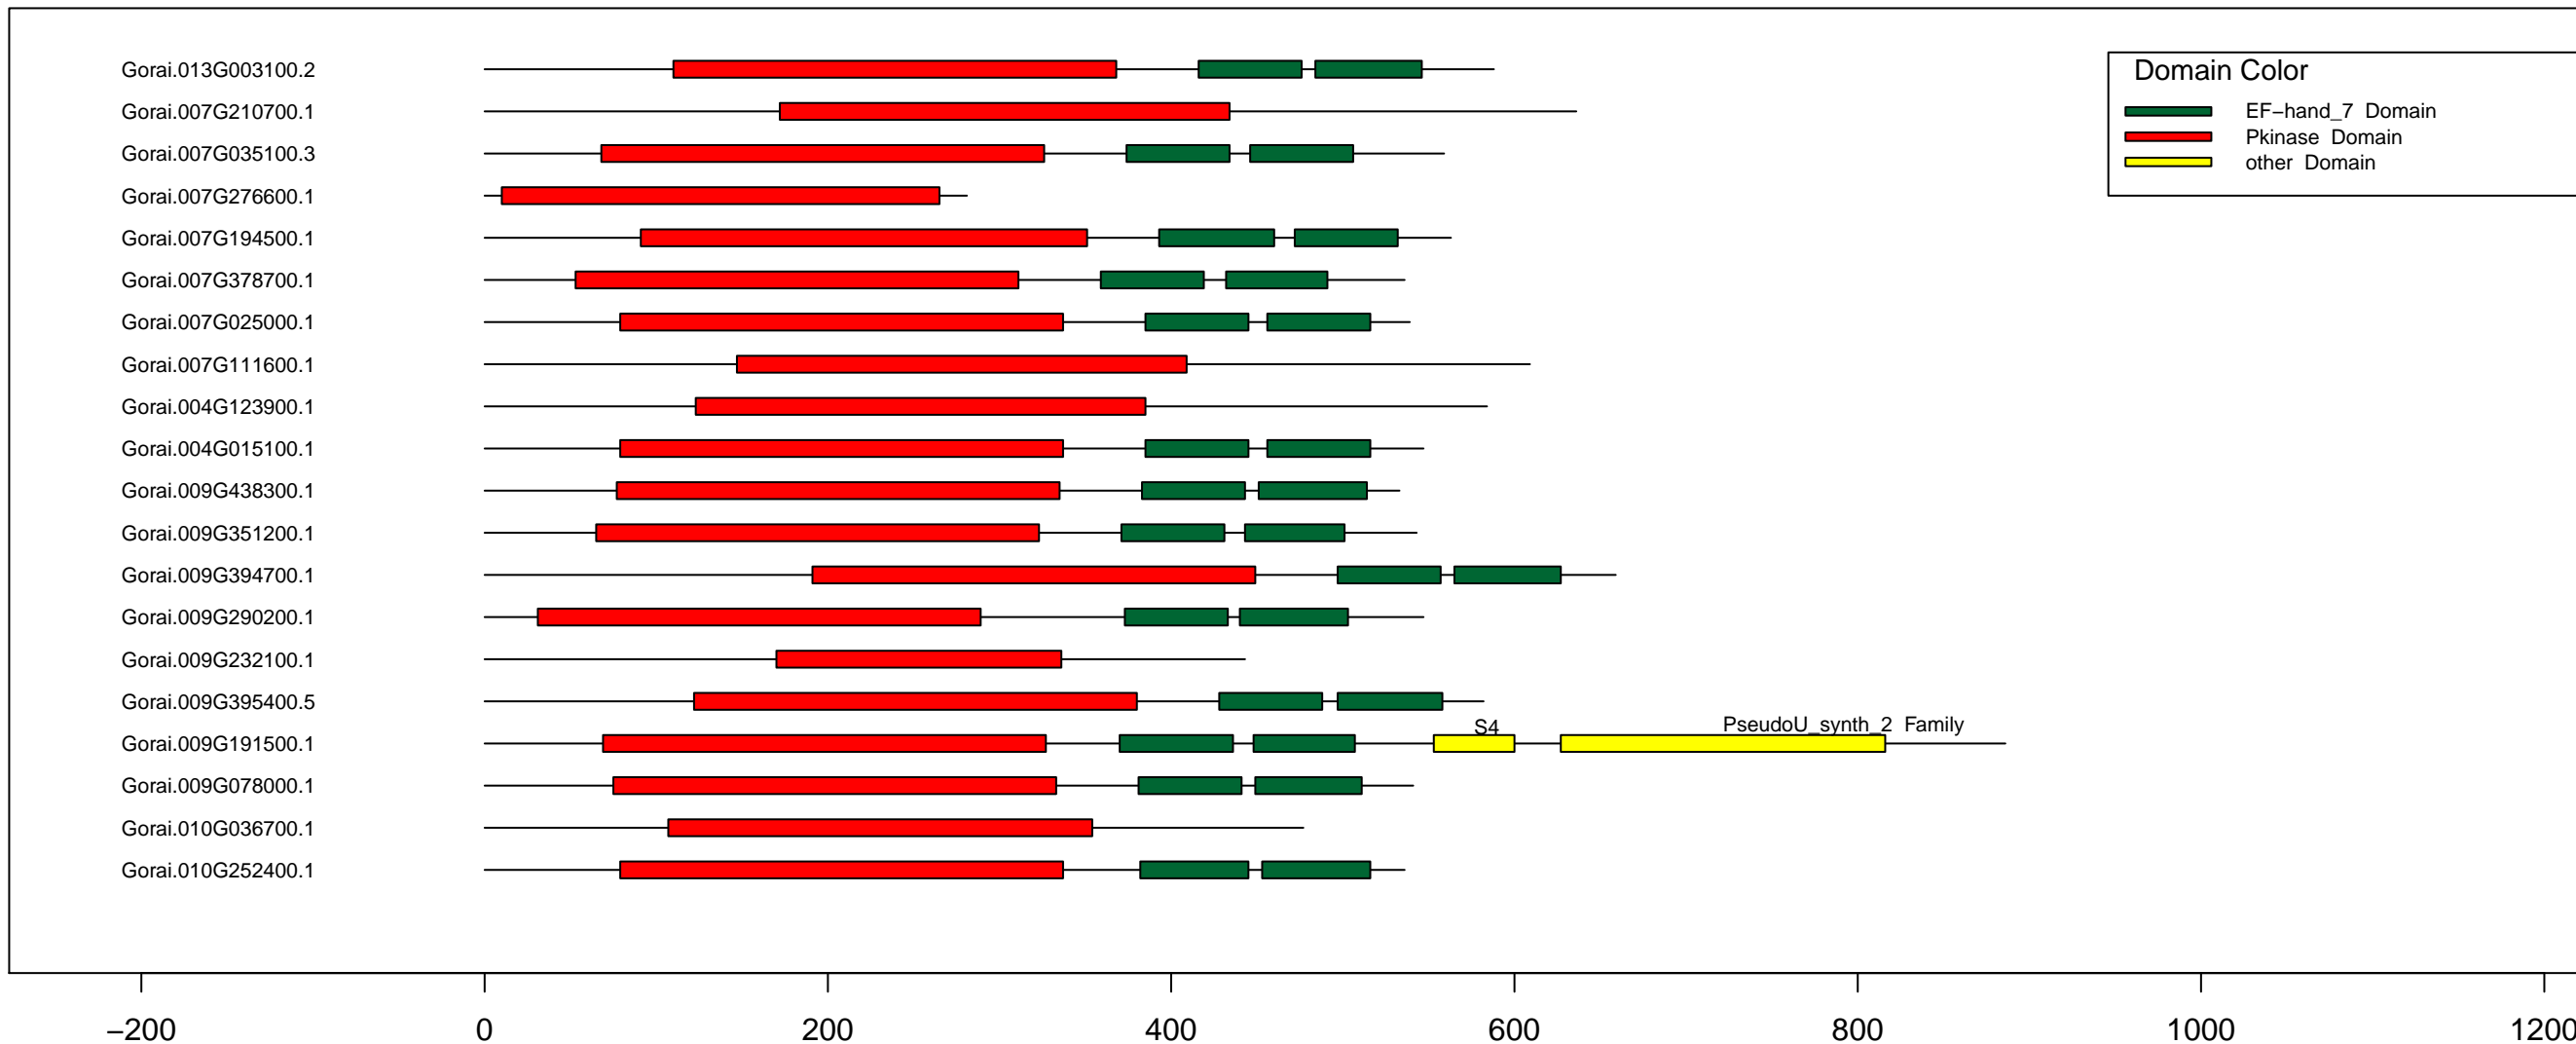

## G.ra CAMK\_CDPK domain diagram (part 2)

Gorai.008G016700.2  
 Gorai.008G074300.1  
 Gorai.008G251000.1  
 Gorai.011G098300.1  
 Gorai.011G173700.2  
 Gorai.011G228500.1  
 Gorai.011G014200.1  
 Gorai.005G216500.2  
 Gorai.005G019800.1  
 Gorai.005G074300.1  
 Gorai.003G084000.1  
 Gorai.003G009500.1  
 Gorai.003G092900.1  
 Gorai.002G088800.3  
 Gorai.002G153600.2  
 Gorai.013G159300.1  
 Gorai.013G064400.4  
 Gorai.013G042100.1  
 Gorai.013G064500.2  
 Gorai.013G253100.1

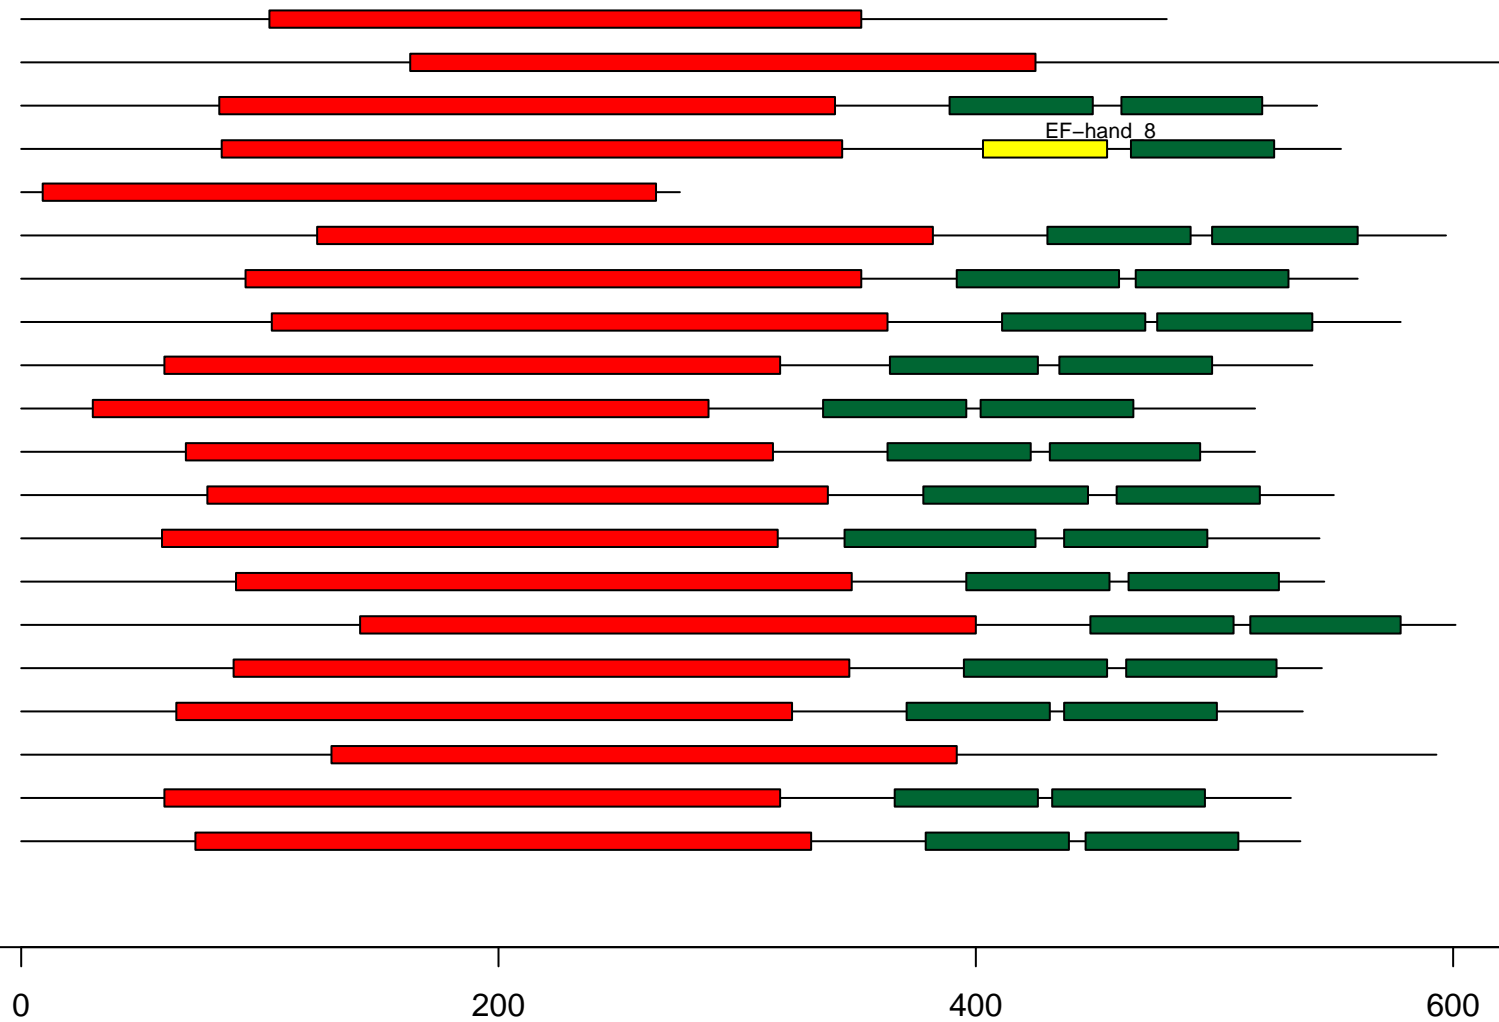

**Domain Color**

|  |                  |
|--|------------------|
|  | EF-hand_7 Domain |
|  | Pkinase Domain   |
|  | other Domain     |



### G.ra CAMK\_CDPK domain diagram (part 3)

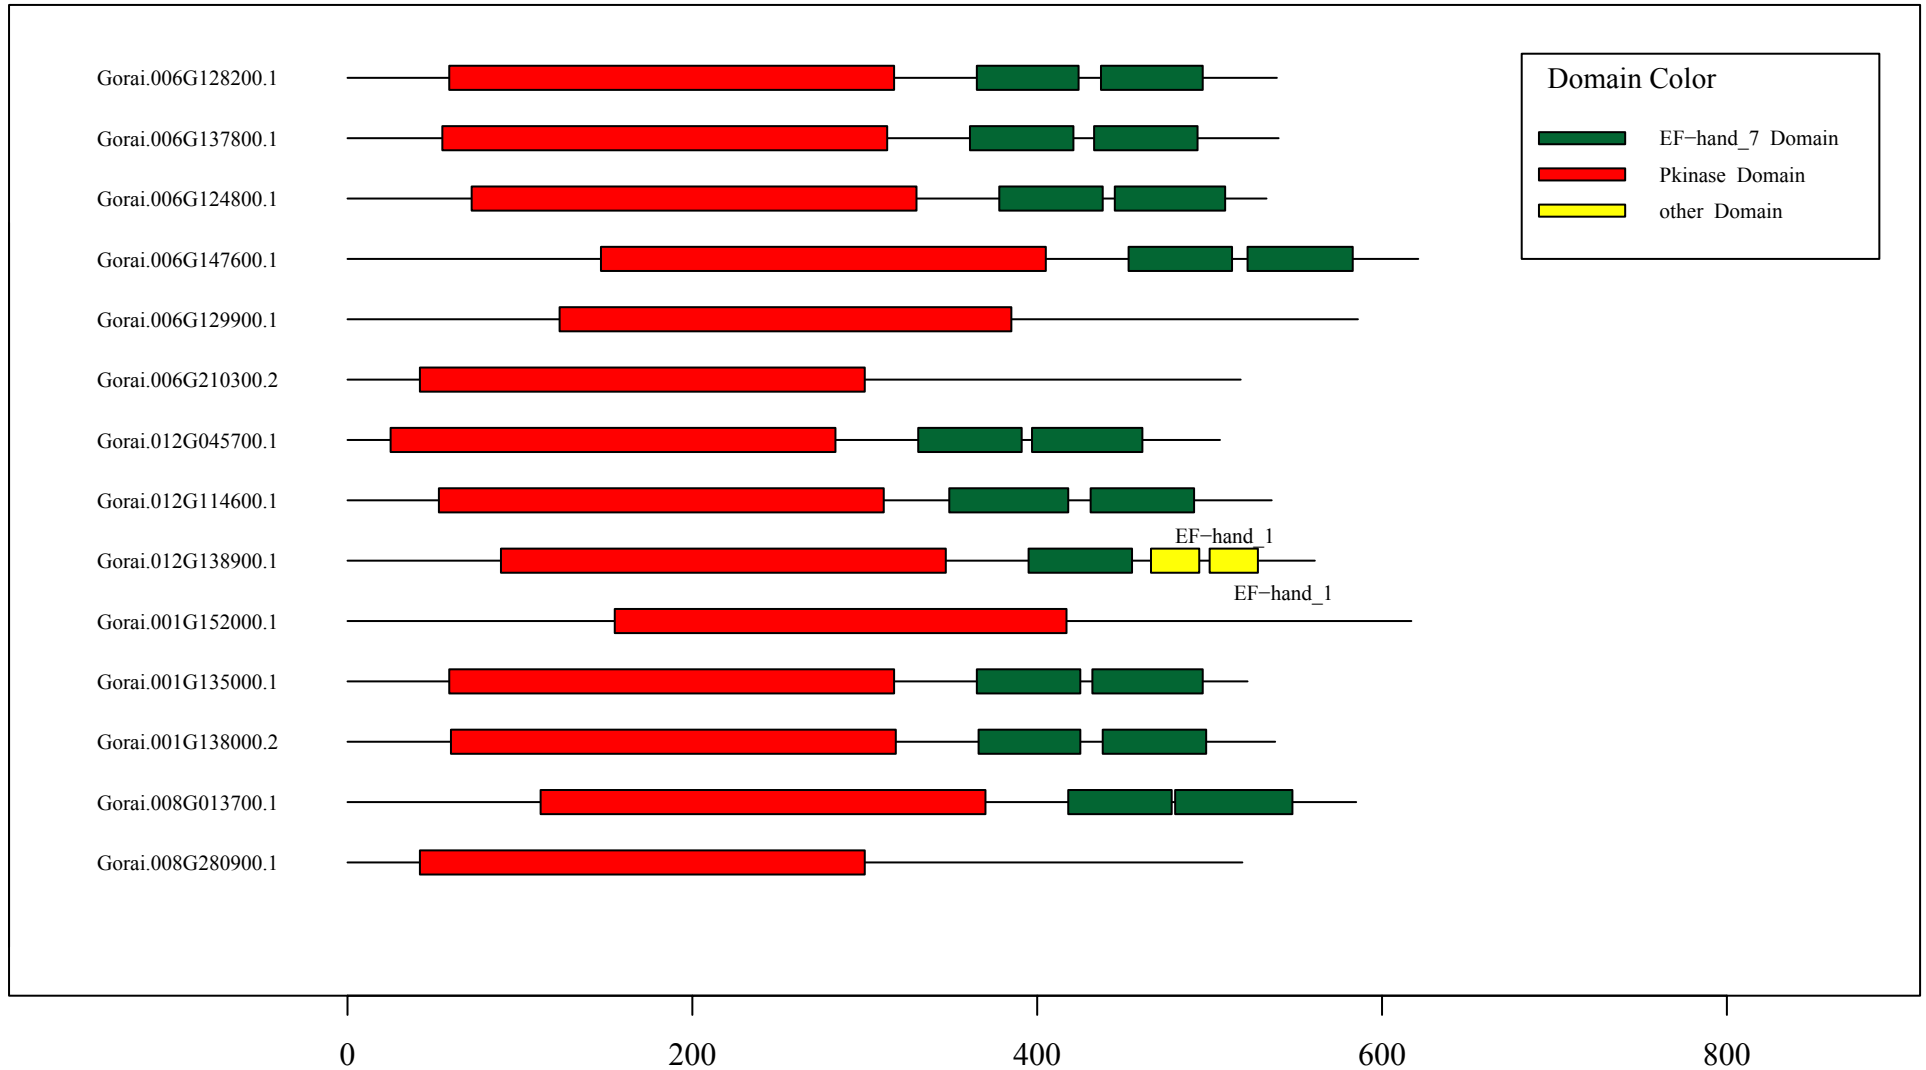

# G.ra CAMK\_OST1L domain diagram (all)

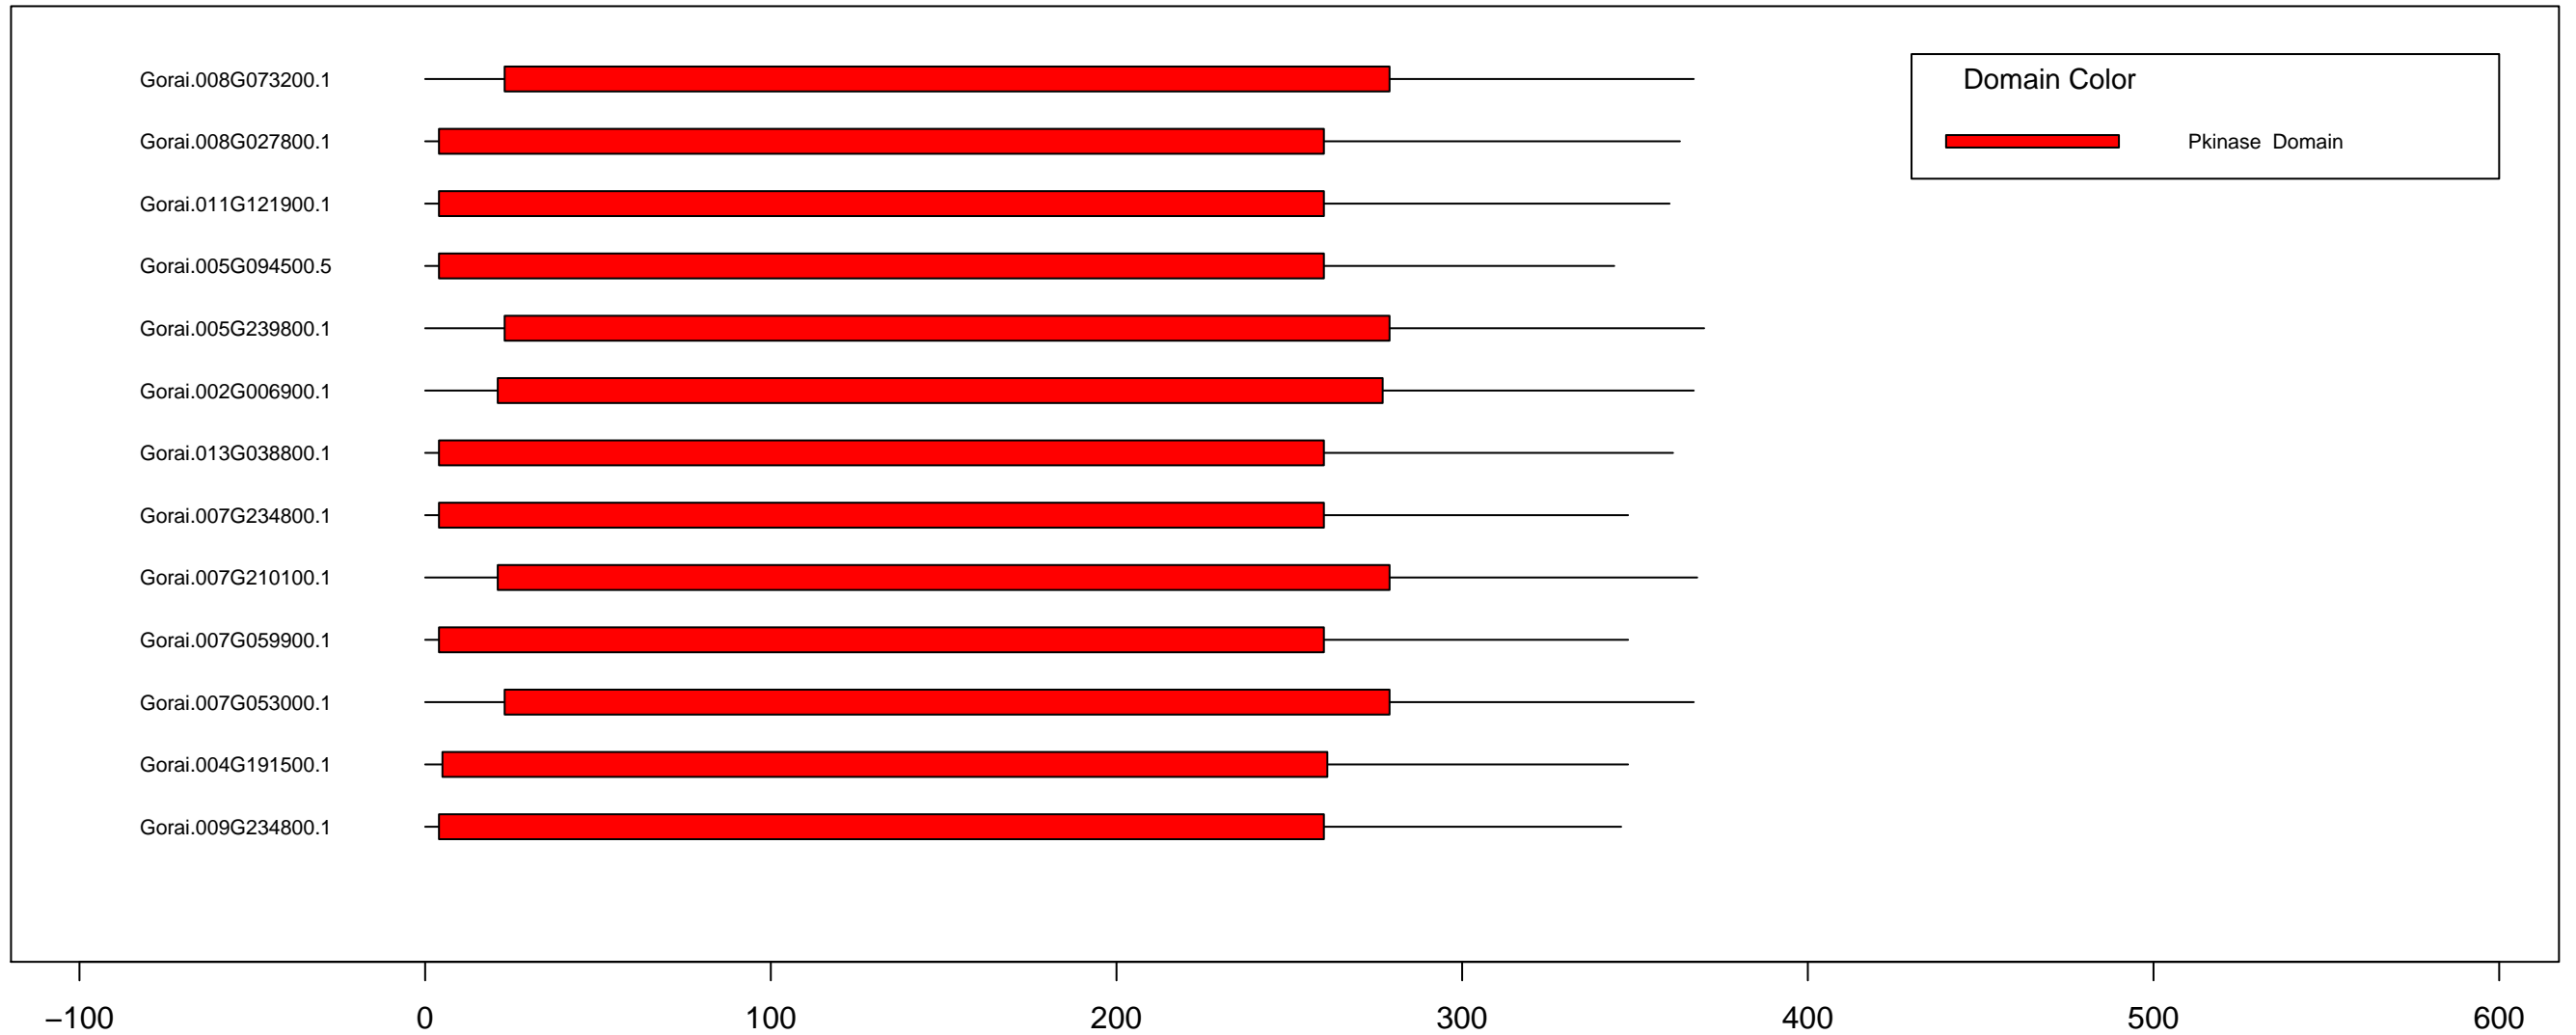

# G.ra CK1\_CK1 domain diagram (all)

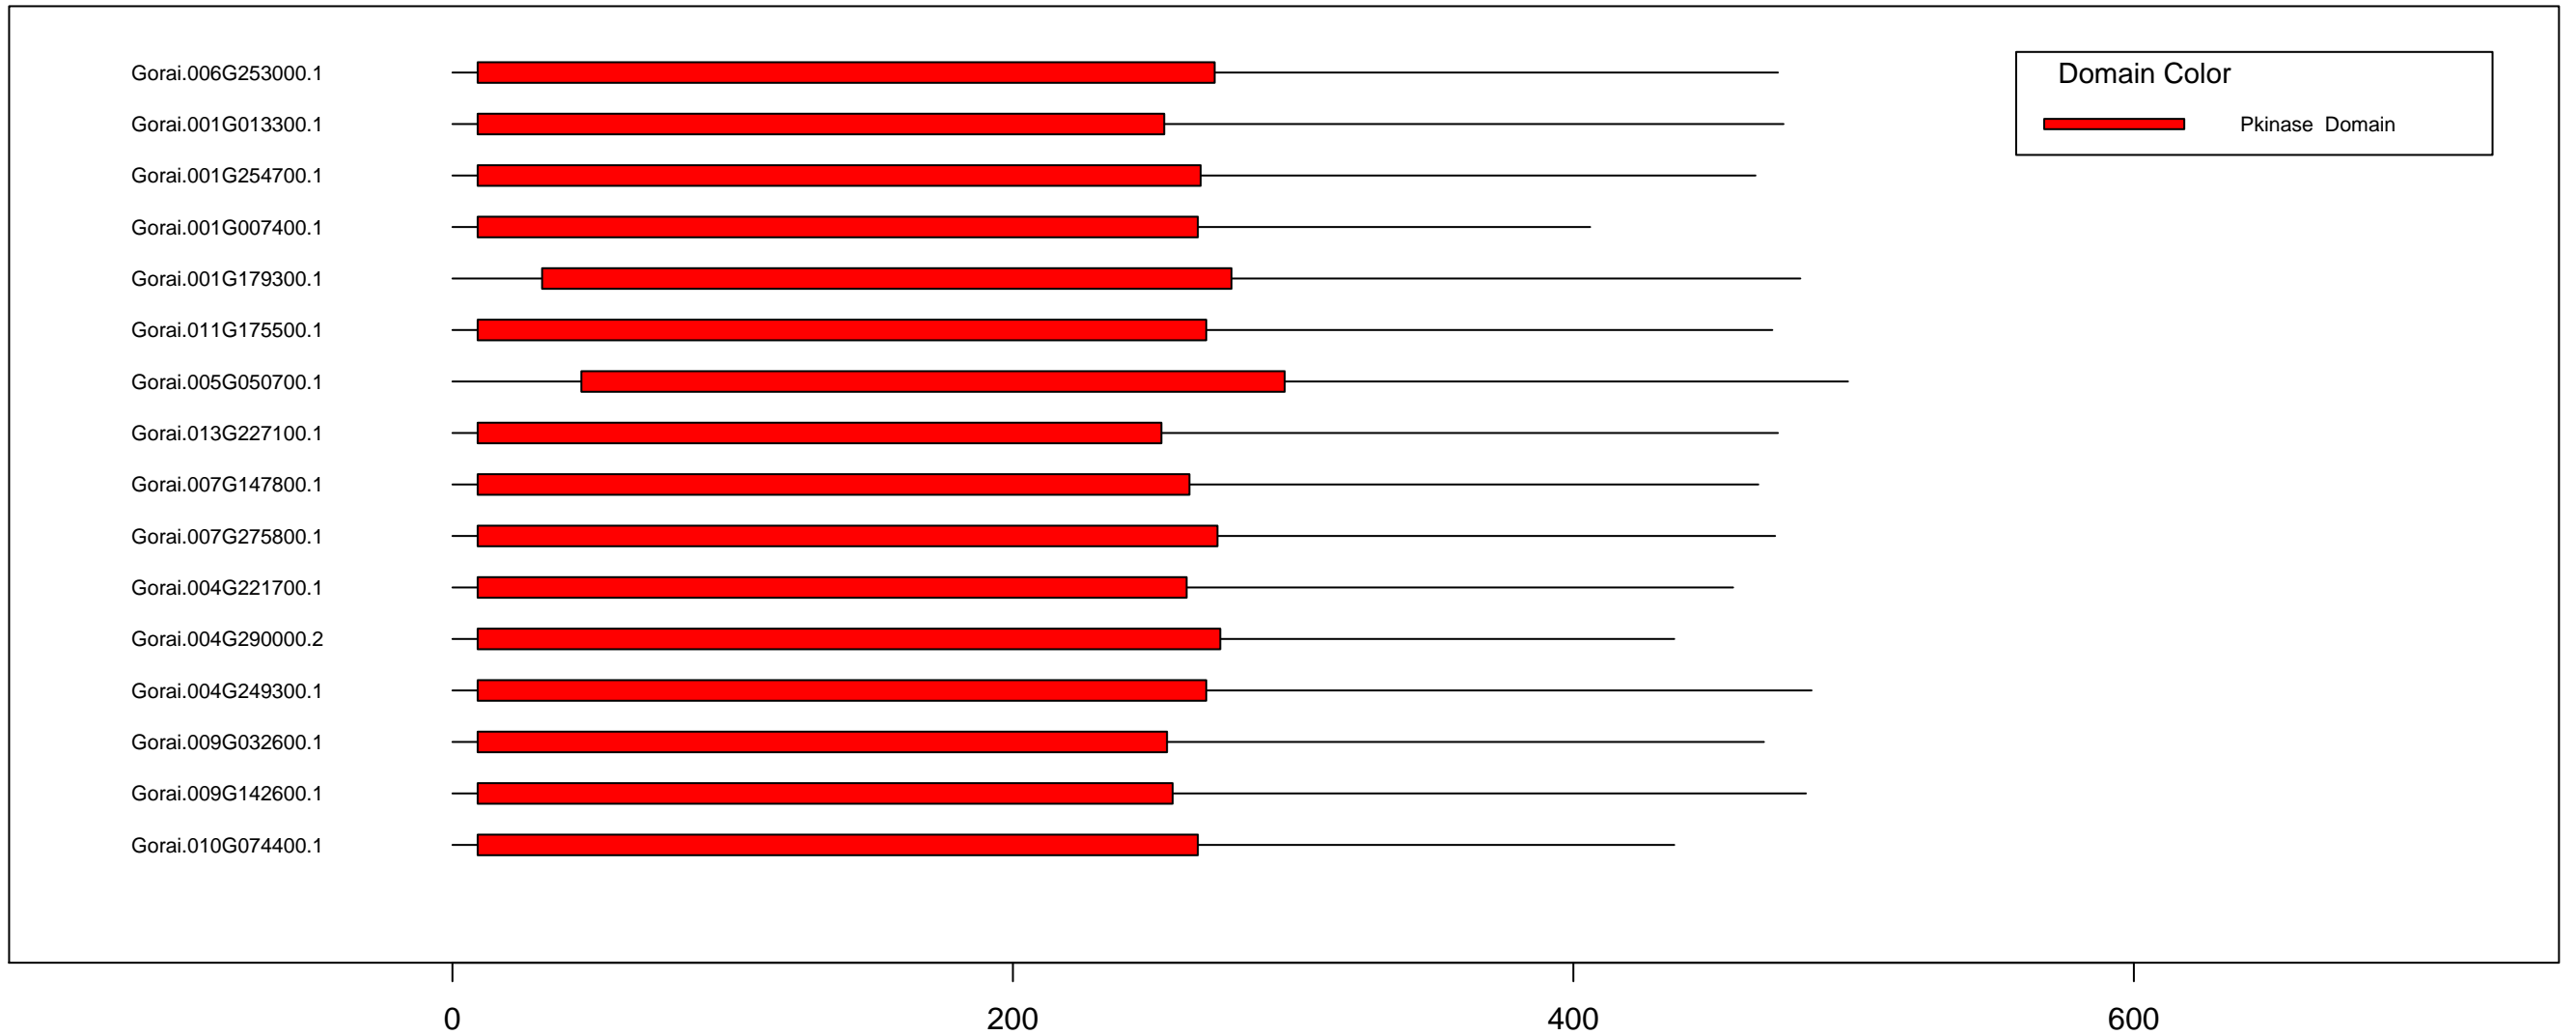

### G.ra CK1\_CK1-PI domain diagram (all)

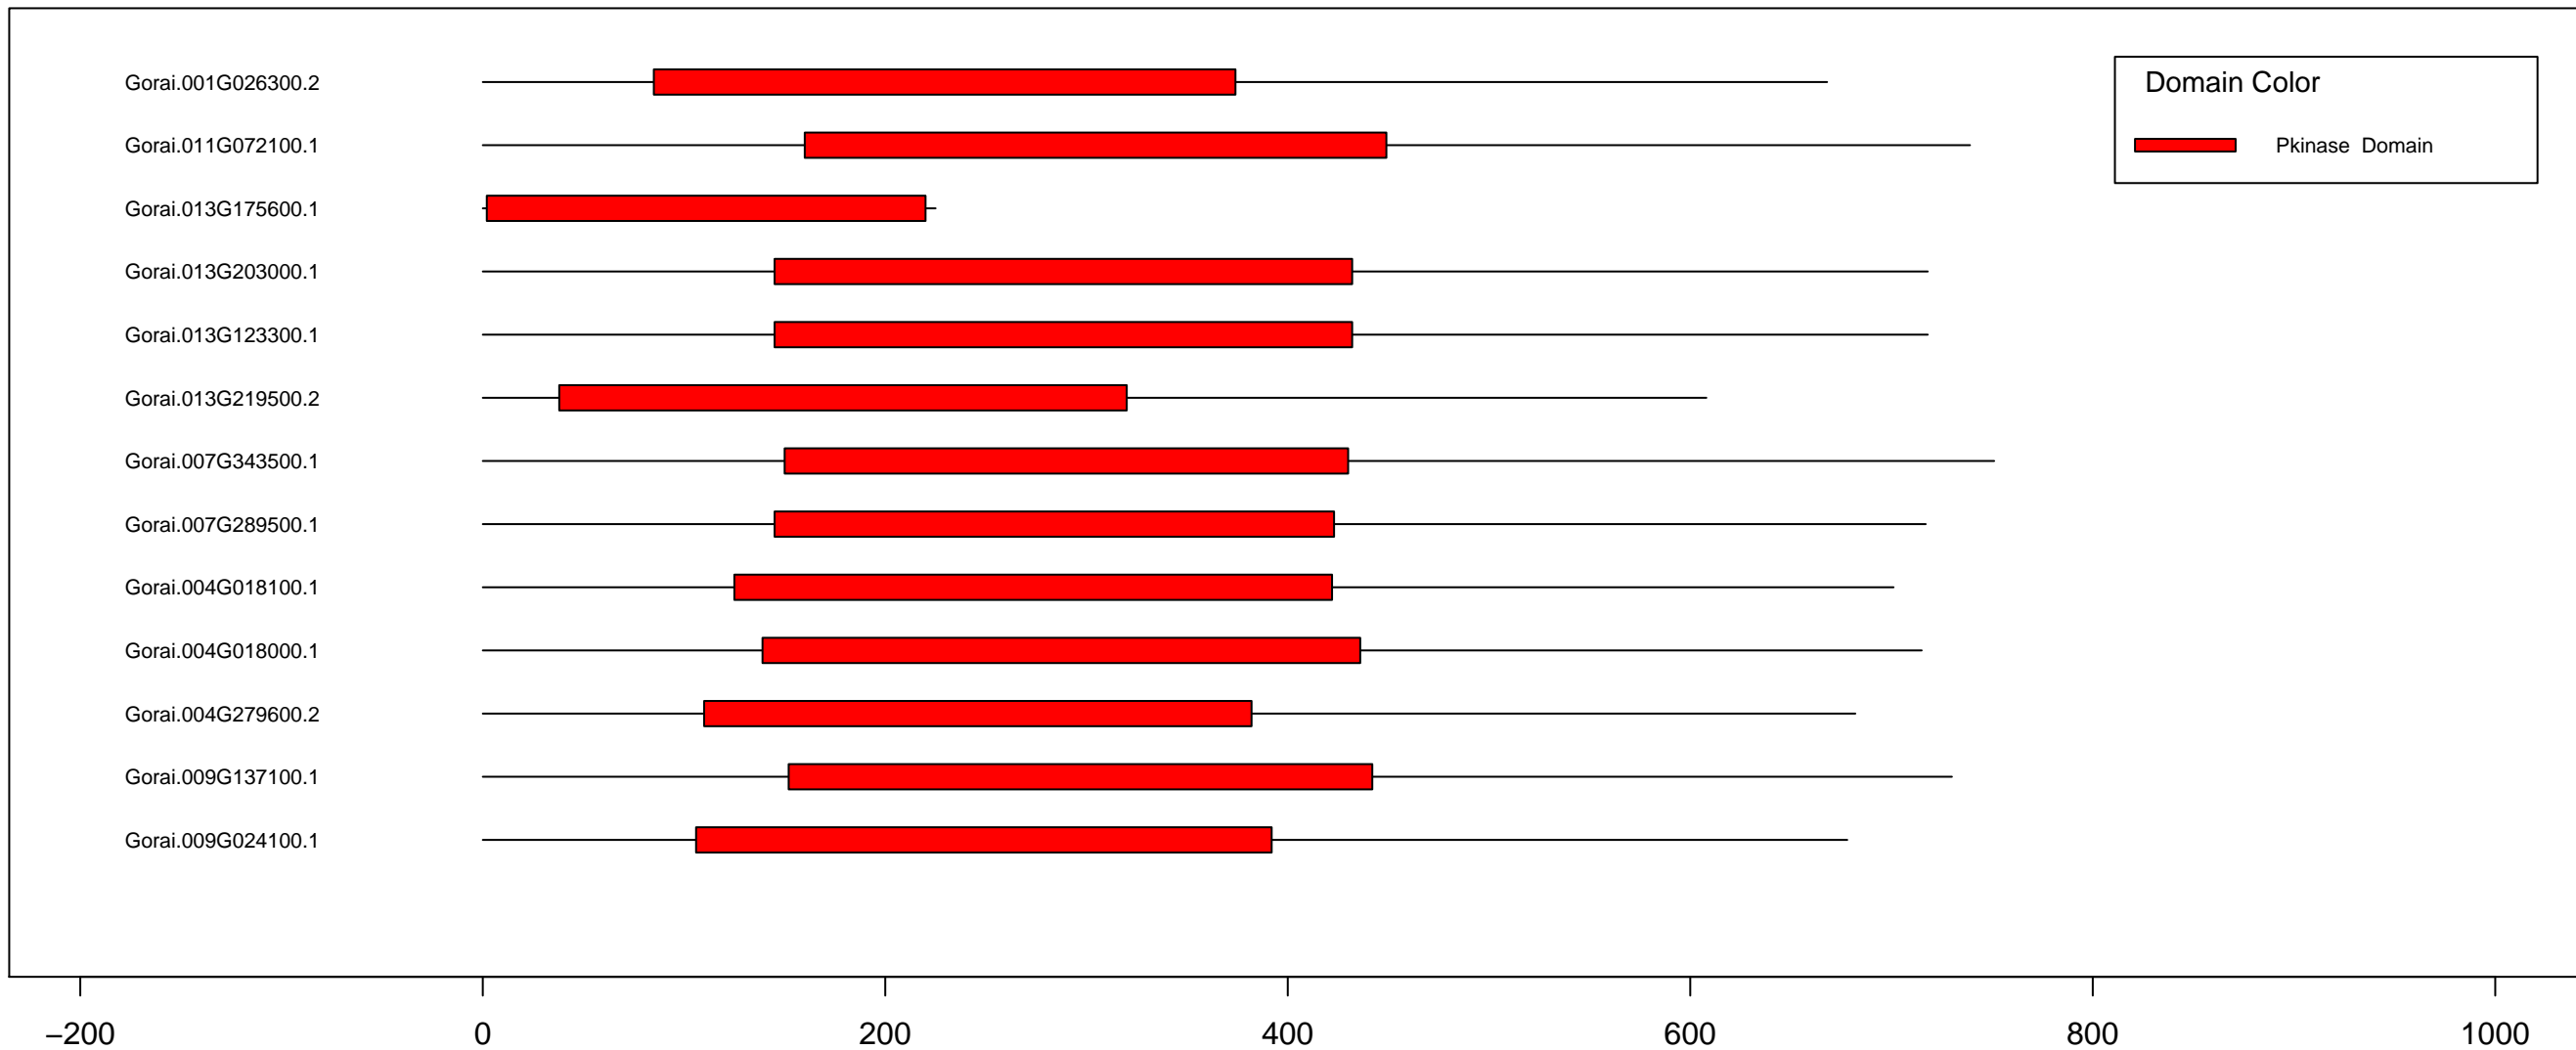

# G.ra CMGC\_CDK-CCRK domain diagram (all)

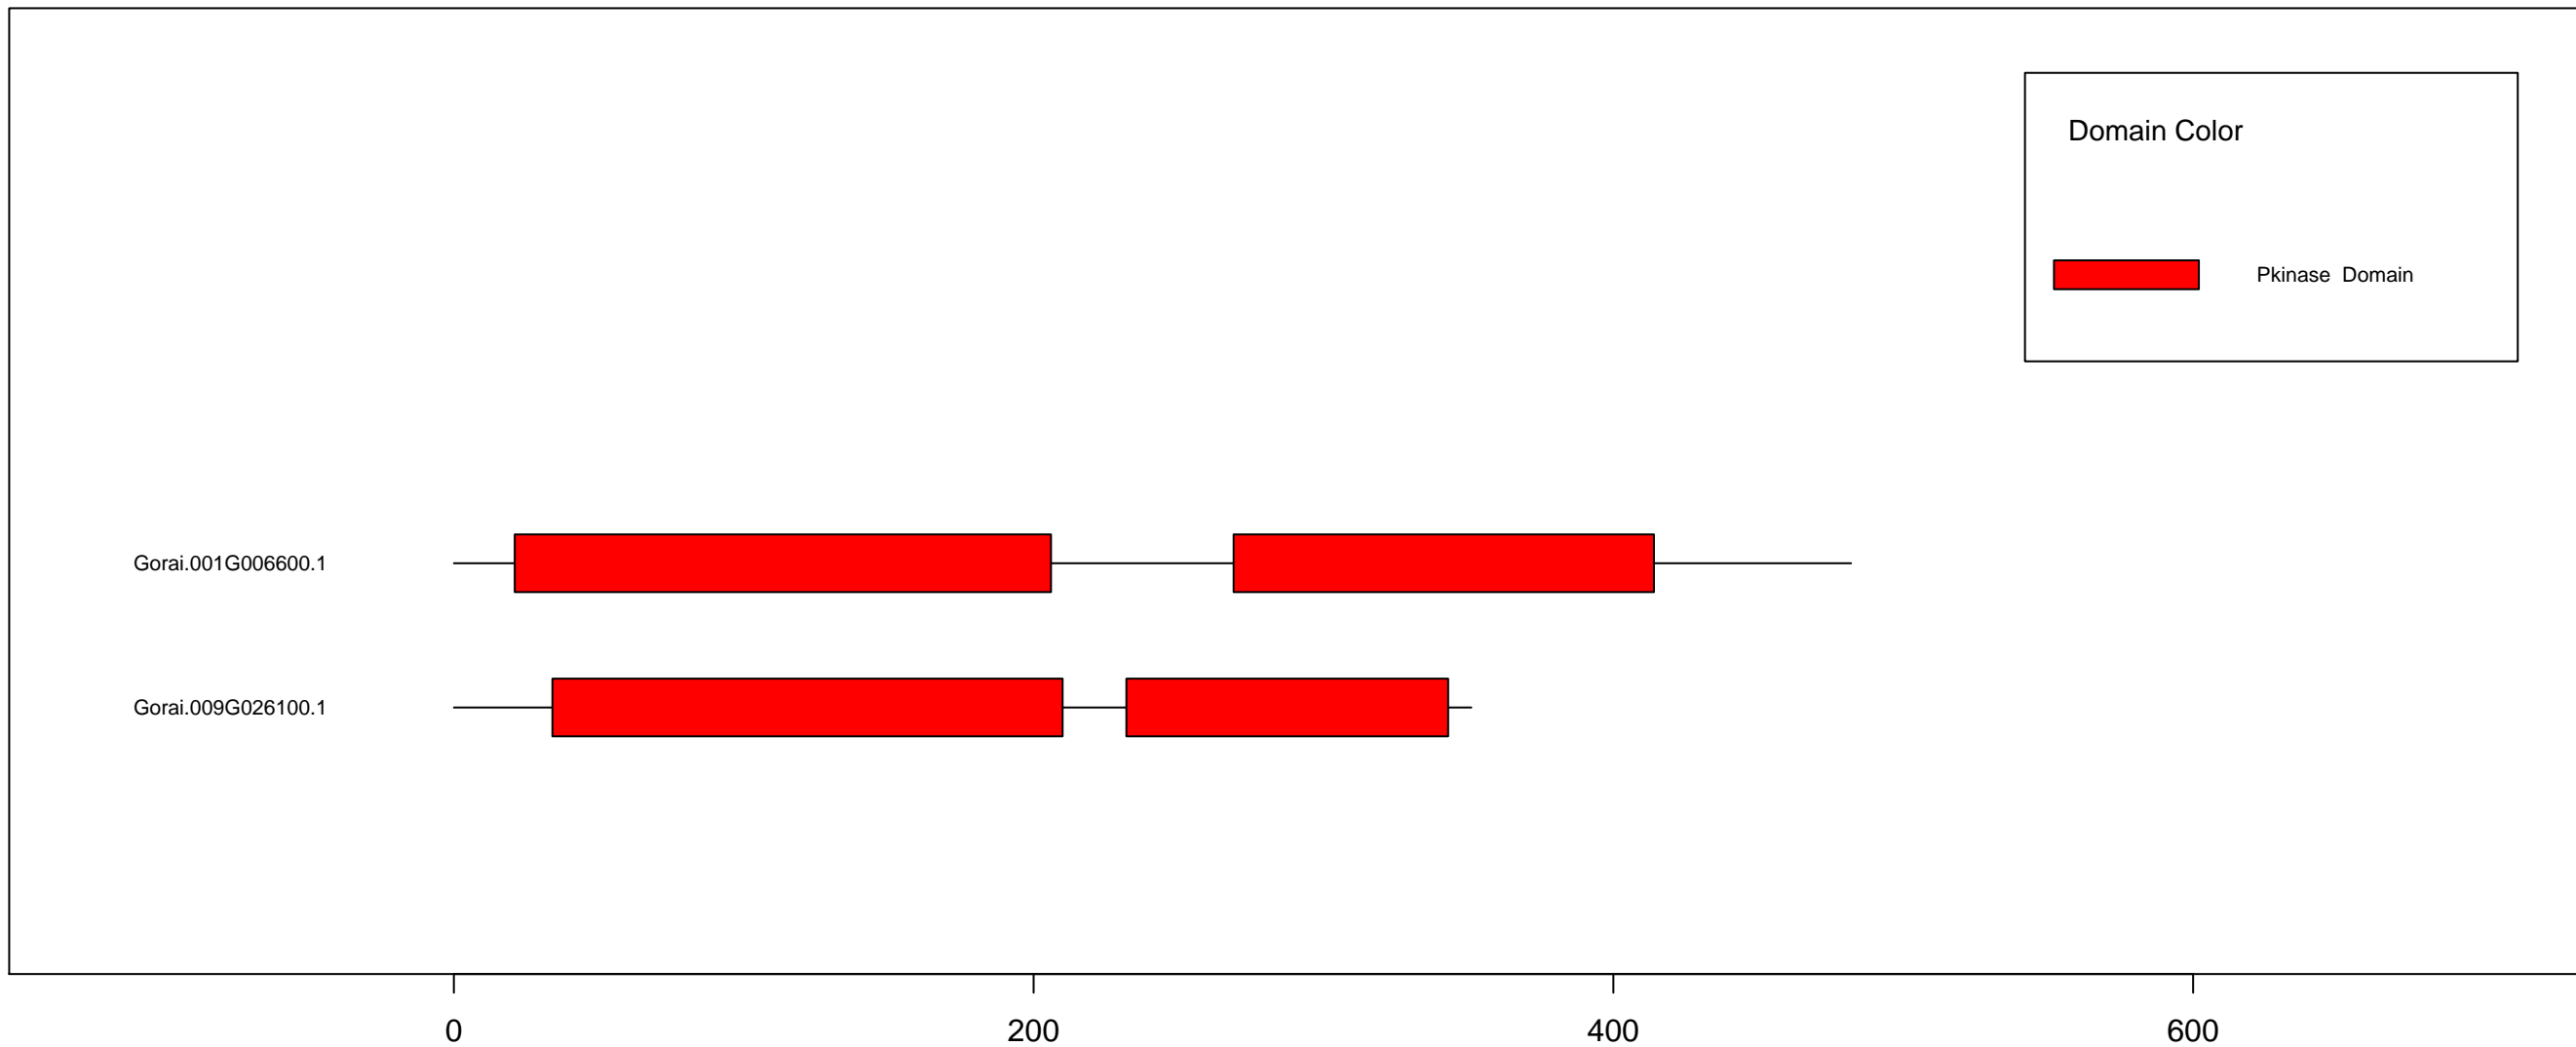

G.ra CMGC\_CDK-CDK7 domain diagram (all)

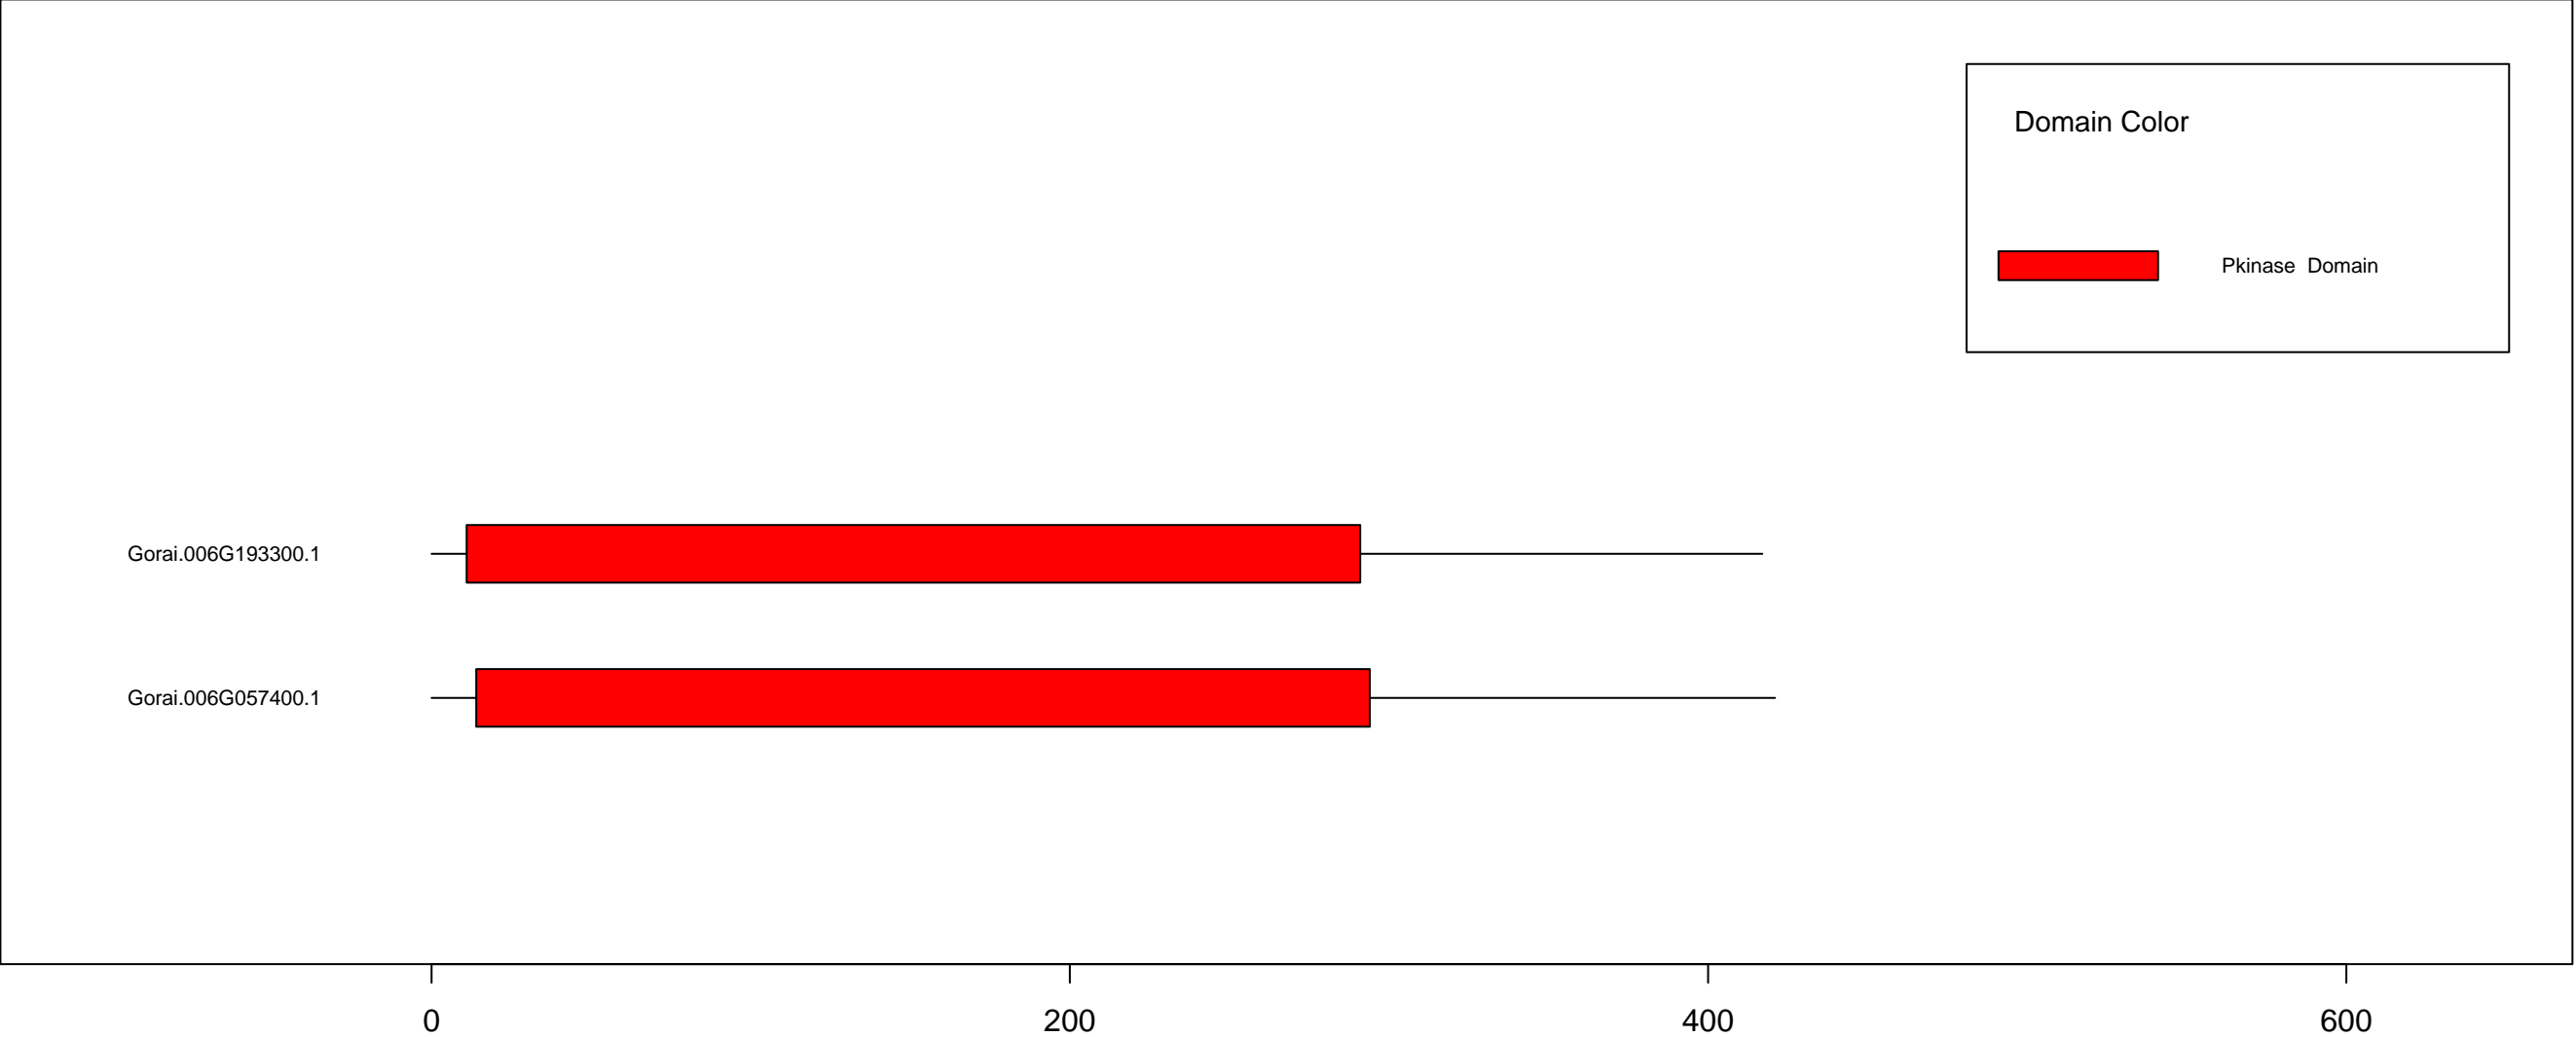

G.ra CMGC\_CDK-CDK8 domain diagram (all)

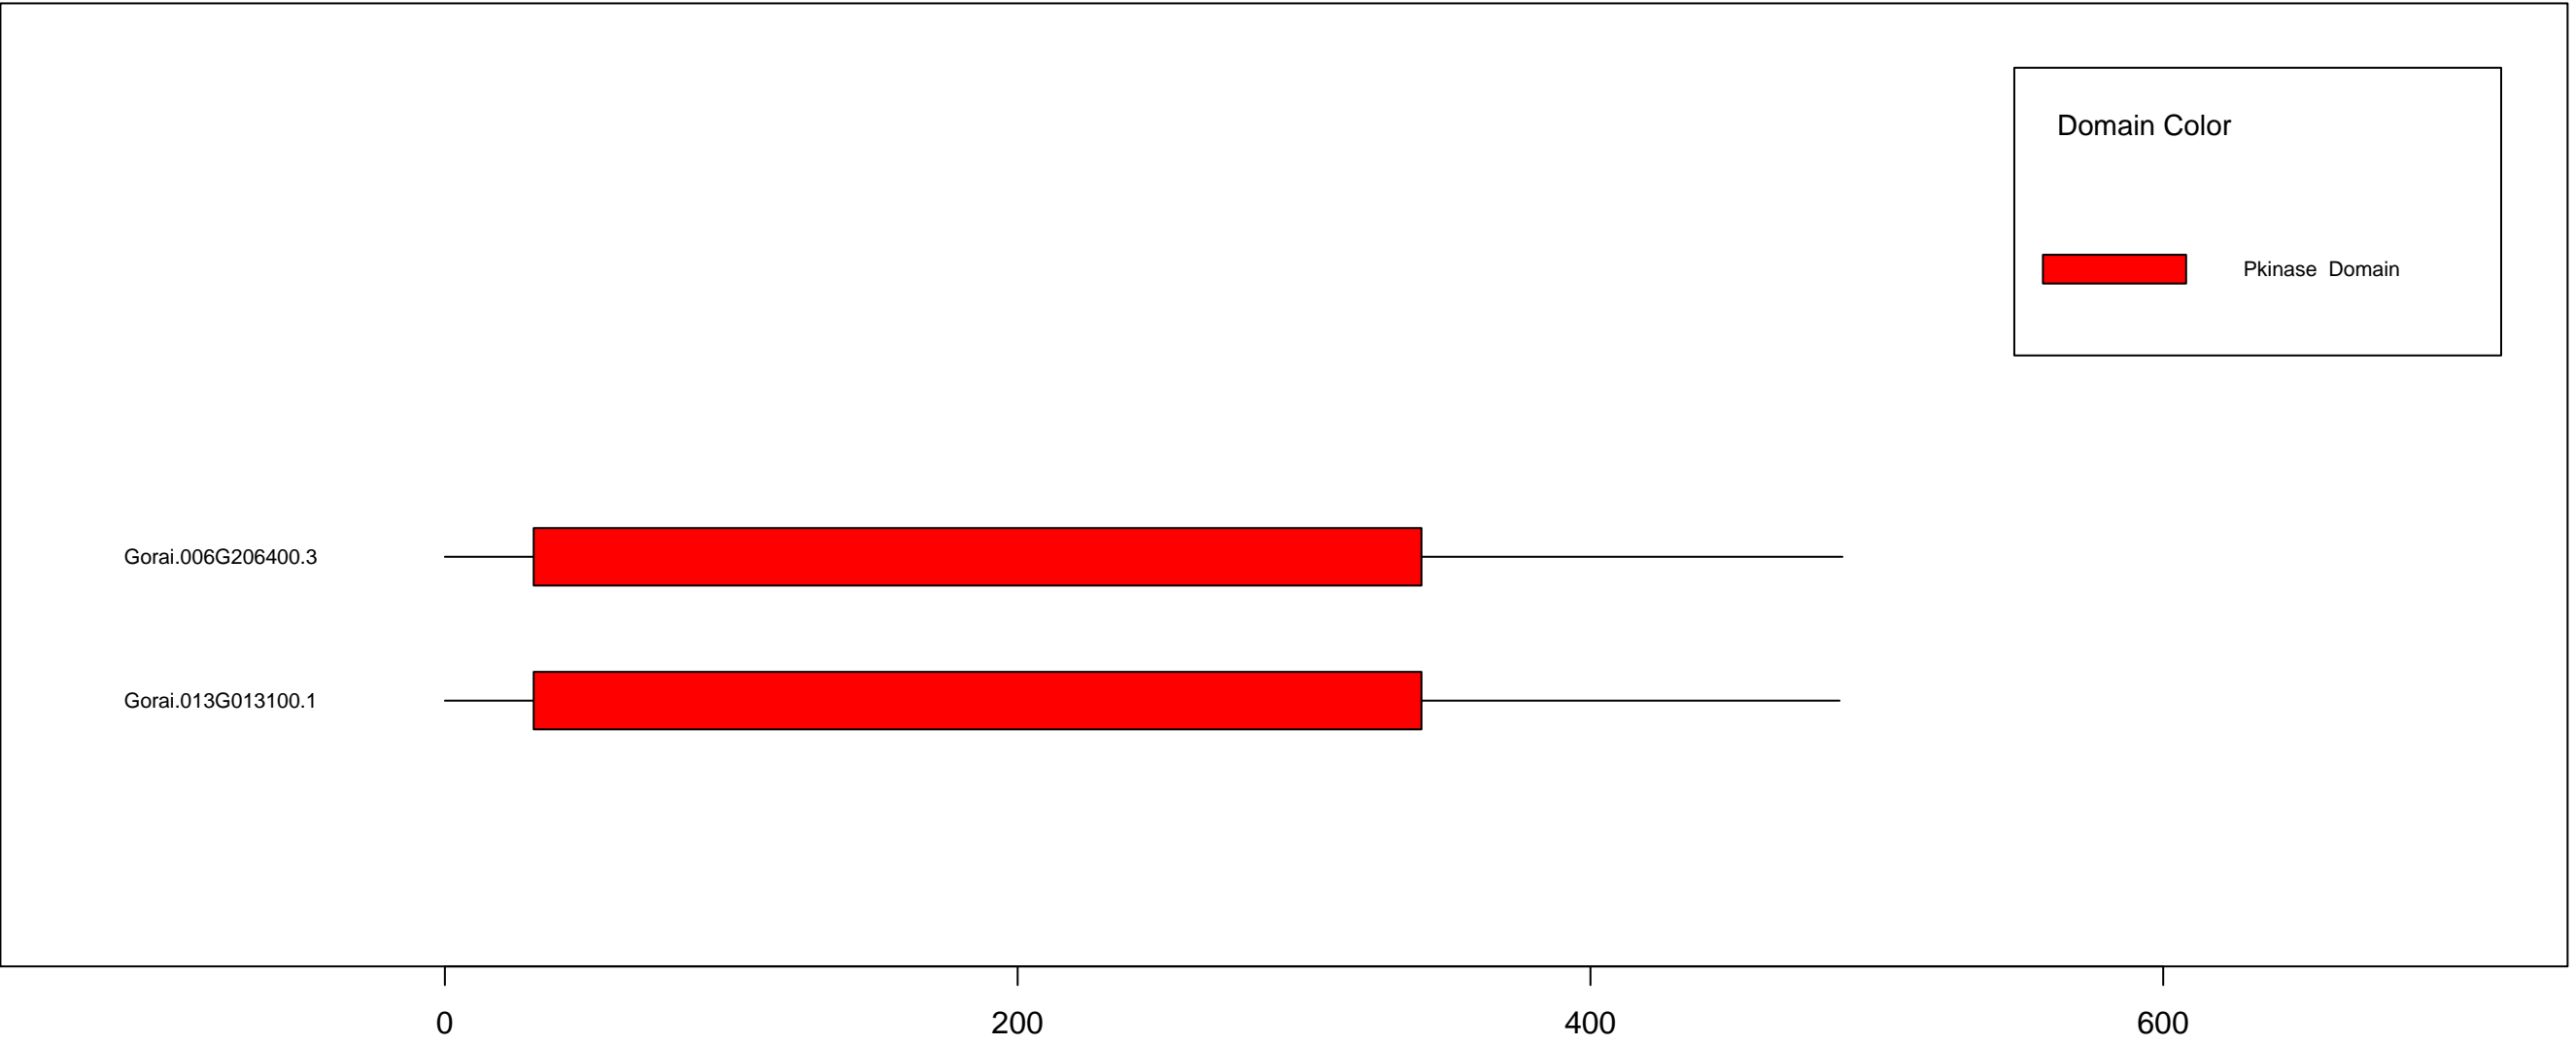

# G.ra CMGC\_CDK-CRK7-CDK9 domain diagram (part 1)

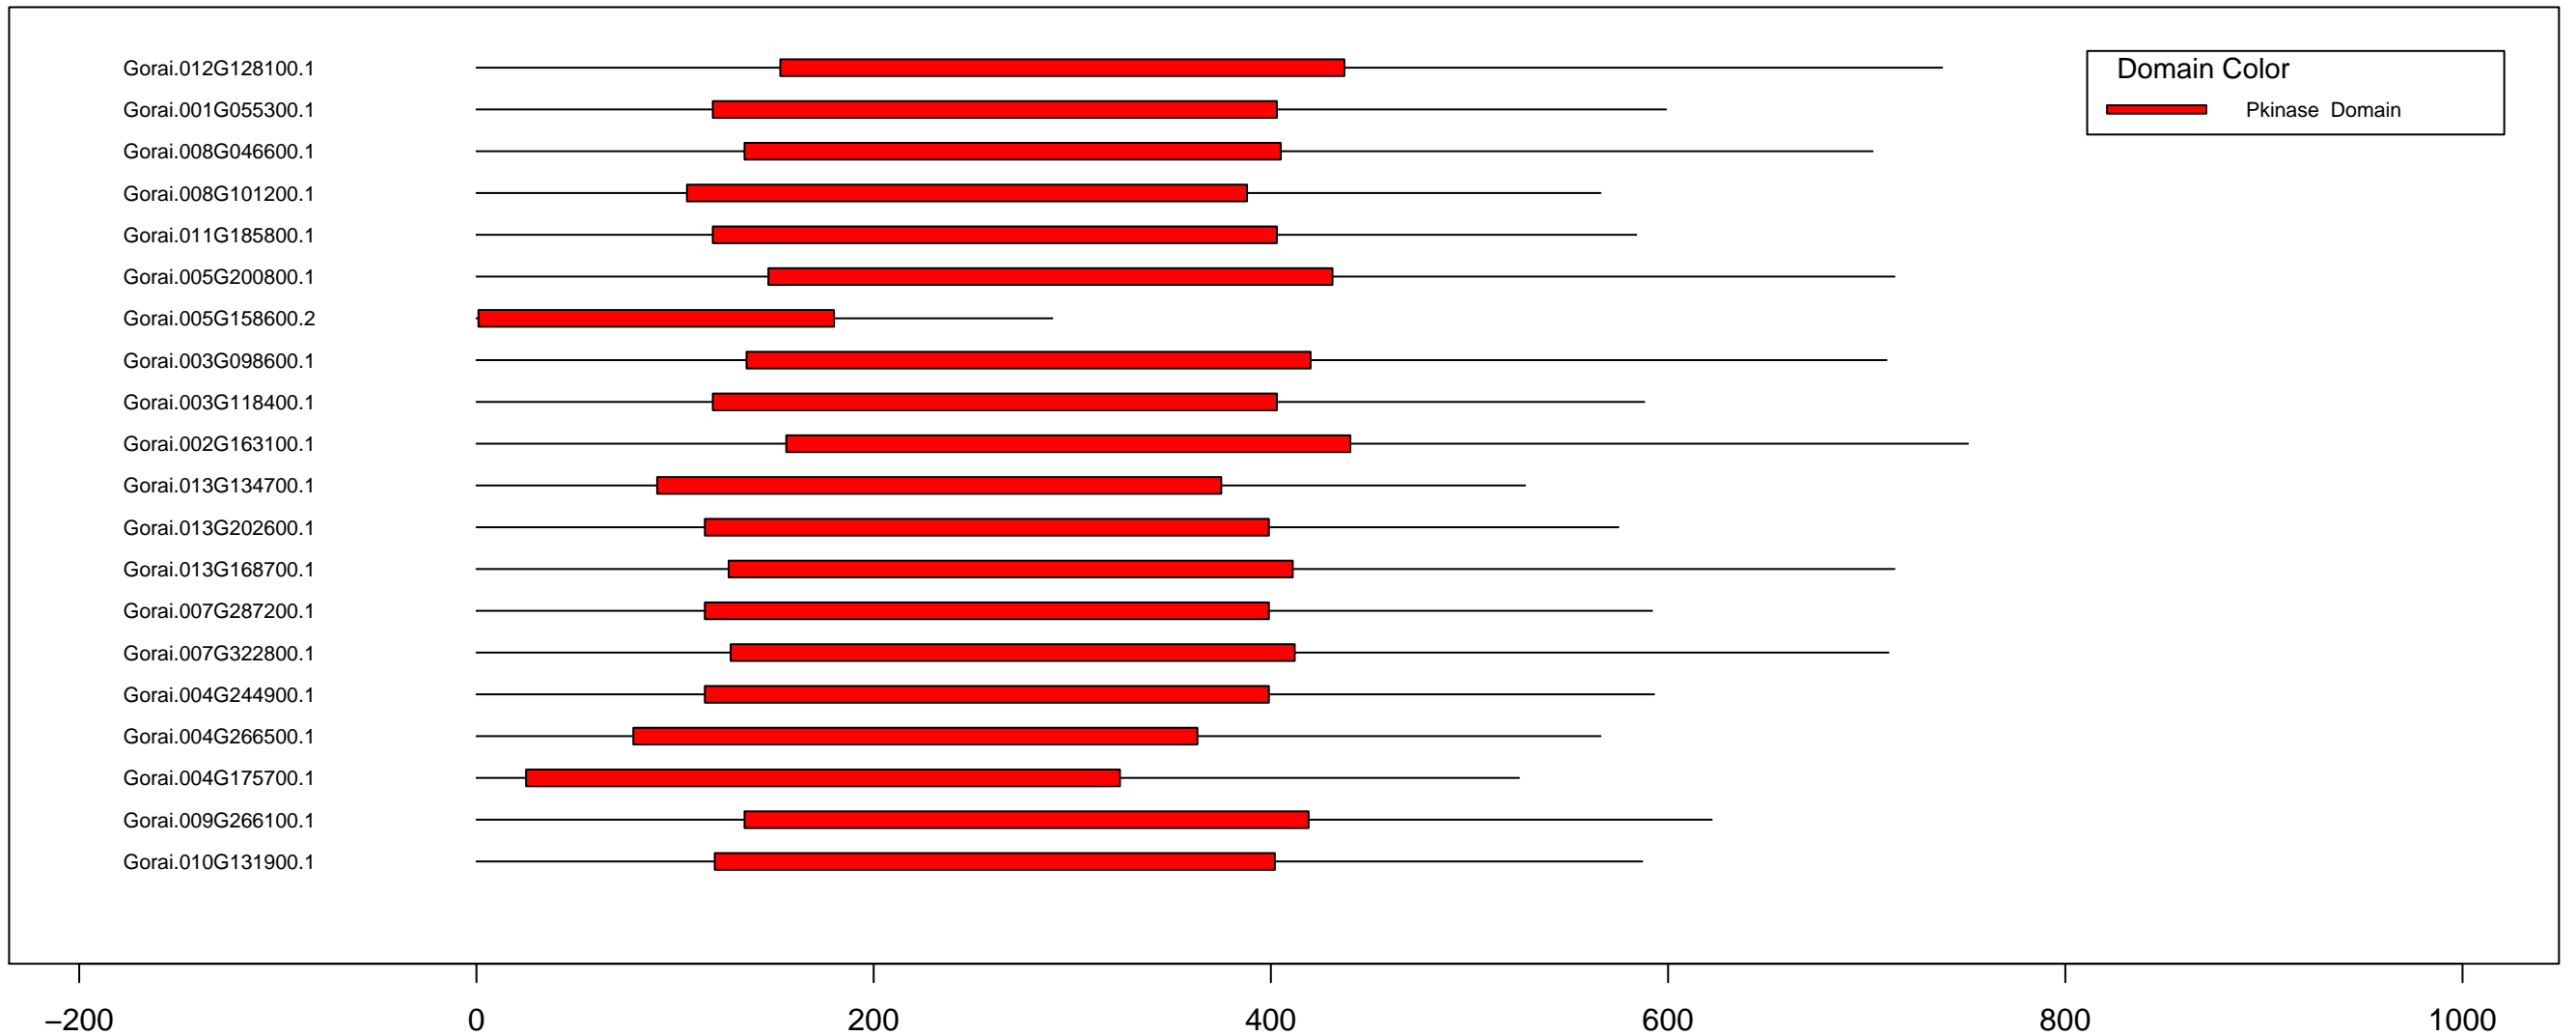



### G.ra CMGC\_CDK-CRK7-CDK9 domain diagram (part 2)

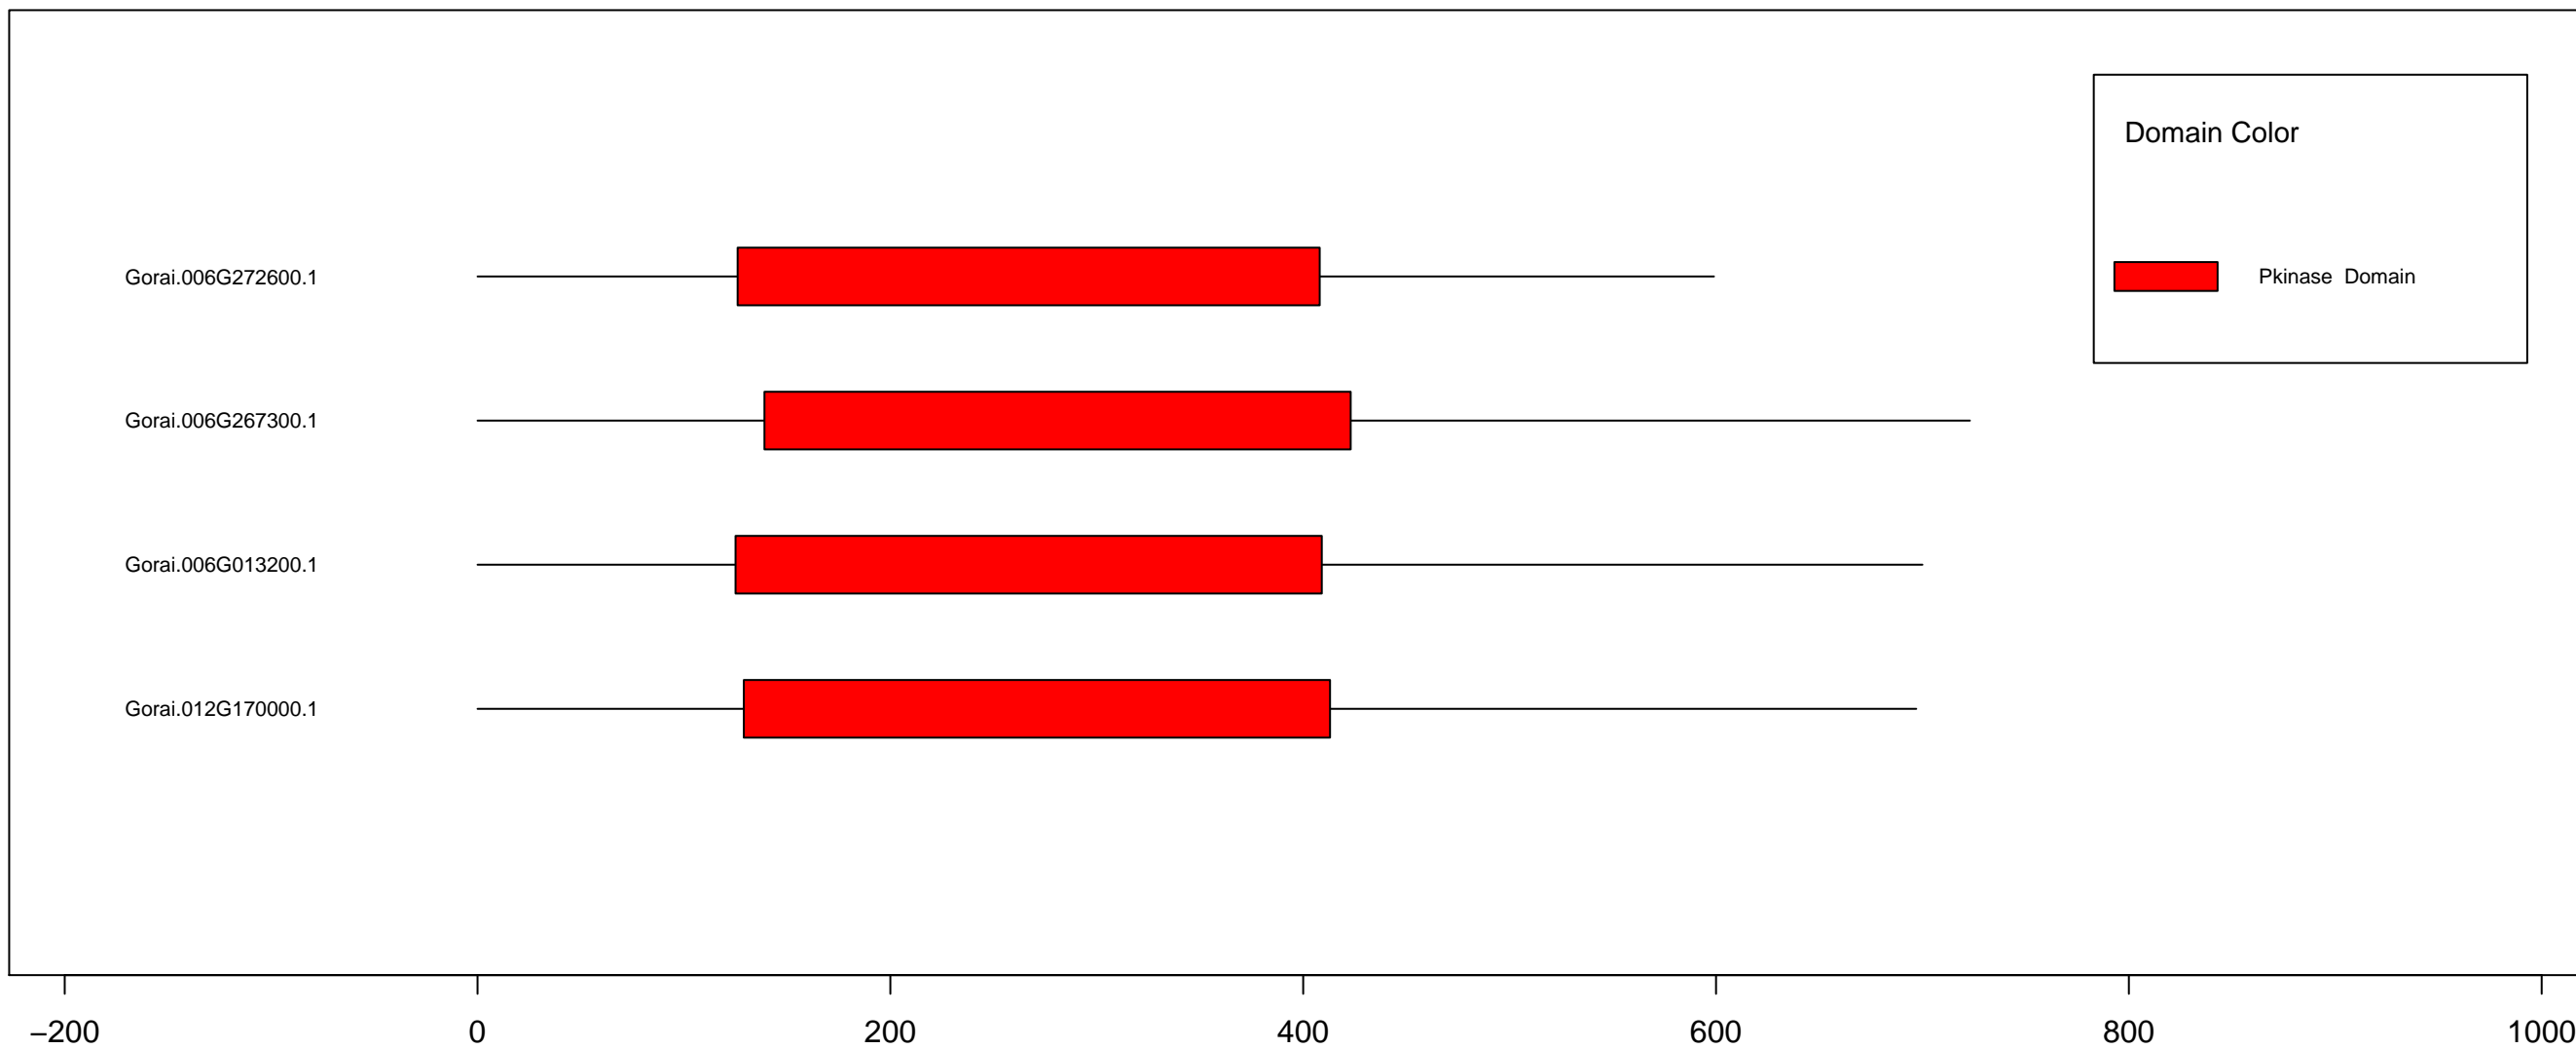

# G.ra CMGC\_CDK-PITSLRE domain diagram (all)

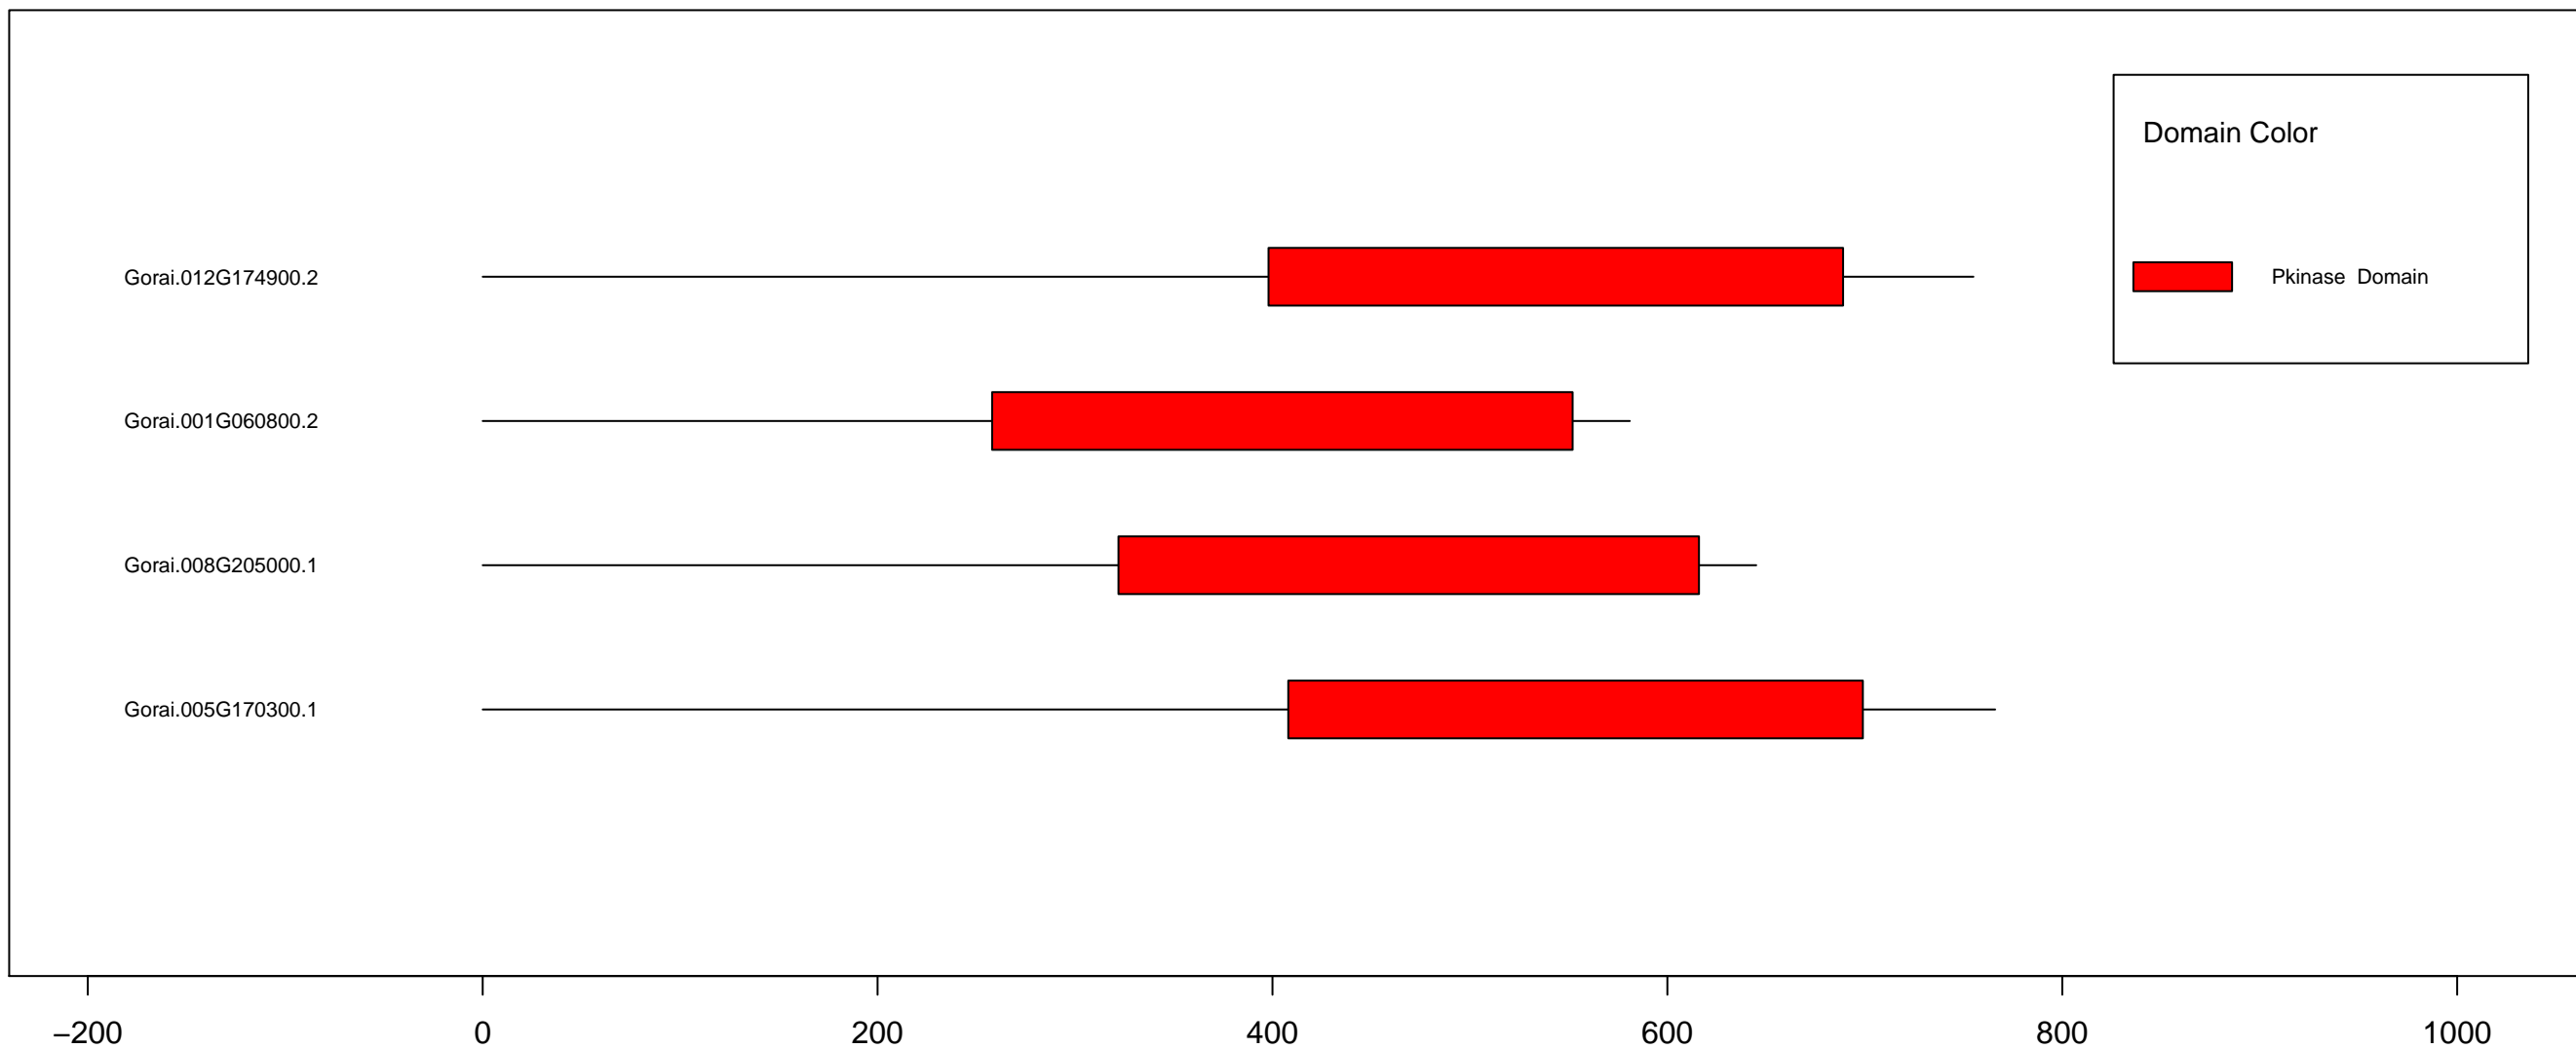

# G.ra CMGC\_CDK-PI domain diagram (all)

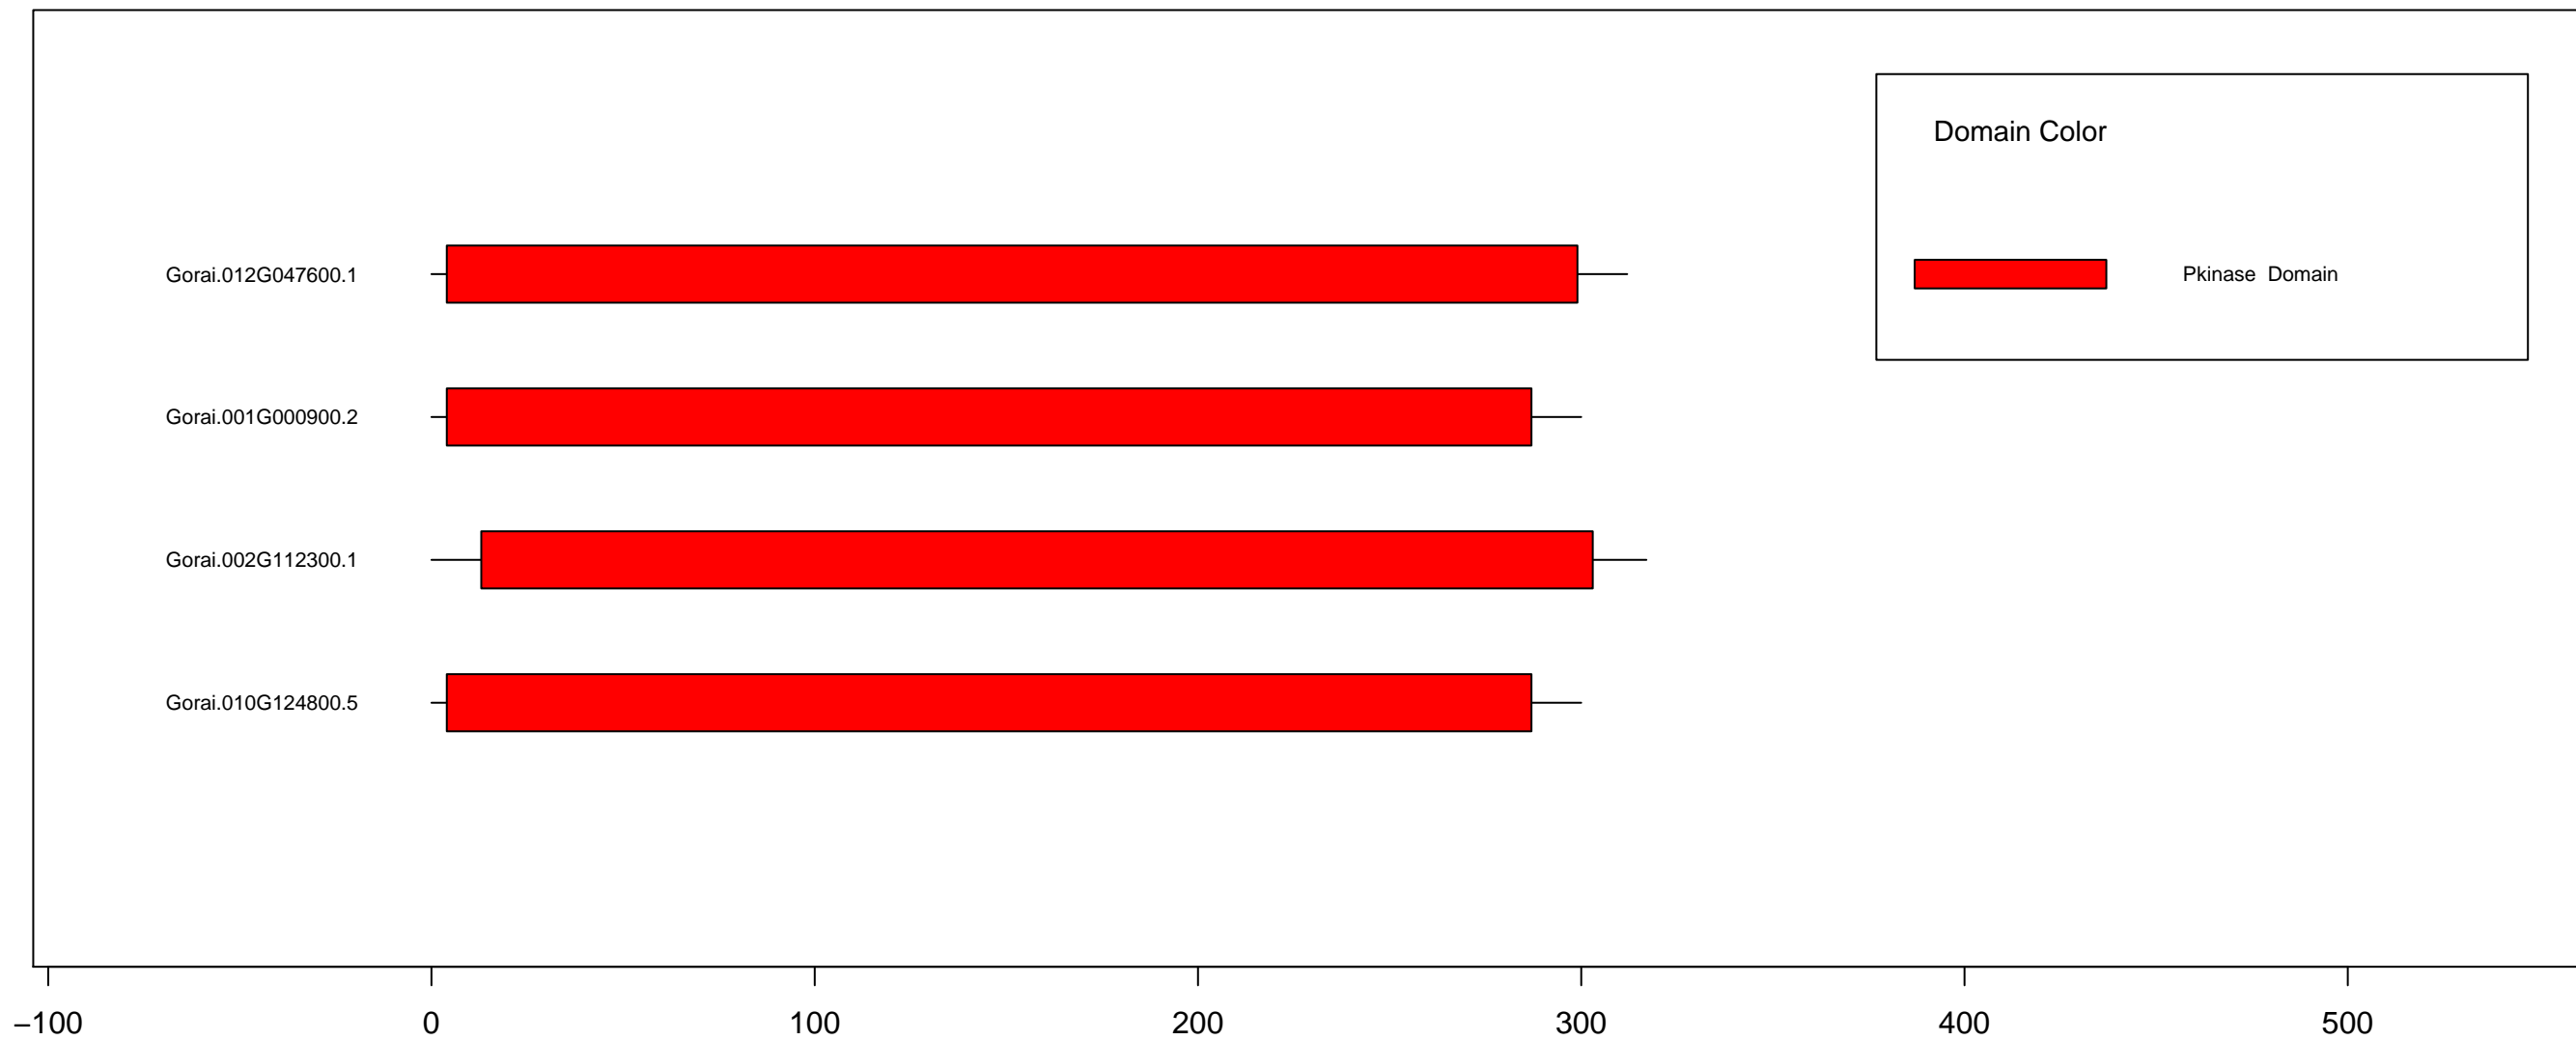

# G.ra CMGC\_CK2 domain diagram (all)

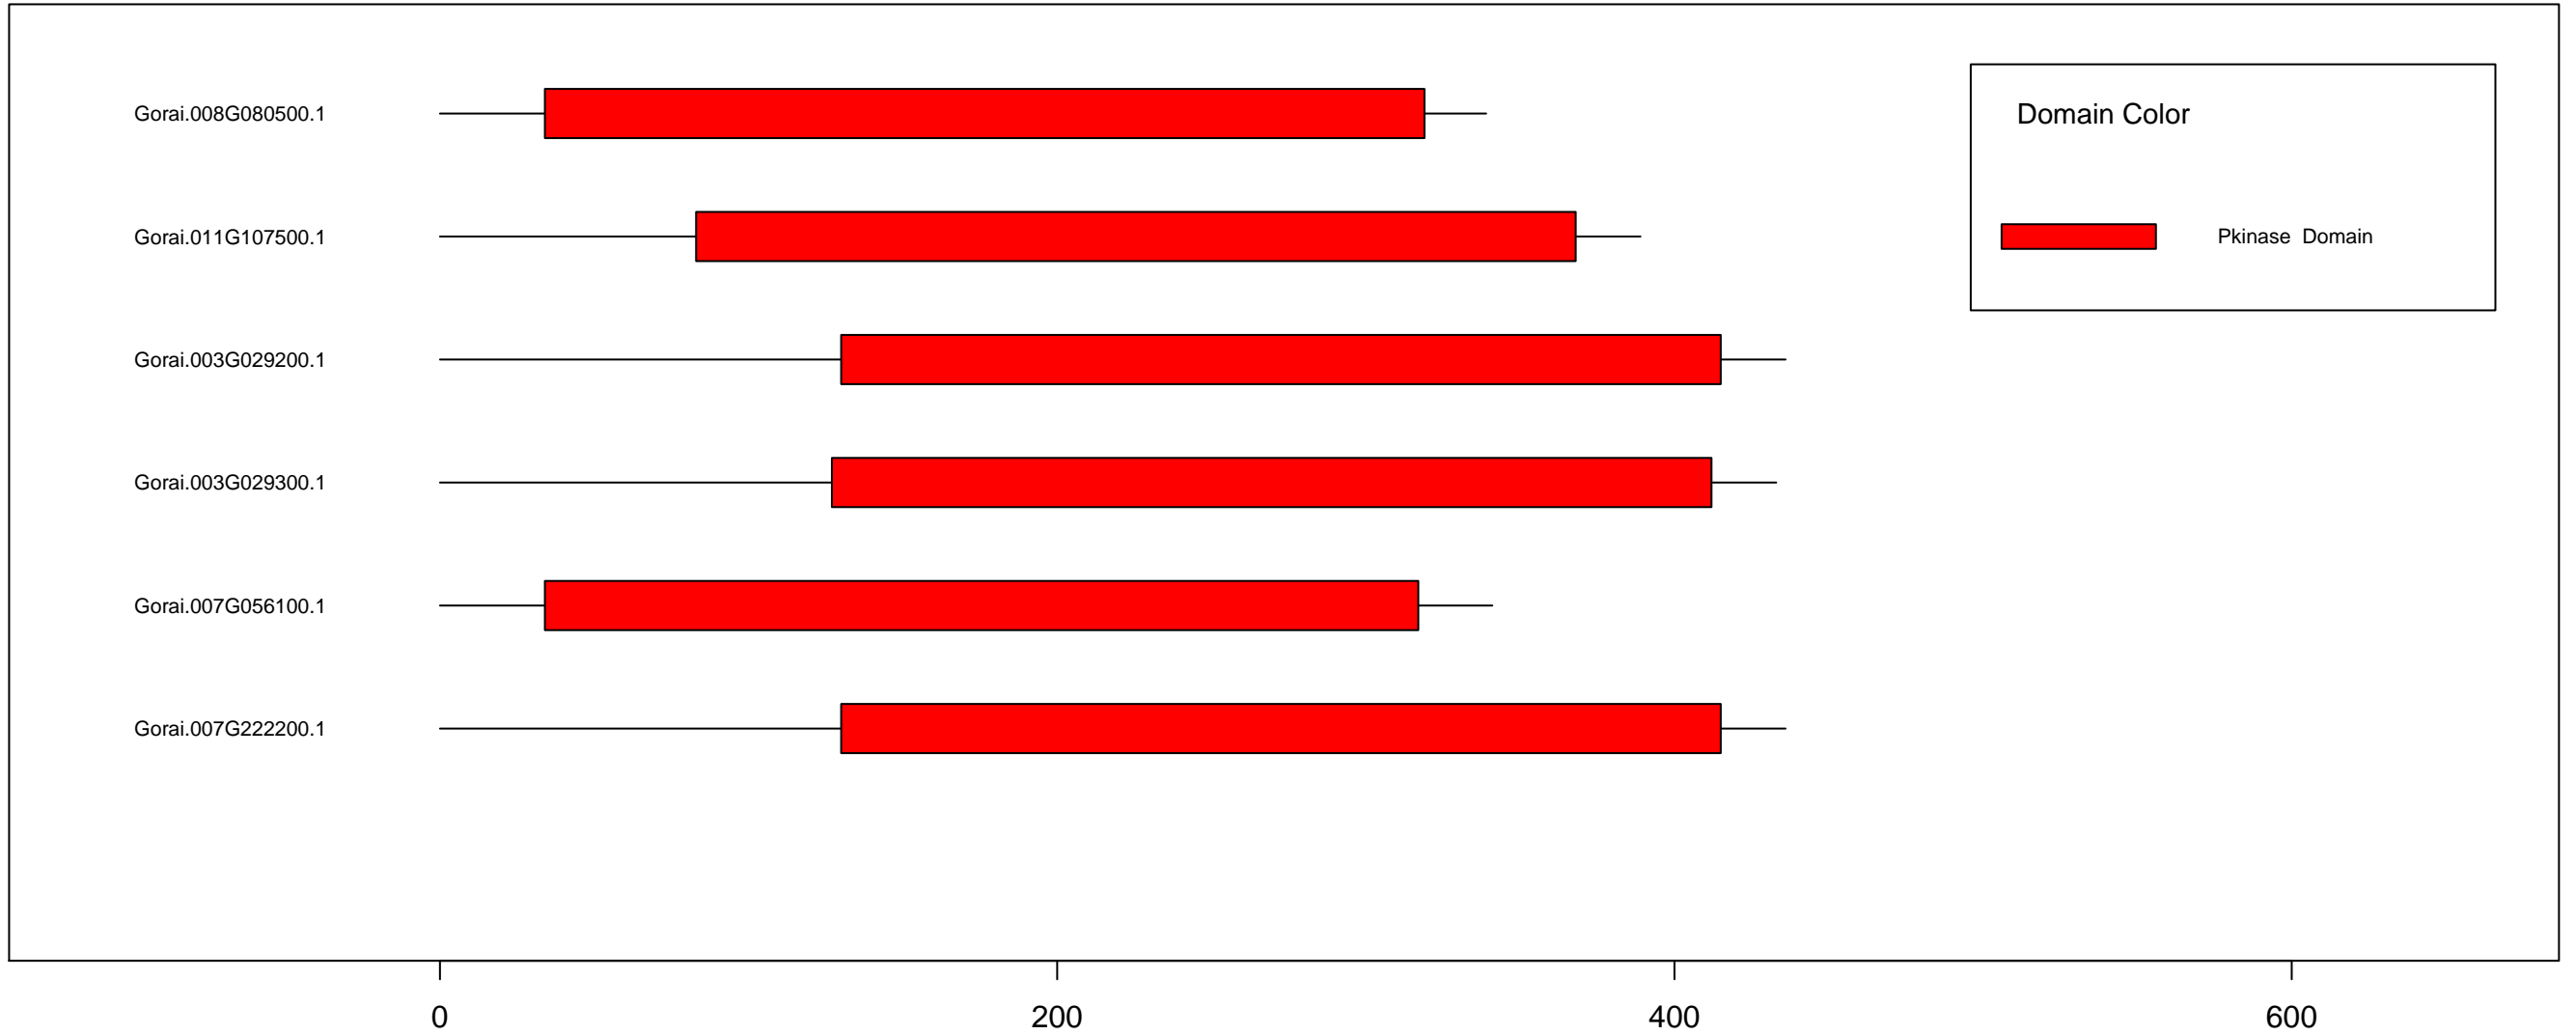

# G.ra CMGC\_CLK domain diagram (all)

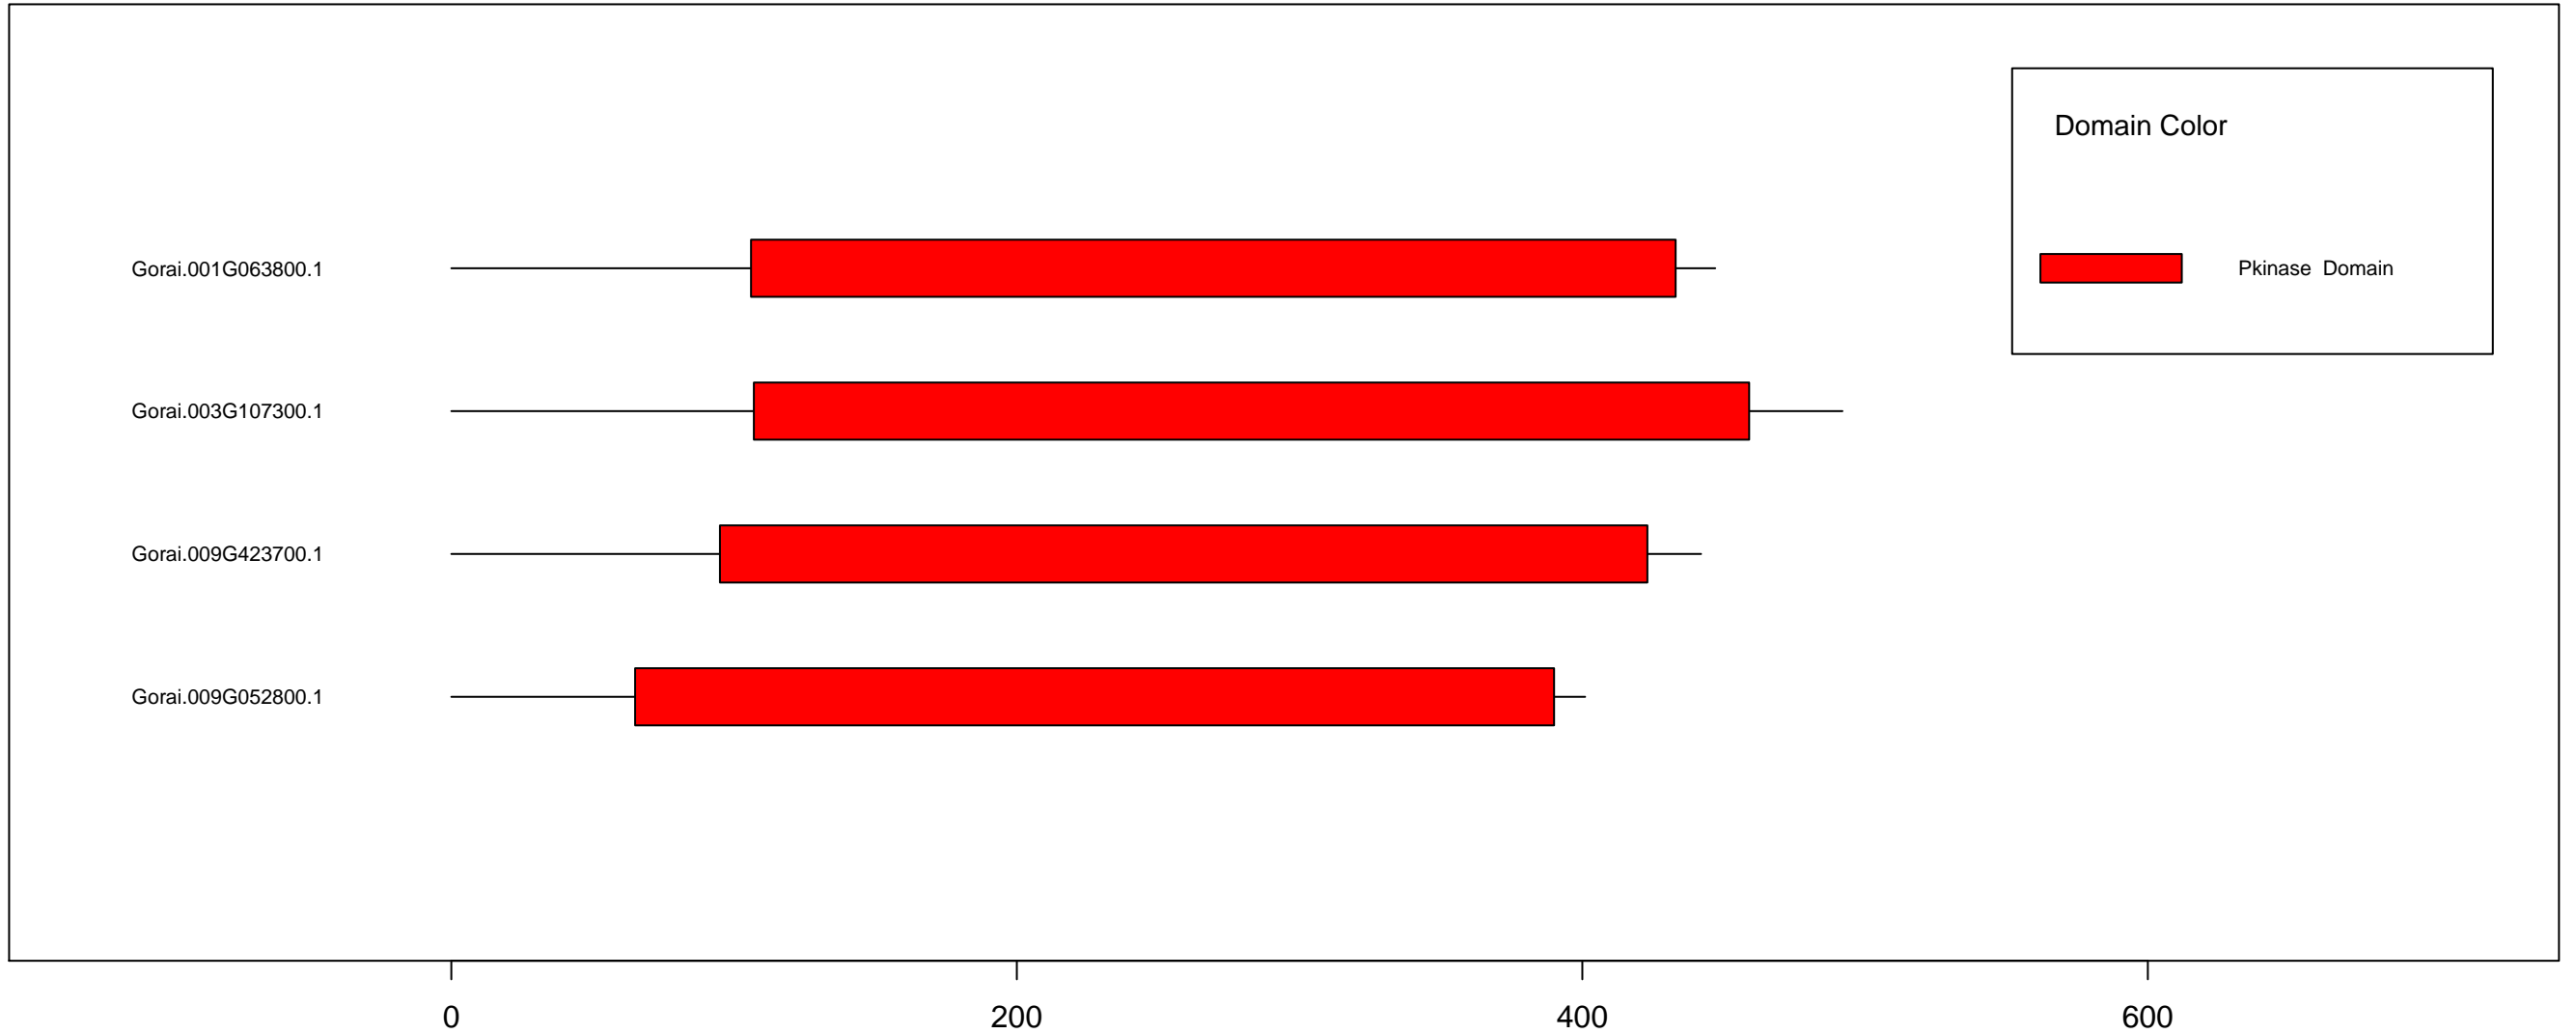

# G.ra CMGC\_DYRK-PRP4 domain diagram (all)

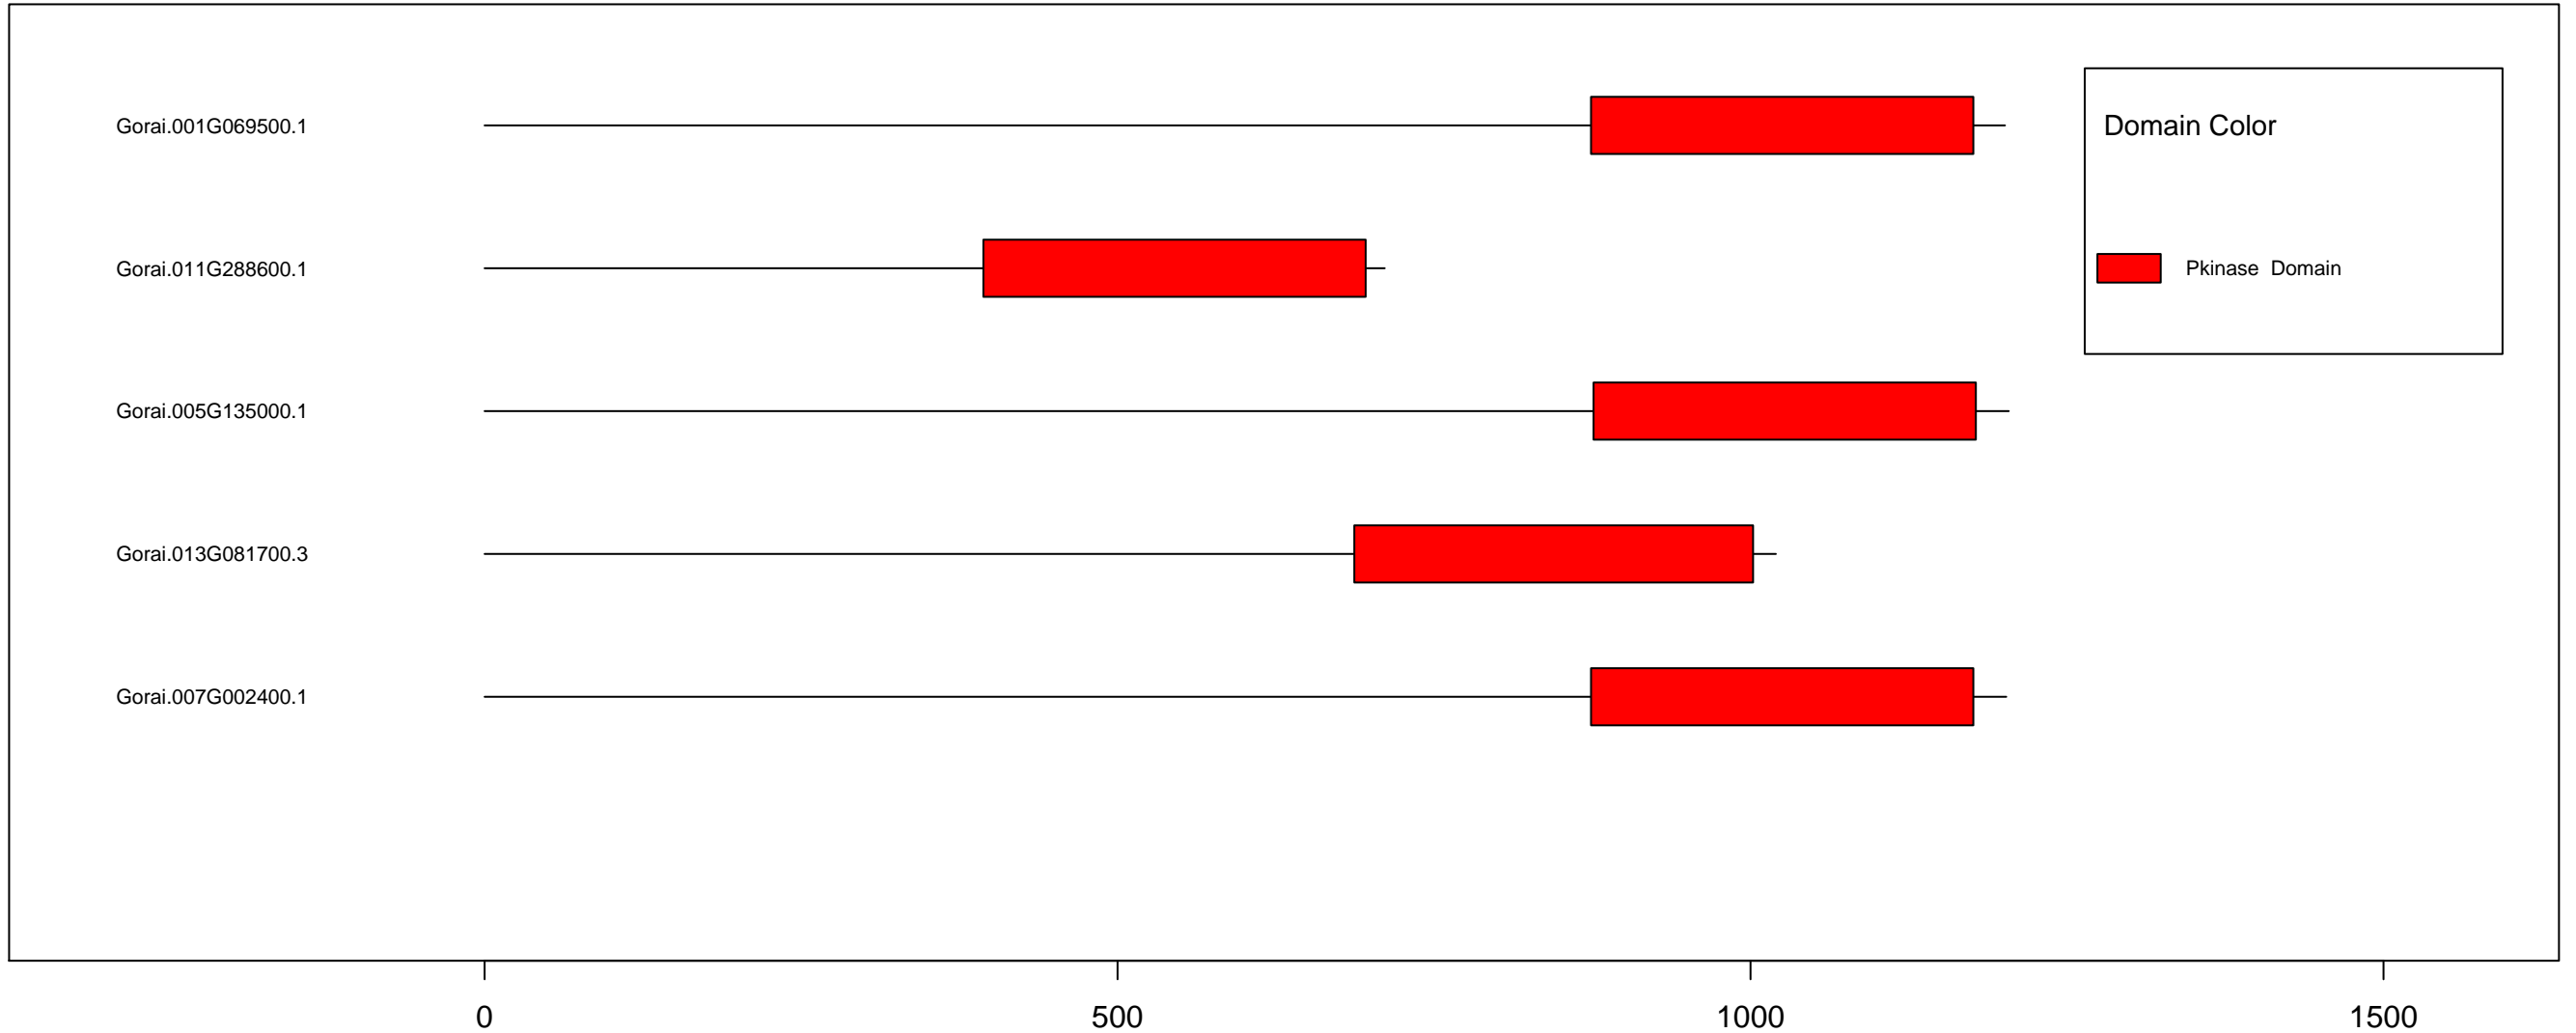

# G.ra CMGC\_DYRK-YAK domain diagram (all)

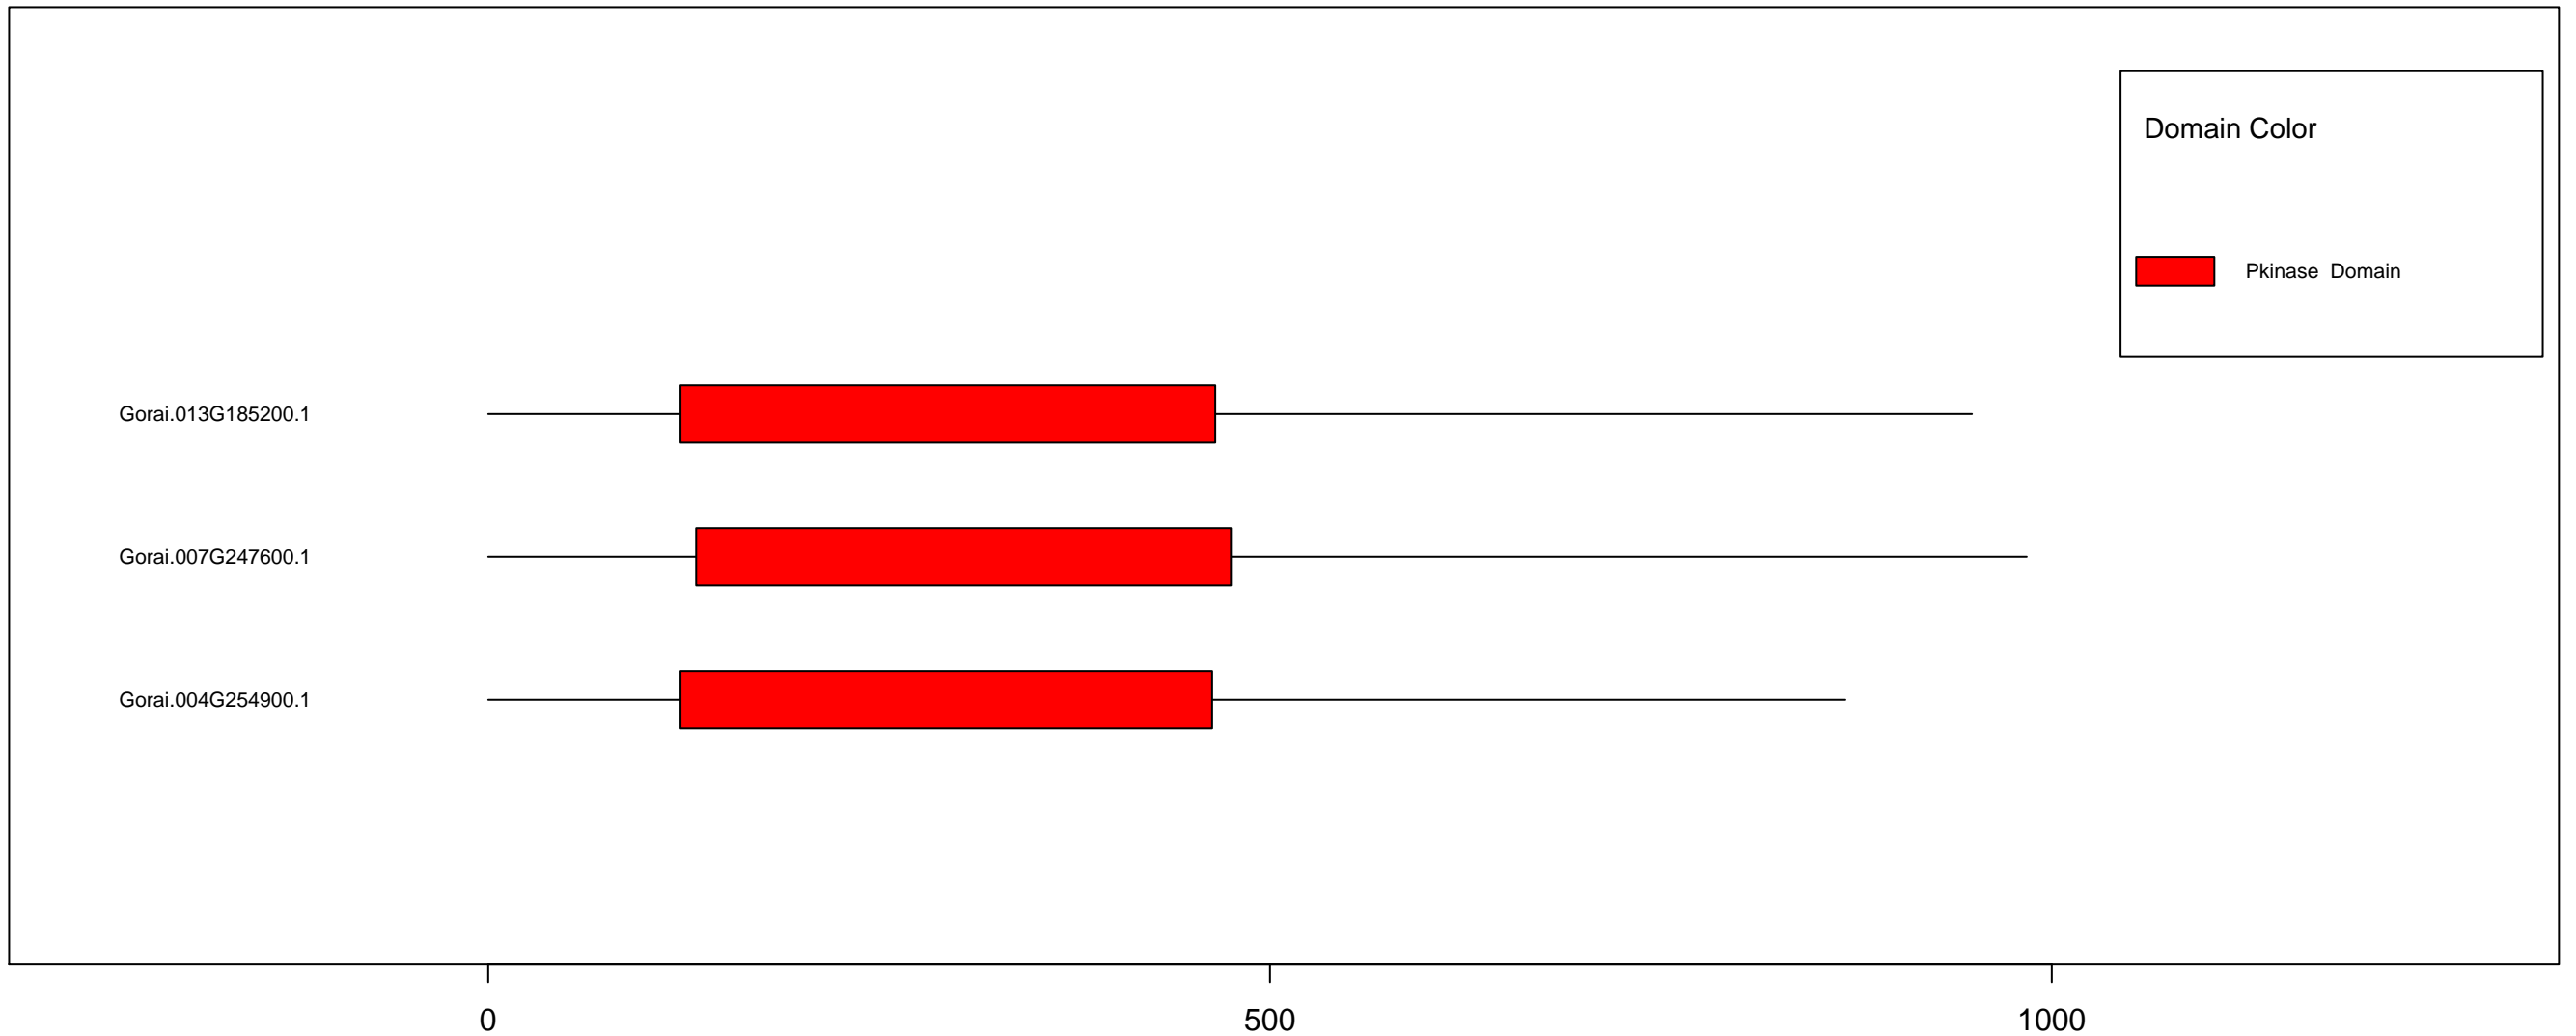

# G.ra CMGC\_GSKL domain diagram (all)

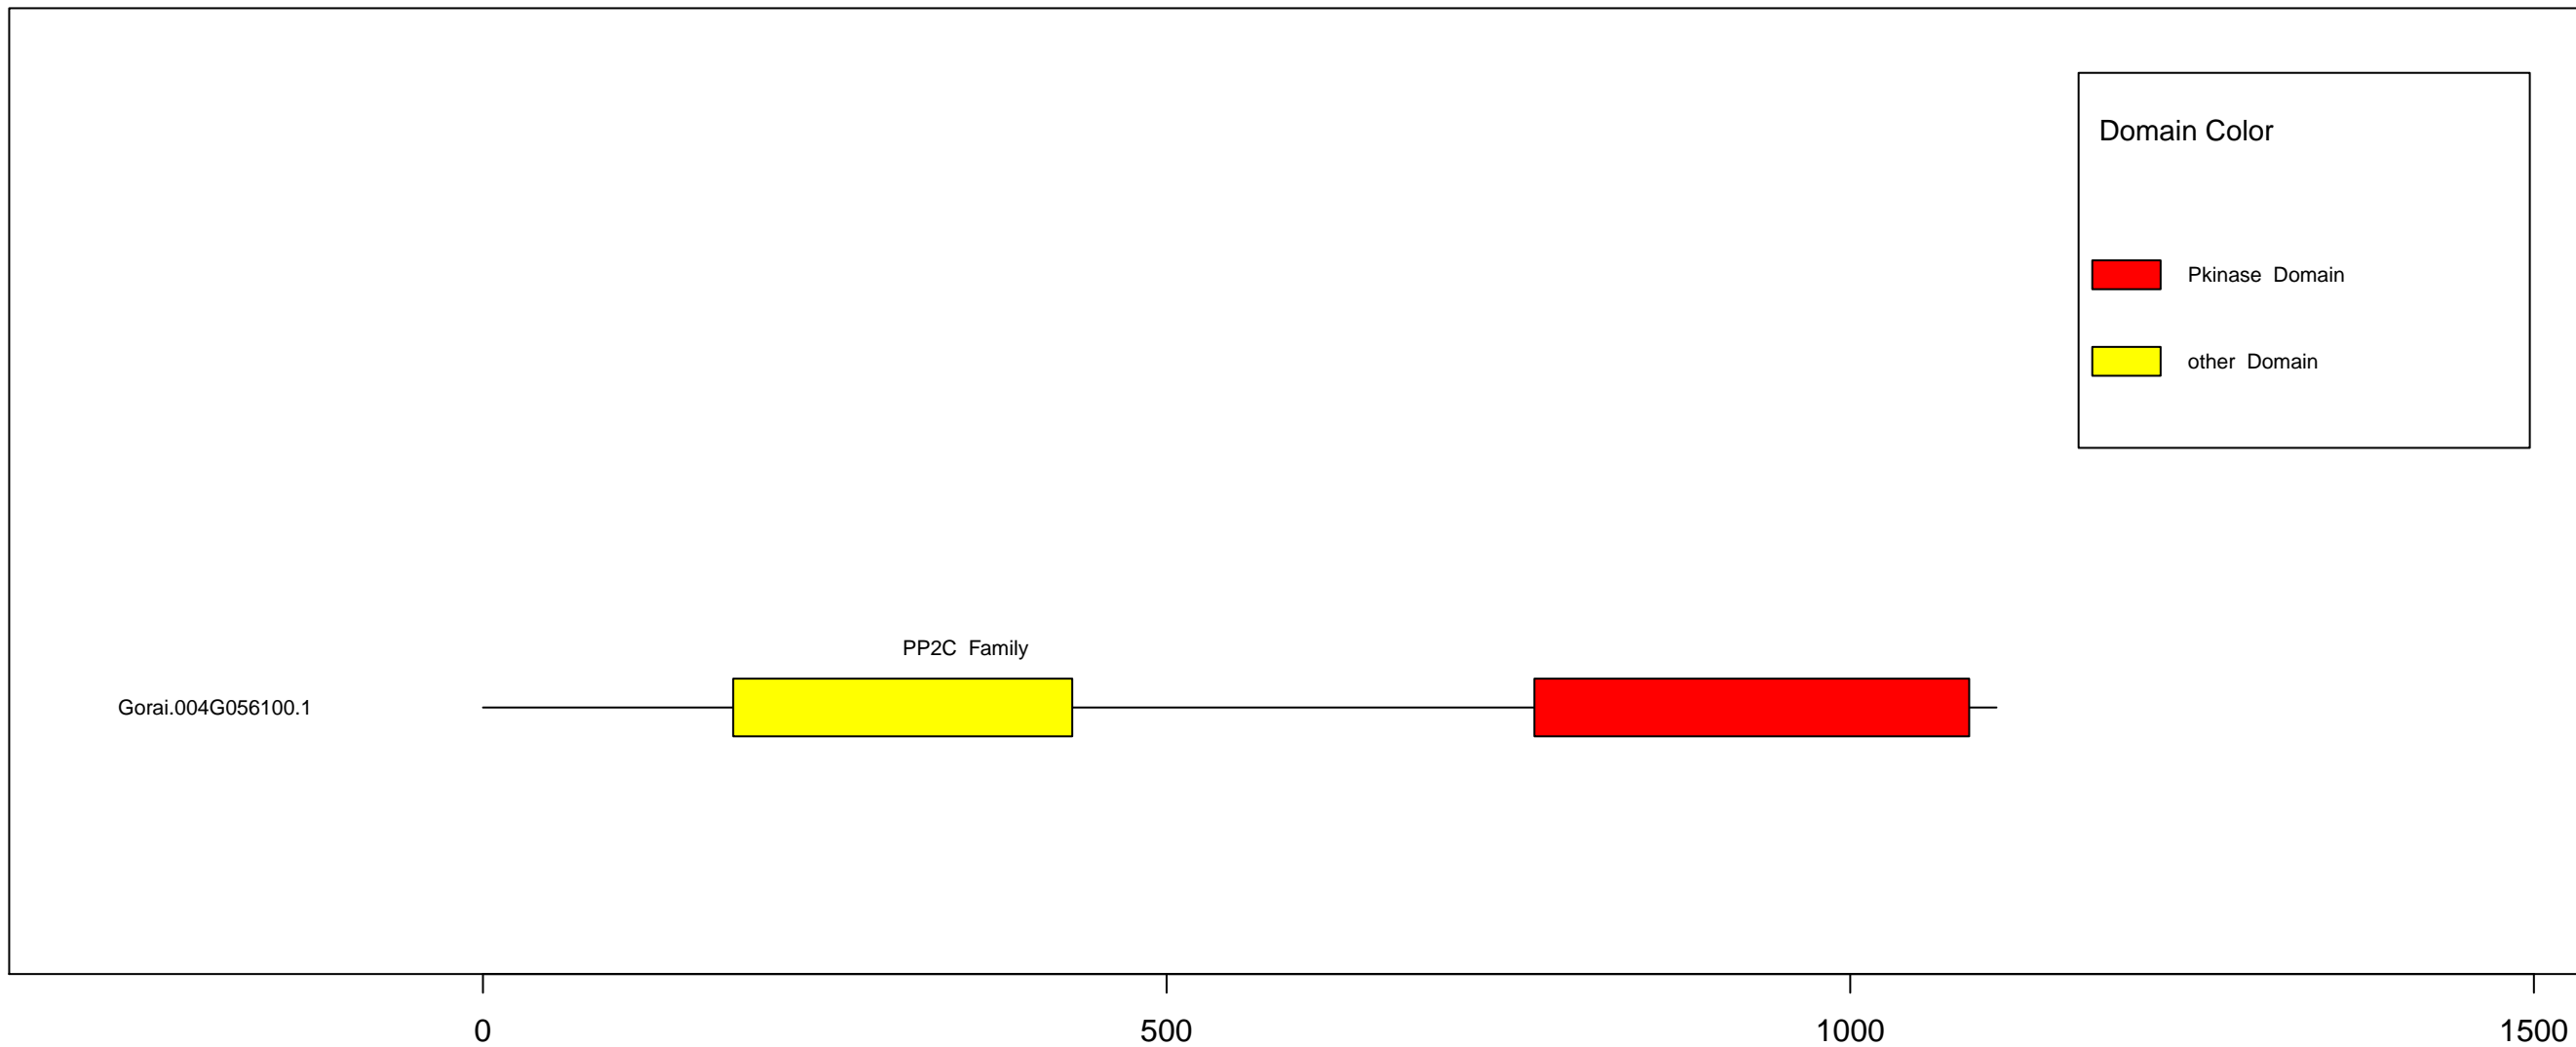



# G.ra CMGC\_GSK domain diagram (all)

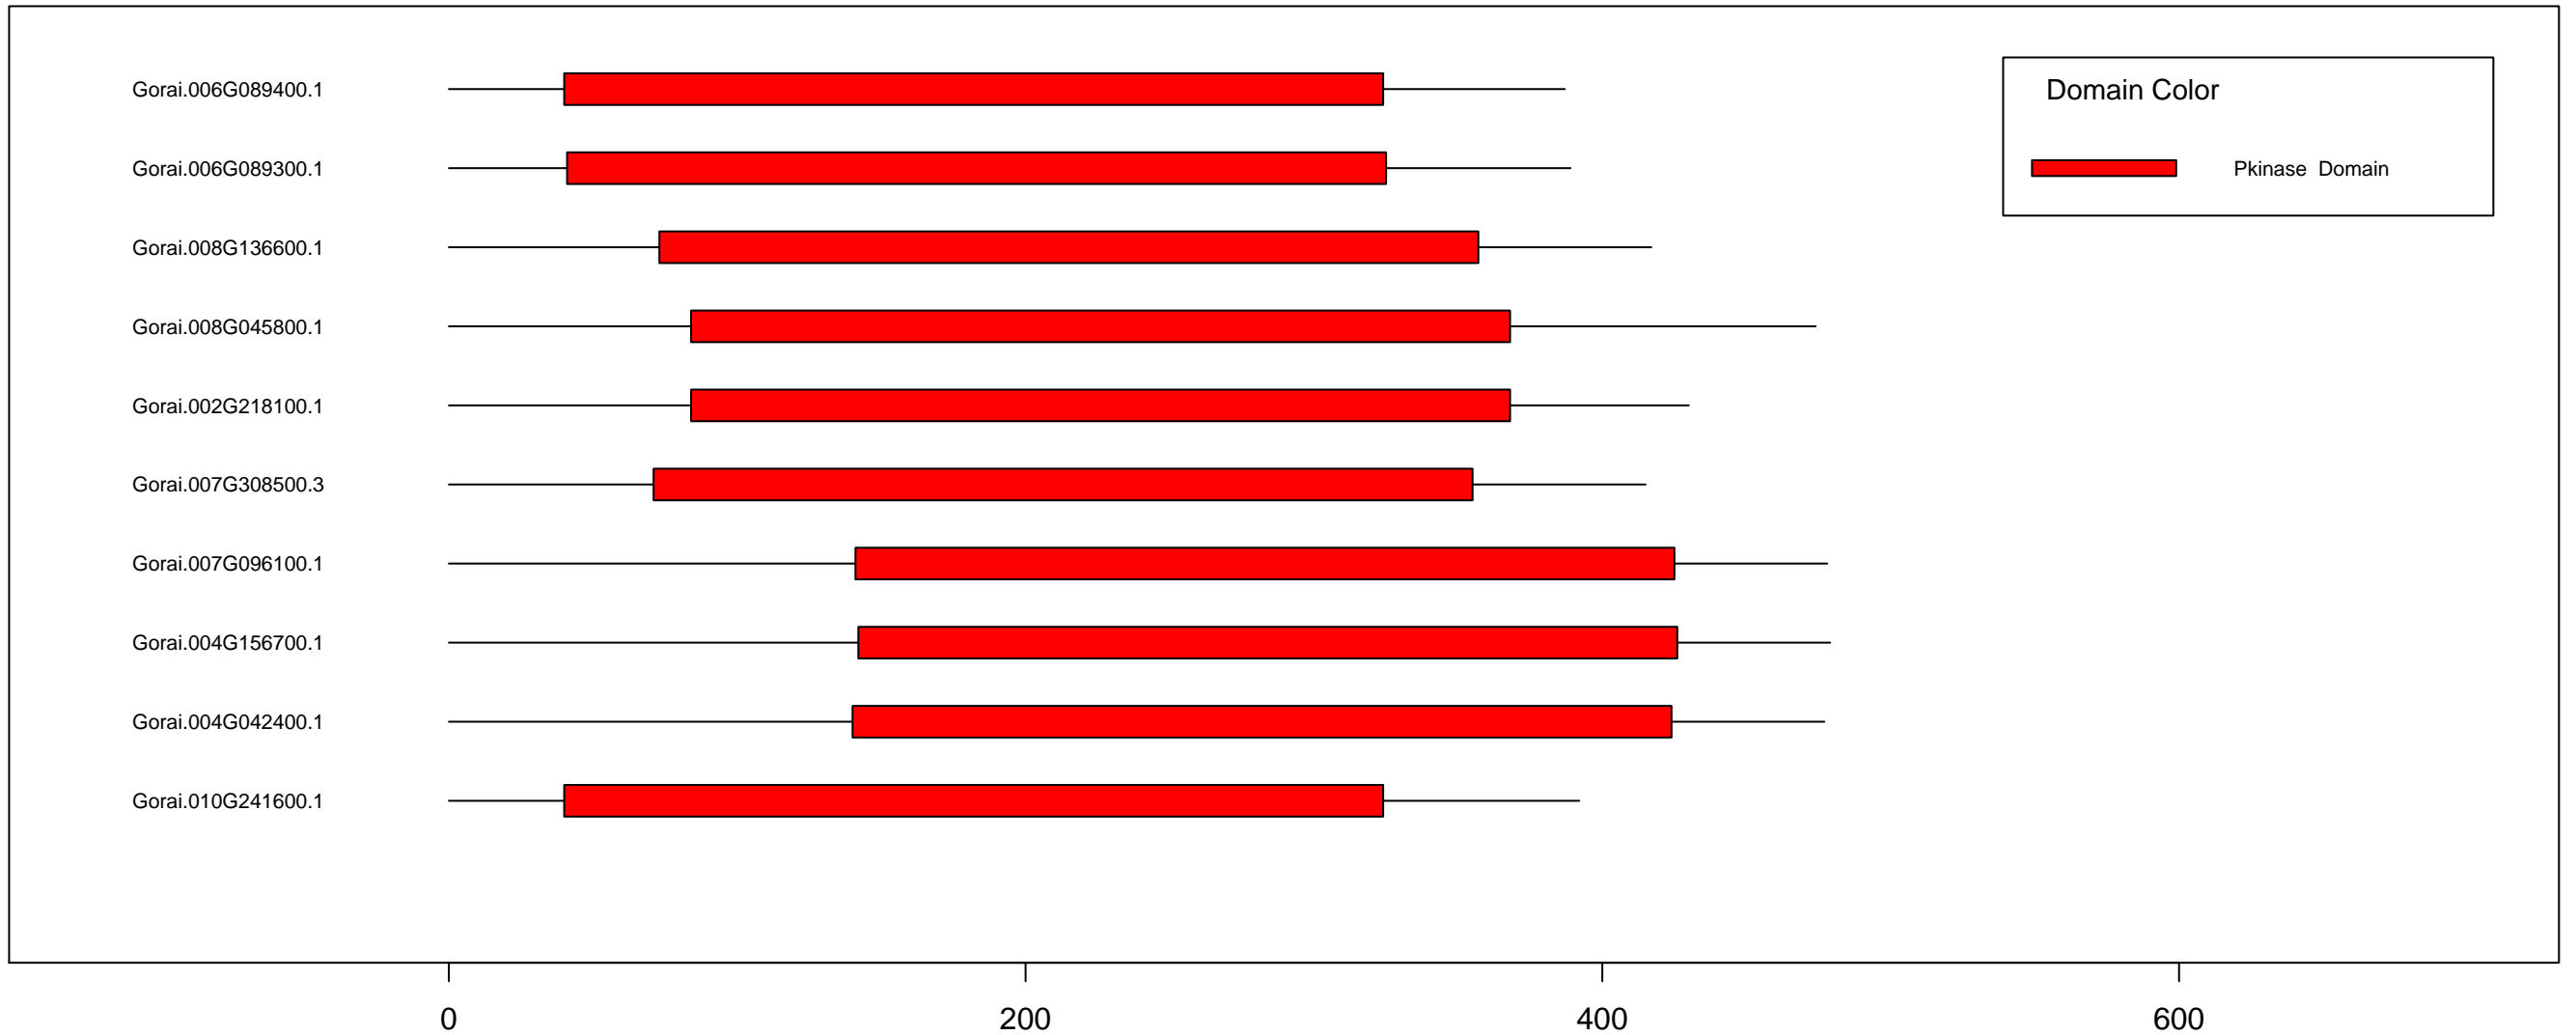

# G.ra CMGC\_MAPK domain diagram (part 1)

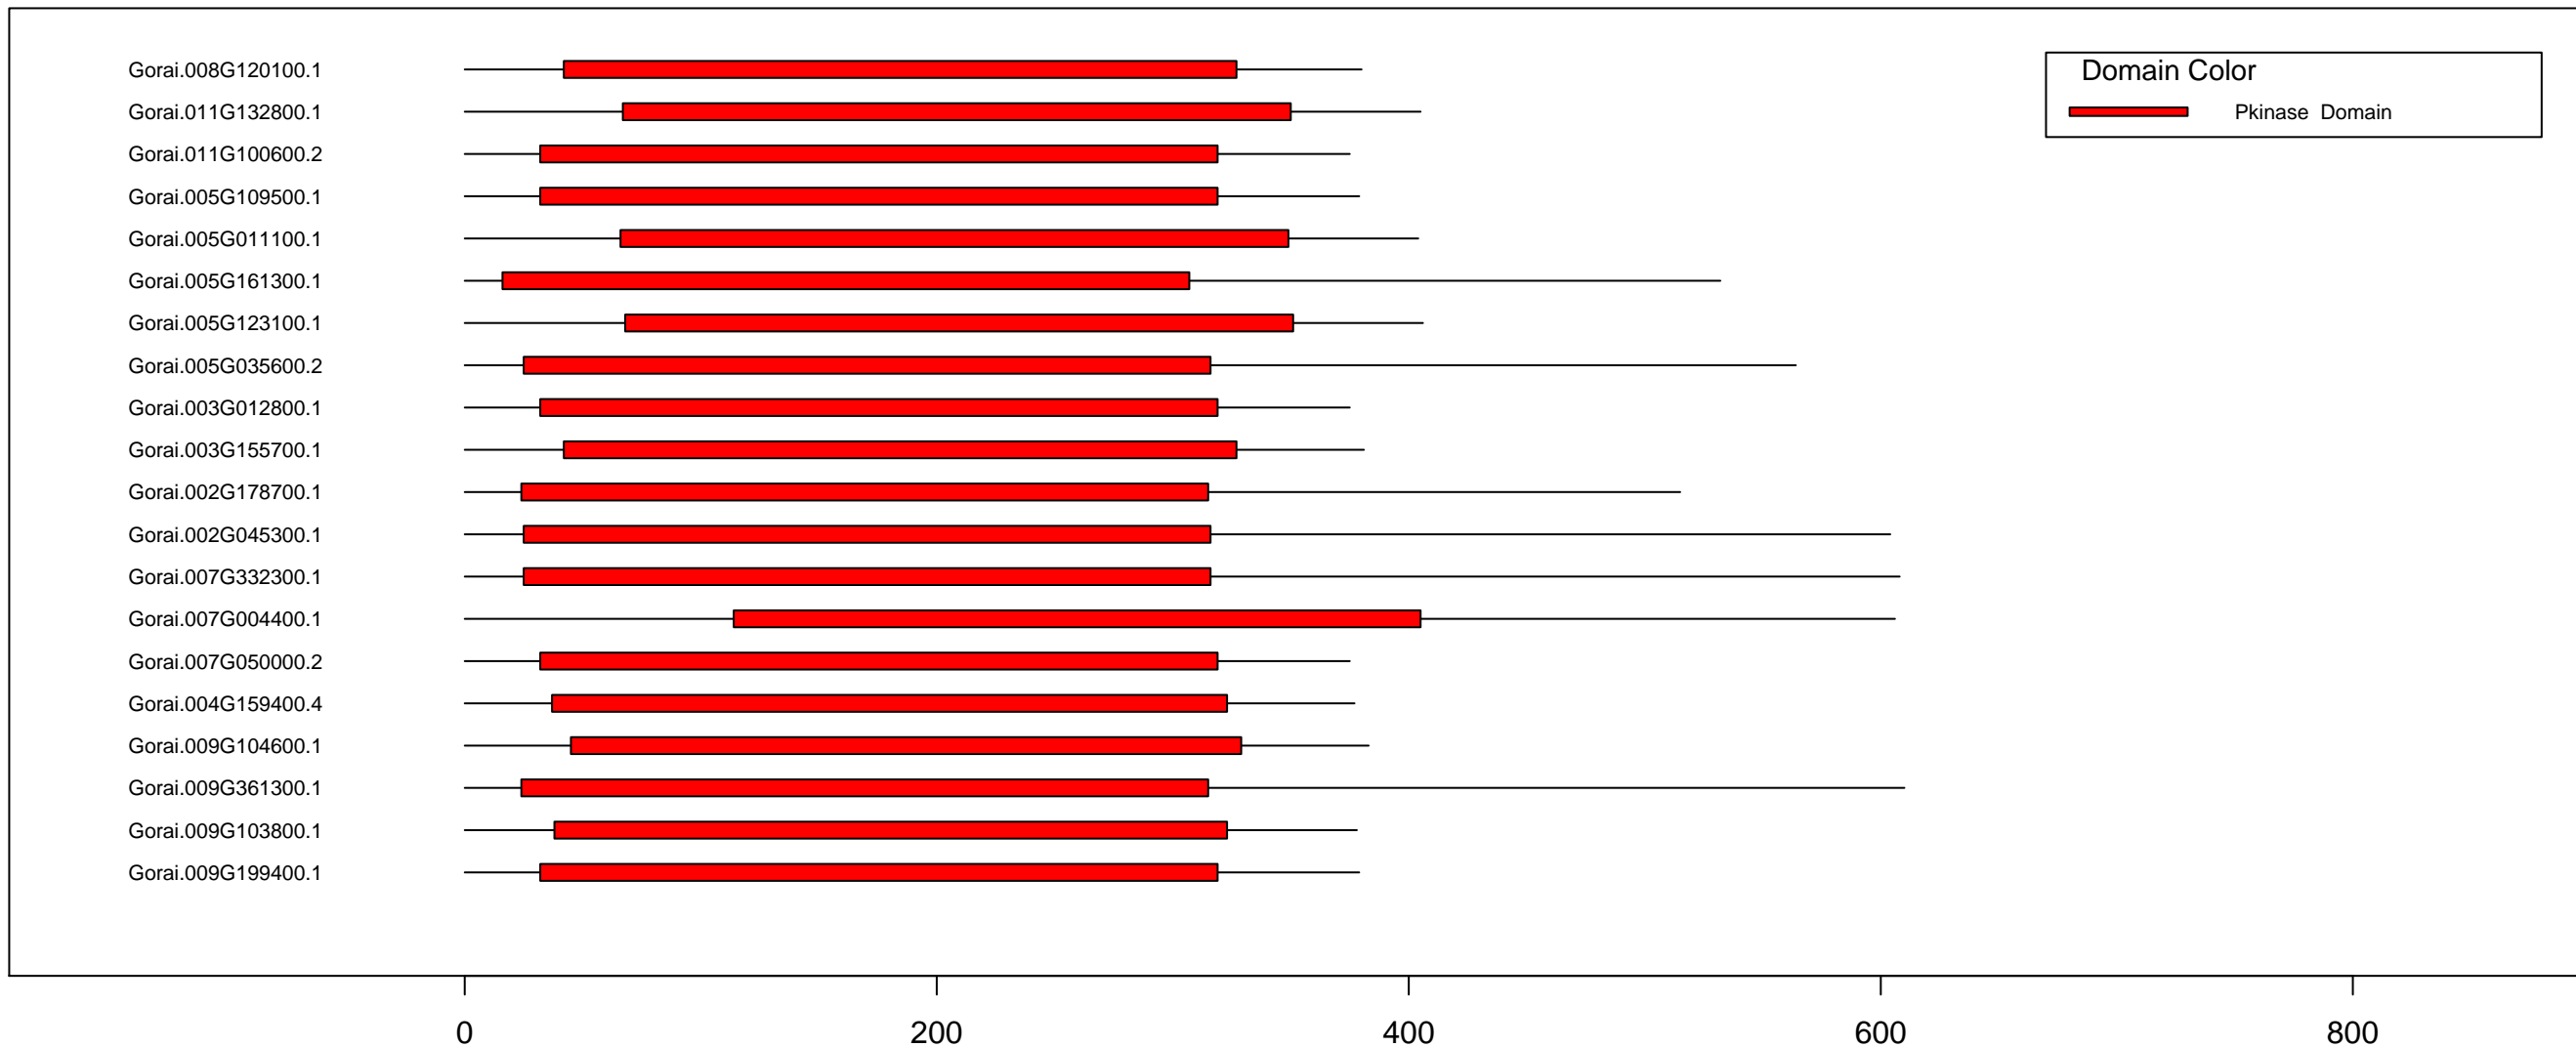

## G.ra CMGC\_MAPK domain diagram (part 2)

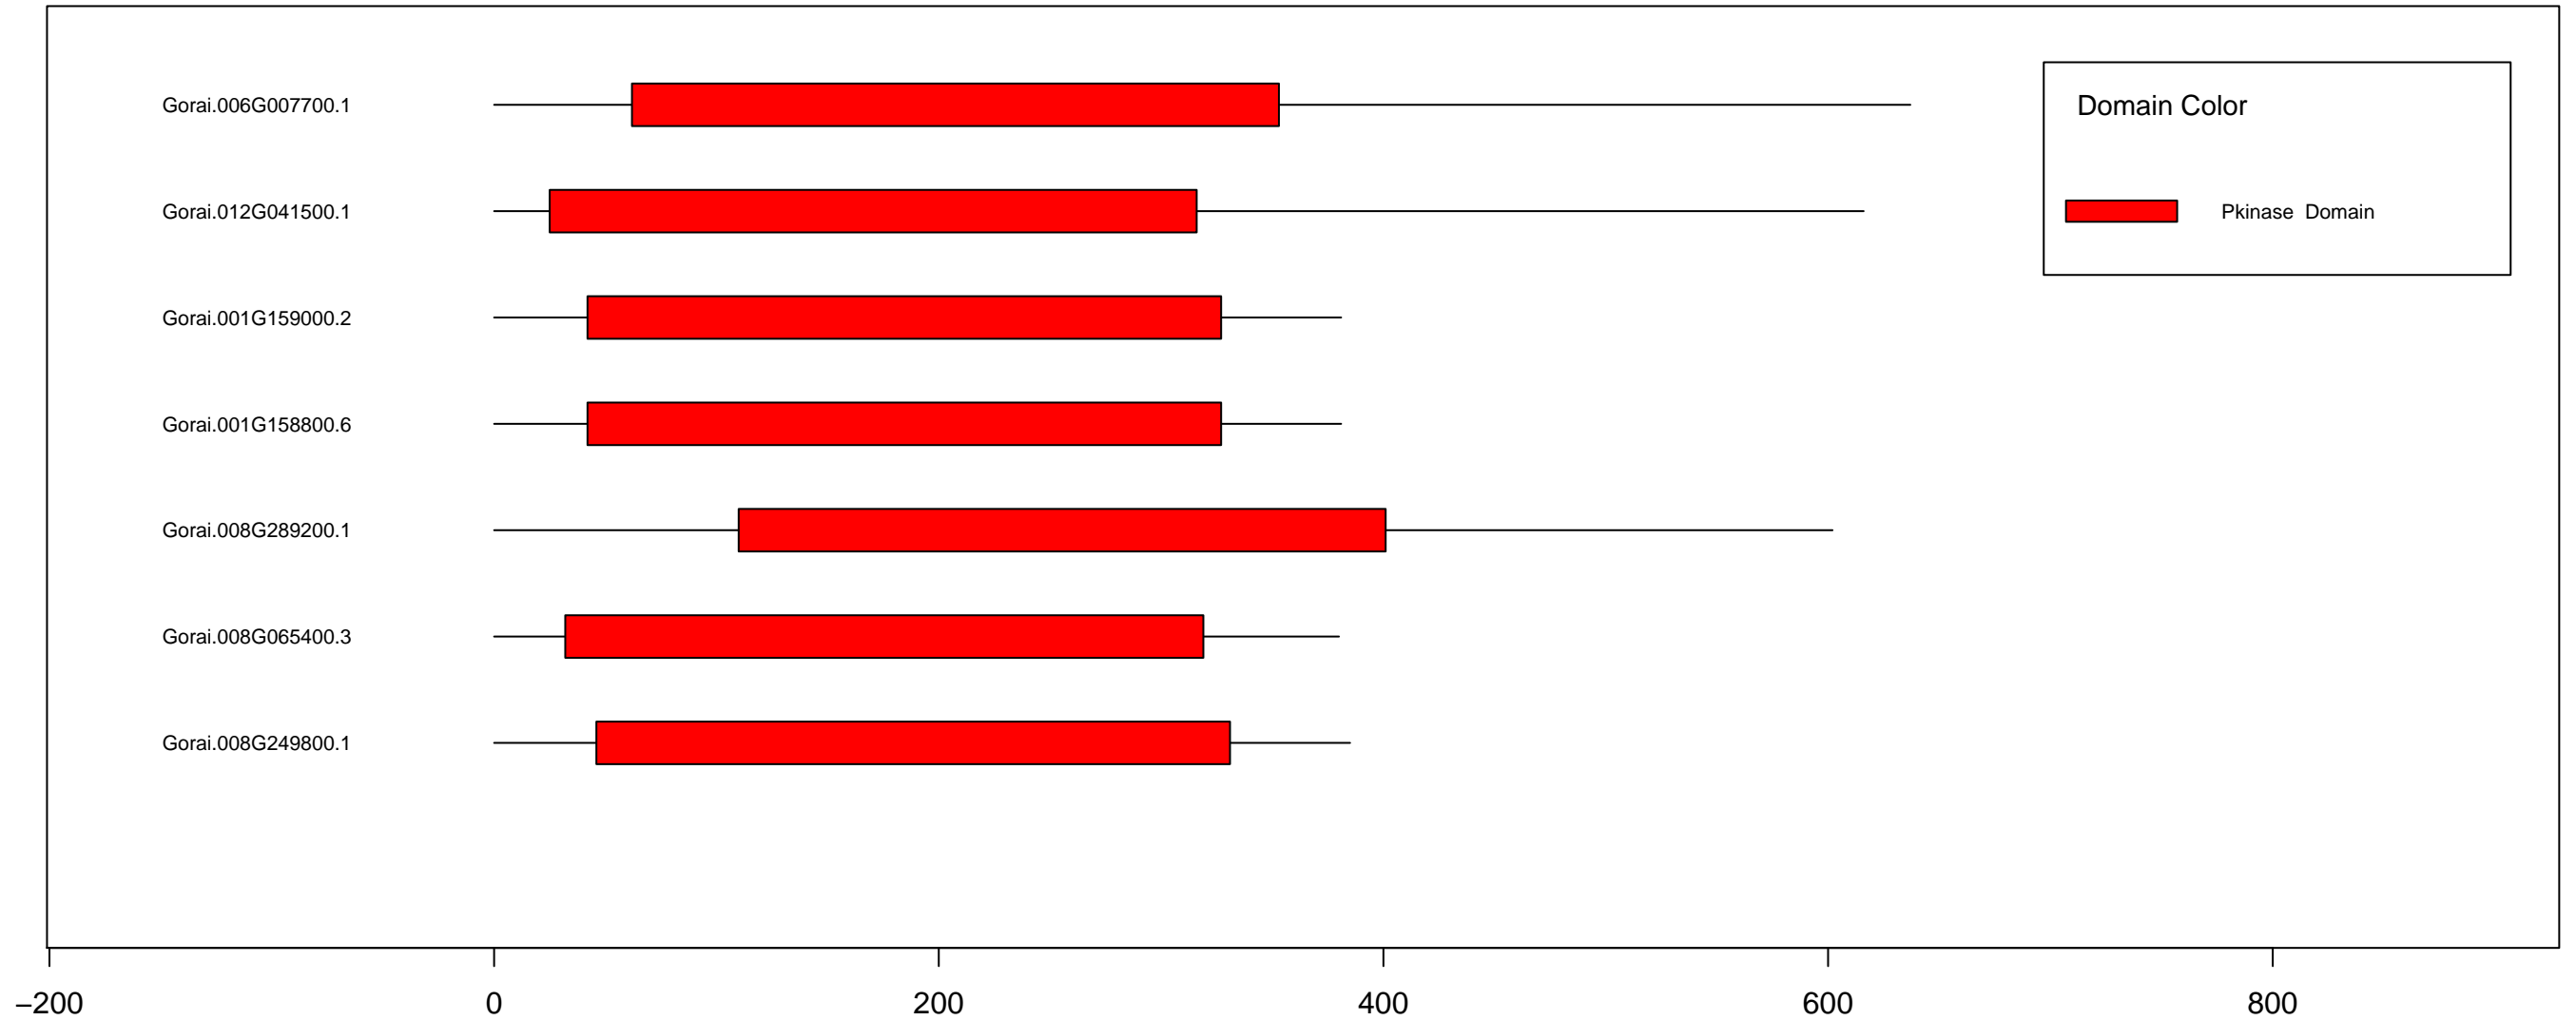

# G.ra CMGC\_PI-Tthe domain diagram (all)

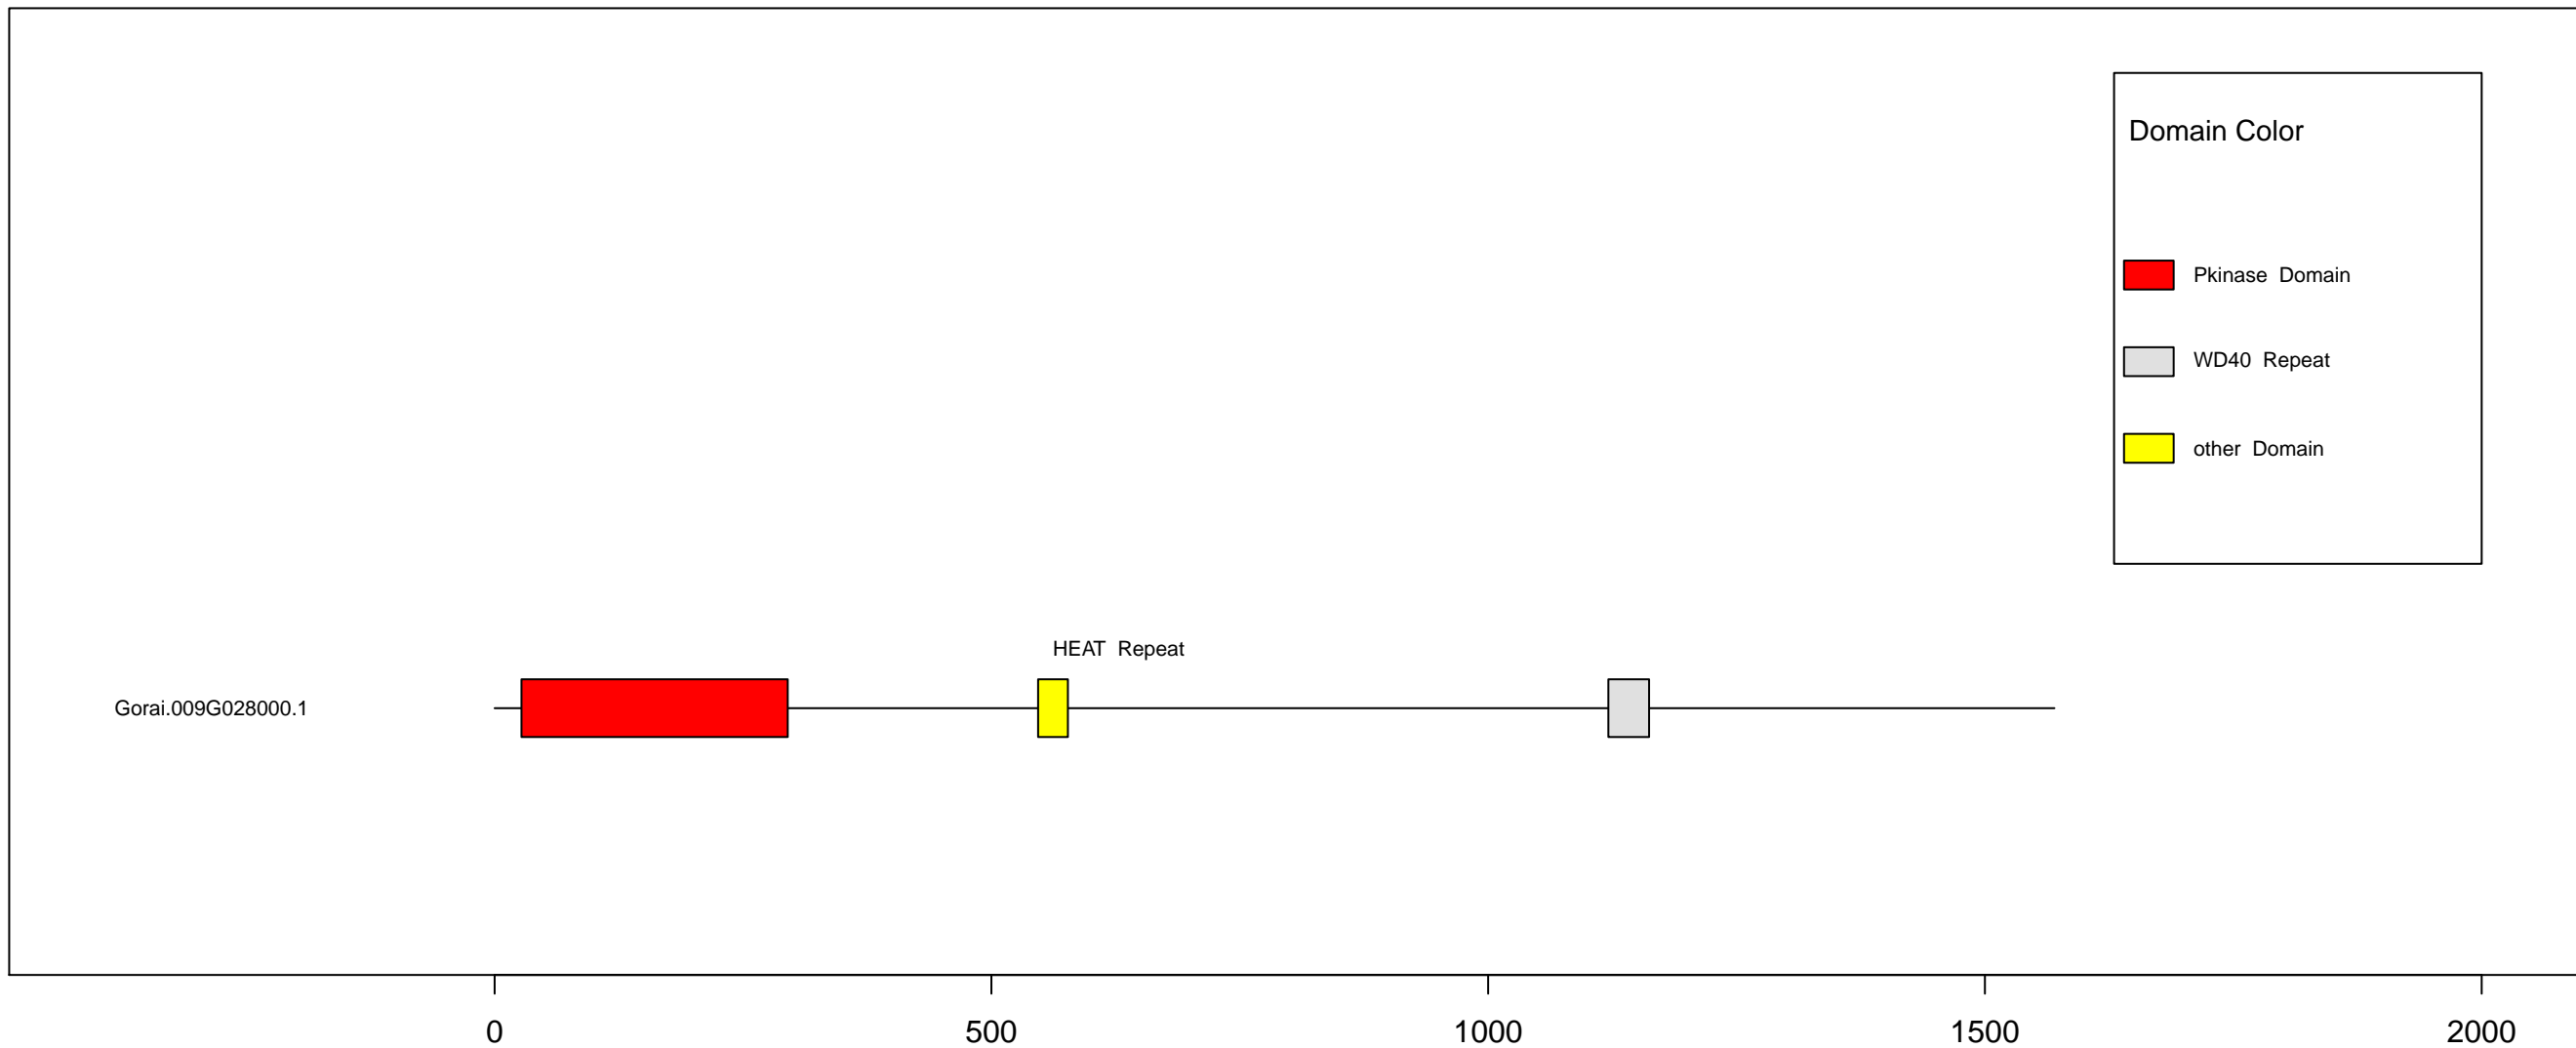

# G.ra CMGC\_RCK domain diagram (all)

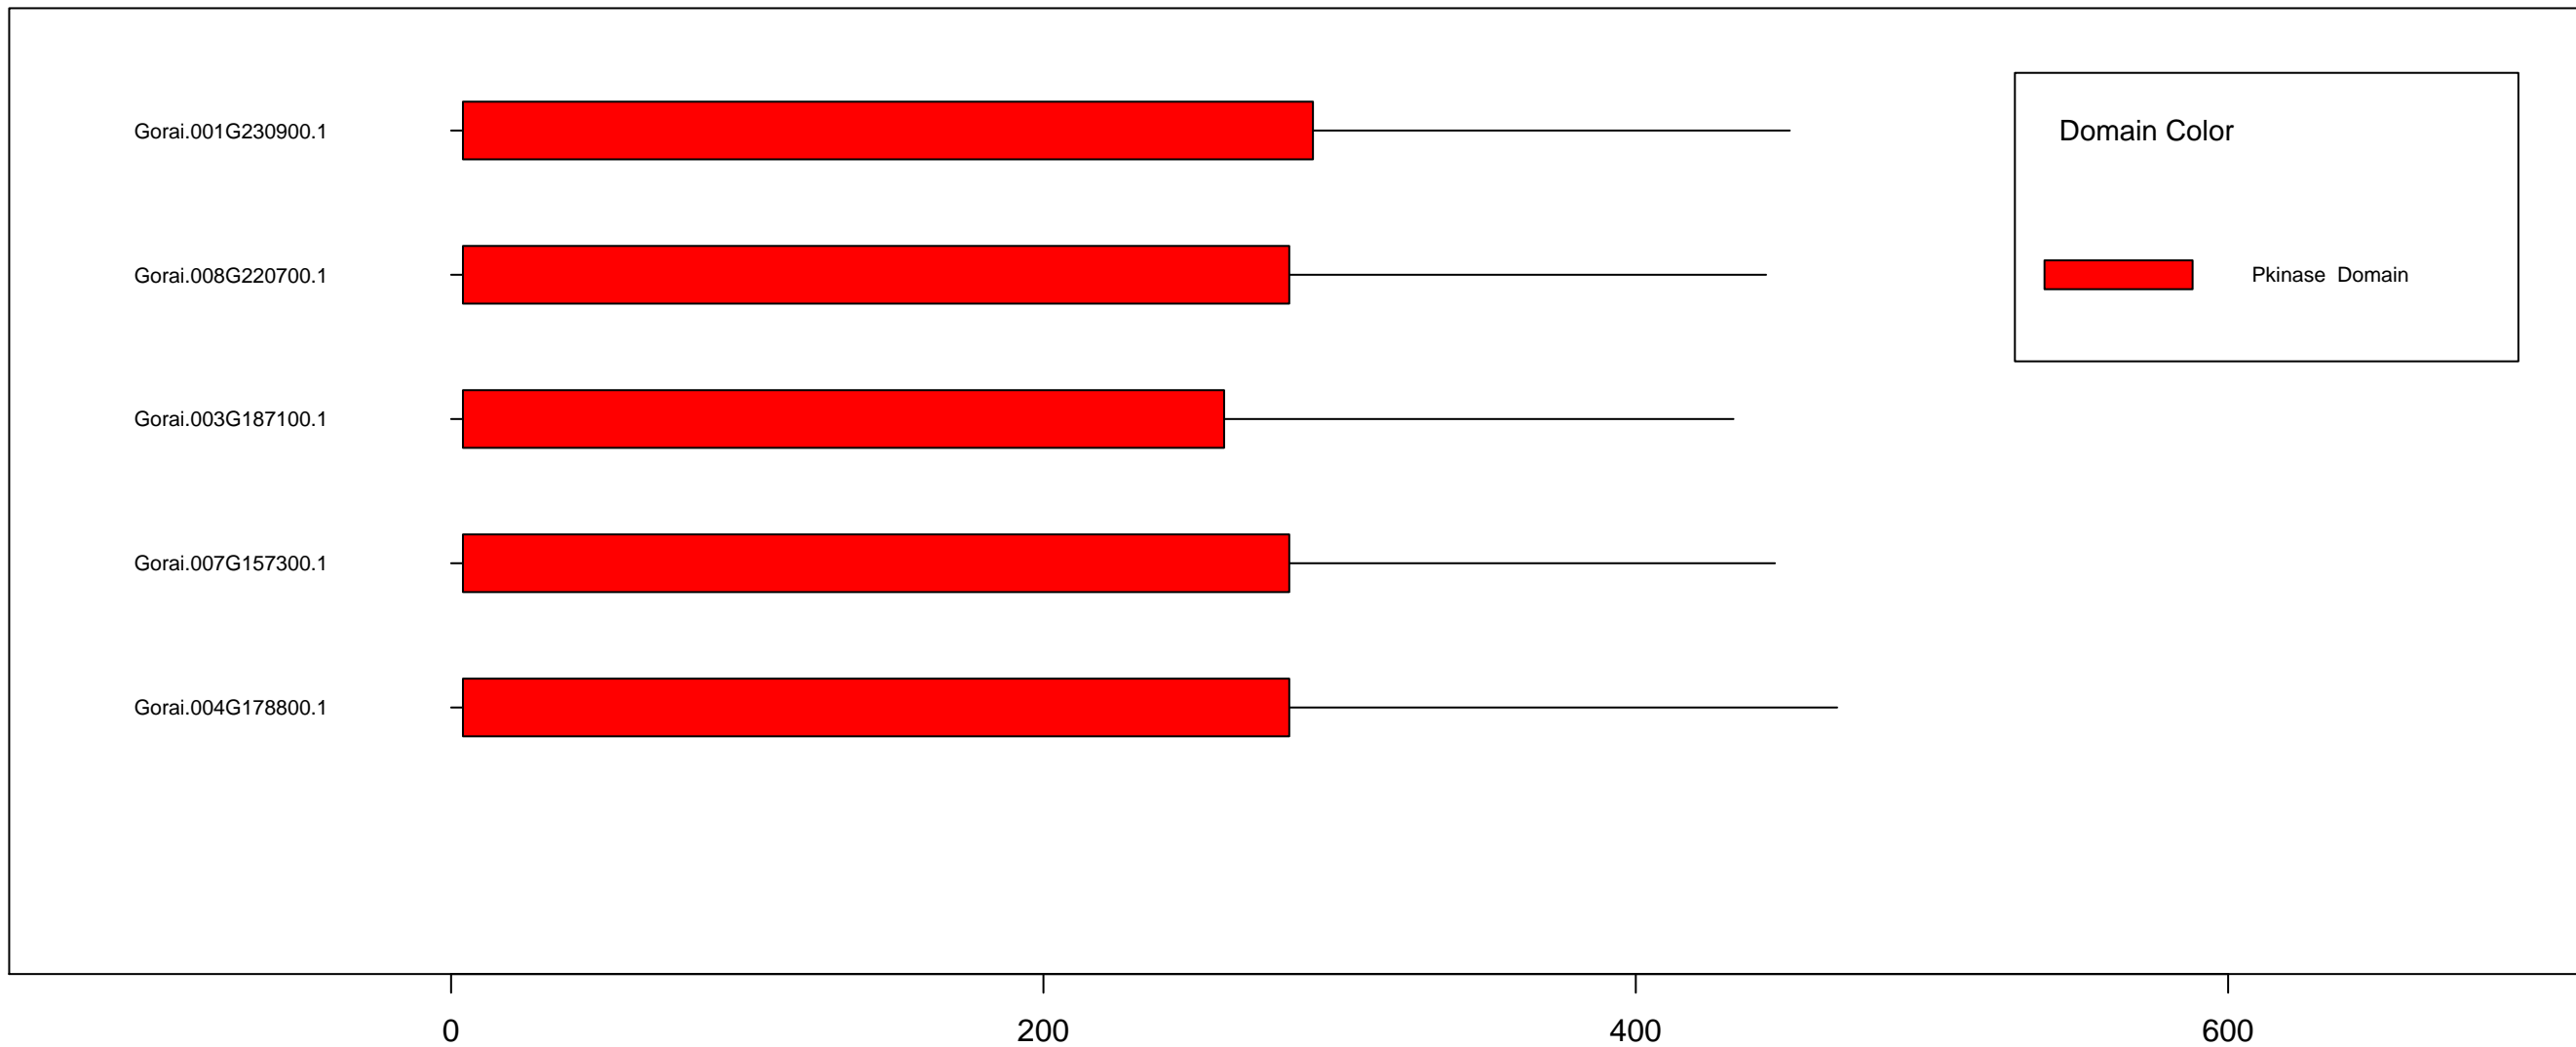

# G.ra CMGC\_SRPK domain diagram (all)

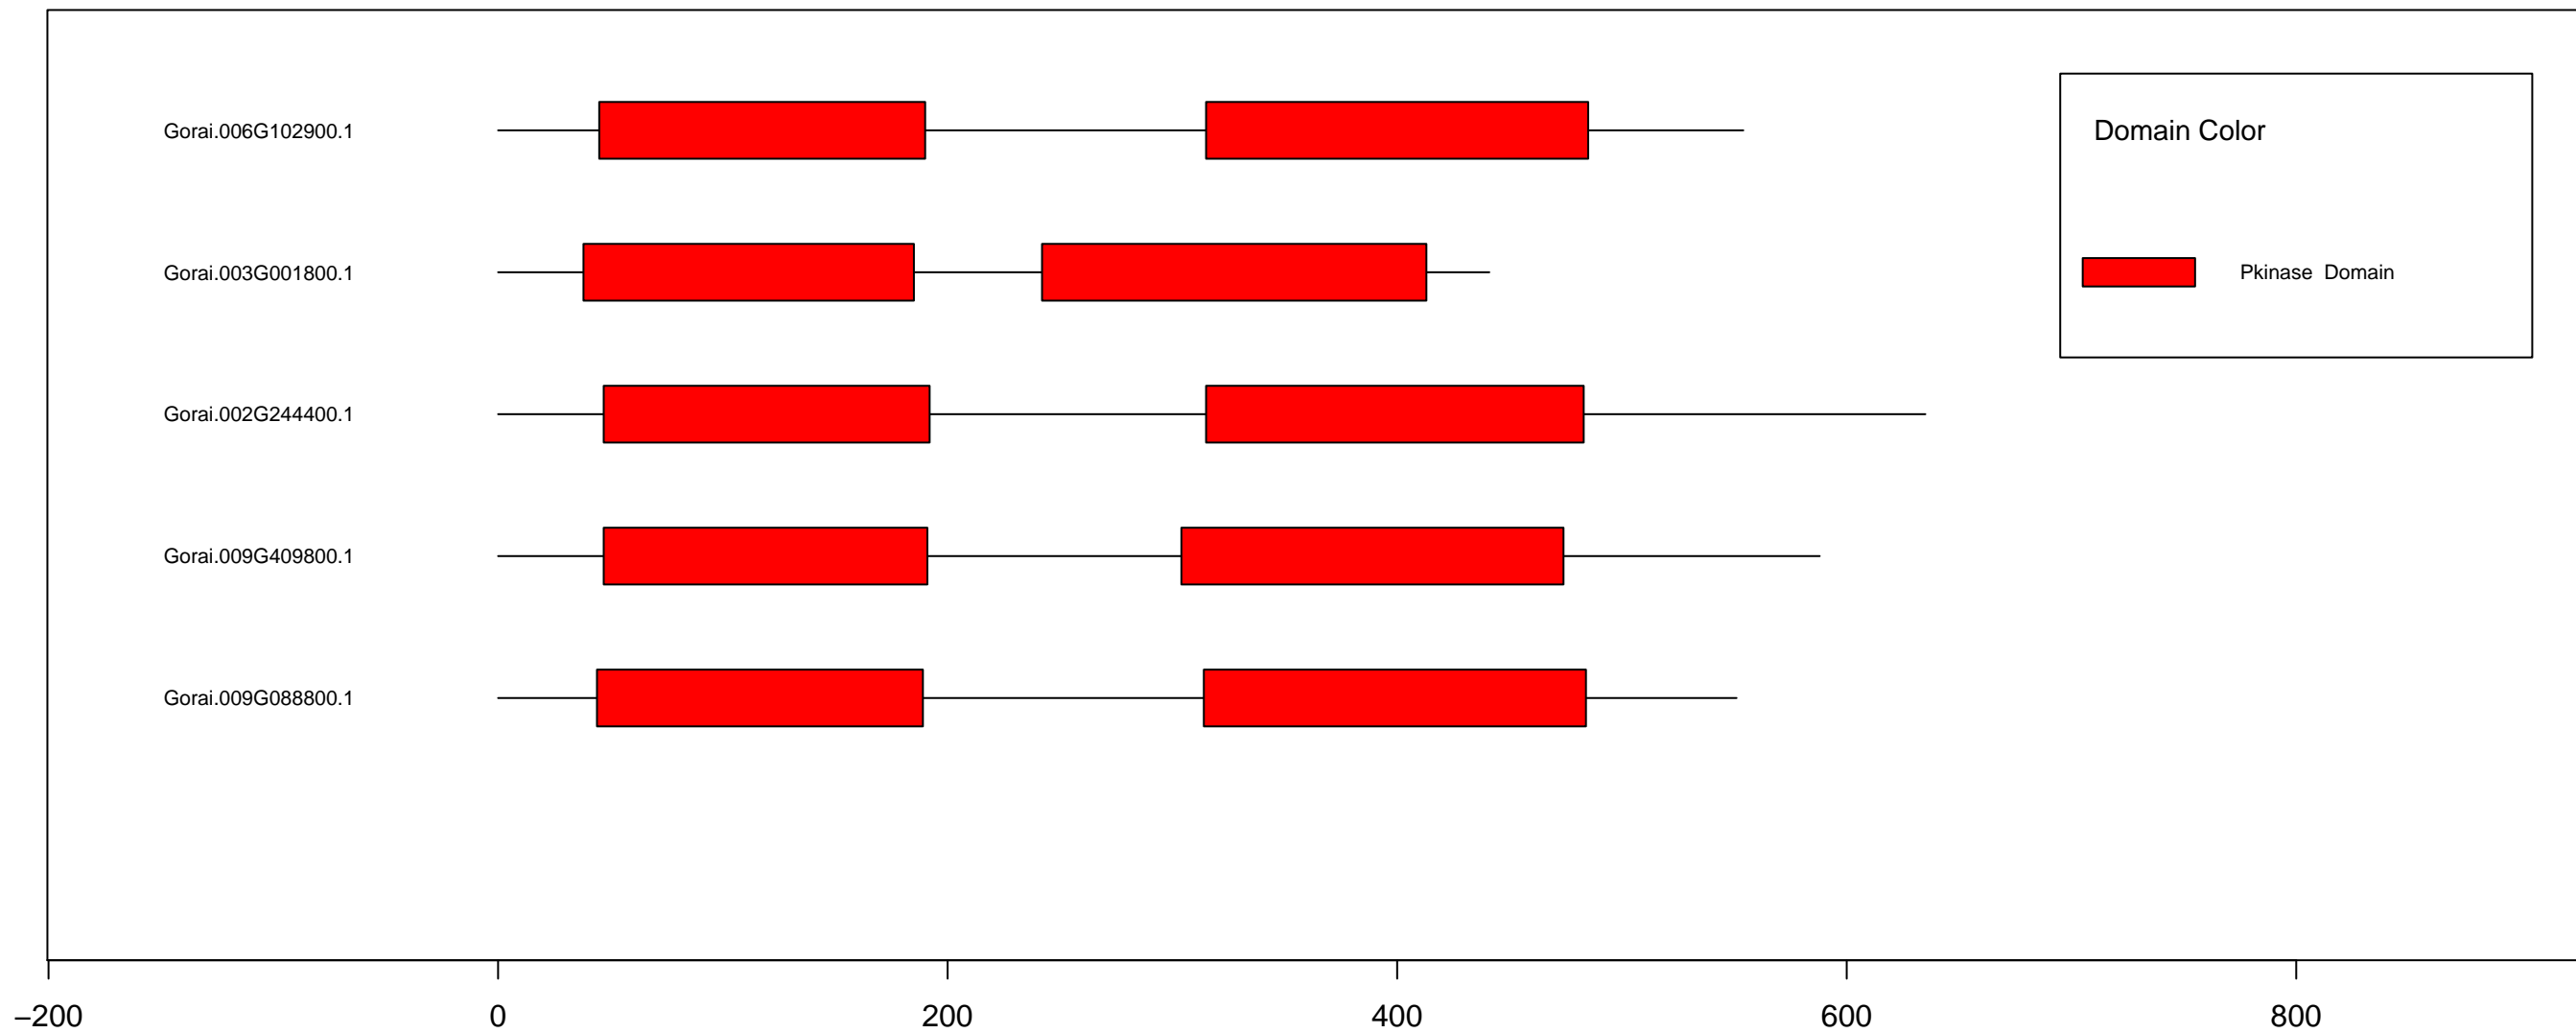

# G.ra Group-PI-2 domain diagram (all)

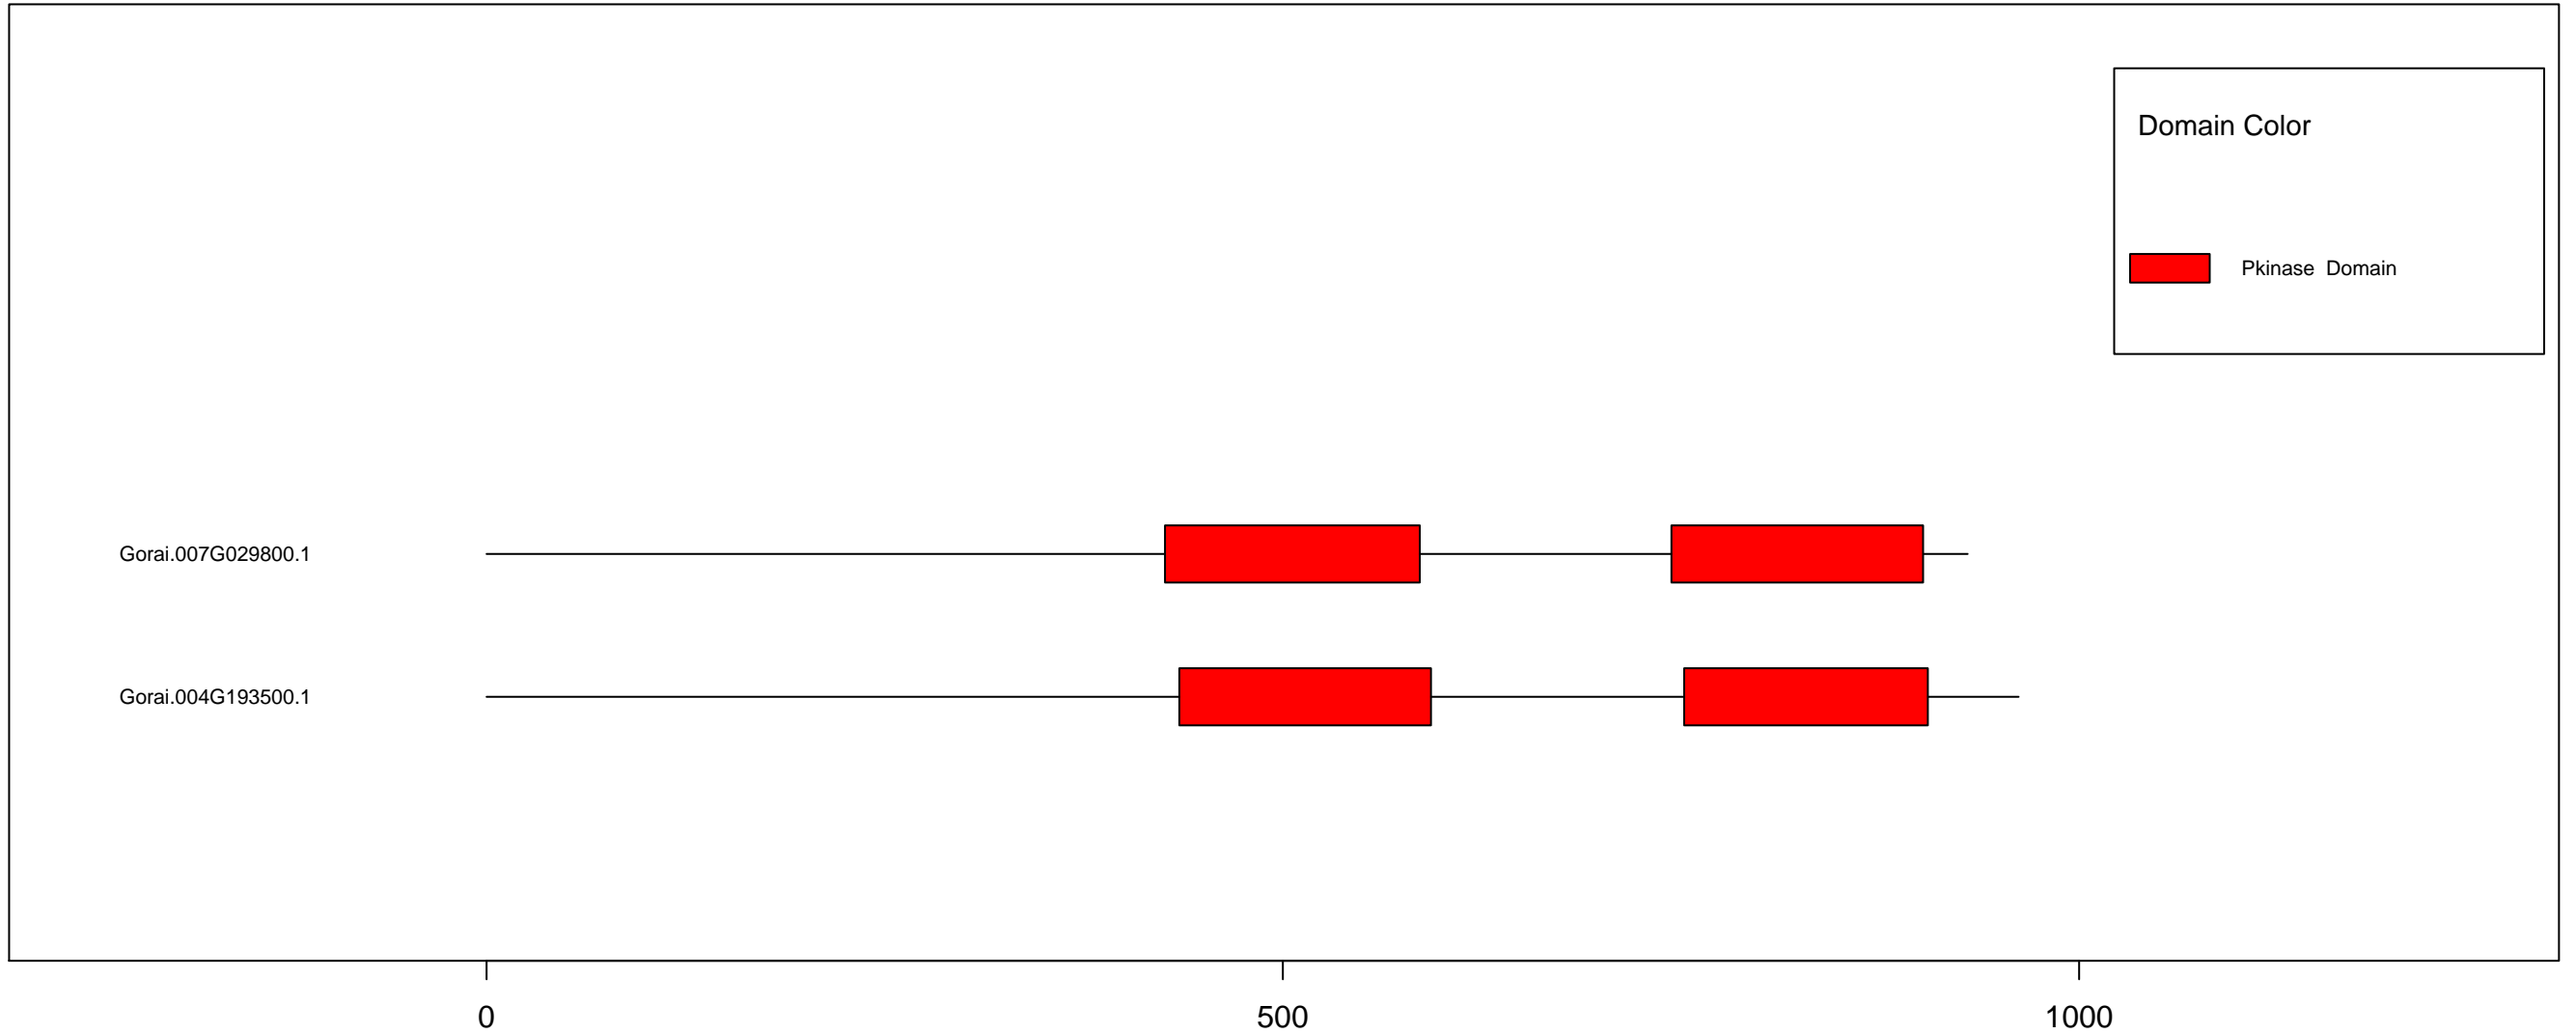

# G.ra Group-PI-3 domain diagram (all)

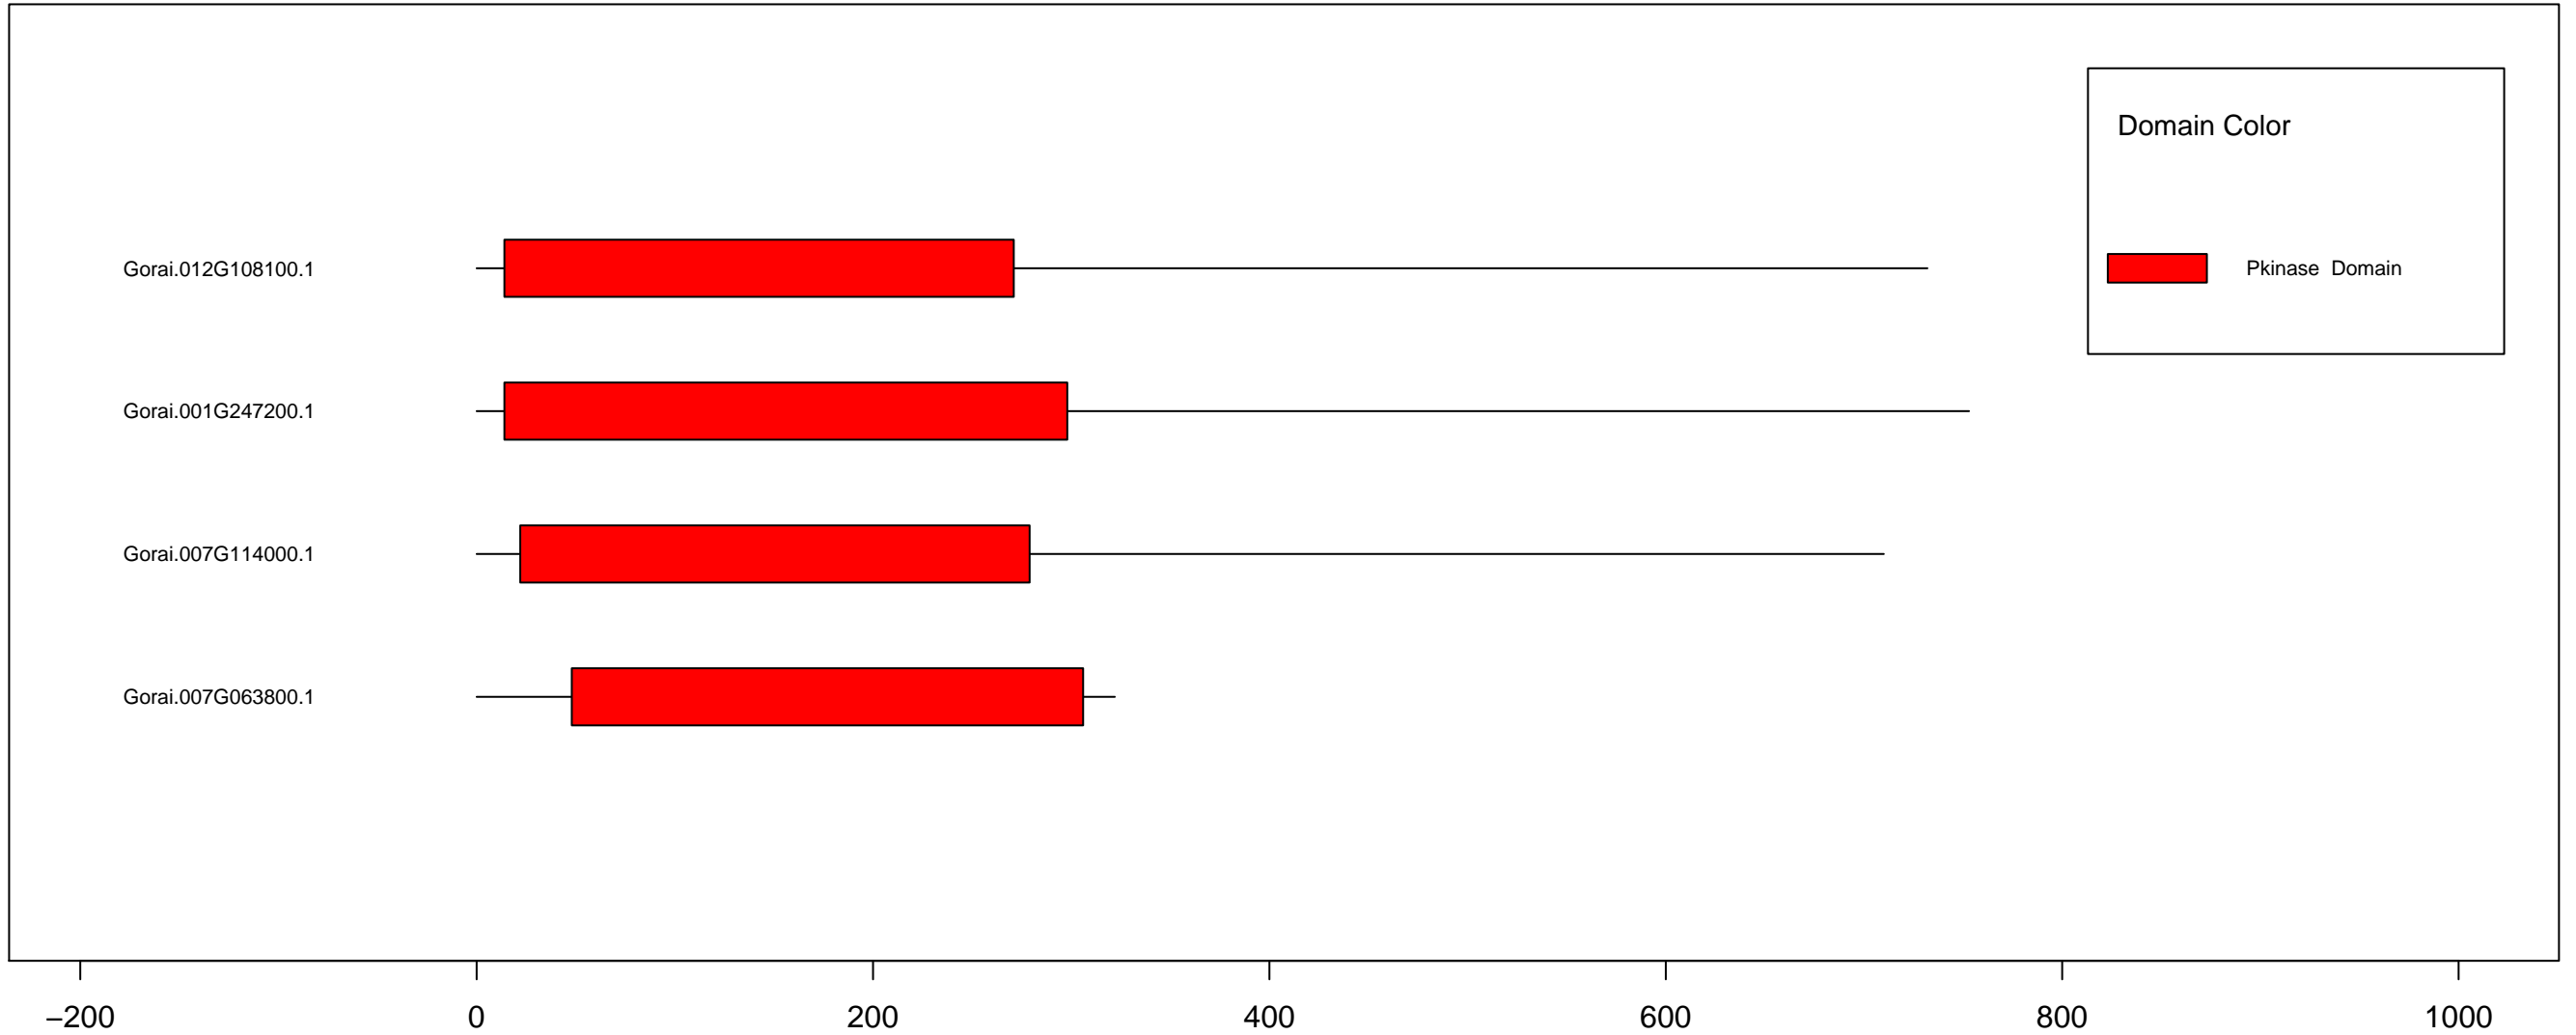



# G.ra Group-PI-4 domain diagram (all)

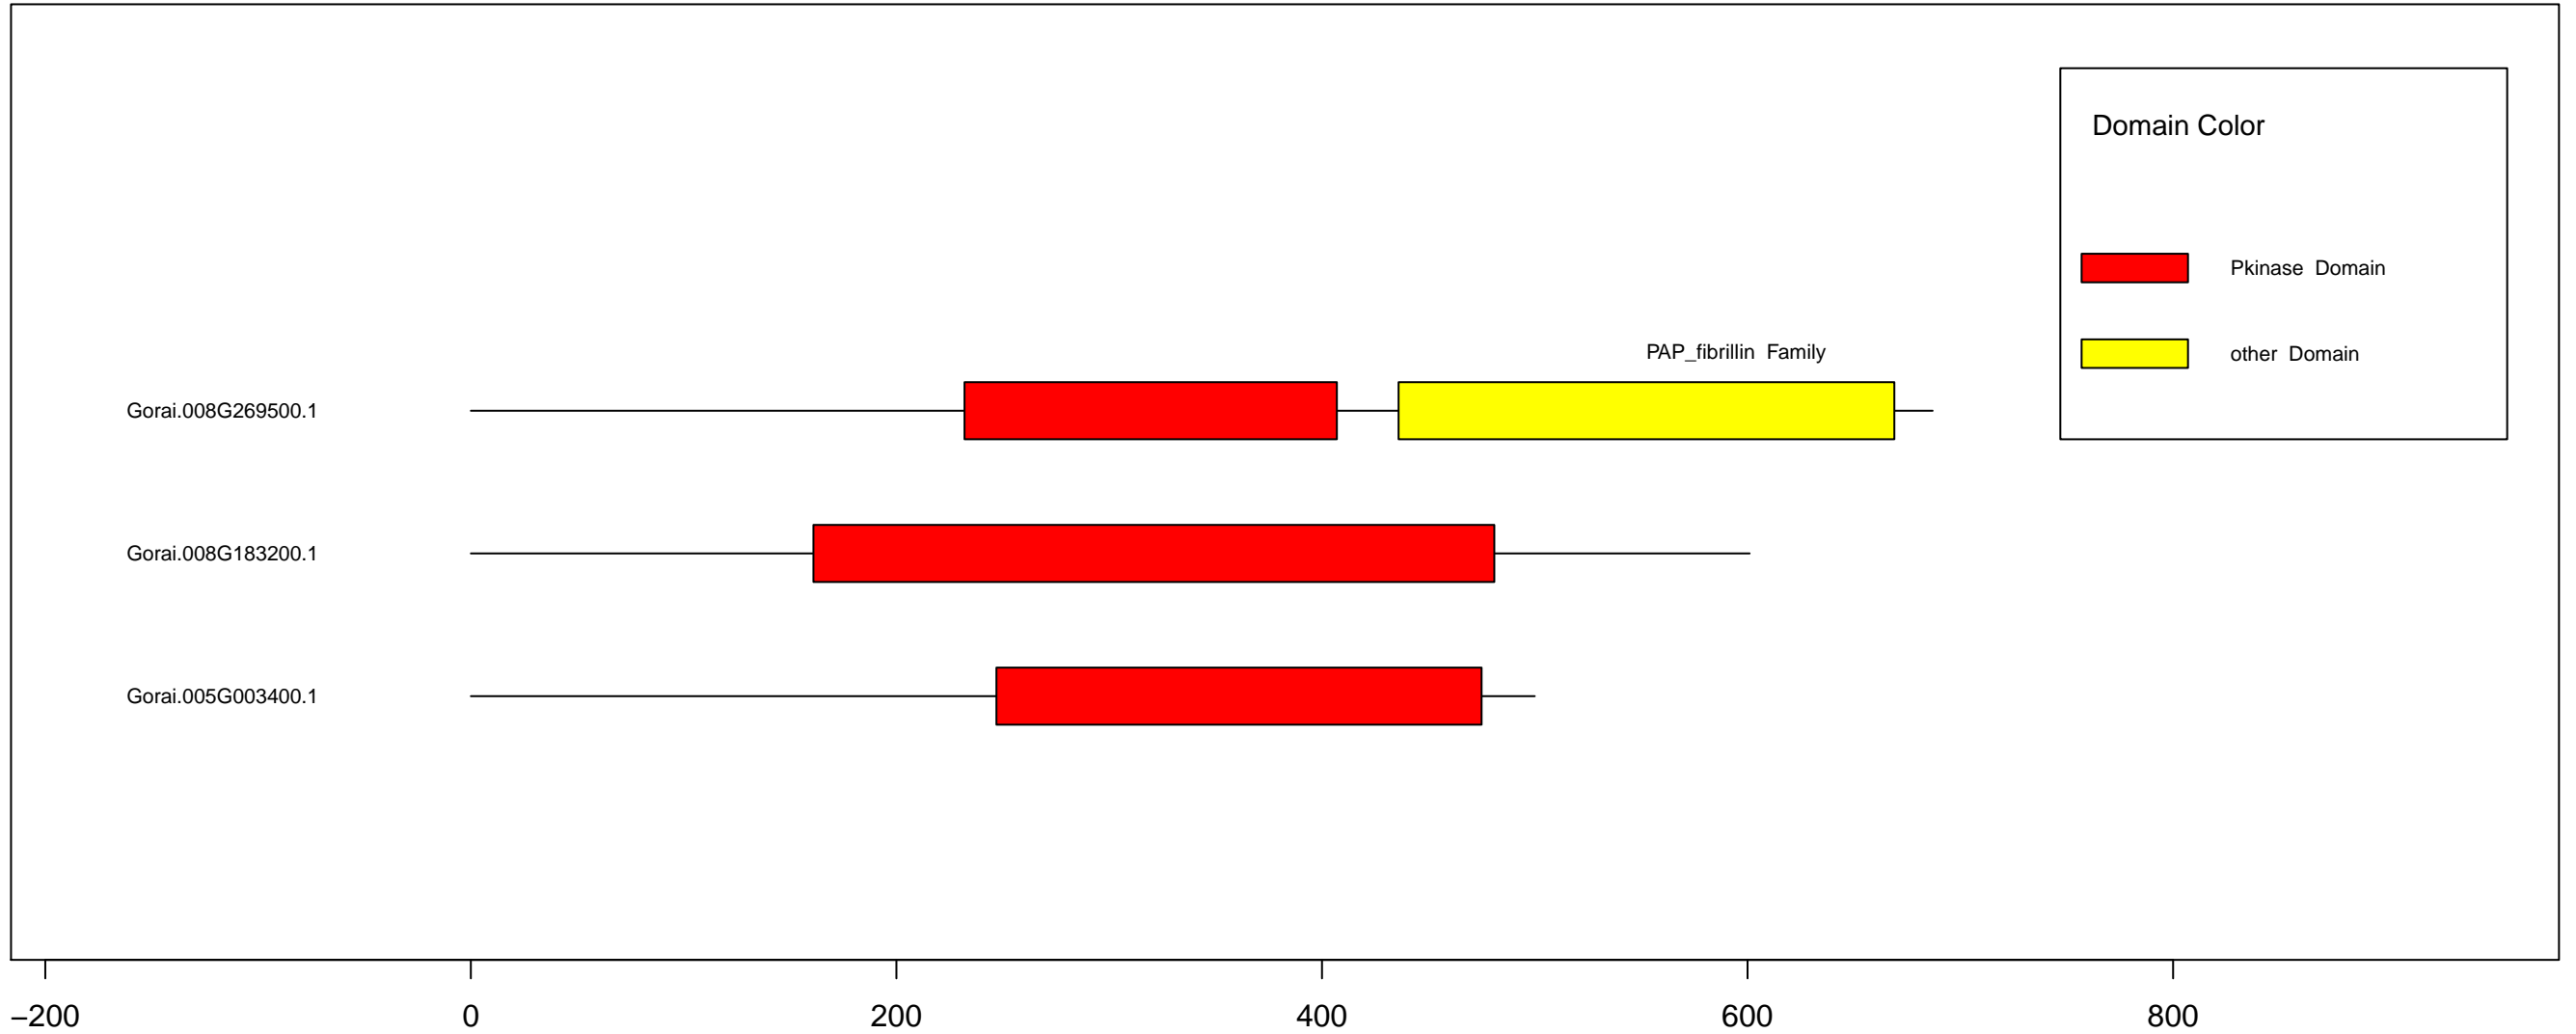

# G.ra IRE1 domain diagram (all)

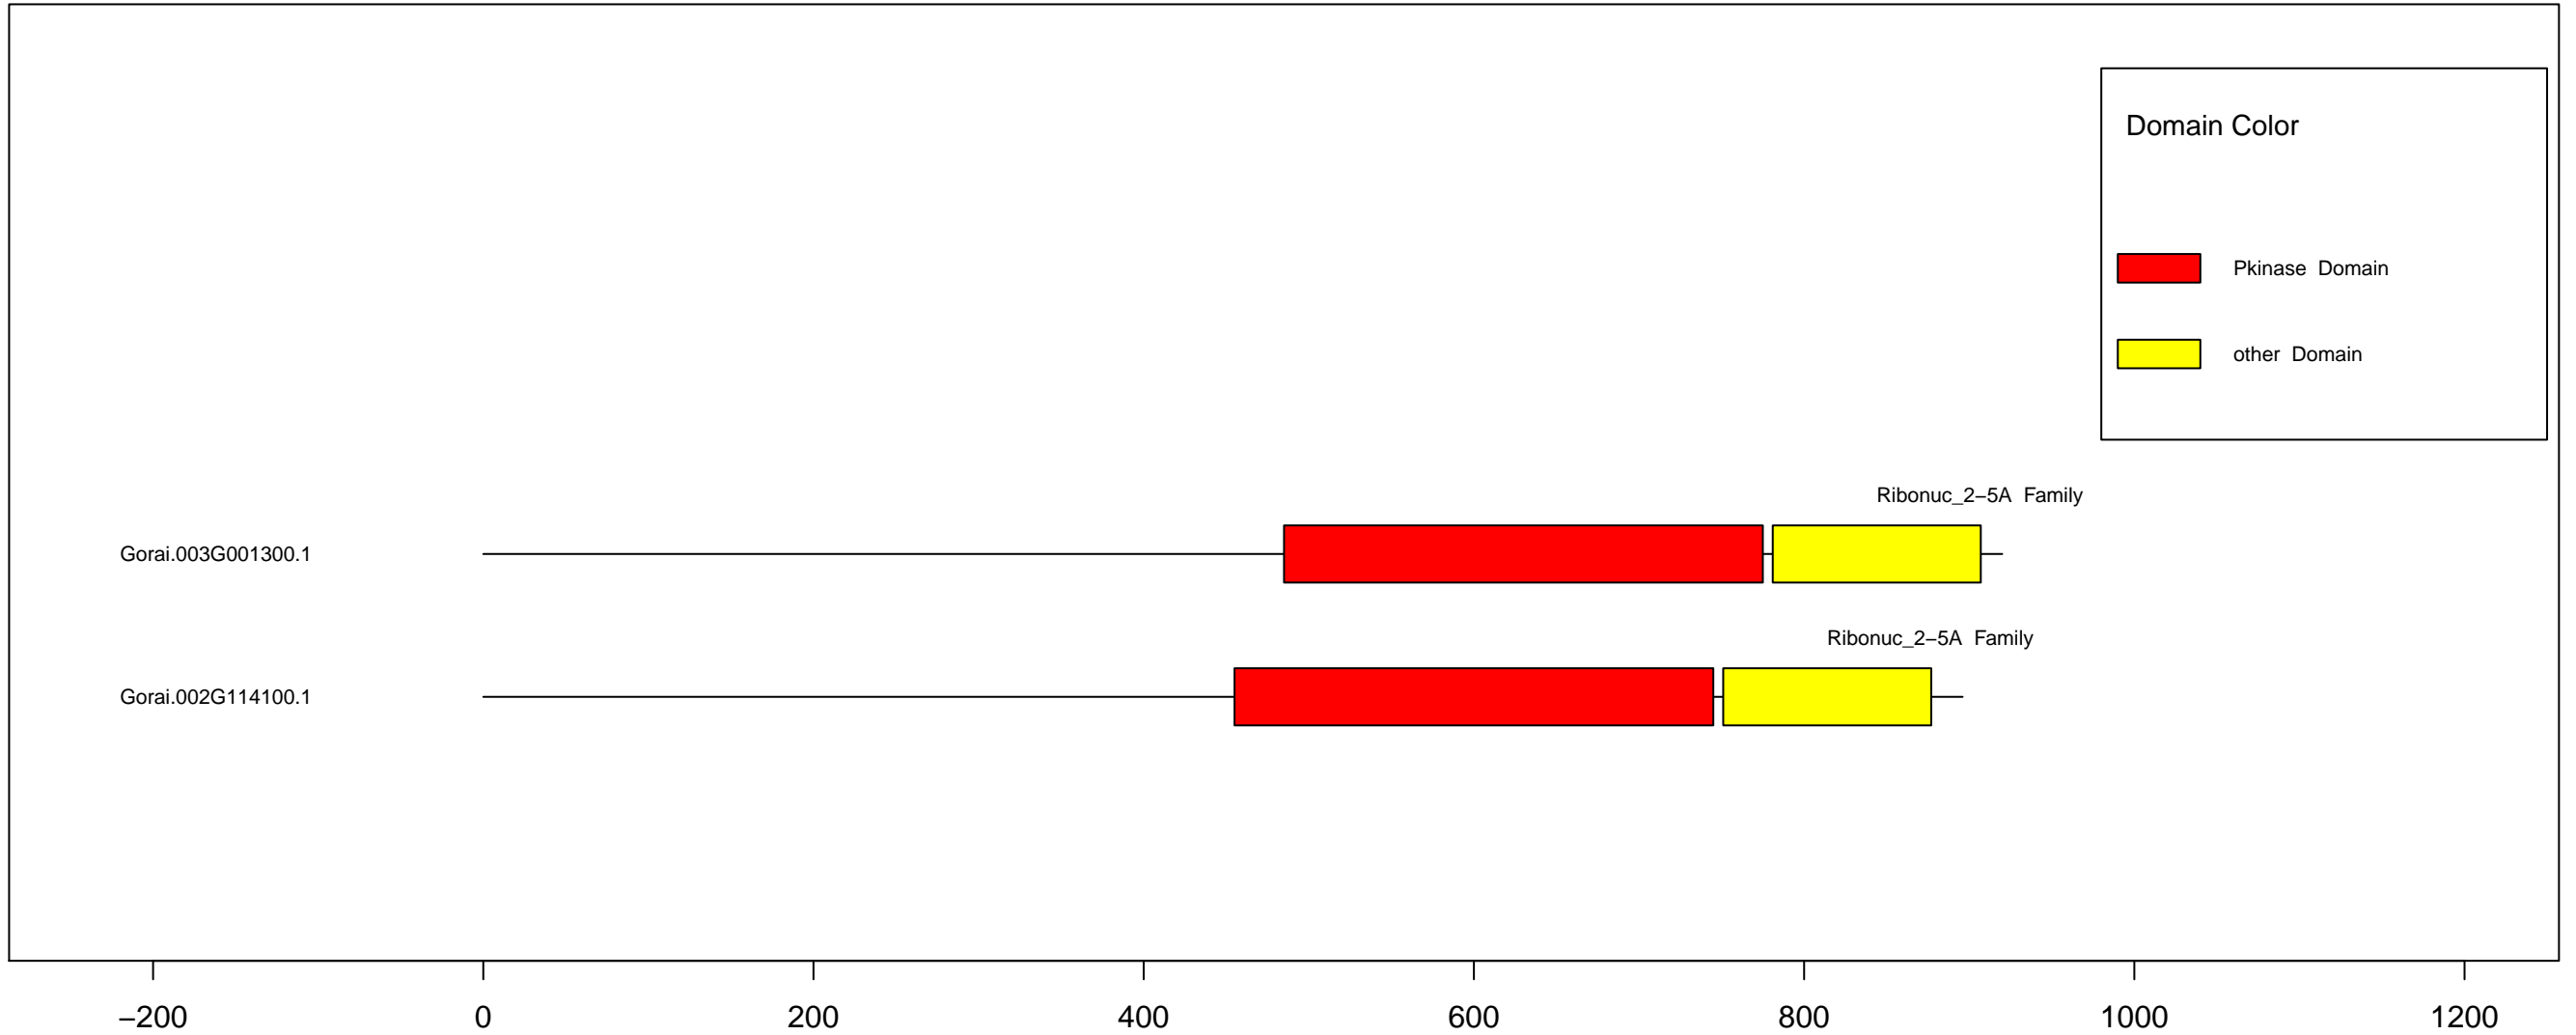

# G.ra NAK domain diagram (all)

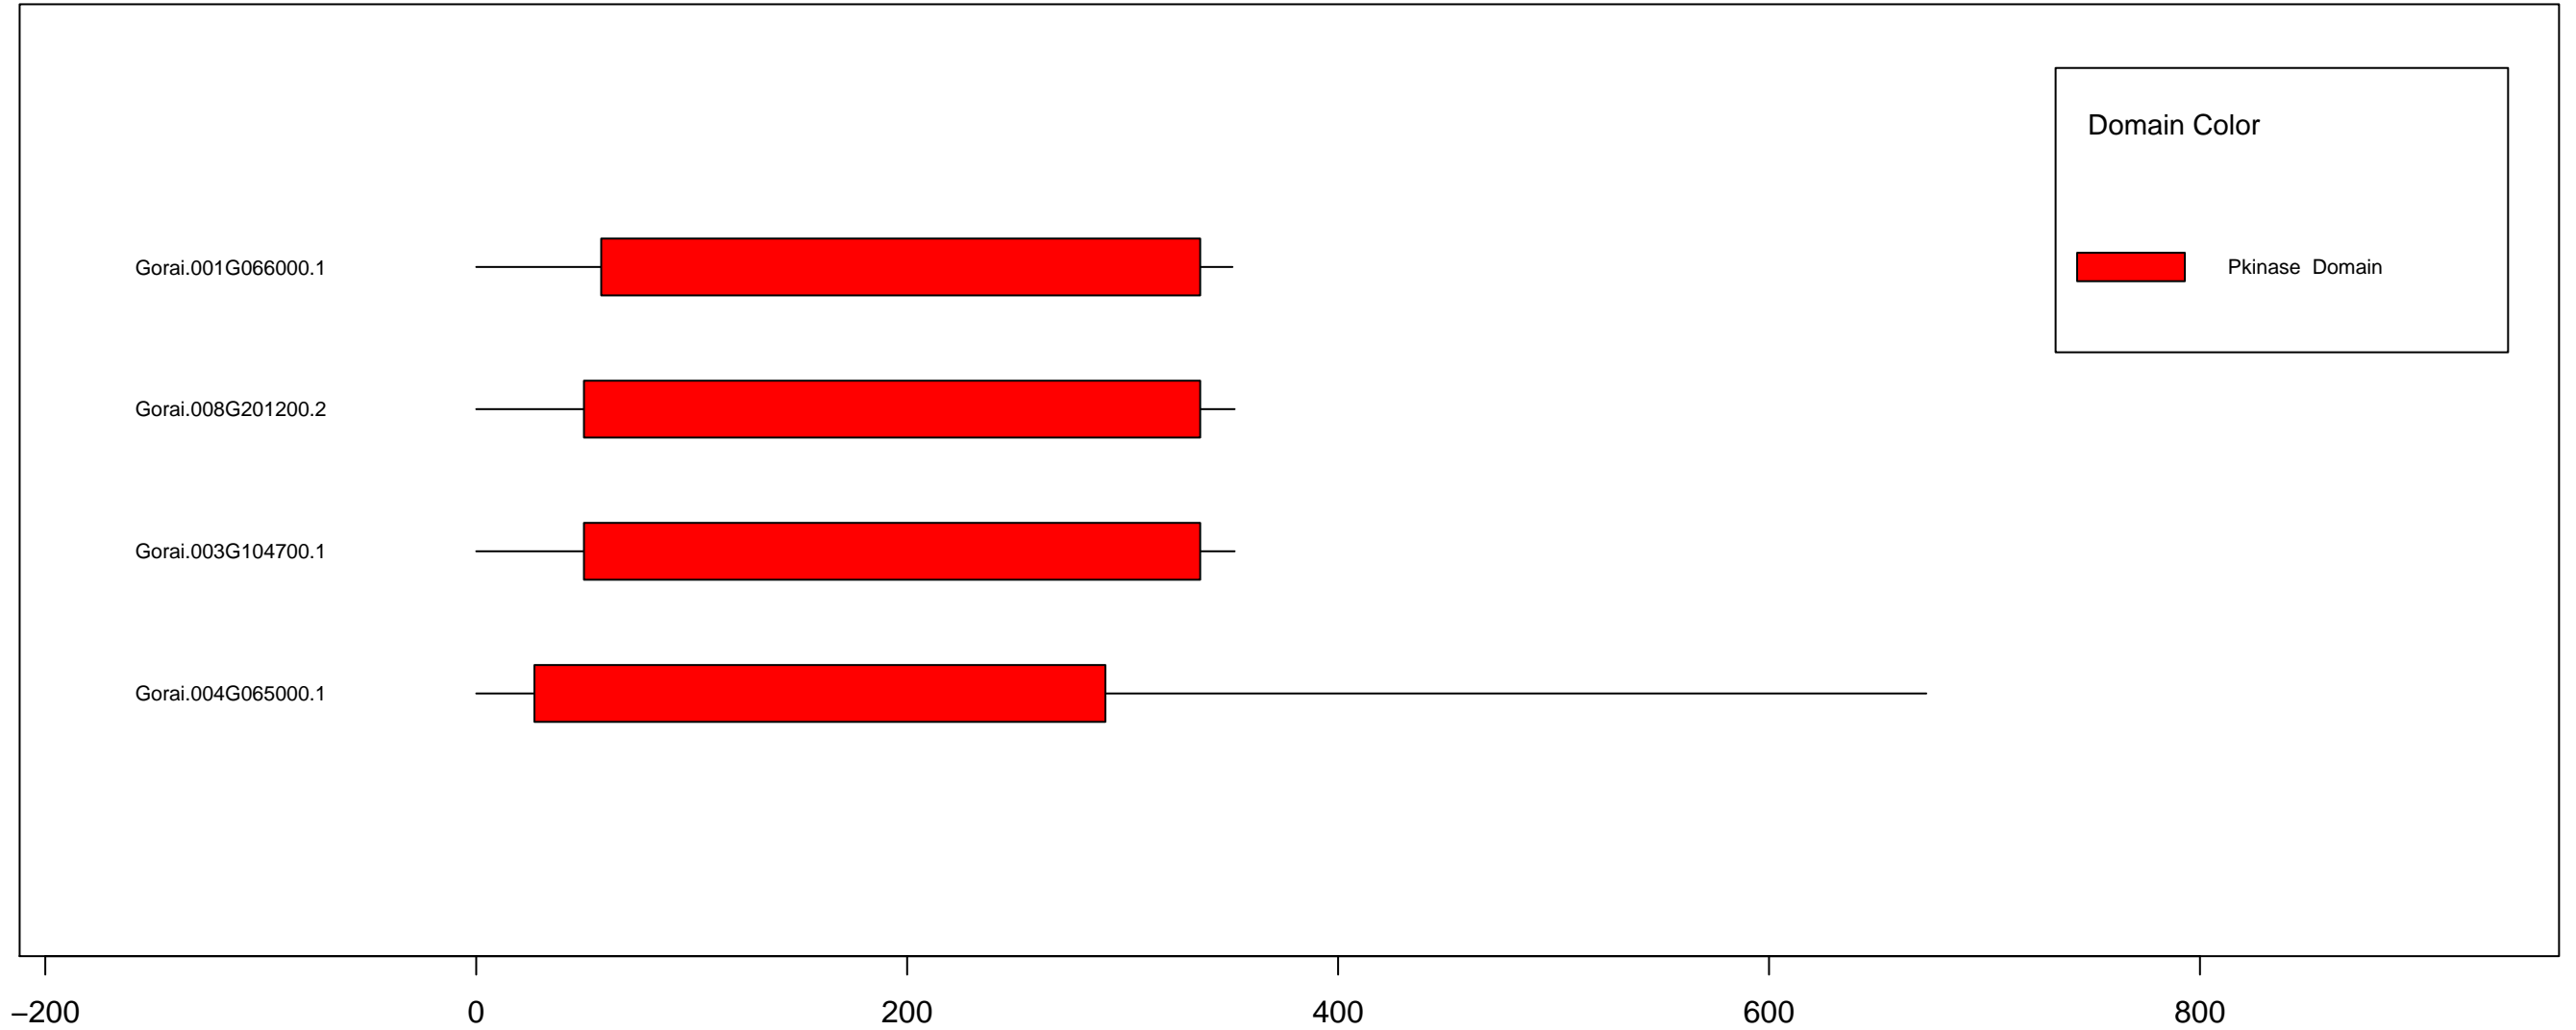

# G.ra NEK domain diagram (all)

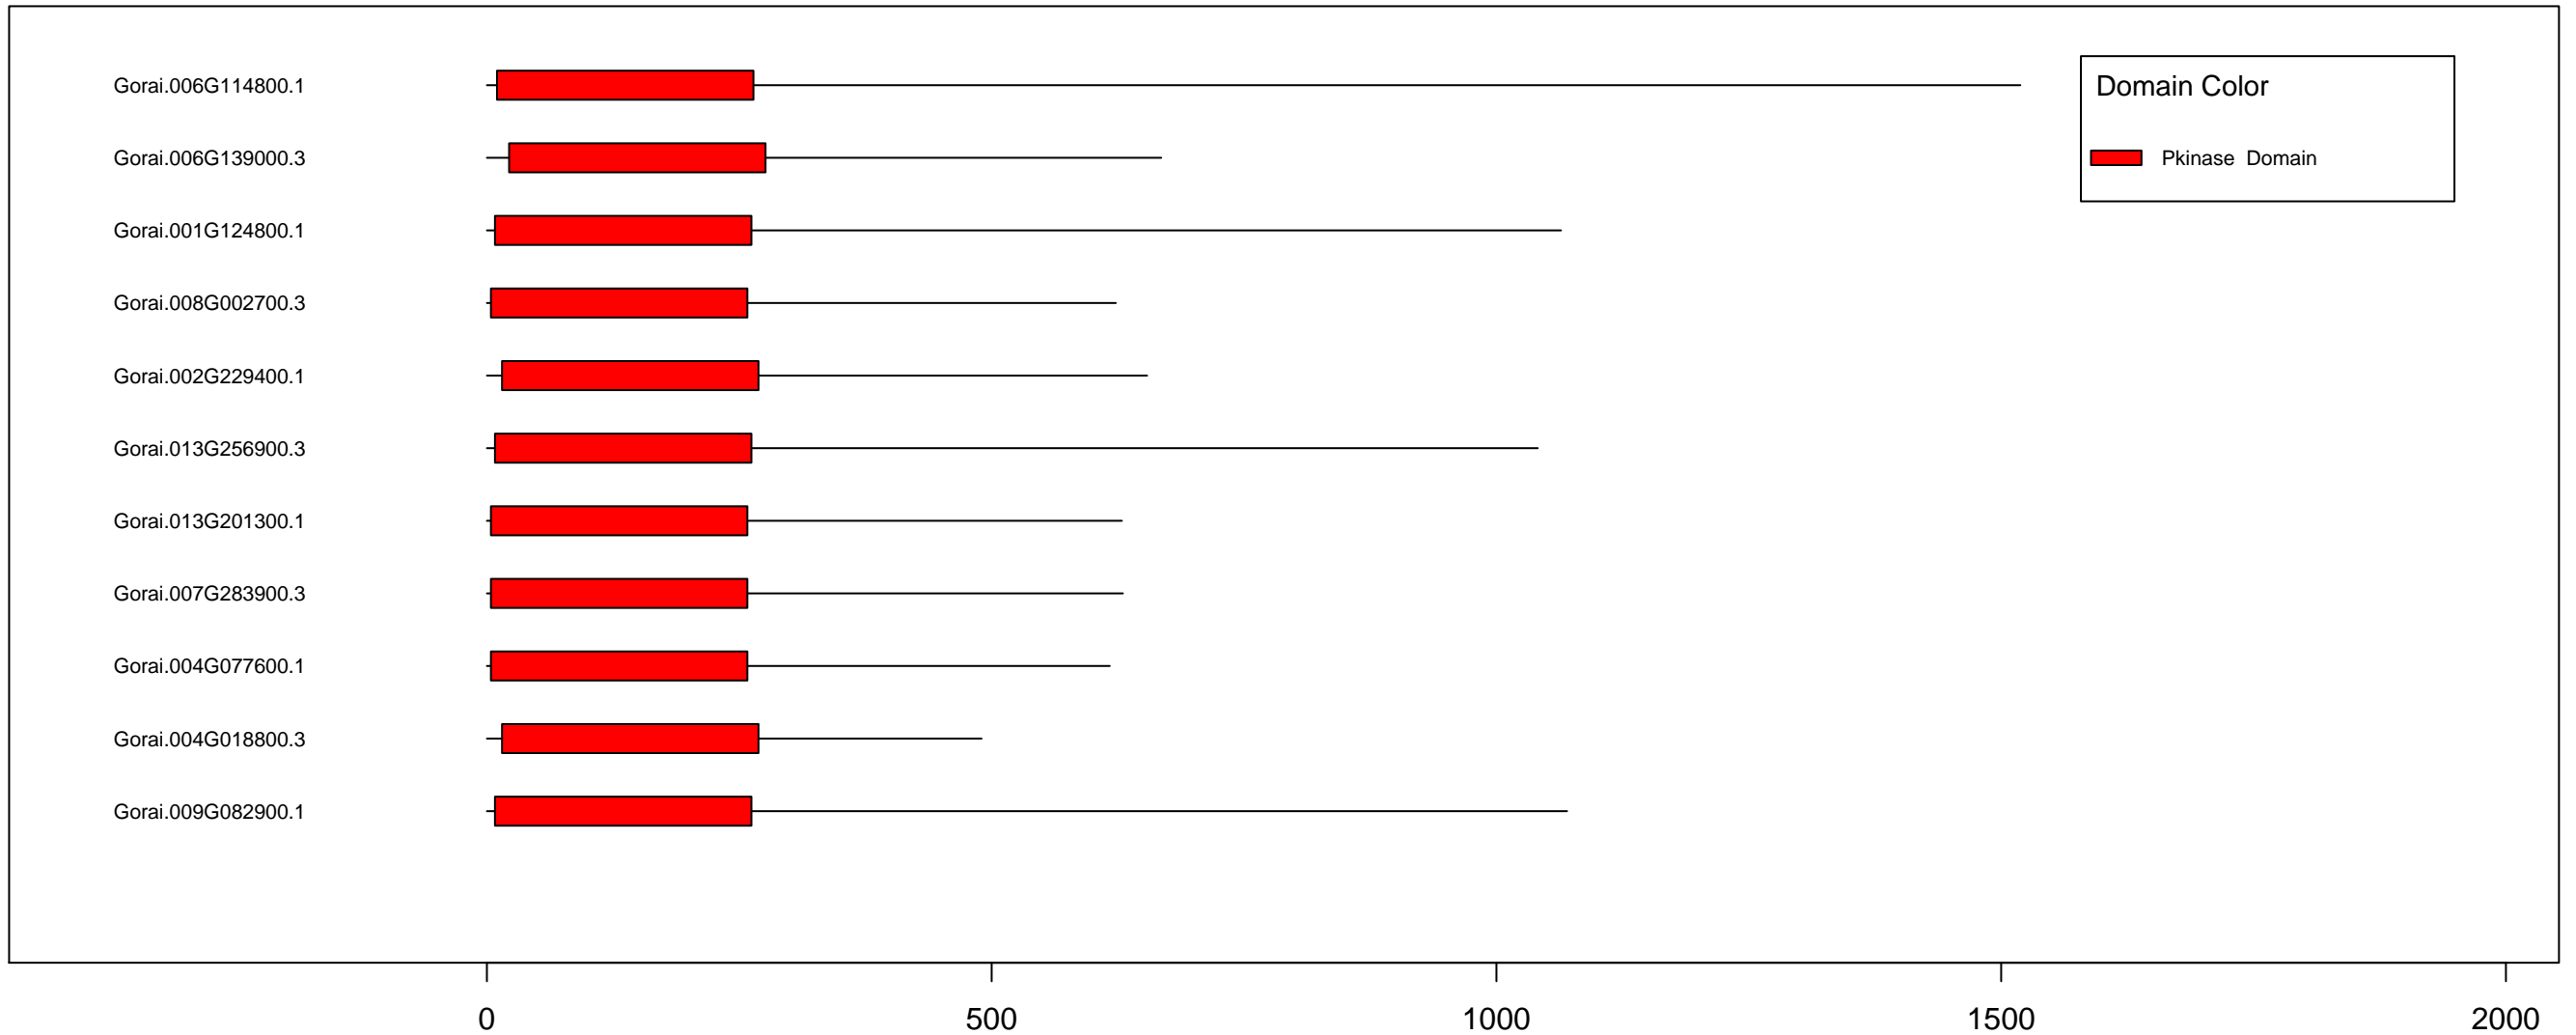

# G.ra PEK\_GCIN2 domain diagram (all)

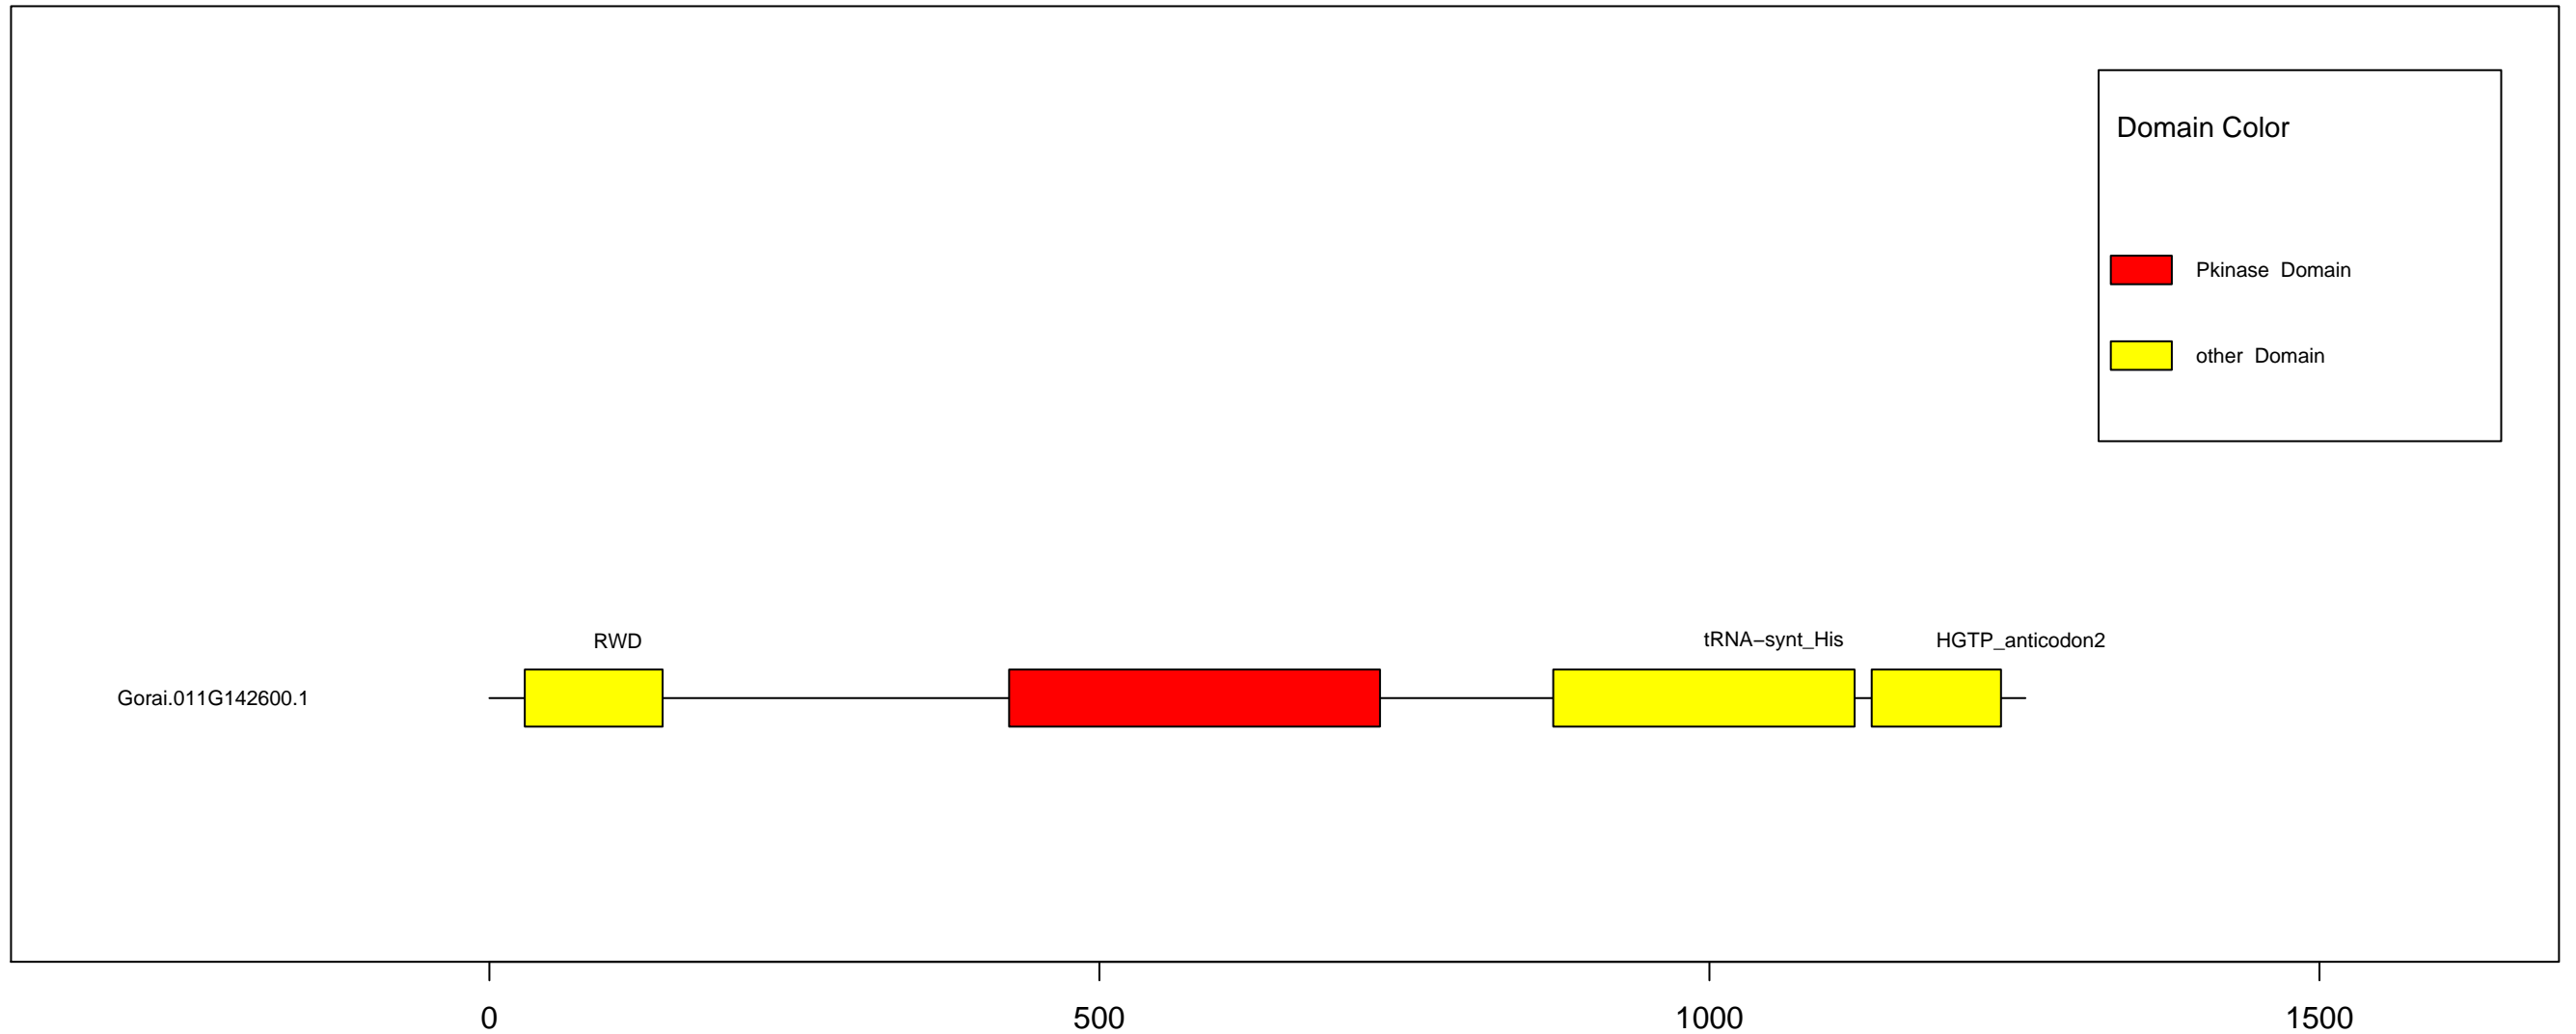

# G.ra PEK\_PEK domain diagram (all)

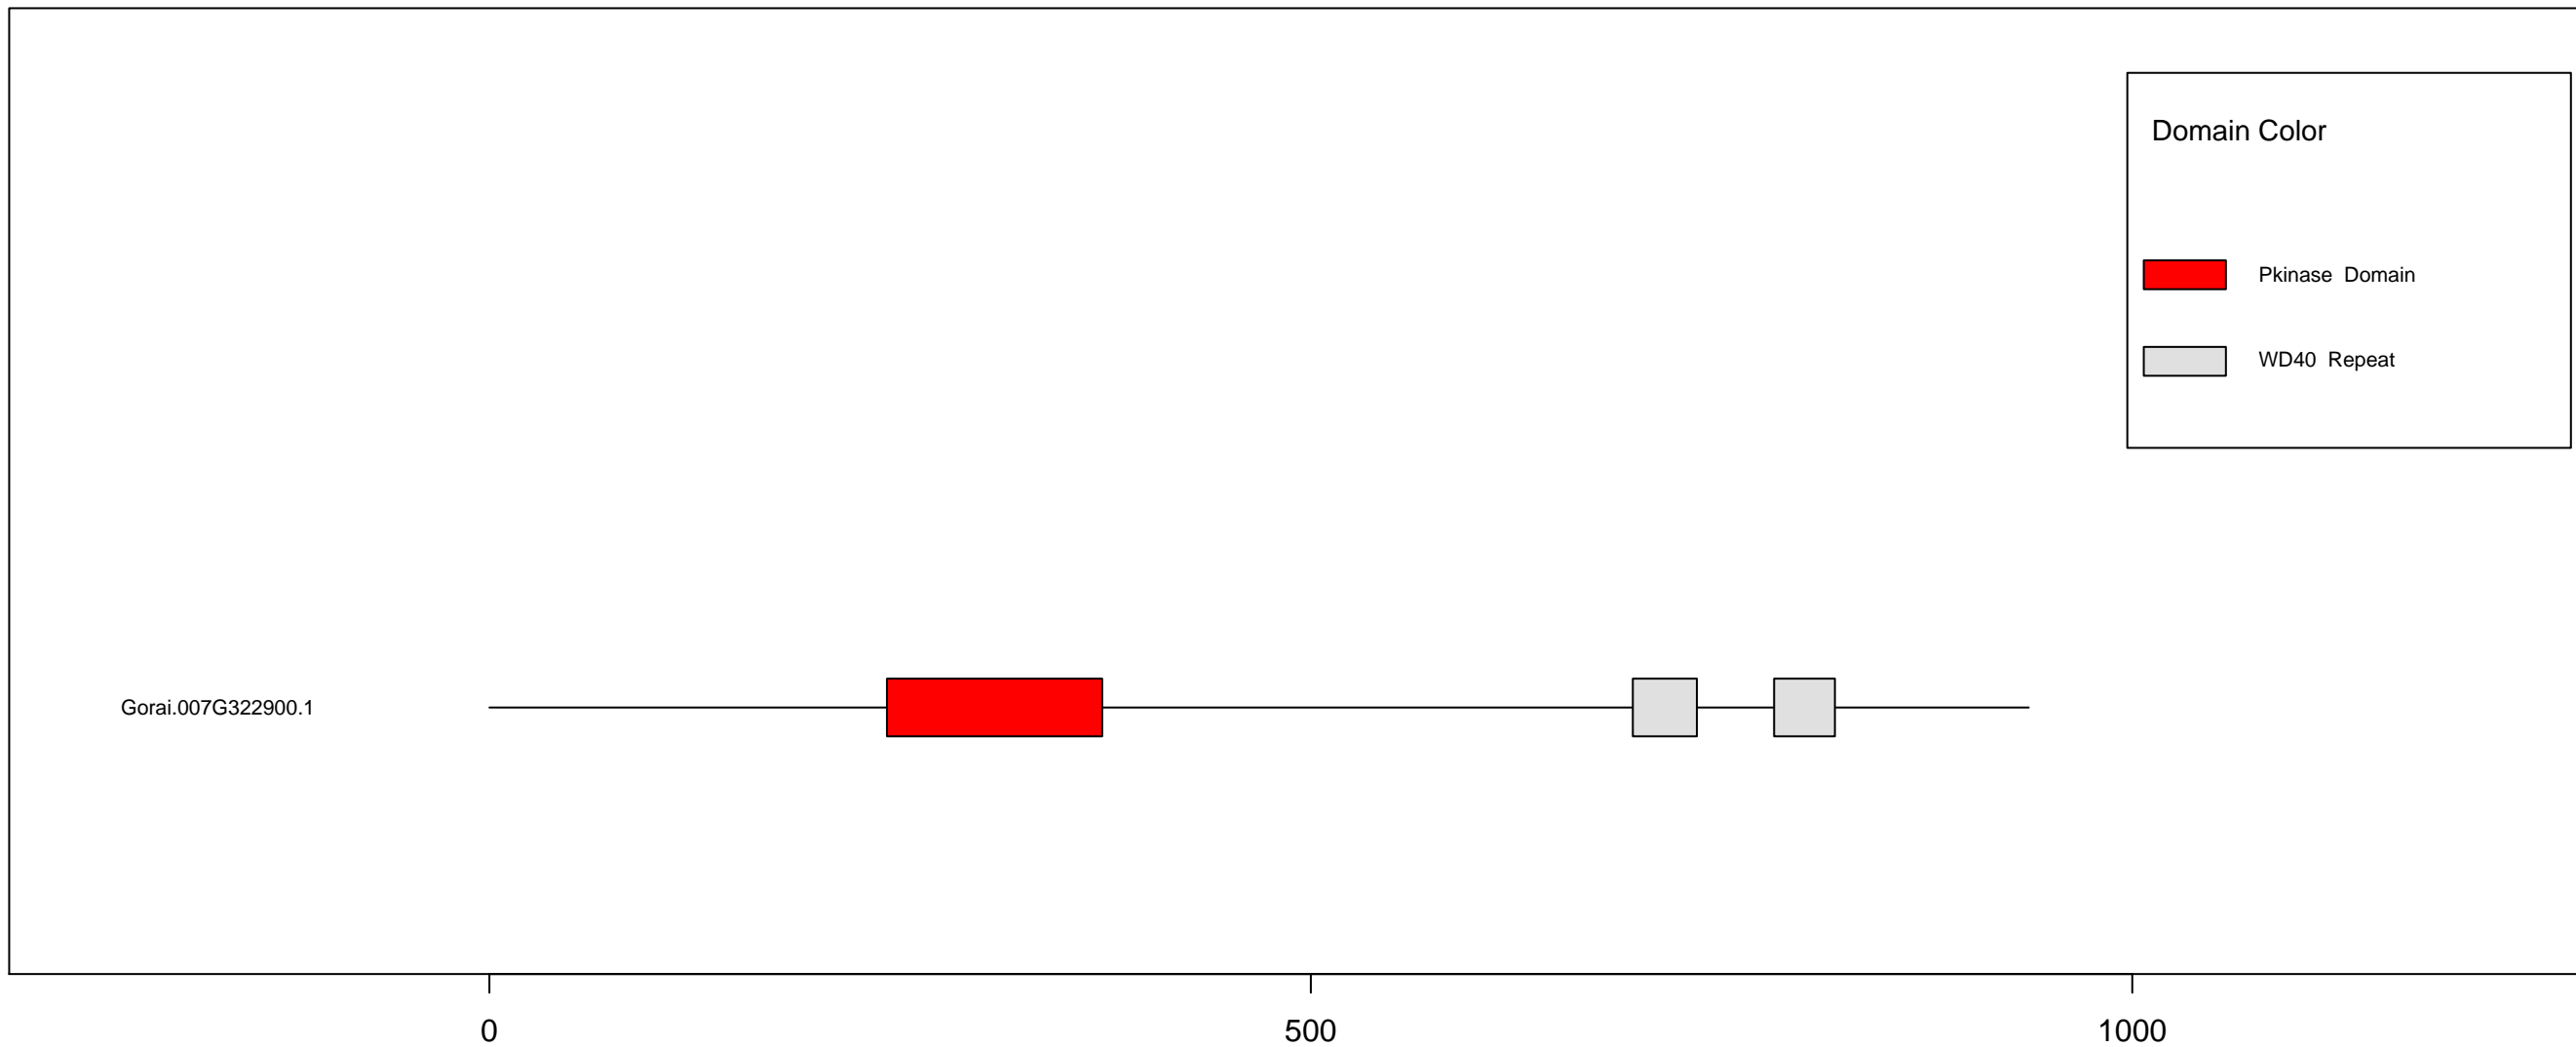

# G.ra RLK-Pelle\_C-LEC domain diagram (all)

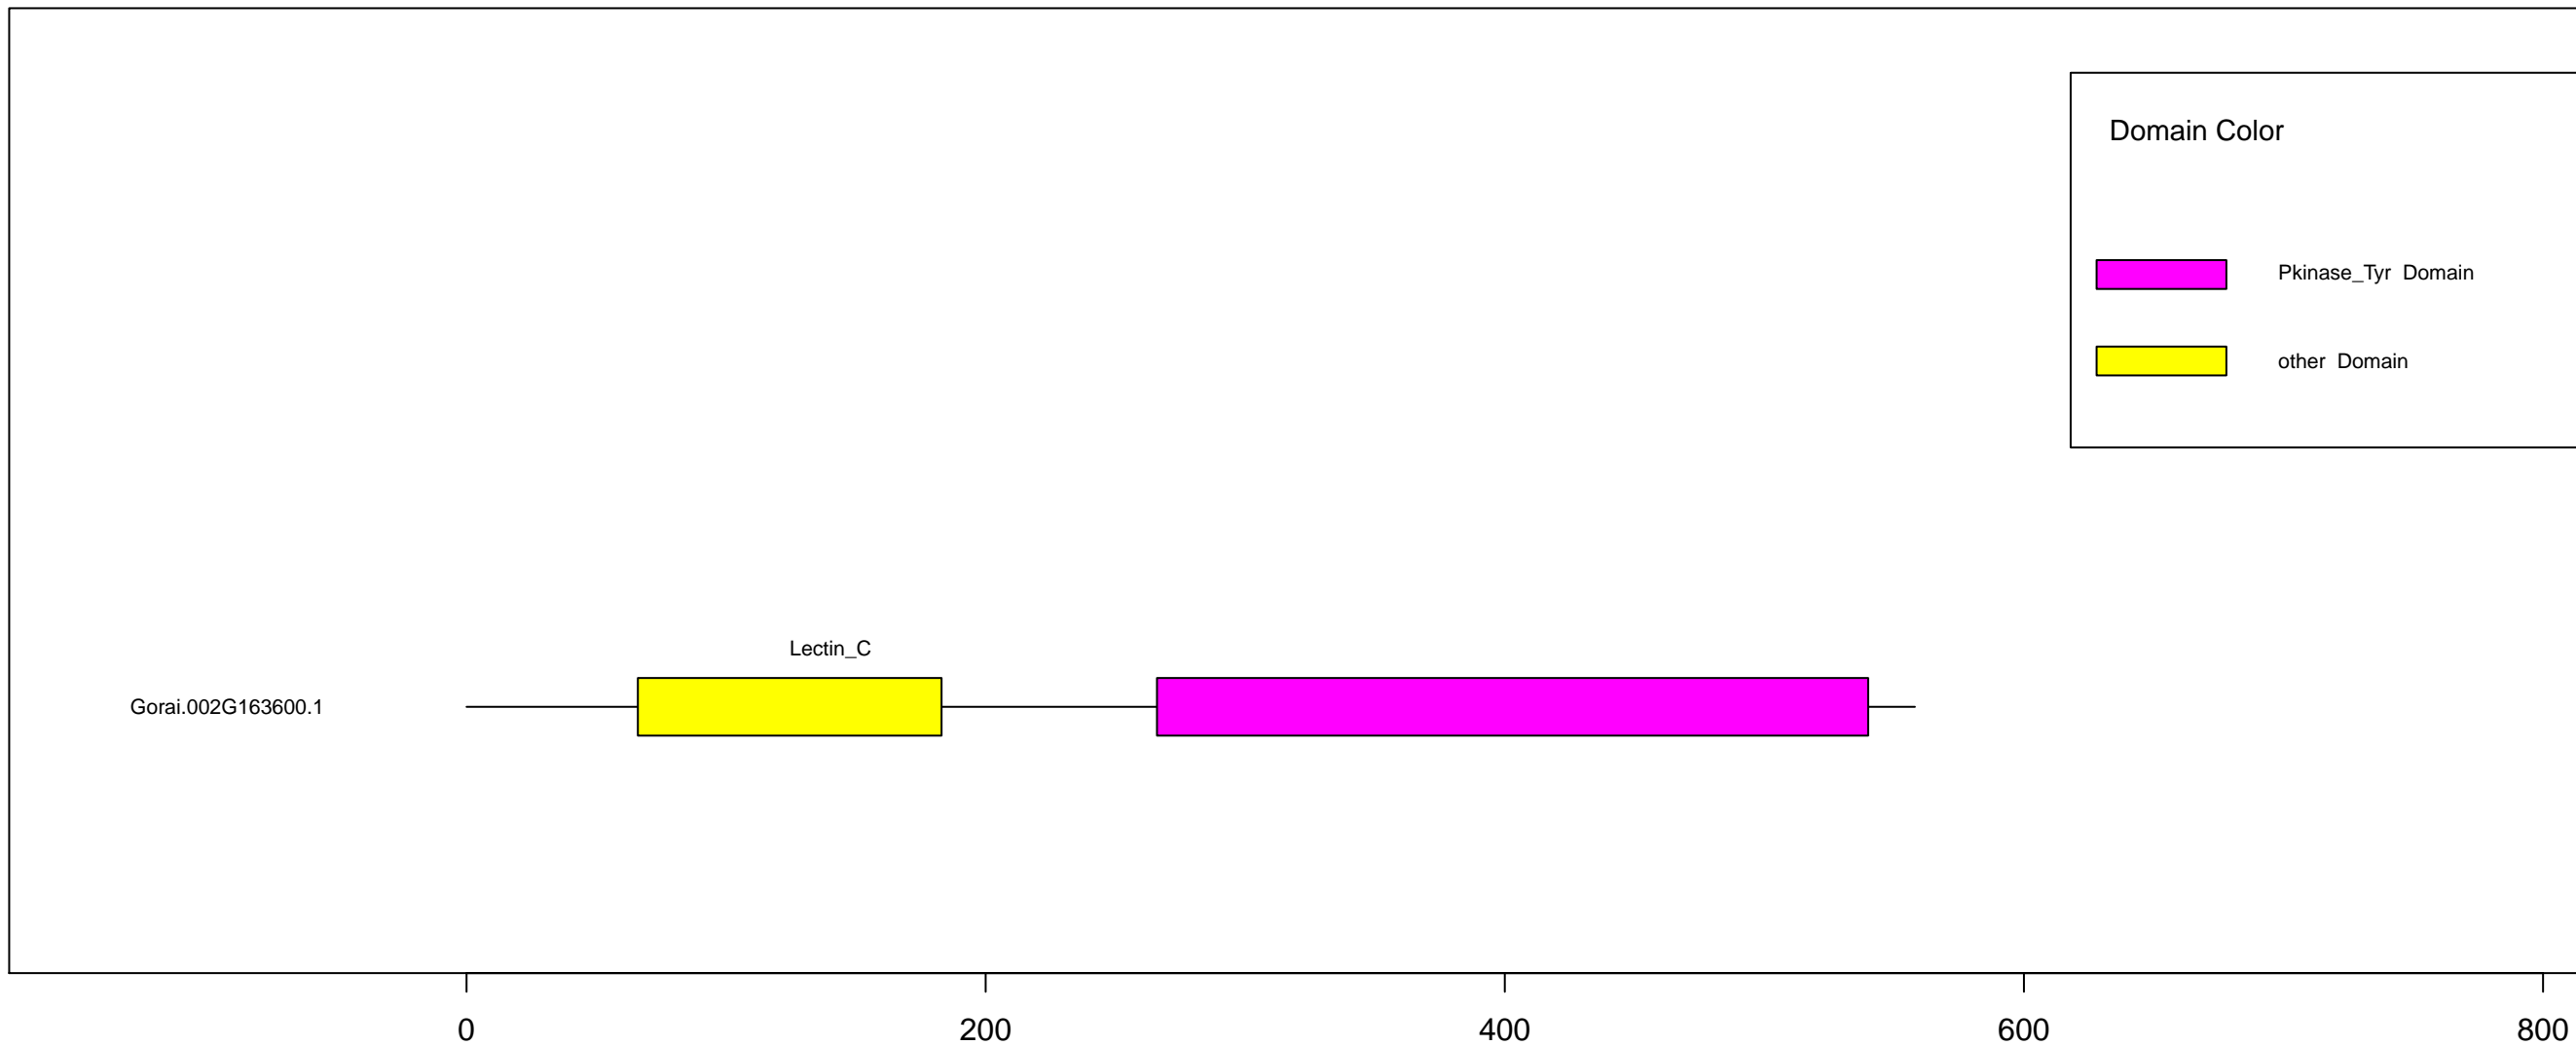

# G.ra RLK-Pelle\_CR4L domain diagram (all)

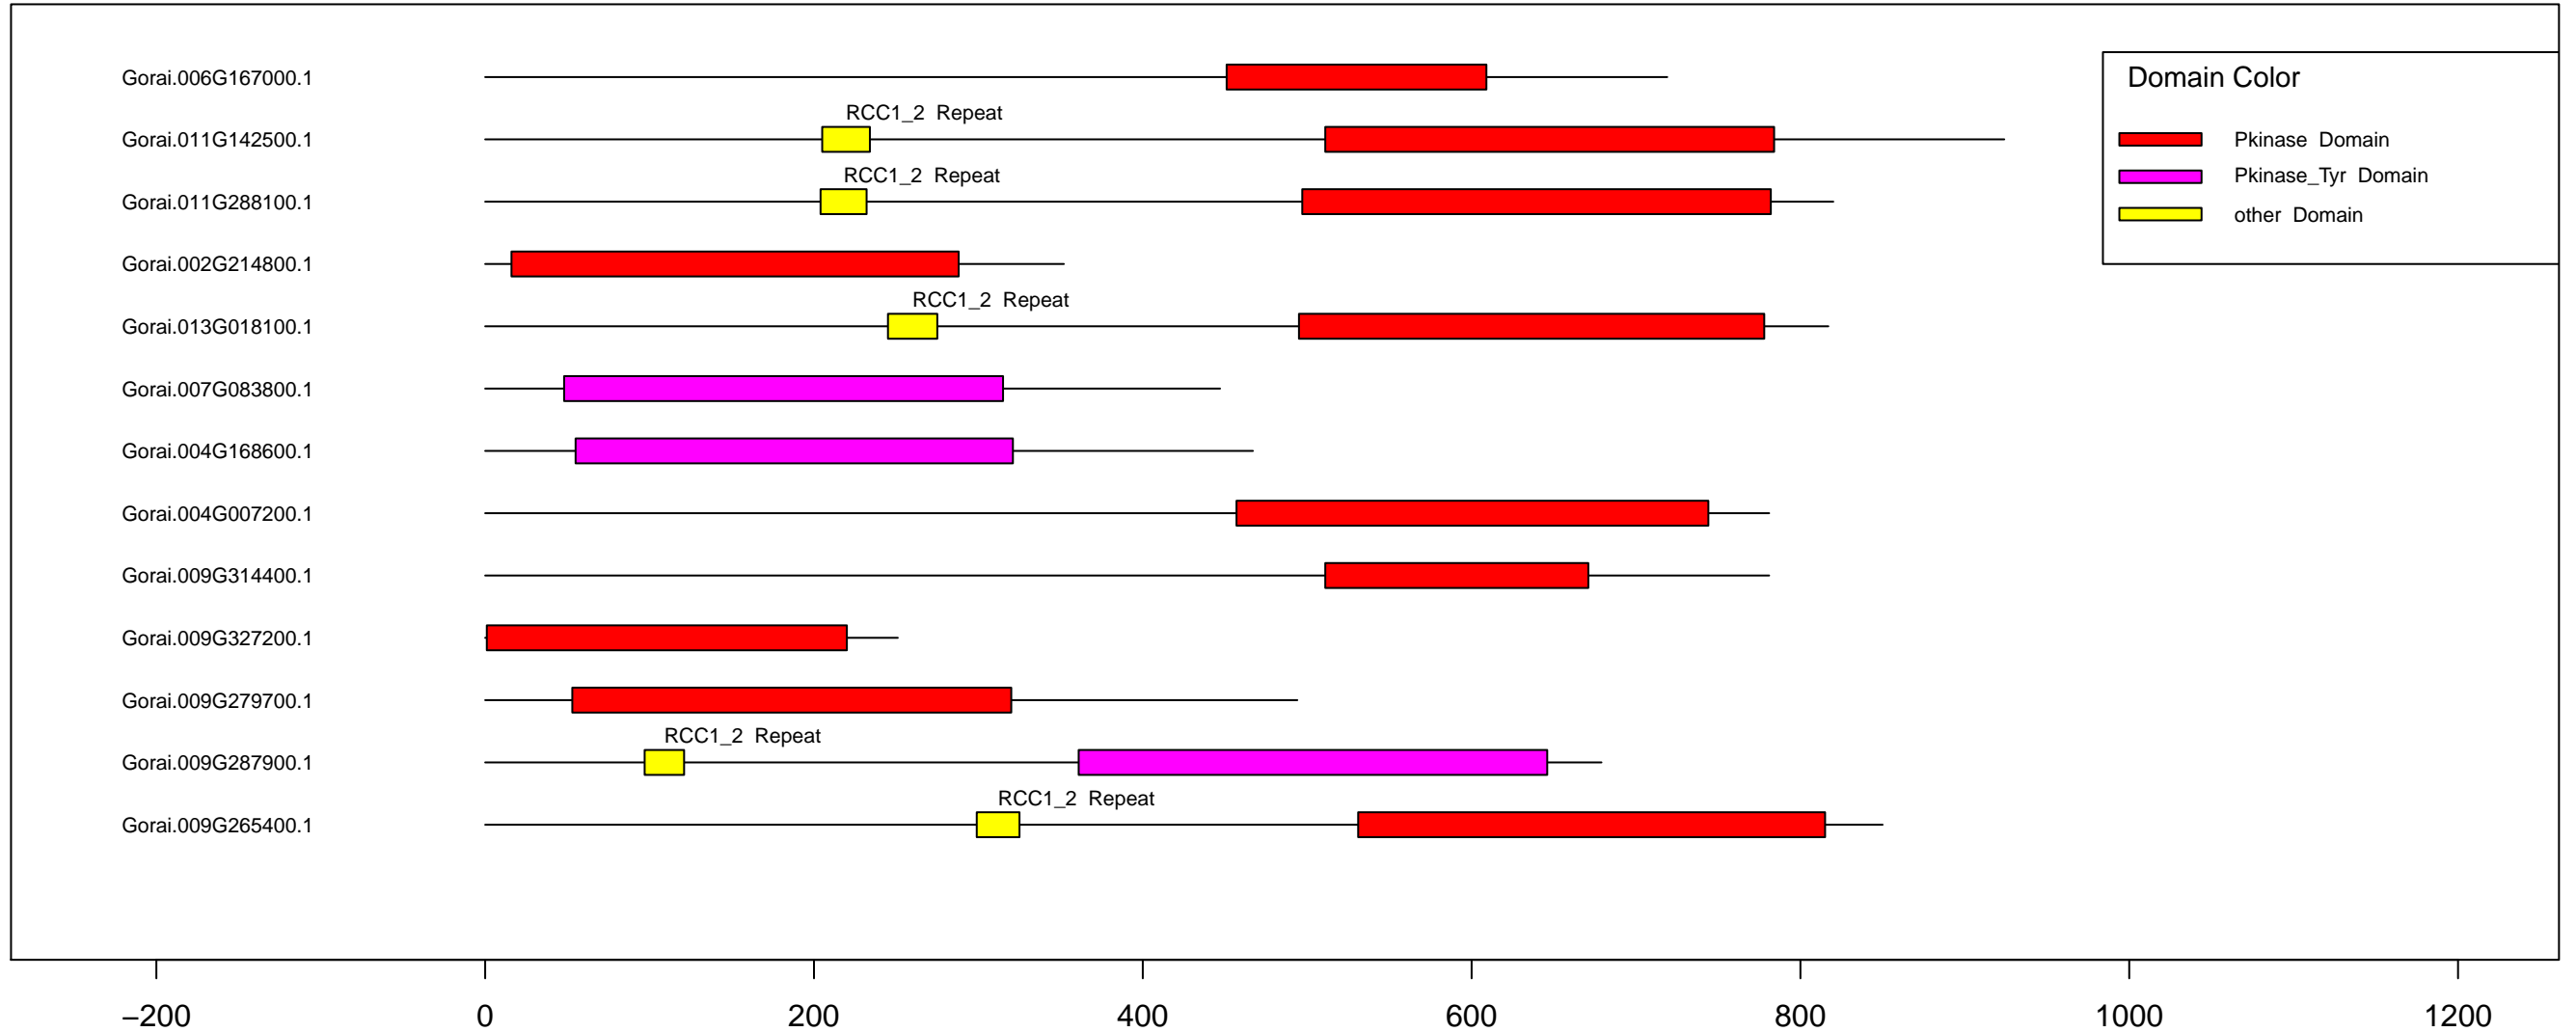



# G.ra RLK-Pelle\_CrRLK1L-1 domain diagram (part 1)

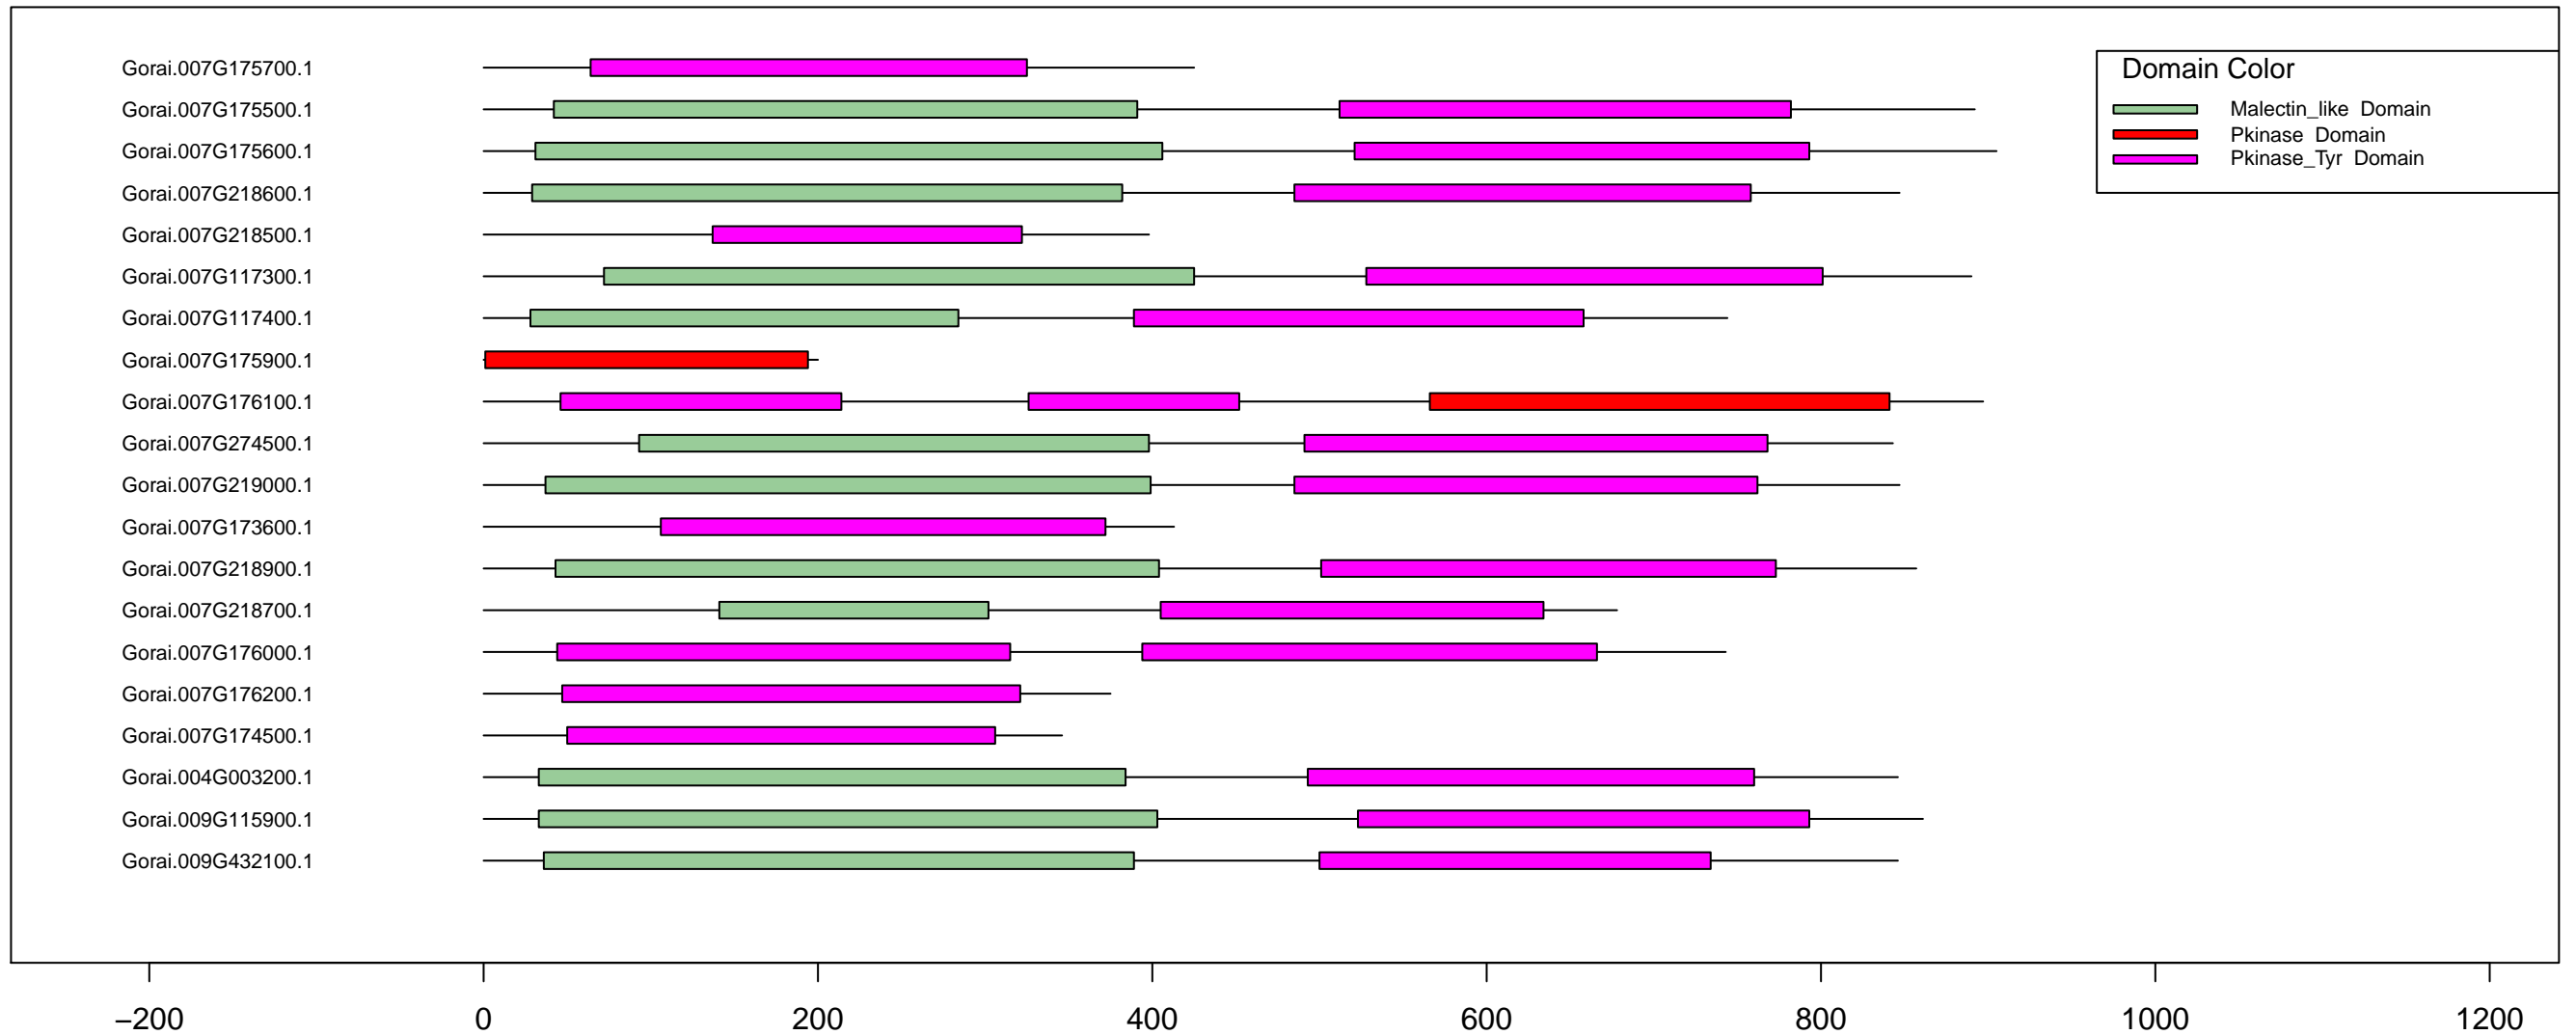

### G.ra RLK-Pelle\_CrRLK1L-1 domain diagram (part 2)

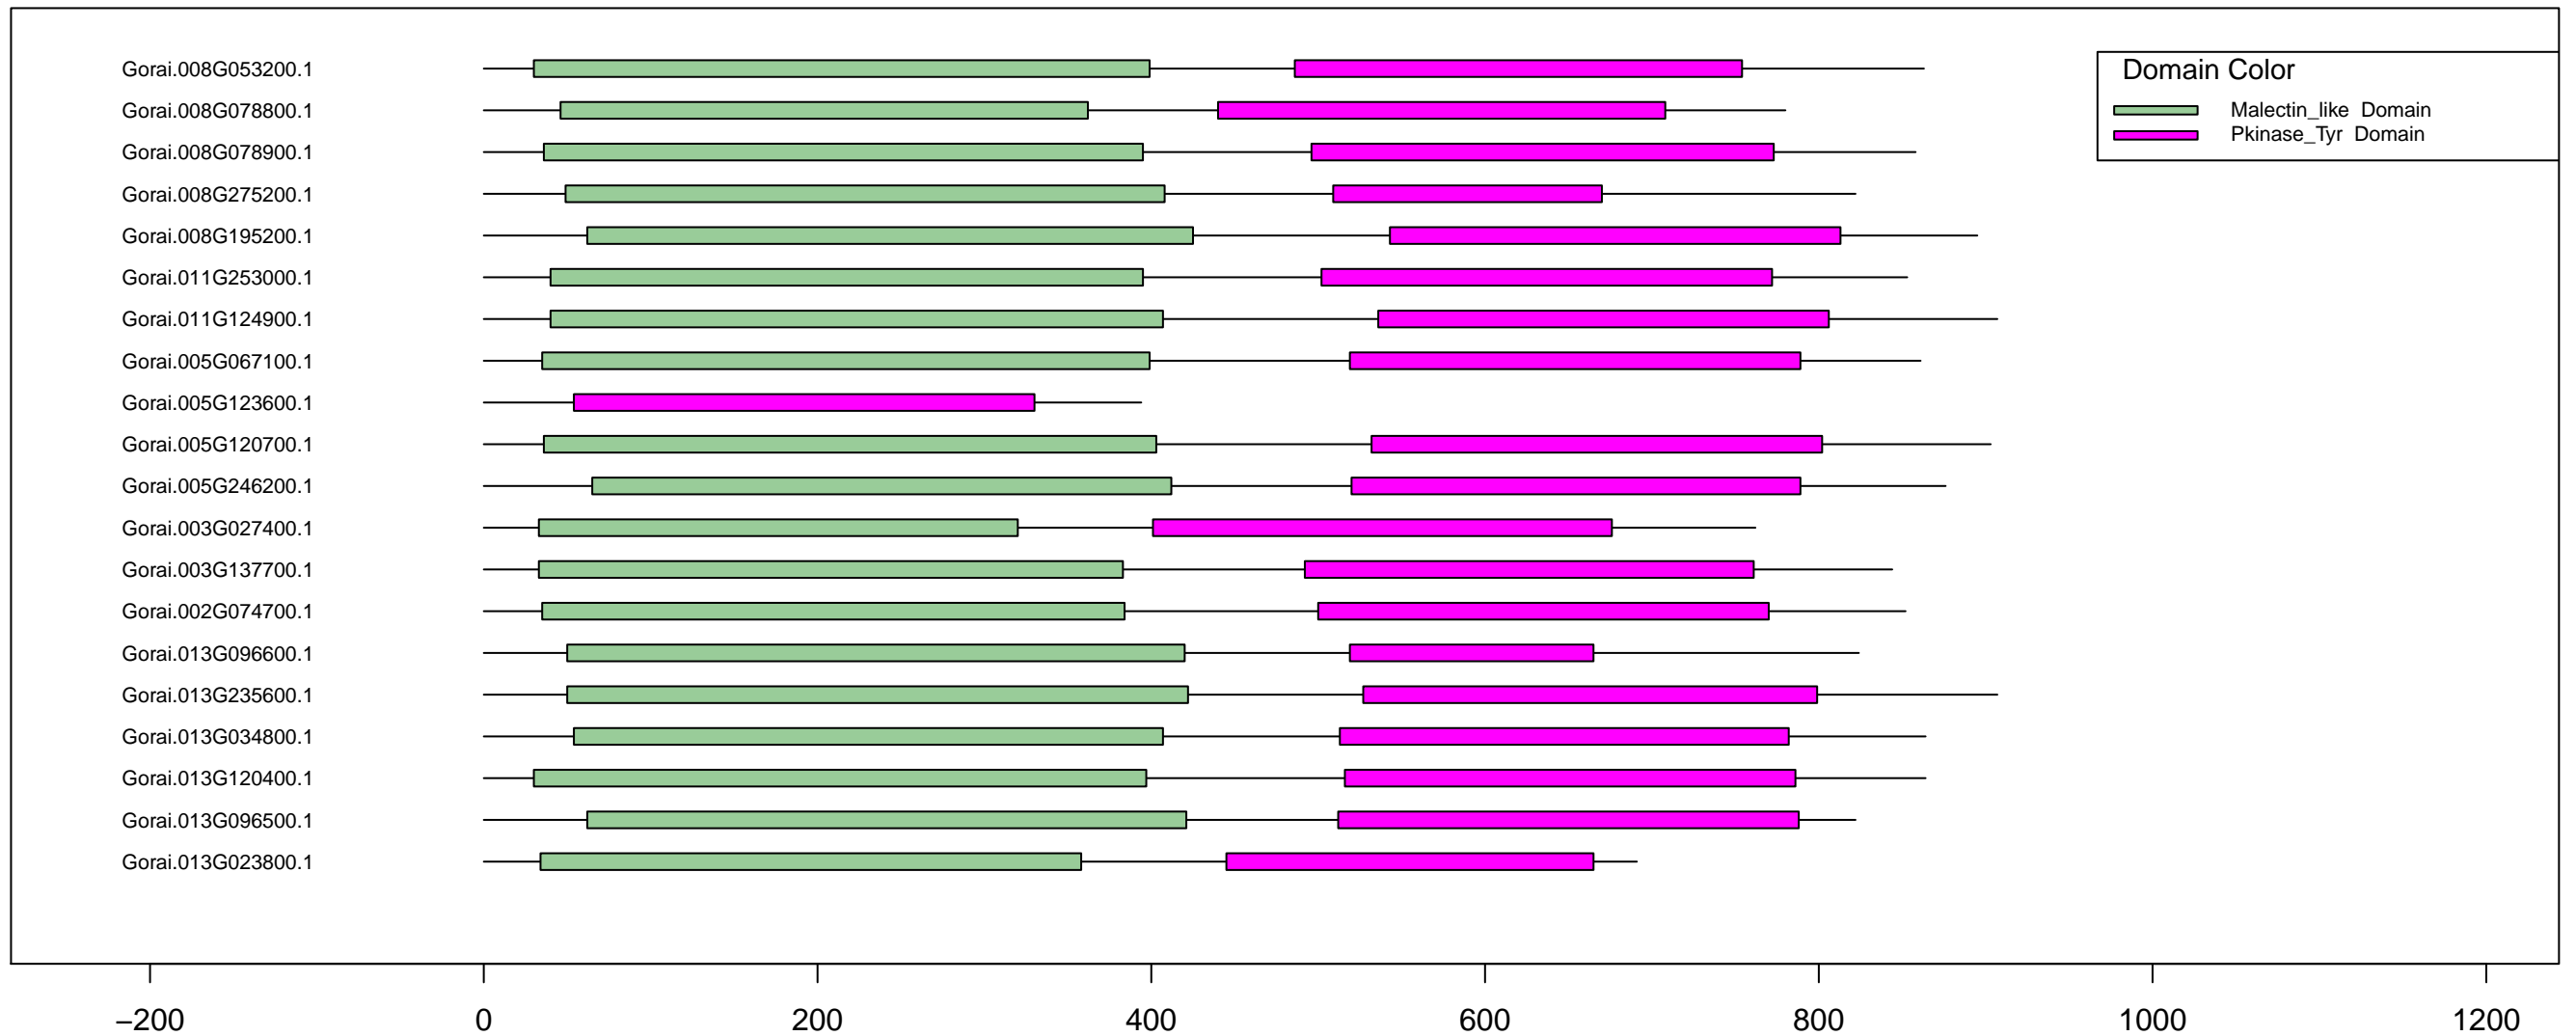

### G.ra RLK-Pelle\_CrRLK1L-1 domain diagram (part 3)

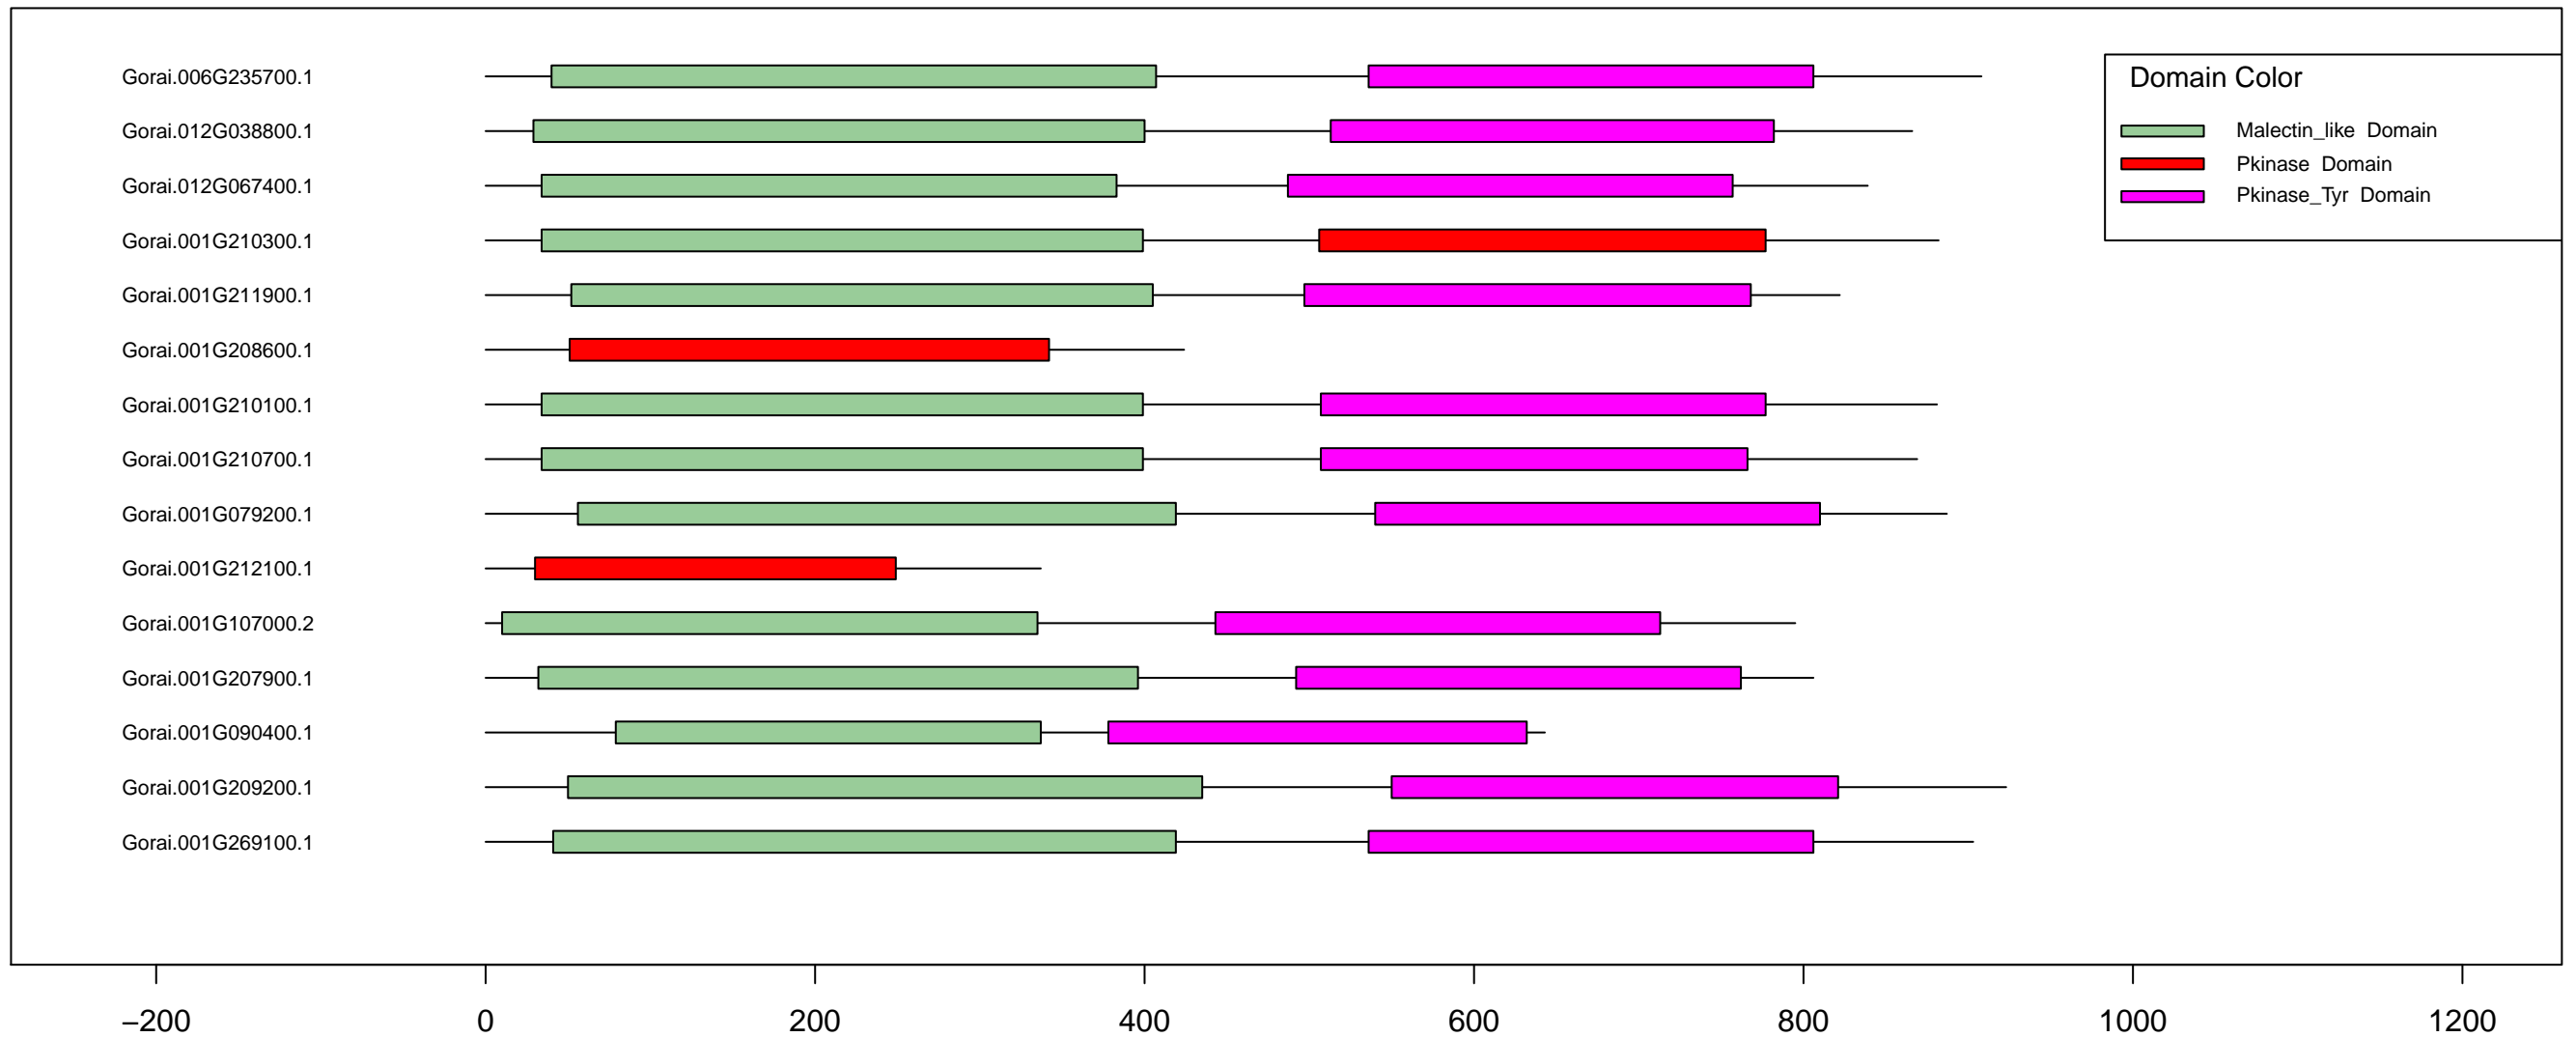

### G.ra RLK-Pelle\_DLSV domain diagram (part 1)

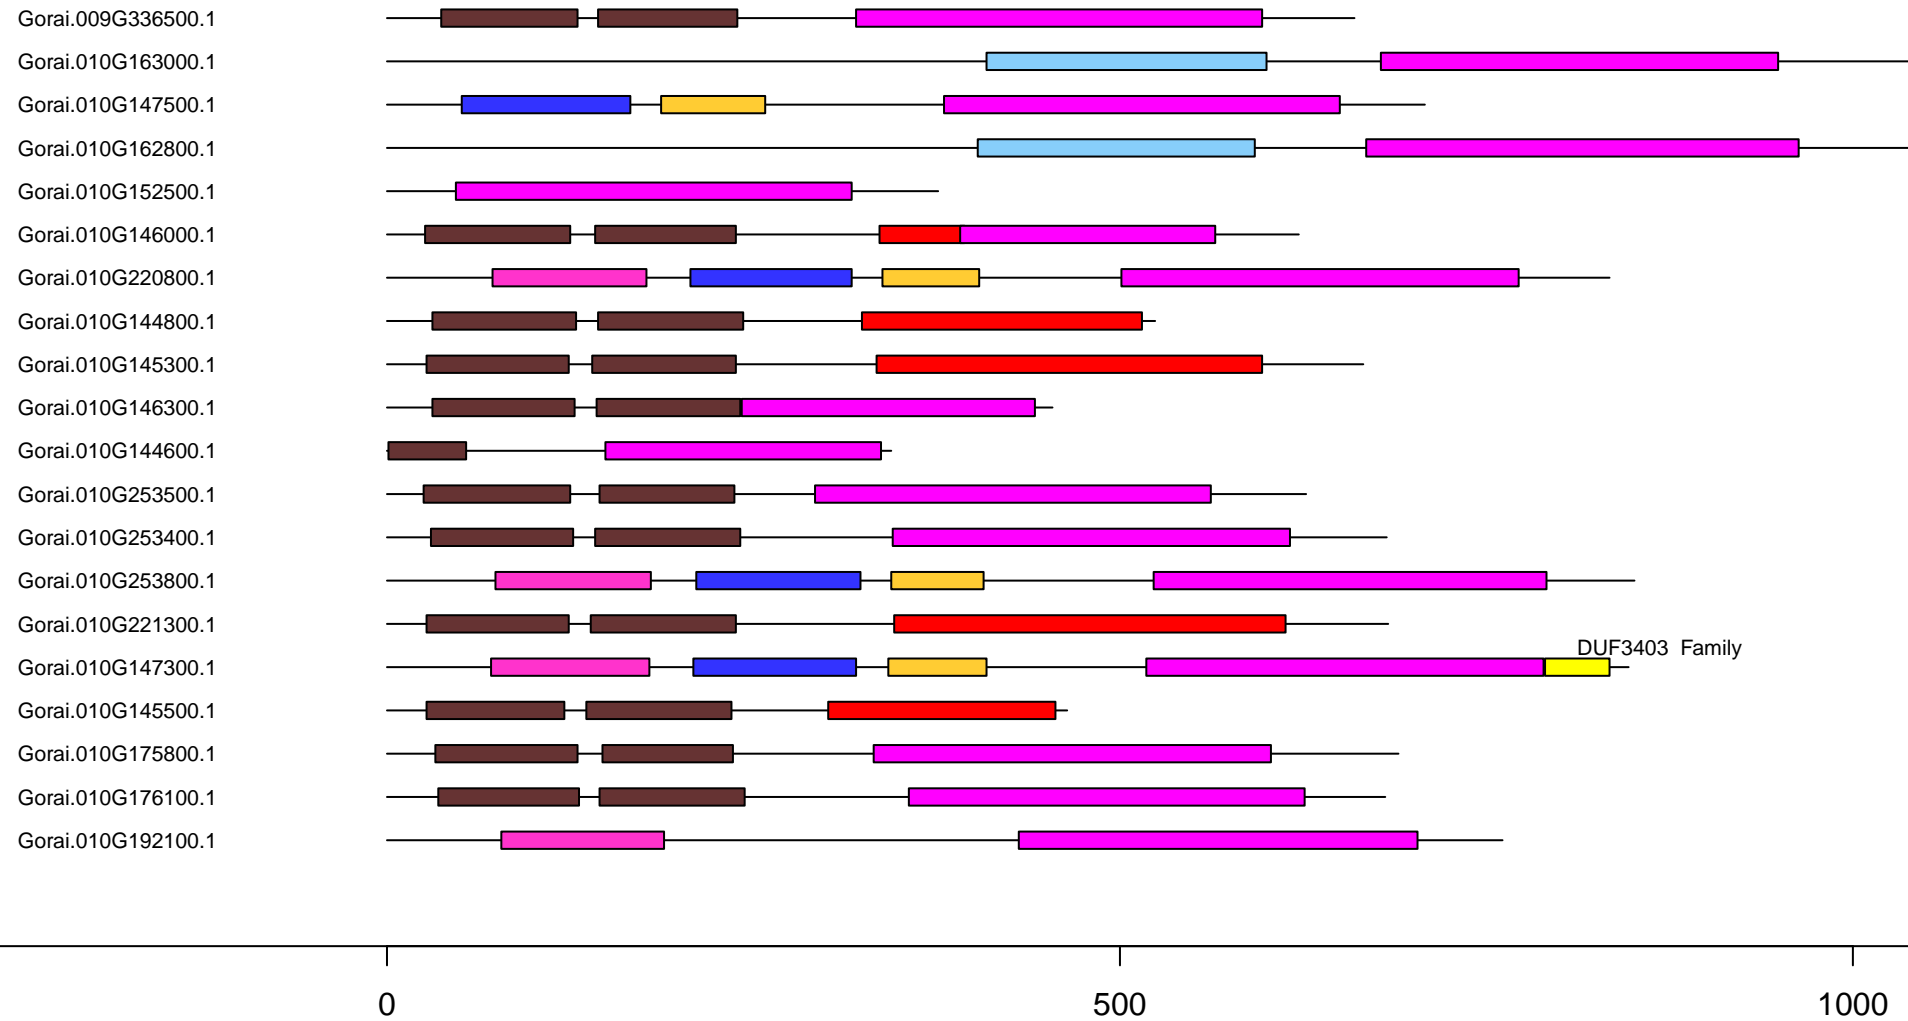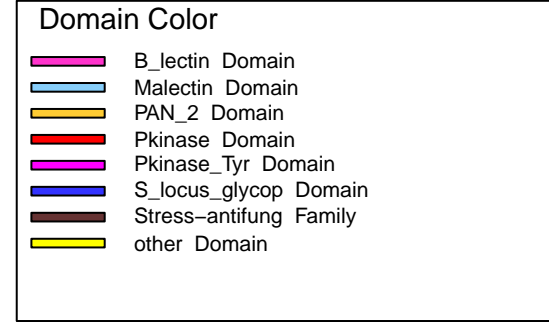

DUF3403 Family

### G.ra RLK-Pelle\_DLSV domain diagram (part 2)

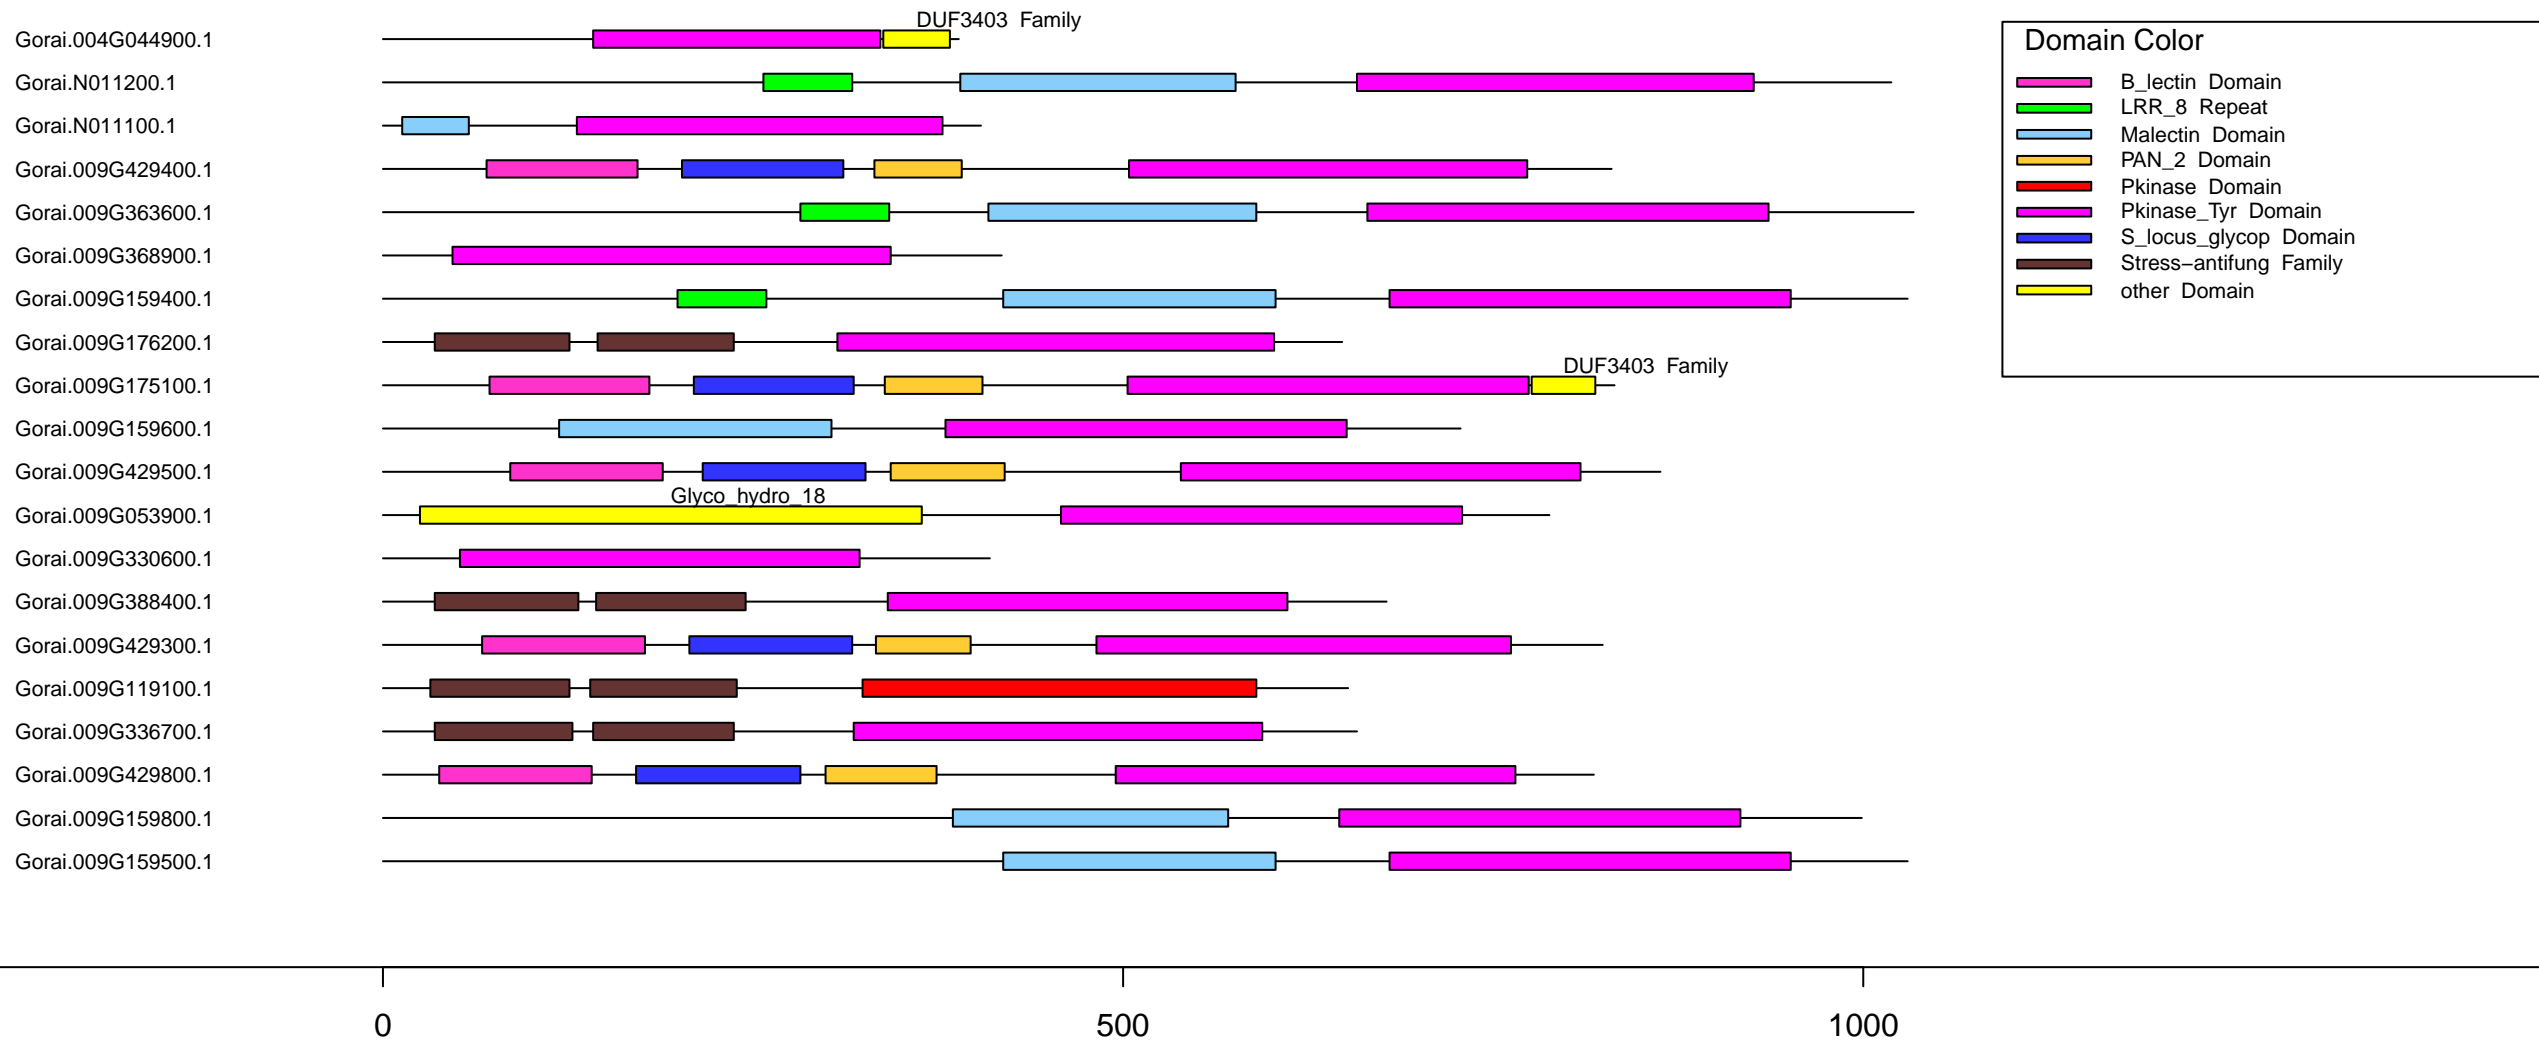

### G.ra RLK-Pelle\_DLSV domain diagram (part 3)

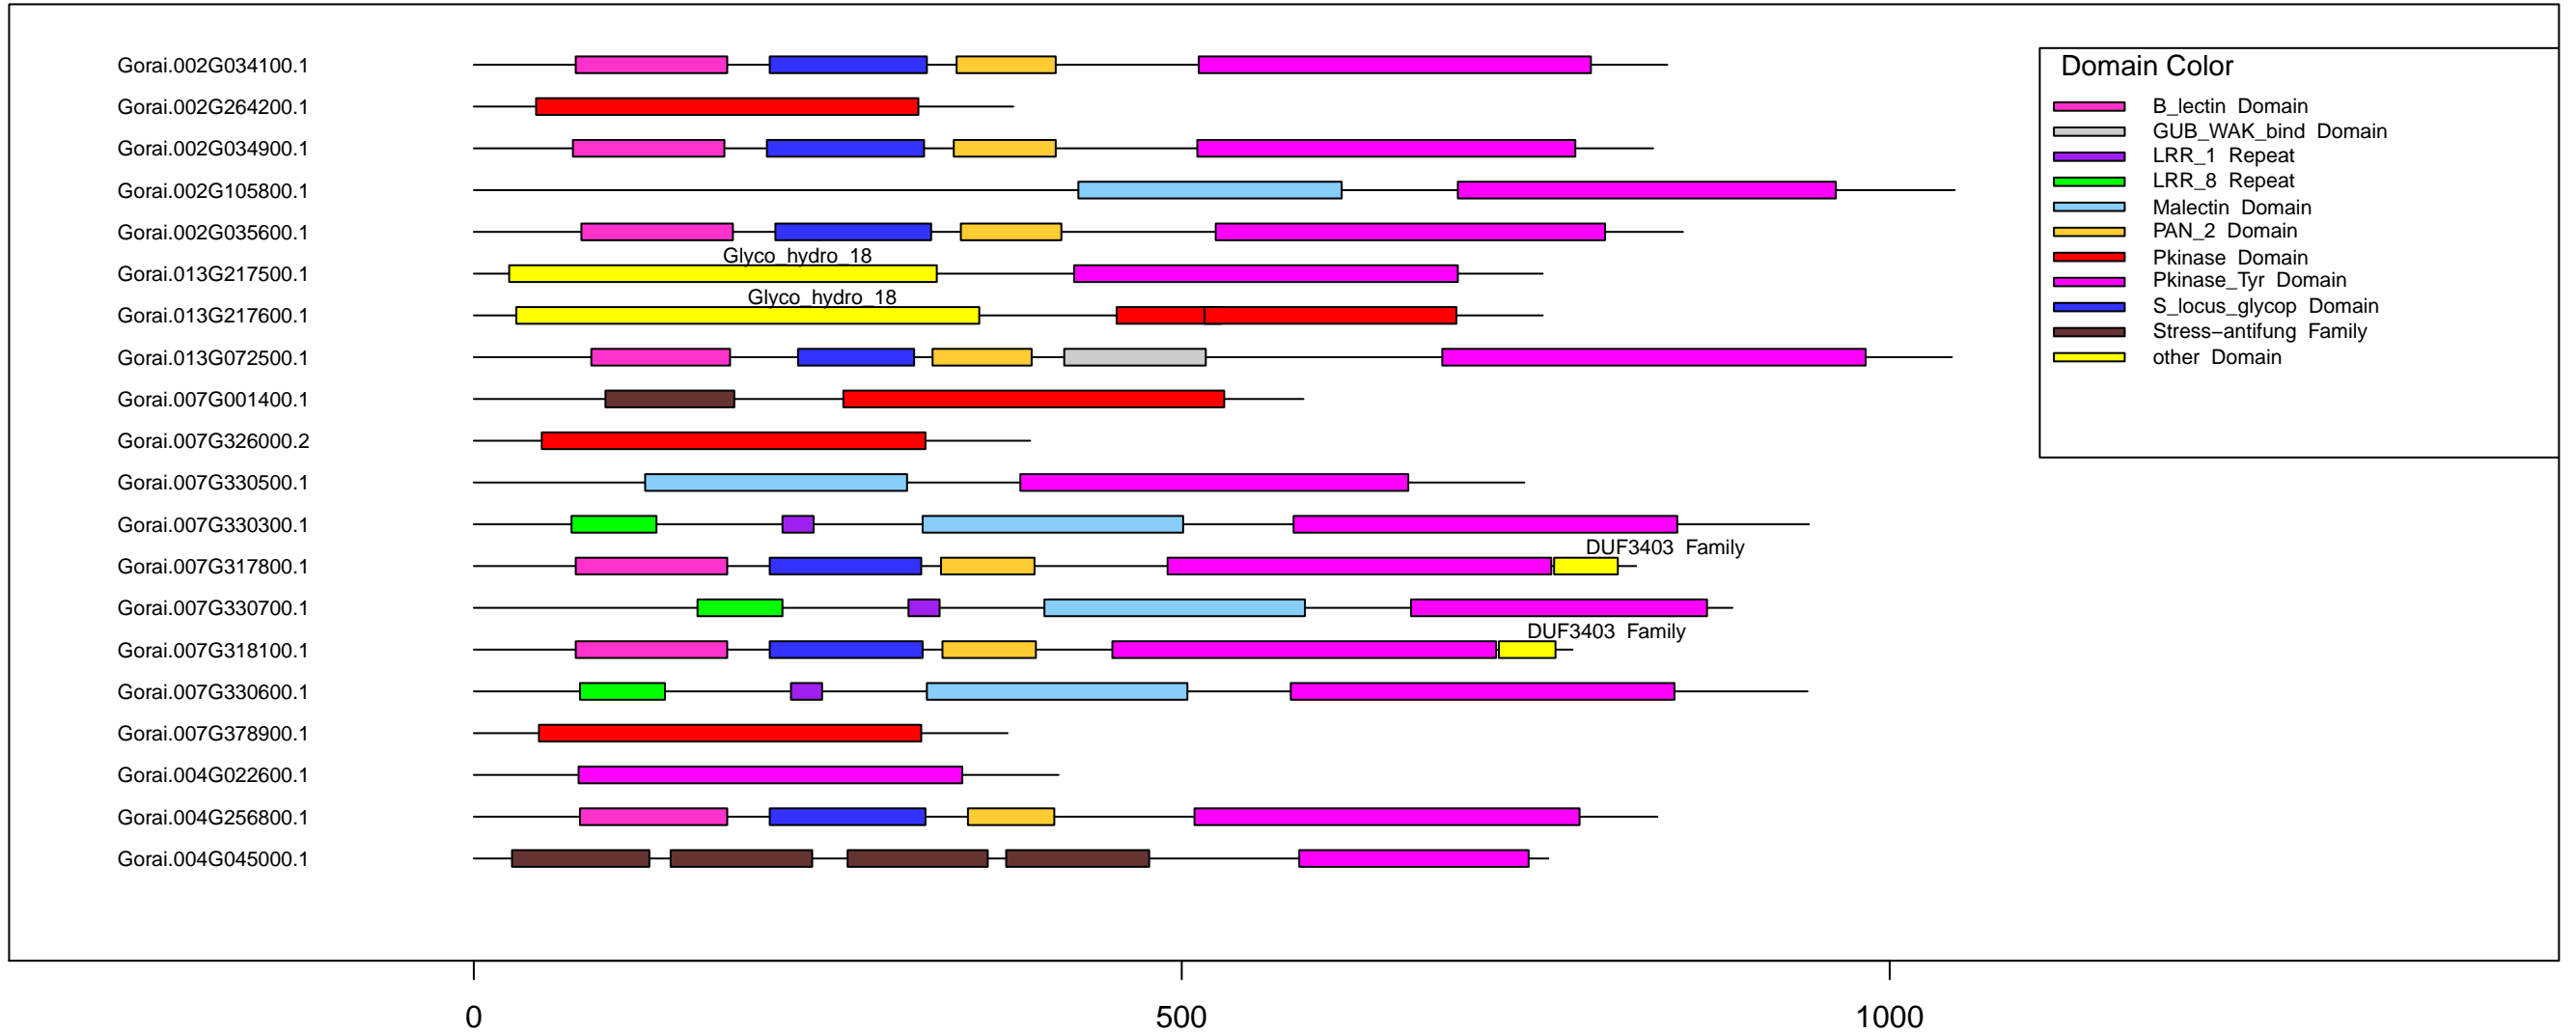

### G.ra RLK-Pelle\_DLSV domain diagram (part 4)

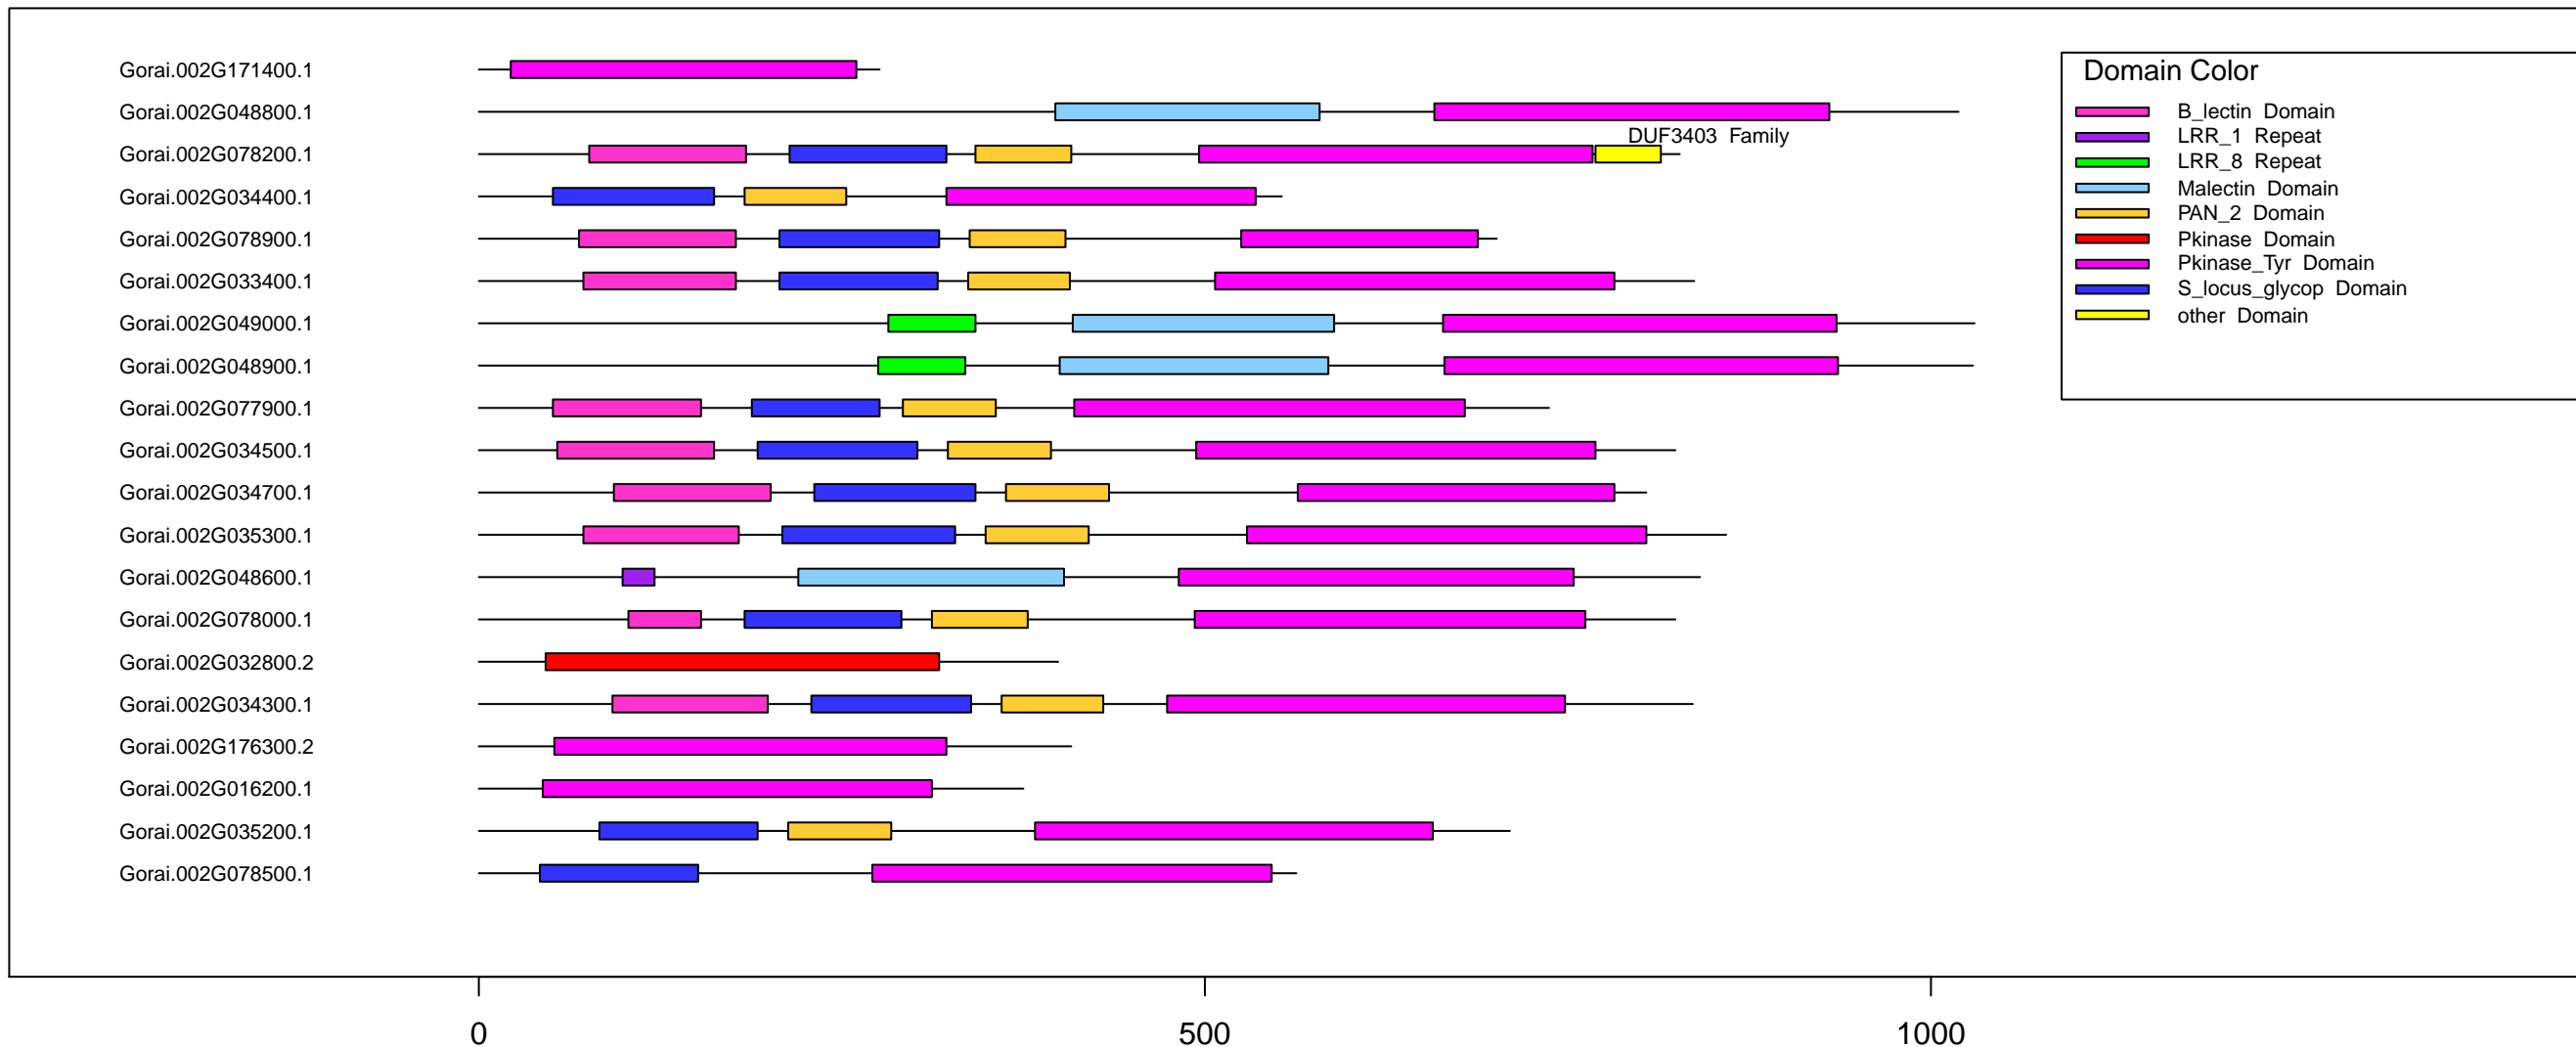

### G.ra RLK-Pelle\_DLSV domain diagram (part 5)

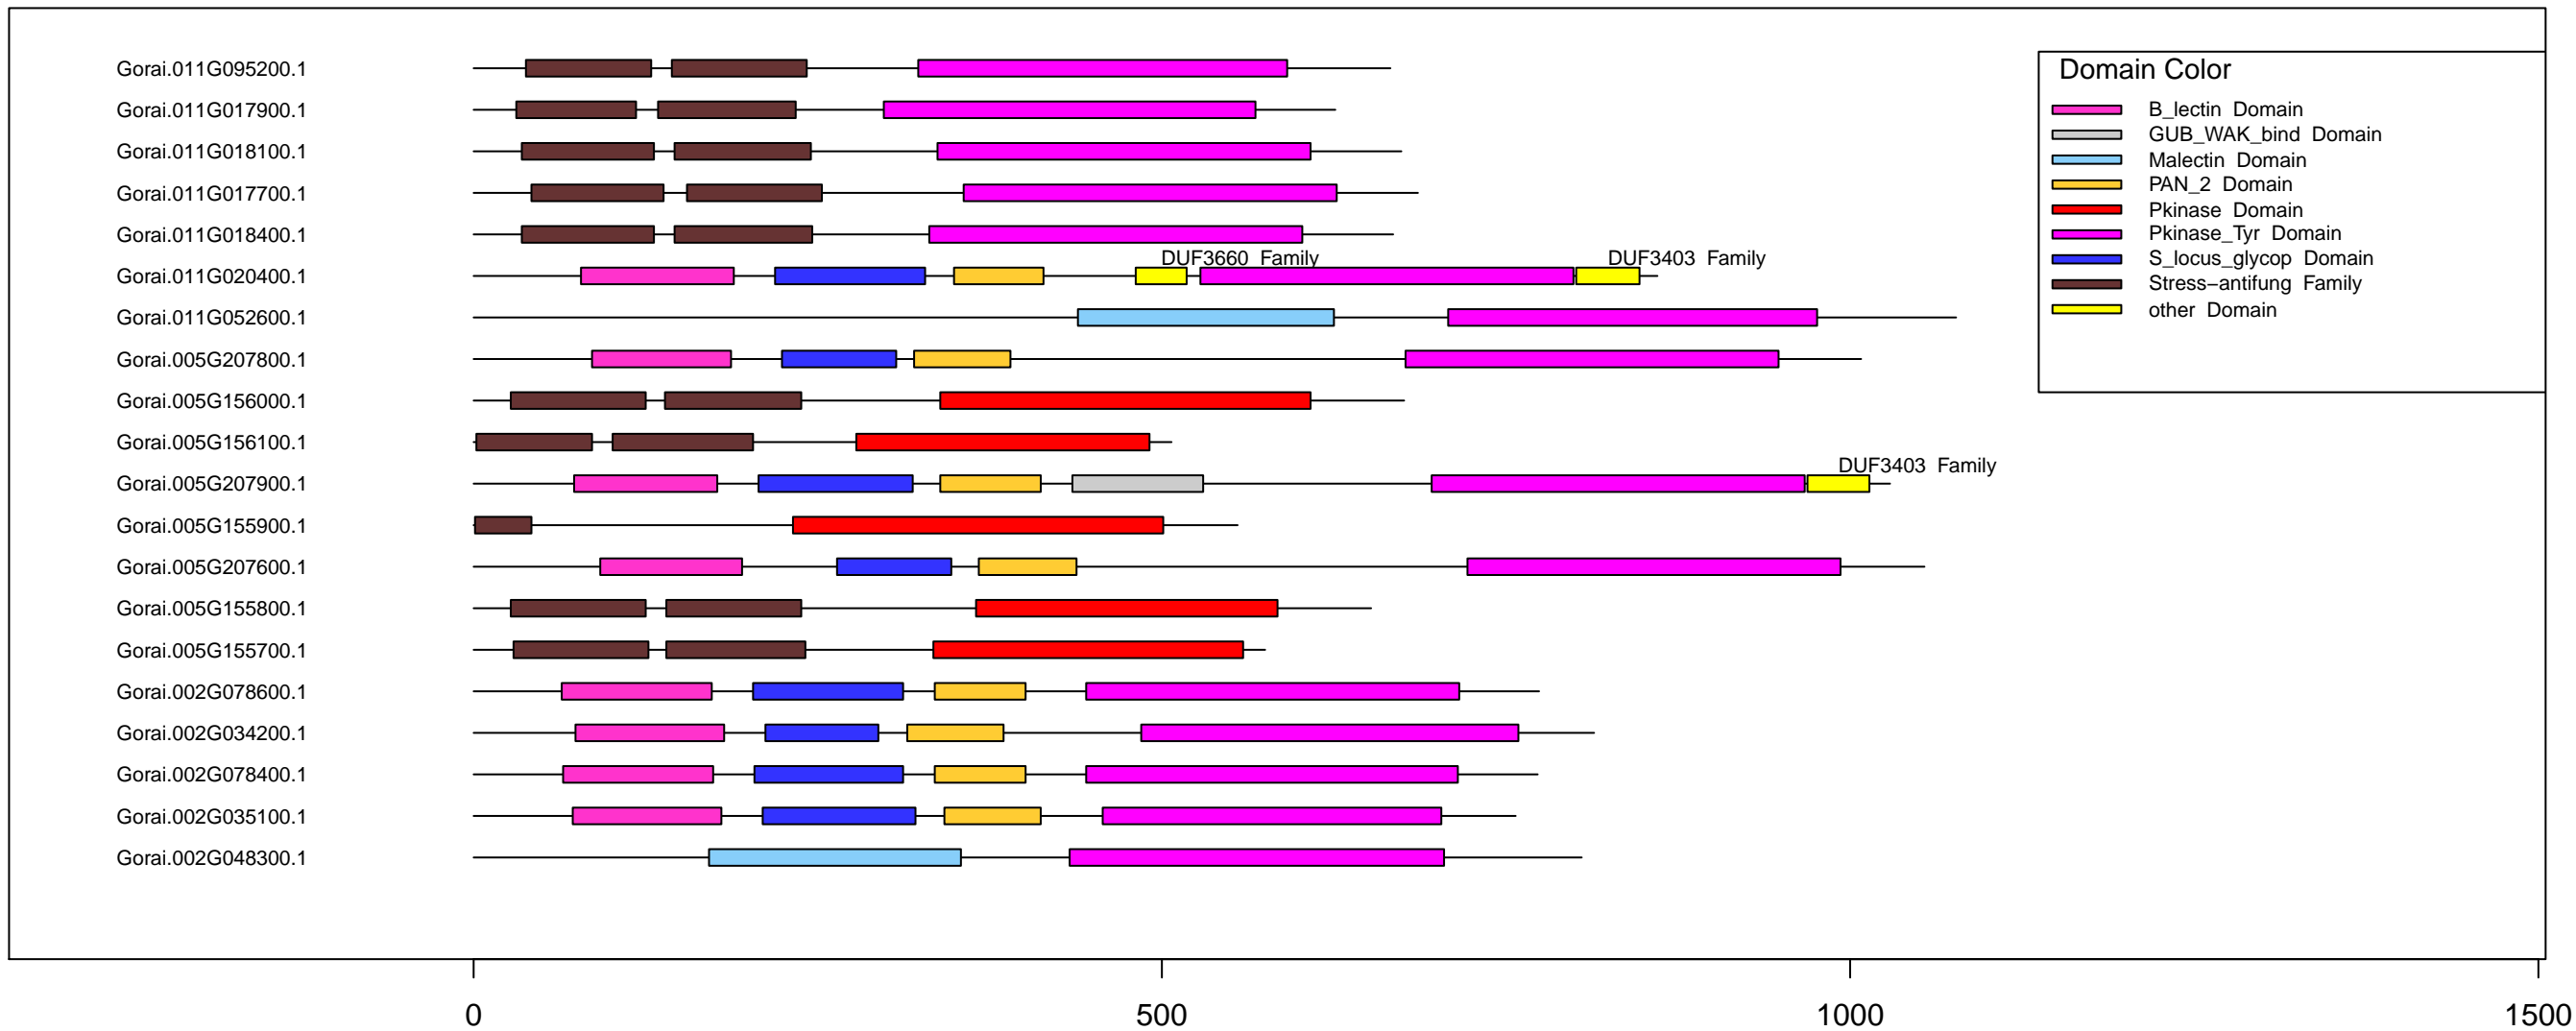



### G.ra RLK-Pelle\_DLSV domain diagram (part 6)

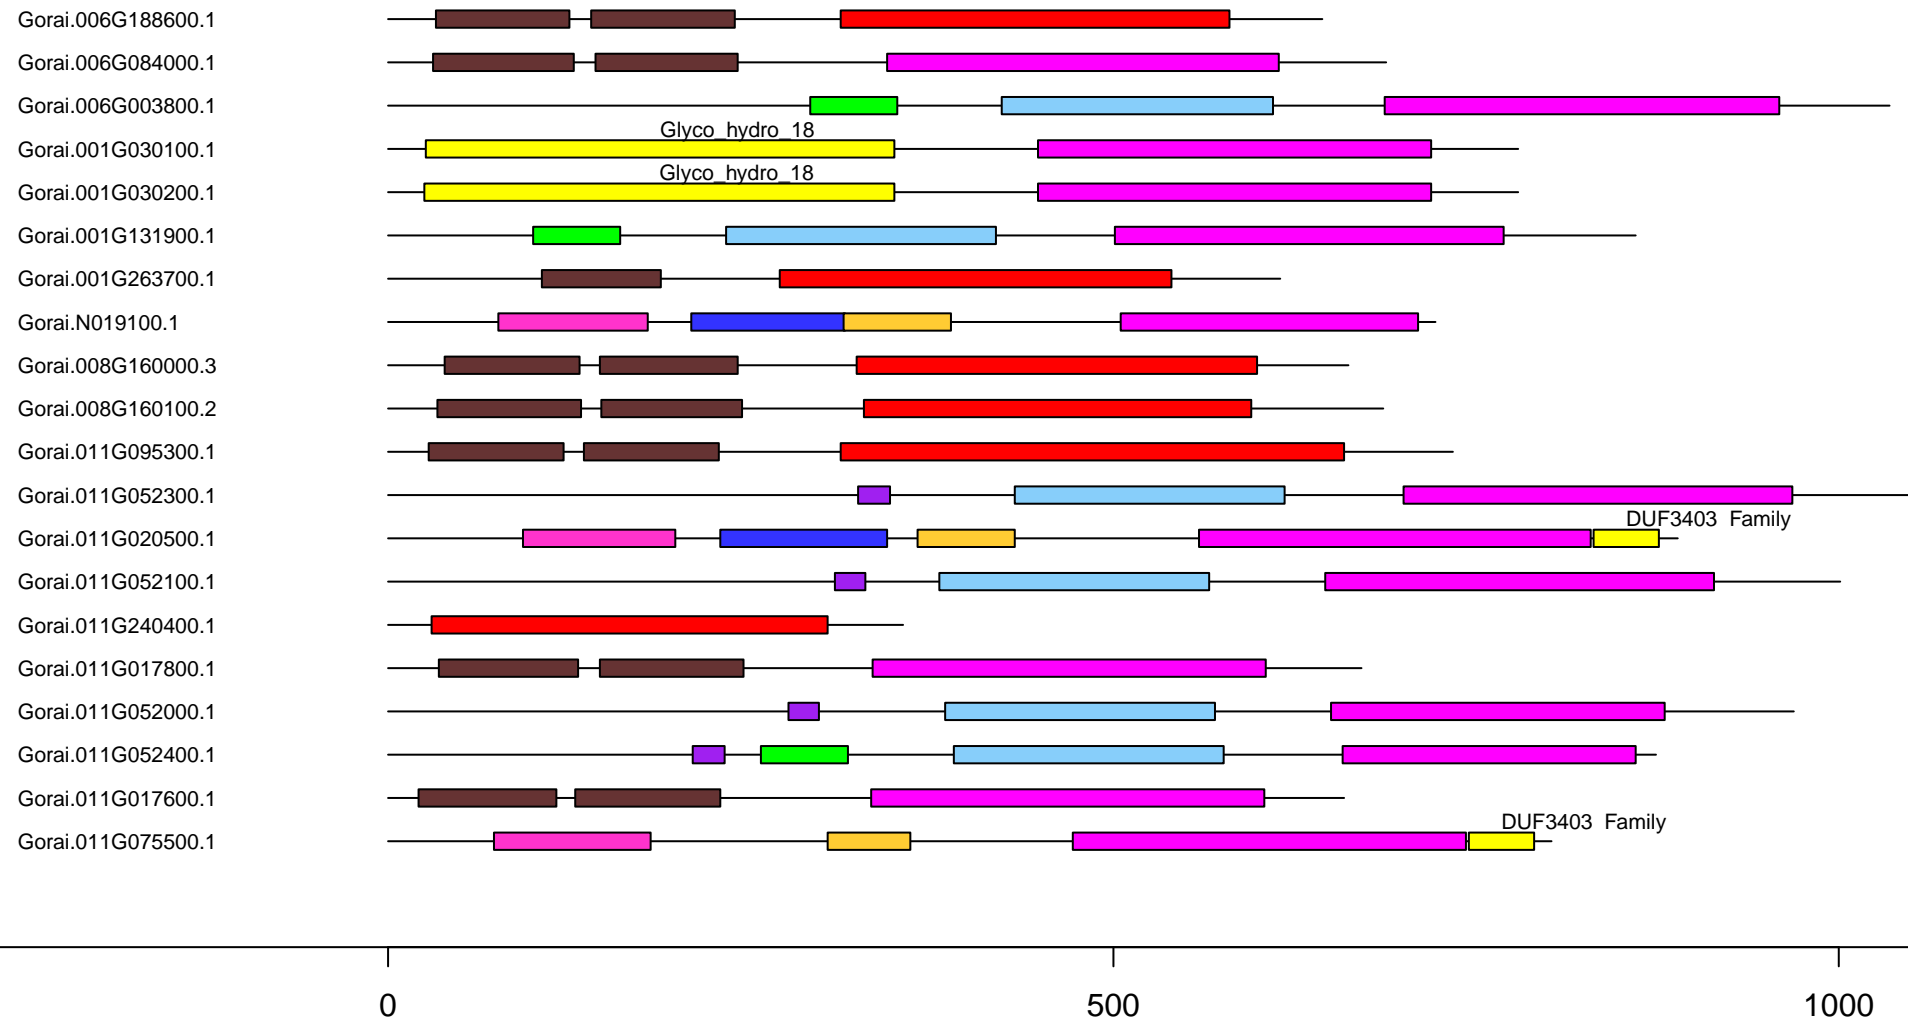

**Domain Color**

- █ B\_lectin Domain
- █ LRR\_1 Repeat
- █ LRR\_8 Repeat
- █ Malectin Domain
- █ PAN\_2 Domain
- █ Pkinase Domain
- █ Pkinase\_Tyr Domain
- █ S\_locus\_glycop Domain
- █ Stress-antifung Family
- █ other Domain

### G.ra RLK-Pelle\_DLSV domain diagram (part 7)

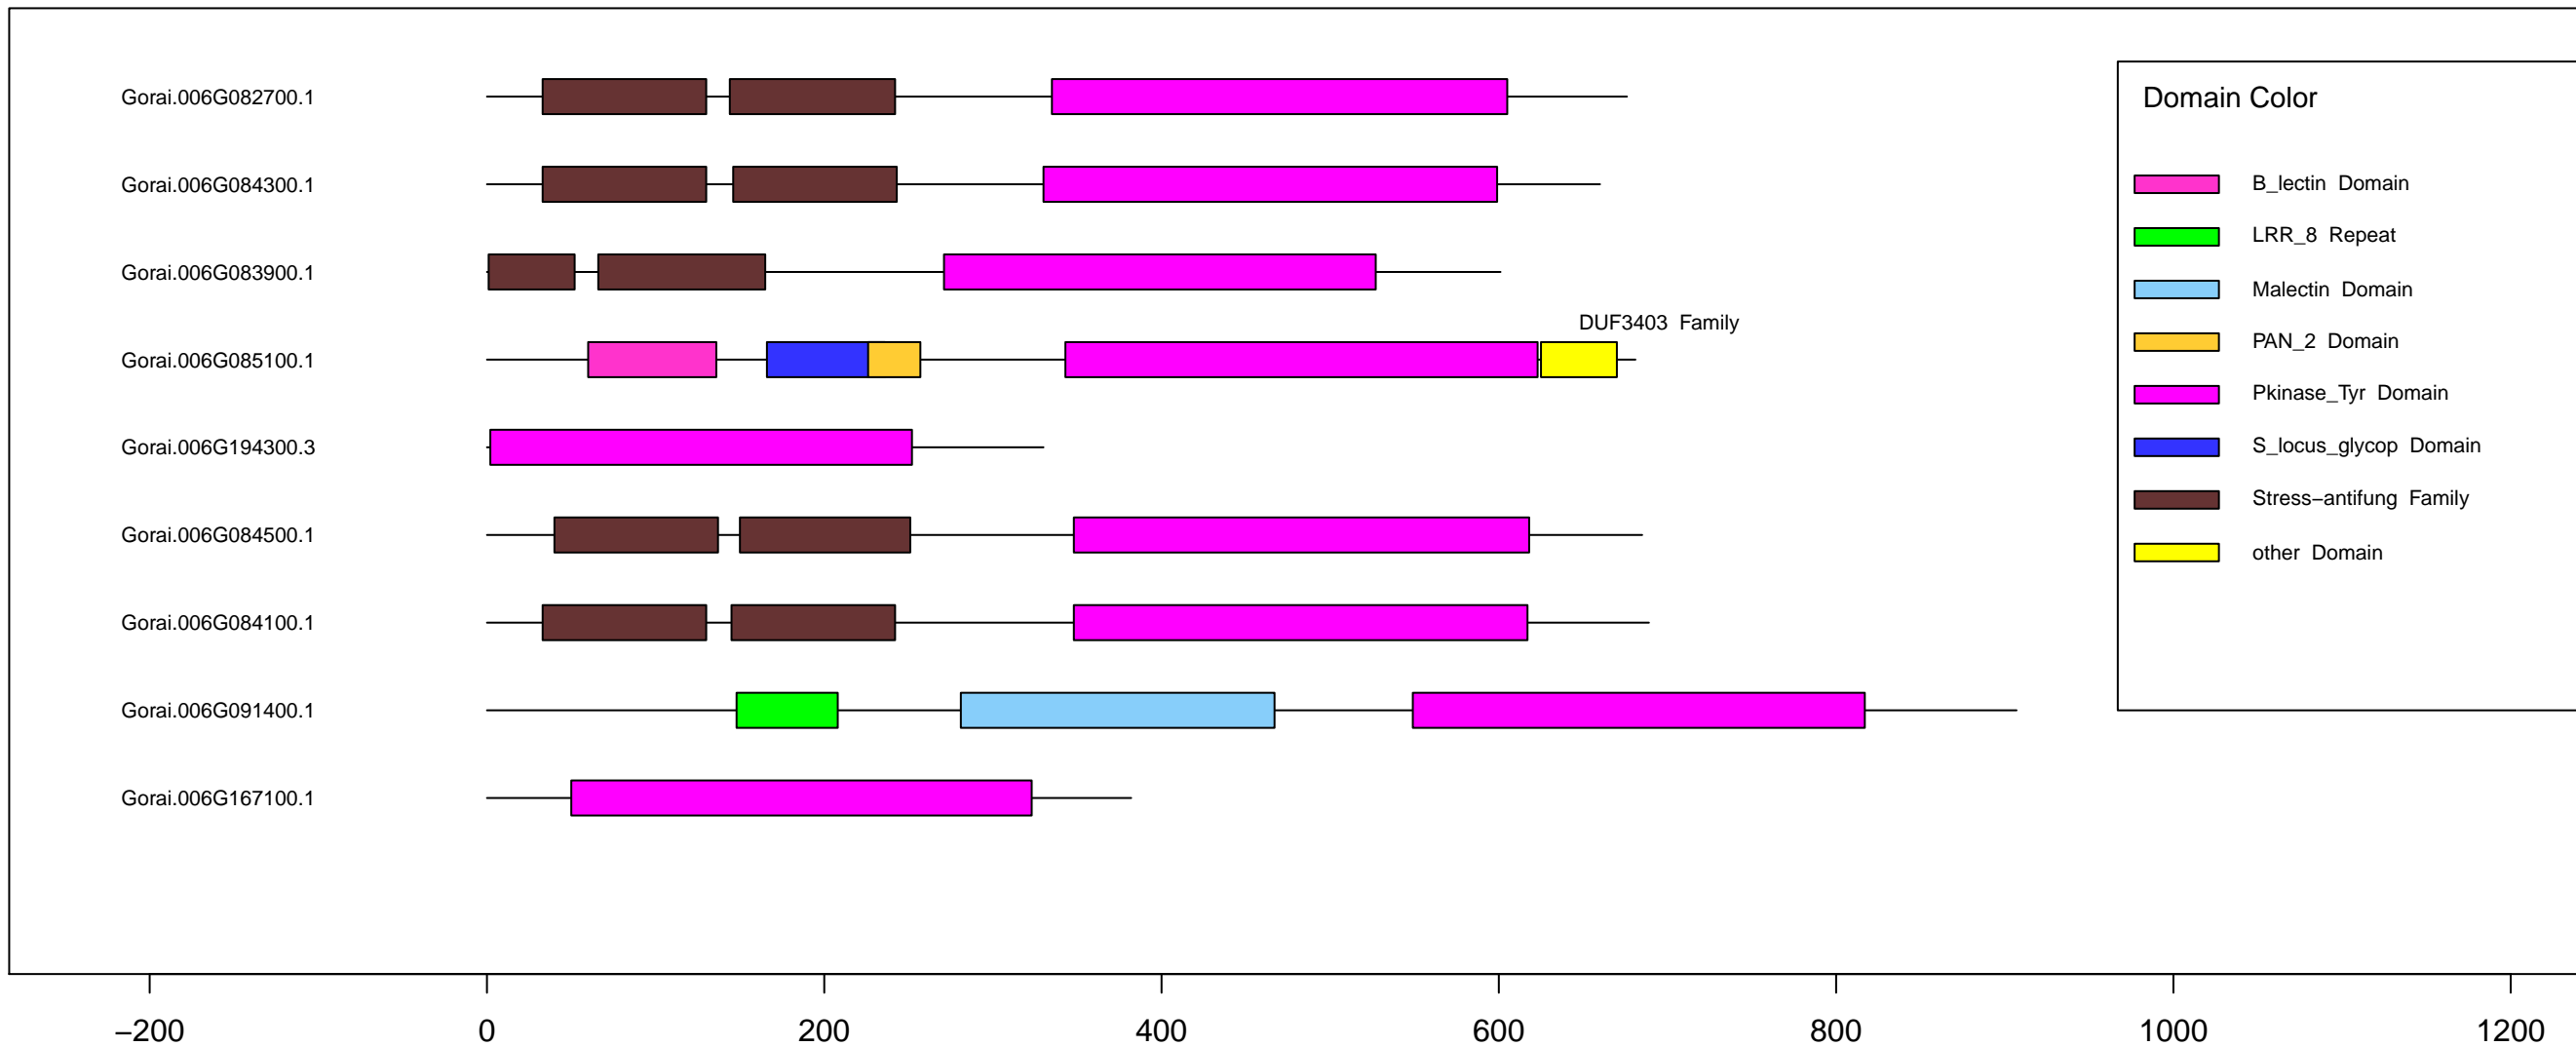

# G.ra RLK-Pelle\_Extensin domain diagram (all)

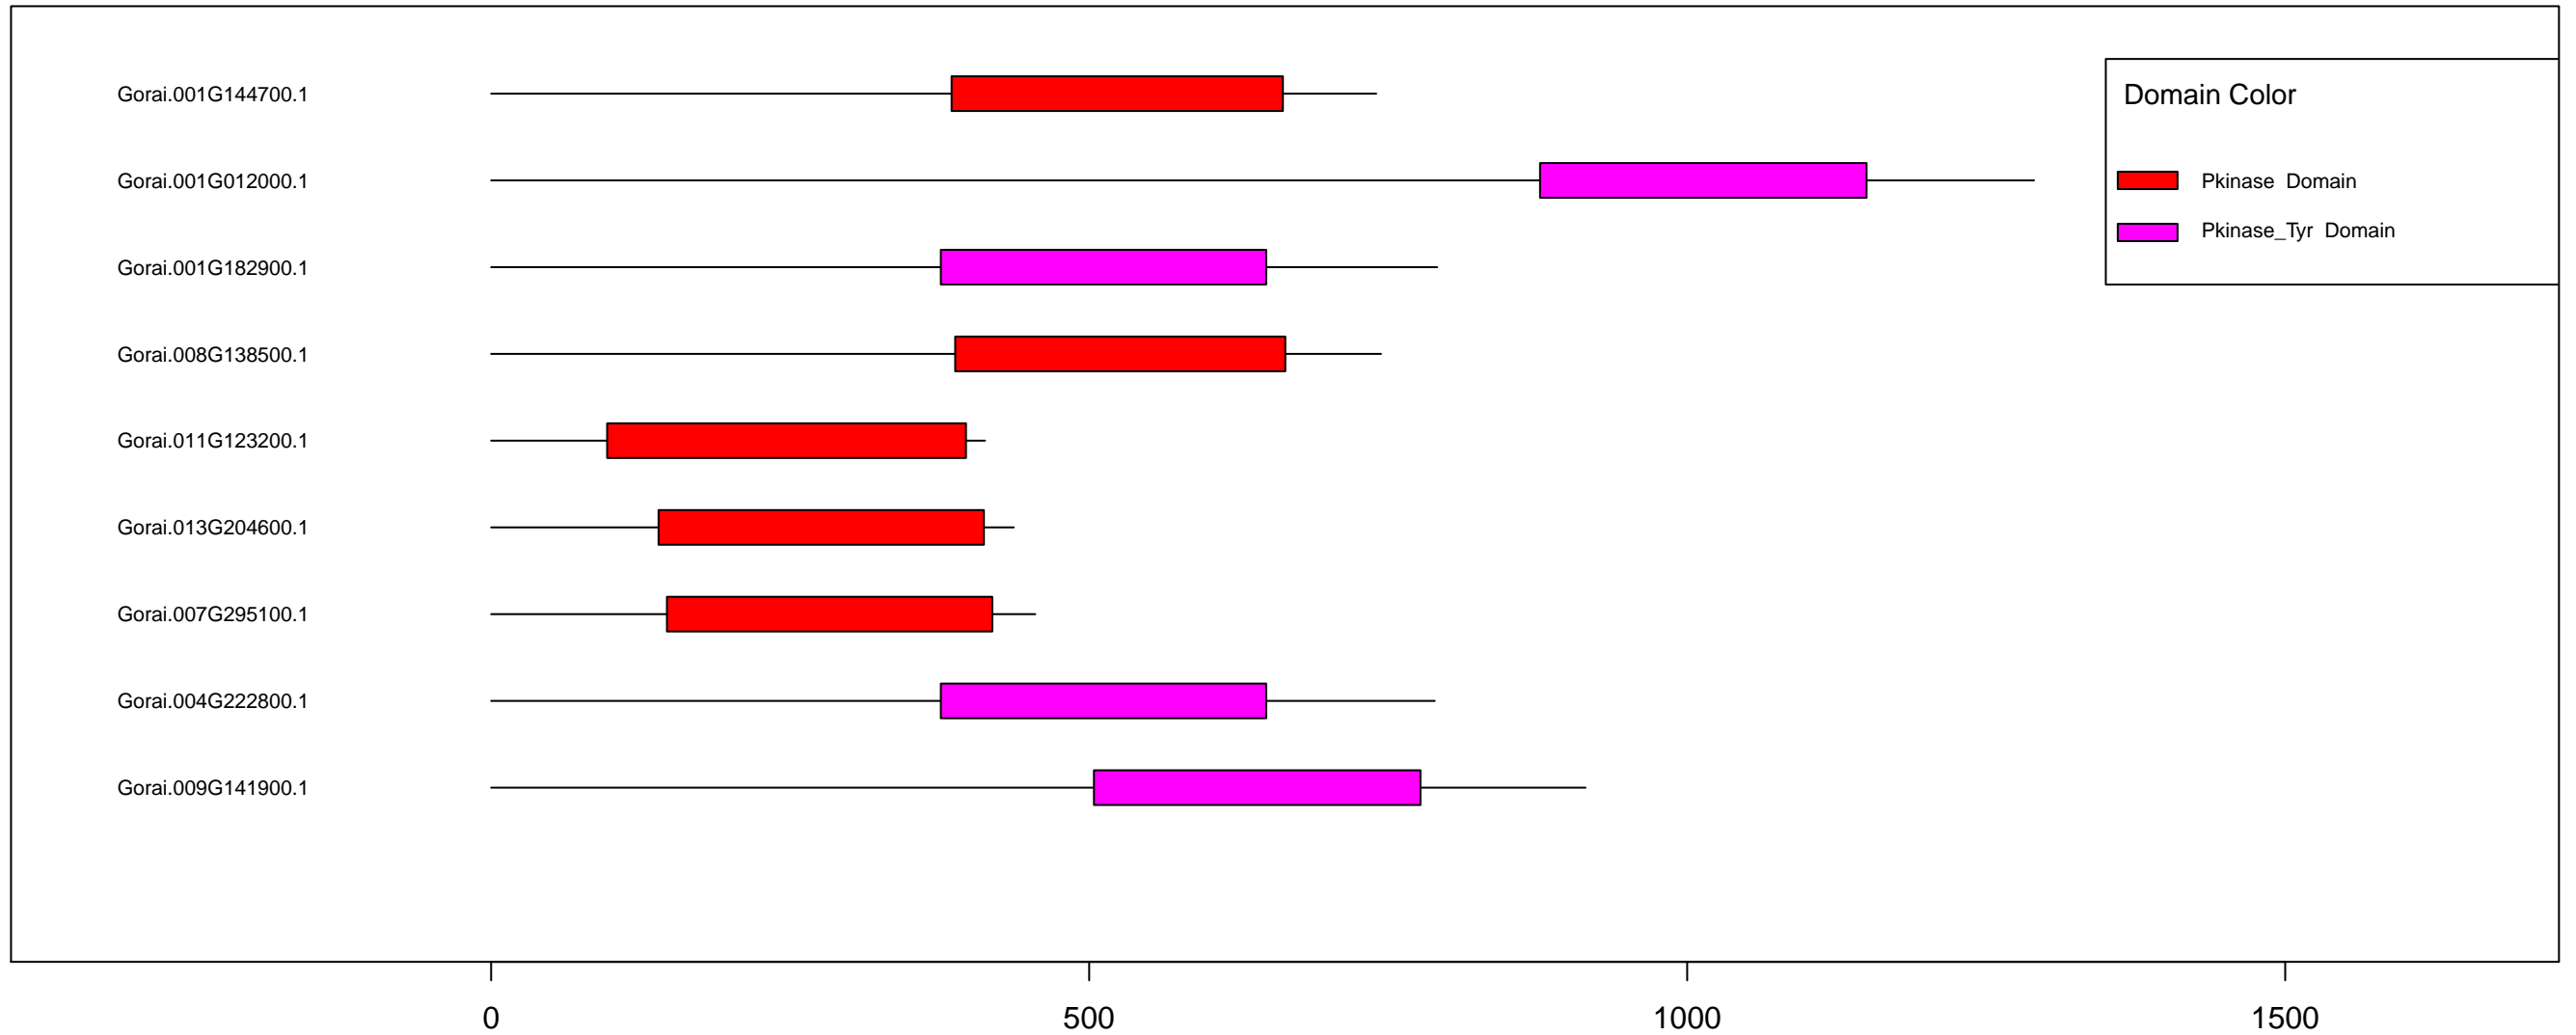

### G.ra RLK-Pelle\_L-LEC domain diagram (part 1)

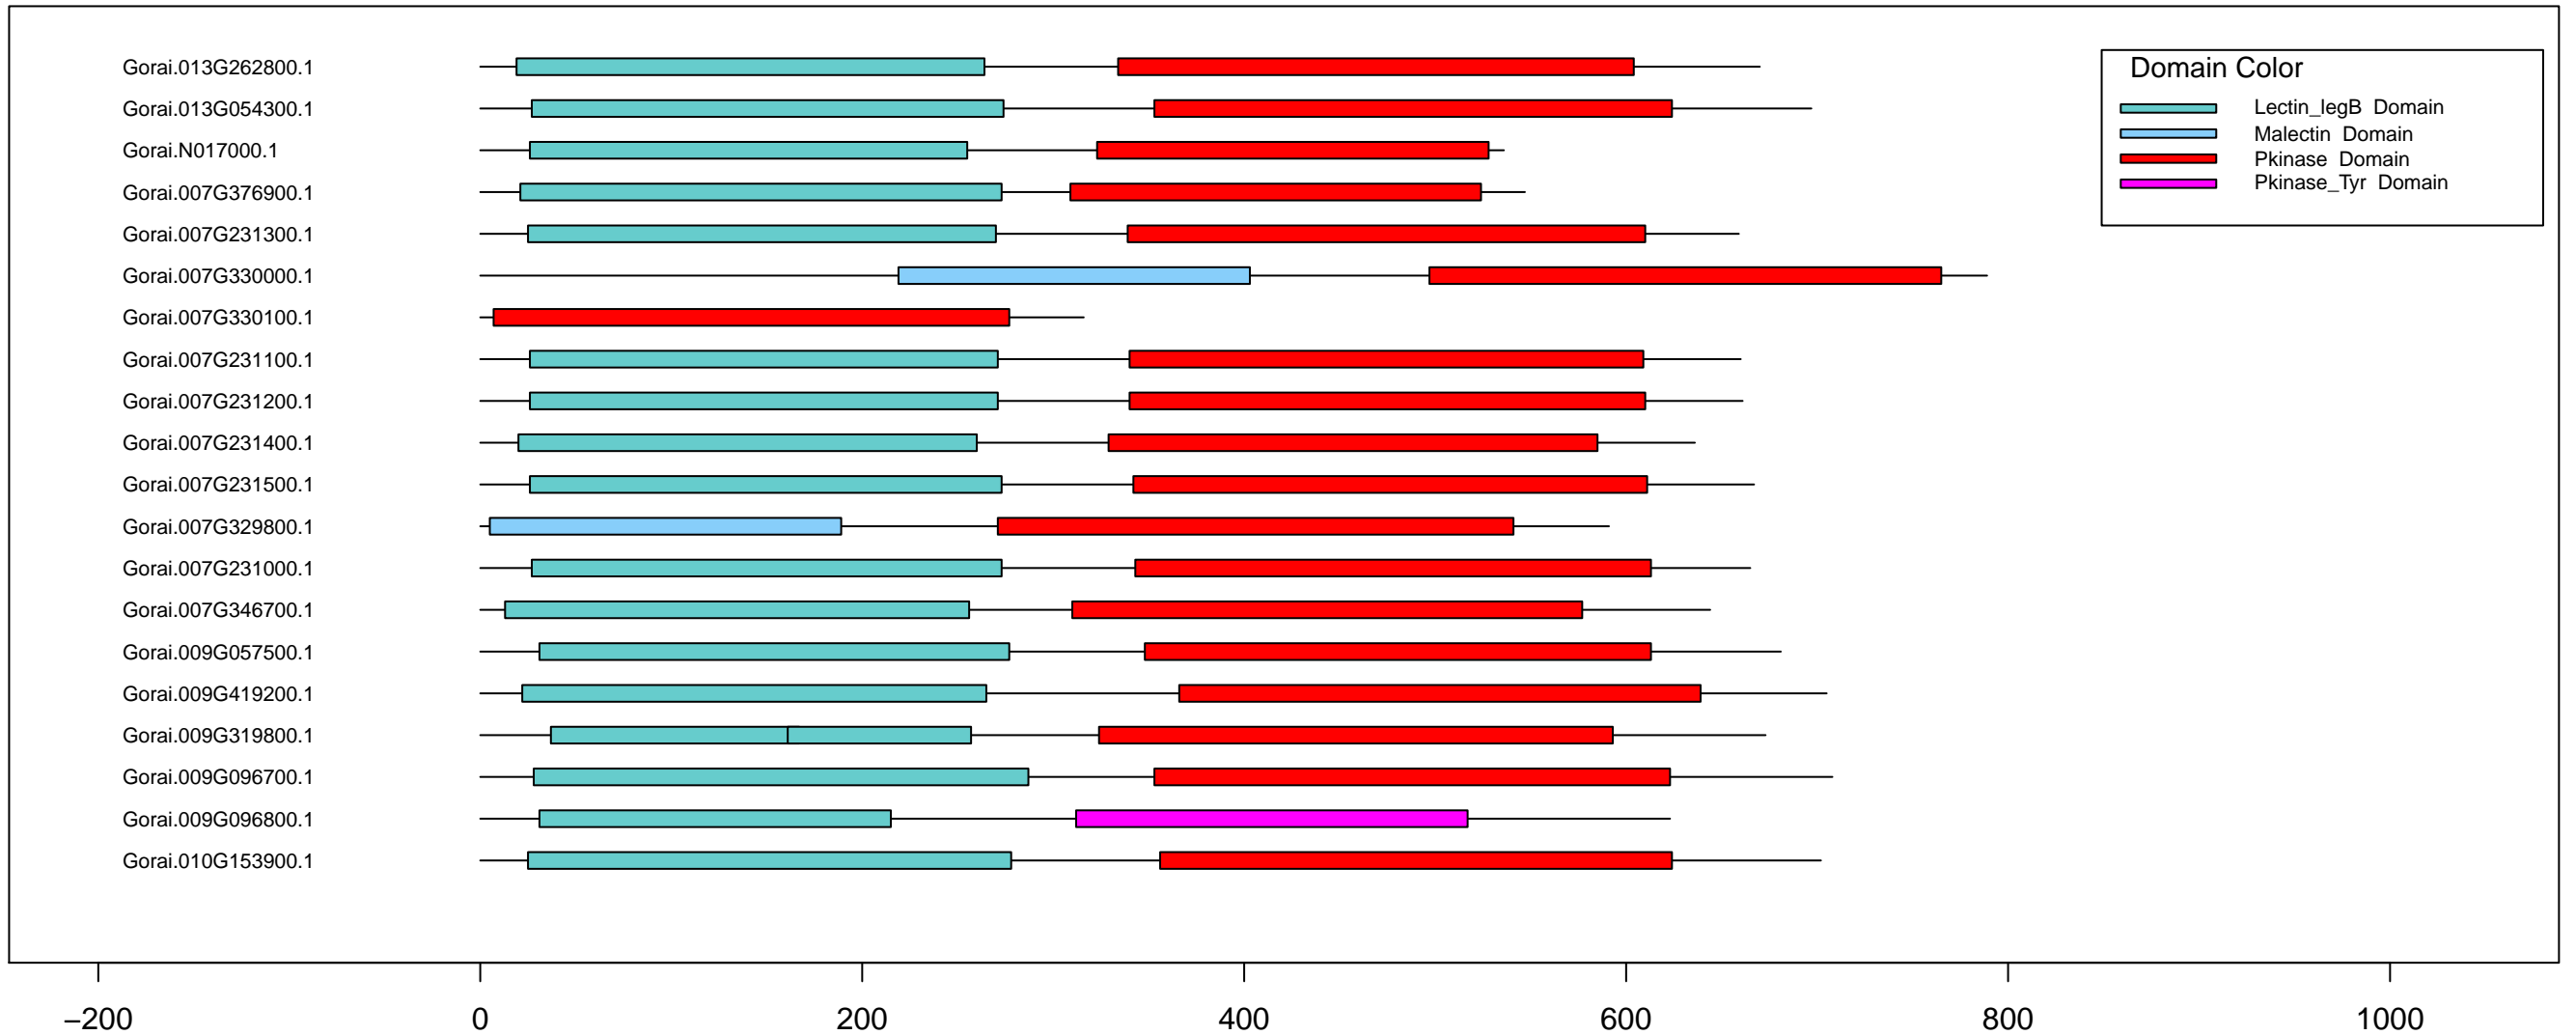

### G.ra RLK-Pelle\_L-LEC domain diagram (part 2)

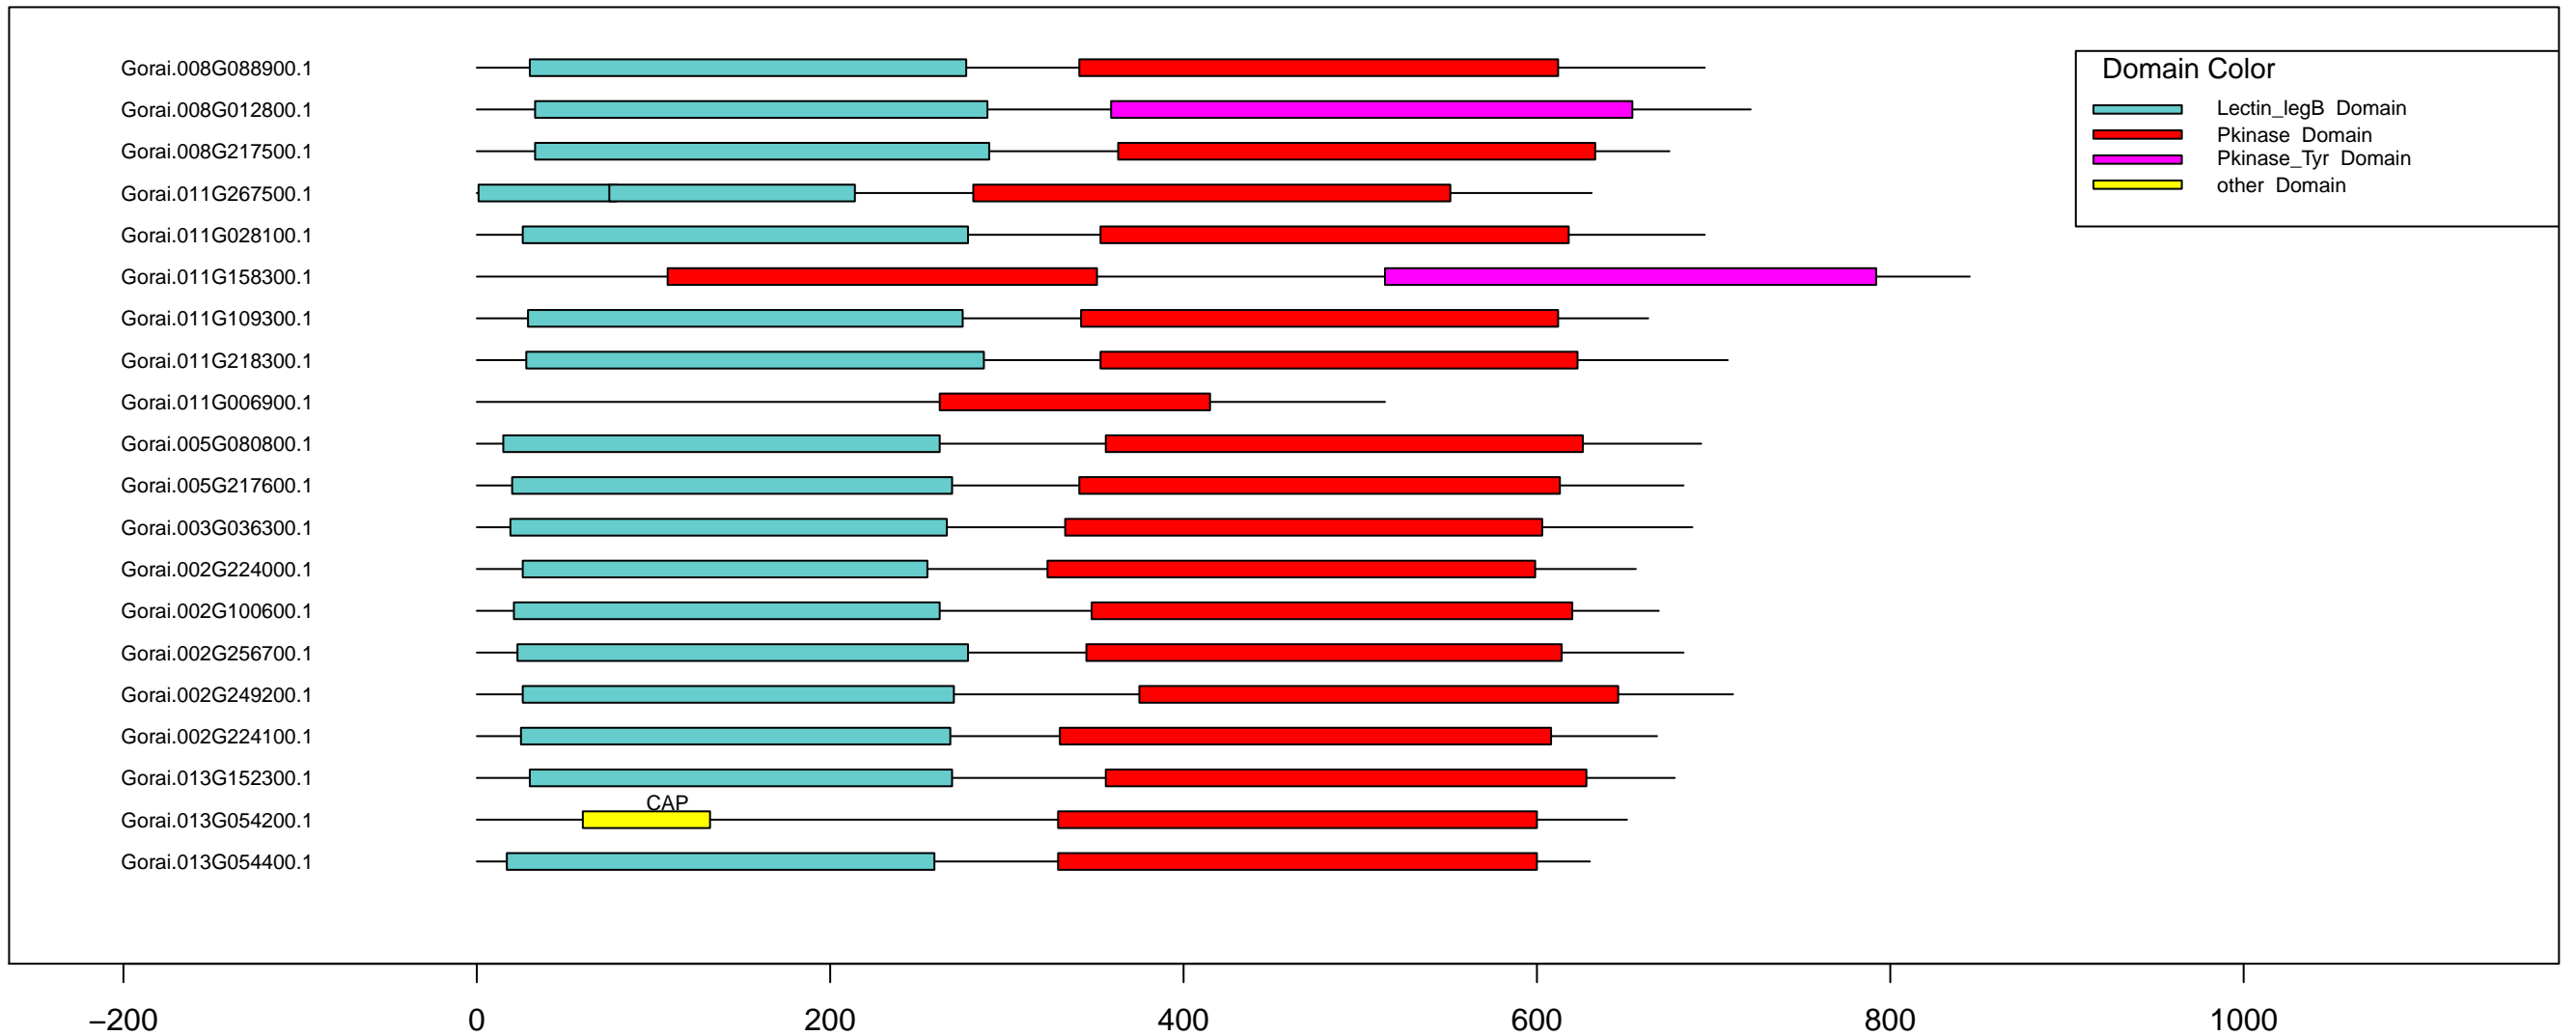

### G.ra RLK-Pelle\_L-LEC domain diagram (part 3)

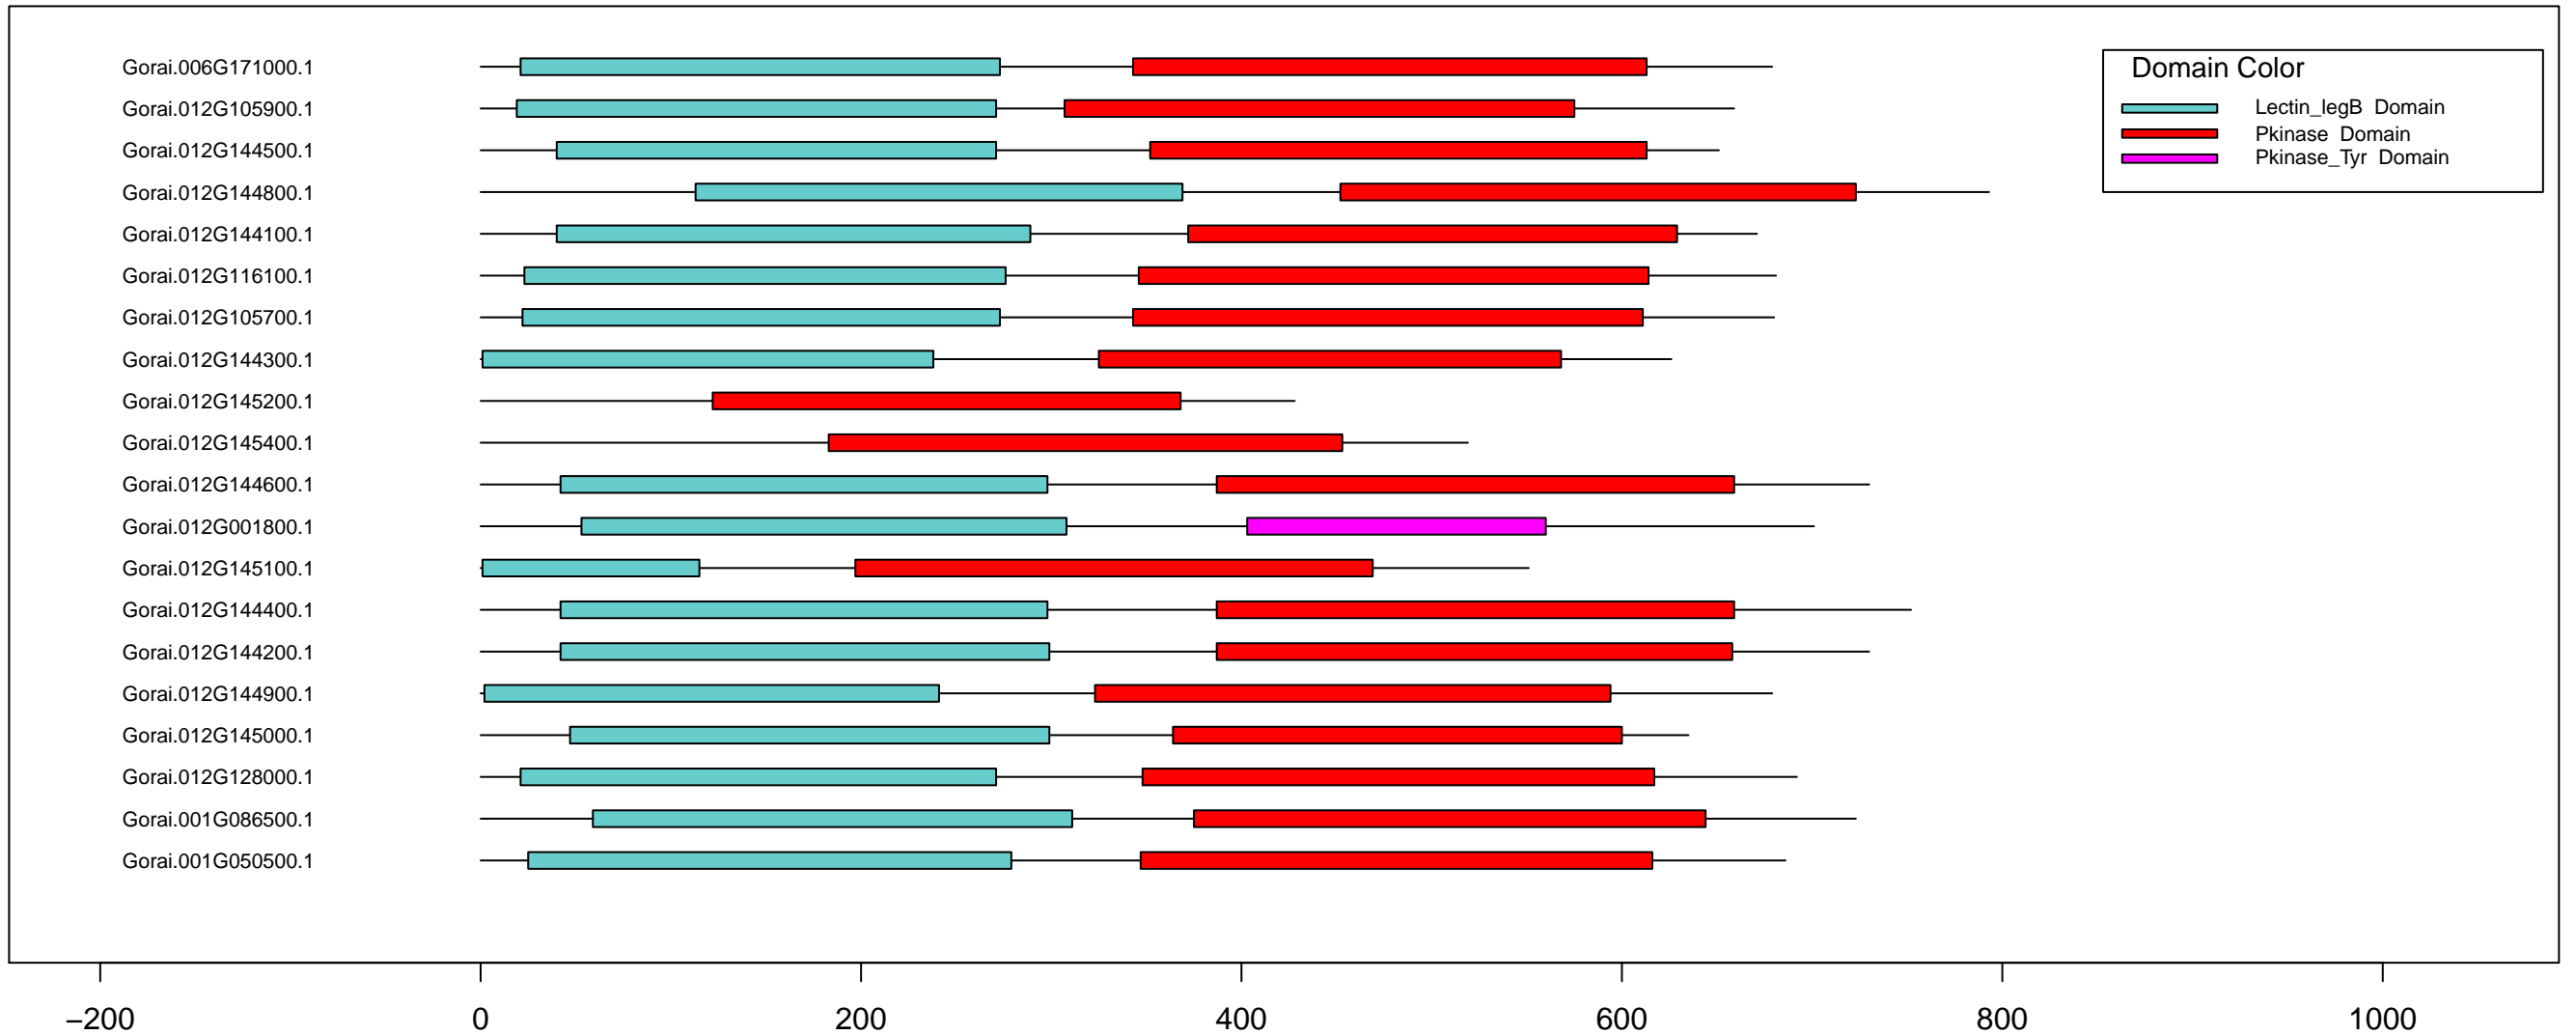

### G.ra RLK-Pelle\_L-LEC domain diagram (part 4)

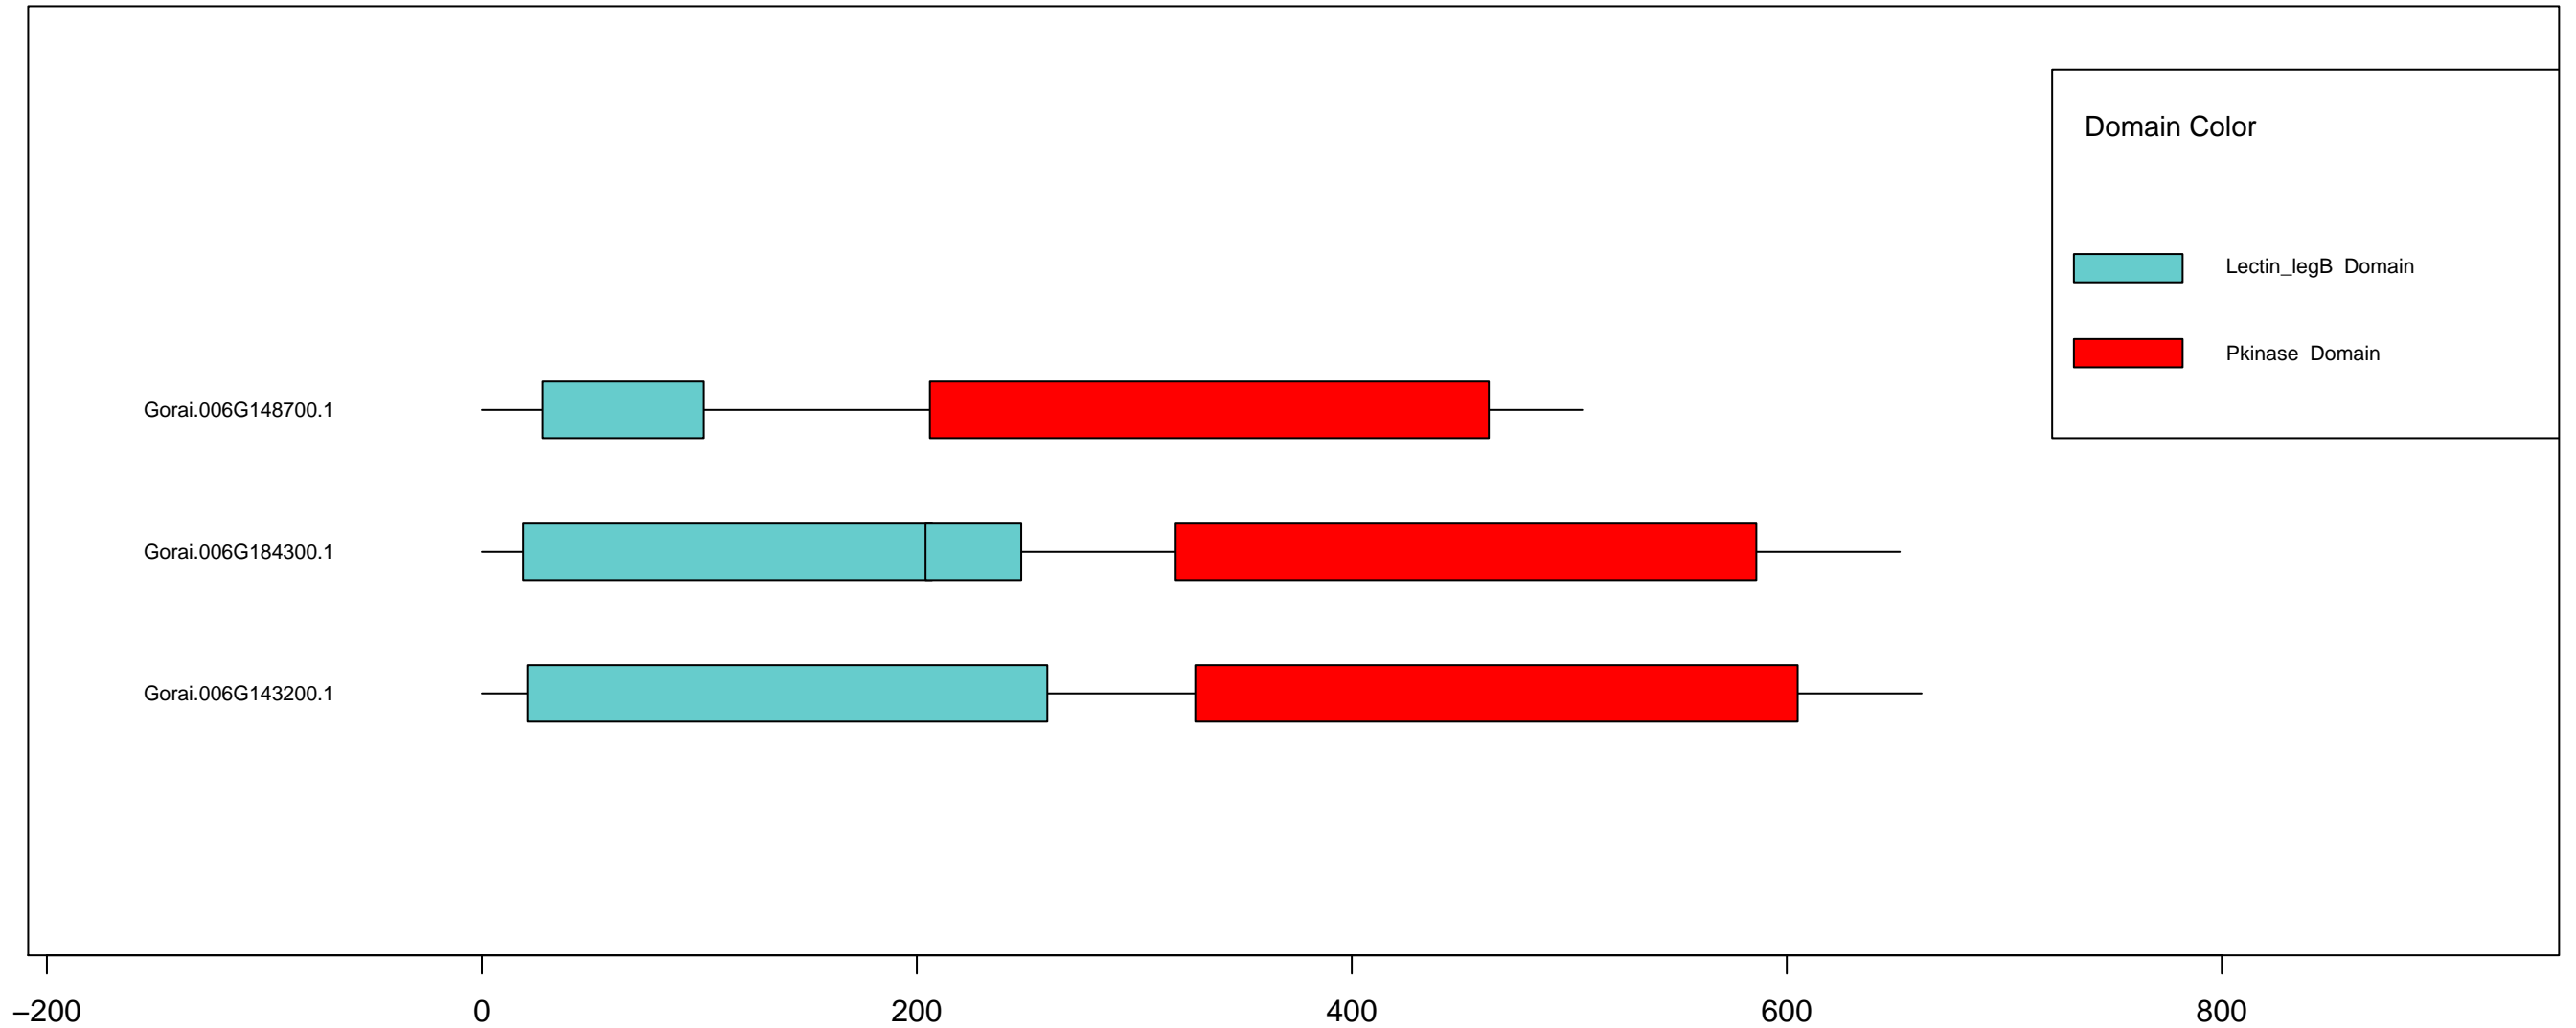

### G.ra RLK-Pelle\_LRK10L-2 domain diagram (part 1)

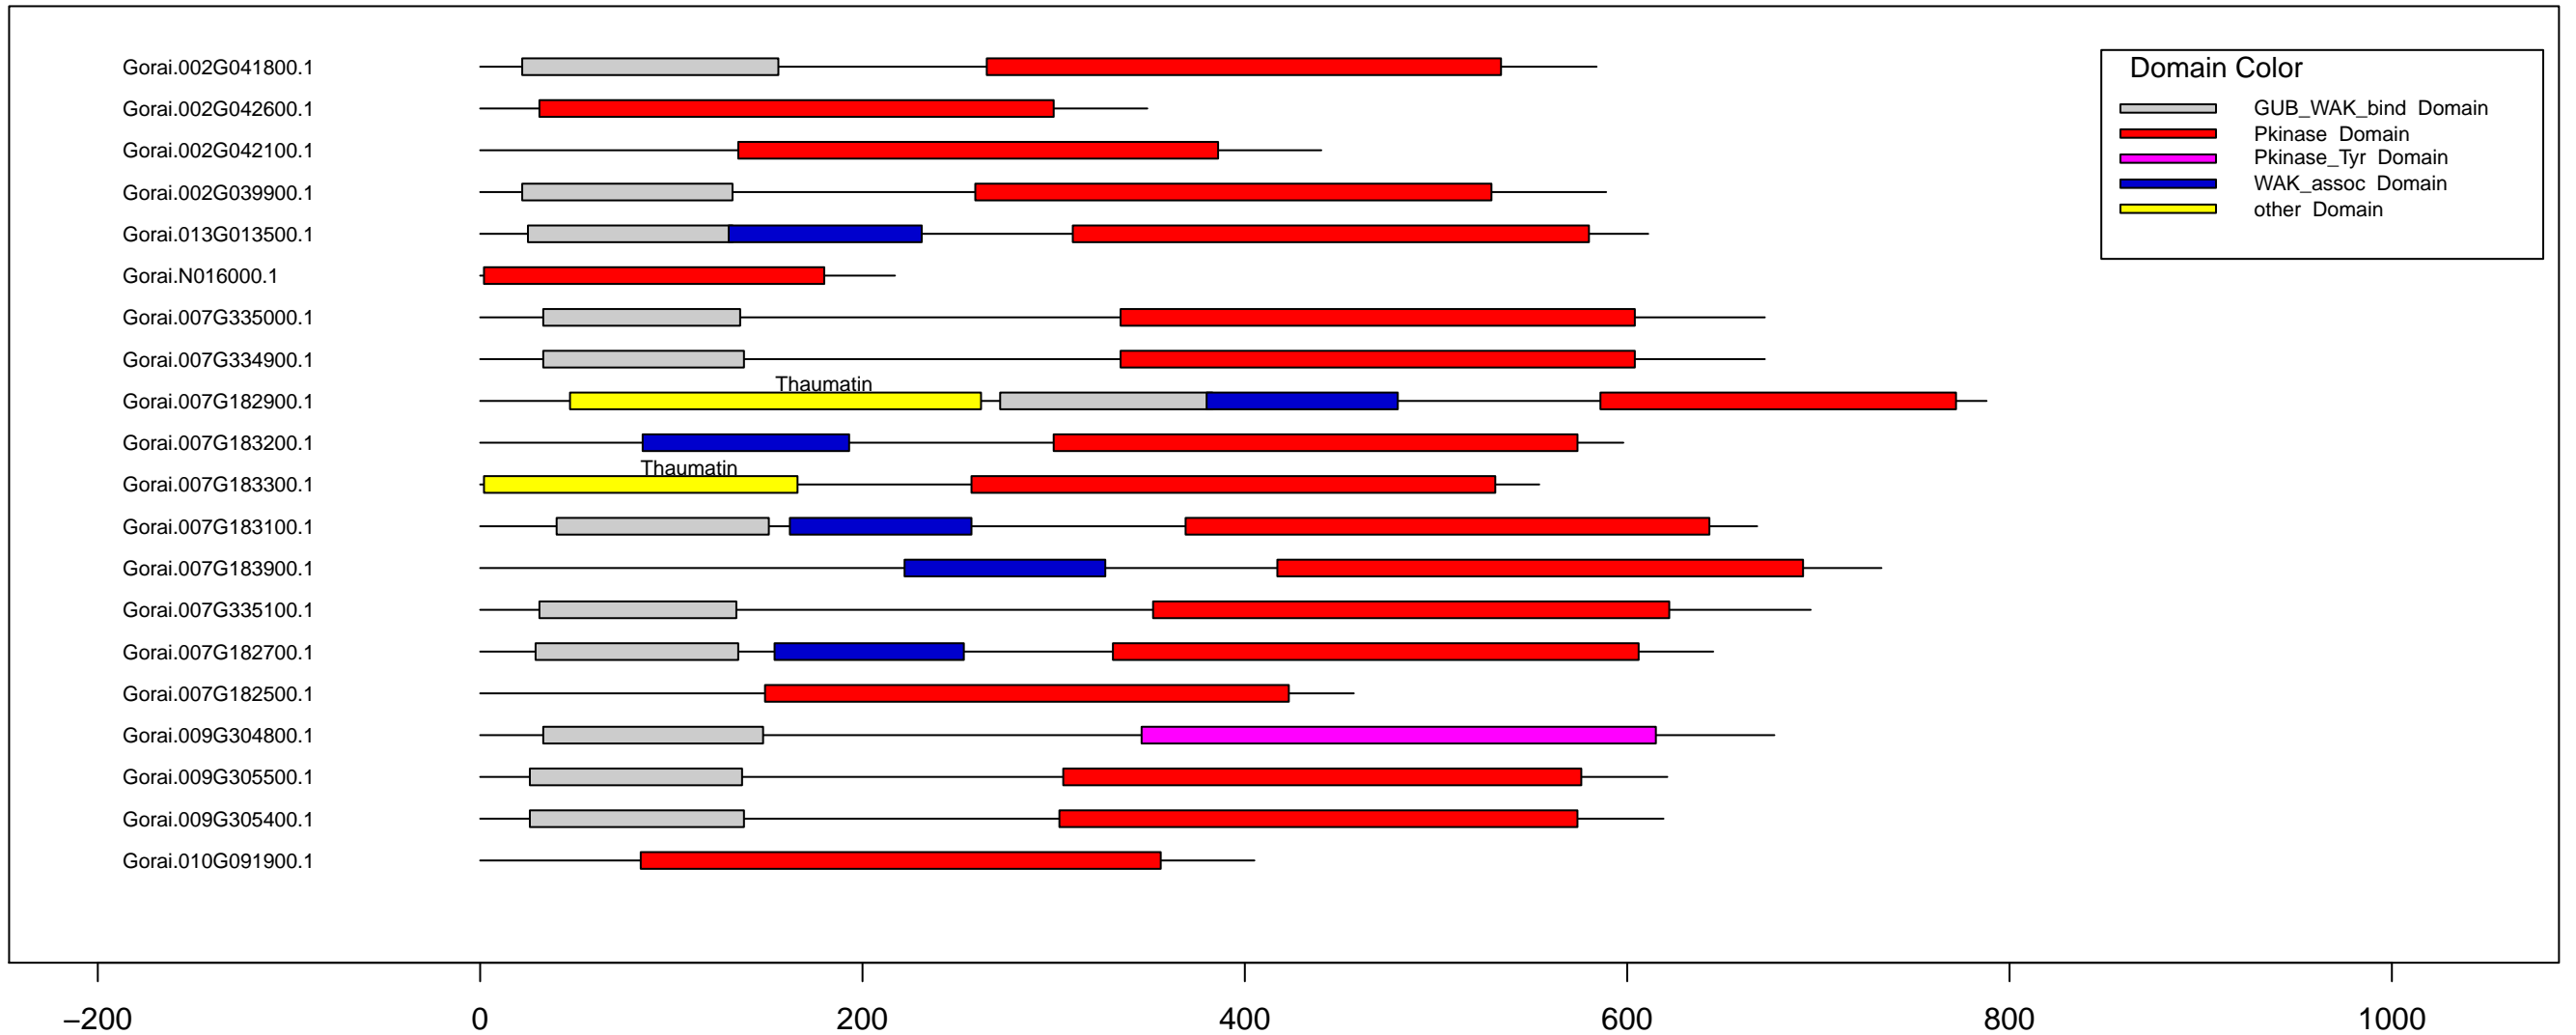



### G.ra RLK-Pelle\_LRK10L-2 domain diagram (part 2)

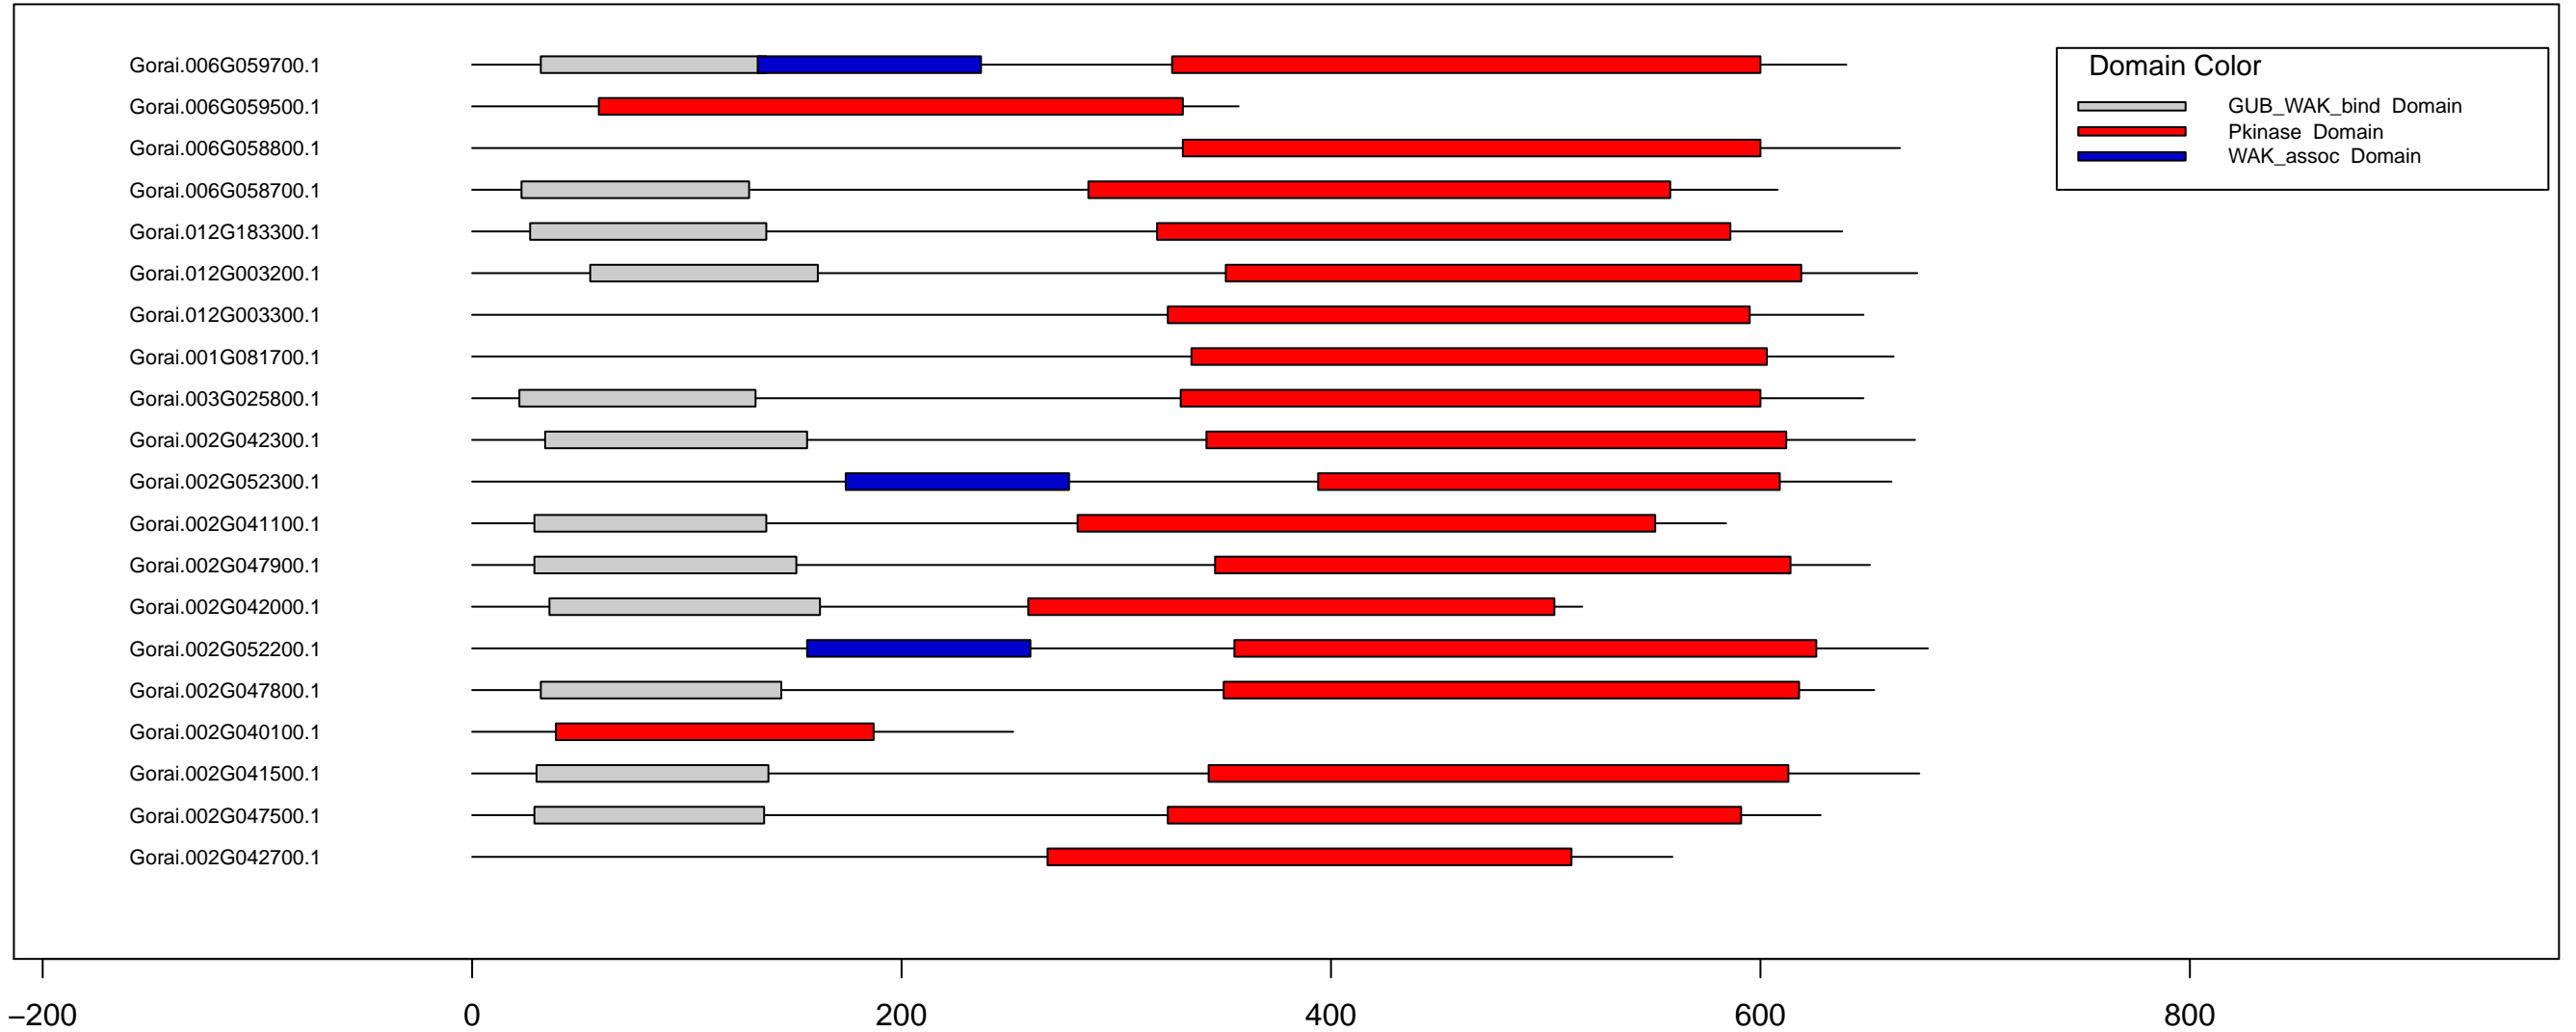

### G.ra RLK-Pelle\_LRK10L-2 domain diagram (part 3)

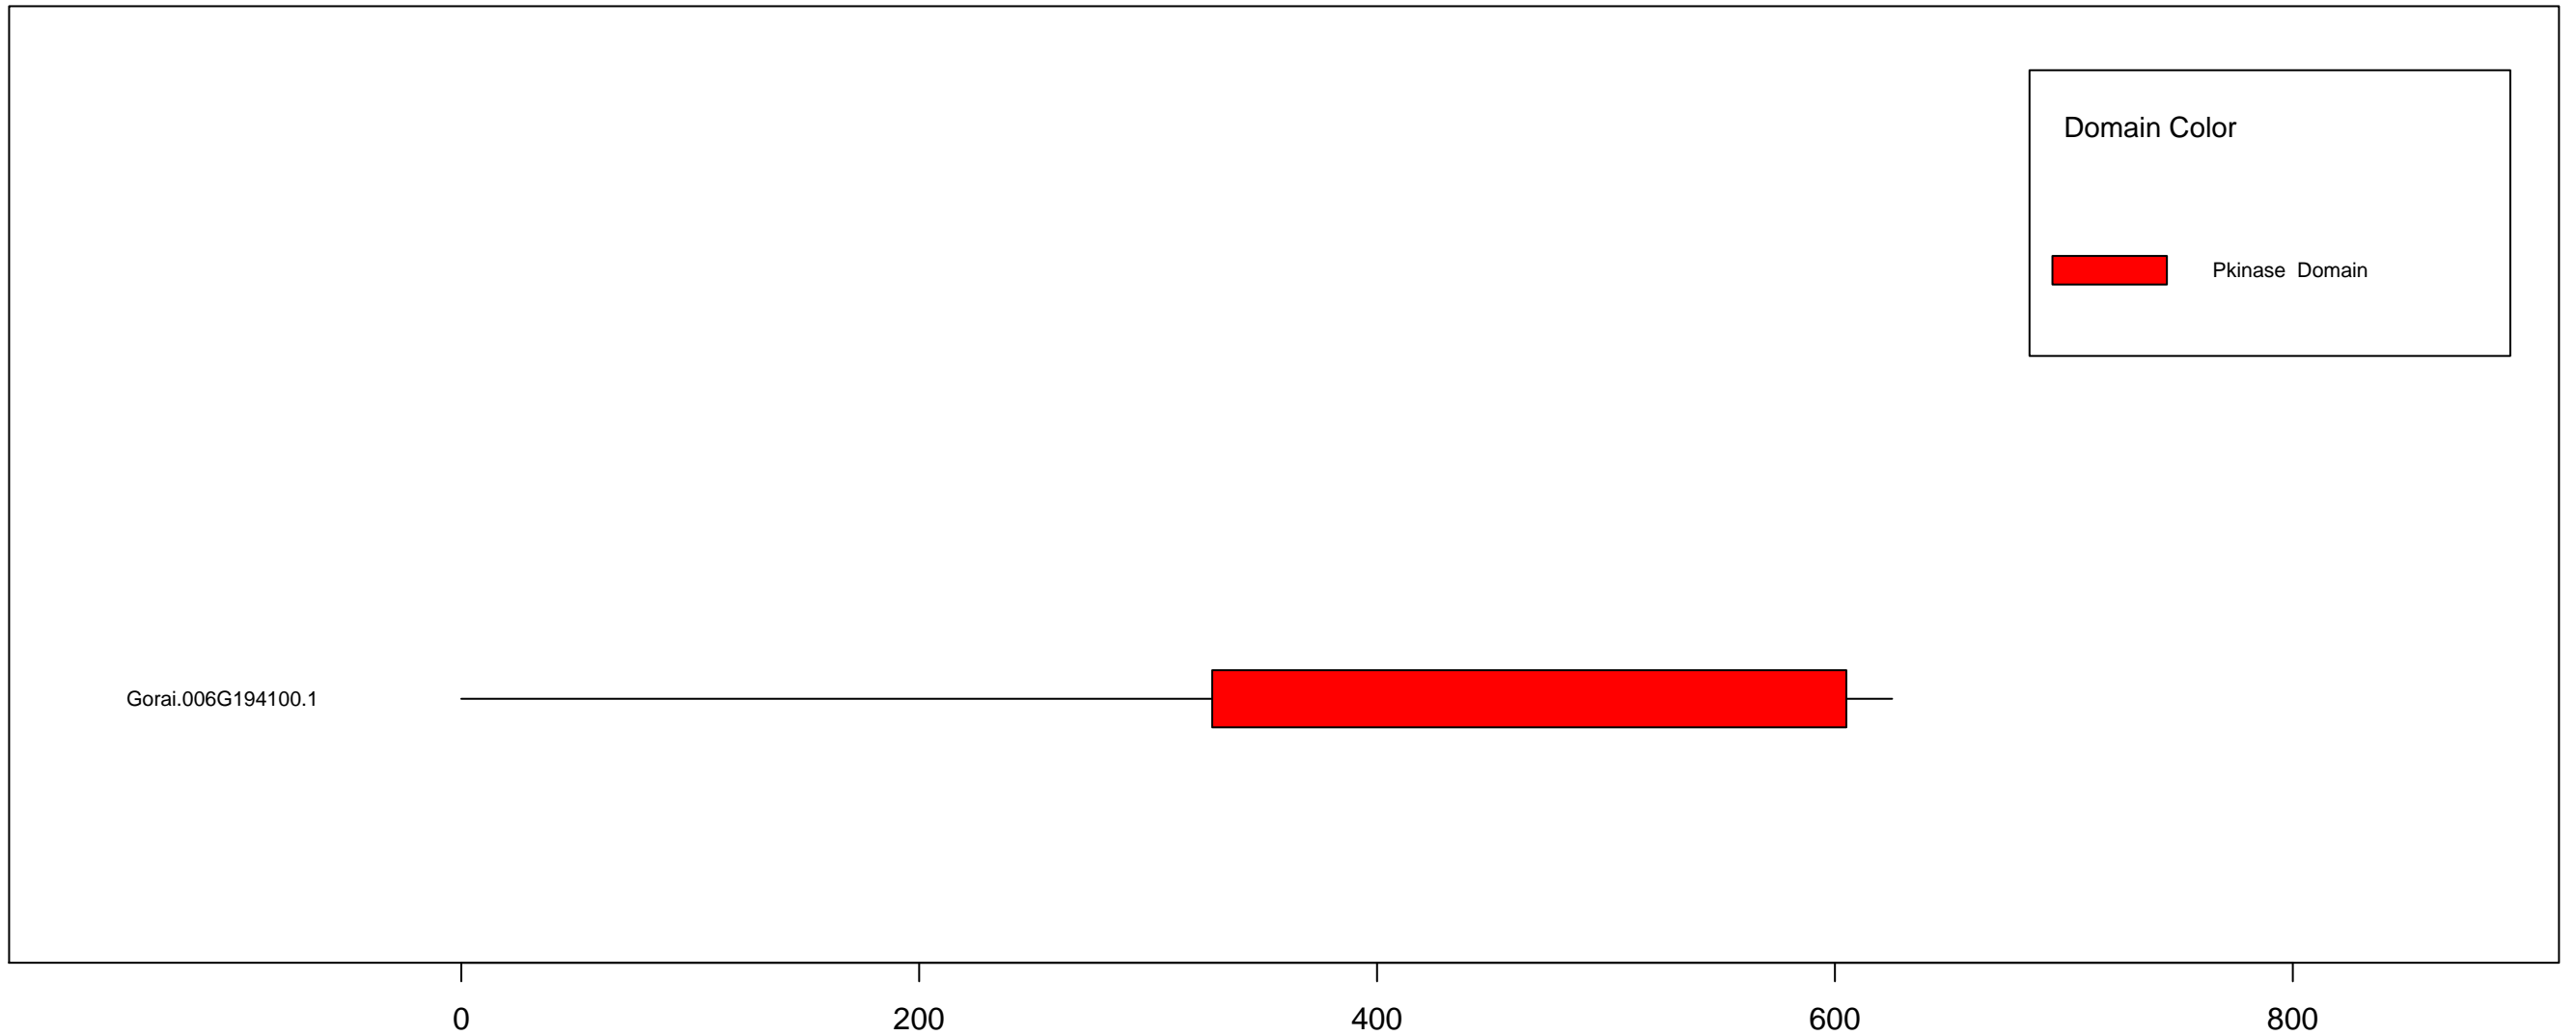

### G.ra RLK-Pelle\_LRR-I-1 domain diagram (all)

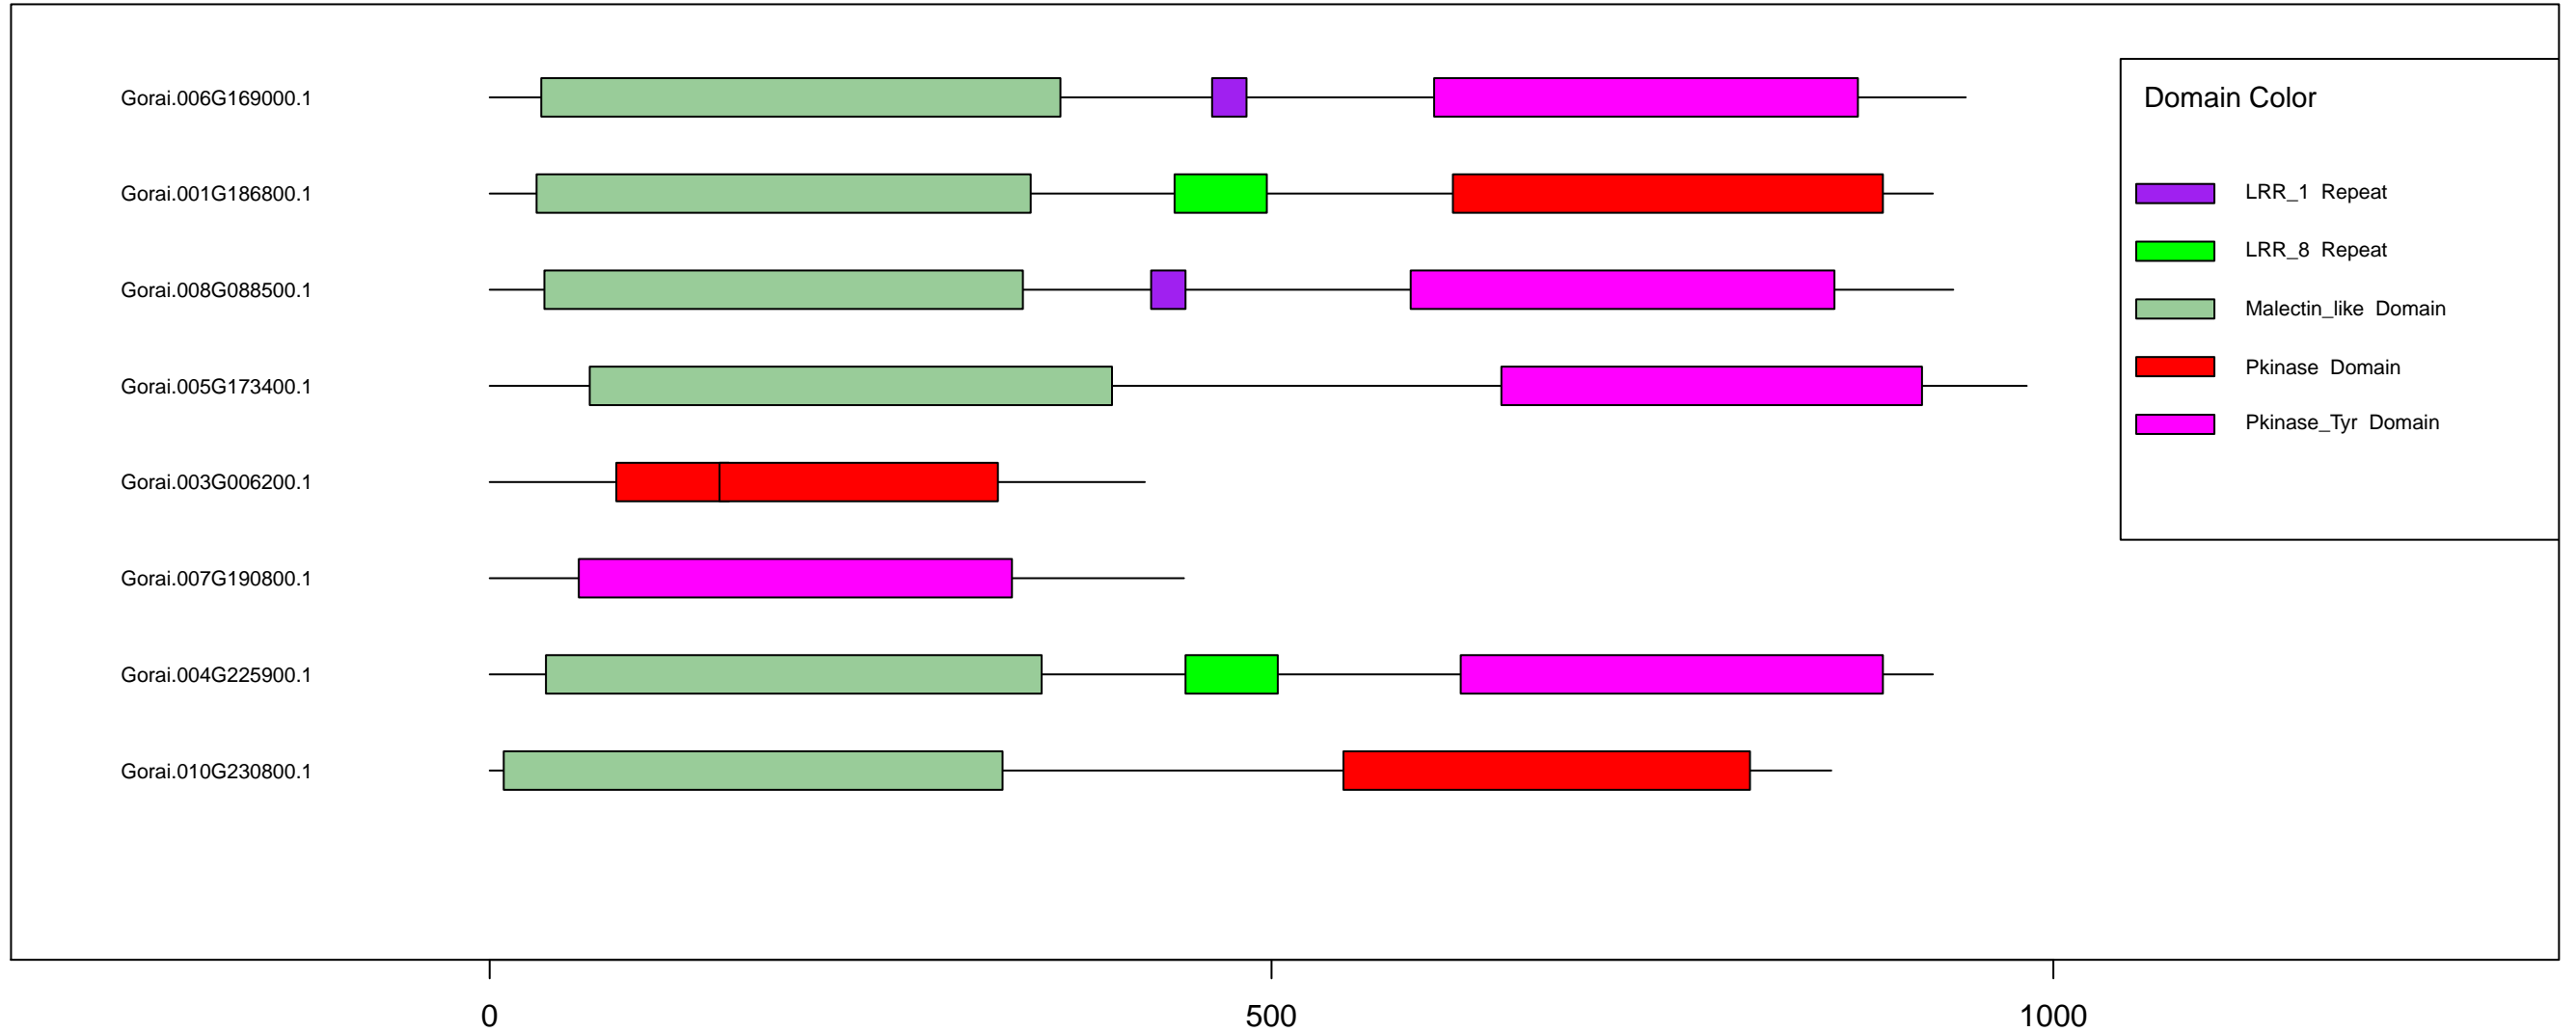

# G.ra RLK-Pelle\_LRR-I-2 domain diagram (all)

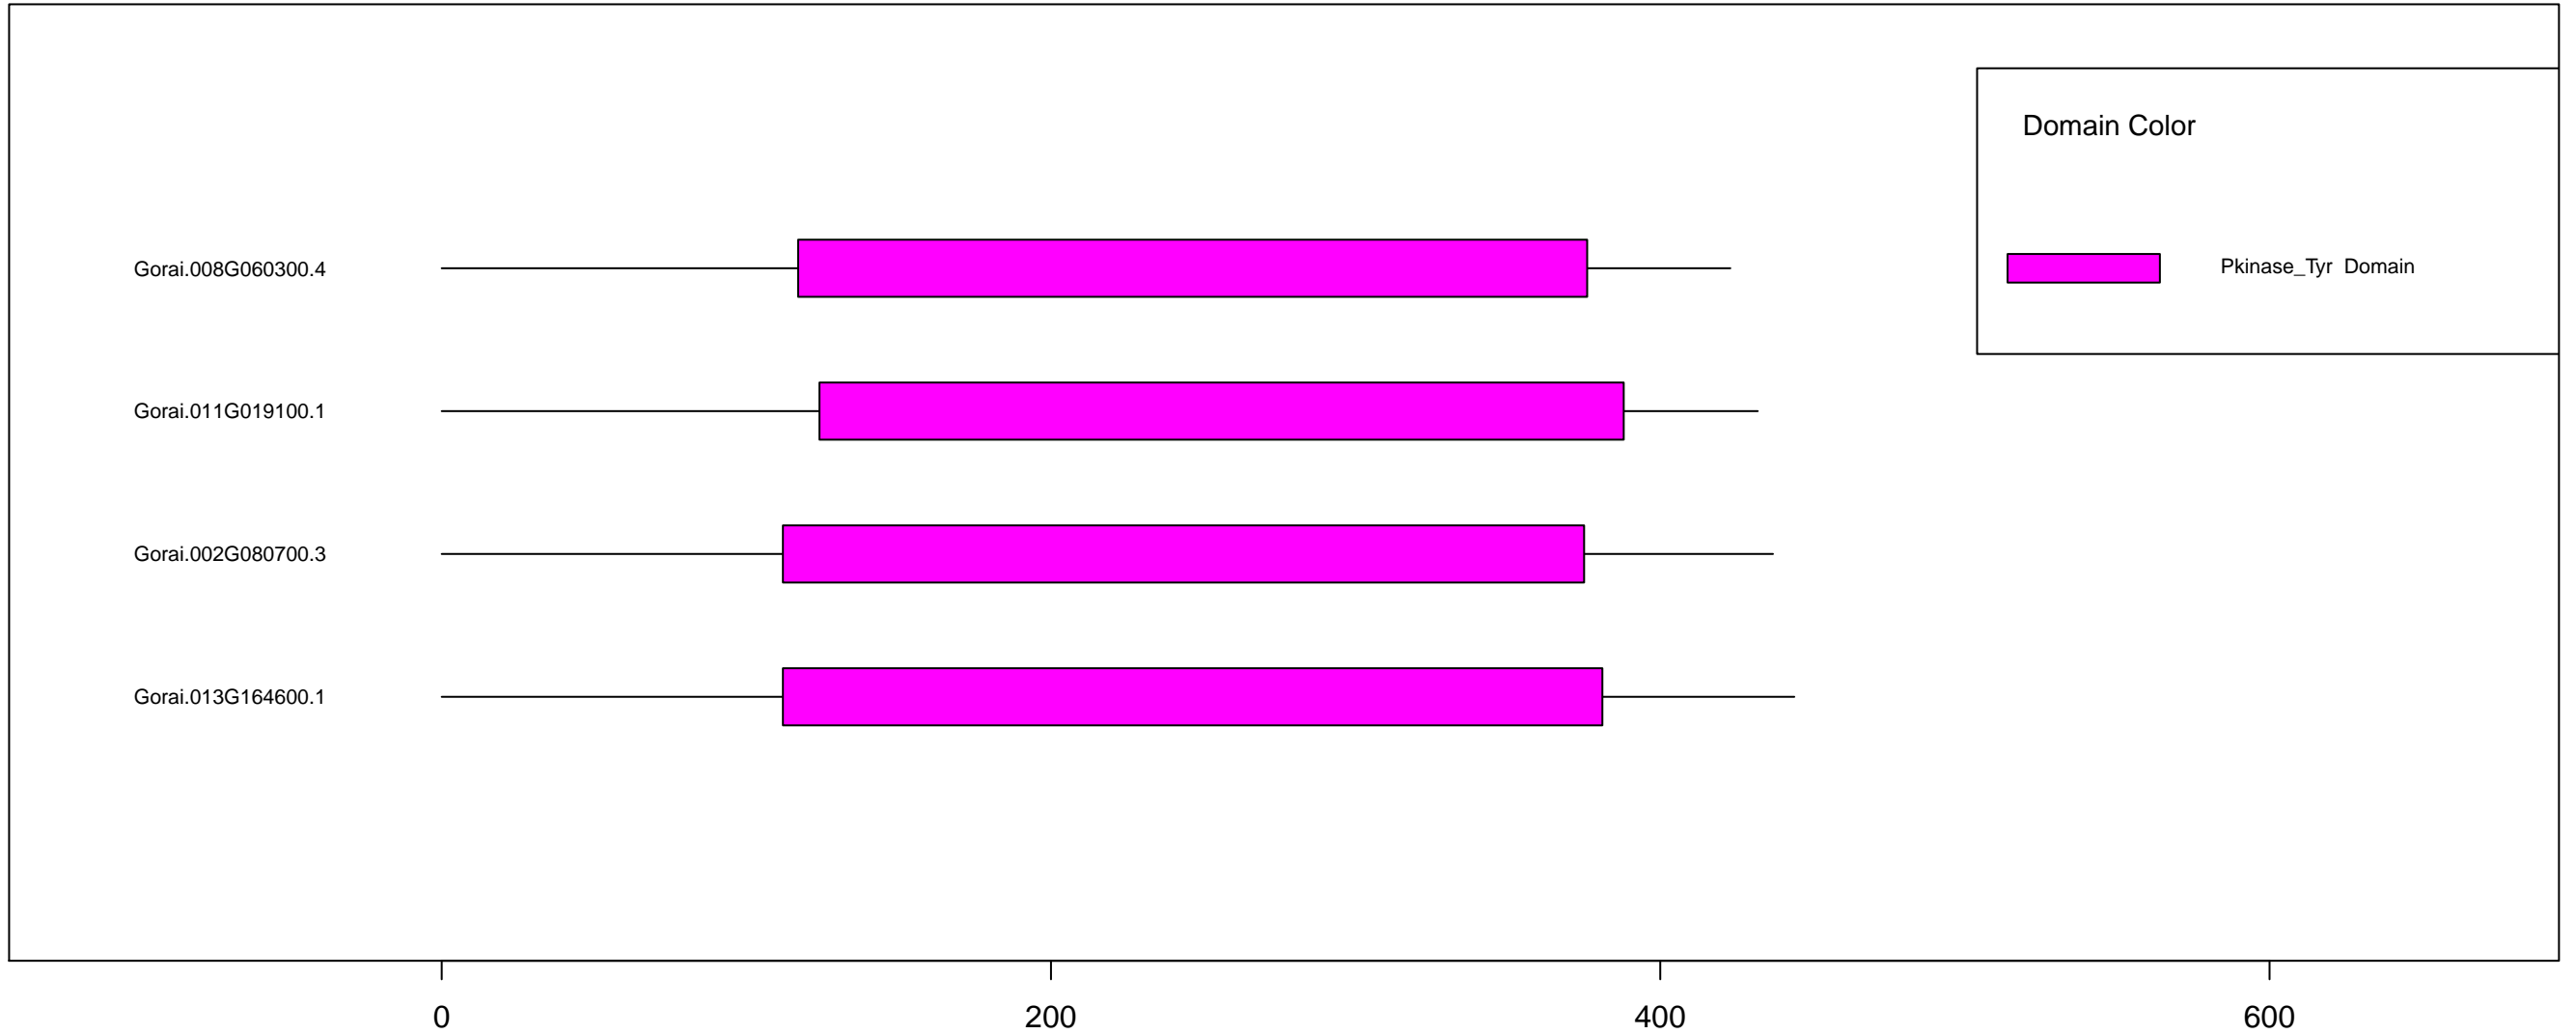

### G.ra RLK-Pelle\_LRR-III domain diagram (part 1)

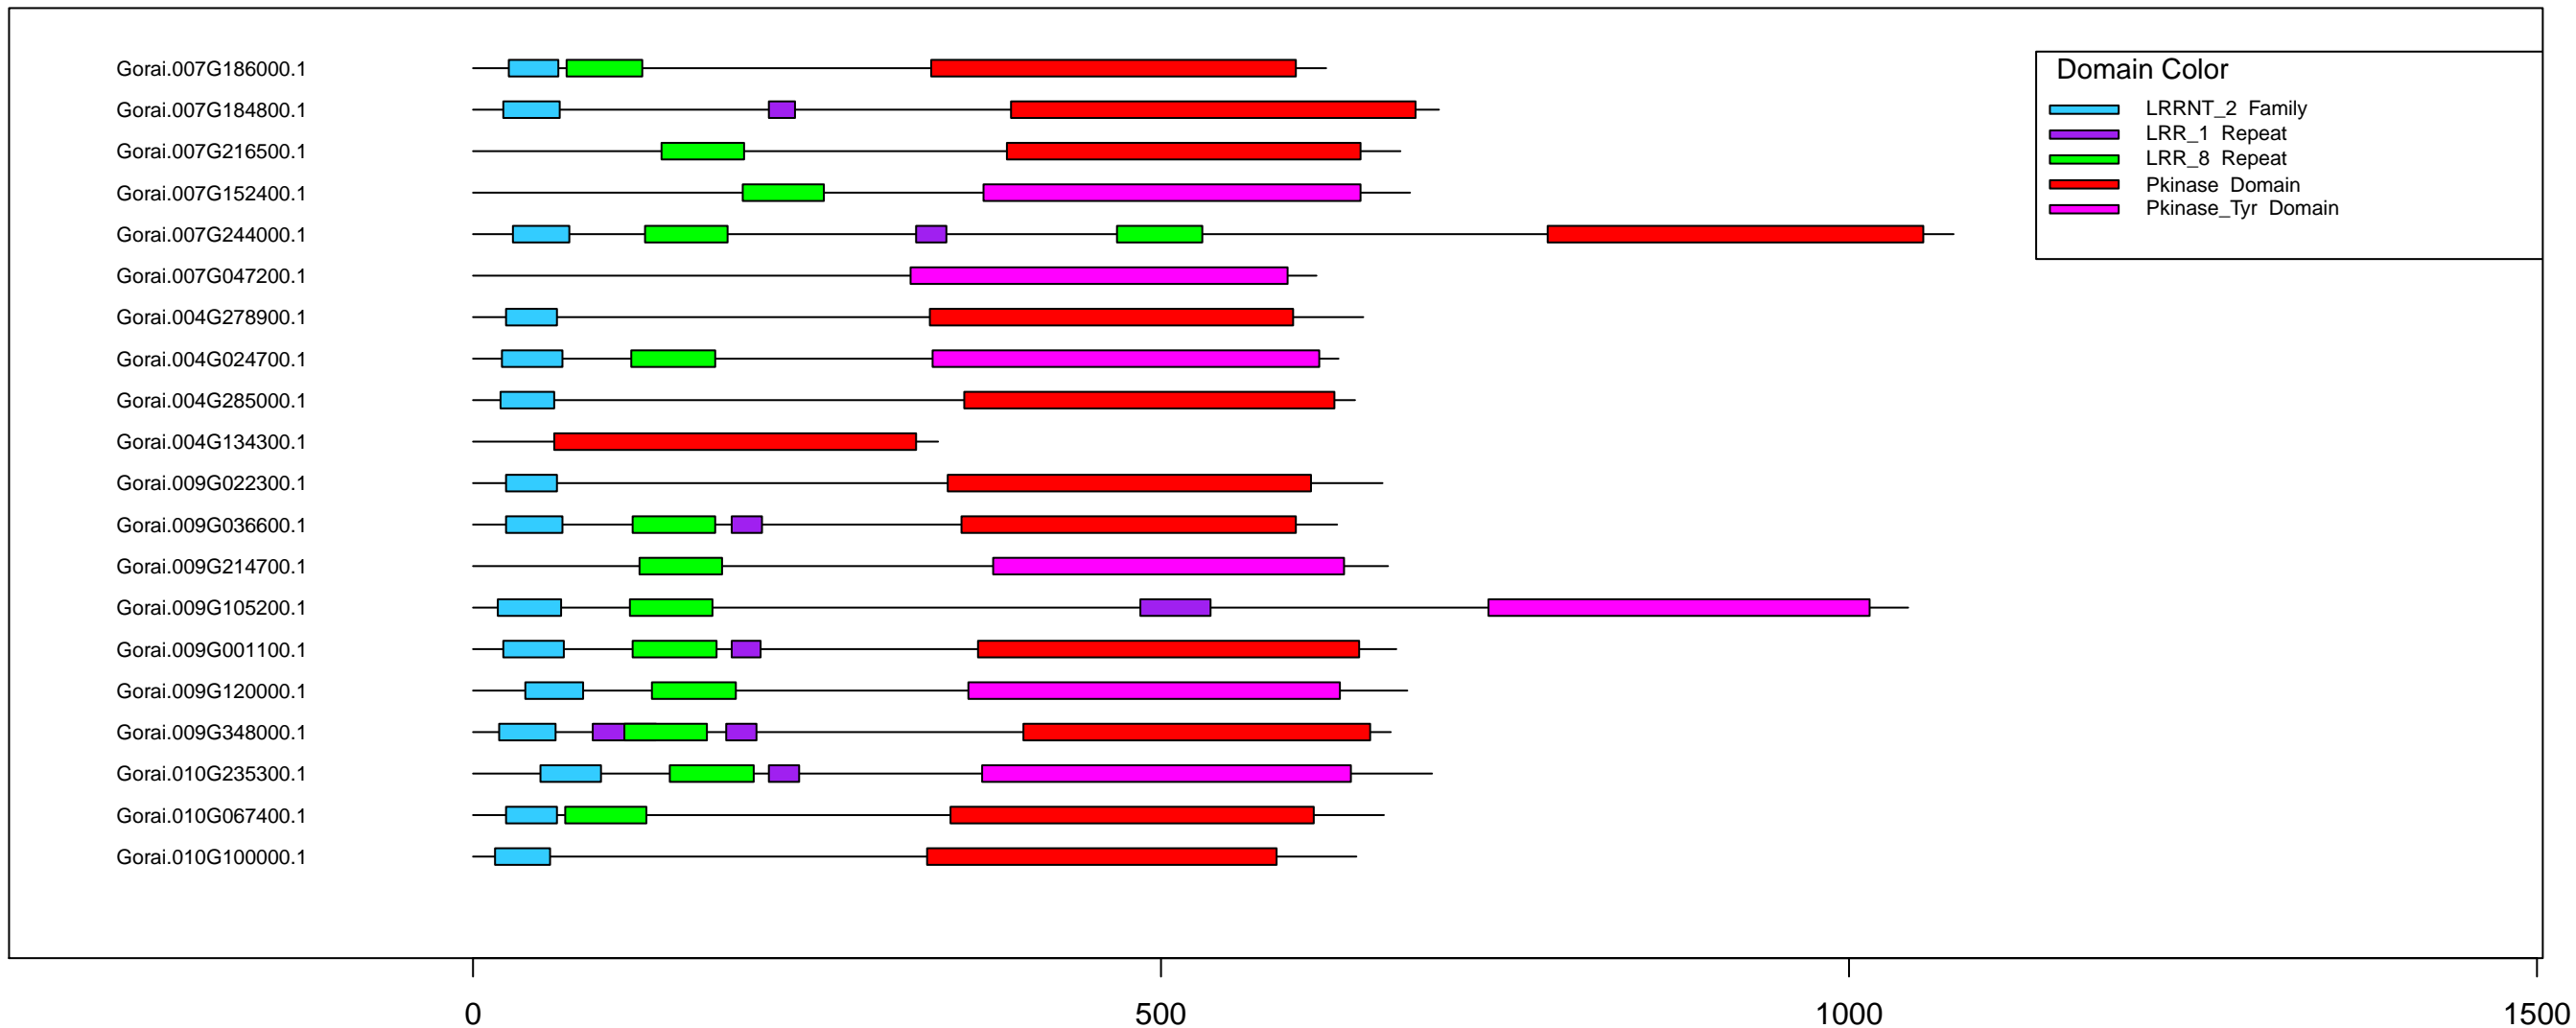

### G.ra RLK-Pelle\_LRR-III domain diagram (part 2)

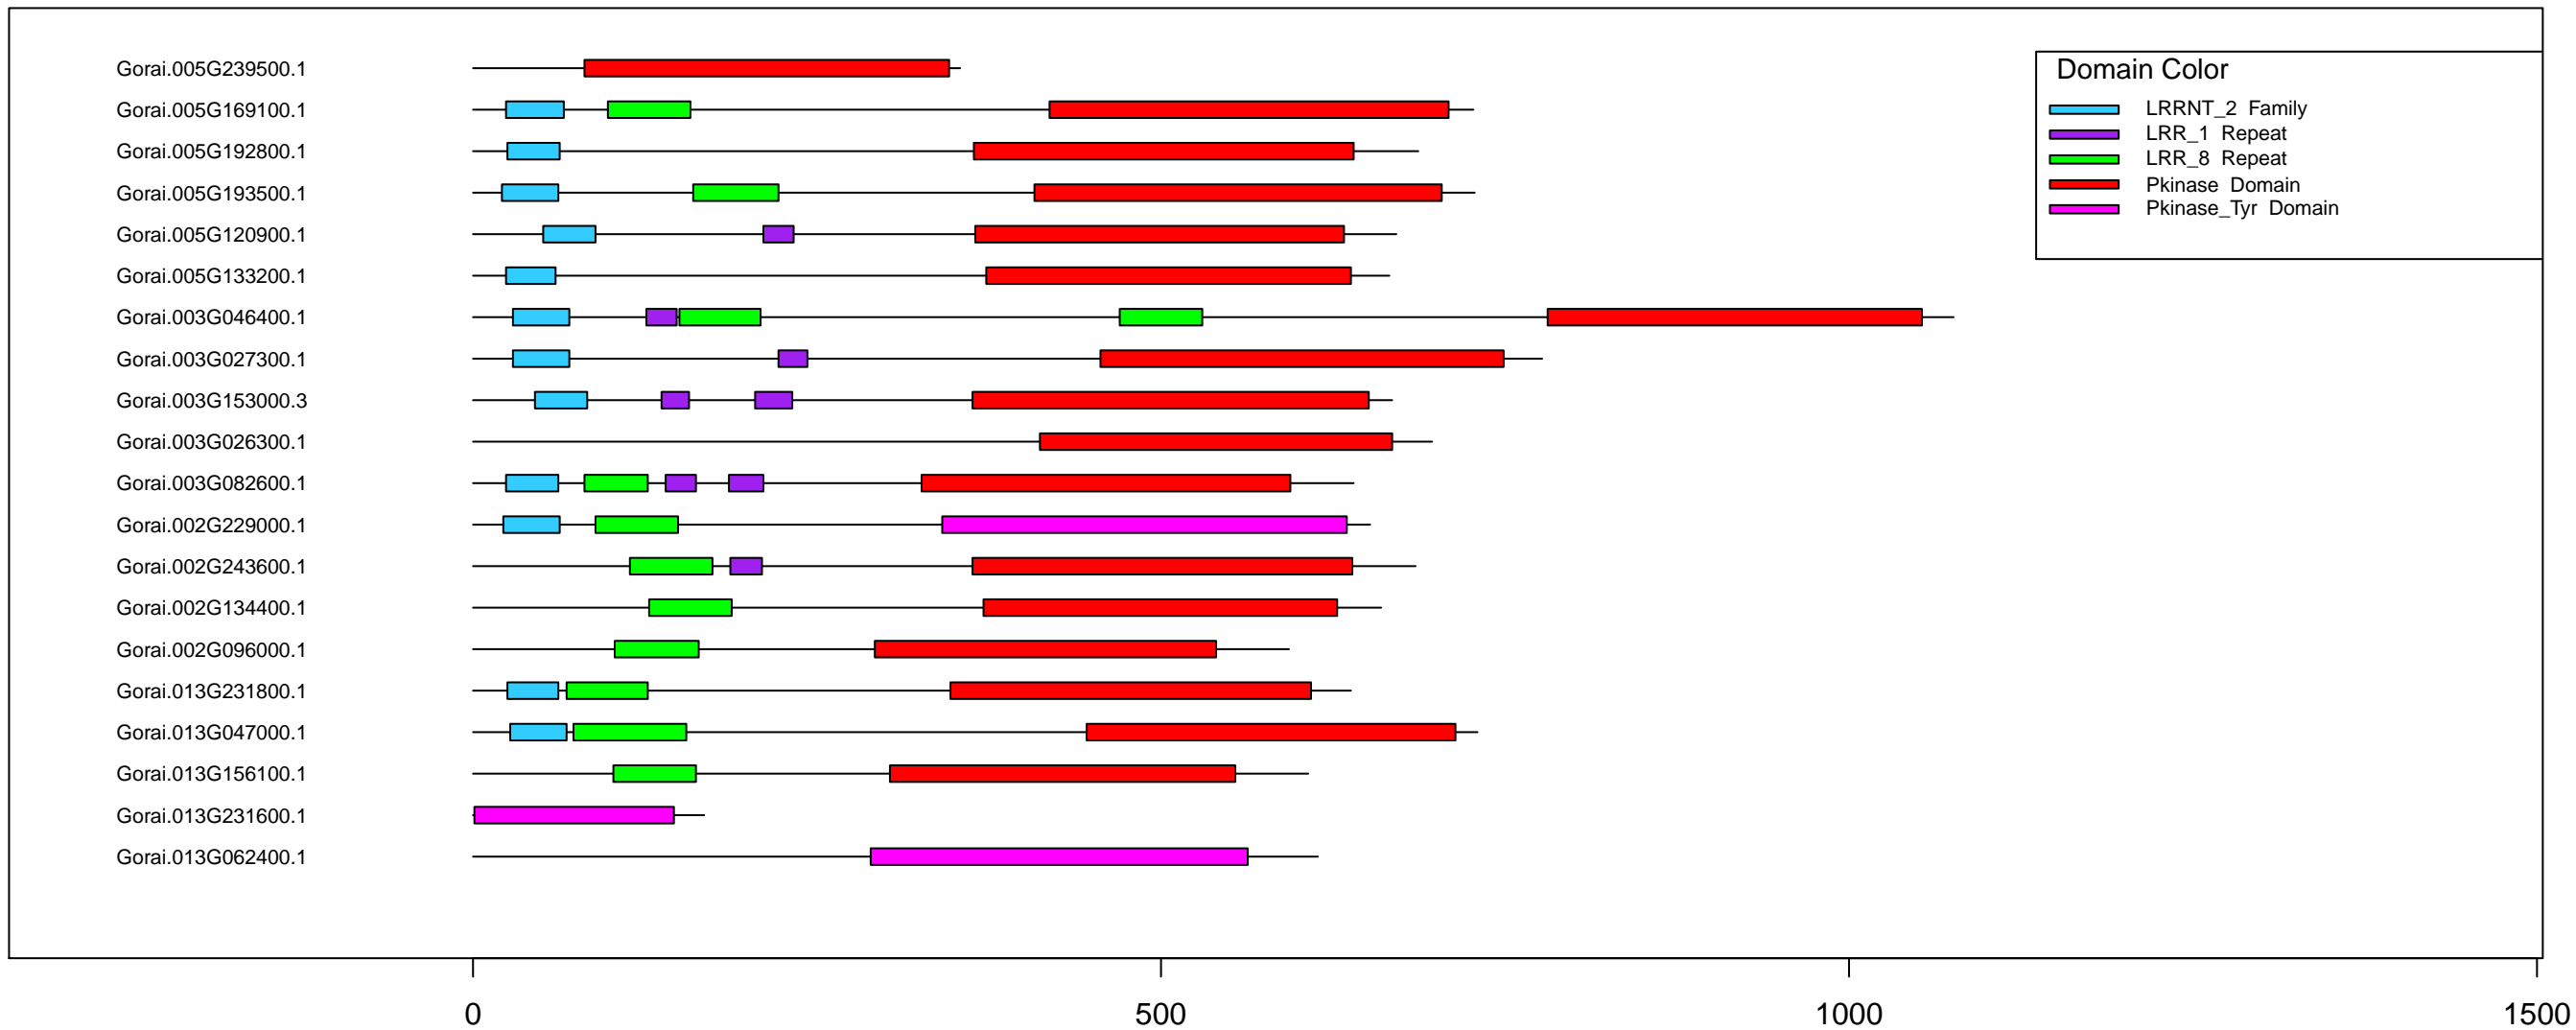

### G.ra RLK-Pelle\_LRR-III domain diagram (part 3)

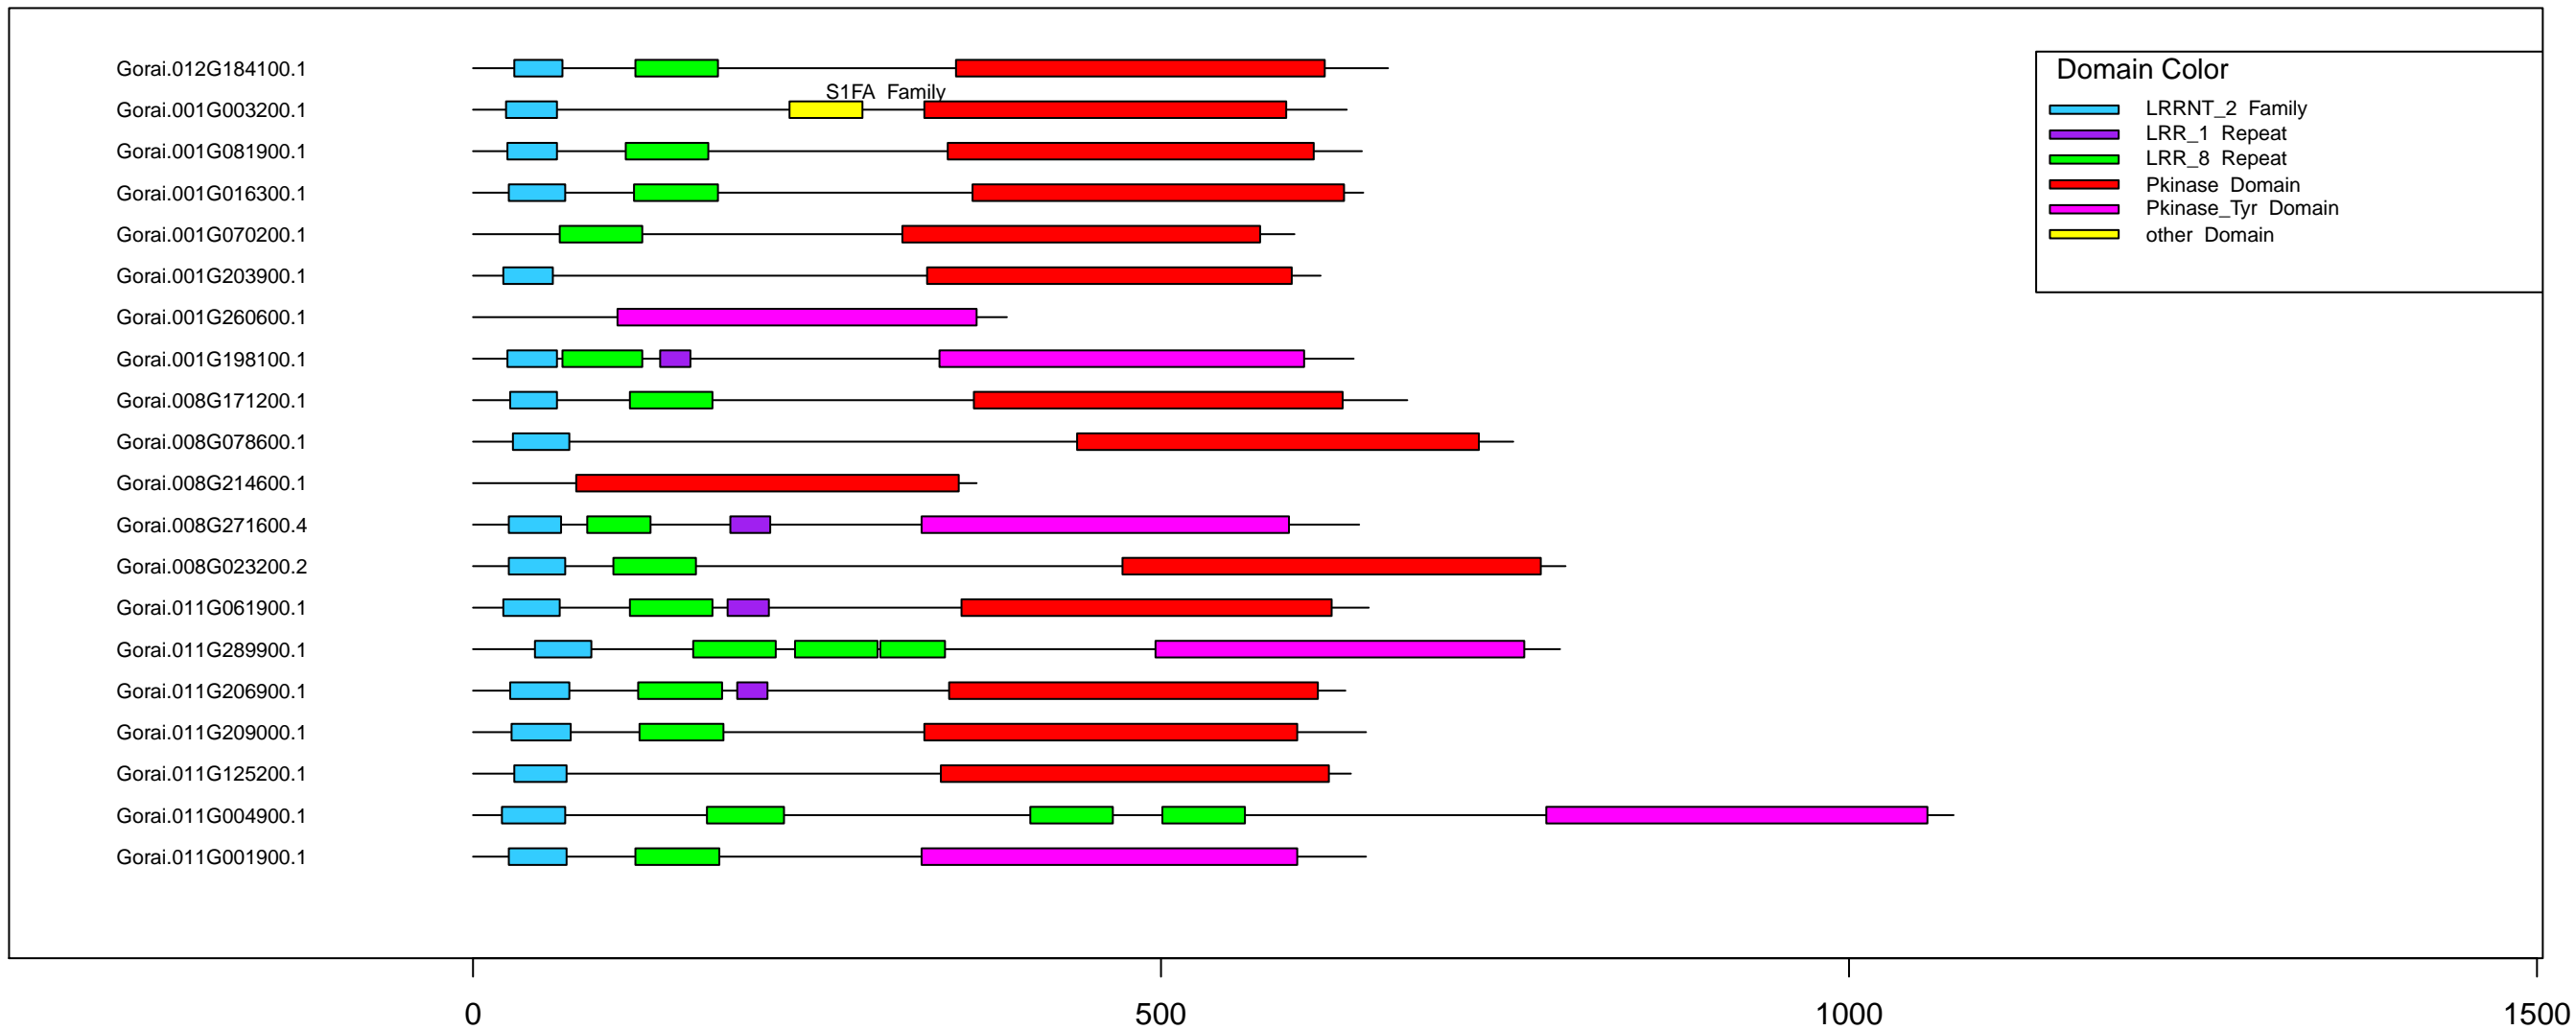

# G.ra RLK-Pelle\_LRR-III domain diagram (part 4)

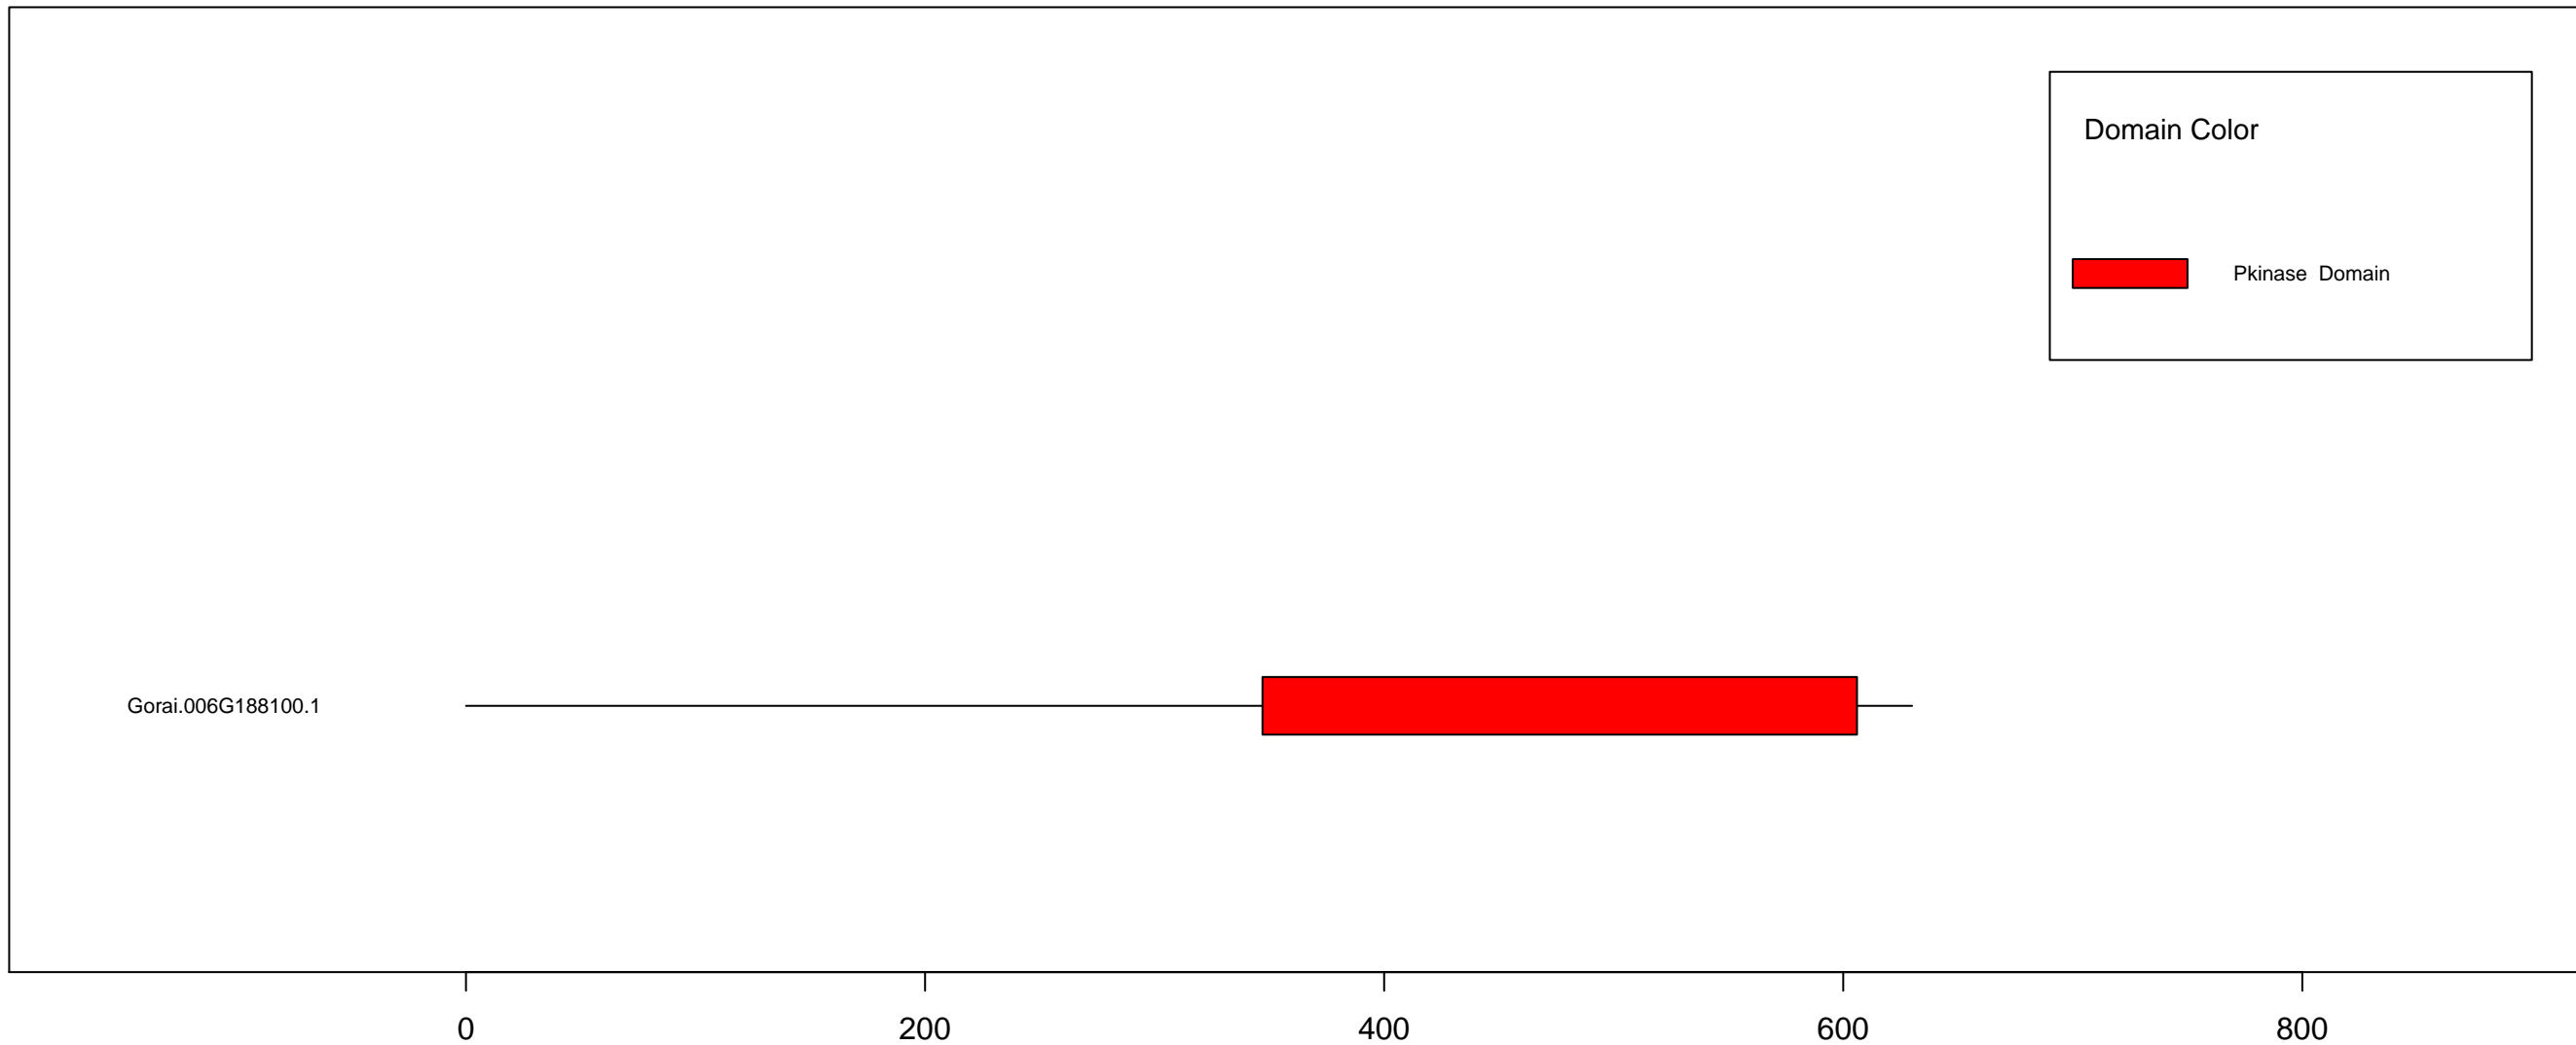

Gorai.006G188100.1



### G.ra RLK-Pelle\_LRR-II domain diagram (all)

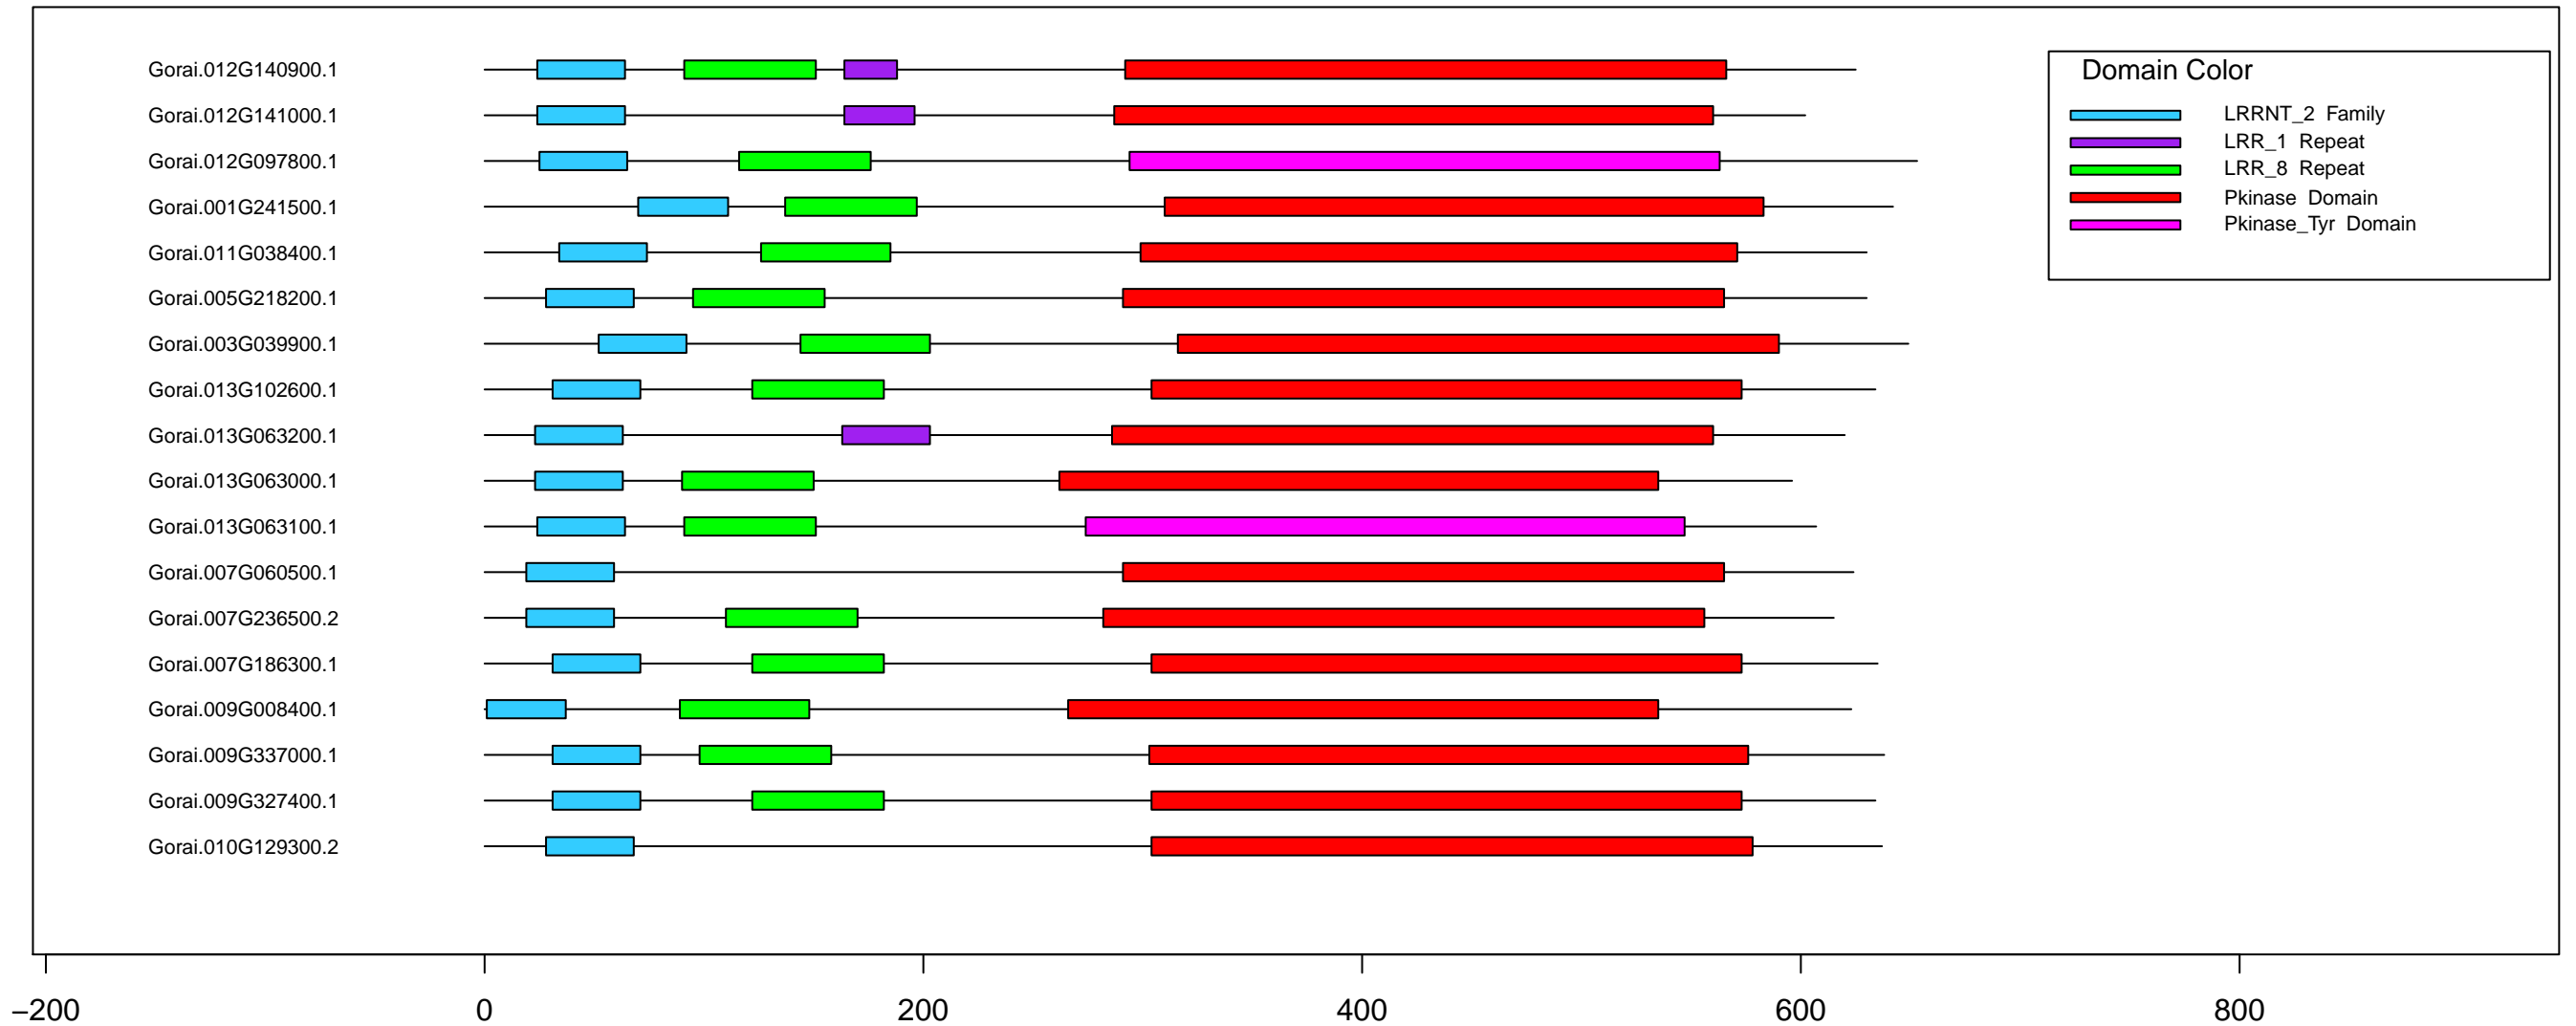

G.ra RLK-Pelle\_LRR-IV domain diagram (all)

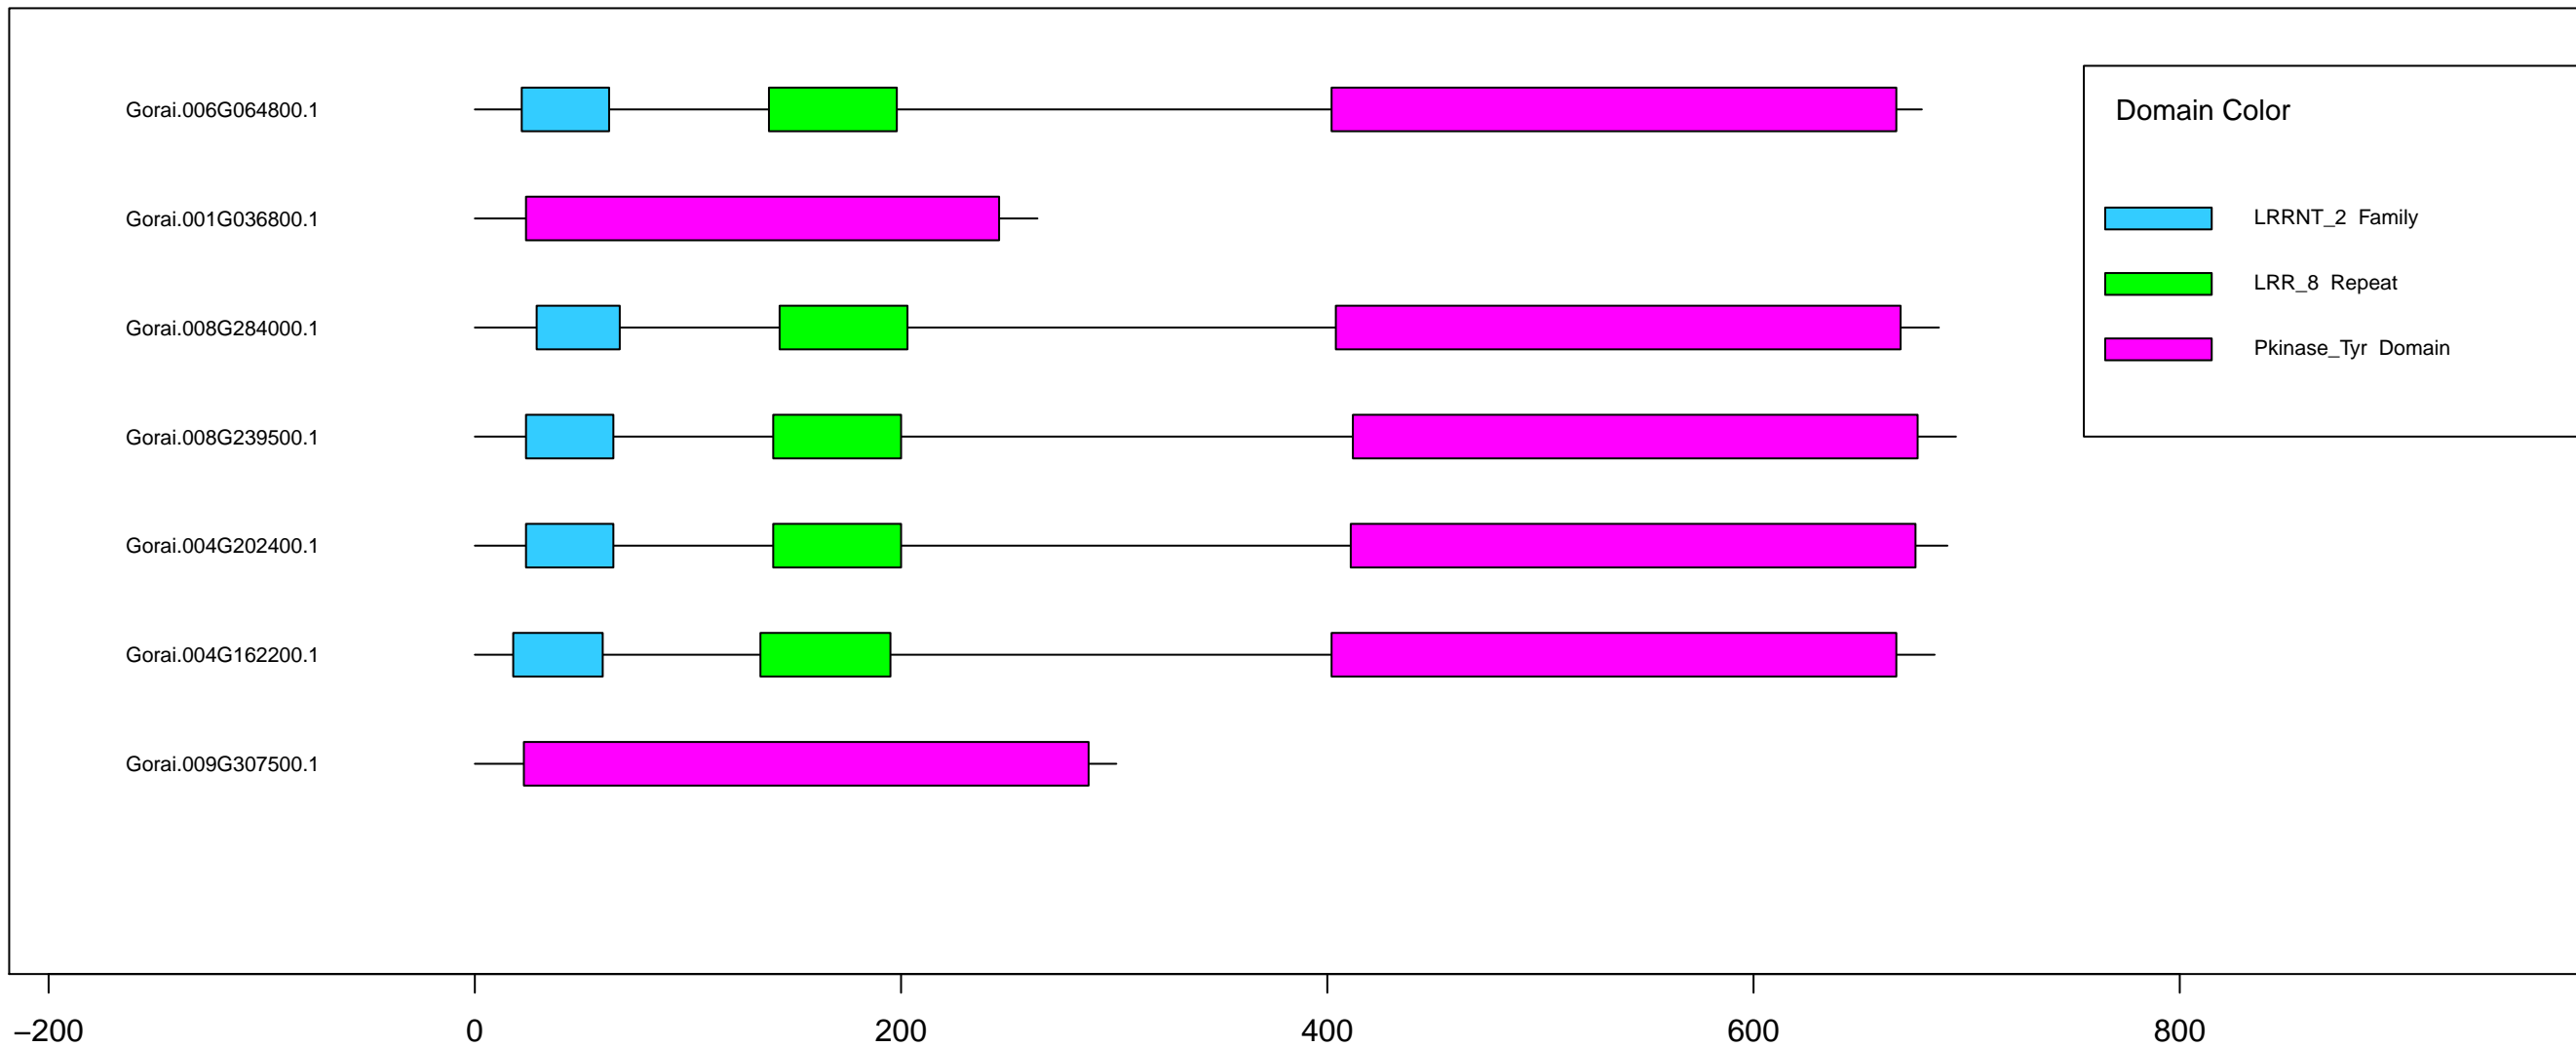

### G.ra RLK-Pelle\_LRR-IX domain diagram (all)

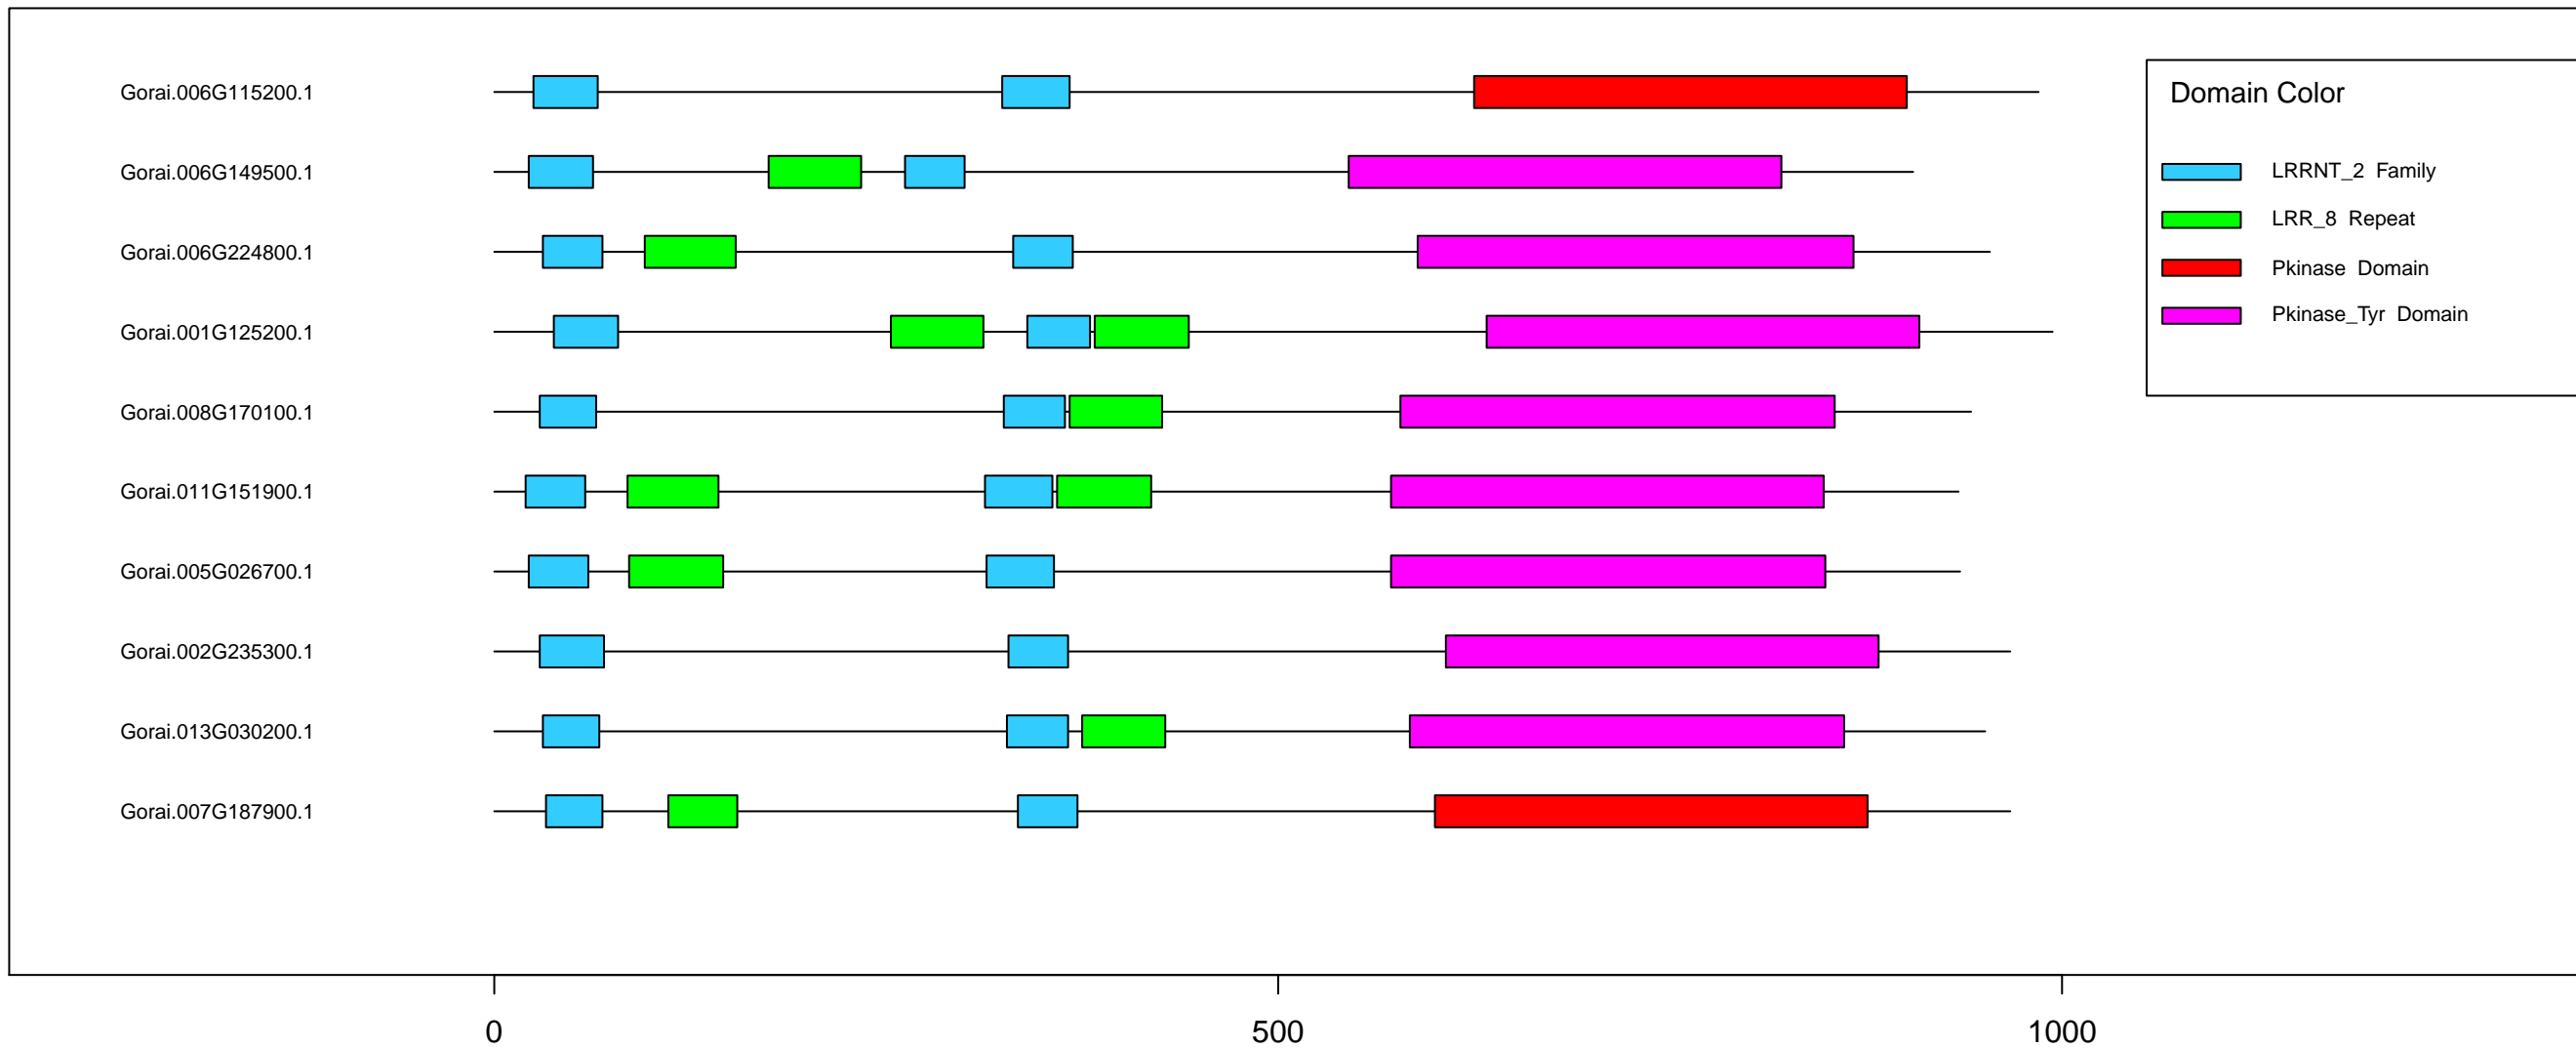

# G.ra RLK-Pelle\_LRR-VI-1 domain diagram (all)

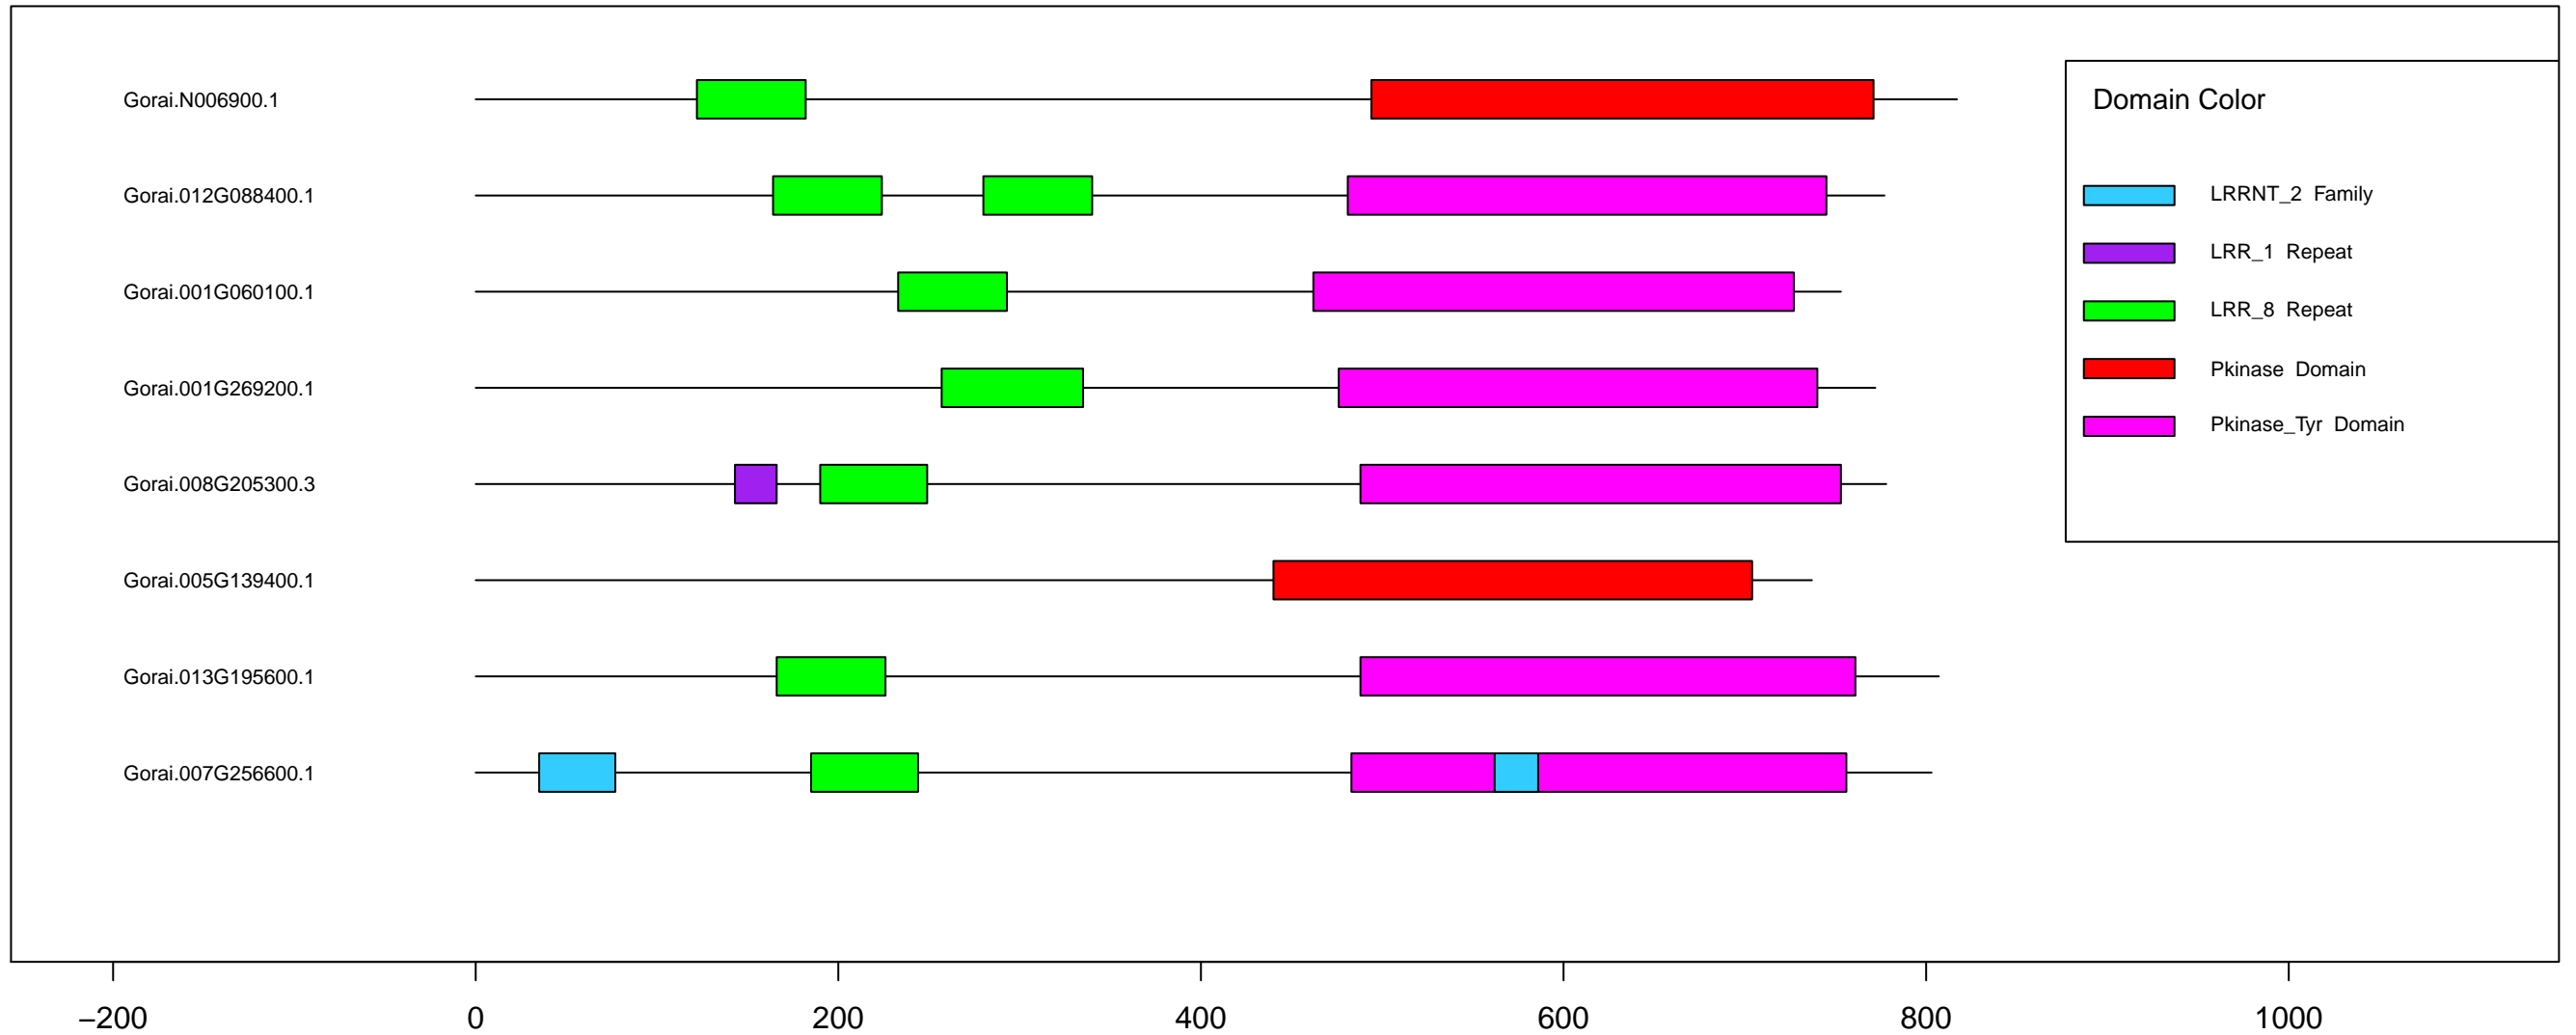

### G.ra RLK-Pelle\_LRR-VI-2 domain diagram (all)

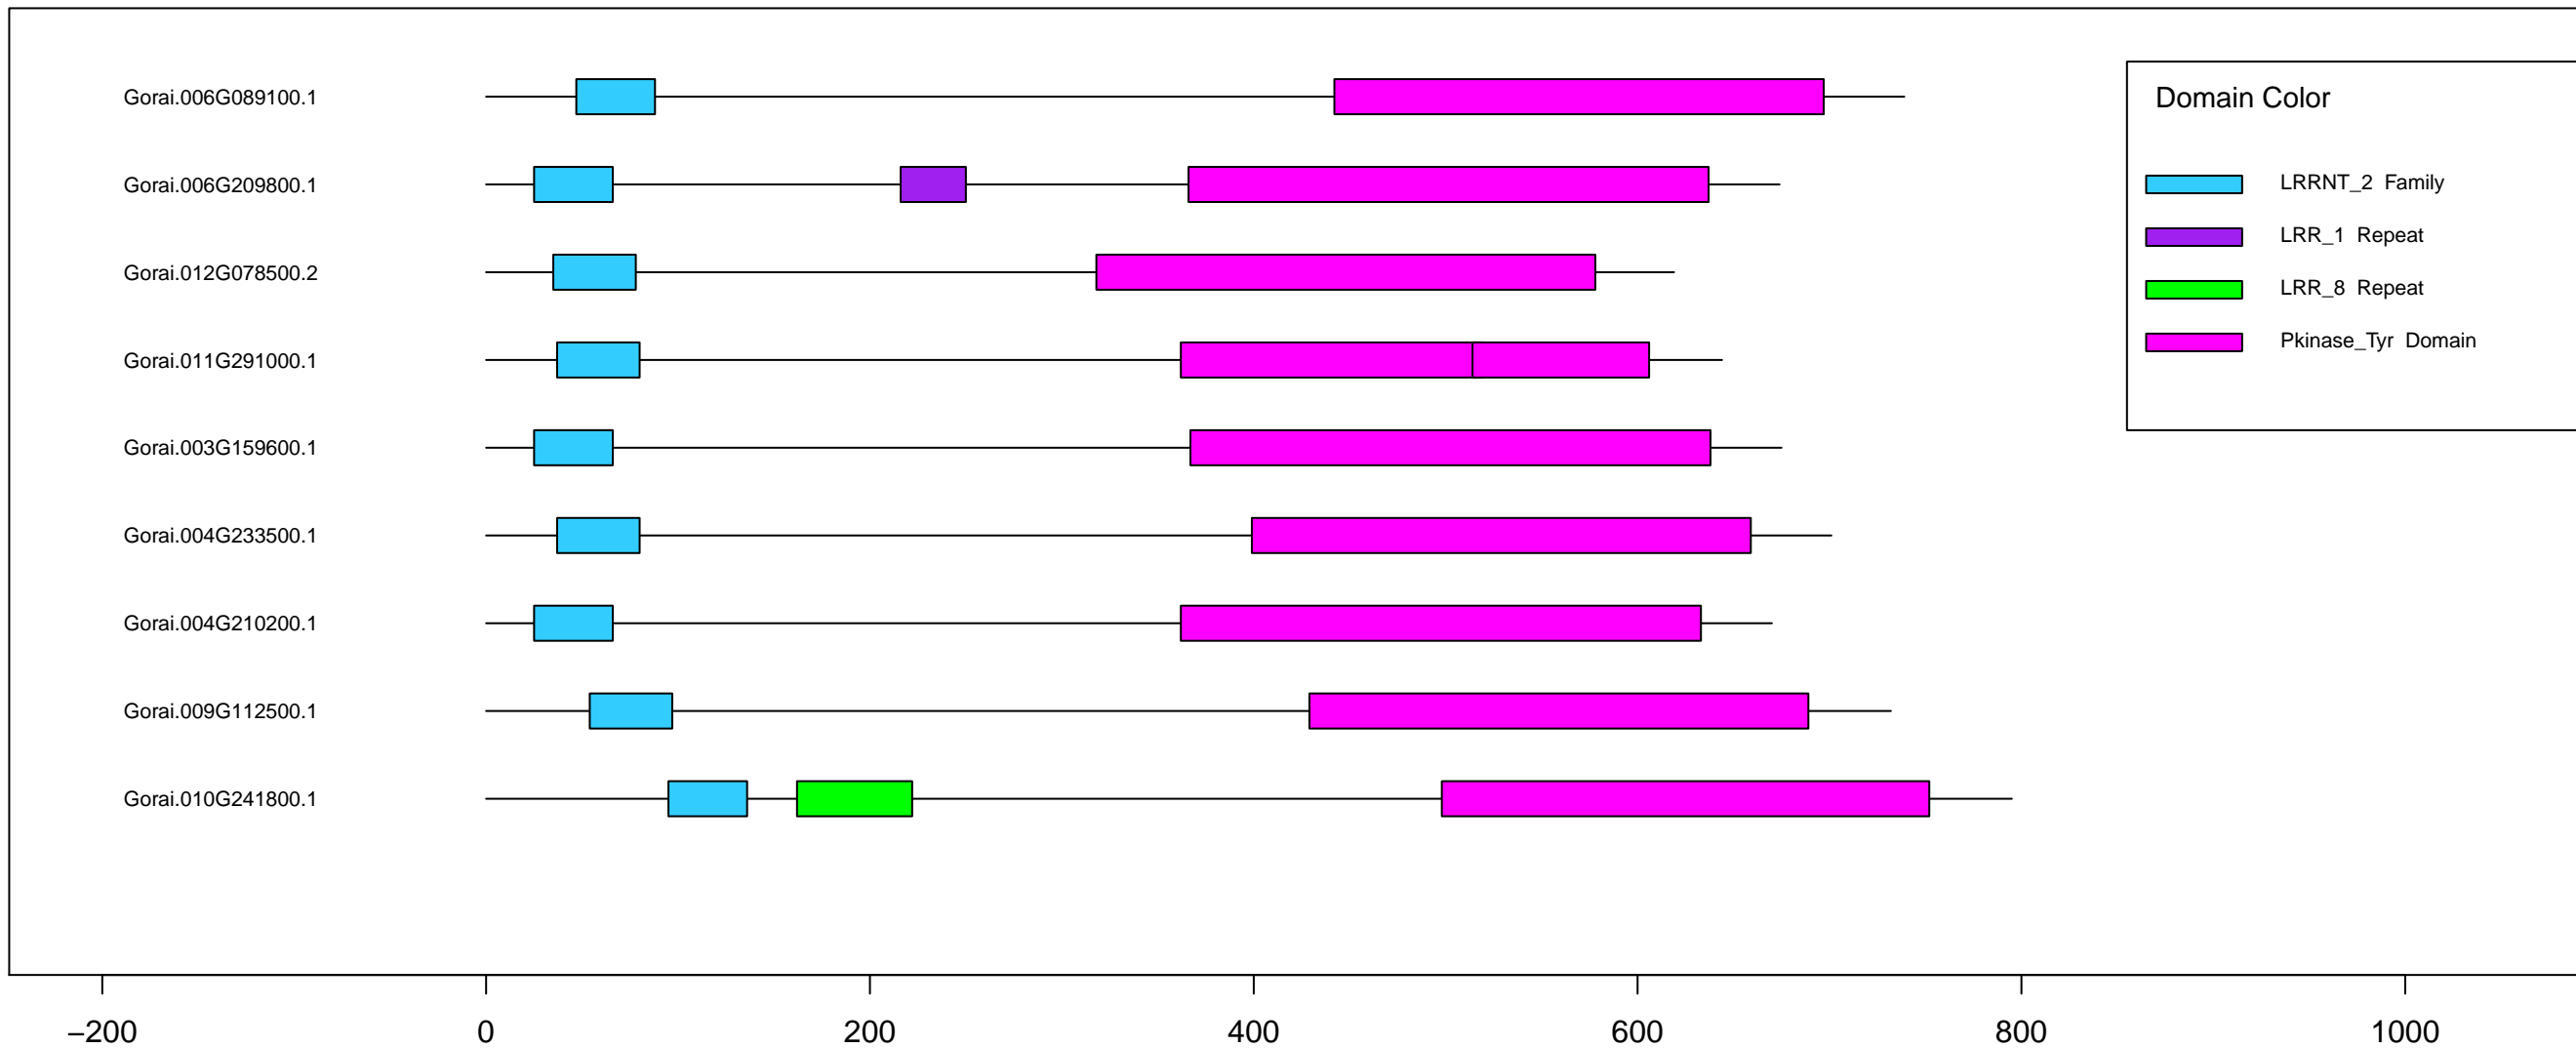

### G.ra RLK-Pelle\_LRR-VII-1 domain diagram (all)

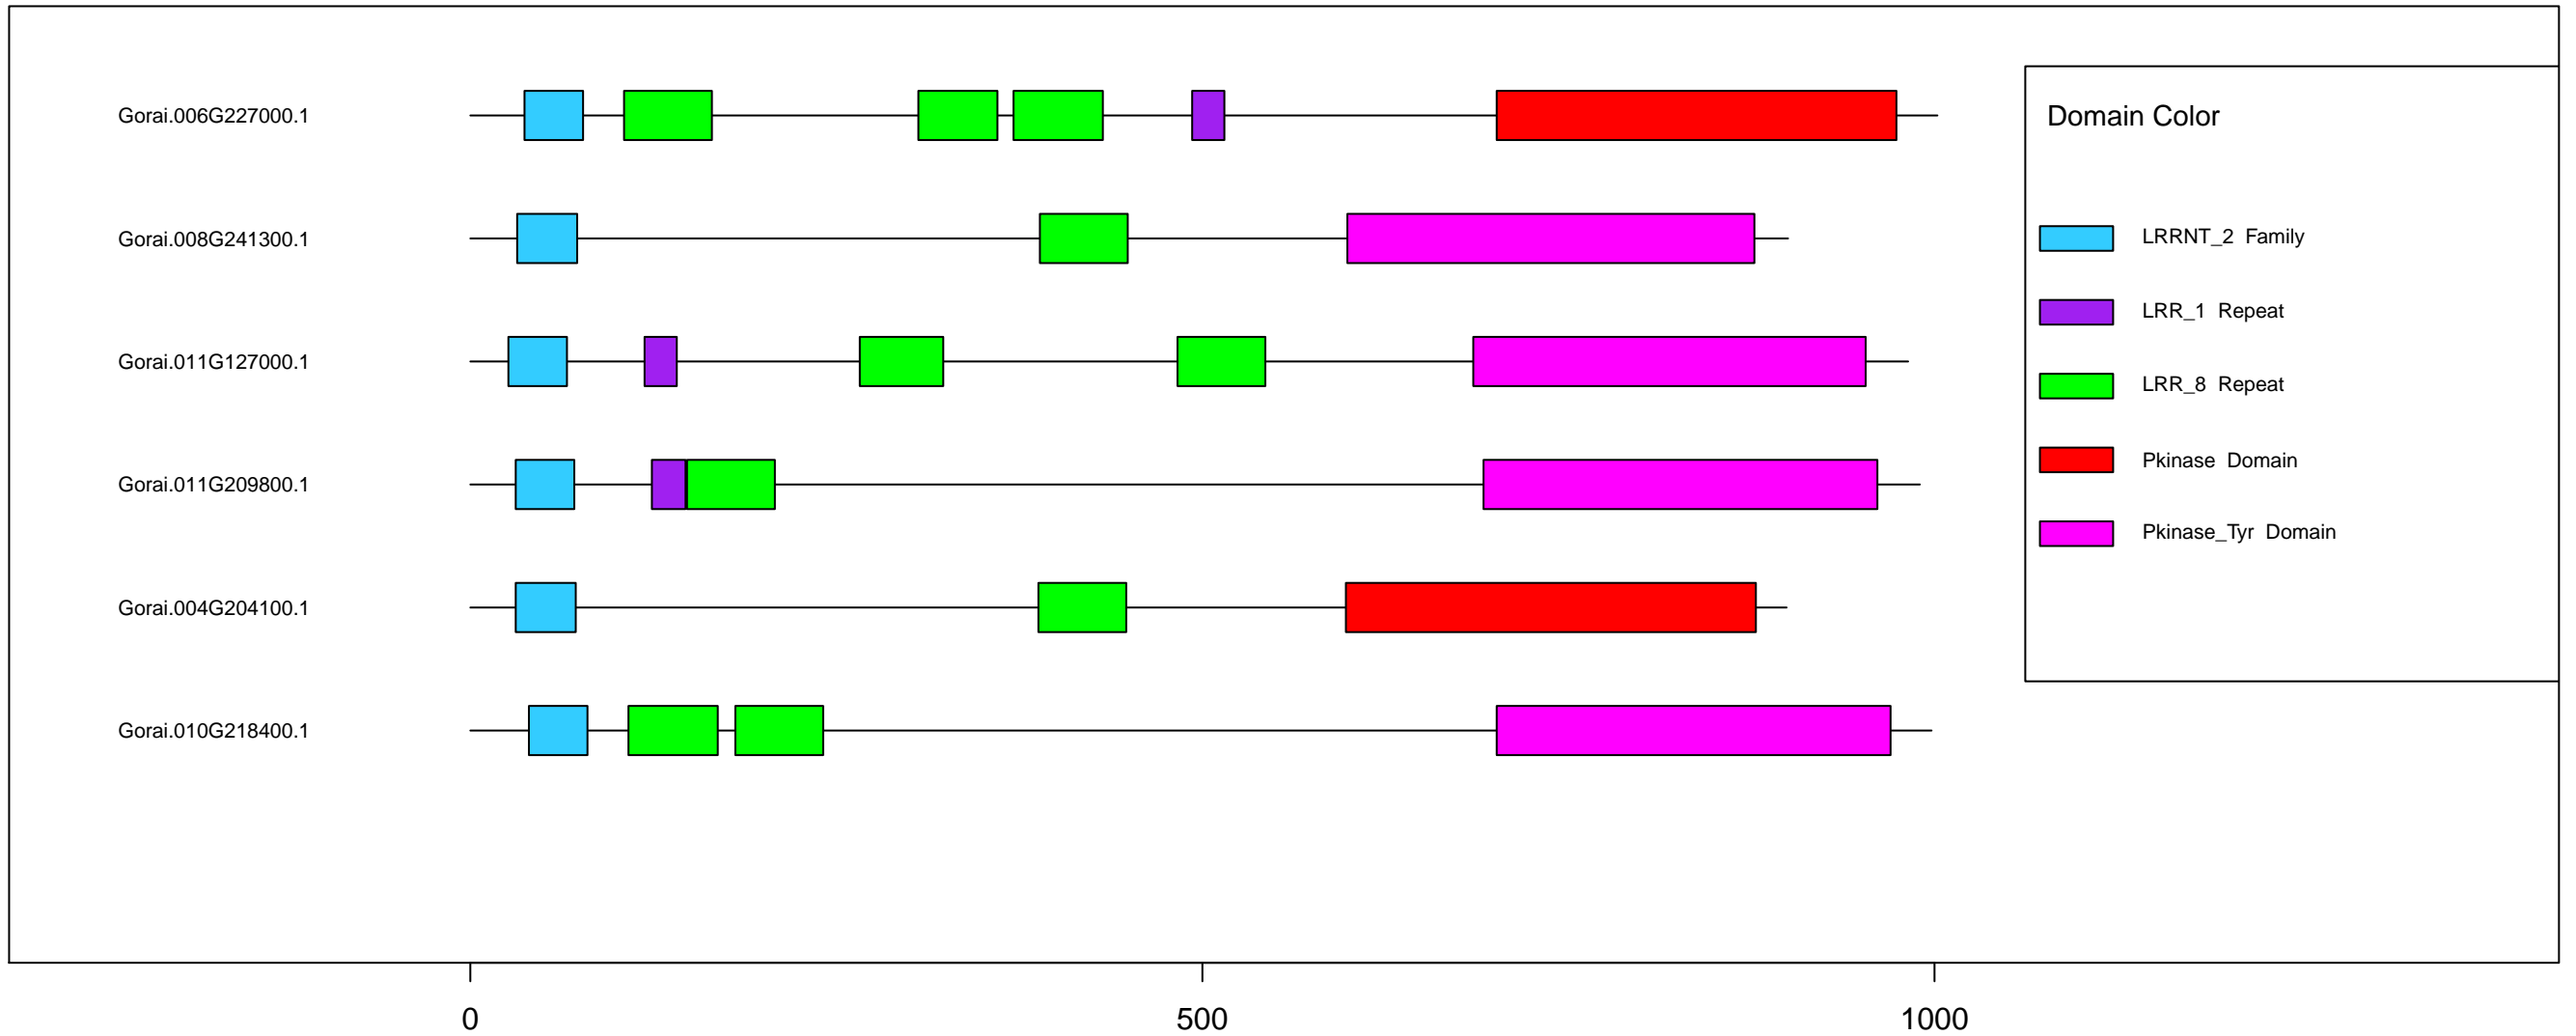

G.ra RLK-Pelle\_LRR-VII-2 domain diagram (all)

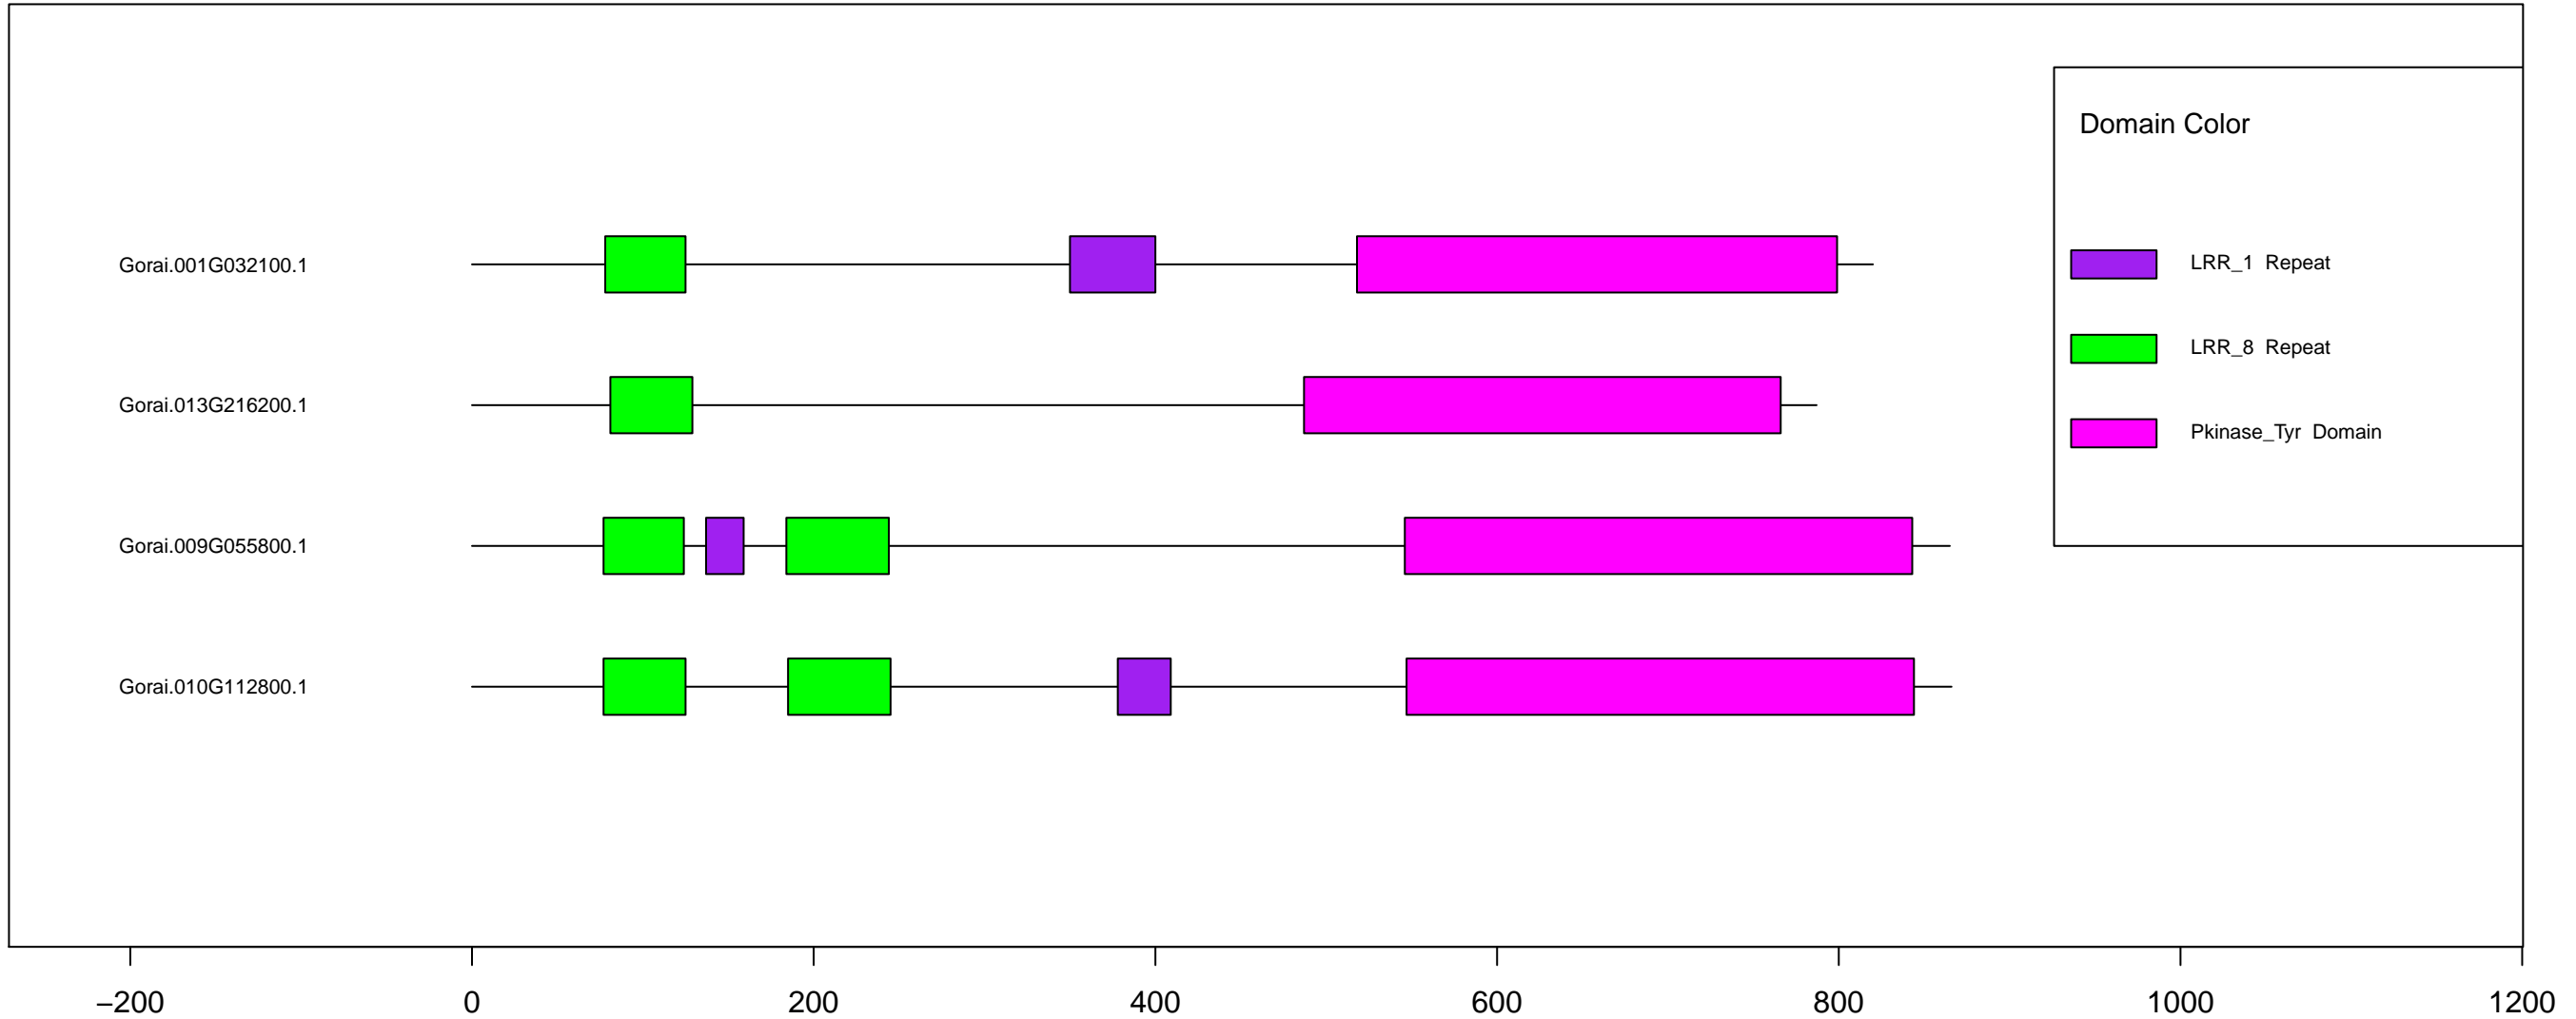

G.ra RLK-Pelle\_LRR-VII-3 domain diagram (all)

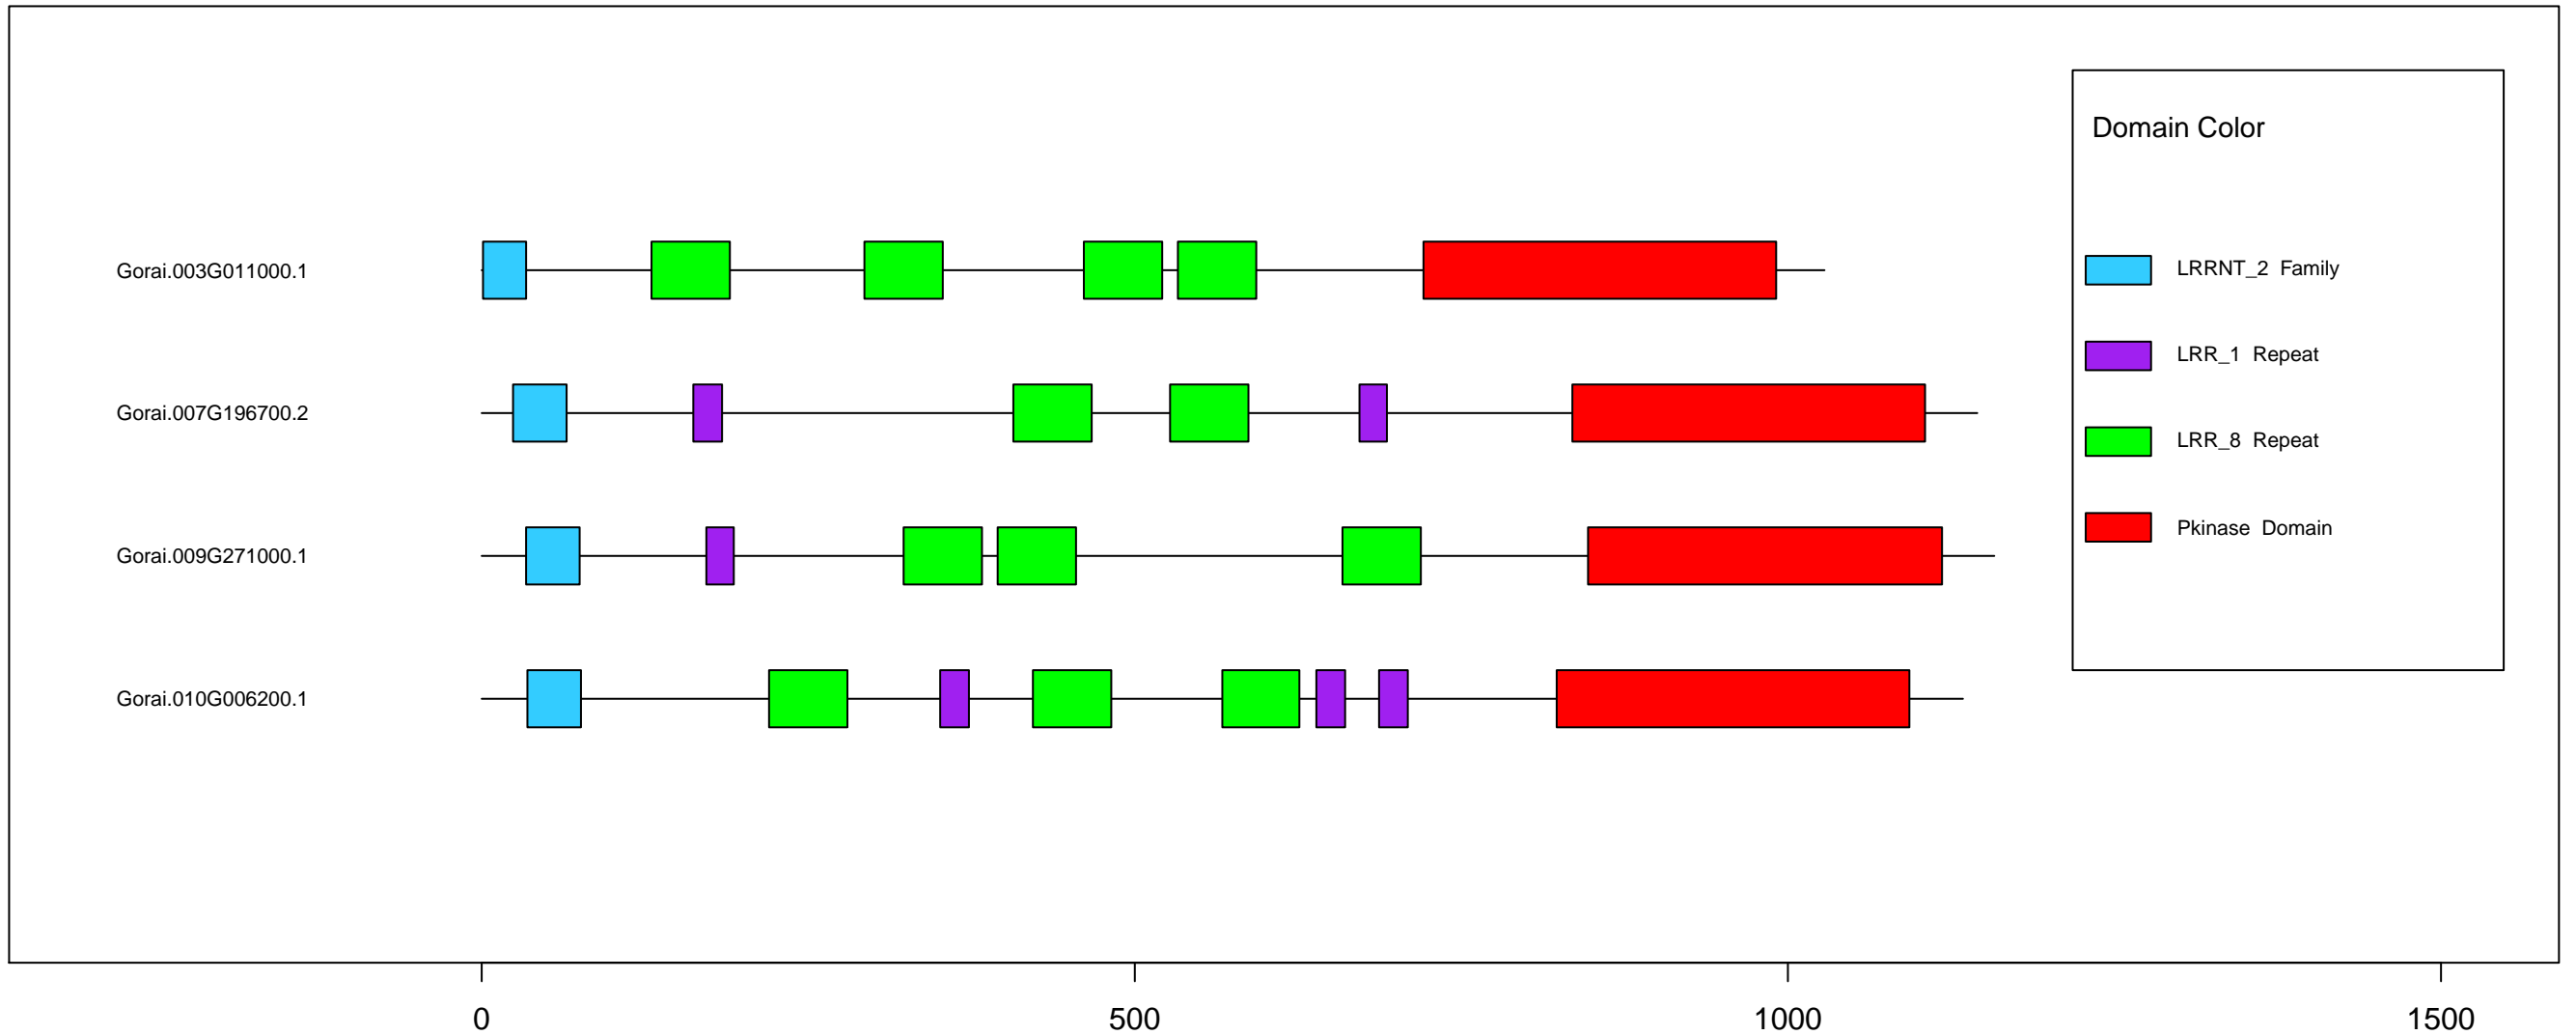



### G.ra RLK-Pelle\_LRR-VIII-1 domain diagram (all)

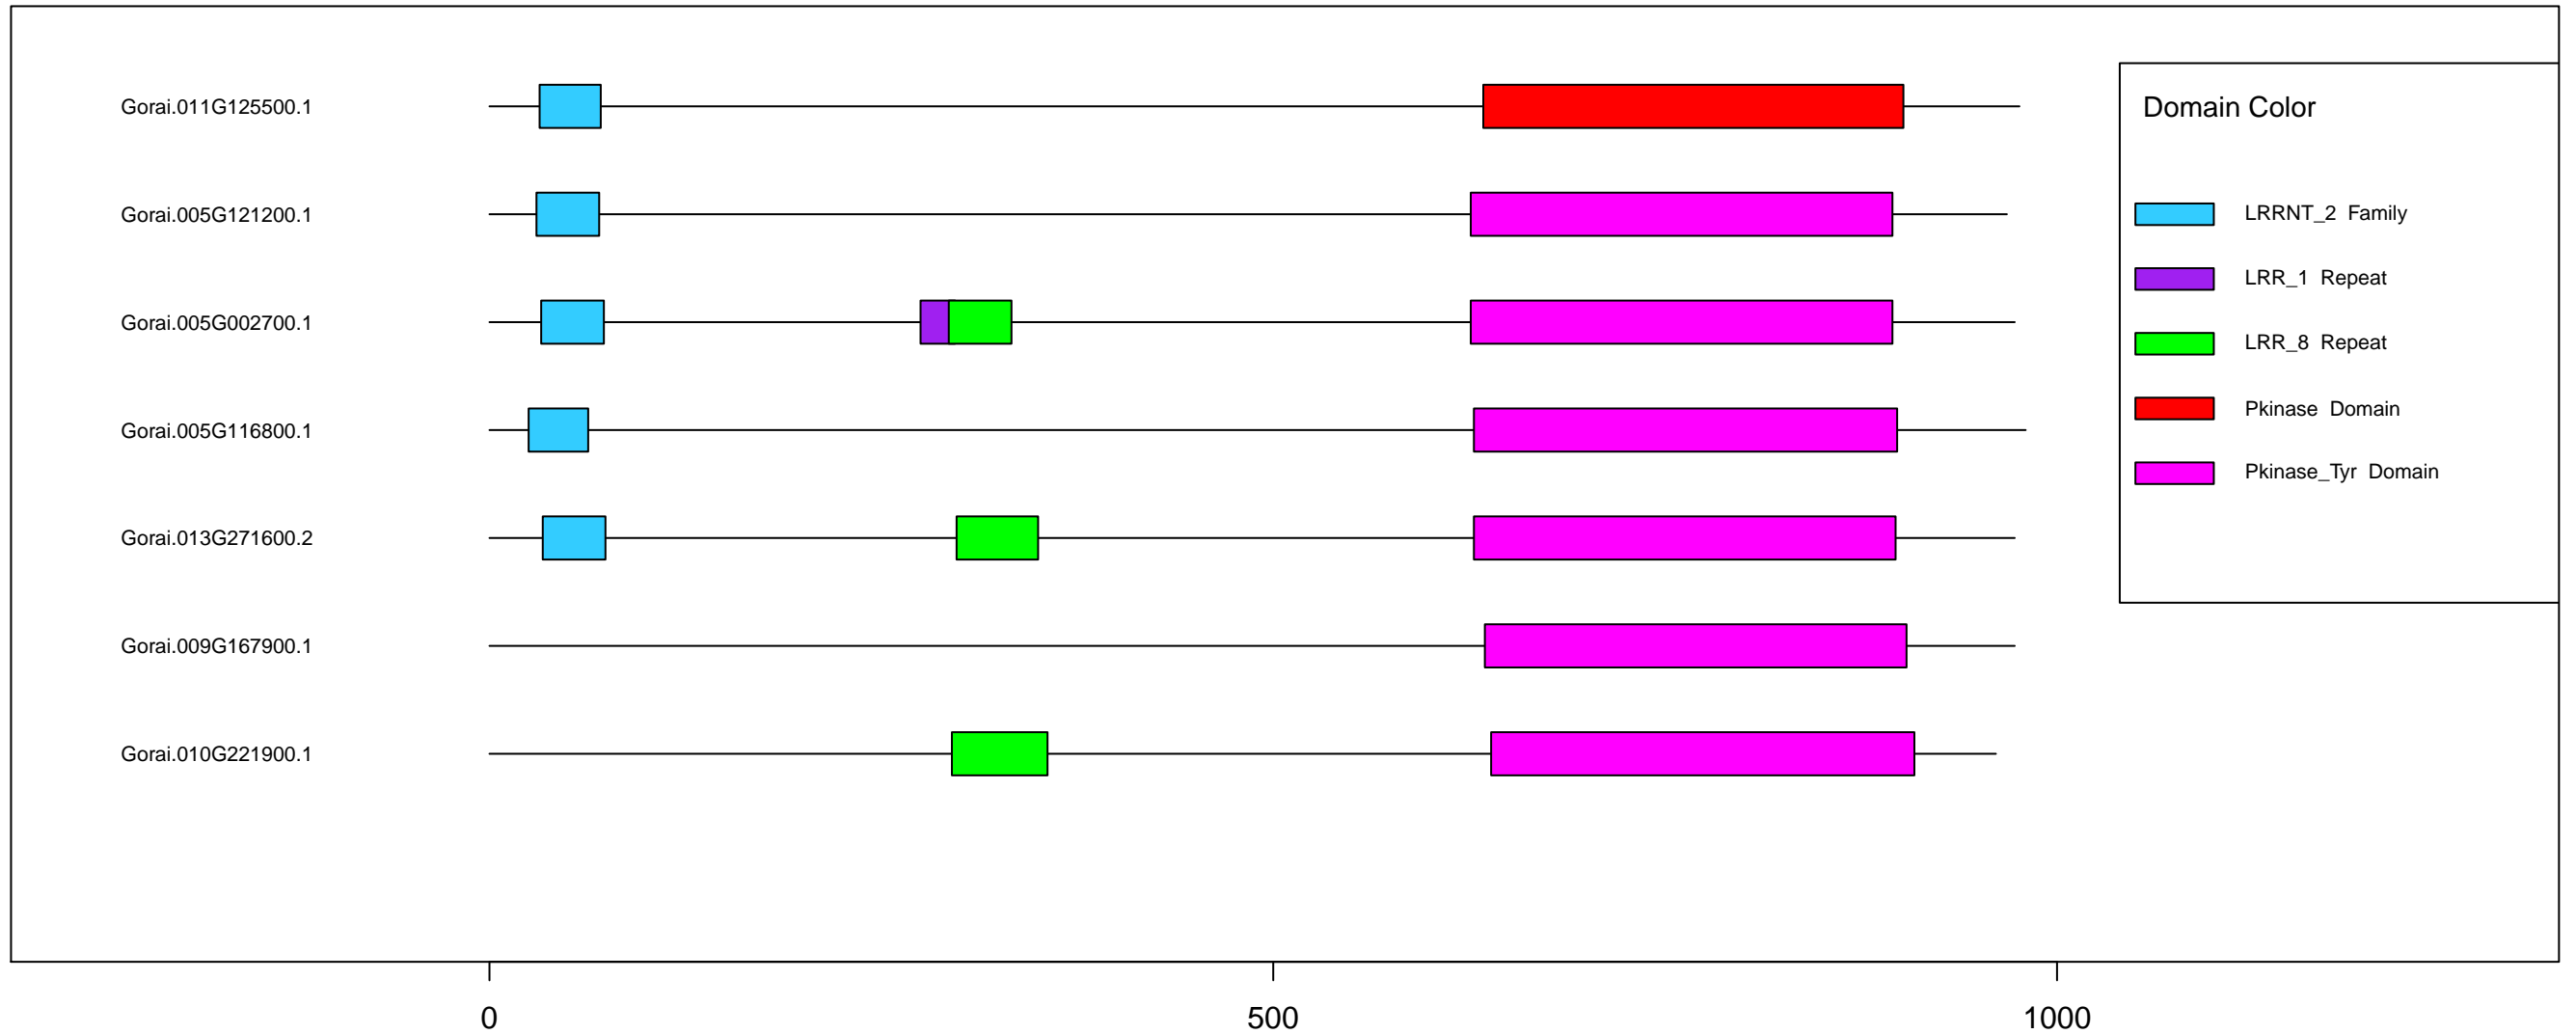

G.ra RLK-Pelle\_LRR-V domain diagram (all)

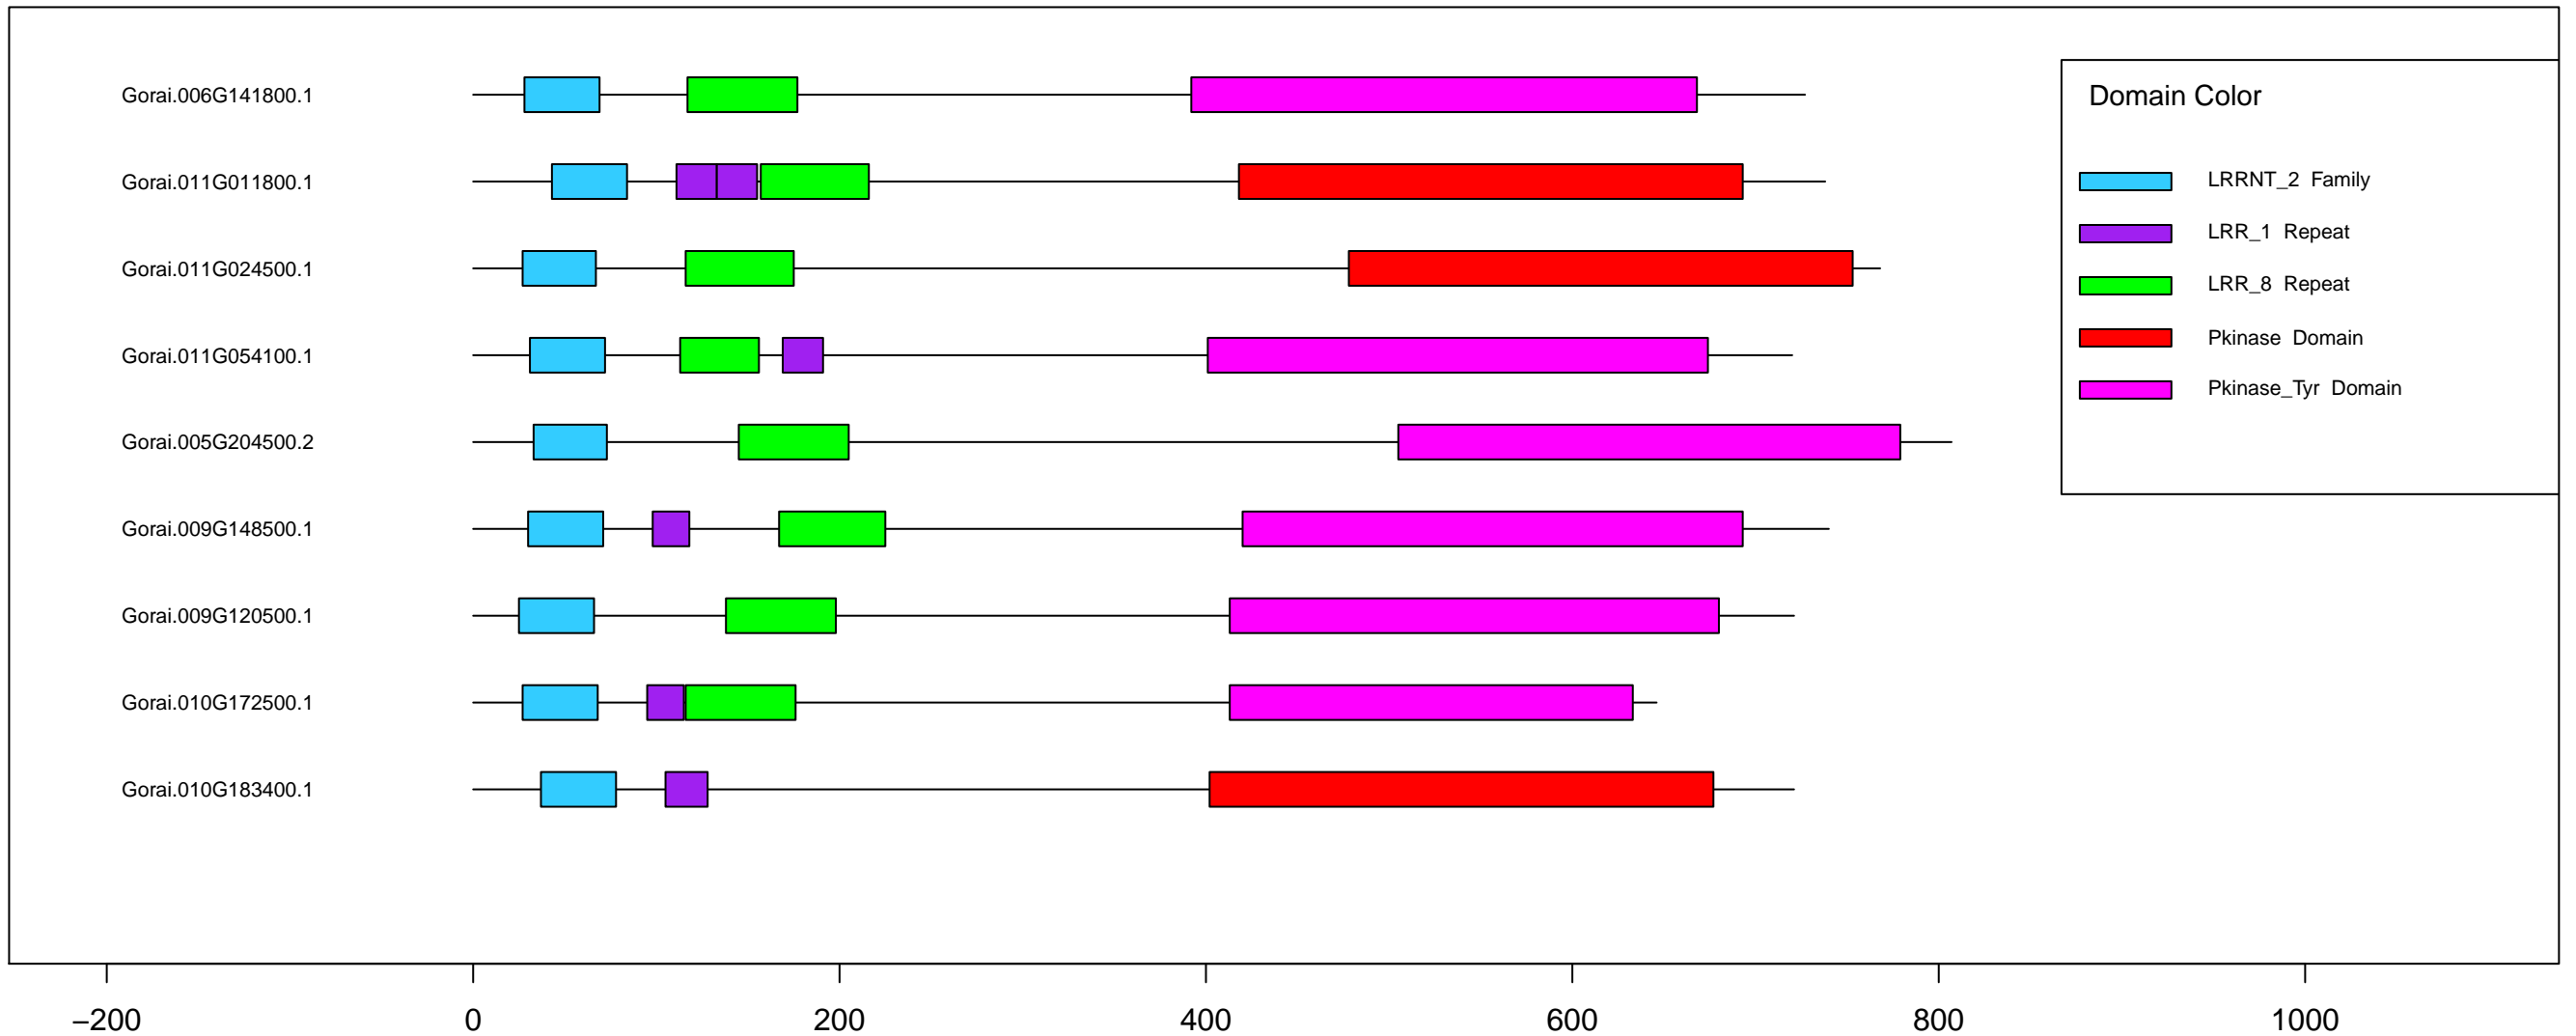

# G.ra RLK-Pelle\_LRR-Xa domain diagram (all)

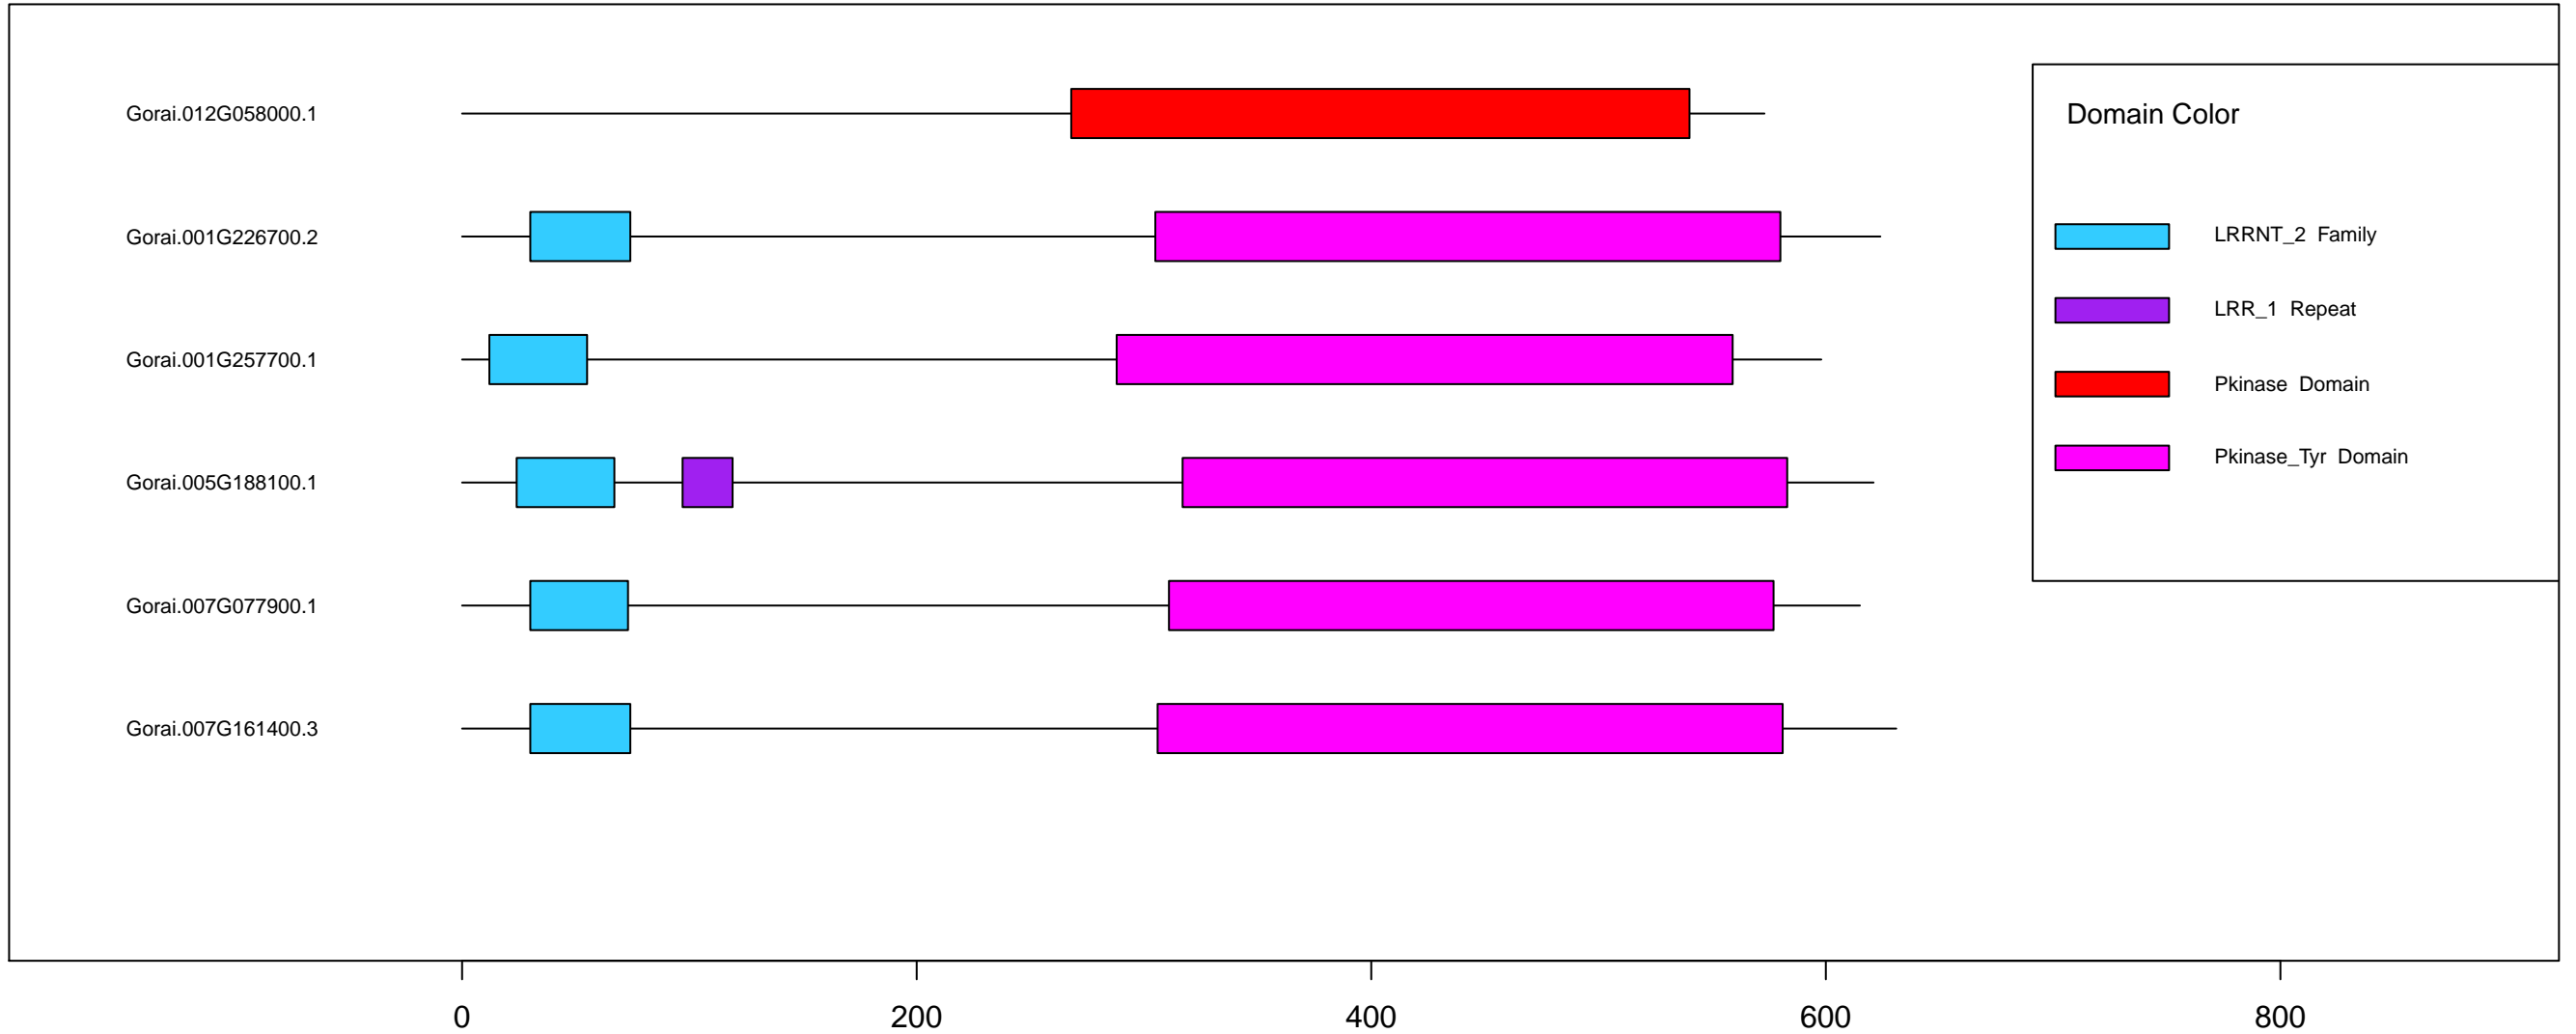

### G.ra RLK-Pelle\_LRR-Xb-1 domain diagram (all)

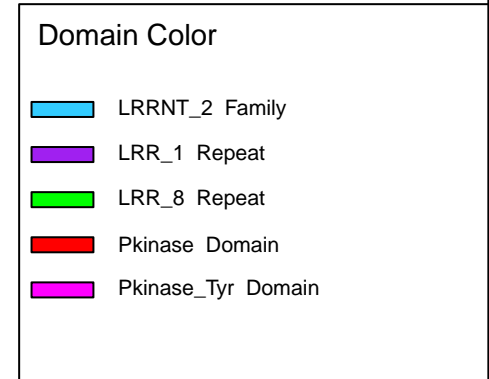

Gorai.011G001200.1  
Gorai.005G151100.1  
Gorai.003G048200.1  
Gorai.002G149600.1  
Gorai.002G068500.1  
Gorai.002G171000.1  
Gorai.007G062800.1  
Gorai.004G120000.1  
Gorai.009G166400.1  
Gorai.009G455100.1  
Gorai.009G258100.1

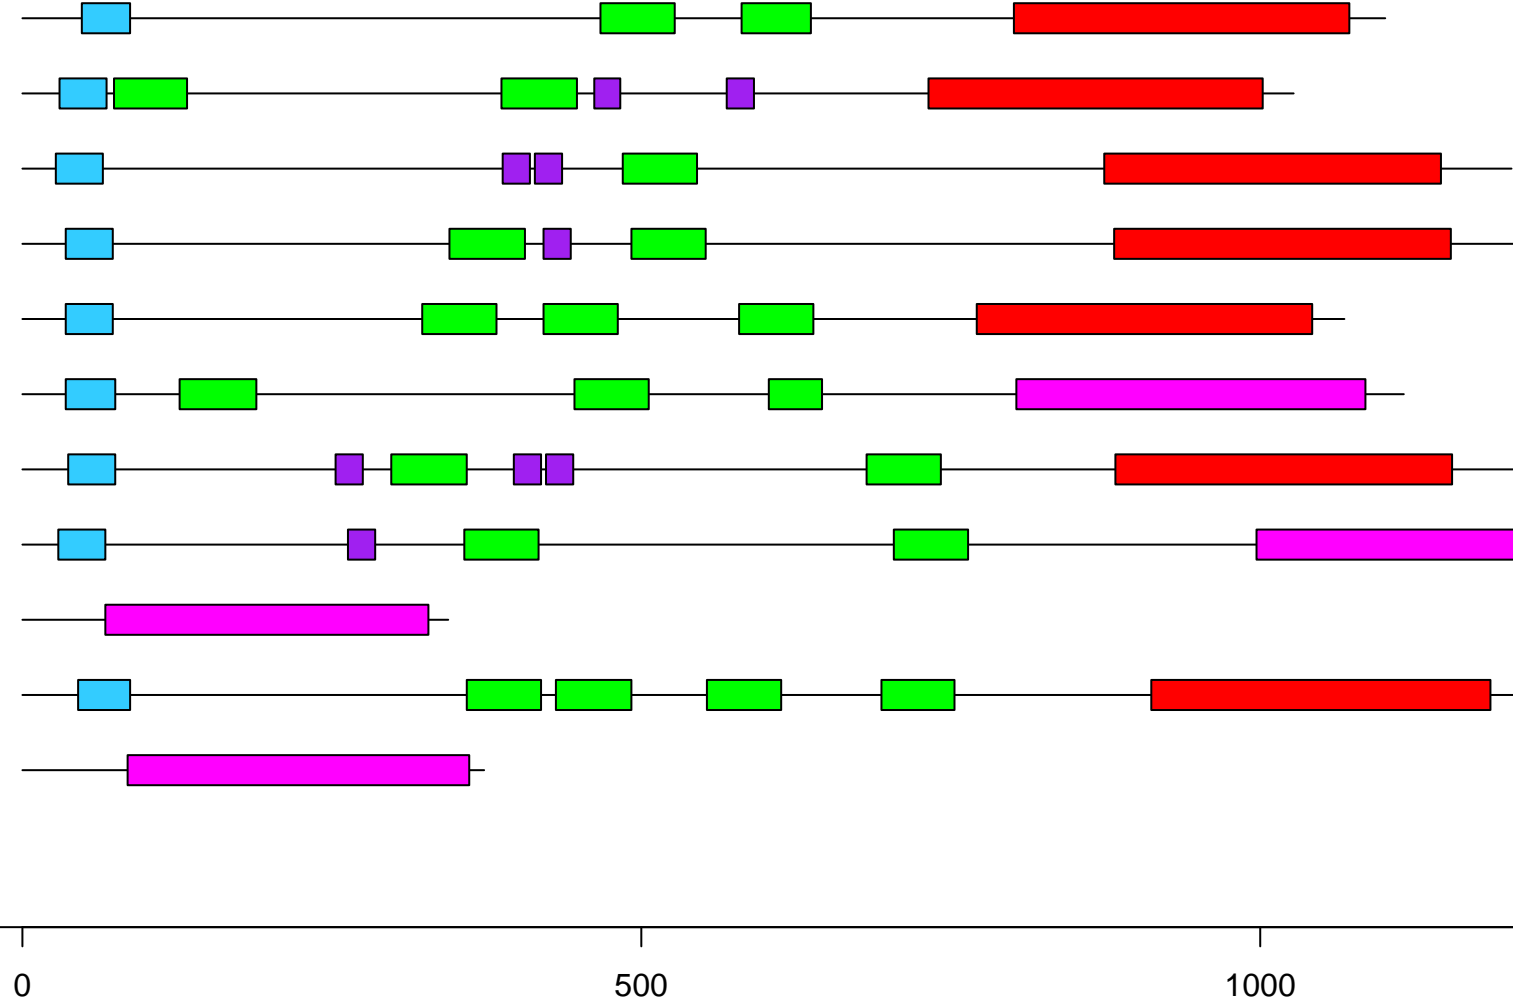

# G.ra RLK-Pelle\_LRR-Xb-2 domain diagram (all)

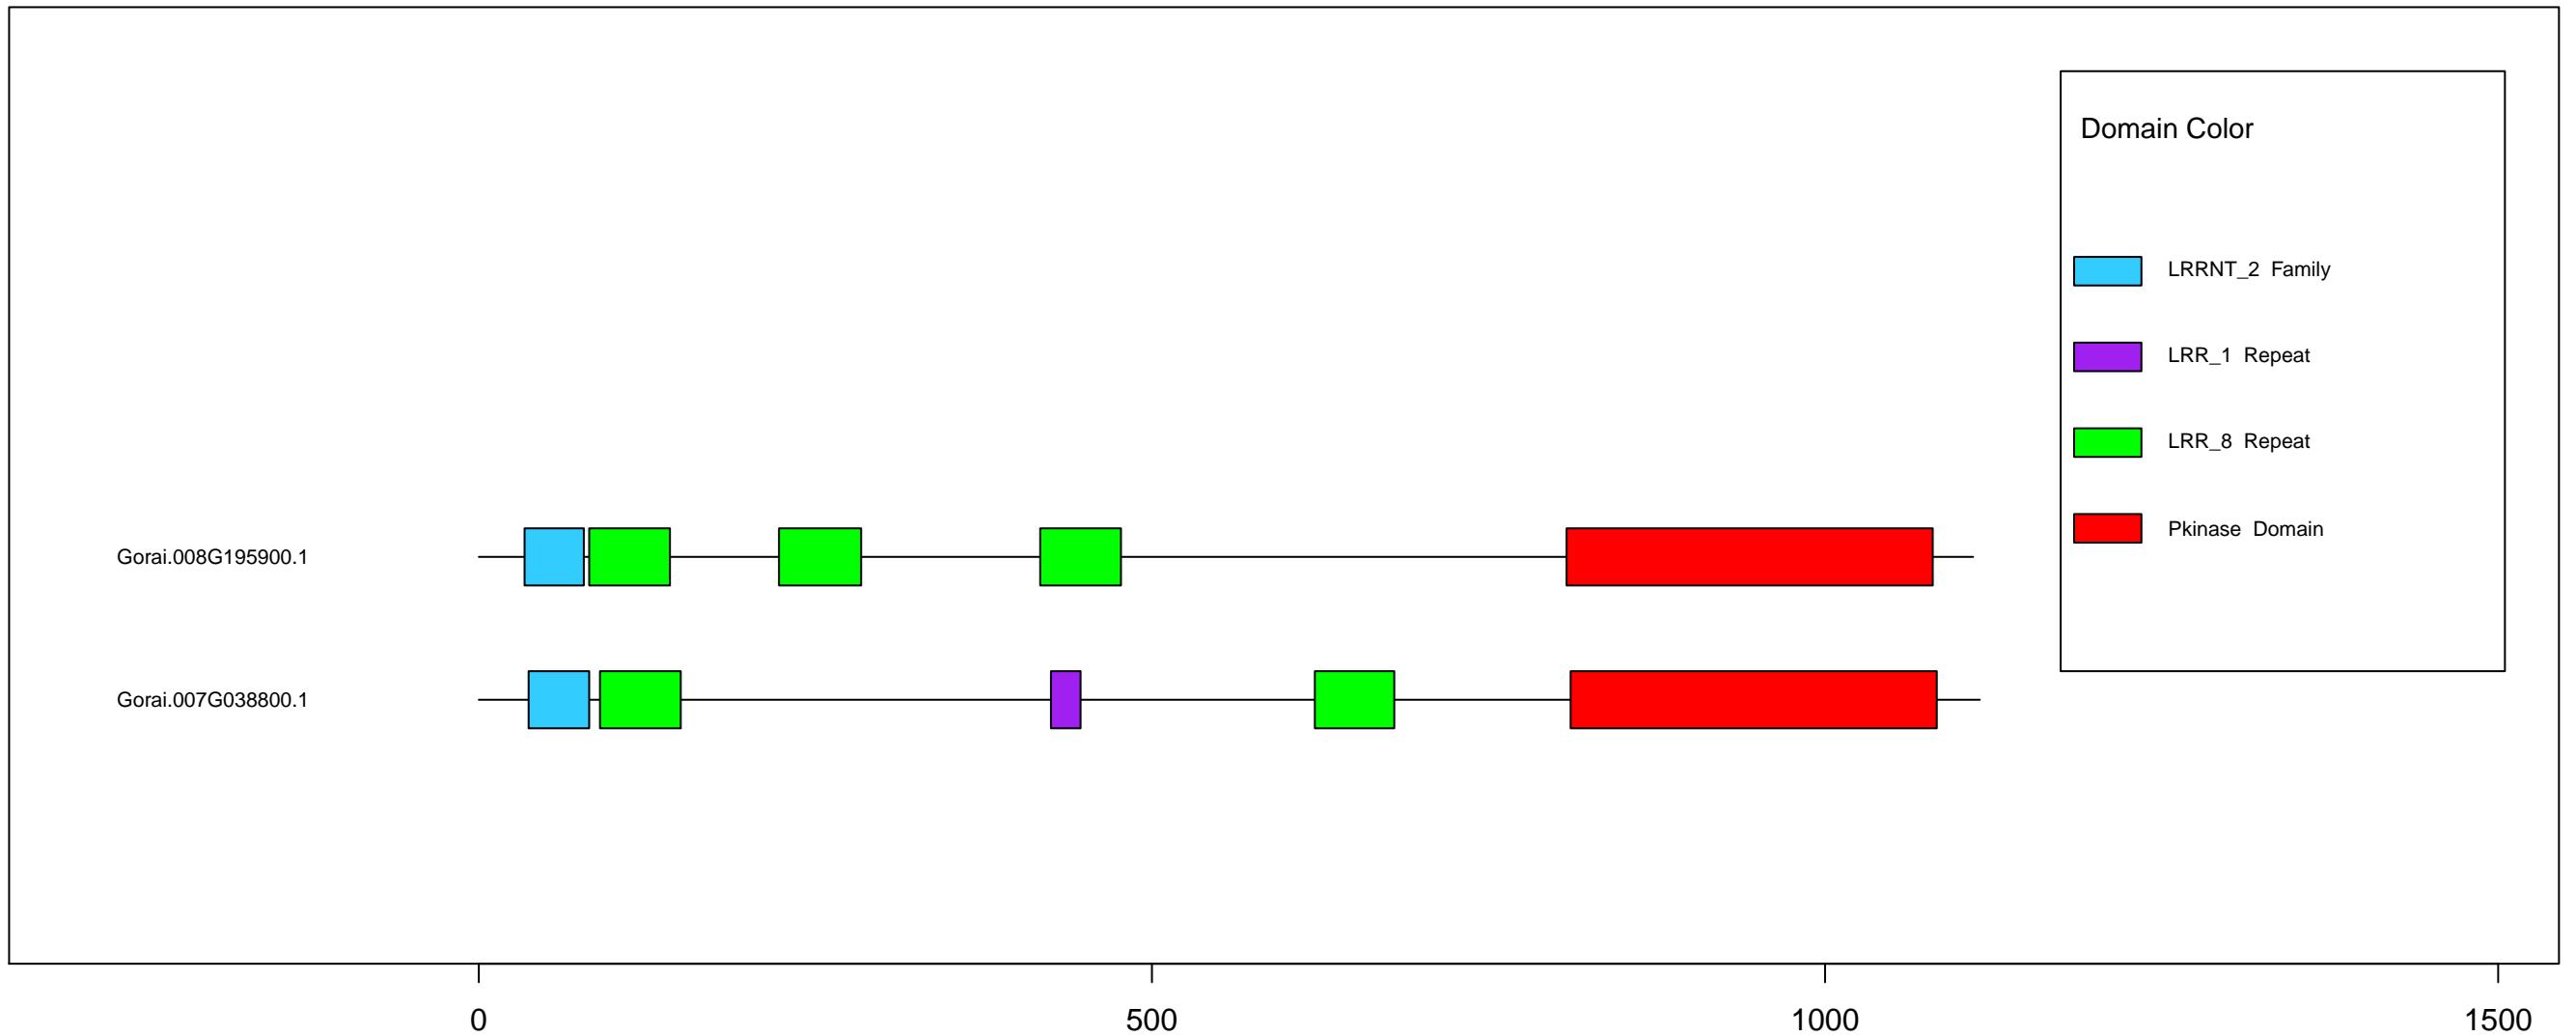

### G.ra RLK-Pelle\_LRR-XI-1 domain diagram (part 1)

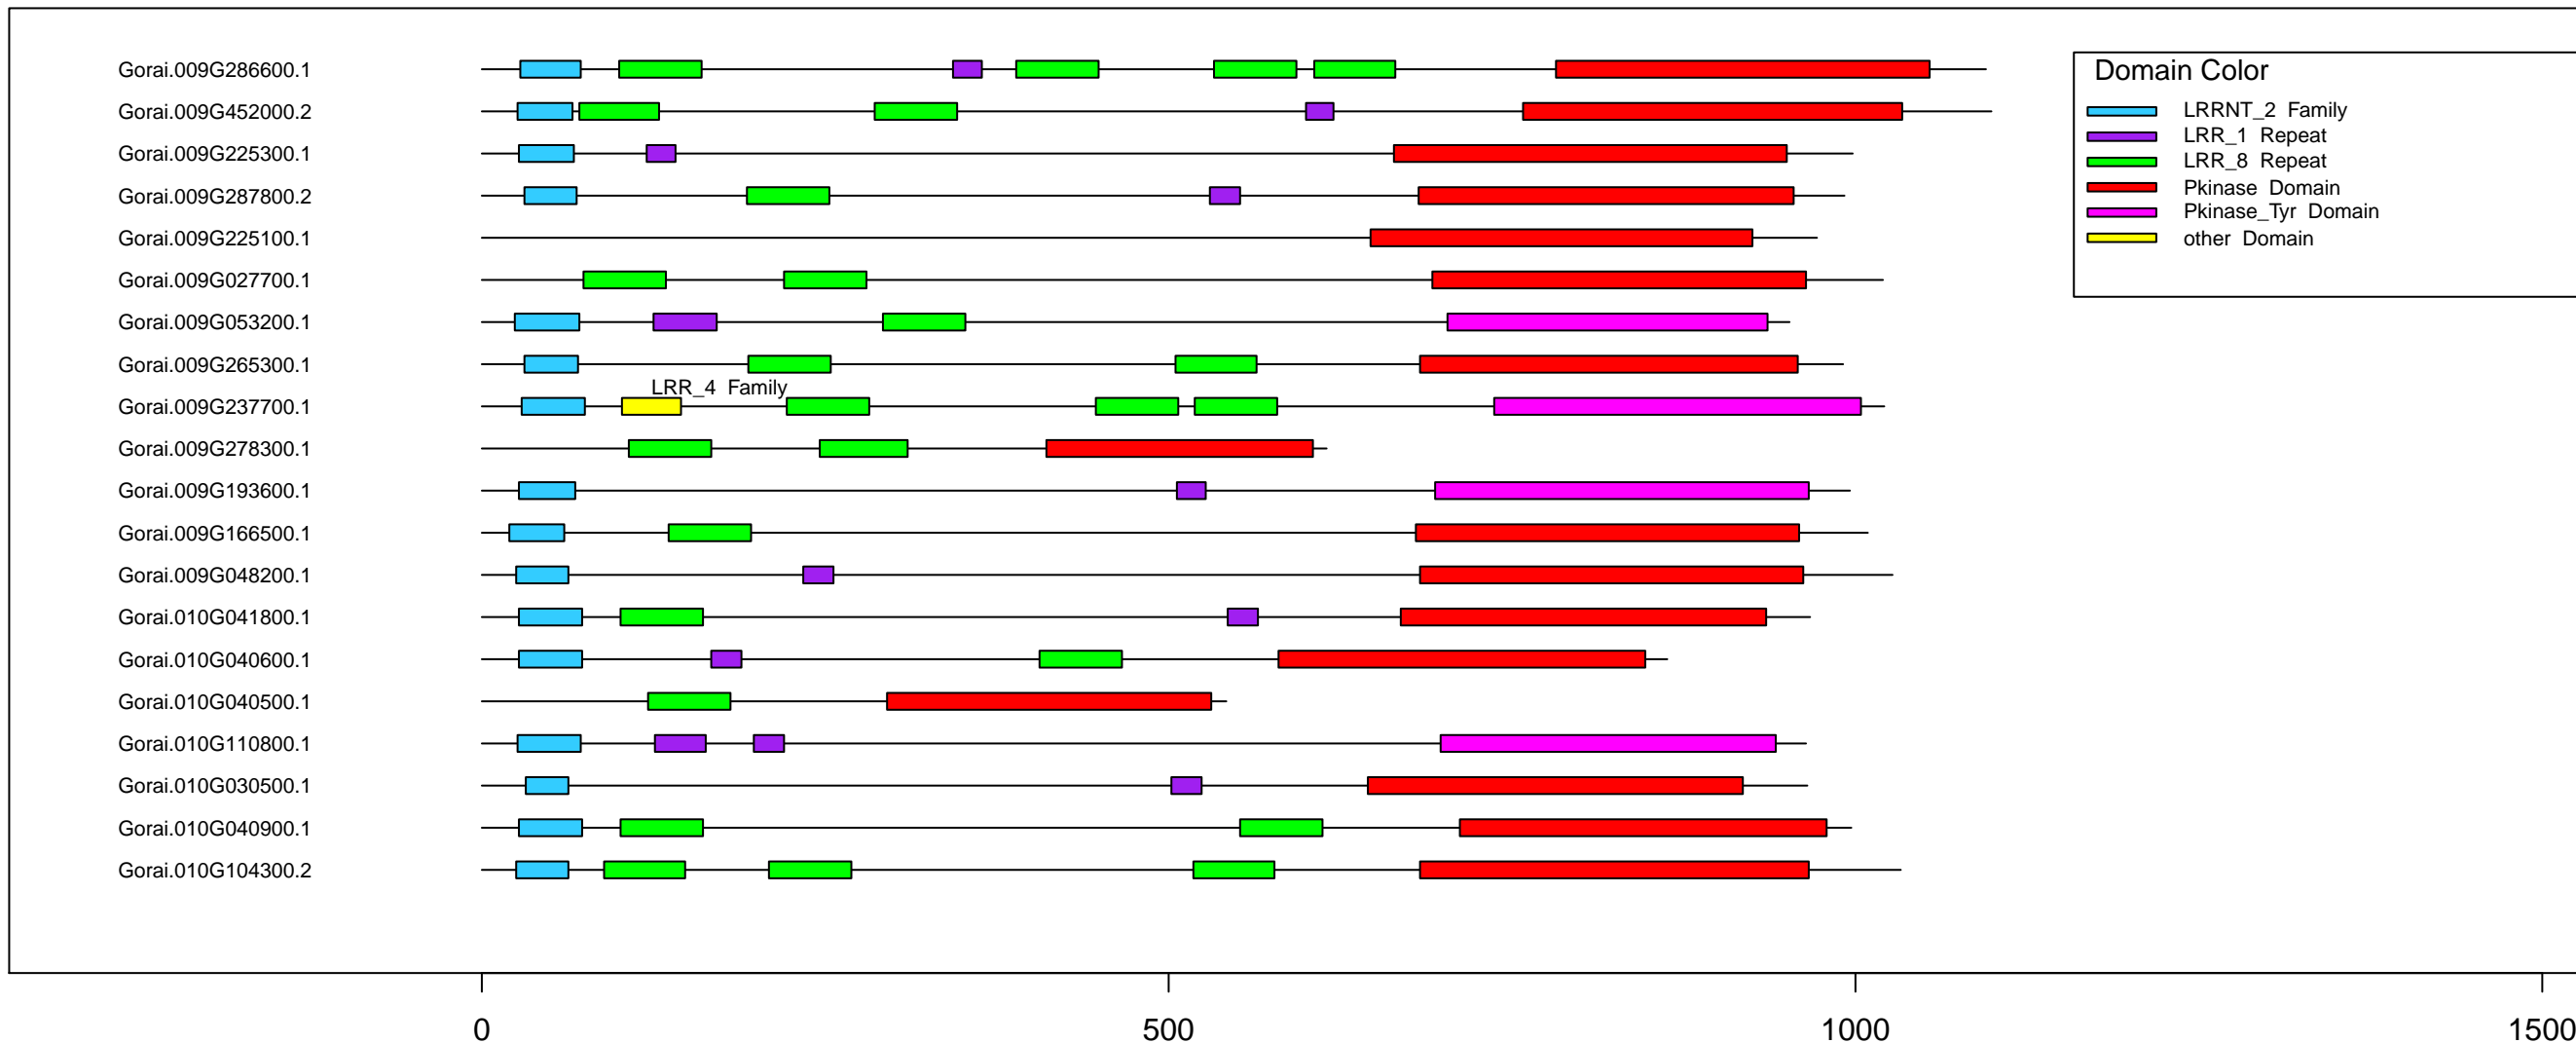

### G.ra RLK-Pelle\_LRR-XI-1 domain diagram (part 2)

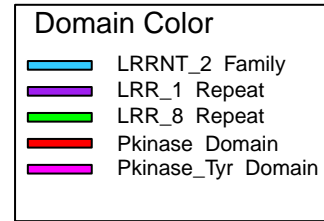

Gorai.005G097700.1  
 Gorai.005G199100.1  
 Gorai.005G265400.1  
 Gorai.005G268400.1  
 Gorai.N025300.1  
 Gorai.N013500.1  
 Gorai.003G034200.1  
 Gorai.003G034400.1  
 Gorai.003G092400.1  
 Gorai.003G034500.1  
 Gorai.002G211900.1  
 Gorai.002G103300.1  
 Gorai.002G217000.1  
 Gorai.007G148900.1  
 Gorai.007G228700.1  
 Gorai.007G273700.1  
 Gorai.007G271300.2  
 Gorai.004G124300.1  
 Gorai.004G249900.1  
 Gorai.004G222100.1

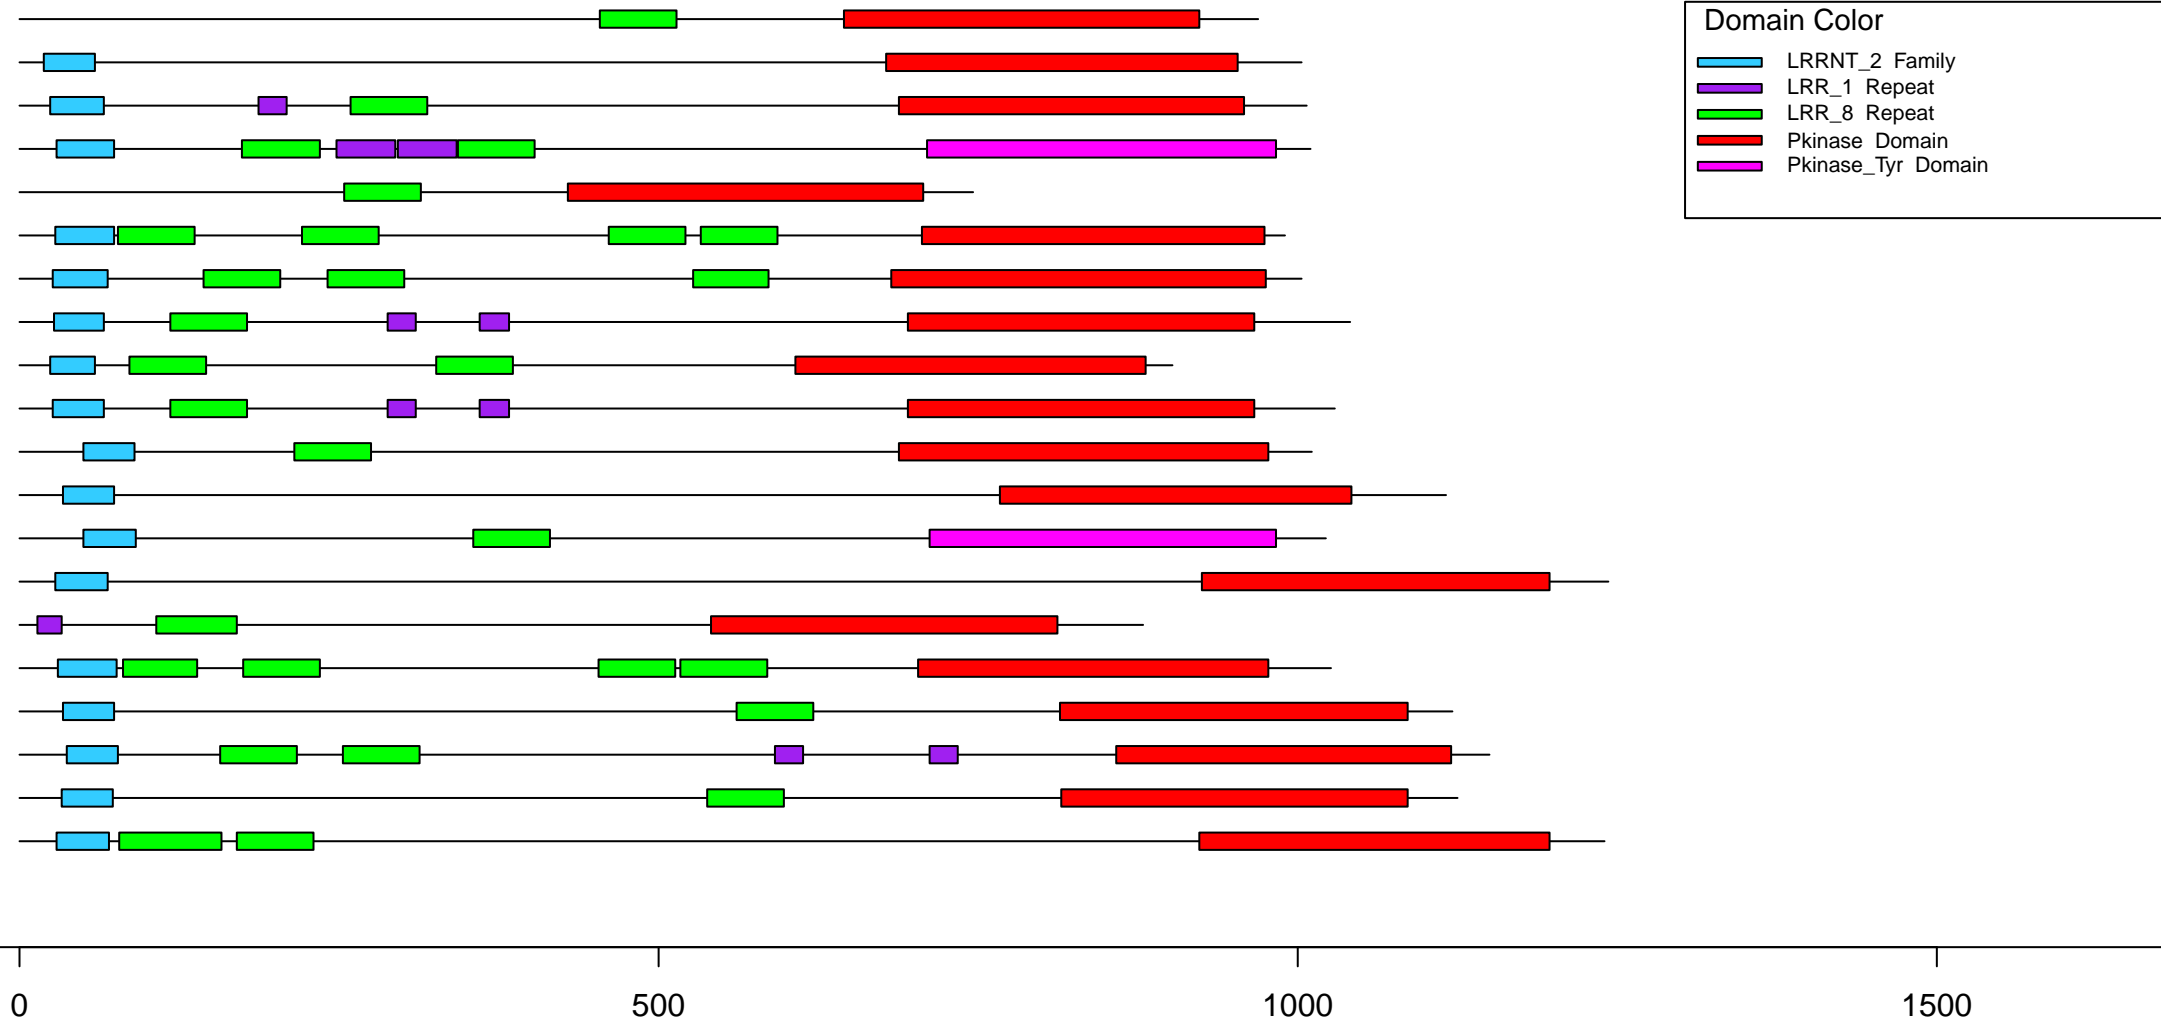

### G.ra RLK-Pelle\_LRR-XI-1 domain diagram (part 3)

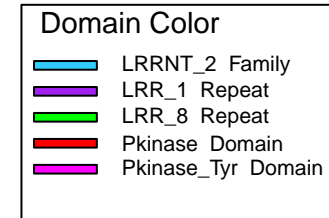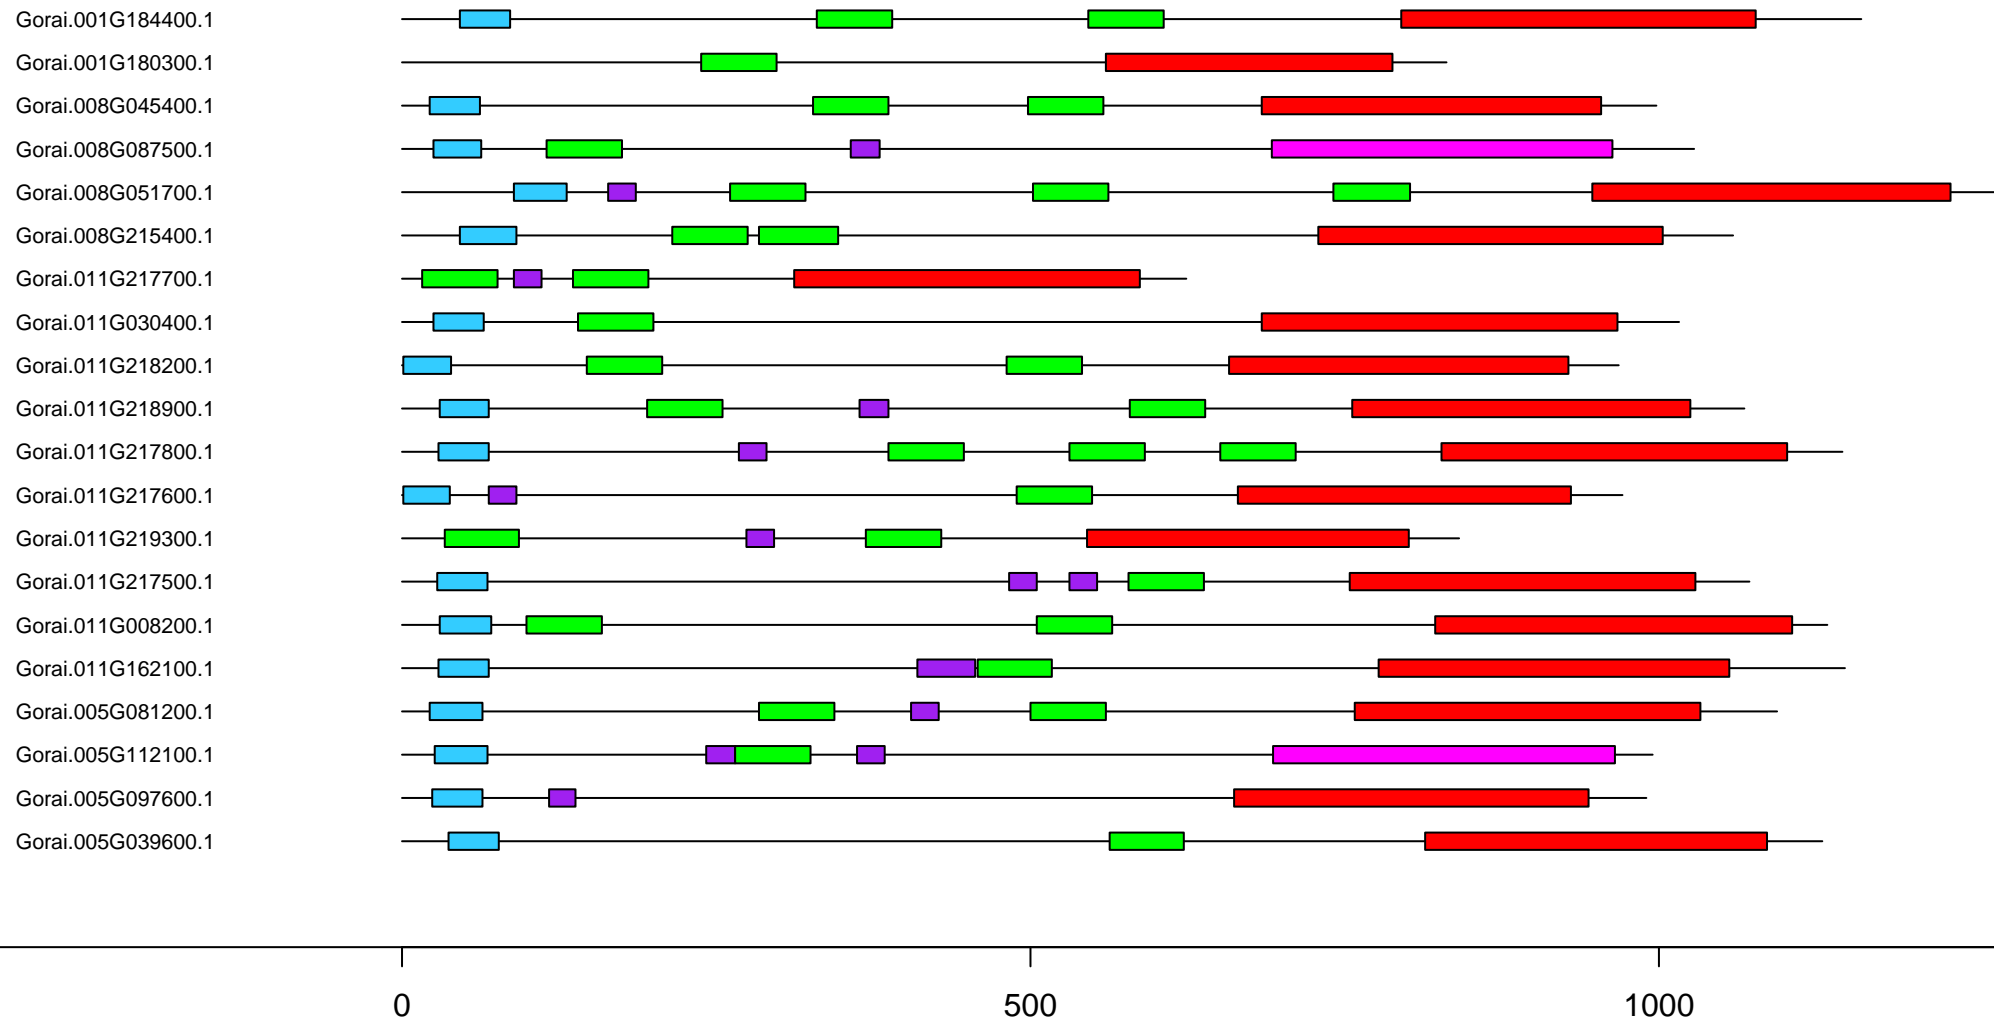



### G.ra RLK-Pelle\_LRR-XI-1 domain diagram (part 4)

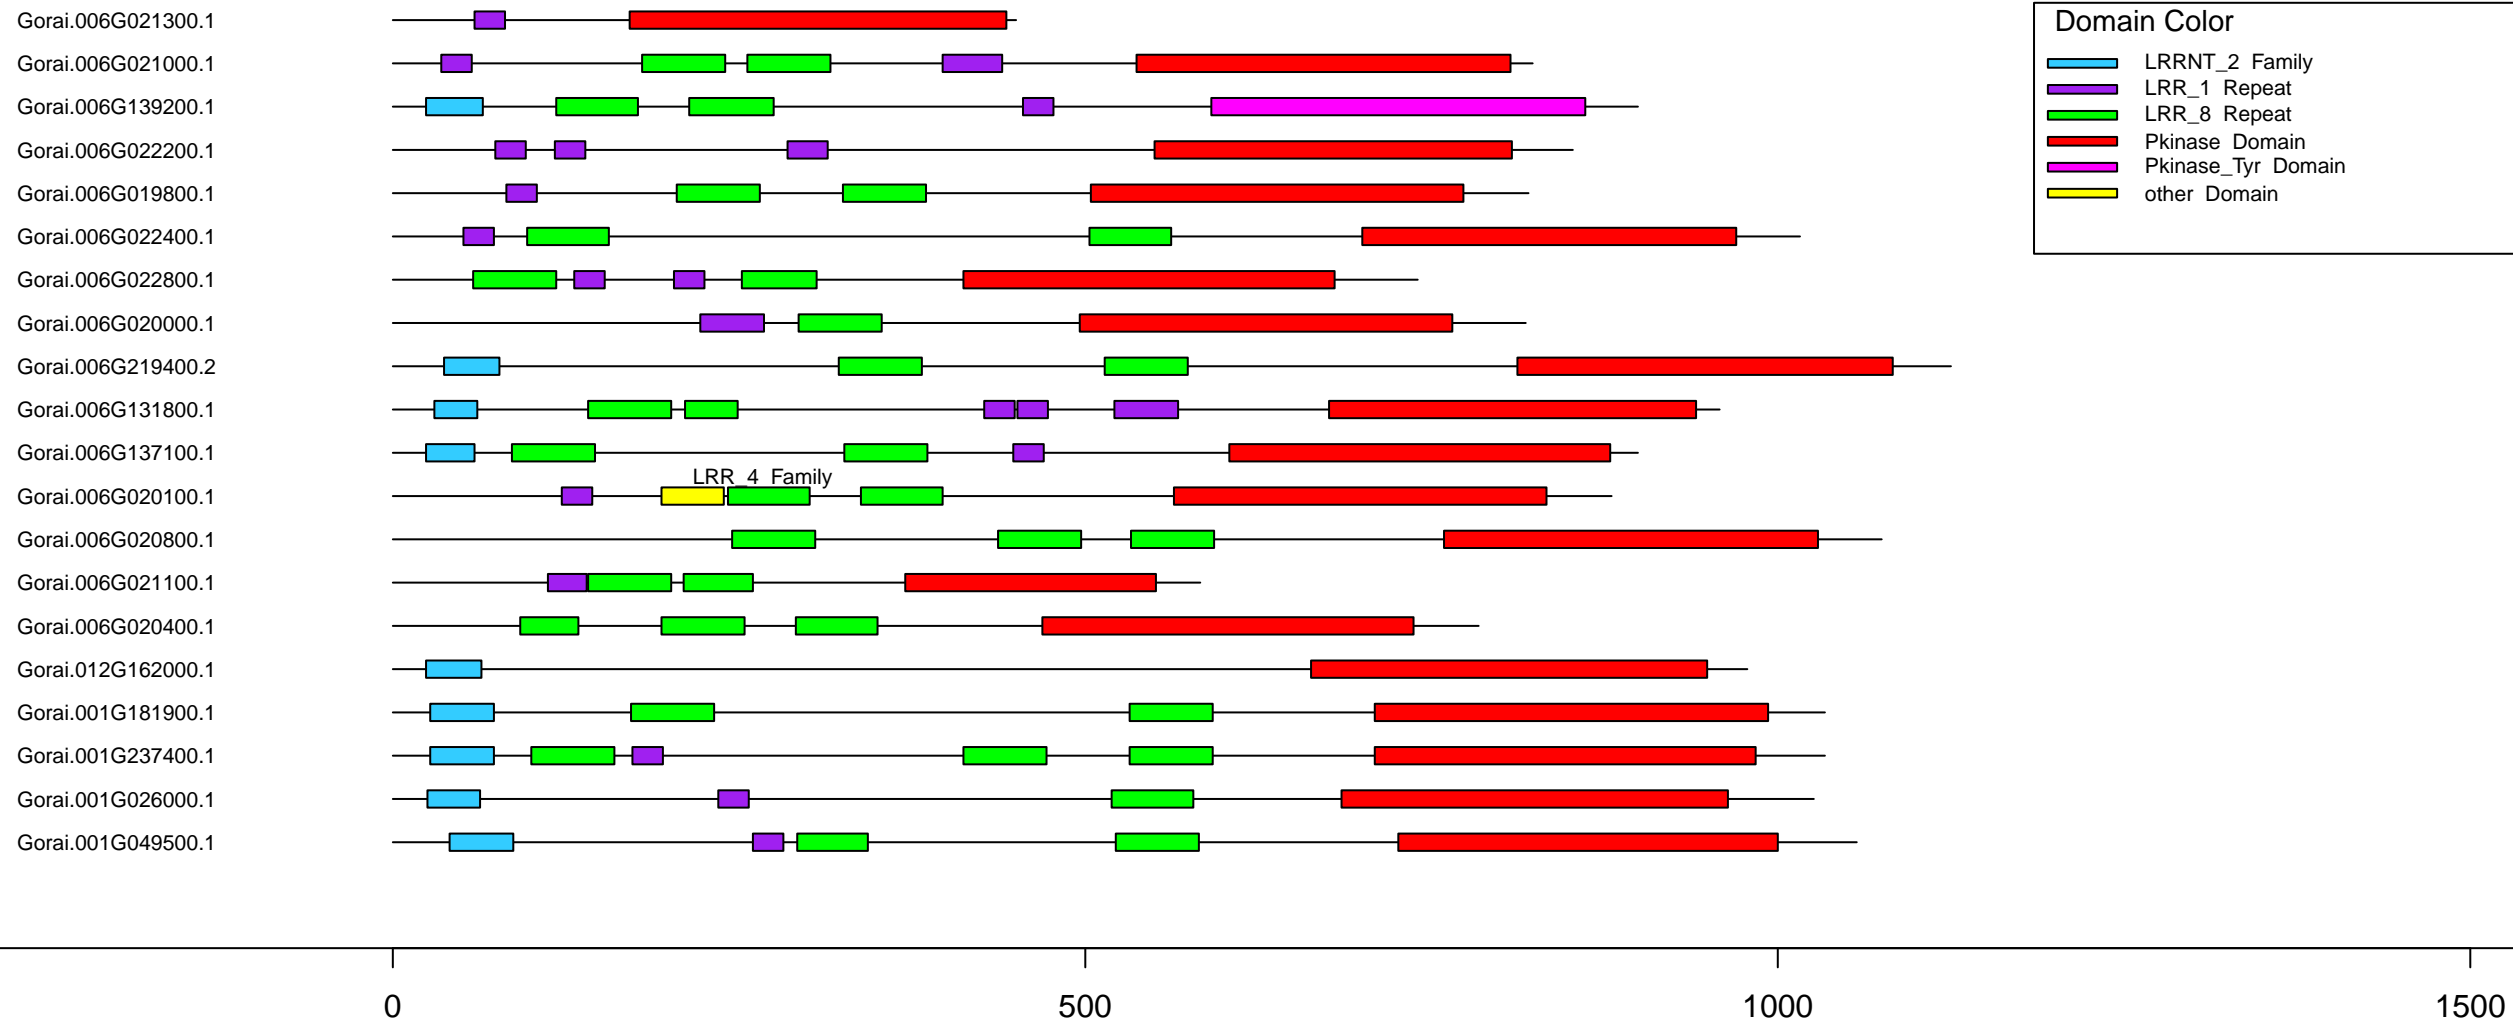

# G.ra RLK-Pelle\_LRR-XI-1 domain diagram (part 5)

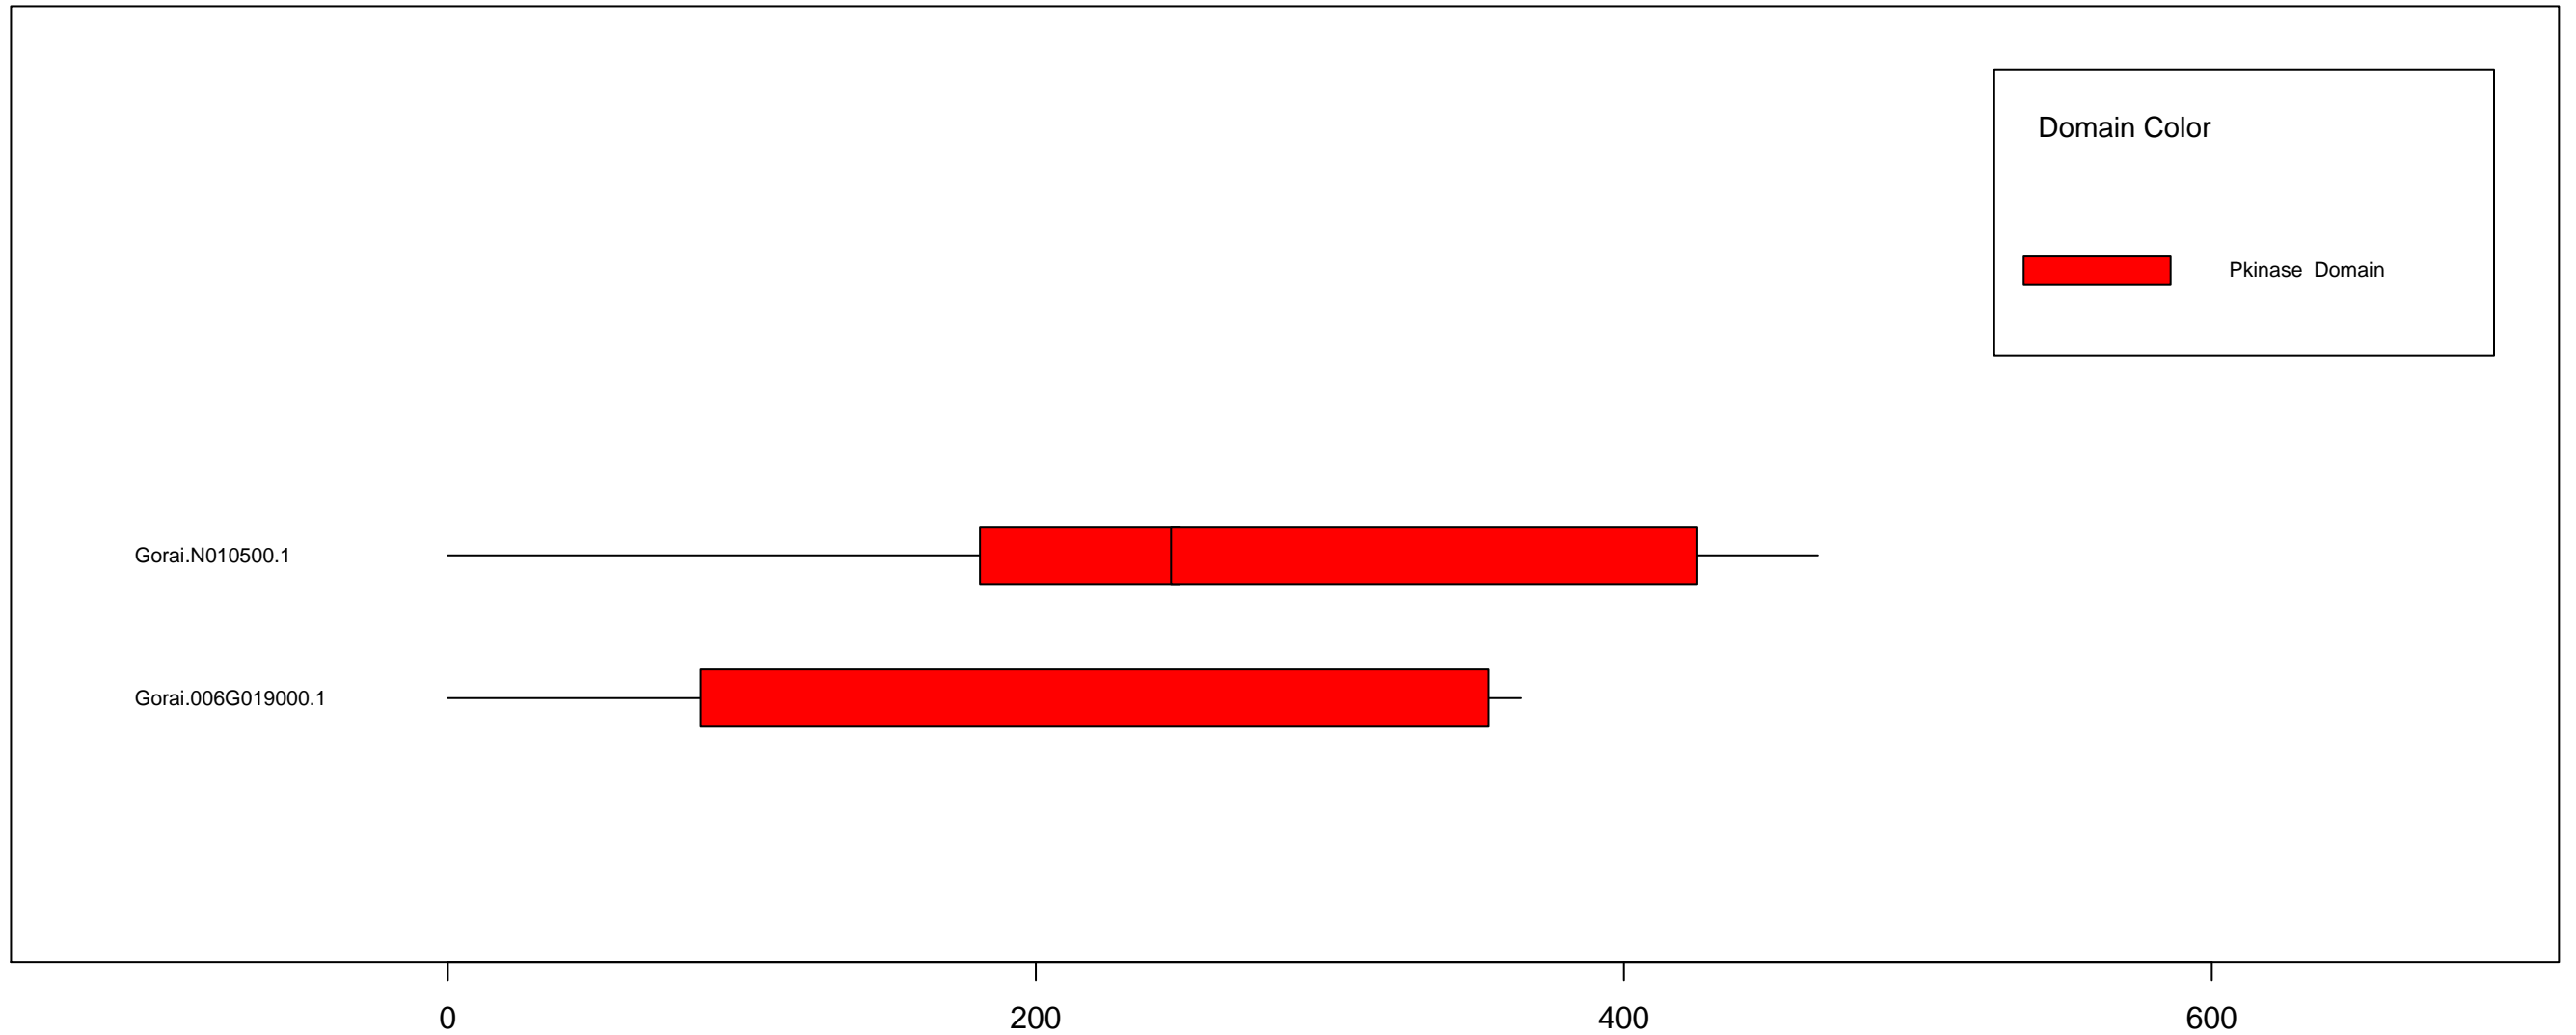

# G.ra RLK-Pelle\_LRR-XI-2 domain diagram (all)

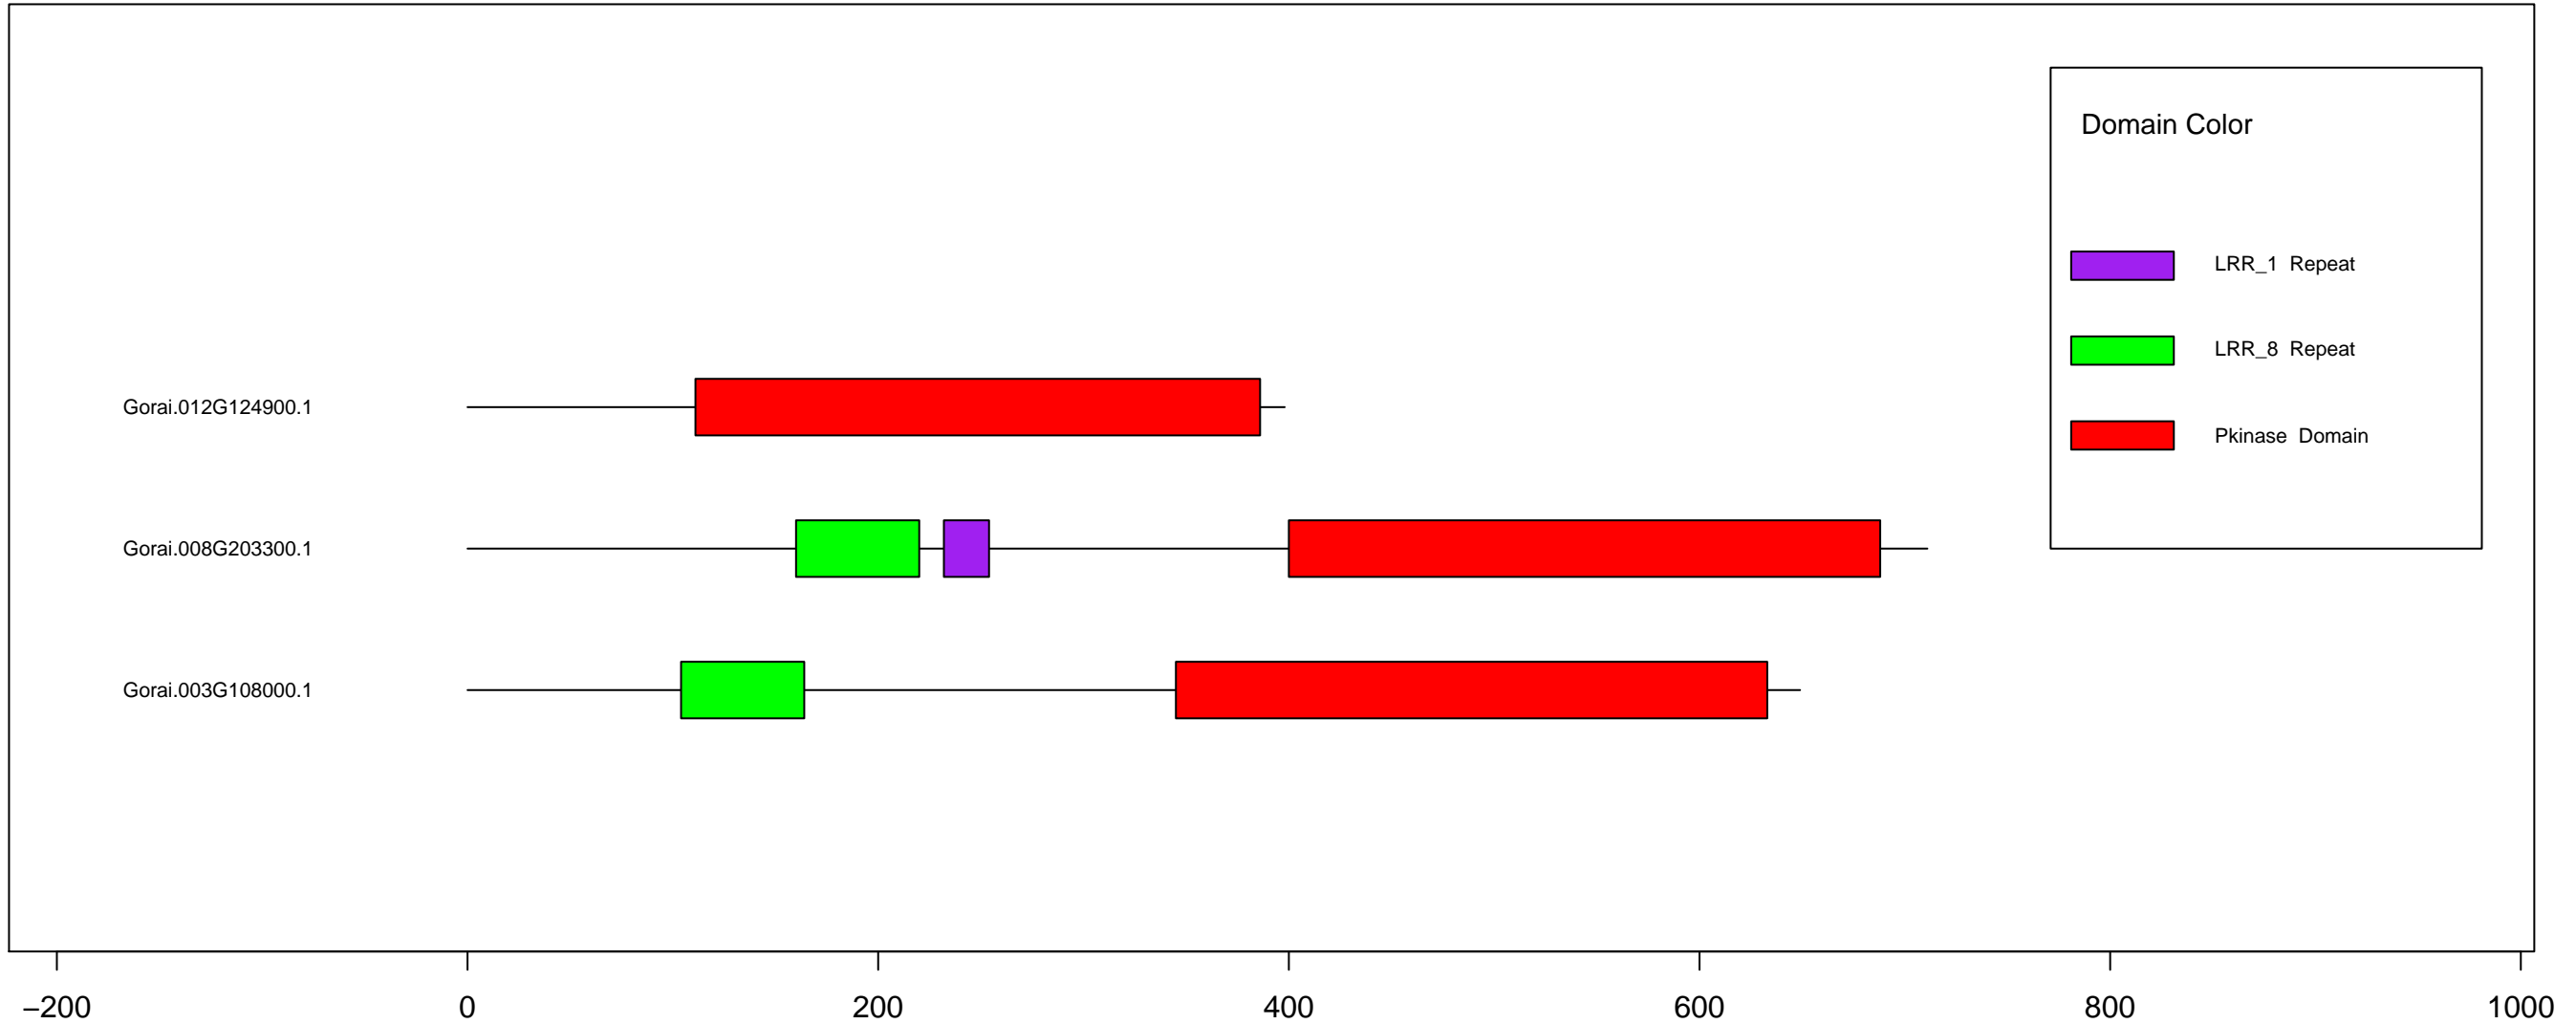

### G.ra RLK-Pelle\_LRR-XII-1 domain diagram (part 1)

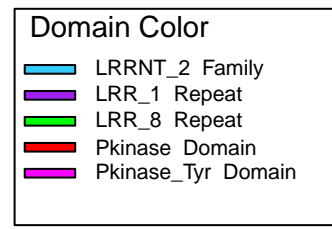

Gorai.009G371600.1  
 Gorai.009G306900.1  
 Gorai.009G365300.1  
 Gorai.009G307100.1  
 Gorai.009G366200.1  
 Gorai.009G370700.1  
 Gorai.009G365900.1  
 Gorai.009G366000.1  
 Gorai.009G436200.1  
 Gorai.009G369800.1  
 Gorai.009G365700.1  
 Gorai.009G314000.1  
 Gorai.009G371300.1  
 Gorai.009G371100.1  
 Gorai.009G340400.1  
 Gorai.009G371900.1  
 Gorai.010G165300.1  
 Gorai.N018700.1  
 Gorai.N016200.1  
 Gorai.010G136200.1

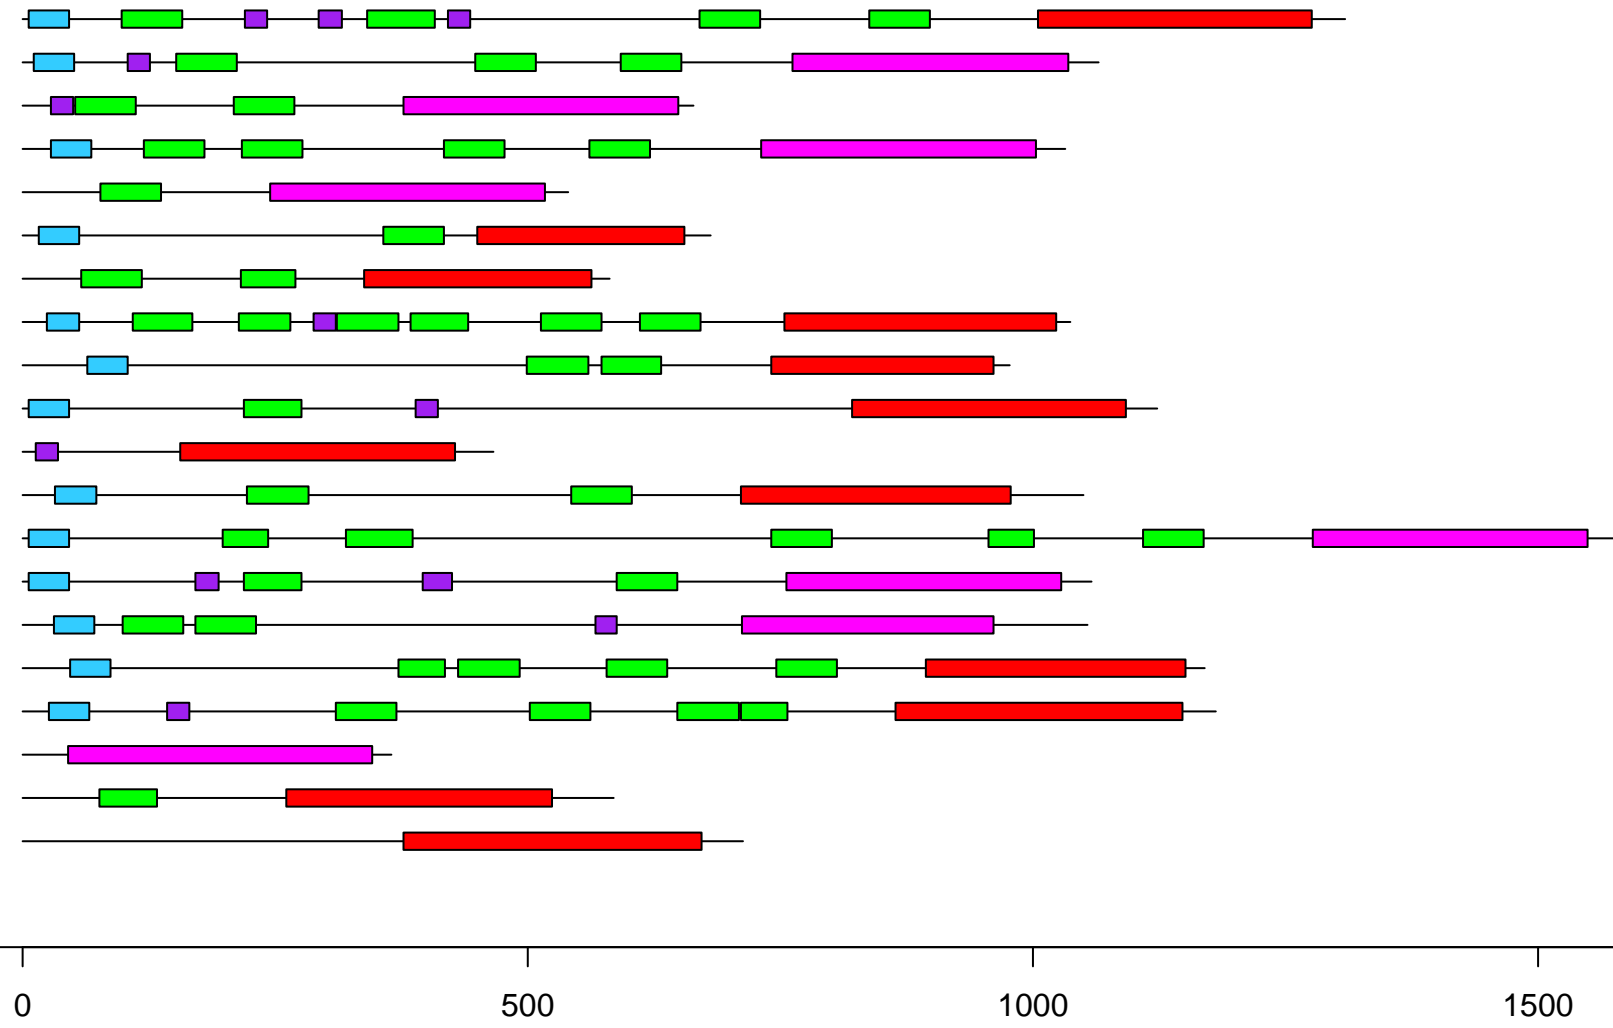

### G.ra RLK-Pelle\_LRR-XII-1 domain diagram (part 2)

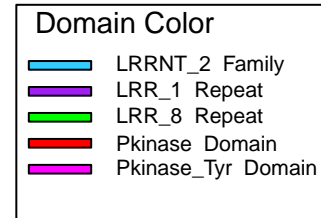

Gorai.002G260200.1  
 Gorai.002G051700.1  
 Gorai.002G051900.1  
 Gorai.002G051100.1  
 Gorai.002G064300.1  
 Gorai.002G051800.1  
 Gorai.002G049400.1  
 Gorai.002G131000.1  
 Gorai.002G133000.1  
 Gorai.002G051300.1  
 Gorai.N016600.1  
 Gorai.007G181000.1  
 Gorai.007G045900.1  
 Gorai.004G027800.1  
 Gorai.009G370300.1  
 Gorai.009G436300.1  
 Gorai.009G435400.1  
 Gorai.009G308400.1  
 Gorai.009G370900.1  
 Gorai.009G370000.1

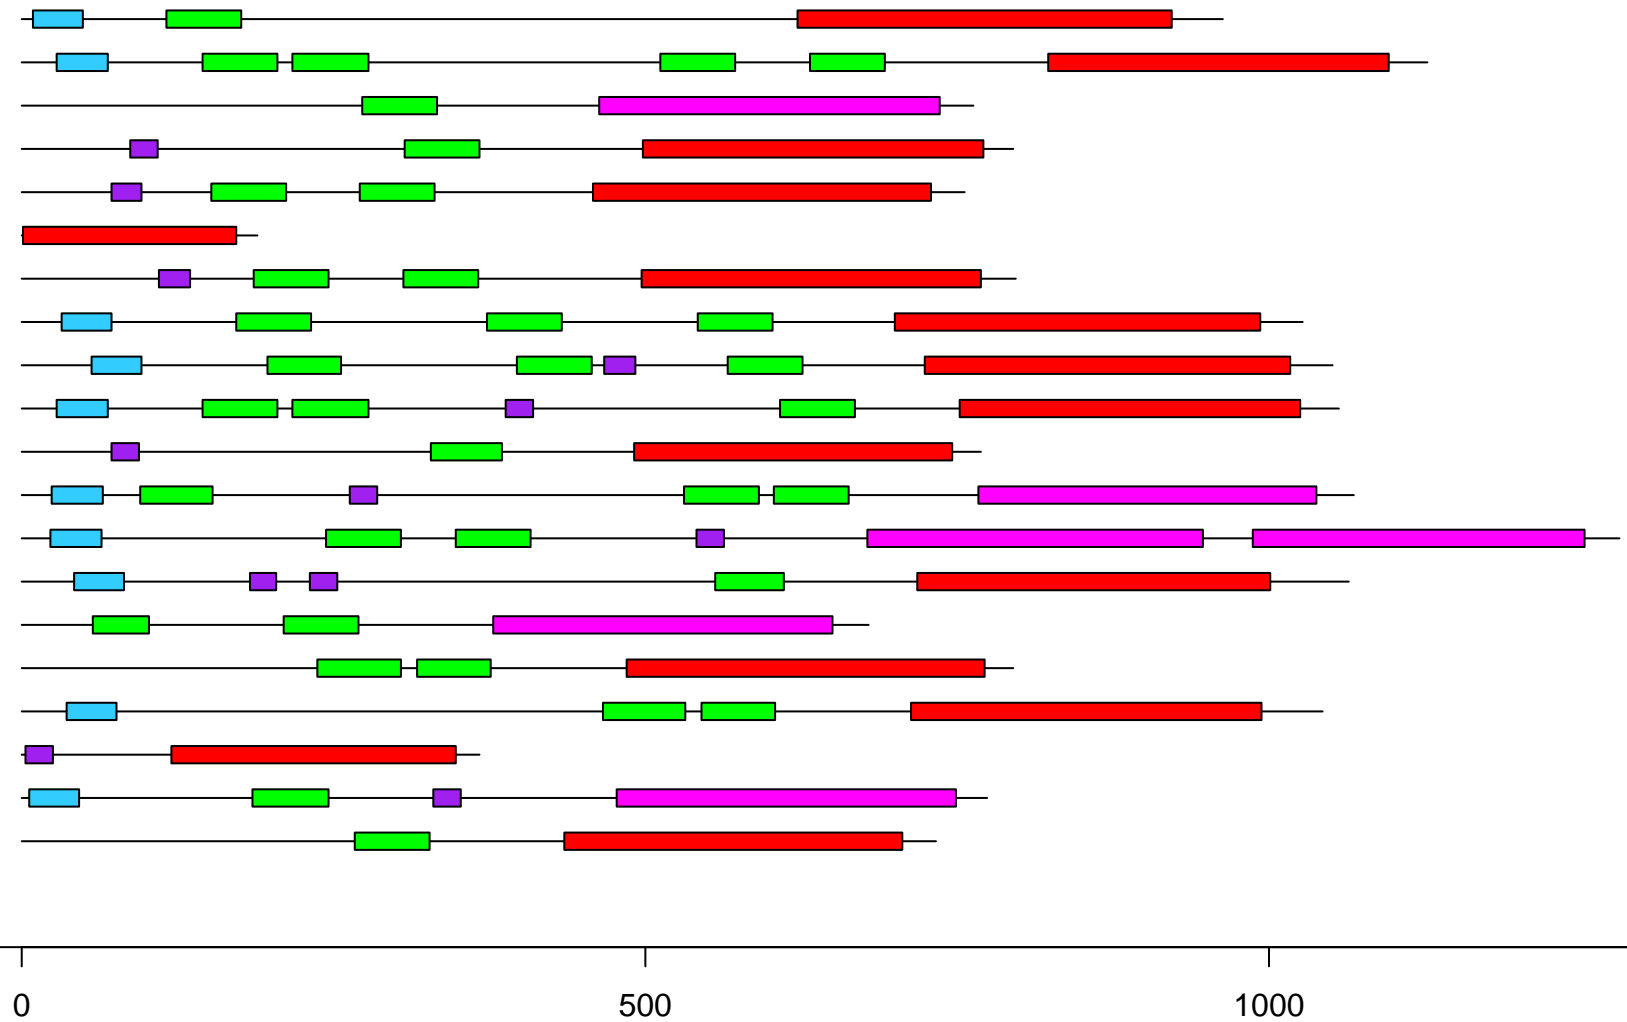

### G.ra RLK-Pelle\_LRR-XII-1 domain diagram (part 3)

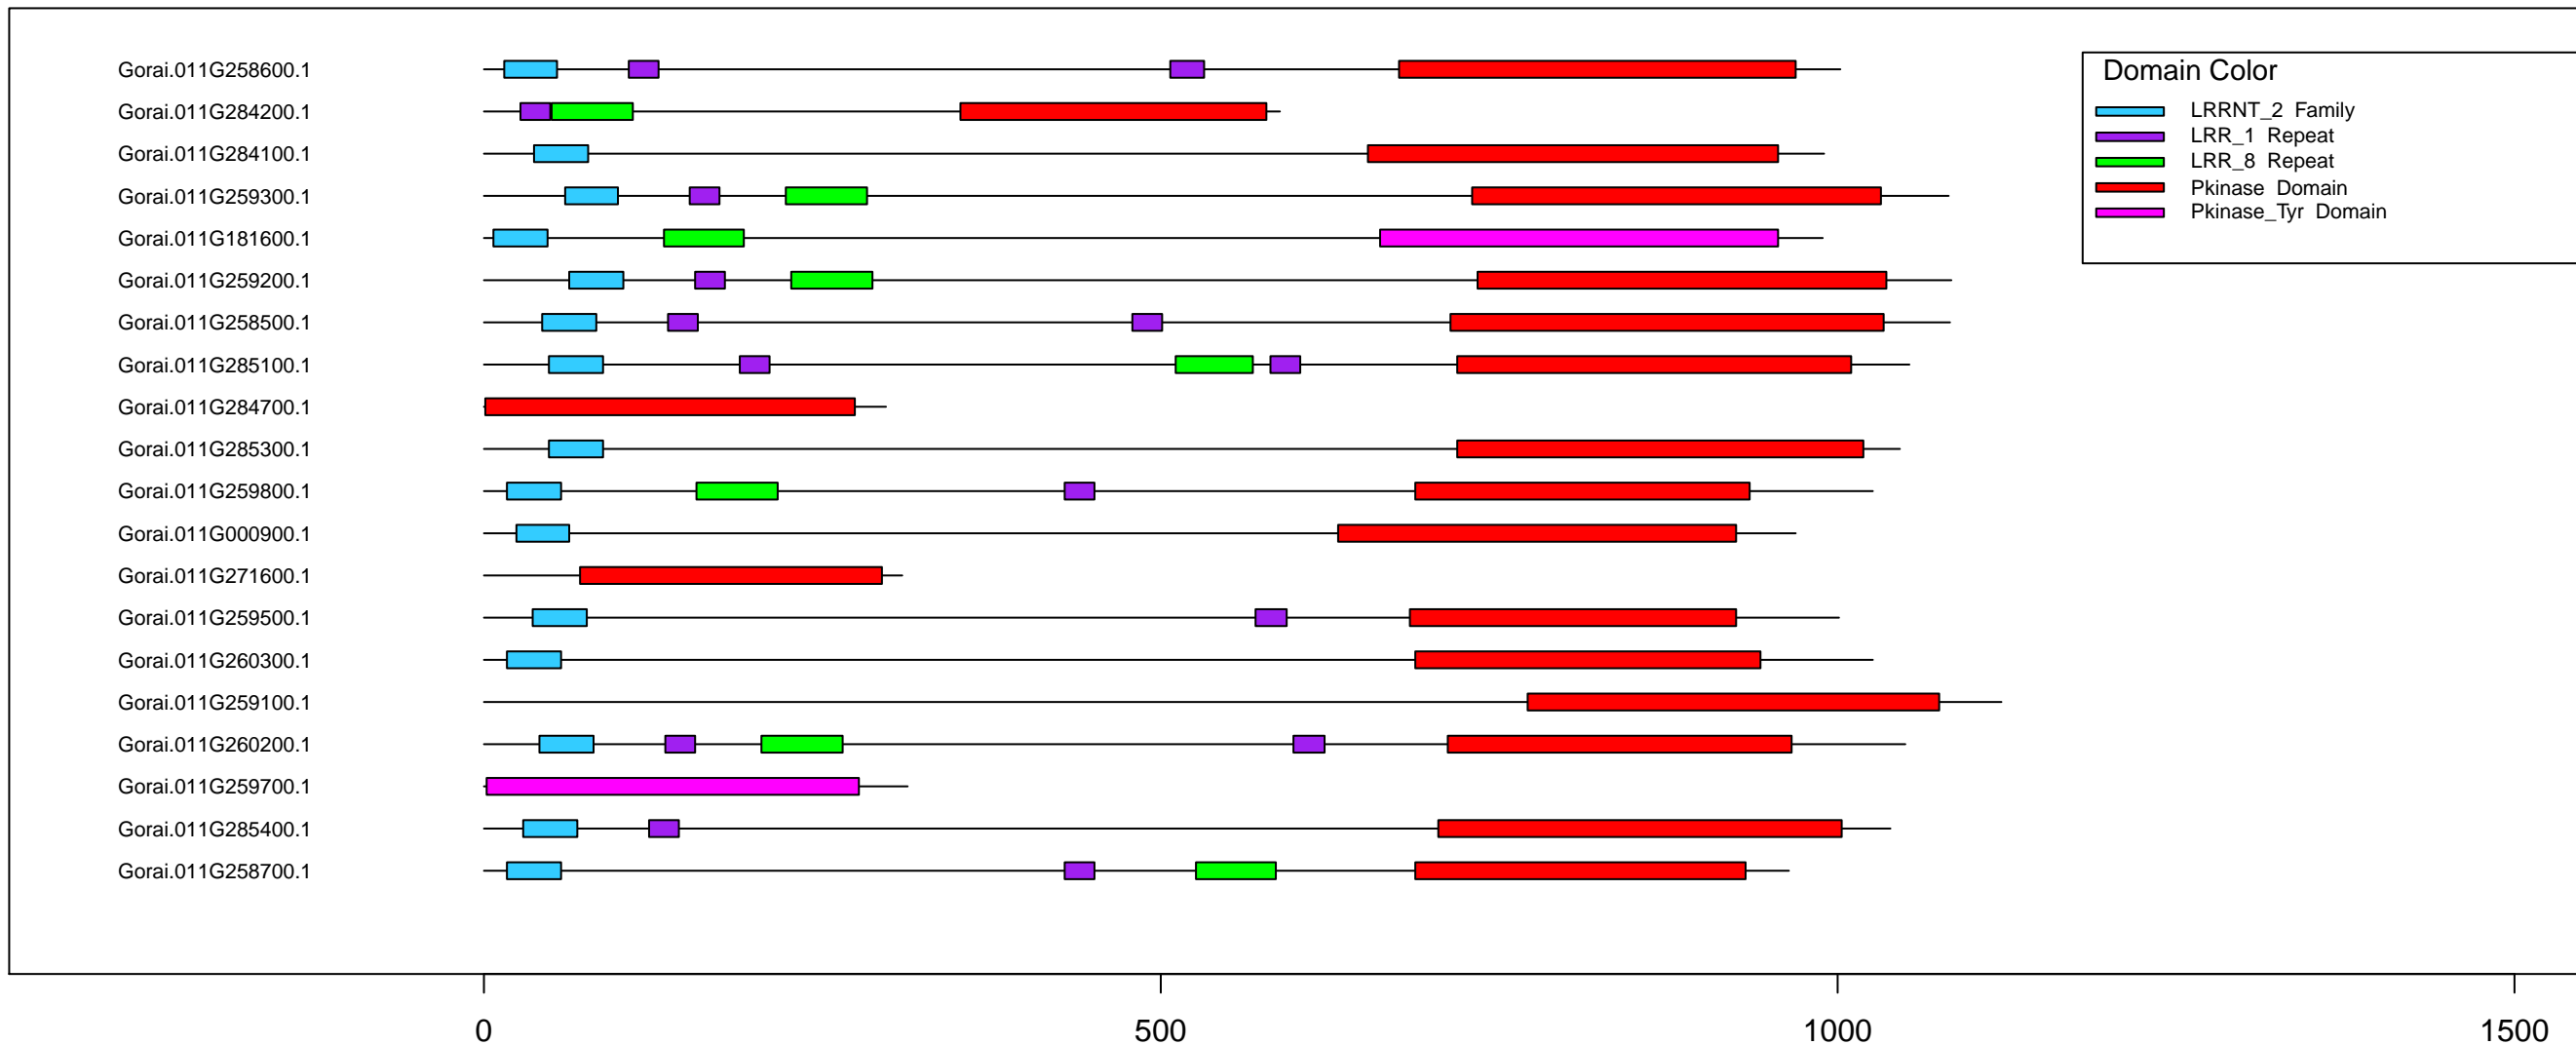

### G.ra RLK-Pelle\_LRR-XII-1 domain diagram (part 4)

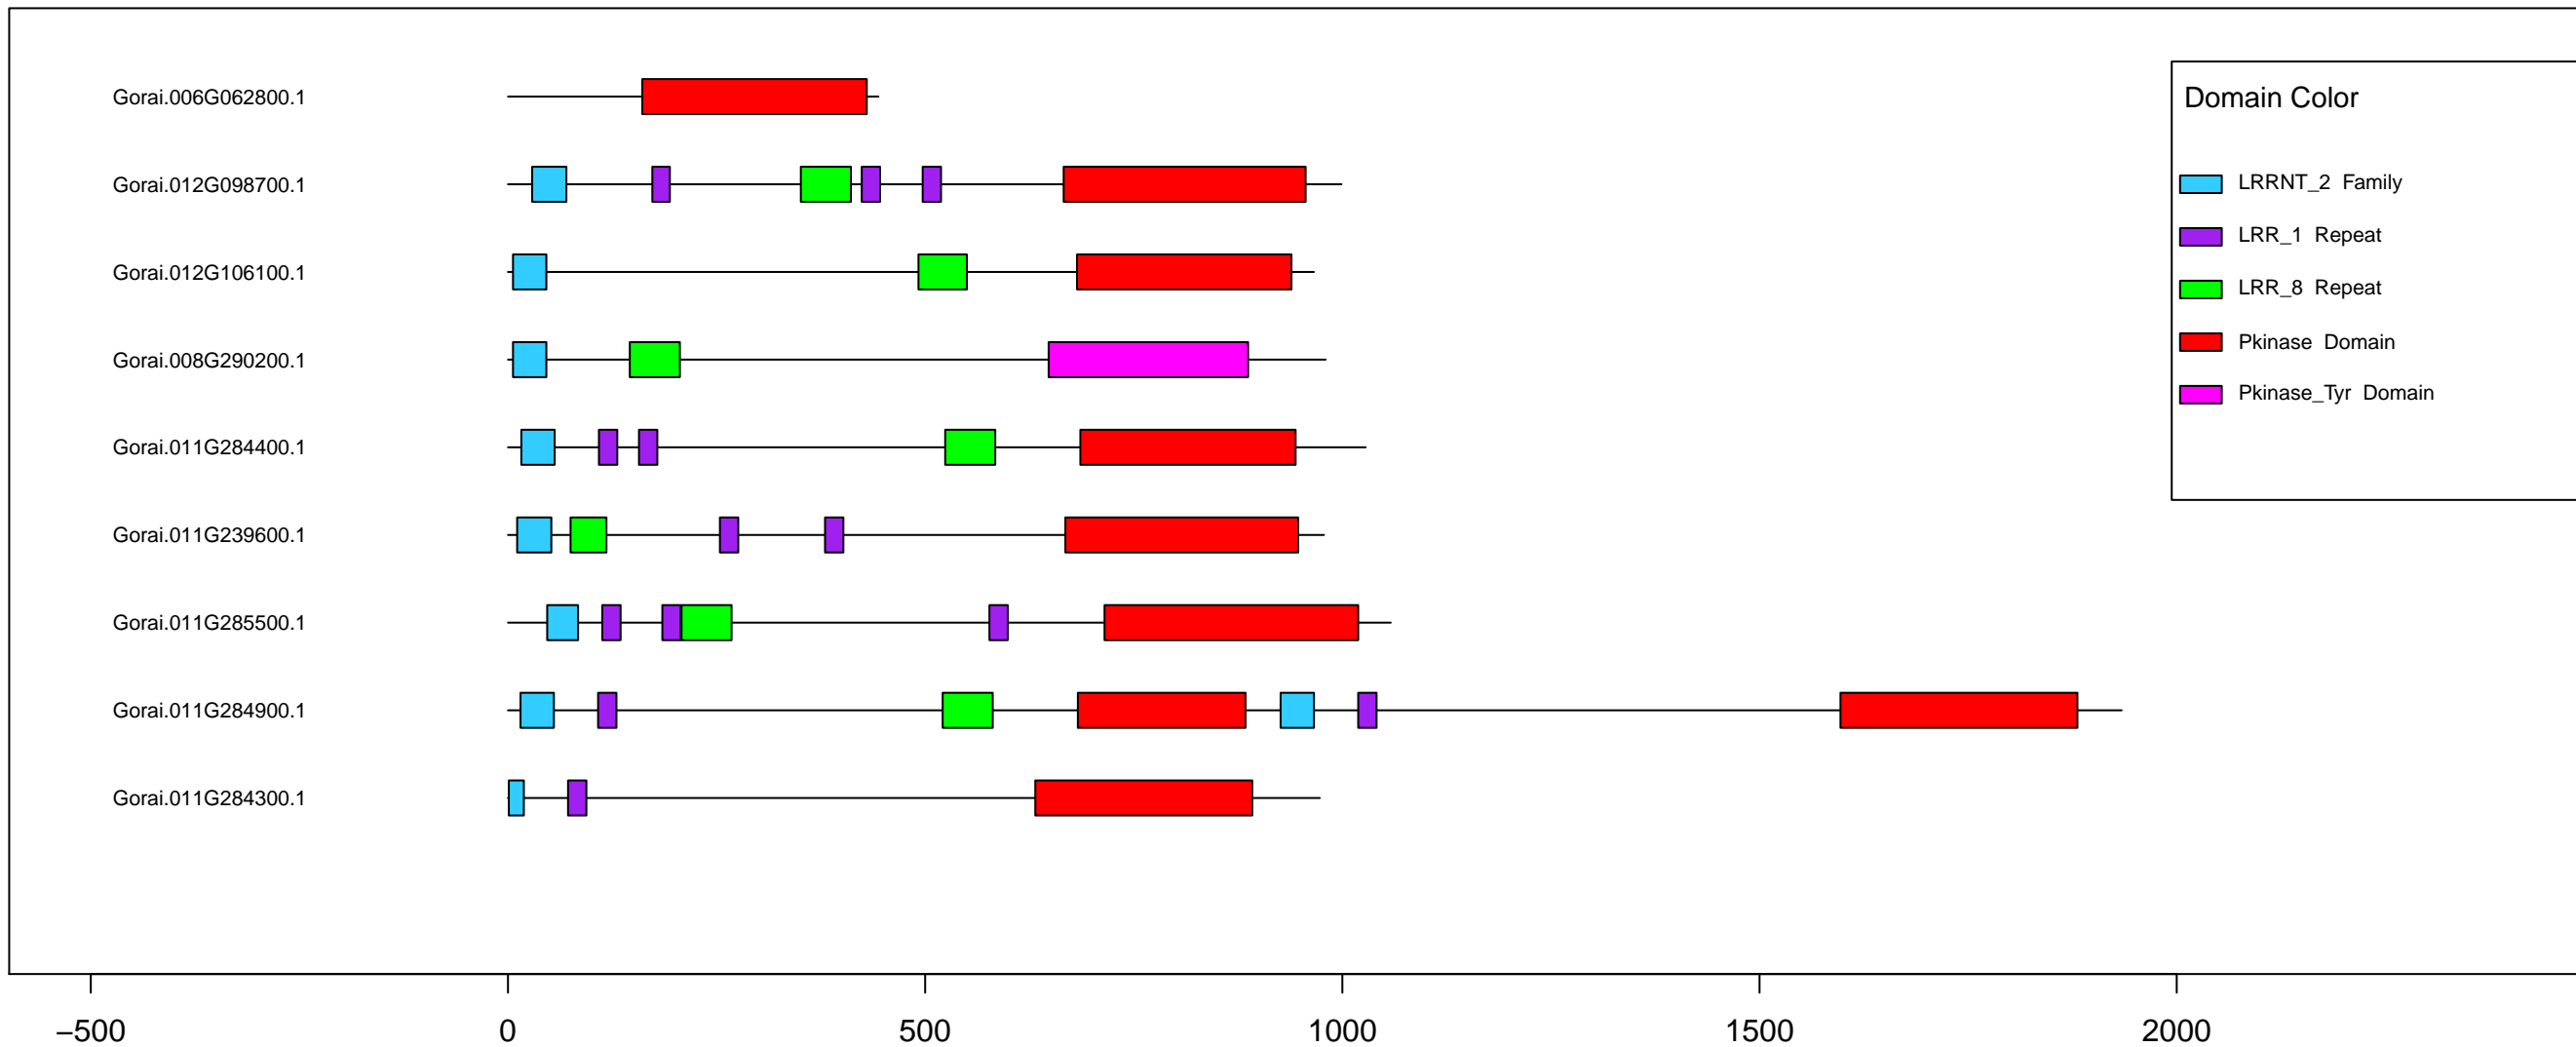

# G.ra RLK-Pelle\_LRR-Xlla domain diagram (all)

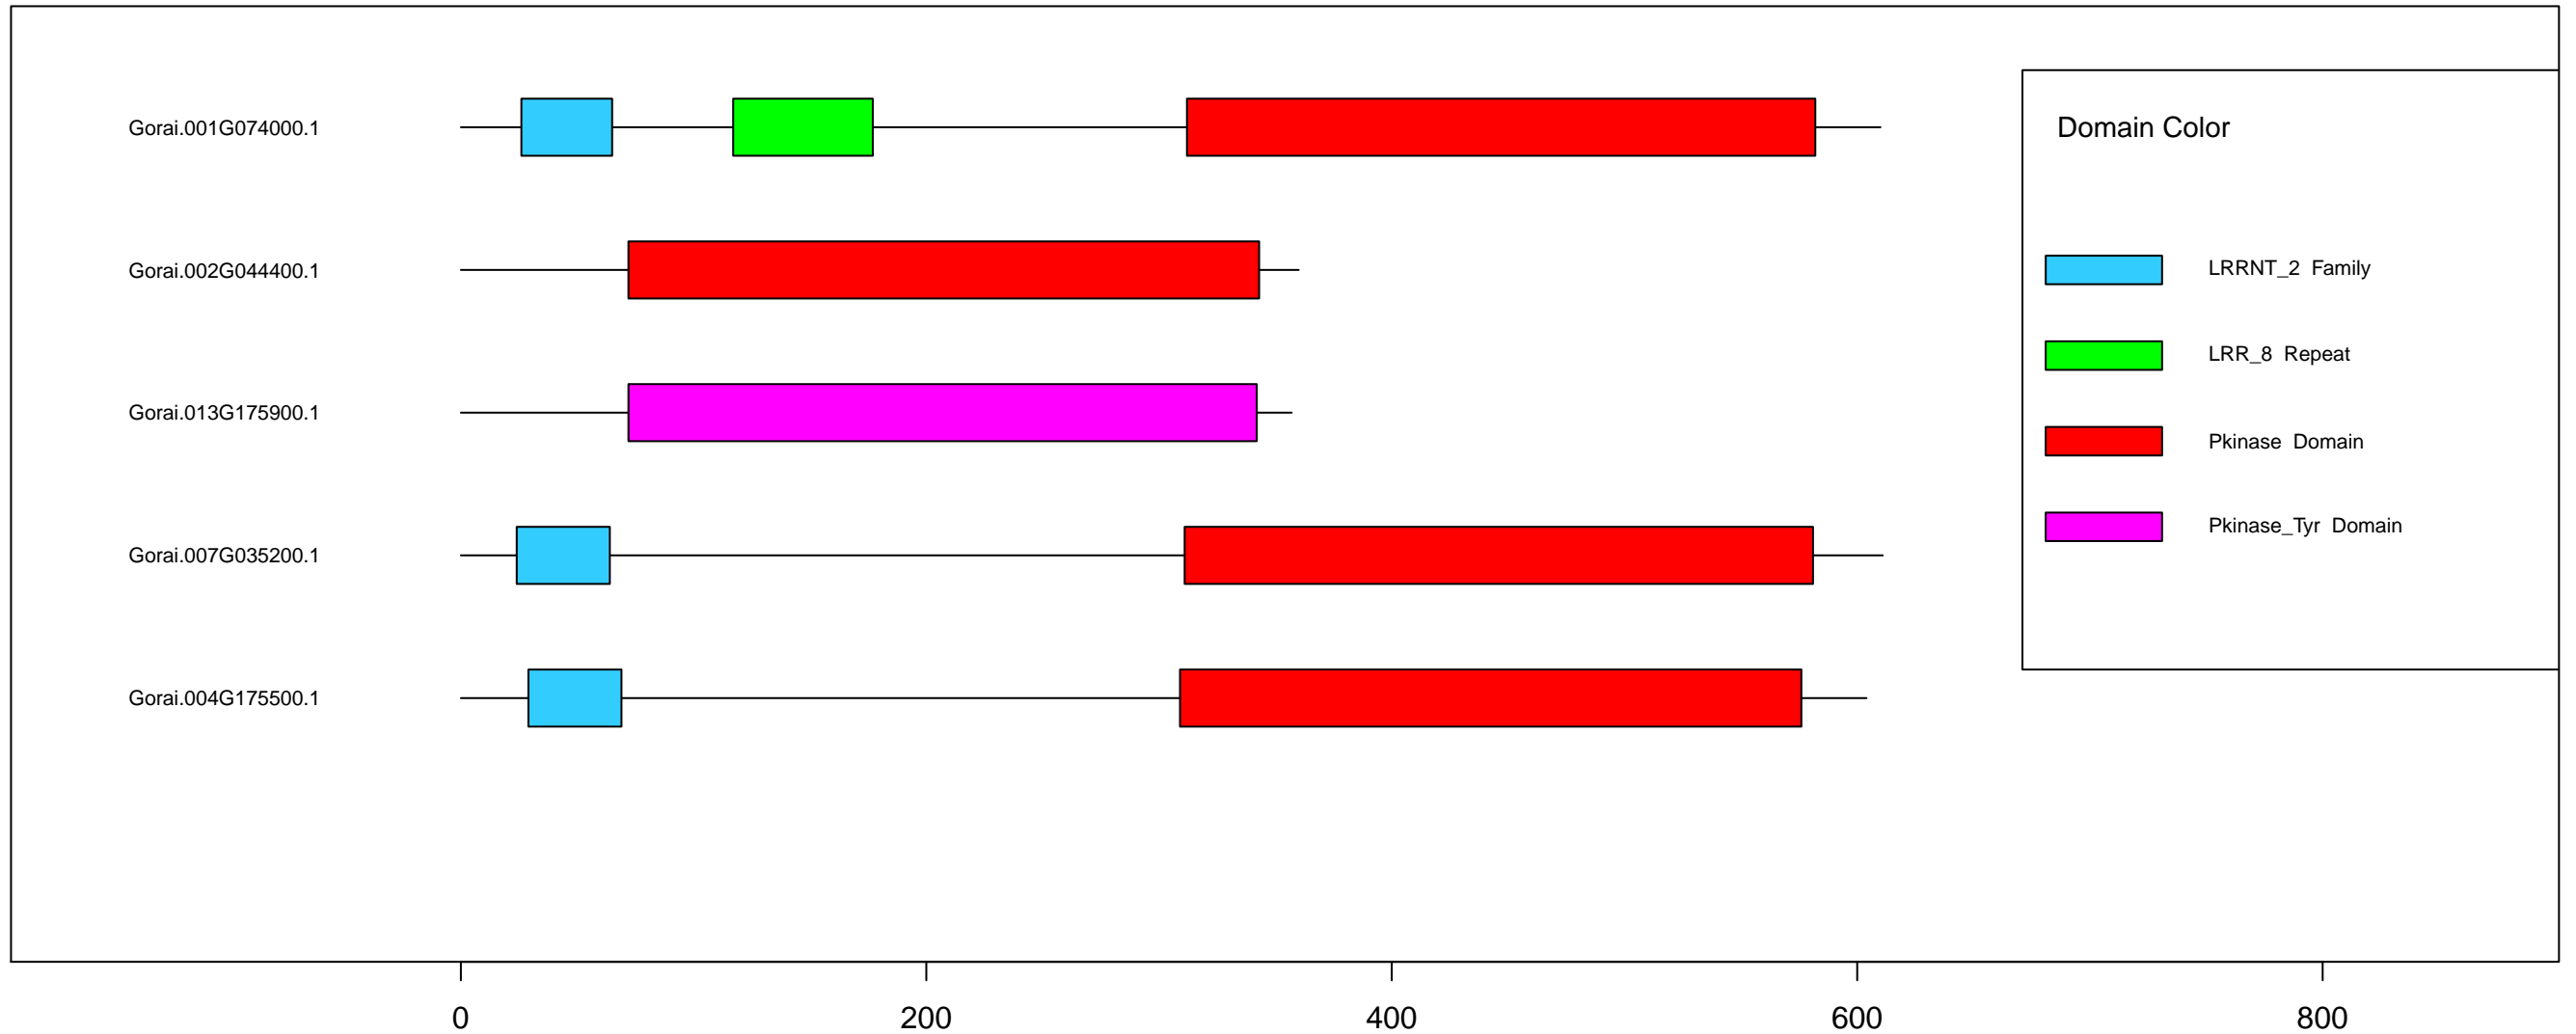



# G.ra RLK-Pelle\_LRR-XIIIb domain diagram (all)

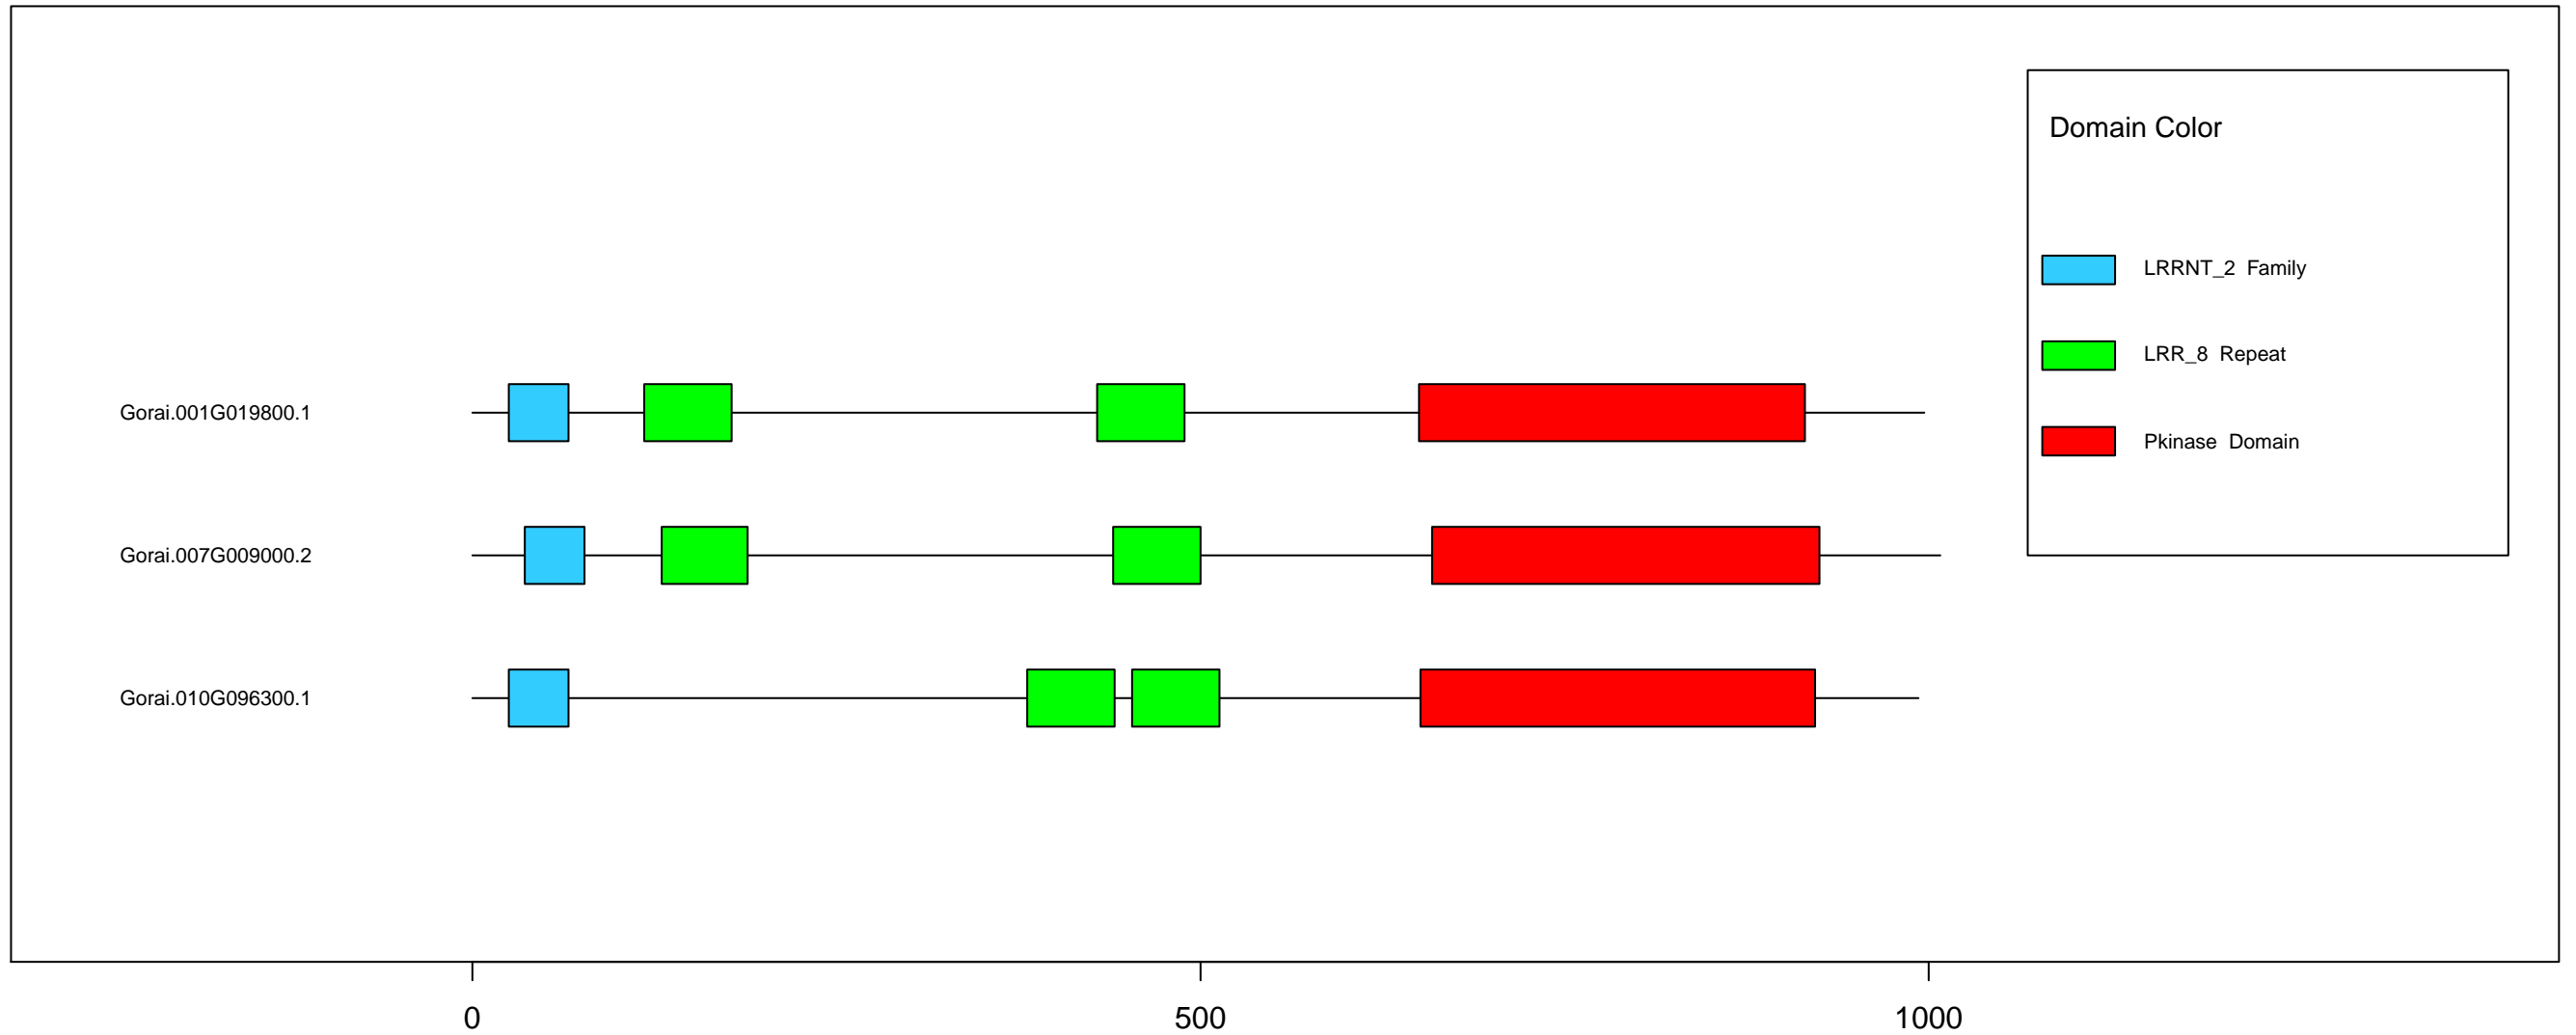

G.ra RLK-Pelle\_LRR-XIV domain diagram (all)

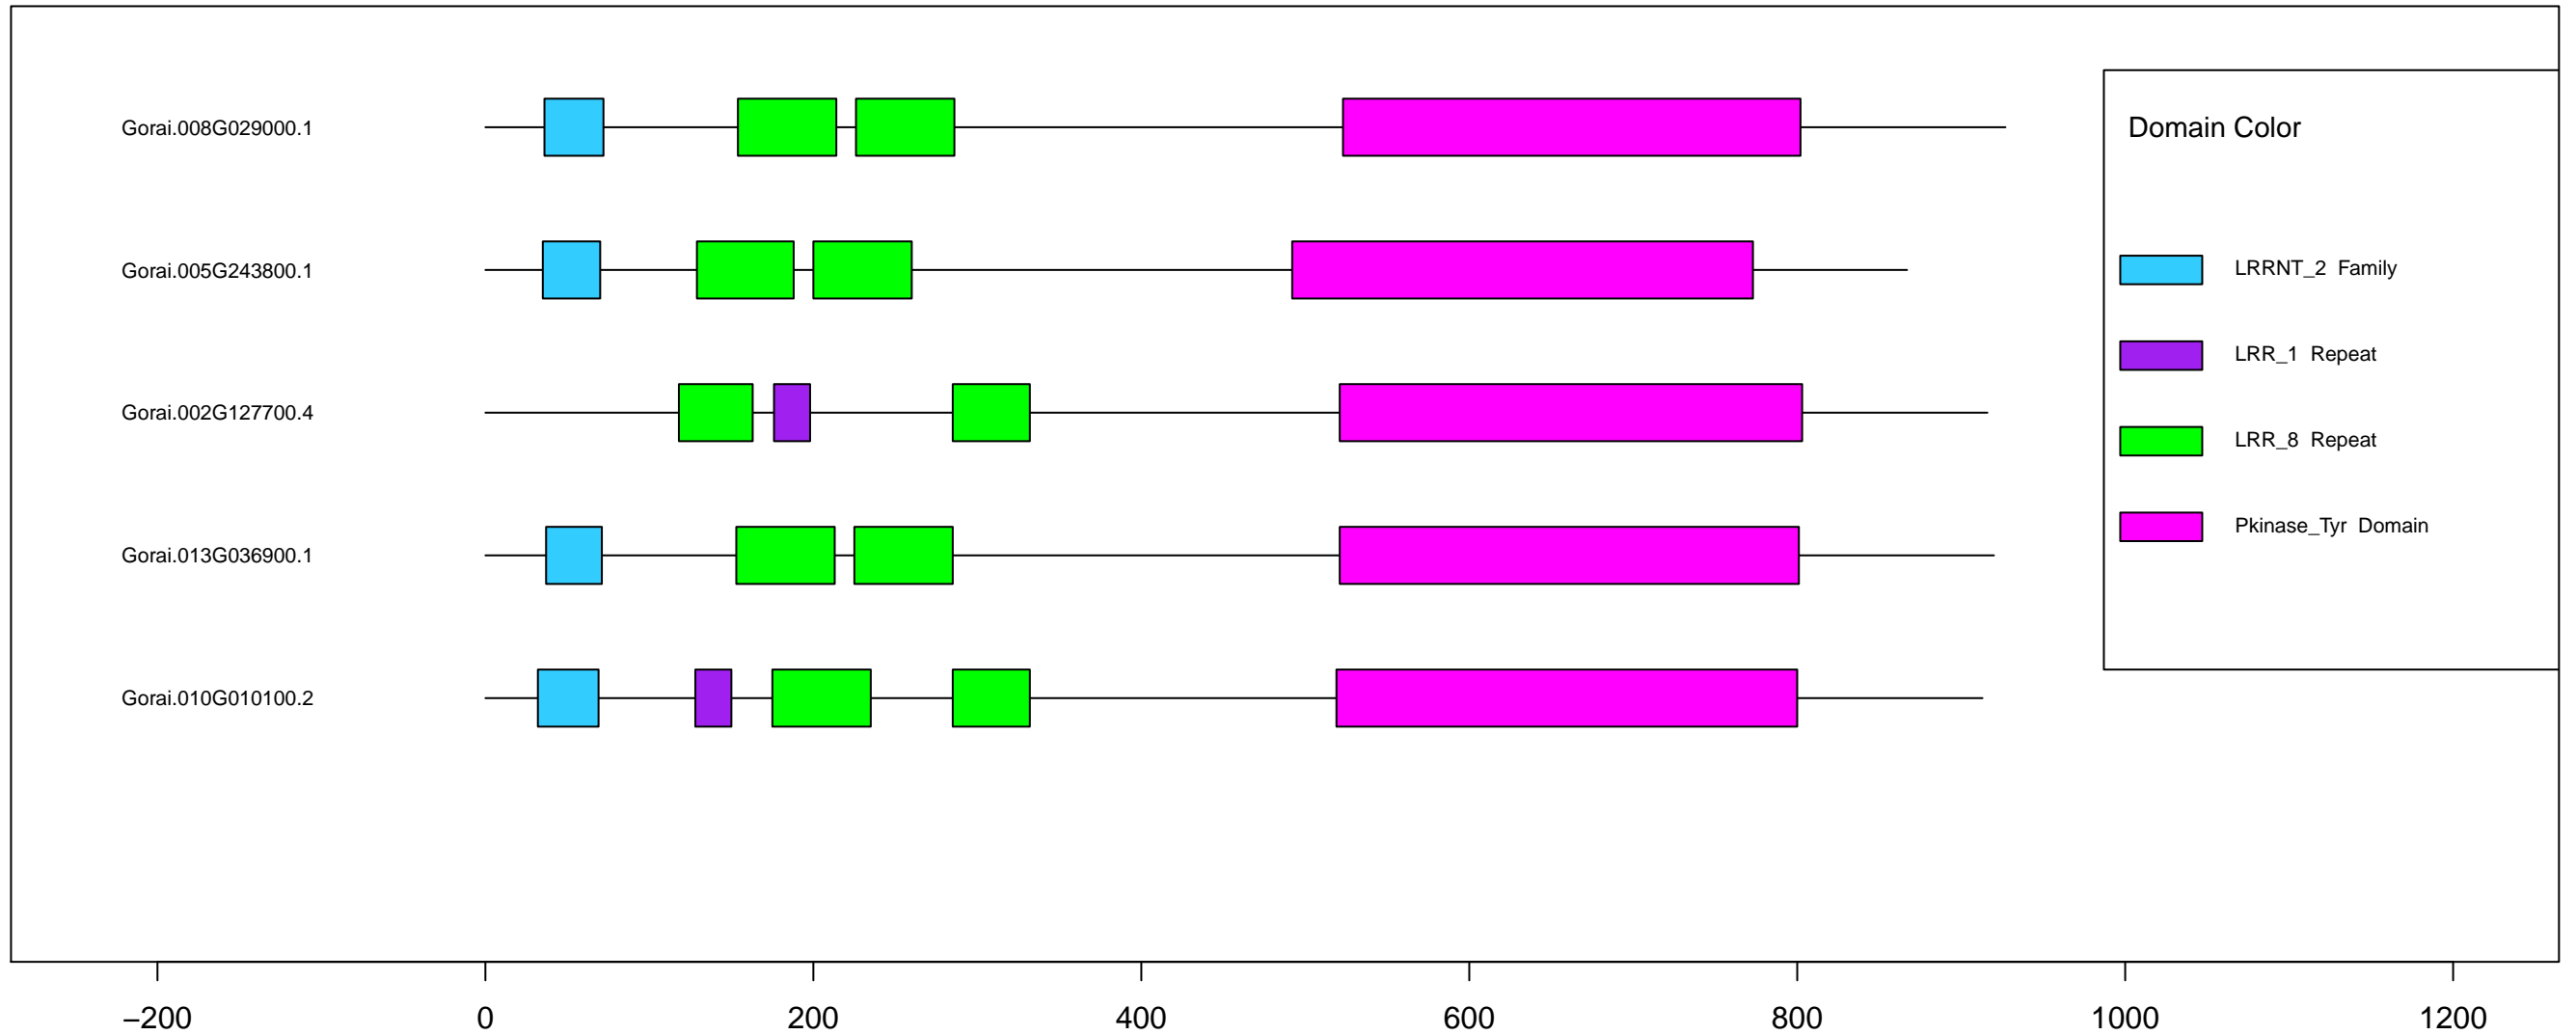

### G.ra RLK-Pelle\_LRR-XV domain diagram (all)

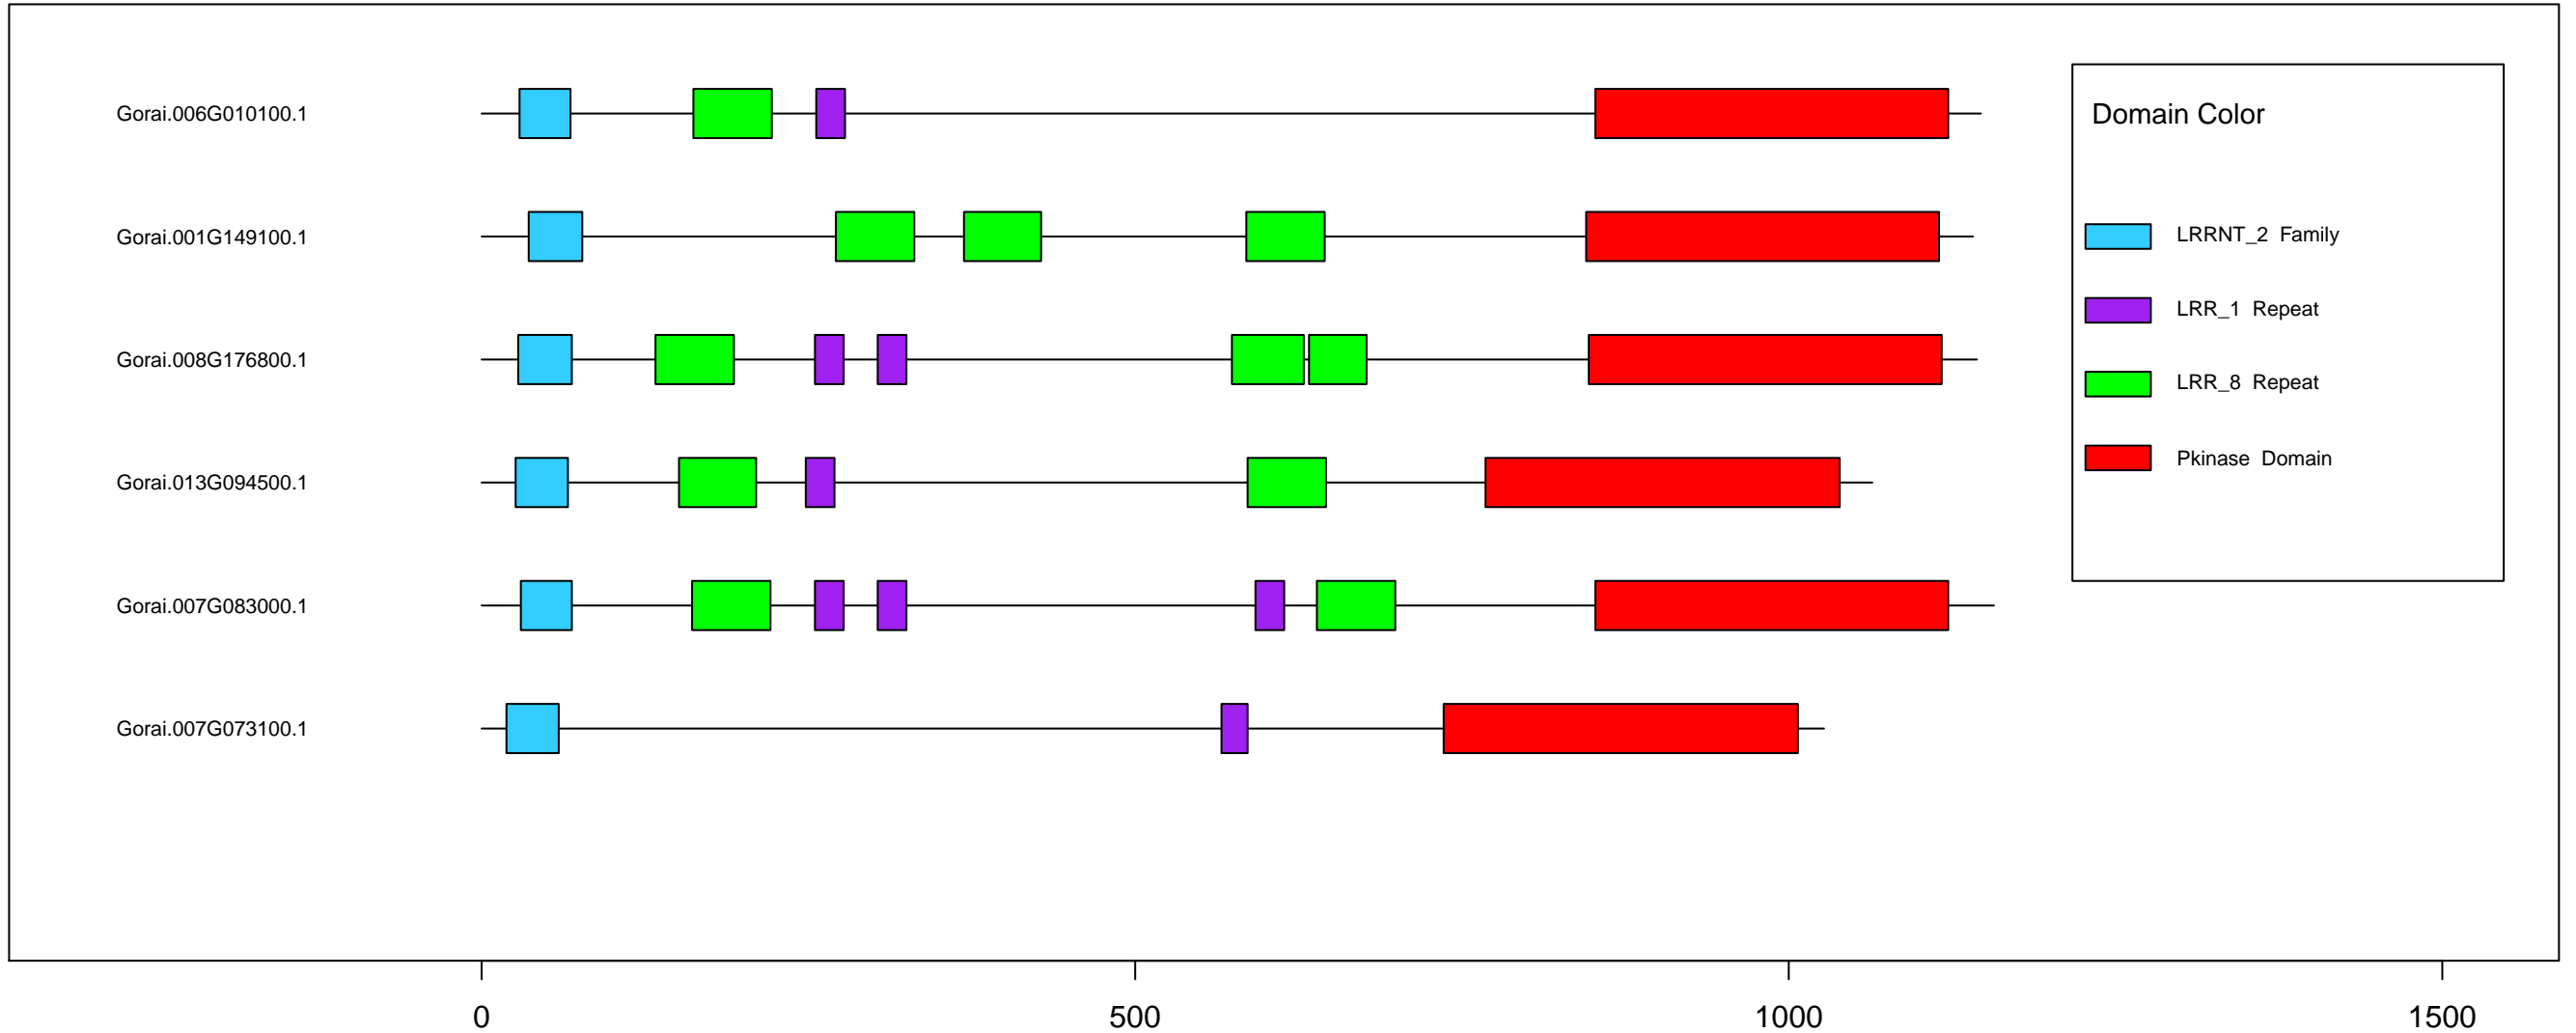

### G.ra RLK-Pelle\_LysM domain diagram (all)

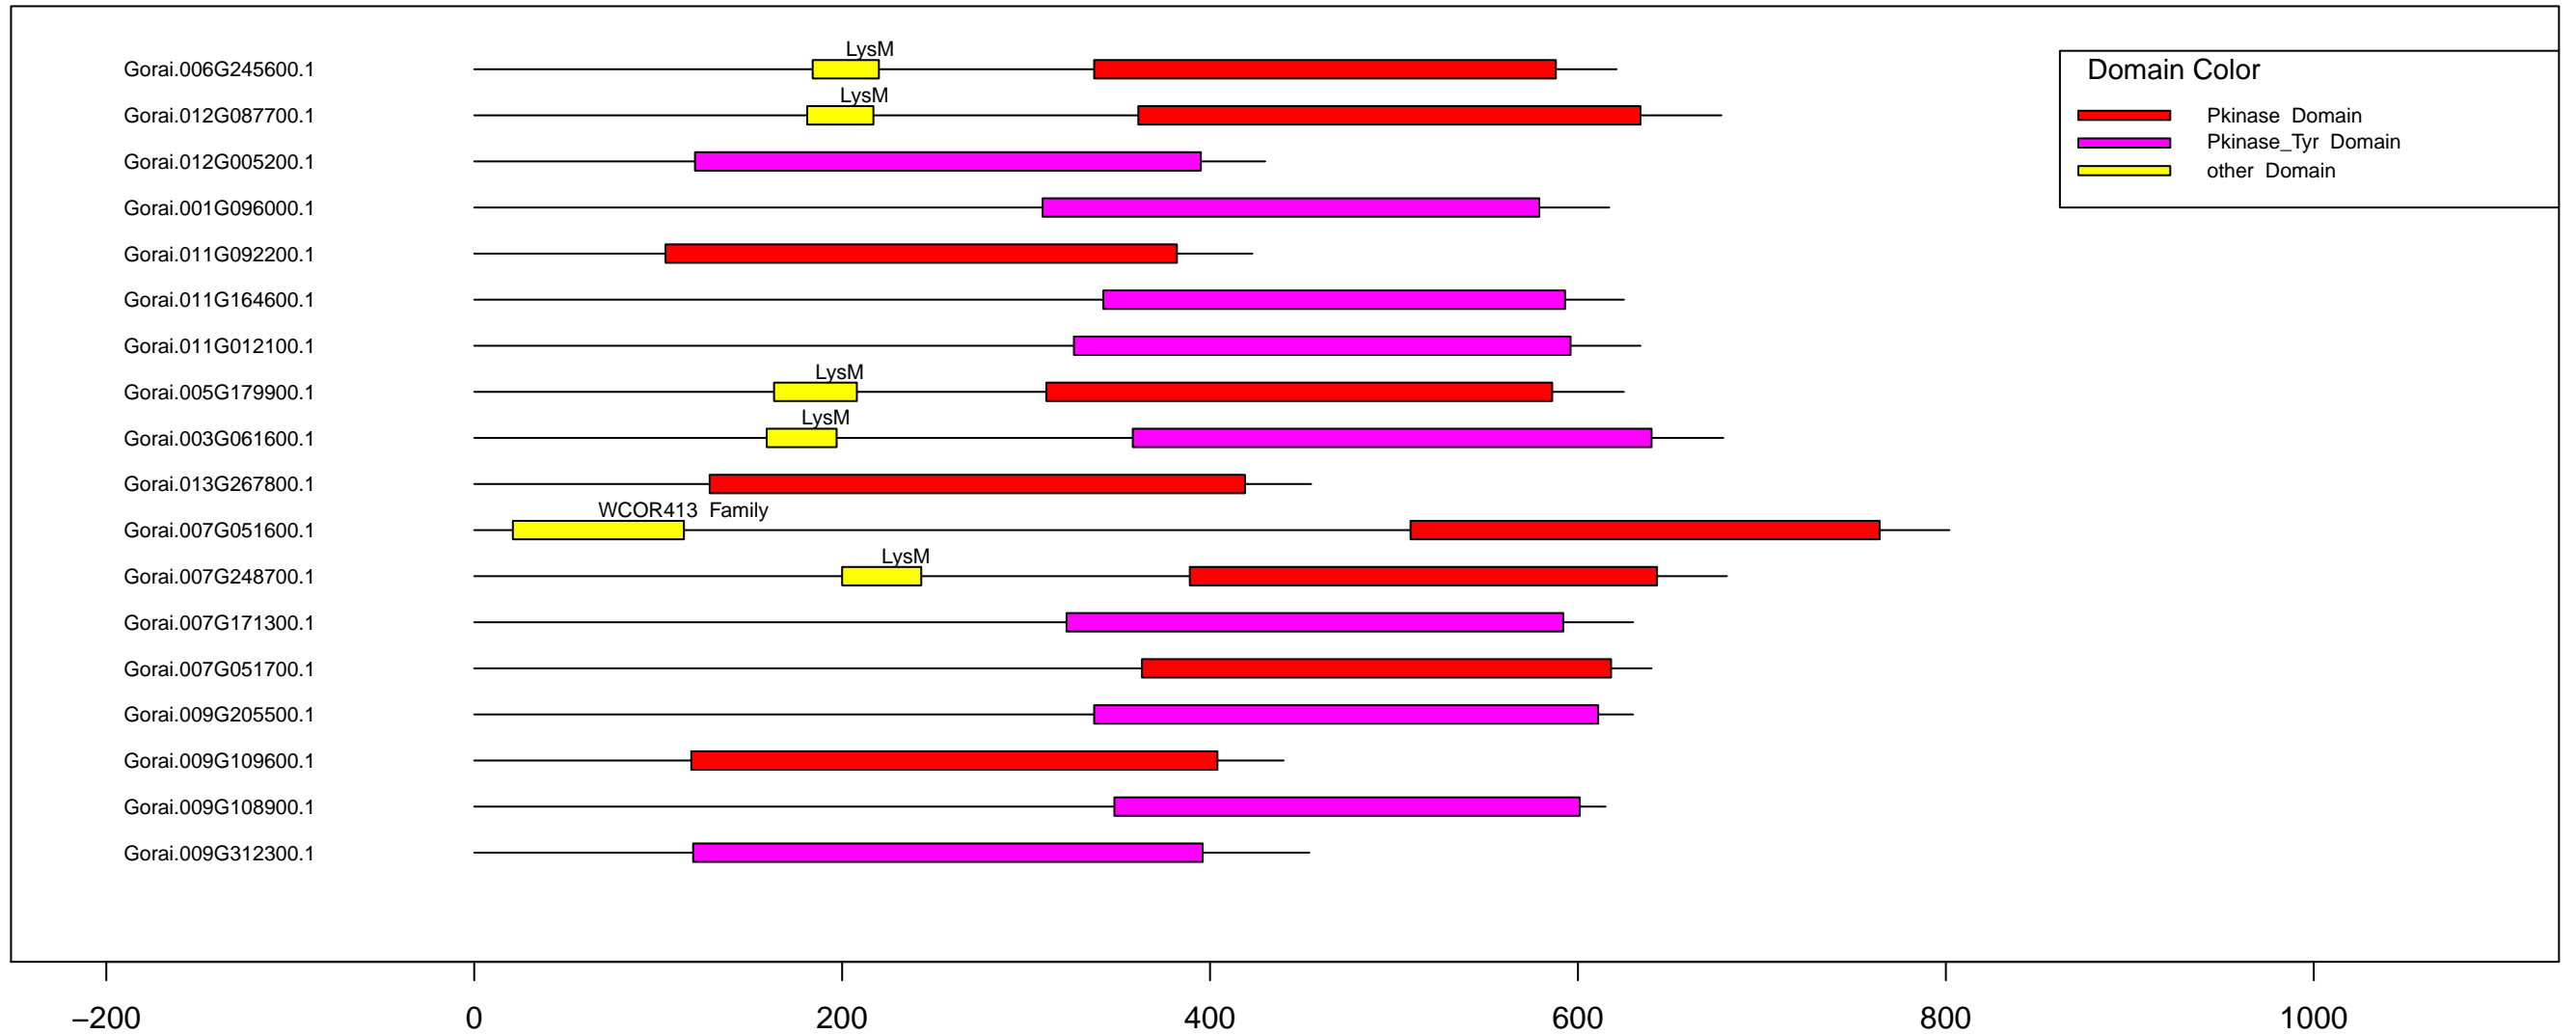

# G.ra RLK-Pelle\_PERK-1 domain diagram (all)

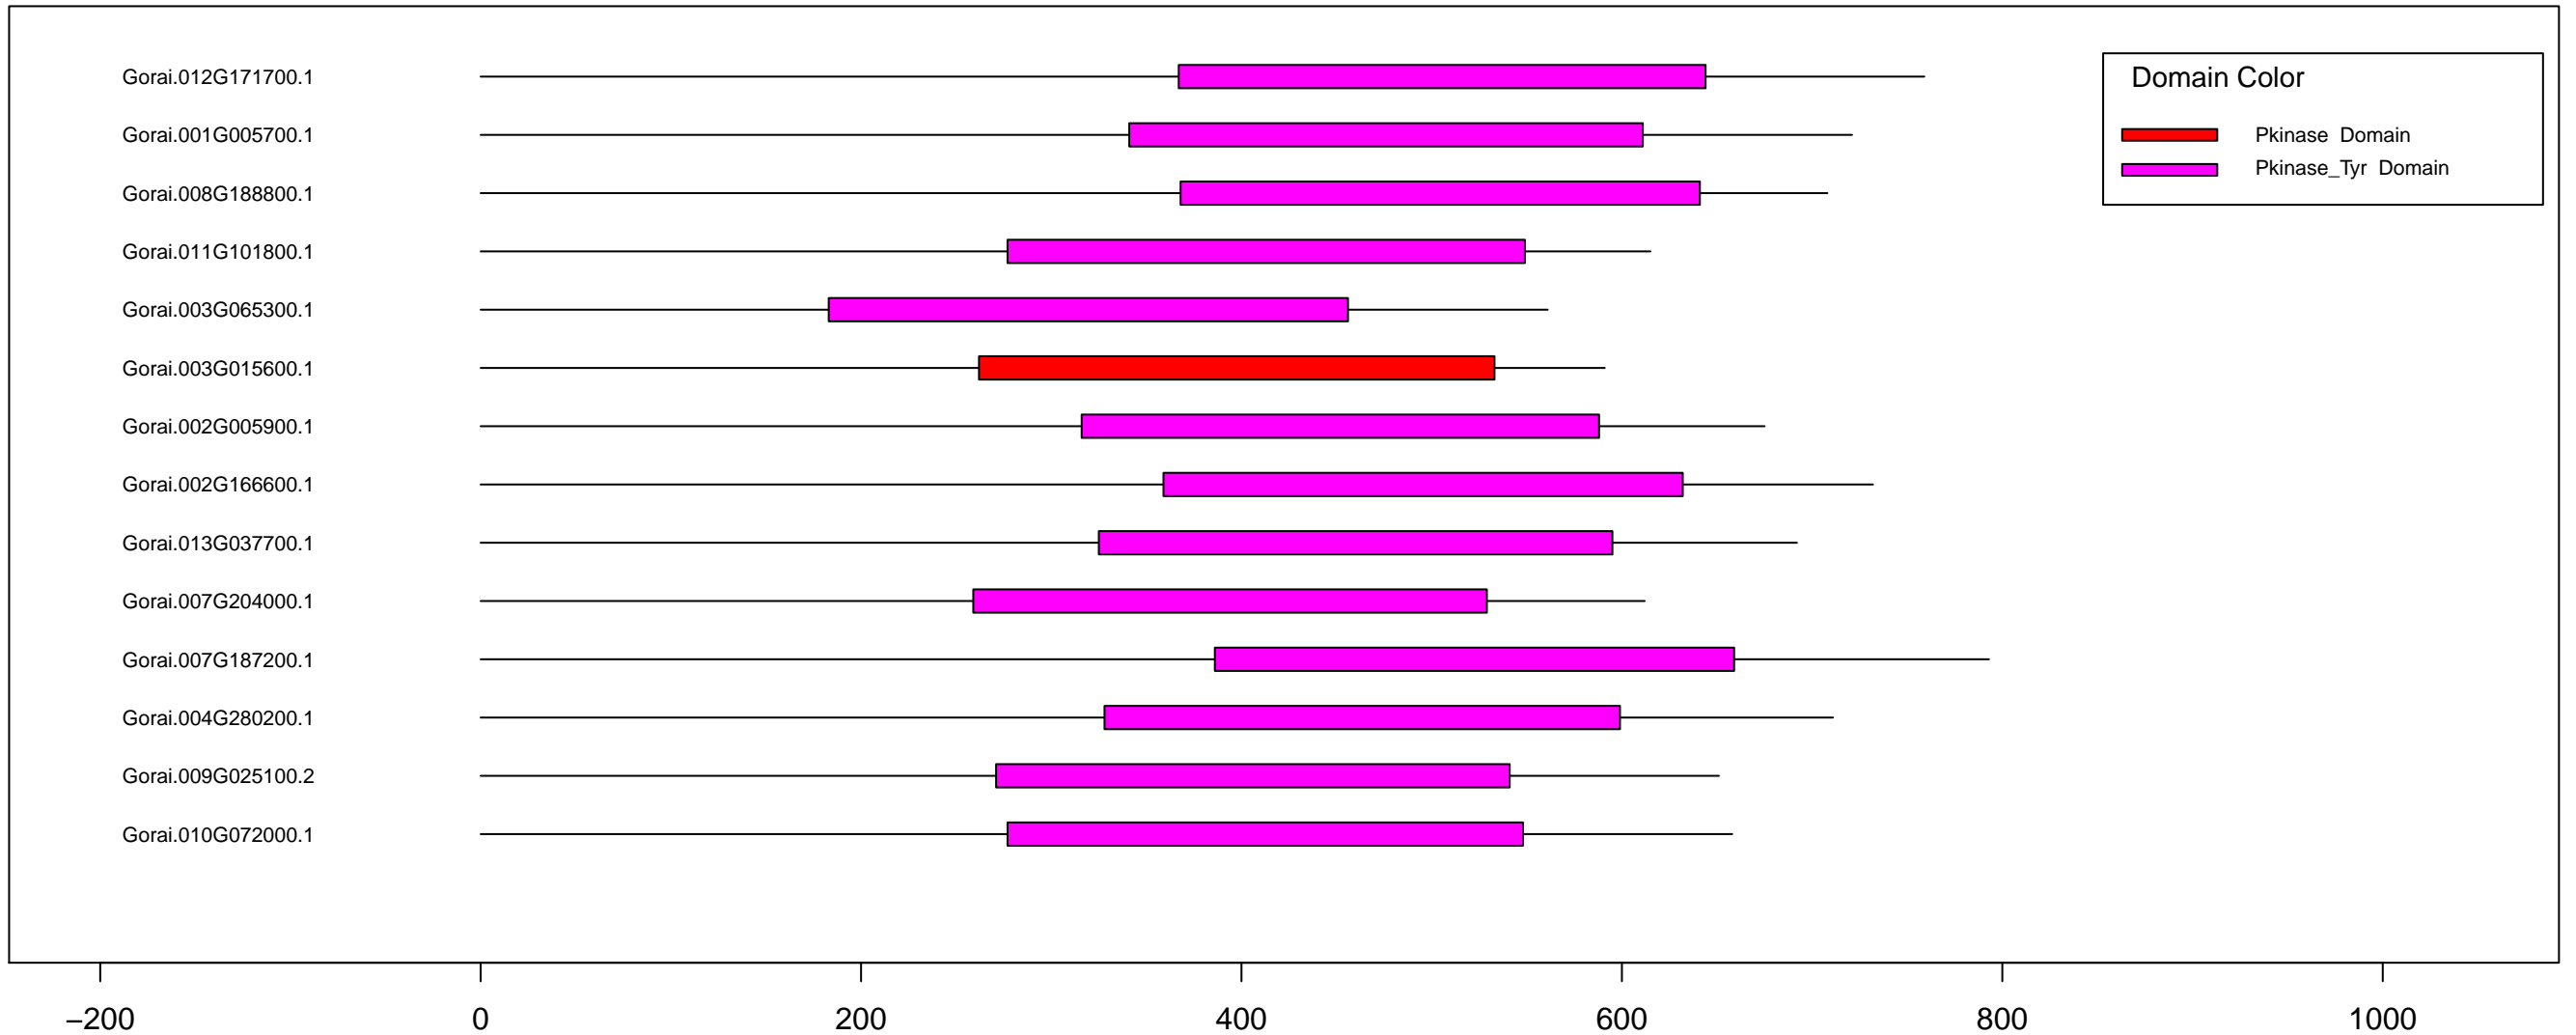

# G.ra RLK-Pelle\_PERK-2 domain diagram (all)

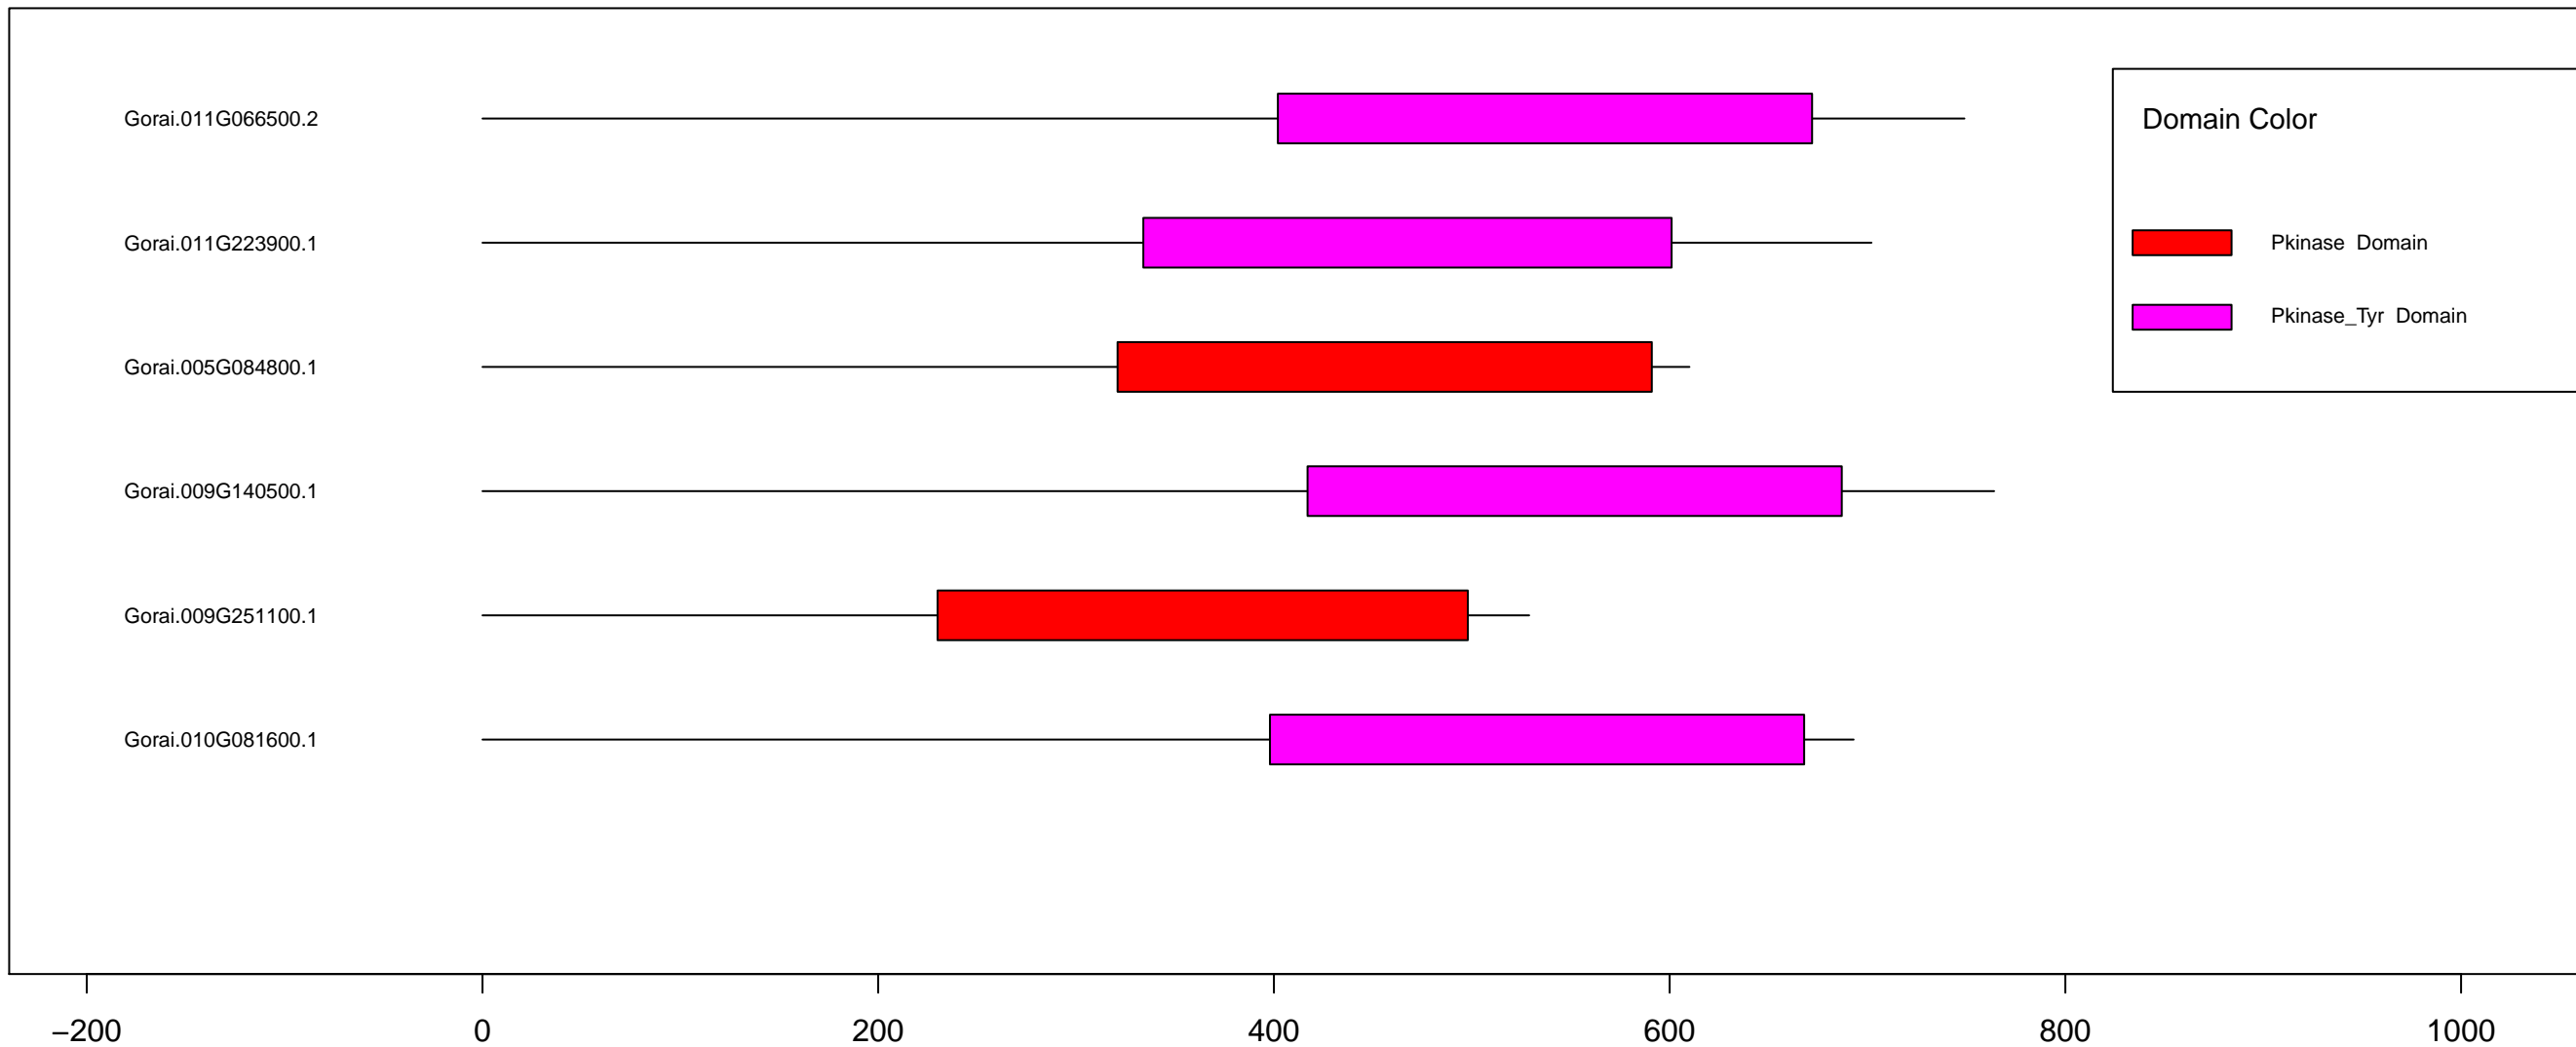

# G.ra RLK-Pelle\_RKF3 domain diagram (all)

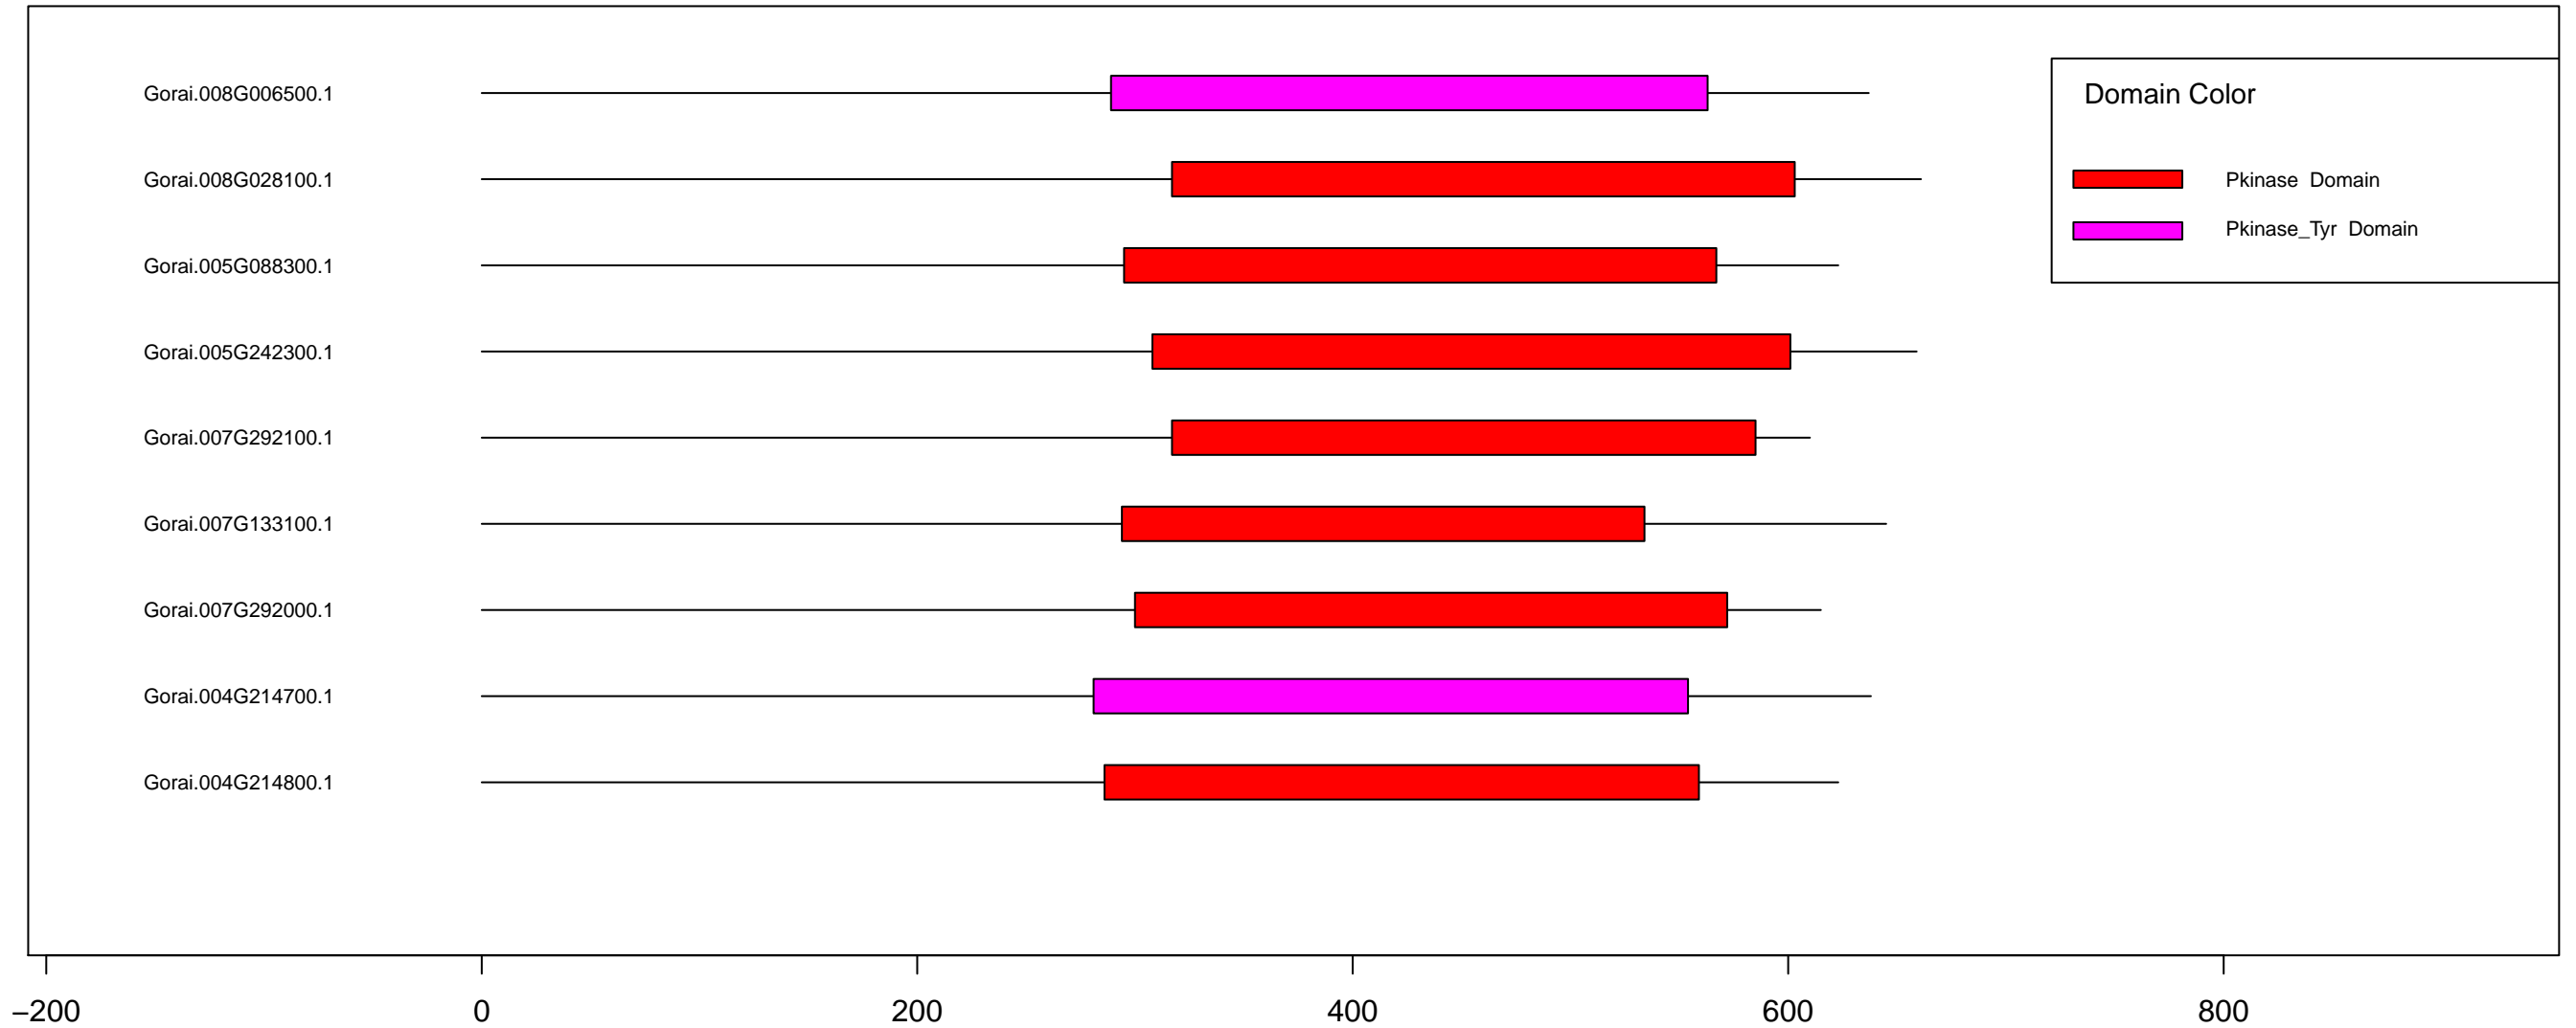

# G.ra RLK-Pelle\_RLCK-II domain diagram (all)

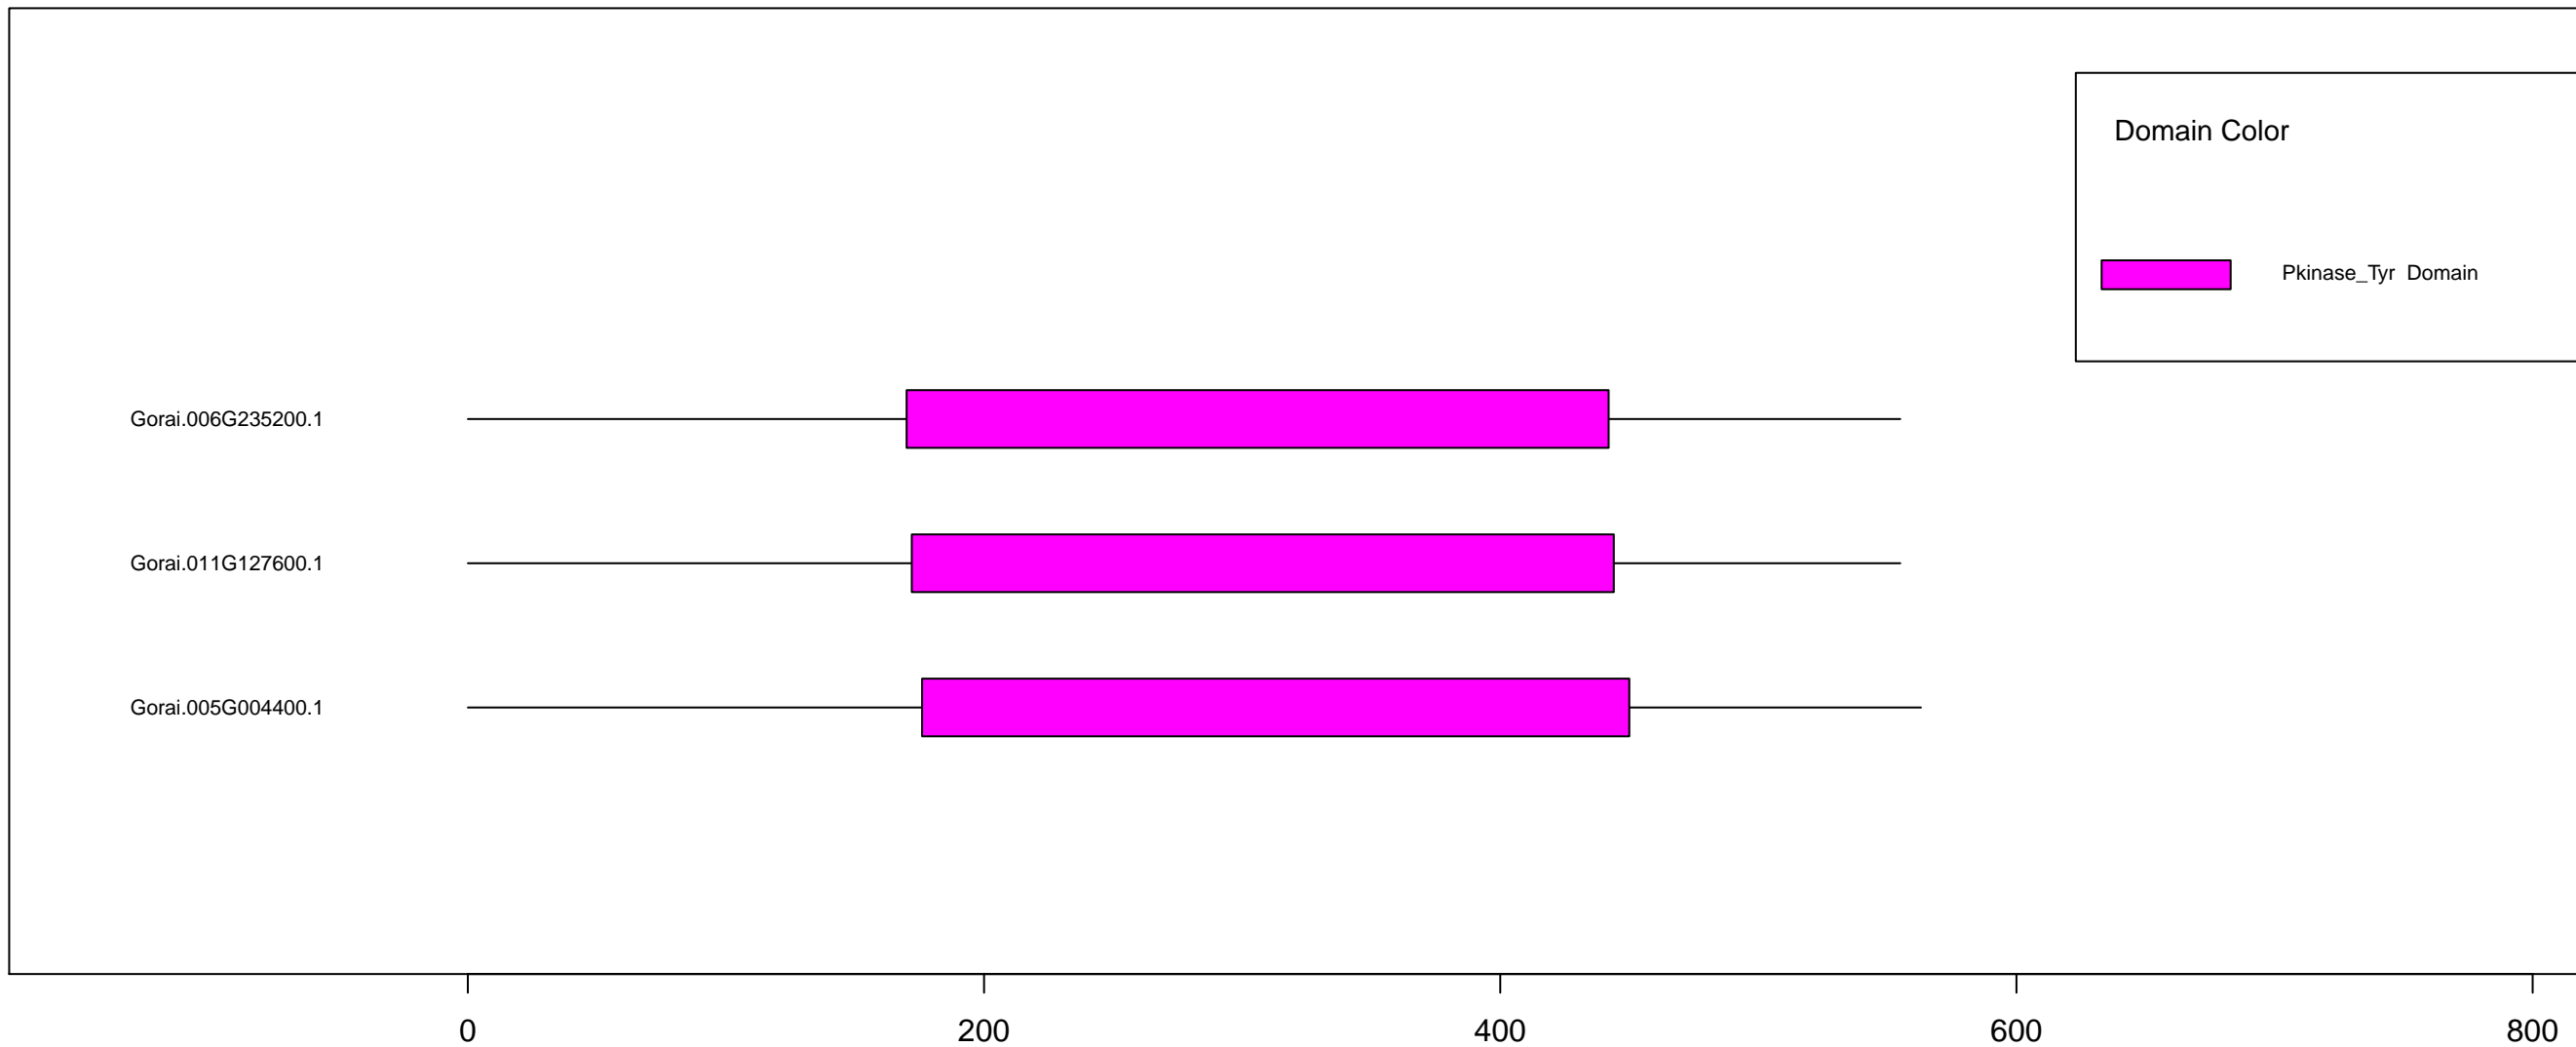



# G.ra RLK-Pelle\_RLCK-IV domain diagram (all)

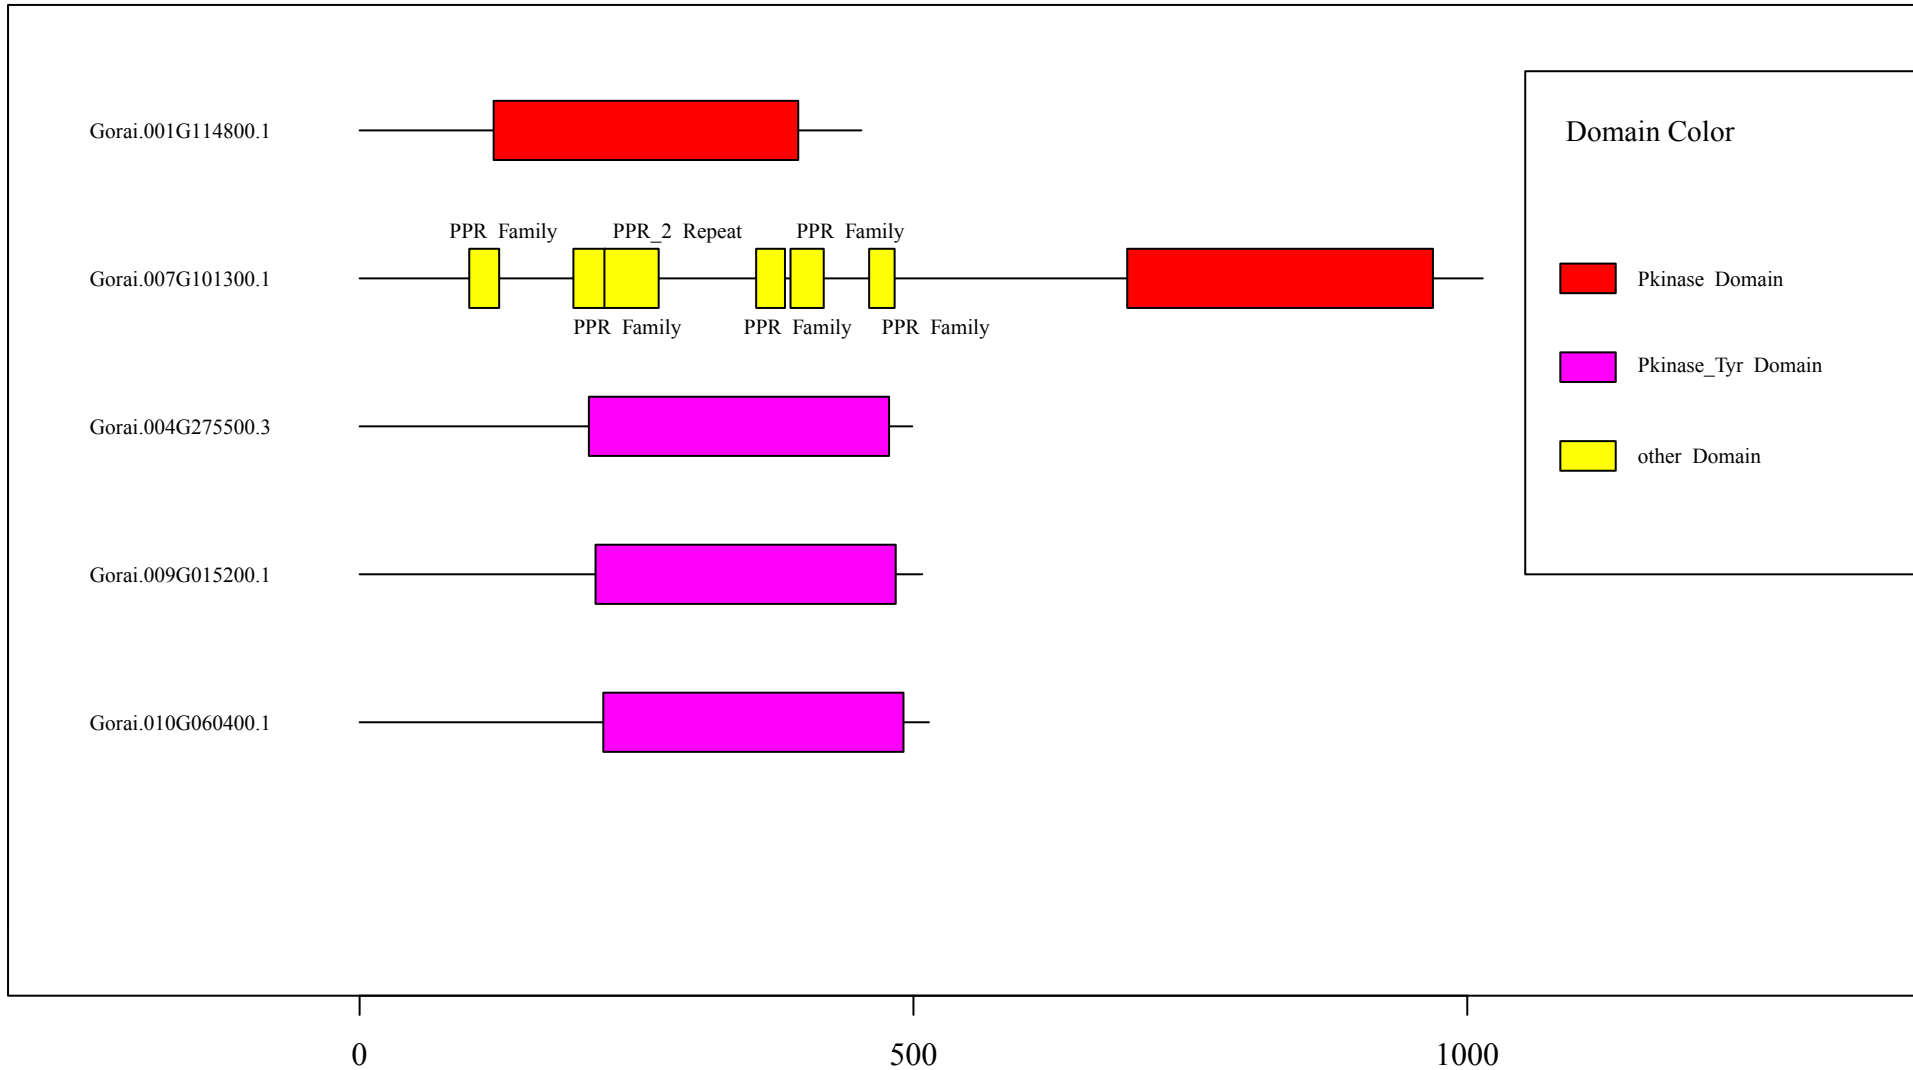

# G.ra RLK-Pelle\_RLCK-IXa domain diagram (all)

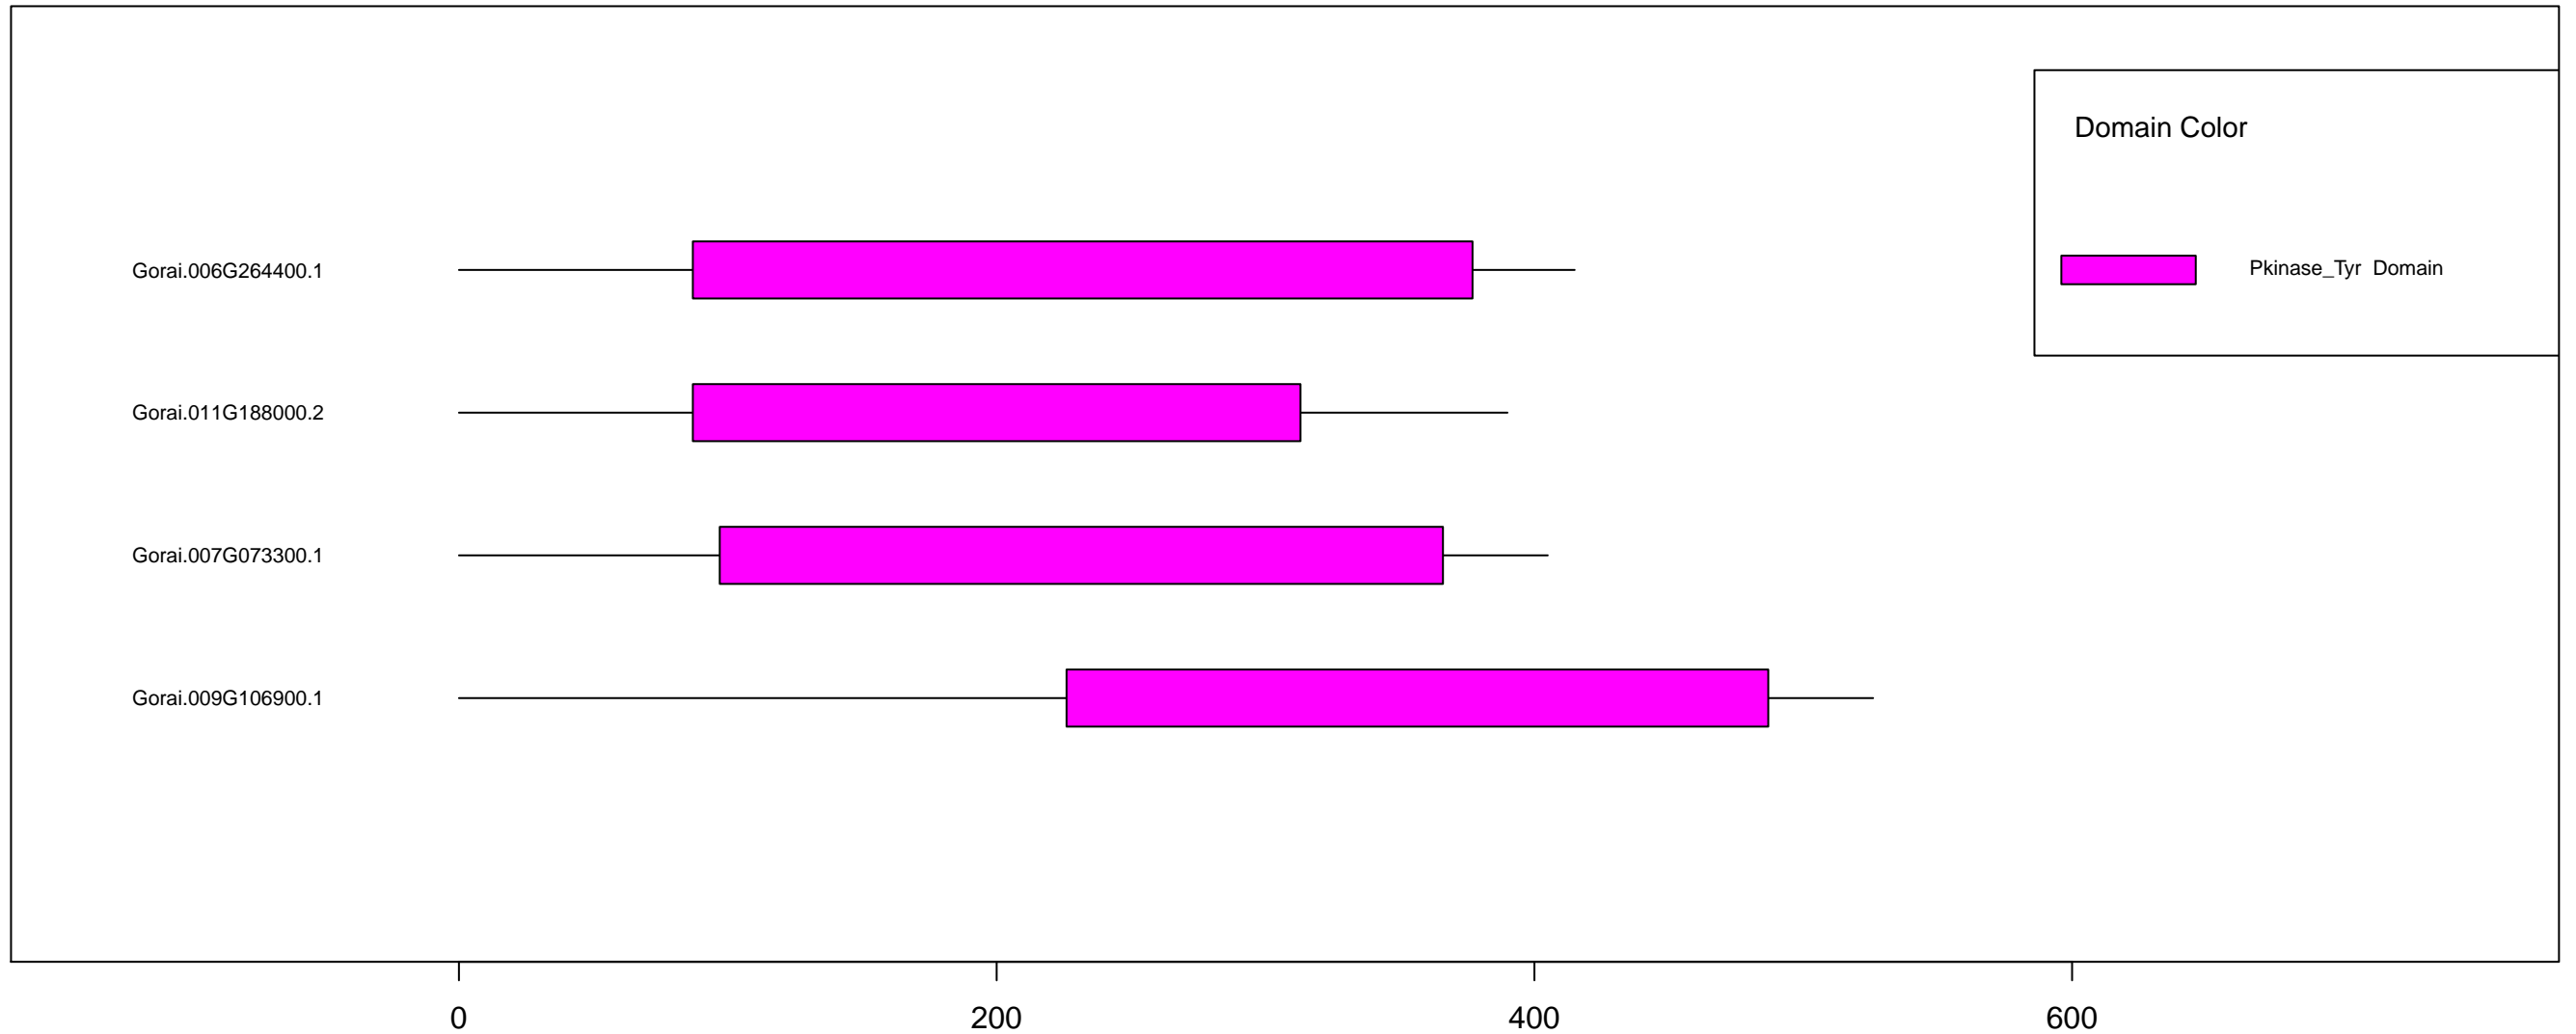

# G.ra RLK-Pelle\_RLCK-IXb domain diagram (all)

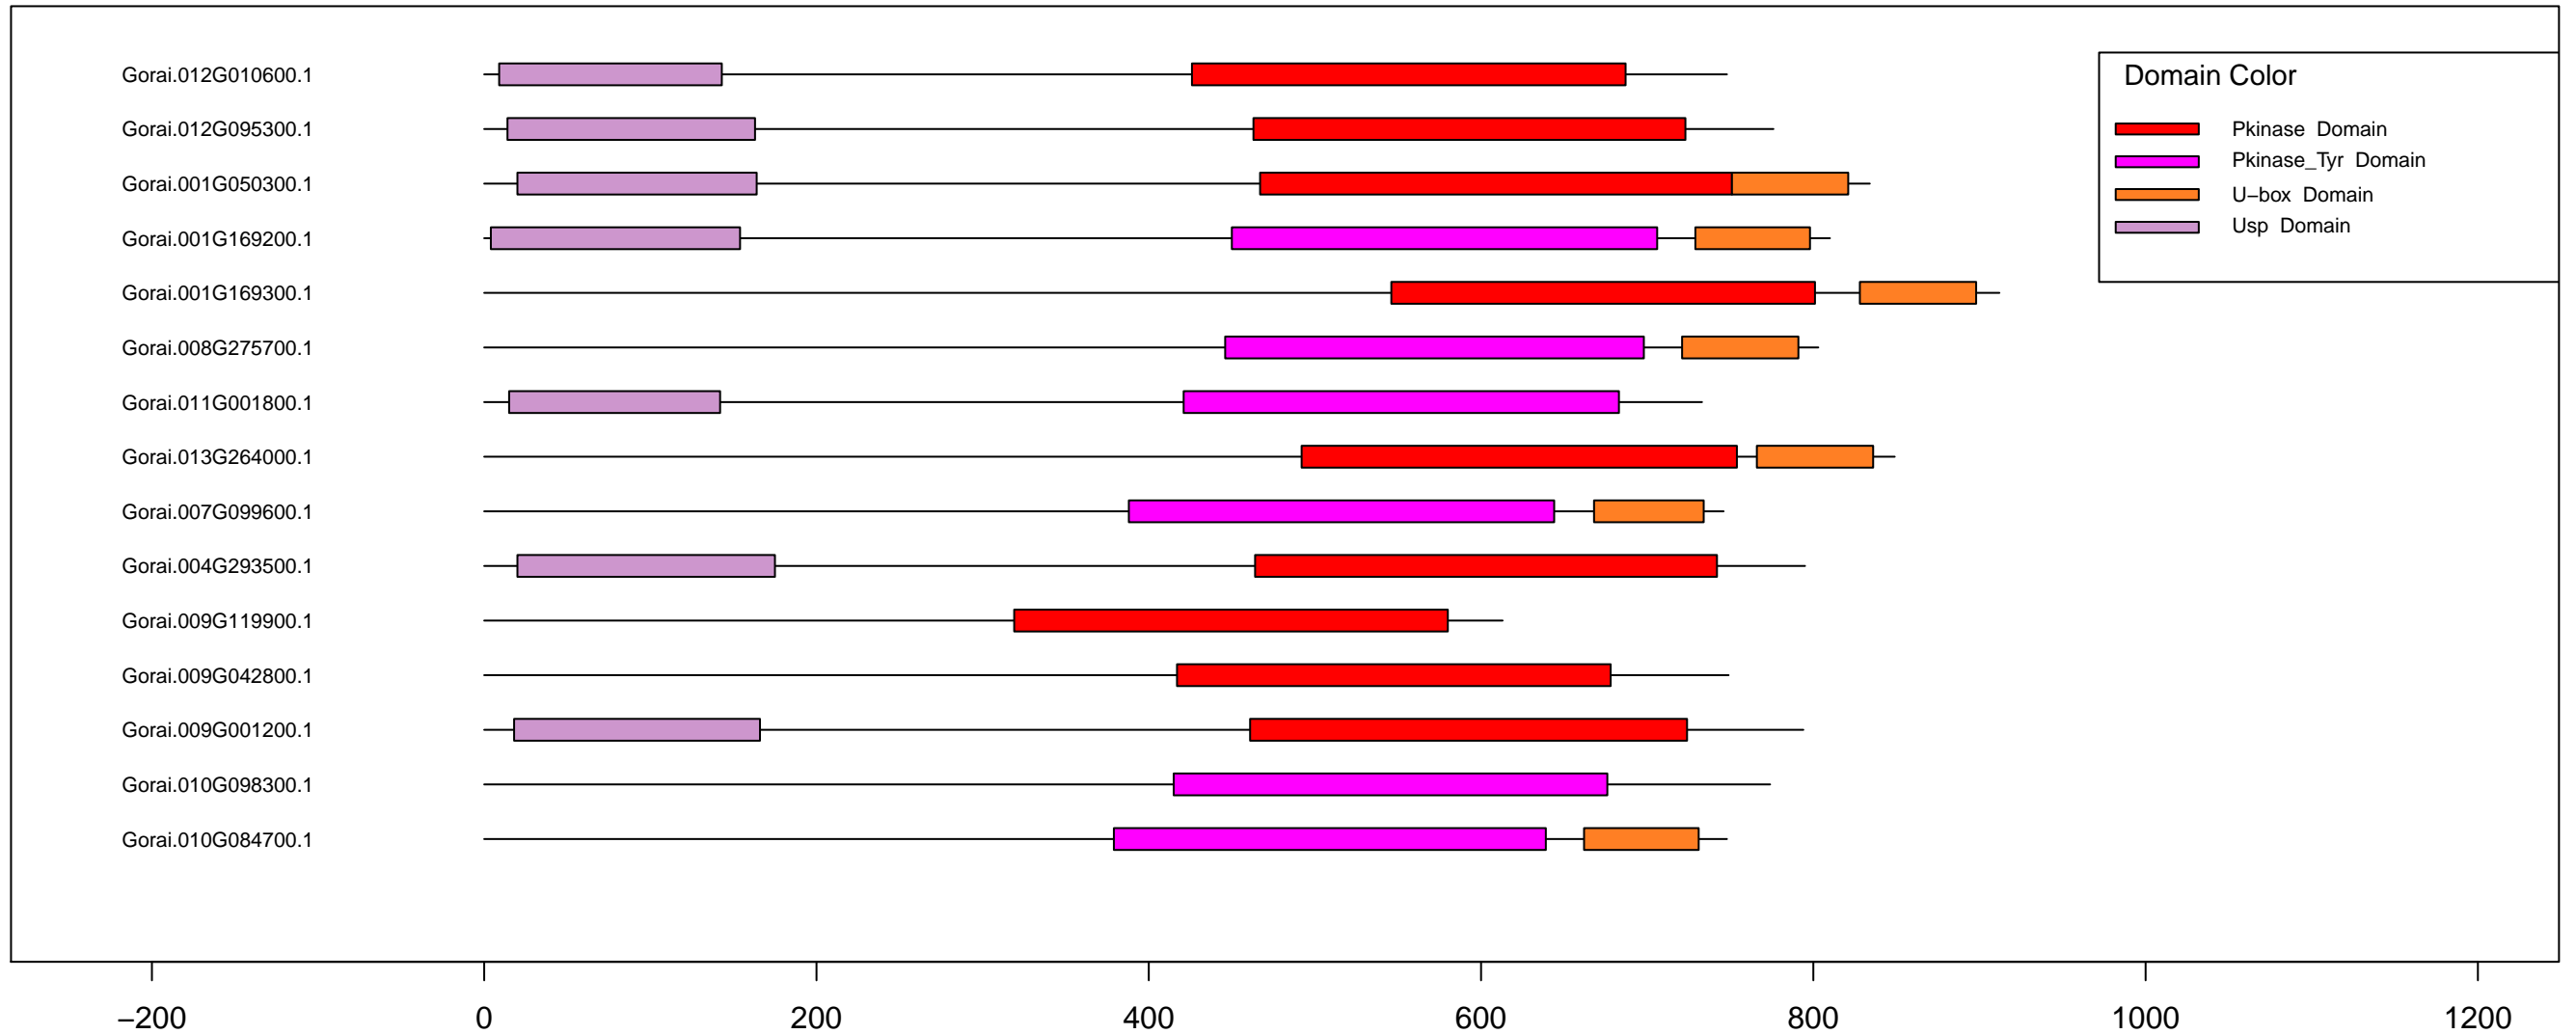

# G.ra RLK-Pelle\_RLCK-Os domain diagram (all)

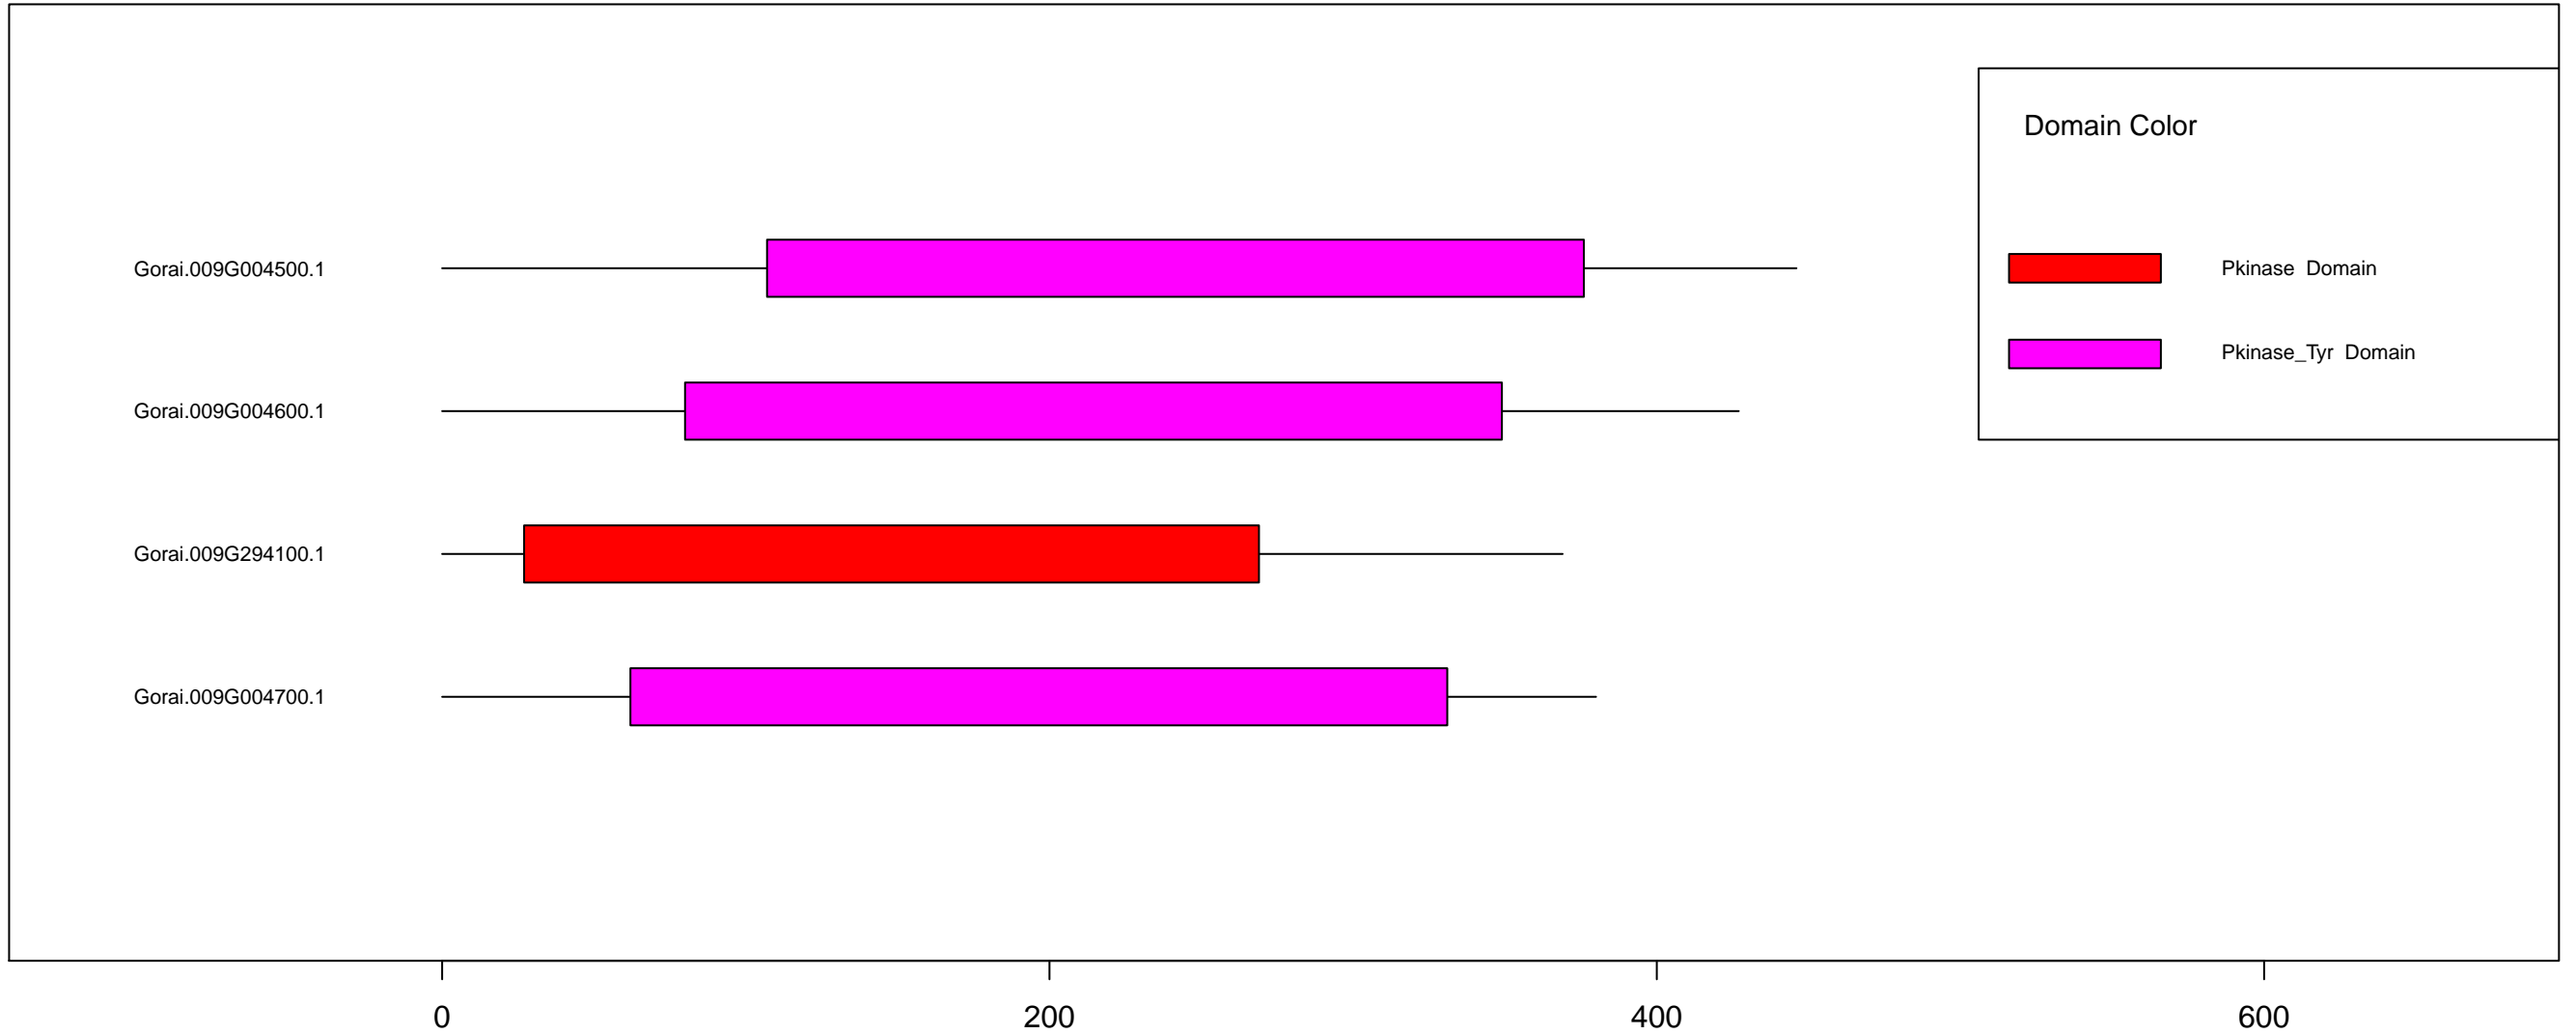

# G.ra RLK-Pelle\_RLCK-Vlla-1 domain diagram (part 1)

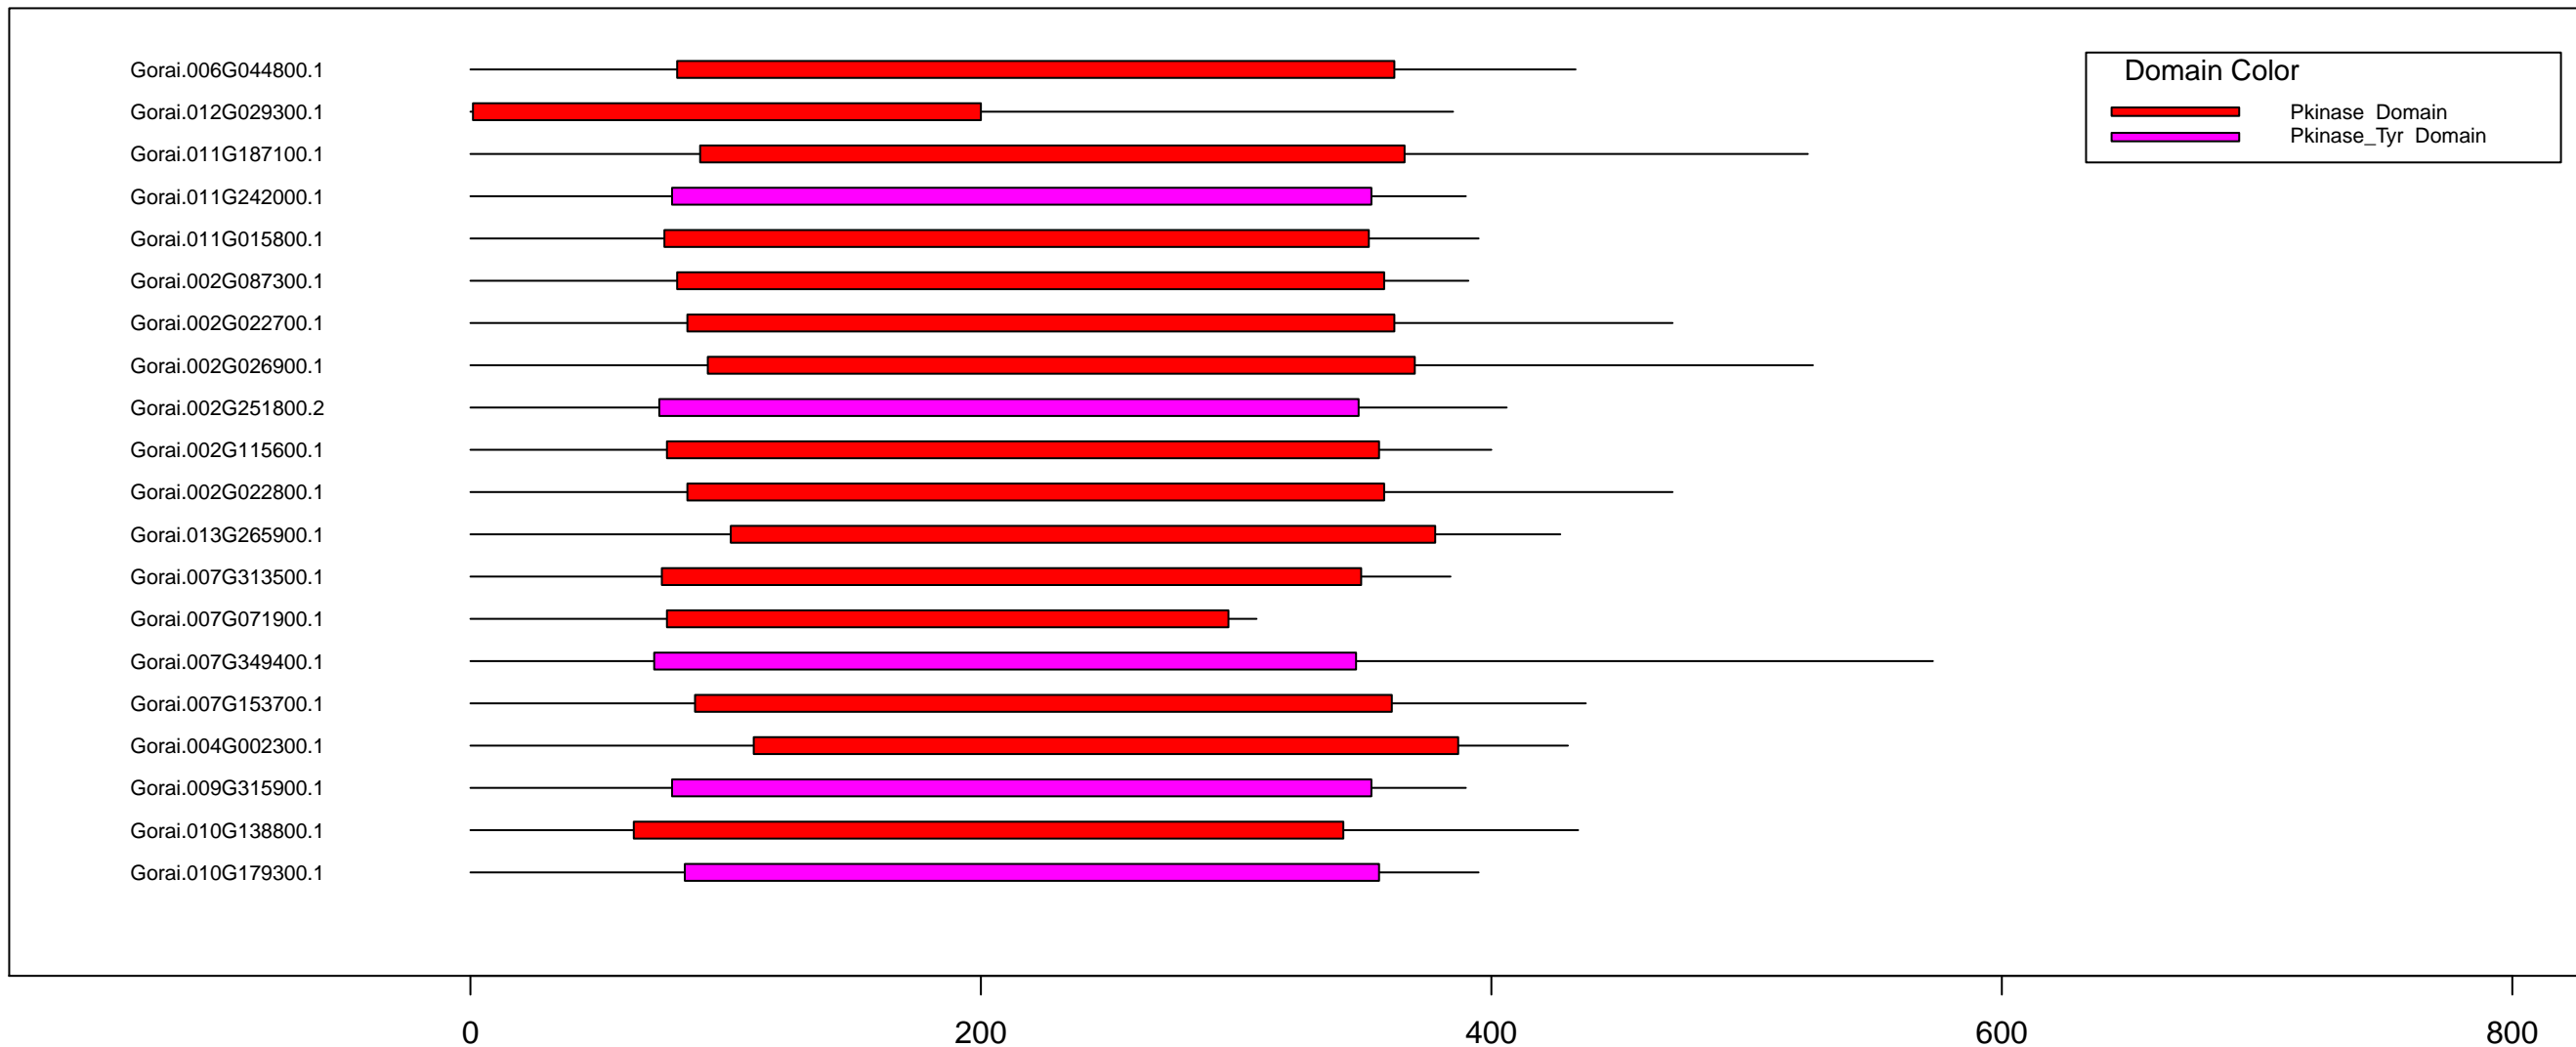

# G.ra RLK-Pelle\_RLCK-VIIa-1 domain diagram (part 2)

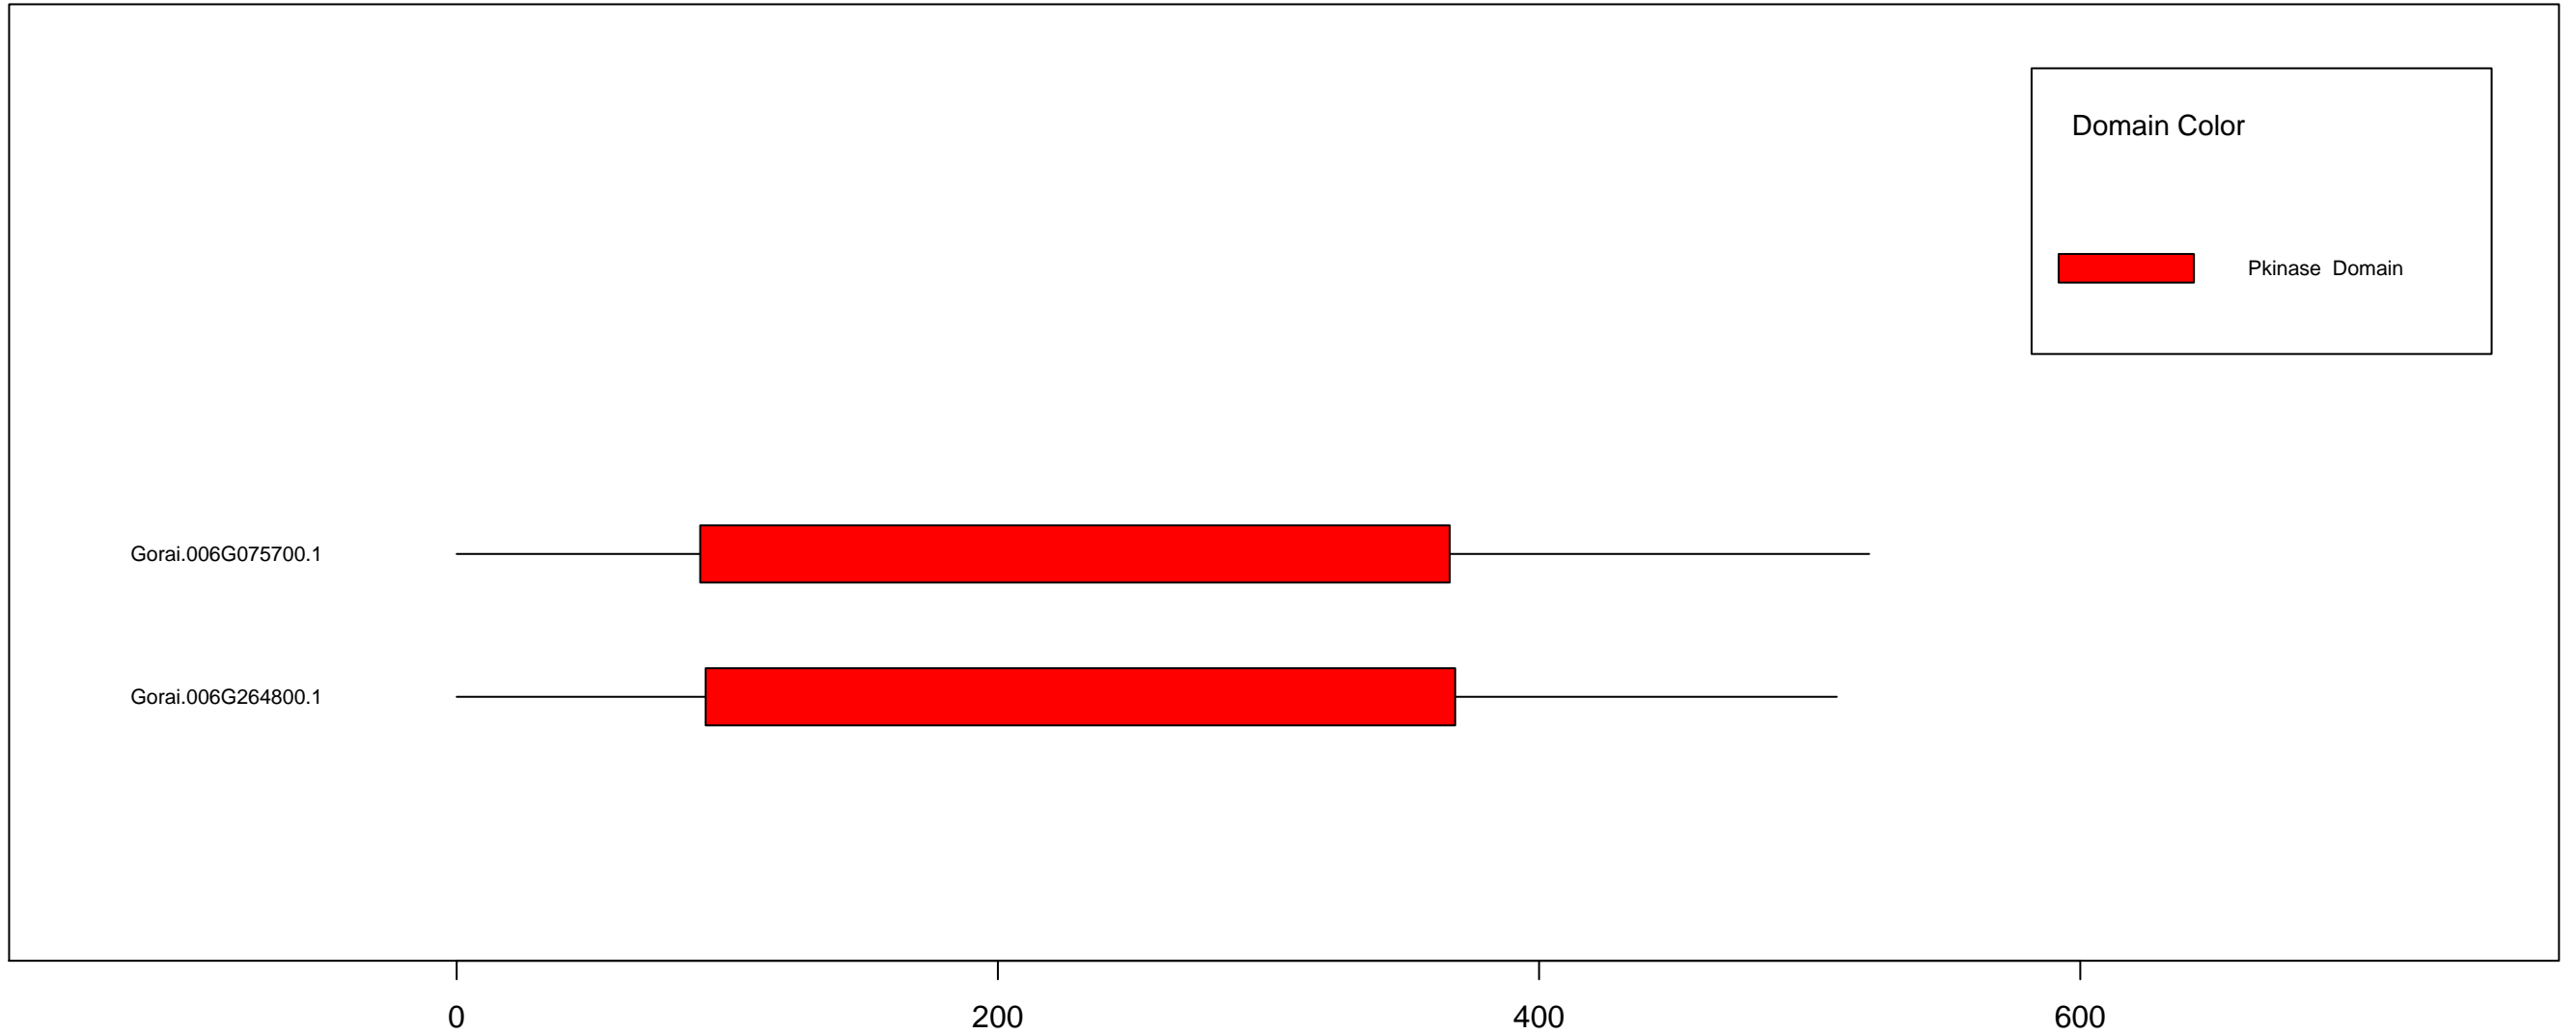

# G.ra RLK-Pelle\_RLCK-Vlla-2 domain diagram (part 1)

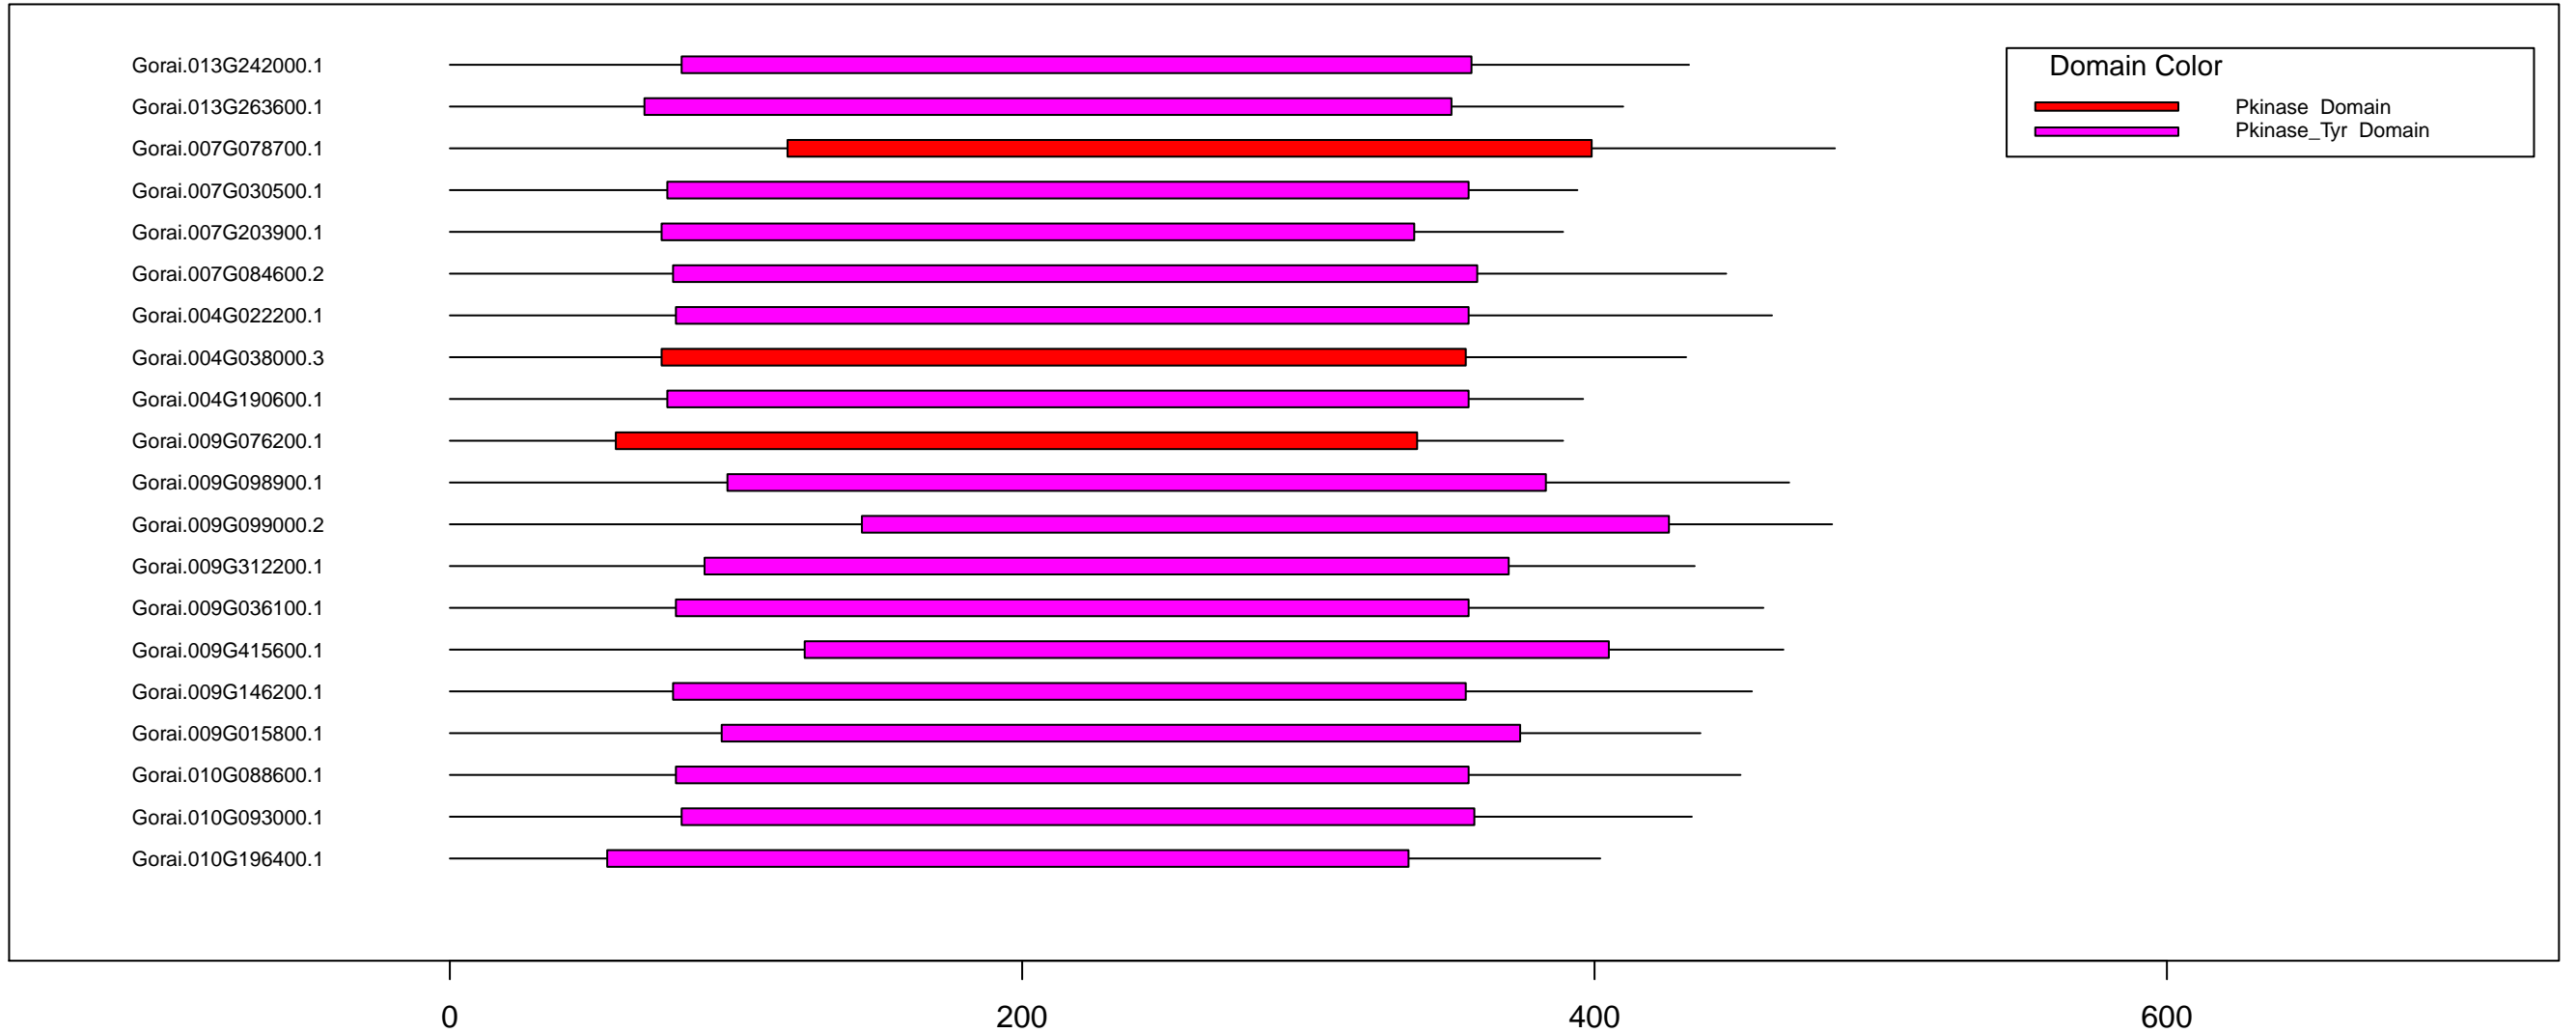

### G.ra RLK-Pelle\_RLCK-Vlla-2 domain diagram (part 2)

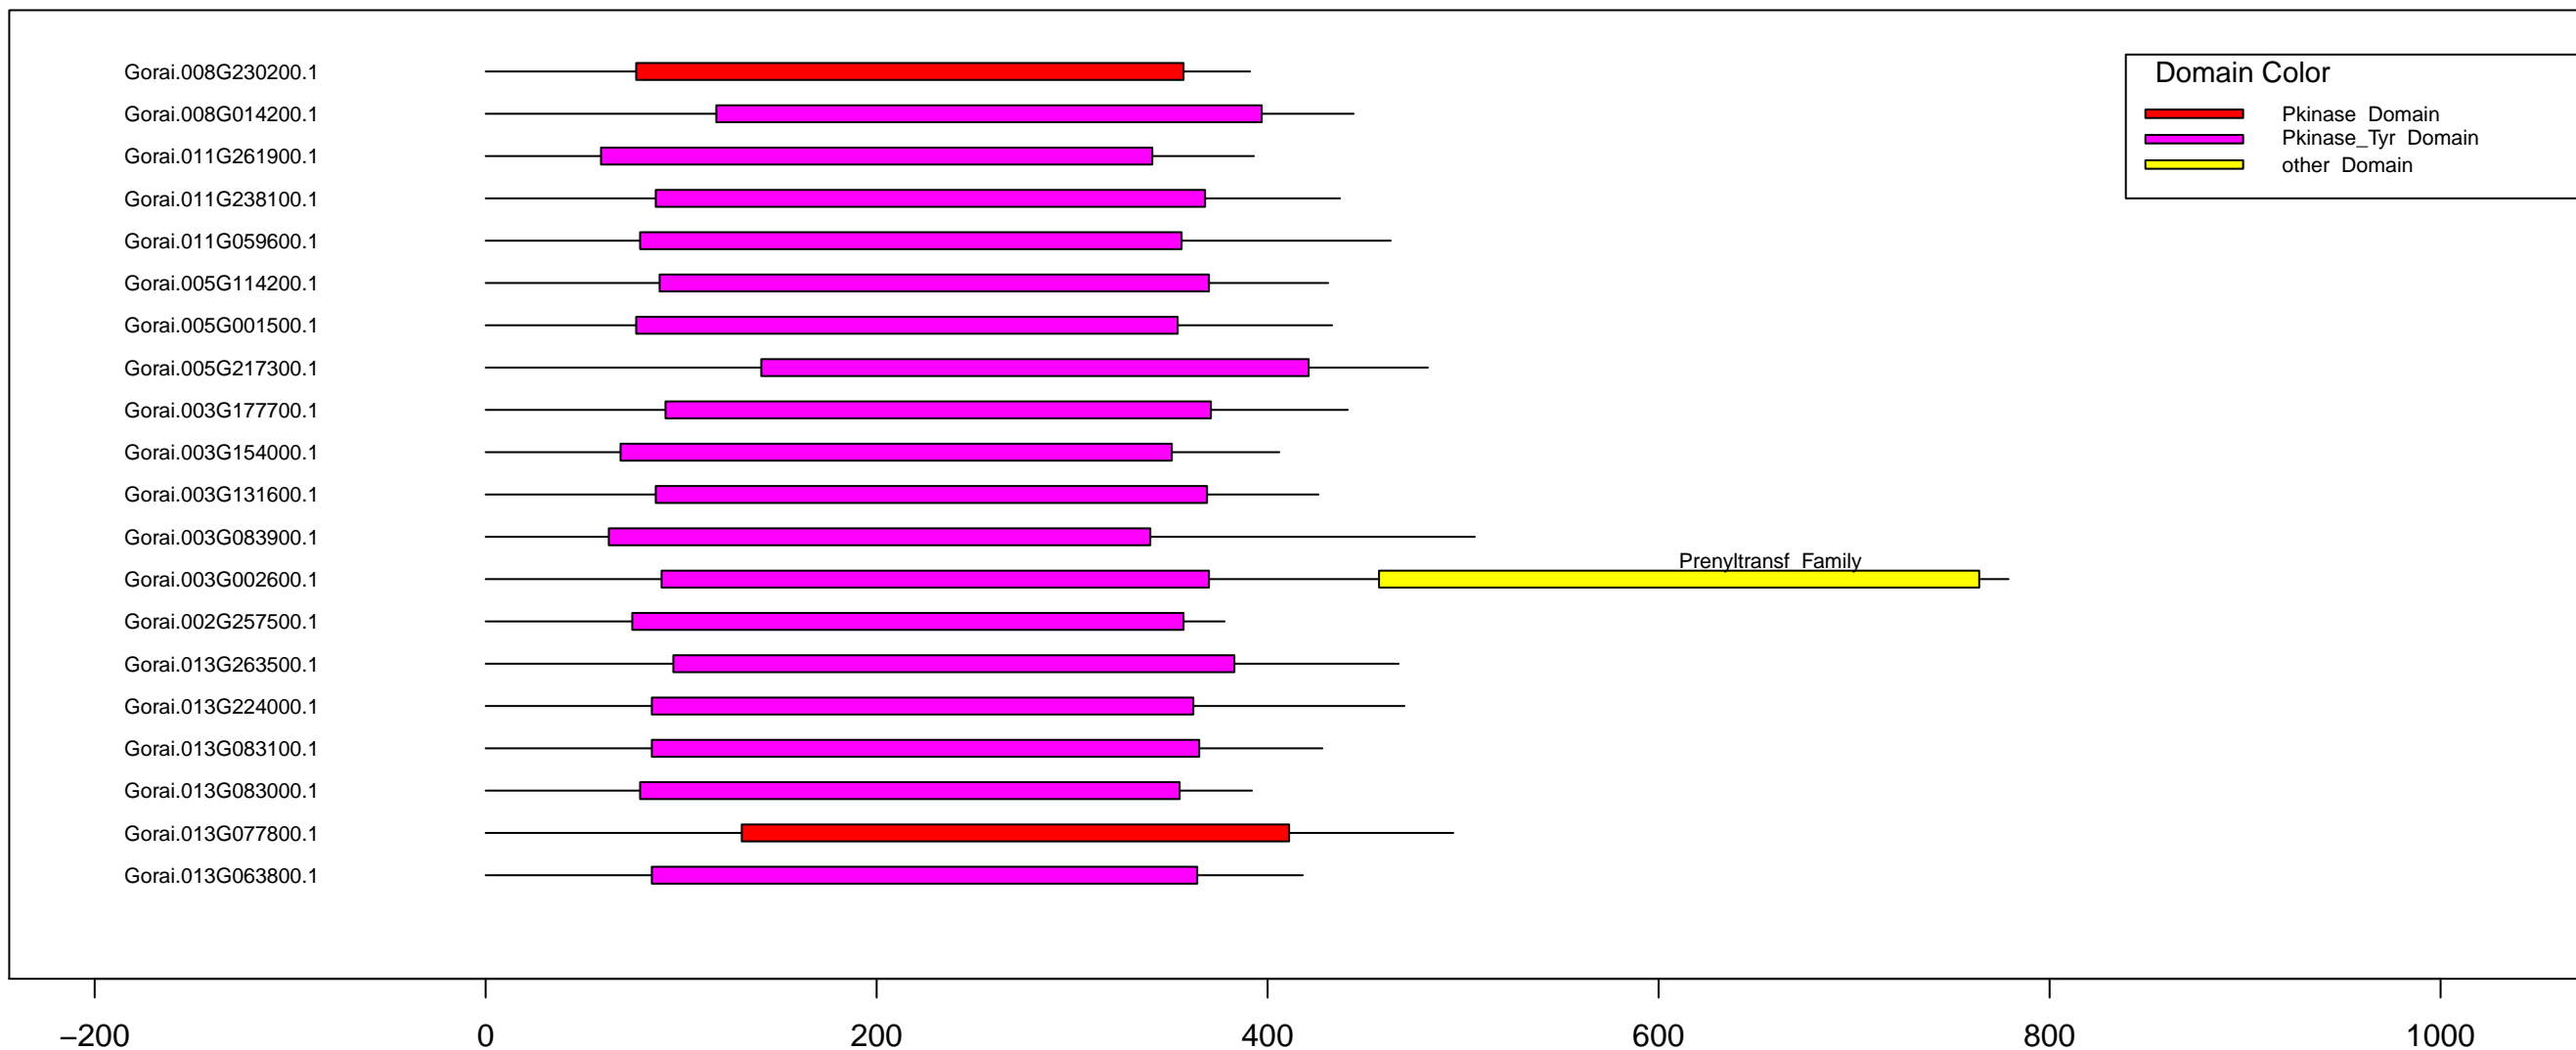



### G.ra RLK-Pelle\_RLCK-Vila-2 domain diagram (part 3)

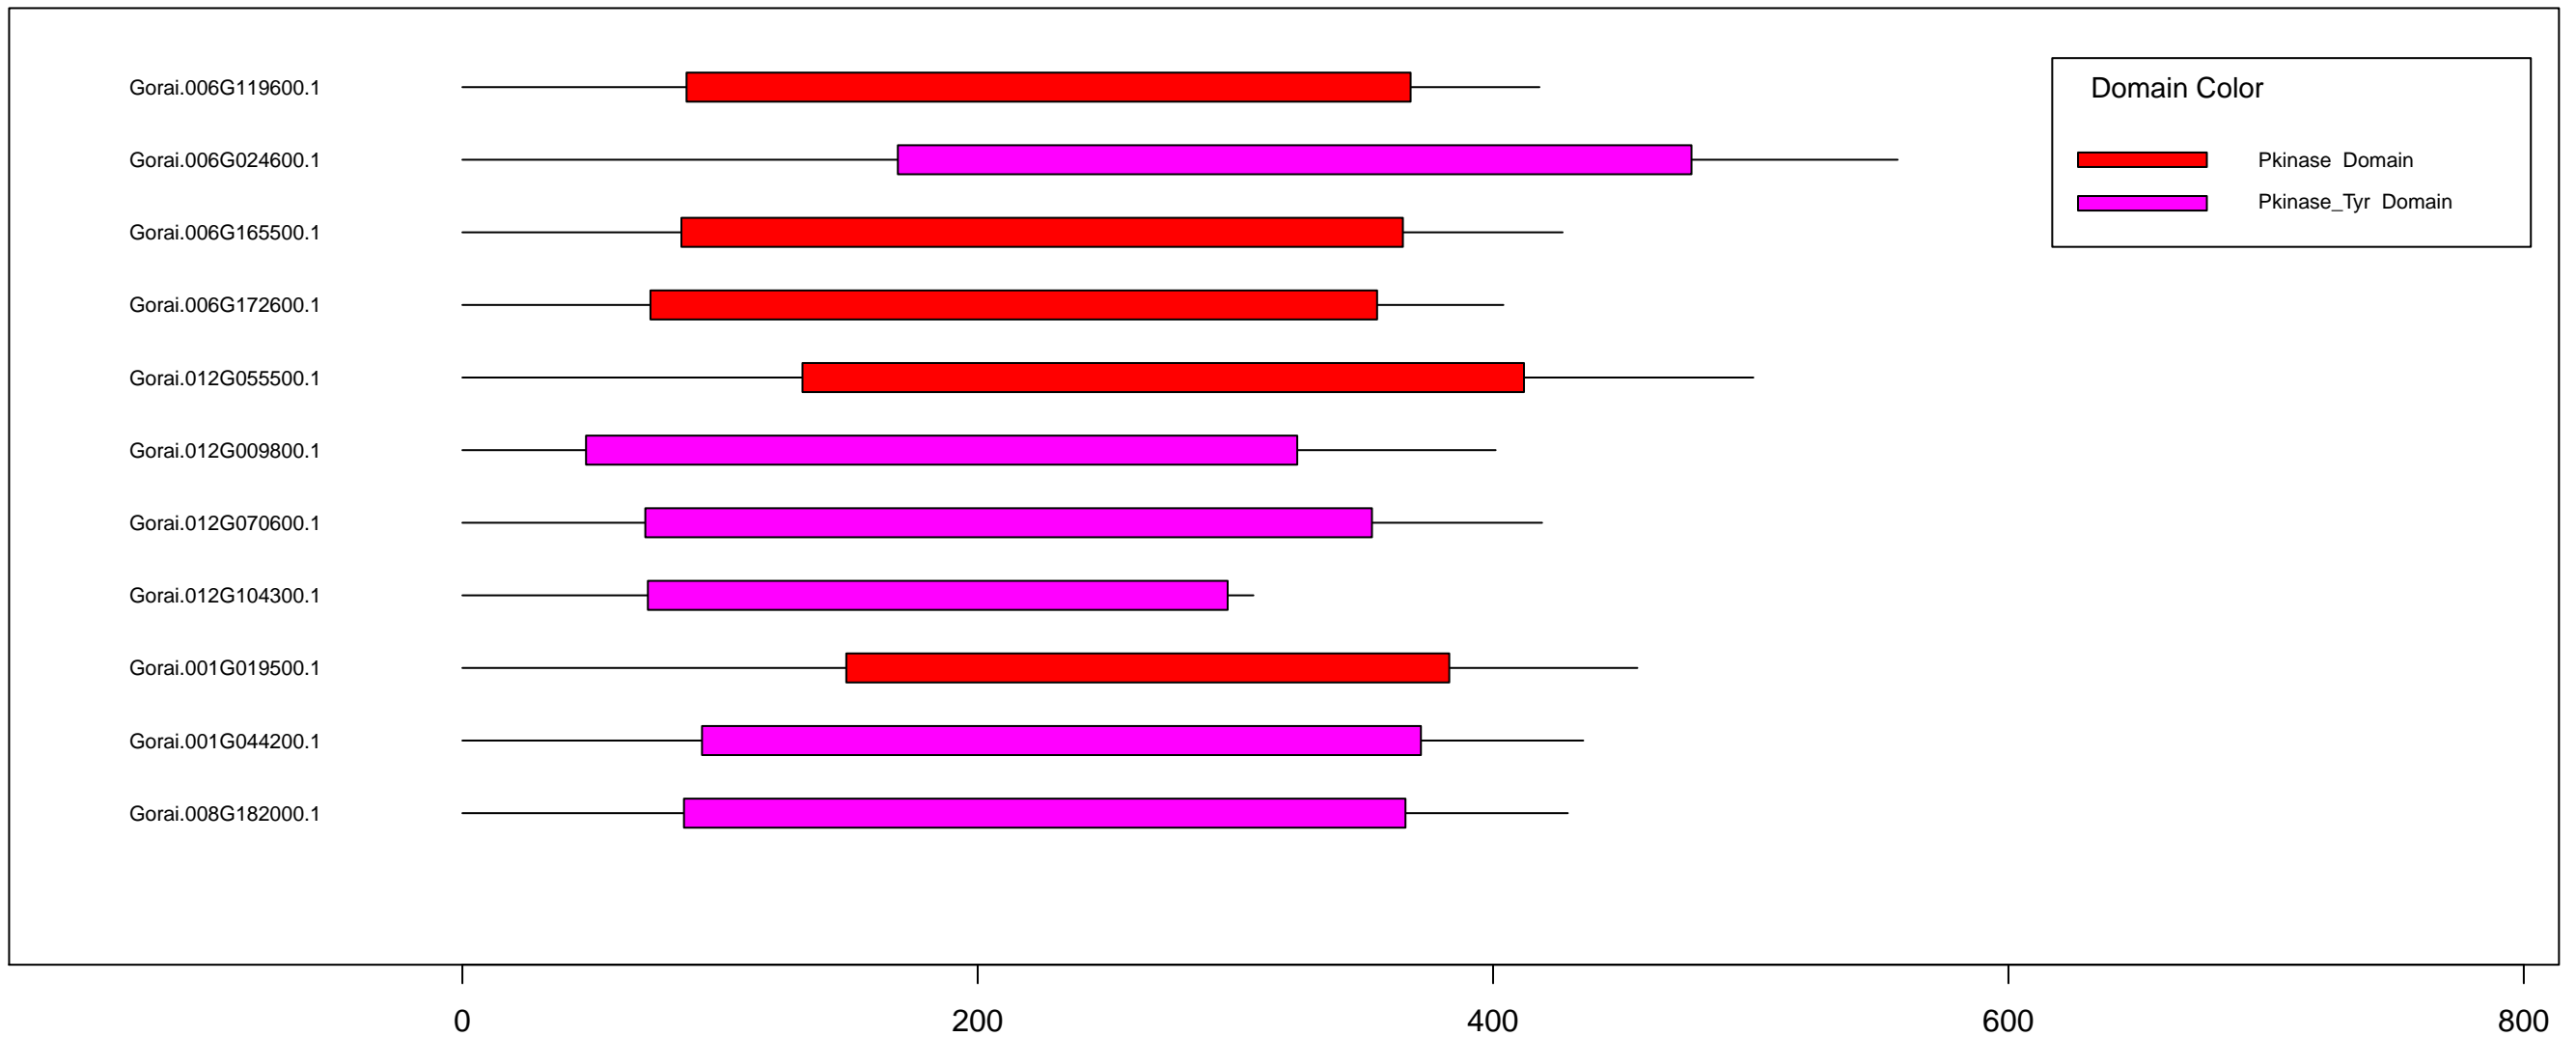

G.ra RLK-Pelle\_RLCK-VIIb domain diagram (all)

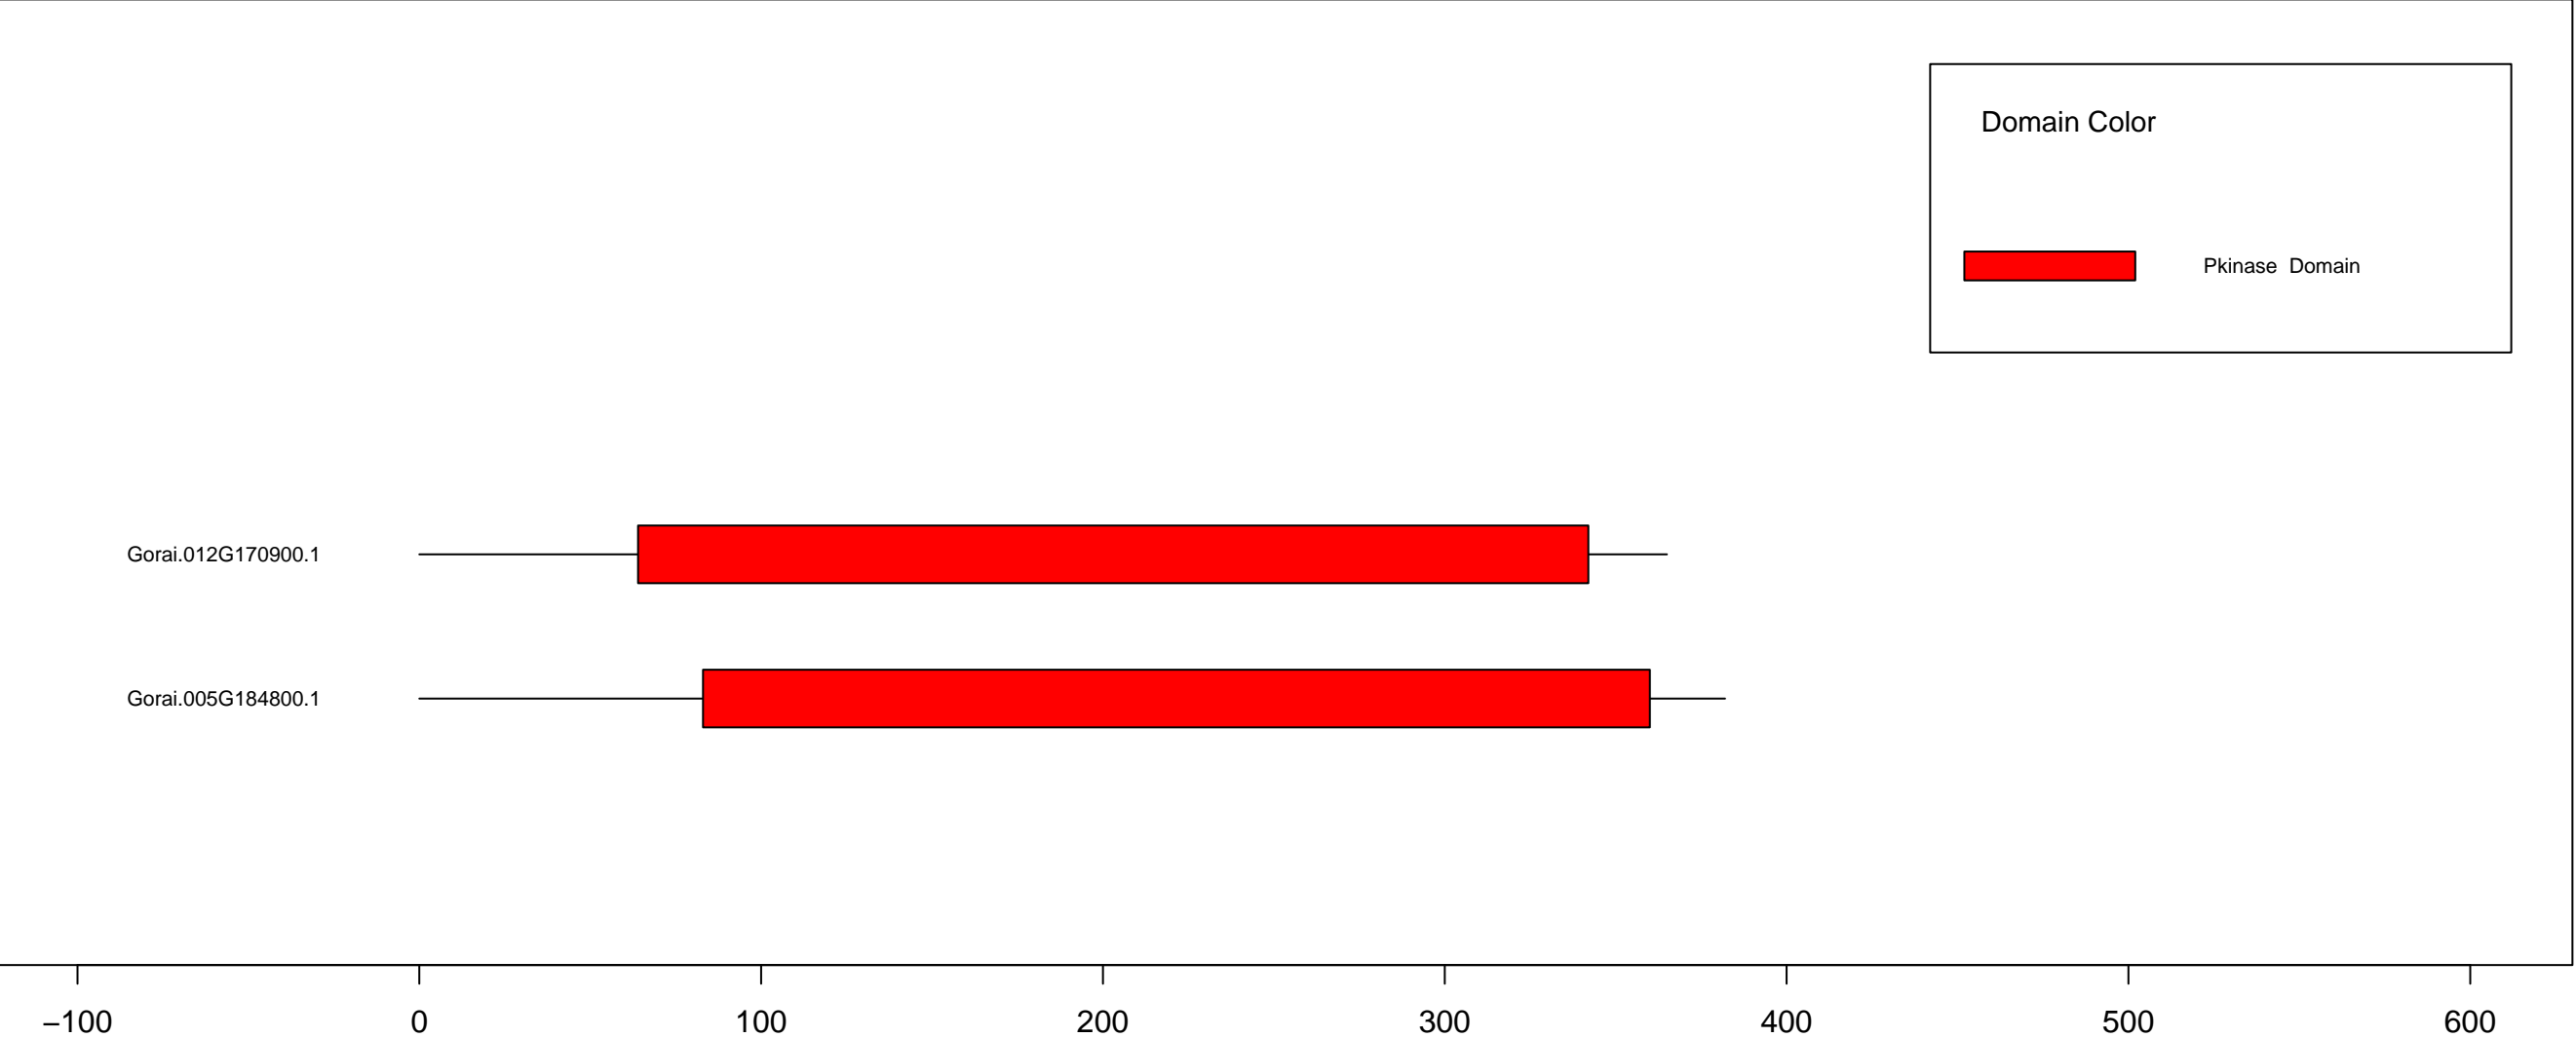

# G.ra RLK-Pelle\_RLCK-VIII domain diagram (all)

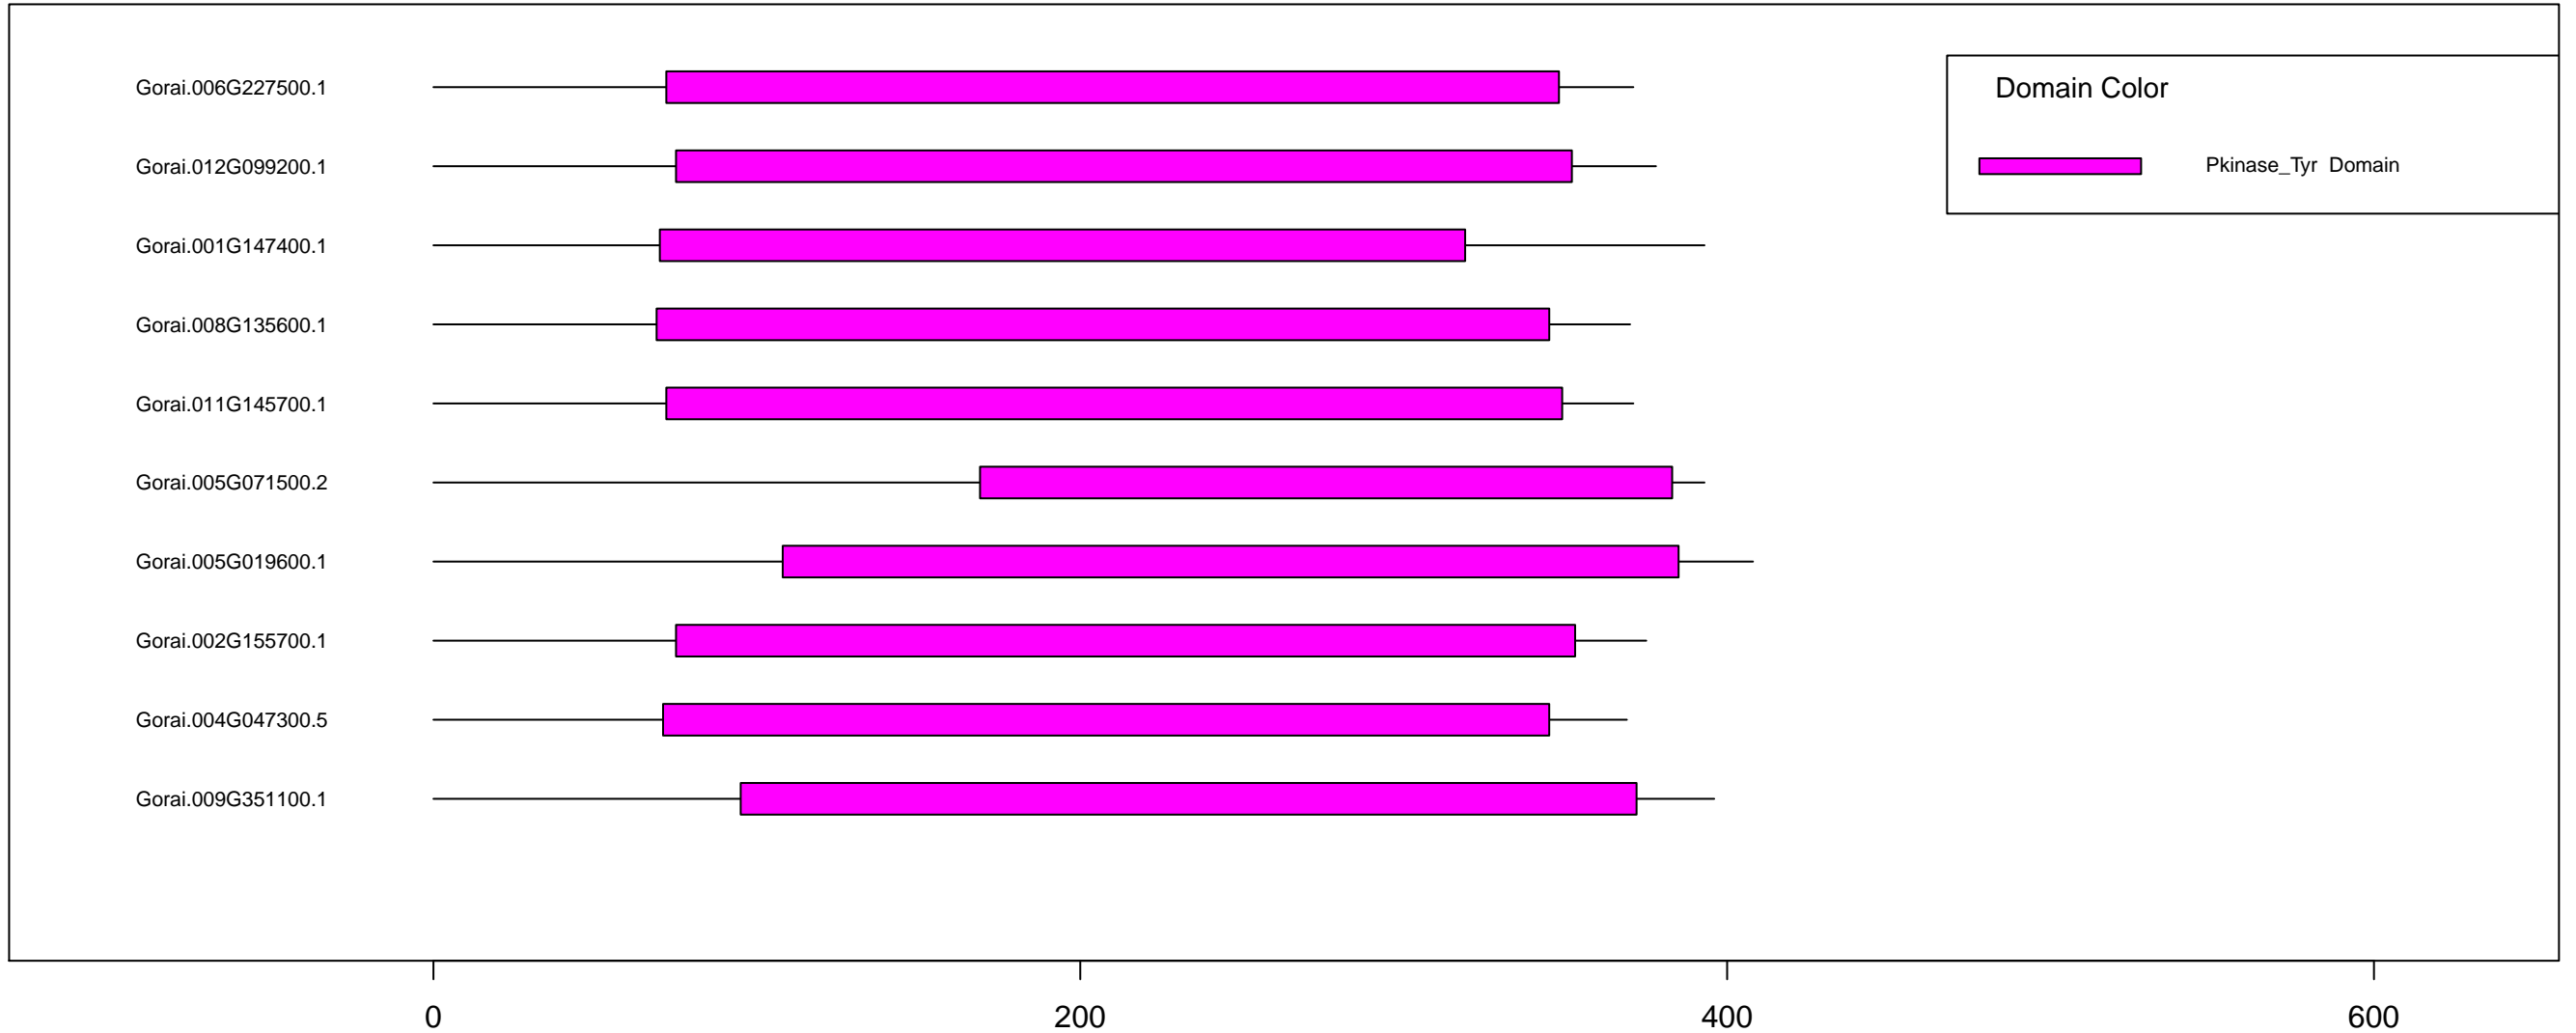

# G.ra RLK-Pelle\_RLCK-VI domain diagram (part 1)

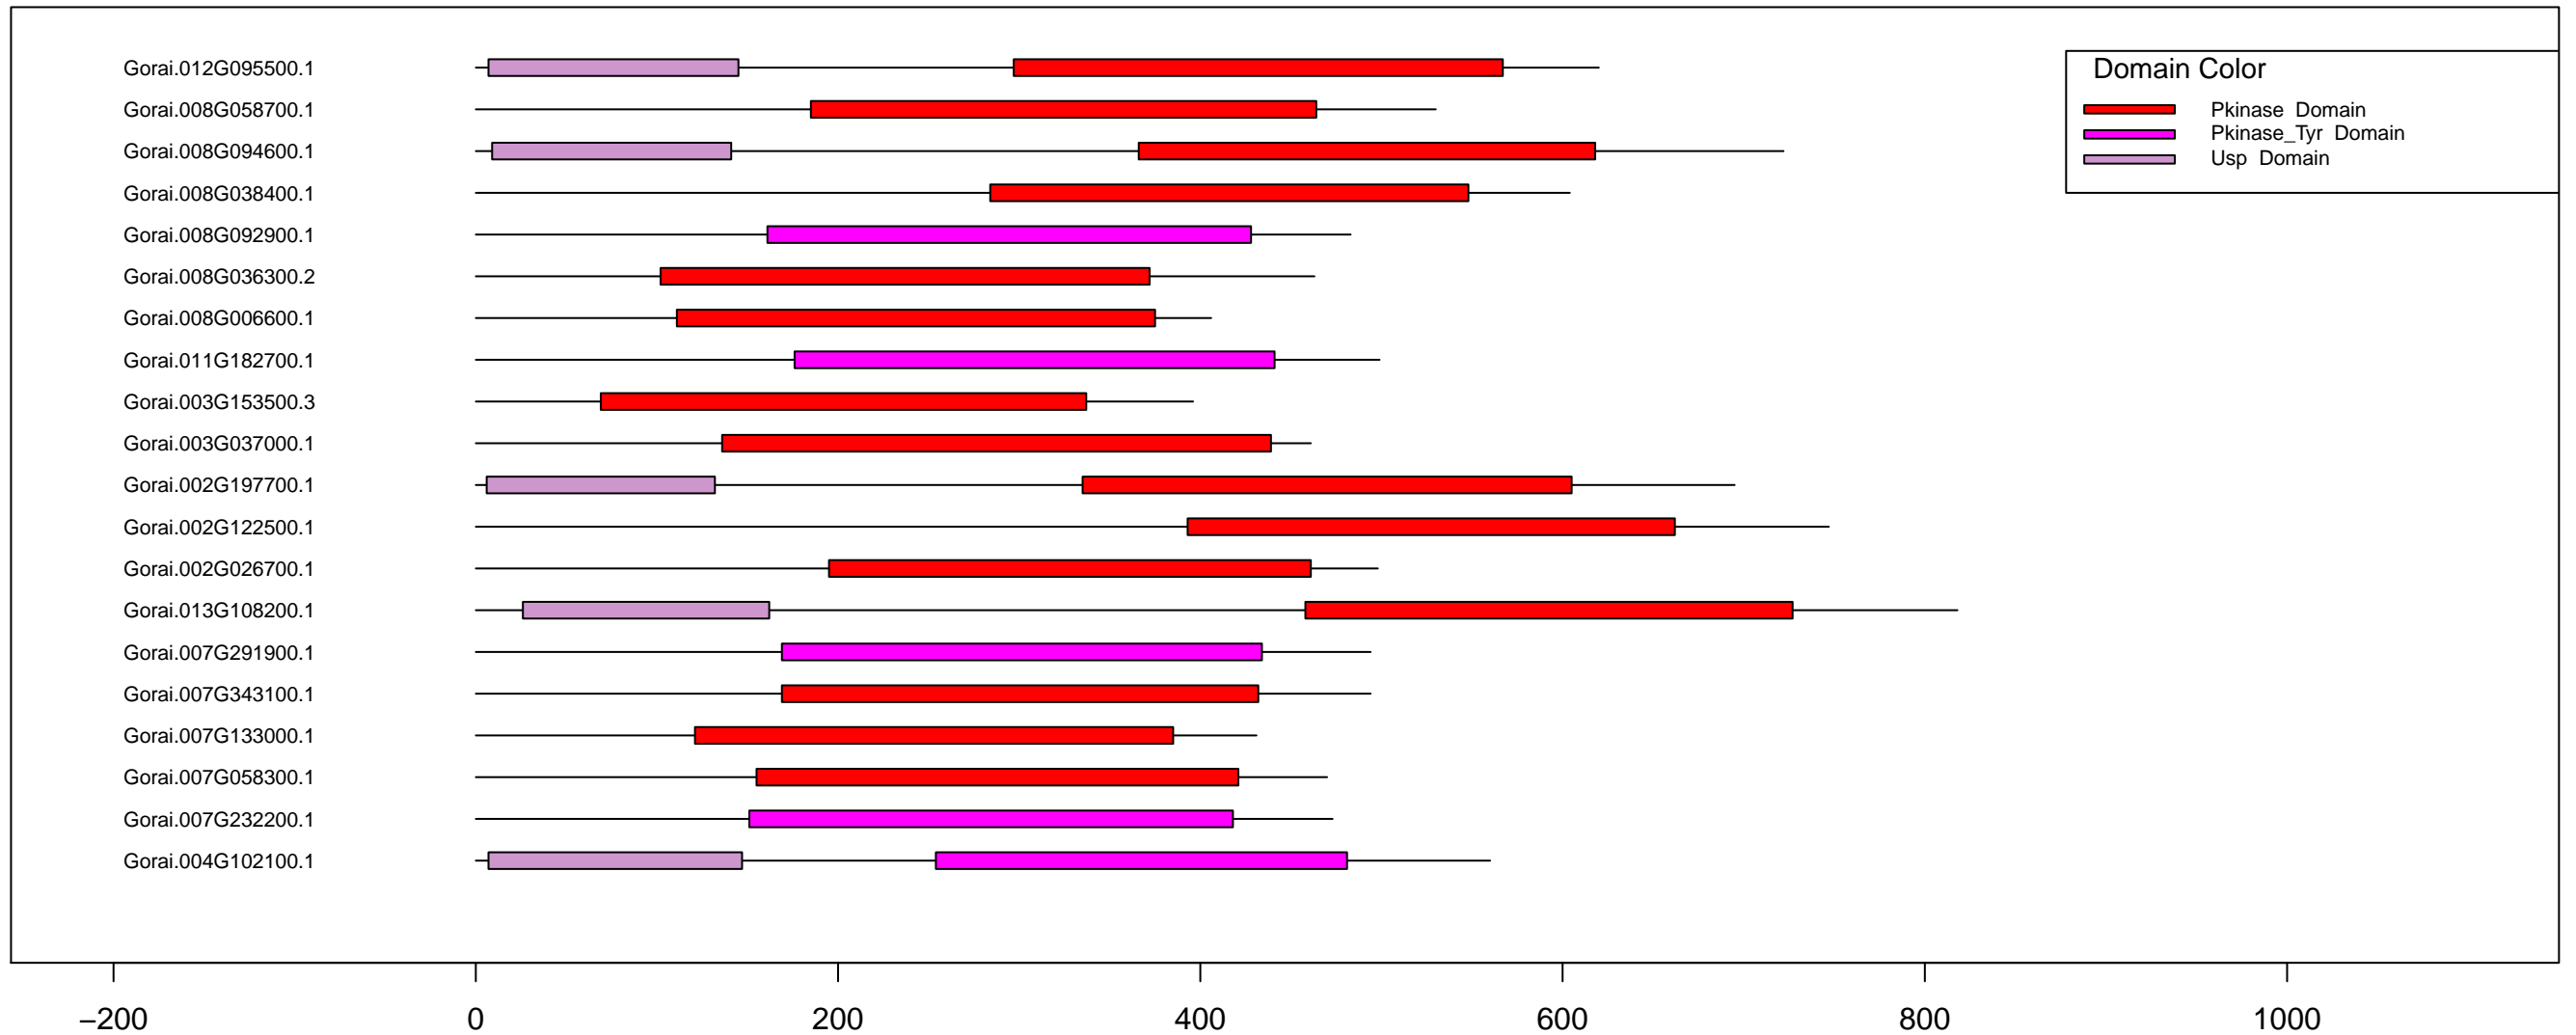

# G.ra RLK-Pelle\_RLCK-VI domain diagram (part 2)

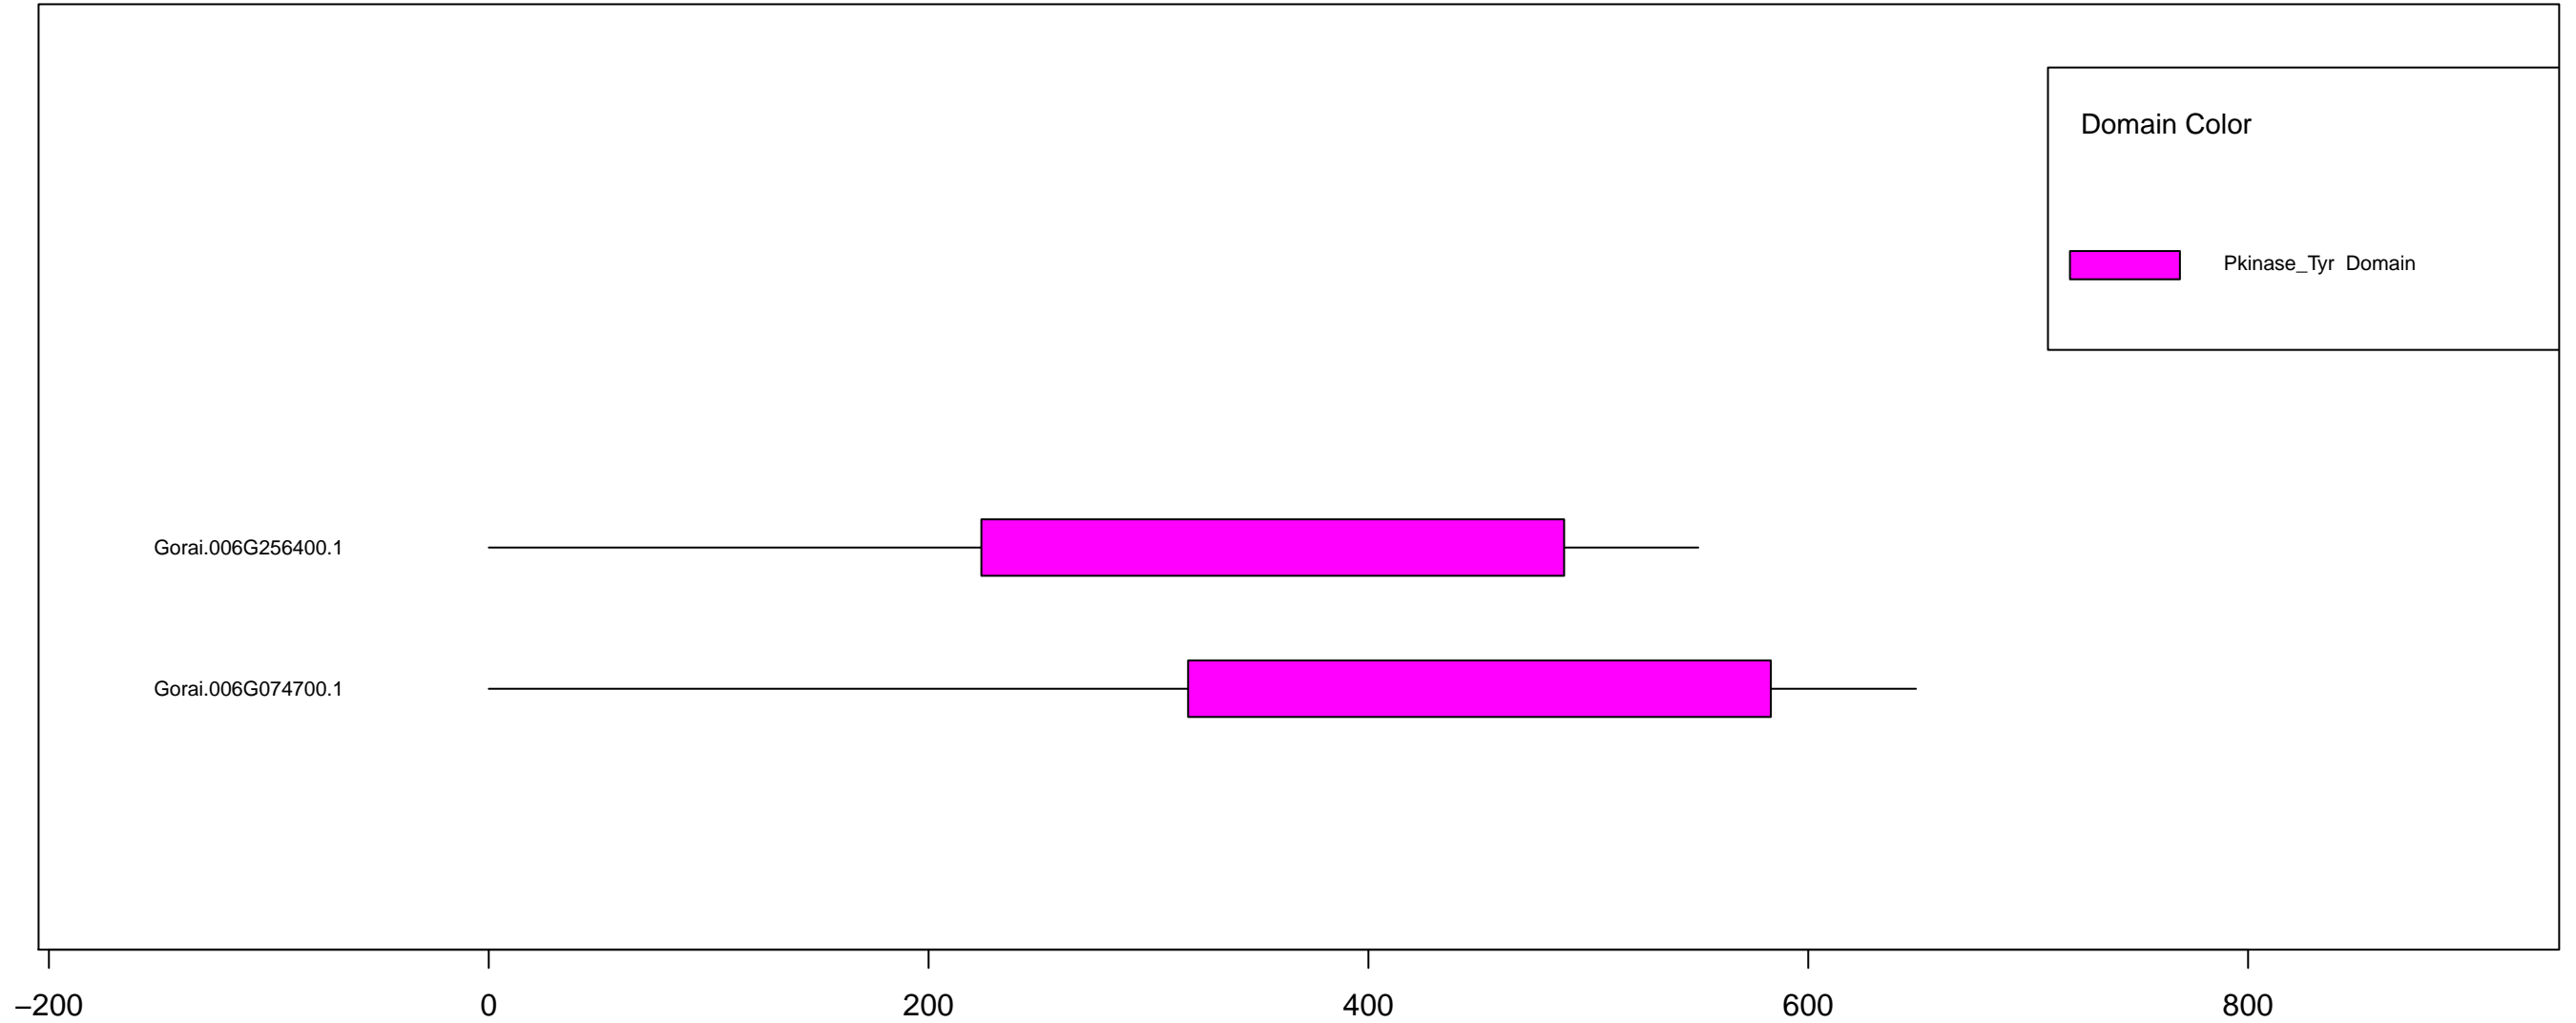

### G.ra RLK-Pelle\_RLCK-V domain diagram (all)

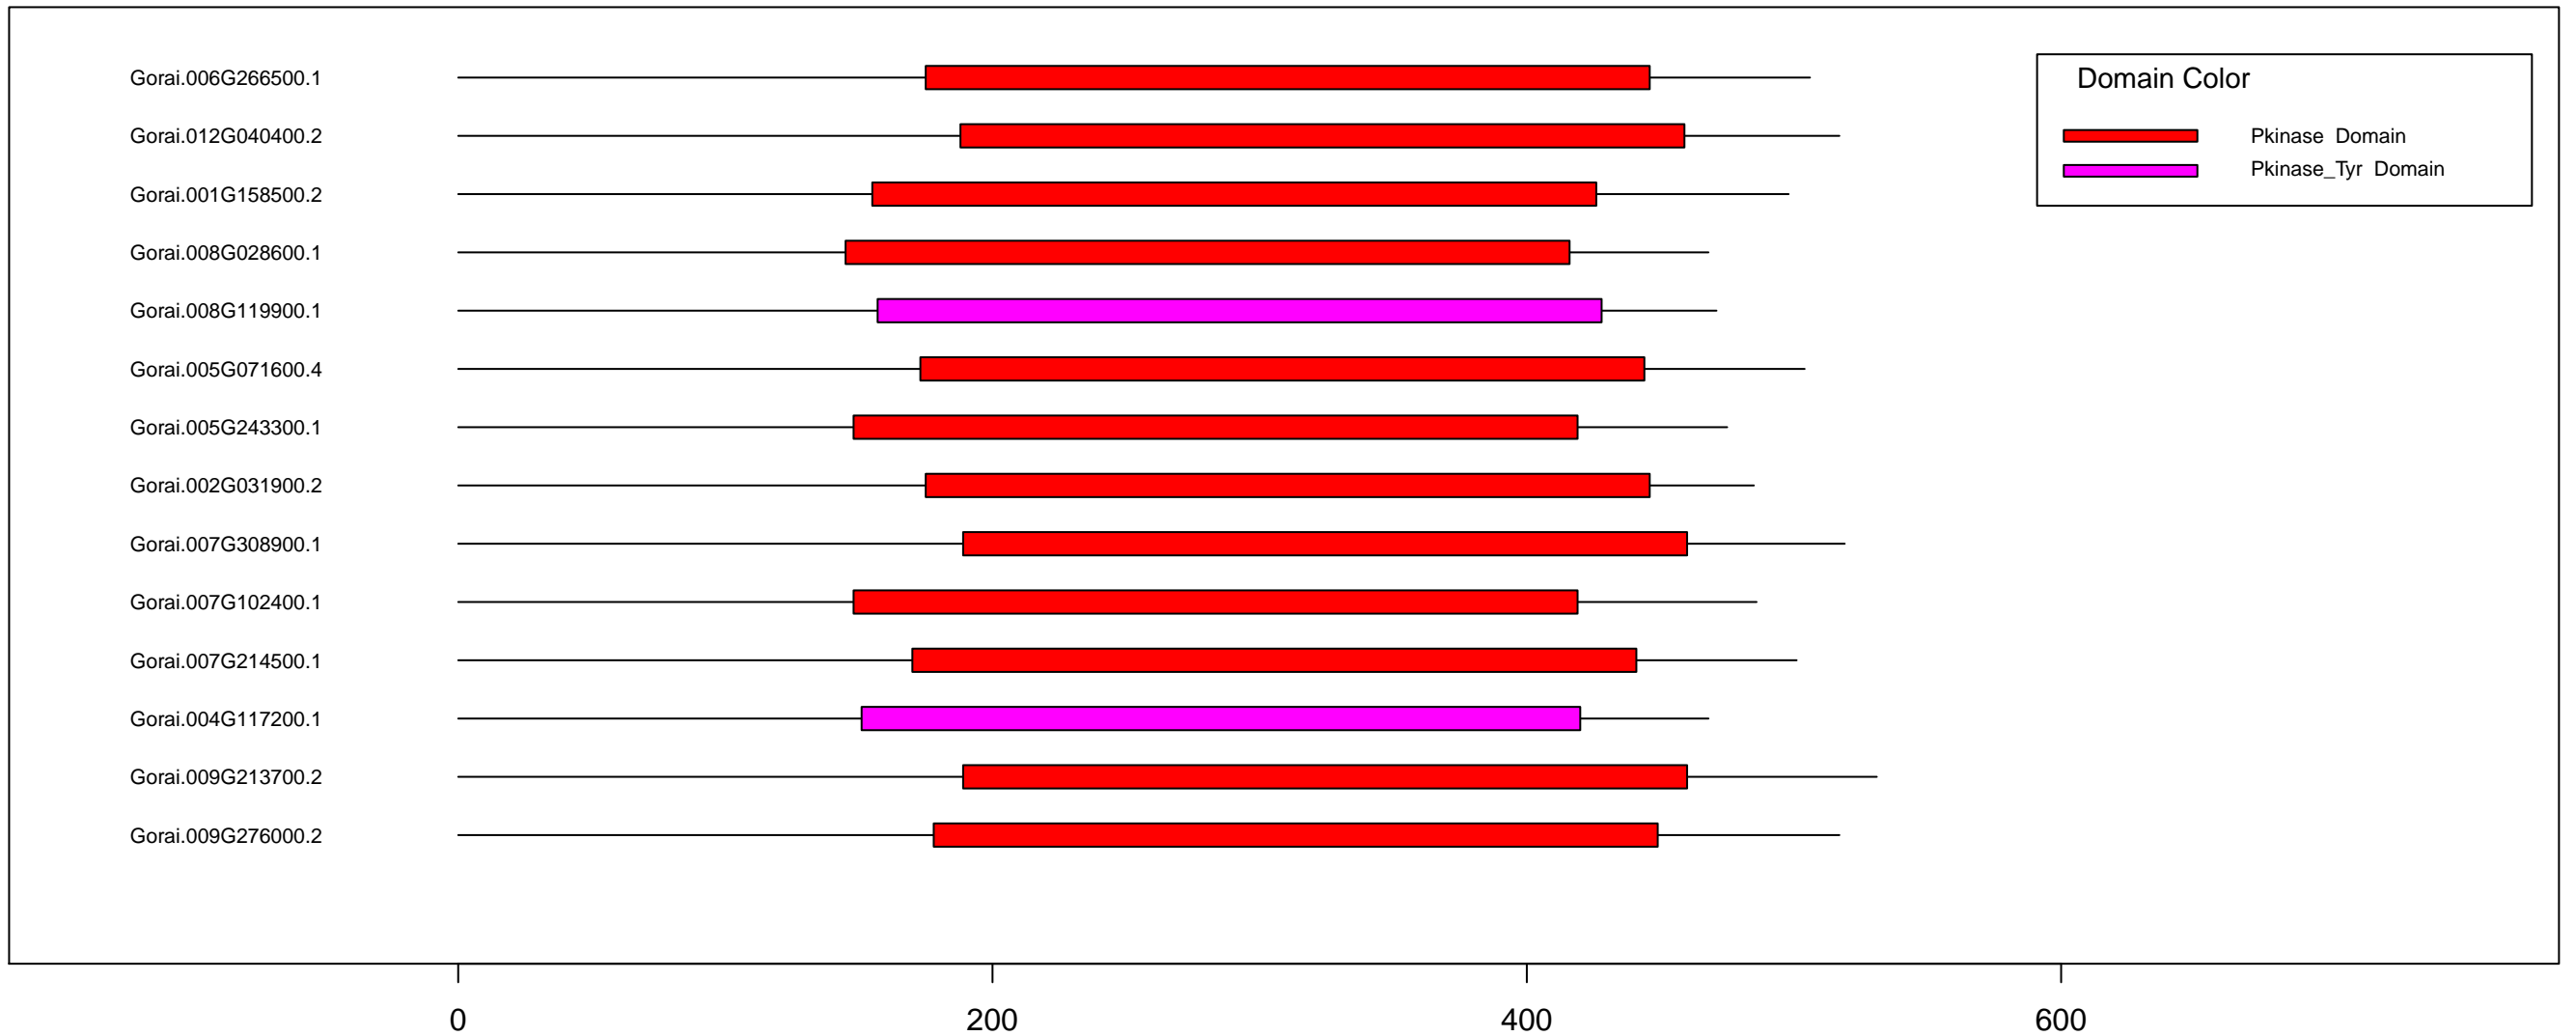

# G.ra RLK-Pelle\_RLCK-XII-1 domain diagram (all)

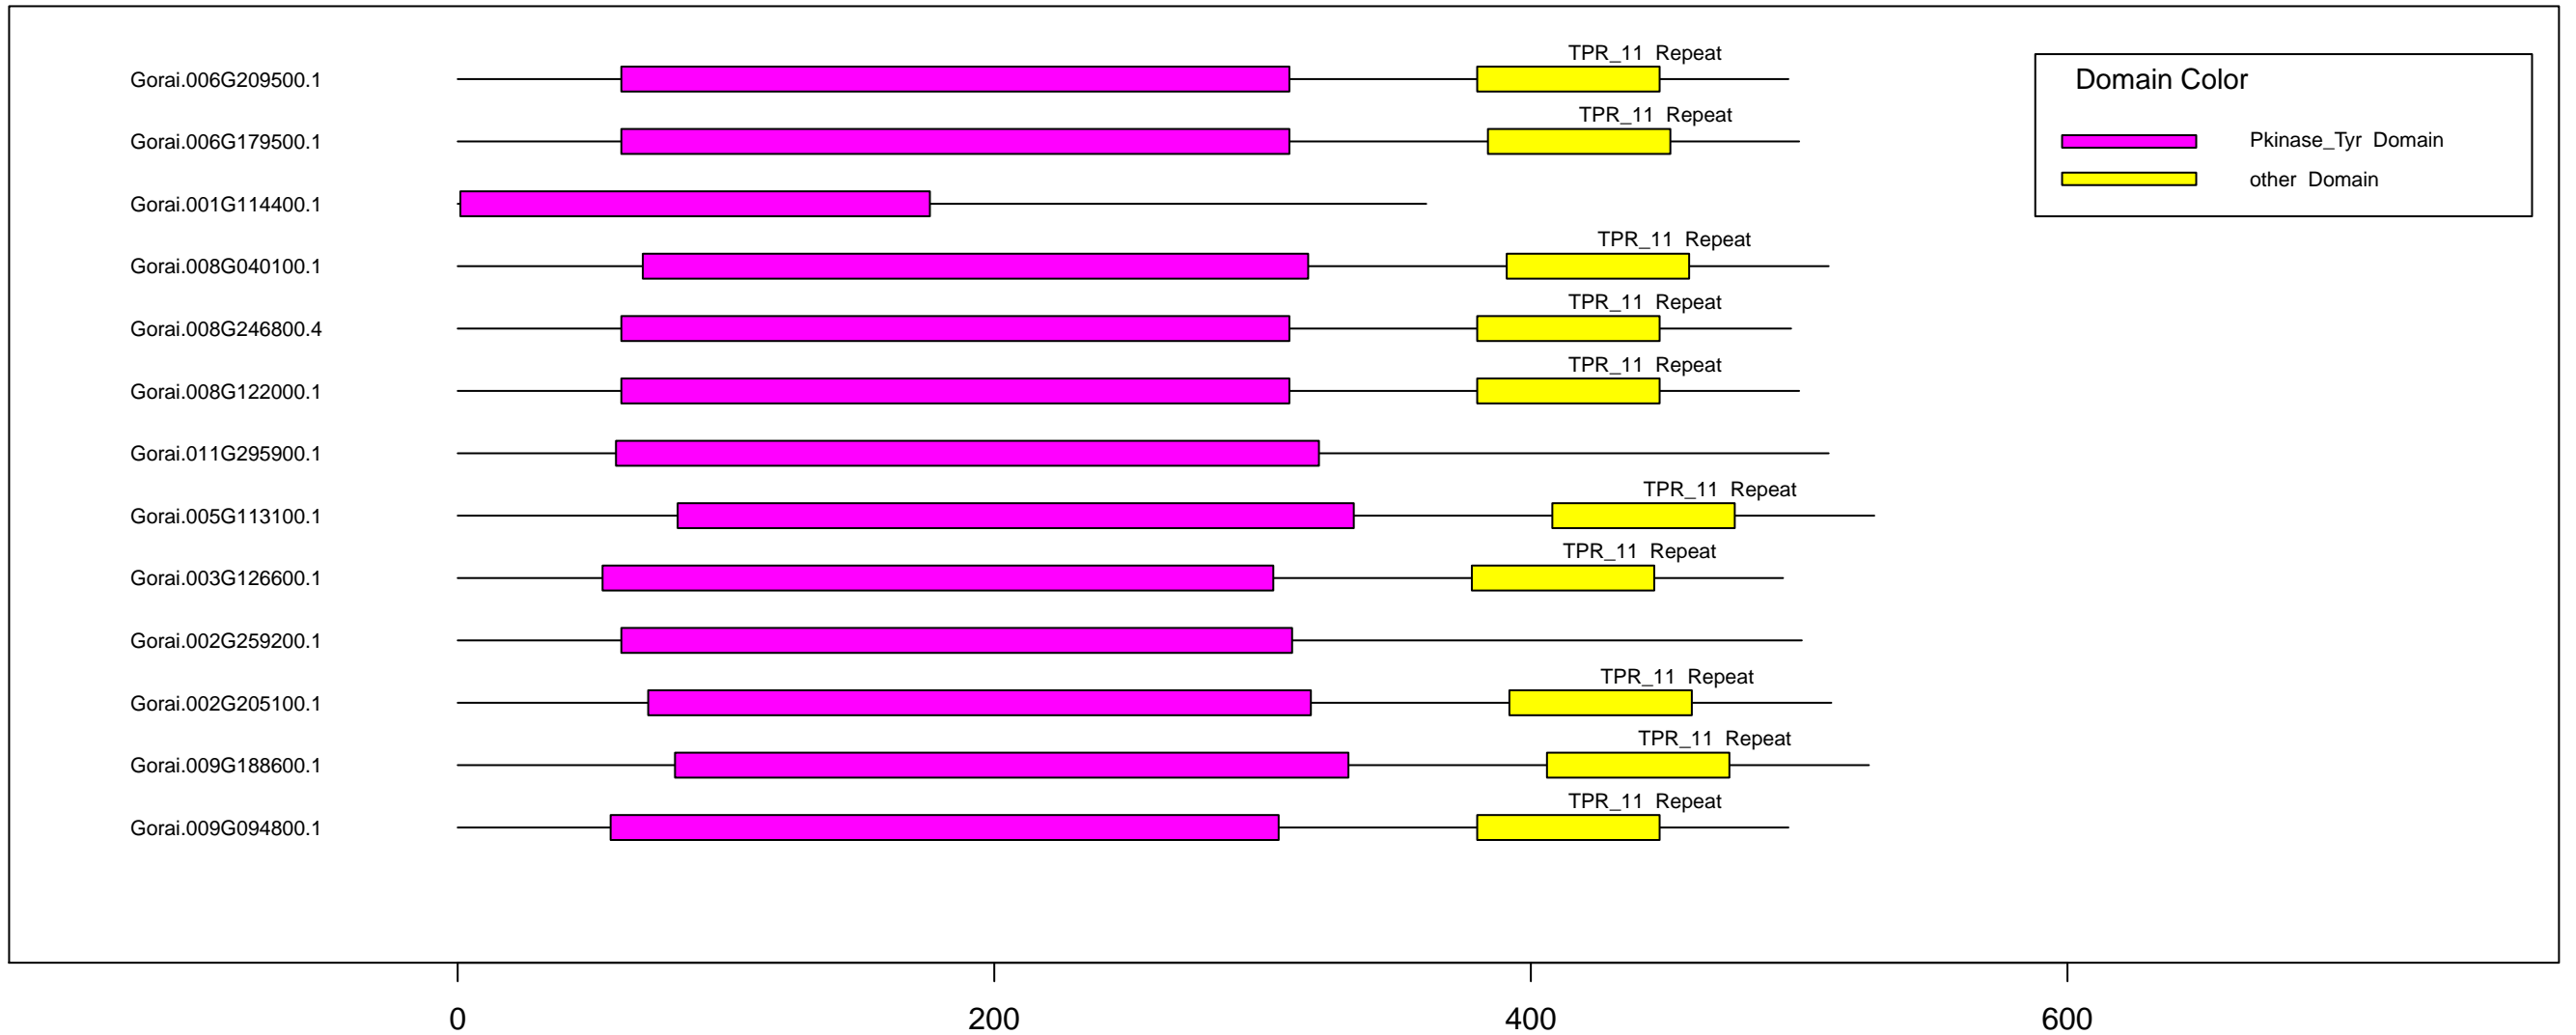

# G.ra RLK-Pelle\_RLCK-XIII domain diagram (all)

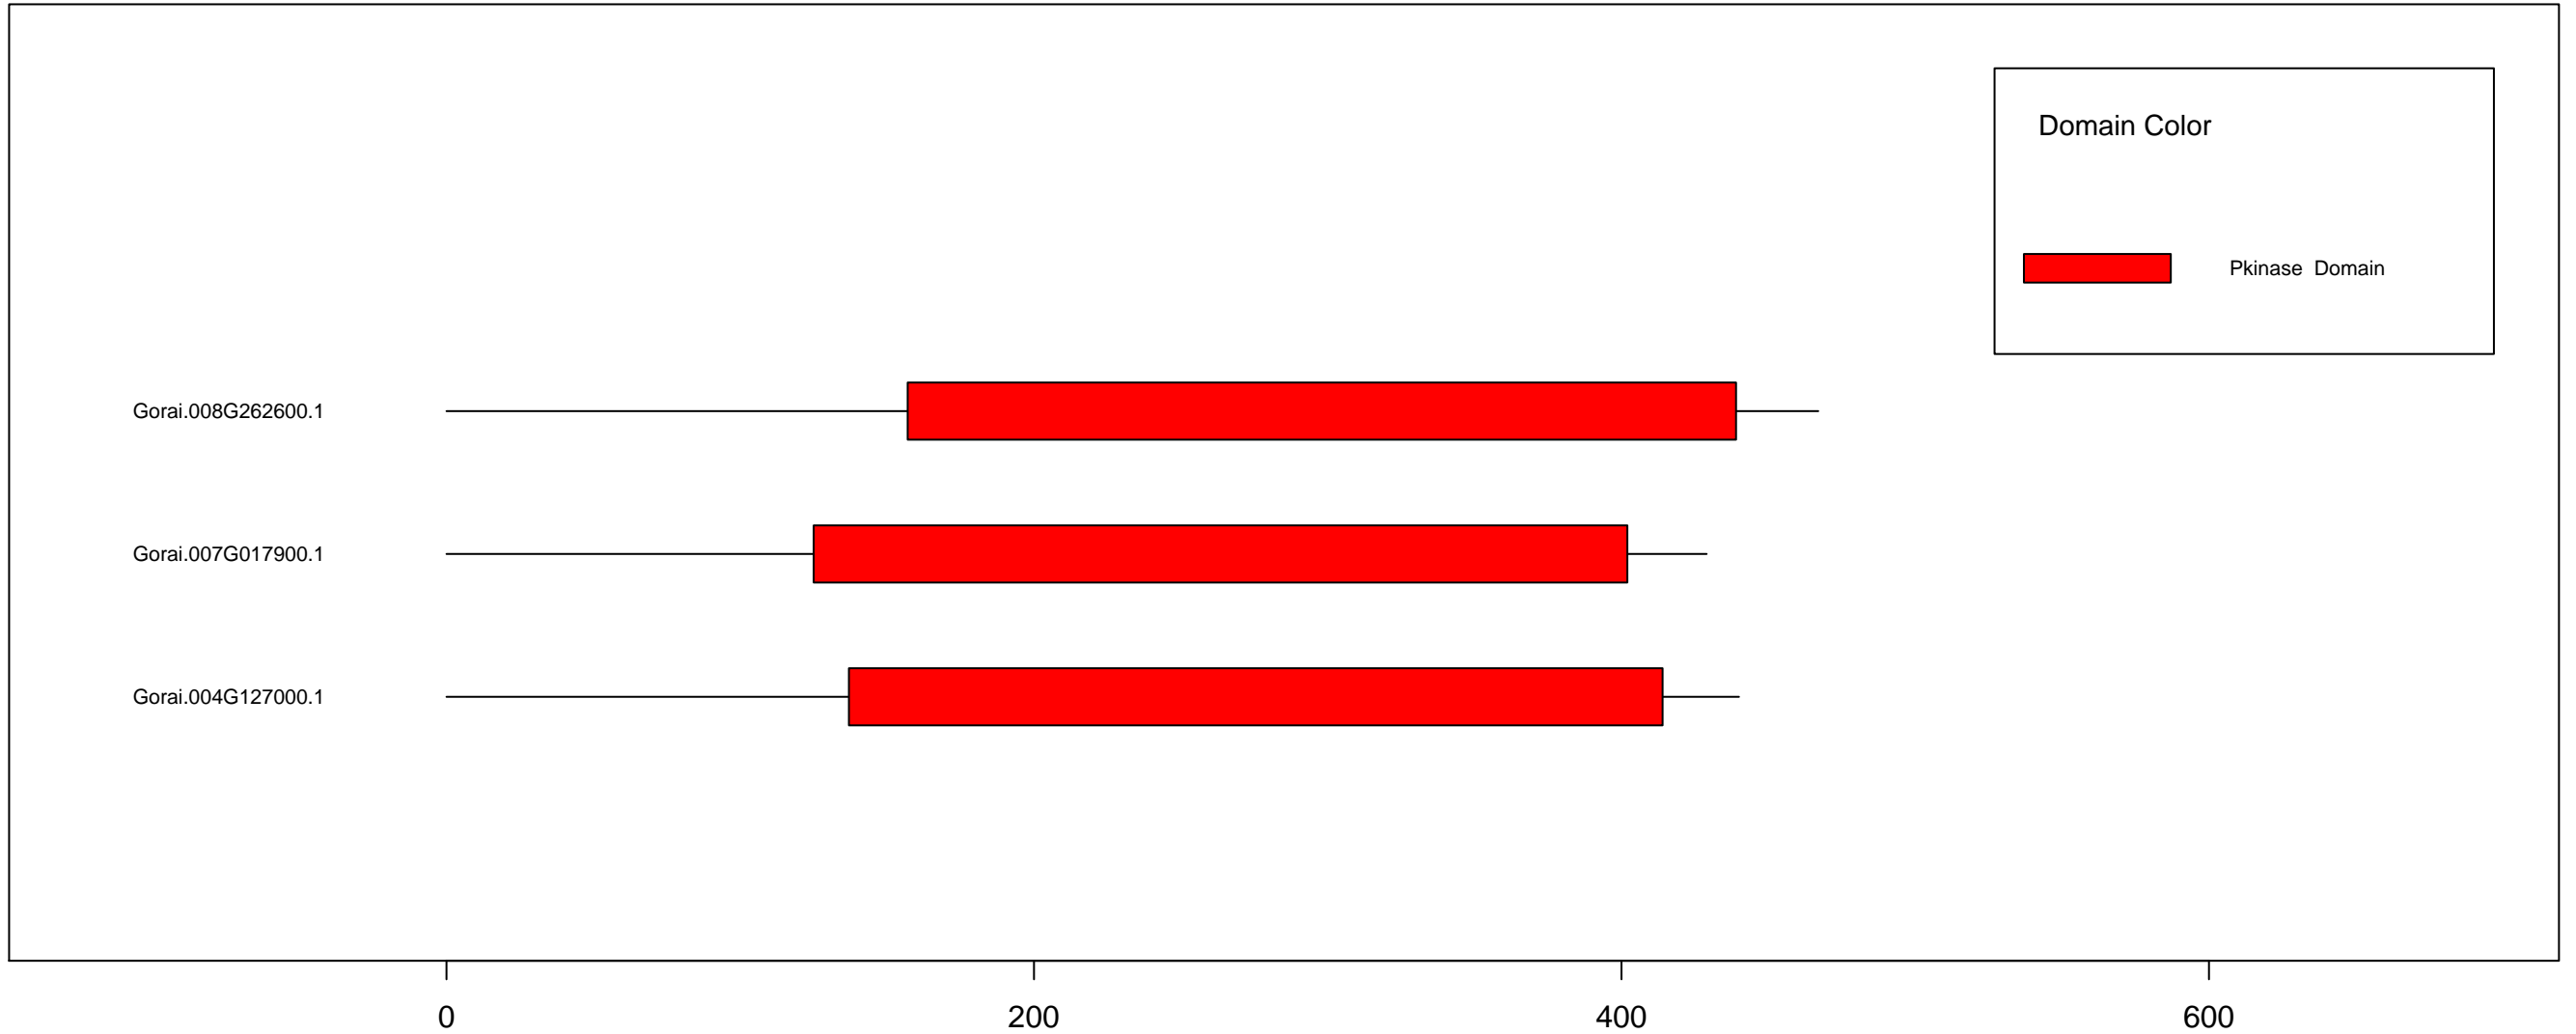



# G.ra RLK-Pelle\_RLCK-XI domain diagram (all)

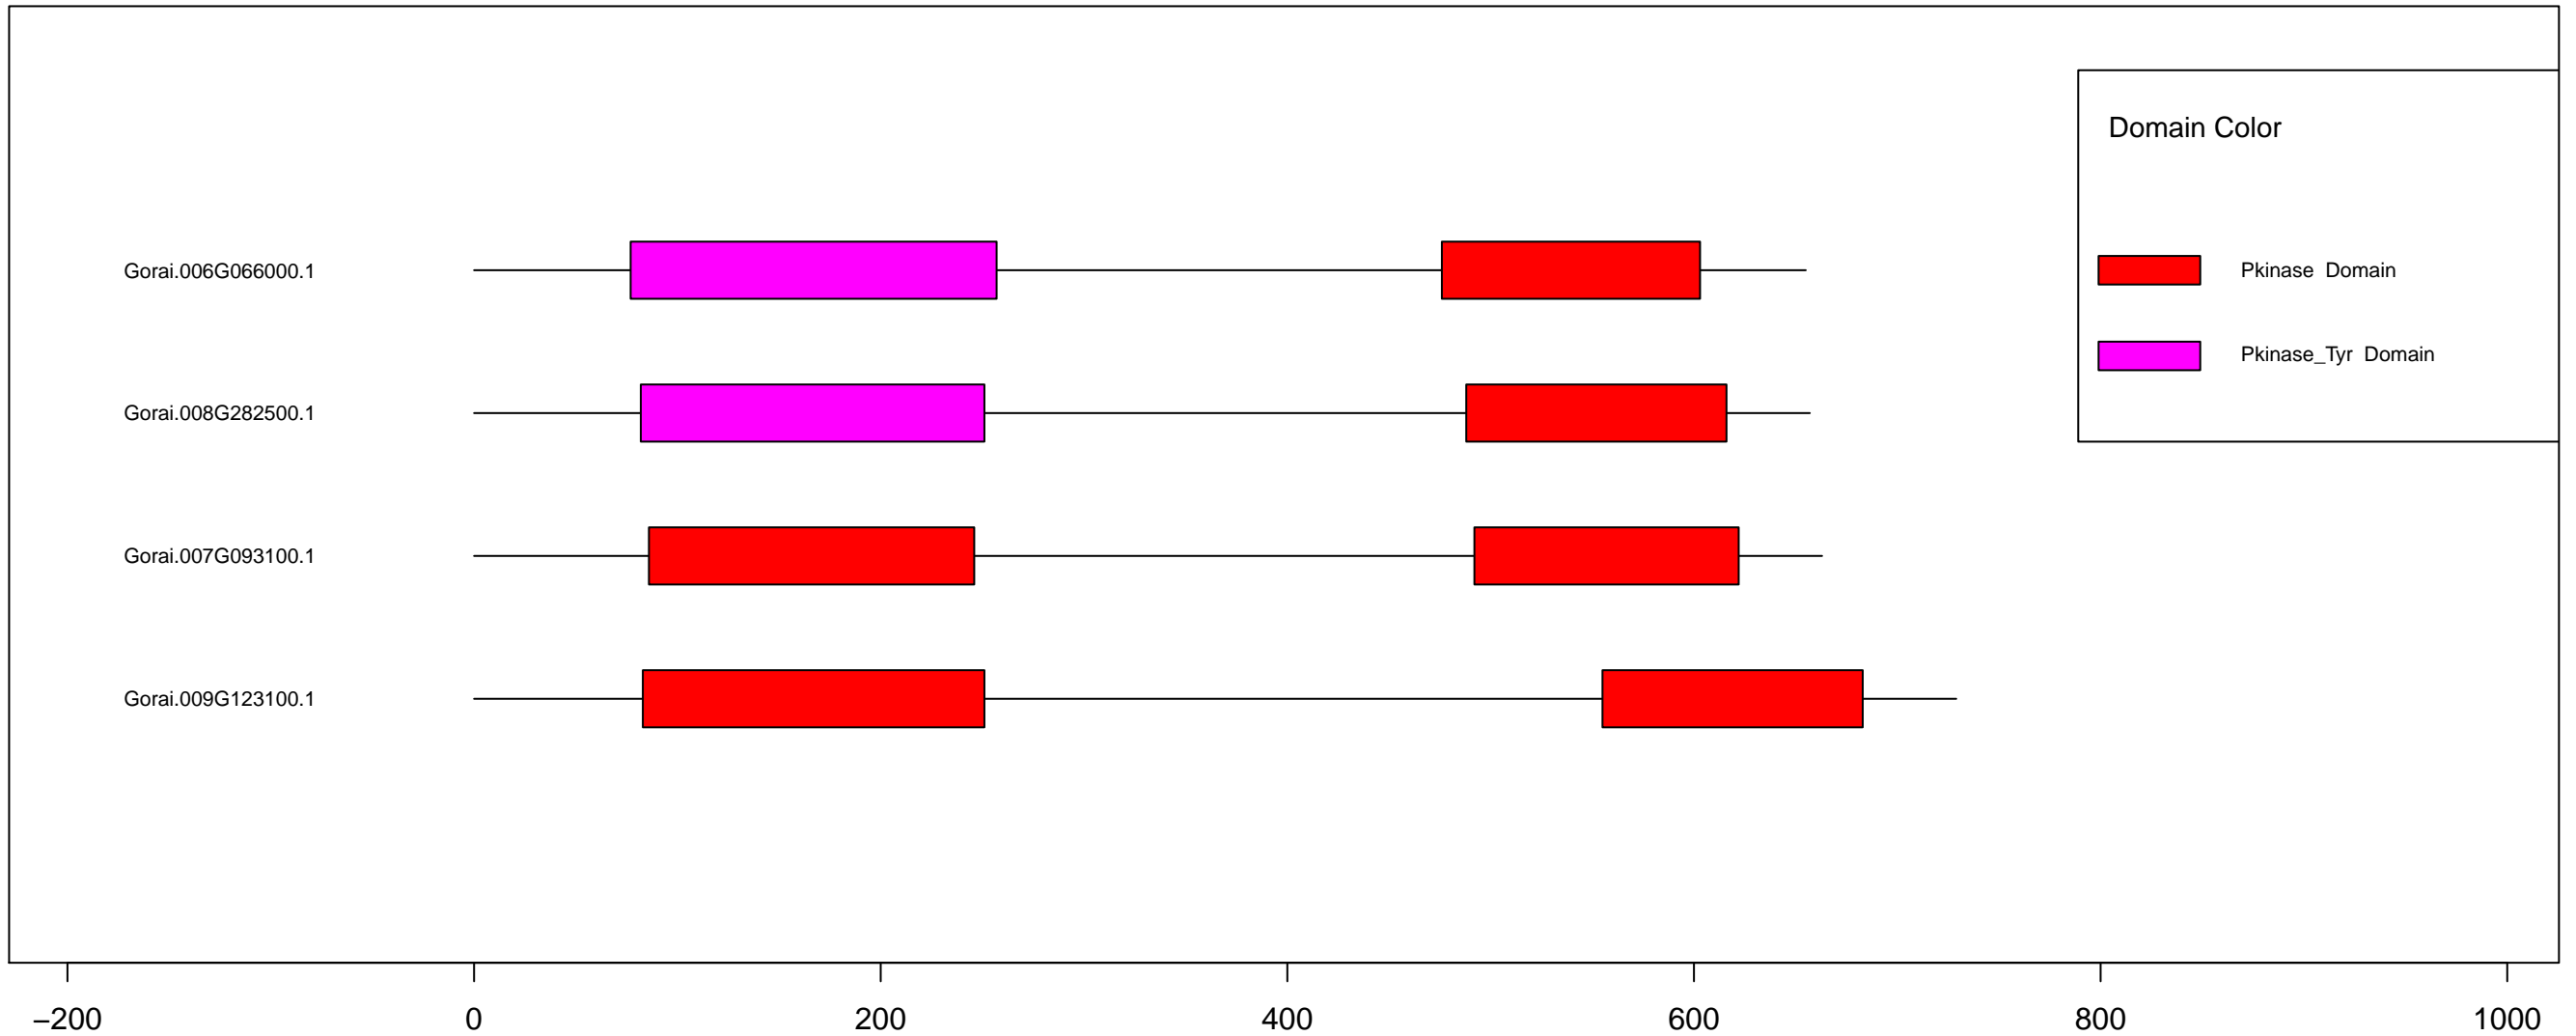

### G.ra RLK-Pelle\_RLCK-X domain diagram (all)

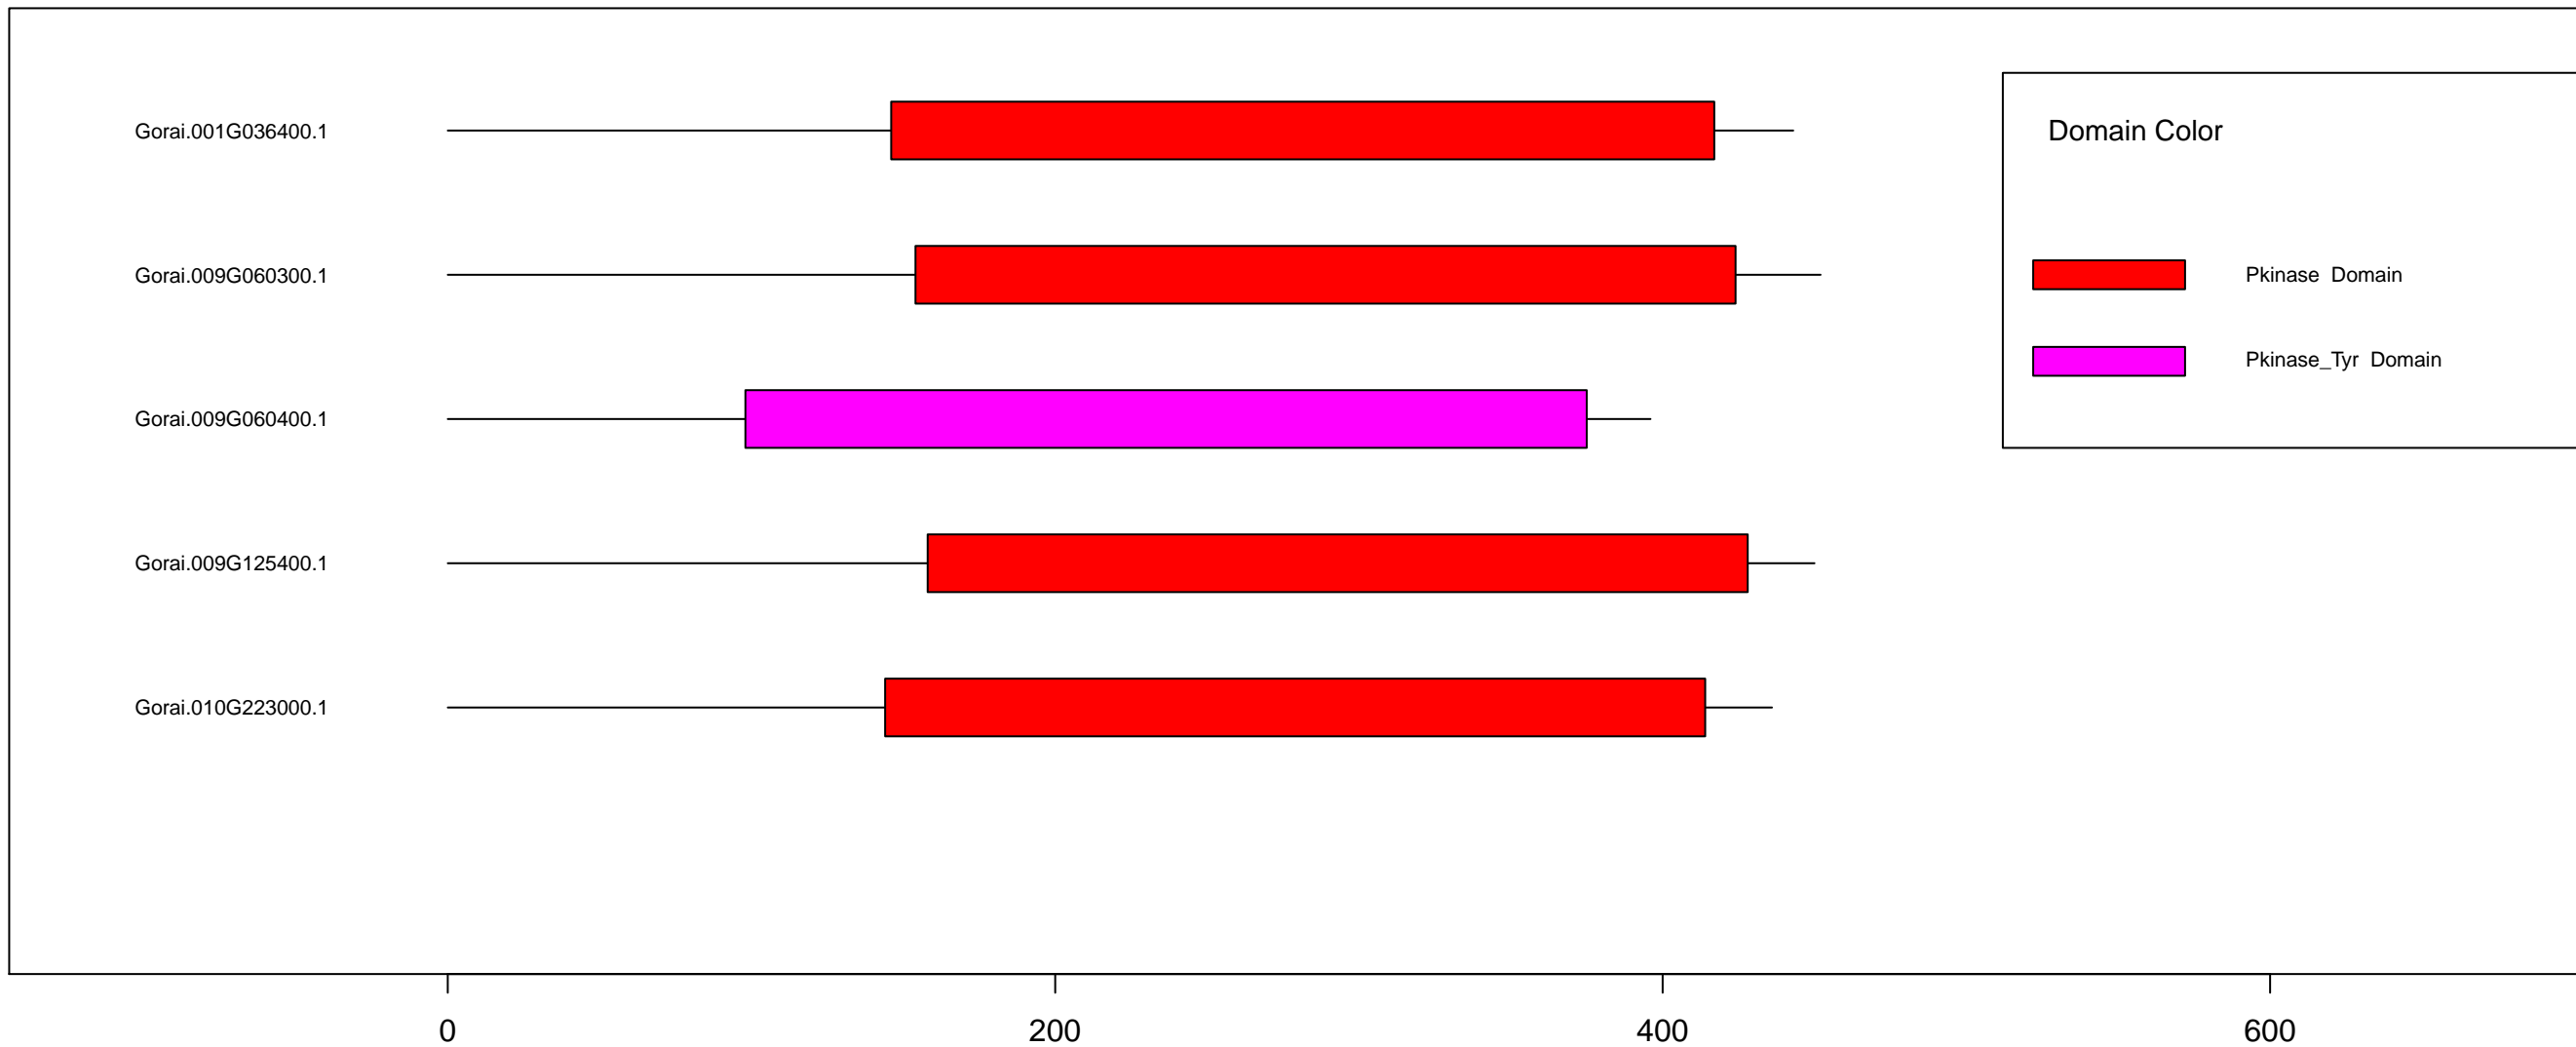

# G.ra RLK-Pelle\_RLCK-XVI domain diagram (all)

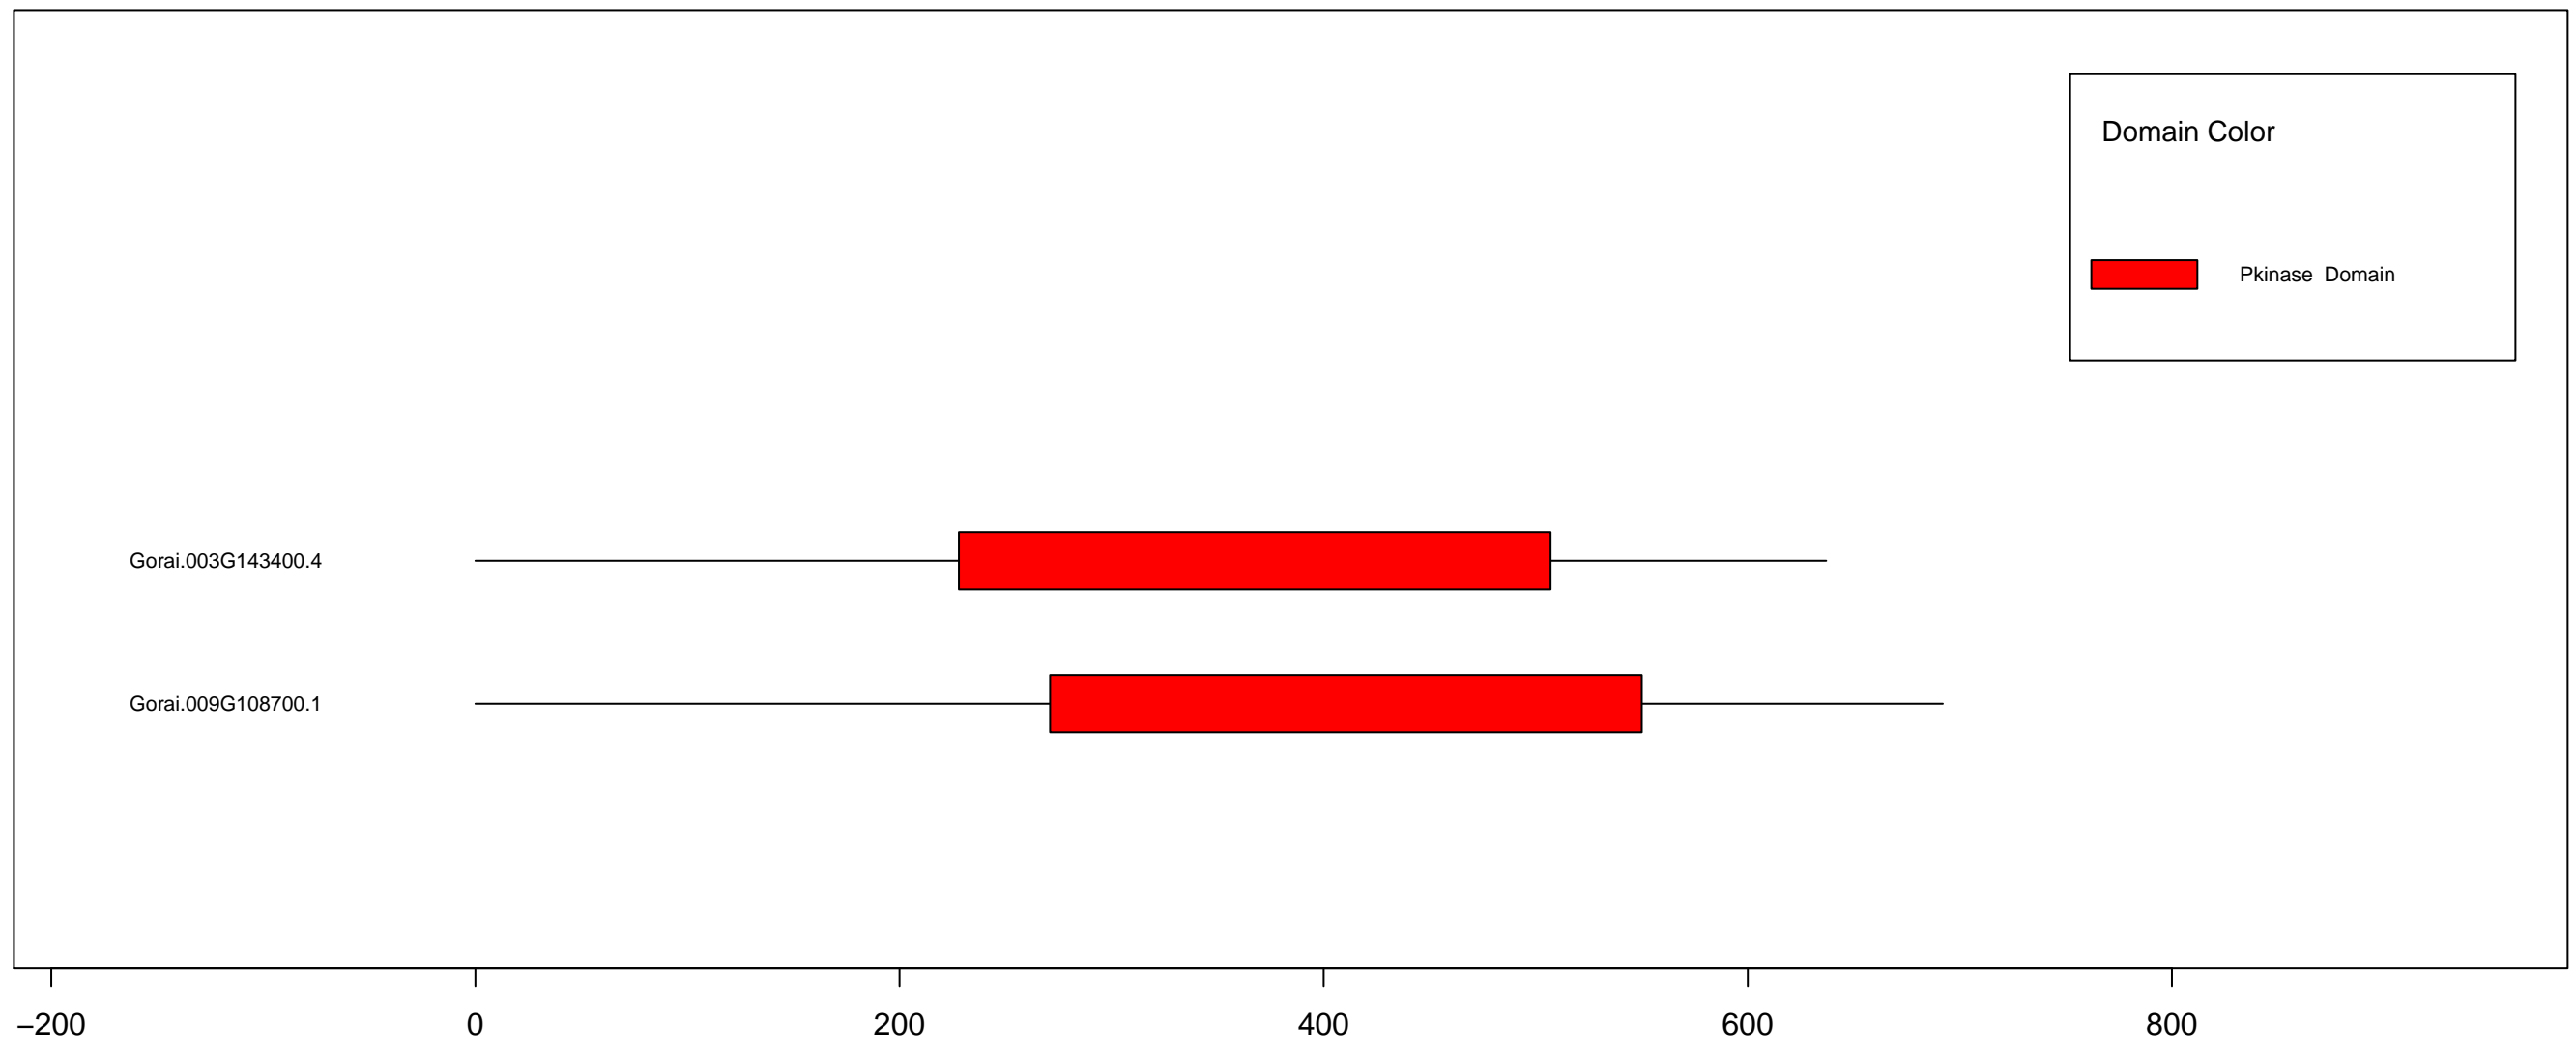

# G.ra RLK-Pelle\_RLCK-XV domain diagram (all)

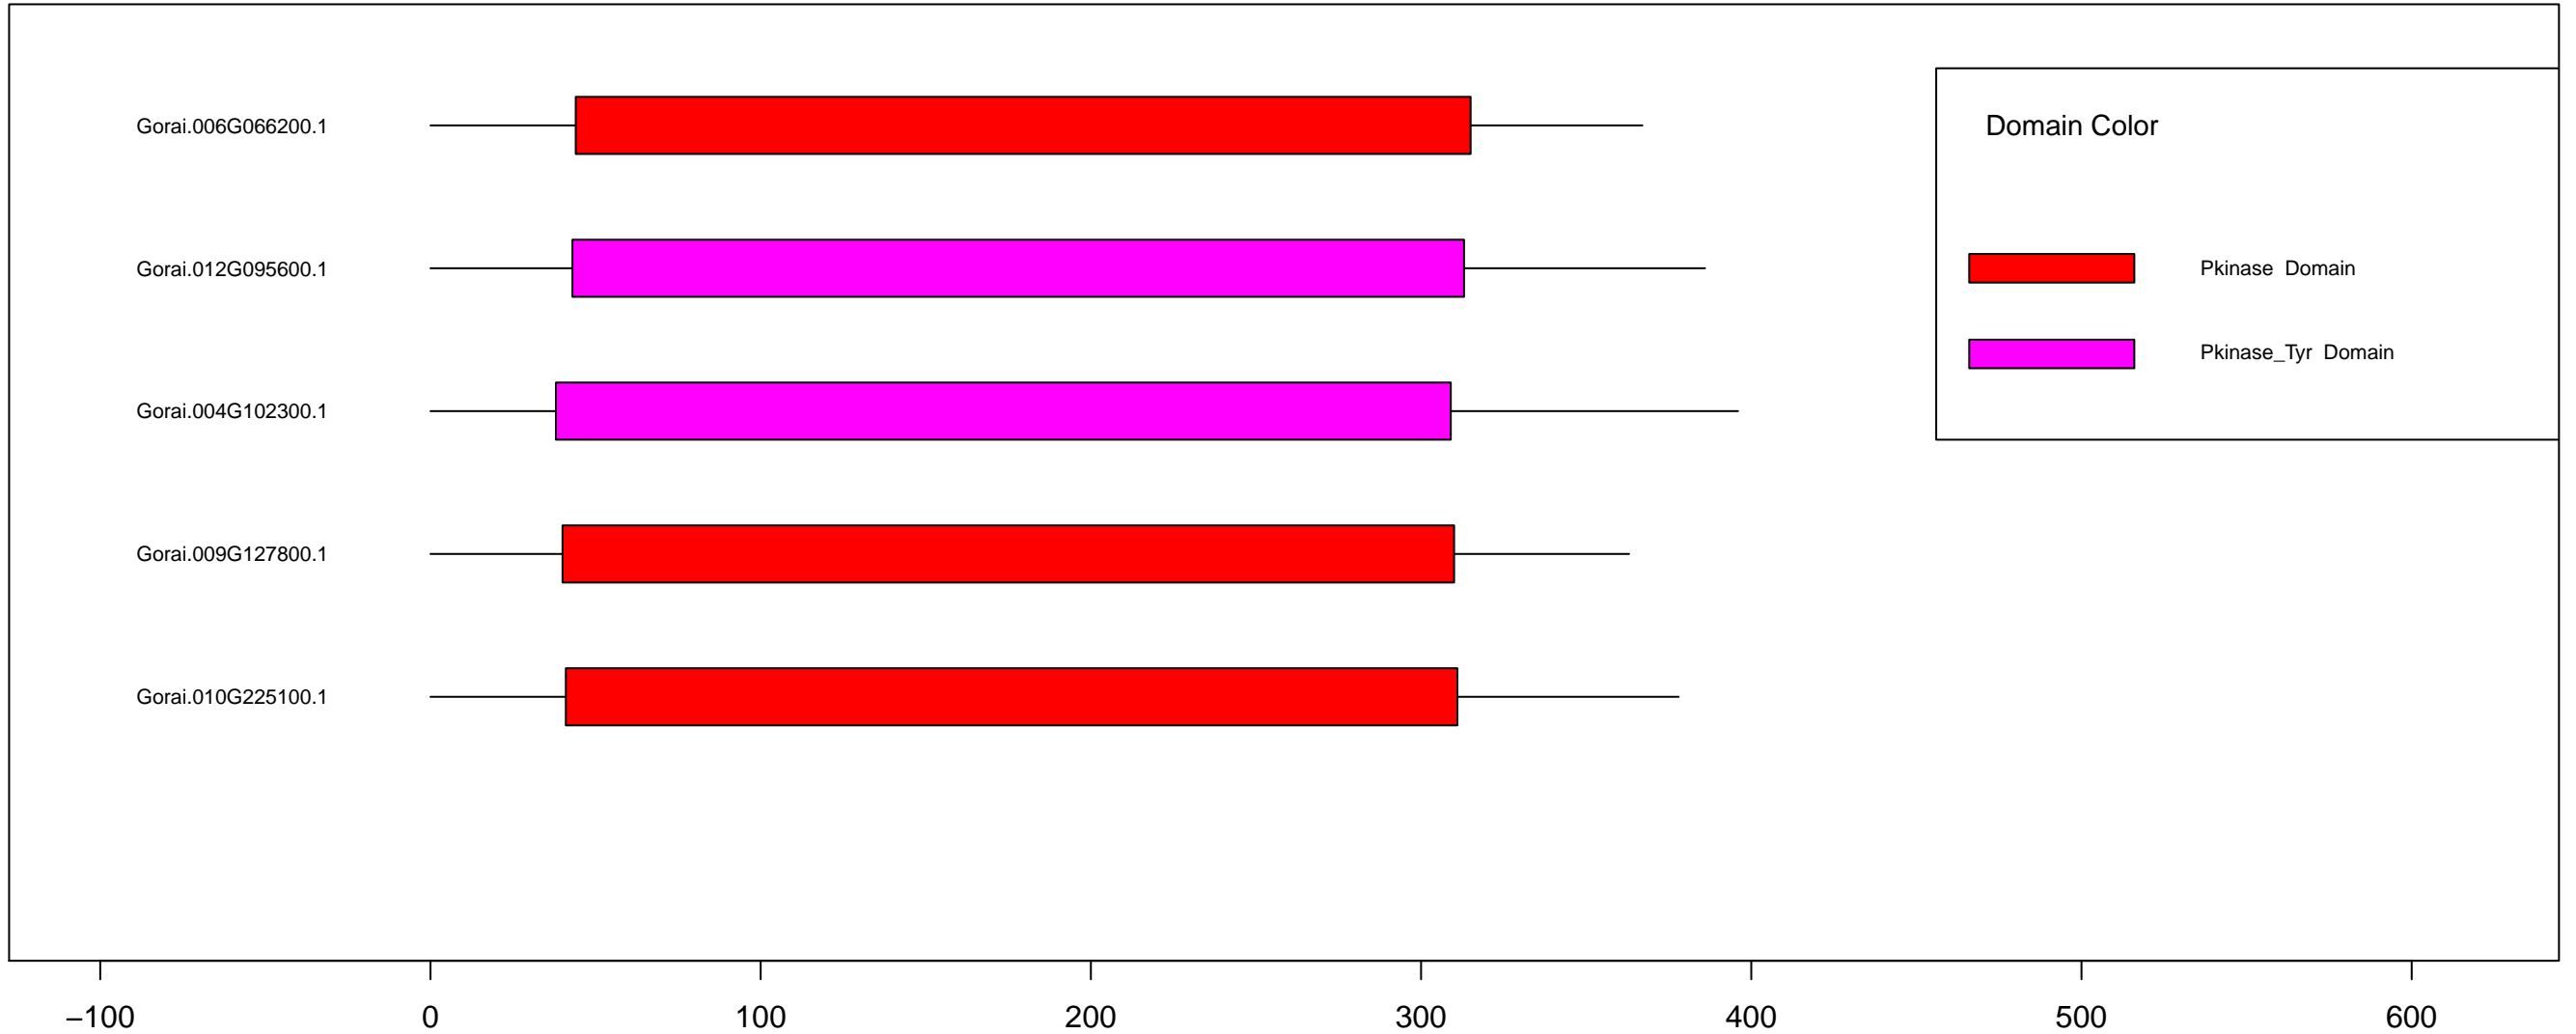

# G.ra RLK-Pelle\_SD-2b domain diagram (part 1)

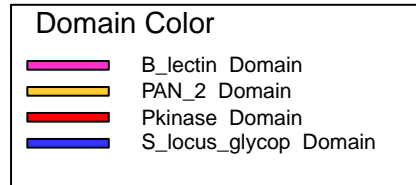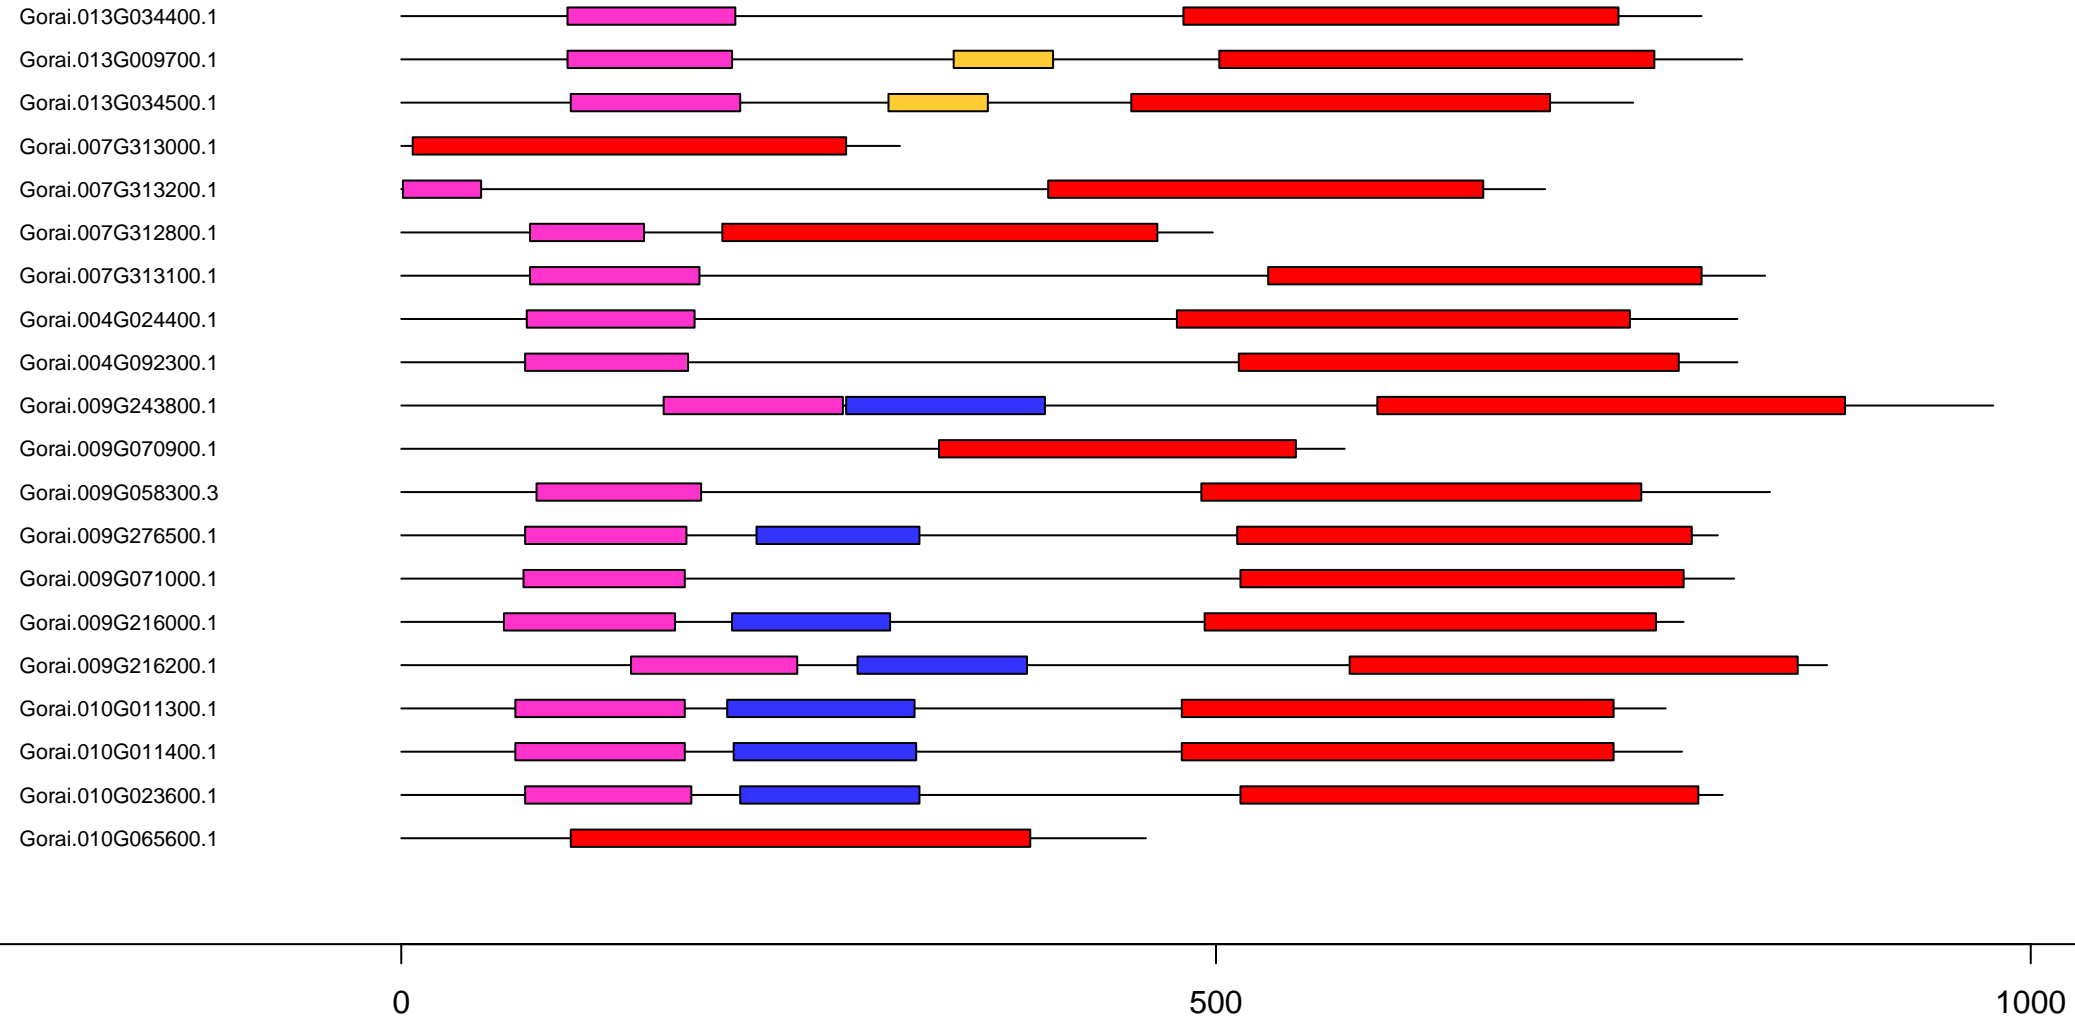

### G.ra RLK-Pelle\_SD-2b domain diagram (part 2)

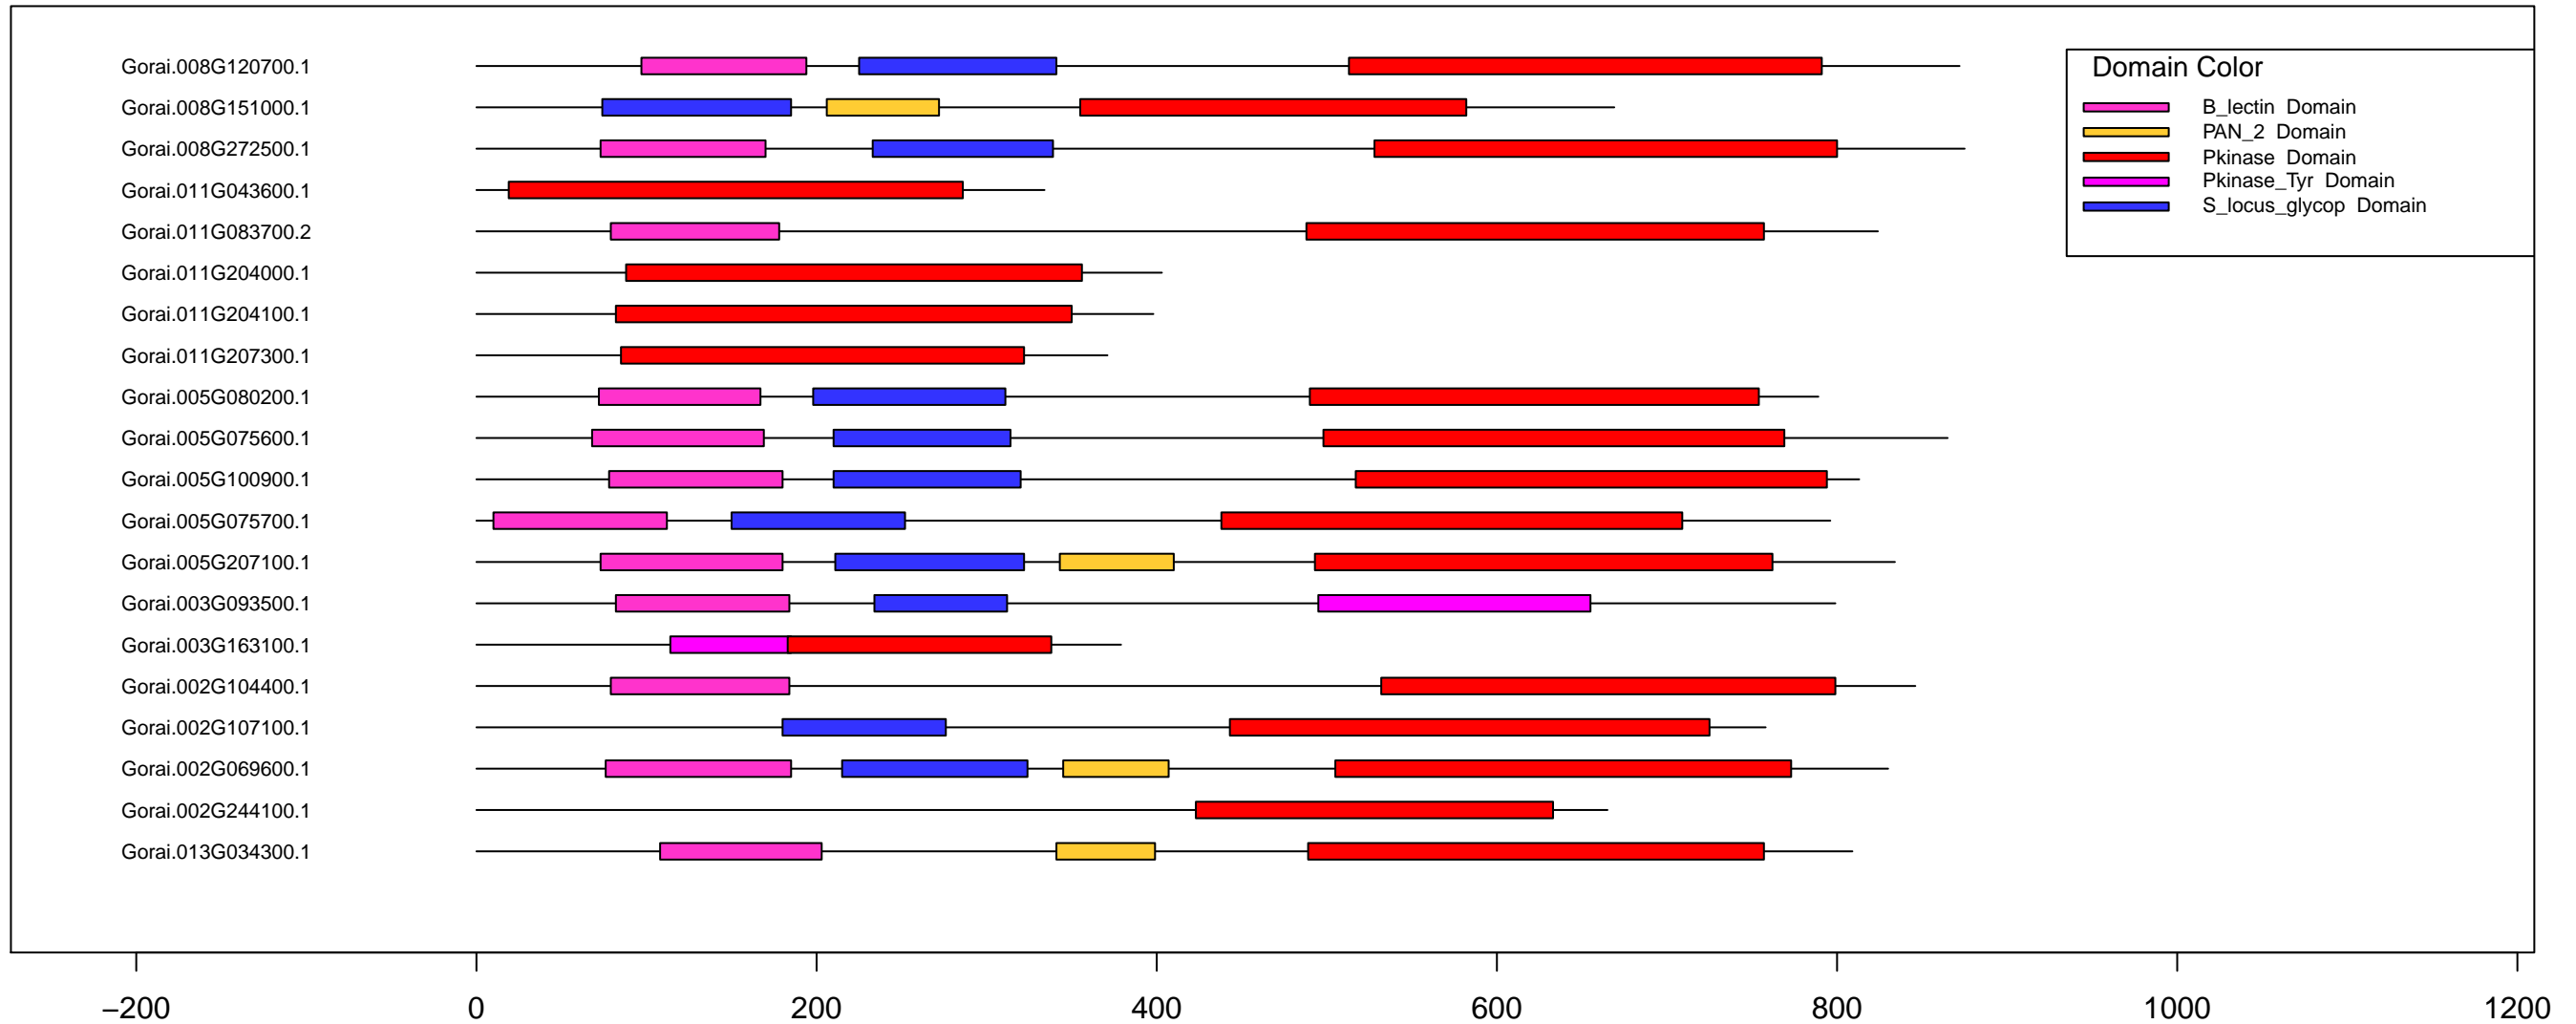

### G.ra RLK-Pelle\_SD-2b domain diagram (part 3)

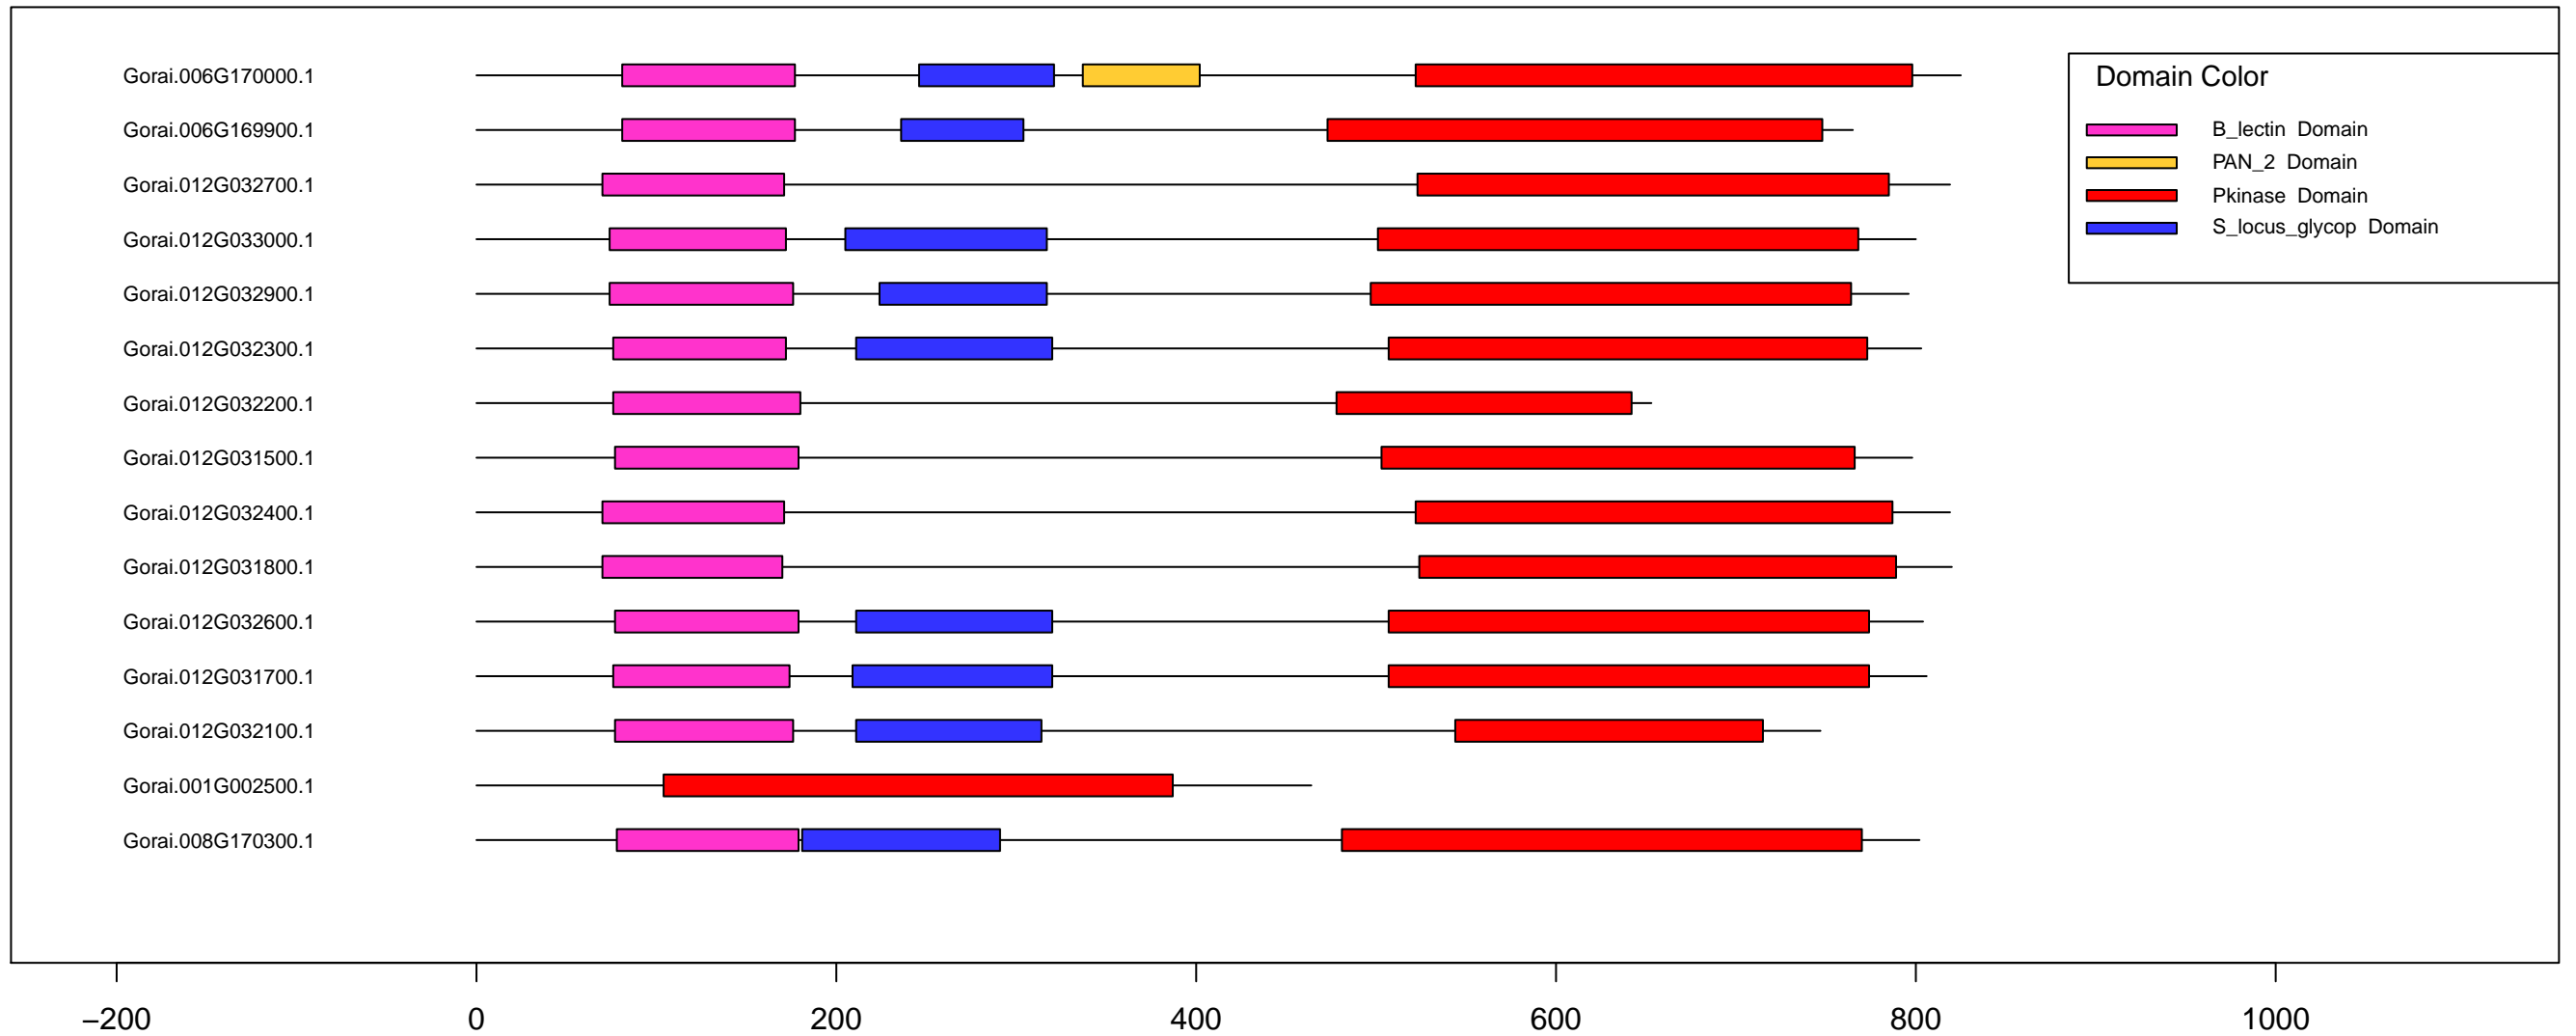

# G.ra RLK-Pelle\_Singleton domain diagram (all)

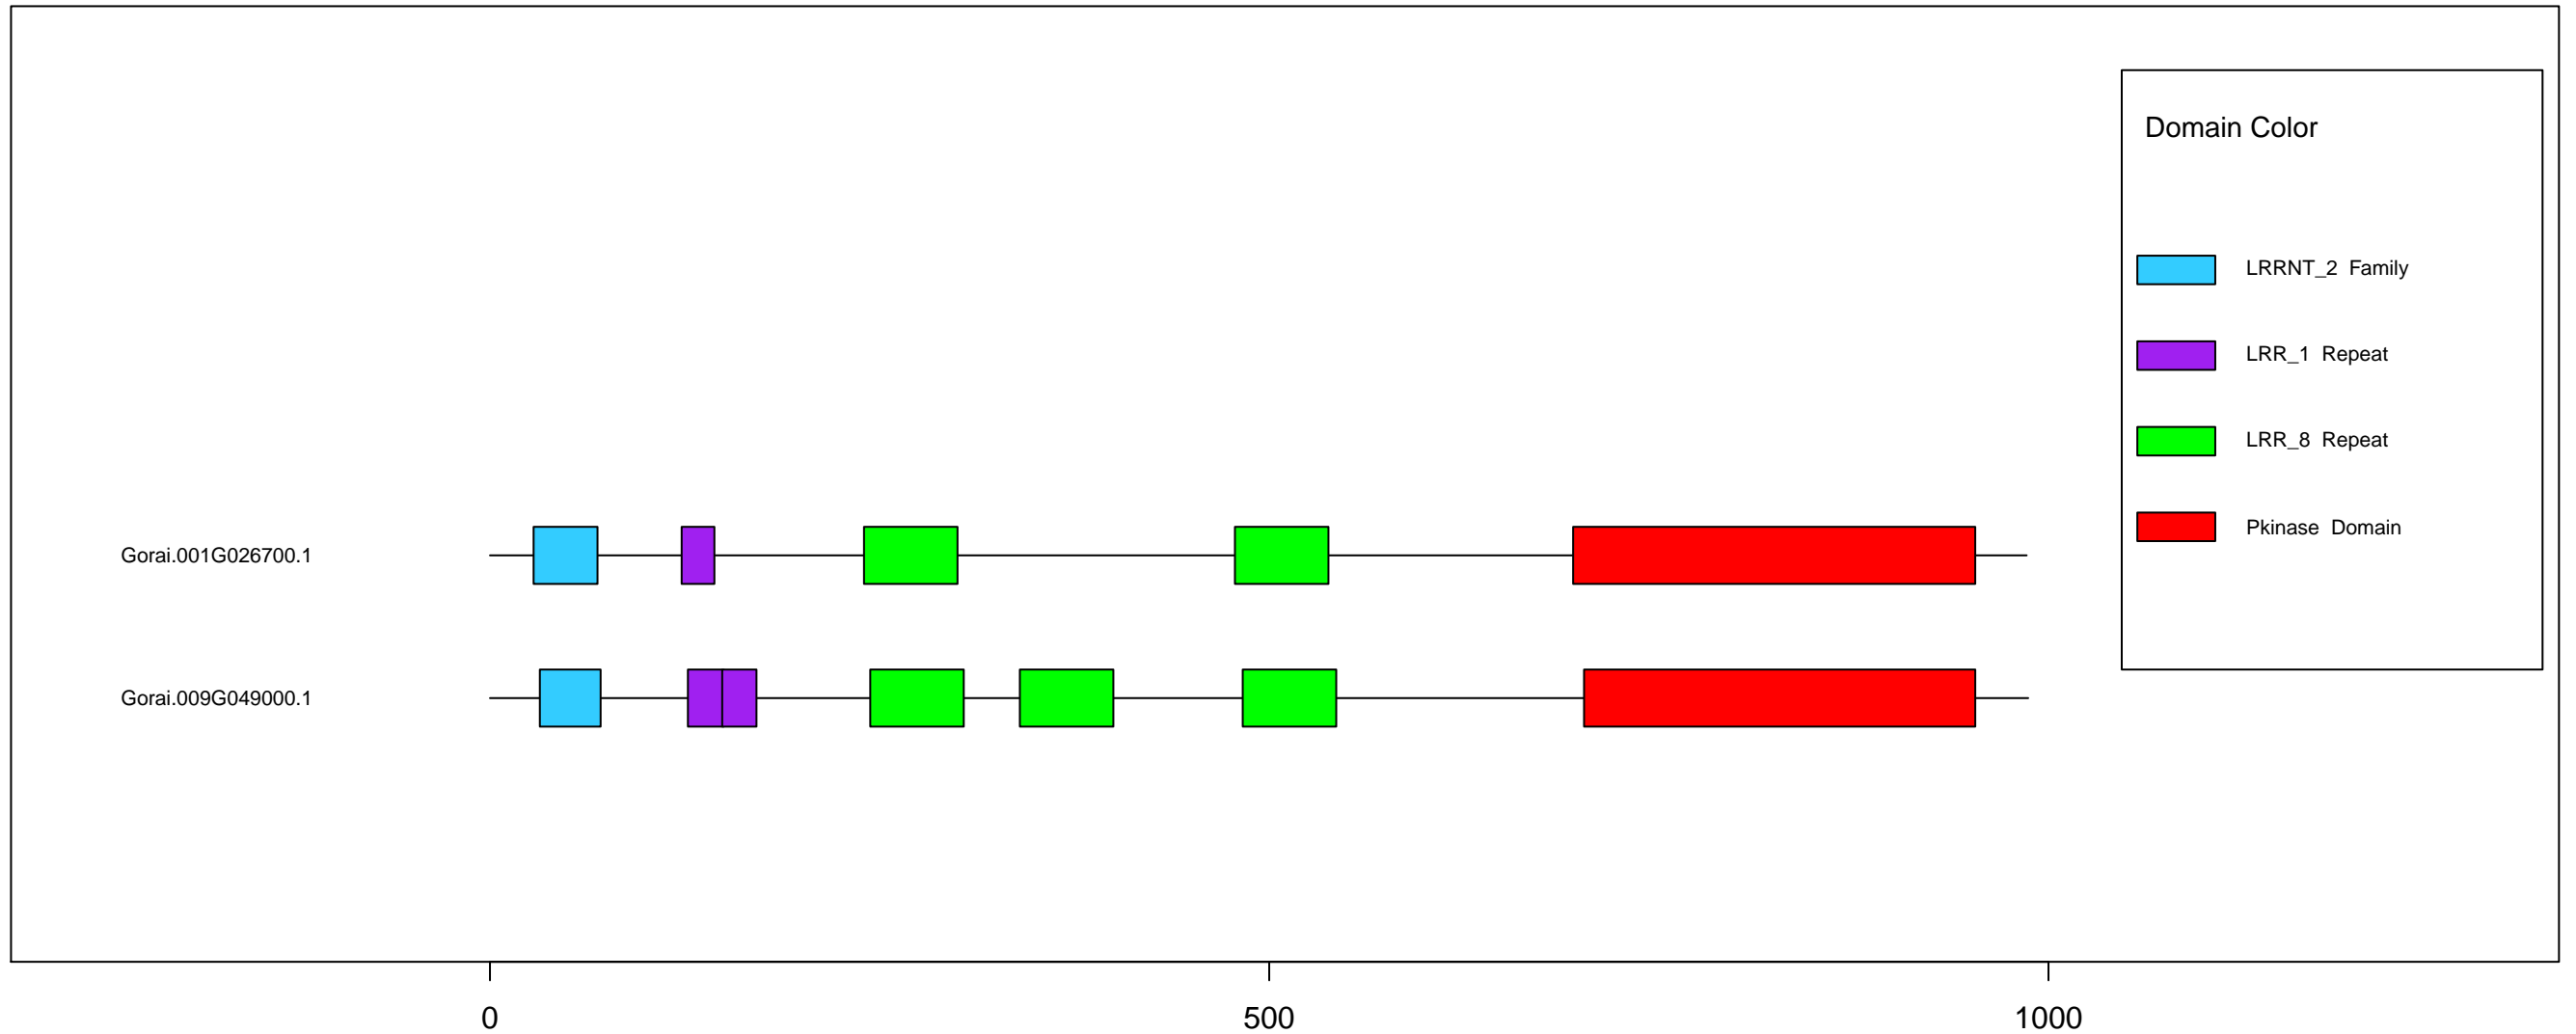



# G.ra RLK-Pelle\_URK-1 domain diagram (all)

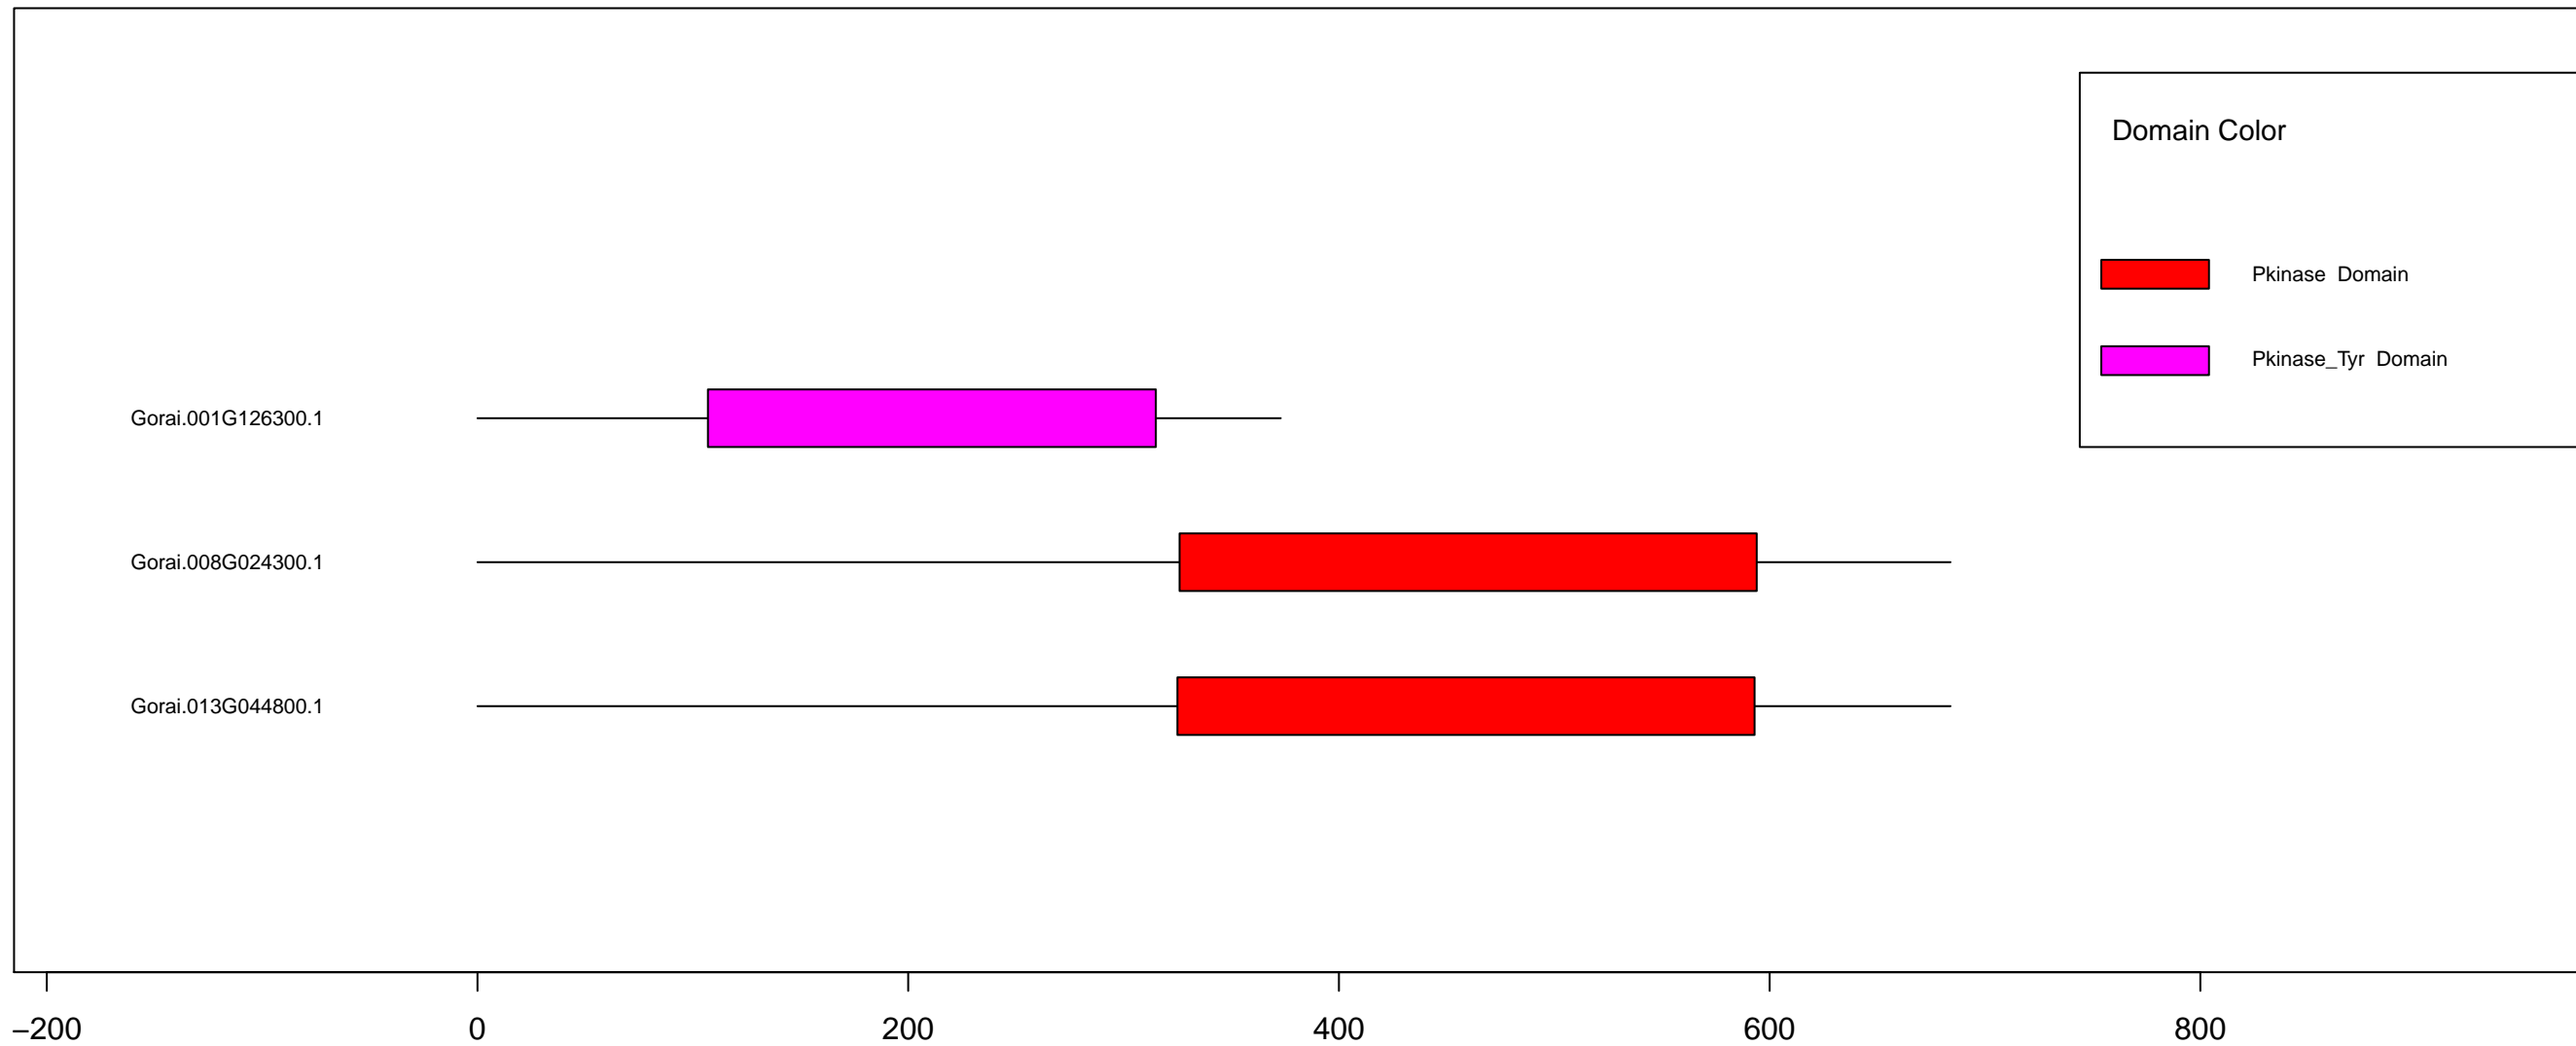

# G.ra RLK-Pelle\_URK-2 domain diagram (all)

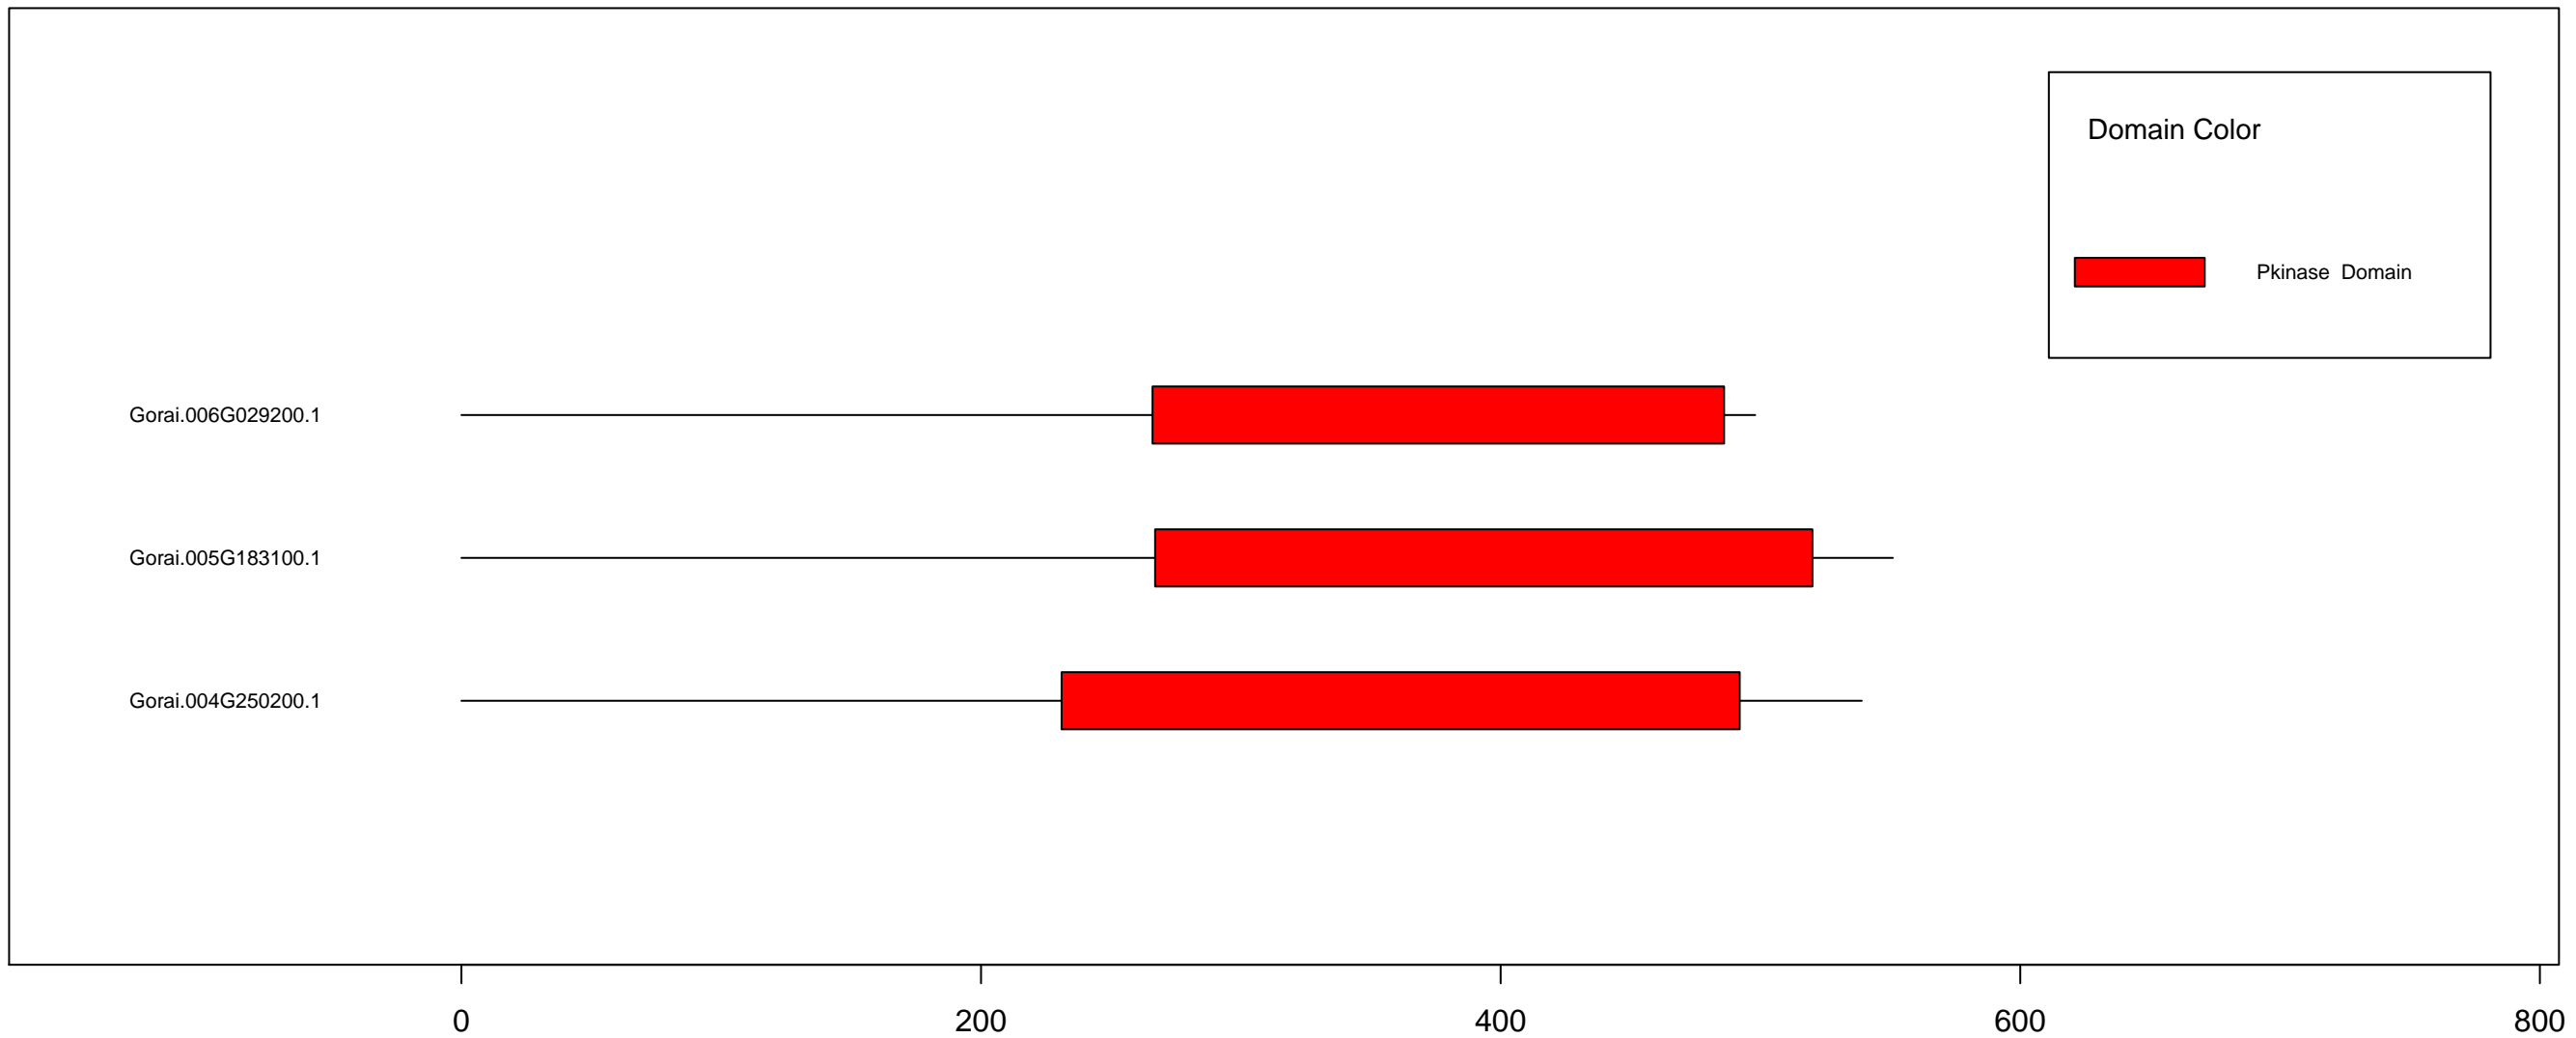

# G.ra RLK-Pelle\_URK-3 domain diagram (all)

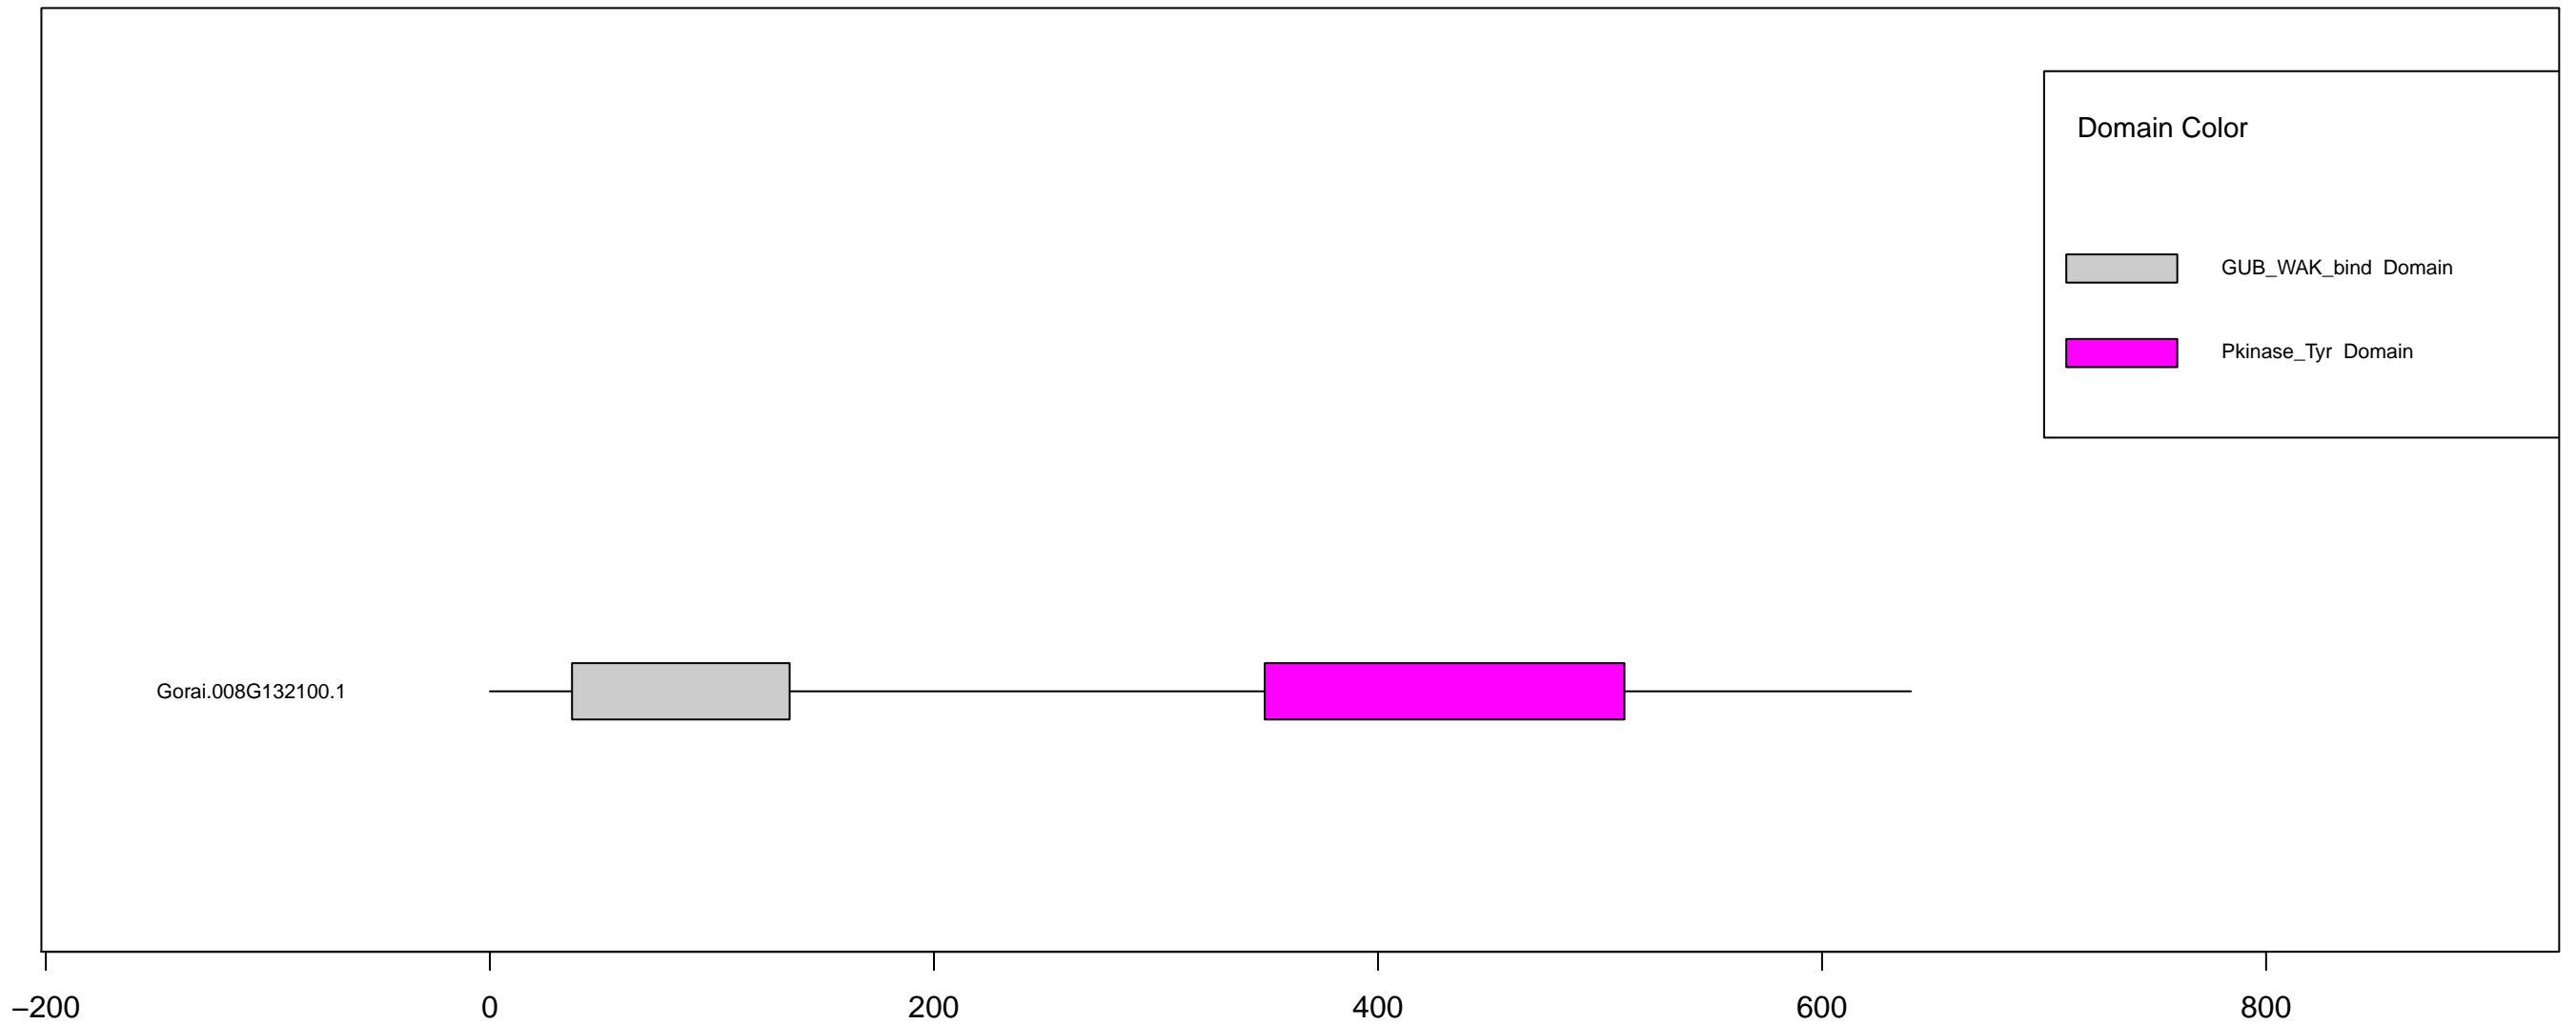

Gorai.008G132100.1

### G.ra RLK-Pelle\_WAK\_LRK10L-1 domain diagram (all)

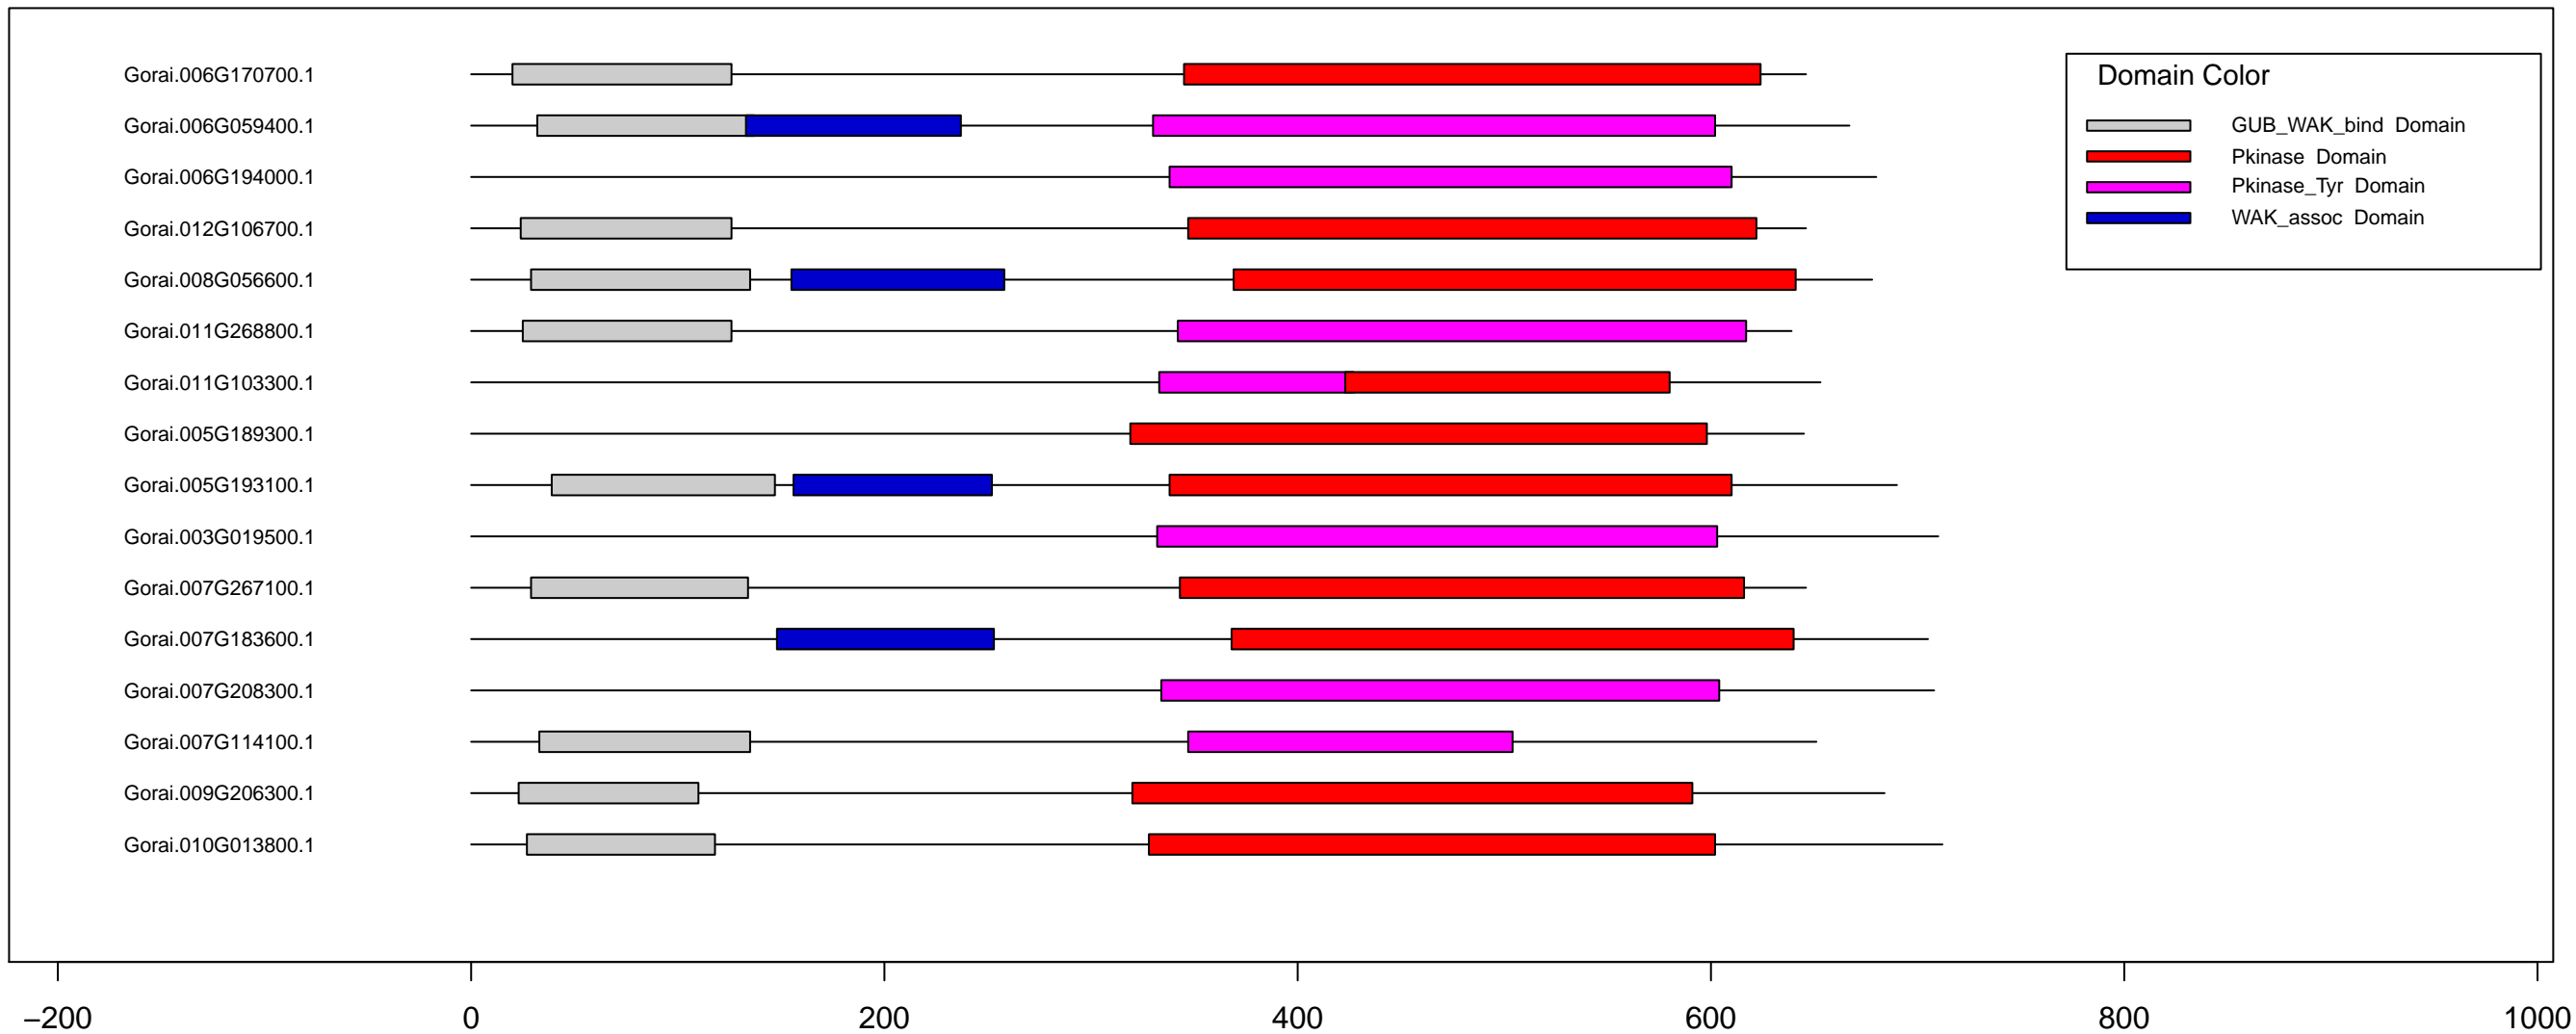

### G.ra RLK-Pelle\_WAK domain diagram (part 1)

**Domain Color**

- EGF\_CA Domain
- GUB\_WAK\_bind Domain
- Pkinase Domain
- Pkinase\_Tyr Domain
- other Domain

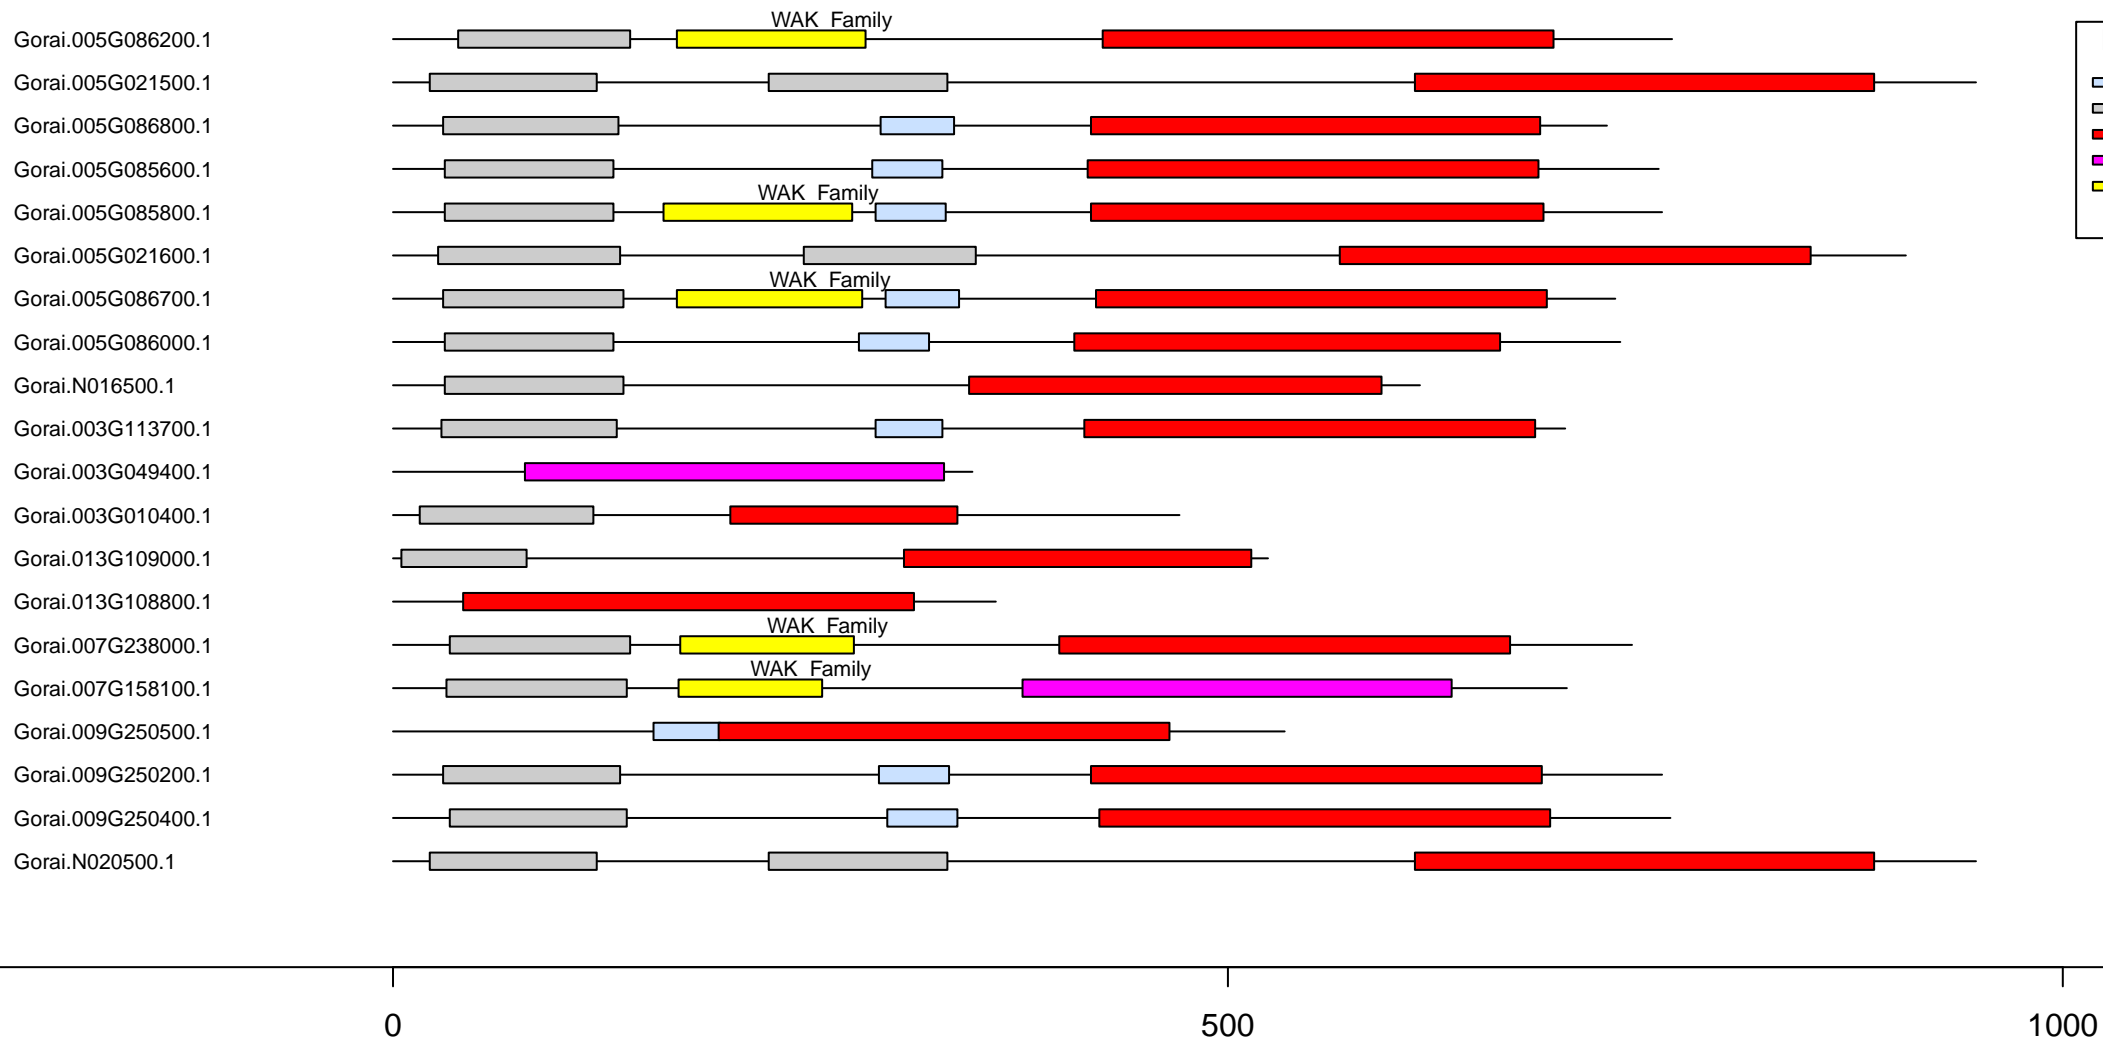

# G.ra RLK-Pelle\_WAK domain diagram (part 2)

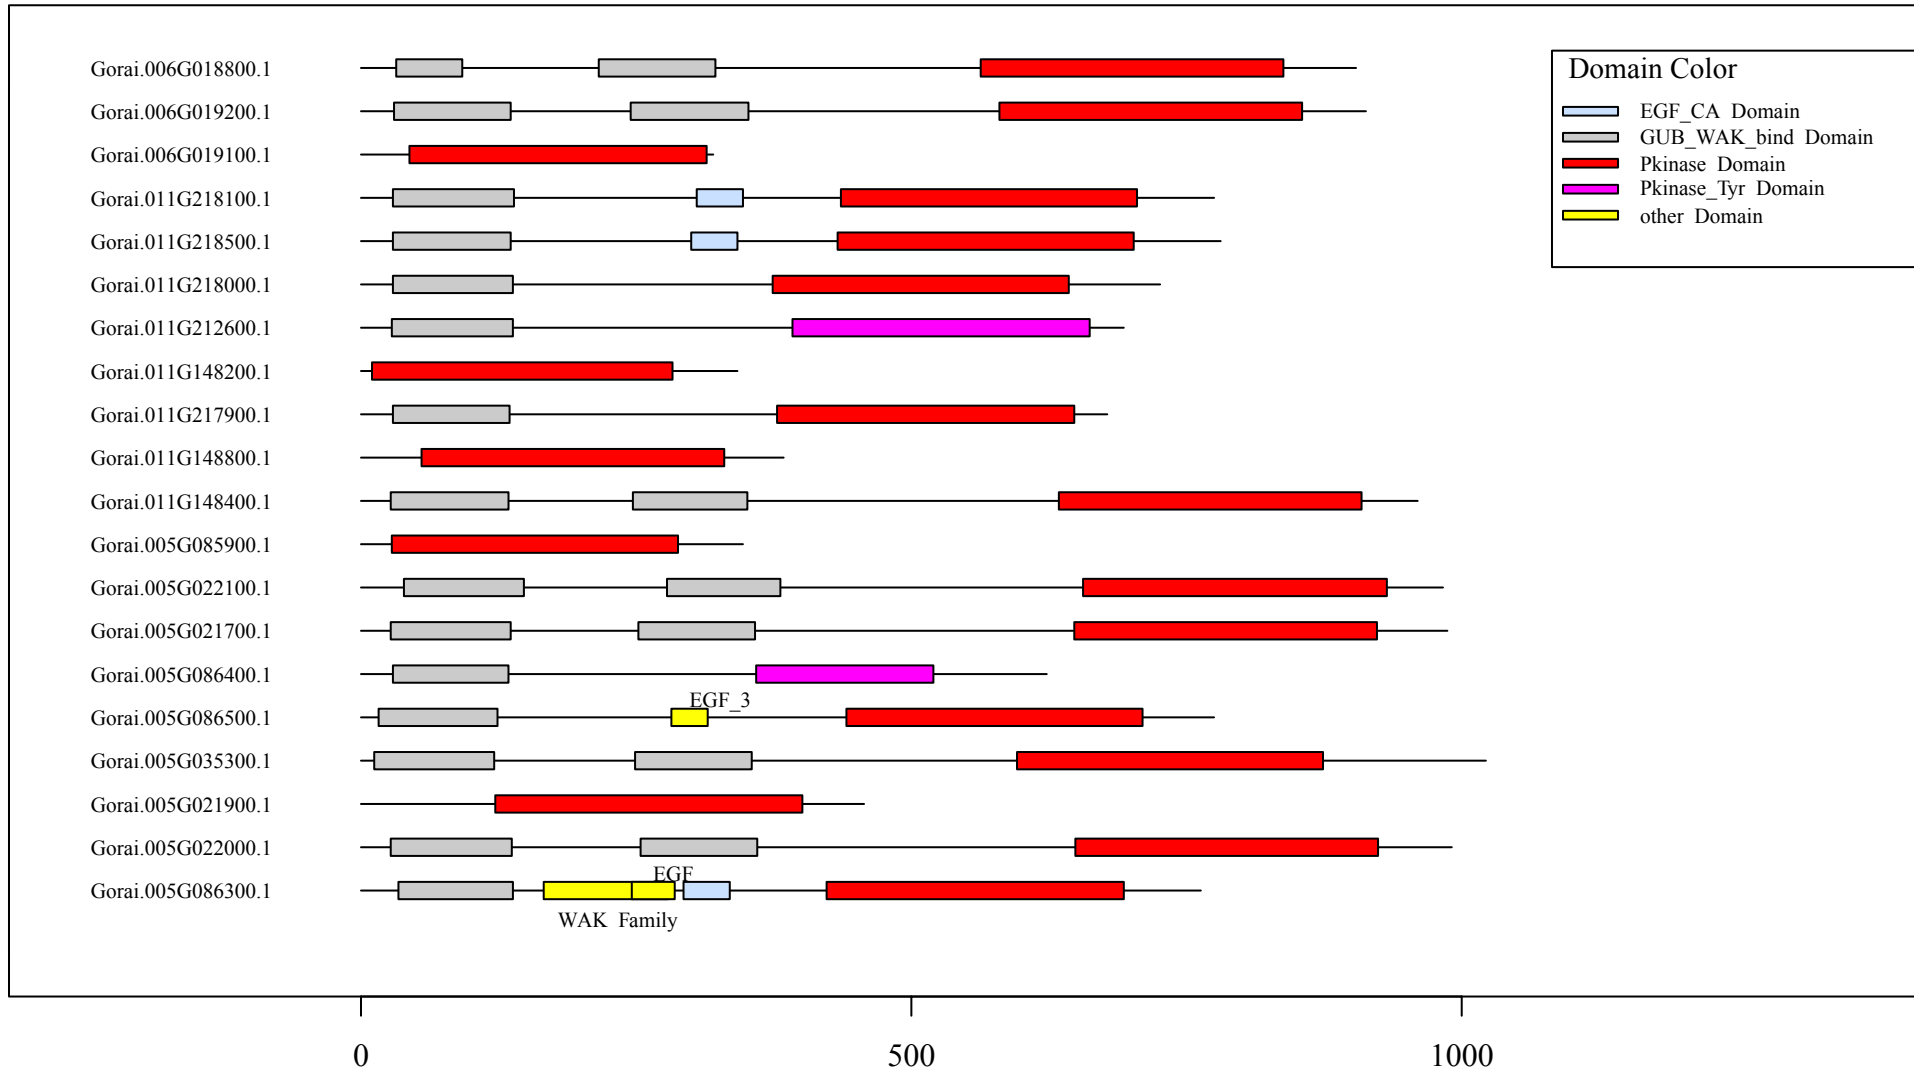

### G.ra RLK-Pelle\_WAK domain diagram (part 3)

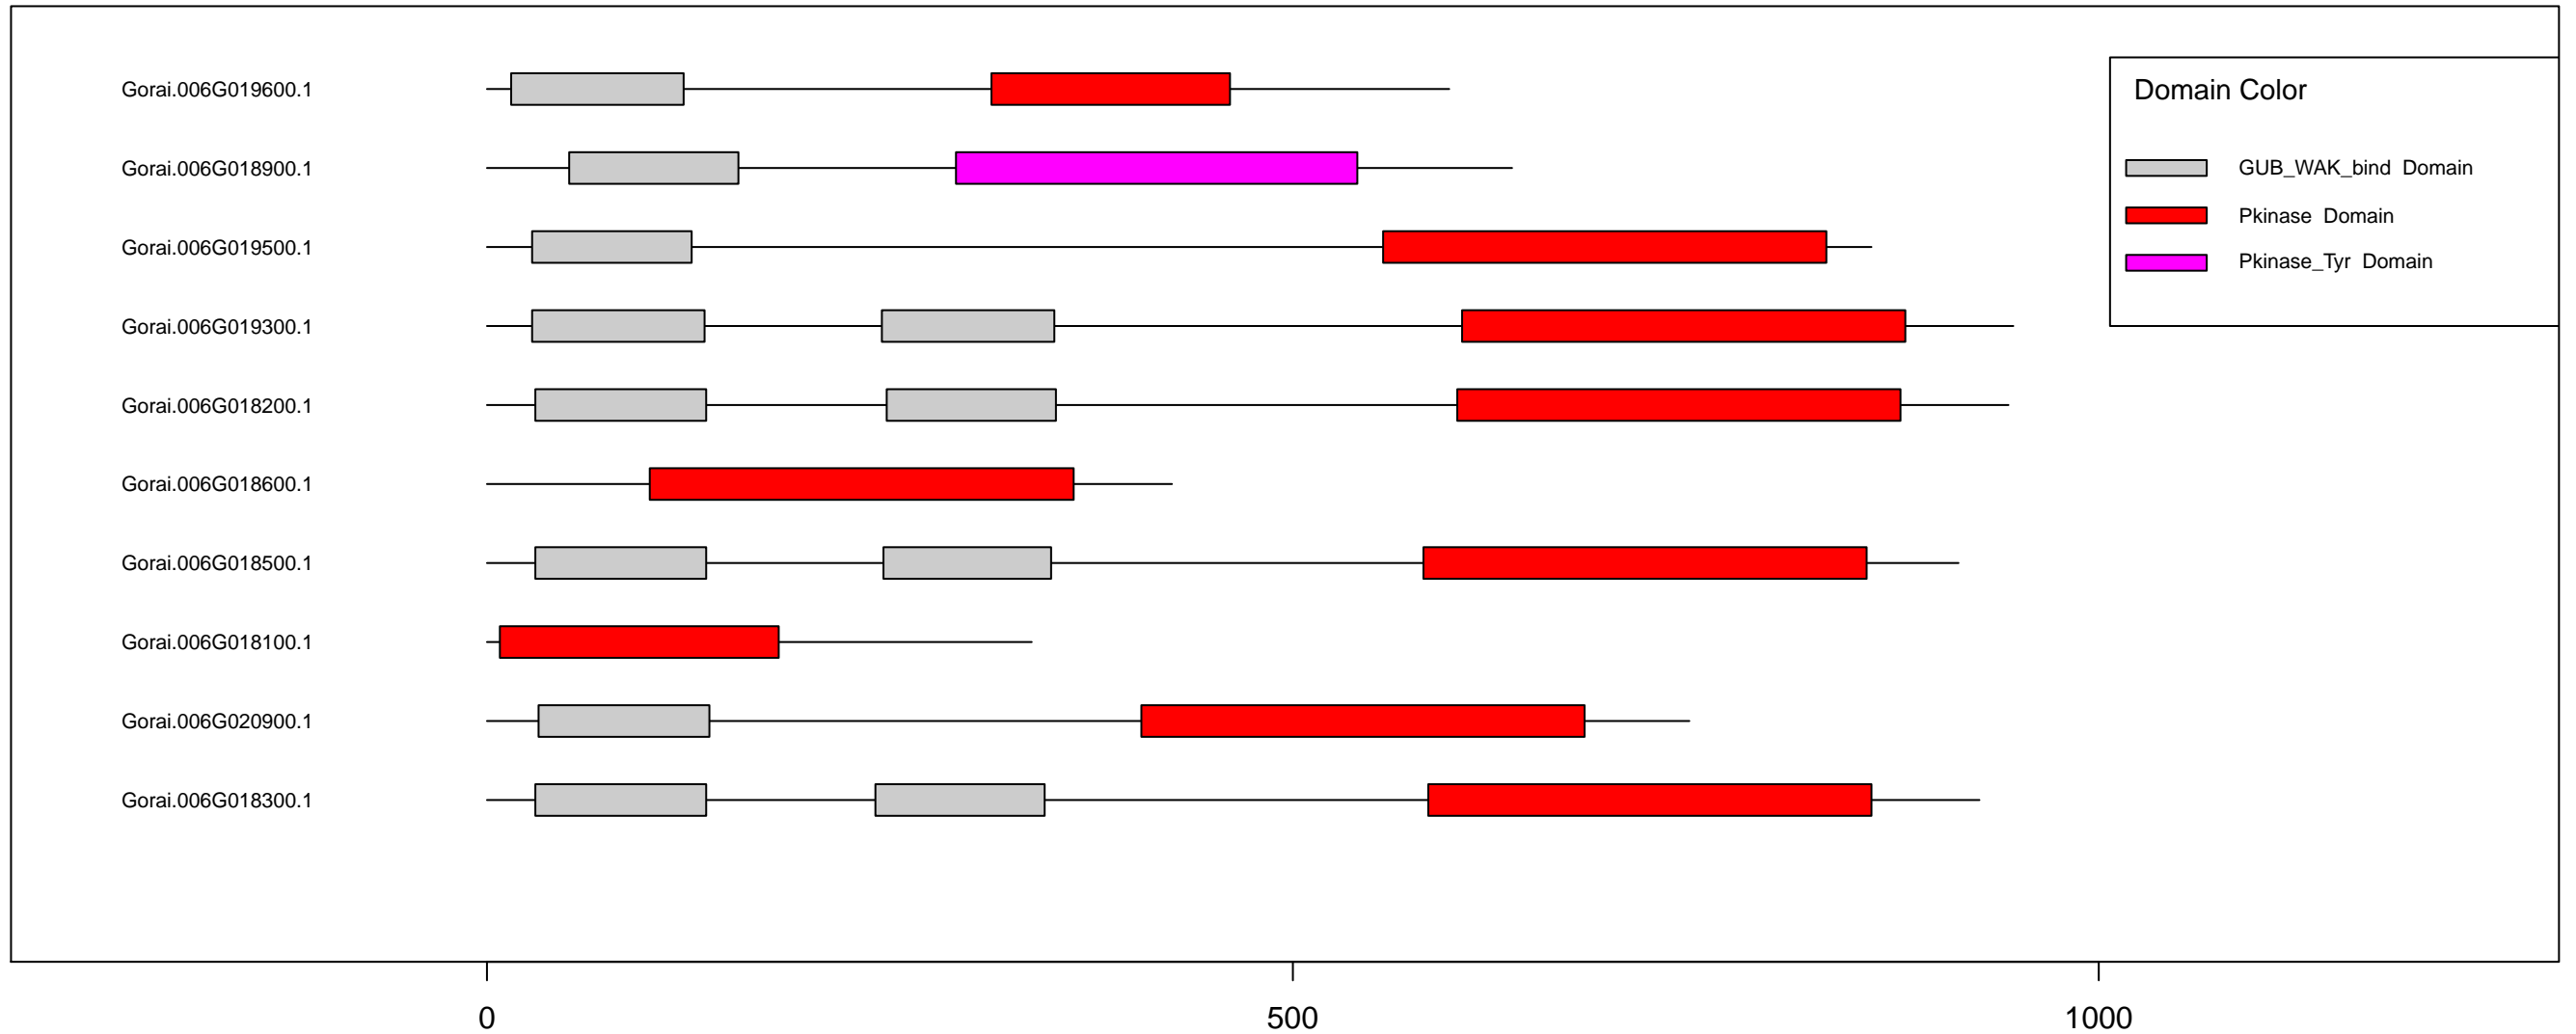

# G.ra SCY1\_SCYL1 domain diagram (all)

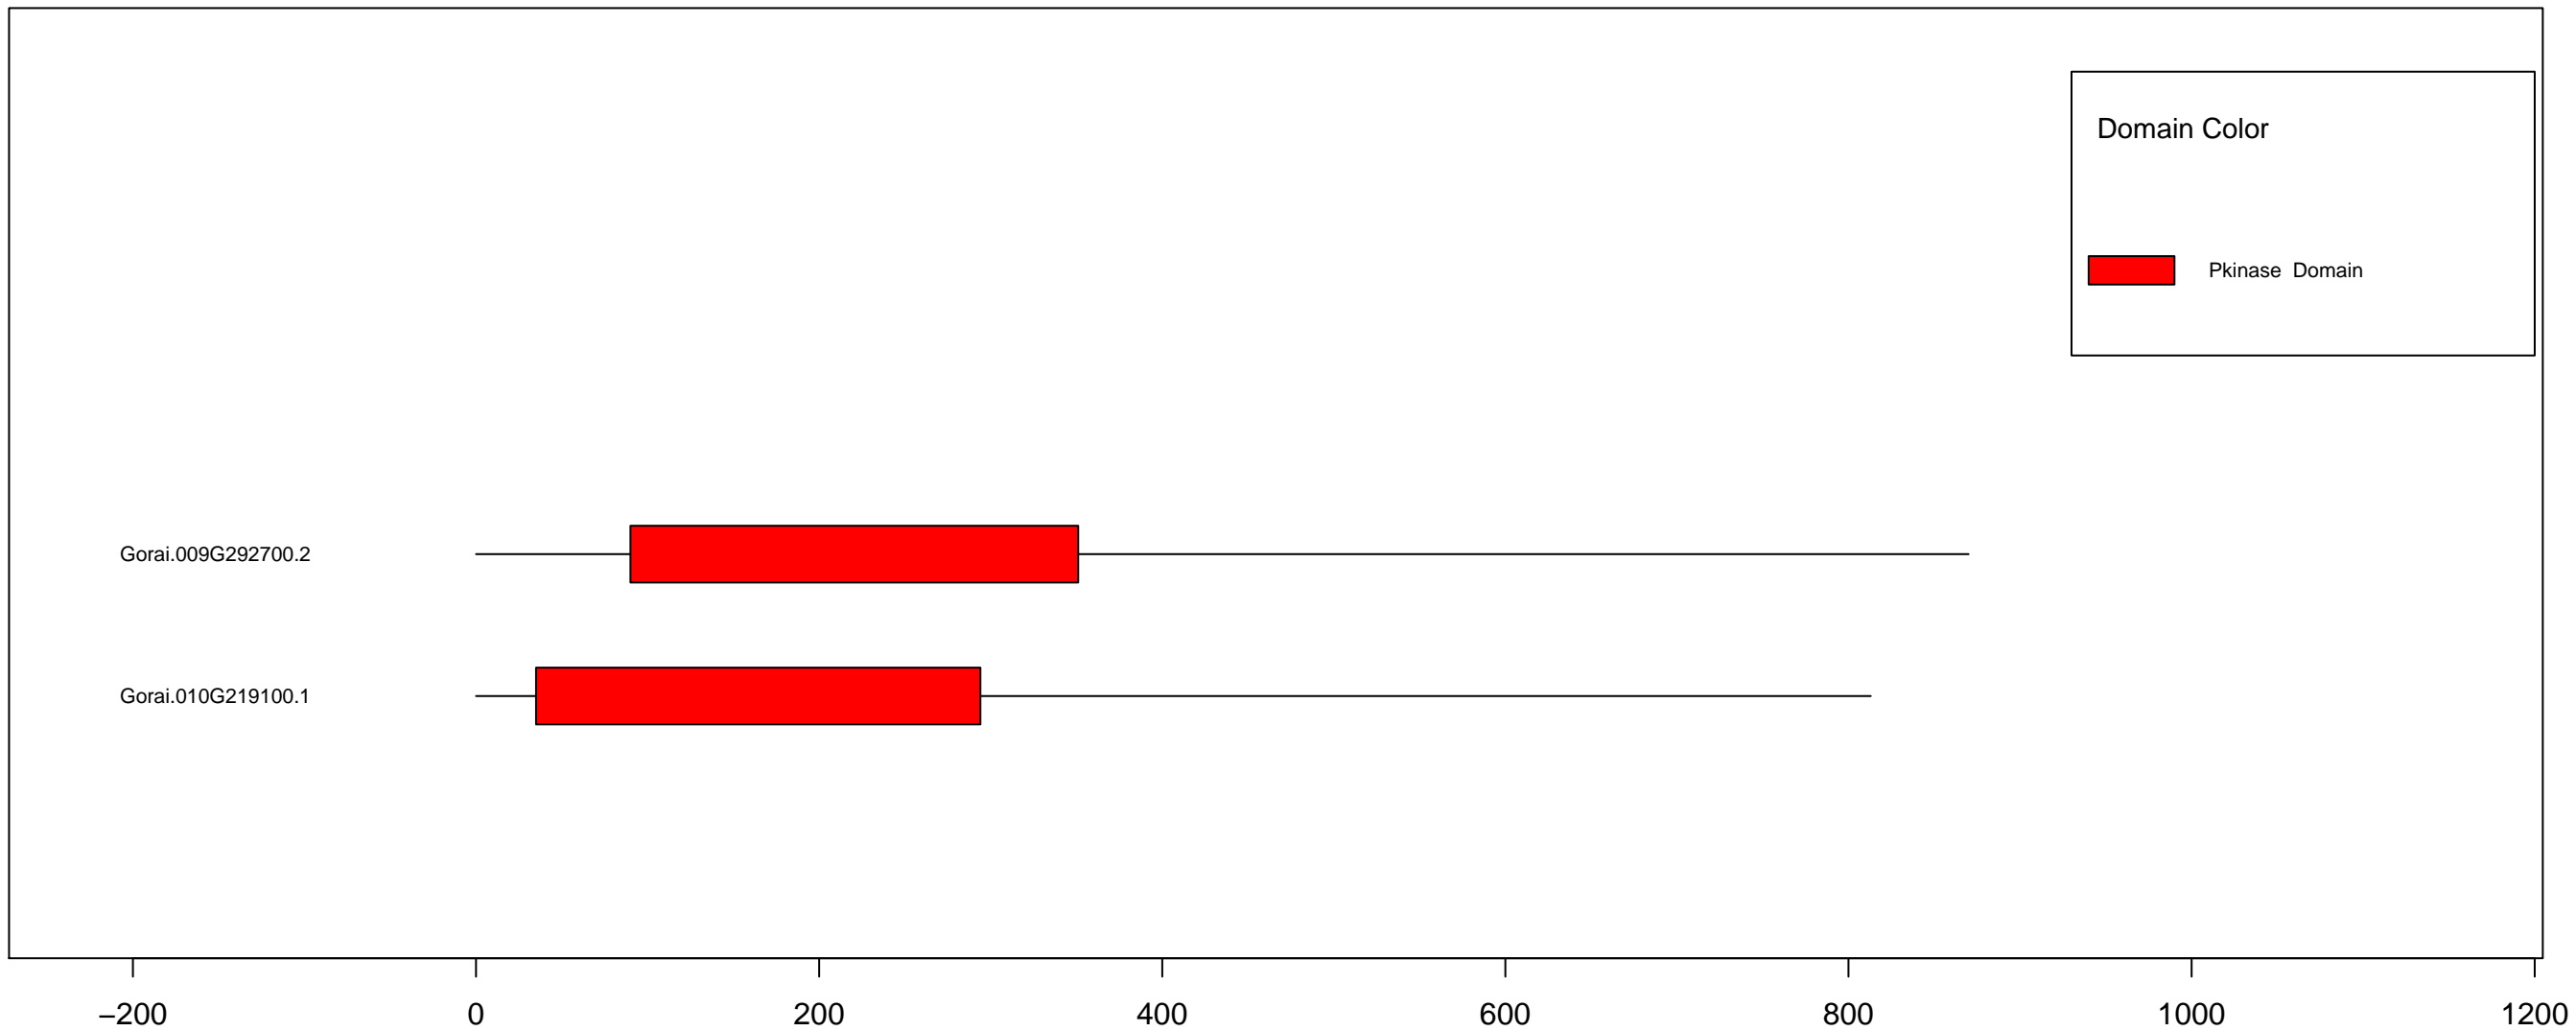



# G.ra SCY1\_SCYL2 domain diagram (all)

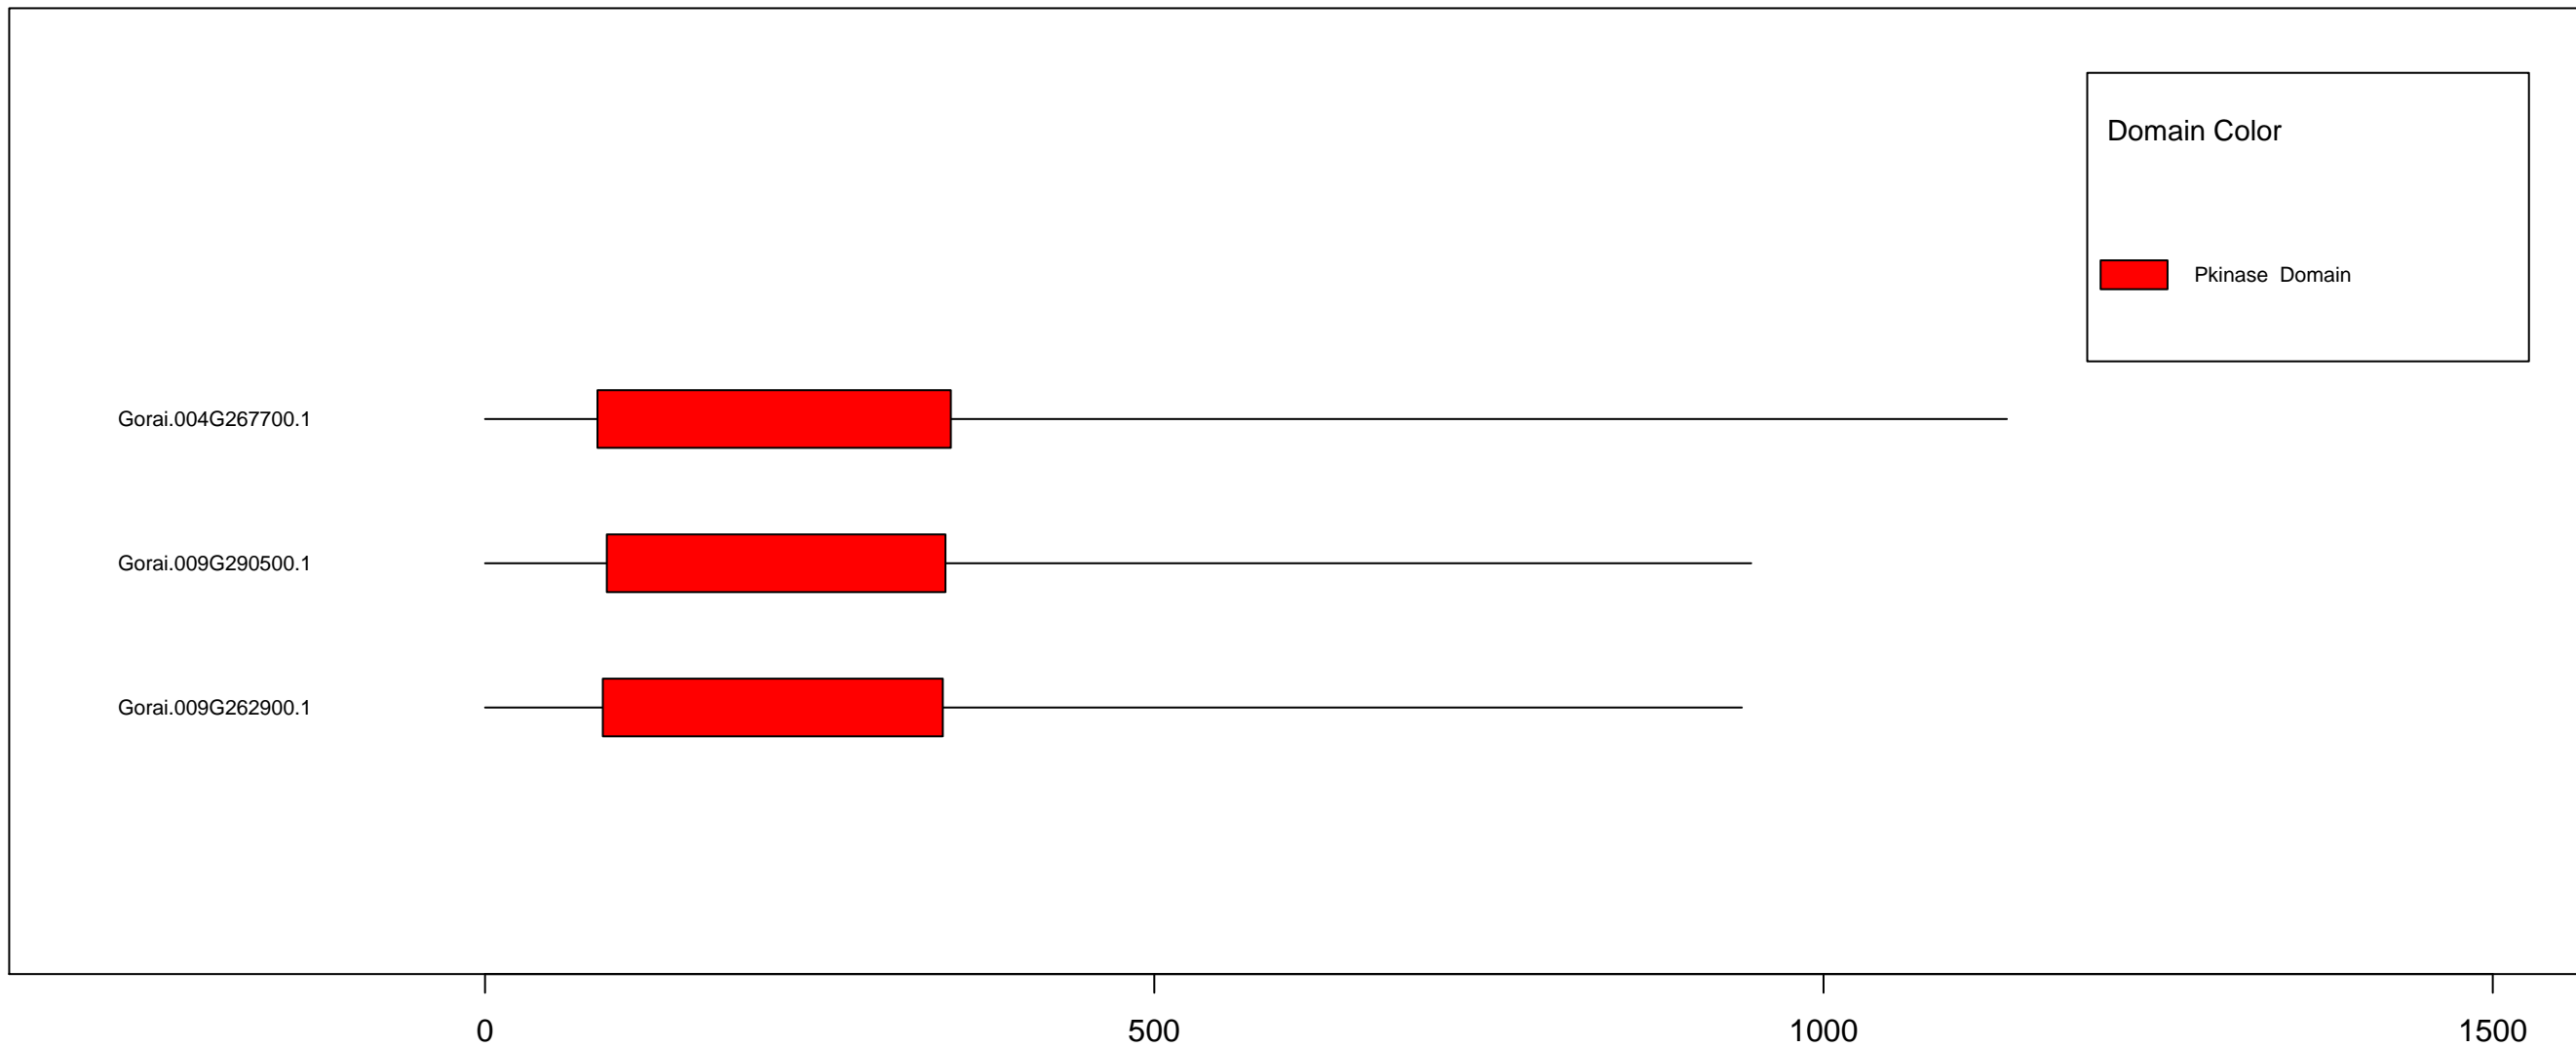

# G.ra STE\_STE11 domain diagram (part 1)

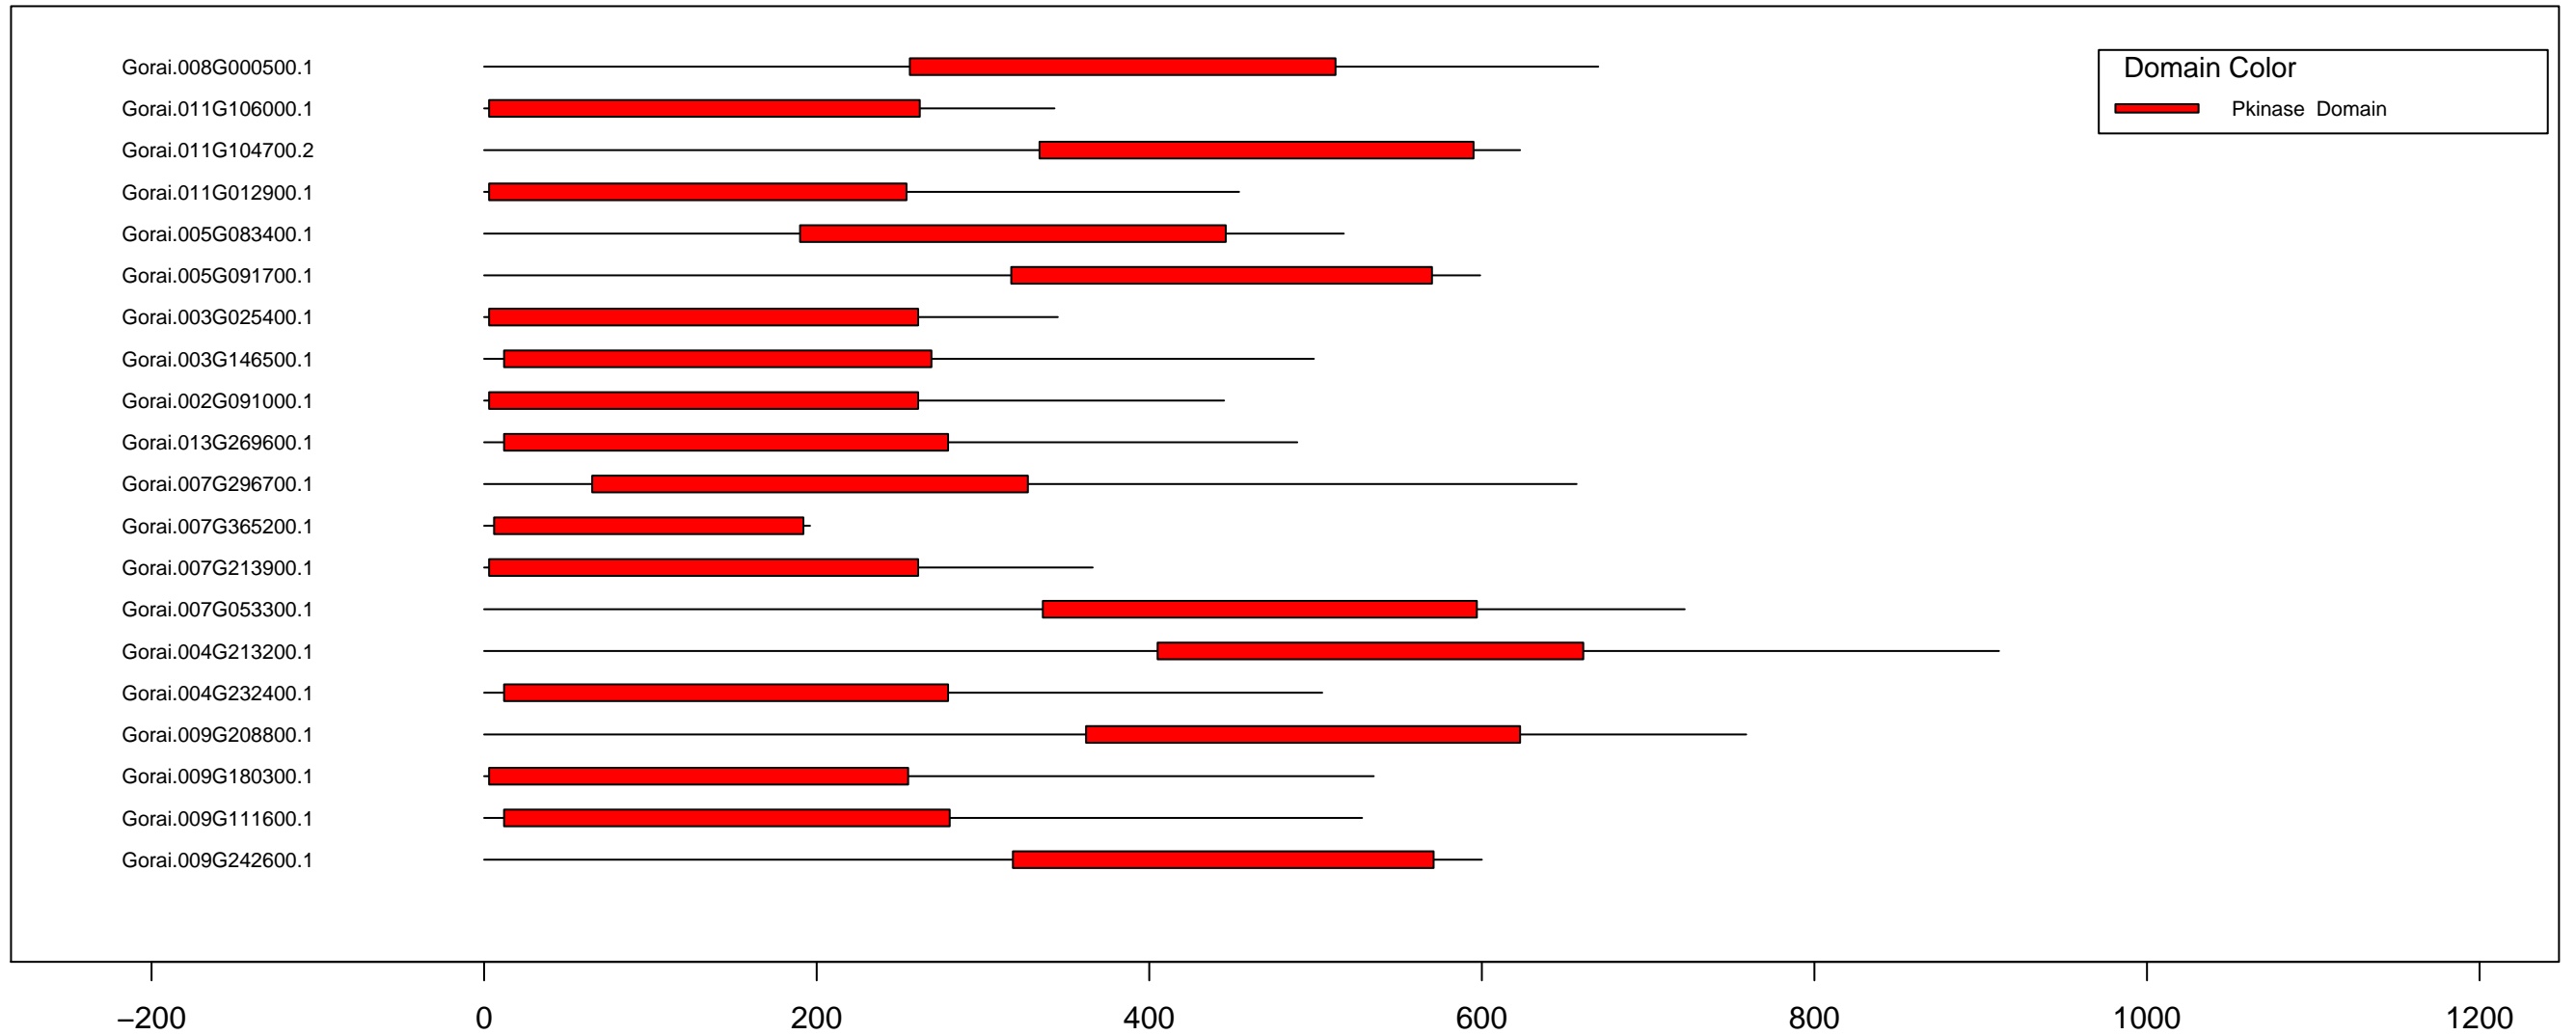

### G.ra STE\_STE11 domain diagram (part 2)

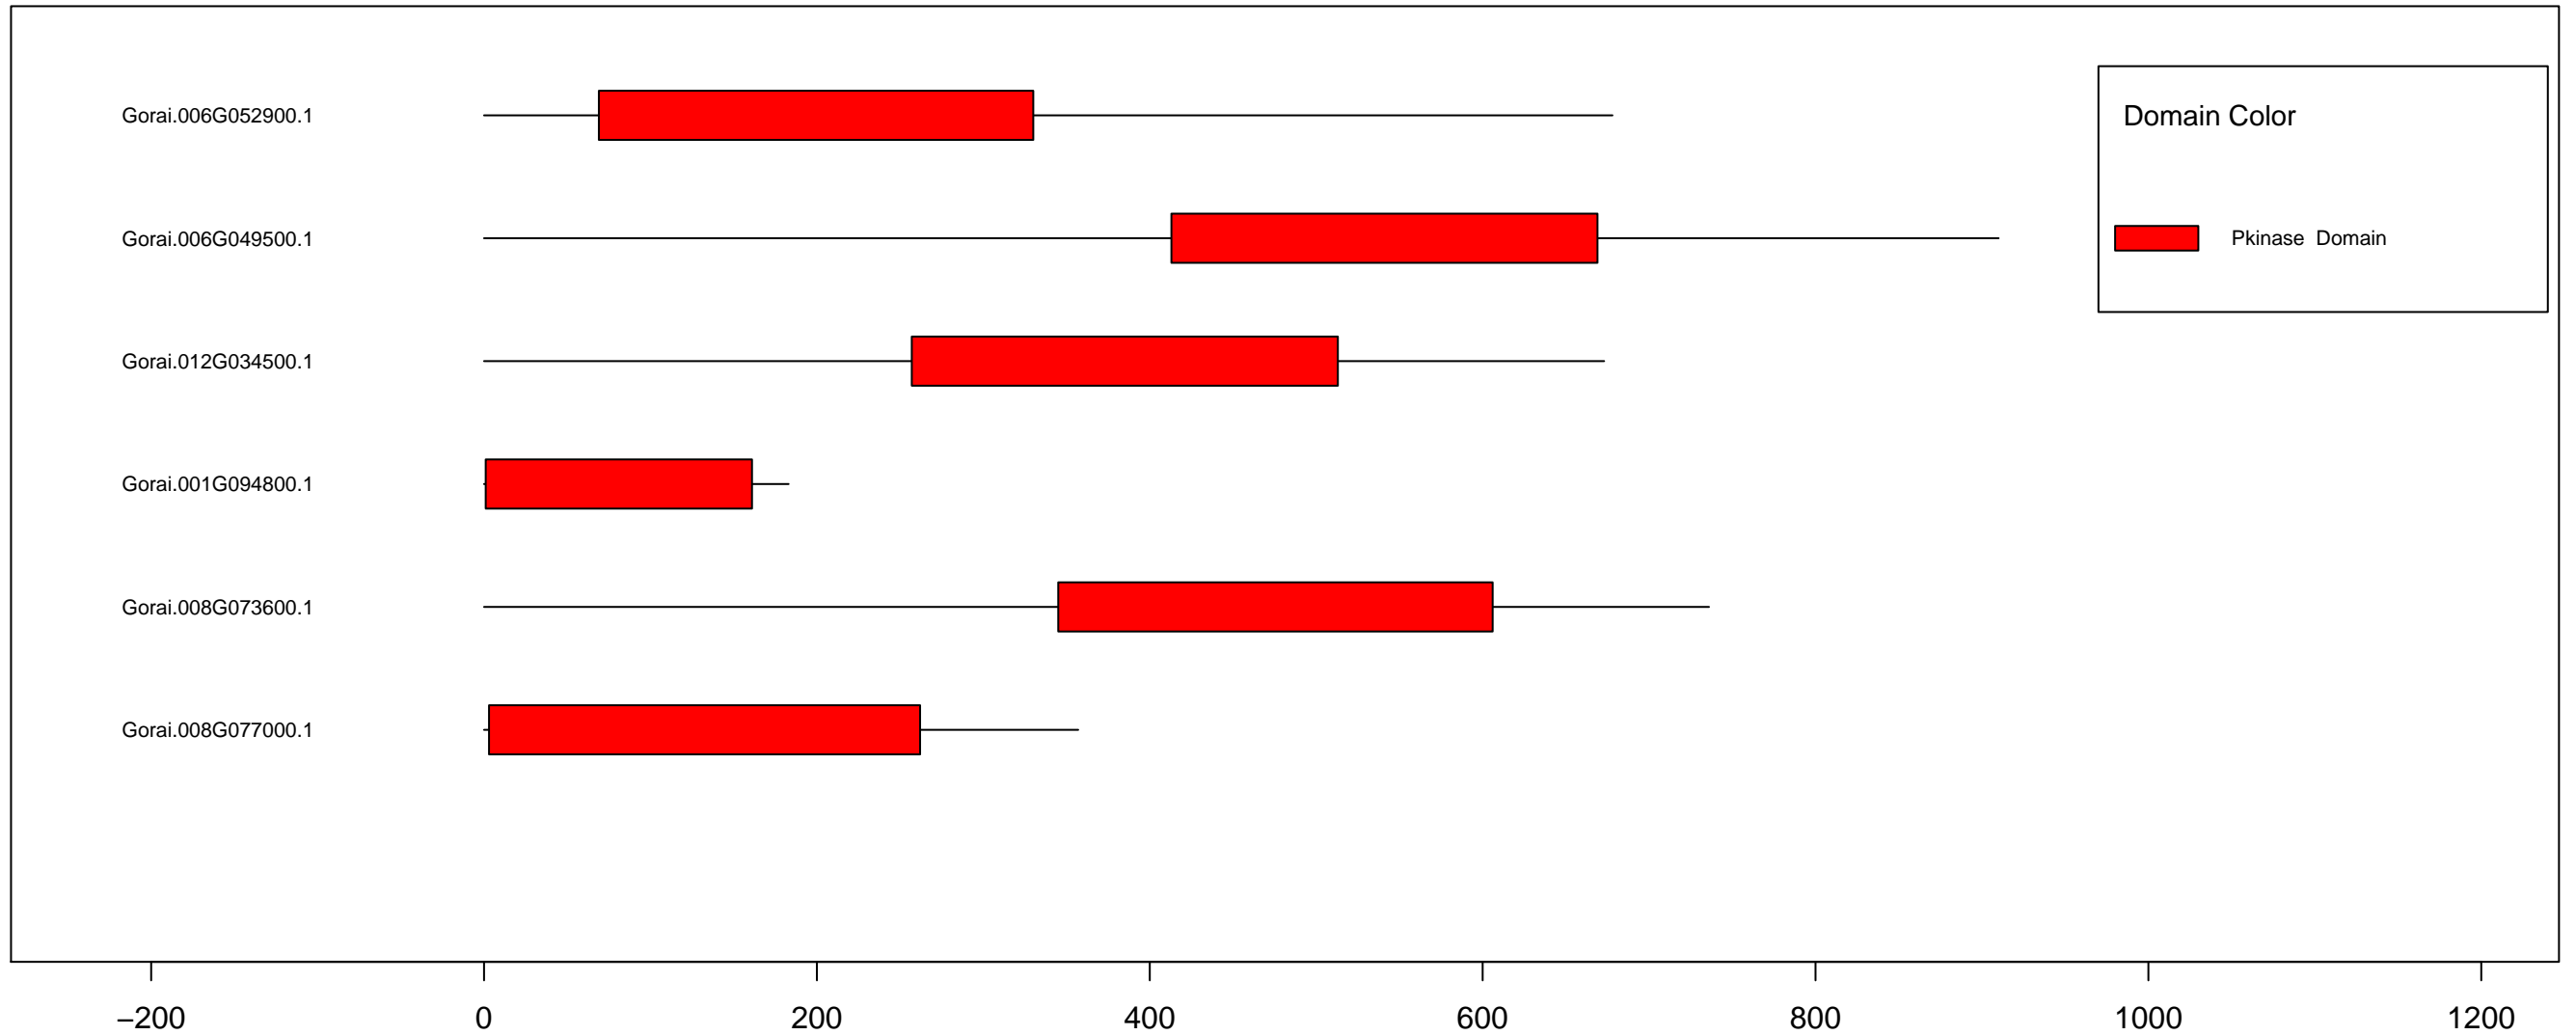

### G.ra STE\_STE20-Fray domain diagram (all)

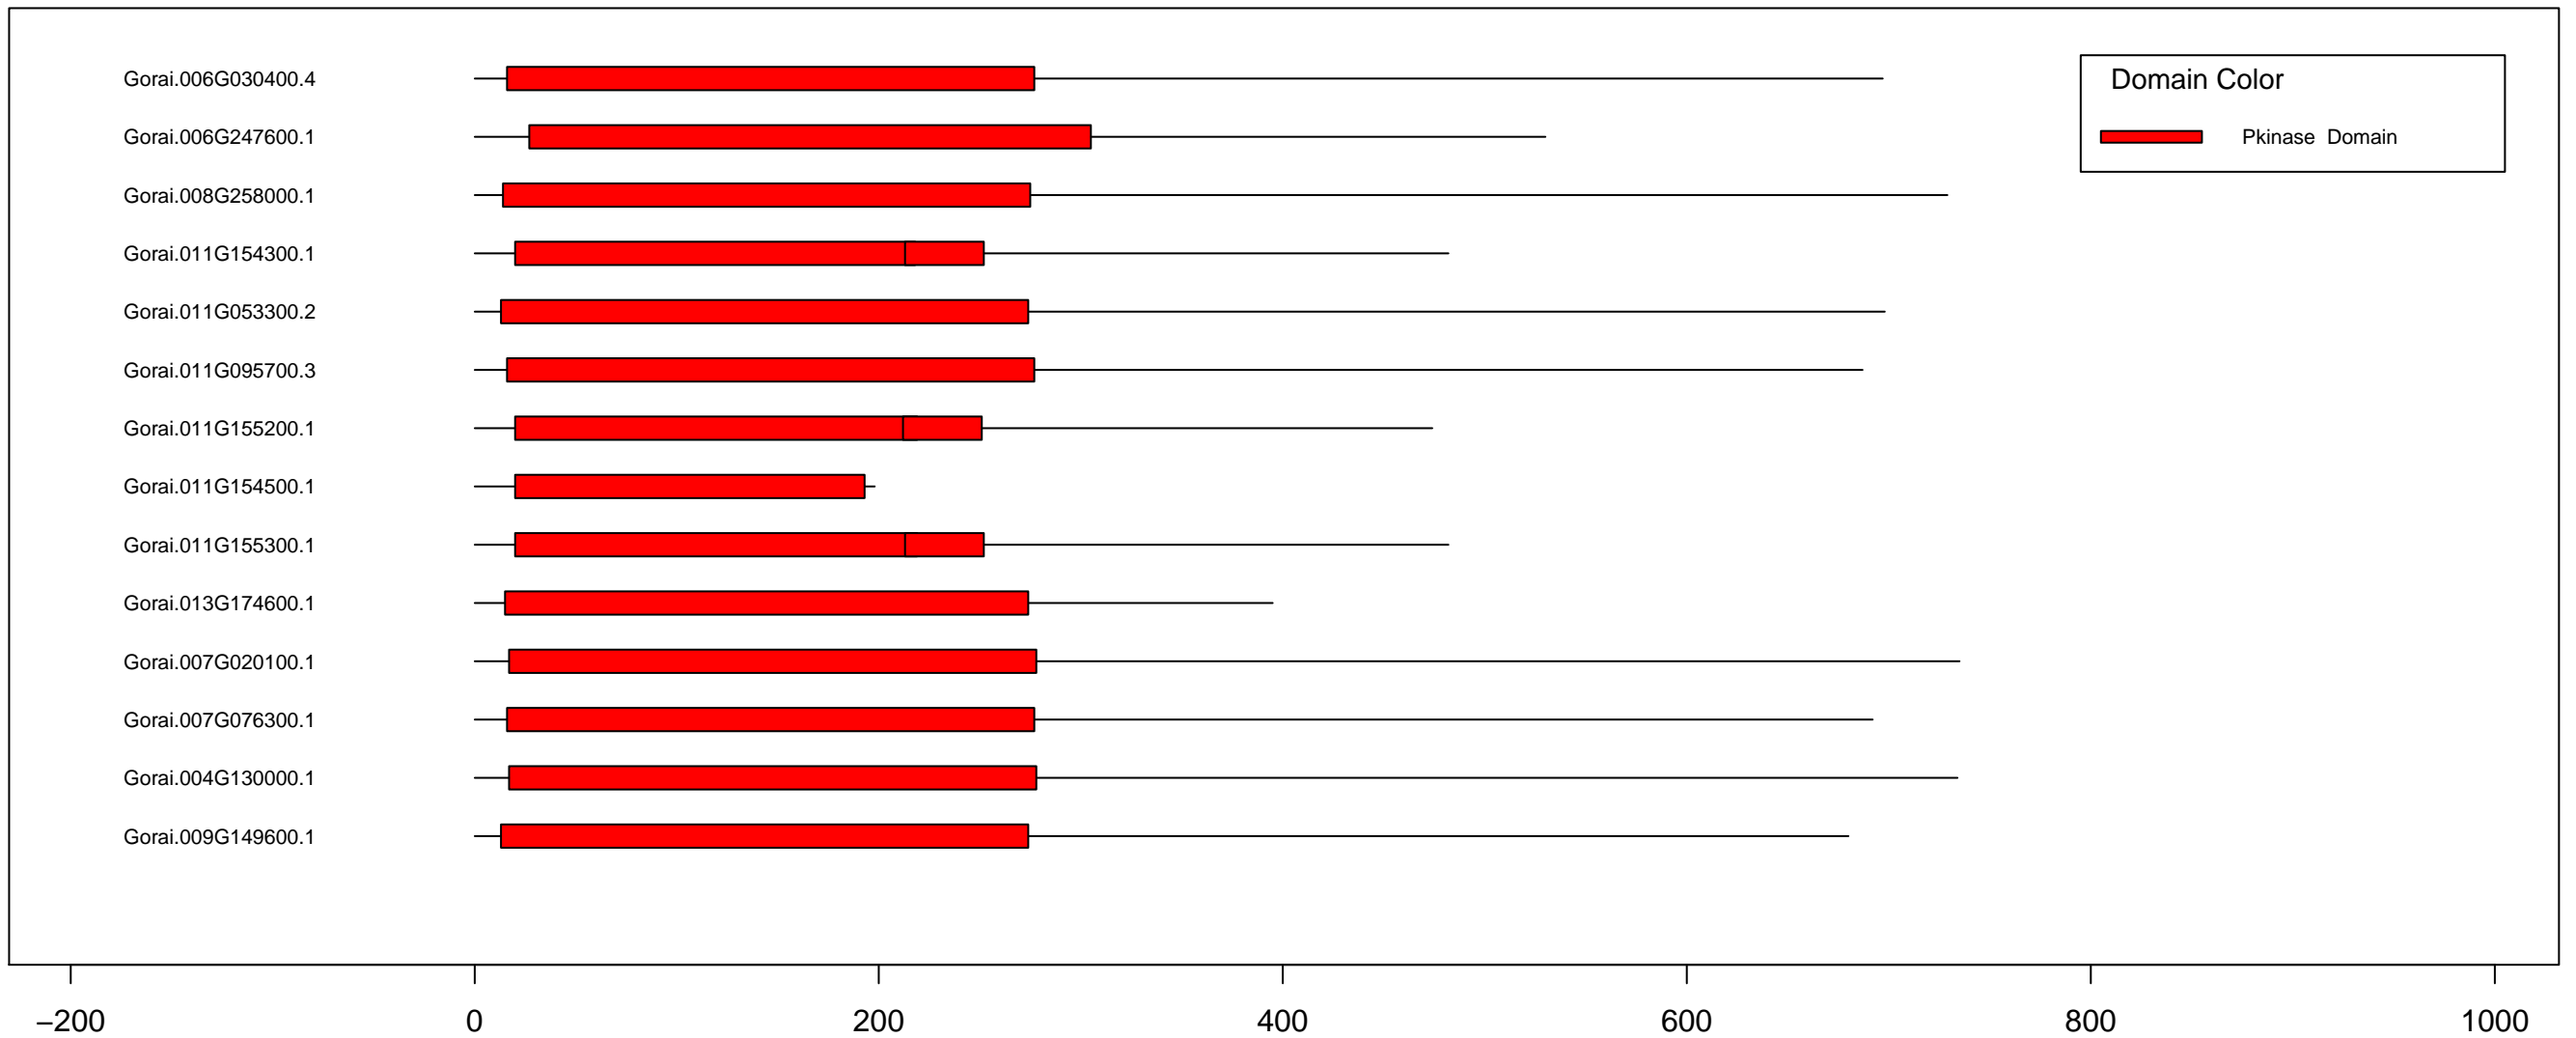

# G.ra STE\_STE20-PI domain diagram (all)

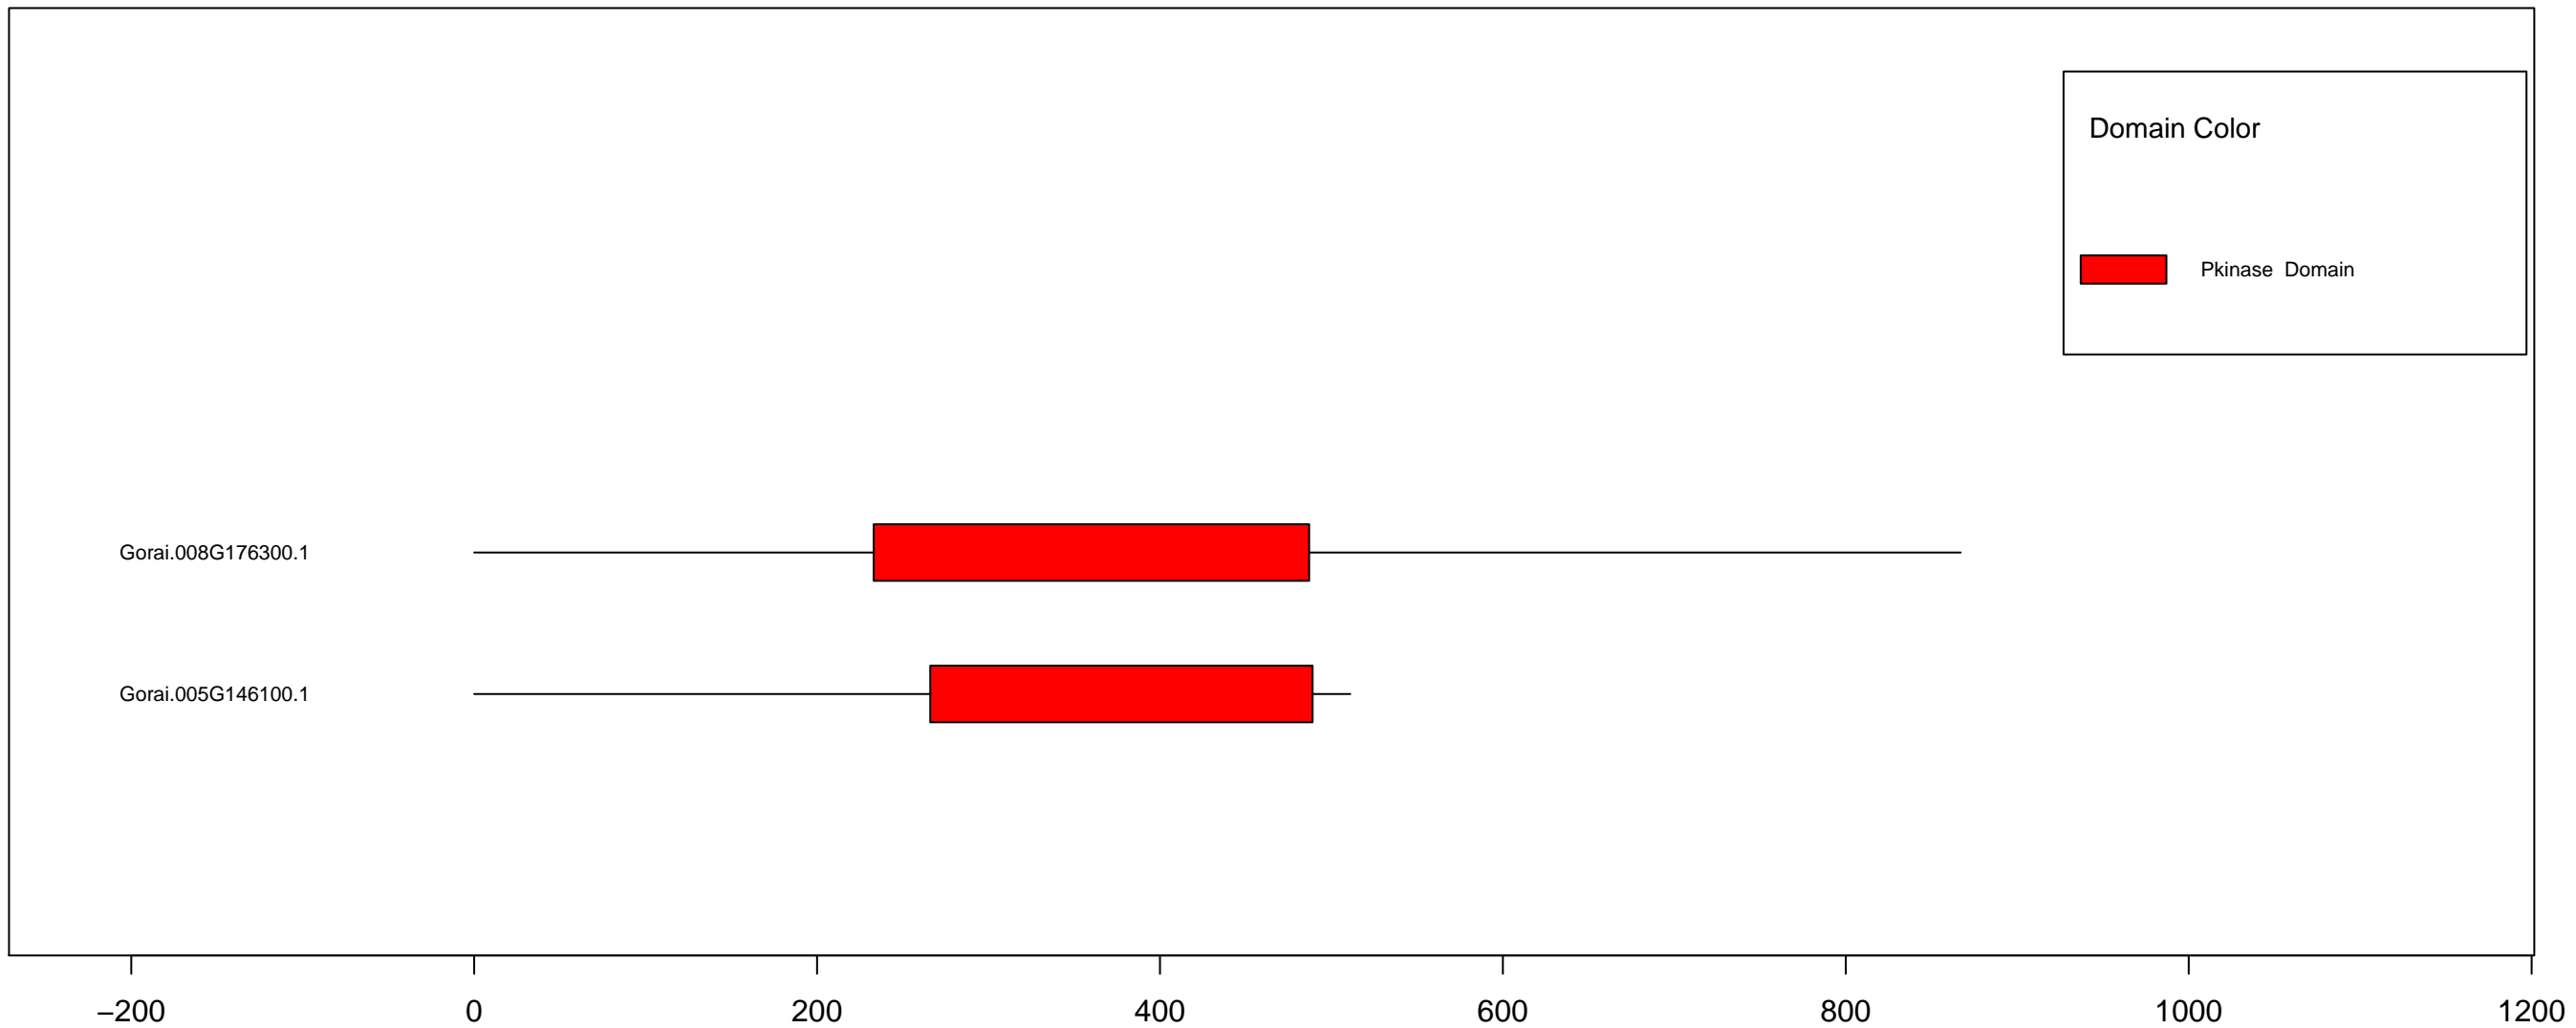

# G.ra STE\_STE20-YSK domain diagram (all)

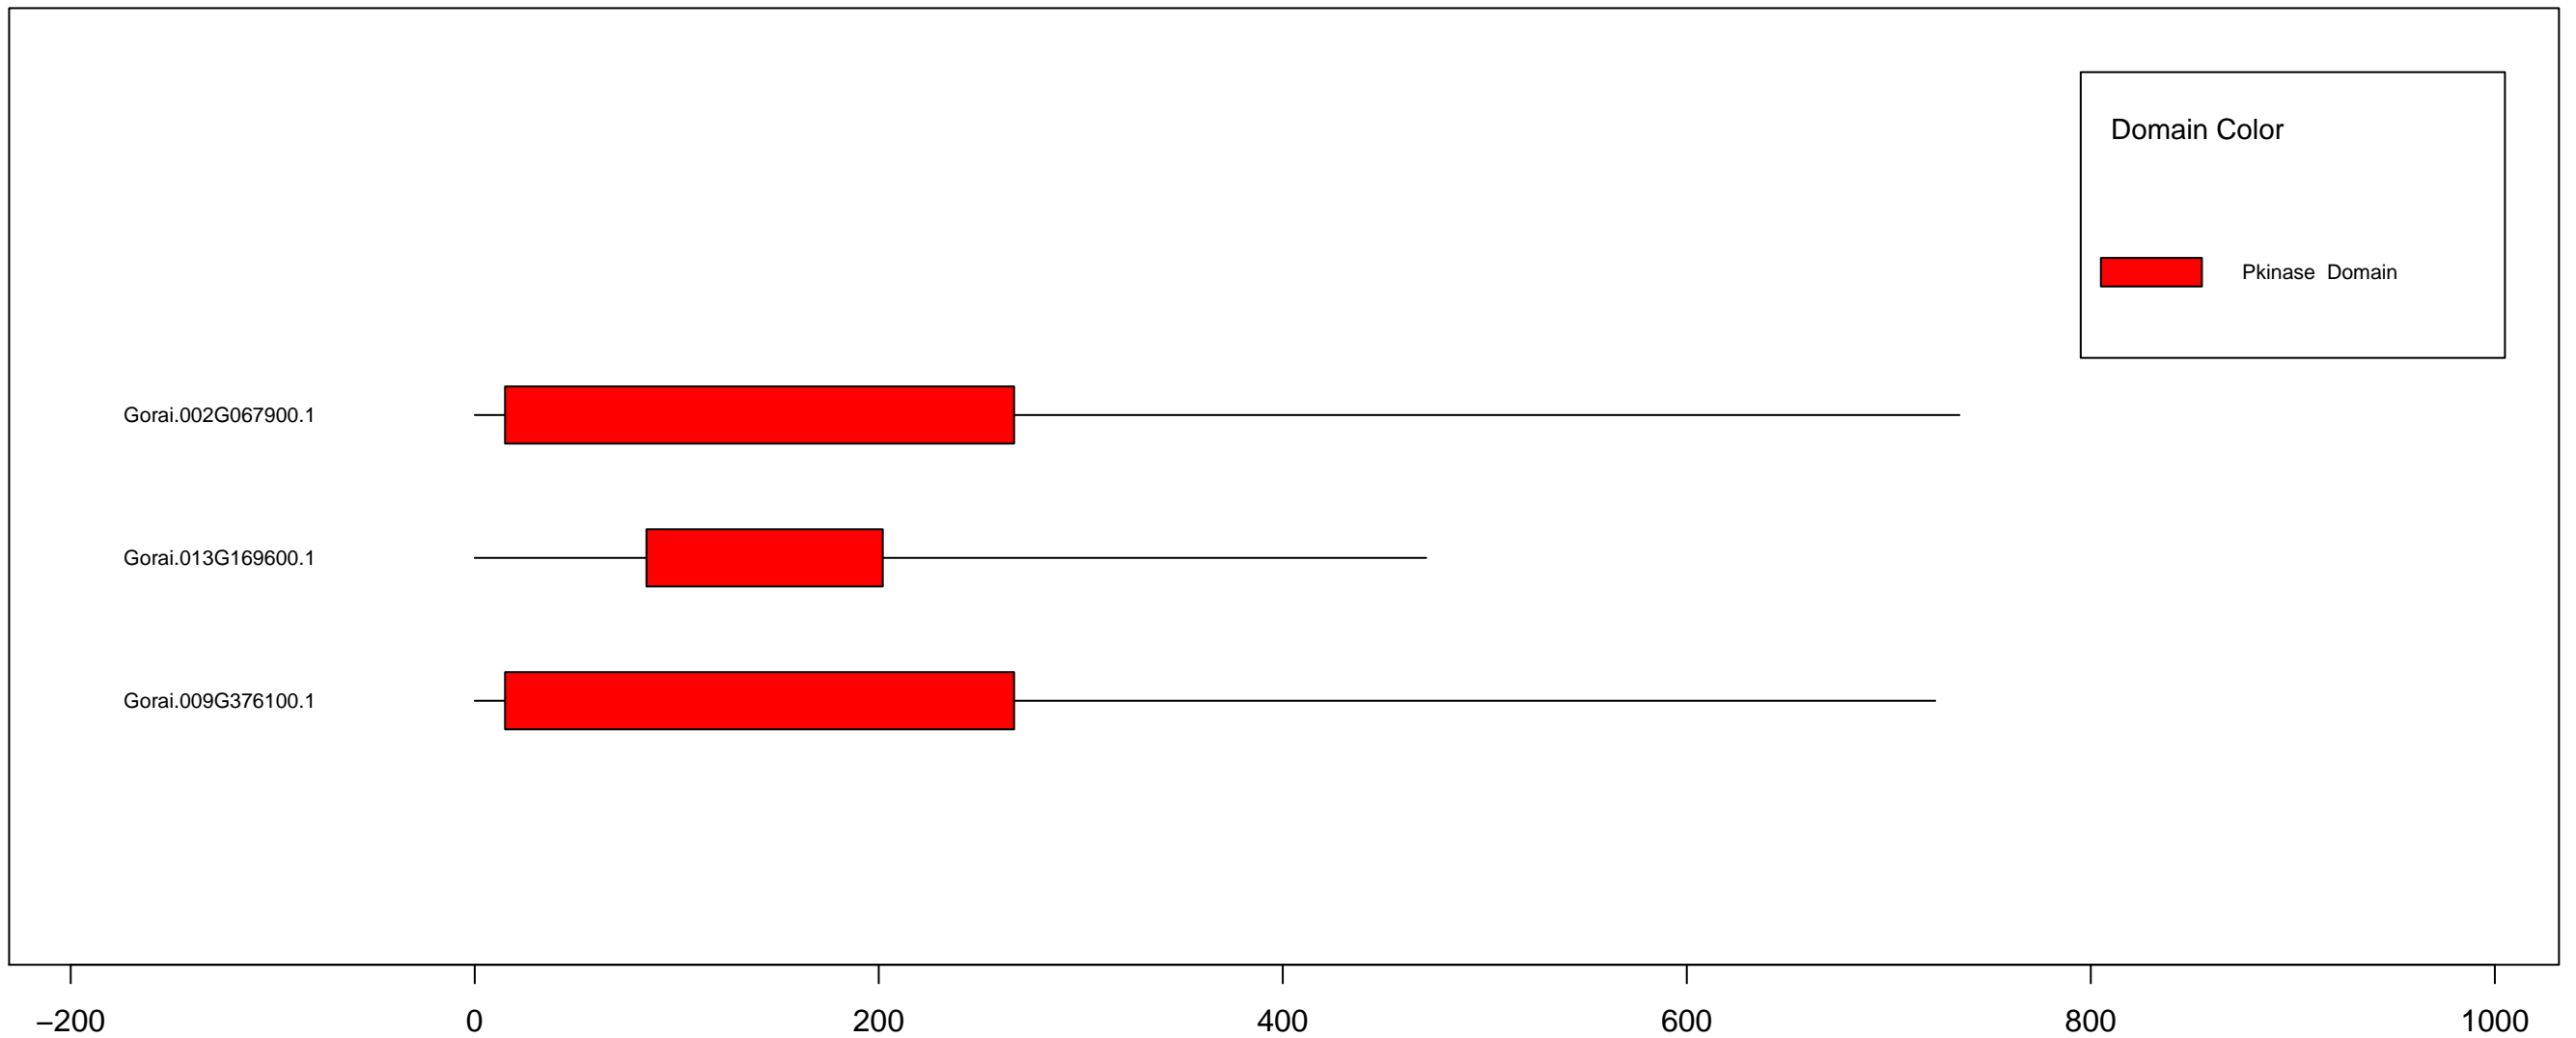

# G.ra STE\_STE7 domain diagram (all)

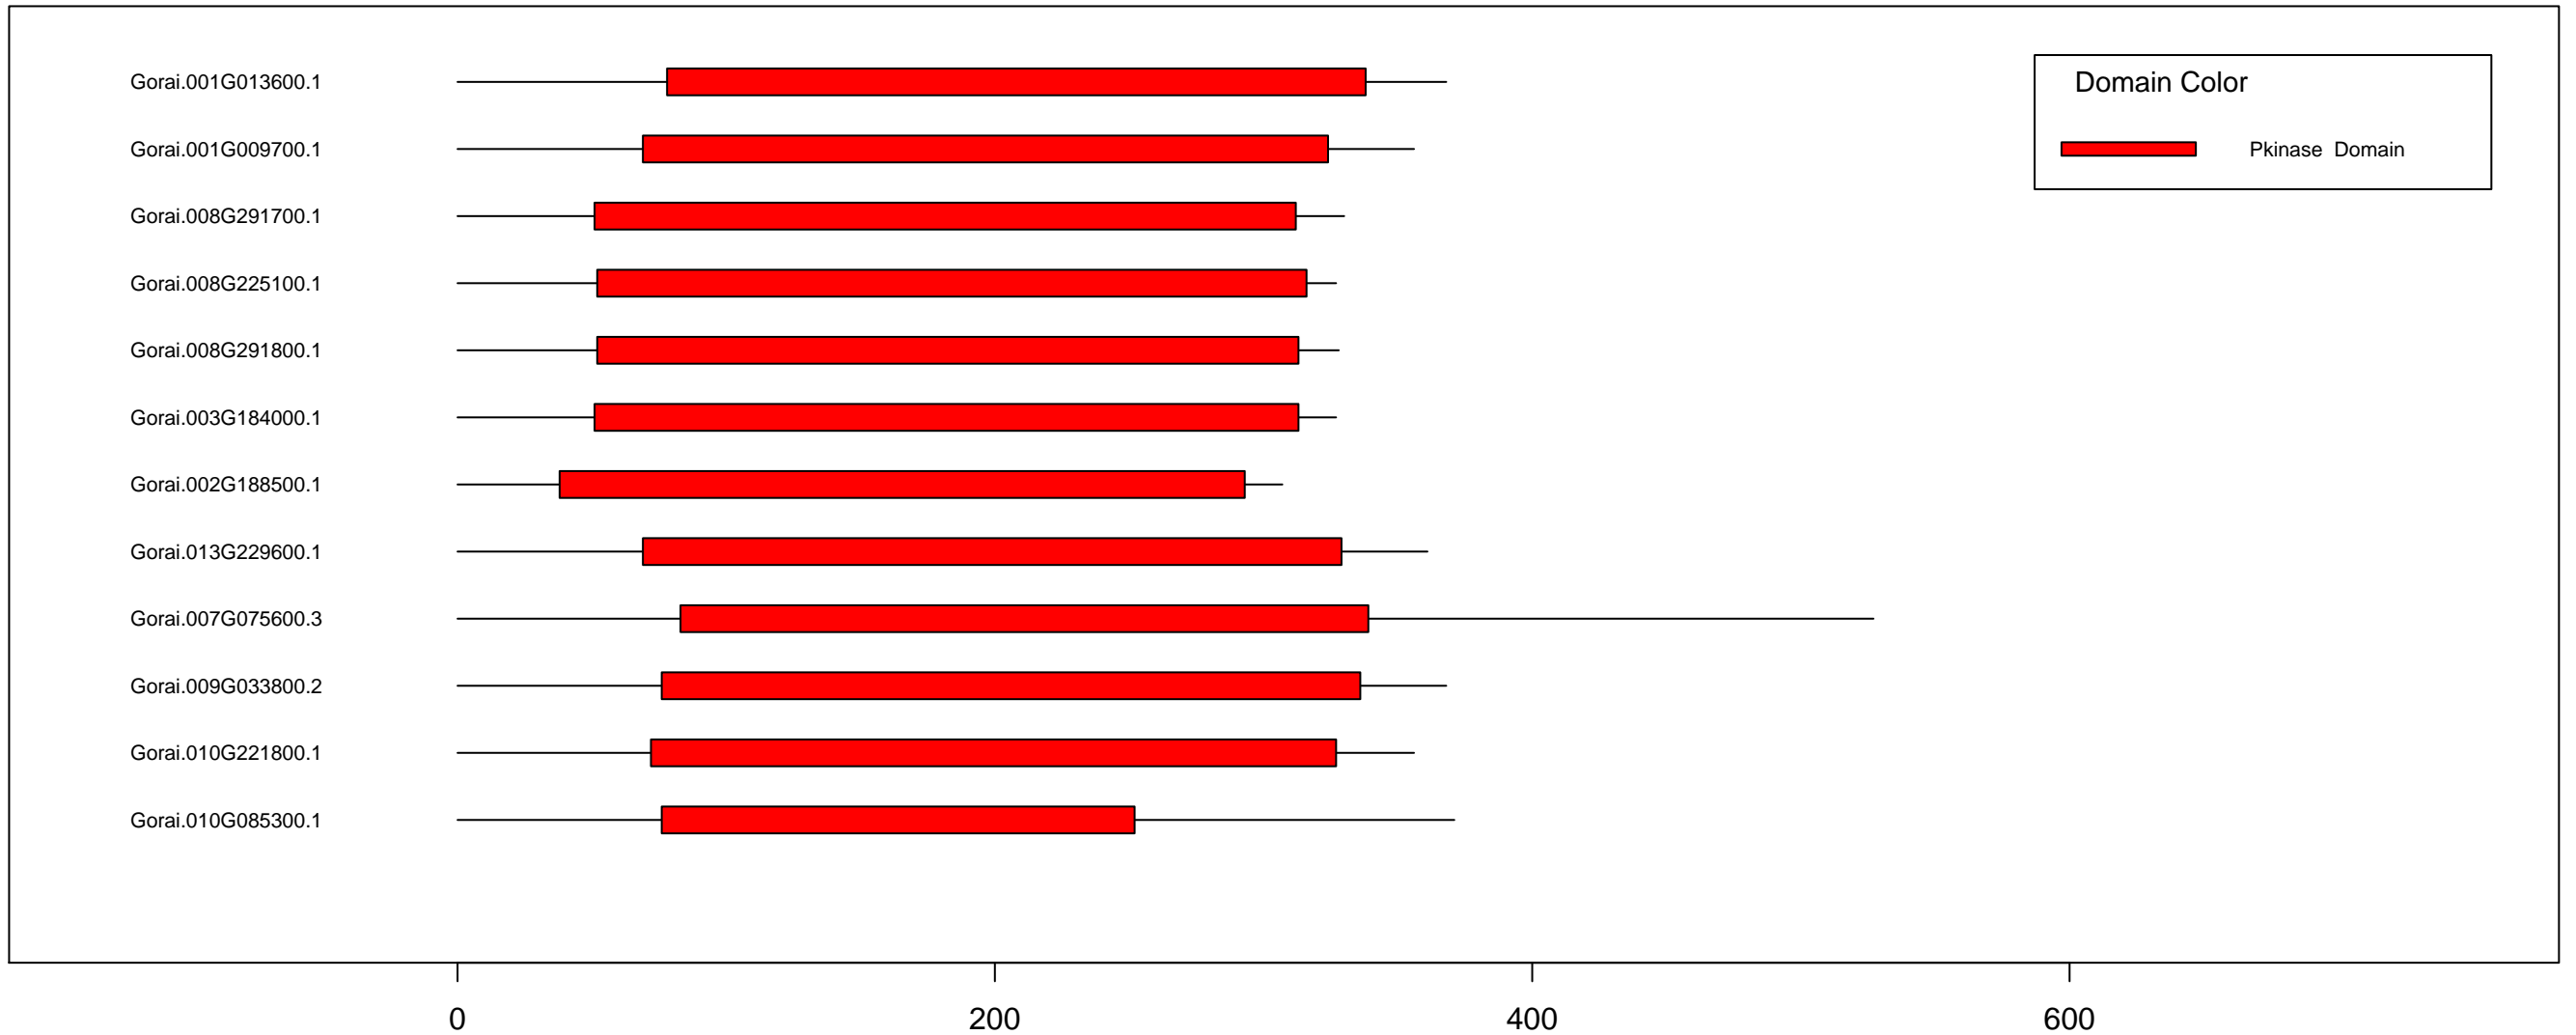

# G.ra STE\_STE-PI domain diagram (all)

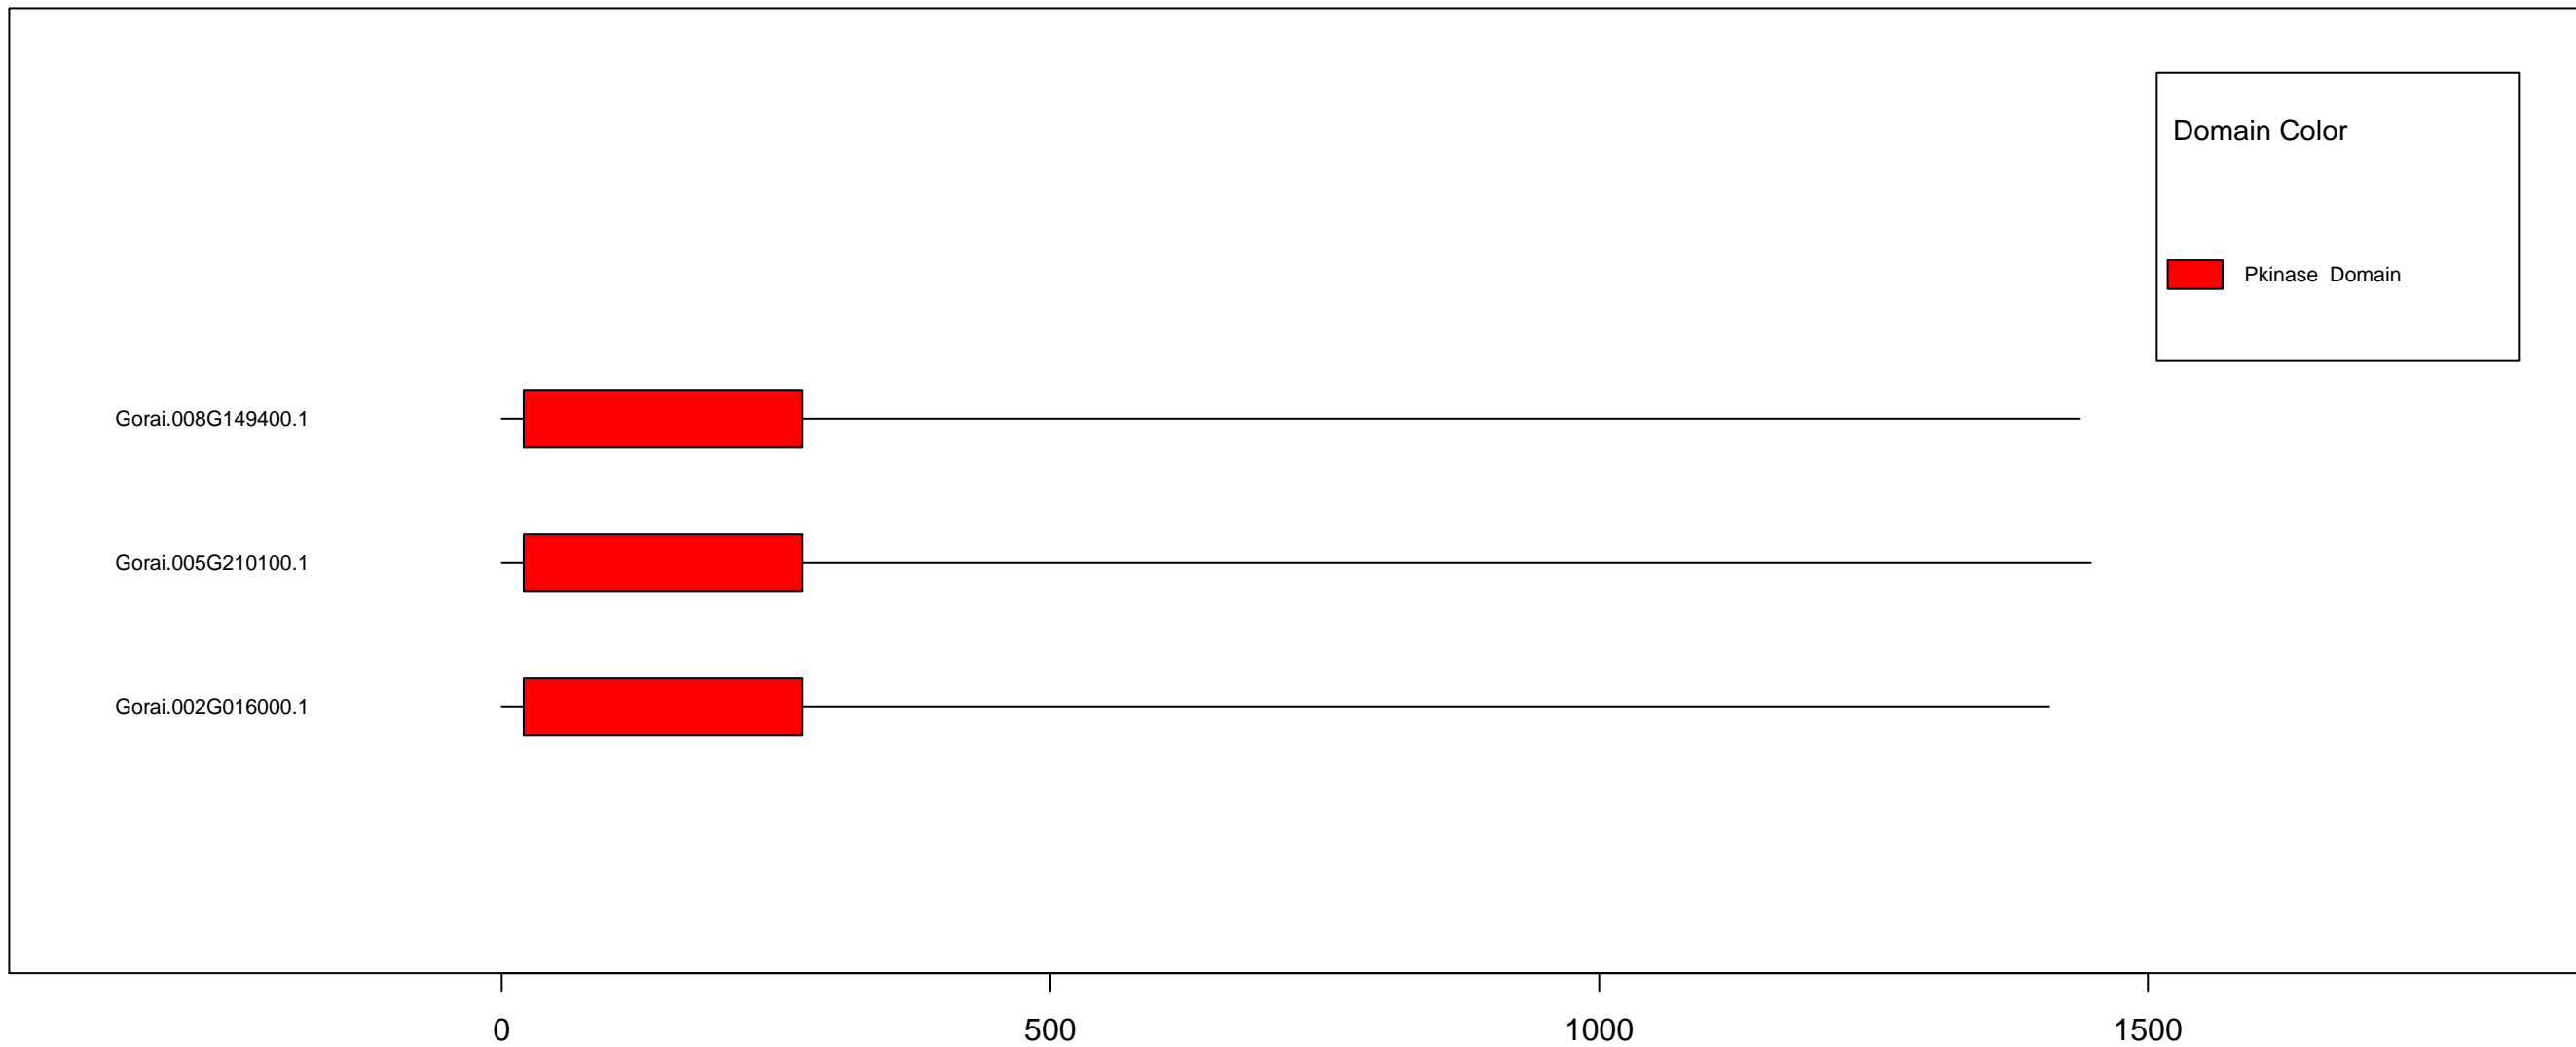



# G.ra TKL\_CTR1-DRK-1 domain diagram (all)

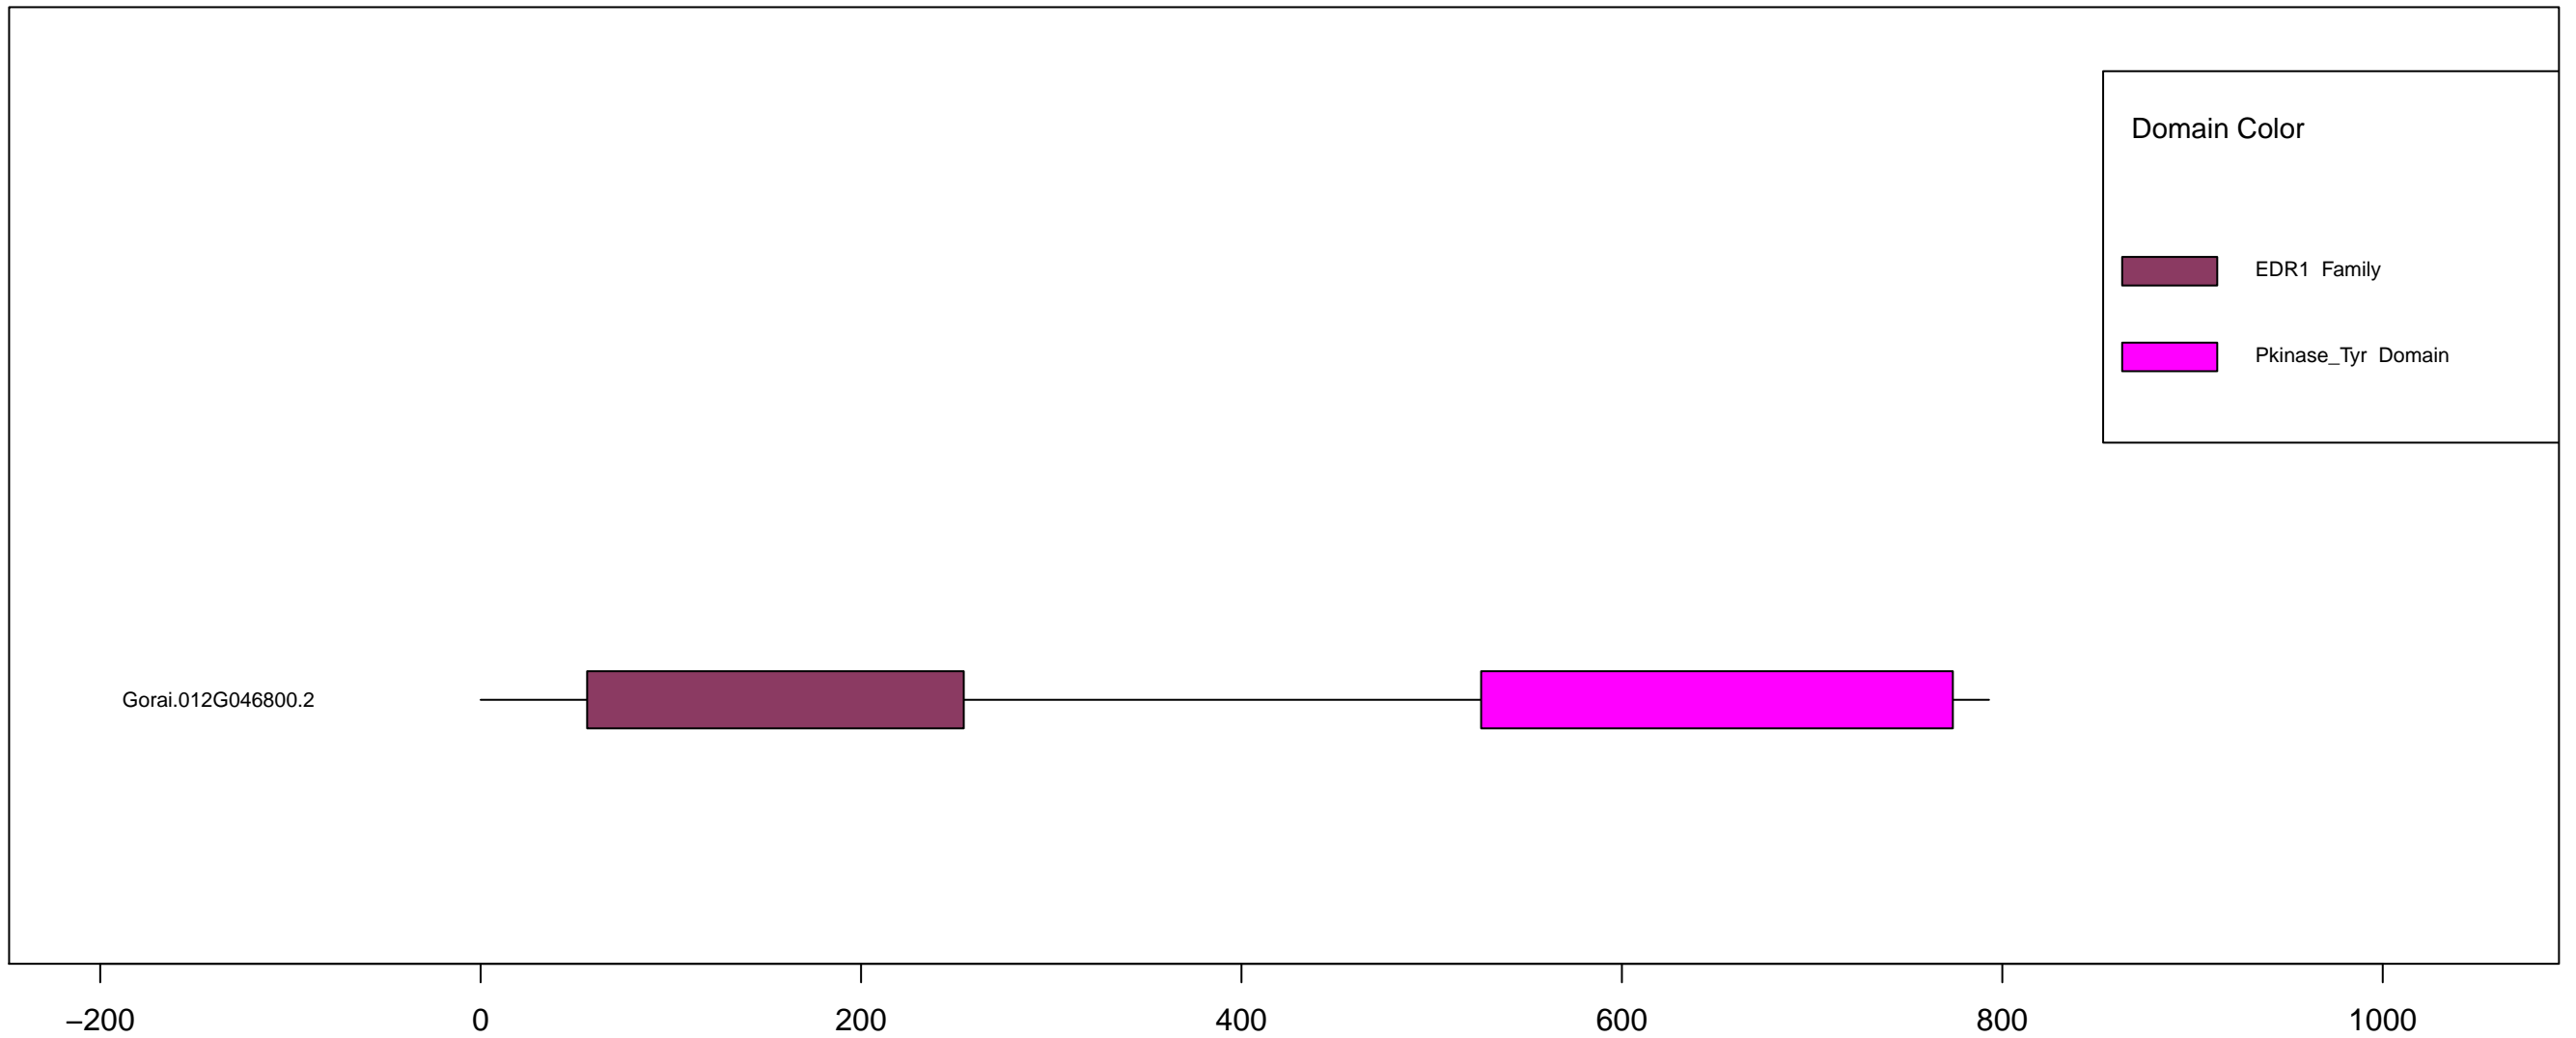

### G.ra TKL\_CTR1-DRK-2 domain diagram (all)

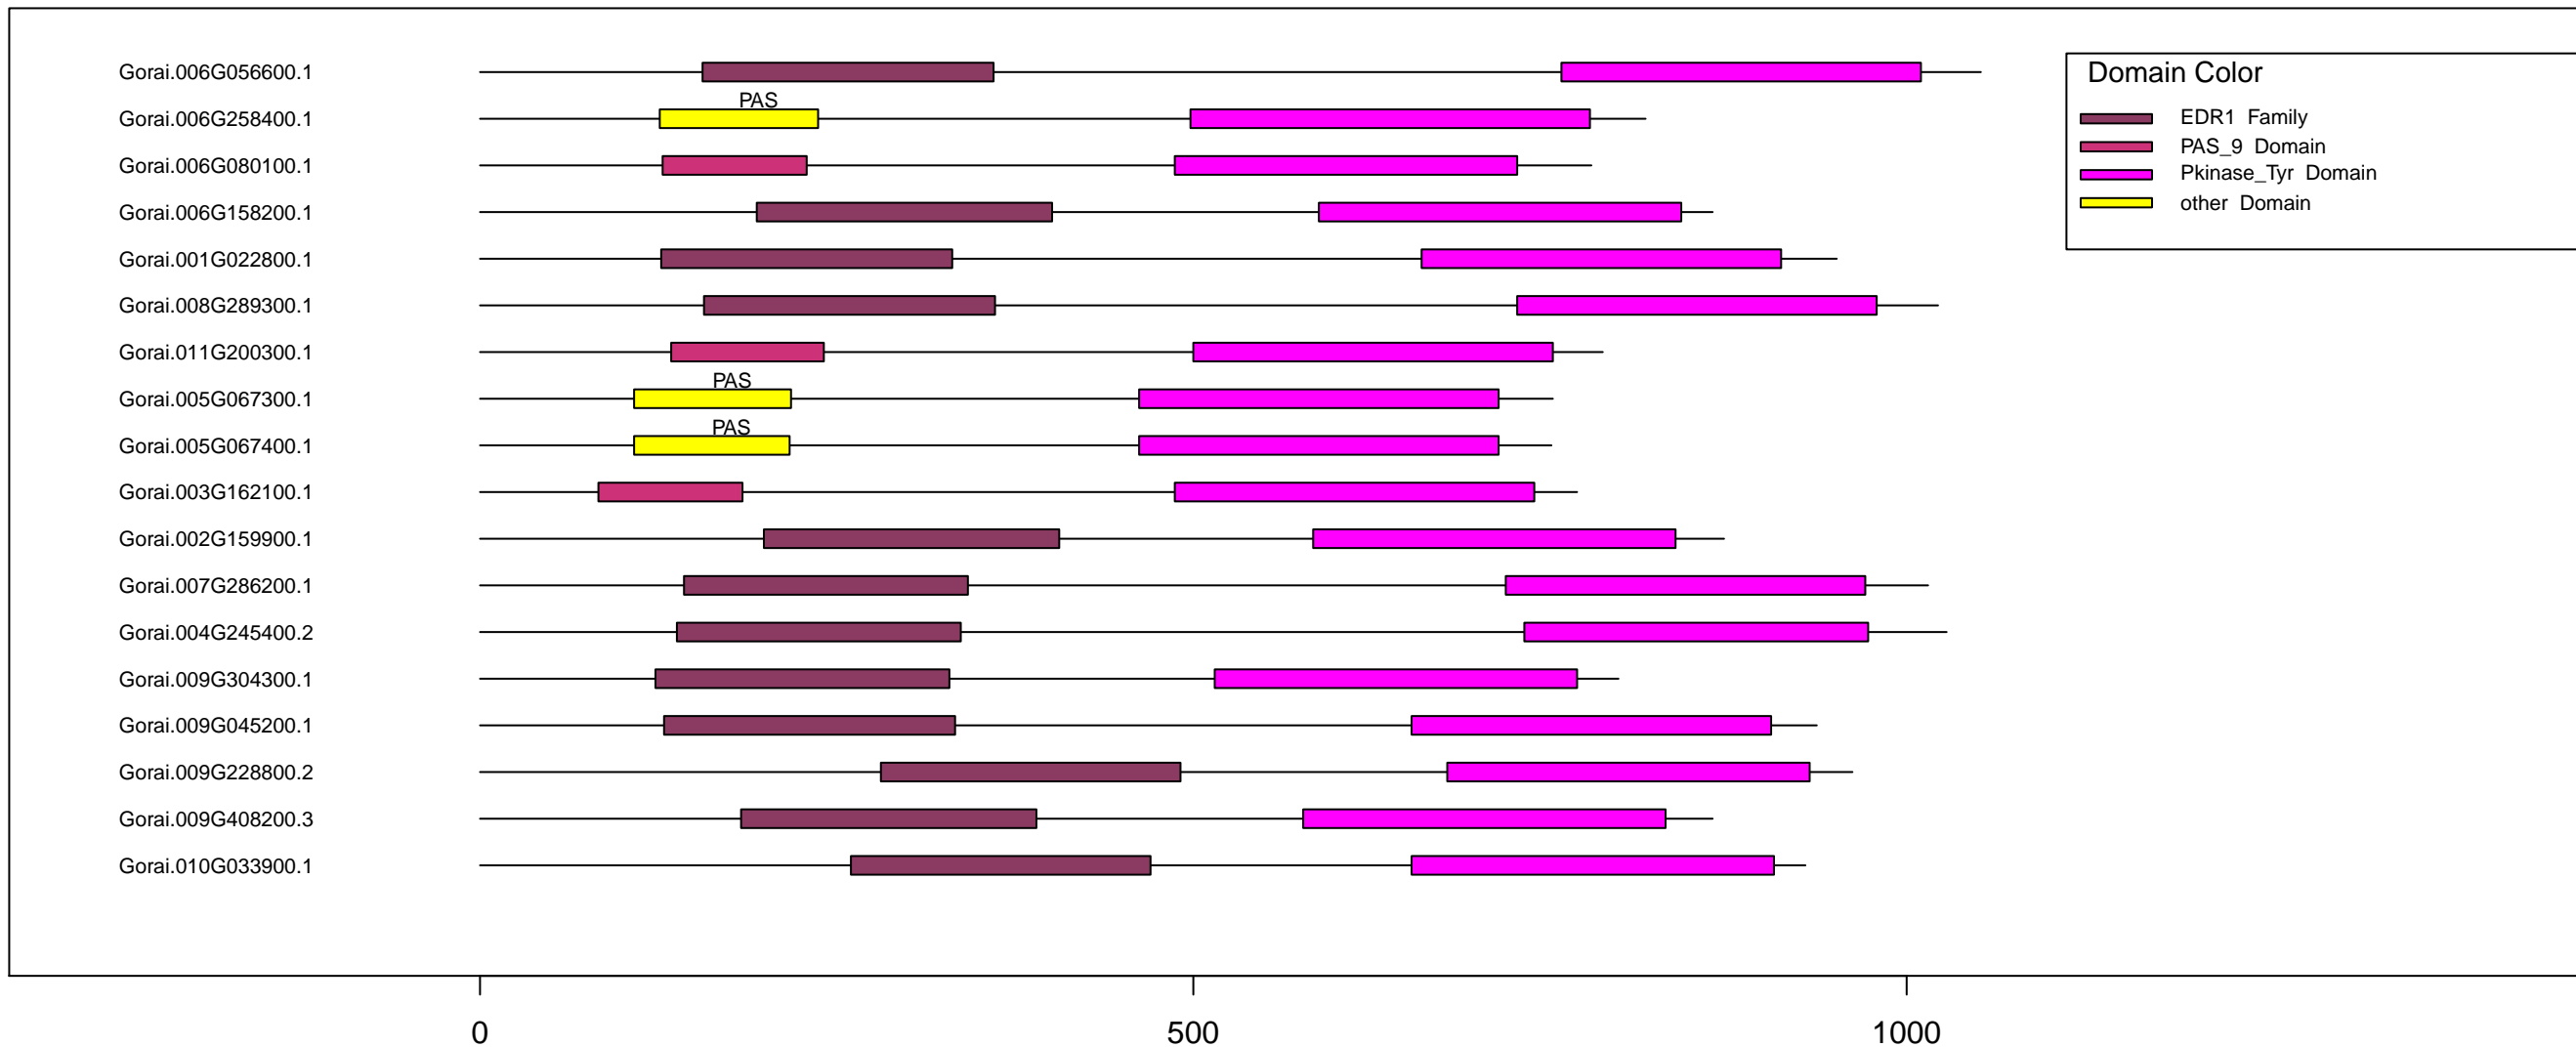

# G.ra TKL\_Gdt domain diagram (all)

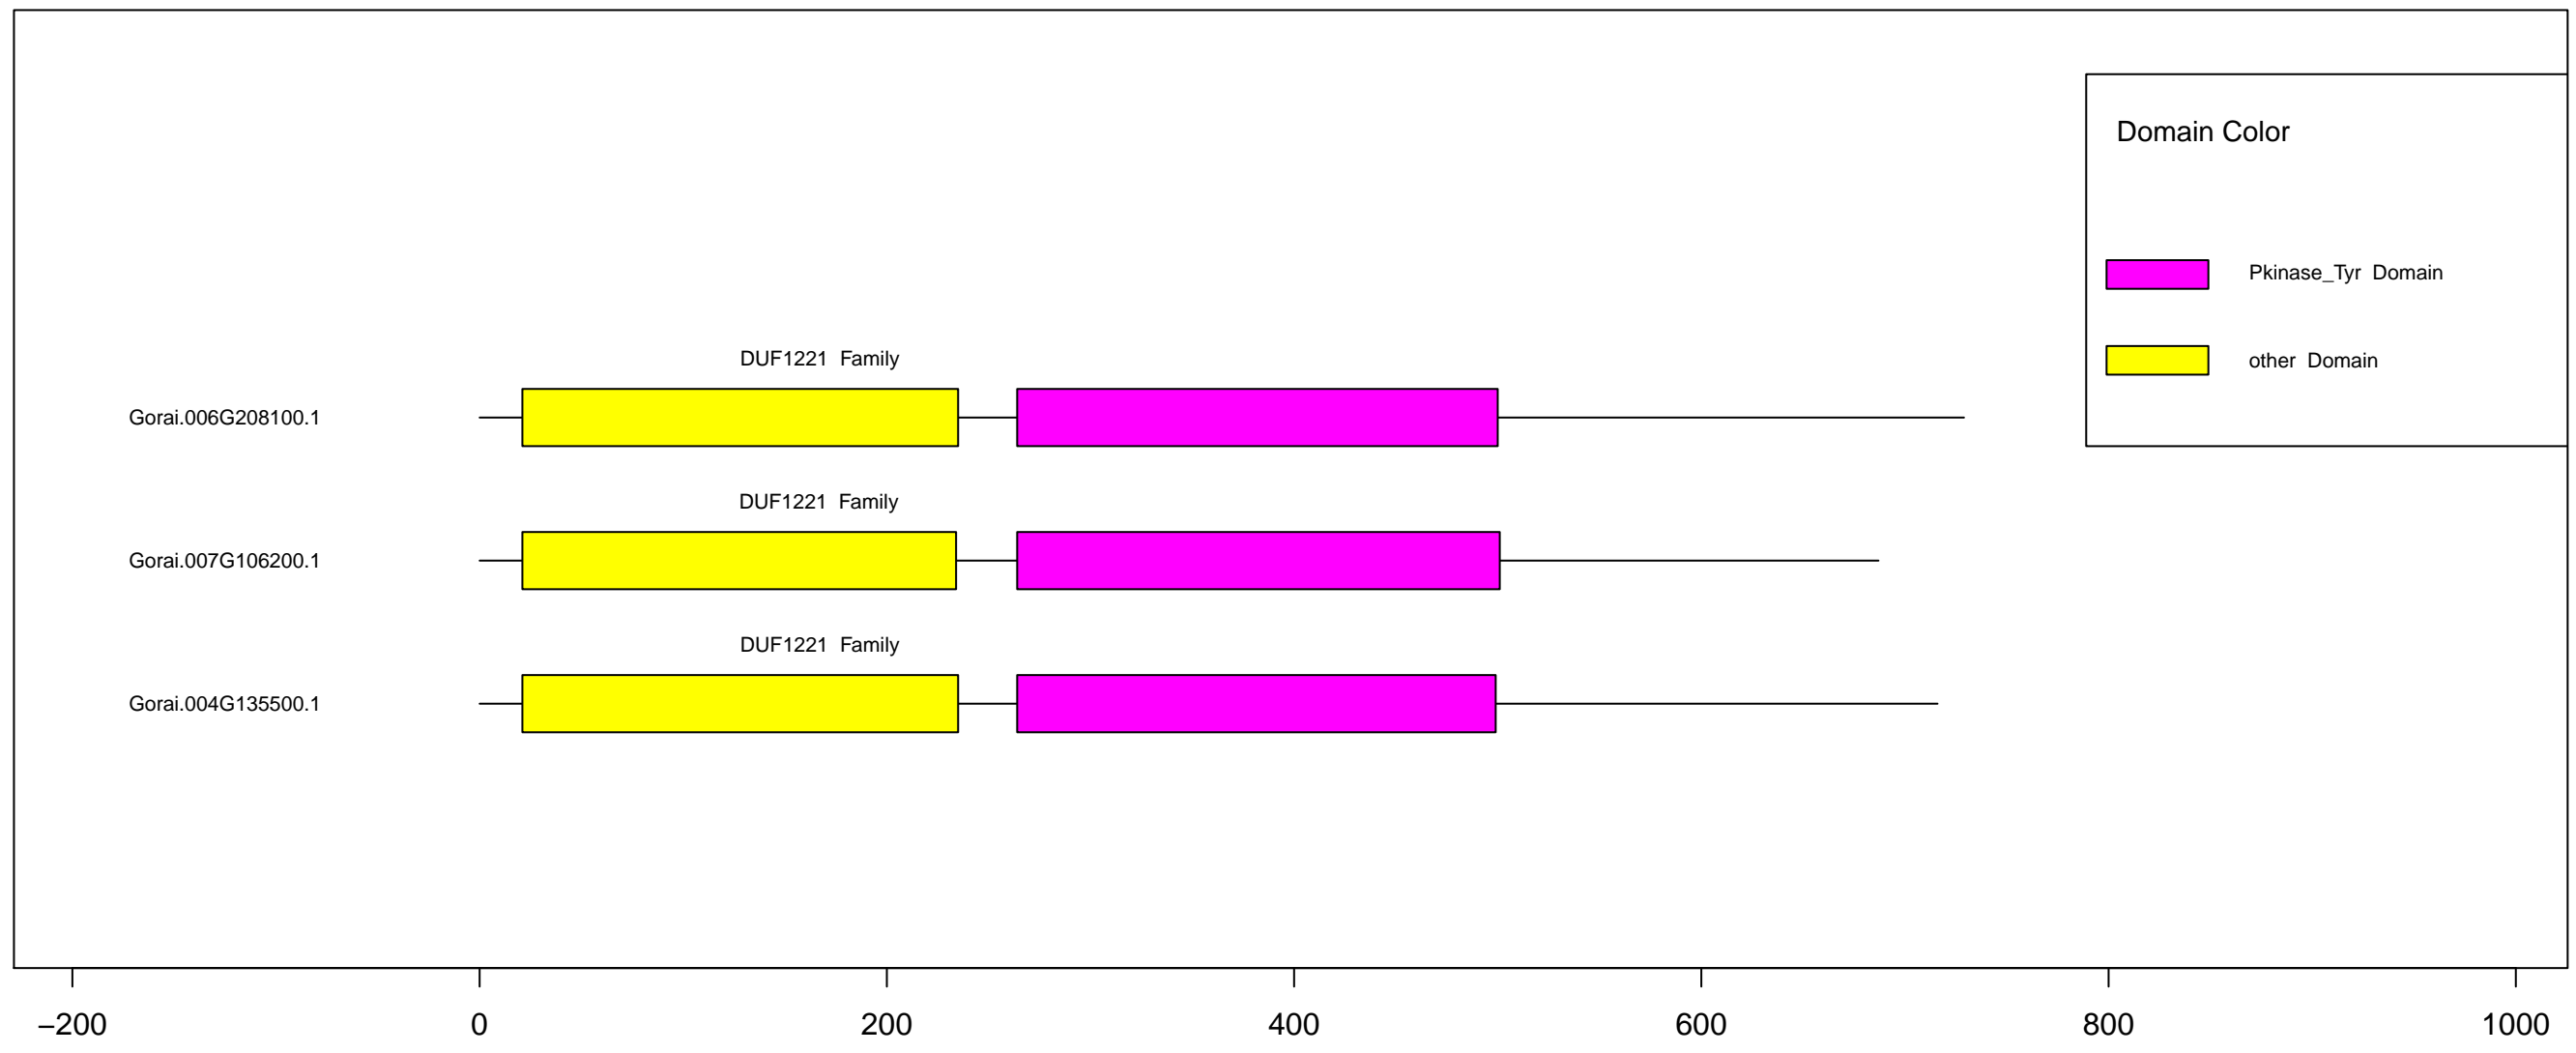

# G.ra TKL-PI-1 domain diagram (all)

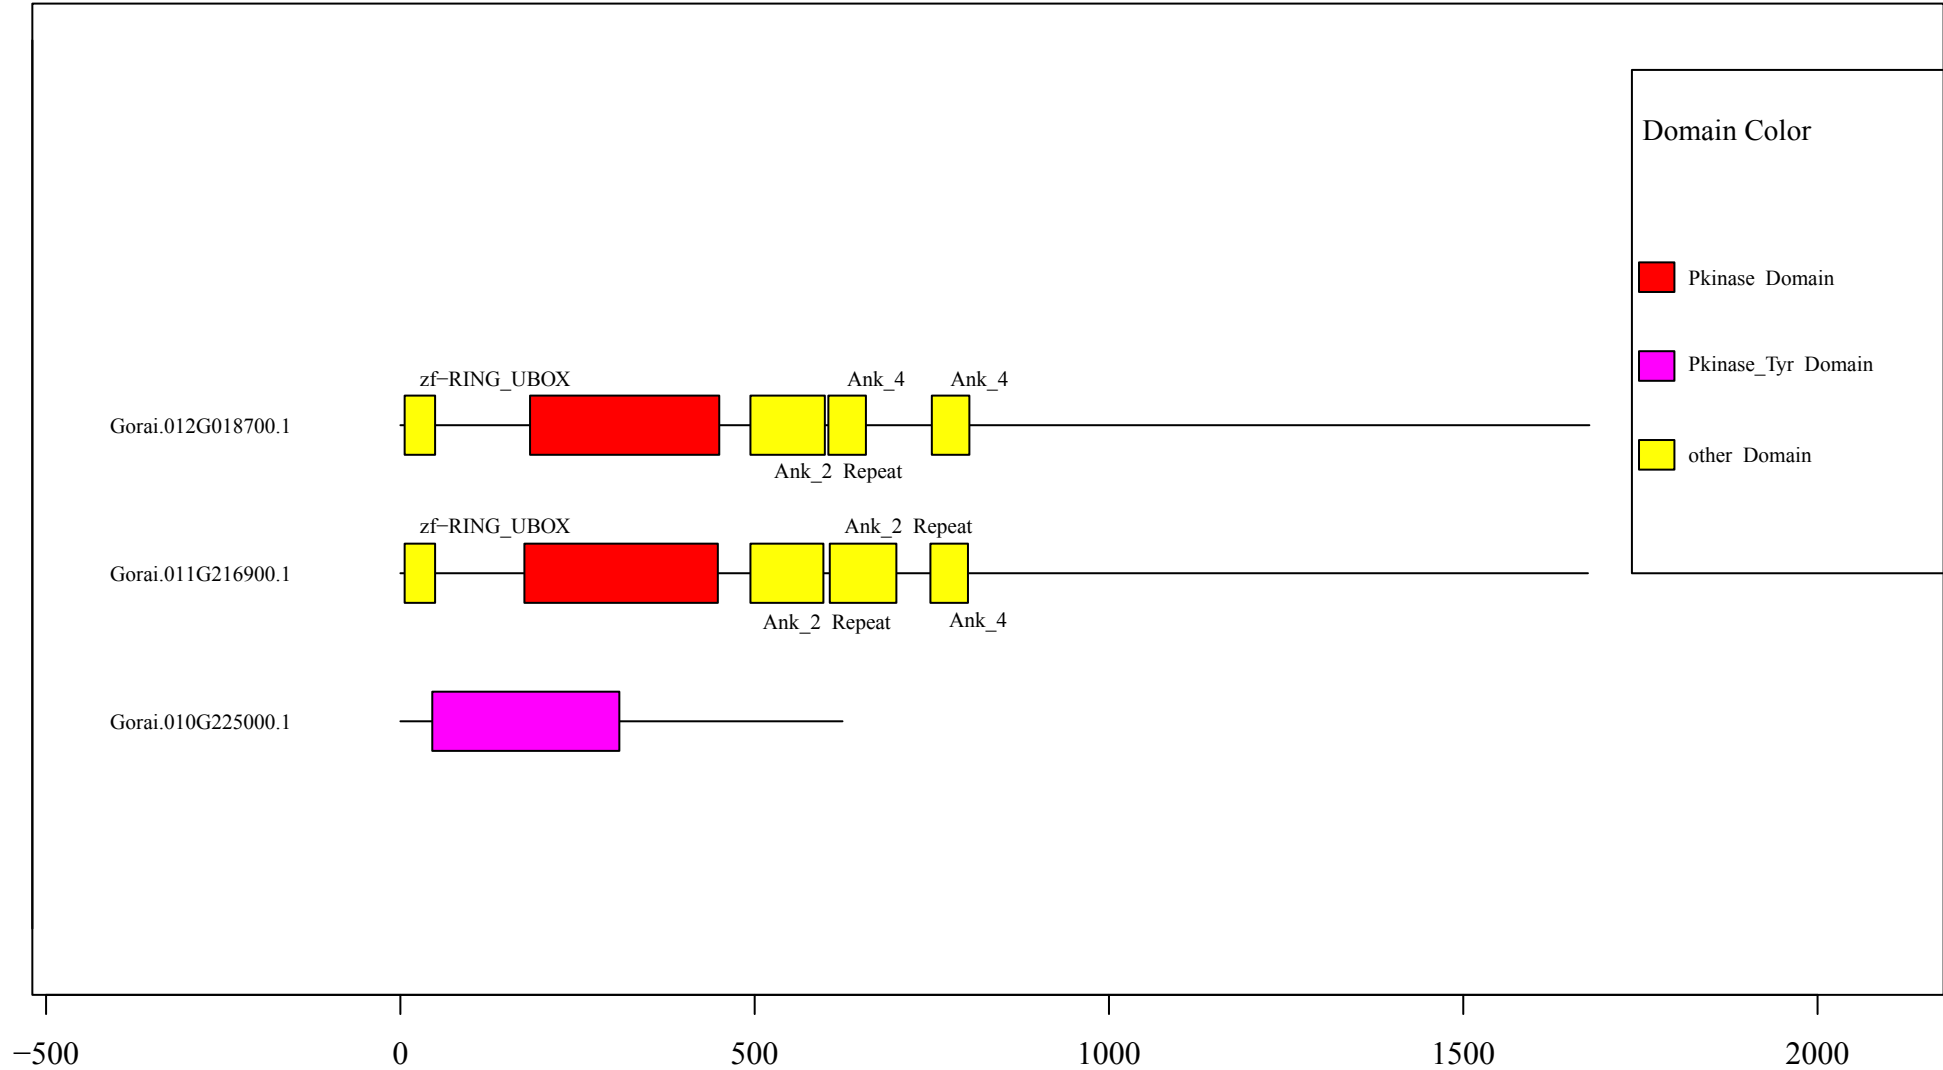

# G.ra TKL-PI-2 domain diagram (all)

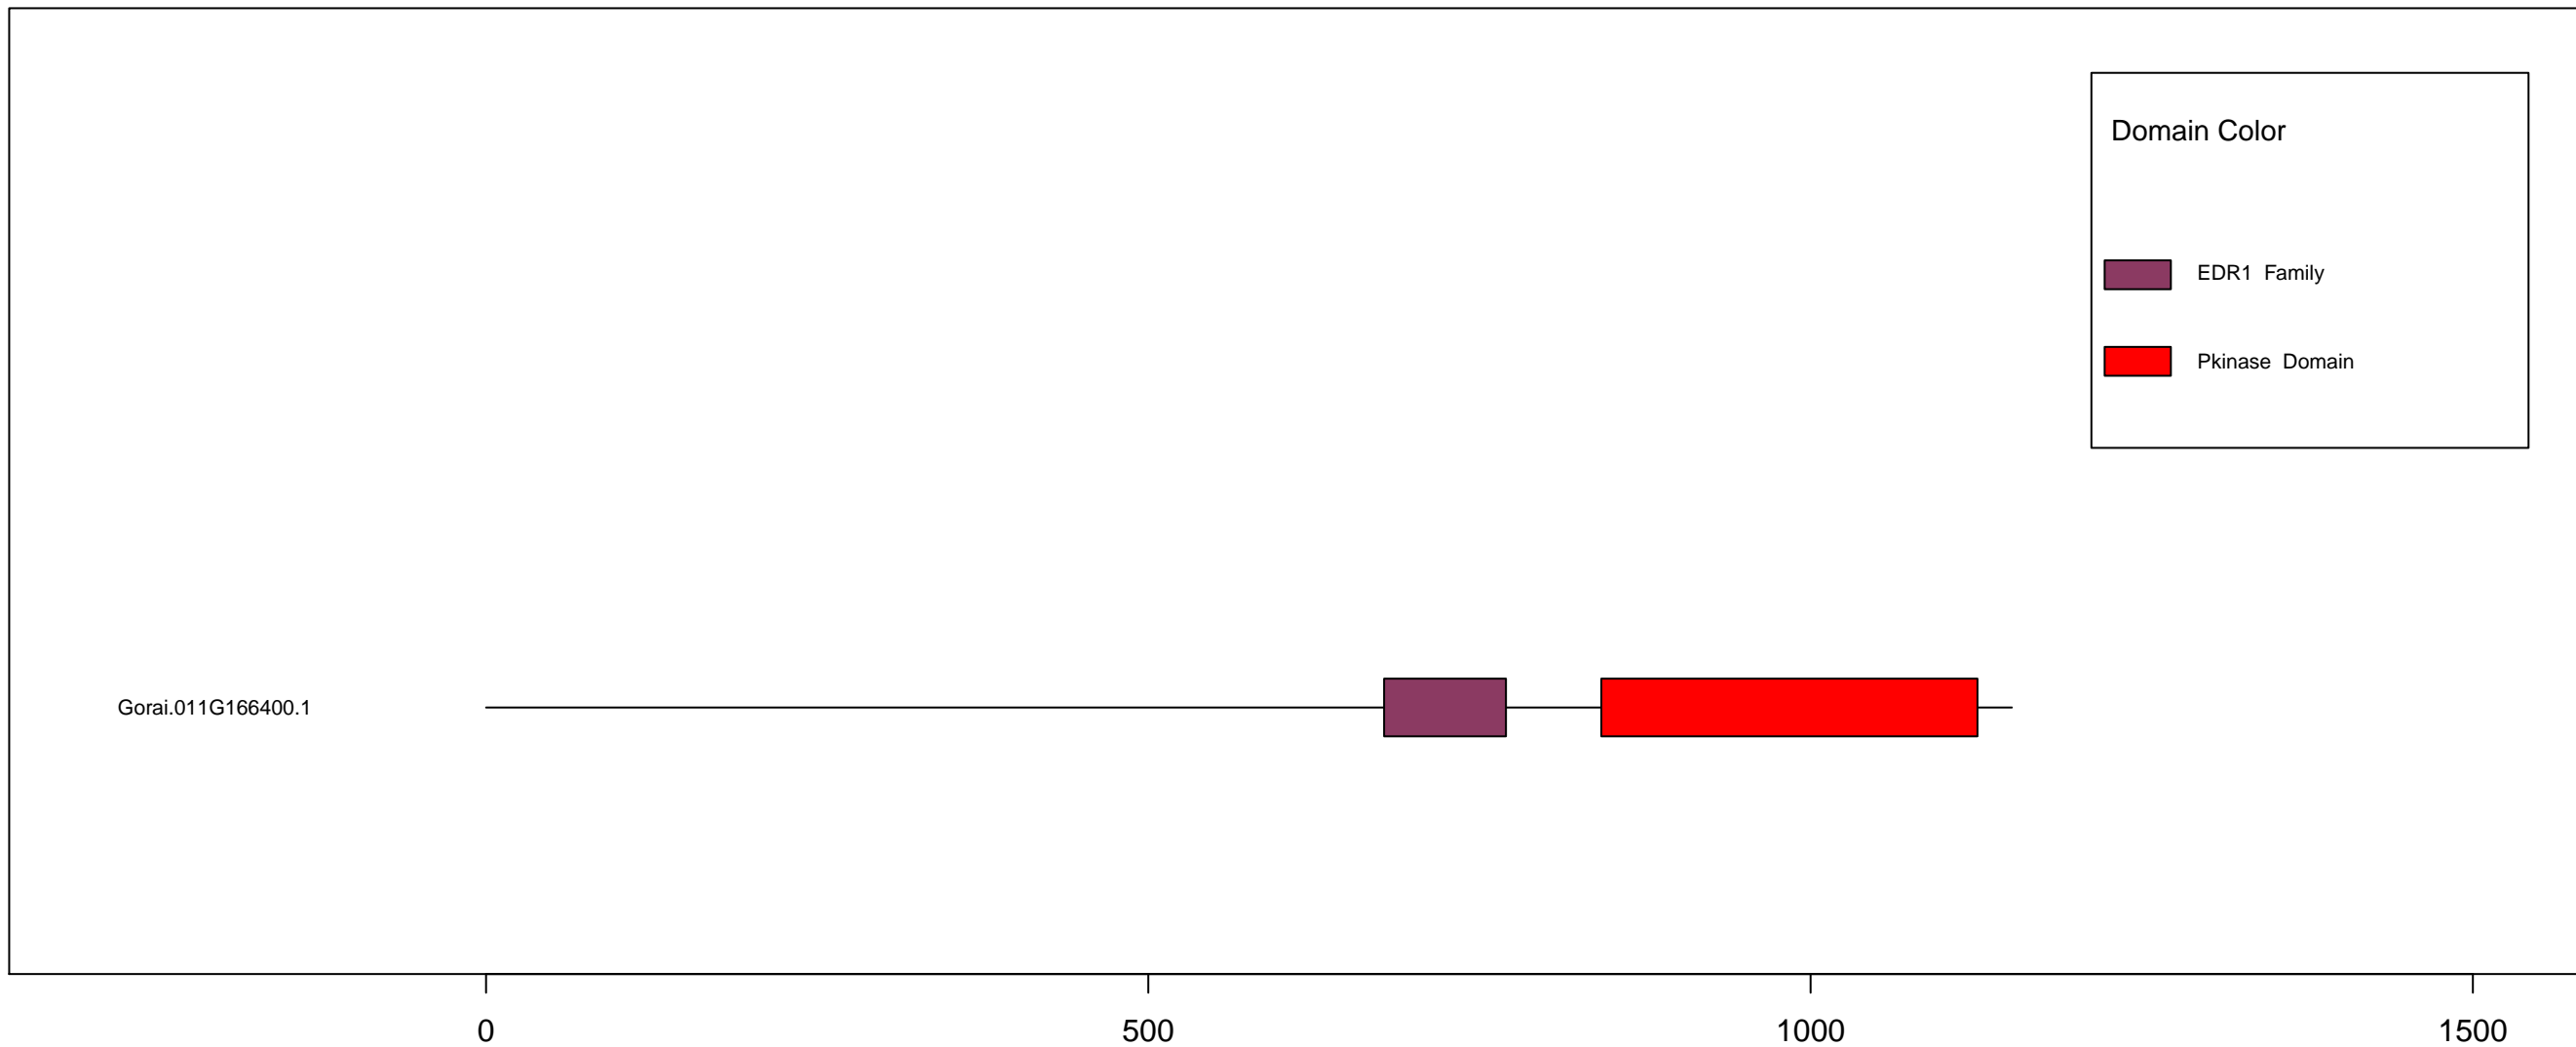

# G.ra TKL-PI-3 domain diagram (all)

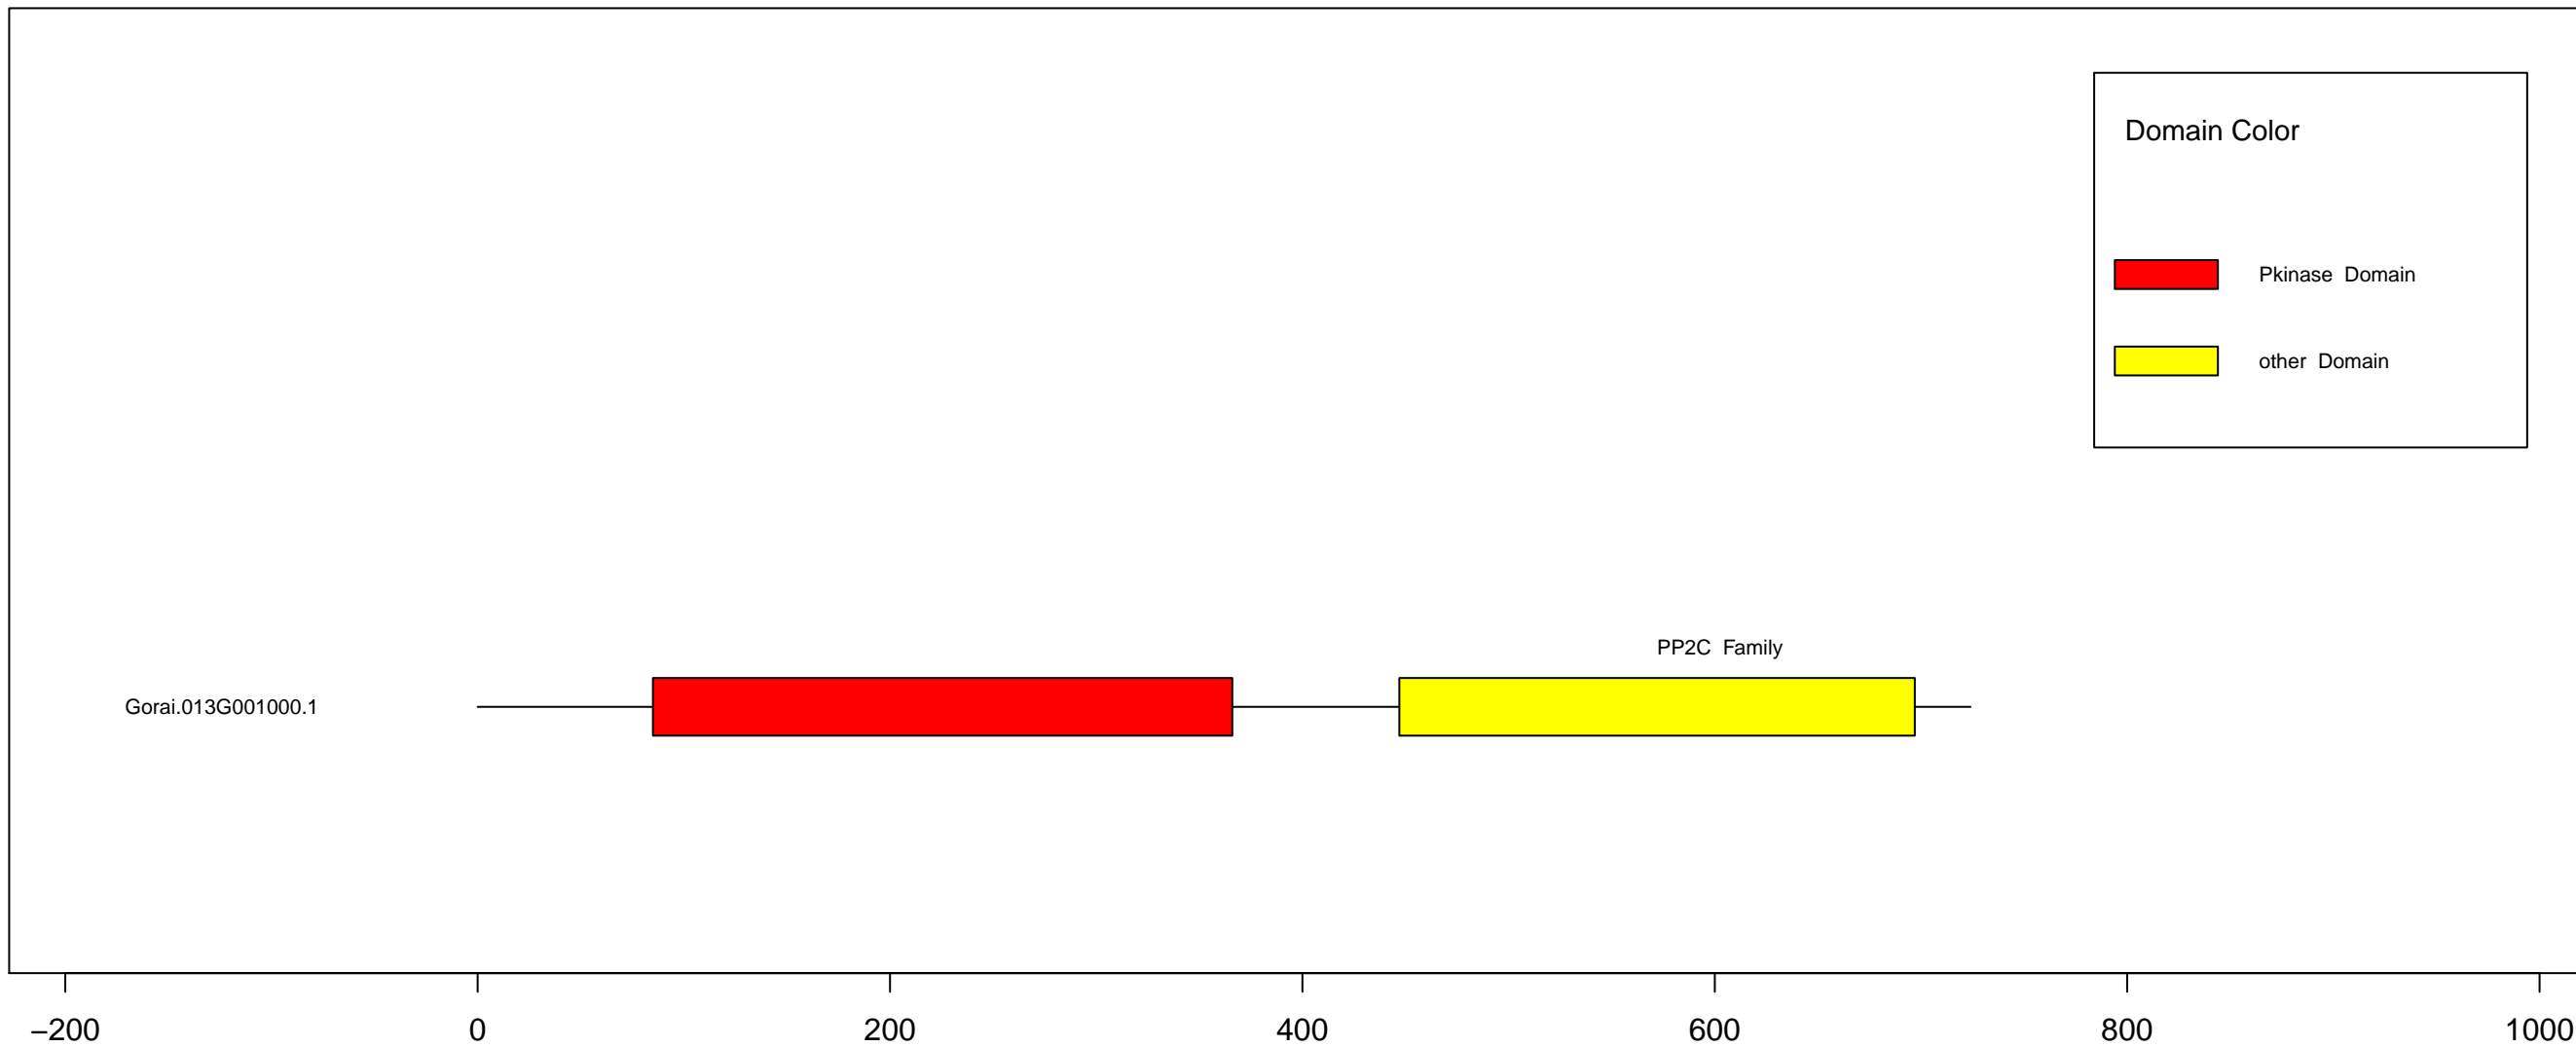

# G.ra TKL-PI-4 domain diagram (part 1)

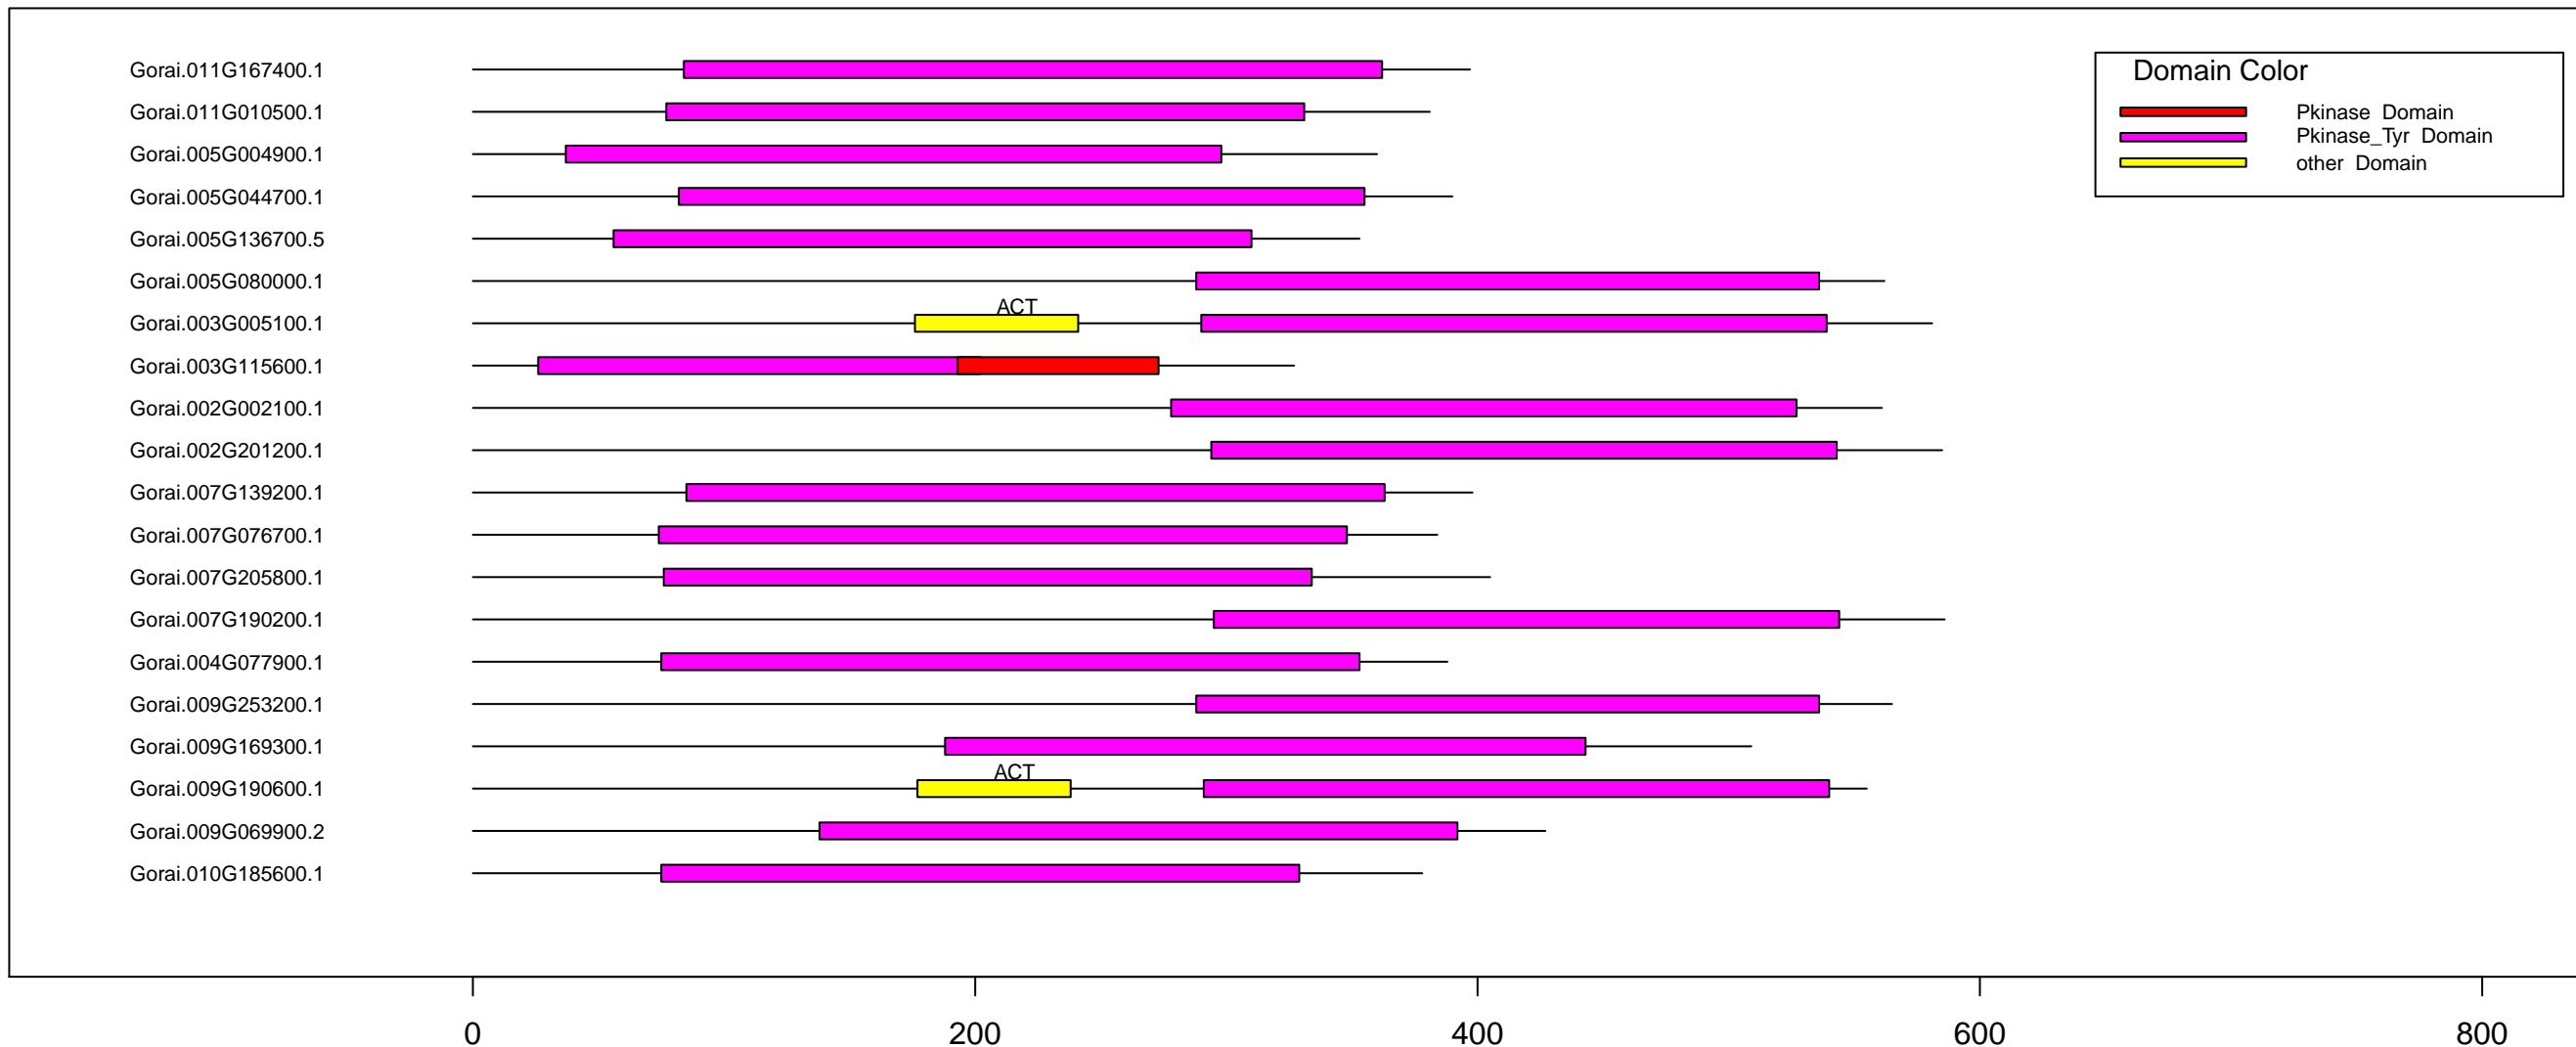

### G.ra TKL-PI-4 domain diagram (part 2)

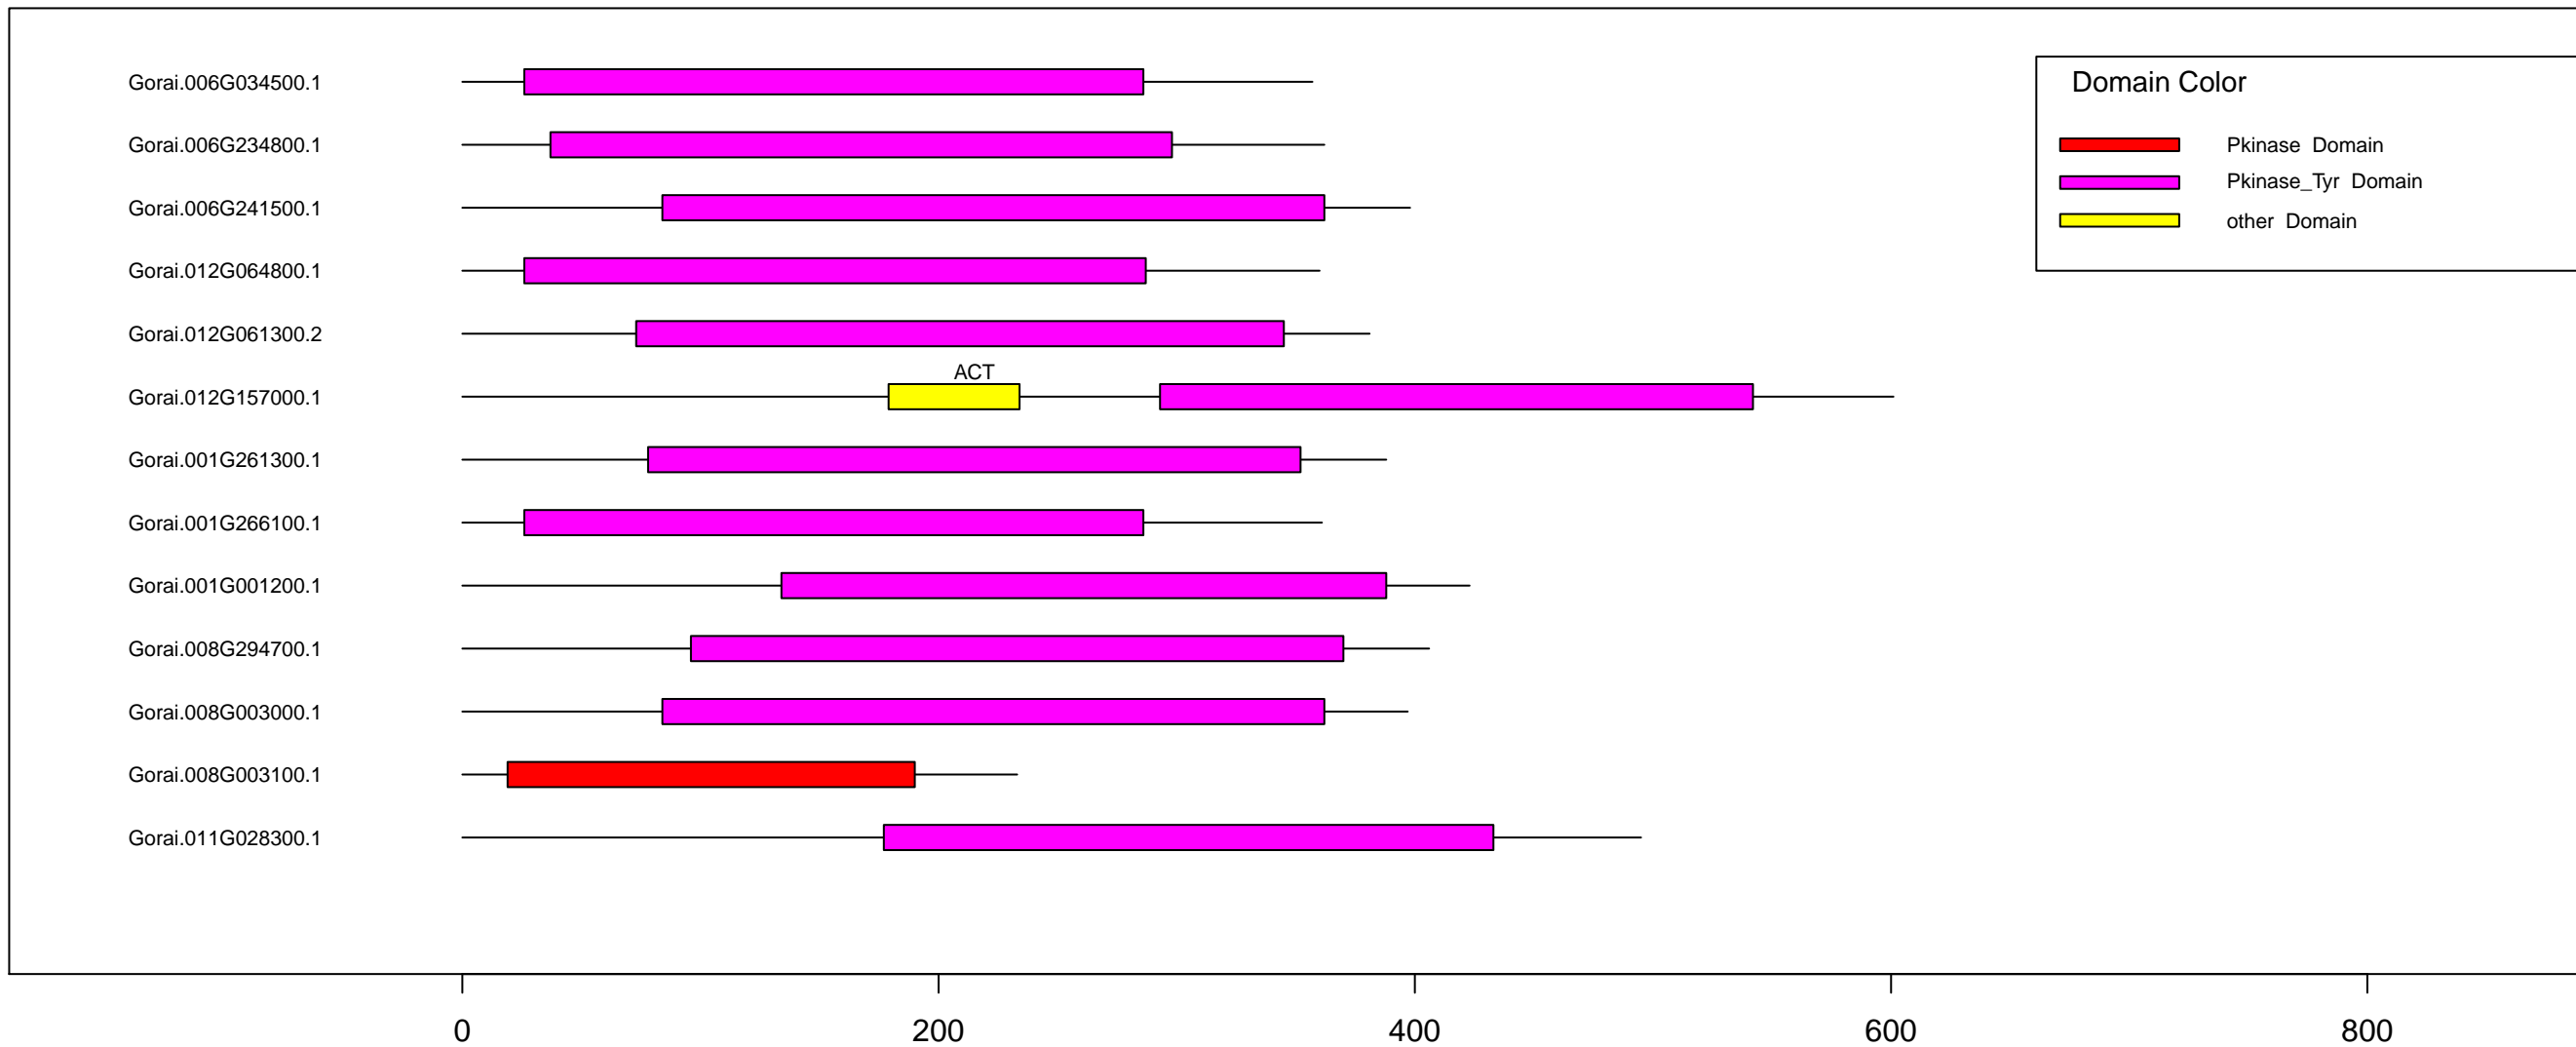



# G.ra TKL-PI-5 domain diagram (all)

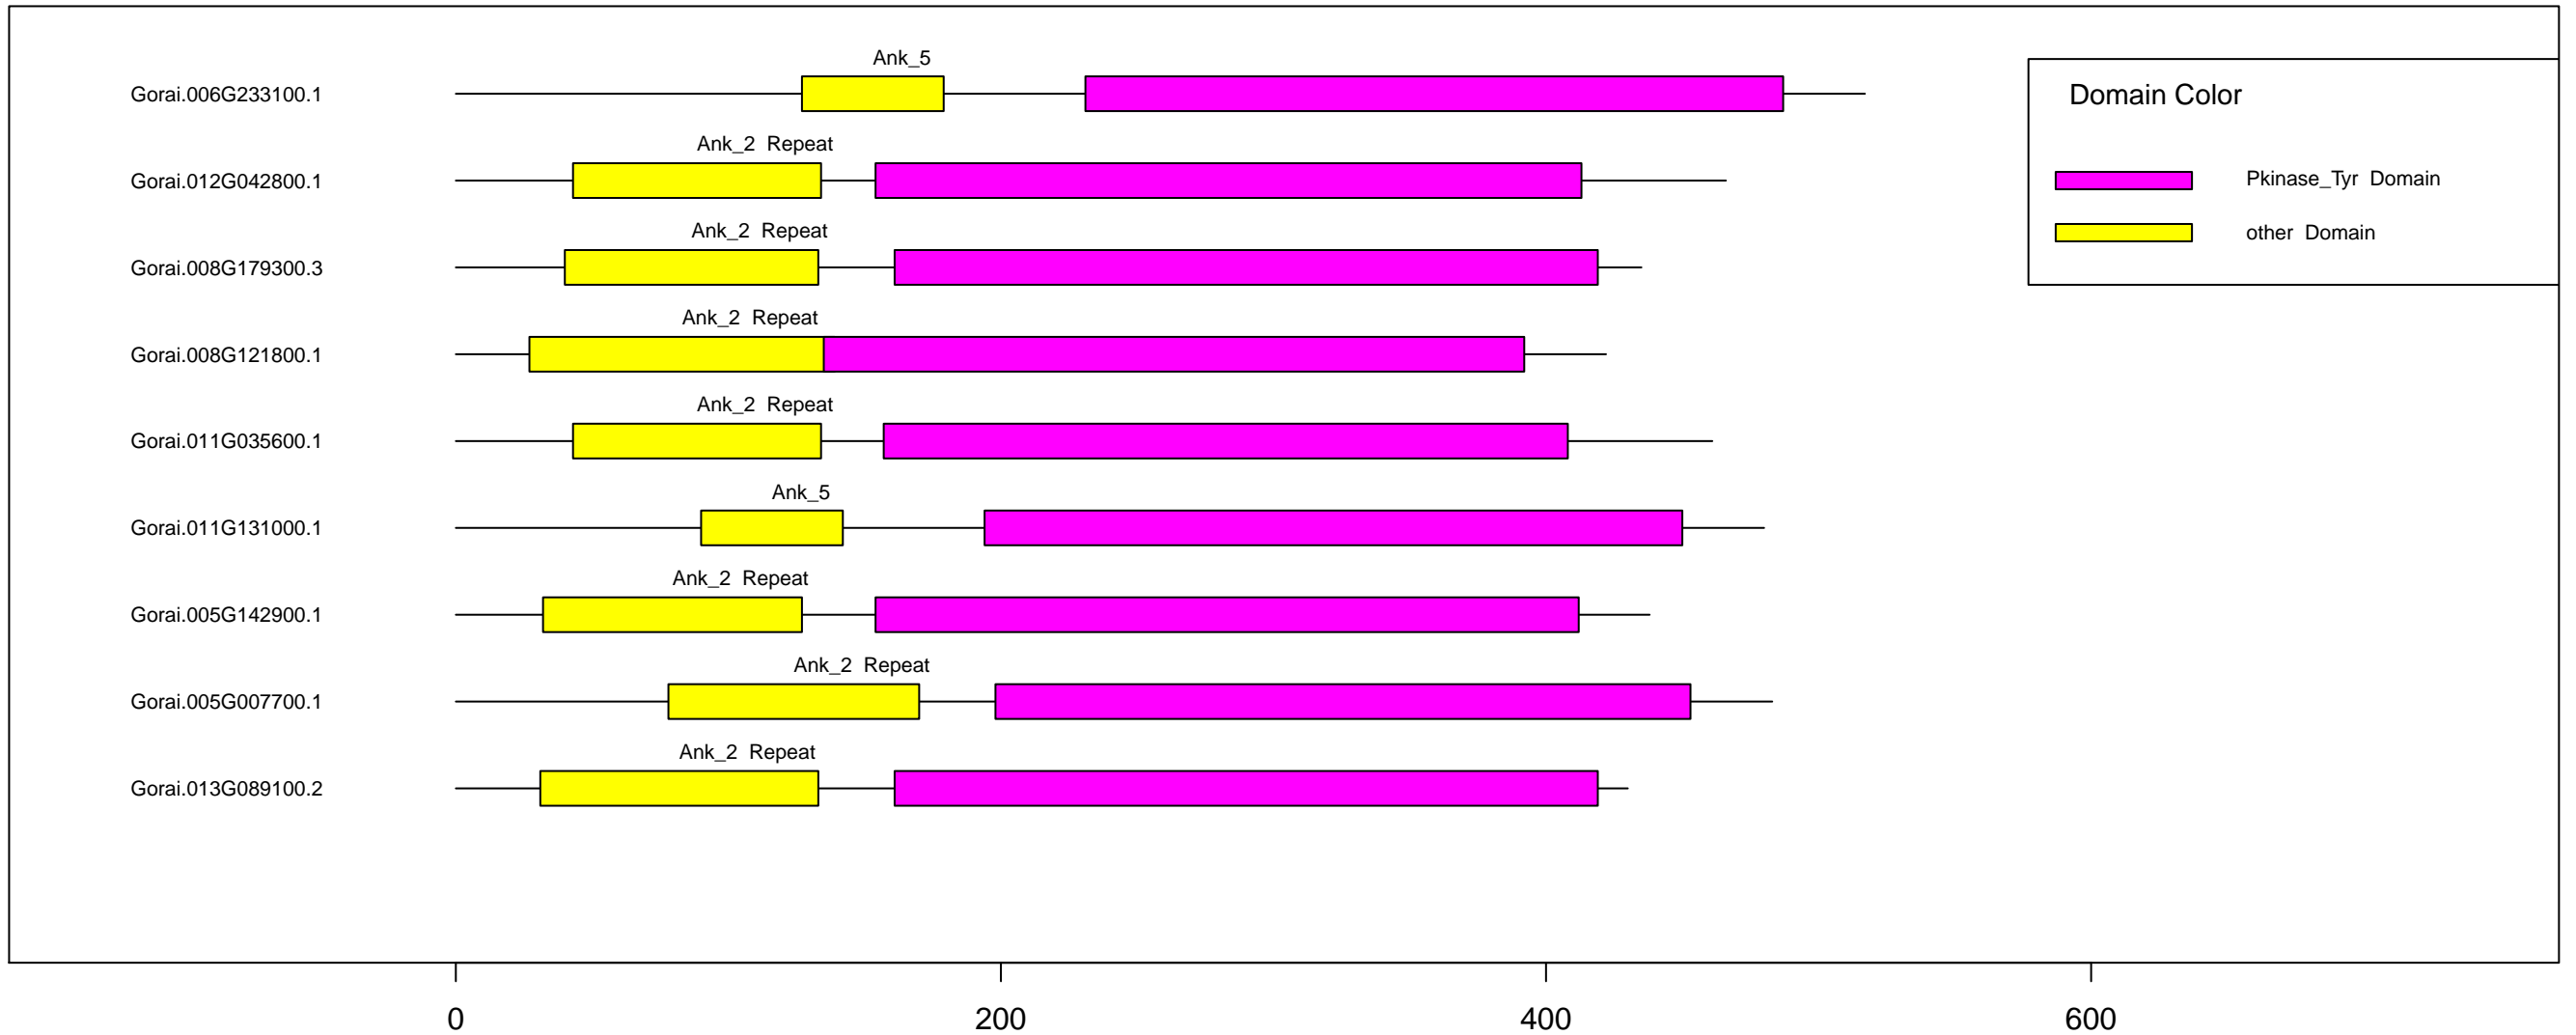

# G.ra TKL-PI-6 domain diagram (all)

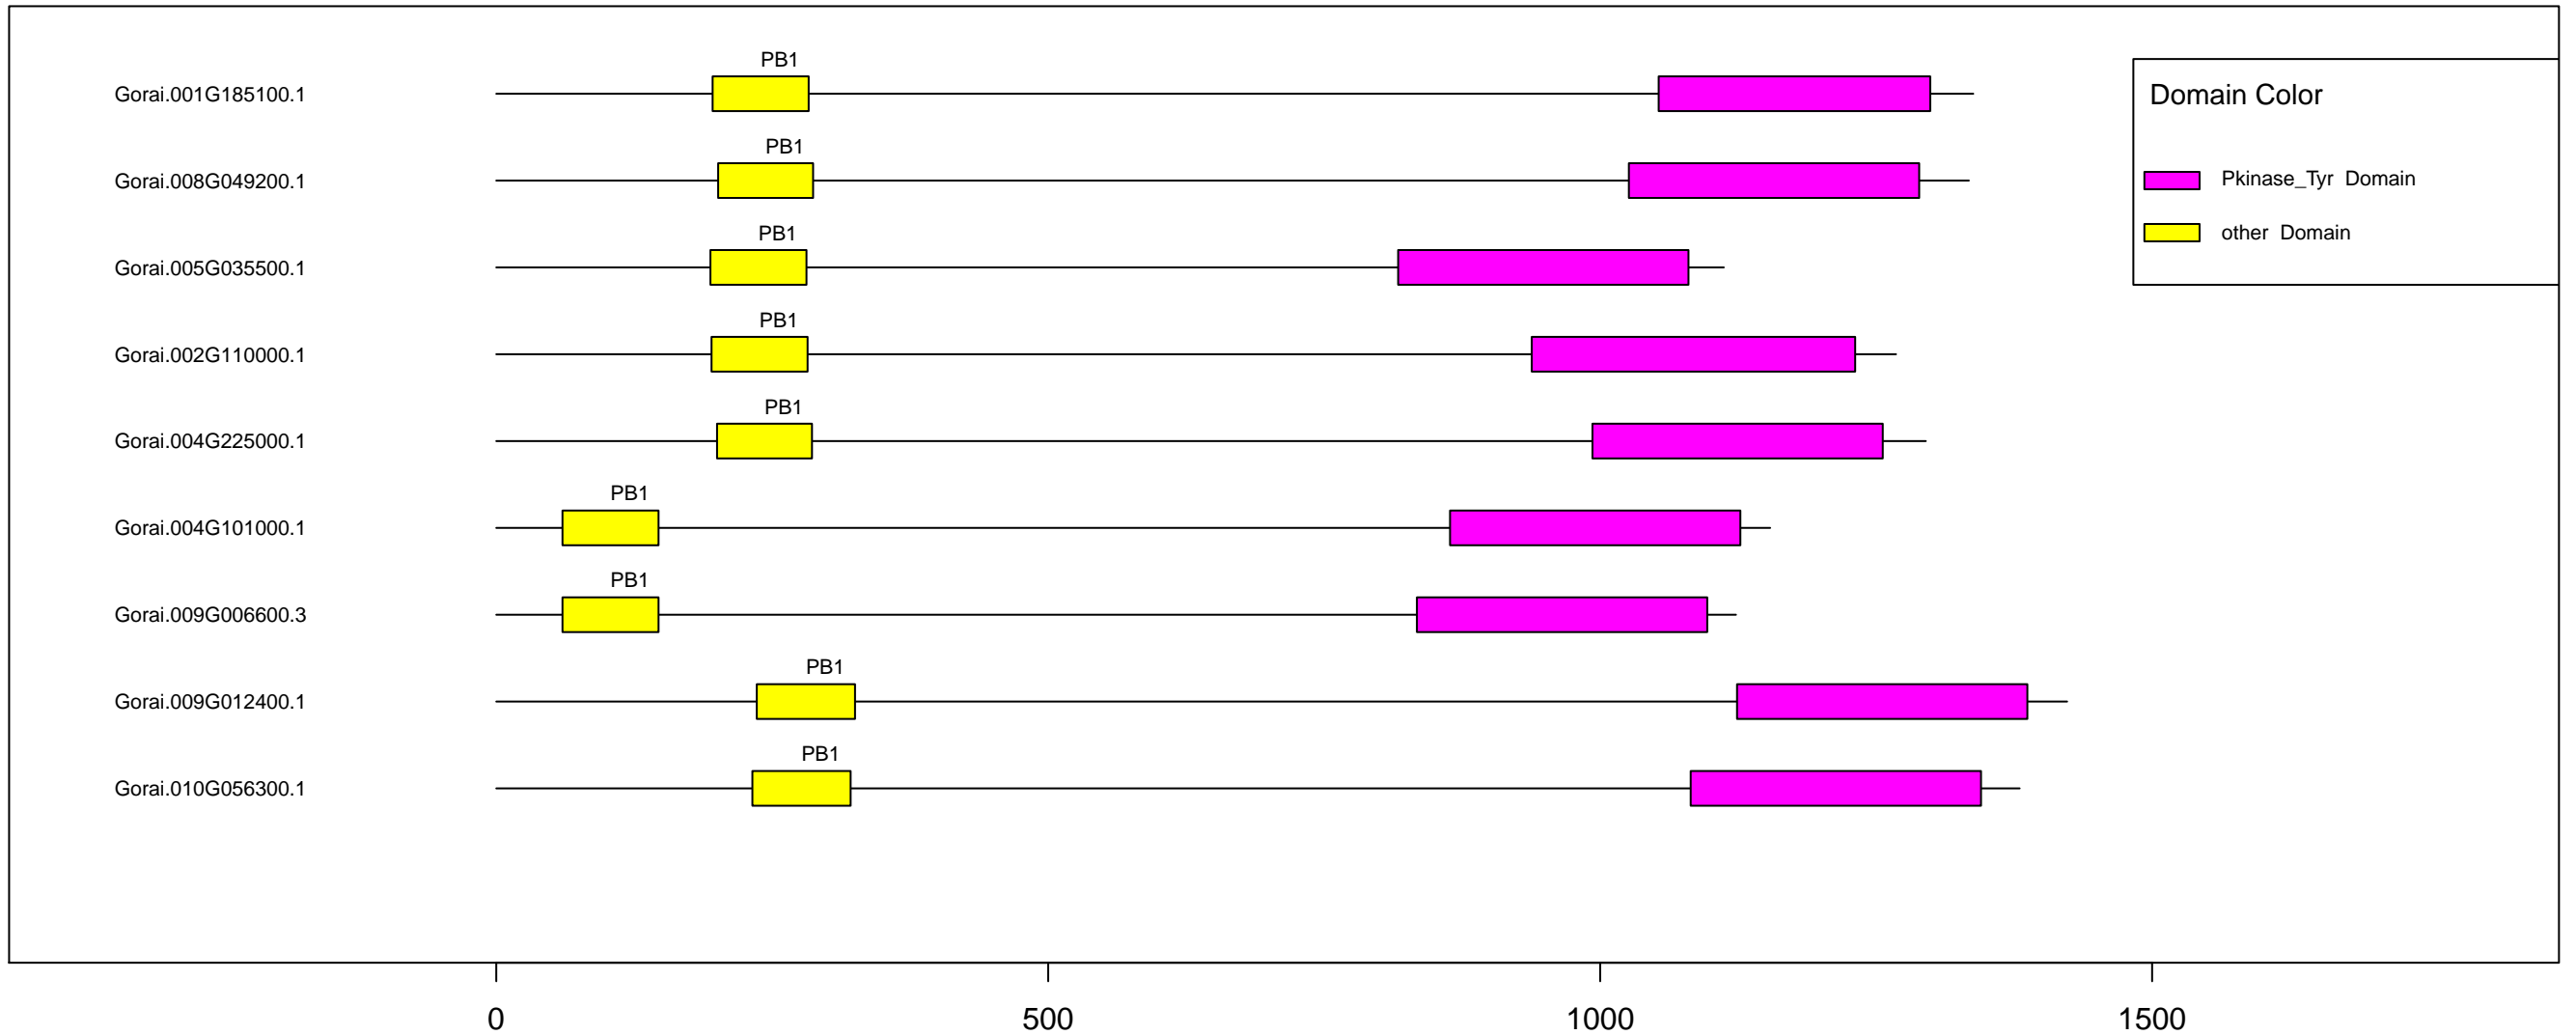

# G.ra TKL-PI-7 domain diagram (all)

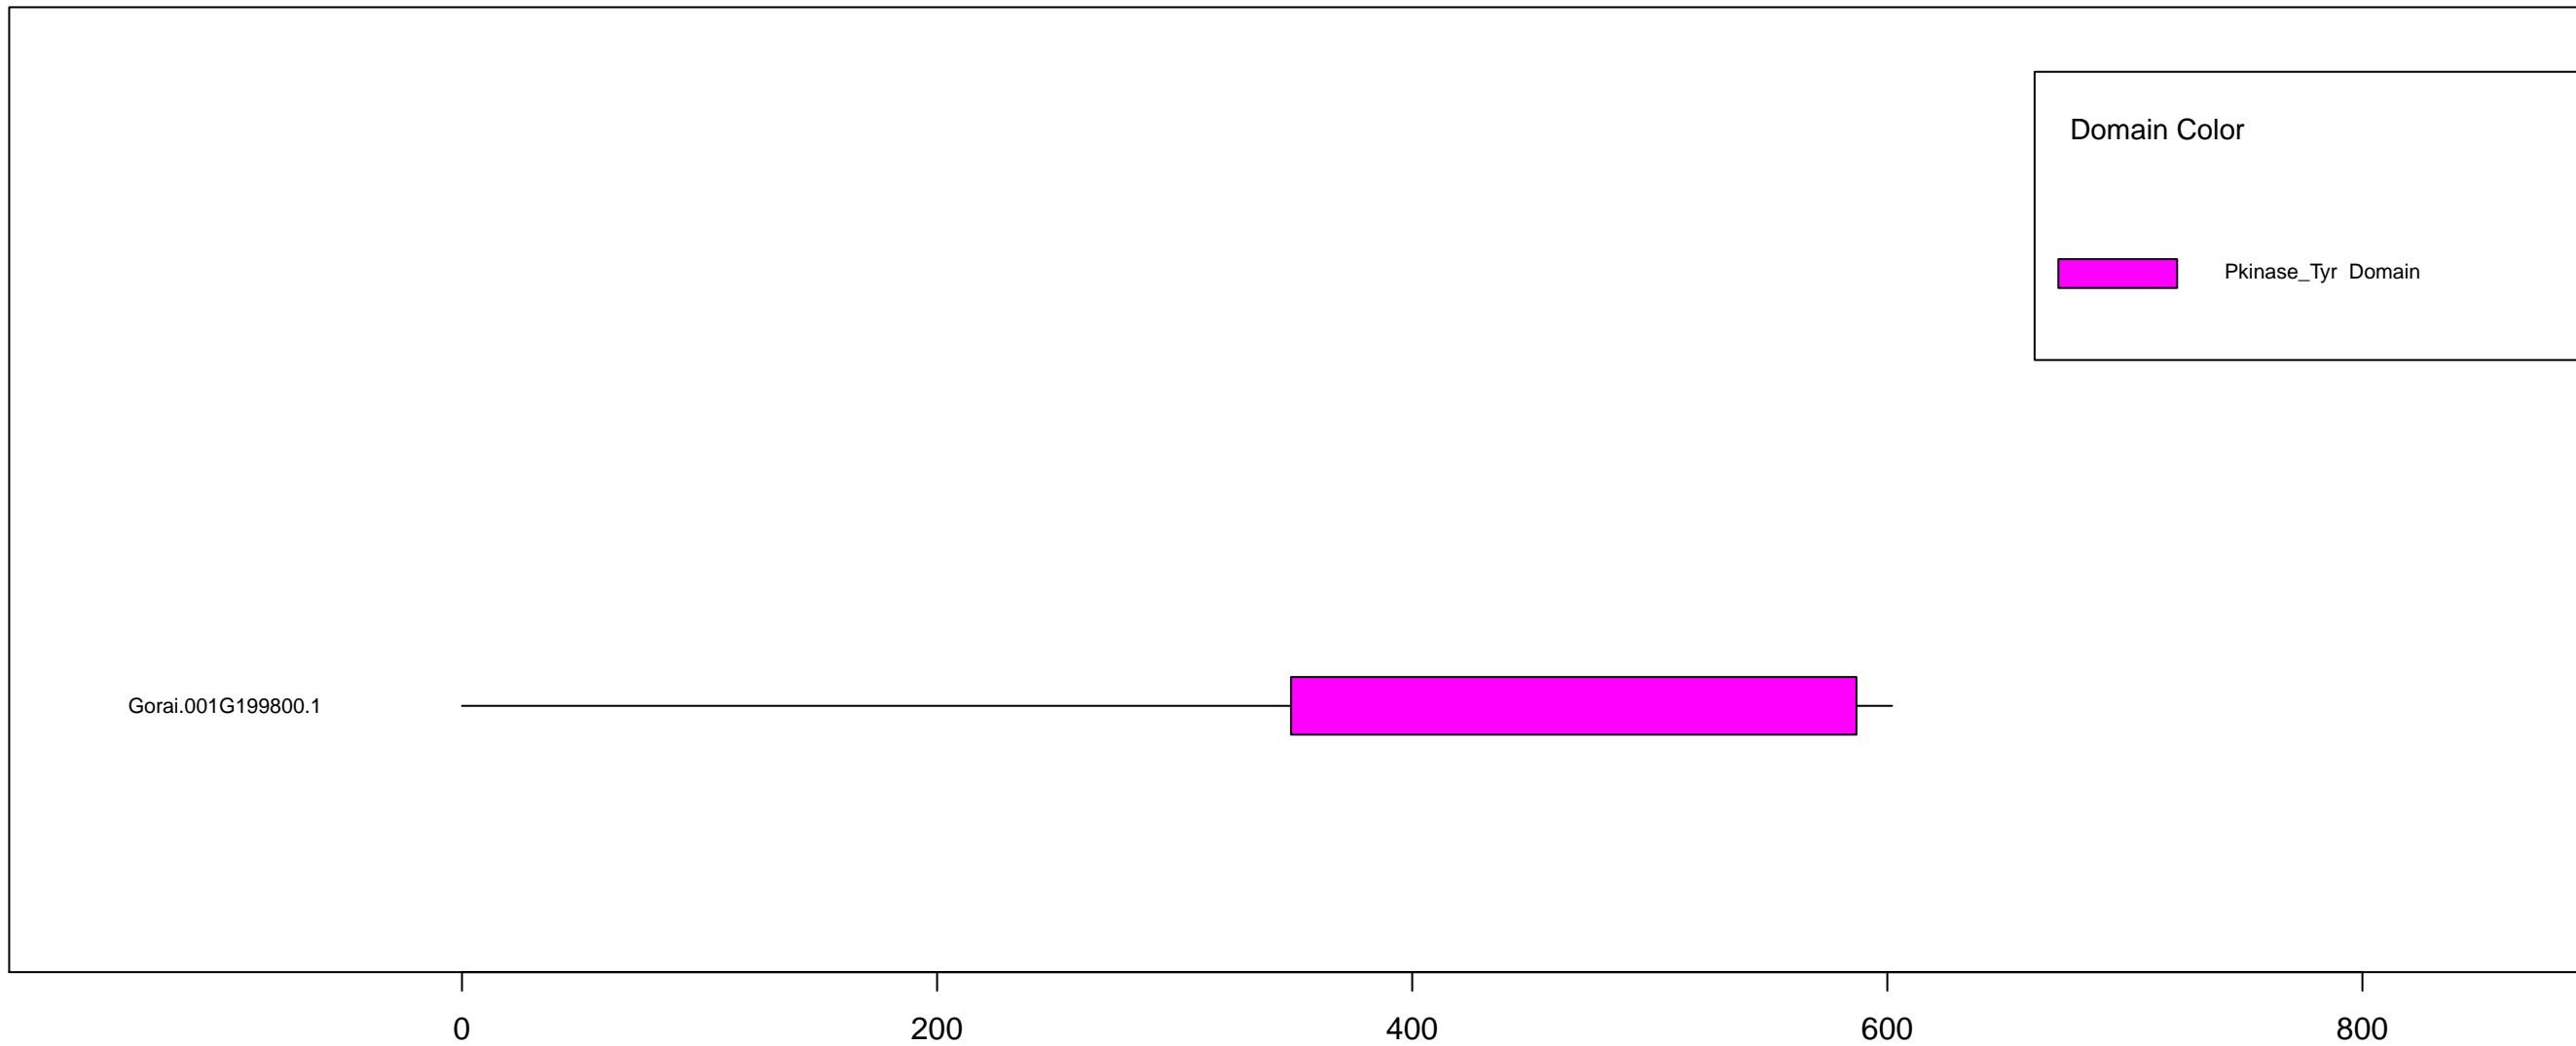

# G.ra TKL-PI-8 domain diagram (all)

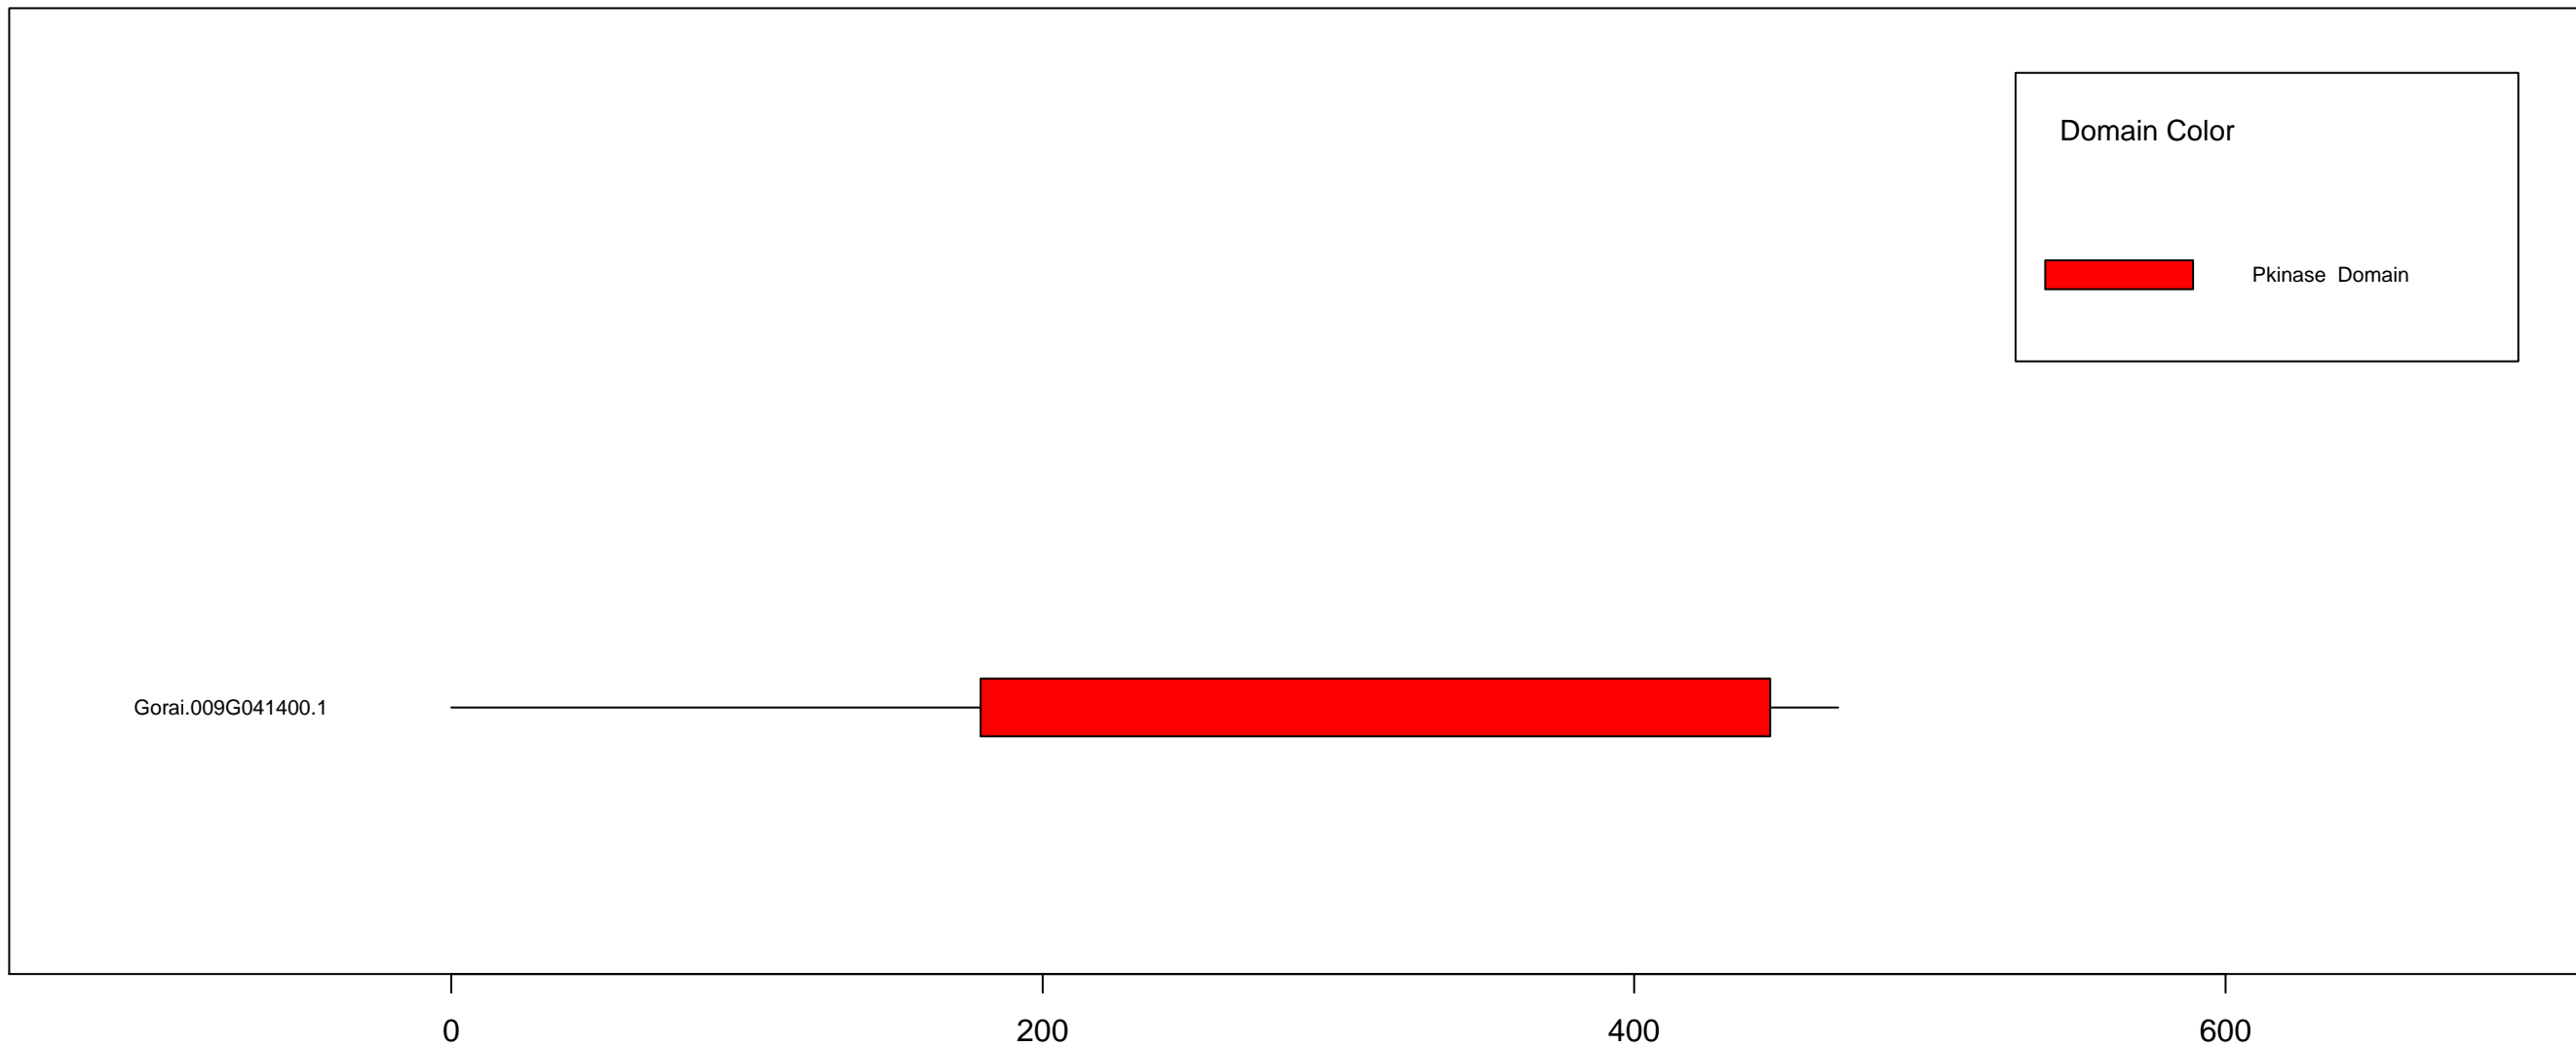

# G.ra TLK domain diagram (all)

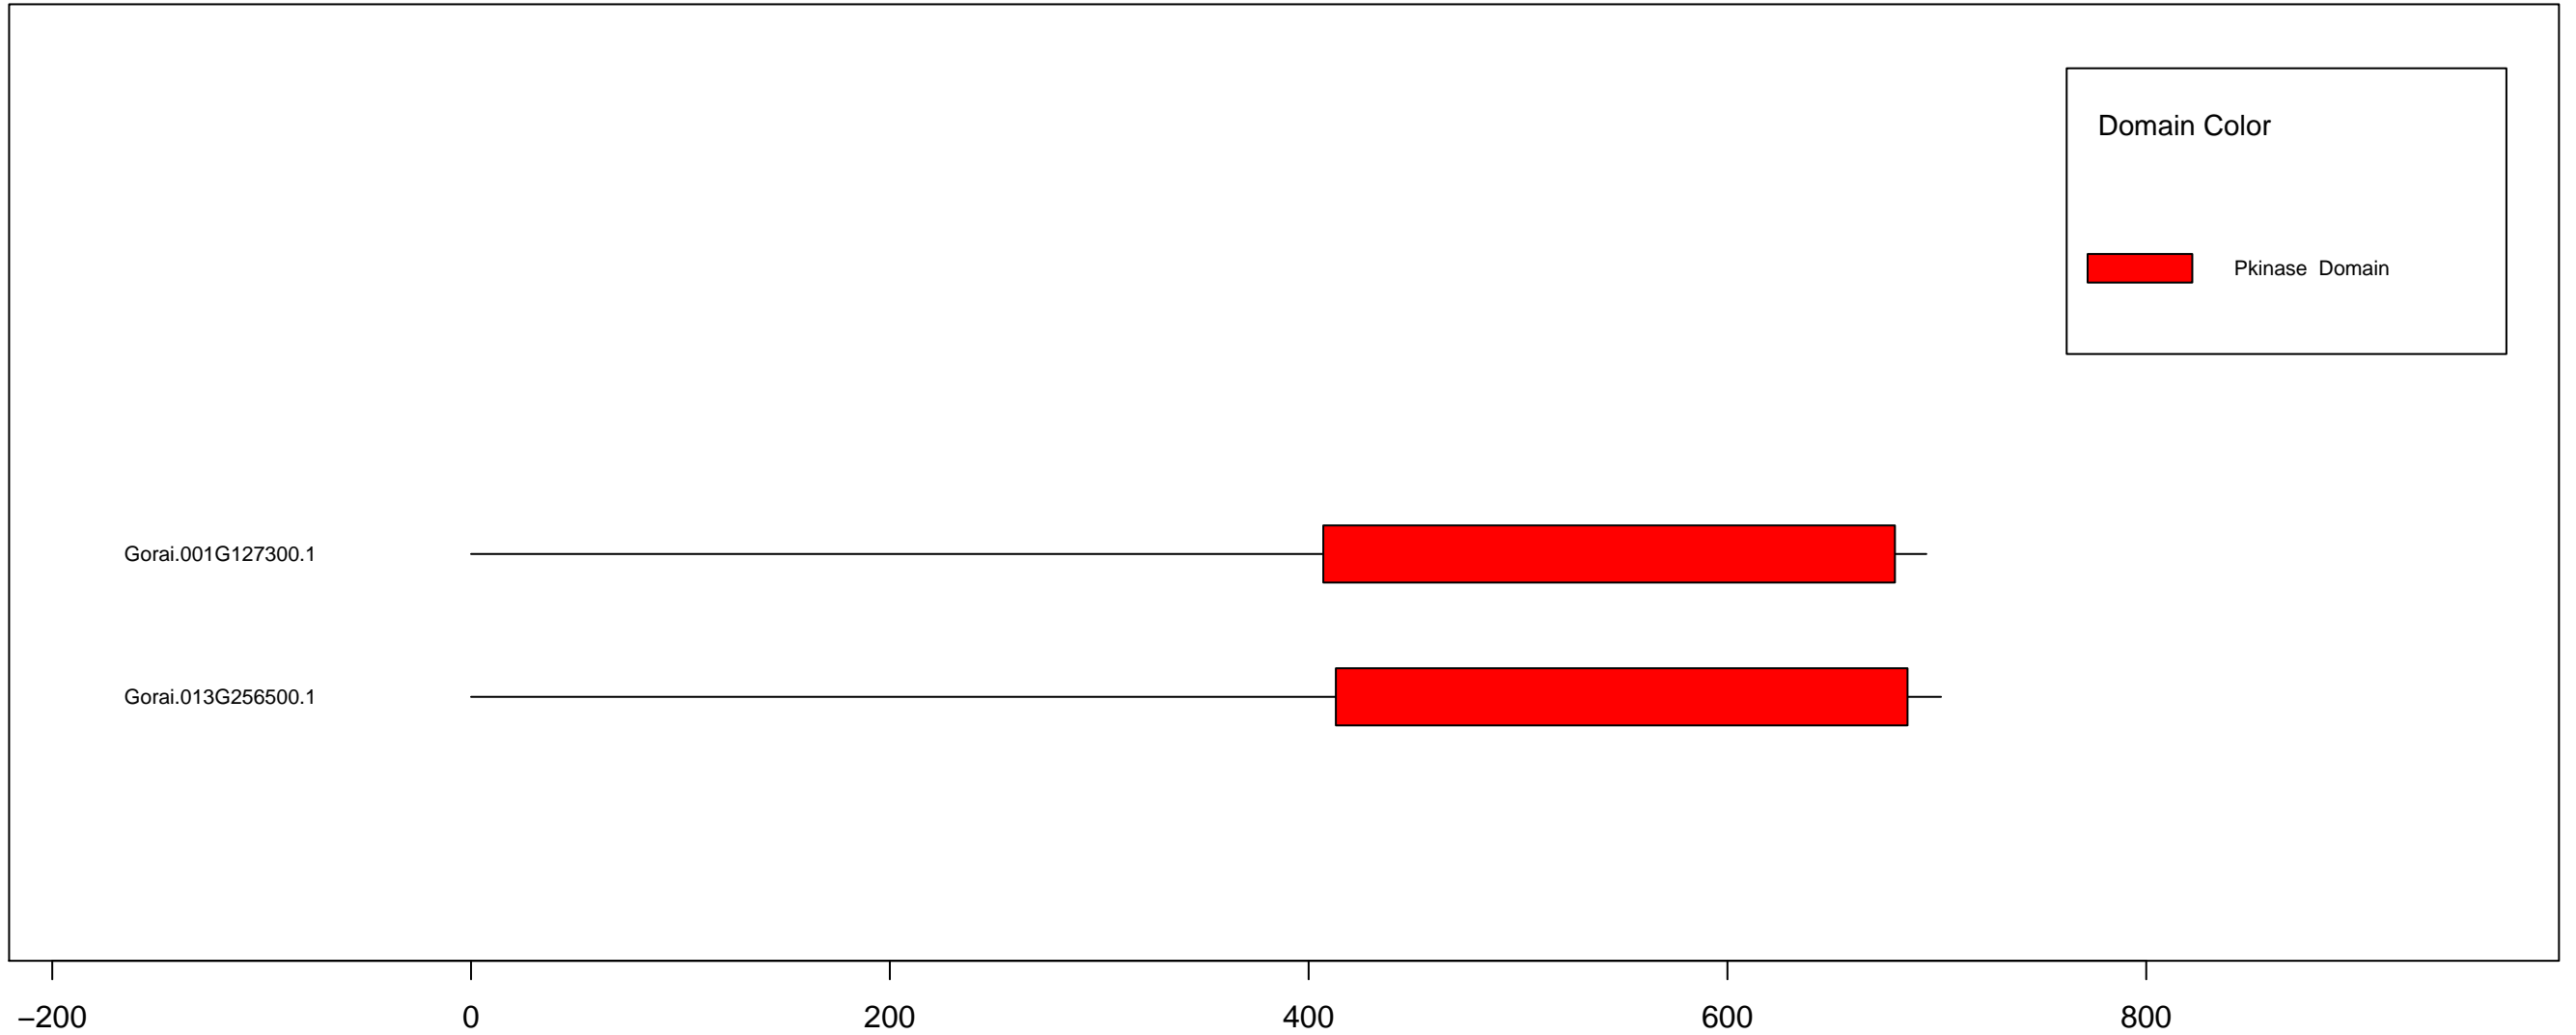

# G.ra TTK domain diagram (all)

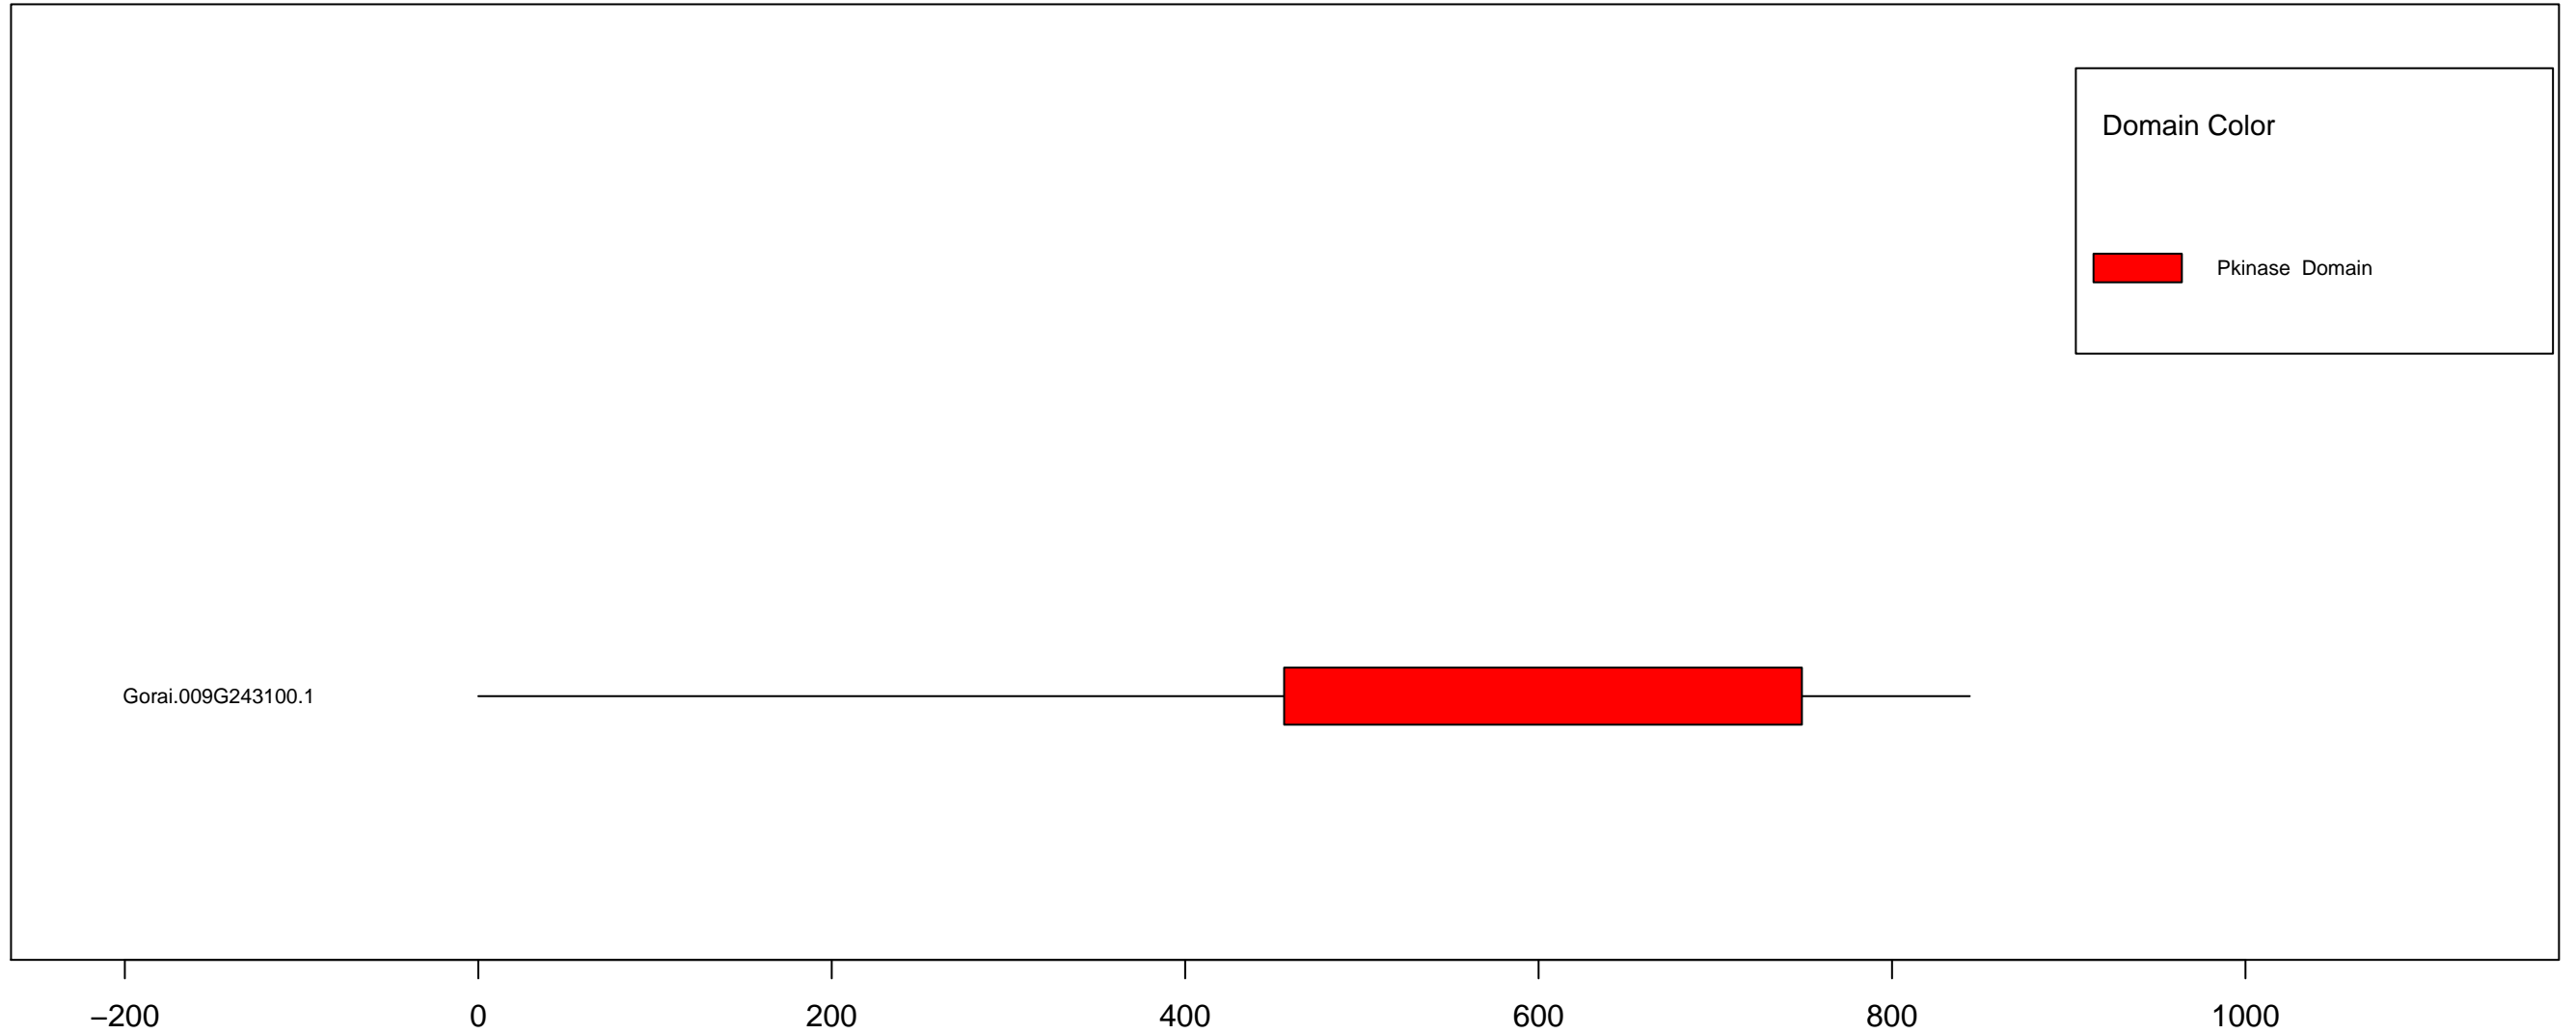

# G.ra ULK\_Fused domain diagram (all)

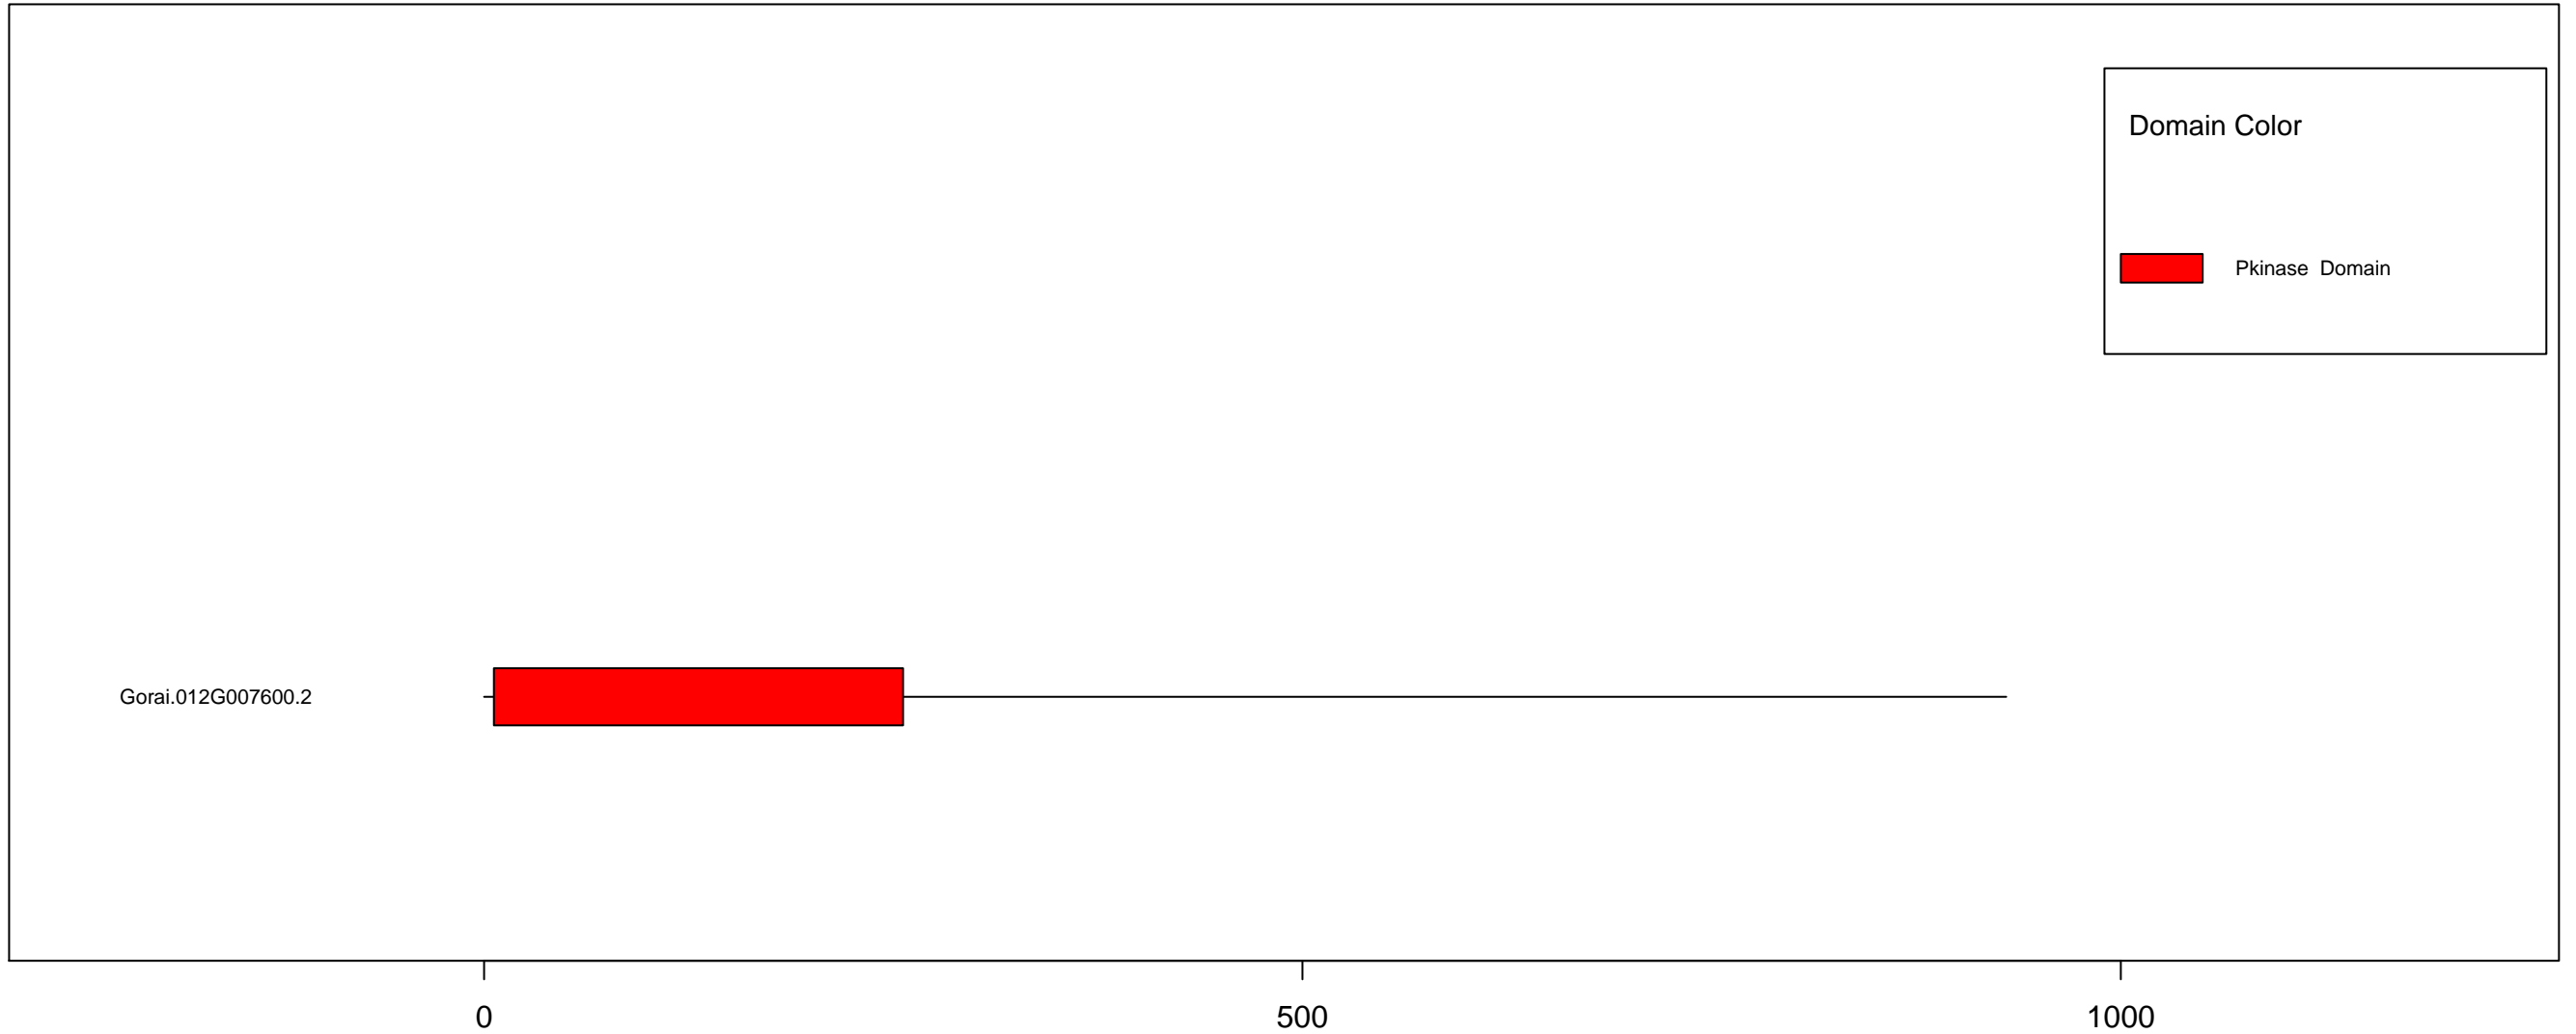

# G.ra ULK\_ULK4 domain diagram (all)

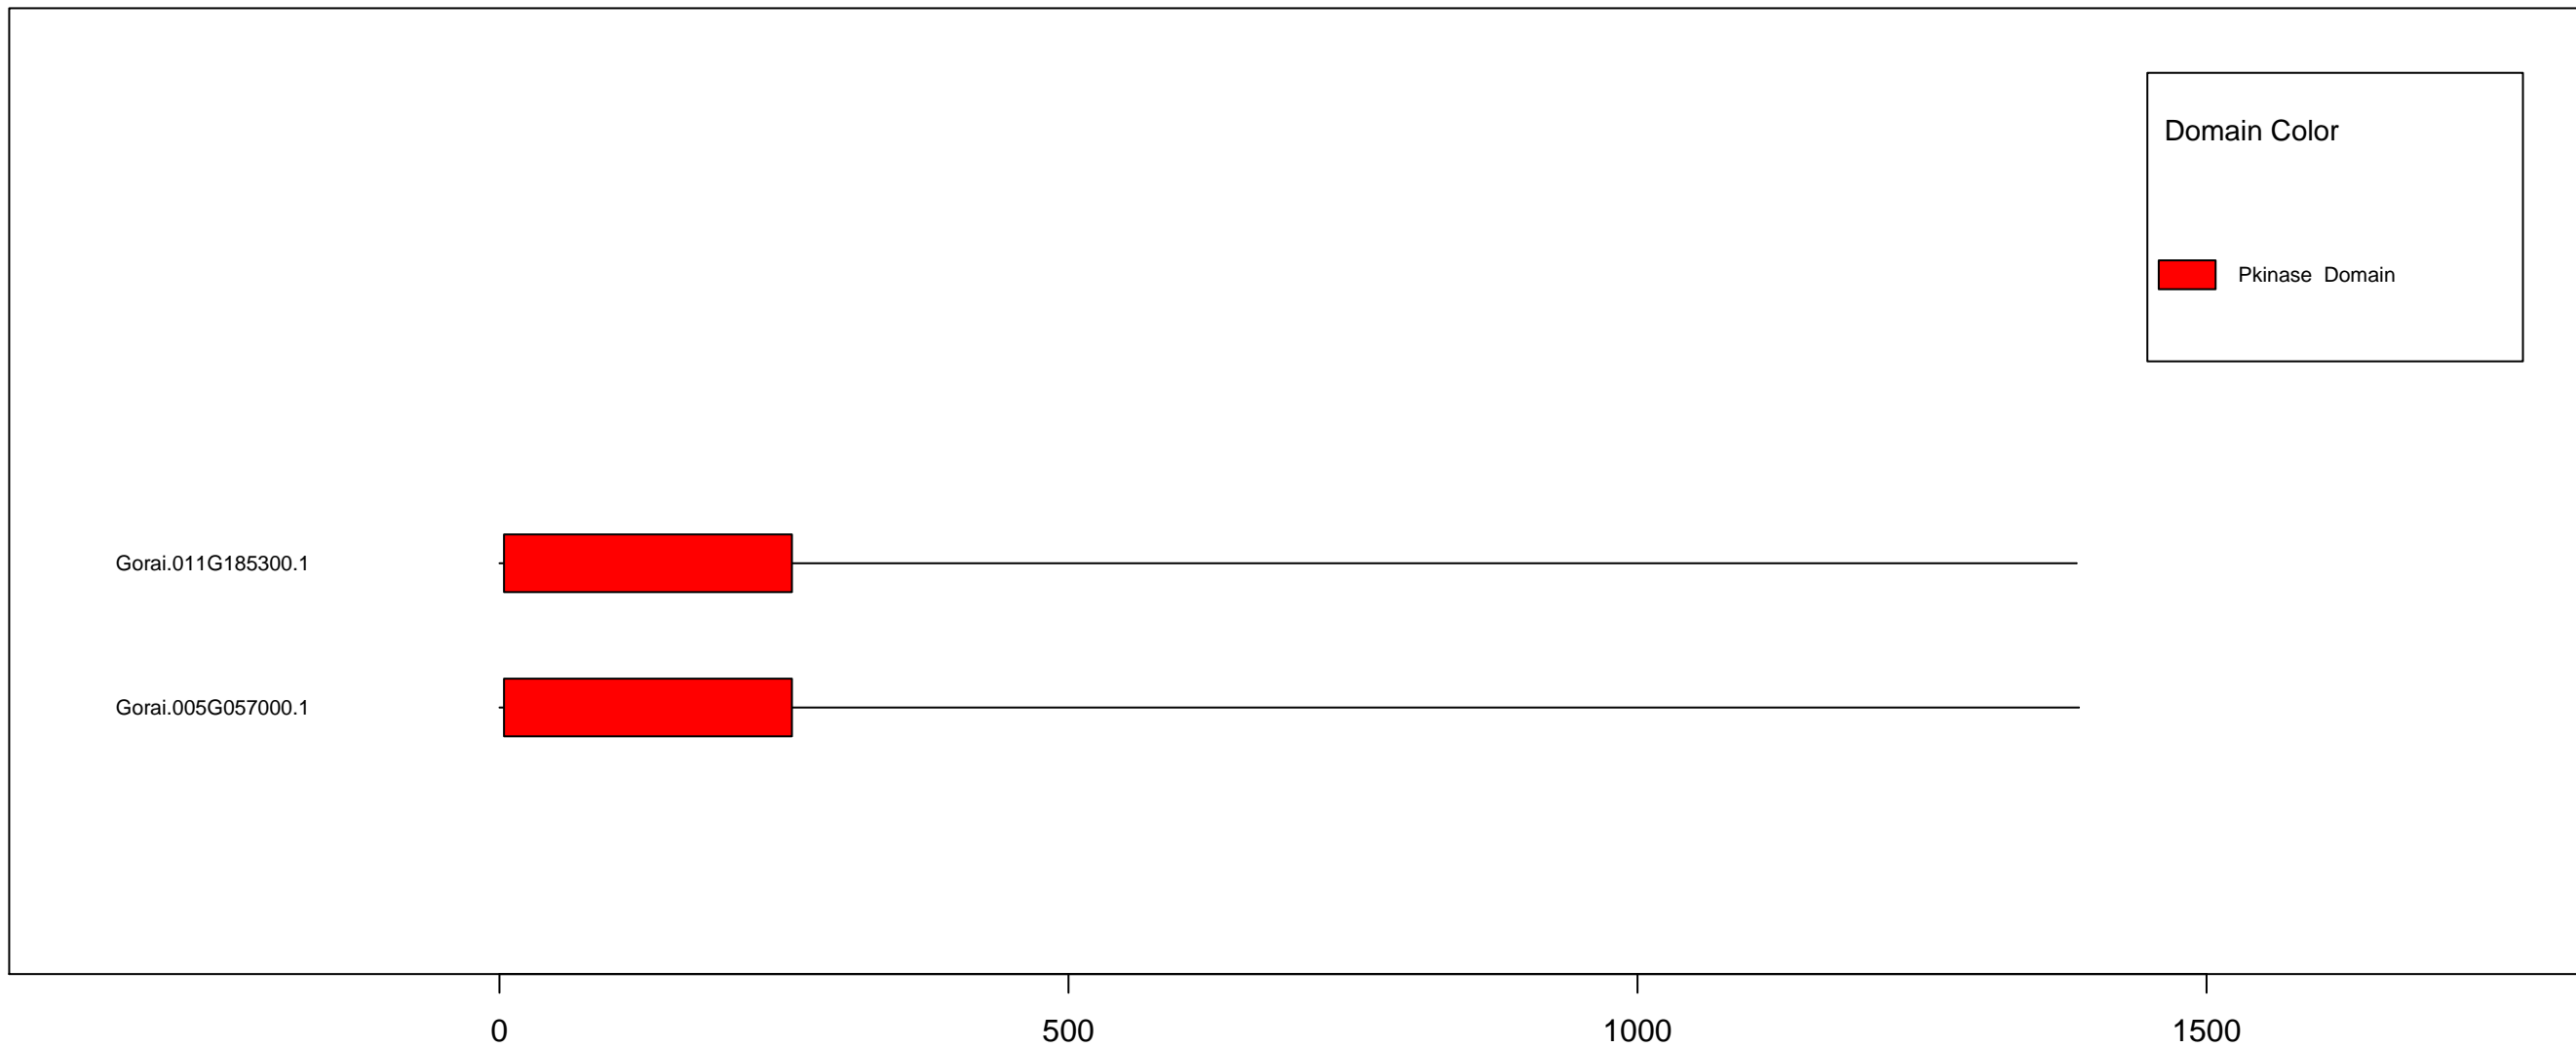



# G.ra WEE domain diagram (all)

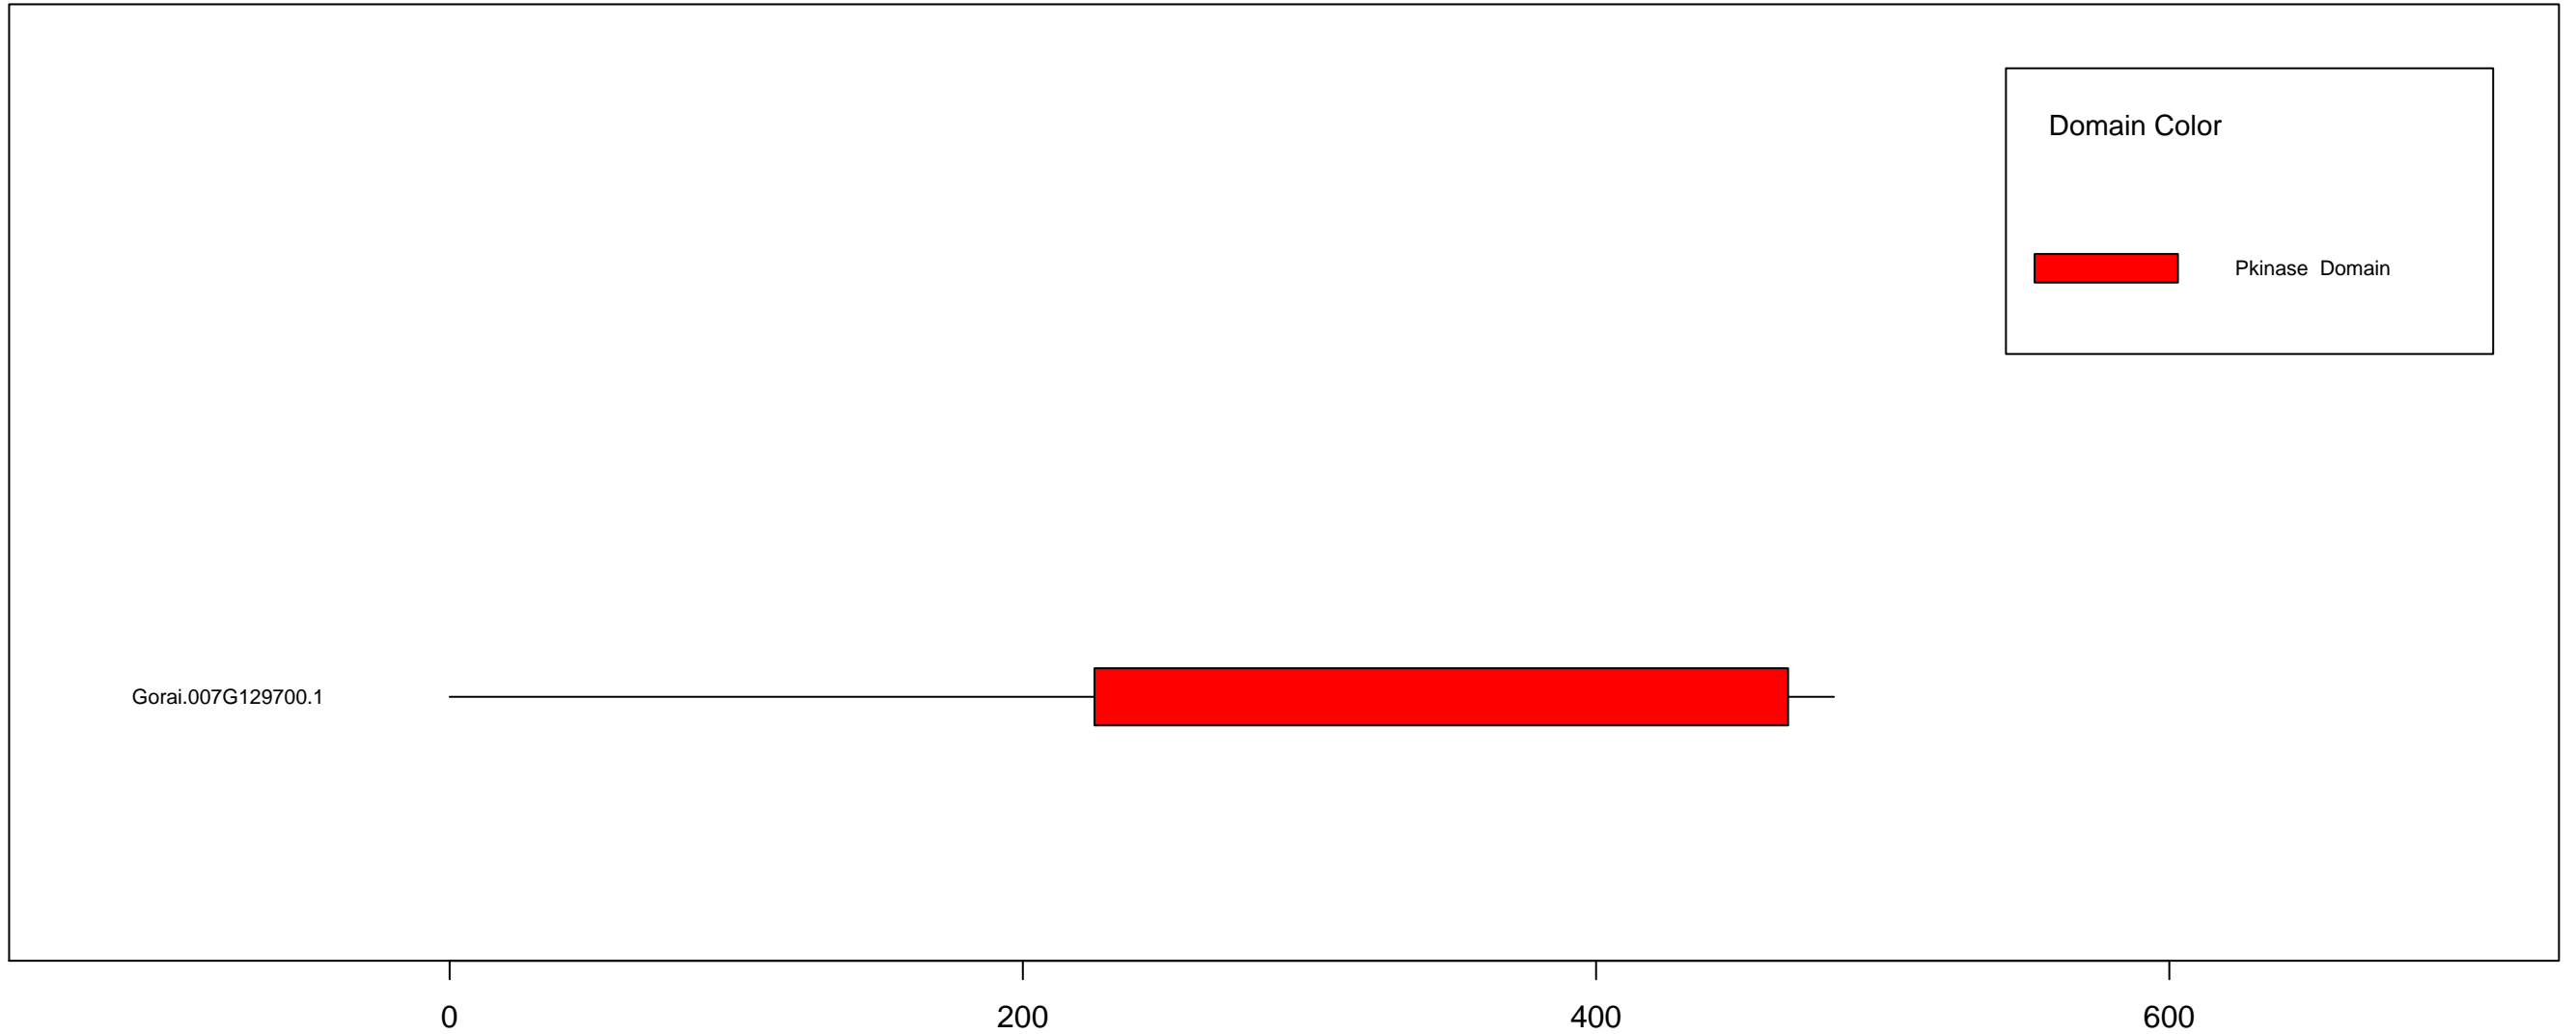

# G.ra WNK\_NRBP domain diagram (all)

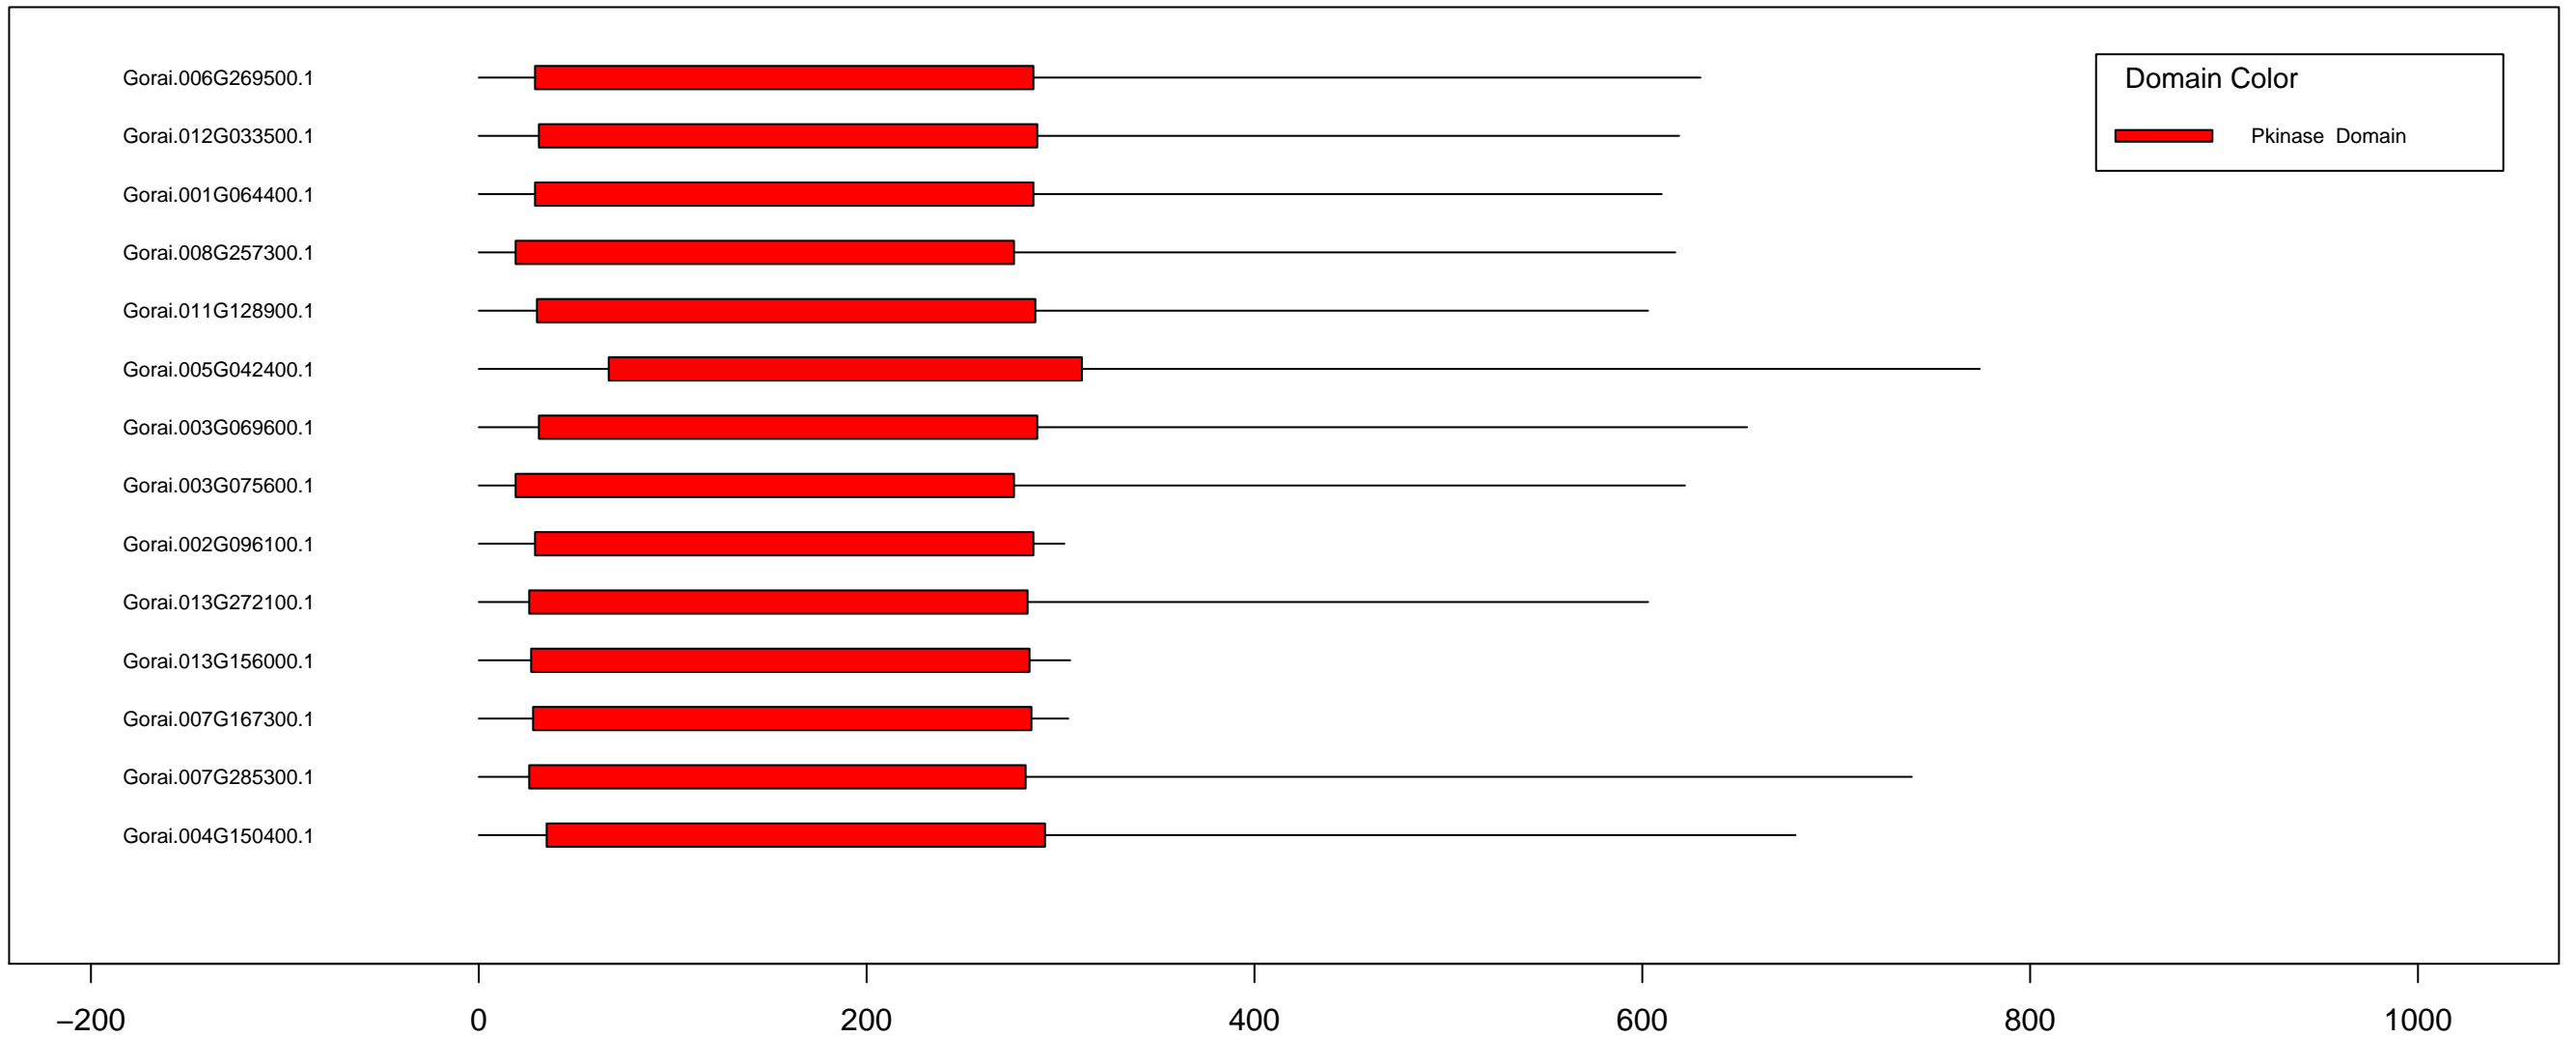

# G.ar AGC\_MAST domain diagram (all)

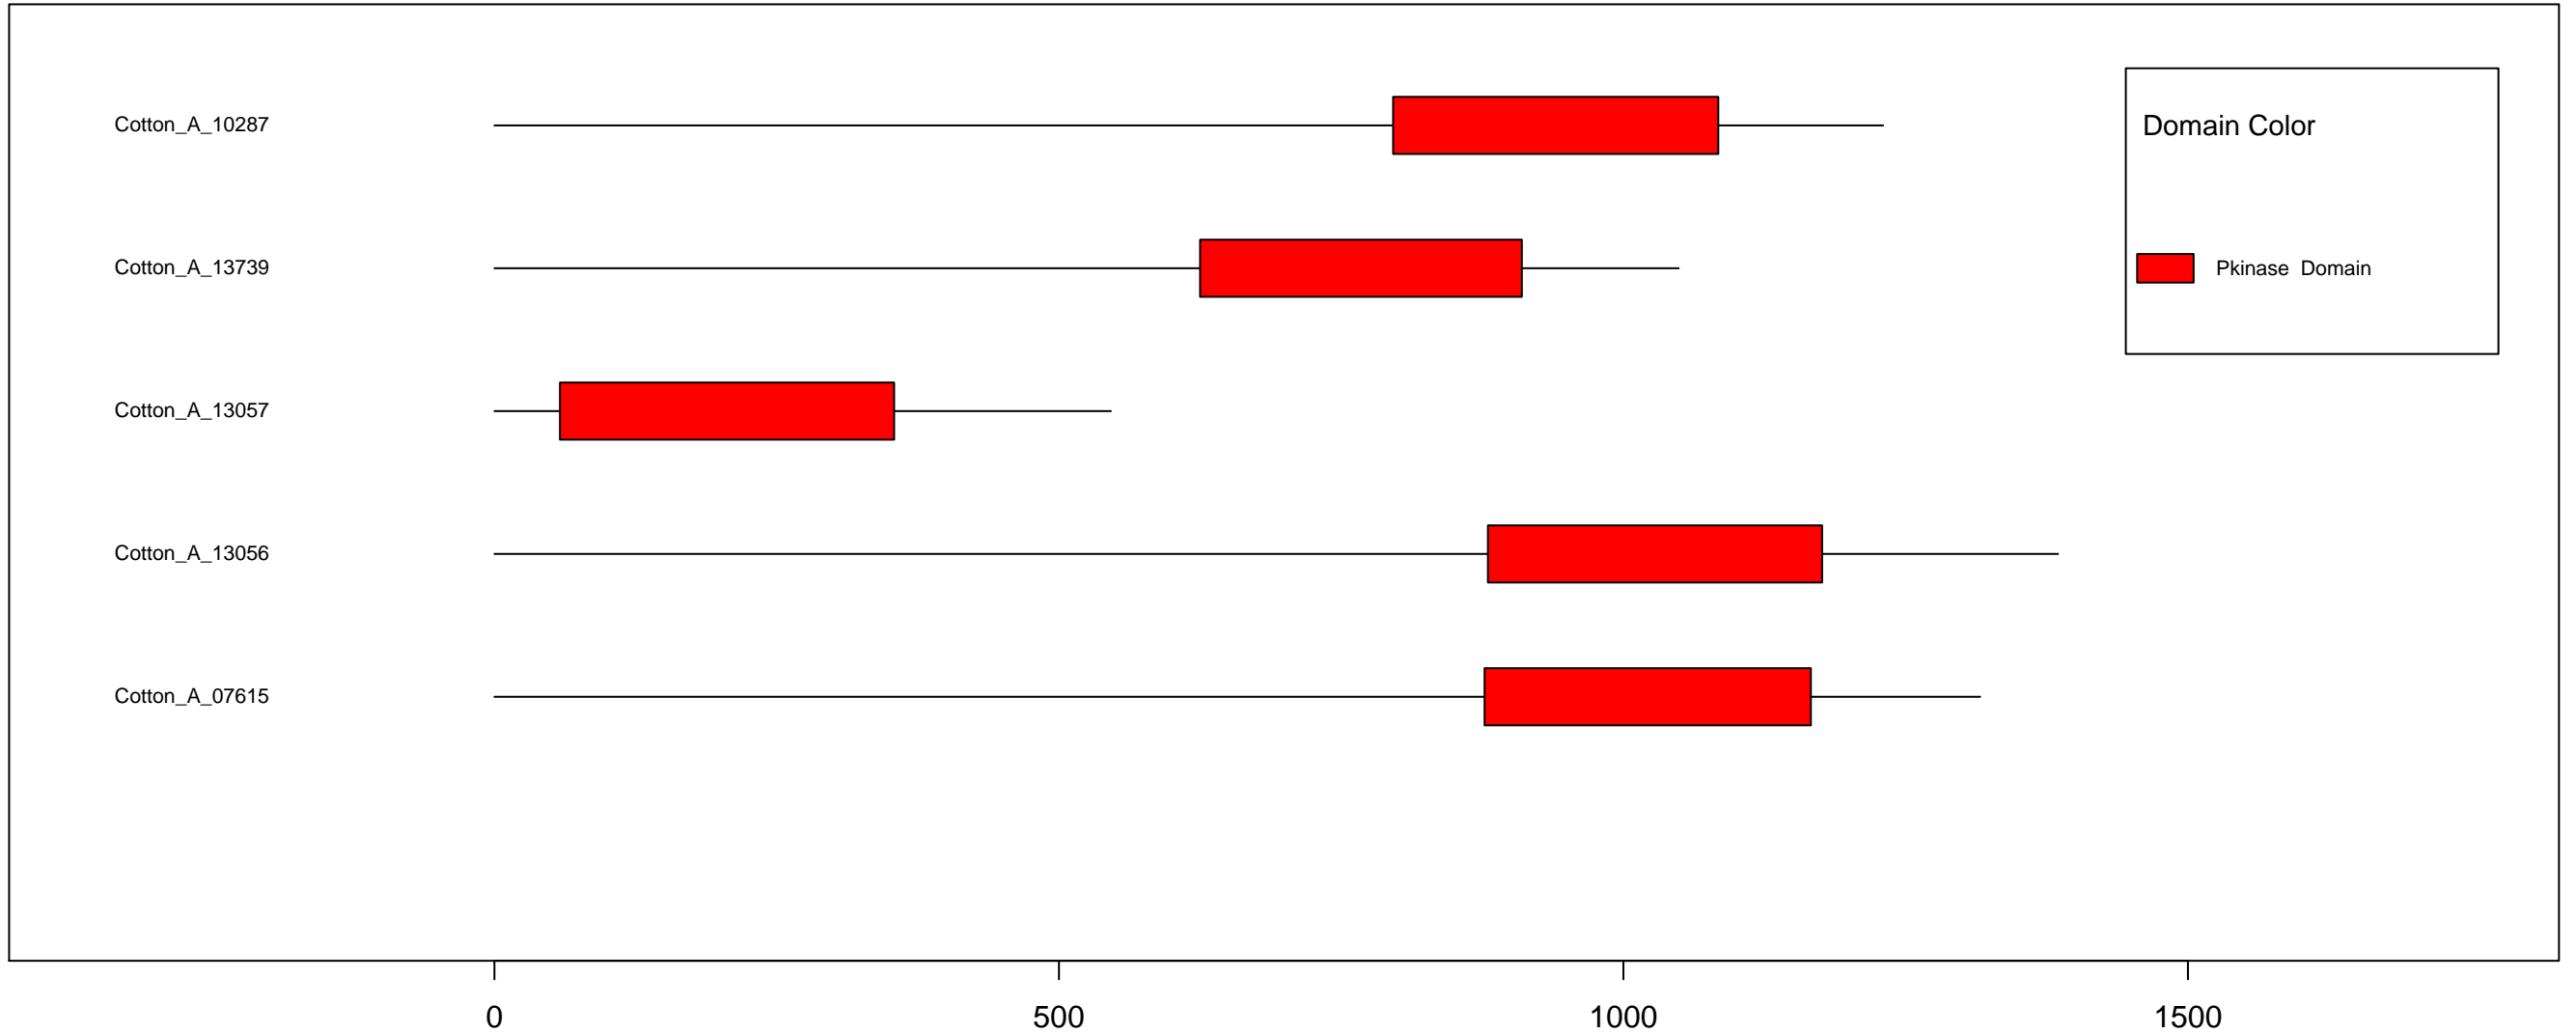

# G.ar AGC\_NDR domain diagram (all)

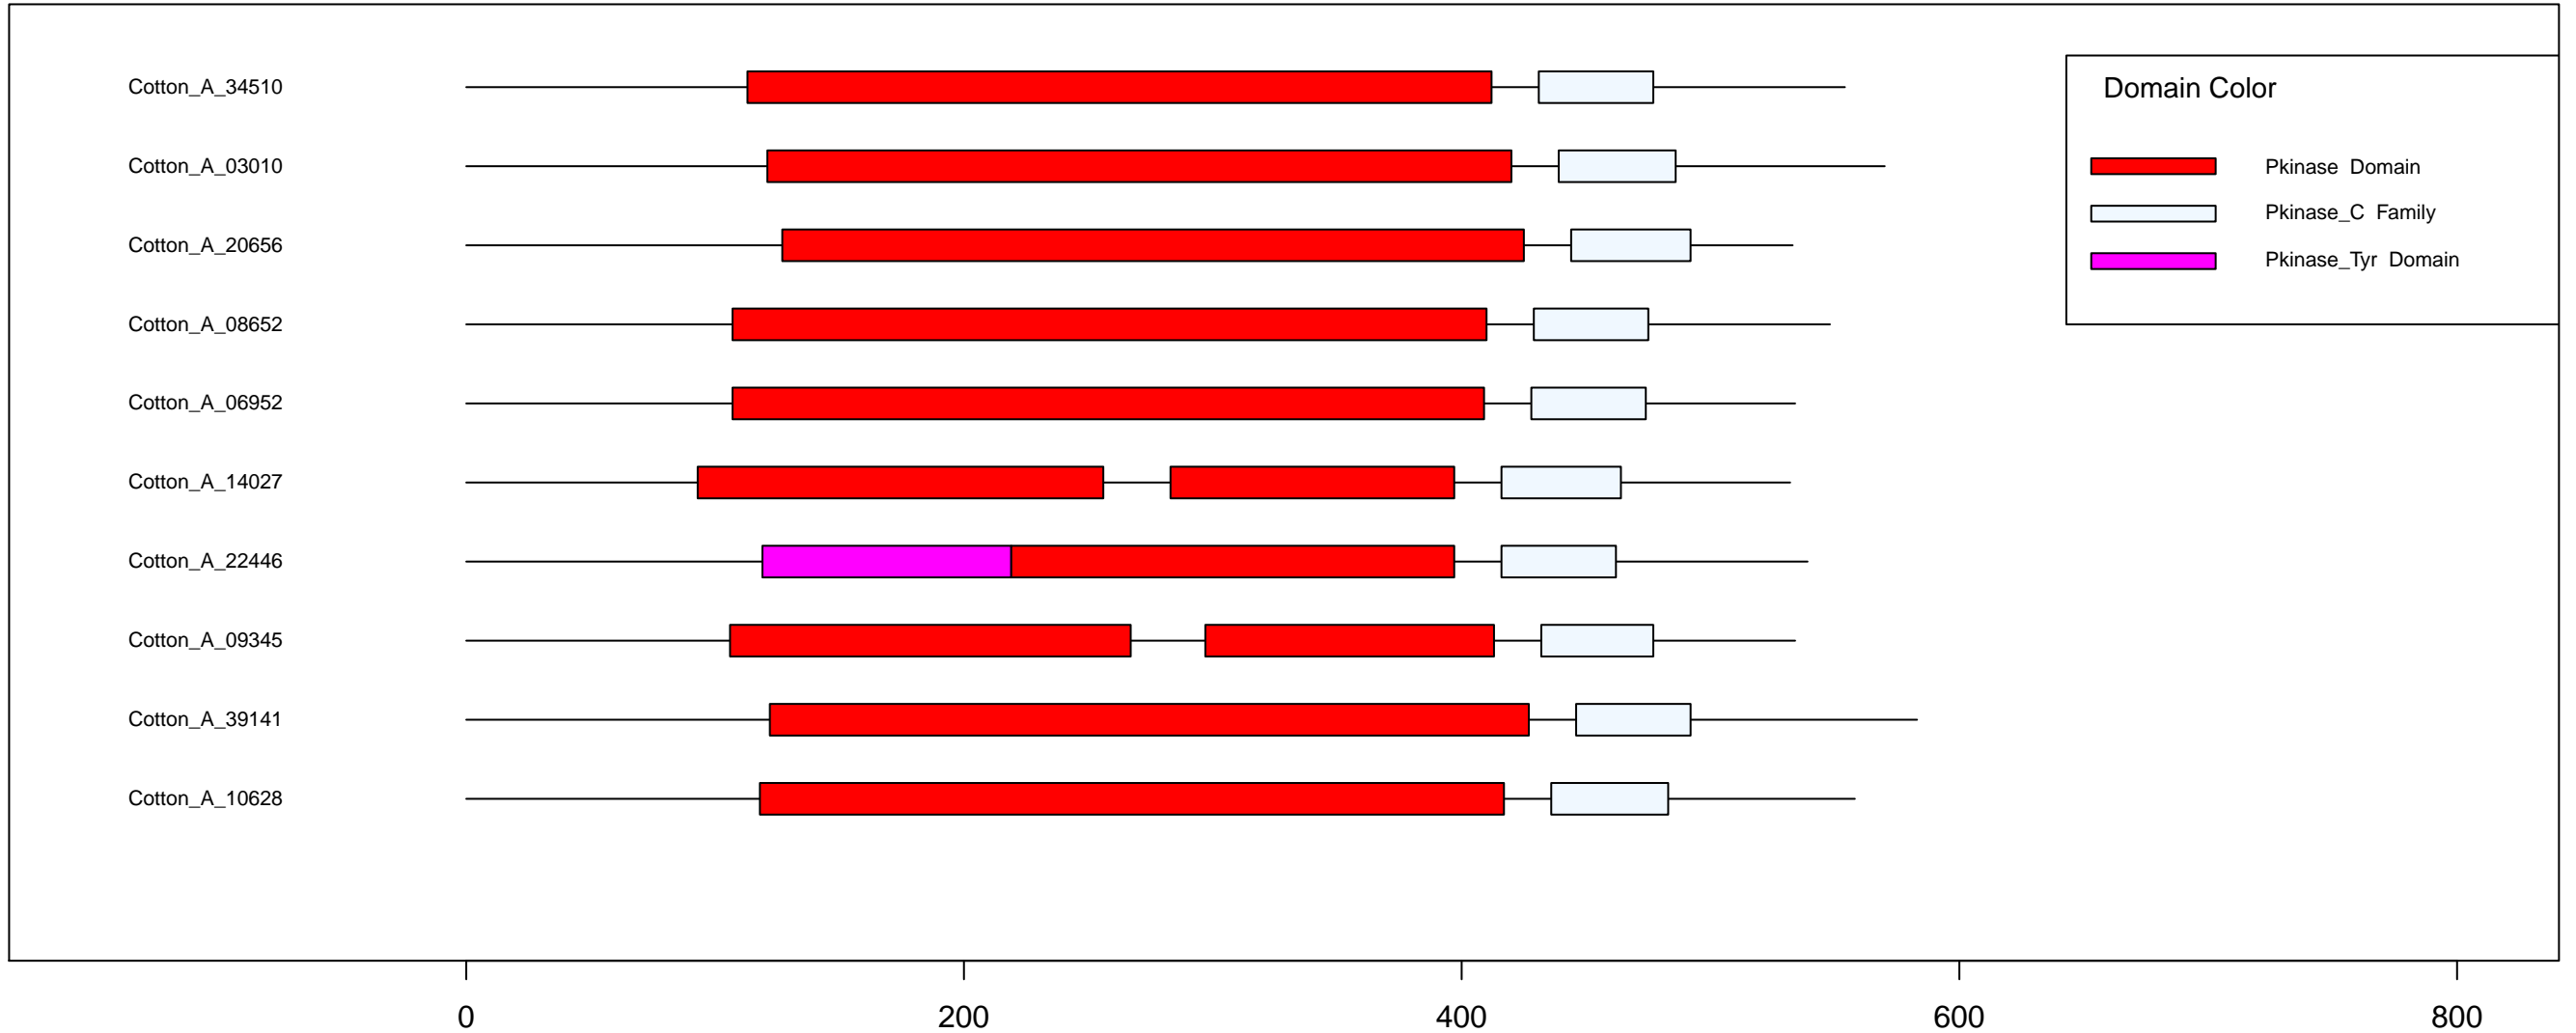

# G.ar AGC\_PDK1 domain diagram (all)

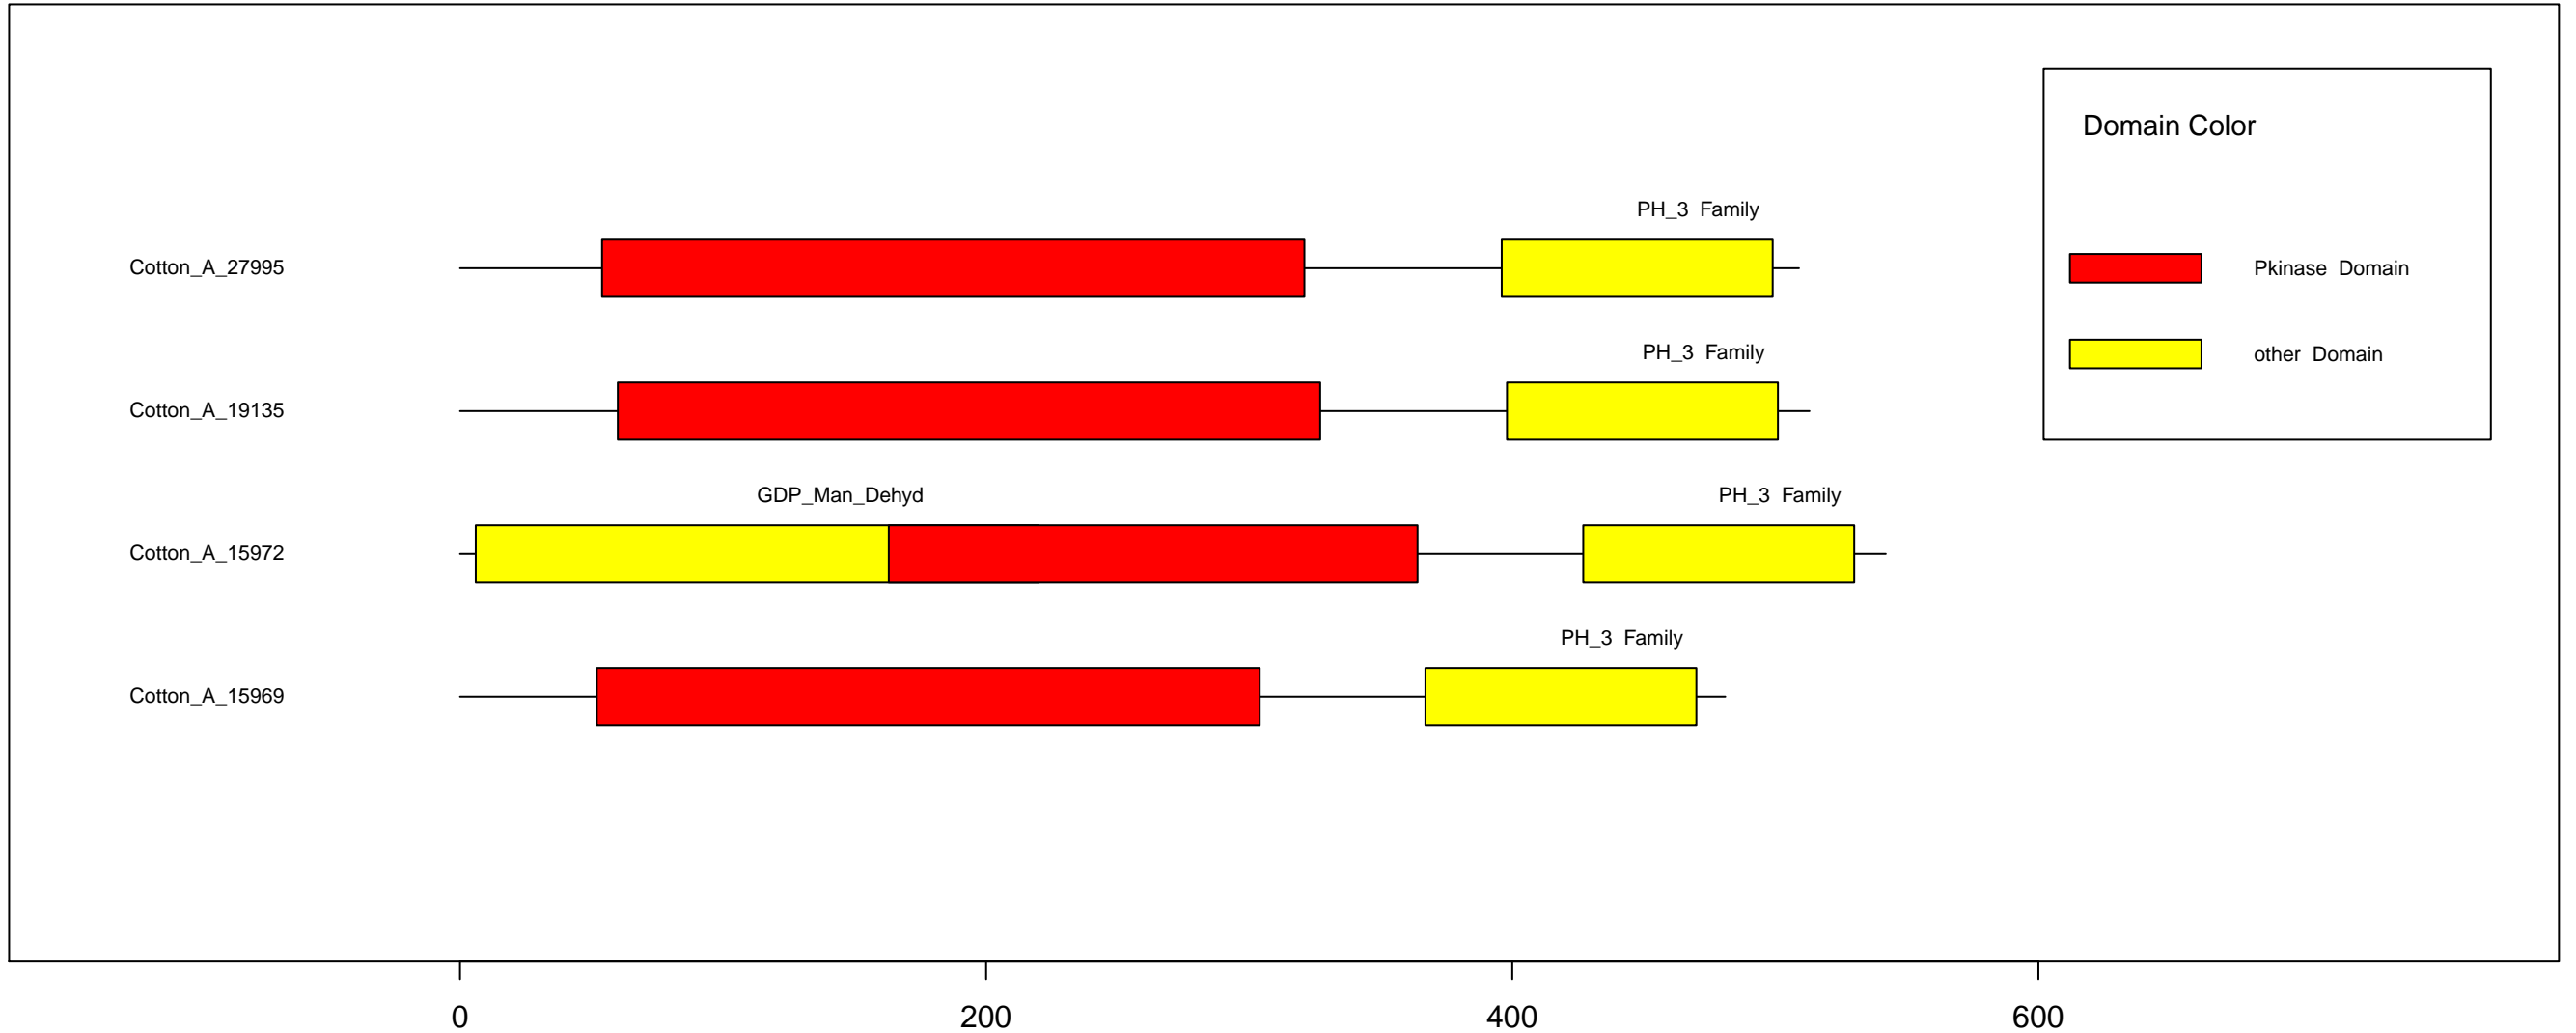

G.ar AGC\_PKA-PKG domain diagram (all)

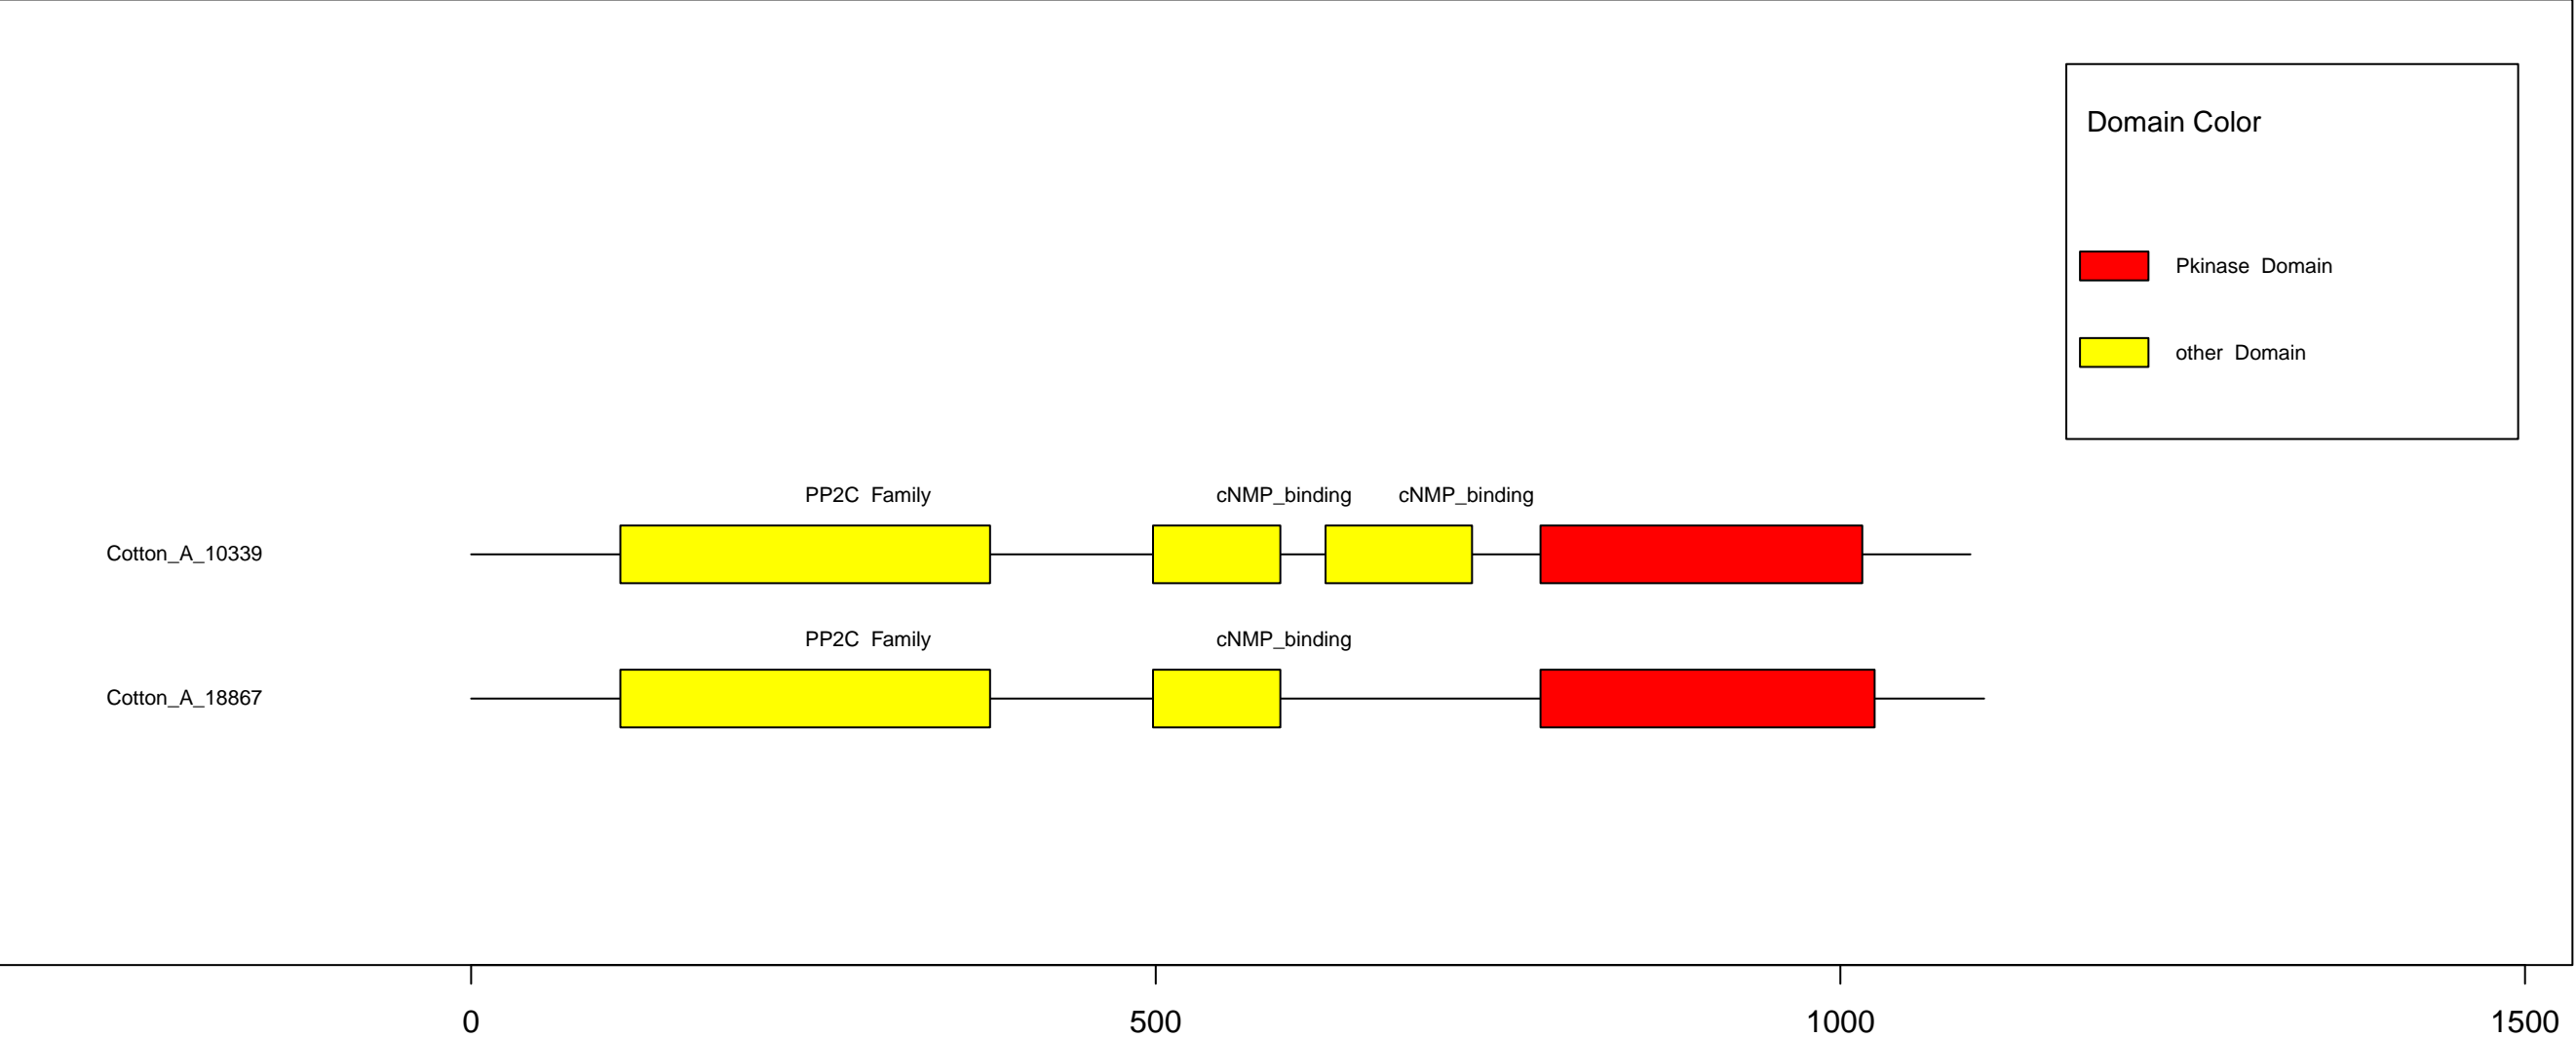

# G.ar AGC\_RSK-2 domain diagram (part 1)

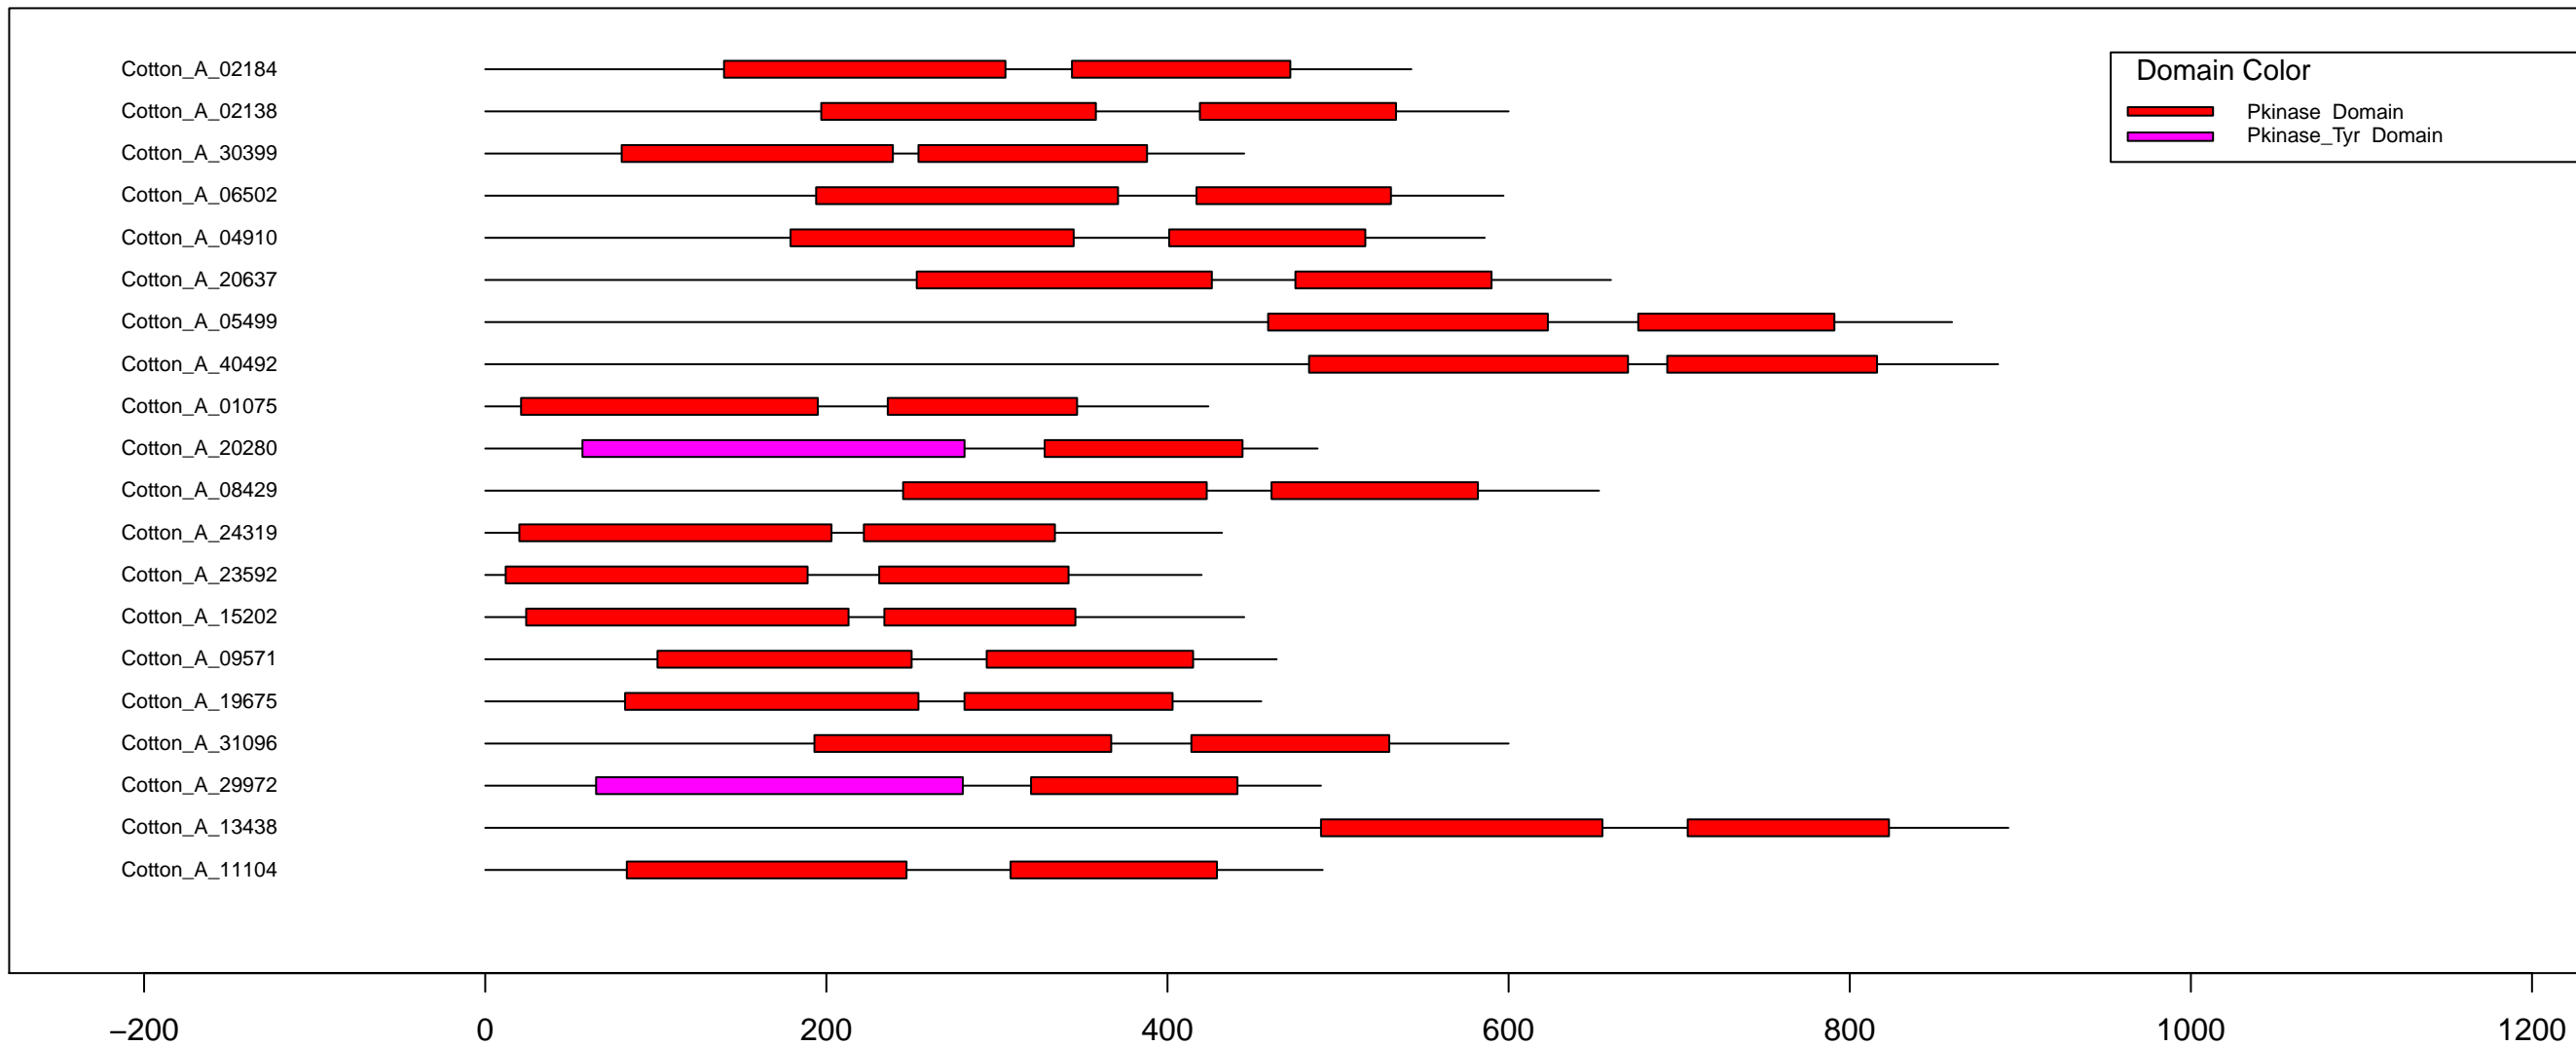

### G.ar AGC\_RSK-2 domain diagram (part 2)

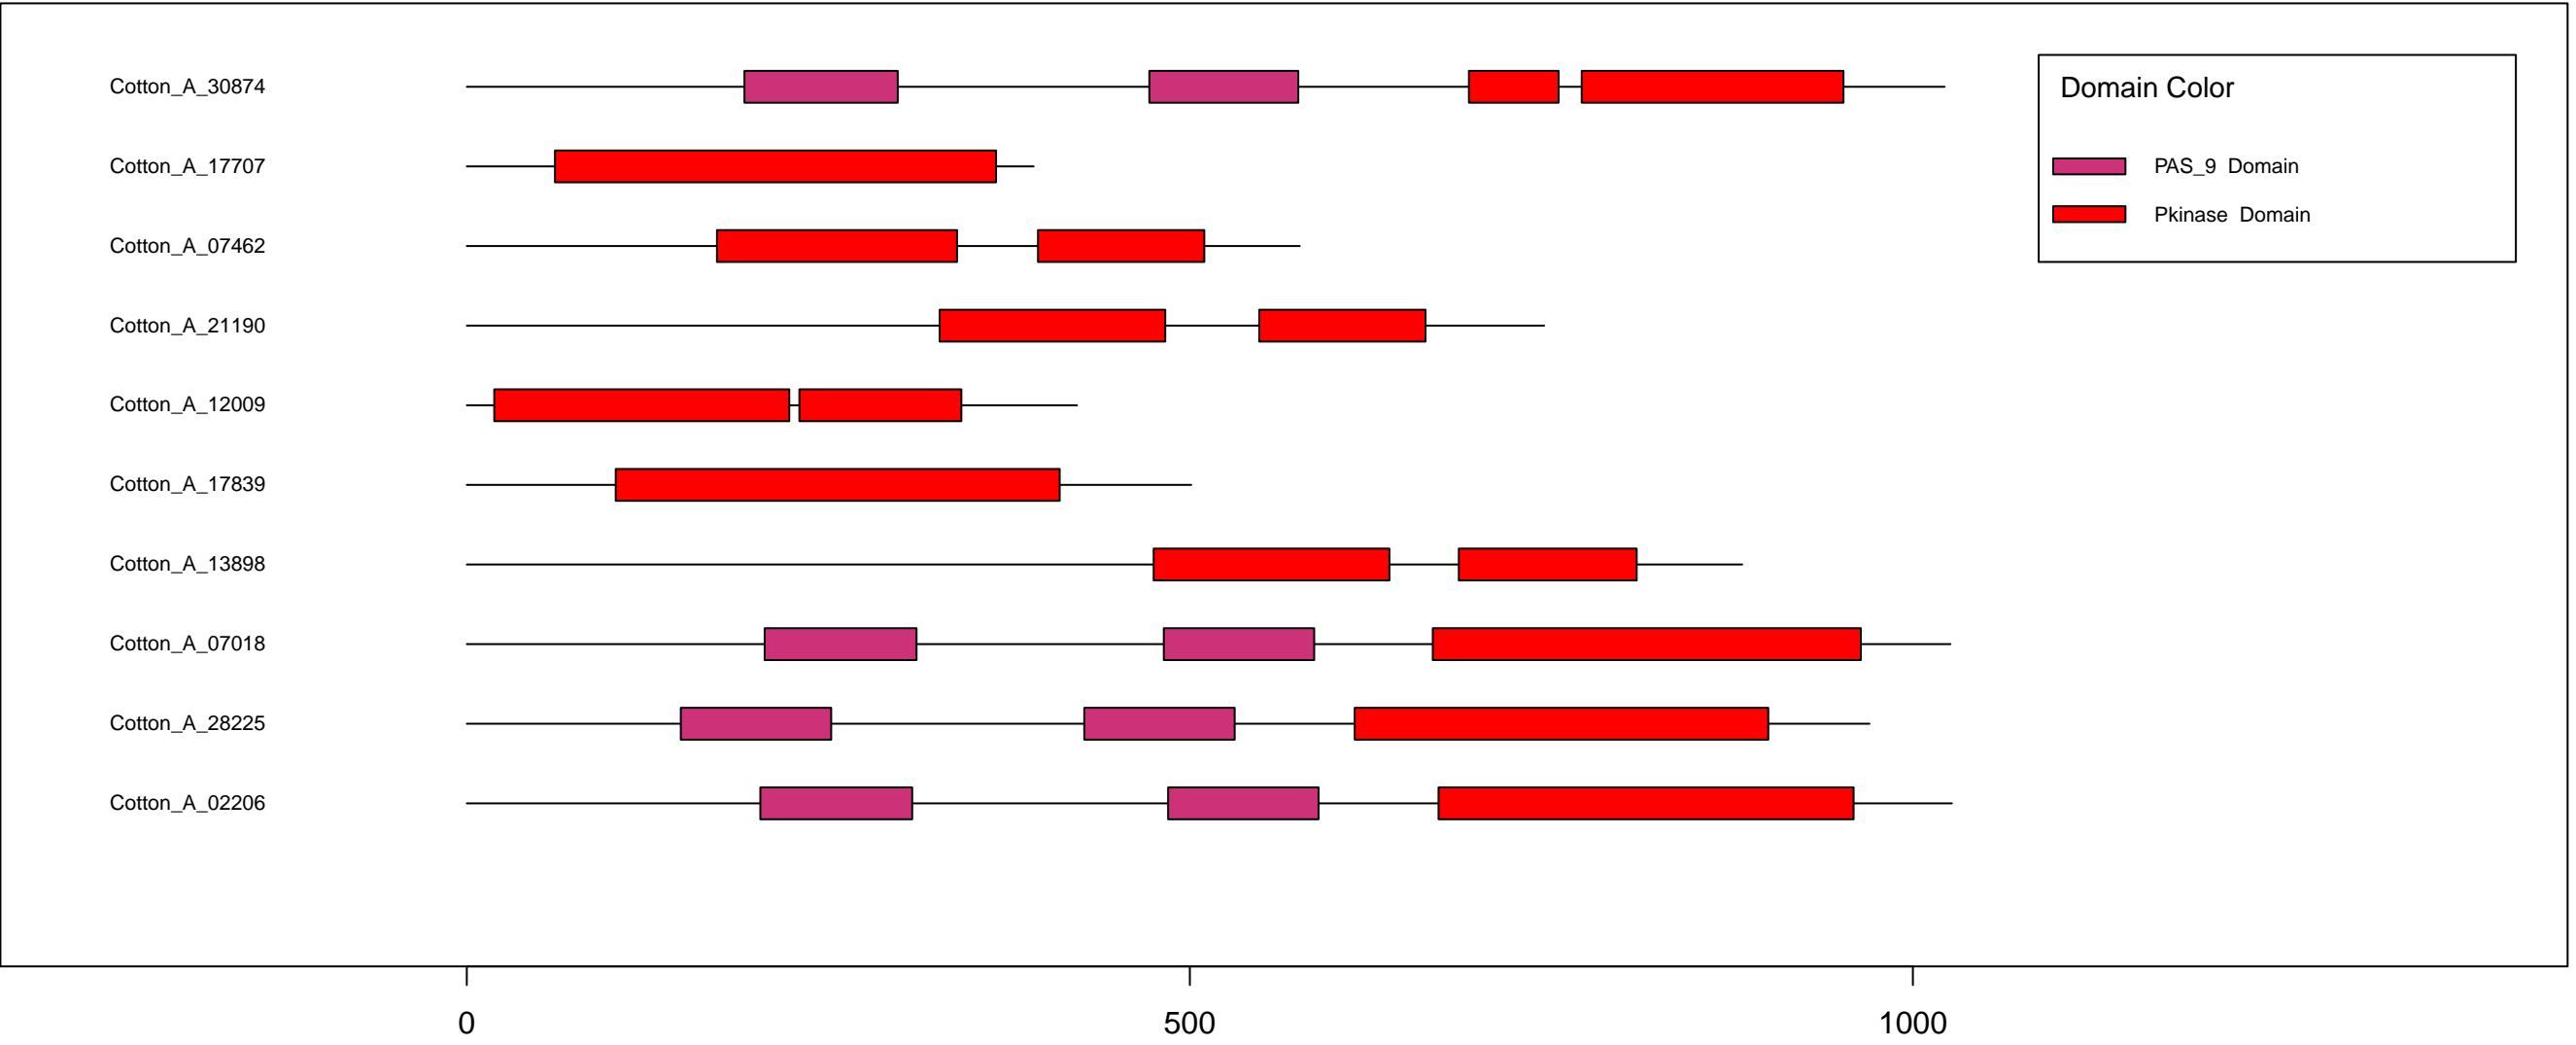



# G.ar AGC-PI domain diagram (all)

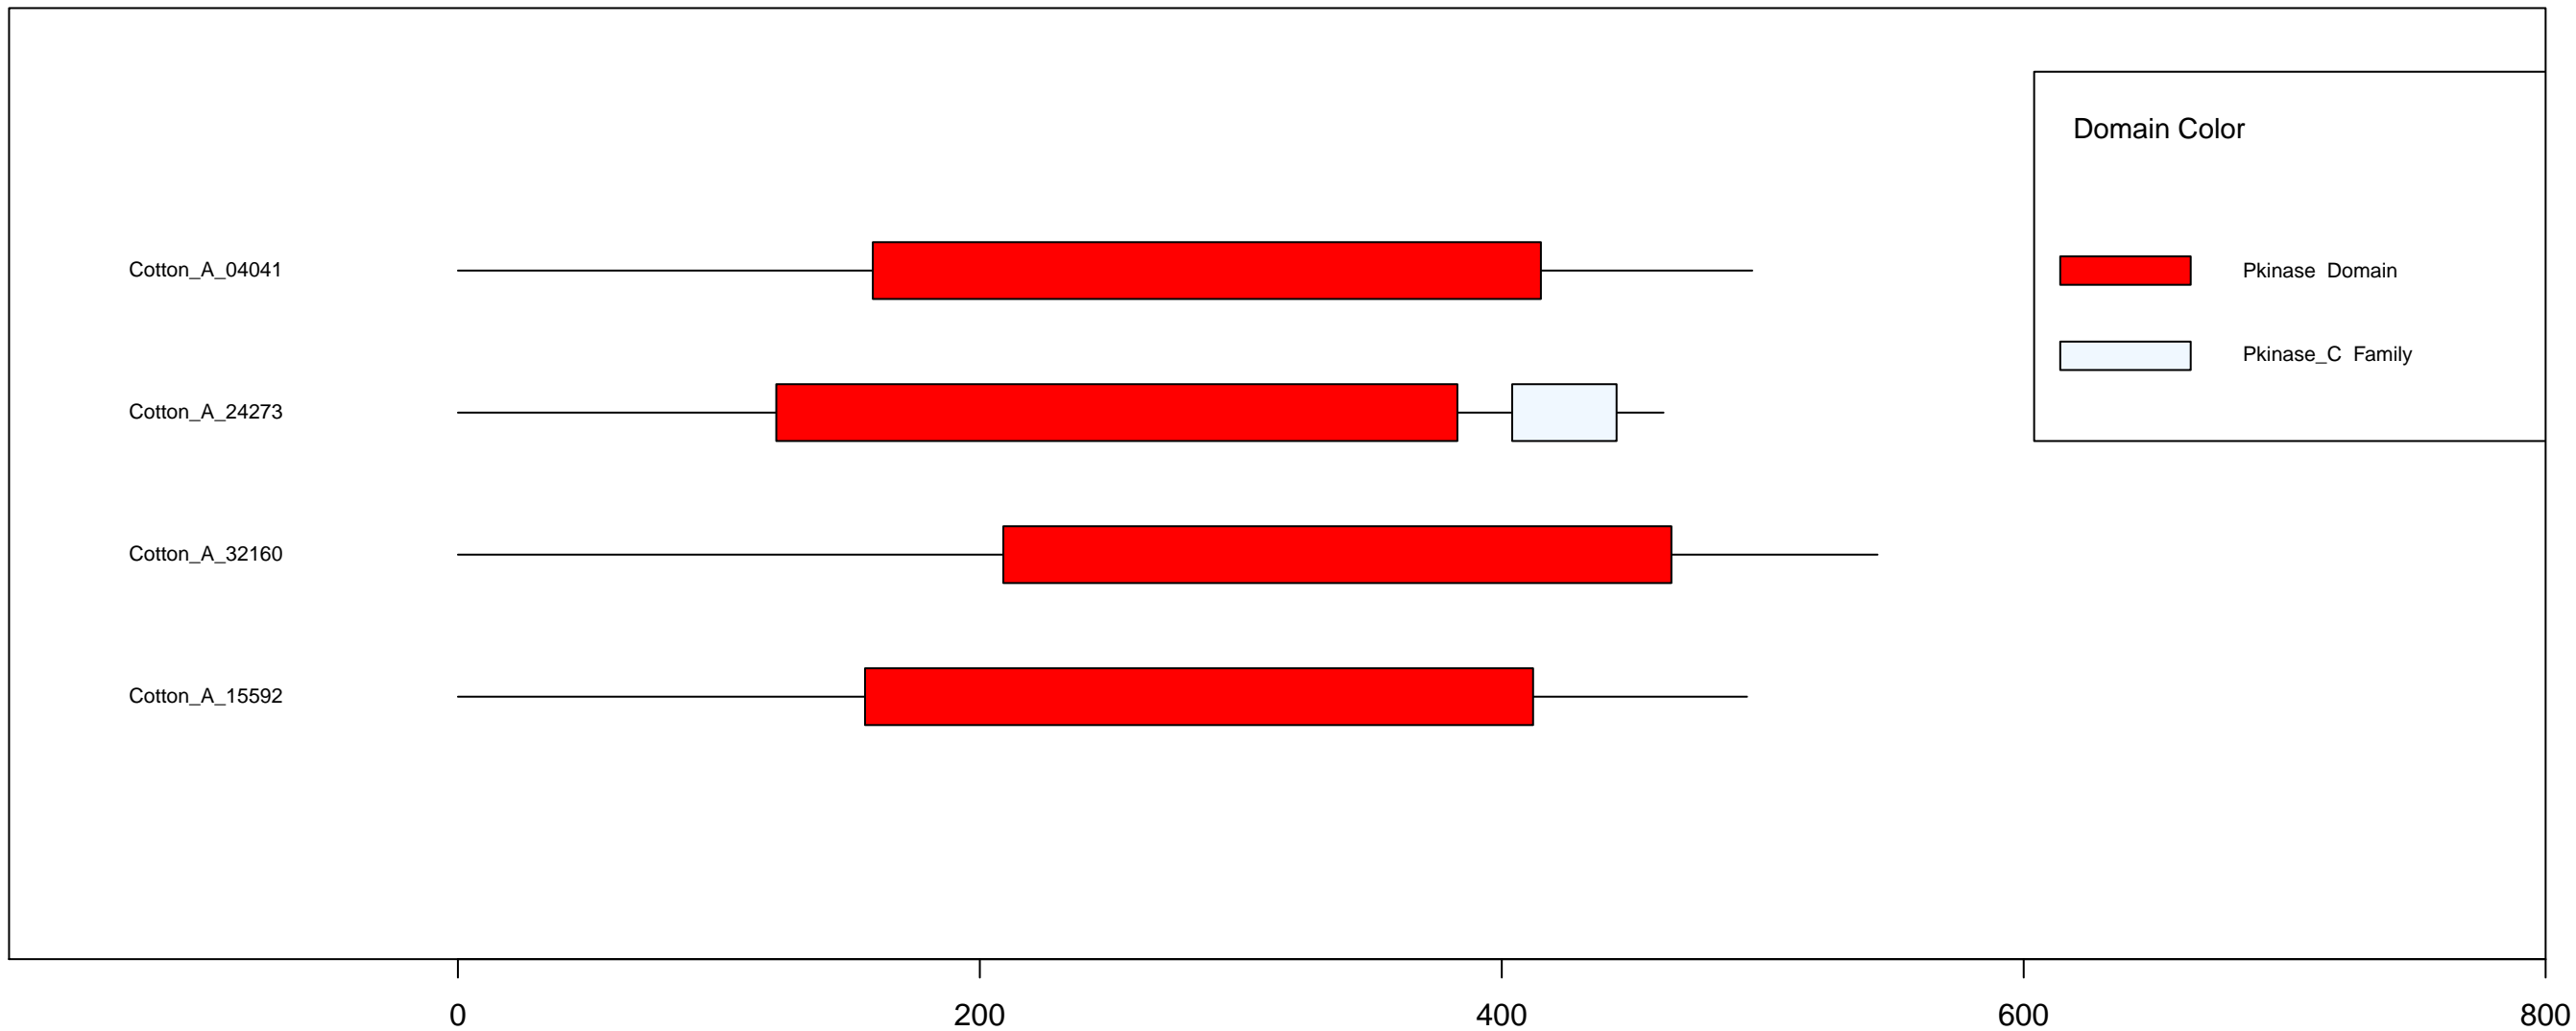

# G.ar Aur domain diagram (all)

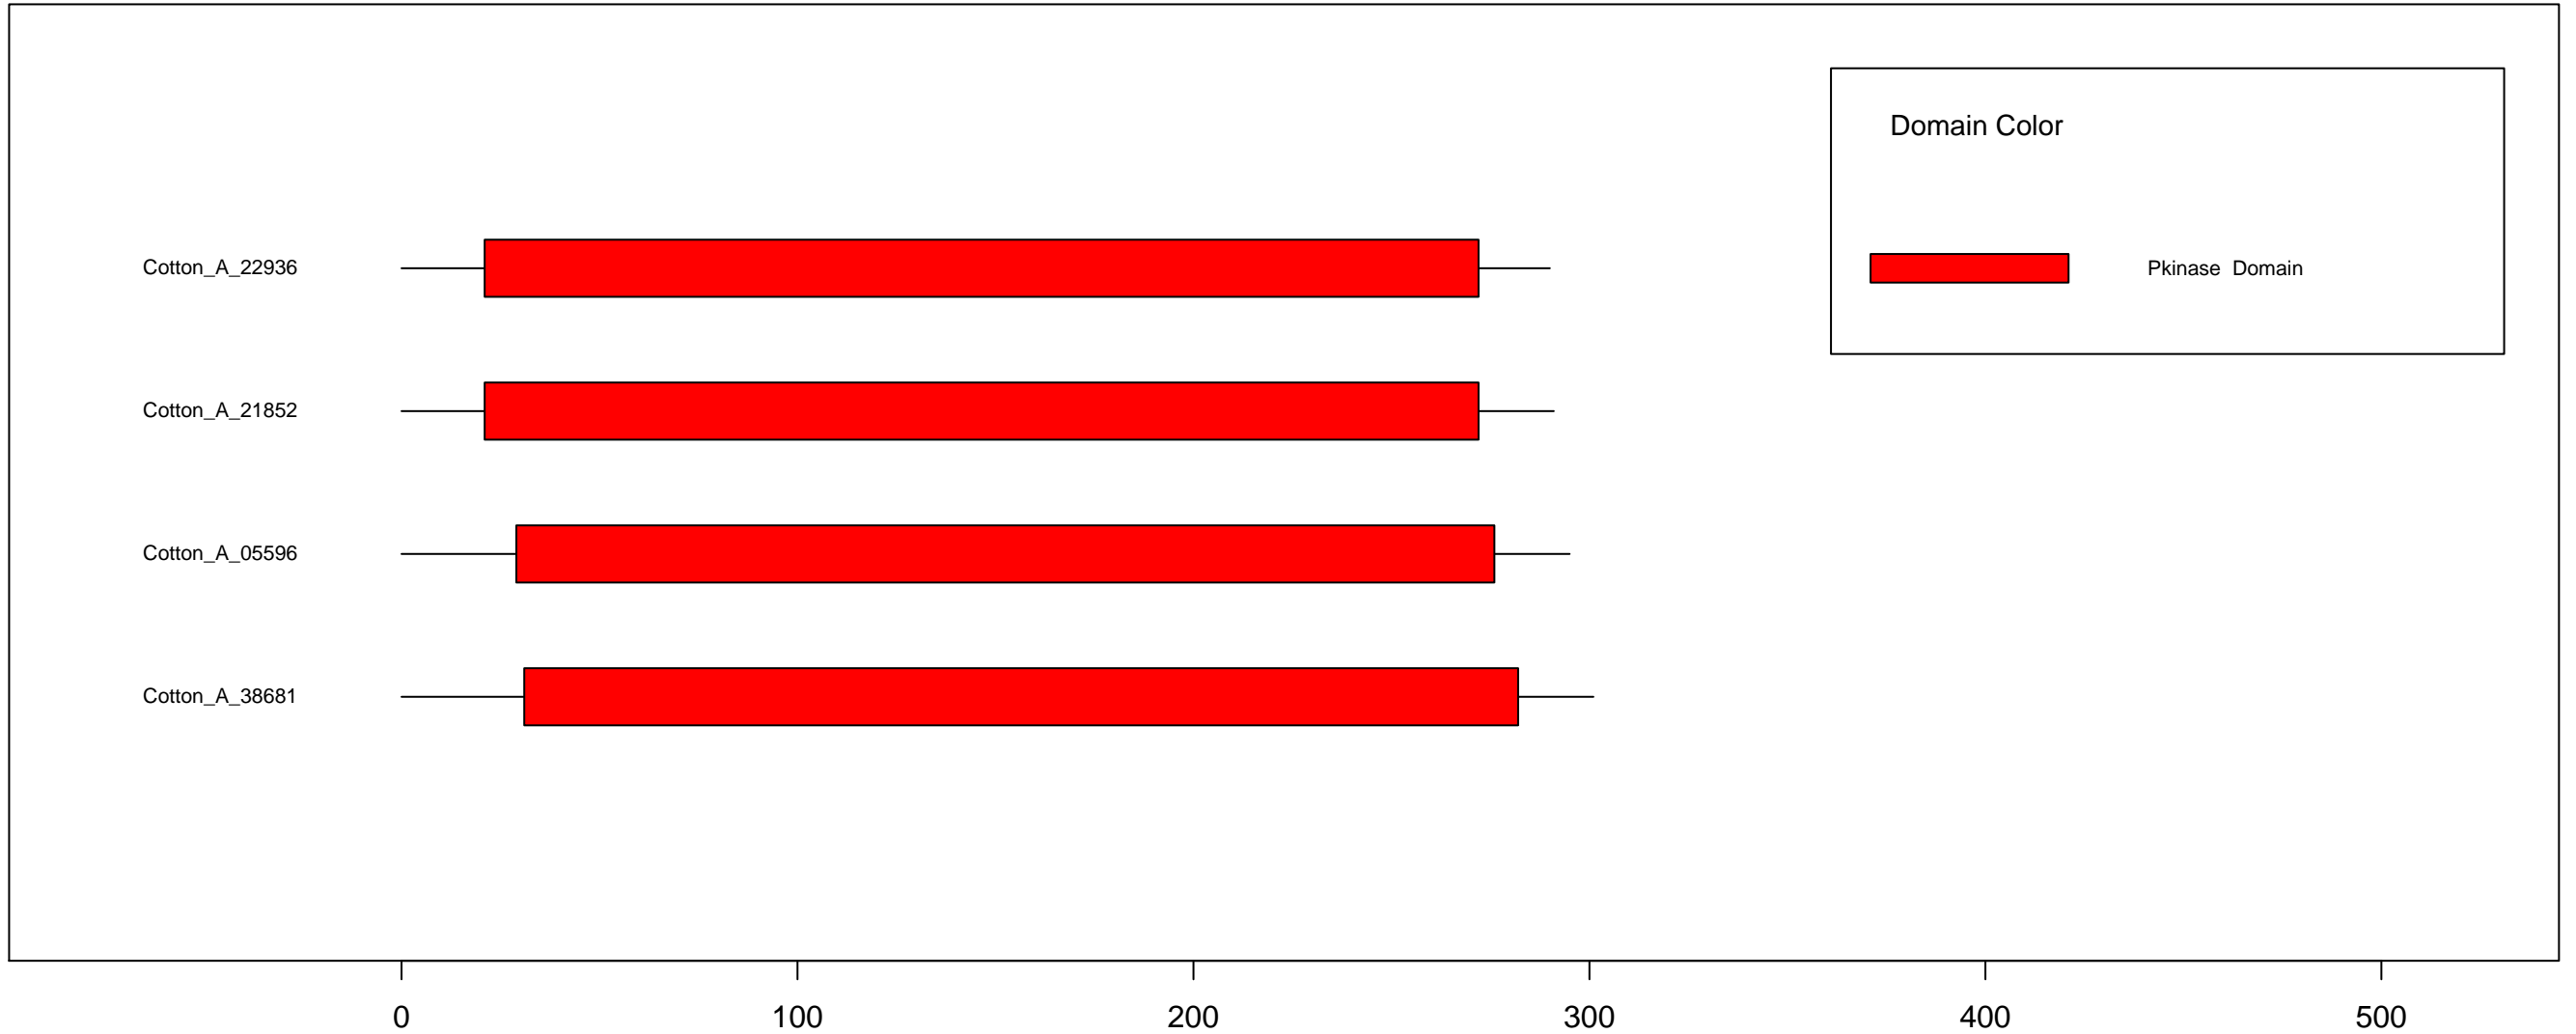

# G.ar BUB domain diagram (all)

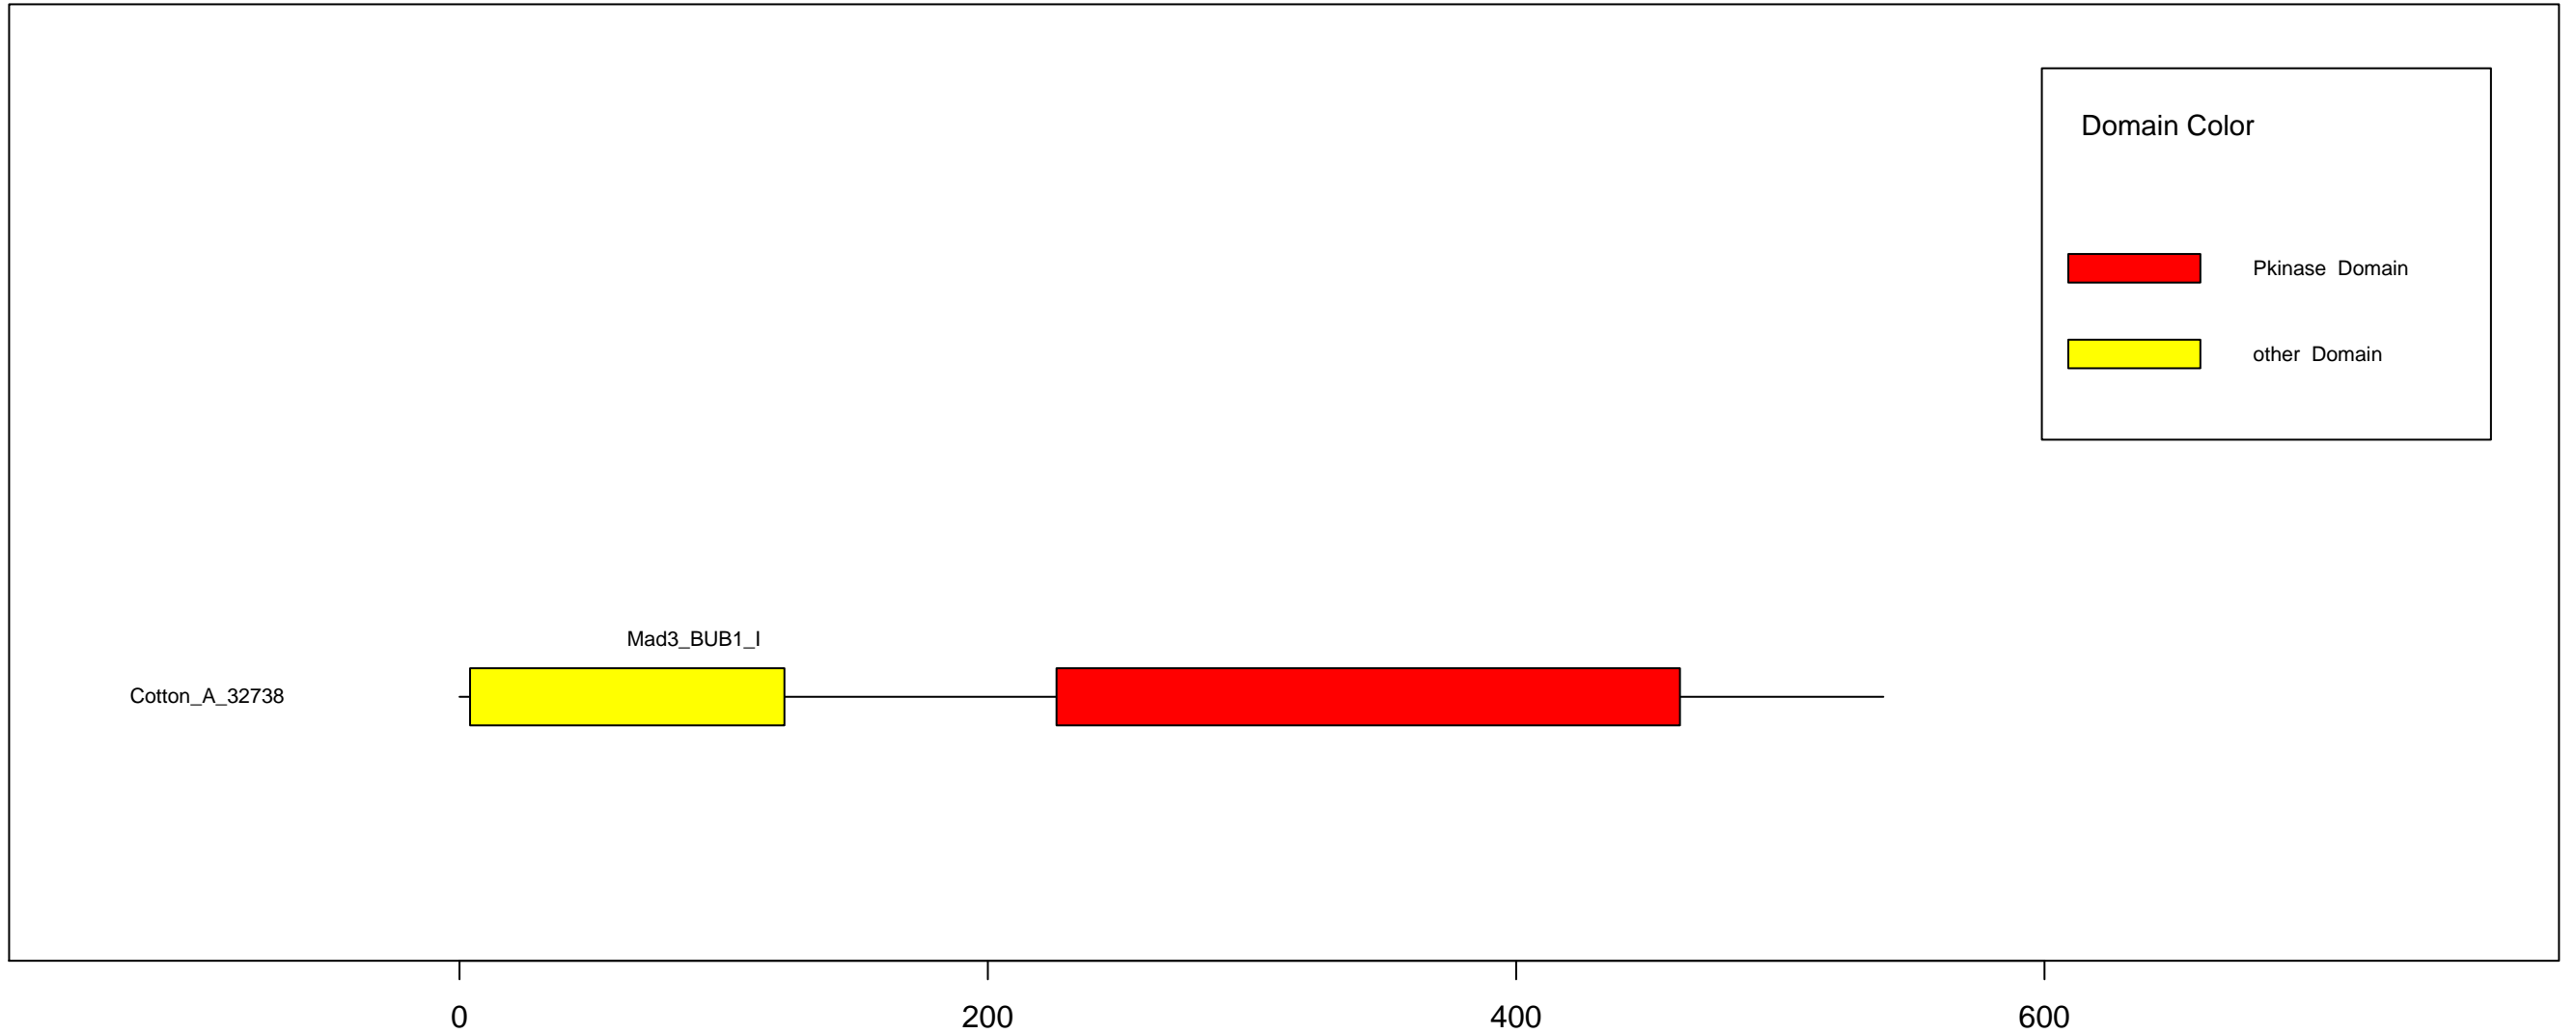

# G.ar CAMK\_AMPK domain diagram (all)

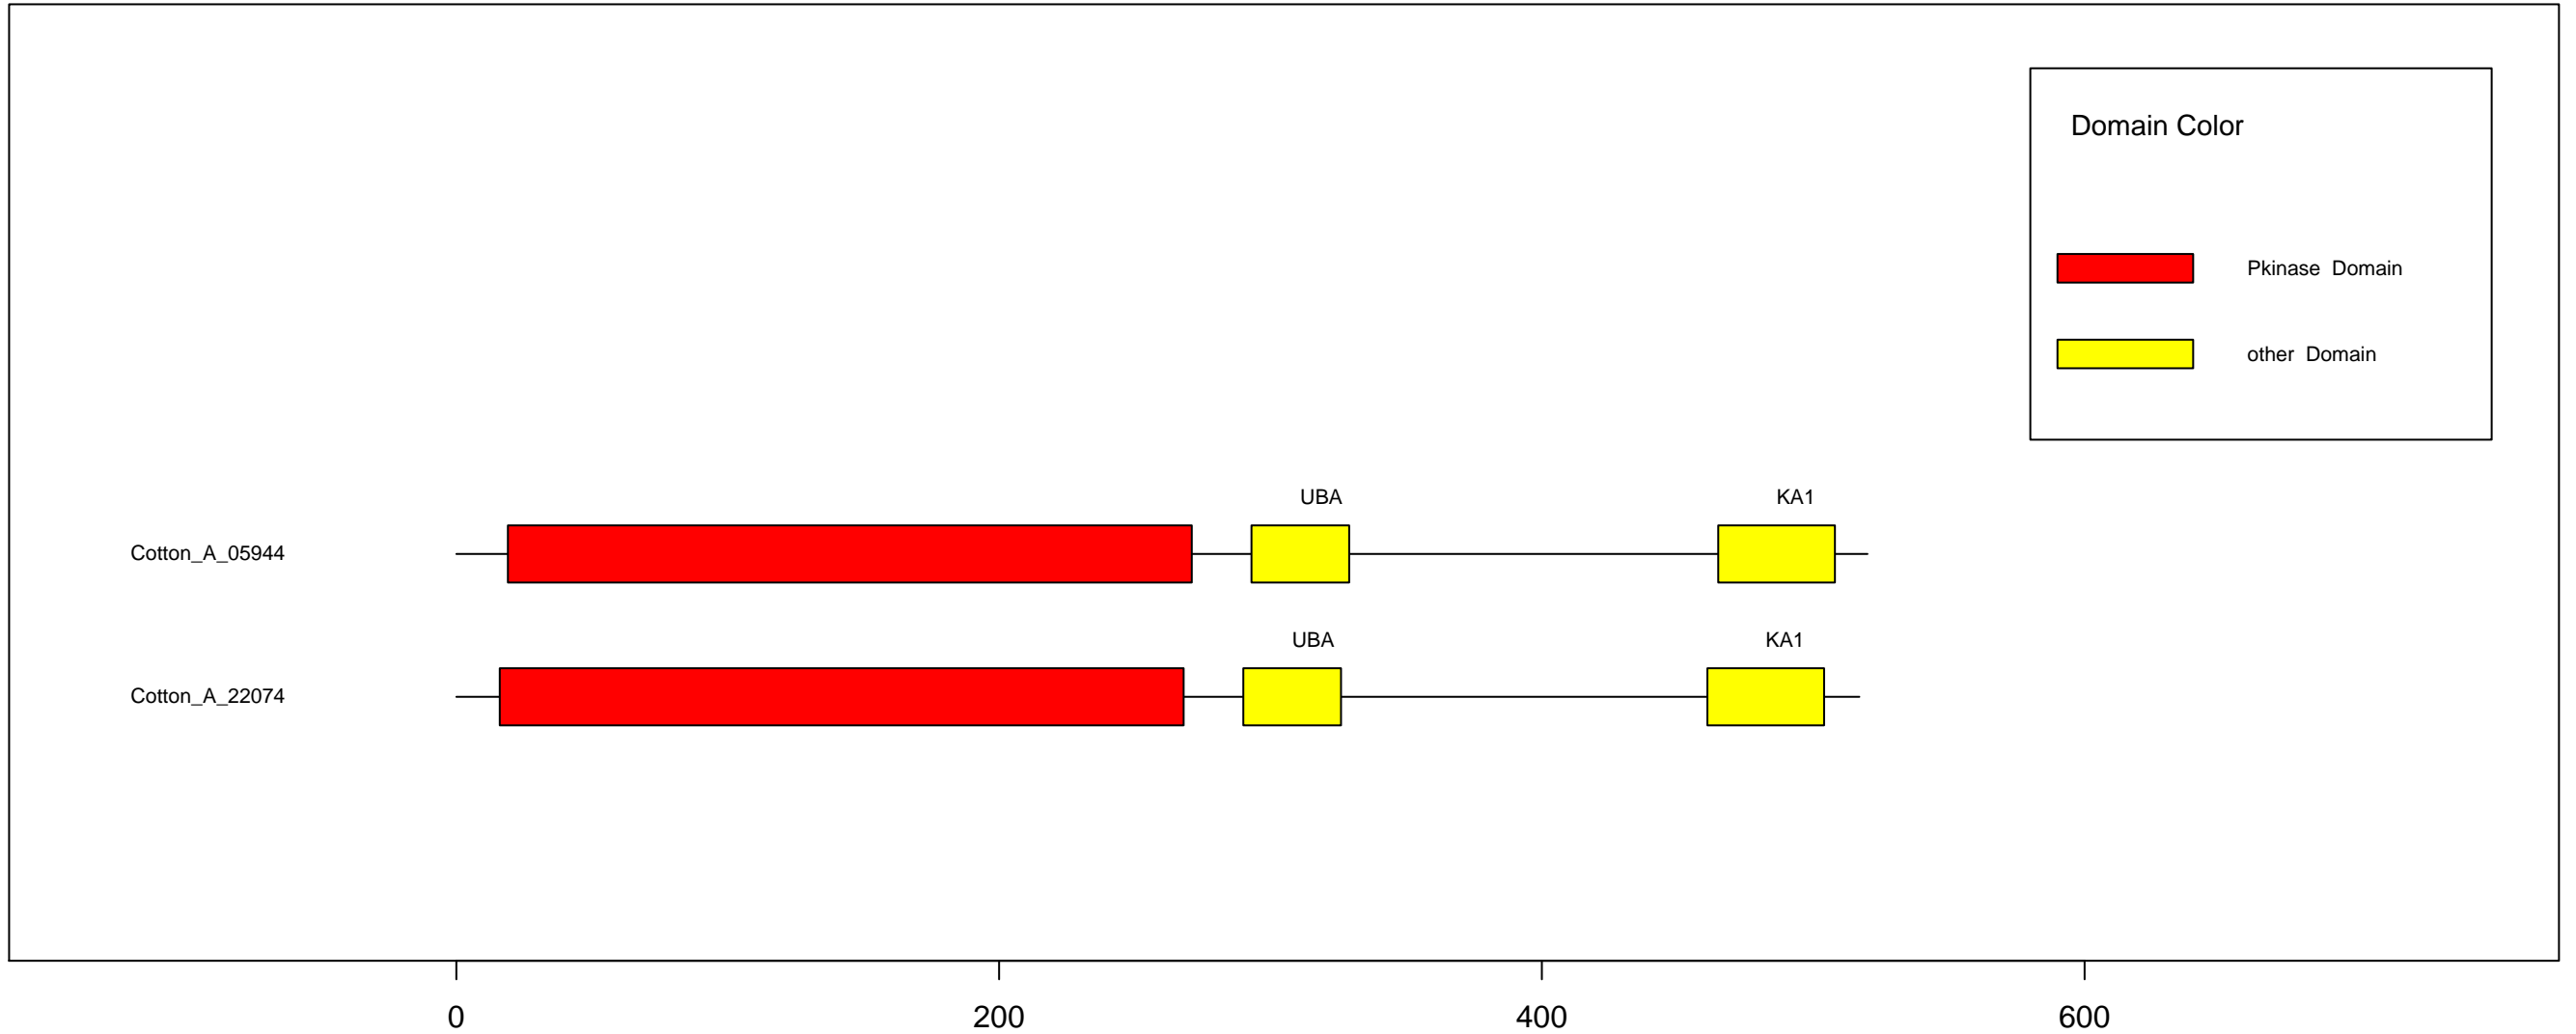

# G.ar CAMK\_CAMK1-DCAMKL domain diagram (all)

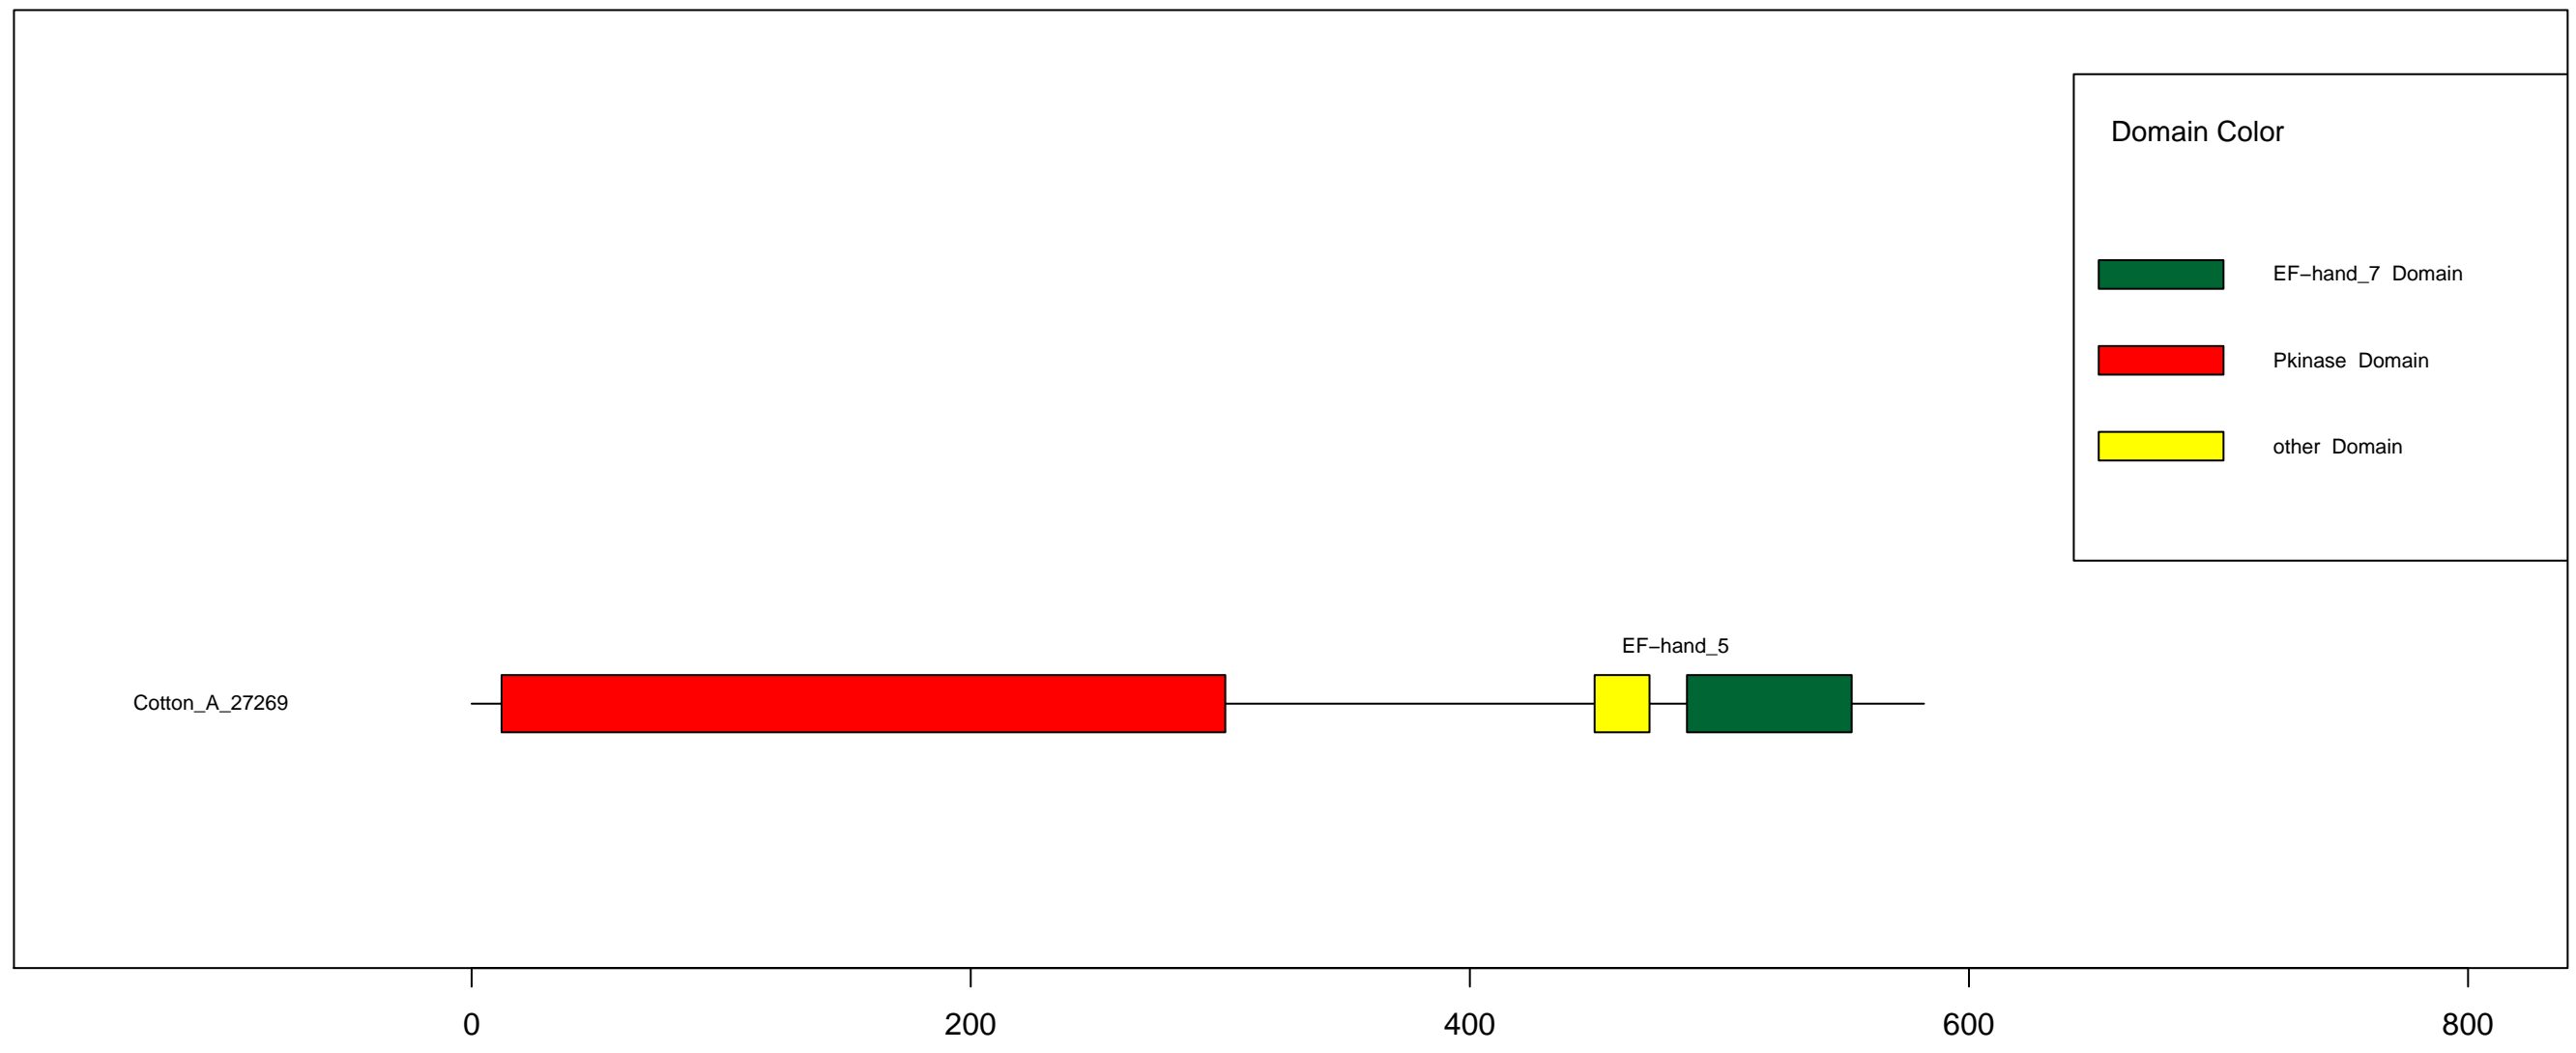

# G.ar CAMK\_CAMKL-CHK1 domain diagram (part 1)

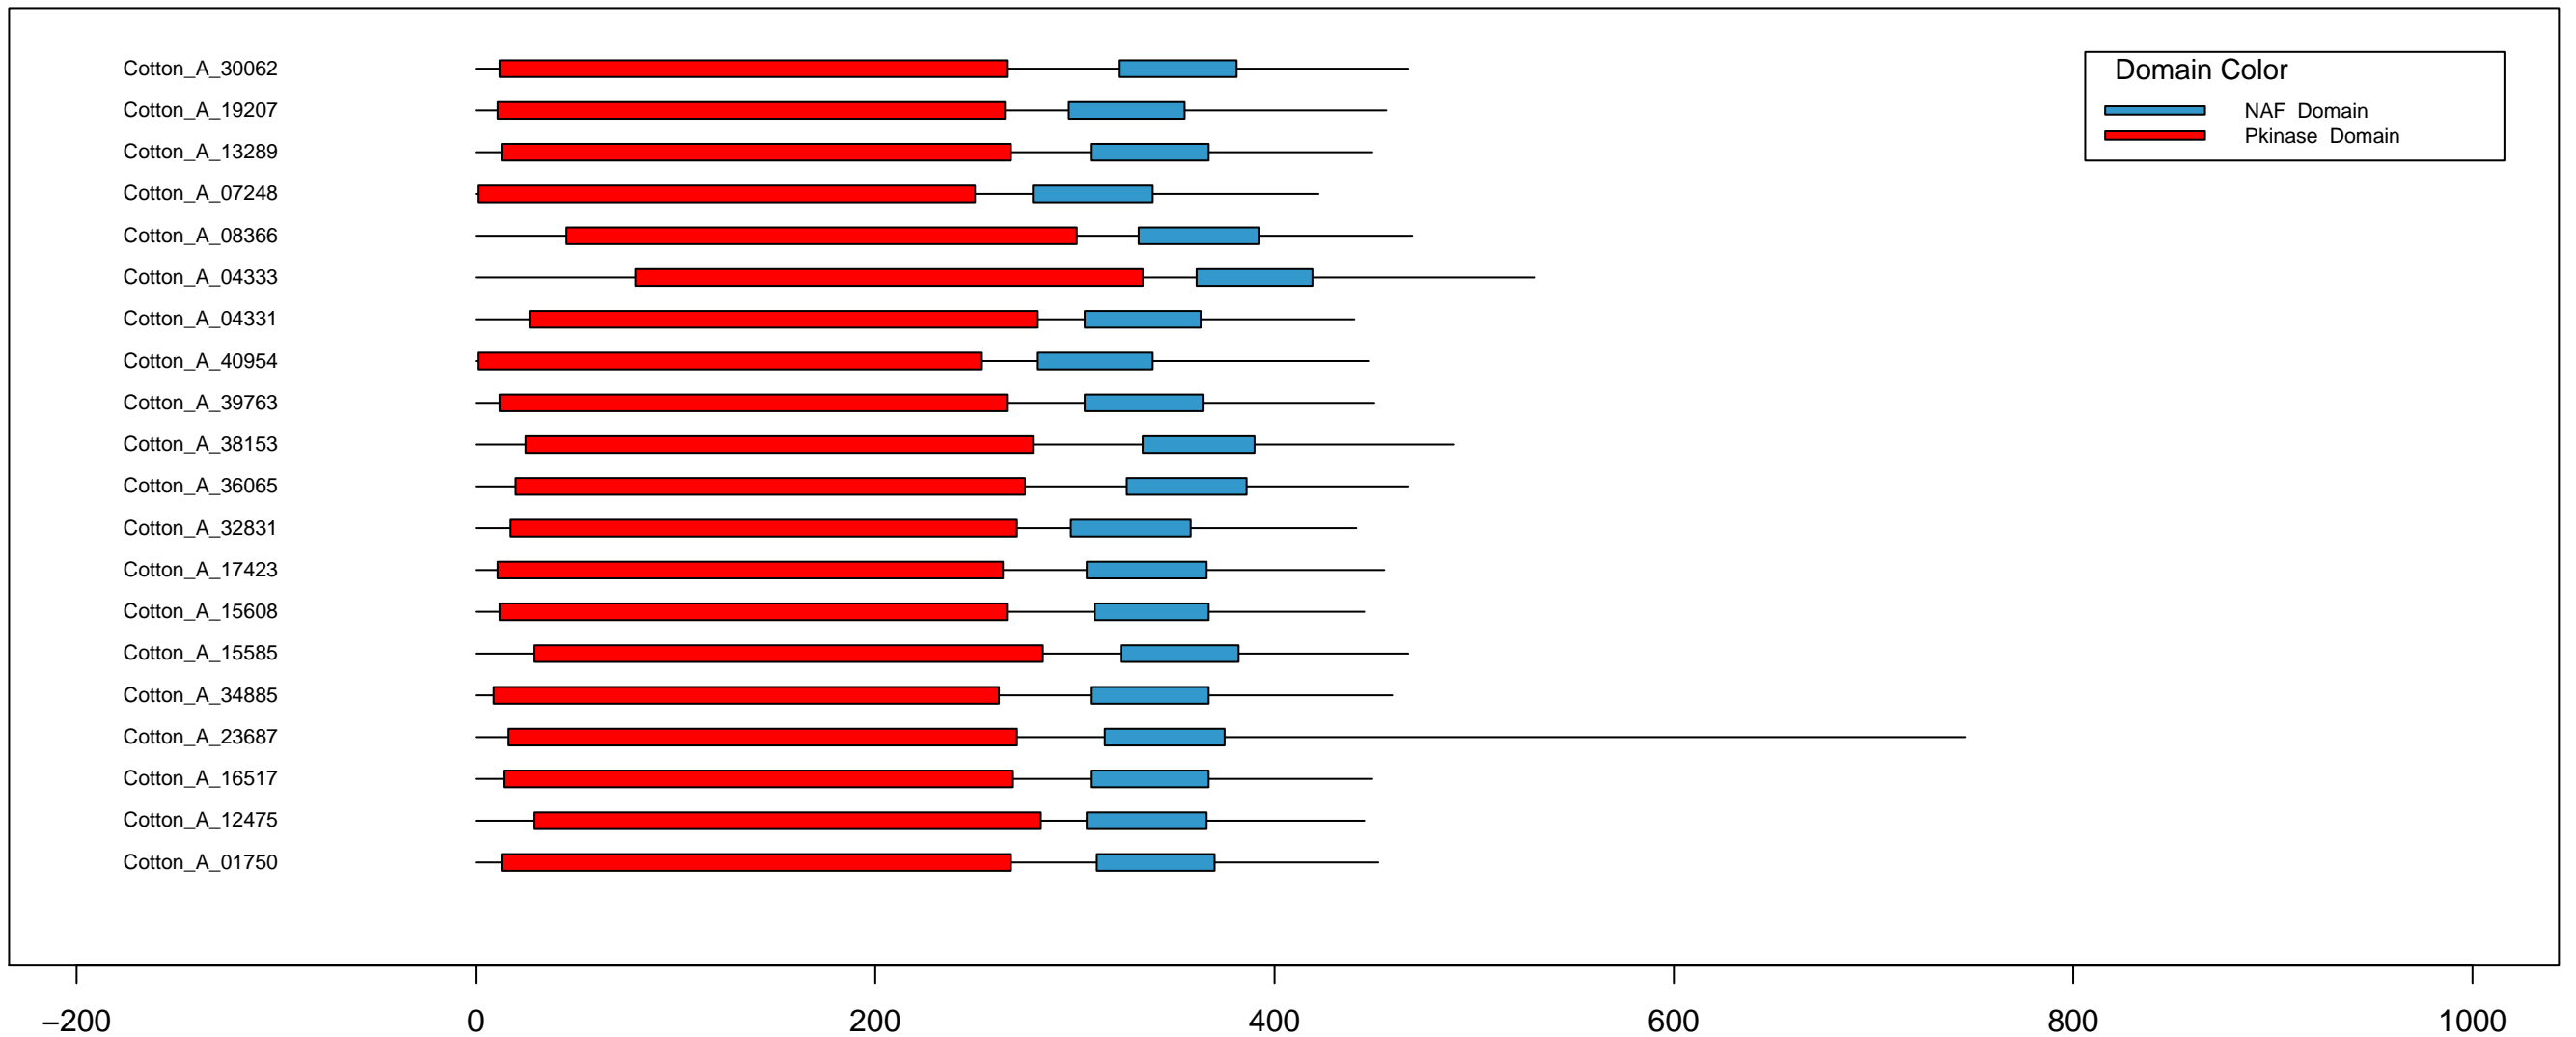

## G.ar CAMK\_CAMKL-CHK1 domain diagram (part 2)

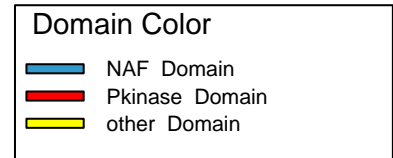

Cotton\_A\_37254  
Cotton\_A\_25899  
Cotton\_A\_32356  
Cotton\_A\_23852  
Cotton\_A\_17529  
Cotton\_A\_02928  
Cotton\_A\_19508  
Cotton\_A\_17083  
Cotton\_A\_11022  
Cotton\_A\_04065  
Cotton\_A\_09063  
Cotton\_A\_25709  
Cotton\_A\_05019  
Cotton\_A\_04158  
Cotton\_A\_04154  
Cotton\_A\_32557  
Cotton\_A\_15642  
Cotton\_A\_01247  
Cotton\_A\_01175

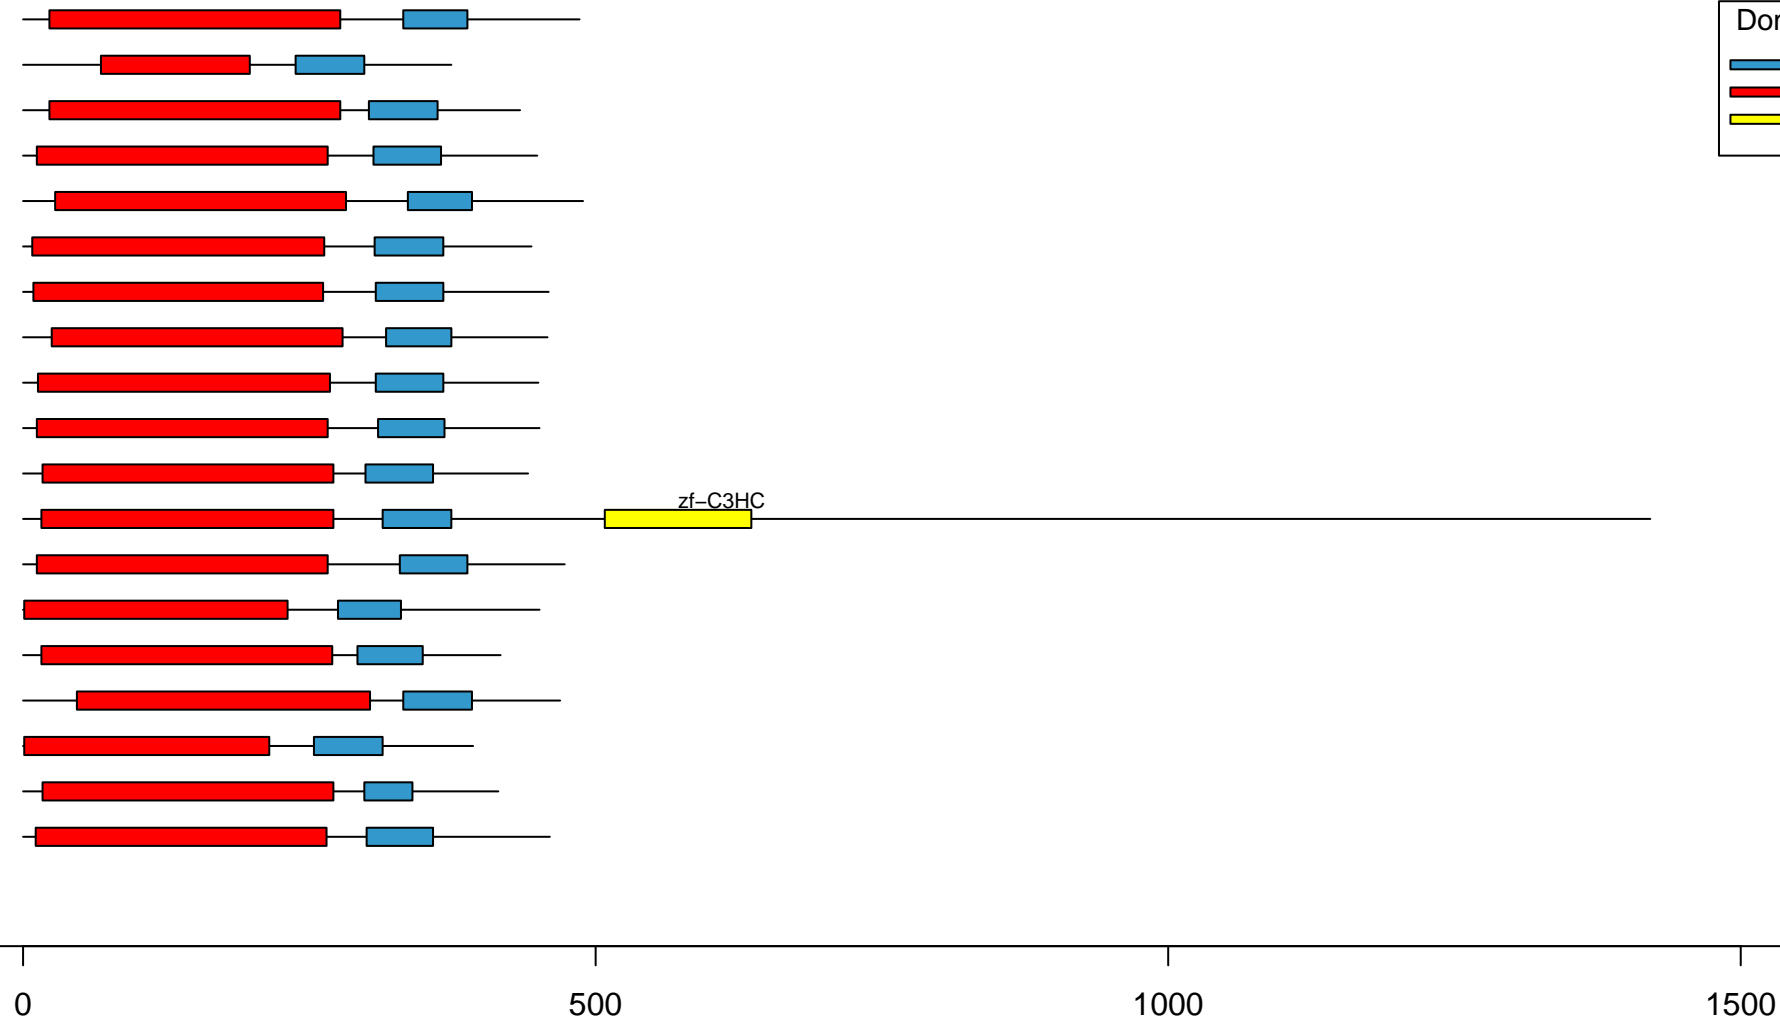

# G.ar CAMK\_CAMKL-LKB domain diagram (all)

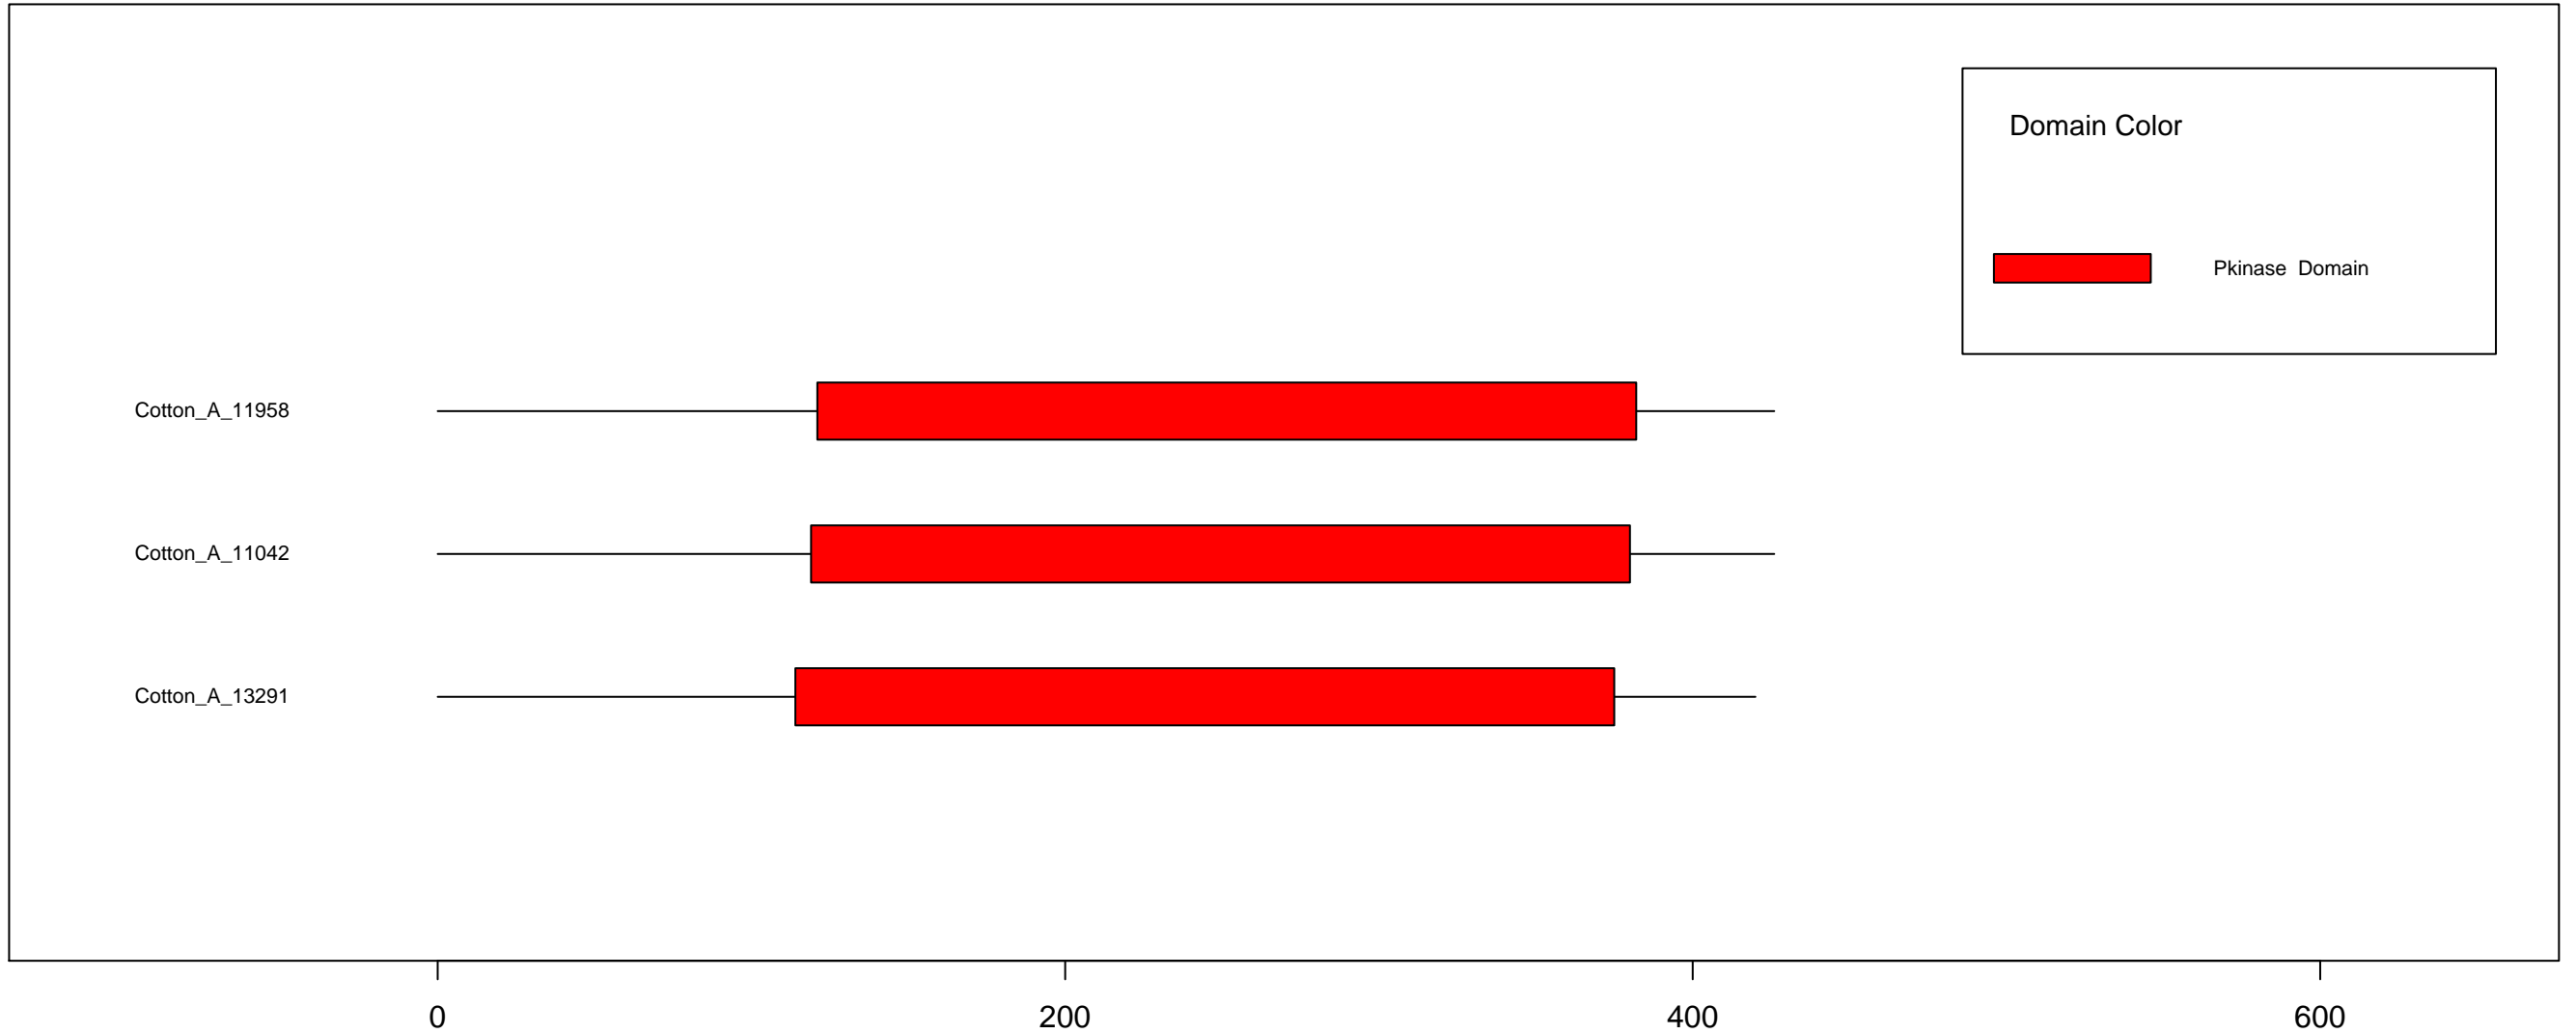



### G.ar CAMK\_CDPK domain diagram (part 1)

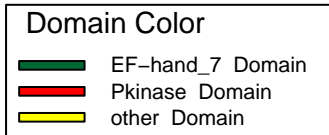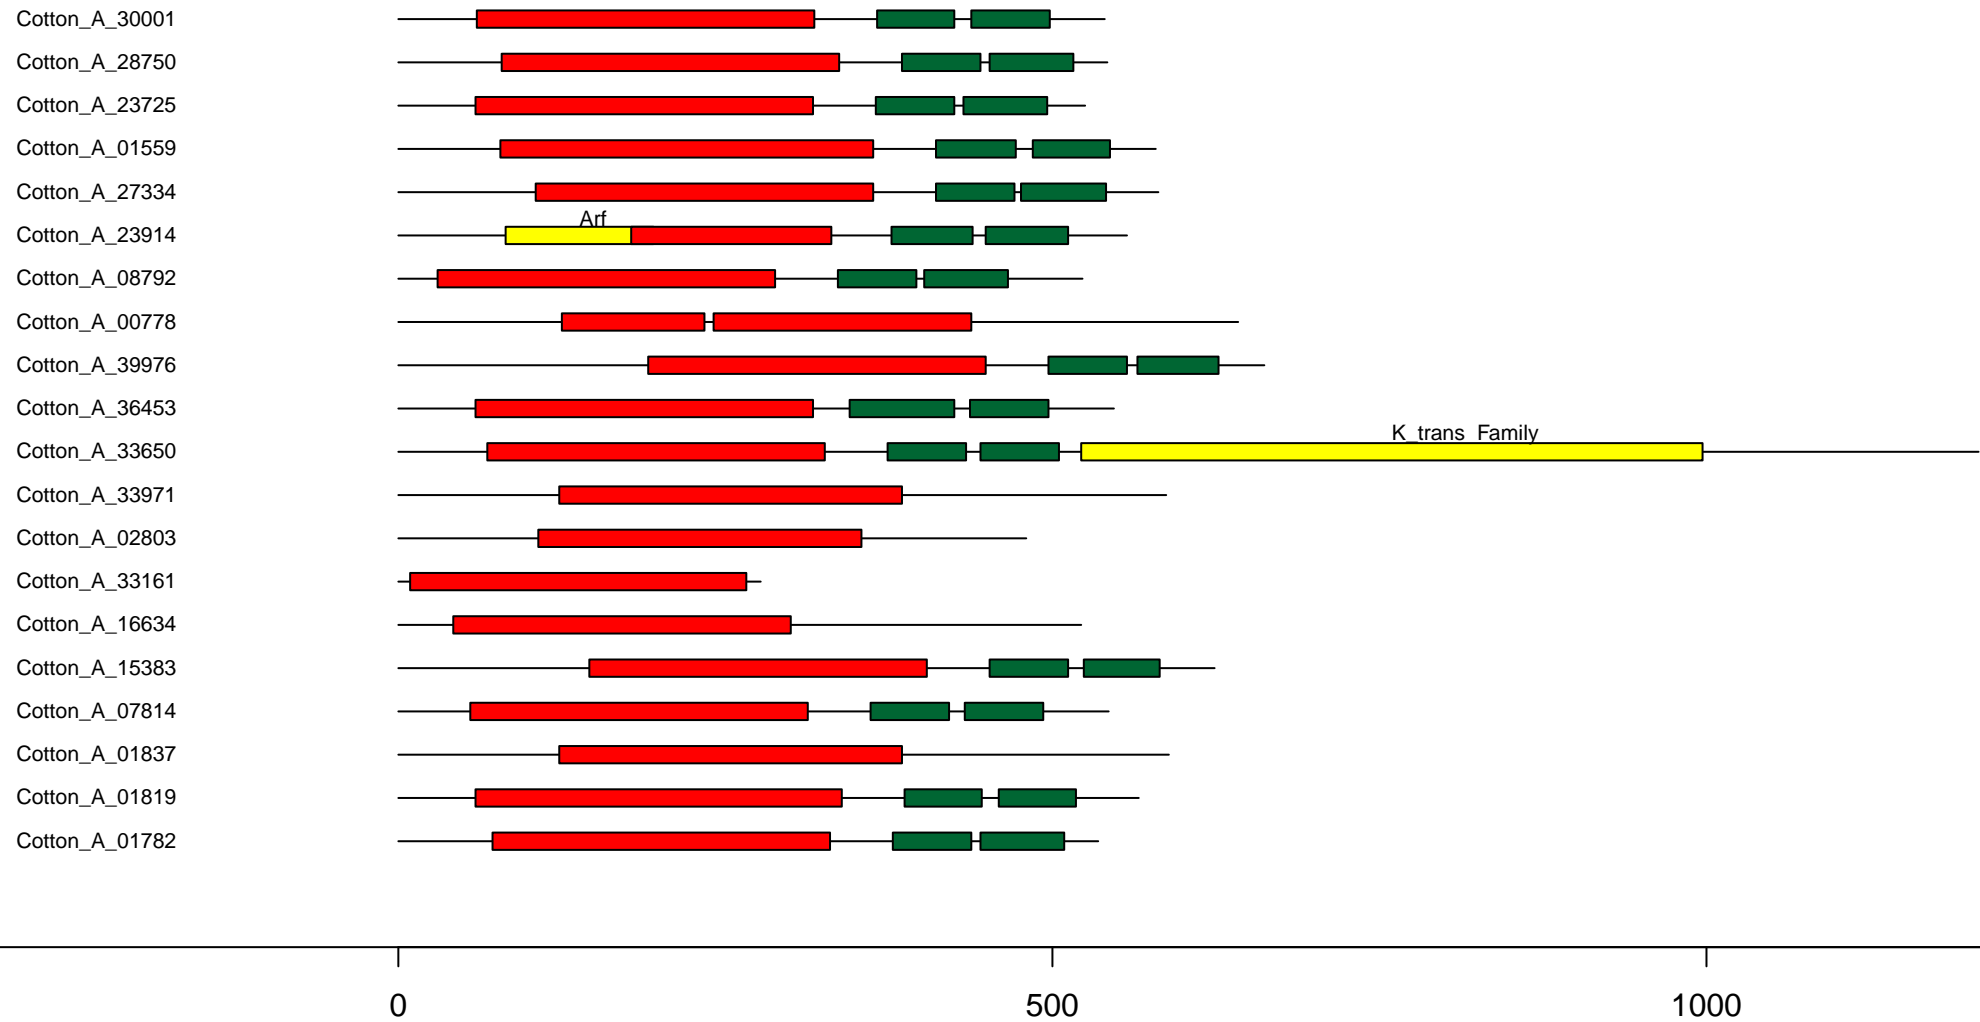

# G.ar CAMK\_CDPK domain diagram (part 2)

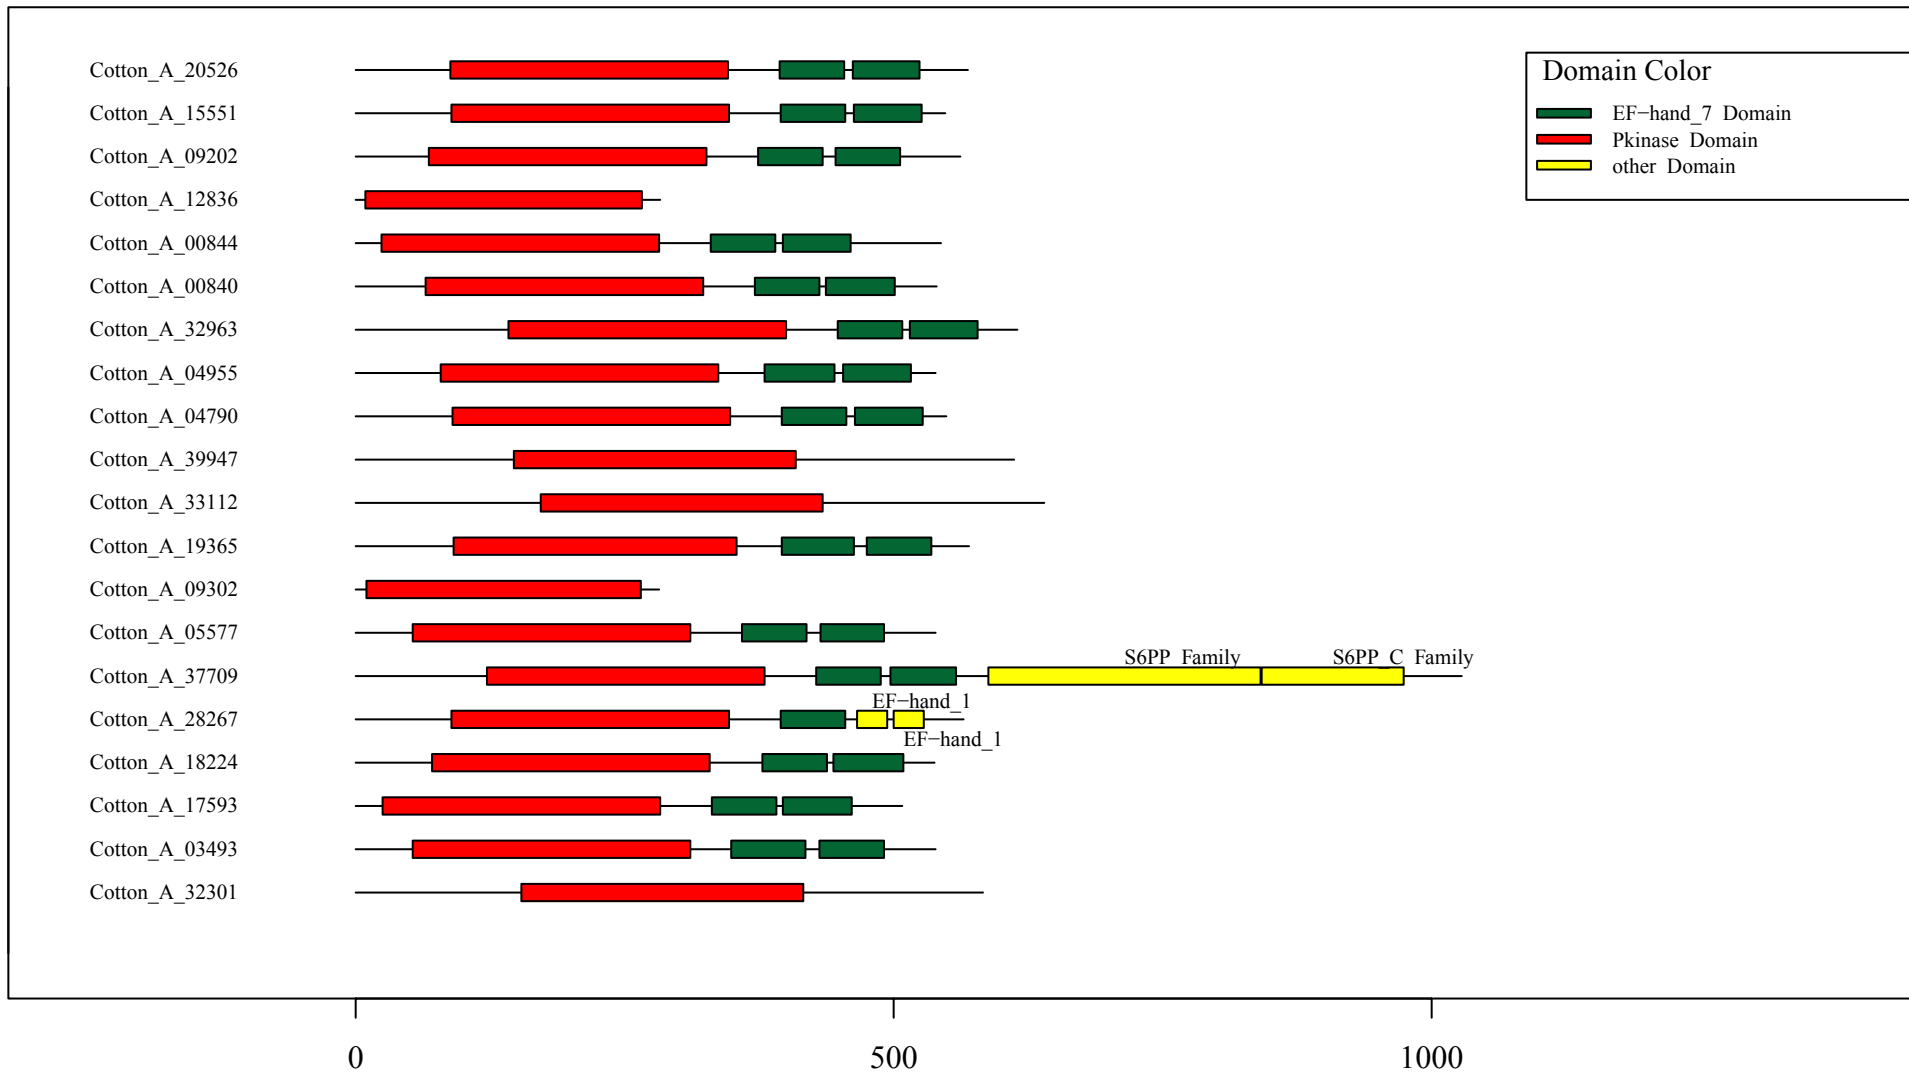

### G.ar CAMK\_CDPK domain diagram (part 3)

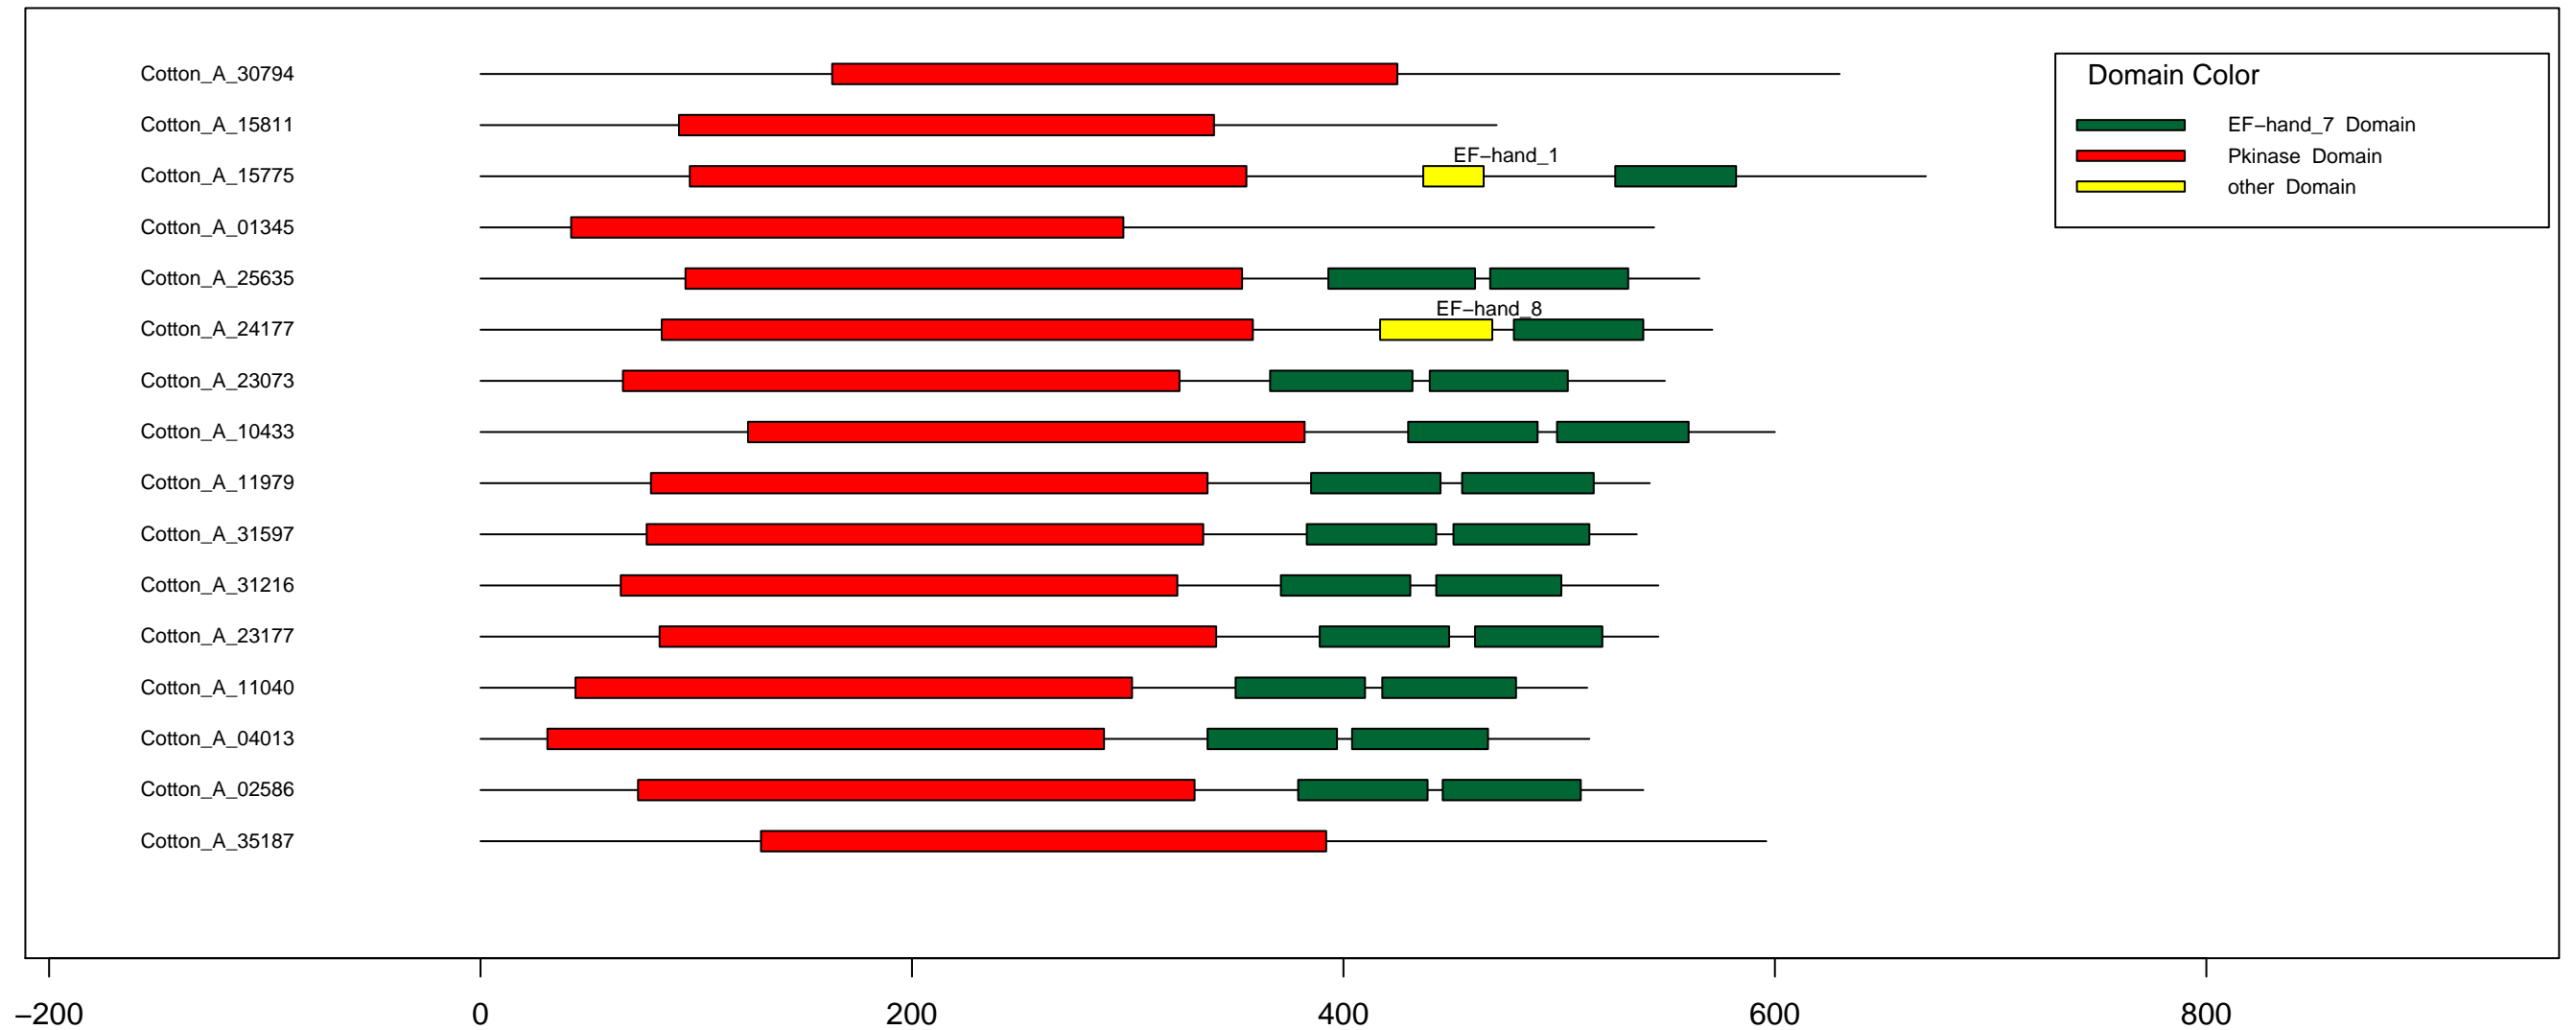

# G.ar CAMK\_OST1L domain diagram (all)

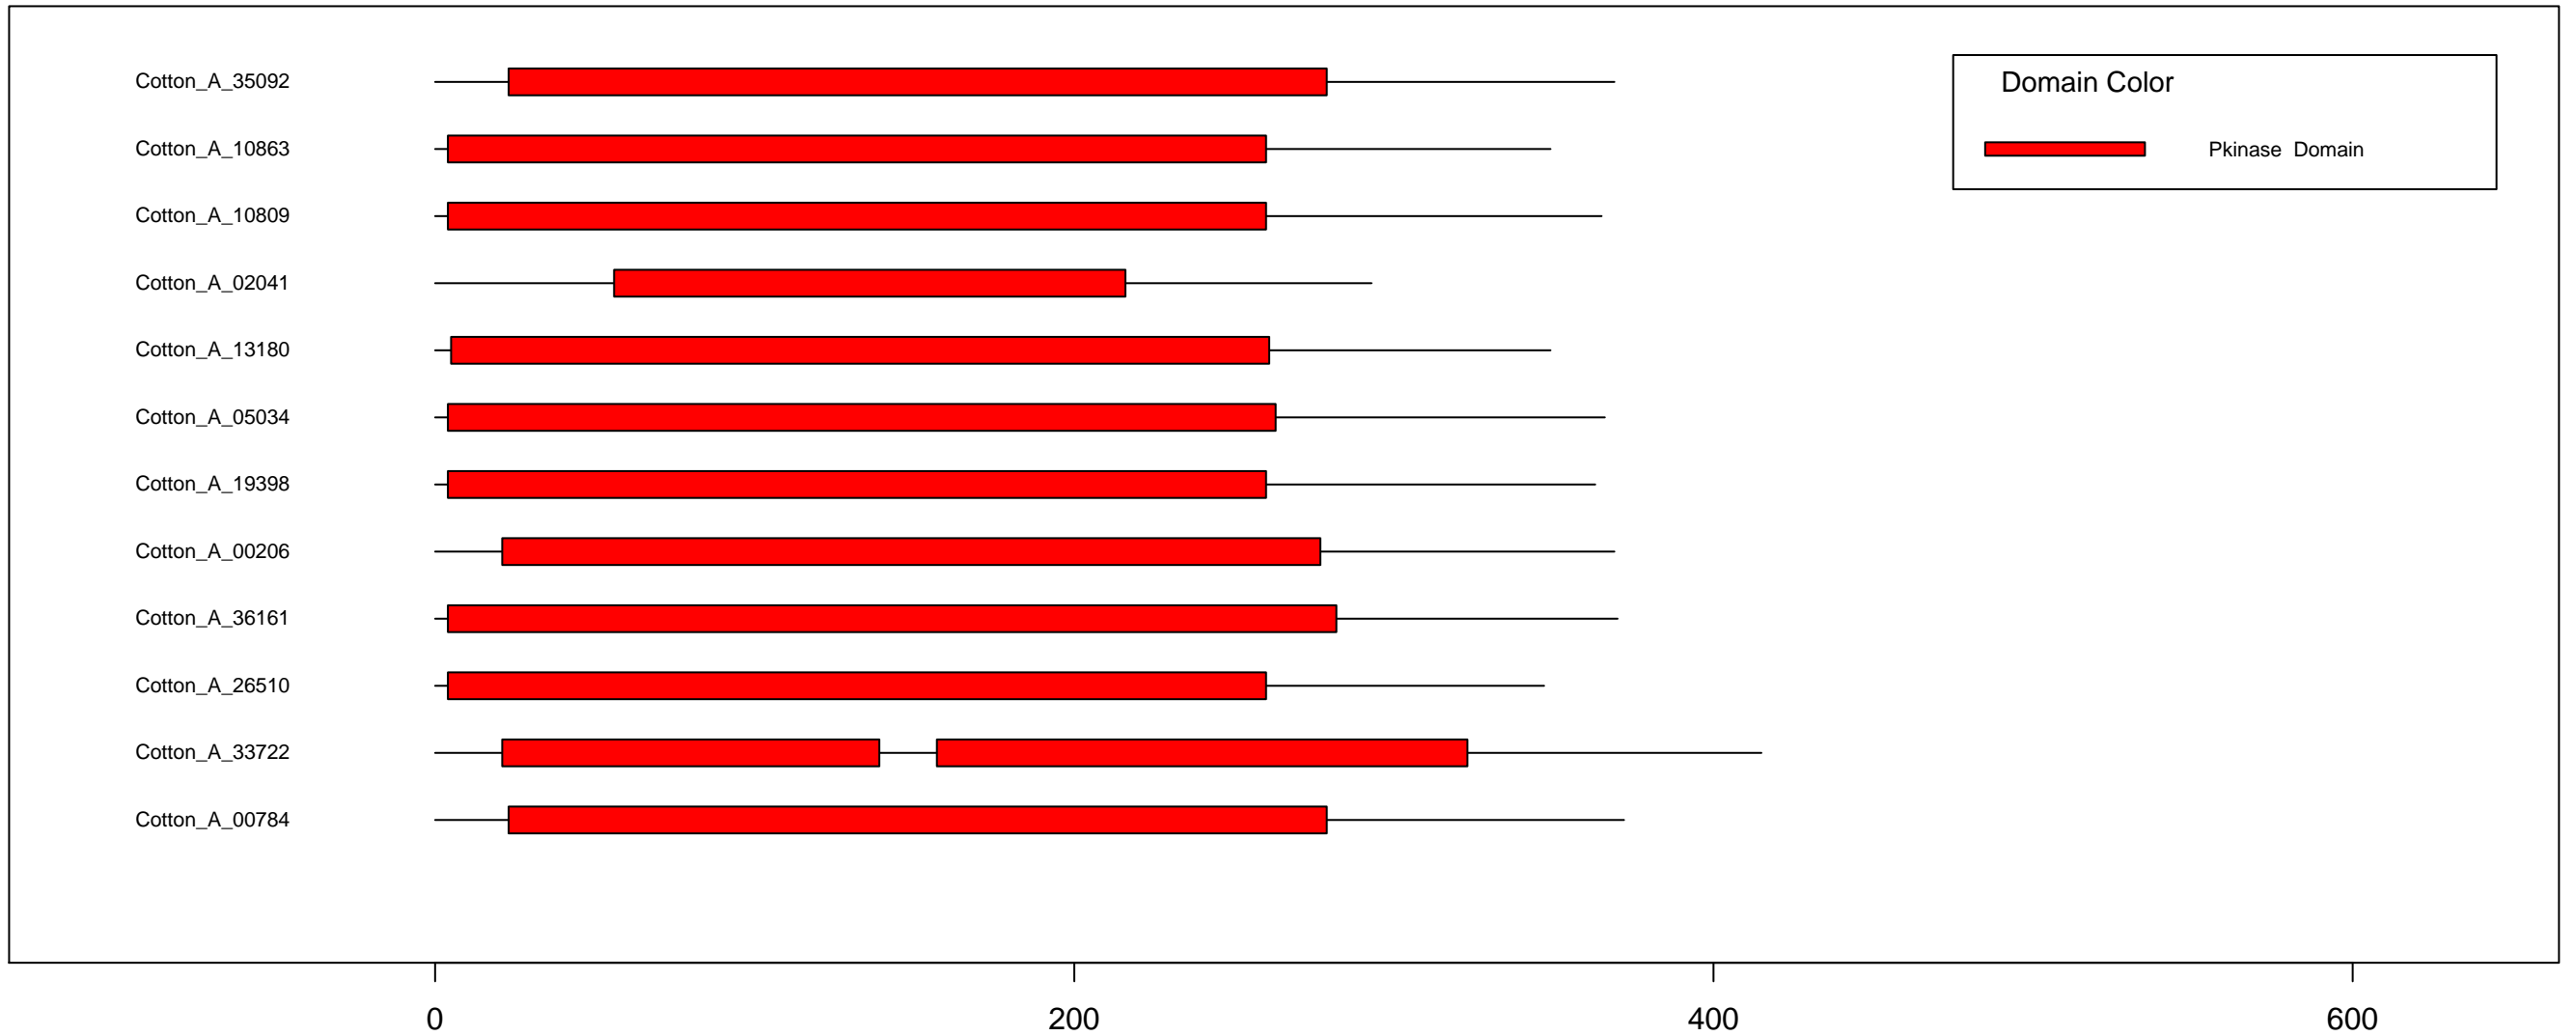

# G.ar CK1\_CK1 domain diagram (all)

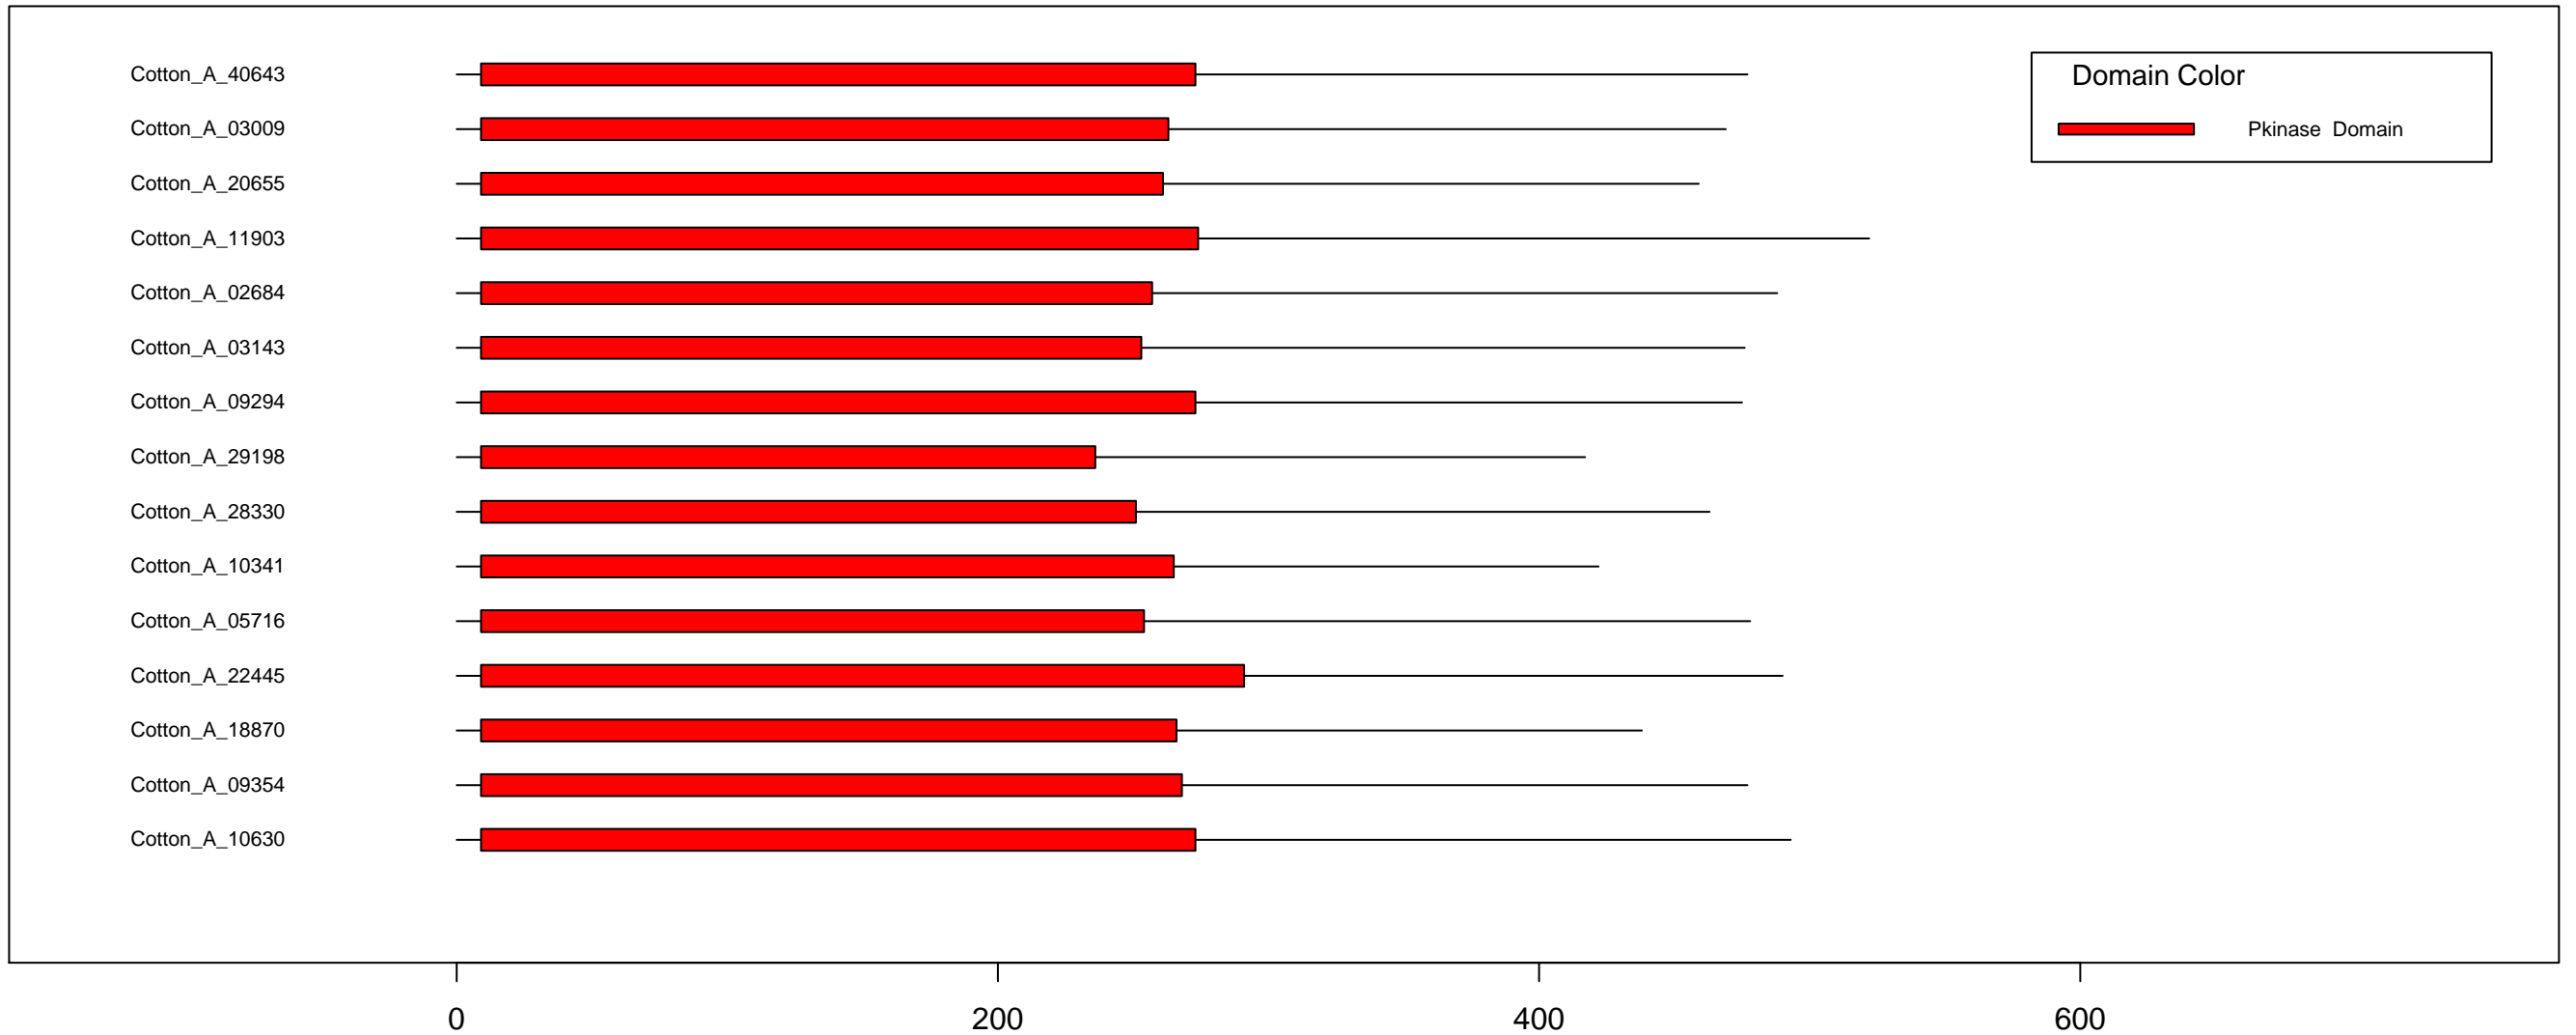

### G.ar CK1\_CK1-PI domain diagram (all)

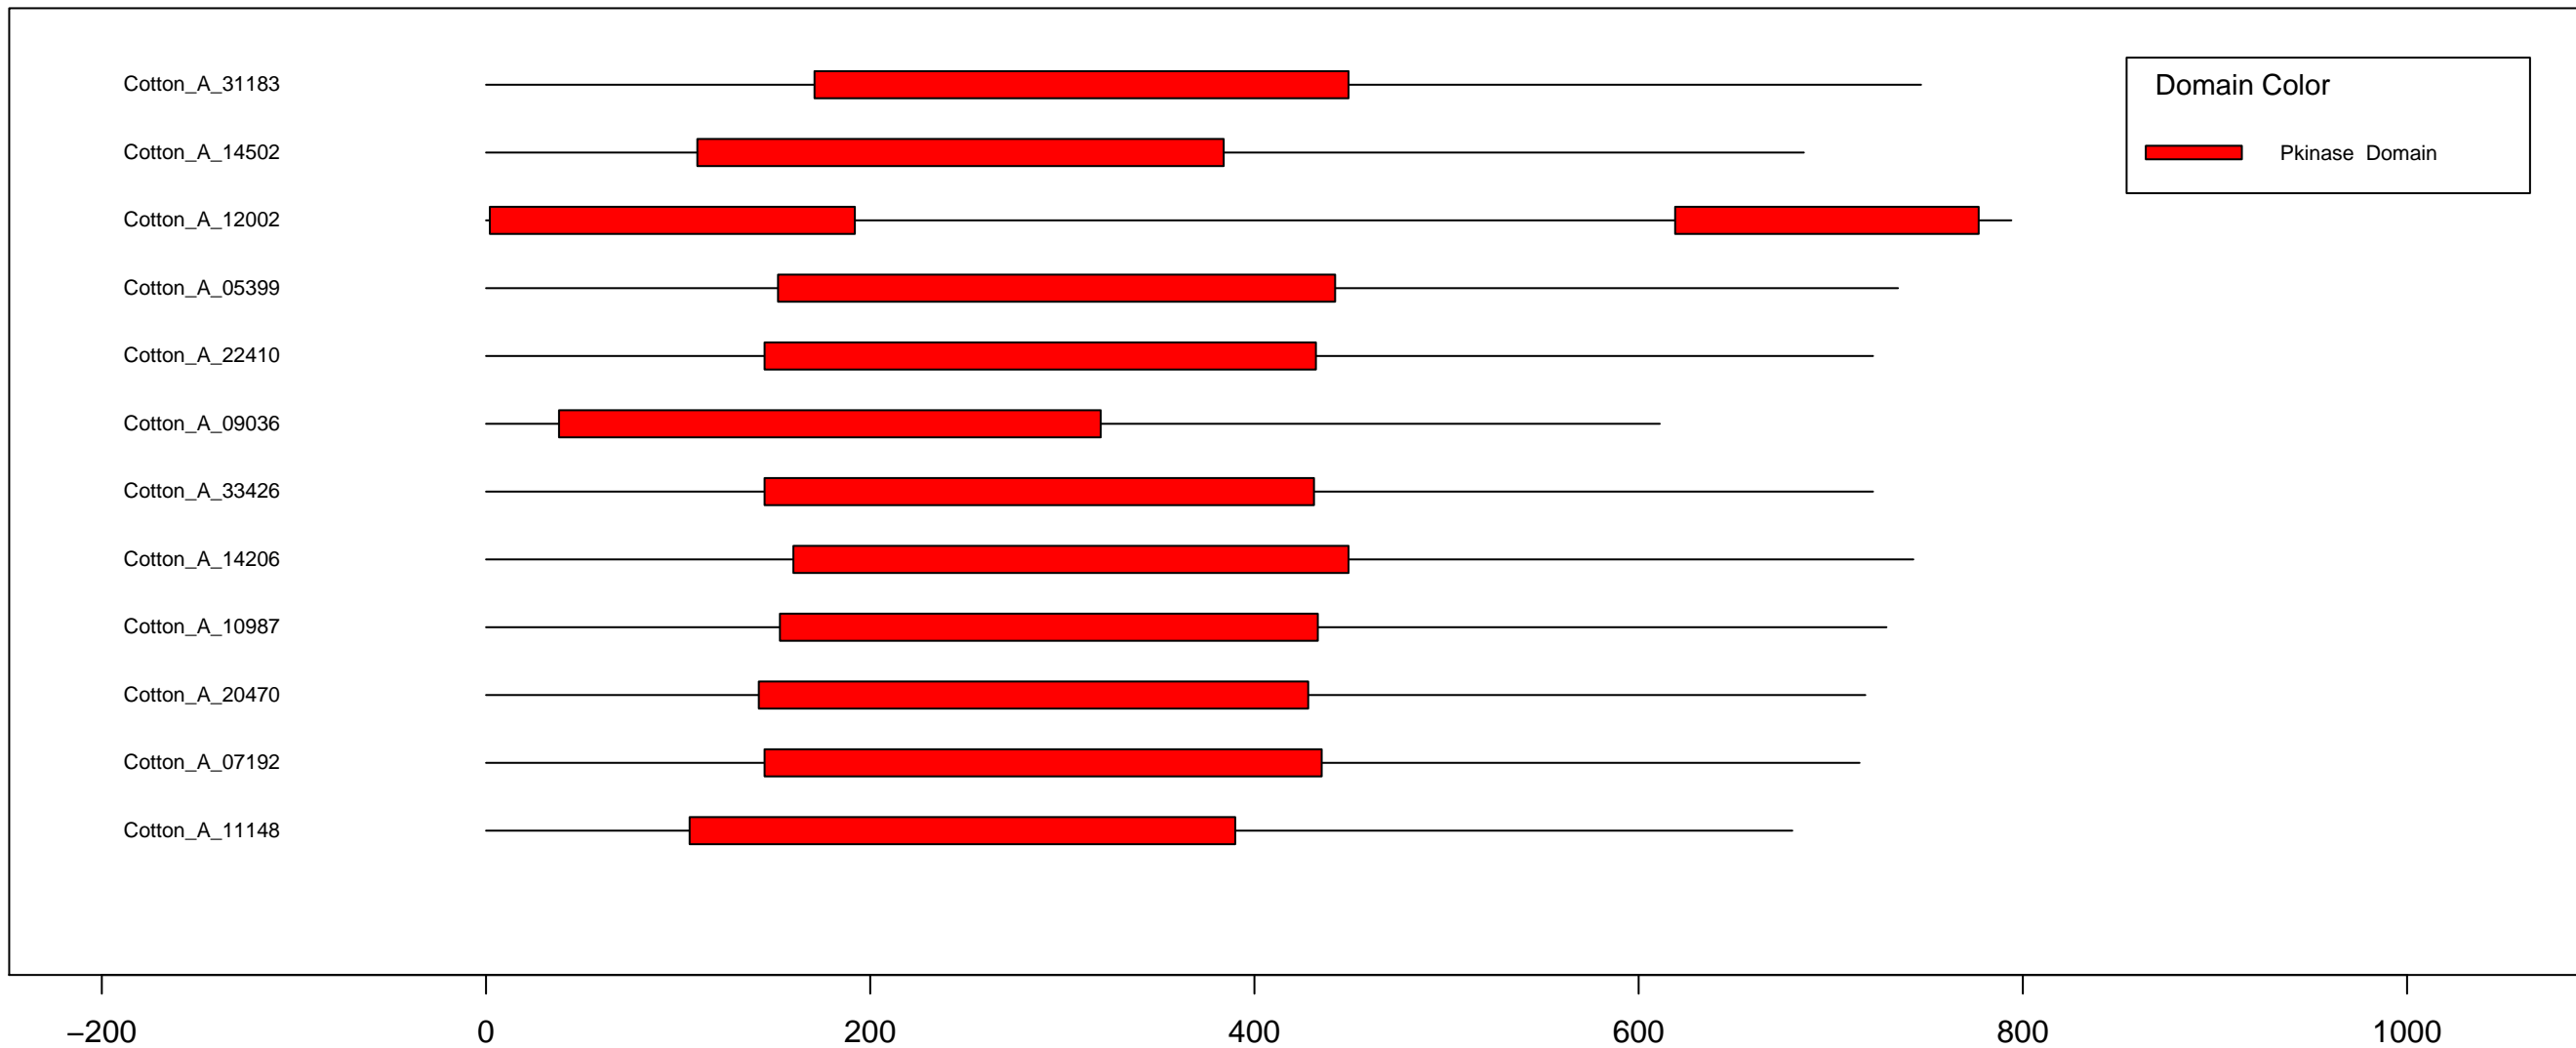

# G.ar CMGC\_CDK-CCRK domain diagram (all)

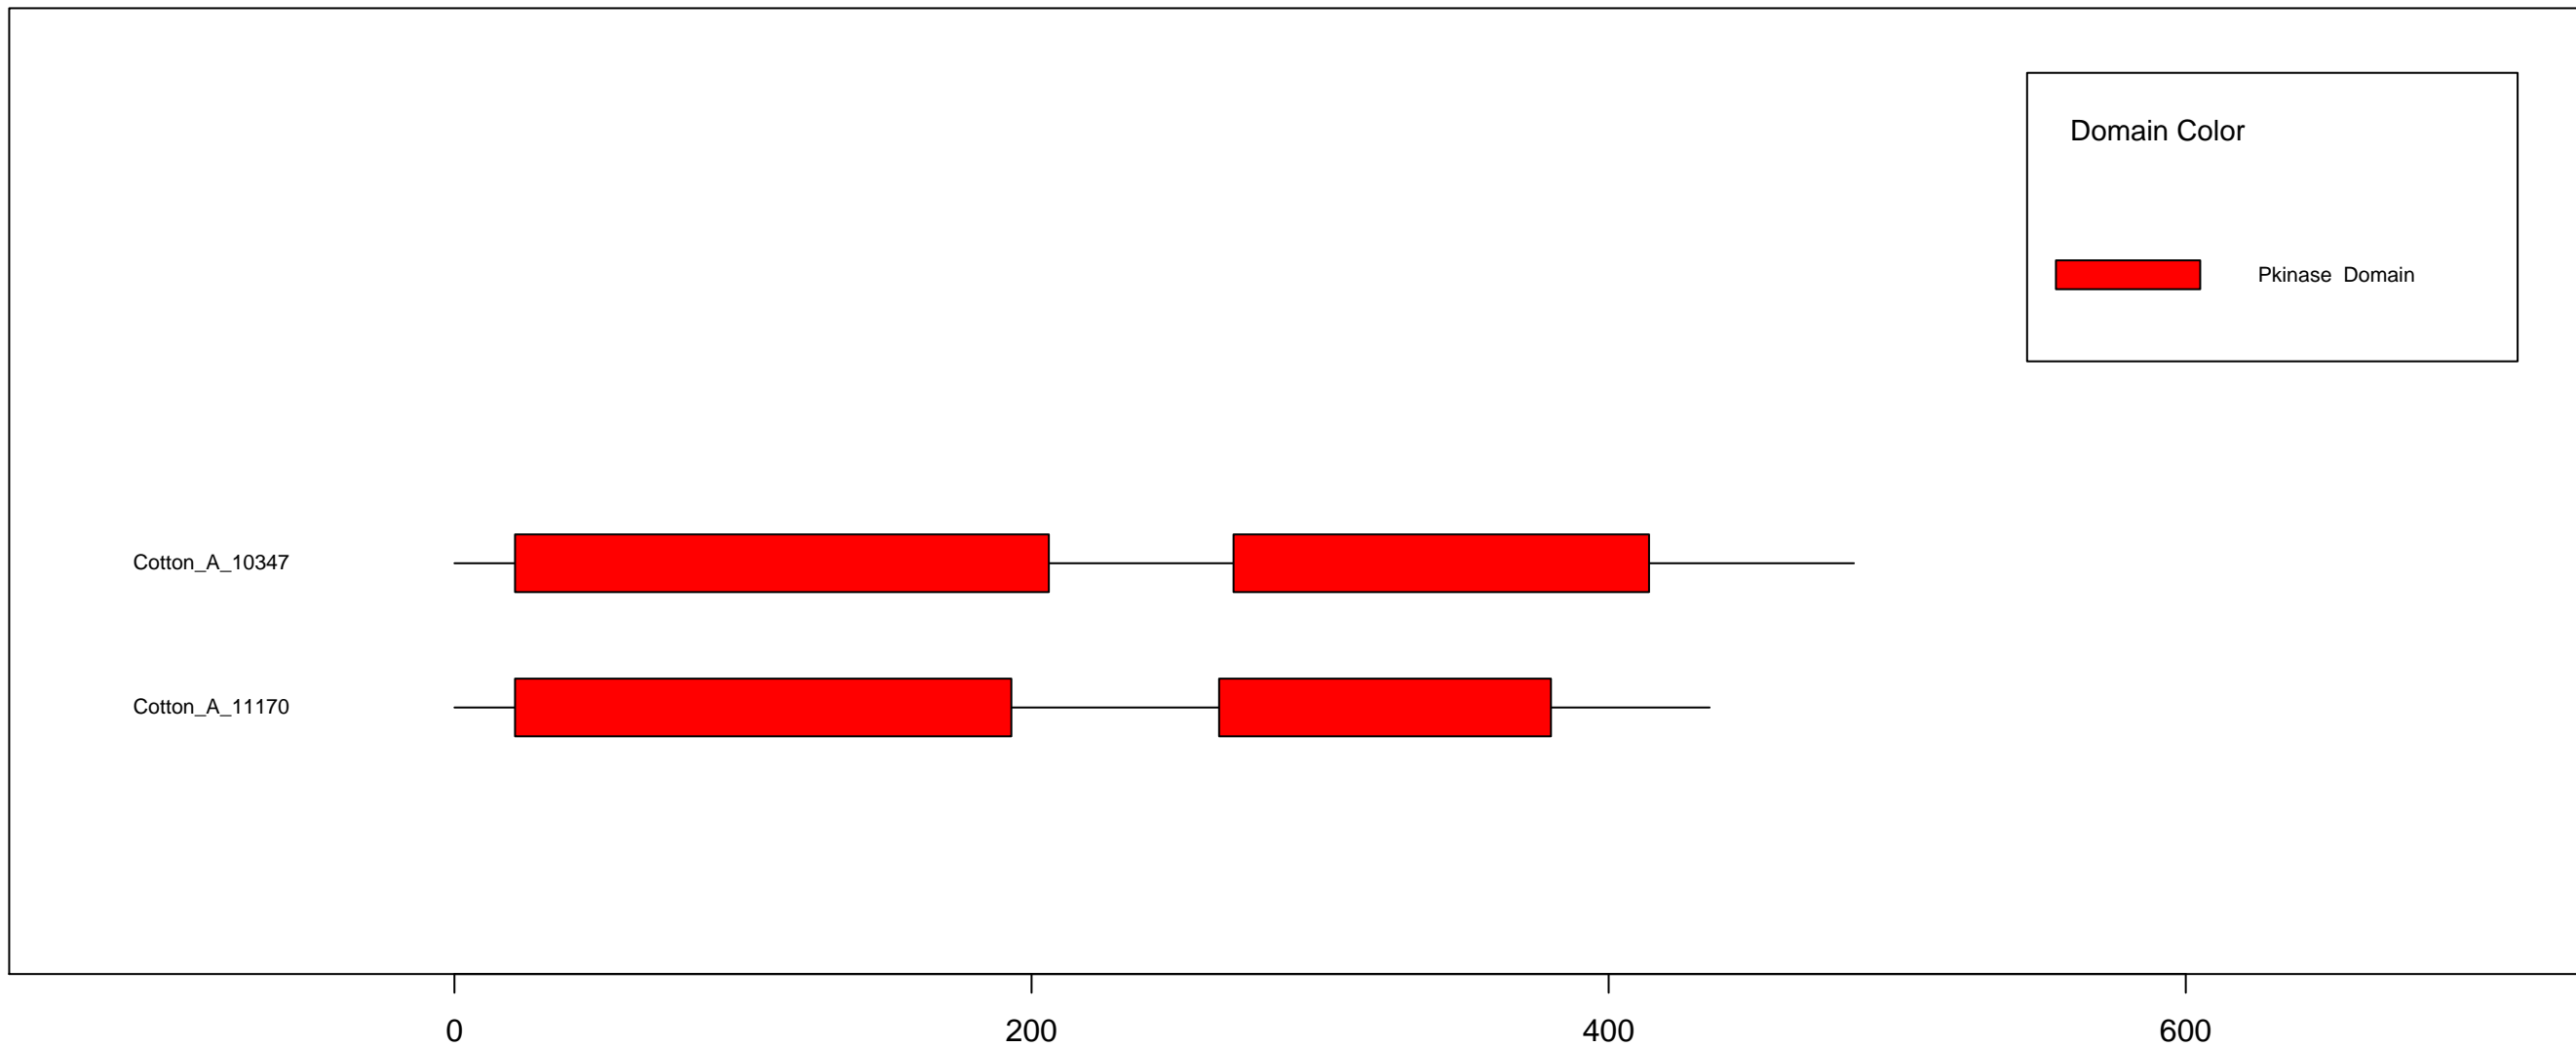

G.ar CMGC\_CDK-CDK7 domain diagram (all)

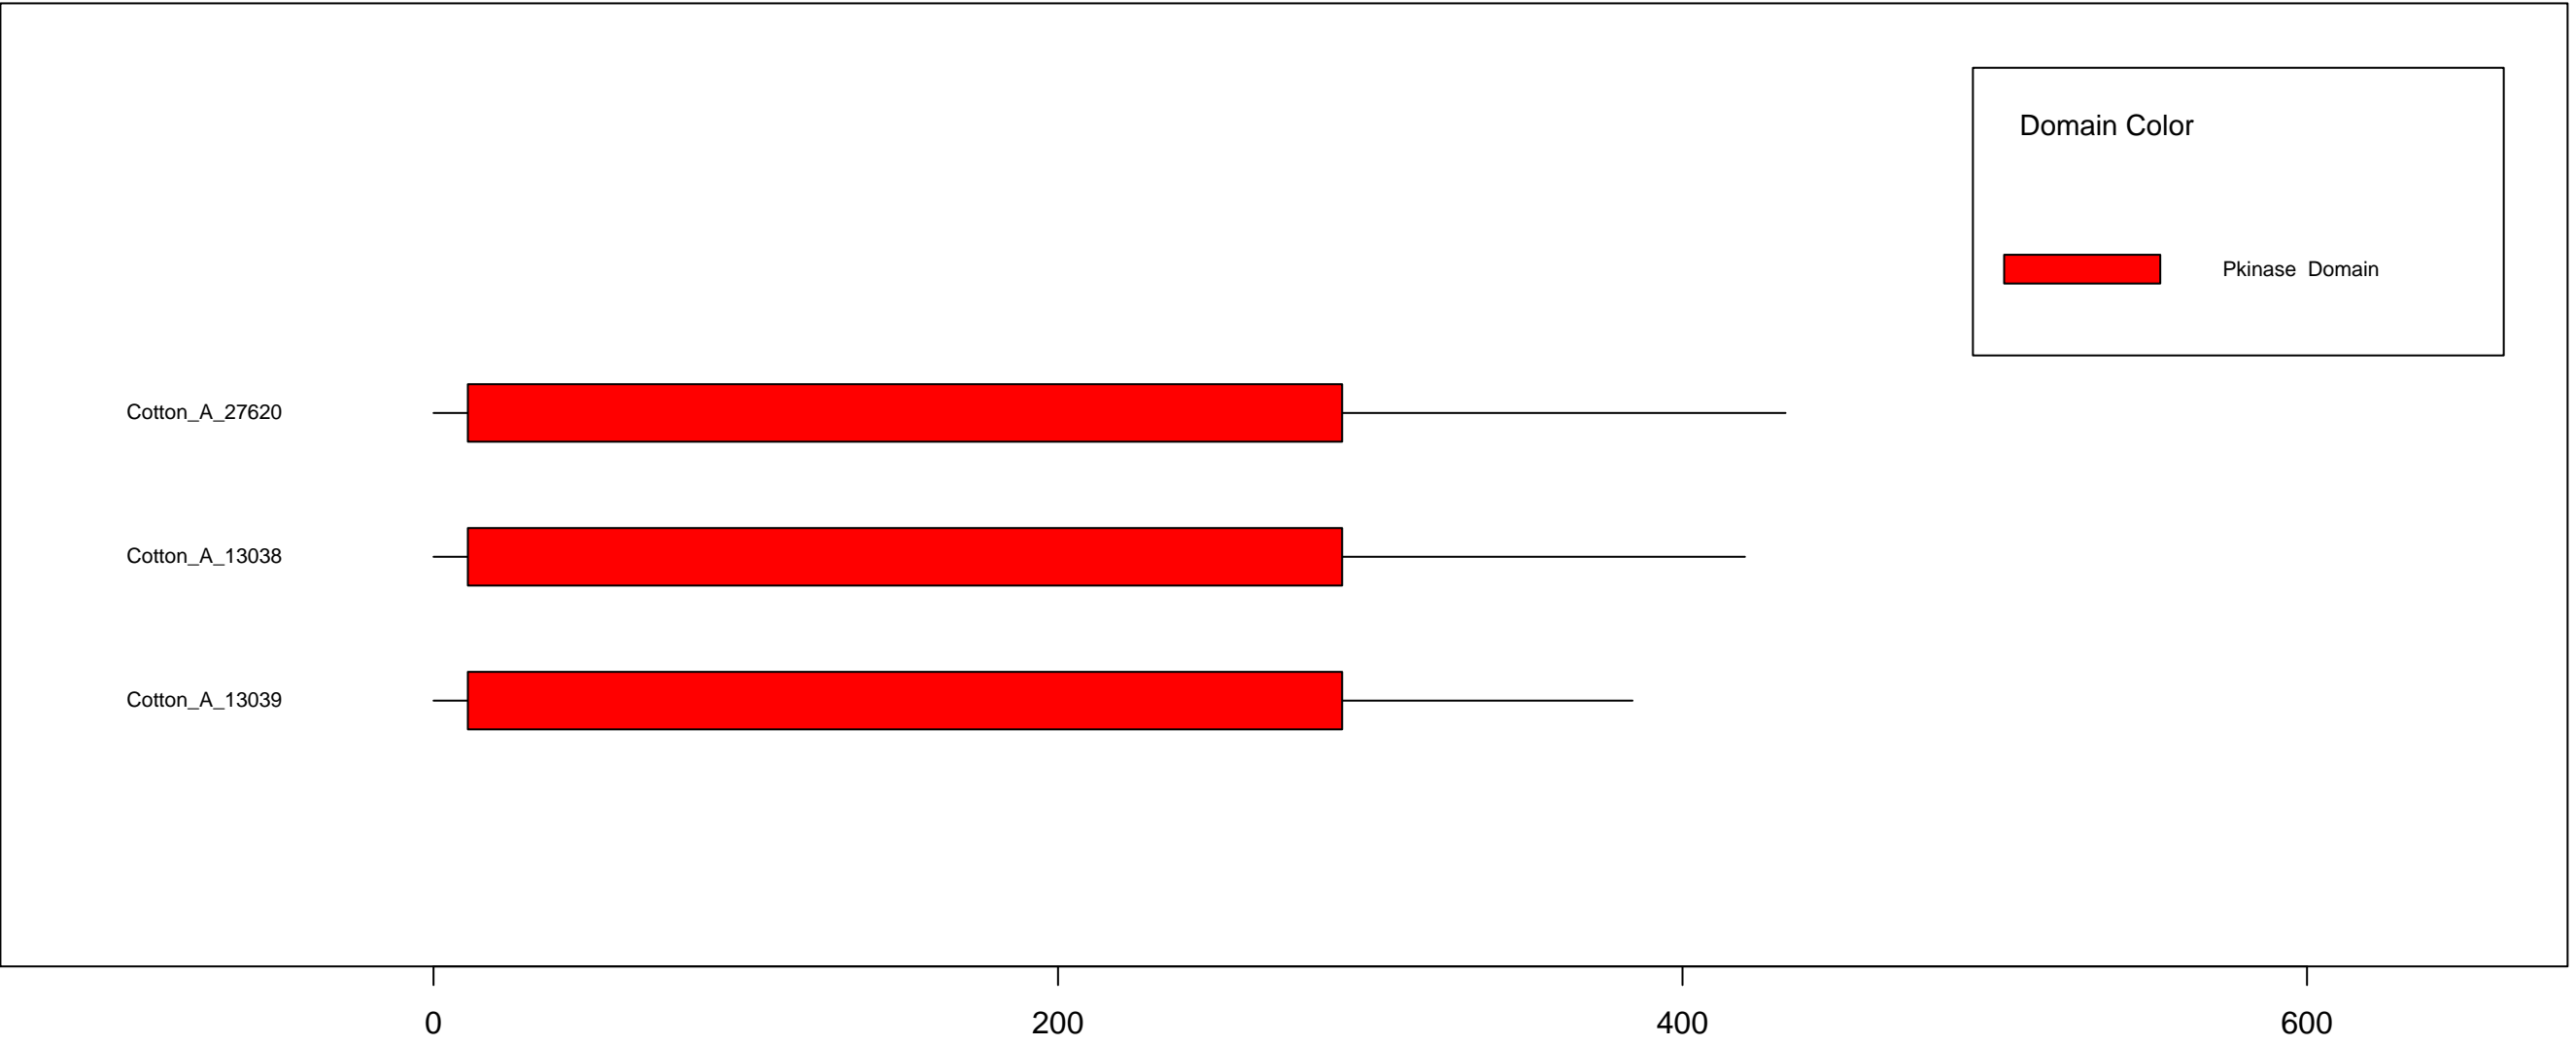



G.ar CMGC\_CDK-CDK8 domain diagram (all)

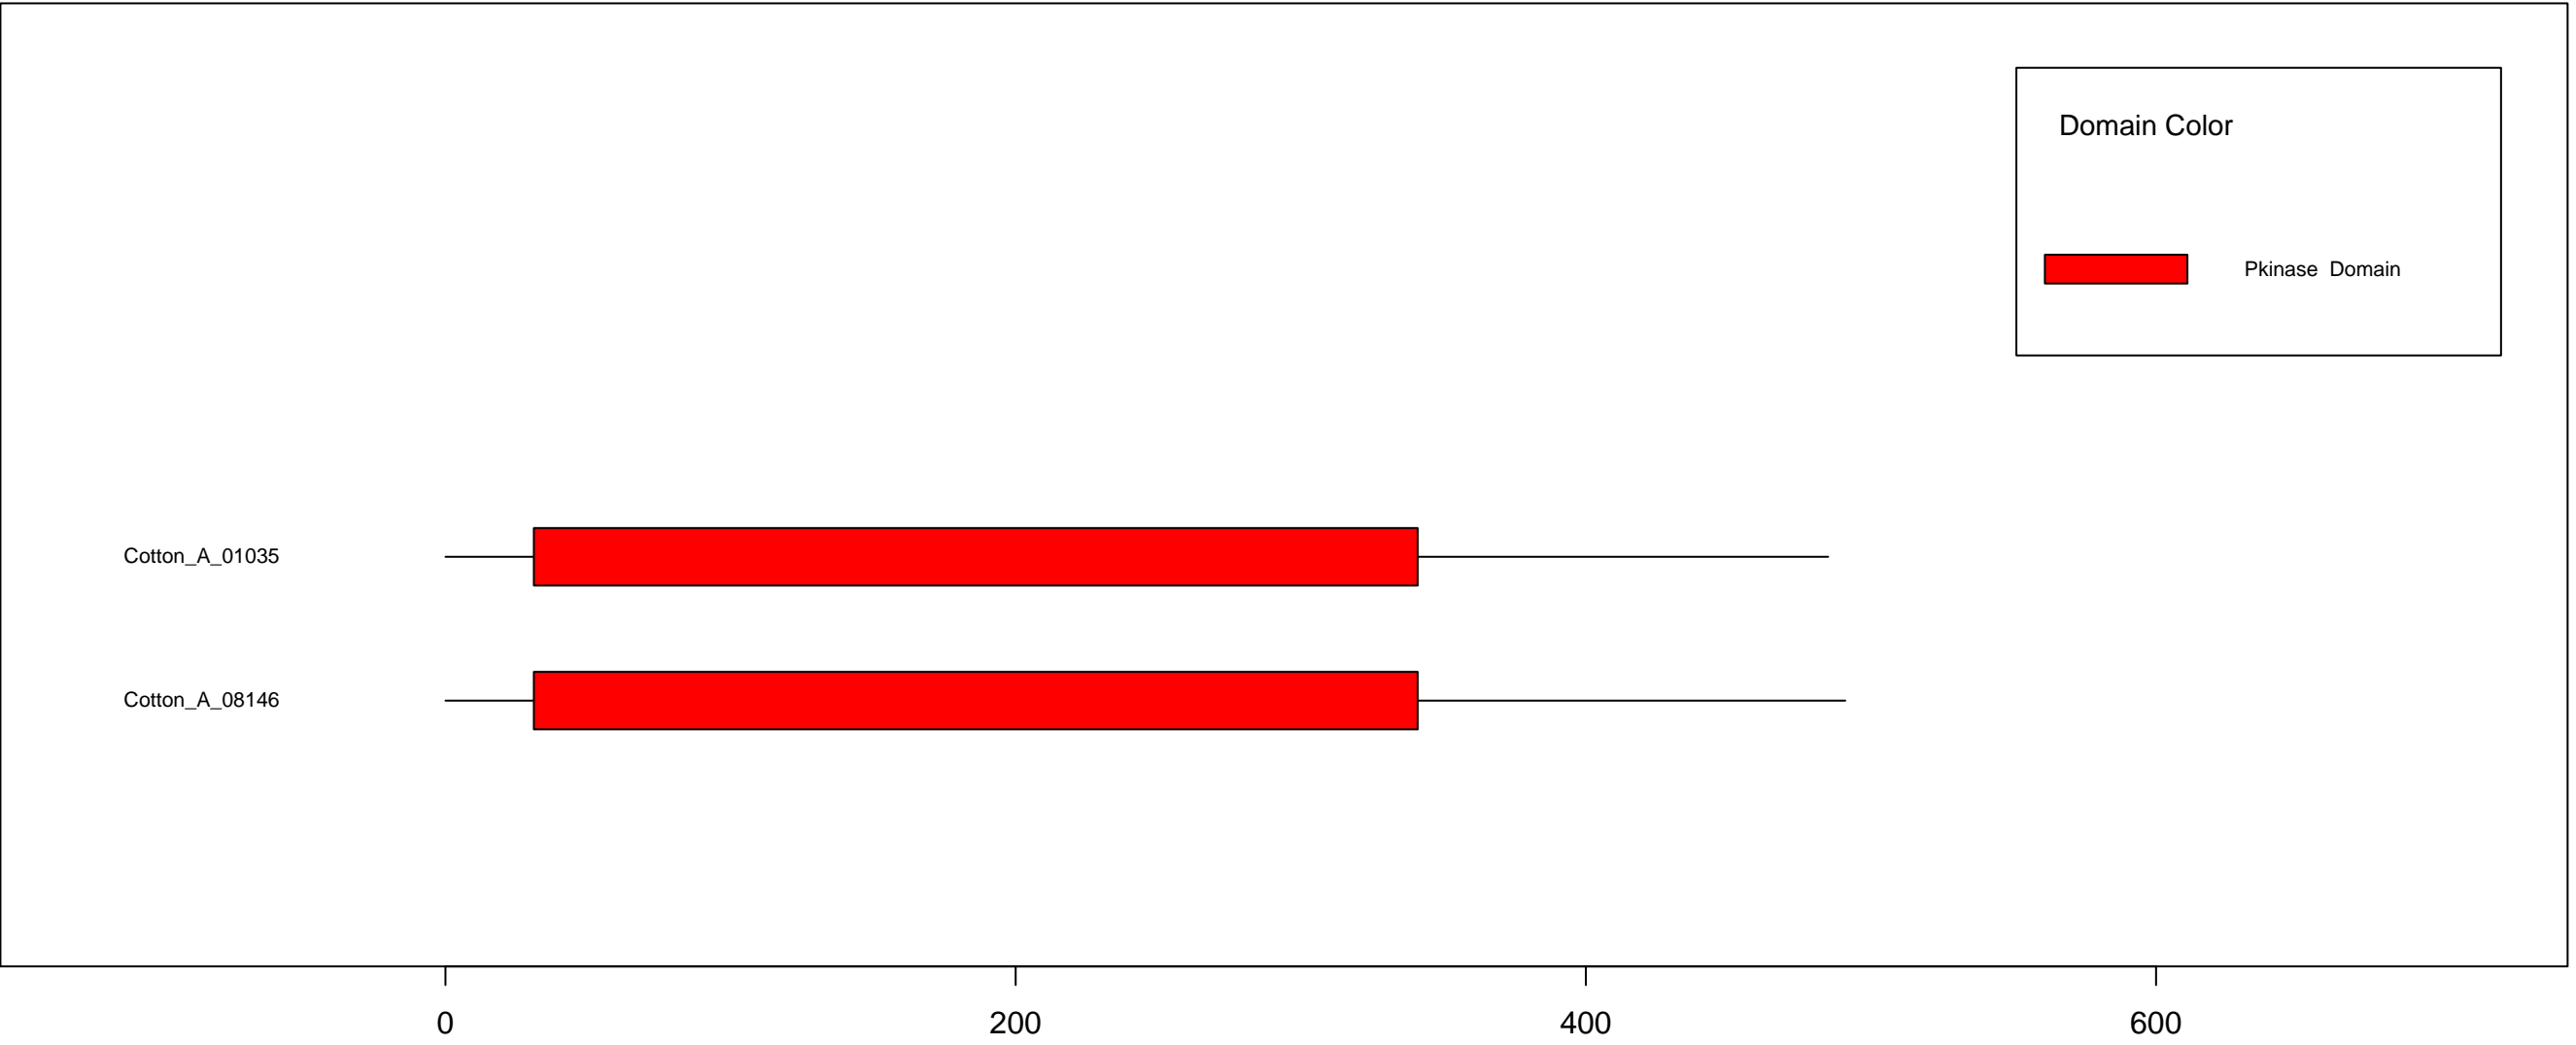

# G.ar CMGC\_CDK-CRK7-CDK9 domain diagram (part 1)

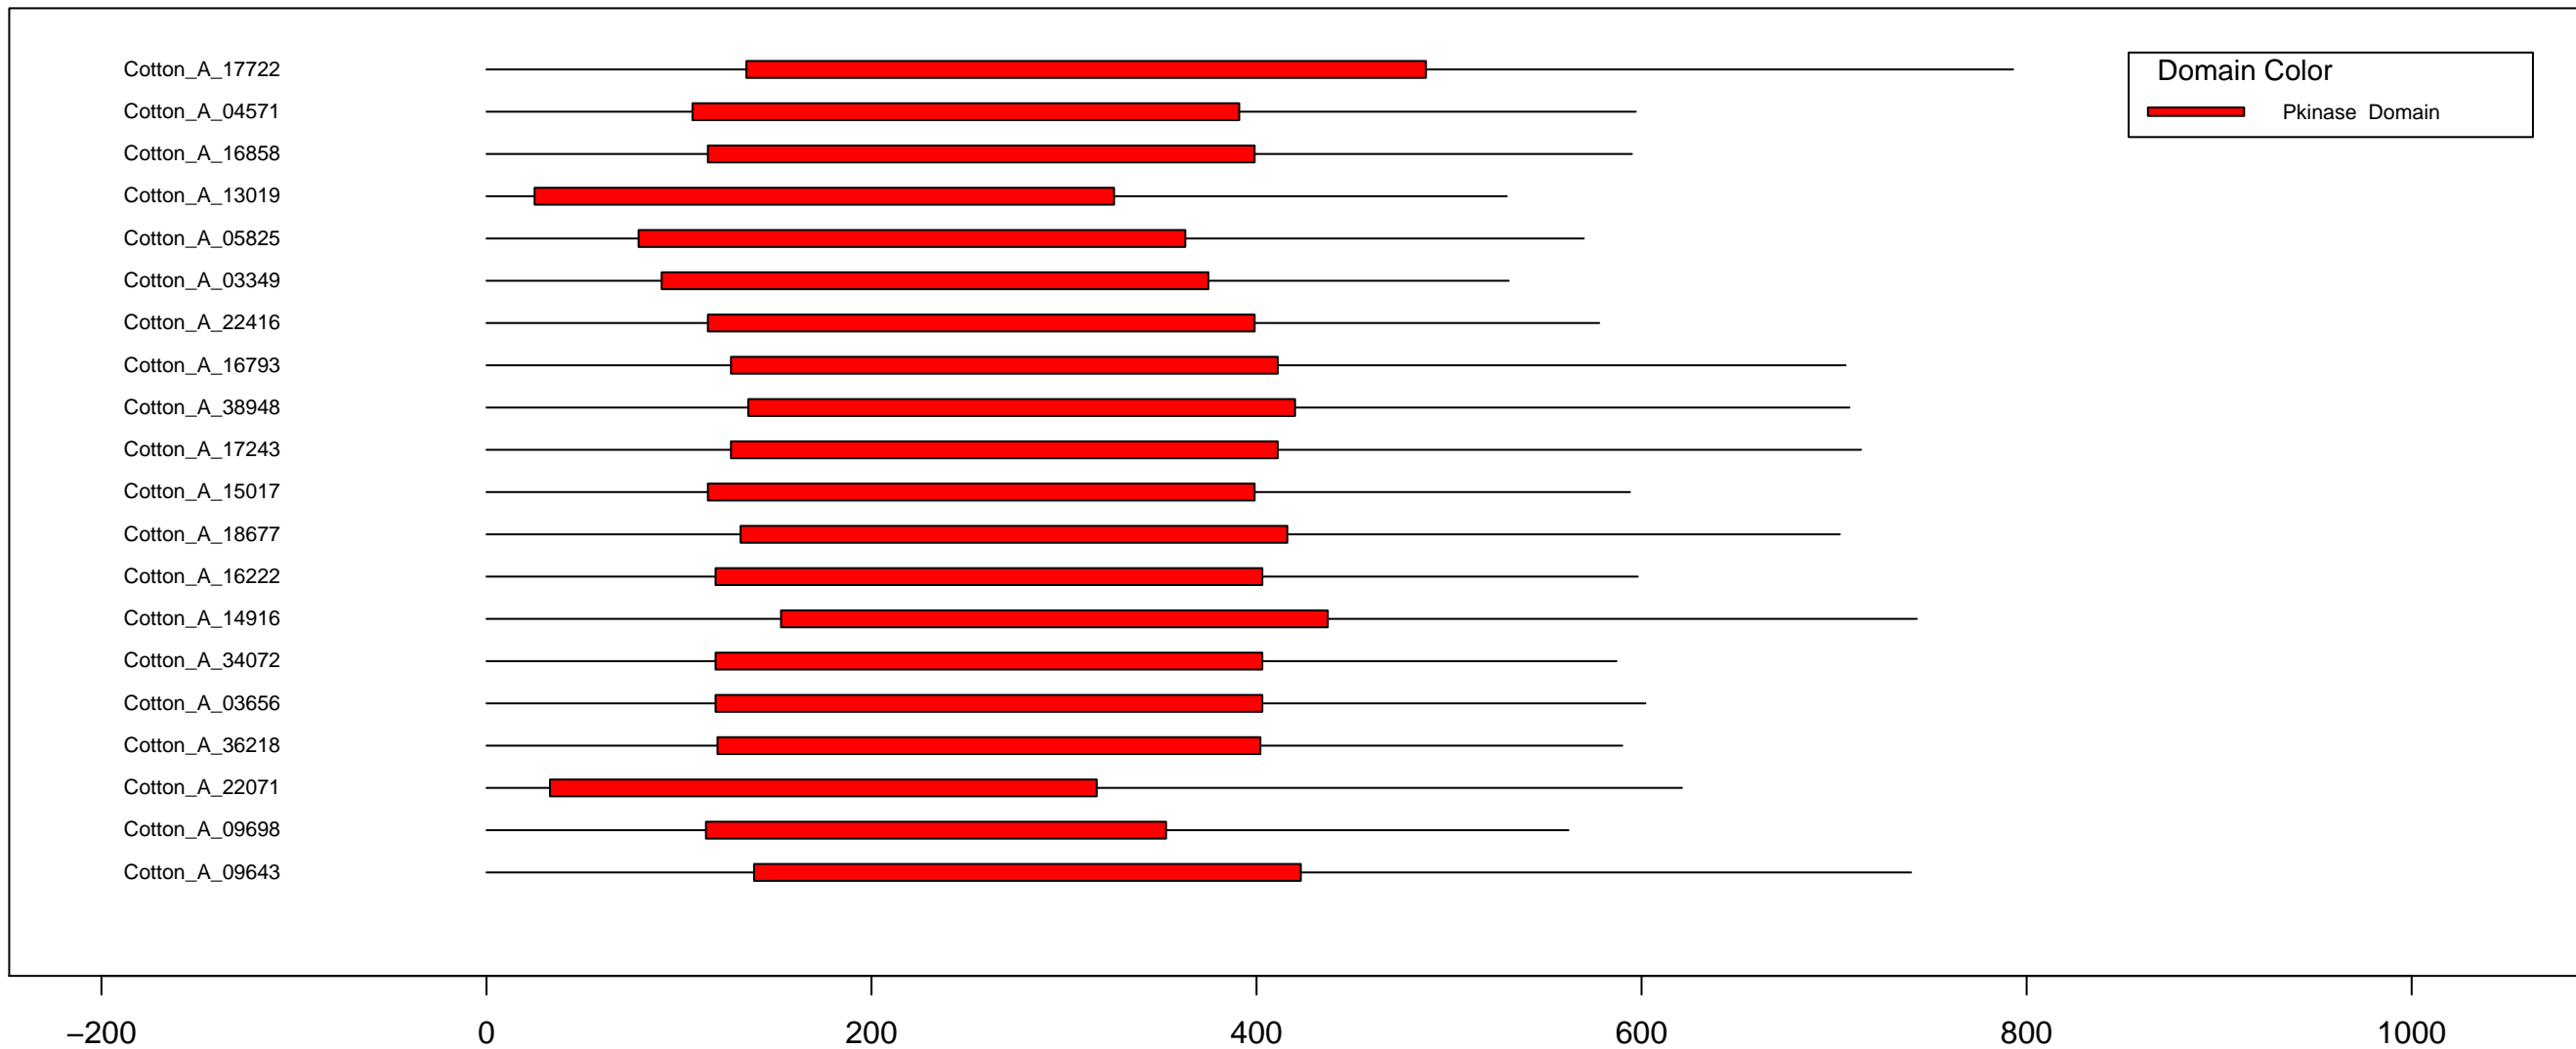

# G.ar CMGC\_CDK-CRK7-CDK9 domain diagram (part 2)

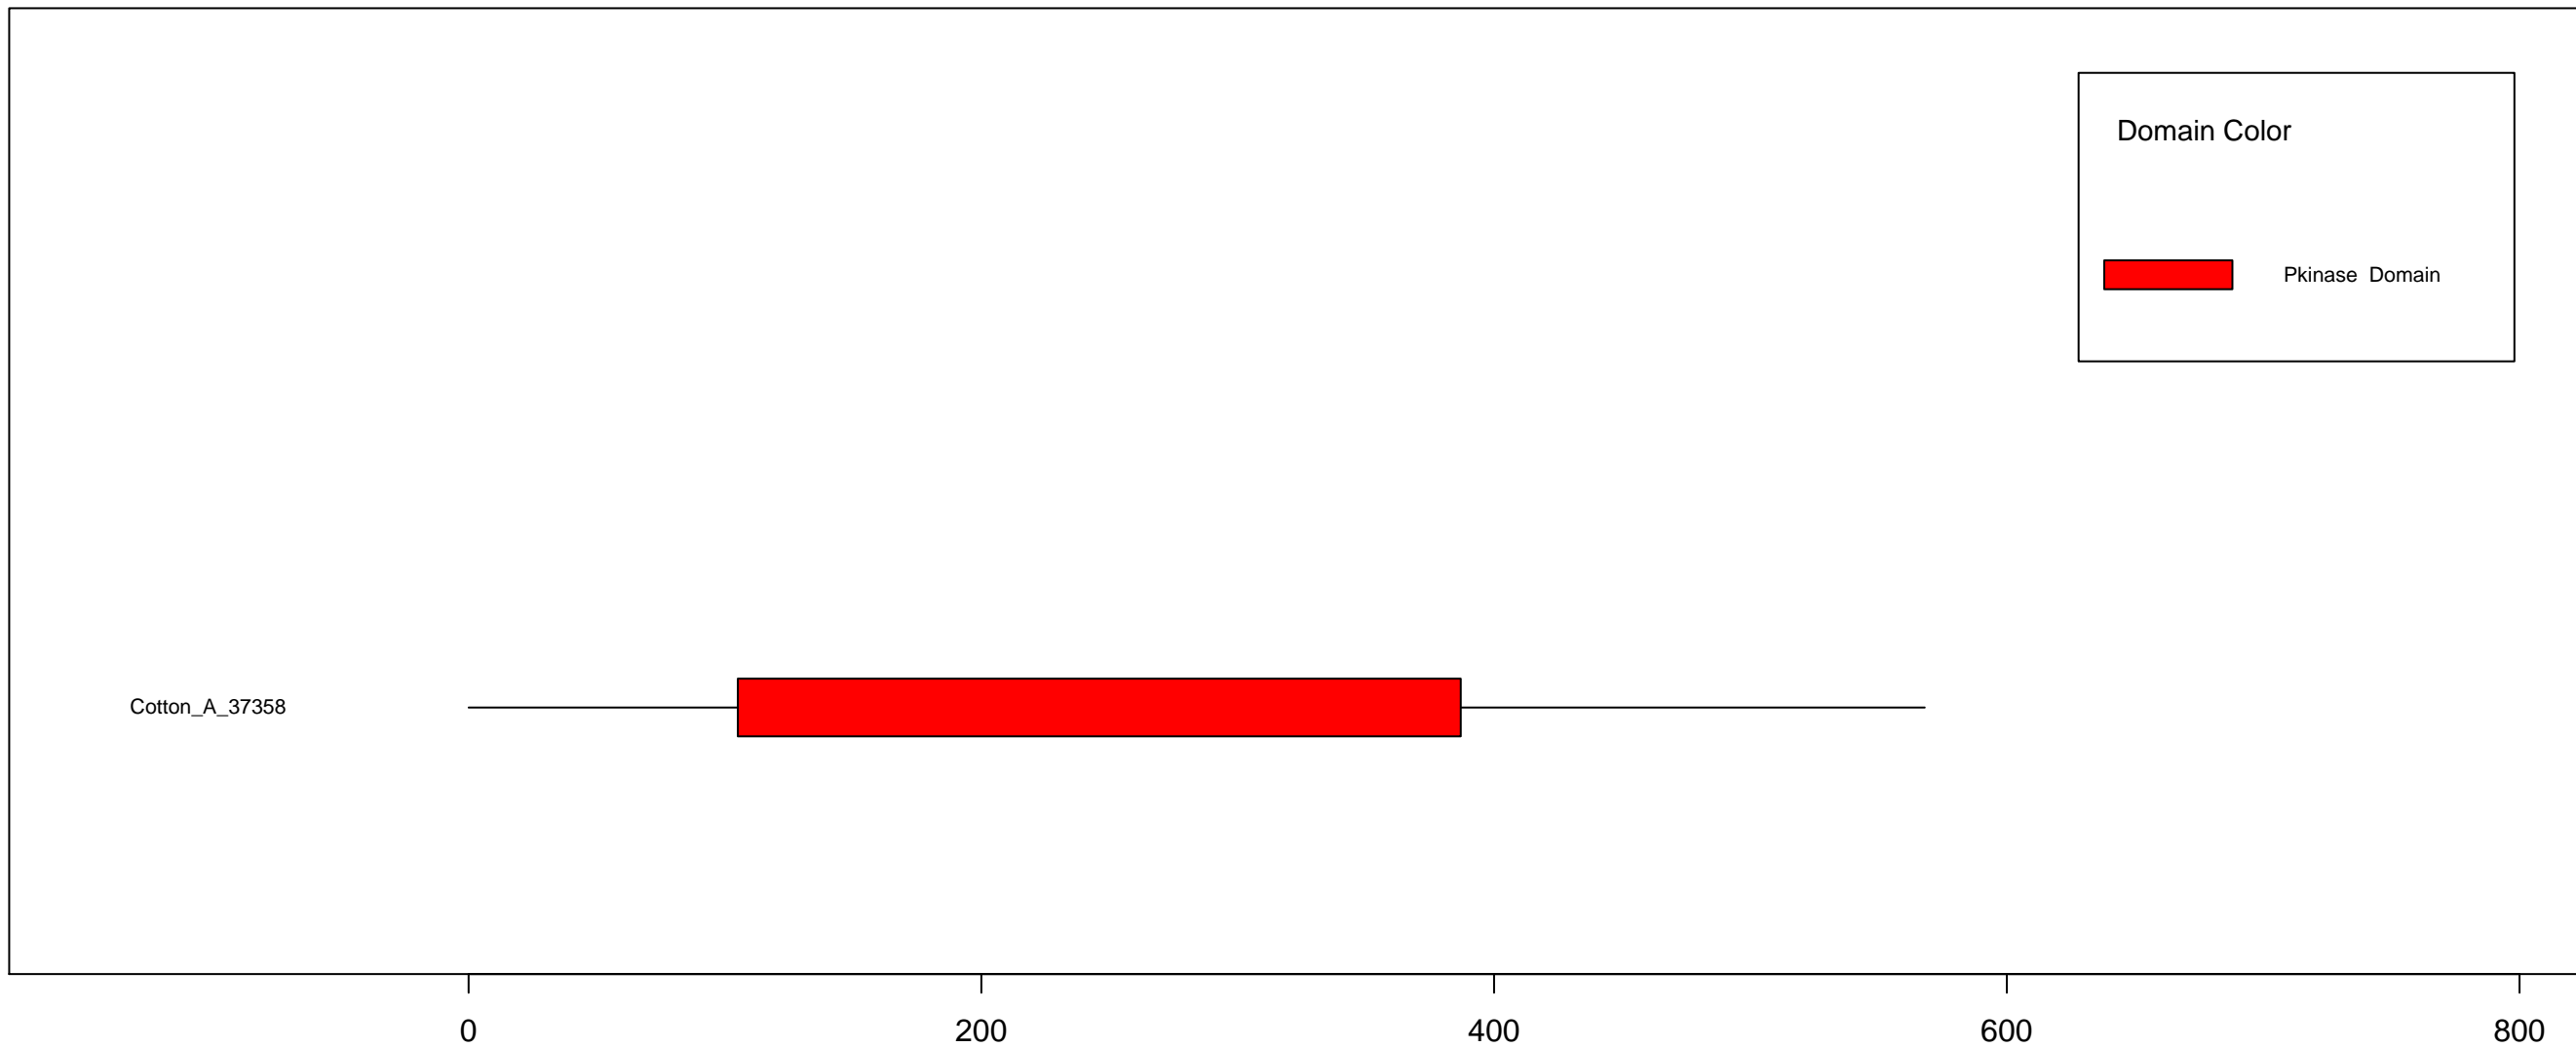

# G.ar CMGC\_CDK-PITSLRE domain diagram (all)

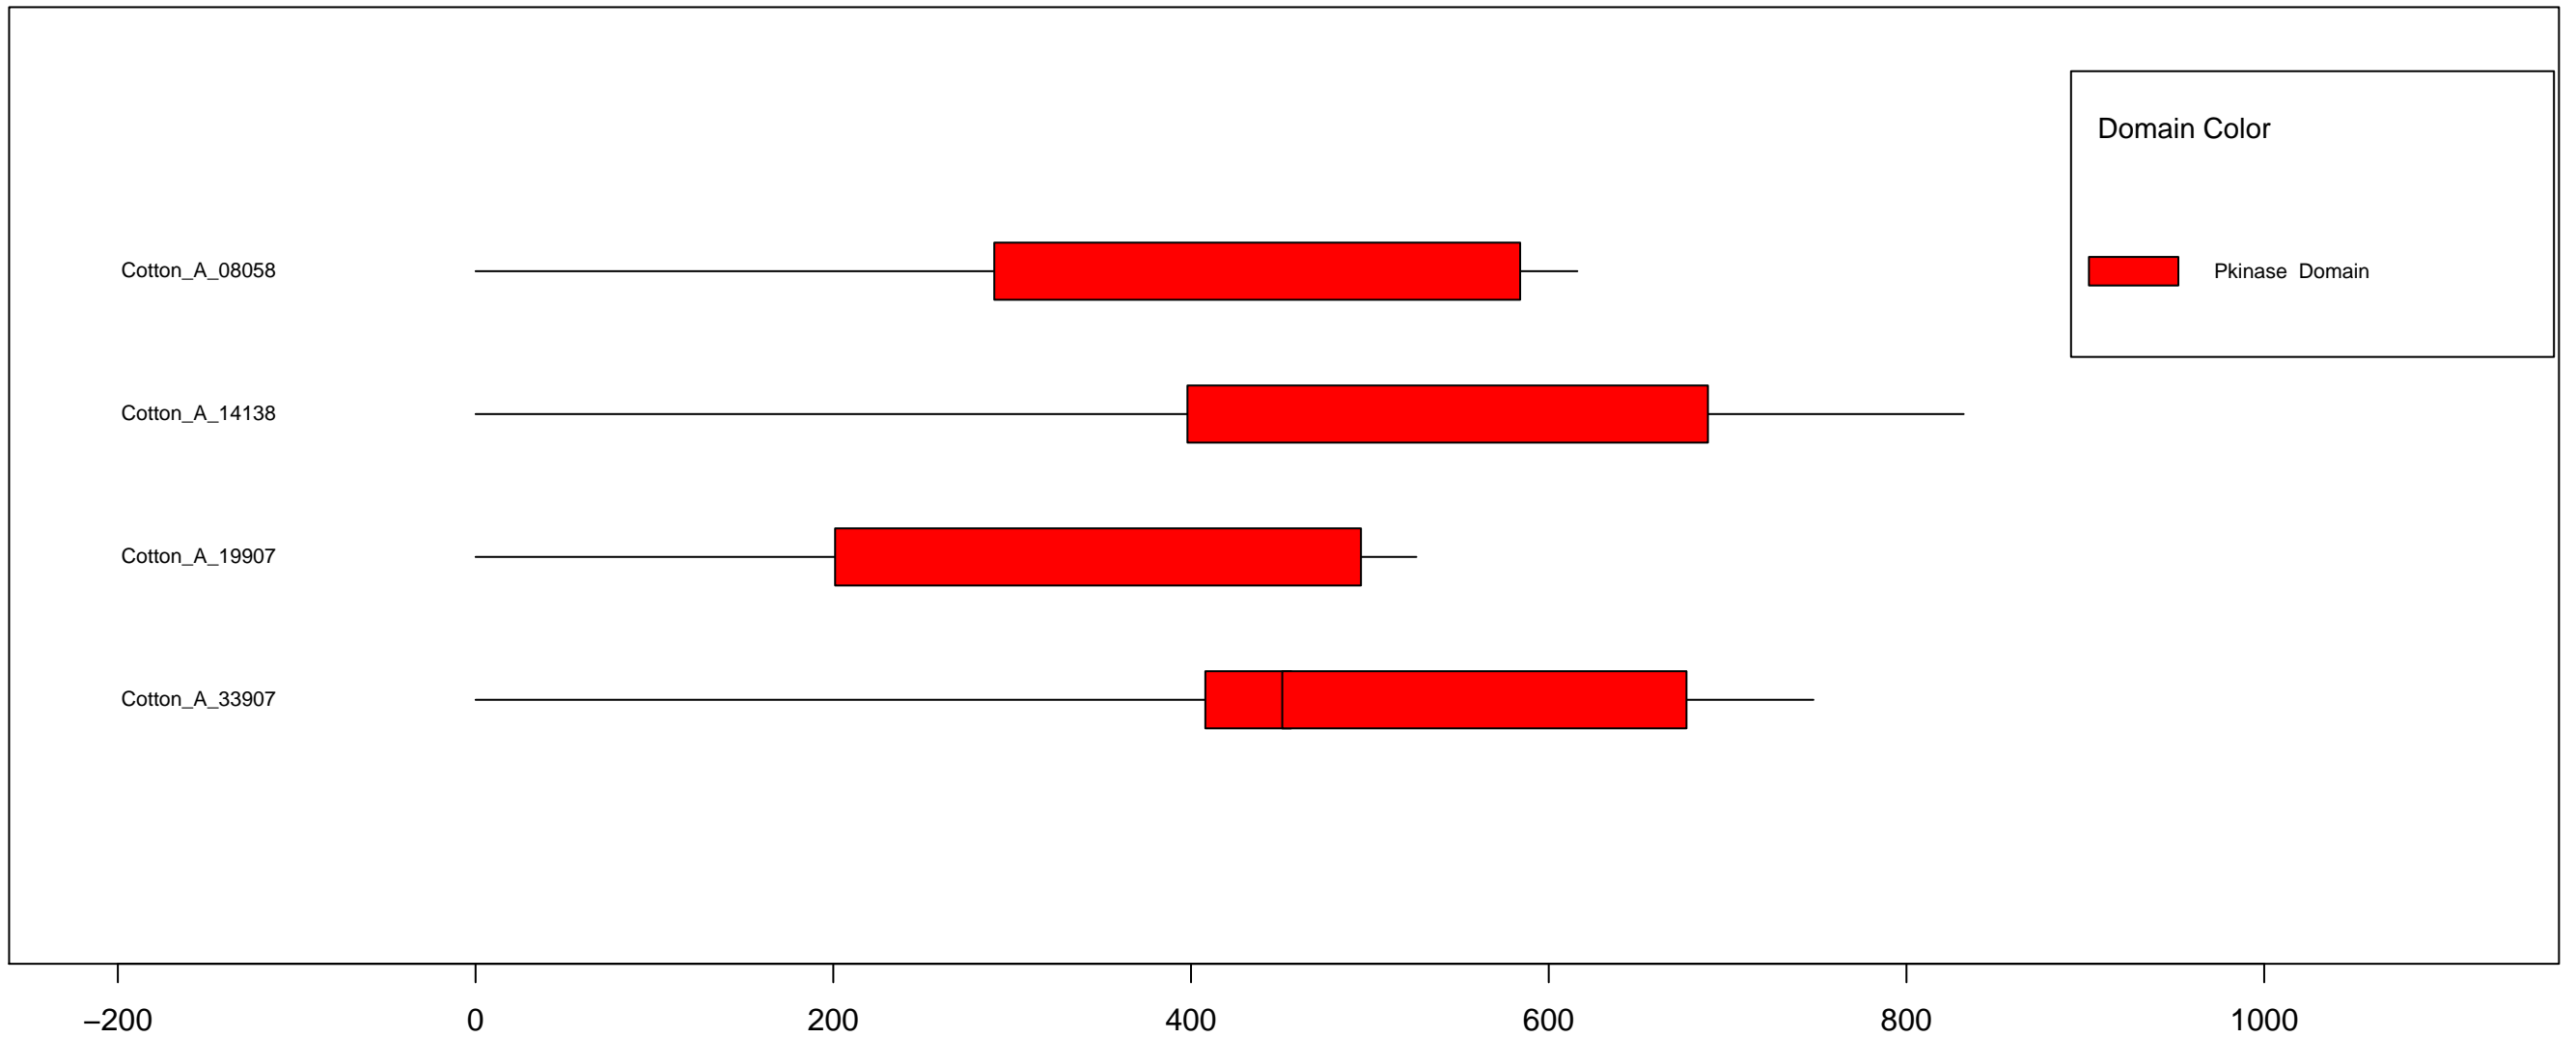

# G.ar CMGC\_CDK-PI domain diagram (all)

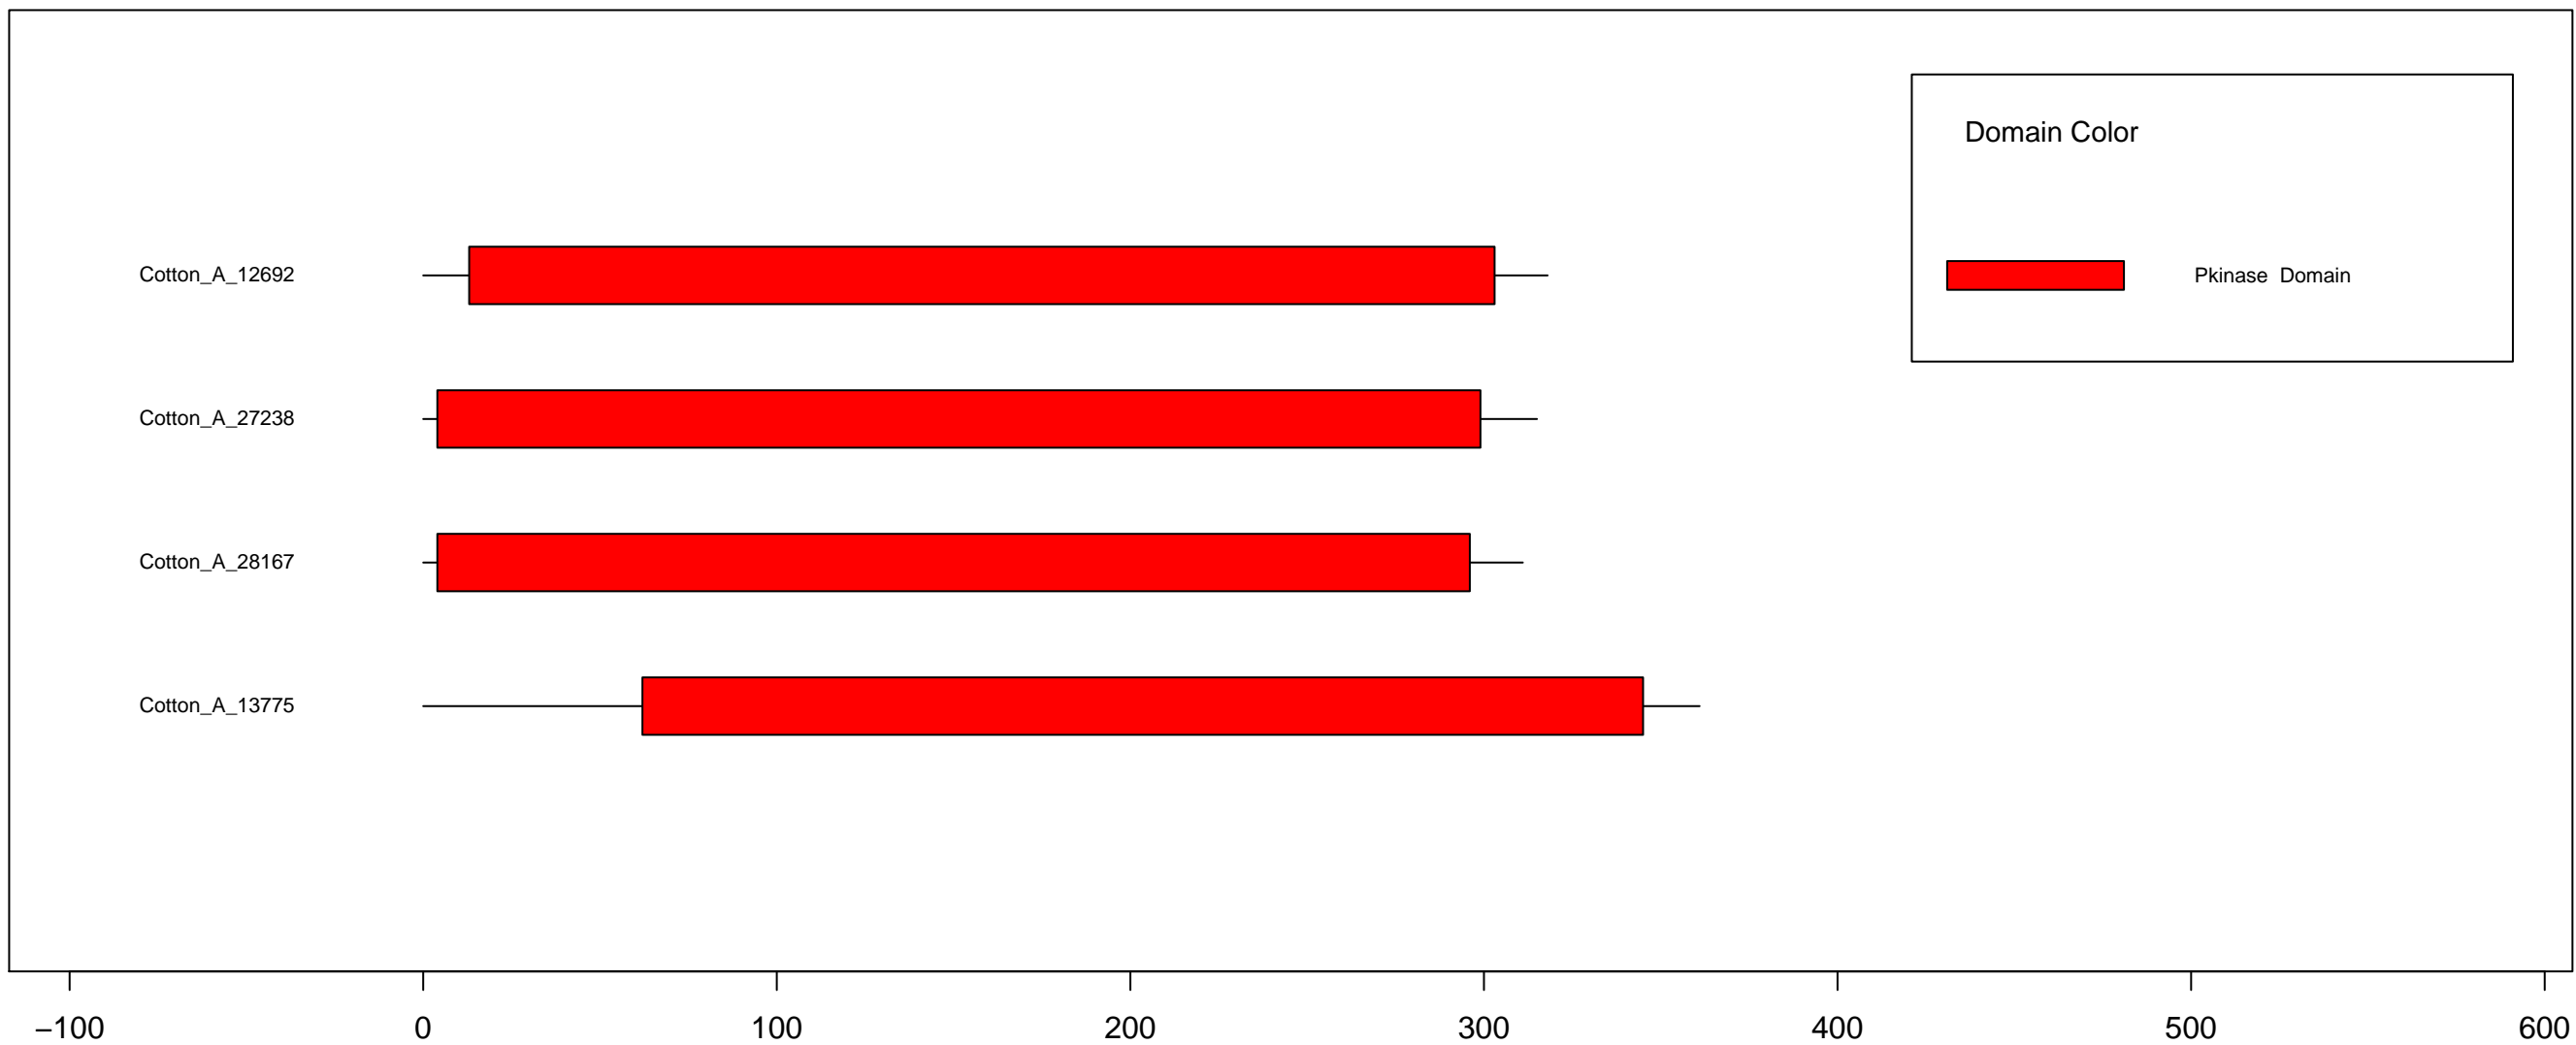

# G.ar CMGC\_CK2 domain diagram (all)

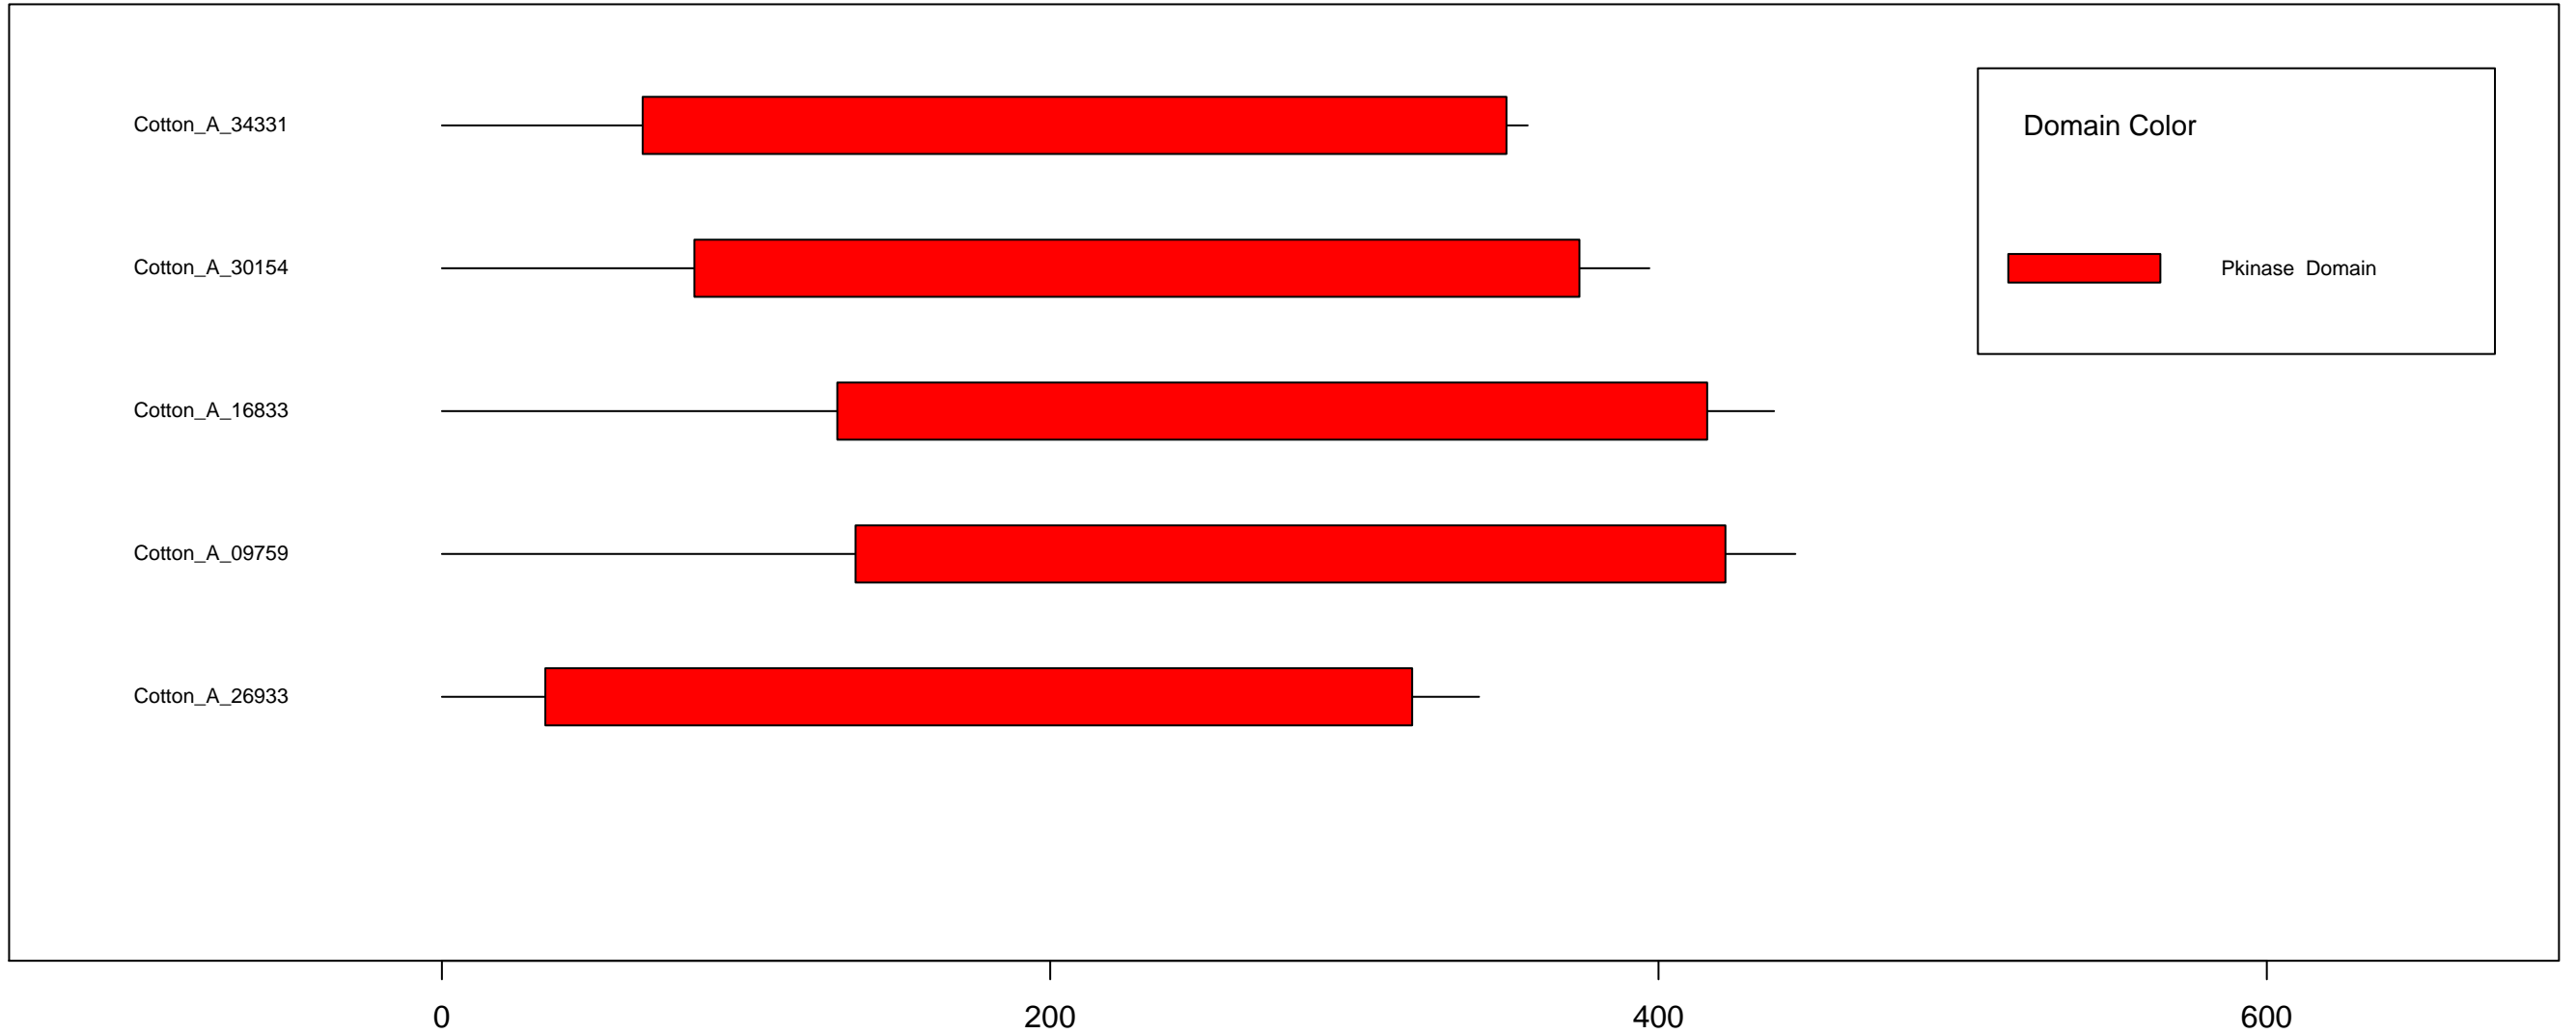

# G.ar CMGC\_CLK domain diagram (all)

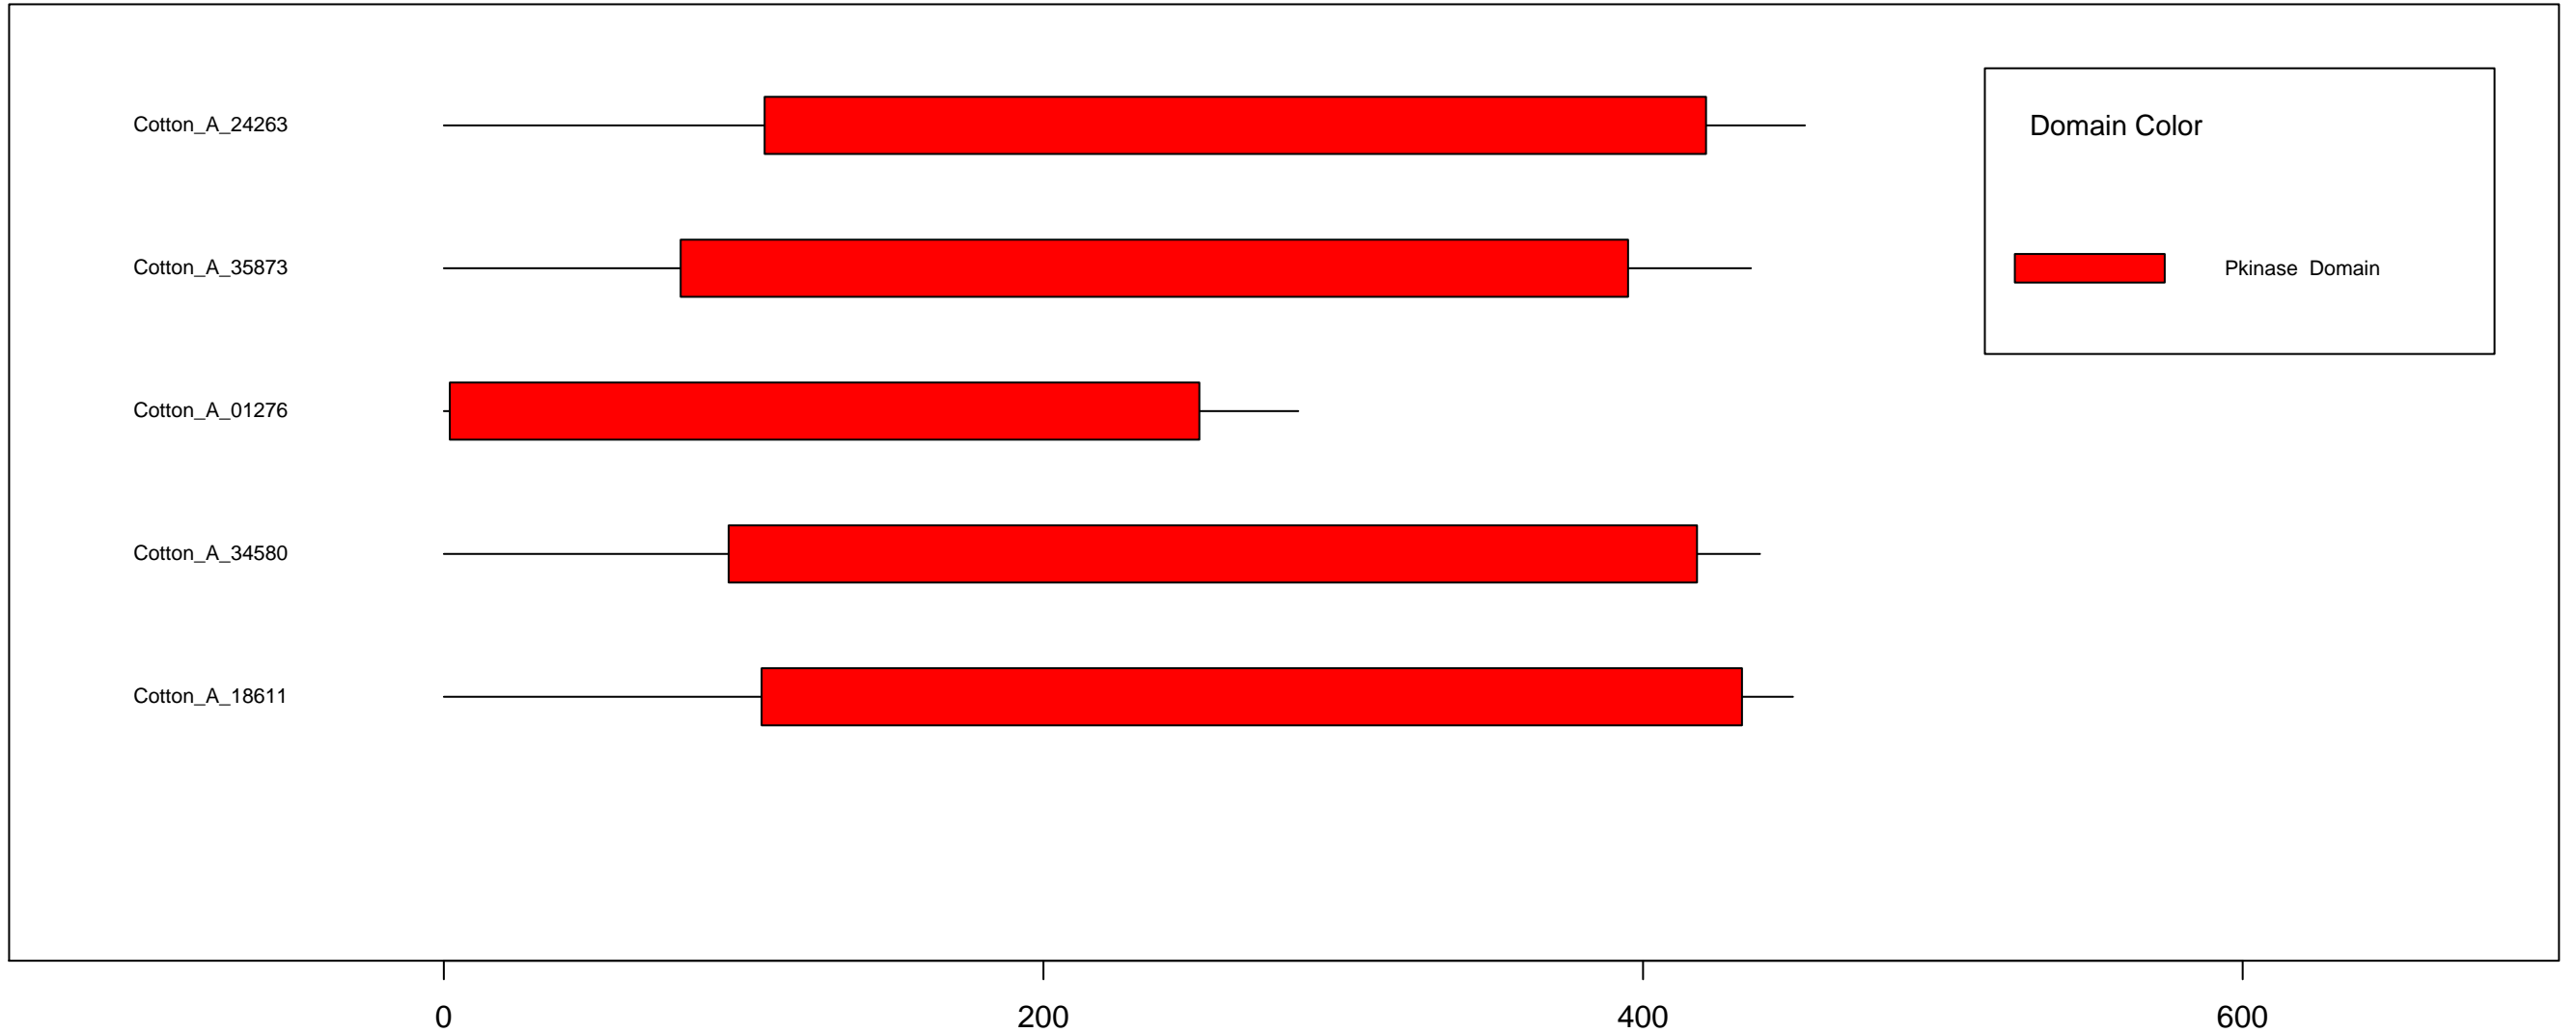

# G.ar CMGC\_DYRK-PRP4 domain diagram (all)

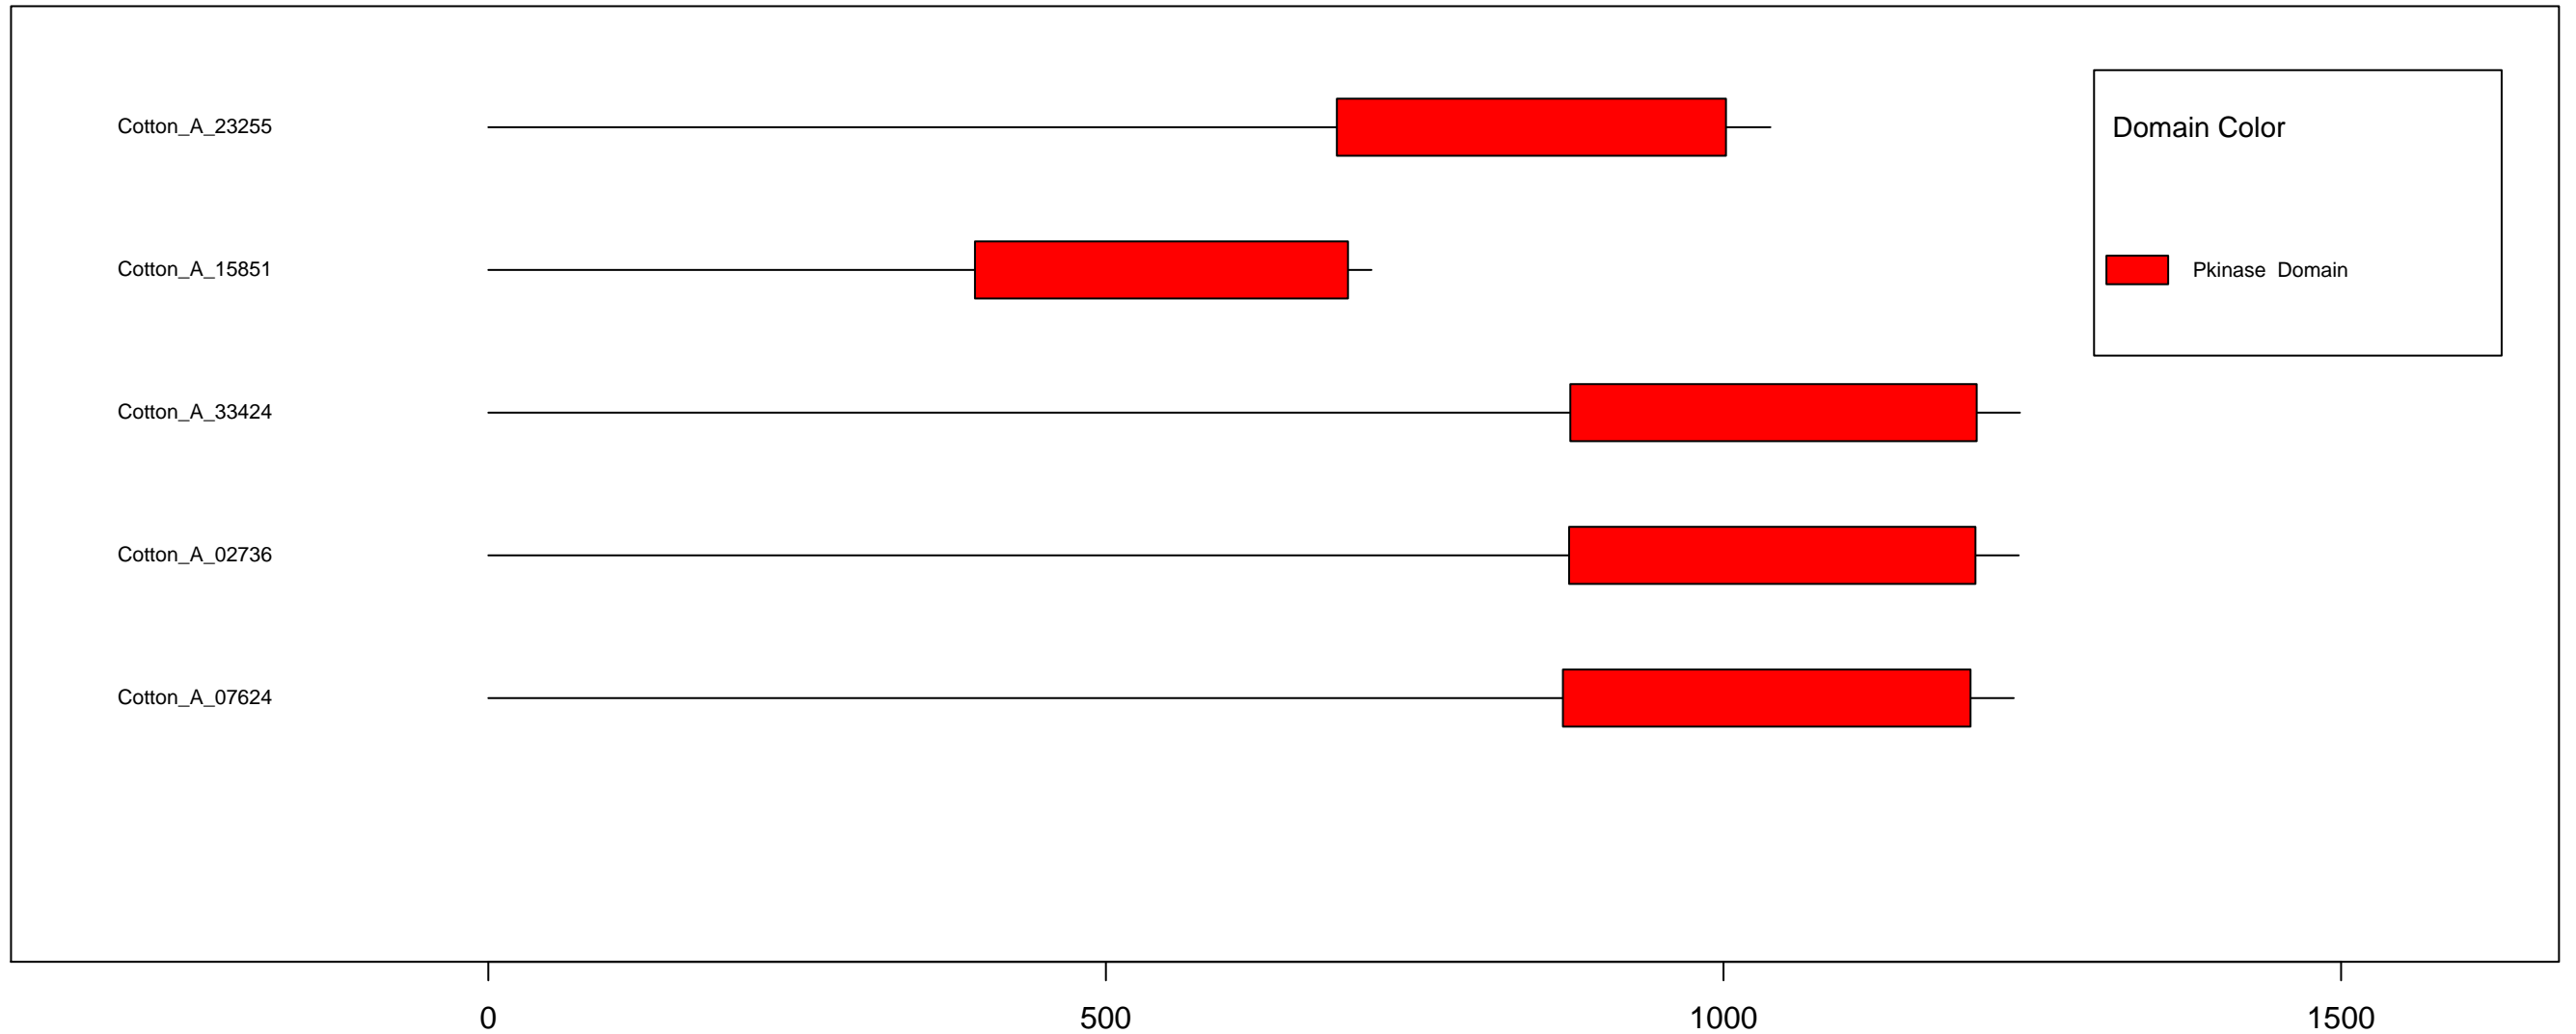



# G.ar CMGC\_DYRK-YAK domain diagram (all)

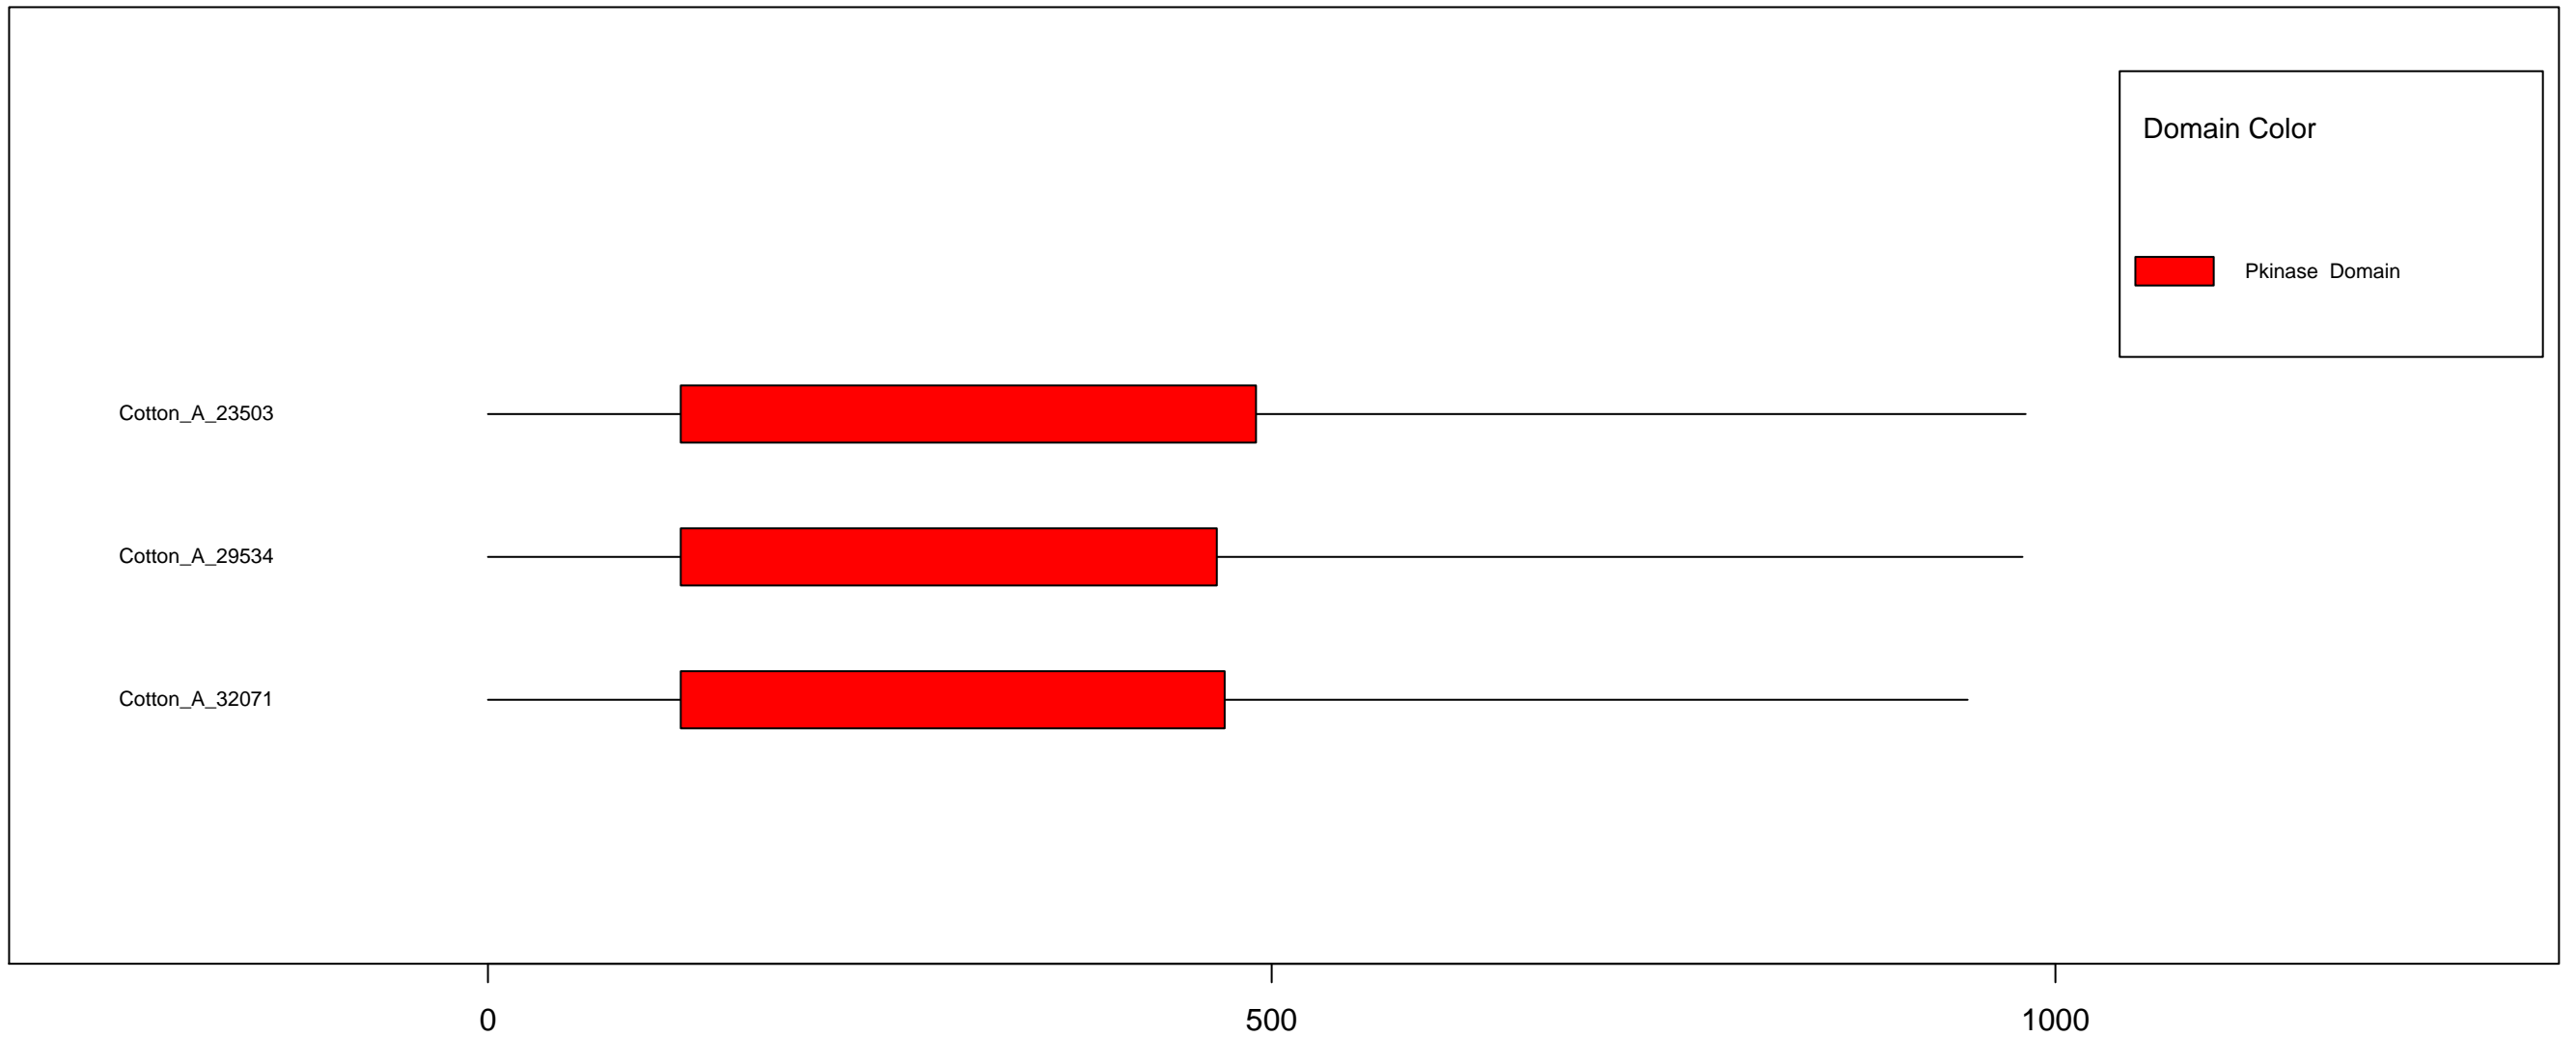

# G.ar CMGC\_GSKL domain diagram (all)

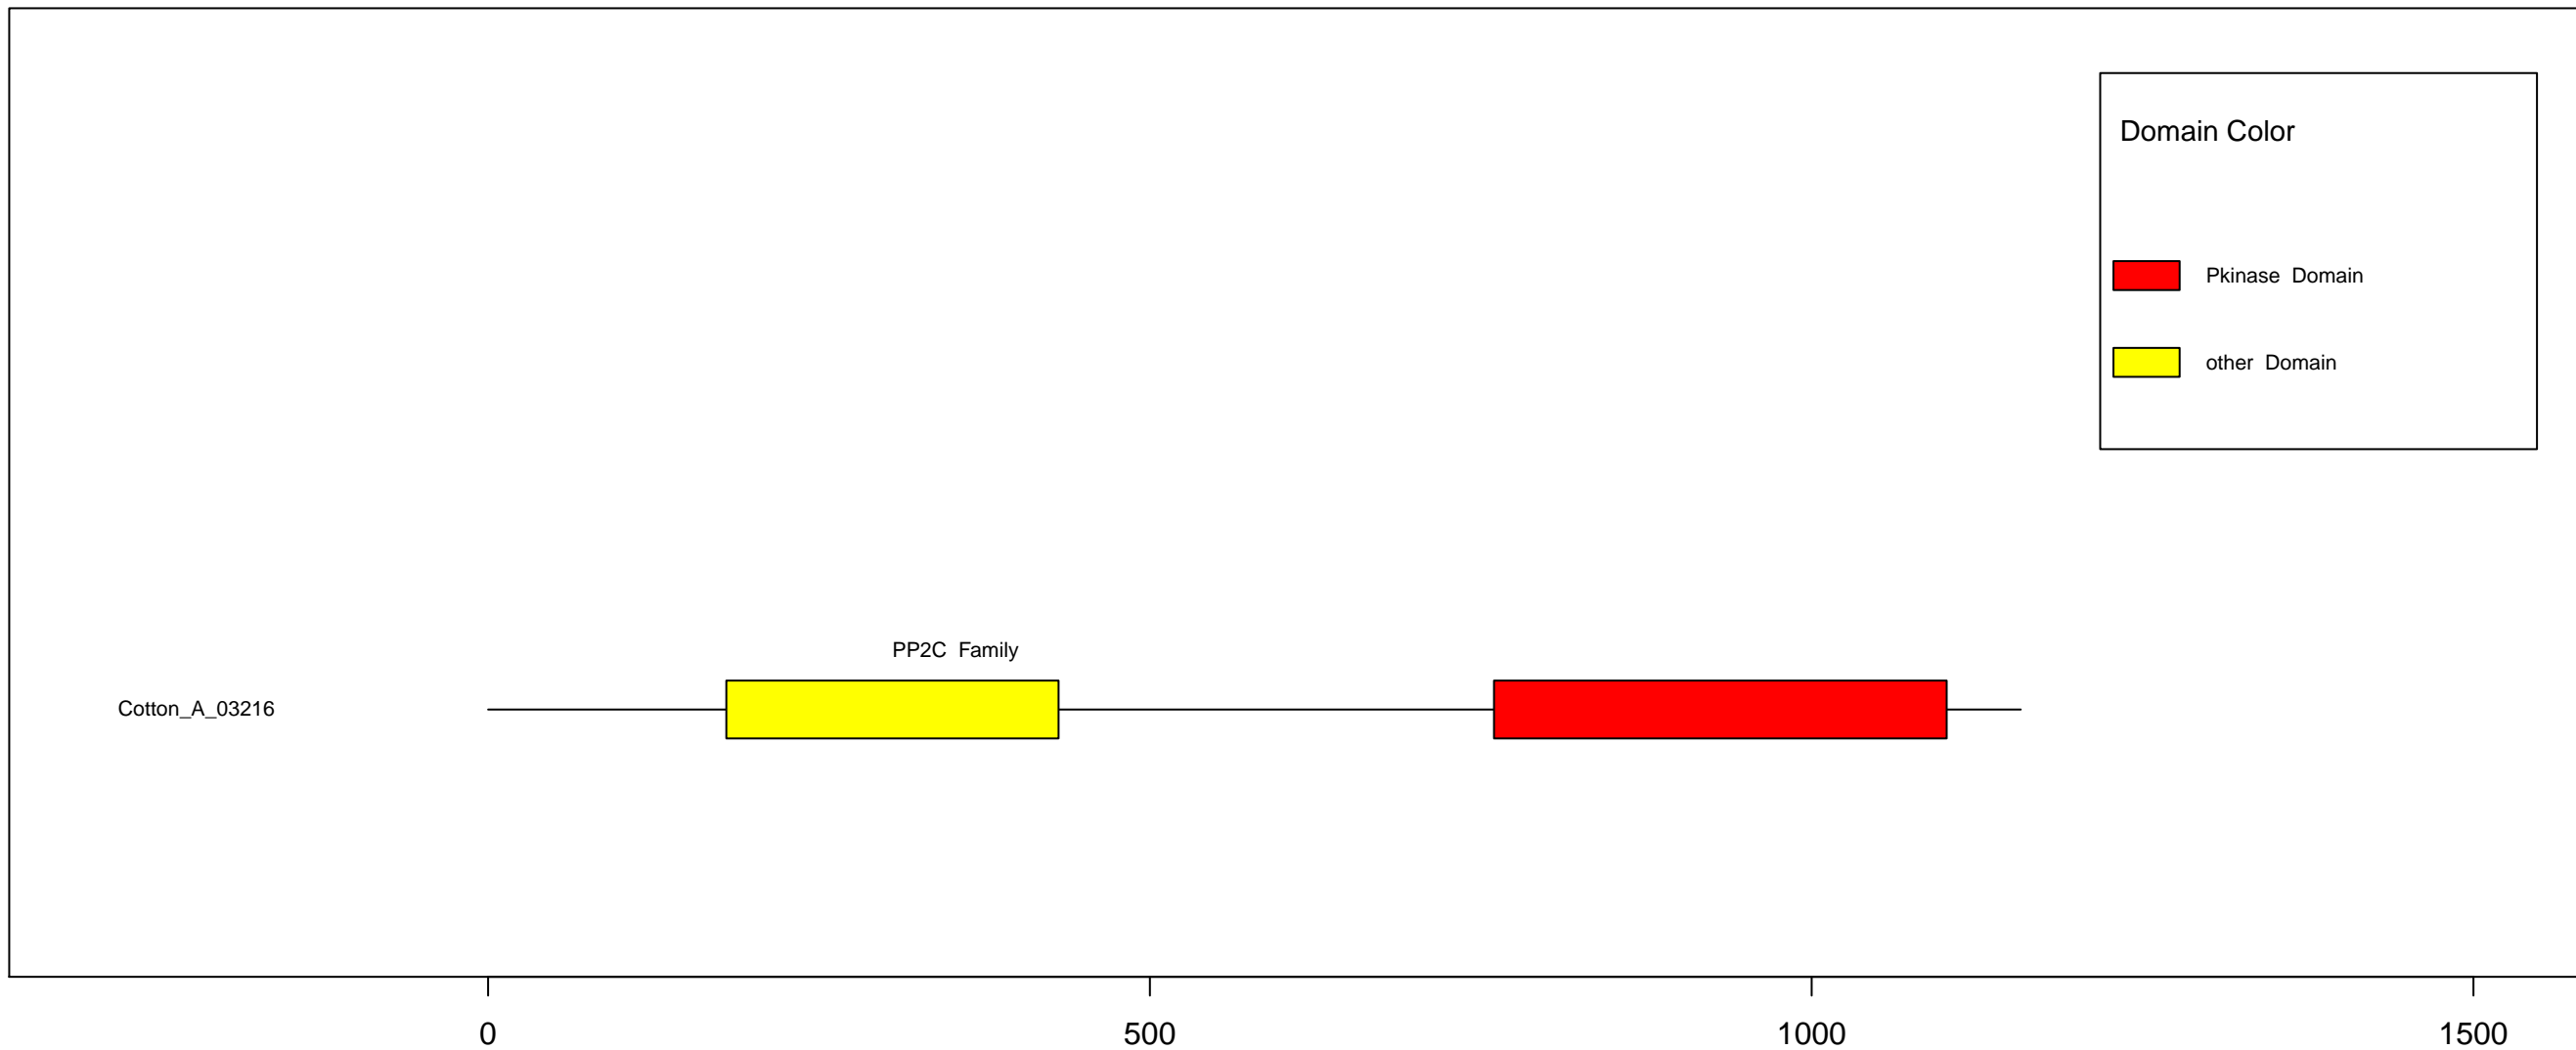

# G.ar CMGC\_GSK domain diagram (all)

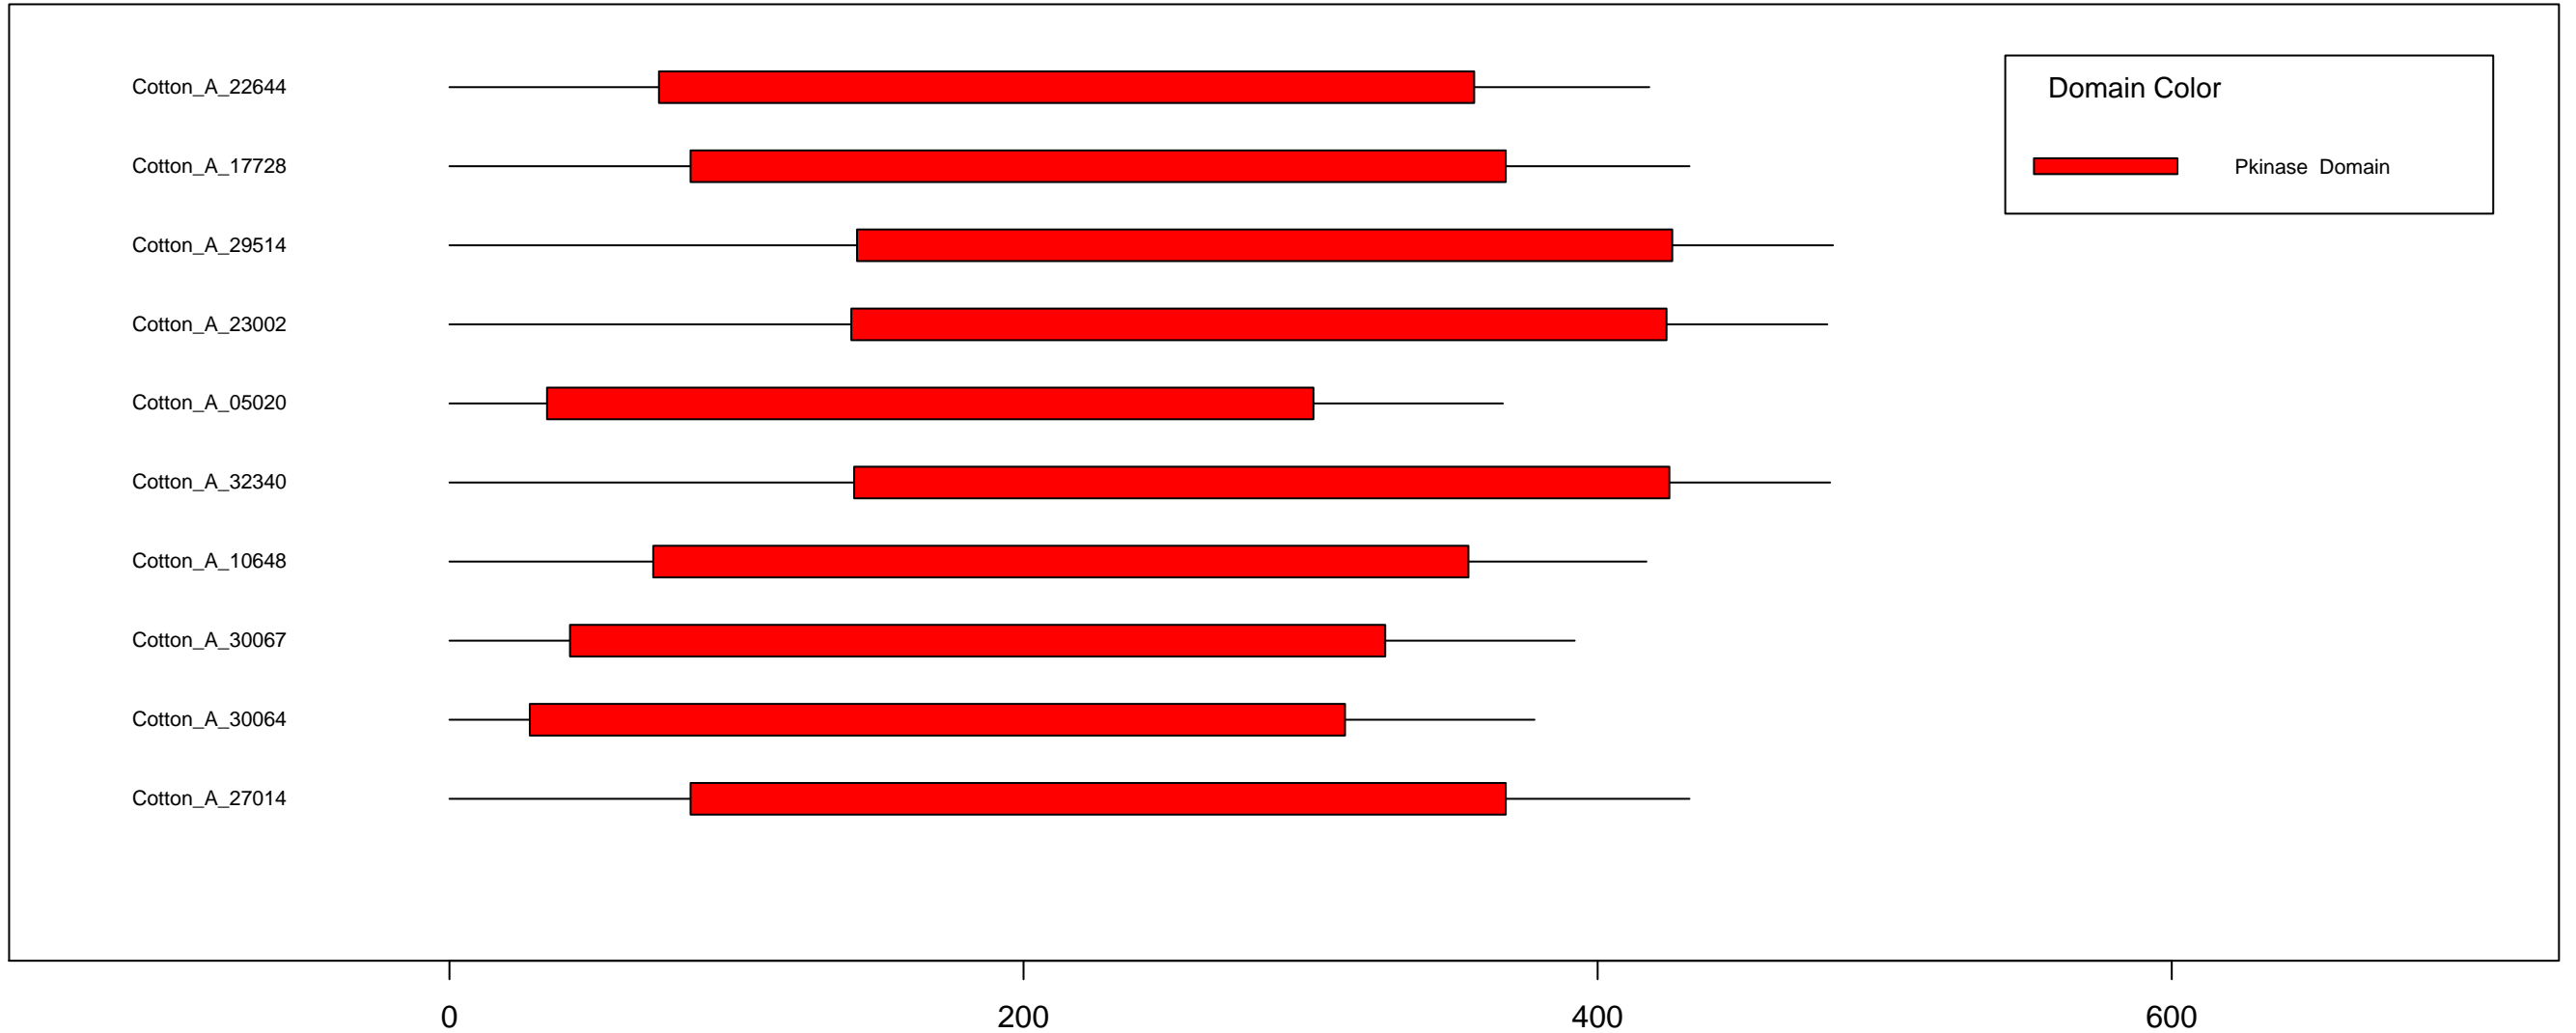

# G.ar CMGC\_MAPK domain diagram (part 1)

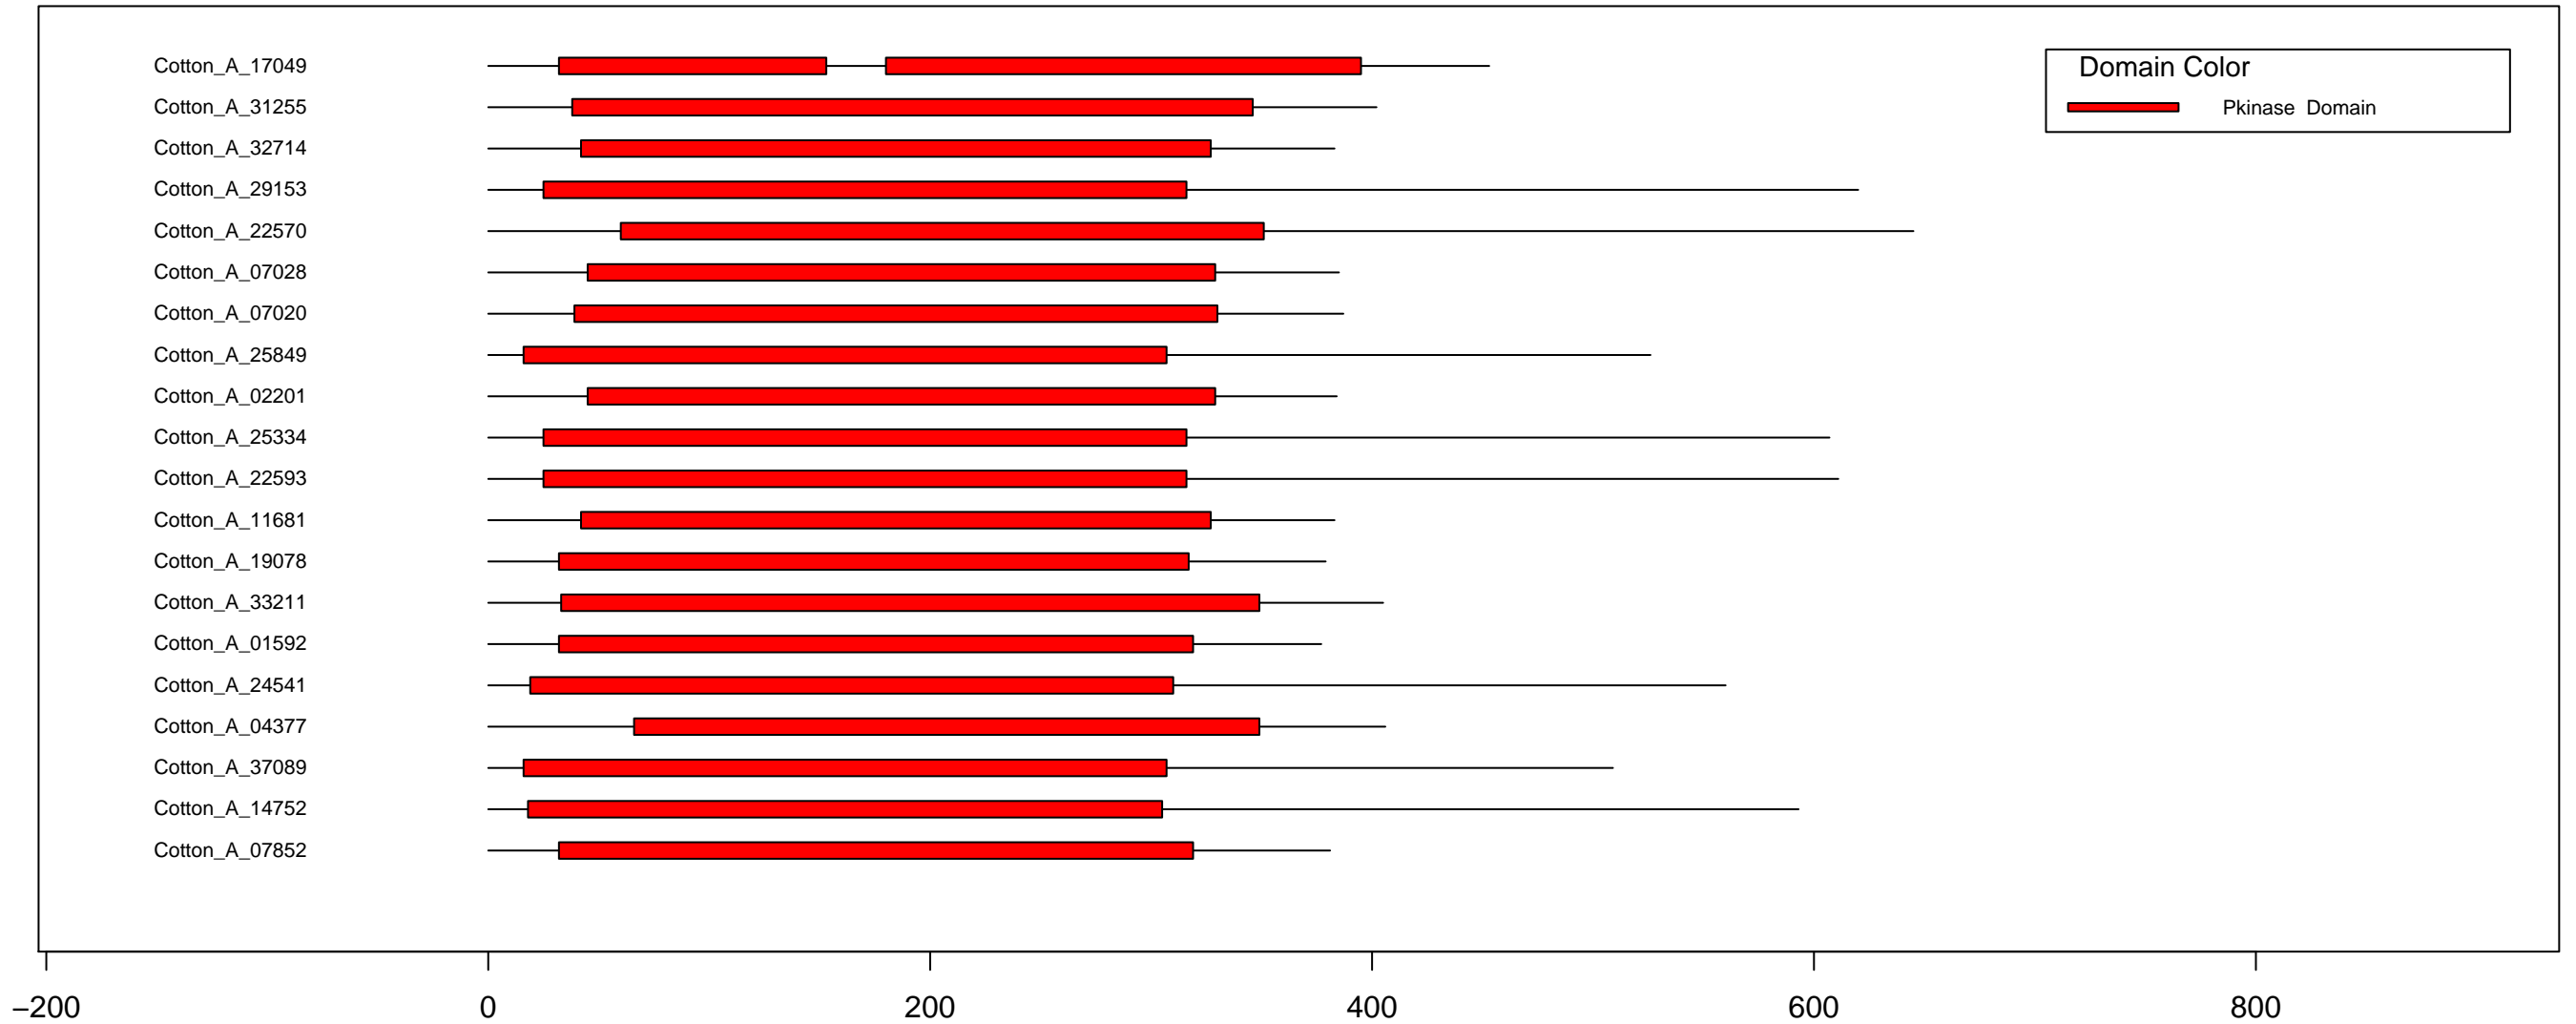

# G.ar CMGC\_MAPK domain diagram (part 2)

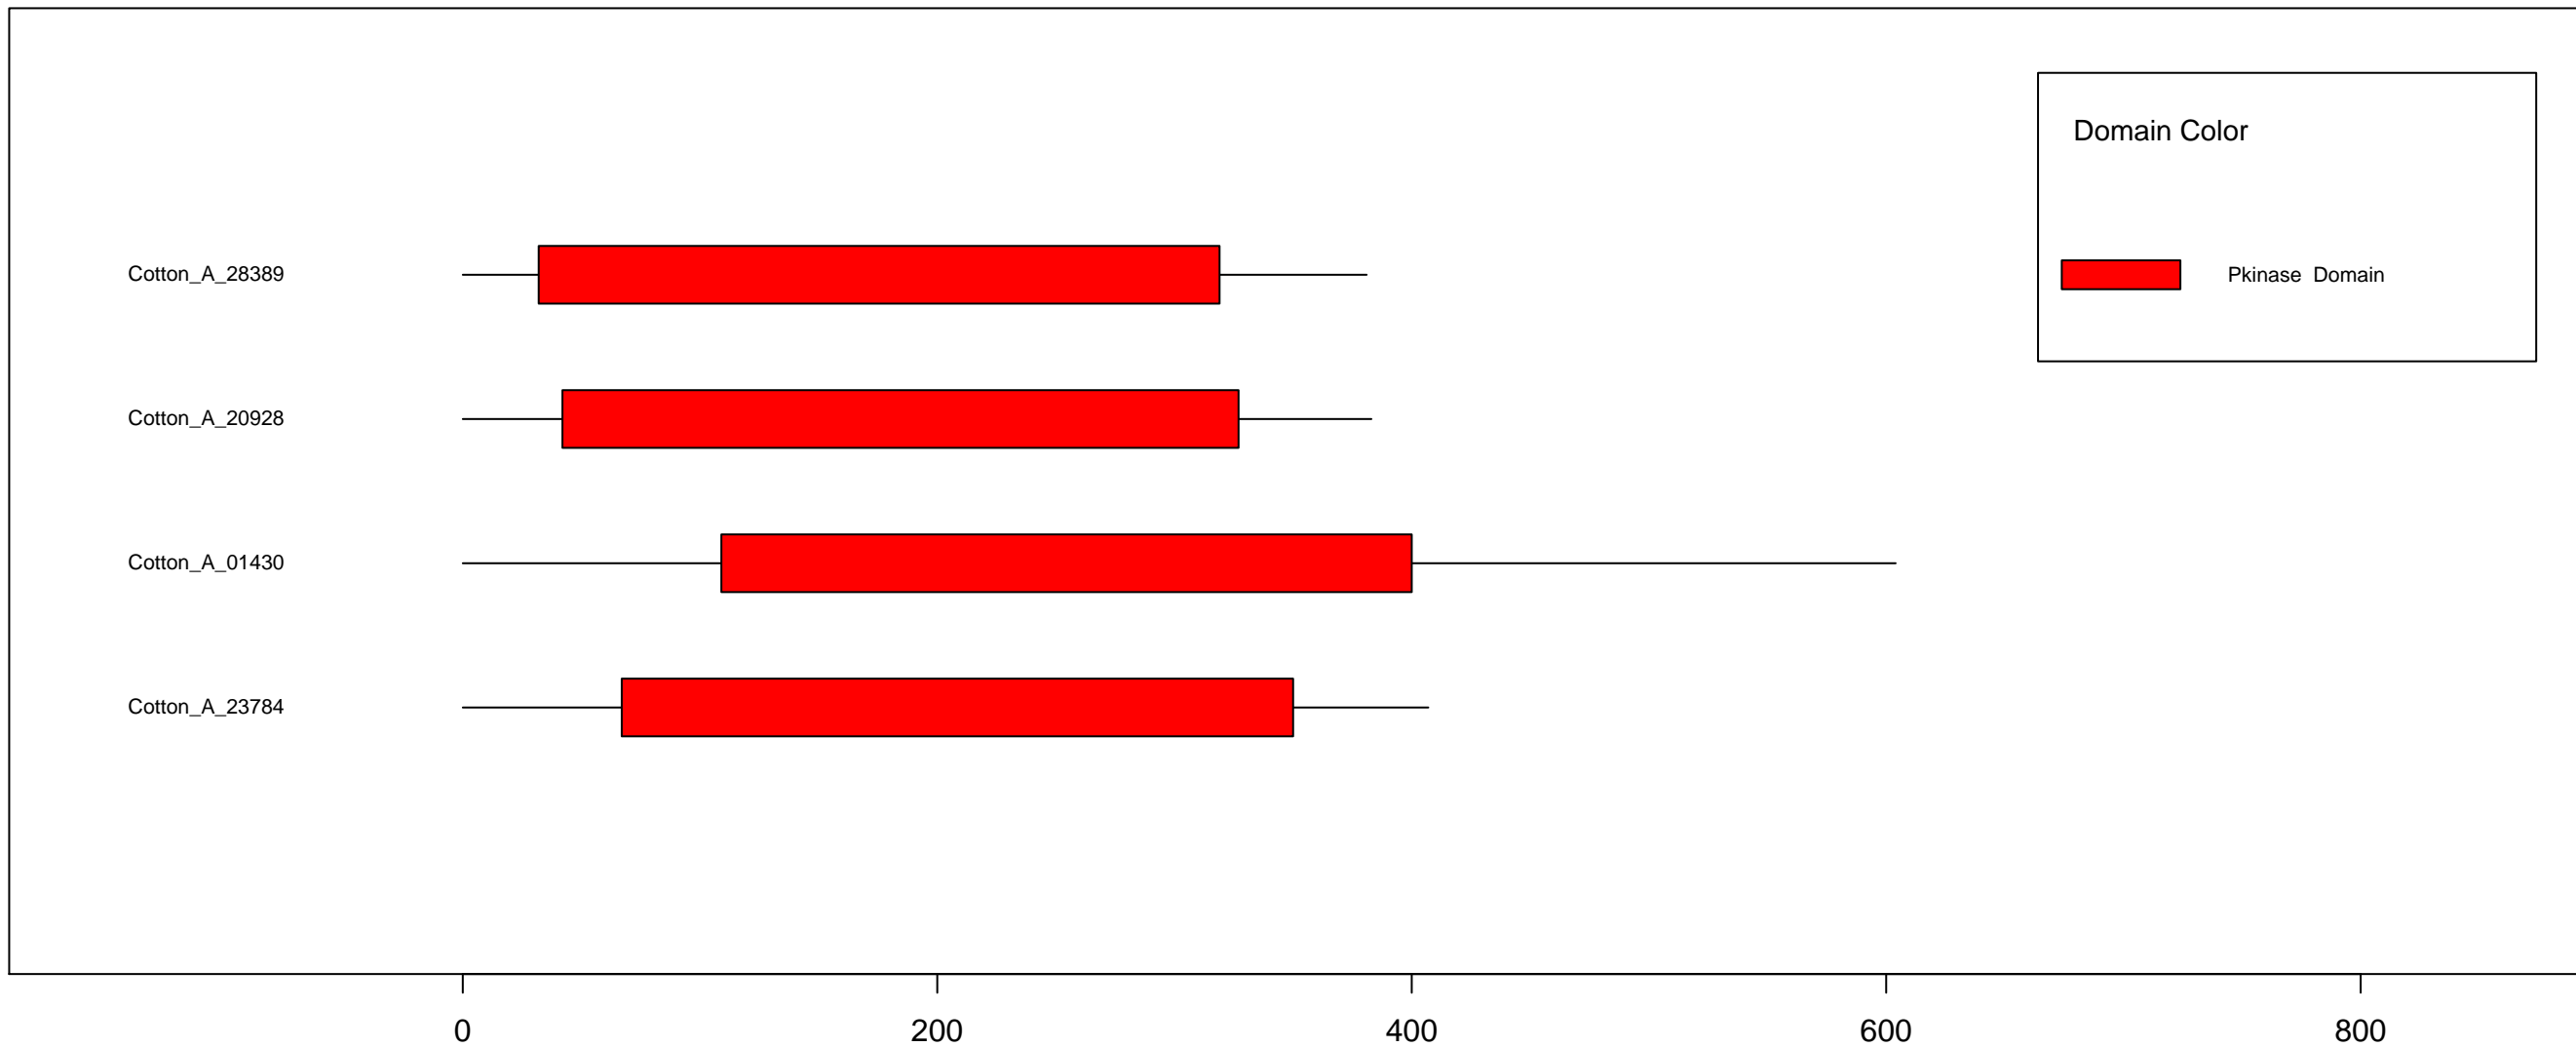

# G.ar CMGC\_PI-Tthe domain diagram (all)

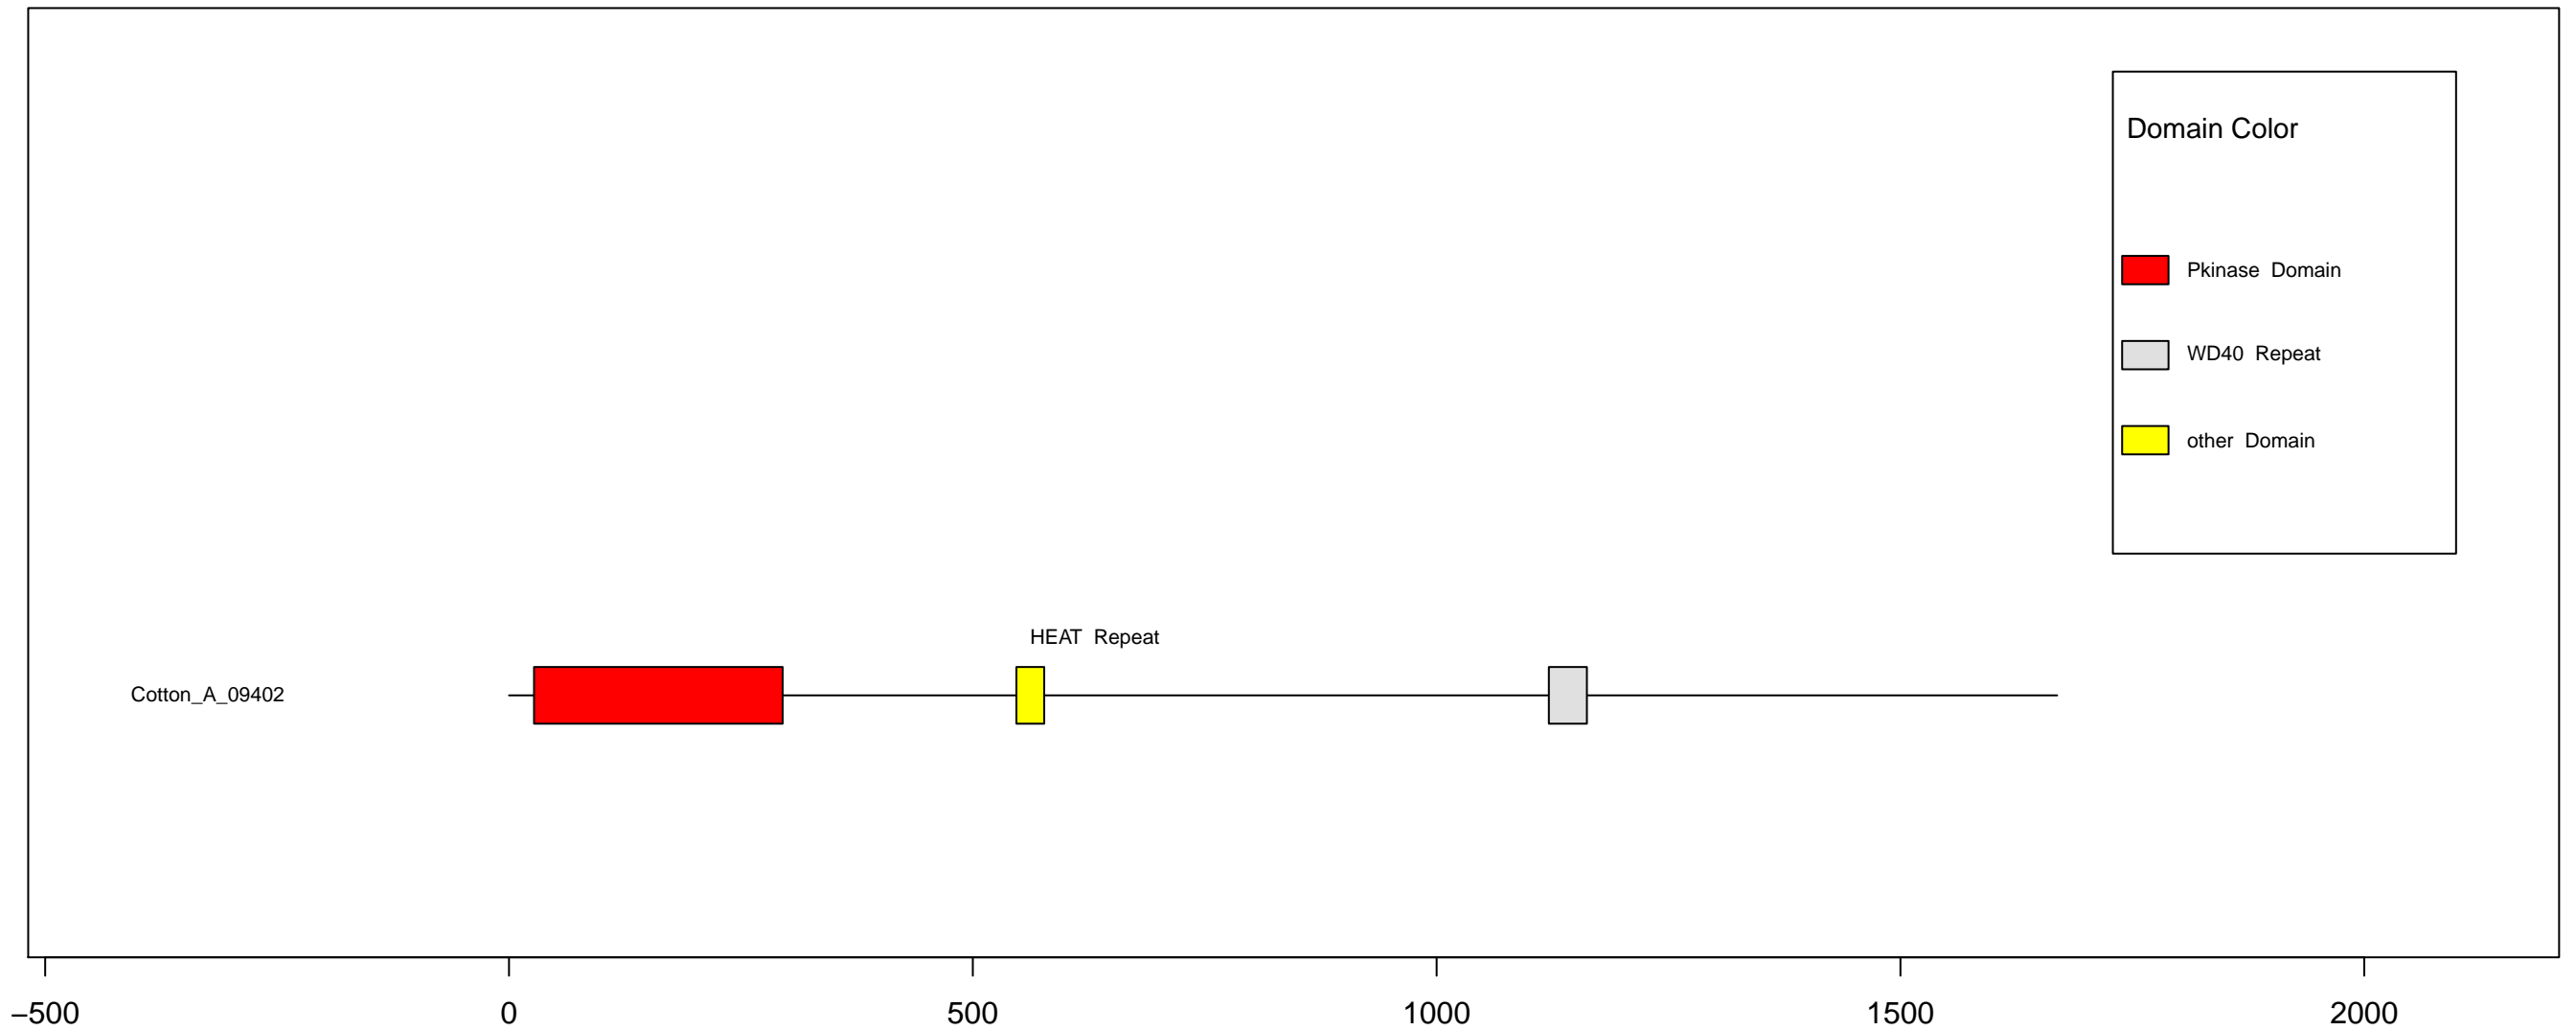

# G.ar CMGC\_RCK domain diagram (all)

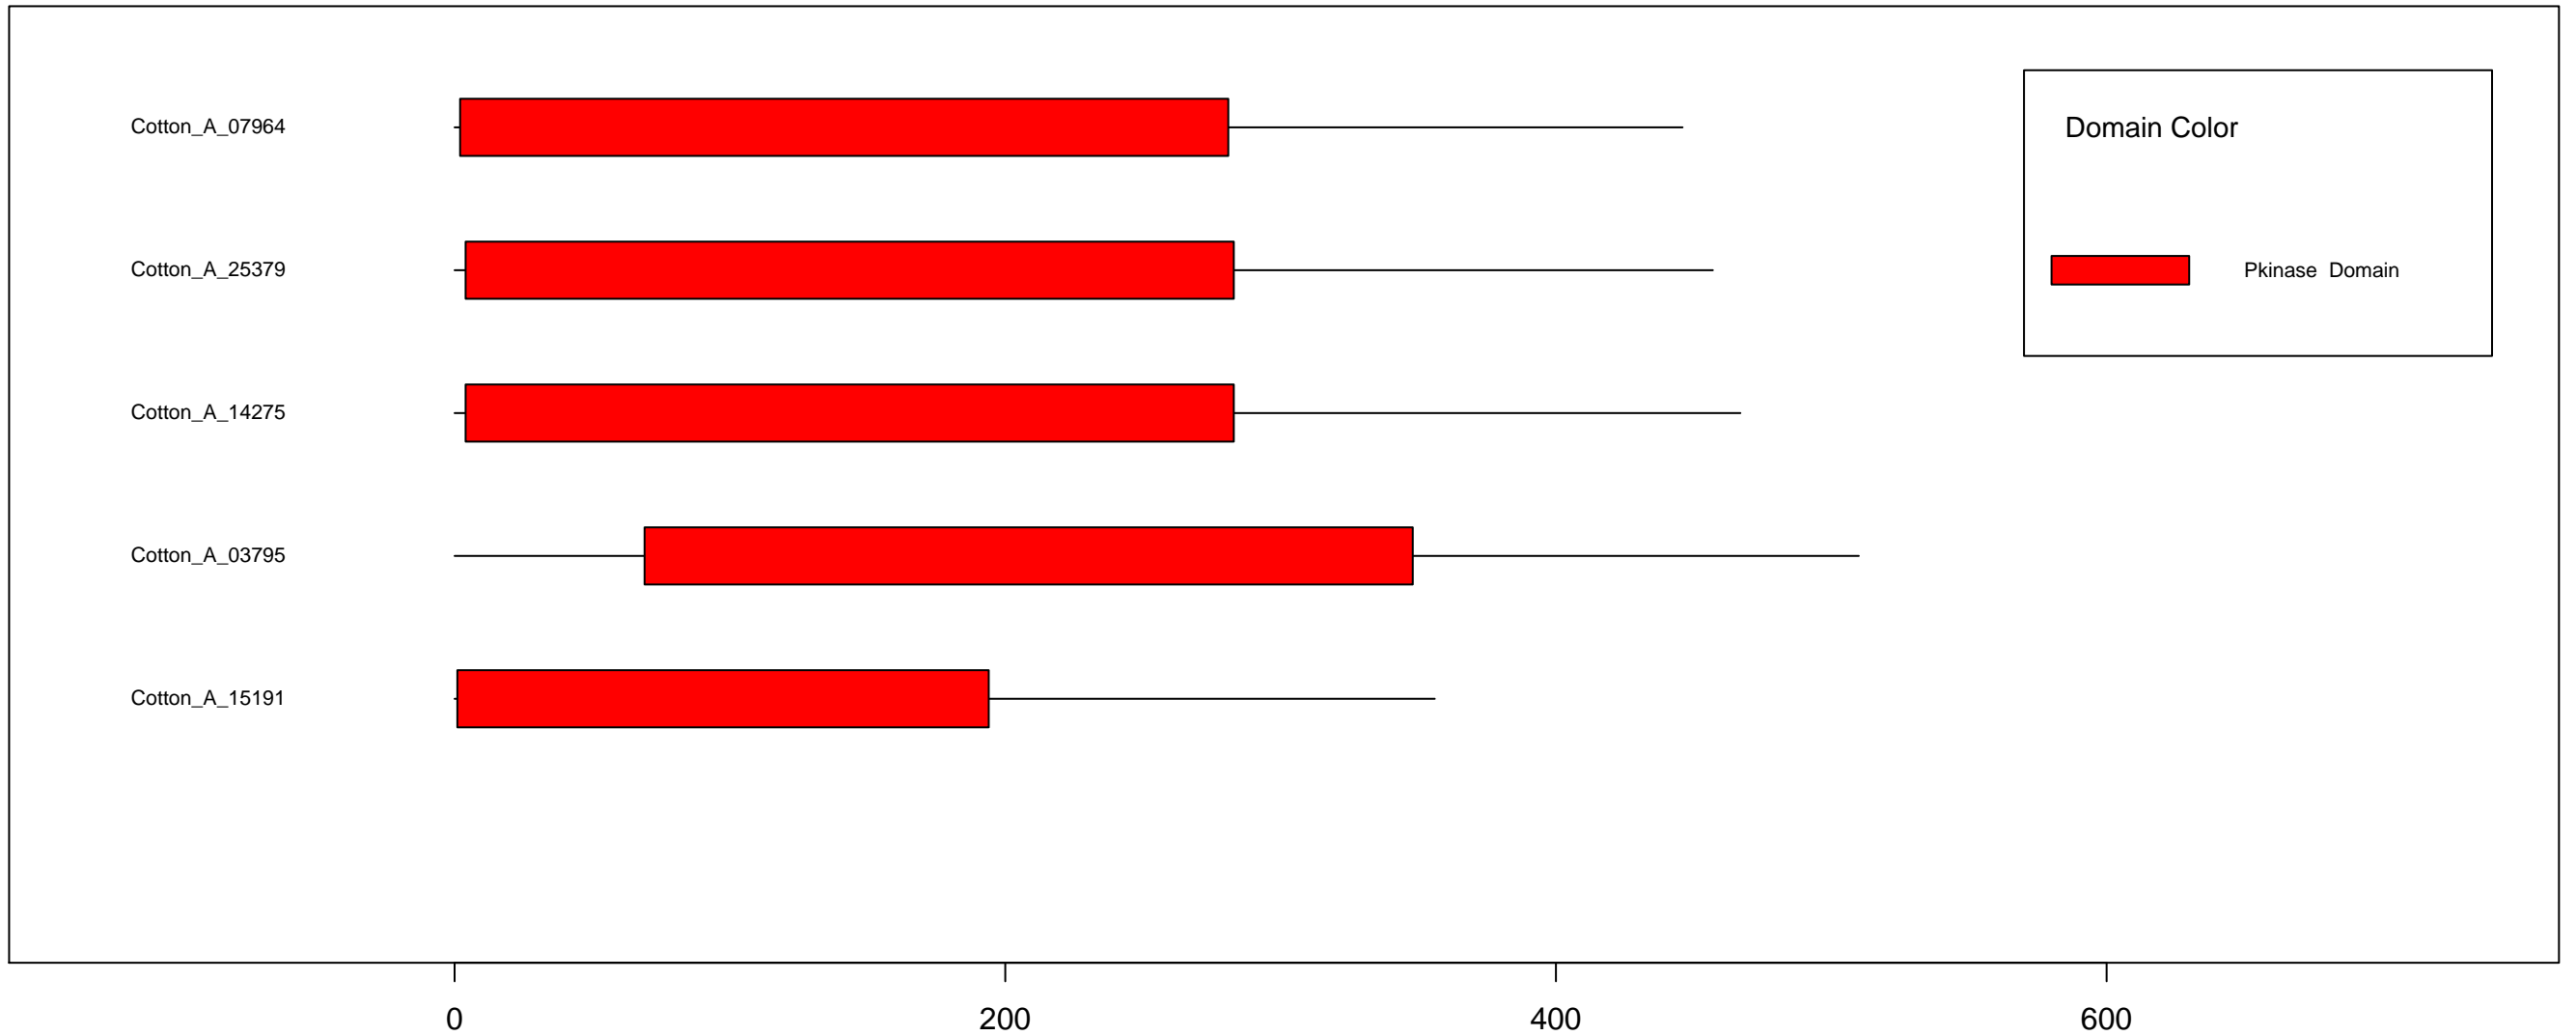

# G.ar CMGC\_SRPK domain diagram (all)

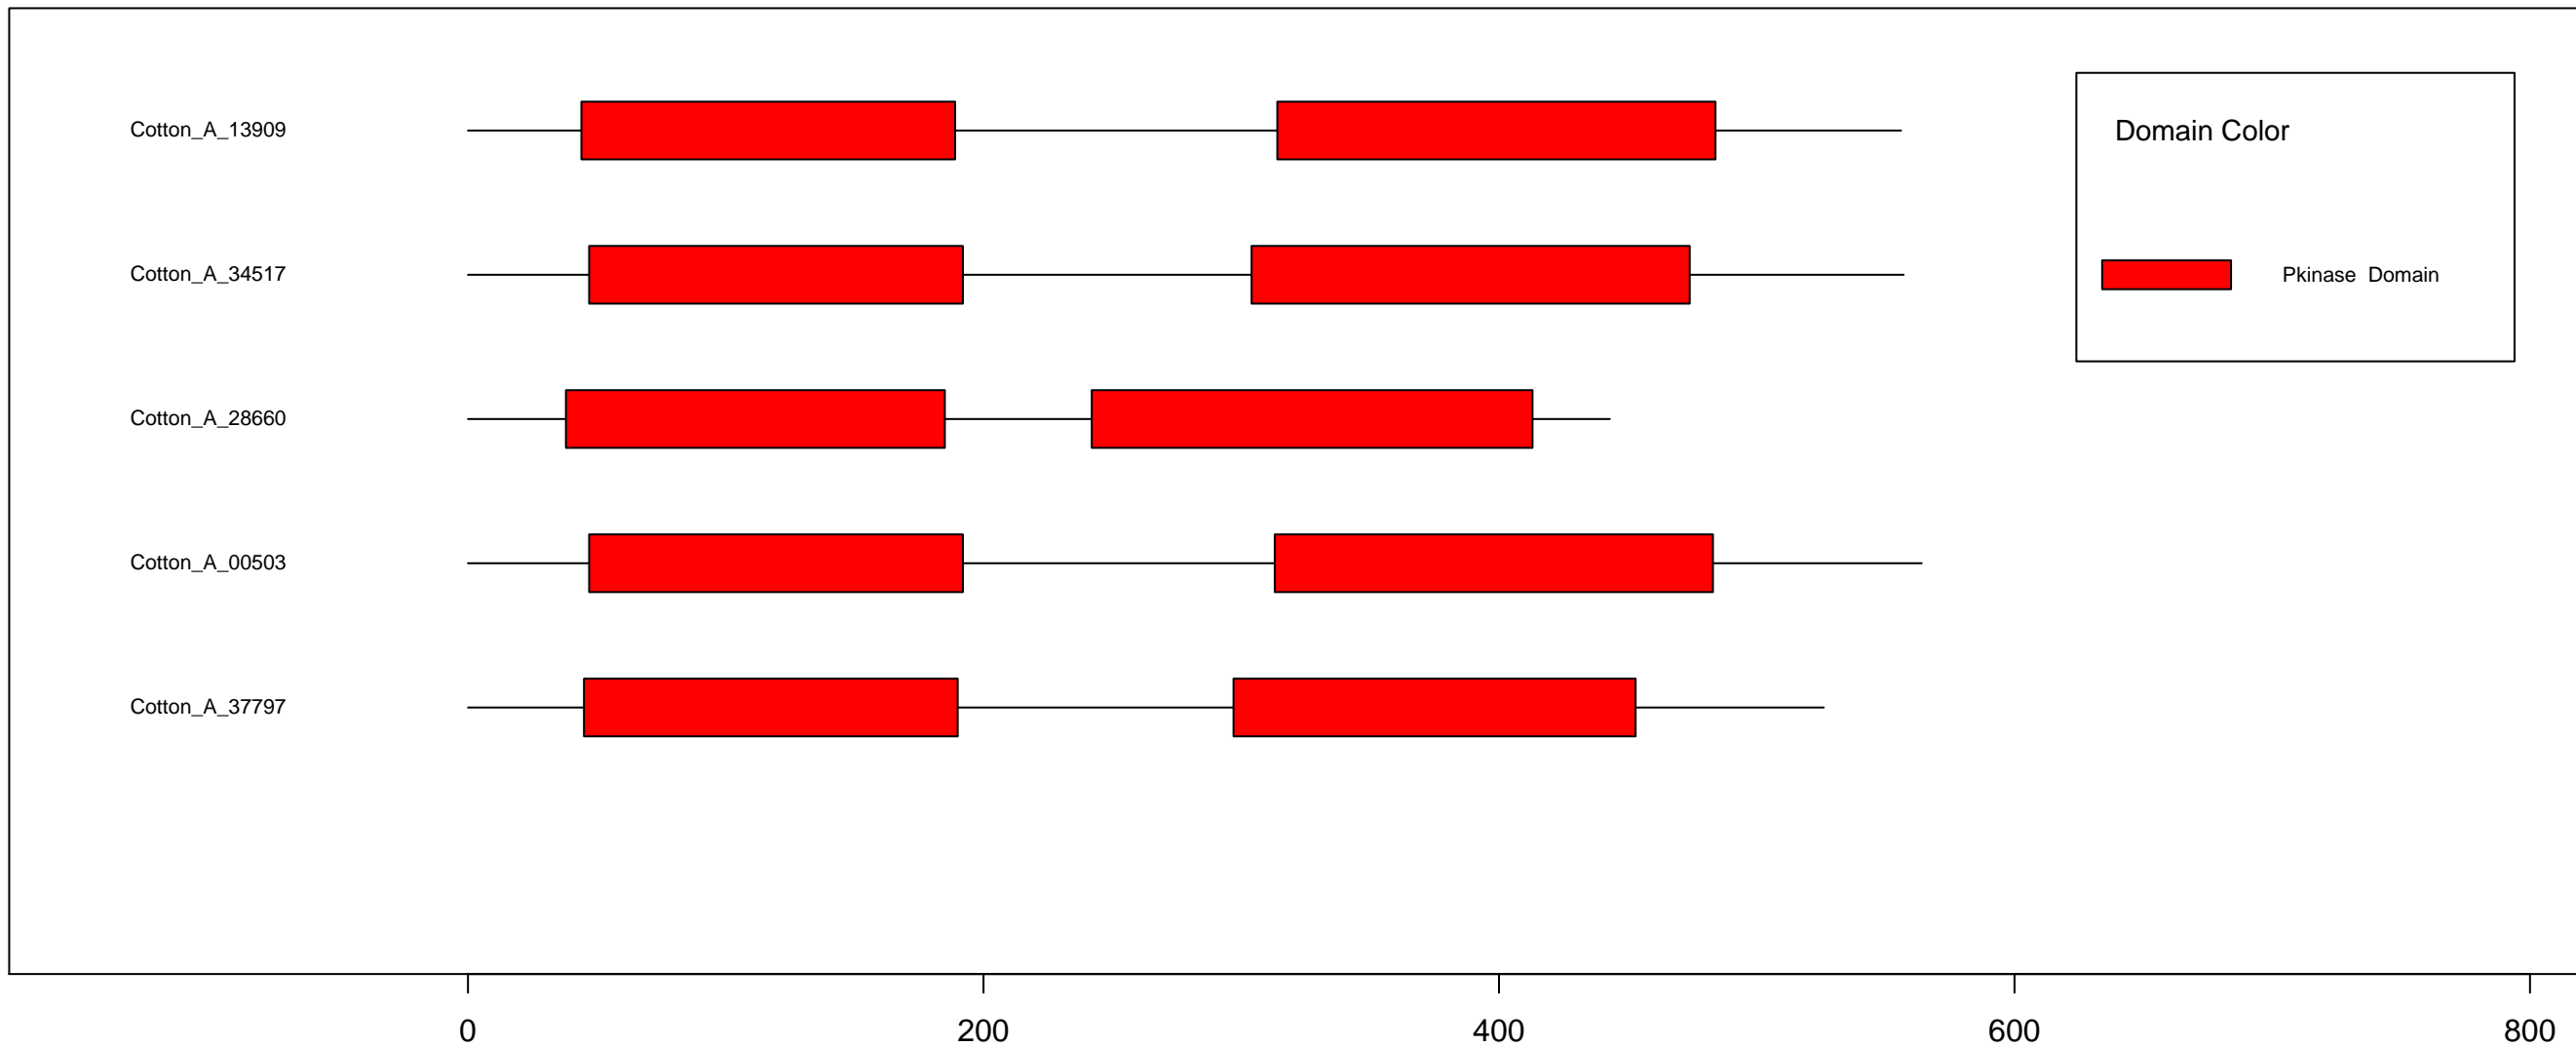



# G.ar Group-PI-2 domain diagram (all)

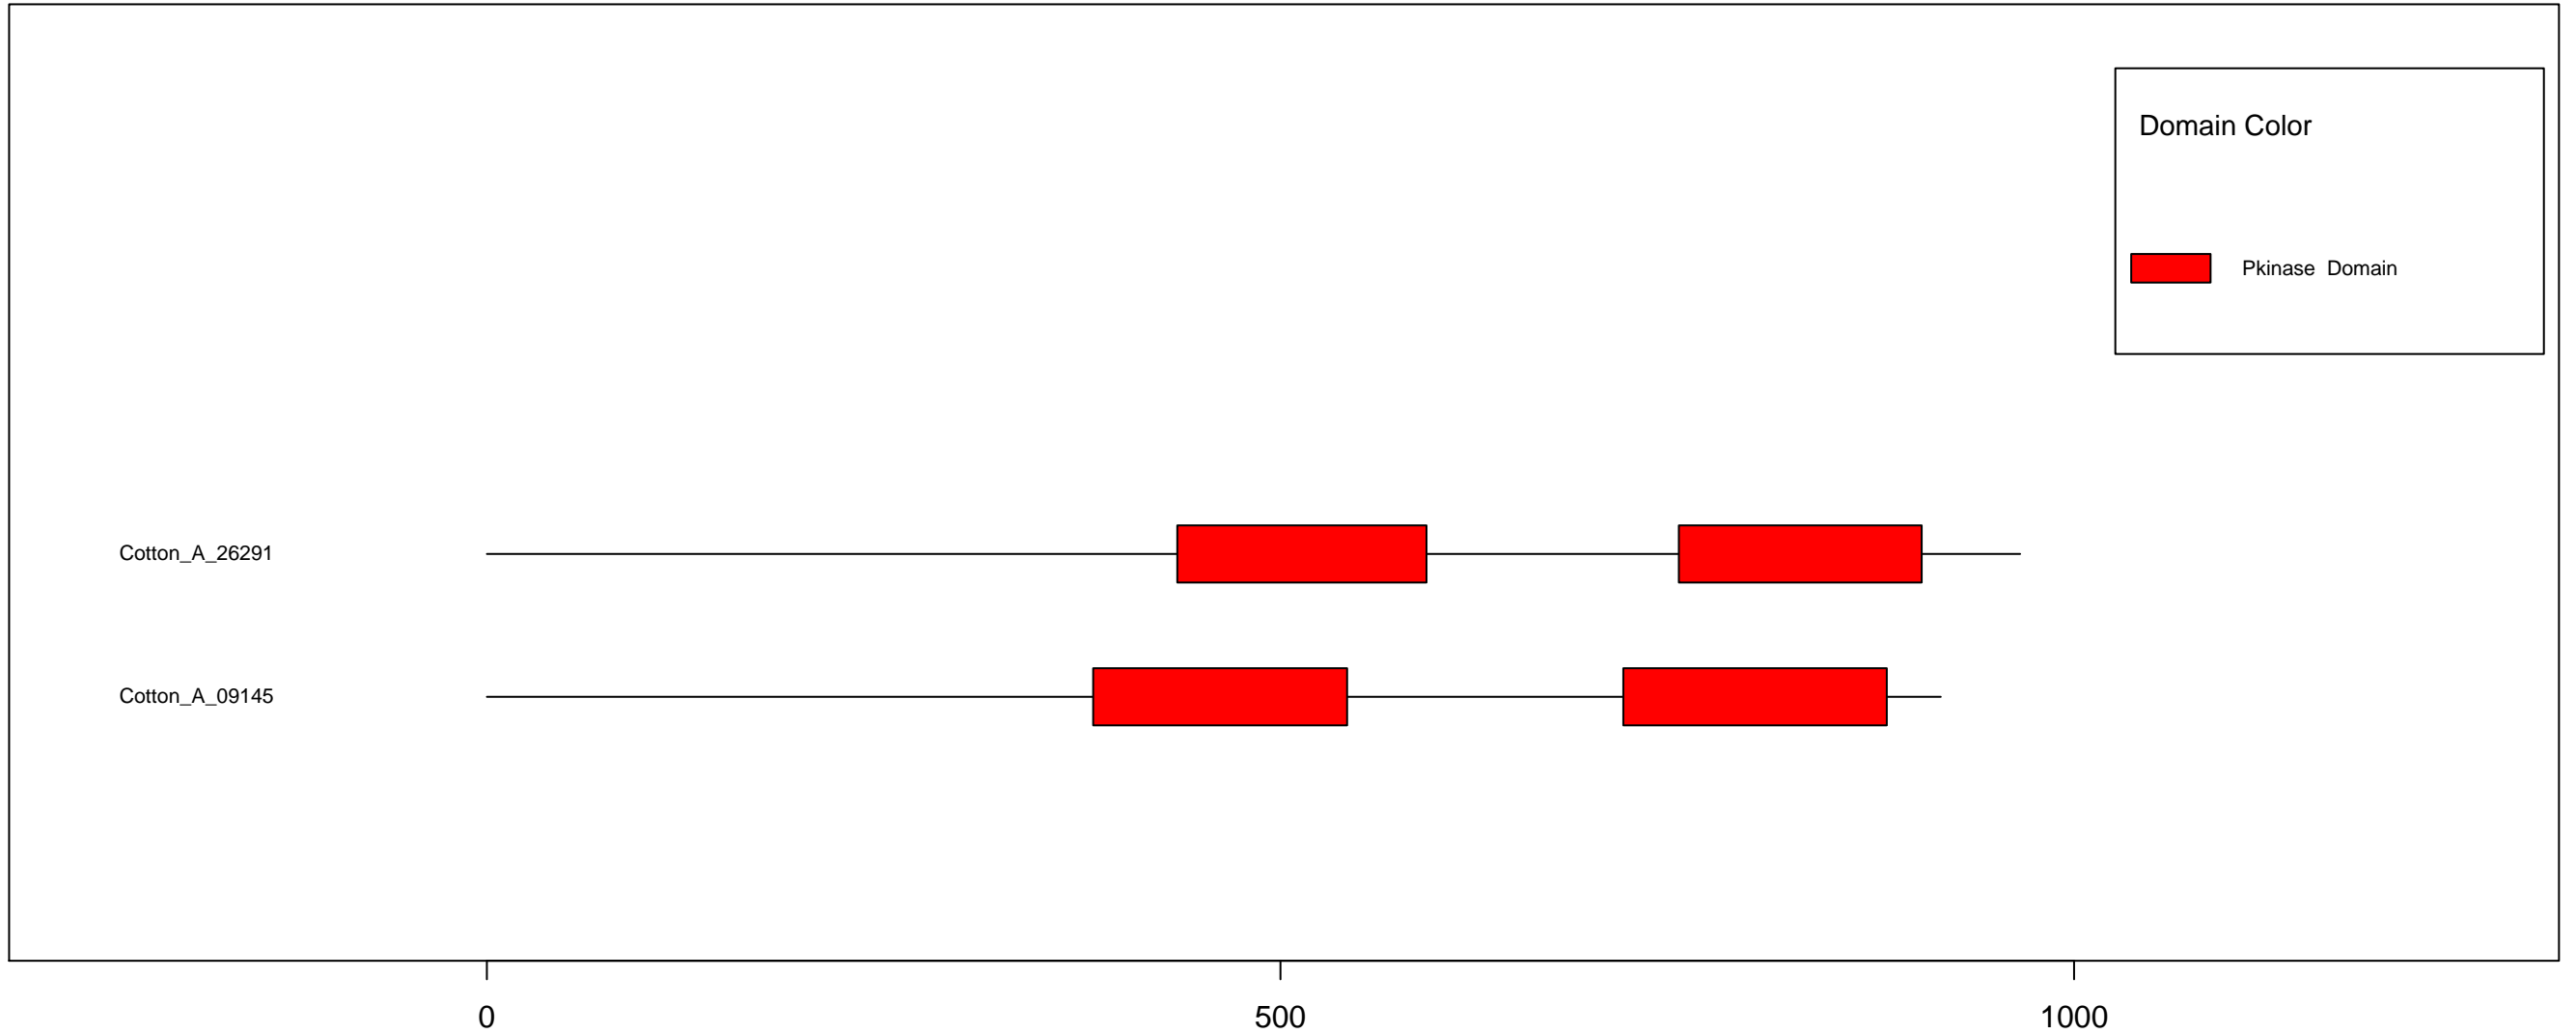

# G.ar Group-PI-3 domain diagram (all)

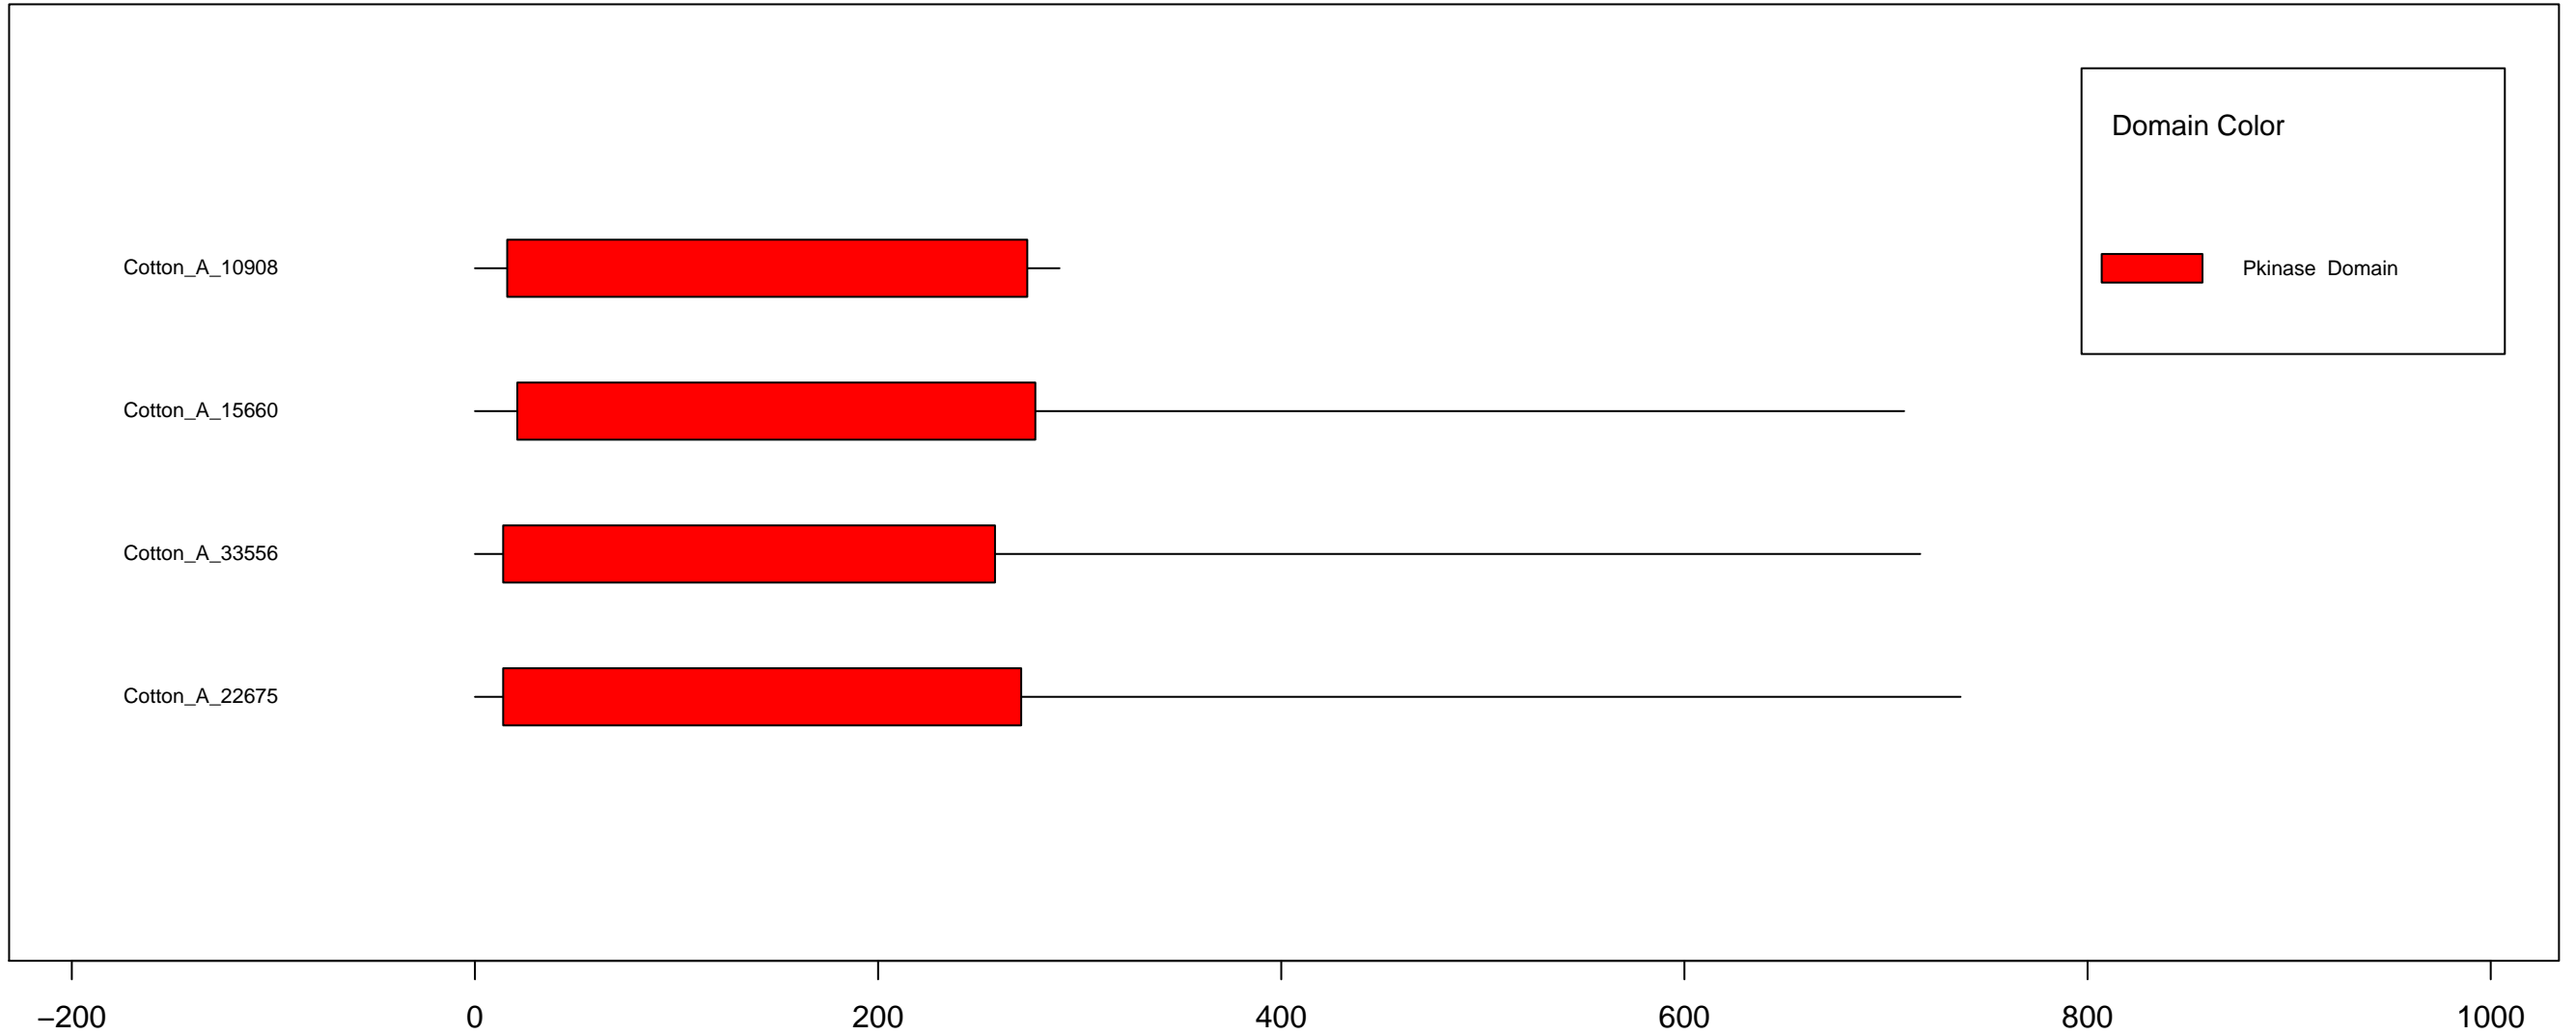

# G.ar Group-PI-4 domain diagram (all)

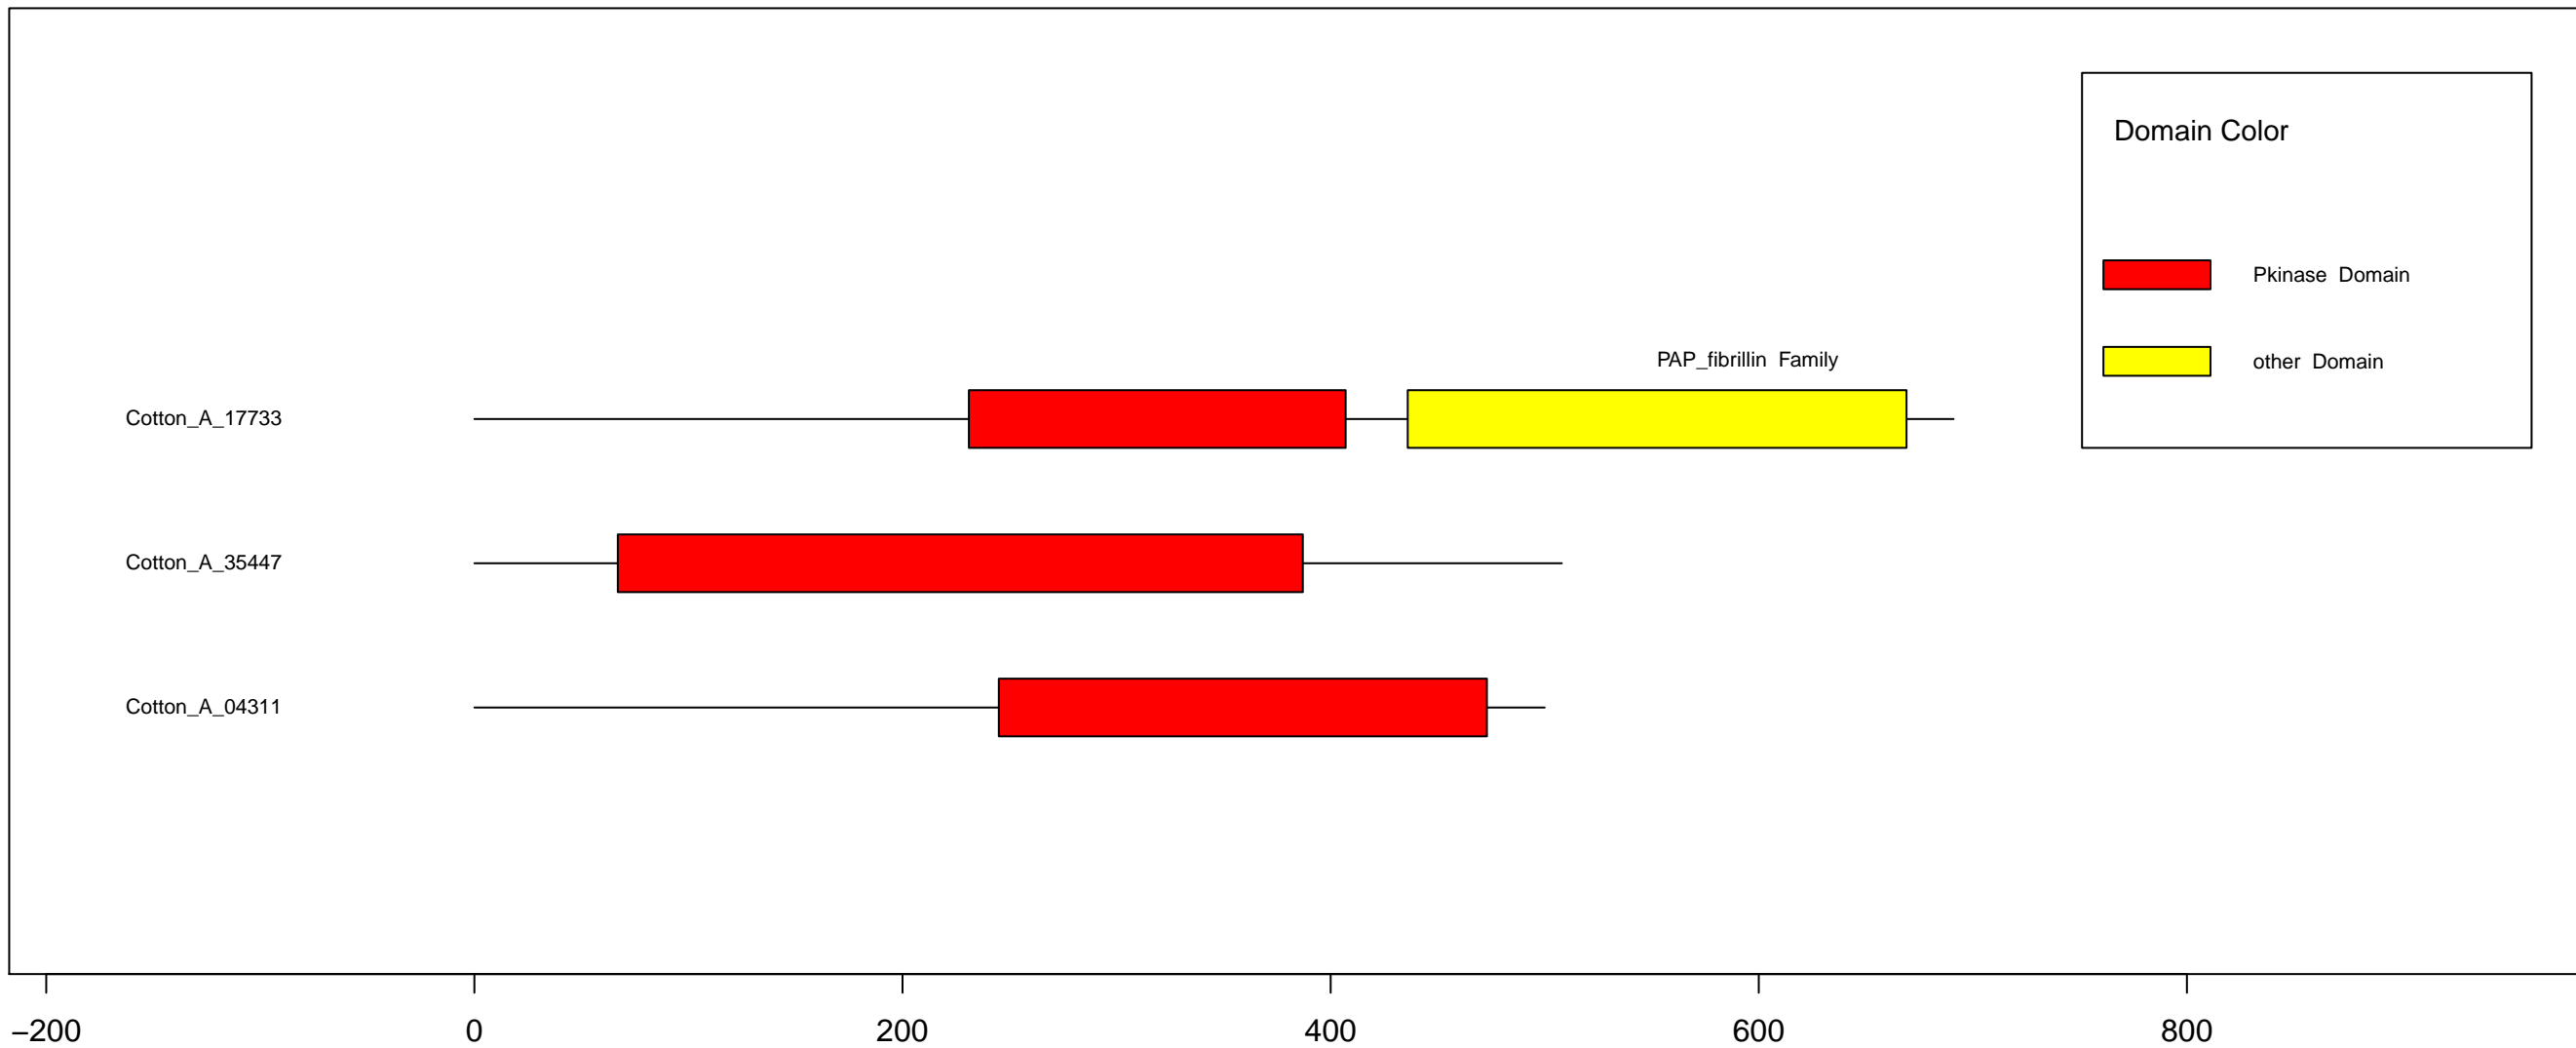

# G.ar IRE1 domain diagram (all)

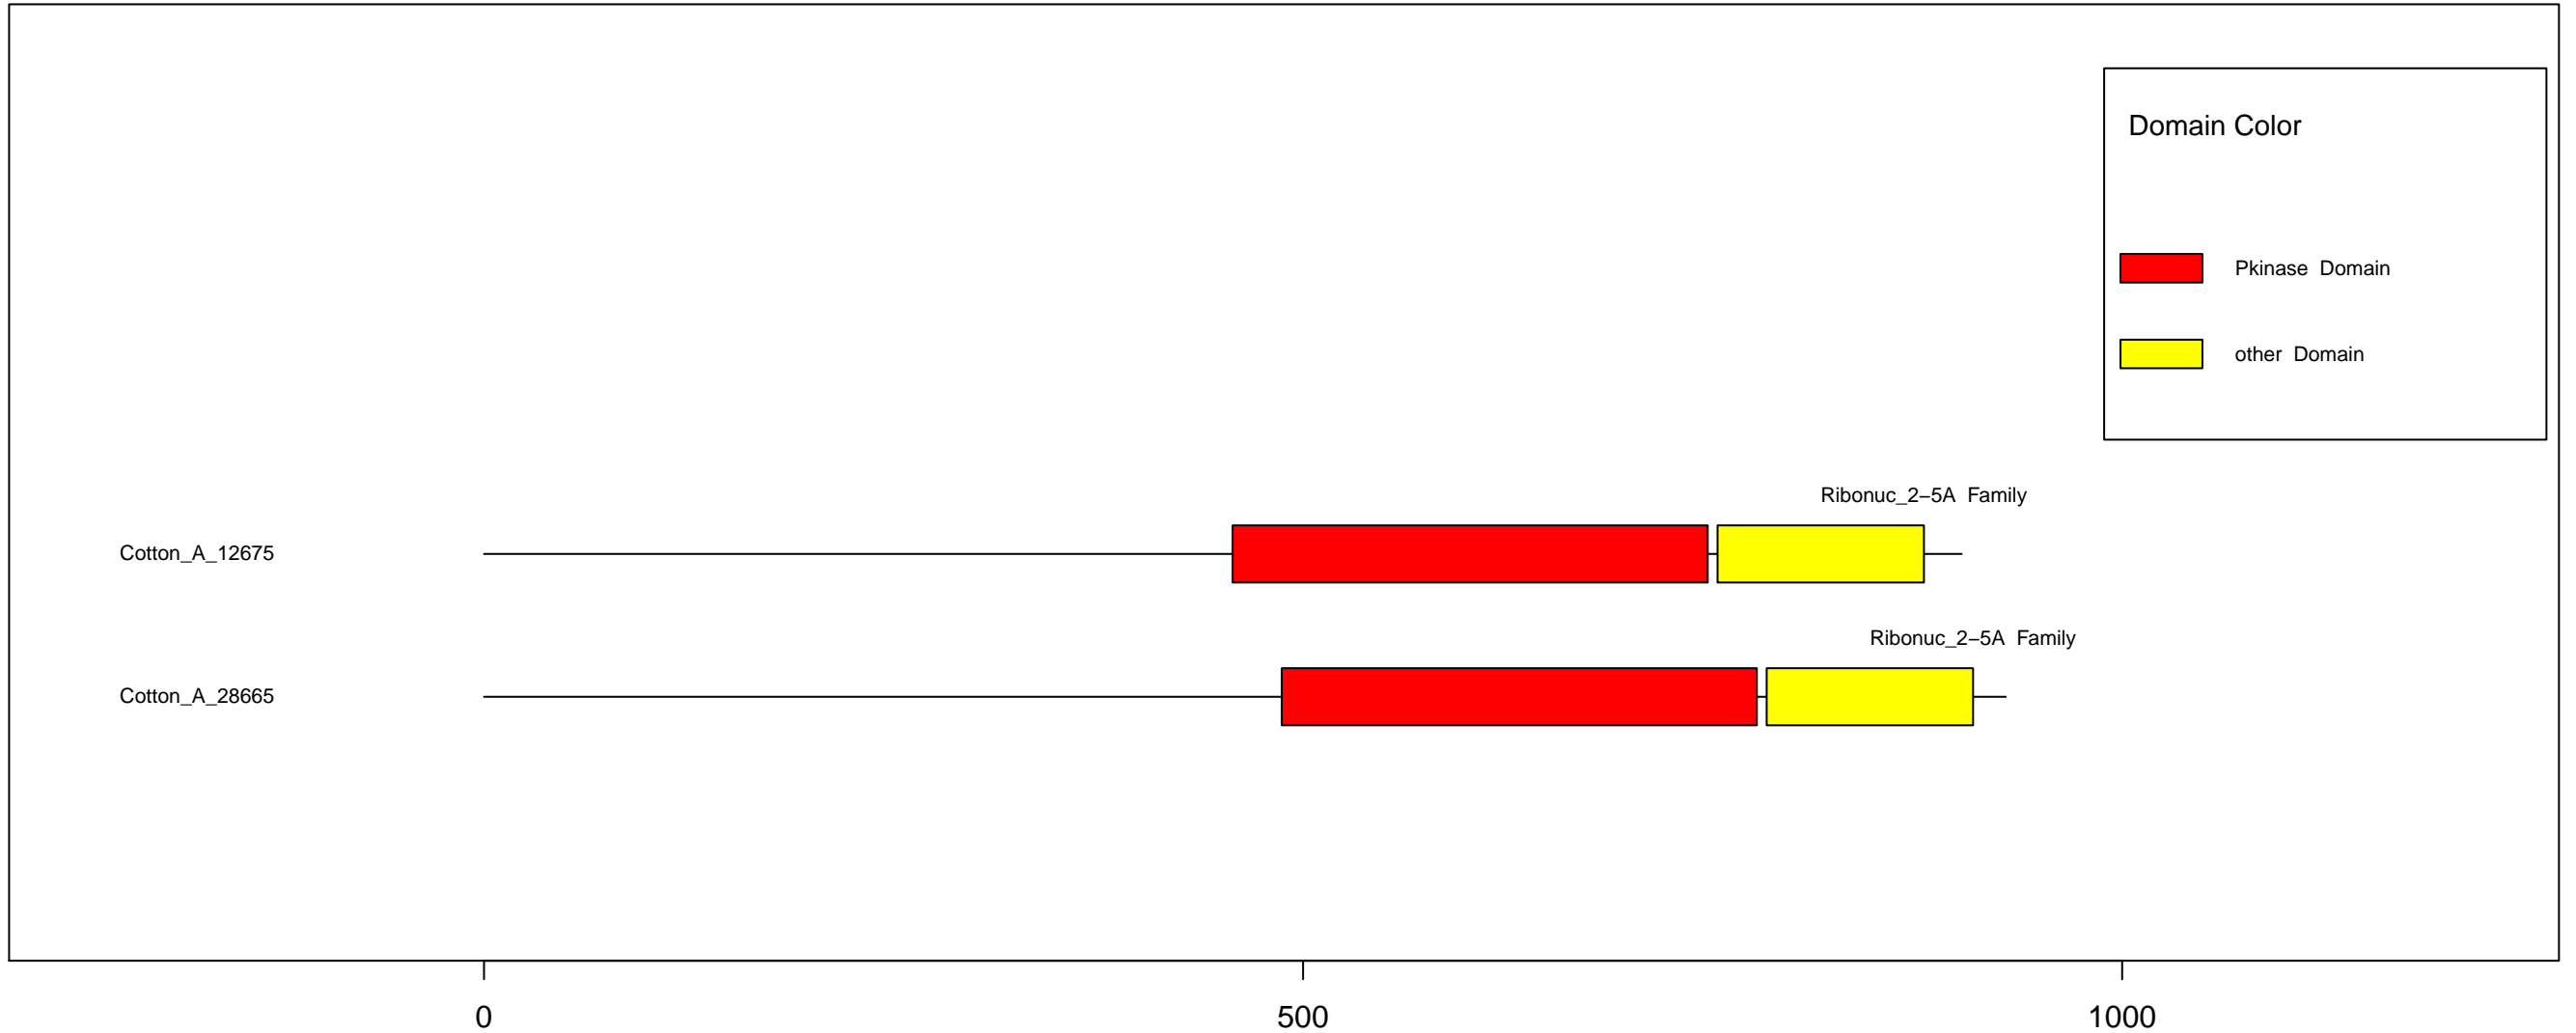

# G.ar NAK domain diagram (all)

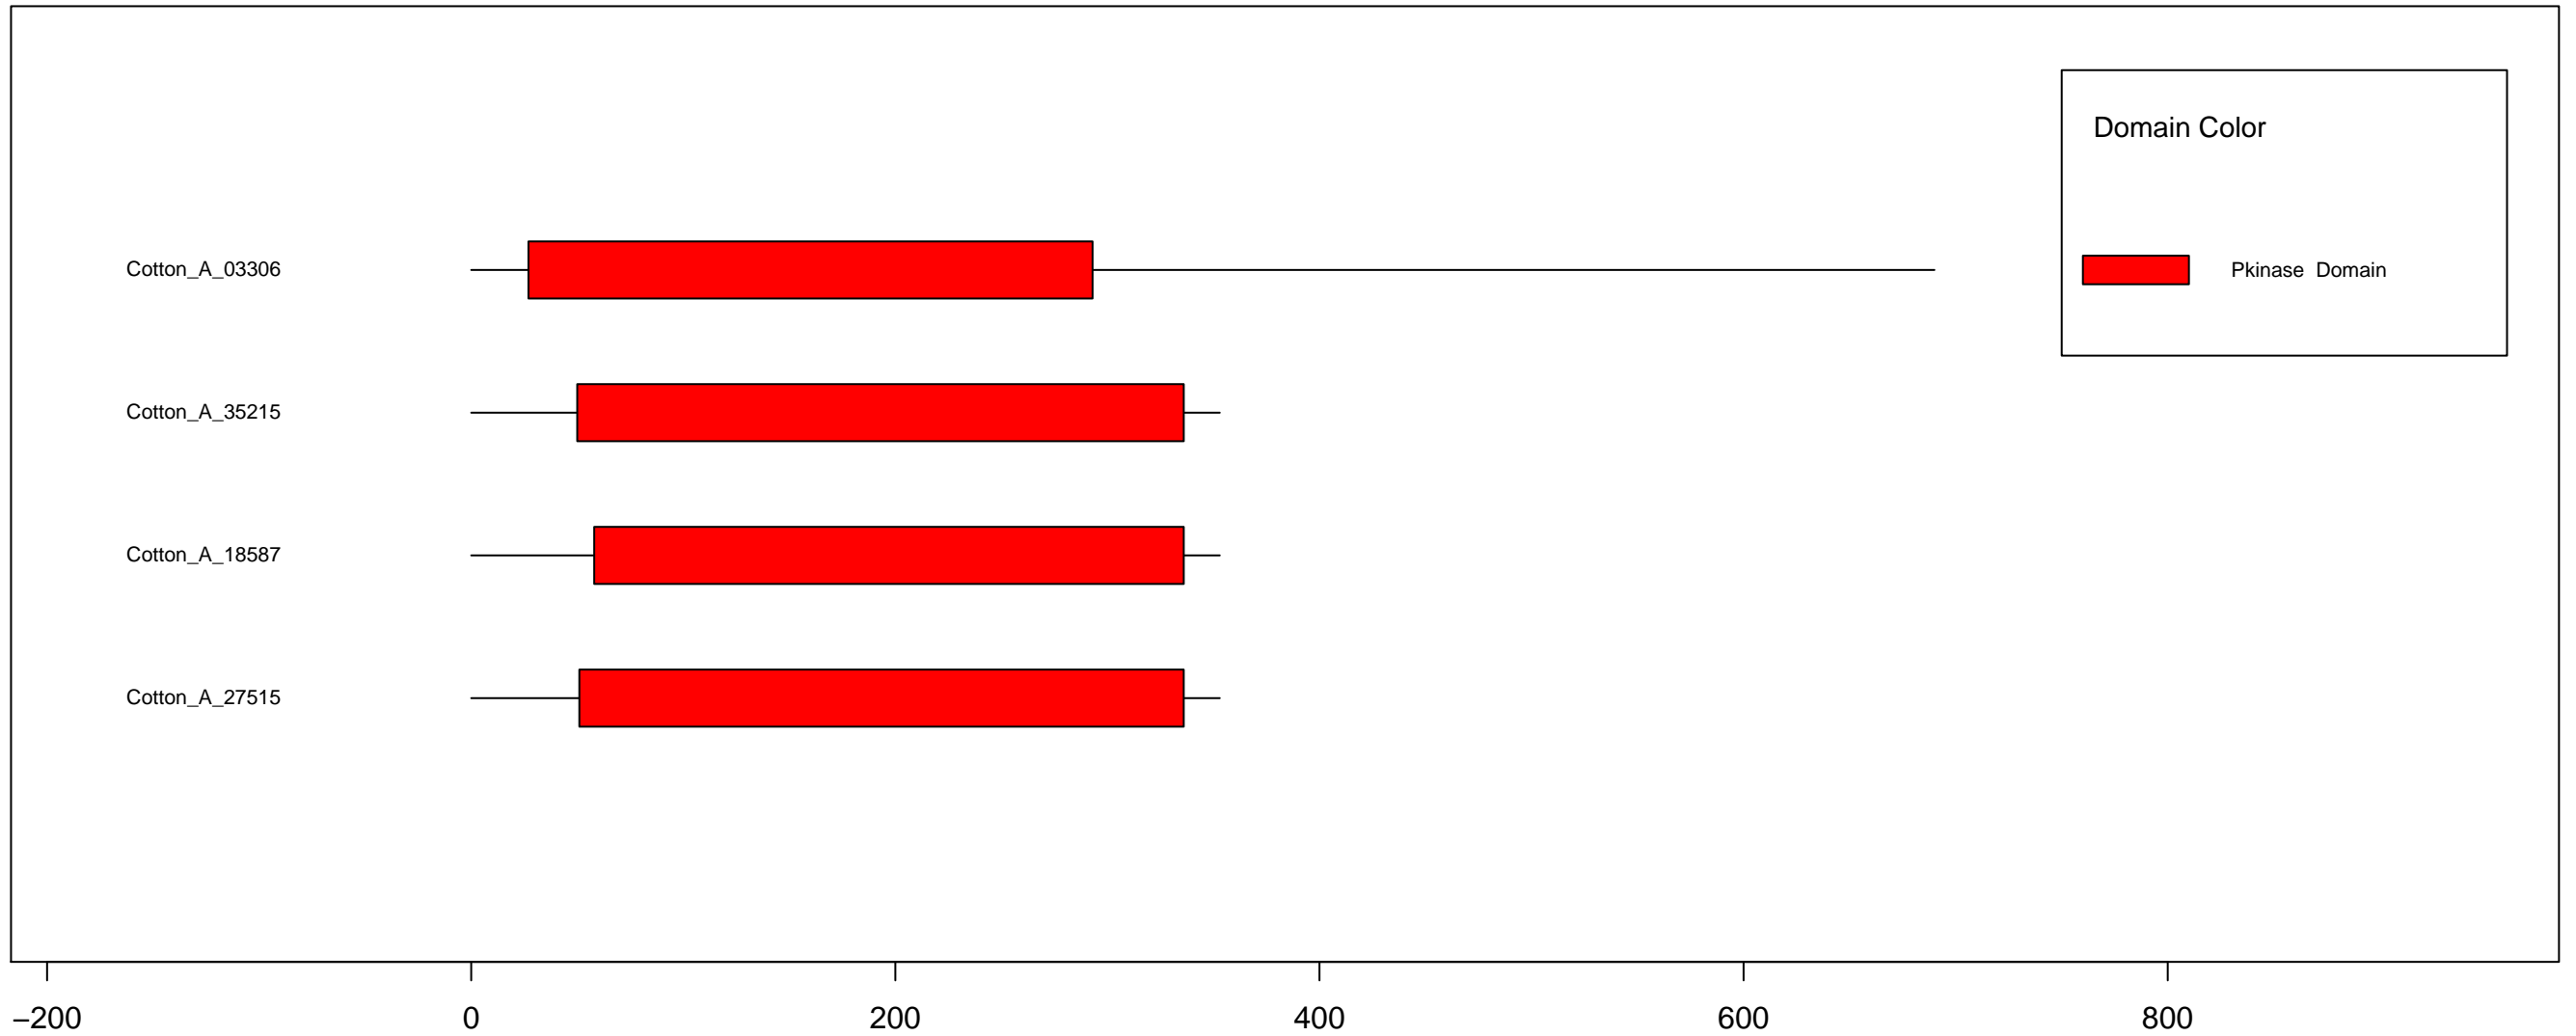

# G.ar NEK domain diagram (all)

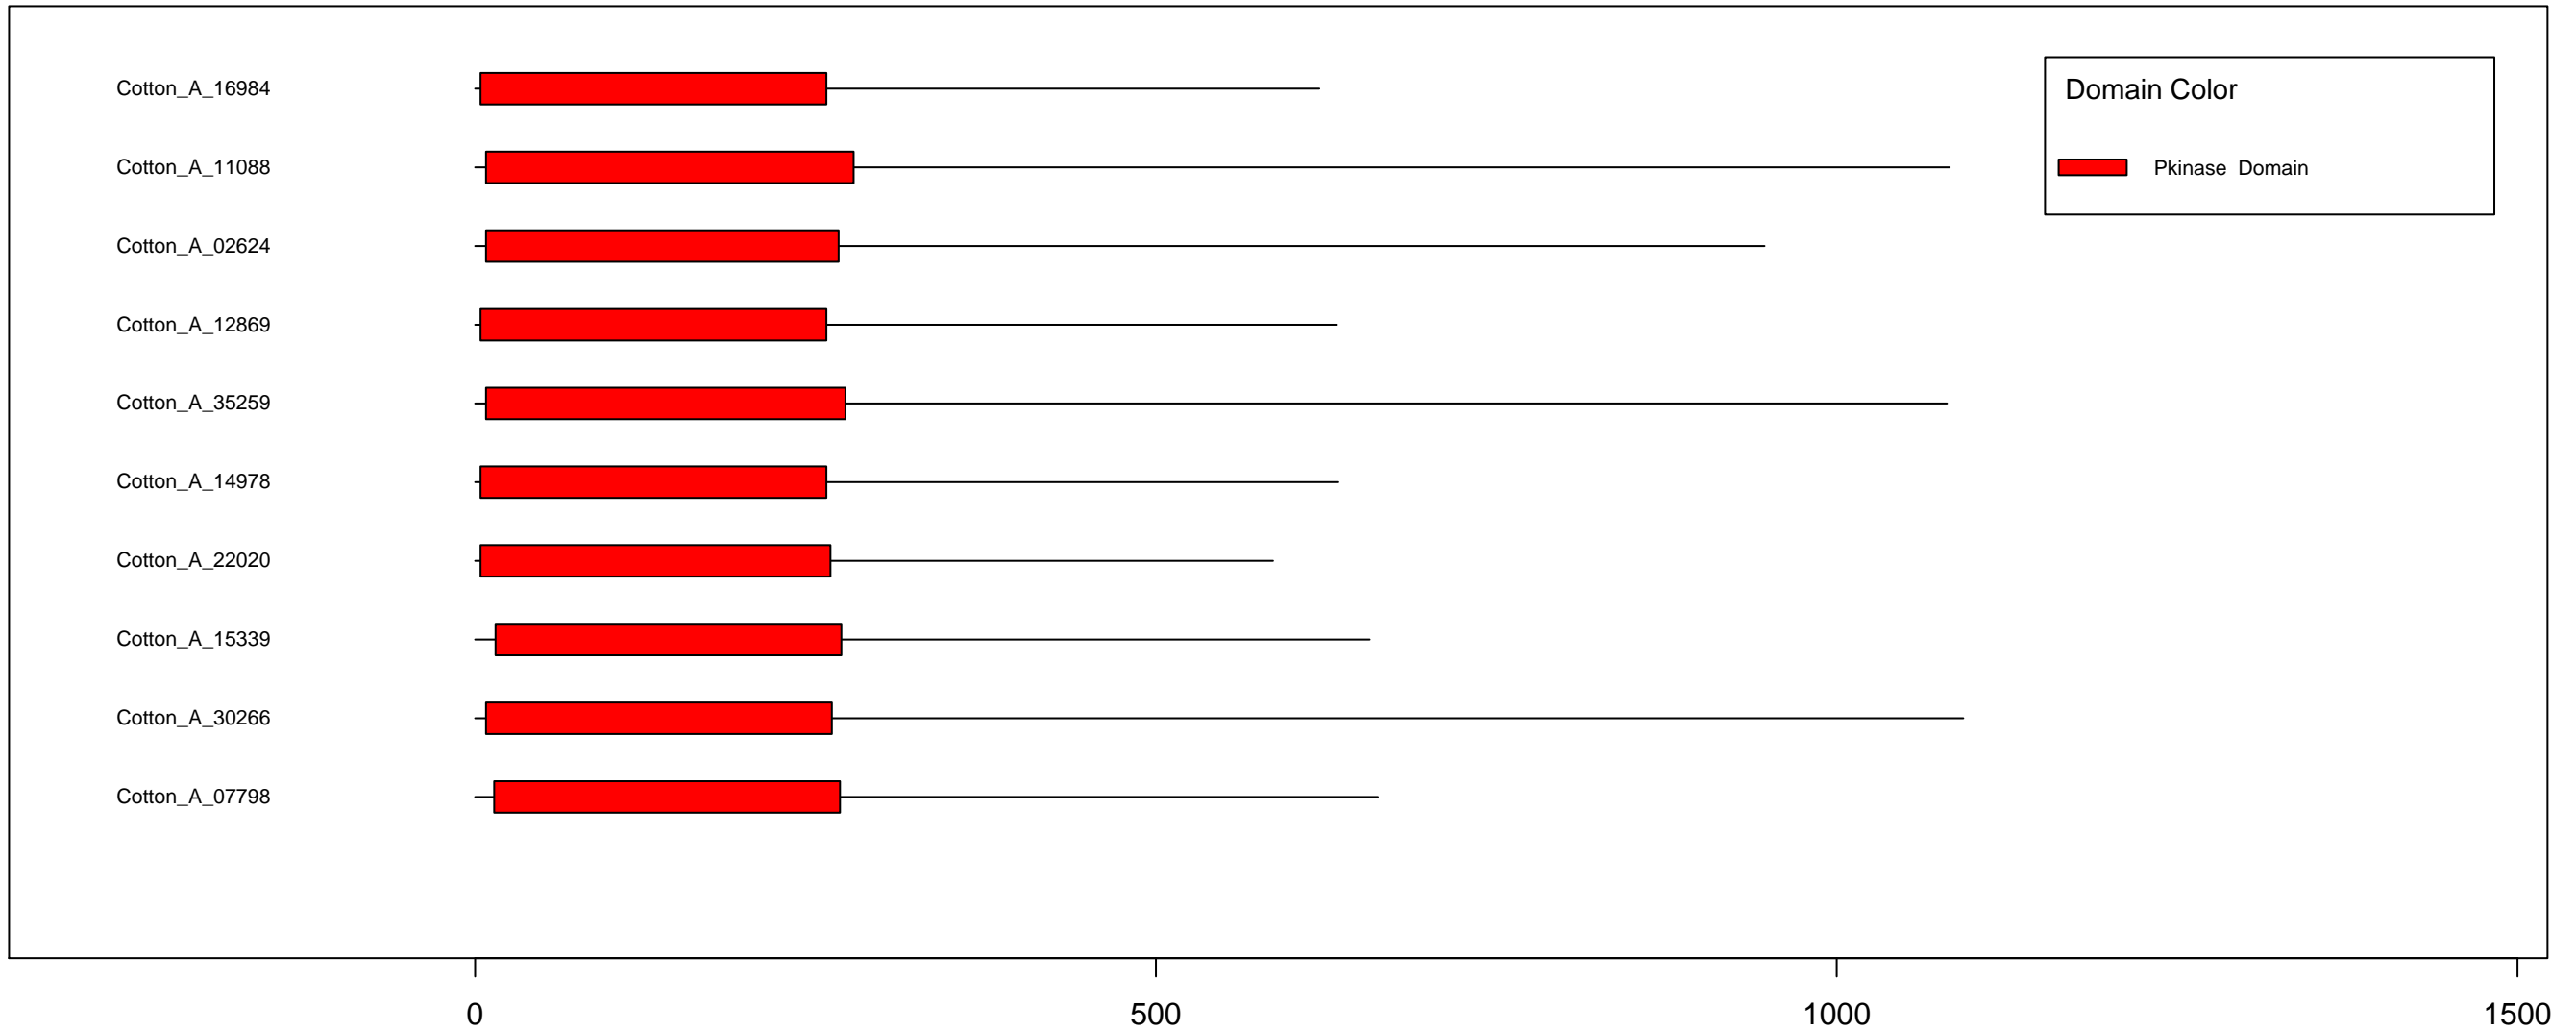

# G.ar PEK\_GCIN2 domain diagram (all)

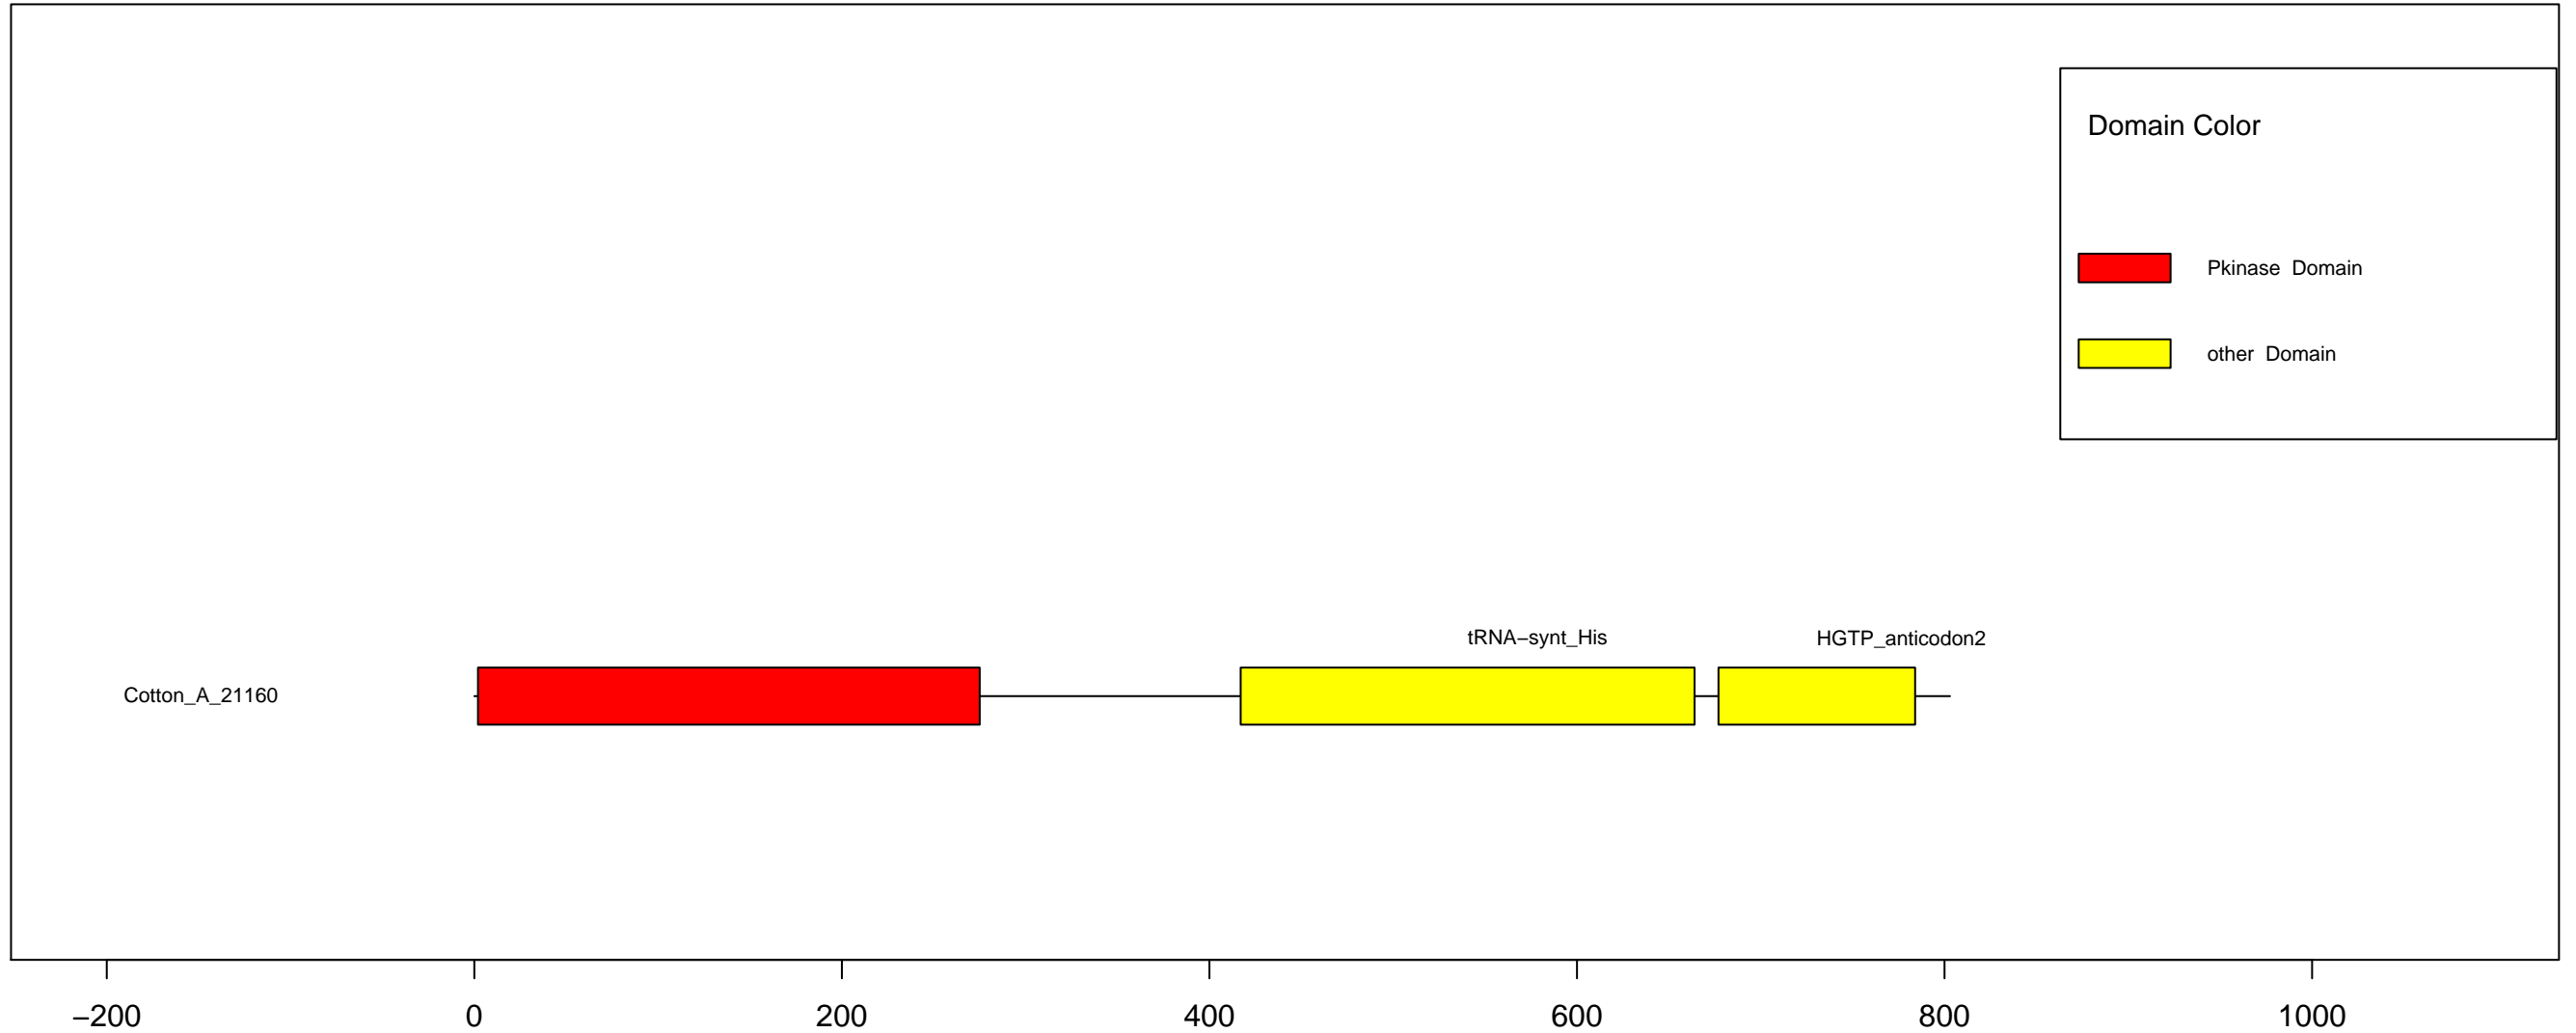

# G.ar PEK\_PEK domain diagram (all)

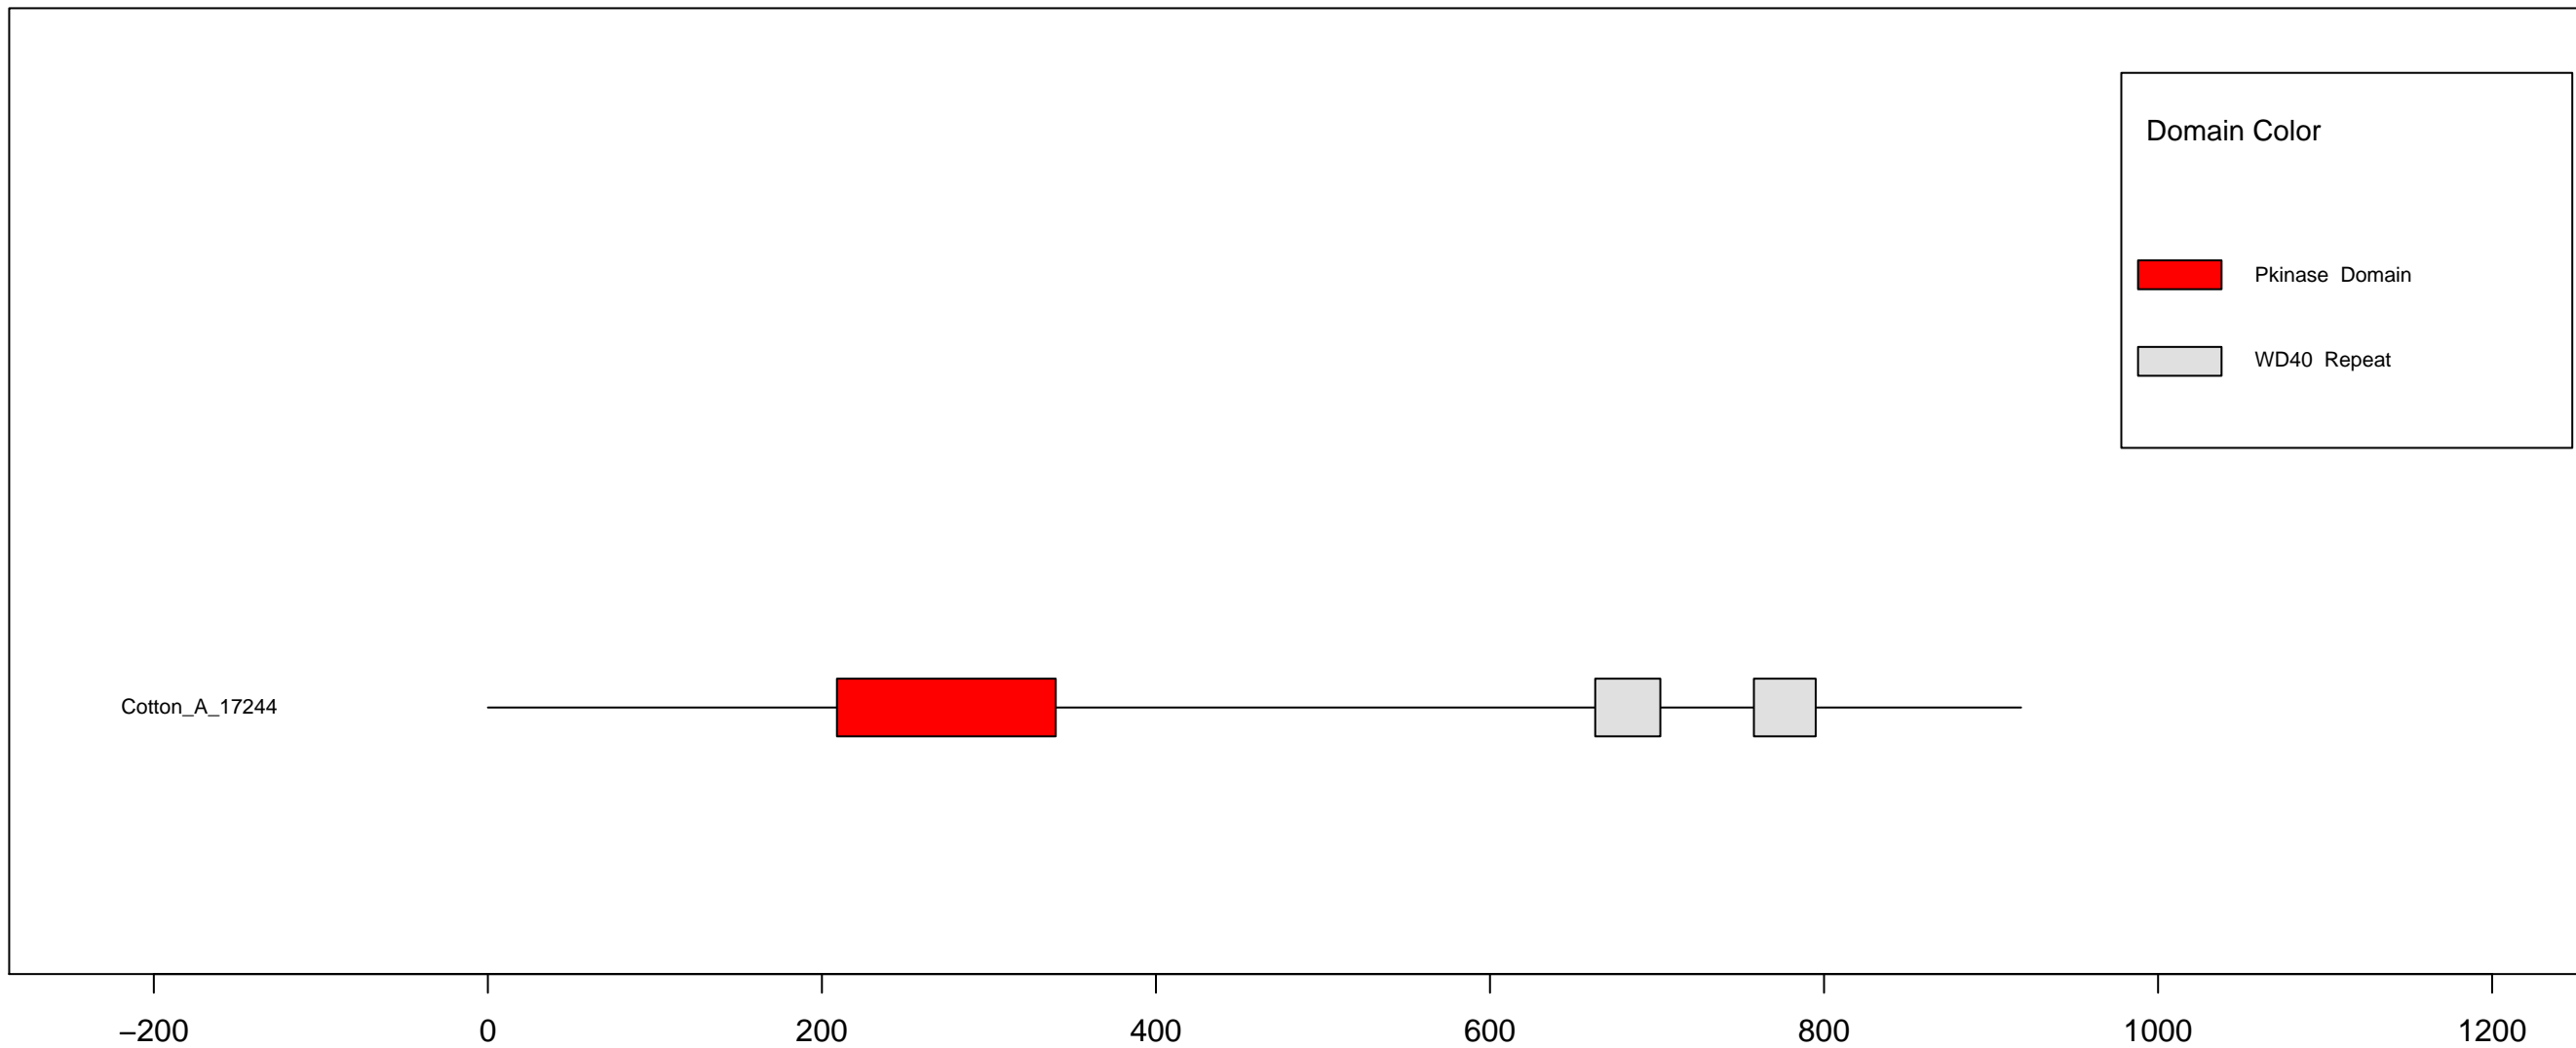



# G.ar RLK-Pelle\_C-LEC domain diagram (all)

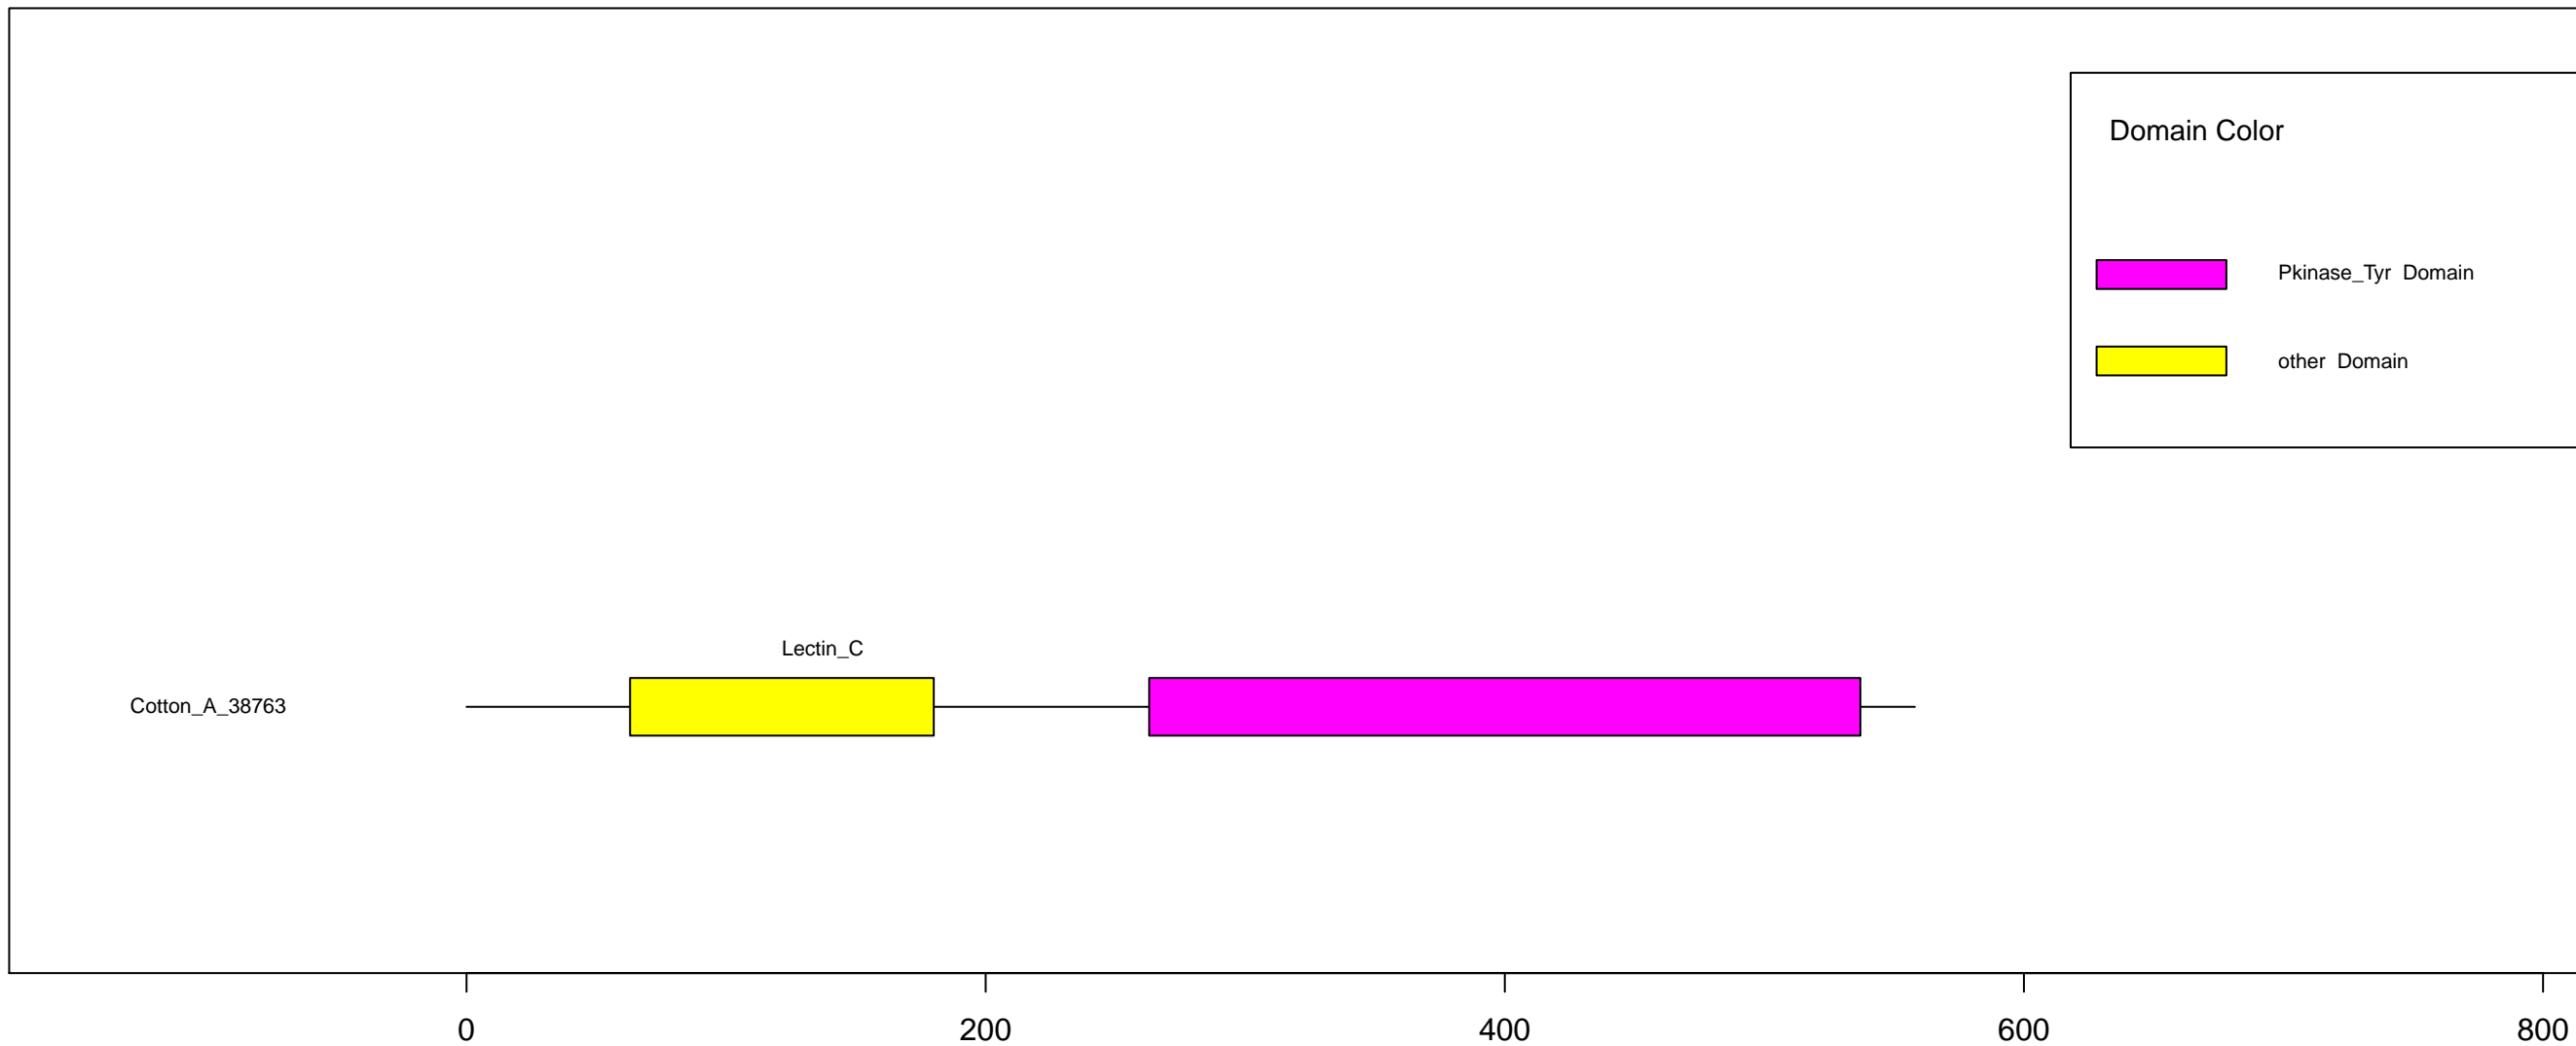



### G.ar RLK-Pelle\_CrRLK1L-1 domain diagram (part 1)

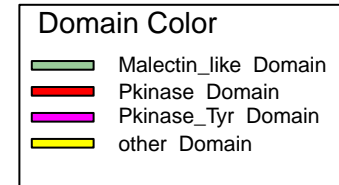

Cotton\_A\_37478  
 Cotton\_A\_37187  
 Cotton\_A\_37182  
 Cotton\_A\_33921  
 Cotton\_A\_33237  
 Cotton\_A\_33235  
 Cotton\_A\_31671  
 Cotton\_A\_29935  
 Cotton\_A\_29931  
 Cotton\_A\_29930  
 Cotton\_A\_27640  
 Cotton\_A\_24662  
 Cotton\_A\_19085  
 Cotton\_A\_11591  
 Cotton\_A\_08717  
 Cotton\_A\_00717  
 Cotton\_A\_23559  
 Cotton\_A\_23558  
 Cotton\_A\_36998  
 Cotton\_A\_12460

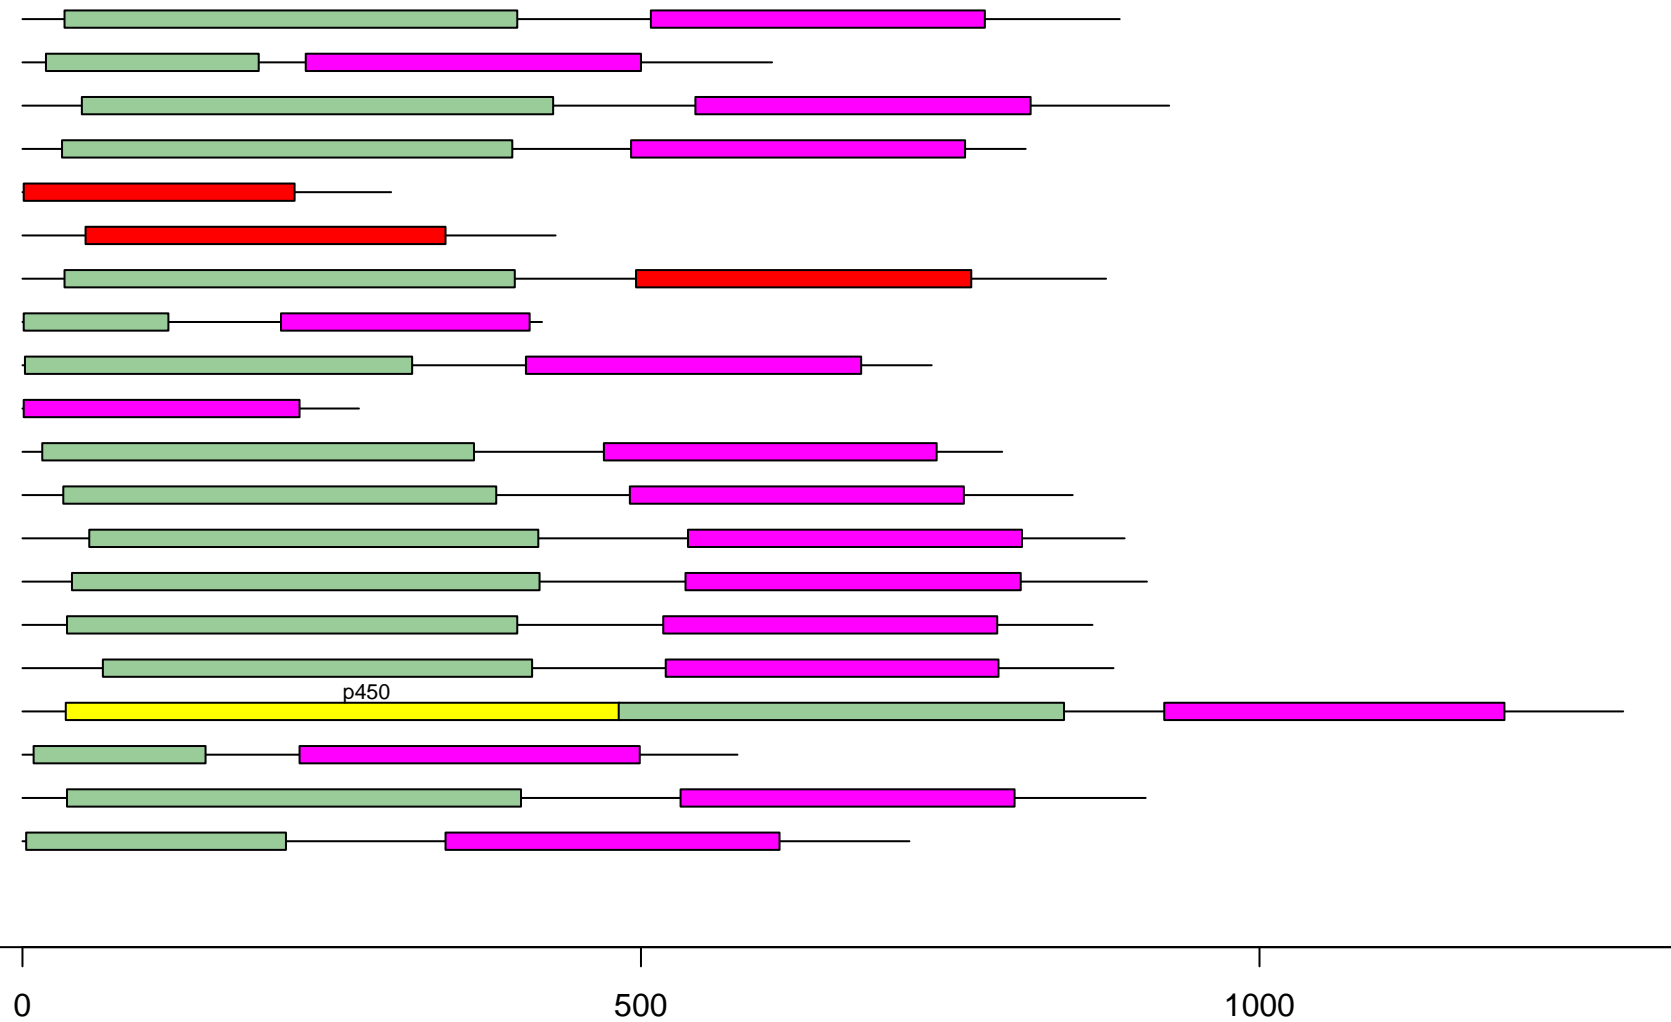

### G.ar RLK-Pelle\_CrRLK1L-1 domain diagram (part 2)

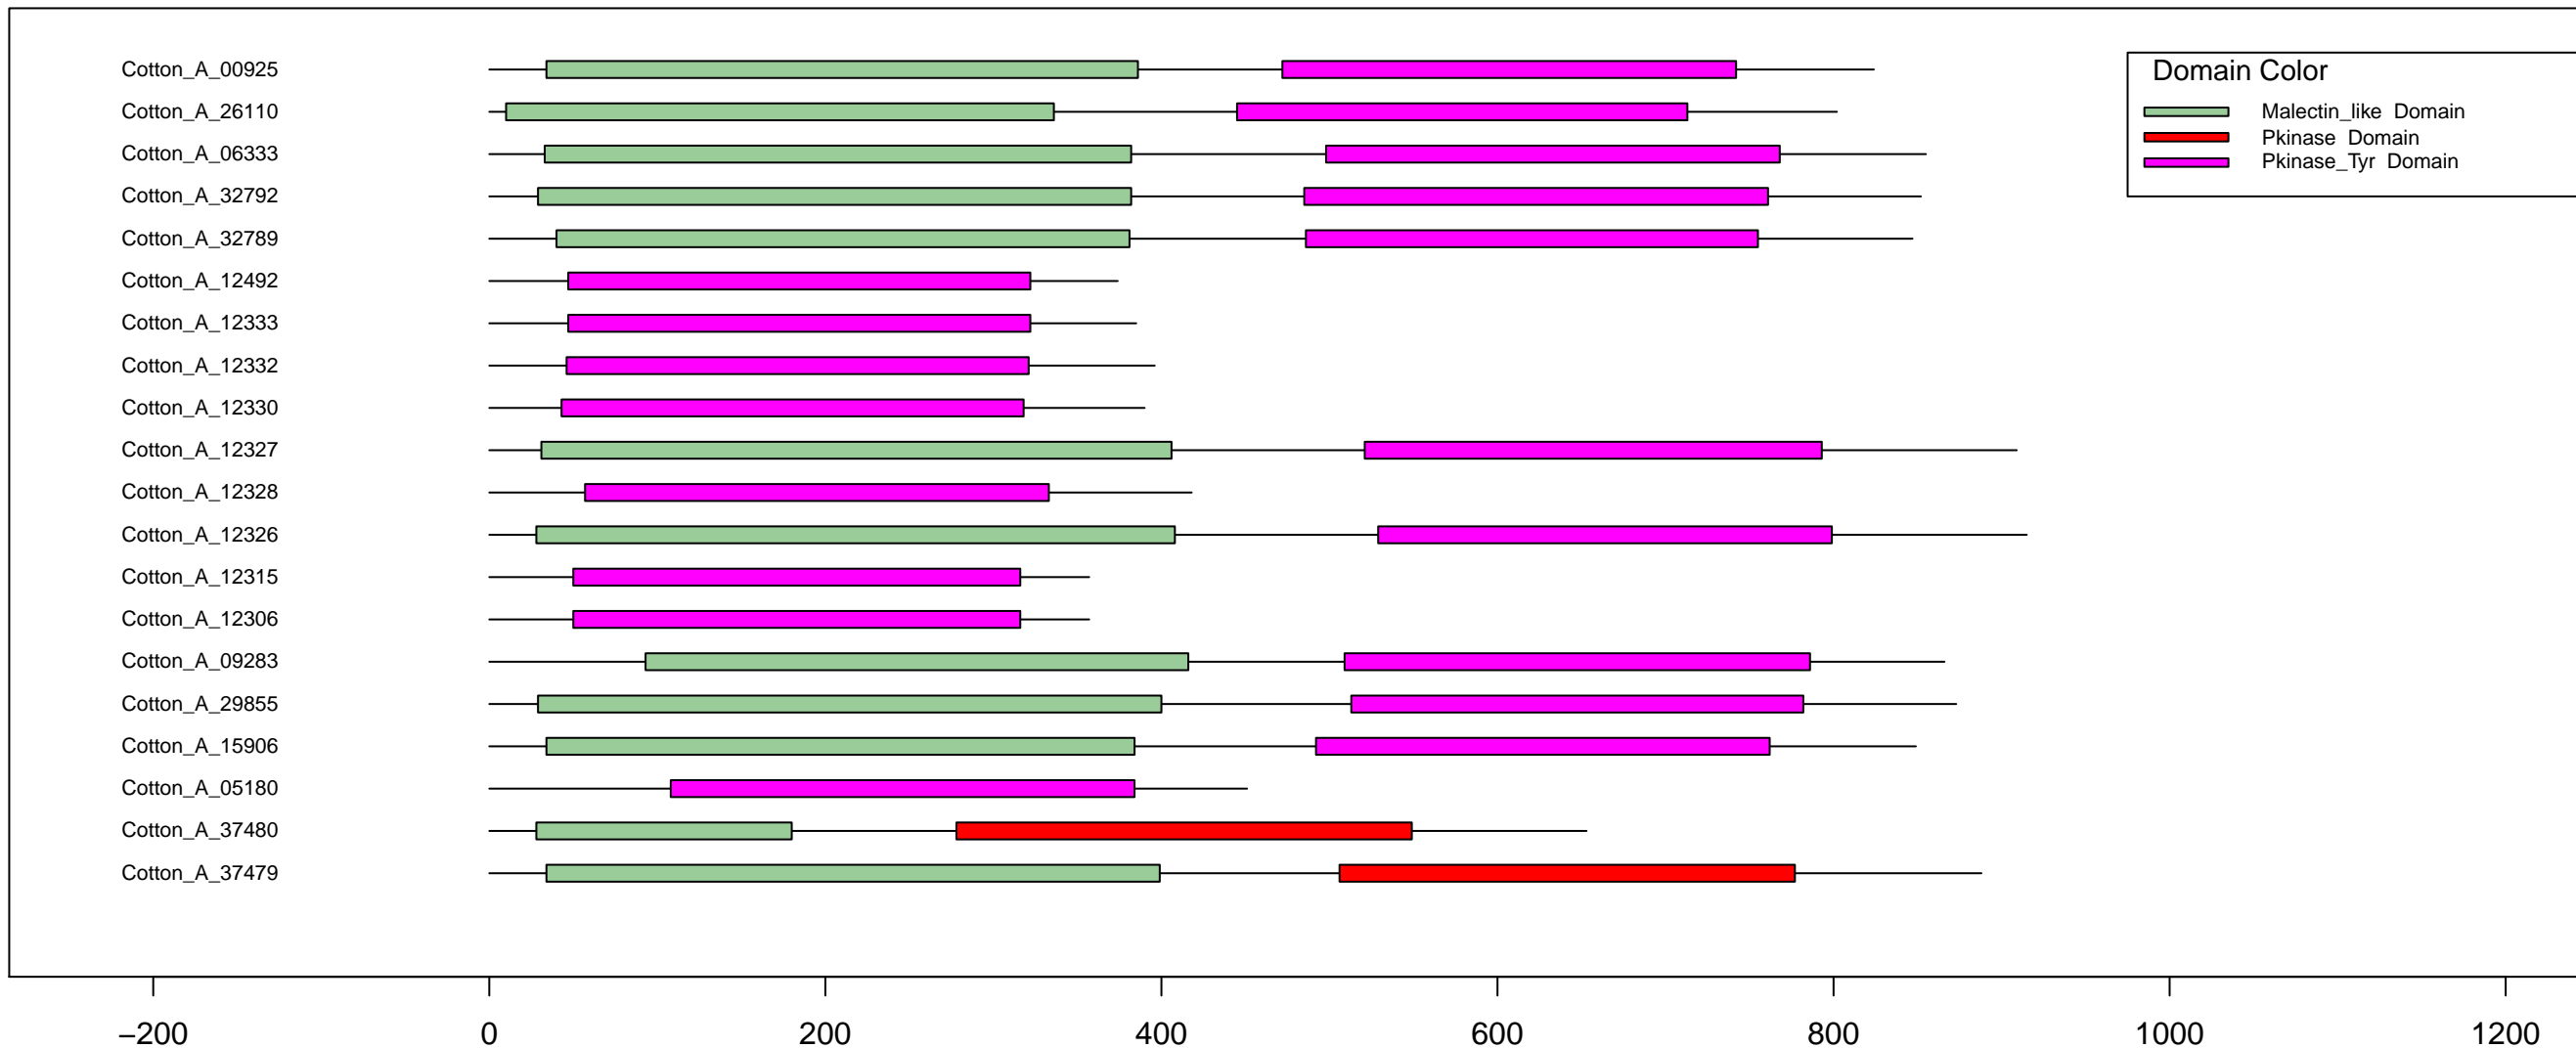

### G.ar RLK-Pelle\_CrRLK1L-1 domain diagram (part 3)

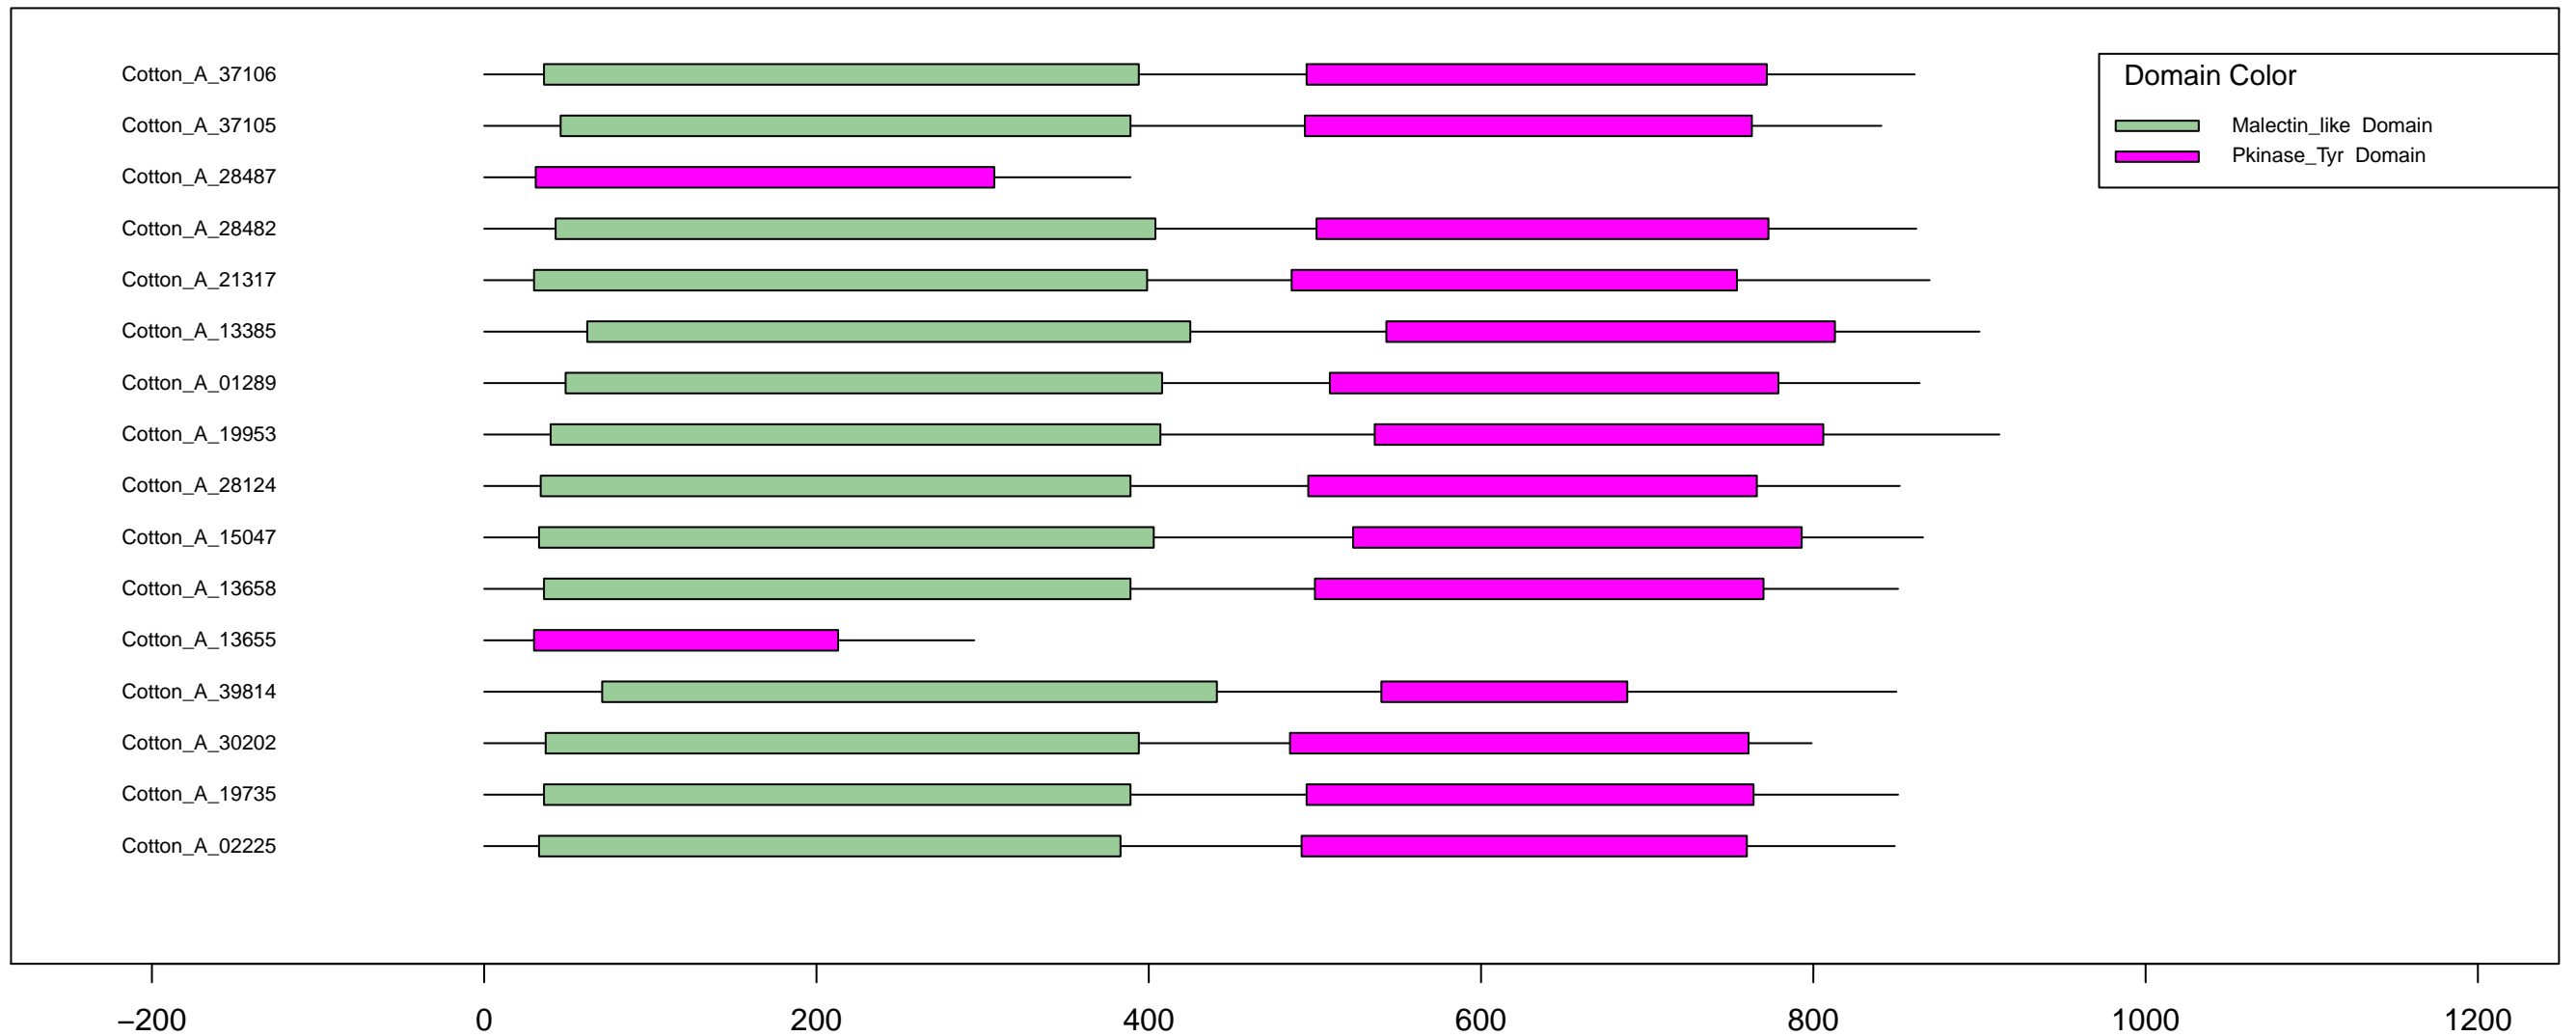

### G.ar RLK-Pelle\_DLSV domain diagram (part 1)

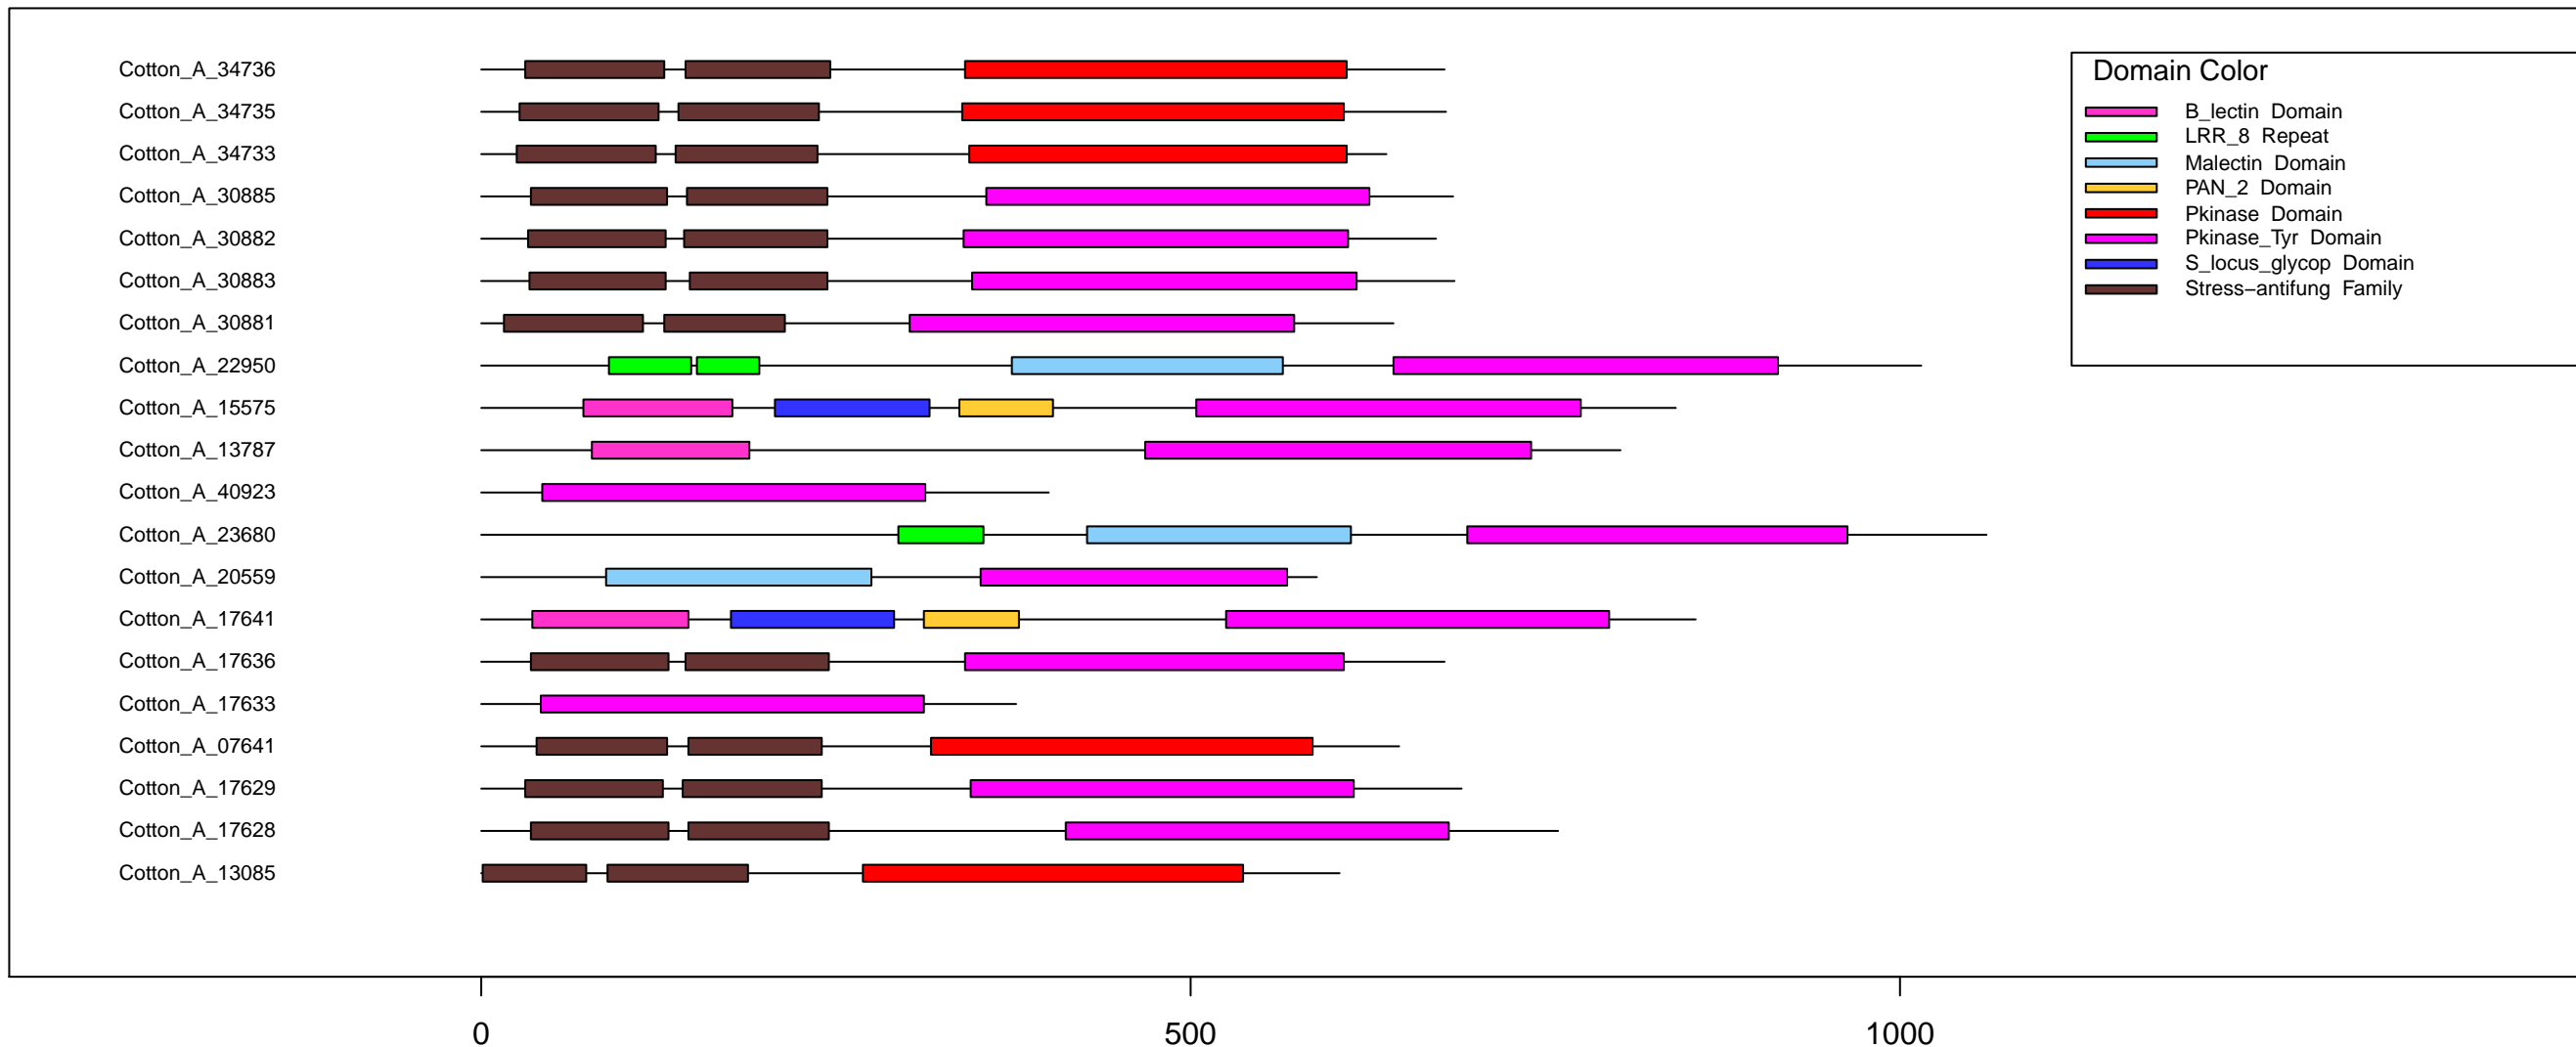

## G.ar RLK-Pelle\_DLSV domain diagram (part 2)

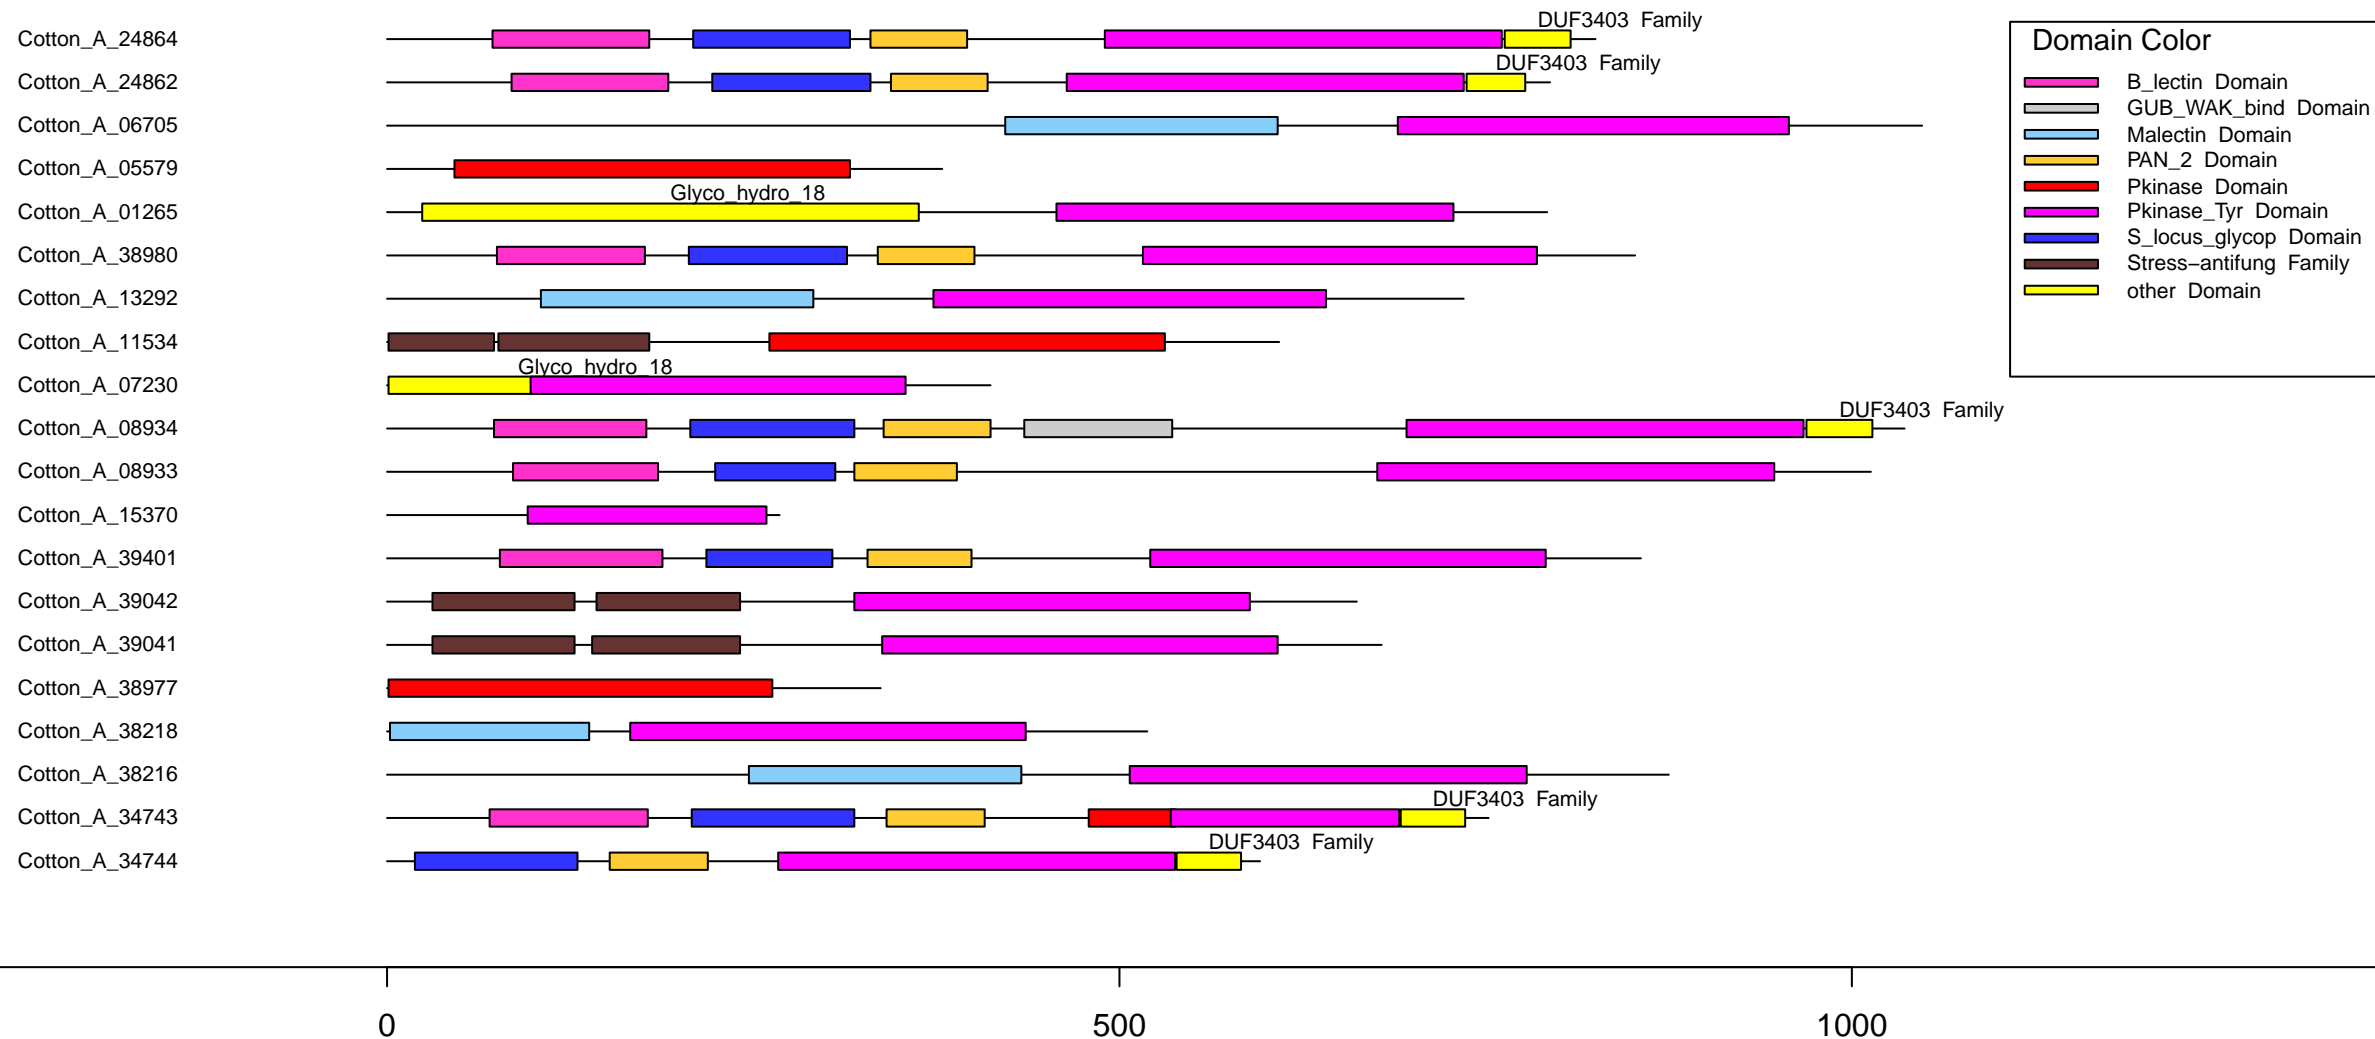

### G.ar RLK-Pelle\_DLSV domain diagram (part 3)

Cotton\_A\_04719  
 Cotton\_A\_04709  
 Cotton\_A\_35690  
 Cotton\_A\_21848  
 Cotton\_A\_09058  
 Cotton\_A\_35383  
 Cotton\_A\_30745  
 Cotton\_A\_30401  
 Cotton\_A\_22780  
 Cotton\_A\_21664  
 Cotton\_A\_21663  
 Cotton\_A\_21659  
 Cotton\_A\_21656  
 Cotton\_A\_21651  
 Cotton\_A\_14231  
 Cotton\_A\_14230  
 Cotton\_A\_04967  
 Cotton\_A\_00100  
 Cotton\_A\_36143  
 Cotton\_A\_28039

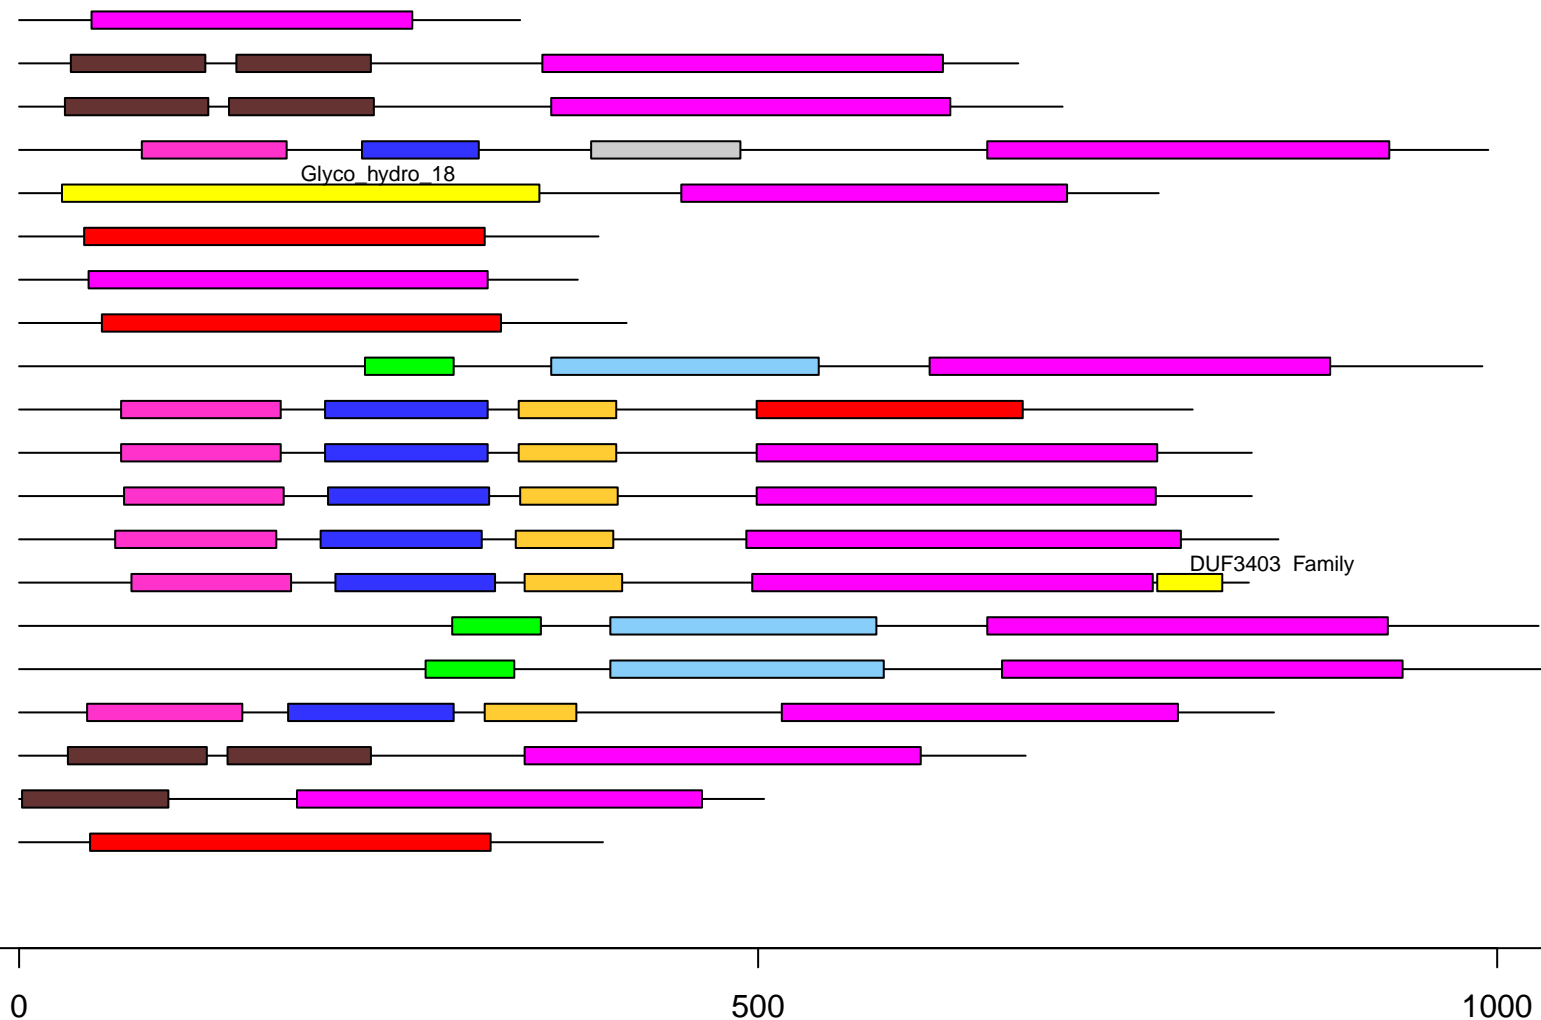

**Domain Color**

- B\_lectin Domain
- GUB\_WAK\_bind Domain
- LRR\_8 Repeat
- Malectin Domain
- PAN\_2 Domain
- Pkinase Domain
- Pkinase\_Tyr Domain
- S\_locus\_glycop Domain
- Stress-antifung Family
- other Domain



### G.ar RLK-Pelle\_DLSV domain diagram (part 4)

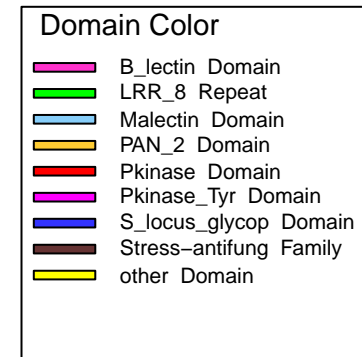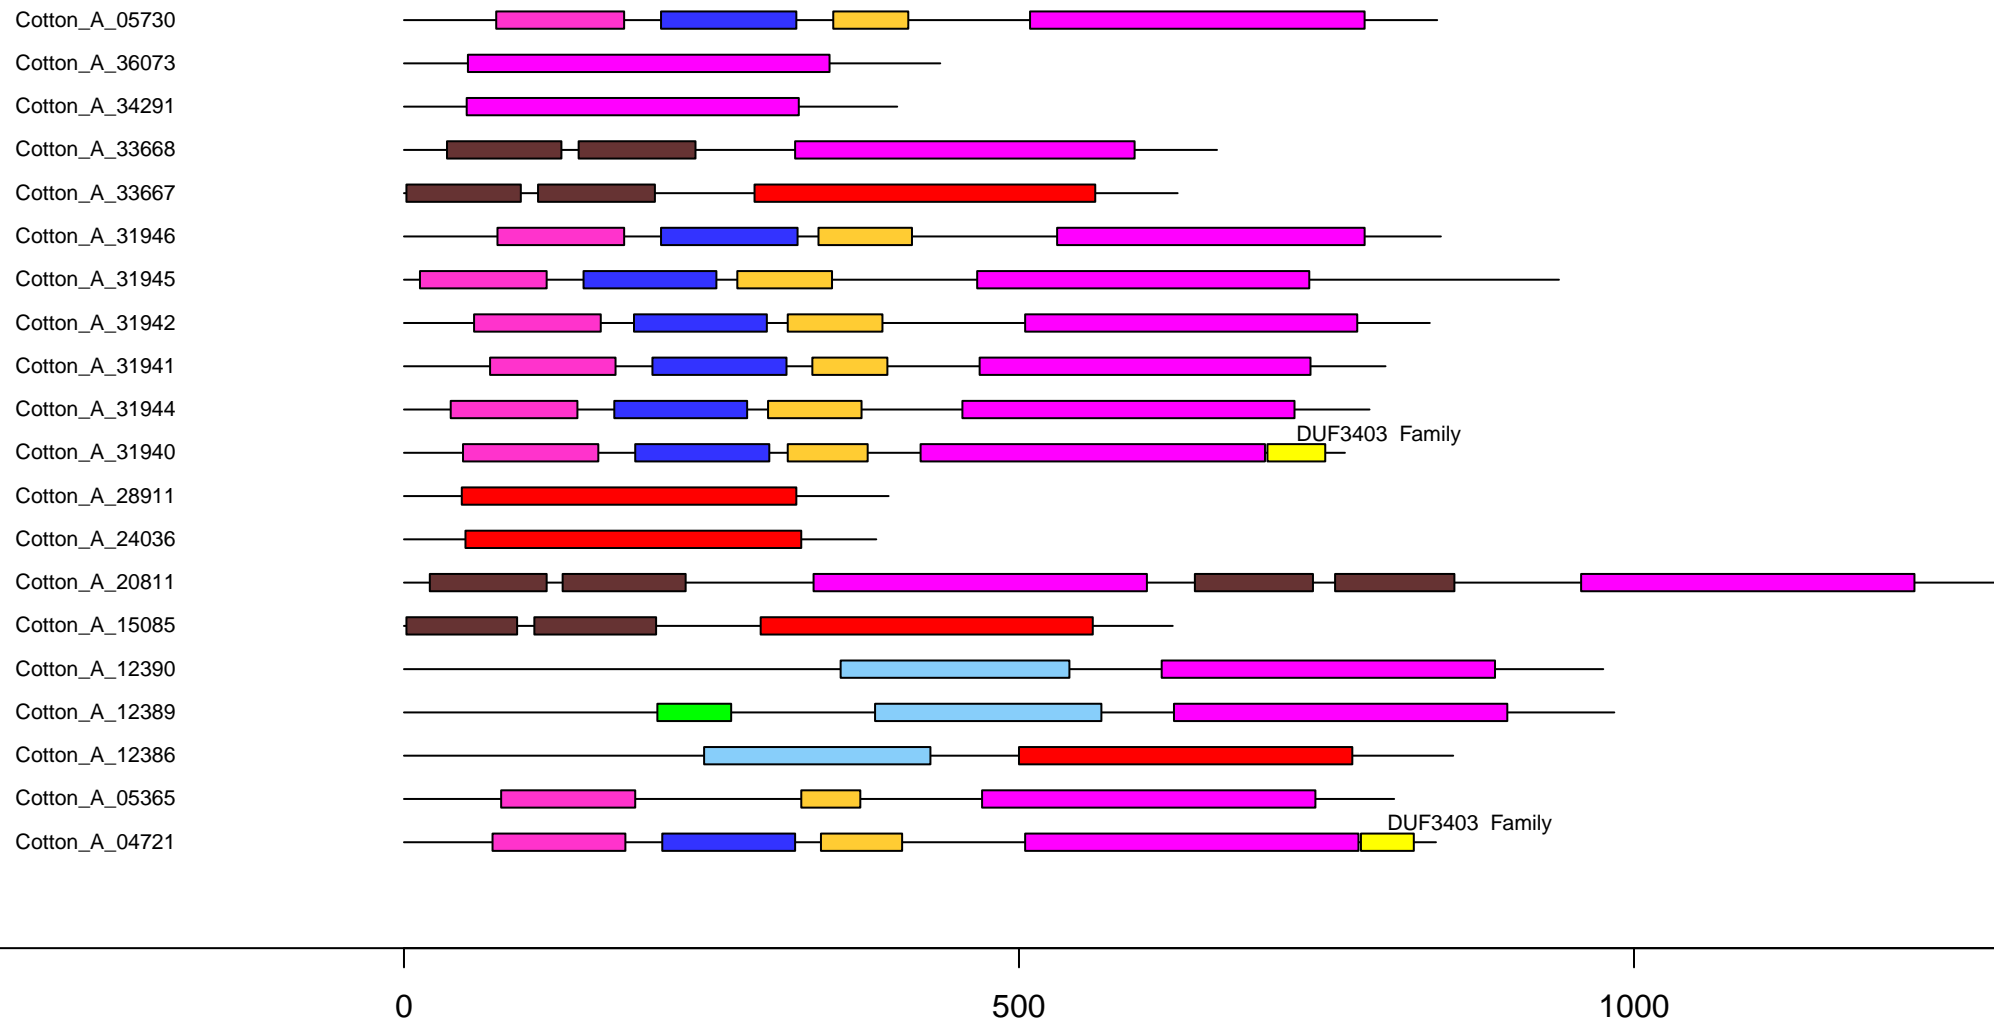

DUF3403 Family

DUF3403 Family

### G.ar RLK-Pelle\_DLSV domain diagram (part 5)

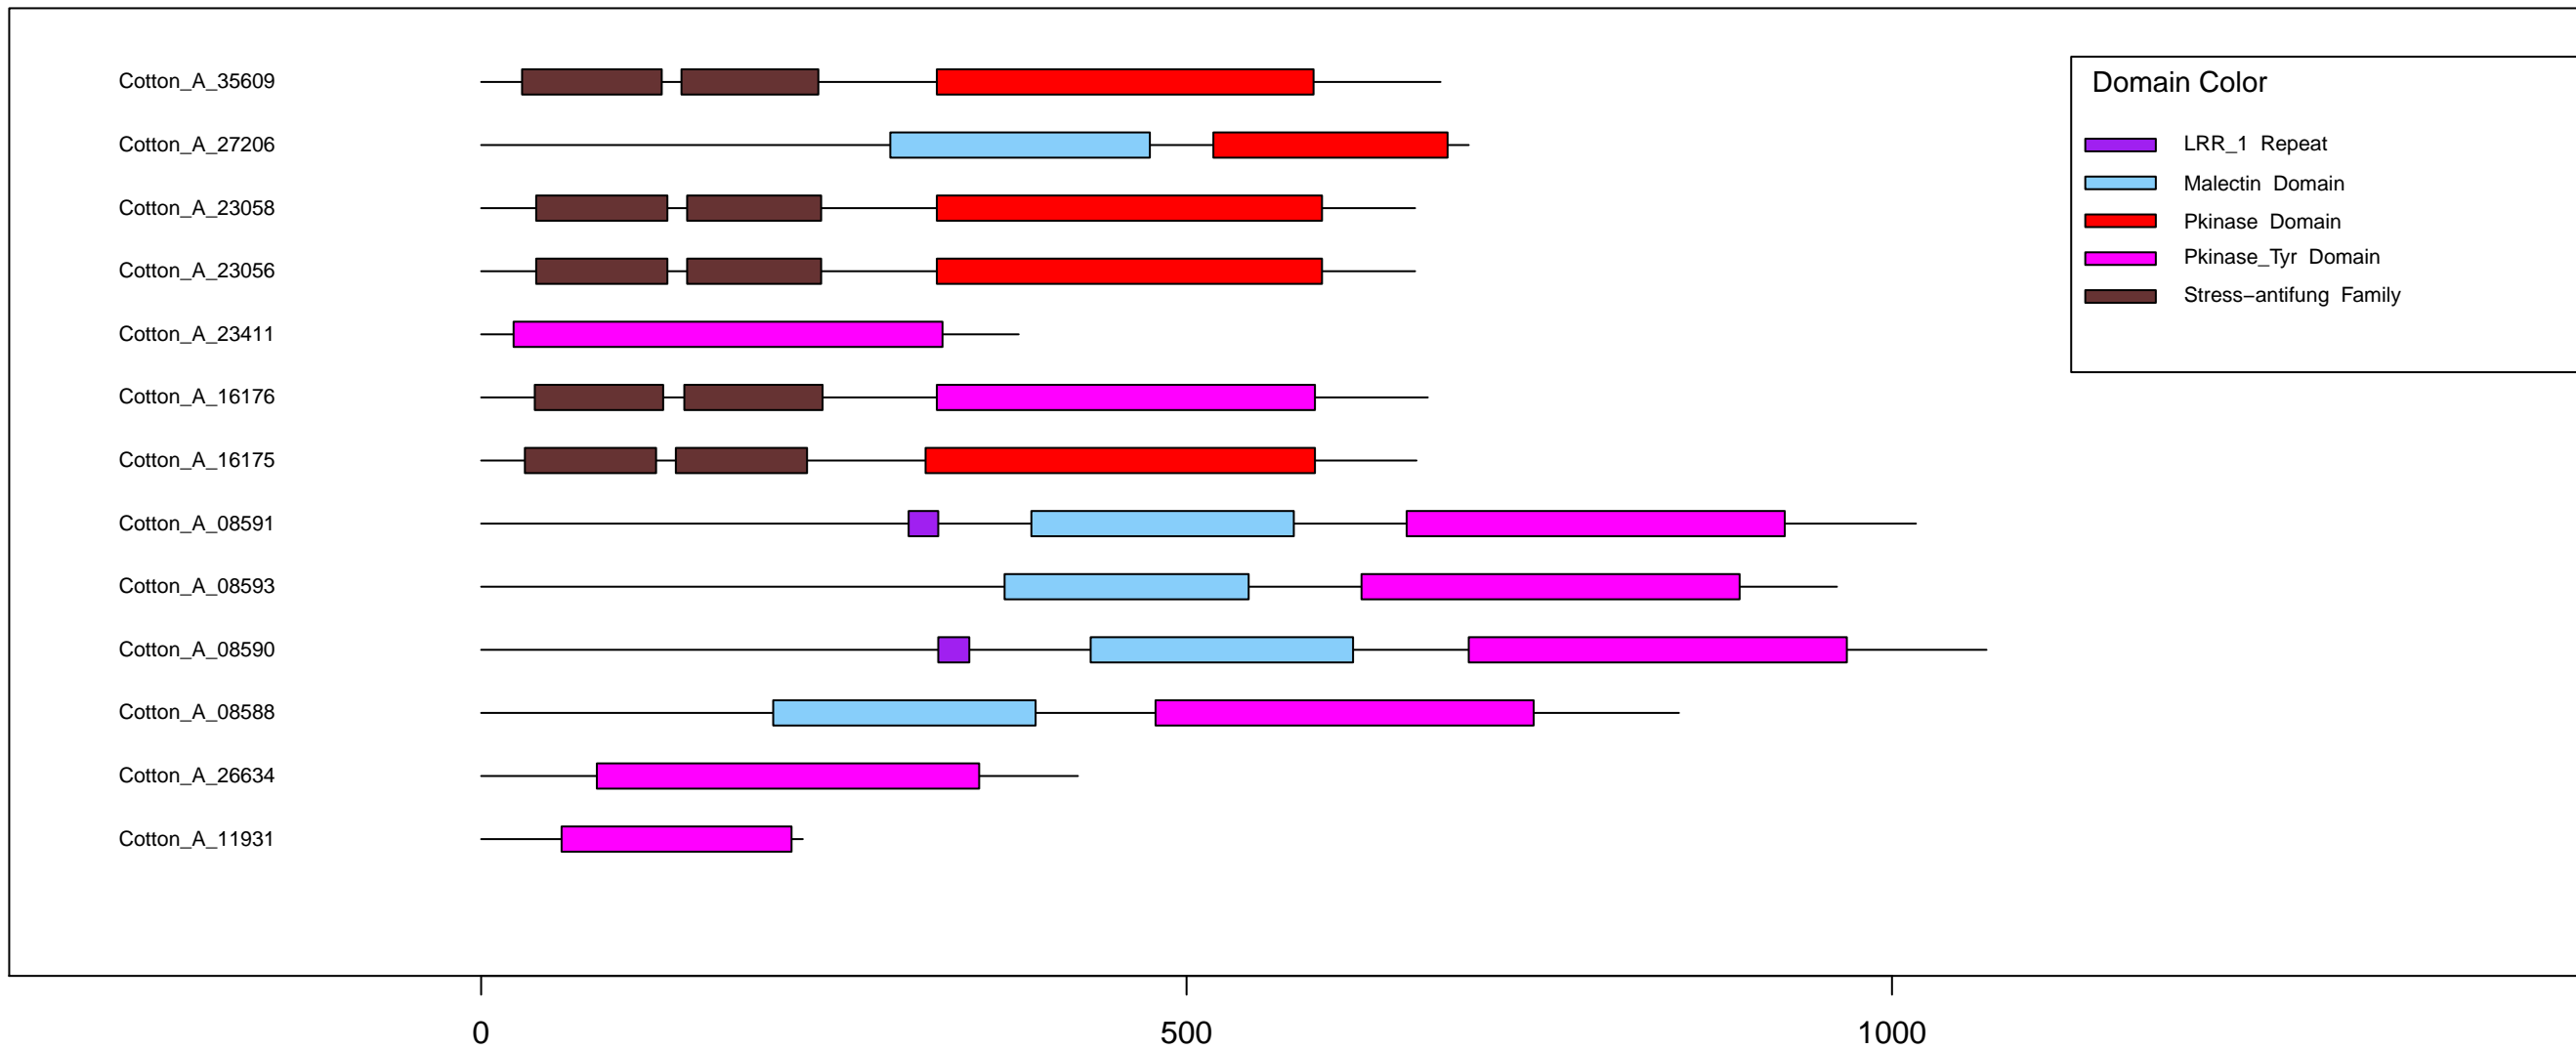

# G.ar RLK-Pelle\_Extensin domain diagram (all)

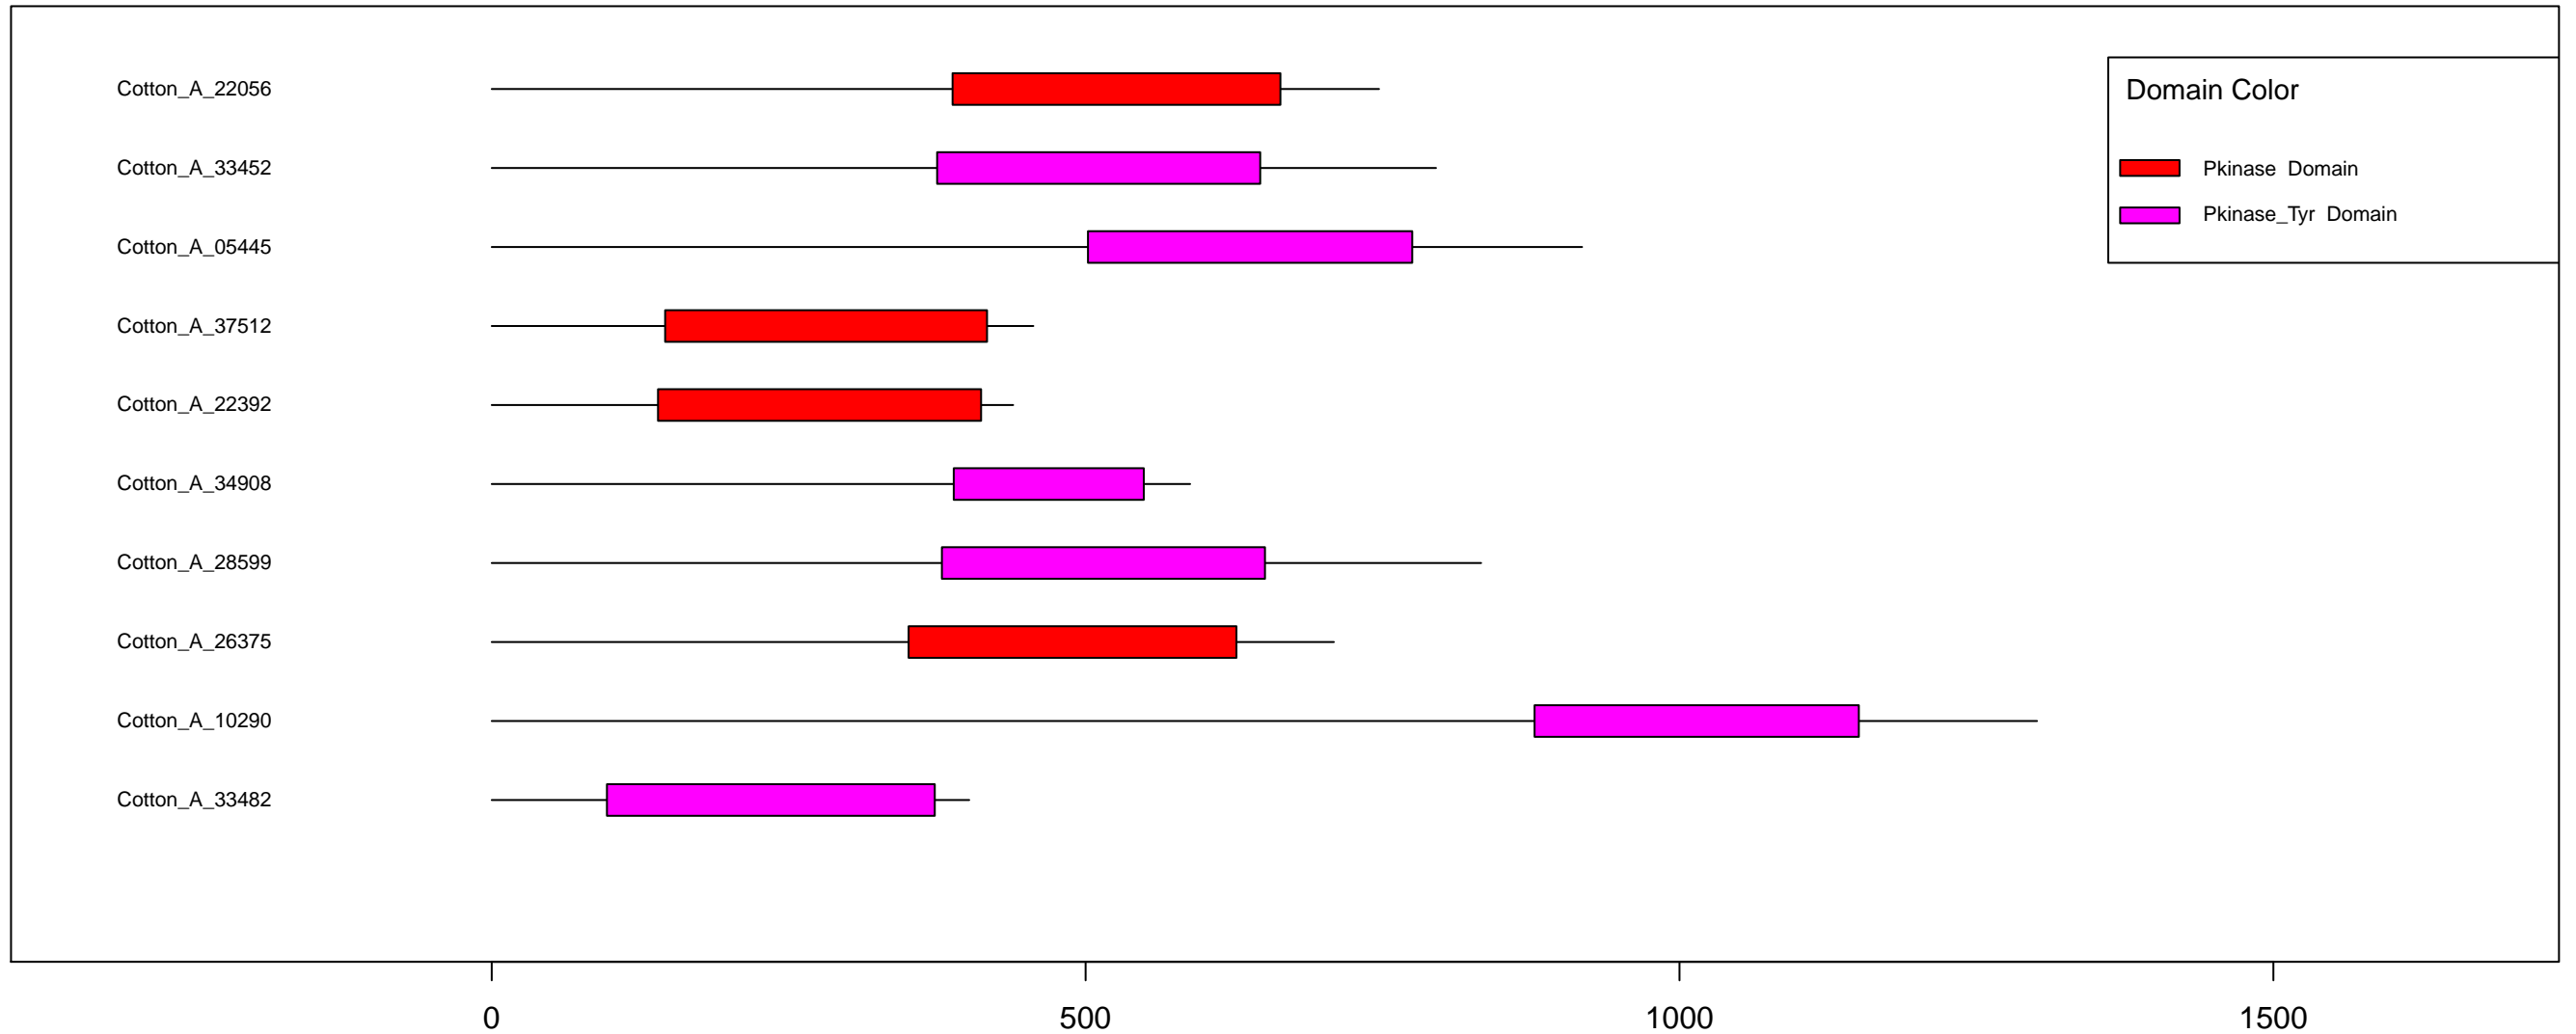

# G.ar RLK-Pelle\_L-LEC domain diagram (part 1)

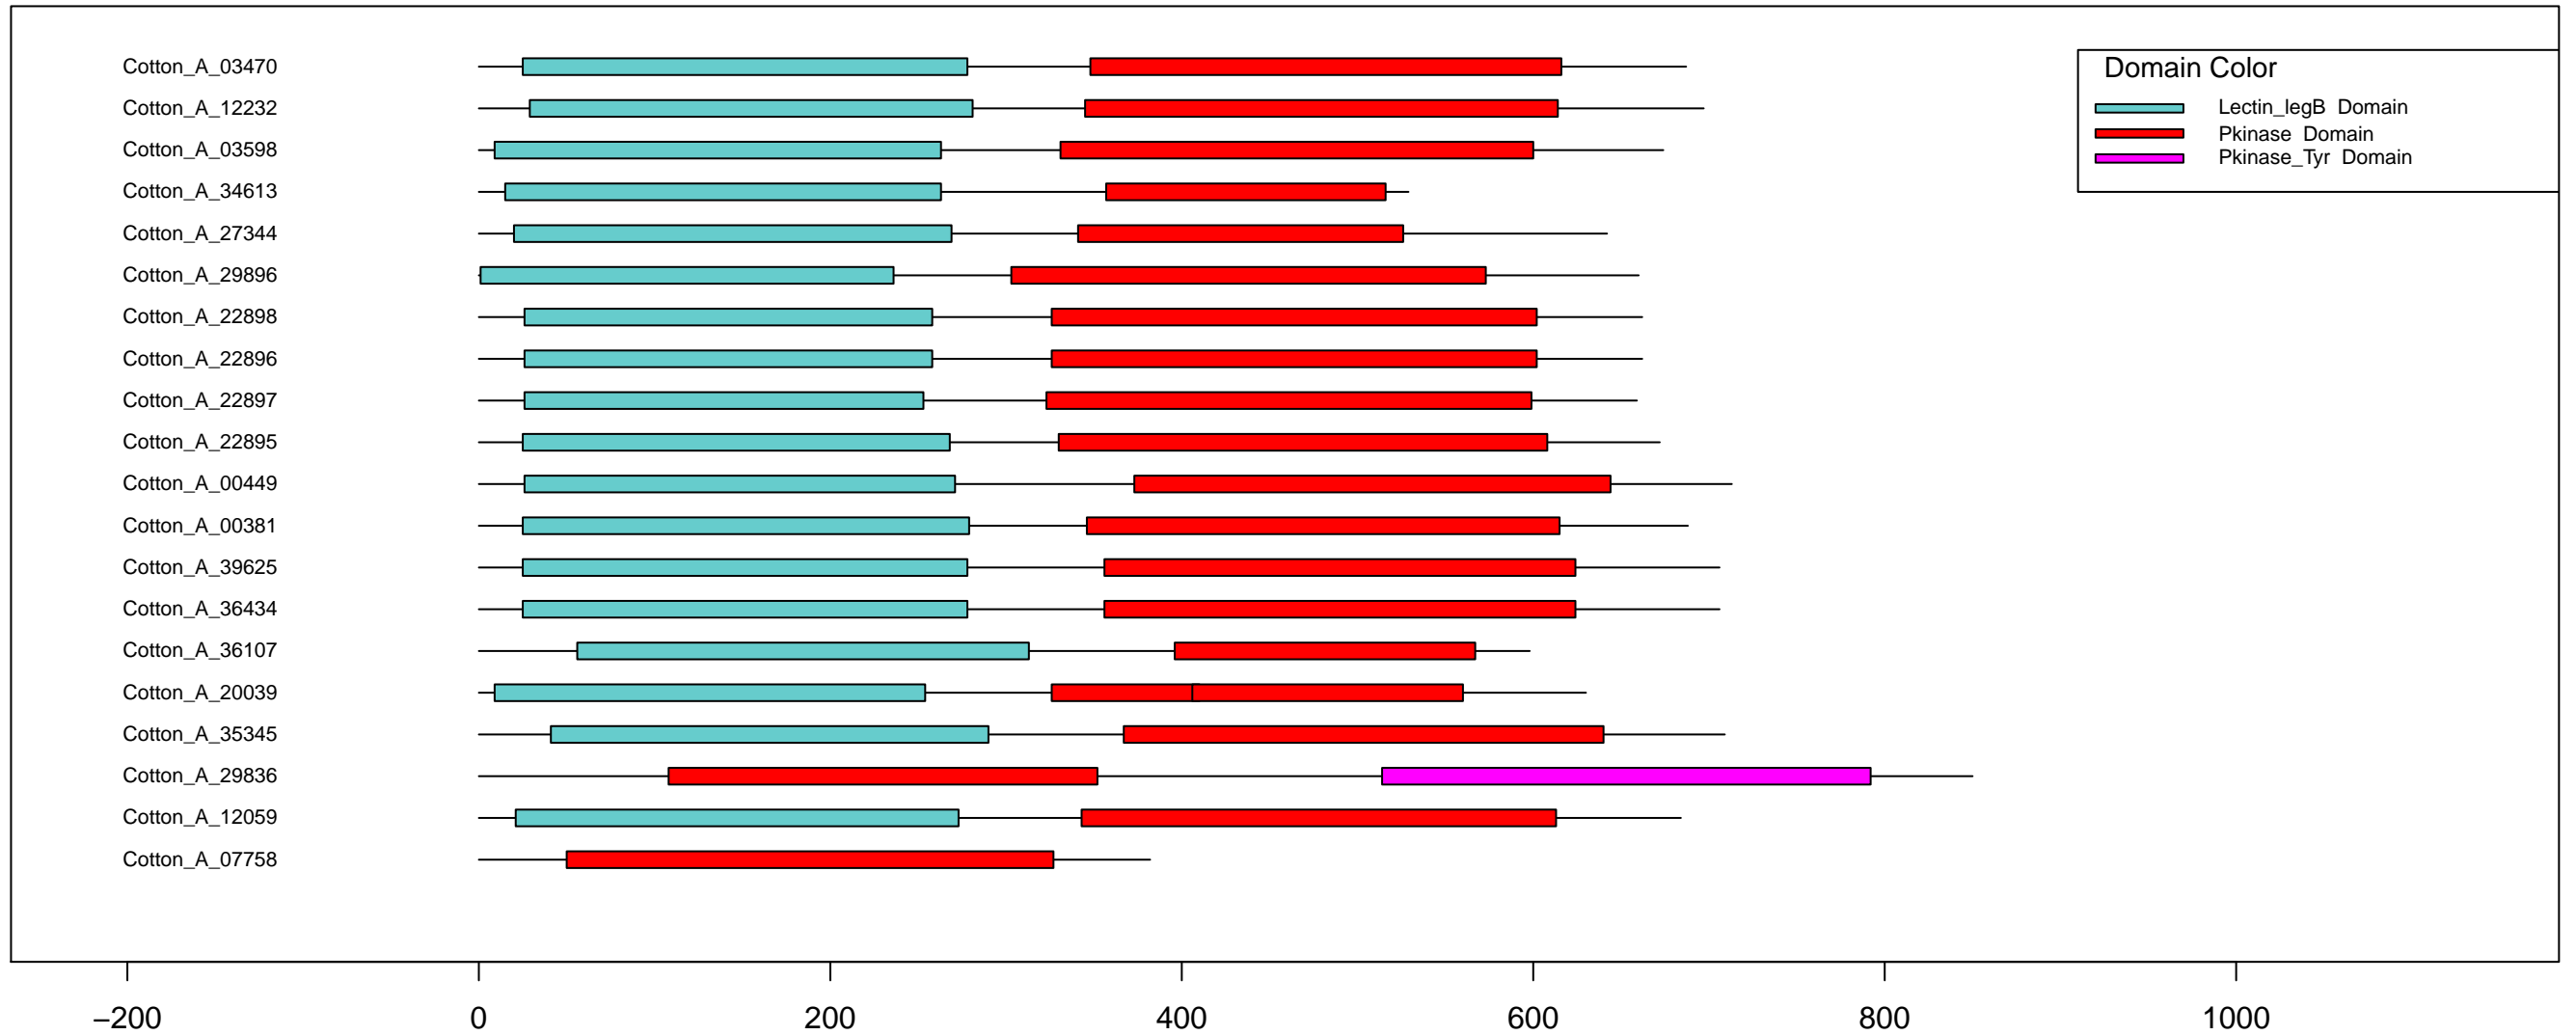

## G.ar RLK-Pelle\_L-LEC domain diagram (part 2)

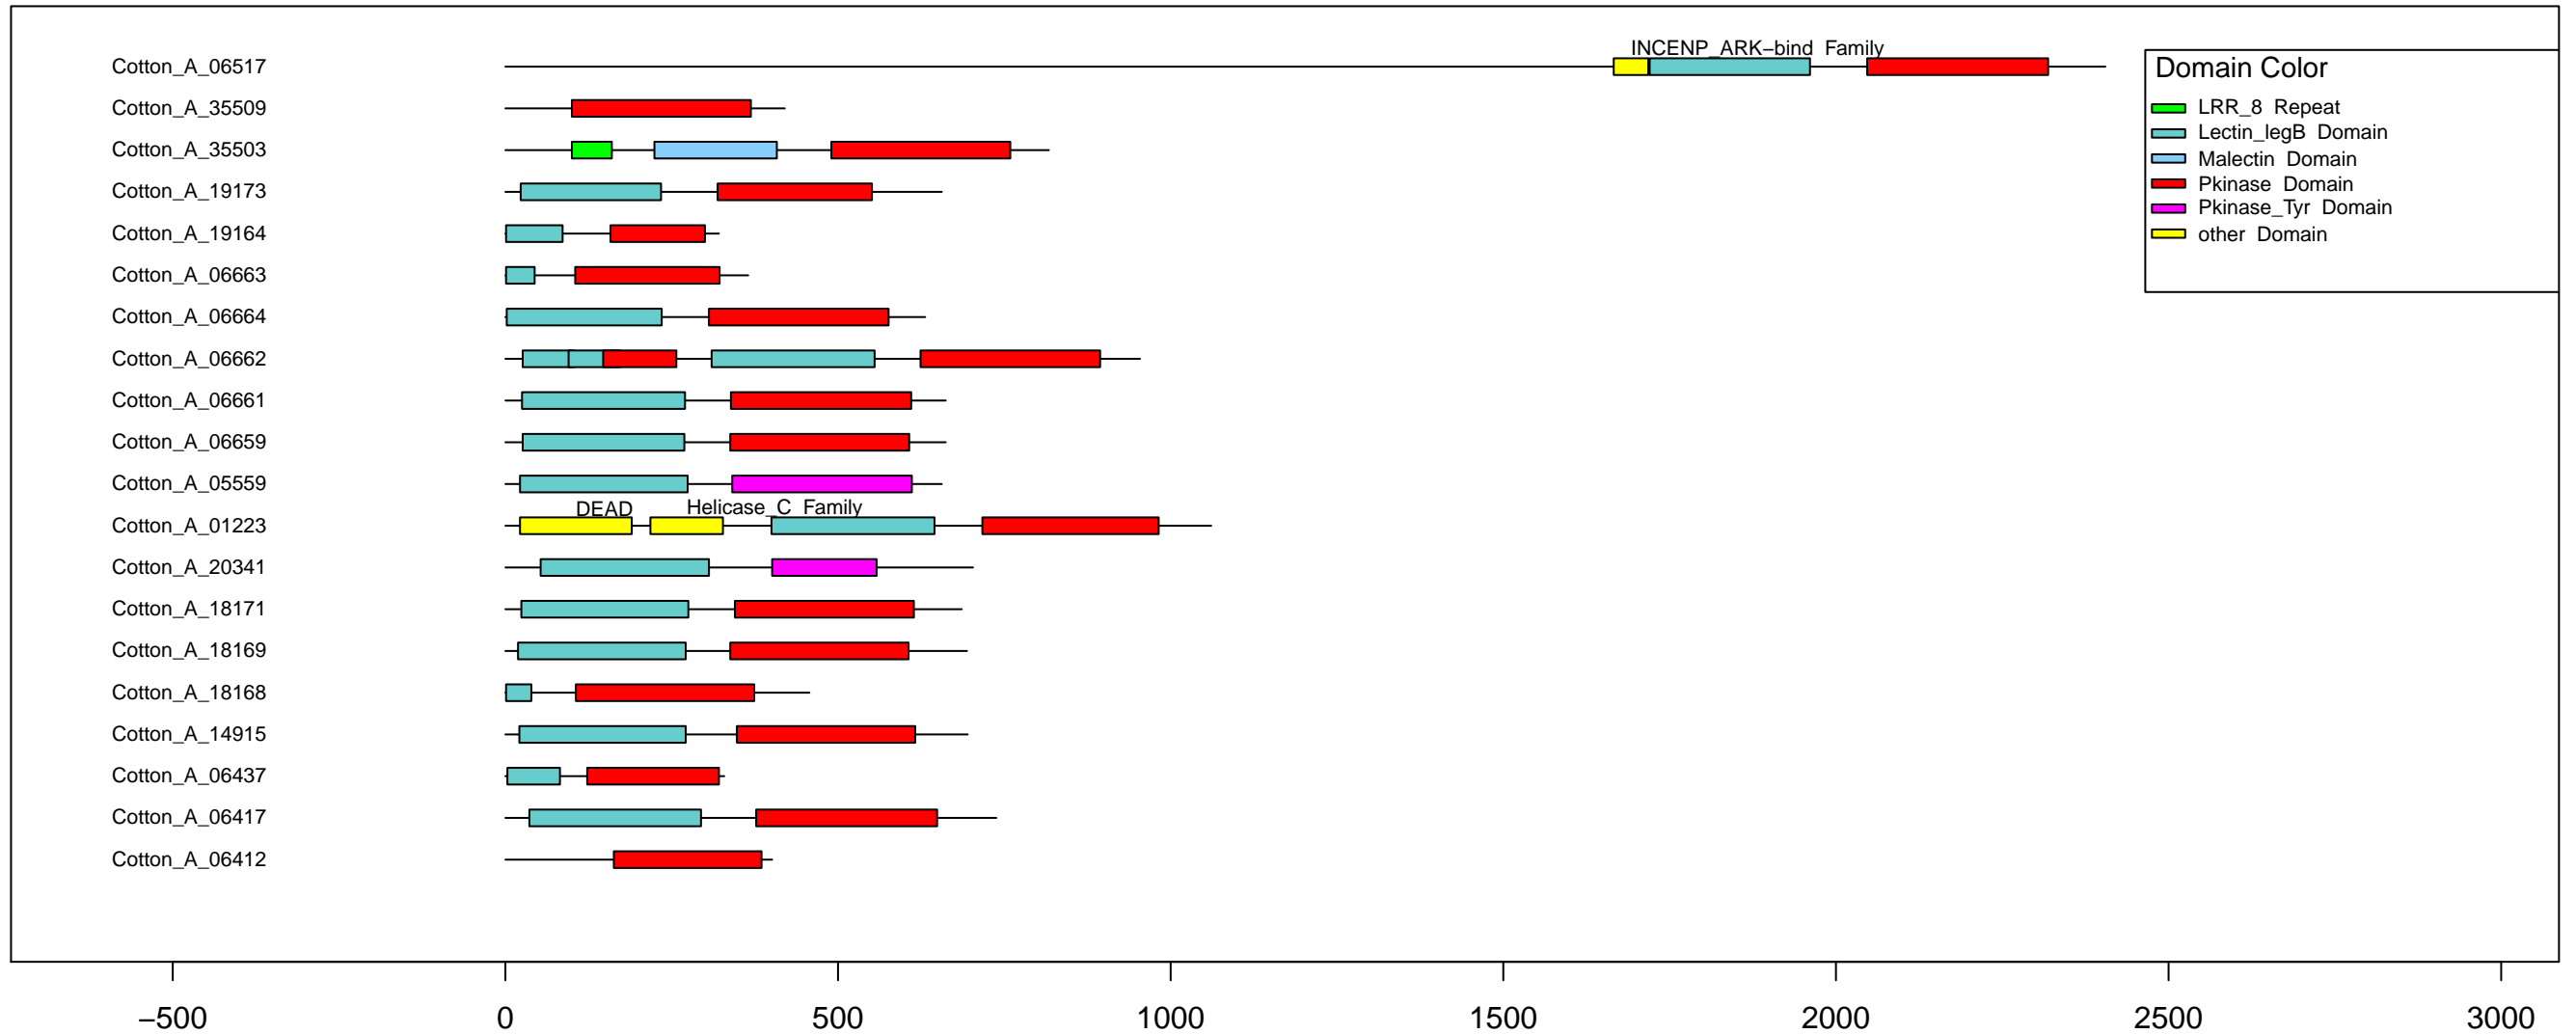

### G.ar RLK-Pelle\_L-LEC domain diagram (part 3)

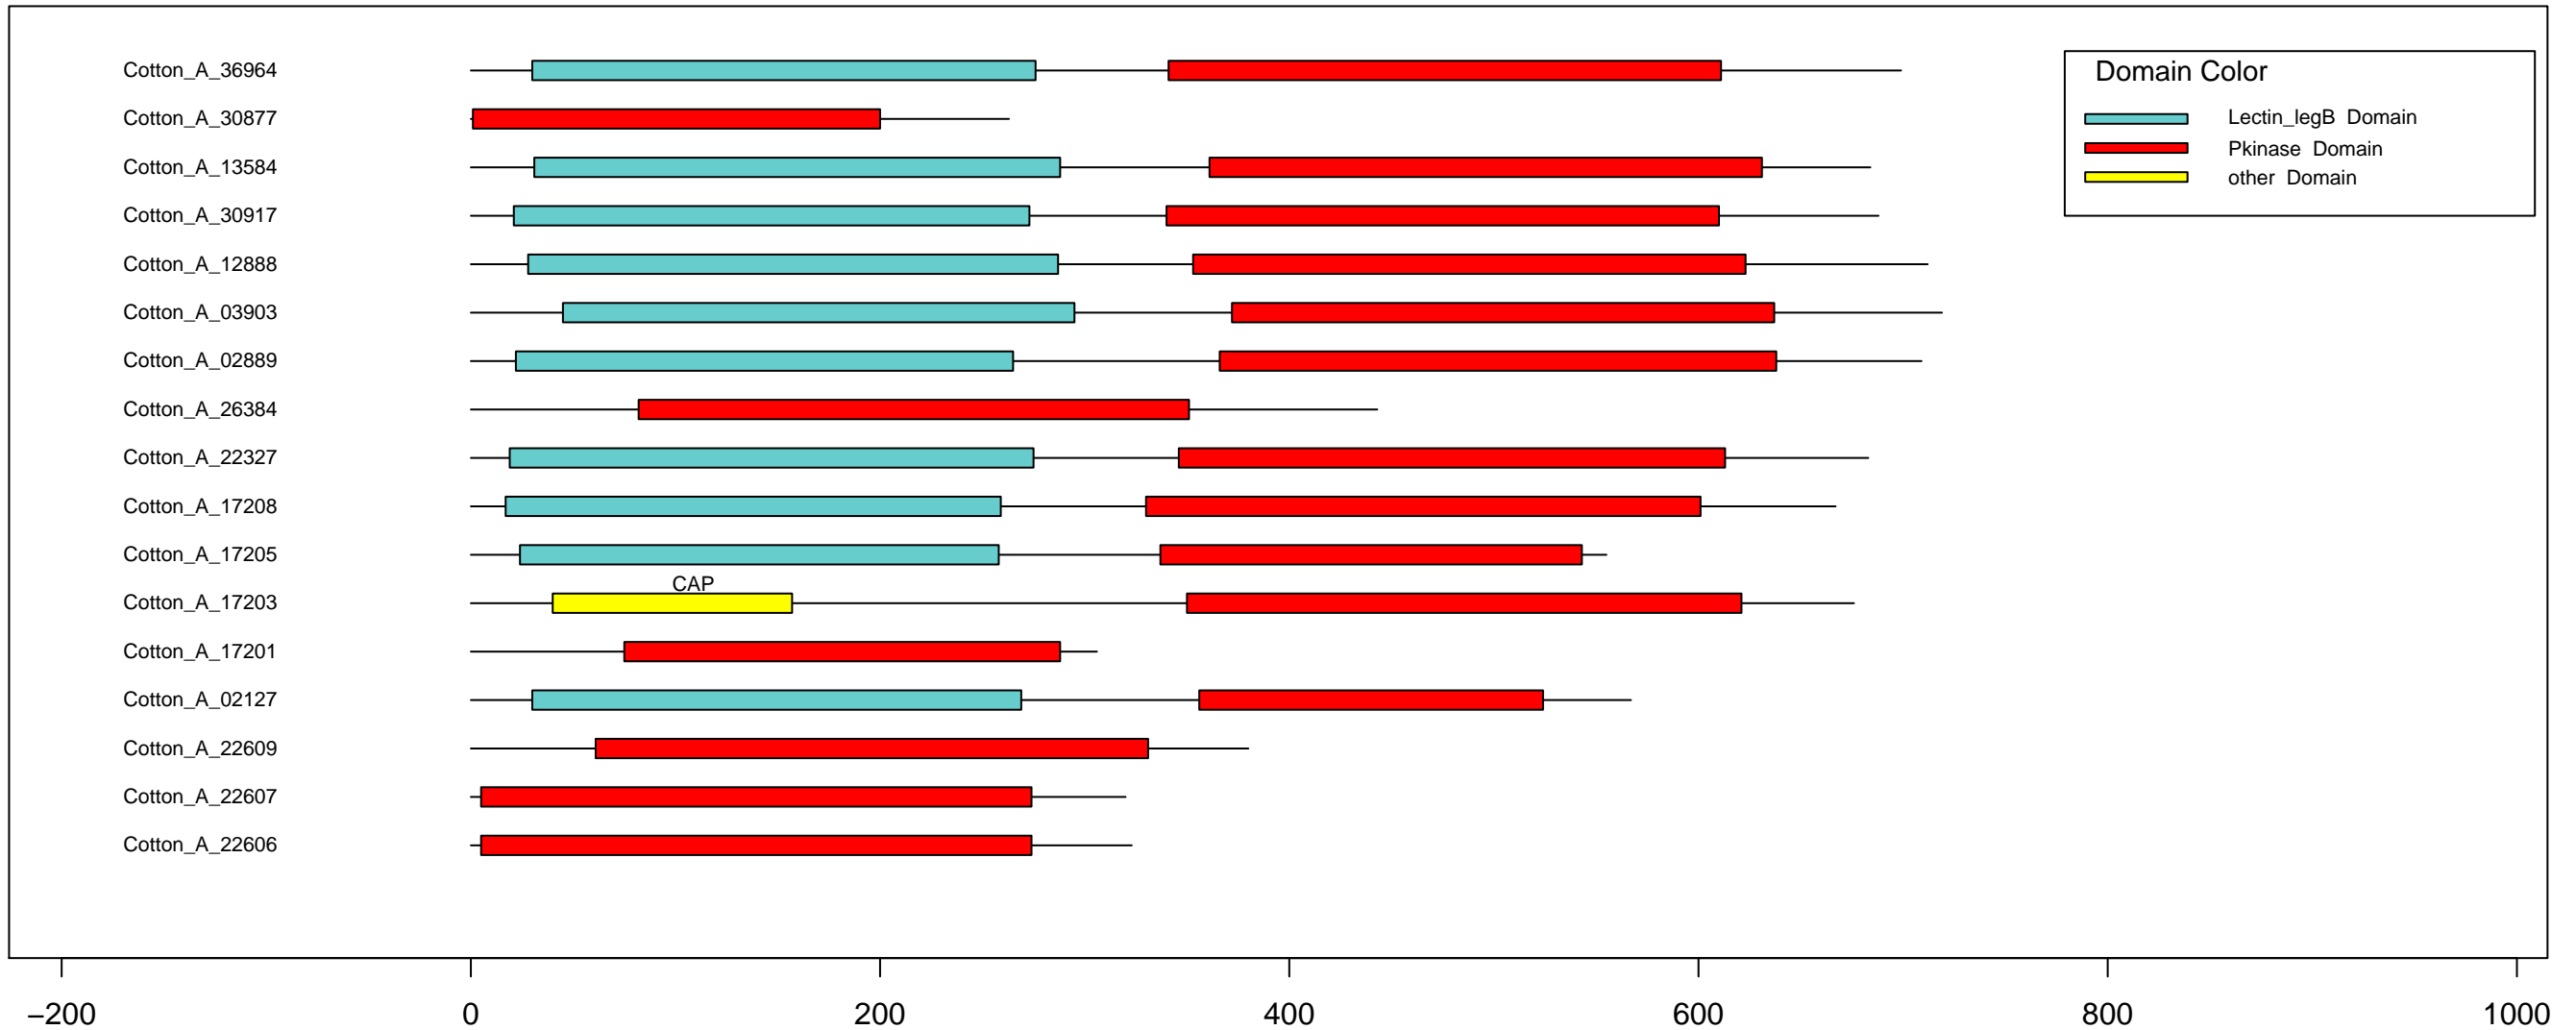

### G.ar RLK-Pelle\_LRK10L-2 domain diagram (part 1)

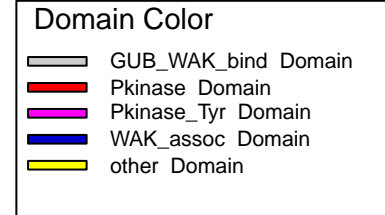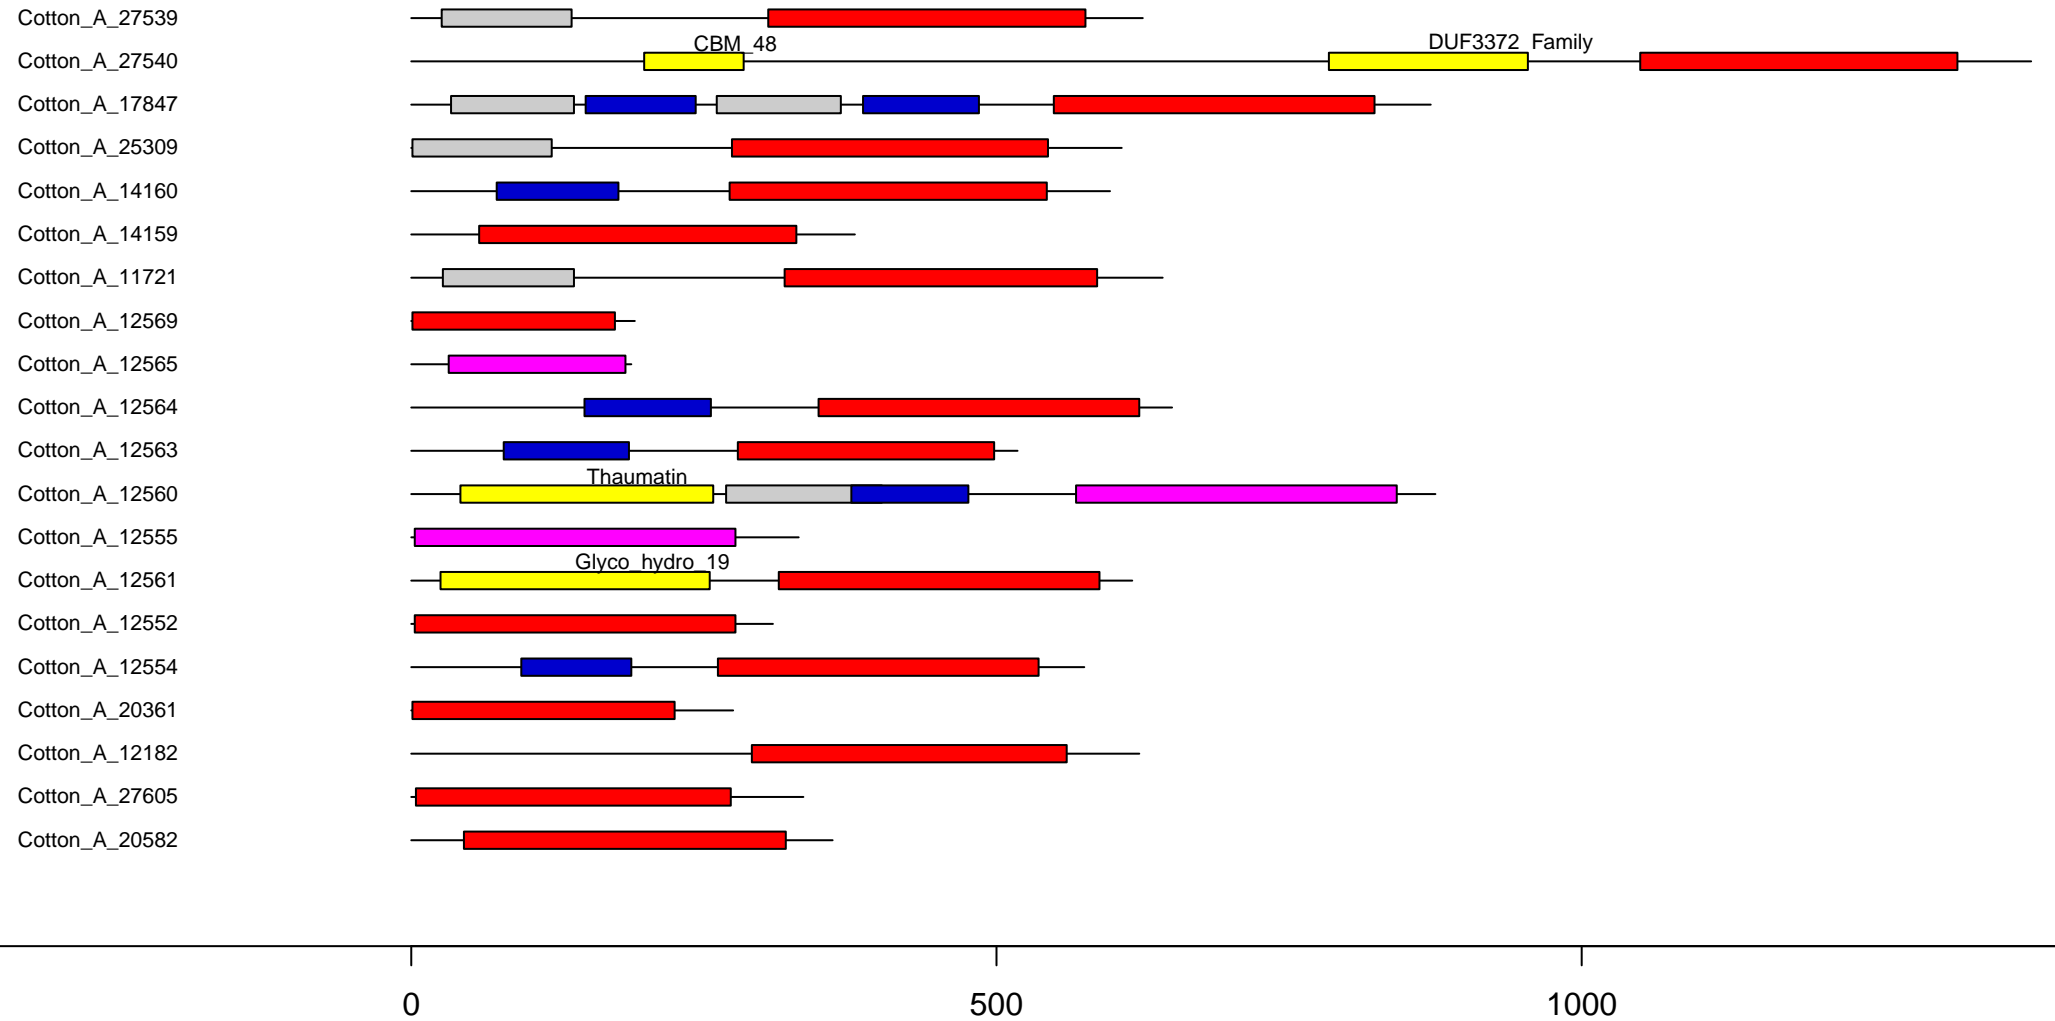

# G.ar RLK-Pelle\_LRK10L-2 domain diagram (part 2)

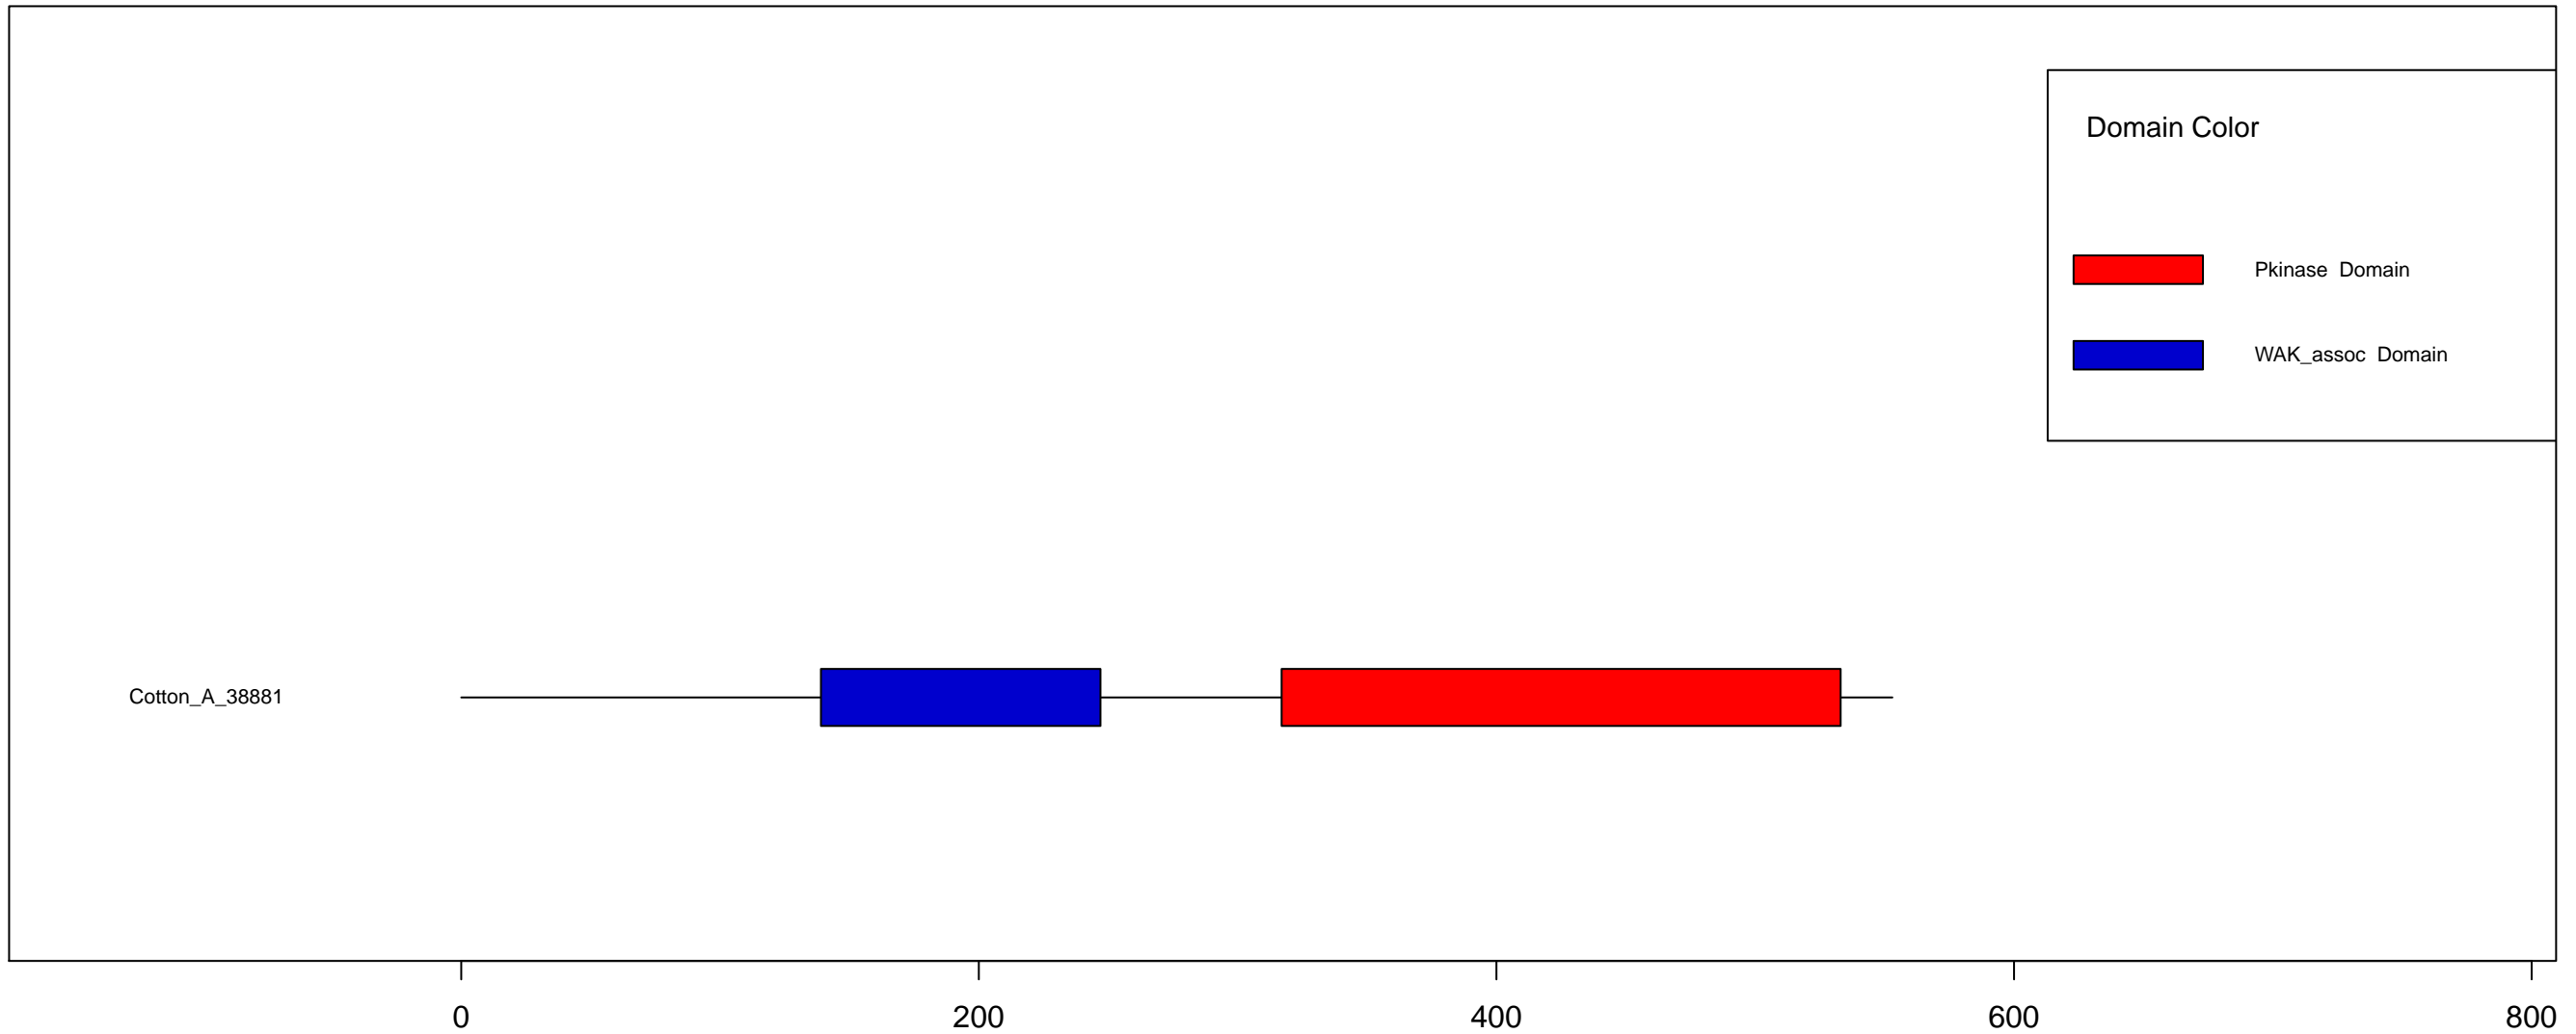



### G.ar RLK-Pelle\_LRR-I-1 domain diagram (all)

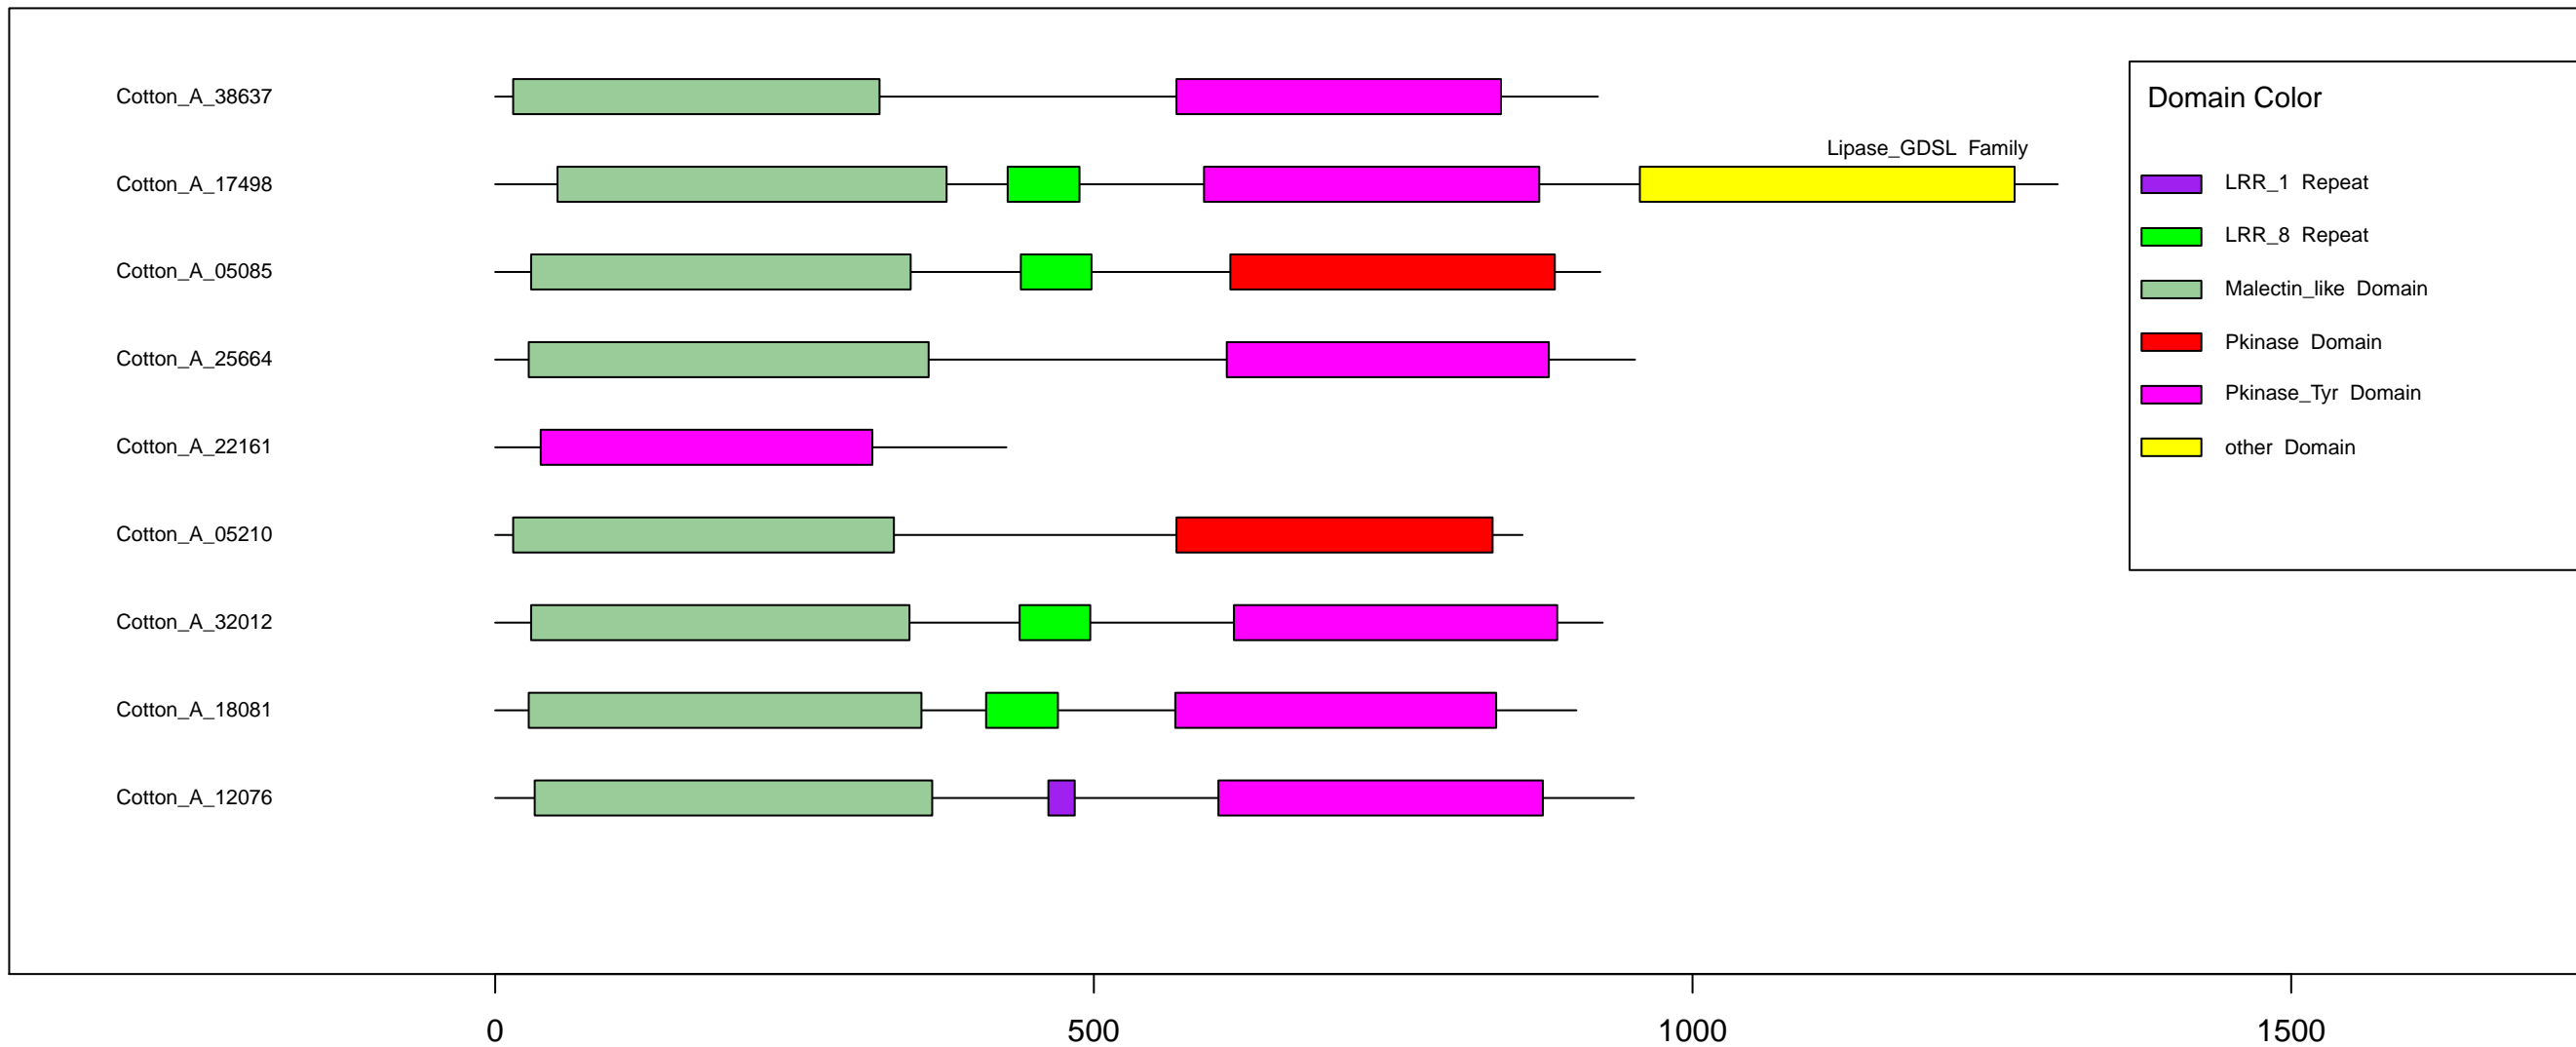

# G.ar RLK-Pelle\_LRR-I-2 domain diagram (all)

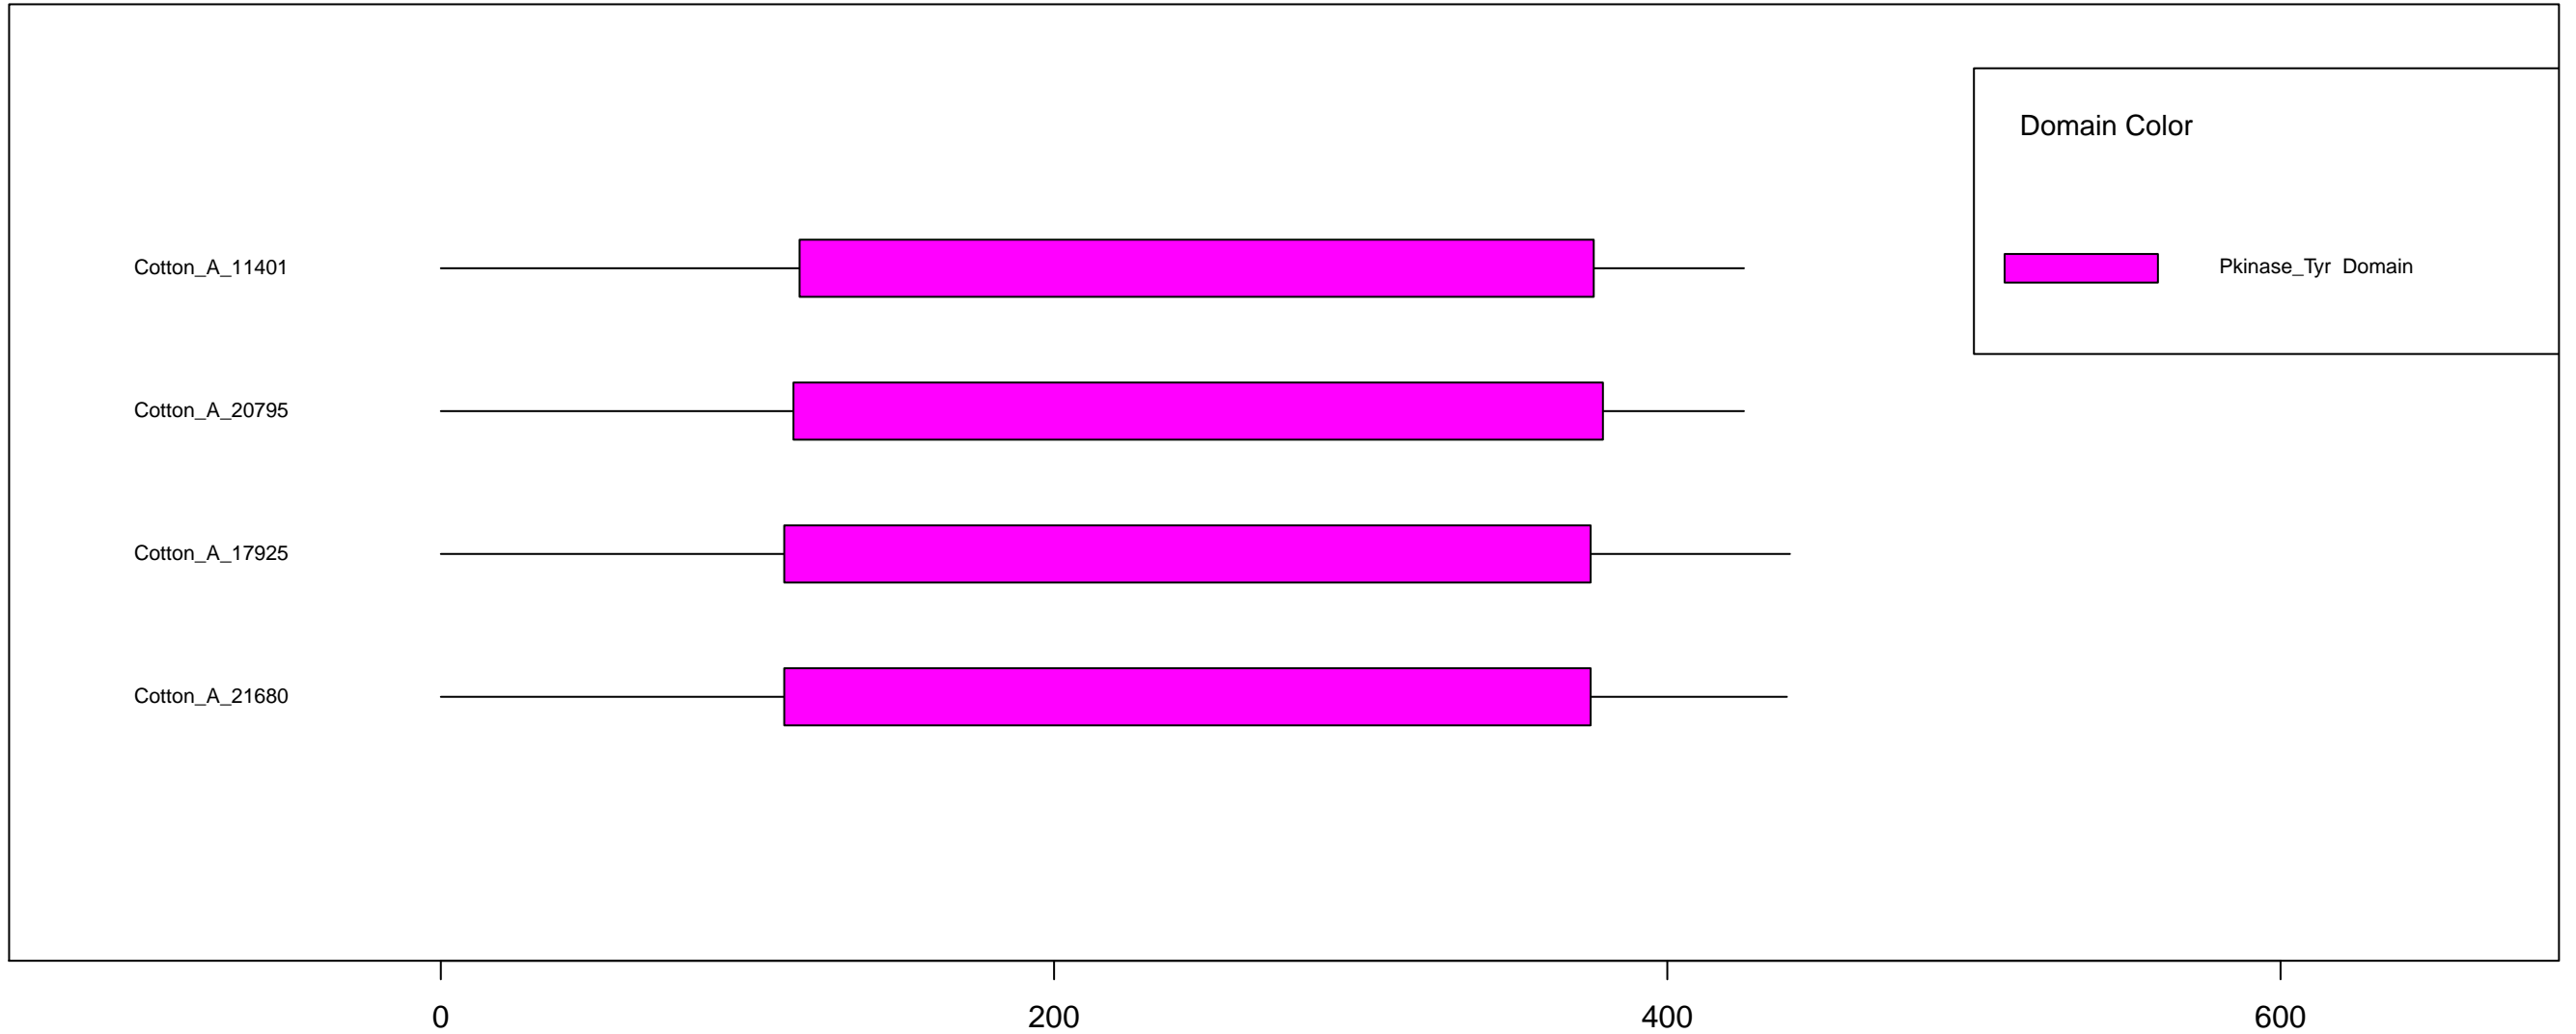

### G.ar RLK-Pelle\_LRR-III domain diagram (part 1)

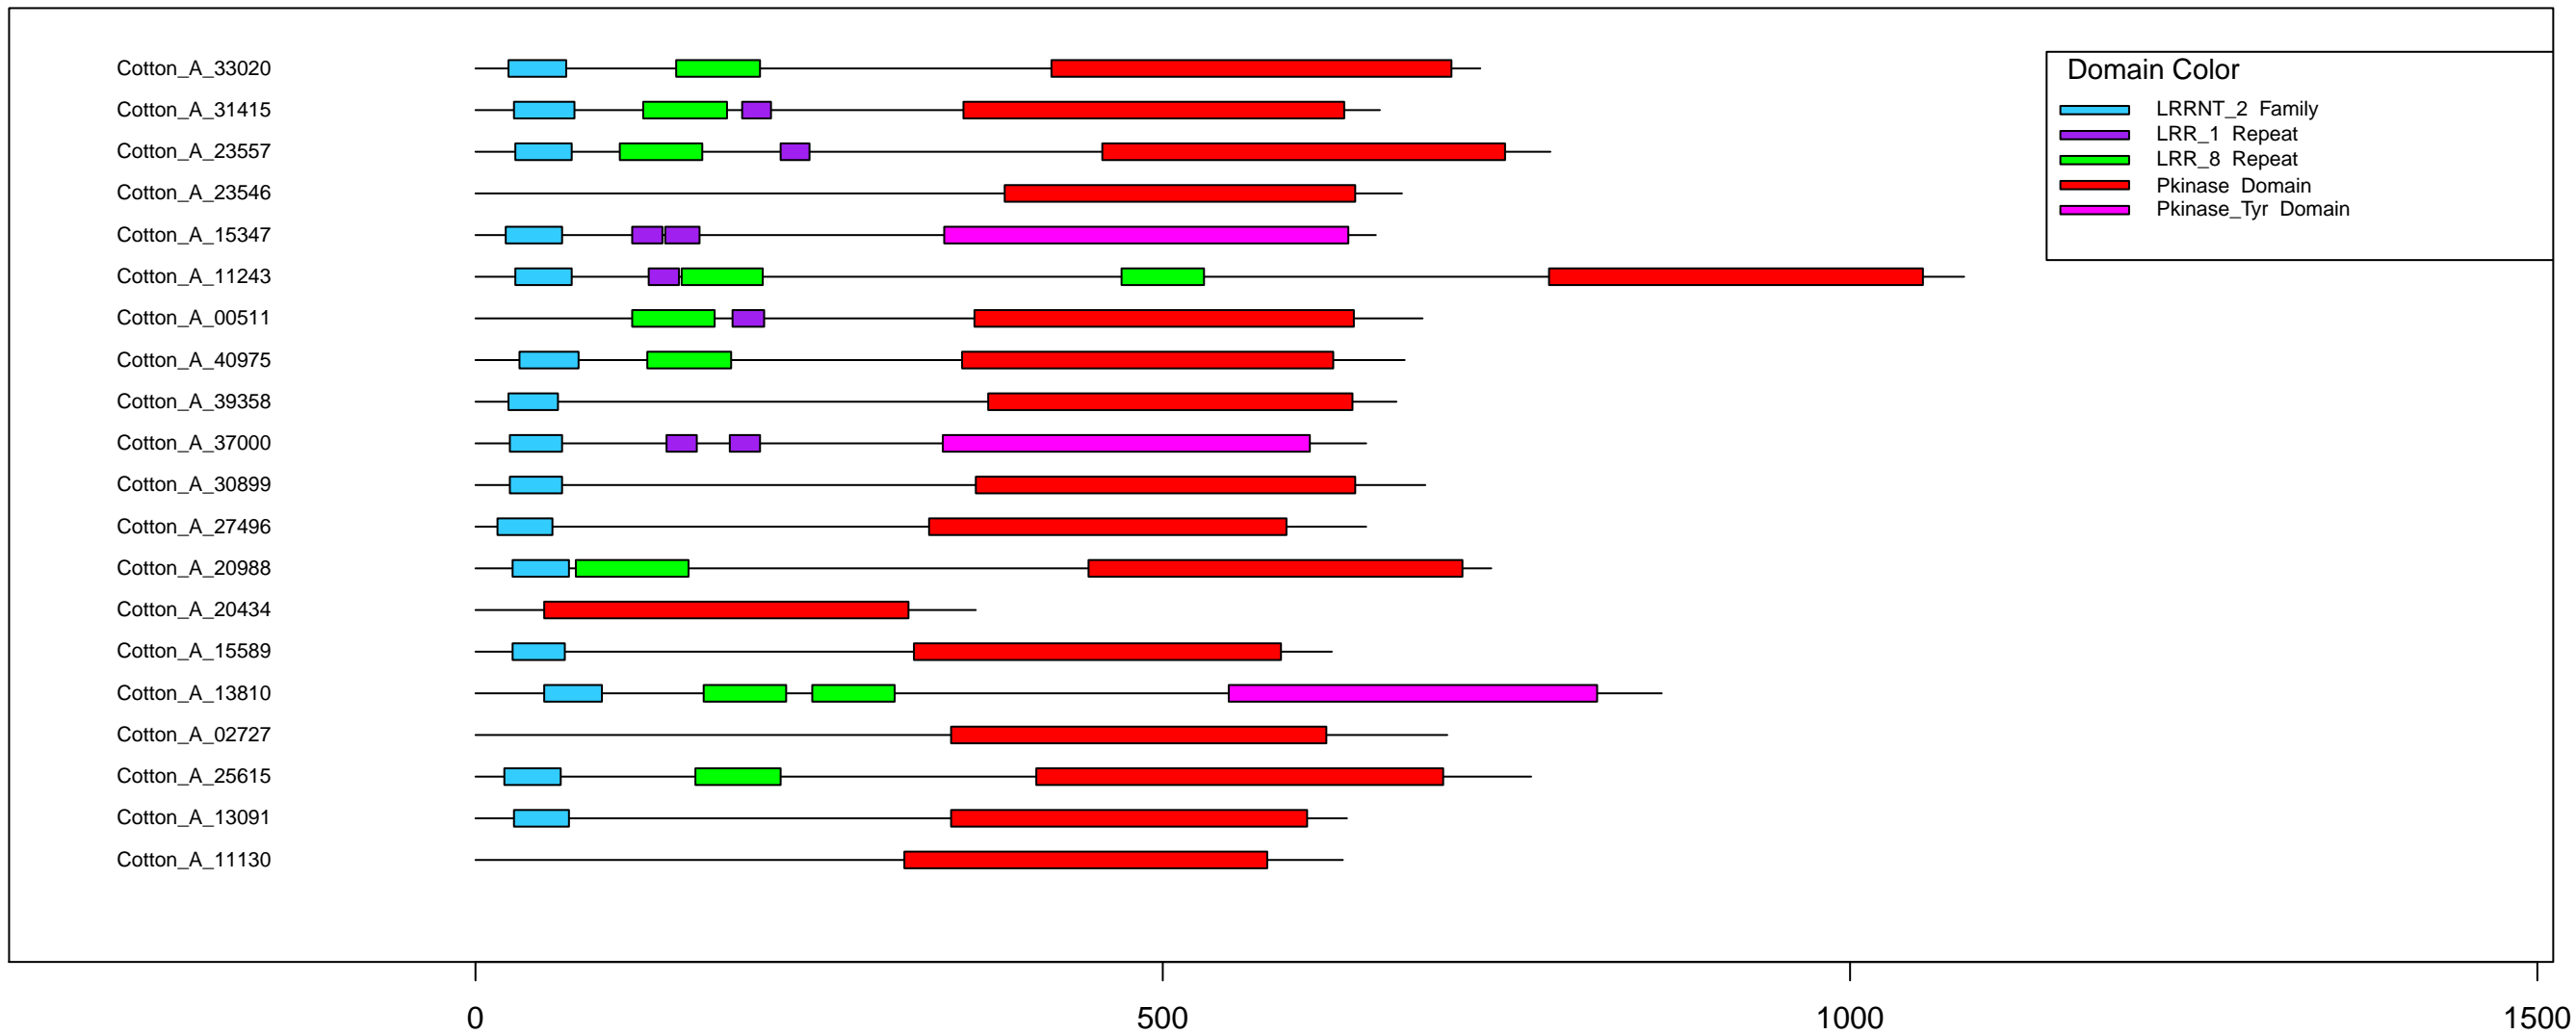

### G.ar RLK-Pelle\_LRR-III domain diagram (part 2)

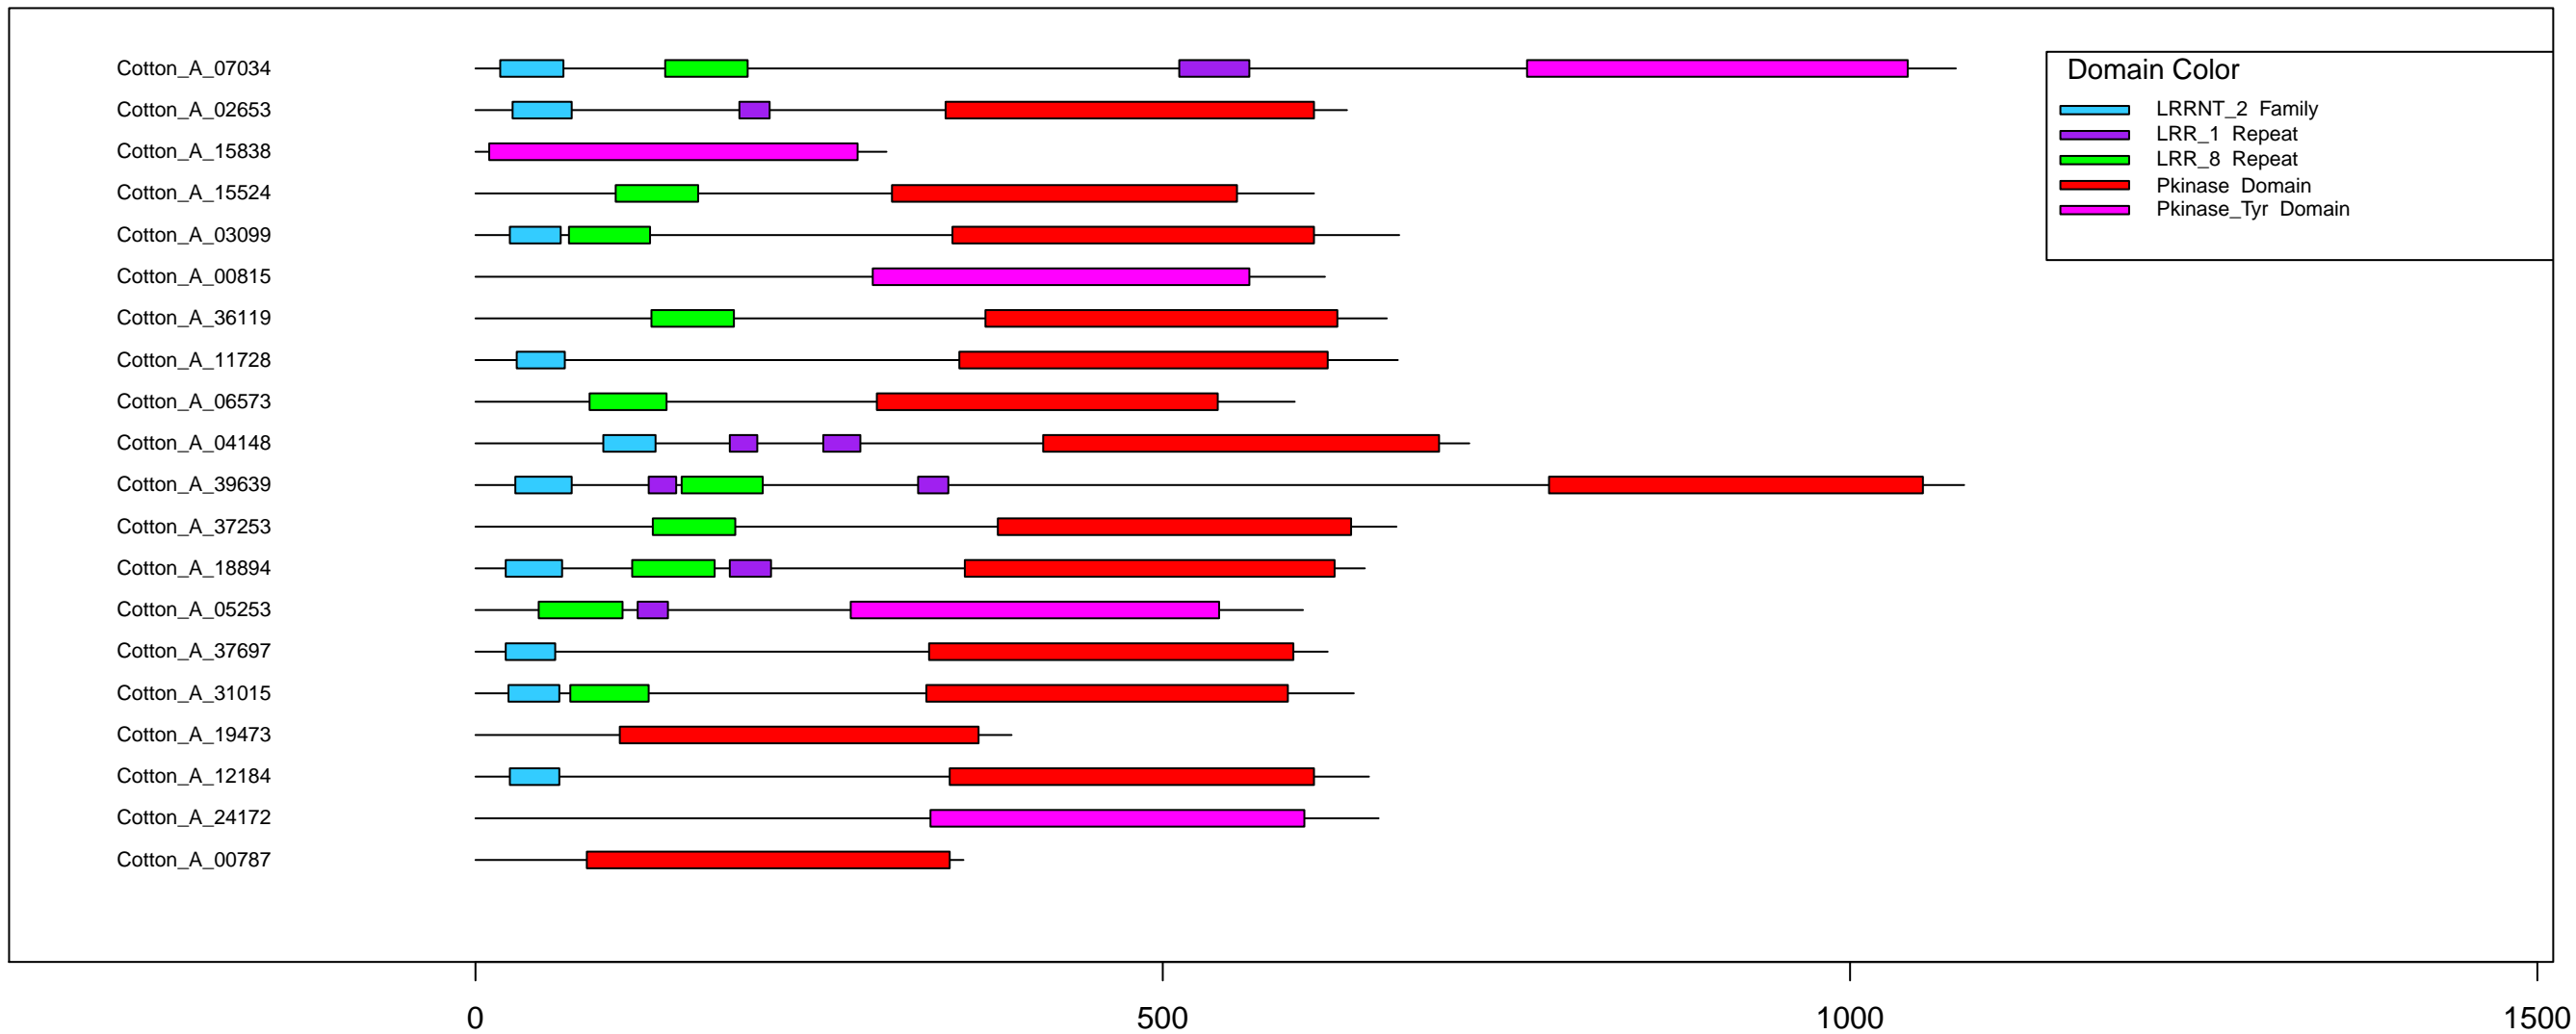

### G.ar RLK-Pelle\_LRR-III domain diagram (part 3)

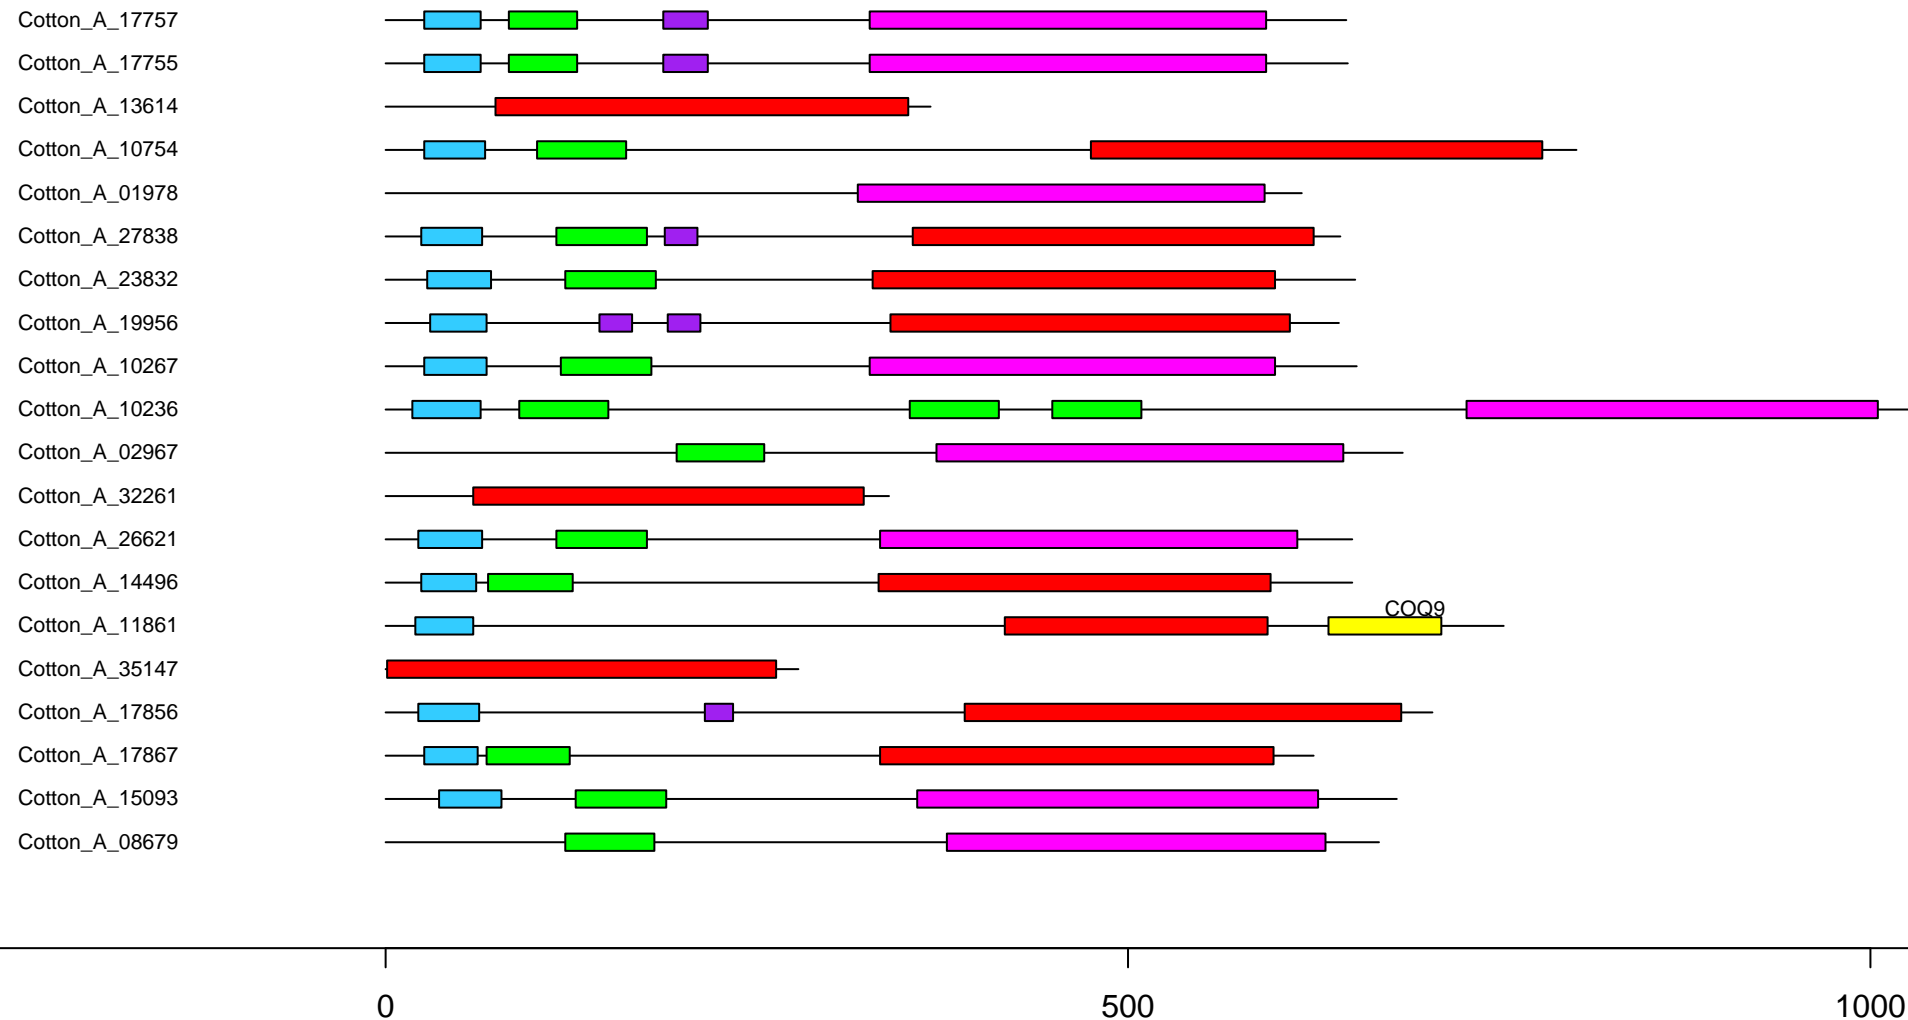

G.ar RLK-Pelle\_LRR-III domain diagram (part 4)

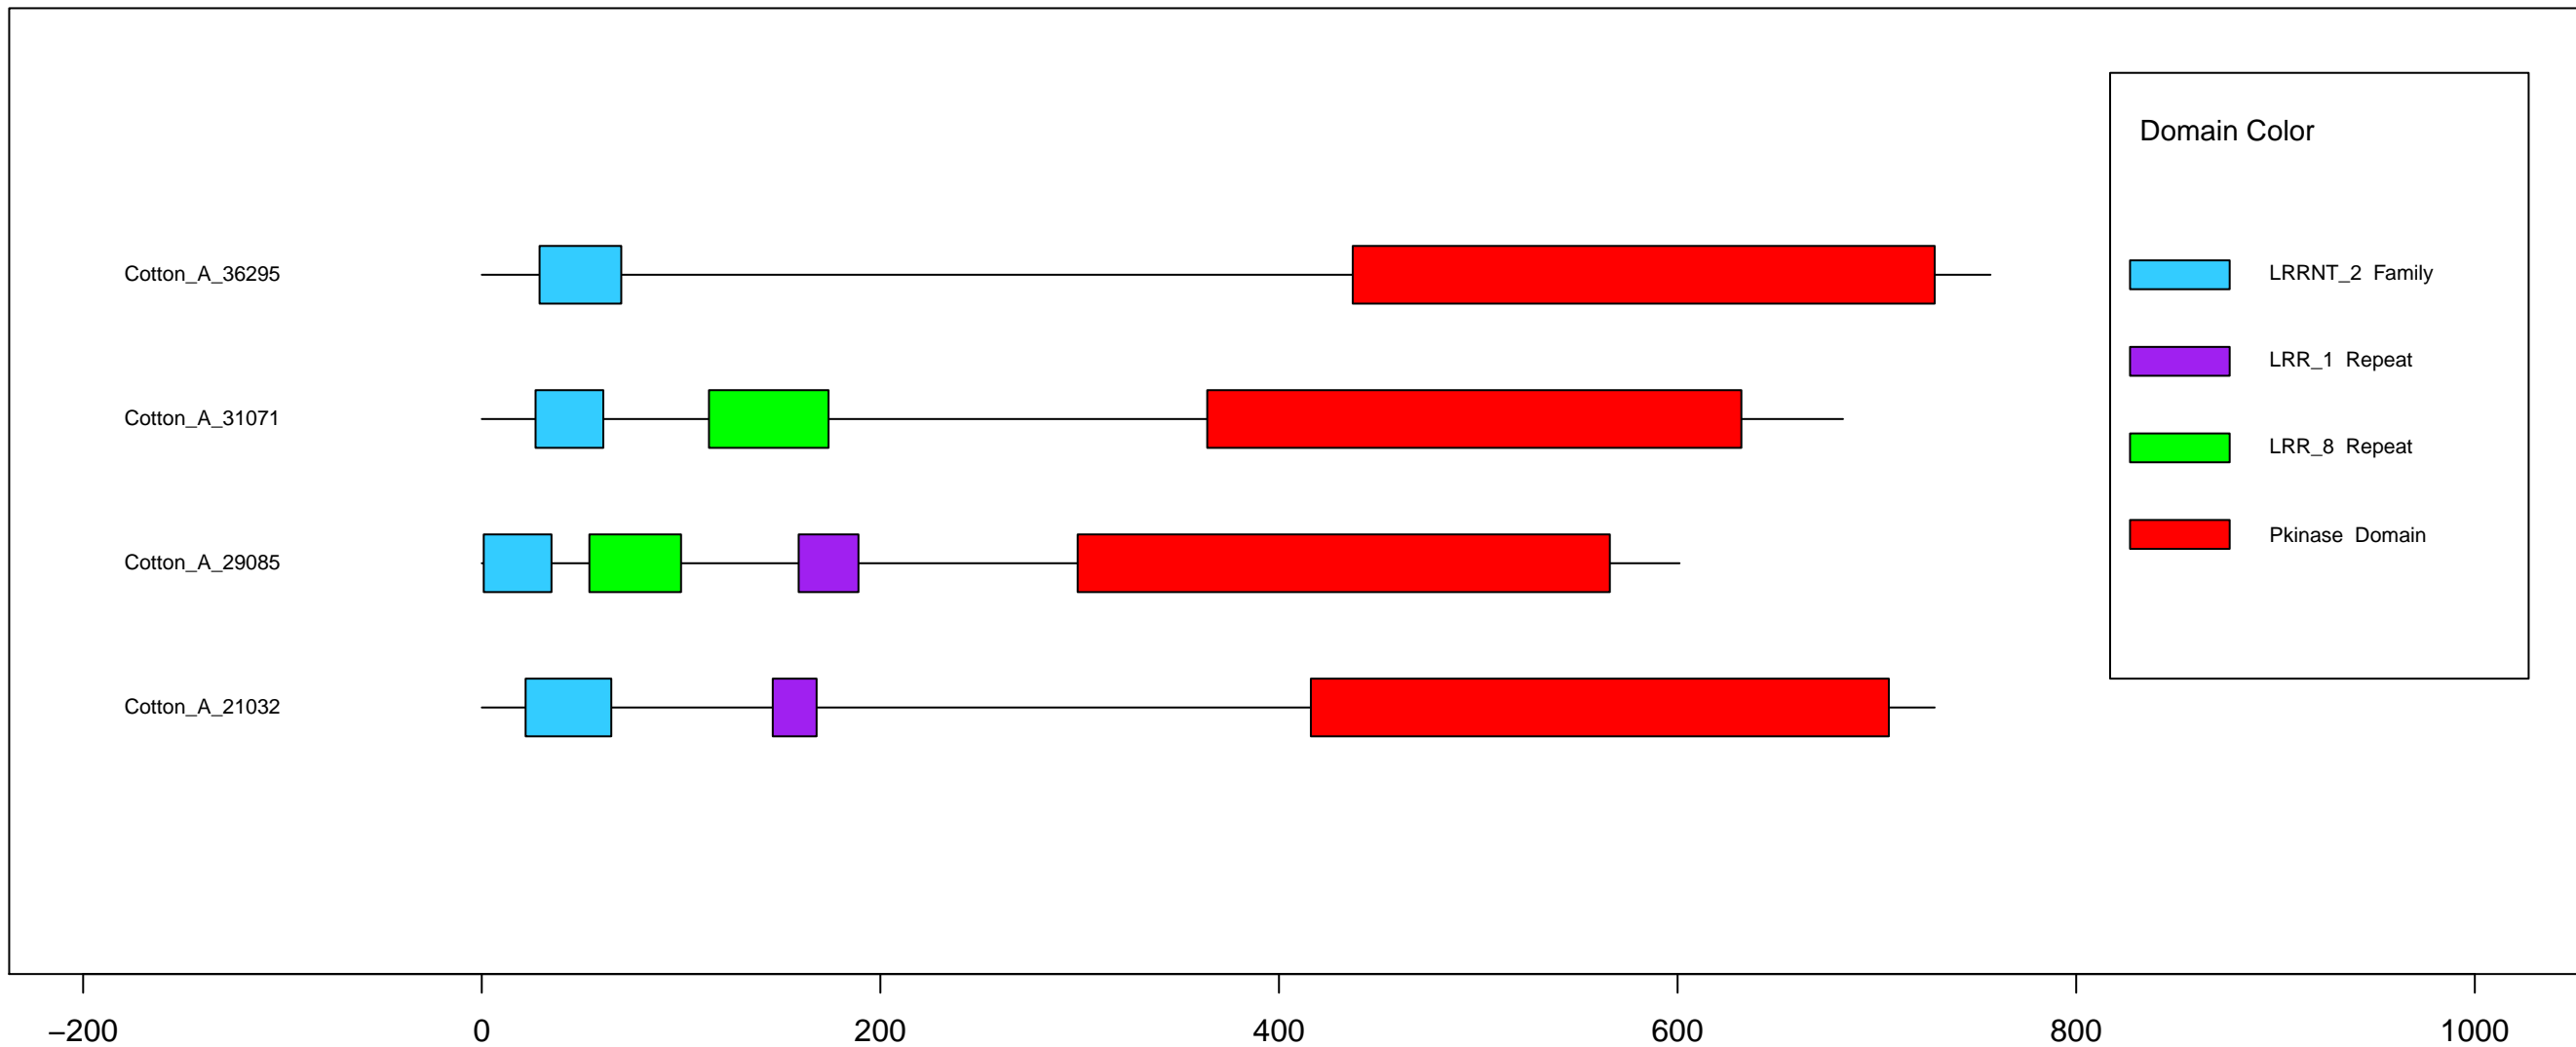

### G.ar RLK-Pelle\_LRR-II domain diagram (all)

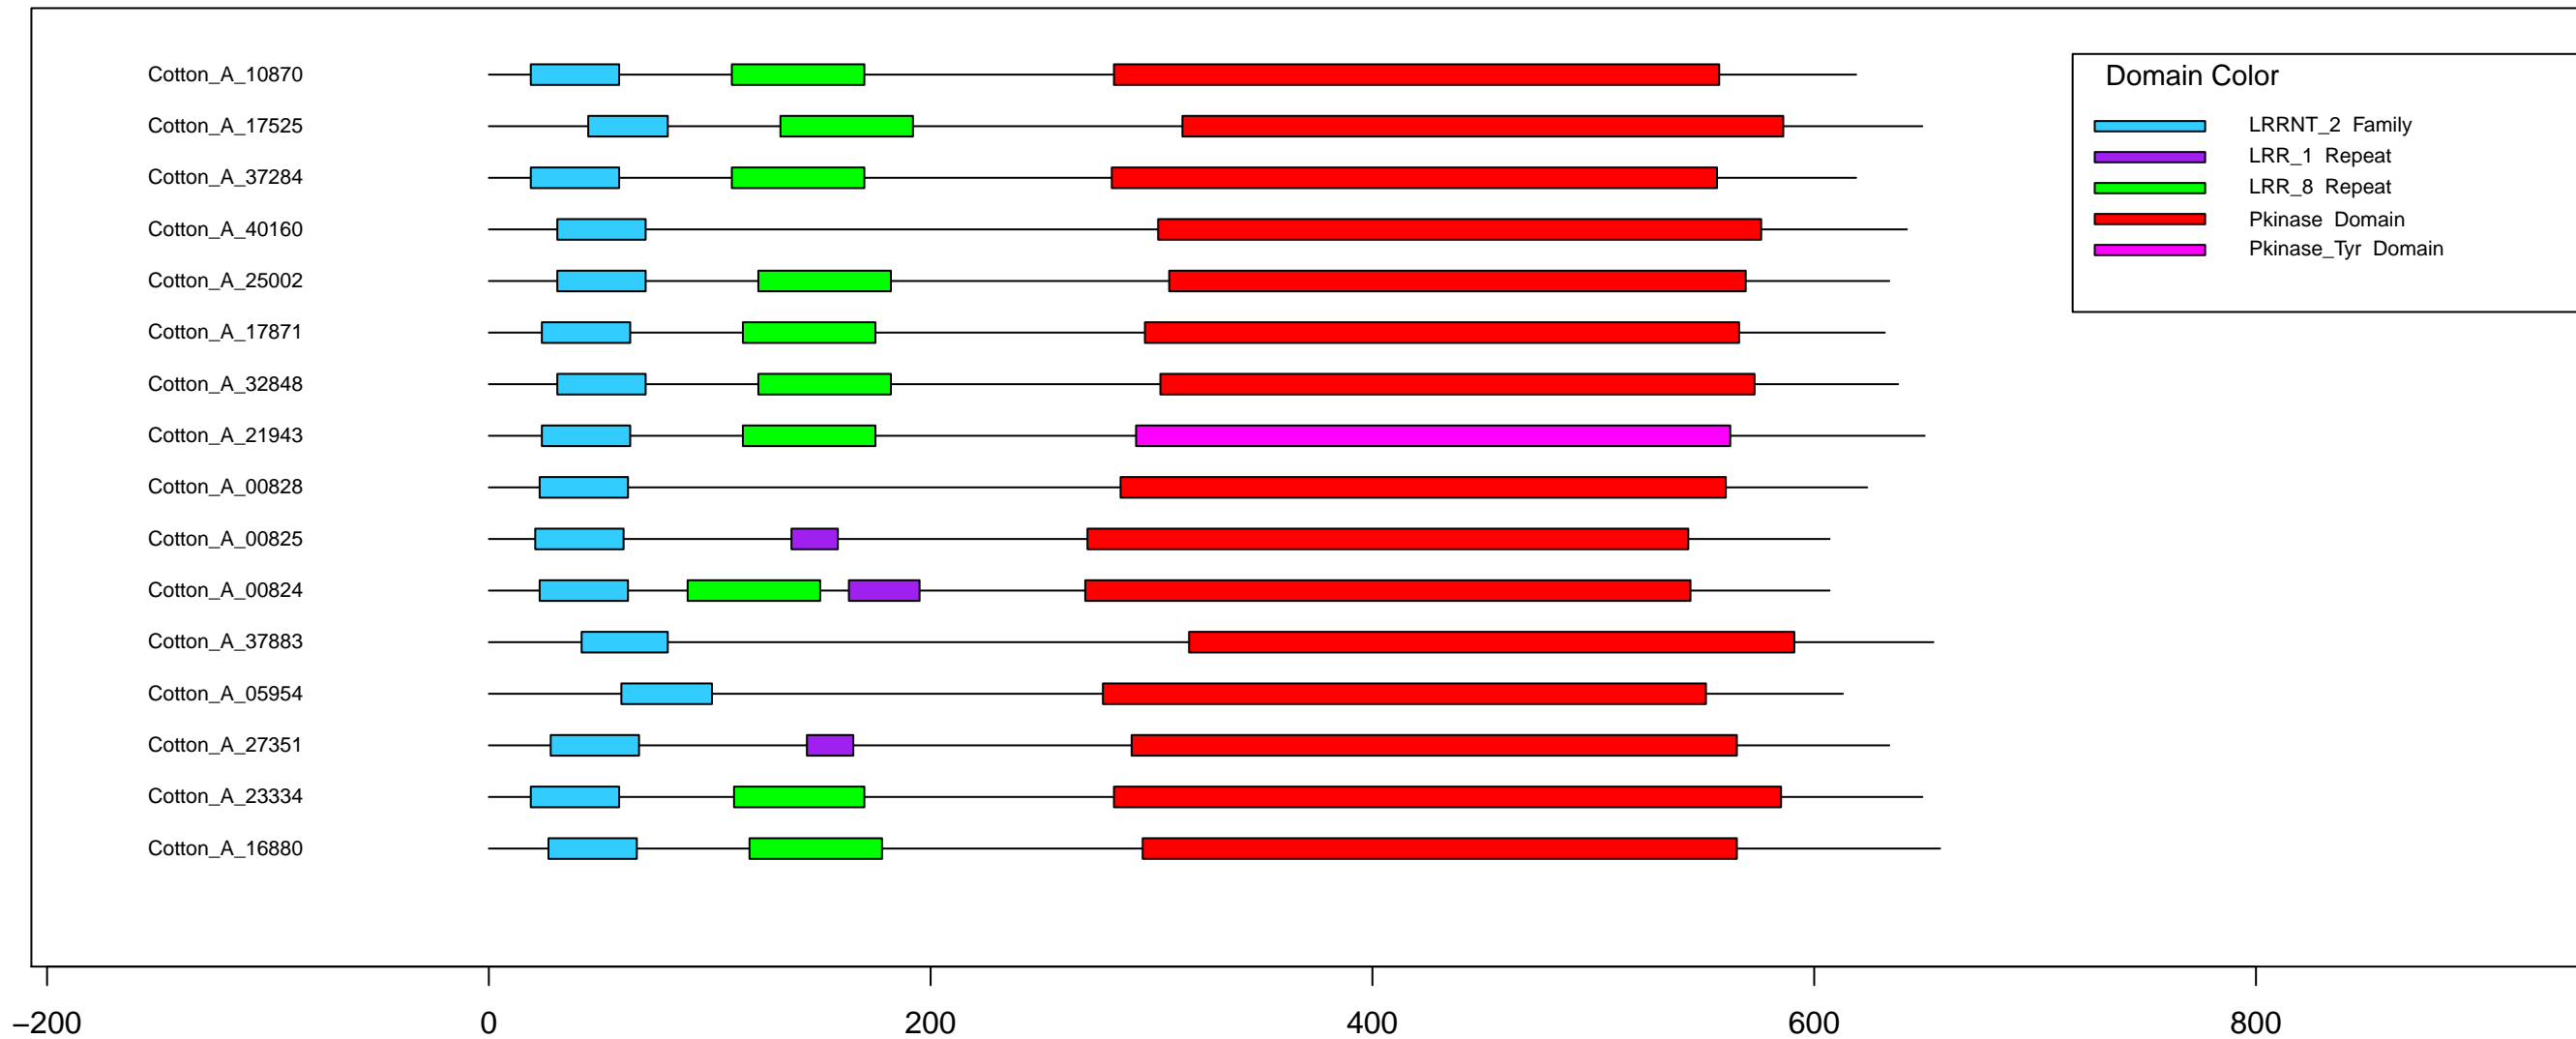

G.ar RLK-Pelle\_LRR-IV domain diagram (all)

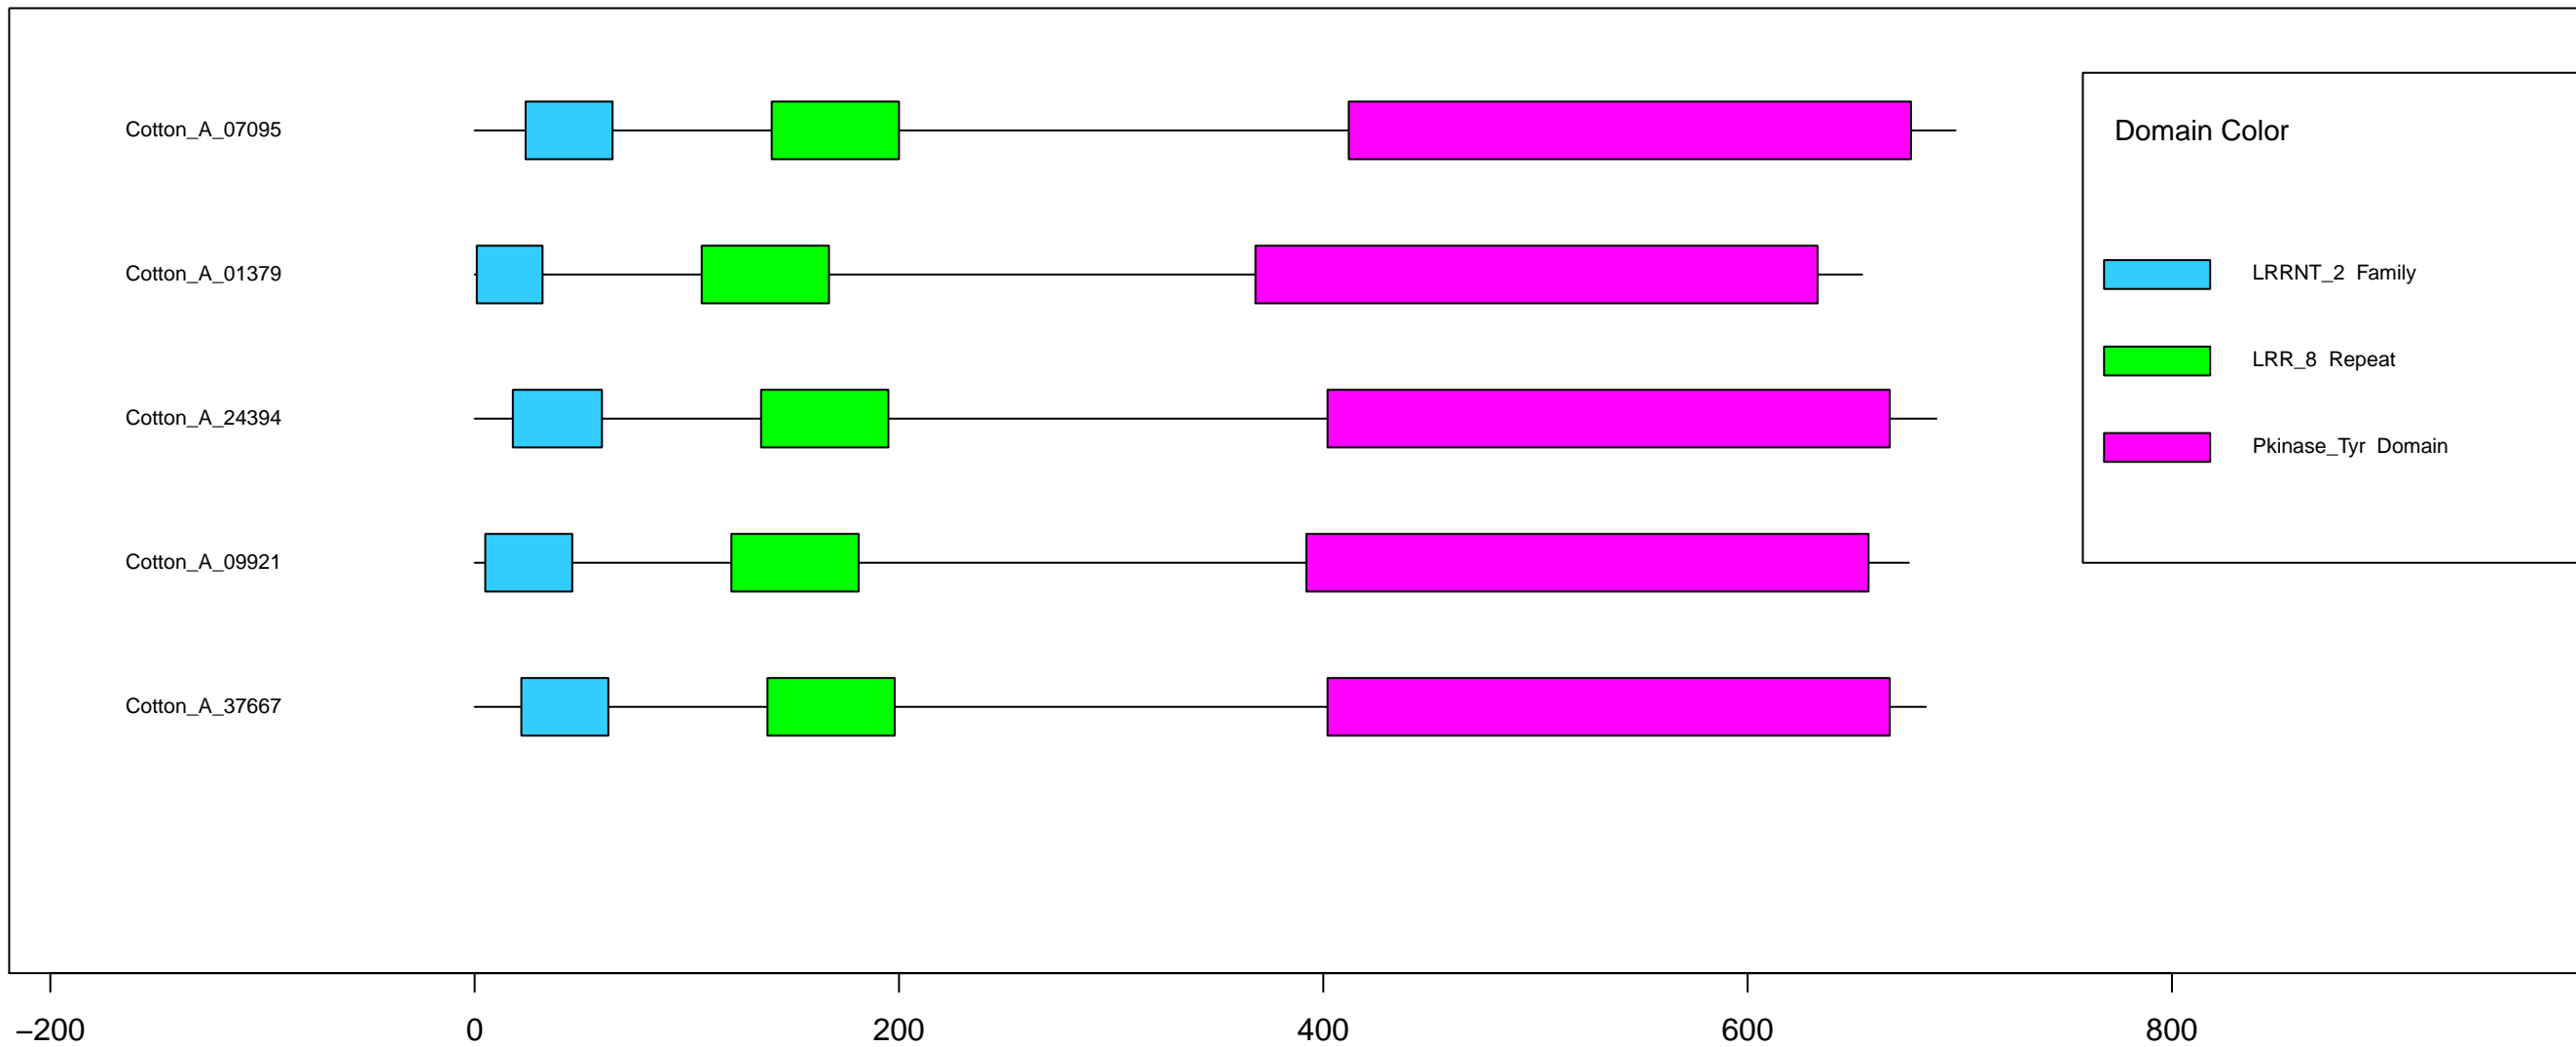



### G.ar RLK-Pelle\_LRR-IX domain diagram (all)

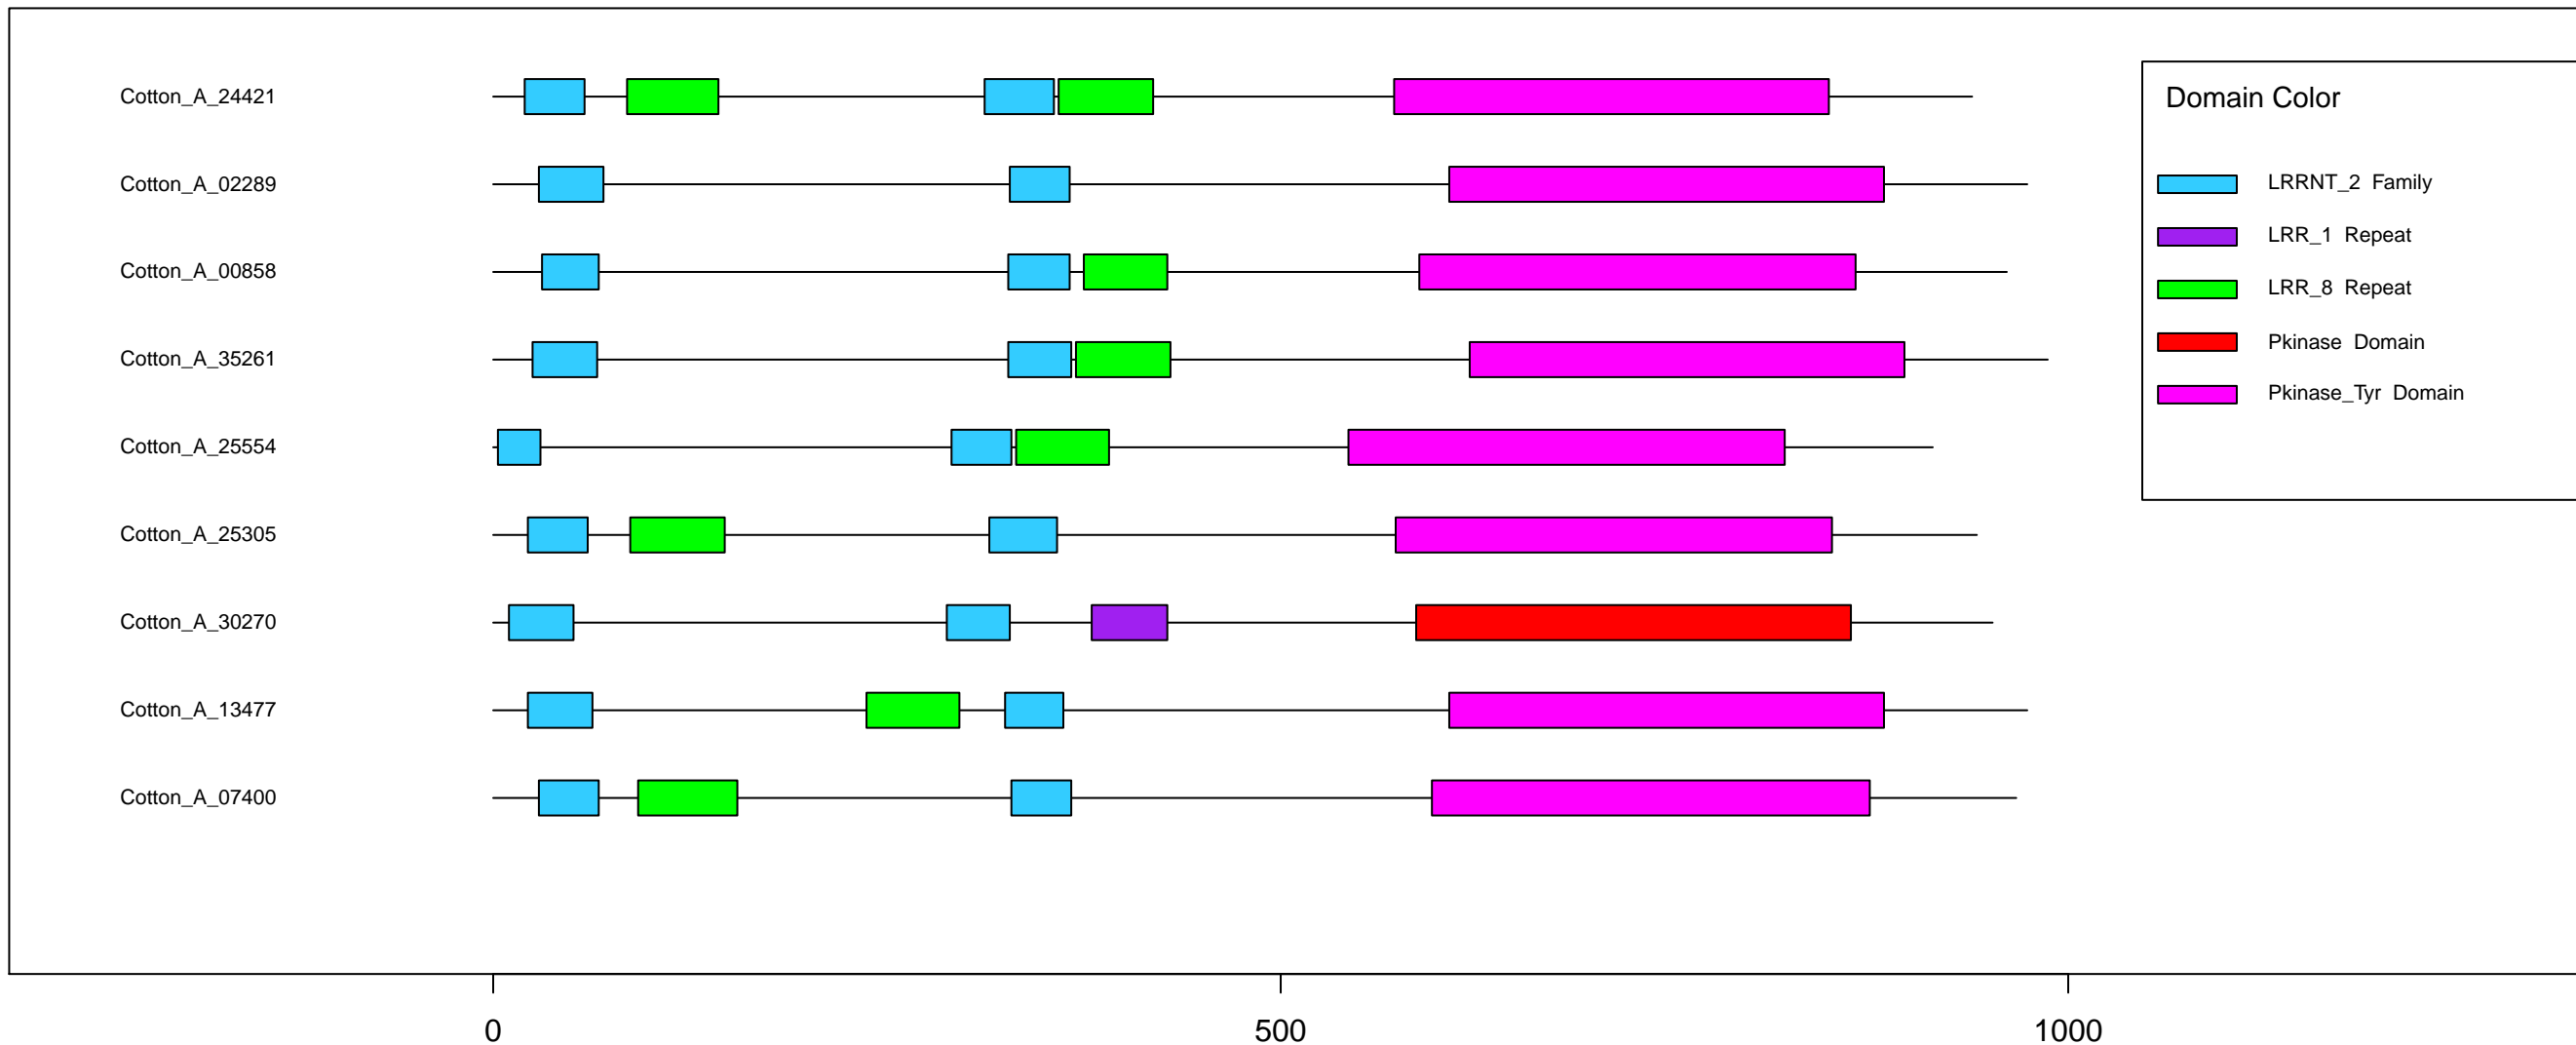

### G.ar RLK-Pelle\_LRR-VI-1 domain diagram (all)

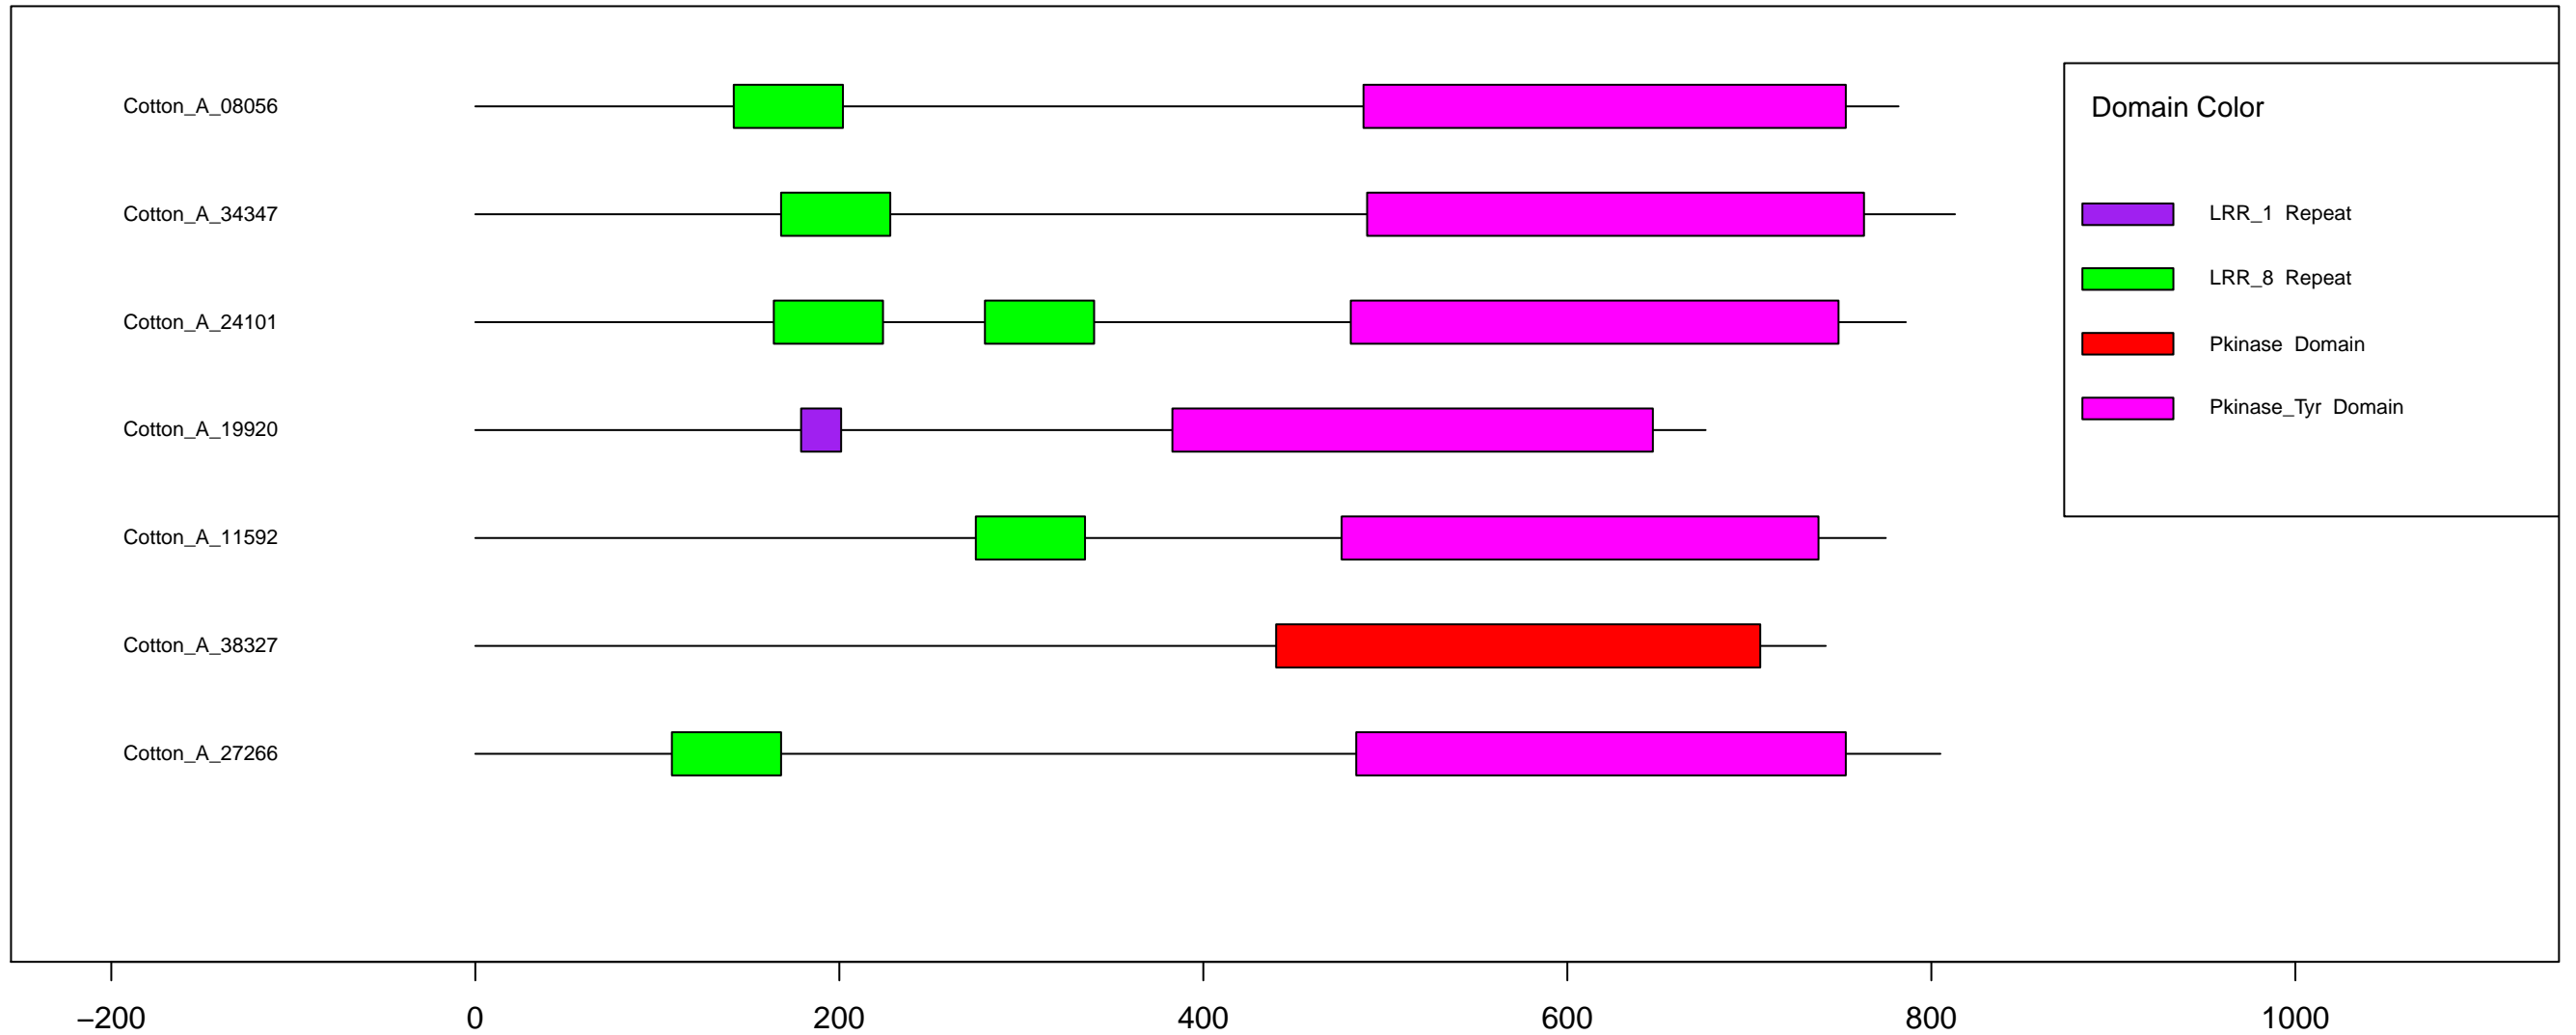

### G.ar RLK-Pelle\_LRR-VI-2 domain diagram (all)

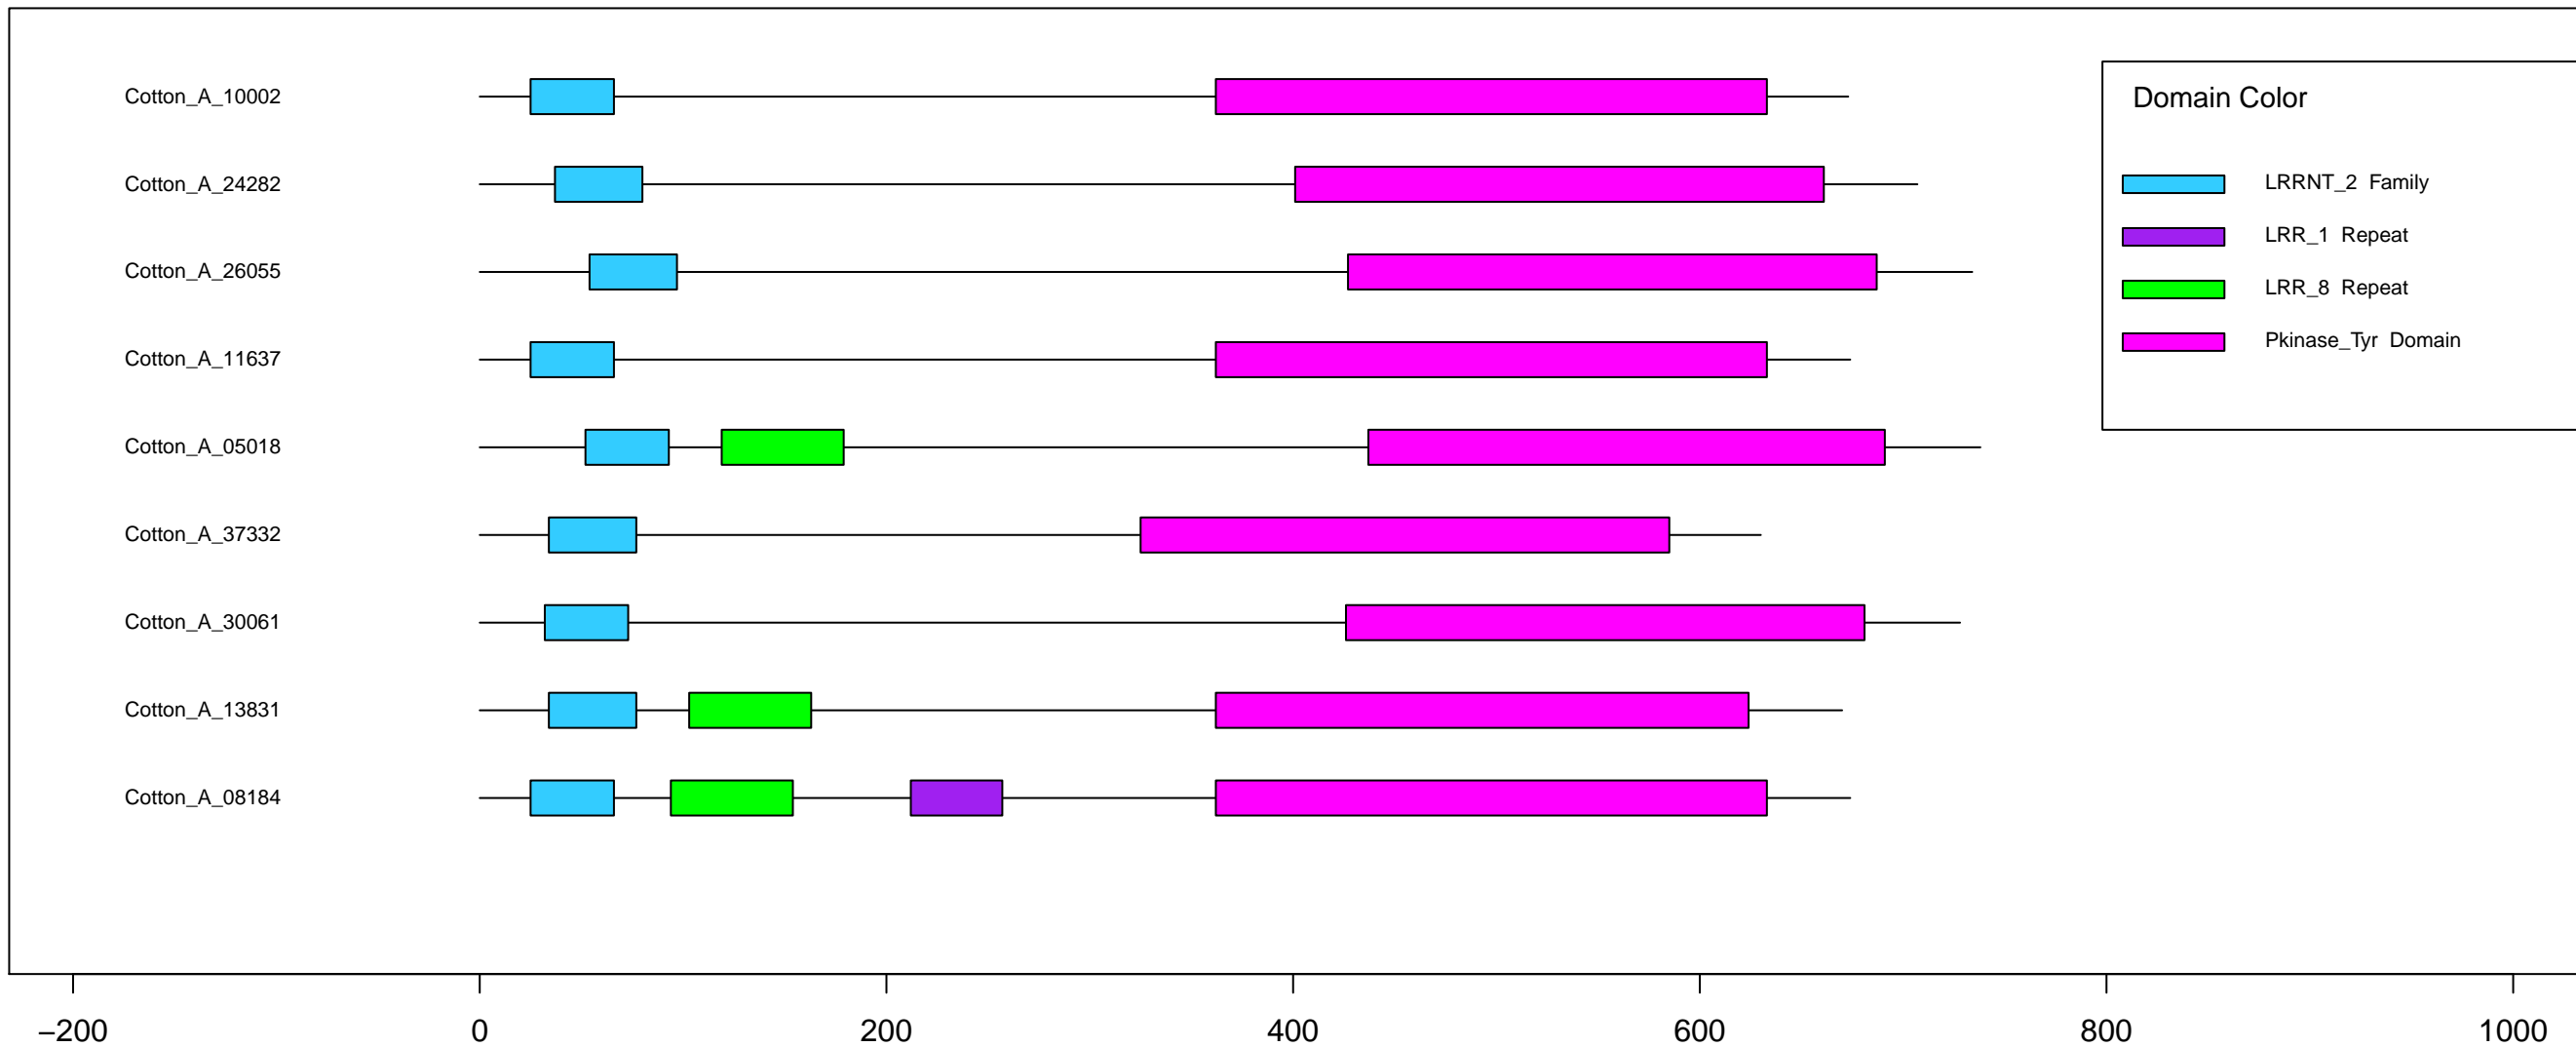

# G.ar RLK-Pelle\_LRR-VII-1 domain diagram (all)

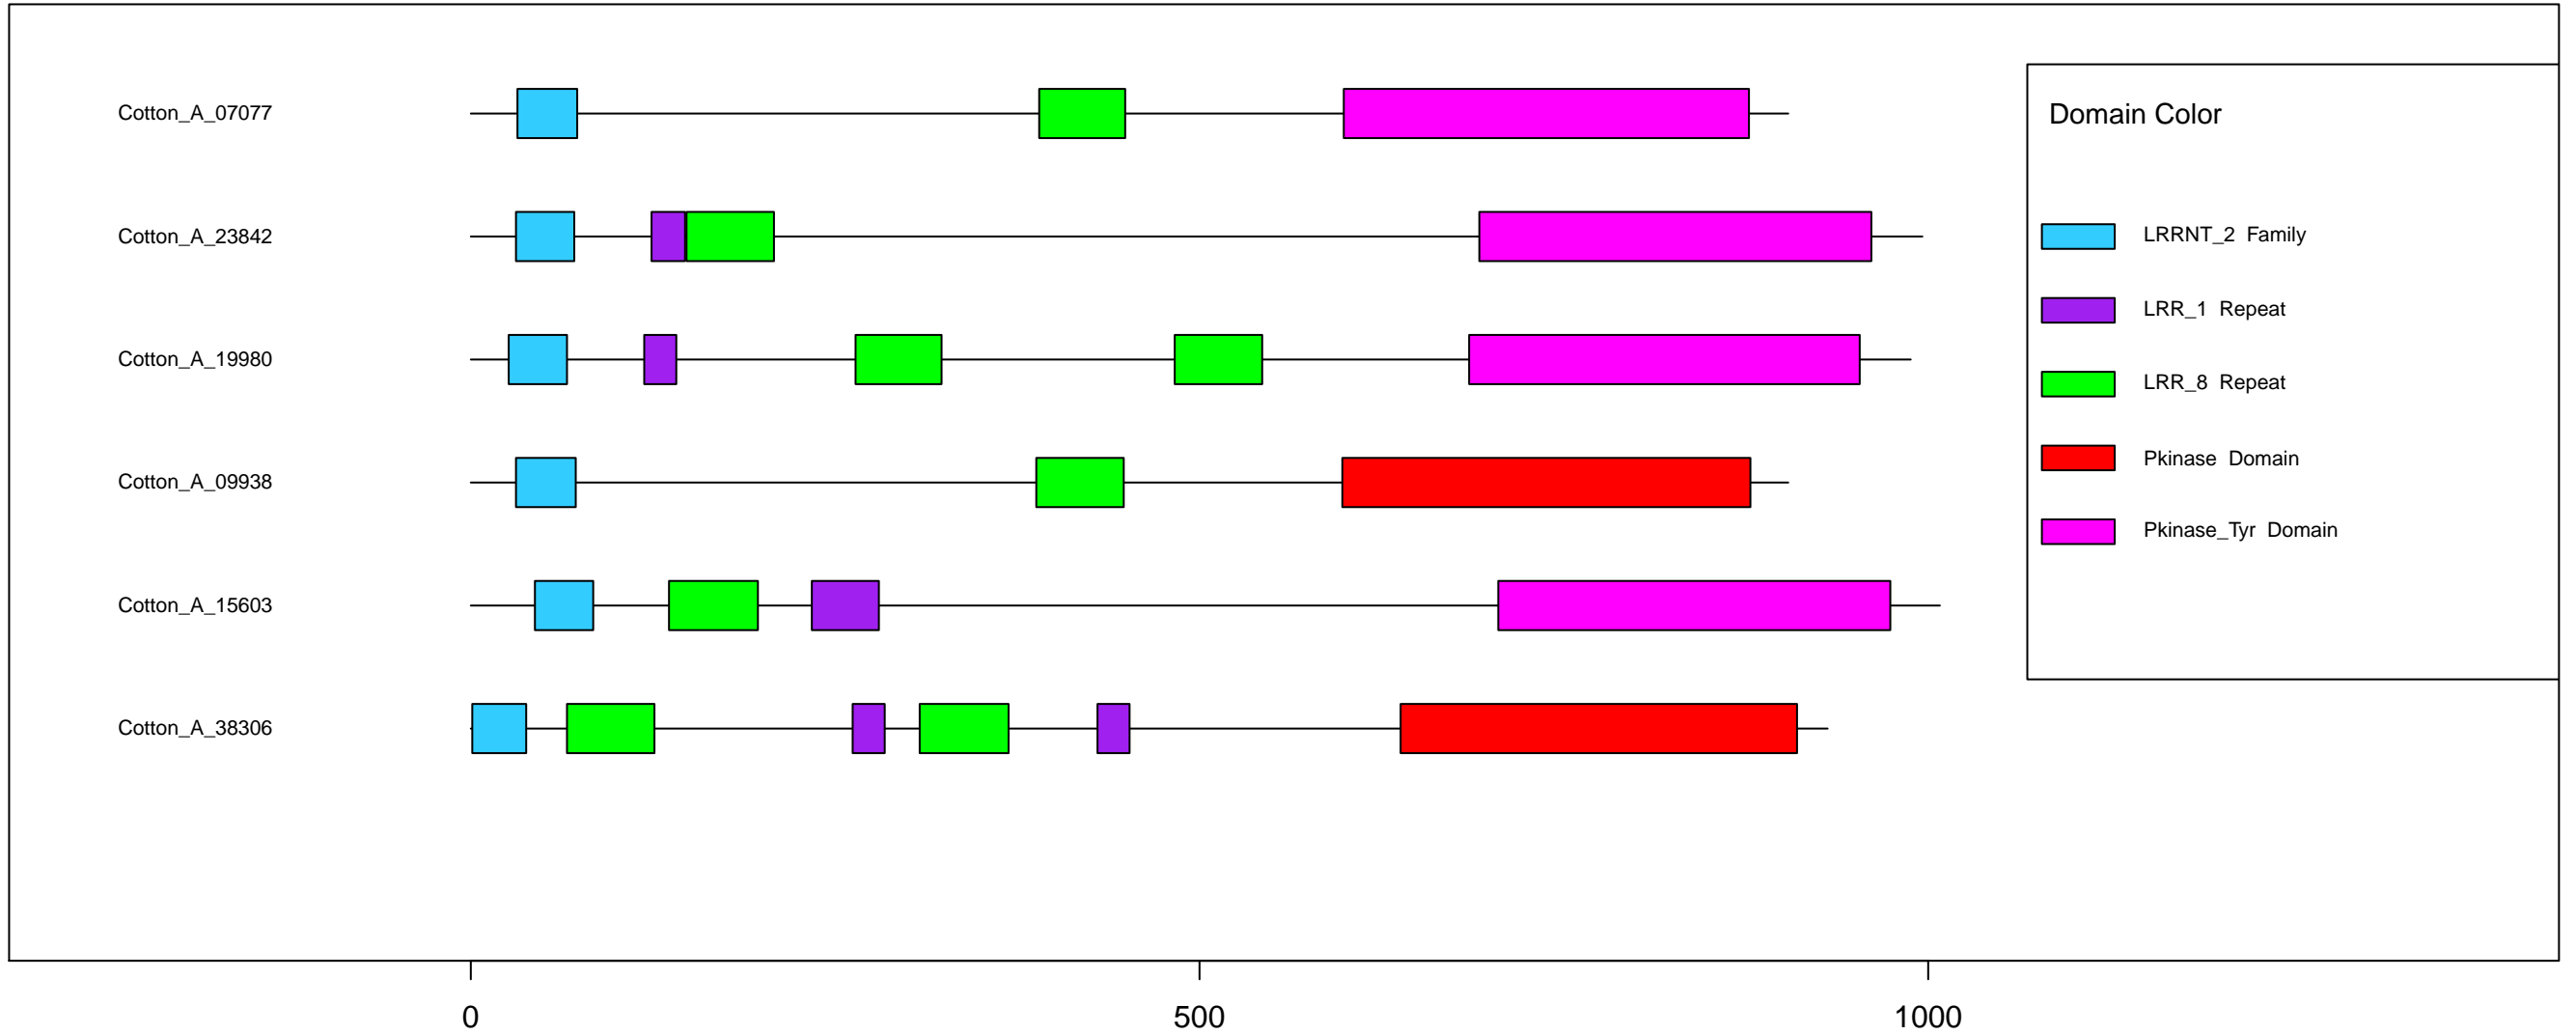

G.ar RLK-Pelle\_LRR-VII-2 domain diagram (all)

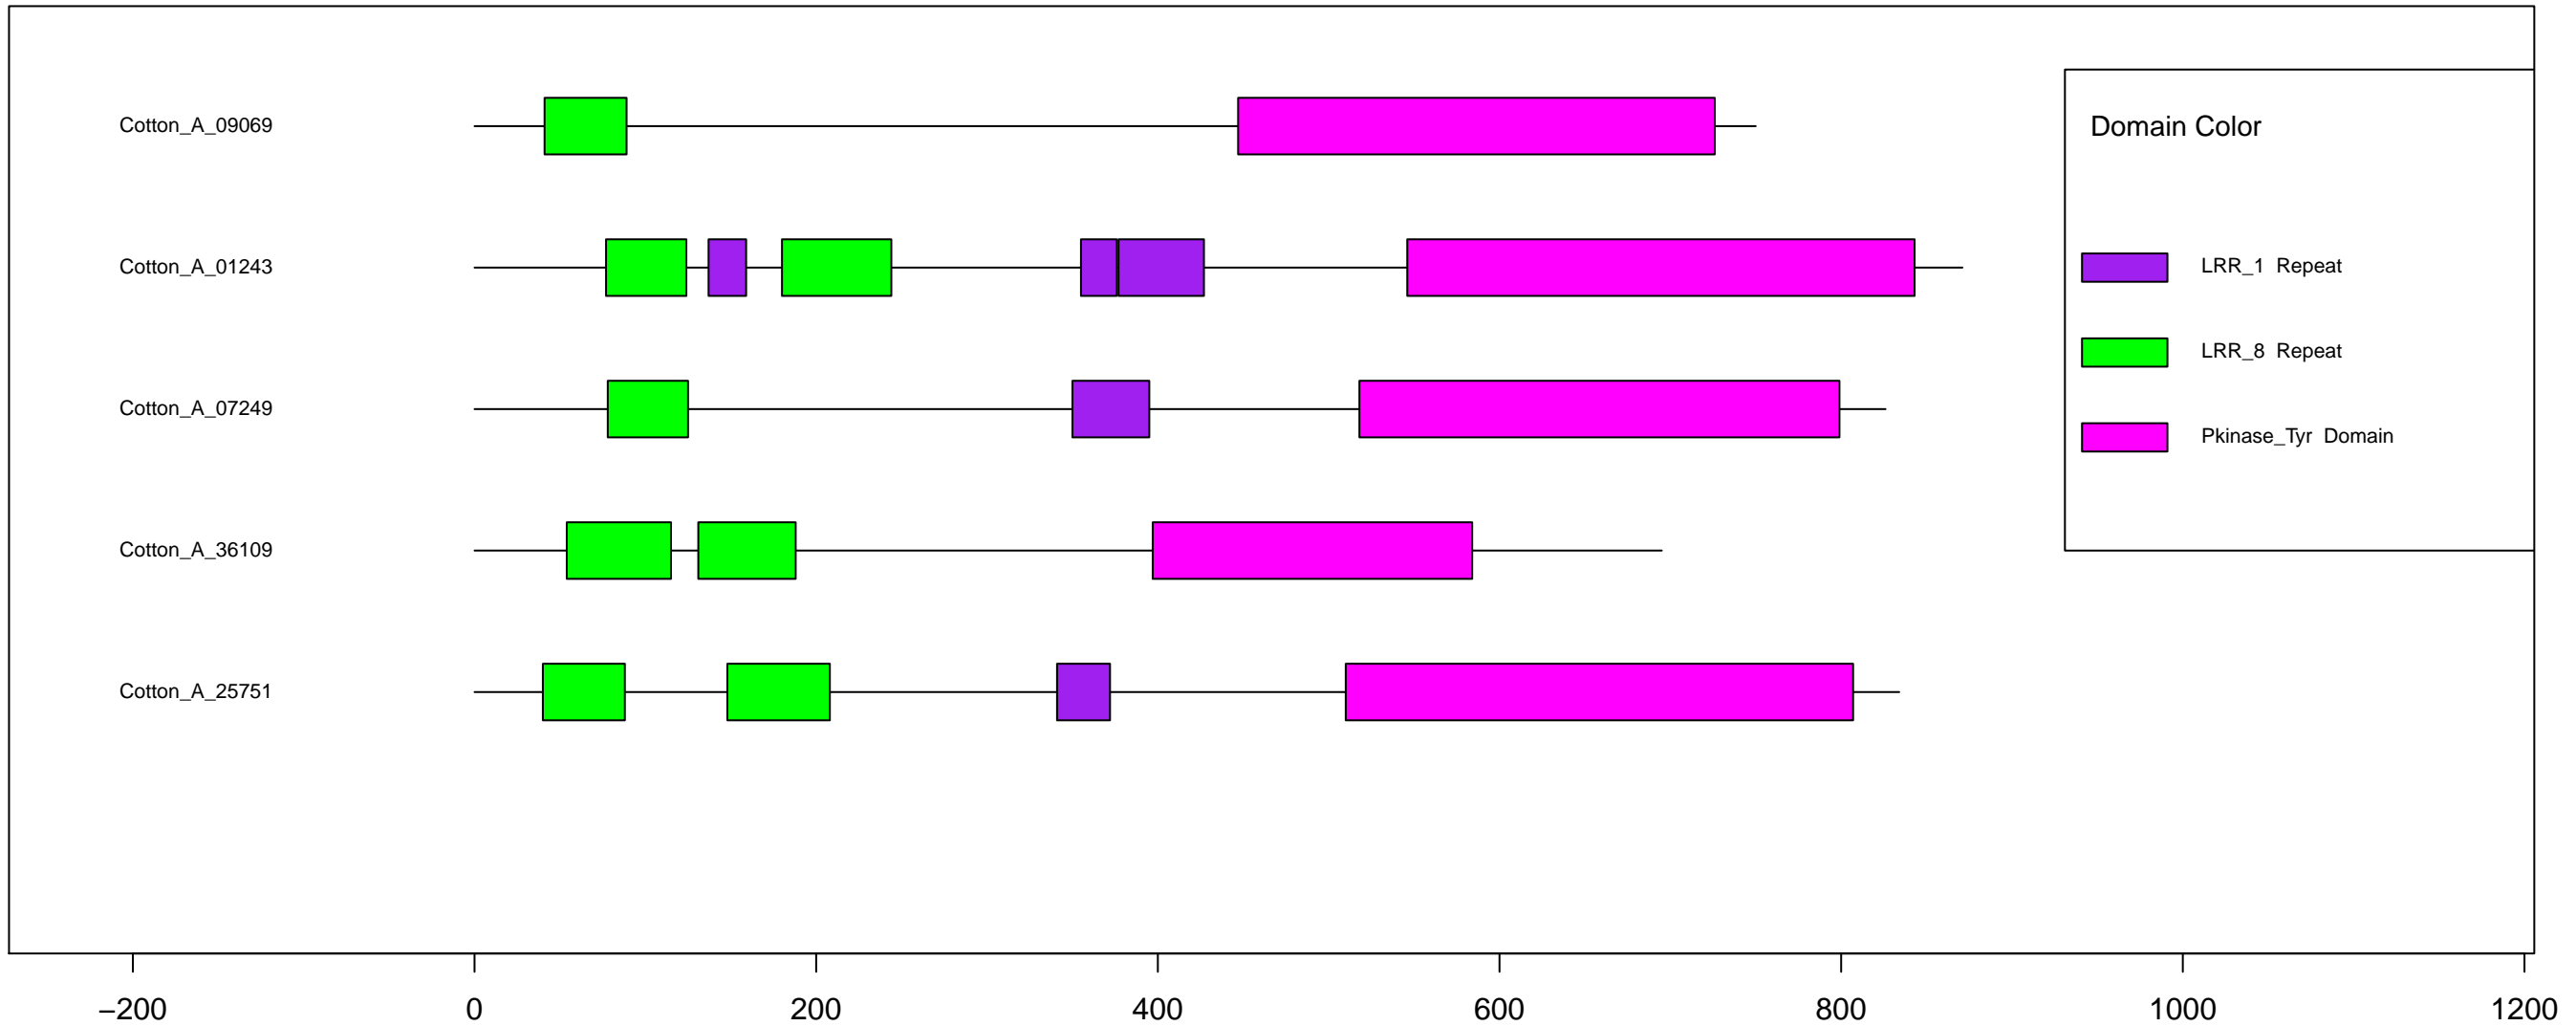

# G.ar RLK-Pelle\_LRR-VII-3 domain diagram (all)

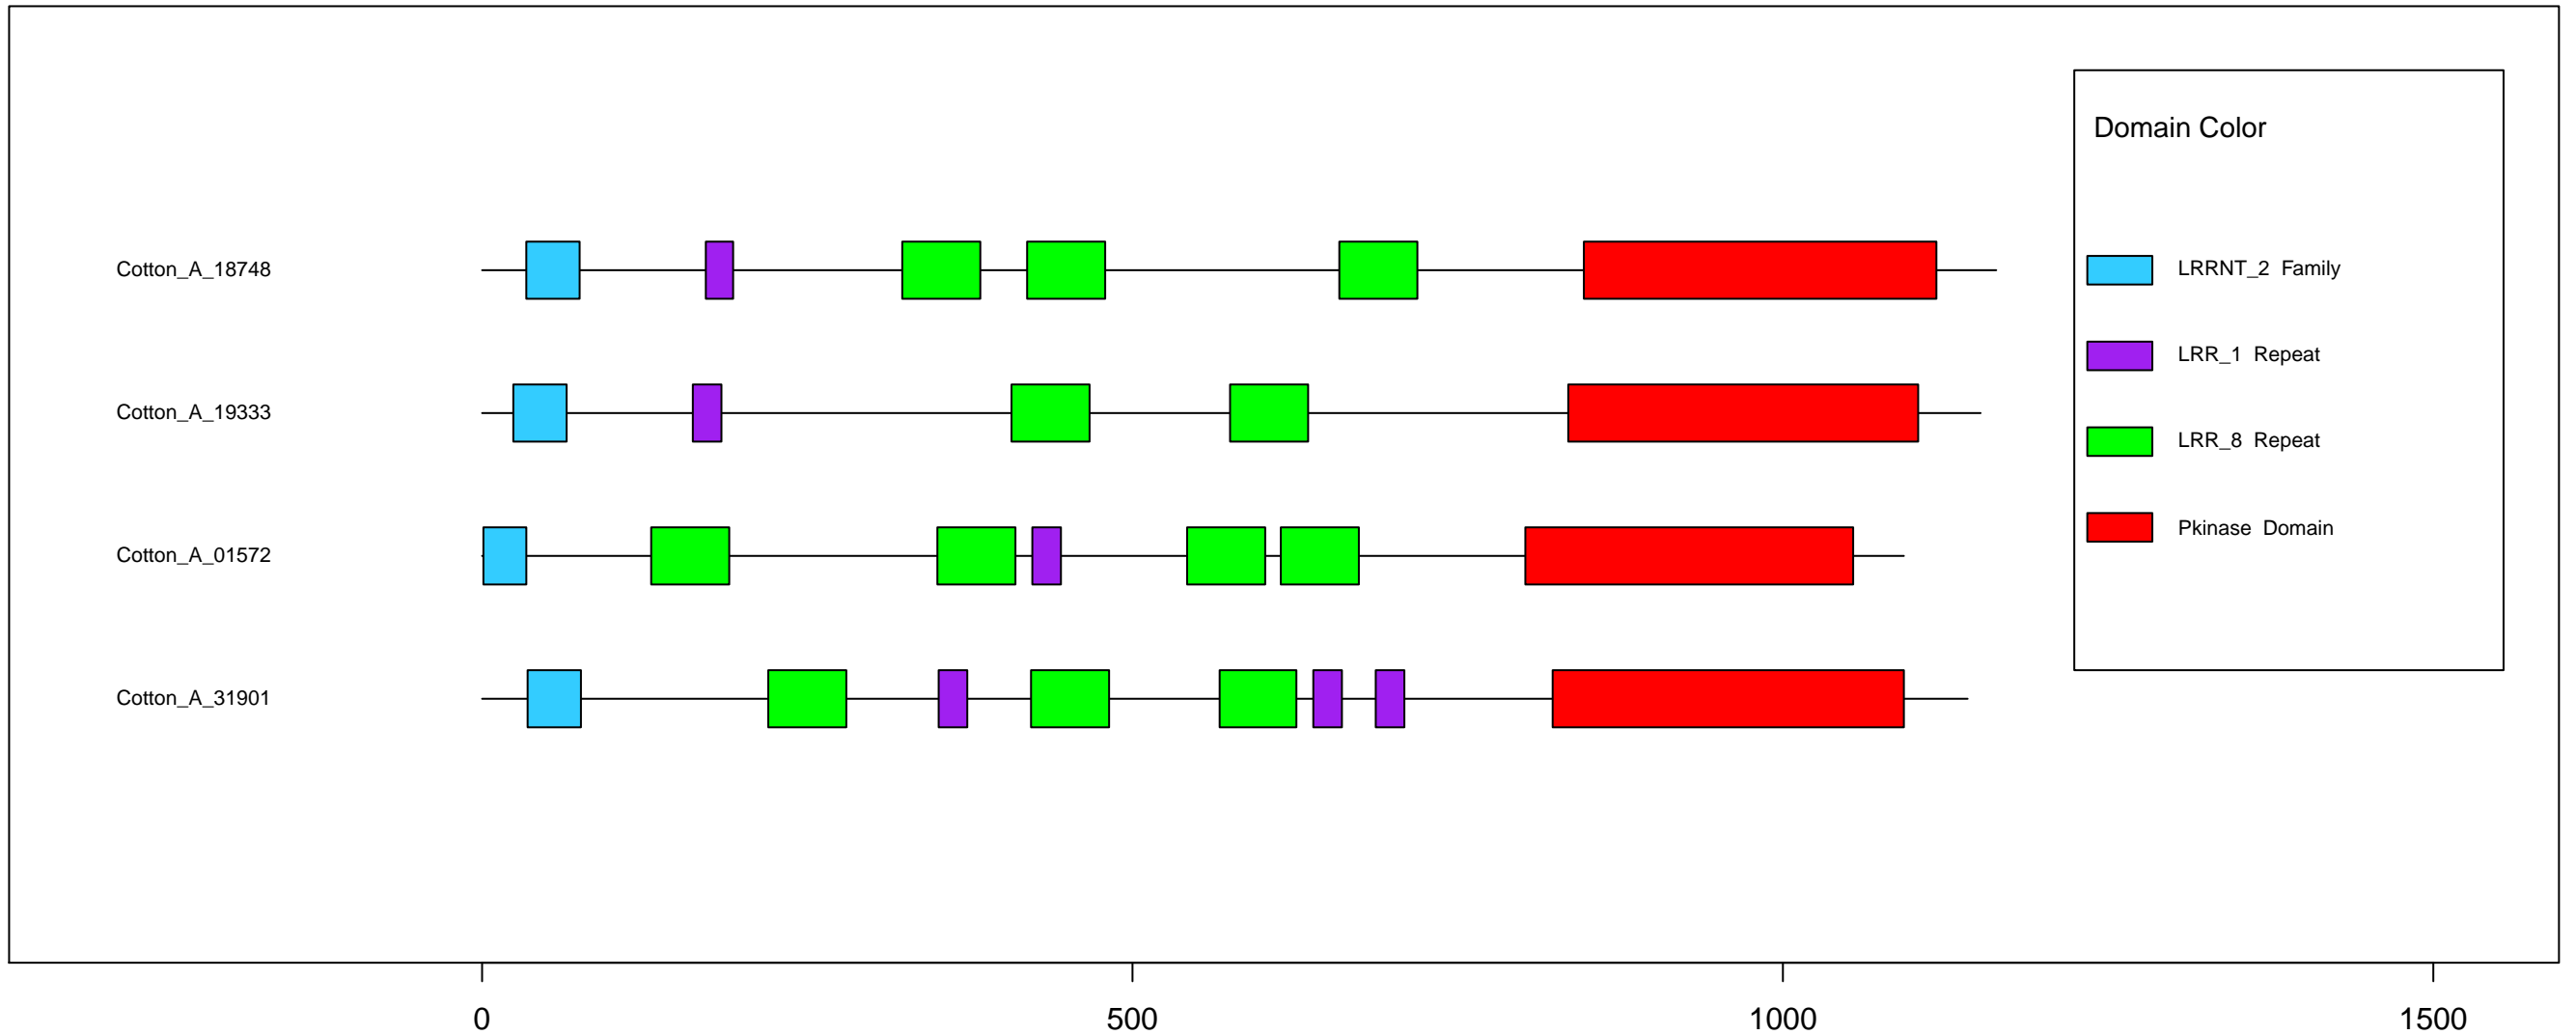

### G.ar RLK-Pelle\_LRR-VIII-1 domain diagram (all)

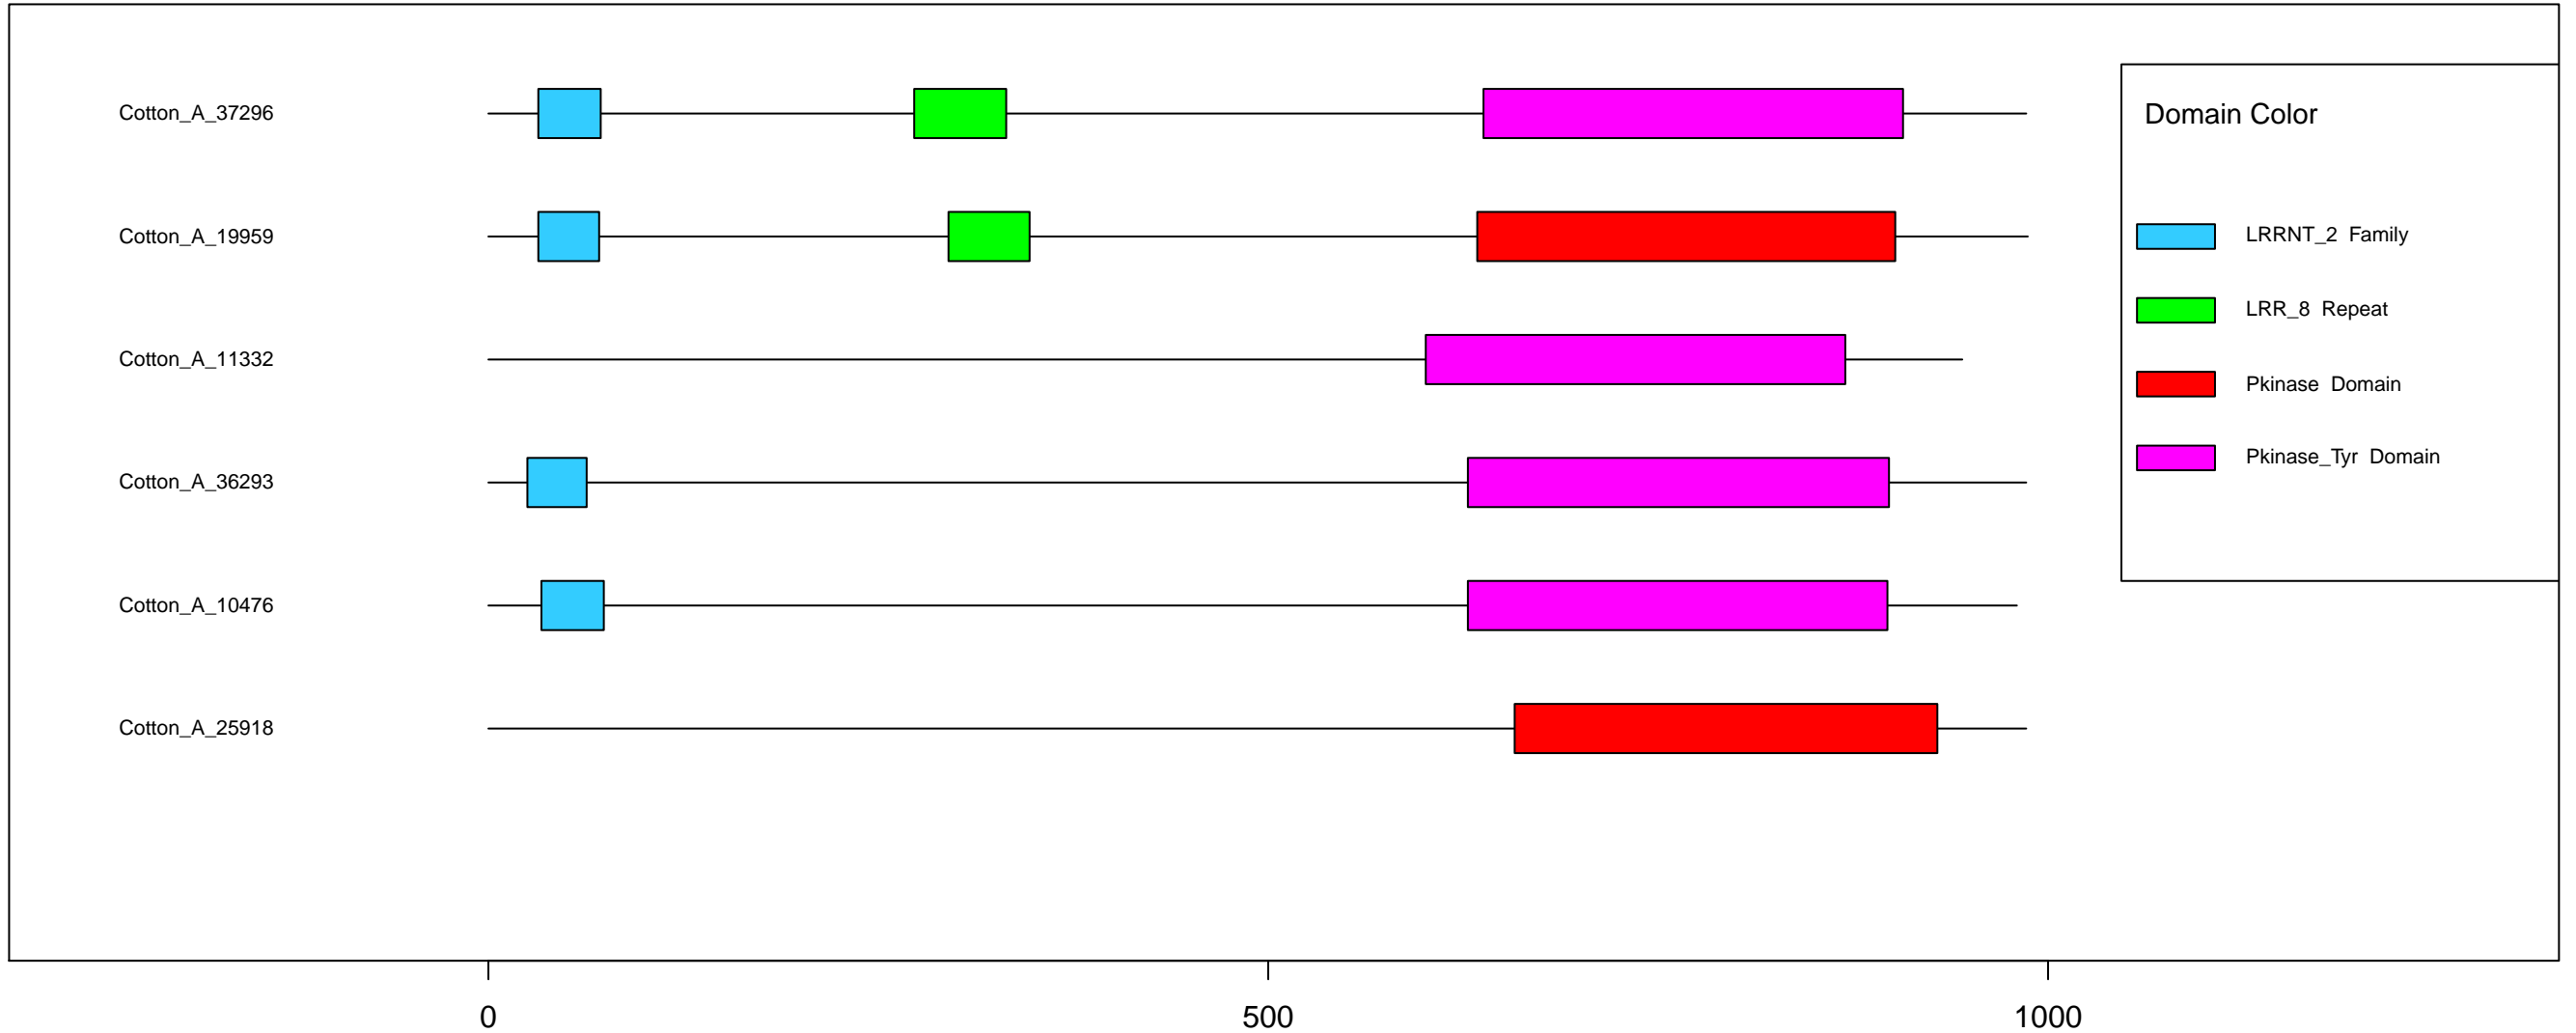

G.ar RLK-Pelle\_LRR-V domain diagram (all)

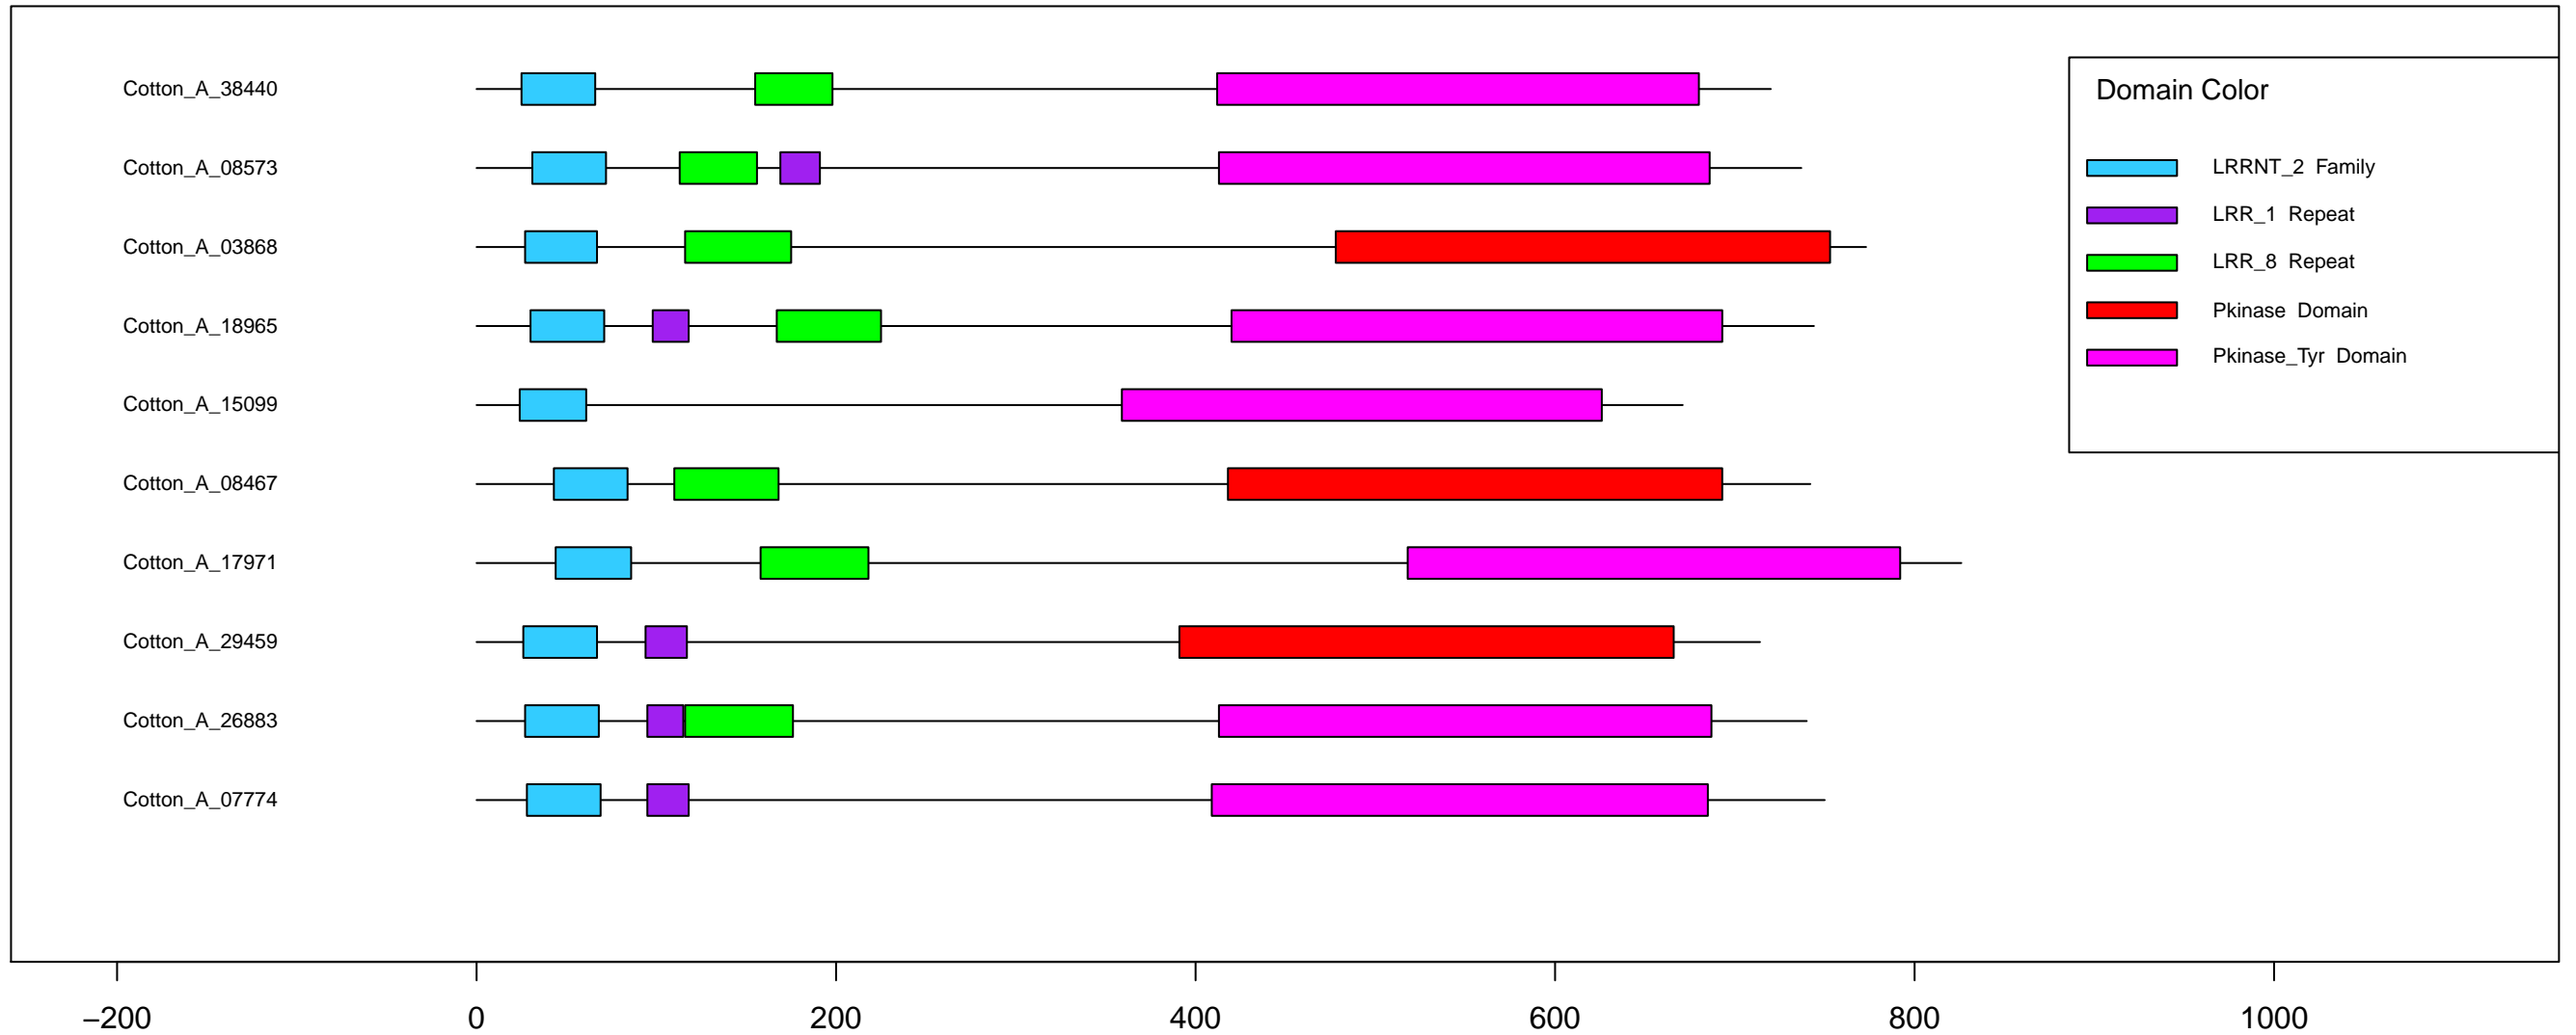



### G.ar RLK-Pelle\_LRR-Xa domain diagram (all)

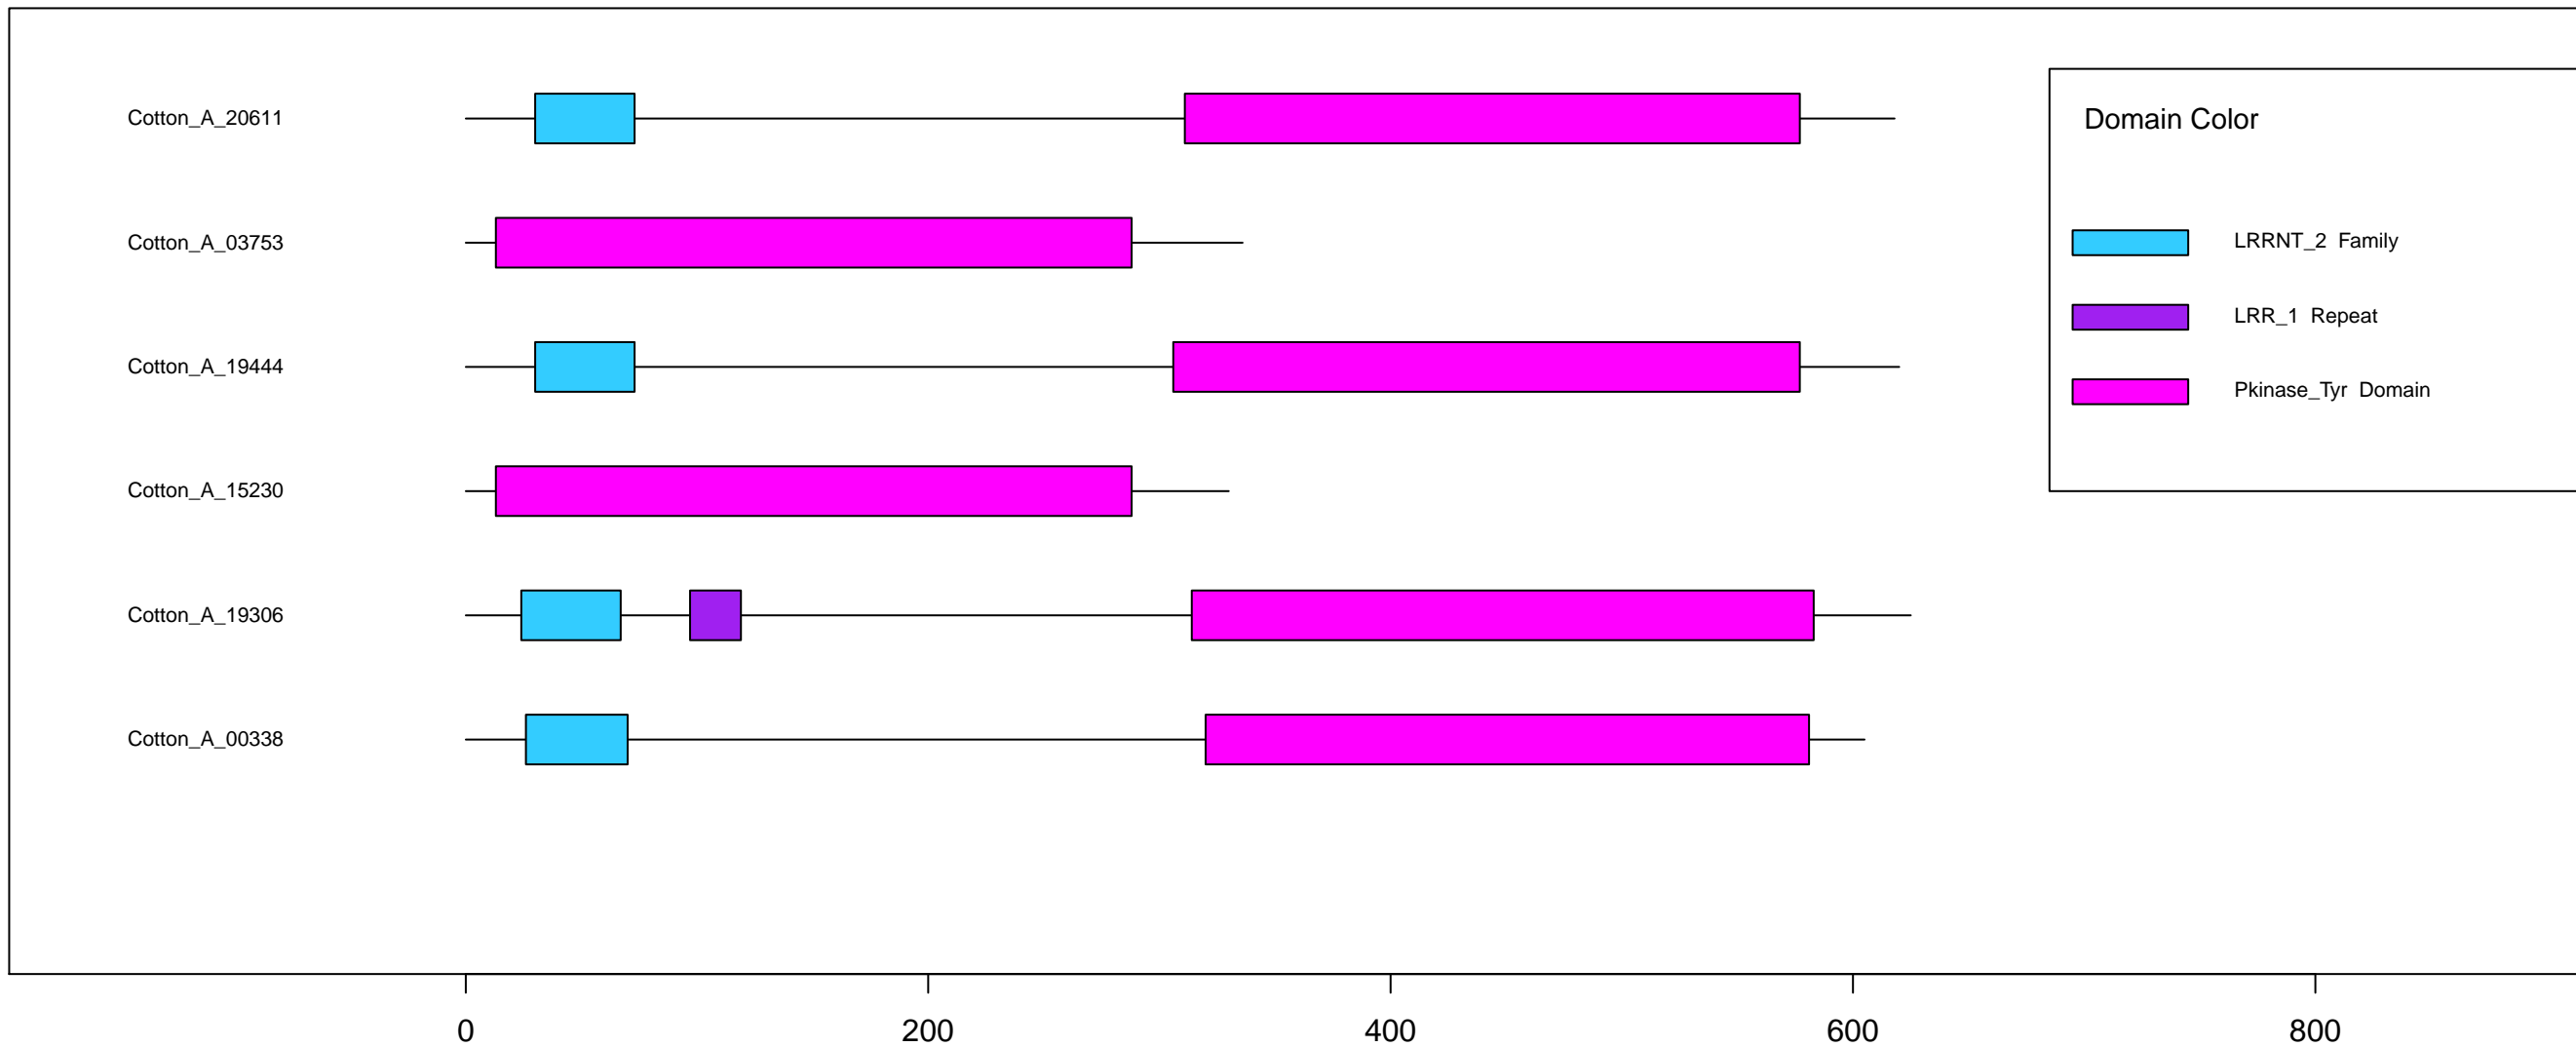

### G.ar RLK-Pelle\_LRR-Xb-1 domain diagram (all)

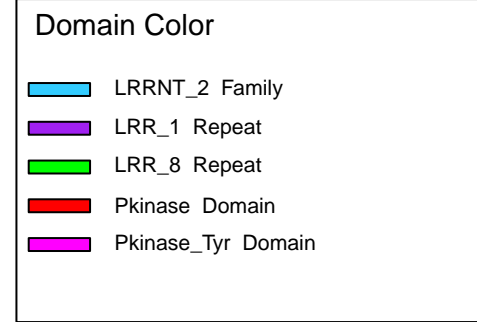

Cotton\_A\_10894  
 Cotton\_A\_10274  
 Cotton\_A\_07426  
 Cotton\_A\_38124  
 Cotton\_A\_11314  
 Cotton\_A\_21581  
 Cotton\_A\_37268  
 Cotton\_A\_06265  
 Cotton\_A\_20417  
 Cotton\_A\_22824  
 Cotton\_A\_11267  
 Cotton\_A\_40804  
 Cotton\_A\_39754

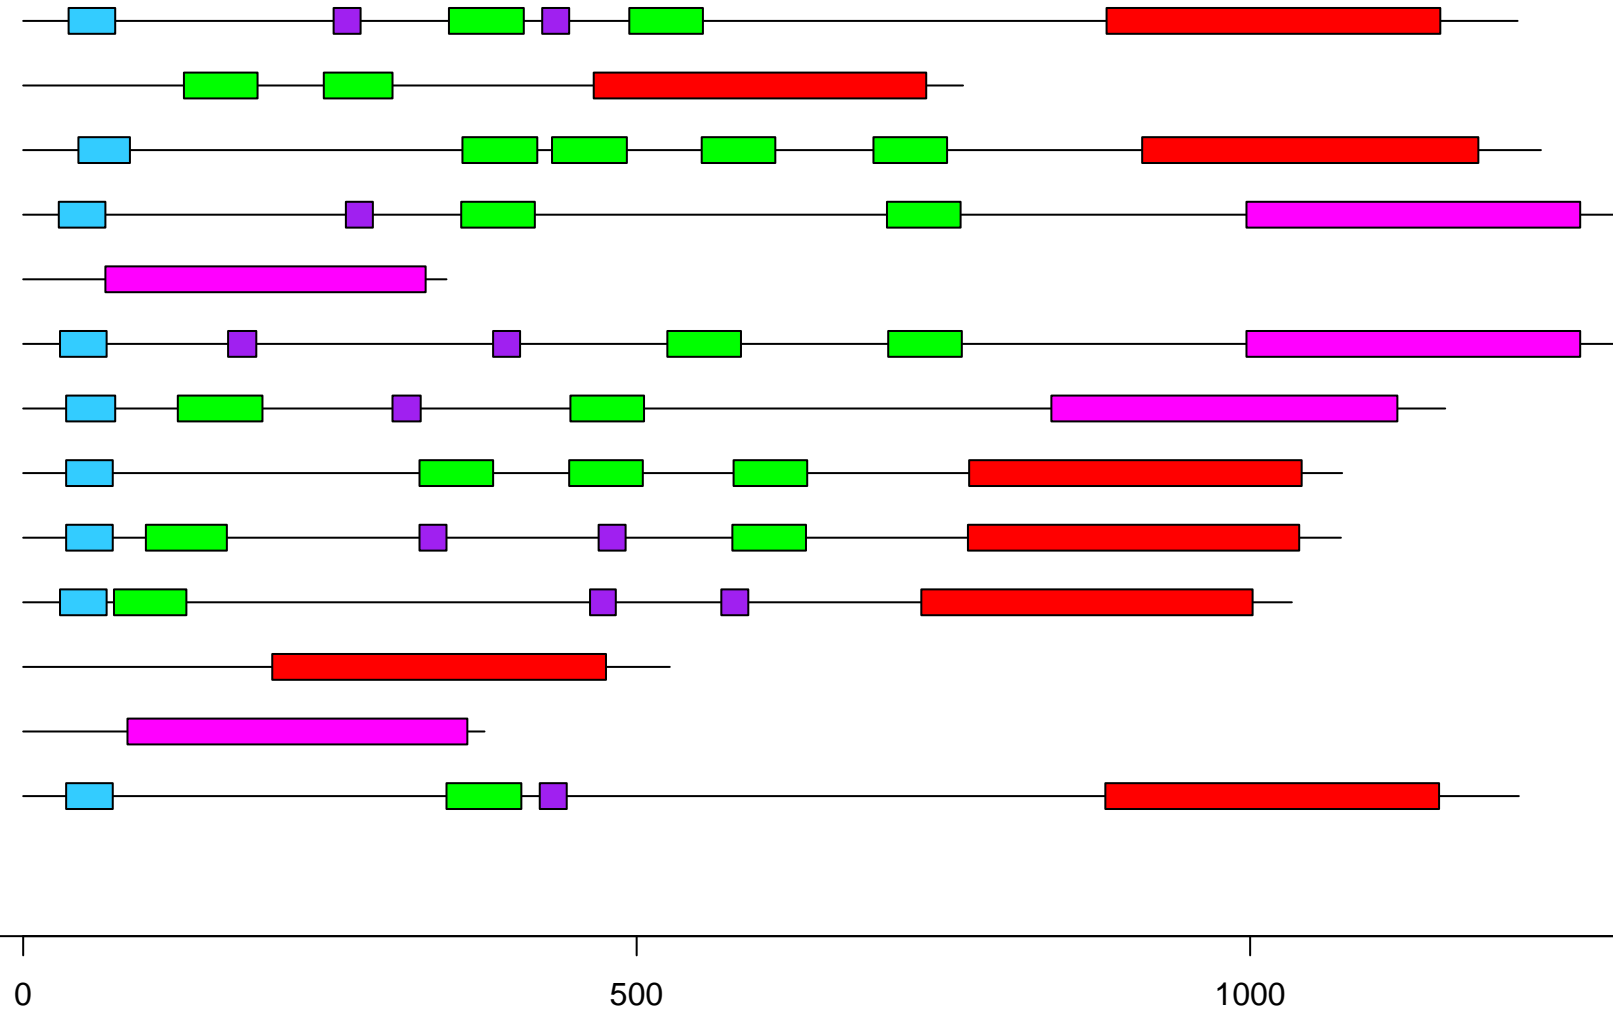

G.ar RLK-Pelle\_LRR-Xb-2 domain diagram (all)

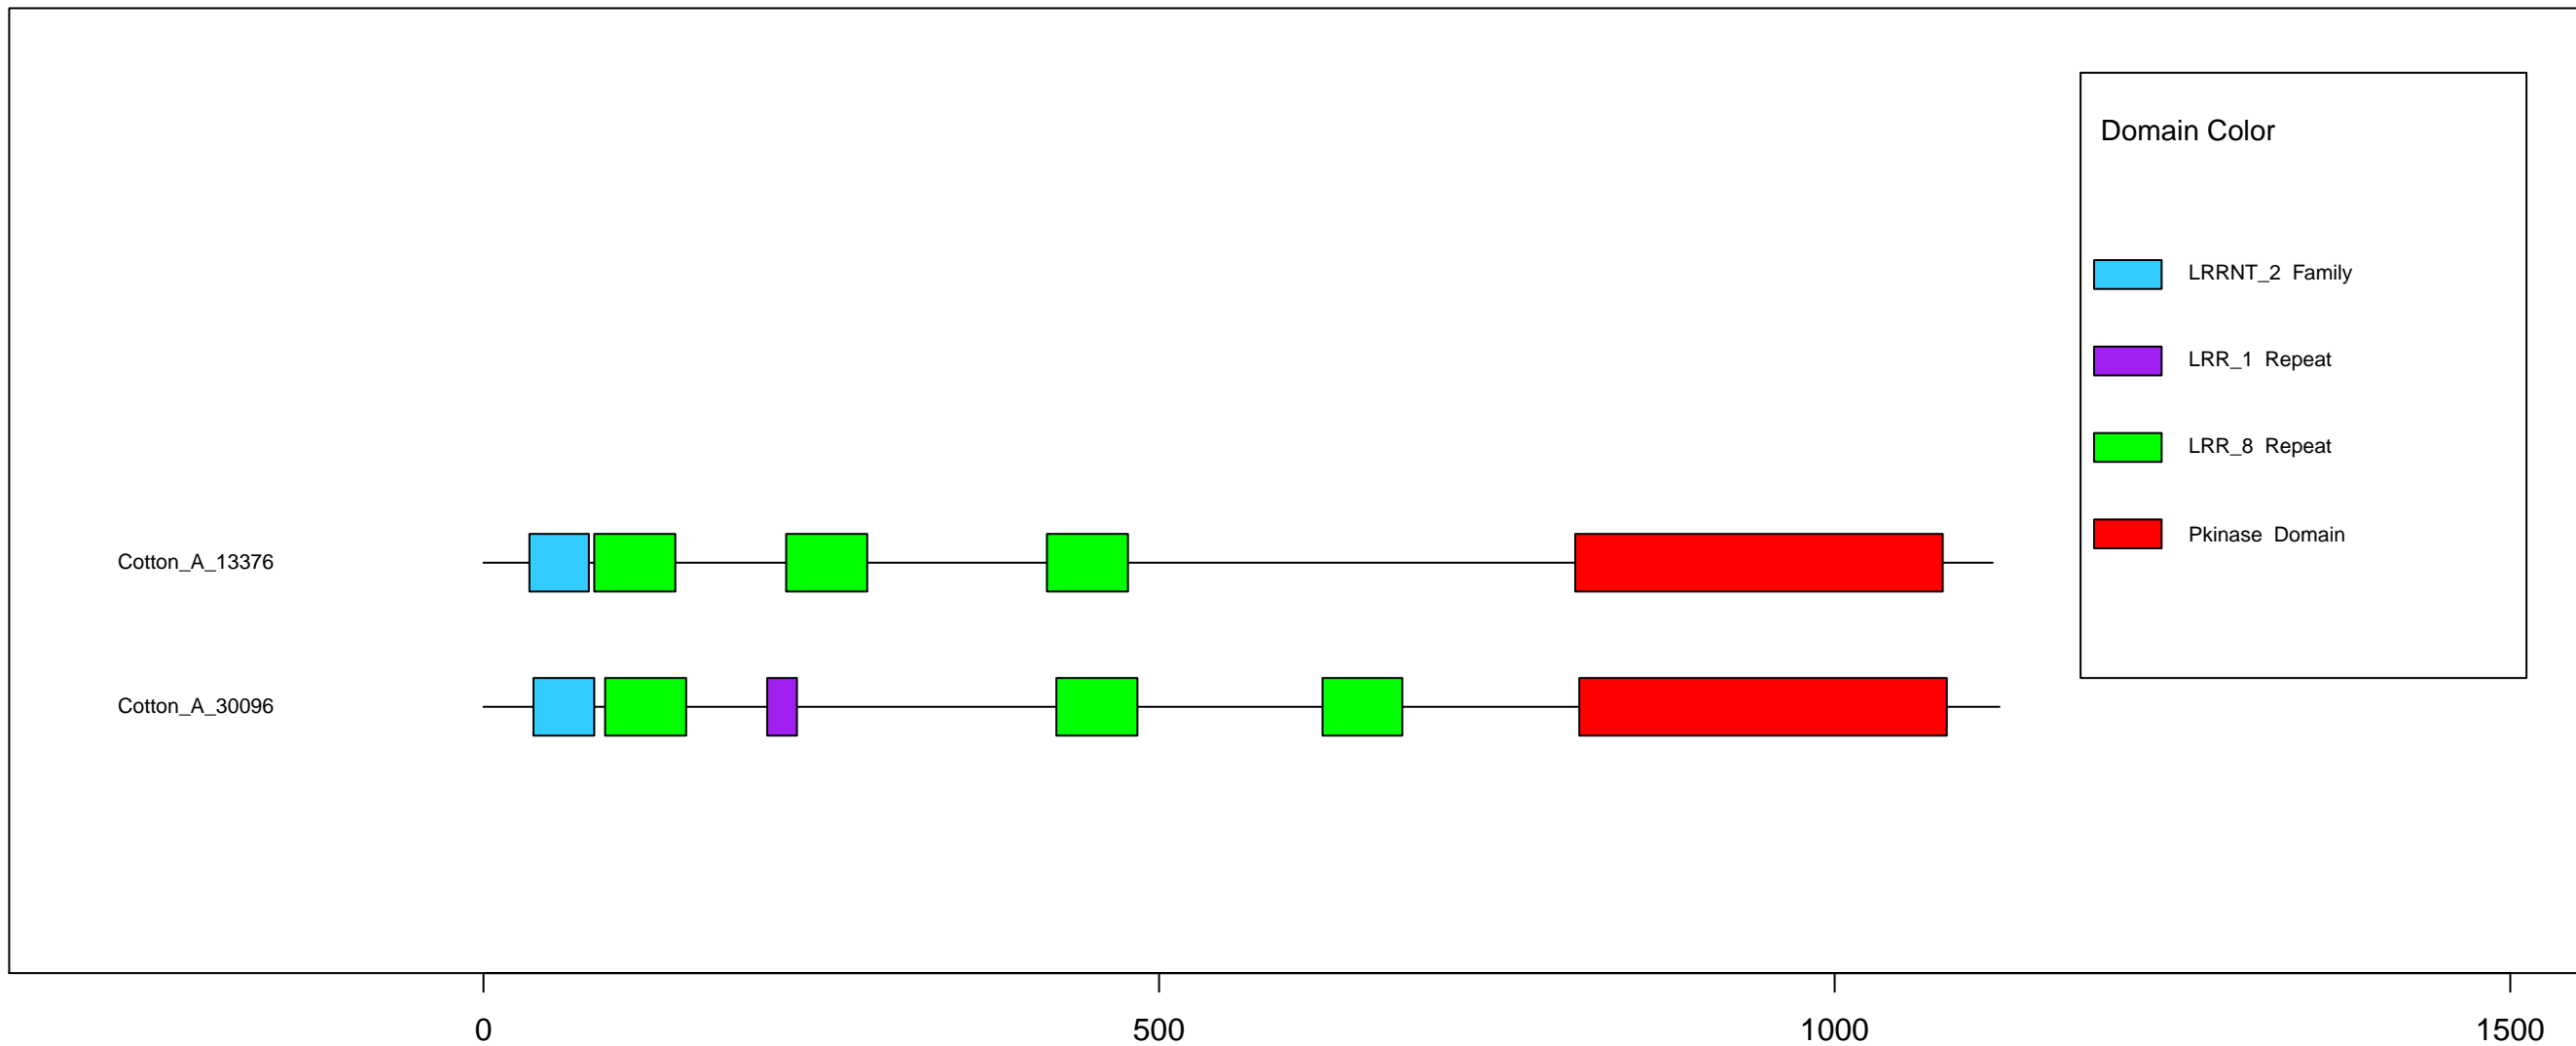

### G.ar RLK-Pelle\_LRR-XI-1 domain diagram (part 1)

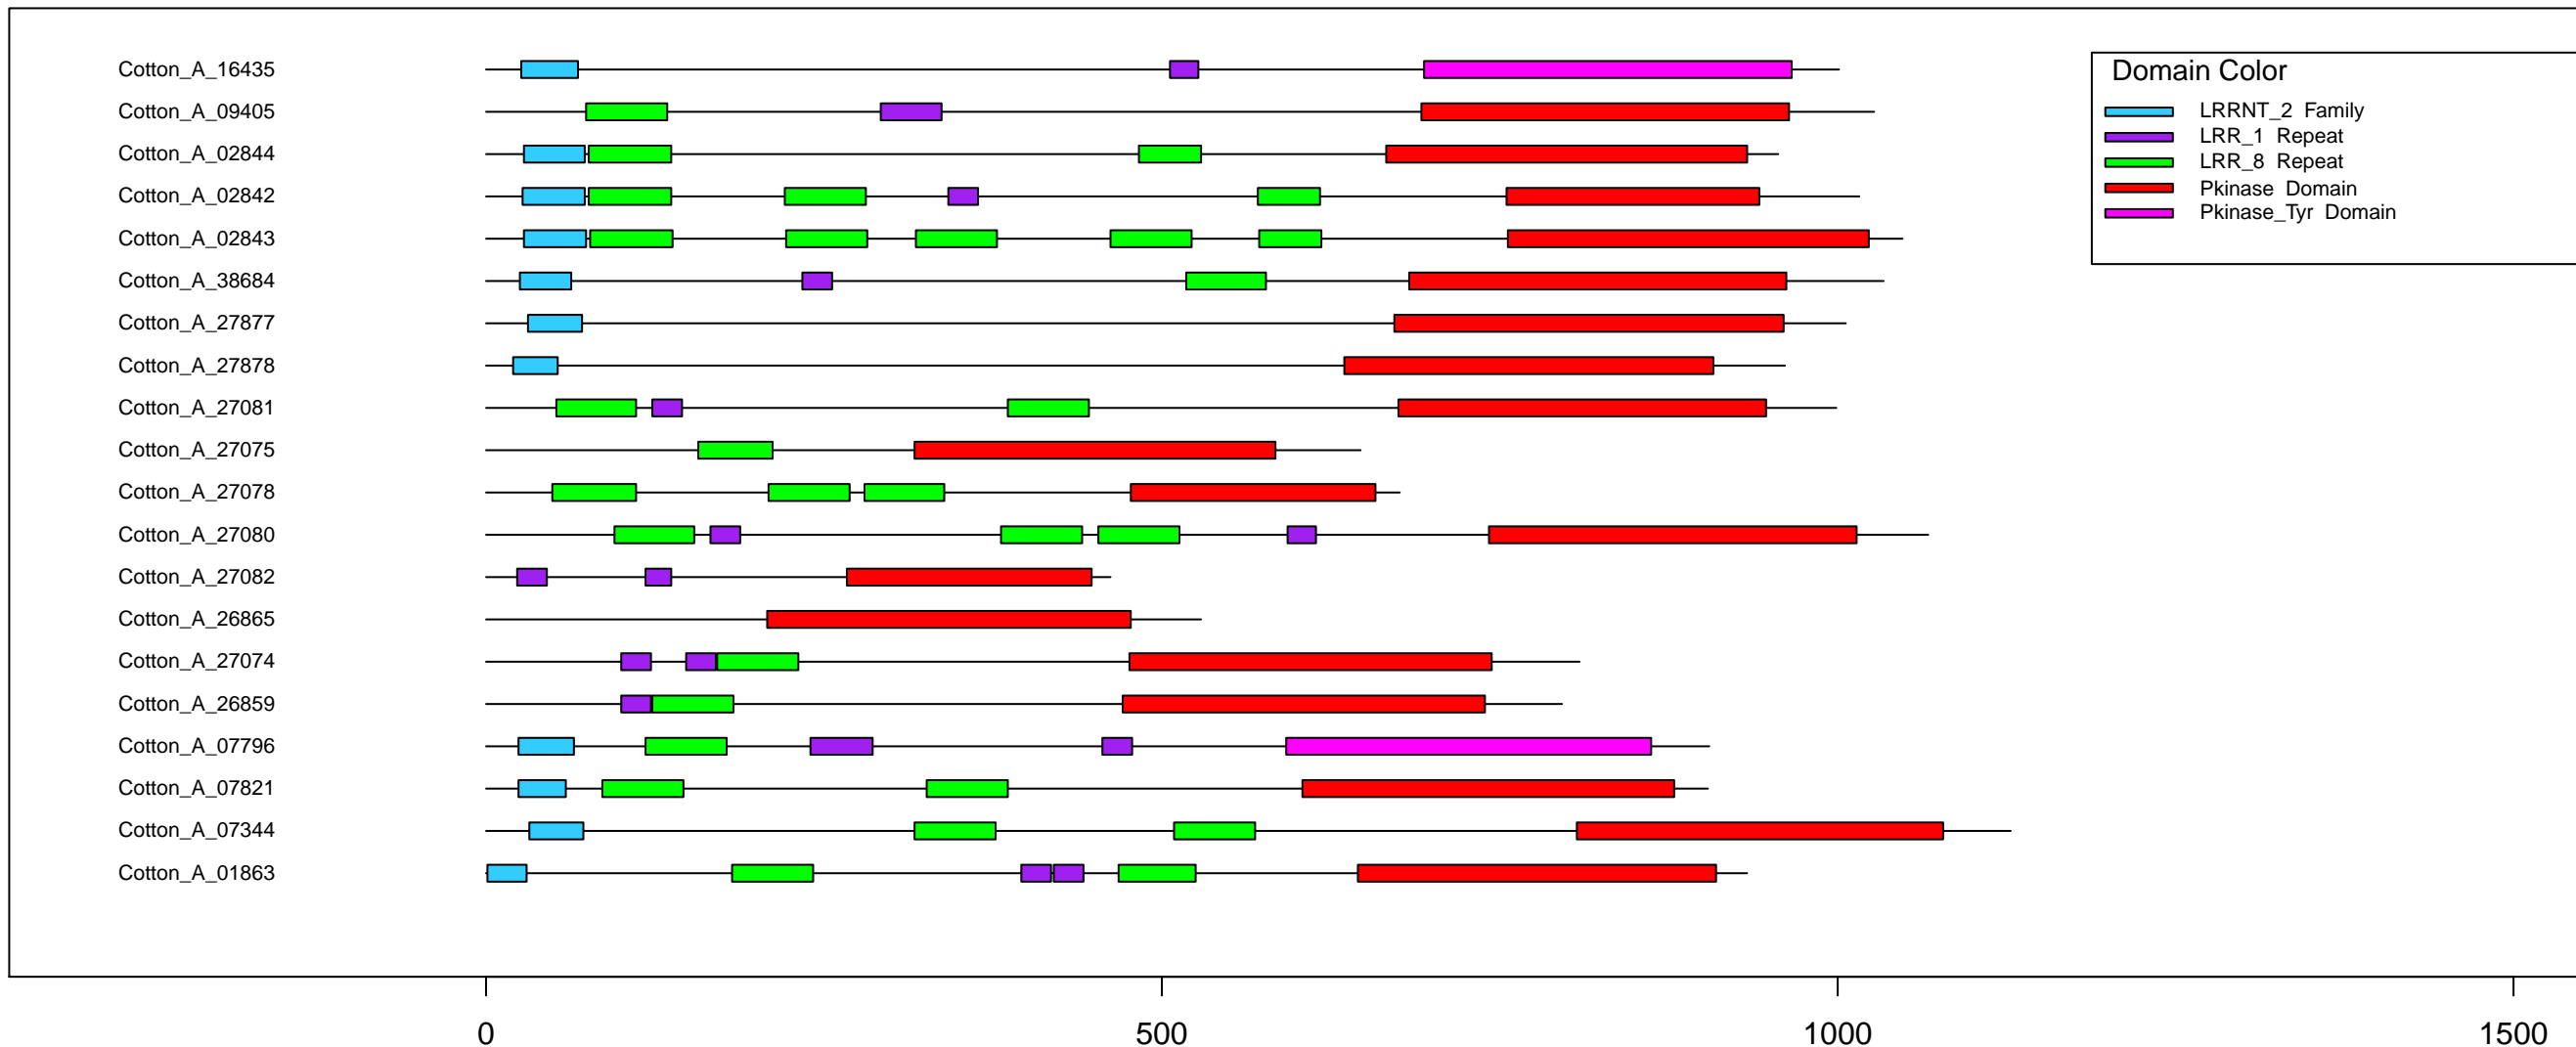

### G.ar RLK-Pelle\_LRR-XI-1 domain diagram (part 2)

Cotton\_A\_18191  
 Cotton\_A\_39416  
 Cotton\_A\_28584  
 Cotton\_A\_18683  
 Cotton\_A\_05912  
 Cotton\_A\_05590  
 Cotton\_A\_03588  
 Cotton\_A\_34822  
 Cotton\_A\_34609  
 Cotton\_A\_22838  
 Cotton\_A\_19693  
 Cotton\_A\_08296  
 Cotton\_A\_39167  
 Cotton\_A\_39216  
 Cotton\_A\_36487  
 Cotton\_A\_27038  
 Cotton\_A\_16741  
 Cotton\_A\_40475  
 Cotton\_A\_32822  
 Cotton\_A\_22249

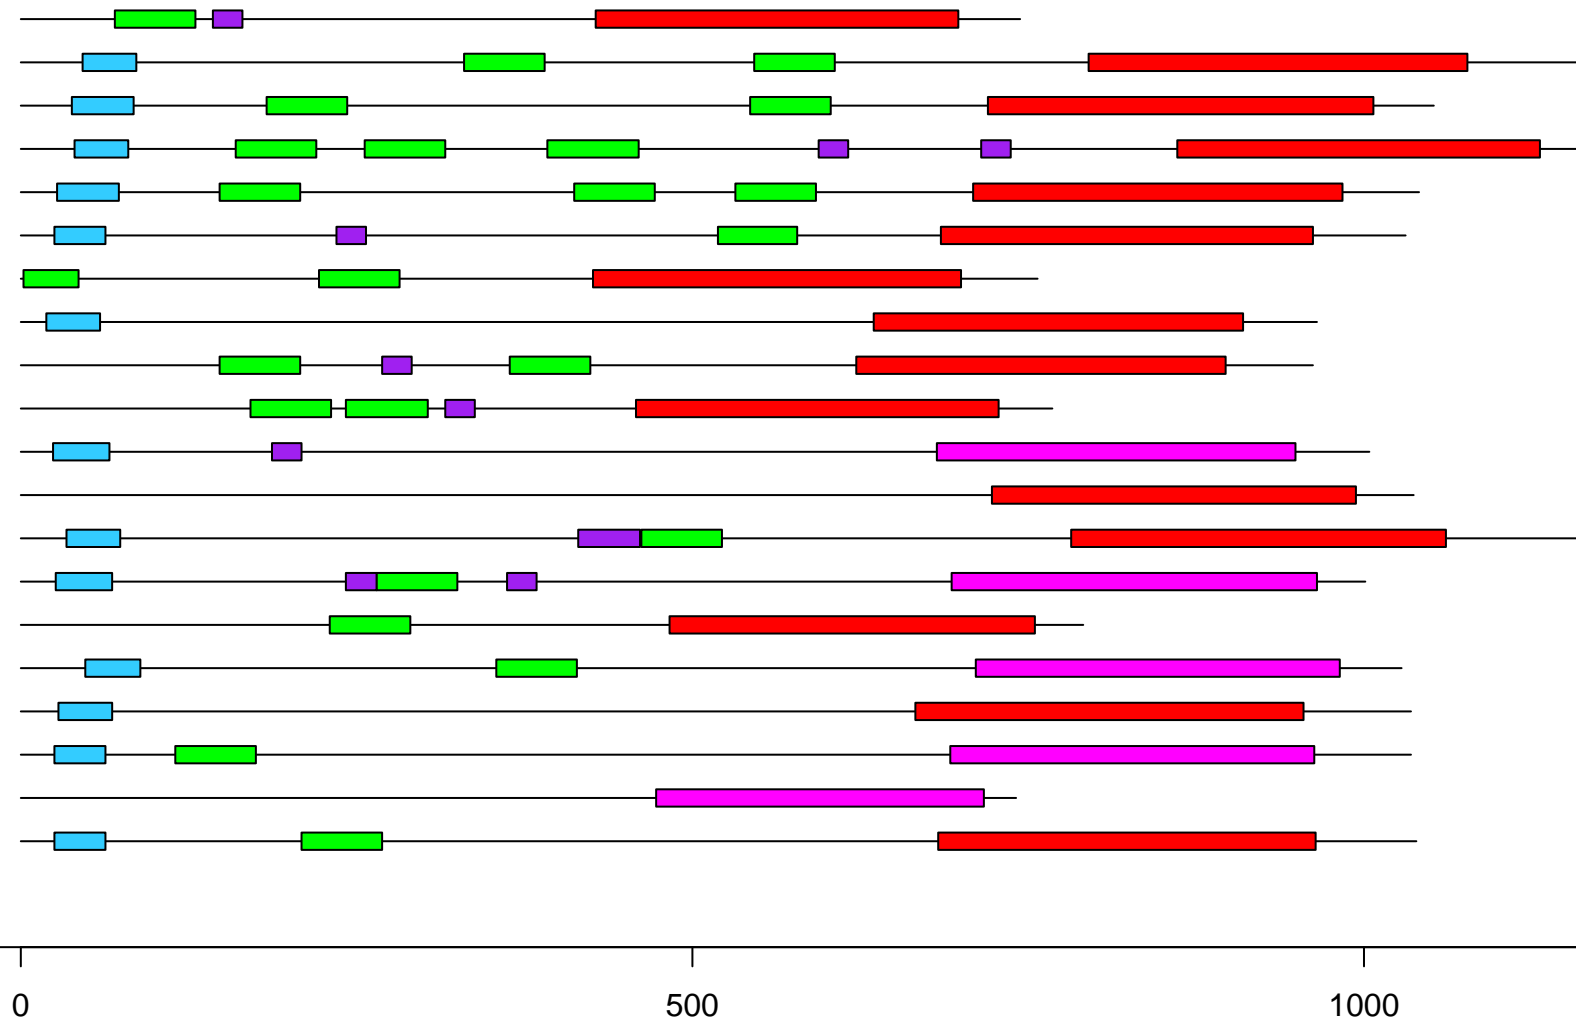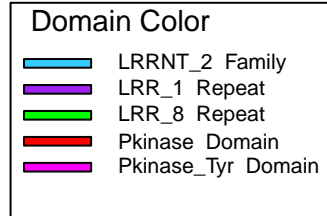

### G.ar RLK-Pelle\_LRR-XI-1 domain diagram (part 3)

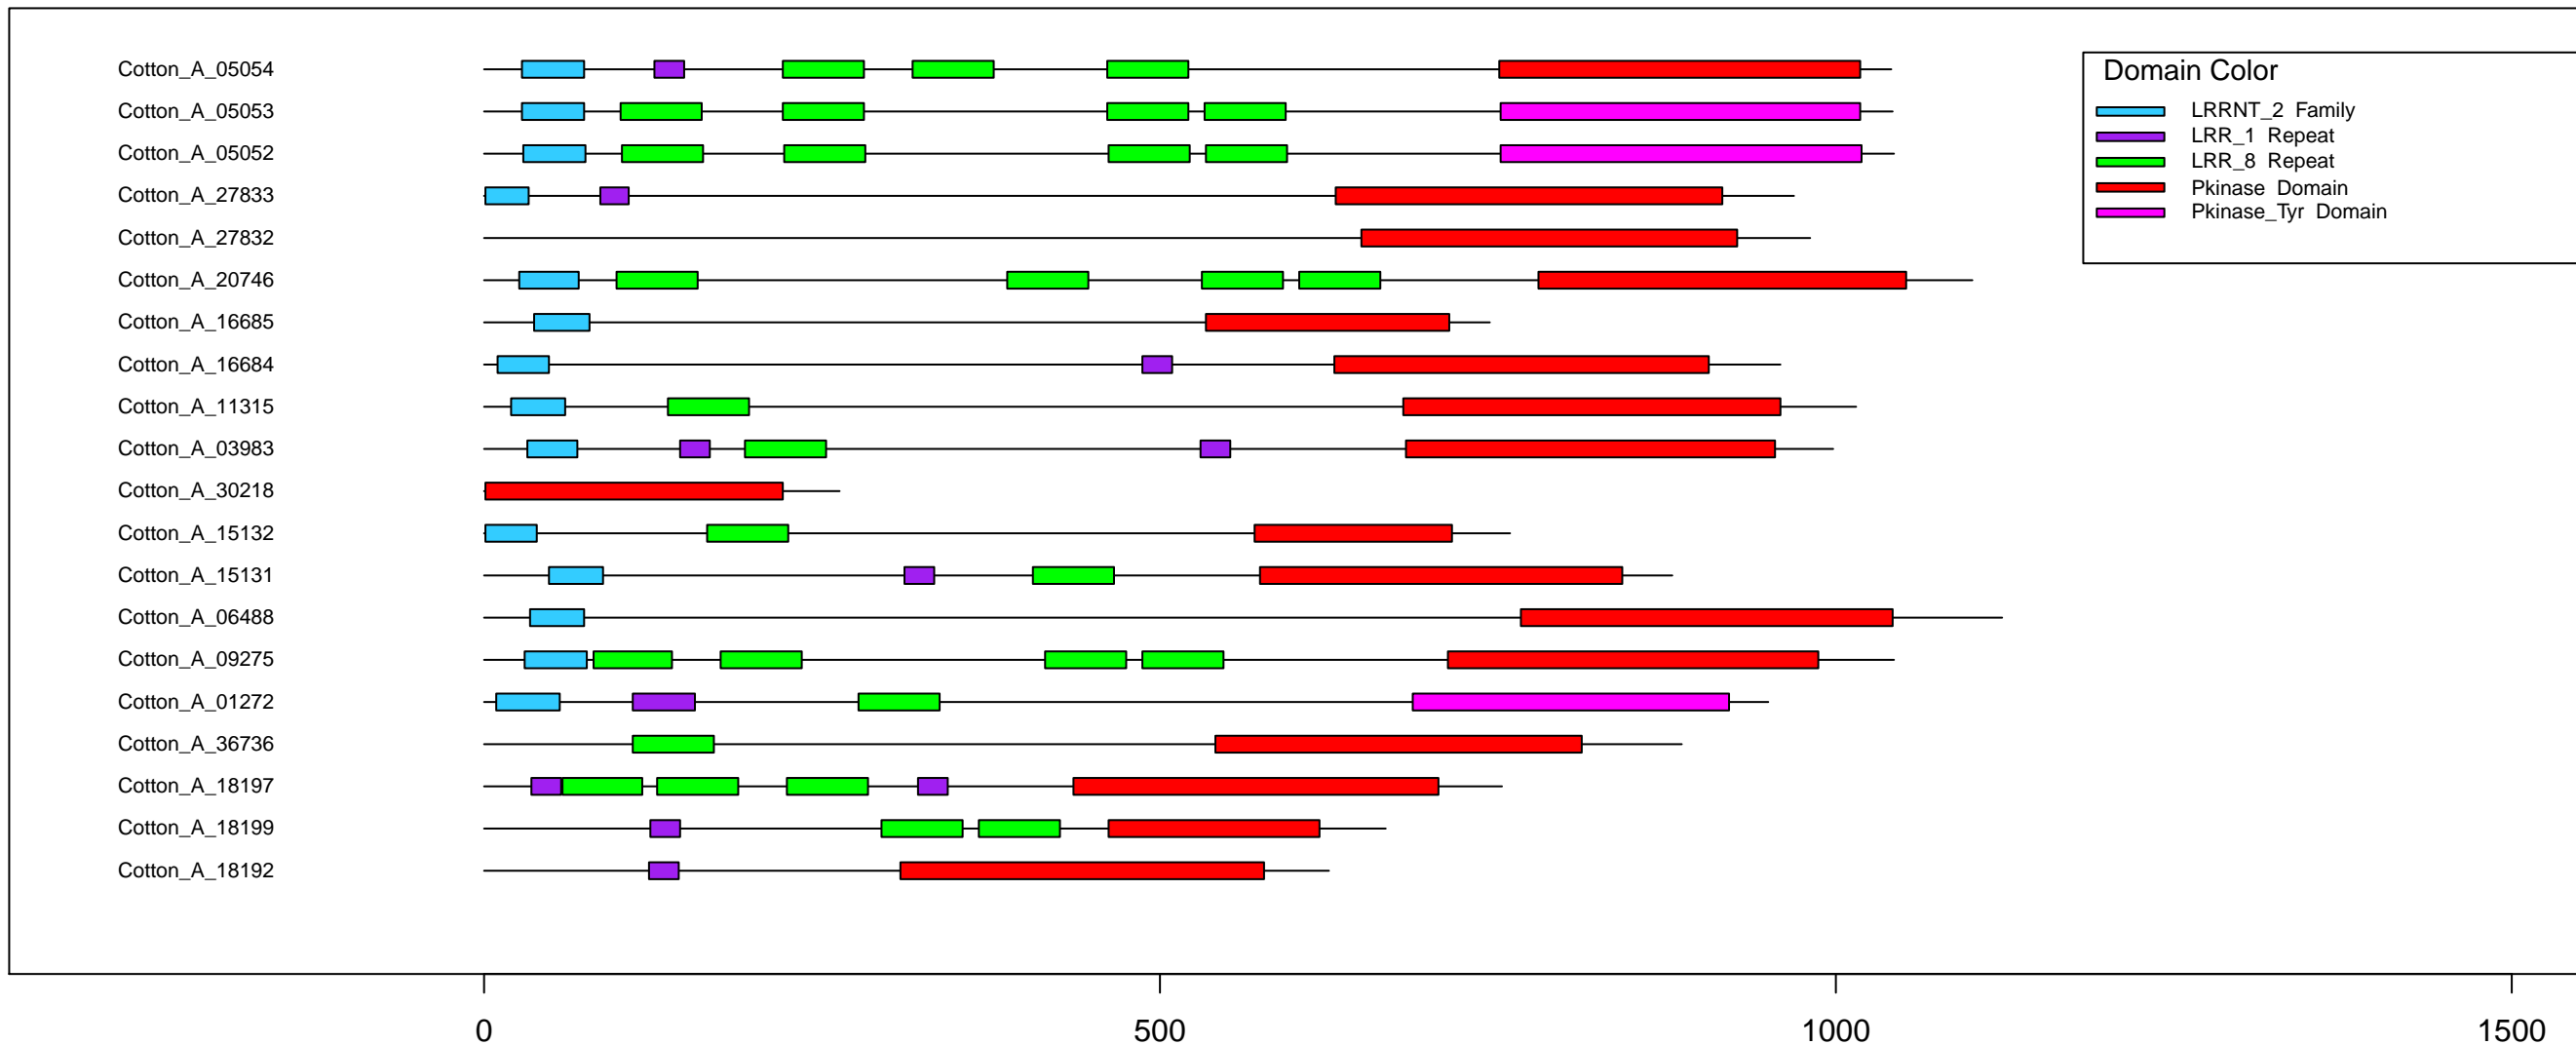

### G.ar RLK-Pelle\_LRR-XI-1 domain diagram (part 4)

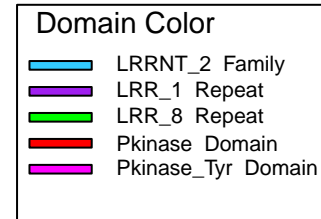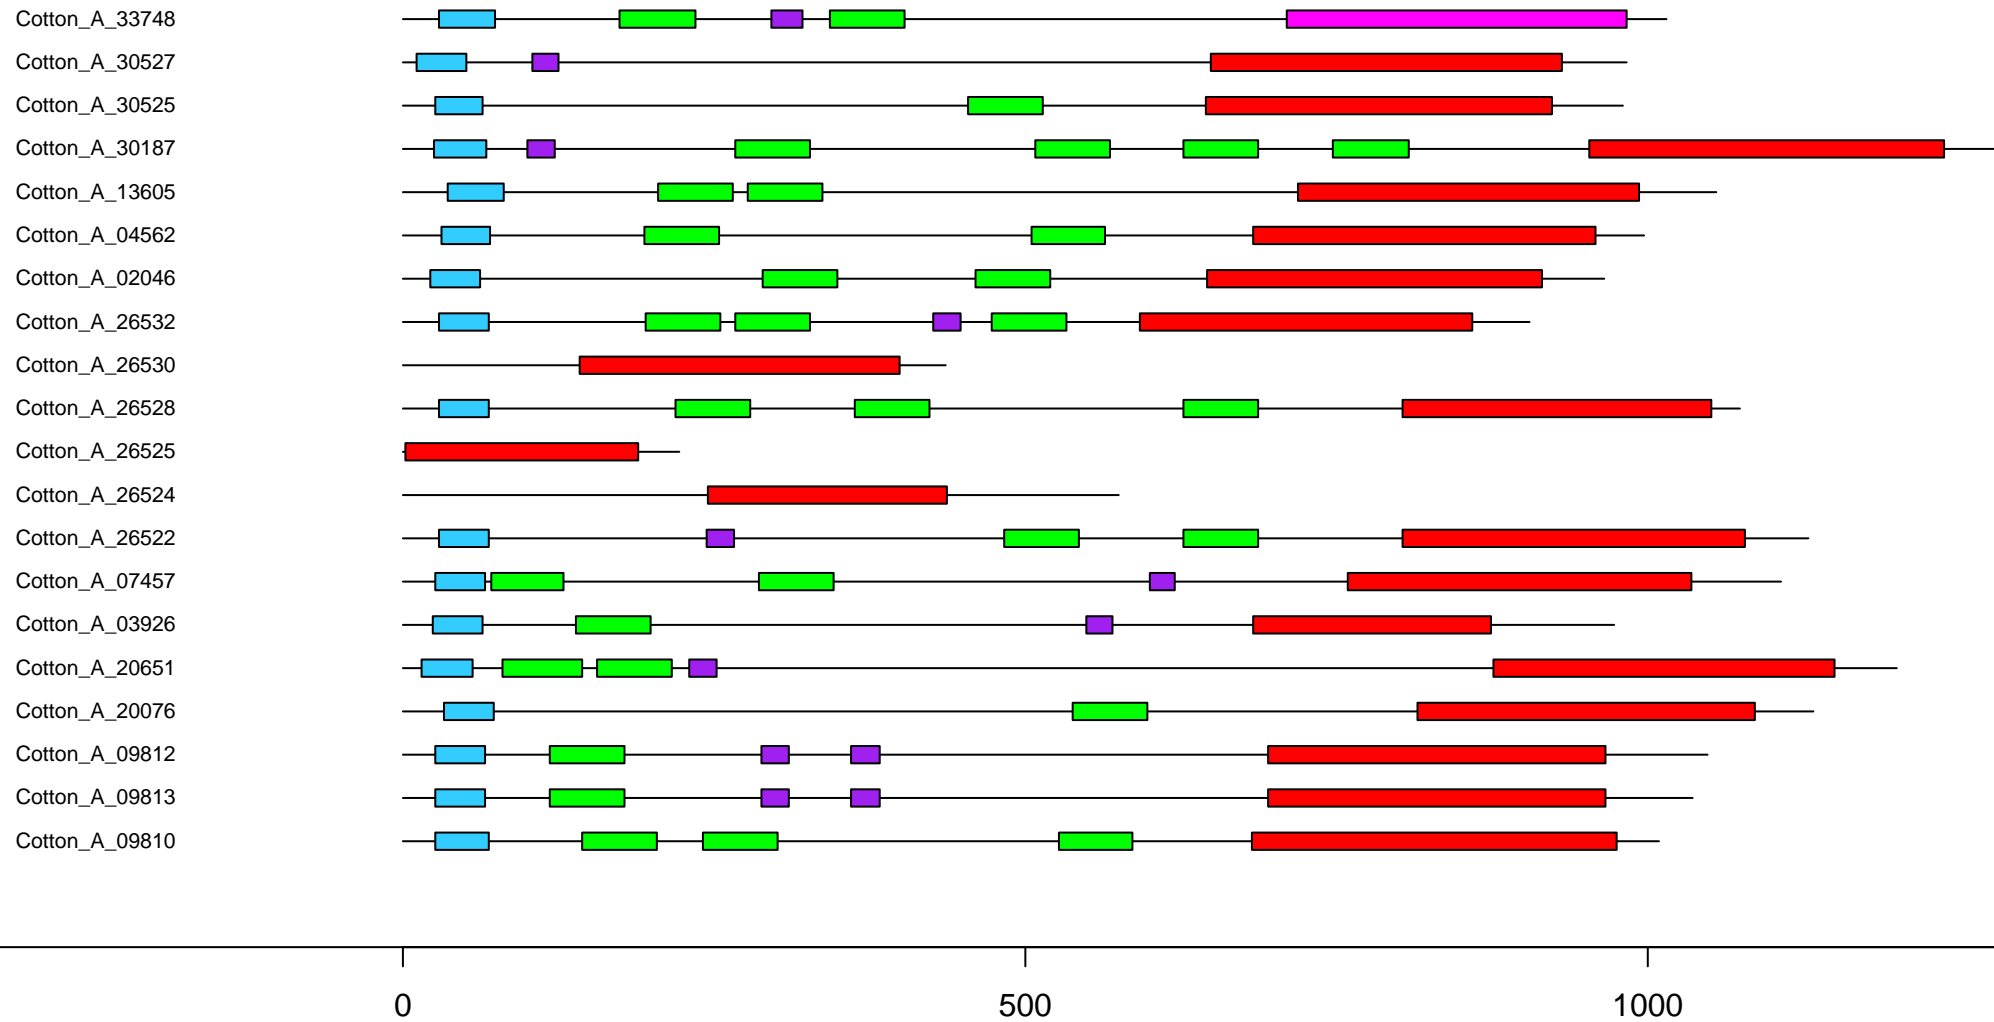

# G.ar RLK-Pelle\_LRR-XI-2 domain diagram (all)

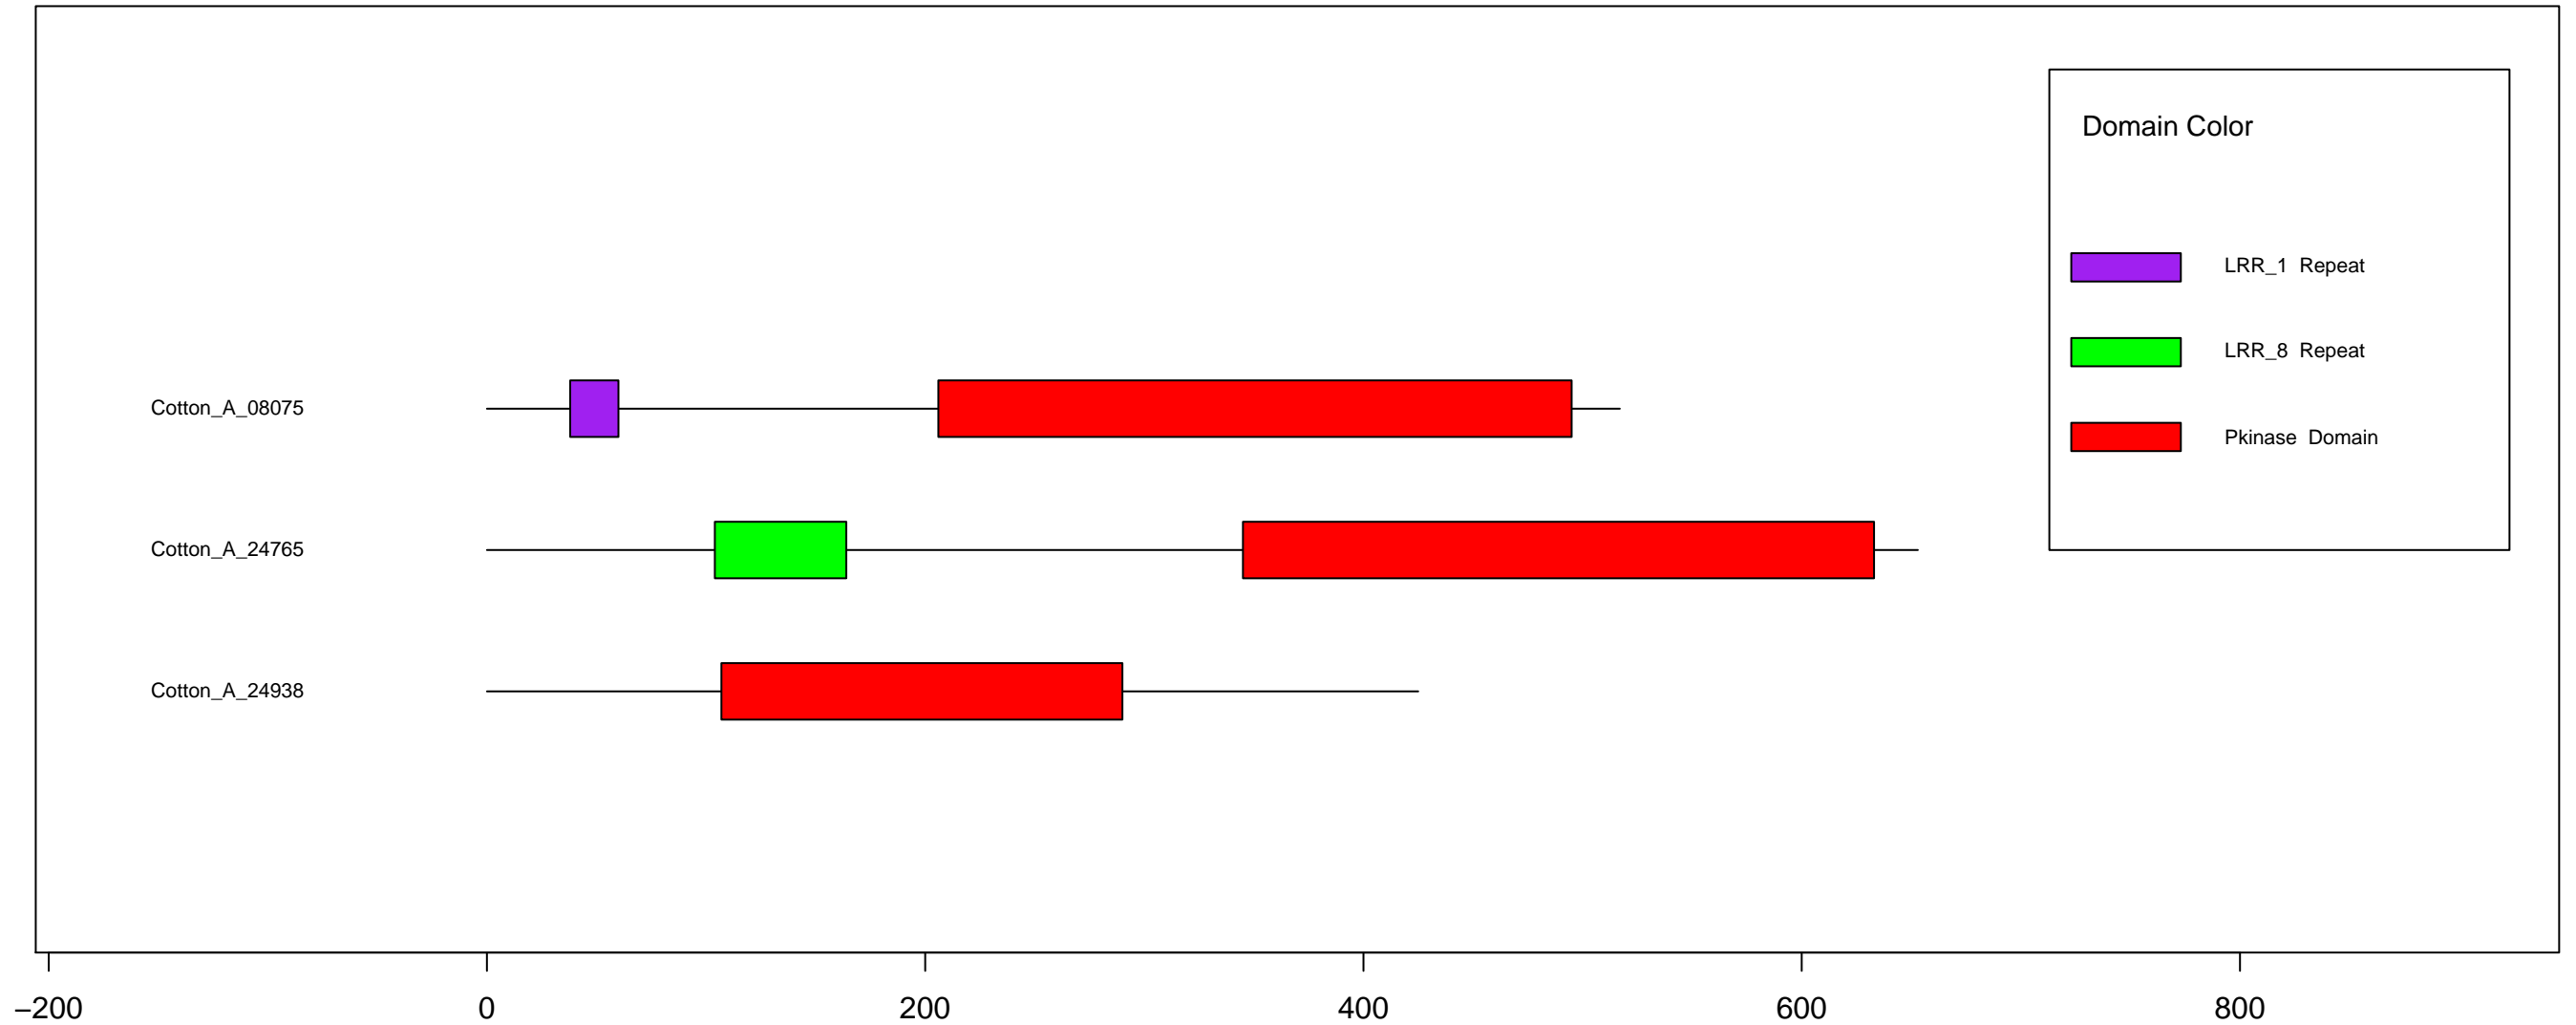



### G.ar RLK-Pelle\_LRR-XII-1 domain diagram (part 1)

Cotton\_A\_20114  
 Cotton\_A\_14486  
 Cotton\_A\_14237  
 Cotton\_A\_14232  
 Cotton\_A\_14156  
 Cotton\_A\_14155  
 Cotton\_A\_14152  
 Cotton\_A\_14154  
 Cotton\_A\_35230  
 Cotton\_A\_35229  
 Cotton\_A\_19136  
 Cotton\_A\_19137  
 Cotton\_A\_12535  
 Cotton\_A\_21985  
 Cotton\_A\_18166  
 Cotton\_A\_39152  
 Cotton\_A\_21959  
 Cotton\_A\_25900  
 Cotton\_A\_25344  
 Cotton\_A\_25343

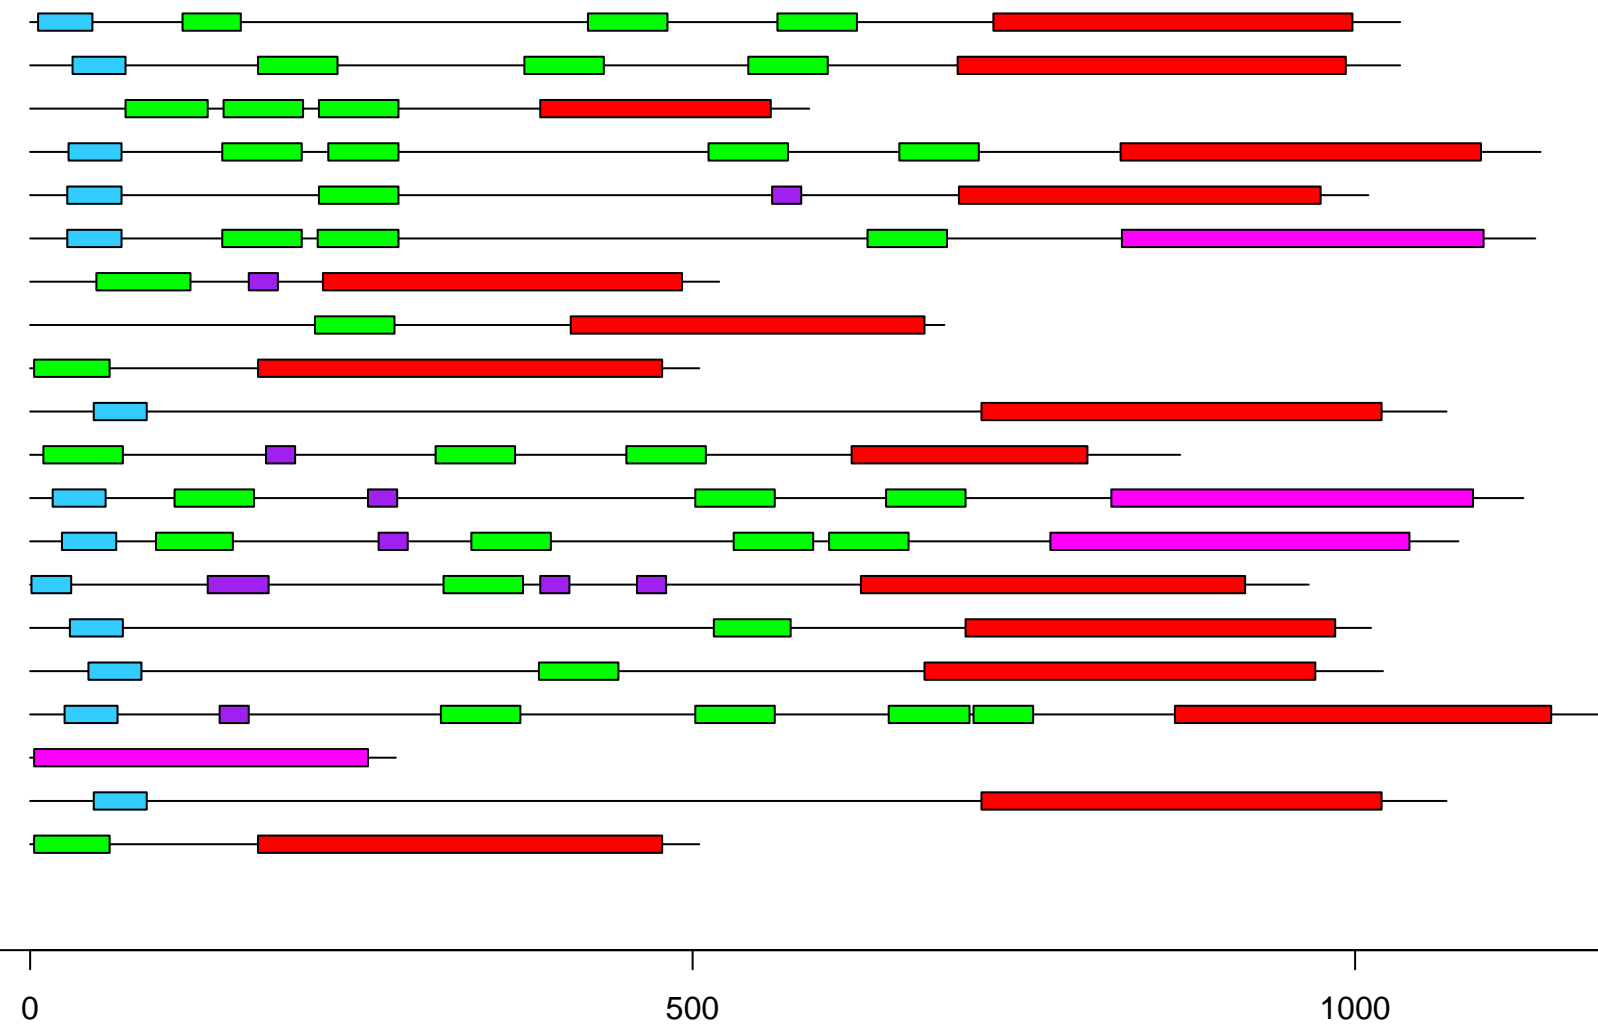

**Domain Color**

- █ LRRNT\_2 Family
- █ LRR\_1 Repeat
- █ LRR\_8 Repeat
- █ Pkinase Domain
- █ Pkinase\_Tyr Domain

### G.ar RLK-Pelle\_LRR-XII-1 domain diagram (part 2)

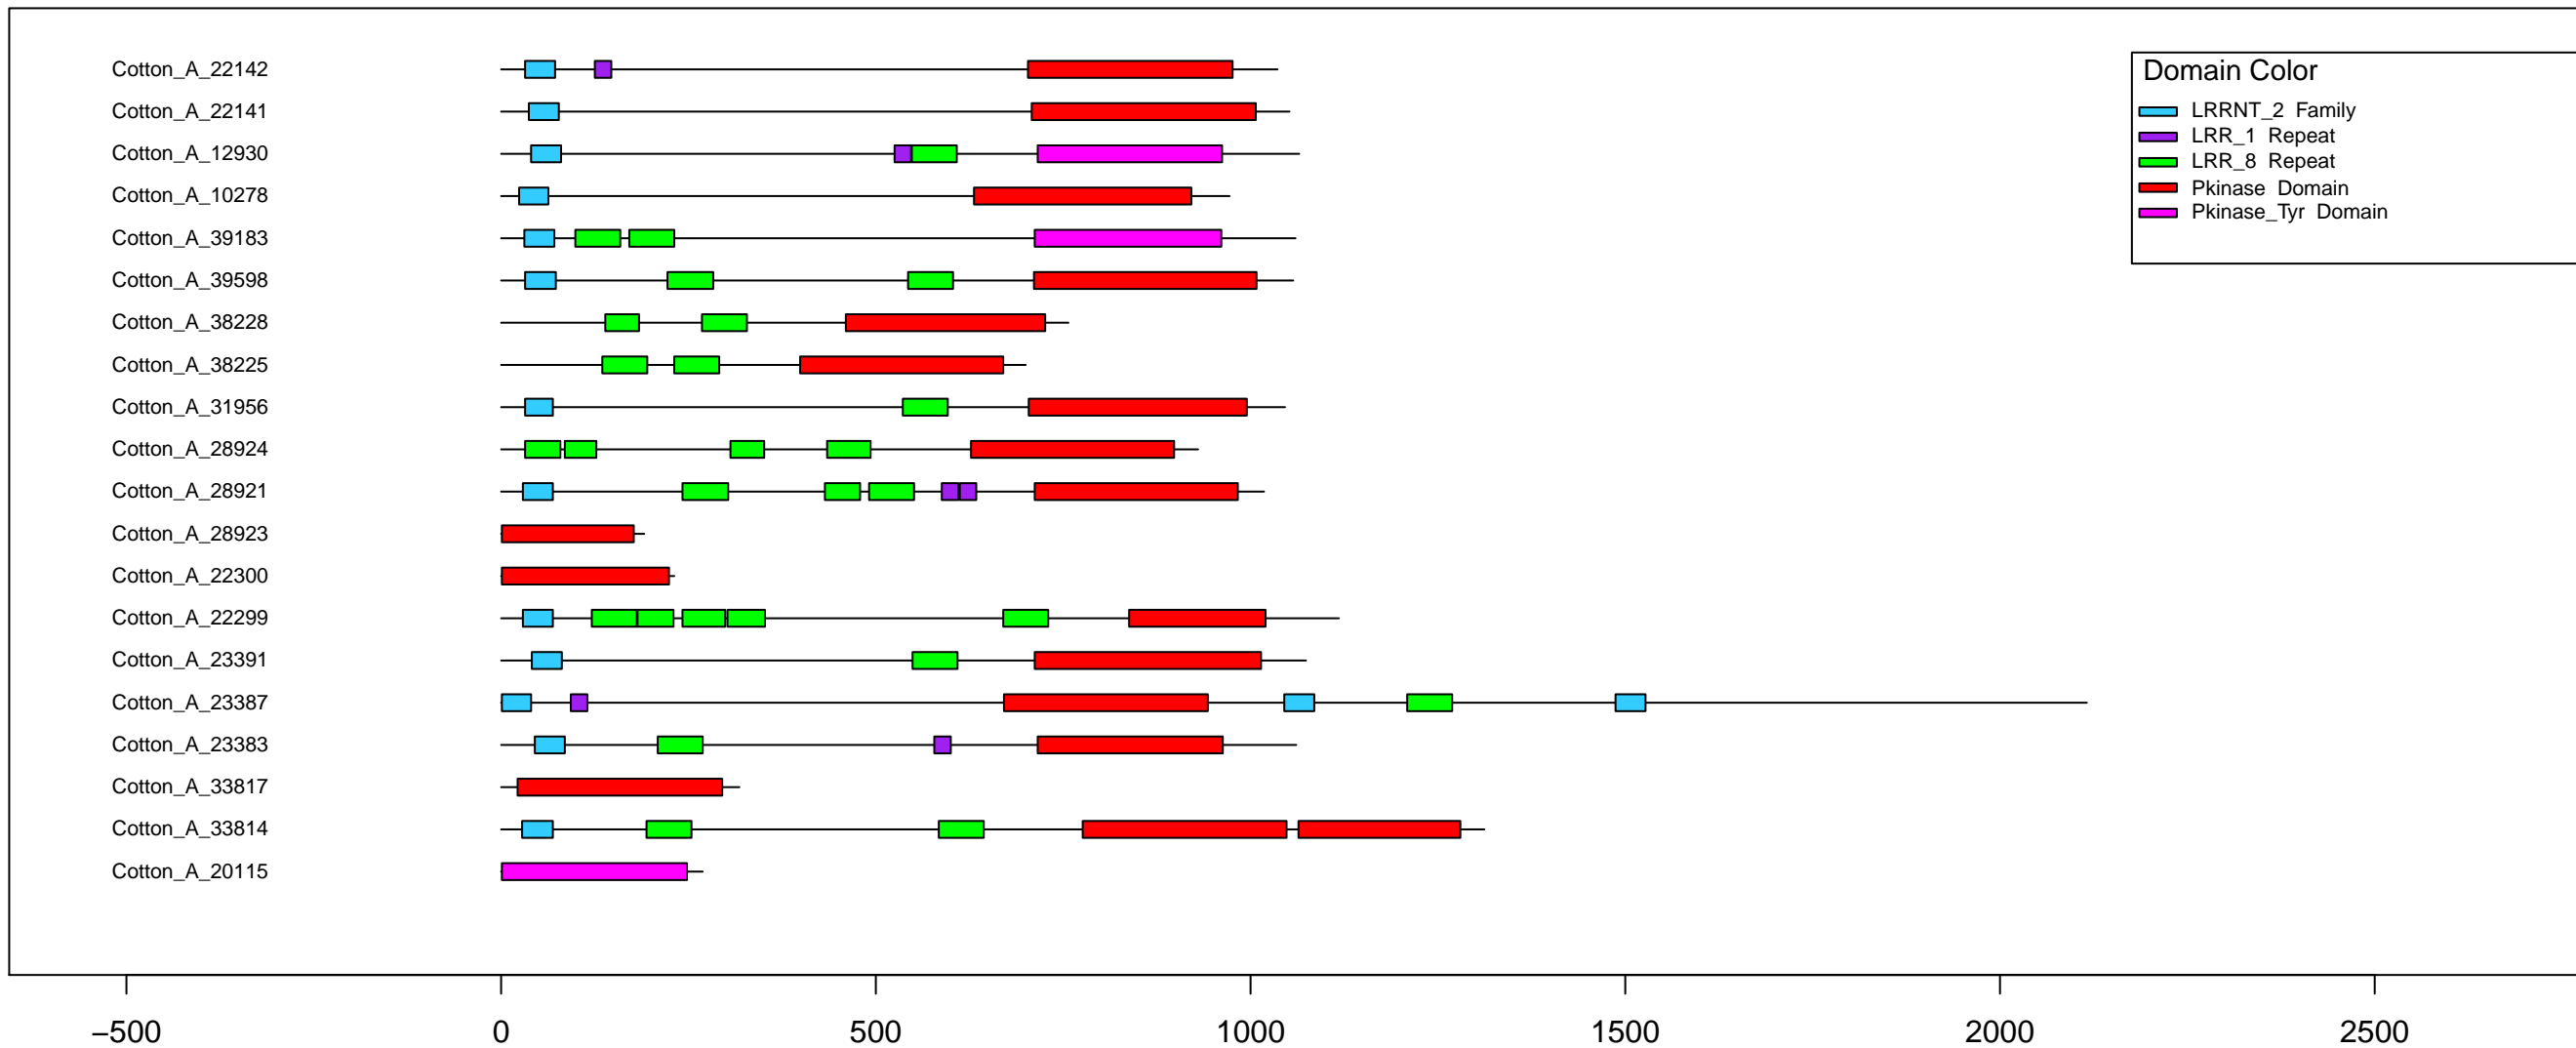

### G.ar RLK-Pelle\_LRR-XII-1 domain diagram (part 3)

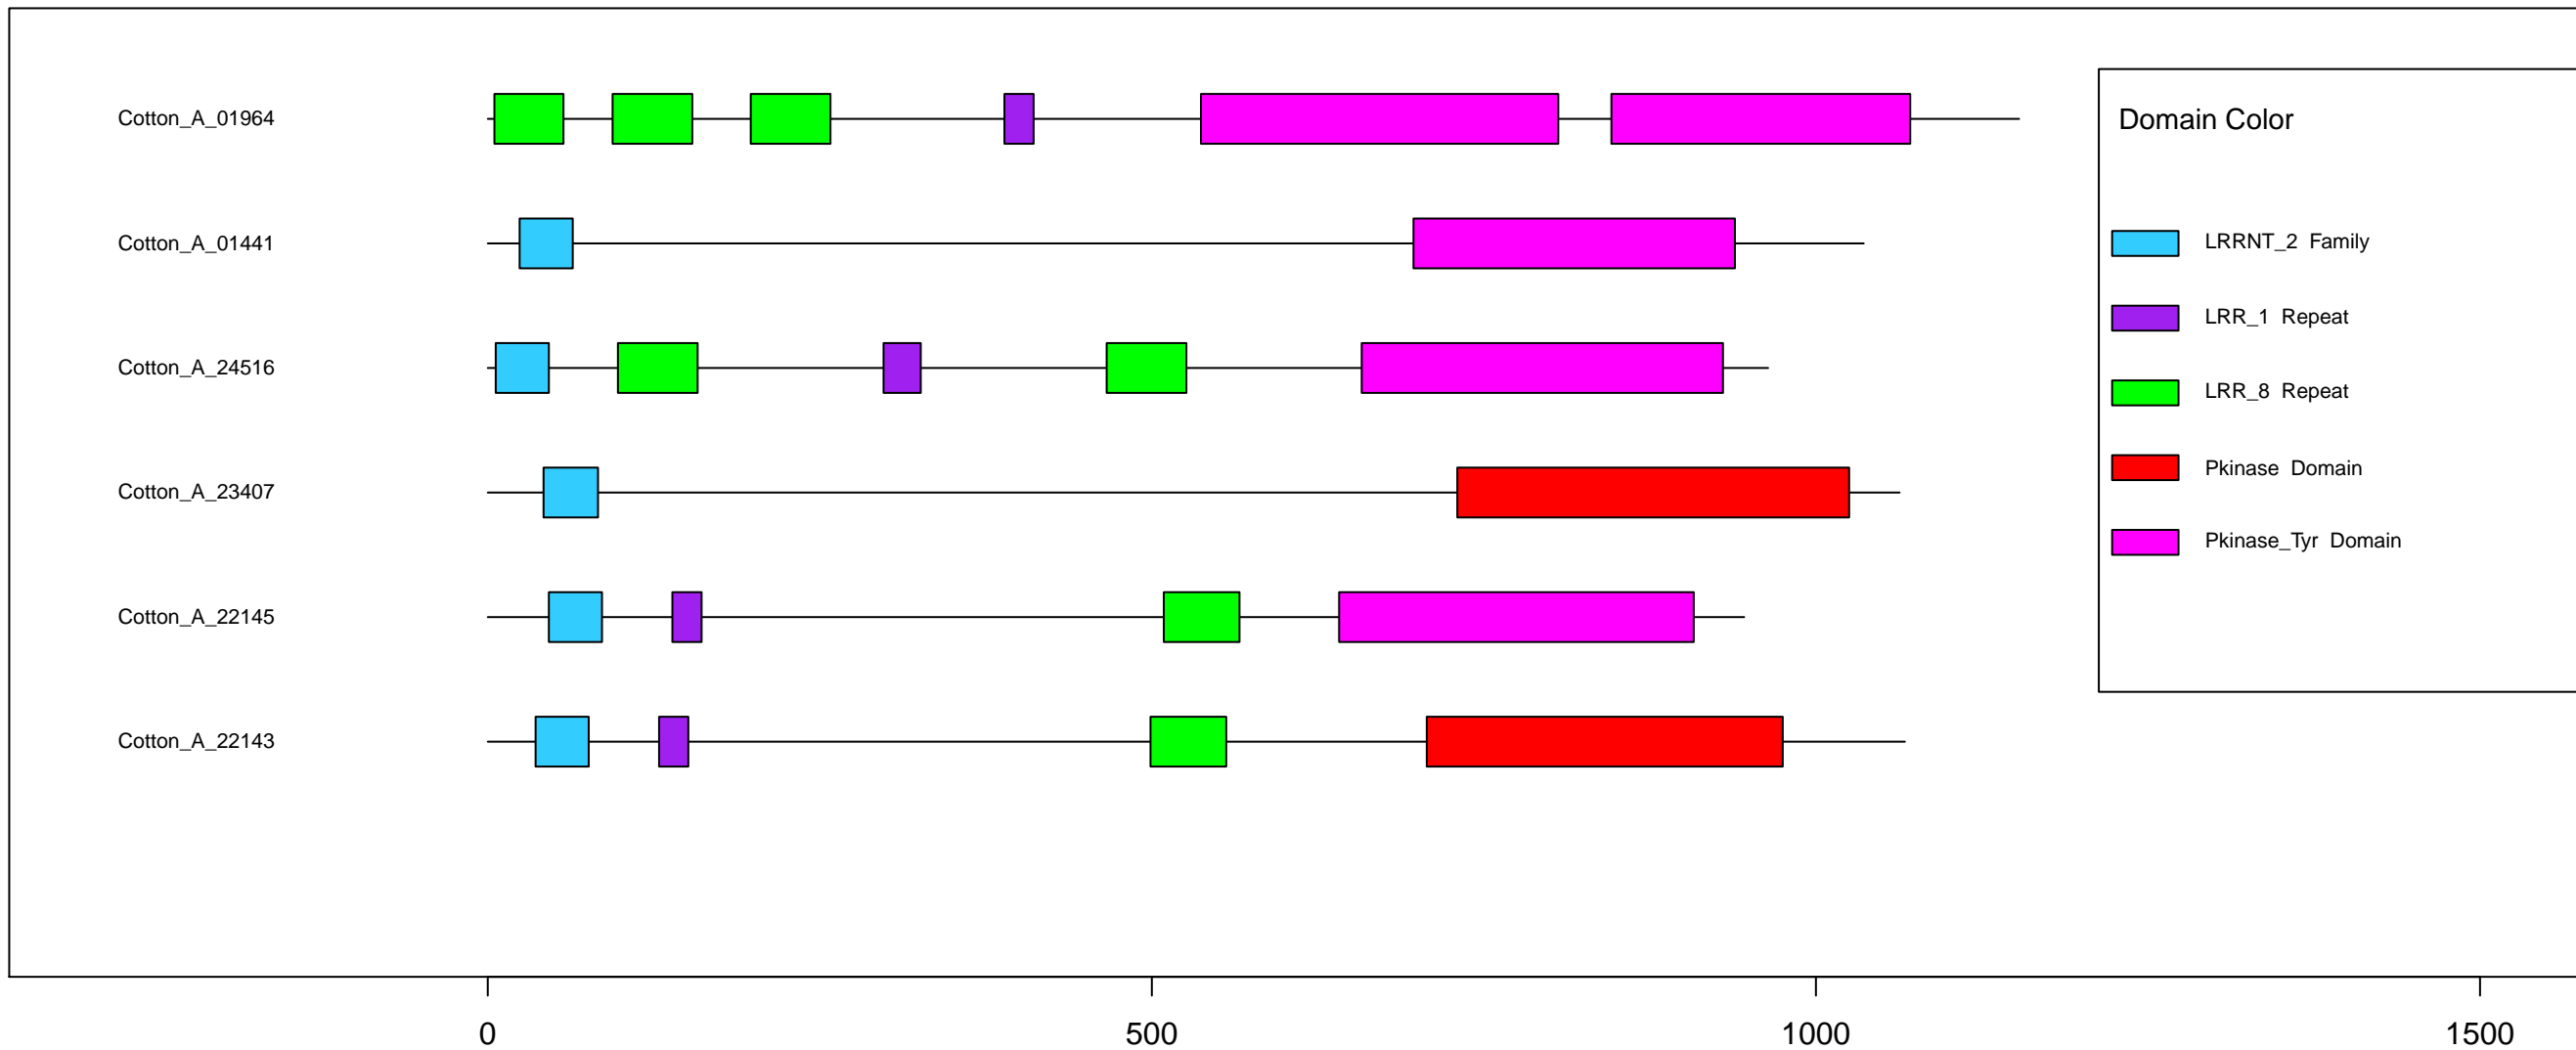

# G.ar RLK-Pelle\_LRR-XIIIa domain diagram (all)

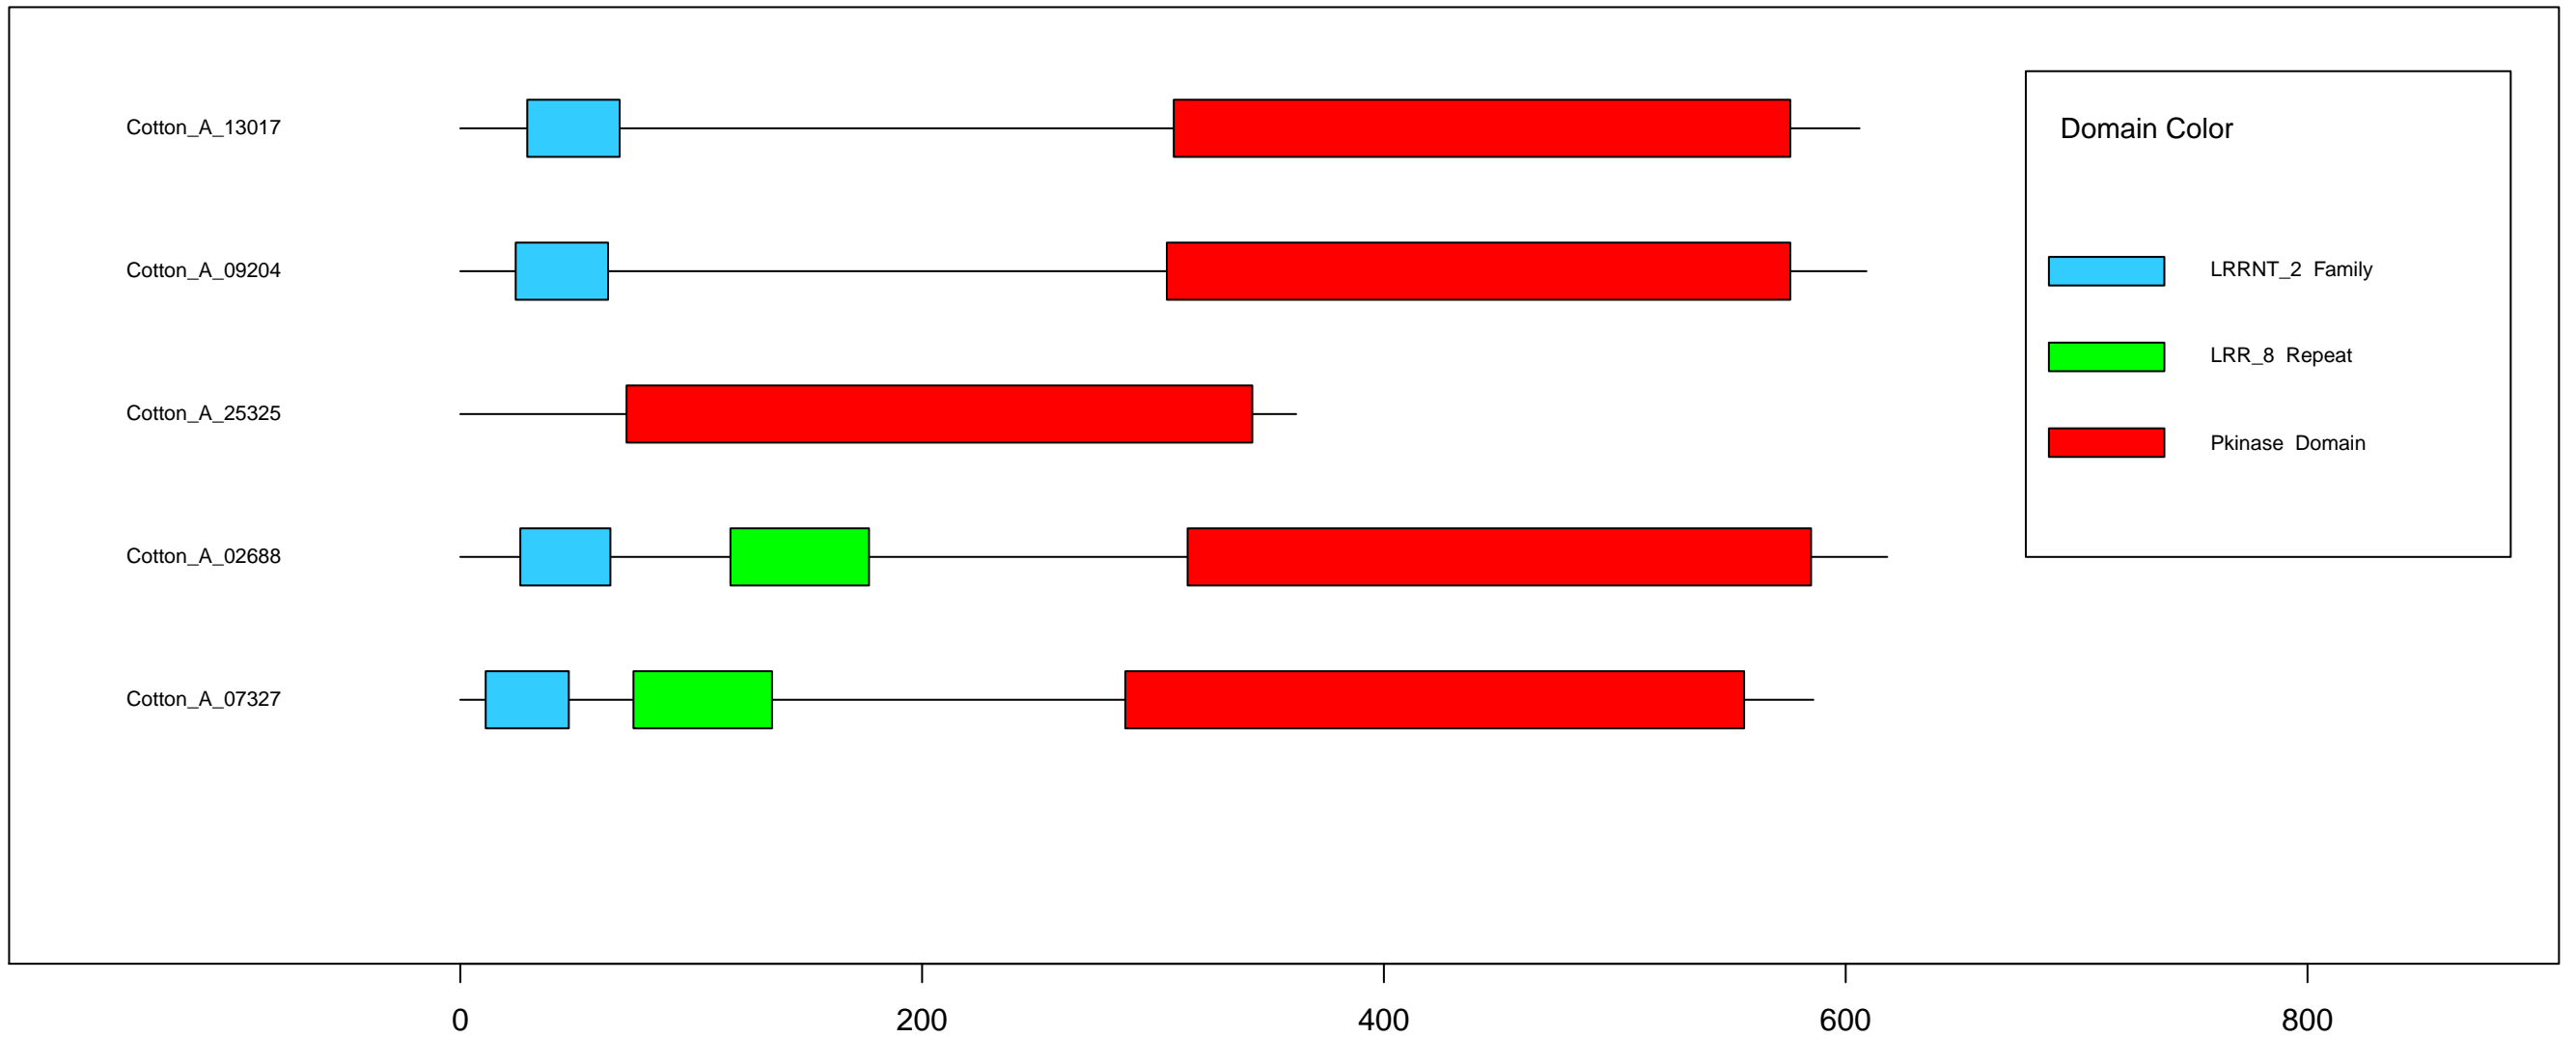

# G.ar RLK-Pelle\_LRR-XIIIb domain diagram (all)

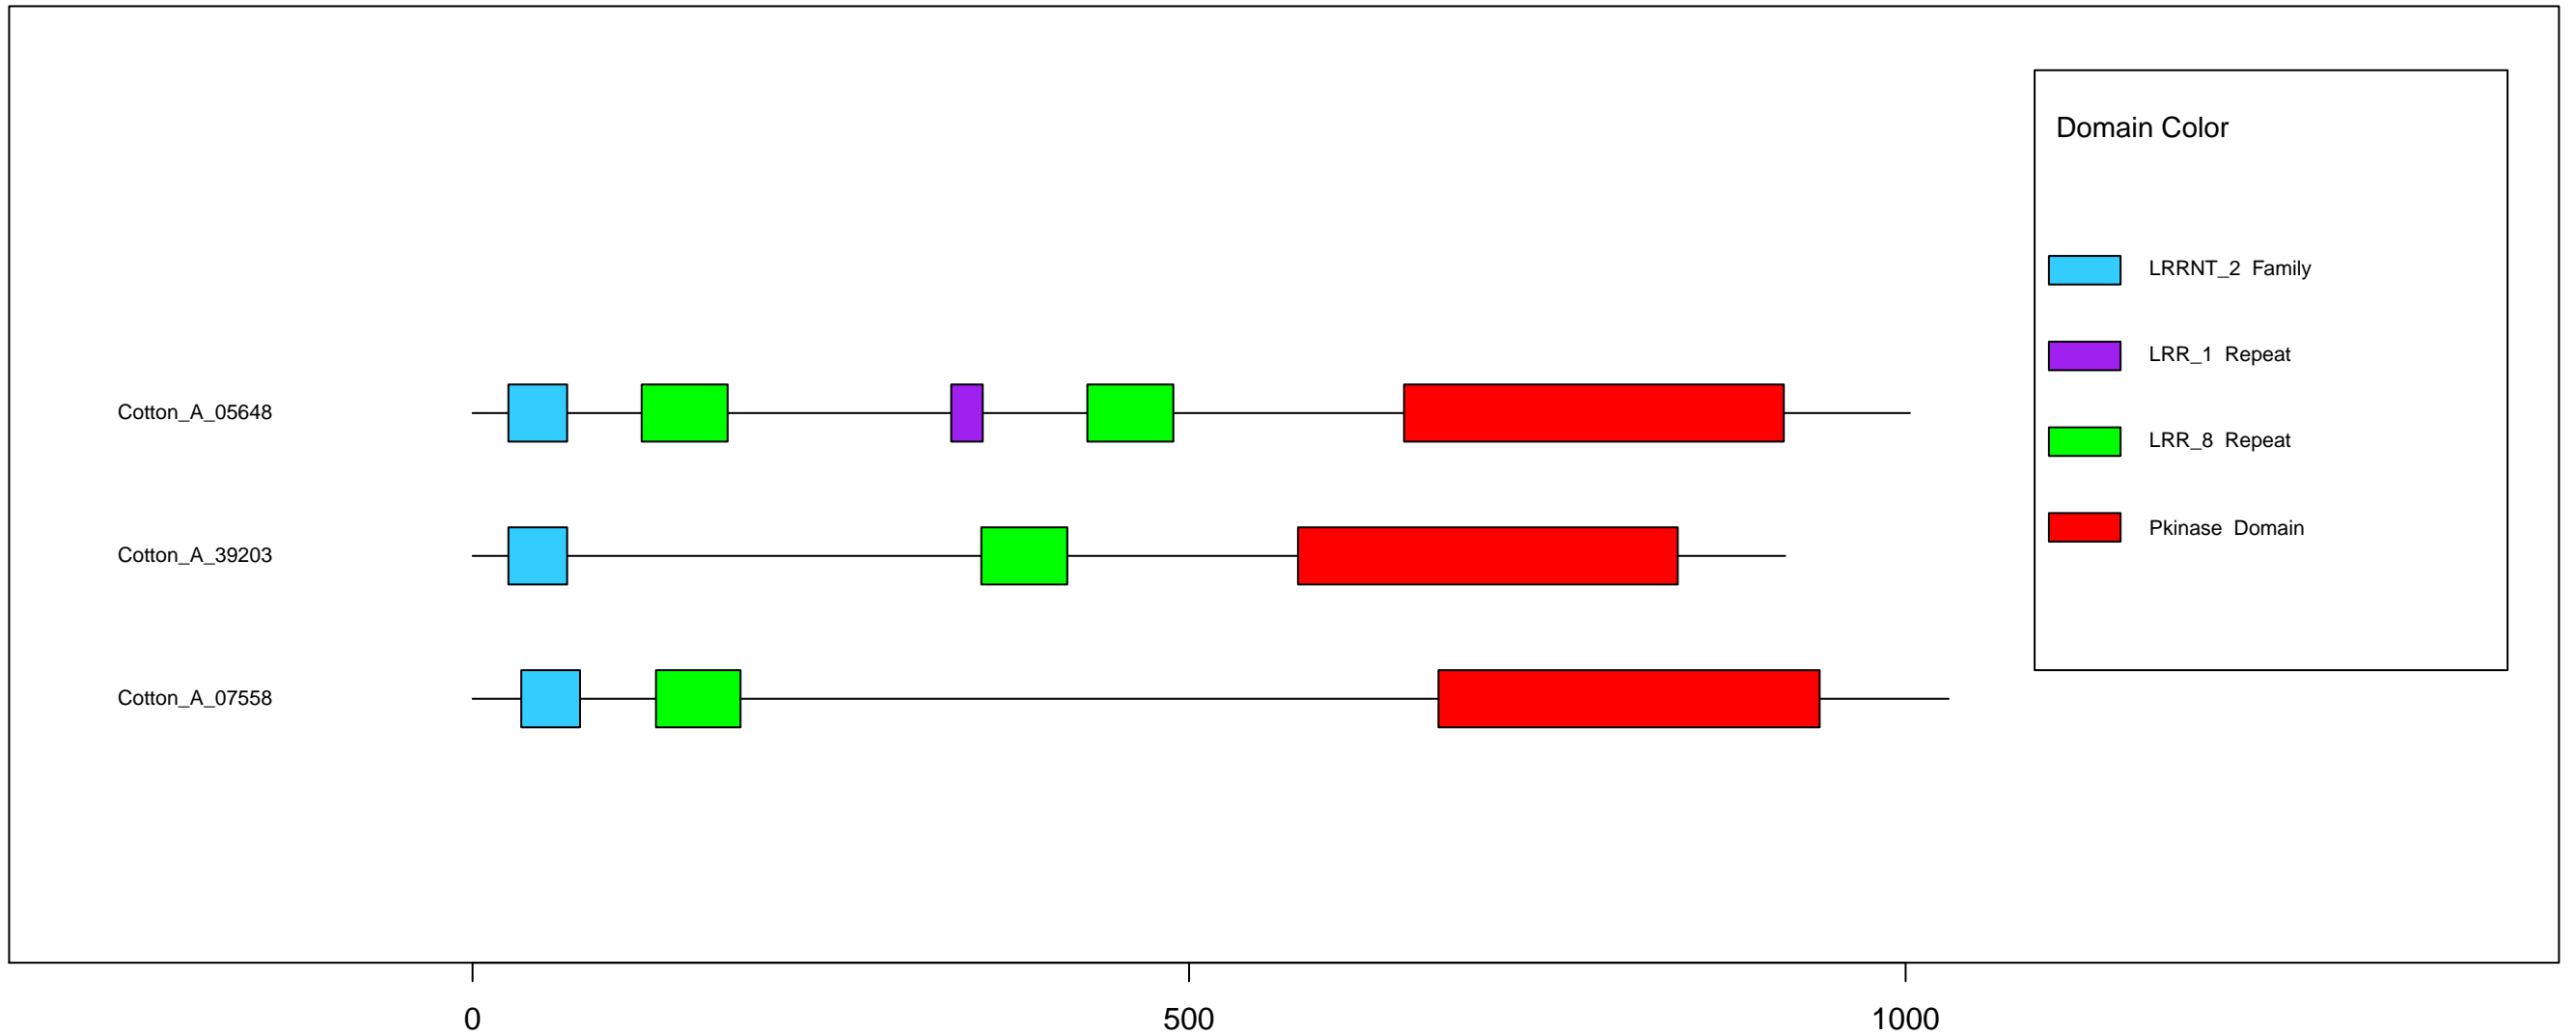

# G.ar RLK-Pelle\_LRR-XIV domain diagram (all)

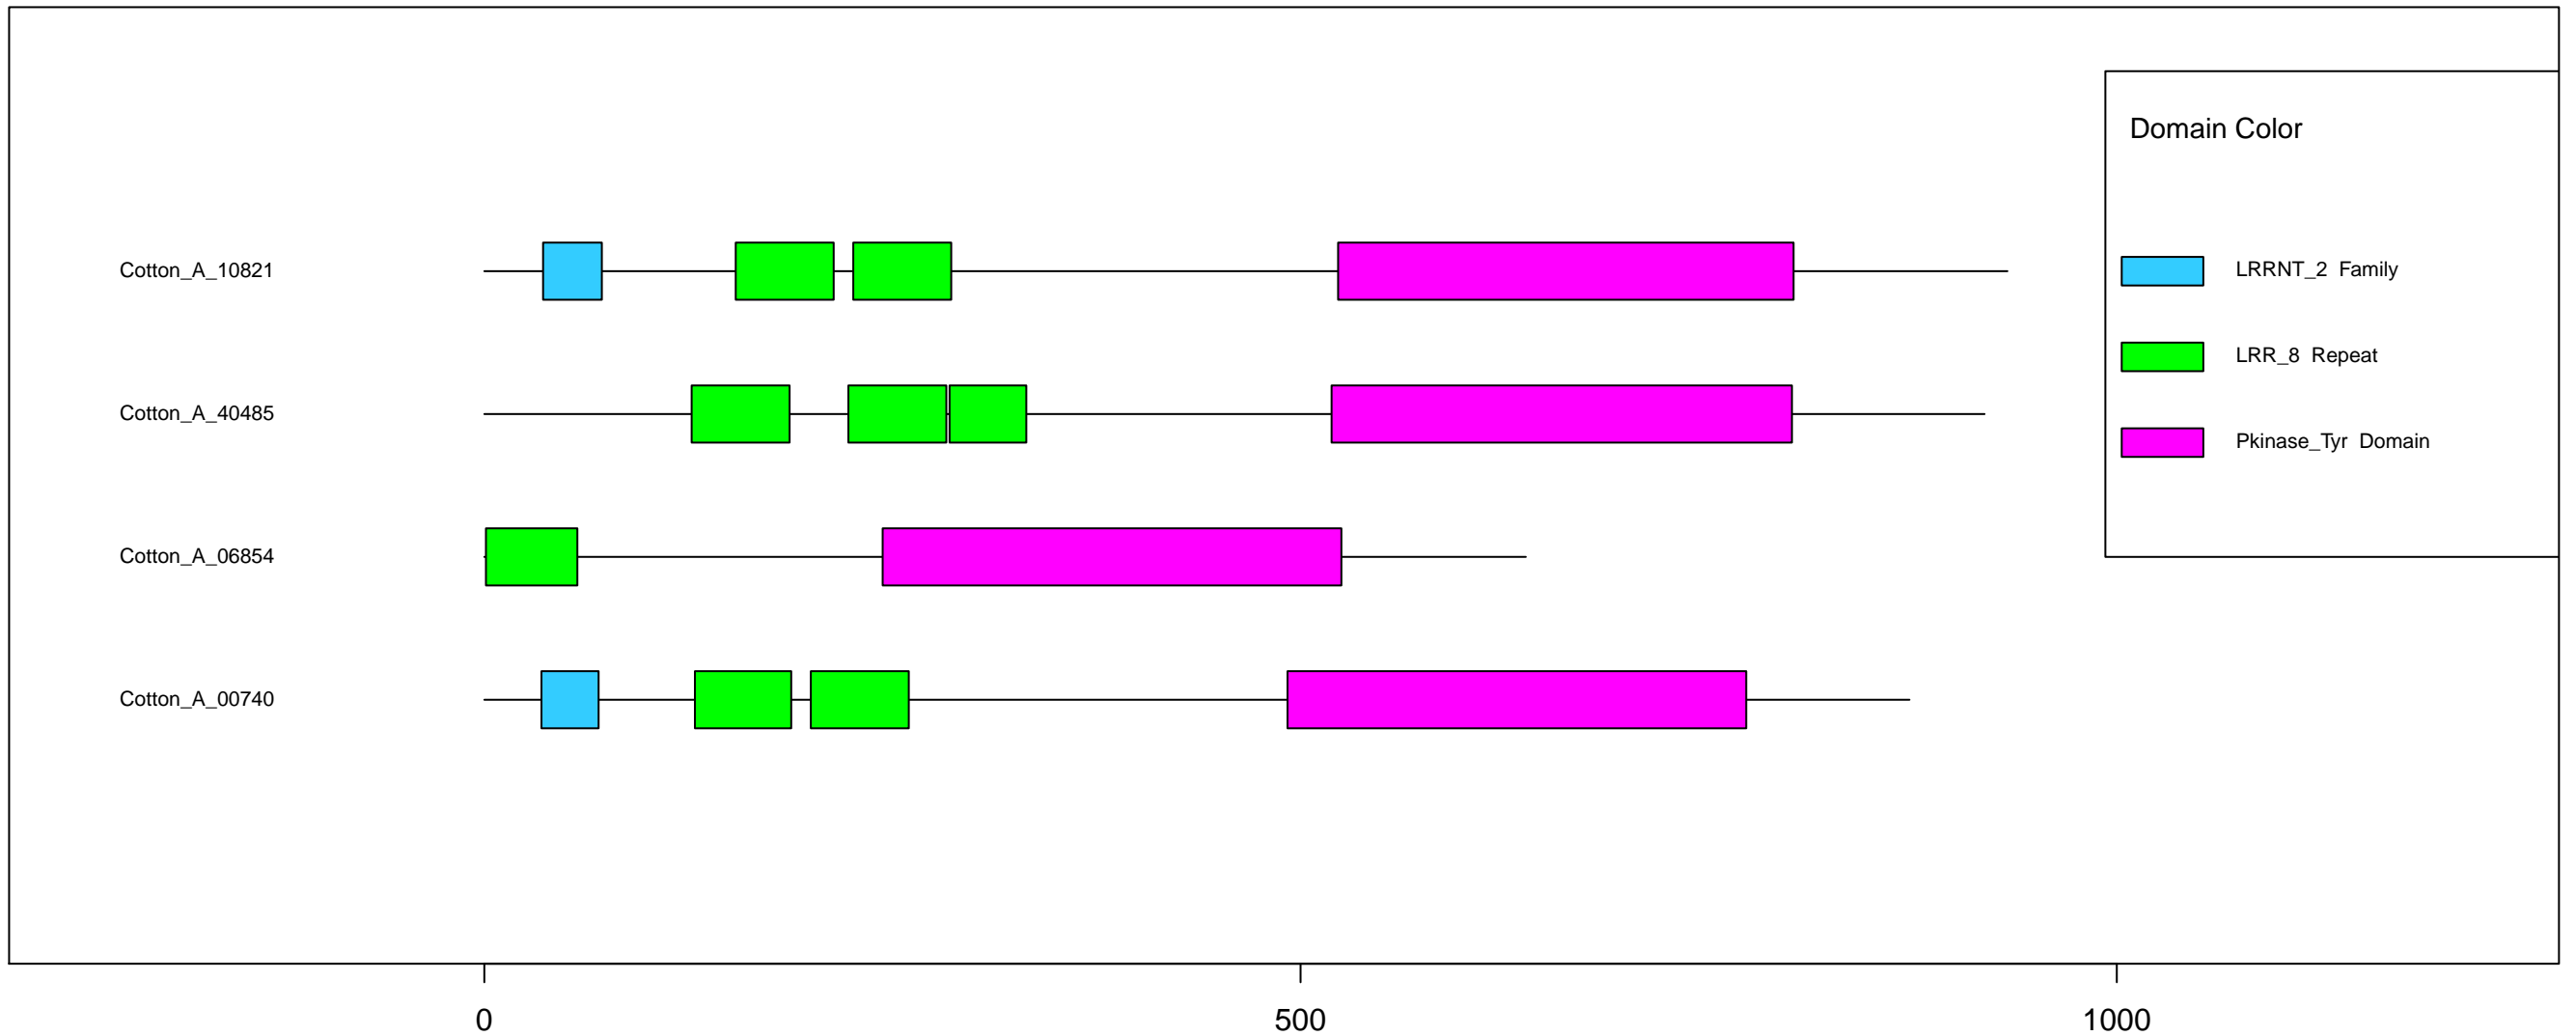

G.ar RLK-Pelle\_LRR-XV domain diagram (all)

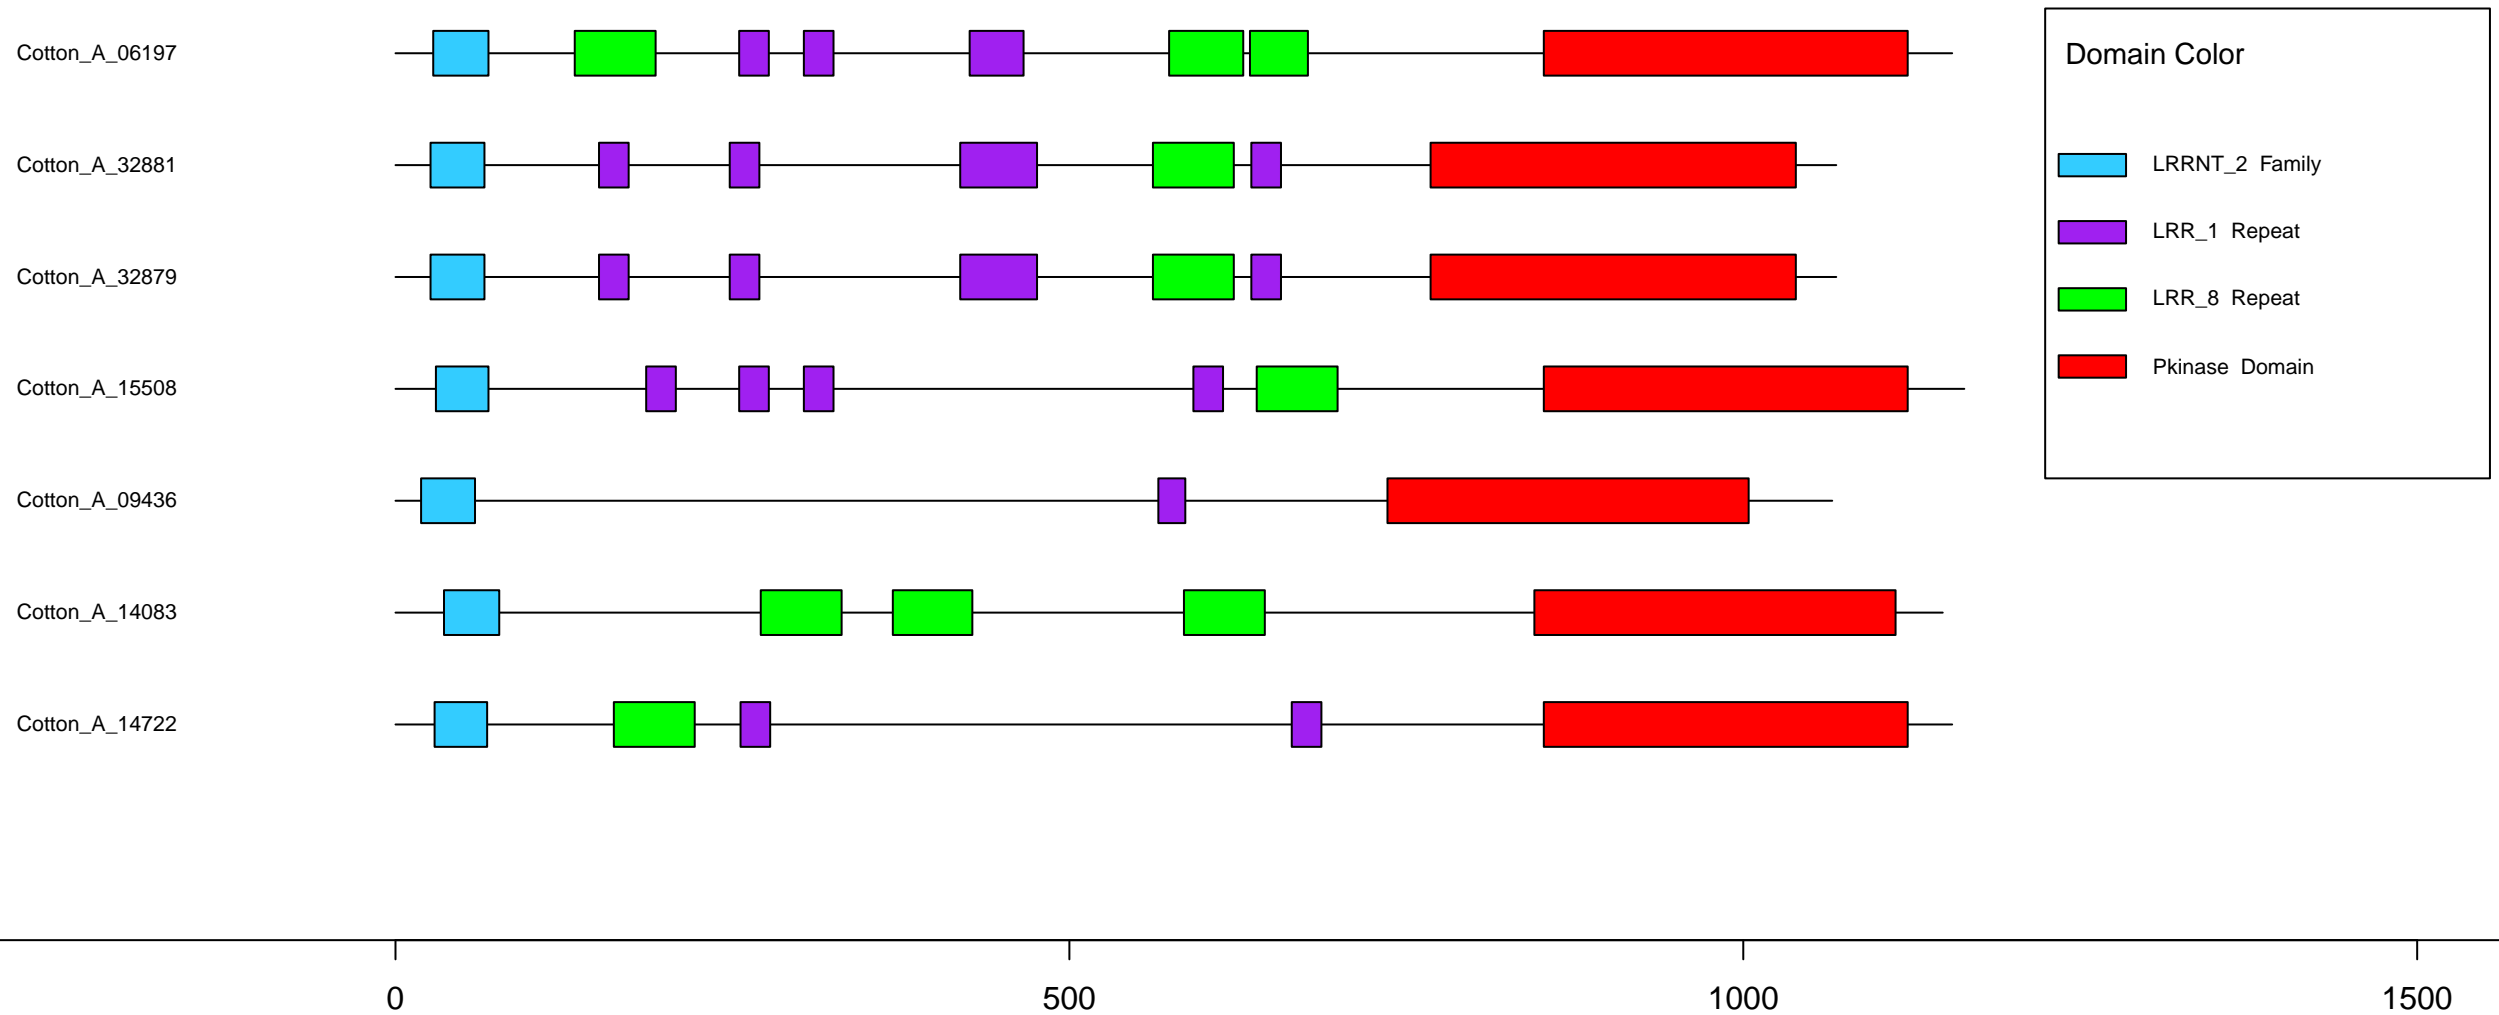

### G.ar RLK-Pelle\_LysM domain diagram (all)

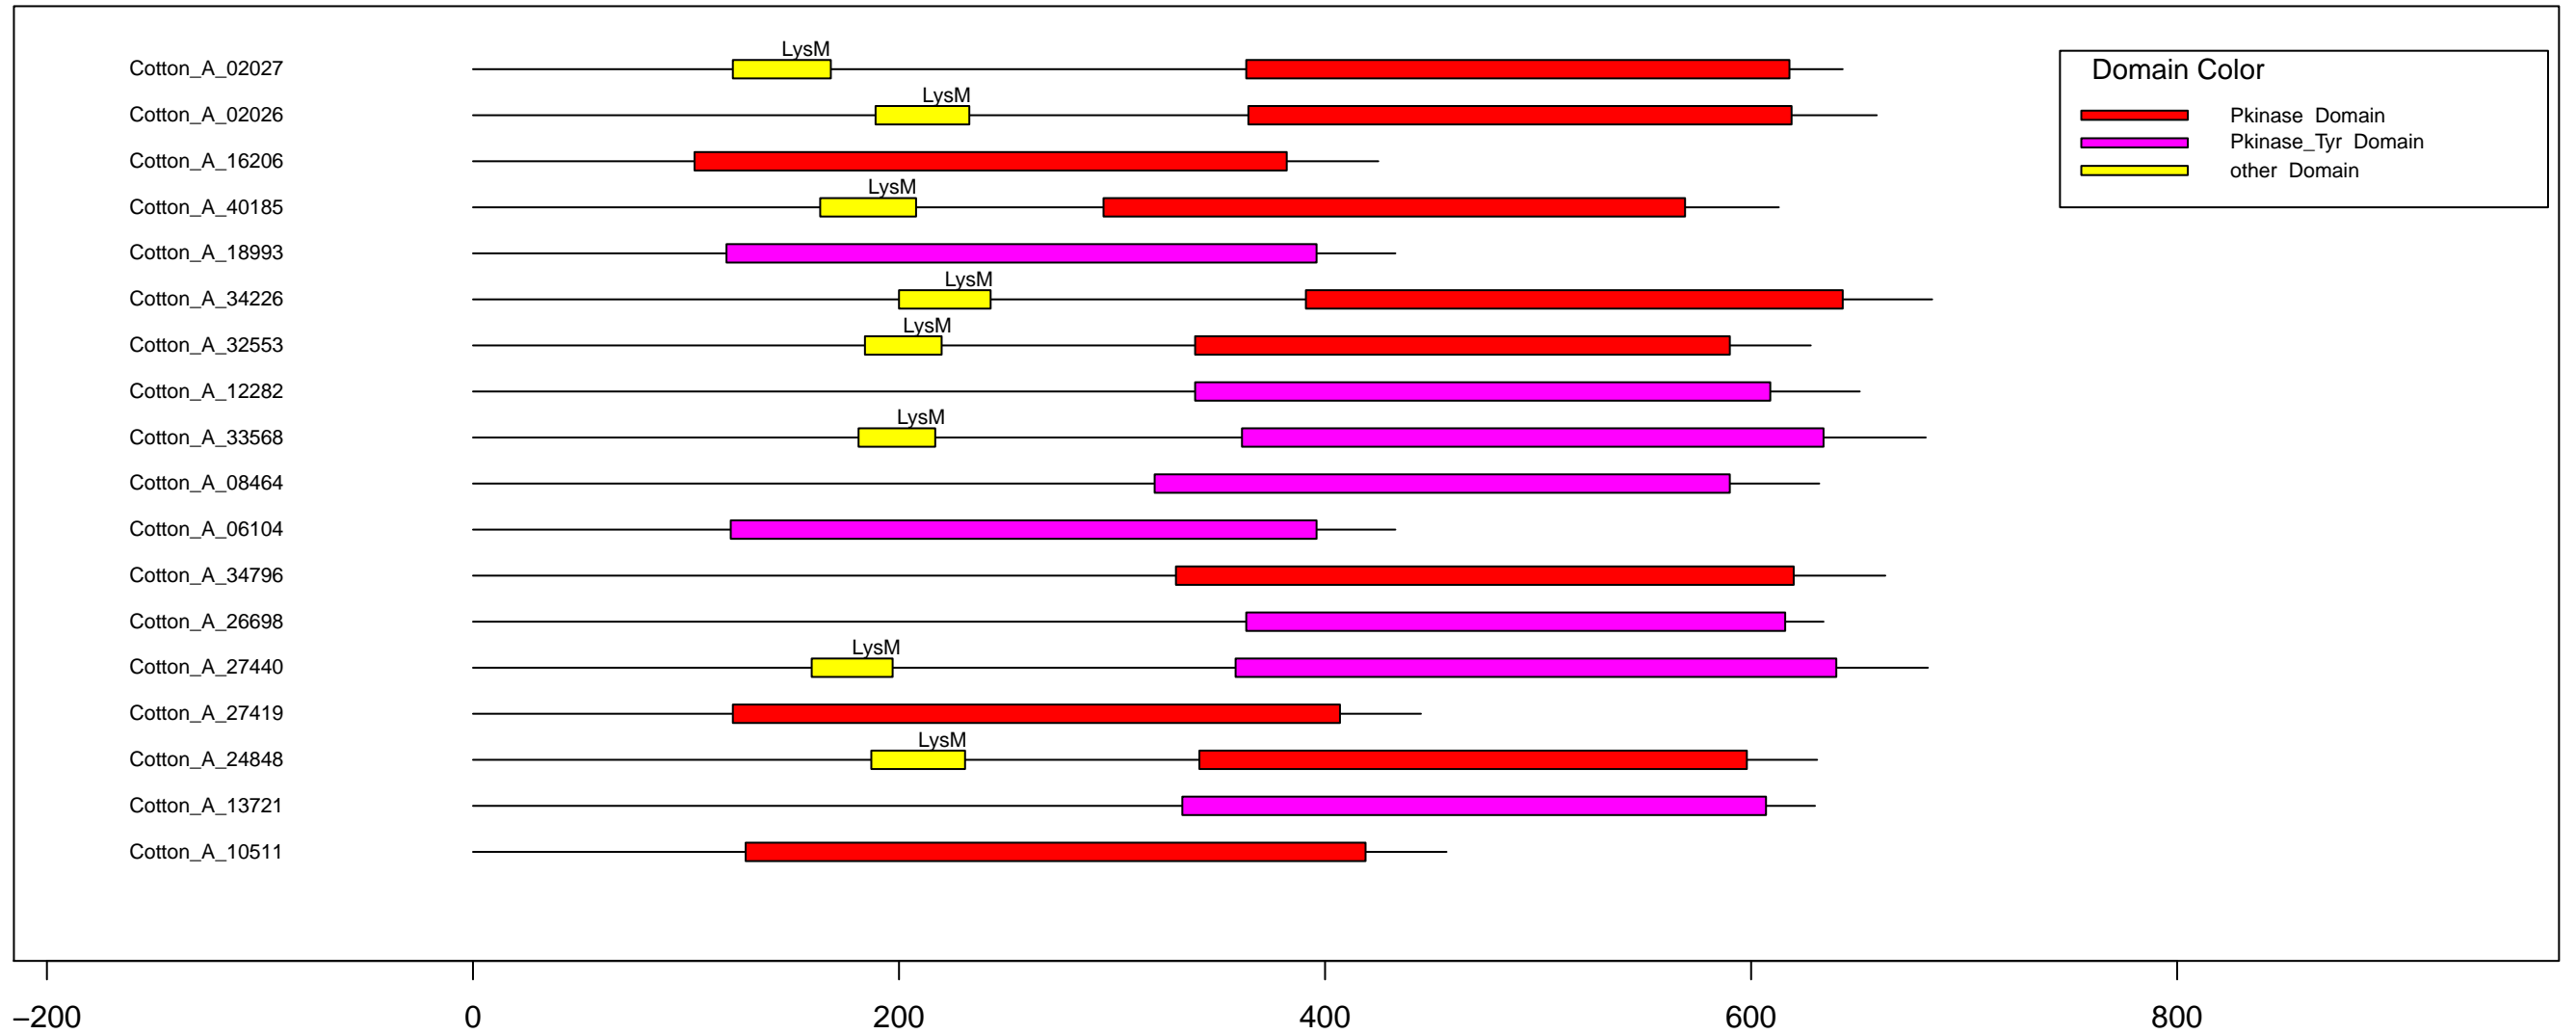



# G.ar RLK-Pelle\_PERK-1 domain diagram (all)

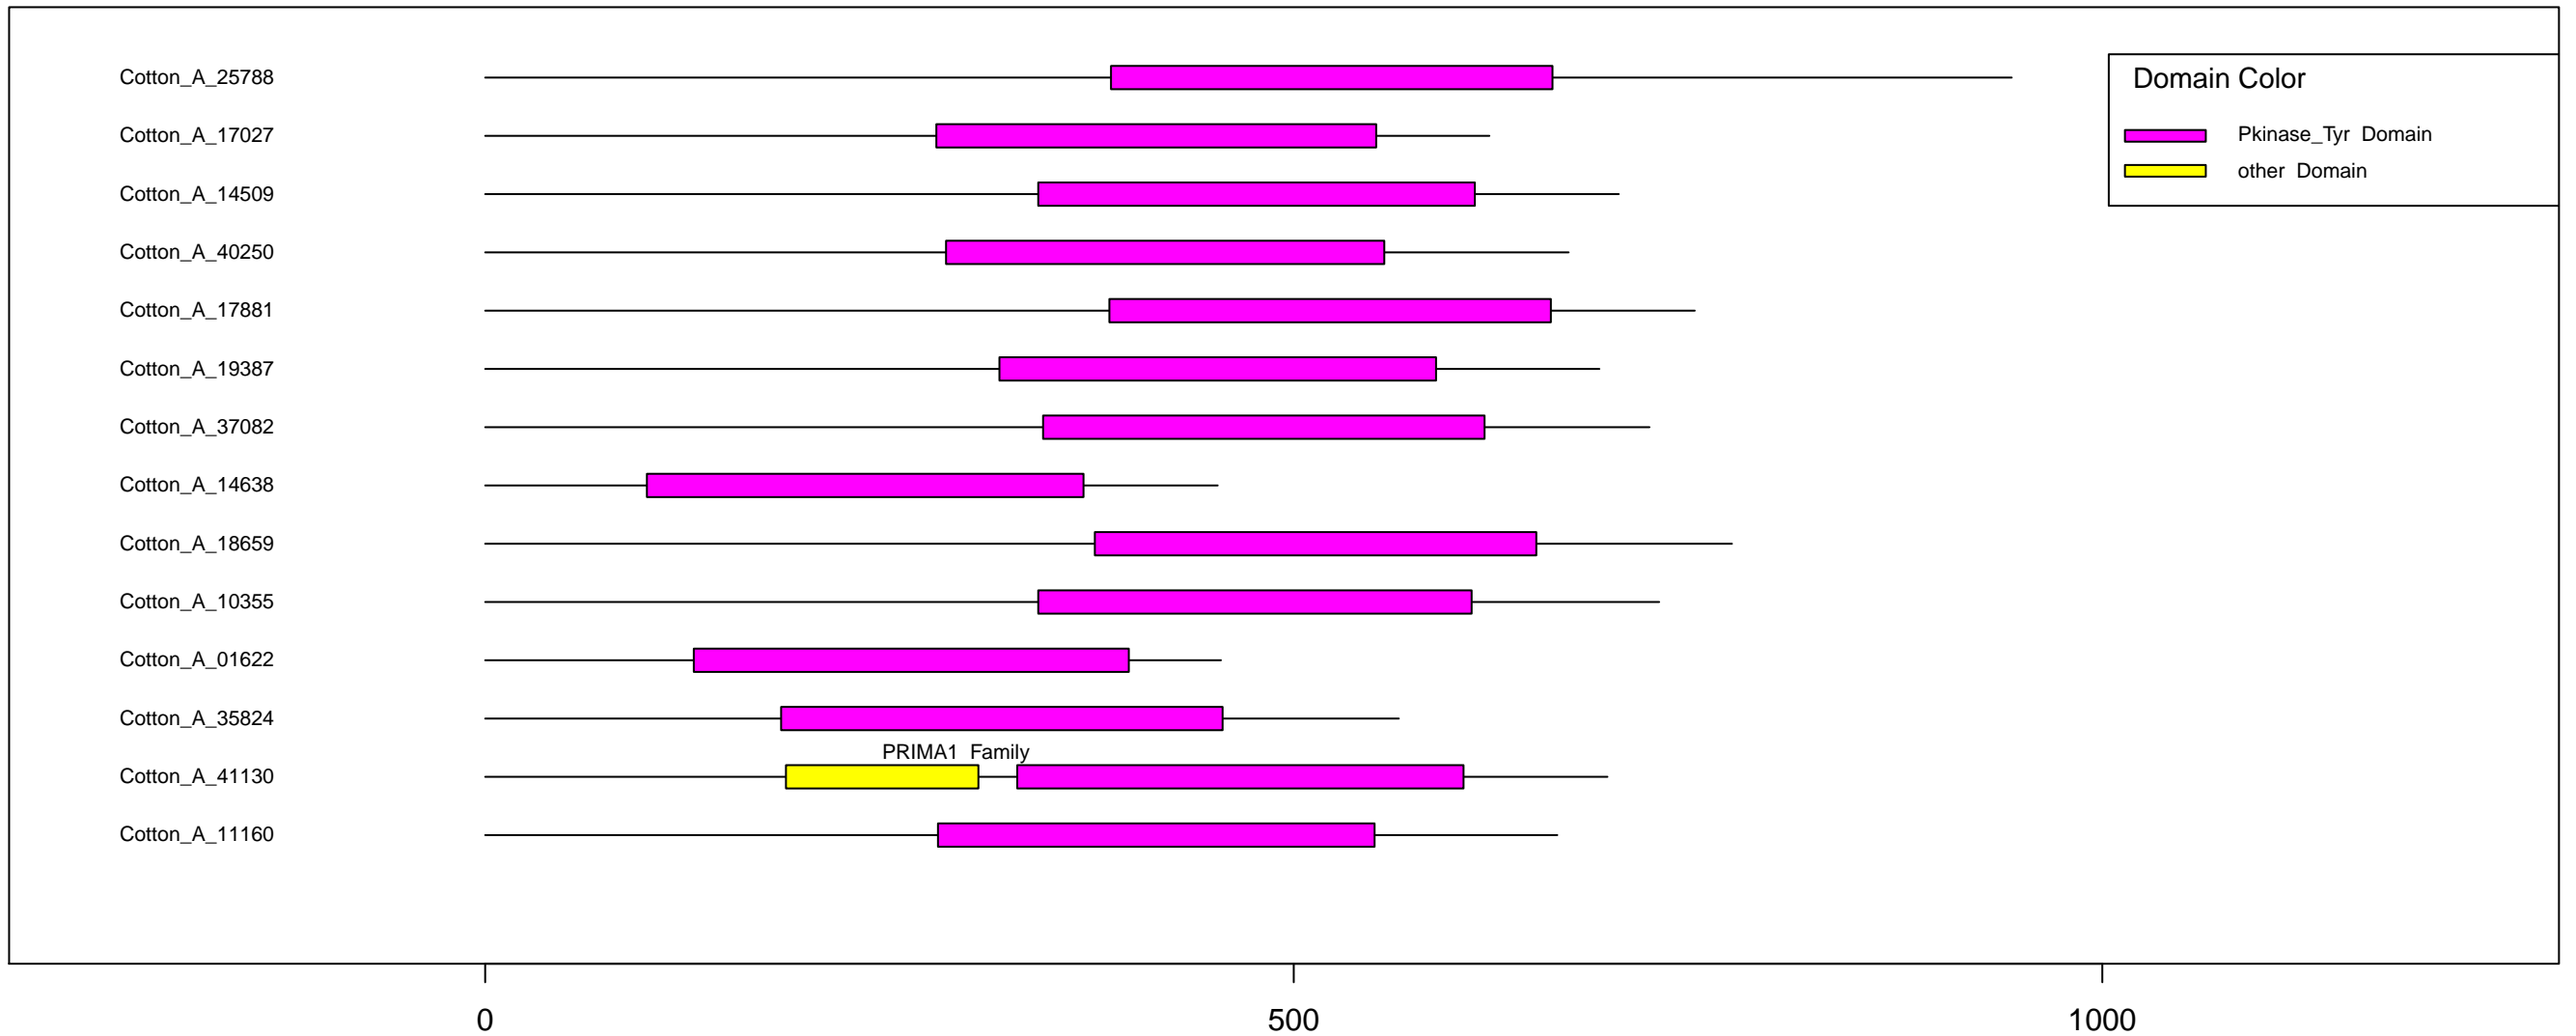

# G.ar RLK-Pelle\_PERK-2 domain diagram (all)

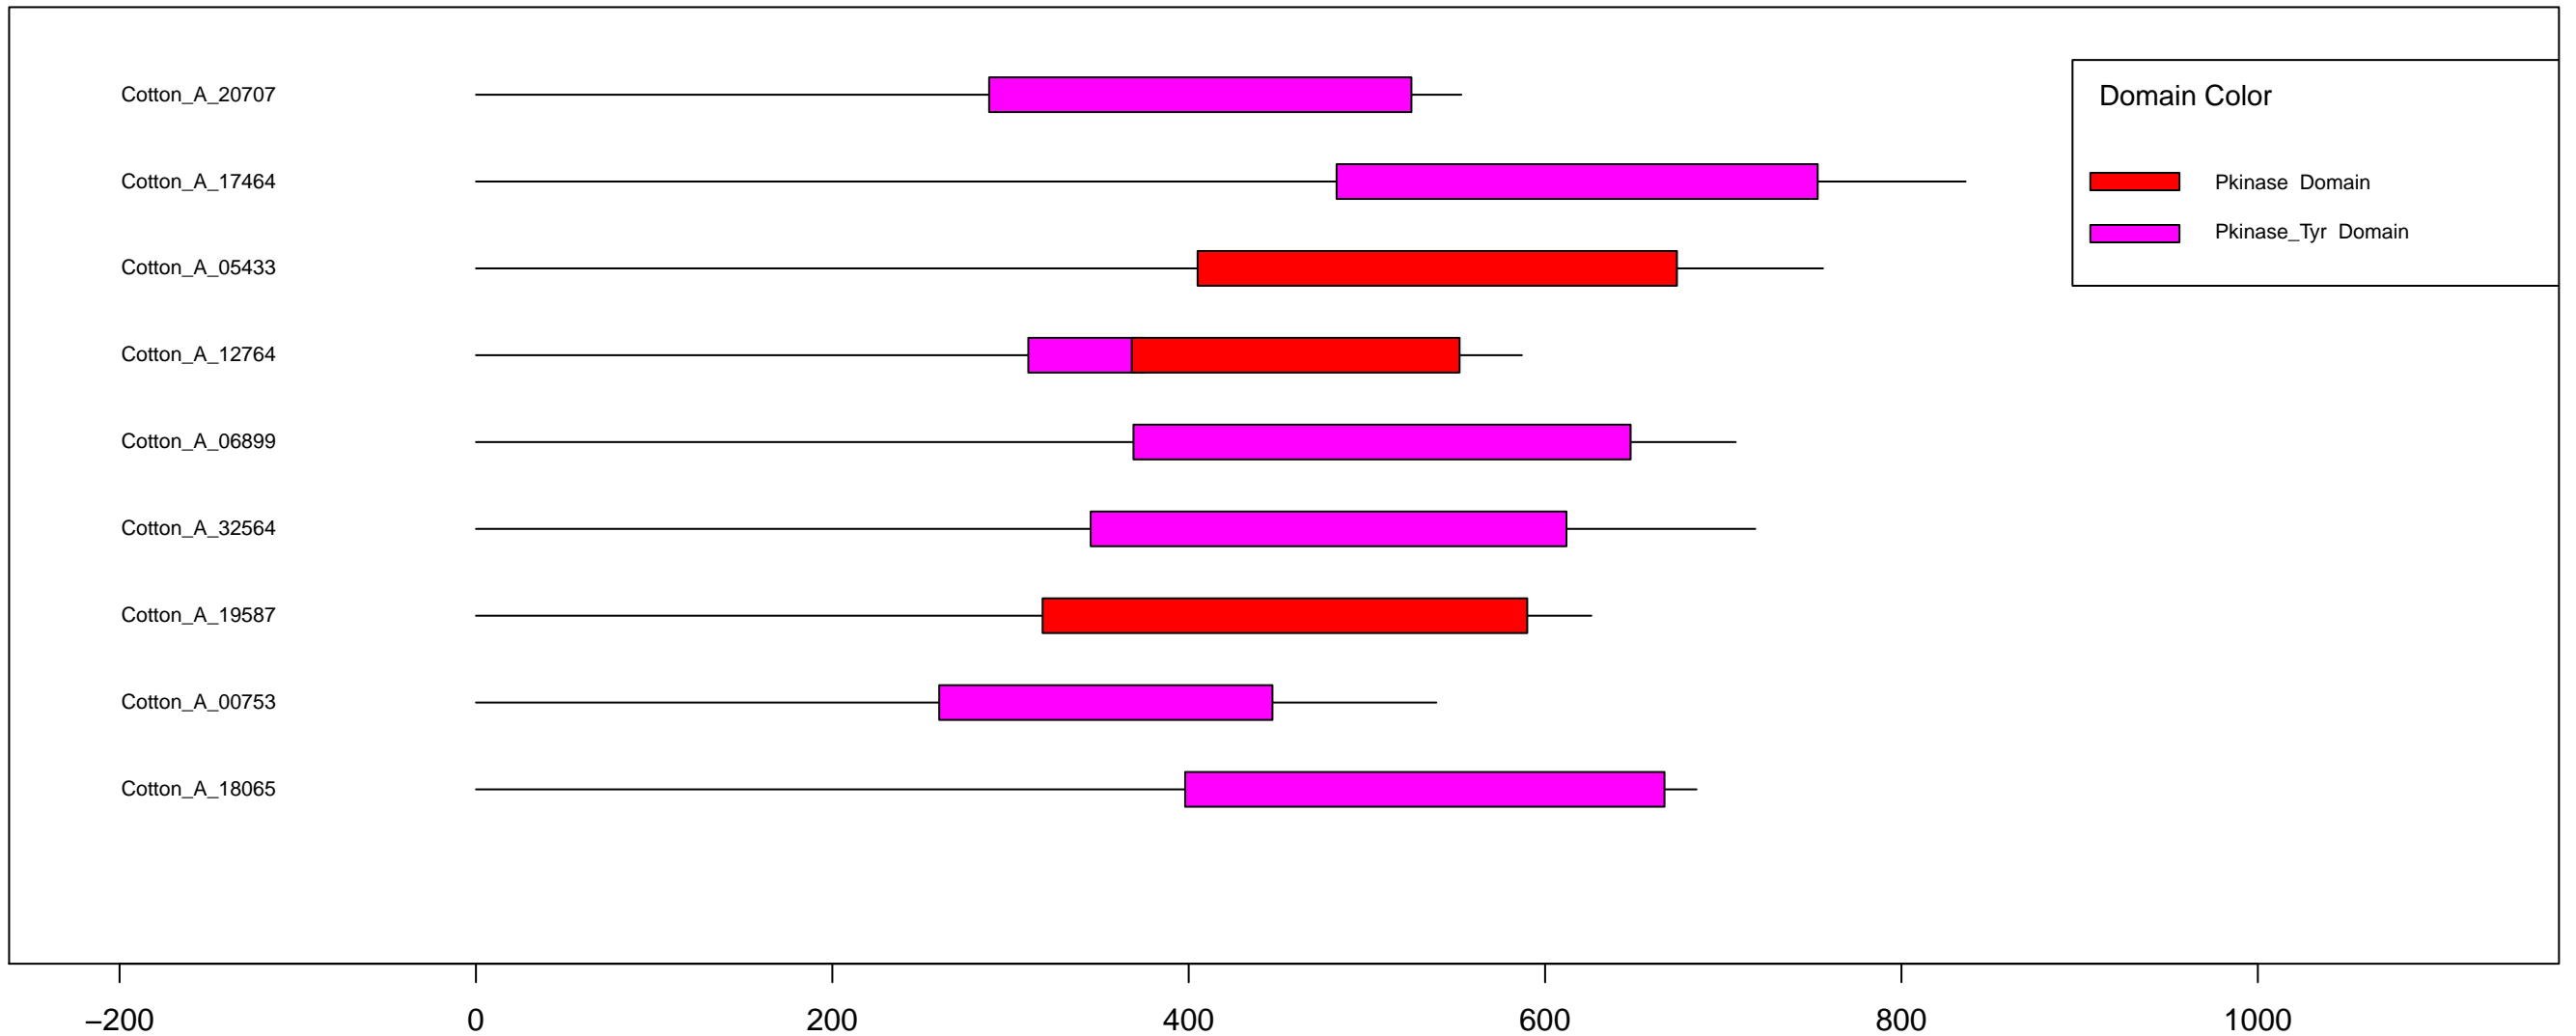

# G.ar RLK-Pelle\_RKF3 domain diagram (all)

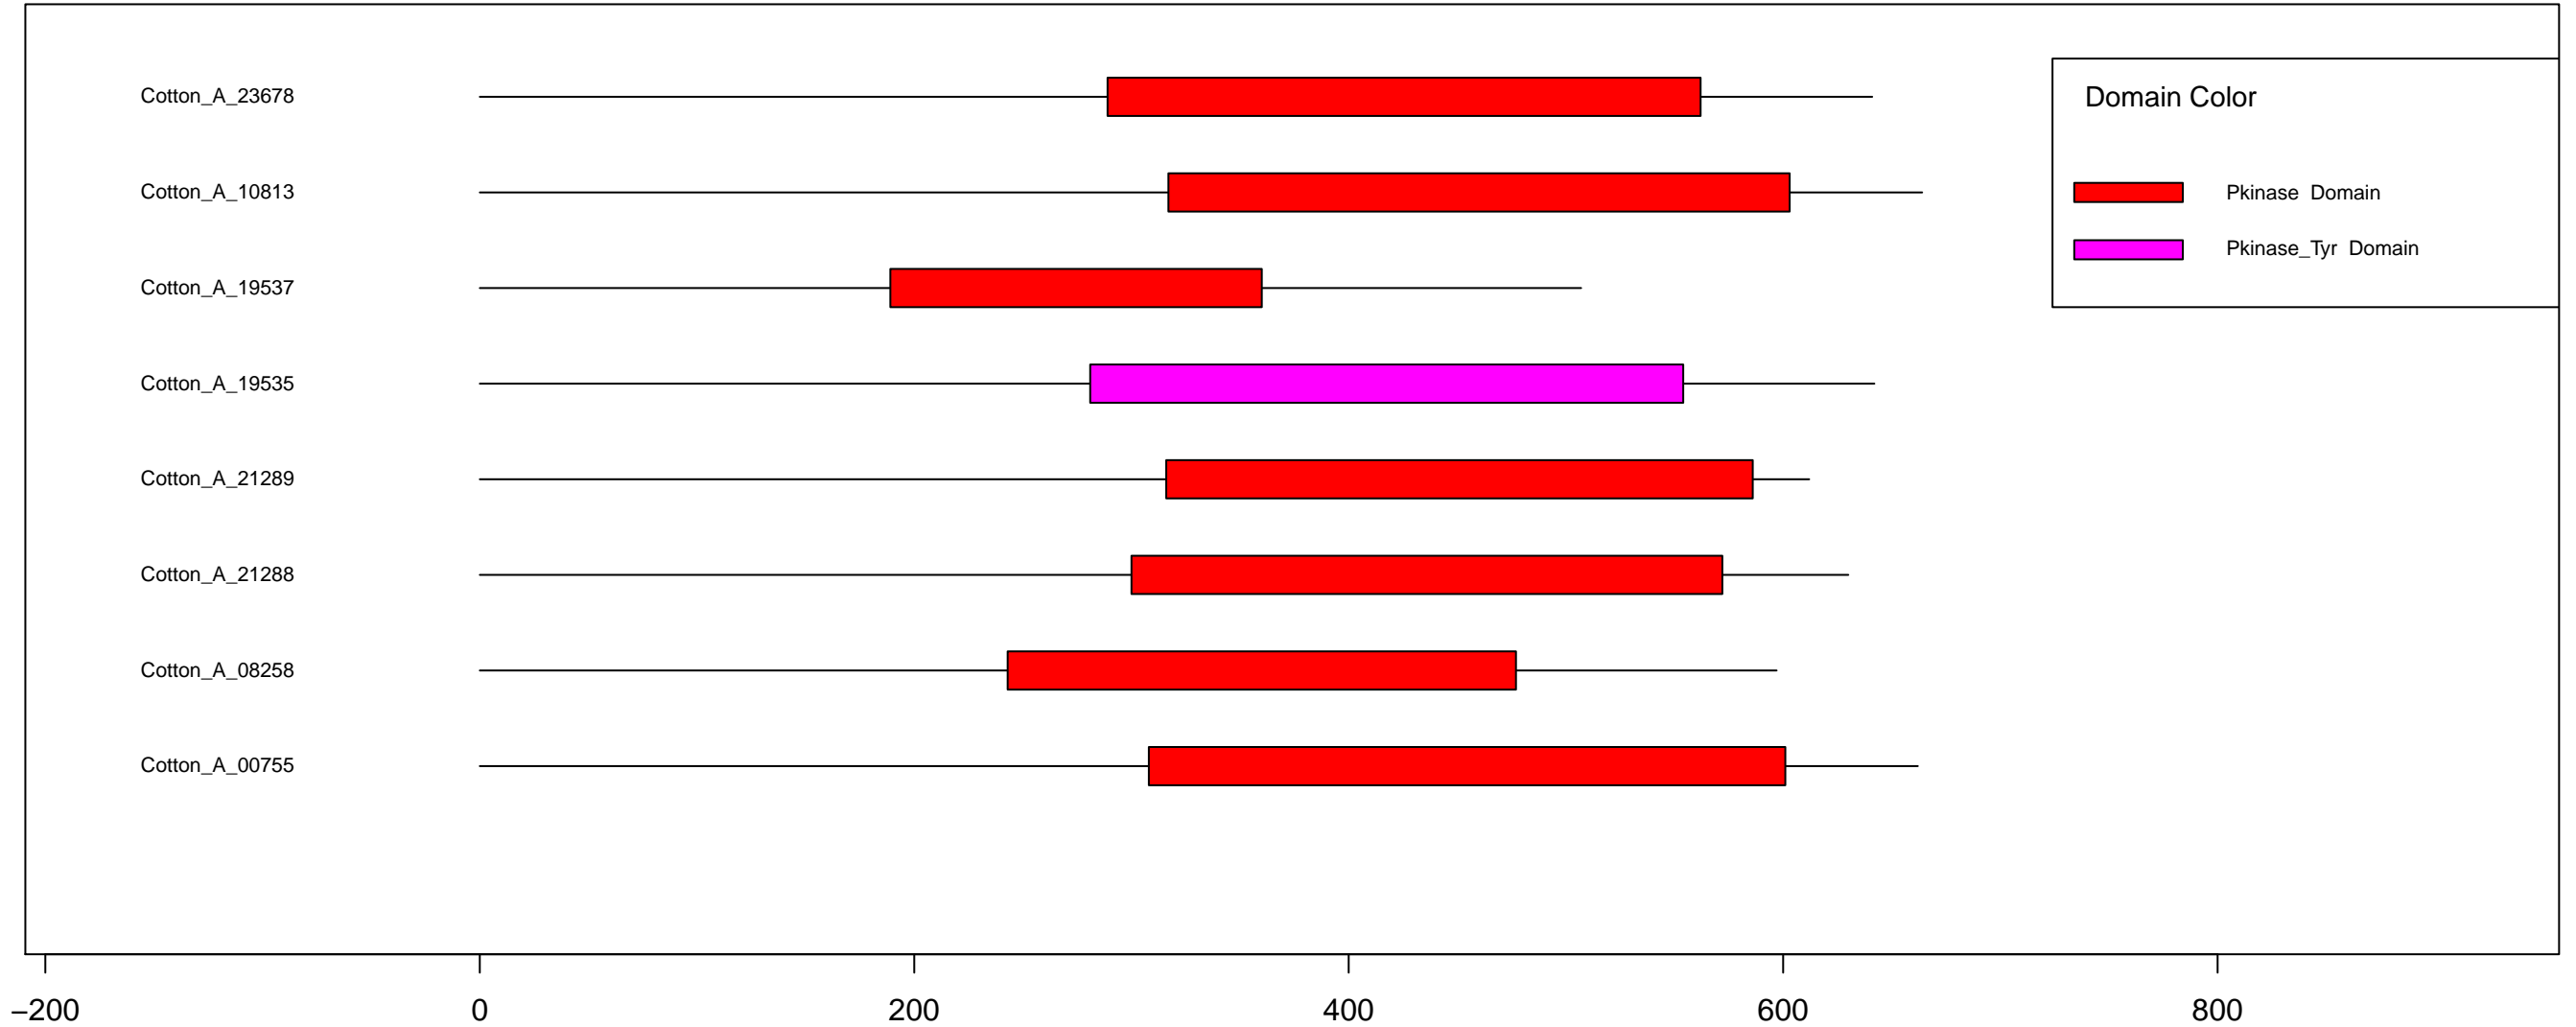

# G.ar RLK-Pelle\_RLCK-II domain diagram (all)

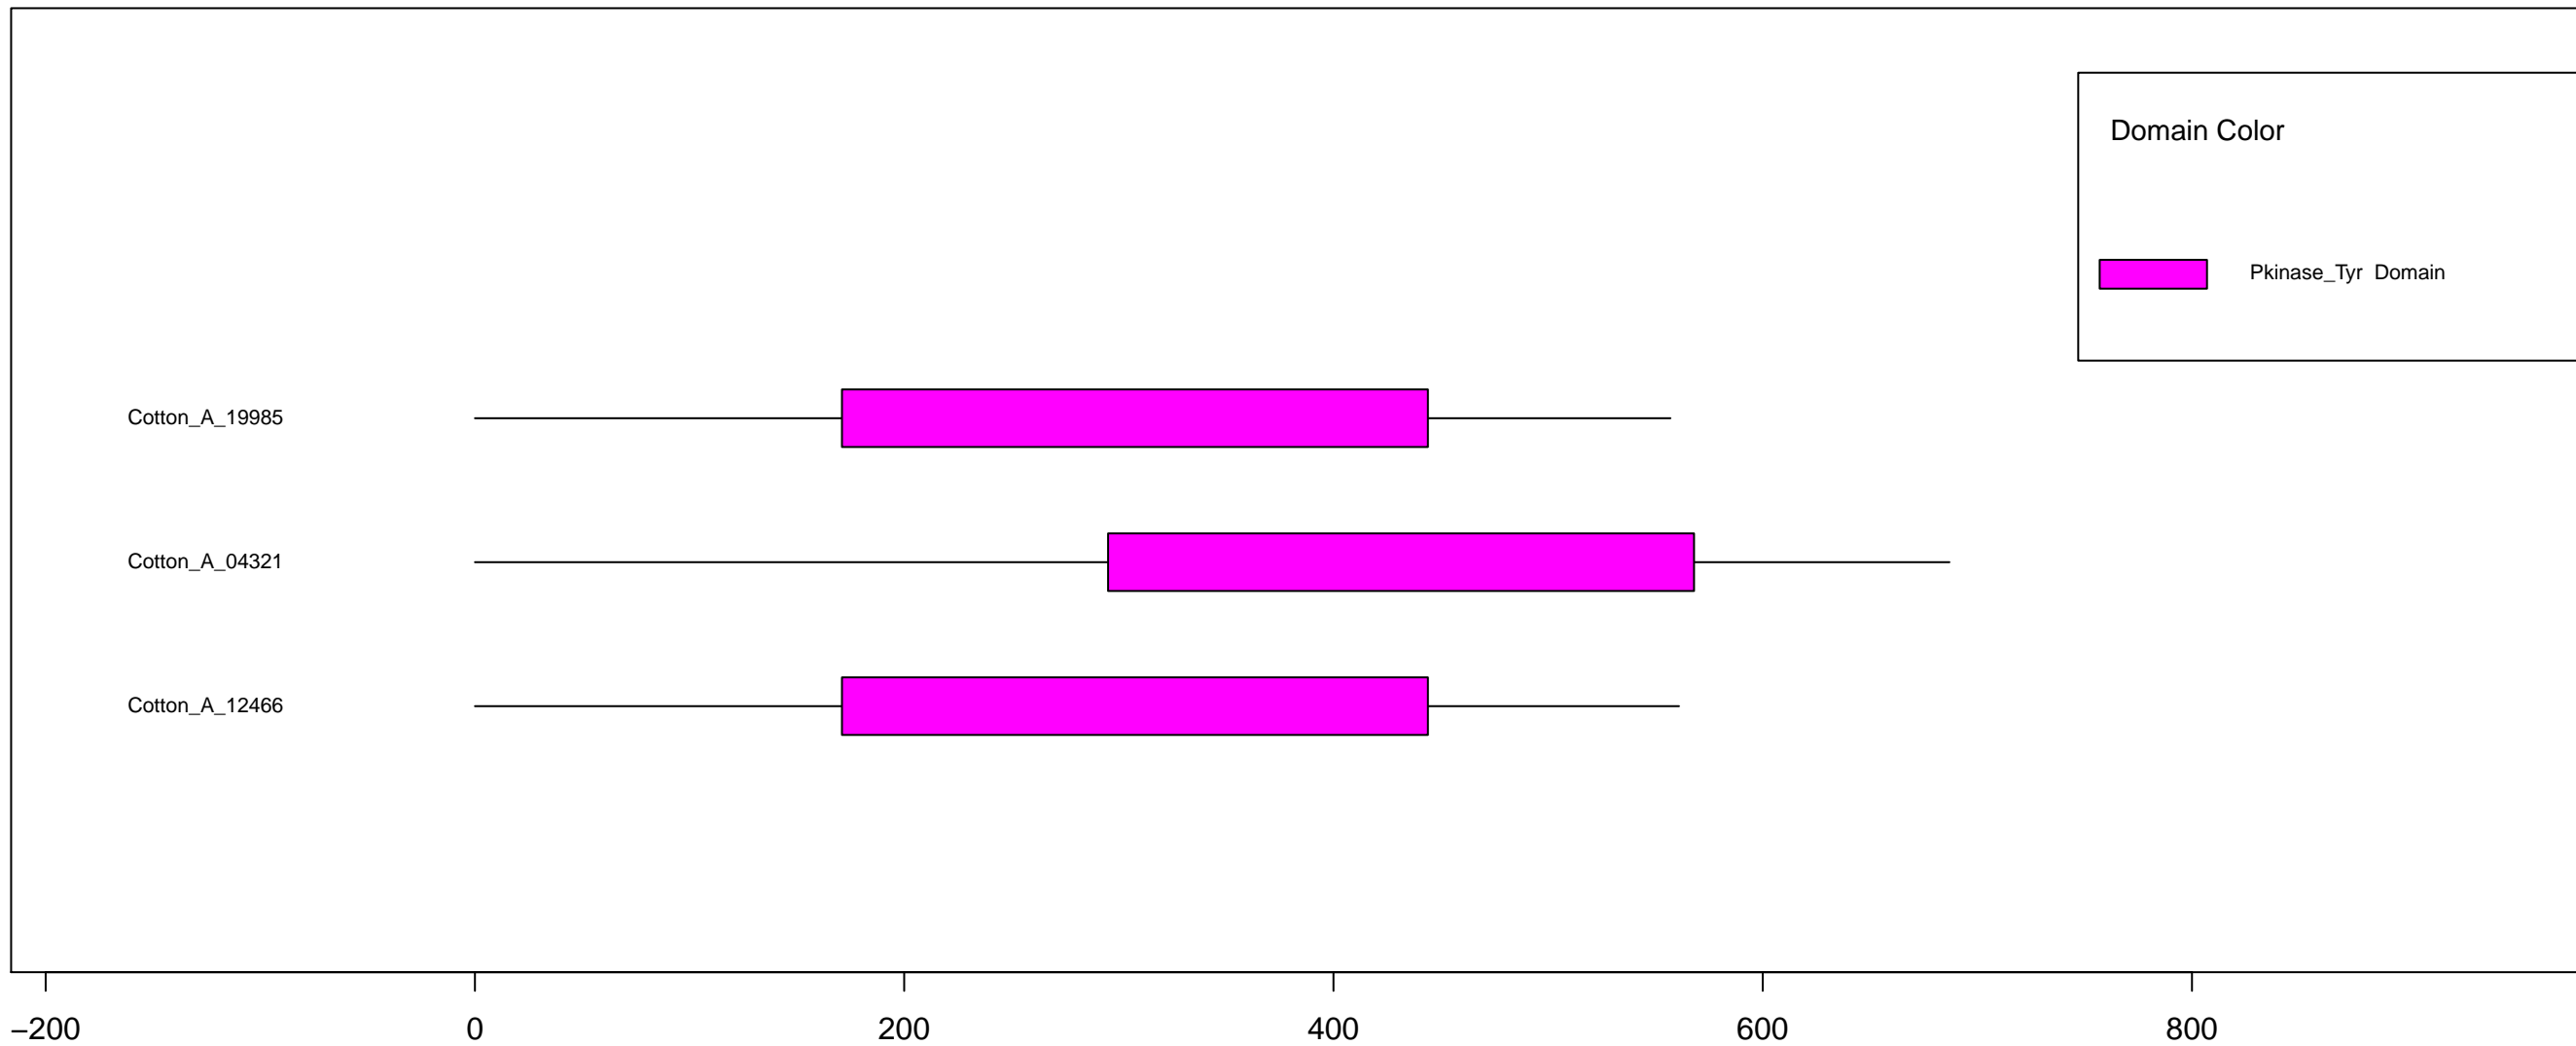

# G.ar RLK-Pelle\_RLCK-IV domain diagram (all)

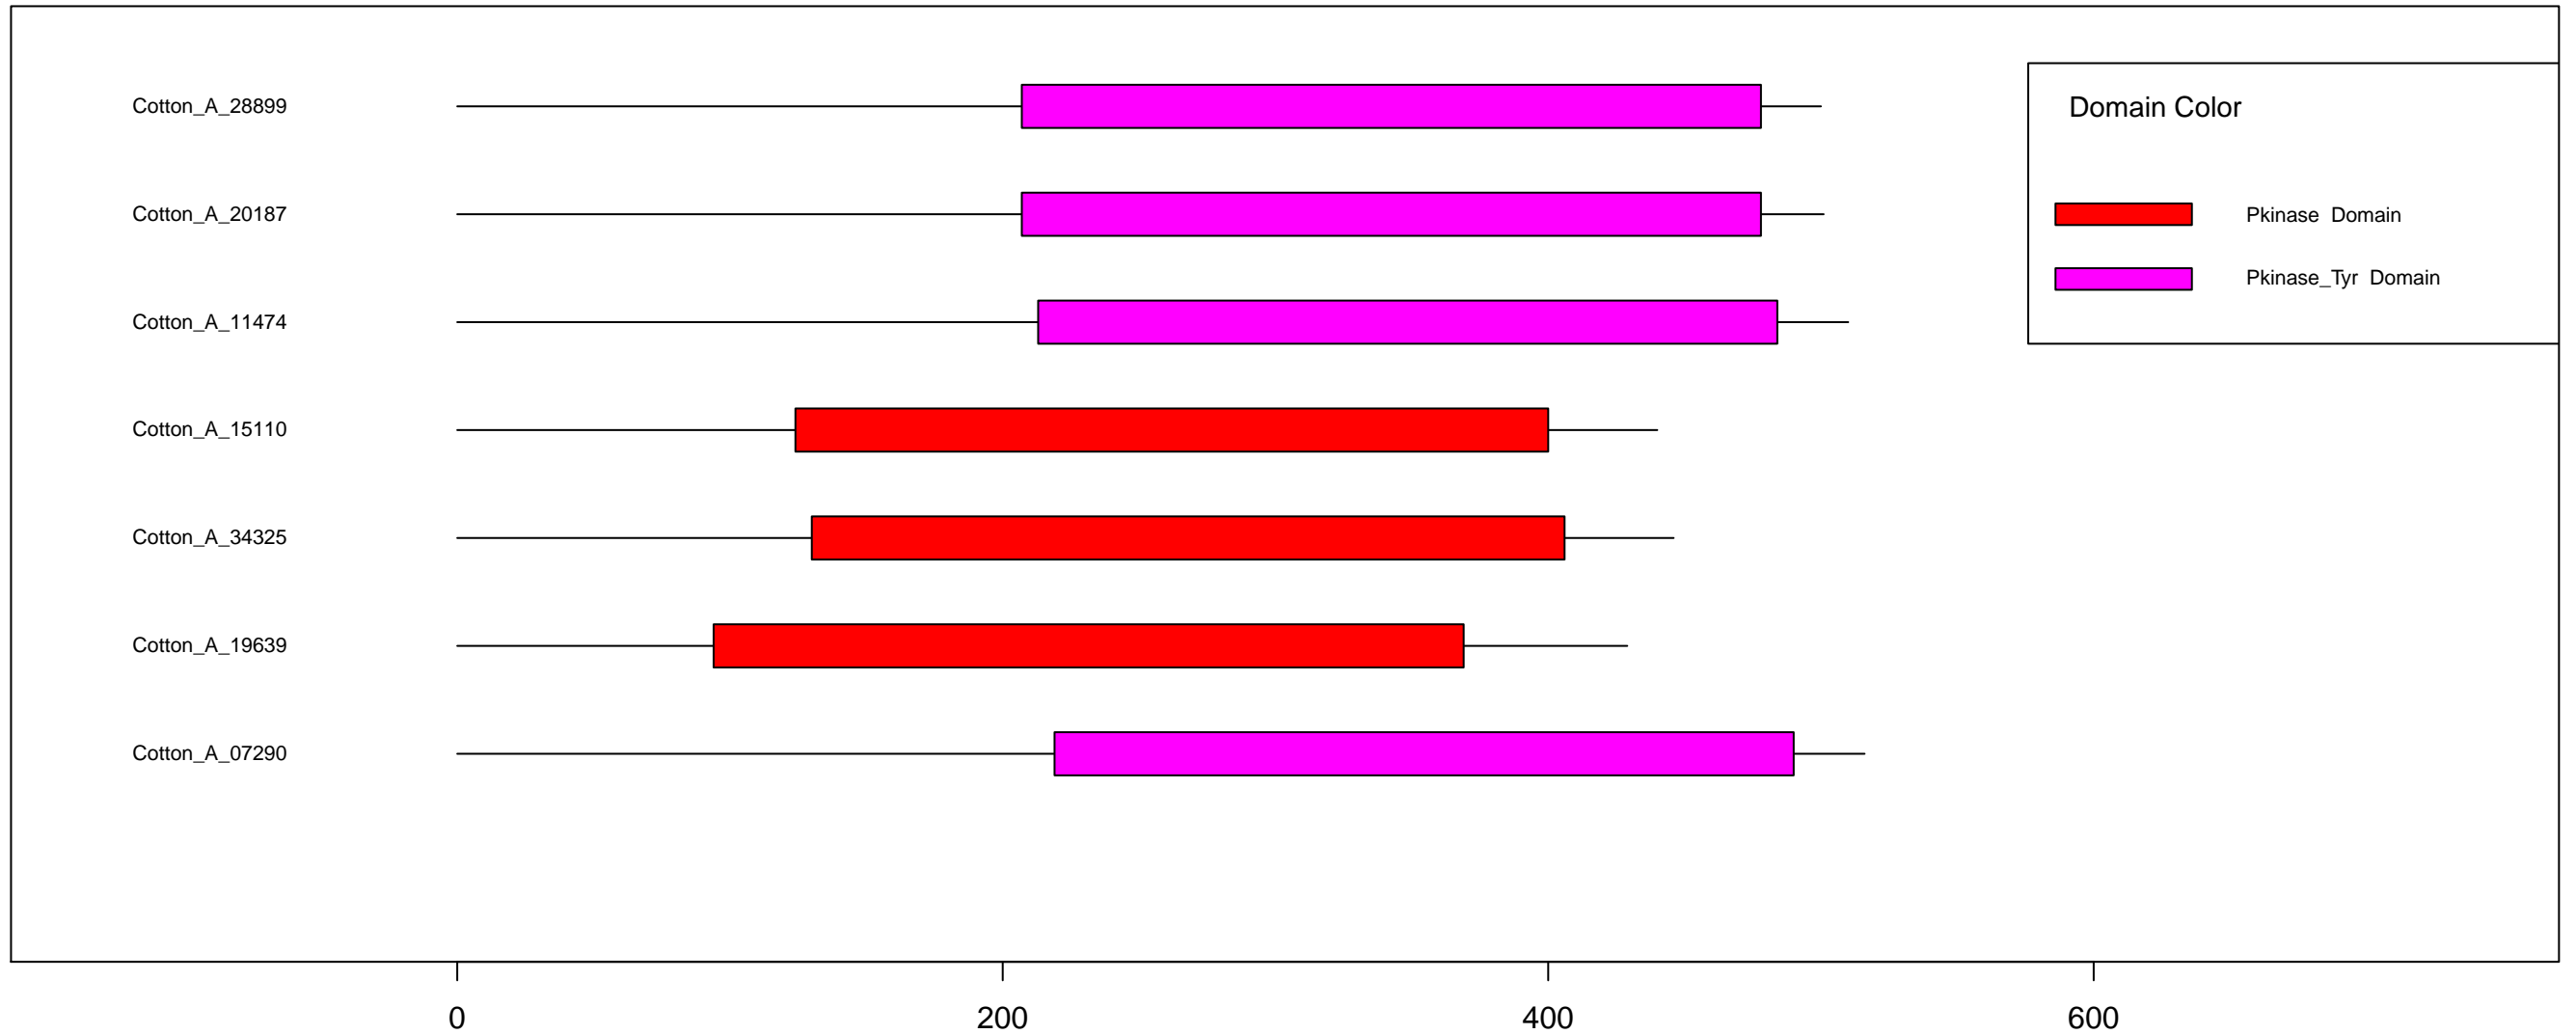

# G.ar RLK-Pelle\_RLCK-IXa domain diagram (all)

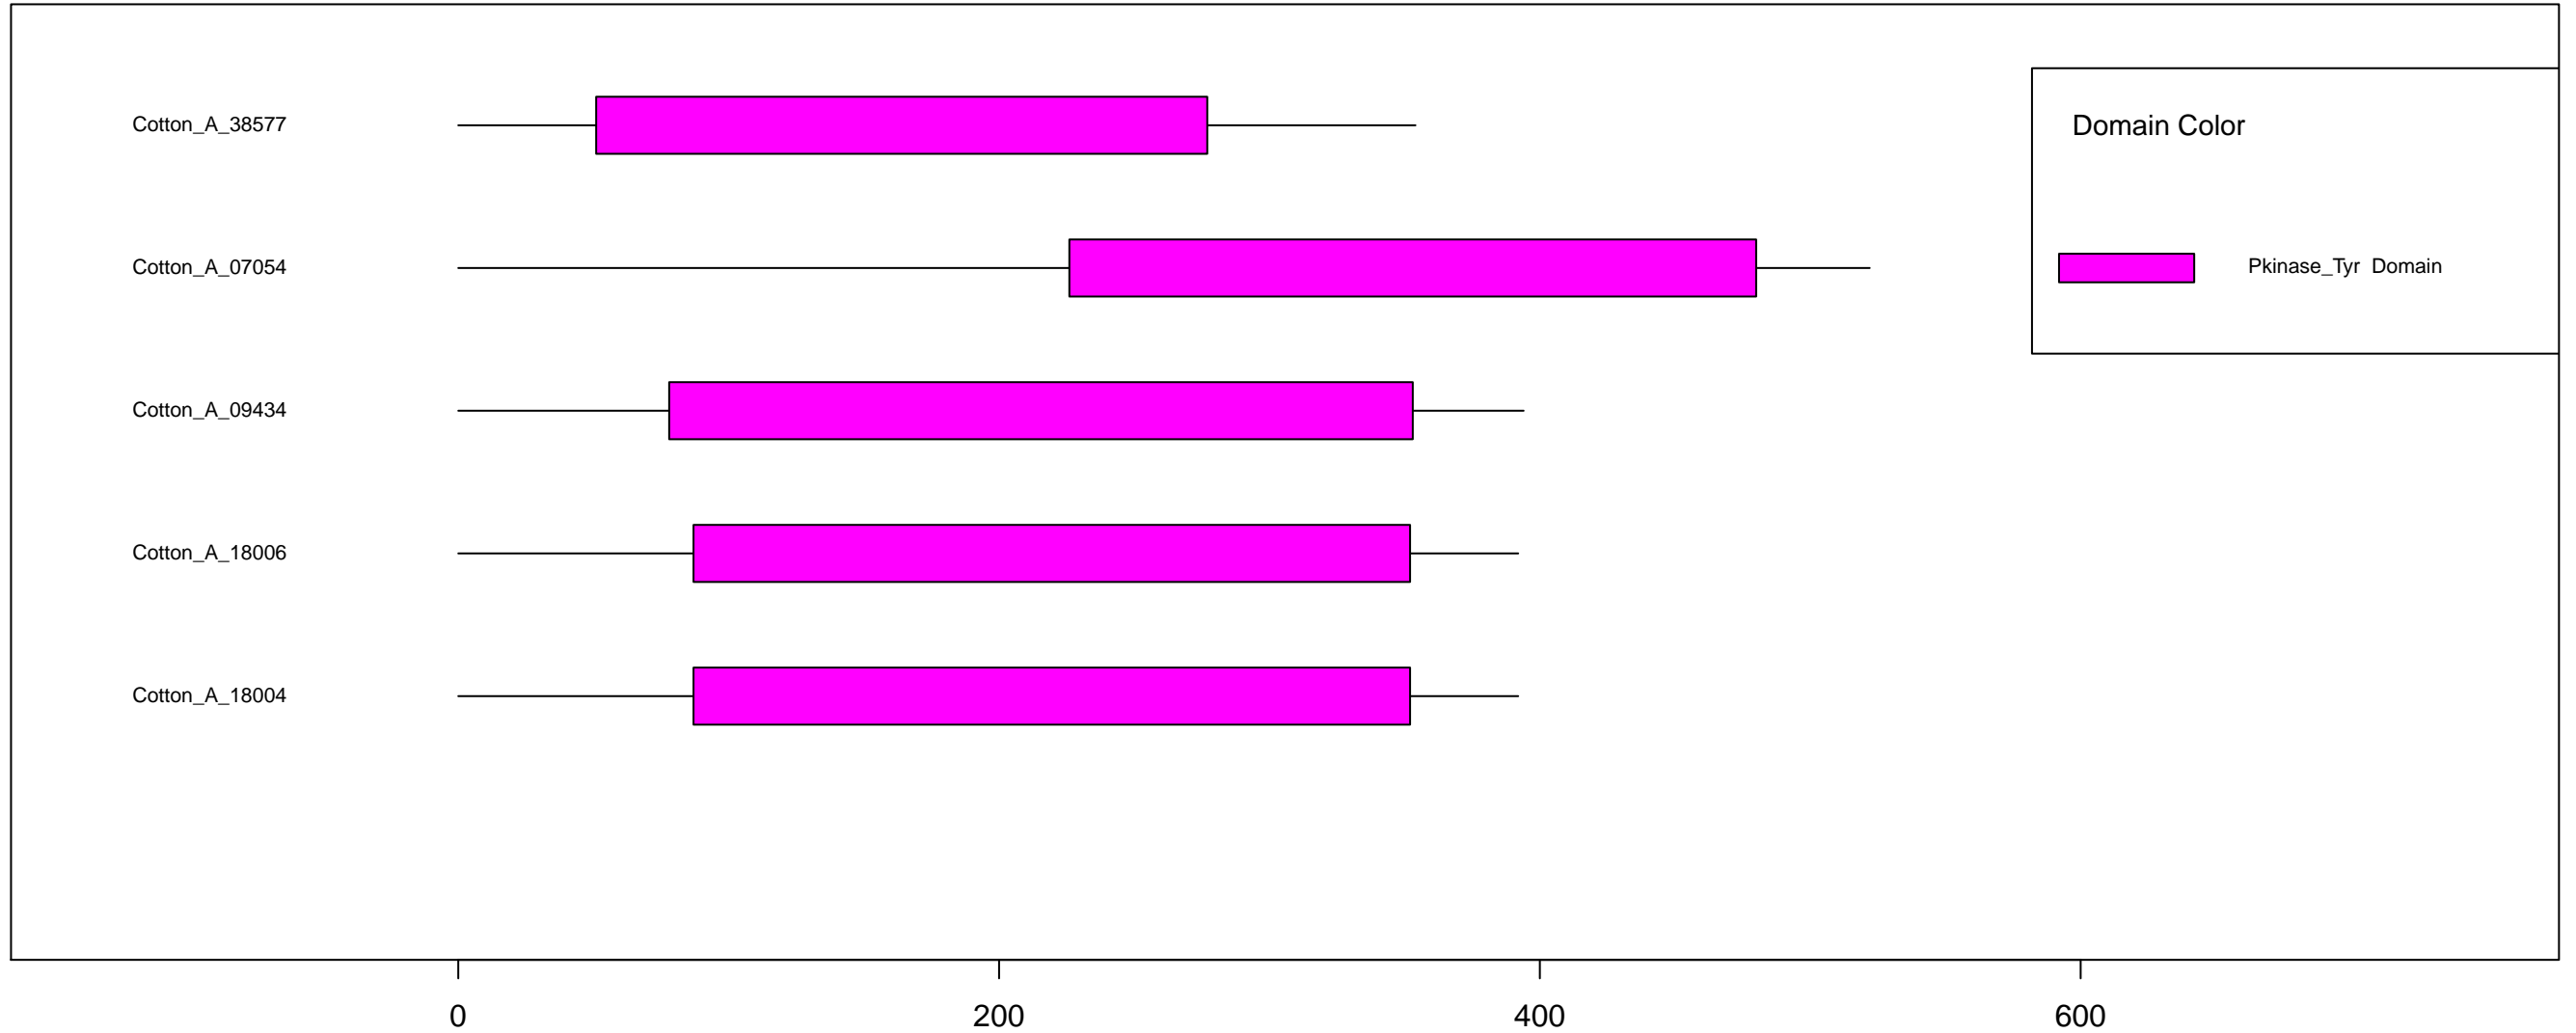

### G.ar RLK-Pelle\_RLCK-IXb domain diagram (all)

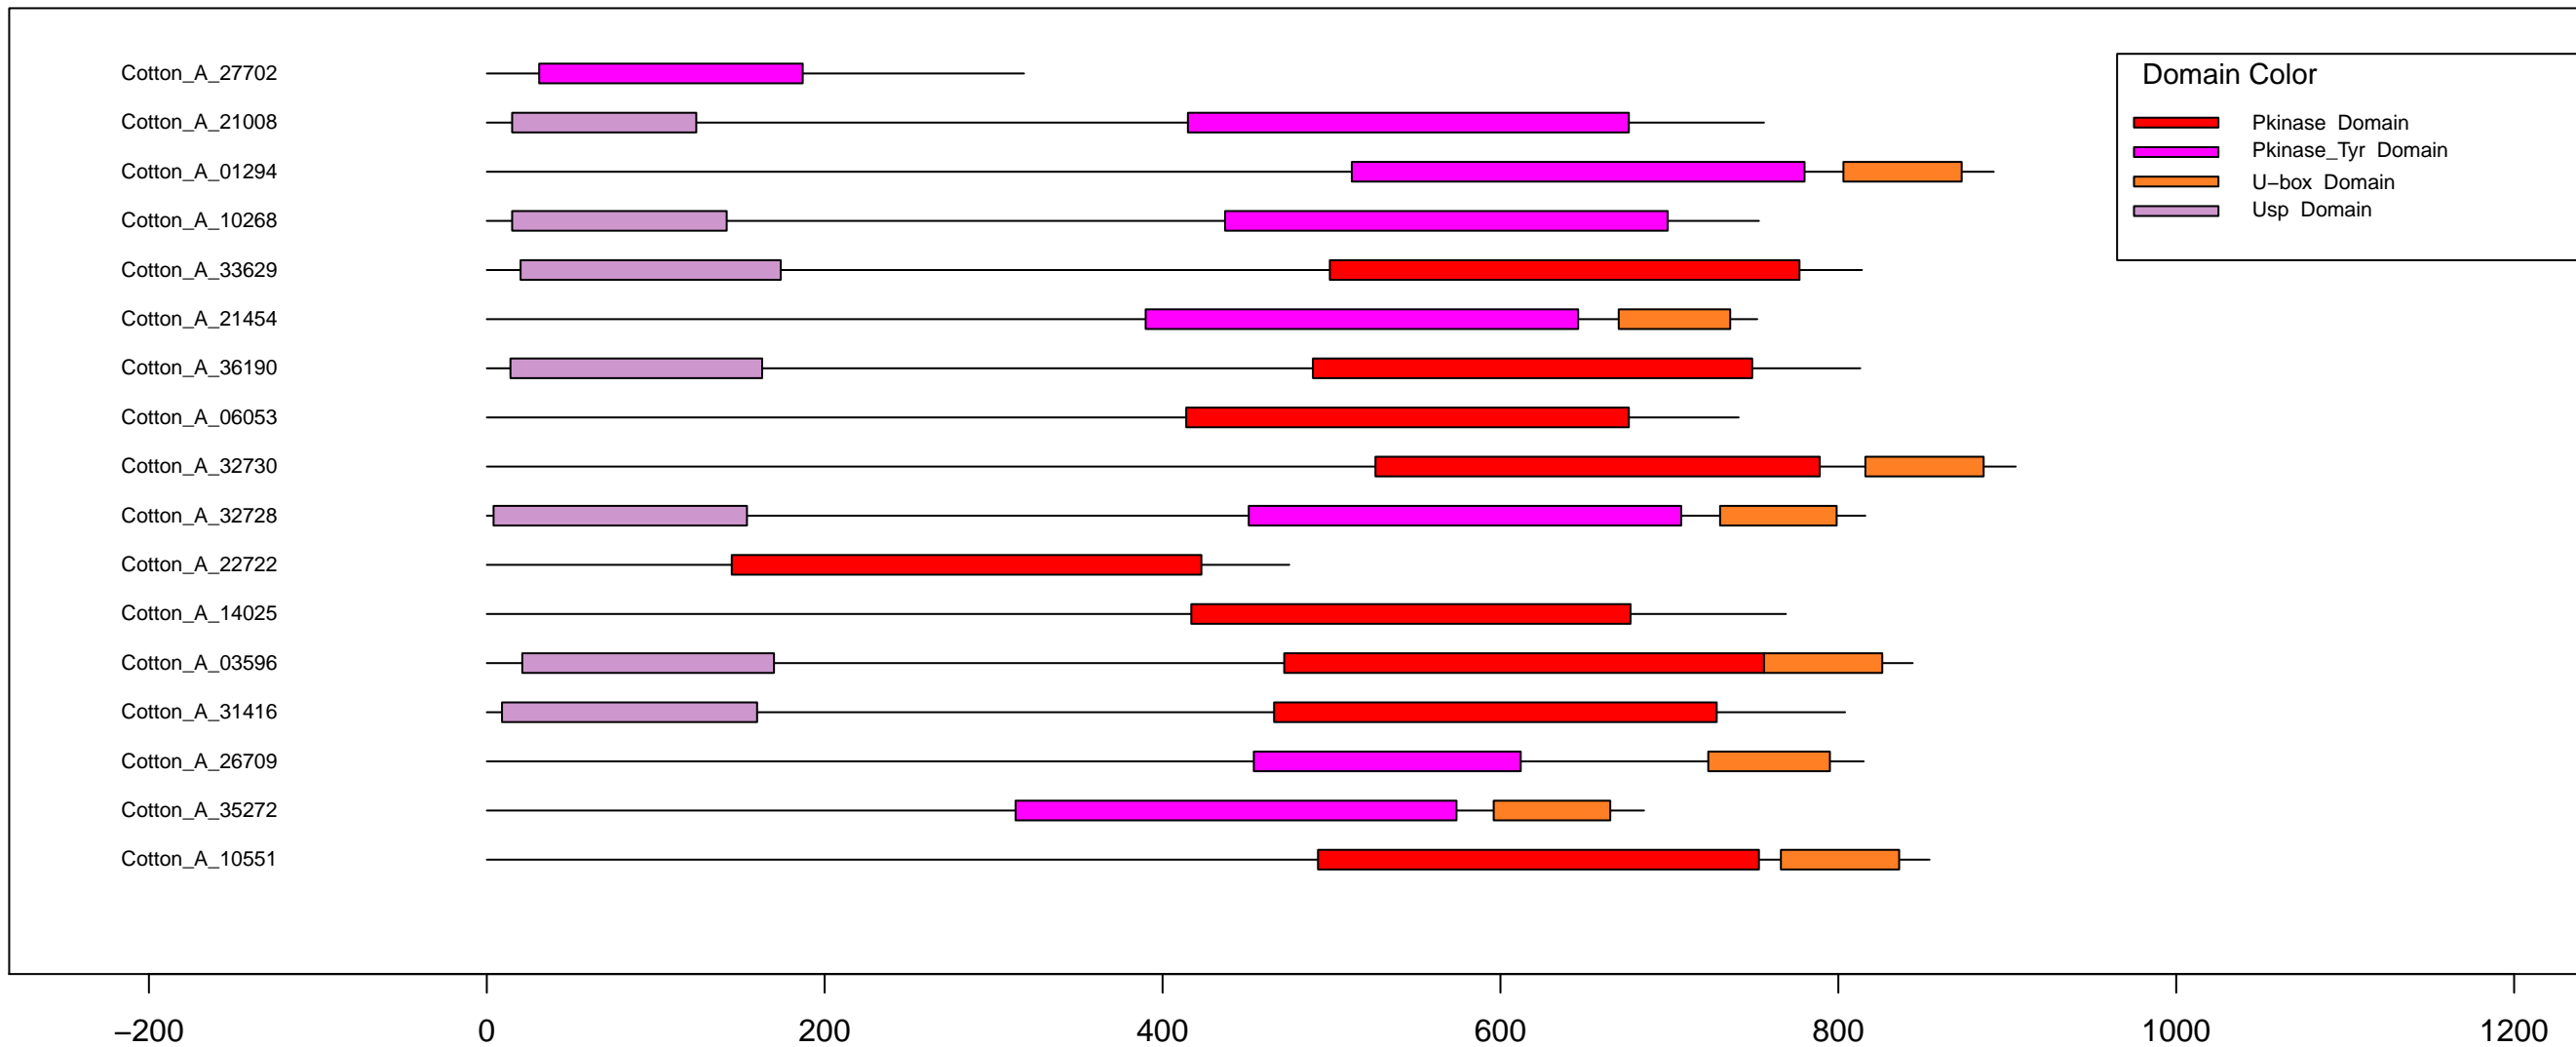

# G.ar RLK-Pelle\_RLCK-Os domain diagram (all)

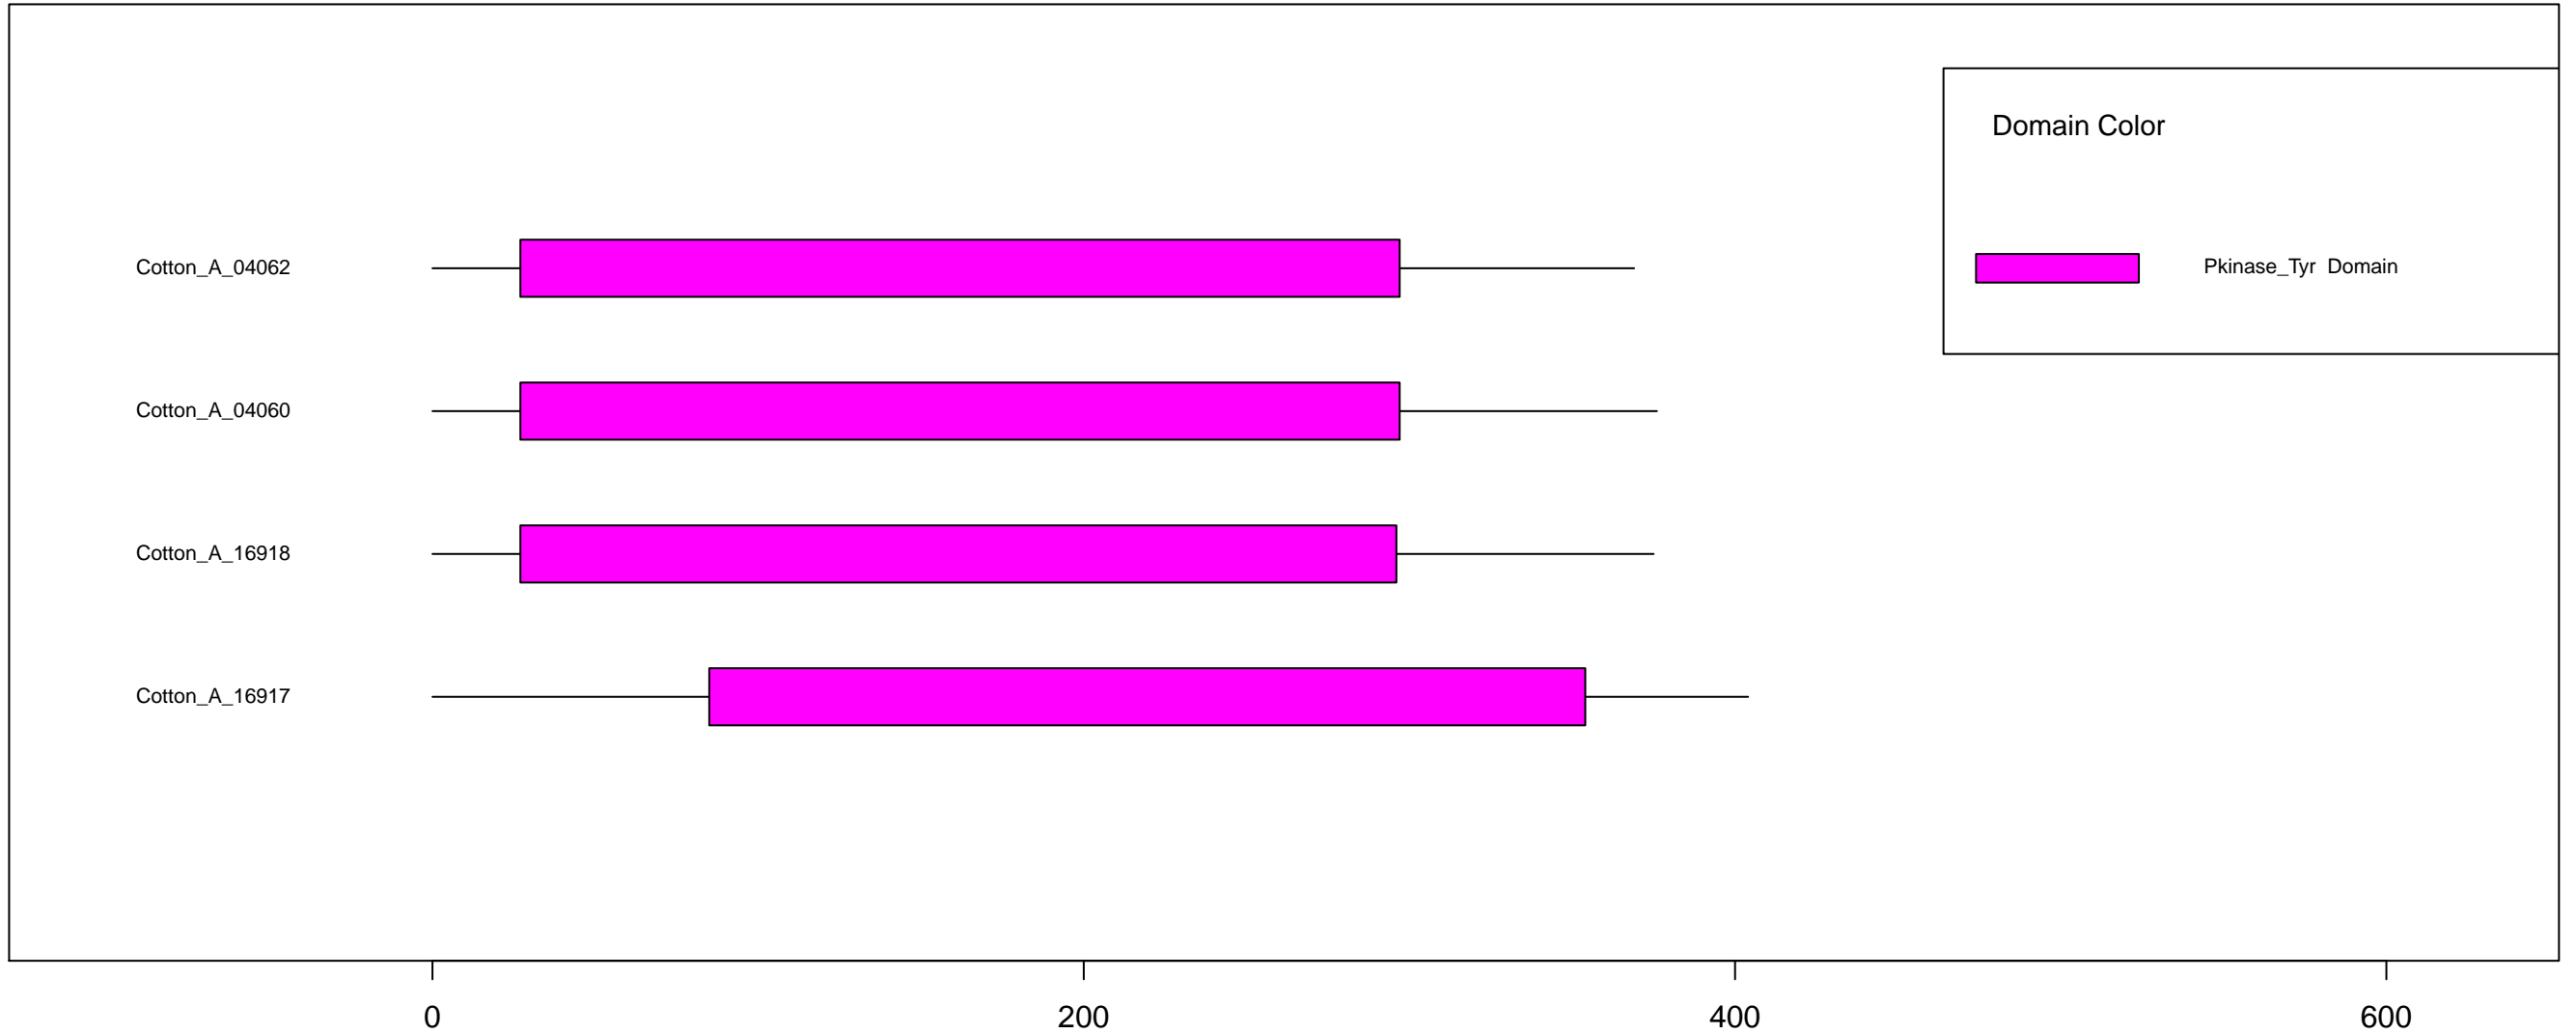



### G.ar RLK-Pelle\_RLCK-VIIa-1 domain diagram (all)

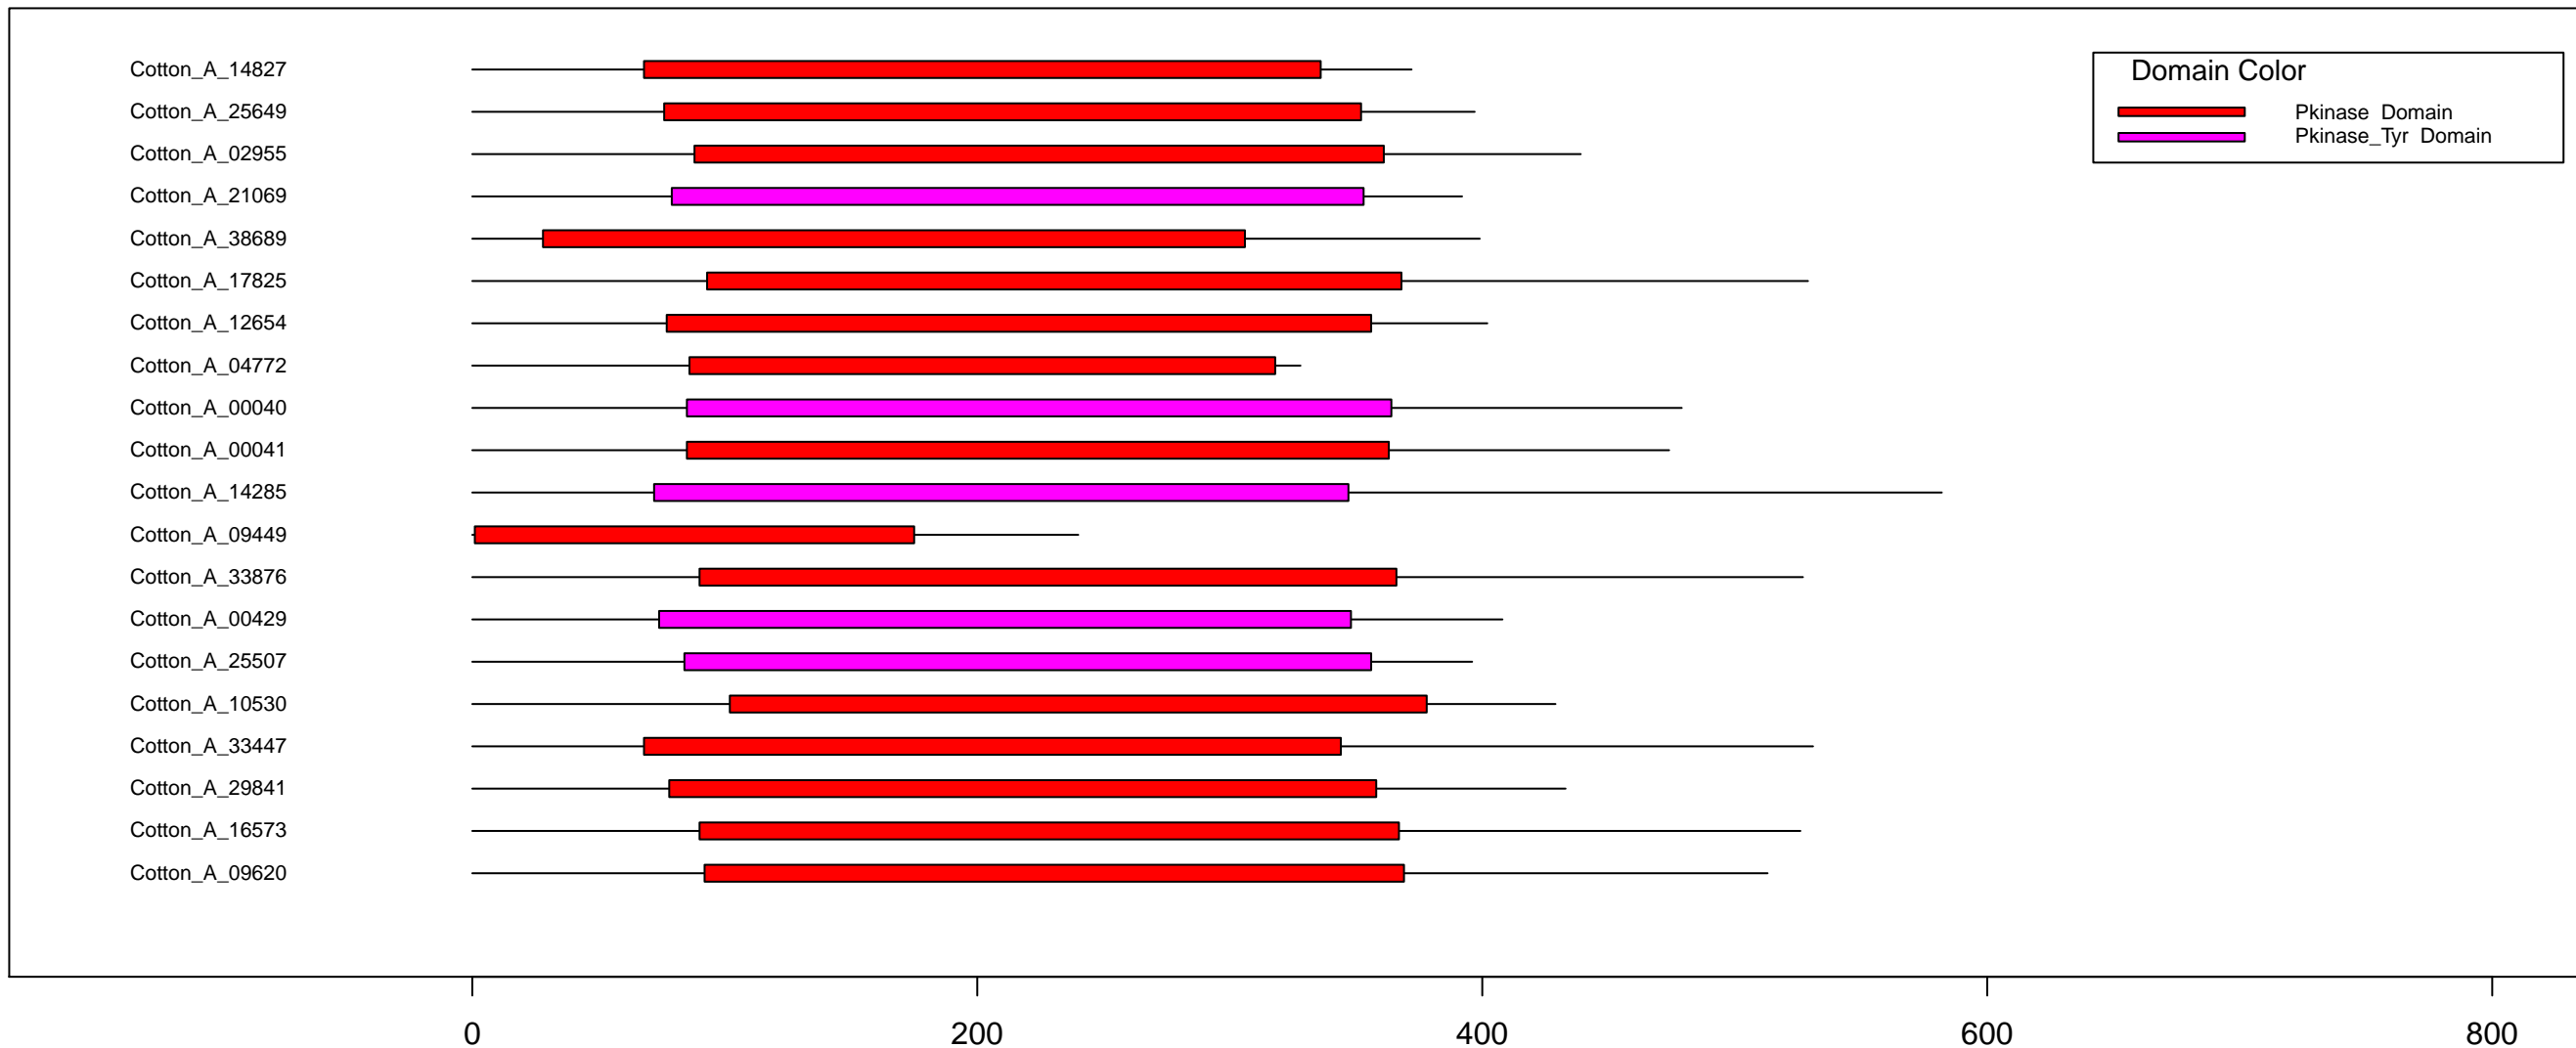

# G.ar RLK-Pelle\_RLCK-VIIa-2 domain diagram (part 1)

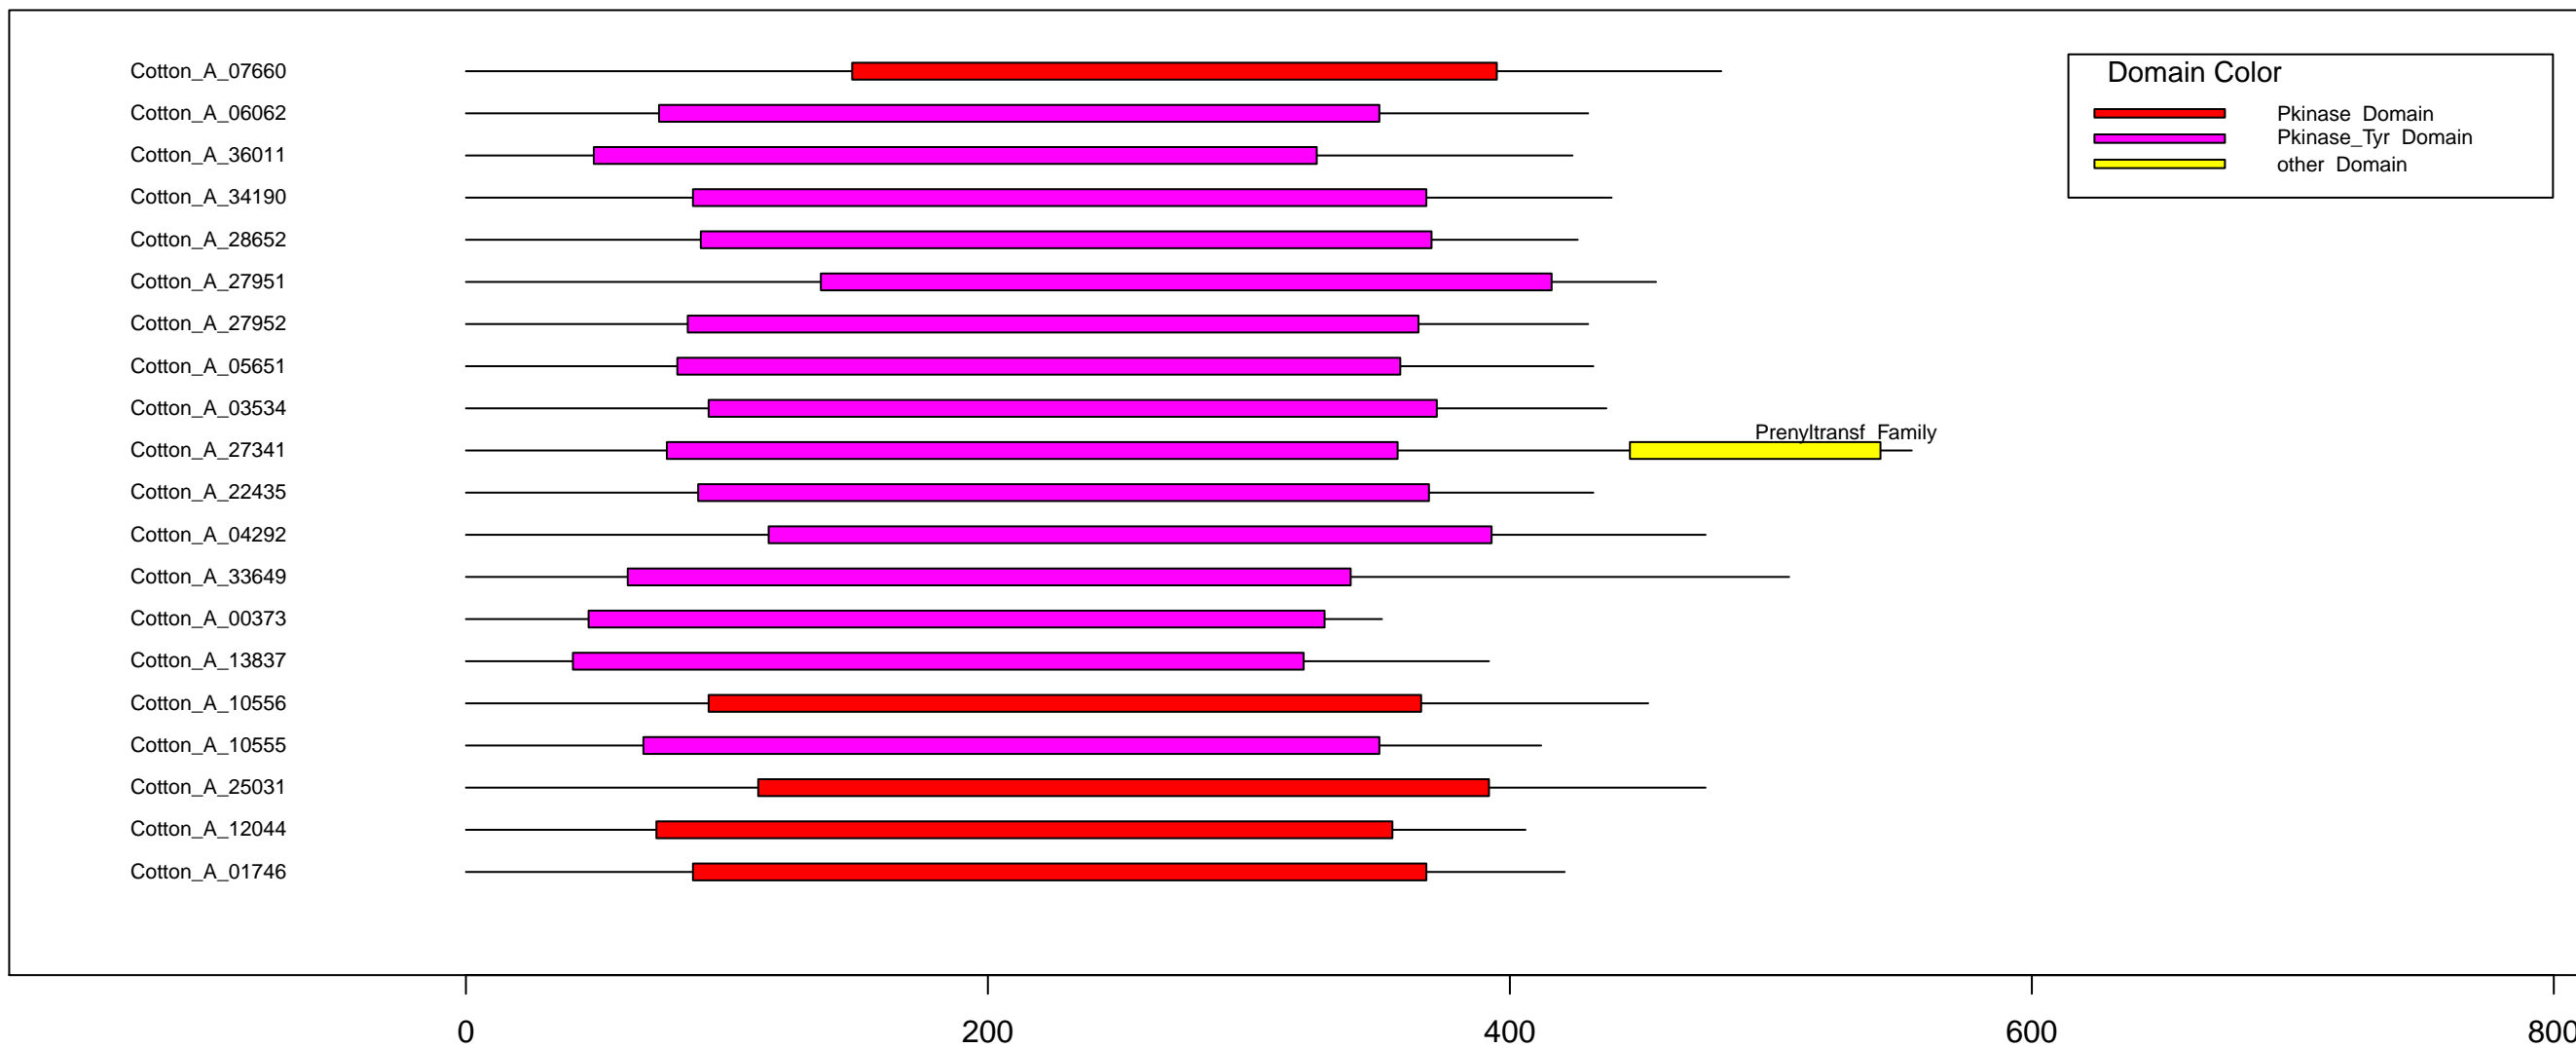

### G.ar RLK-Pelle\_RLCK-VIIa-2 domain diagram (part 2)

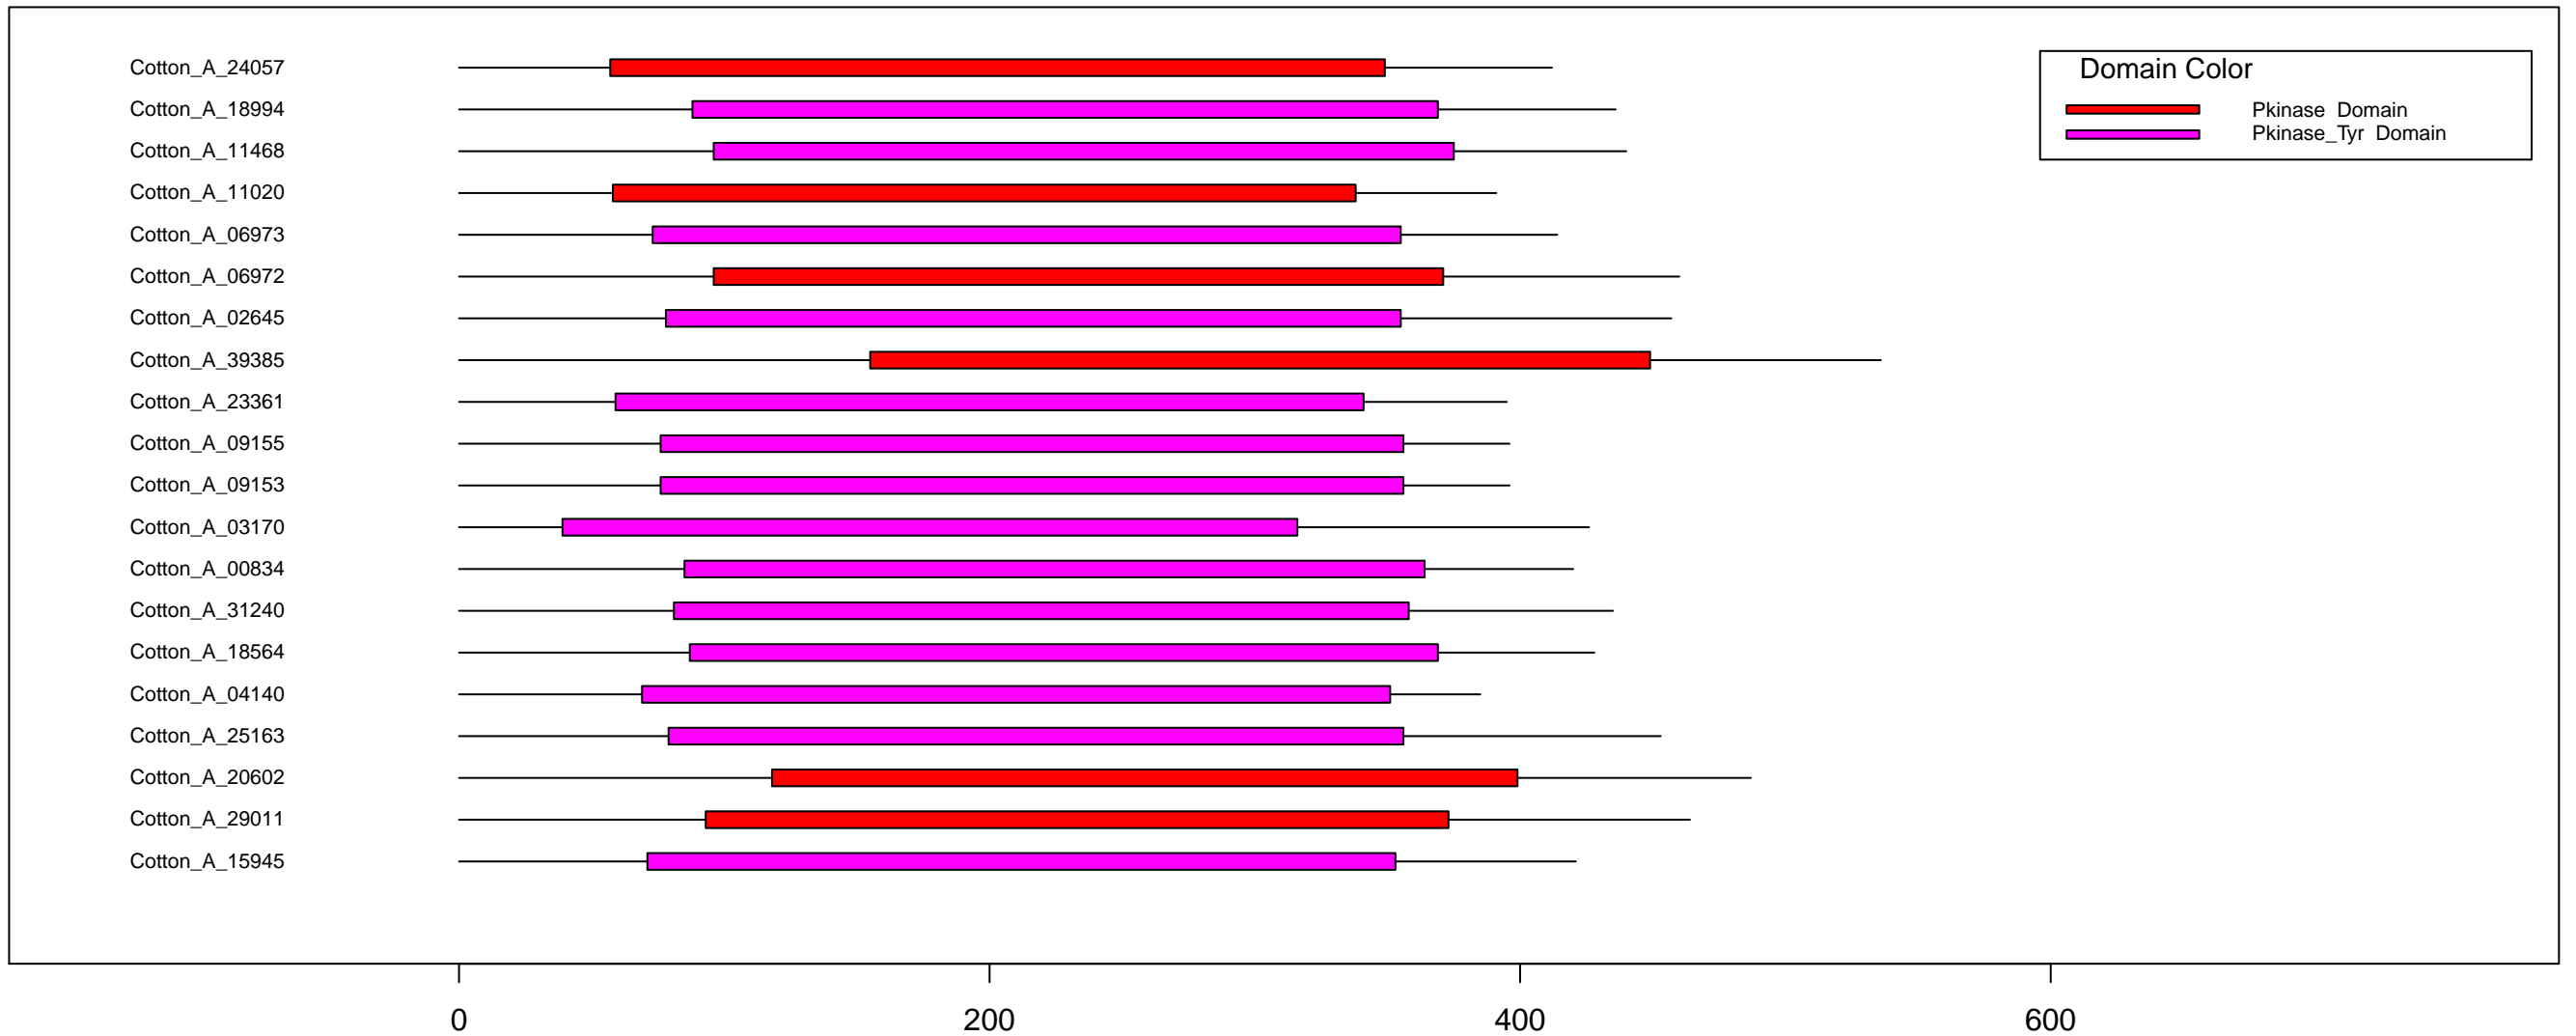

### G.ar RLK-Pelle\_RLCK-VIIa-2 domain diagram (part 3)

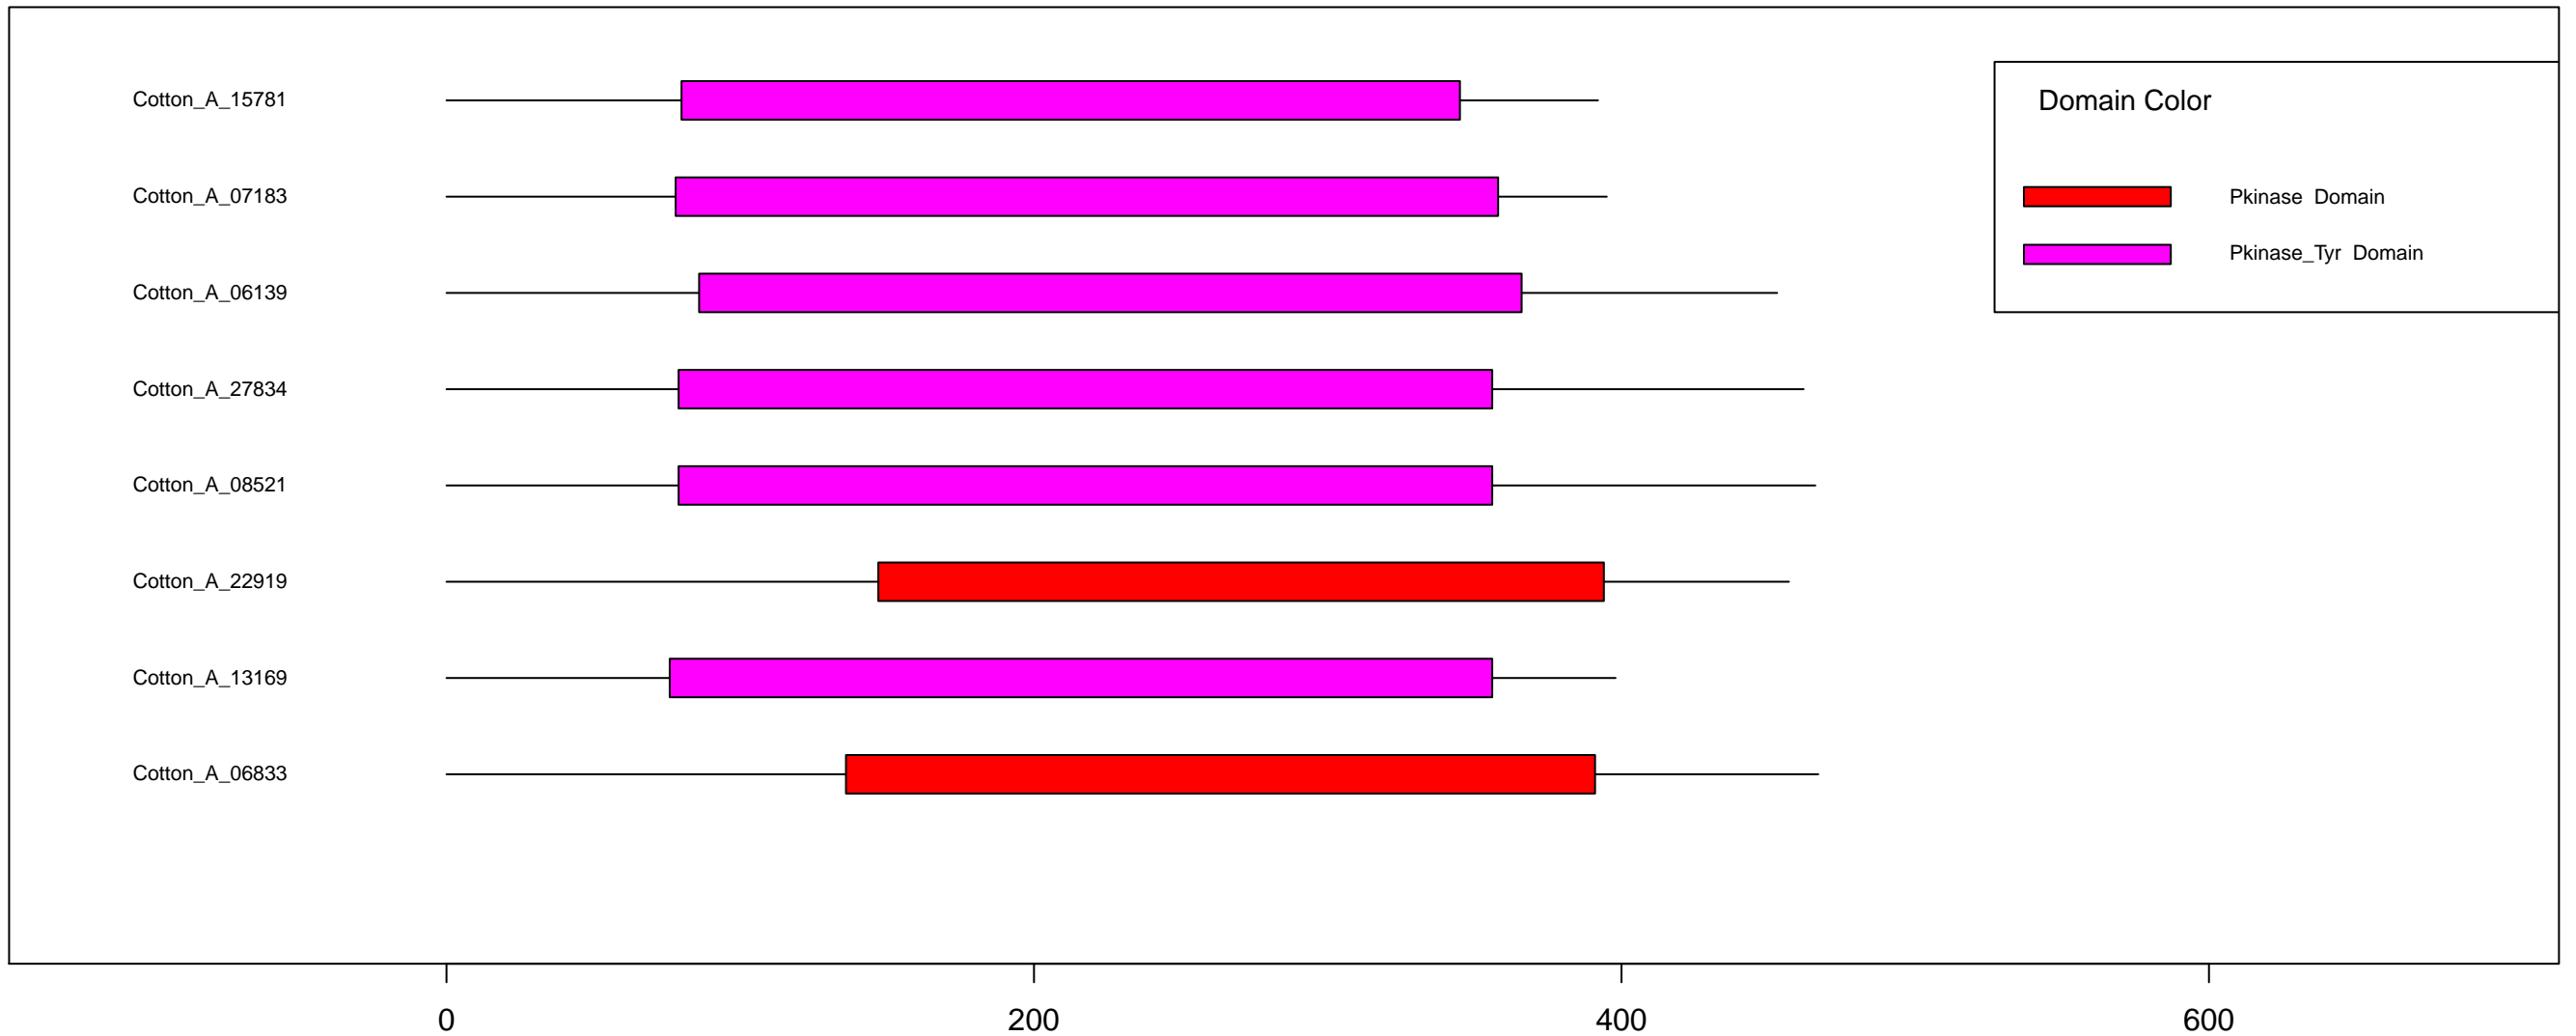

G.ar RLK-Pelle\_RLCK-VIIb domain diagram (all)

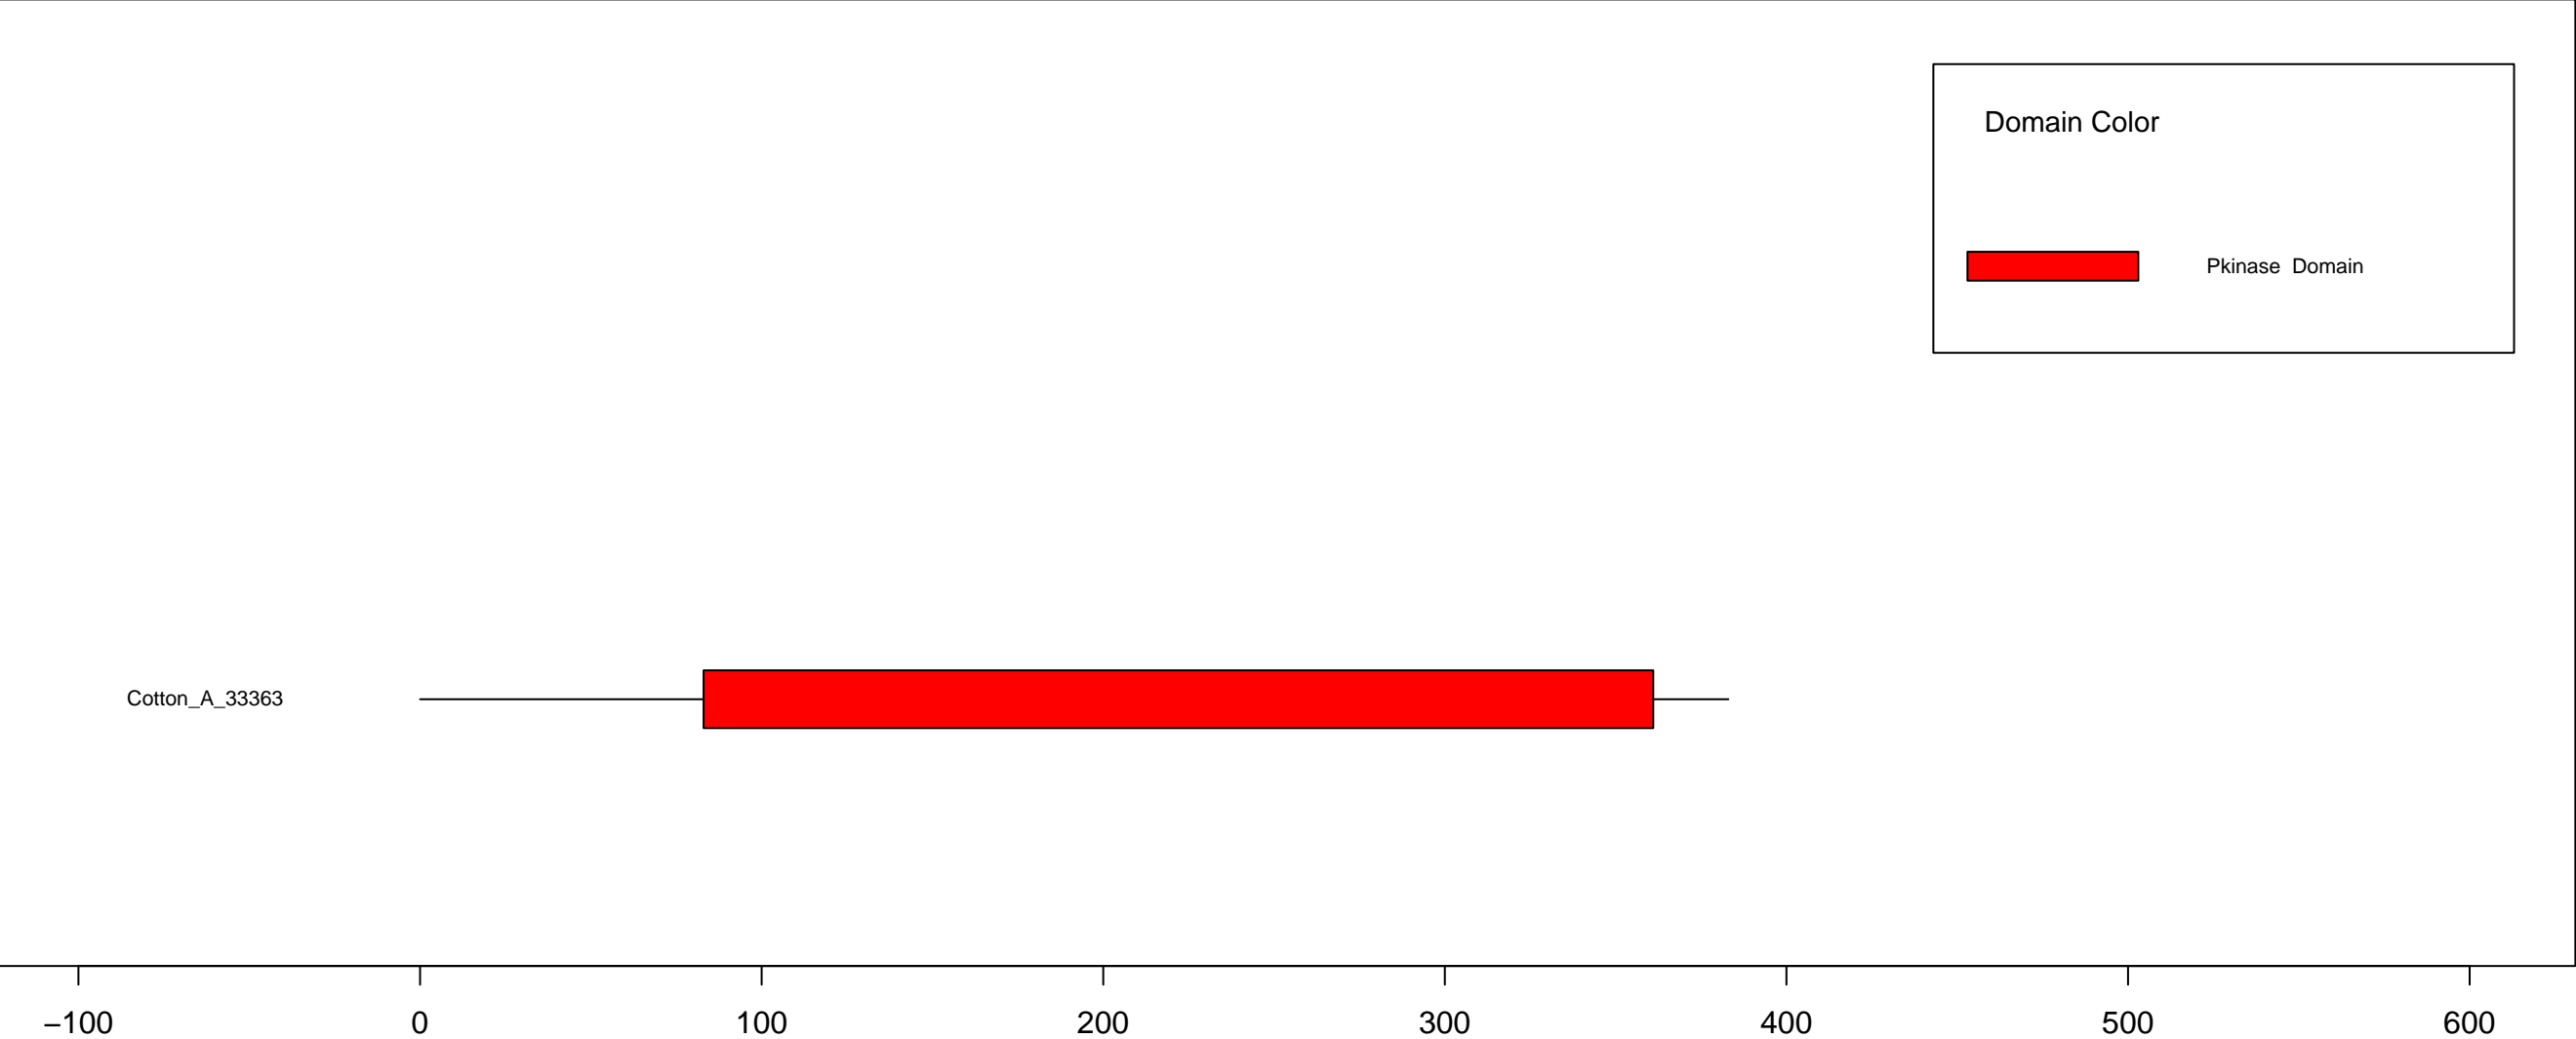

# G.ar RLK-Pelle\_RLCK-VIII domain diagram (all)

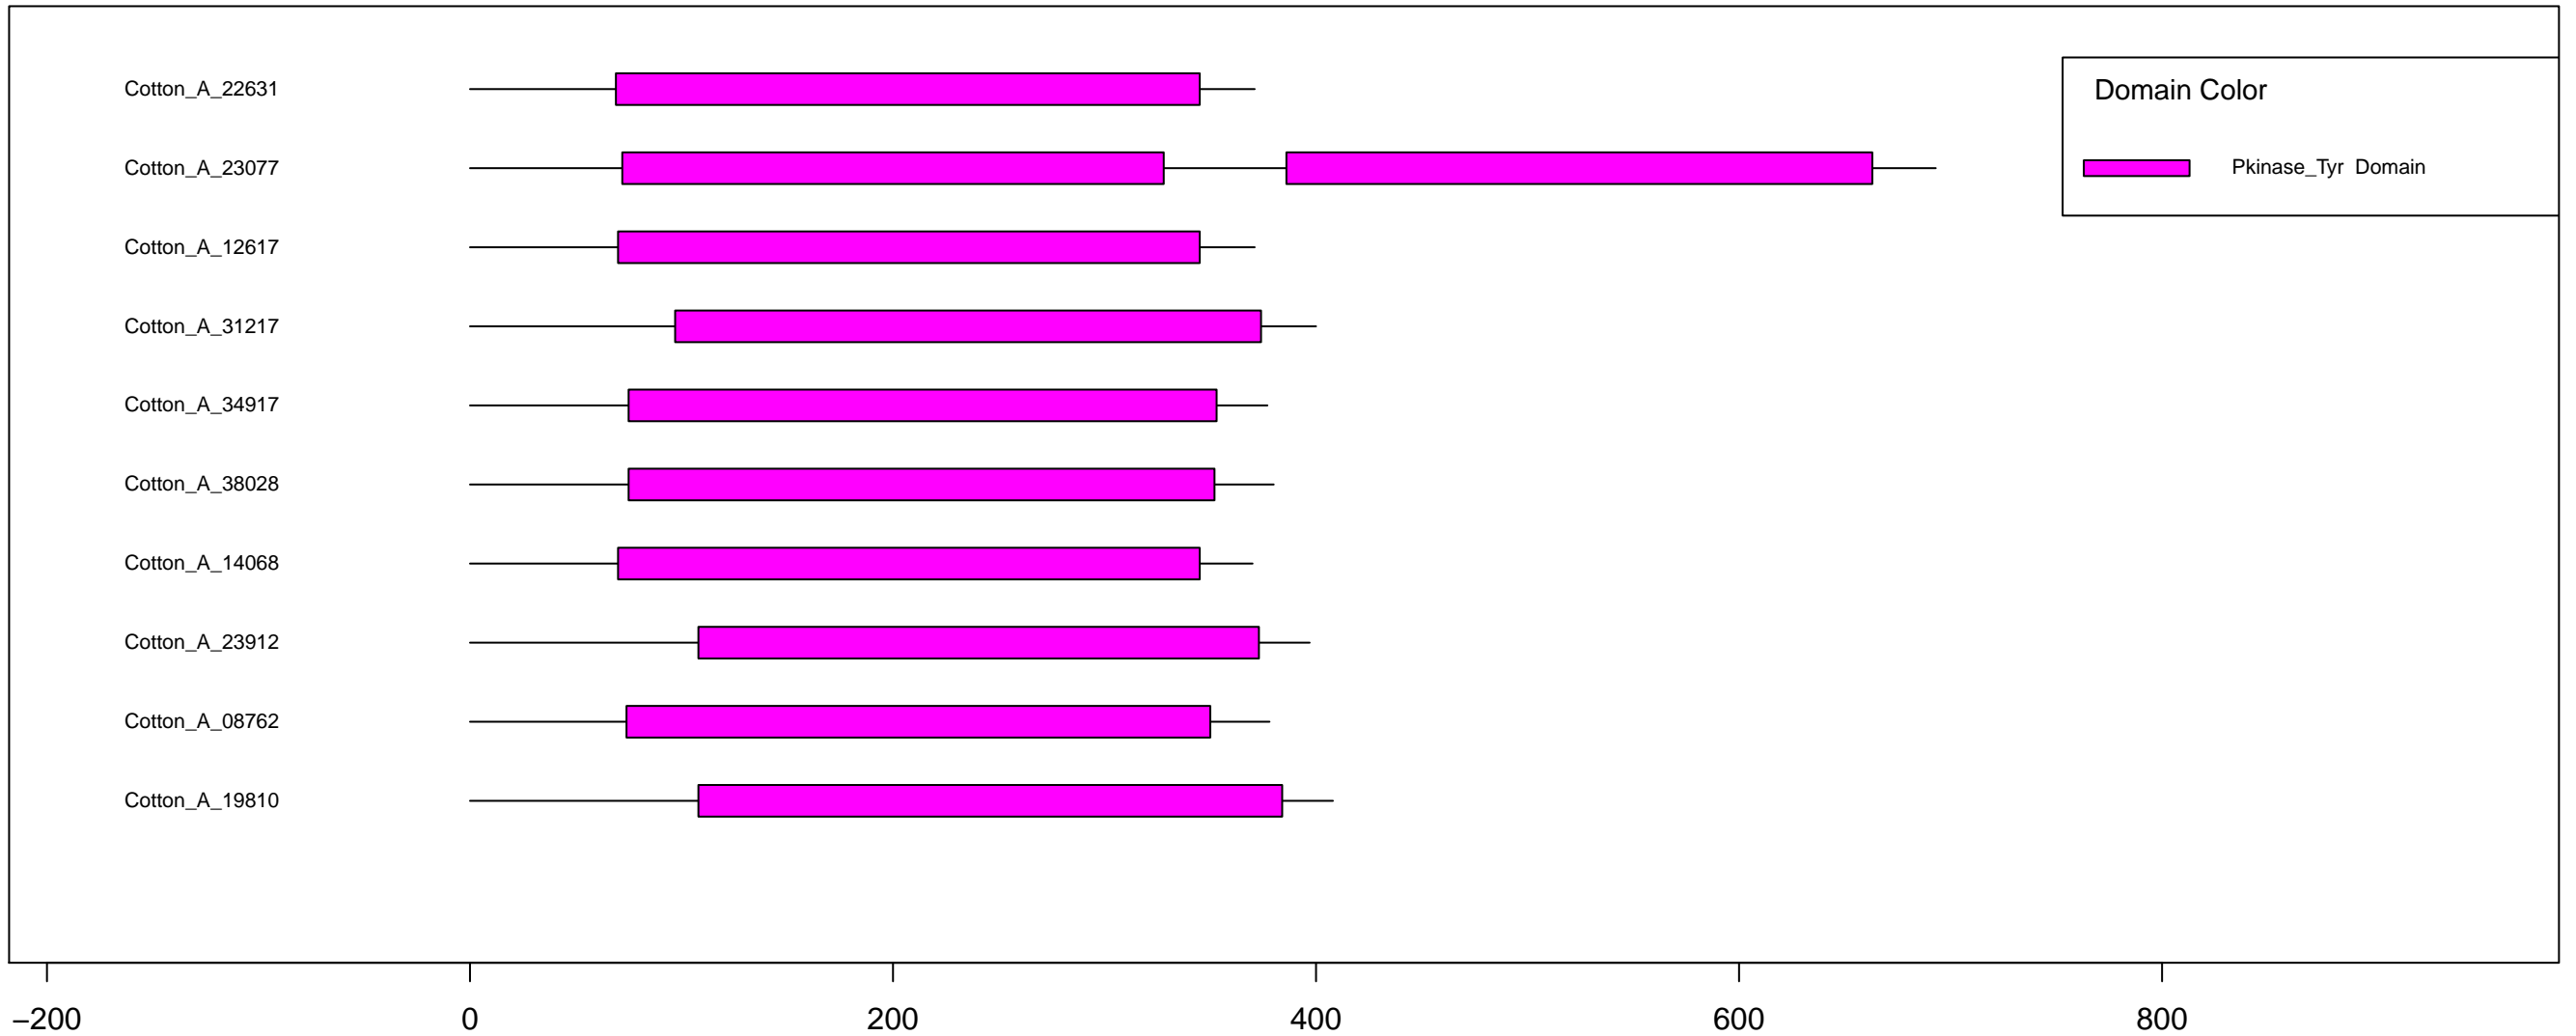

### G.ar RLK-Pelle\_RLCK-VI domain diagram (all)

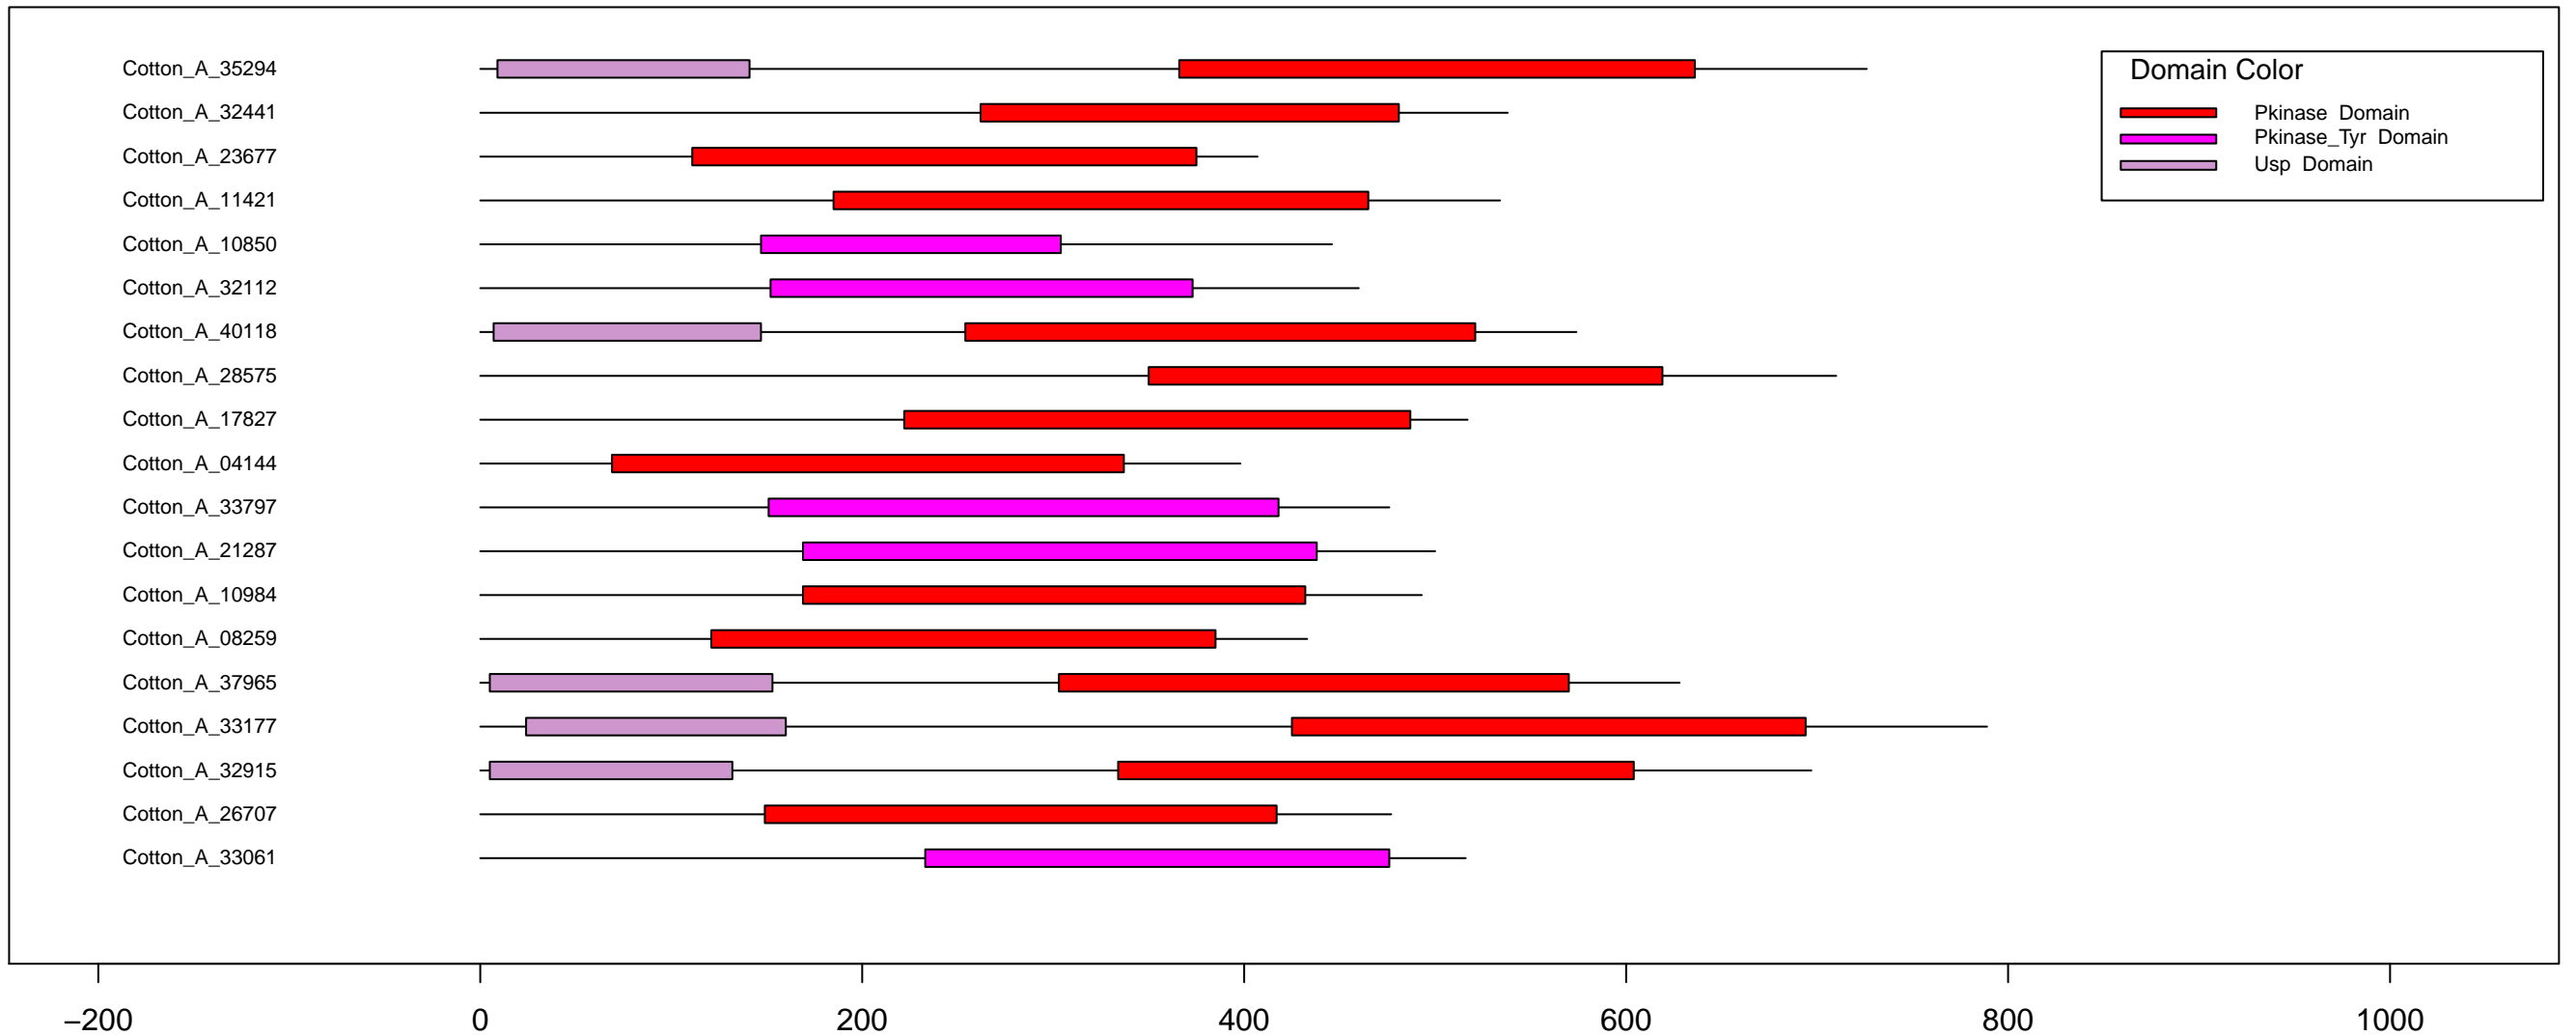

### G.ar RLK-Pelle\_RLCK-V domain diagram (all)

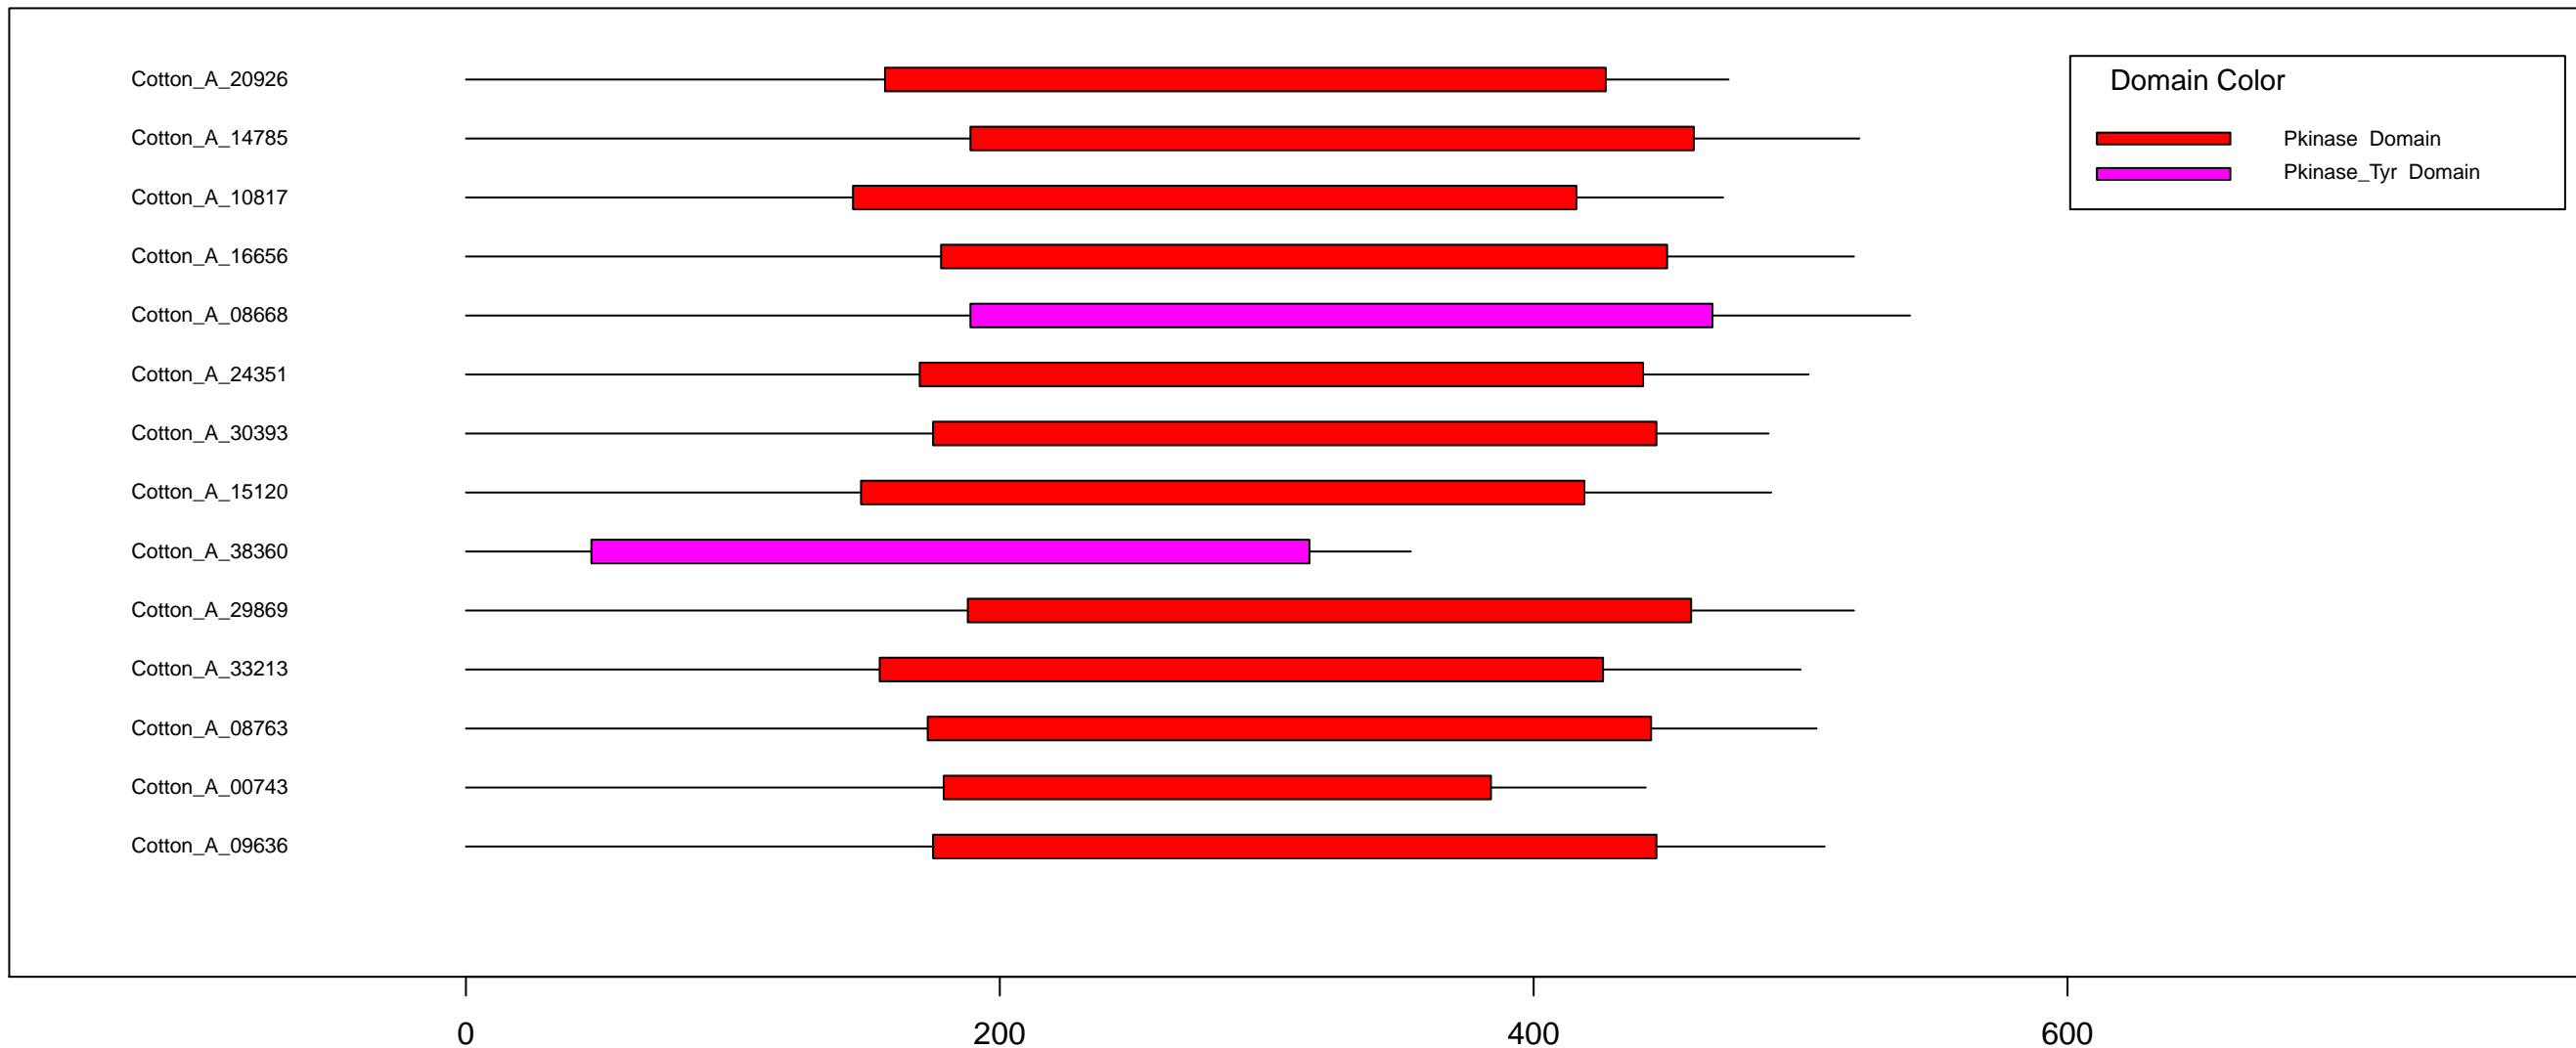



# G.ar RLK-Pelle\_RLCK-XII-1 domain diagram (all)

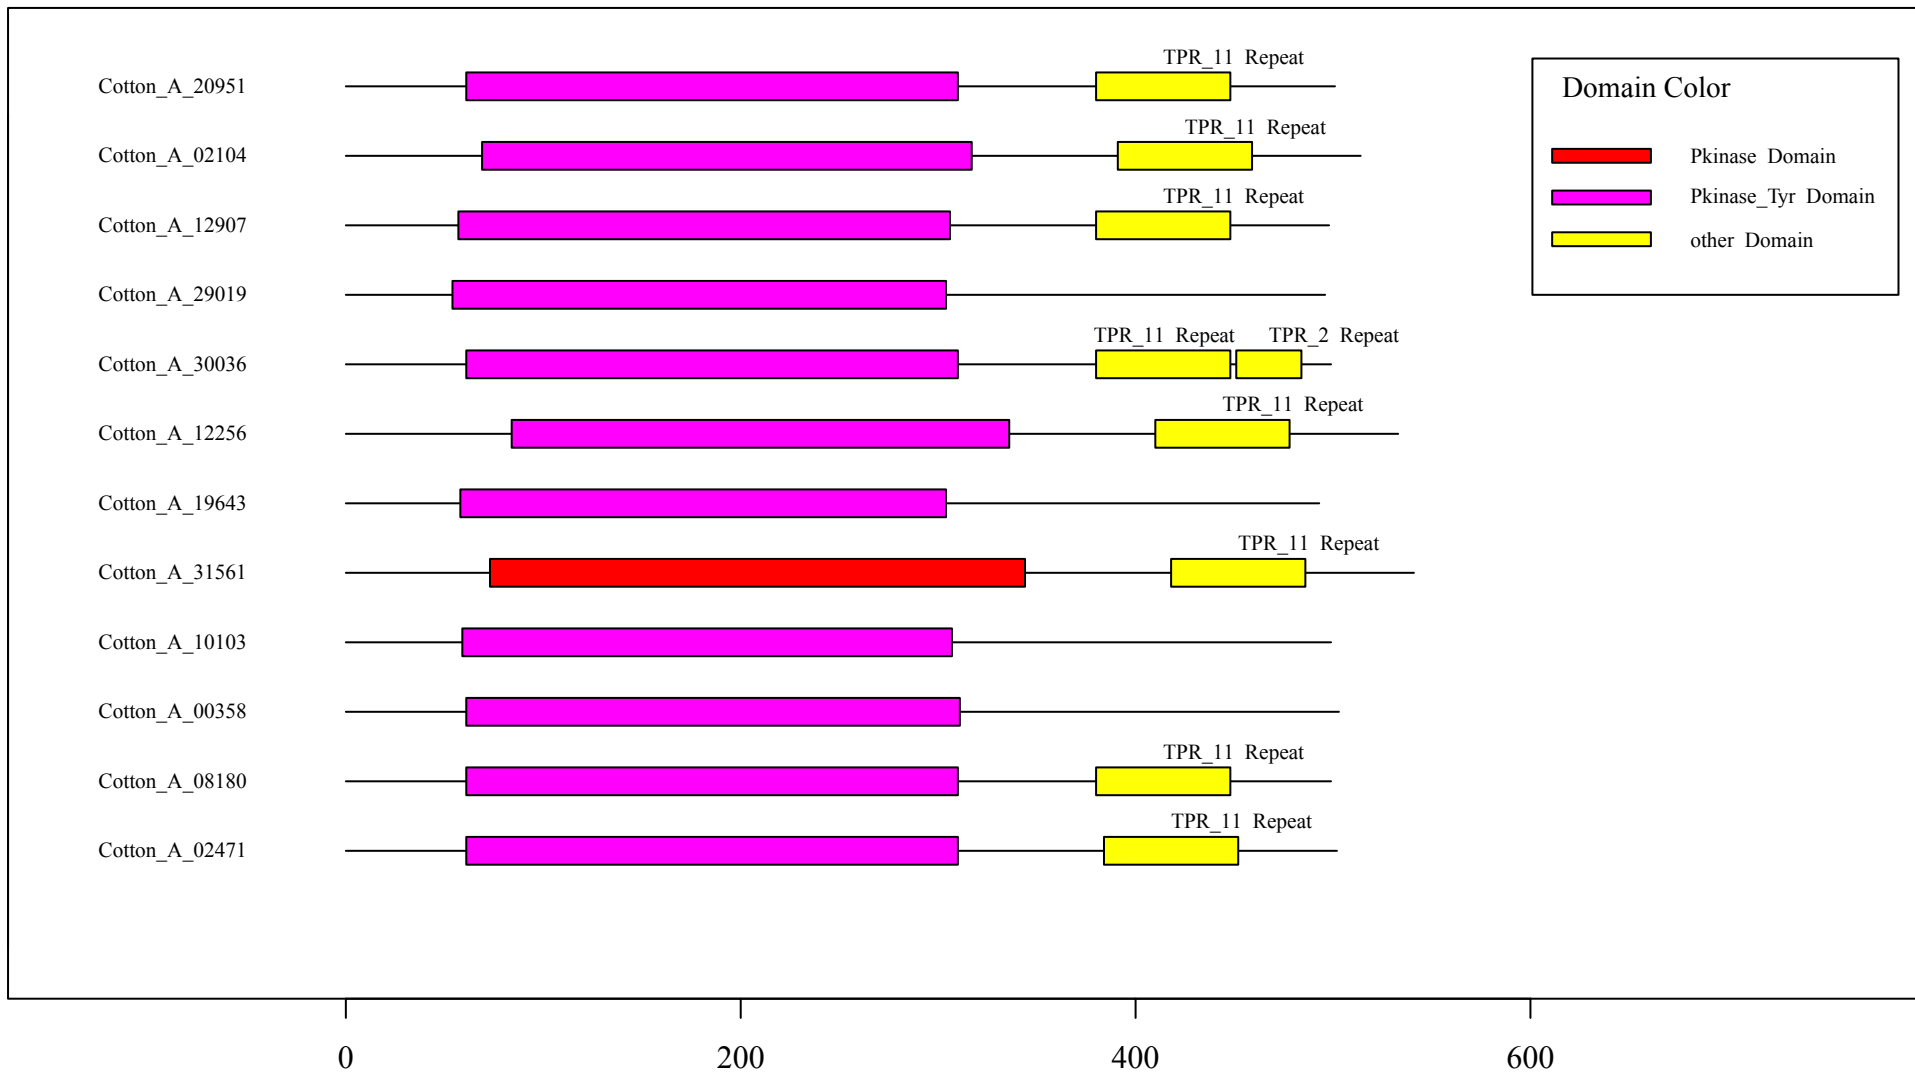

# G.ar RLK-Pelle\_RLCK-XII-2 domain diagram (all)

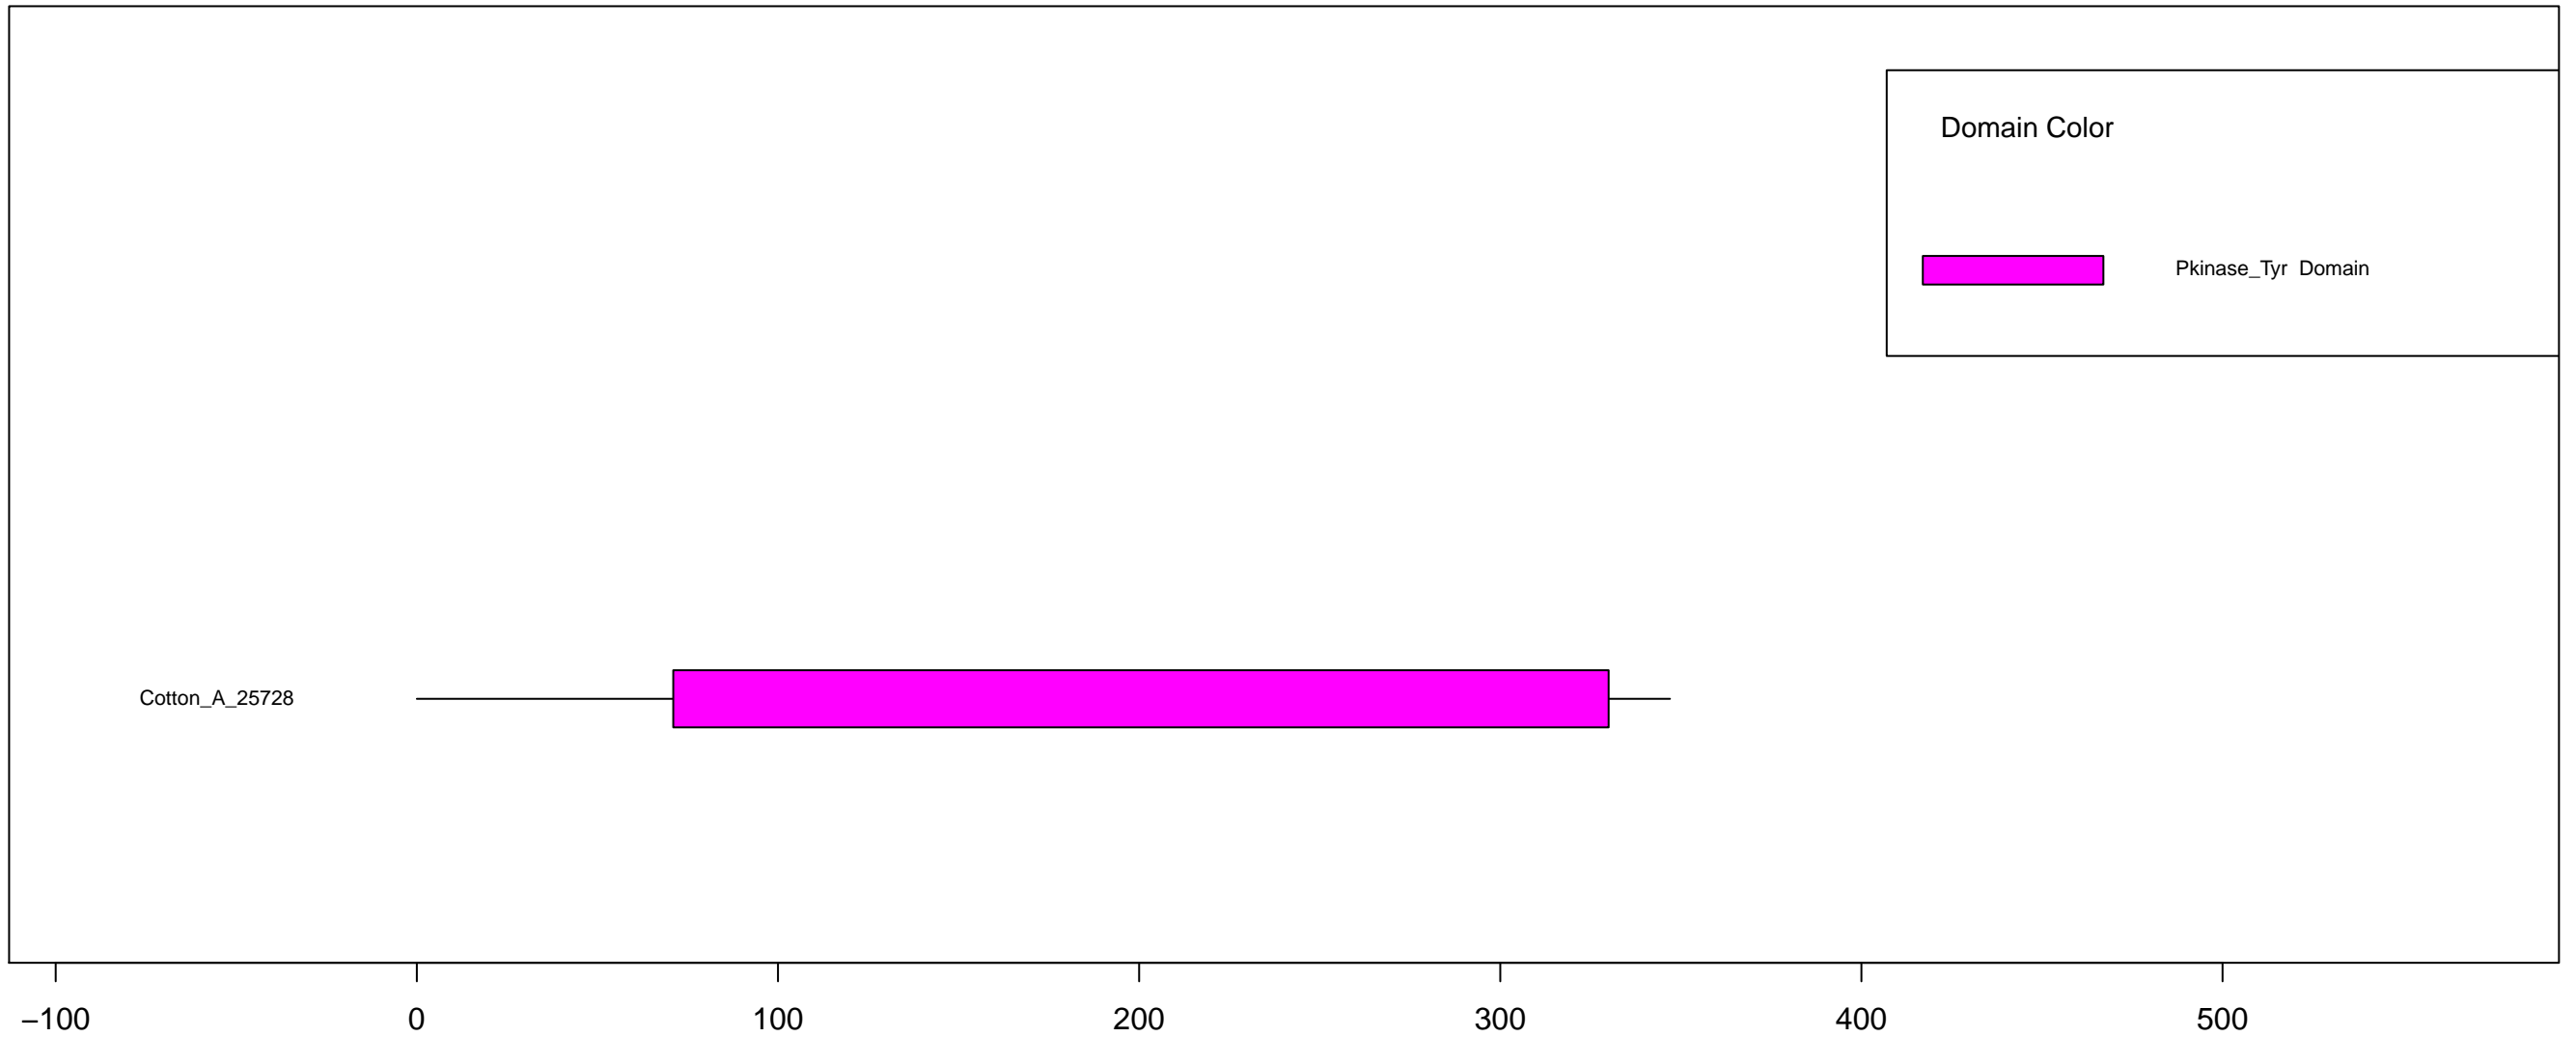

# G.ar RLK-Pelle\_RLCK-XIII domain diagram (all)

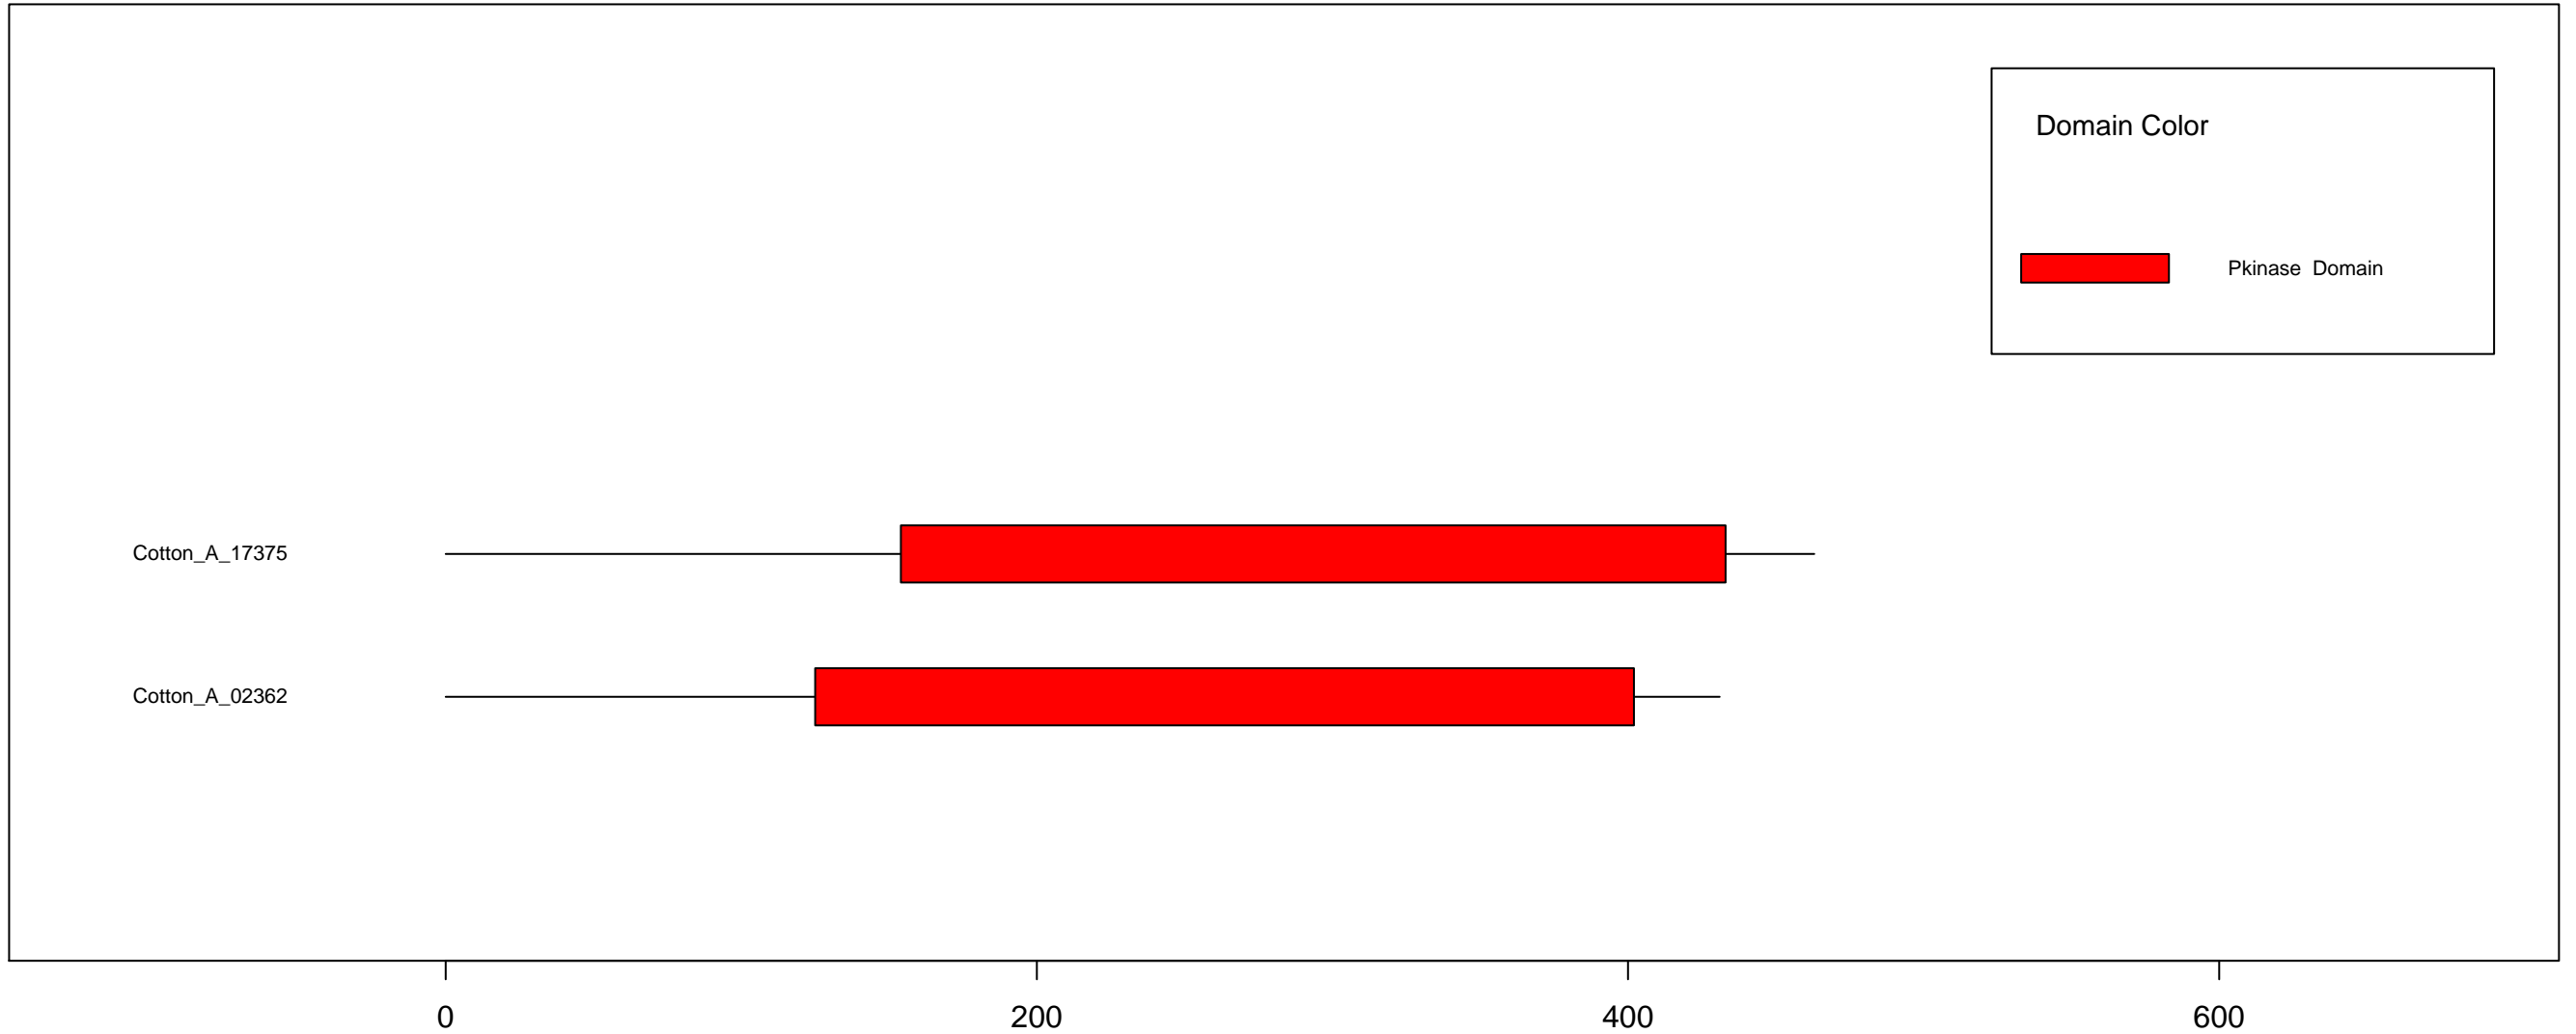

### G.ar RLK-Pelle\_RLCK-XI domain diagram (all)

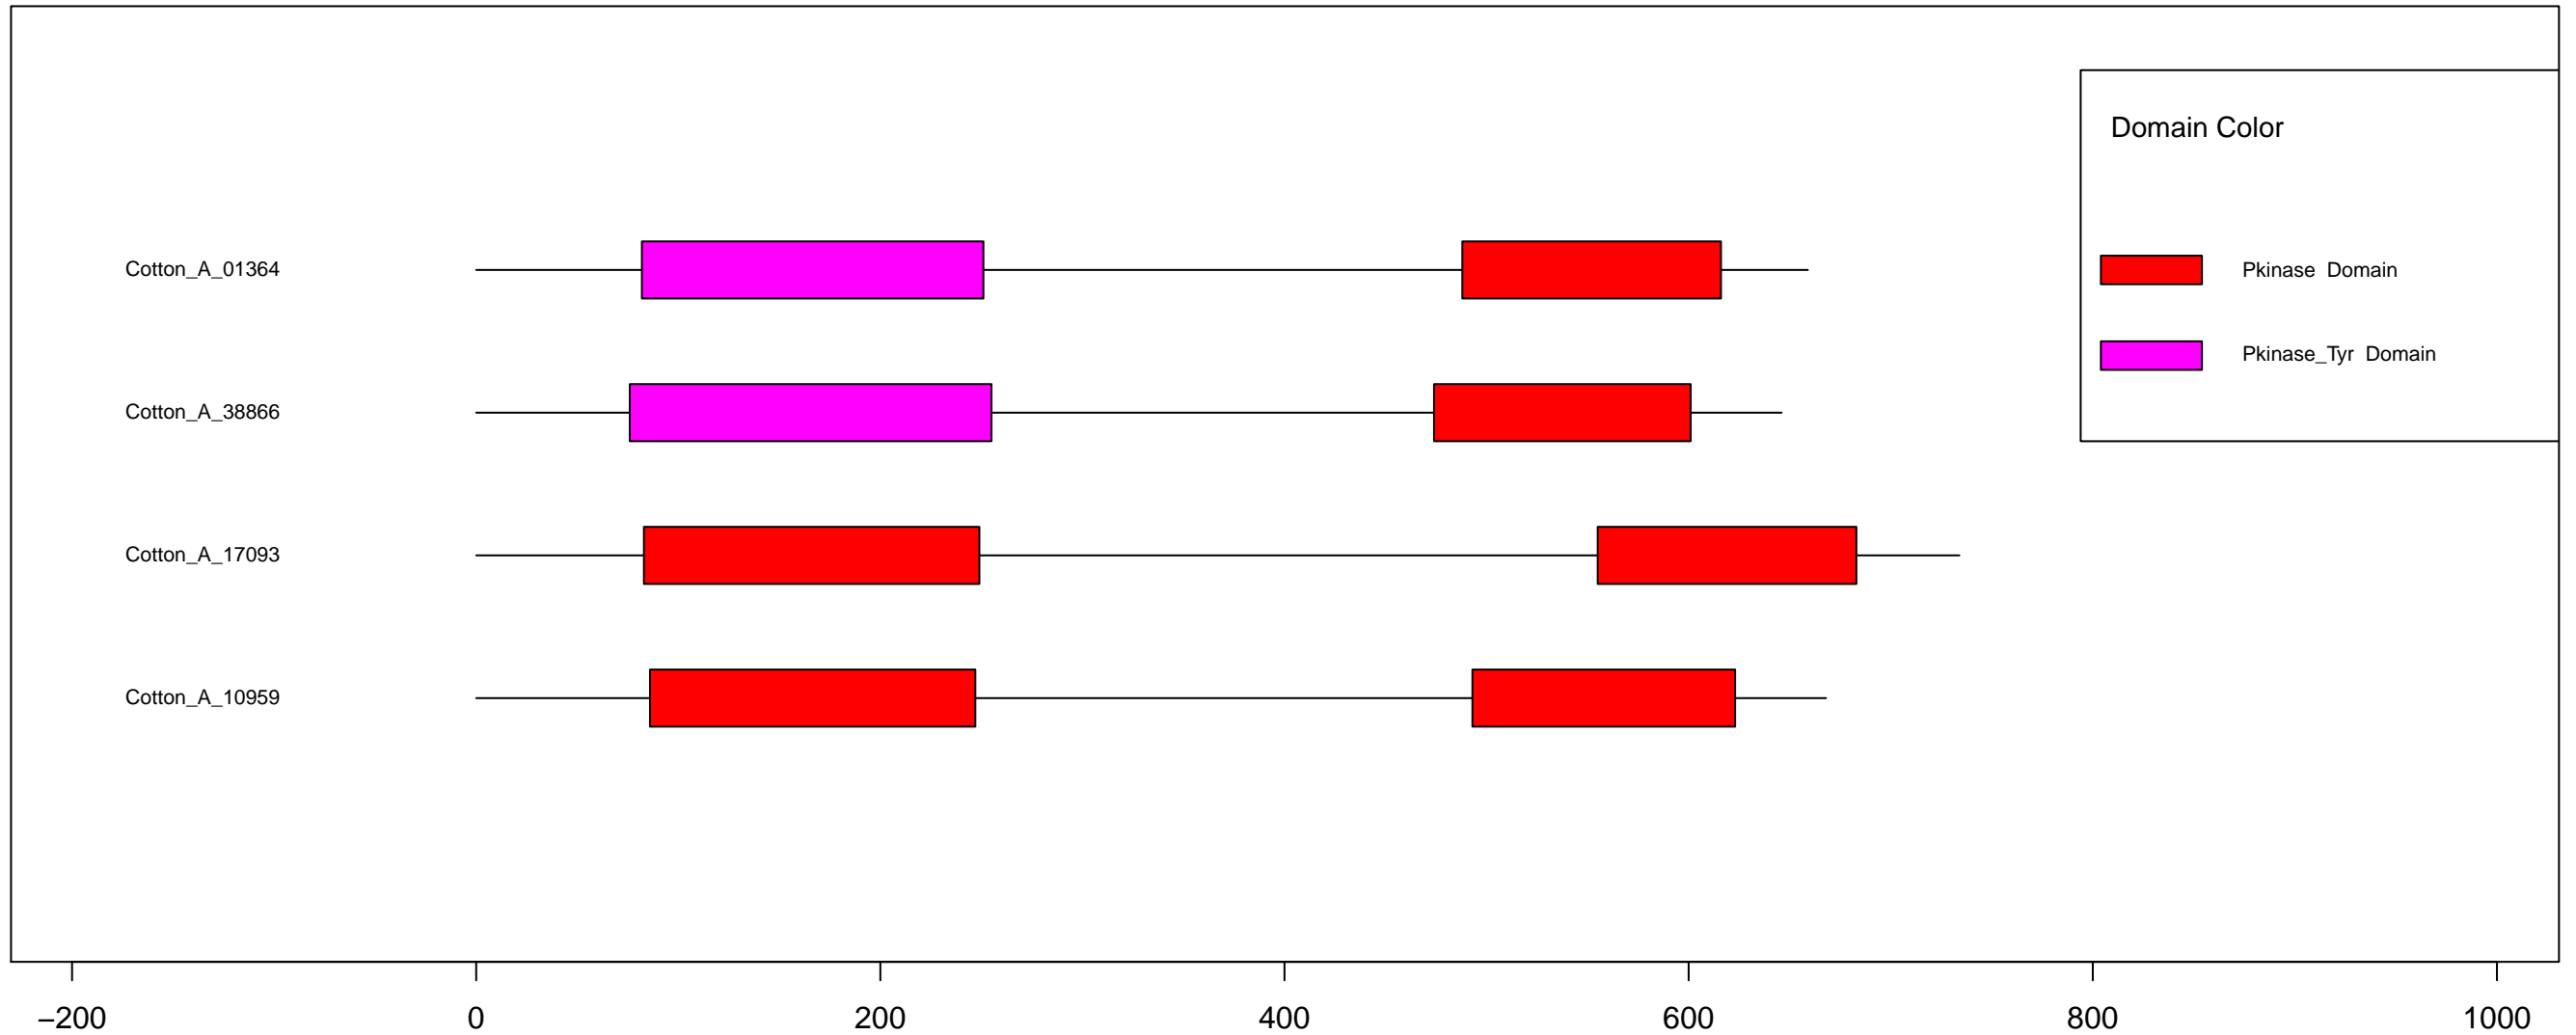

# G.ar RLK-Pelle\_RLCK-X domain diagram (all)

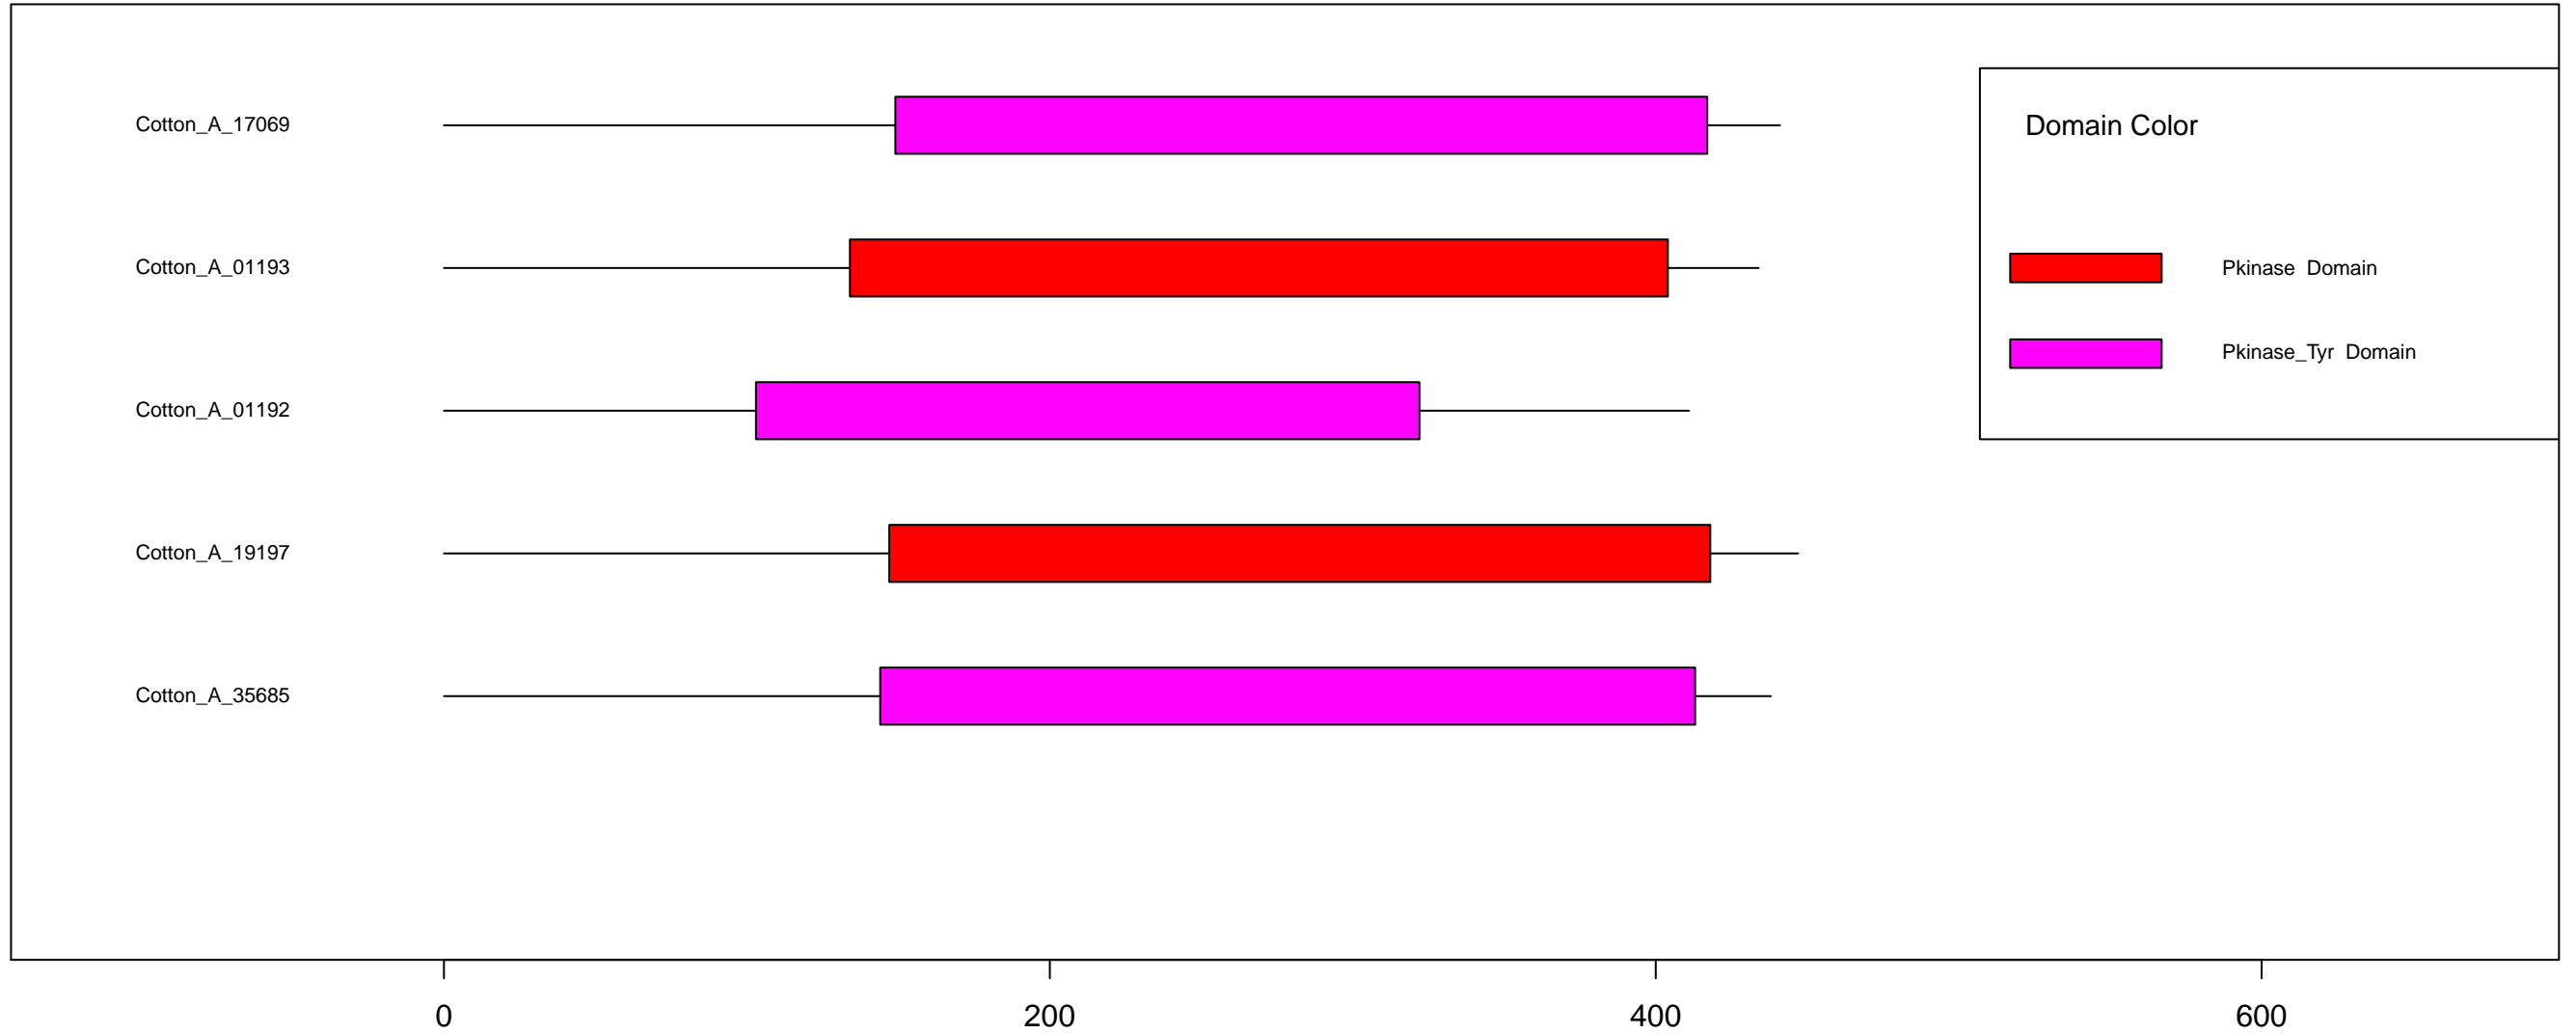

# G.ar RLK-Pelle\_RLCK-XVI domain diagram (all)

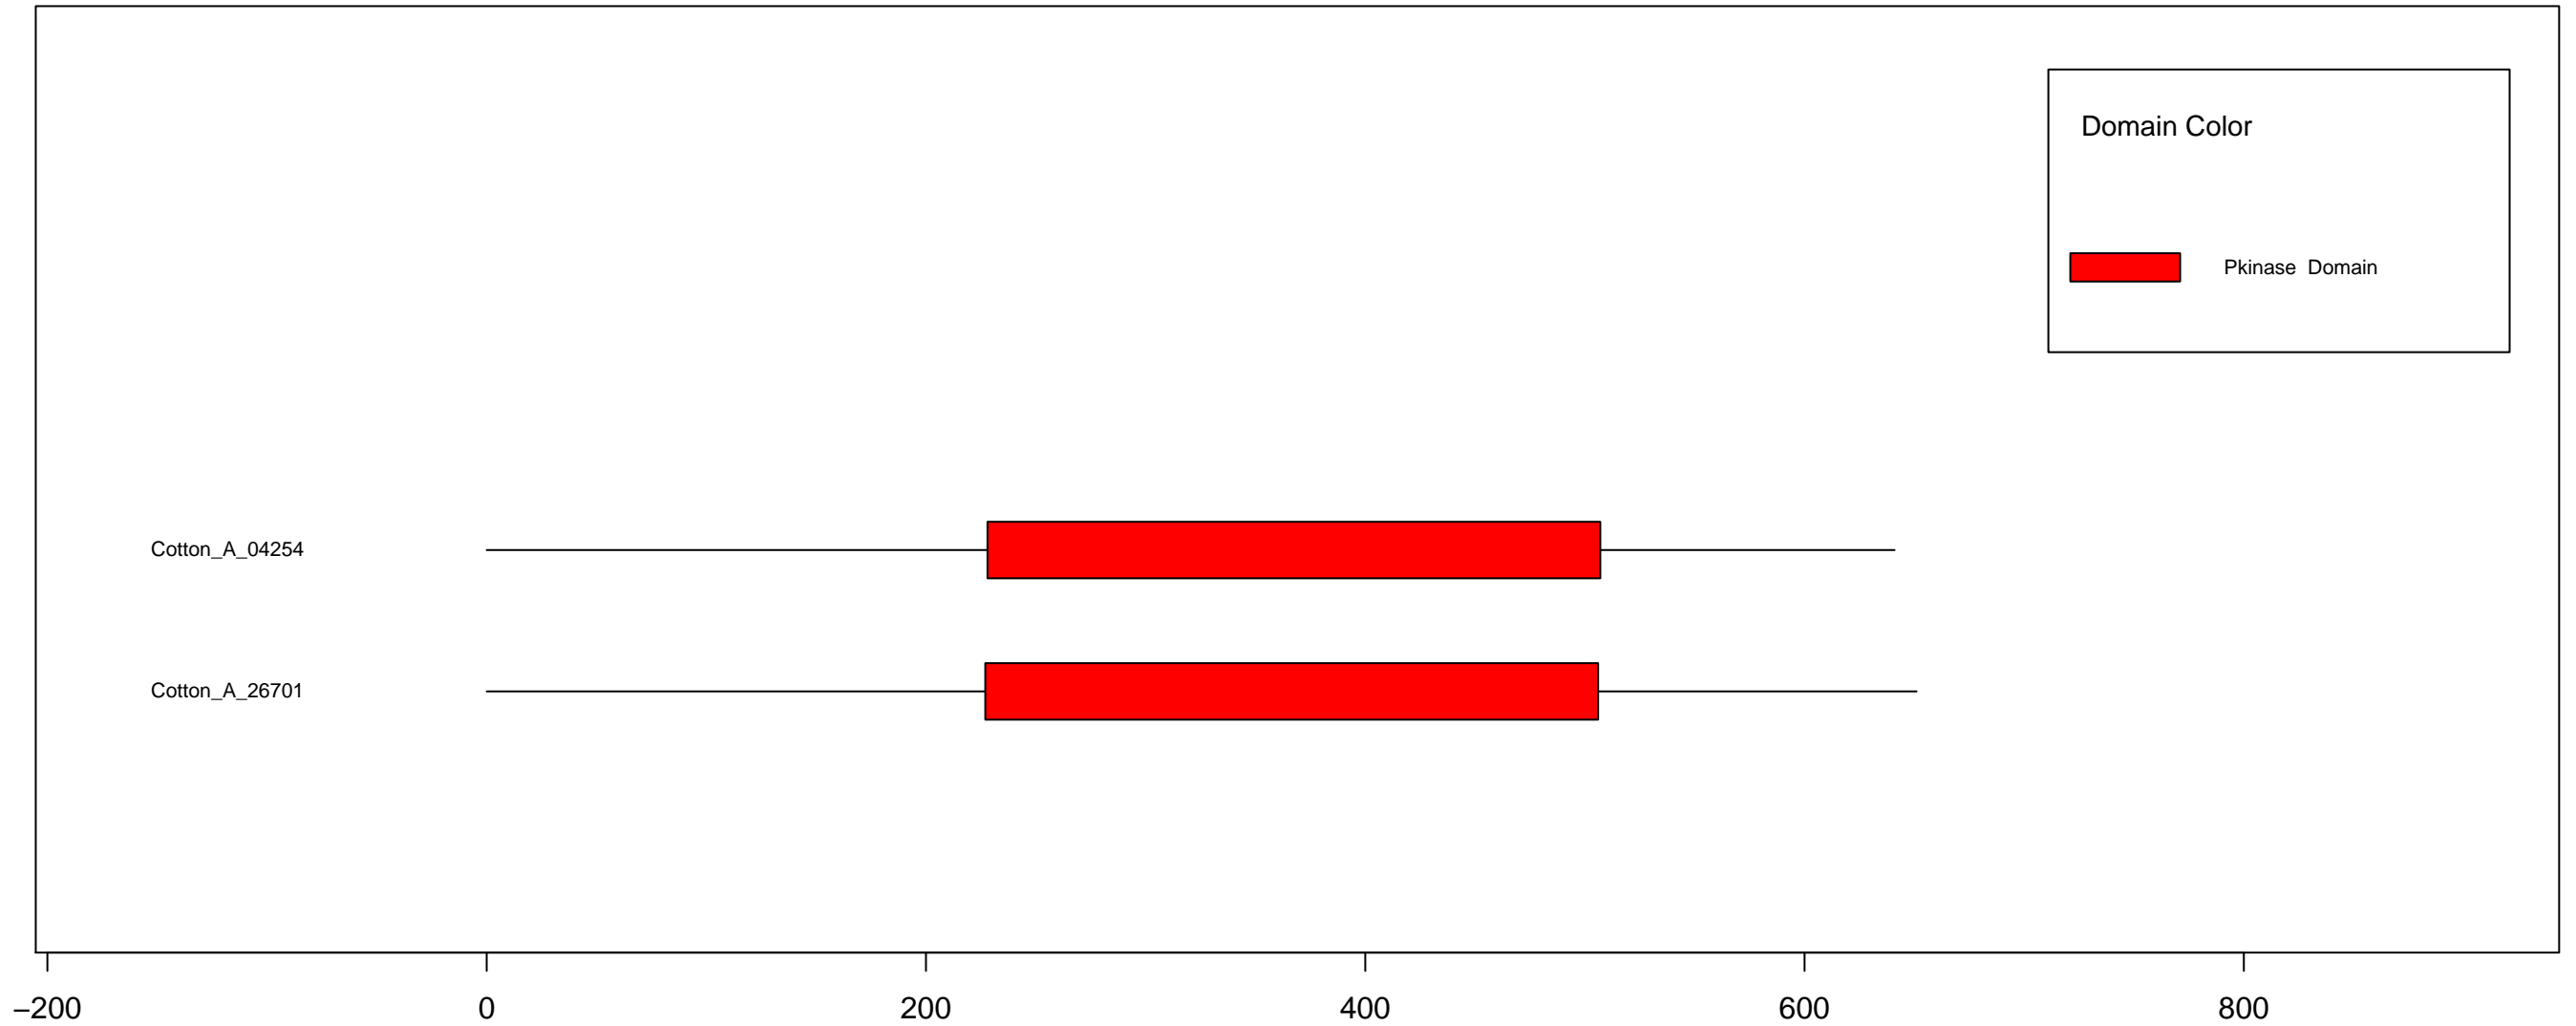

# G.ar RLK-Pelle\_RLCK-XV domain diagram (all)

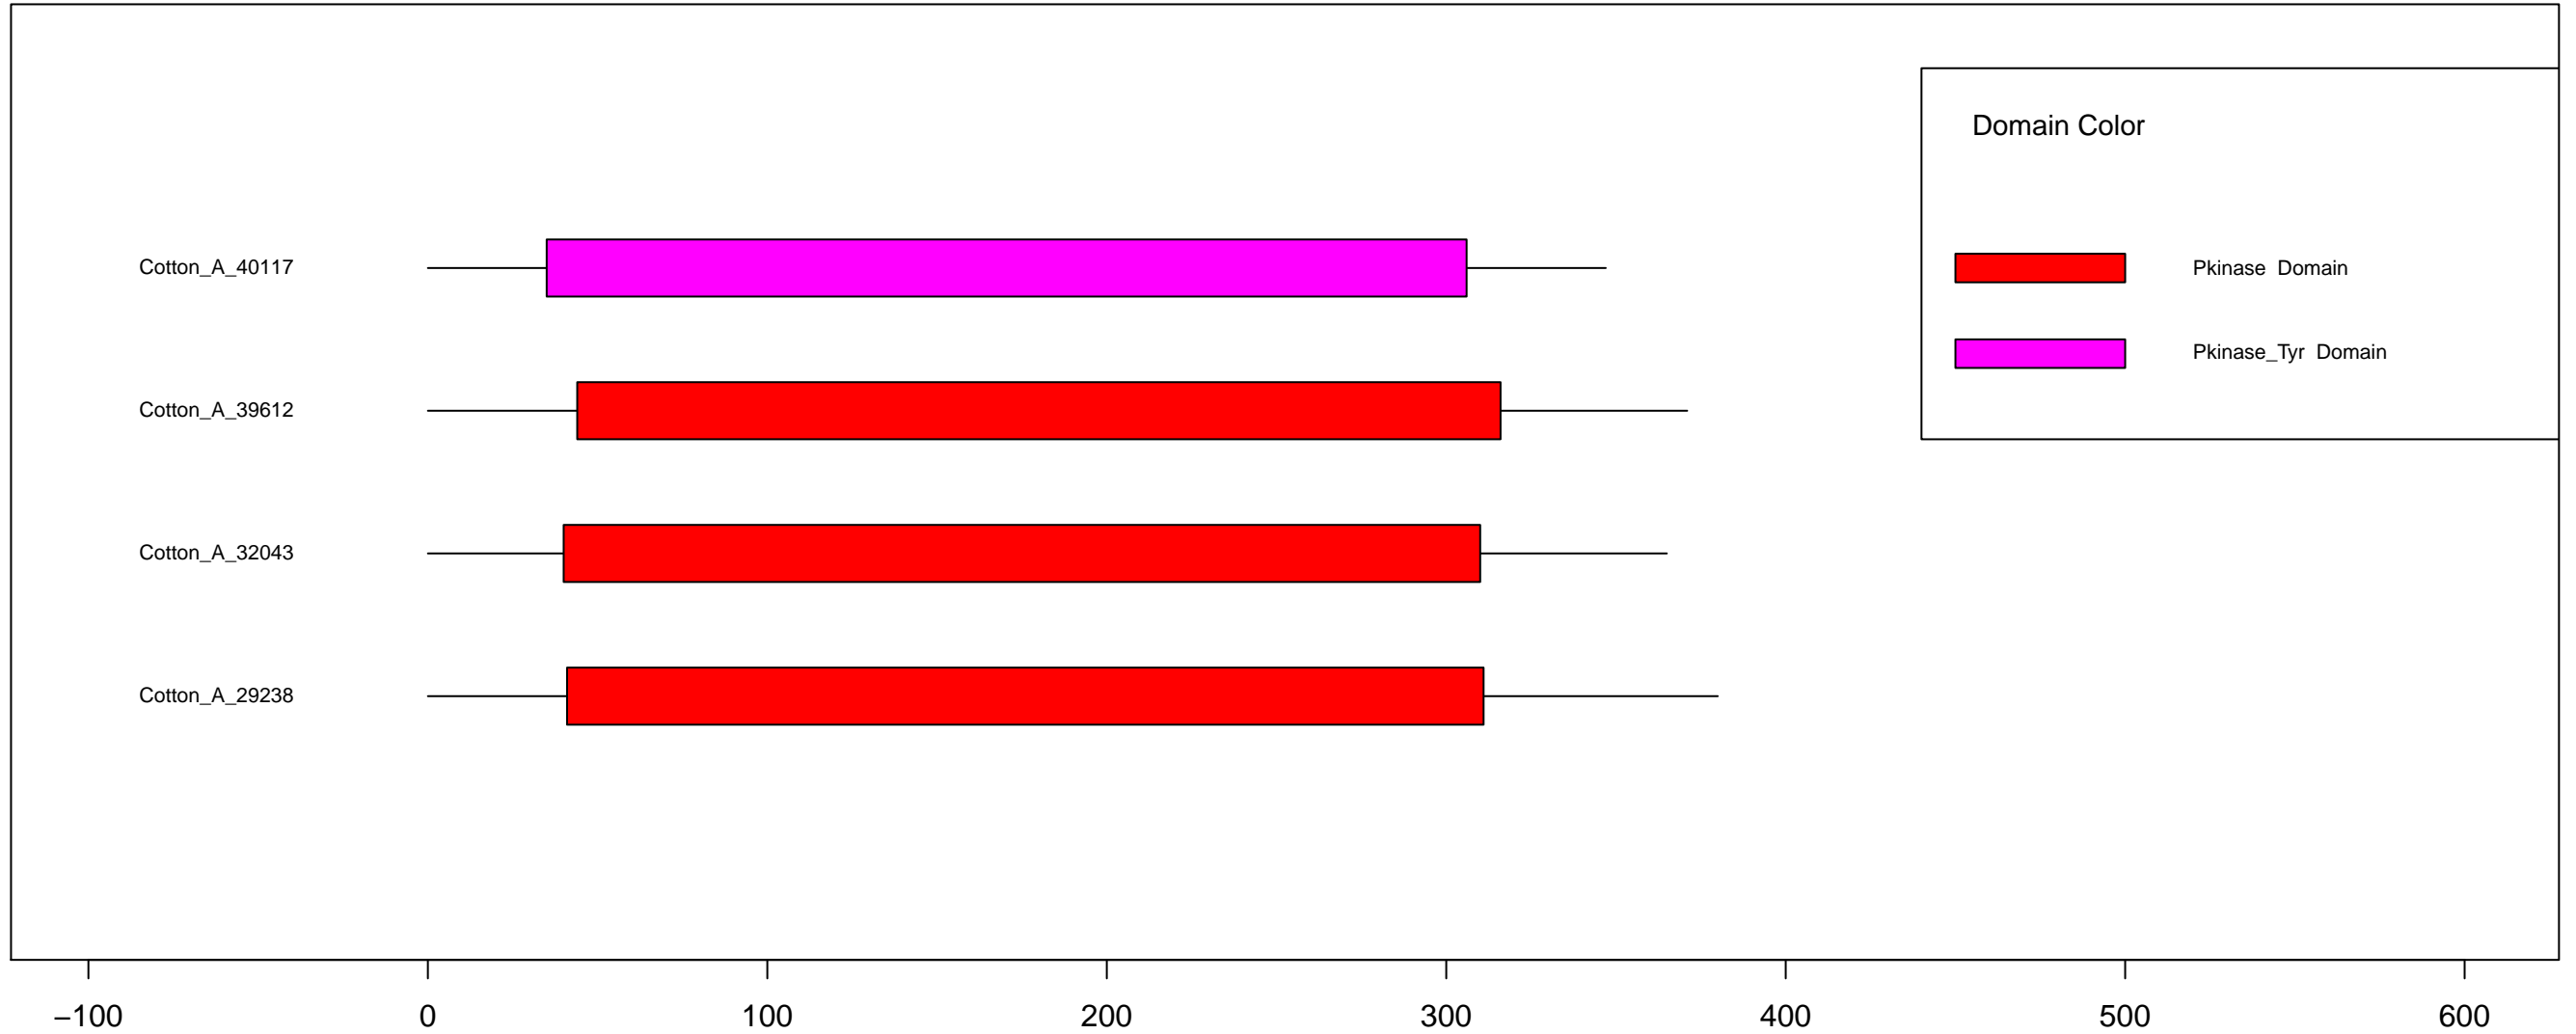

### G.ar RLK-Pelle\_SD-2b domain diagram (part 1)

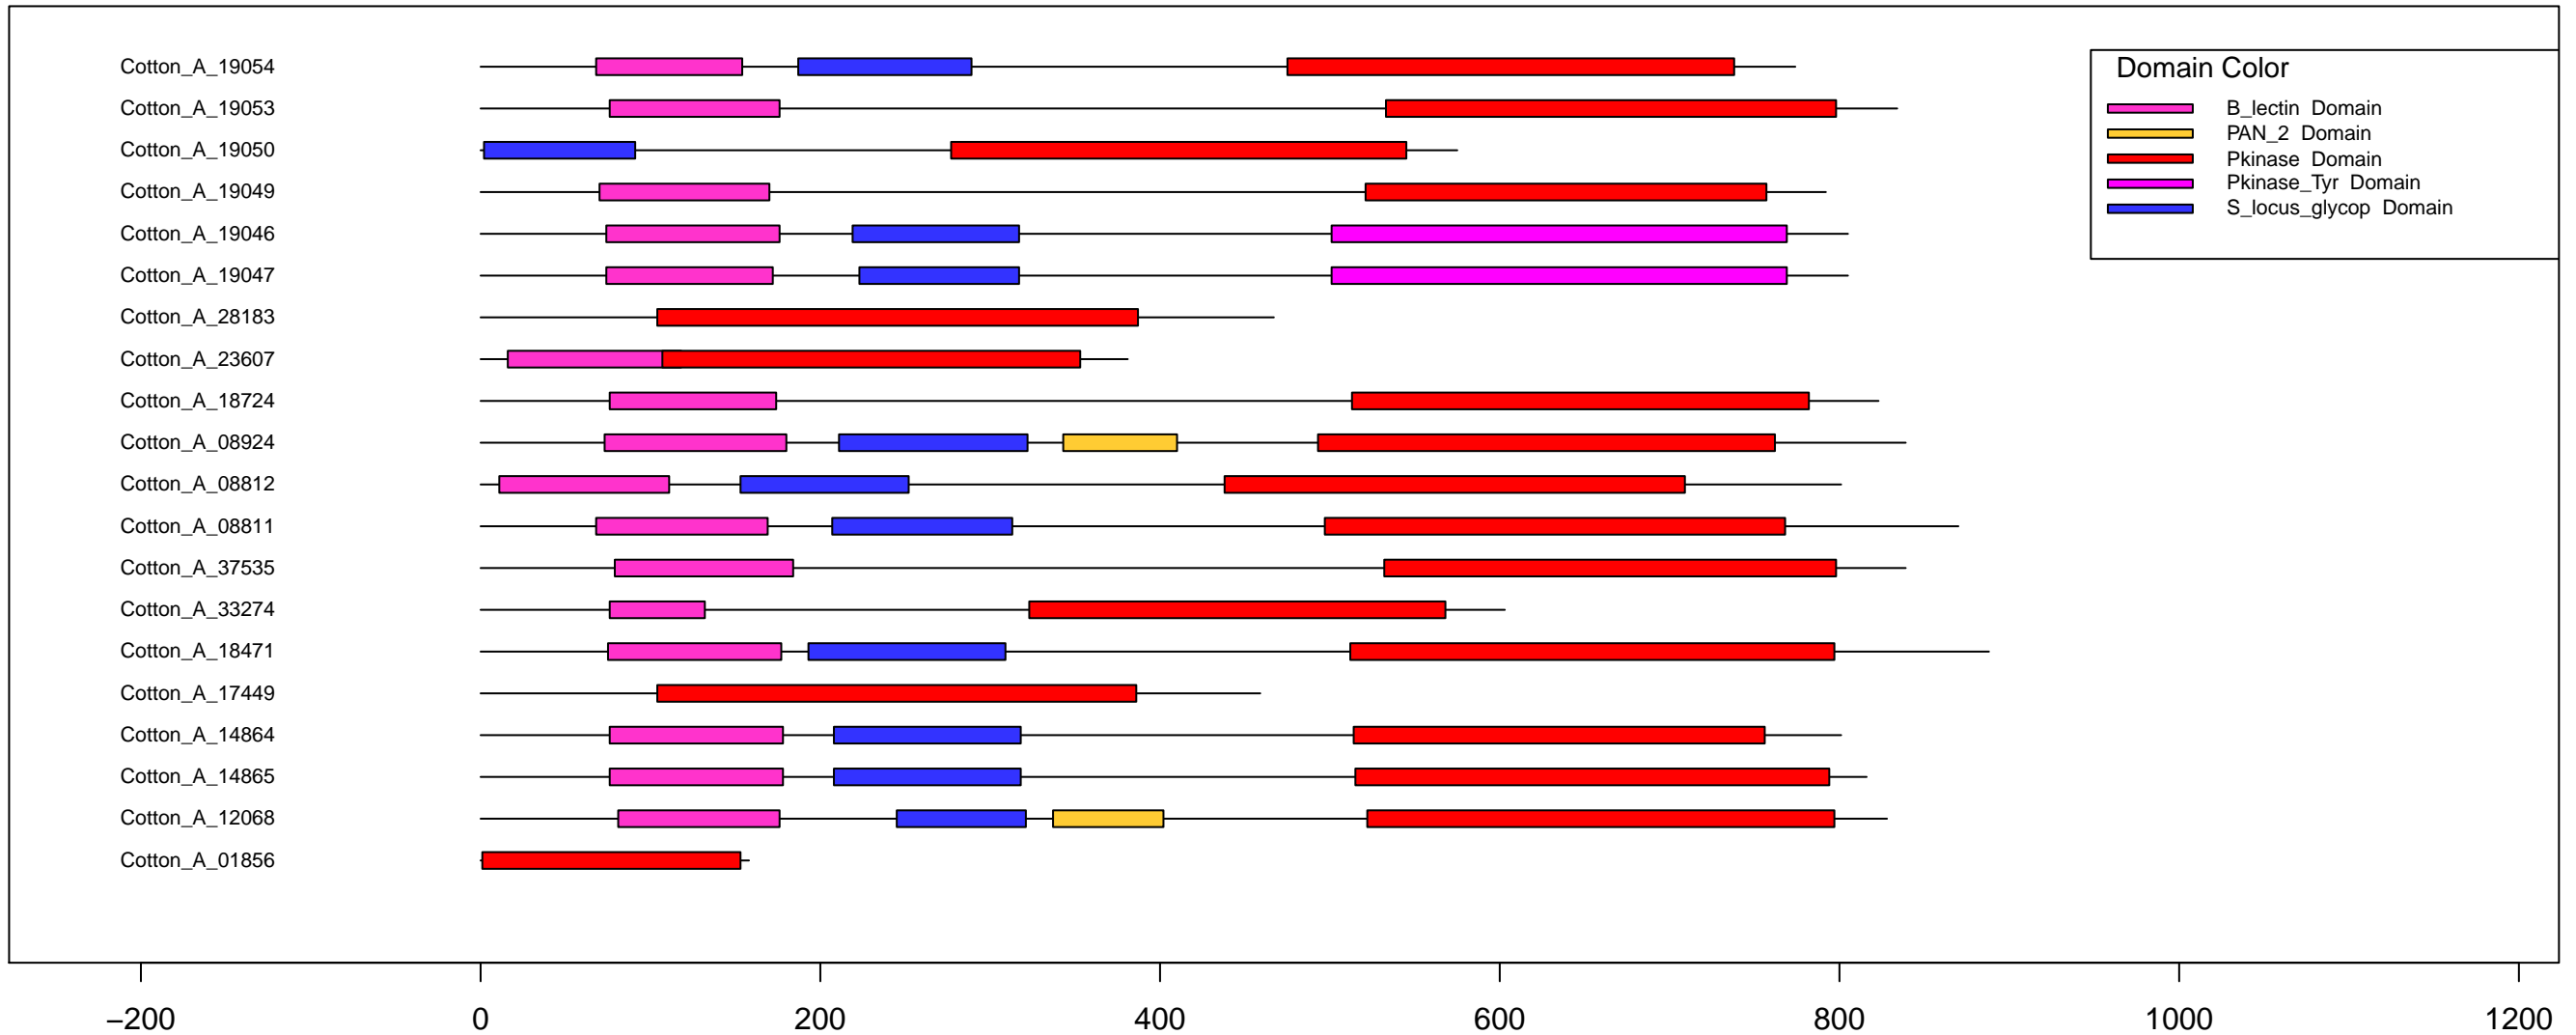



### G.ar RLK-Pelle\_SD-2b domain diagram (part 2)

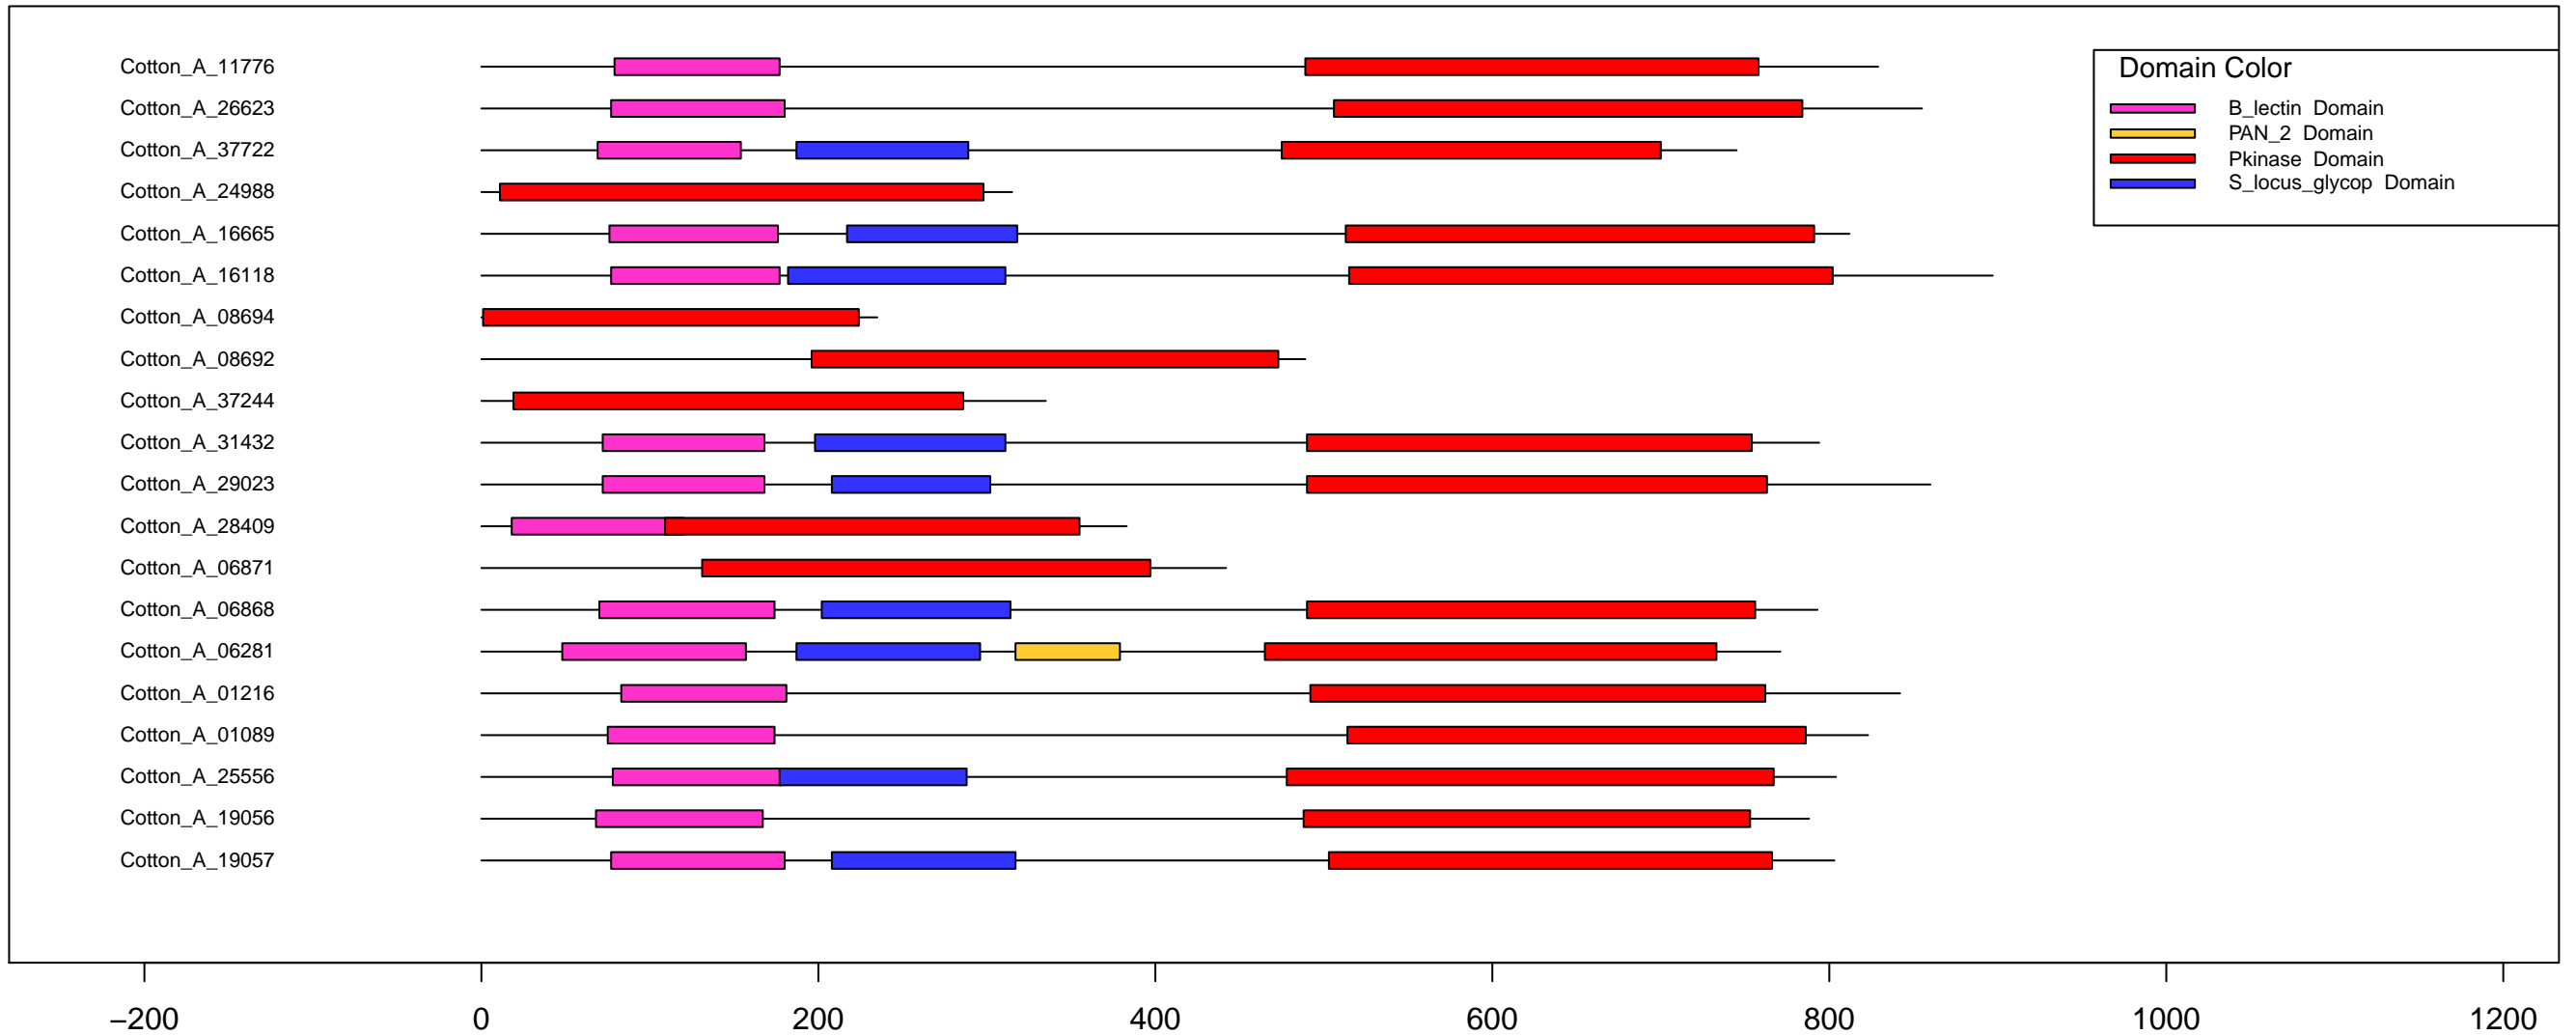

### G.ar RLK-Pelle\_SD-2b domain diagram (part 3)

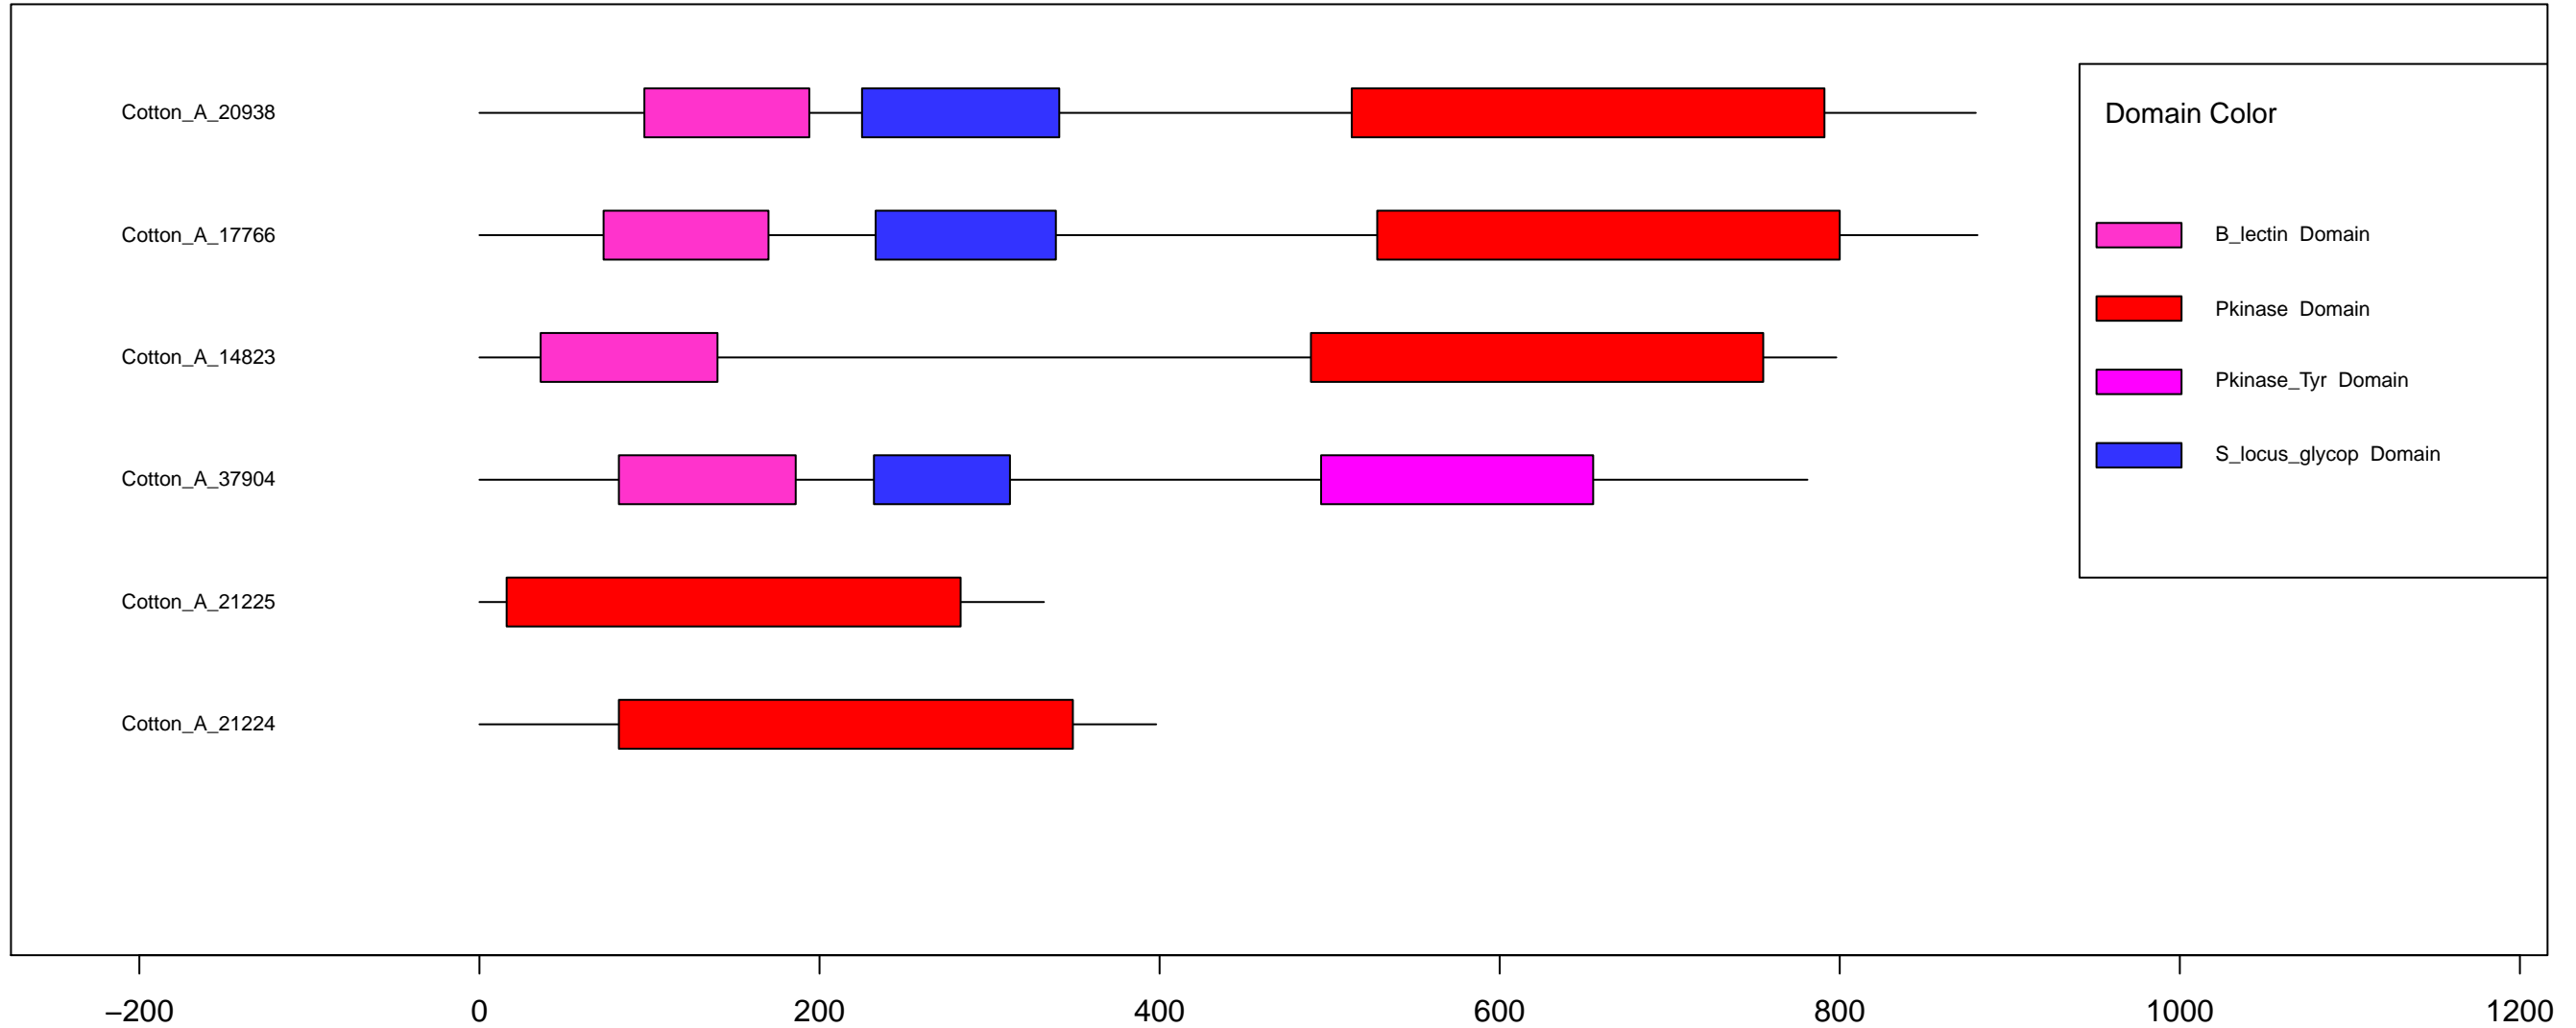

# G.ar RLK-Pelle\_Singleton domain diagram (all)

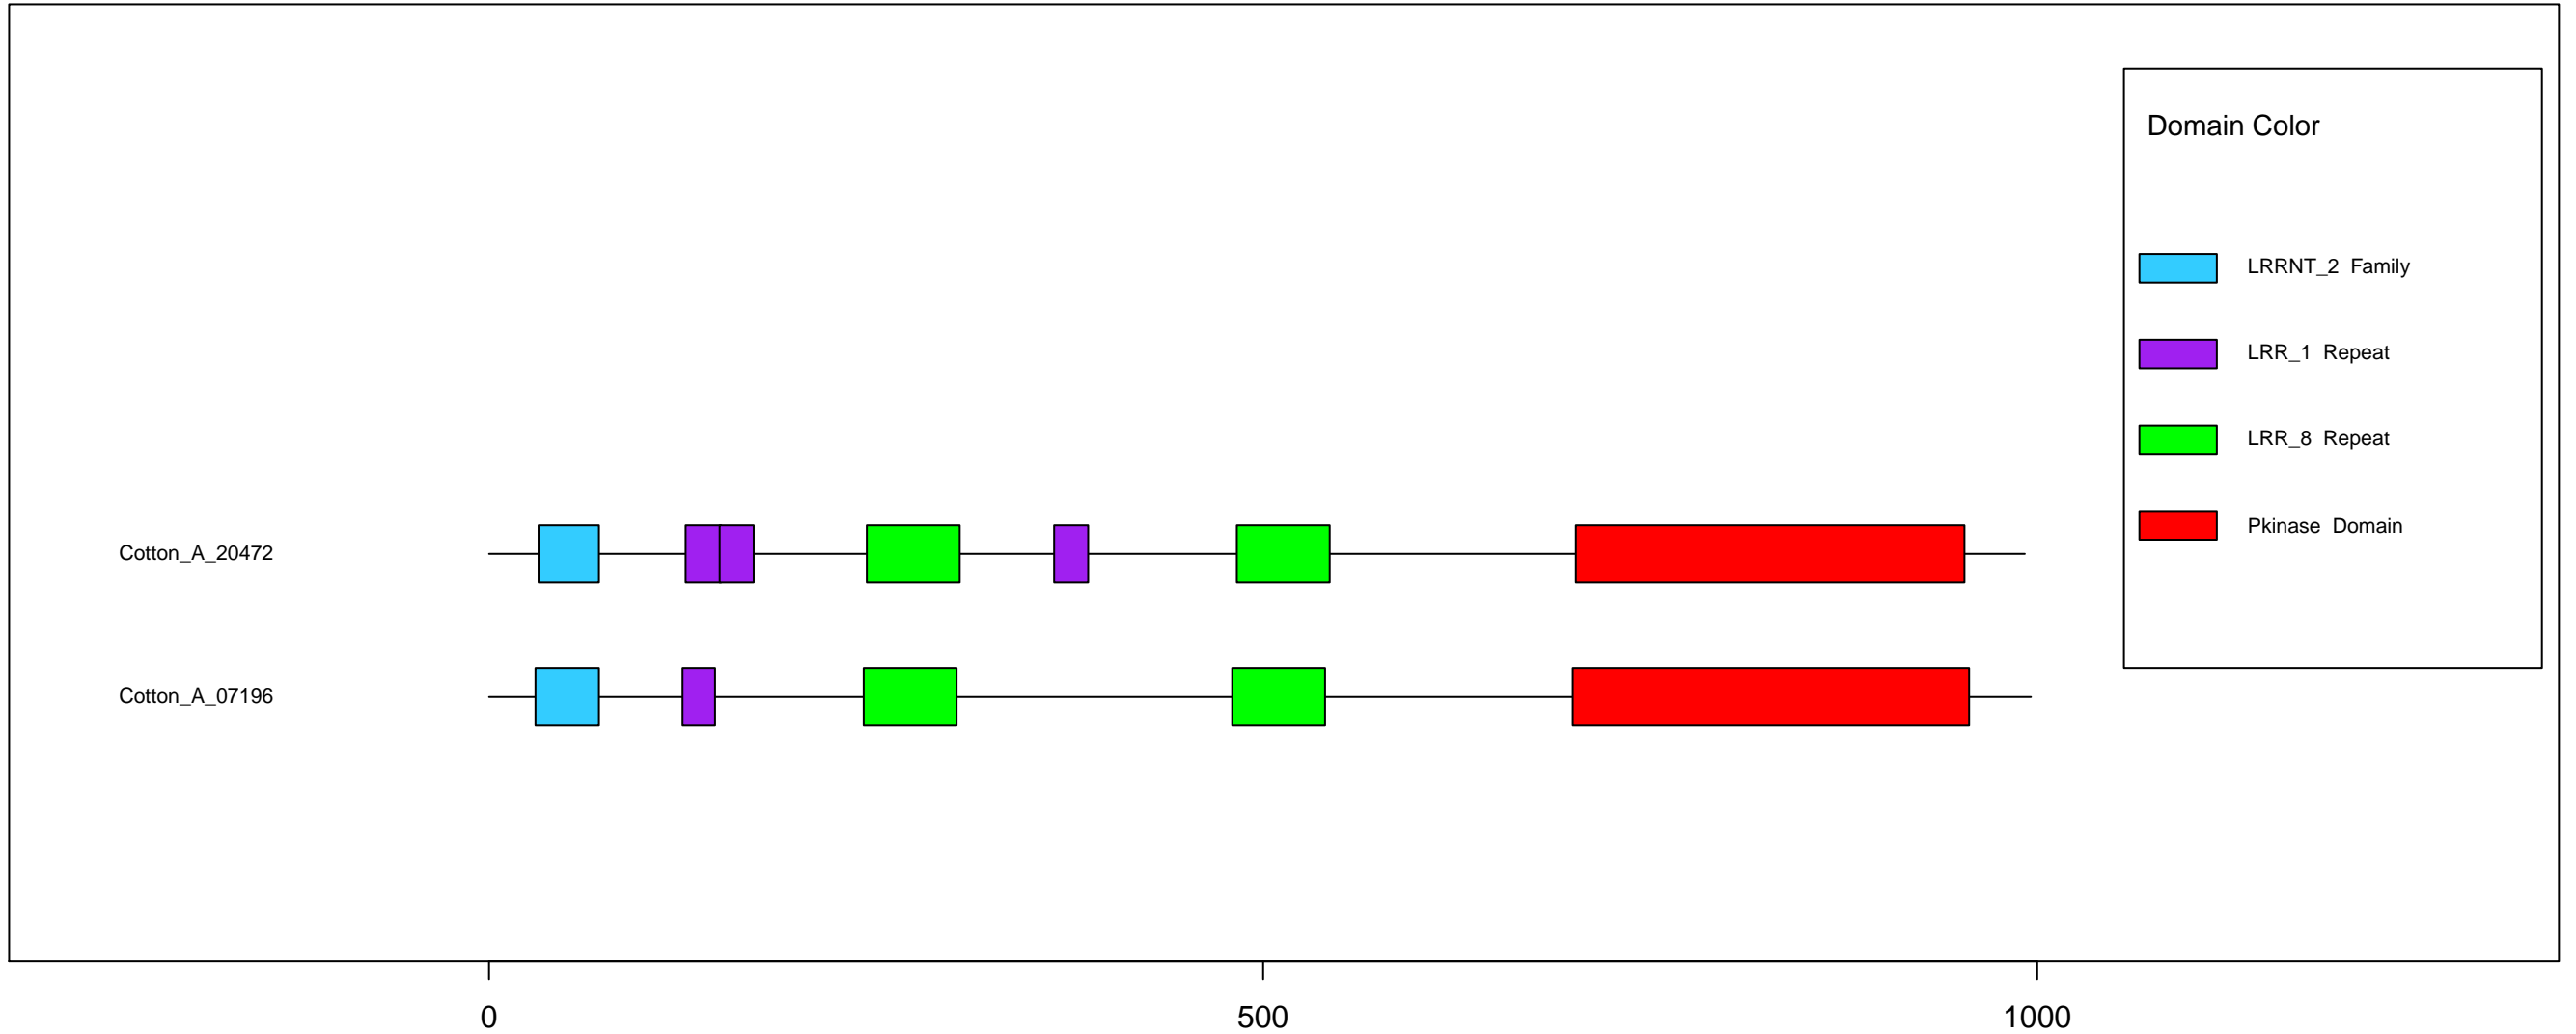

# G.ar RLK-Pelle\_URK-1 domain diagram (all)

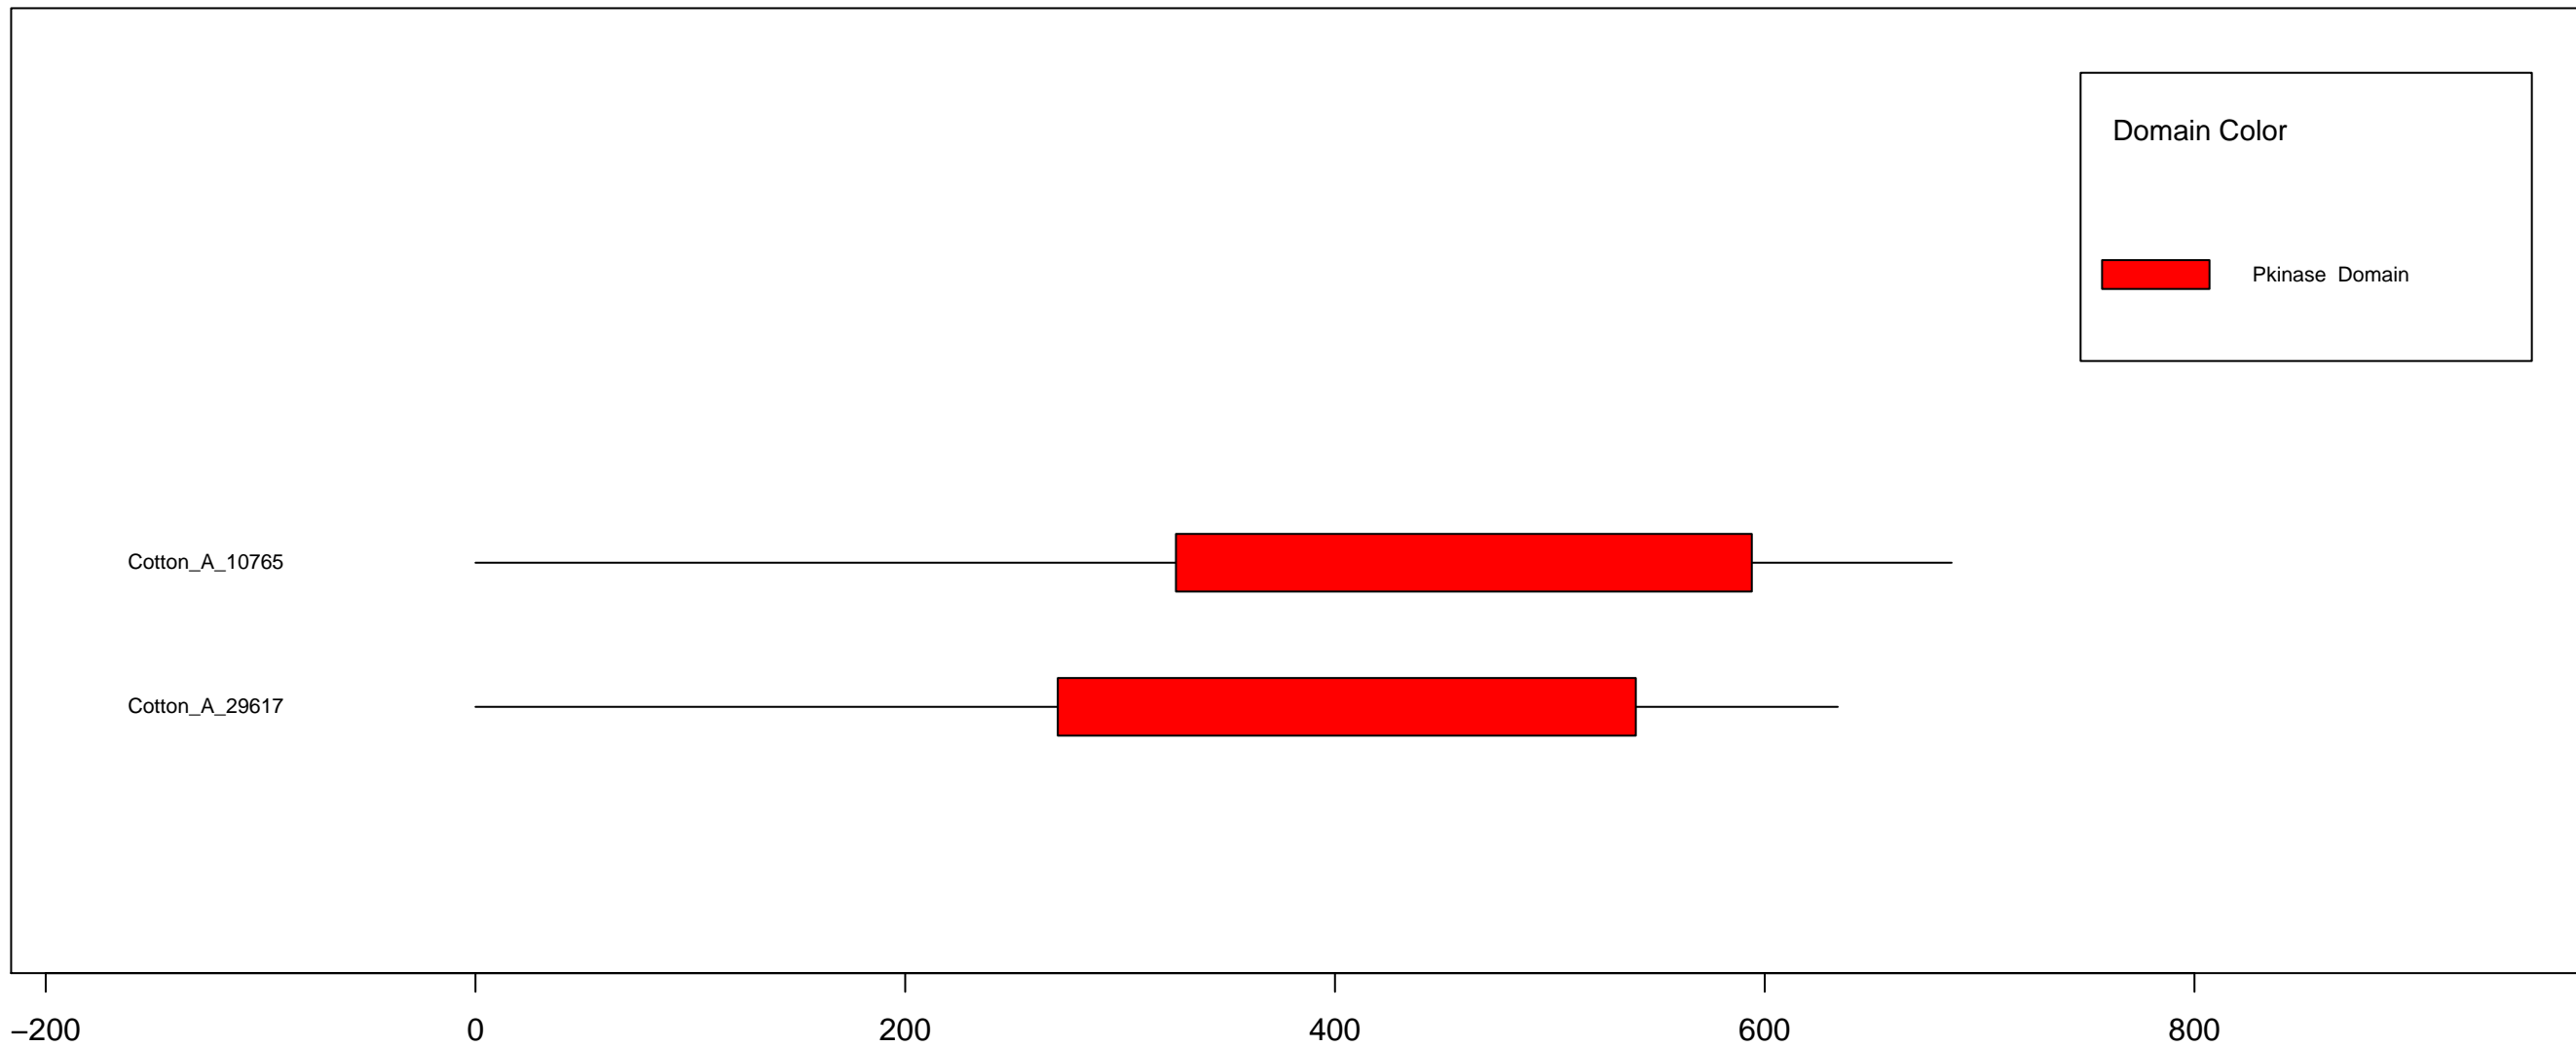

# G.ar RLK-Pelle\_URK-2 domain diagram (all)

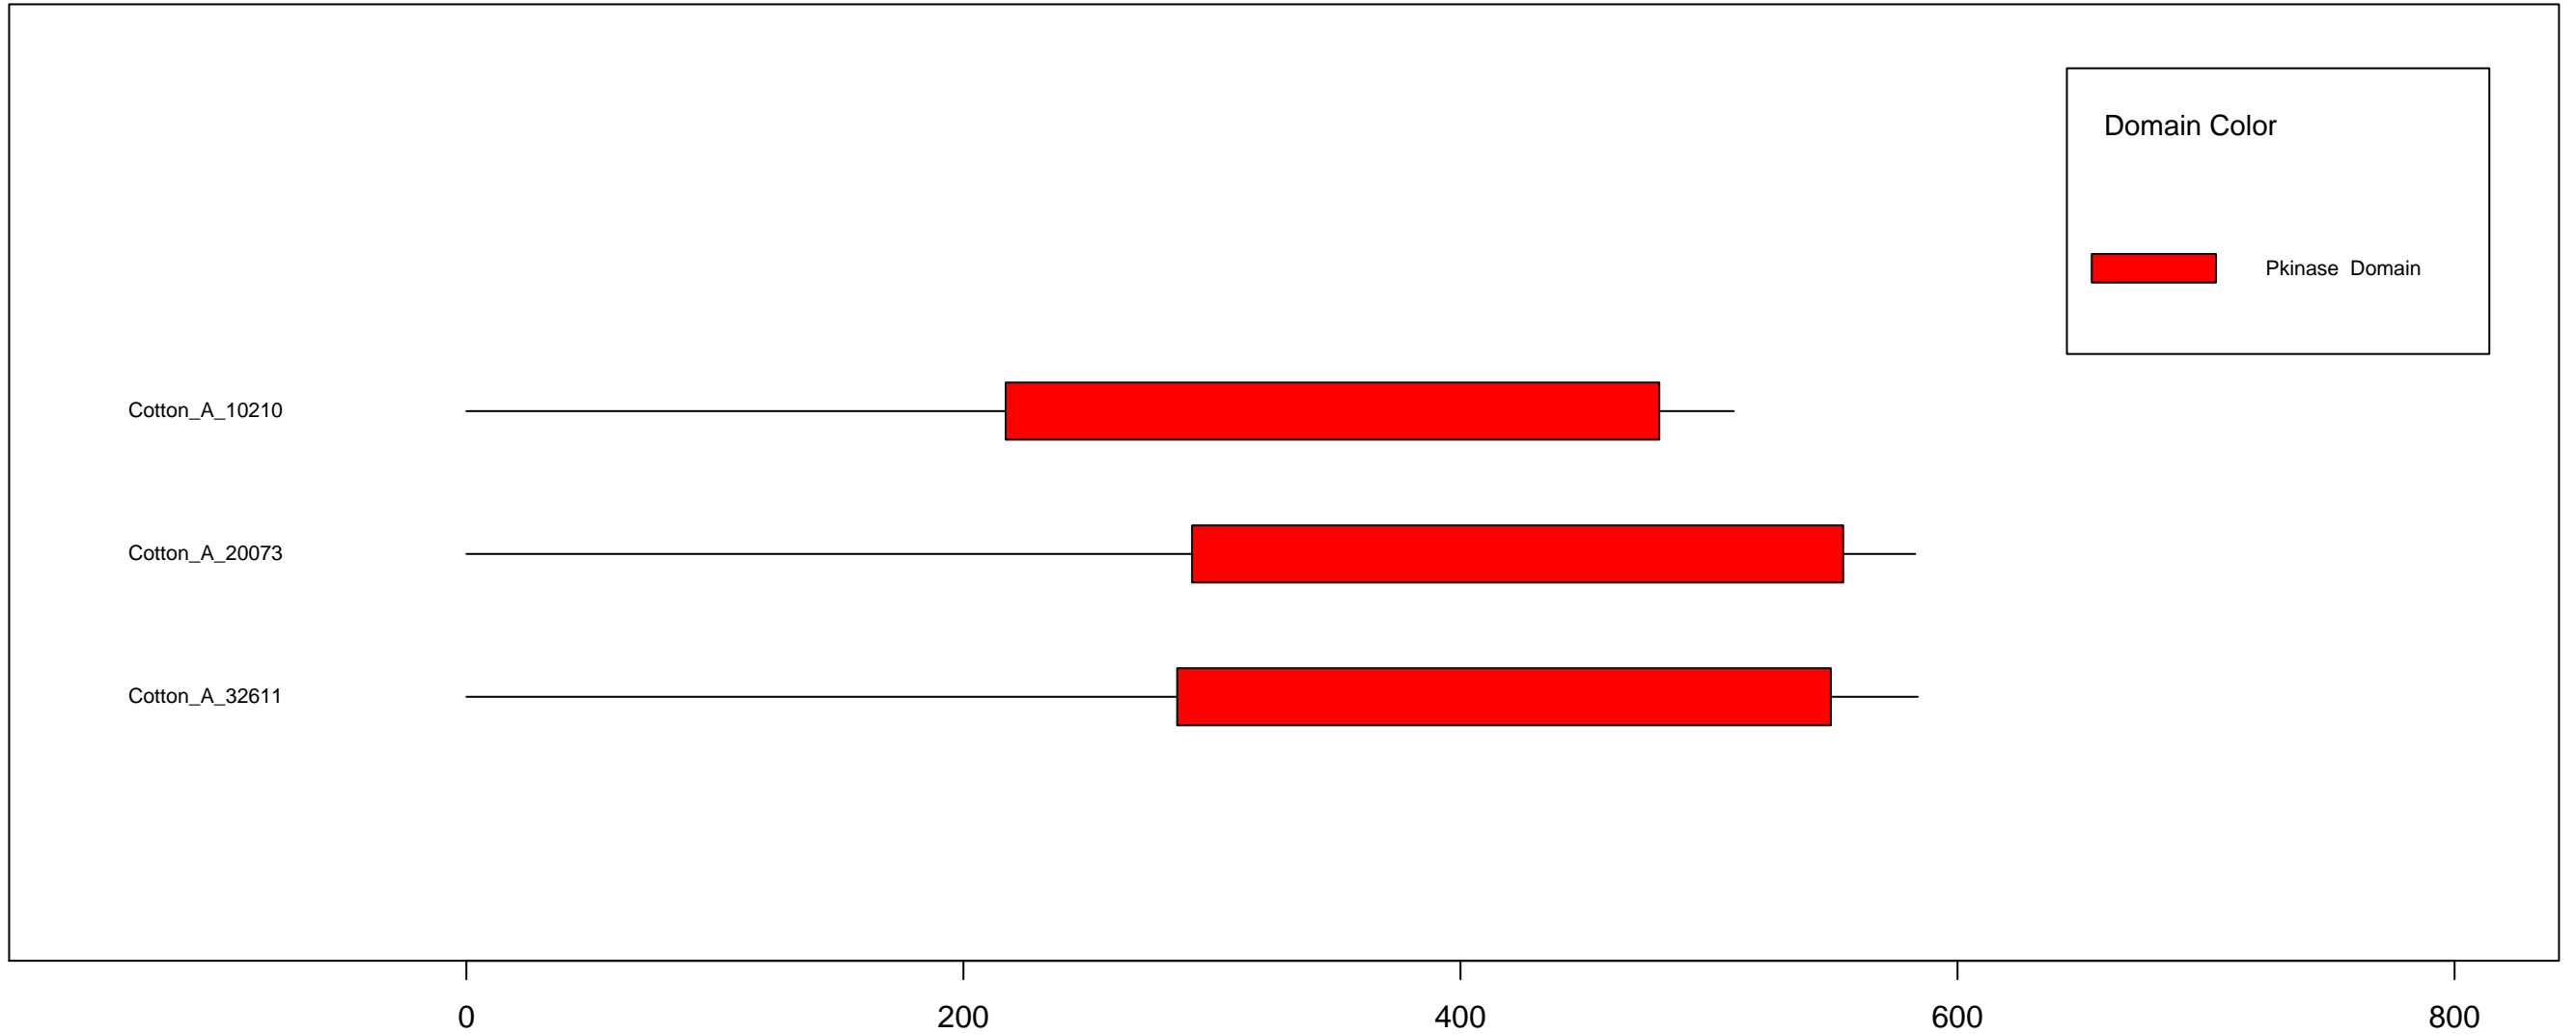

# G.ar RLK-Pelle\_URK-3 domain diagram (all)

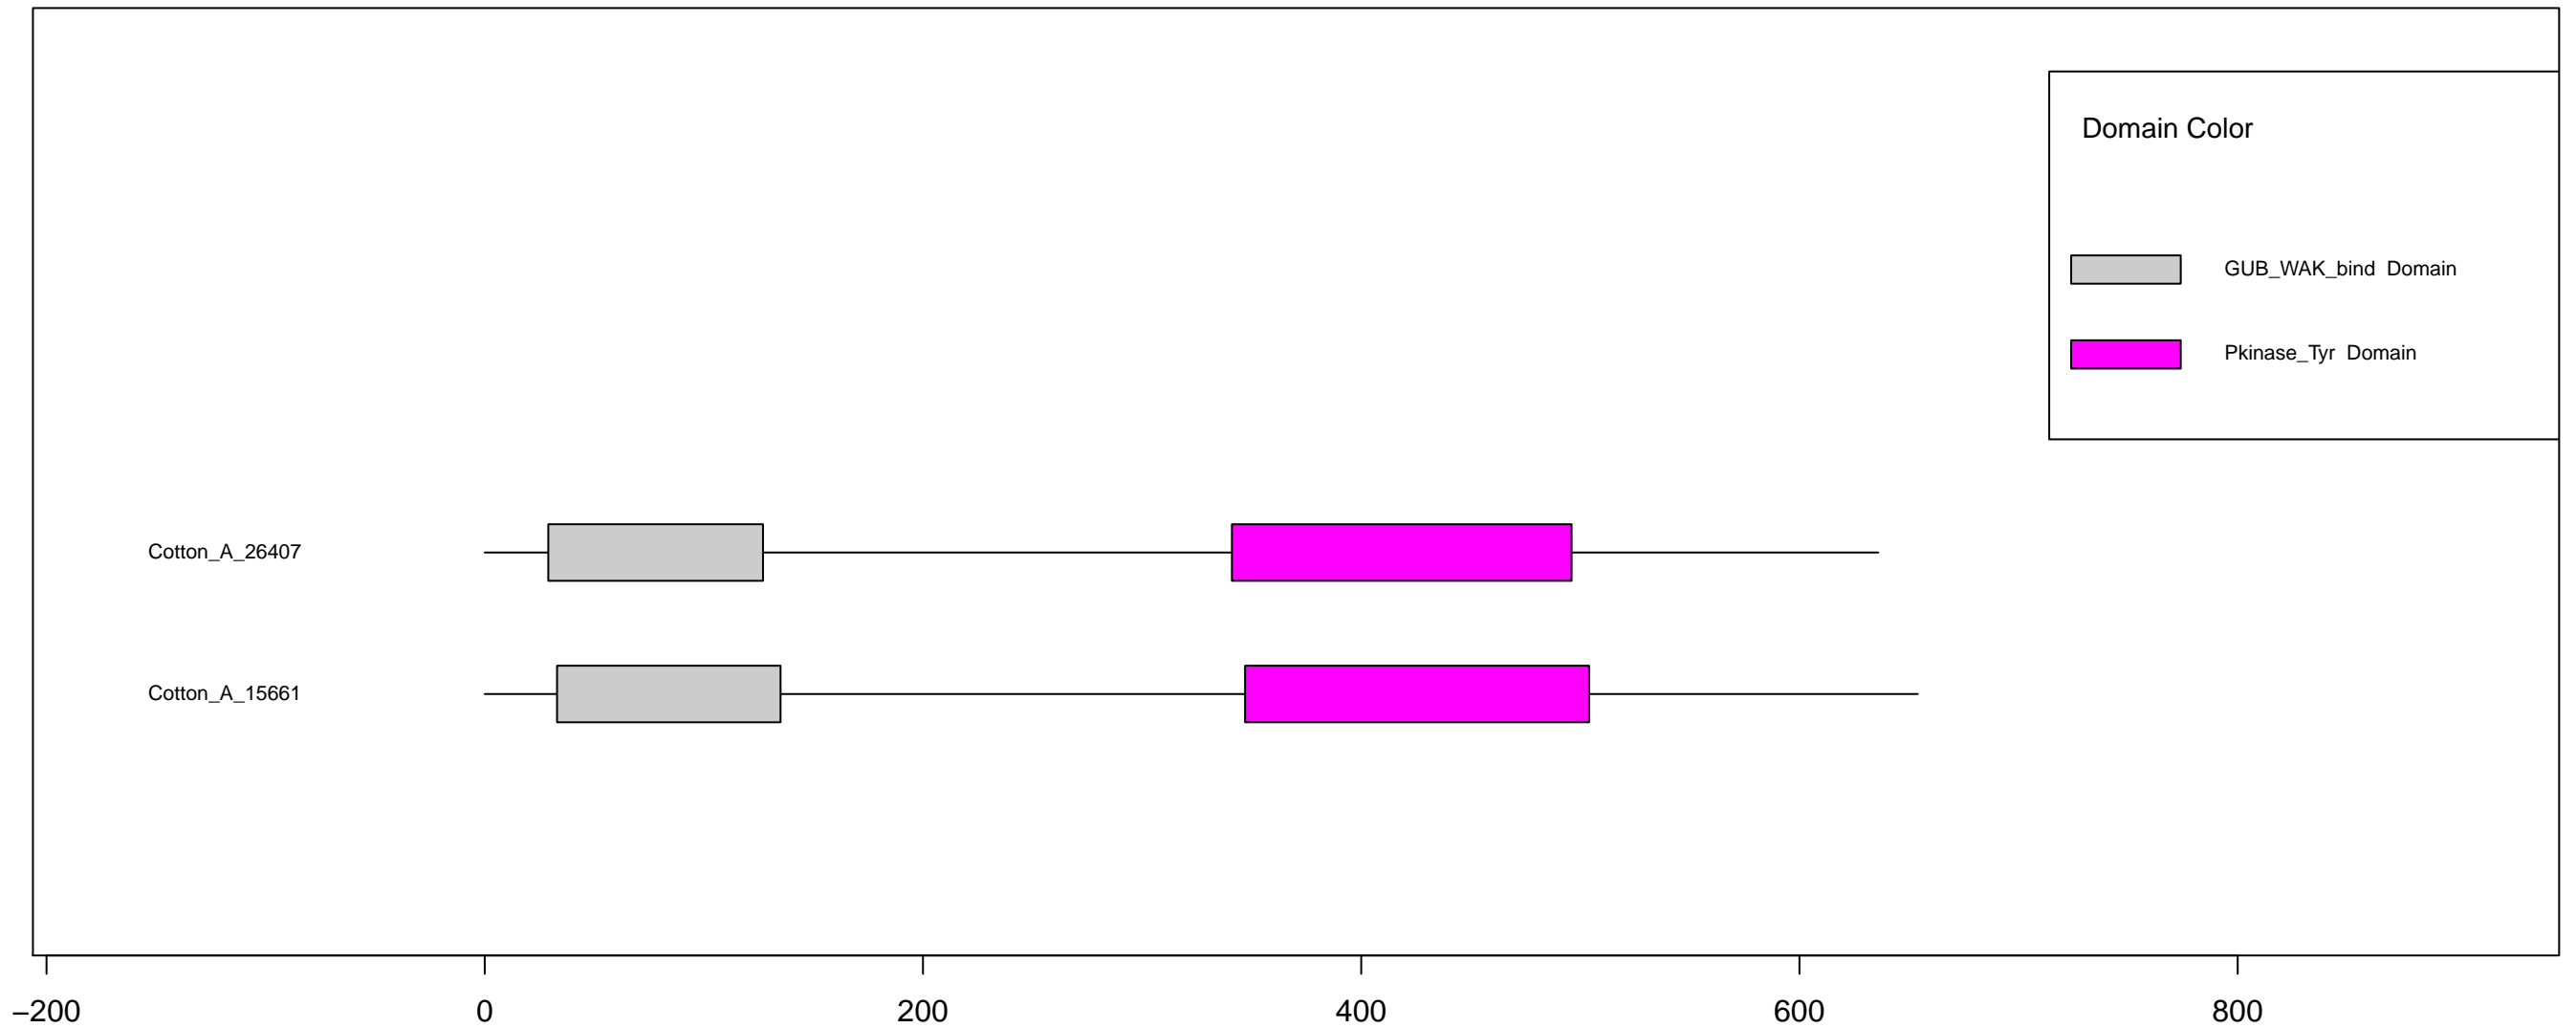

### G.ar RLK-Pelle\_WAK\_LRK10L-1 domain diagram (all)

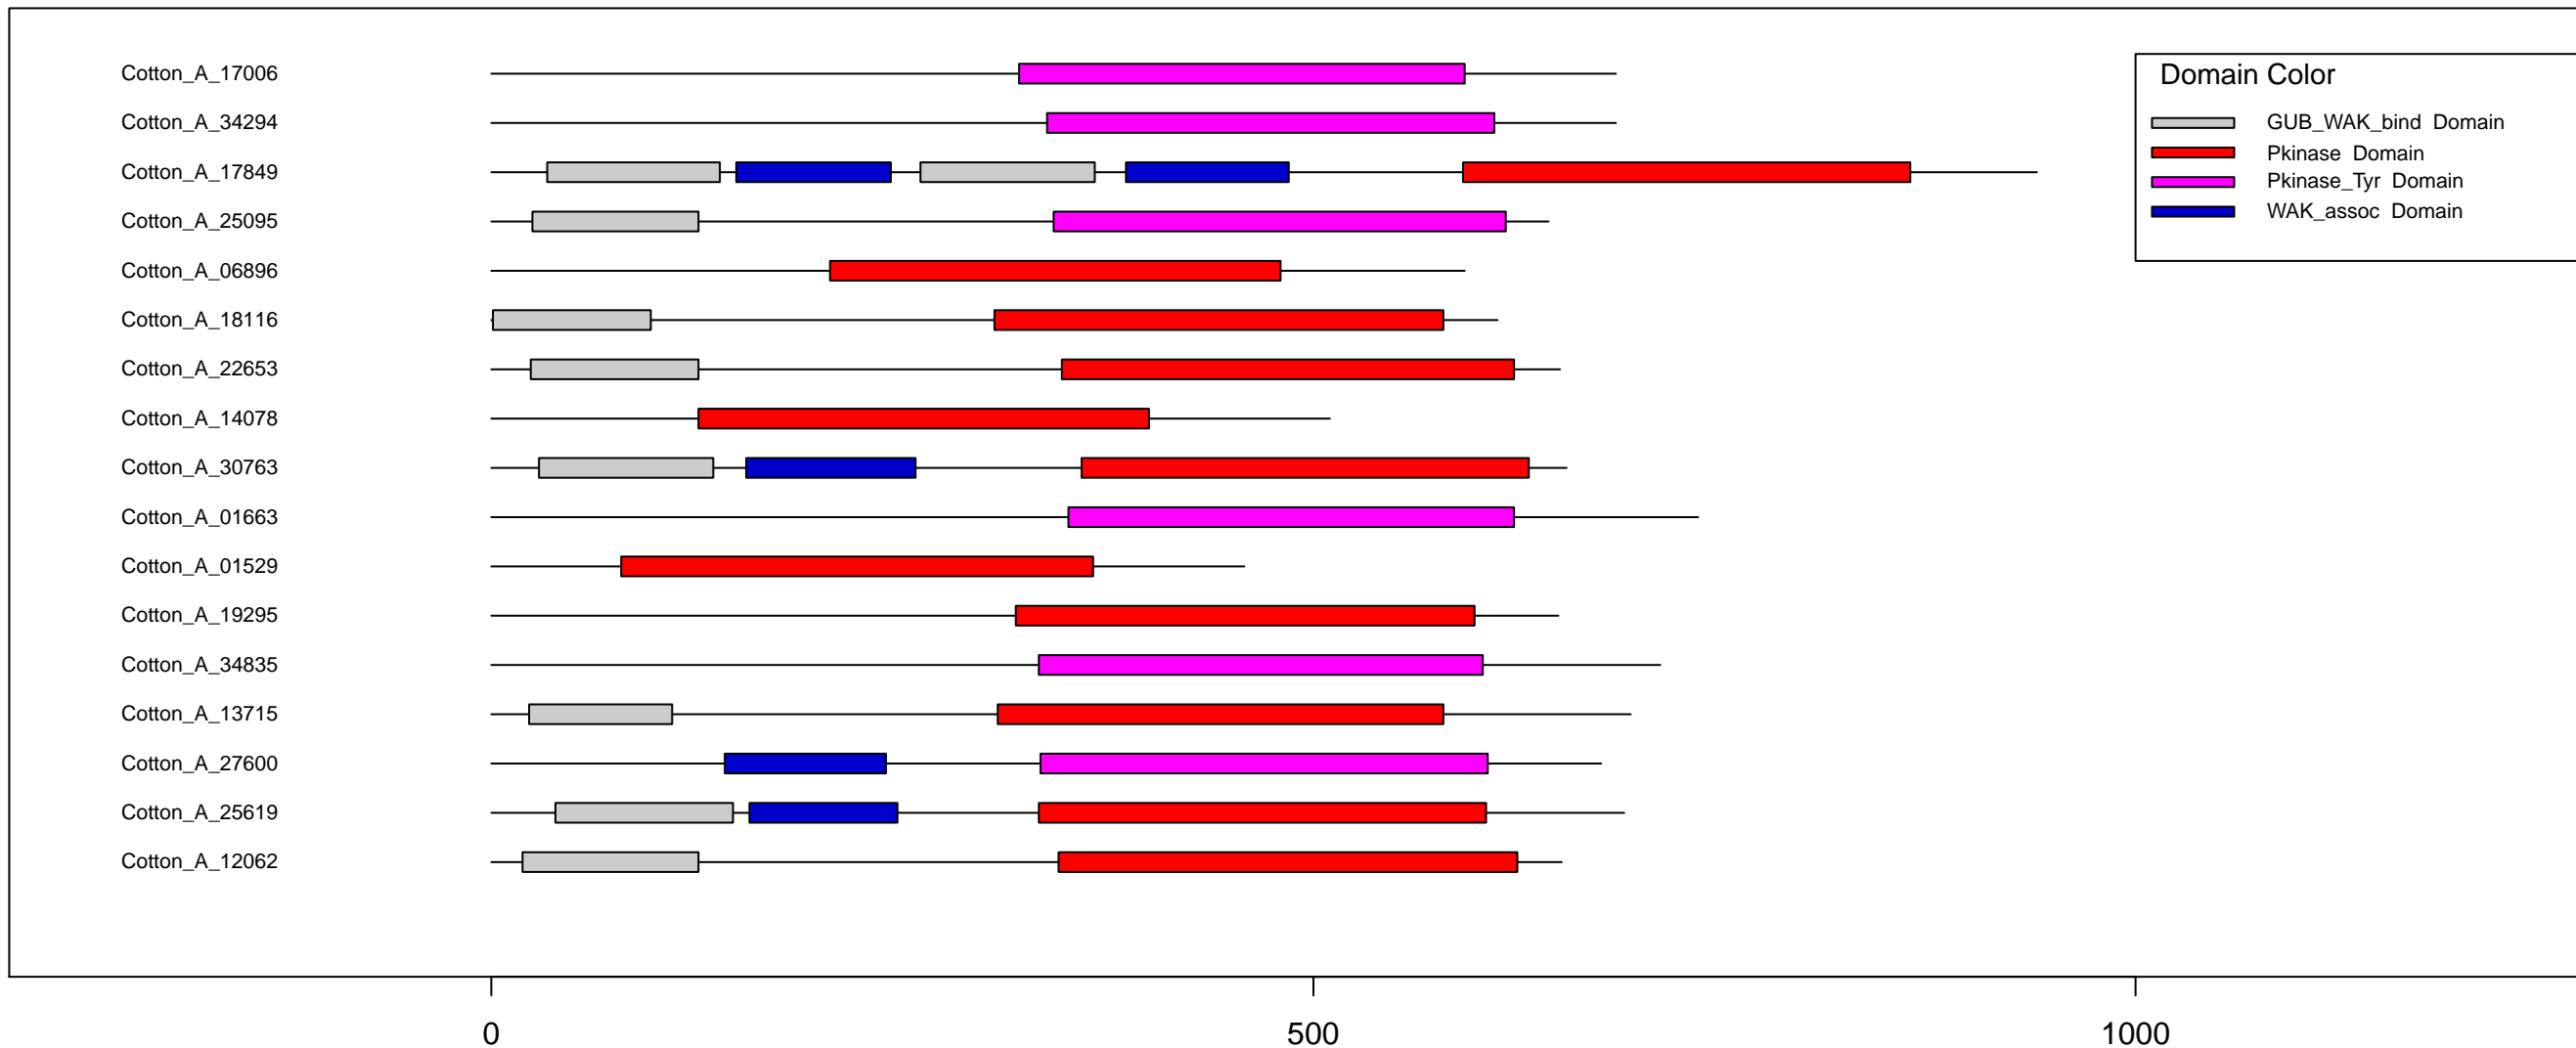

### G.ar RLK-Pelle\_WAK domain diagram (part 1)

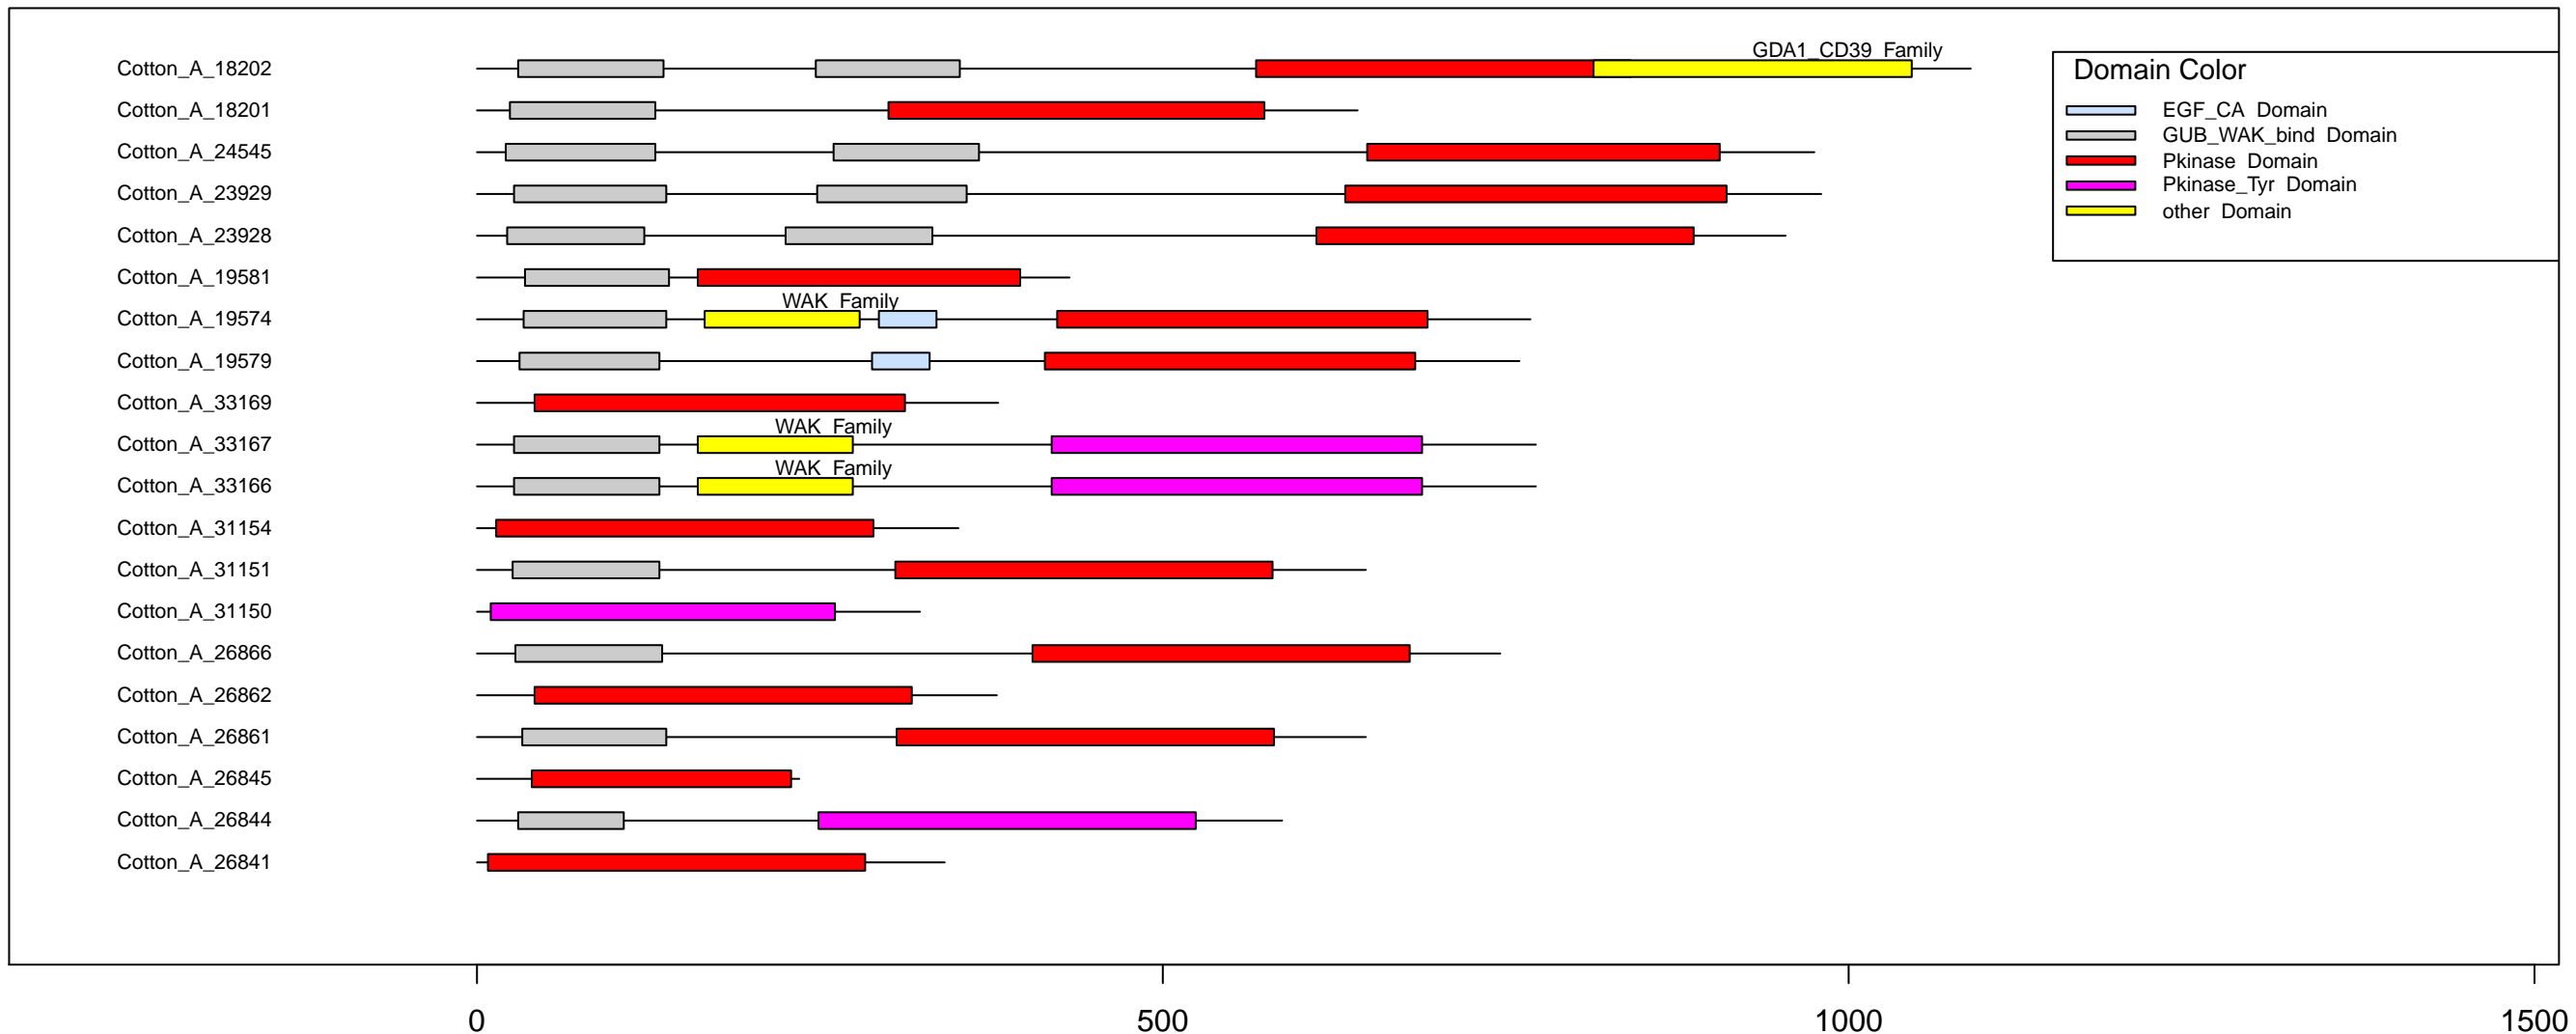



### G.ar RLK-Pelle\_WAK domain diagram (part 2)

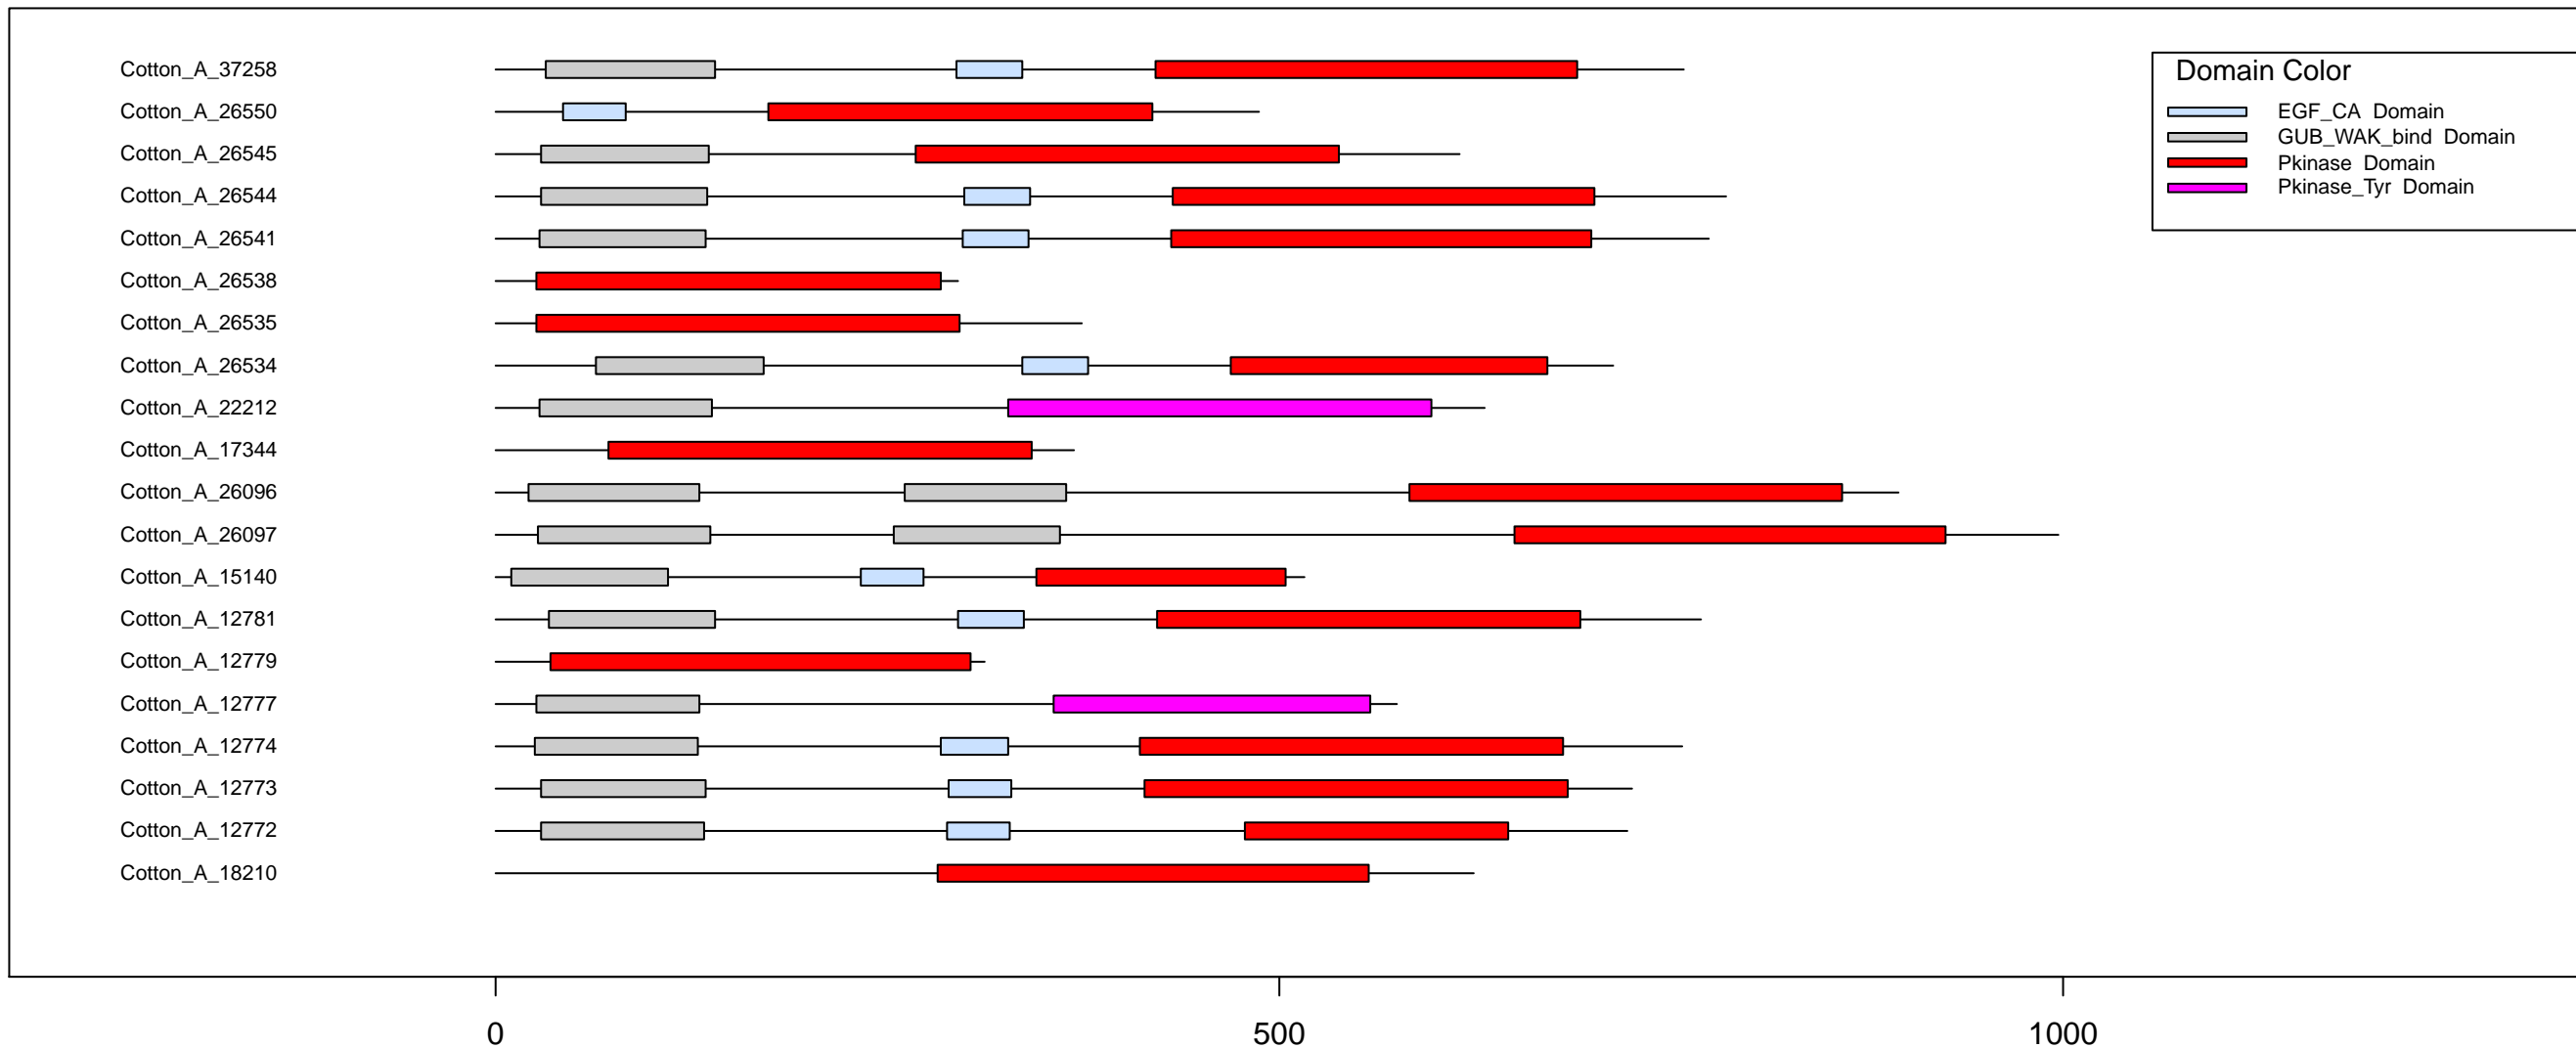

# G.ar SCY1\_SCYL1 domain diagram (all)

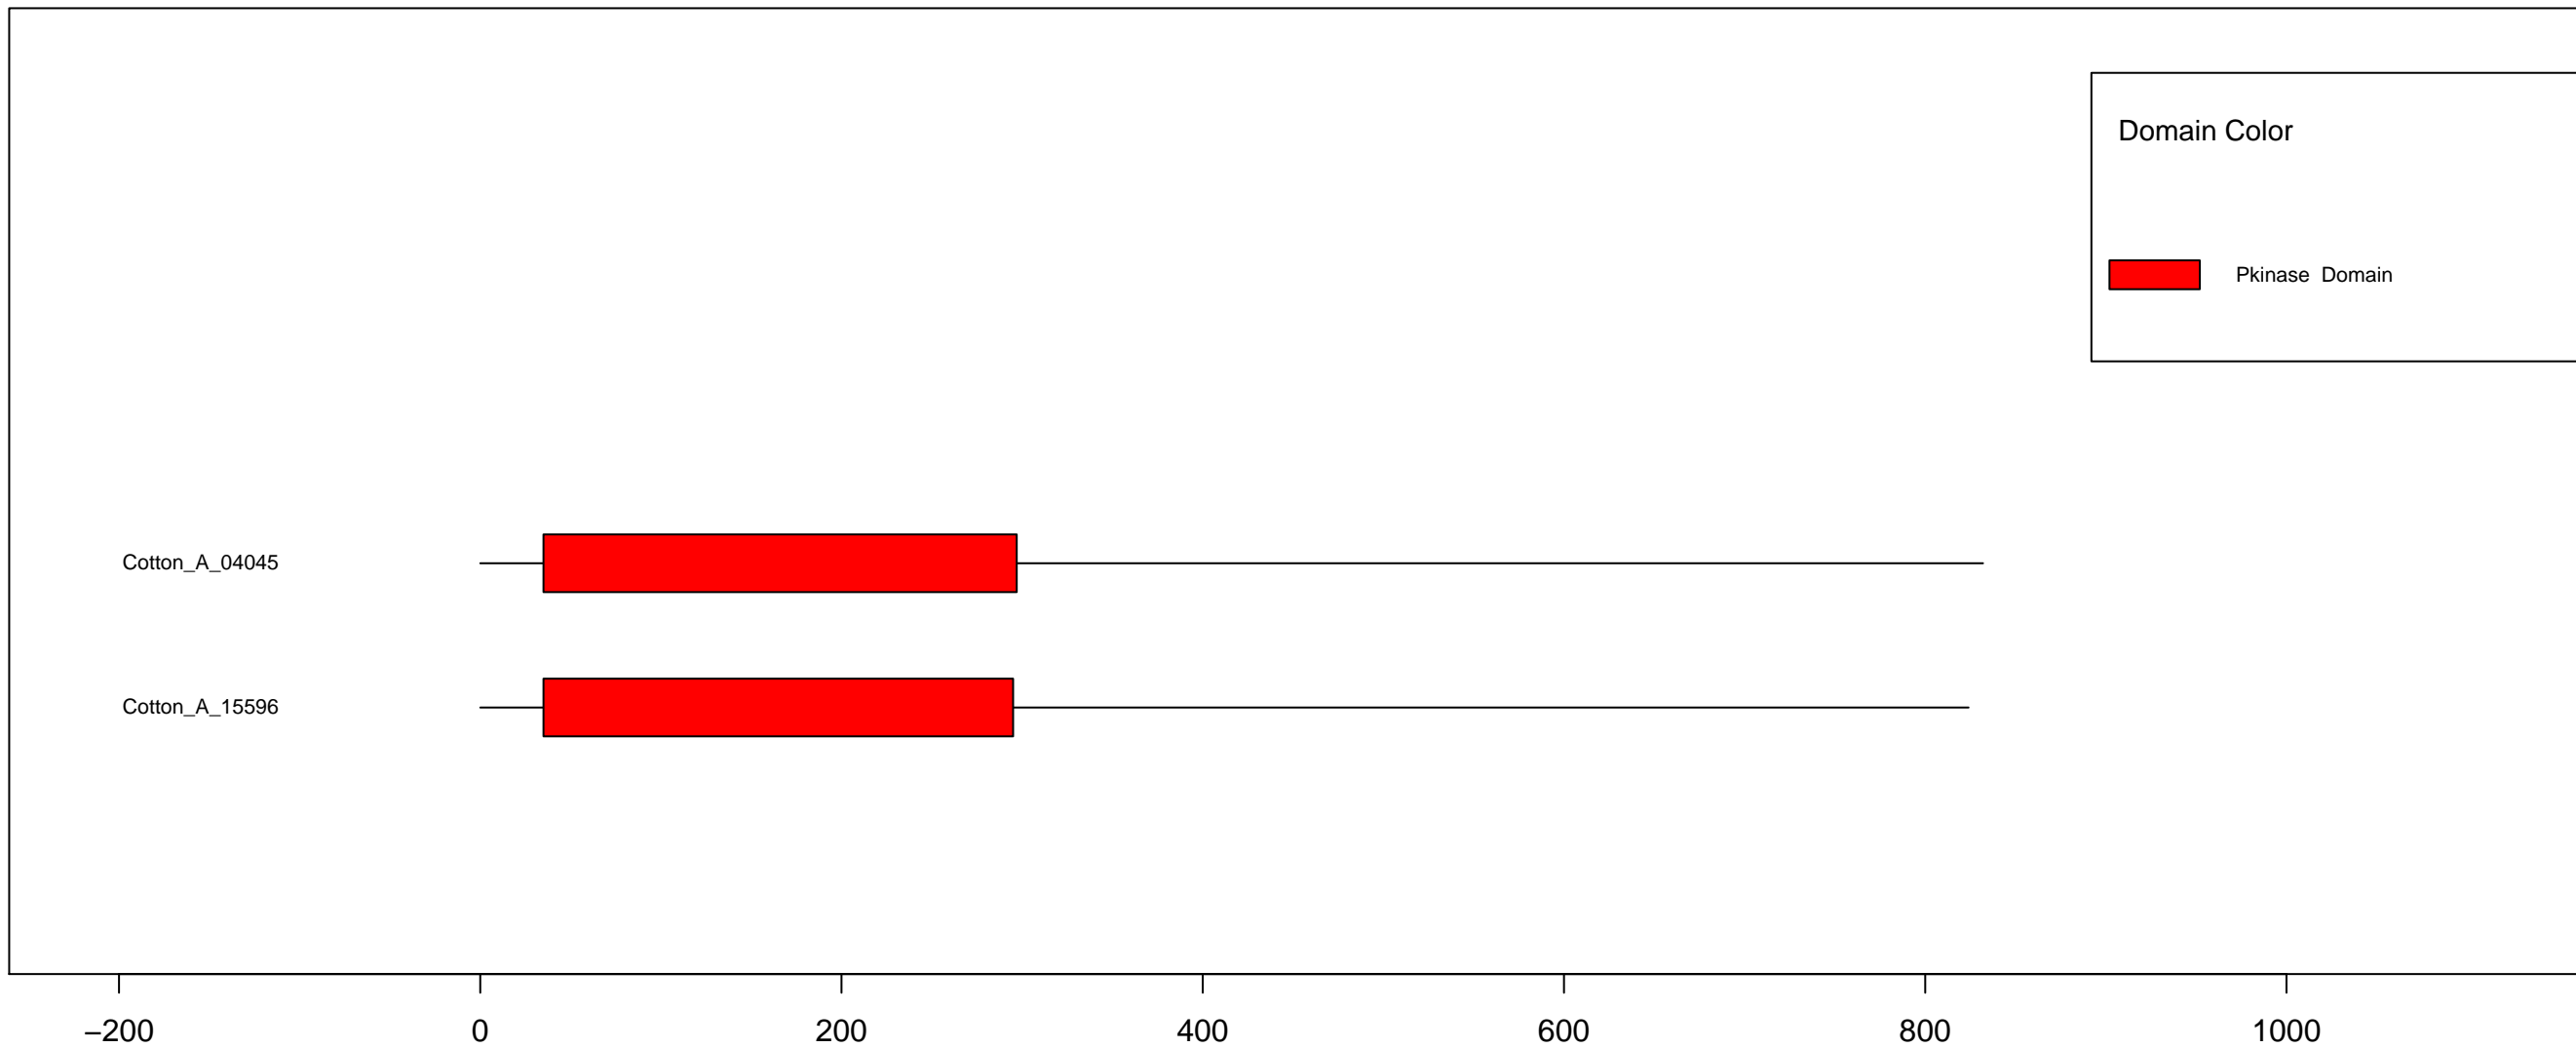

# G.ar SCY1\_SCYL2 domain diagram (all)

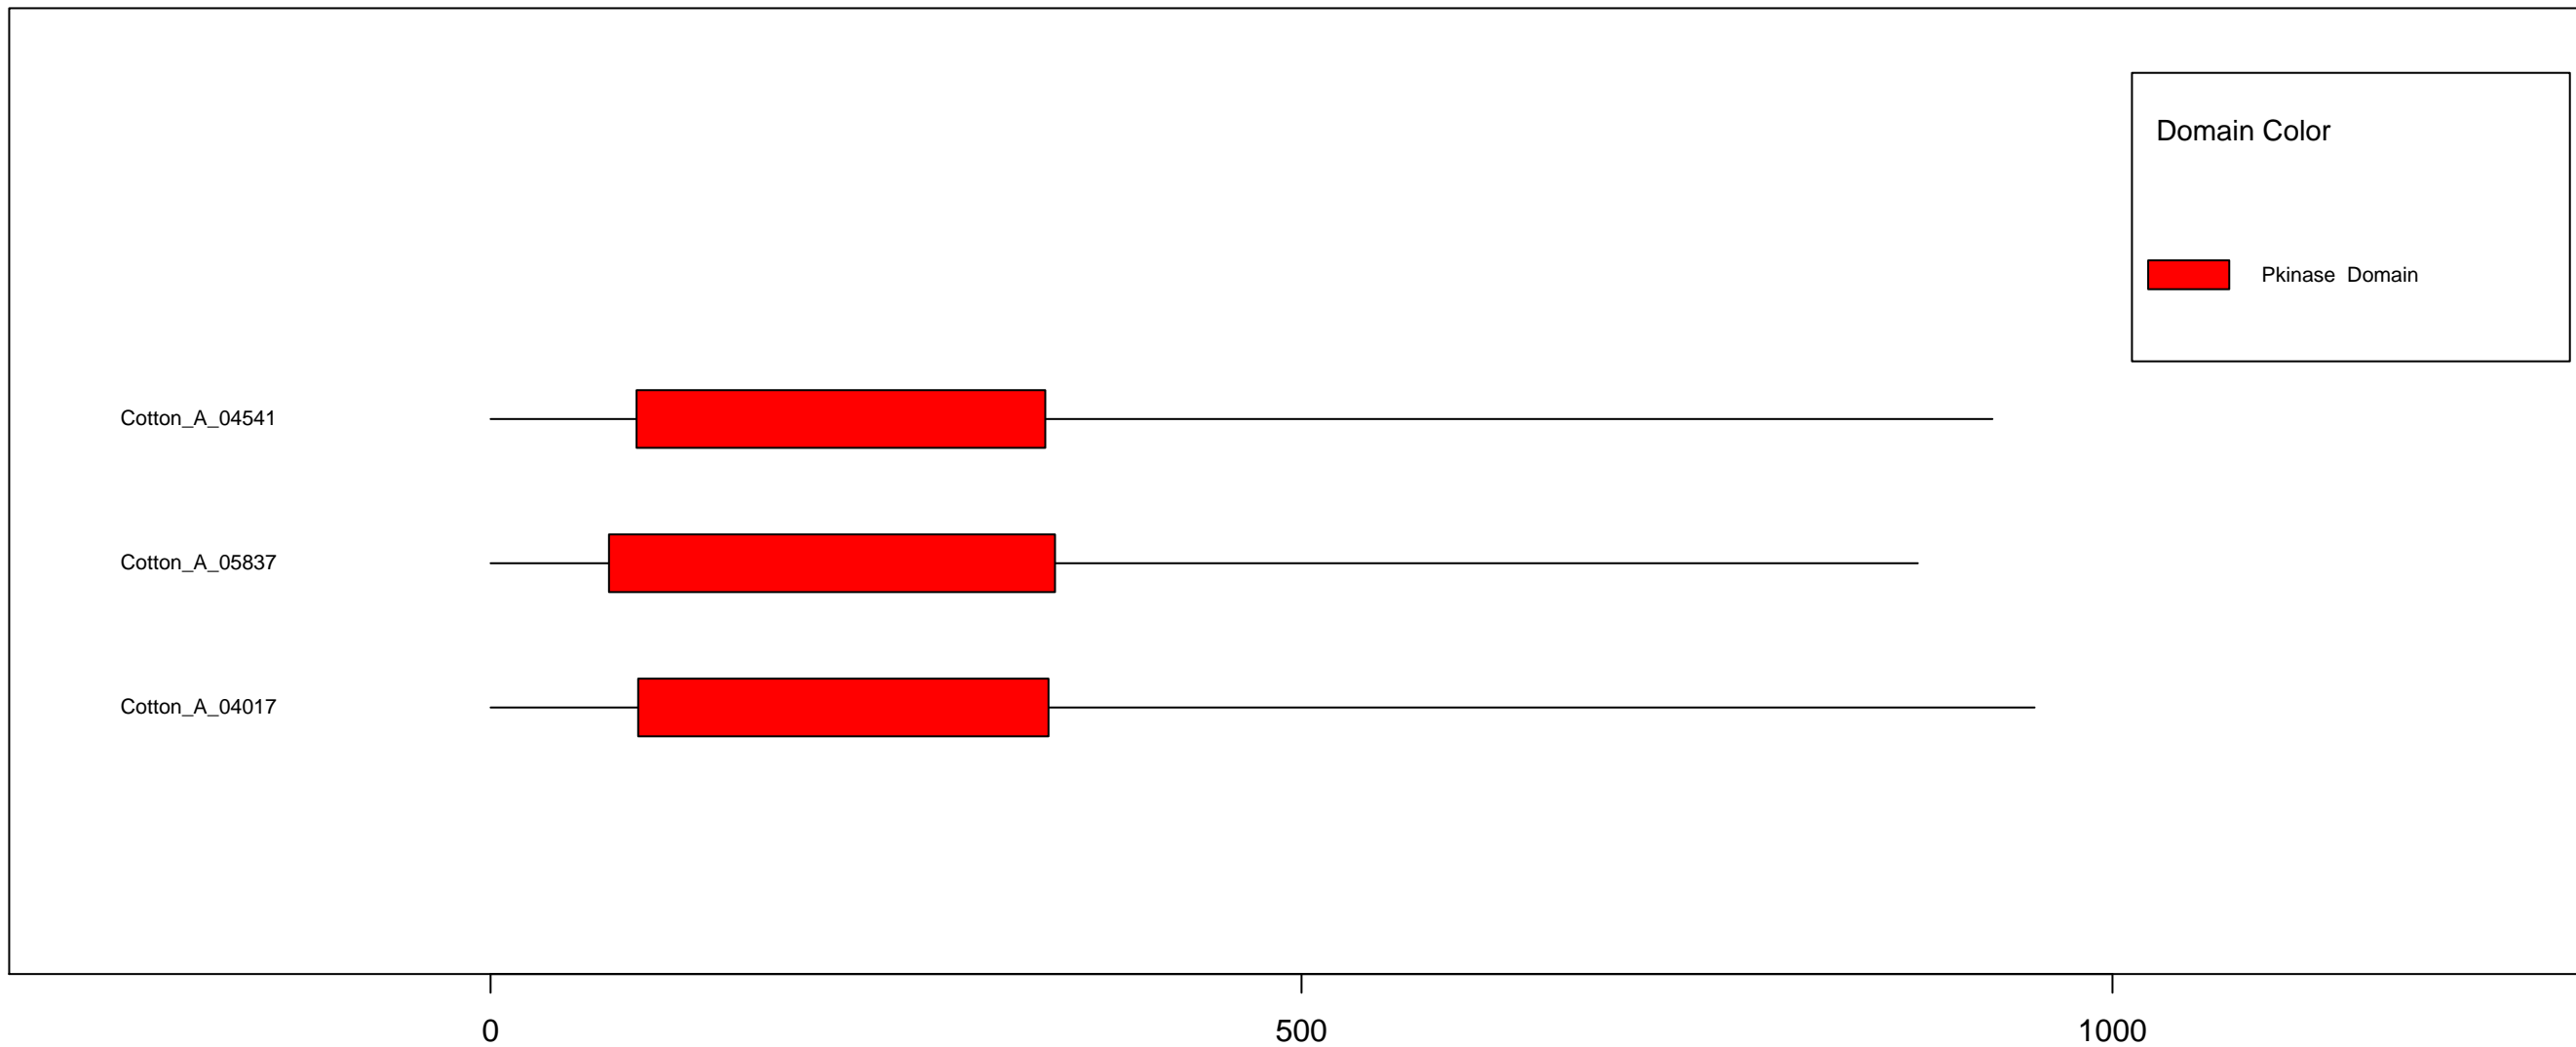

# G.ar STE\_STE11 domain diagram (part 1)

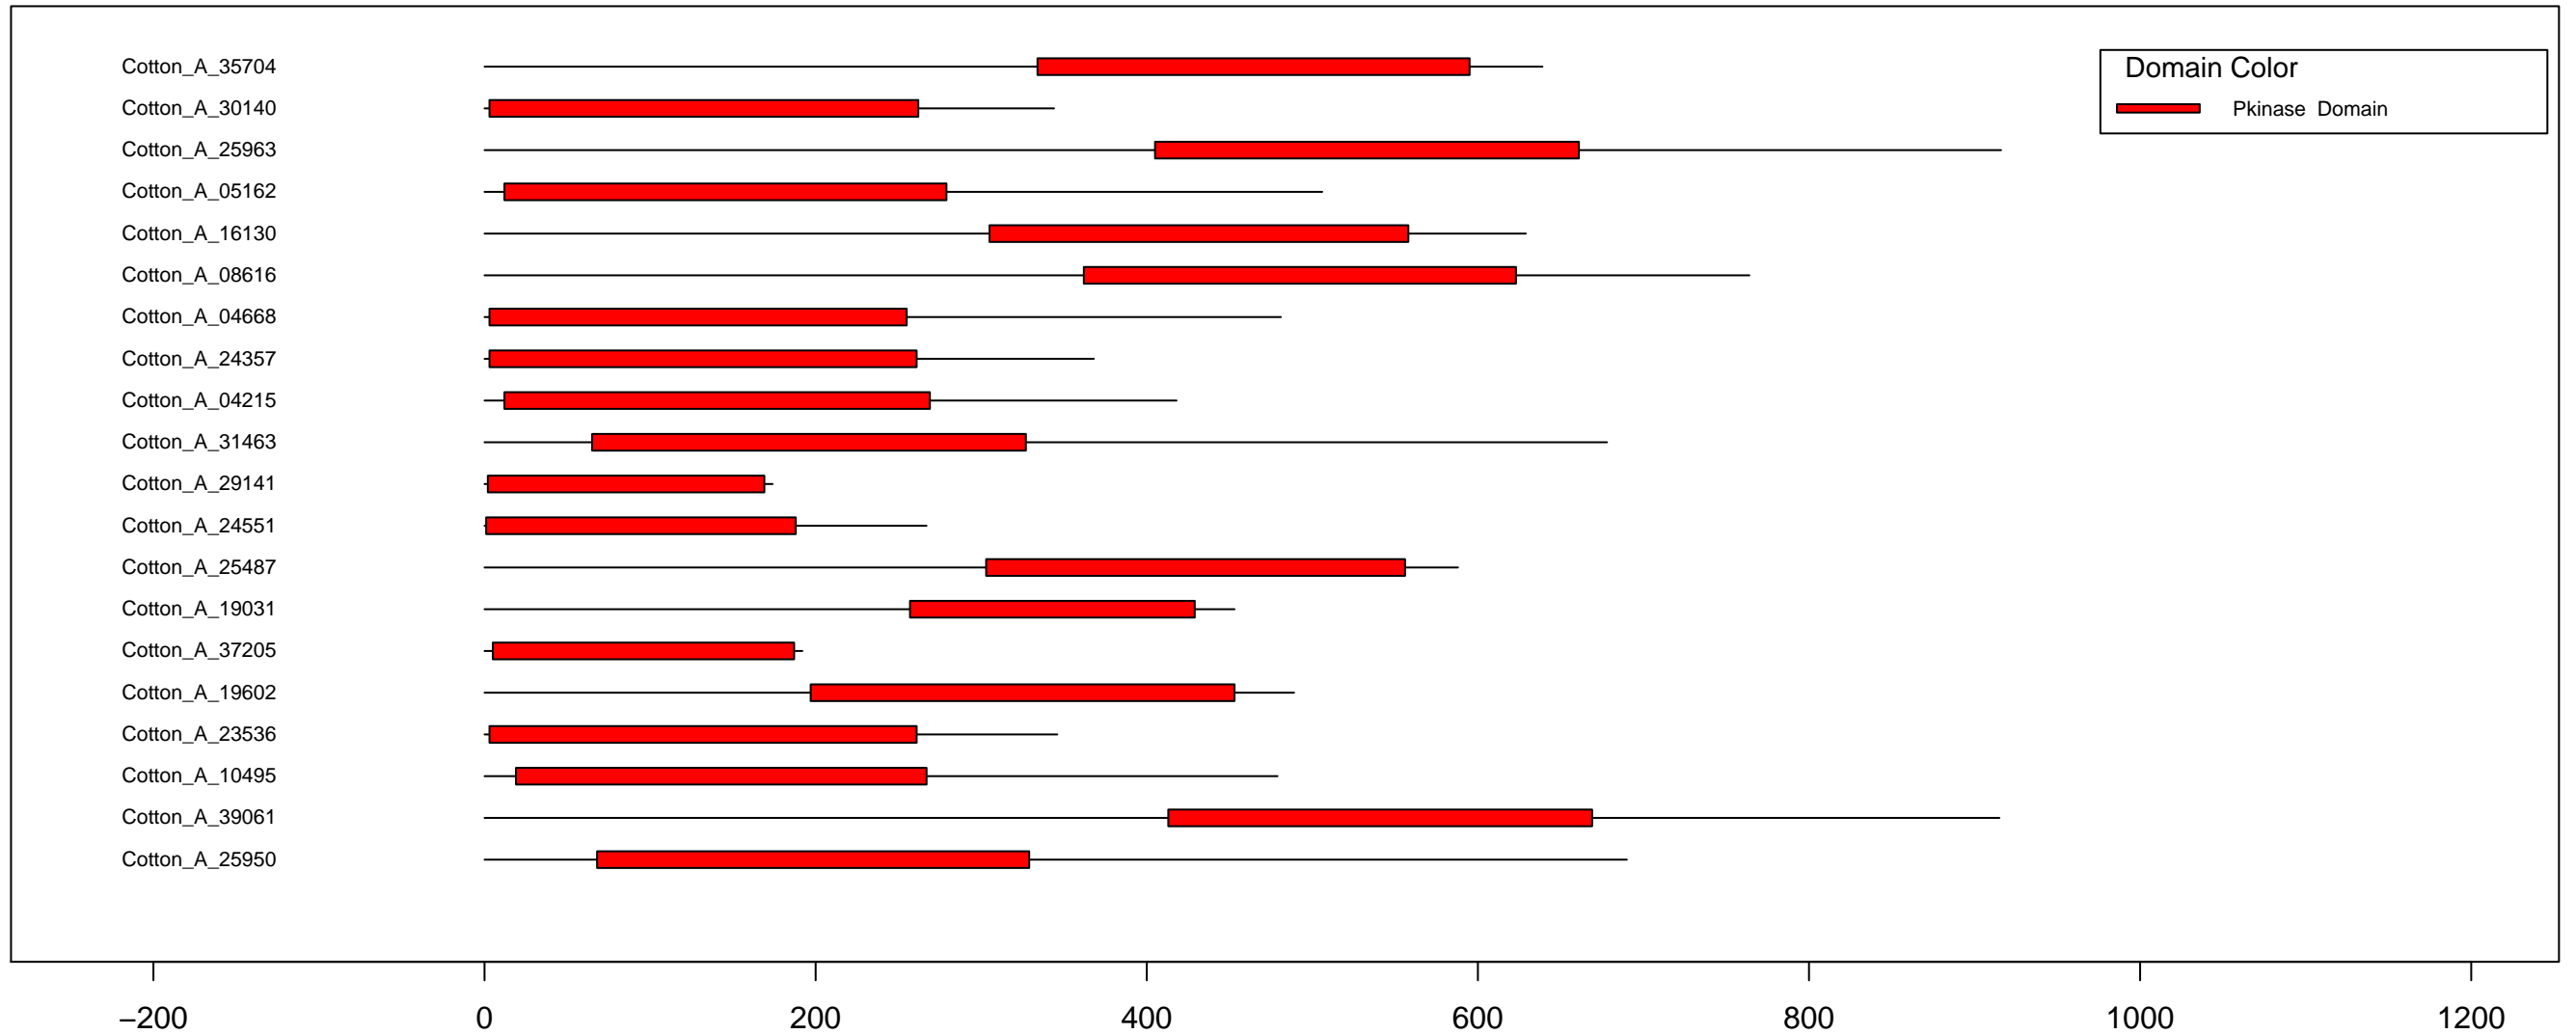

# G.ar STE\_STE11 domain diagram (part 2)

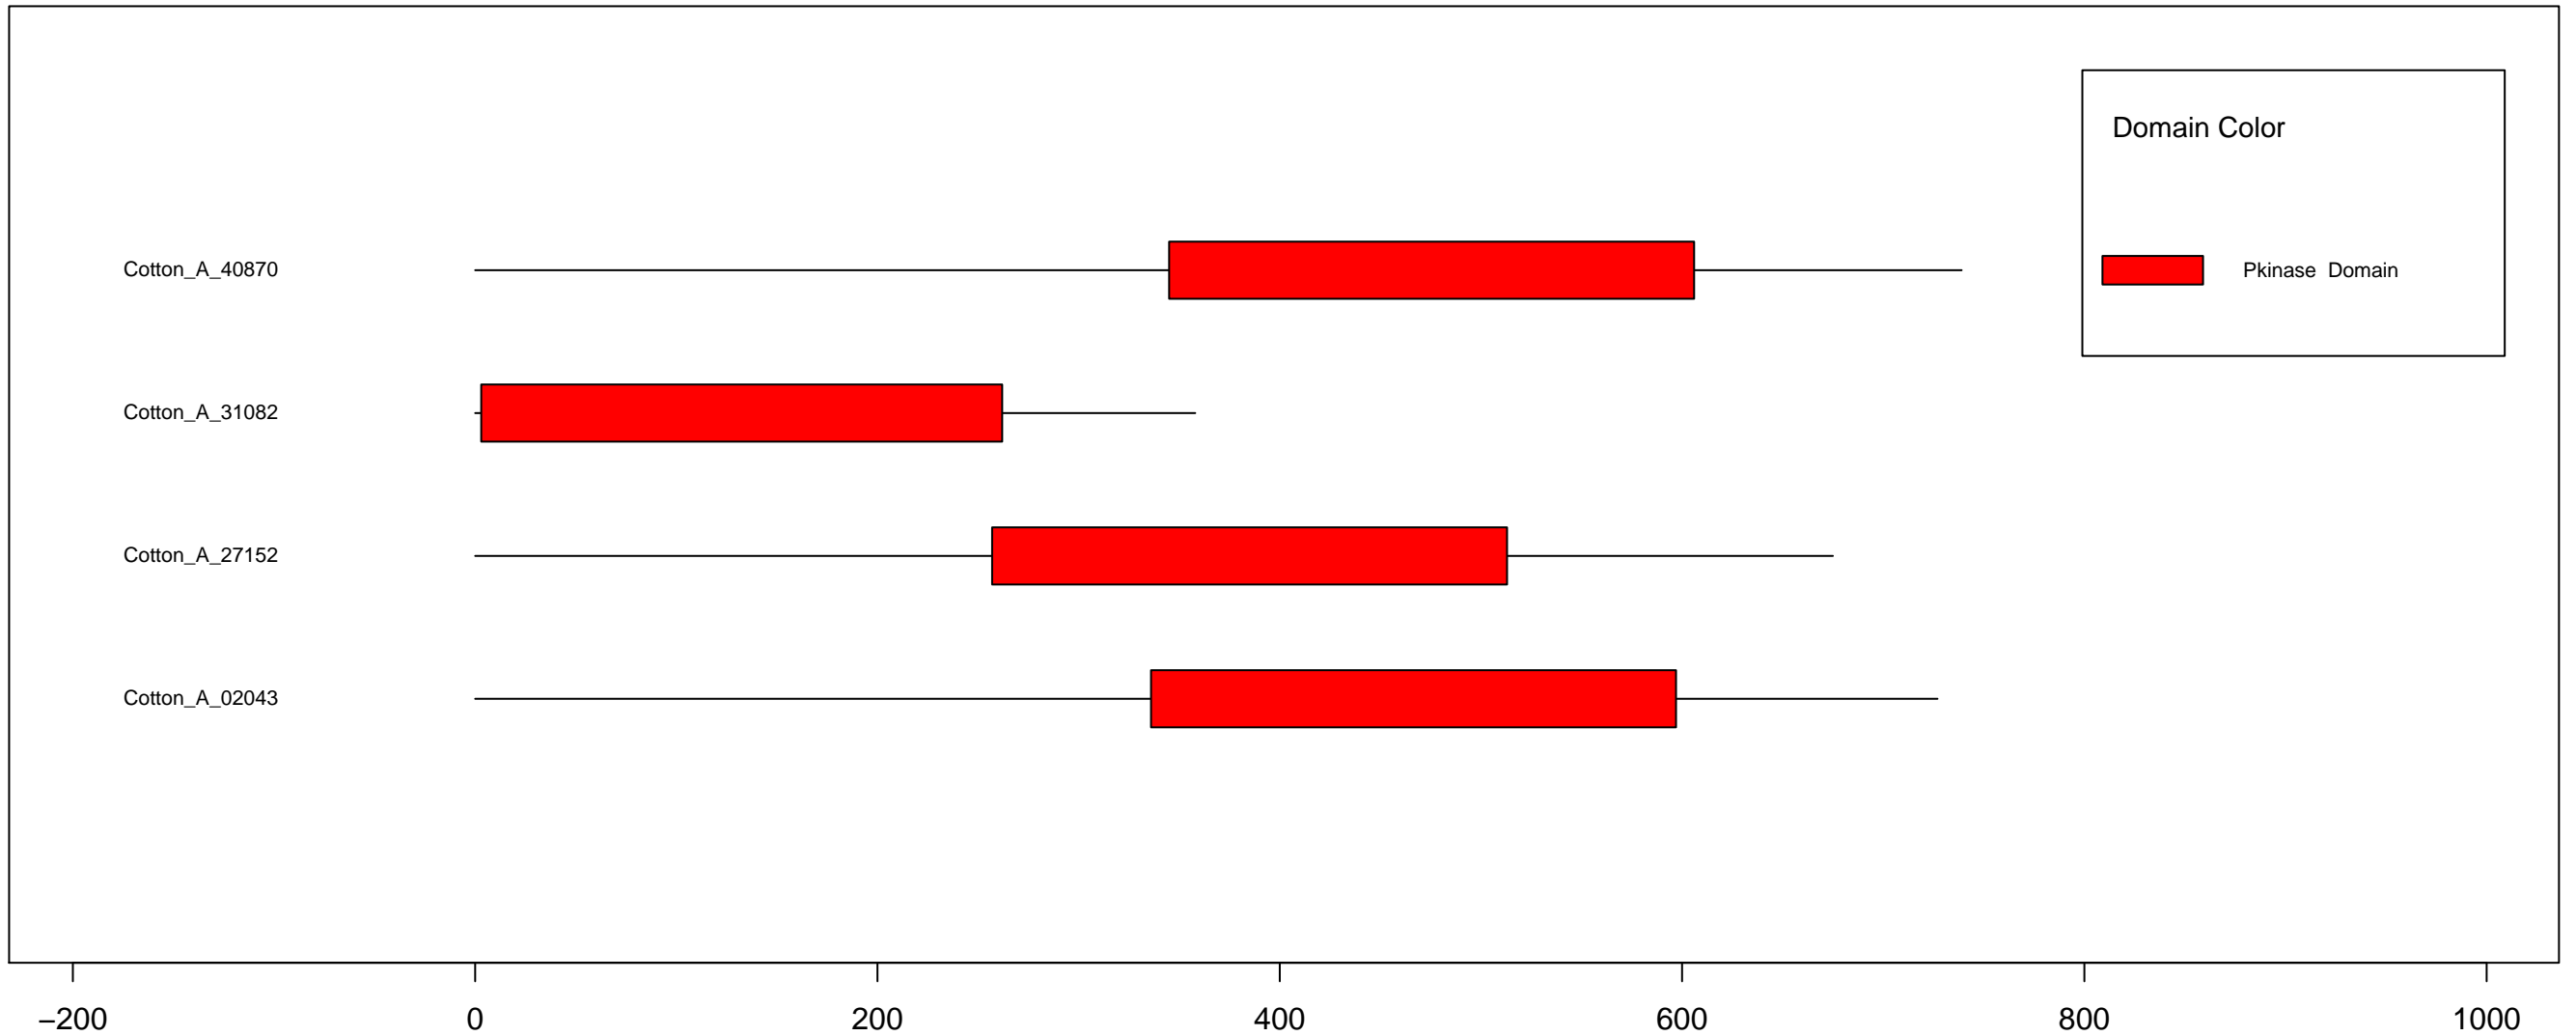

# G.ar STE\_STE20-Fray domain diagram (all)

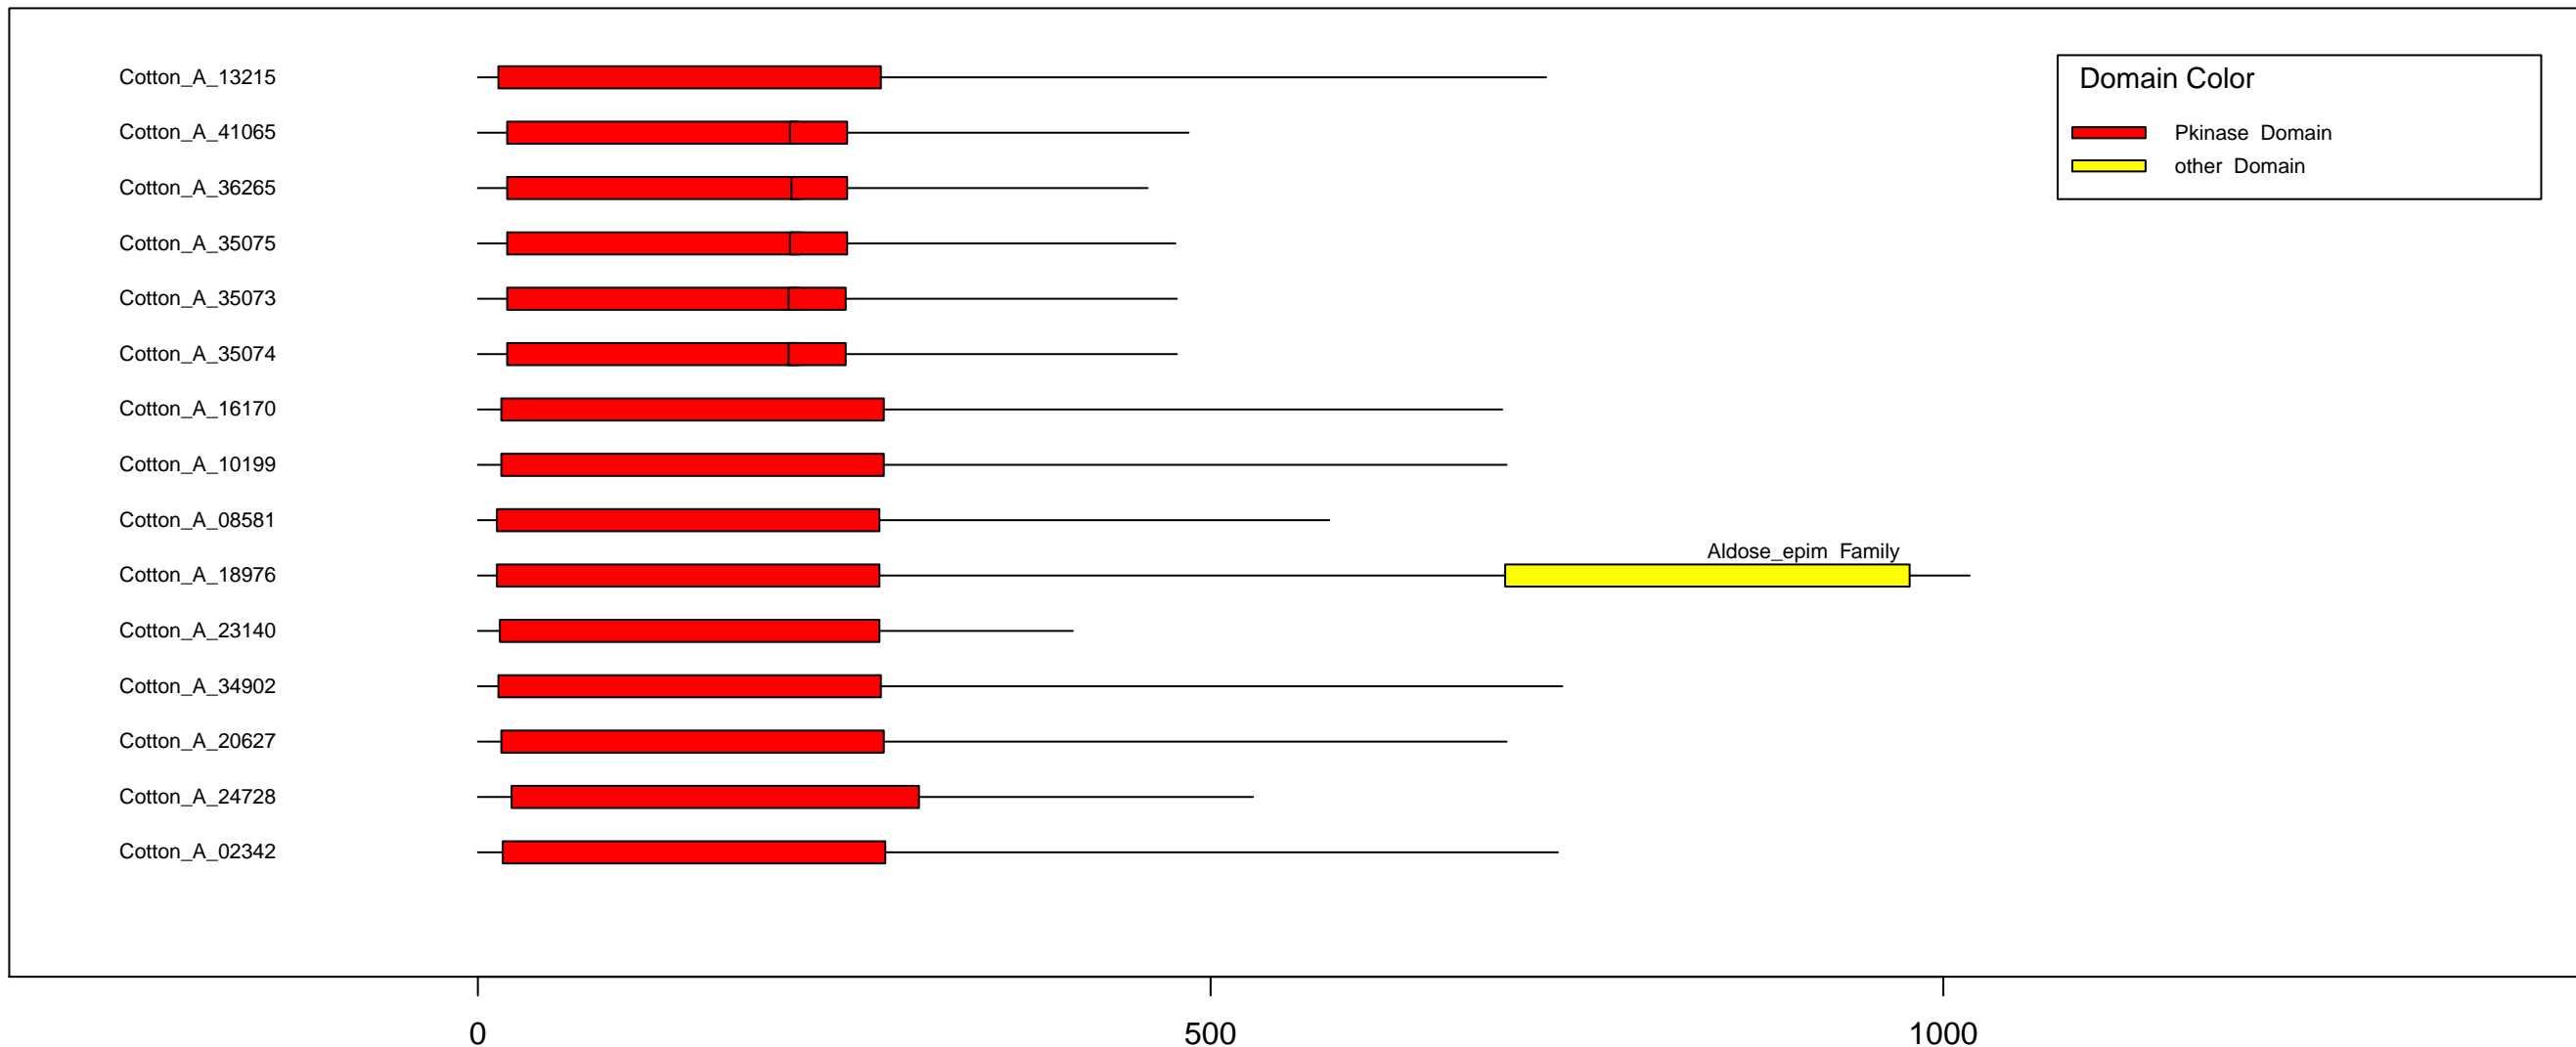

# G.ar STE\_STE20-PI domain diagram (all)

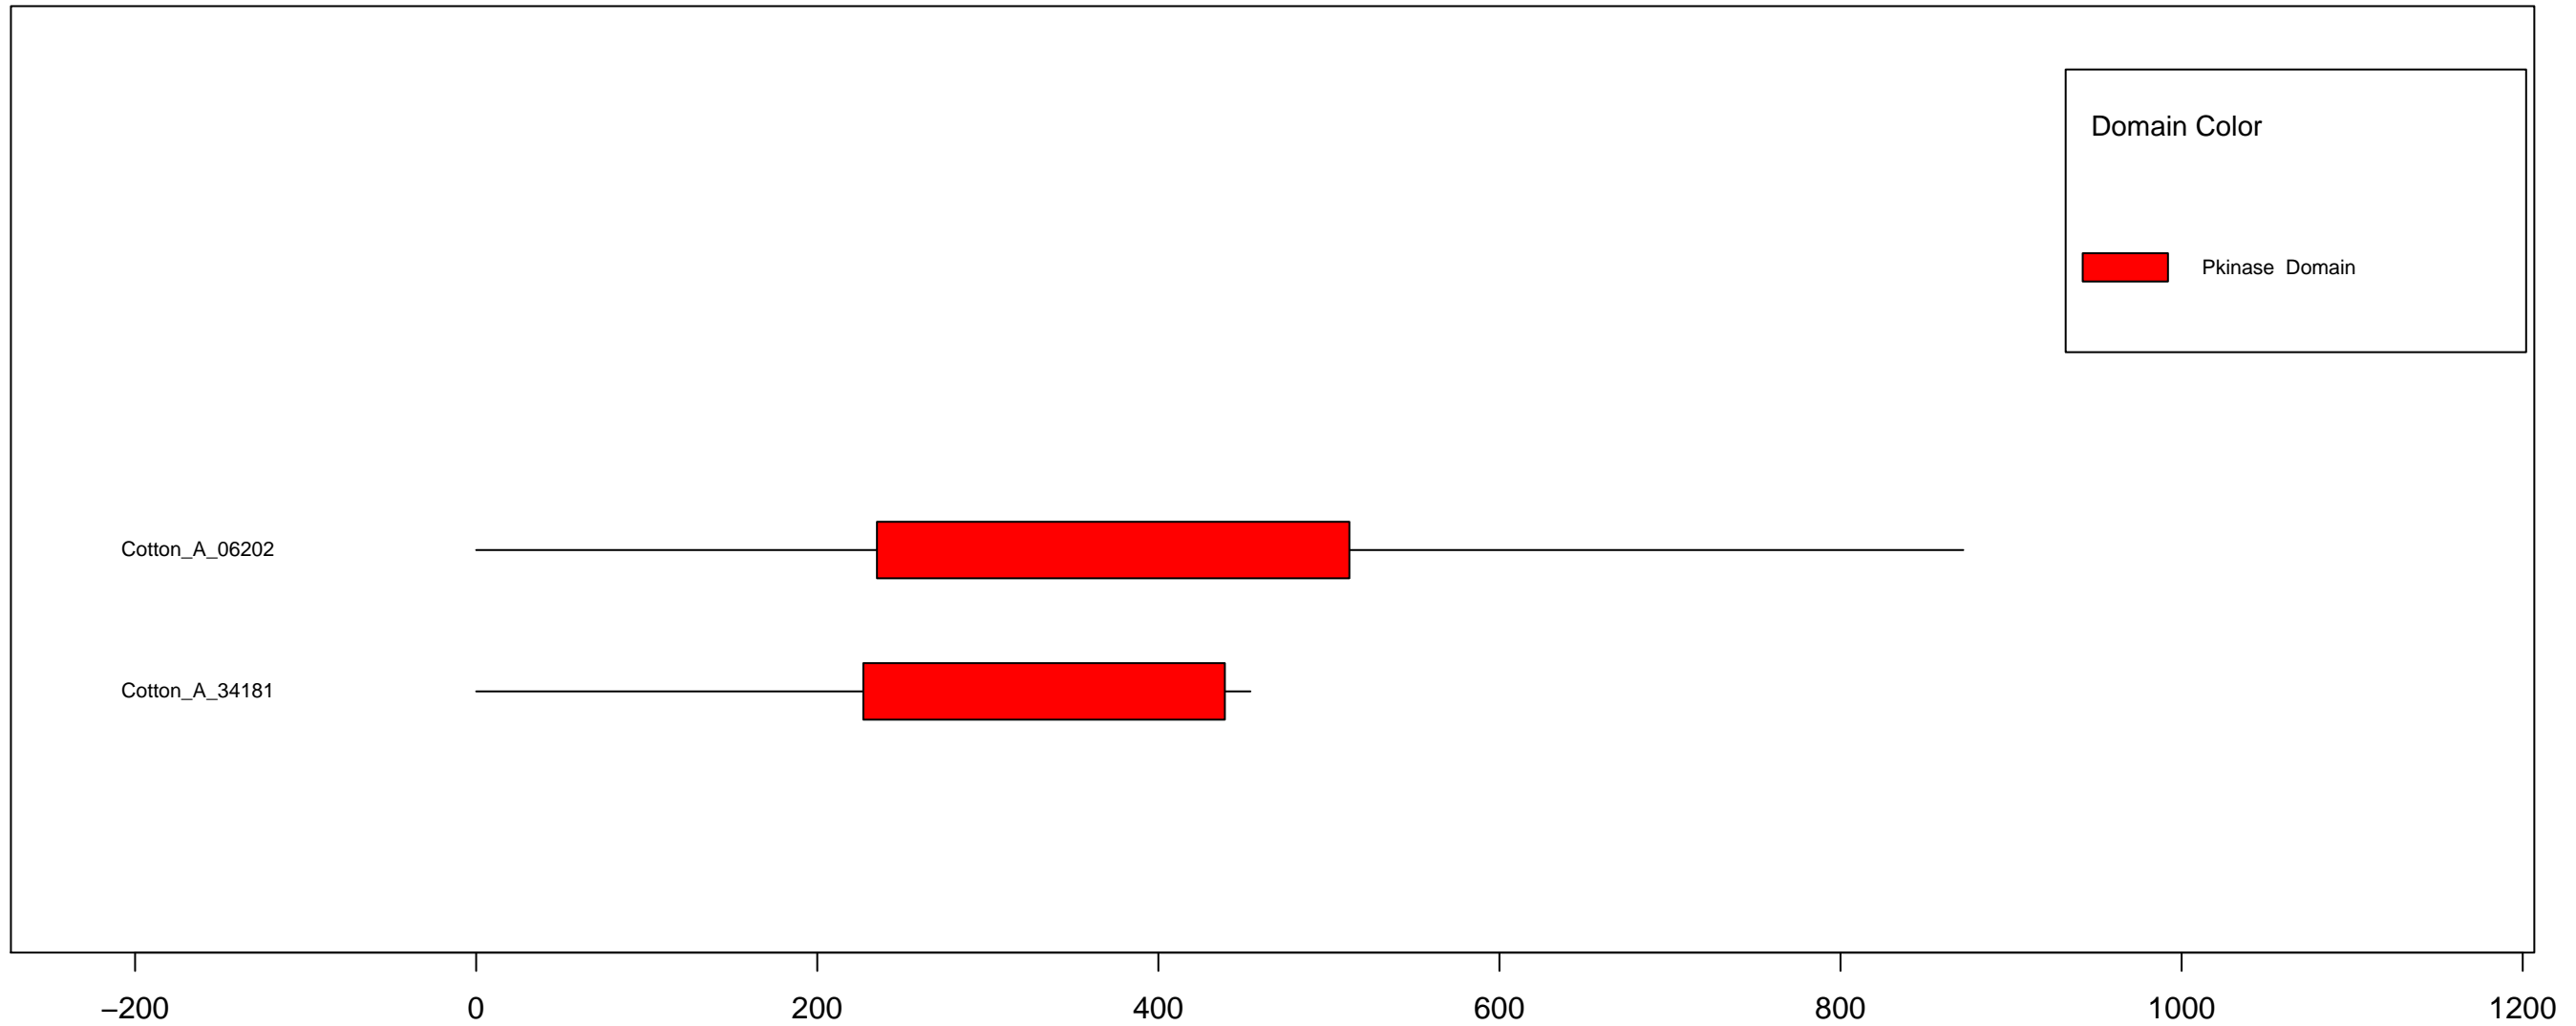

# G.ar STE\_STE20-YSK domain diagram (all)

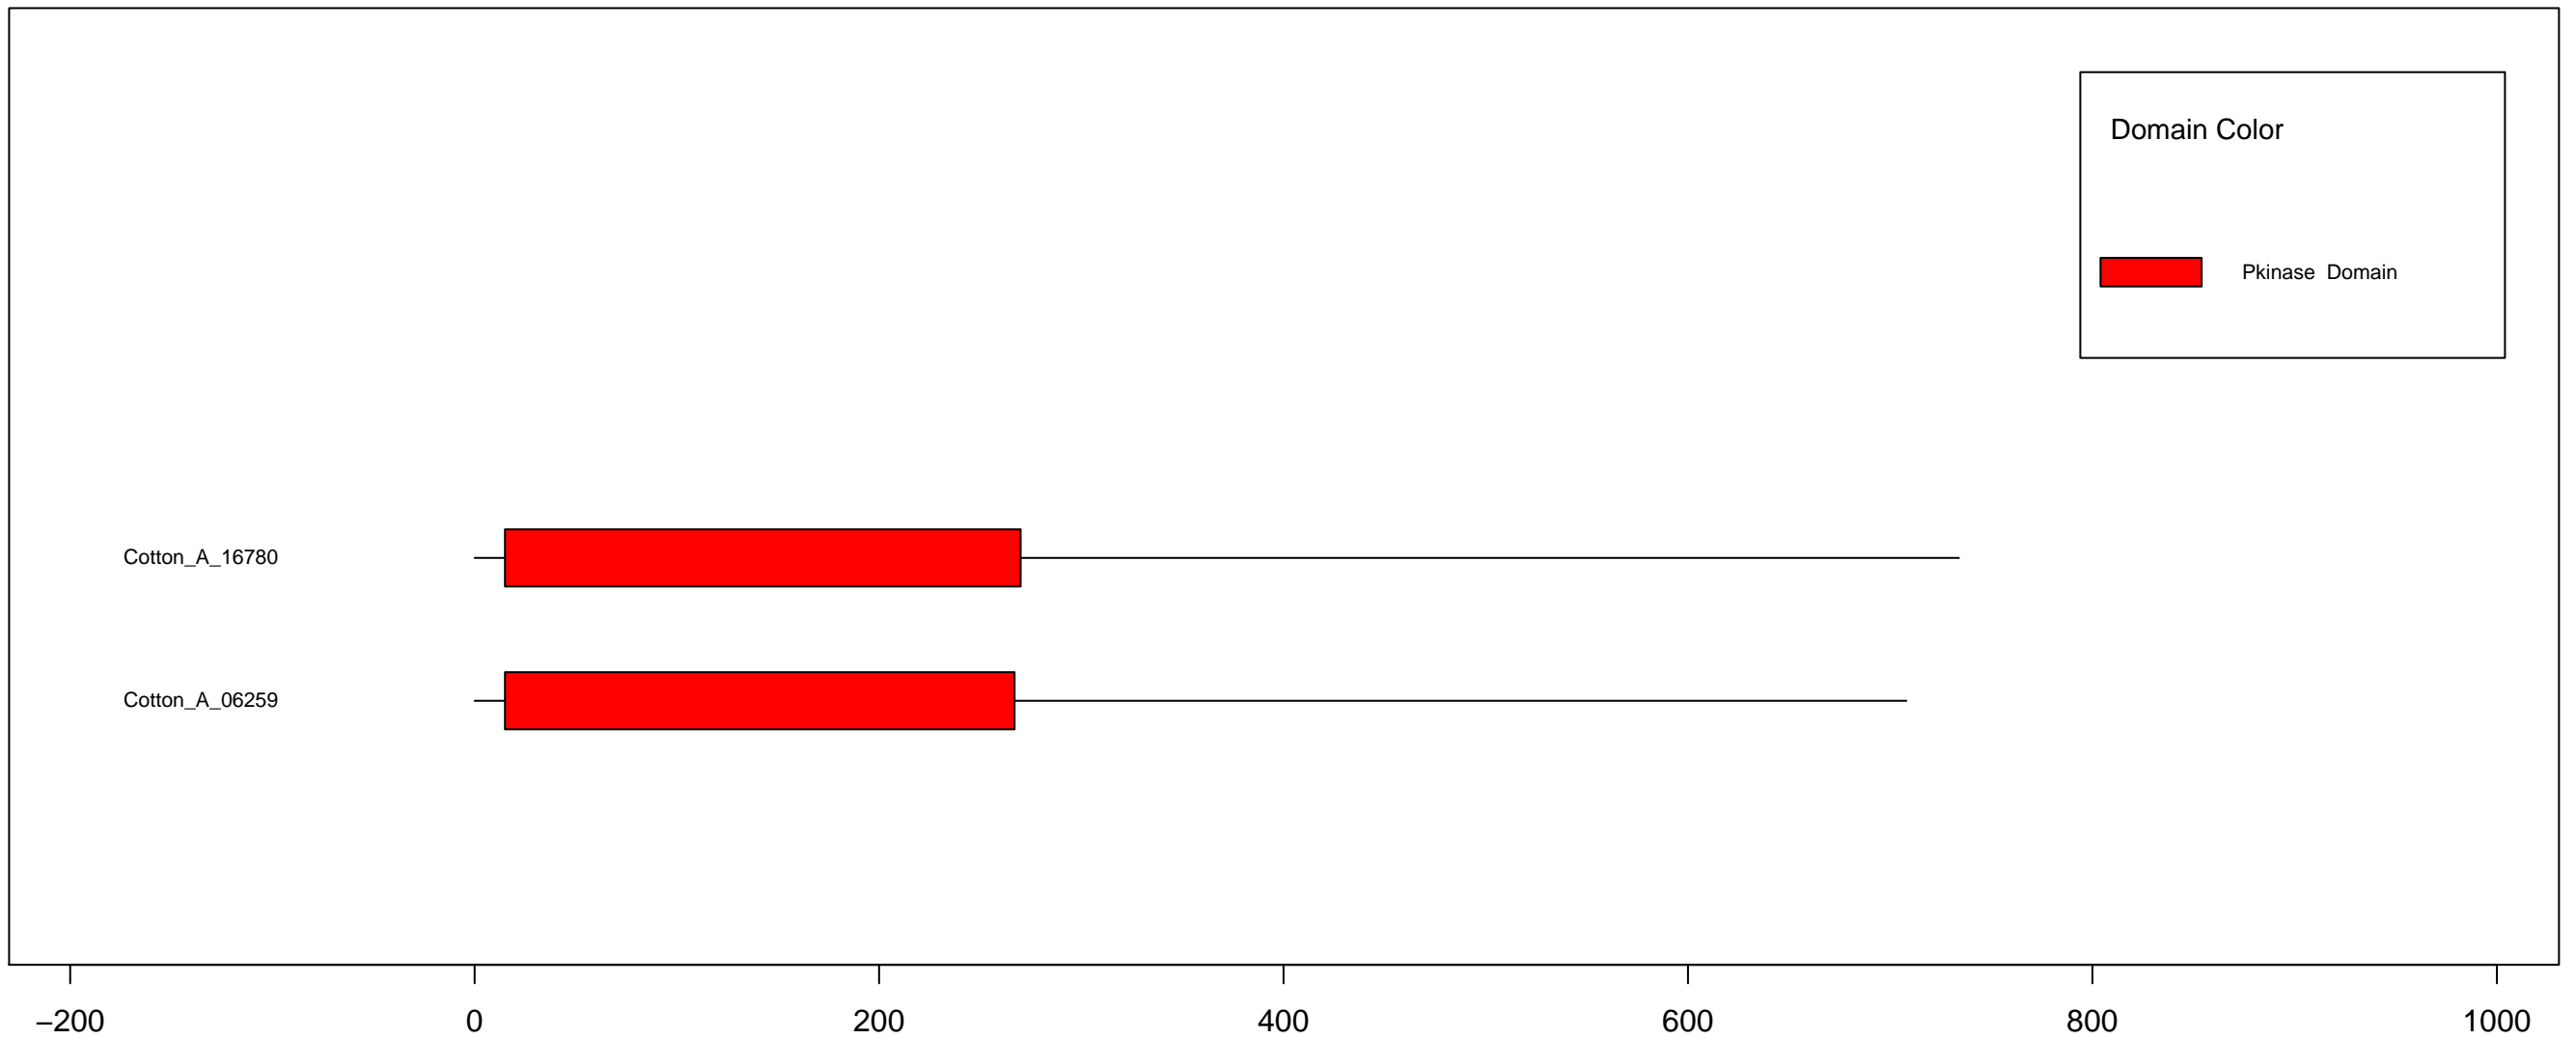



# G.ar STE\_STE7 domain diagram (all)

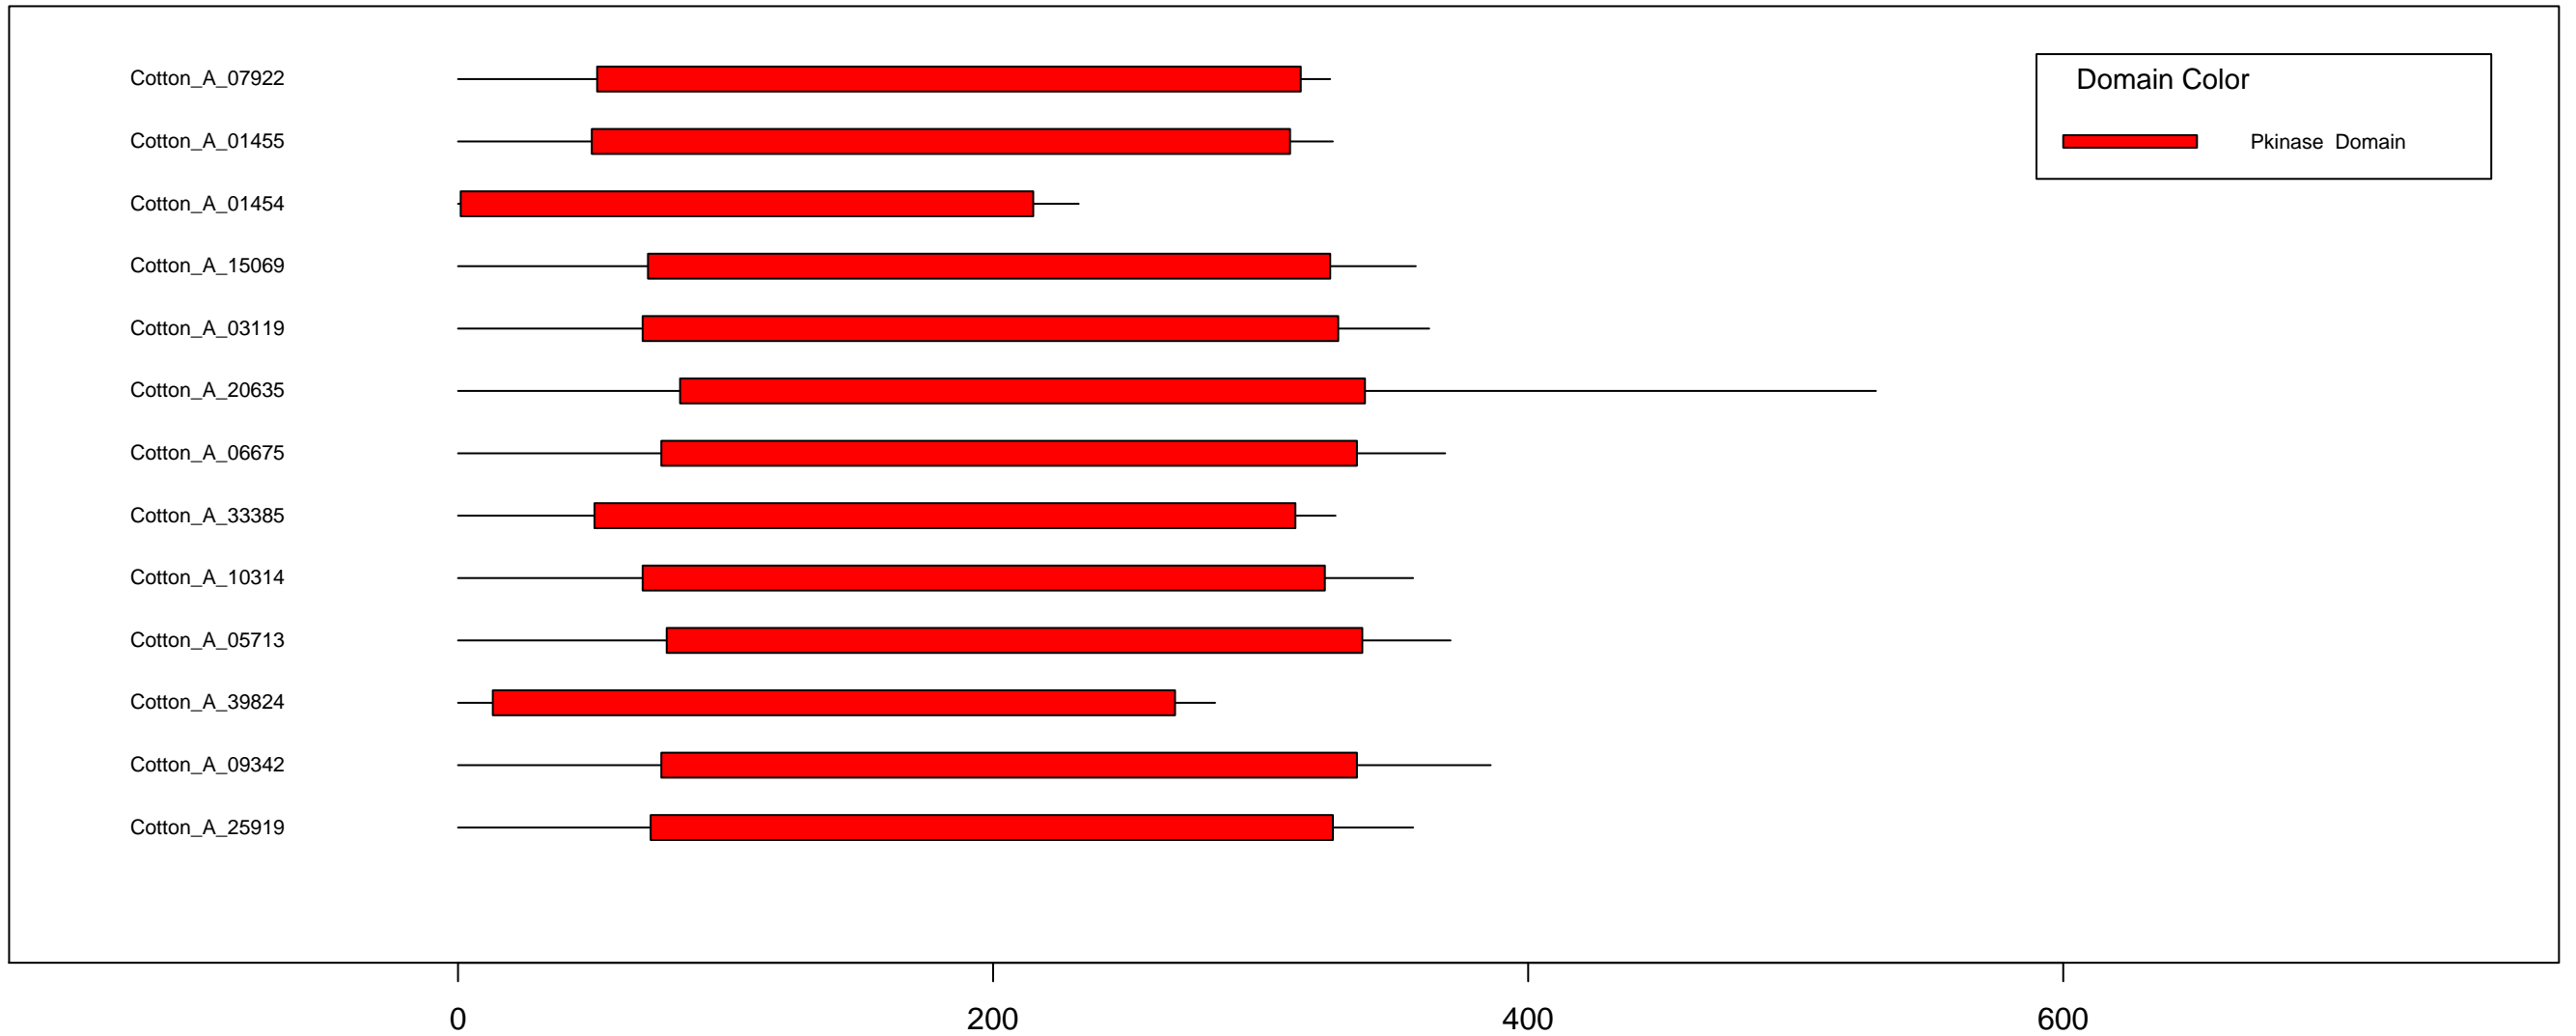

# G.ar STE\_STE-PI domain diagram (all)

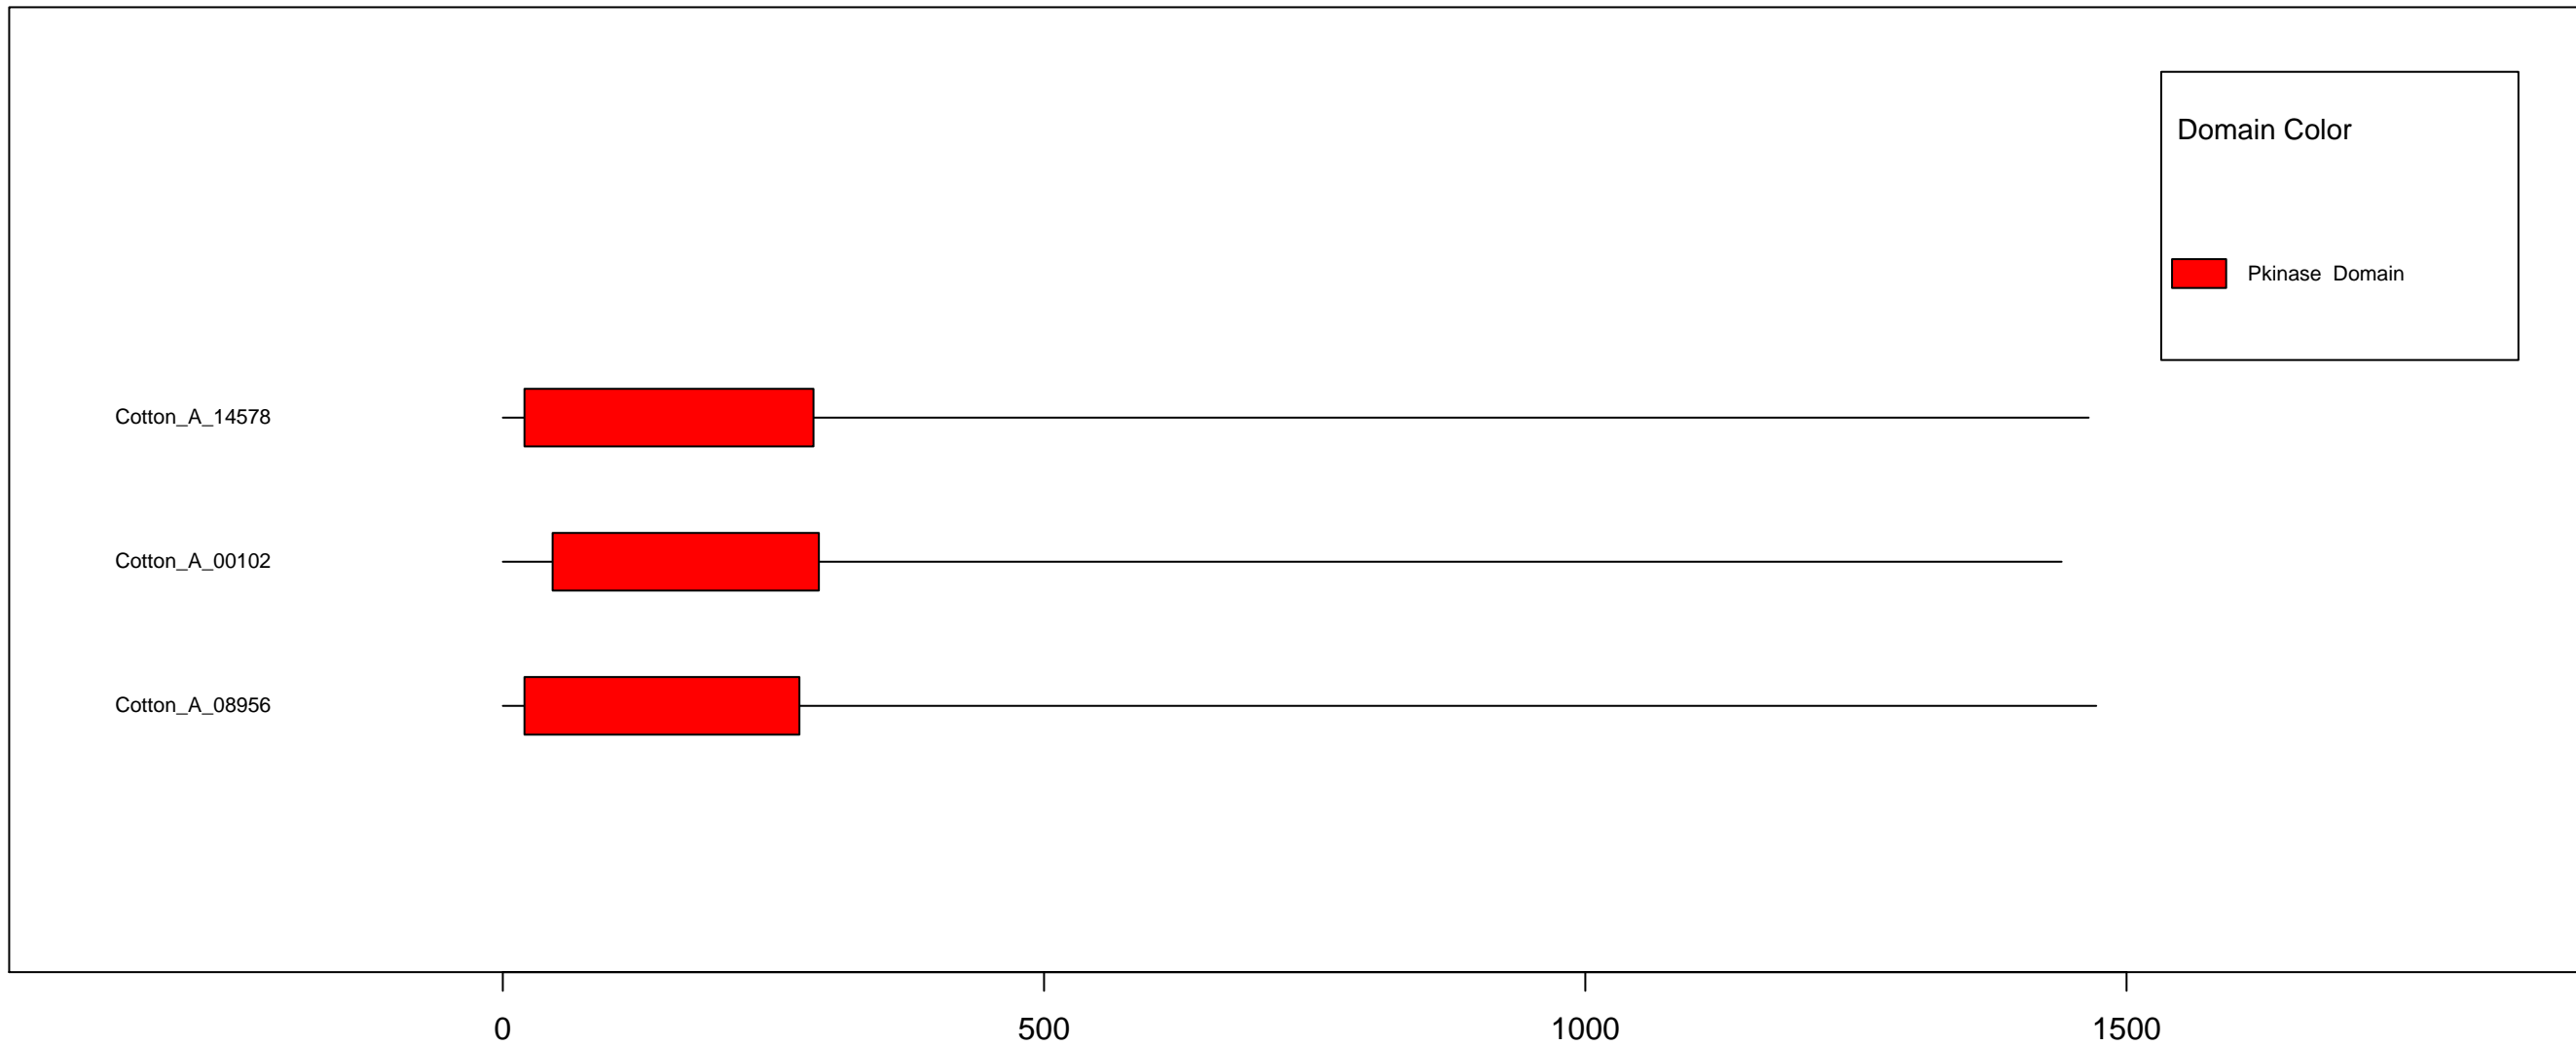

G.ar TKL\_CTR1-DRK-1 domain diagram (all)

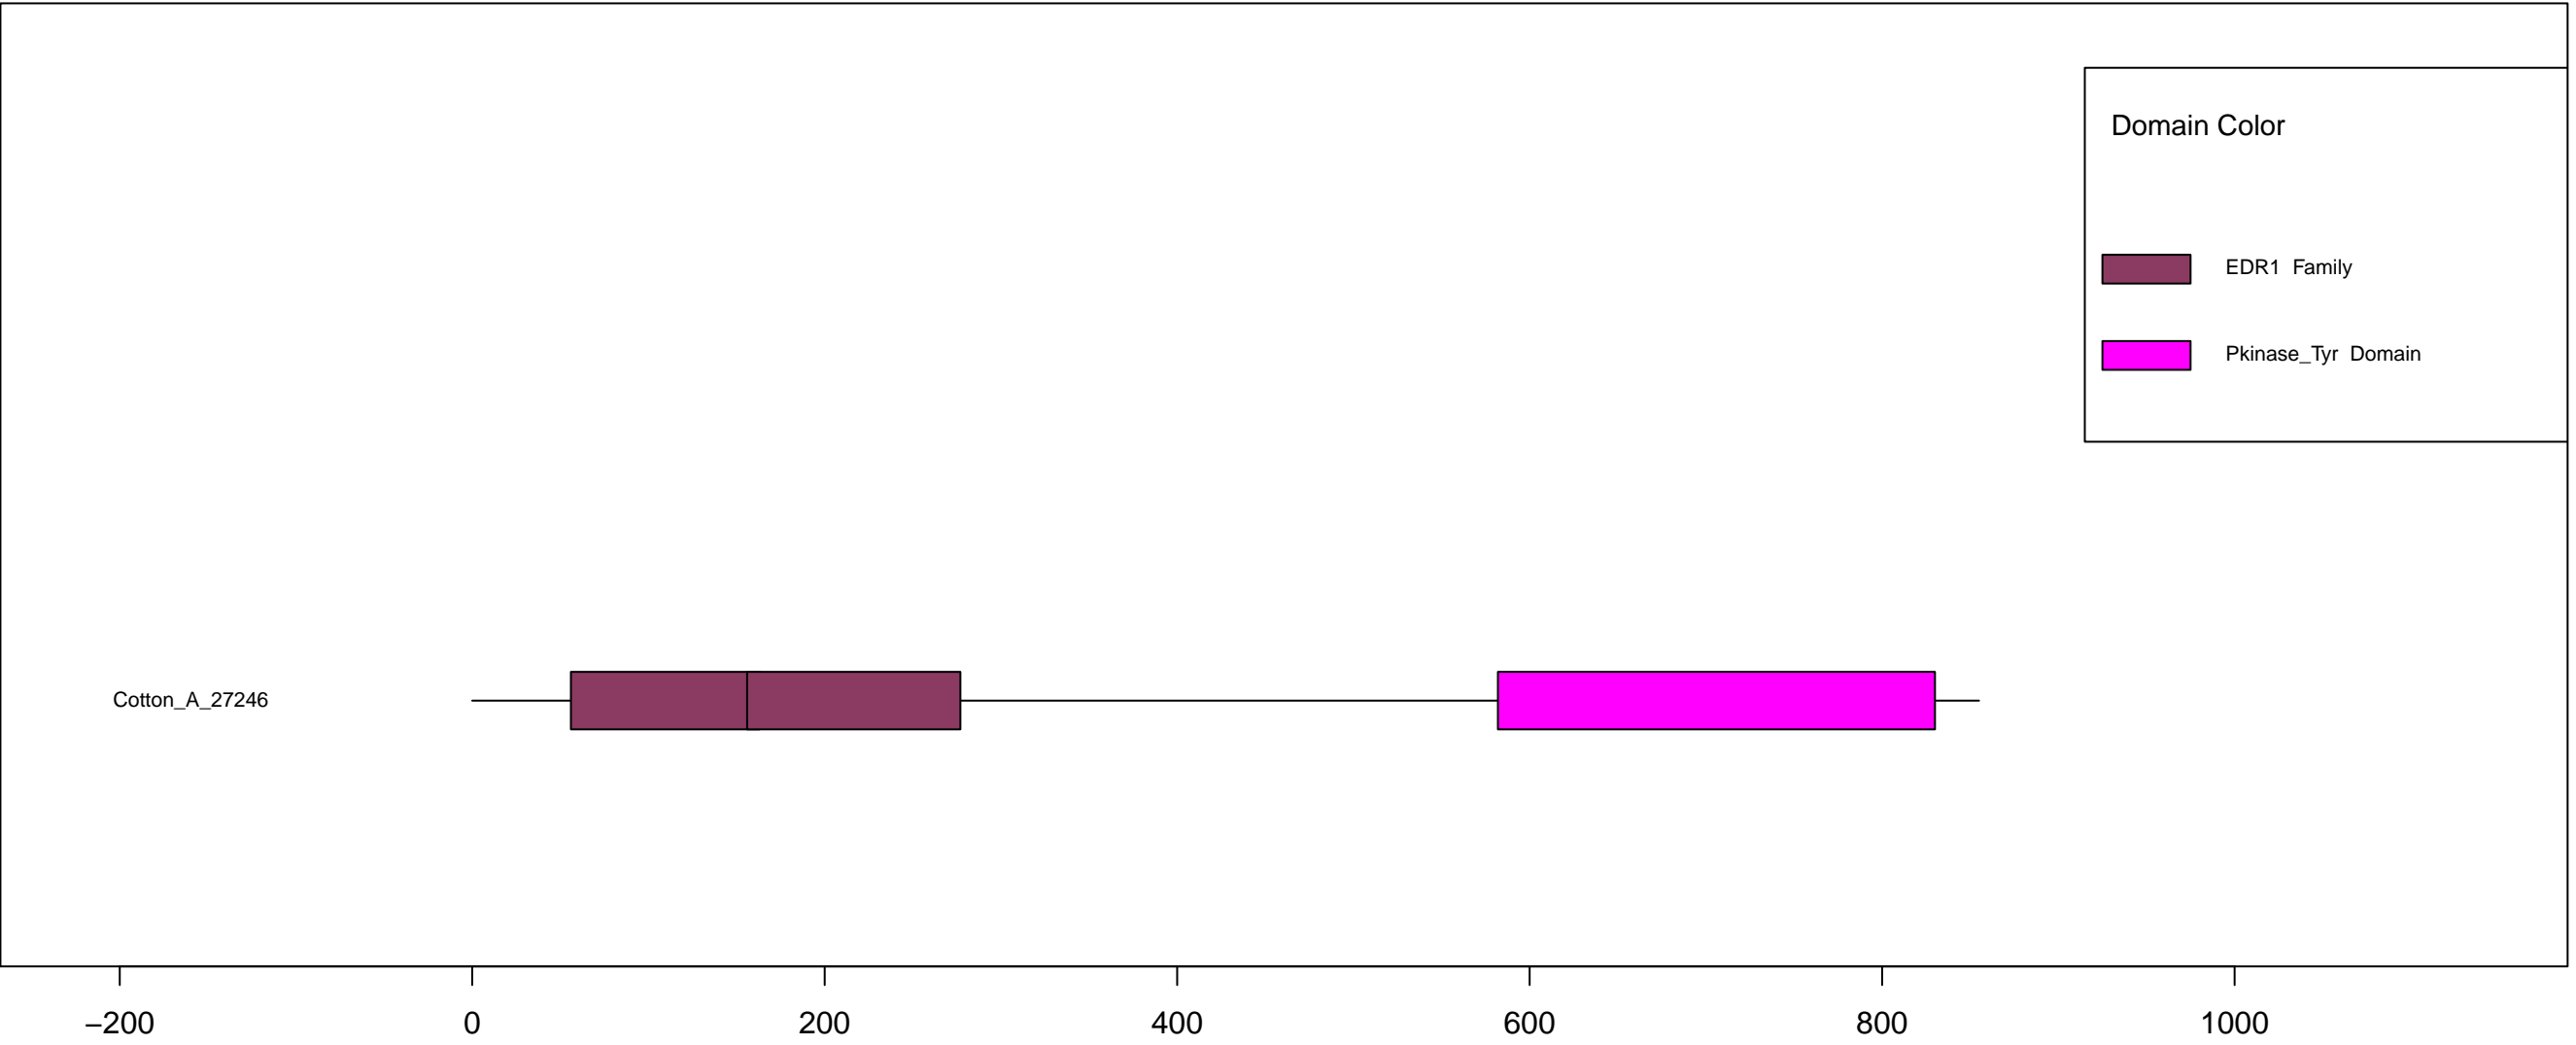

### G.ar TKL\_CTR1-DRK-2 domain diagram (all)

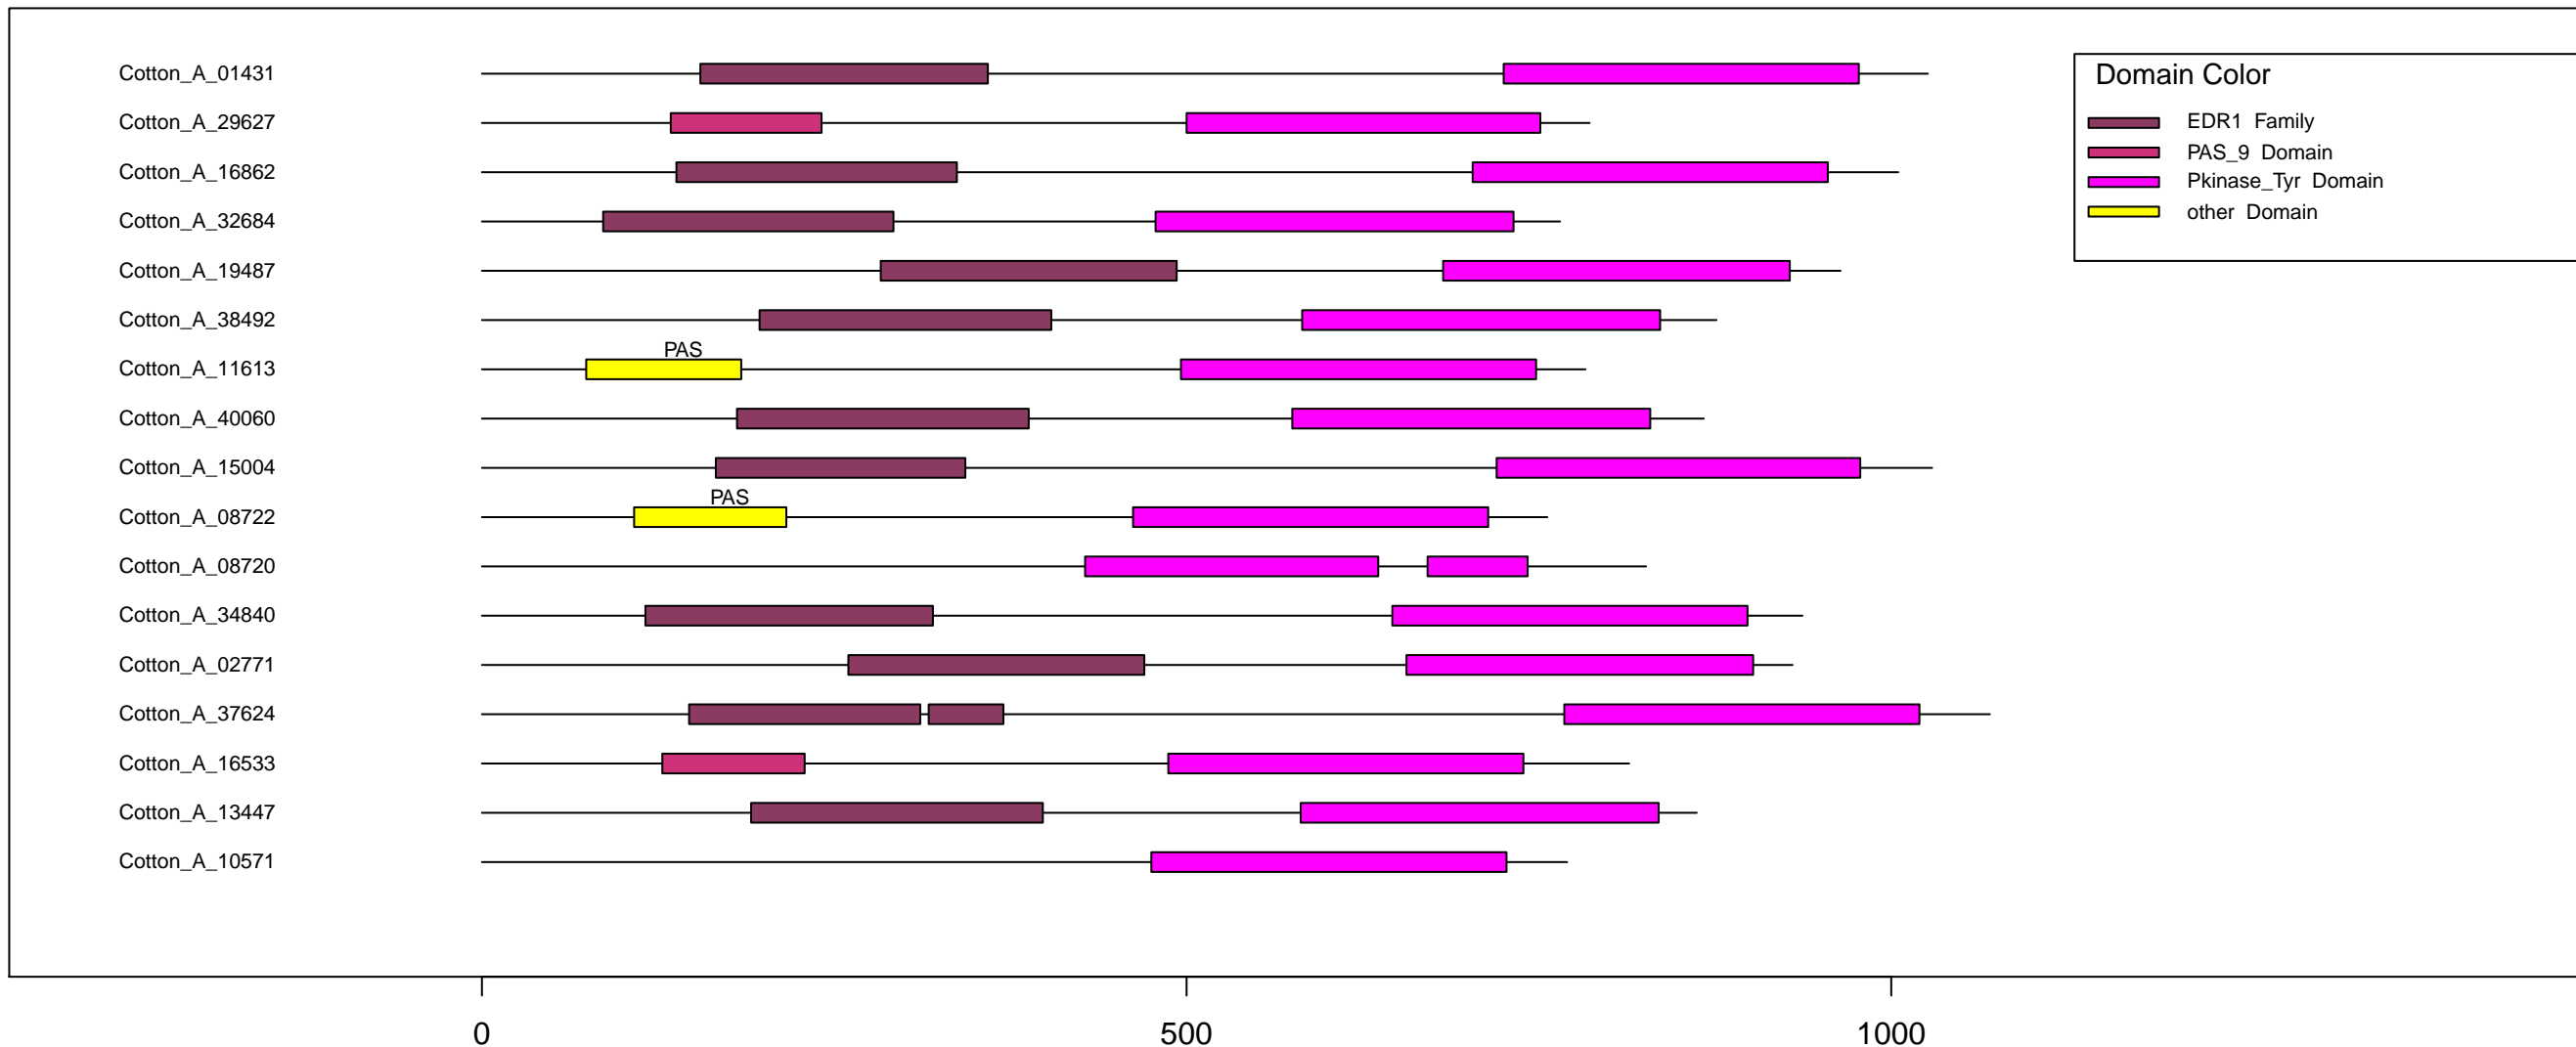

# G.ar TKL\_Gdt domain diagram (all)

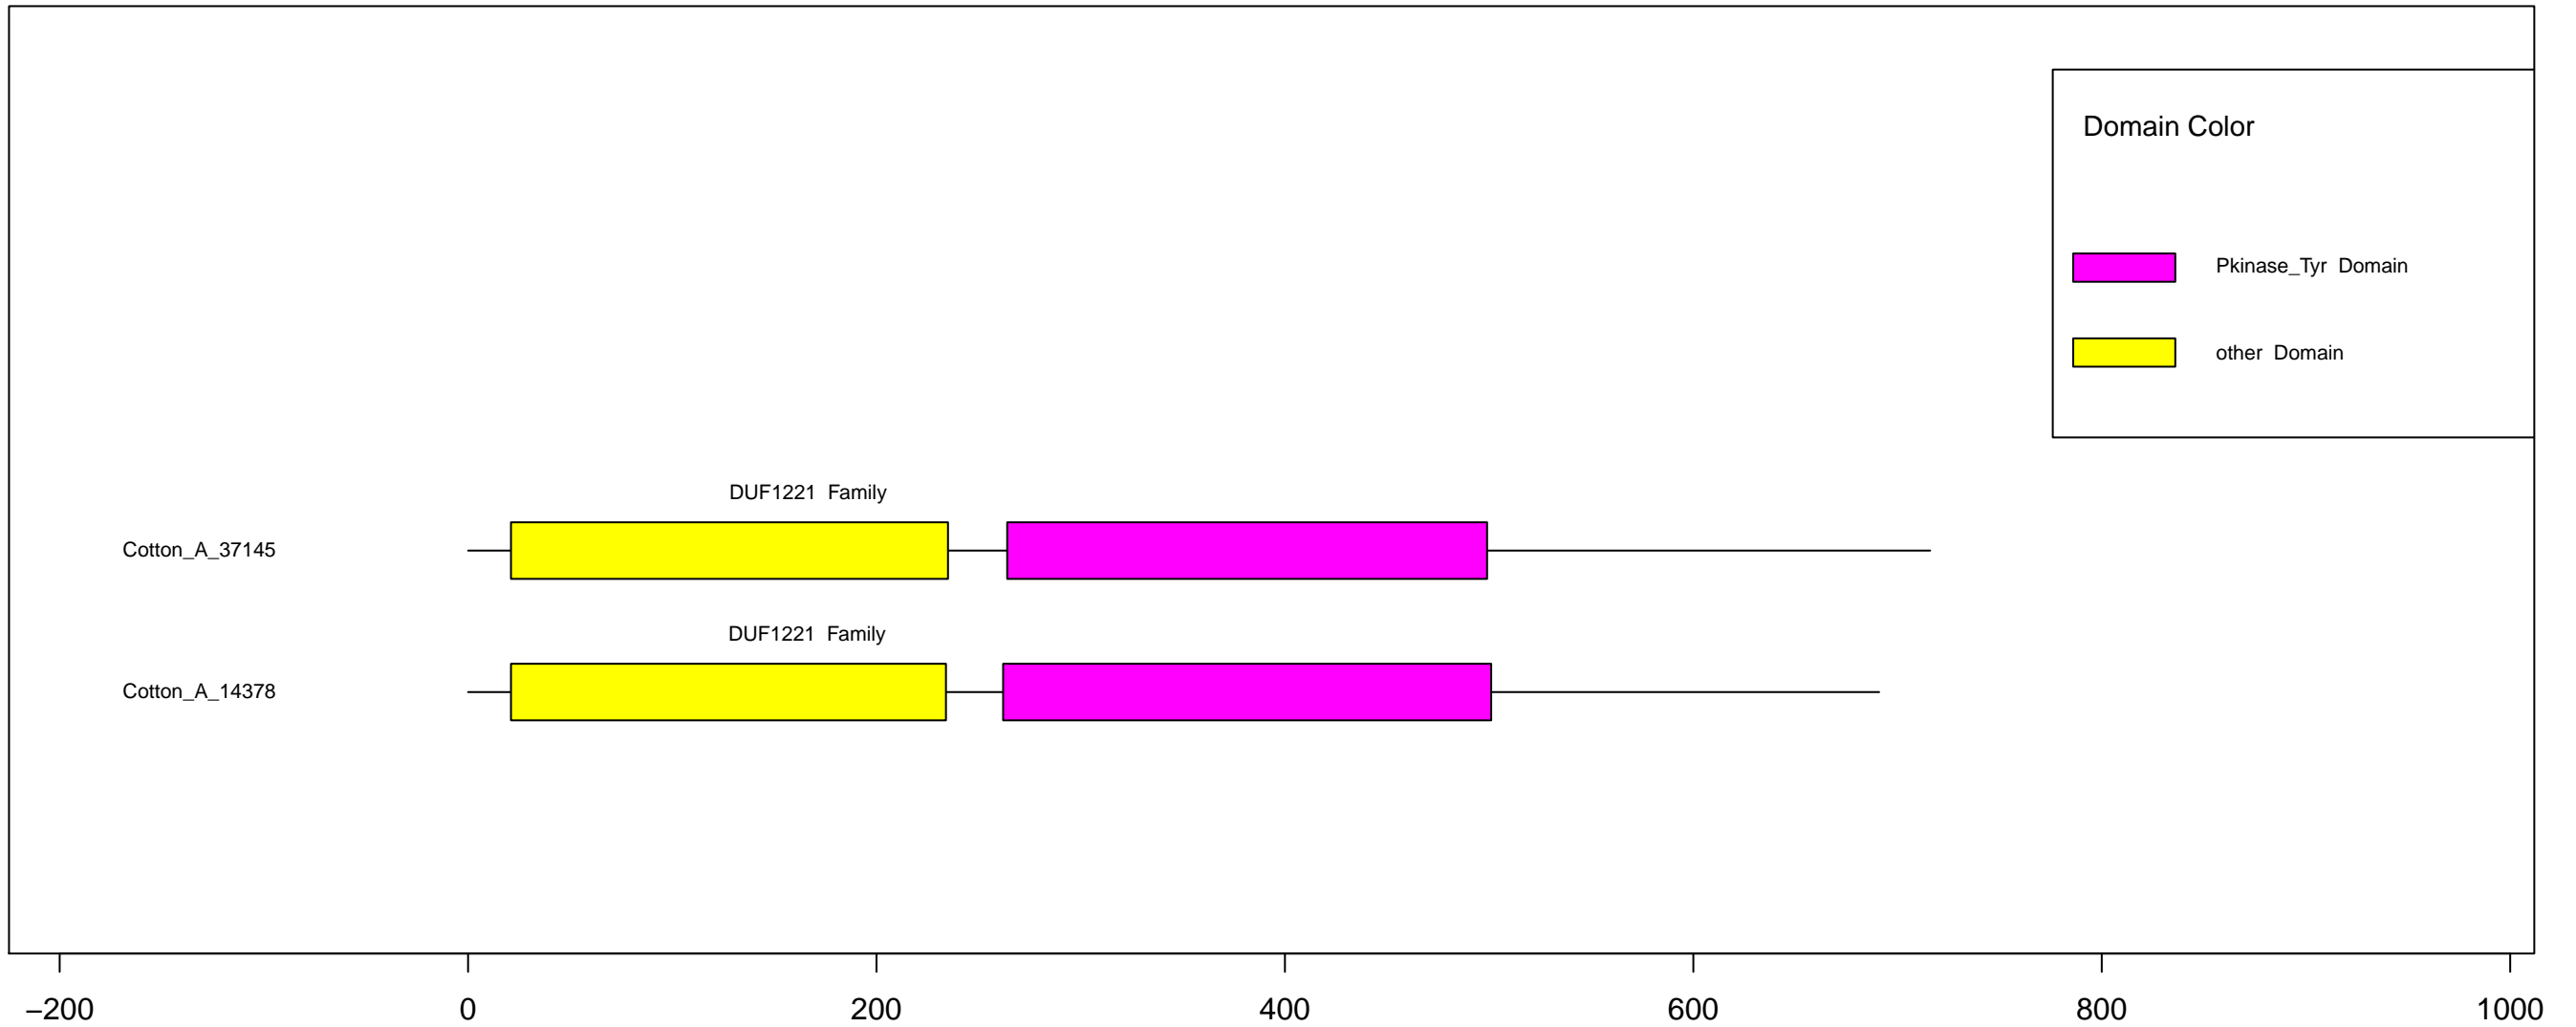

# G.ar TKL-PI-1 domain diagram (all)

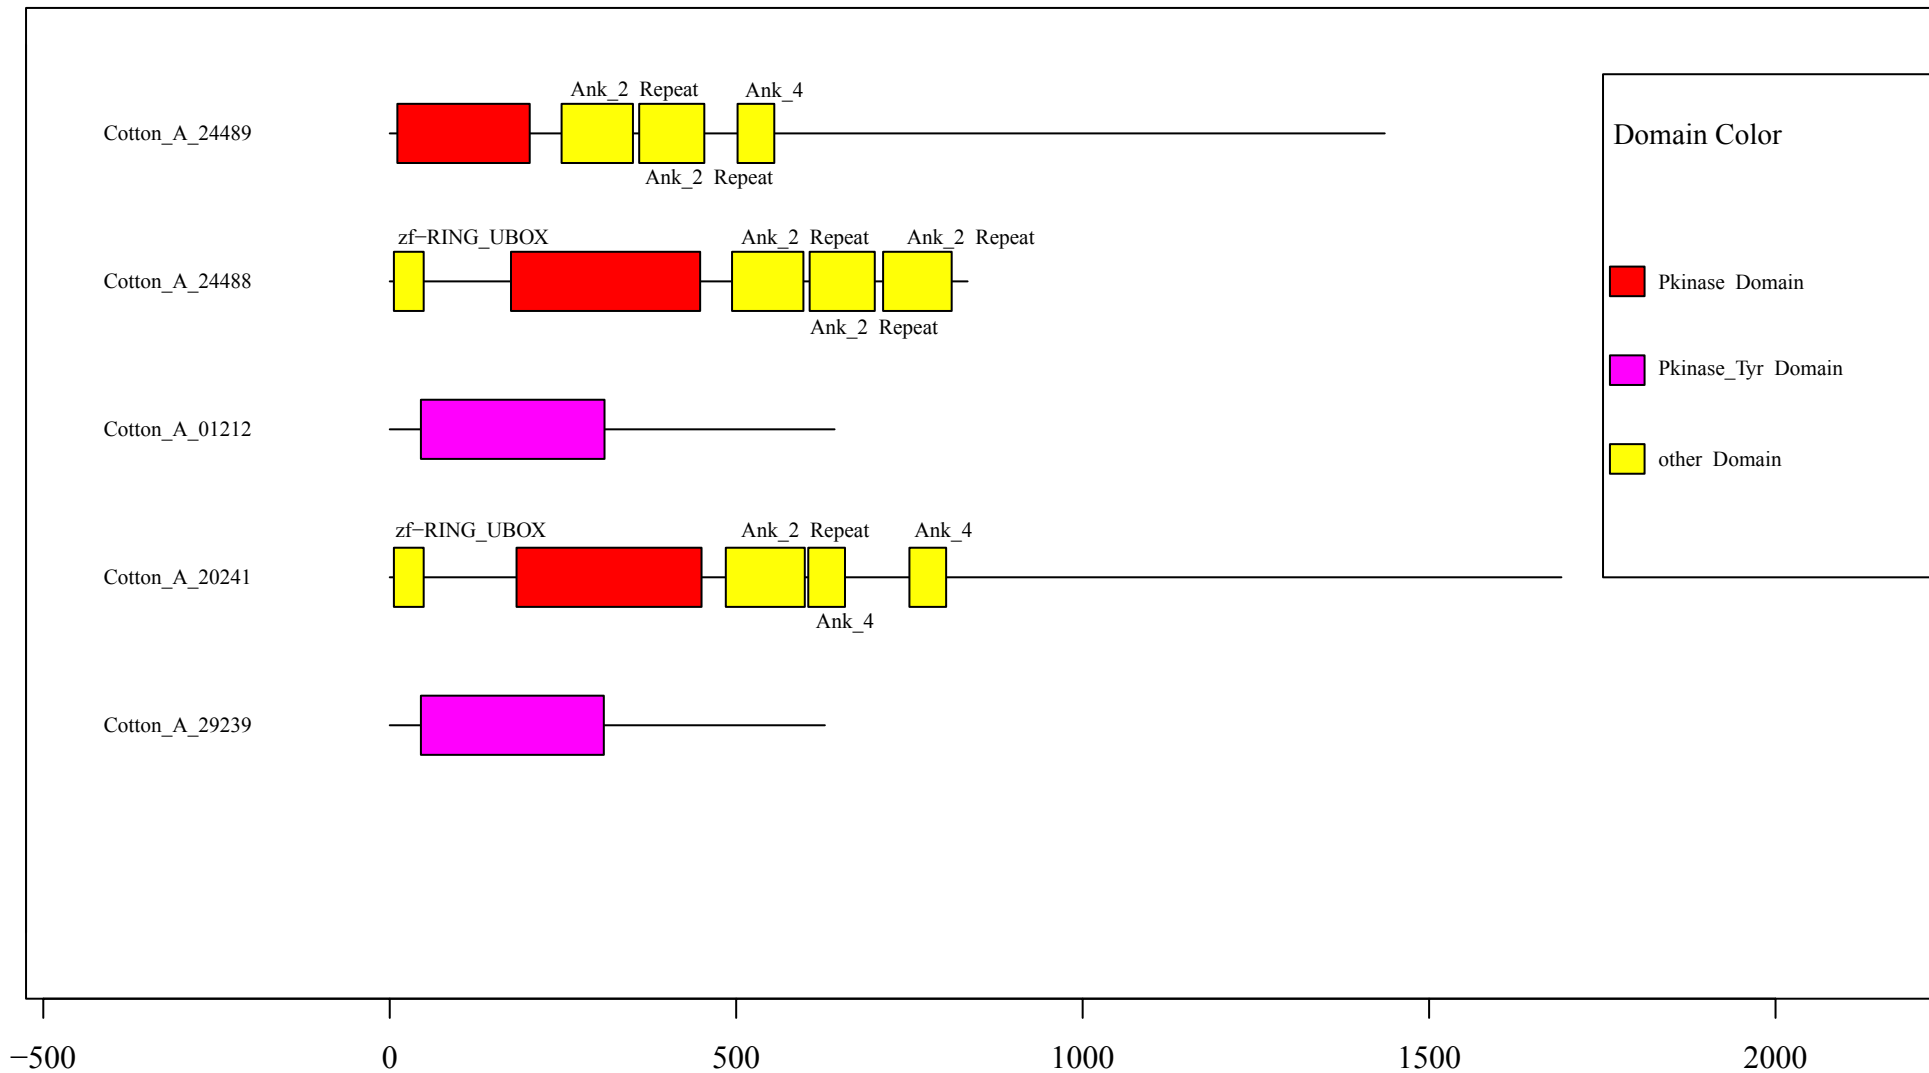

# G.ar TKL-PI-2 domain diagram (all)

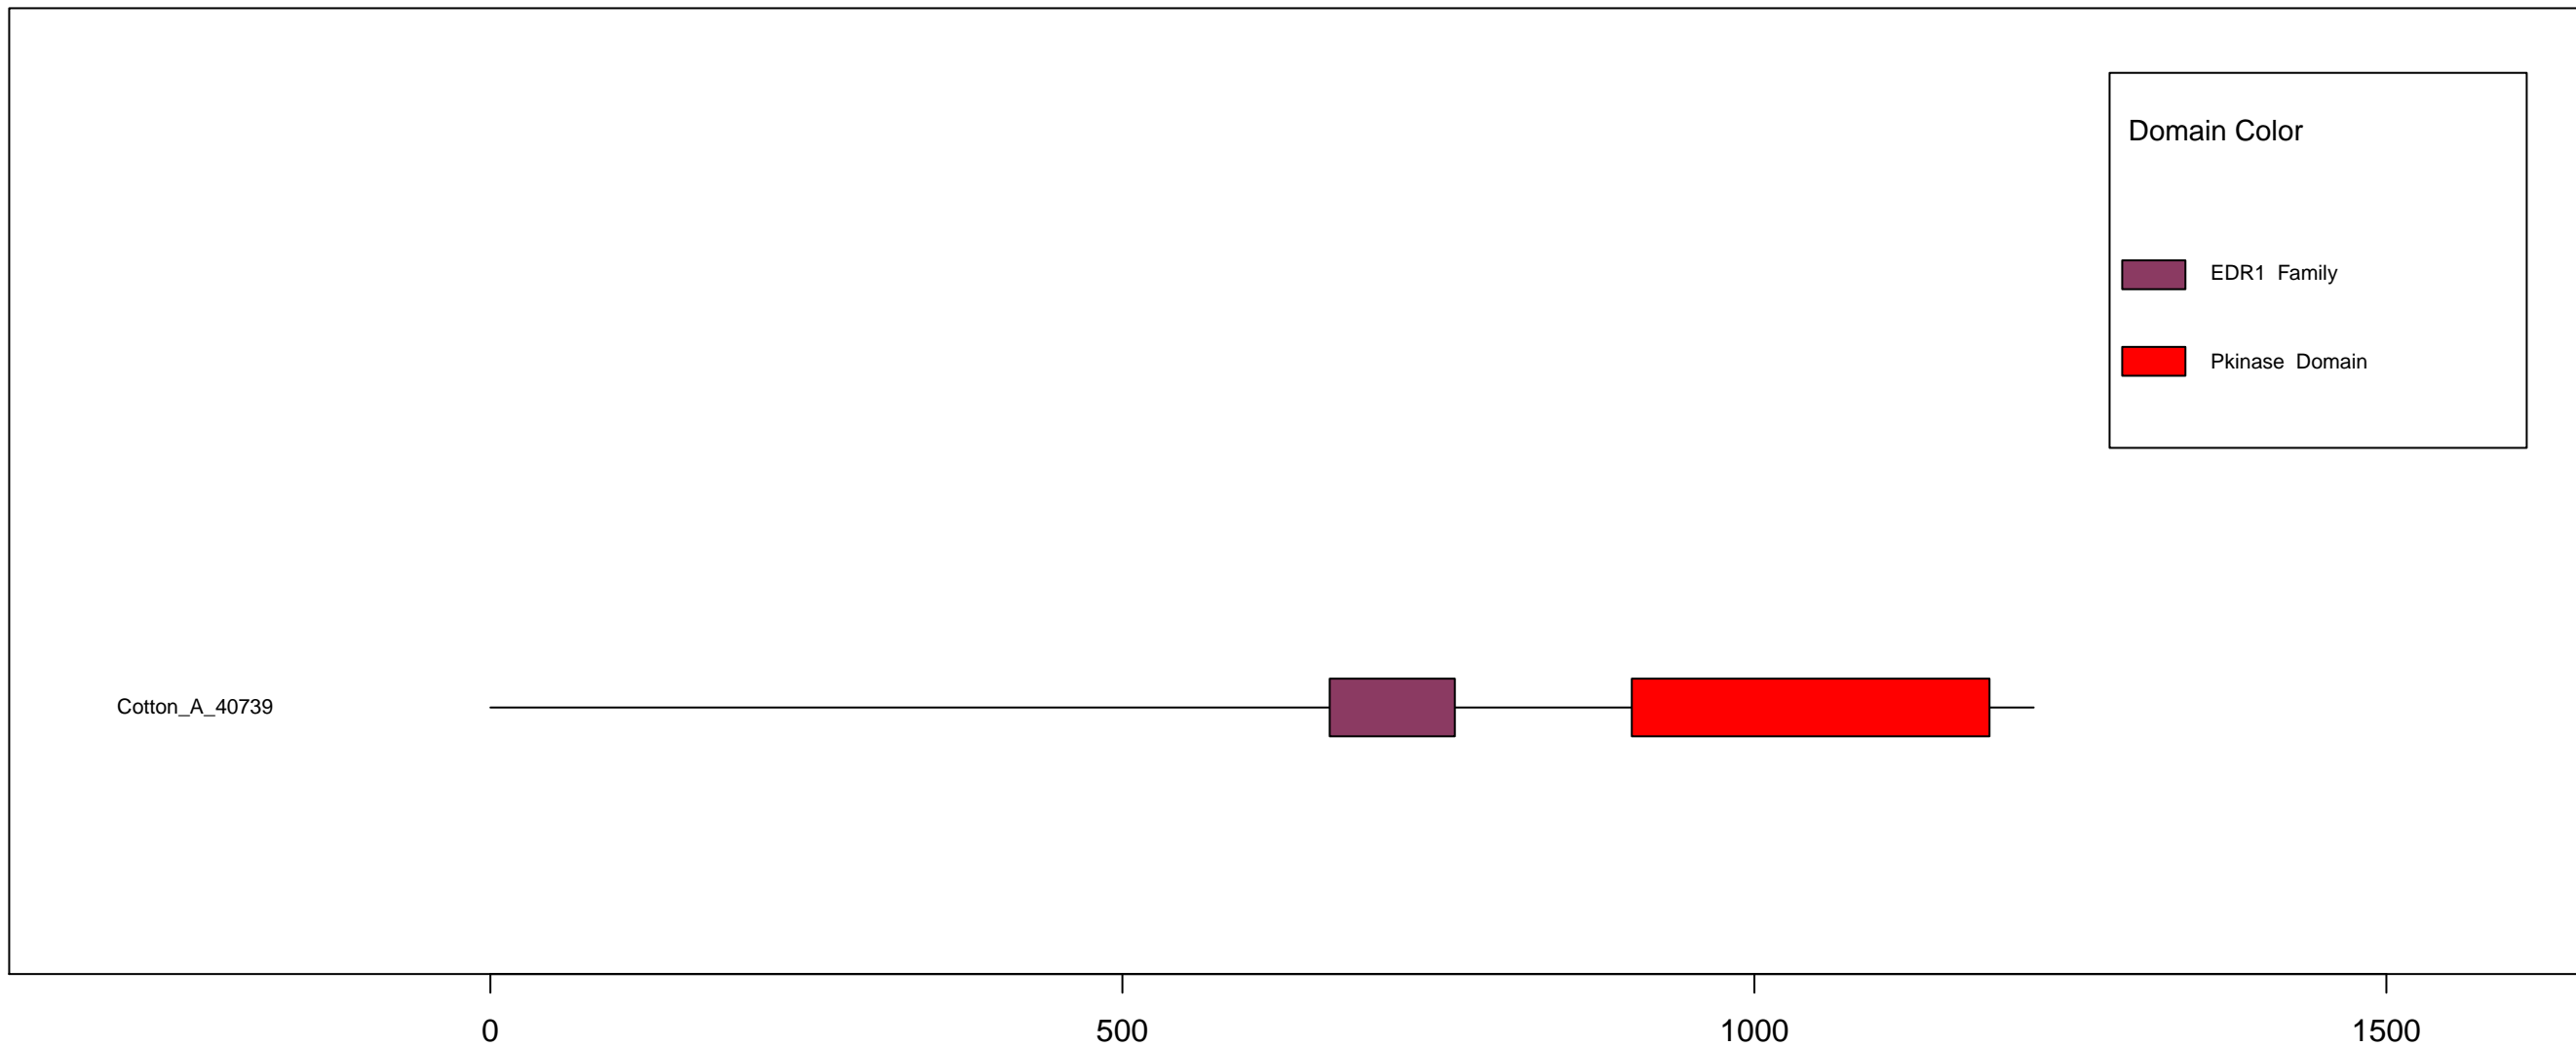

# G.ar TKL-PI-3 domain diagram (all)

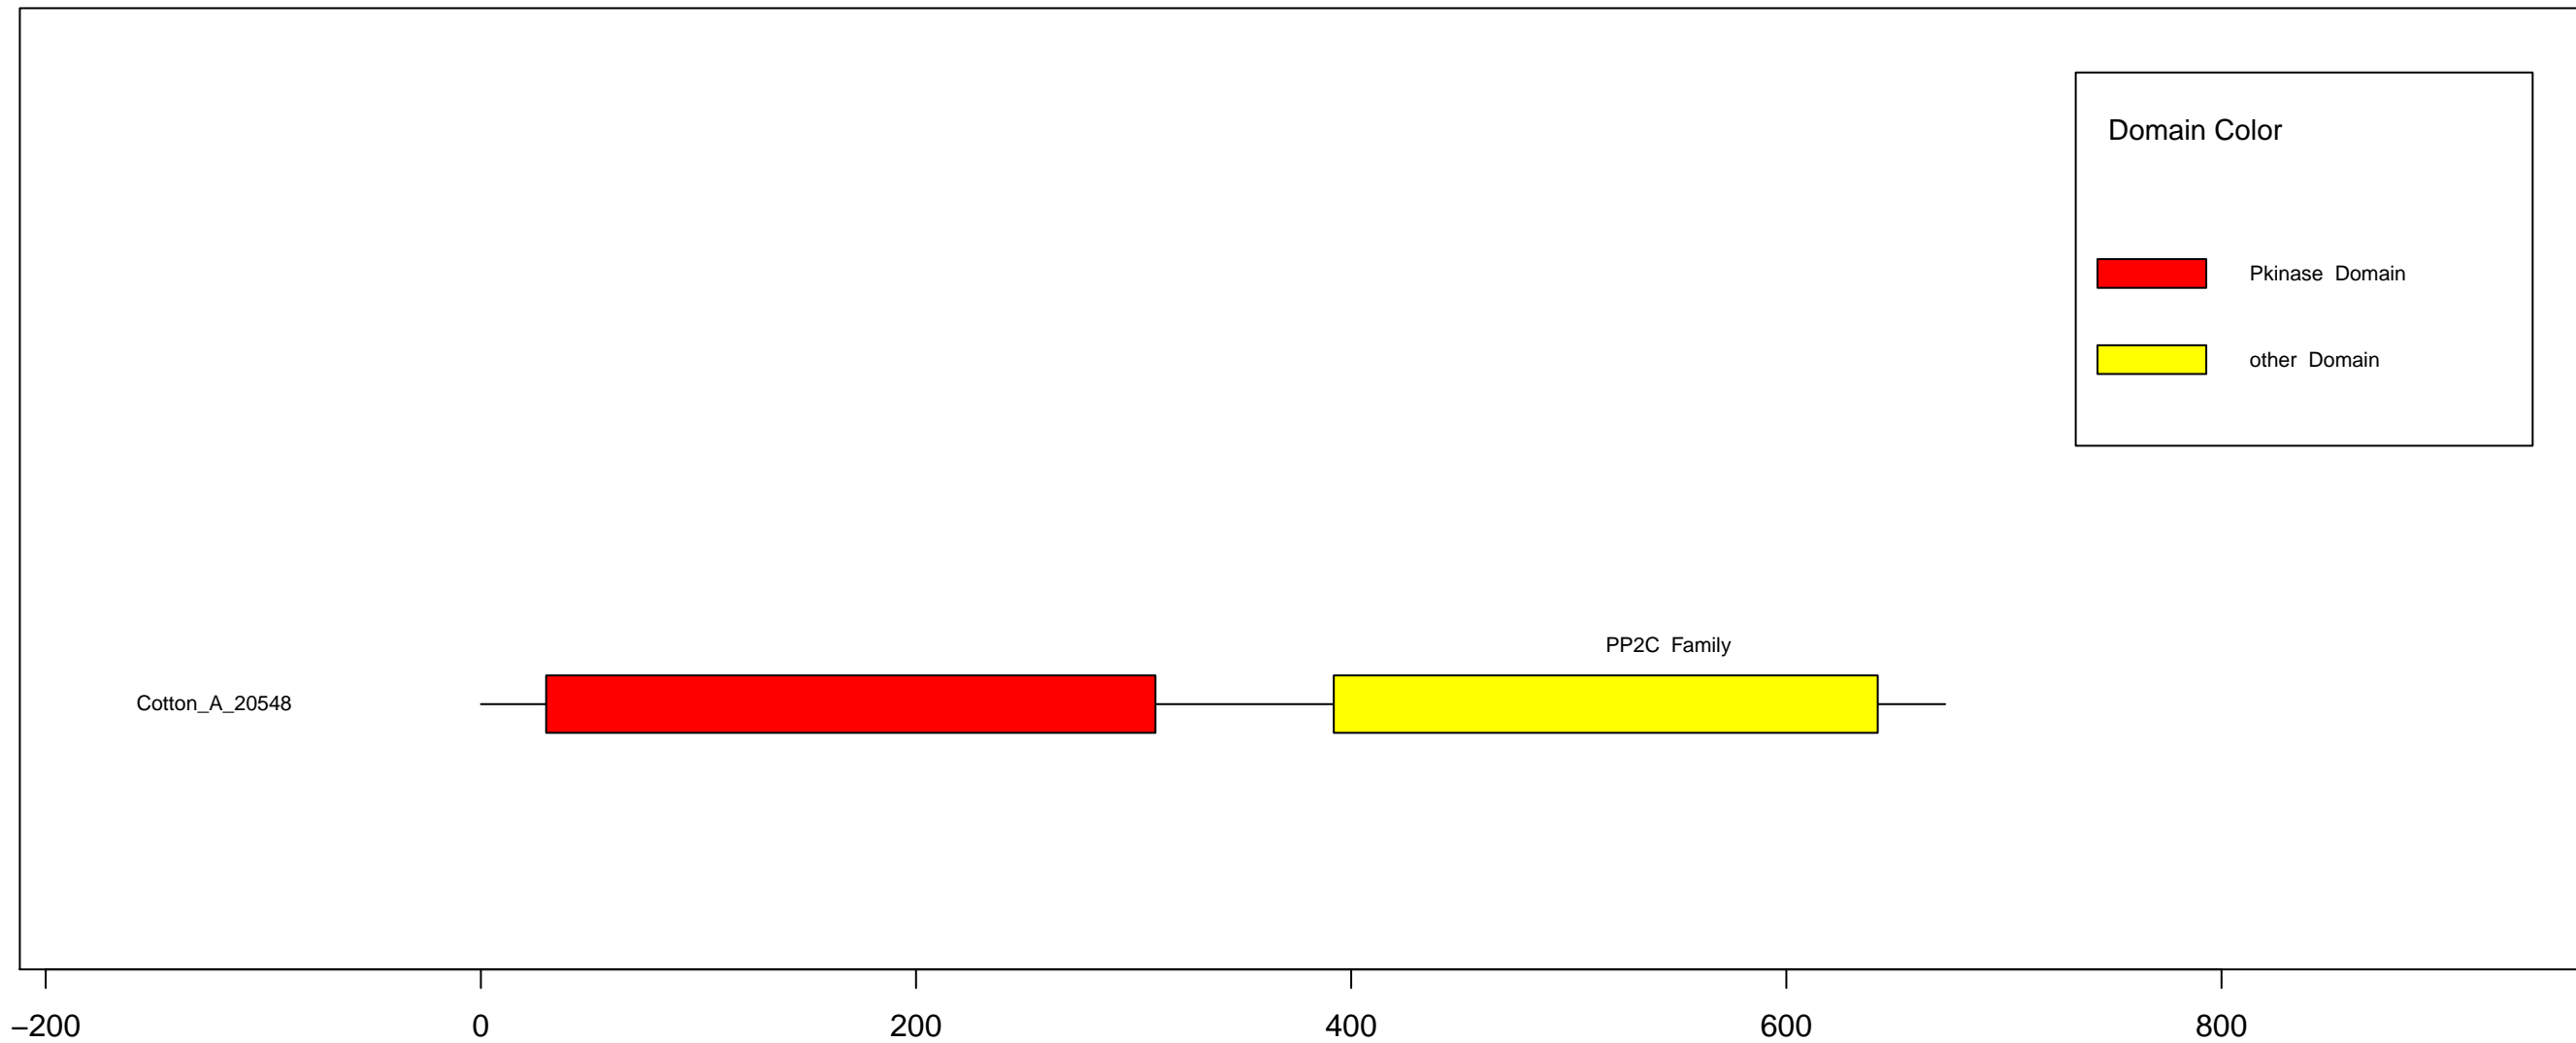



# G.ar TKL-PI-4 domain diagram (part 1)

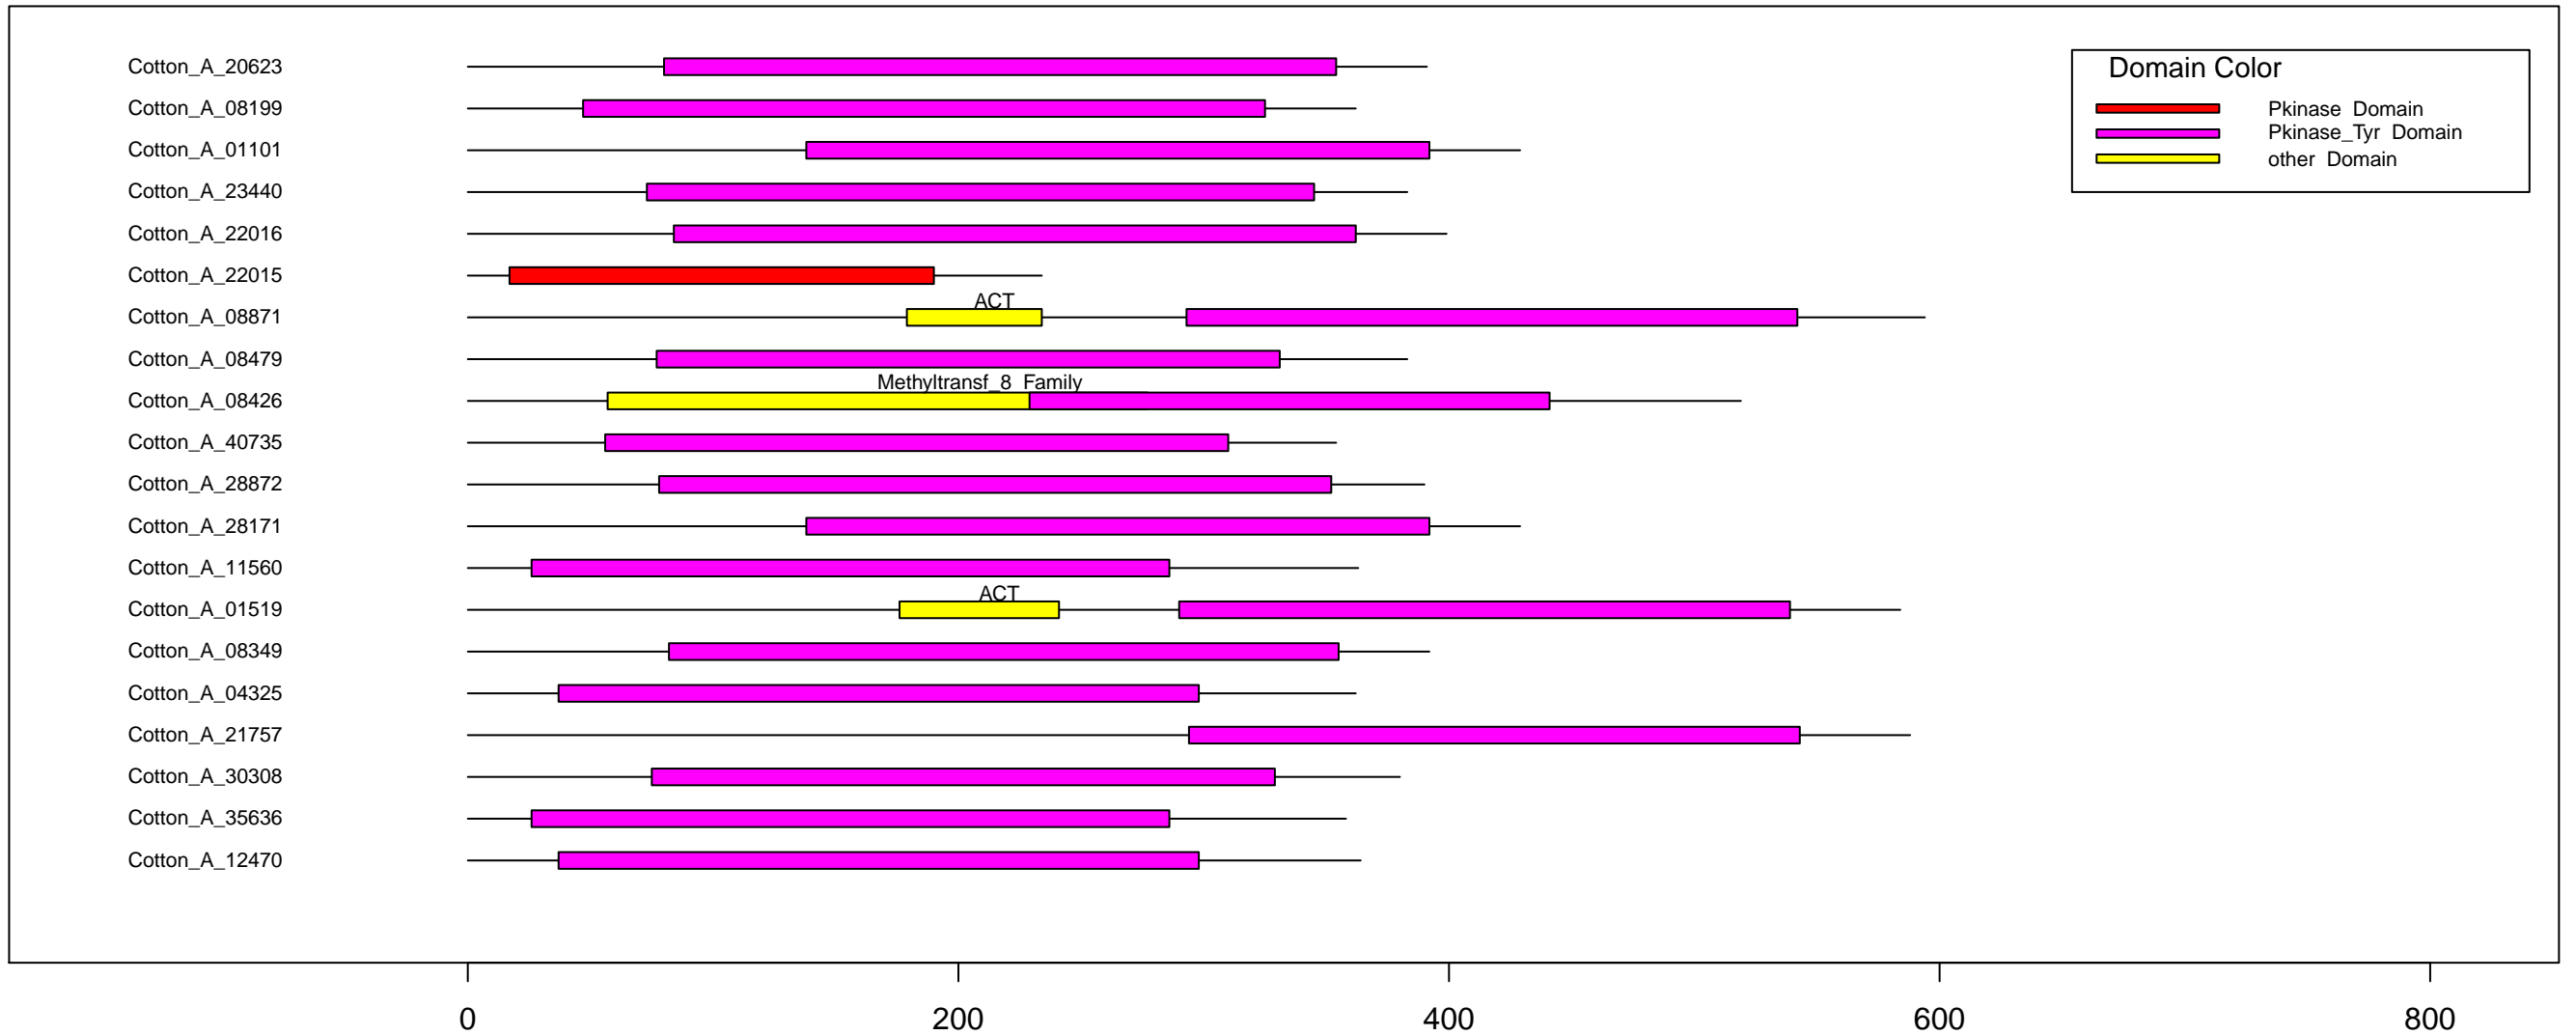

### G.ar TKL-PI-4 domain diagram (part 2)

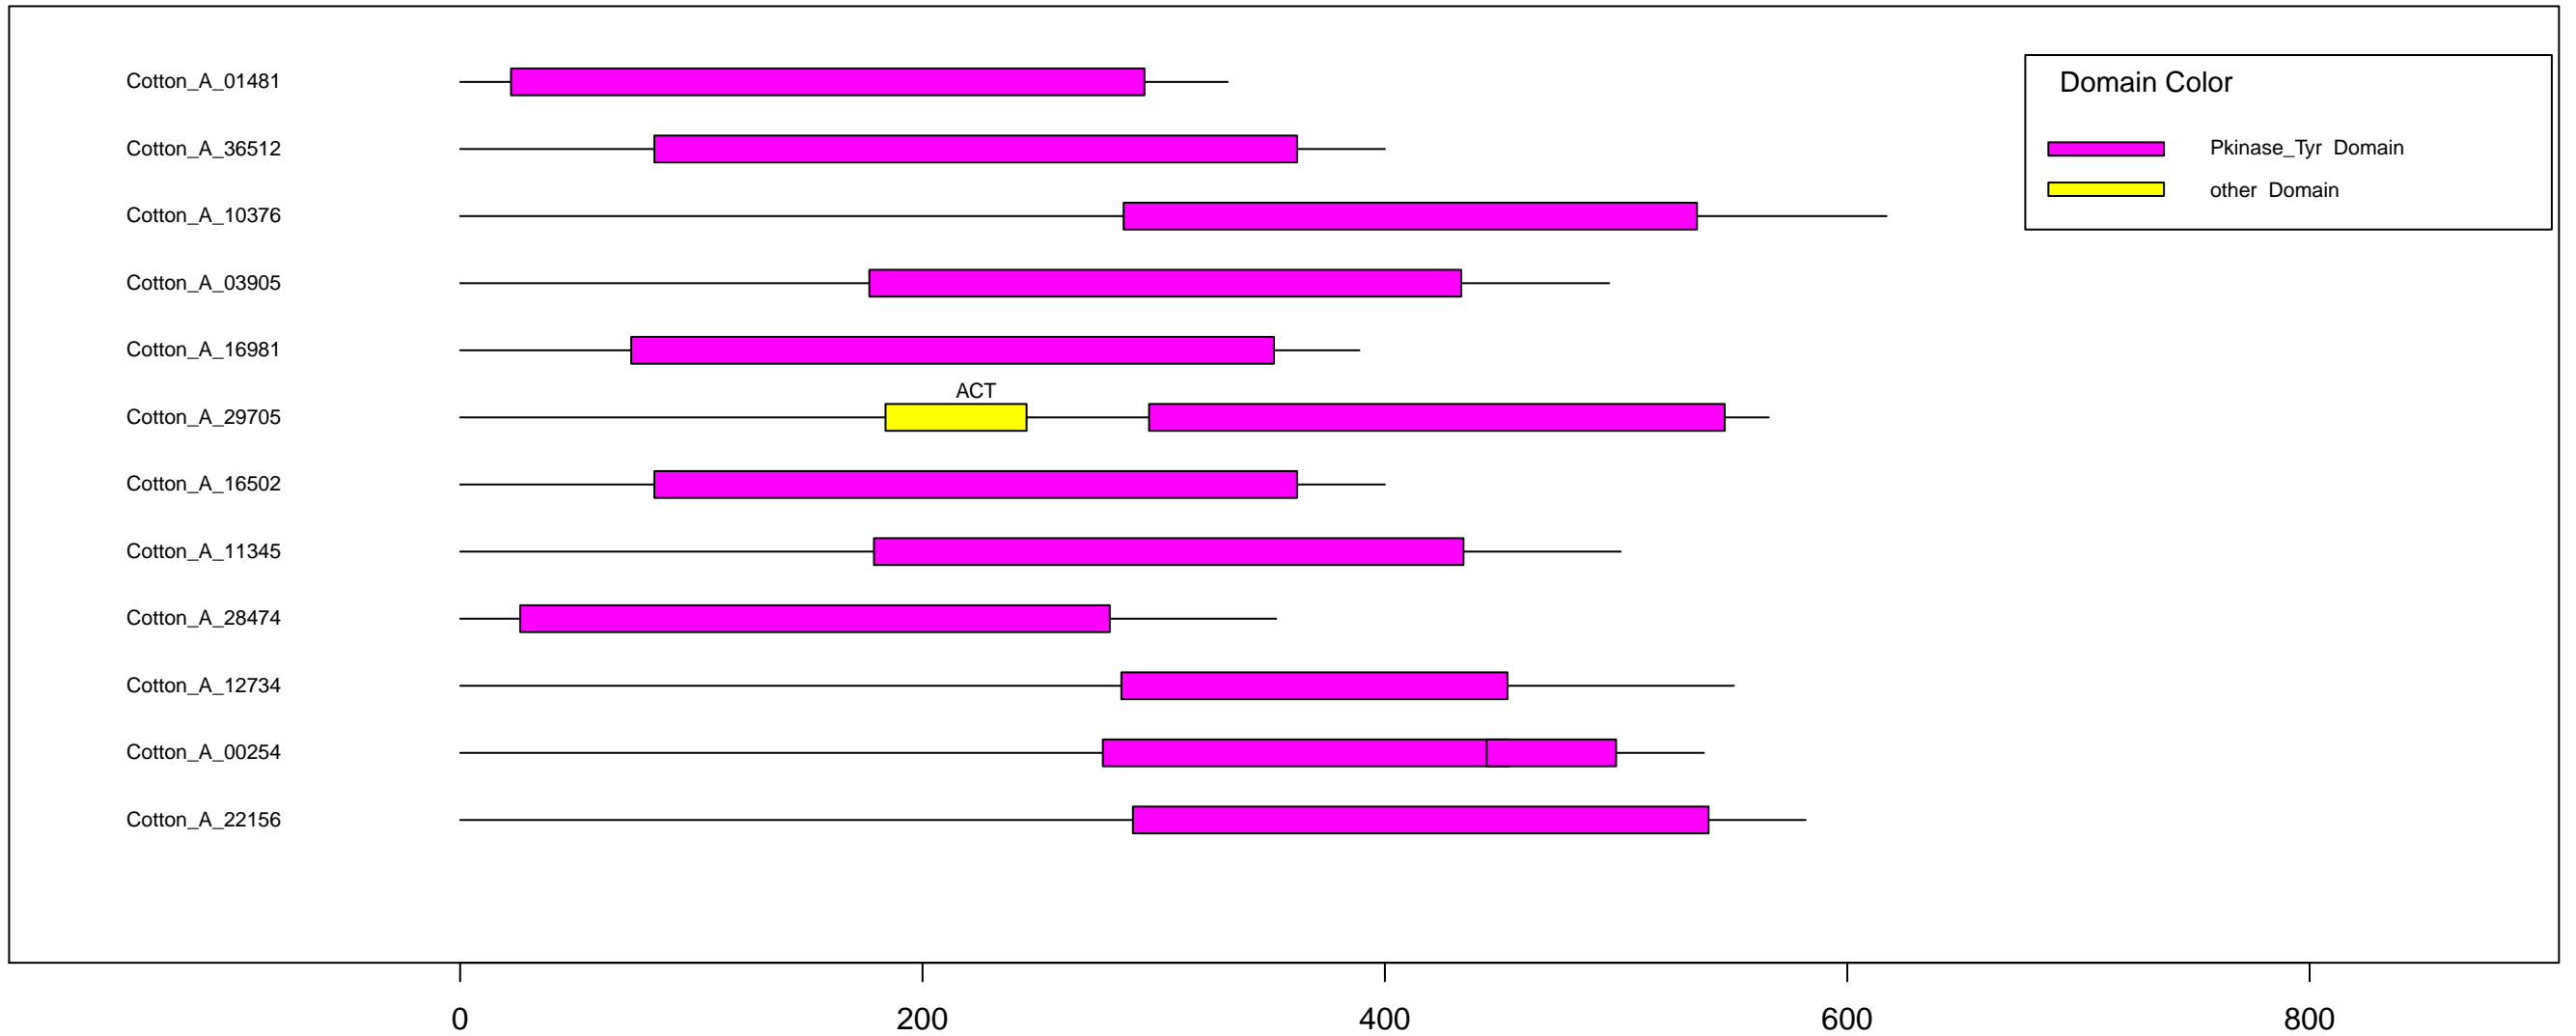

# G.ar TKL-PI-5 domain diagram (all)

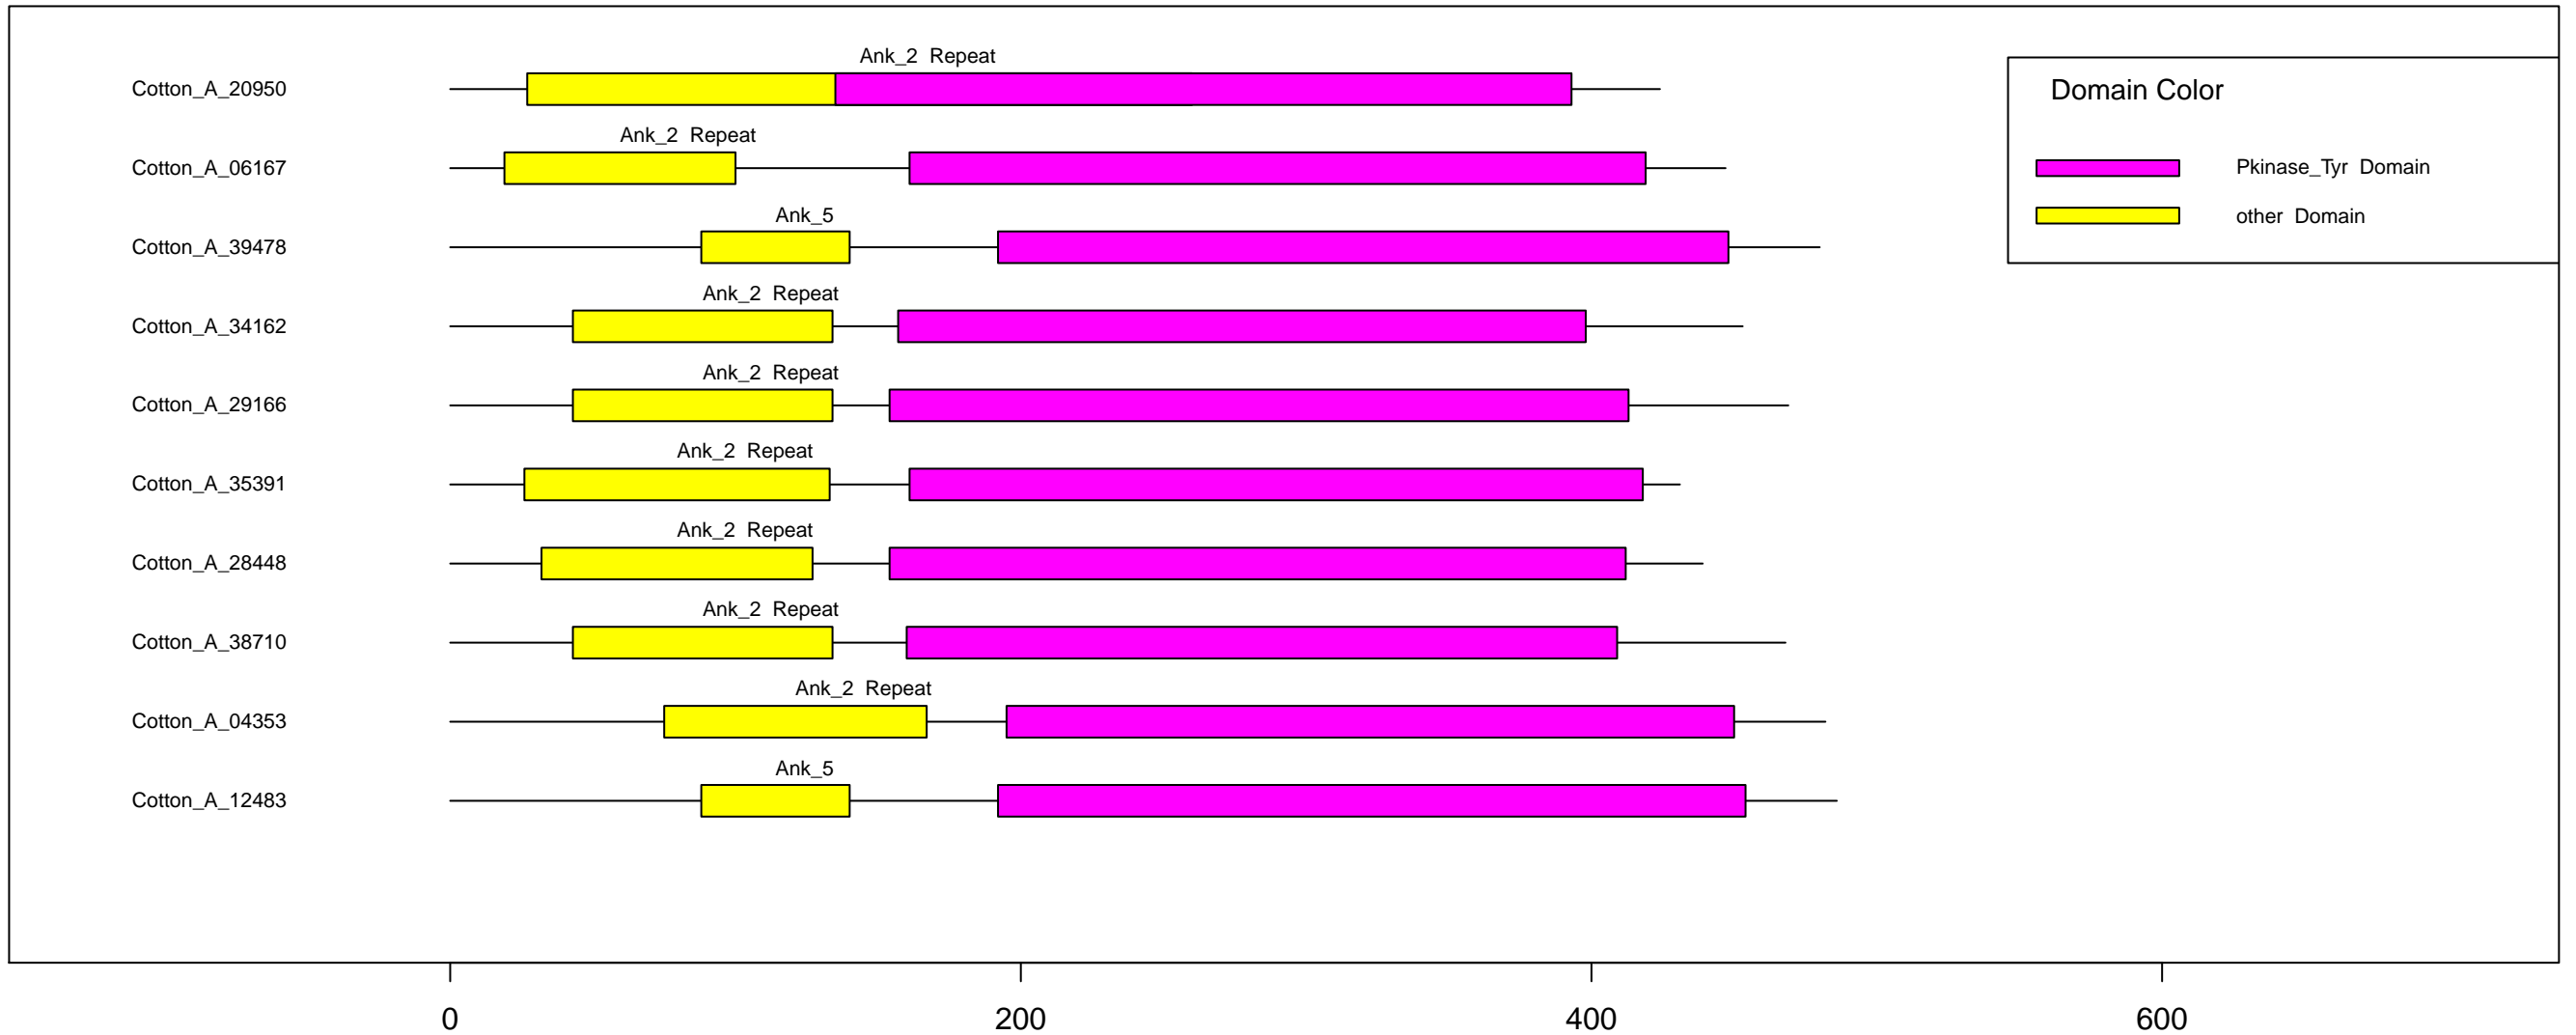

# G.ar TKL-PI-6 domain diagram (all)

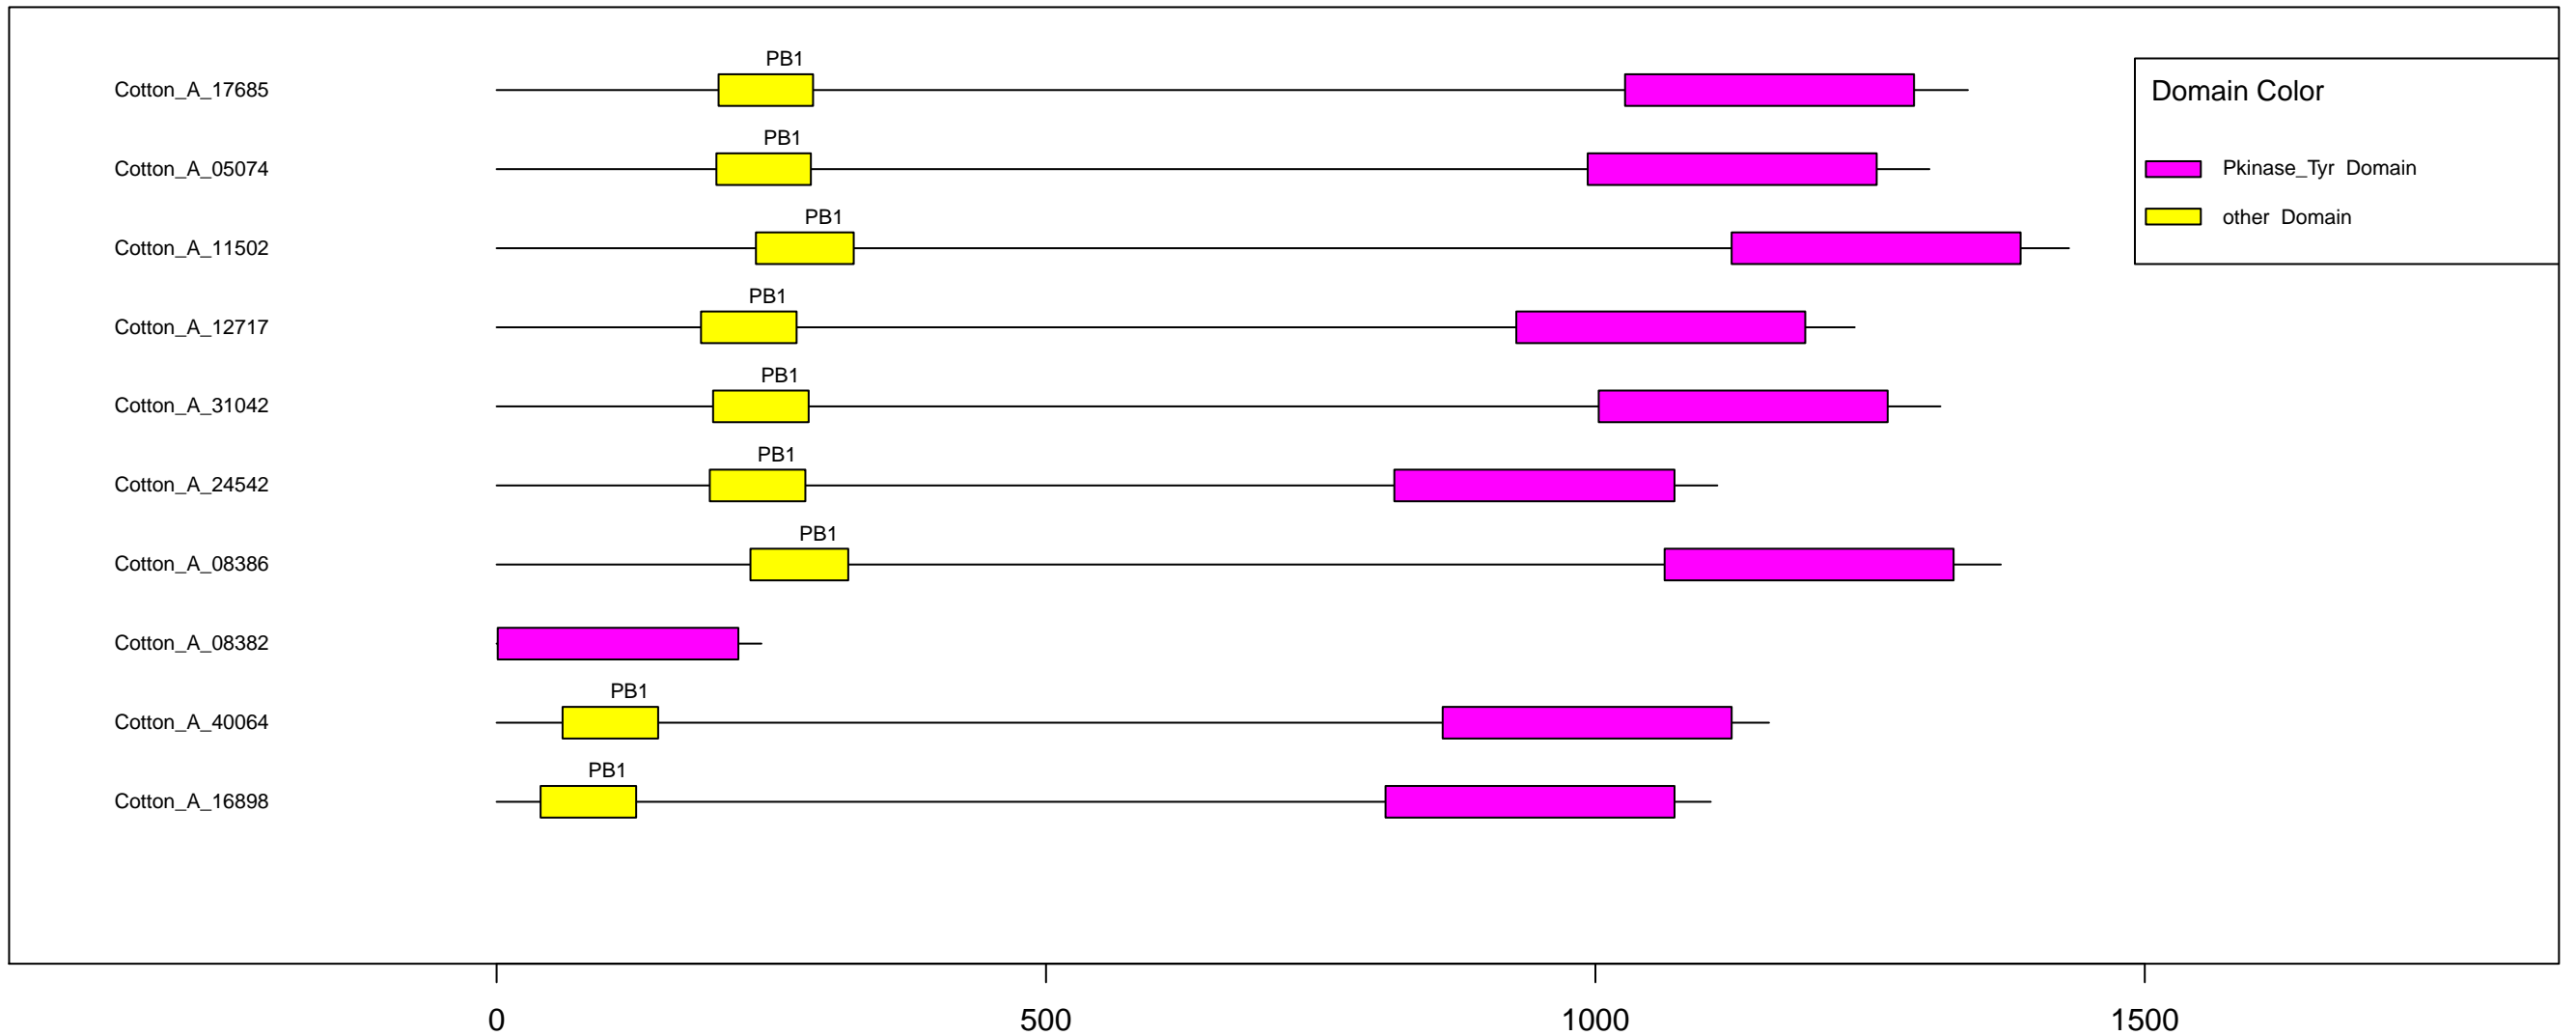

# G.ar TKL-PI-7 domain diagram (all)

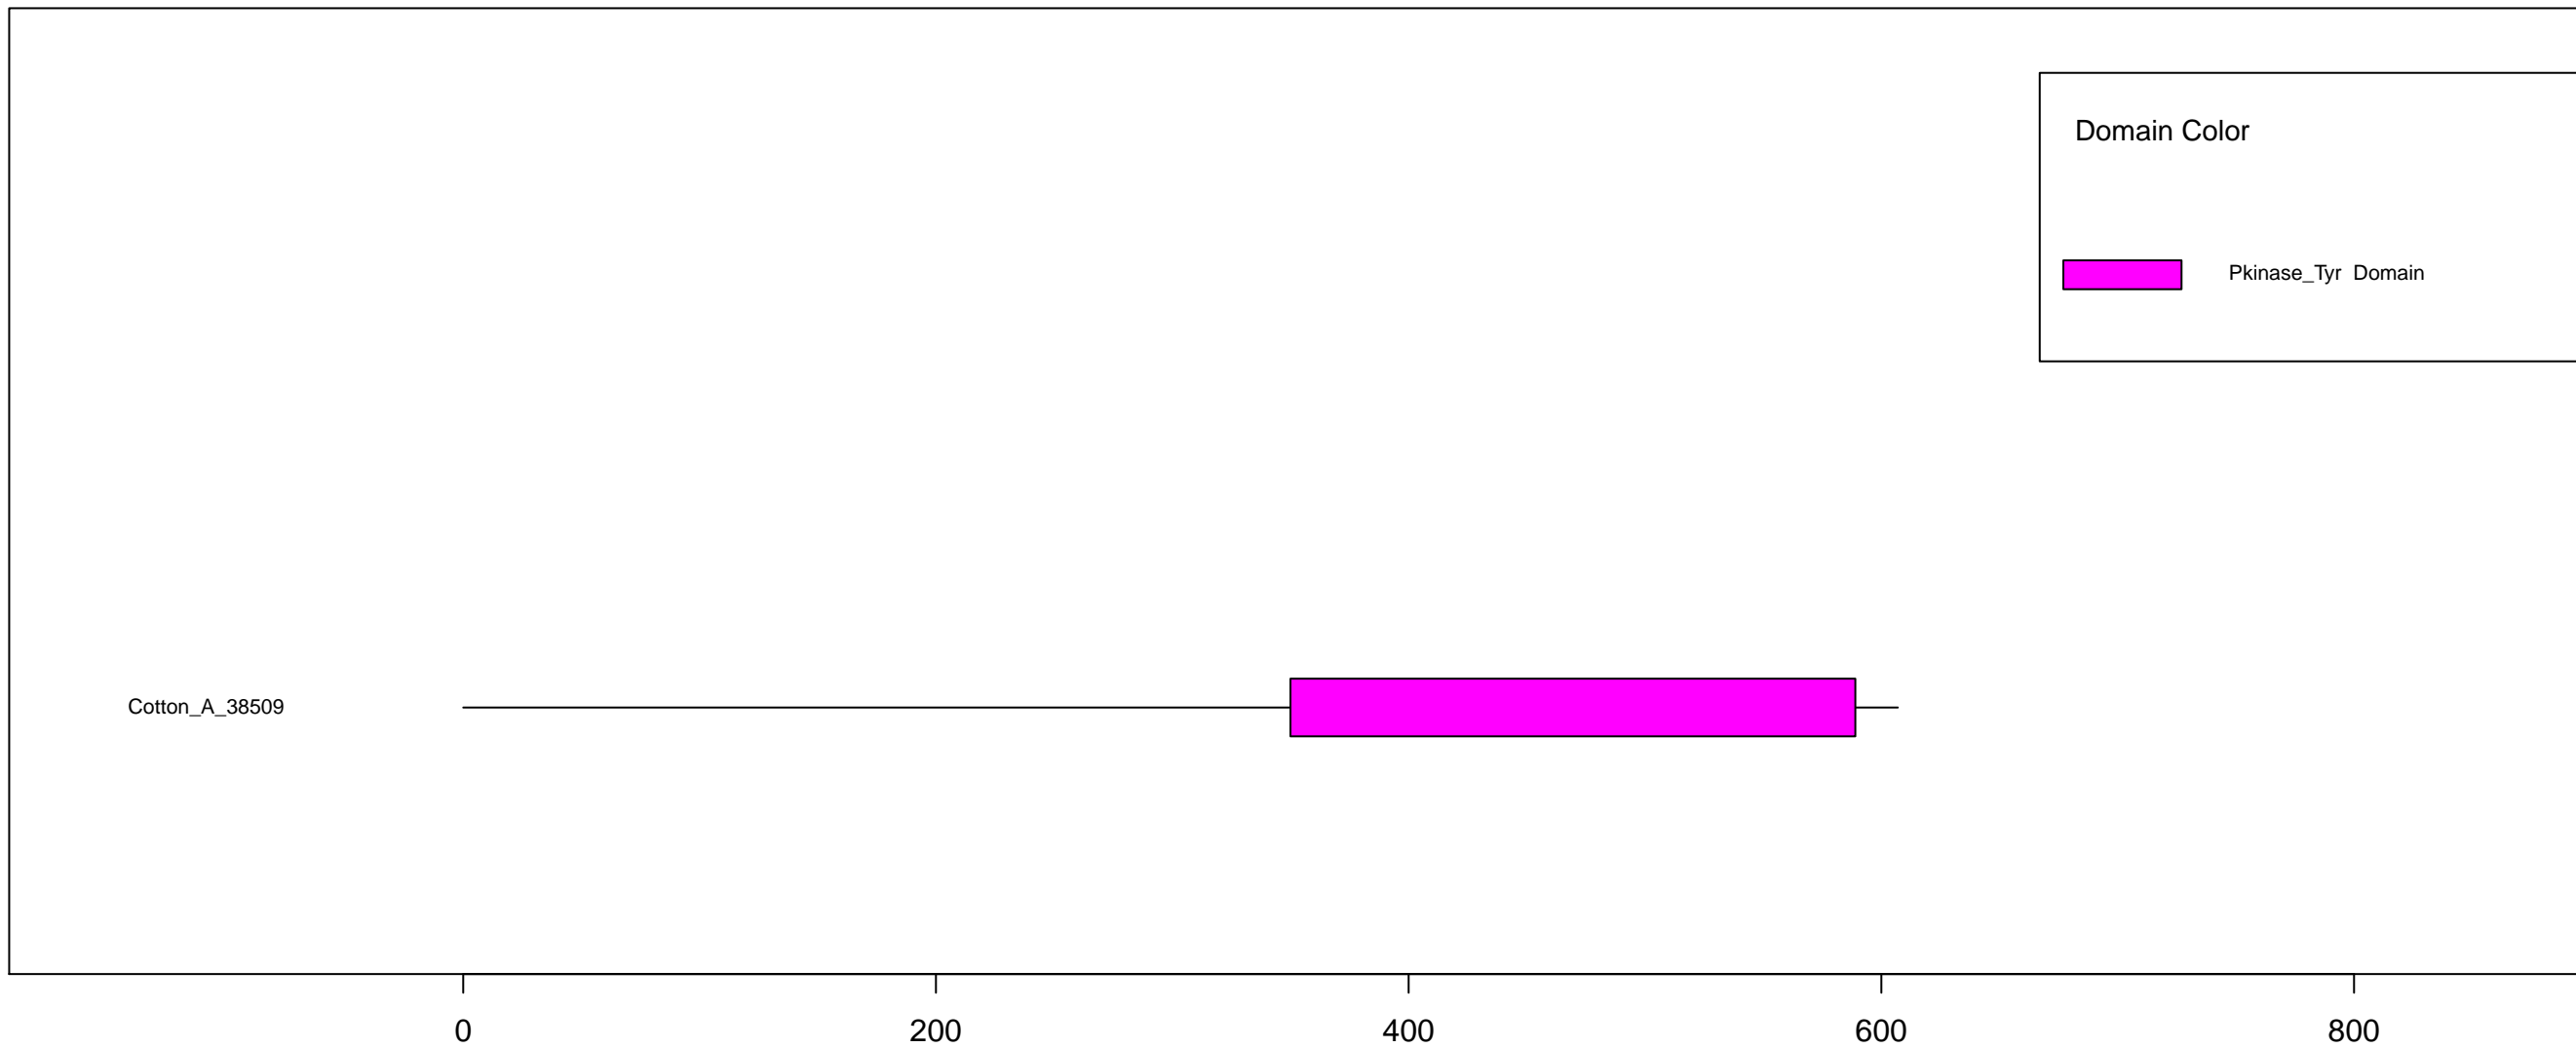

# G.ar TLK domain diagram (all)

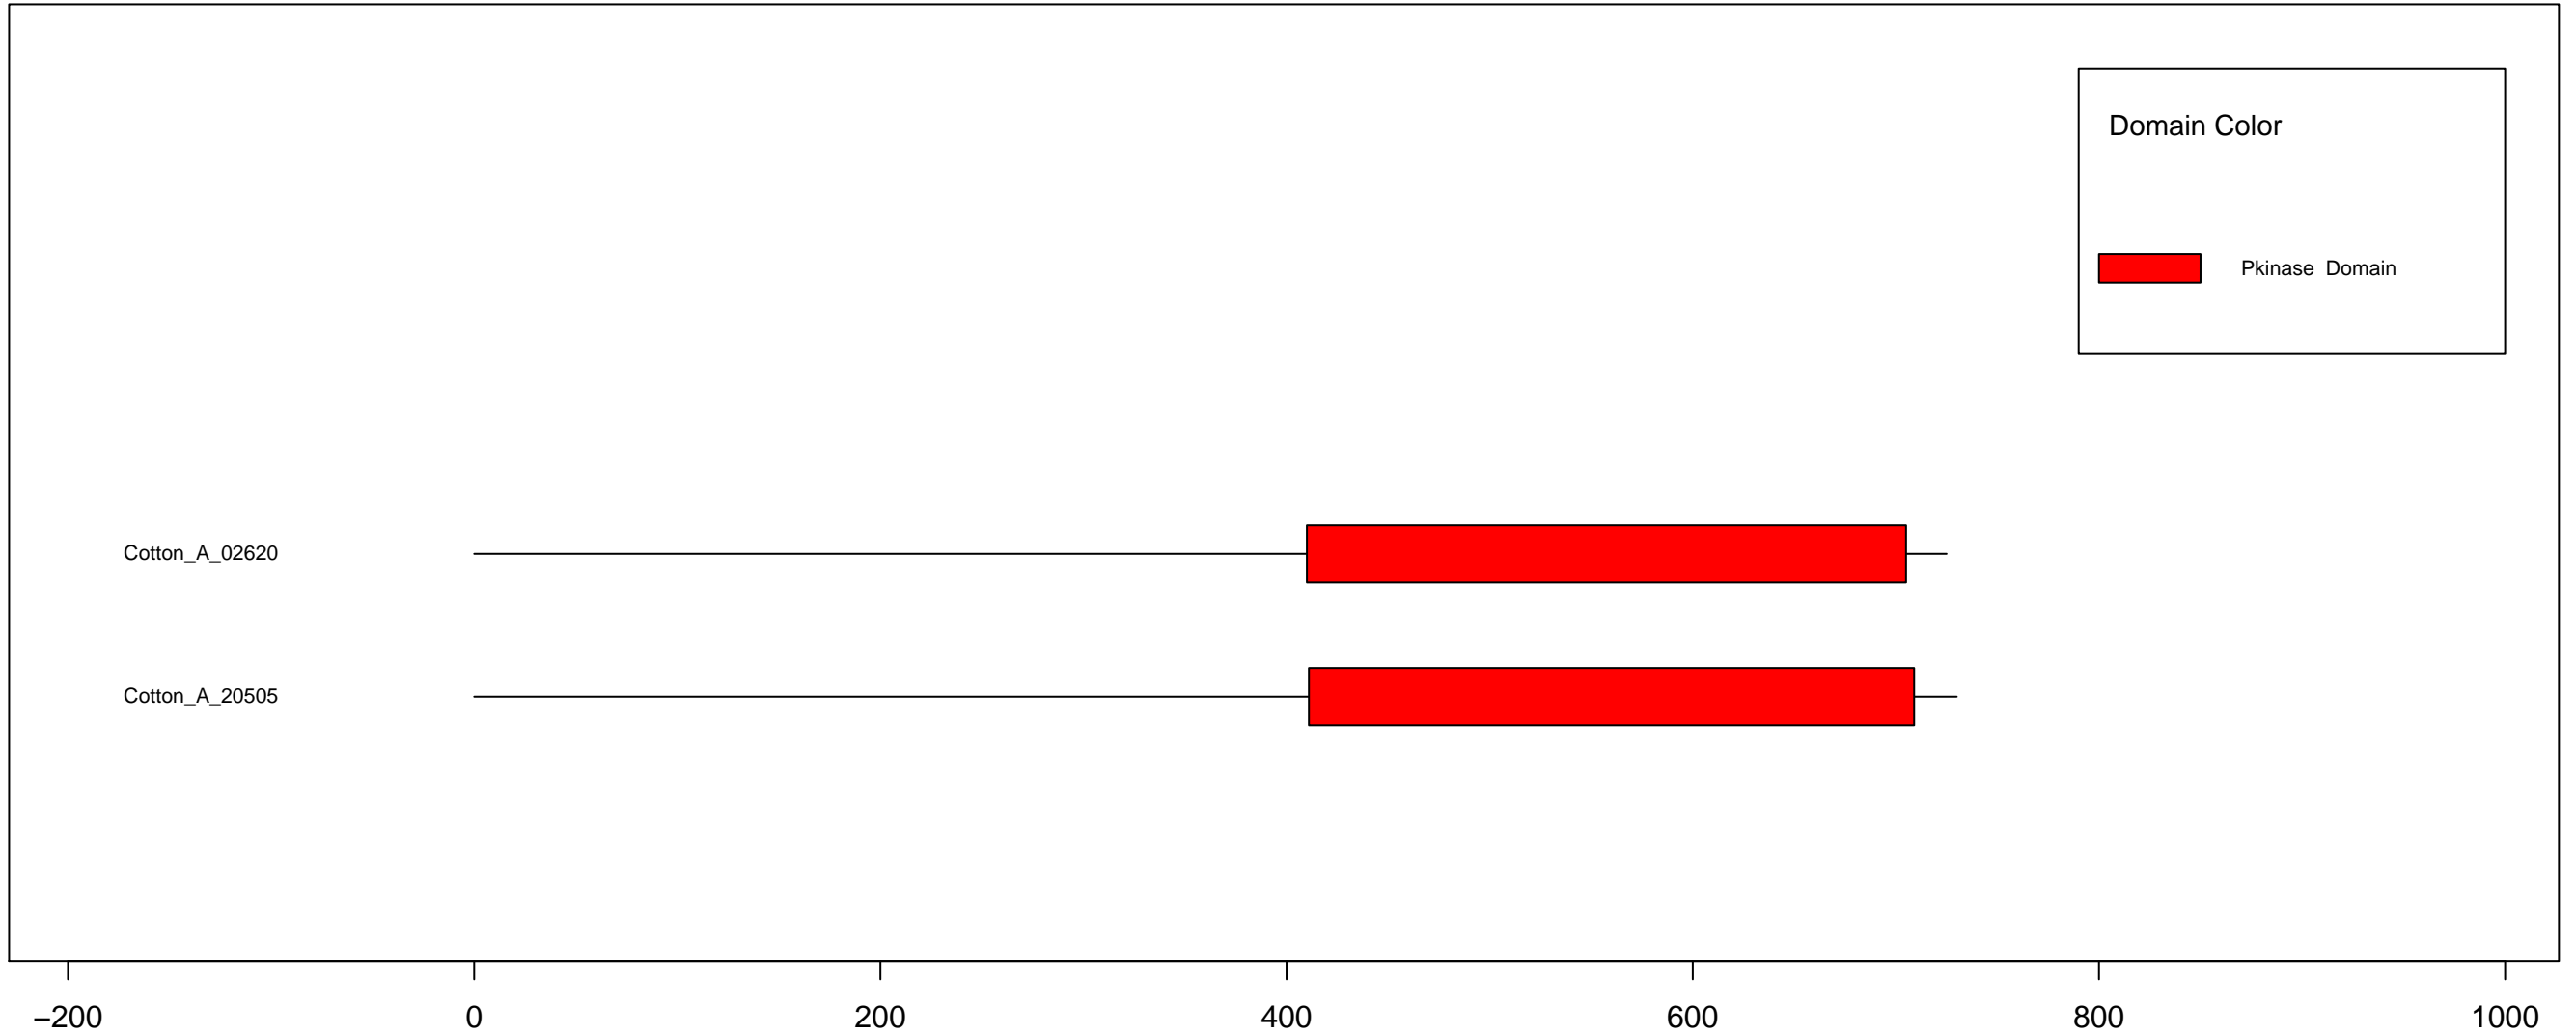

# G.ar TTK domain diagram (all)

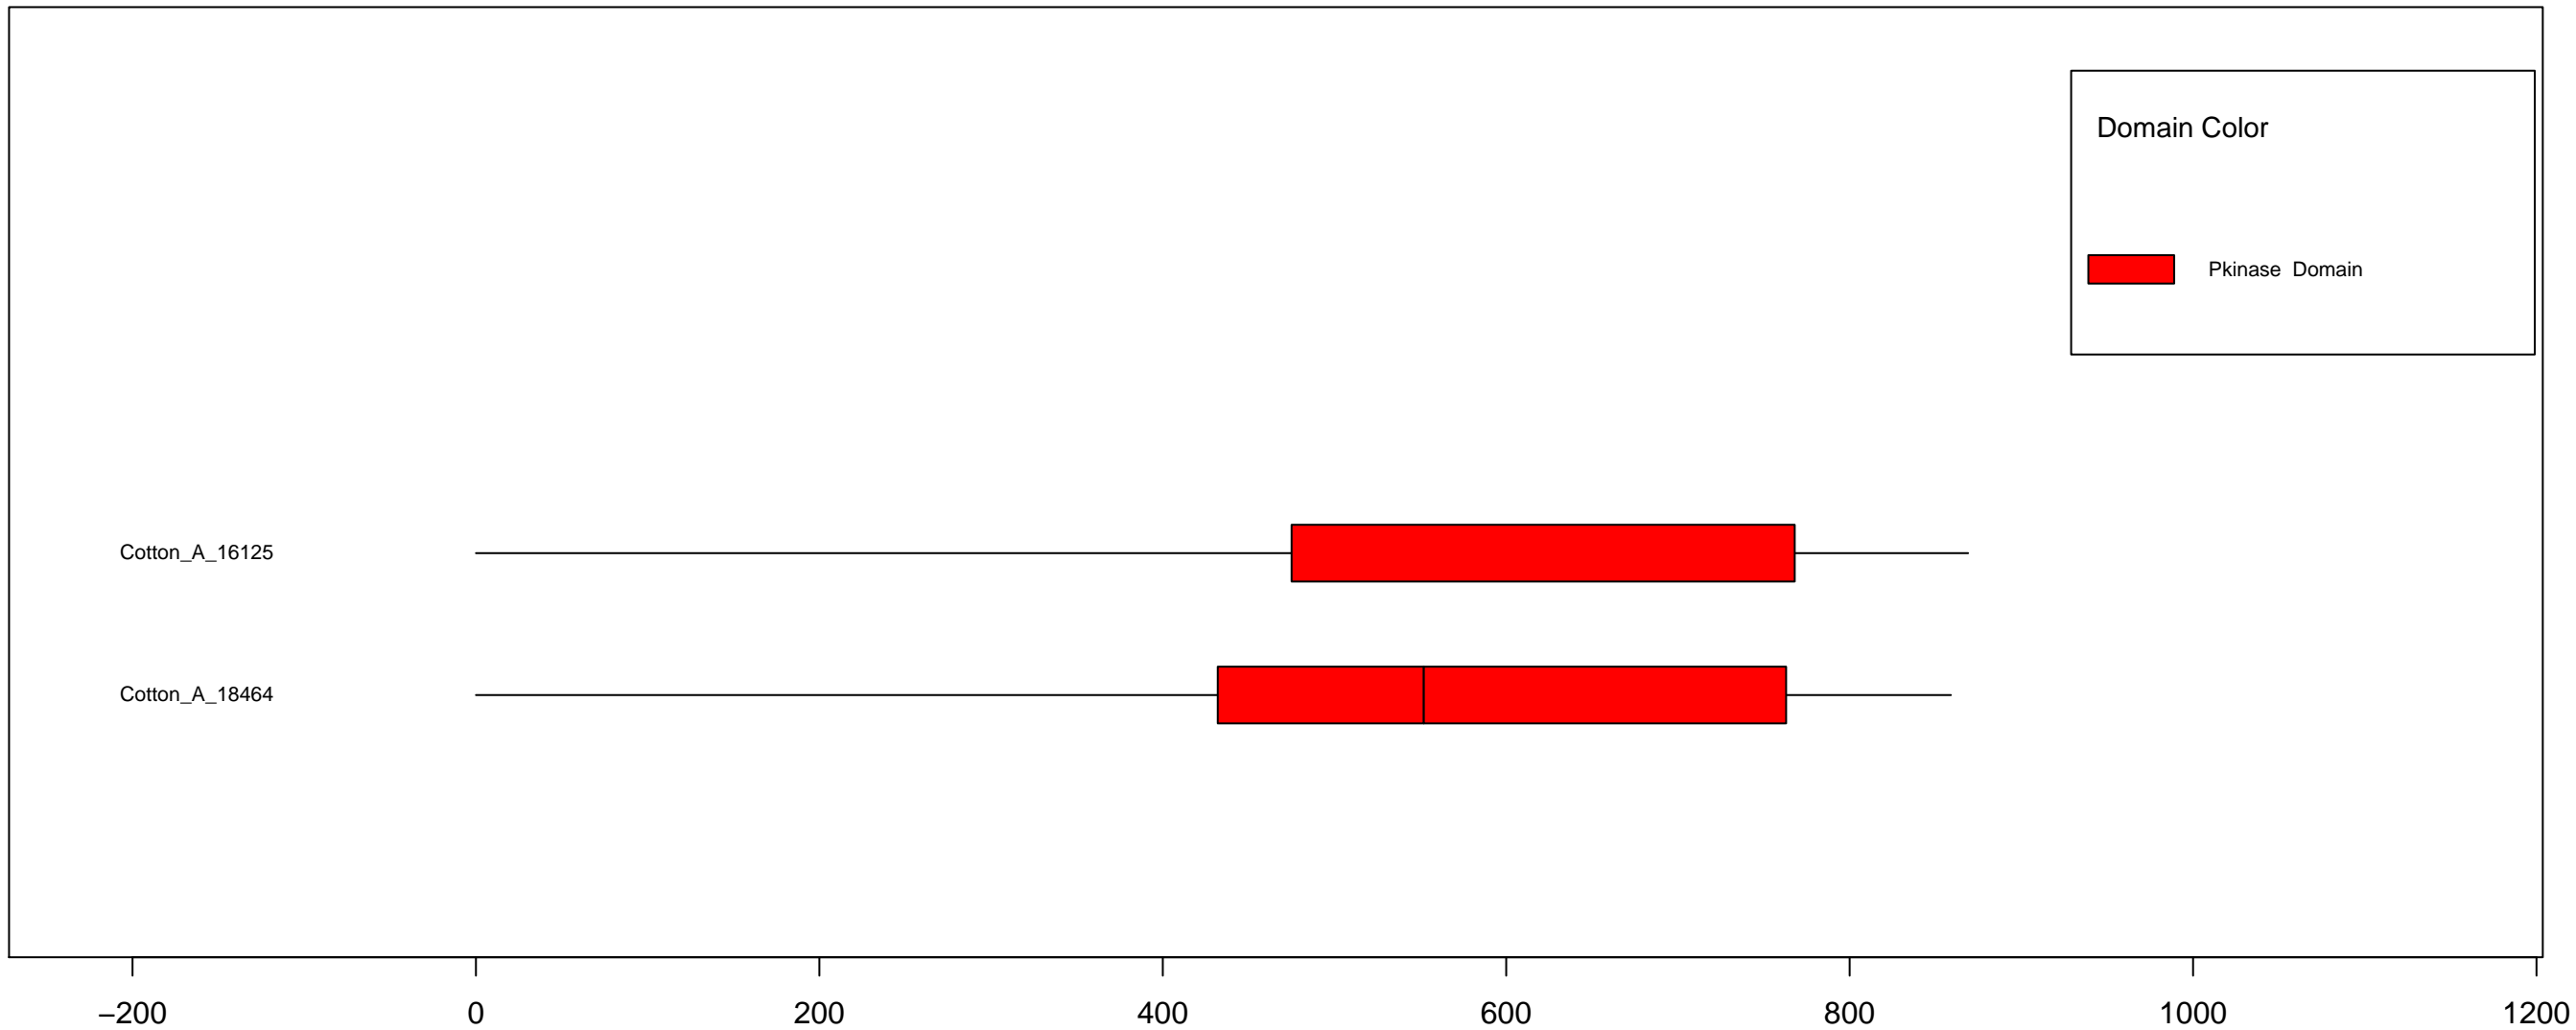

# G.ar ULK\_Fused domain diagram (all)

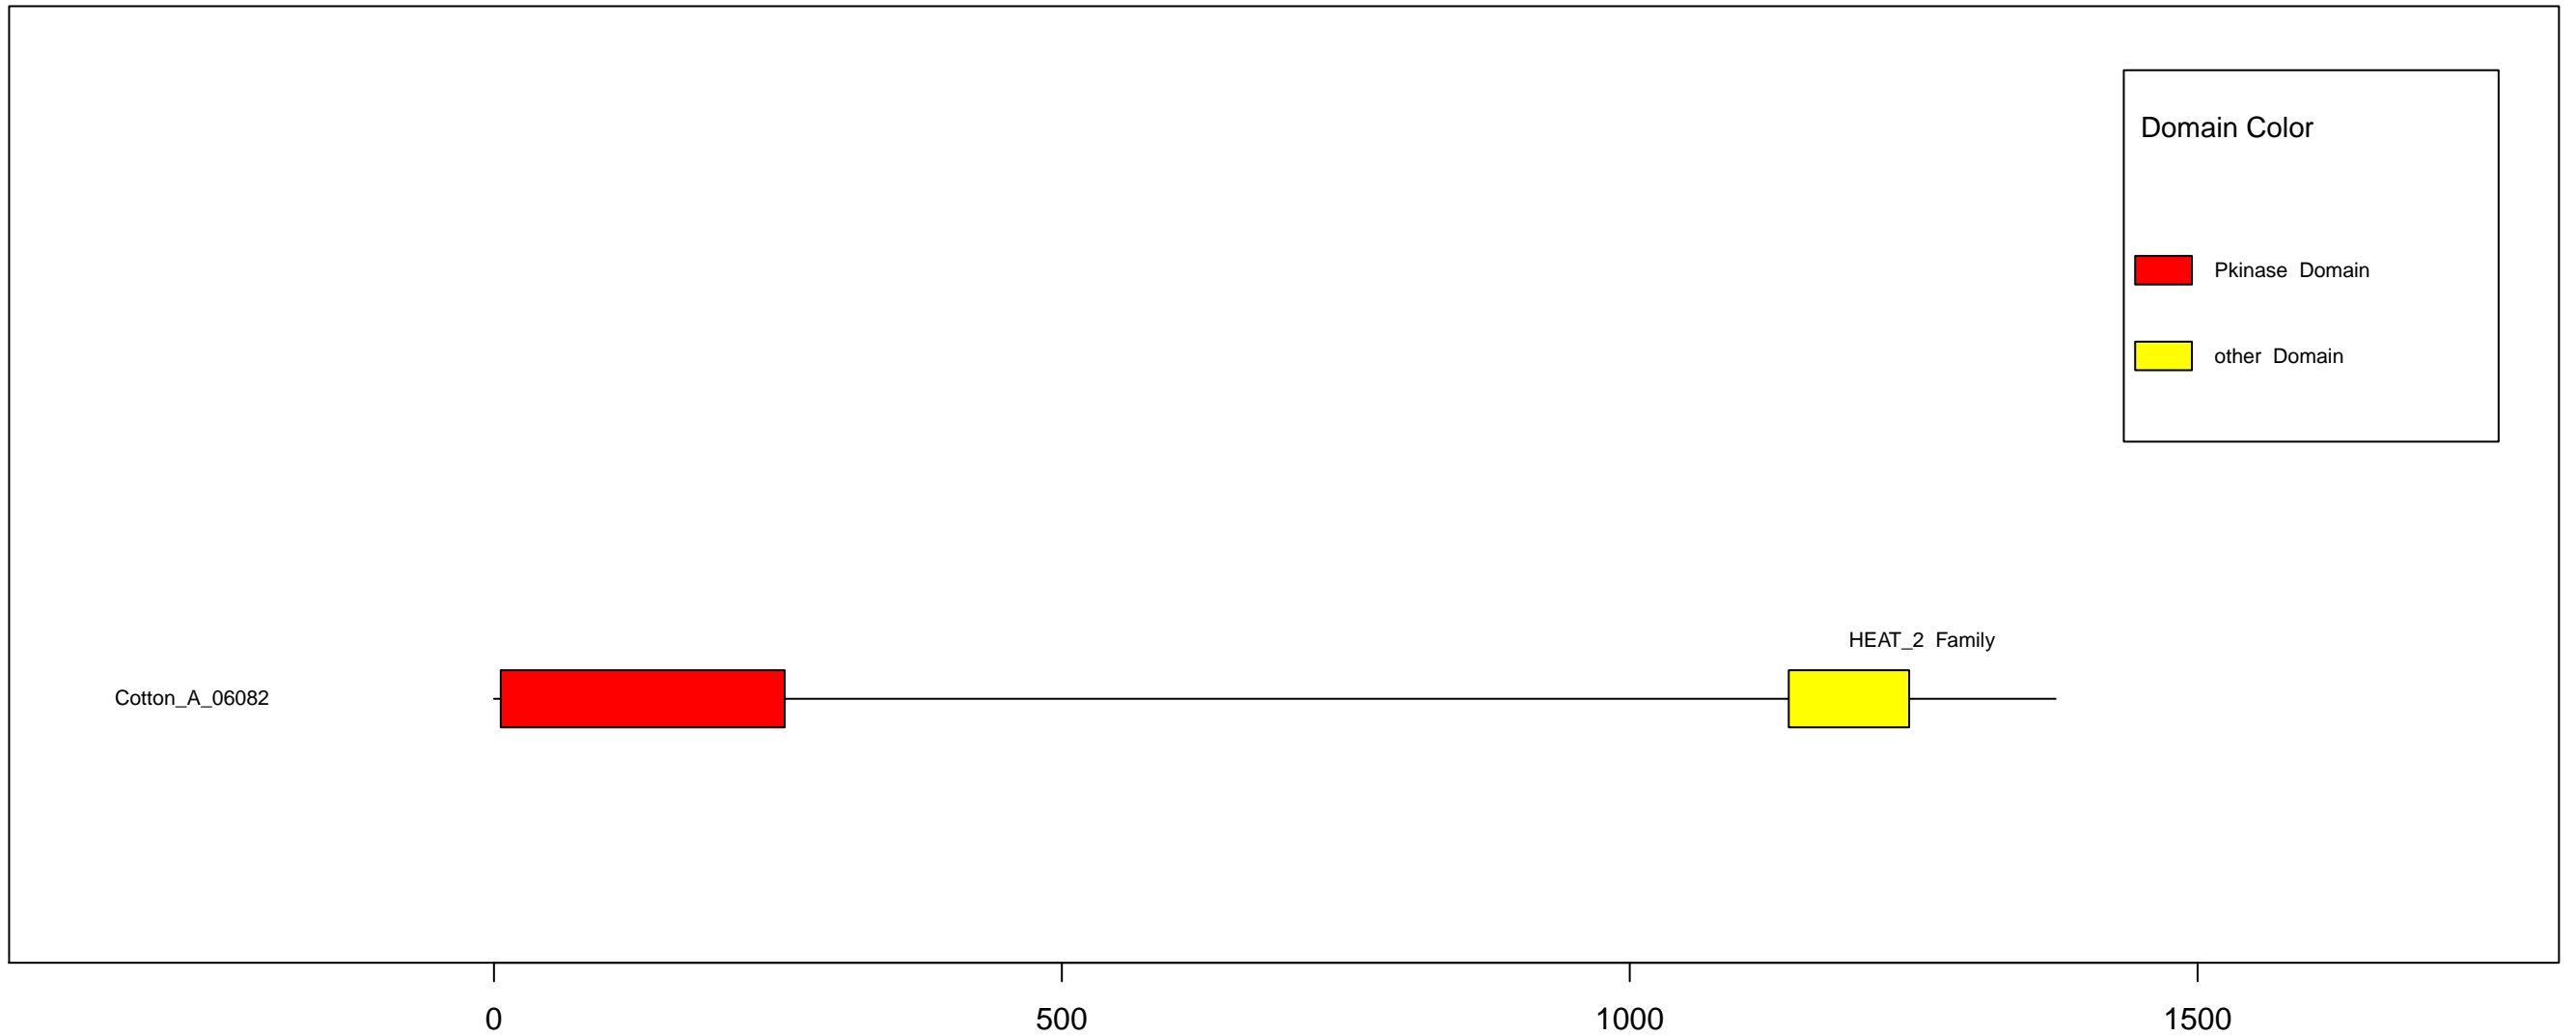



# G.ar ULK\_ULK4 domain diagram (all)

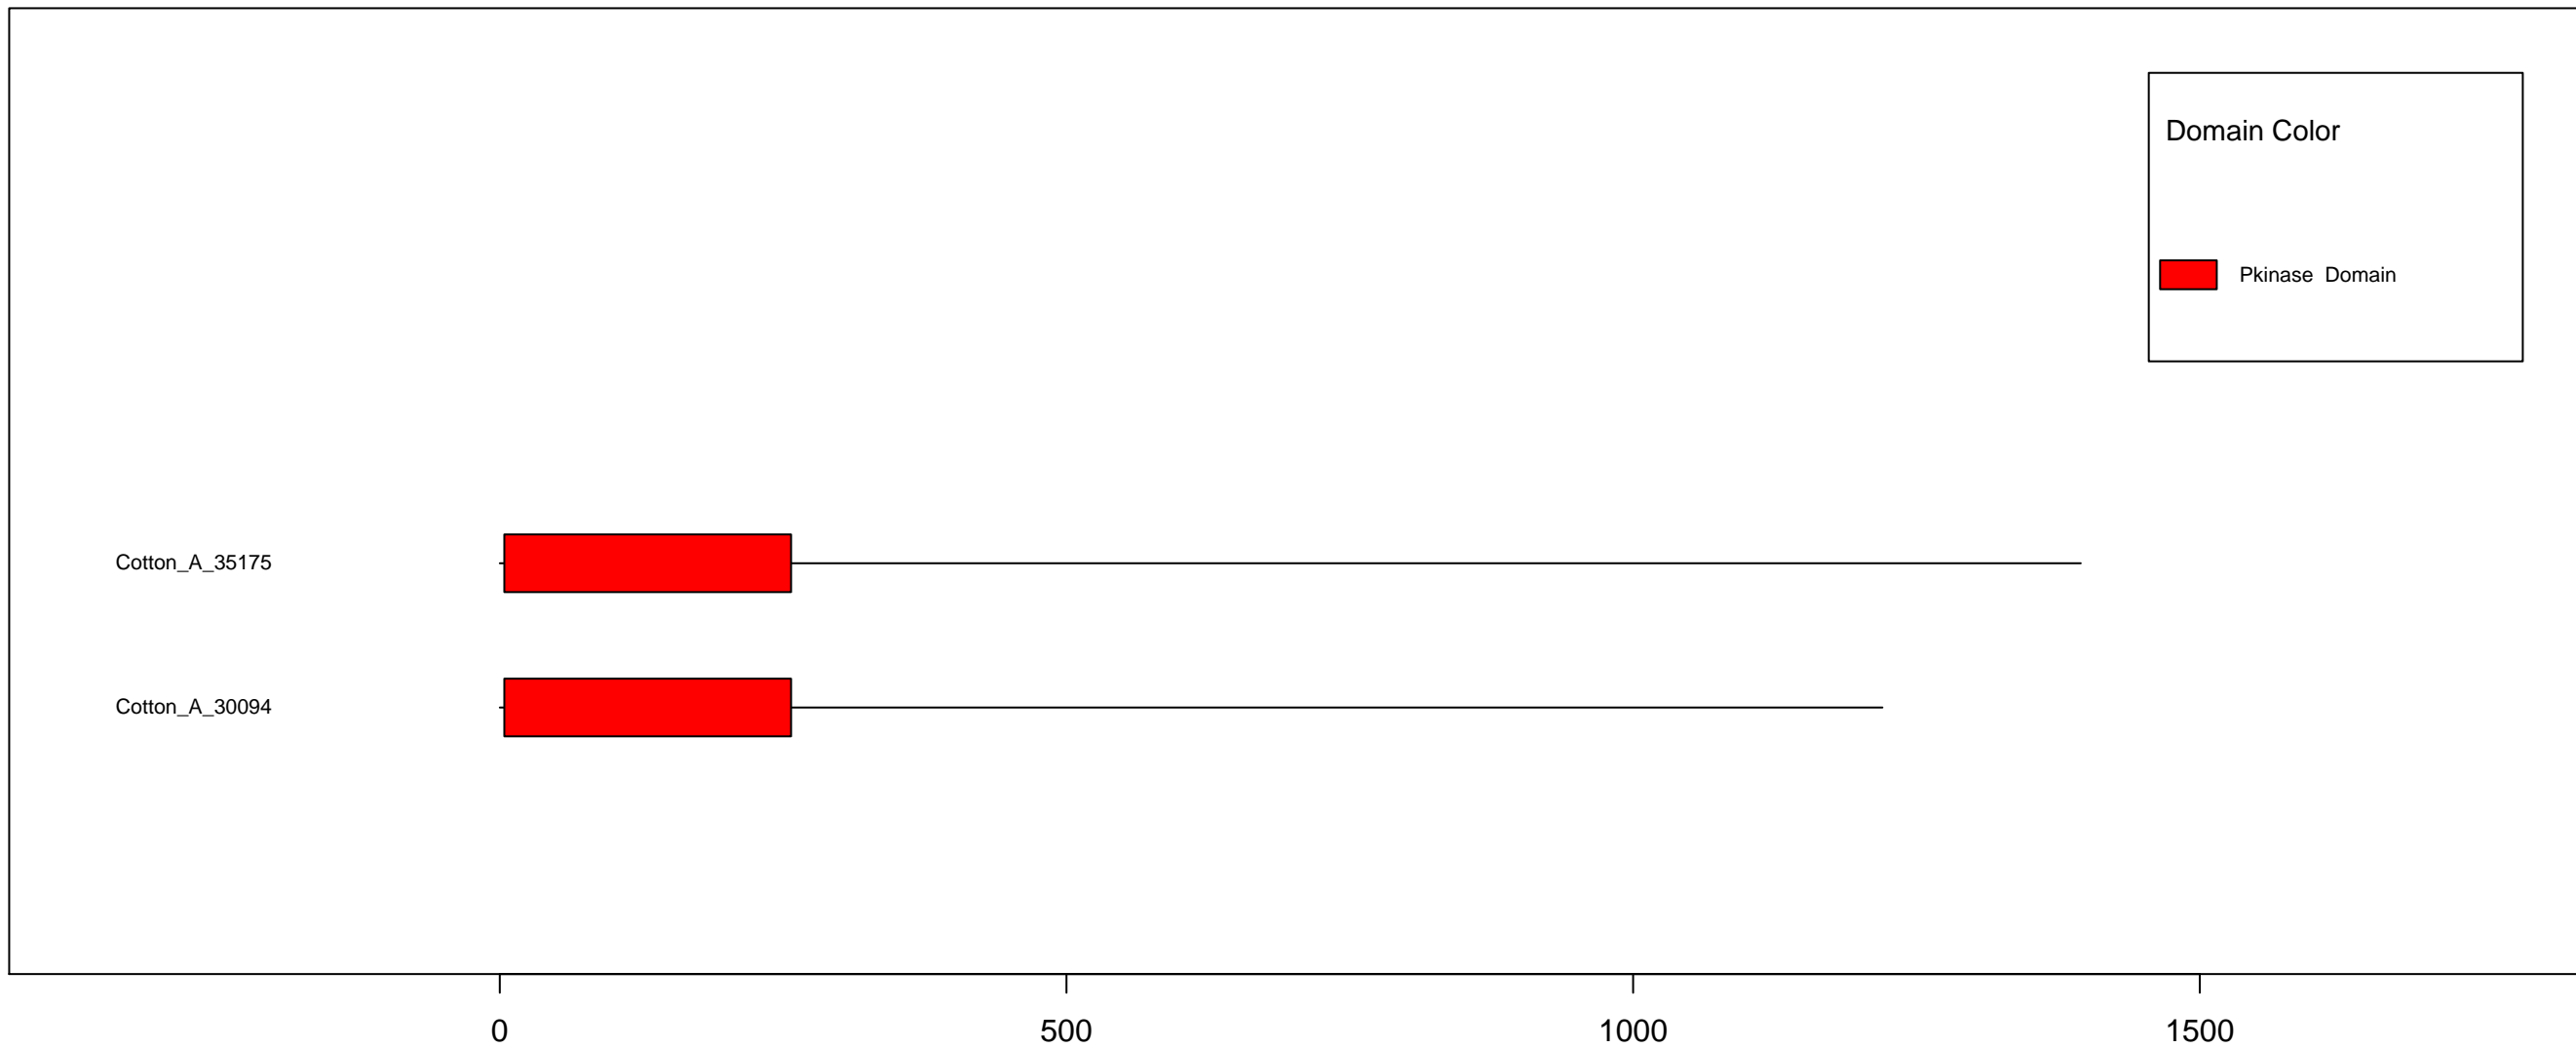

# G.ar WEE domain diagram (all)

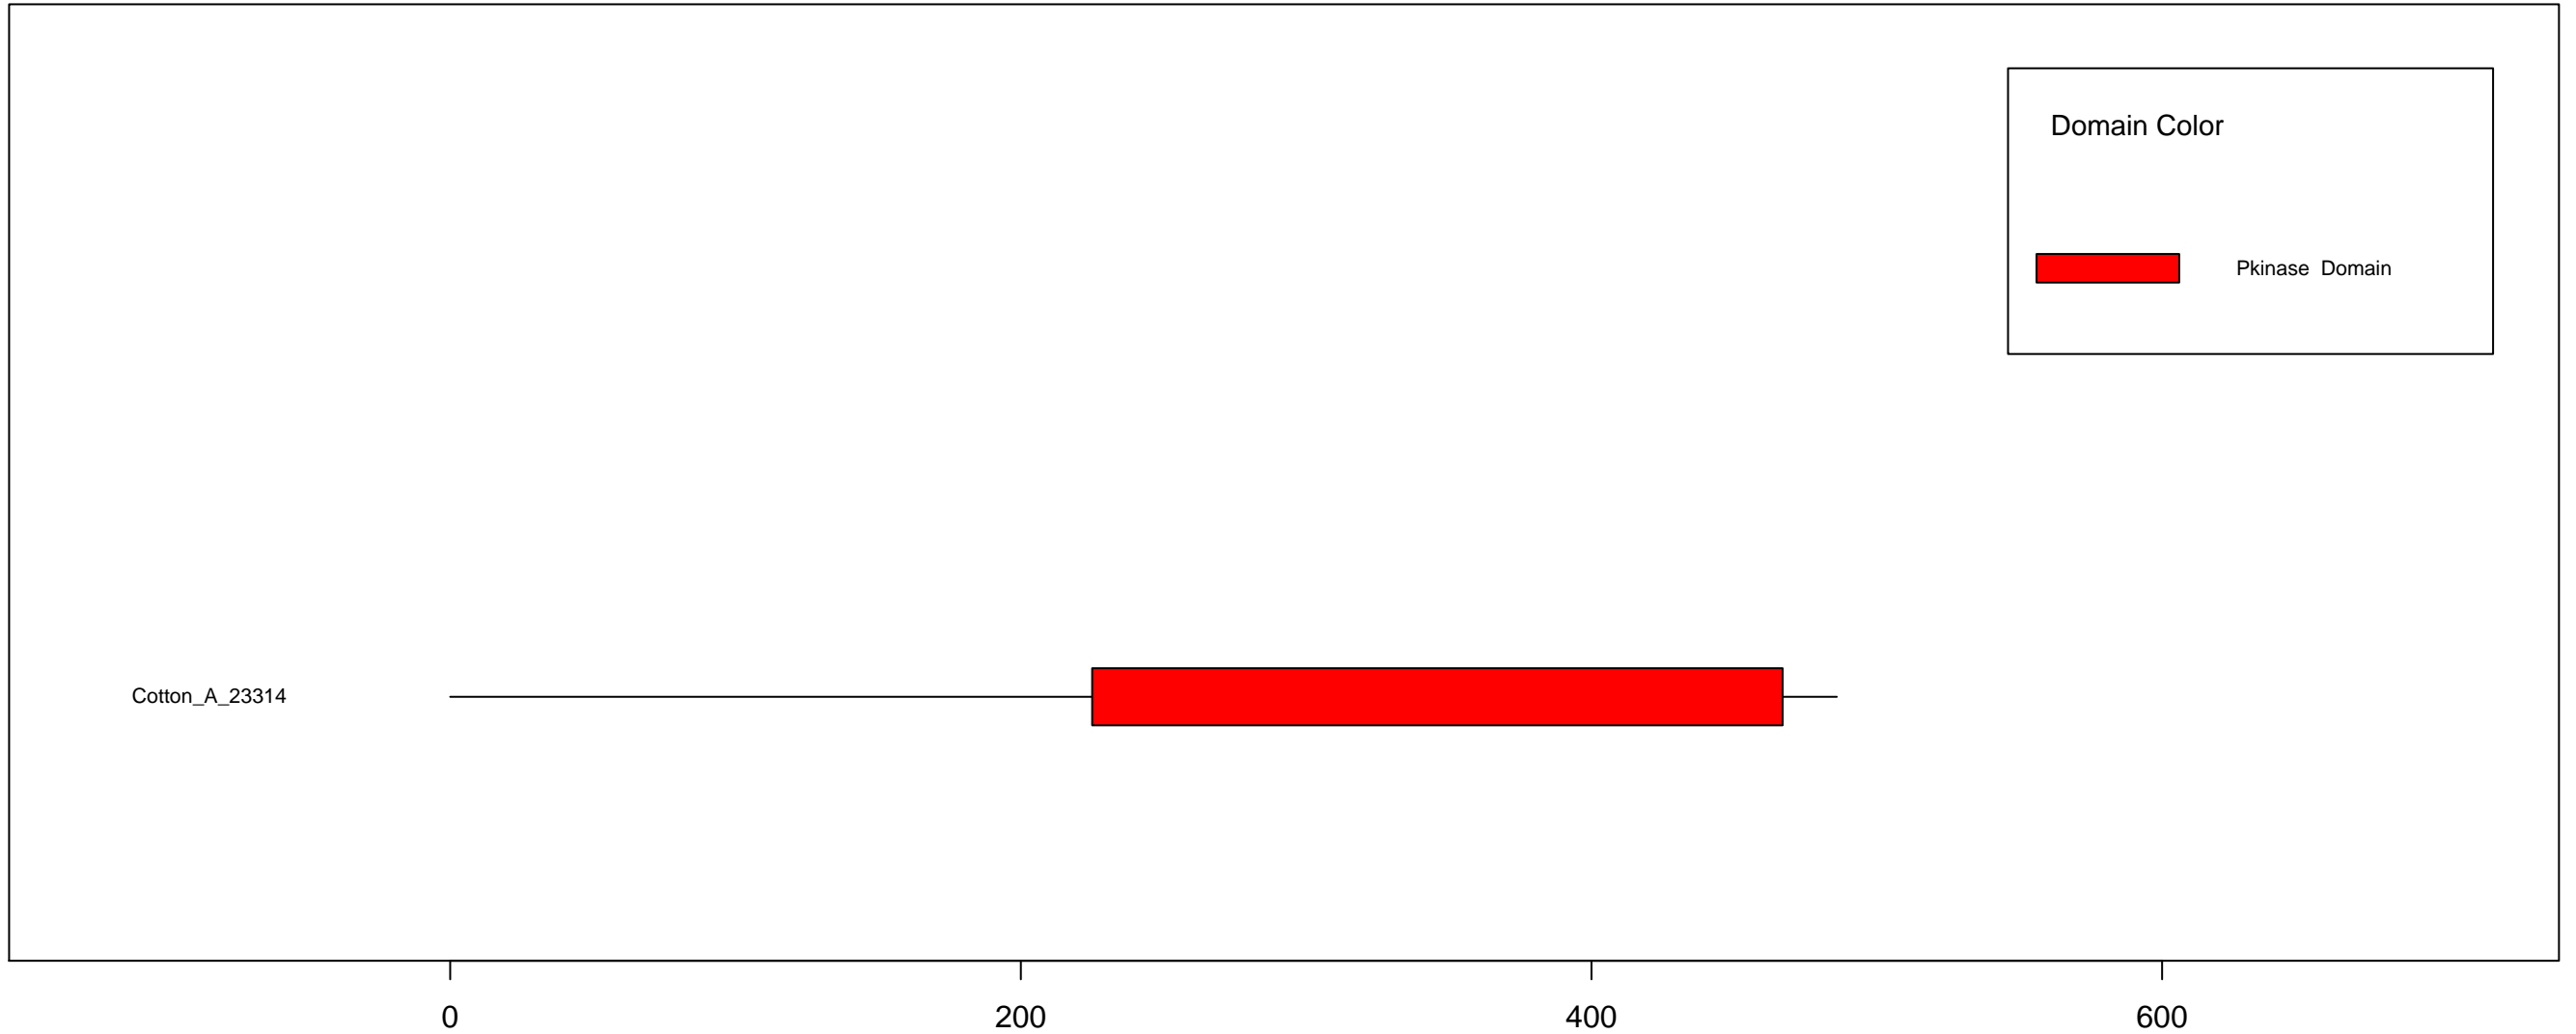

# G.ar WNK\_NRBP domain diagram (all)

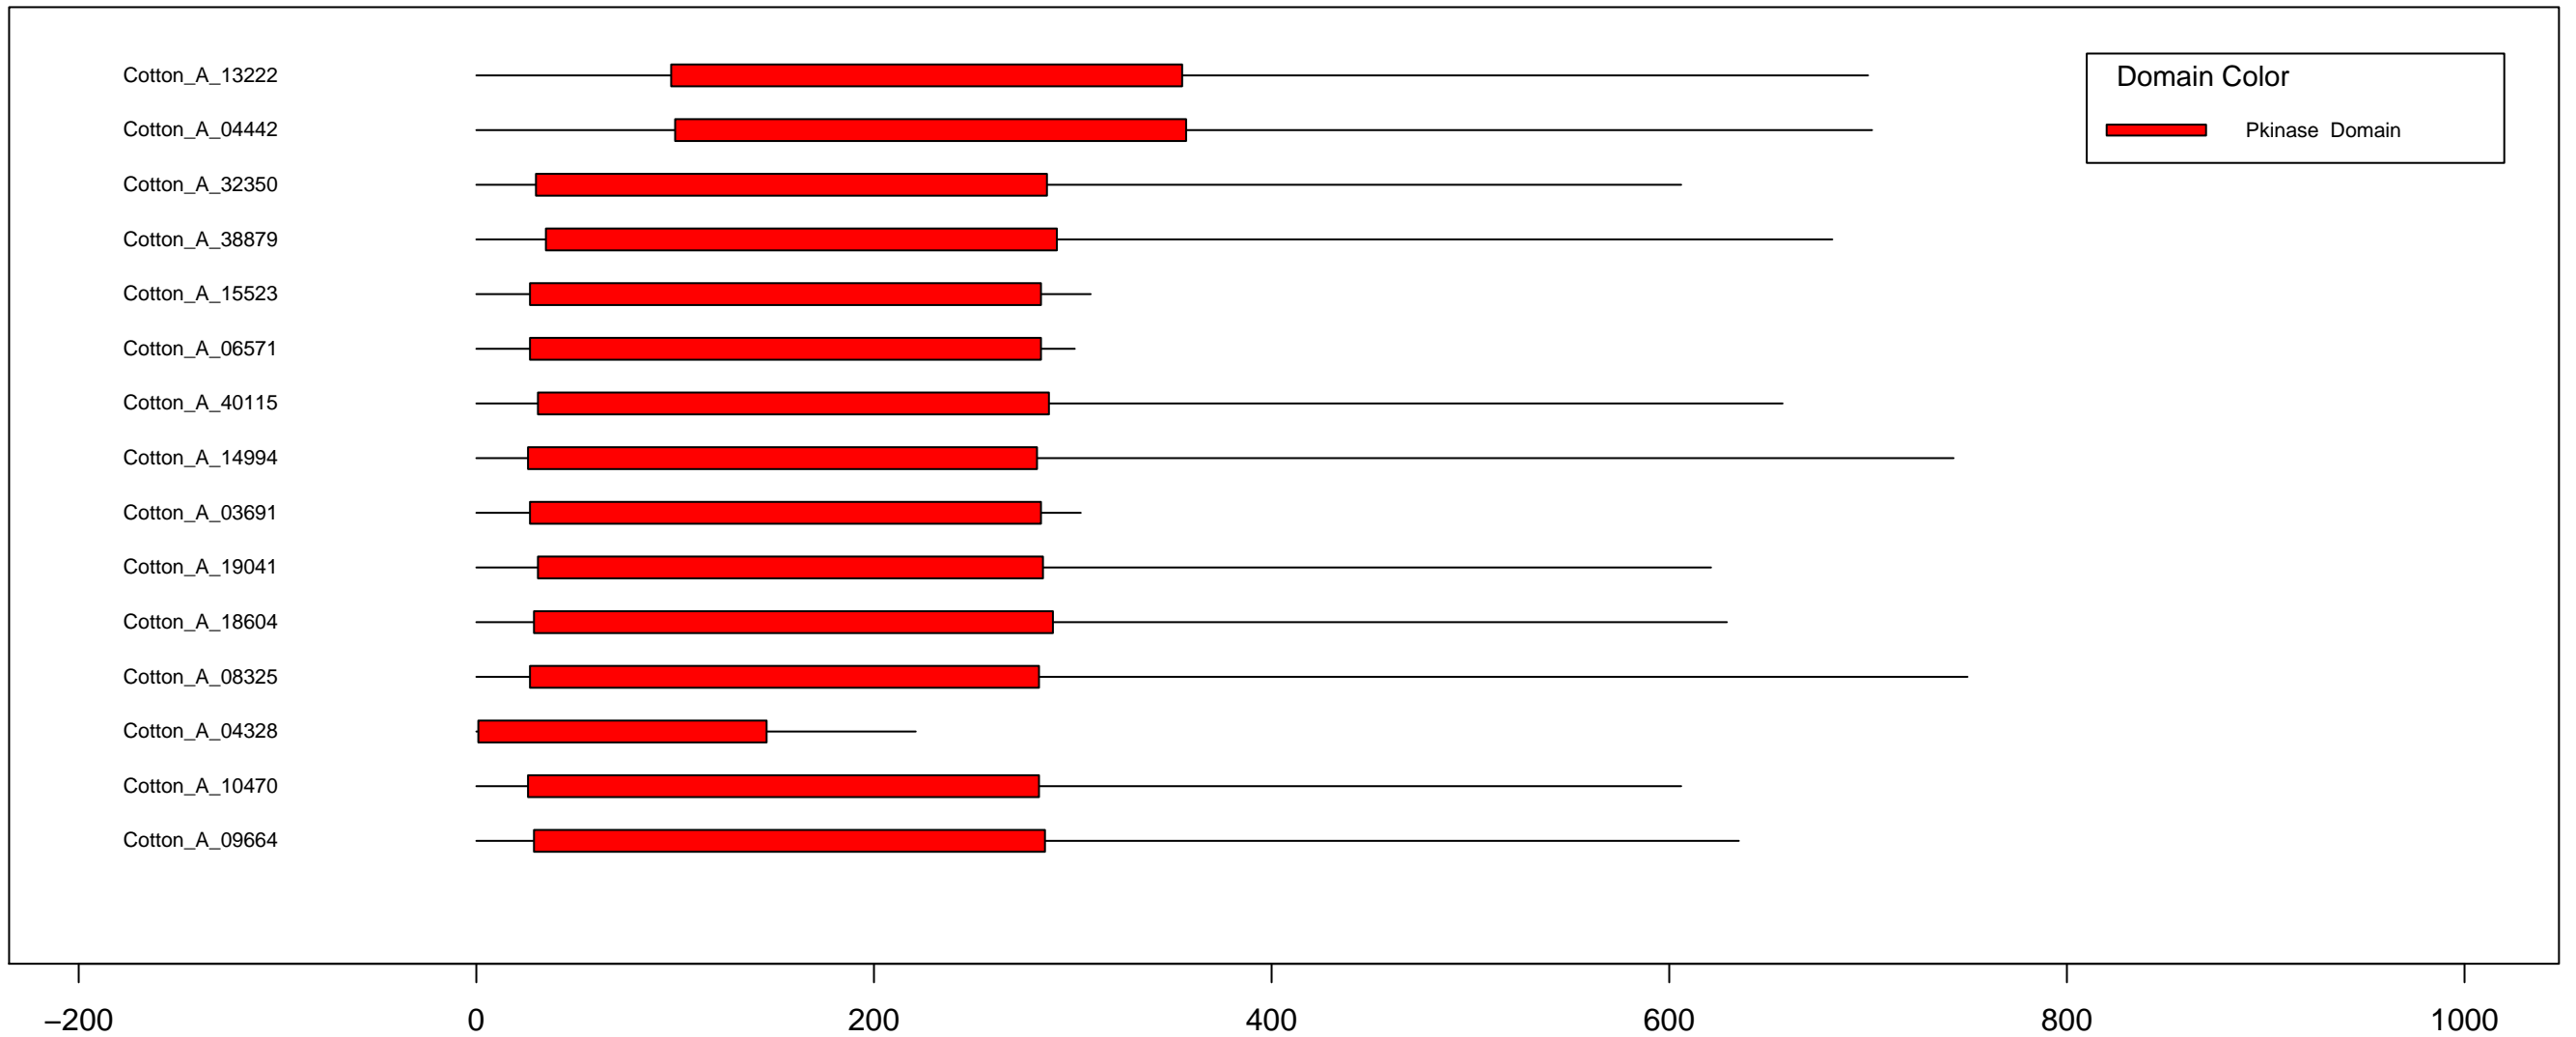

# G.hi AGC\_MAST domain diagram (all)

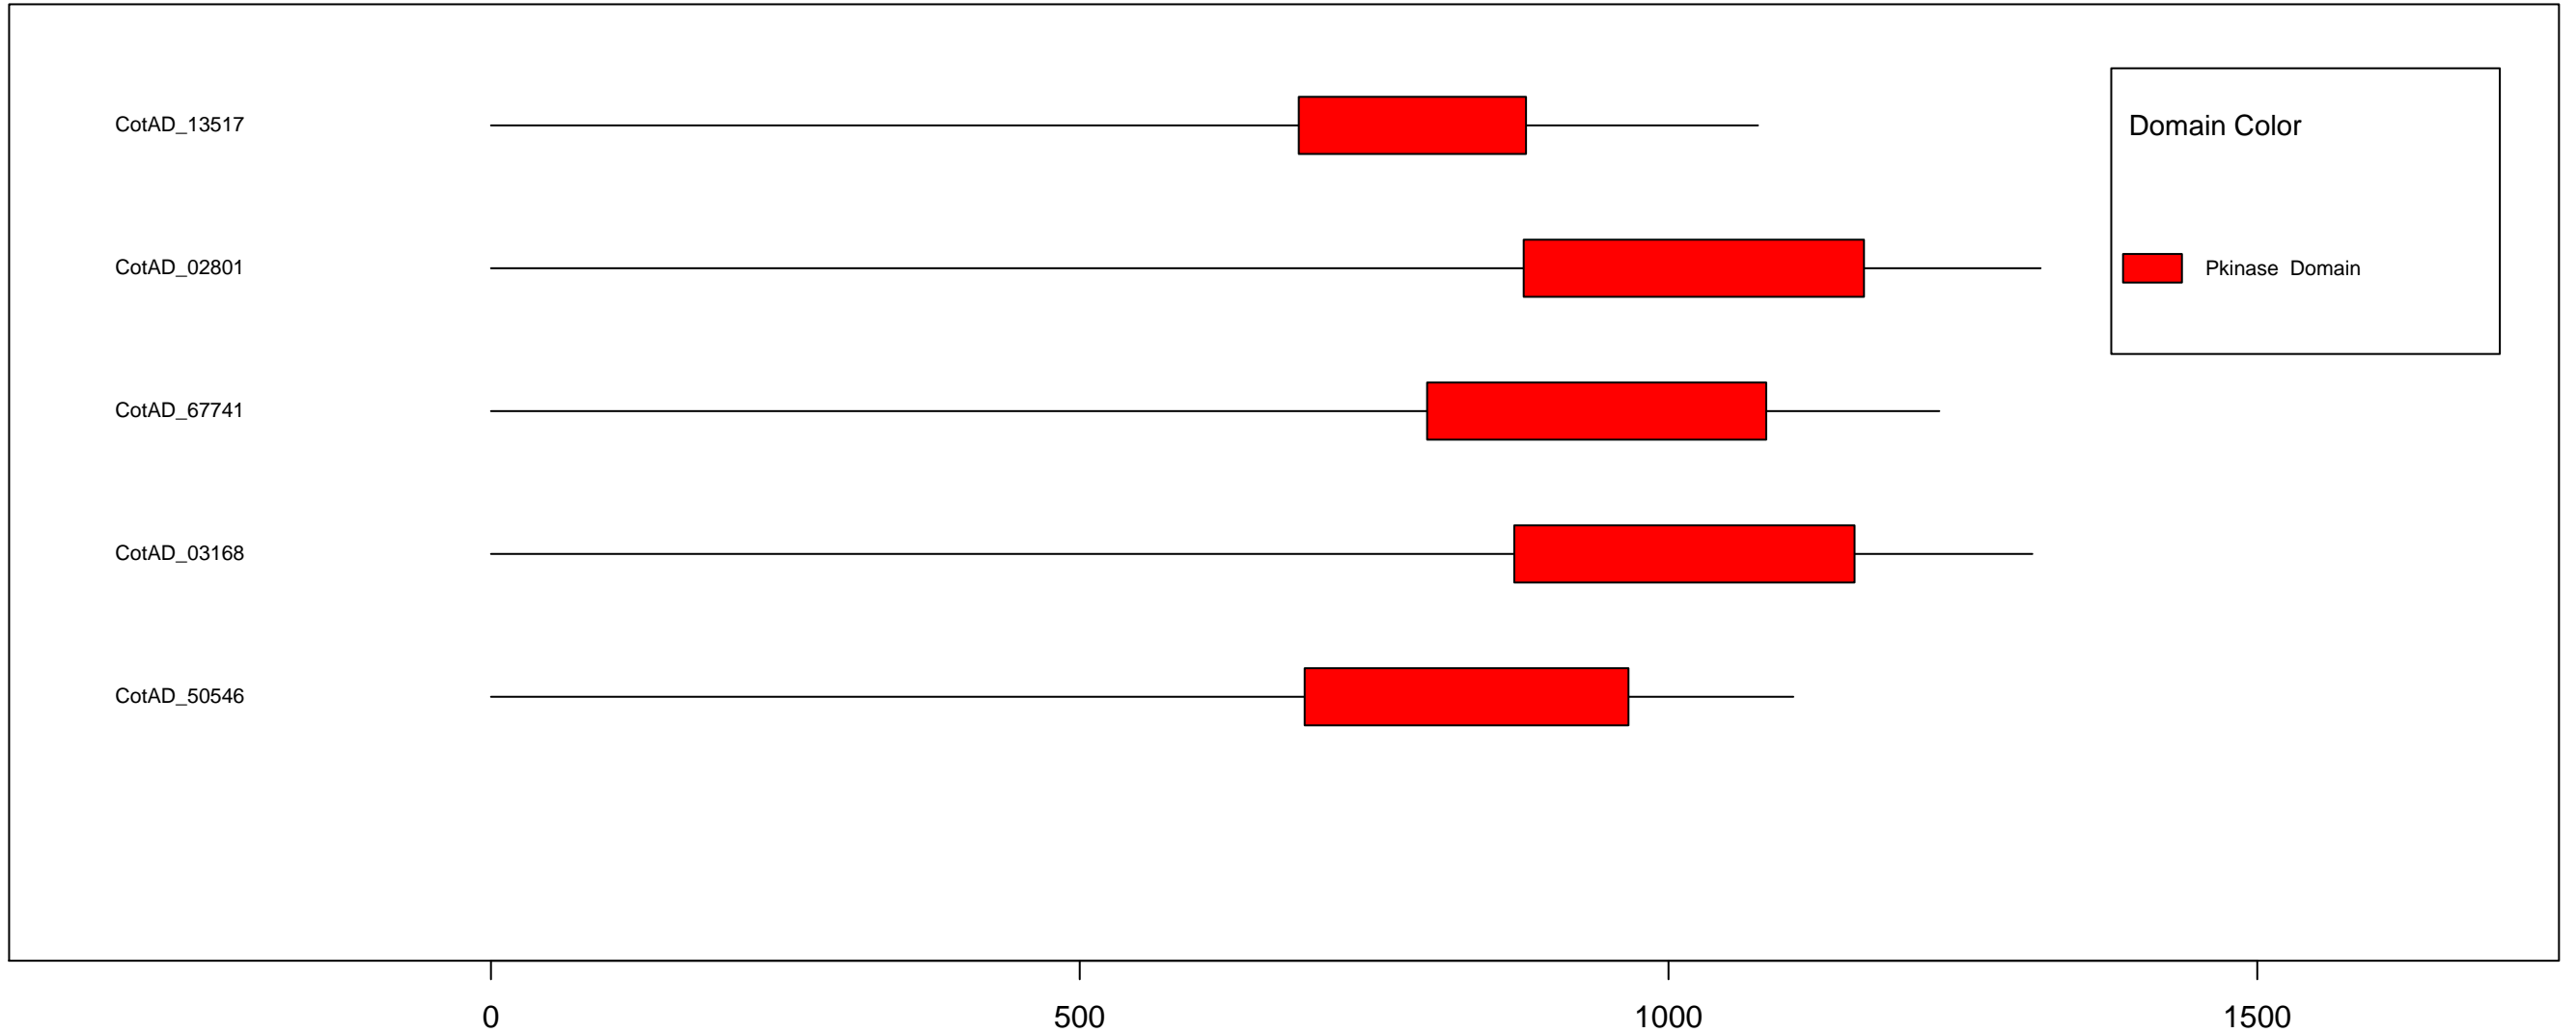

# G.hi AGC\_NDR domain diagram (all)

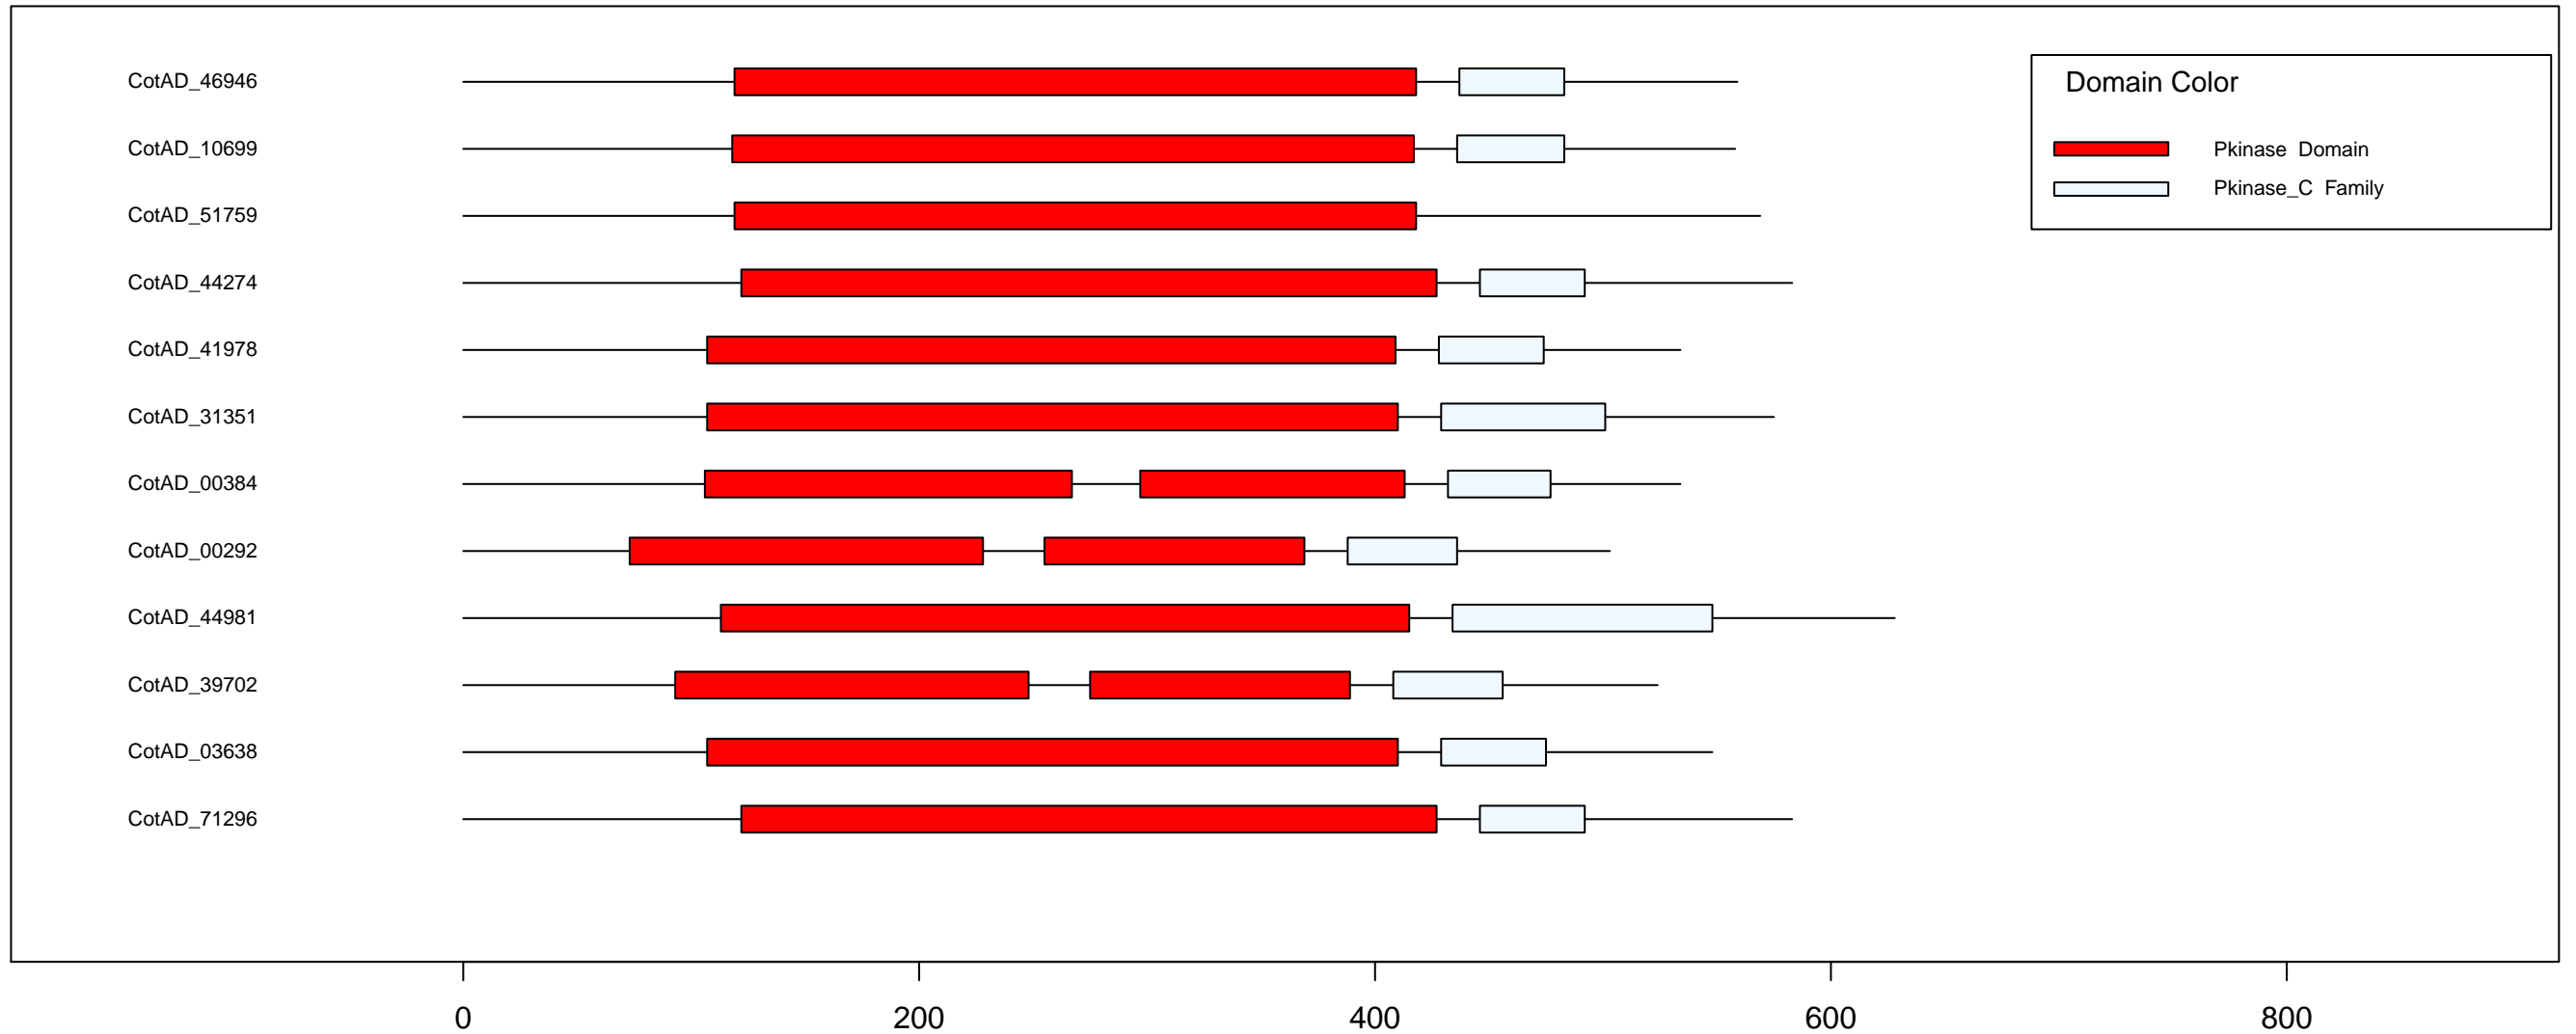

# G.hi AGC\_PDK1 domain diagram (all)

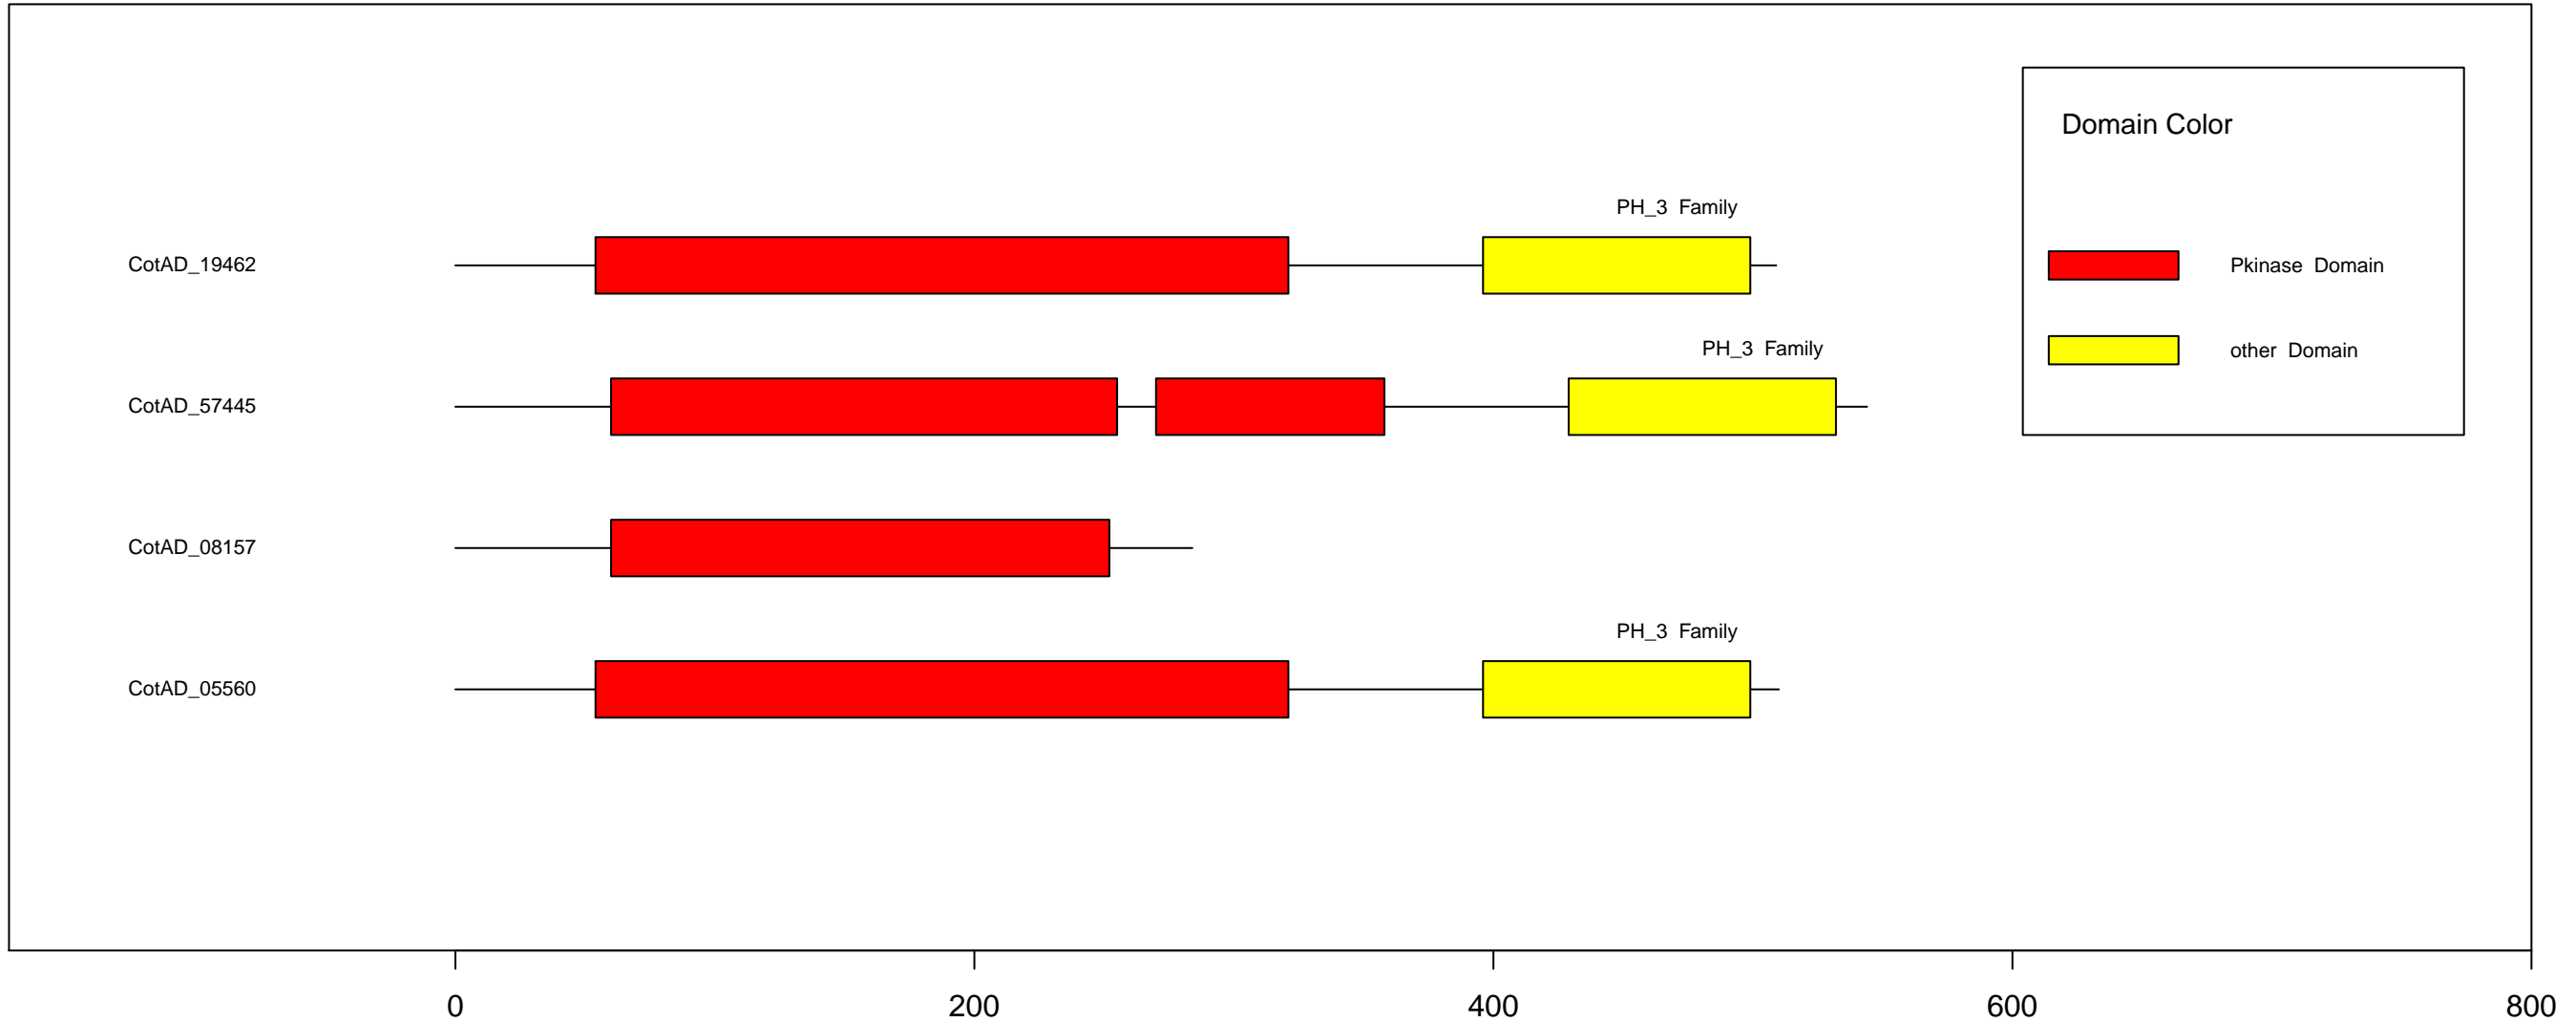

# G.hi AGC\_PKA-PKG domain diagram (all)

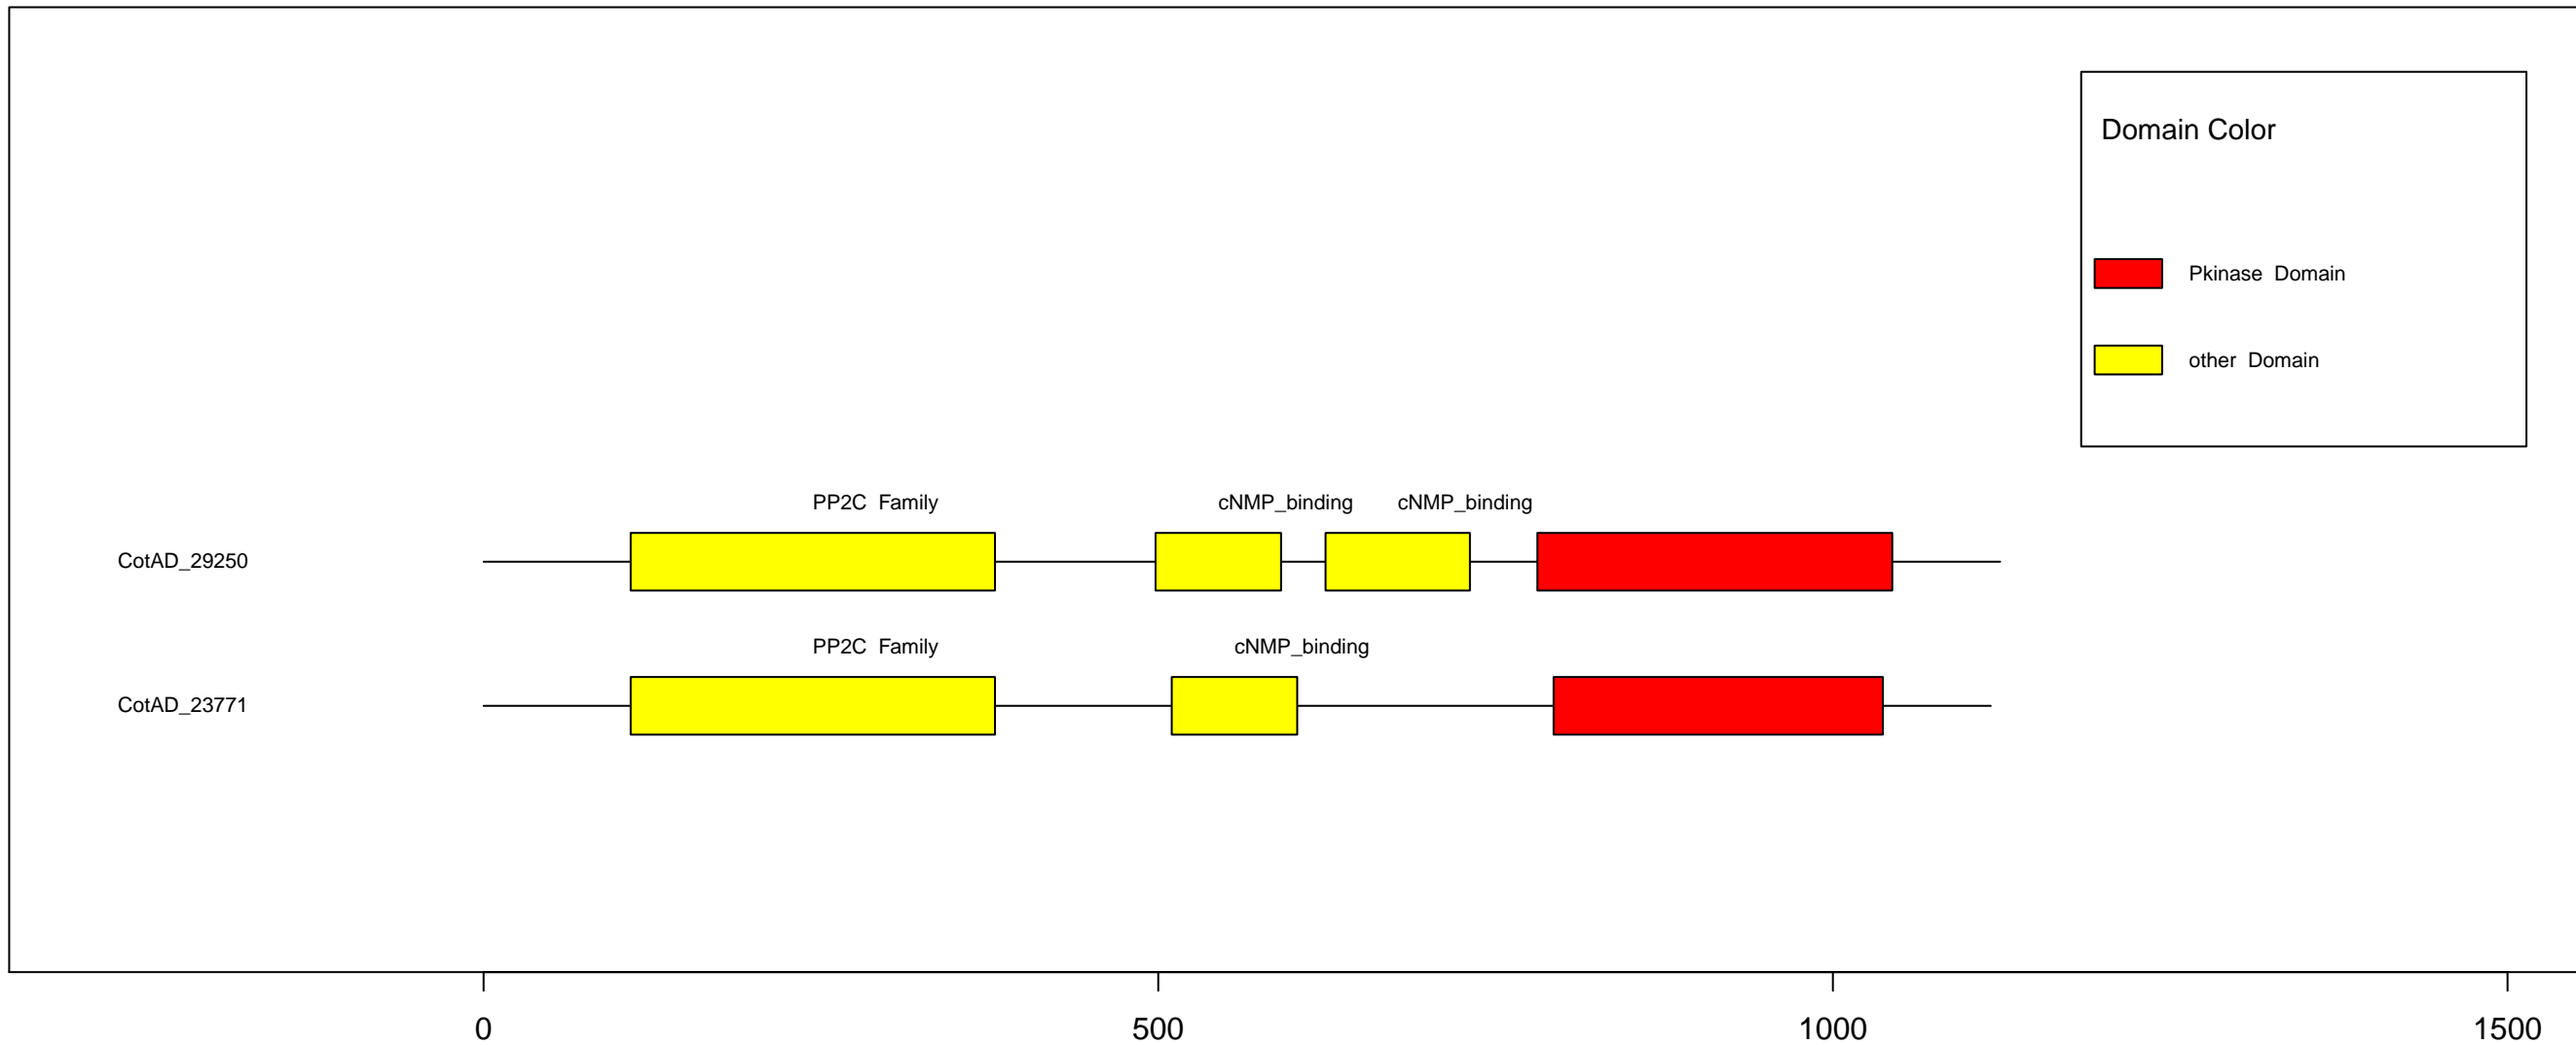

# G.hi AGC\_RSK-2 domain diagram (part 1)

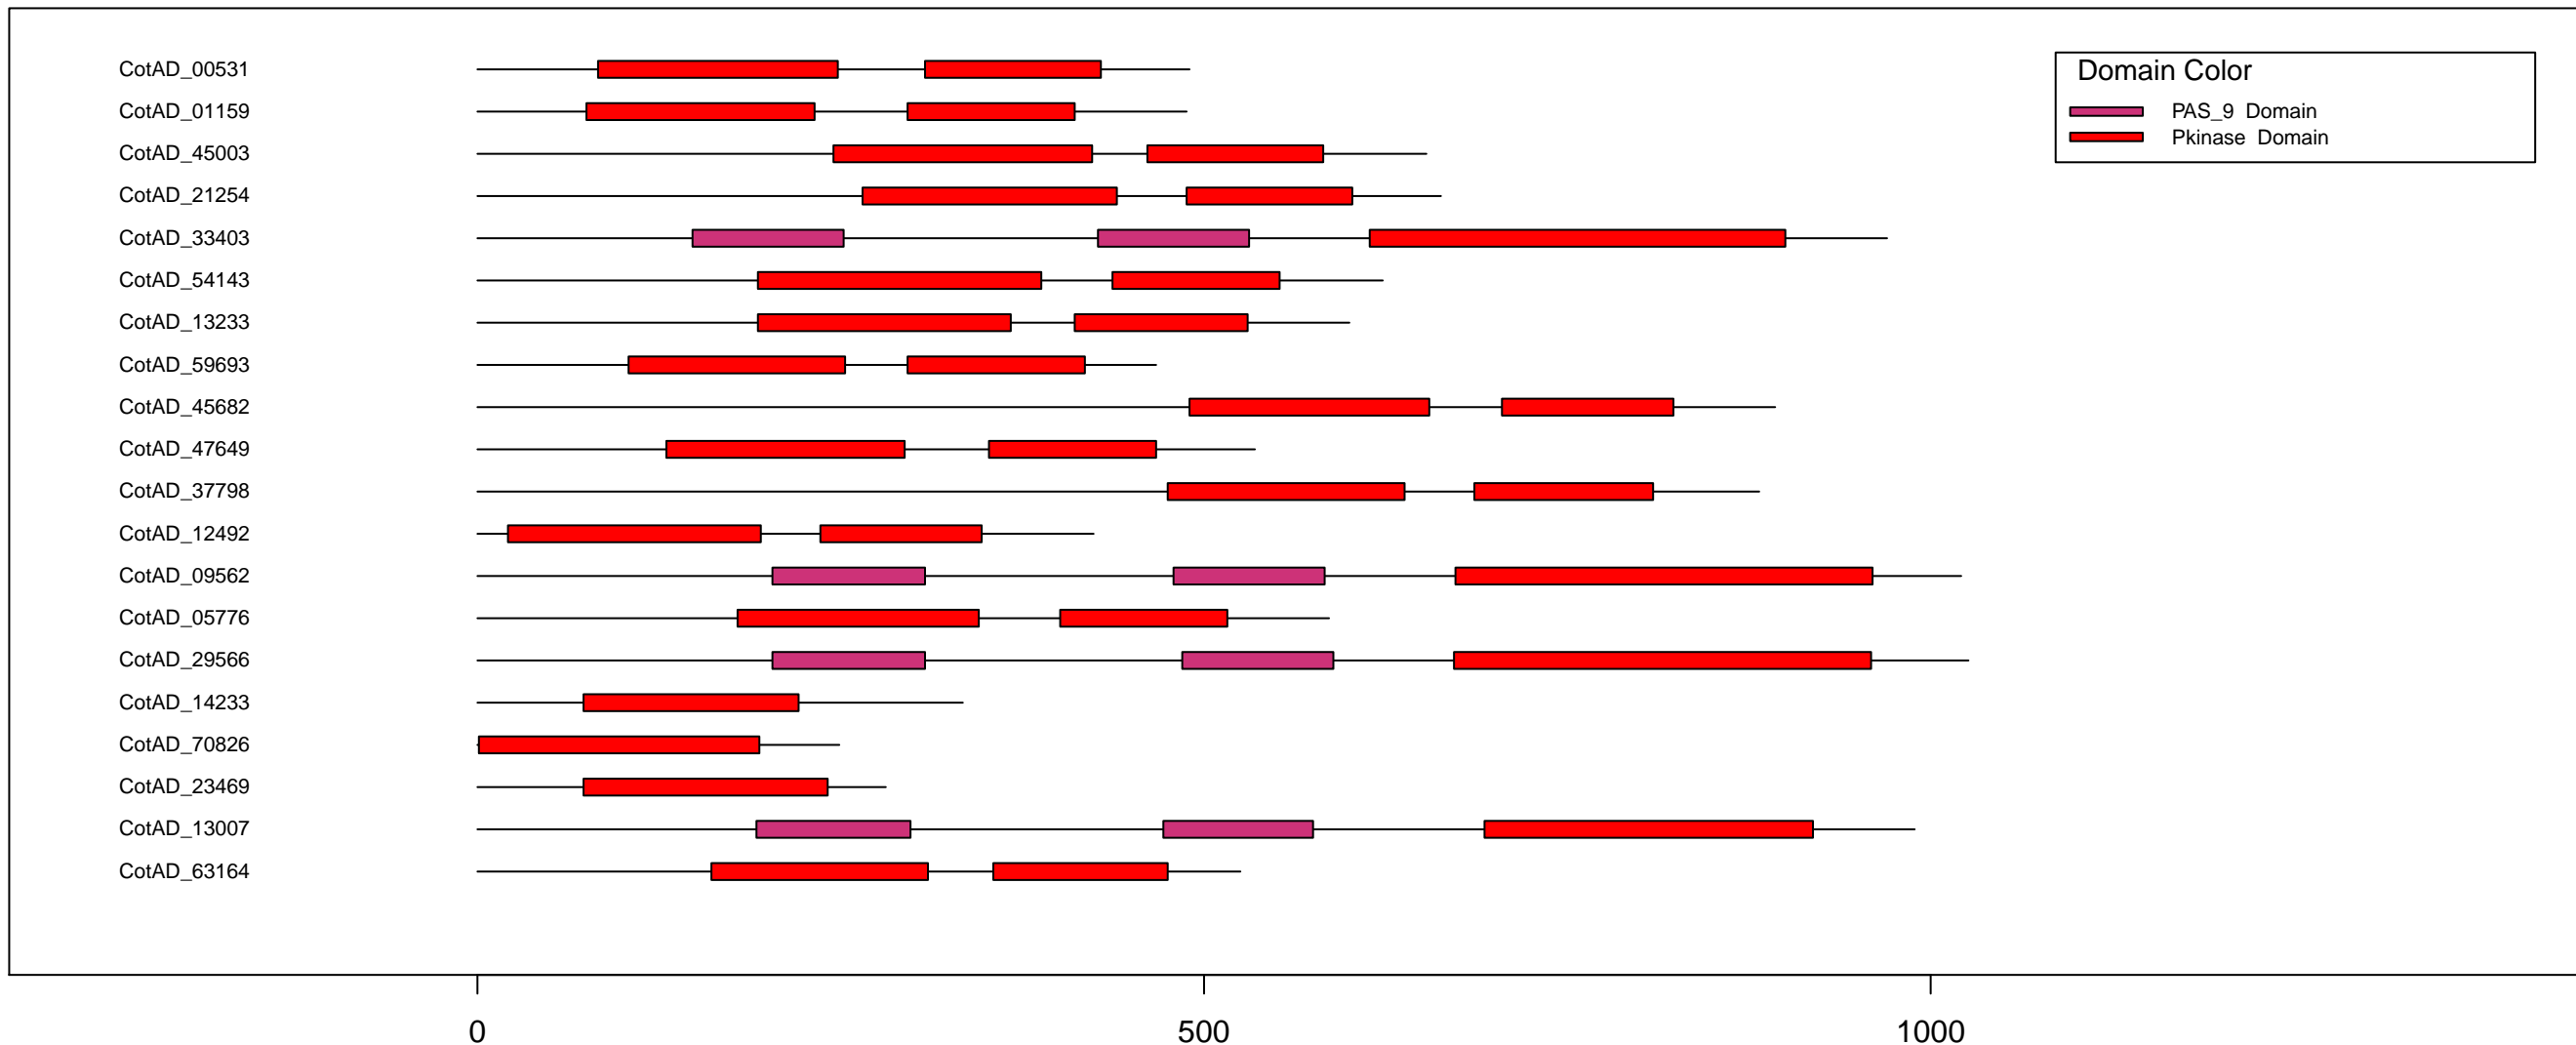



## G.hi AGC\_RSK-2 domain diagram (part 2)

CotAD\_34560  
 CotAD\_16512  
 CotAD\_72389  
 CotAD\_51853  
 CotAD\_10104  
 CotAD\_60197  
 CotAD\_28209  
 CotAD\_46931  
 CotAD\_52077  
 CotAD\_39779  
 CotAD\_12100  
 CotAD\_71439  
 CotAD\_15633  
 CotAD\_69997  
 CotAD\_03114  
 CotAD\_02897  
 CotAD\_71302  
 CotAD\_59977  
 CotAD\_45054  
 CotAD\_01717

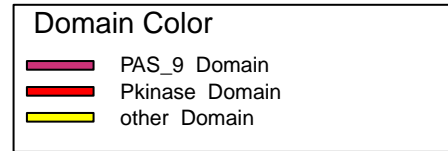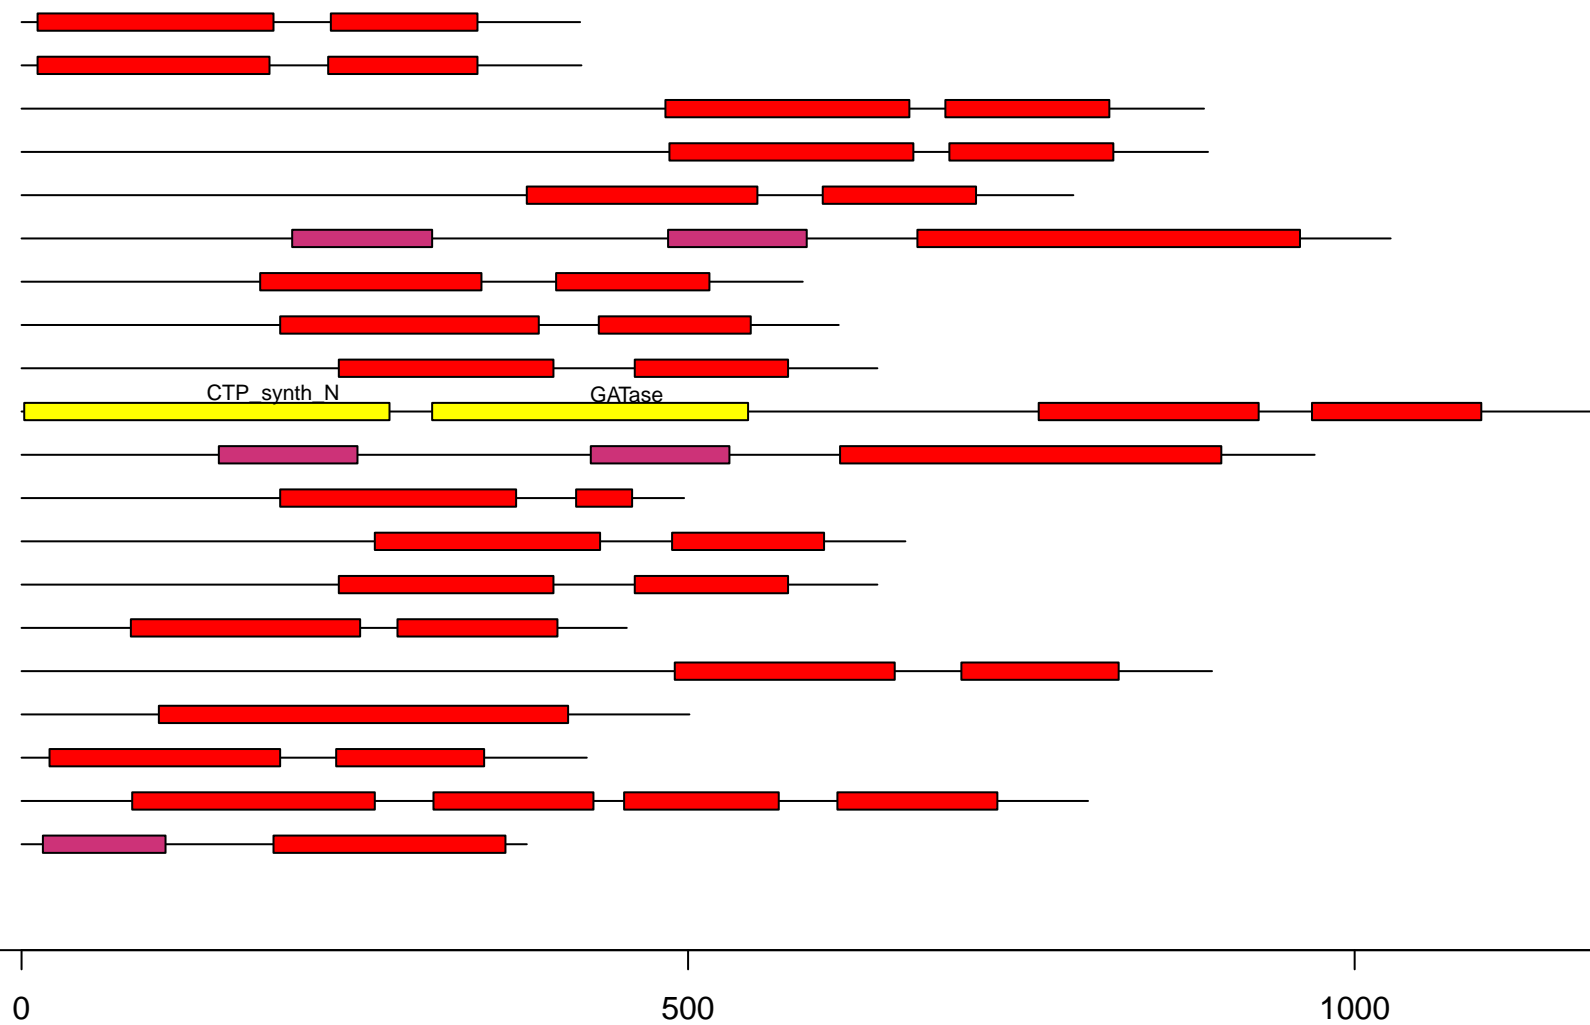

### G.hi AGC\_RSK-2 domain diagram (part 3)

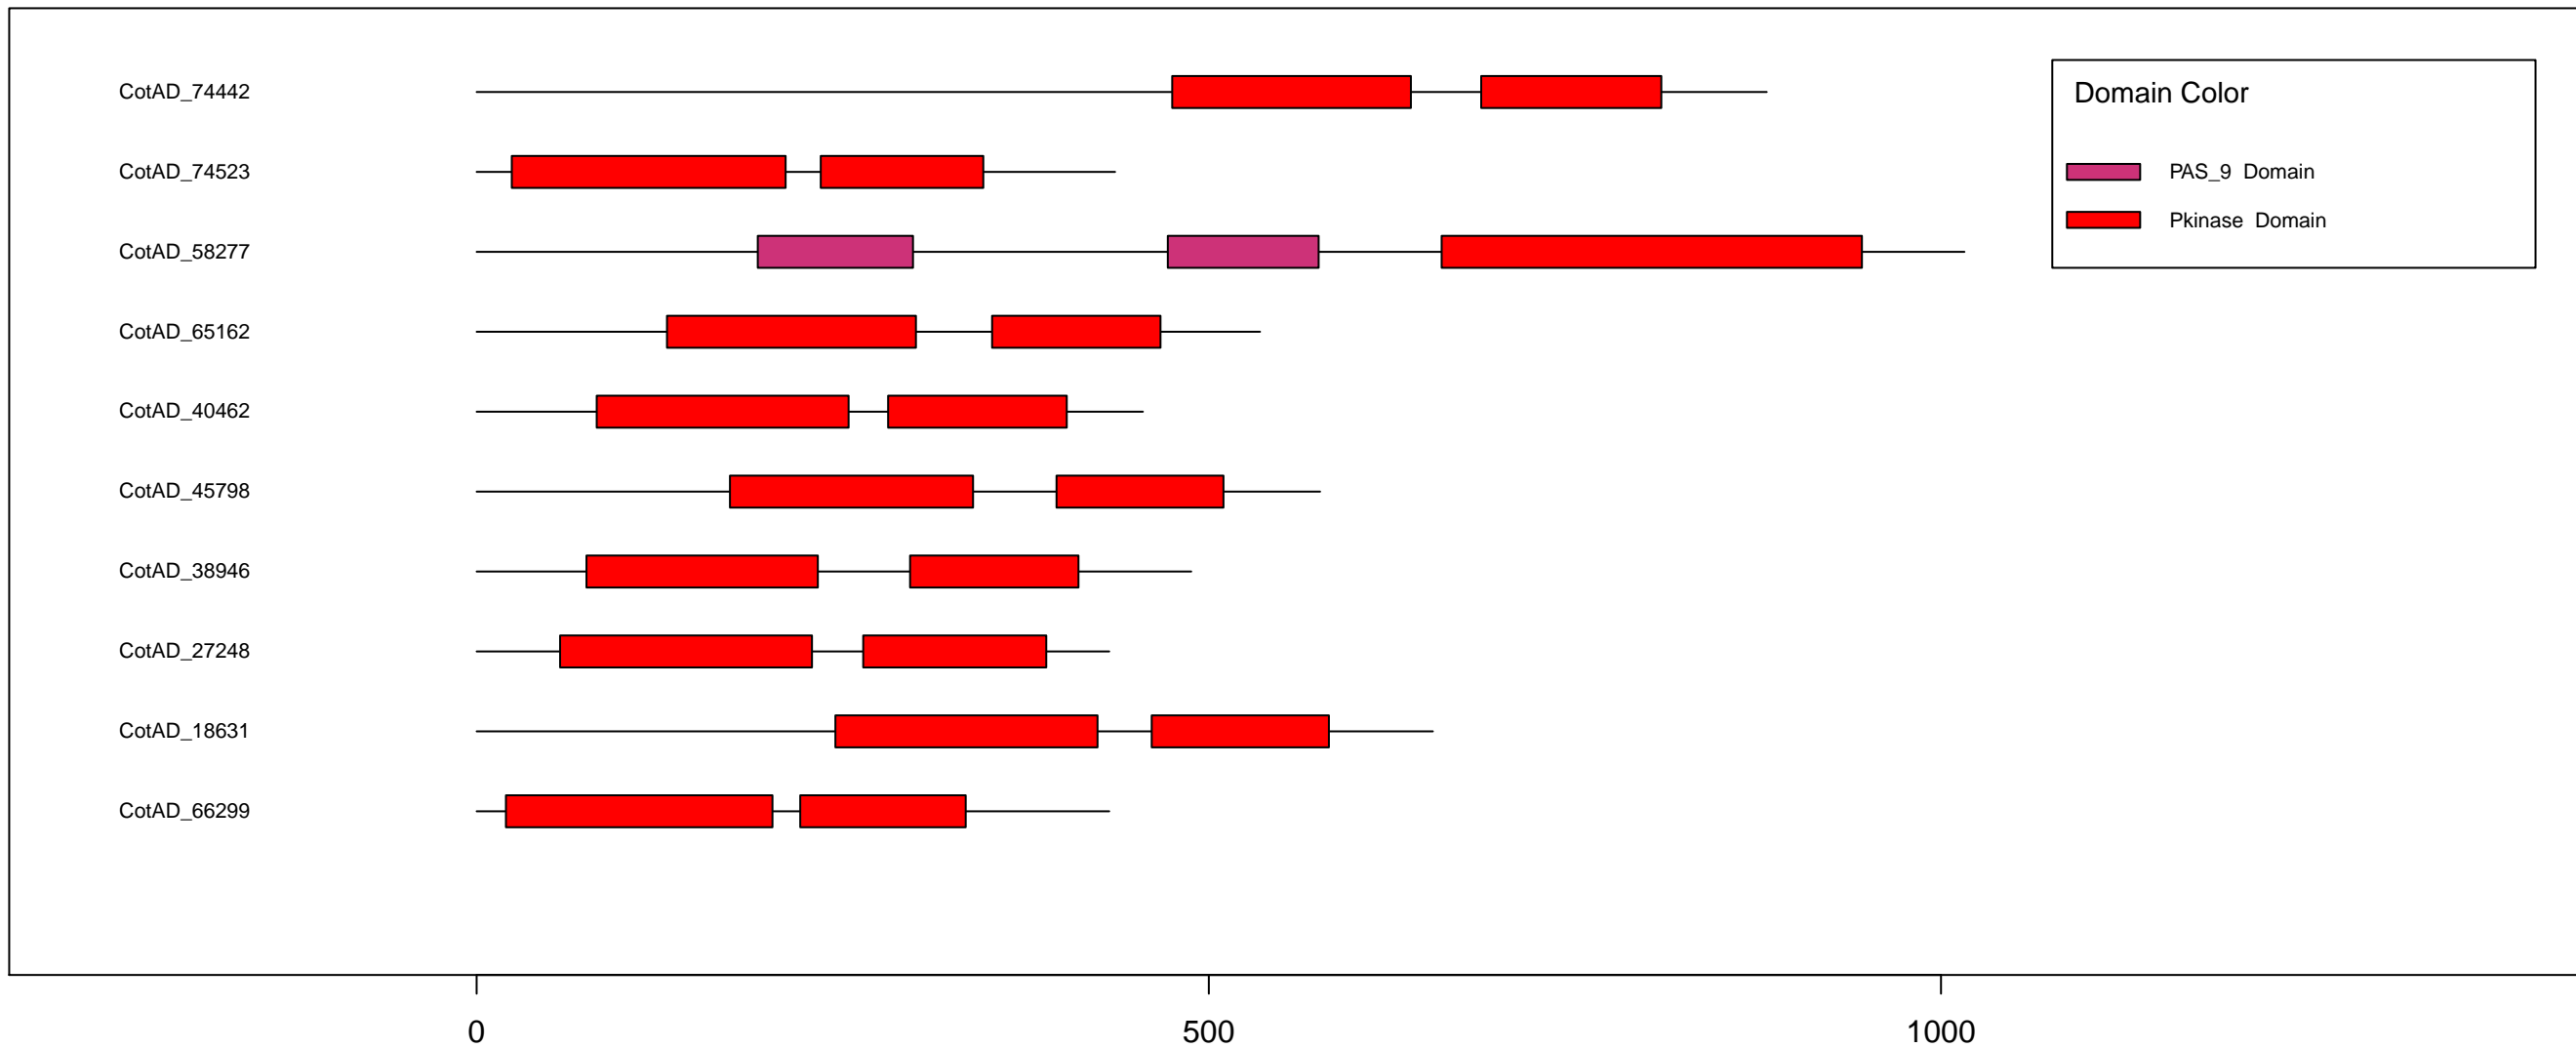

# G.hi AGC-PI domain diagram (all)

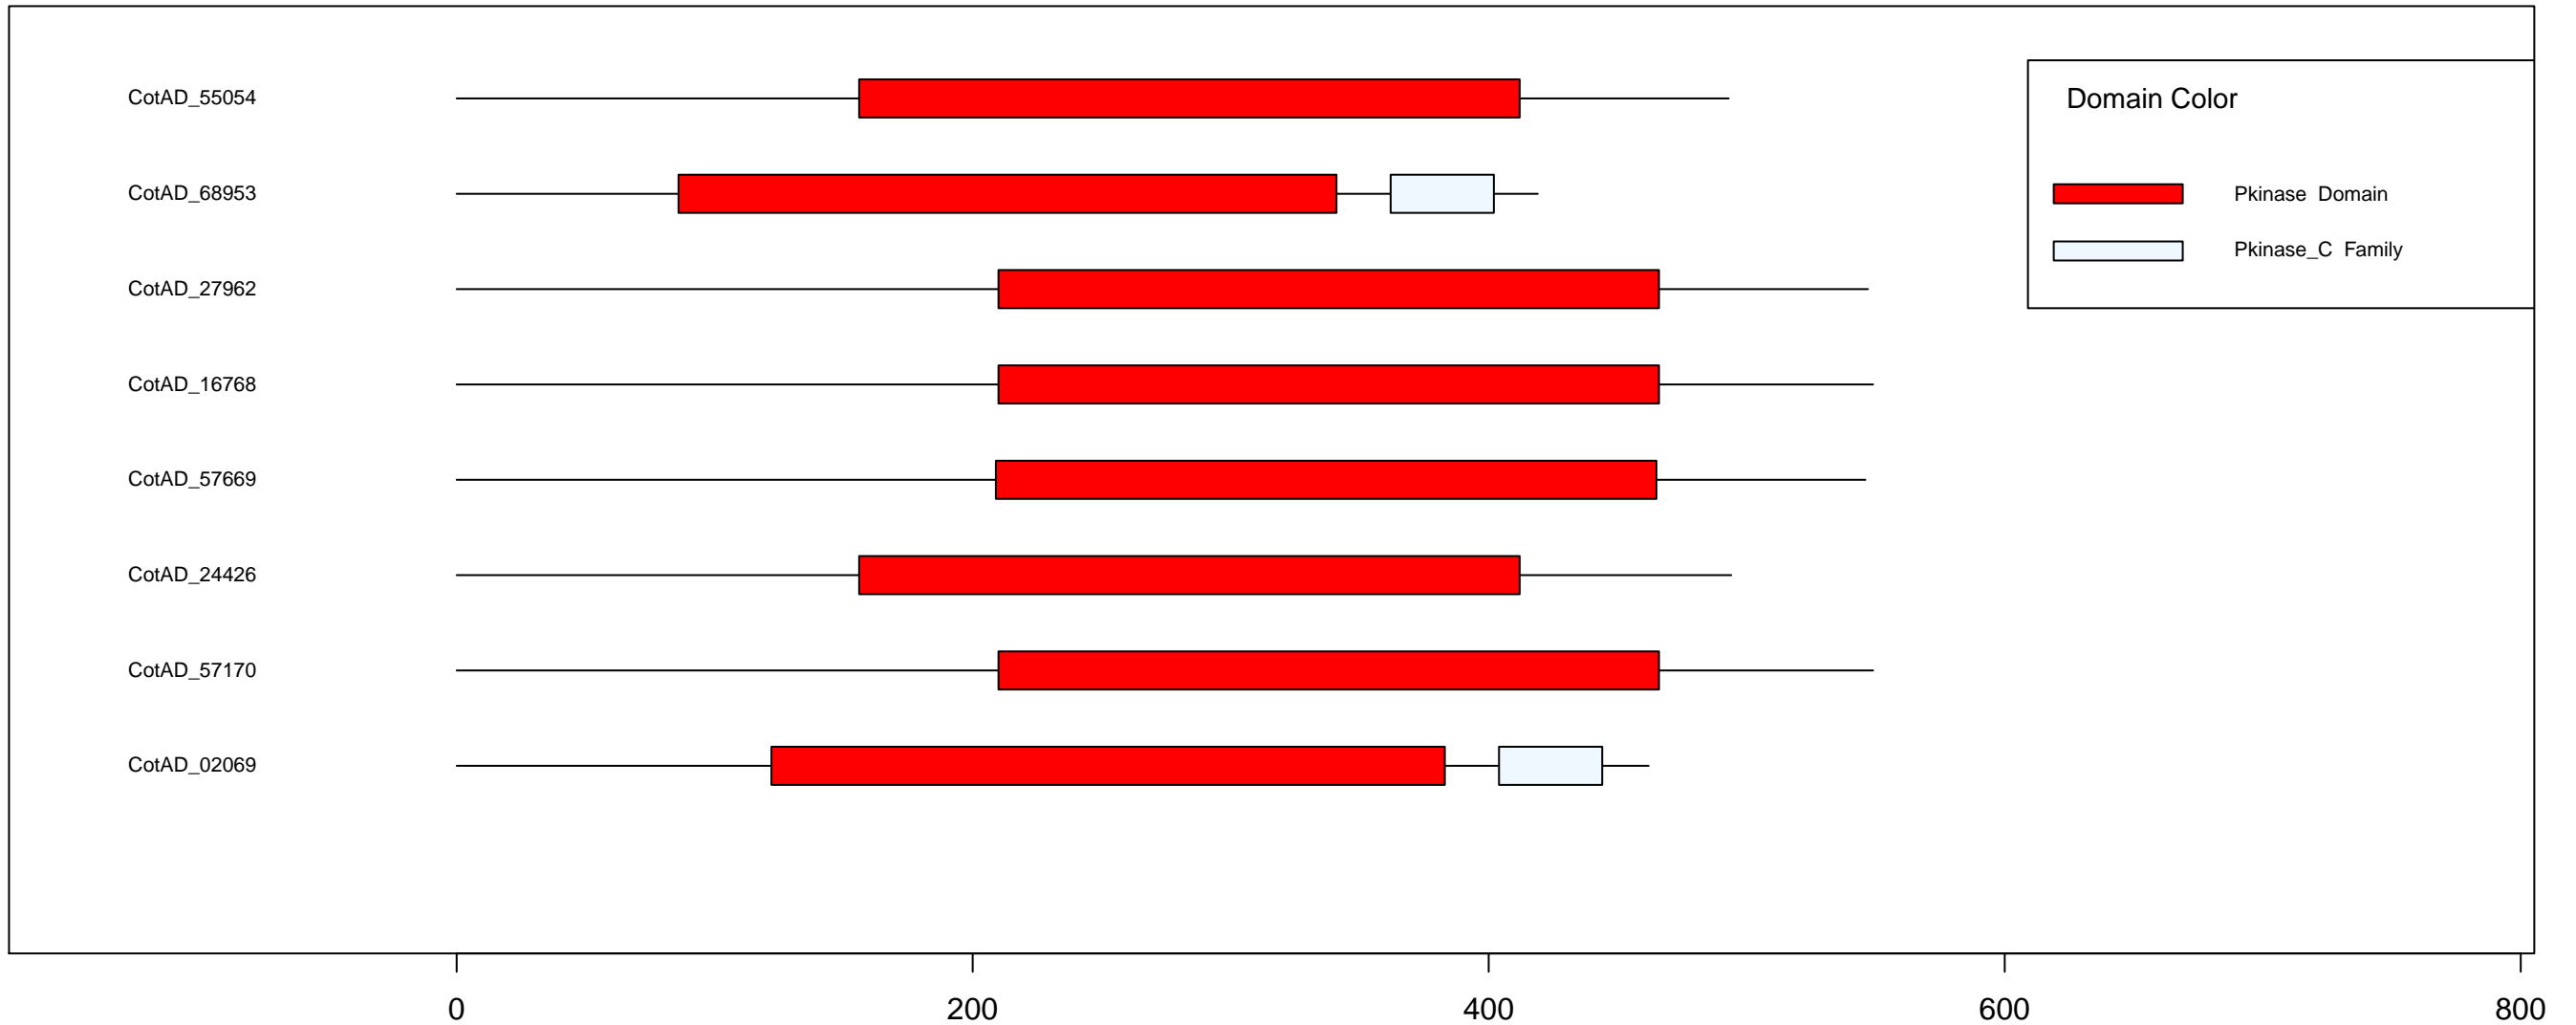

# G.hi Aur domain diagram (all)

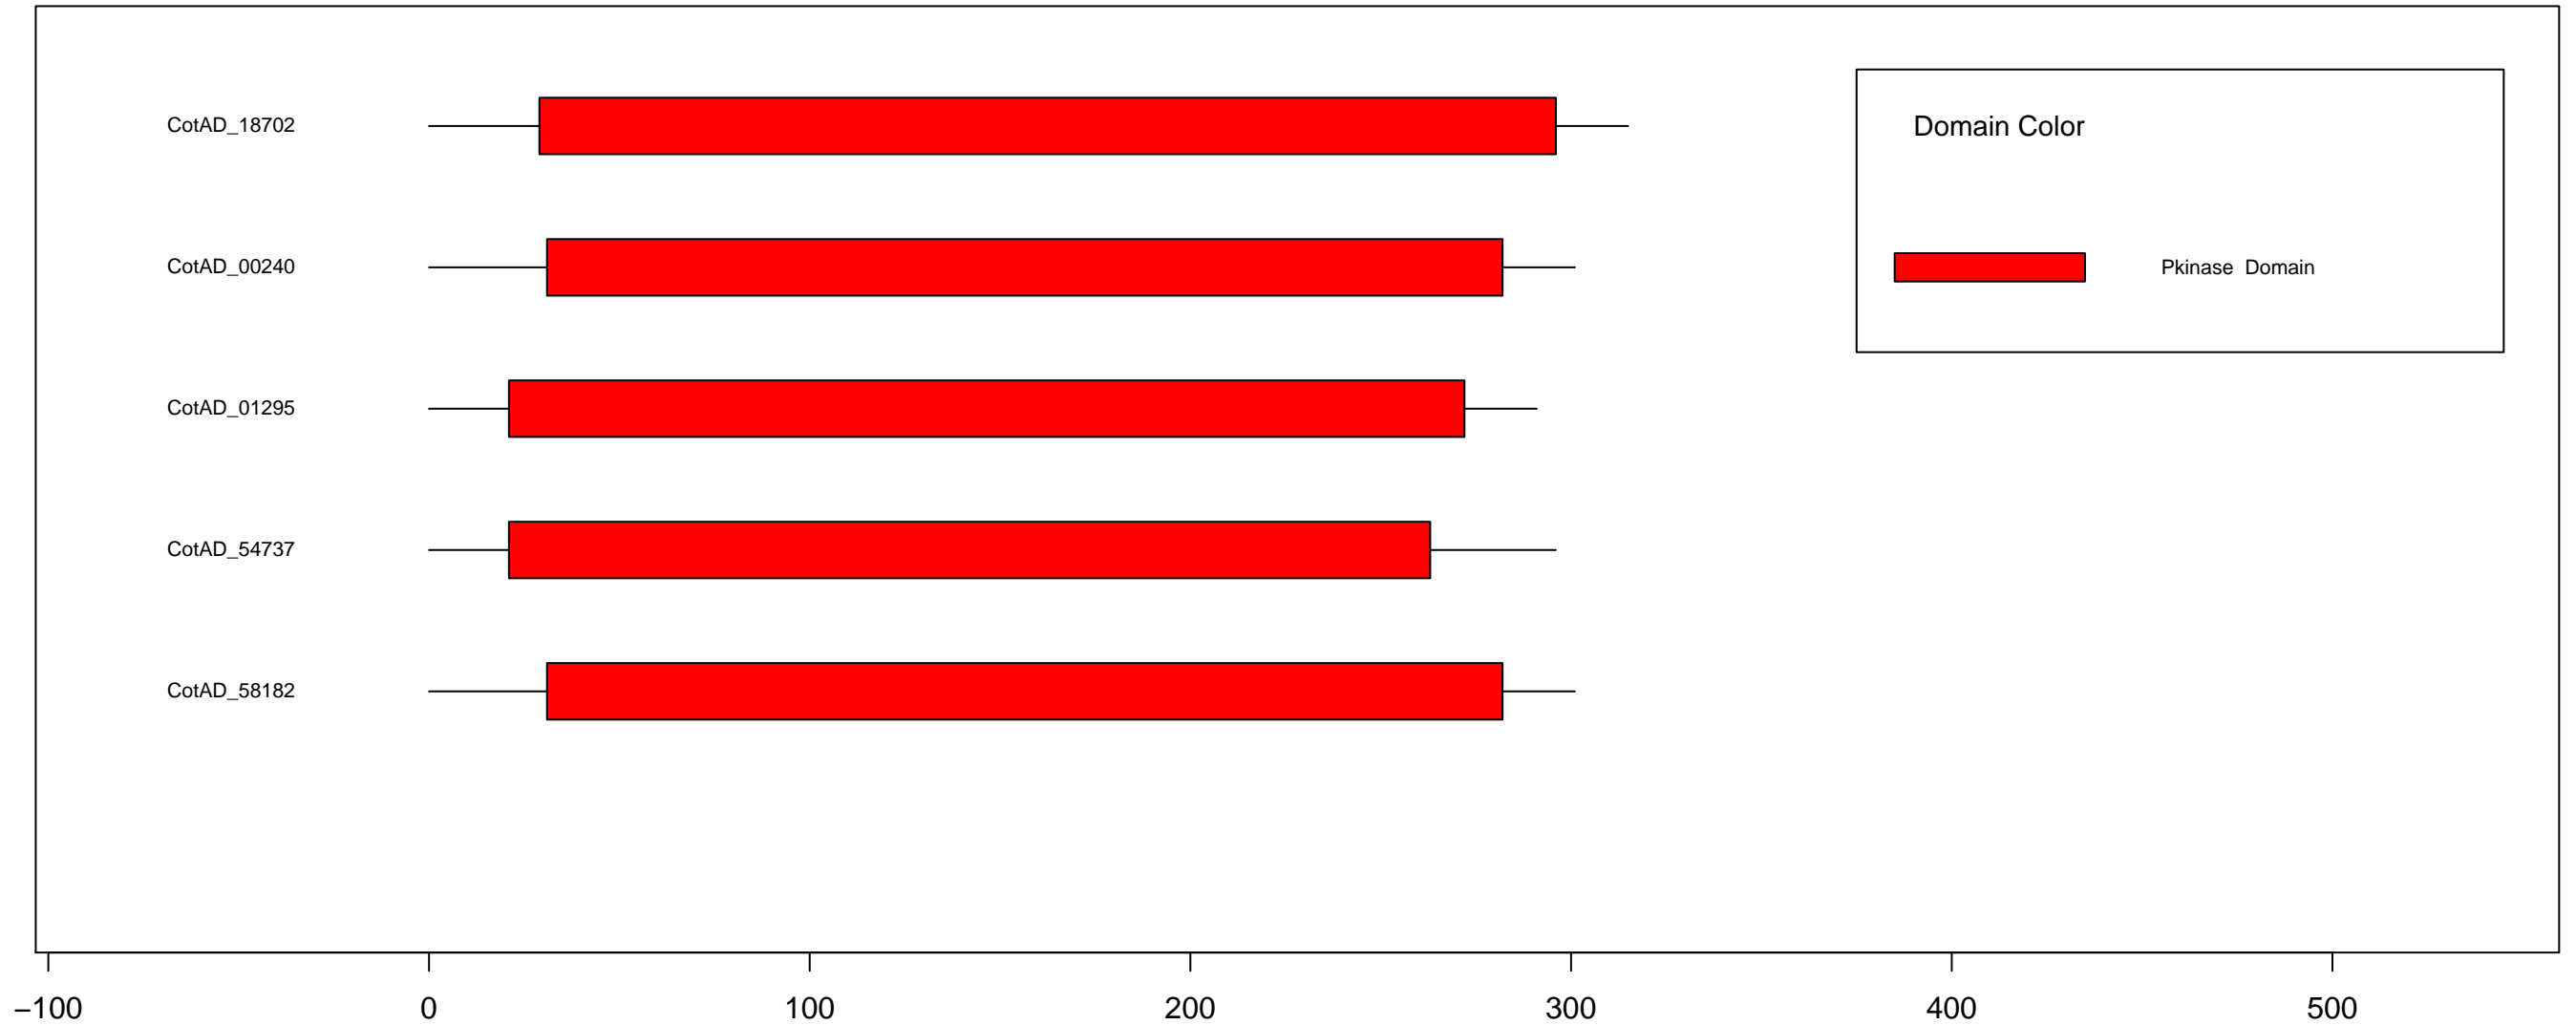

# G.hi BUB domain diagram (all)

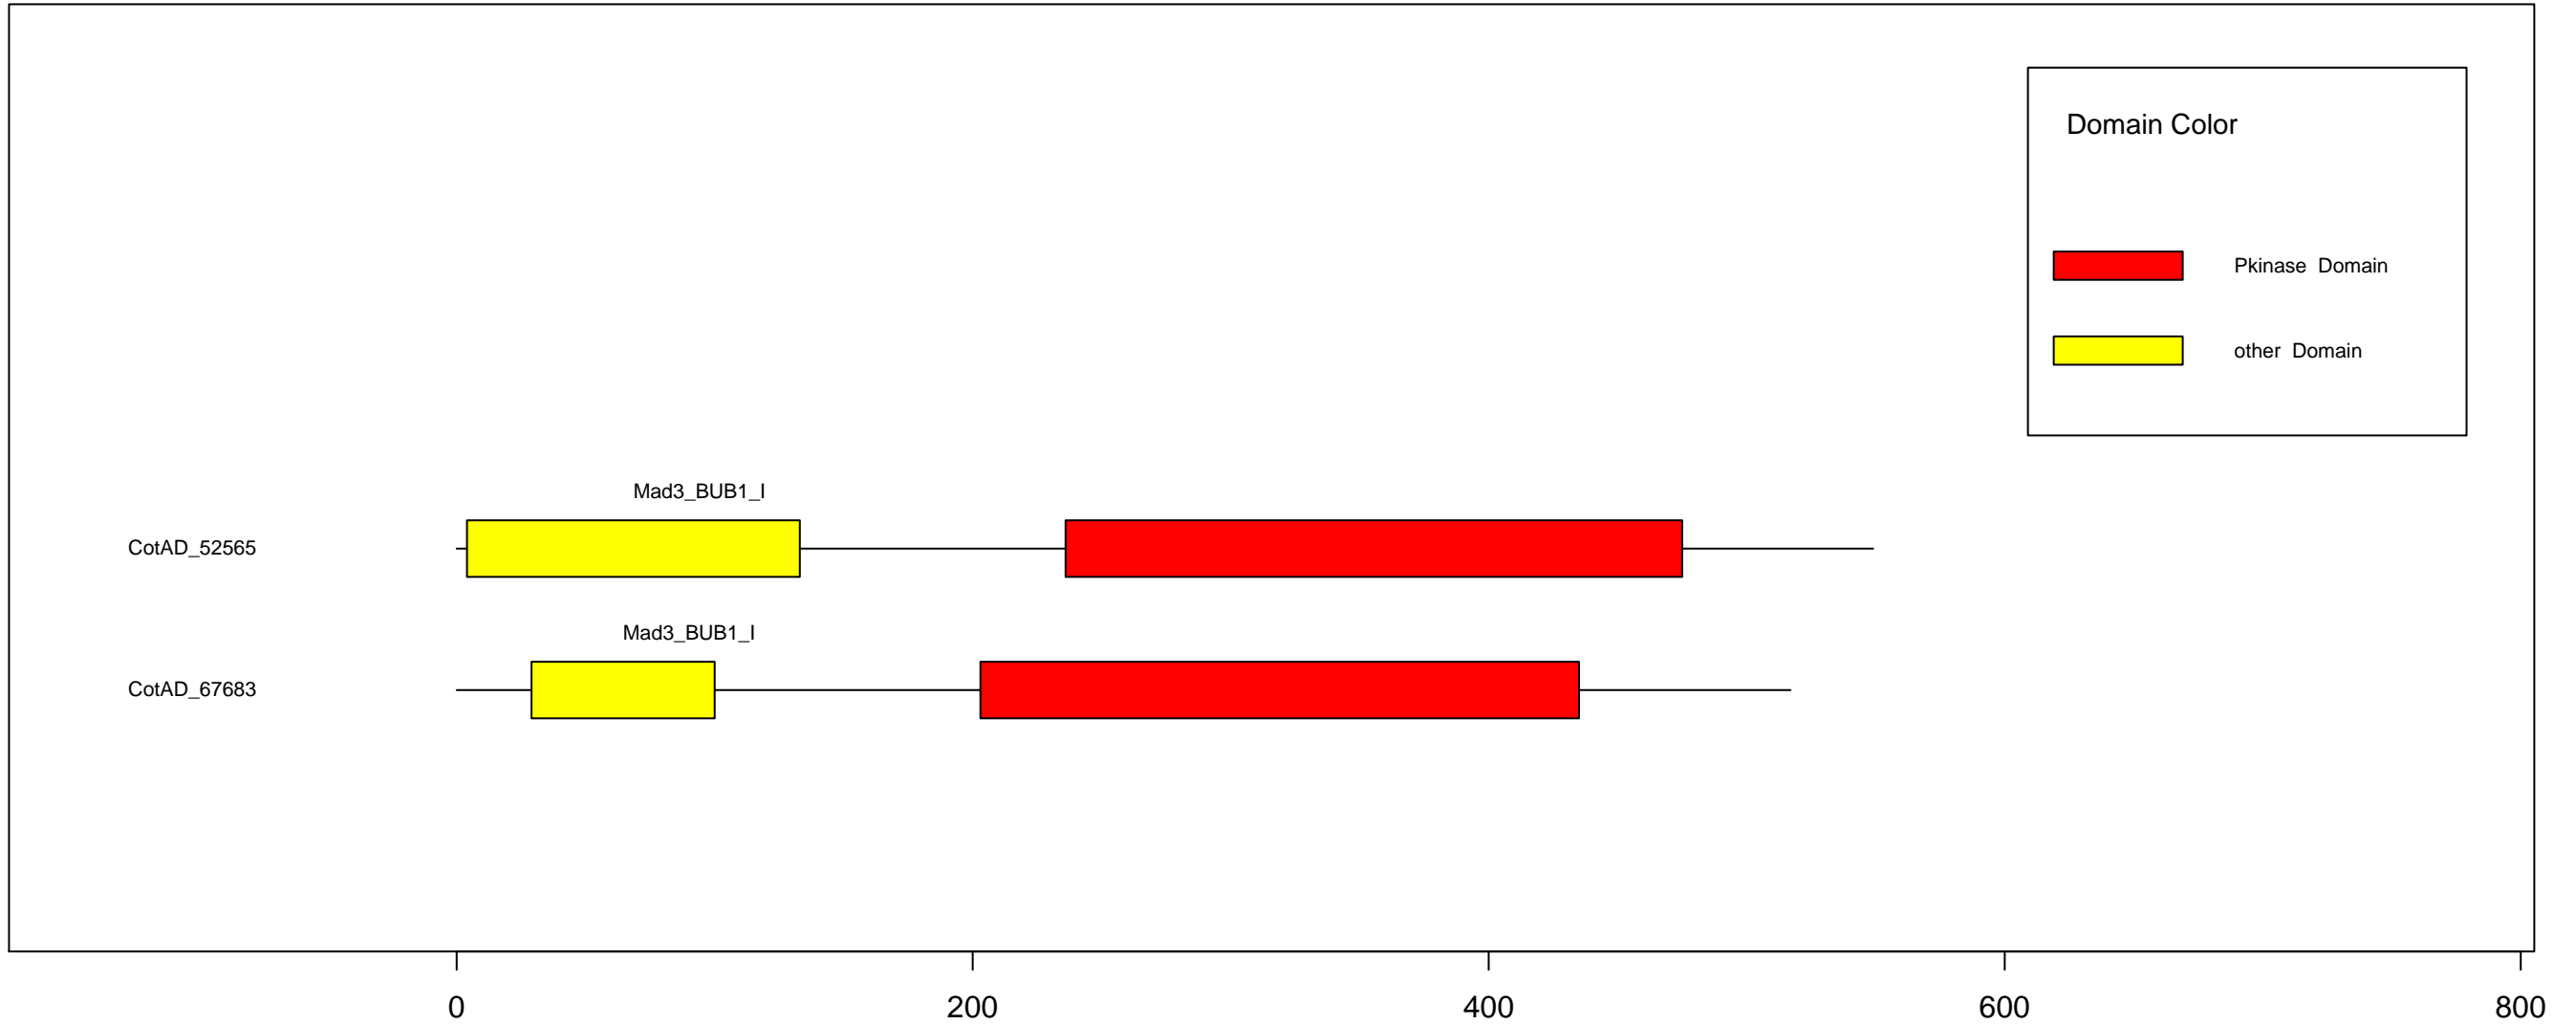

# G.hi CAMK\_AMPK domain diagram (all)

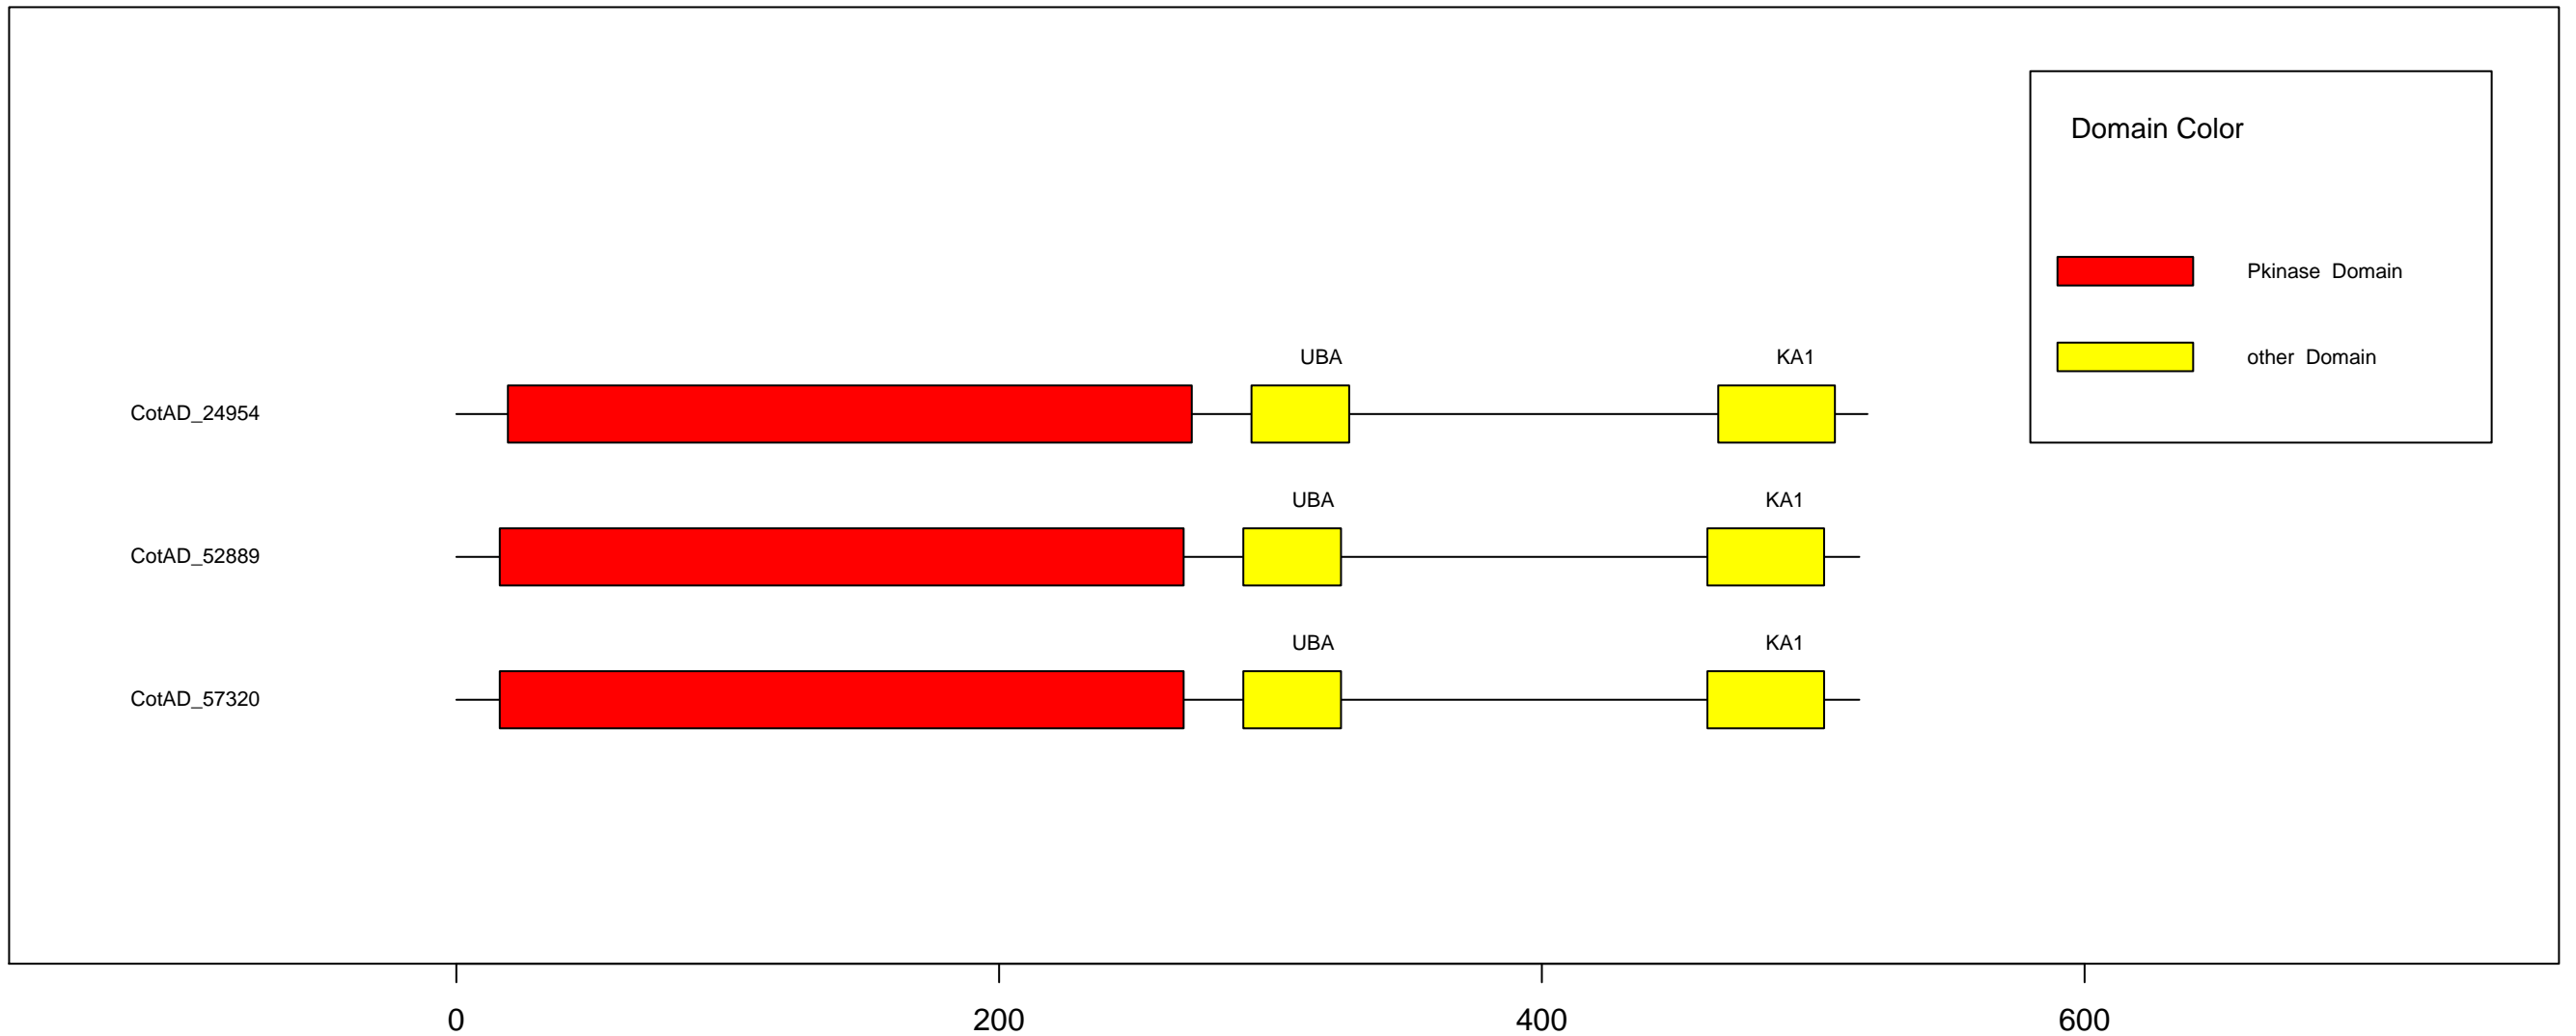

# G.hi CAMK\_CAMK1-DCAMKL domain diagram (all)

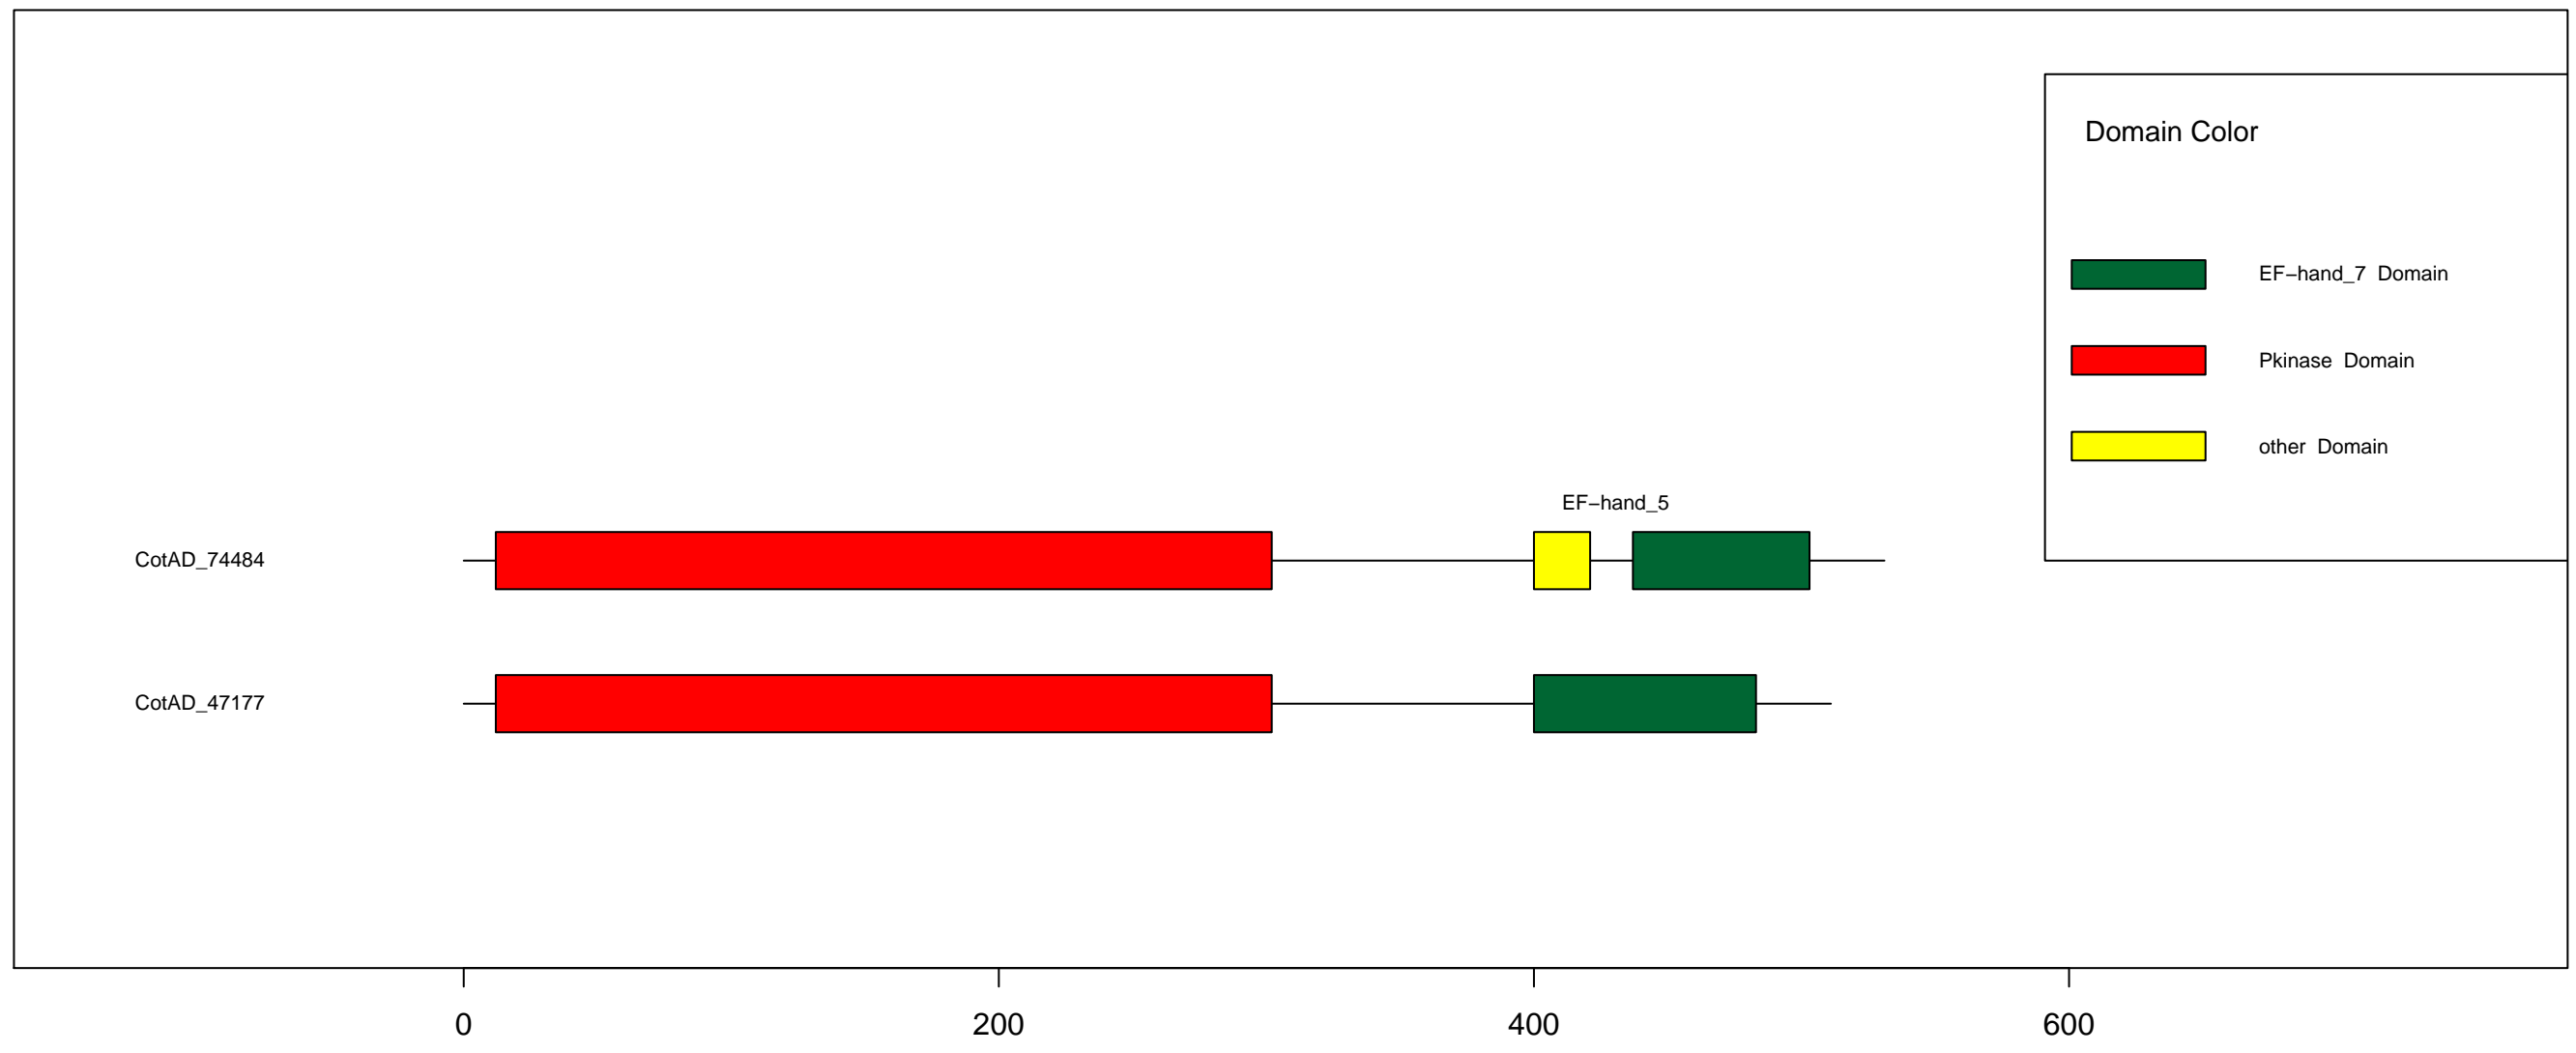

# G.hi CAMK\_CAMKL-CHK1 domain diagram (part 1)

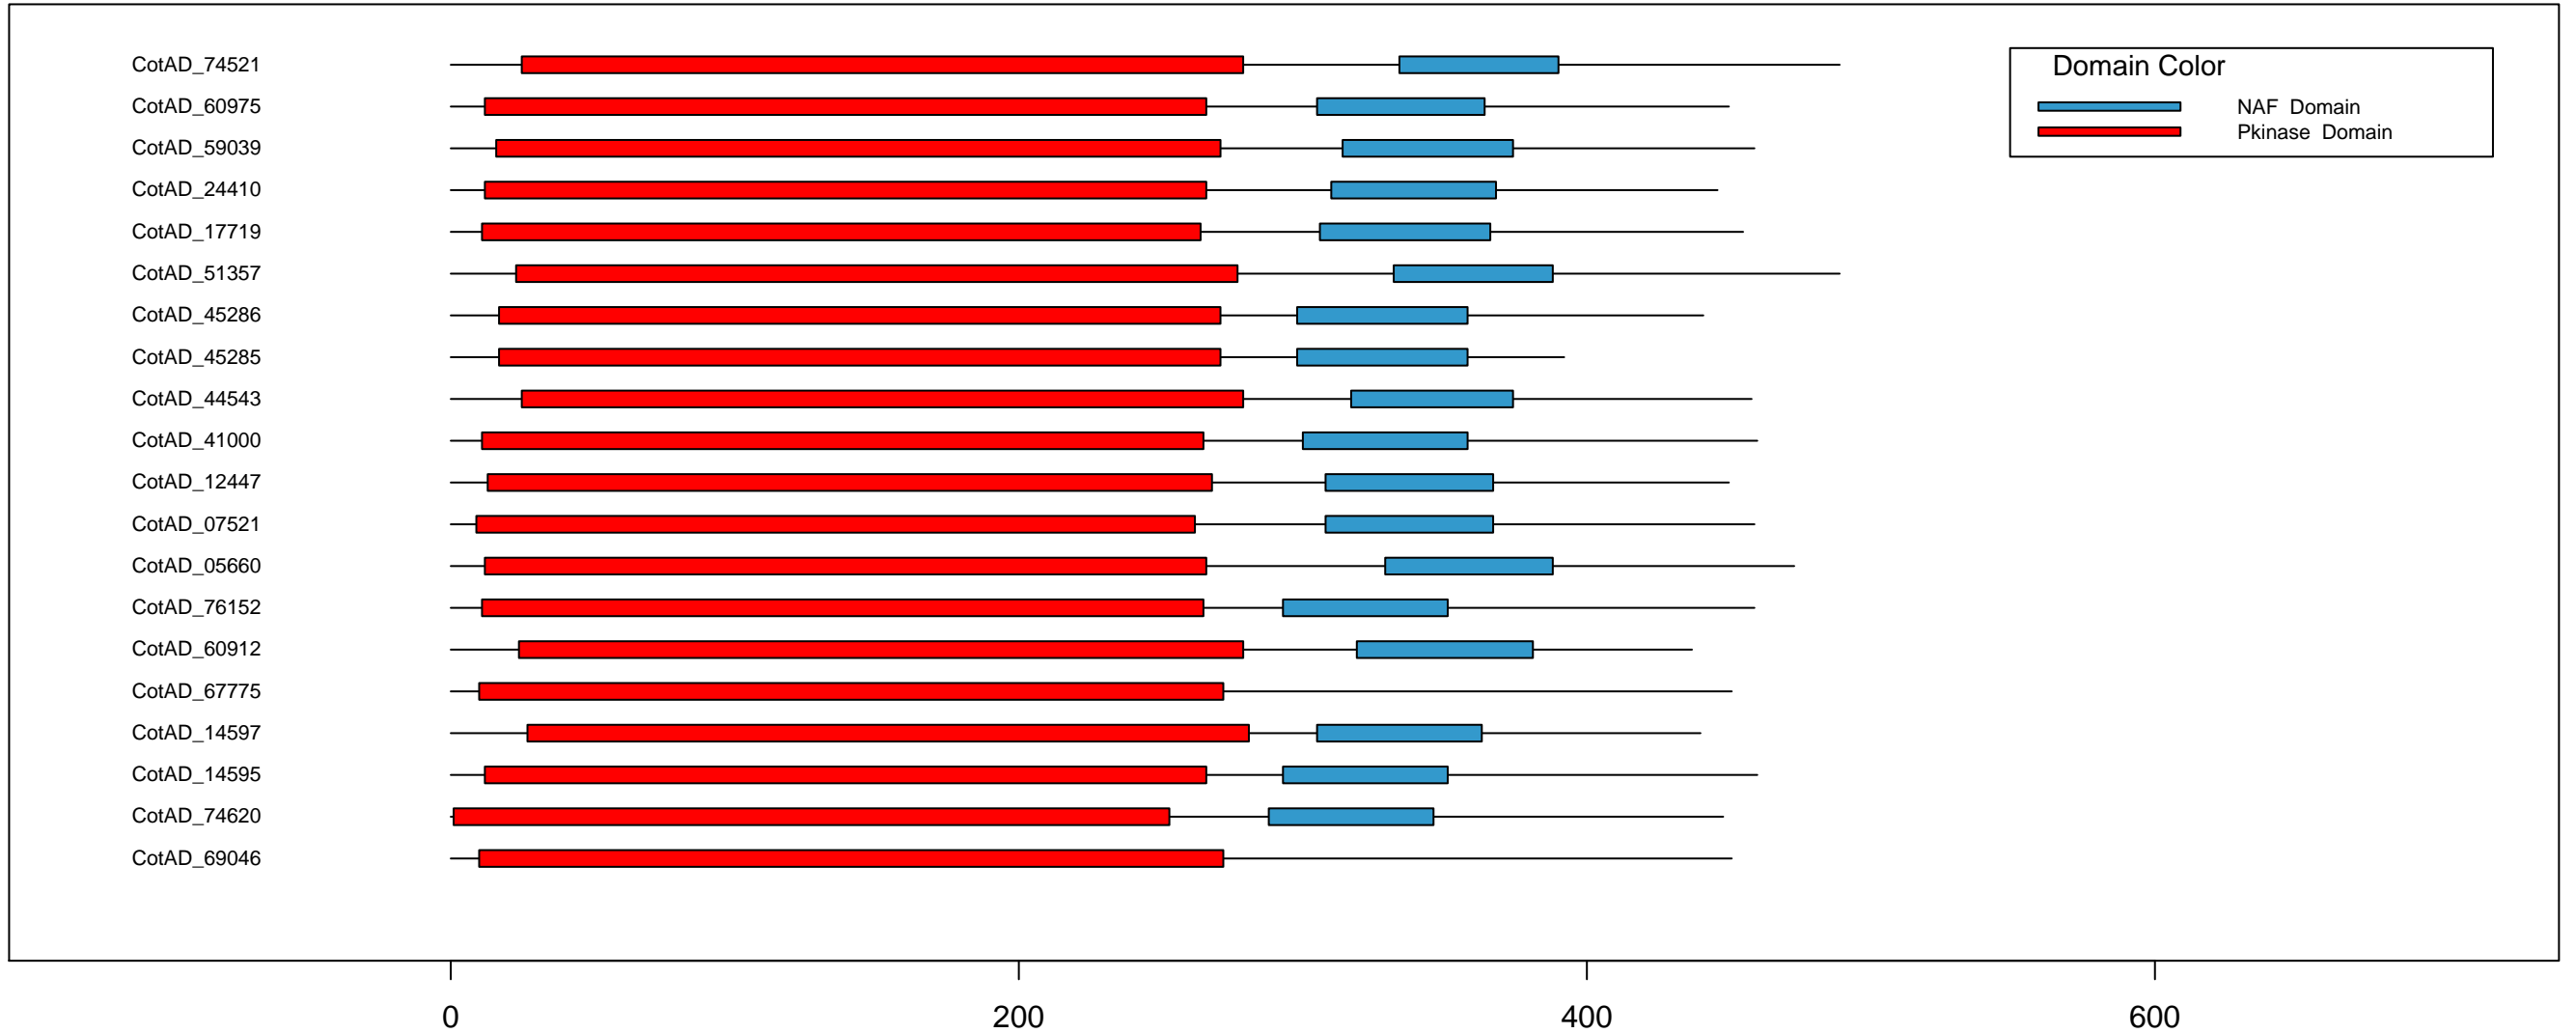



# G.hi CAMK\_CAMKL-CHK1 domain diagram (part 2)

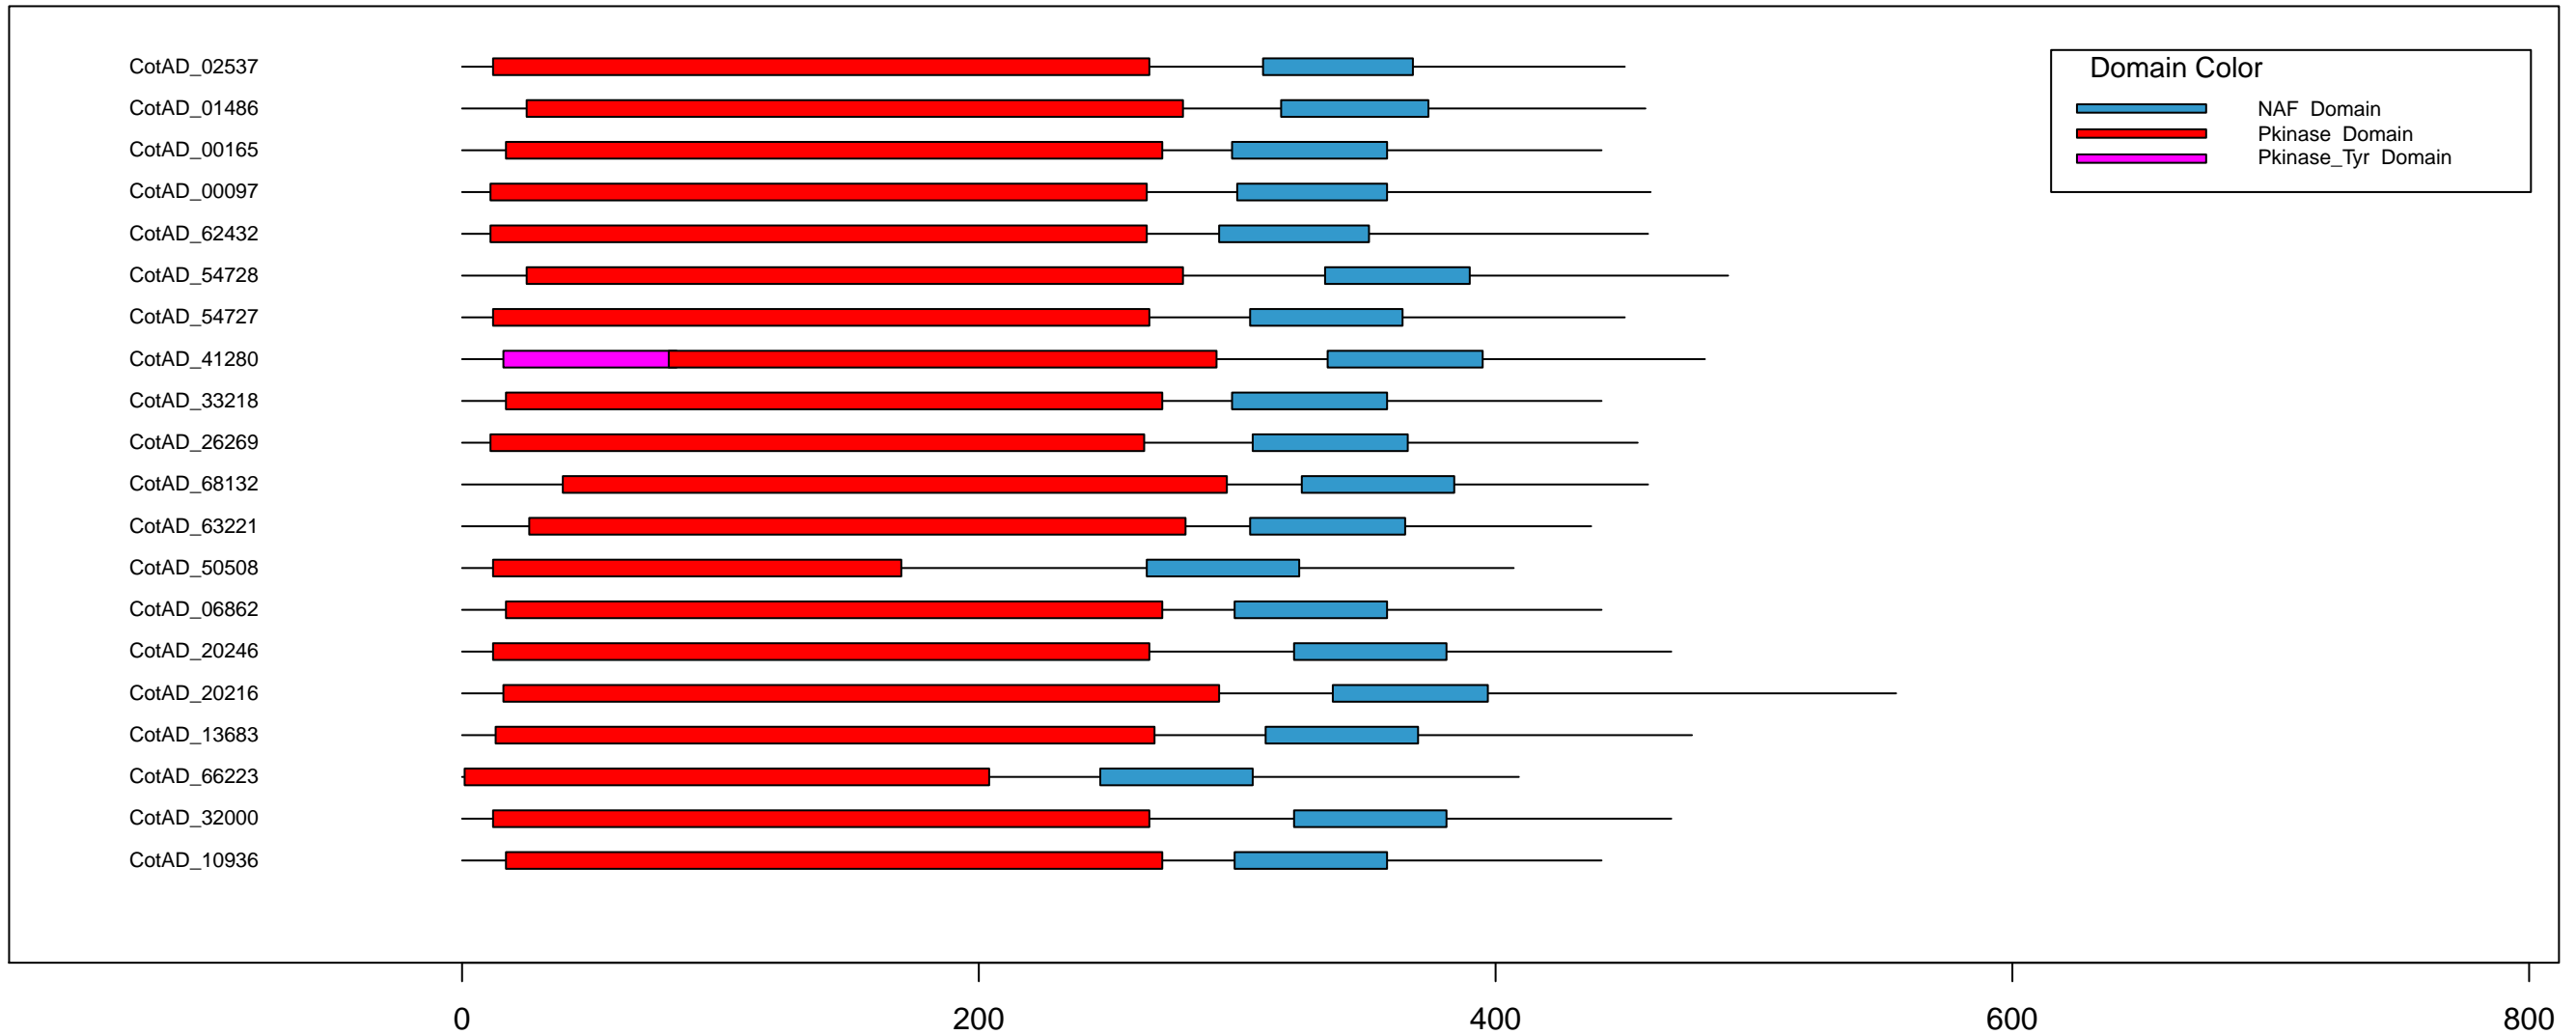

### G.hi CAMK\_CAMKL-CHK1 domain diagram (part 3)

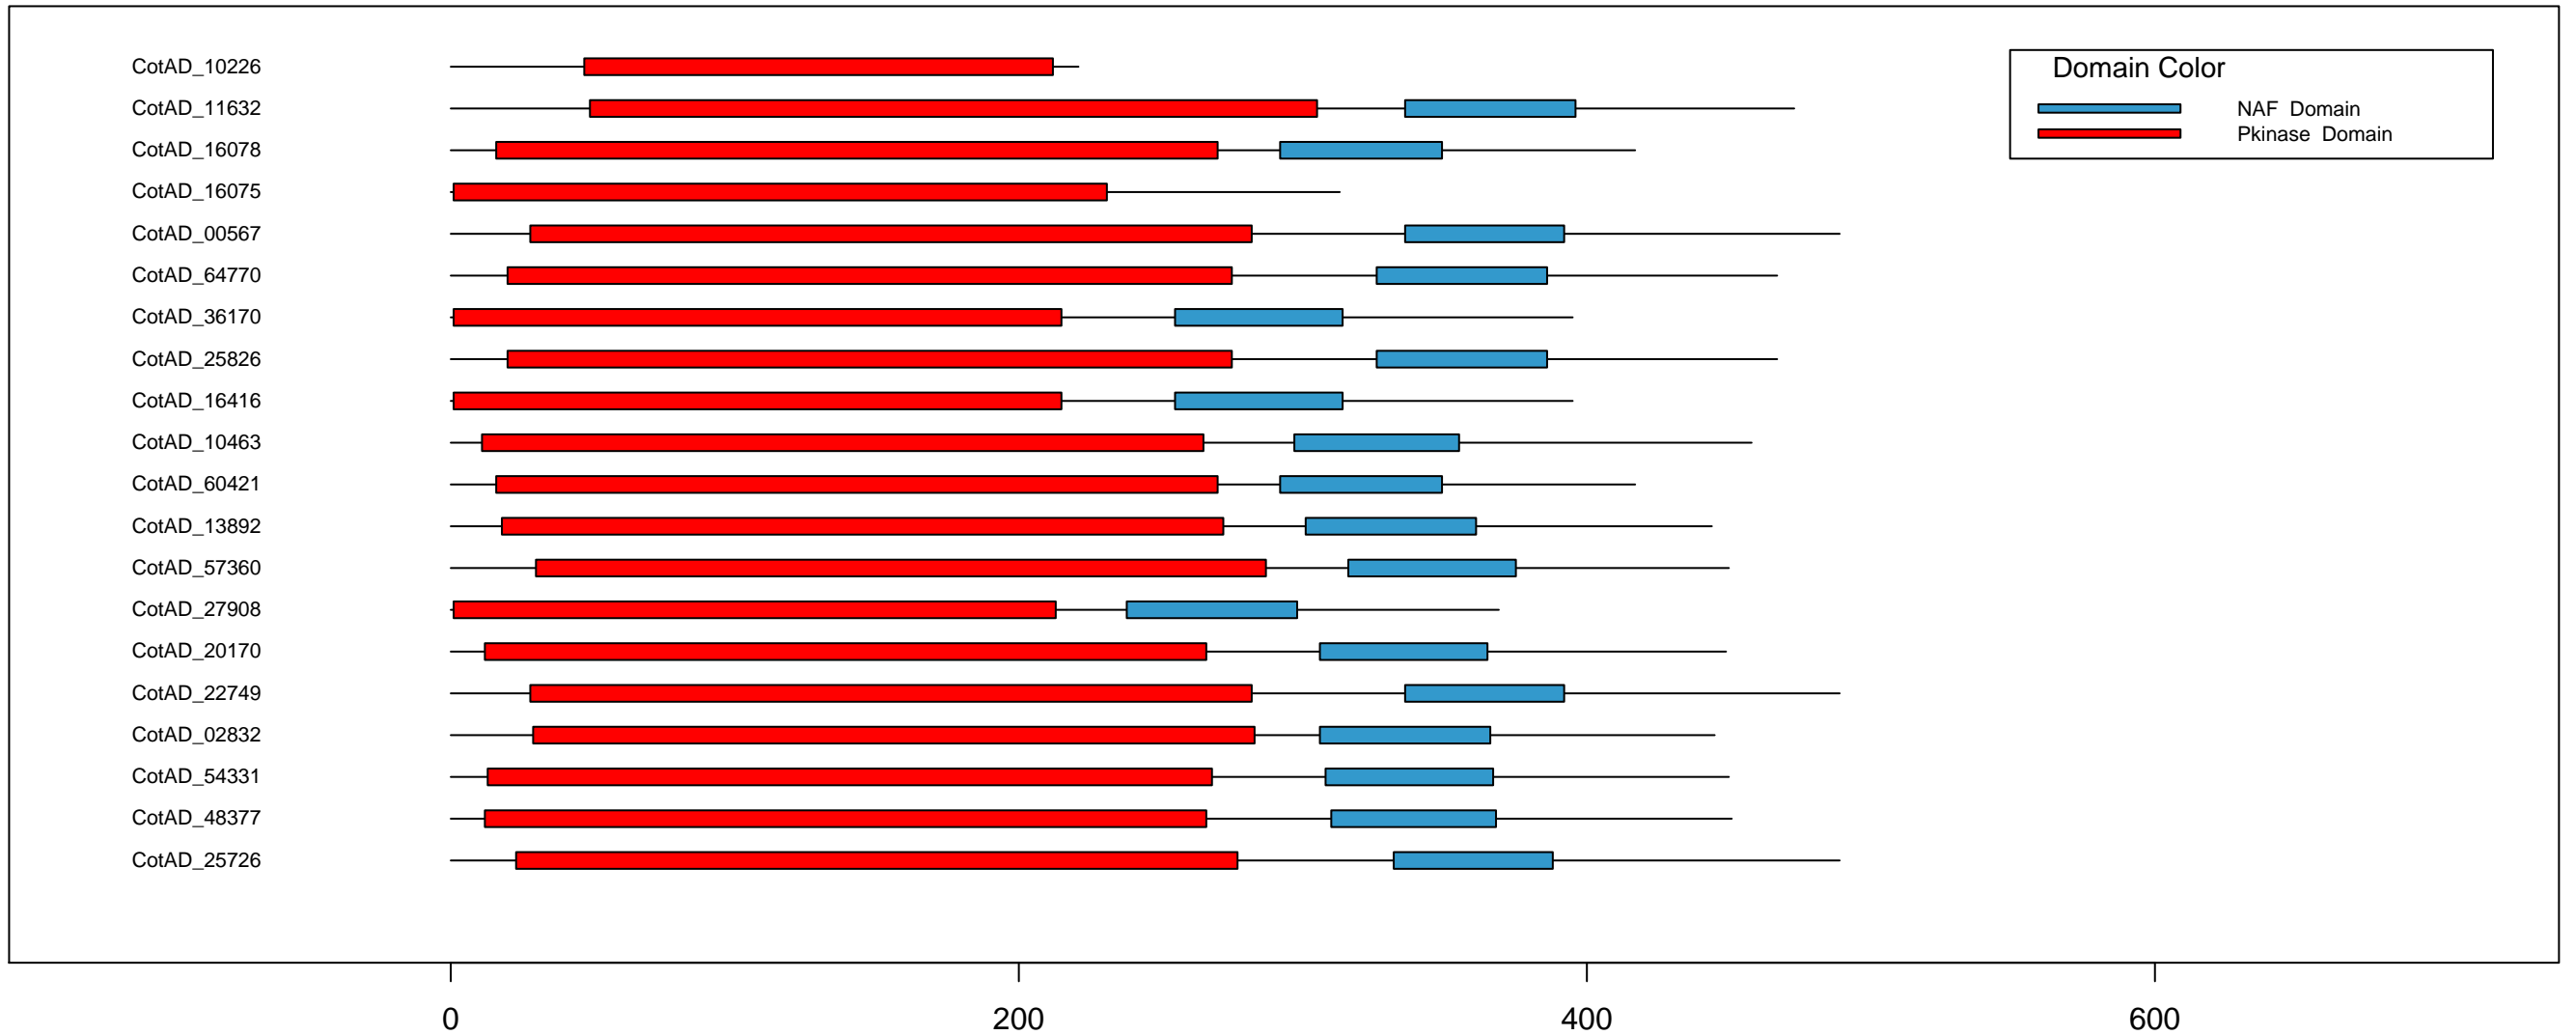

### G.hi CAMK\_CAMKL-CHK1 domain diagram (part 4)

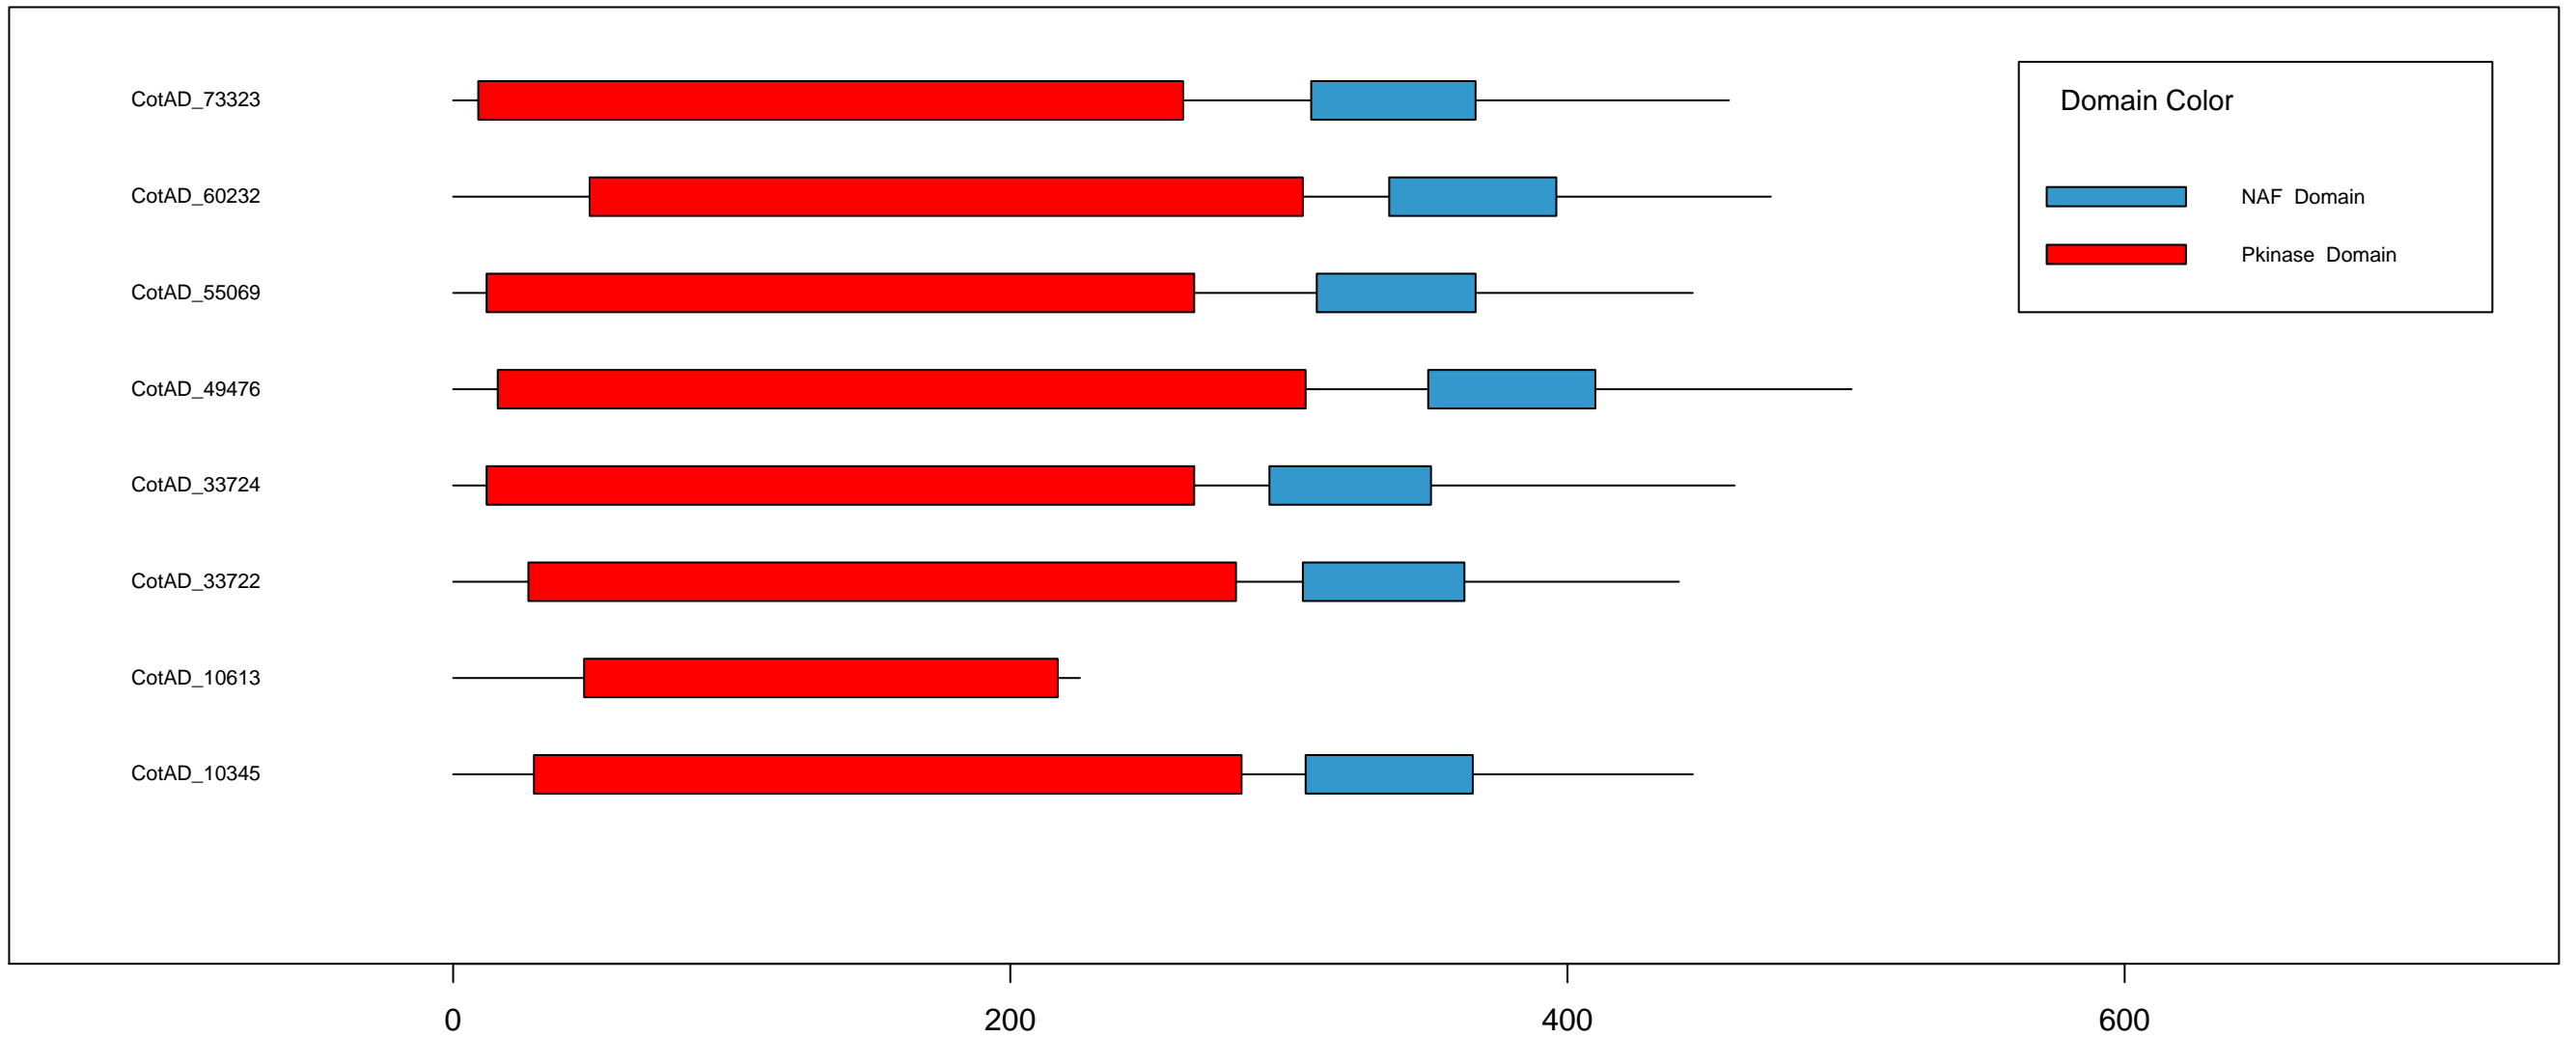

### G.hi CAMK\_CAMKL-LKB domain diagram (all)

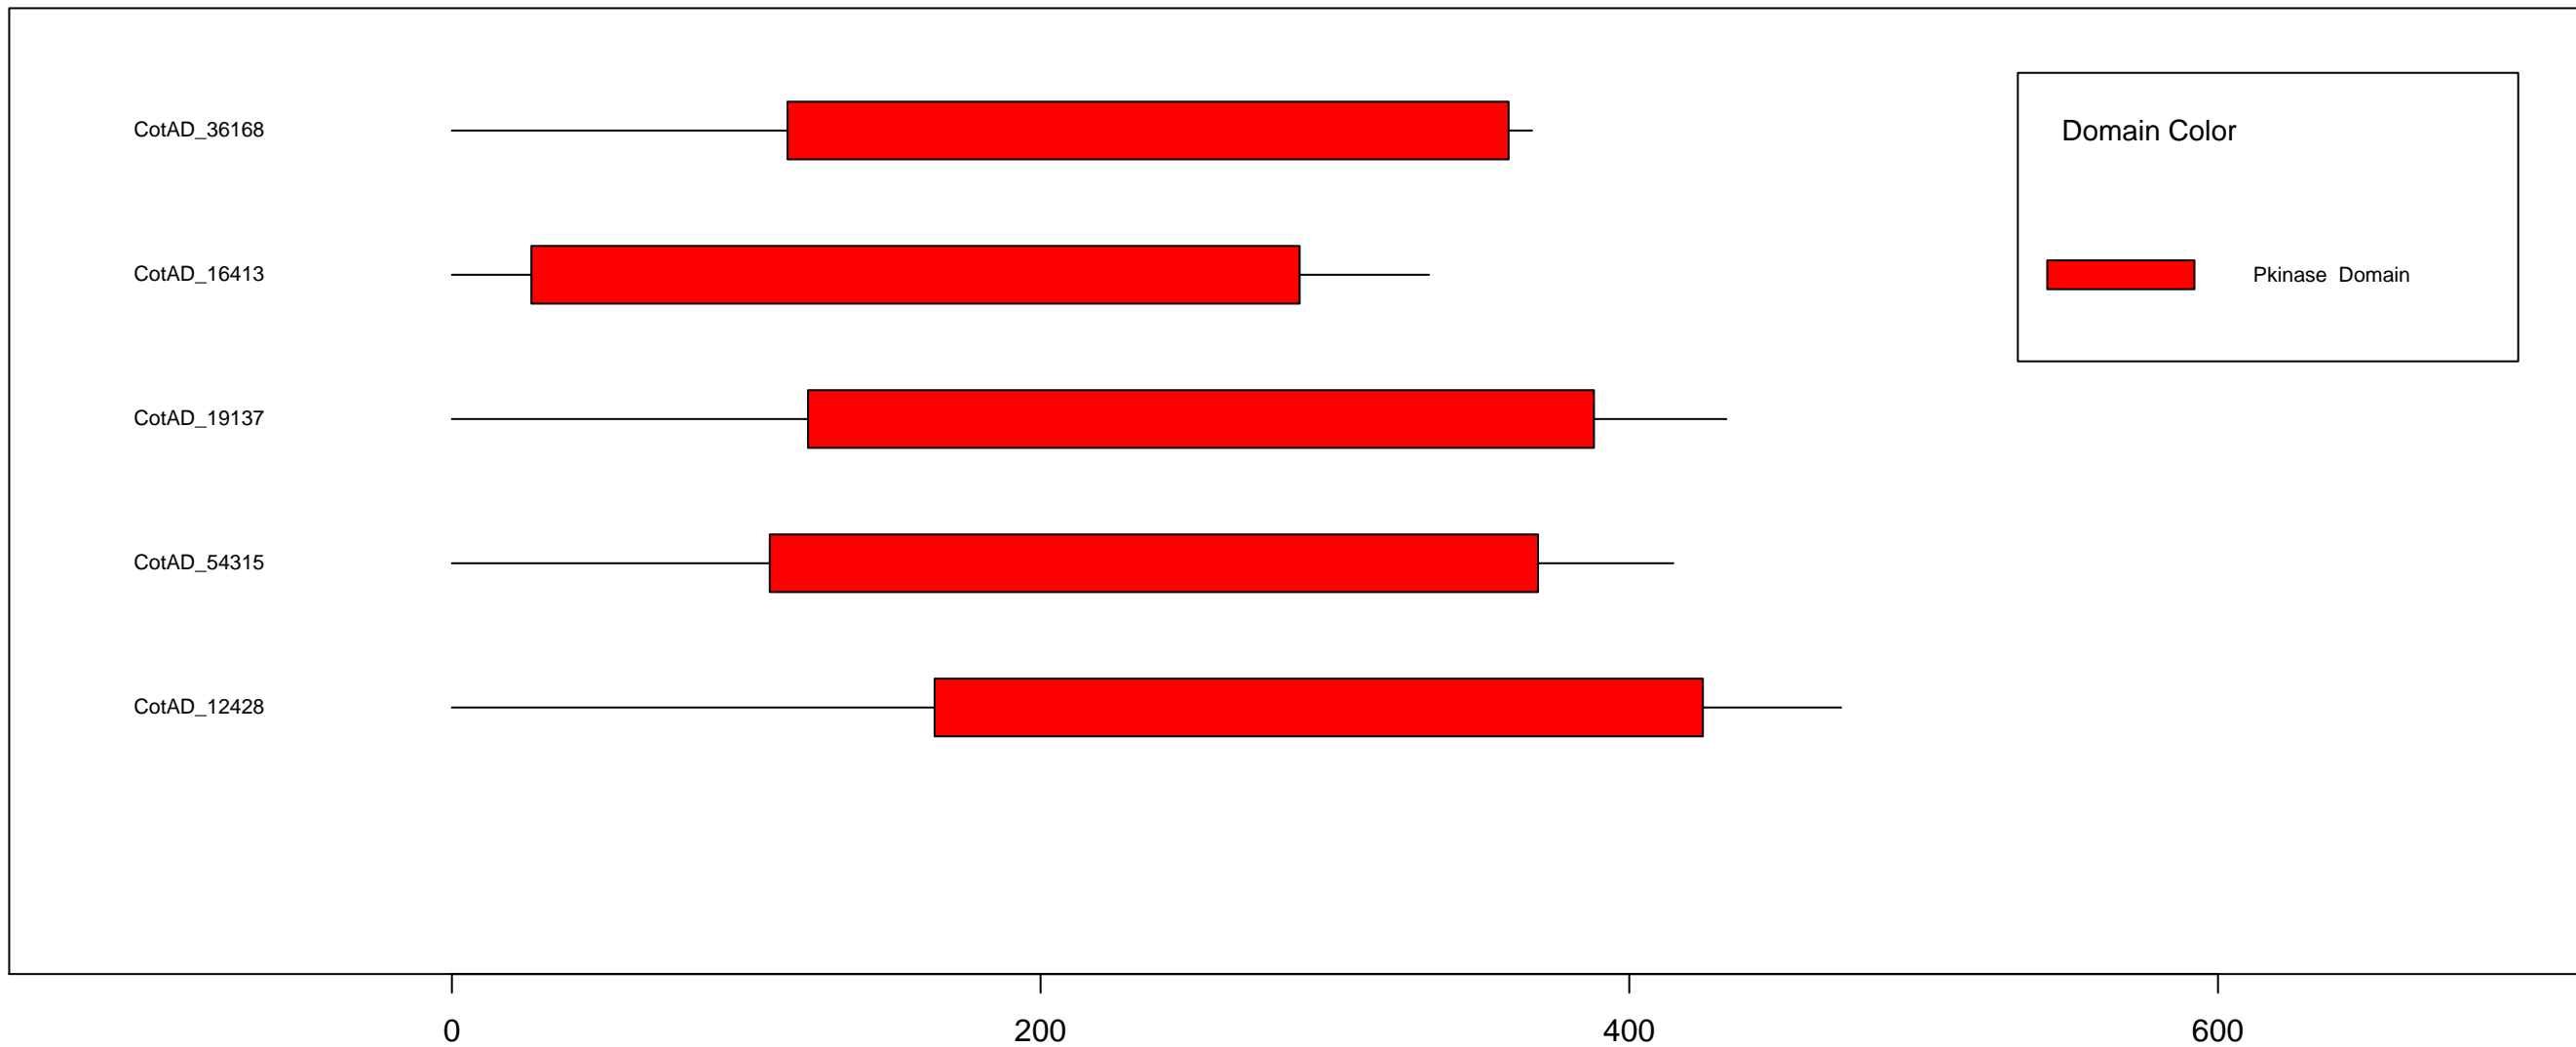

# G.hi CAMK\_CDPK domain diagram (part 1)

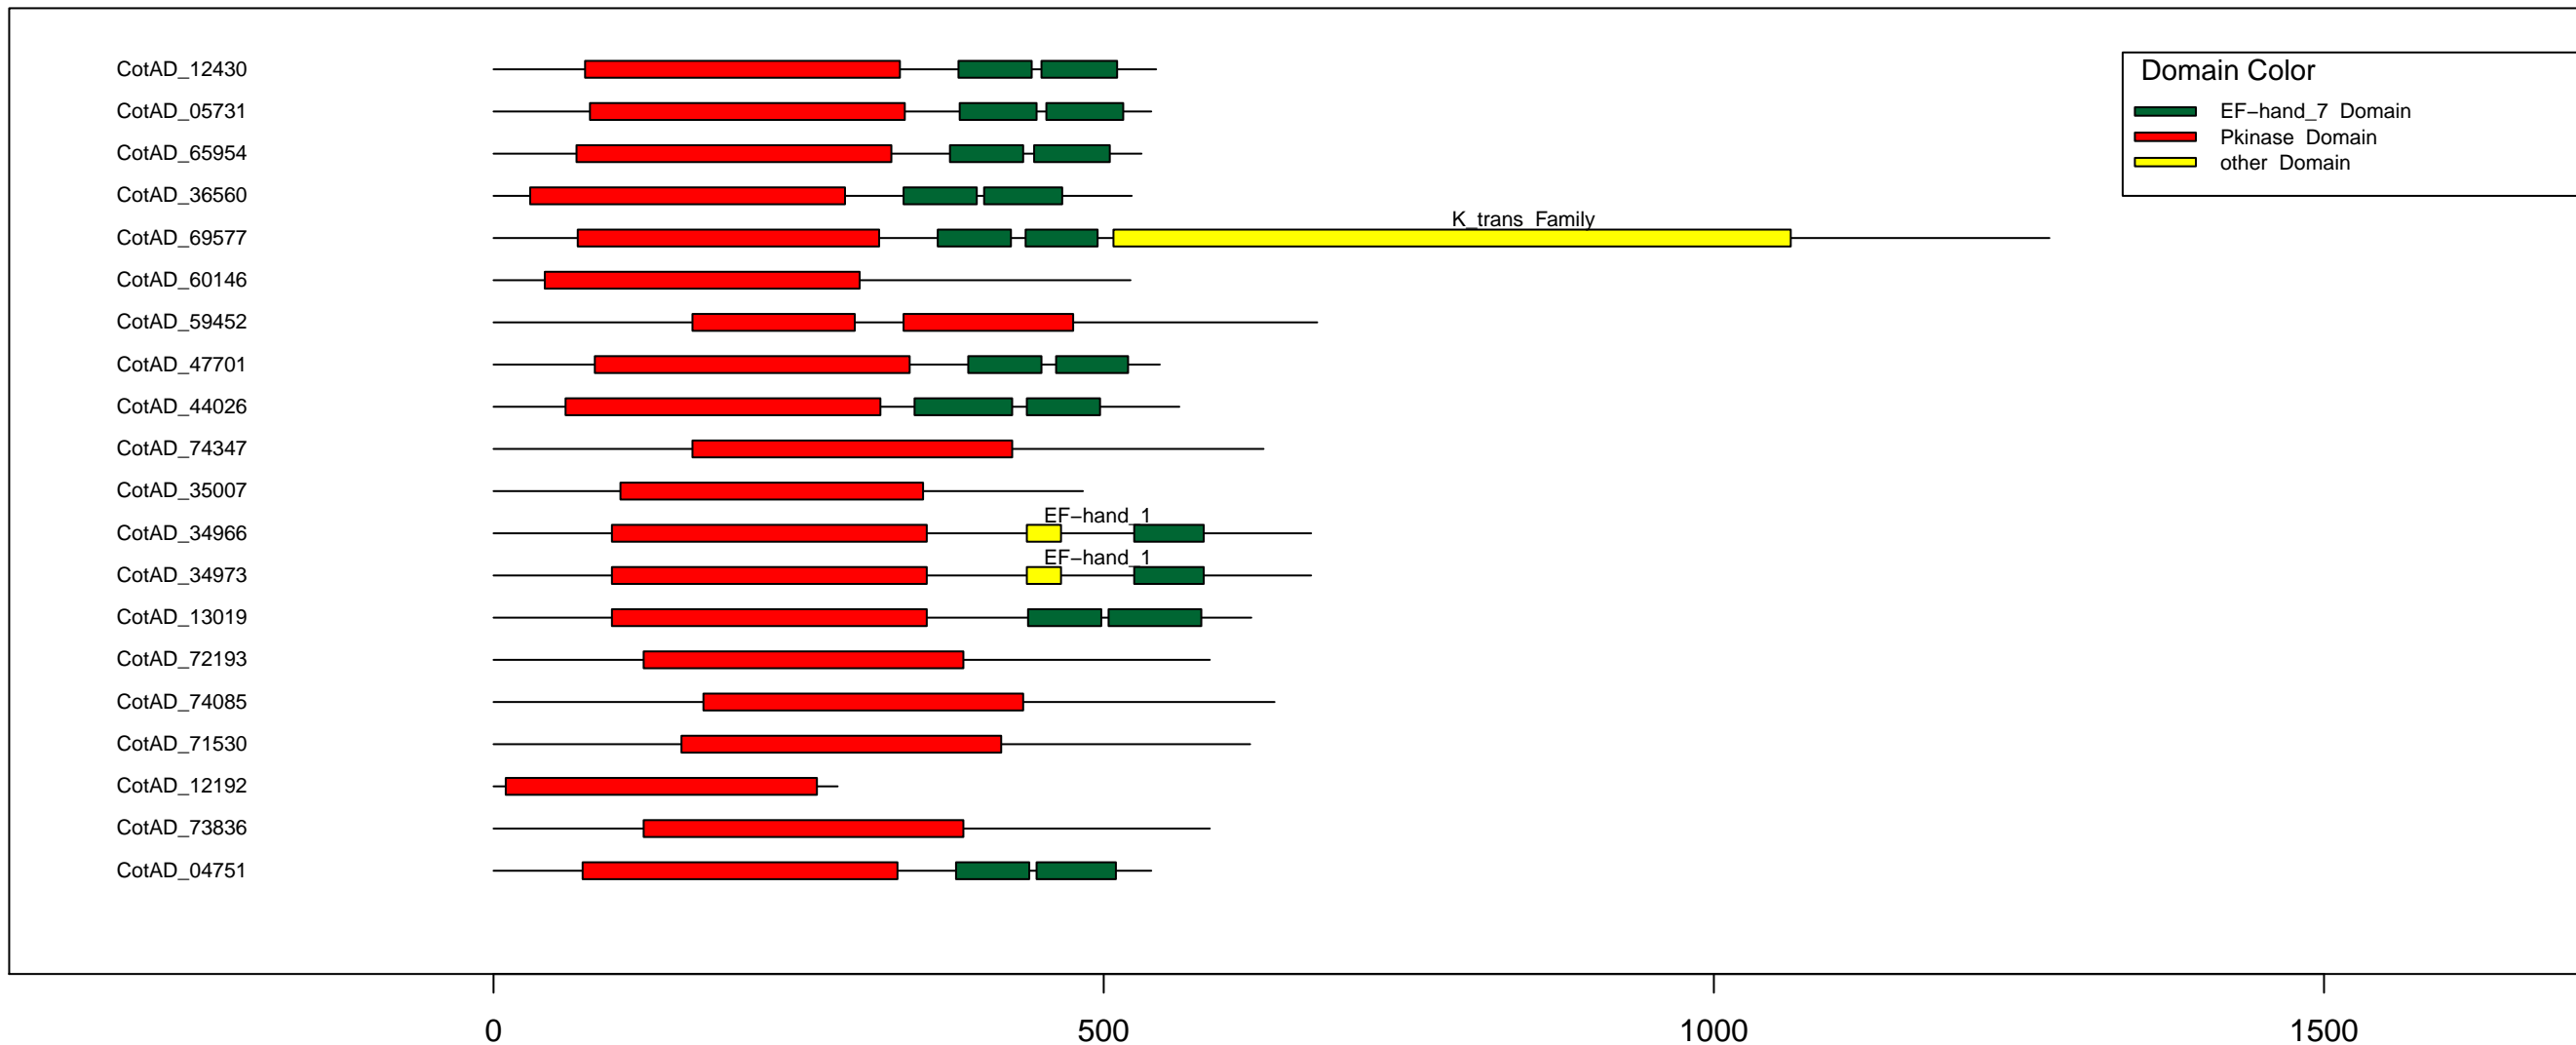

# G.hi CAMK\_CDPK domain diagram (part 2)

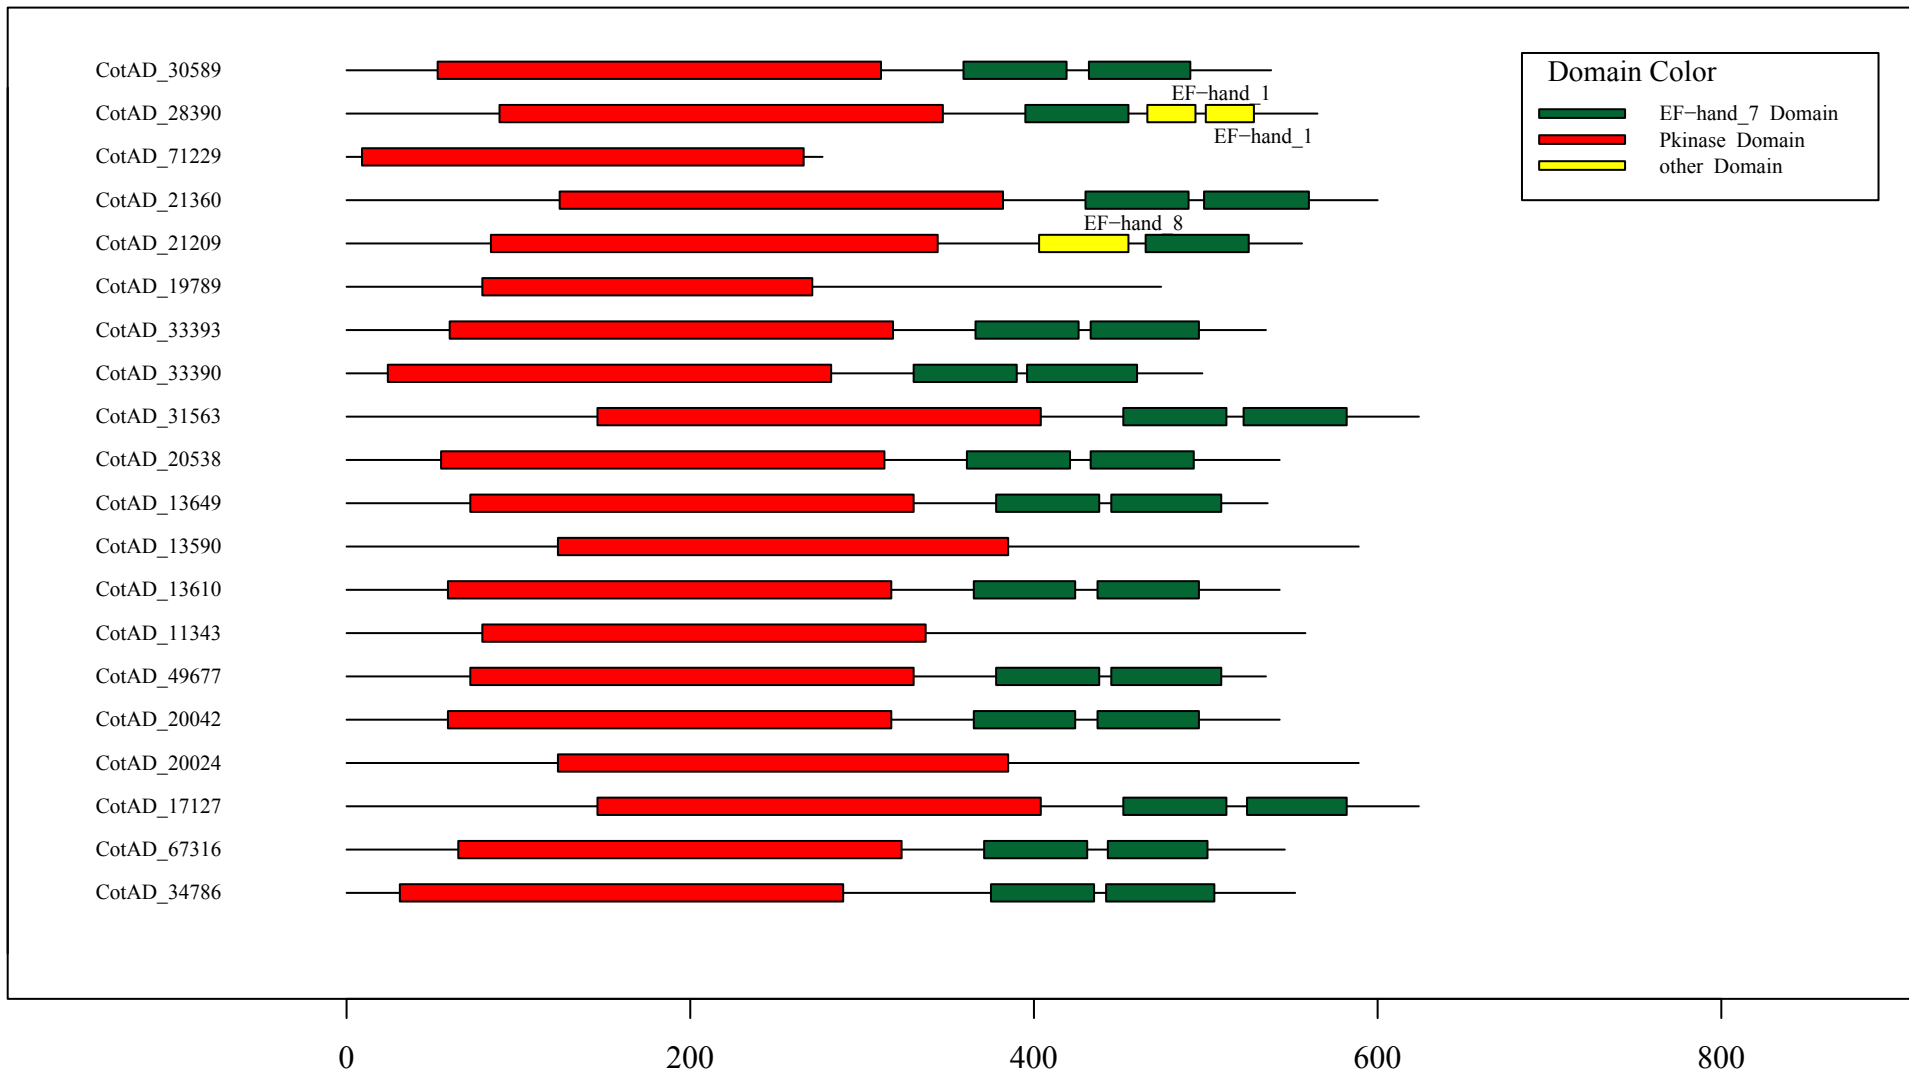

# G.hi CAMK\_CDPK domain diagram (part 3)

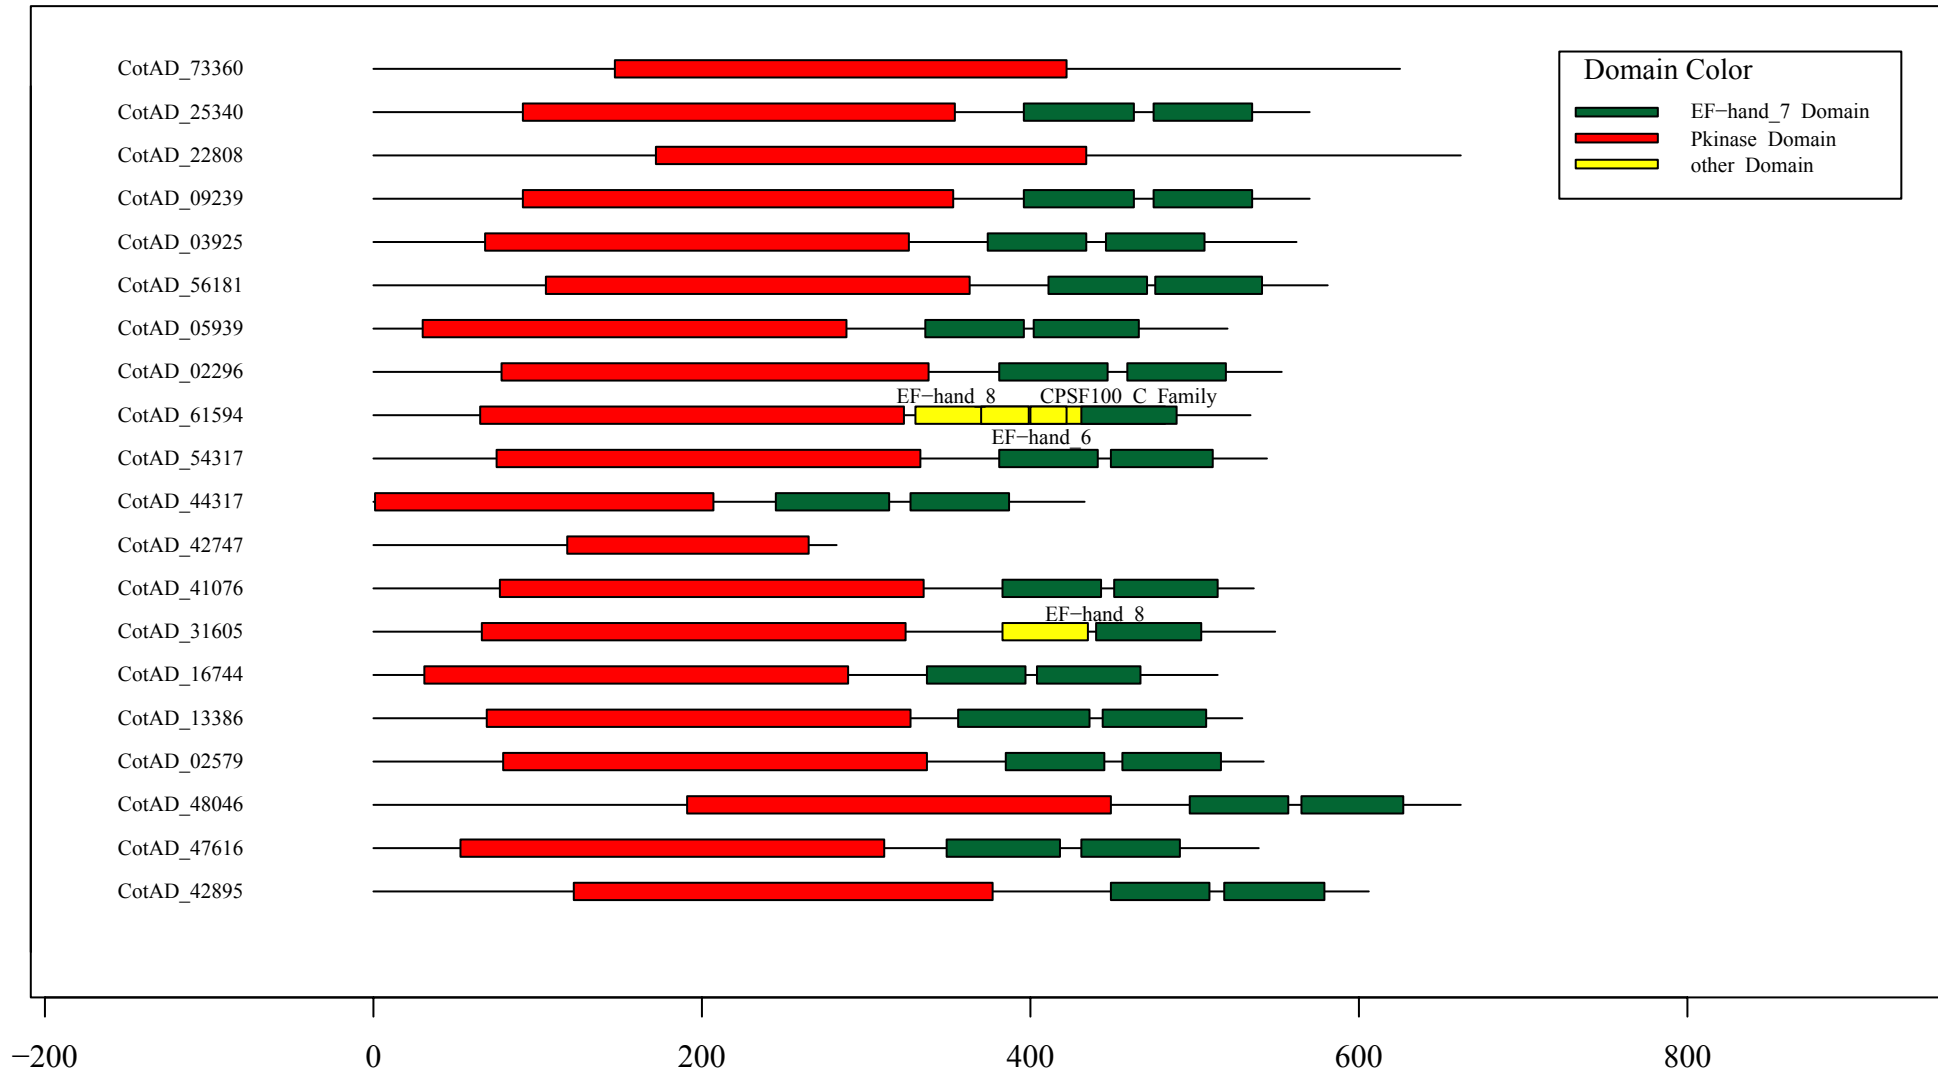

### G.hi CAMK\_CDPK domain diagram (part 4)

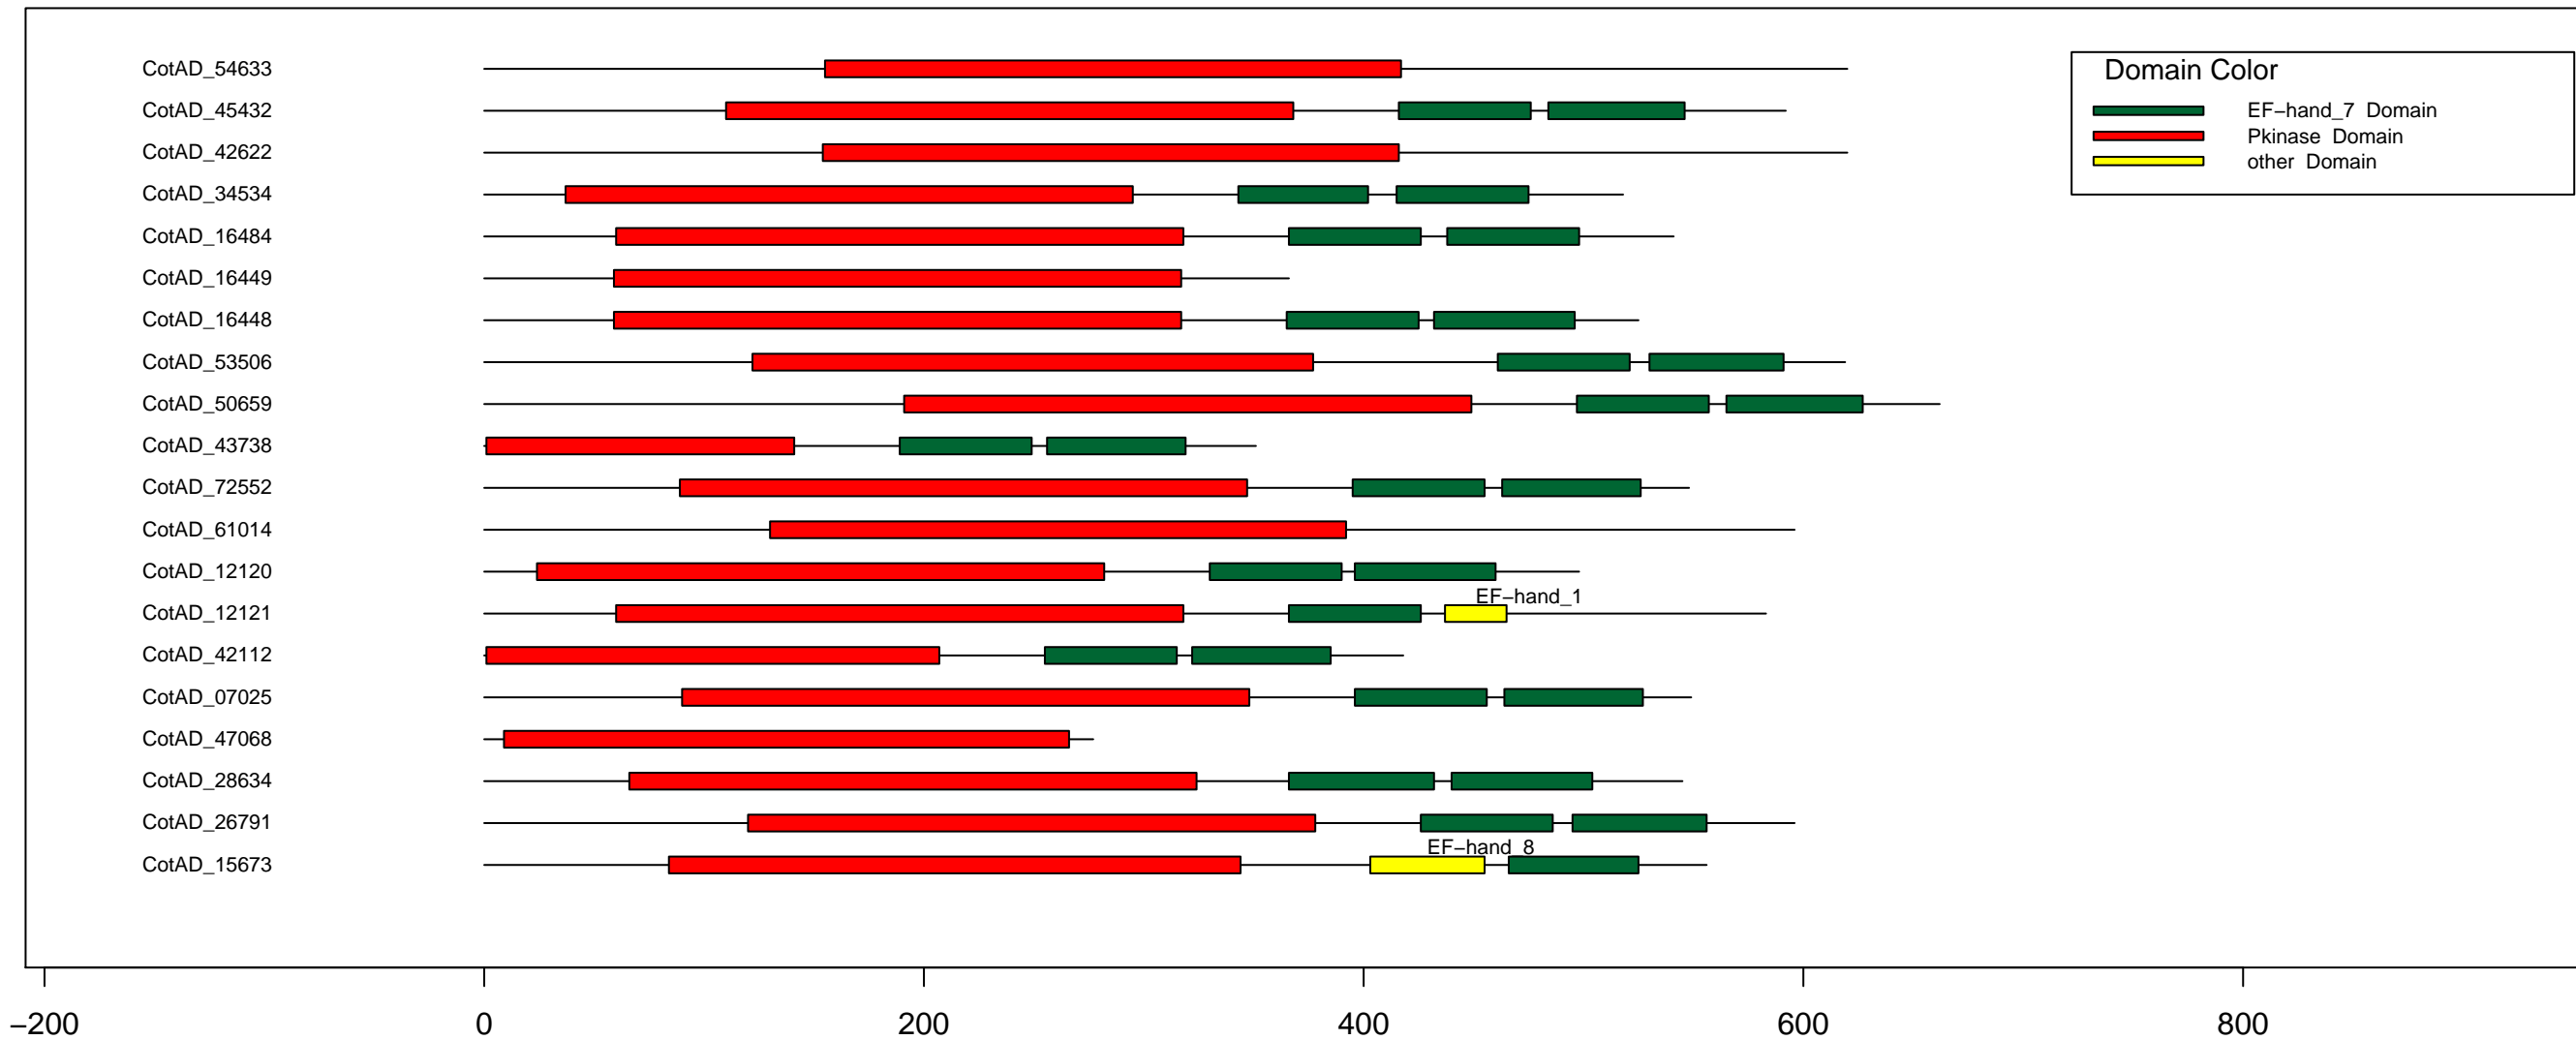



### G.hi CAMK\_CDPK domain diagram (part 5)

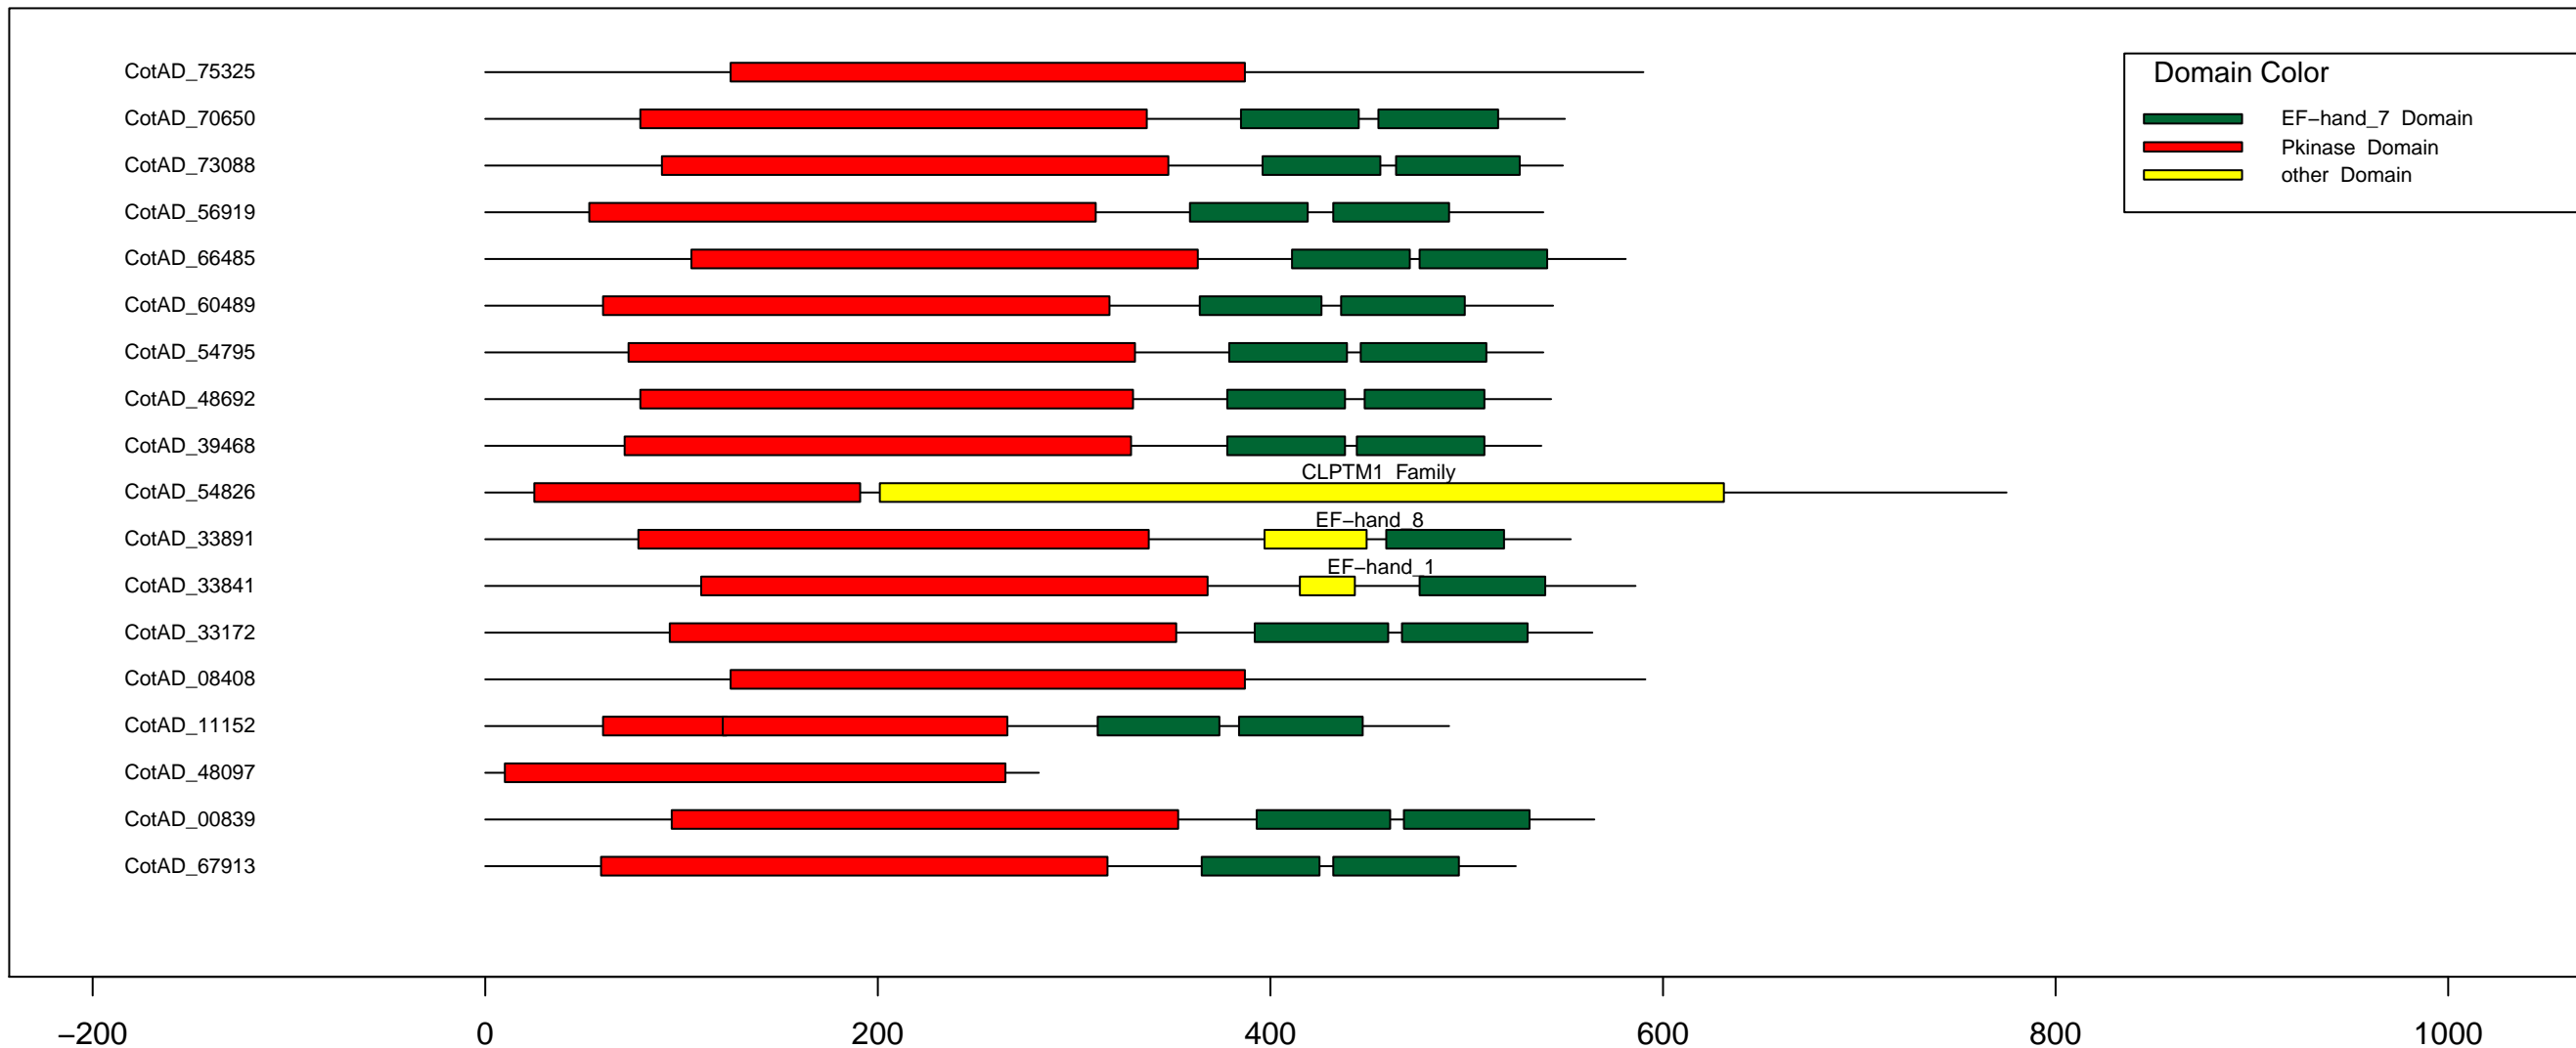

### G.hi CAMK\_OST1L domain diagram (all)

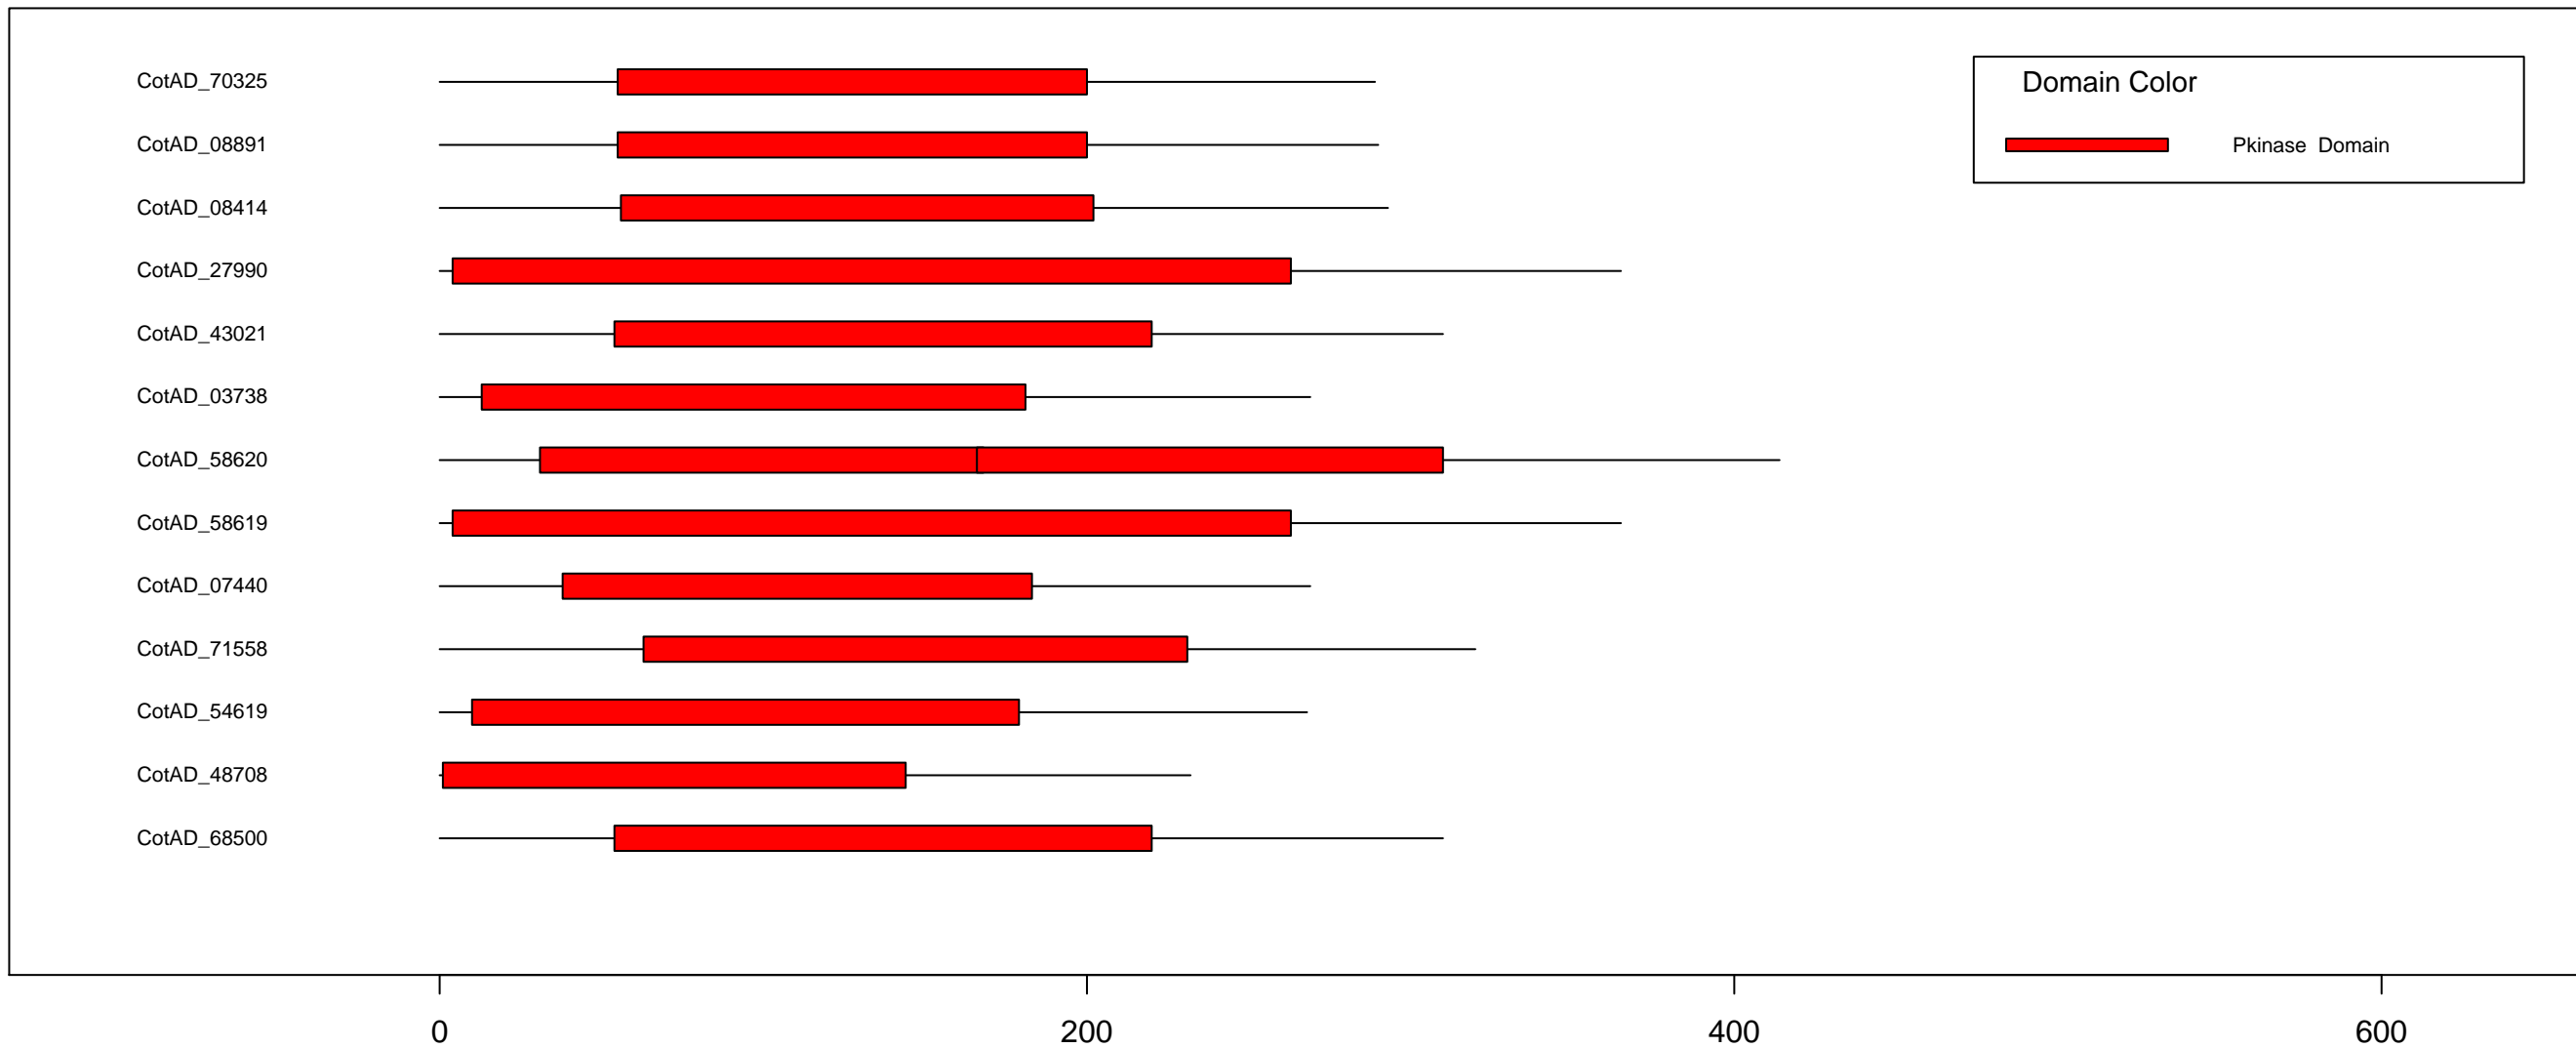

# G.hi CK1\_CK1 domain diagram (part 1)

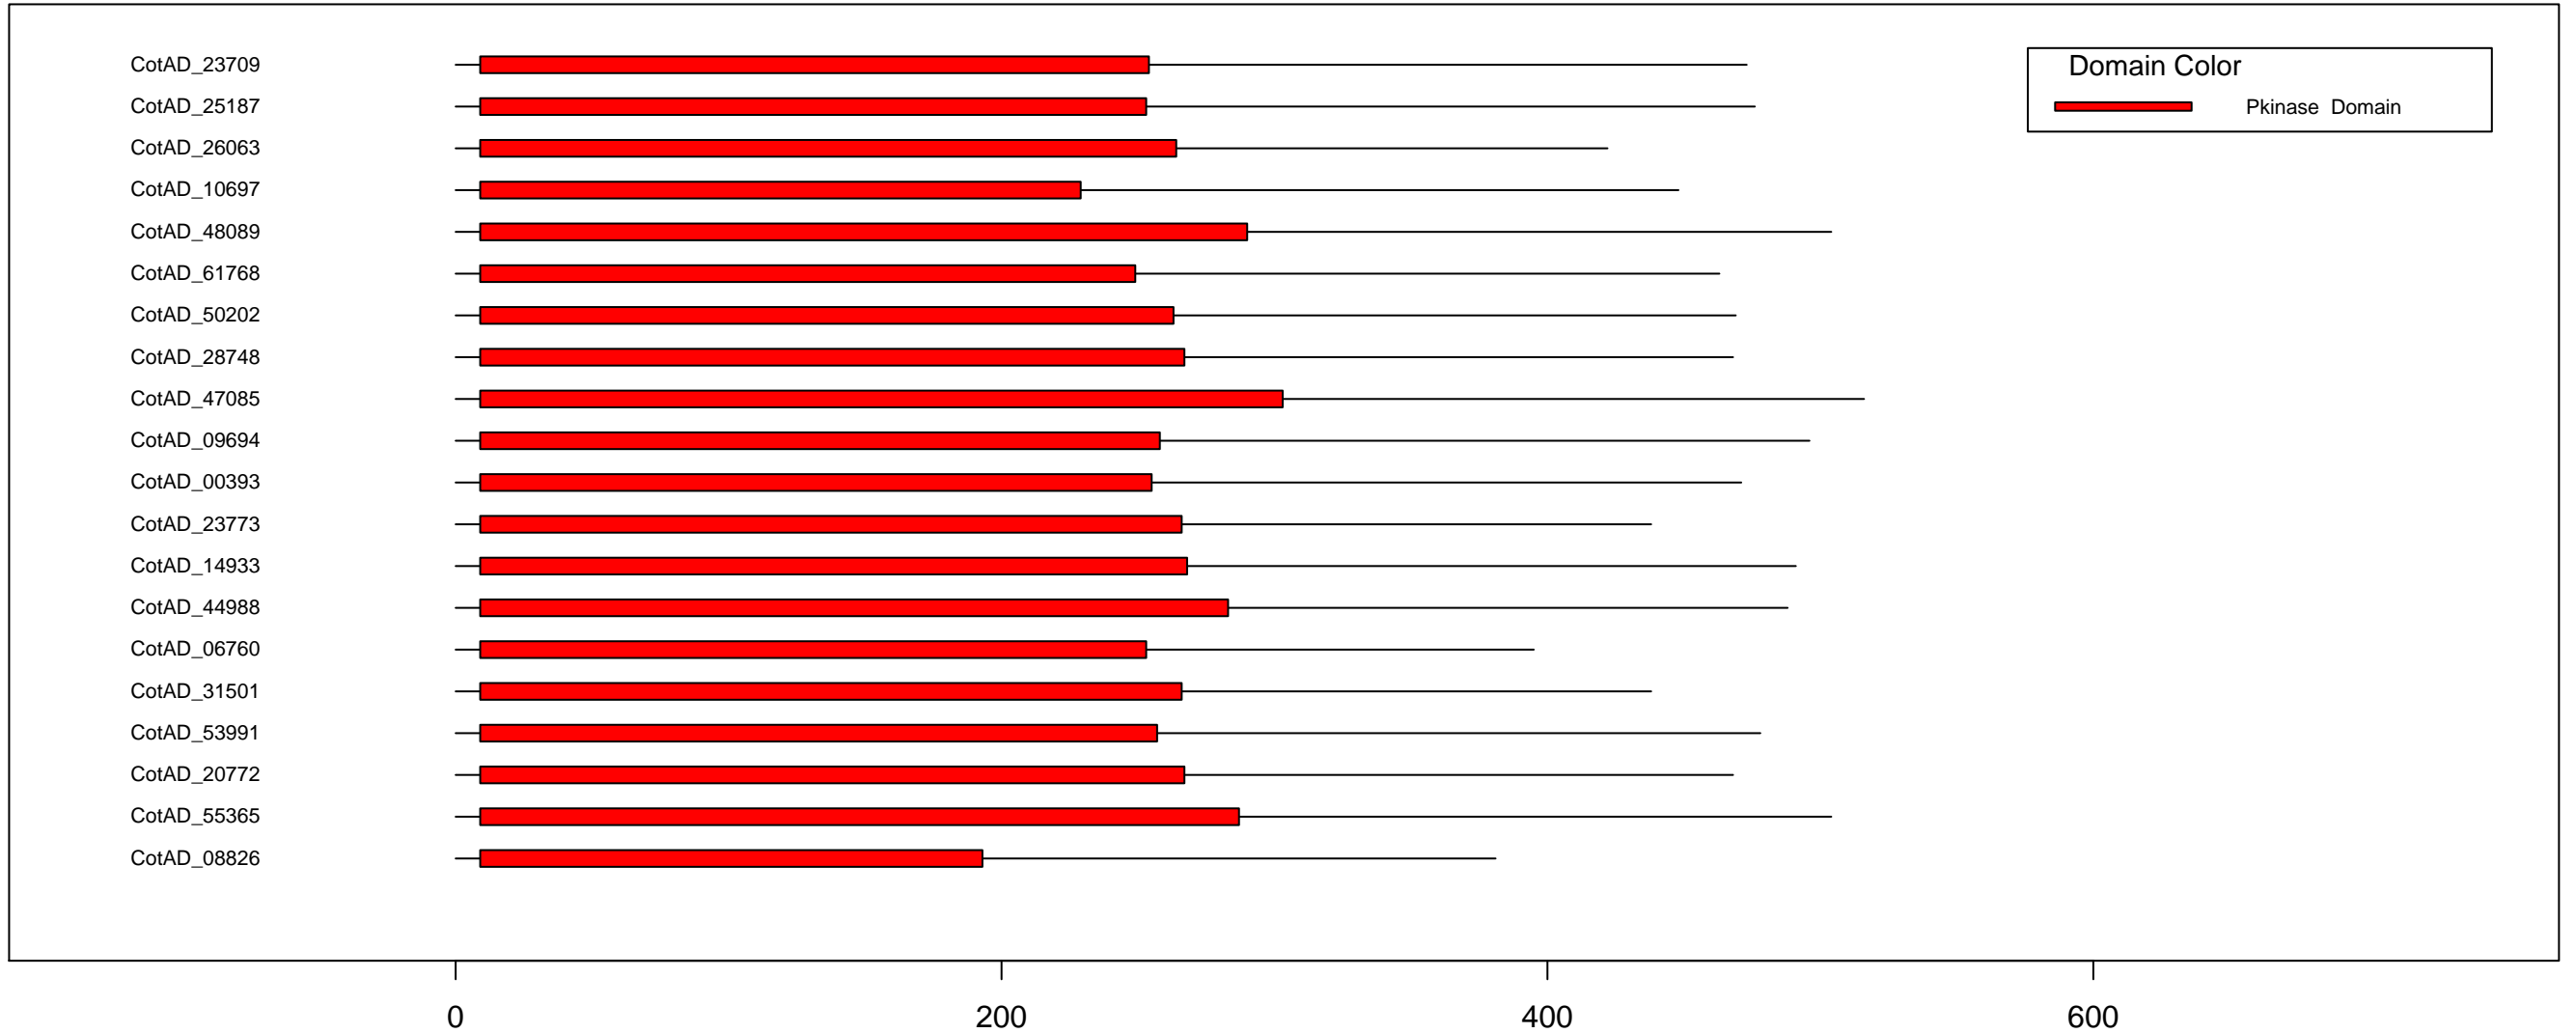

## G.hi CK1\_CK1 domain diagram (part 2)

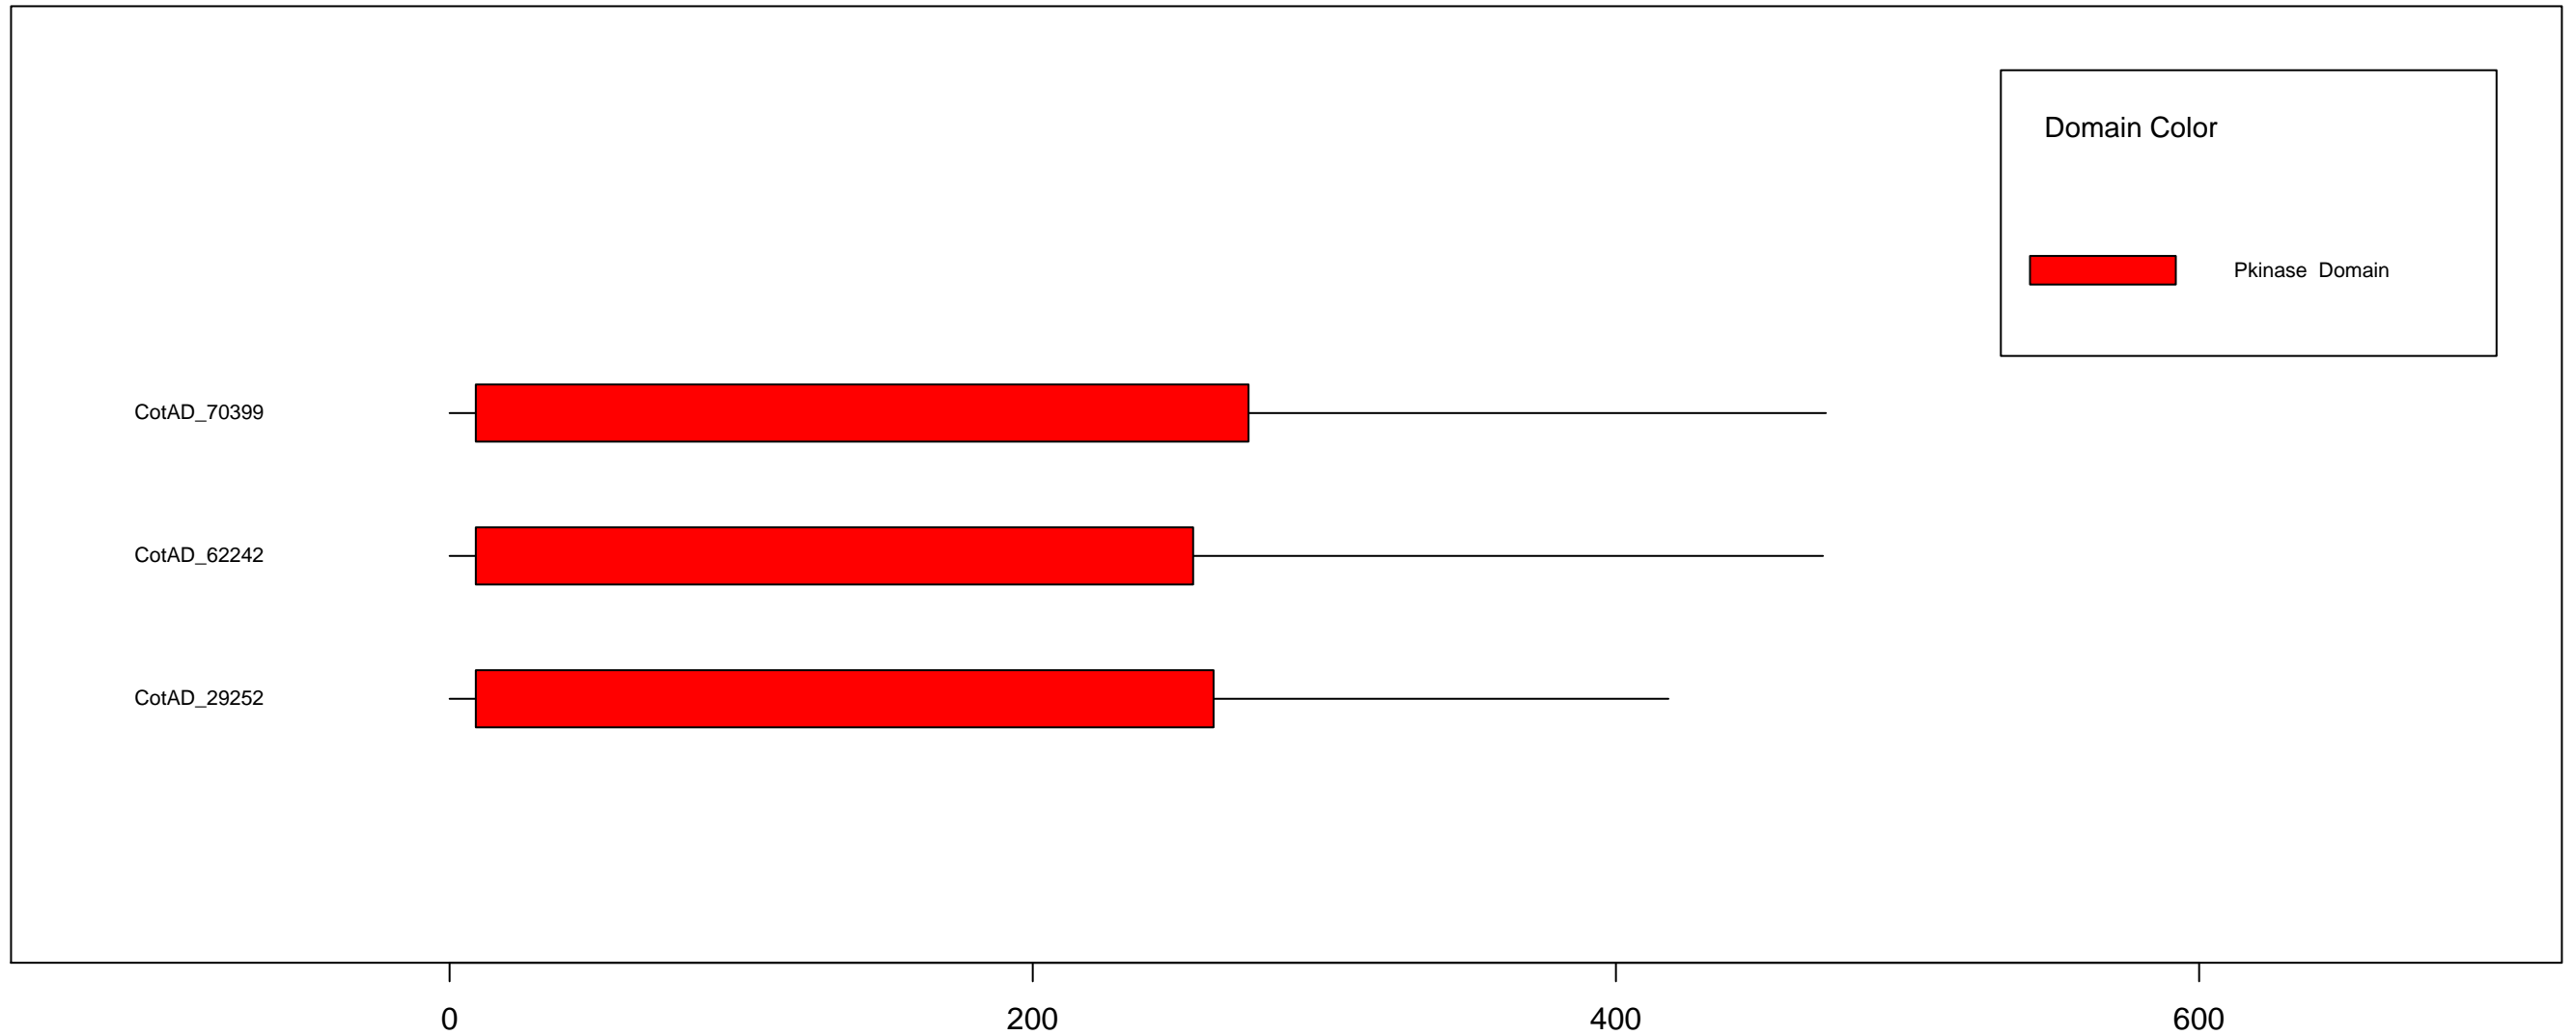

### G.hi CK1\_CK1-PI domain diagram (part 1)

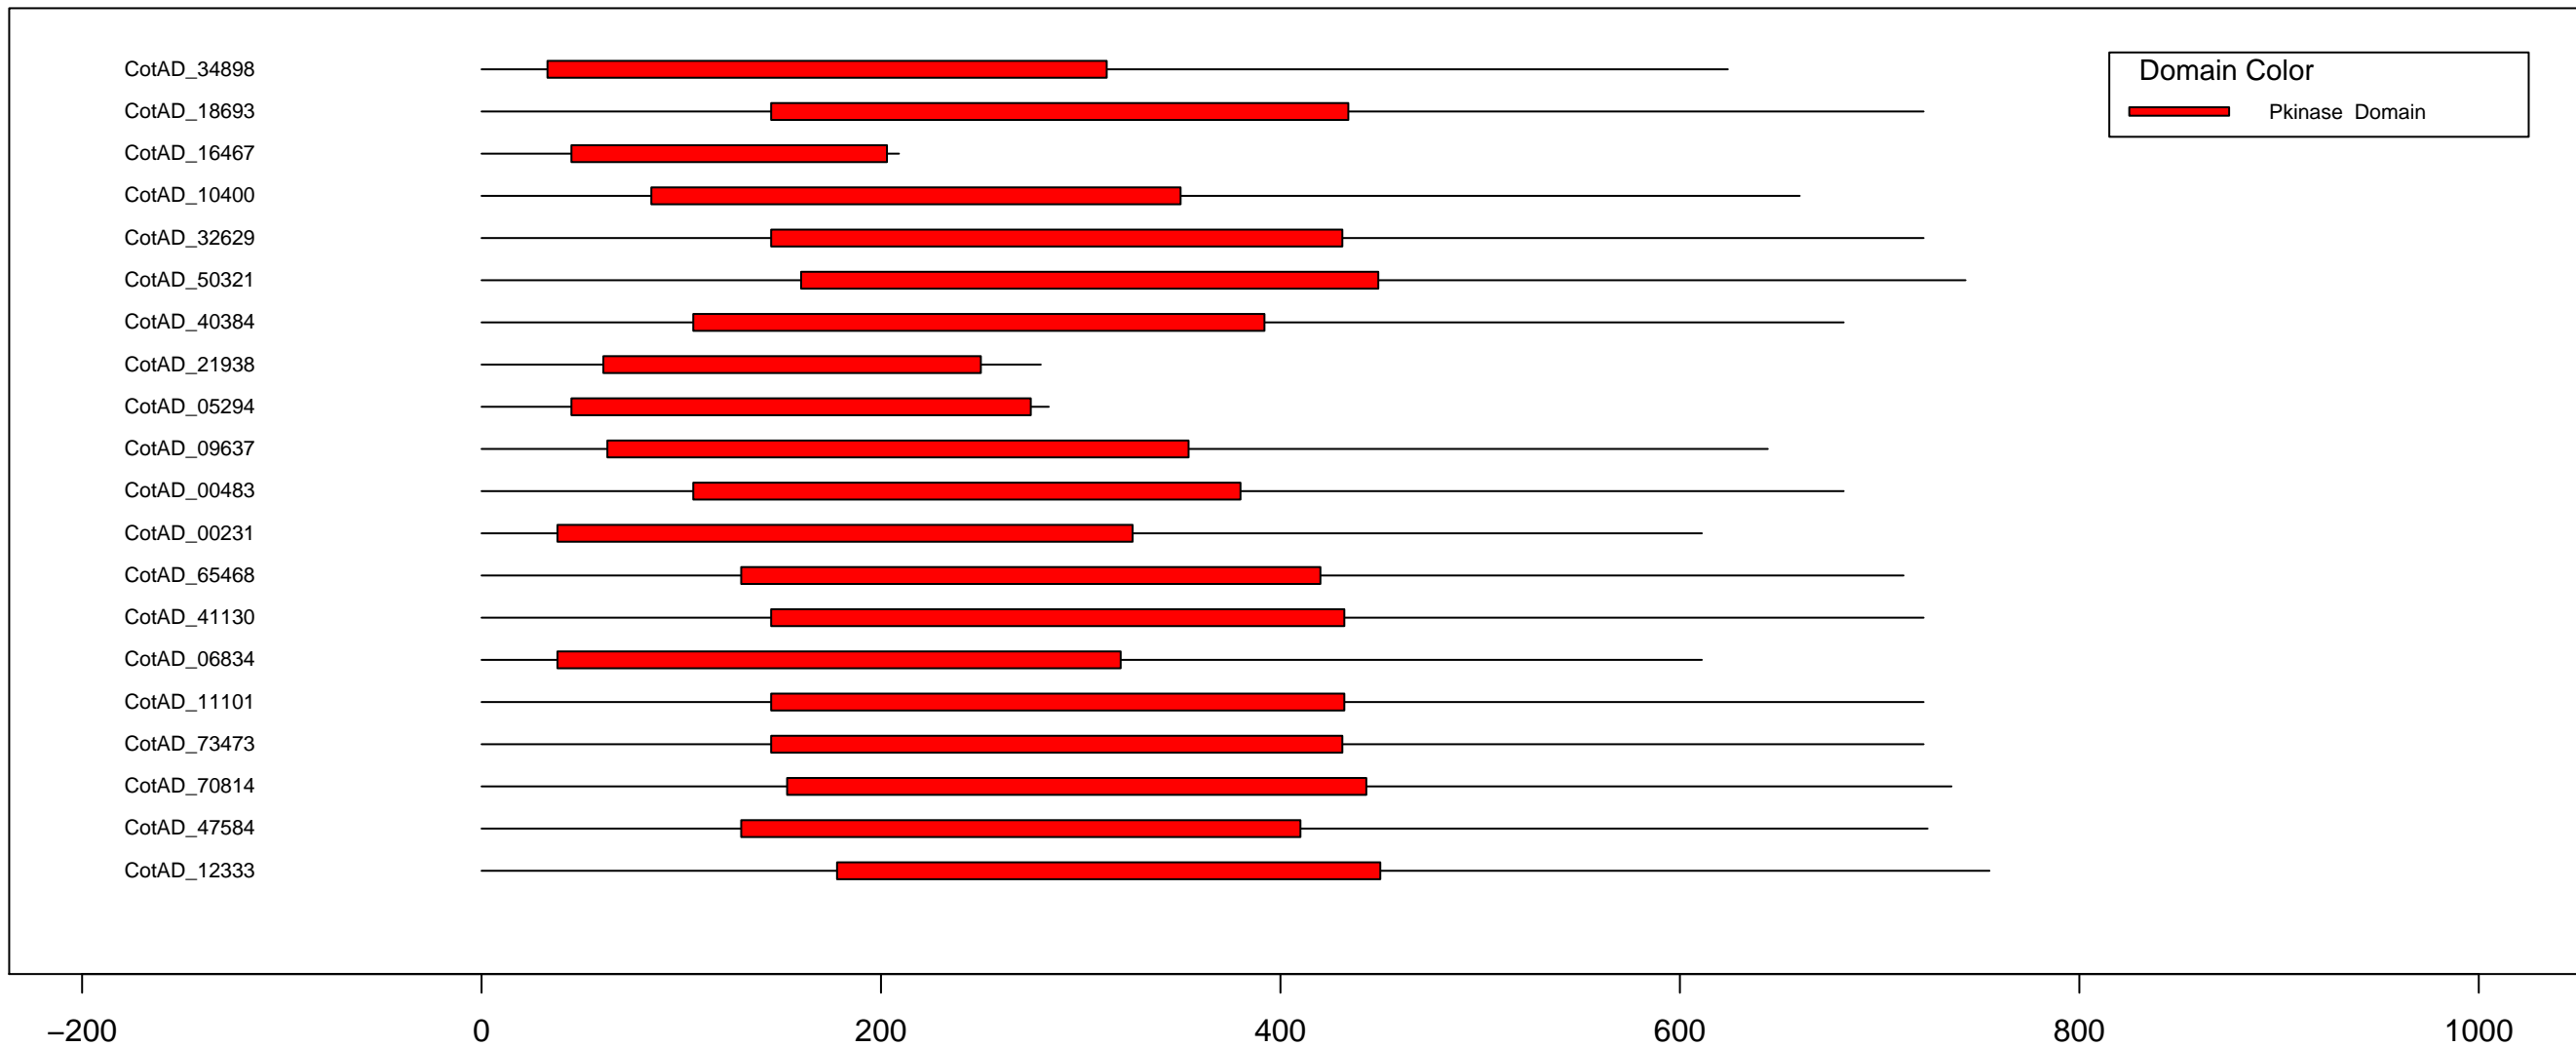

### G.hi CK1\_CK1-PI domain diagram (part 2)

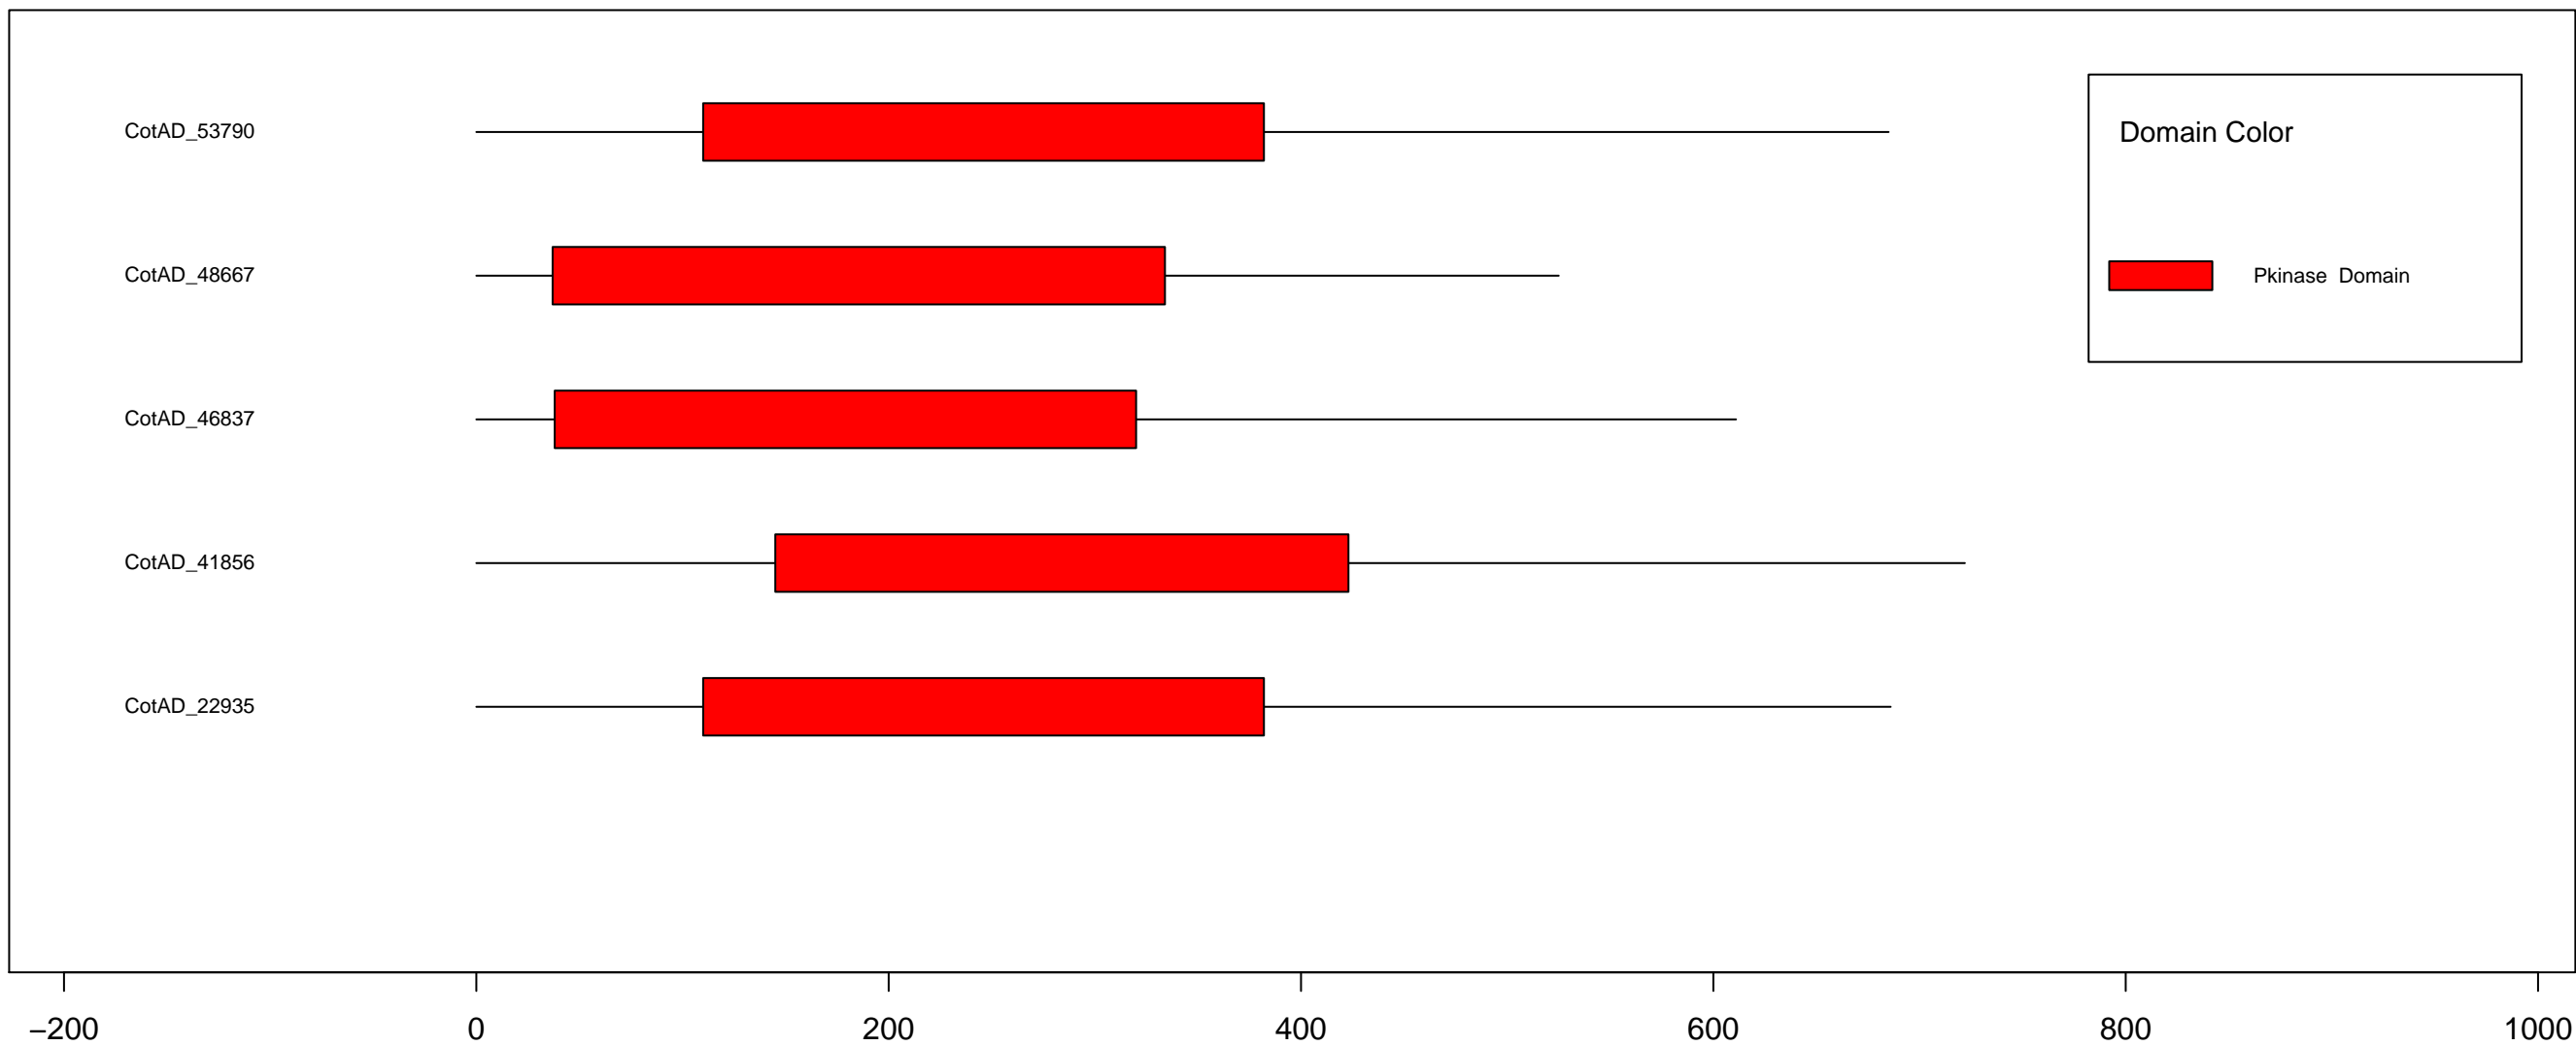

G.hi CMGC\_CDK-CCRK domain diagram (all)

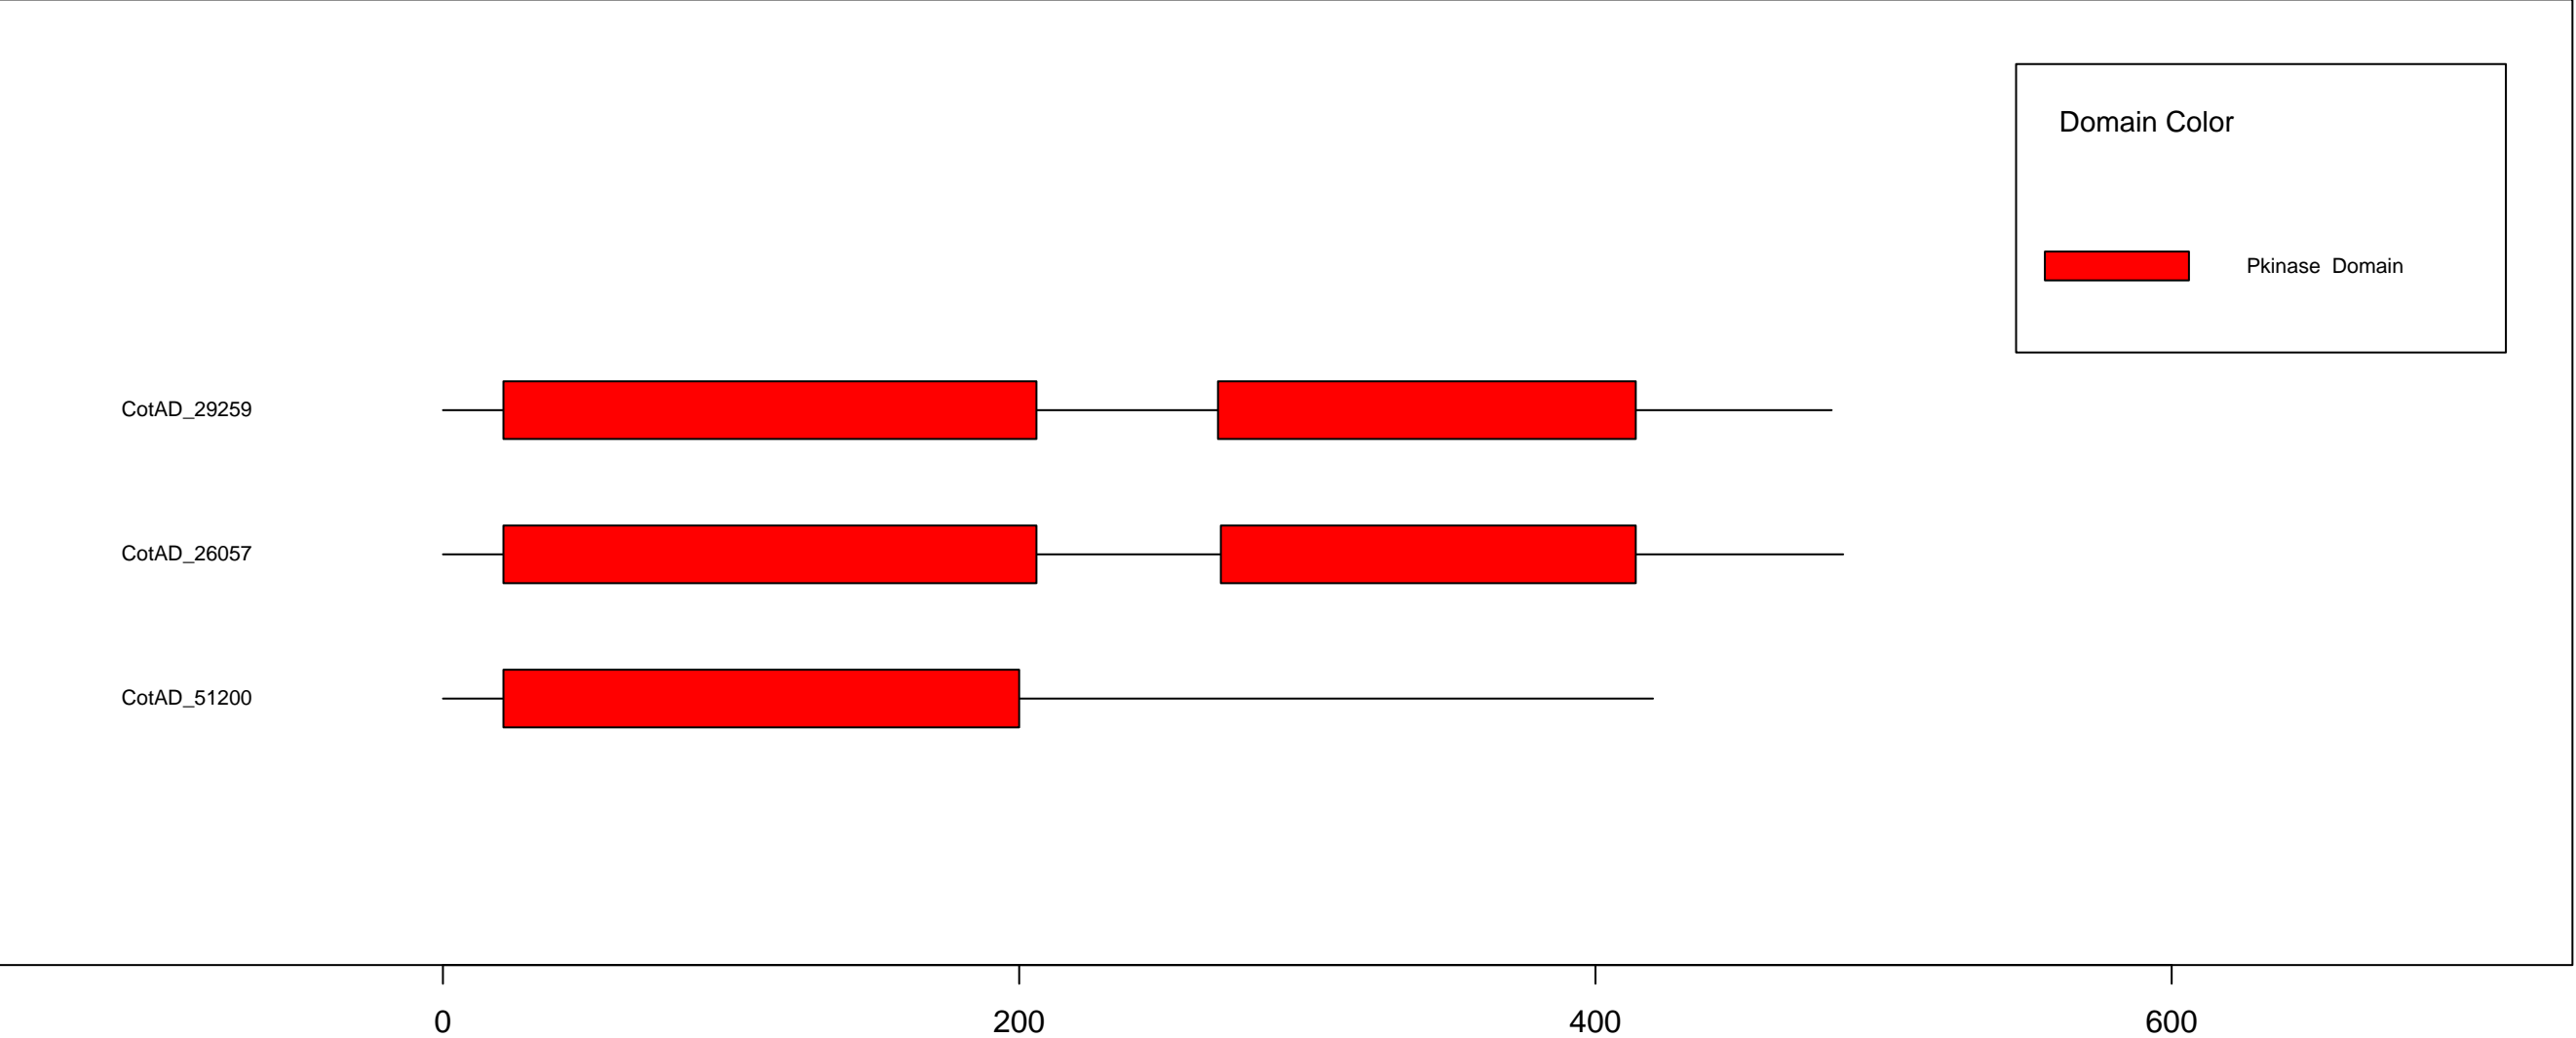

# G.hi CMGC\_CDK-CDK7 domain diagram (all)

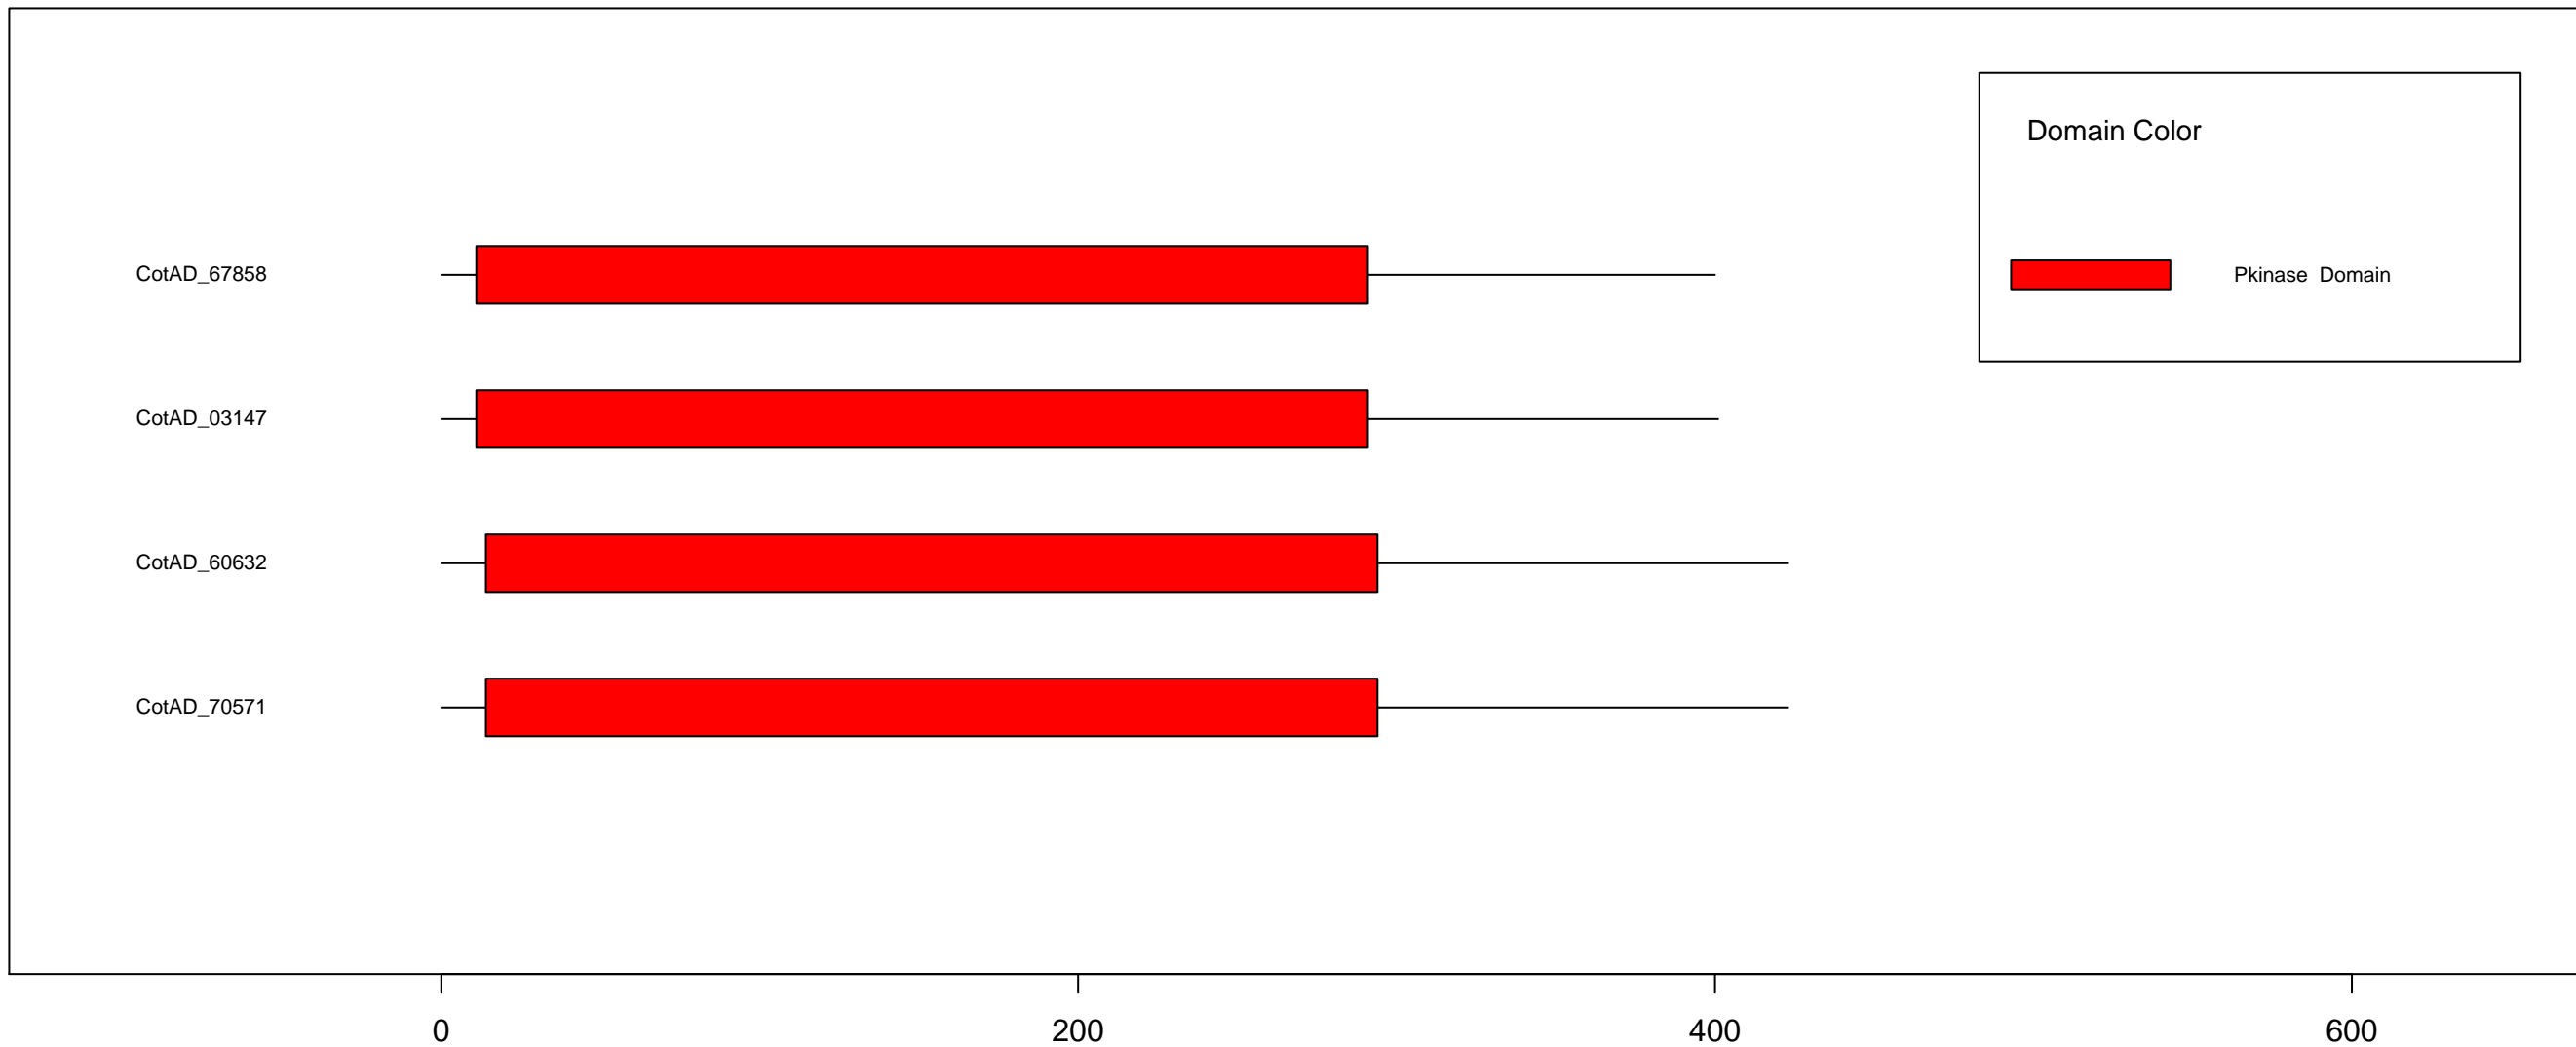



# G.hi CMGC\_CDK-CDK8 domain diagram (all)

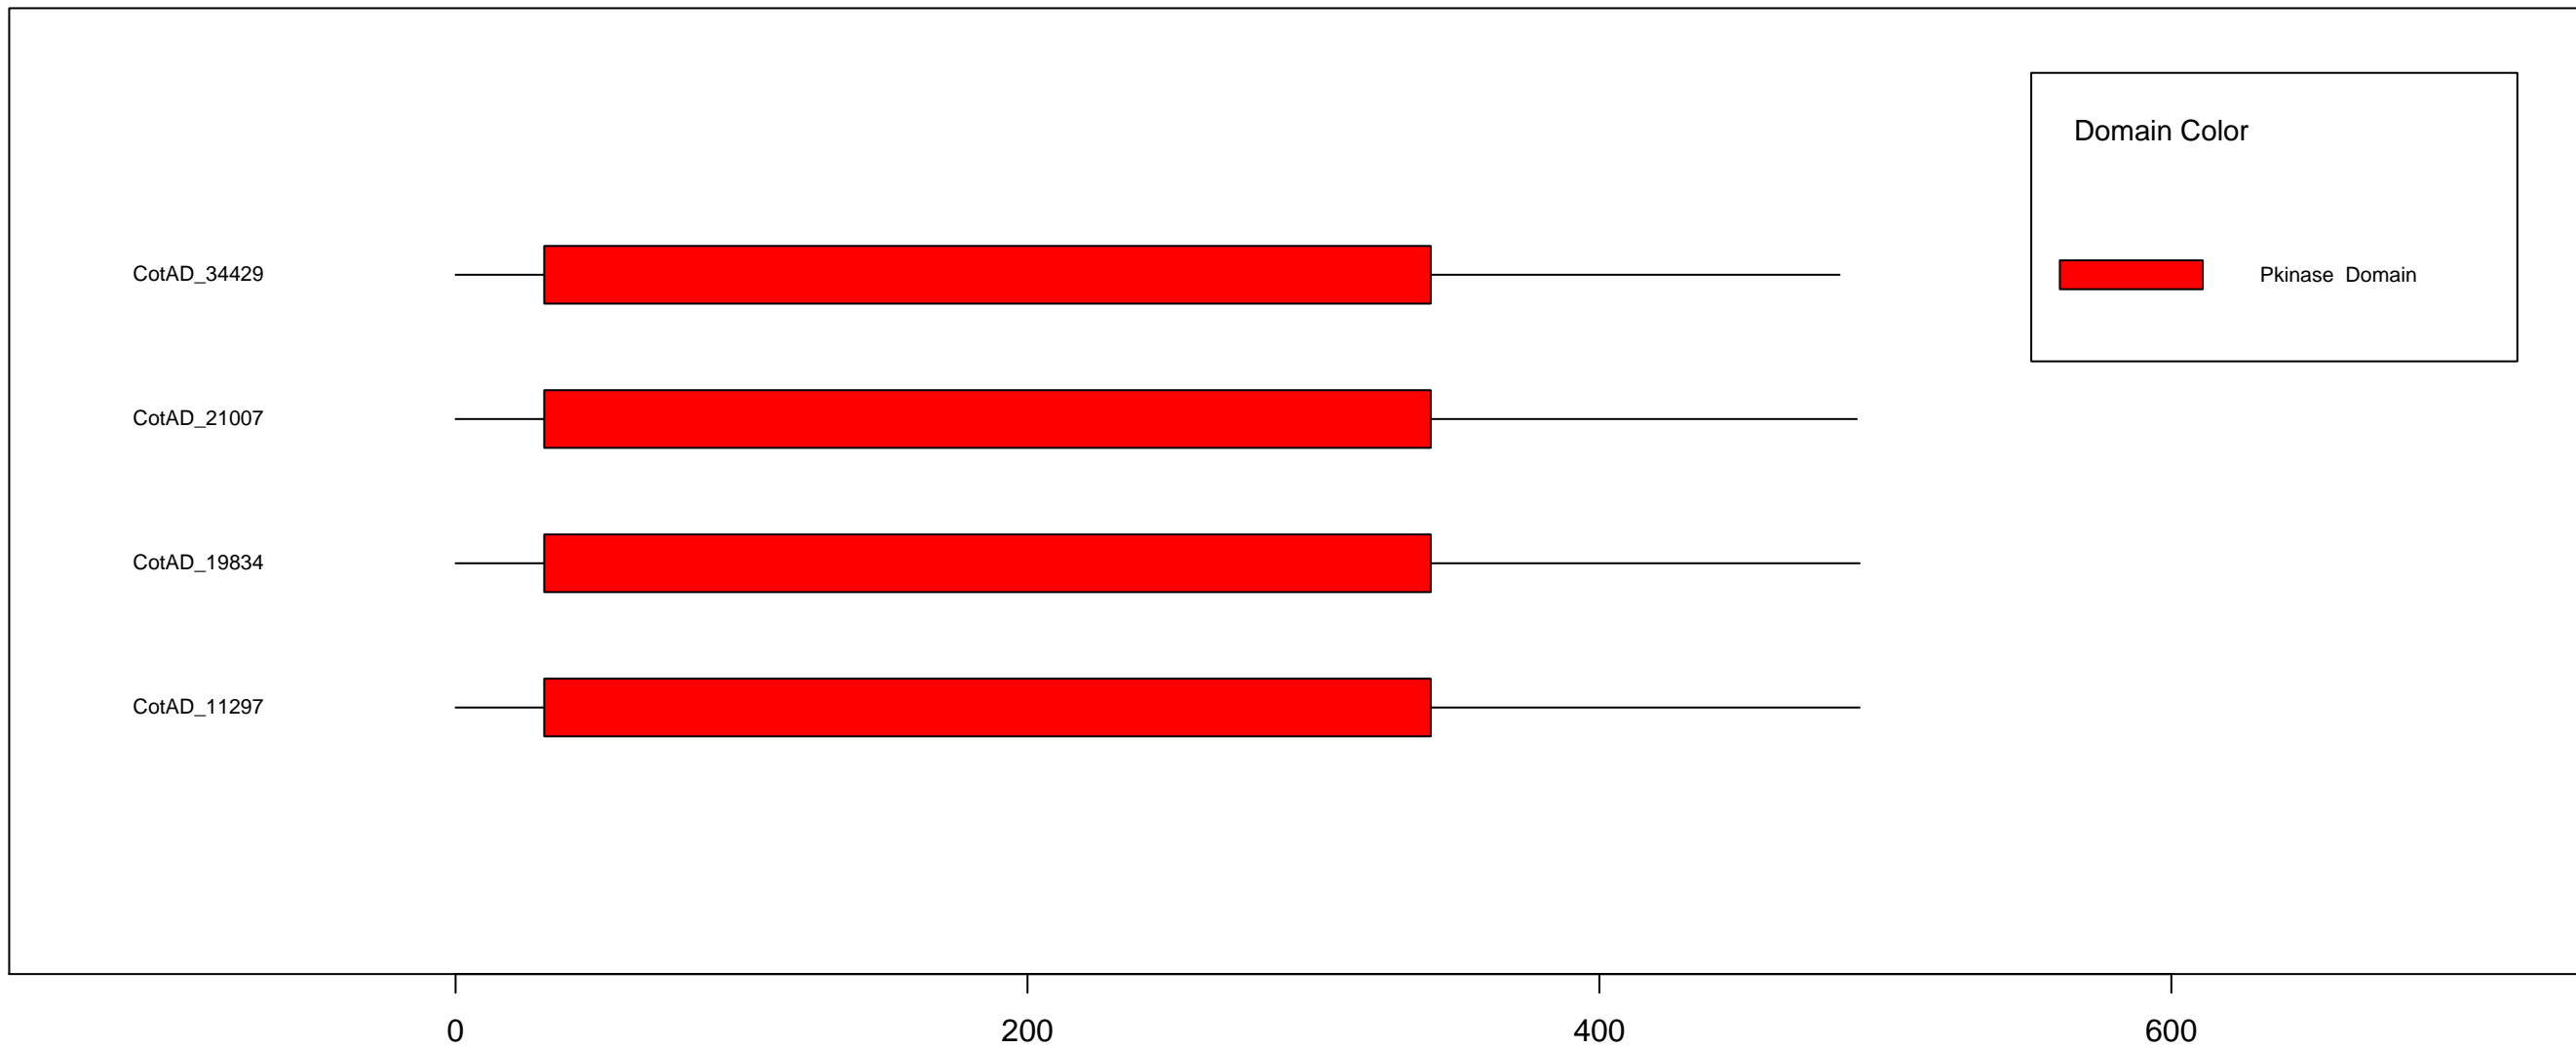

# G.hi CMGC\_CDK-CRK7-CDK9 domain diagram (part 1)

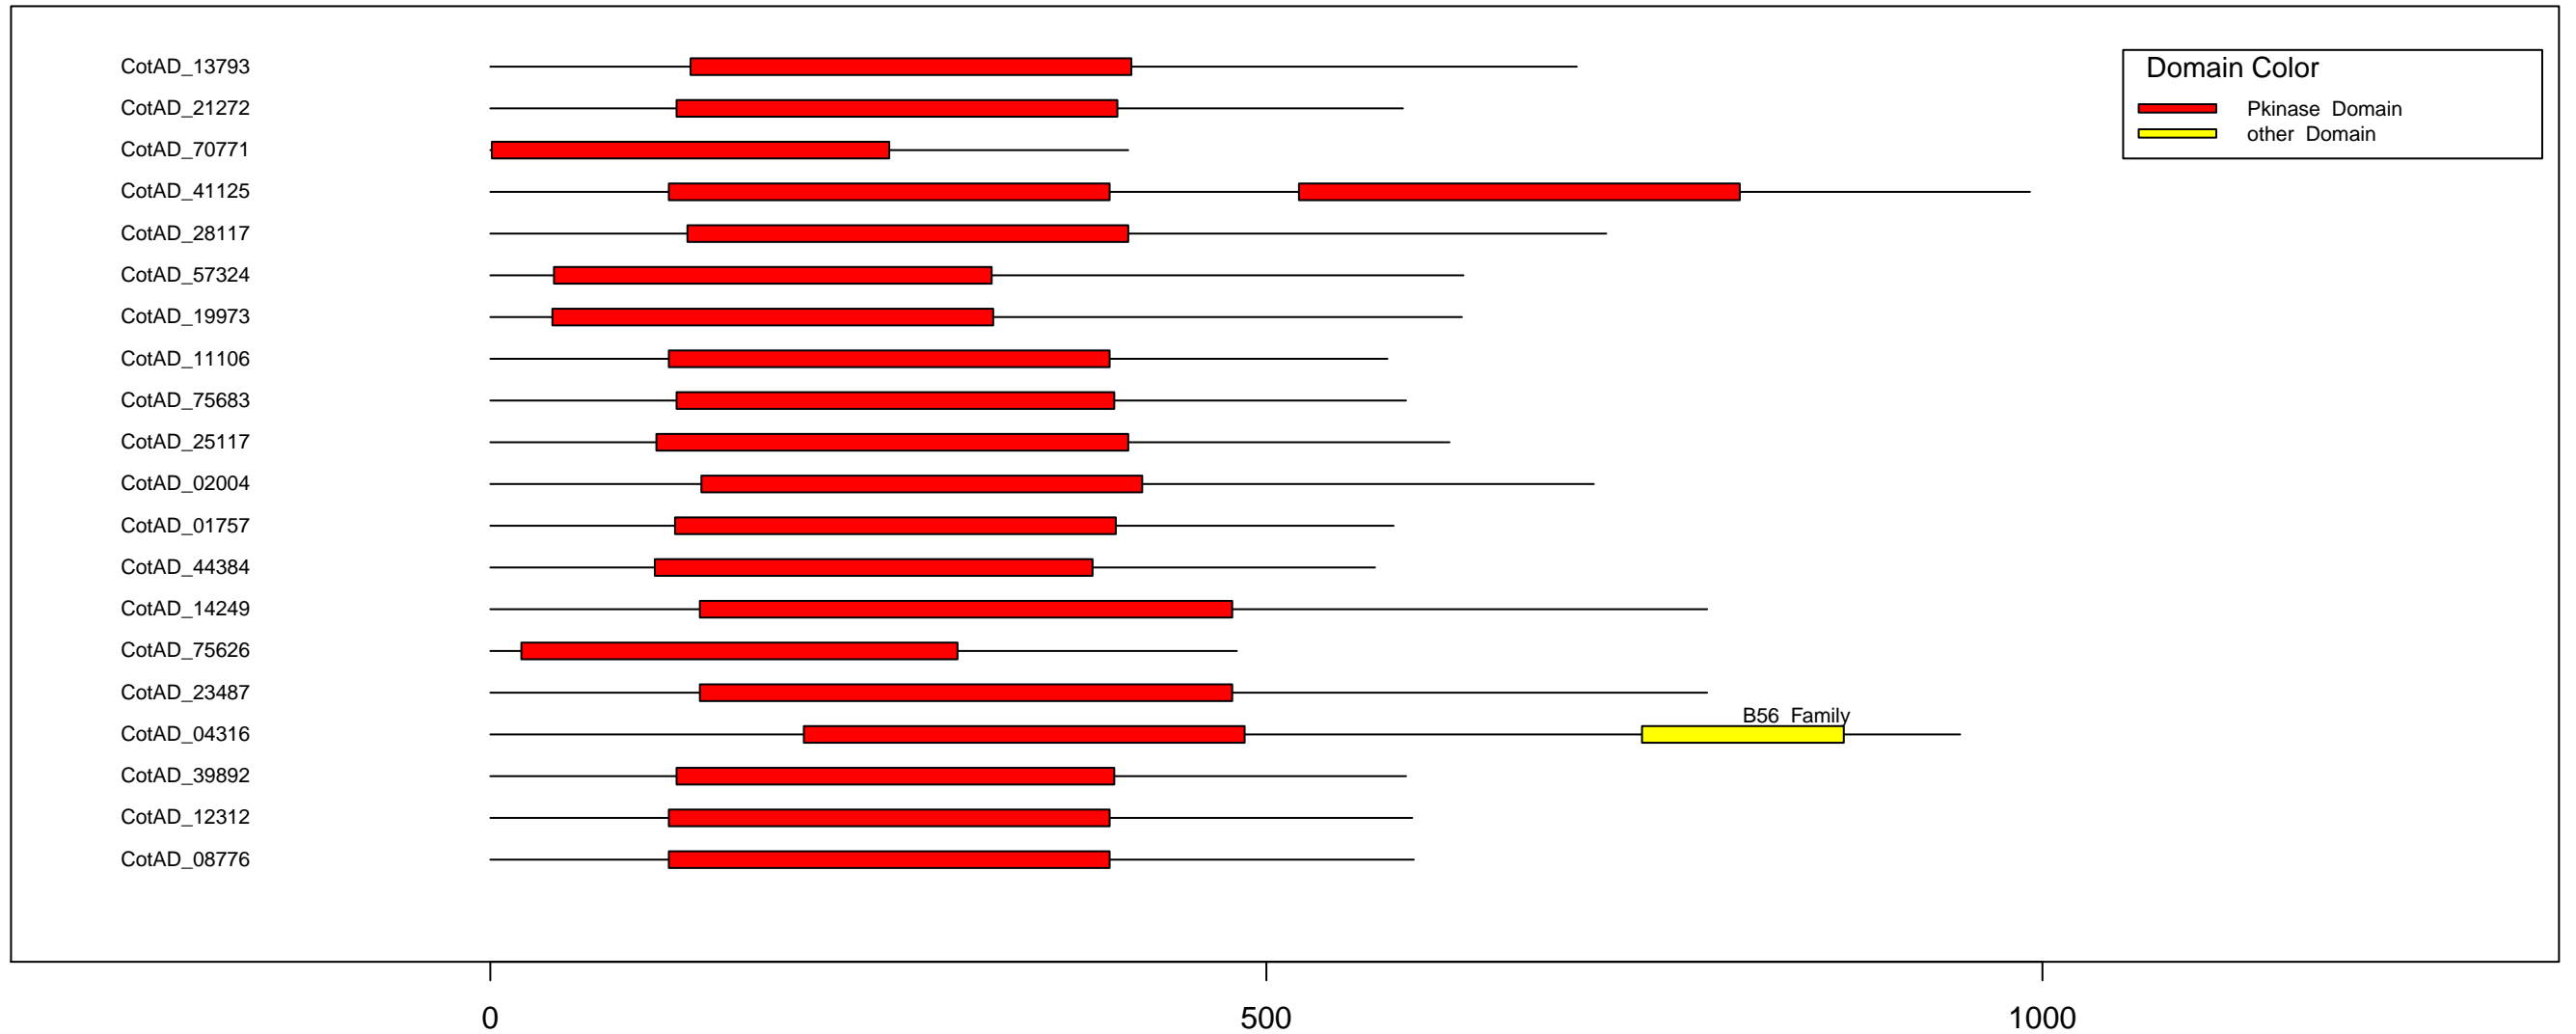

### G.hi CMGC\_CDK-CRK7-CDK9 domain diagram (part 2)

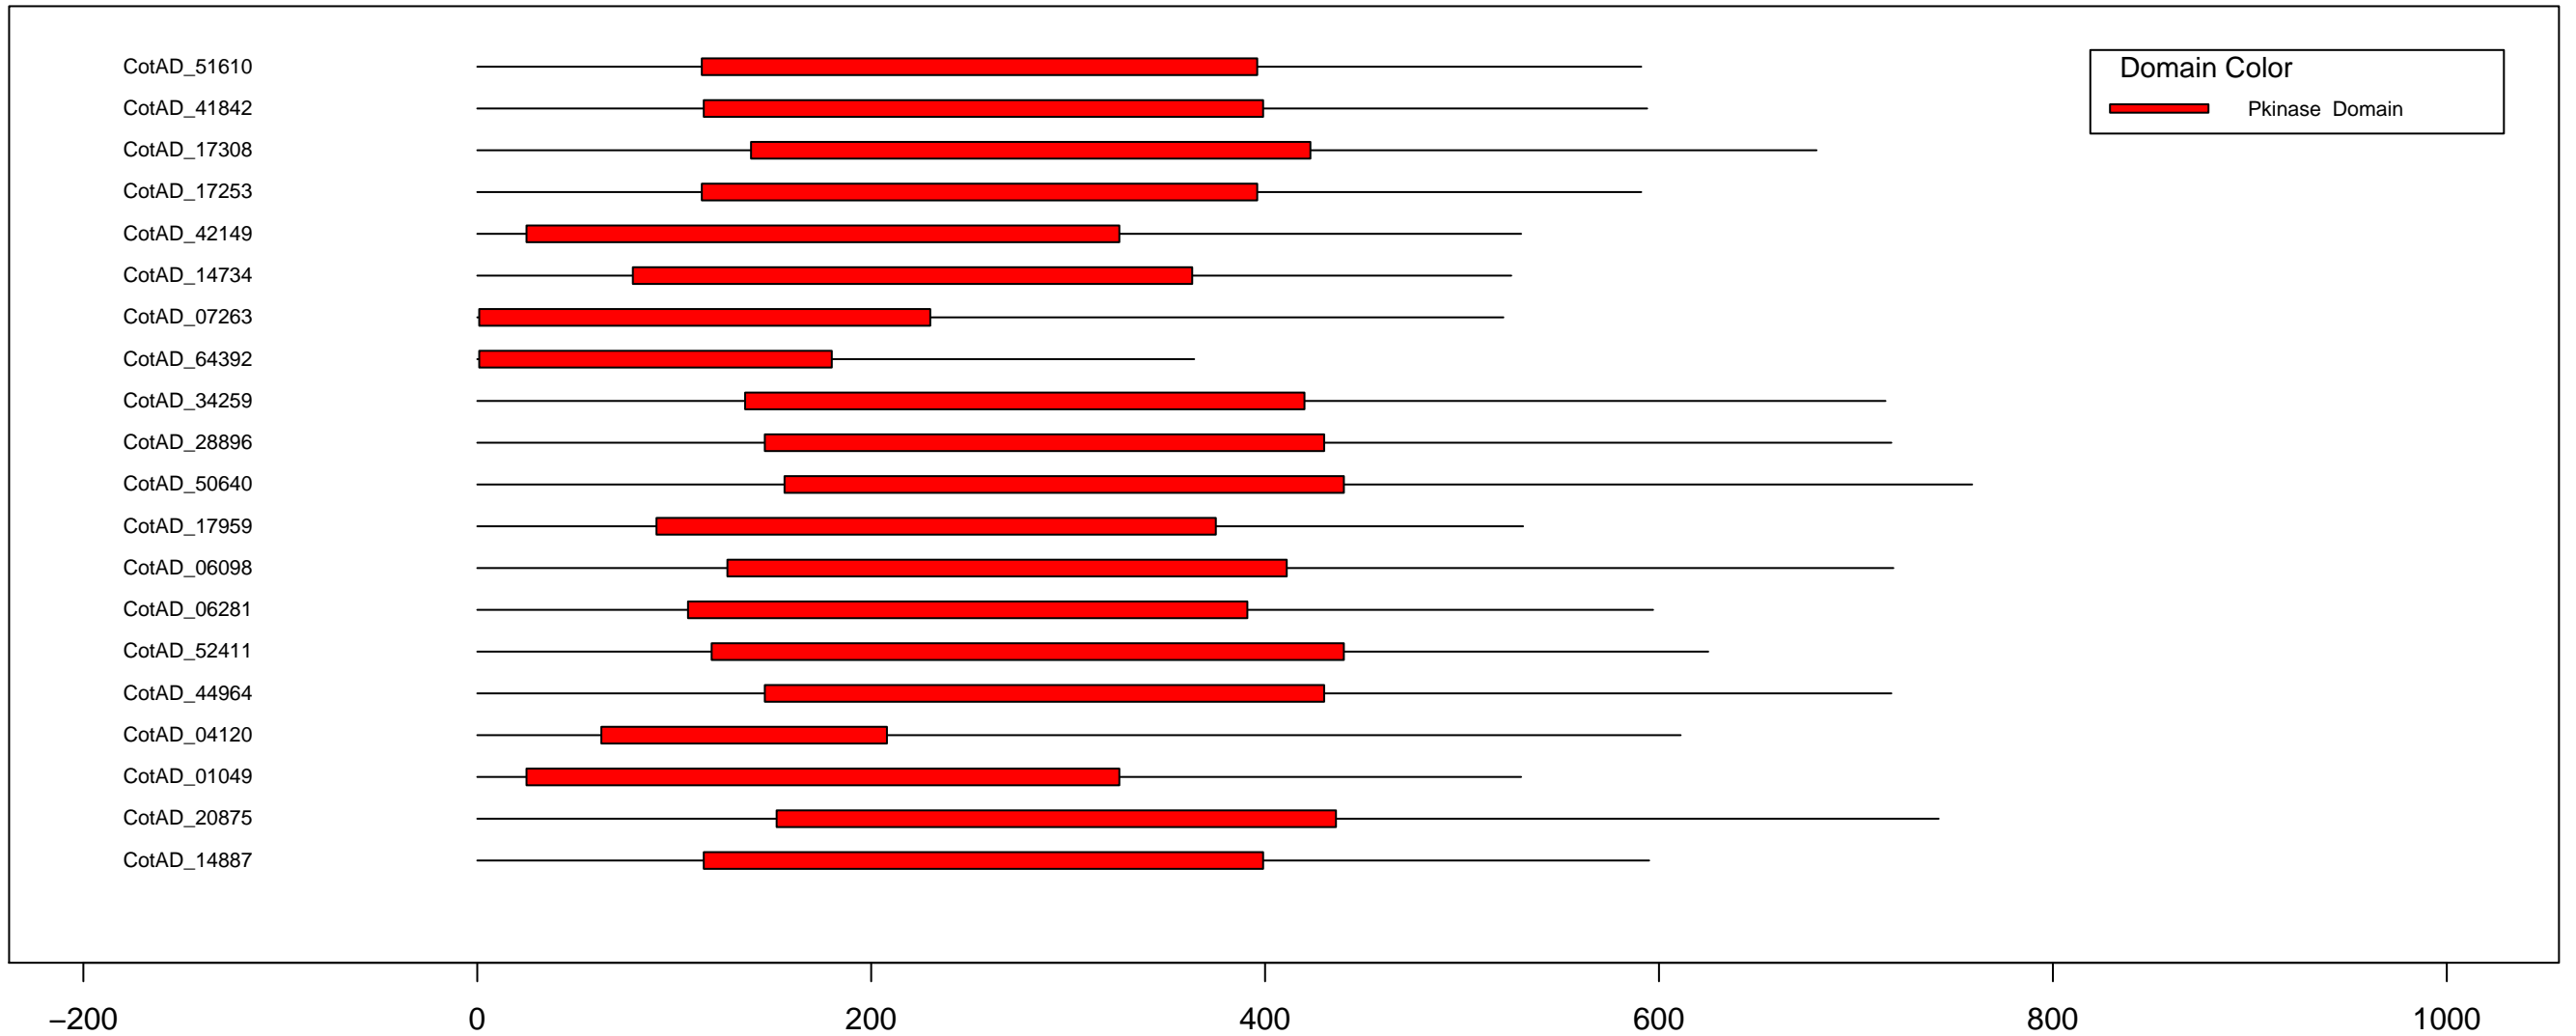

### G.hi CMGC\_CDK-CRK7-CDK9 domain diagram (part 3)

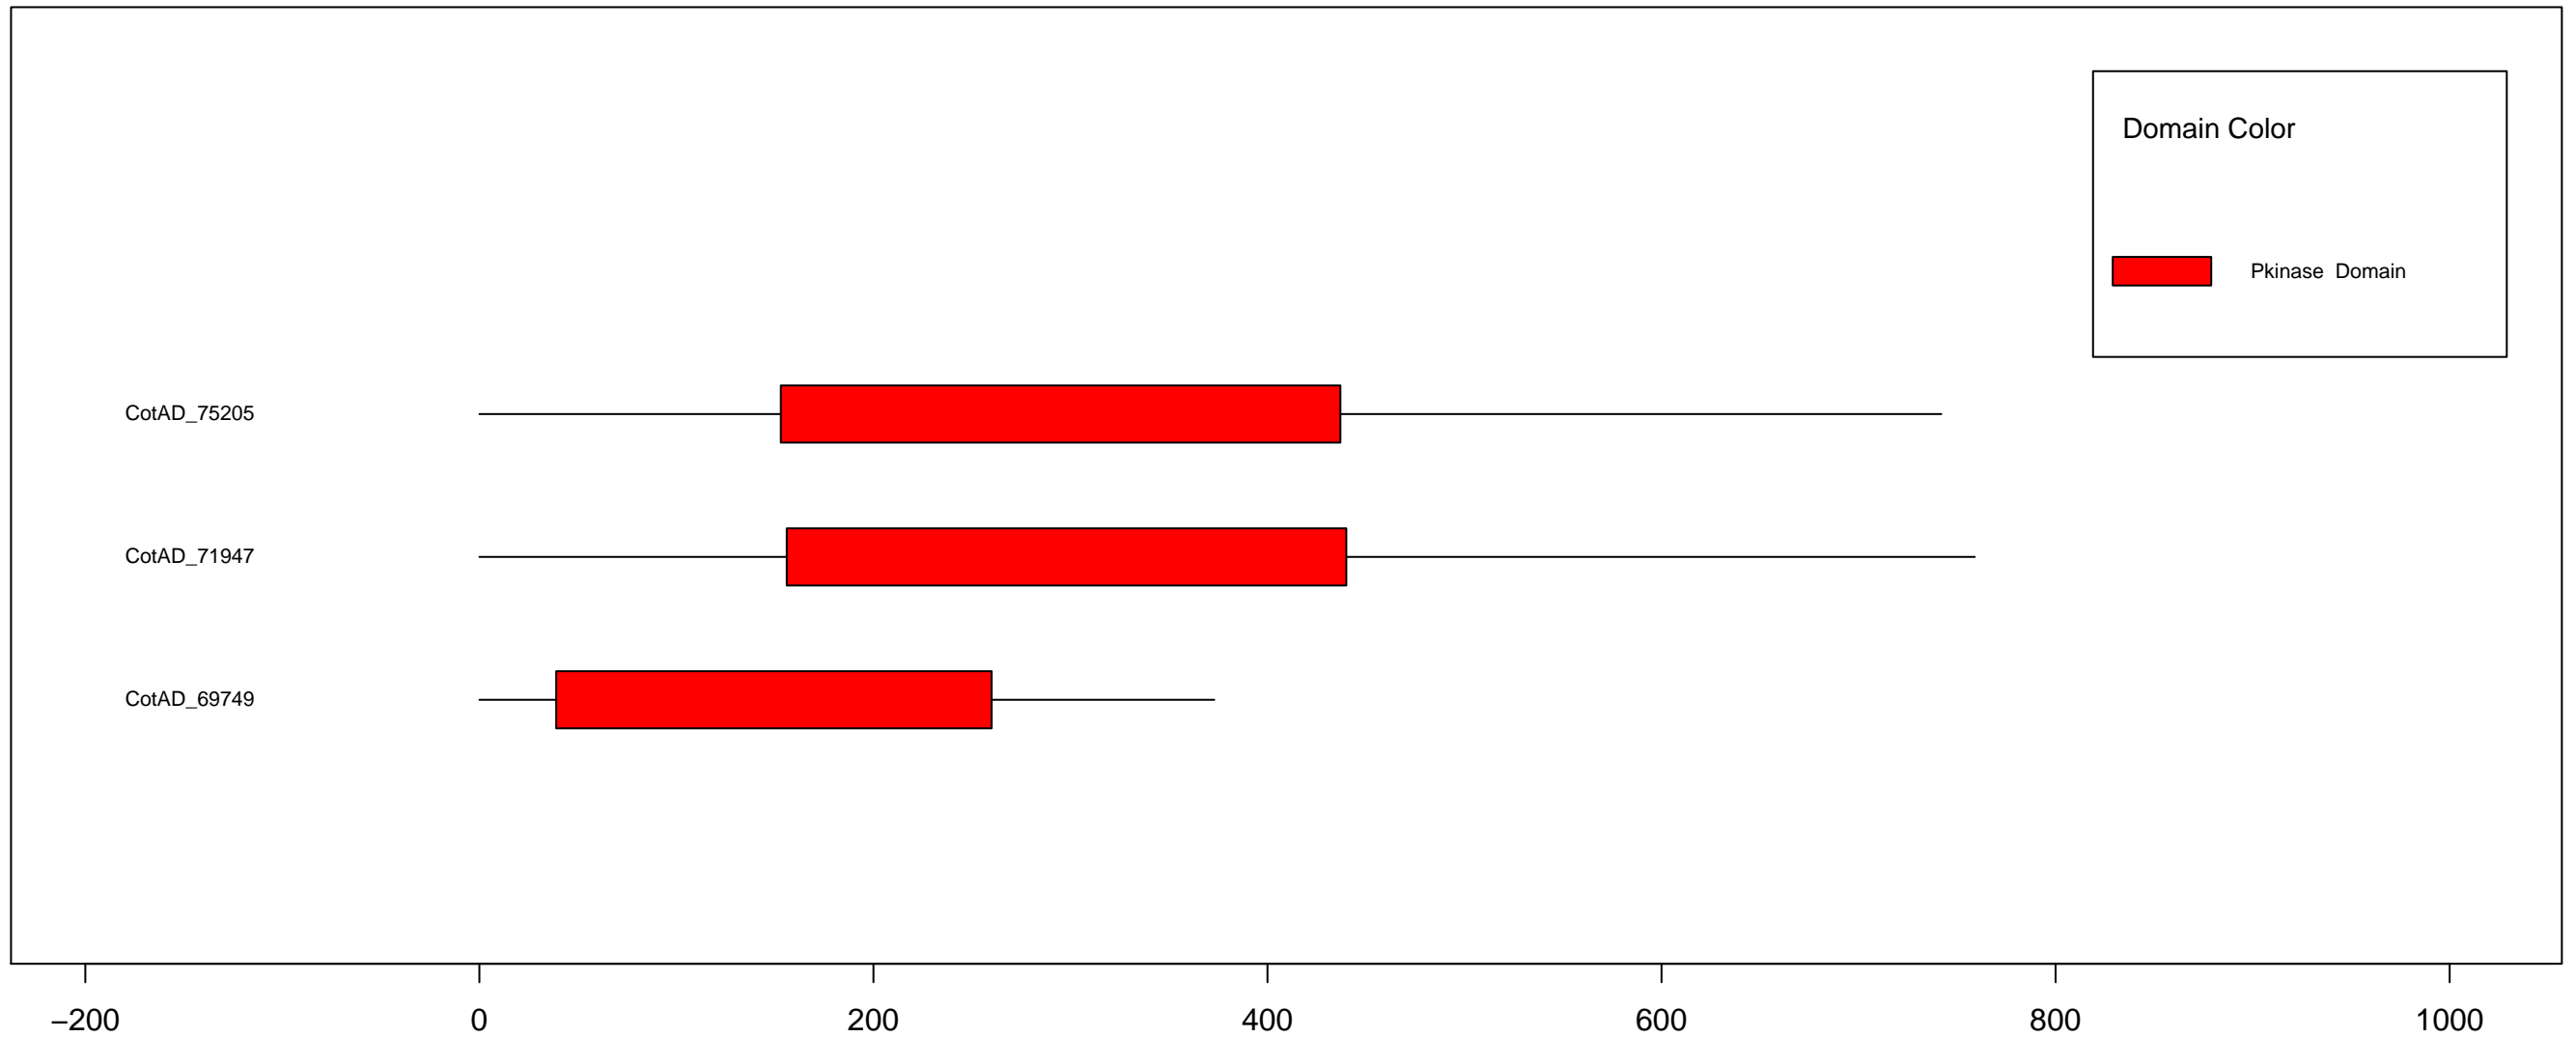

# G.hi CMGC\_CDK-PITSLRE domain diagram (all)

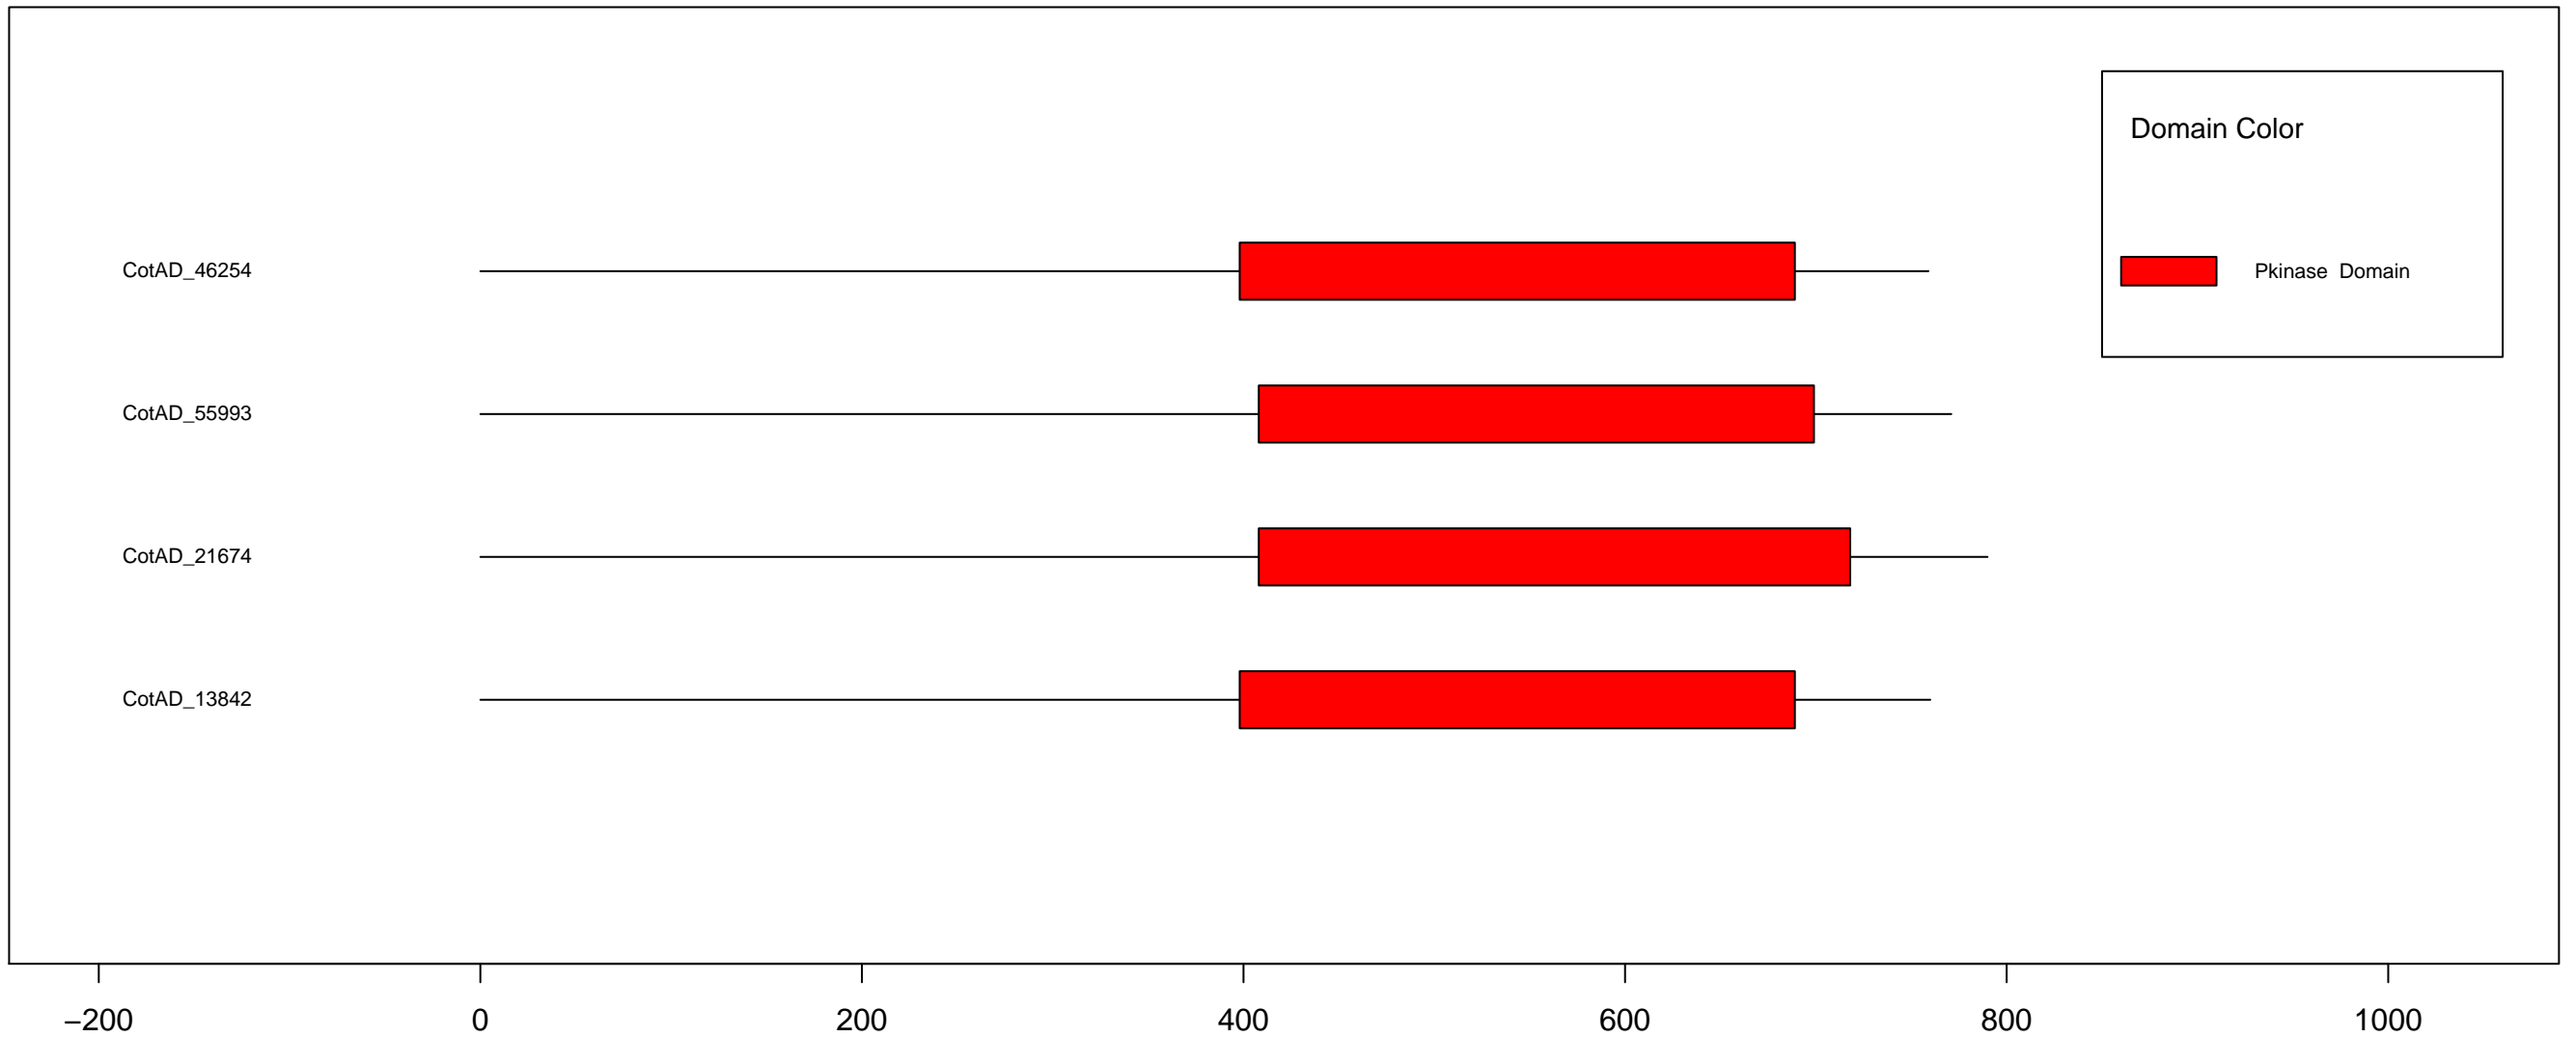

### G.hi CMGC\_CDK-PI domain diagram (all)

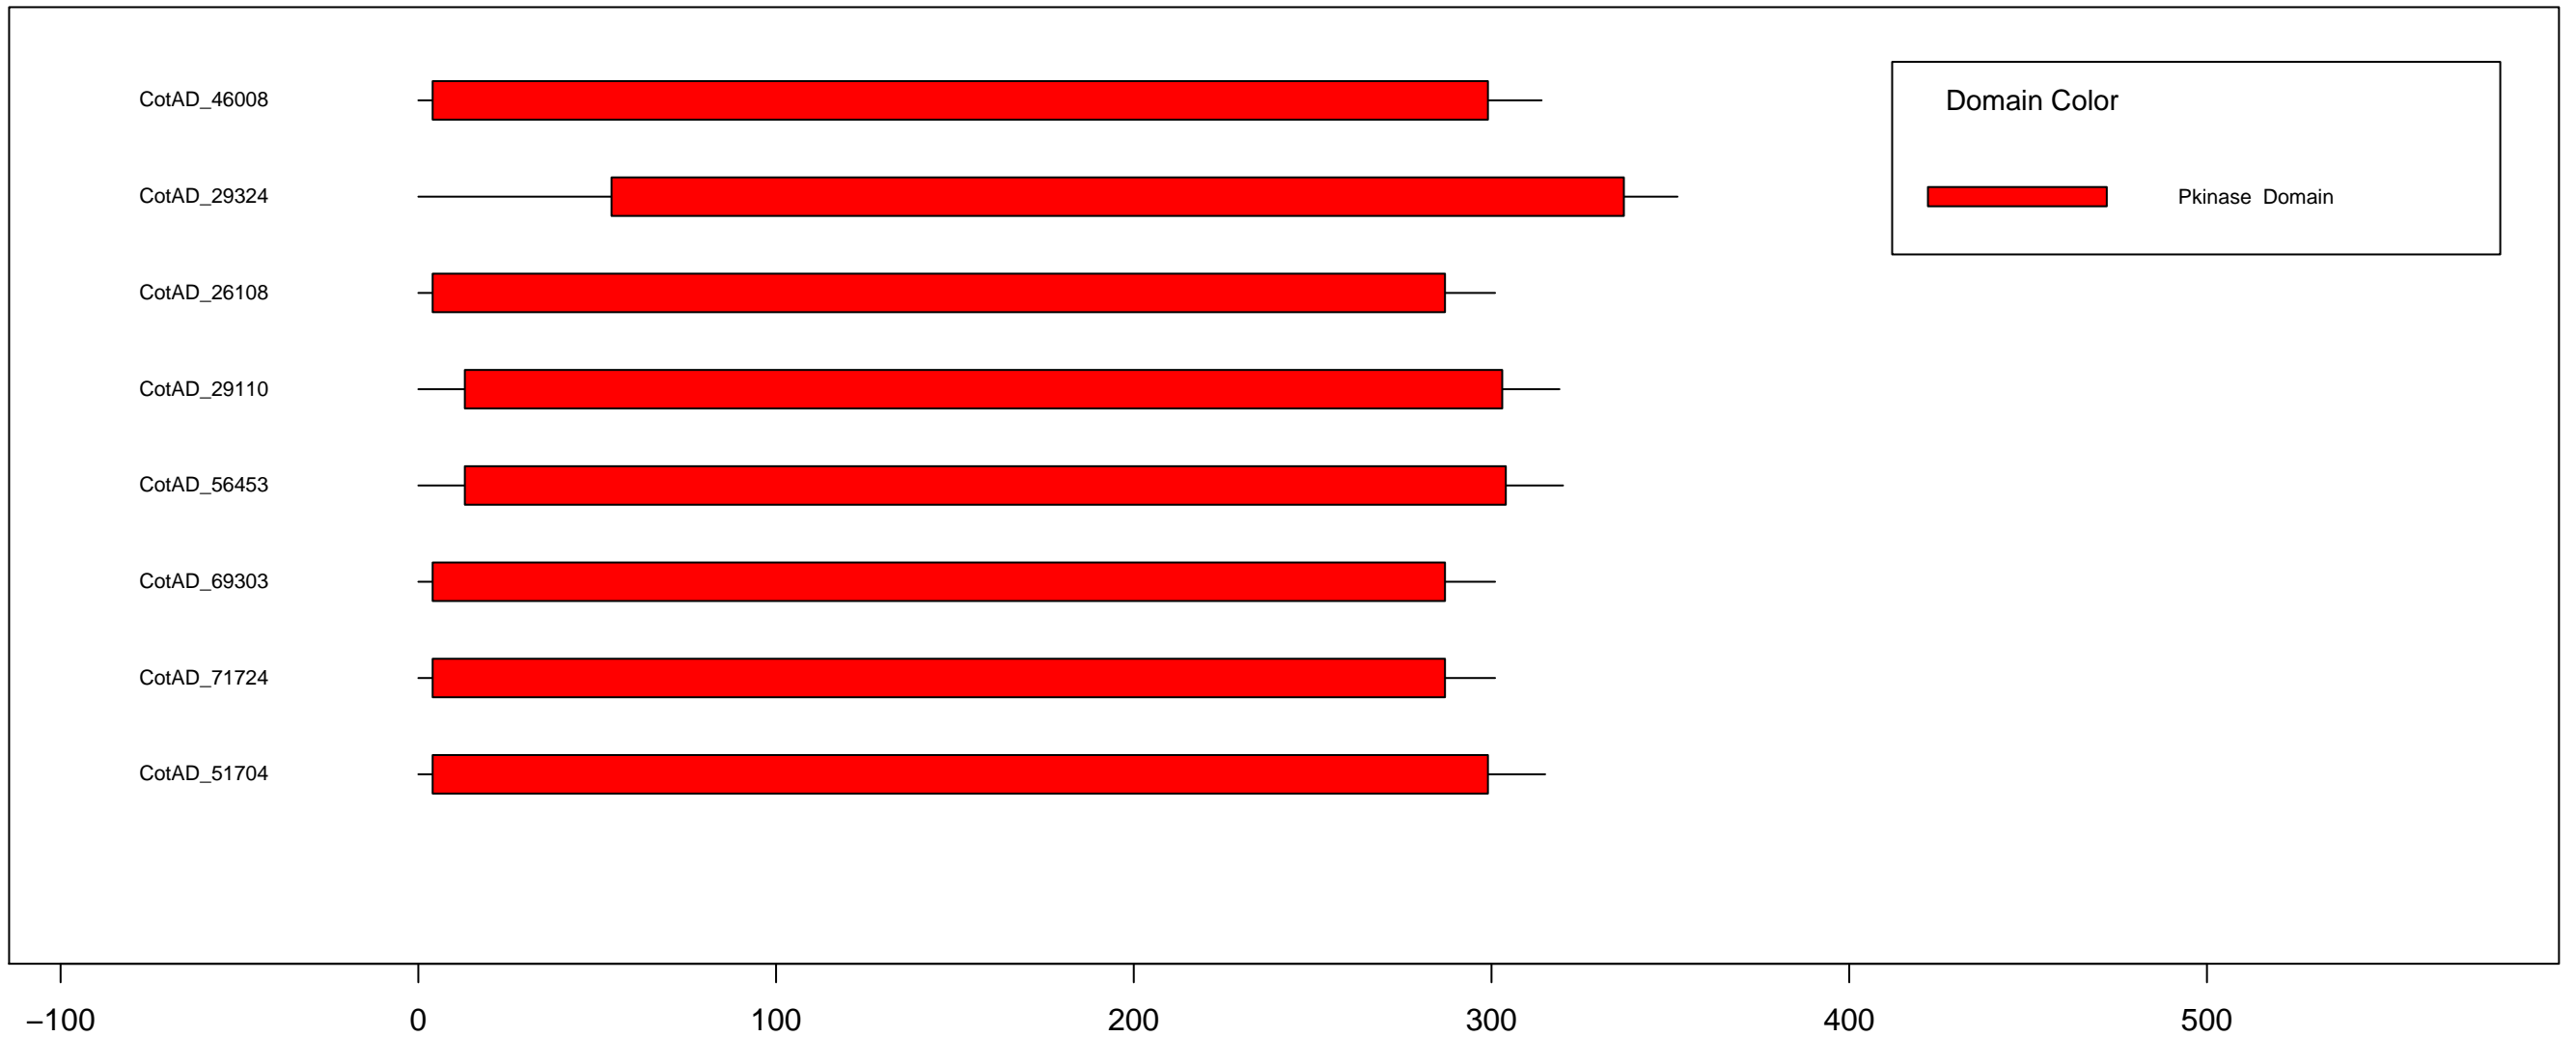

# G.hi CMGC\_CK2 domain diagram (all)

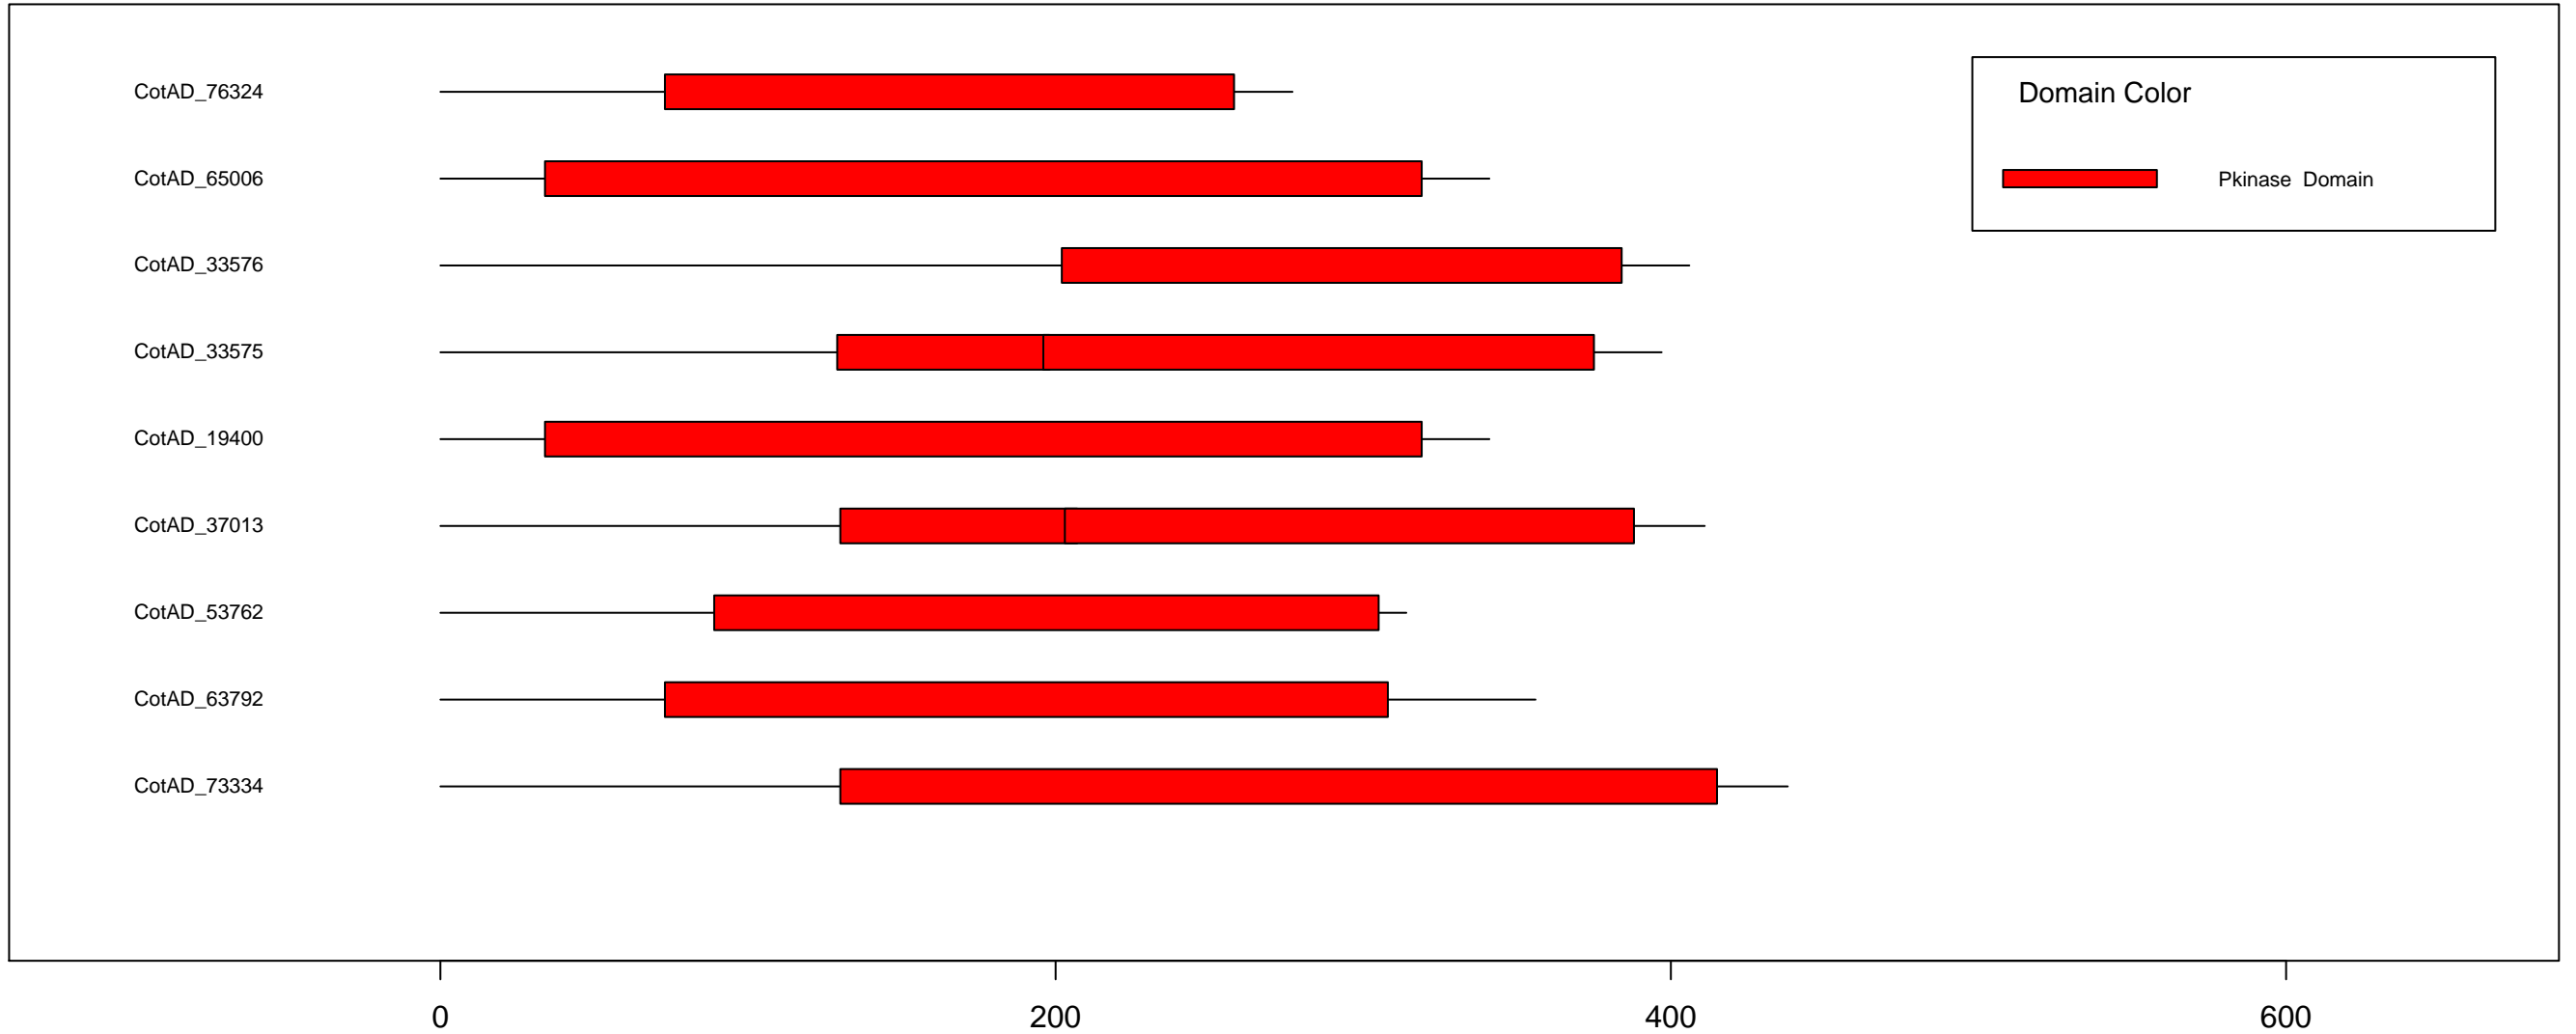

# G.hi CMGC\_CLK domain diagram (all)

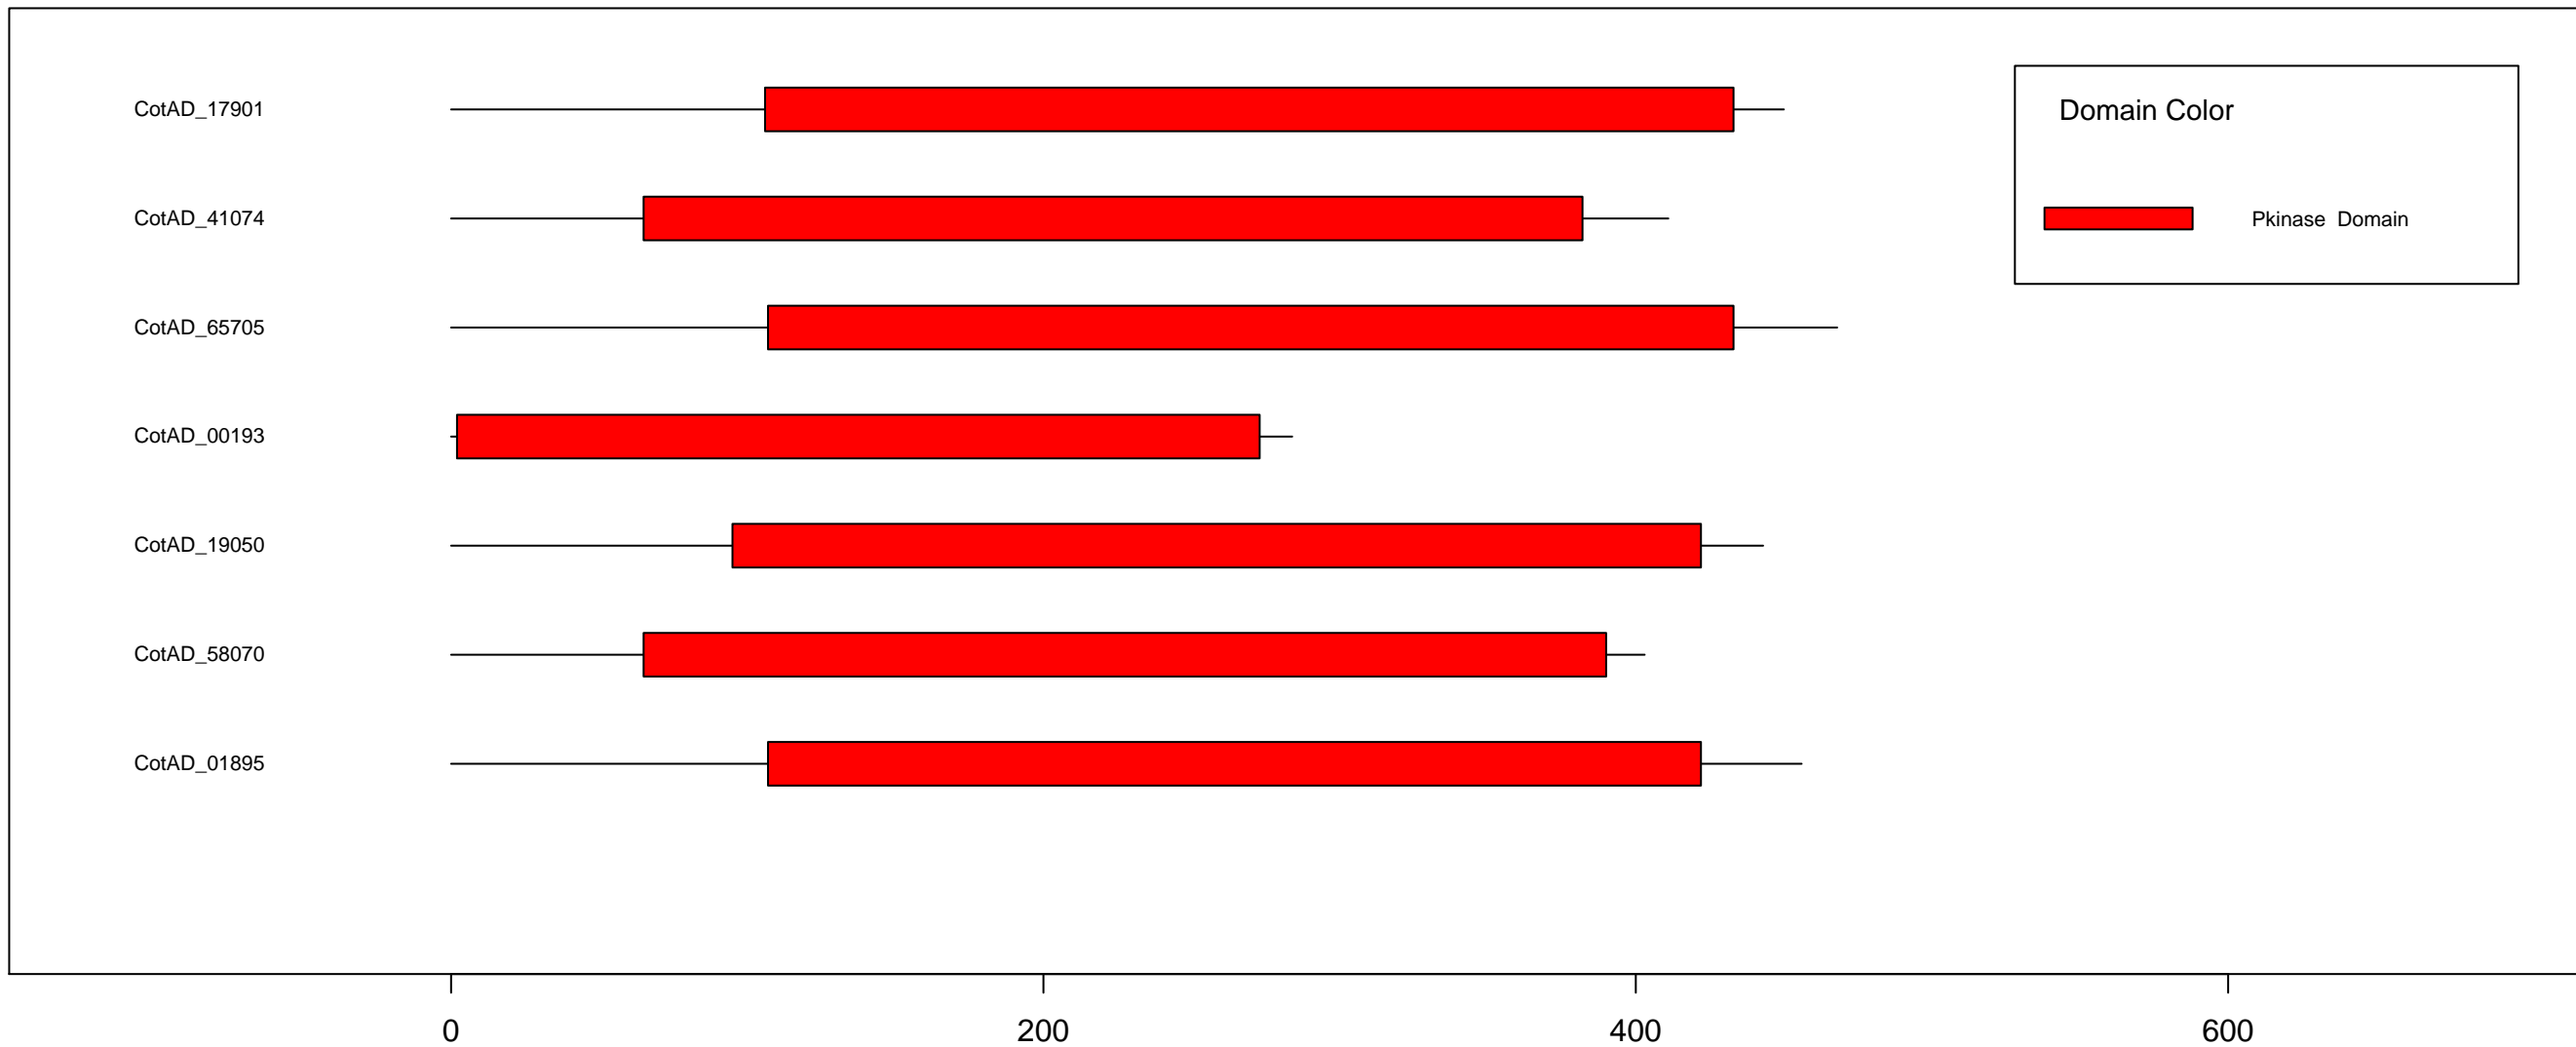



### G.hi CMGC\_DYRK-PRP4 domain diagram (all)

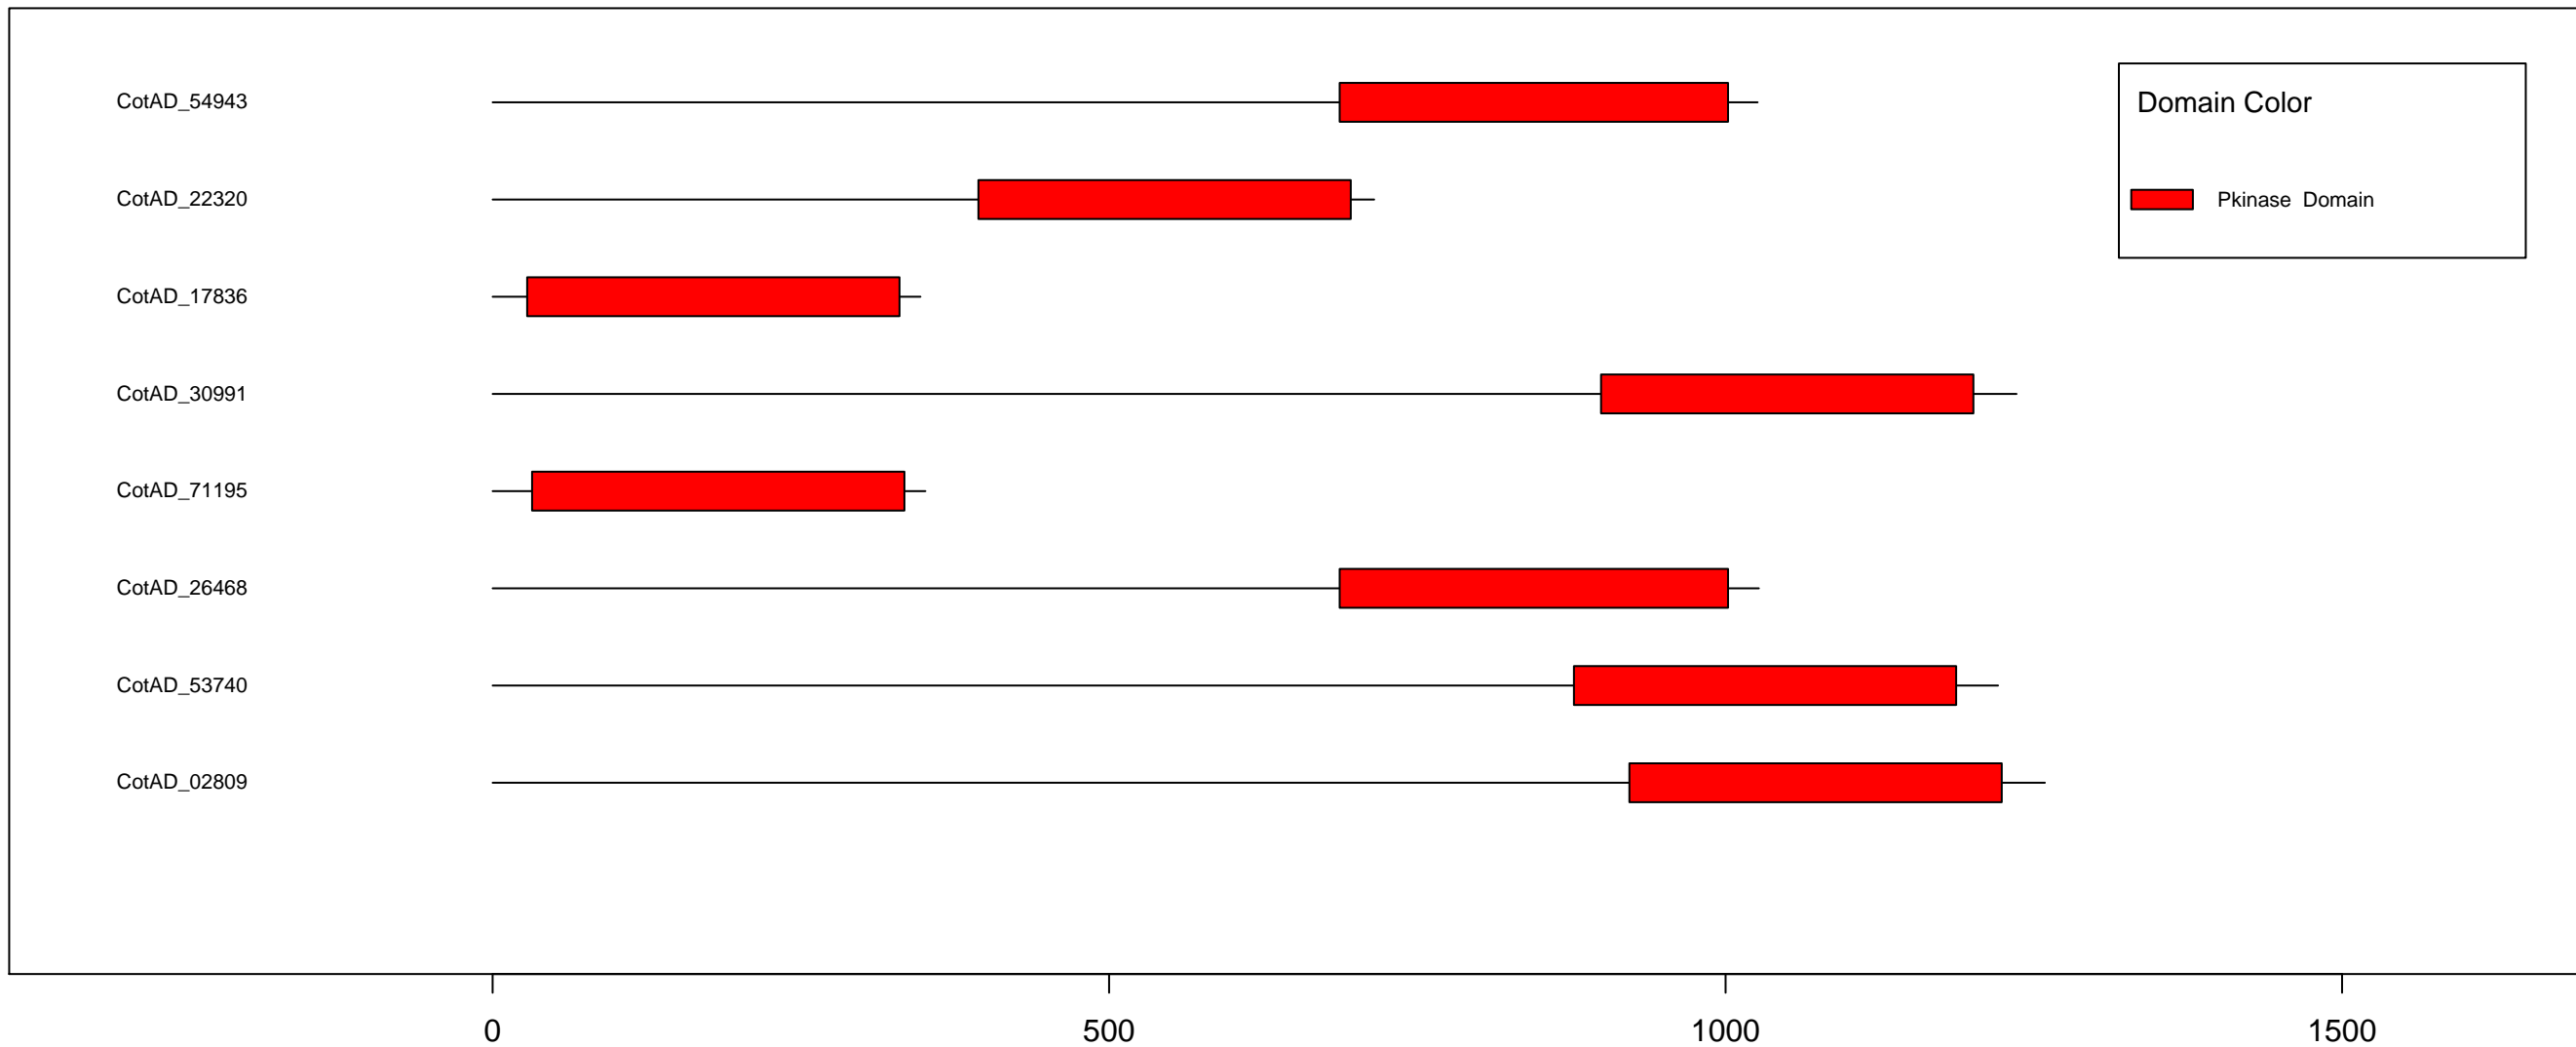

# G.hi CMGC\_DYRK-YAK domain diagram (all)

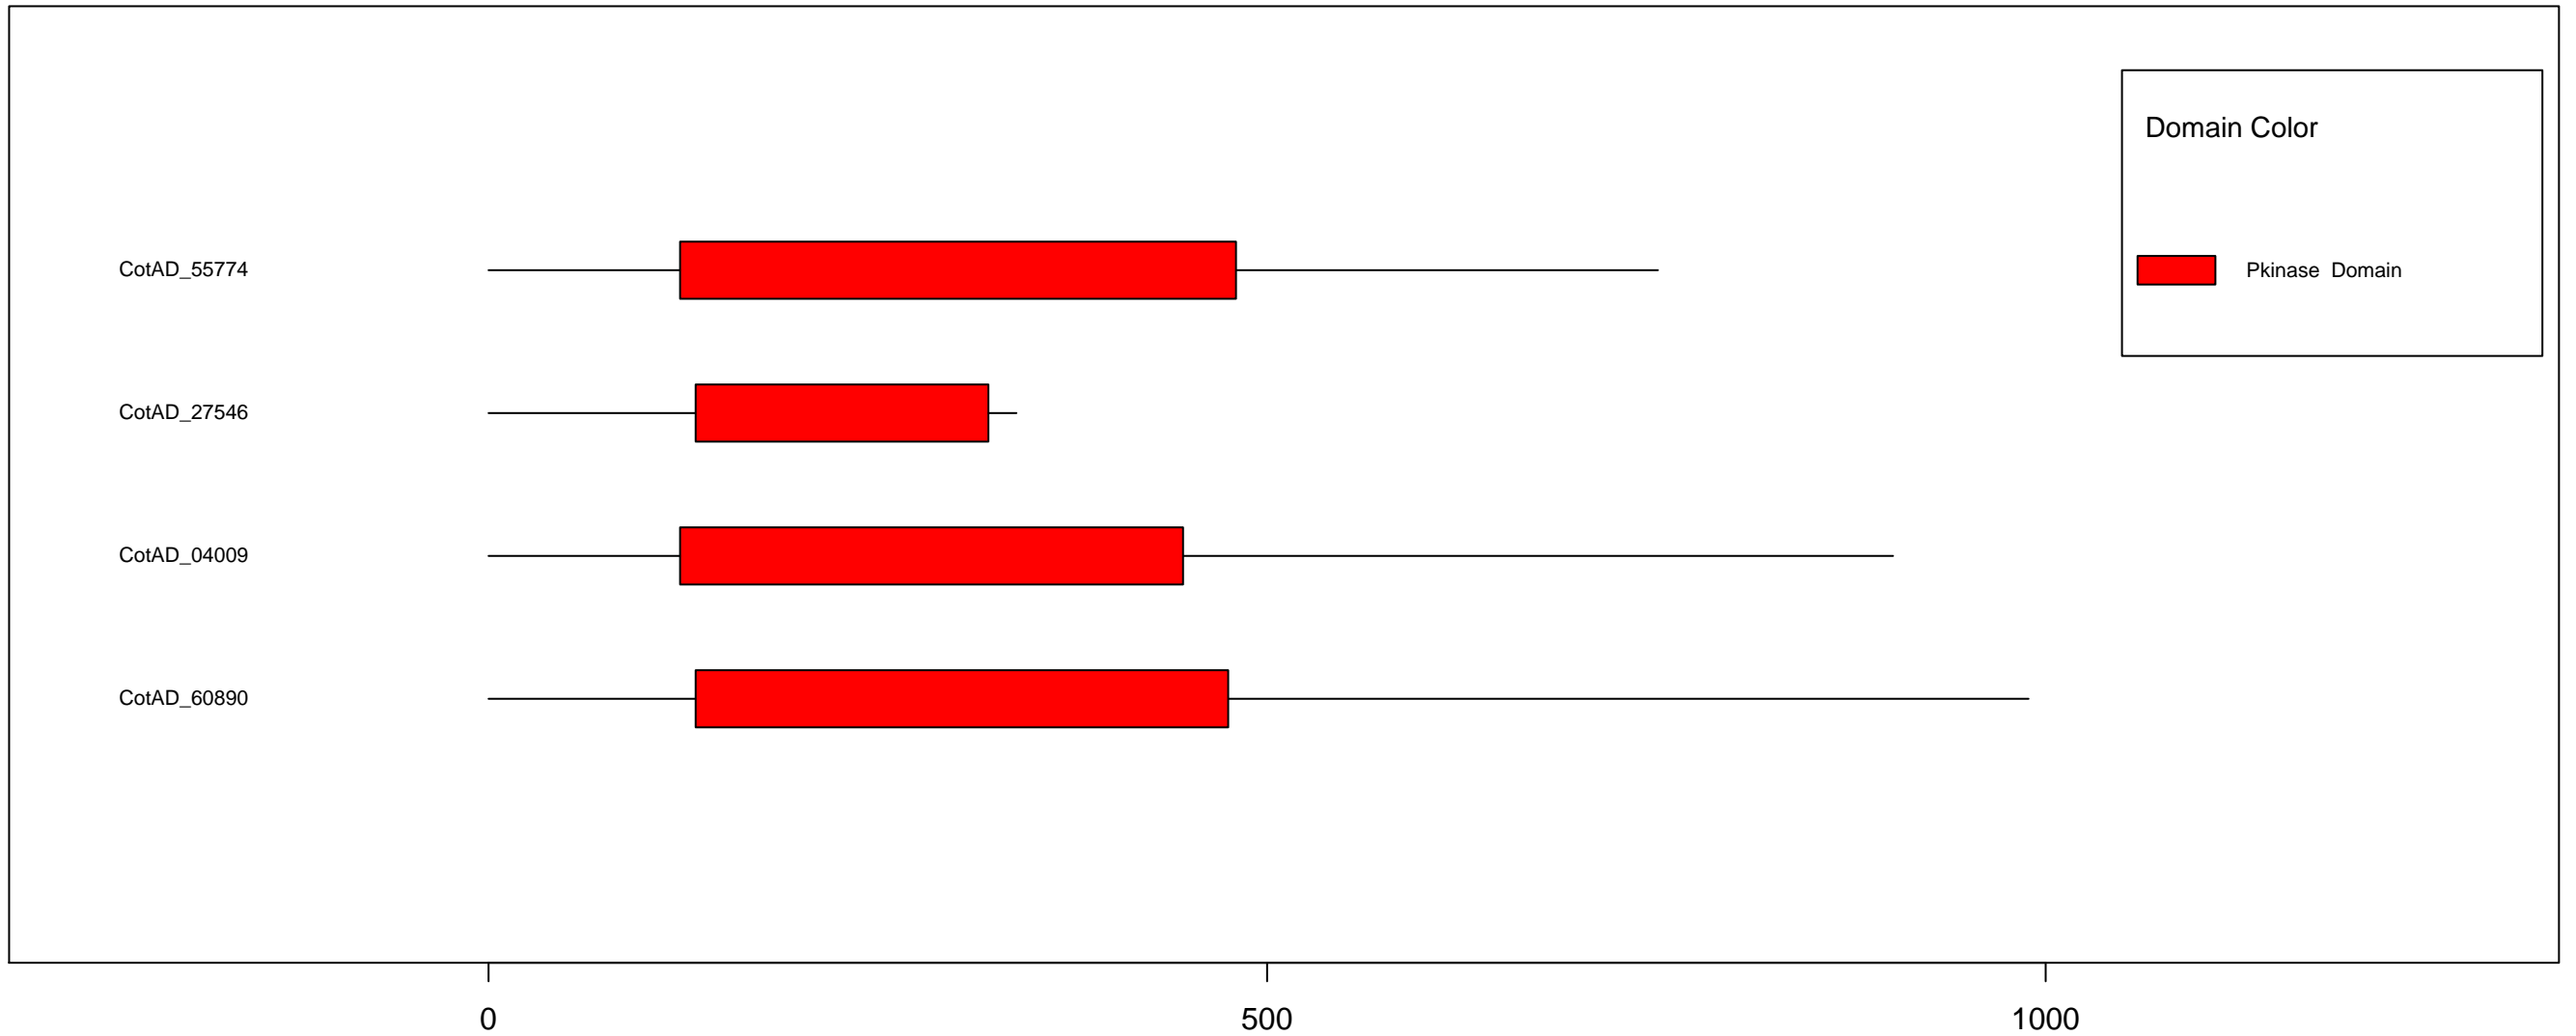

# G.hi CMGC\_GSKL domain diagram (all)

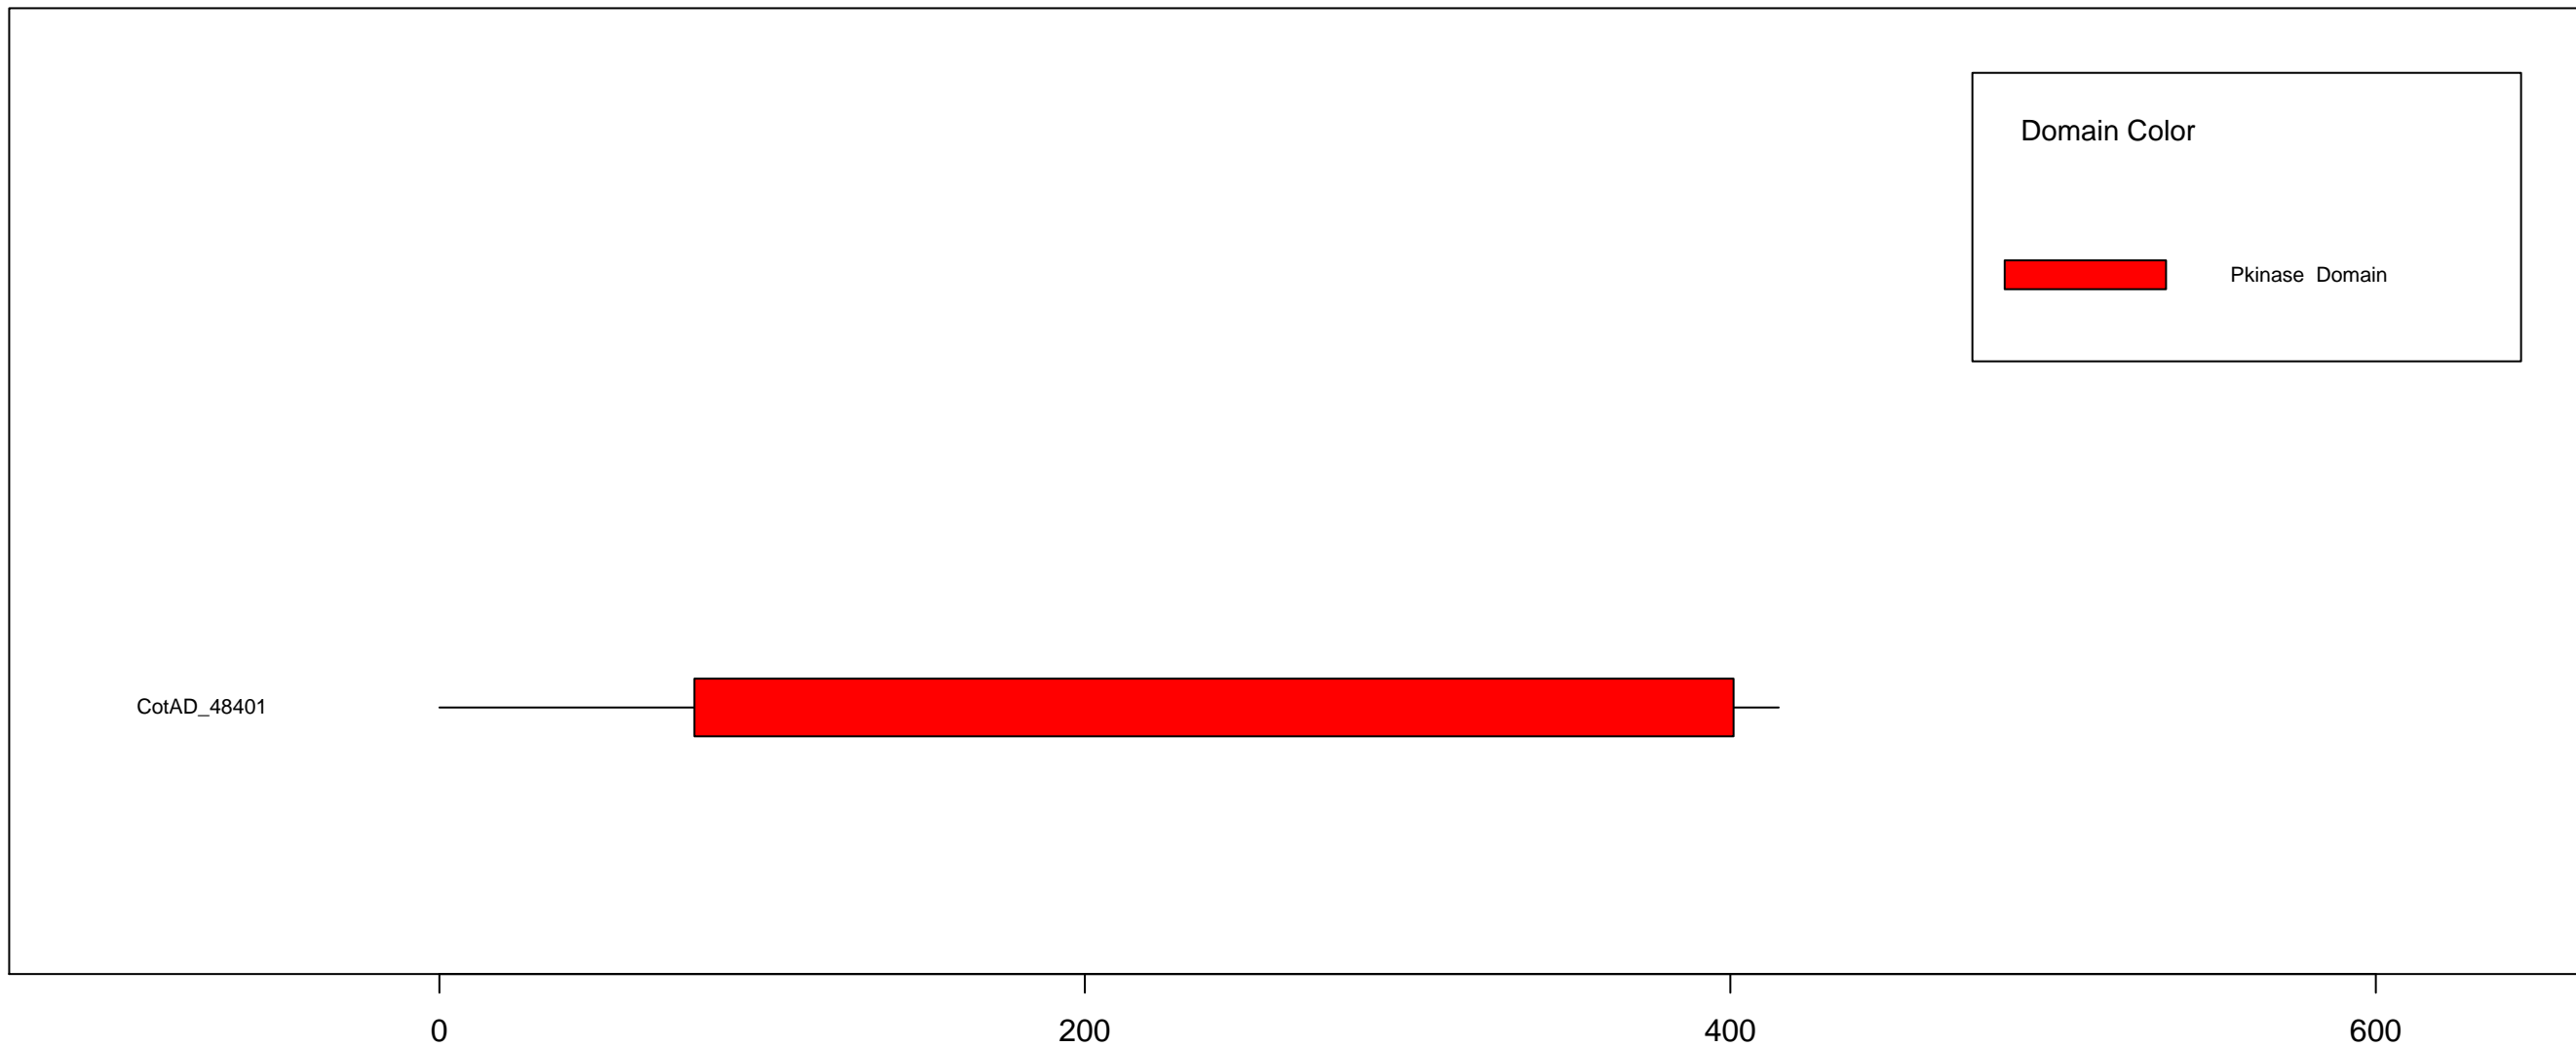

# G.hi CMGC\_GSK domain diagram (all)

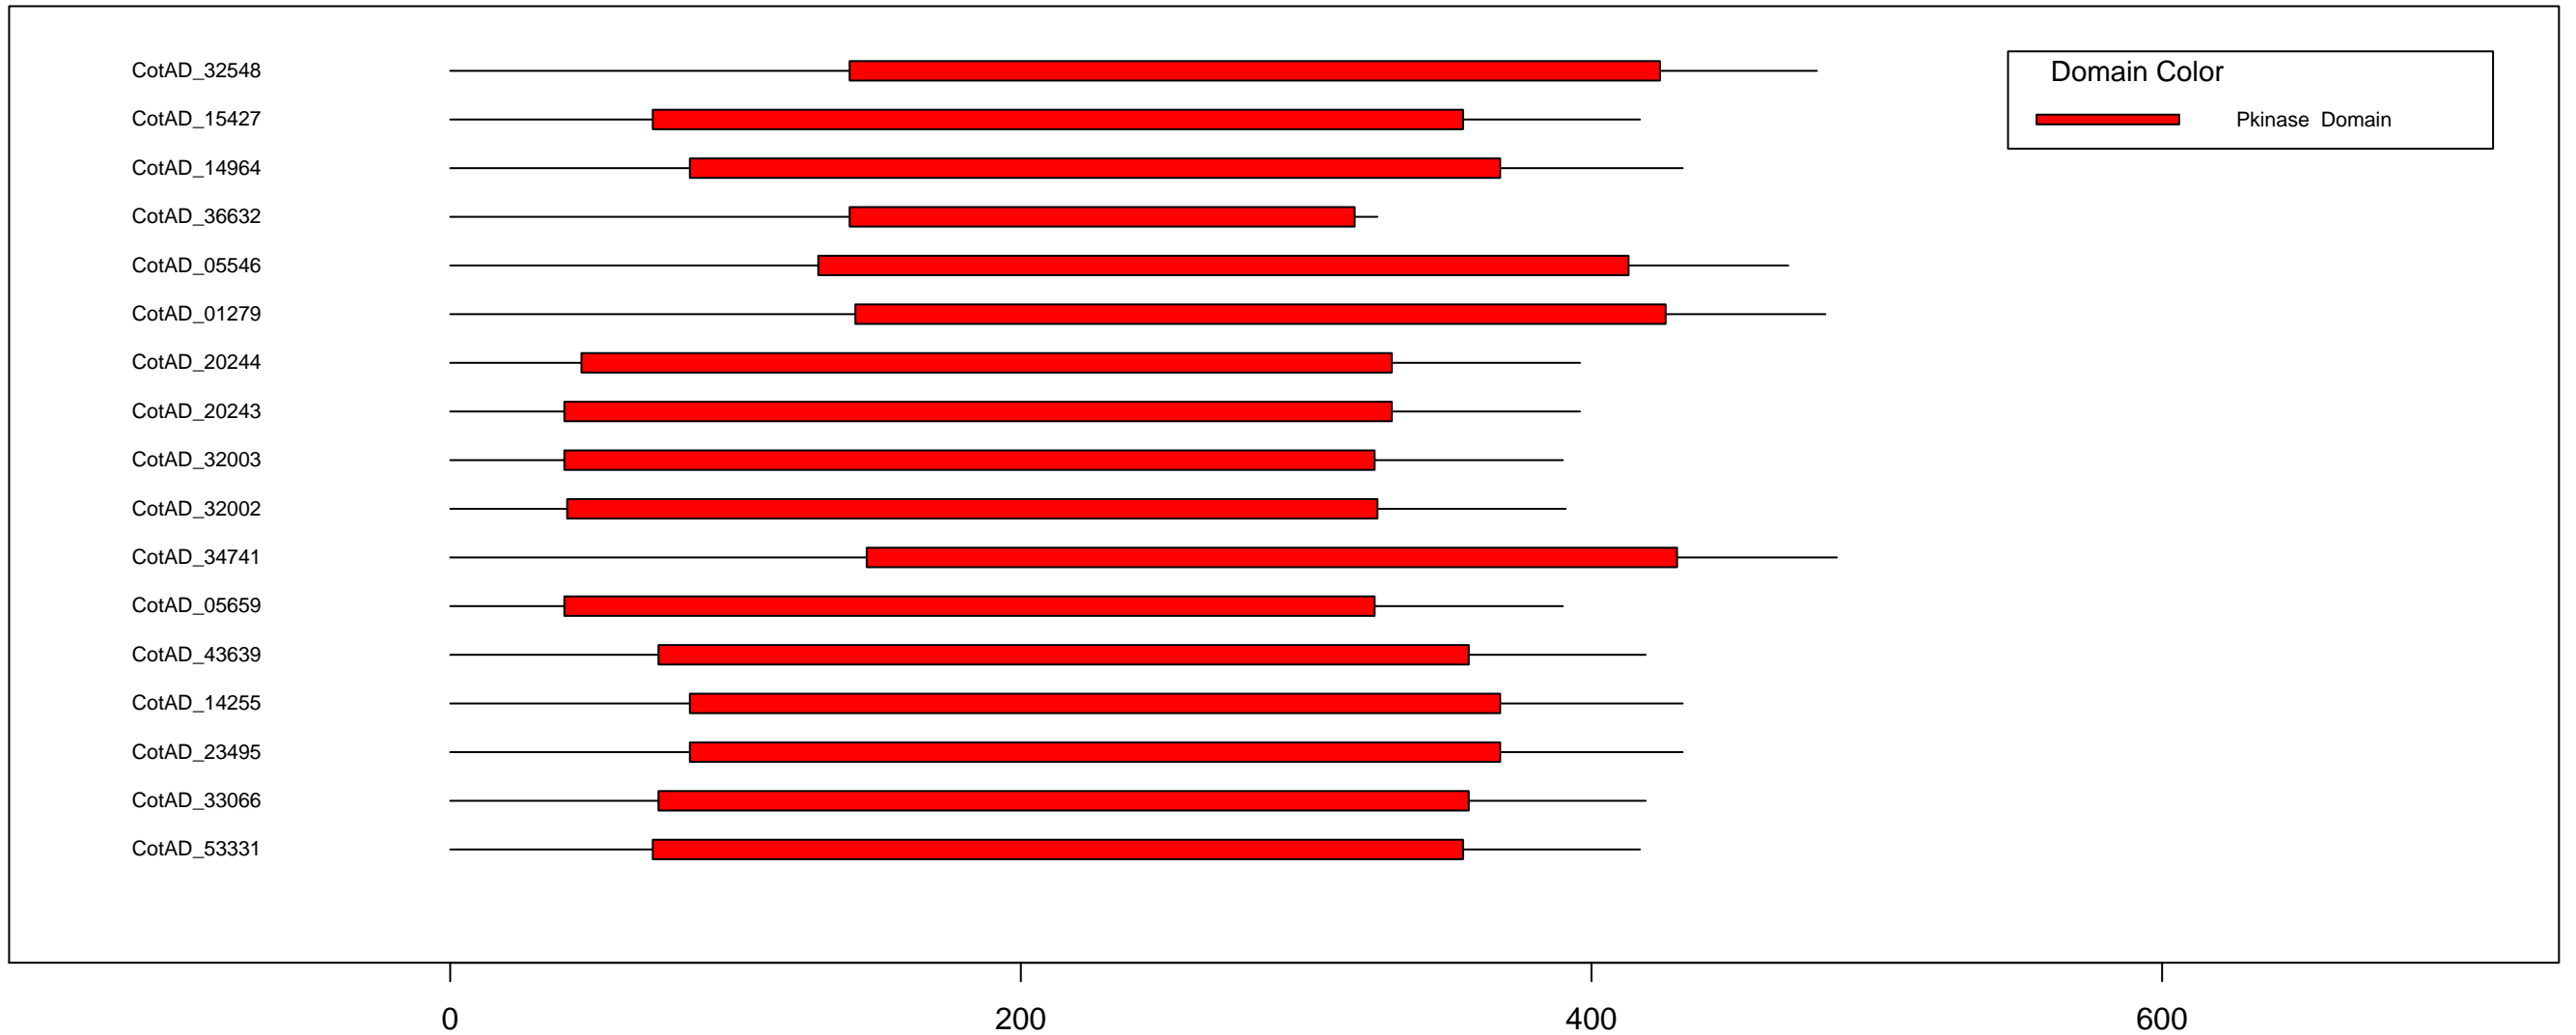

# G.hi CMGC\_MAPK domain diagram (part 1)

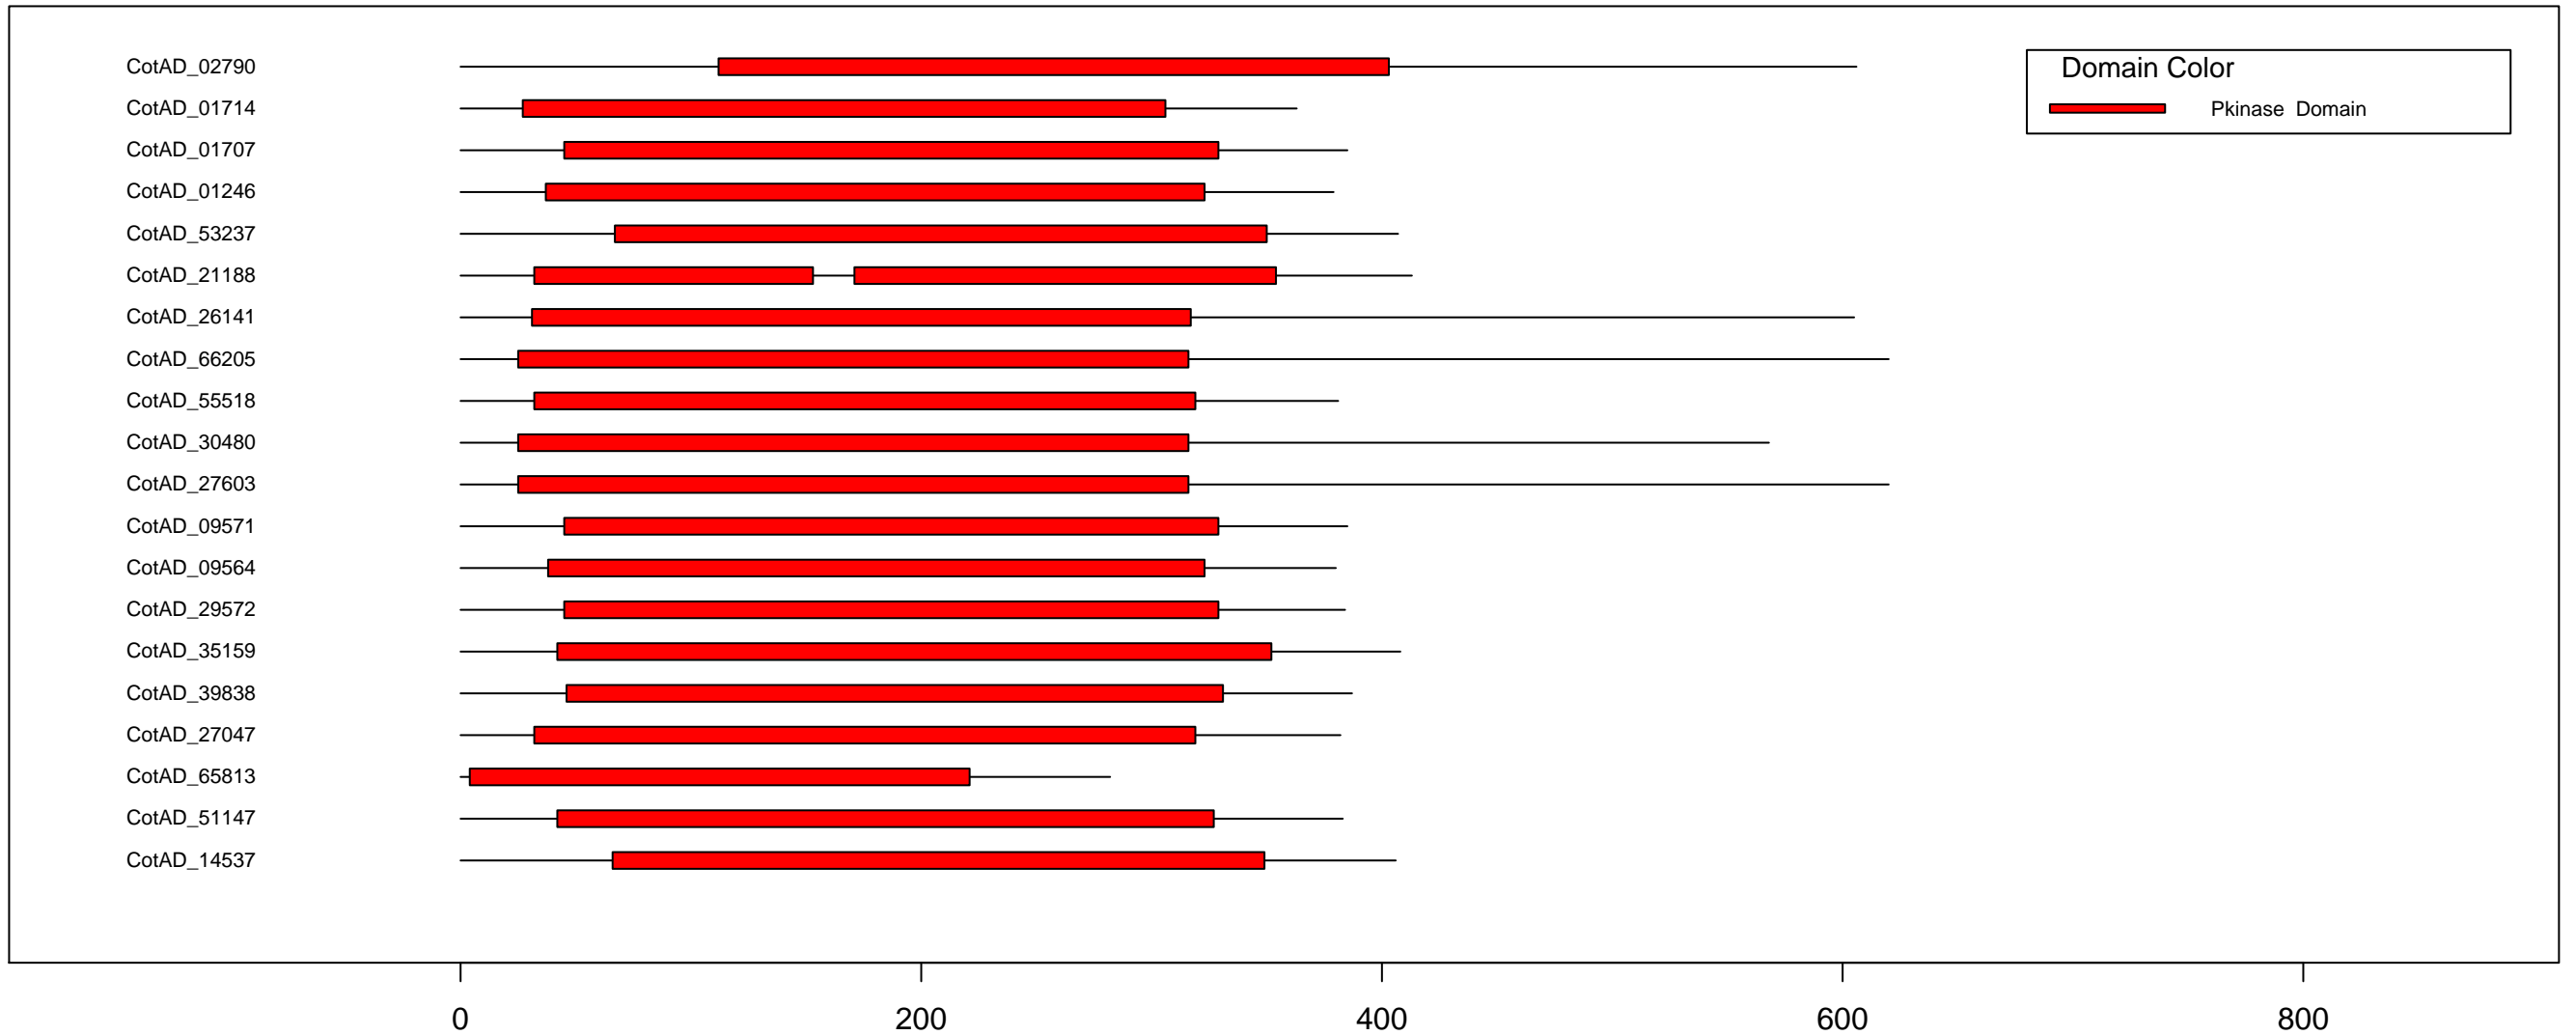

## G.hi CMGC\_MAPK domain diagram (part 2)

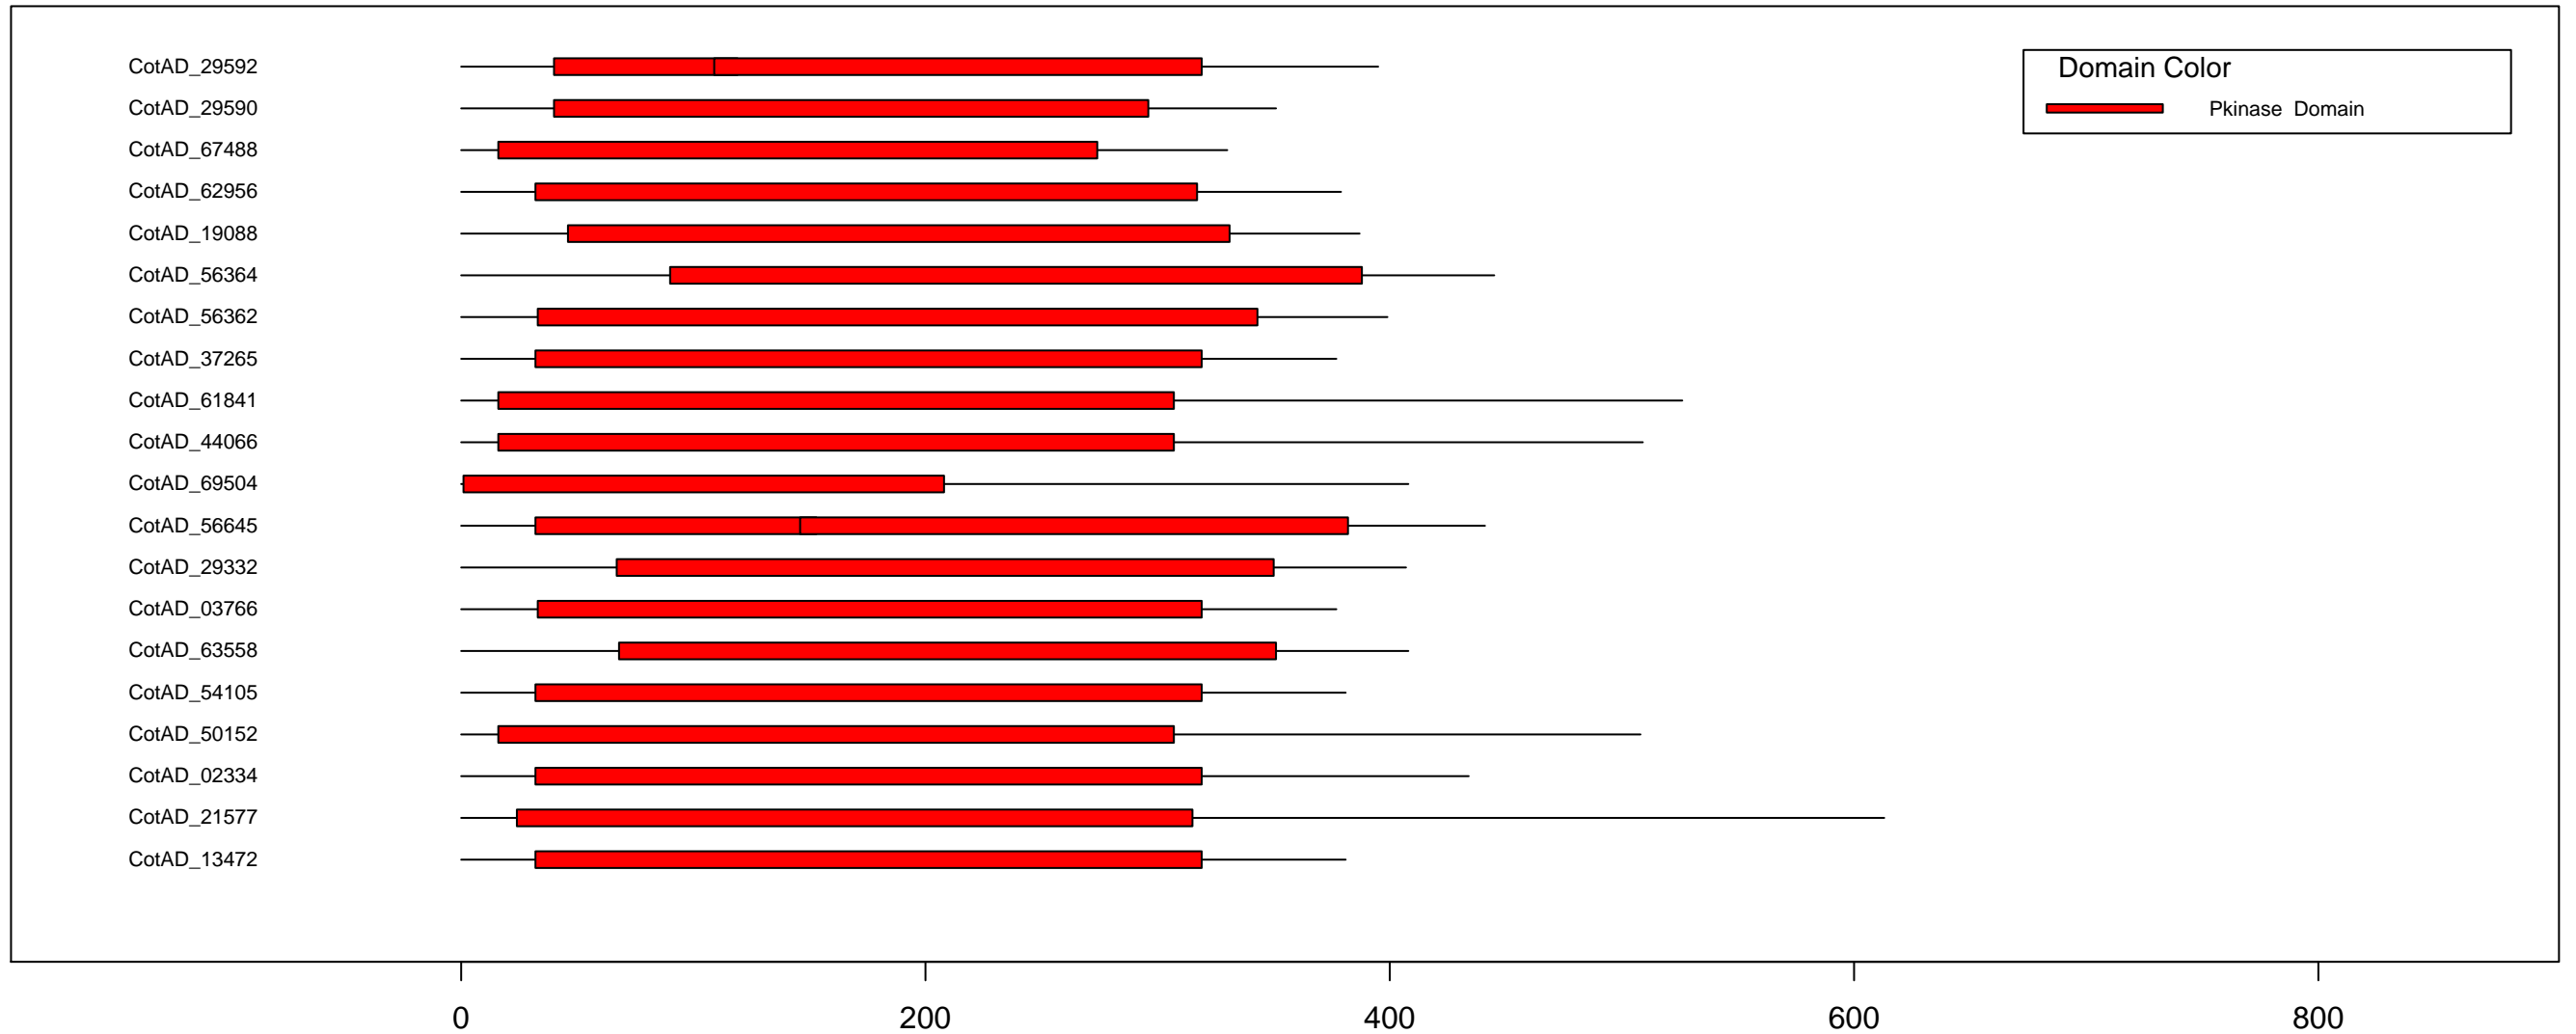

### G.hi CMGC\_MAPK domain diagram (part 3)

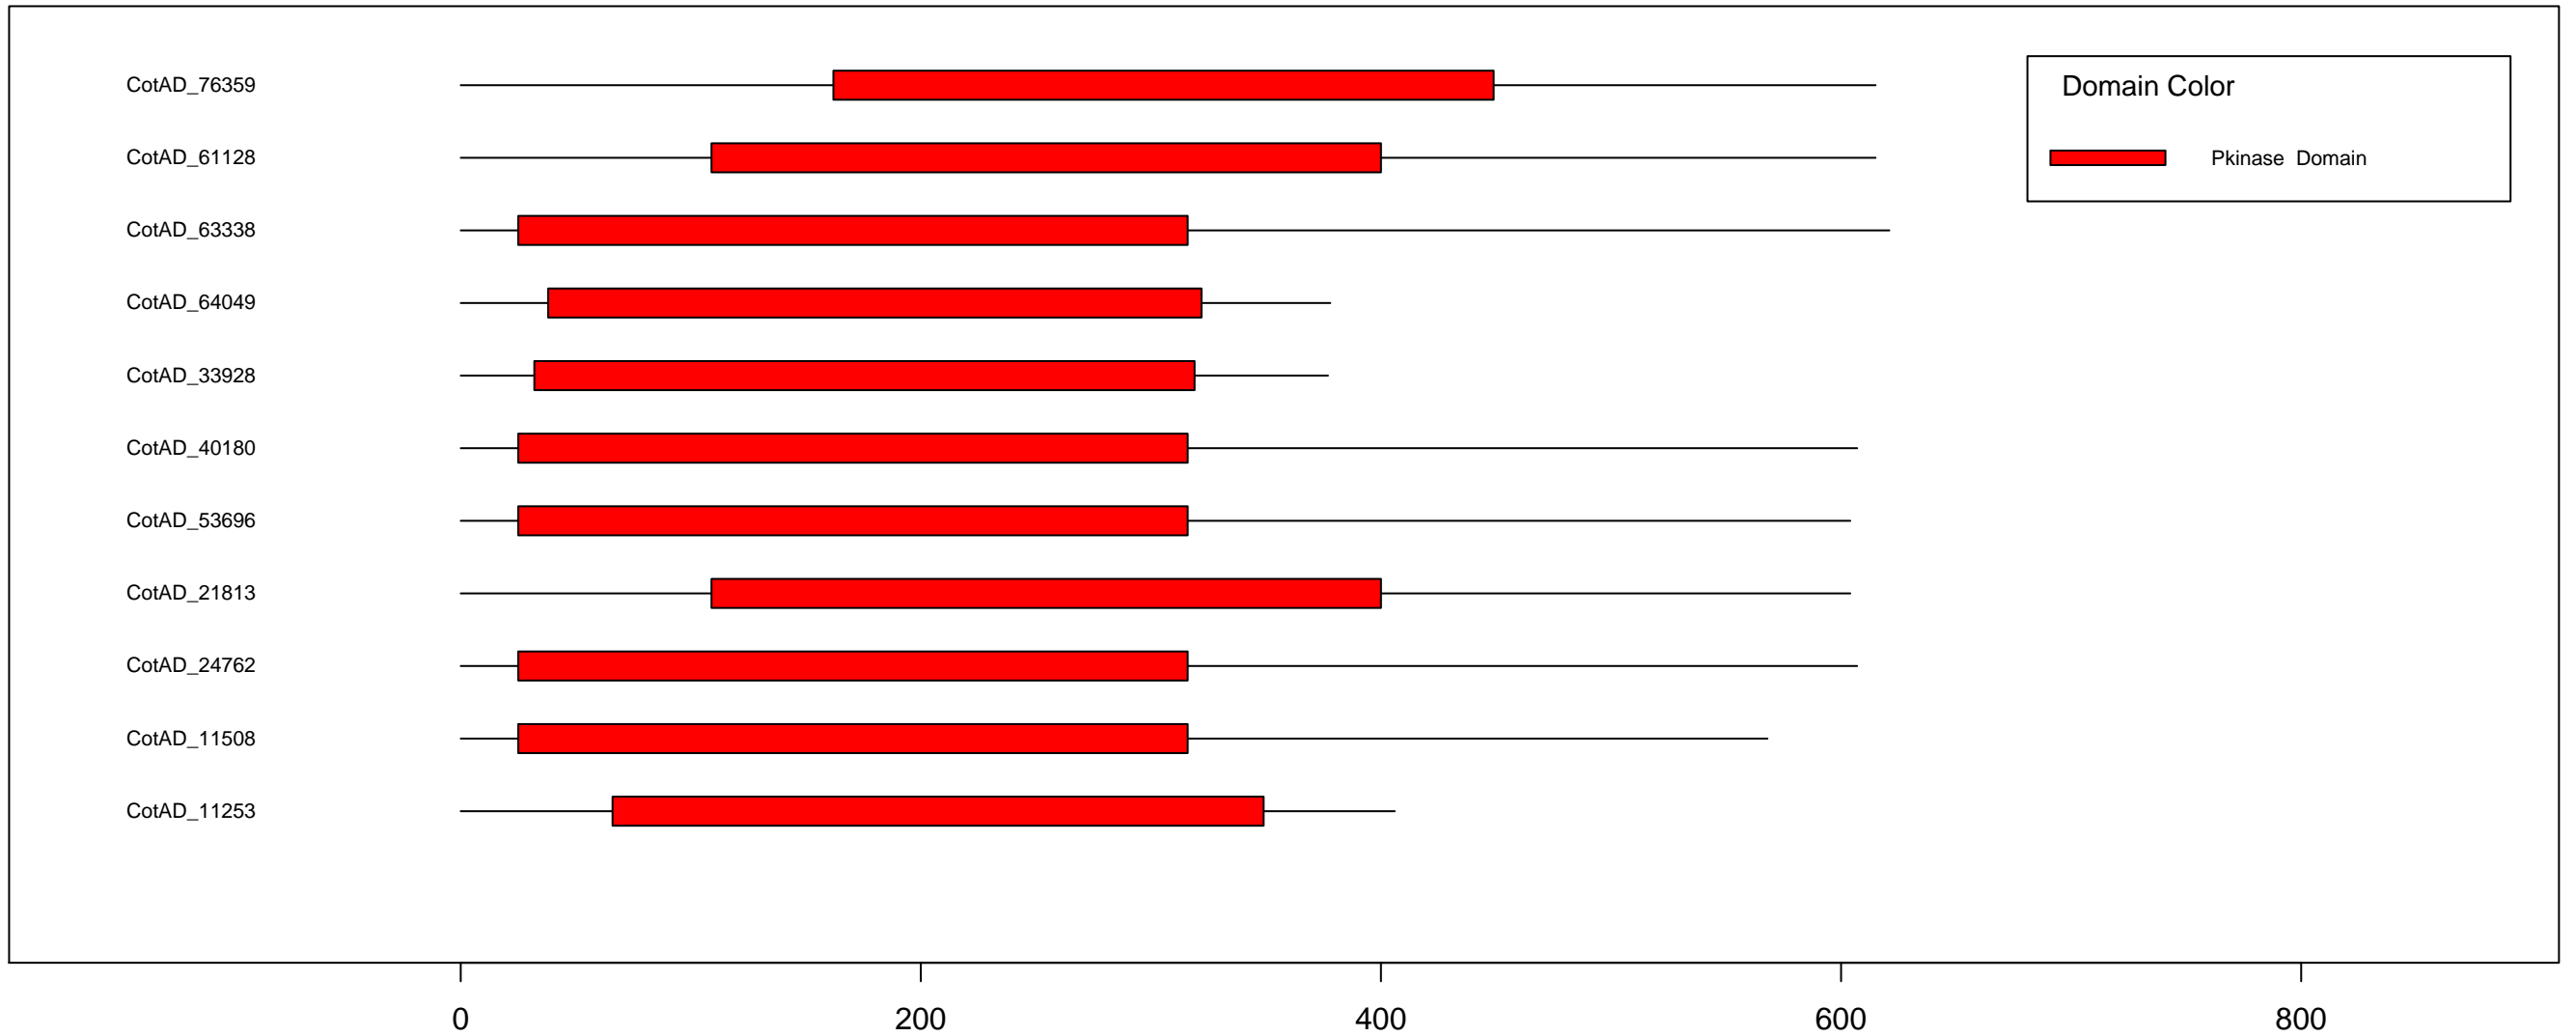

# G.hi CMGC\_PI-Tthe domain diagram (all)

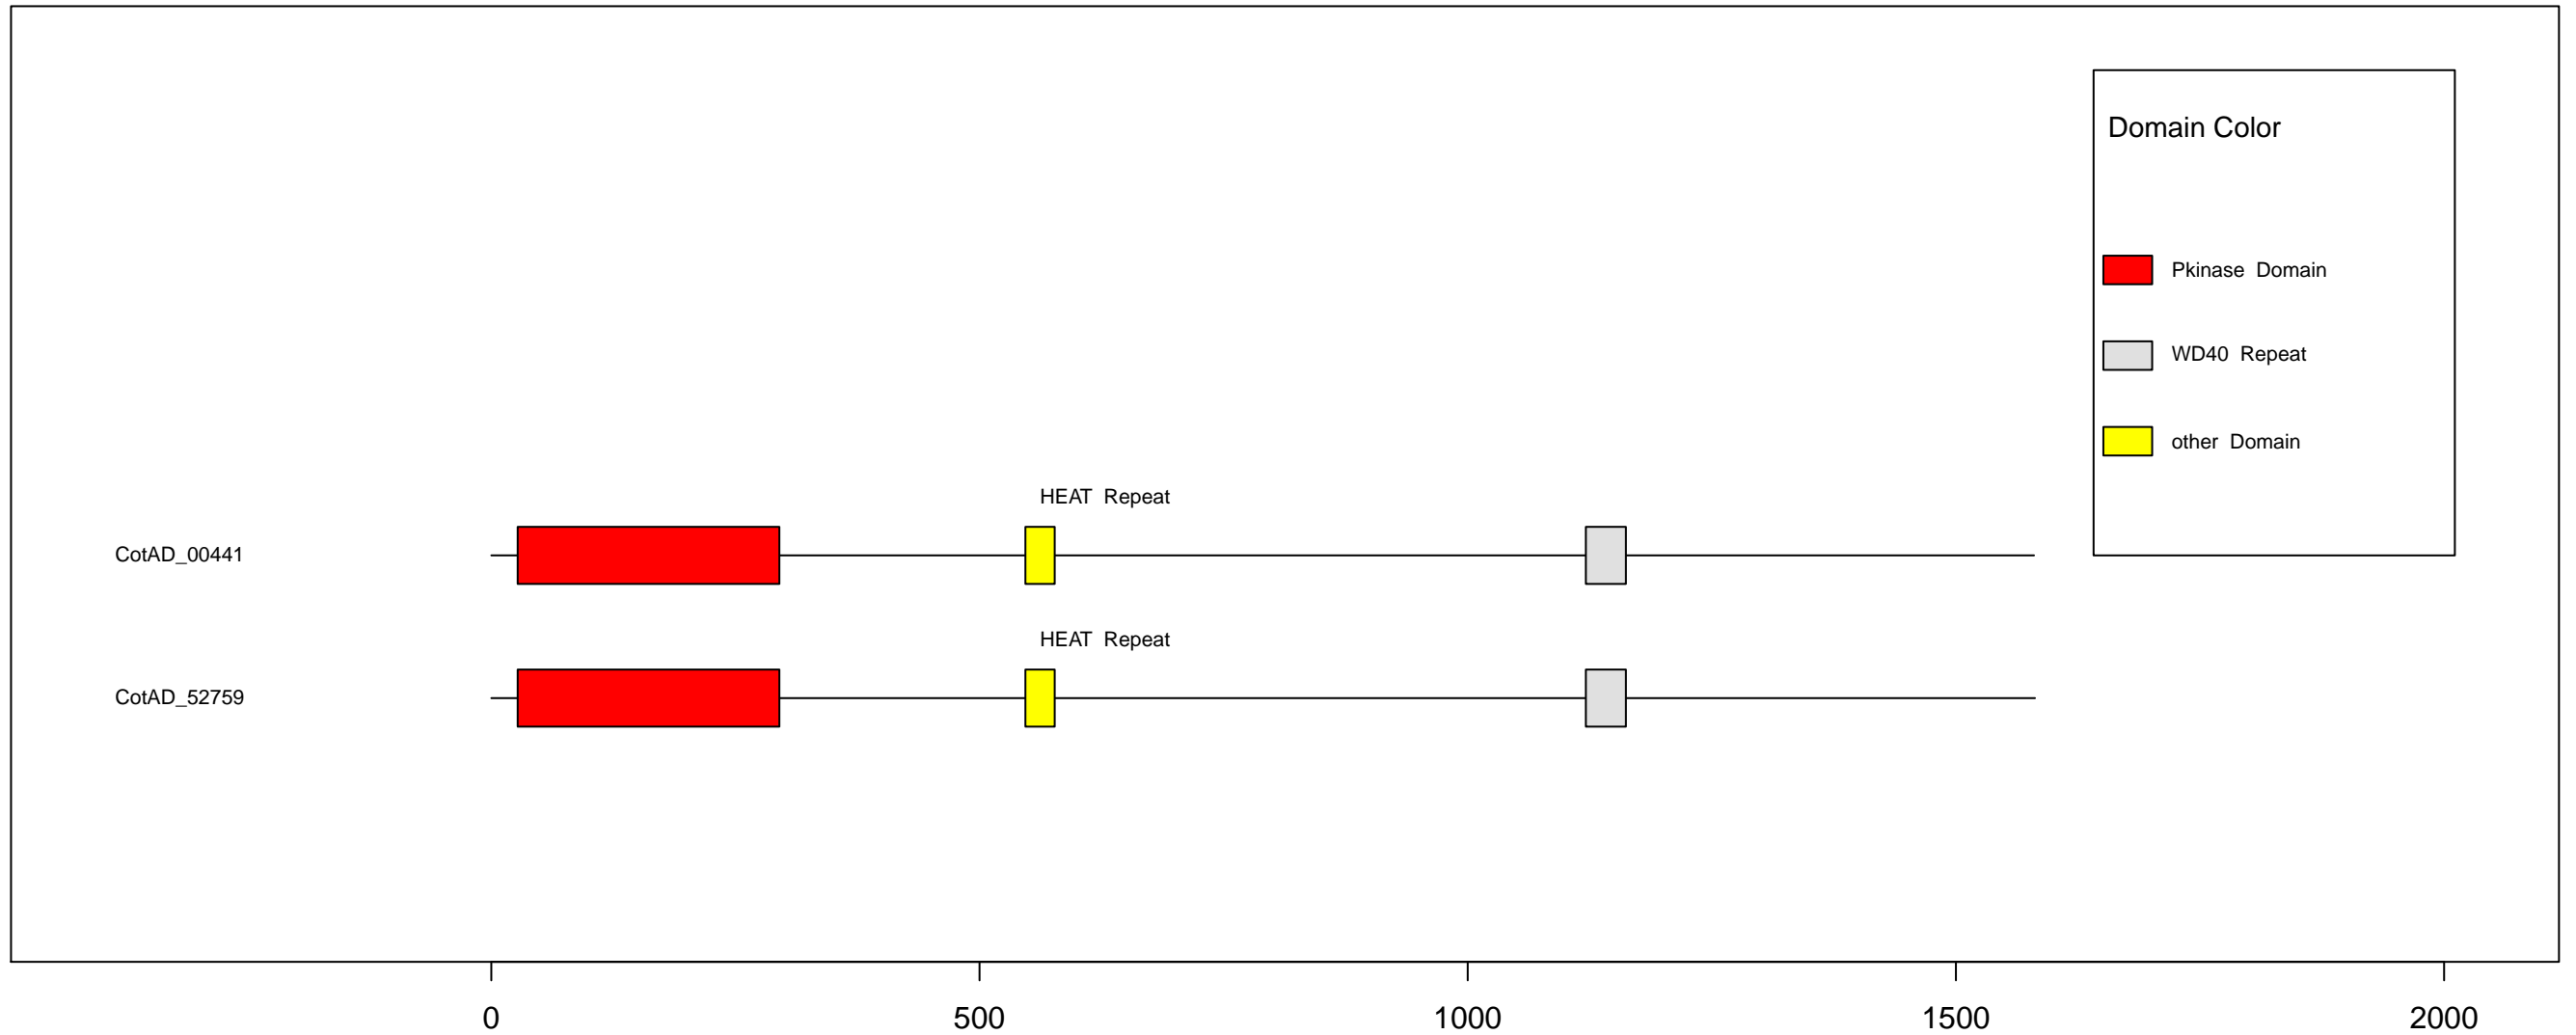



# G.hi CMGC\_RCK domain diagram (all)

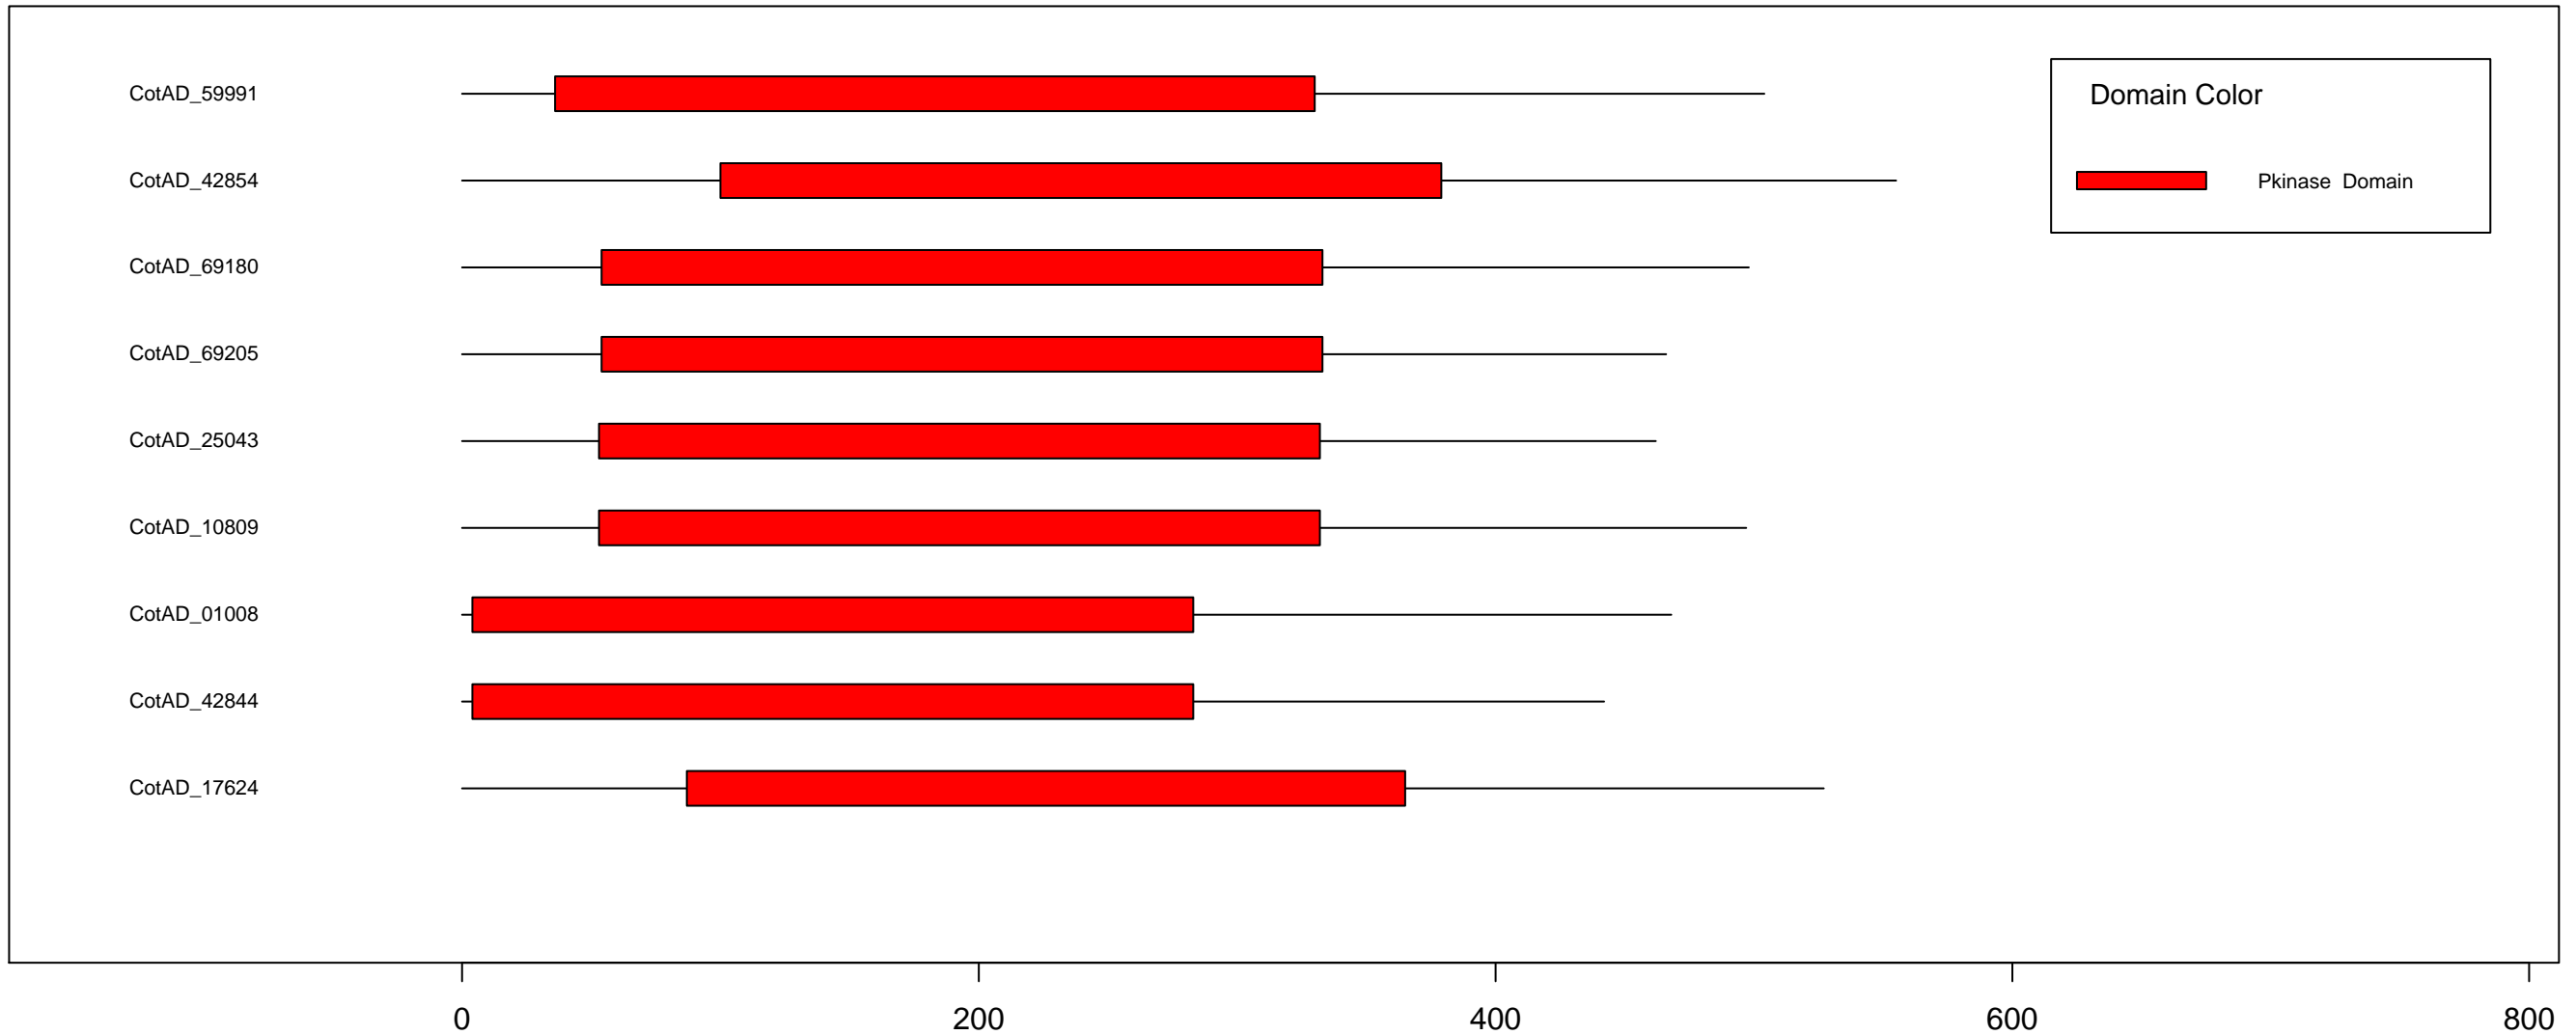

# G.hi CMGC\_SRPK domain diagram (all)

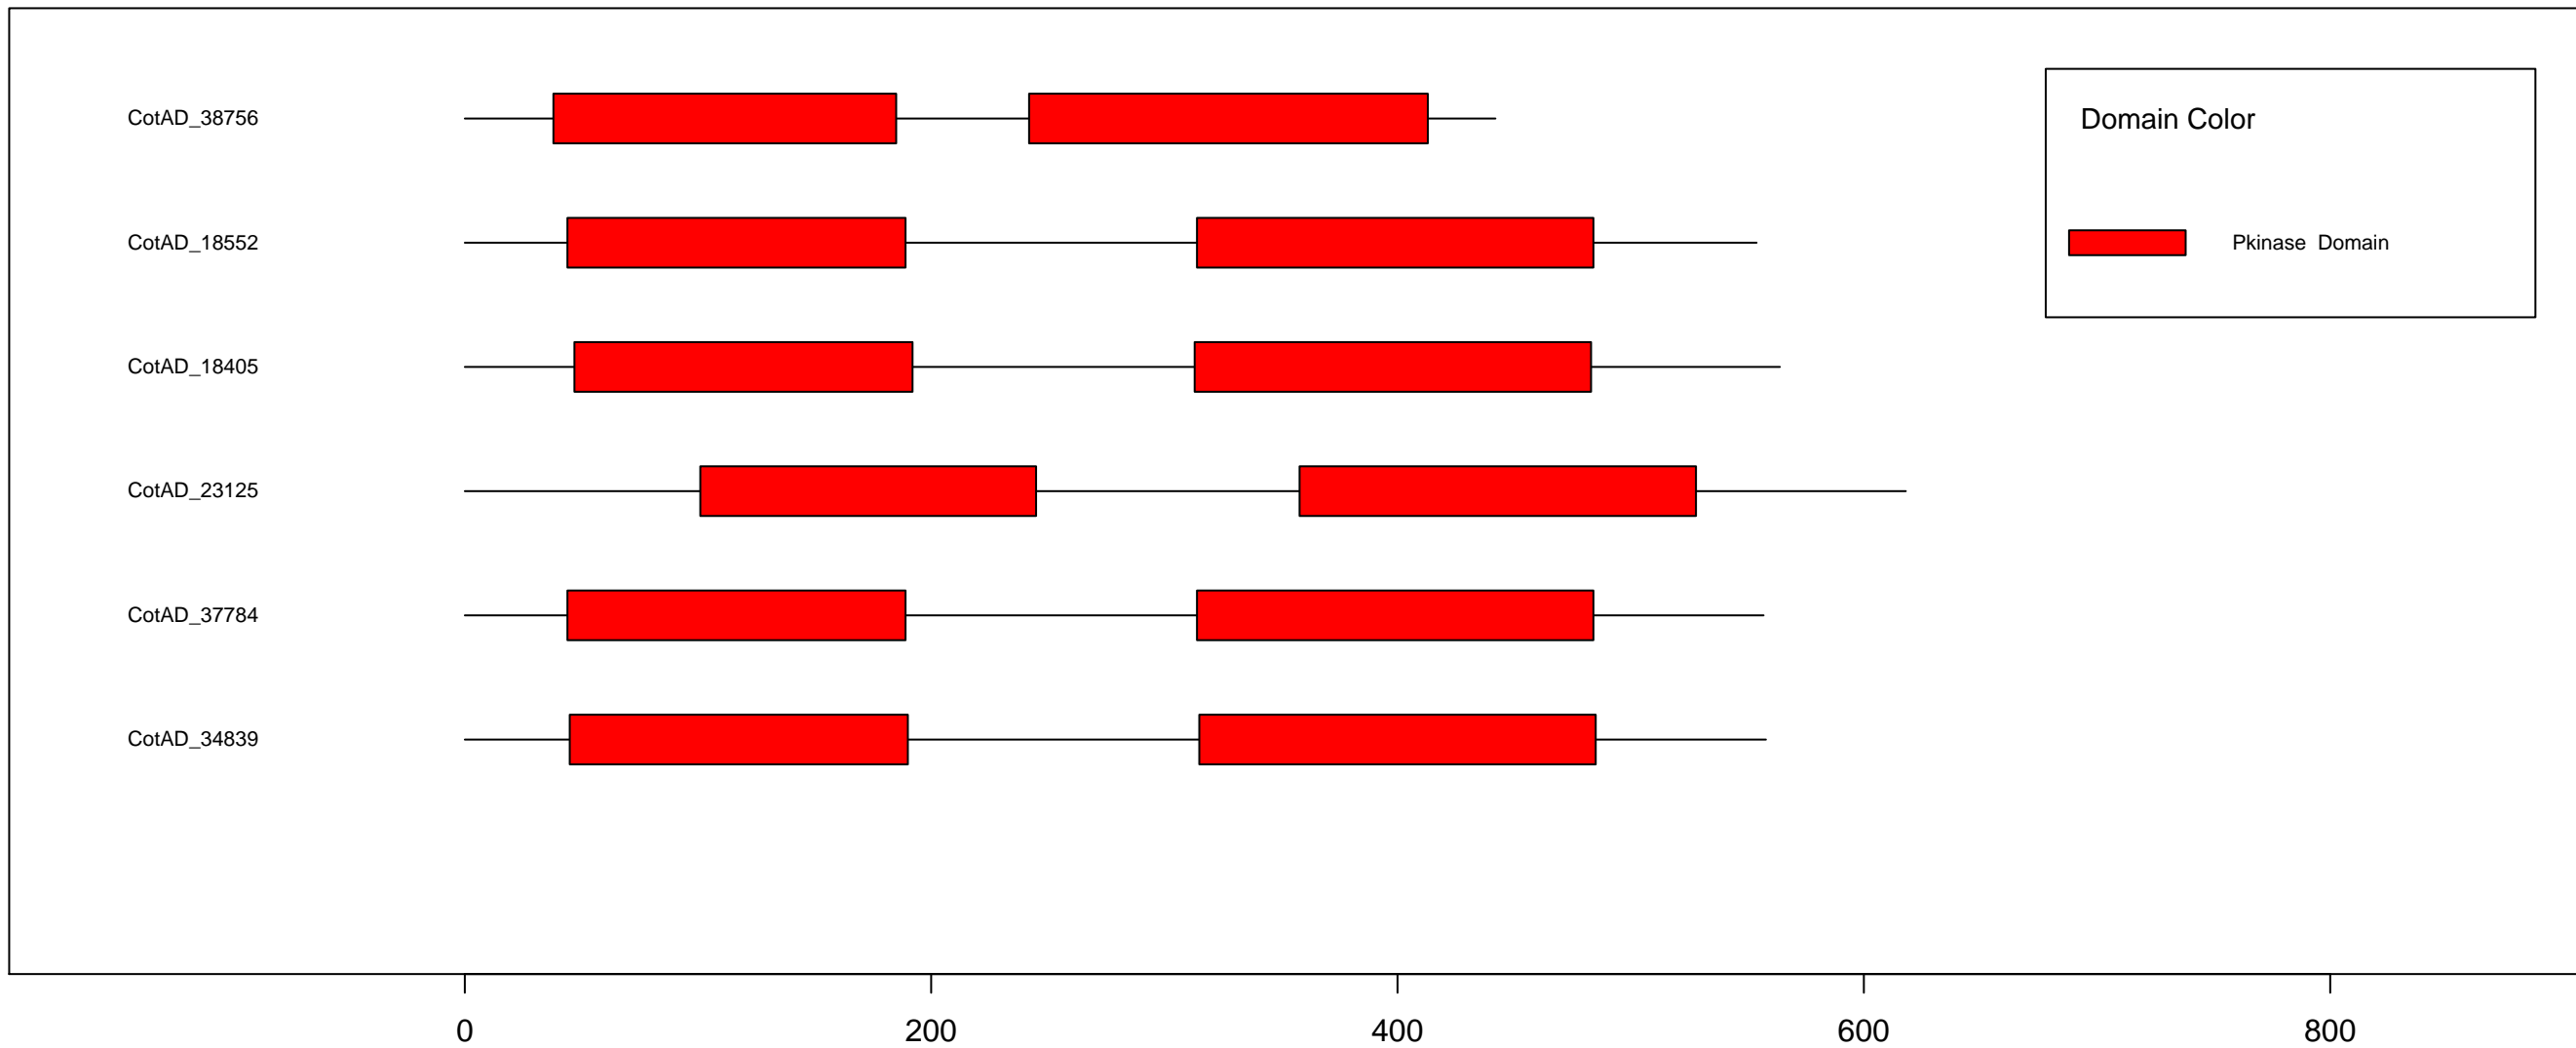

# G.hi Group-PI-2 domain diagram (all)

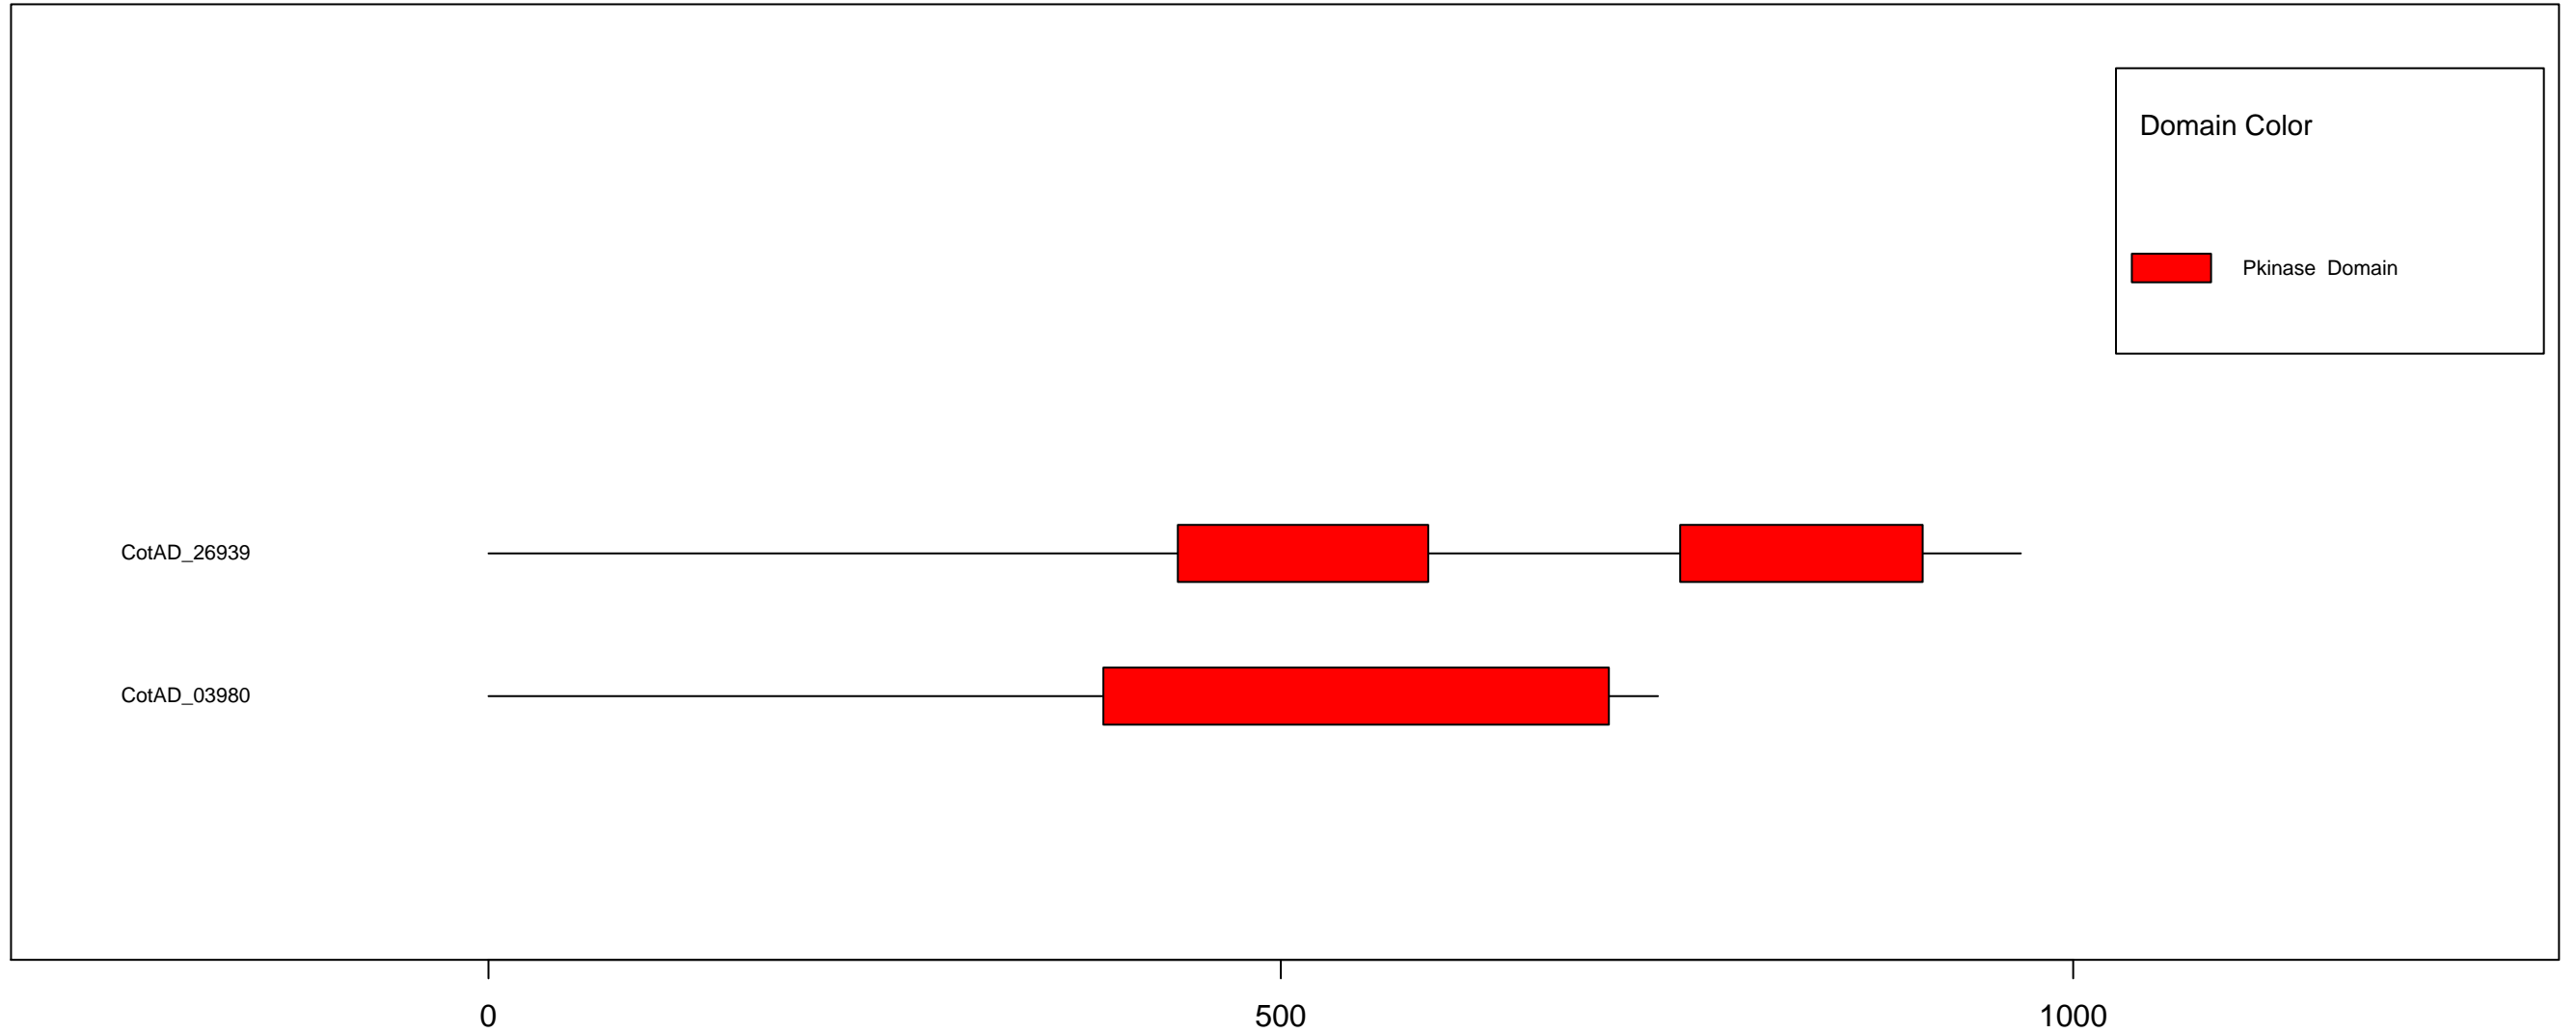

# G.hi Group-PI-3 domain diagram (all)

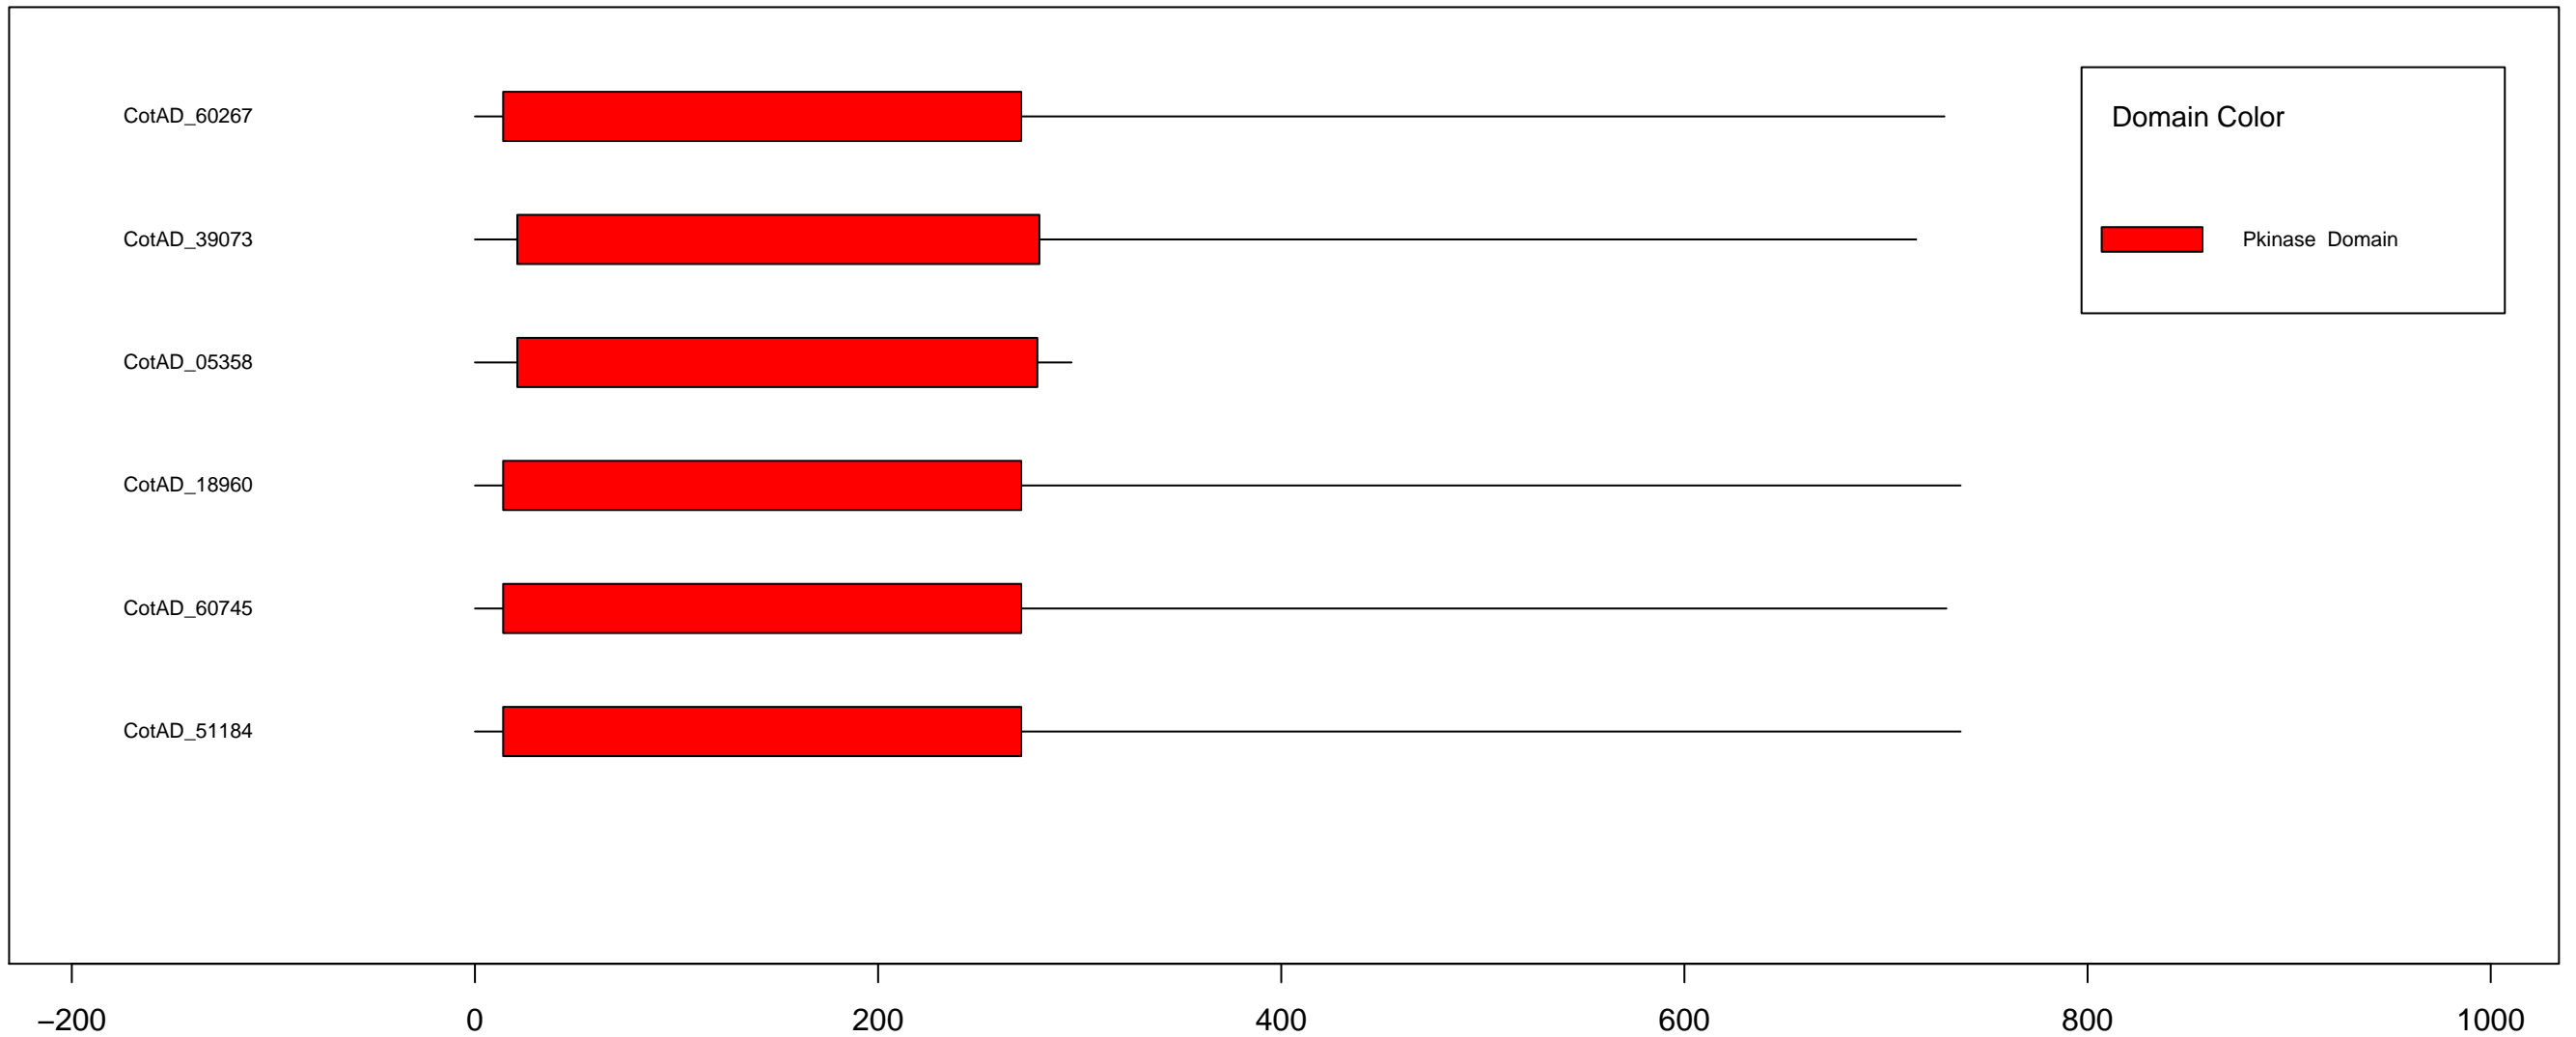

# G.hi Group-PI-4 domain diagram (all)

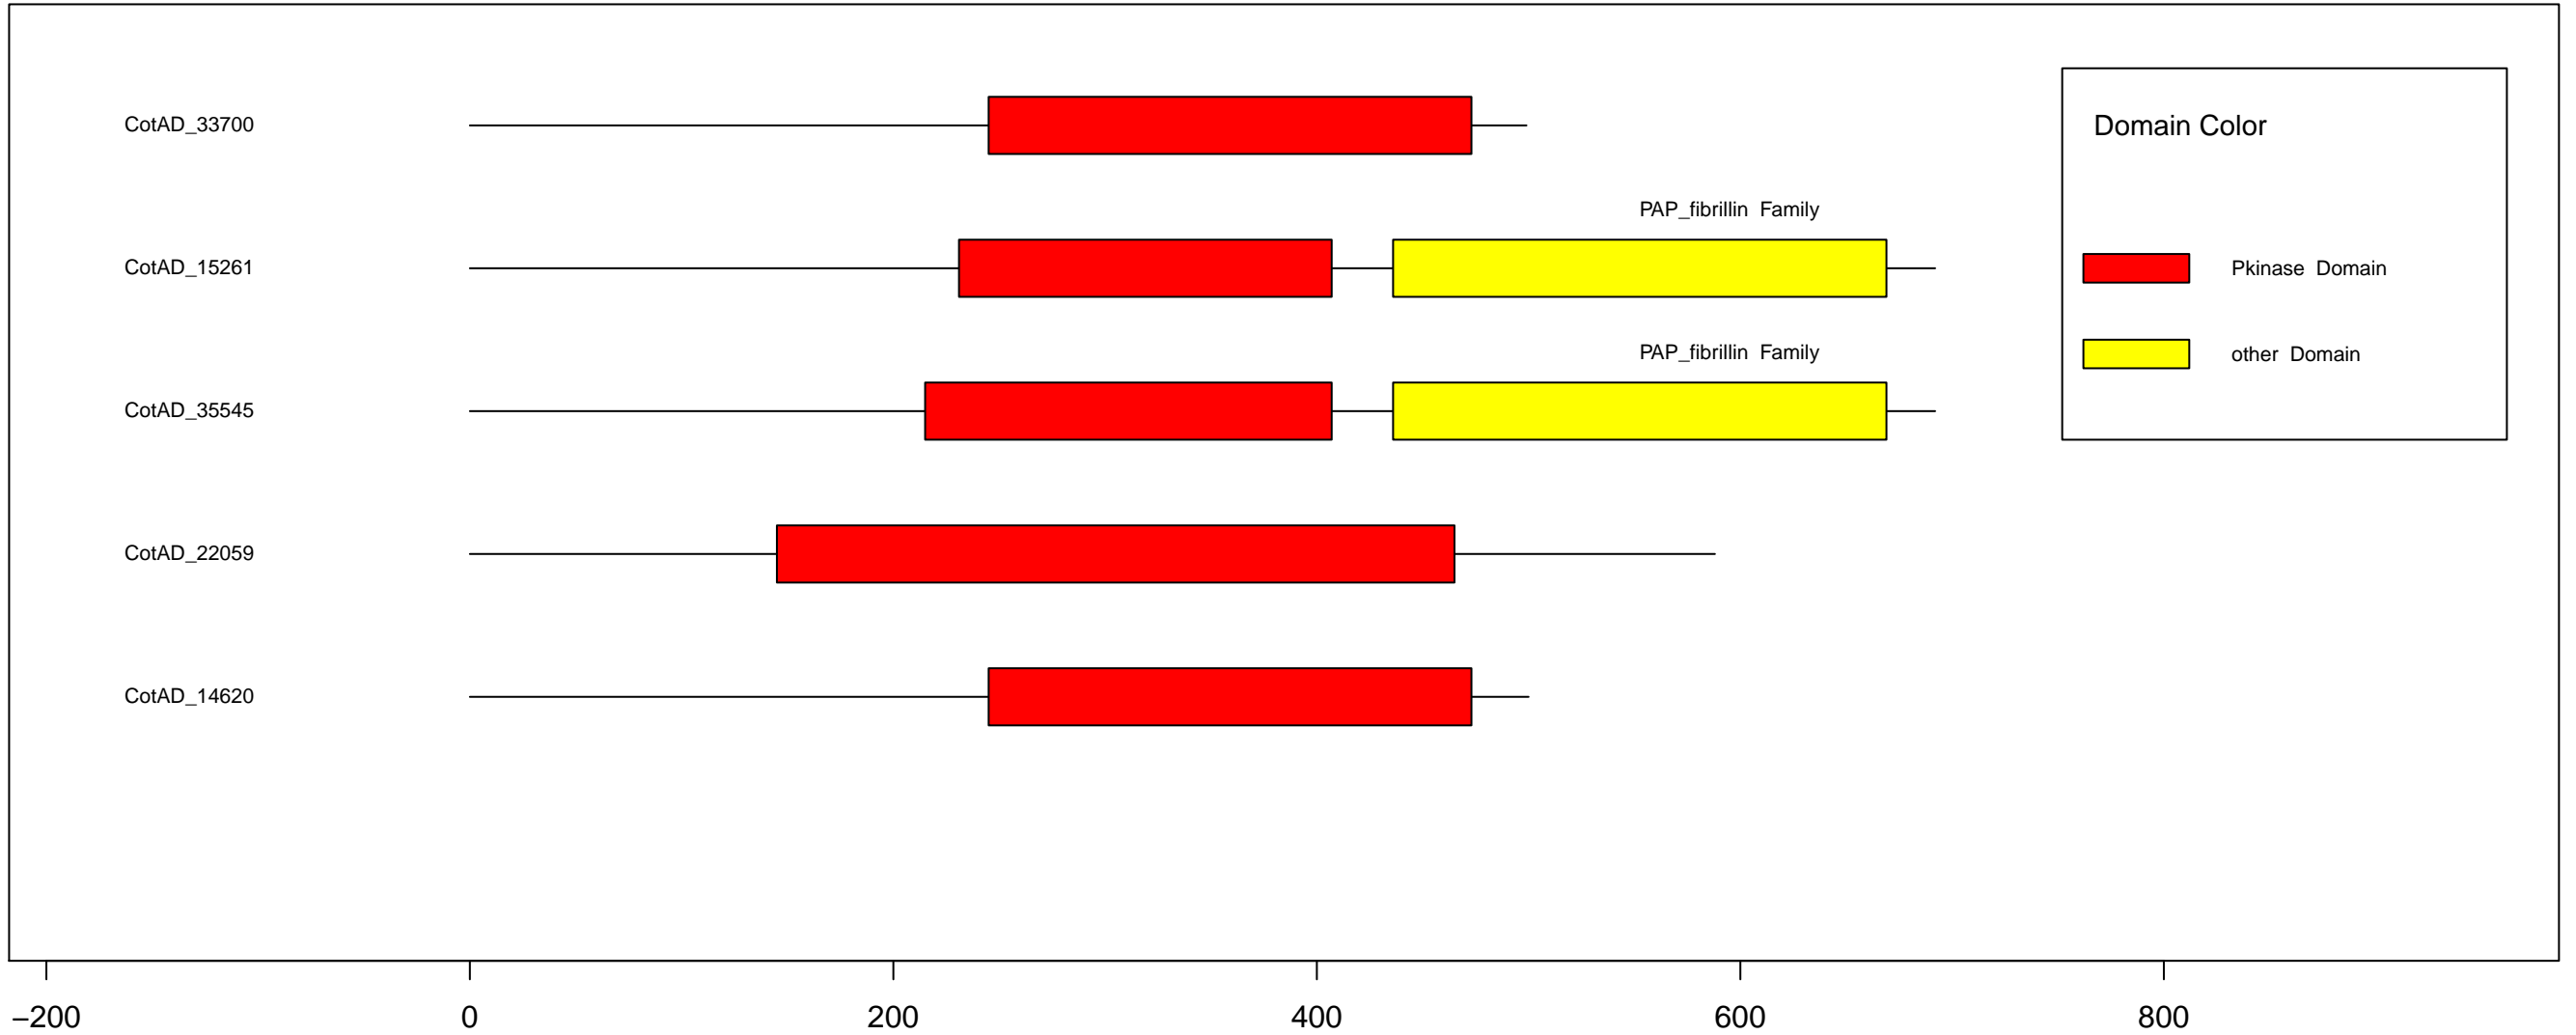

# G.hi IRE1 domain diagram (all)

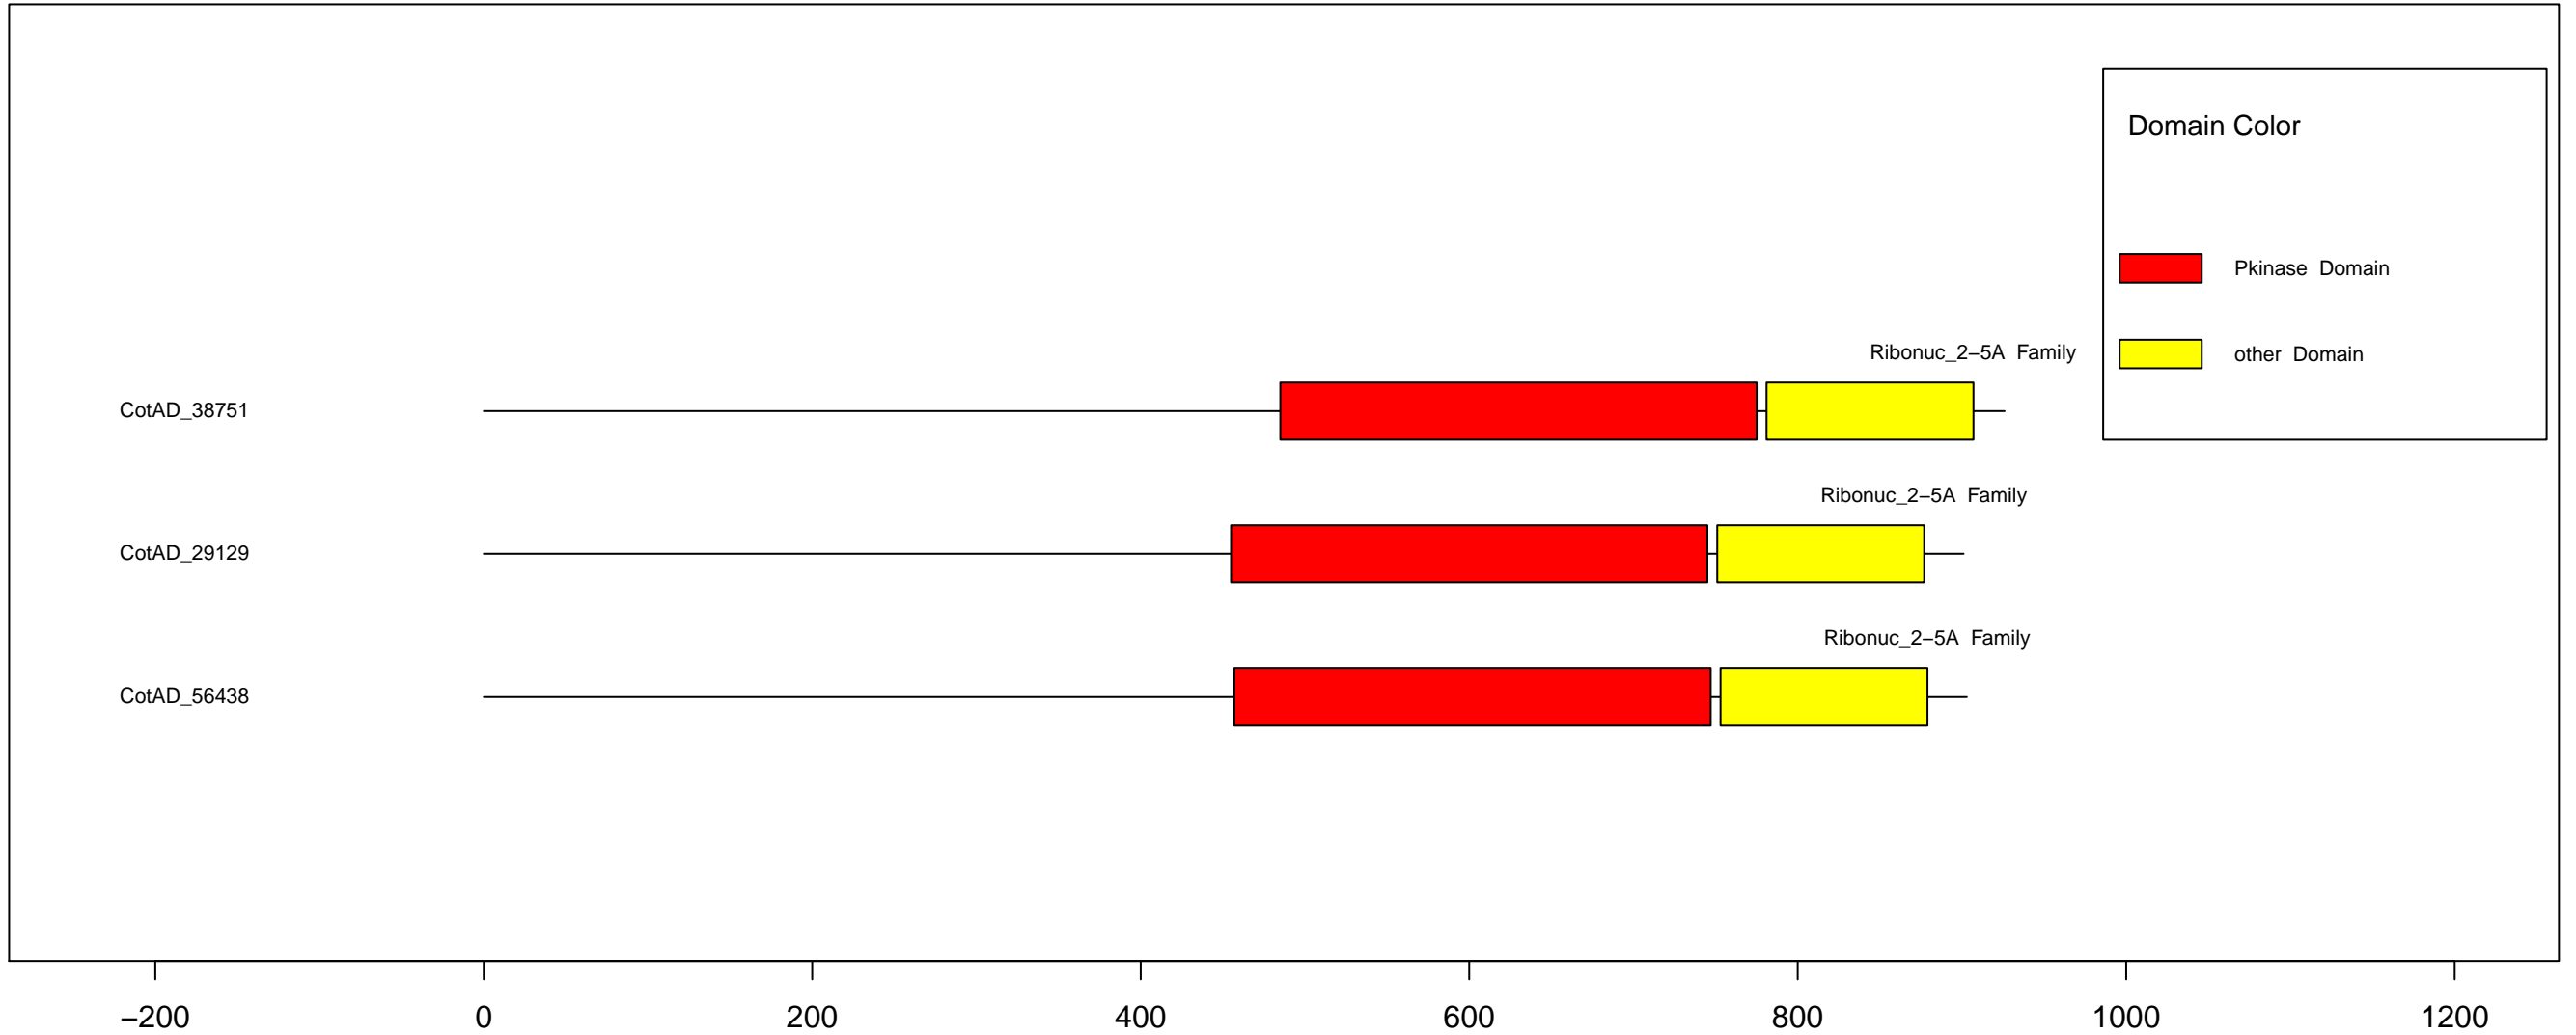

# G.hi NAK domain diagram (all)

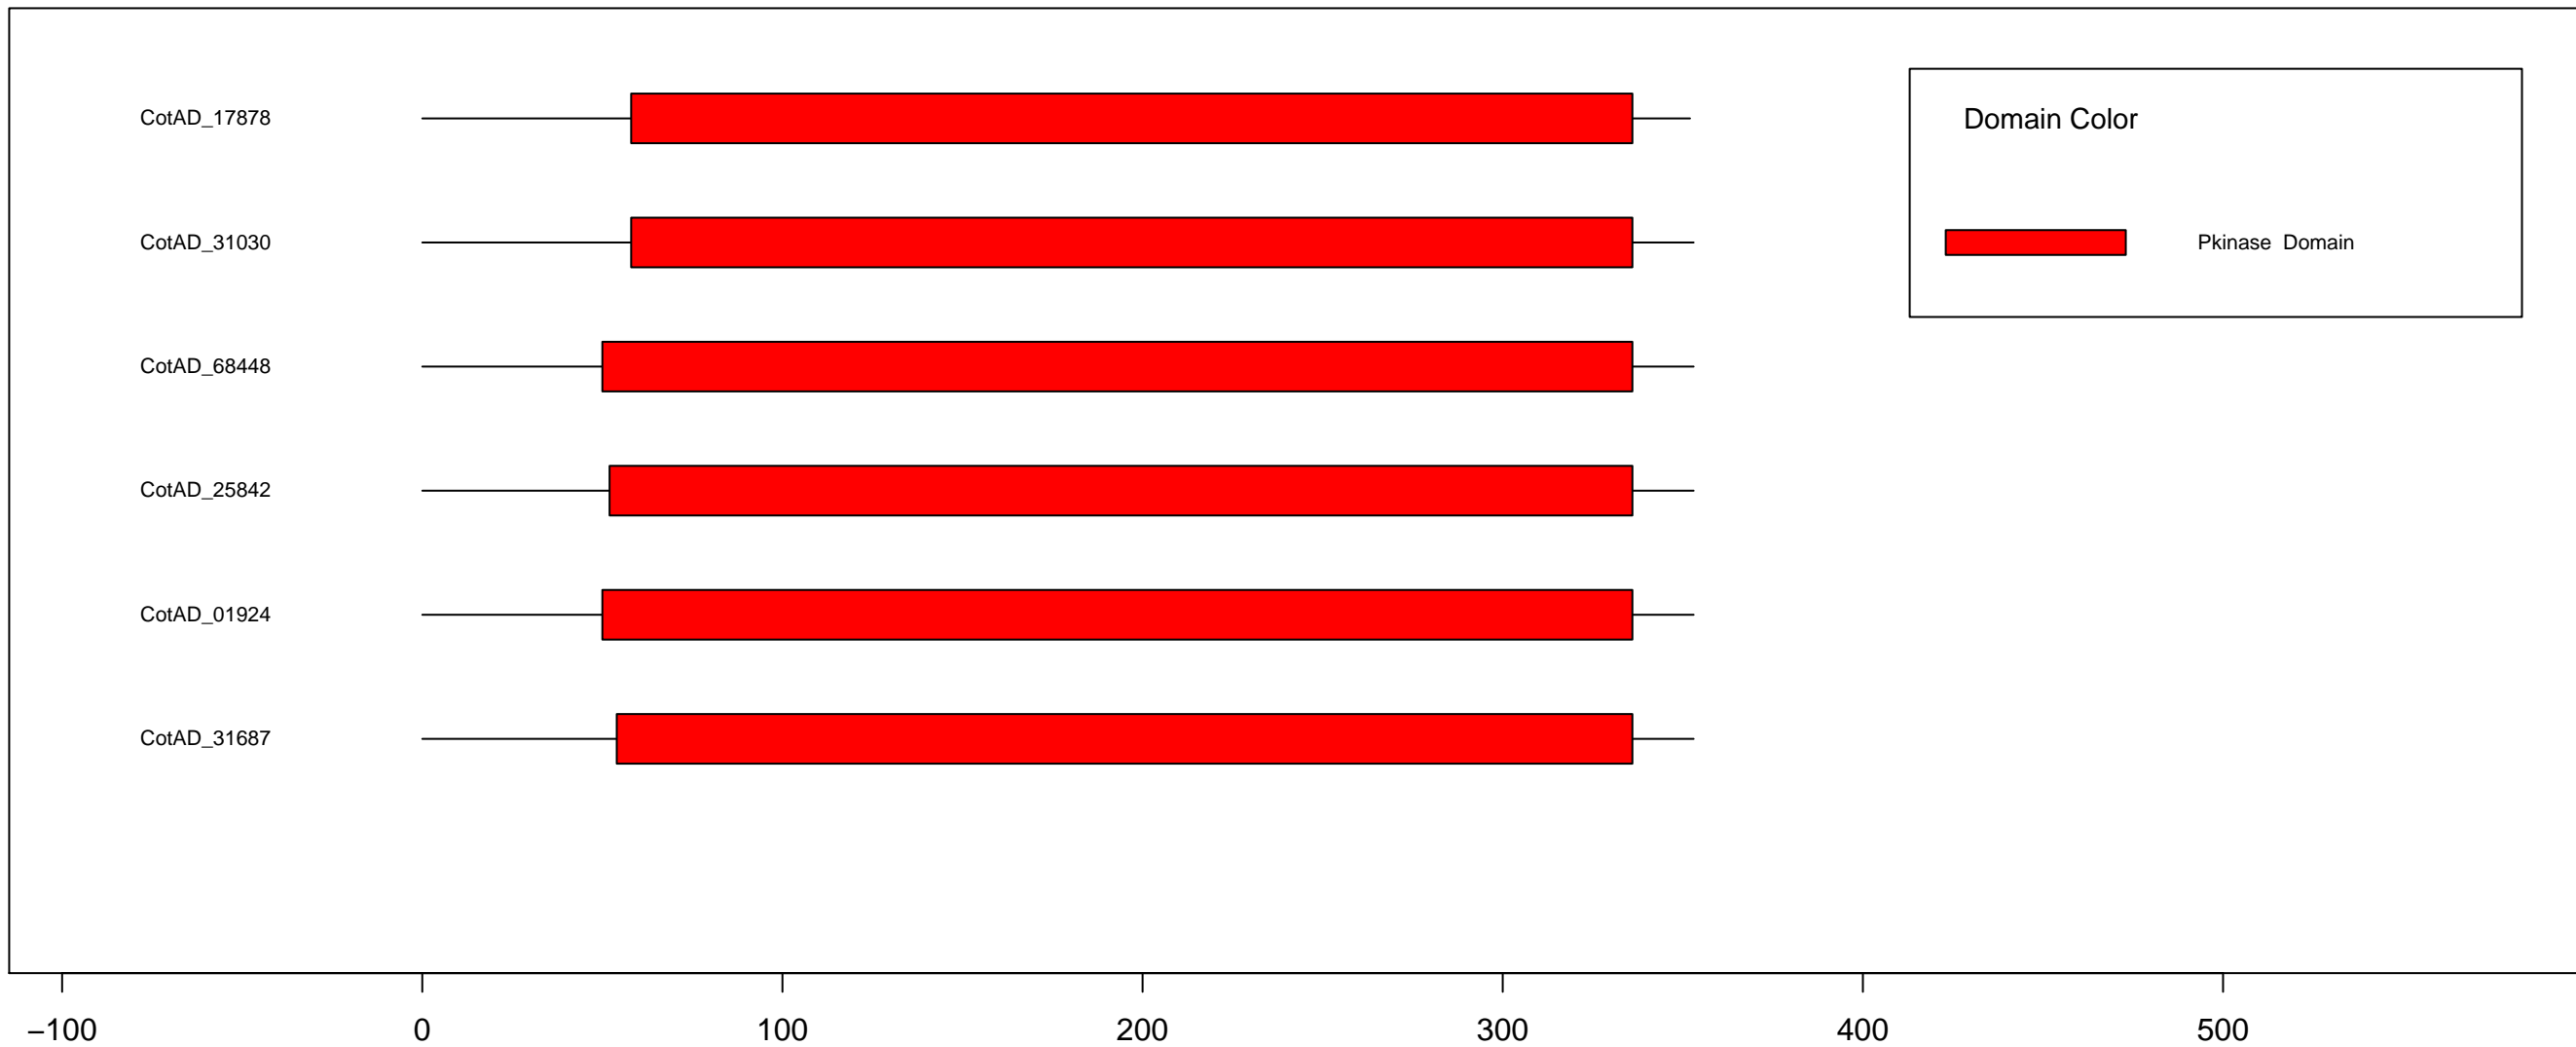

# G.hi NEK domain diagram (all)

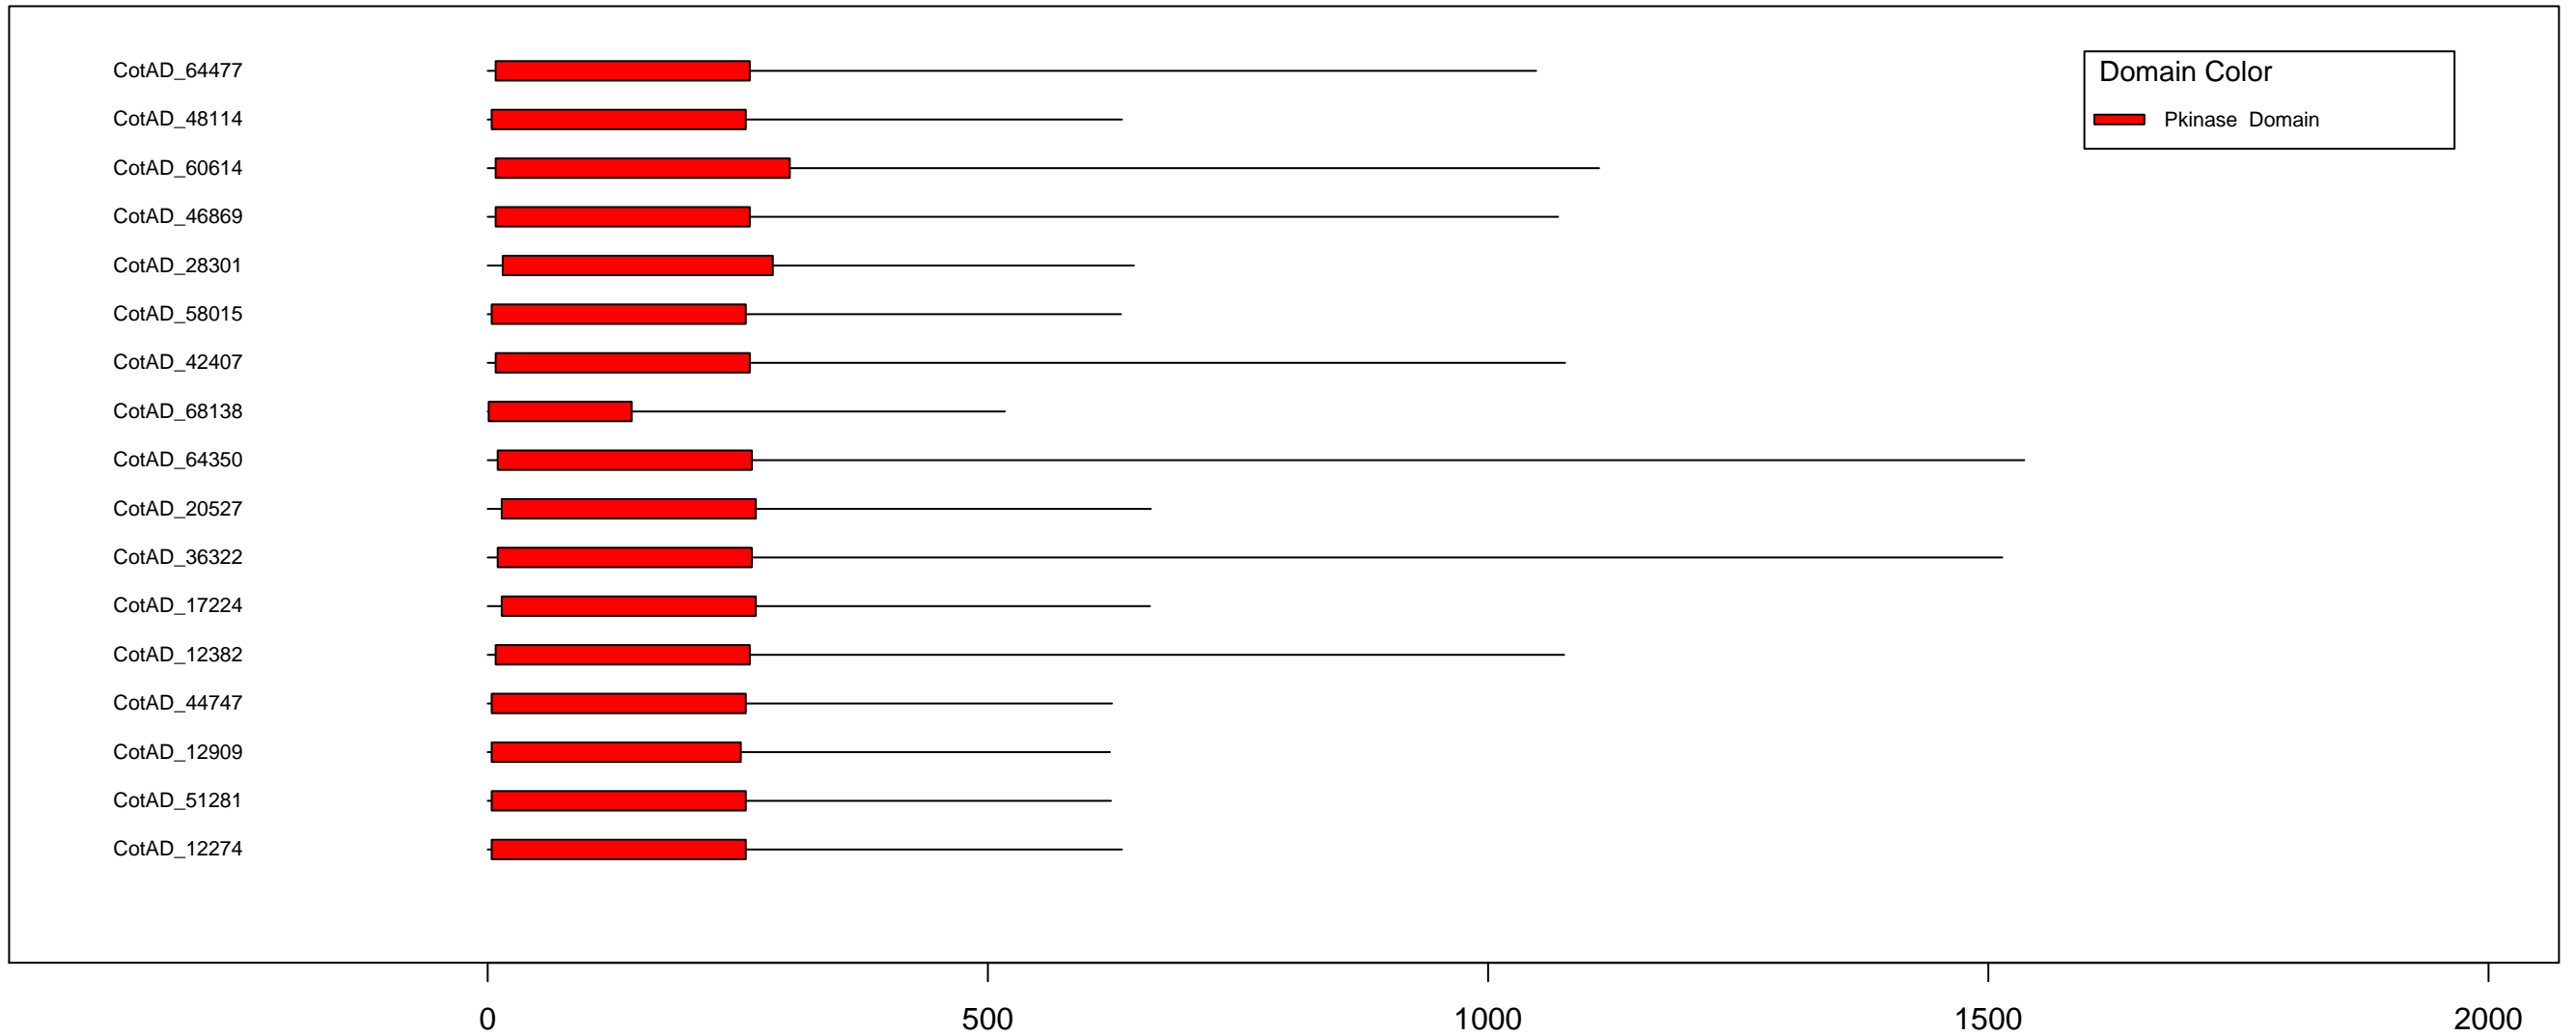



# G.hi PEK\_GCIN2 domain diagram (all)

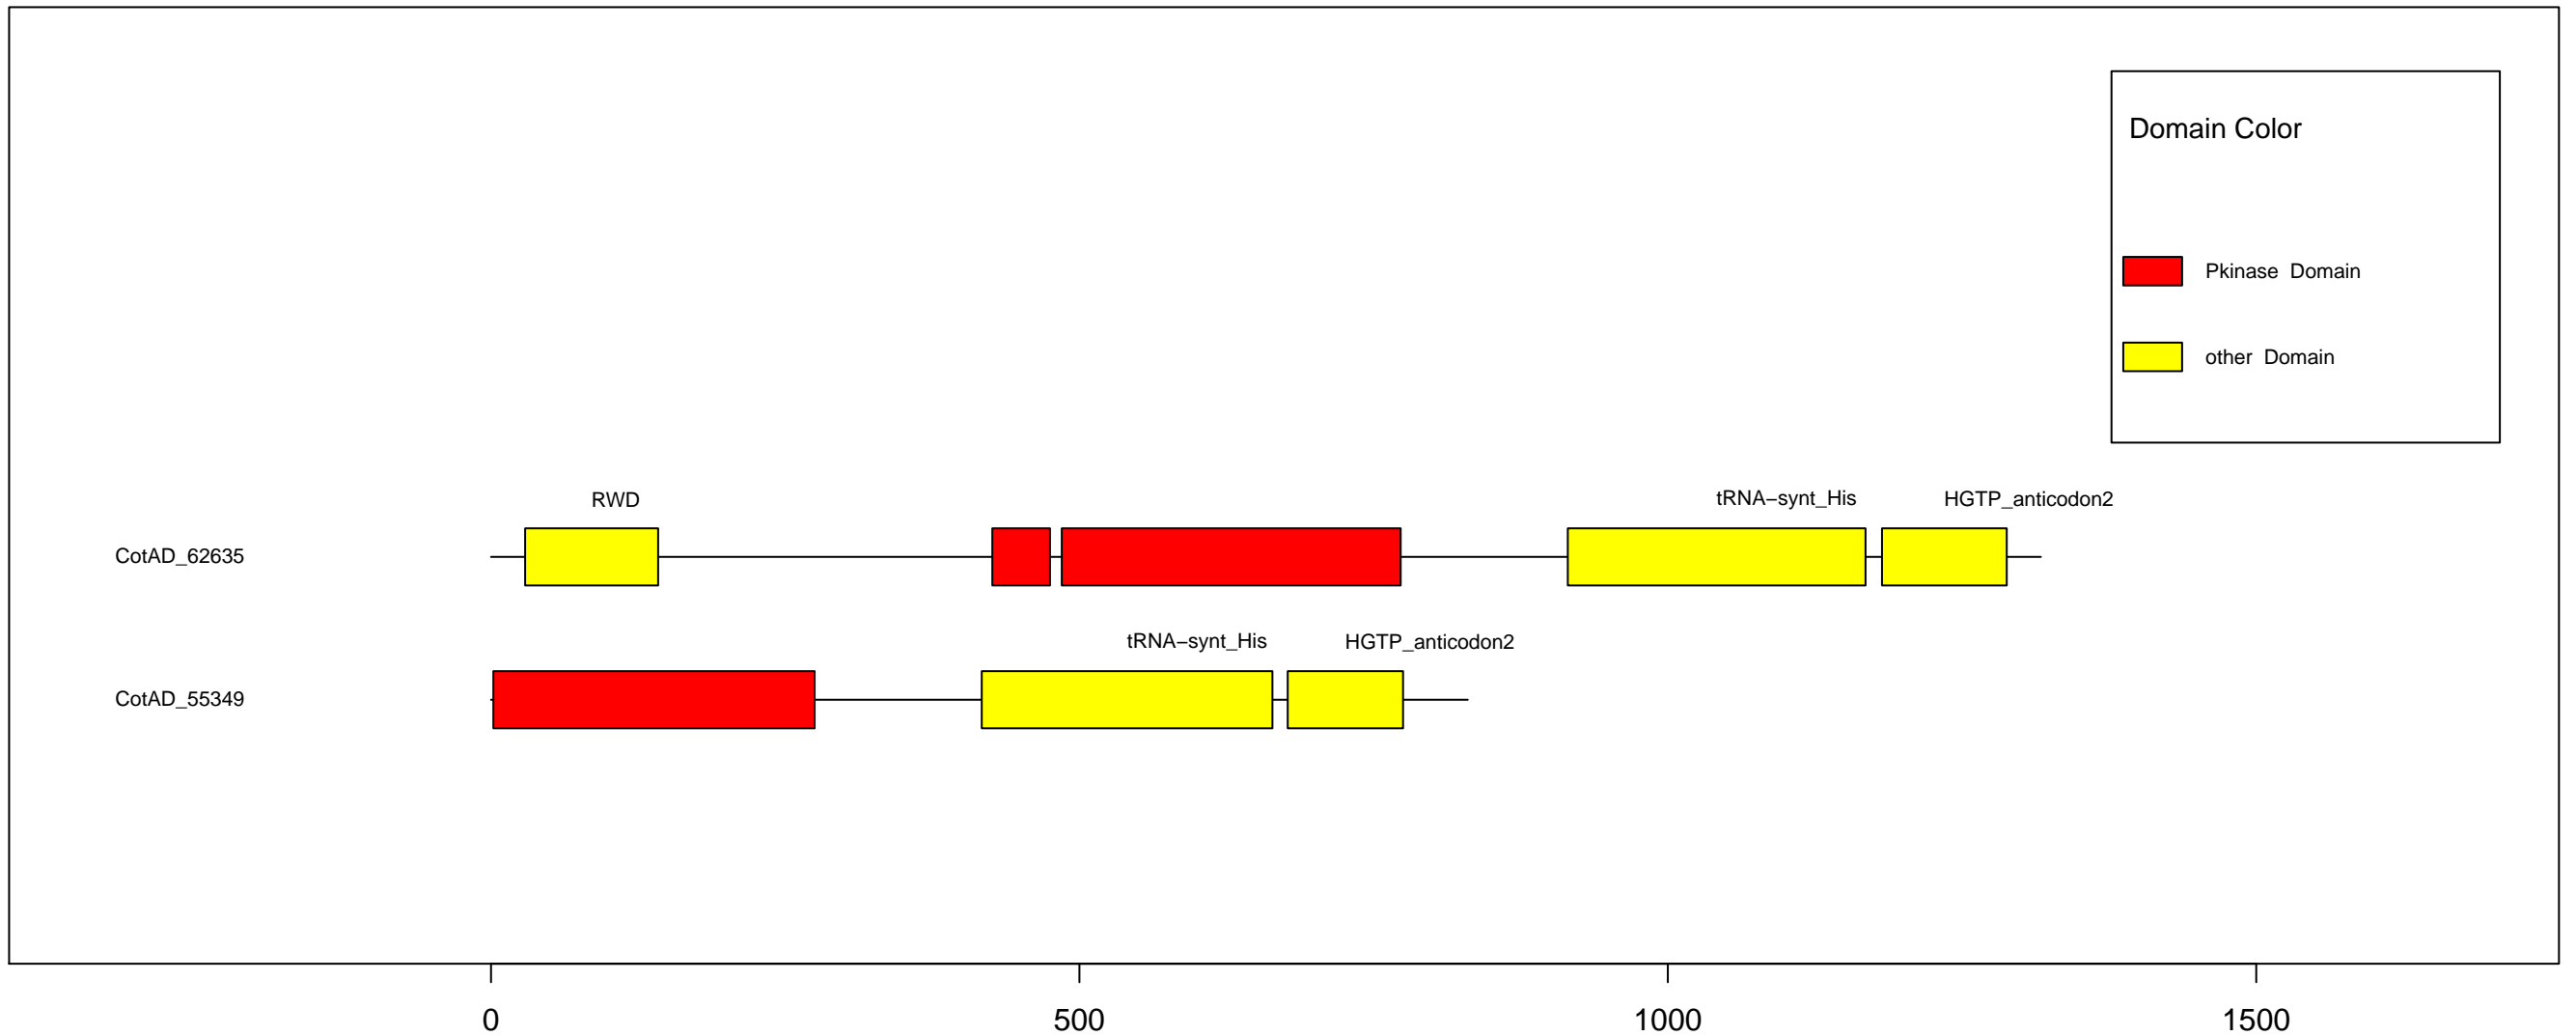

# G.hi PEK\_PEK domain diagram (all)

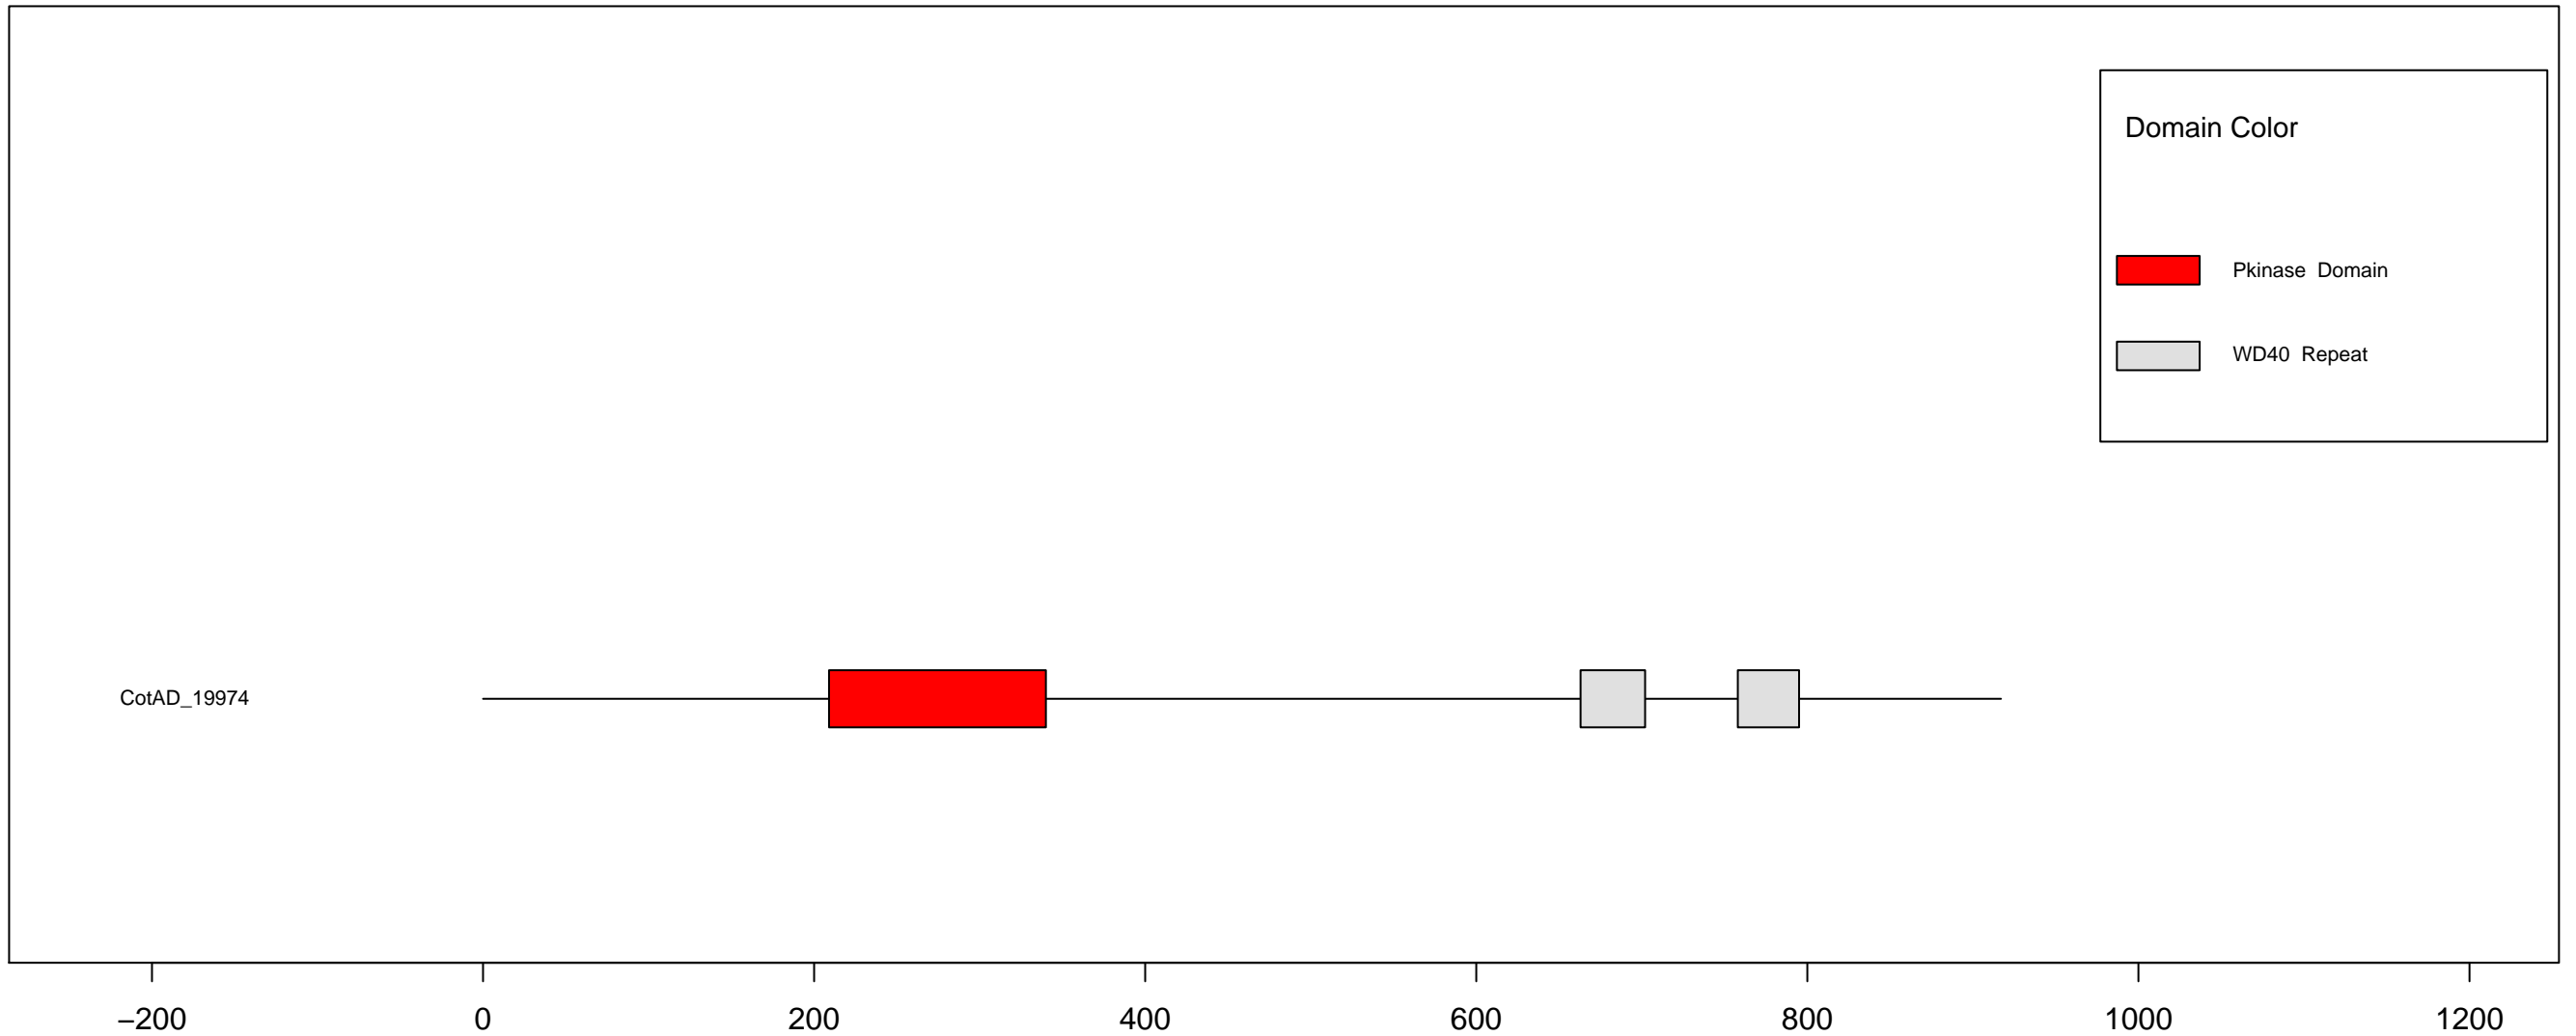

# G.hi RLK-Pelle\_C-LEC domain diagram (all)

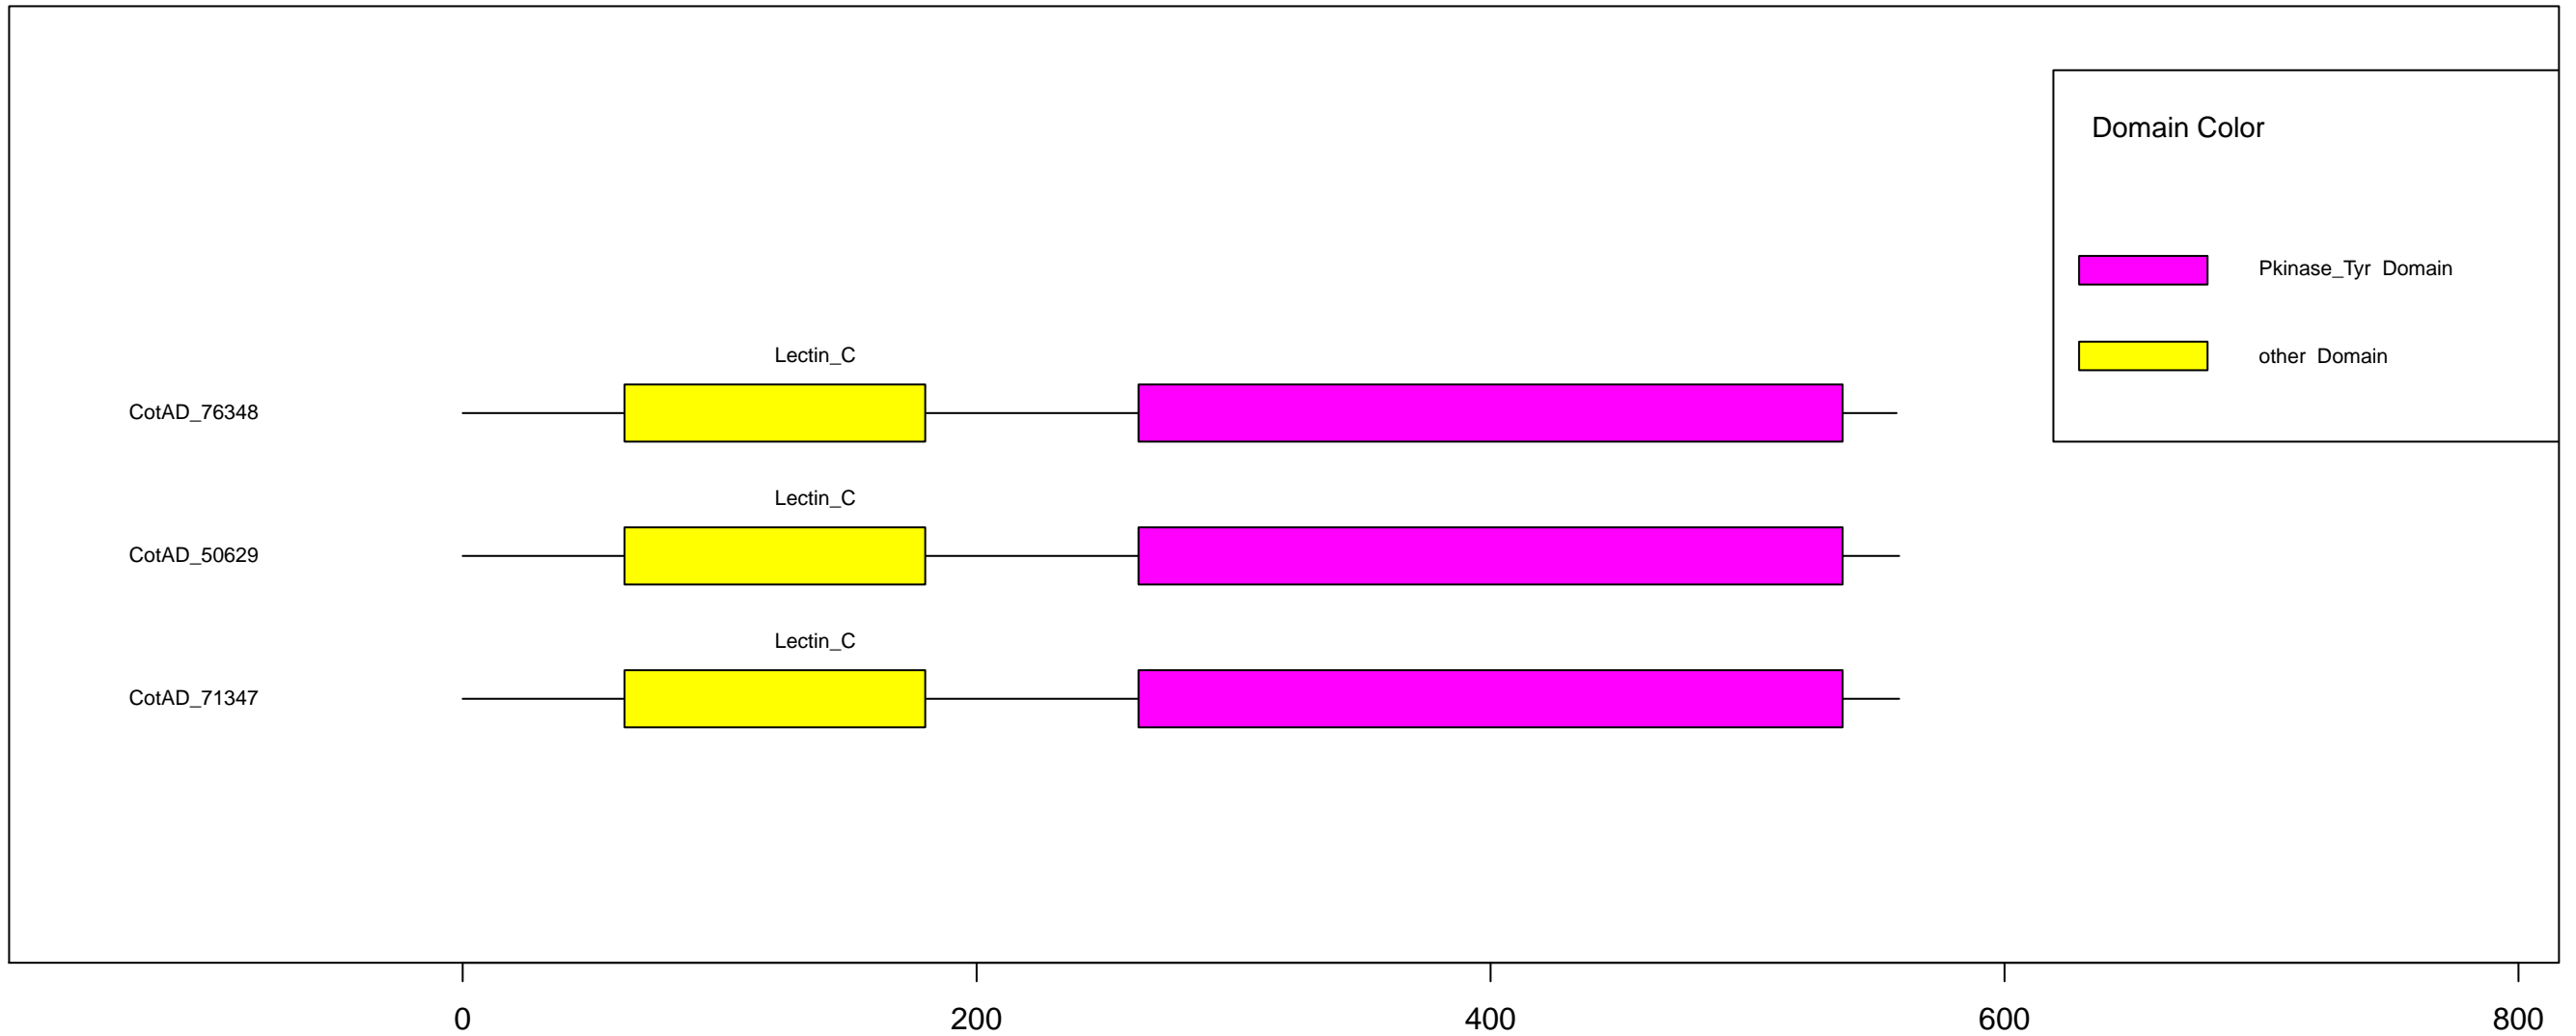

# G.hi RLK-Pelle\_CR4L domain diagram (part 1)

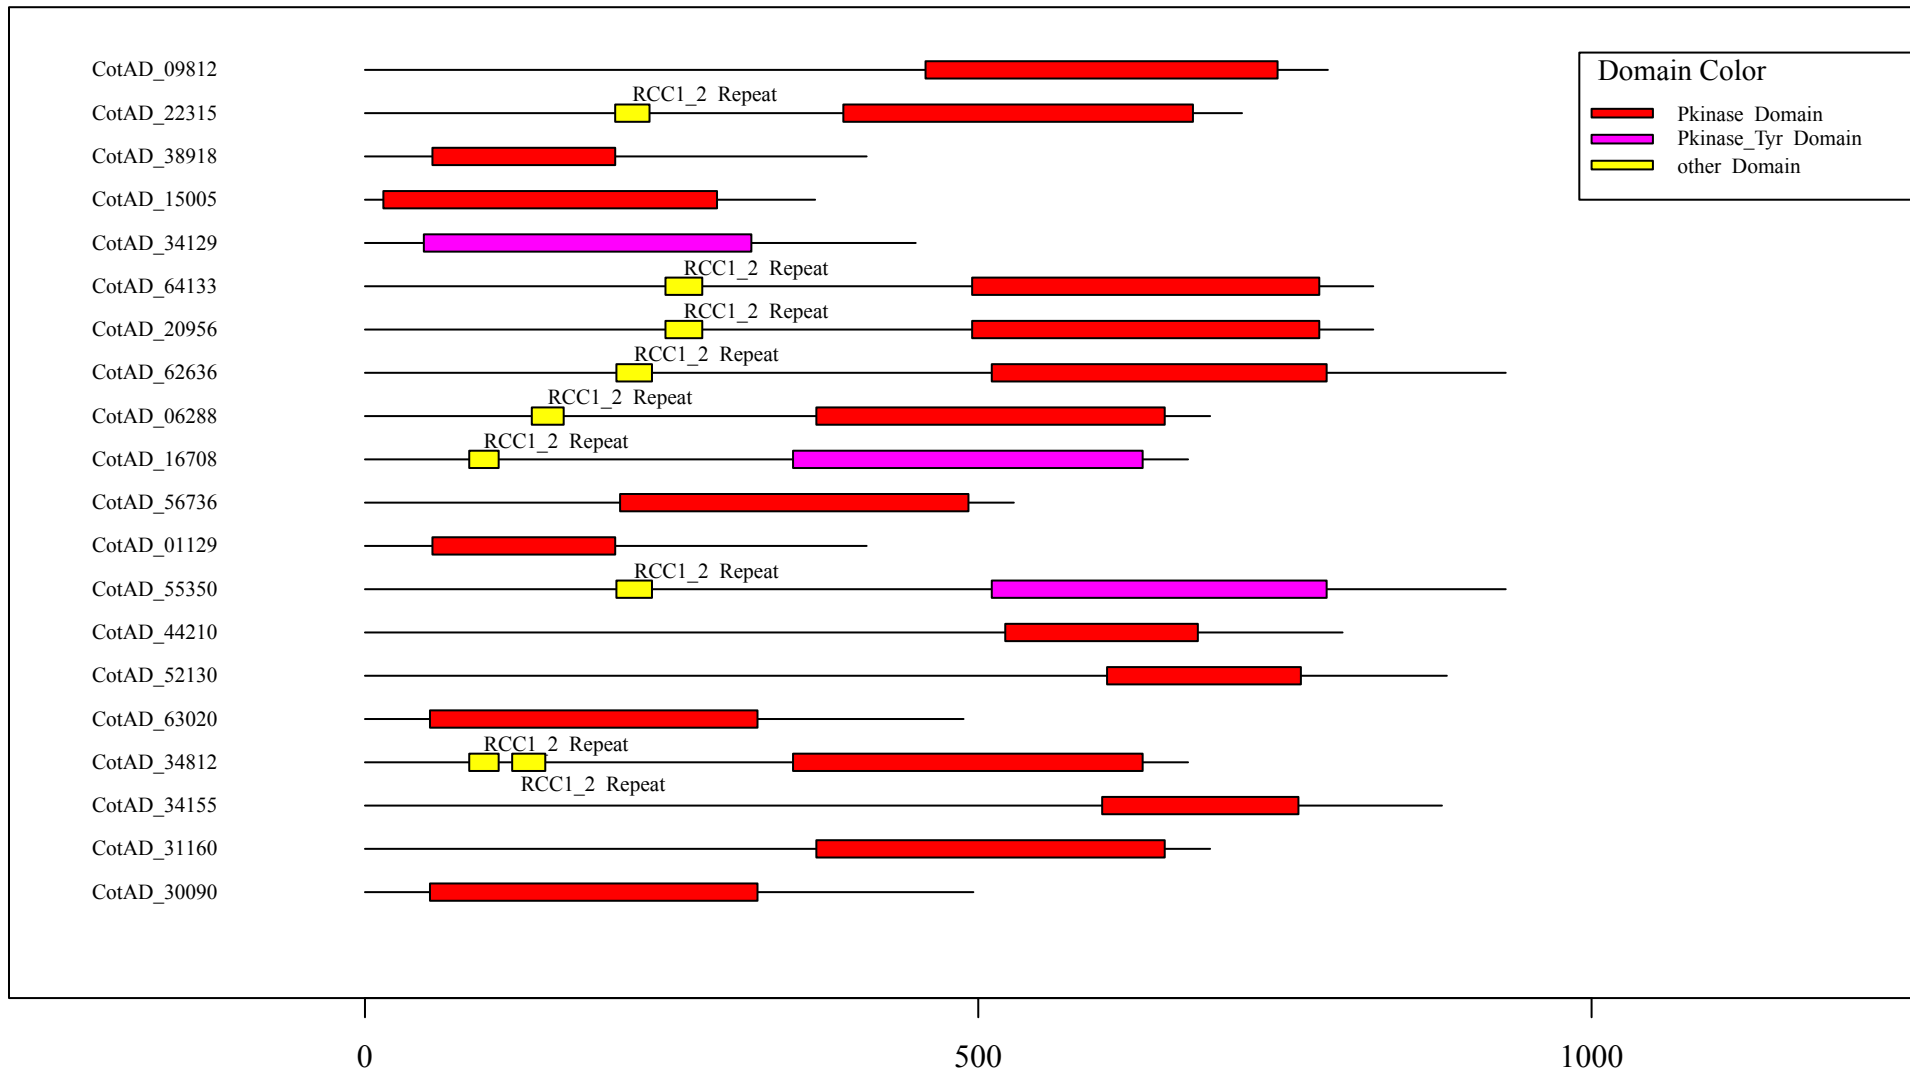

# G.hi RLK-Pelle\_CR4L domain diagram (part 2)

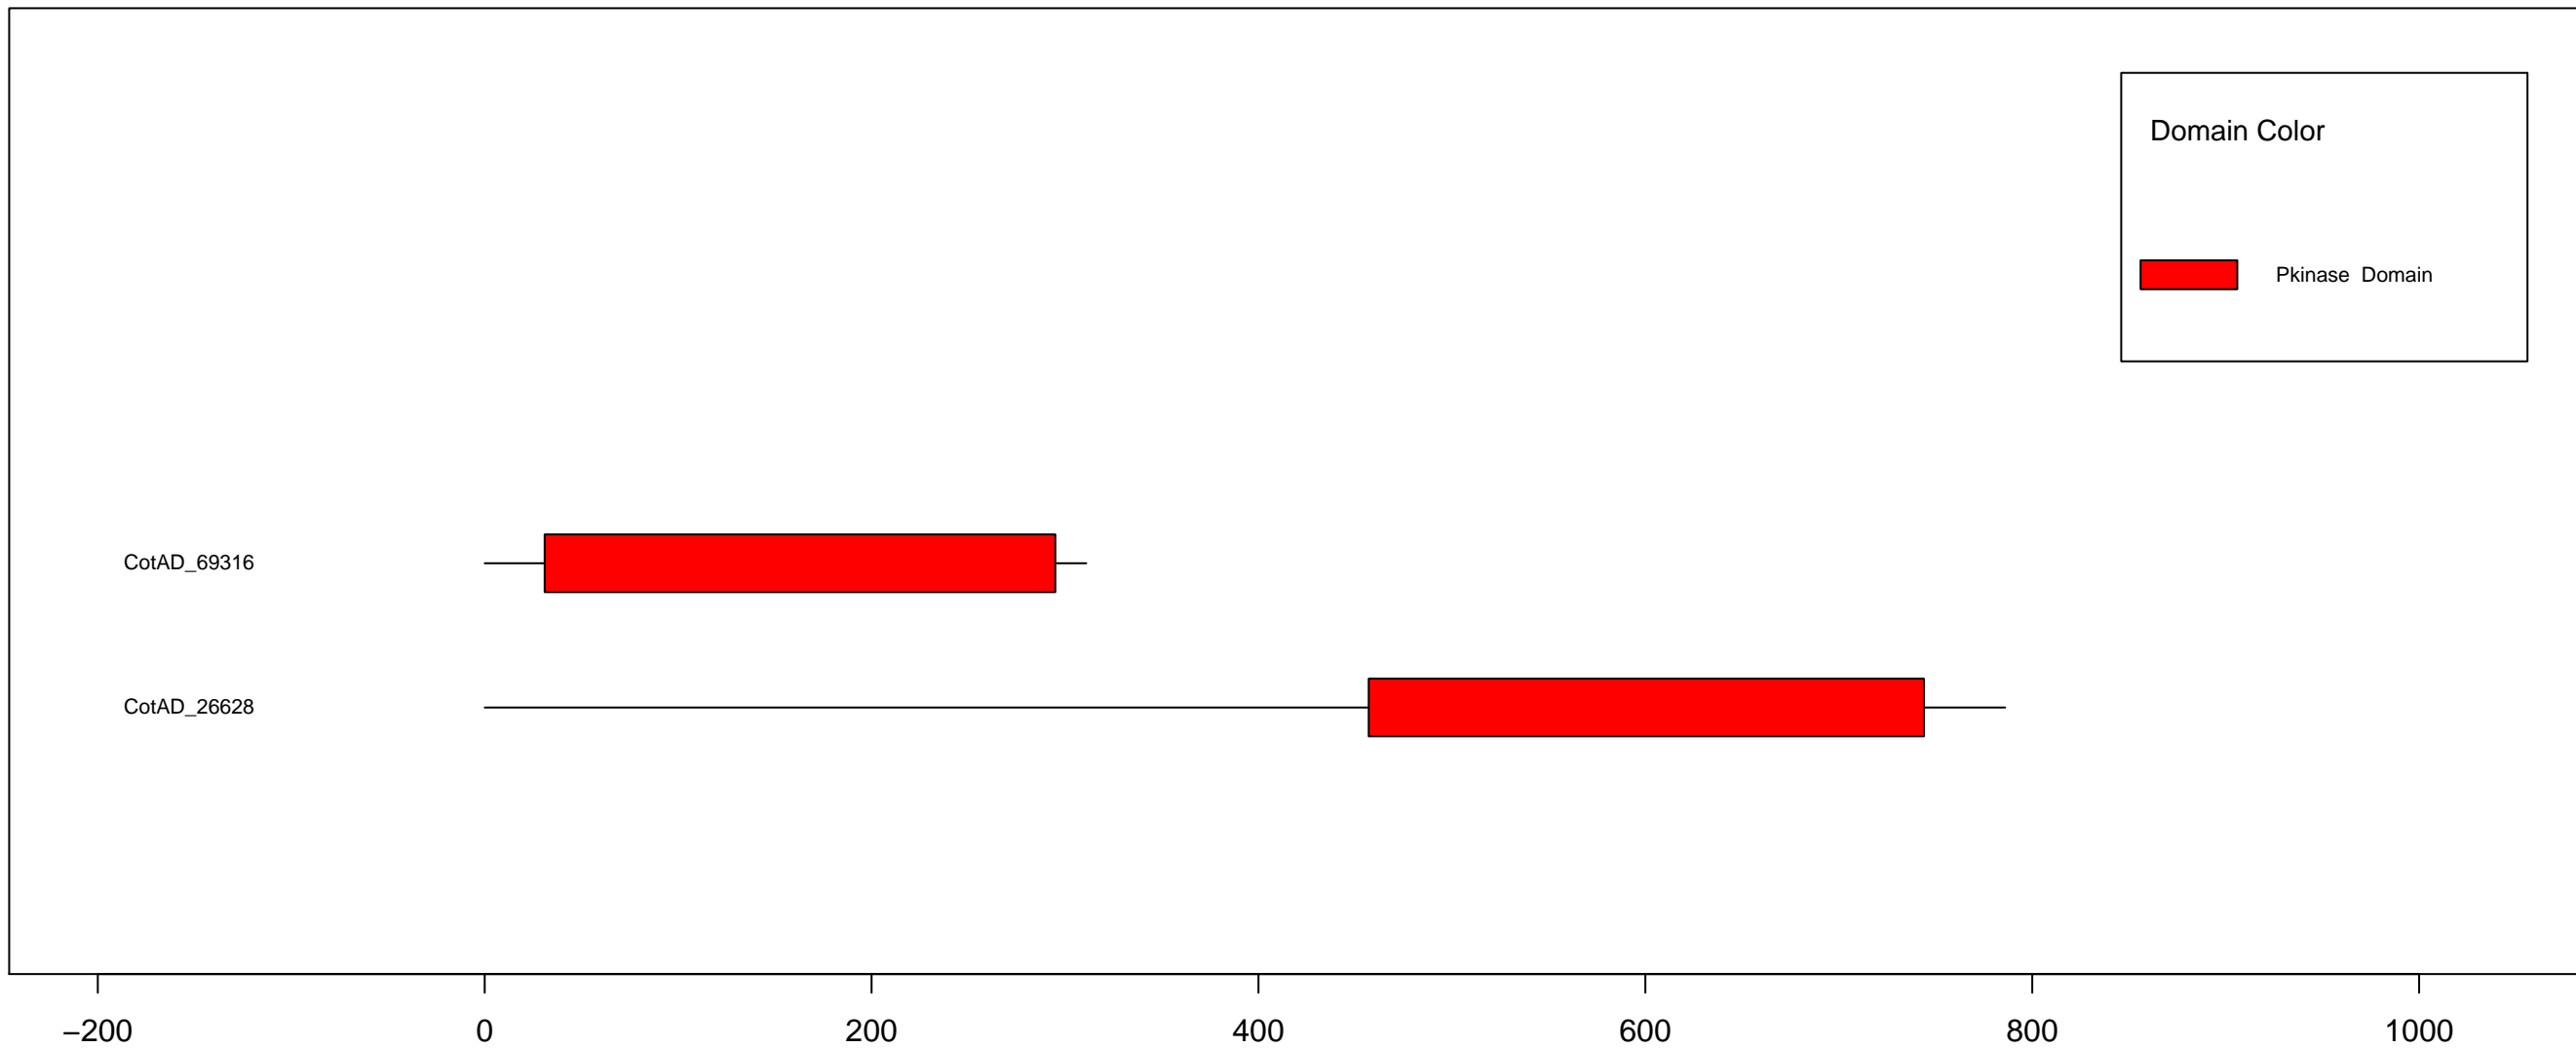

# G.hi RLK-Pelle\_CrRLK1L-1 domain diagram (part 1)

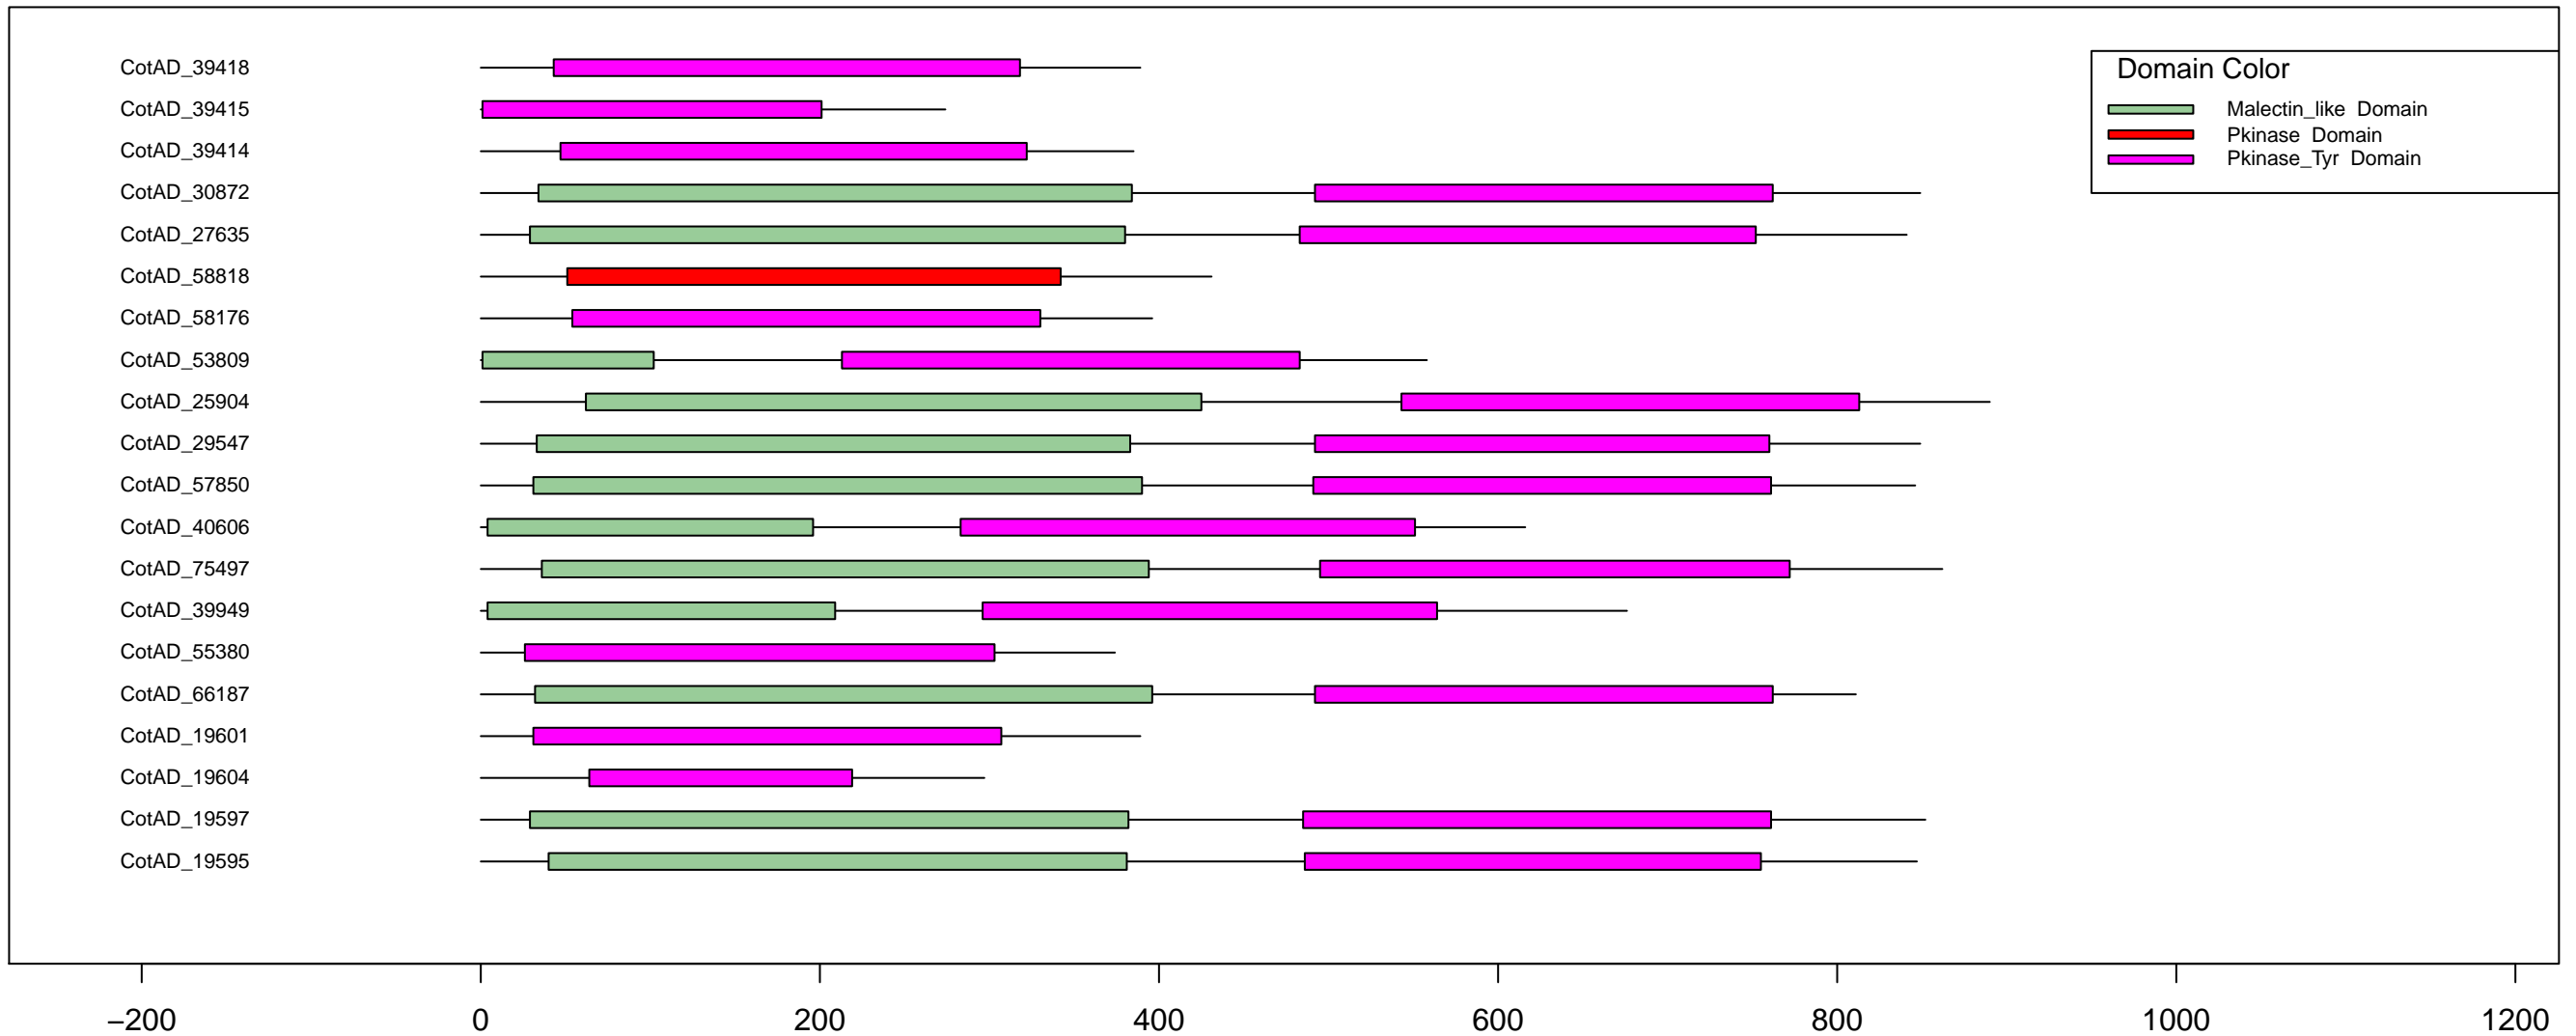

### G.hi RLK-Pelle\_CrRLK1L-1 domain diagram (part 2)

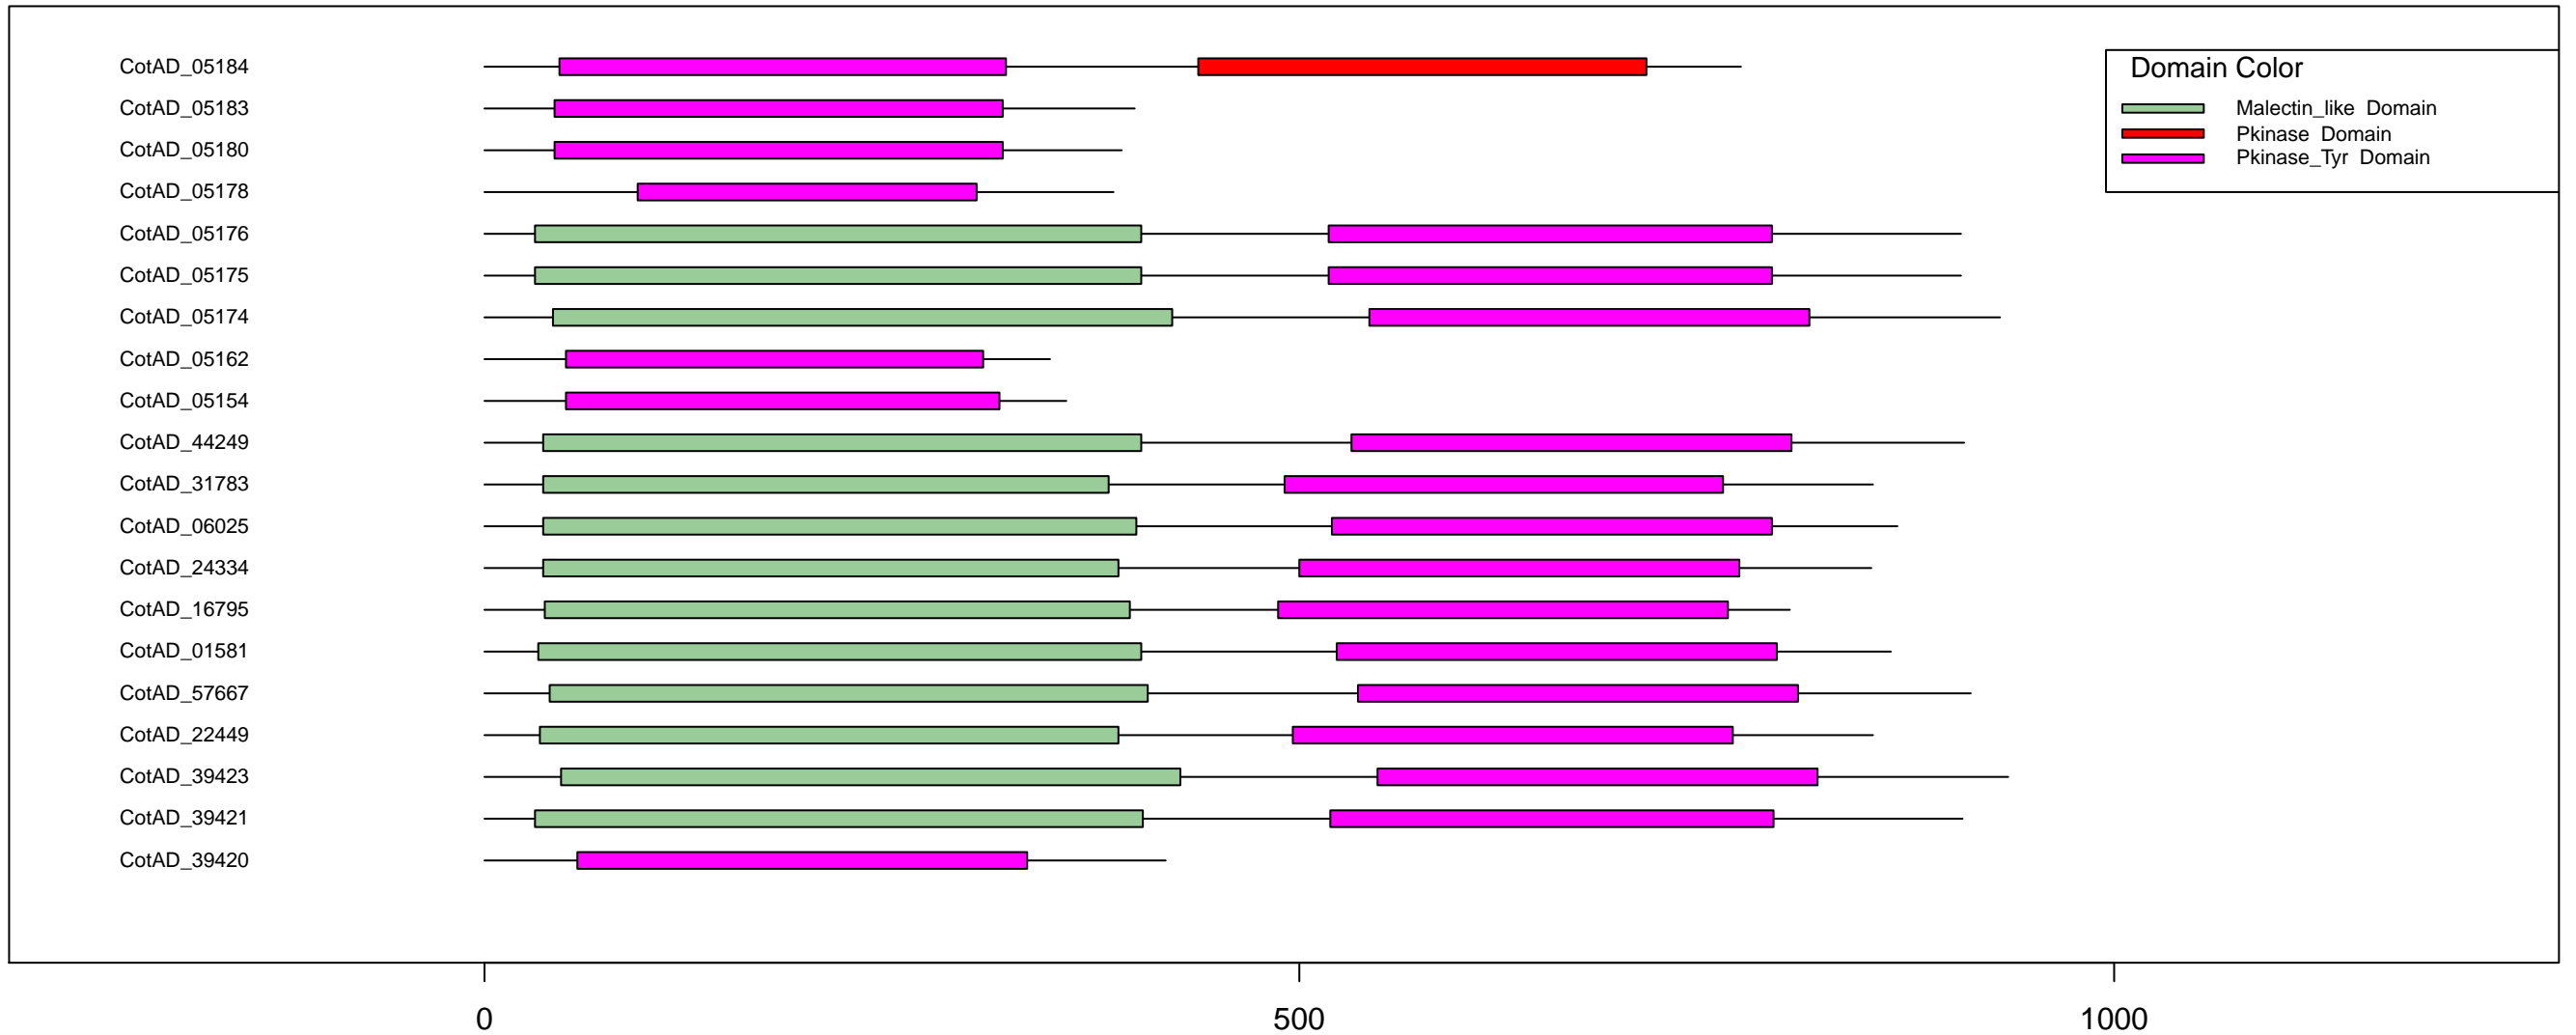

### G.hi RLK-Pelle\_CrRLK1L-1 domain diagram (part 3)

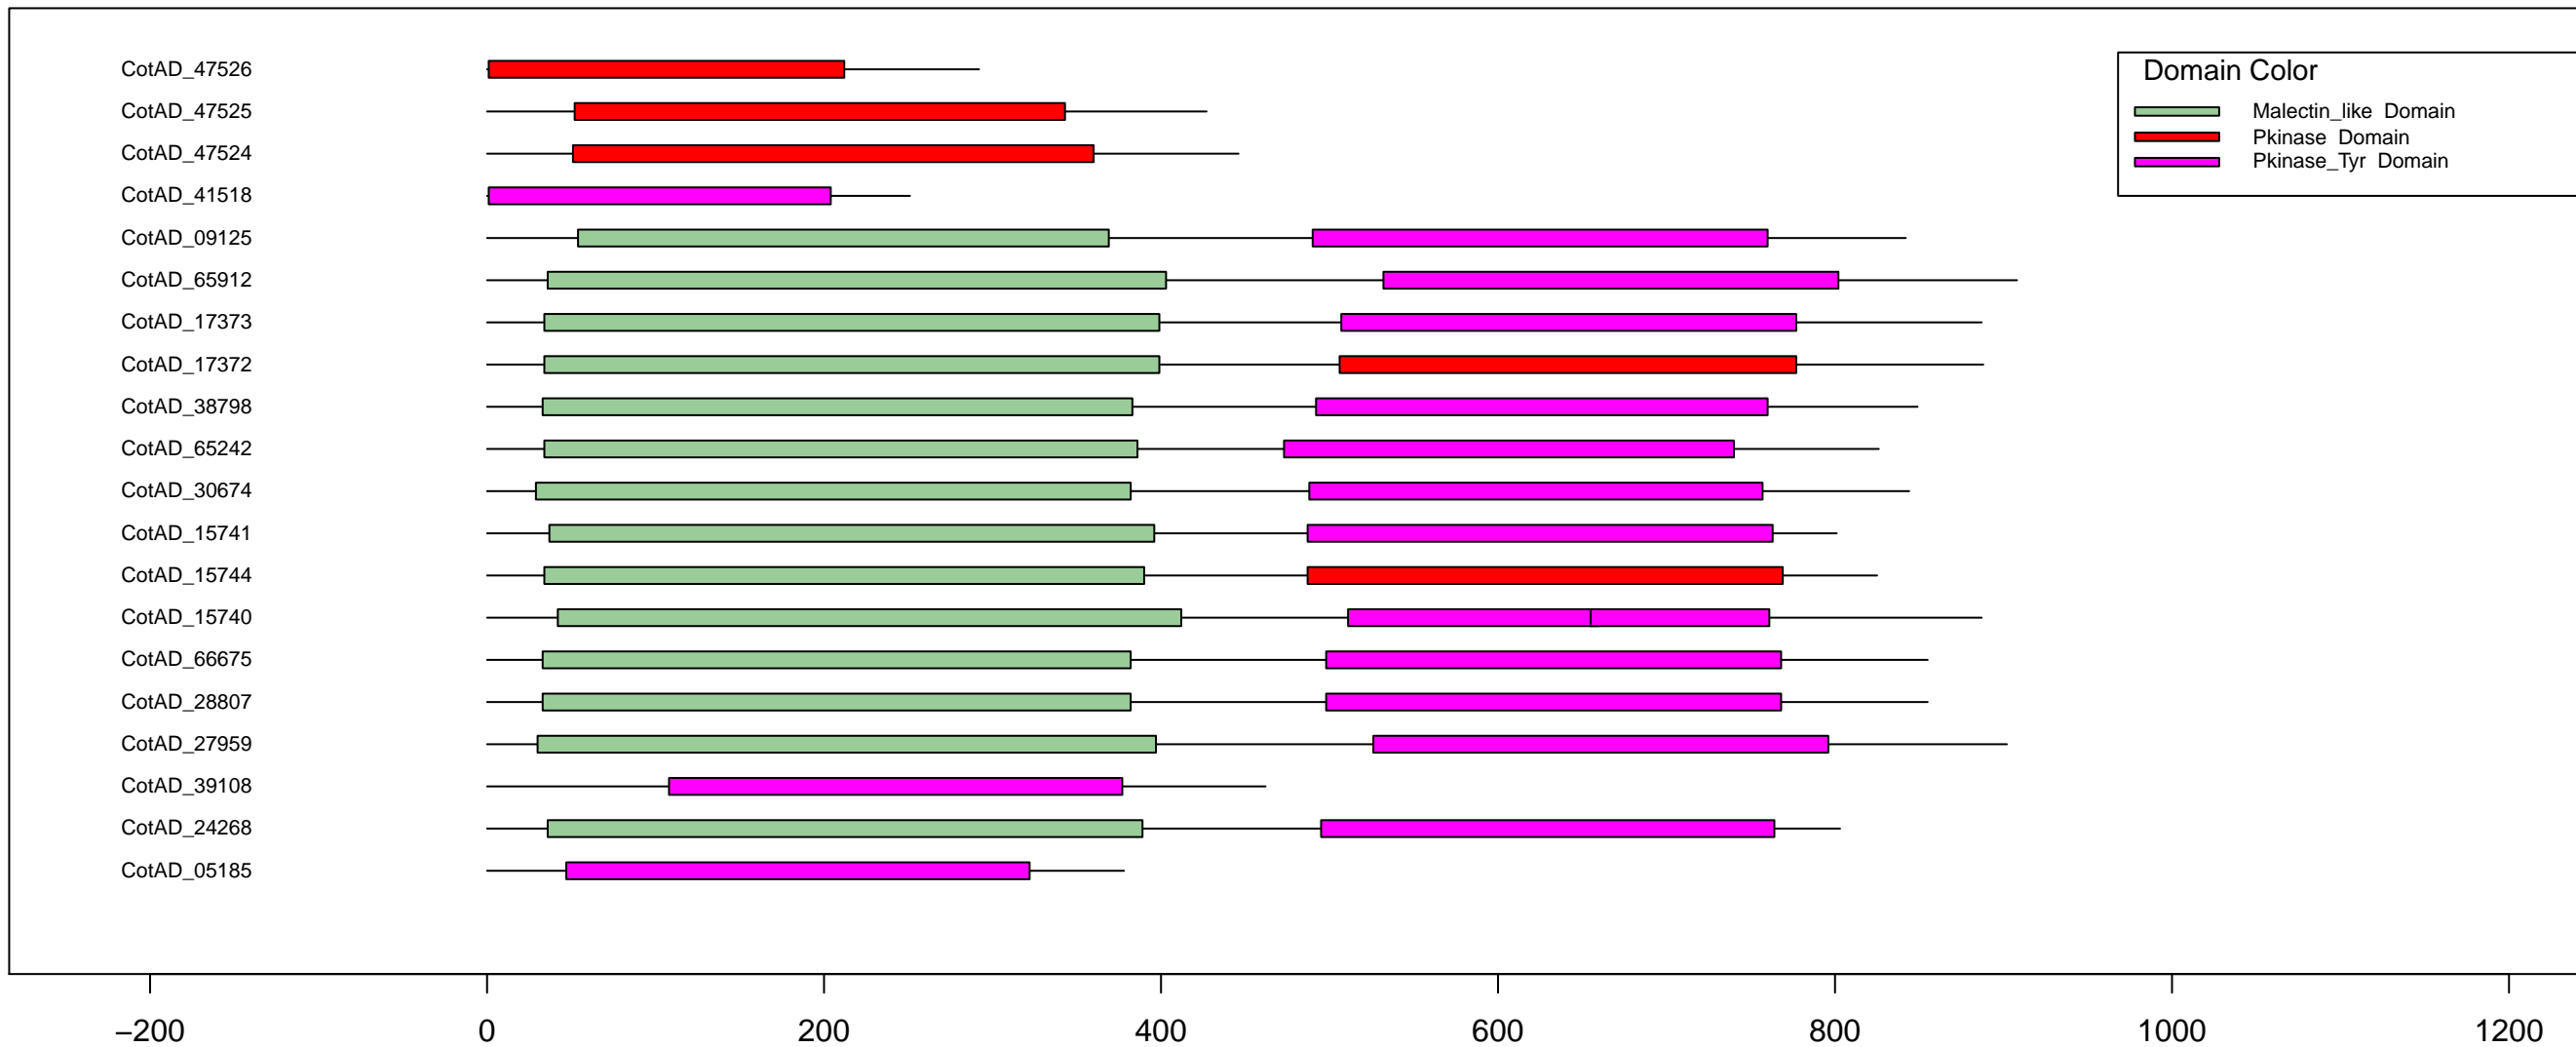



### G.hi RLK-Pelle\_CrRLK1L-1 domain diagram (part 4)

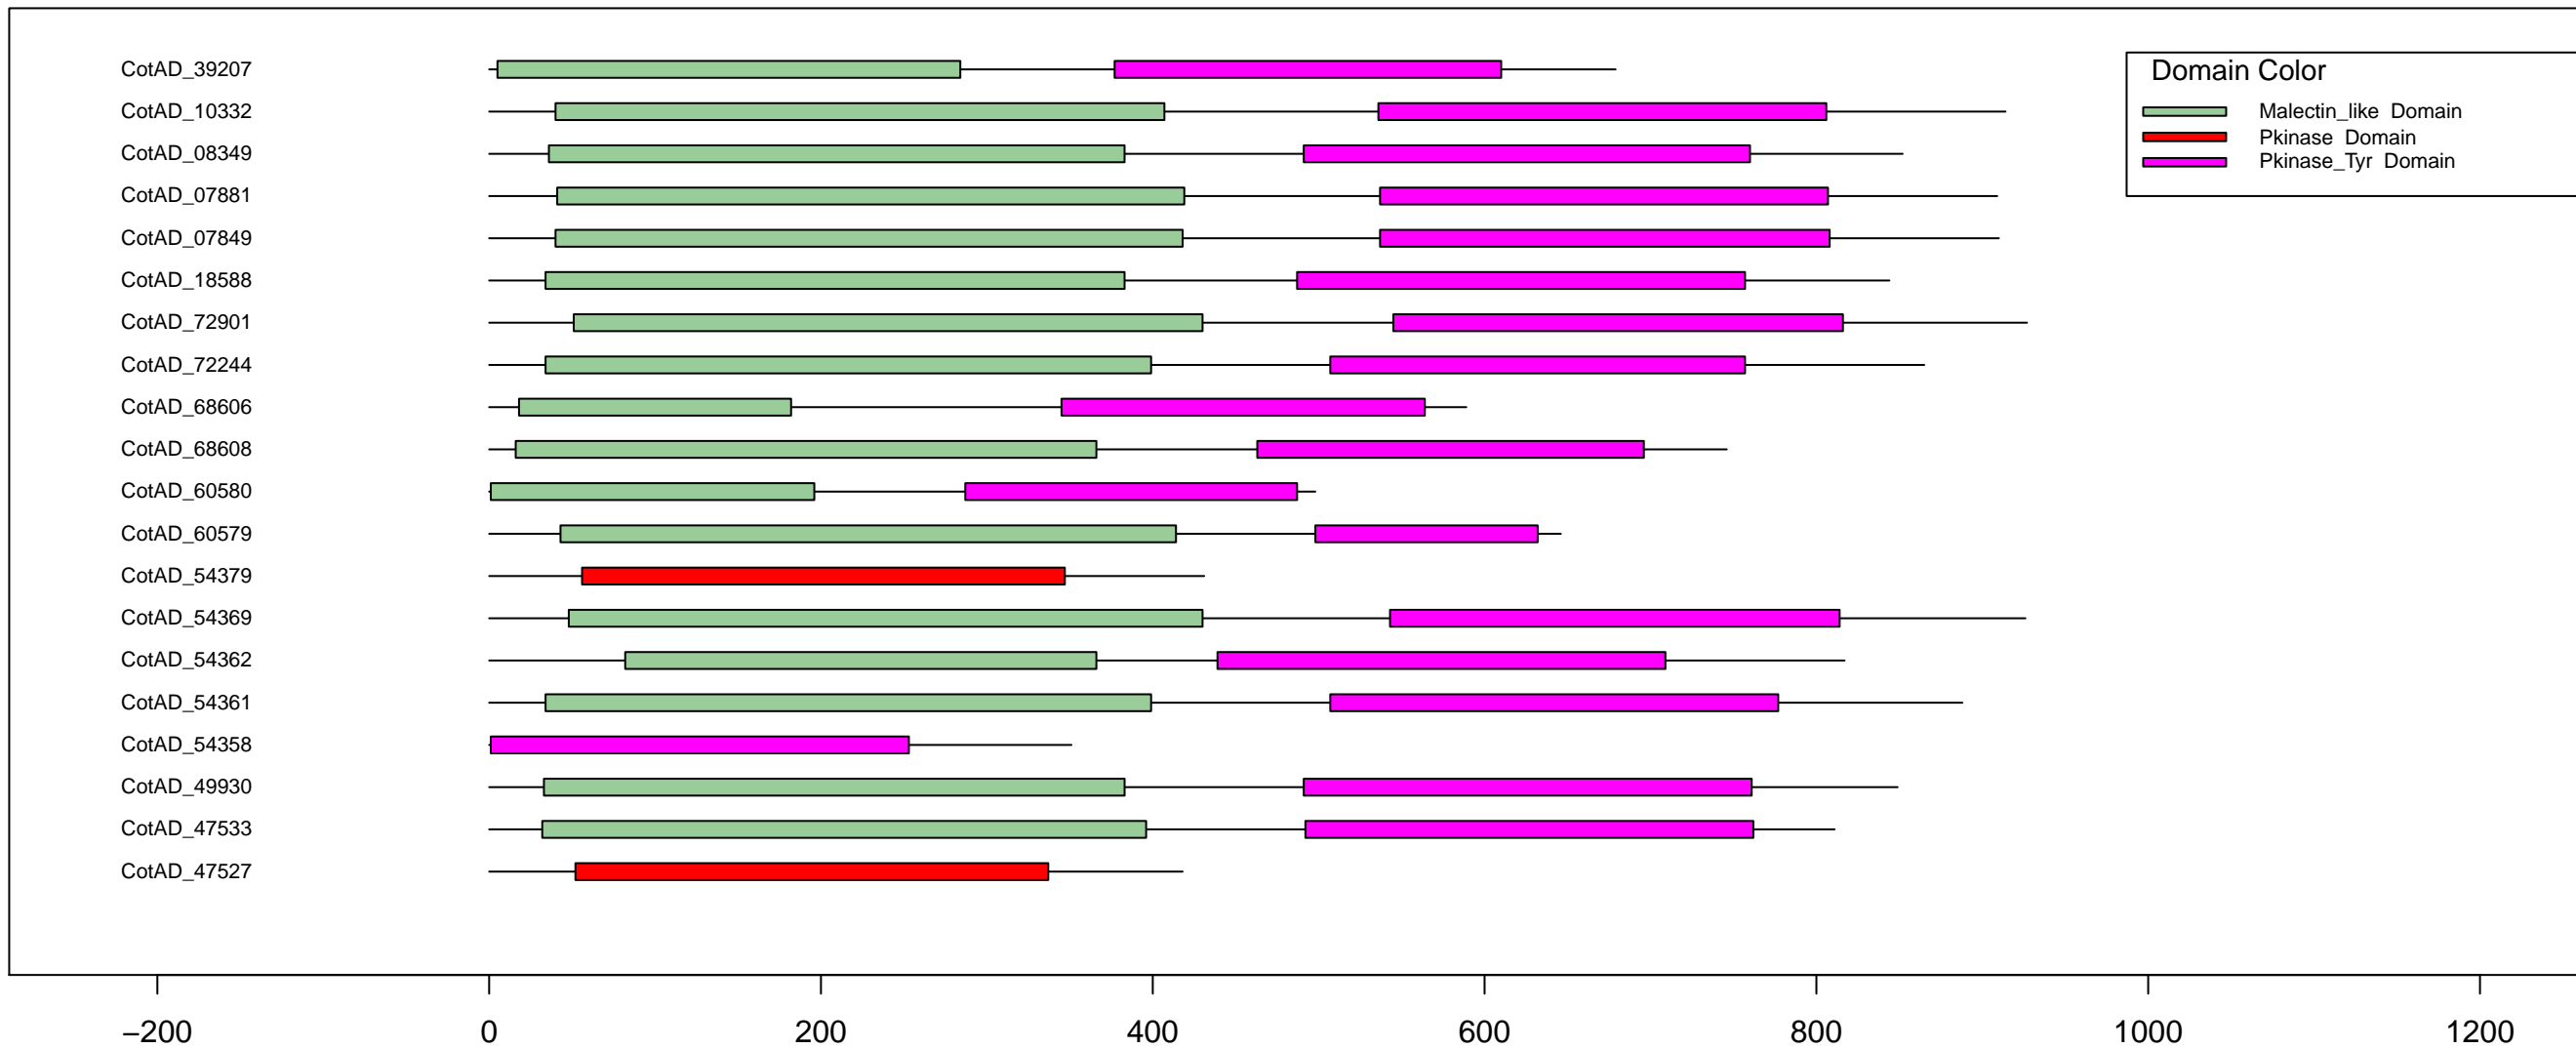

### G.hi RLK-Pelle\_CrRLK1L-1 domain diagram (part 5)

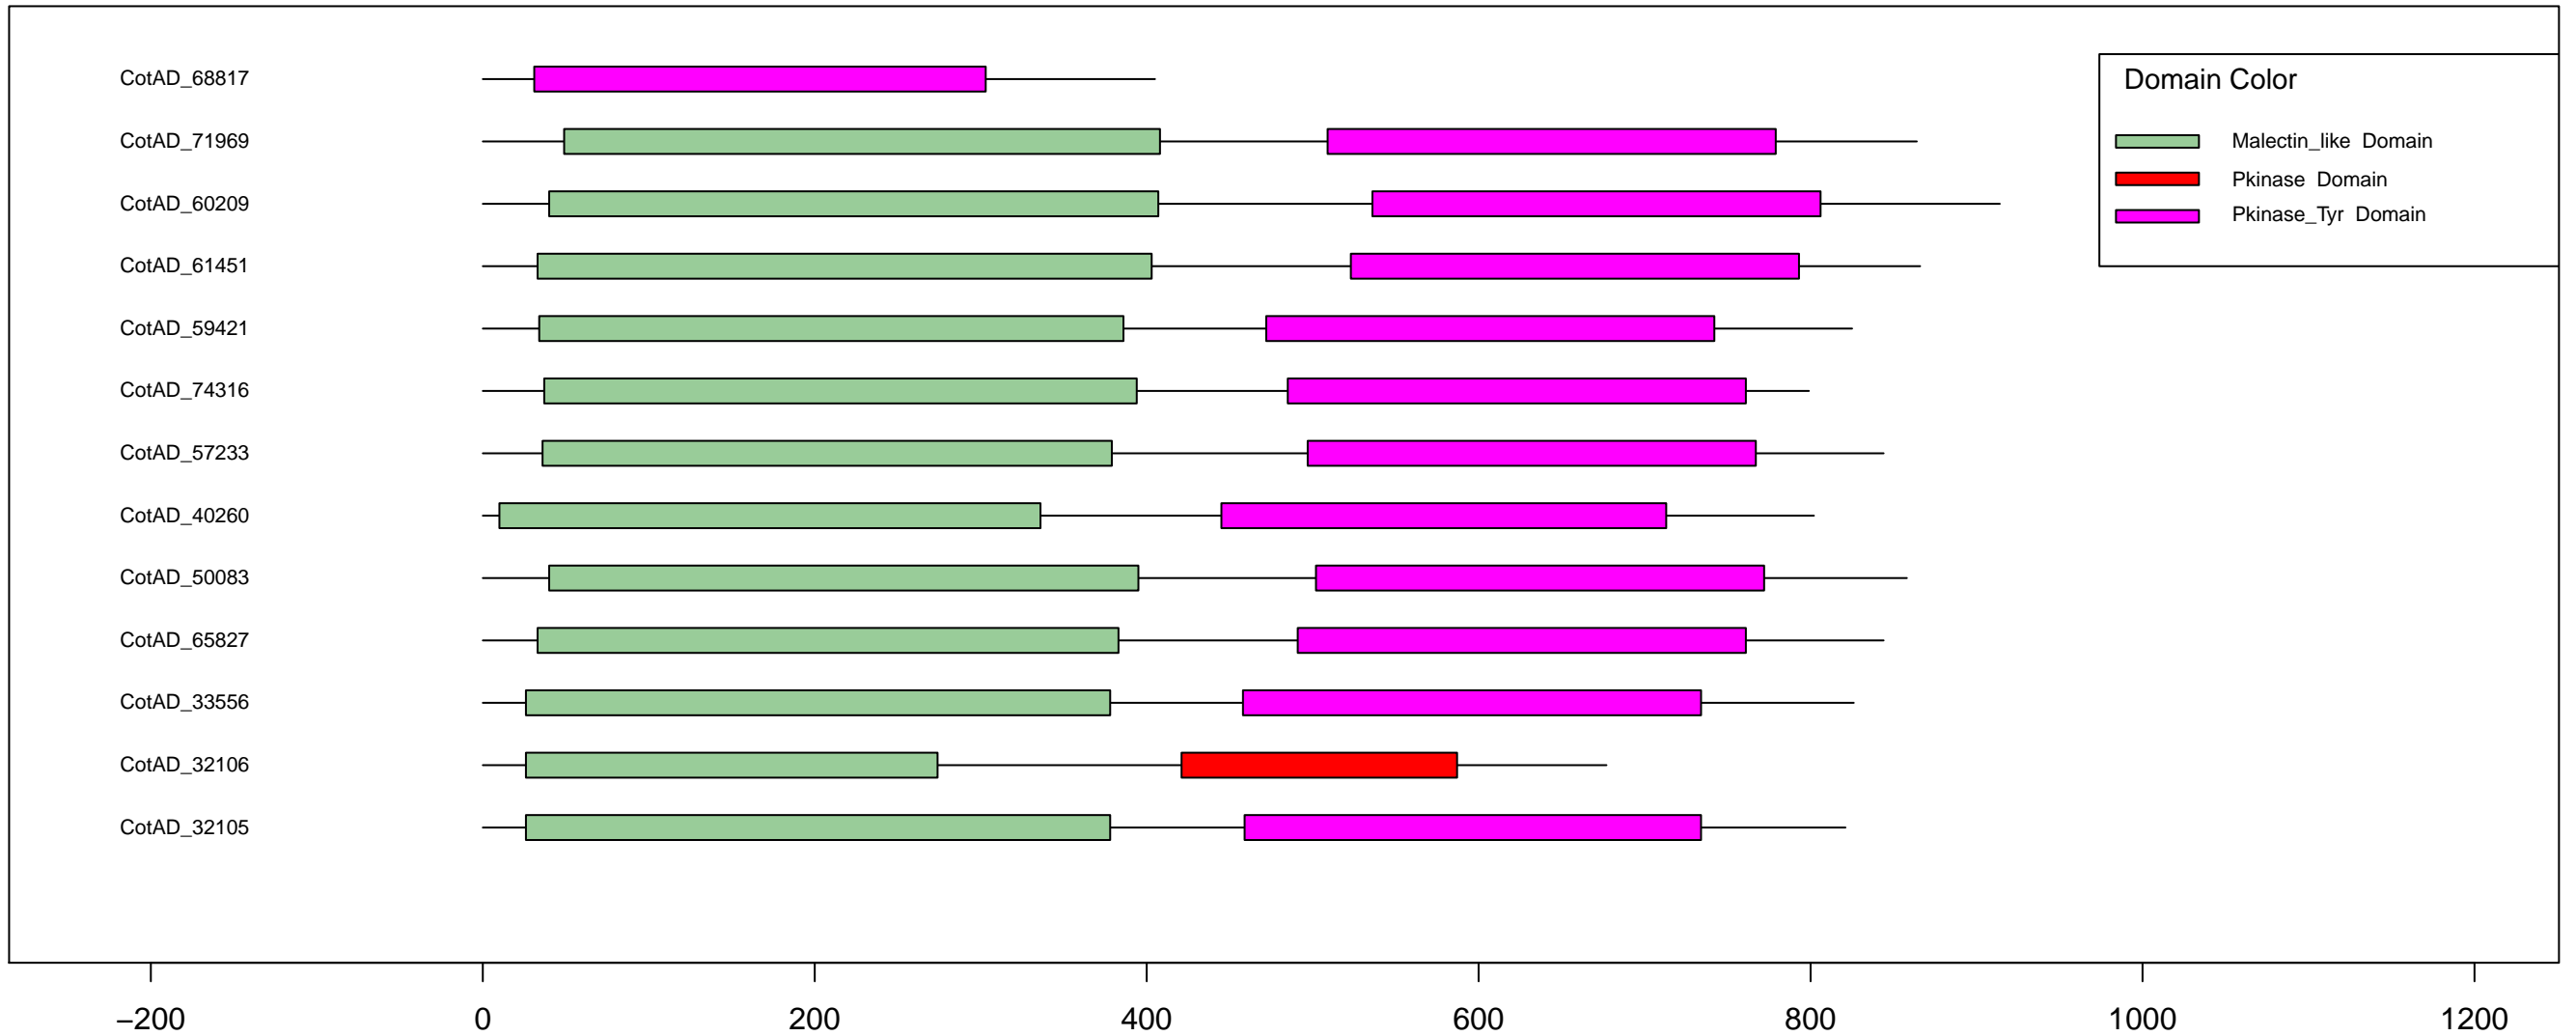

# G.hi RLK-Pelle\_DLSV domain diagram (part 1)

**Domain Color**

- B\_lectin Domain
- Malectin Domain
- PAN\_2 Domain
- Pkinase Domain
- Pkinase\_Tyr Domain
- S\_locus\_glycop Domain
- Stress-antifung Family
- other Domain

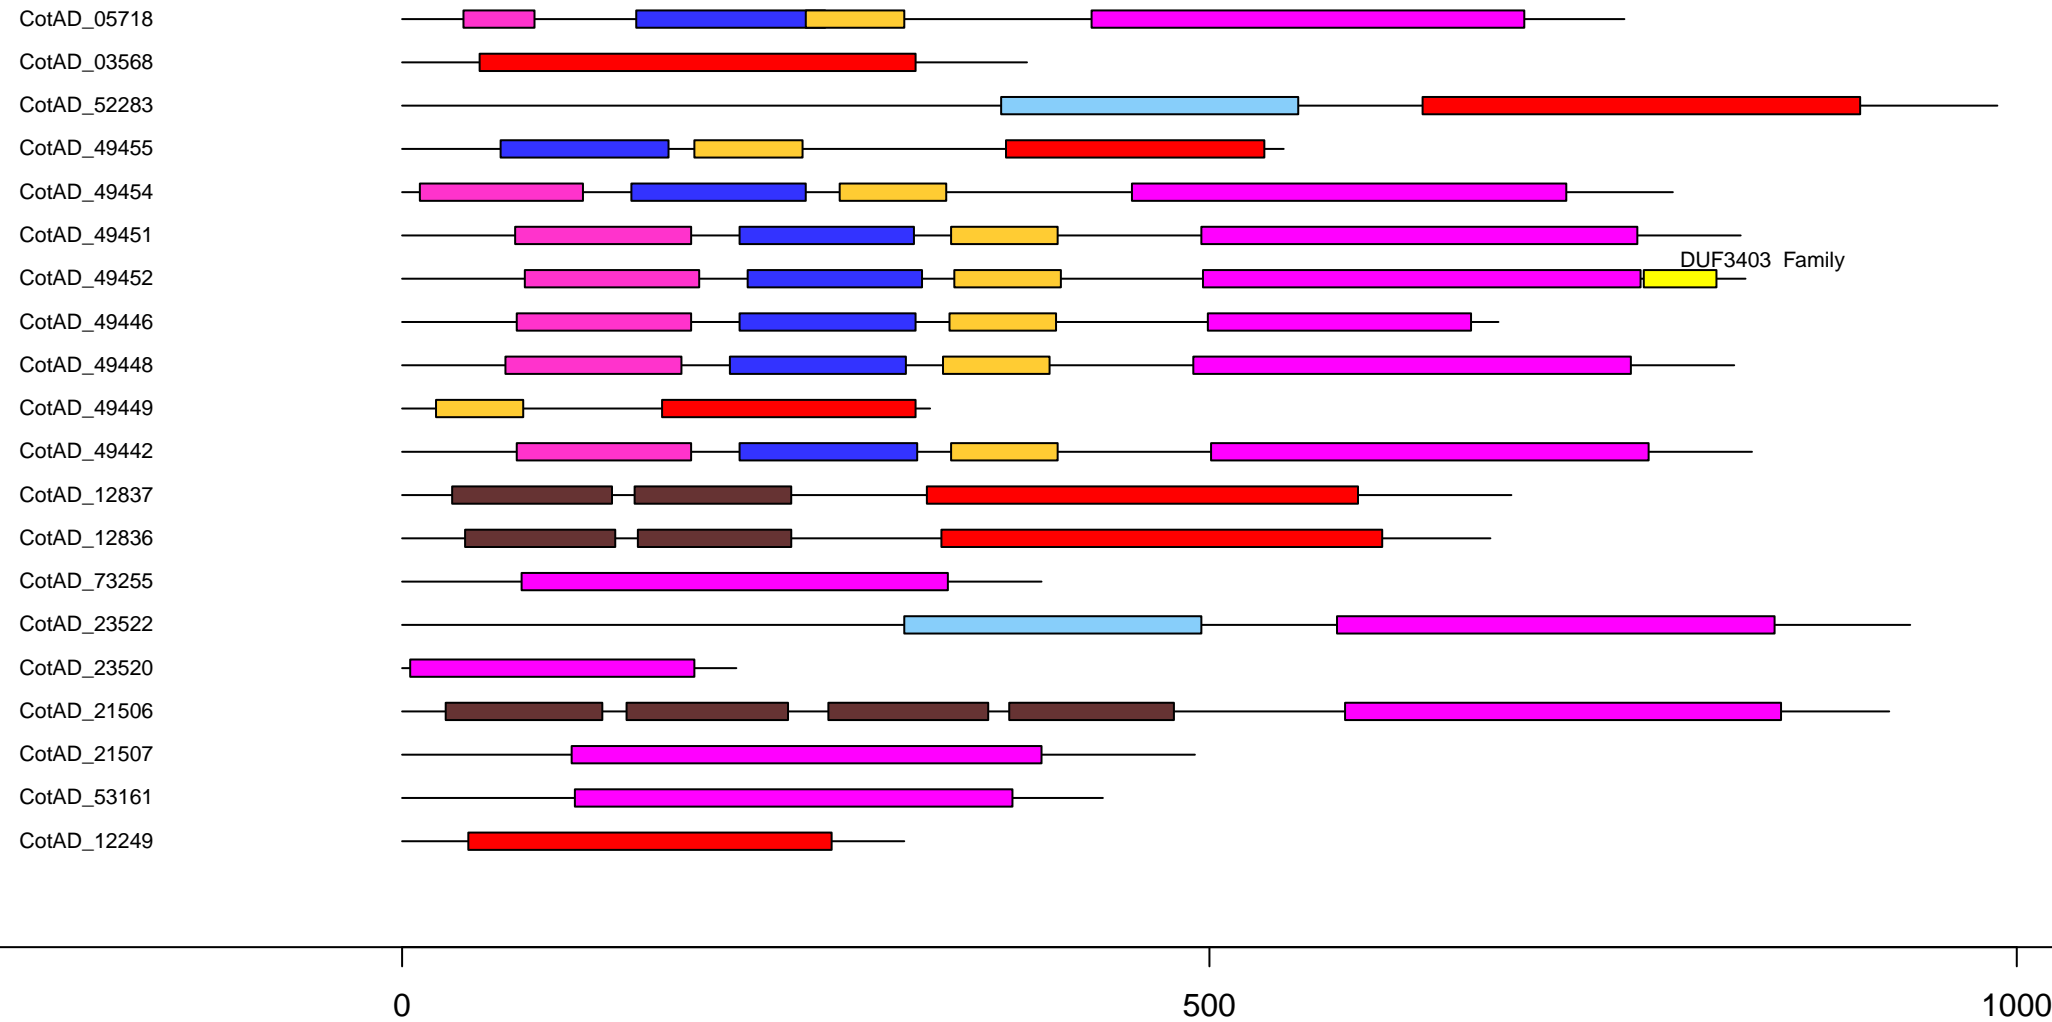

DUF3403 Family

## G.hi RLK-Pelle\_DLSV domain diagram (part 2)

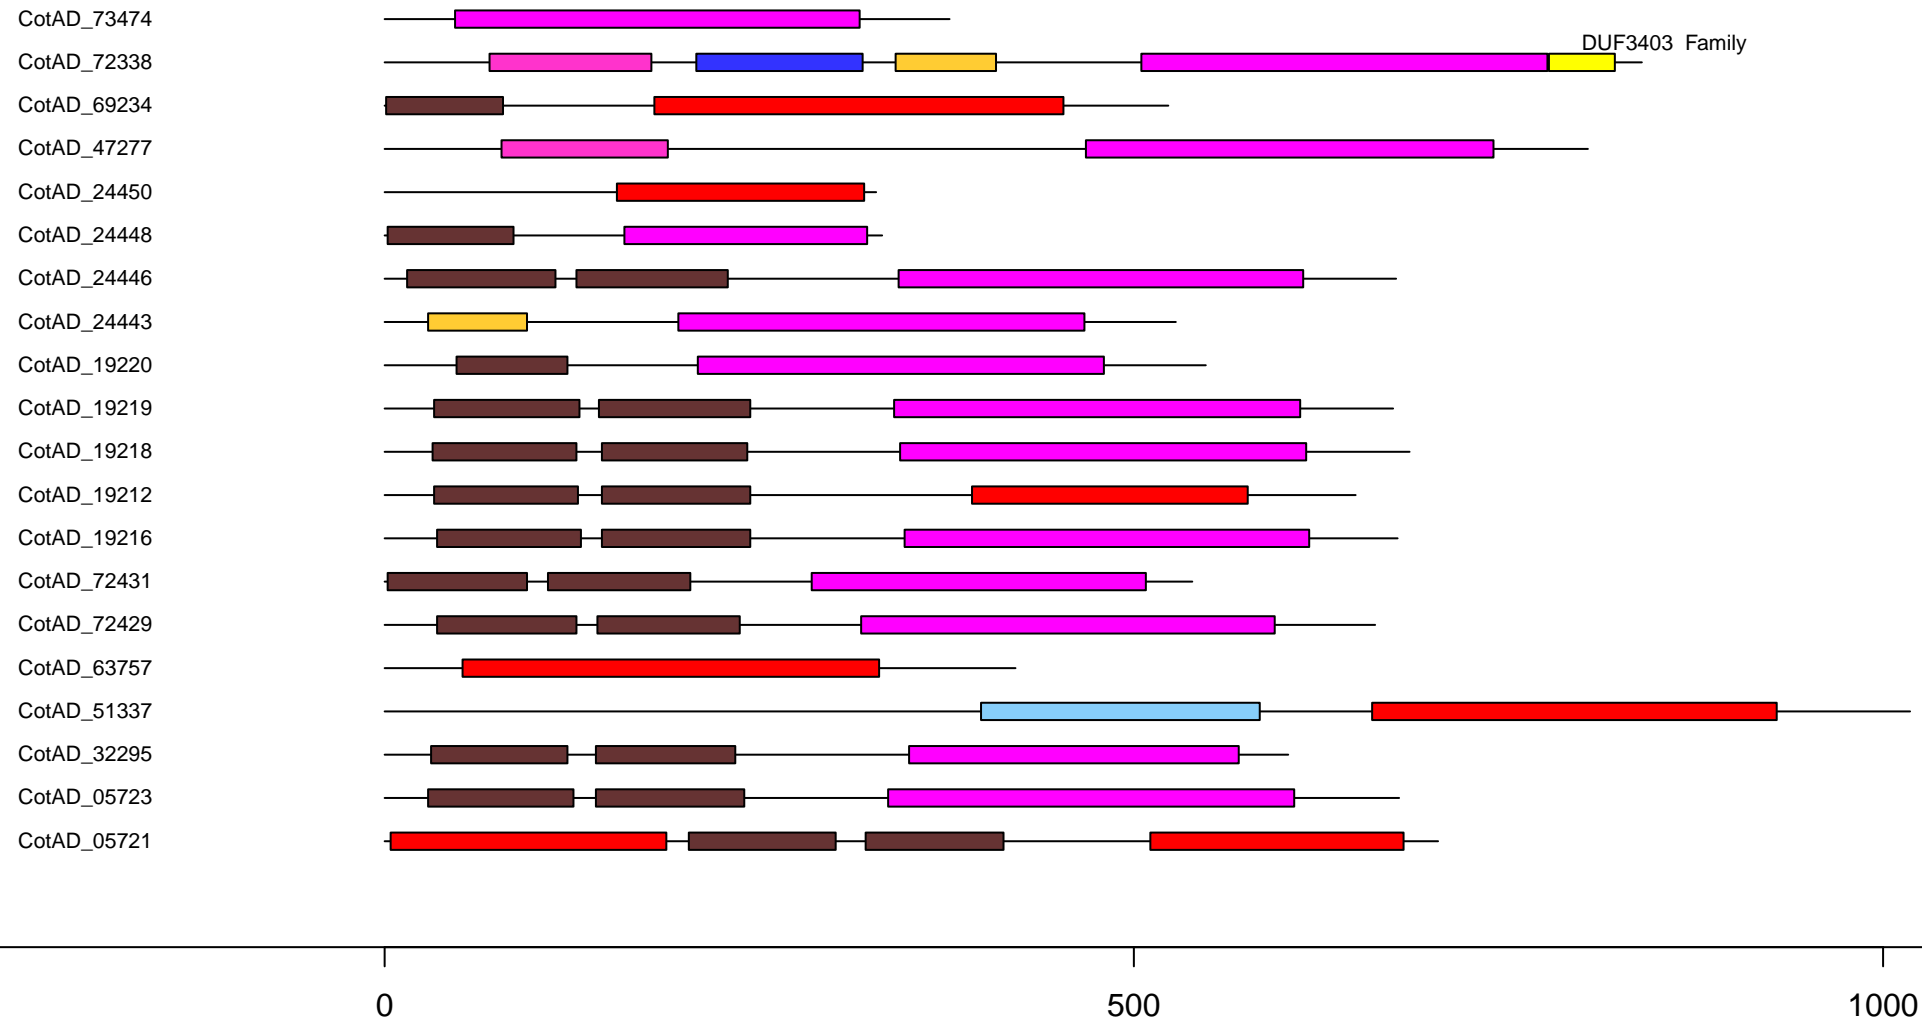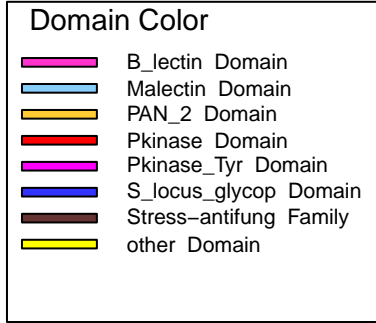

### G.hi RLK-Pelle\_DLSV domain diagram (part 3)

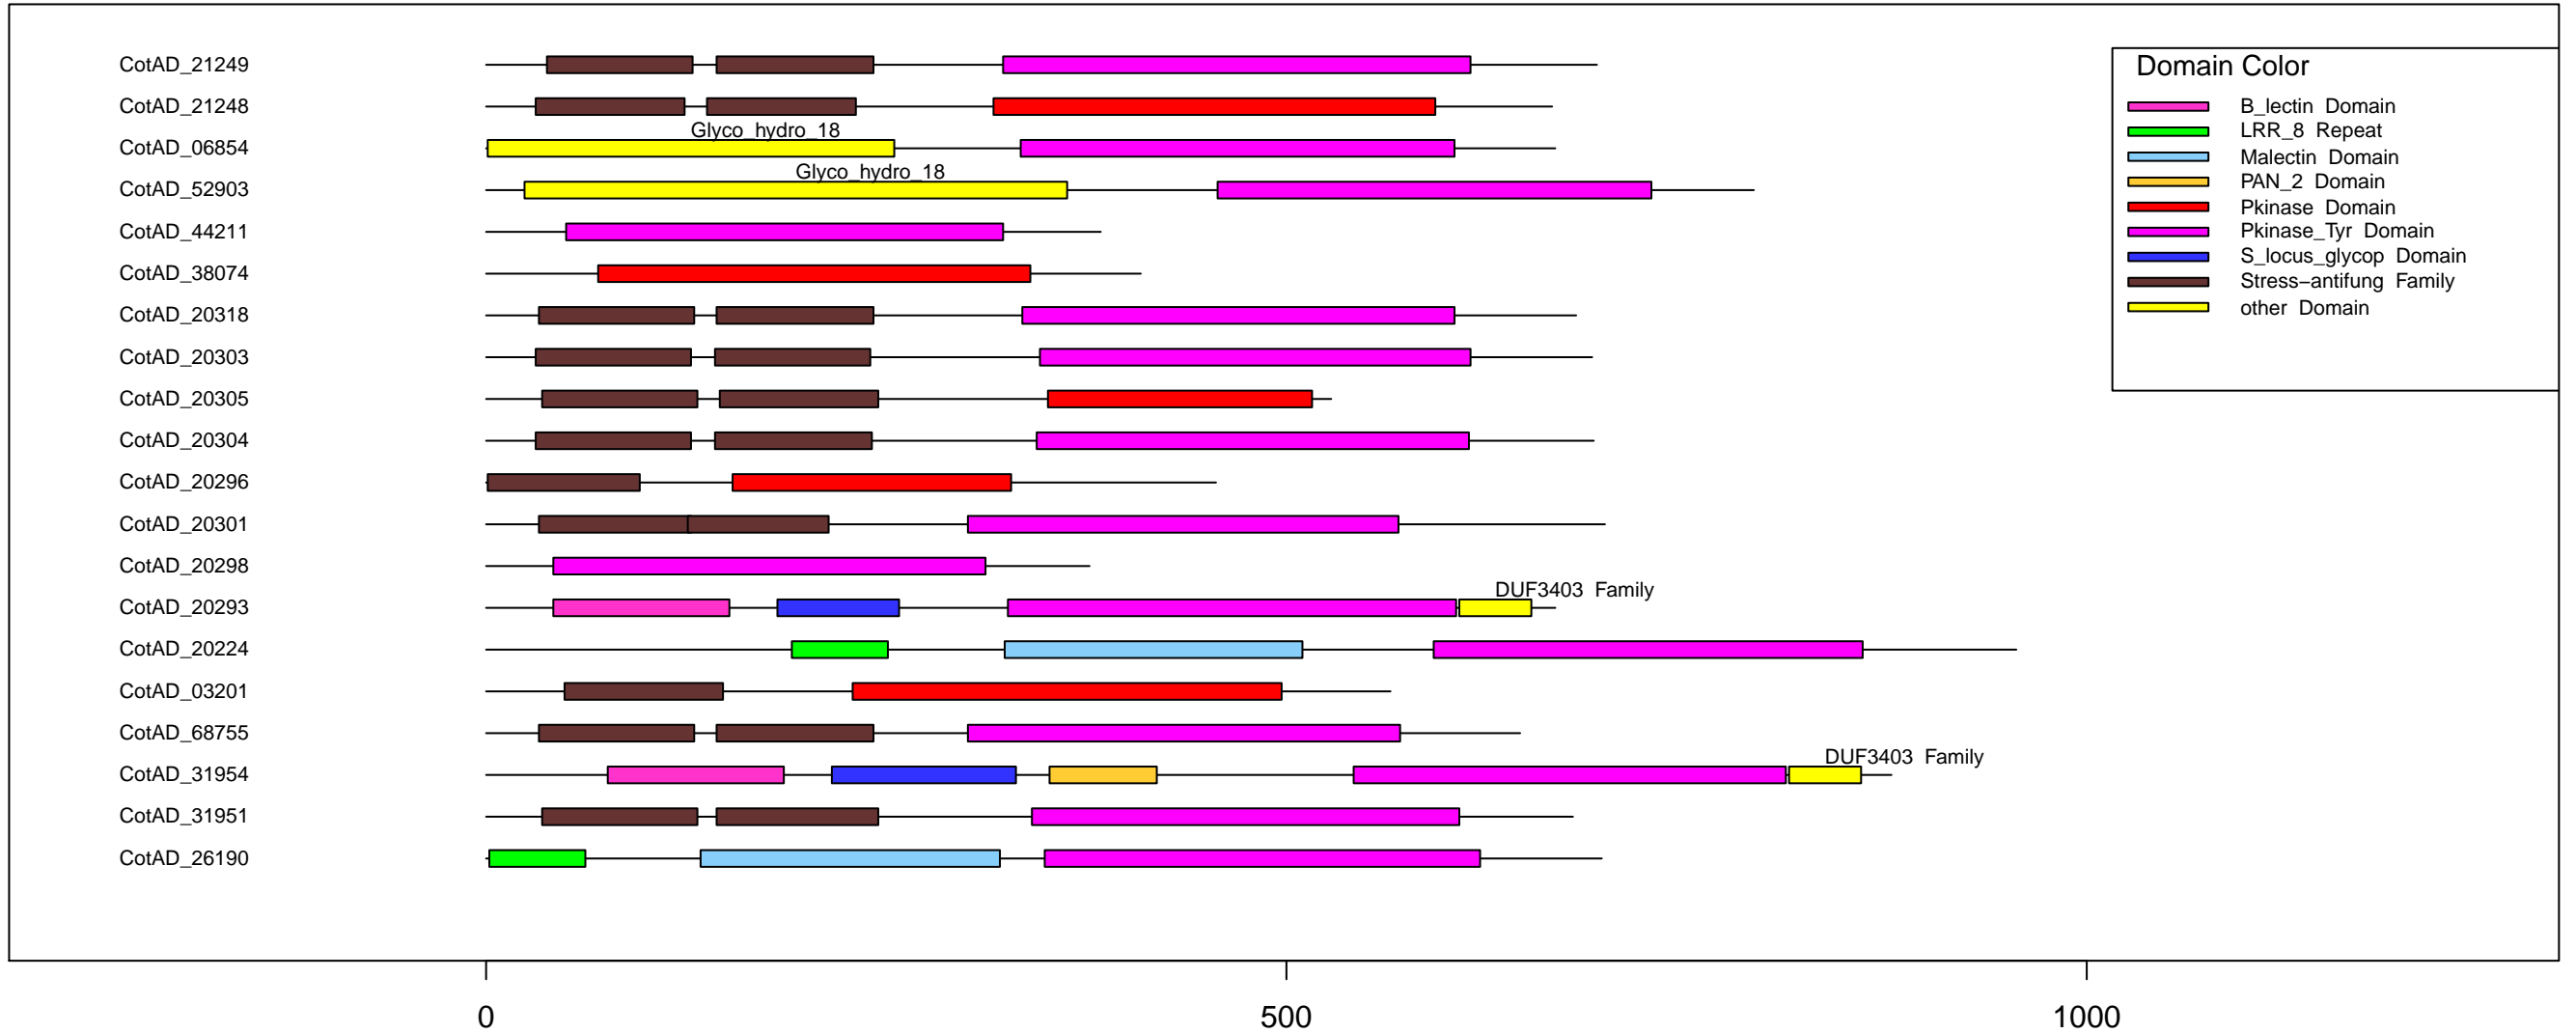

### G.hi RLK-Pelle\_DLSV domain diagram (part 4)

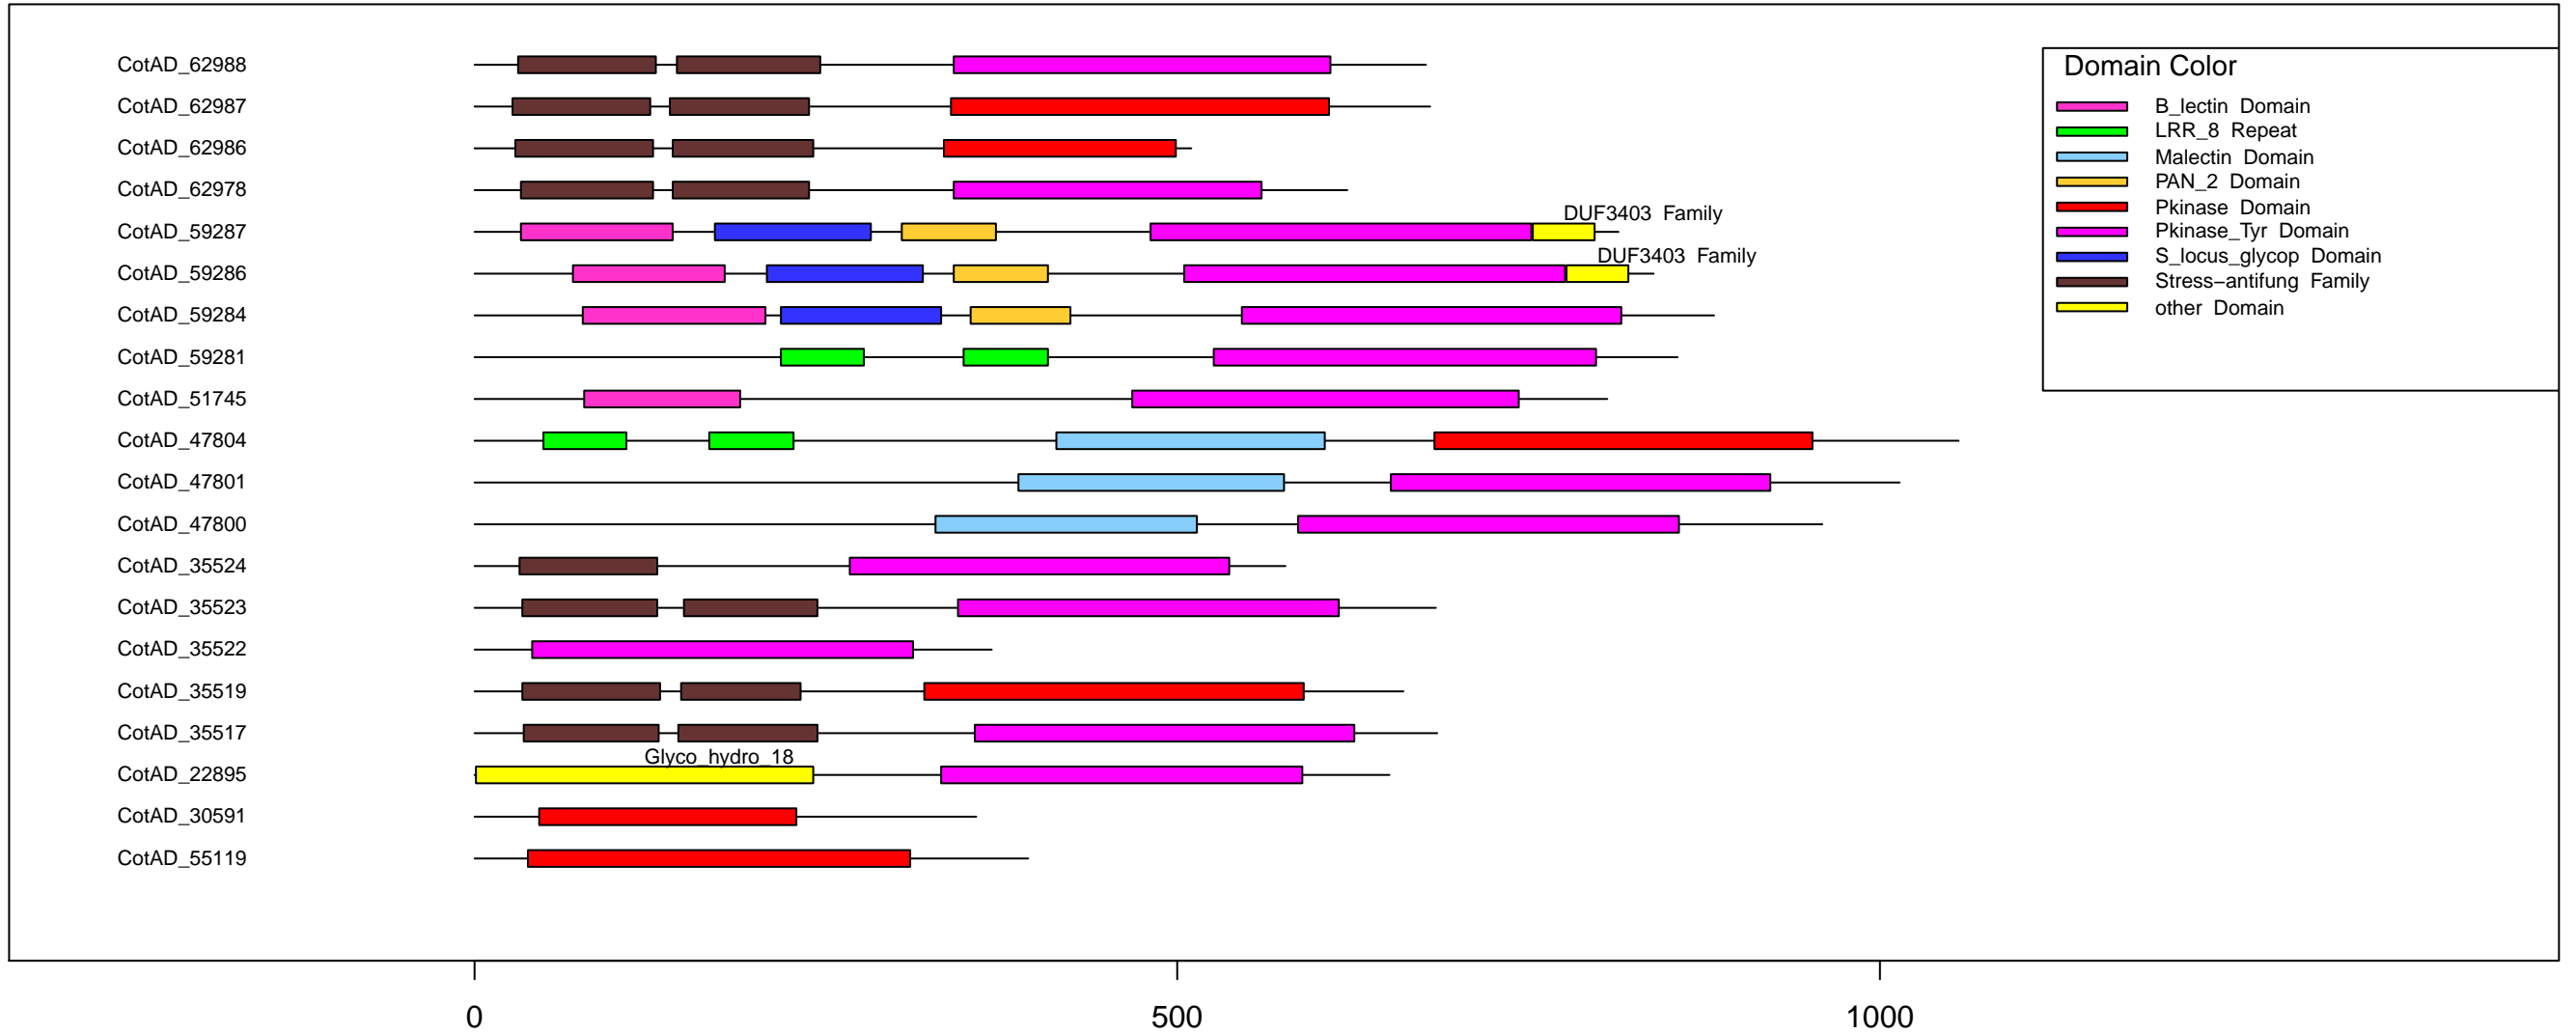

### G.hi RLK-Pelle\_DLSV domain diagram (part 5)

CotAD\_54762  
 CotAD\_54208  
 CotAD\_41946  
 CotAD\_27329  
 CotAD\_27320  
 CotAD\_27319  
 CotAD\_25705  
 CotAD\_25706  
 CotAD\_25703  
 CotAD\_25702  
 CotAD\_24312  
 CotAD\_24309  
 CotAD\_24311  
 CotAD\_24307  
 CotAD\_21607  
 CotAD\_08027  
 CotAD\_02822  
 CotAD\_01546  
 CotAD\_01545  
 CotAD\_00182

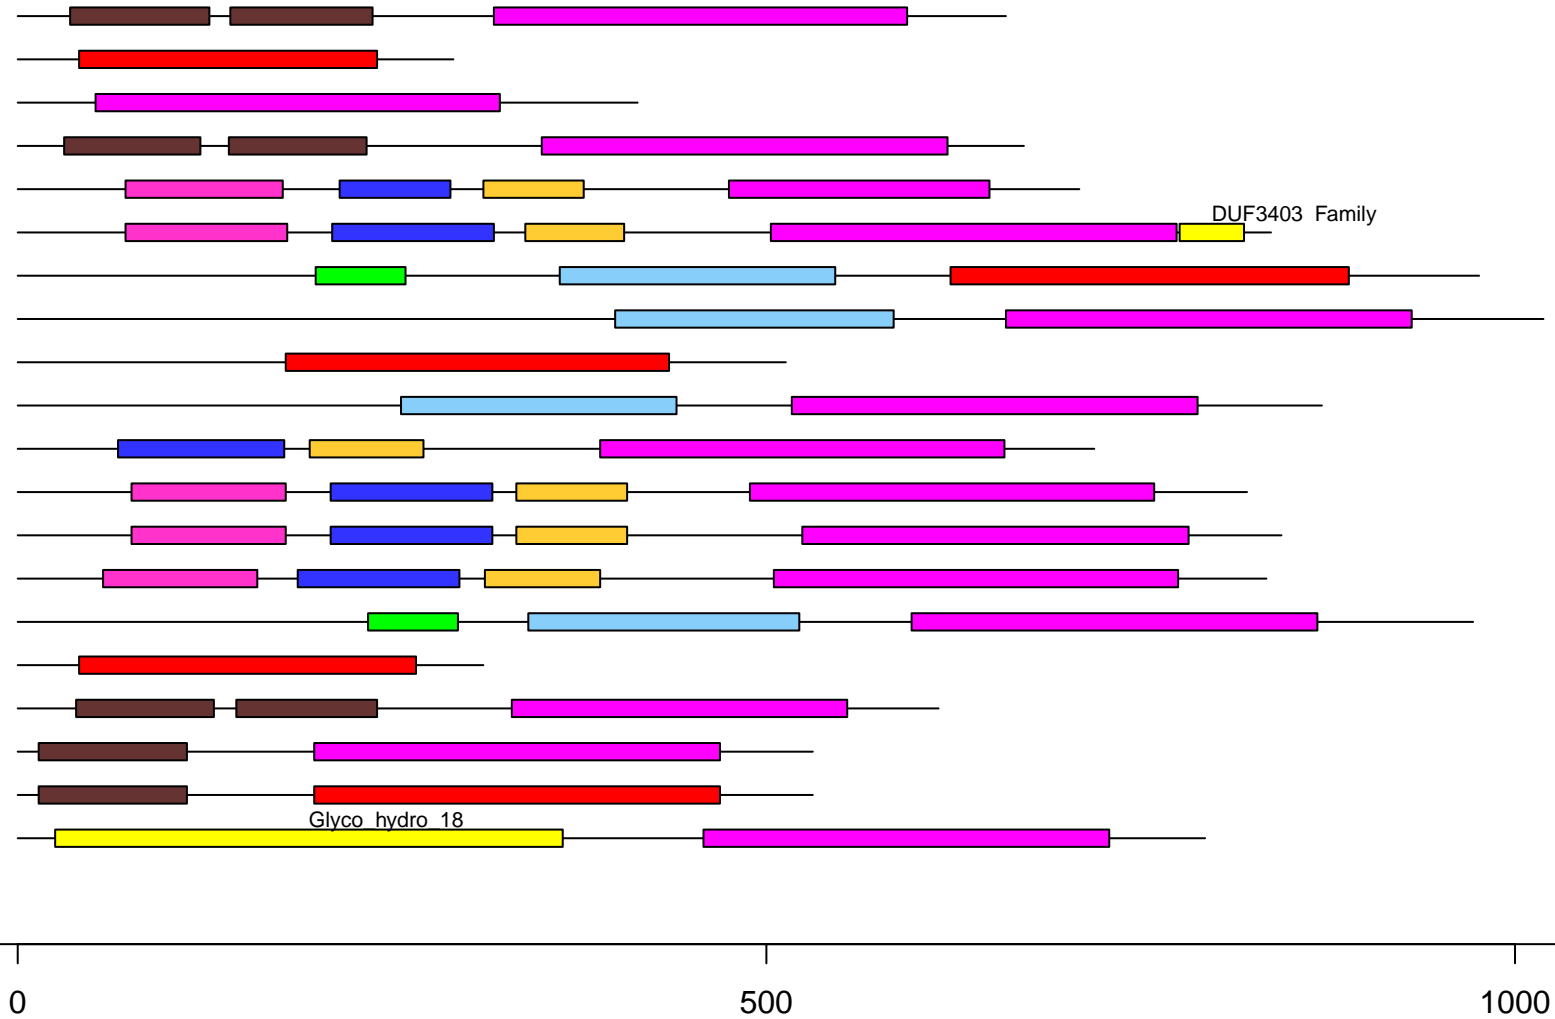

**Domain Color**

- █ B\_lectin Domain
- █ LRR\_8 Repeat
- █ Malectin Domain
- █ PAN\_2 Domain
- █ Pkinase Domain
- █ Pkinase\_Tyr Domain
- █ S\_locus\_glycop Domain
- █ Stress-antifung Family
- █ other Domain

### G.hi RLK-Pelle\_DLSV domain diagram (part 6)

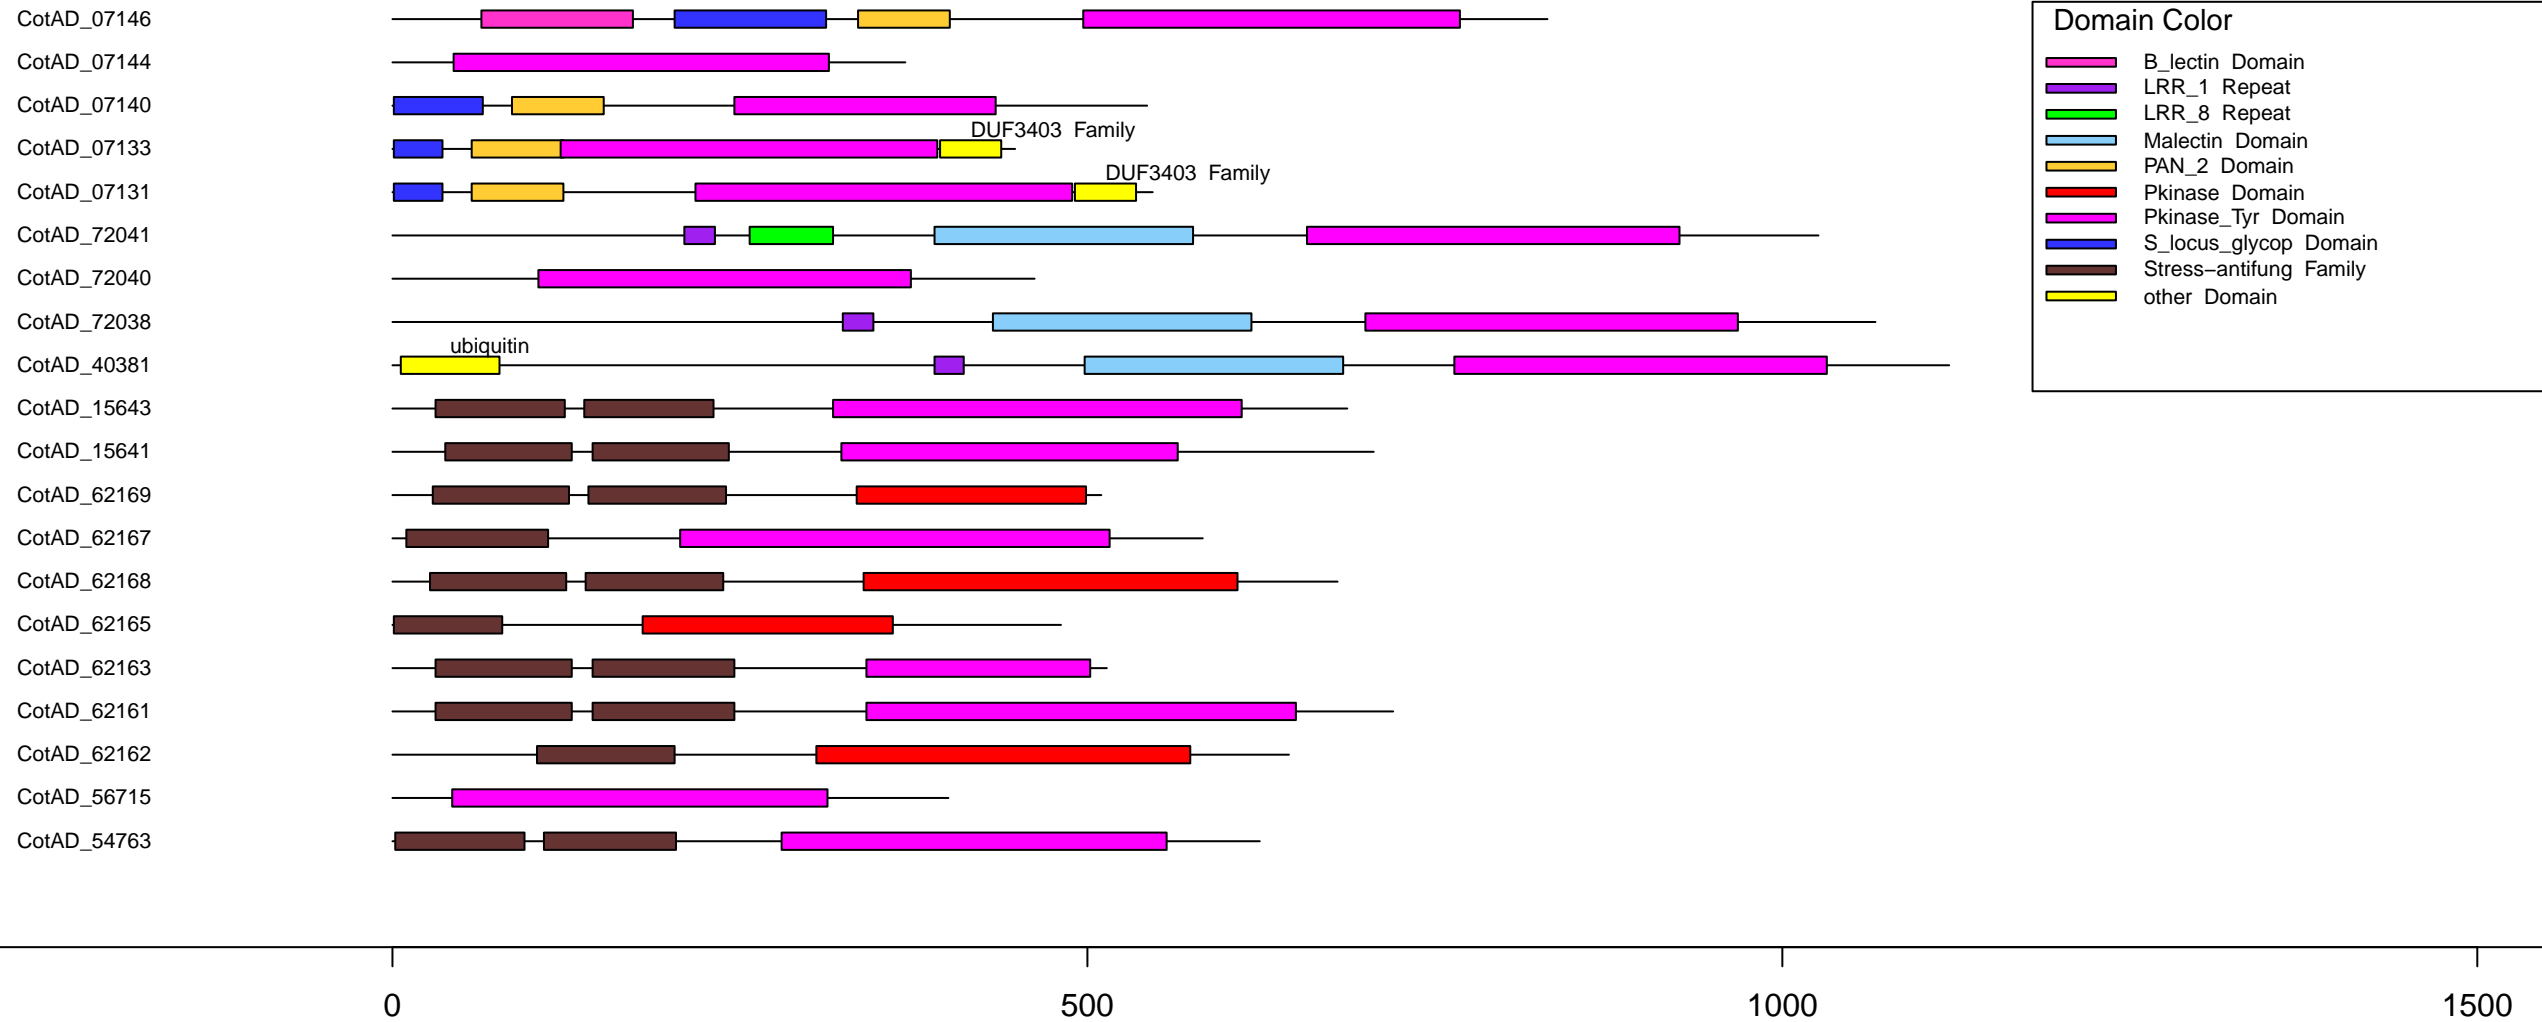



### G.hi RLK-Pelle\_DLSV domain diagram (part 7)

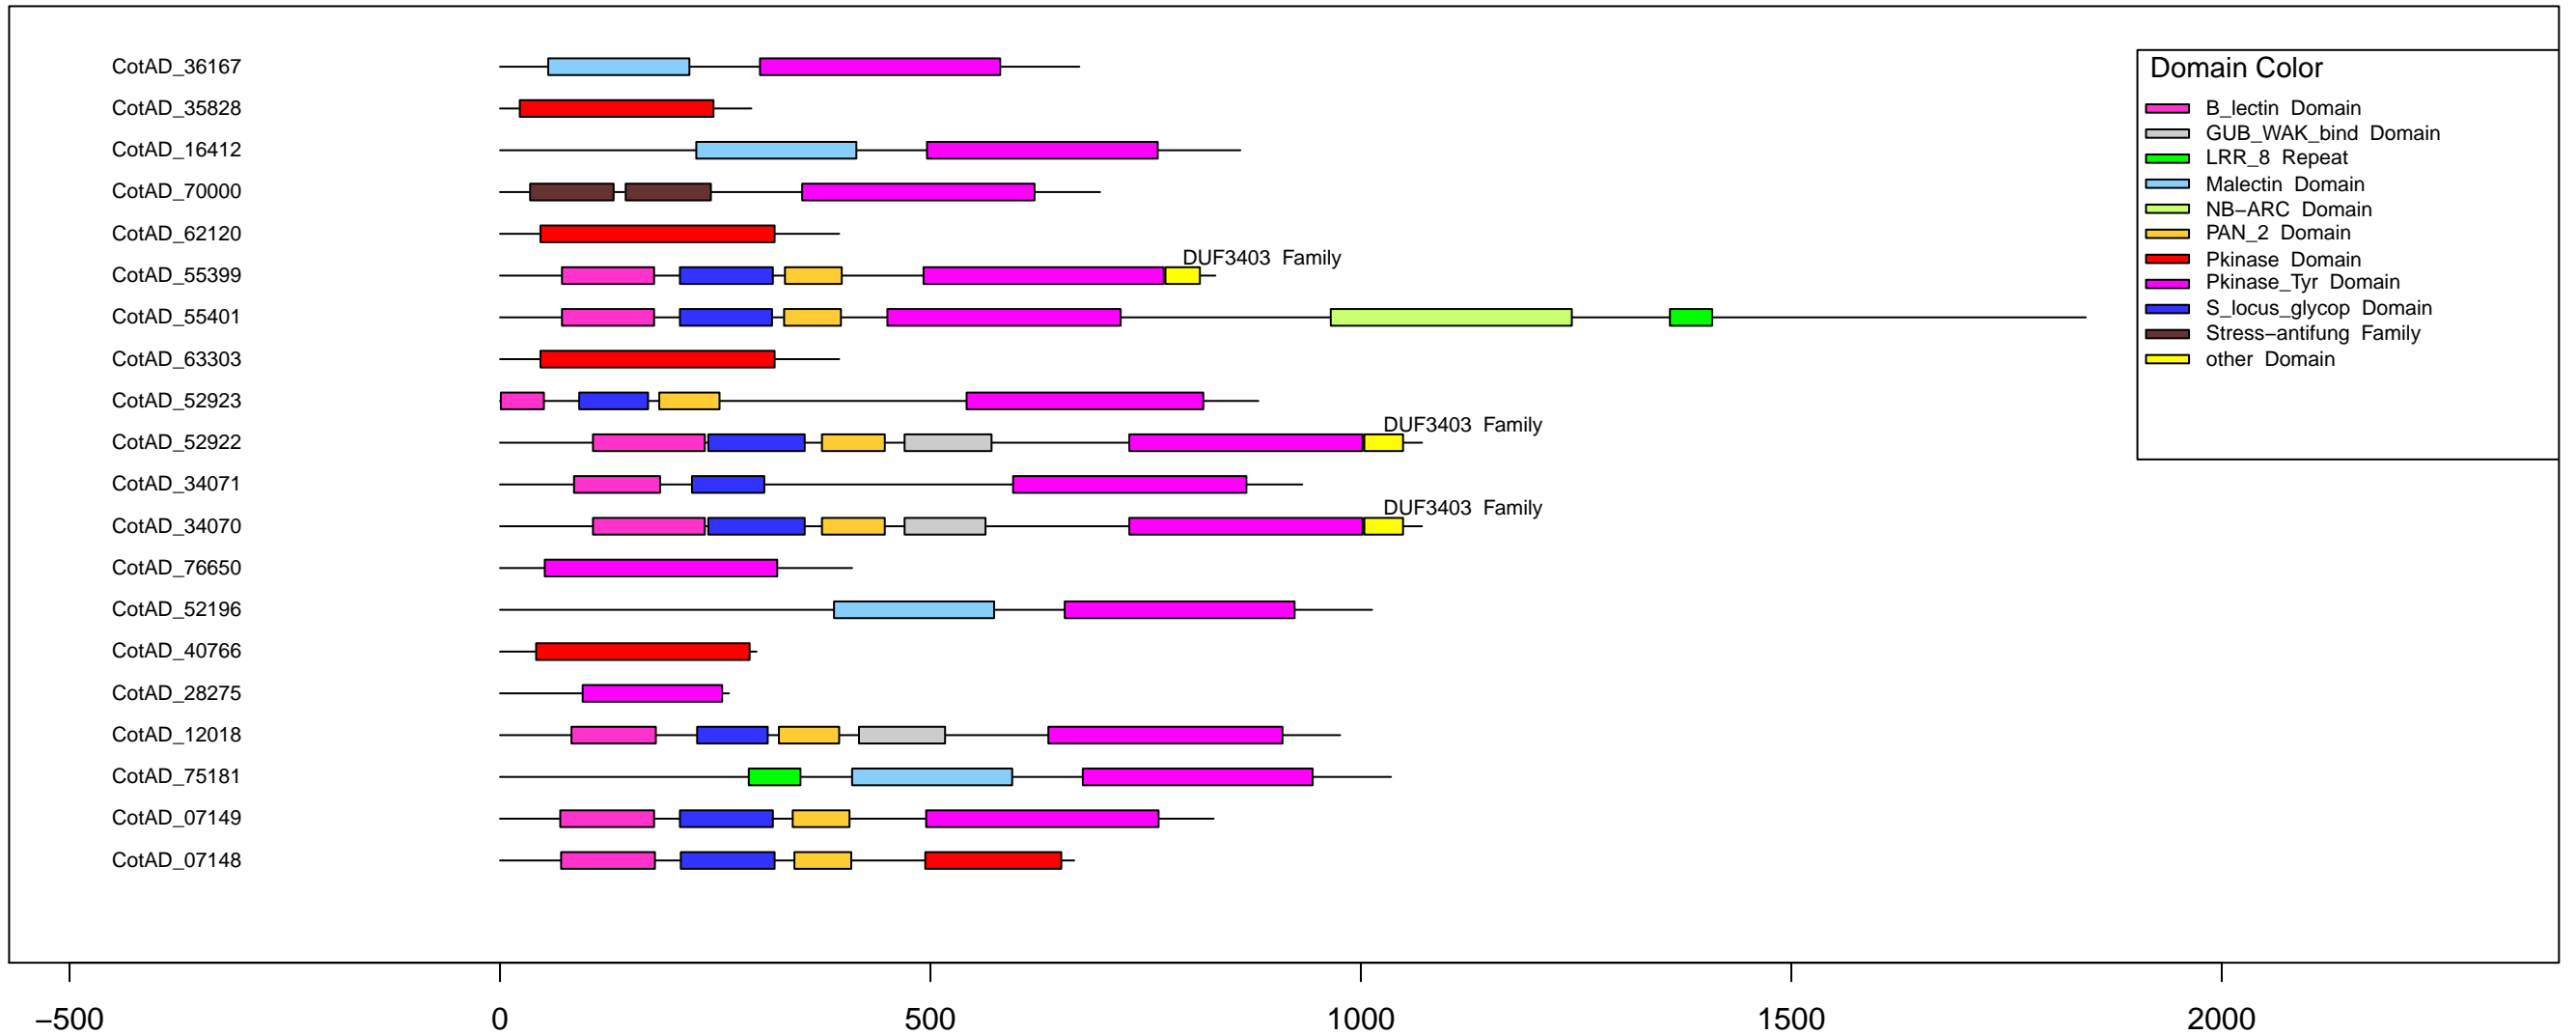

### G.hi RLK-Pelle\_DLSV domain diagram (part 8)

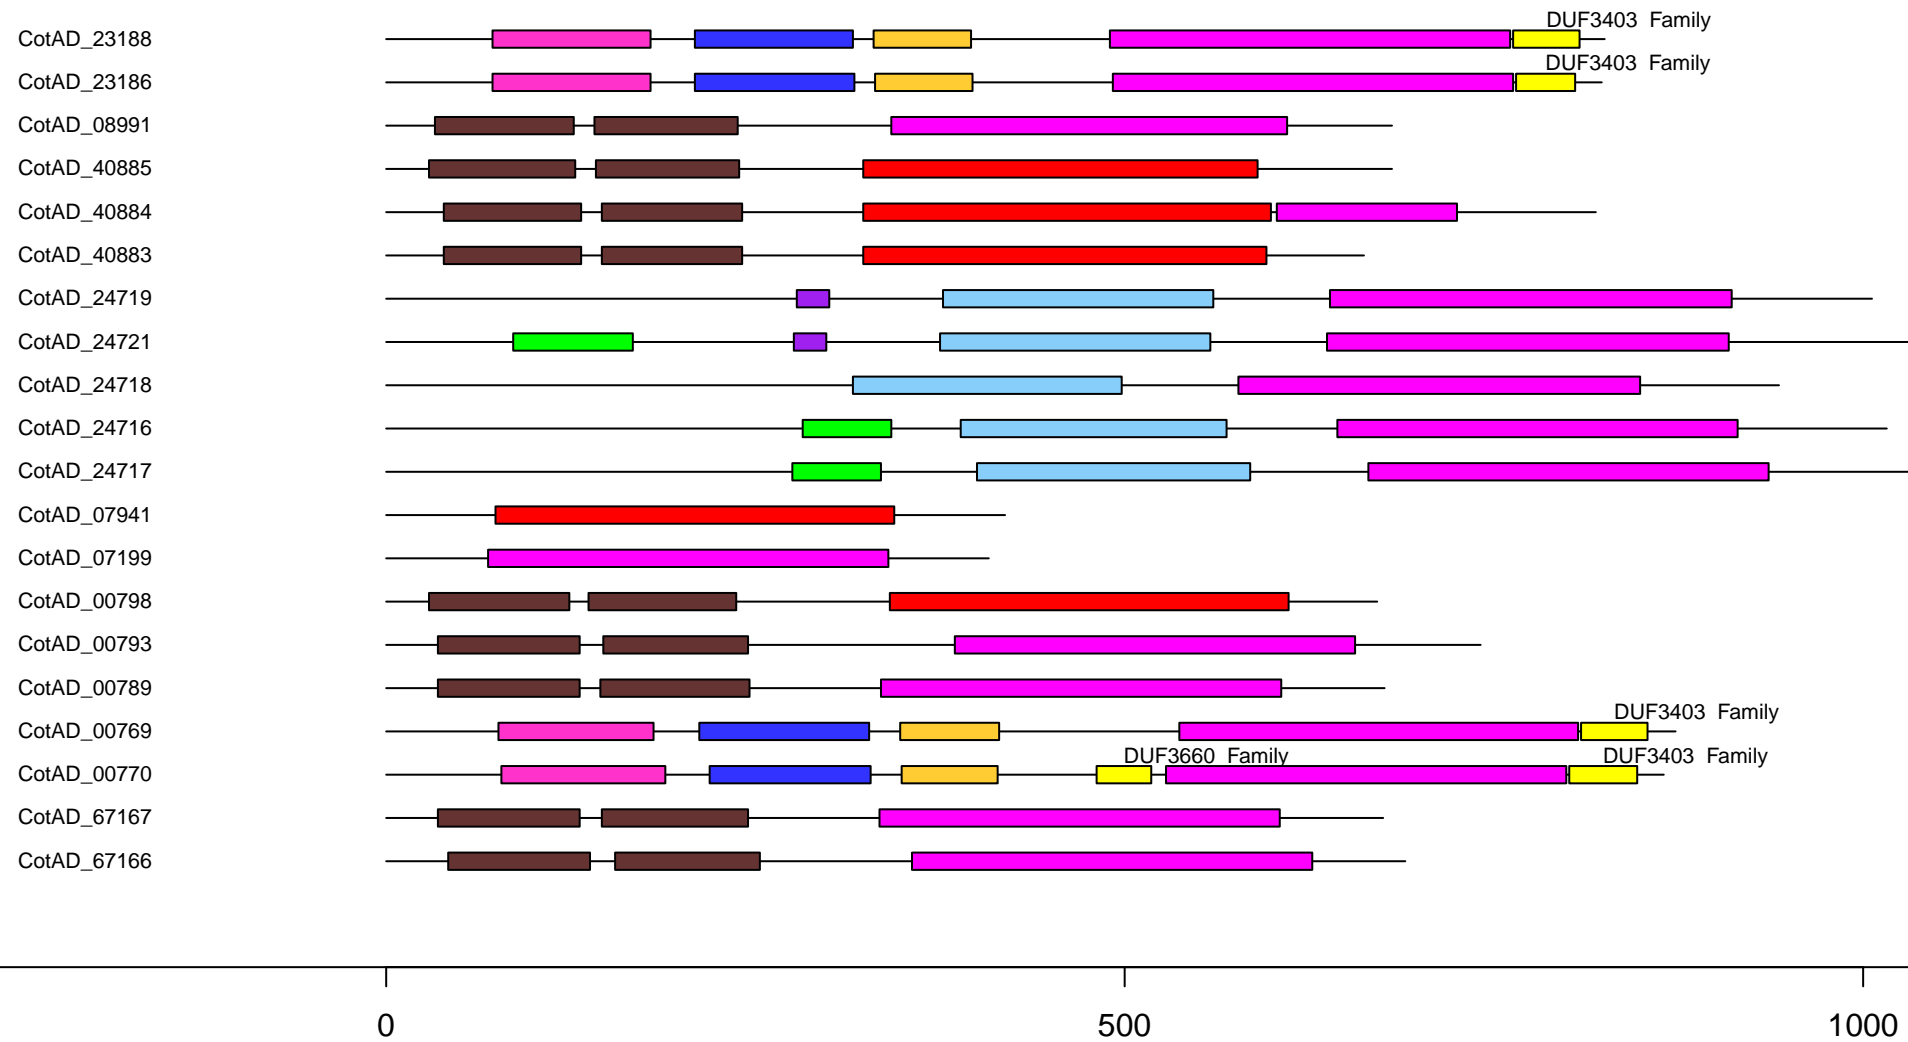

**Domain Color**

- B\_lectin Domain
- LRR\_1 Repeat
- LRR\_8 Repeat
- Malectin Domain
- PAN\_2 Domain
- Pkinase Domain
- Pkinase\_Tyr Domain
- S\_locus\_glycop Domain
- Stress-antifung Family
- other Domain

### G.hi RLK-Pelle\_DLSV domain diagram (part 9)

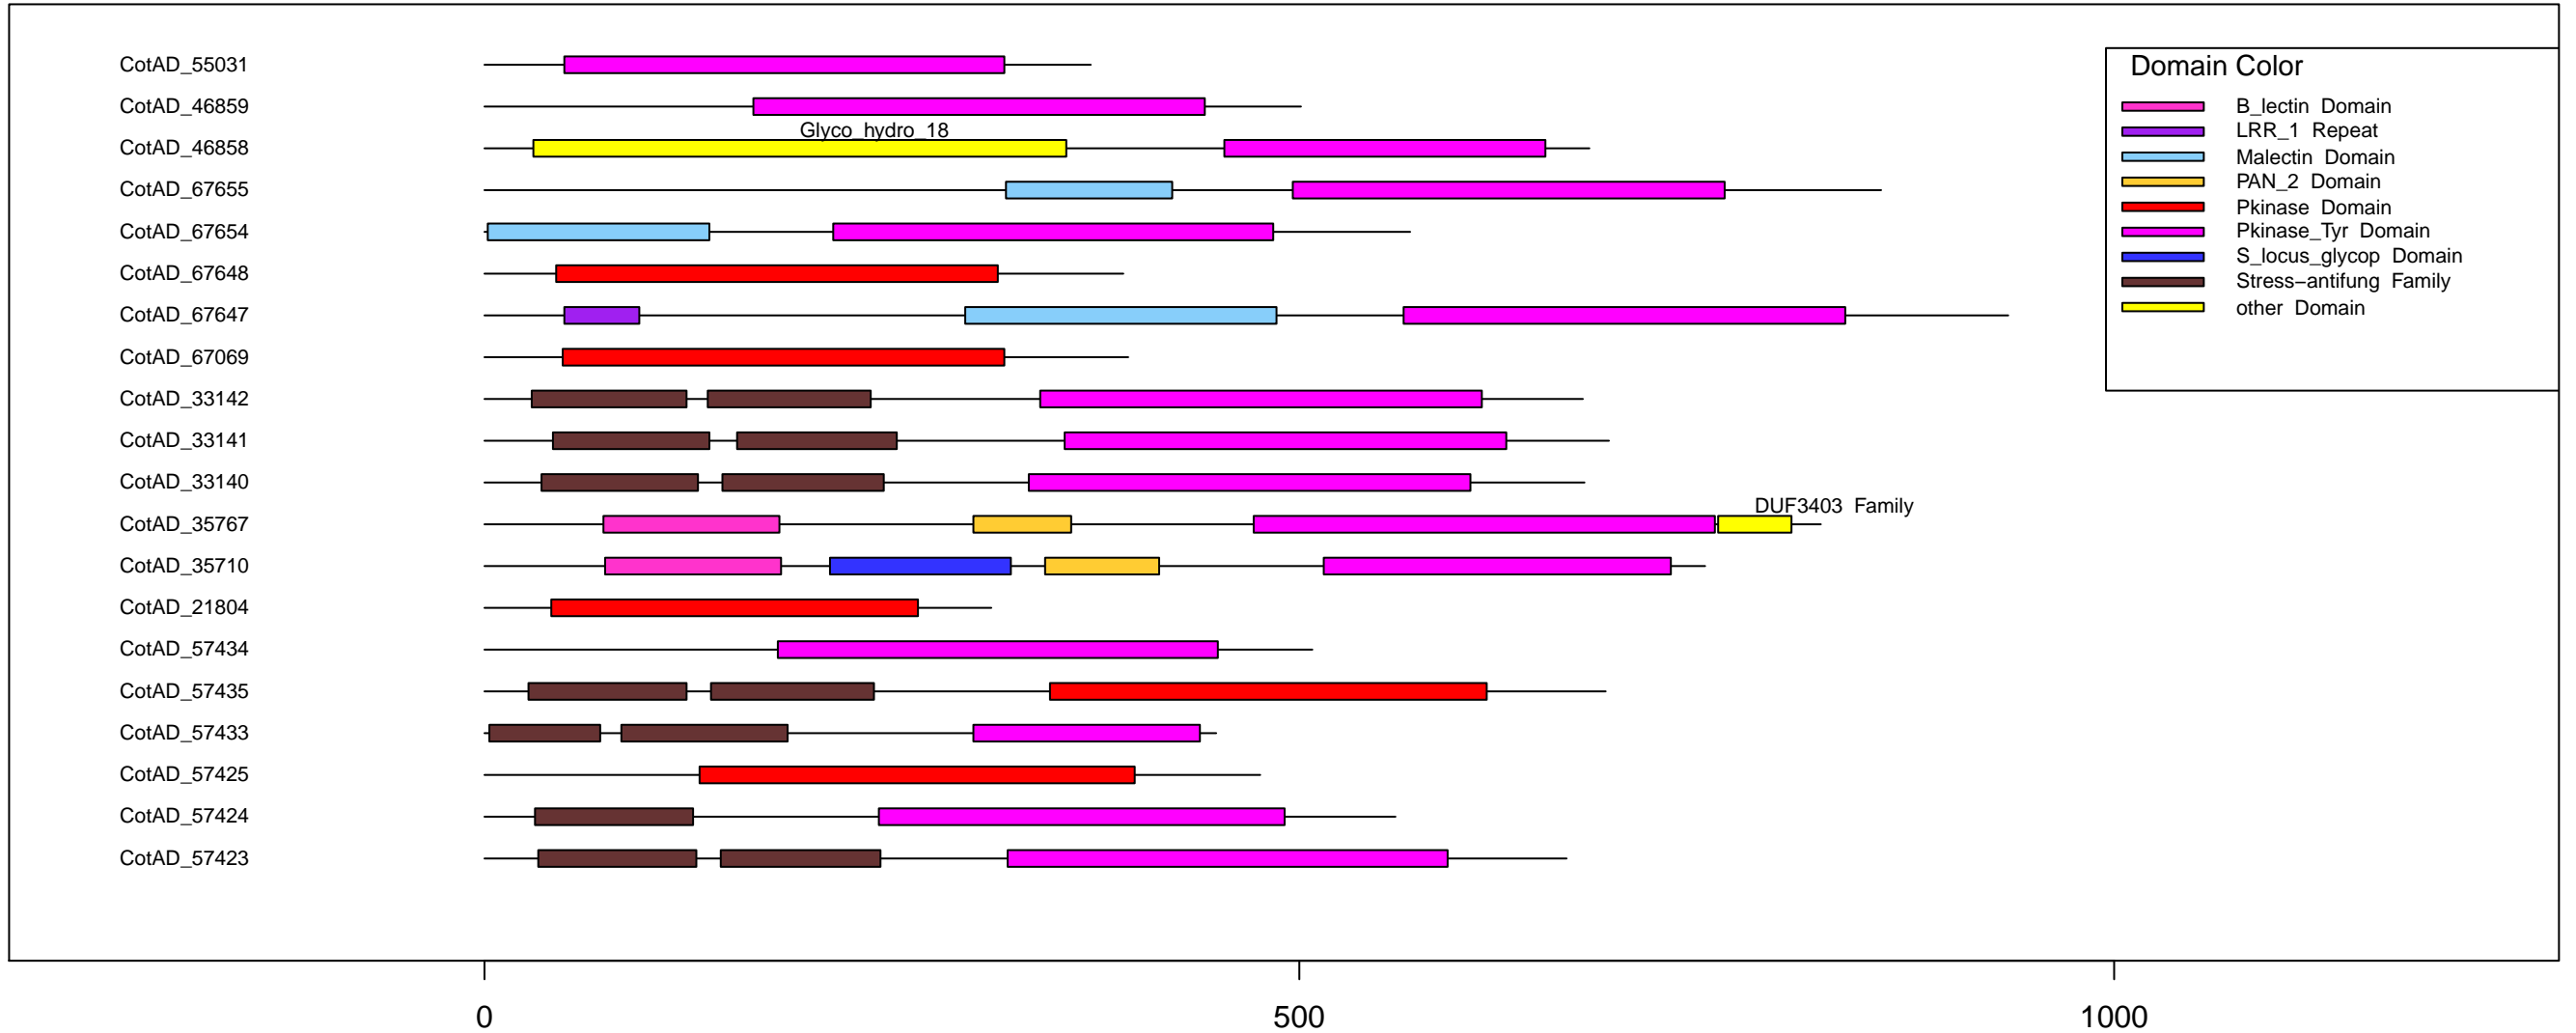

### G.hi RLK-Pelle\_DLSV domain diagram (part 10)

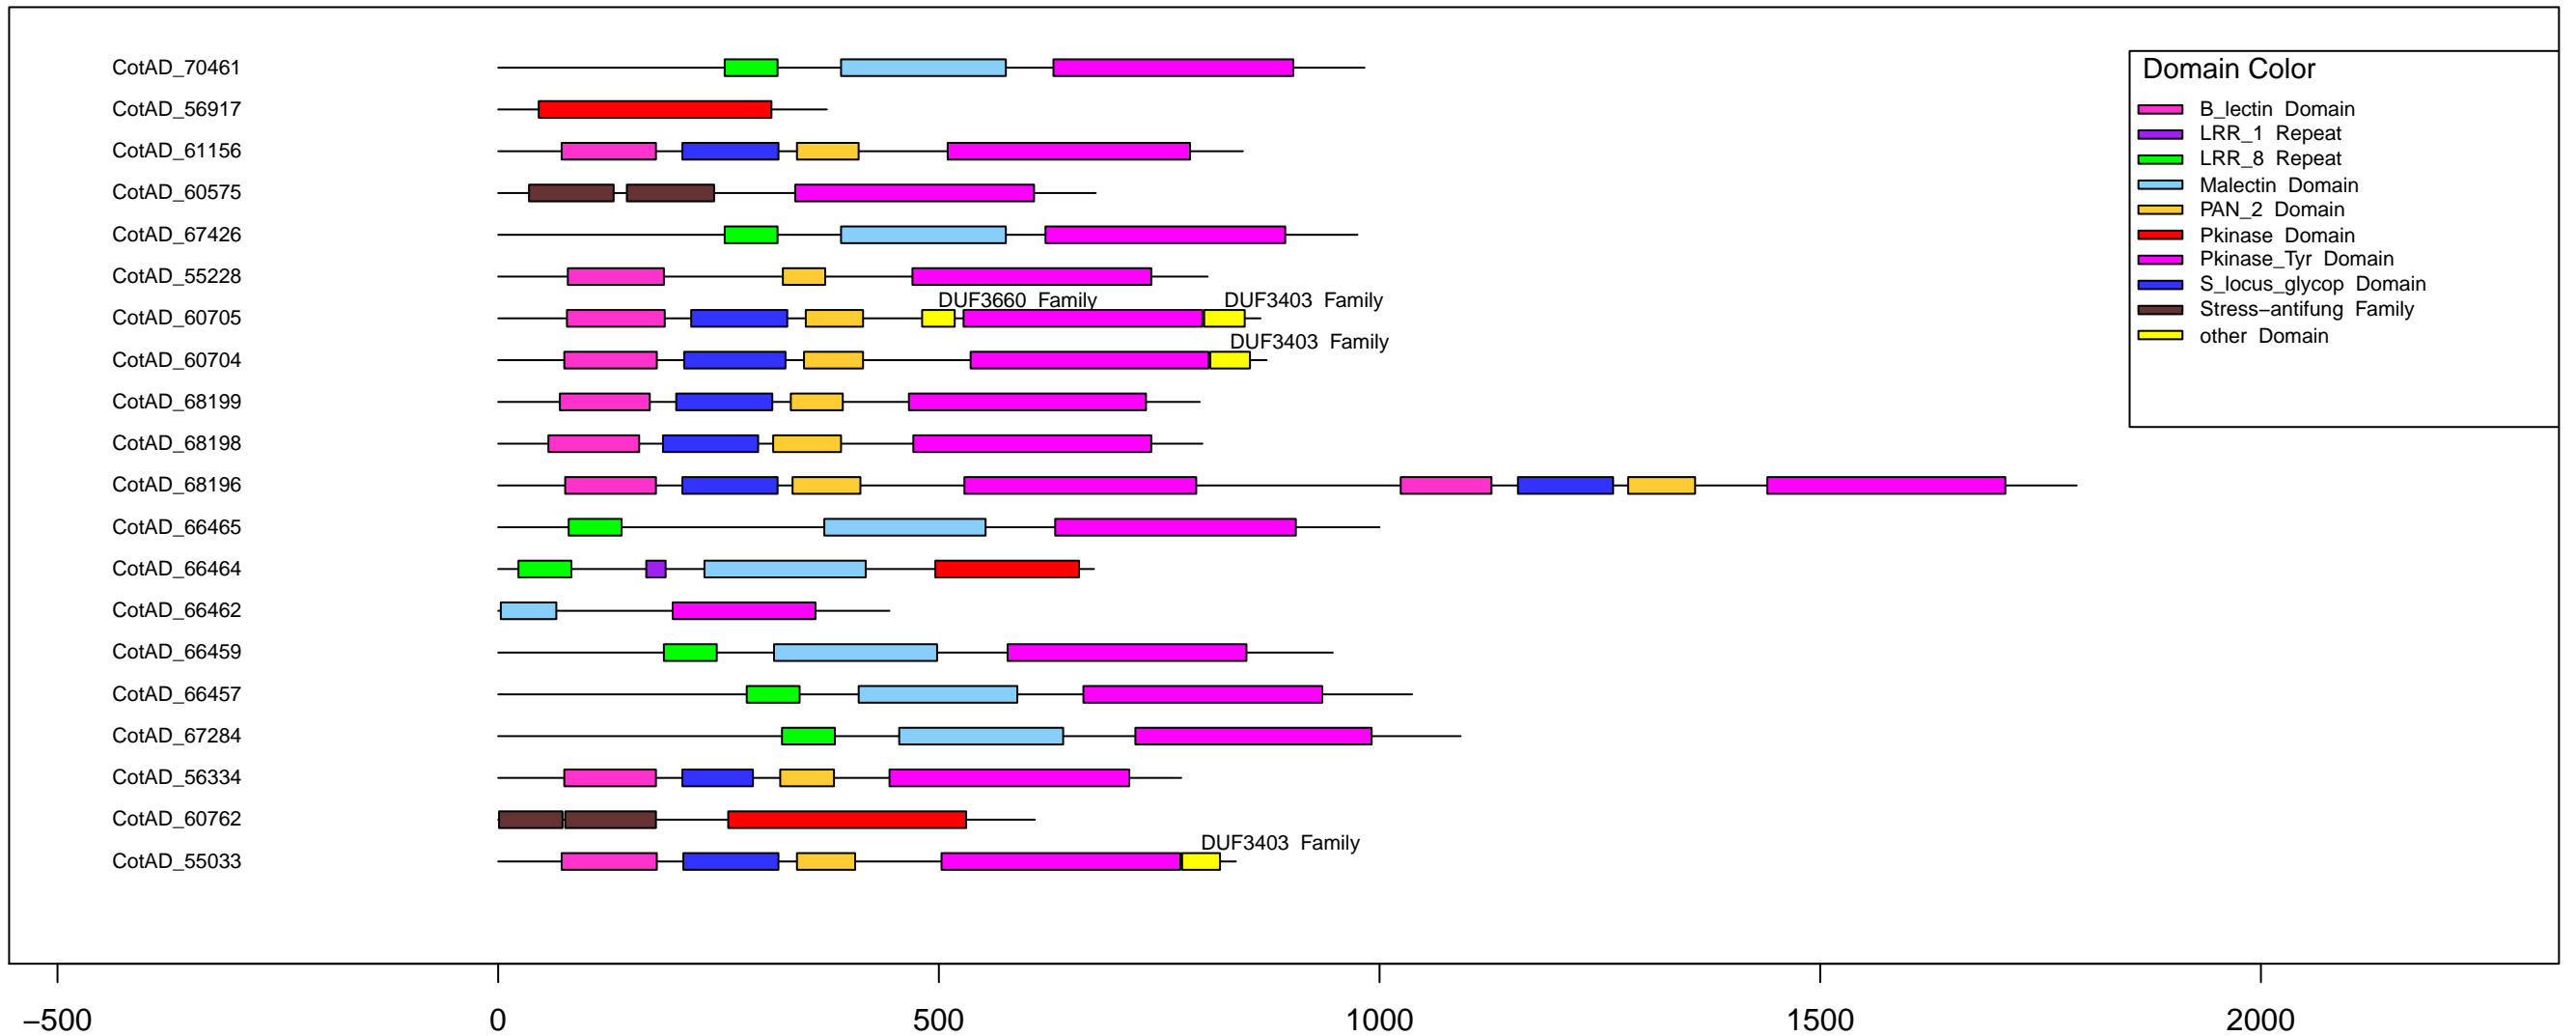

# G.hi RLK-Pelle\_DLSV domain diagram (part 11)

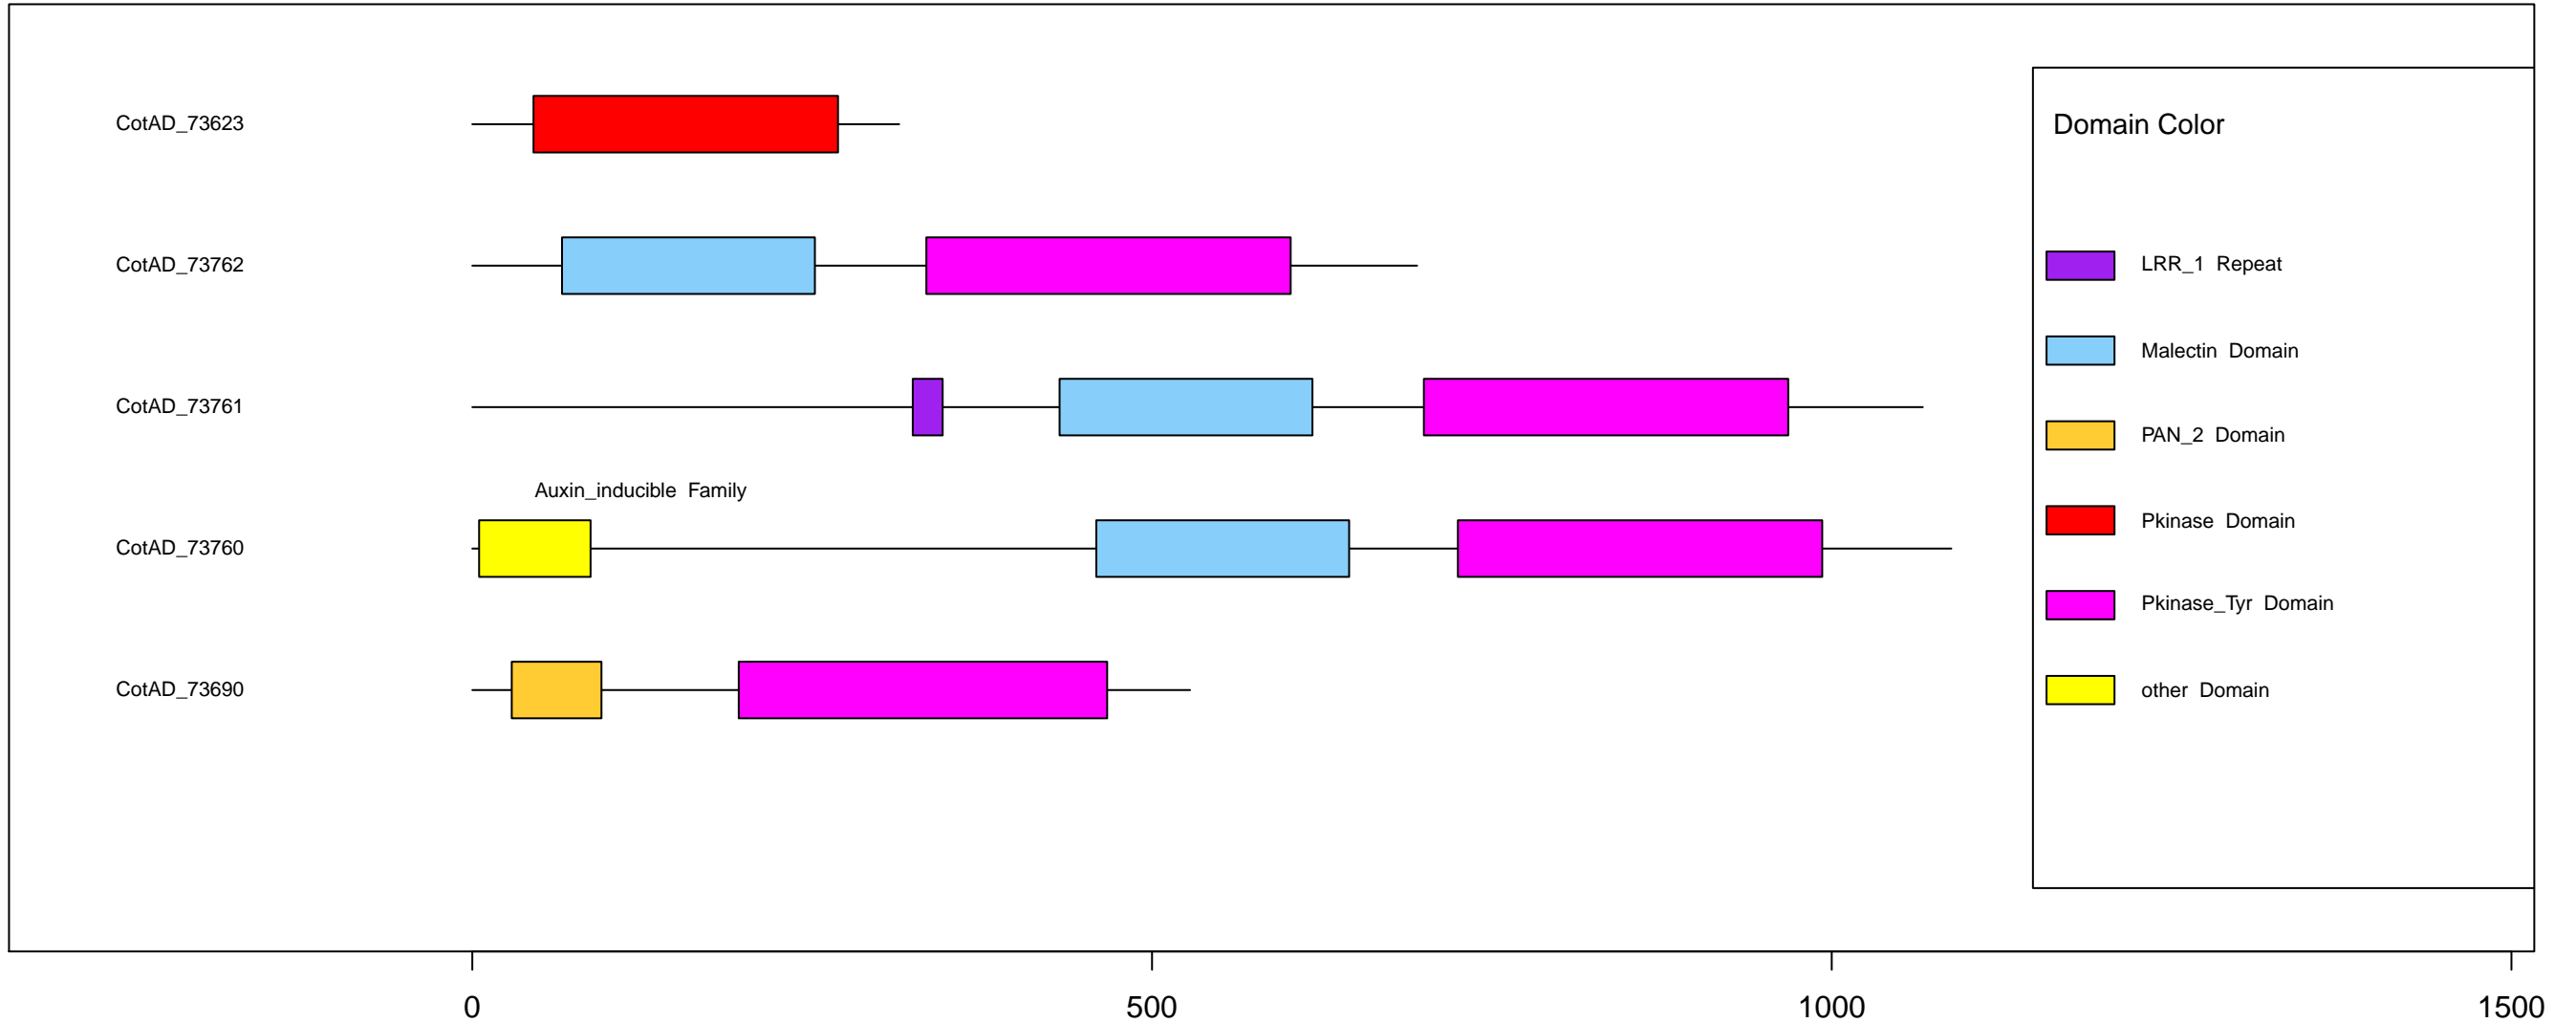

# G.hi RLK-Pelle\_Extensin domain diagram (all)

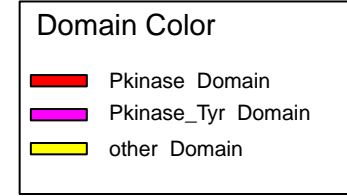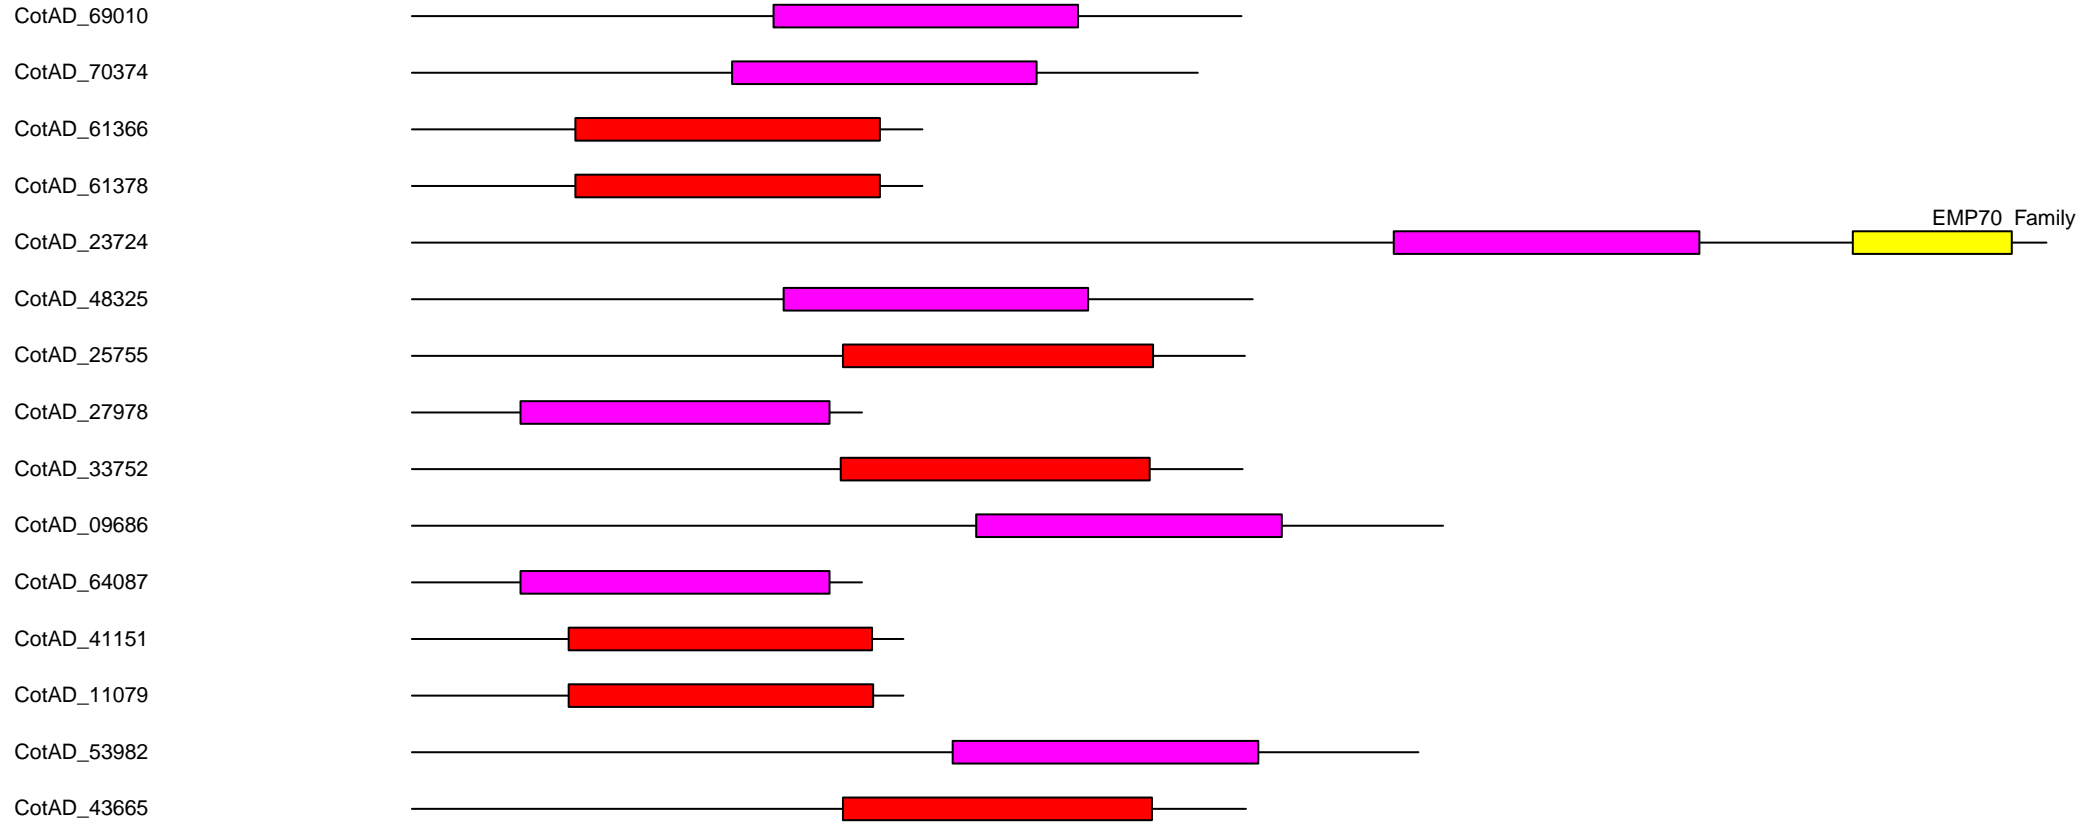

# G.hi RLK-Pelle\_L-LEC domain diagram (part 1)

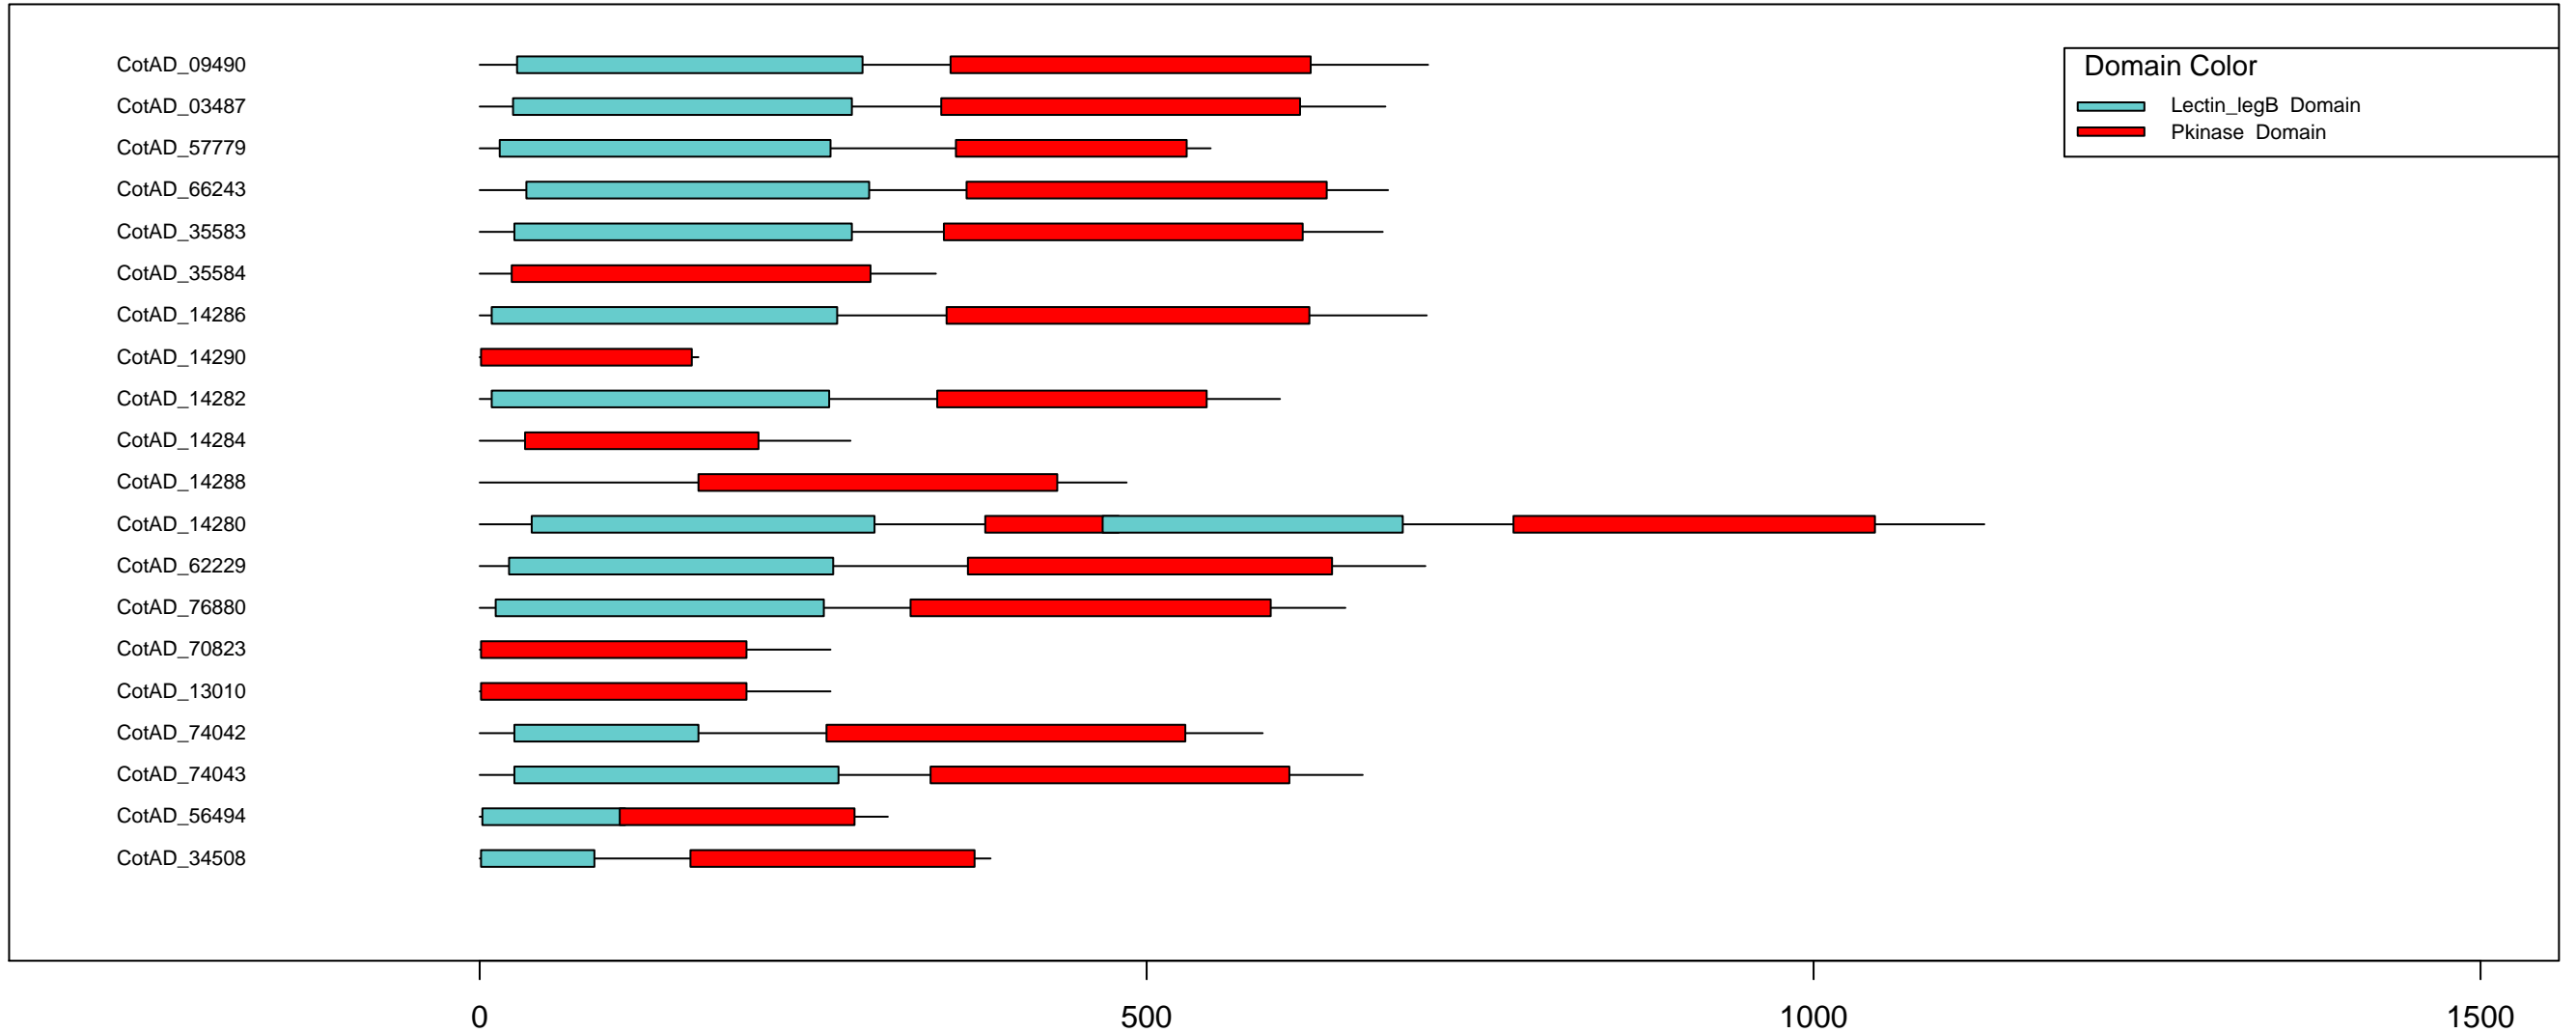

### G.hi RLK-Pelle\_L-LEC domain diagram (part 2)

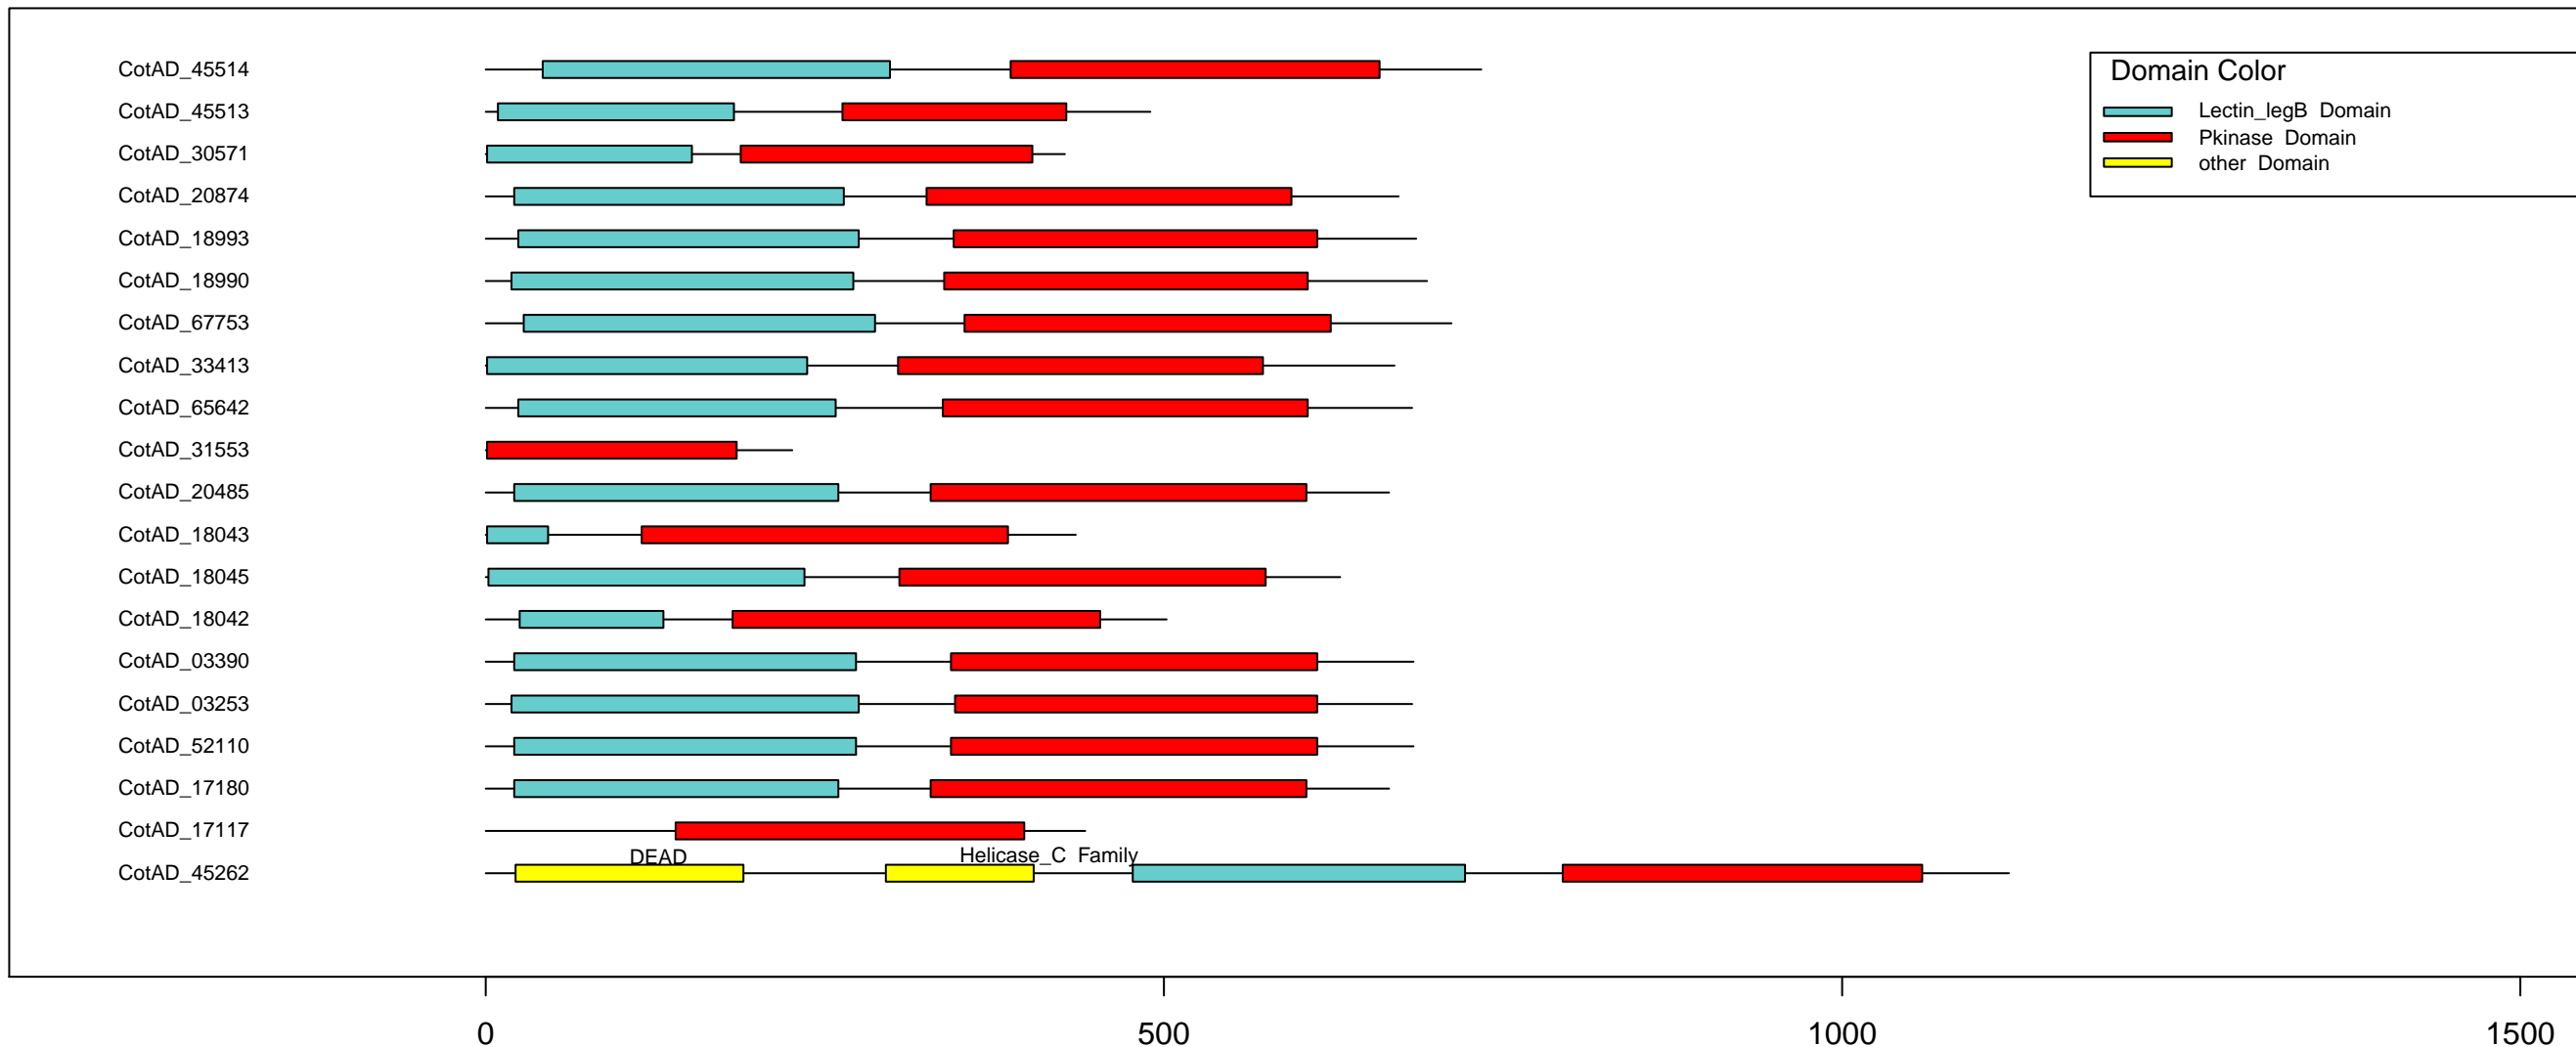



### G.hi RLK-Pelle\_L-LEC domain diagram (part 3)

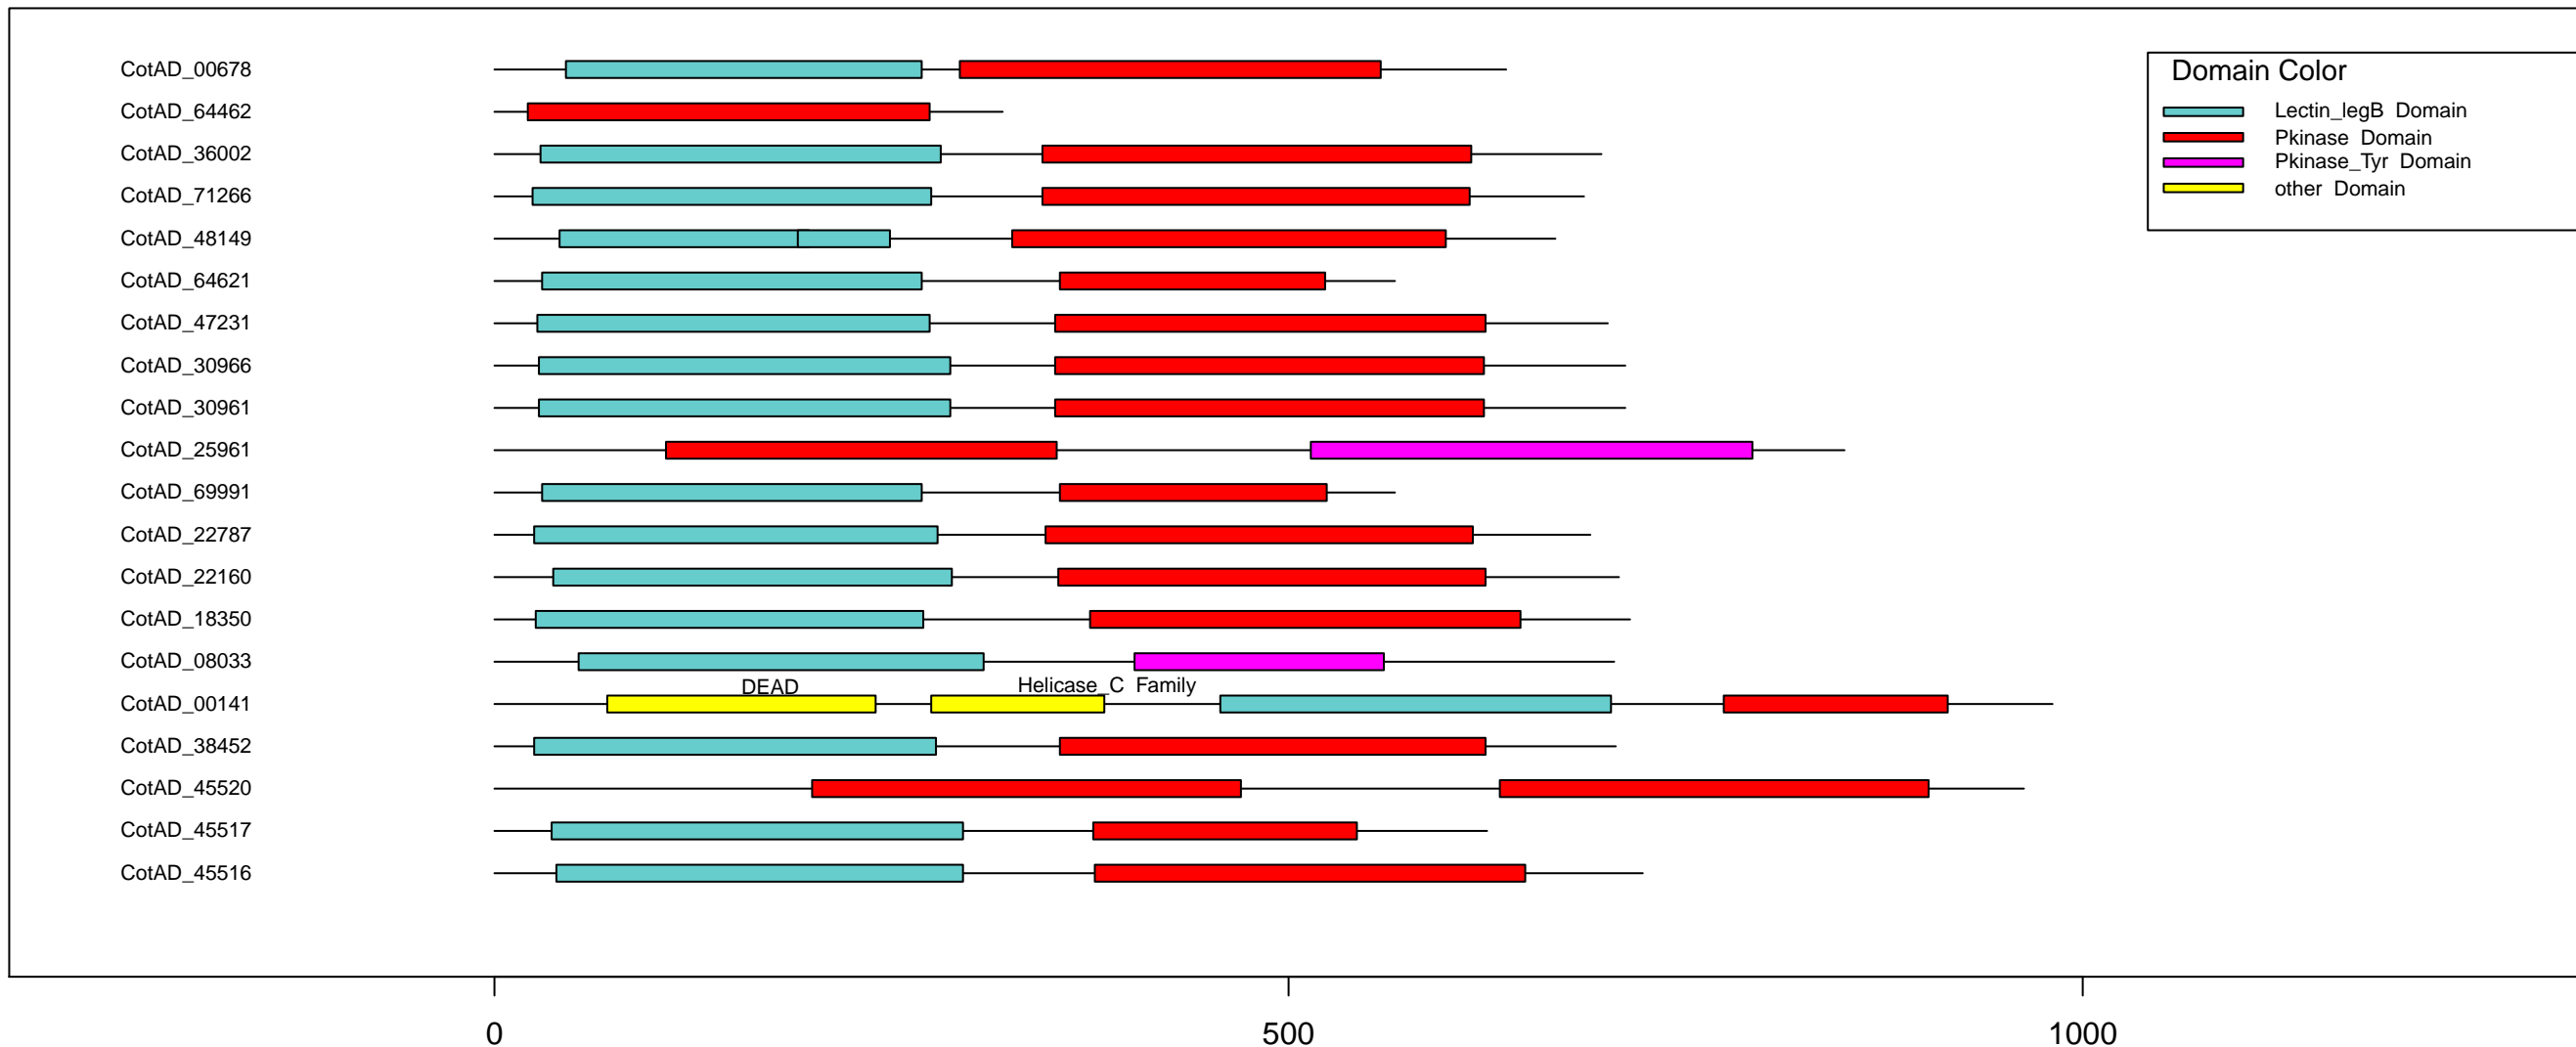

### G.hi RLK-Pelle\_L-LEC domain diagram (part 4)

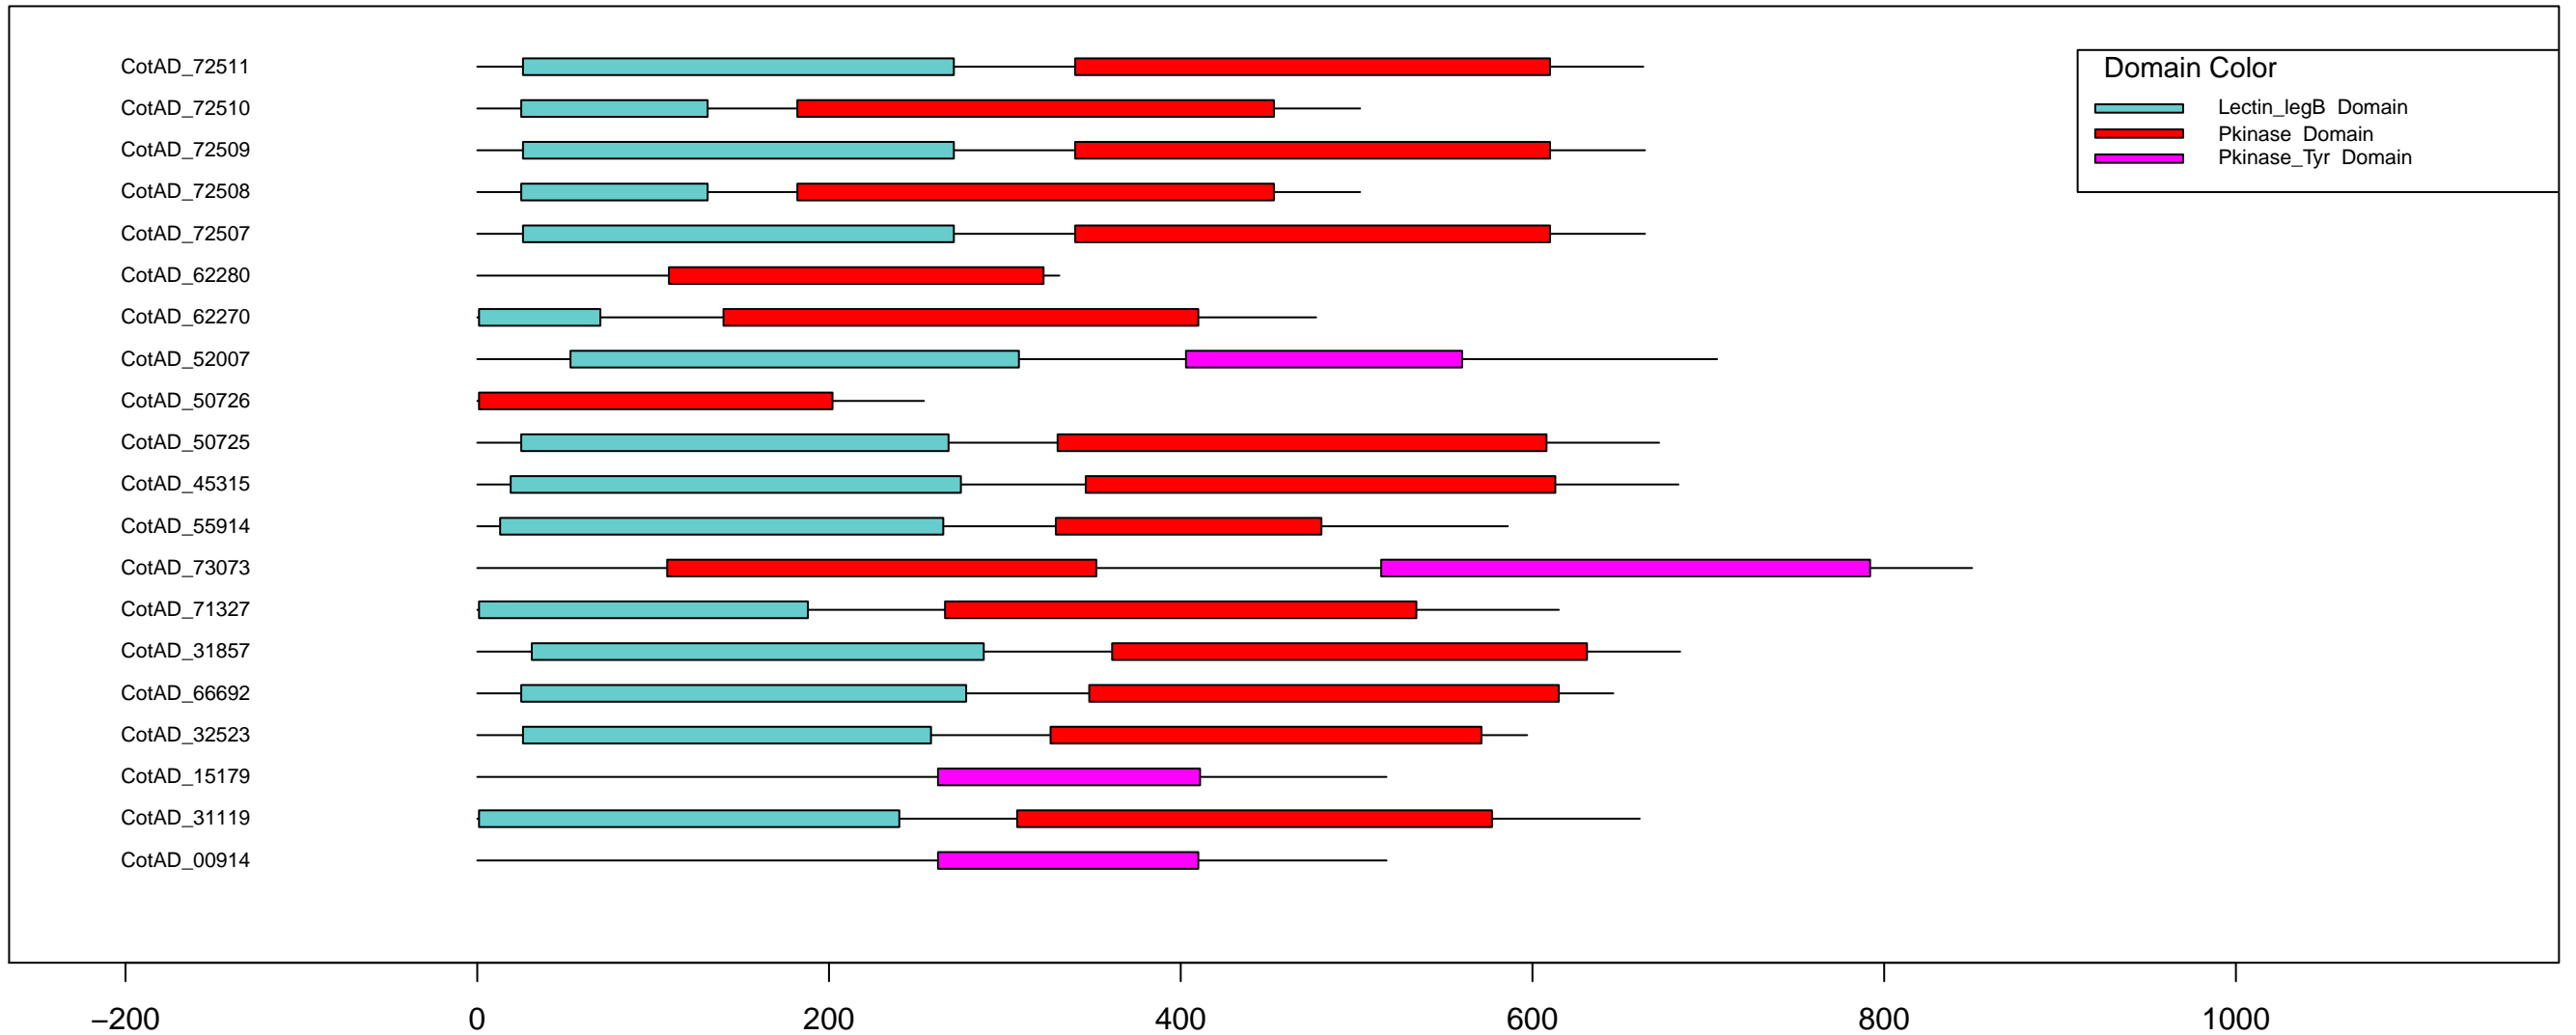

### G.hi RLK-Pelle\_L-LEC domain diagram (part 5)

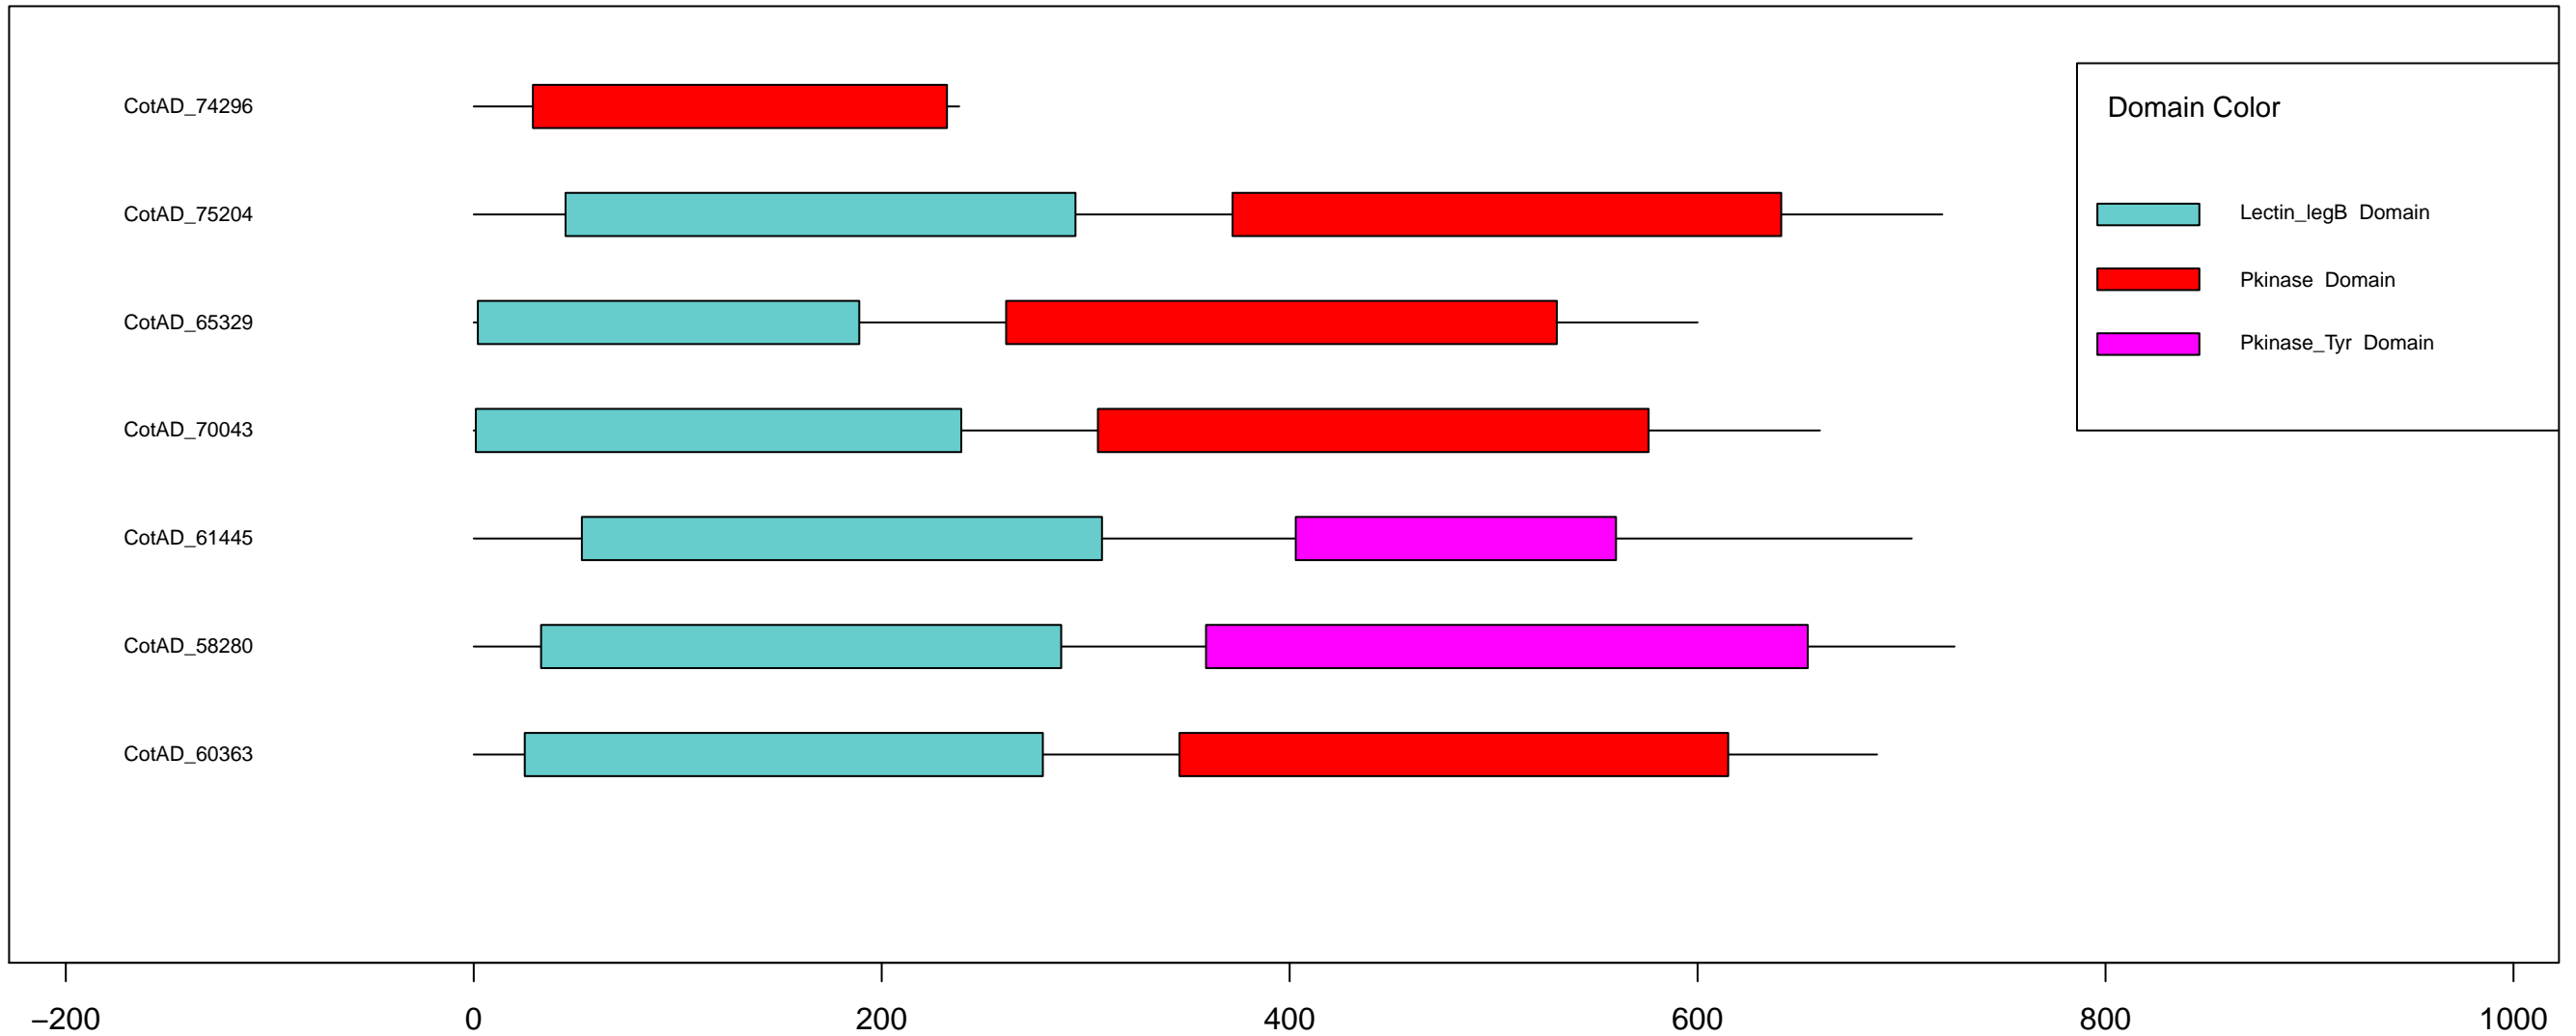

### G.hi RLK-Pelle\_LRK10L-2 domain diagram (part 1)

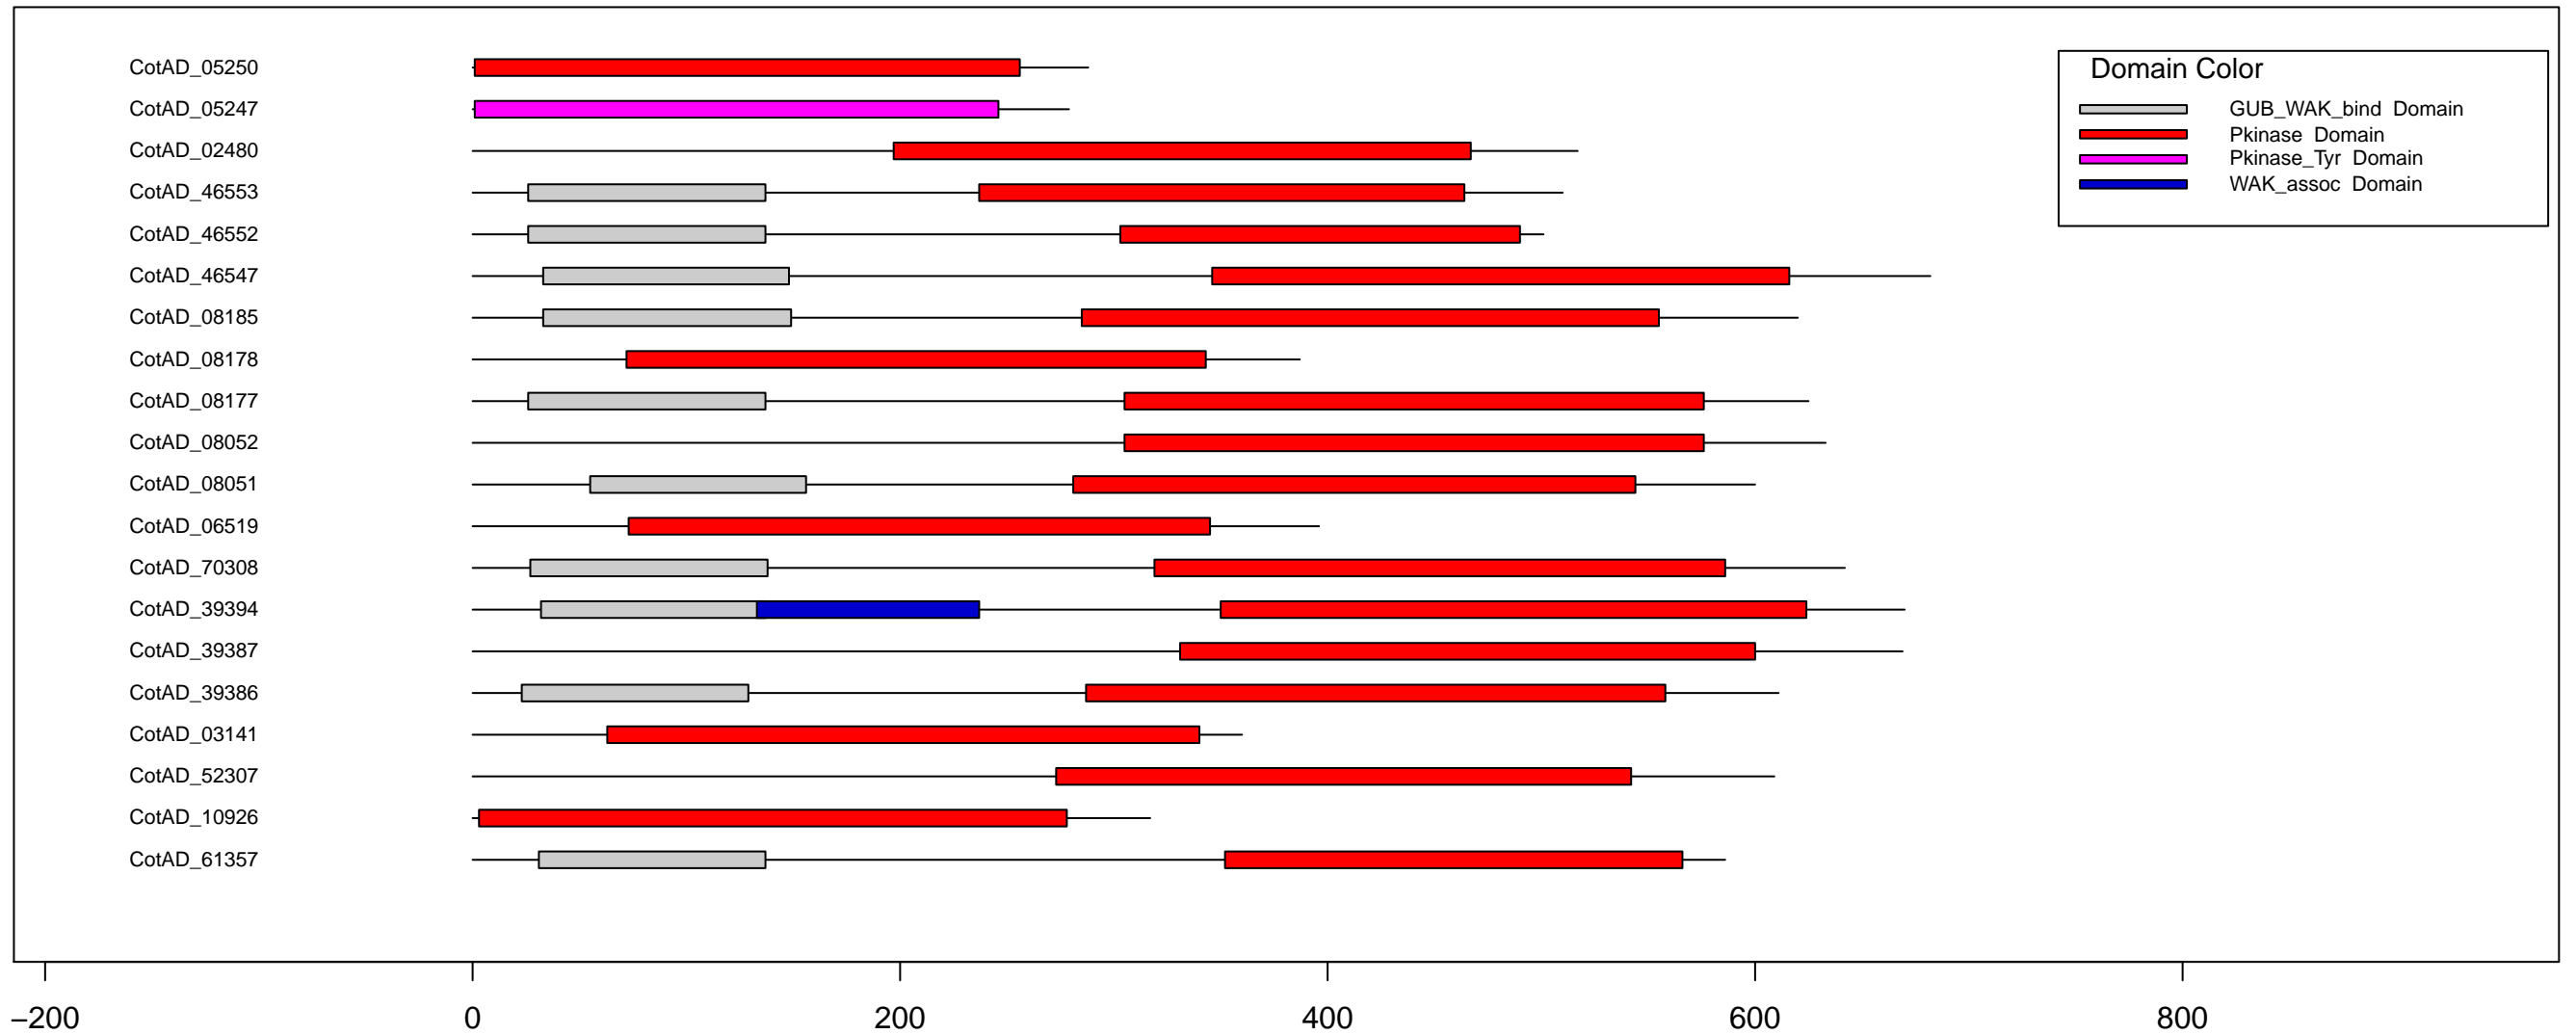

### G.hi RLK-Pelle\_LRK10L-2 domain diagram (part 2)

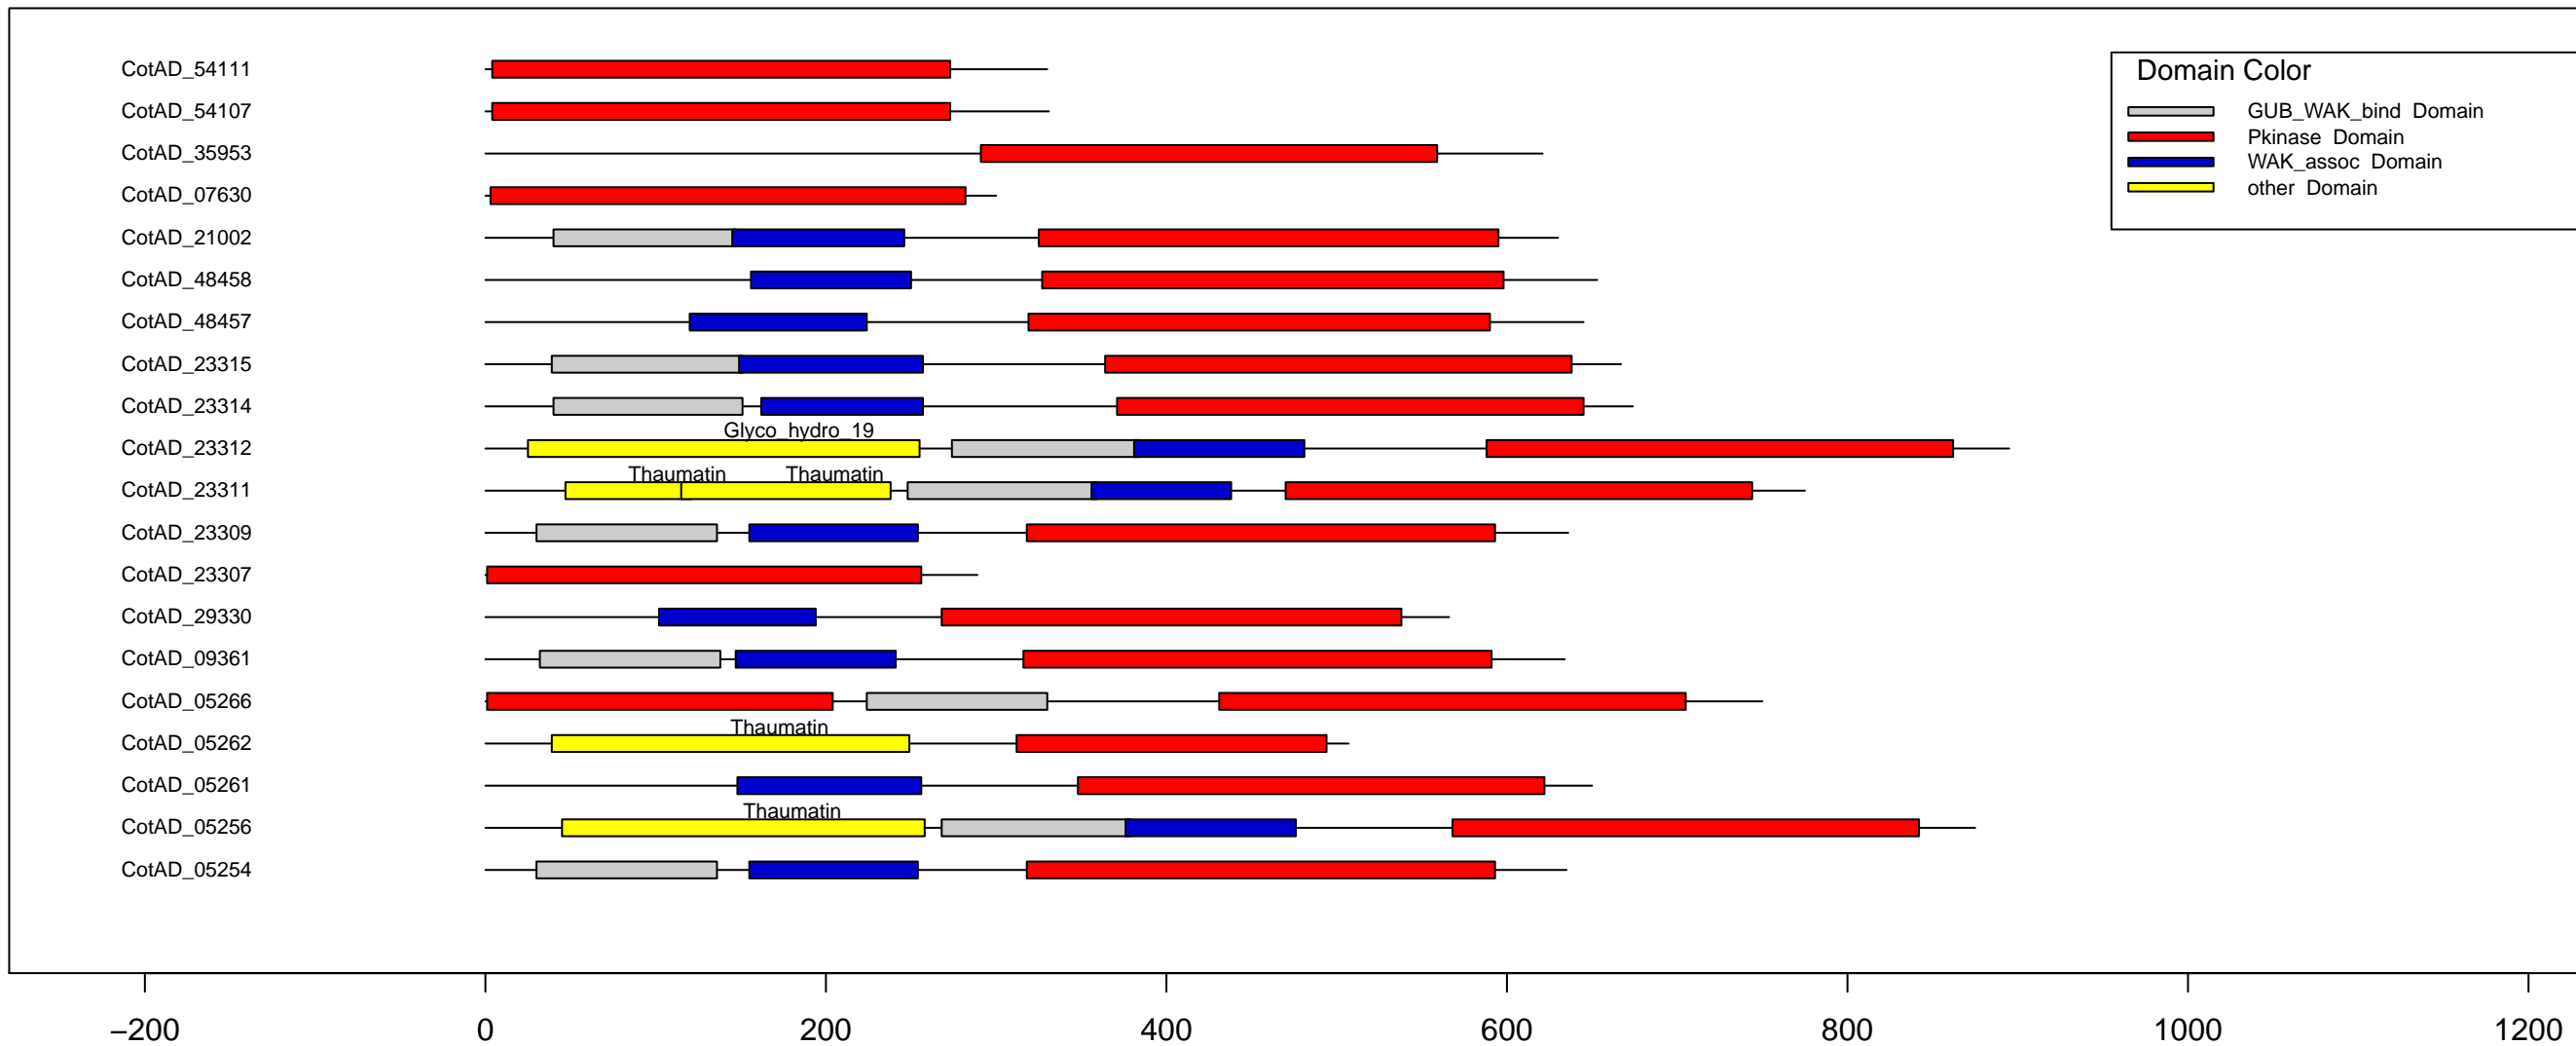

### G.hi RLK-Pelle\_LRK10L-2 domain diagram (part 3)

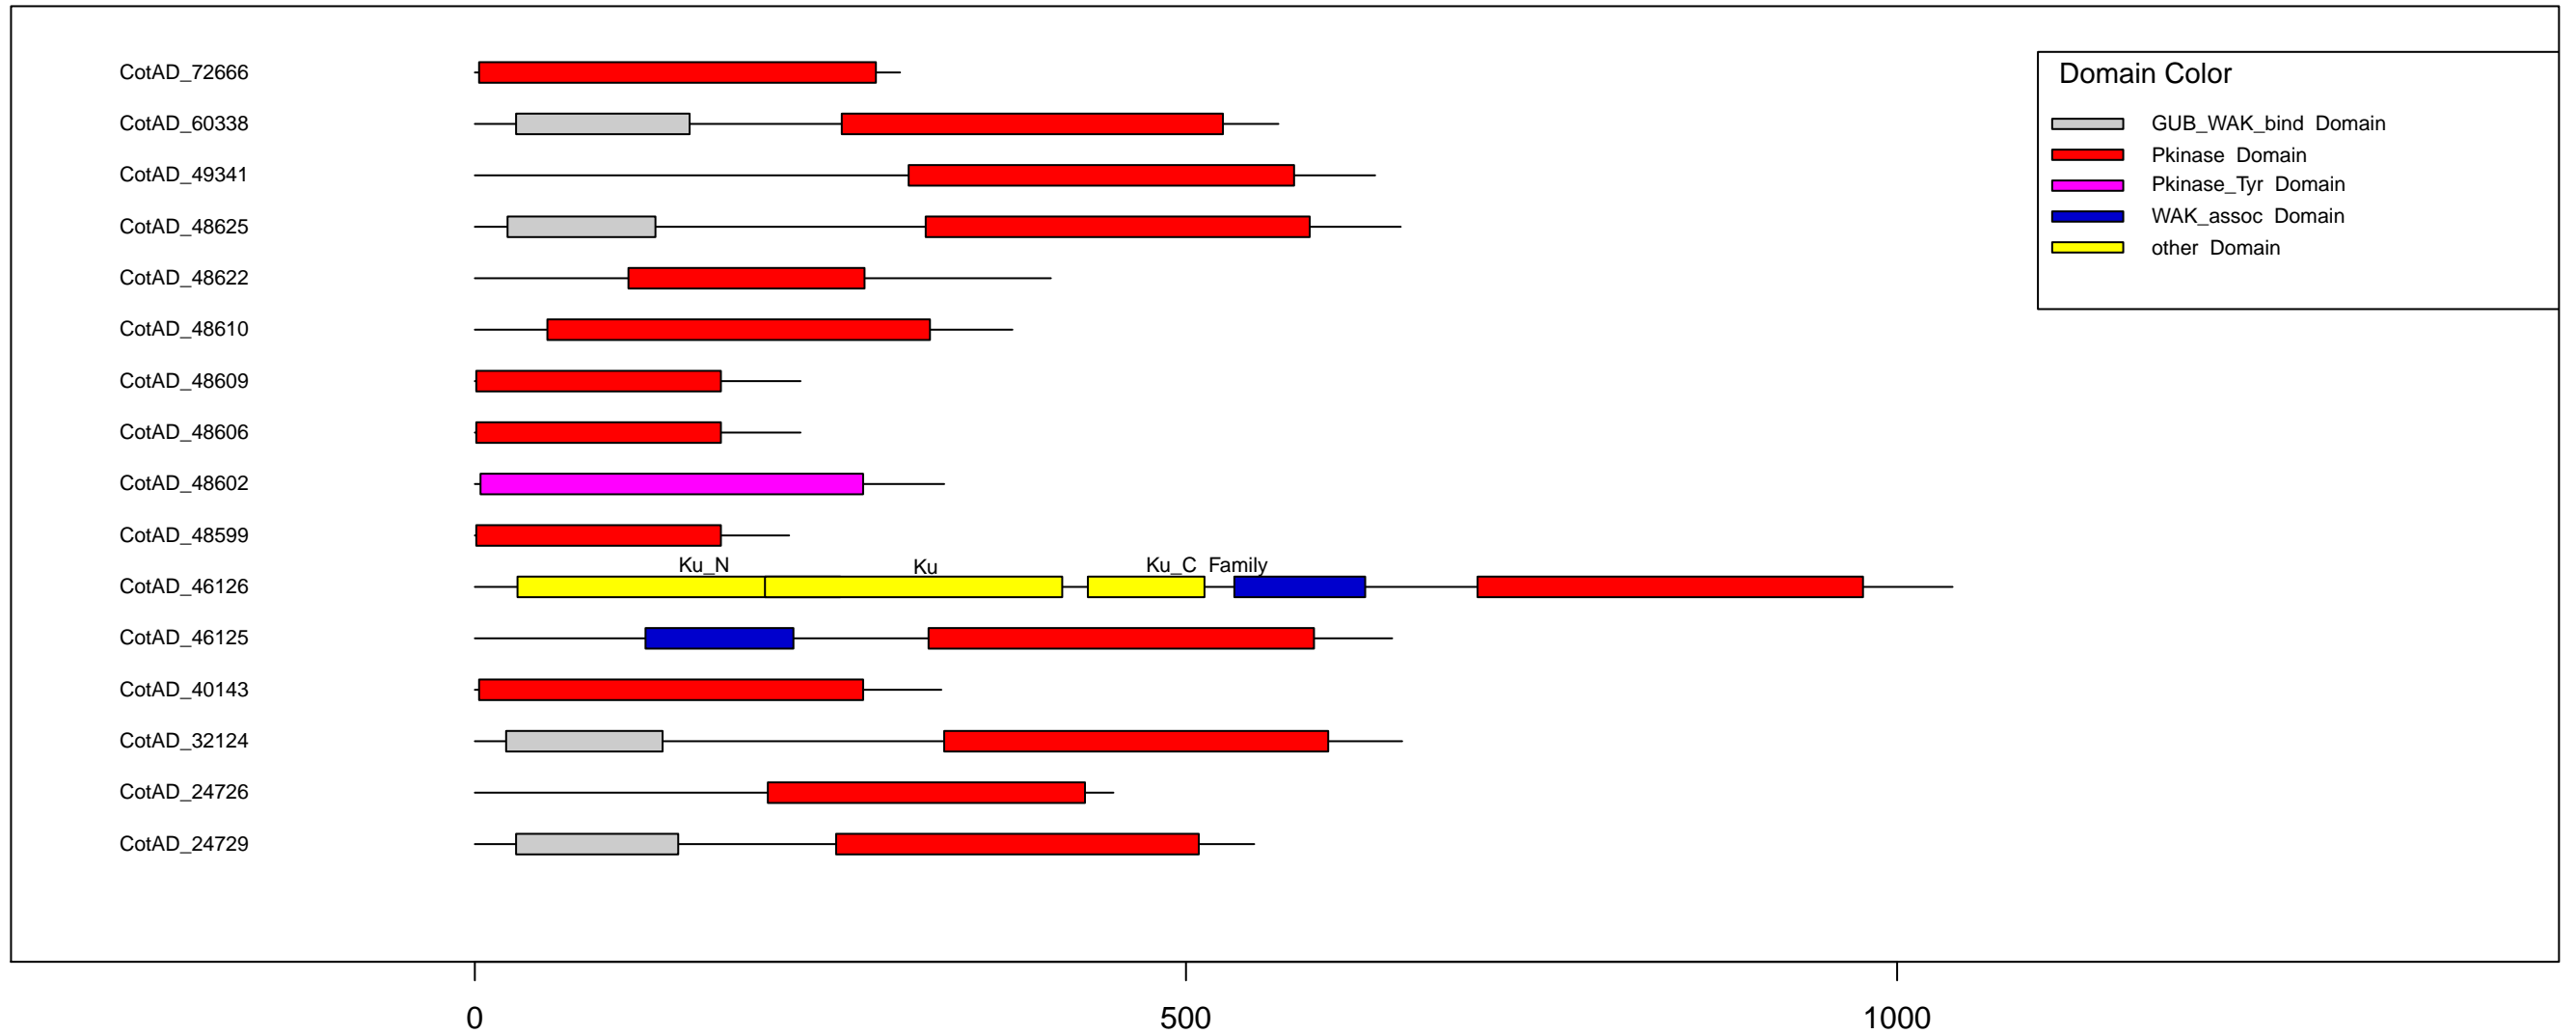

### G.hi RLK-Pelle\_LRR-I-1 domain diagram (all)

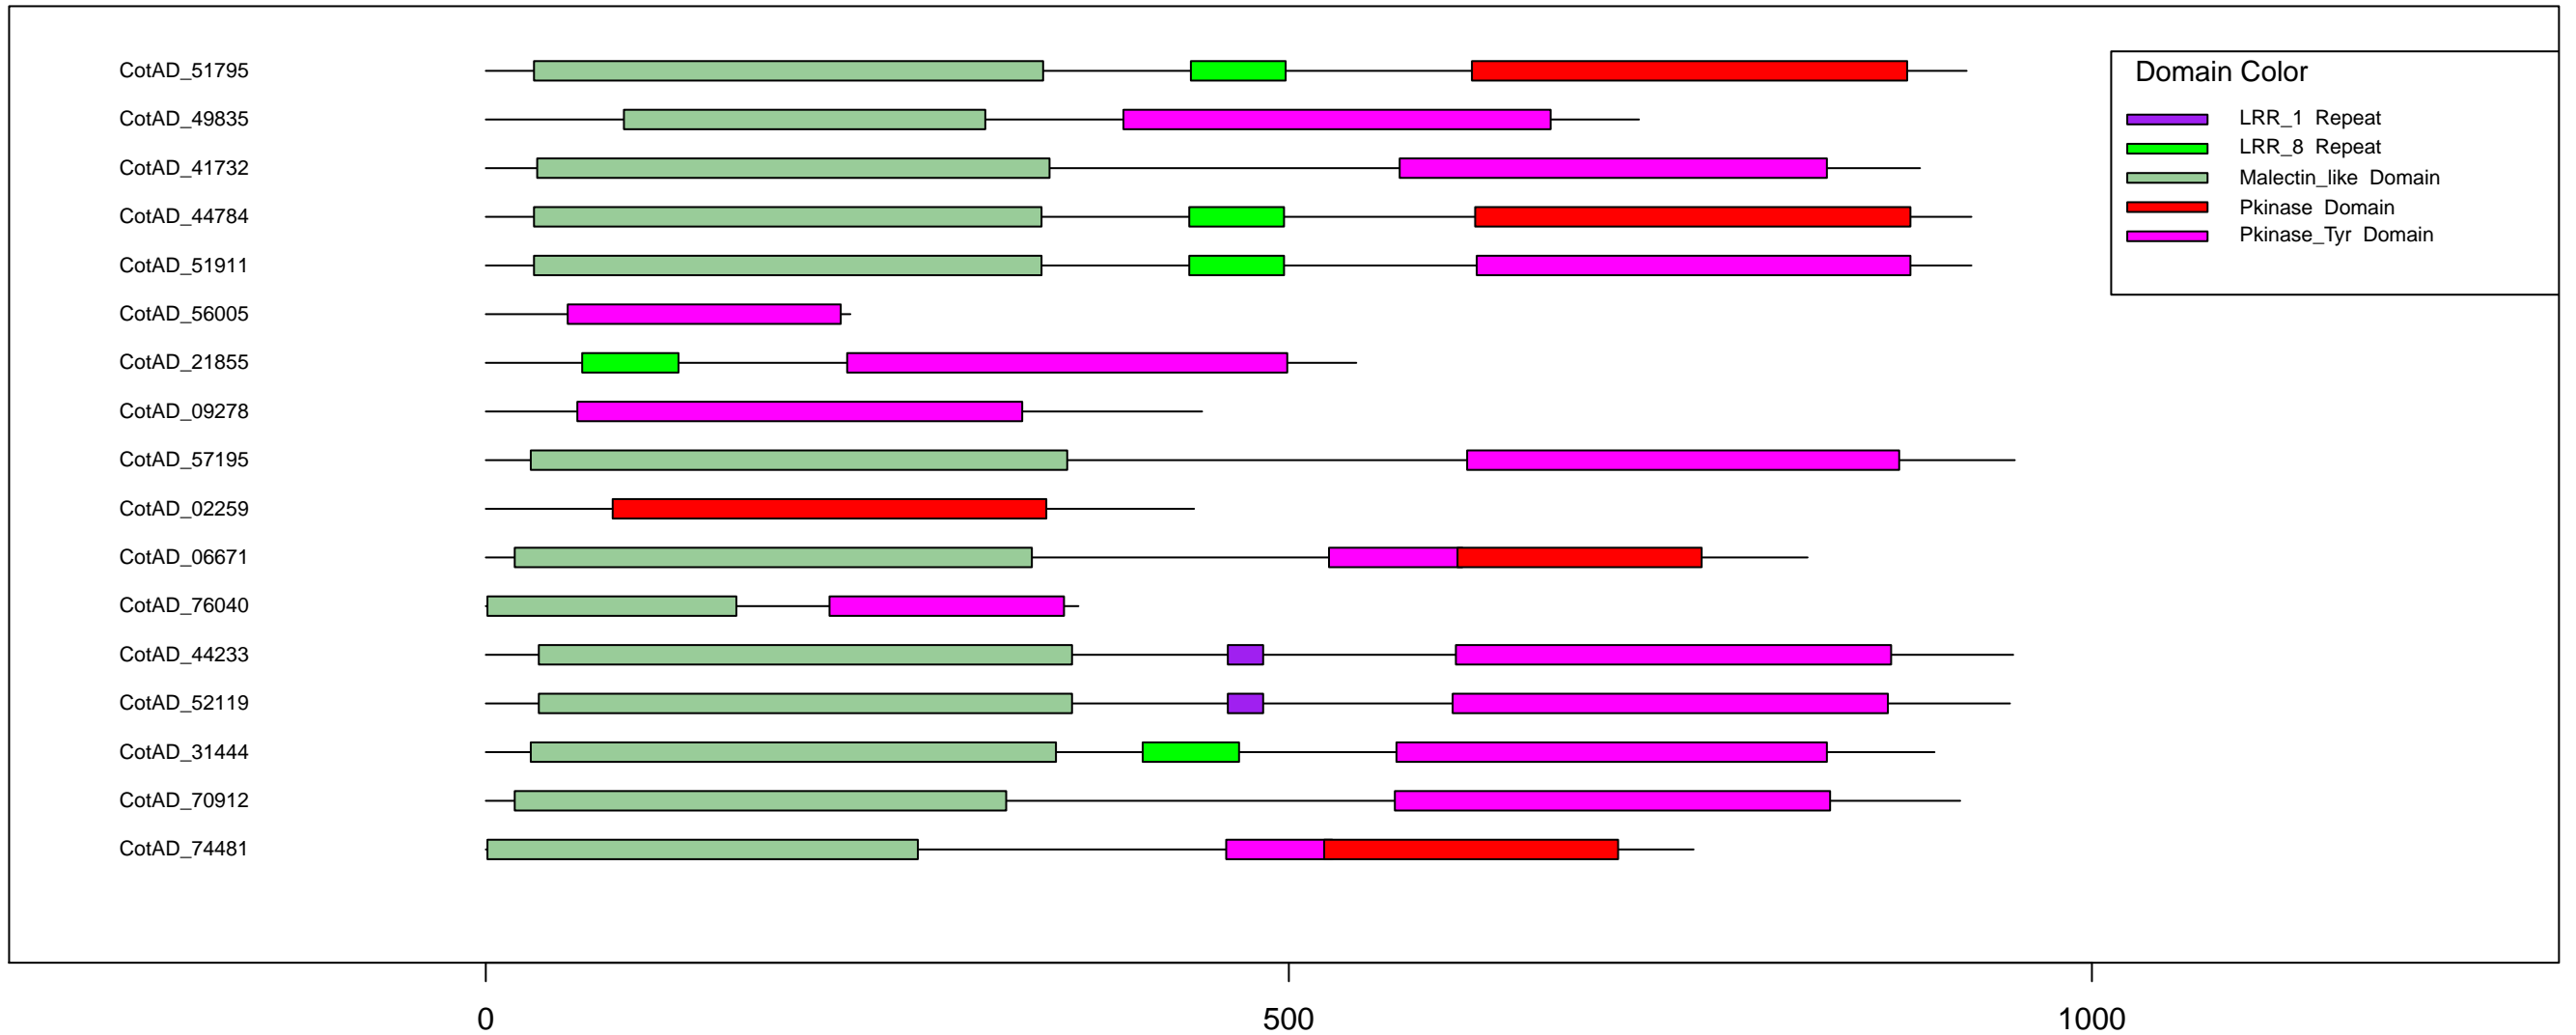

# G.hi RLK-Pelle\_LRR-I-2 domain diagram (all)

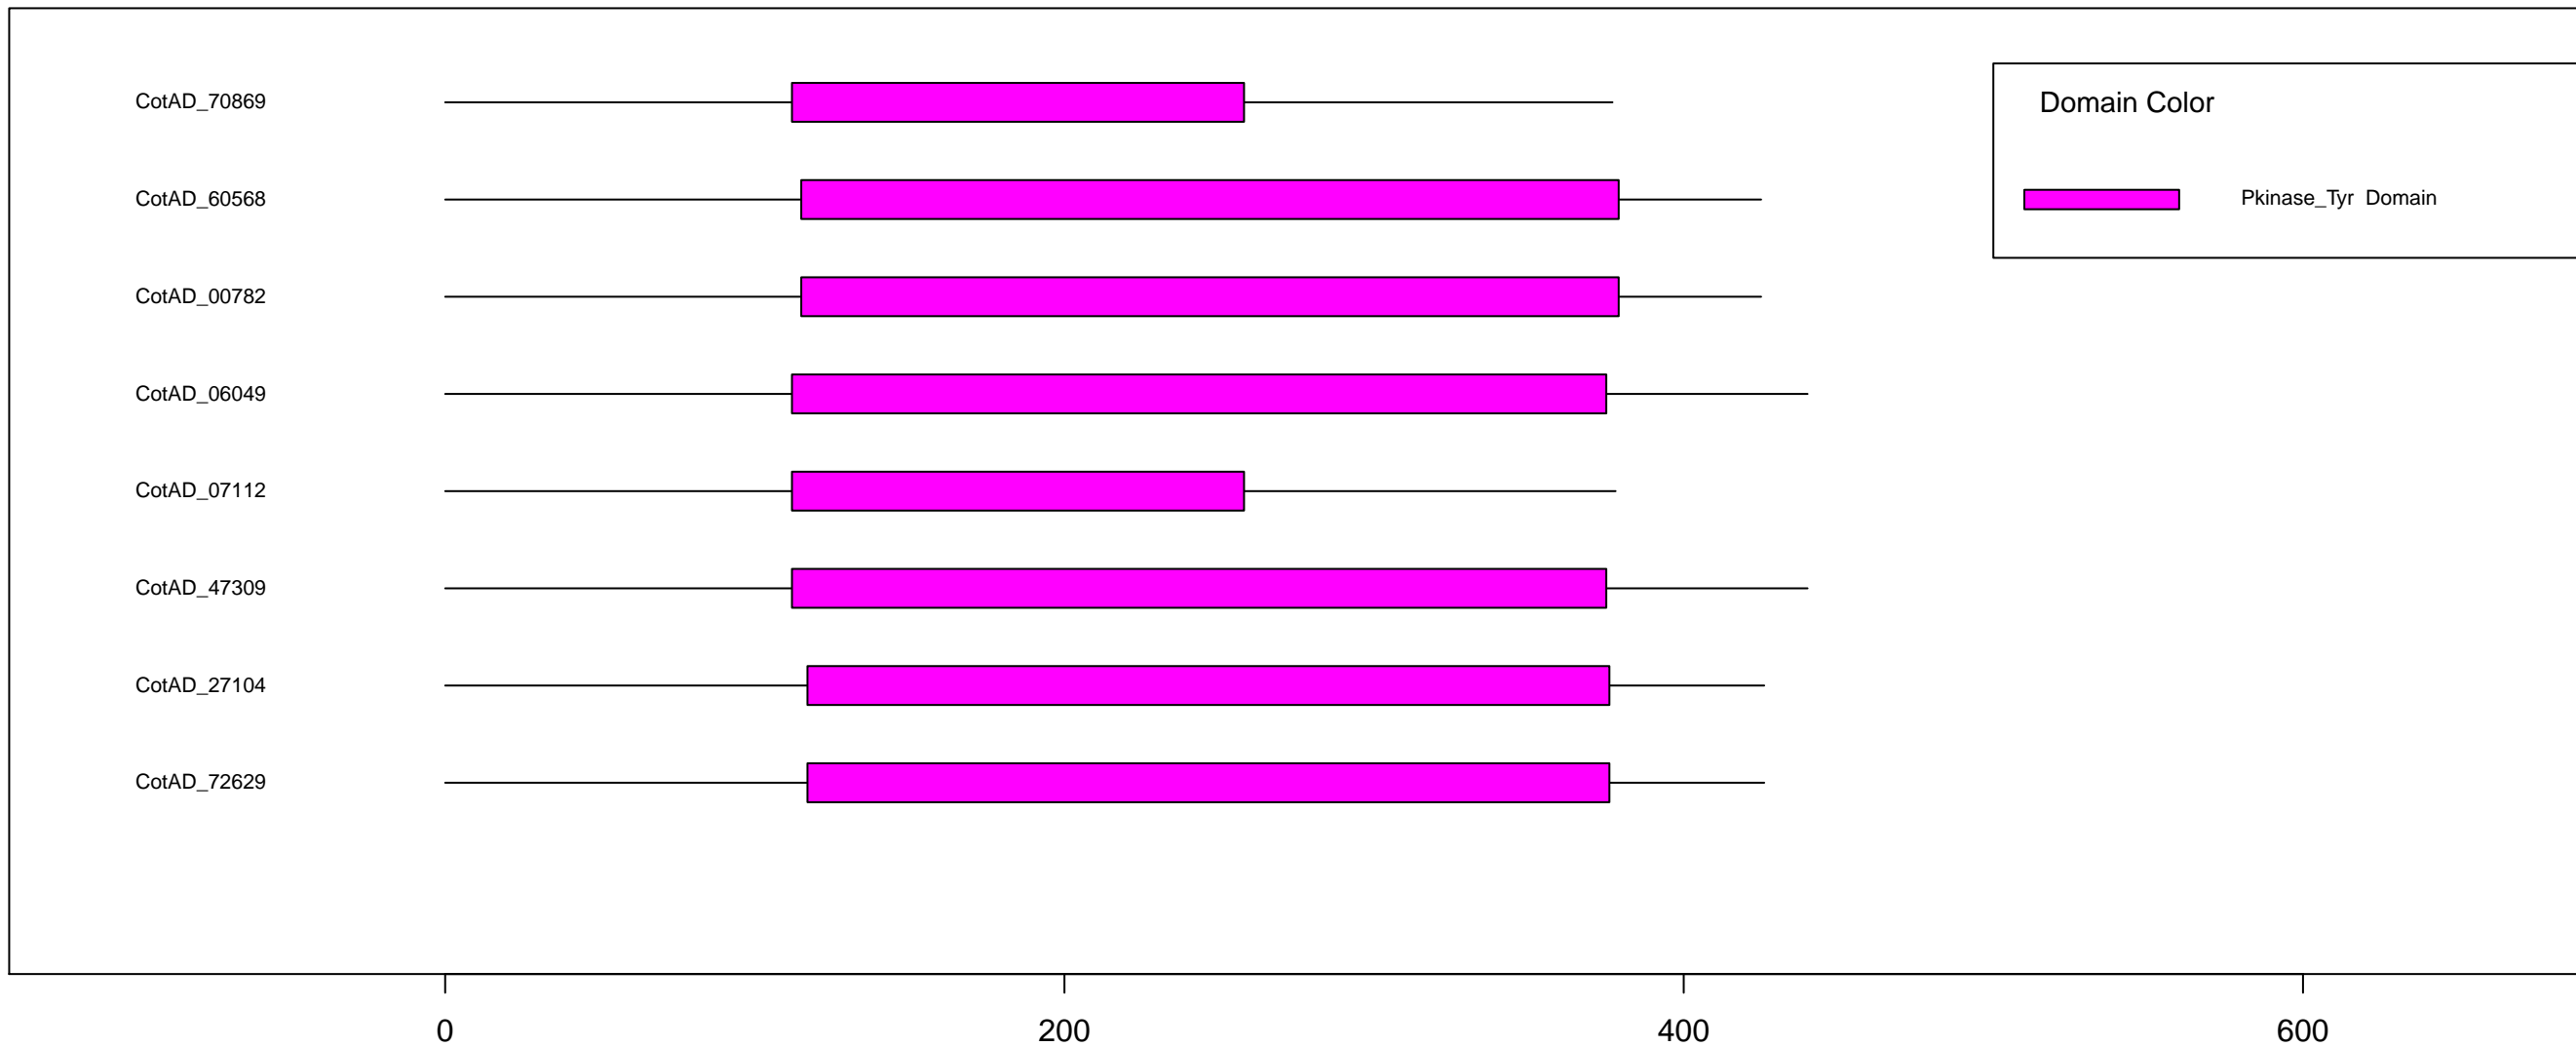



### G.hi RLK-Pelle\_LRR-III domain diagram (part 1)

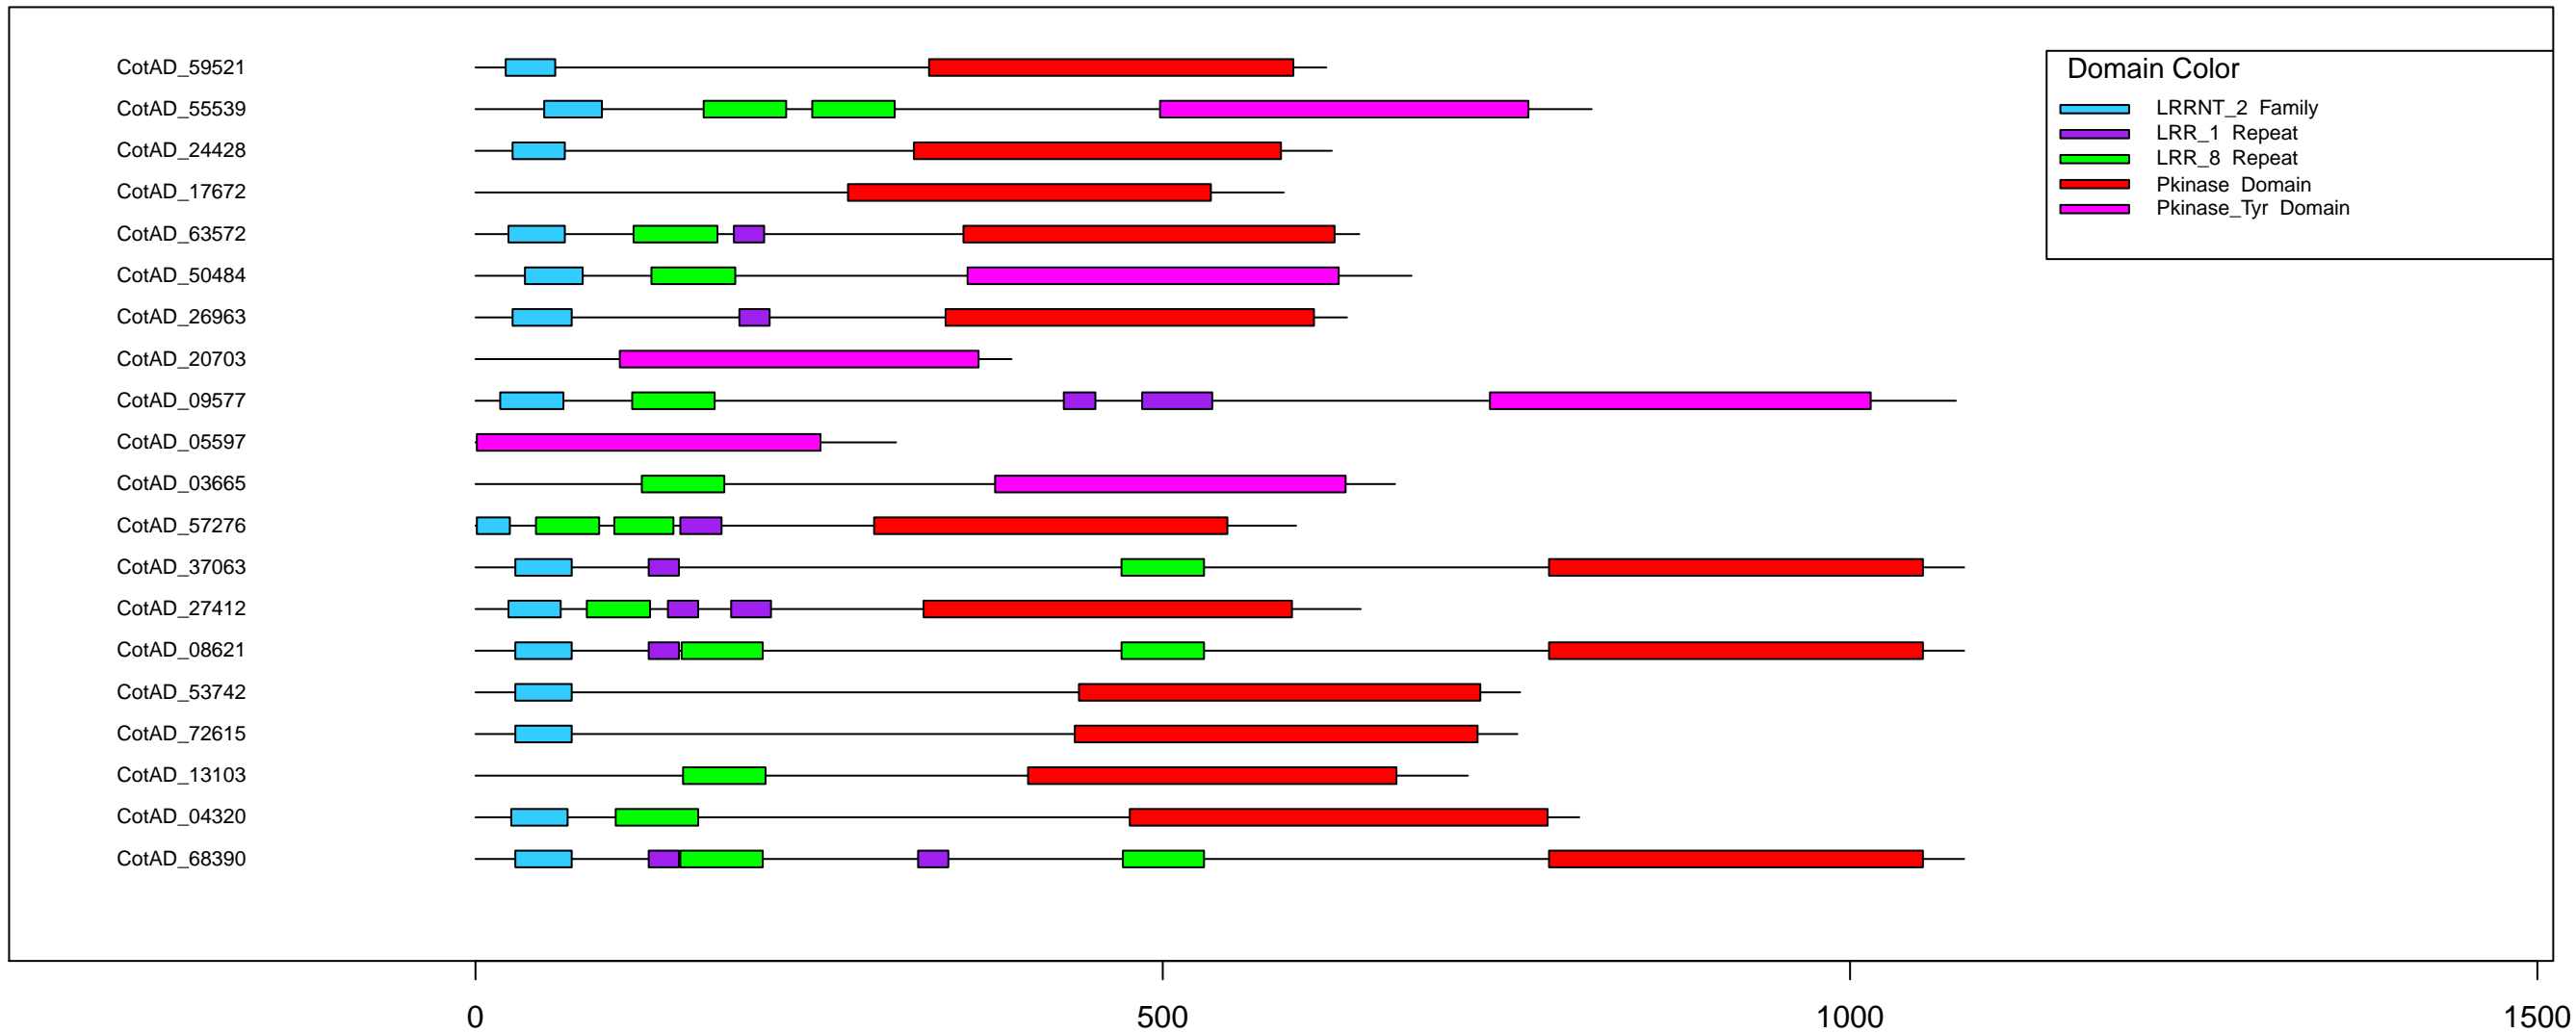

### G.hi RLK-Pelle\_LRR-III domain diagram (part 2)

CotAD\_45027  
 CotAD\_43408  
 CotAD\_31330  
 CotAD\_23361  
 CotAD\_18413  
 CotAD\_09713  
 CotAD\_01701  
 CotAD\_01535  
 CotAD\_00504  
 CotAD\_00353  
 CotAD\_53451  
 CotAD\_51936  
 CotAD\_23850  
 CotAD\_62297  
 CotAD\_57664  
 CotAD\_57023  
 CotAD\_33020  
 CotAD\_03206  
 CotAD\_74021  
 CotAD\_60775

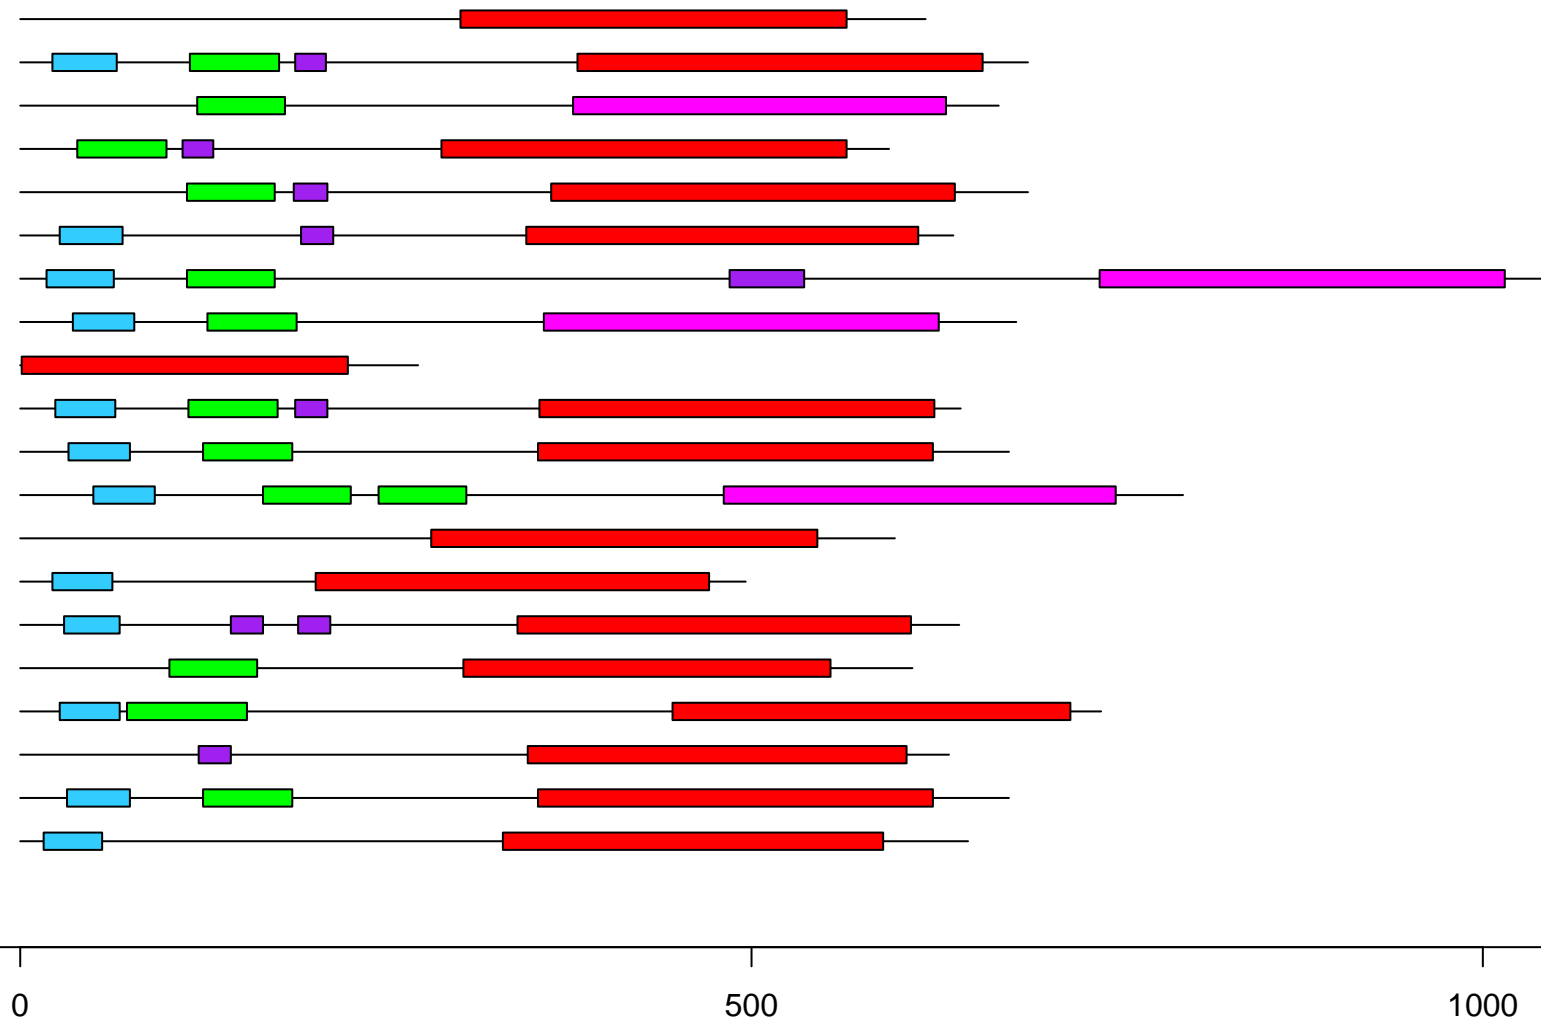

**Domain Color**

- █ LRRNT\_2 Family
- █ LRR\_1 Repeat
- █ LRR\_8 Repeat
- █ Pkinase Domain
- █ Pkinase\_Tyr Domain

### G.hi RLK-Pelle\_LRR-III domain diagram (part 3)

CotAD\_12146  
 CotAD\_64944  
 CotAD\_06952  
 CotAD\_27957  
 CotAD\_21953  
 CotAD\_20152  
 CotAD\_20150  
 CotAD\_69922  
 CotAD\_09352  
 CotAD\_09336  
 CotAD\_05288  
 CotAD\_05278  
 CotAD\_03797  
 CotAD\_74134  
 CotAD\_67385  
 CotAD\_44246  
 CotAD\_21656  
 CotAD\_04243  
 CotAD\_02161  
 CotAD\_02174

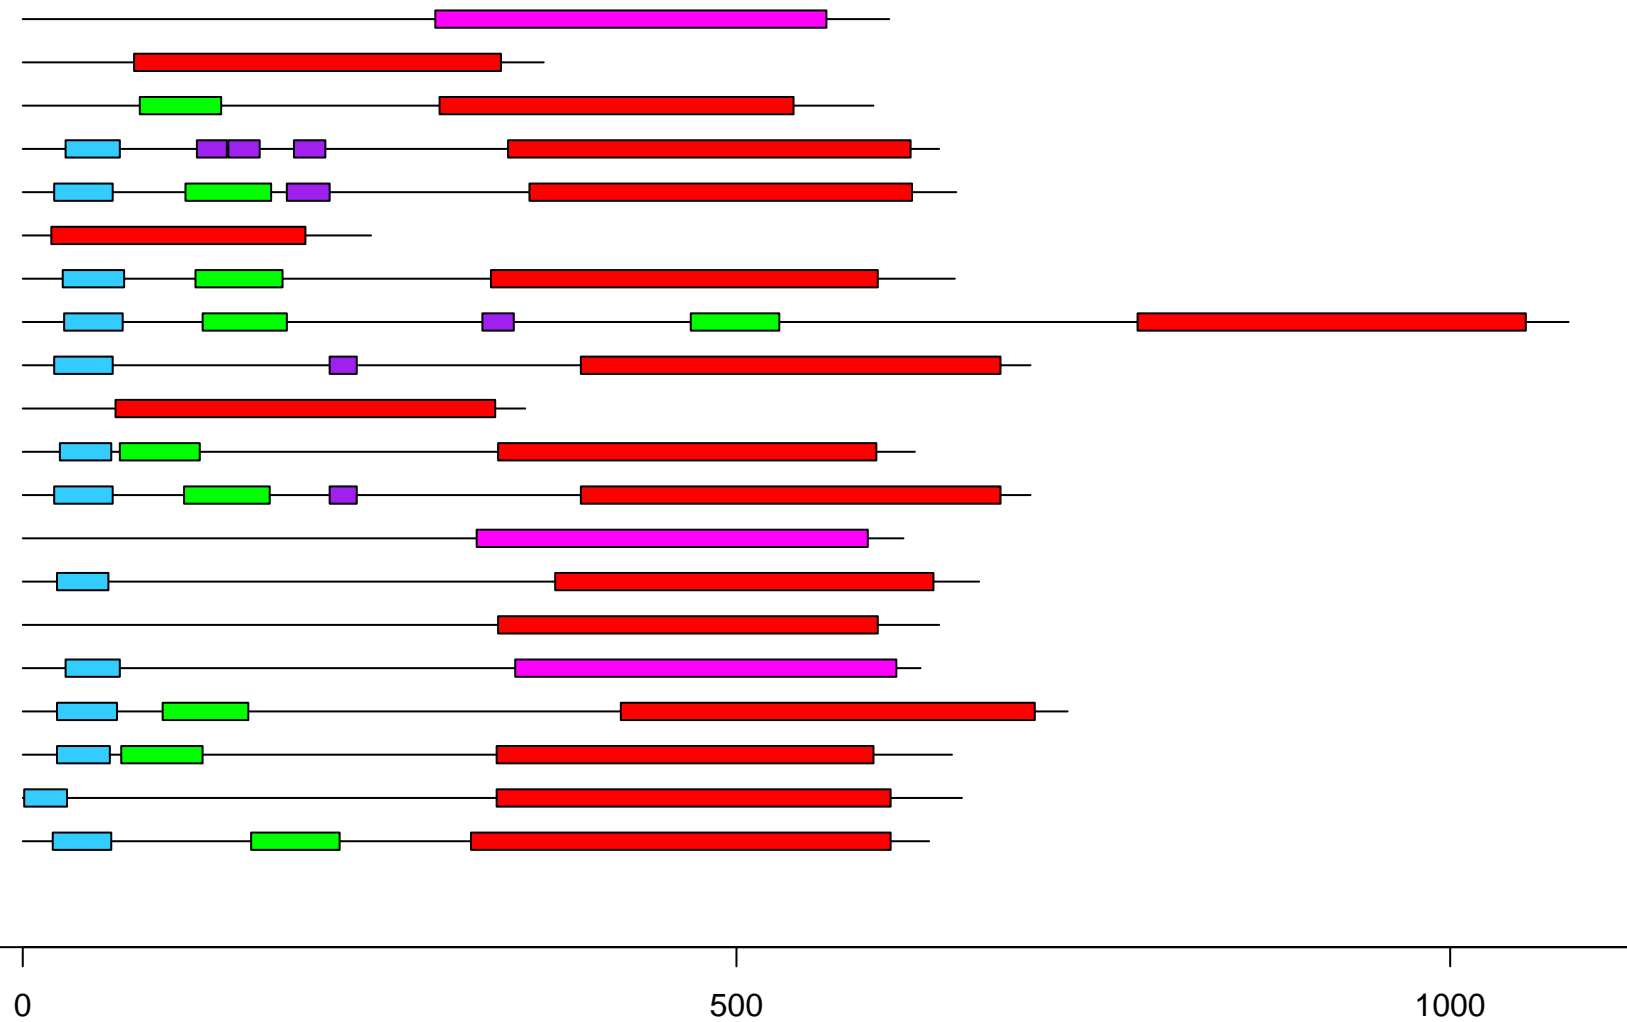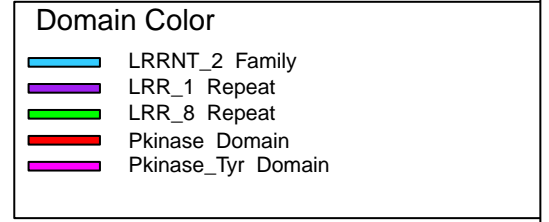

### G.hi RLK-Pelle\_LRR-III domain diagram (part 4)

CotAD\_00967  
 CotAD\_00934  
 CotAD\_70672  
 CotAD\_41057  
 CotAD\_35956  
 CotAD\_30981  
 CotAD\_28684  
 CotAD\_09217  
 CotAD\_70286  
 CotAD\_65914  
 CotAD\_62520  
 CotAD\_62511  
 CotAD\_37236  
 CotAD\_17490  
 CotAD\_69284  
 CotAD\_60417  
 CotAD\_37346  
 CotAD\_29800  
 CotAD\_28297  
 CotAD\_47120

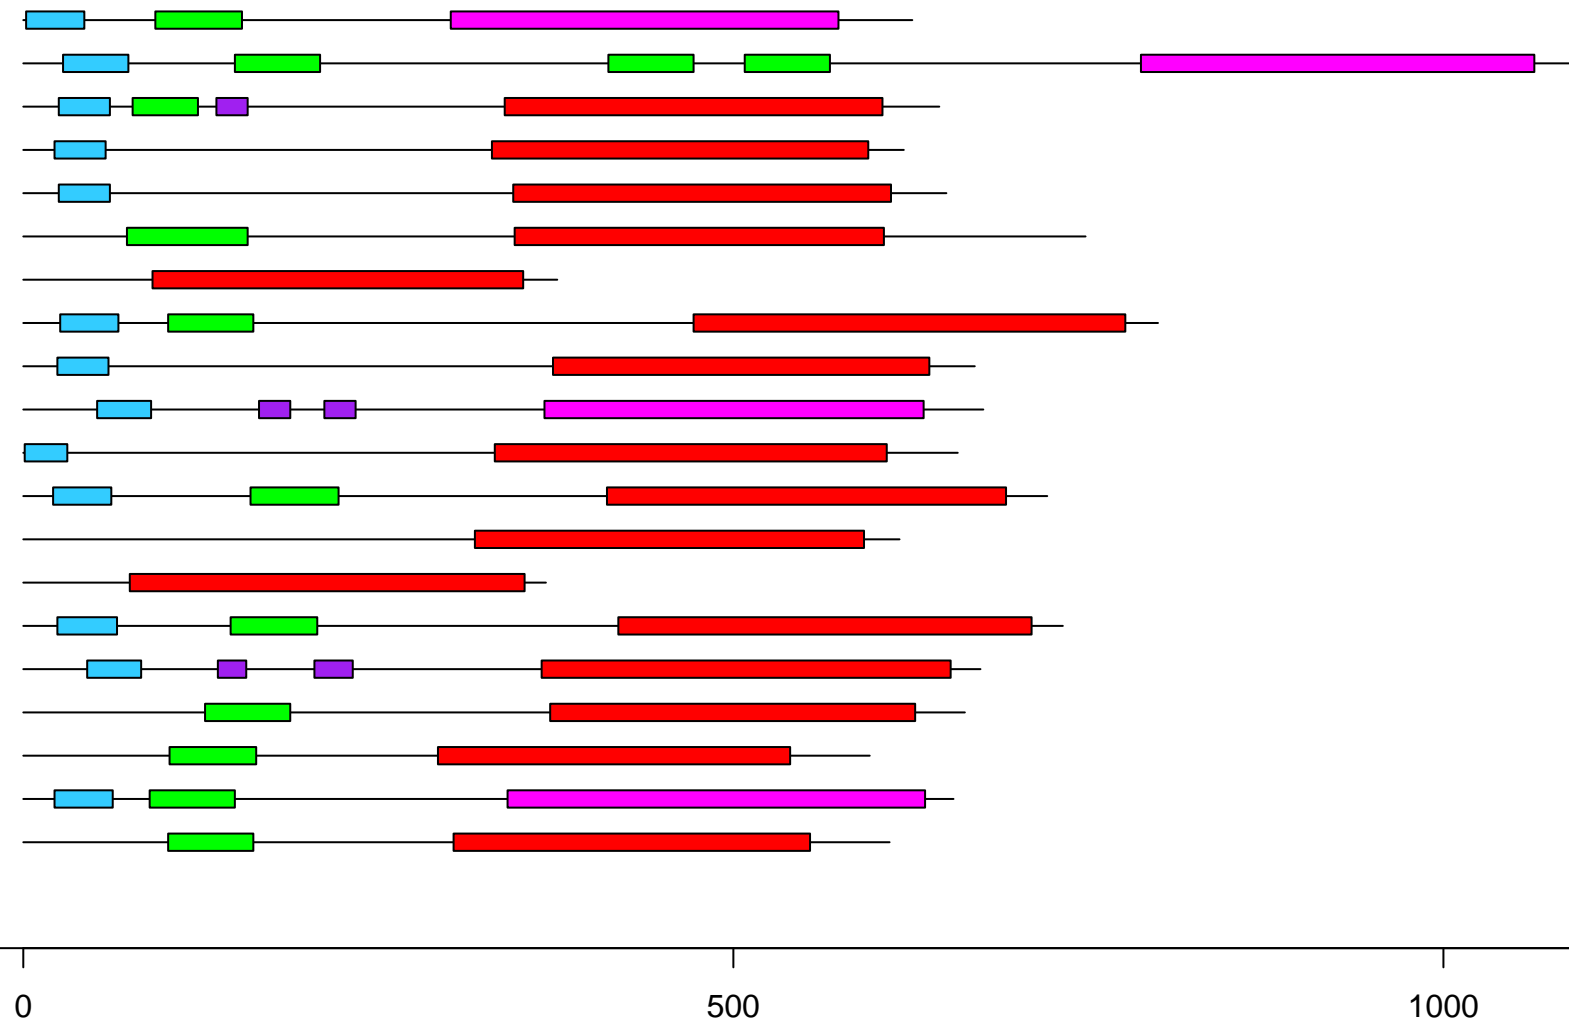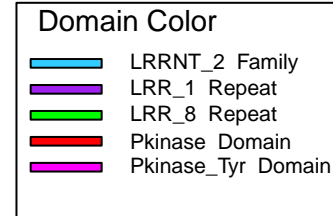

### G.hi RLK-Pelle\_LRR-III domain diagram (part 5)

CotAD\_50752  
 CotAD\_61551  
 CotAD\_29297  
 CotAD\_22998  
 CotAD\_33555  
 CotAD\_33544  
 CotAD\_23672  
 CotAD\_25235  
 CotAD\_22332  
 CotAD\_32119  
 CotAD\_32107  
 CotAD\_26081  
 CotAD\_15231  
 CotAD\_15200  
 CotAD\_18790  
 CotAD\_56545  
 CotAD\_08417  
 CotAD\_16085  
 CotAD\_17827  
 CotAD\_07216

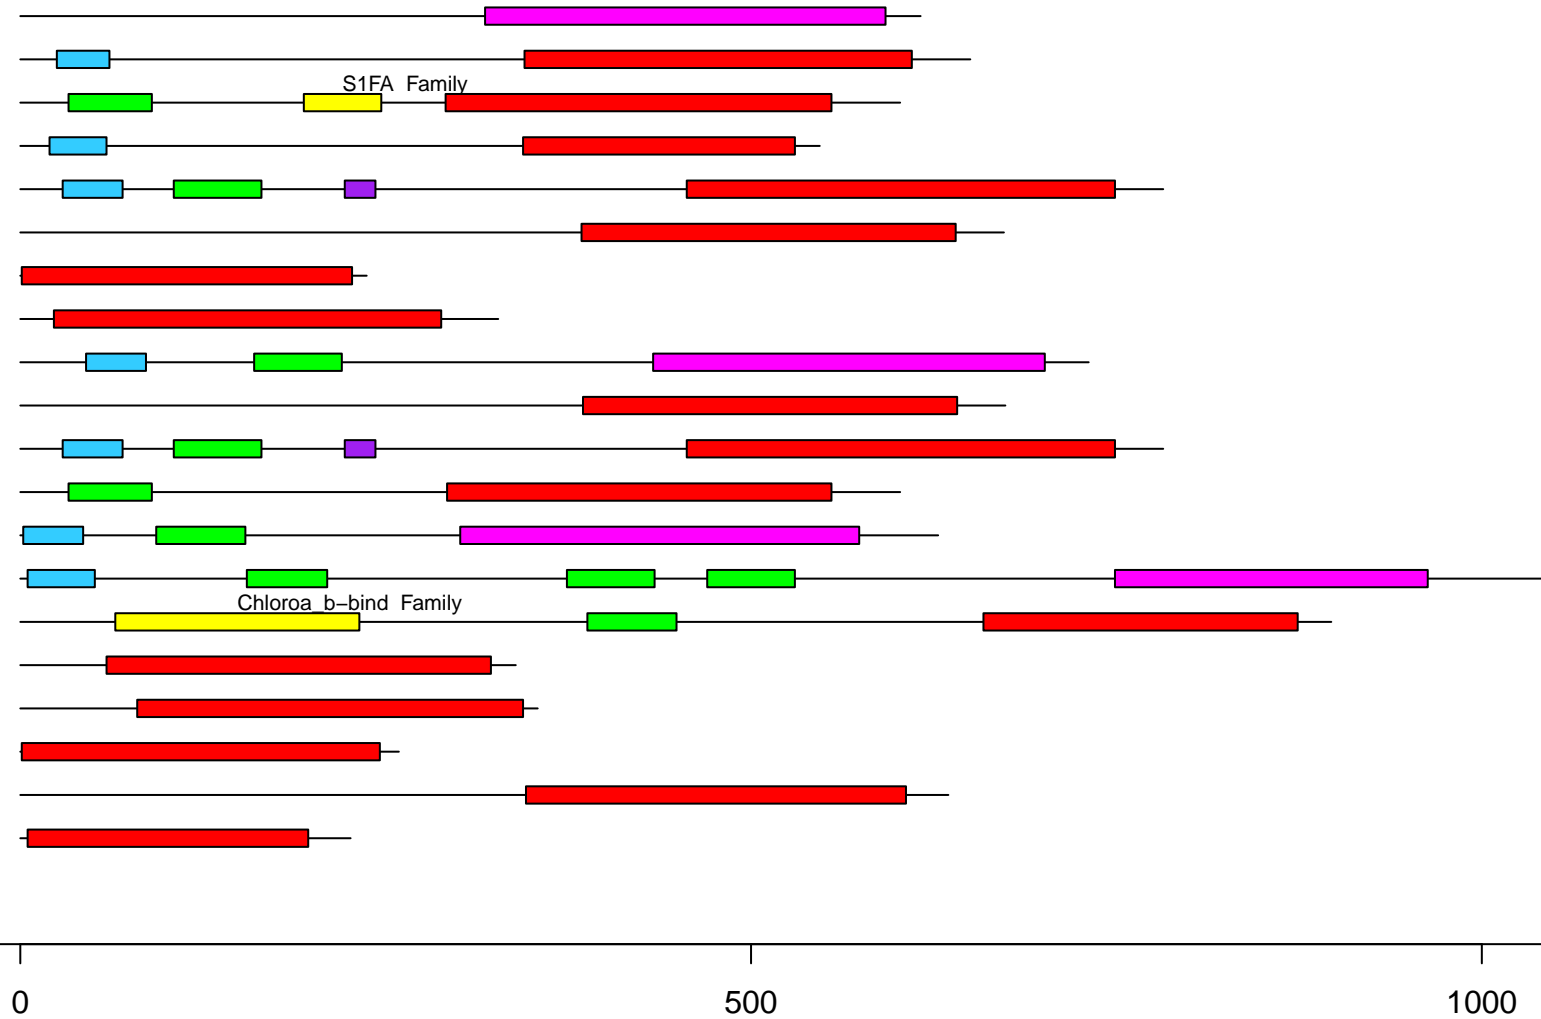

**Domain Color**

- LRRNT\_2 Family
- LRR\_1 Repeat
- LRR\_8 Repeat
- Pkinase Domain
- Pkinase\_Tyr Domain
- other Domain

### G.hi RLK-Pelle\_LRR-III domain diagram (part 6)

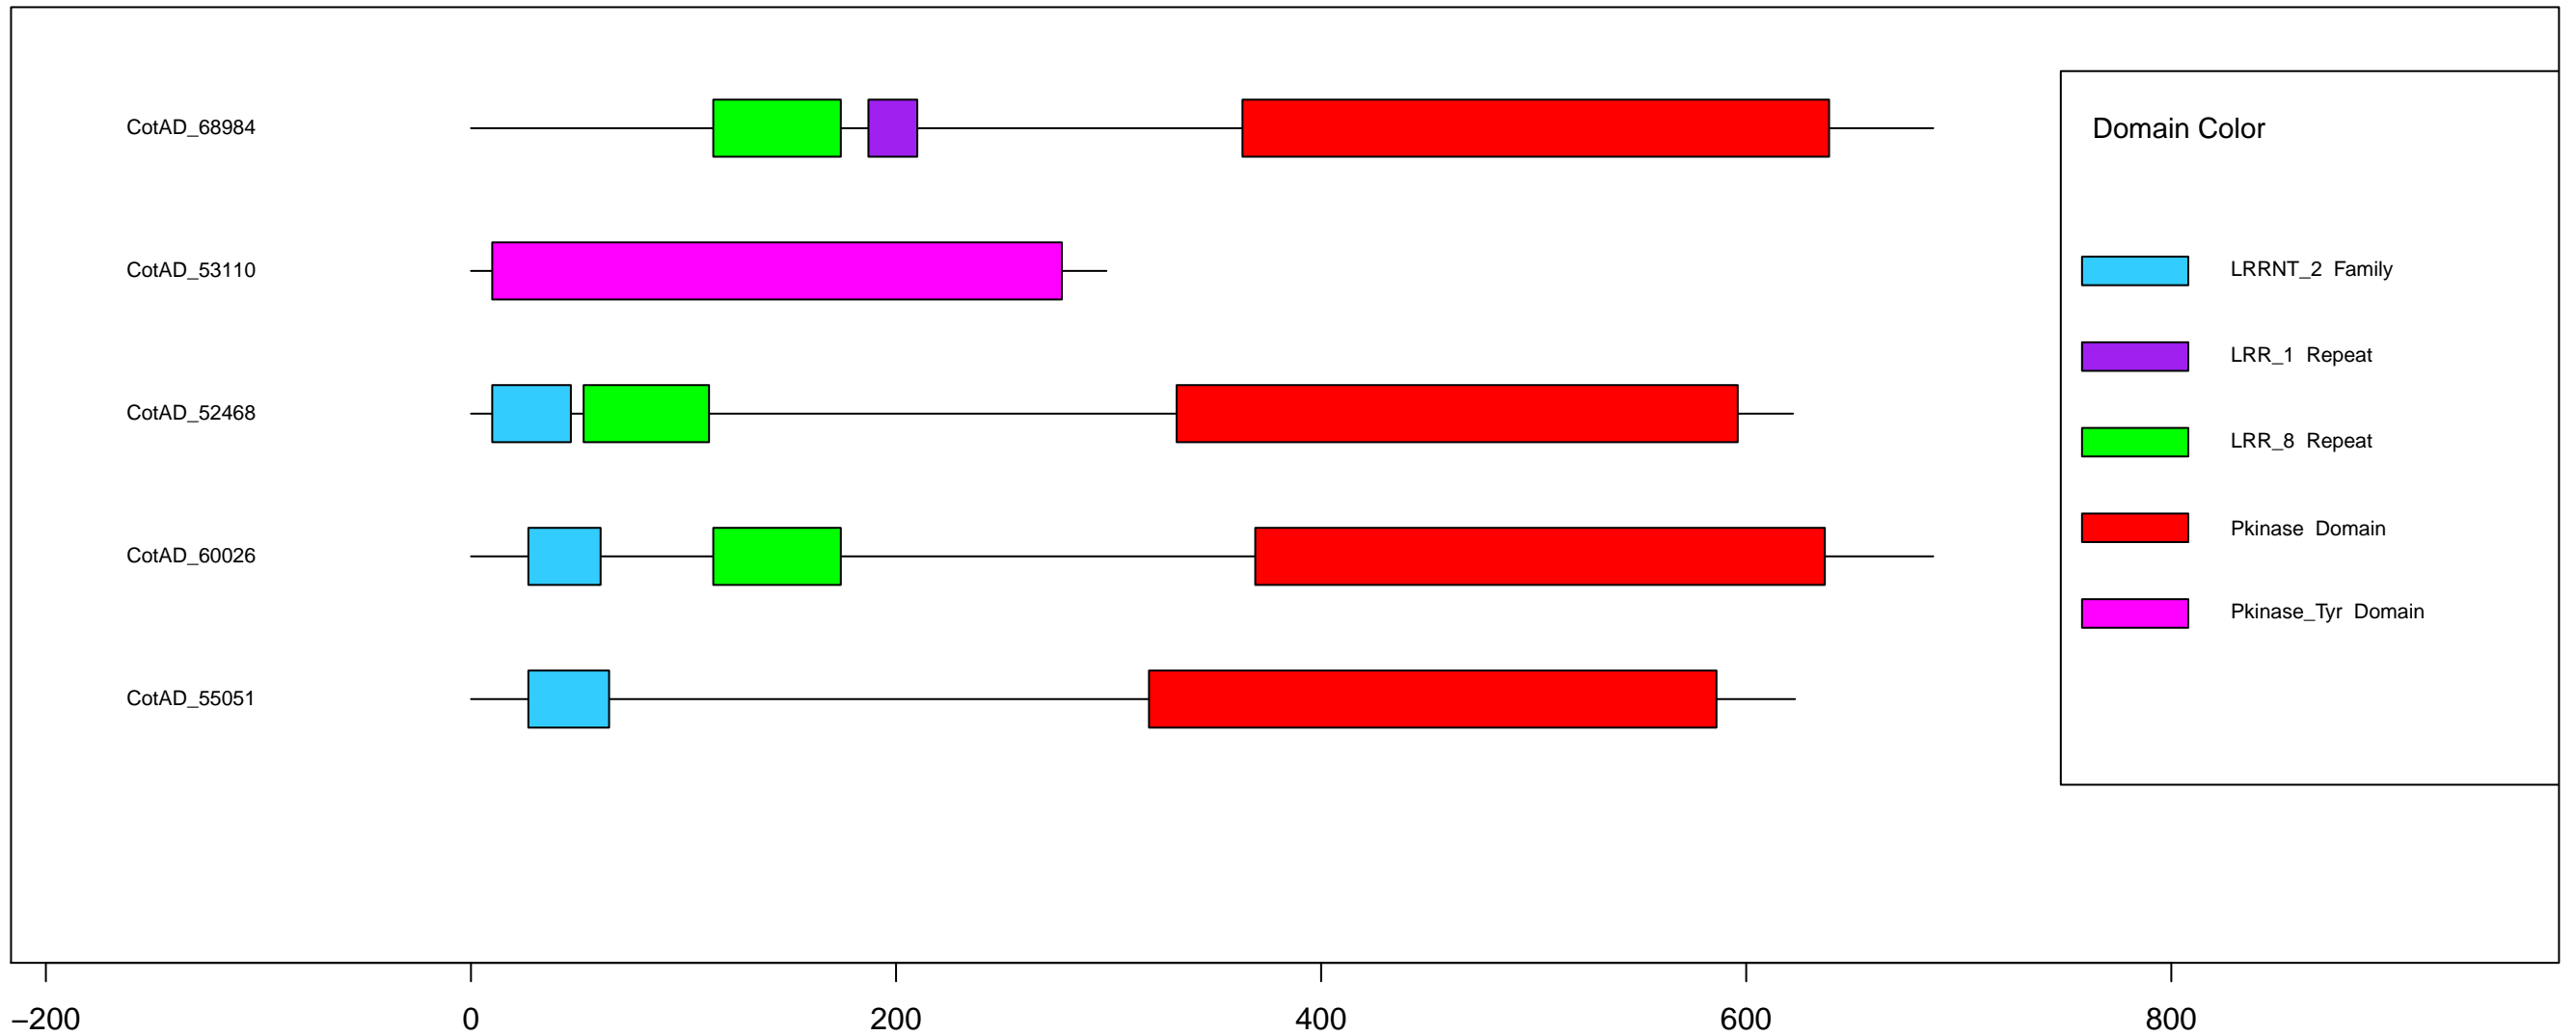

### G.hi RLK-Pelle\_LRR-II domain diagram (part 1)

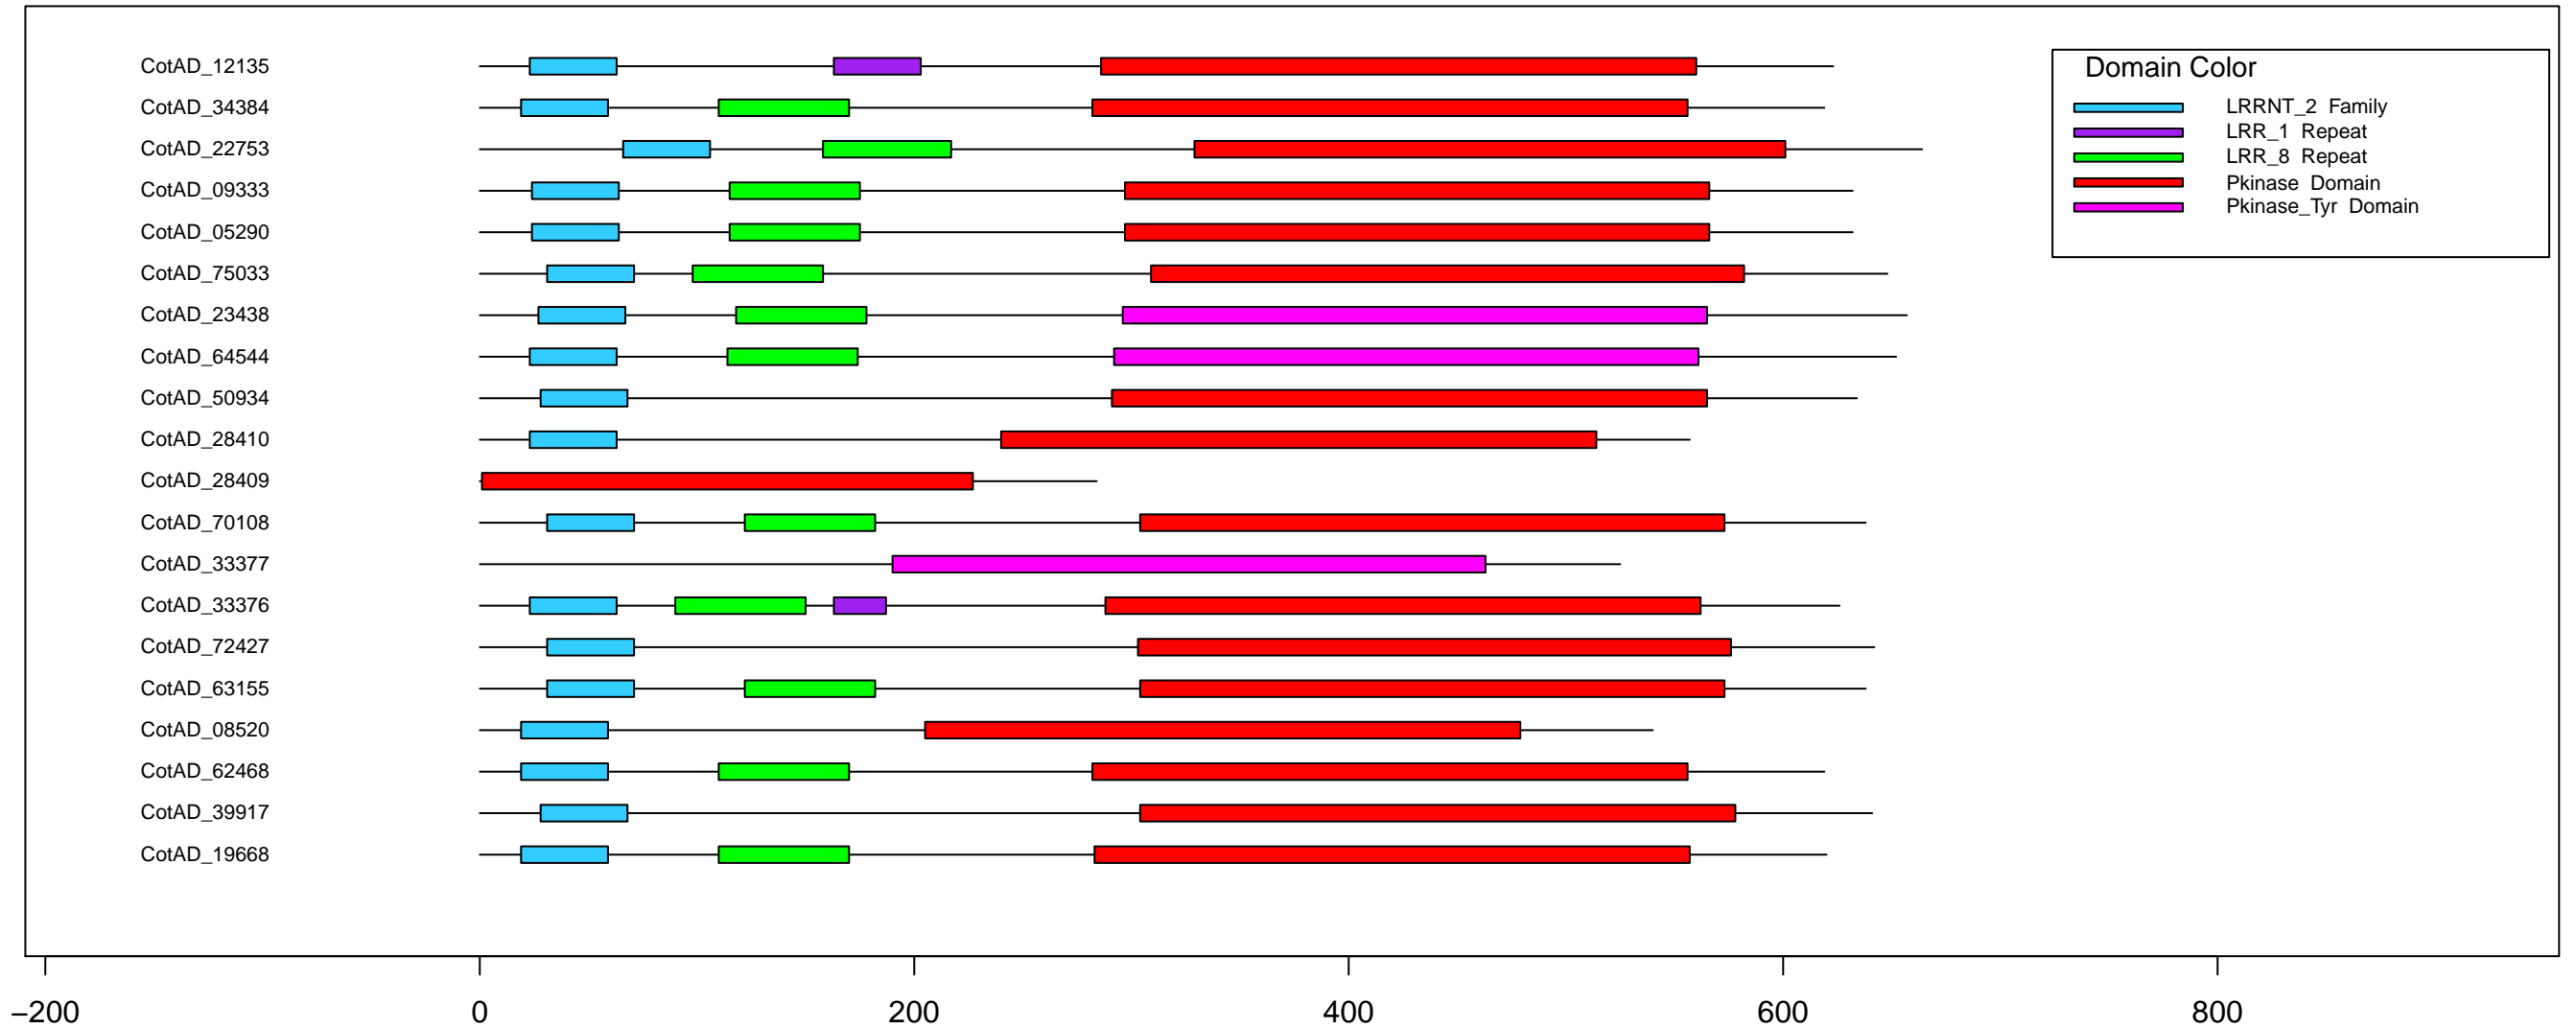

### G.hi RLK-Pelle\_LRR-II domain diagram (part 2)

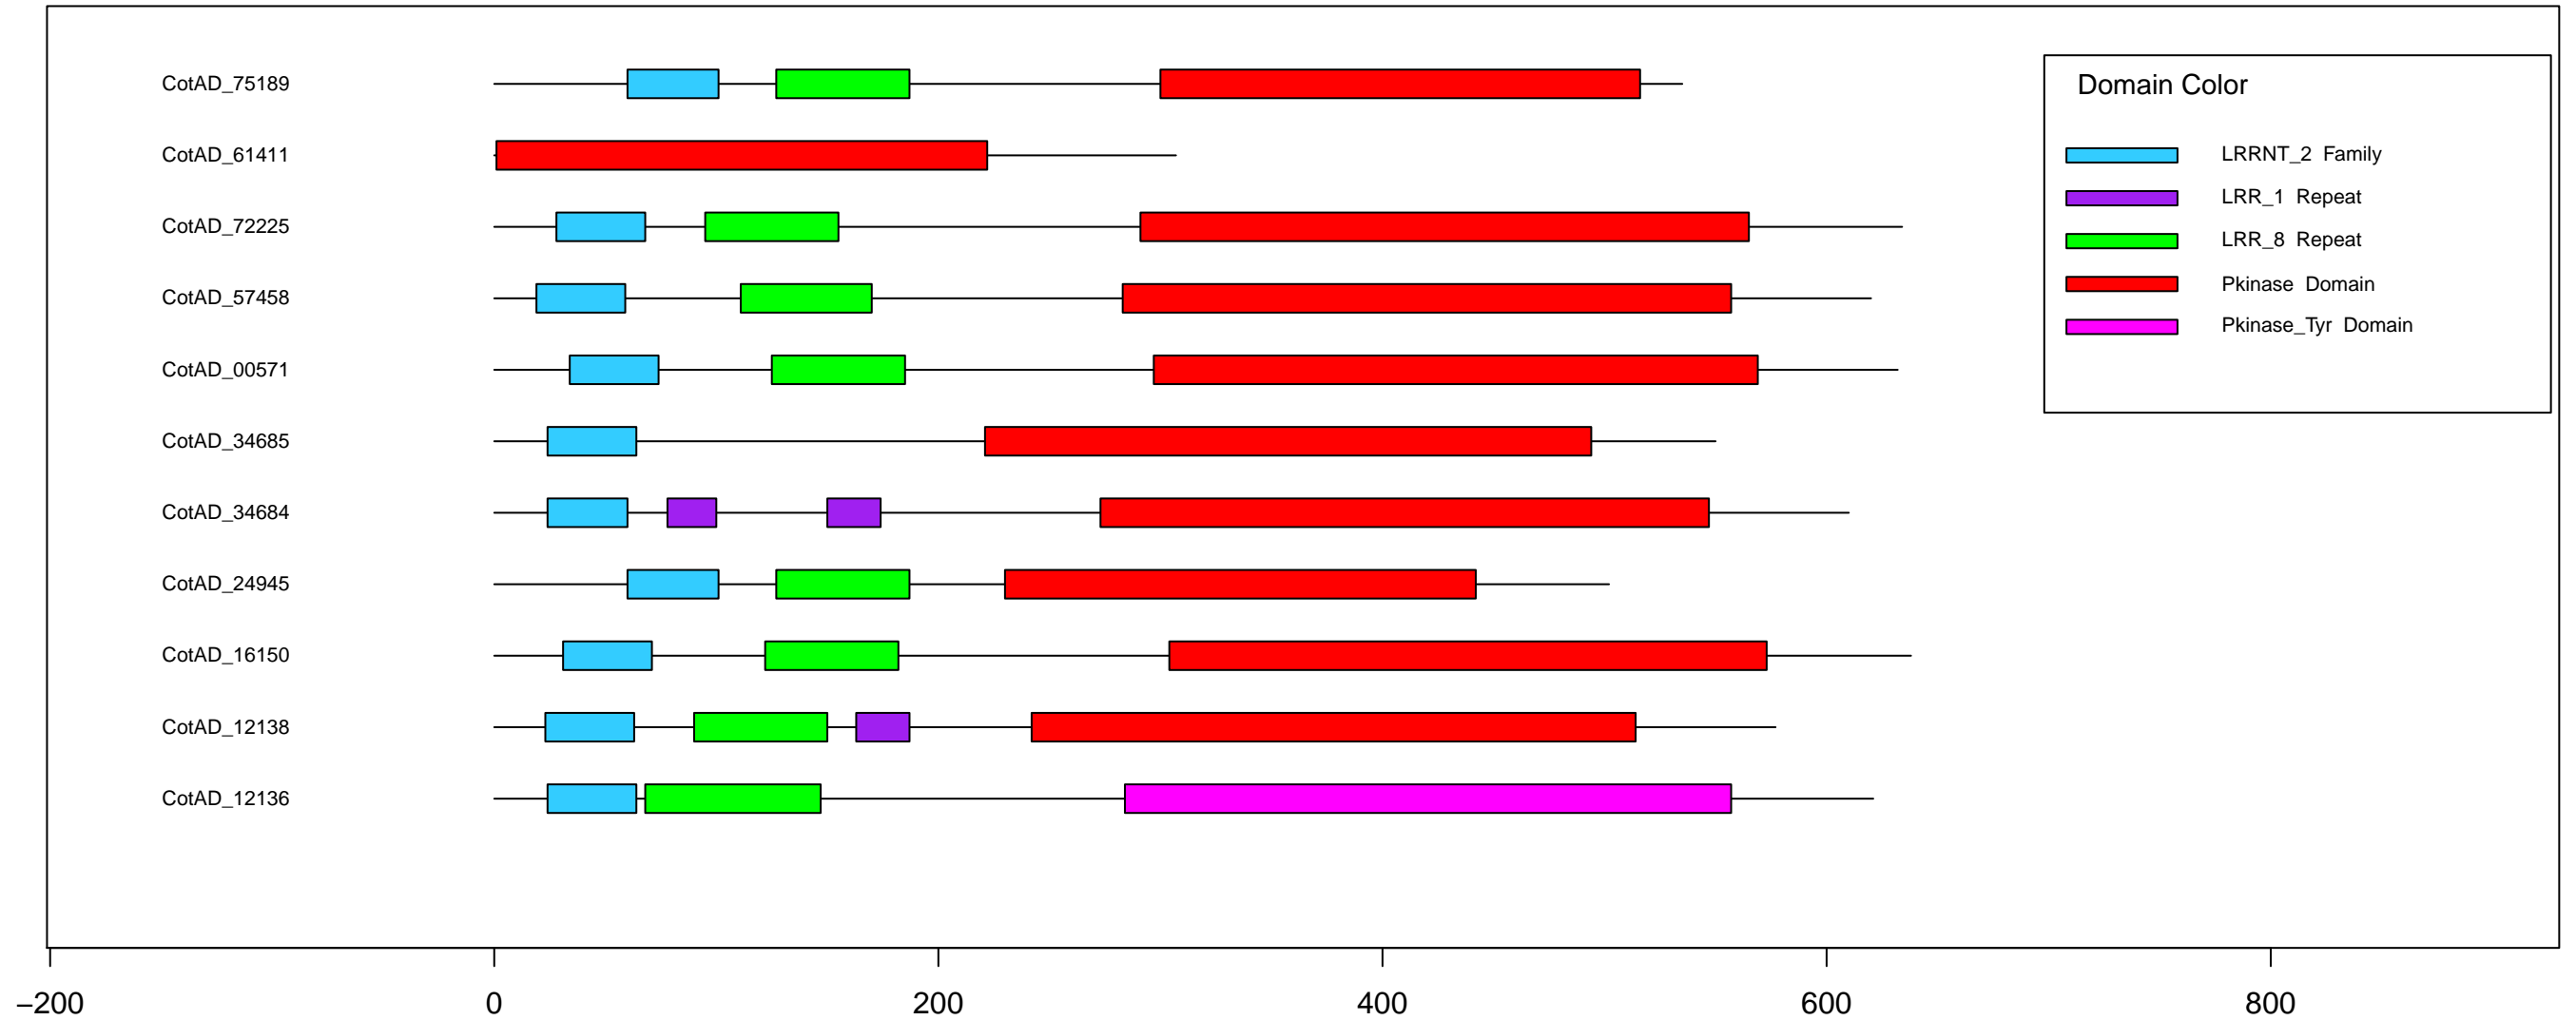



# G.hi RLK-Pelle\_LRR-IV domain diagram (all)

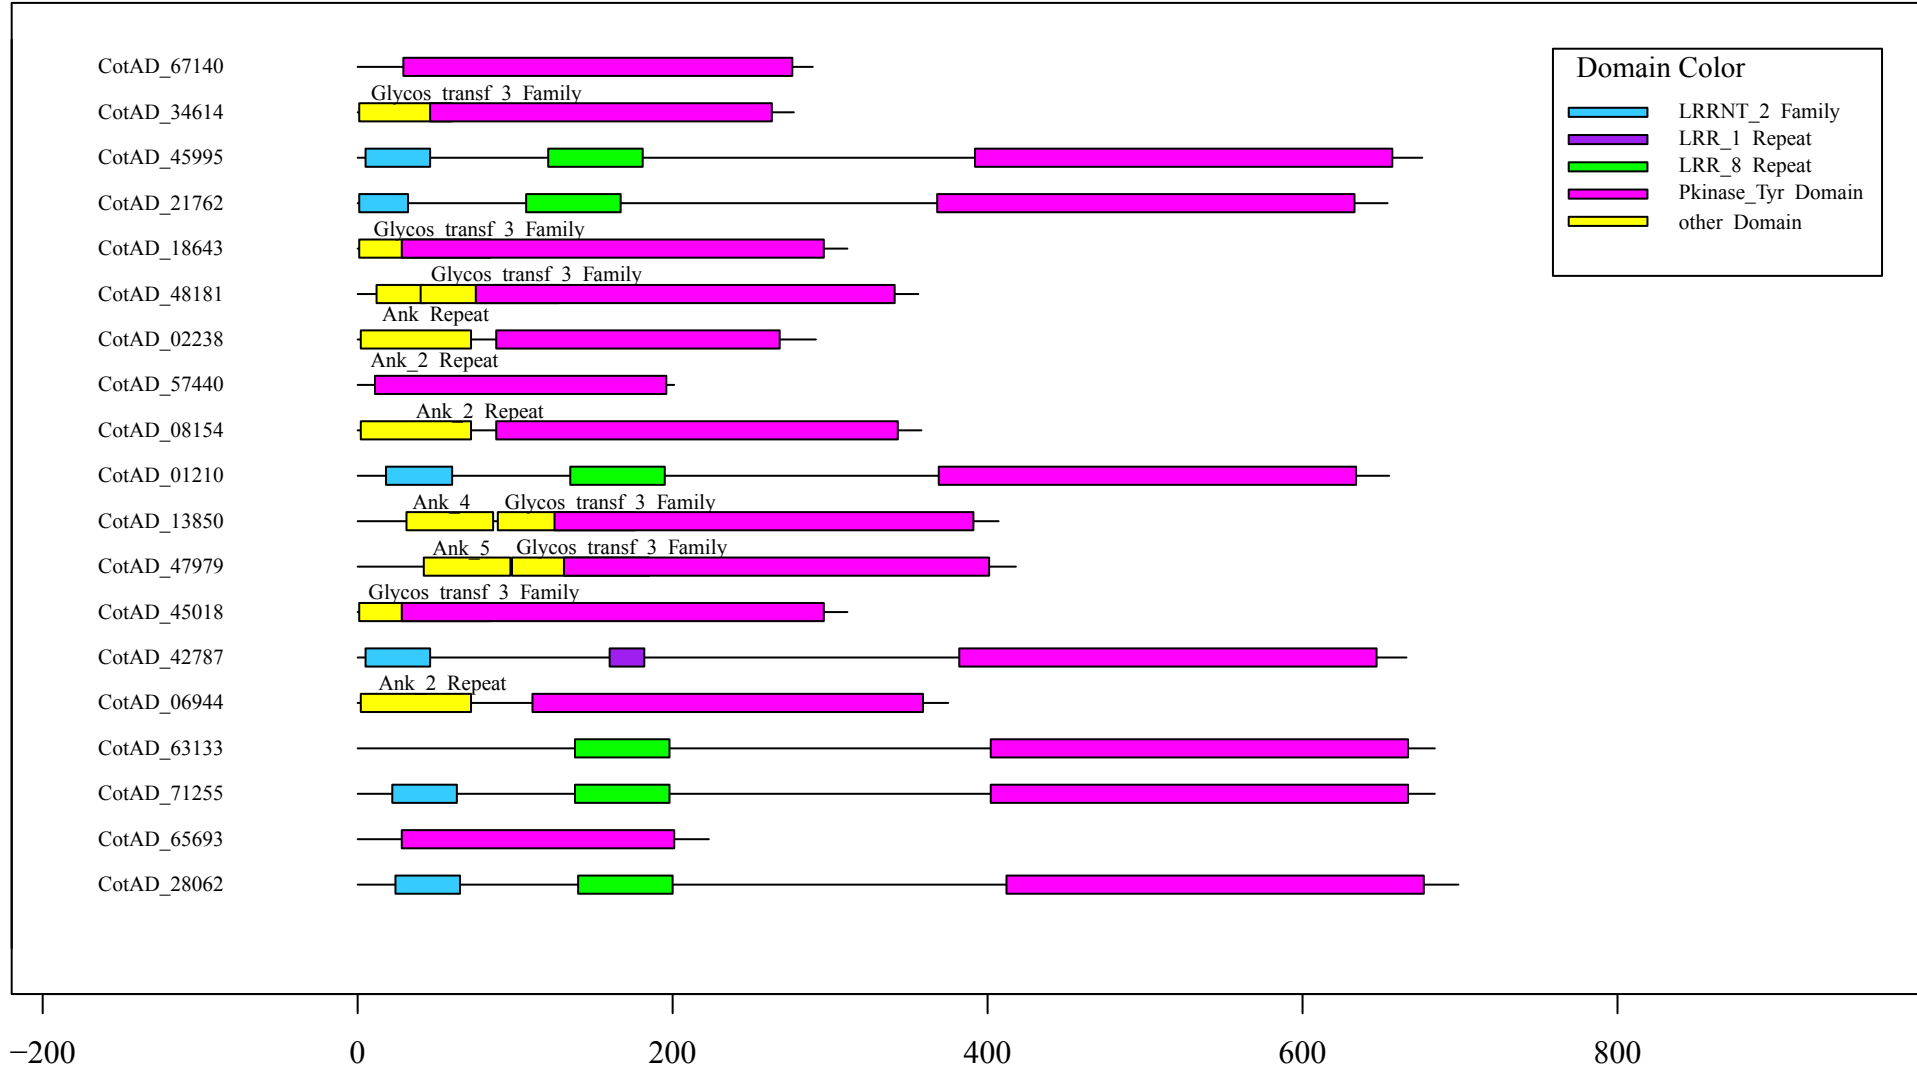

### G.hi RLK-Pelle\_LRR-IX domain diagram (all)

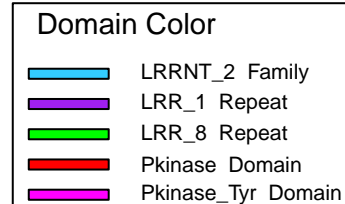

CotAD\_53070  
 CotAD\_33520  
 CotAD\_24493  
 CotAD\_27211  
 CotAD\_11871  
 CotAD\_60611  
 CotAD\_46866  
 CotAD\_30717  
 CotAD\_52669  
 CotAD\_36211  
 CotAD\_24219  
 CotAD\_09317  
 CotAD\_31541  
 CotAD\_26554  
 CotAD\_36318  
 CotAD\_17108  
 CotAD\_13091

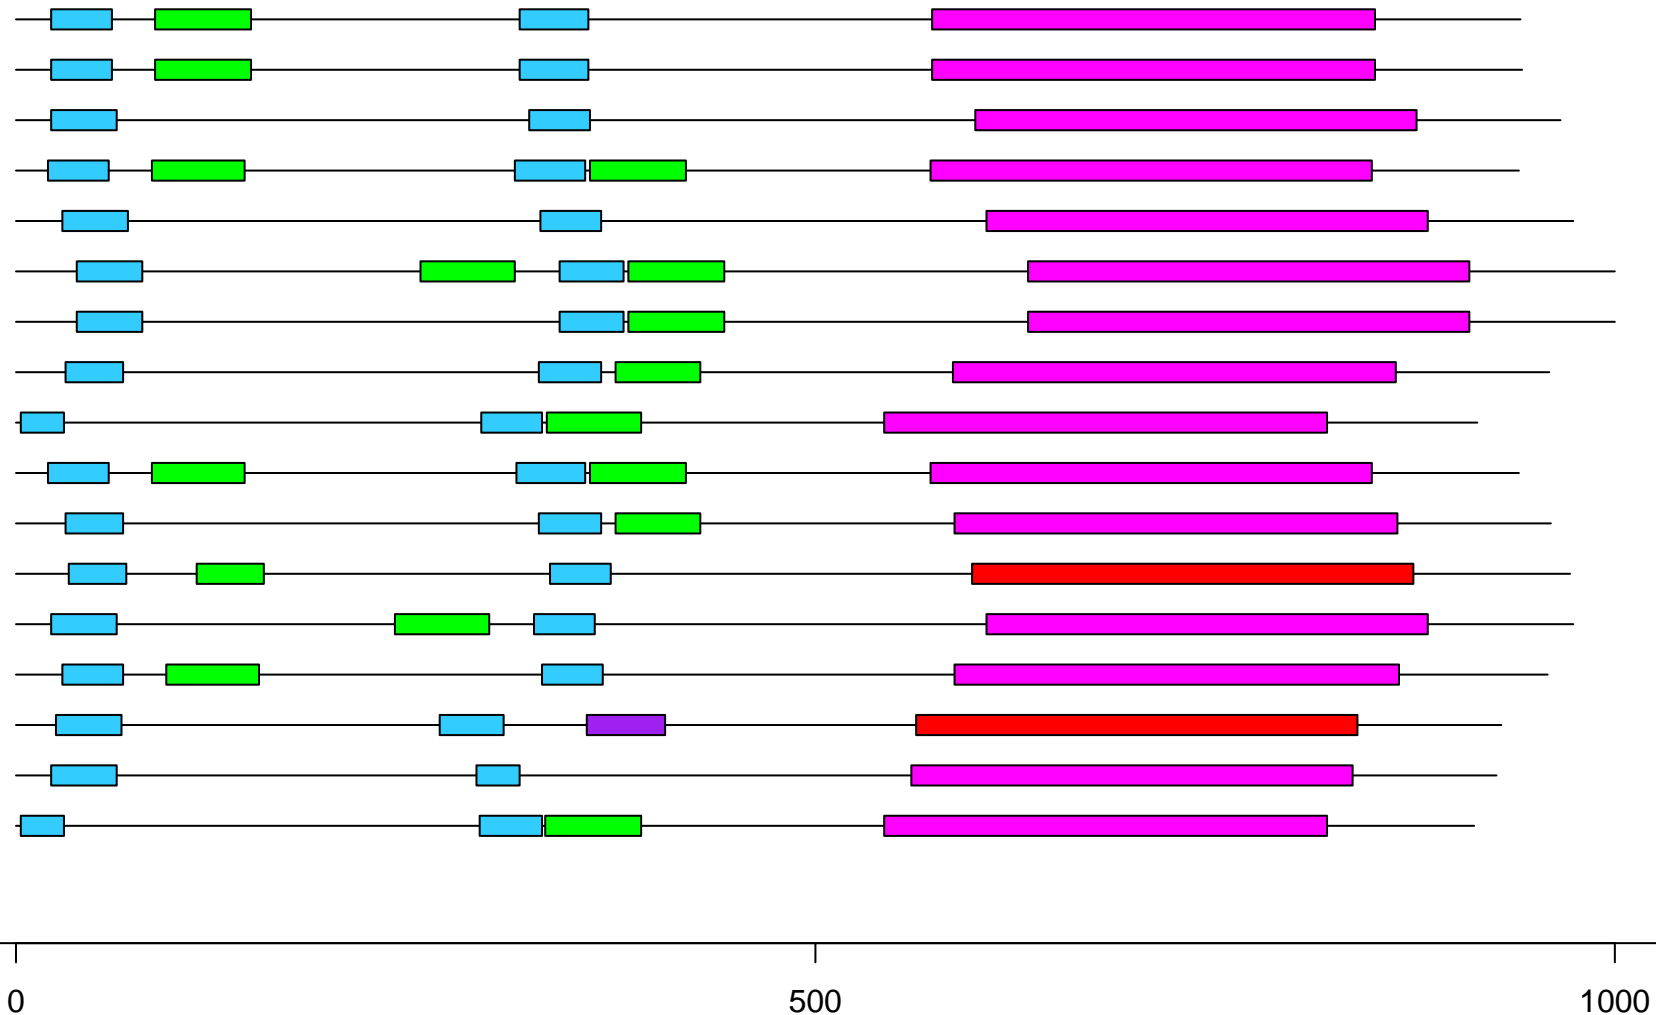

### G.hi RLK-Pelle\_LRR-VI-1 domain diagram (all)

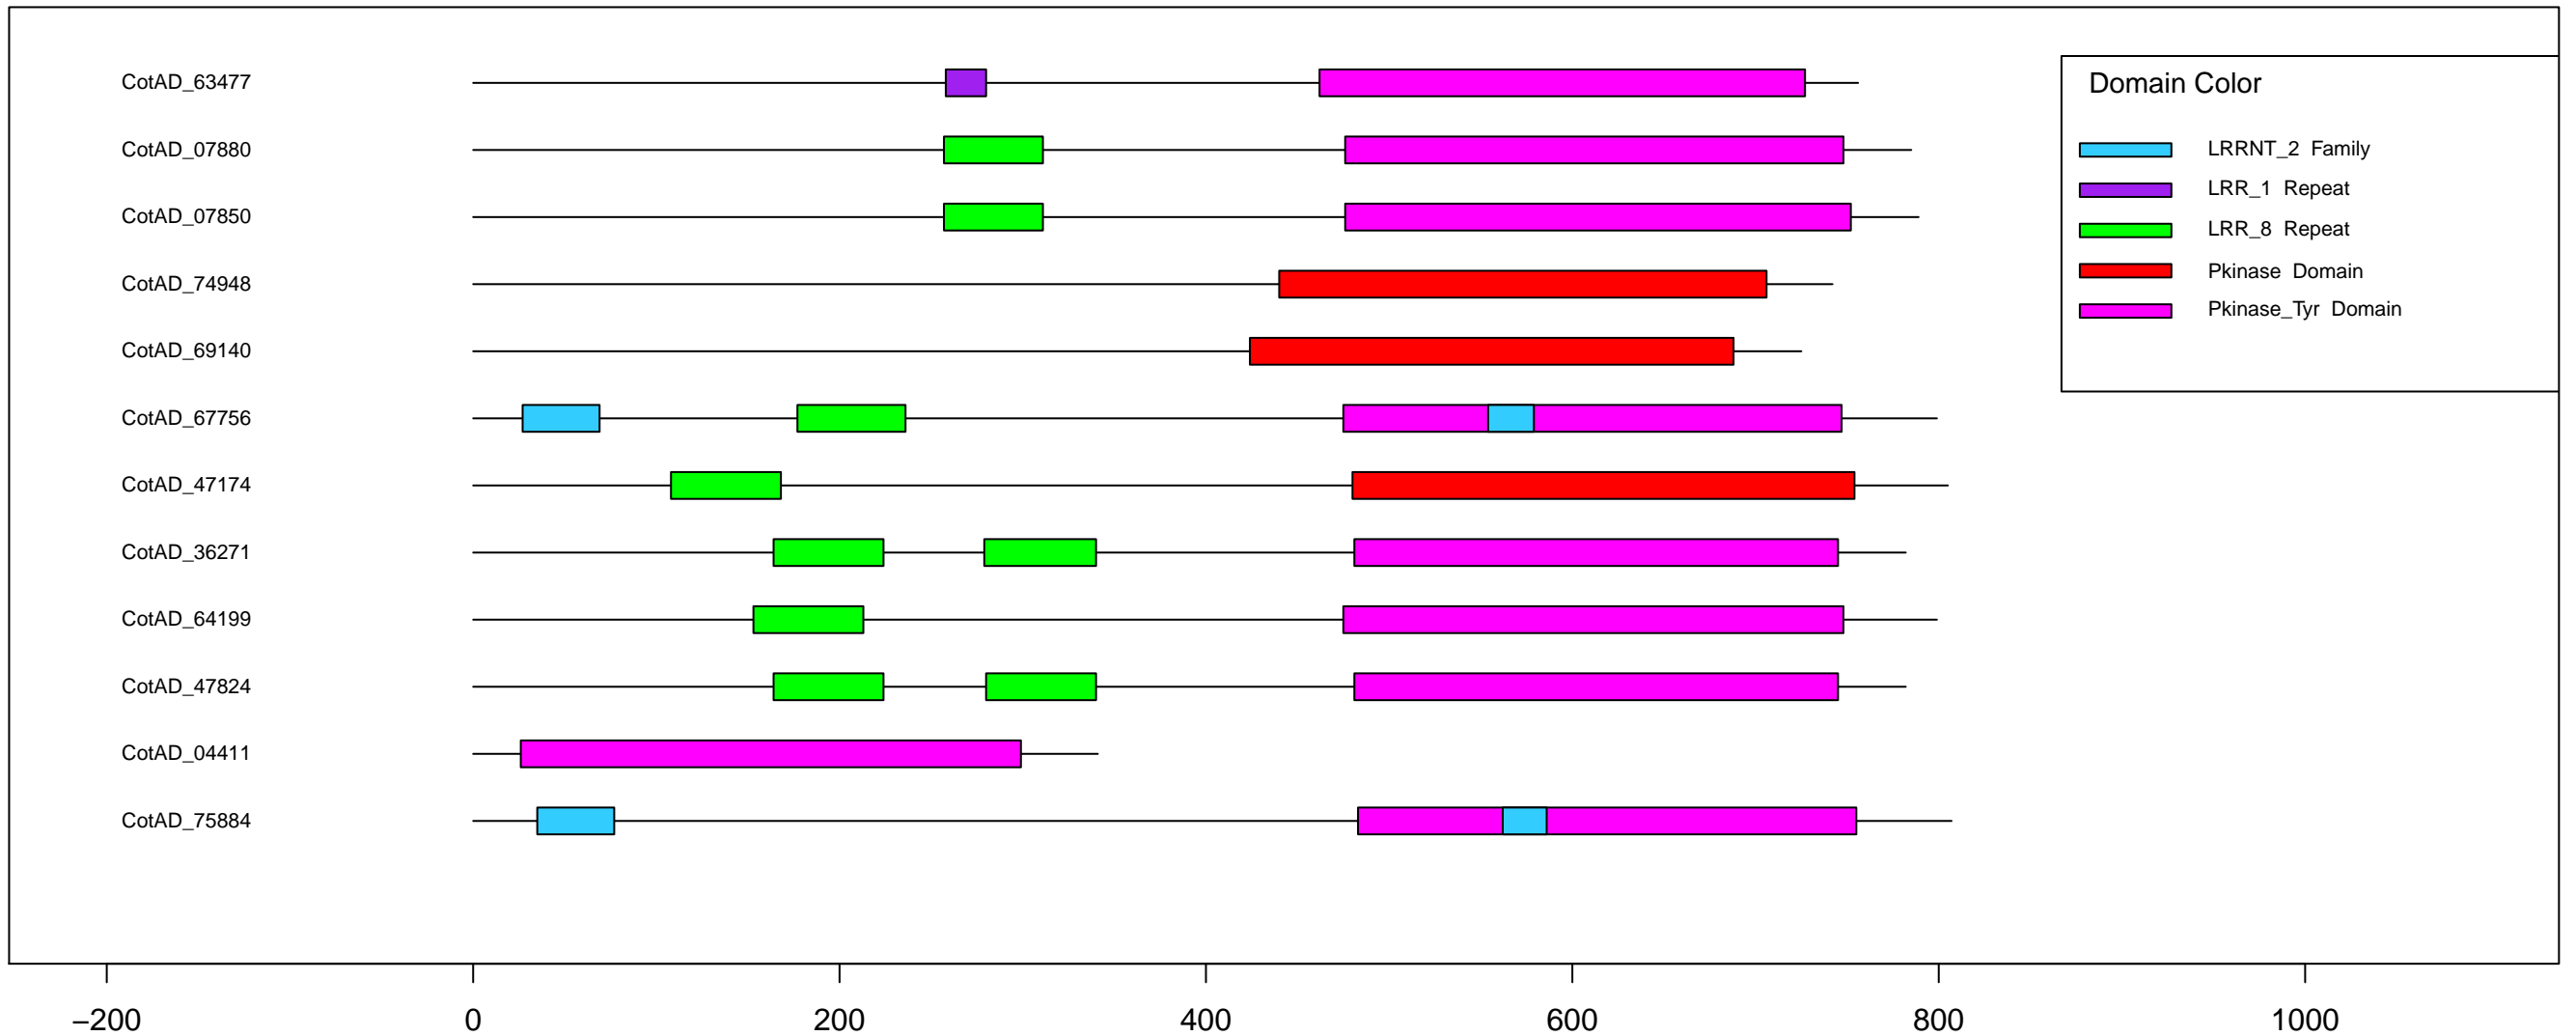

### G.hi RLK-Pelle\_LRR-VI-2 domain diagram (all)

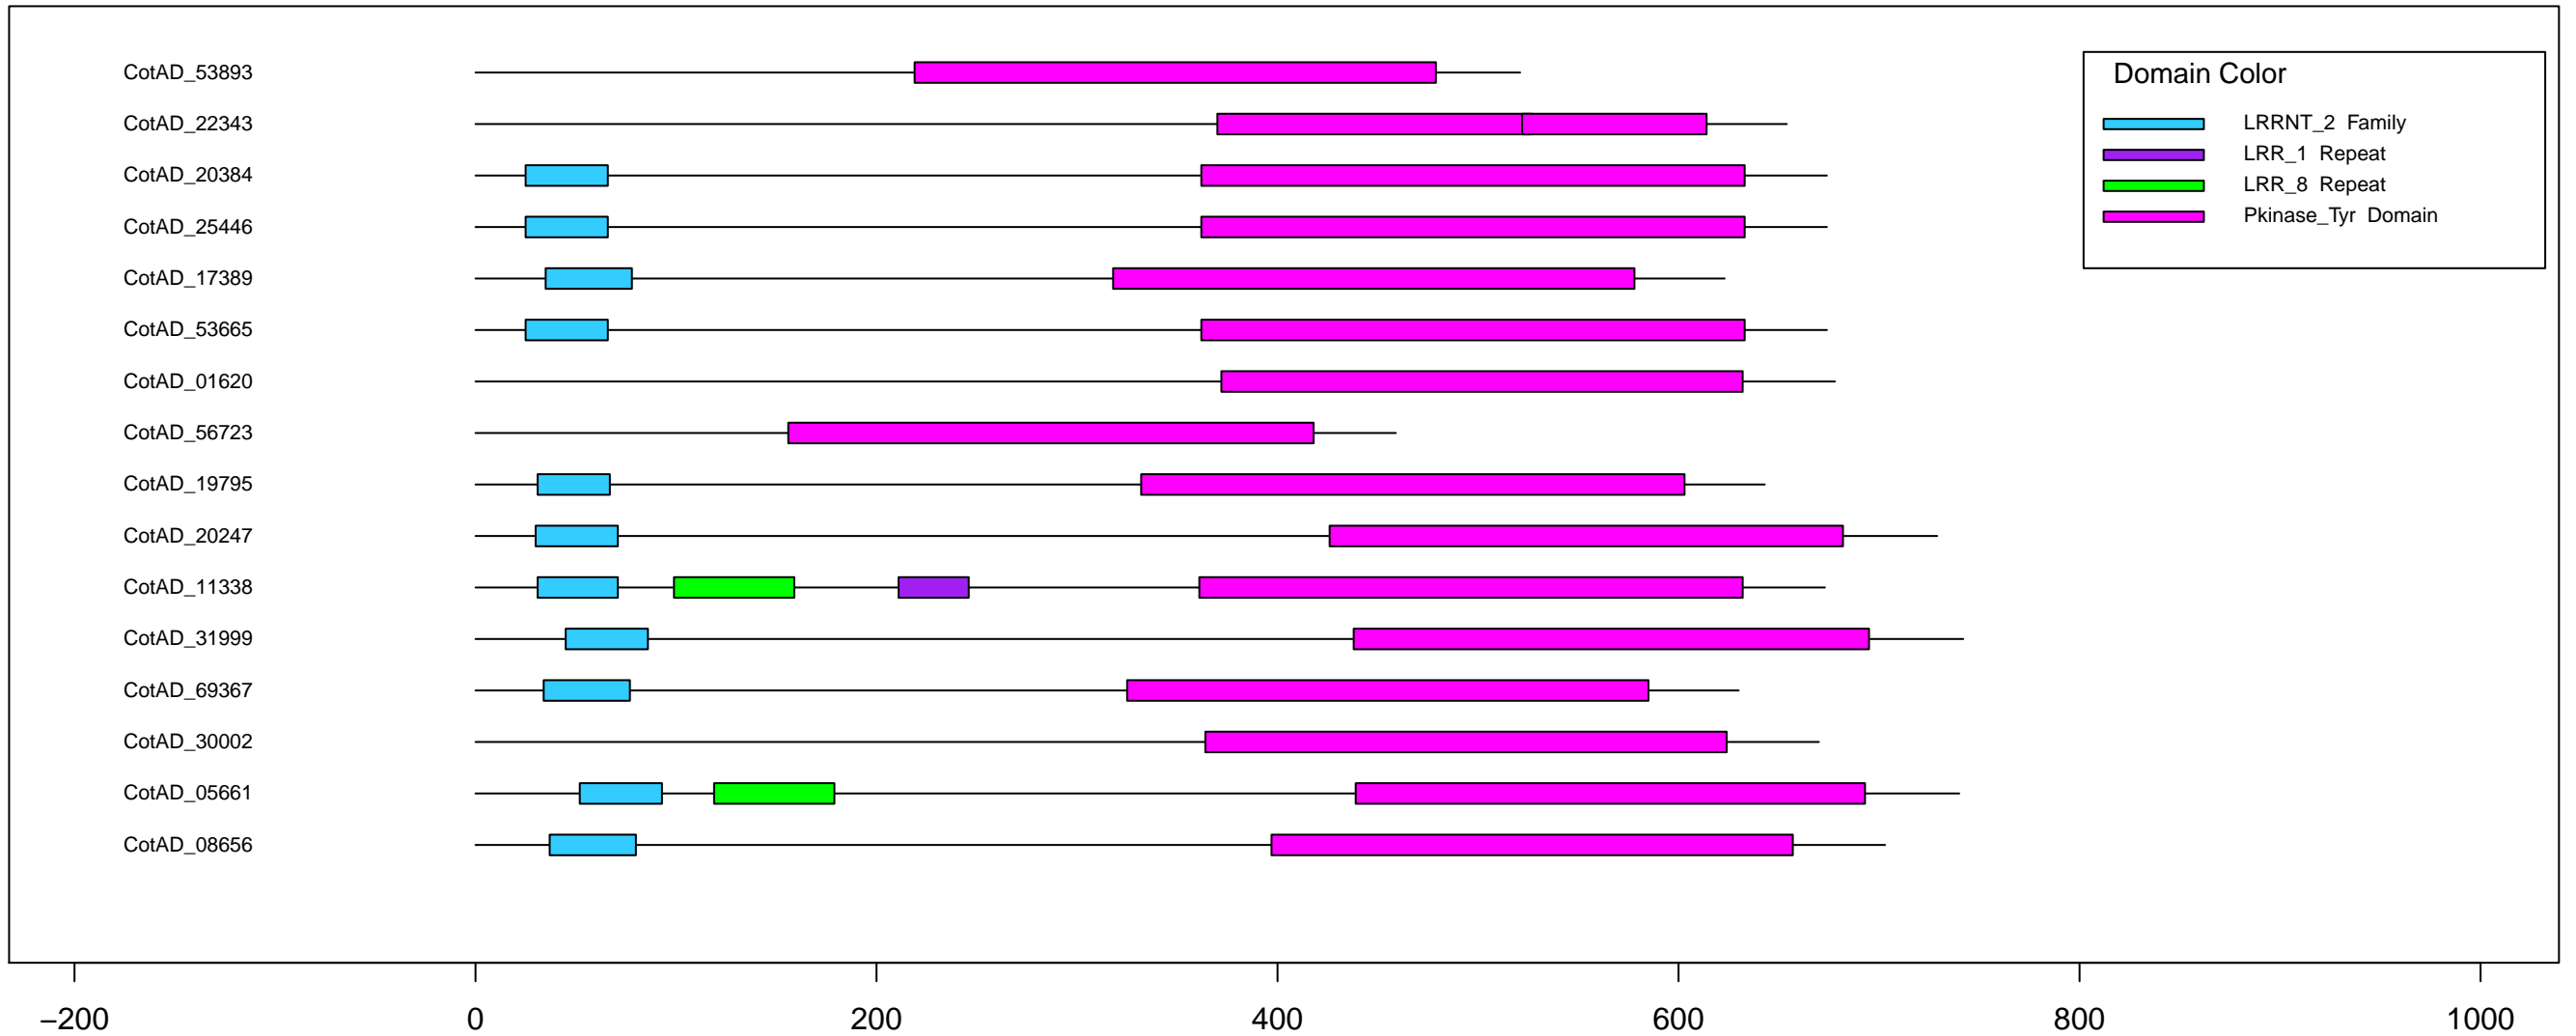

### G.hi RLK-Pelle\_LRR-VII-1 domain diagram (all)

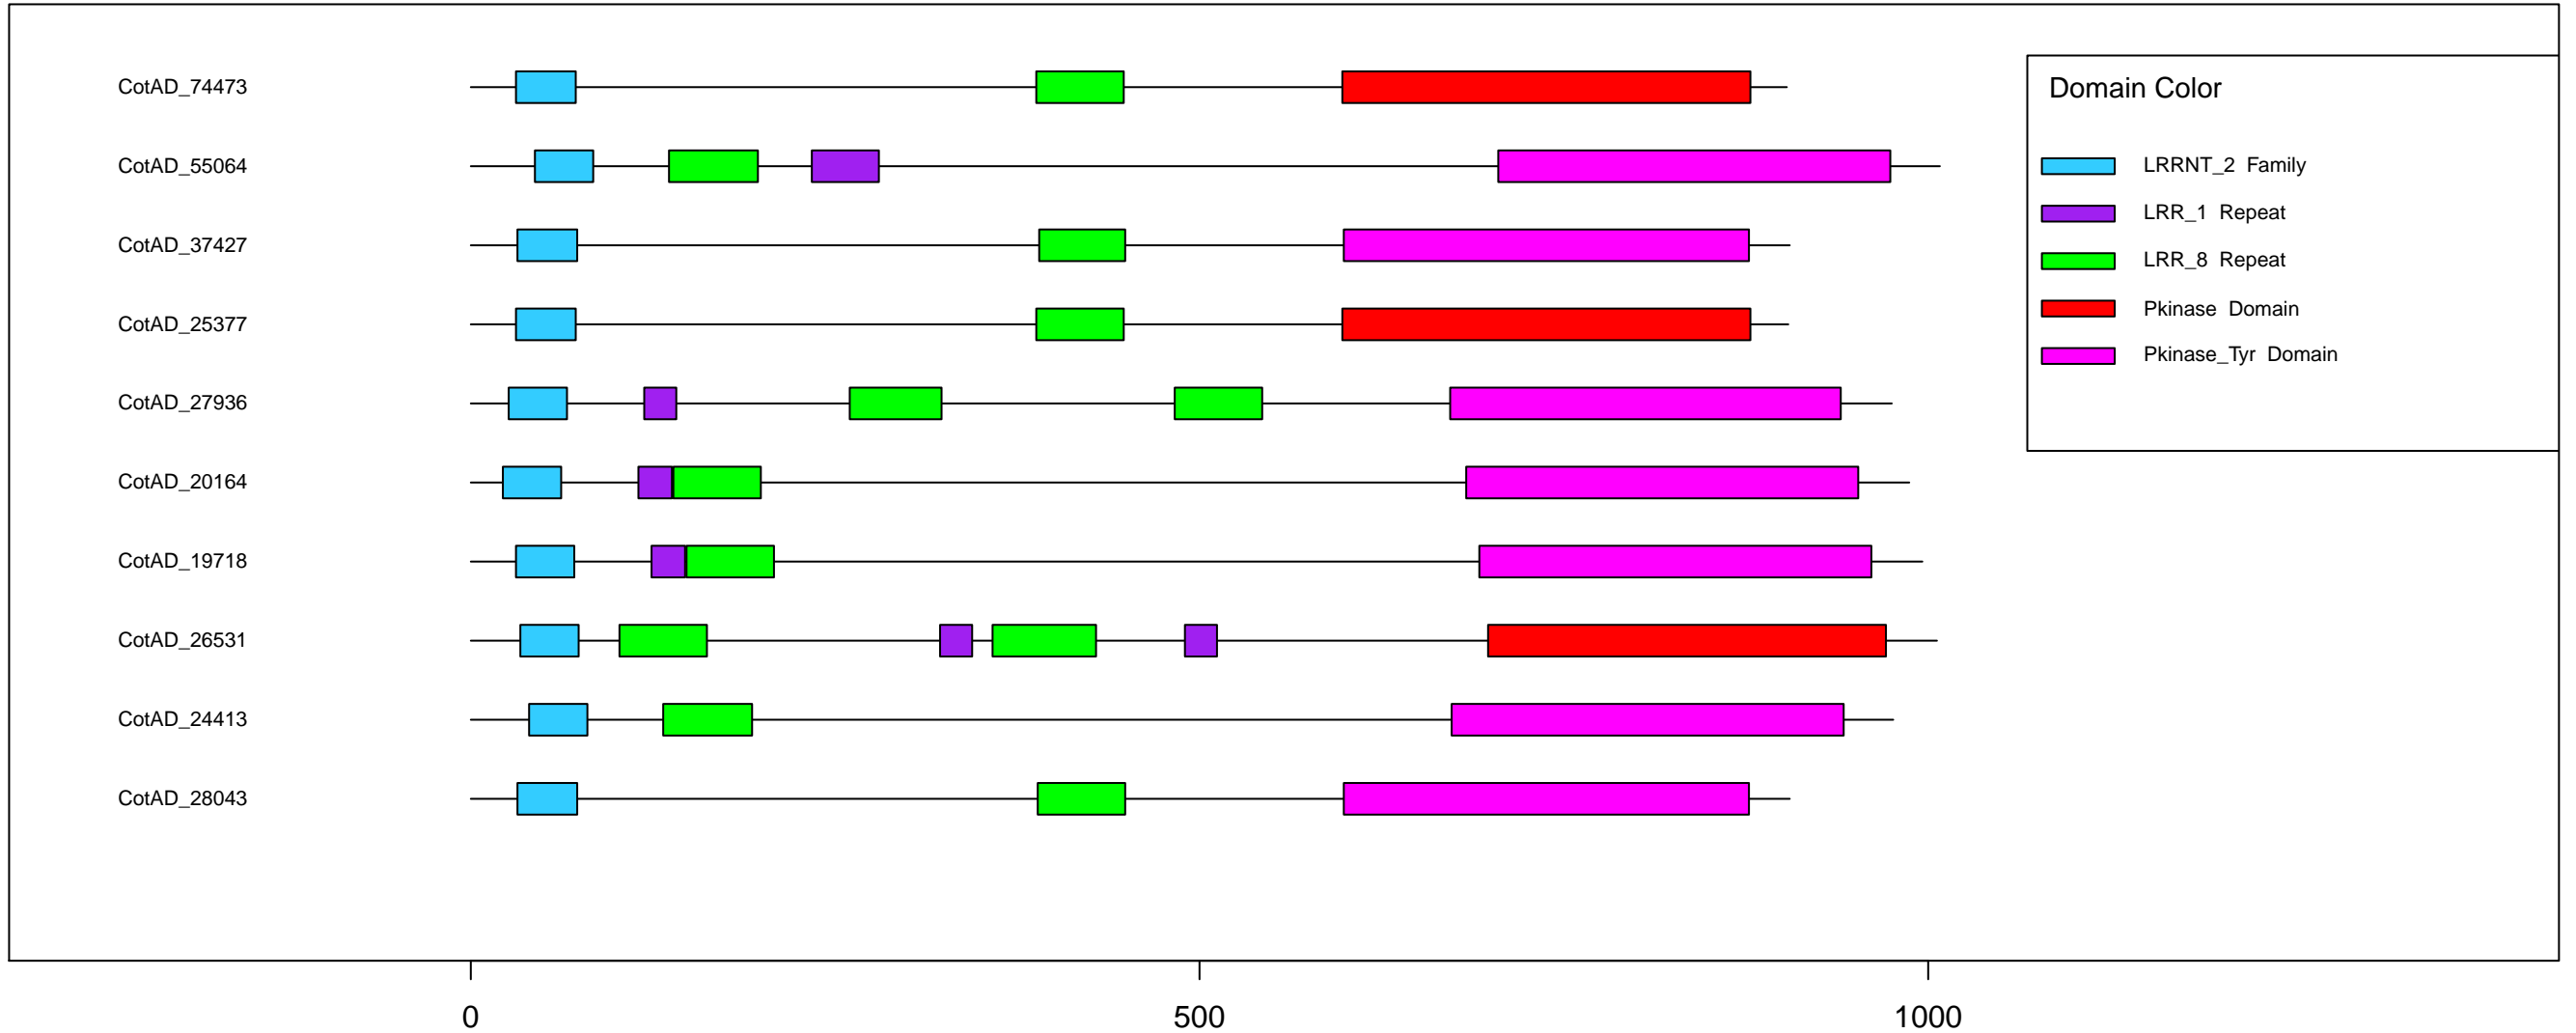

# G.hi RLK-Pelle\_LRR-VII-2 domain diagram (all)

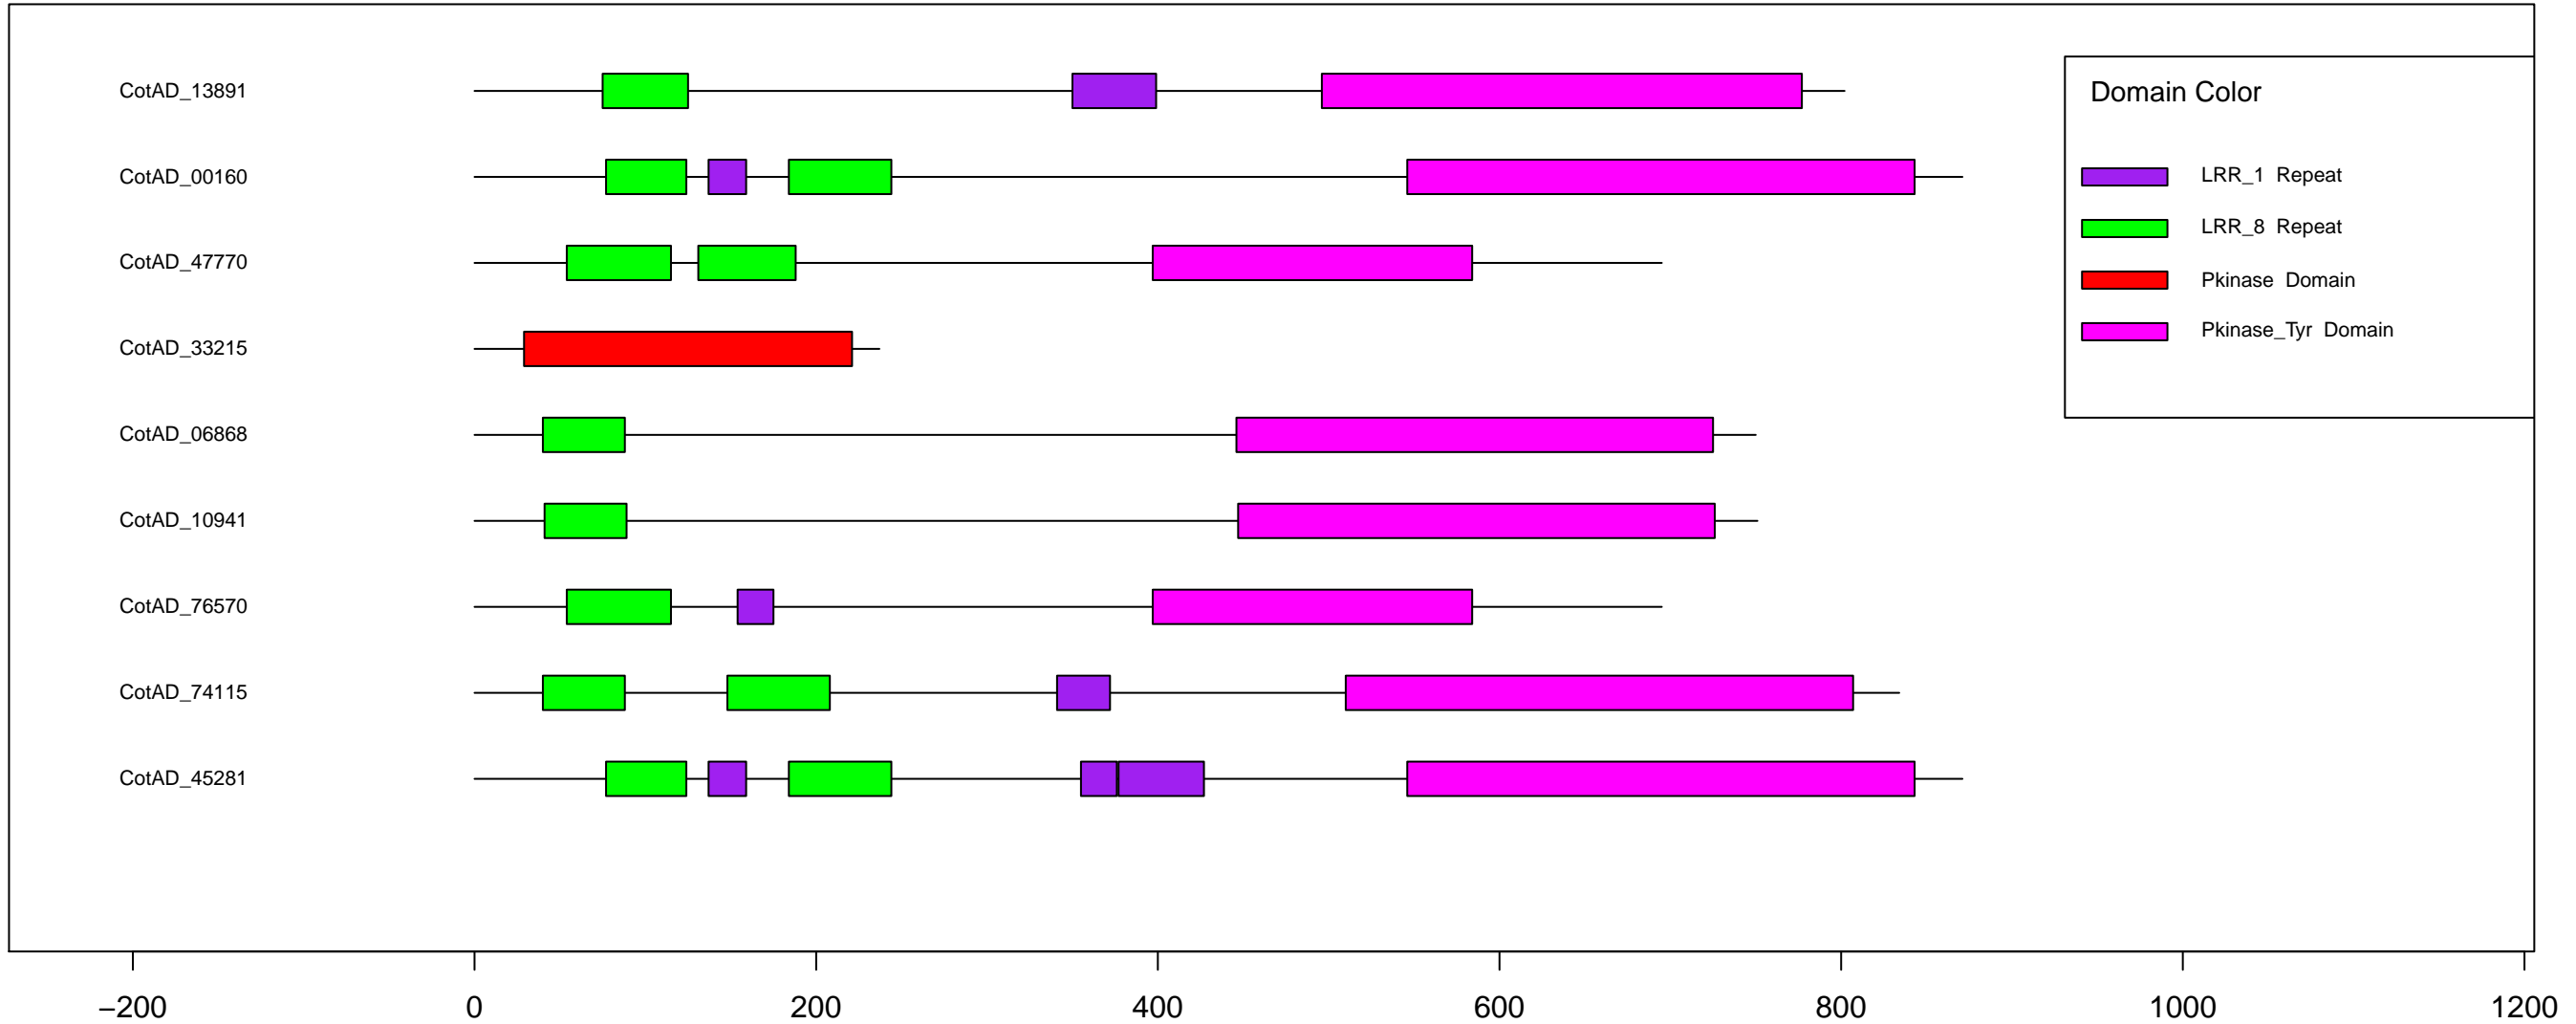

G.hi RLK-Pelle\_LRR-VII-3 domain diagram (all)

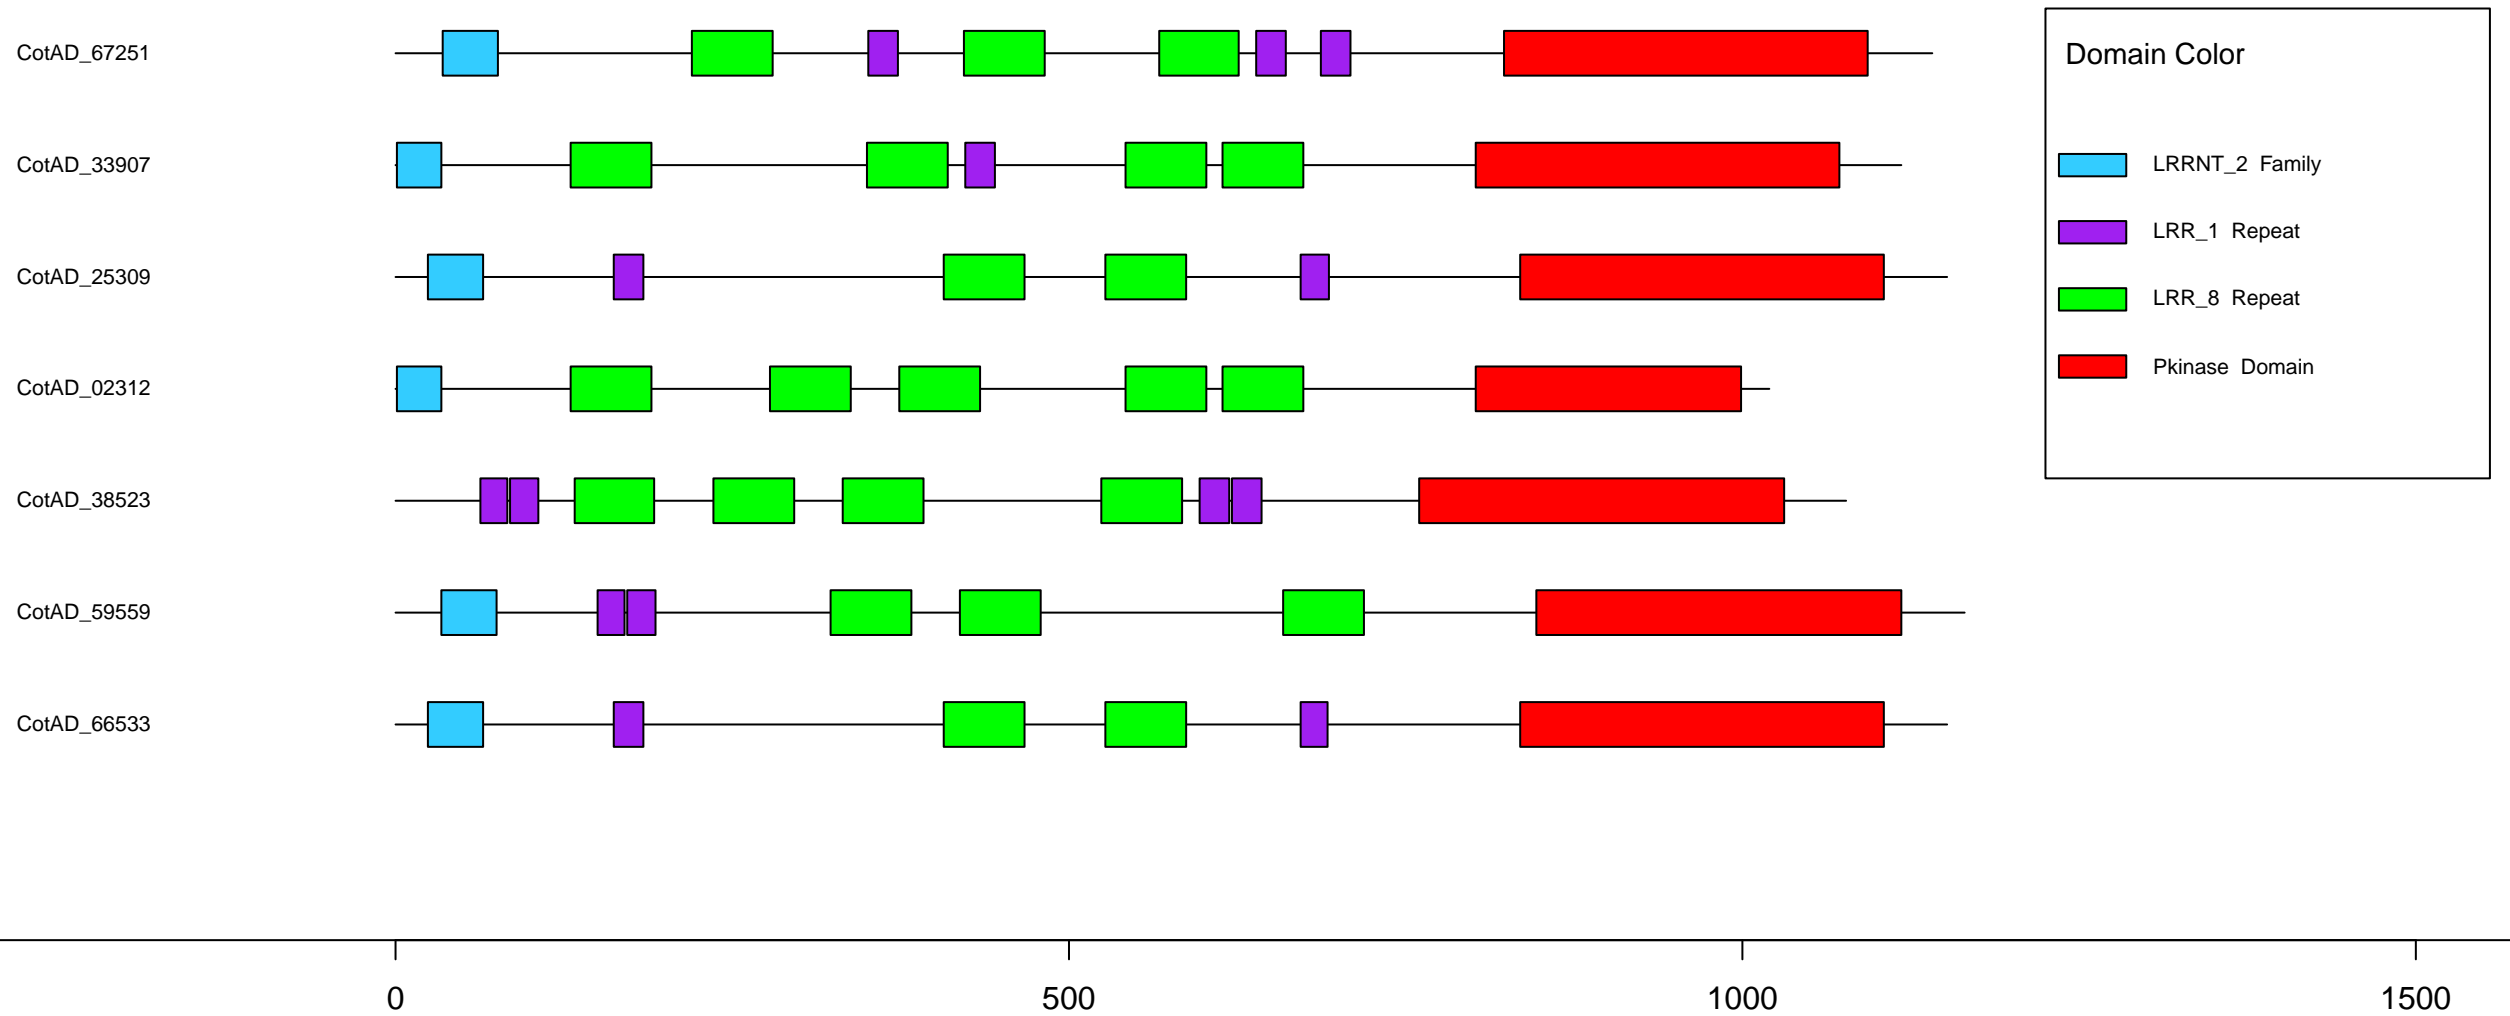

### G.hi RLK-Pelle\_LRR-VIII-1 domain diagram (all)

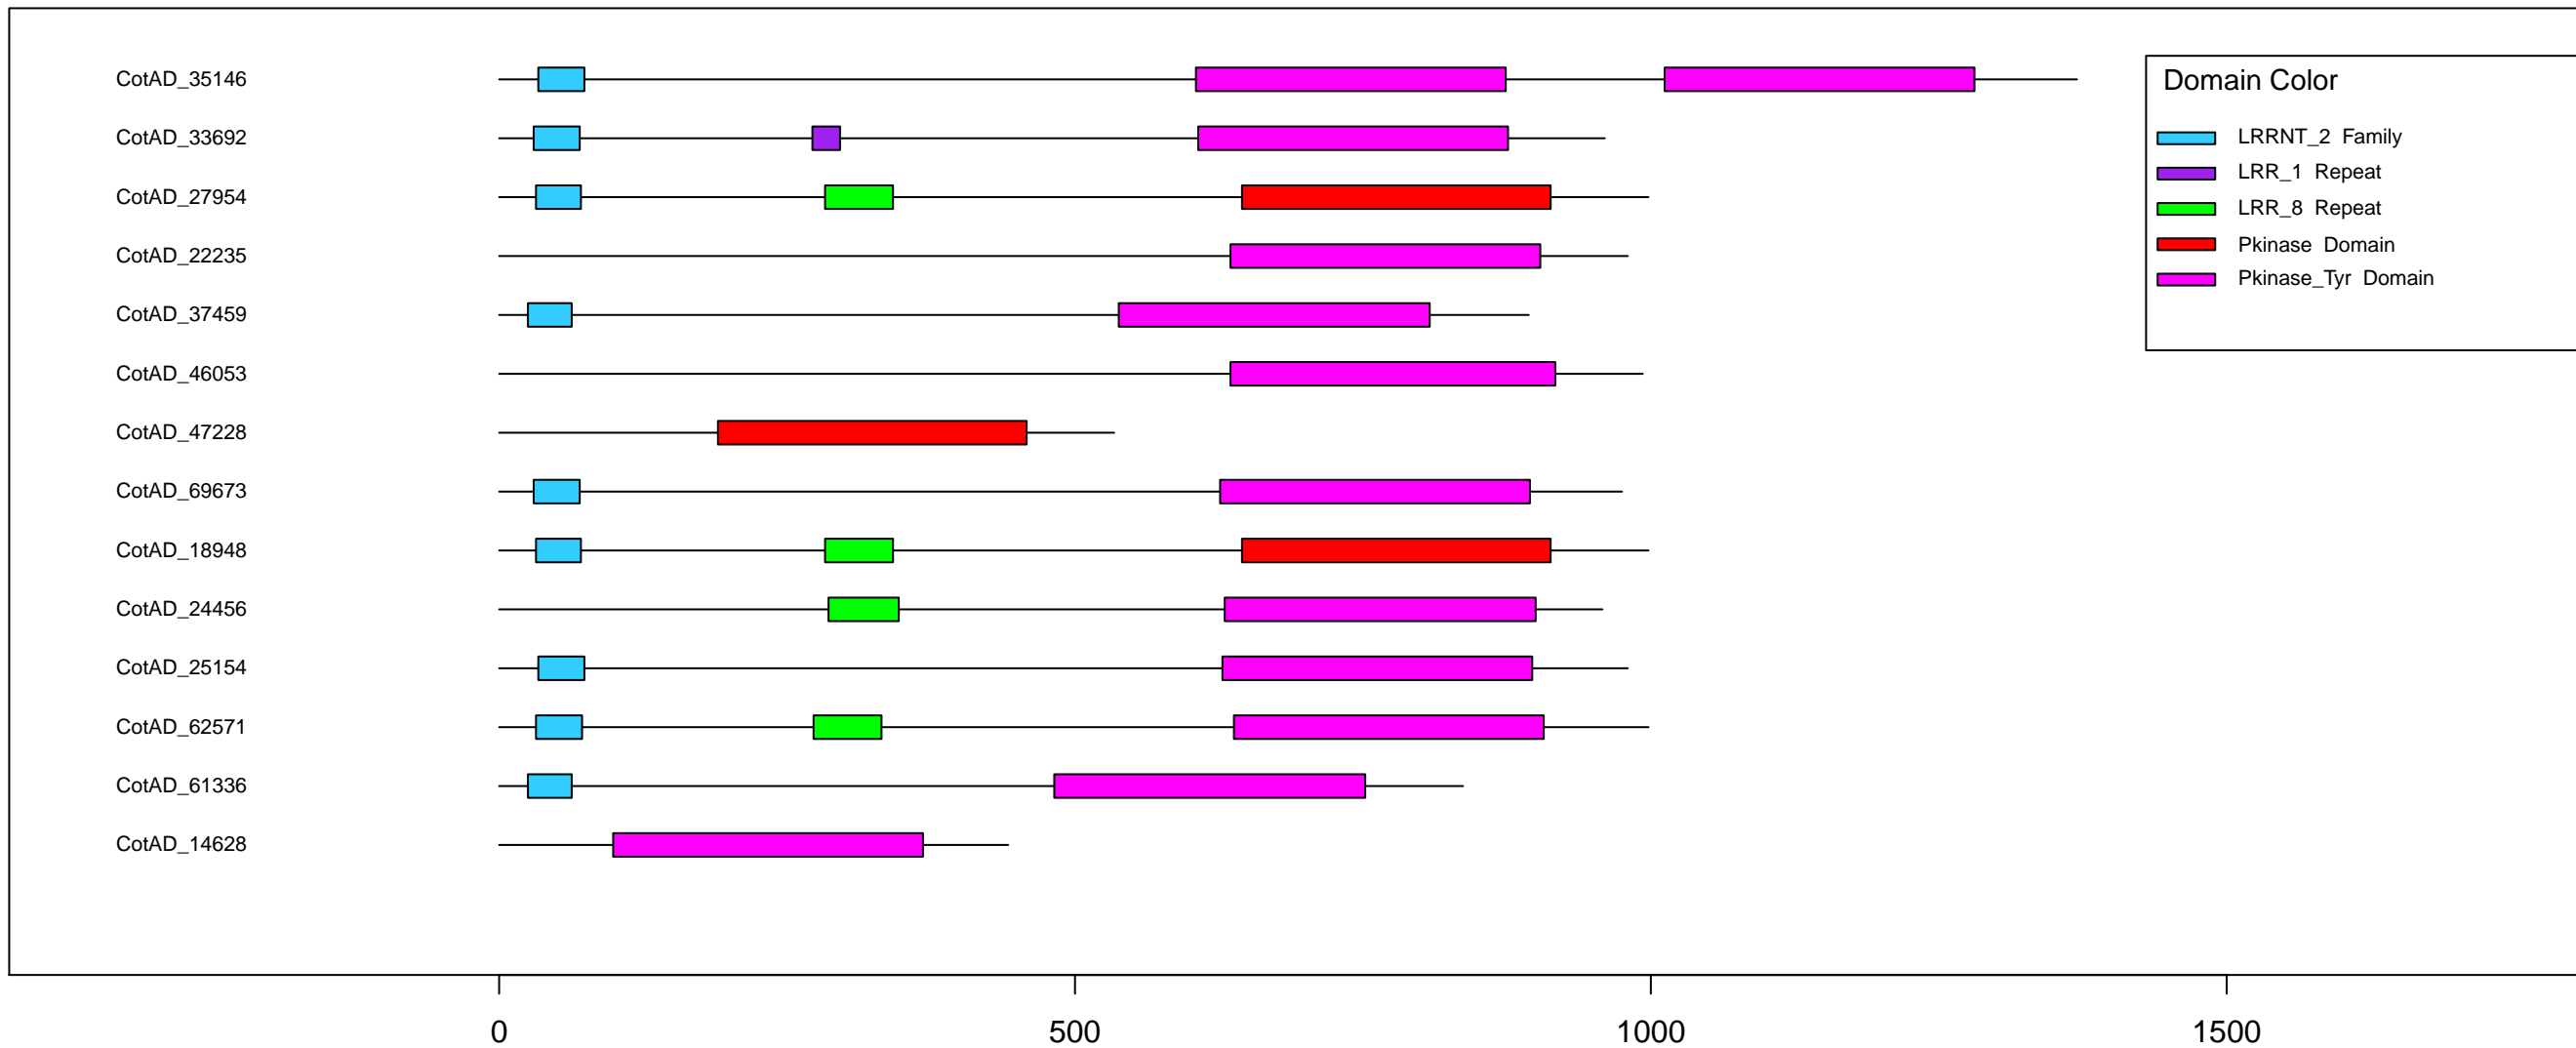



# G.hi RLK-Pelle\_LRR-V domain diagram (all)

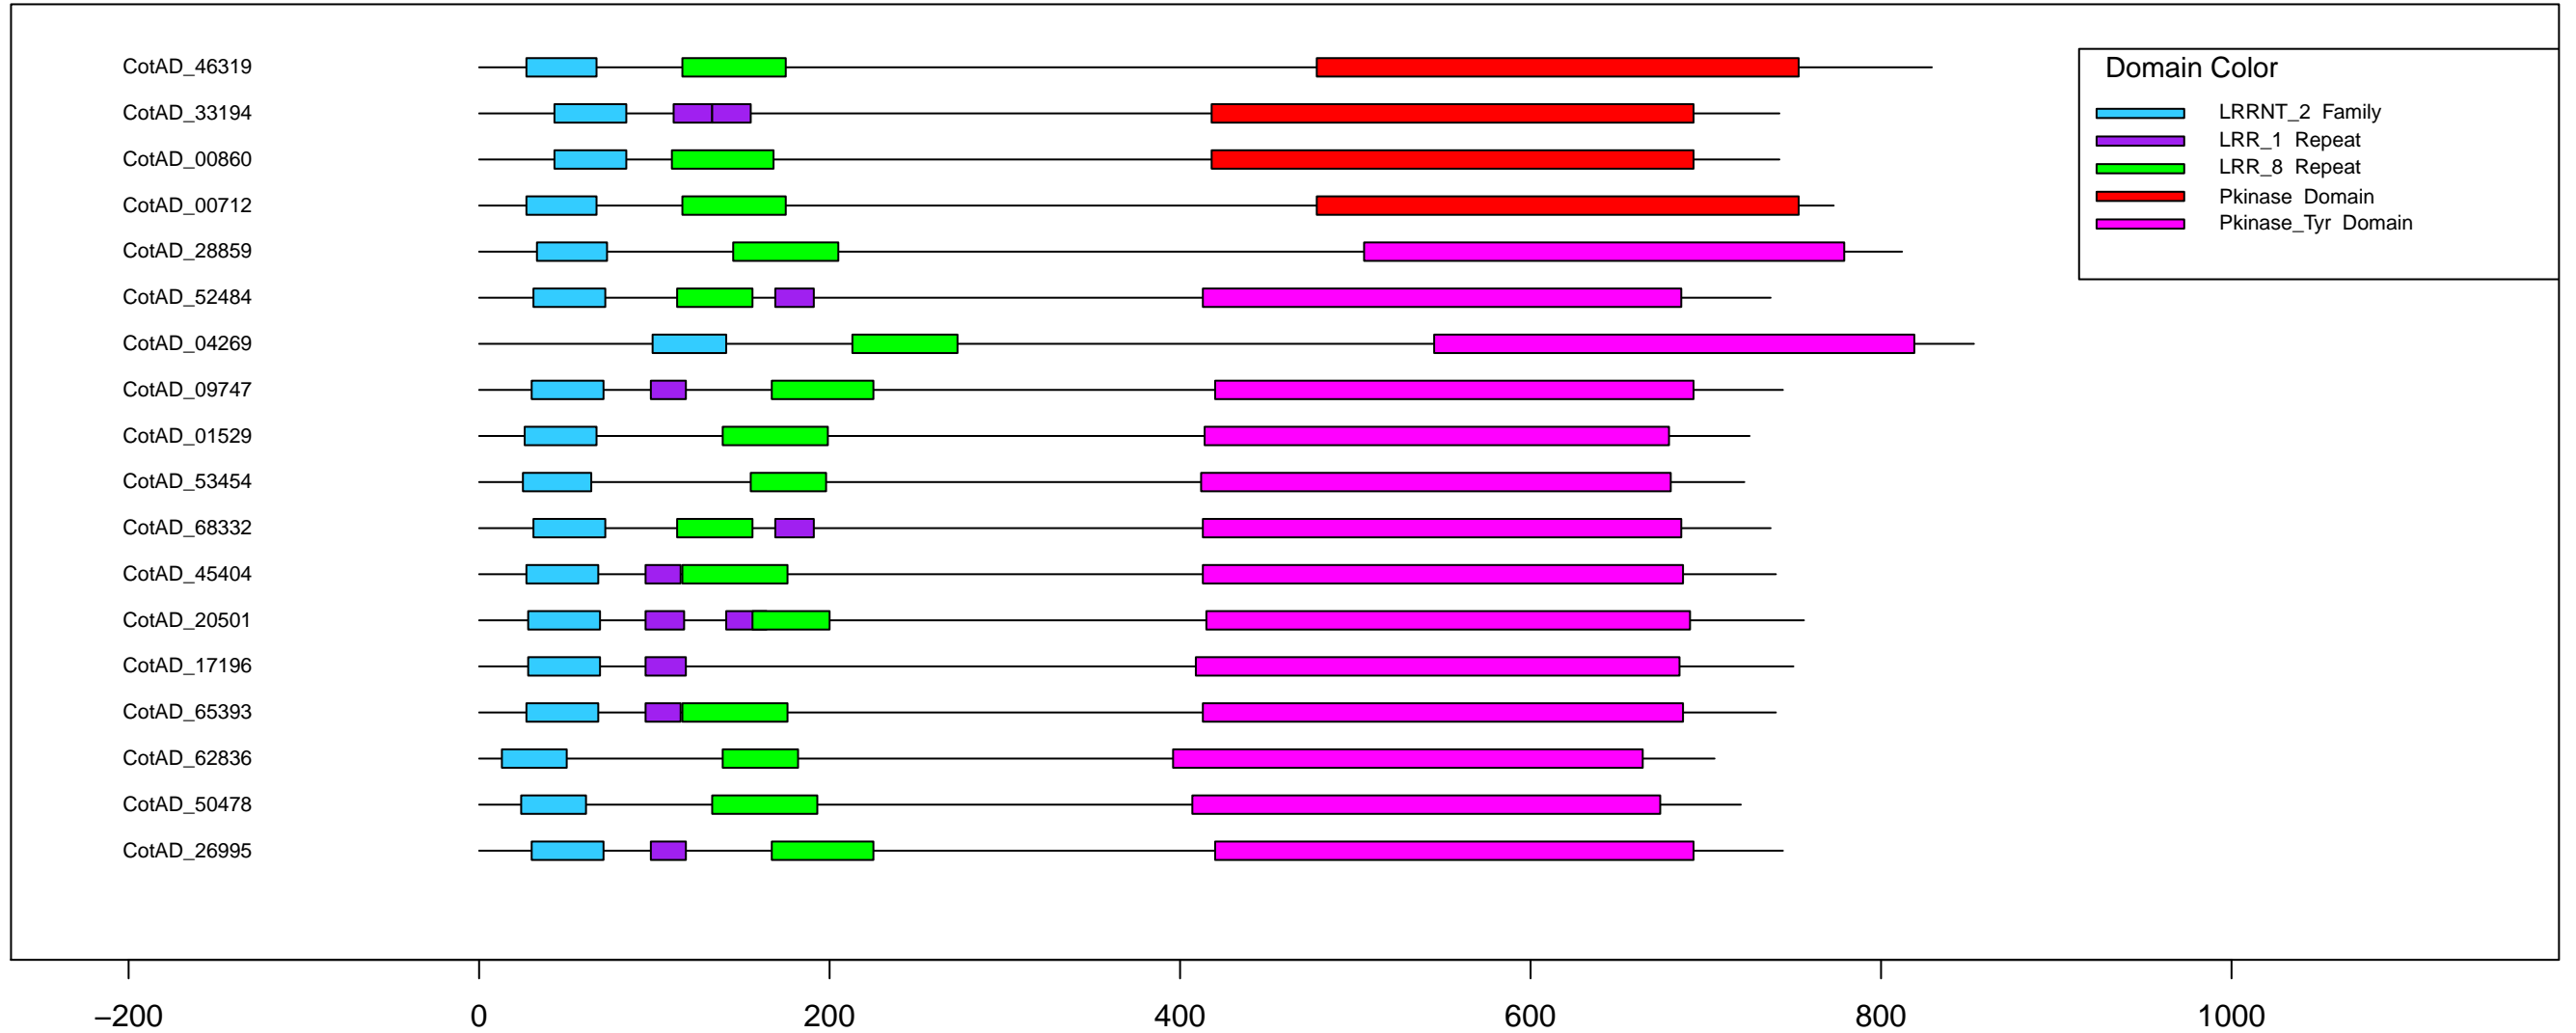

### G.hi RLK-Pelle\_LRR-Xa domain diagram (all)

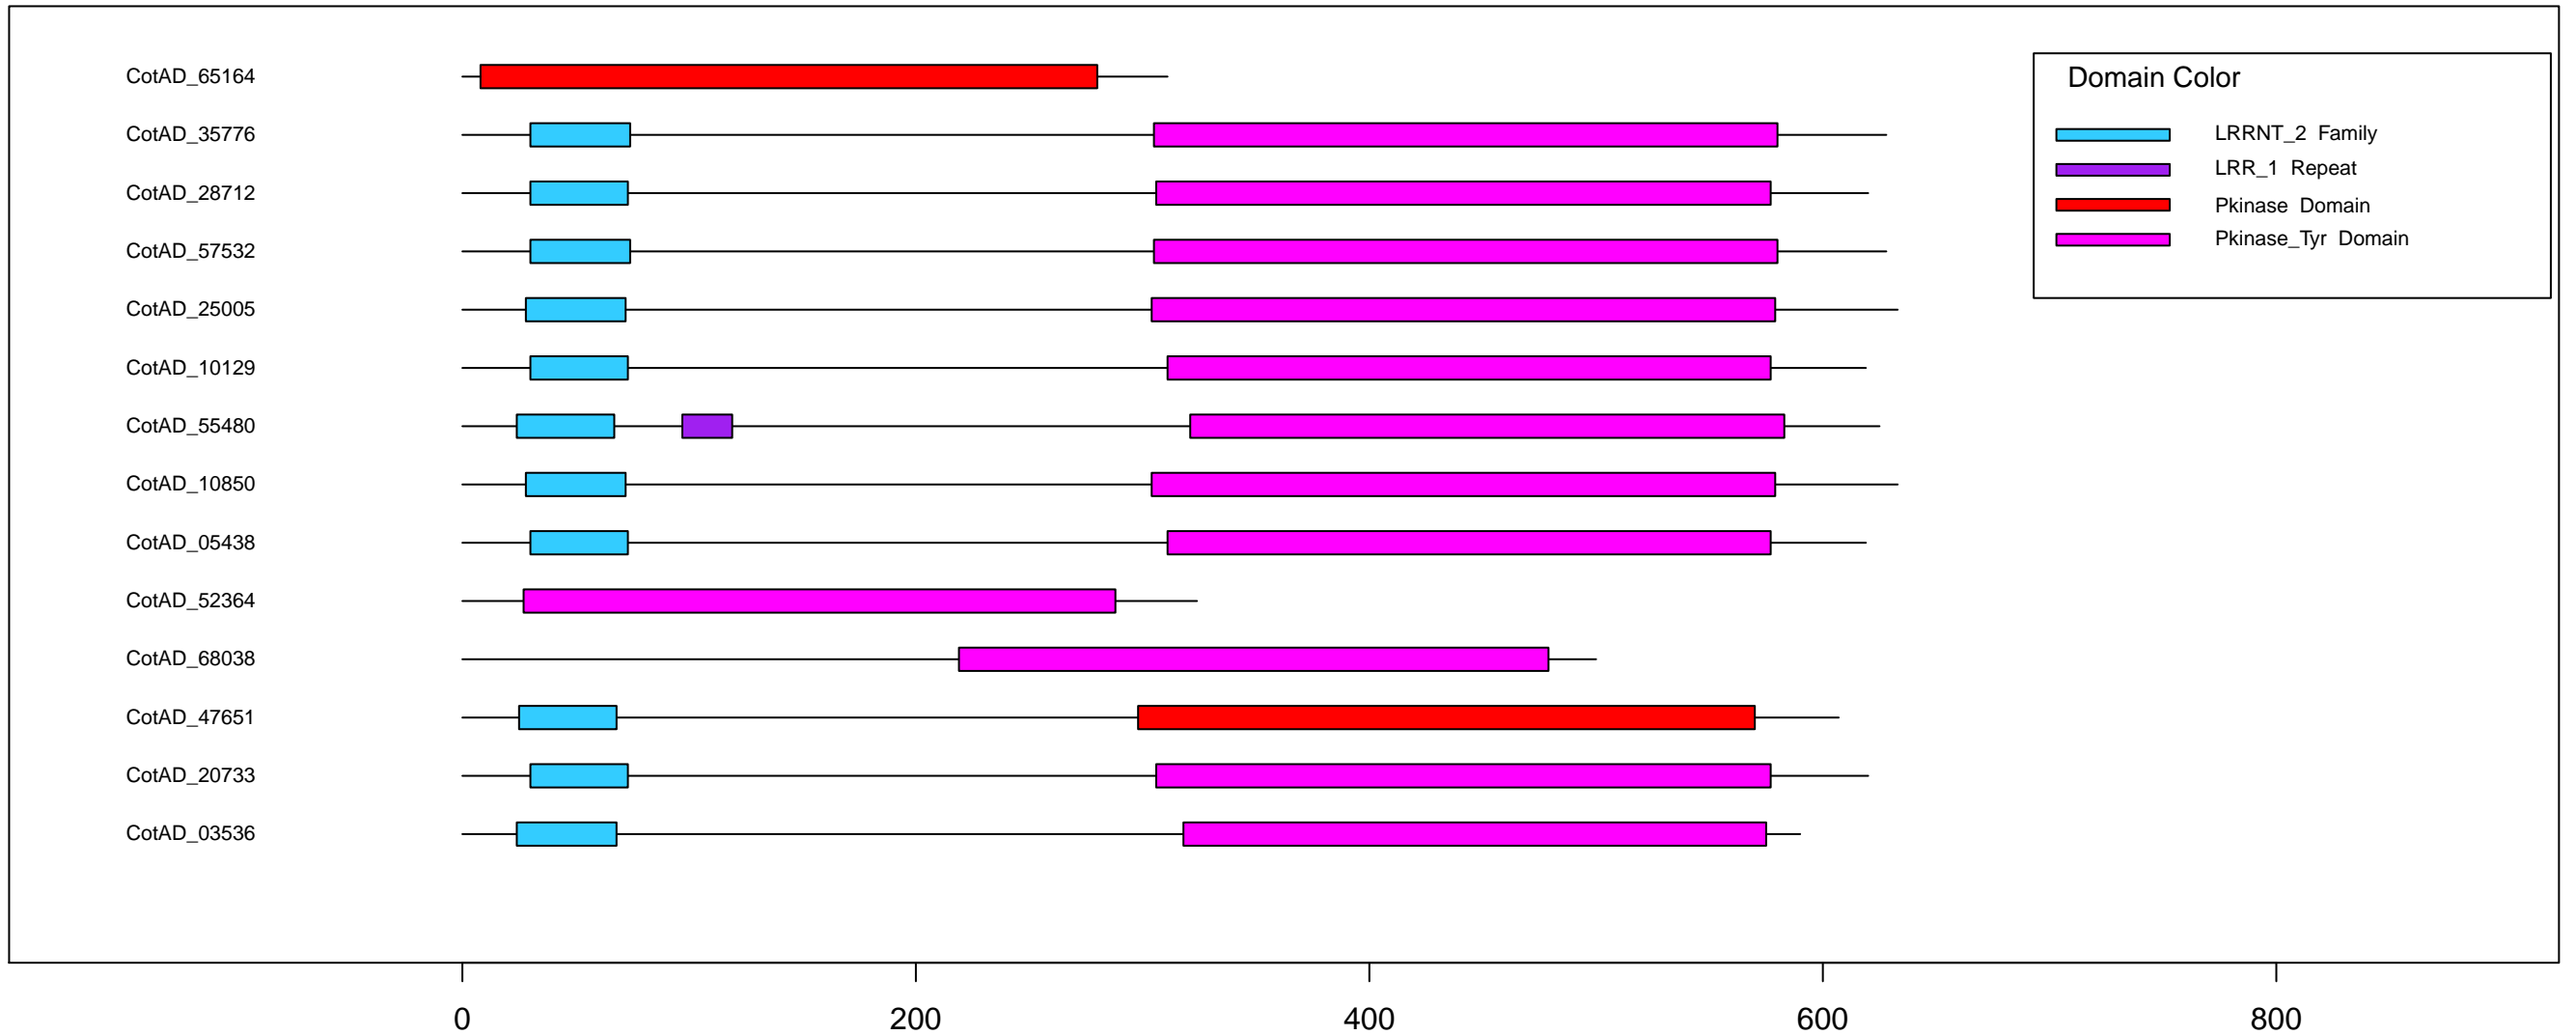

### G.hi RLK-Pelle\_LRR-Xb-1 domain diagram (all)

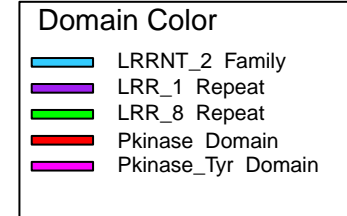

CotAD\_64057  
 CotAD\_72117  
 CotAD\_45775  
 CotAD\_15239  
 CotAD\_18195  
 CotAD\_00975  
 CotAD\_70056  
 CotAD\_59591  
 CotAD\_39293  
 CotAD\_16886  
 CotAD\_06360  
 CotAD\_24661  
 CotAD\_47479  
 CotAD\_21149  
 CotAD\_69129  
 CotAD\_57105  
 CotAD\_71049  
 CotAD\_52735  
 CotAD\_39894  
 CotAD\_19693

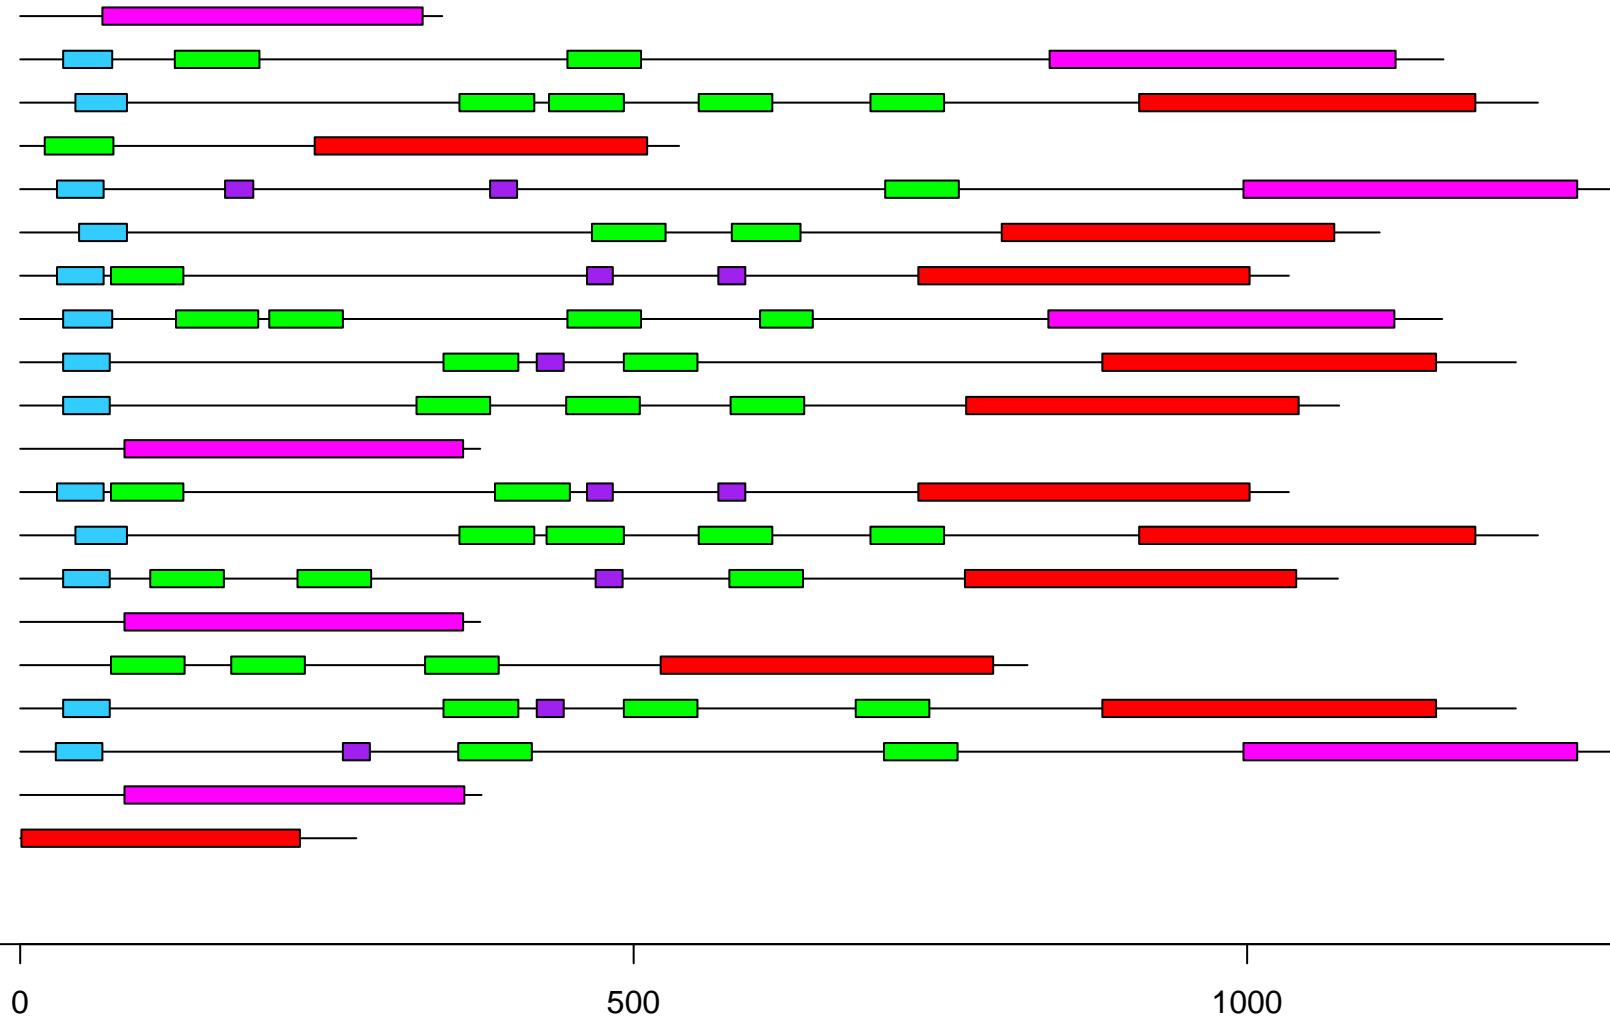

# G.hi RLK-Pelle\_LRR-Xb-2 domain diagram (all)

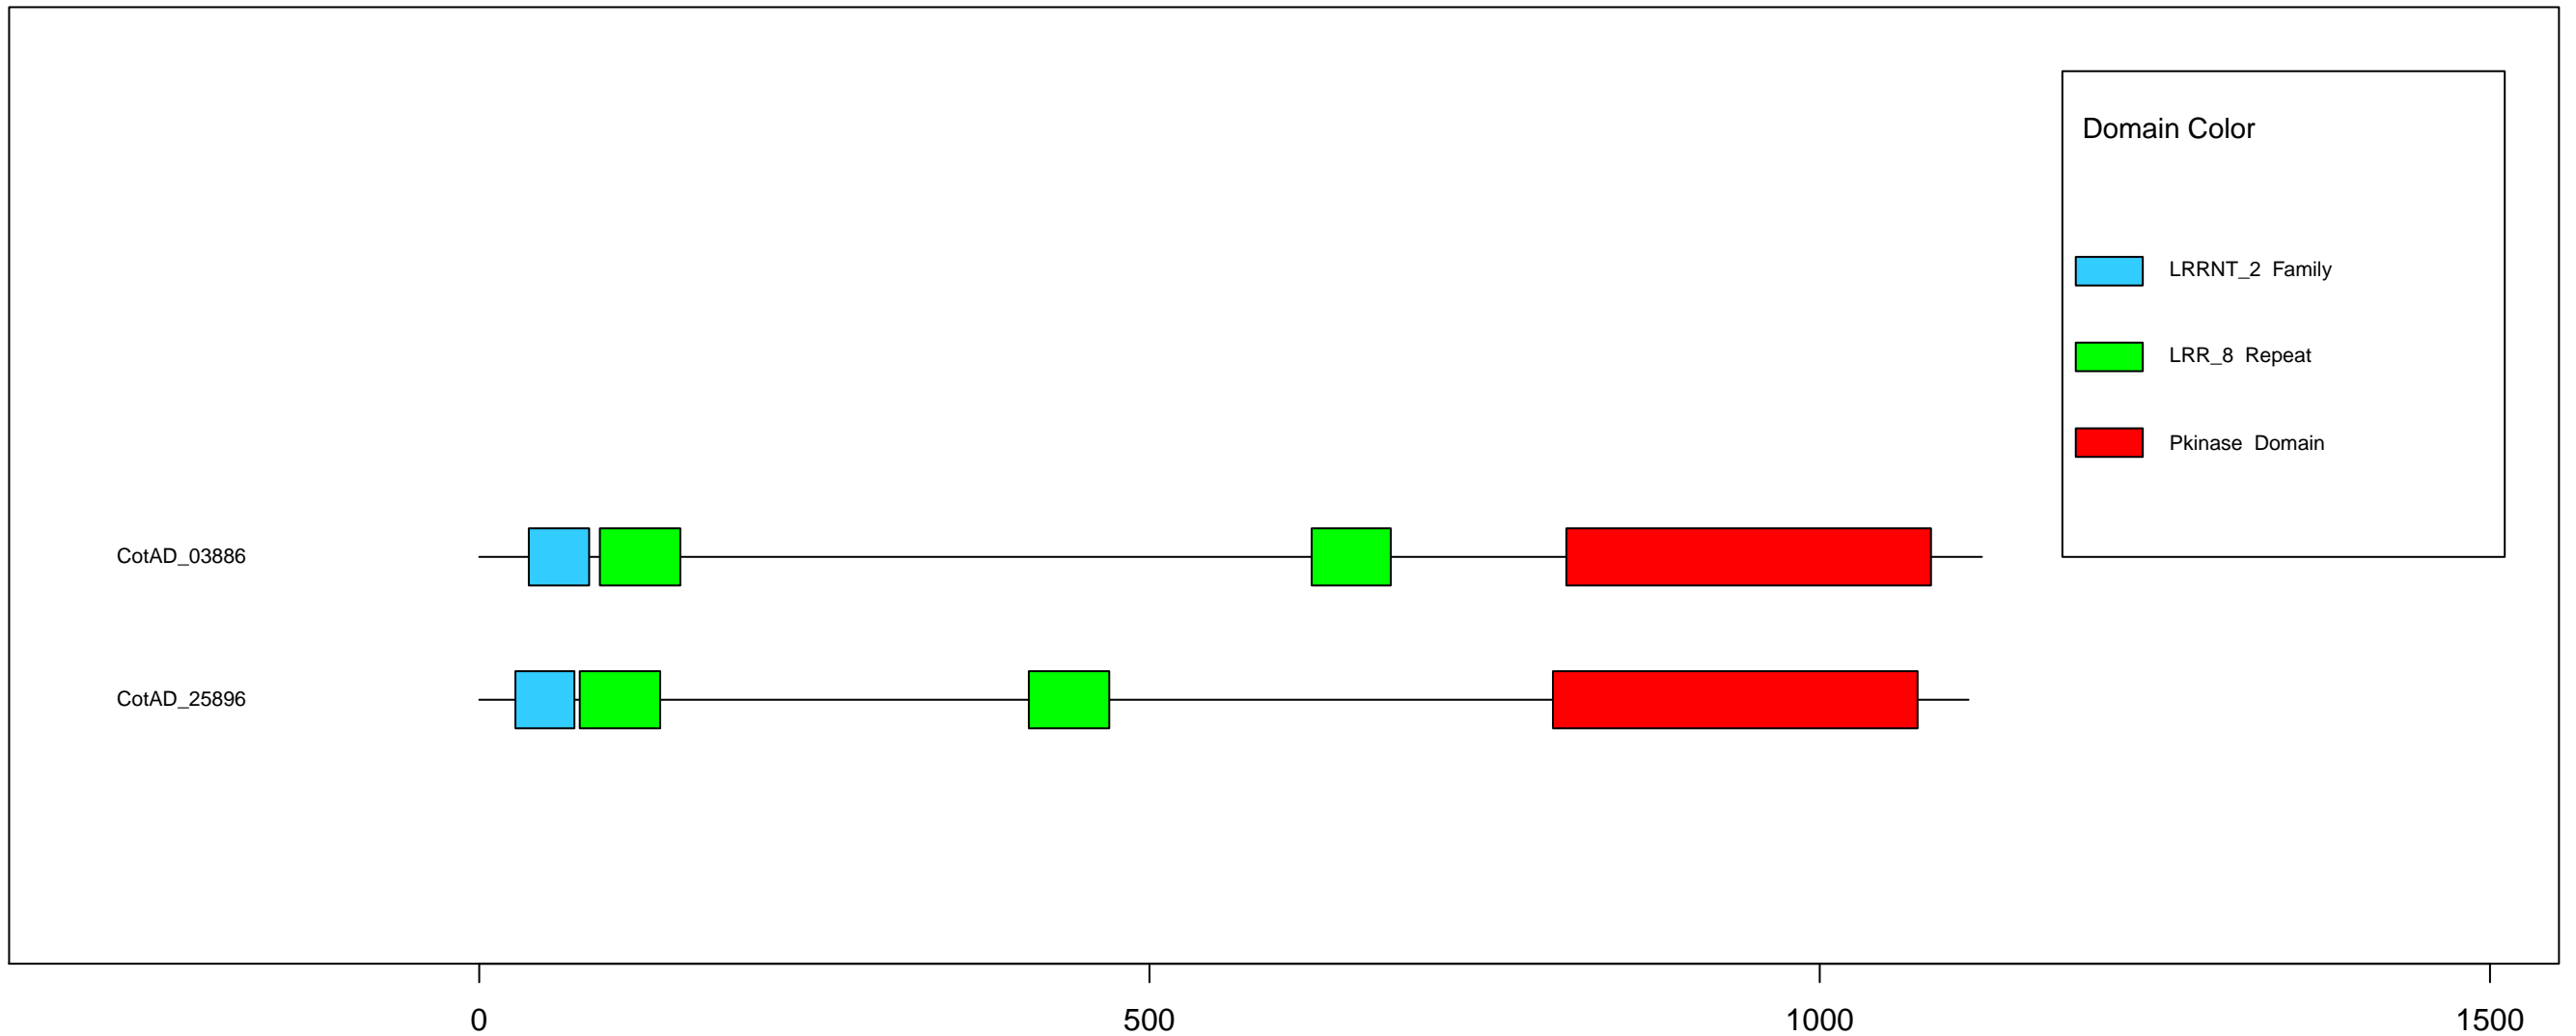

### G.hi RLK-Pelle\_LRR-XI-1 domain diagram (part 1)

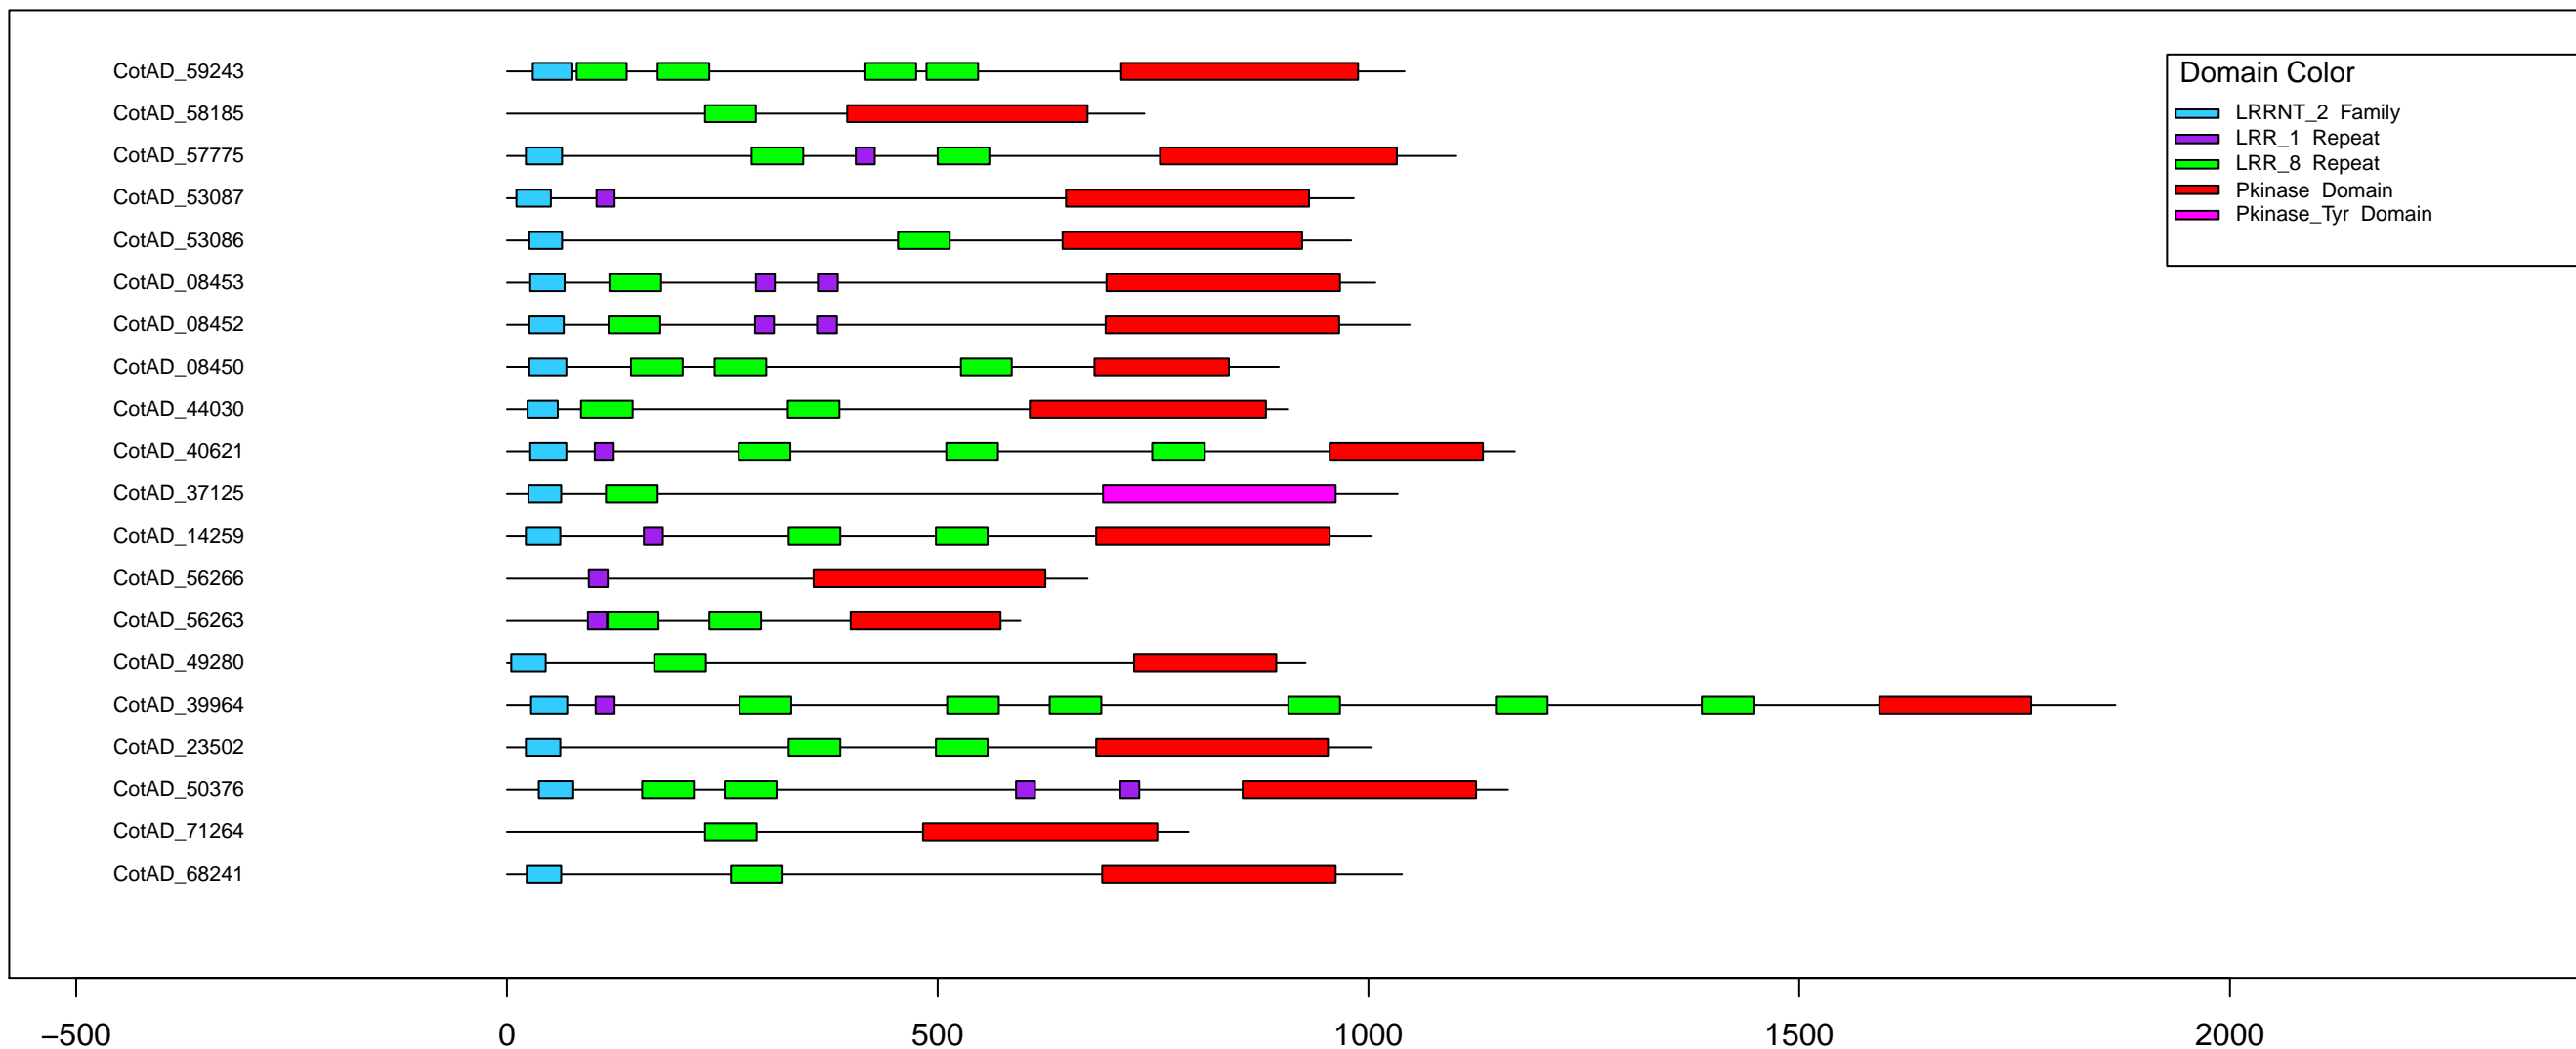

### G.hi RLK-Pelle\_LRR-XI-1 domain diagram (part 2)

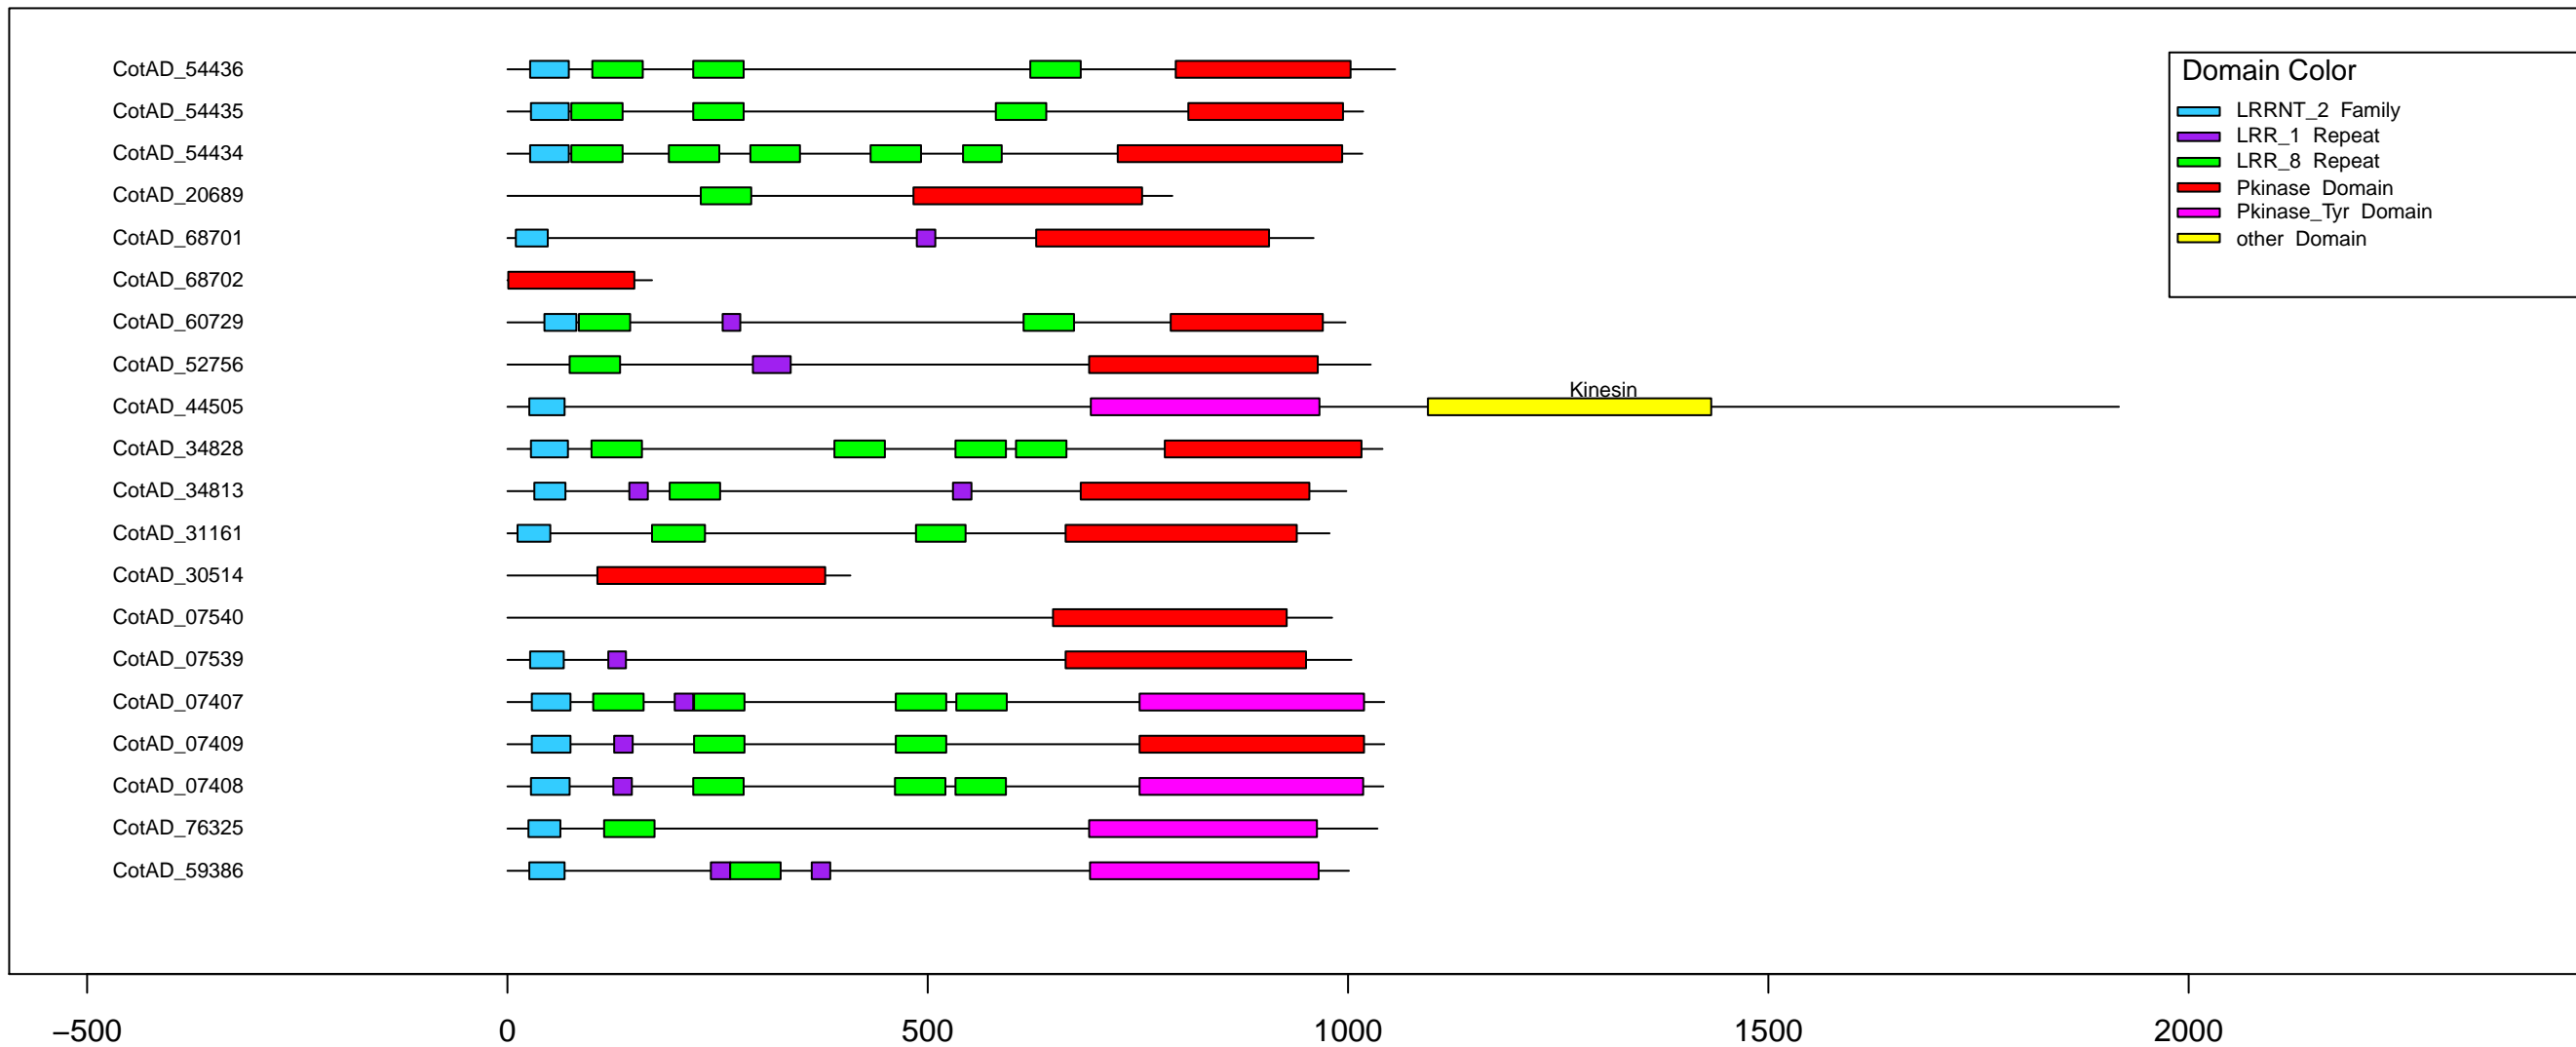

### G.hi RLK-Pelle\_LRR-XI-1 domain diagram (part 3)

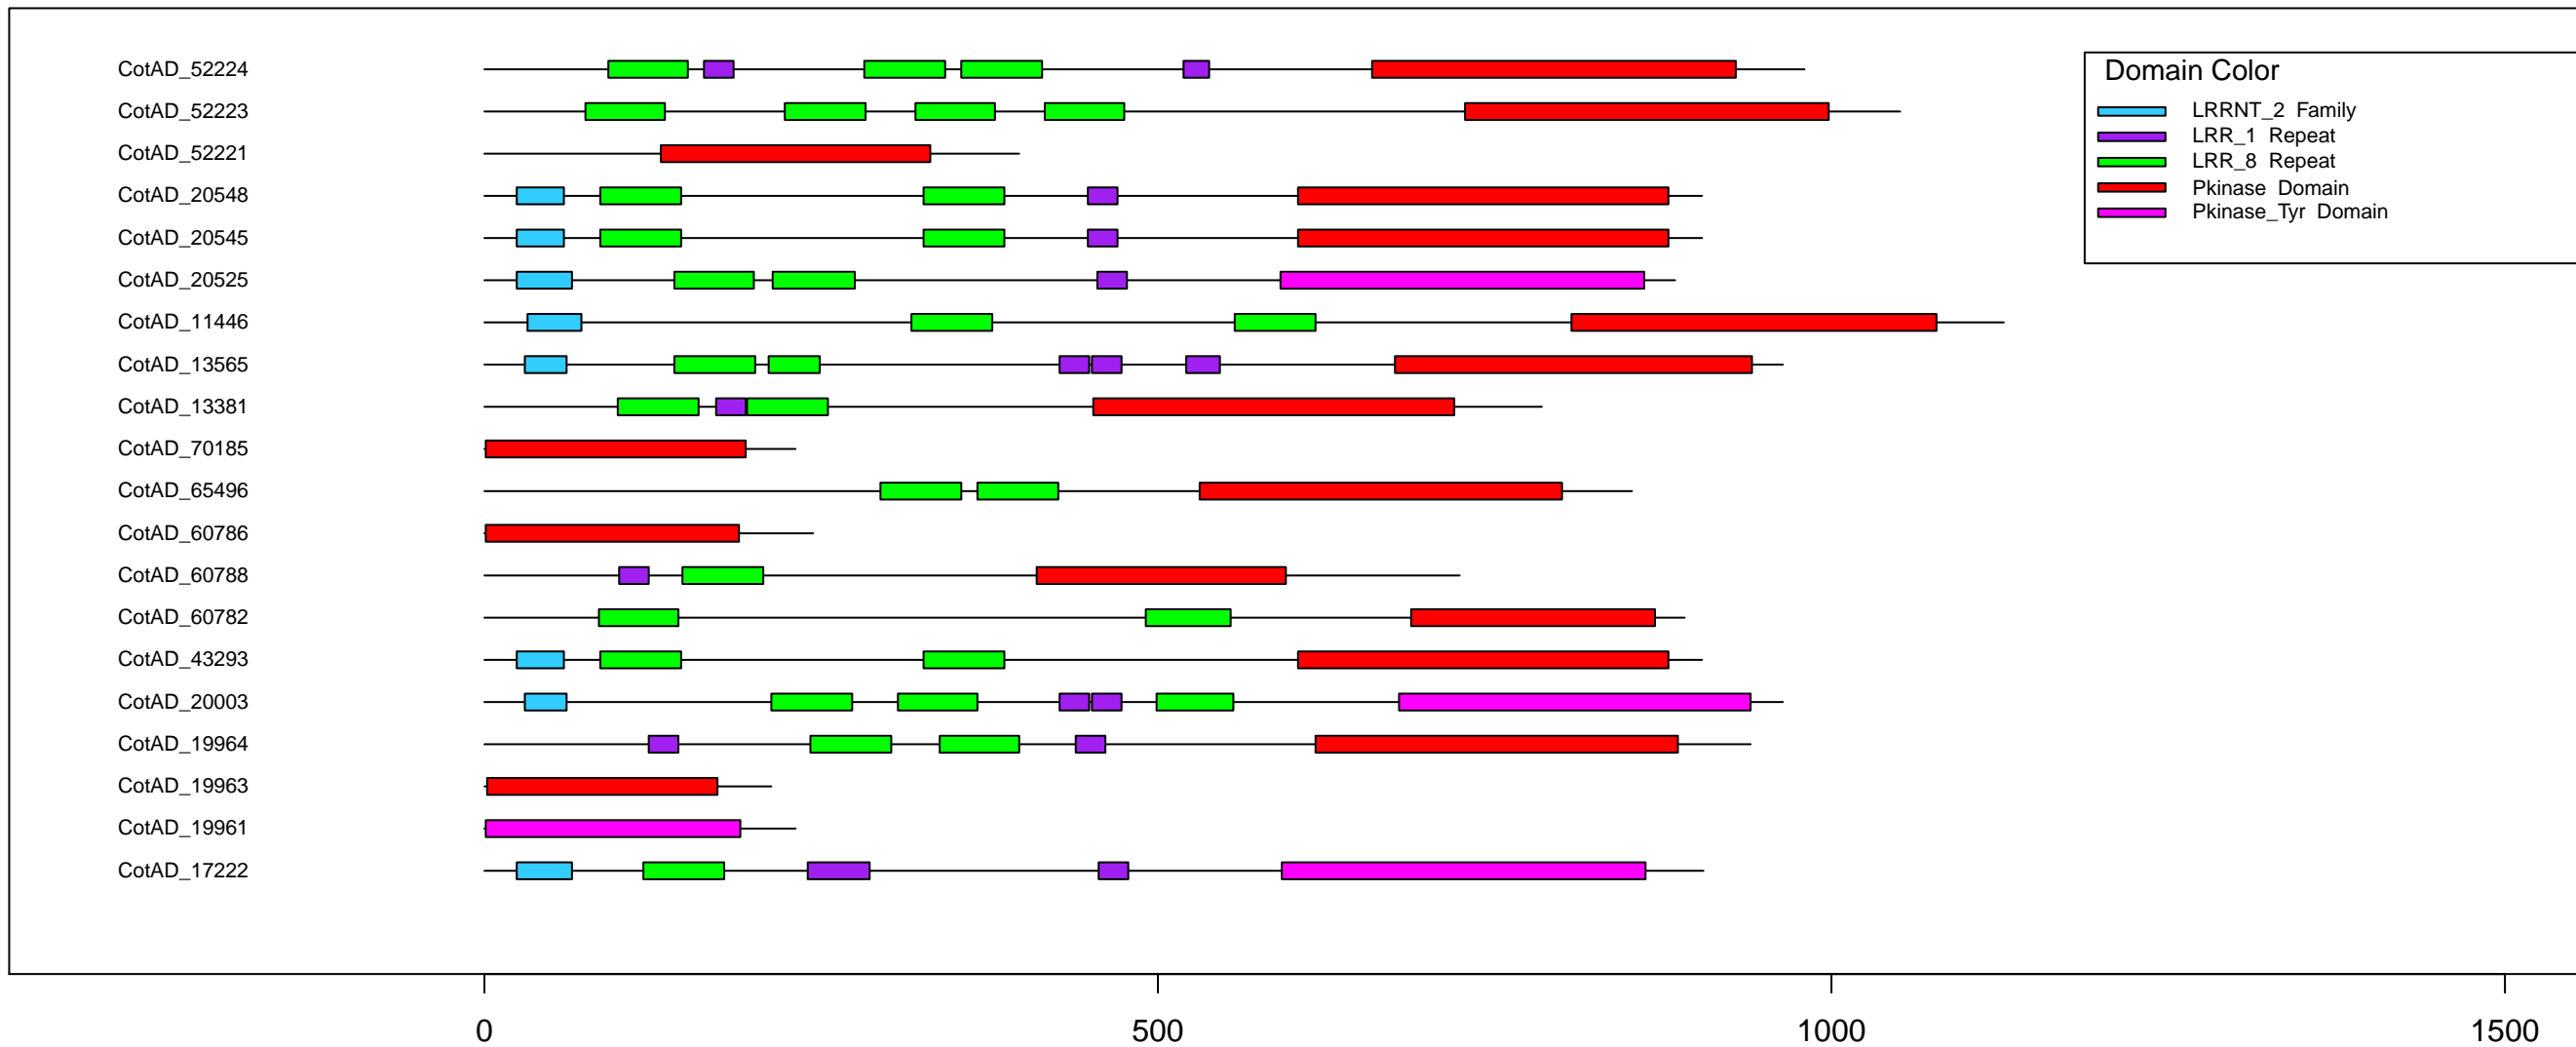

# G.hi RLK-Pelle\_LRR-XI-1 domain diagram (part 4)

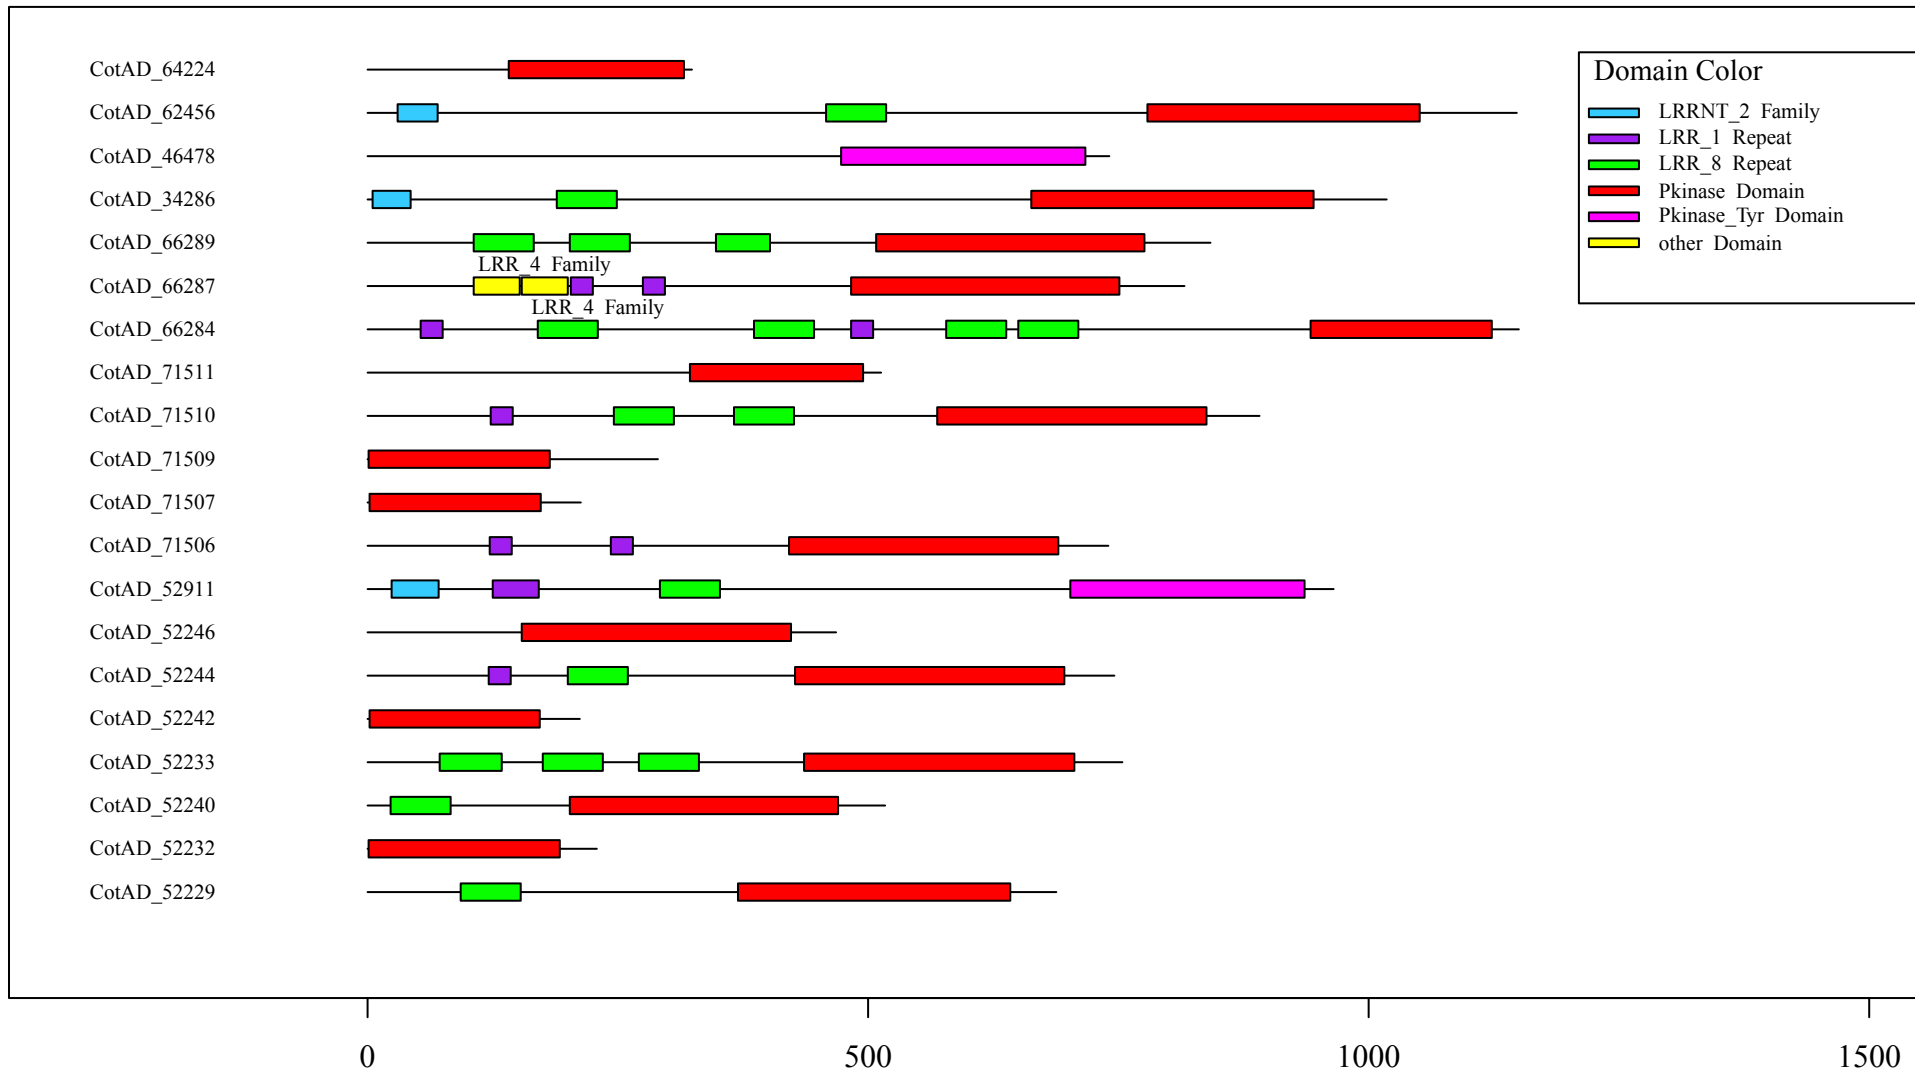



### G.hi RLK-Pelle\_LRR-XI-1 domain diagram (part 5)

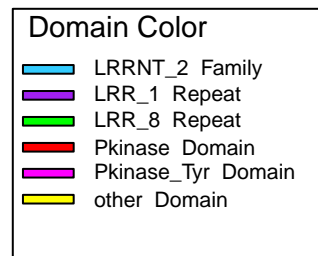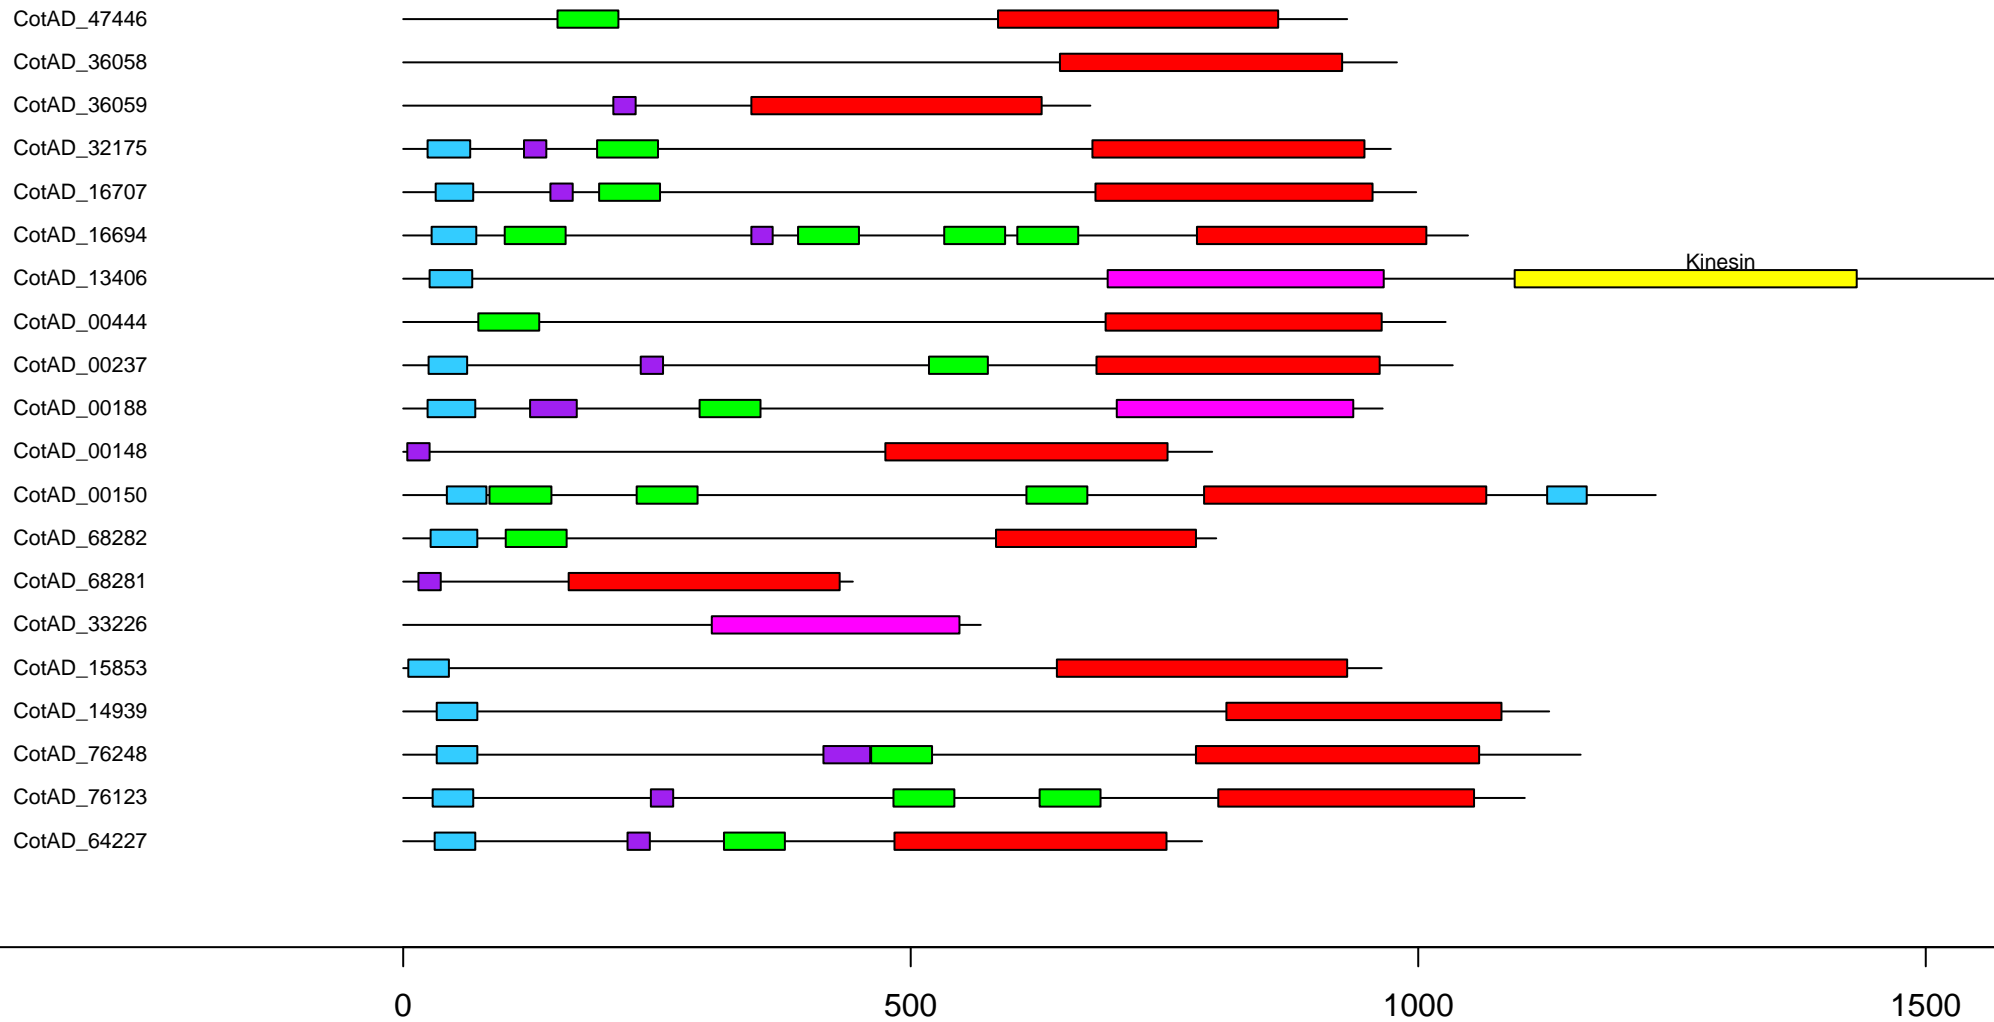

### G.hi RLK-Pelle\_LRR-XI-1 domain diagram (part 6)

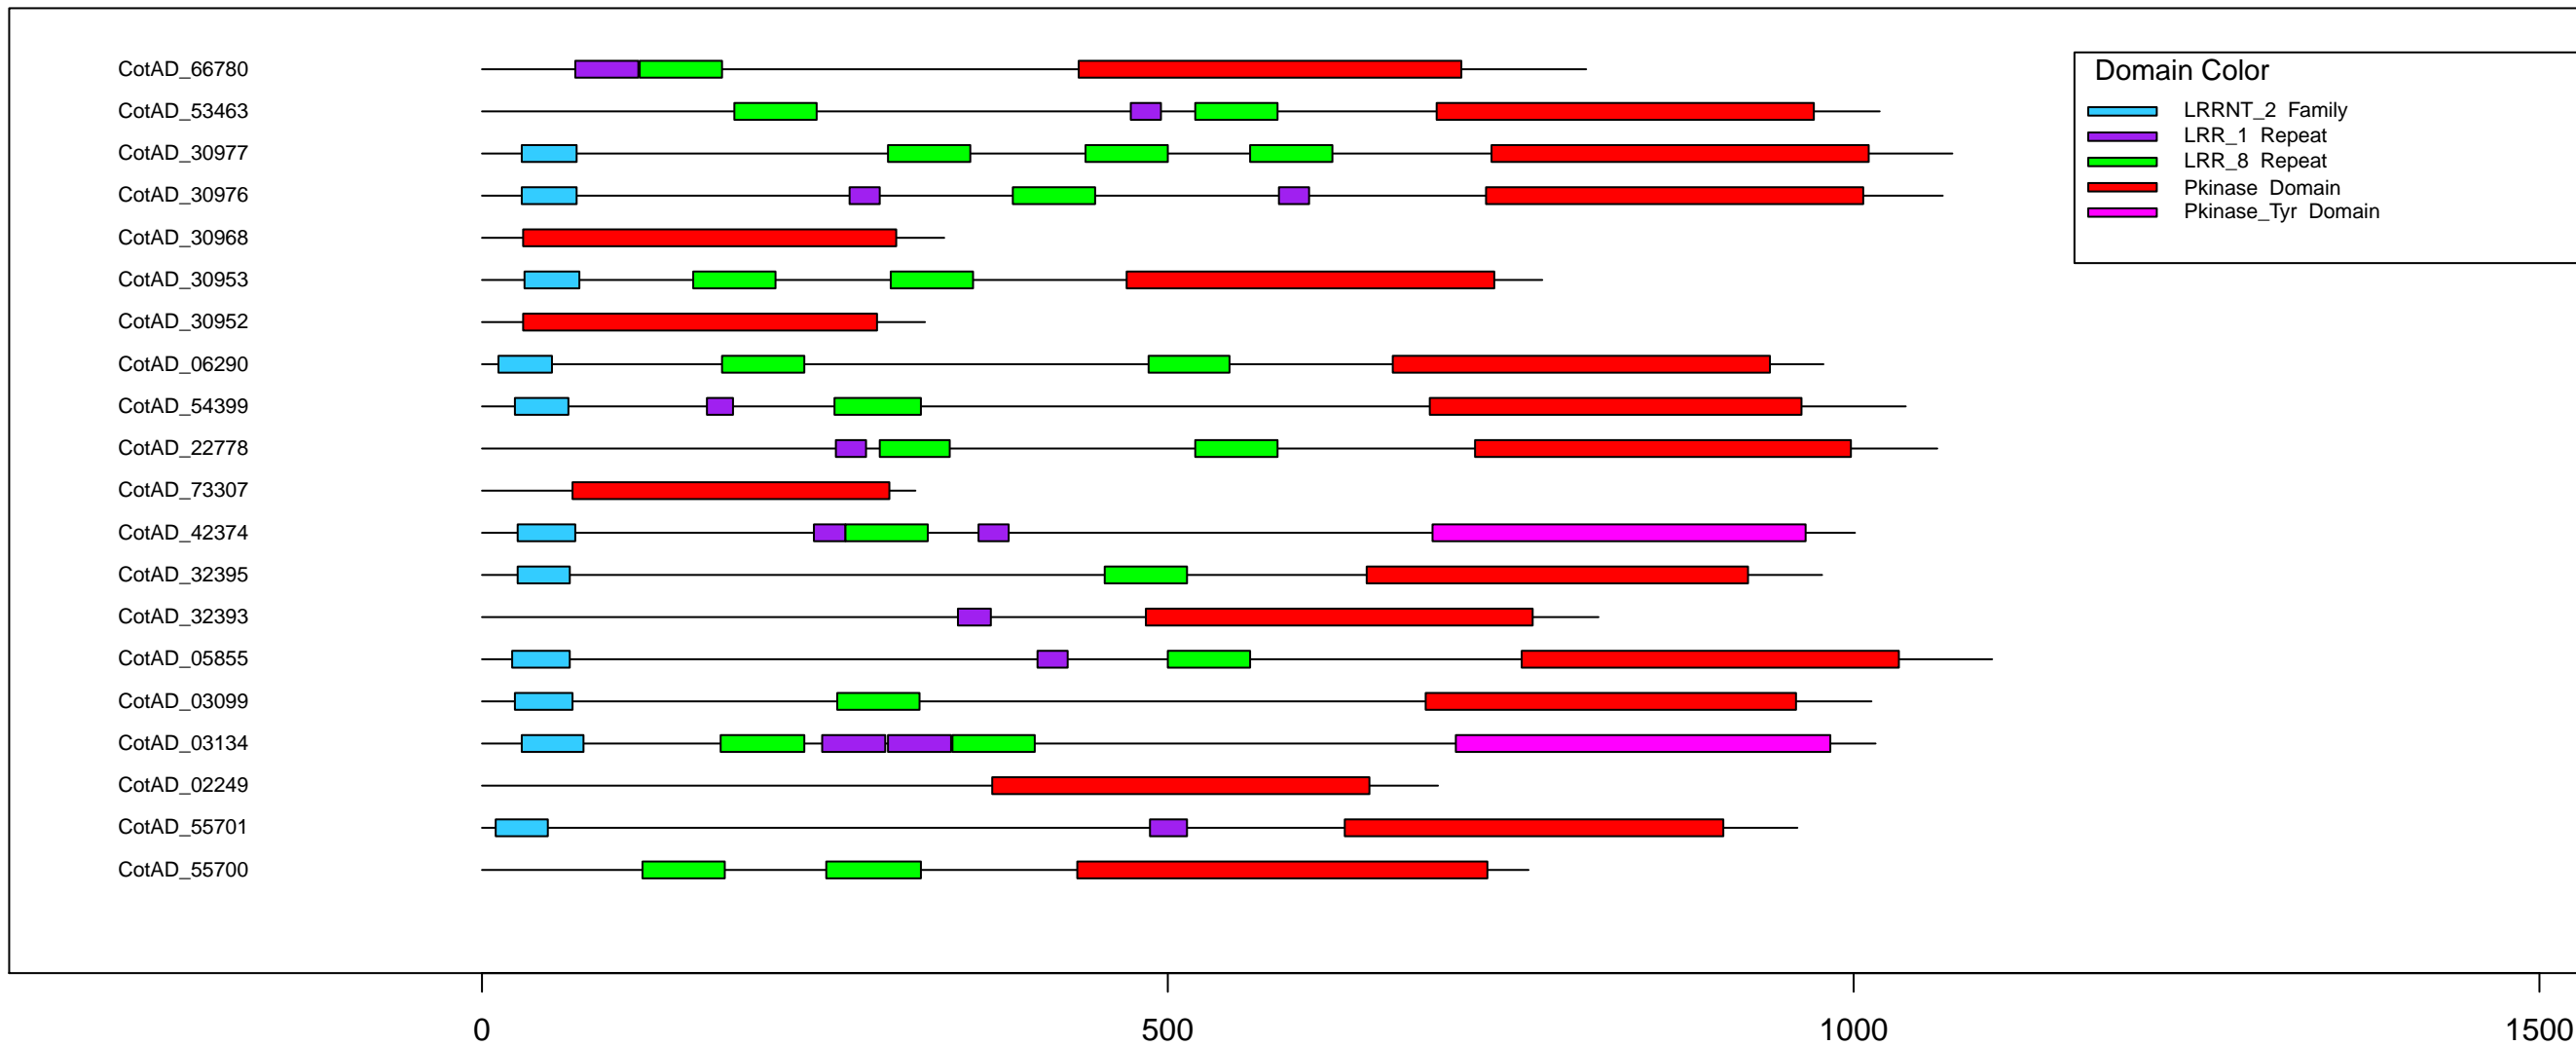

### G.hi RLK-Pelle\_LRR-XI-1 domain diagram (part 7)

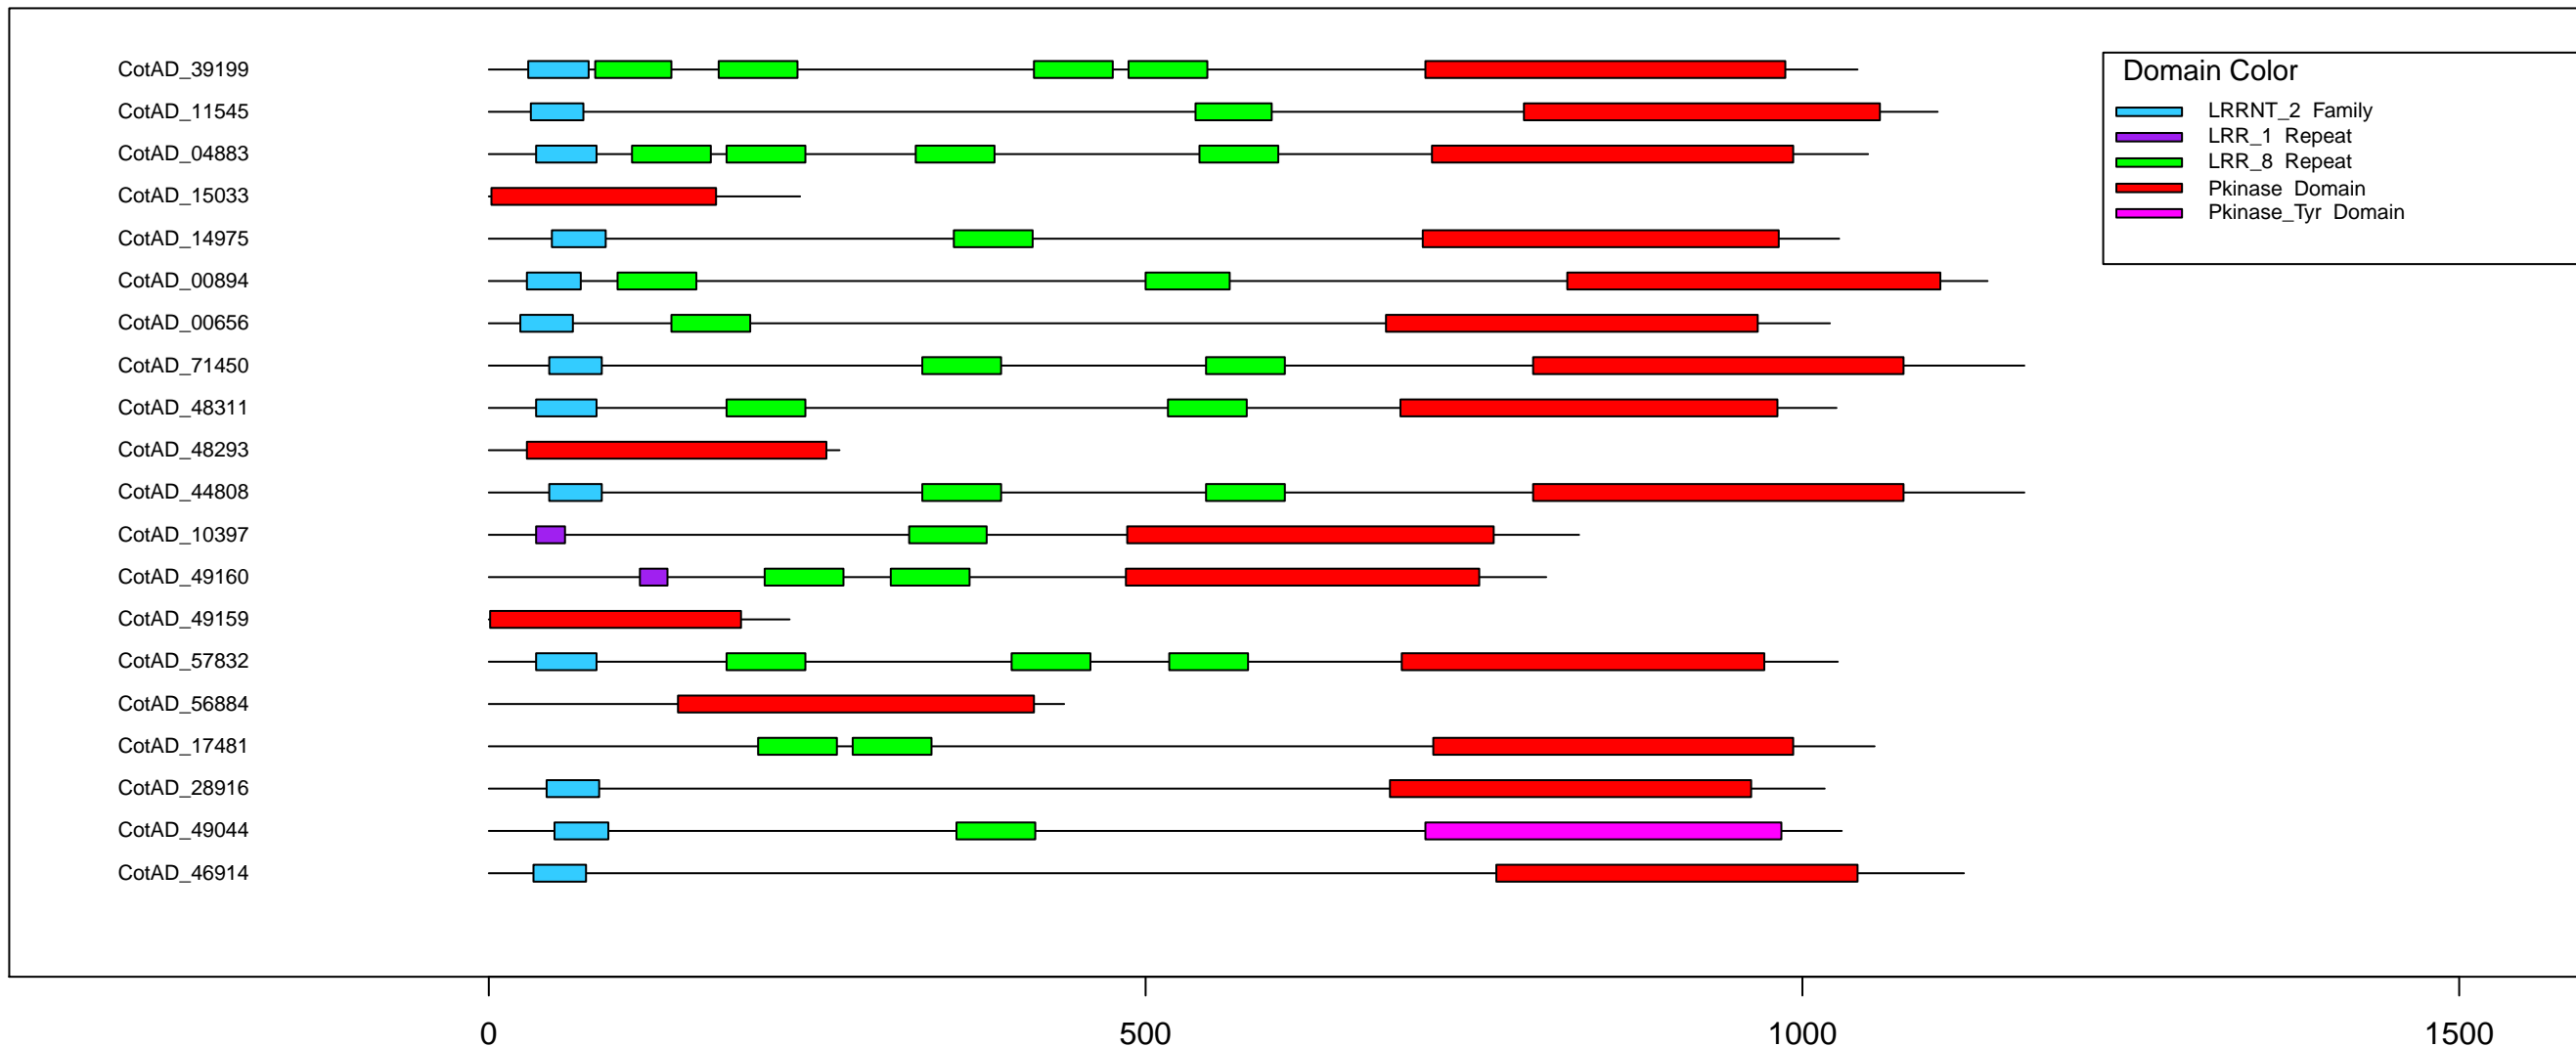

### G.hi RLK-Pelle\_LRR-XI-1 domain diagram (part 8)

CotAD\_69015  
 CotAD\_70369  
 CotAD\_64056  
 CotAD\_65075  
 CotAD\_65074  
 CotAD\_49490  
 CotAD\_49489  
 CotAD\_40479  
 CotAD\_40450  
 CotAD\_60544  
 CotAD\_47868  
 CotAD\_47865  
 CotAD\_47867  
 CotAD\_73608  
 CotAD\_31836  
 CotAD\_33968  
 CotAD\_25641  
 CotAD\_25642  
 CotAD\_15160  
 CotAD\_18696

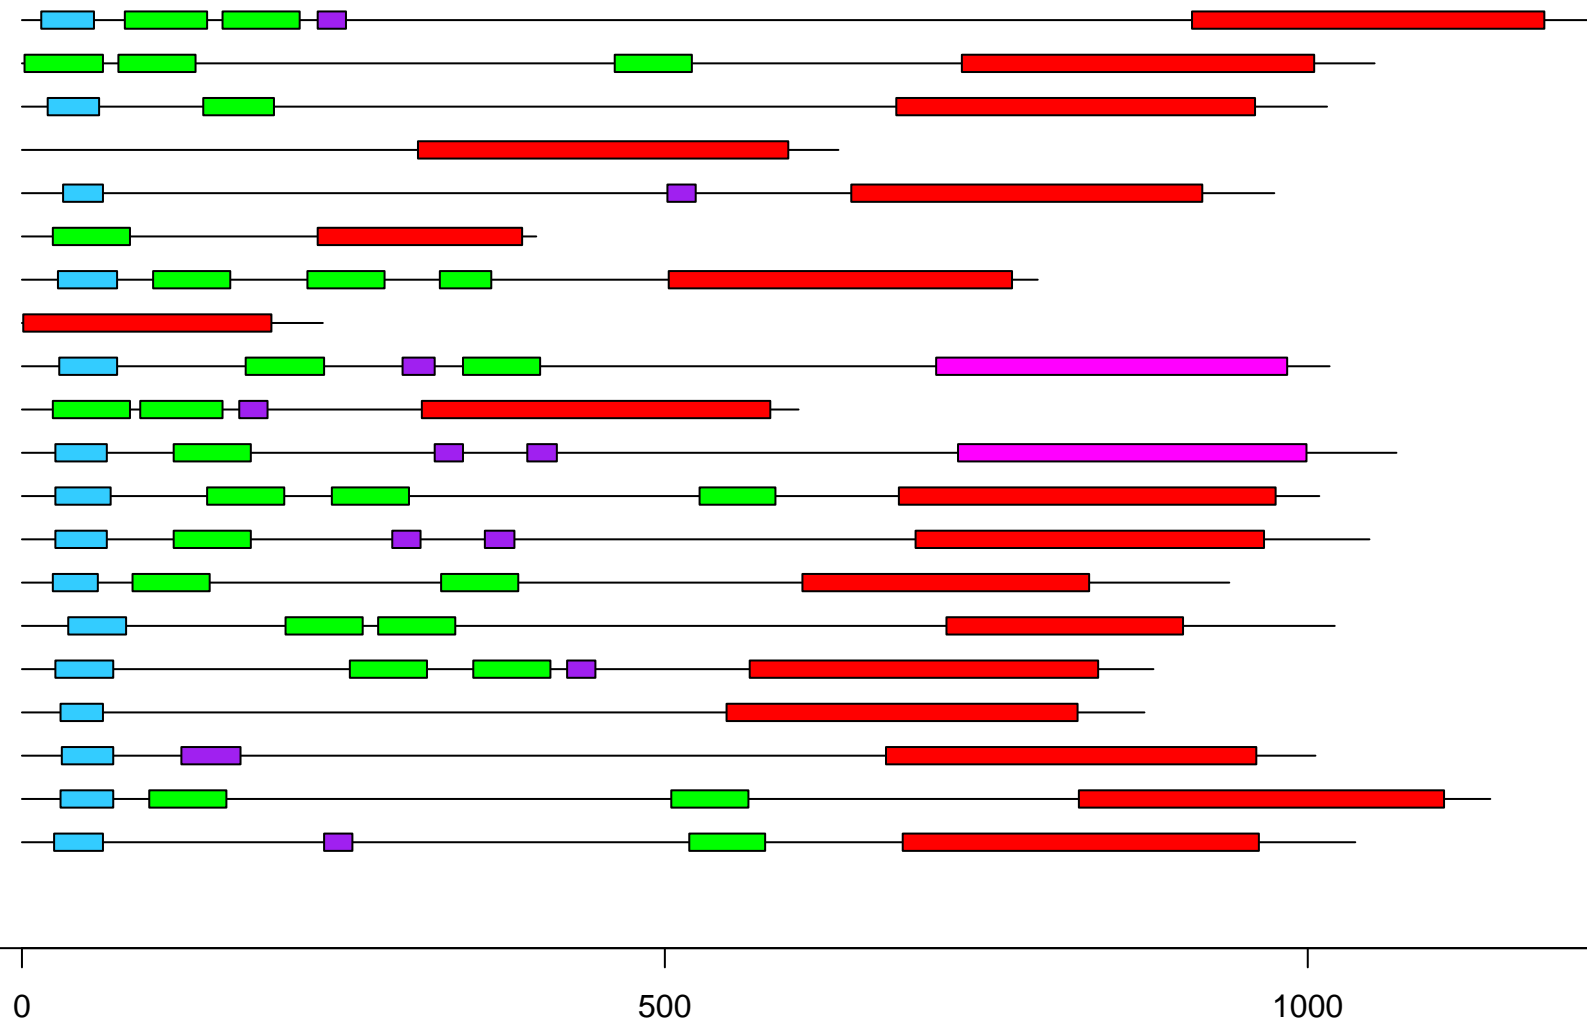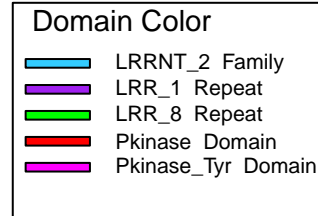

### G.hi RLK-Pelle\_LRR-XI-1 domain diagram (part 9)

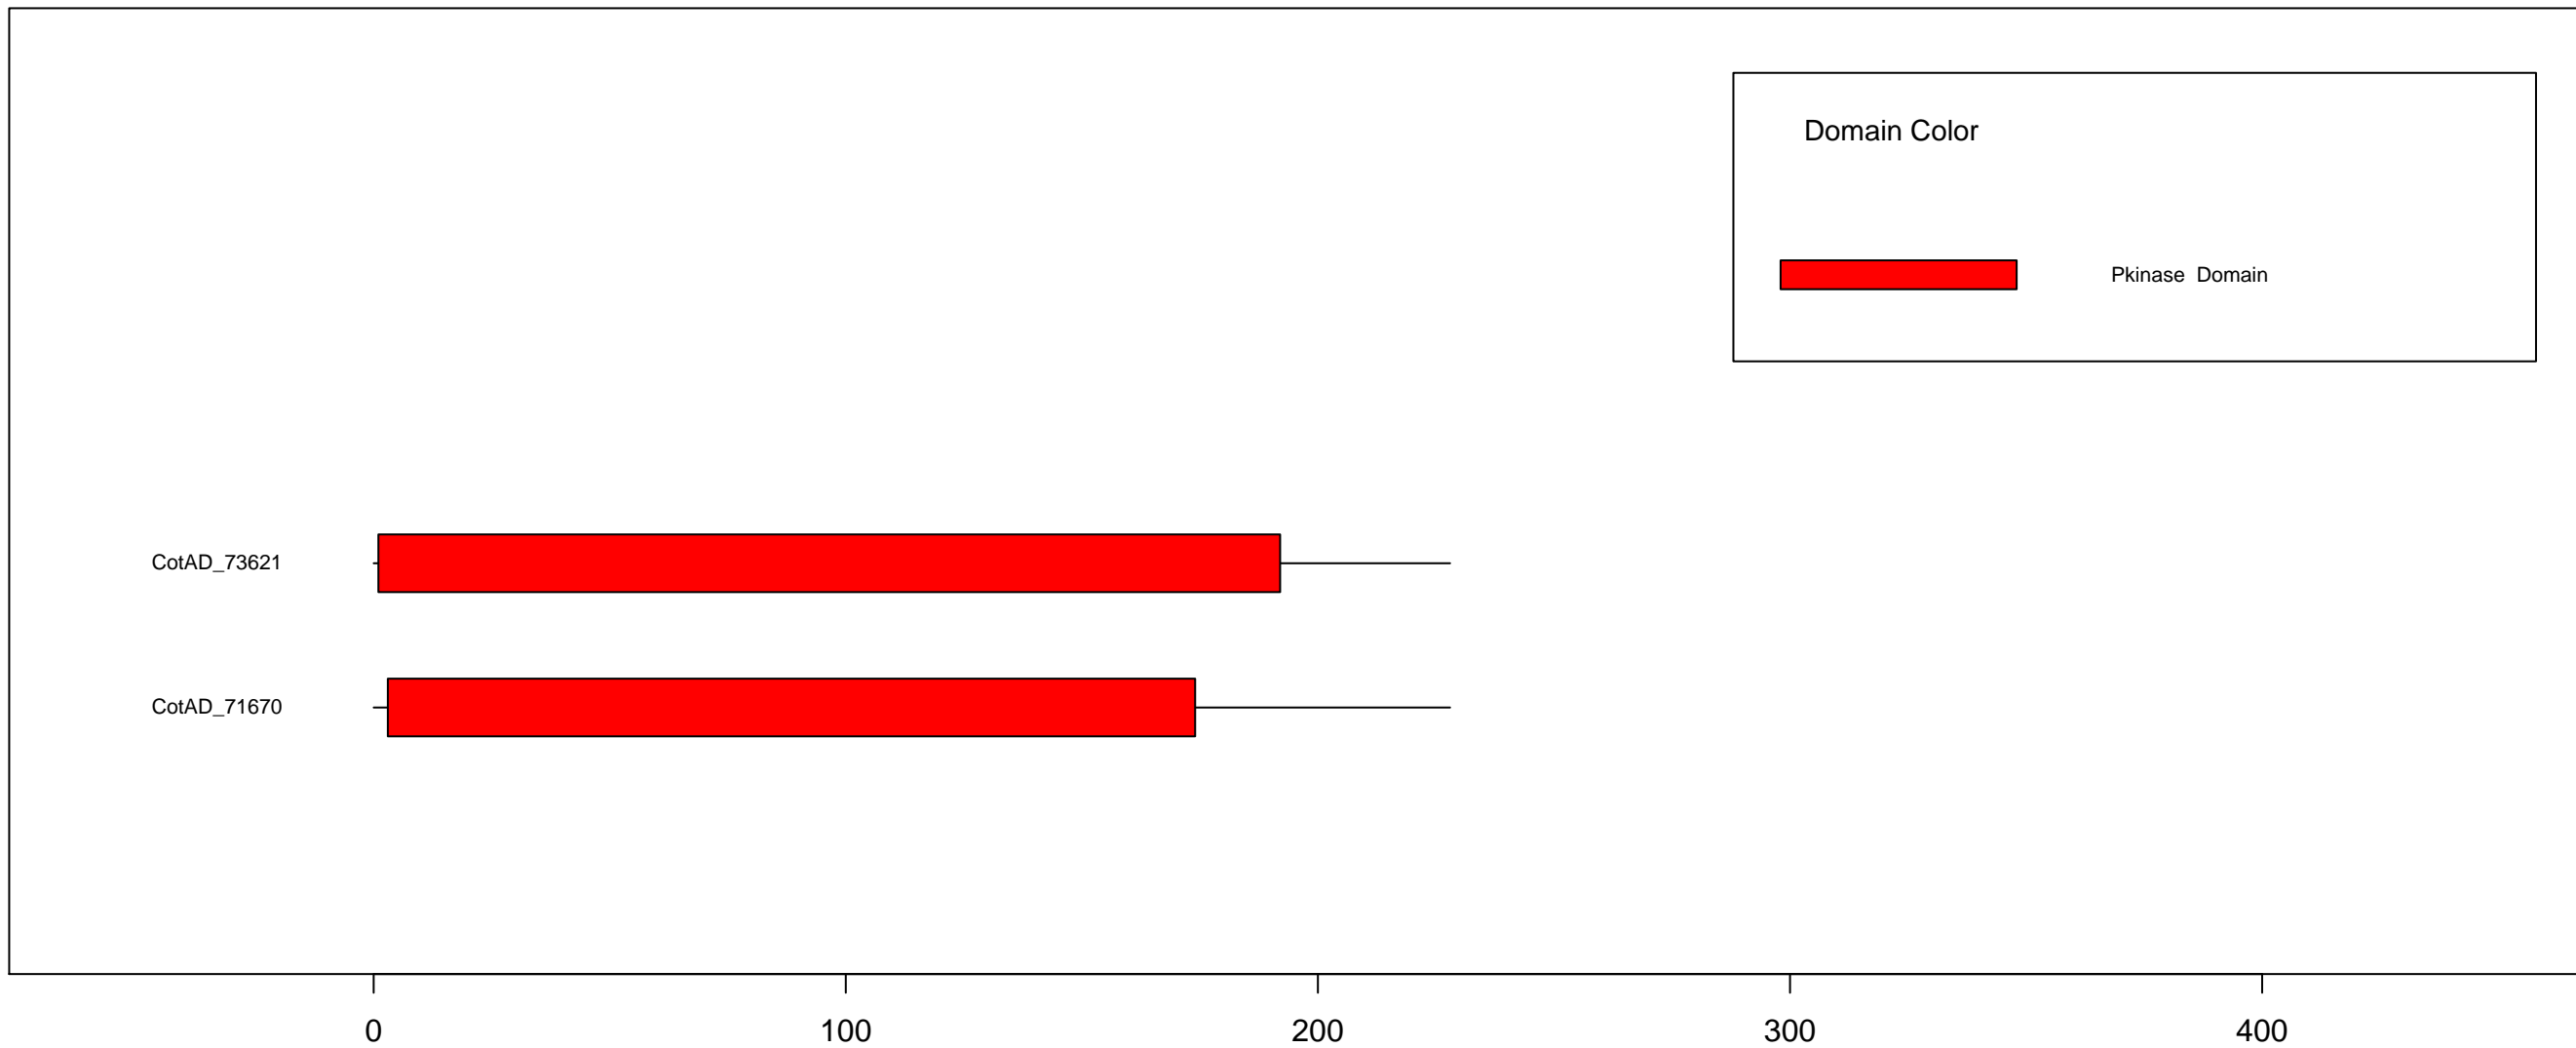

# G.hi RLK-Pelle\_LRR-XI-2 domain diagram (all)

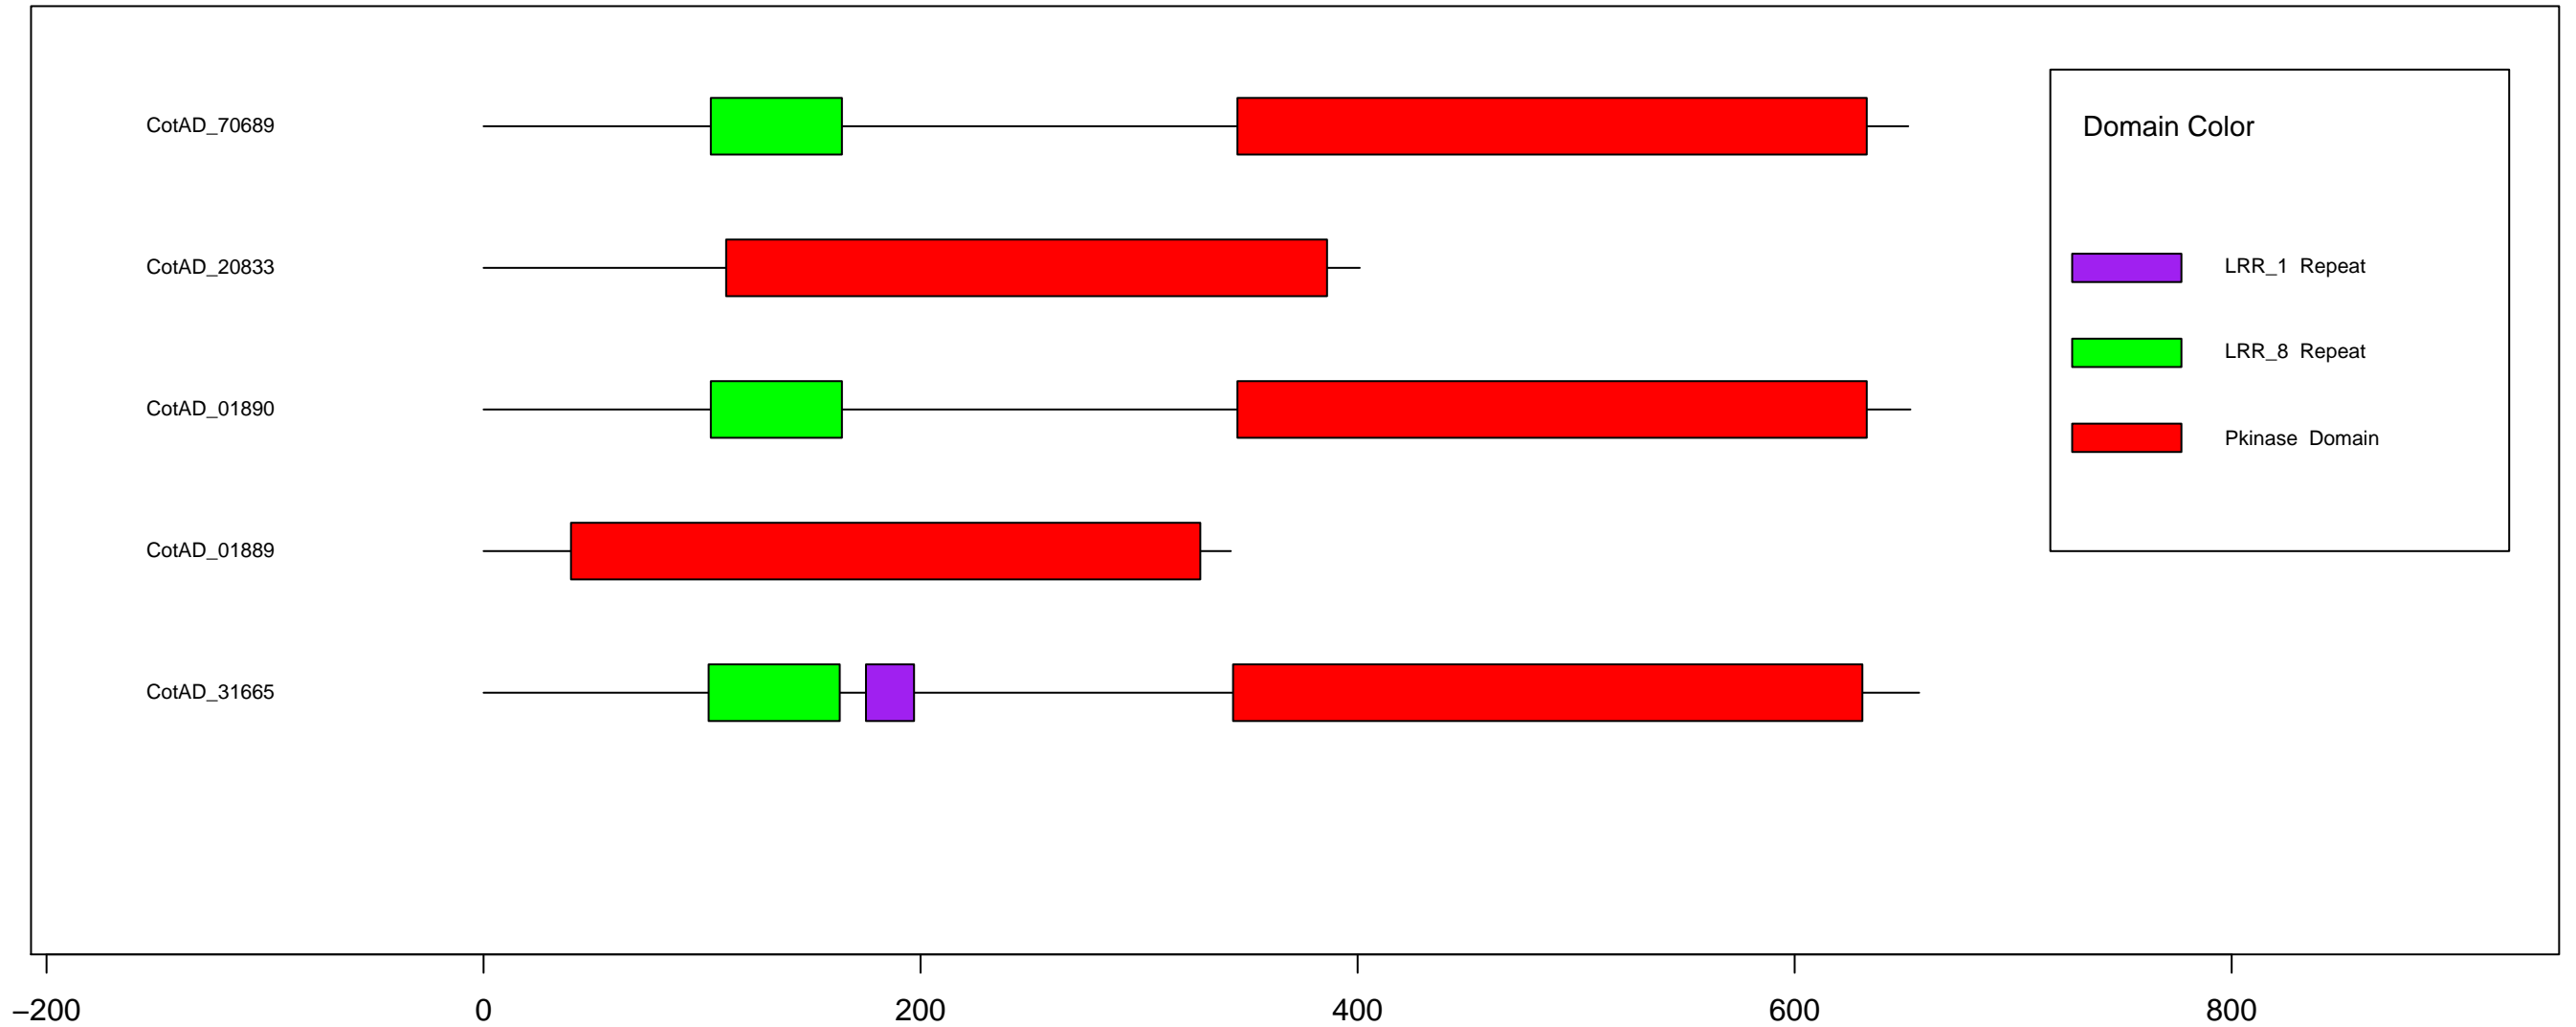

### G.hi RLK-Pelle\_LRR-XII-1 domain diagram (part 1)

CotAD\_41090  
 CotAD\_41092  
 CotAD\_31636  
 CotAD\_22088  
 CotAD\_22086  
 CotAD\_08161  
 CotAD\_08159  
 CotAD\_55631  
 CotAD\_53449  
 CotAD\_38709  
 CotAD\_18985  
 CotAD\_44689  
 CotAD\_71243  
 CotAD\_73763  
 CotAD\_52268  
 CotAD\_73467  
 CotAD\_34158  
 CotAD\_34157  
 CotAD\_09444  
 CotAD\_03524

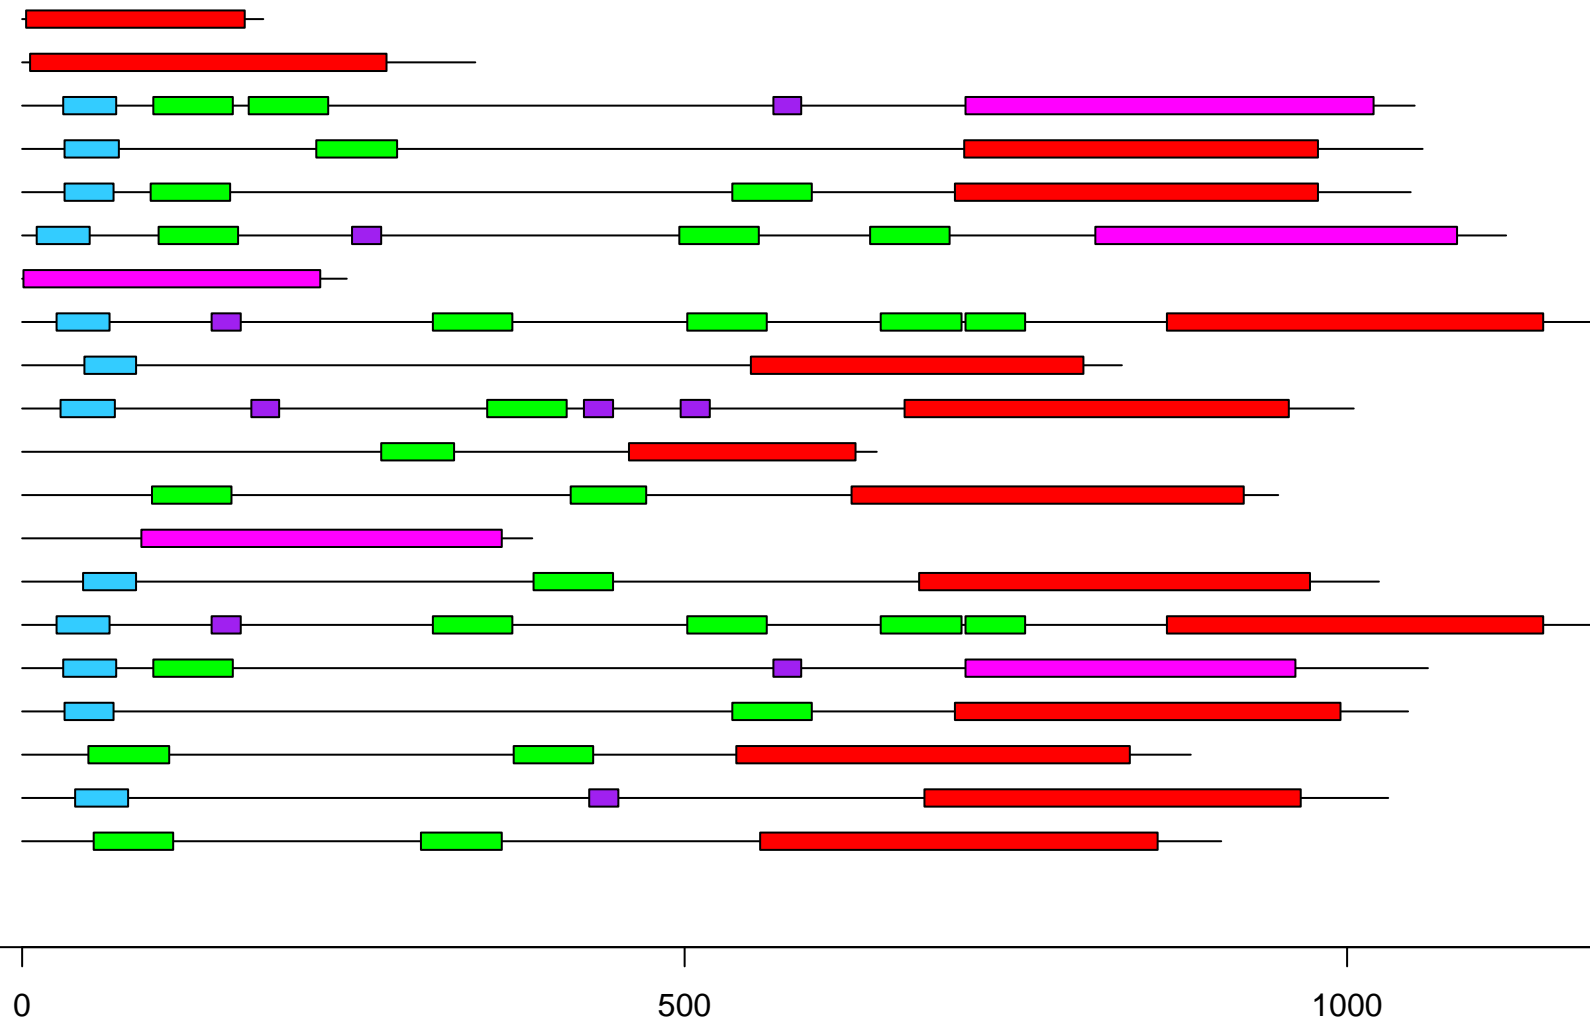

**Domain Color**

- █ LRRNT\_2 Family
- █ LRR\_1 Repeat
- █ LRR\_8 Repeat
- █ Pkinase Domain
- █ Pkinase\_Tyr Domain

### G.hi RLK-Pelle\_LRR-XII-1 domain diagram (part 2)

CotAD\_68509  
 CotAD\_68508  
 CotAD\_59737  
 CotAD\_48462  
 CotAD\_43555  
 CotAD\_43554  
 CotAD\_23291  
 CotAD\_16847  
 CotAD\_16846  
 CotAD\_22730  
 CotAD\_05231  
 CotAD\_03811  
 CotAD\_44234  
 CotAD\_57447  
 CotAD\_41216  
 CotAD\_41212  
 CotAD\_41214  
 CotAD\_41207  
 CotAD\_41205  
 CotAD\_41202

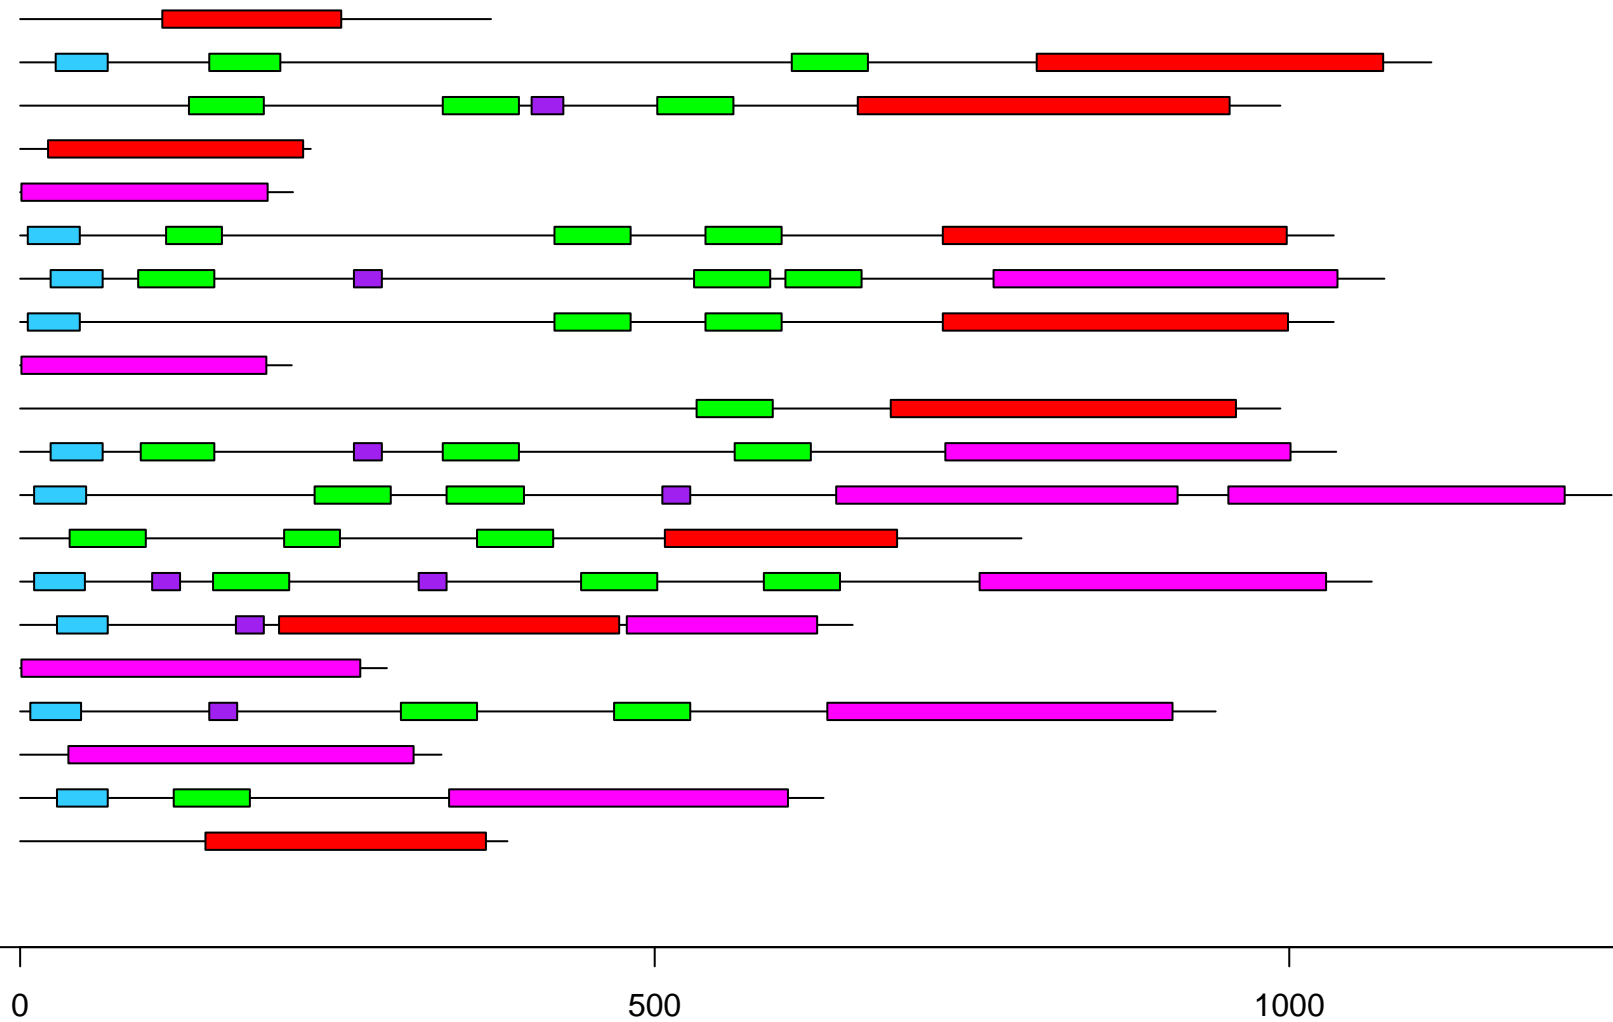

**Domain Color**

- LRRNT\_2 Family
- LRR\_1 Repeat
- LRR\_8 Repeat
- Pkinase Domain
- Pkinase\_Tyr Domain

0 500 1000 1500



### G.hi RLK-Pelle\_LRR-XII-1 domain diagram (part 3)

CotAD\_22291  
 CotAD\_22292  
 CotAD\_22290  
 CotAD\_21823  
 CotAD\_15243  
 CotAD\_24714  
 CotAD\_24711  
 CotAD\_07244  
 CotAD\_00979  
 CotAD\_00978  
 CotAD\_41031  
 CotAD\_41028  
 CotAD\_76641  
 CotAD\_49129  
 CotAD\_37222  
 CotAD\_63311  
 CotAD\_63312  
 CotAD\_37359  
 CotAD\_06159  
 CotAD\_68511

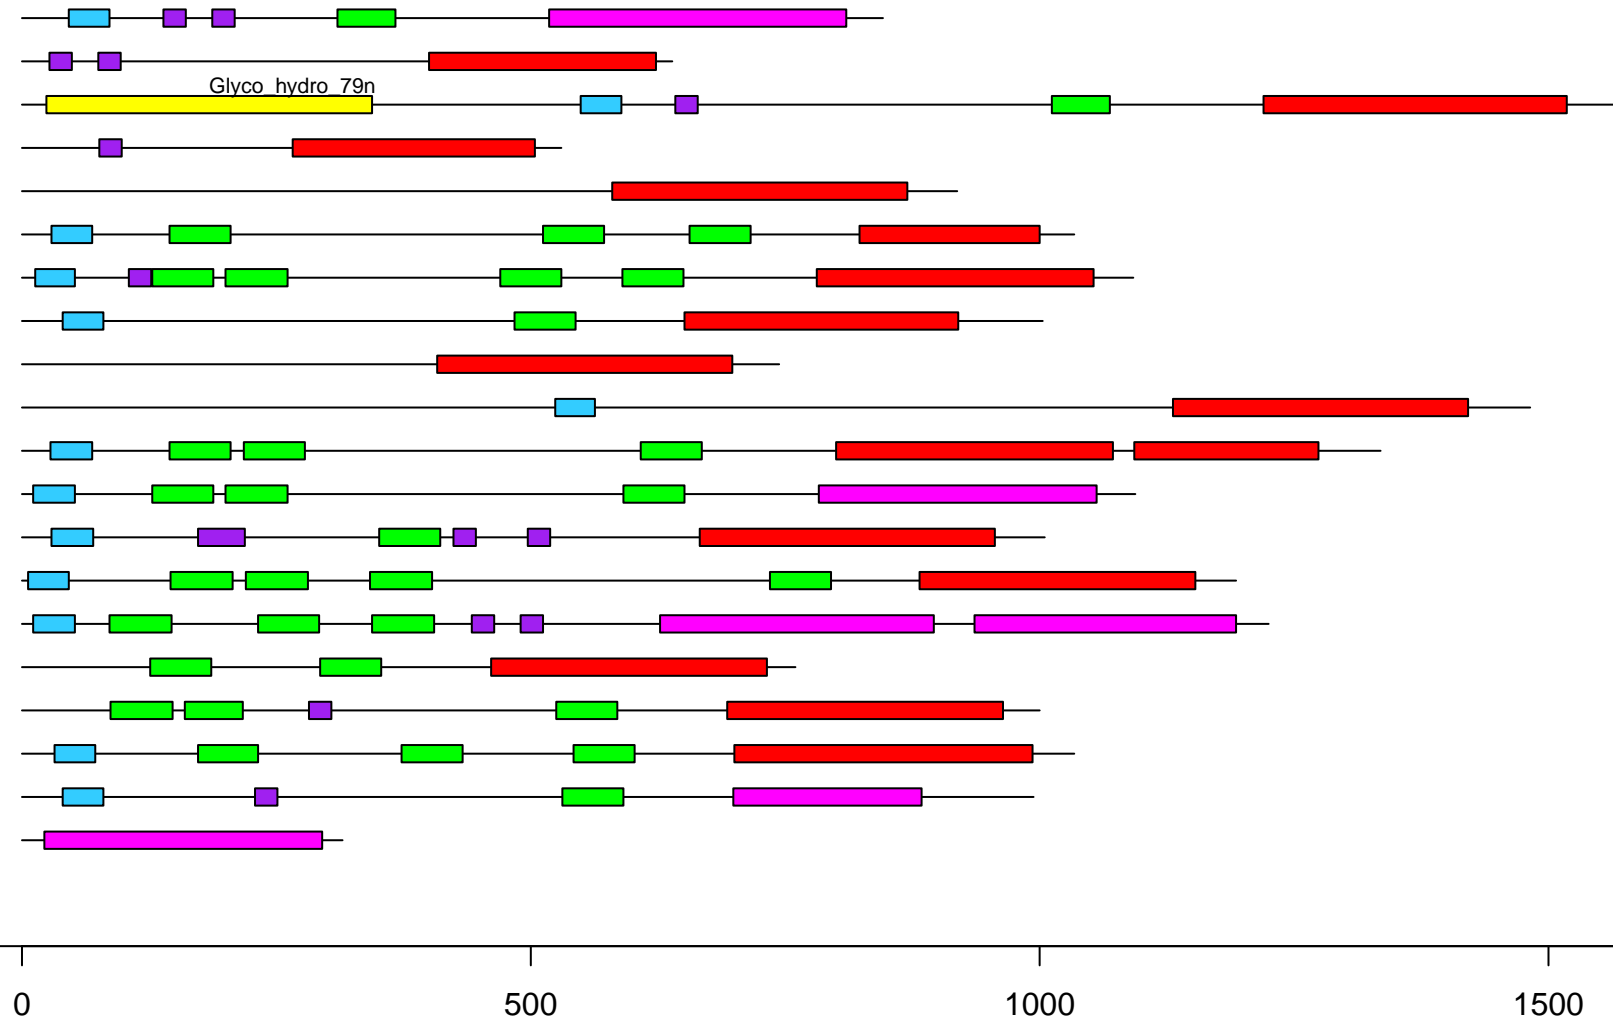

**Domain Color**

- █ LRRNT\_2 Family
- █ LRR\_1 Repeat
- █ LRR\_8 Repeat
- █ Pkinase Domain
- █ Pkinase\_Tyr Domain
- █ other Domain

### G.hi RLK-Pelle\_LRR-XII-1 domain diagram (part 4)

CotAD\_56976  
 CotAD\_56975  
 CotAD\_45931  
 CotAD\_46130  
 CotAD\_46131  
 CotAD\_46128  
 CotAD\_36664  
 CotAD\_36660  
 CotAD\_36659  
 CotAD\_36658  
 CotAD\_36657  
 CotAD\_22301  
 CotAD\_22302  
 CotAD\_22300  
 CotAD\_22299  
 CotAD\_22298  
 CotAD\_22296  
 CotAD\_22297  
 CotAD\_22295  
 CotAD\_22294

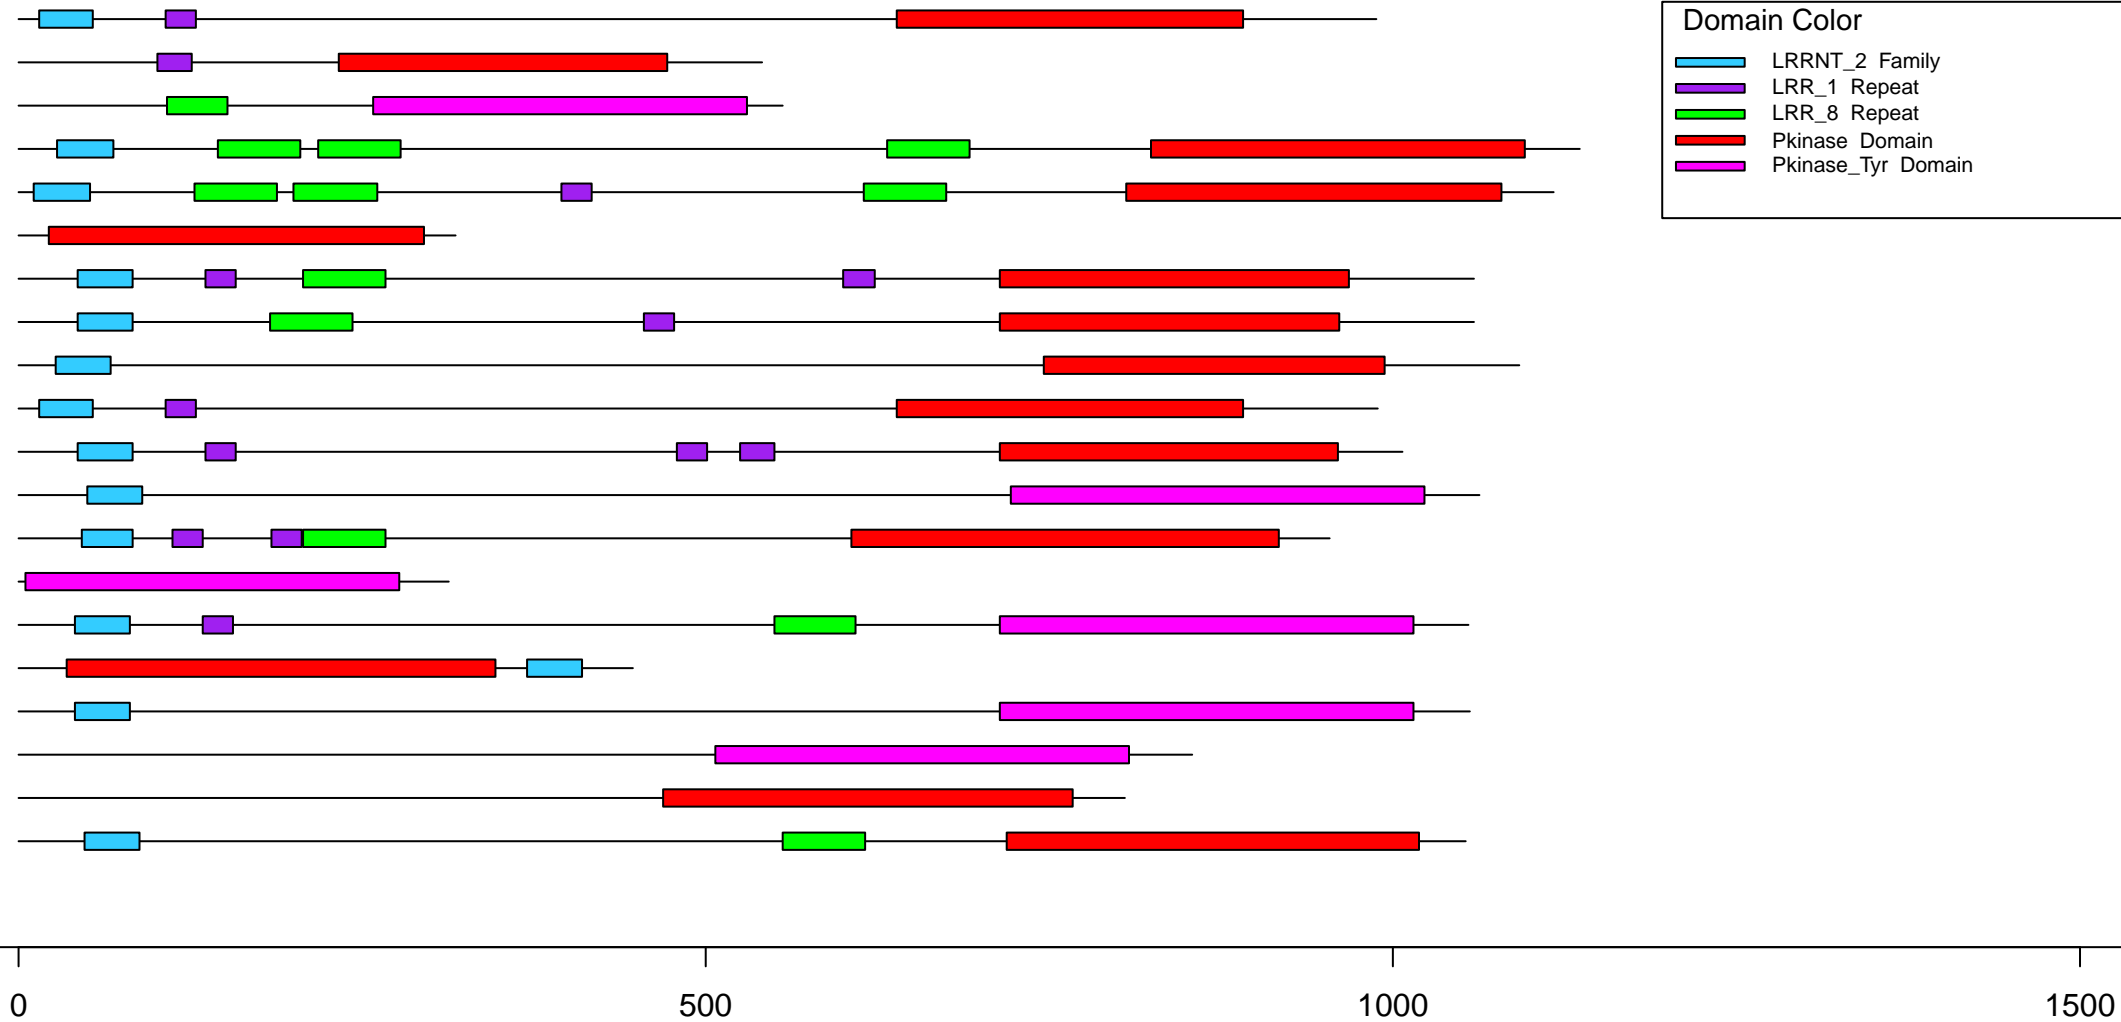

### G.hi RLK-Pelle\_LRR-XII-1 domain diagram (part 5)

CotAD\_73871  
 CotAD\_76097  
 CotAD\_74144  
 CotAD\_76453  
 CotAD\_56921  
 CotAD\_56602  
 CotAD\_56601  
 CotAD\_56600  
 CotAD\_56596  
 CotAD\_56595  
 CotAD\_56592  
 CotAD\_56591  
 CotAD\_53290  
 CotAD\_56983  
 CotAD\_56981  
 CotAD\_56982  
 CotAD\_56980  
 CotAD\_56979  
 CotAD\_56978

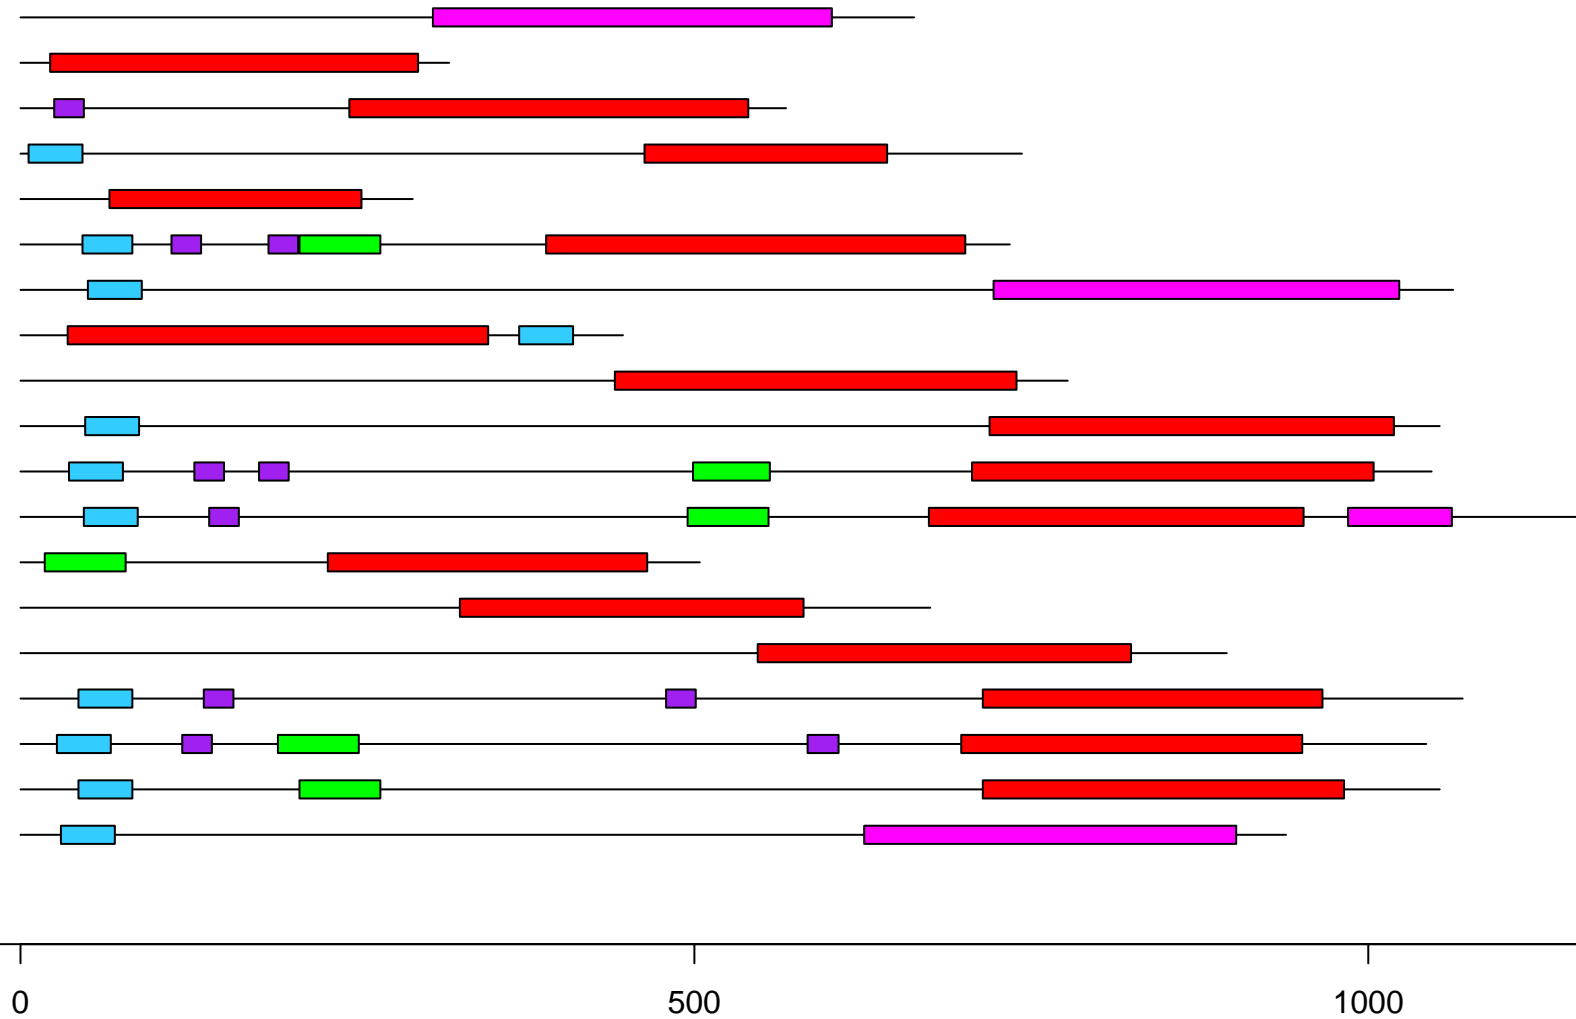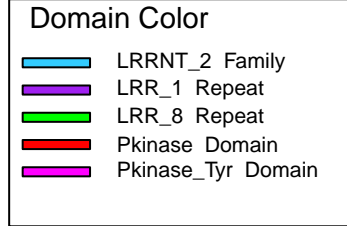

### G.hi RLK-Pelle\_LRR-XIIIa domain diagram (all)

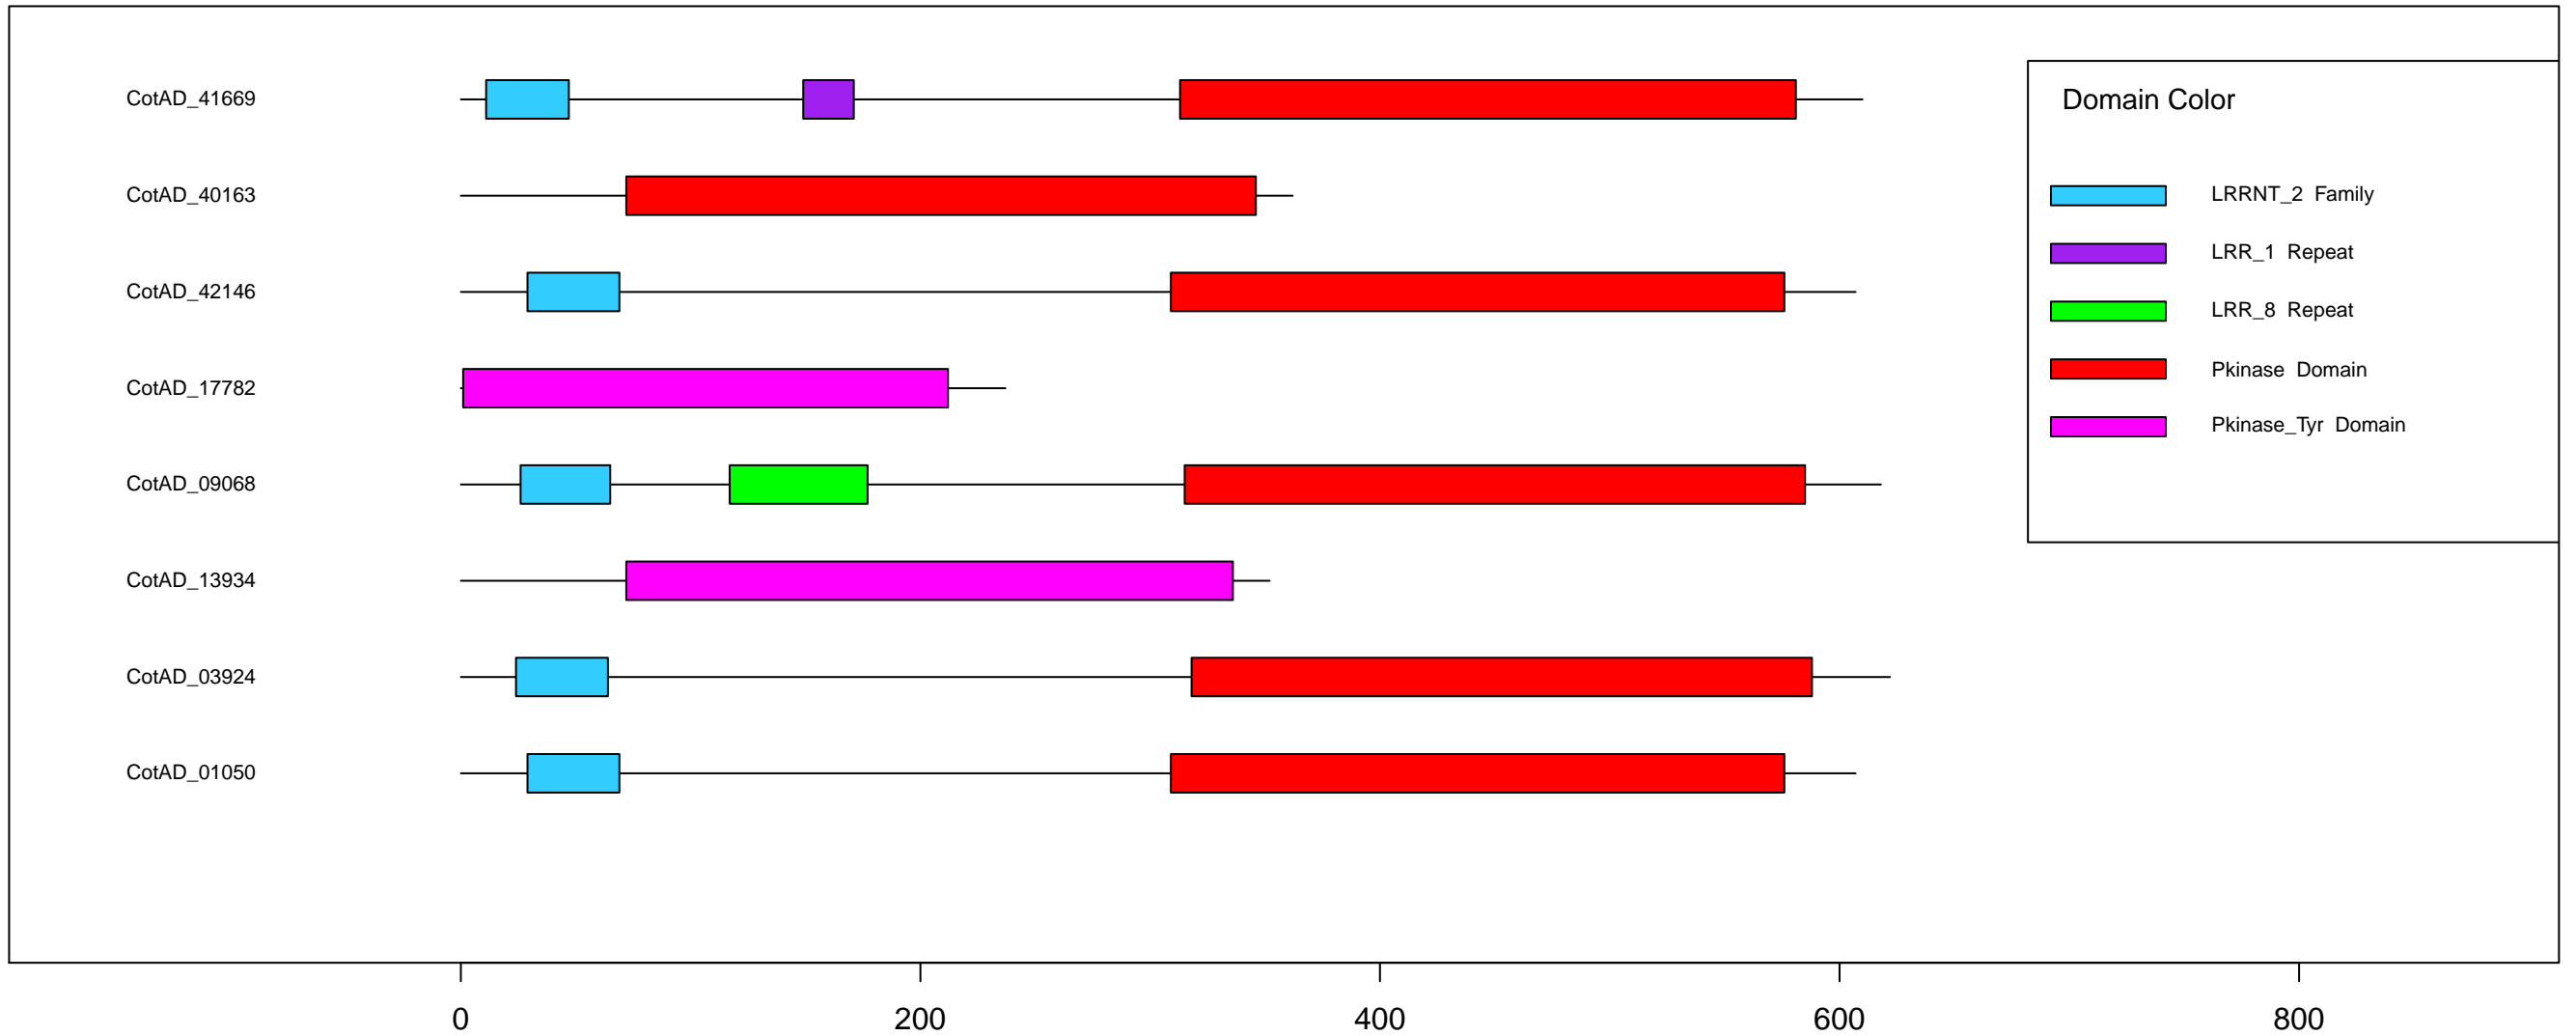

# G.hi RLK-Pelle\_LRR-XIIIb domain diagram (all)

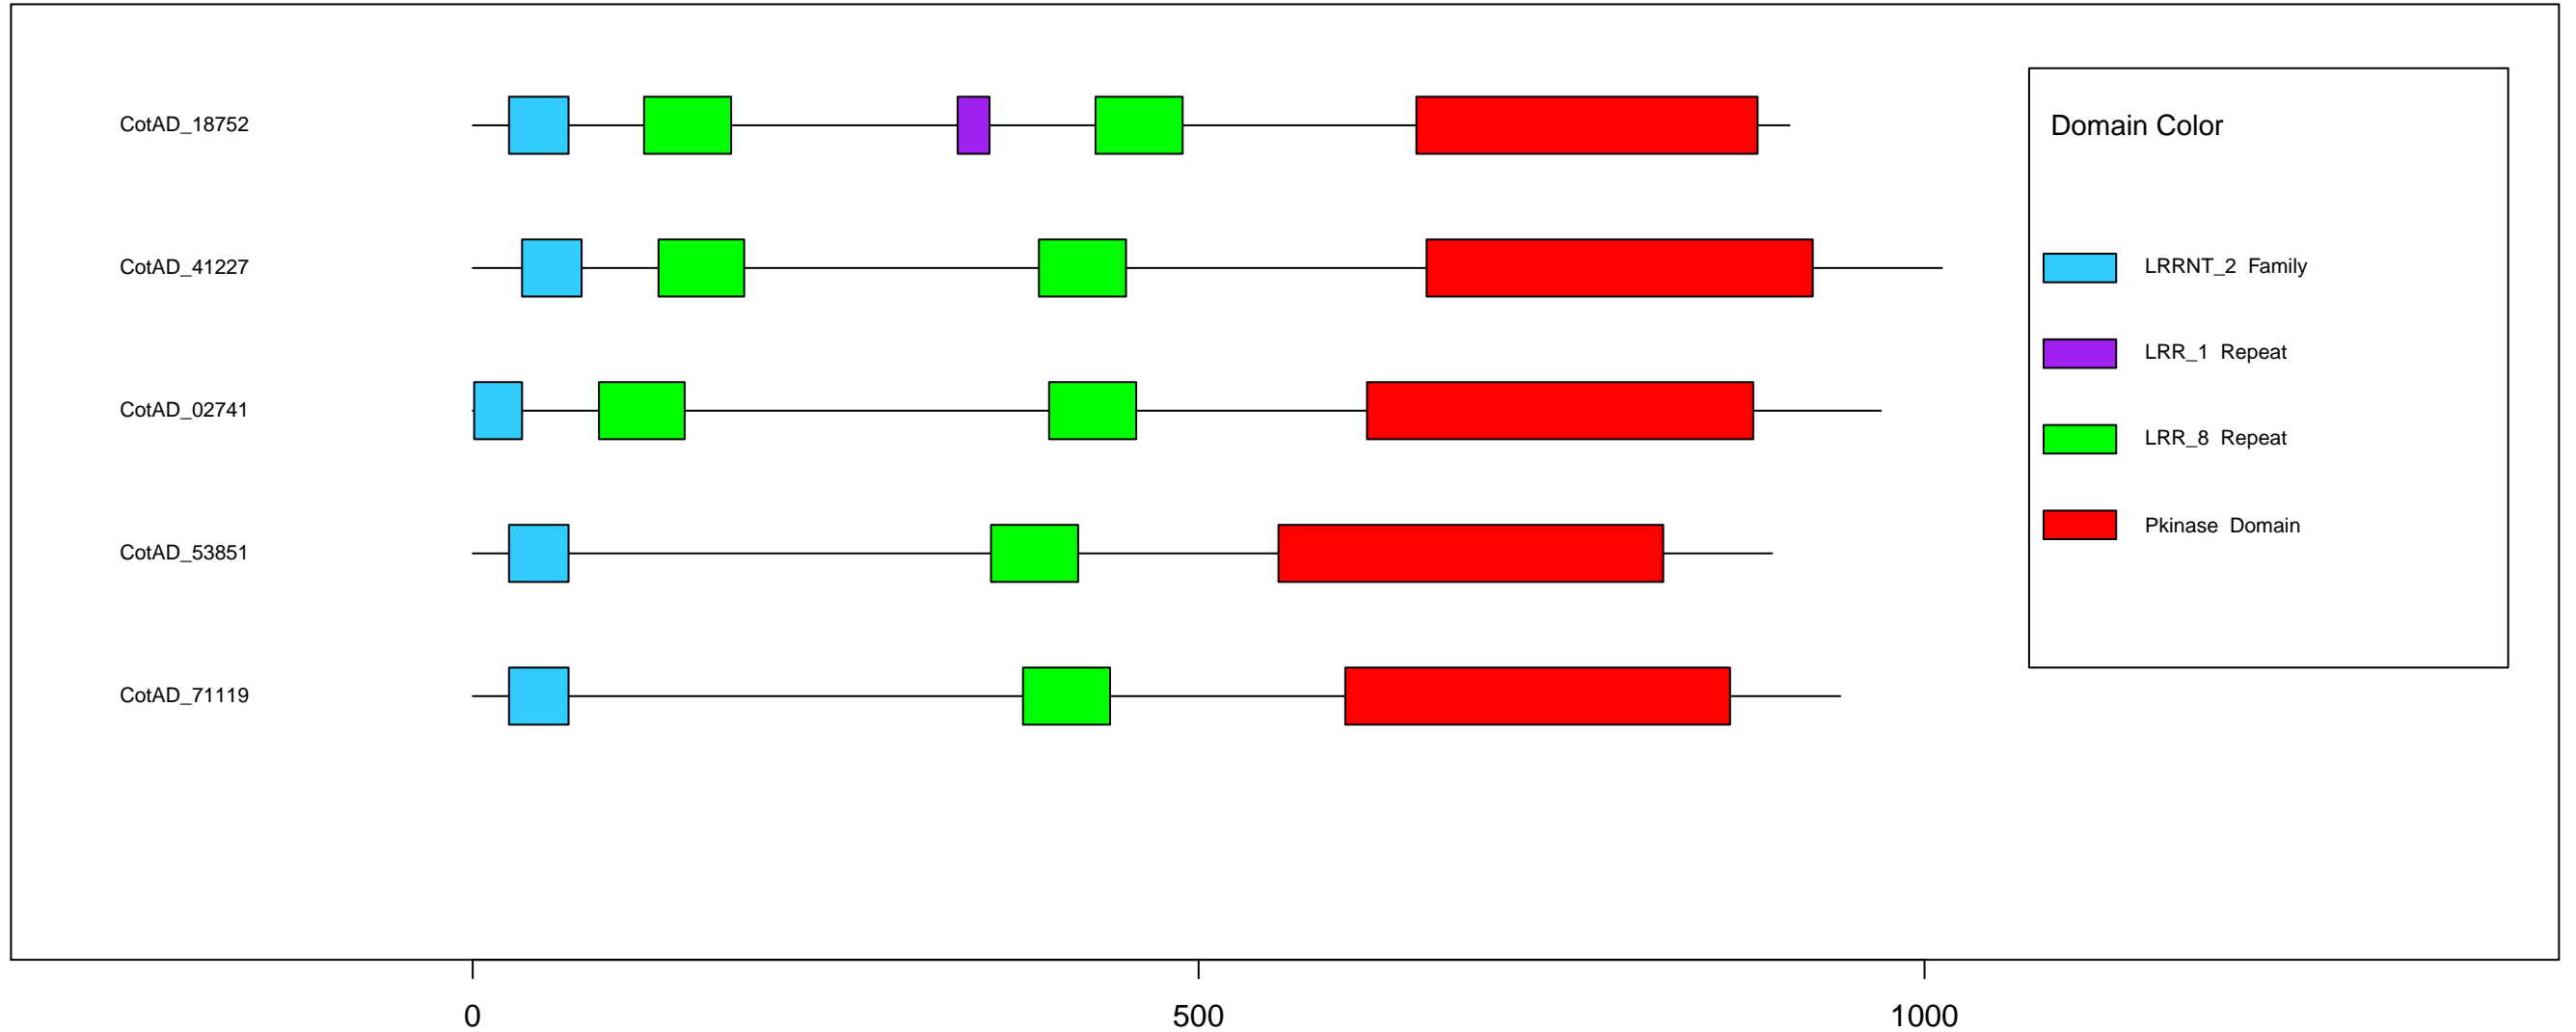

# G.hi RLK-Pelle\_LRR-XIV domain diagram (all)

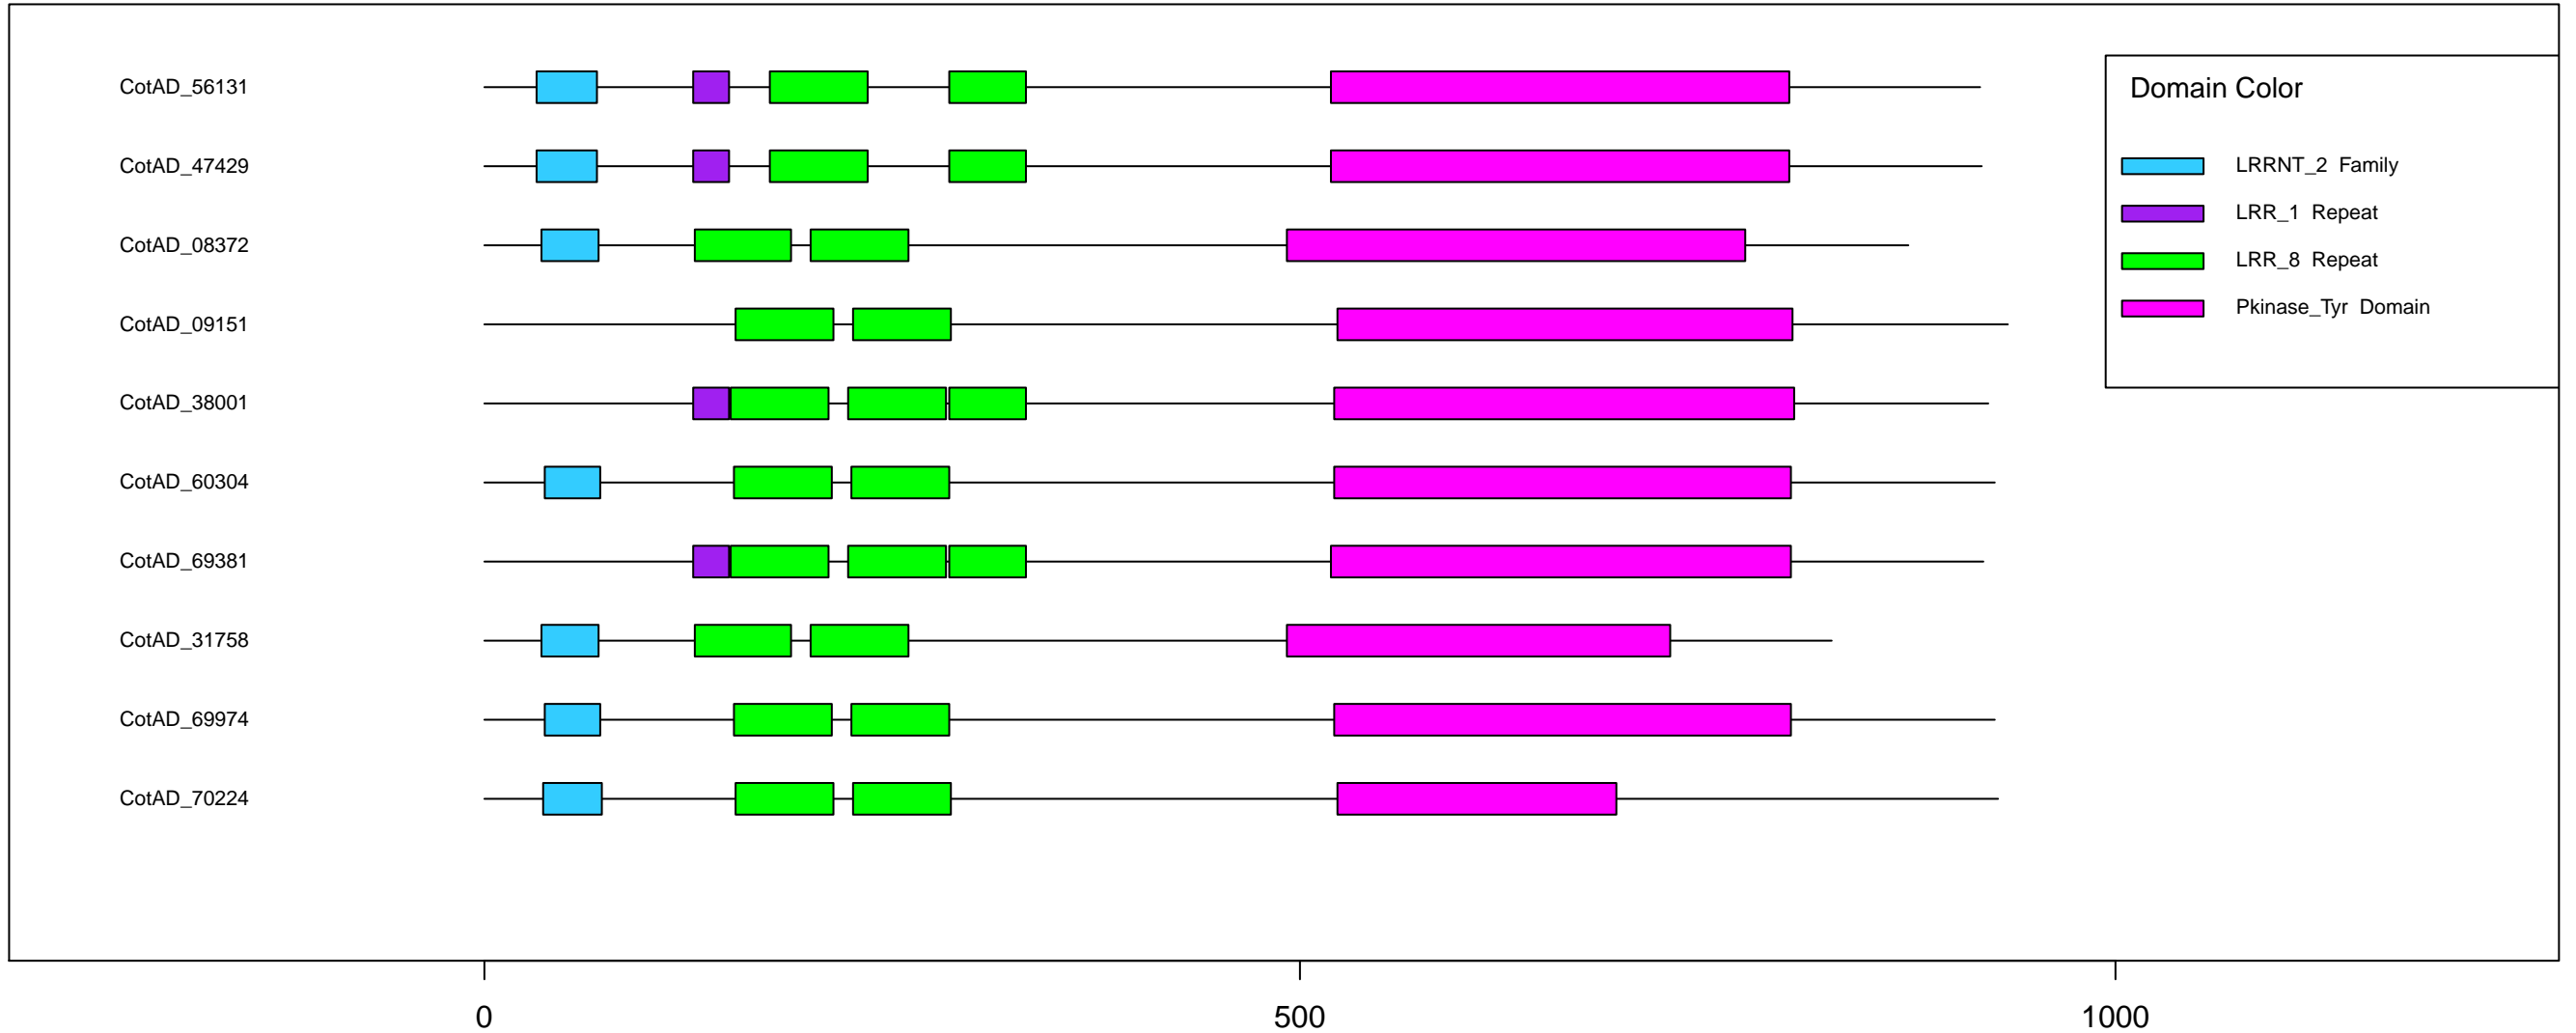

### G.hi RLK-Pelle\_LRR-XV domain diagram (all)

CotAD\_70298

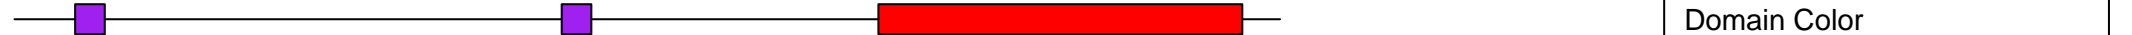

CotAD\_44726

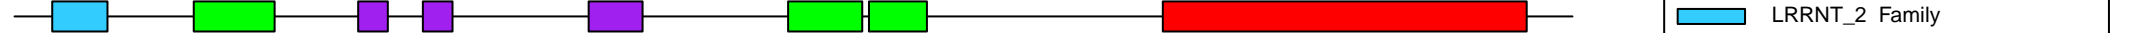

CotAD\_67300

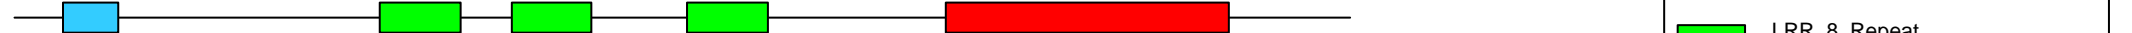

CotAD\_25801

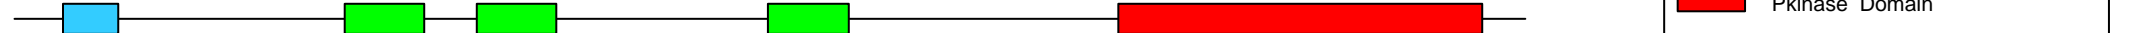

CotAD\_10180

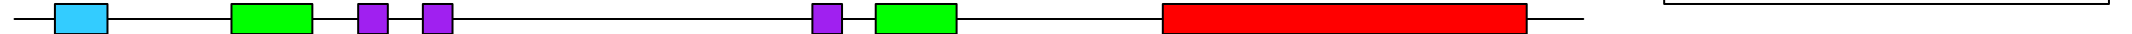

CotAD\_10082

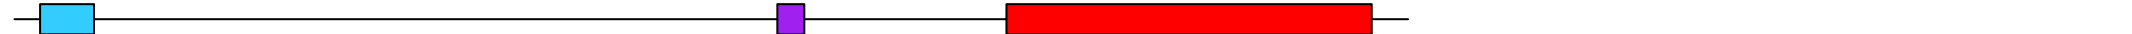

CotAD\_15772

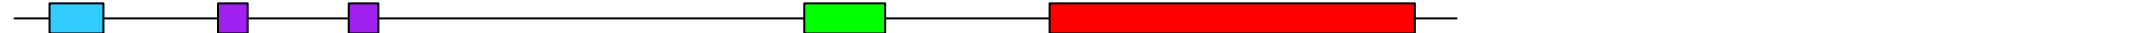

CotAD\_05471

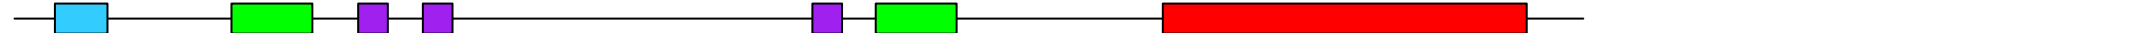

CotAD\_05413

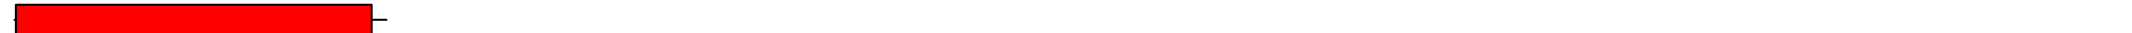

CotAD\_52152

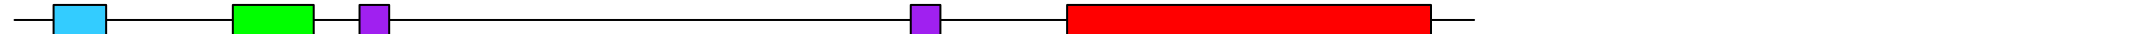

CotAD\_13173

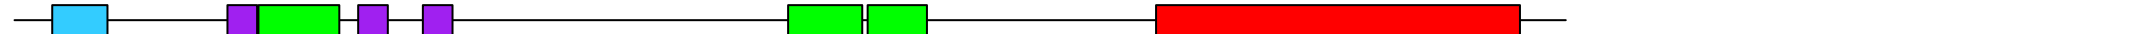

#### Domain Color

- LRRNT\_2 Family
- LRR\_1 Repeat
- LRR\_8 Repeat
- Pkinase Domain

### G.hi RLK-Pelle\_LysM domain diagram (part 1)

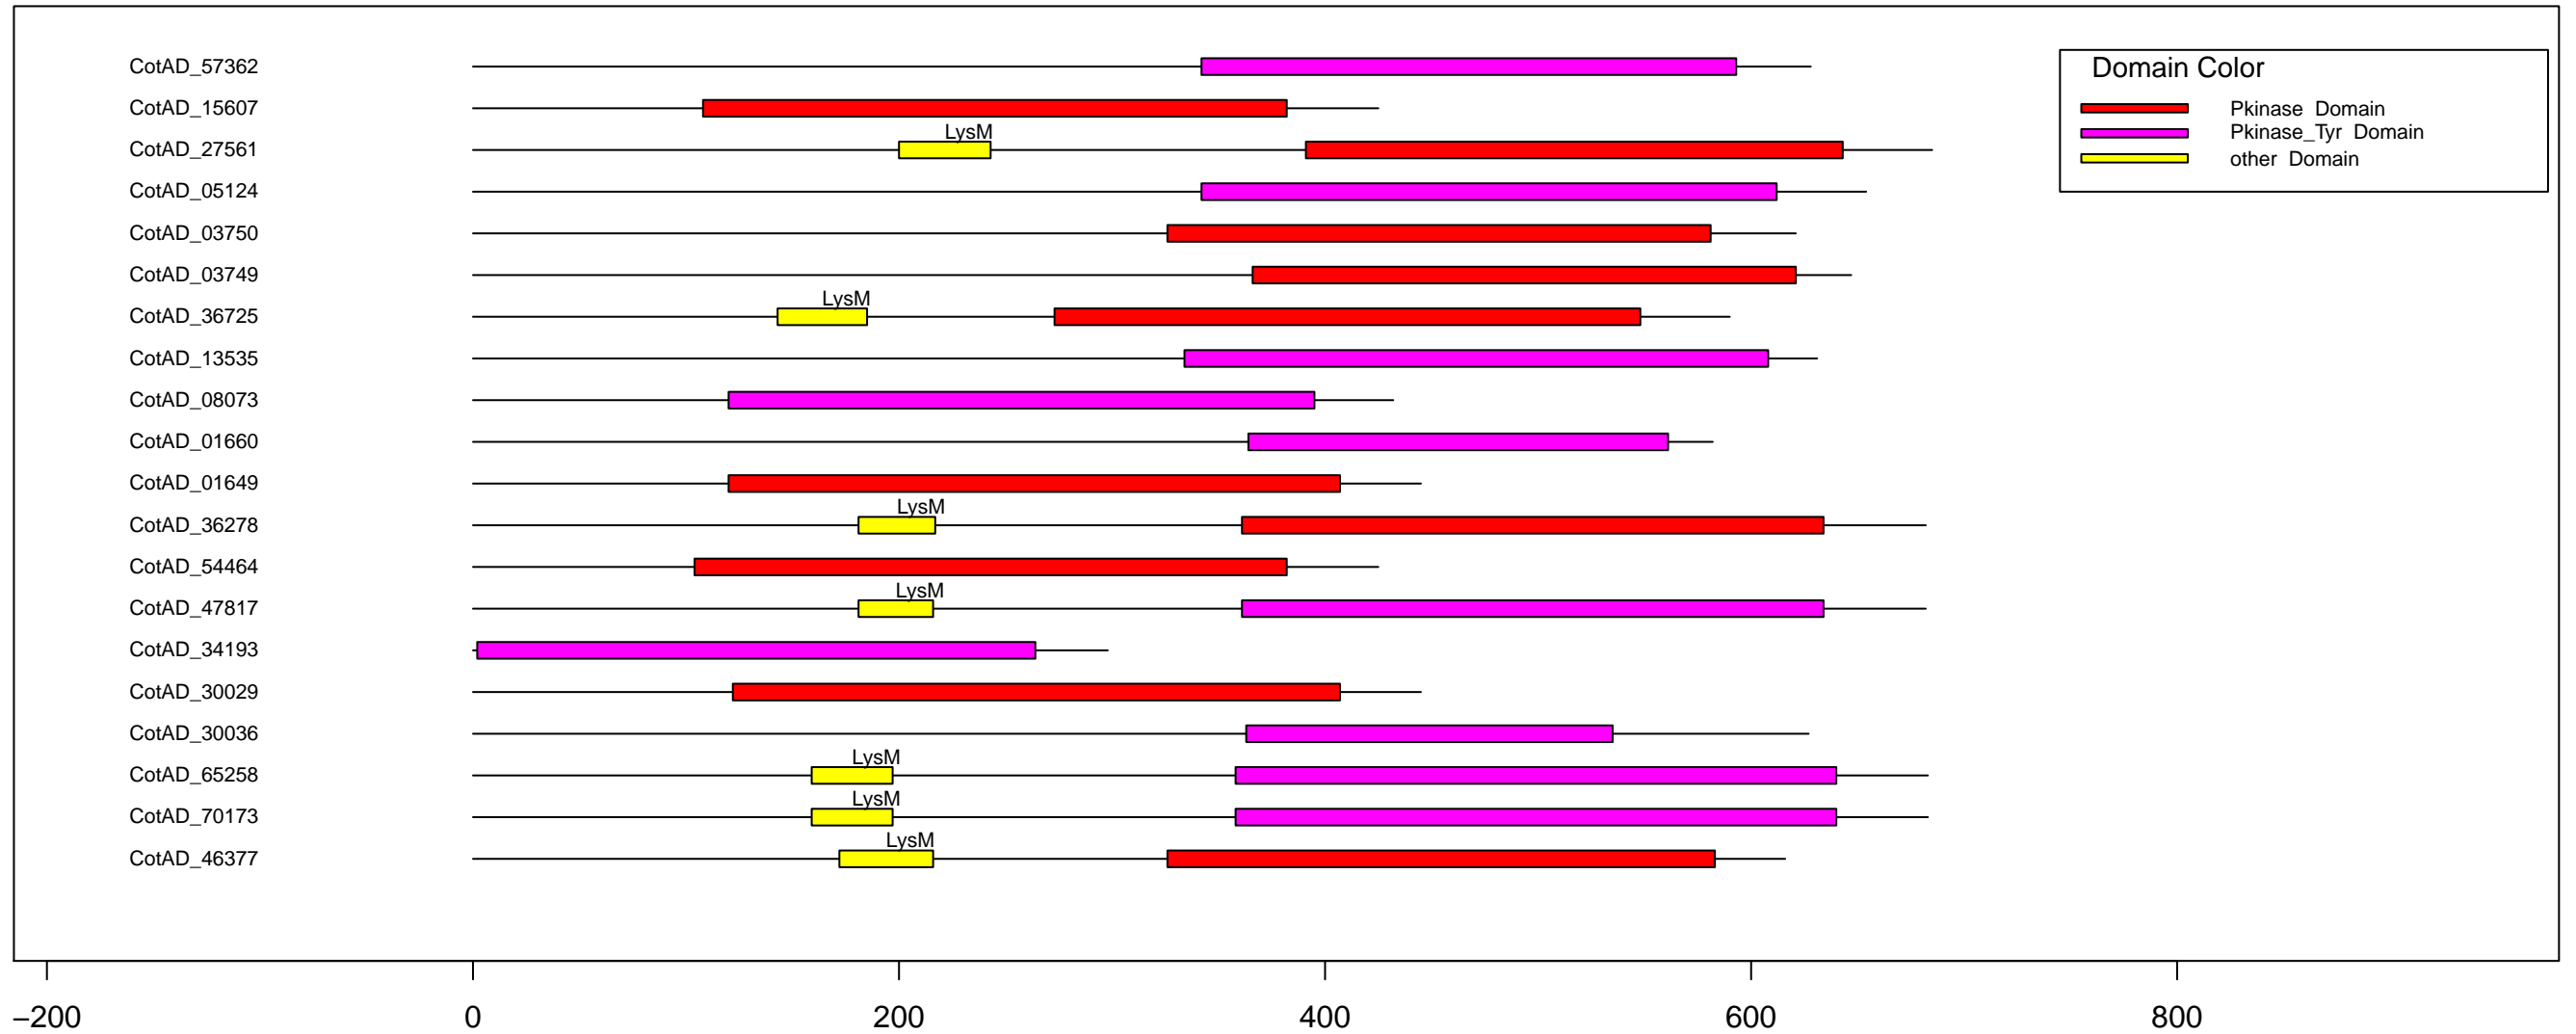



# G.hi RLK-Pelle\_LysM domain diagram (part 2)

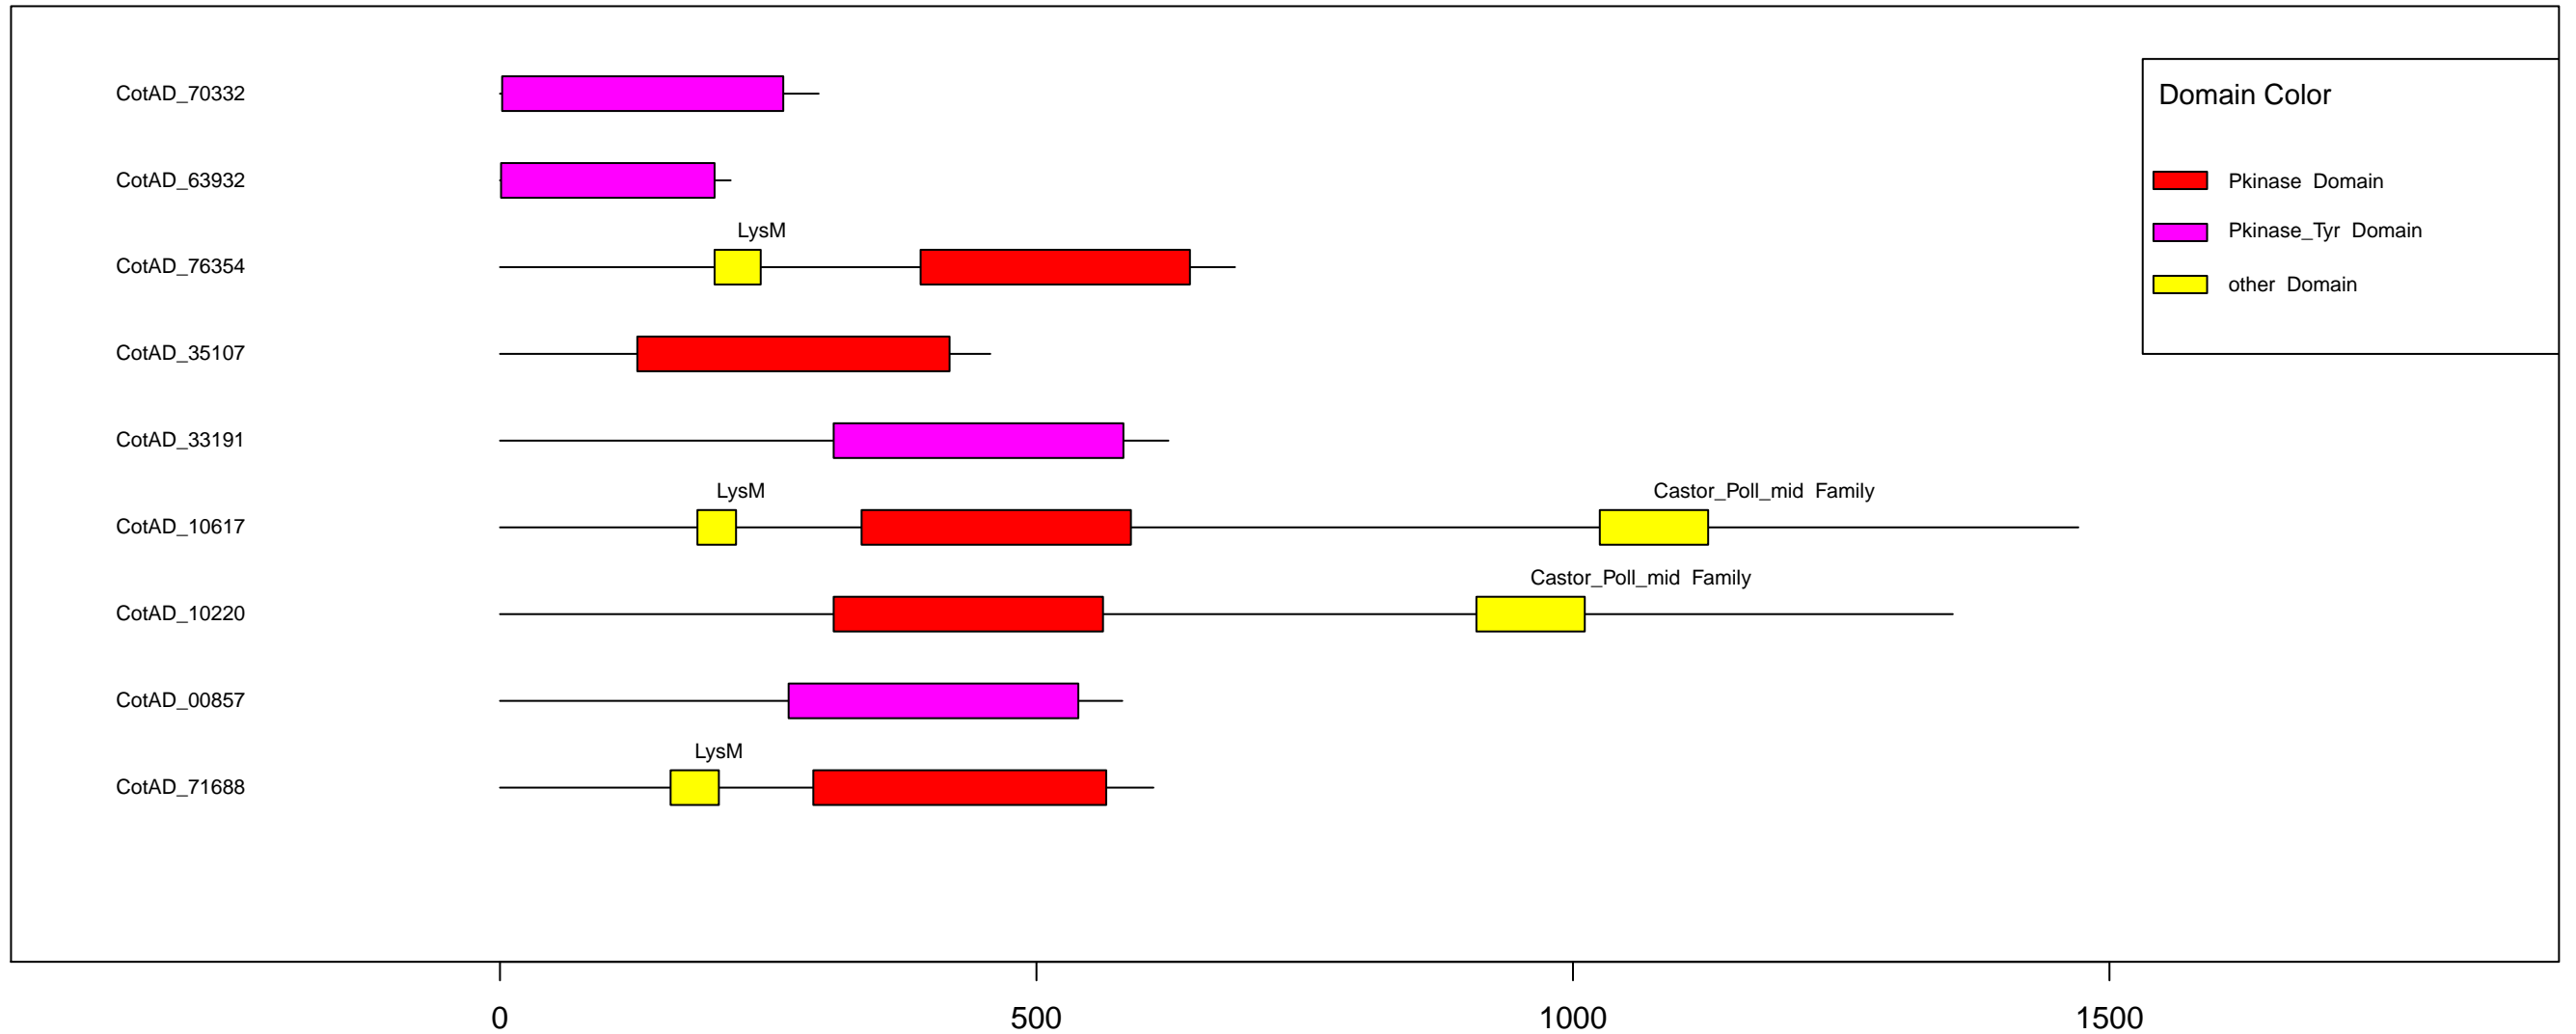

# G.hi RLK-Pelle\_PERK-1 domain diagram (part 1)

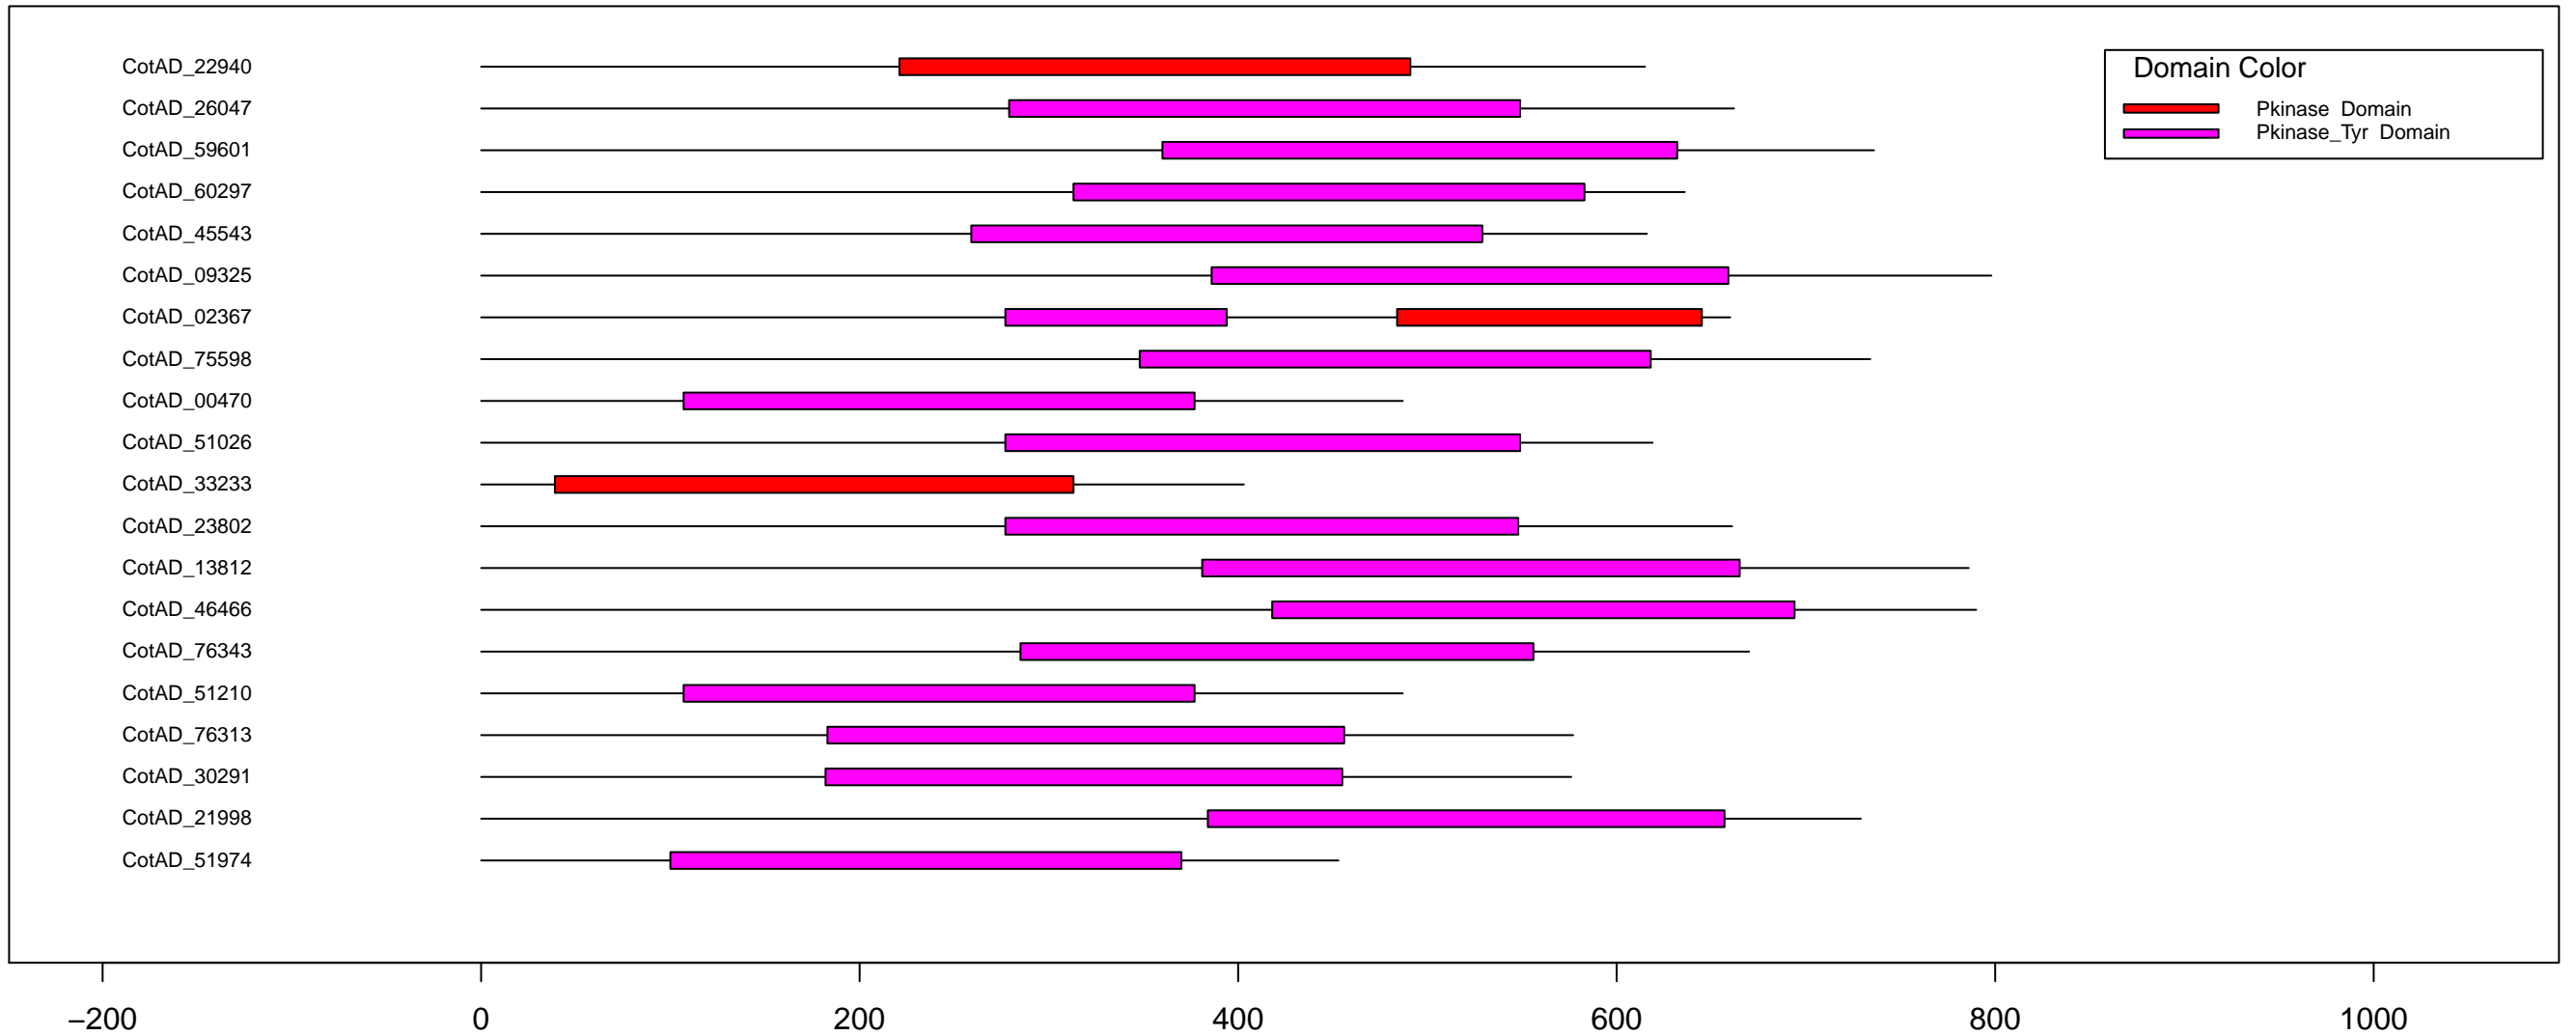

### G.hi RLK-Pelle\_PERK-1 domain diagram (part 2)

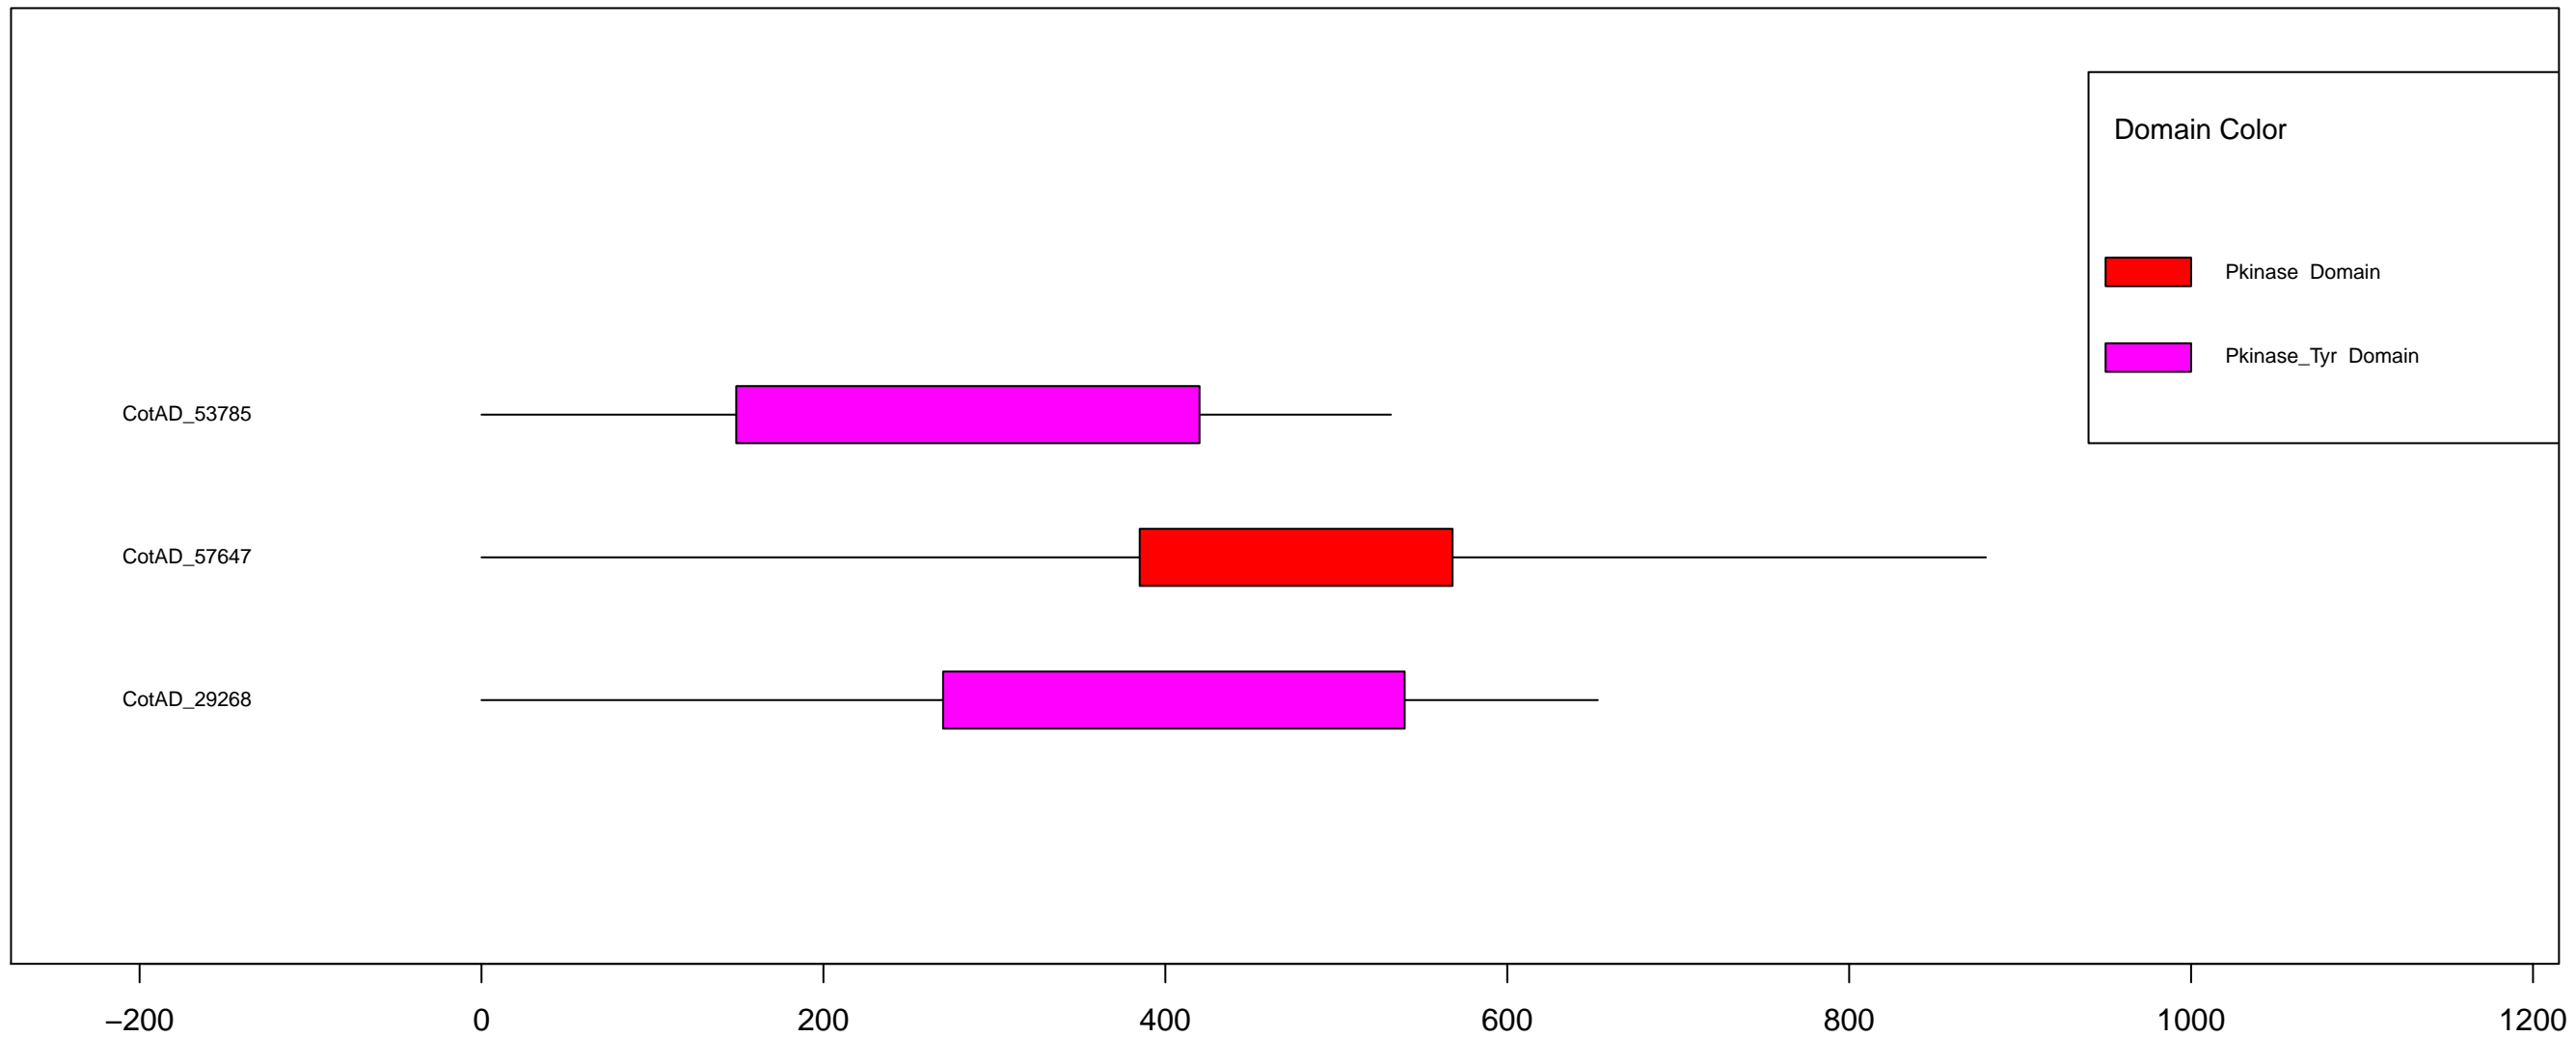

### G.hi RLK-Pelle\_PERK-2 domain diagram (all)

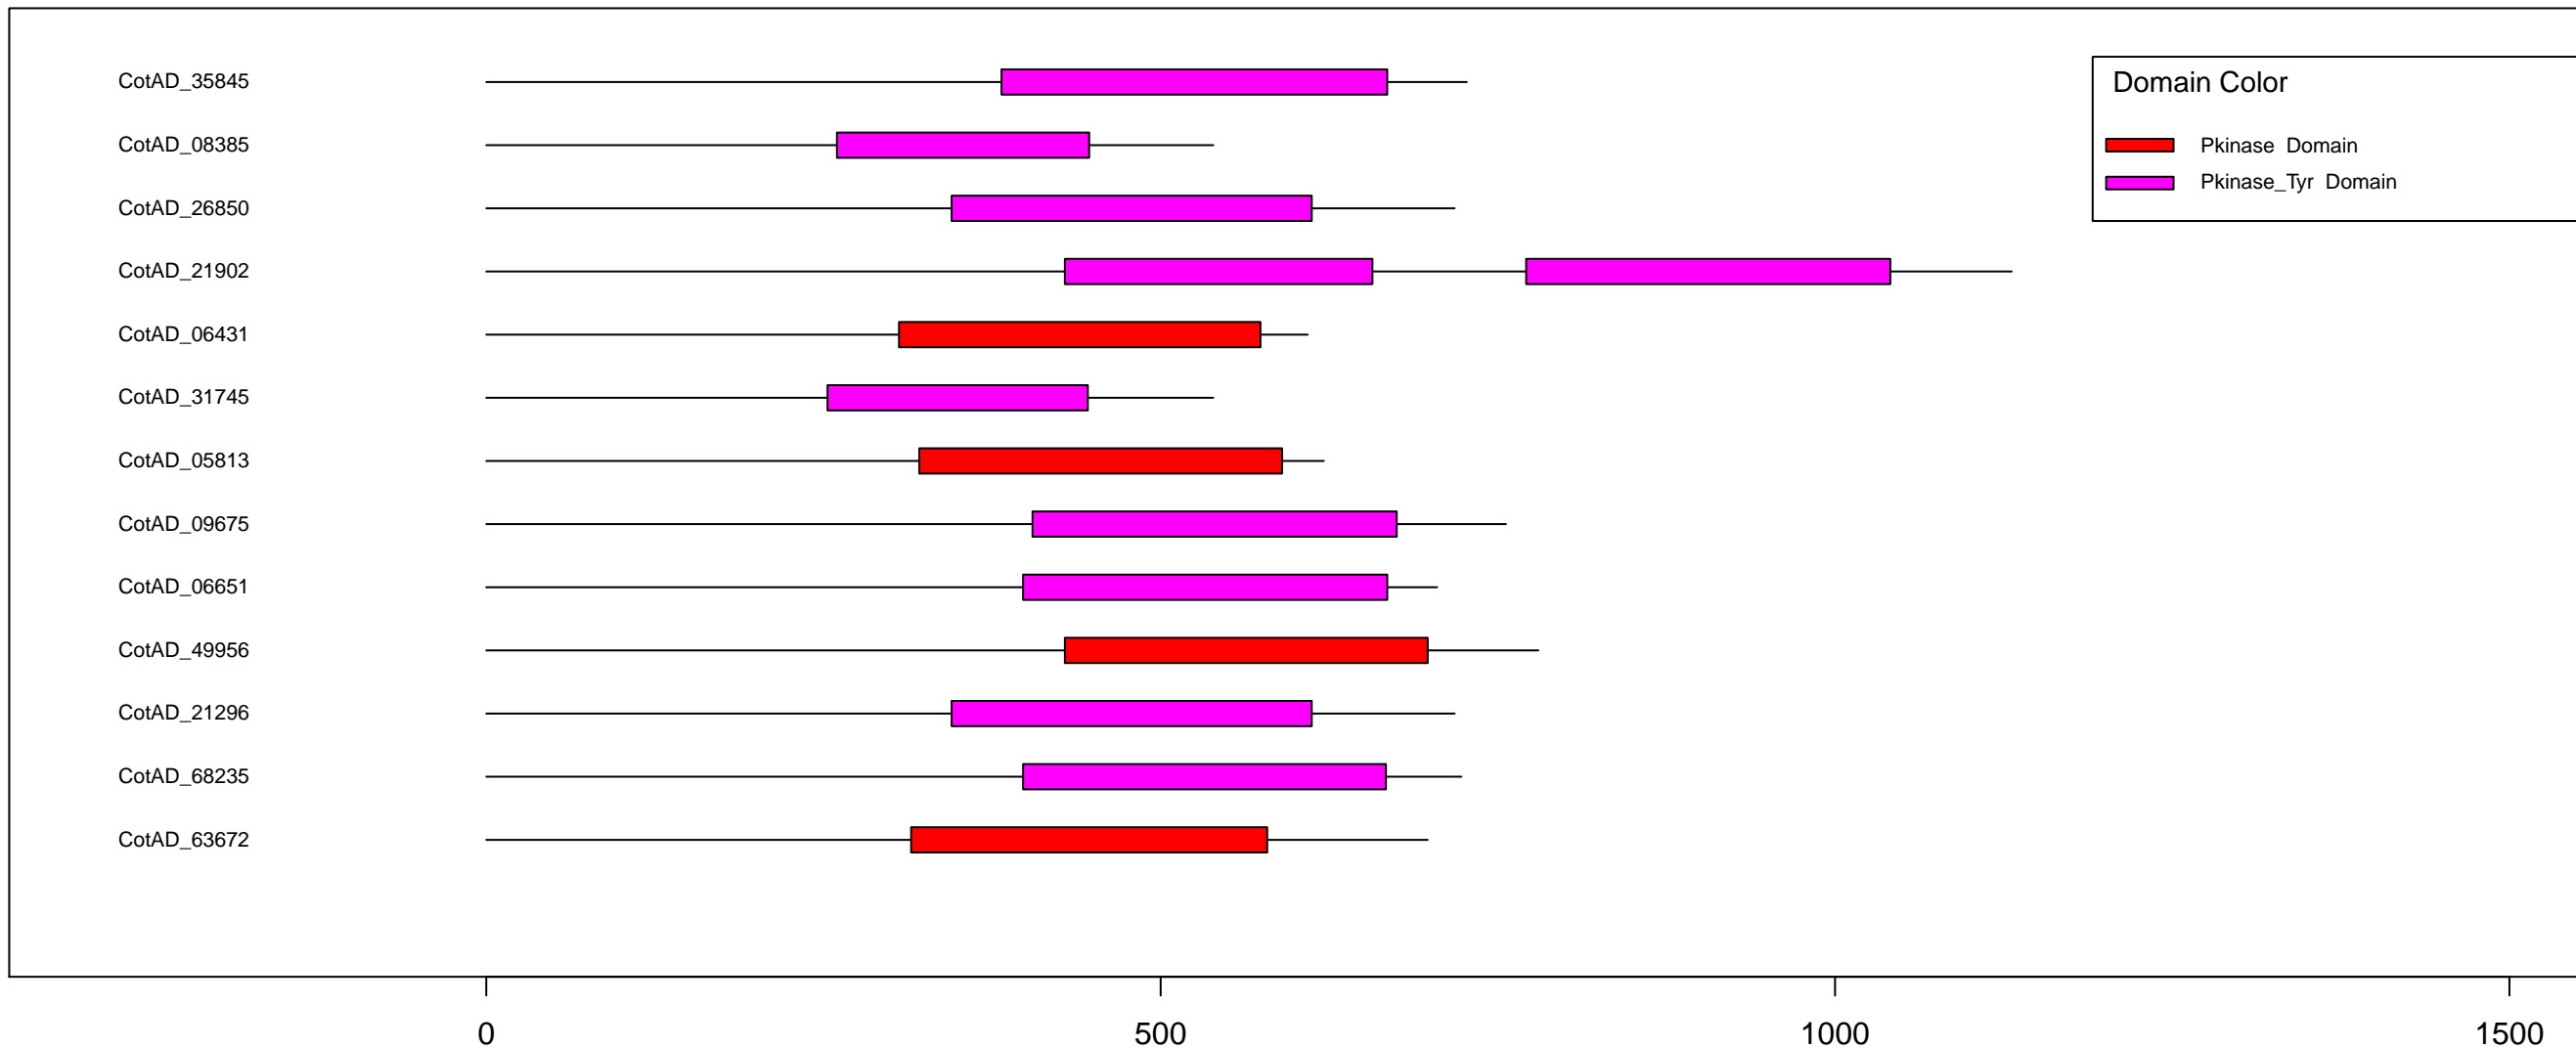

# G.hi RLK-Pelle\_RKF3 domain diagram (all)

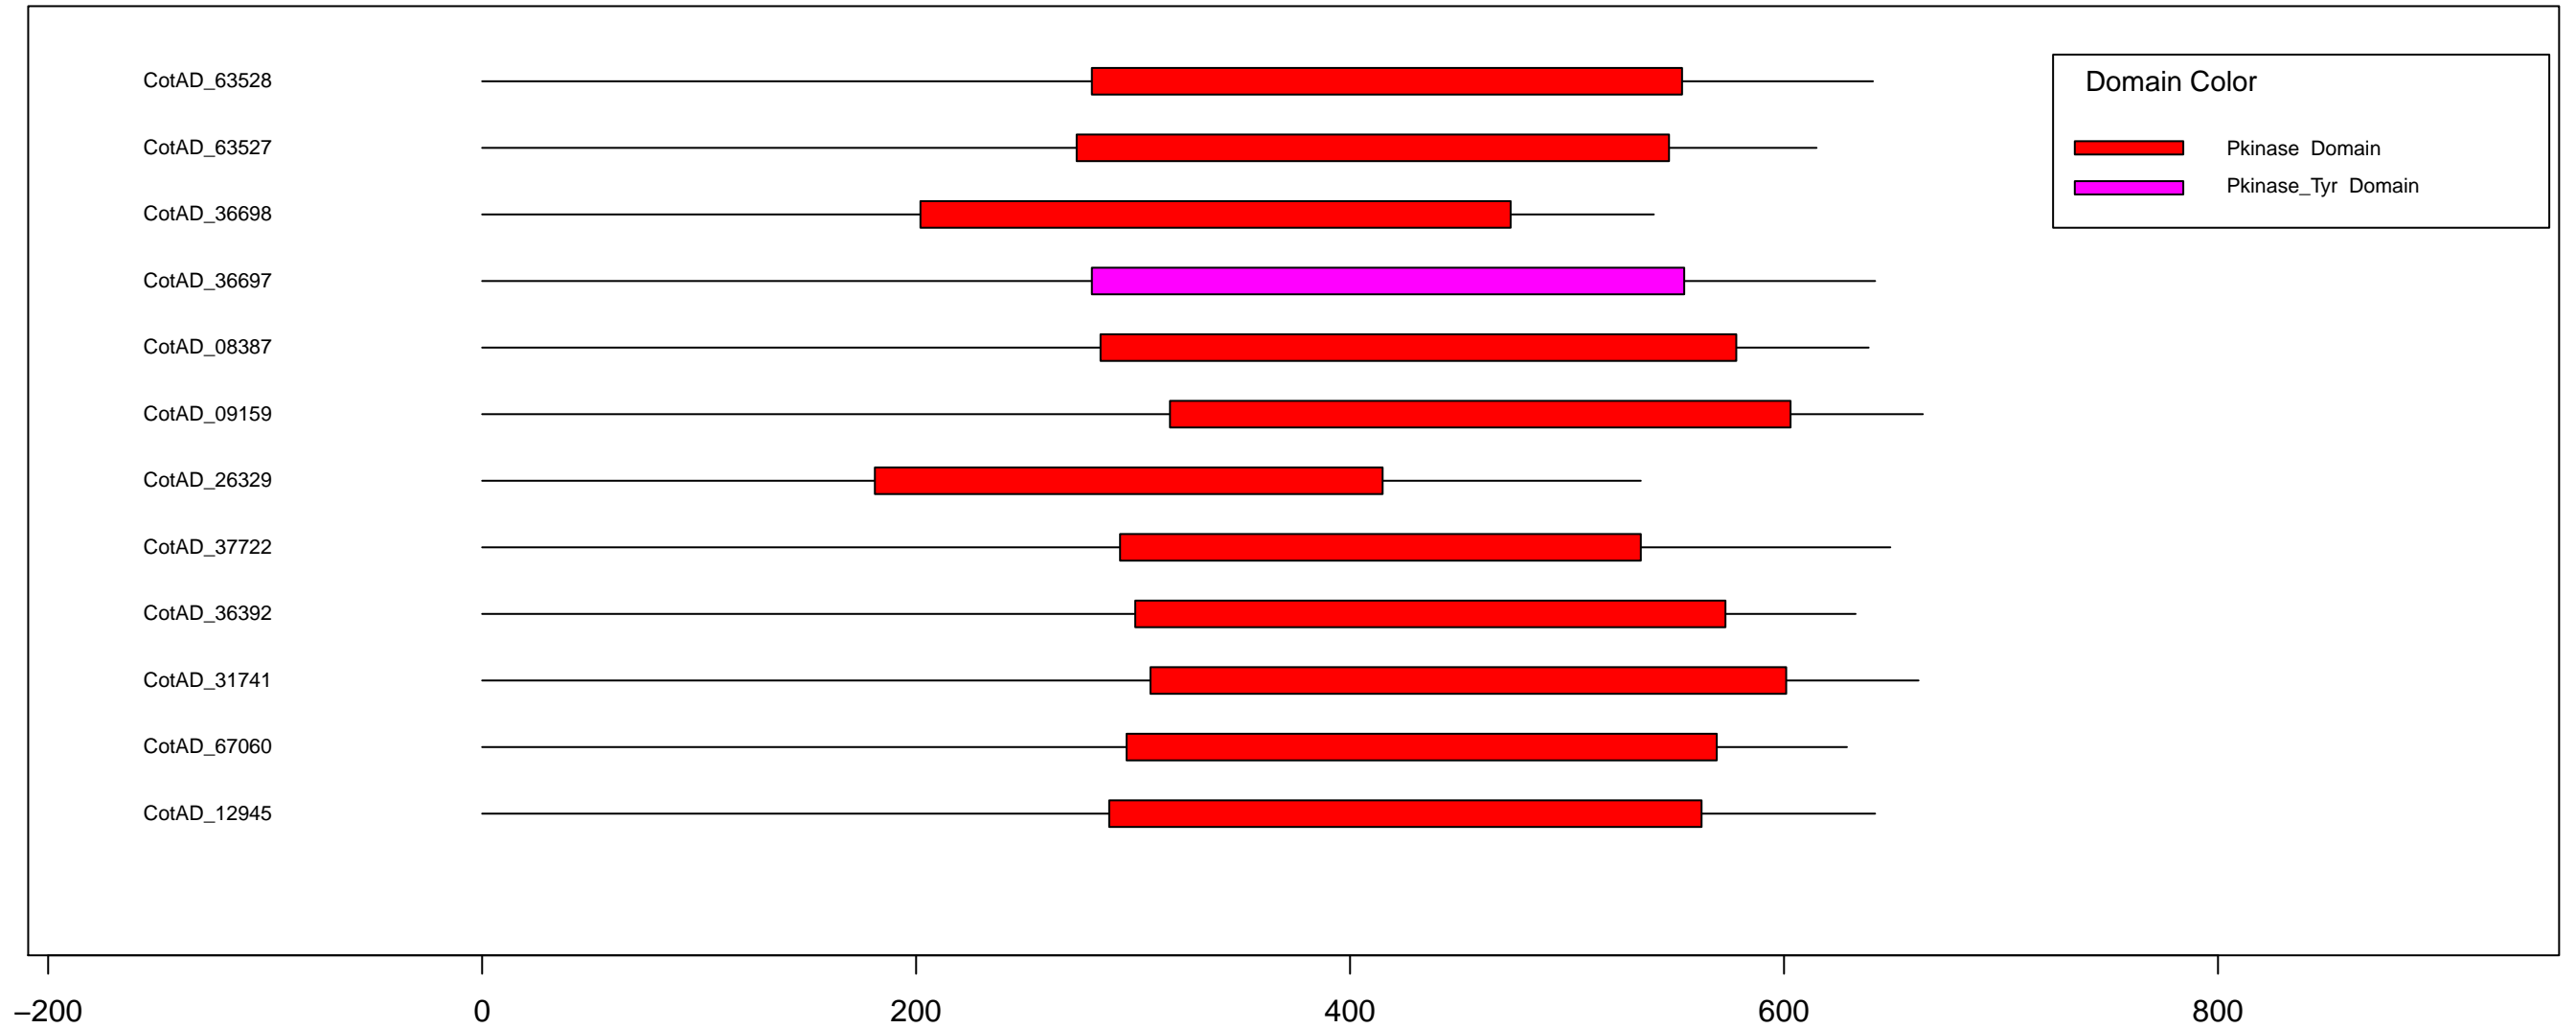

# G.hi RLK-Pelle\_RLCK-II domain diagram (all)

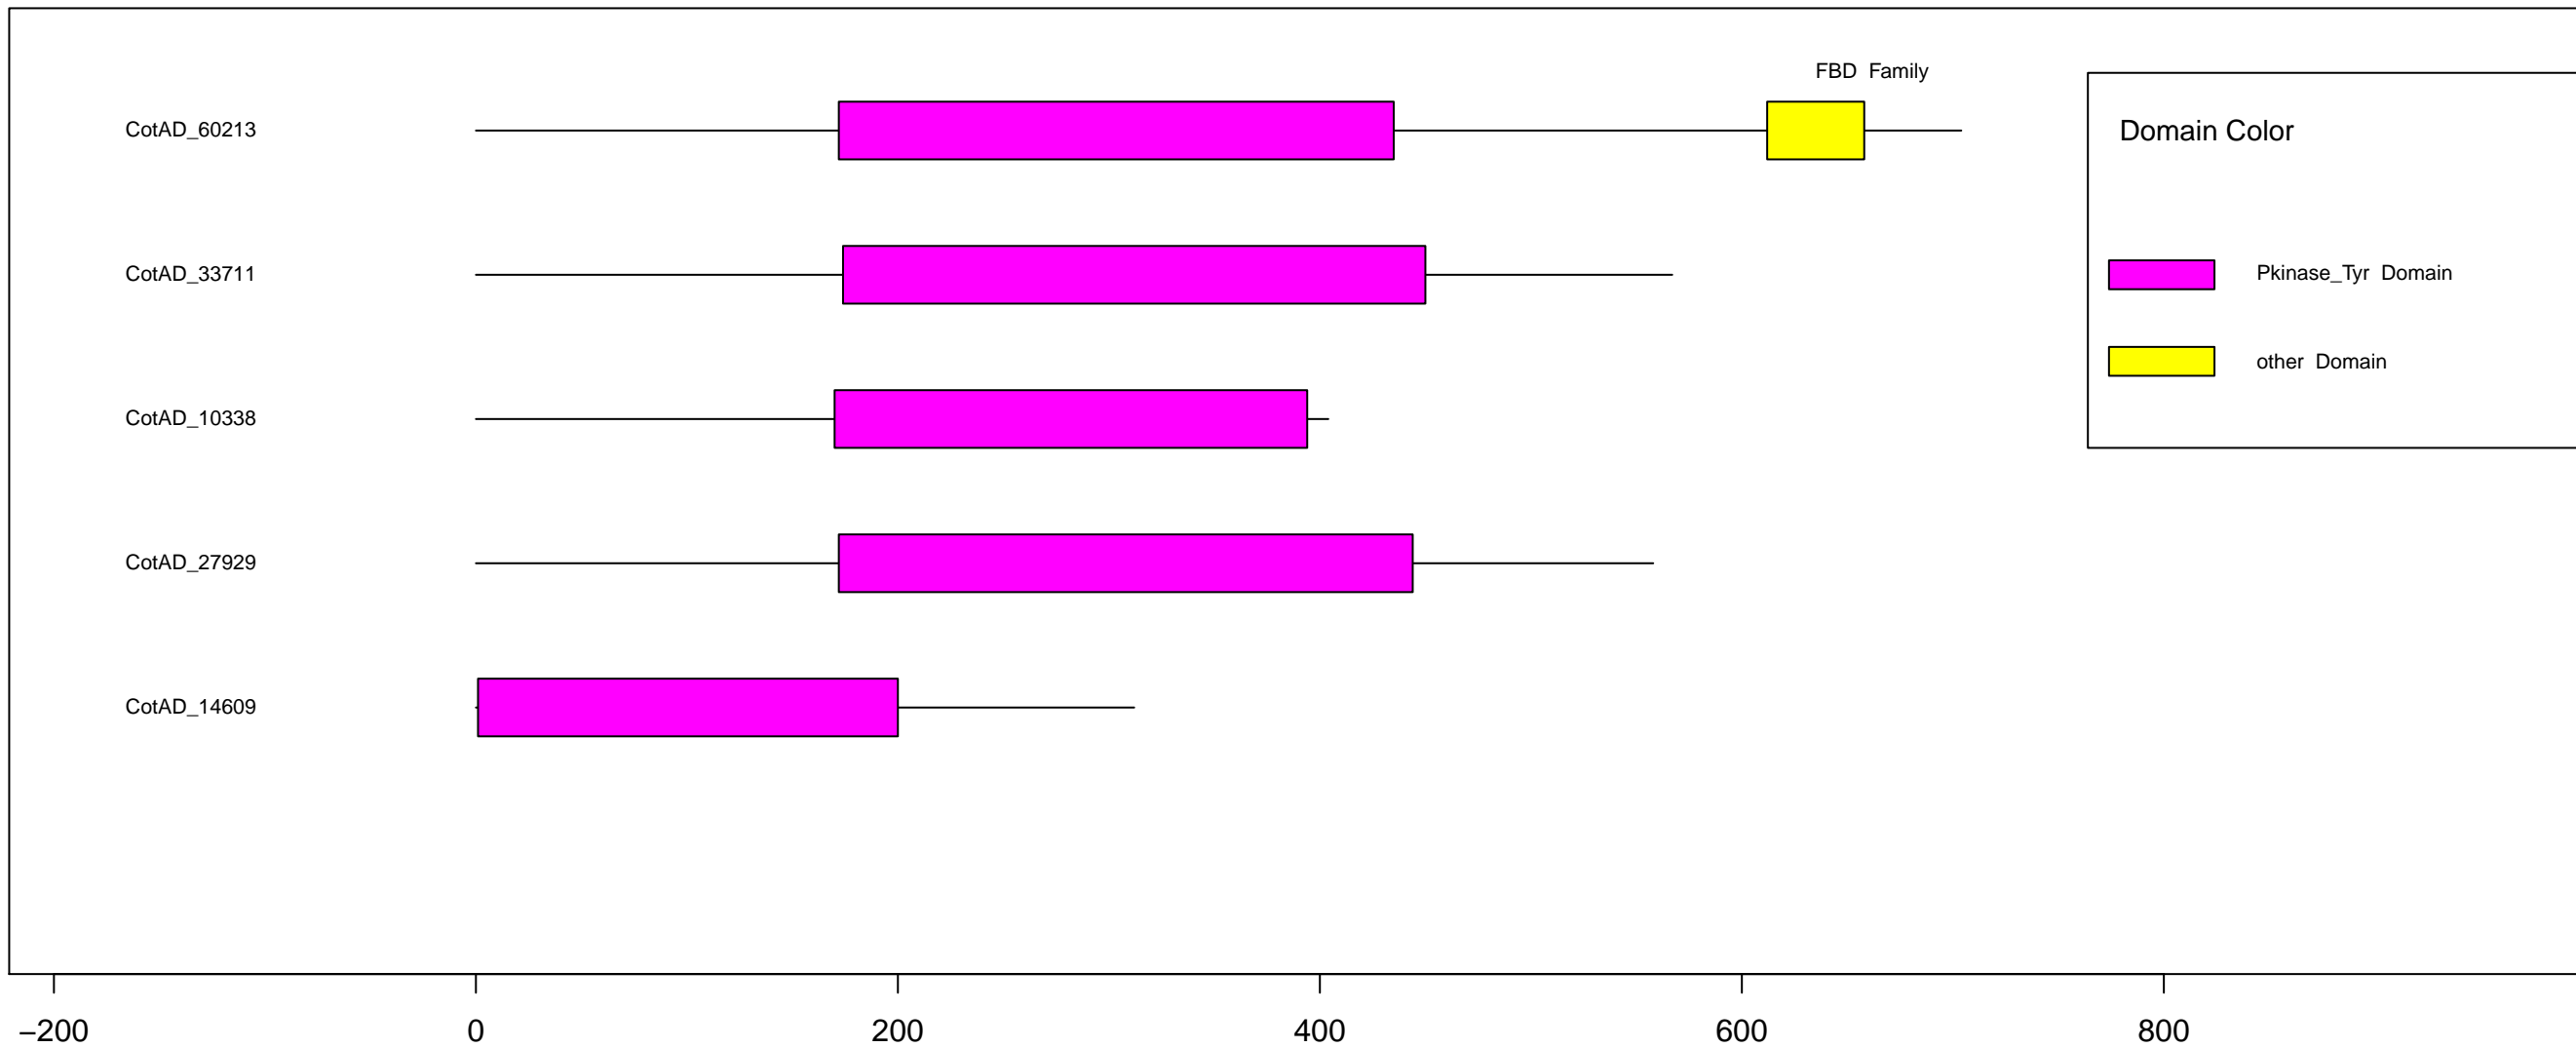

# G.hi RLK-Pelle\_RLCK-IV domain diagram (all)

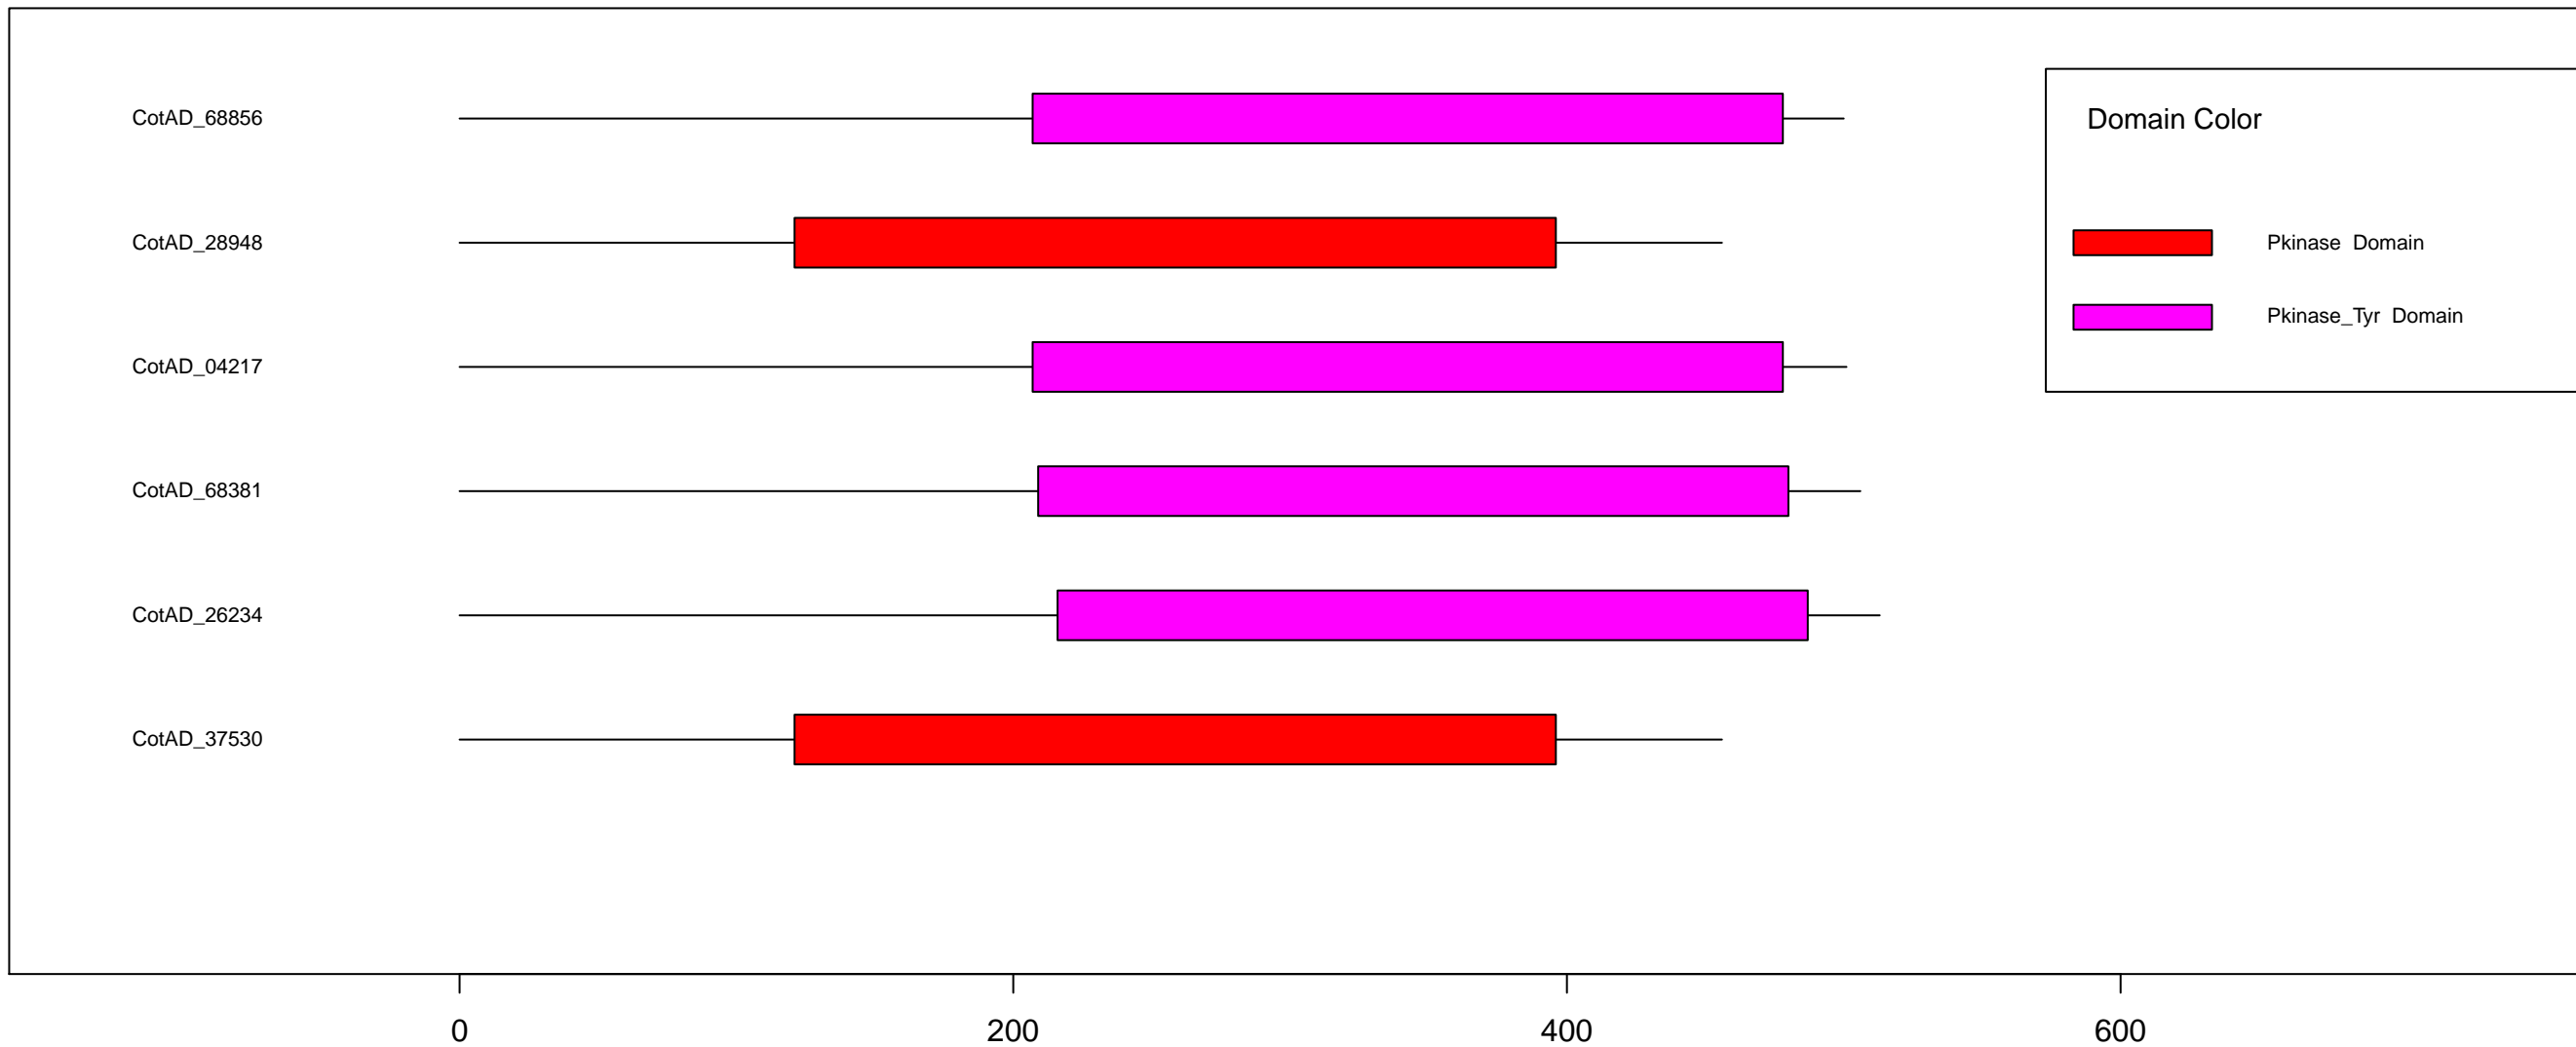

# G.hi RLK-Pelle\_RLCK-IXa domain diagram (all)

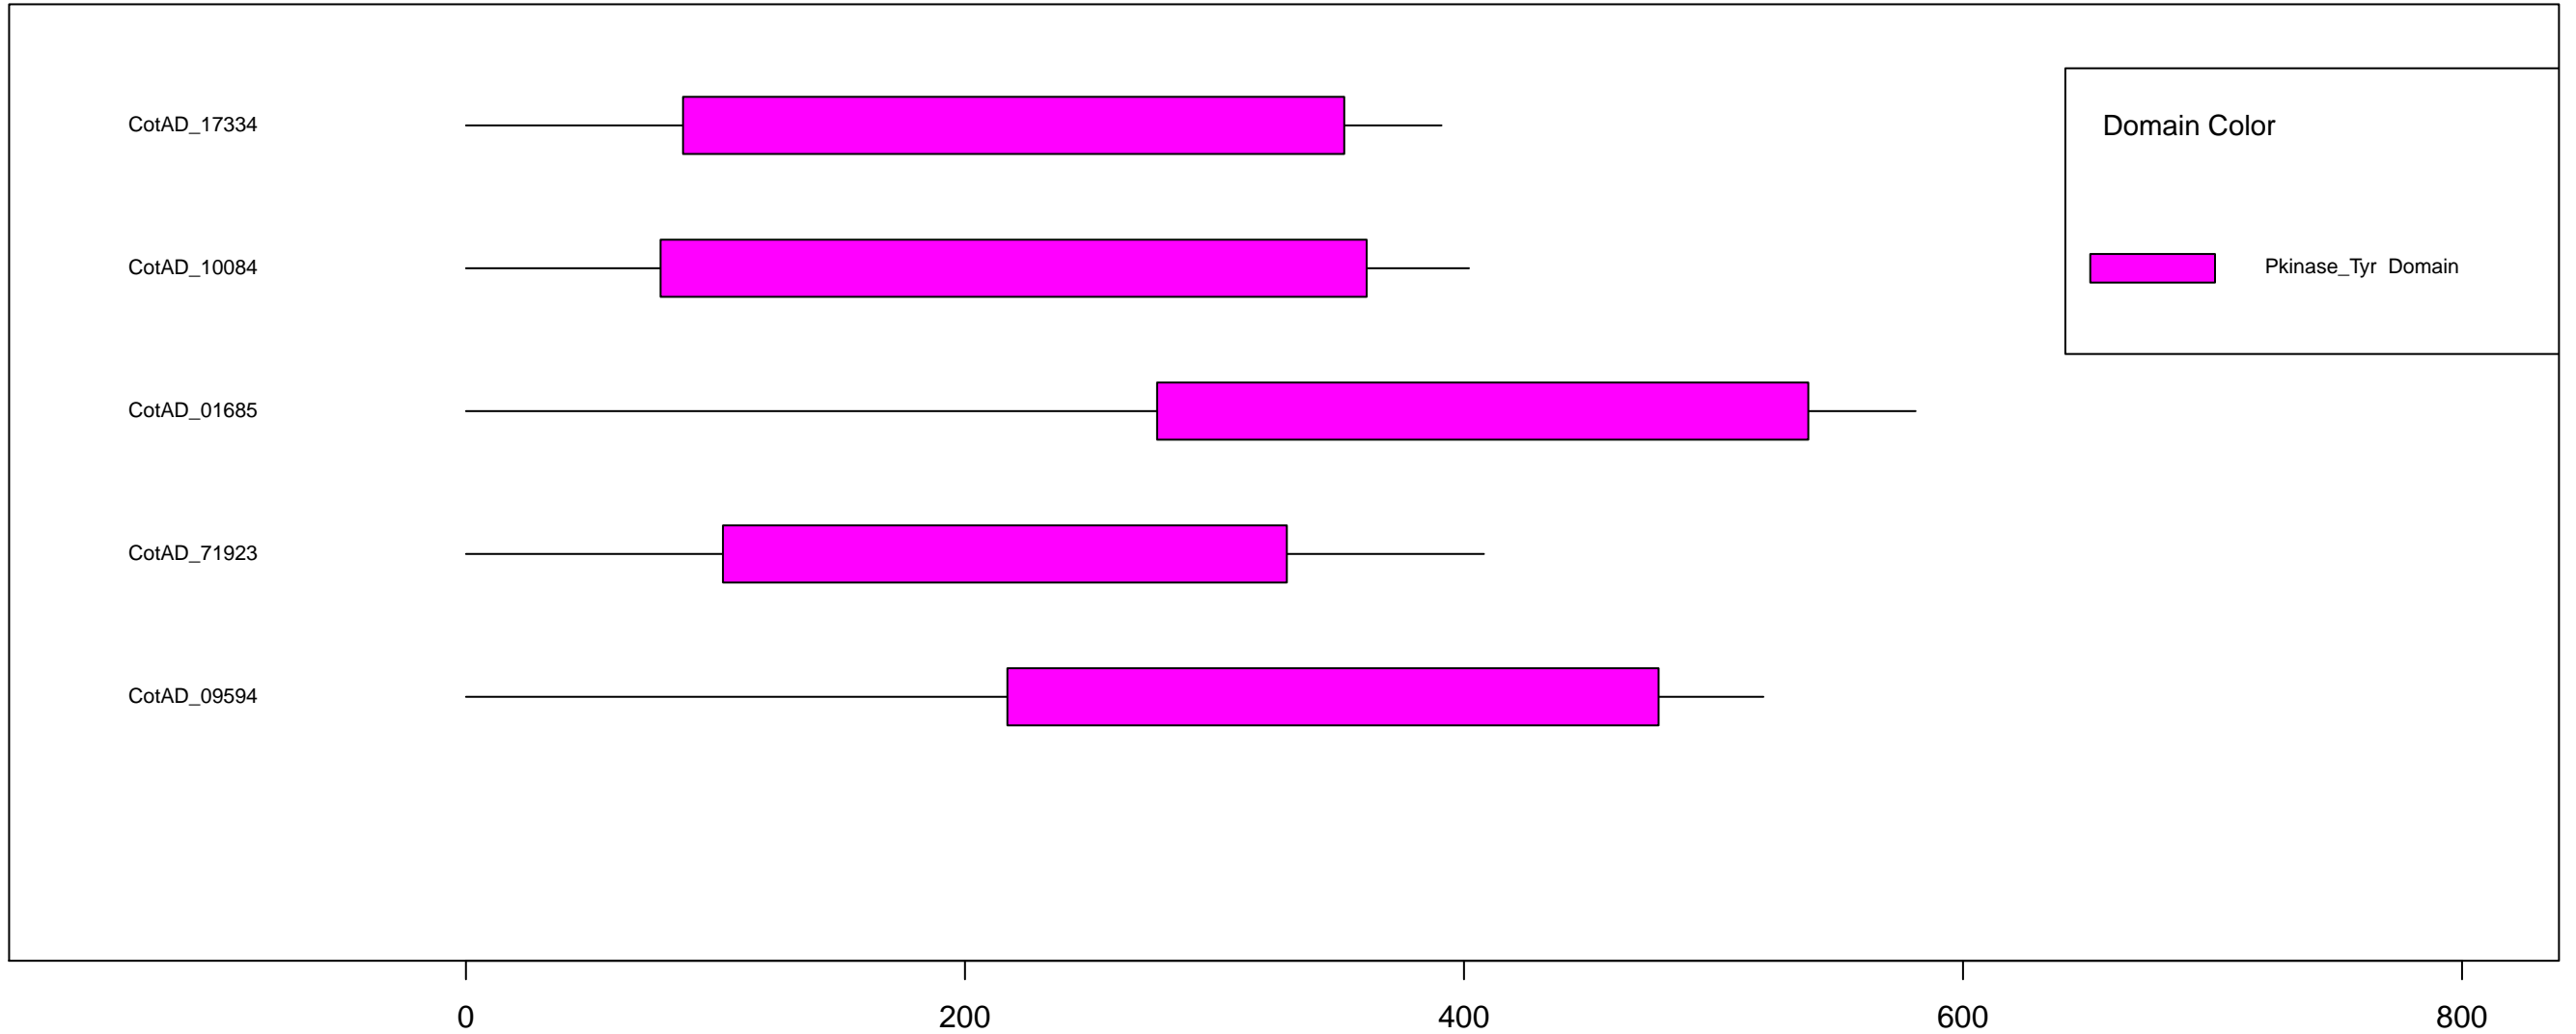



# G.hi RLK-Pelle\_RLCK-IXb domain diagram (part 1)

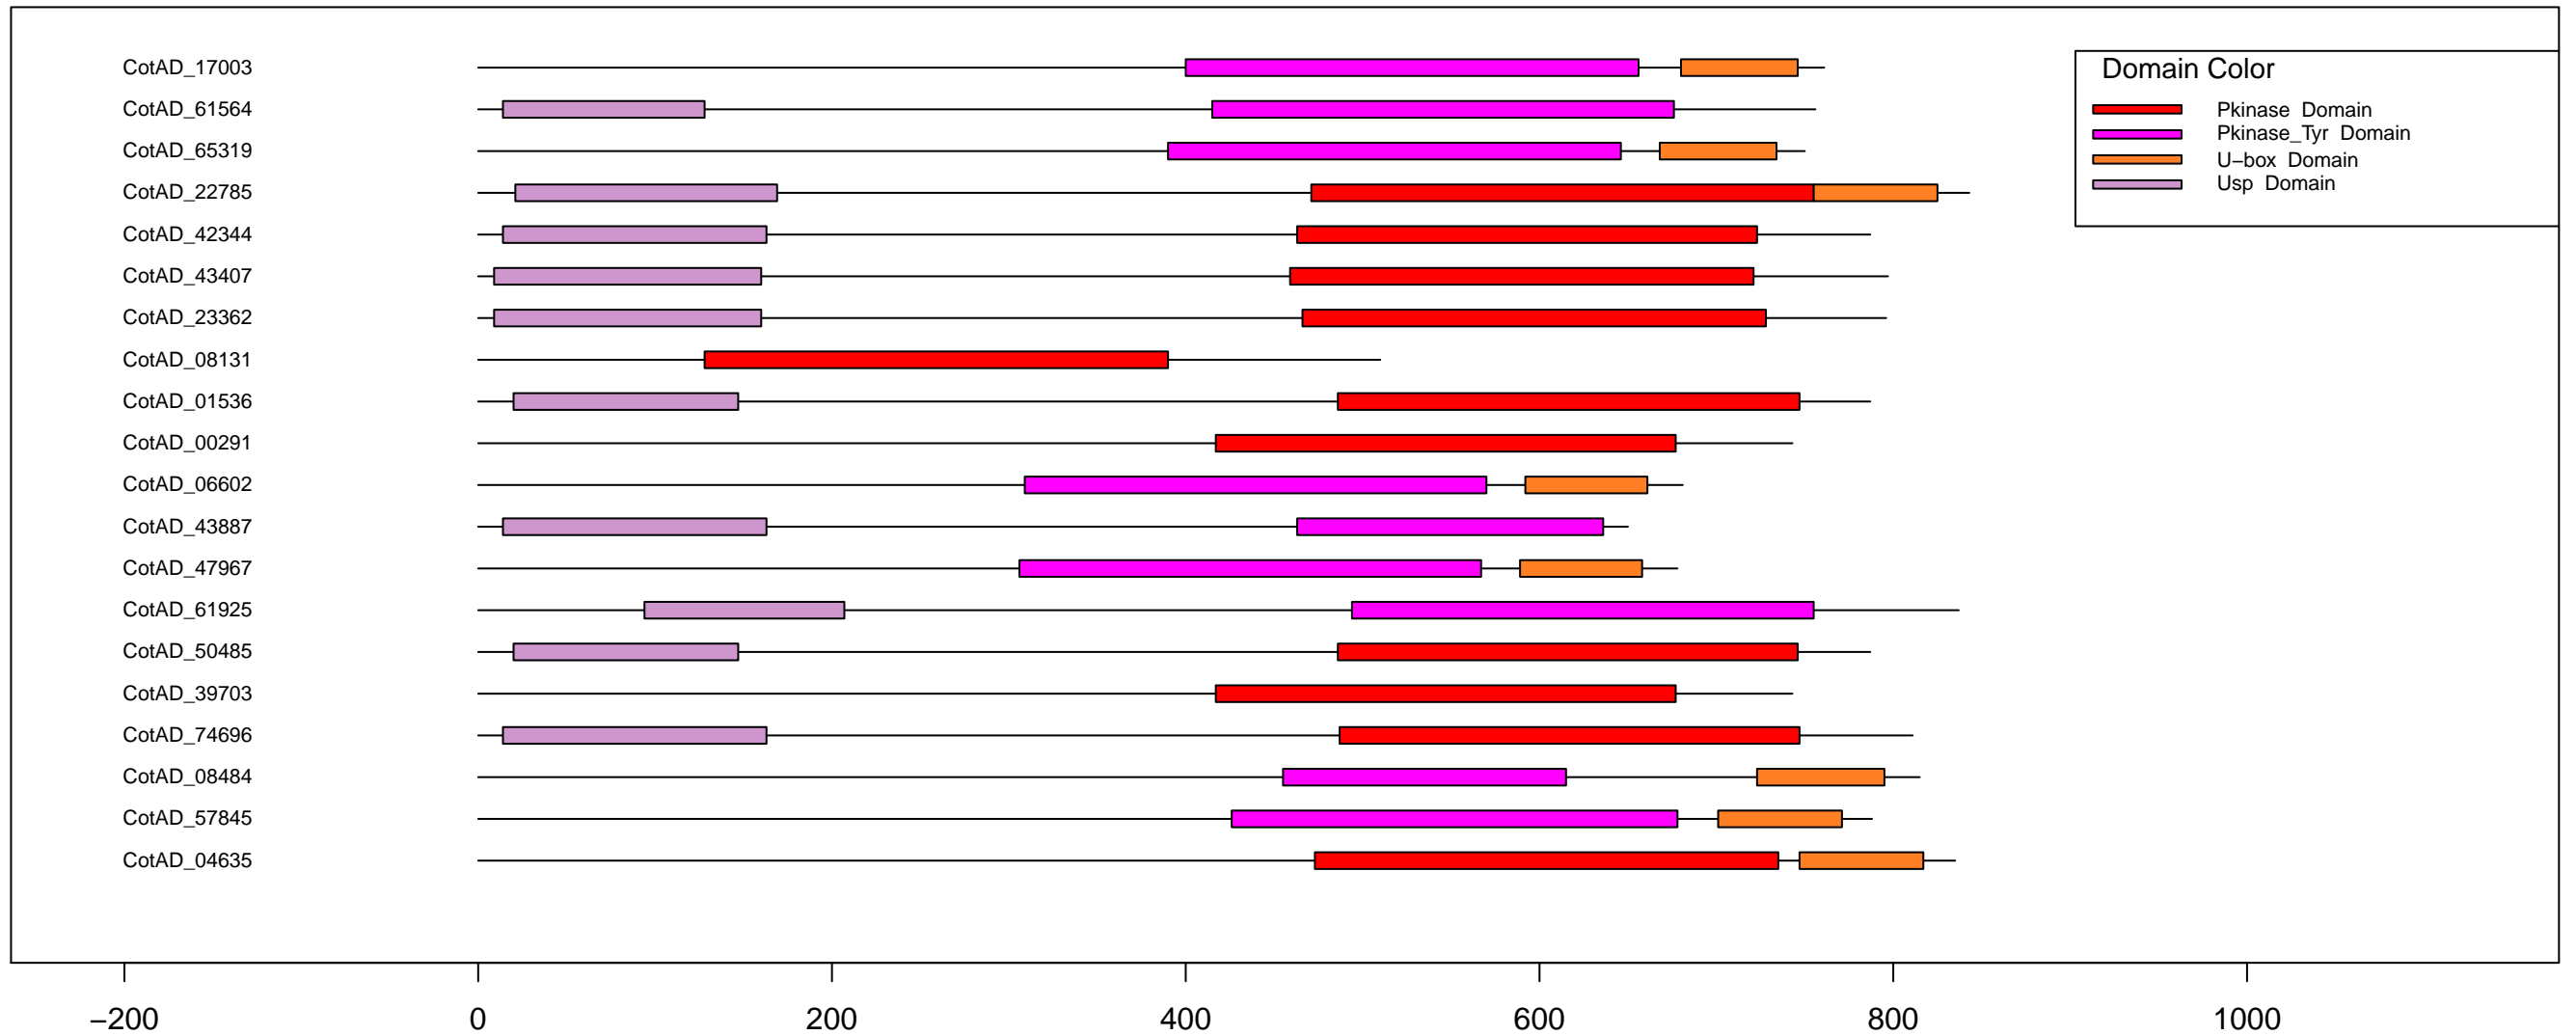

### G.hi RLK-Pelle\_RLCK-IXb domain diagram (part 2)

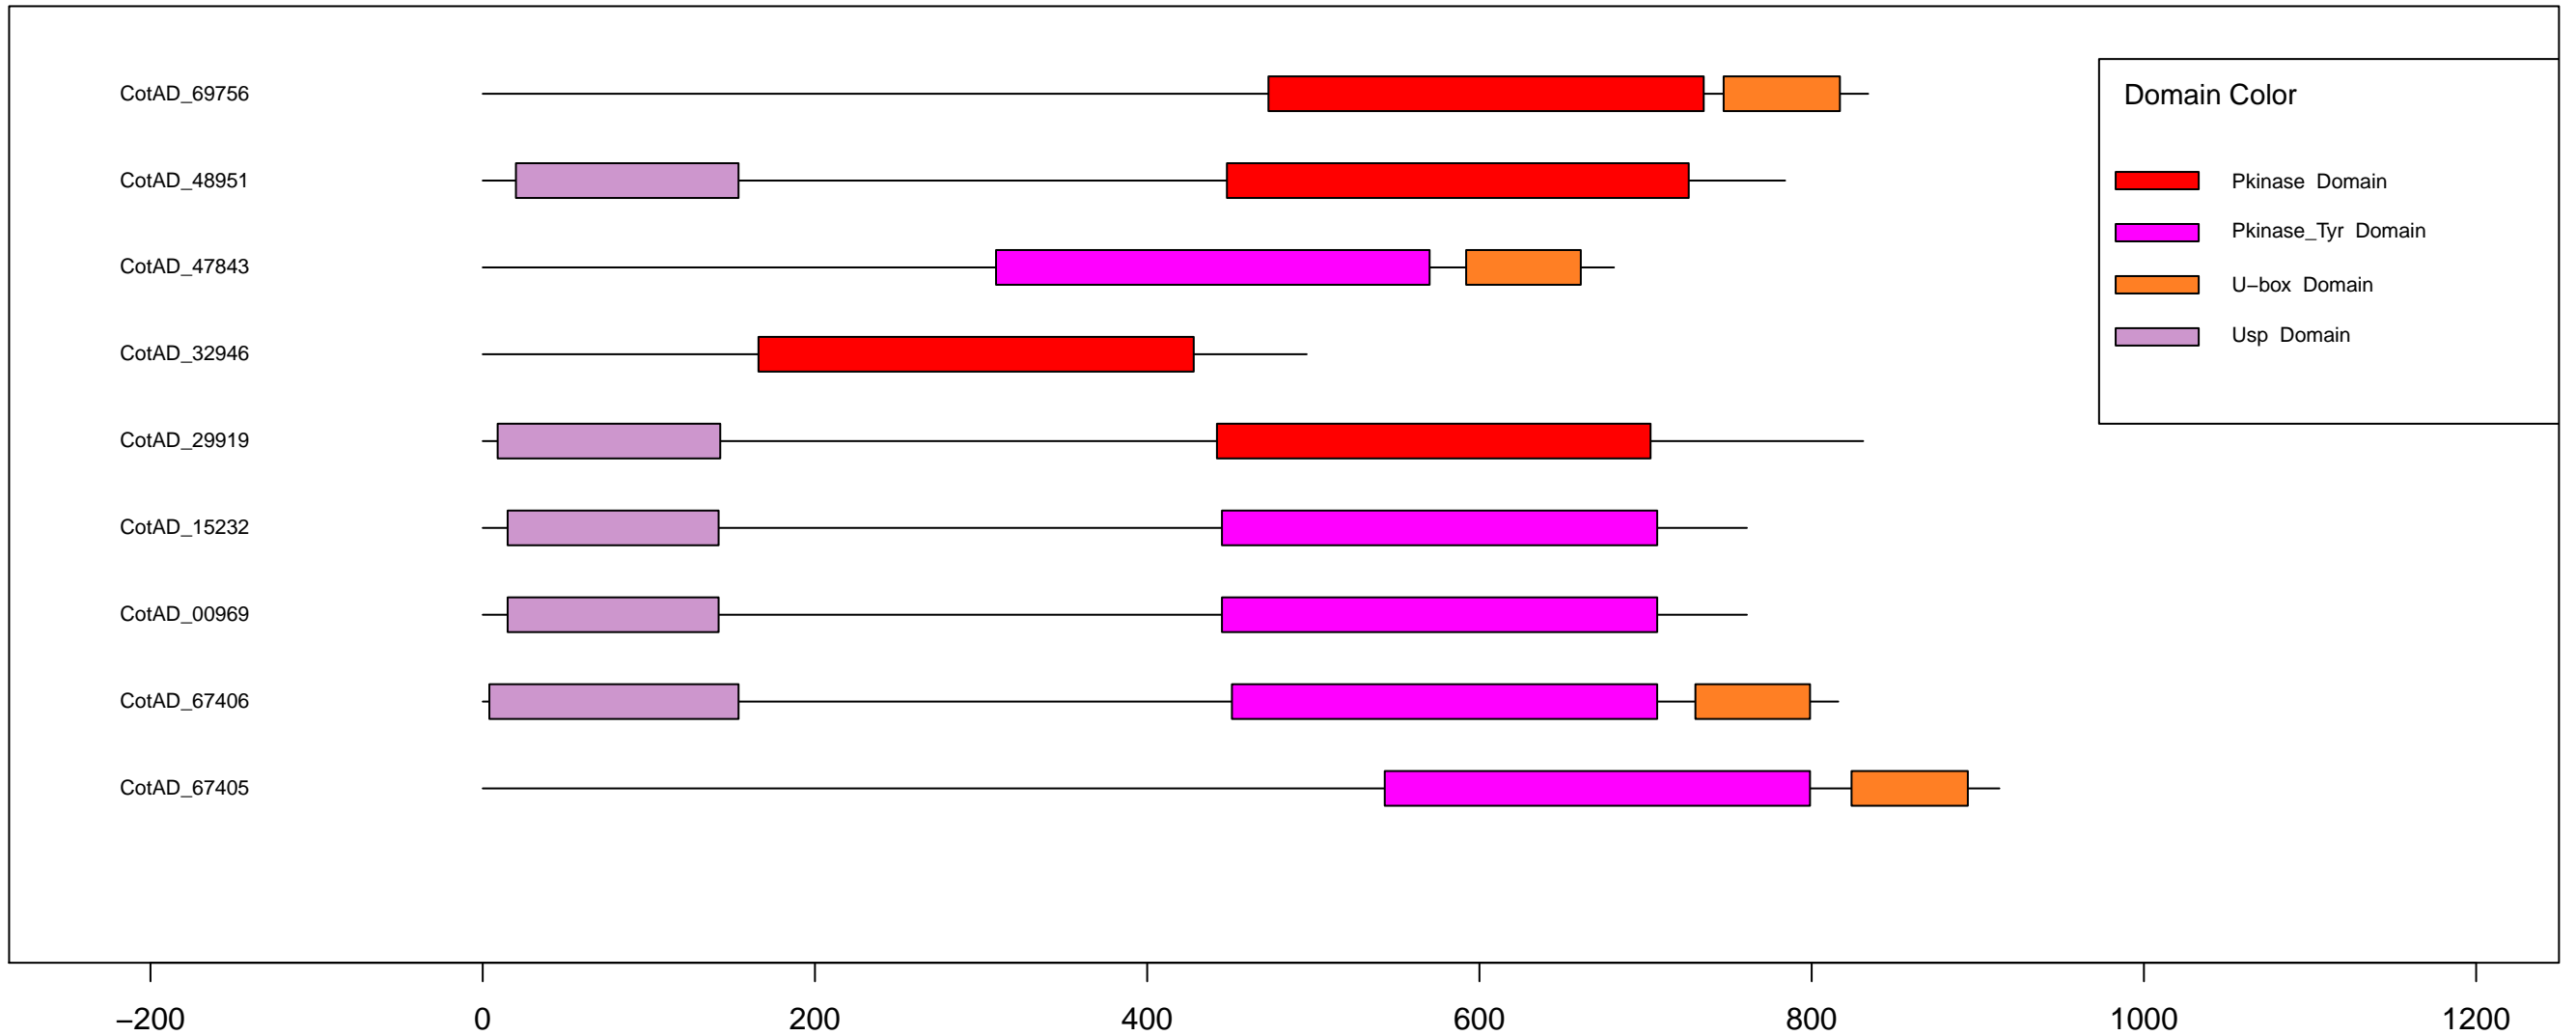

# G.hi RLK-Pelle\_RLCK-Os domain diagram (all)

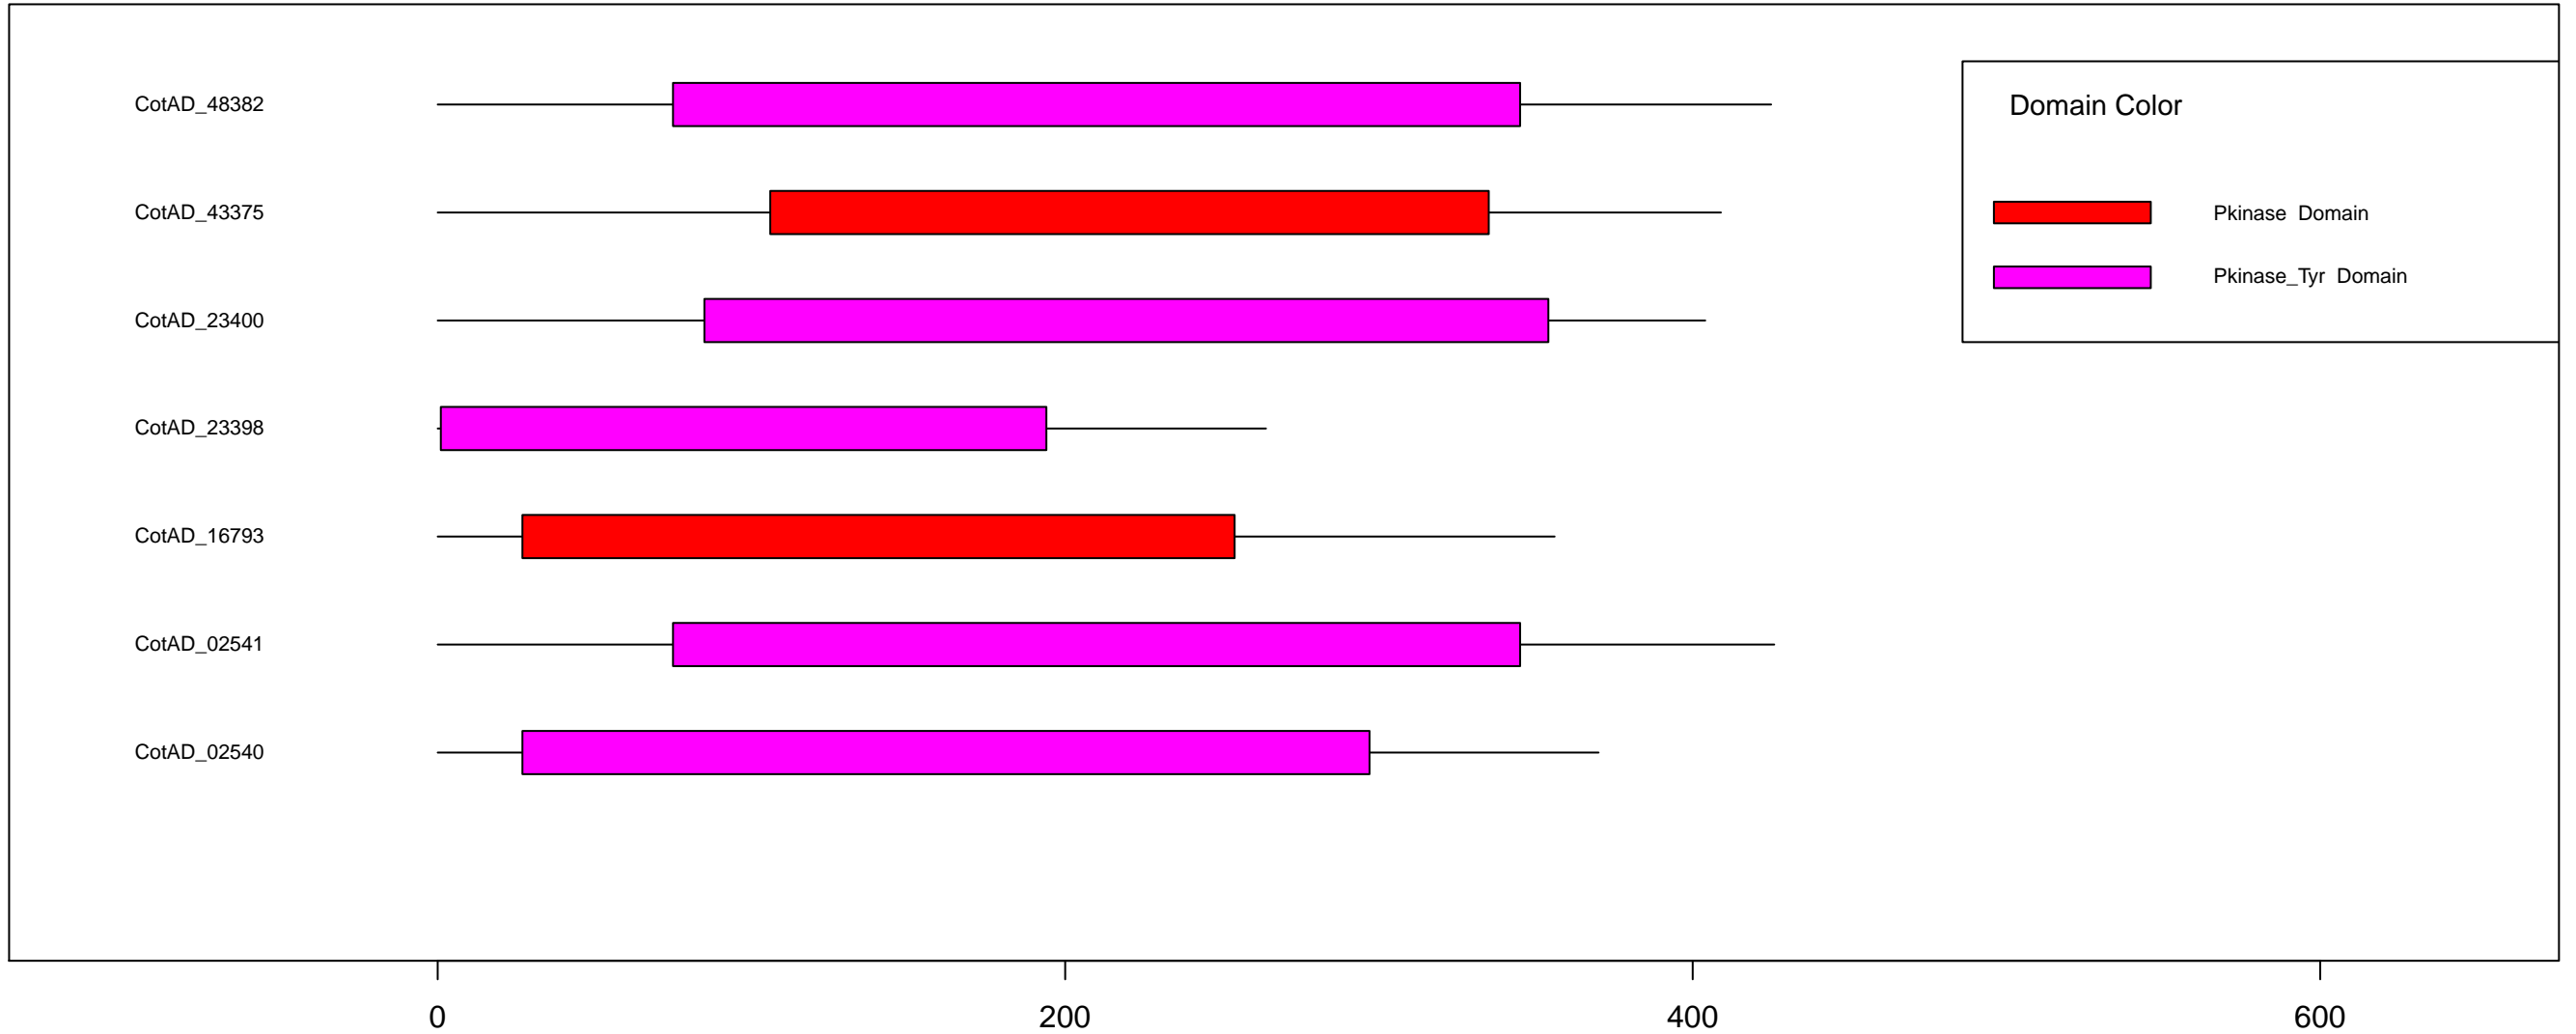

# G.hi RLK-Pelle\_RLCK-VIIa-1 domain diagram (part 1)

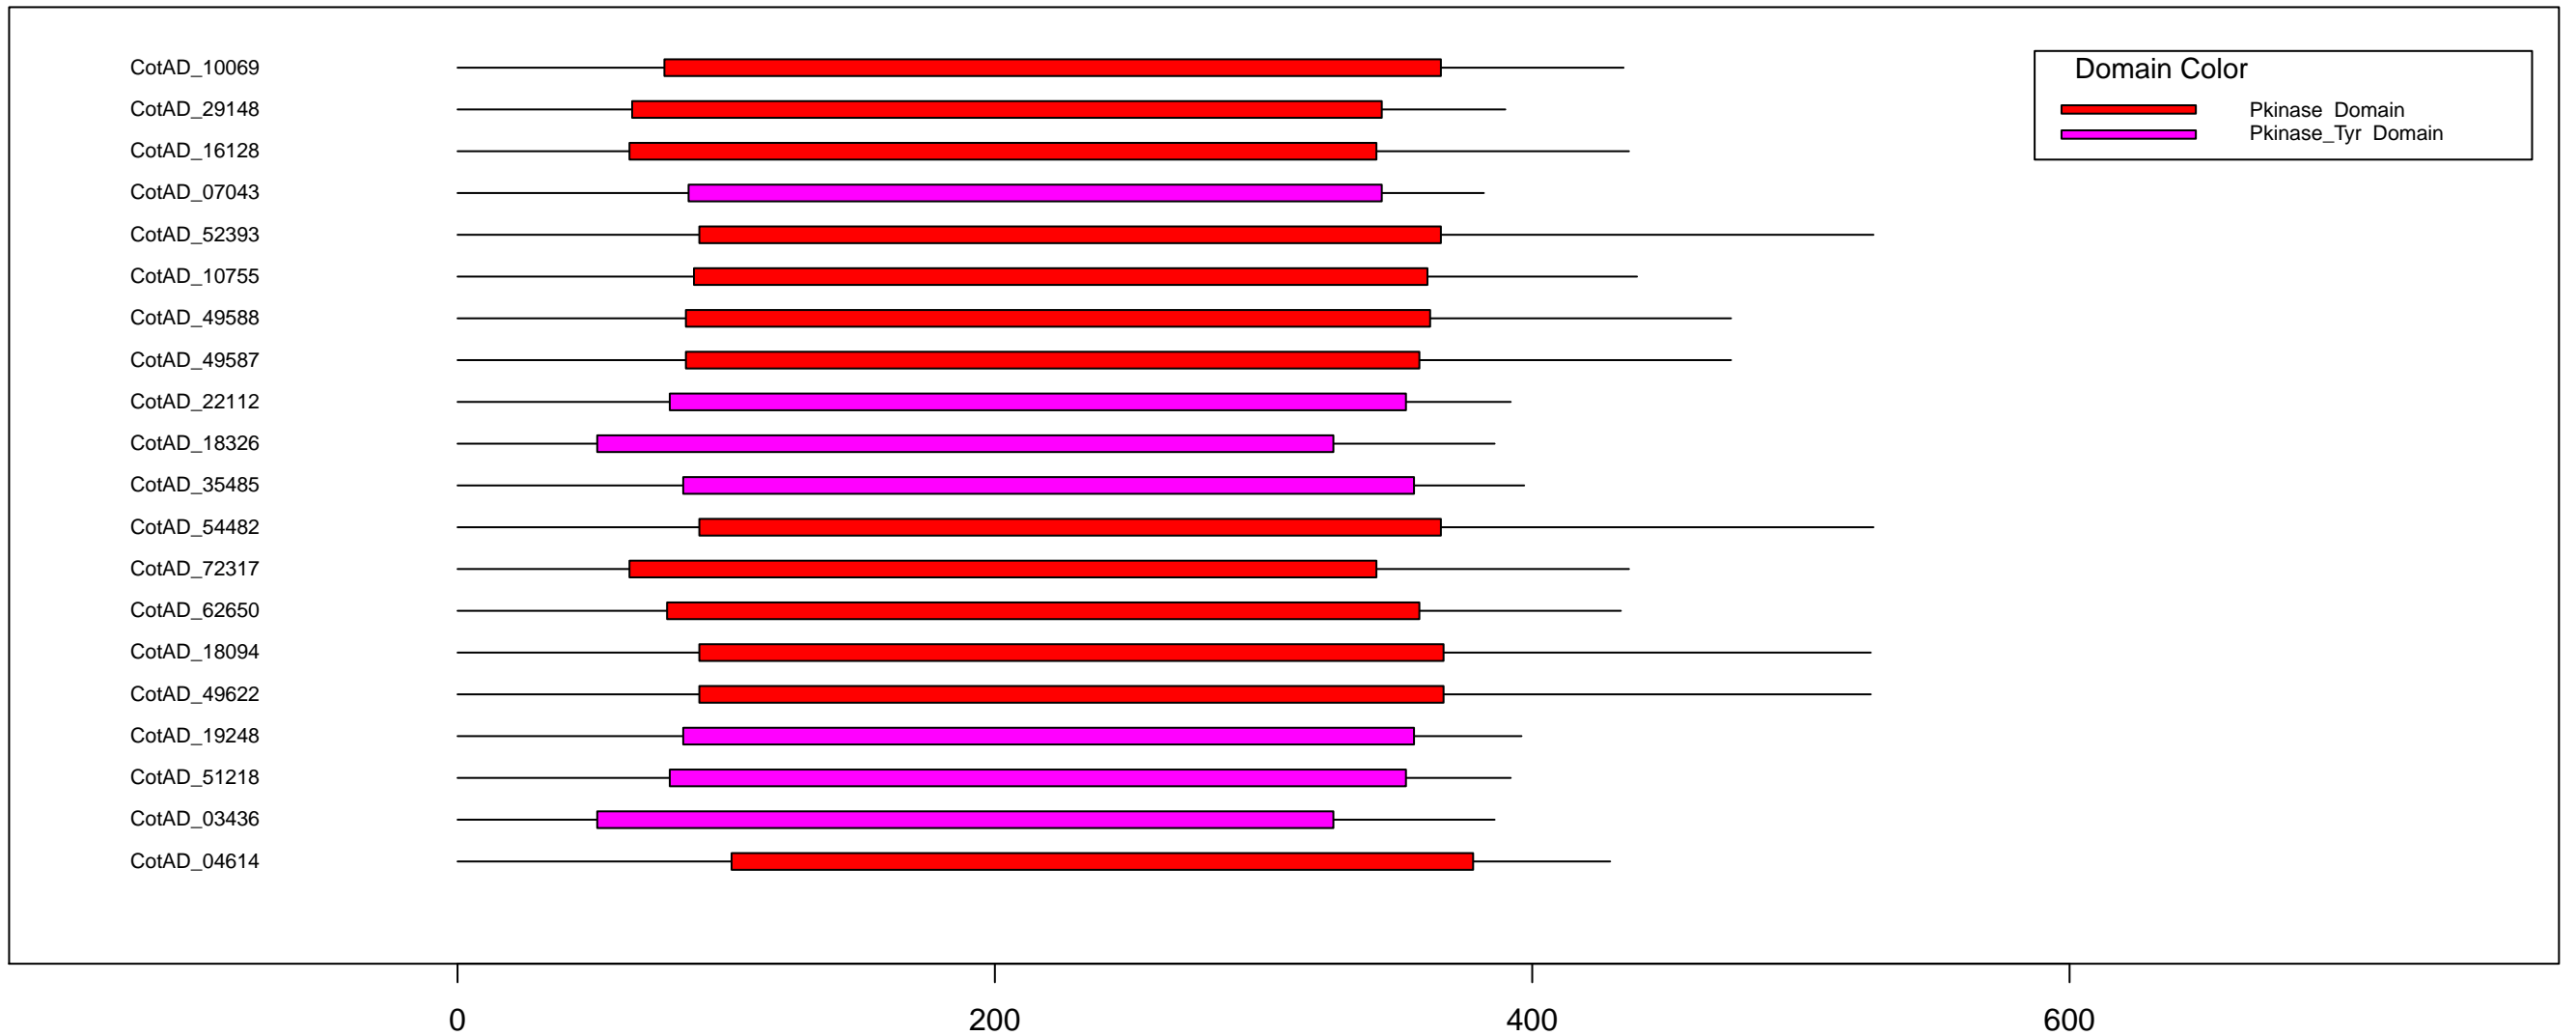

### G.hi RLK-Pelle\_RLCK-VIIa-1 domain diagram (part 2)

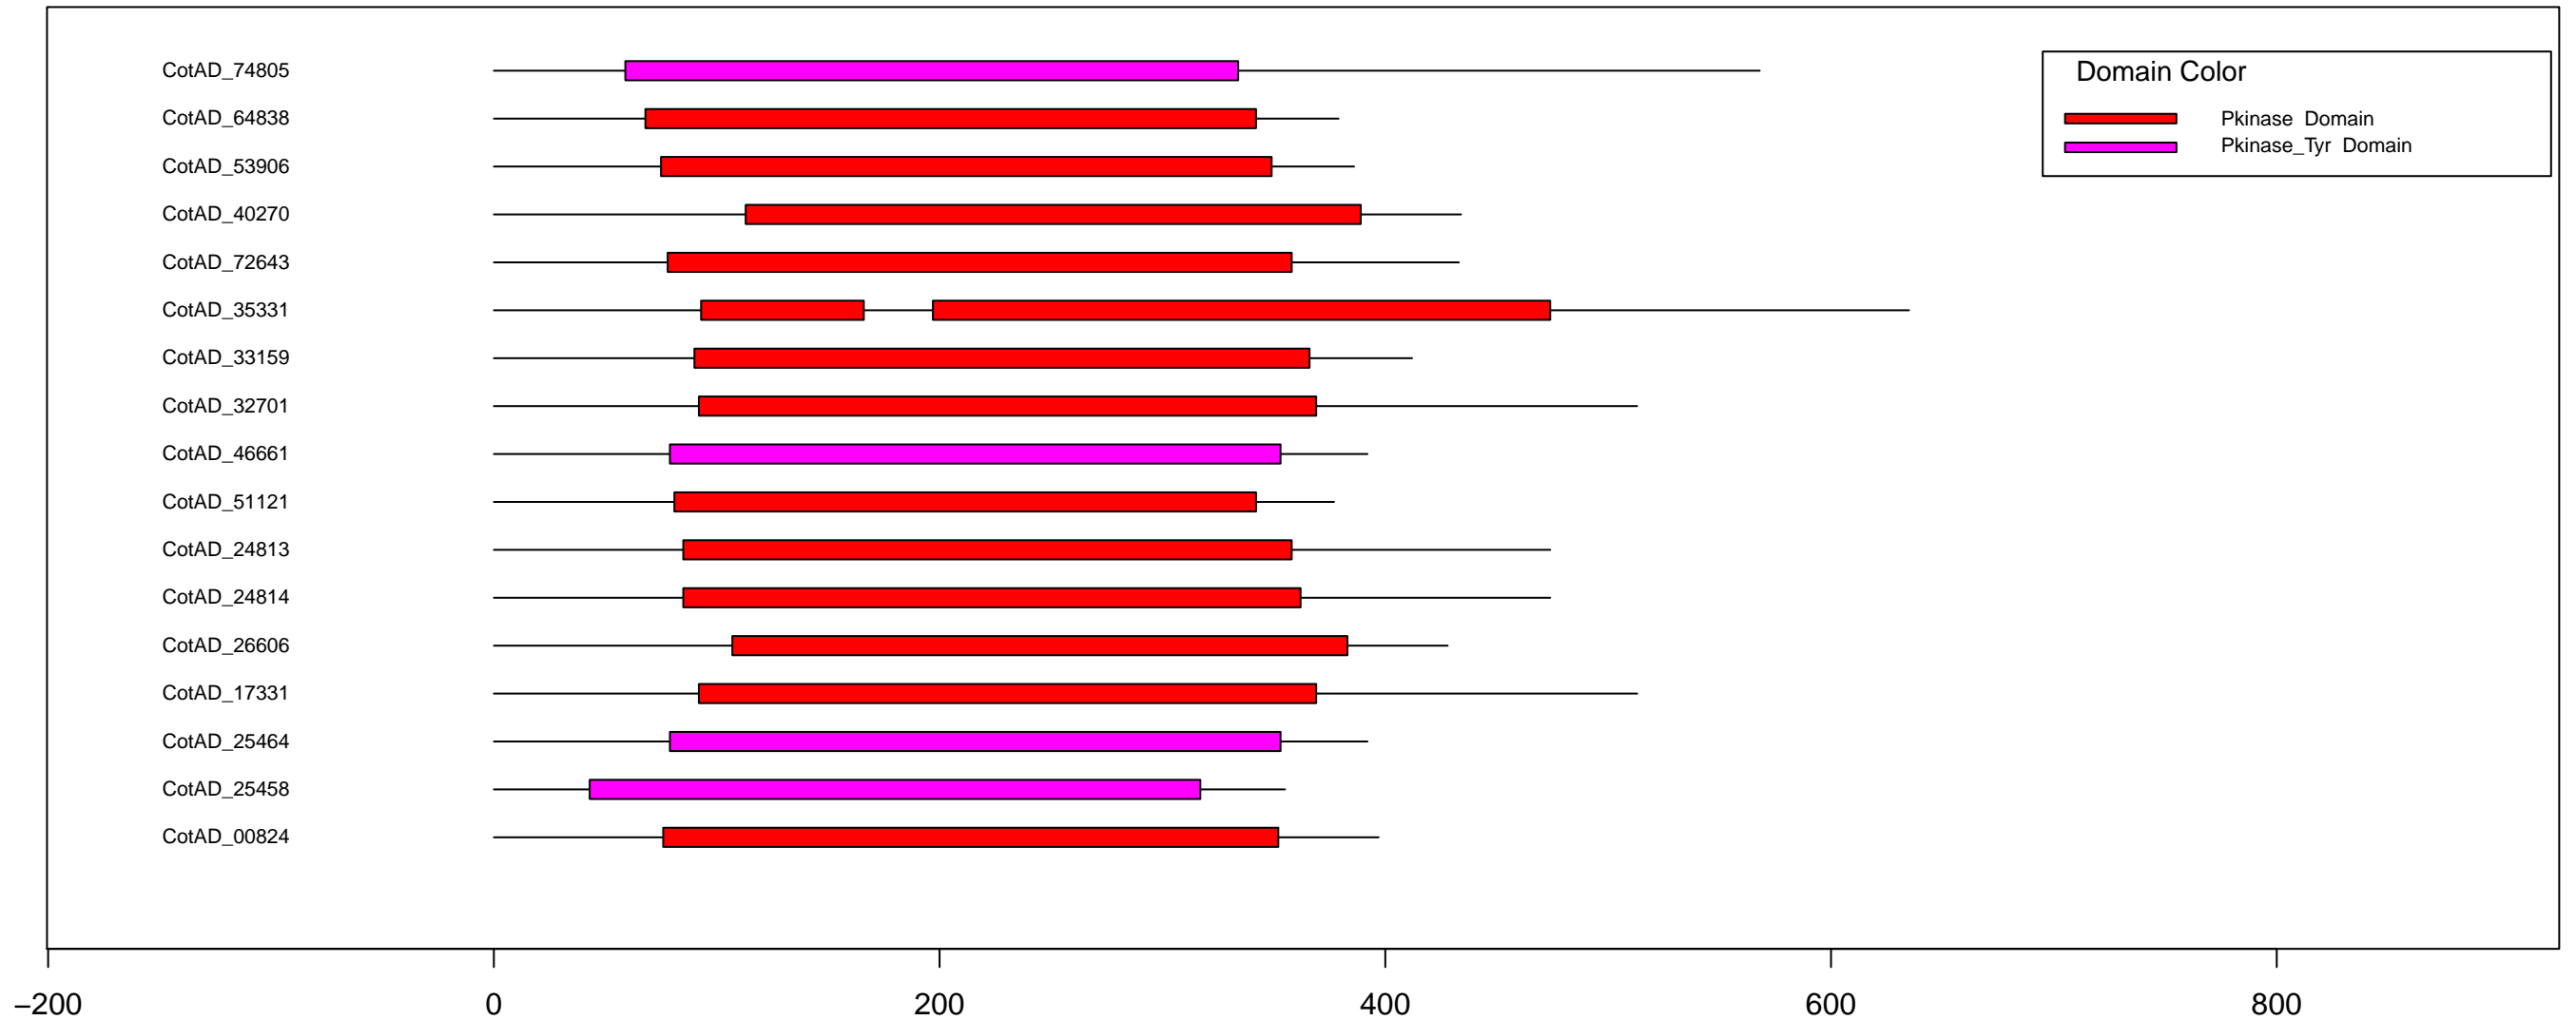

### G.hi RLK-Pelle\_RLCK-VIIa-2 domain diagram (part 1)

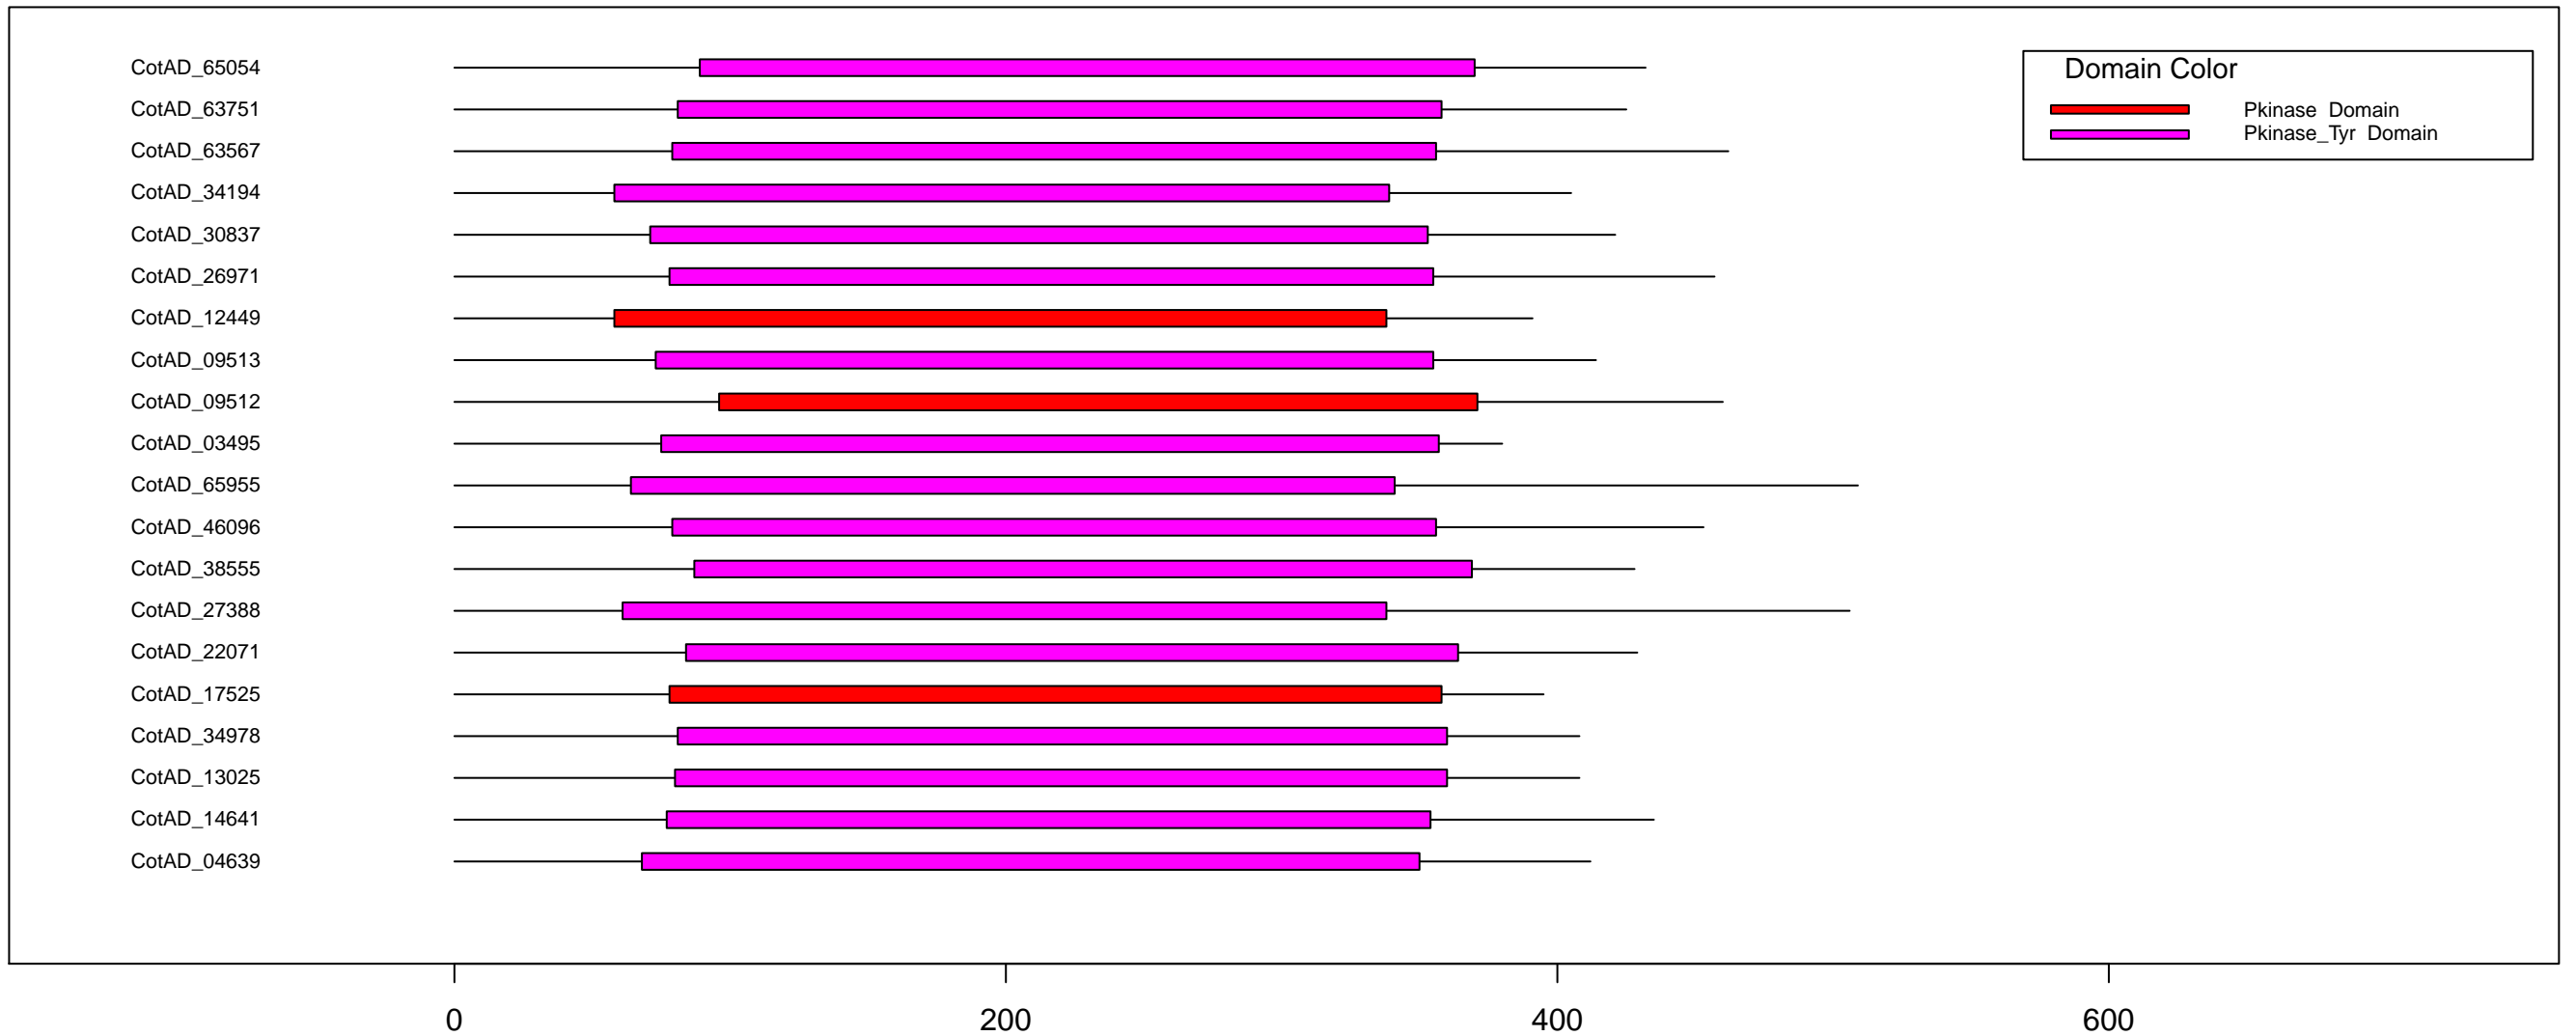

### G.hi RLK-Pelle\_RLCK-VIIa-2 domain diagram (part 2)

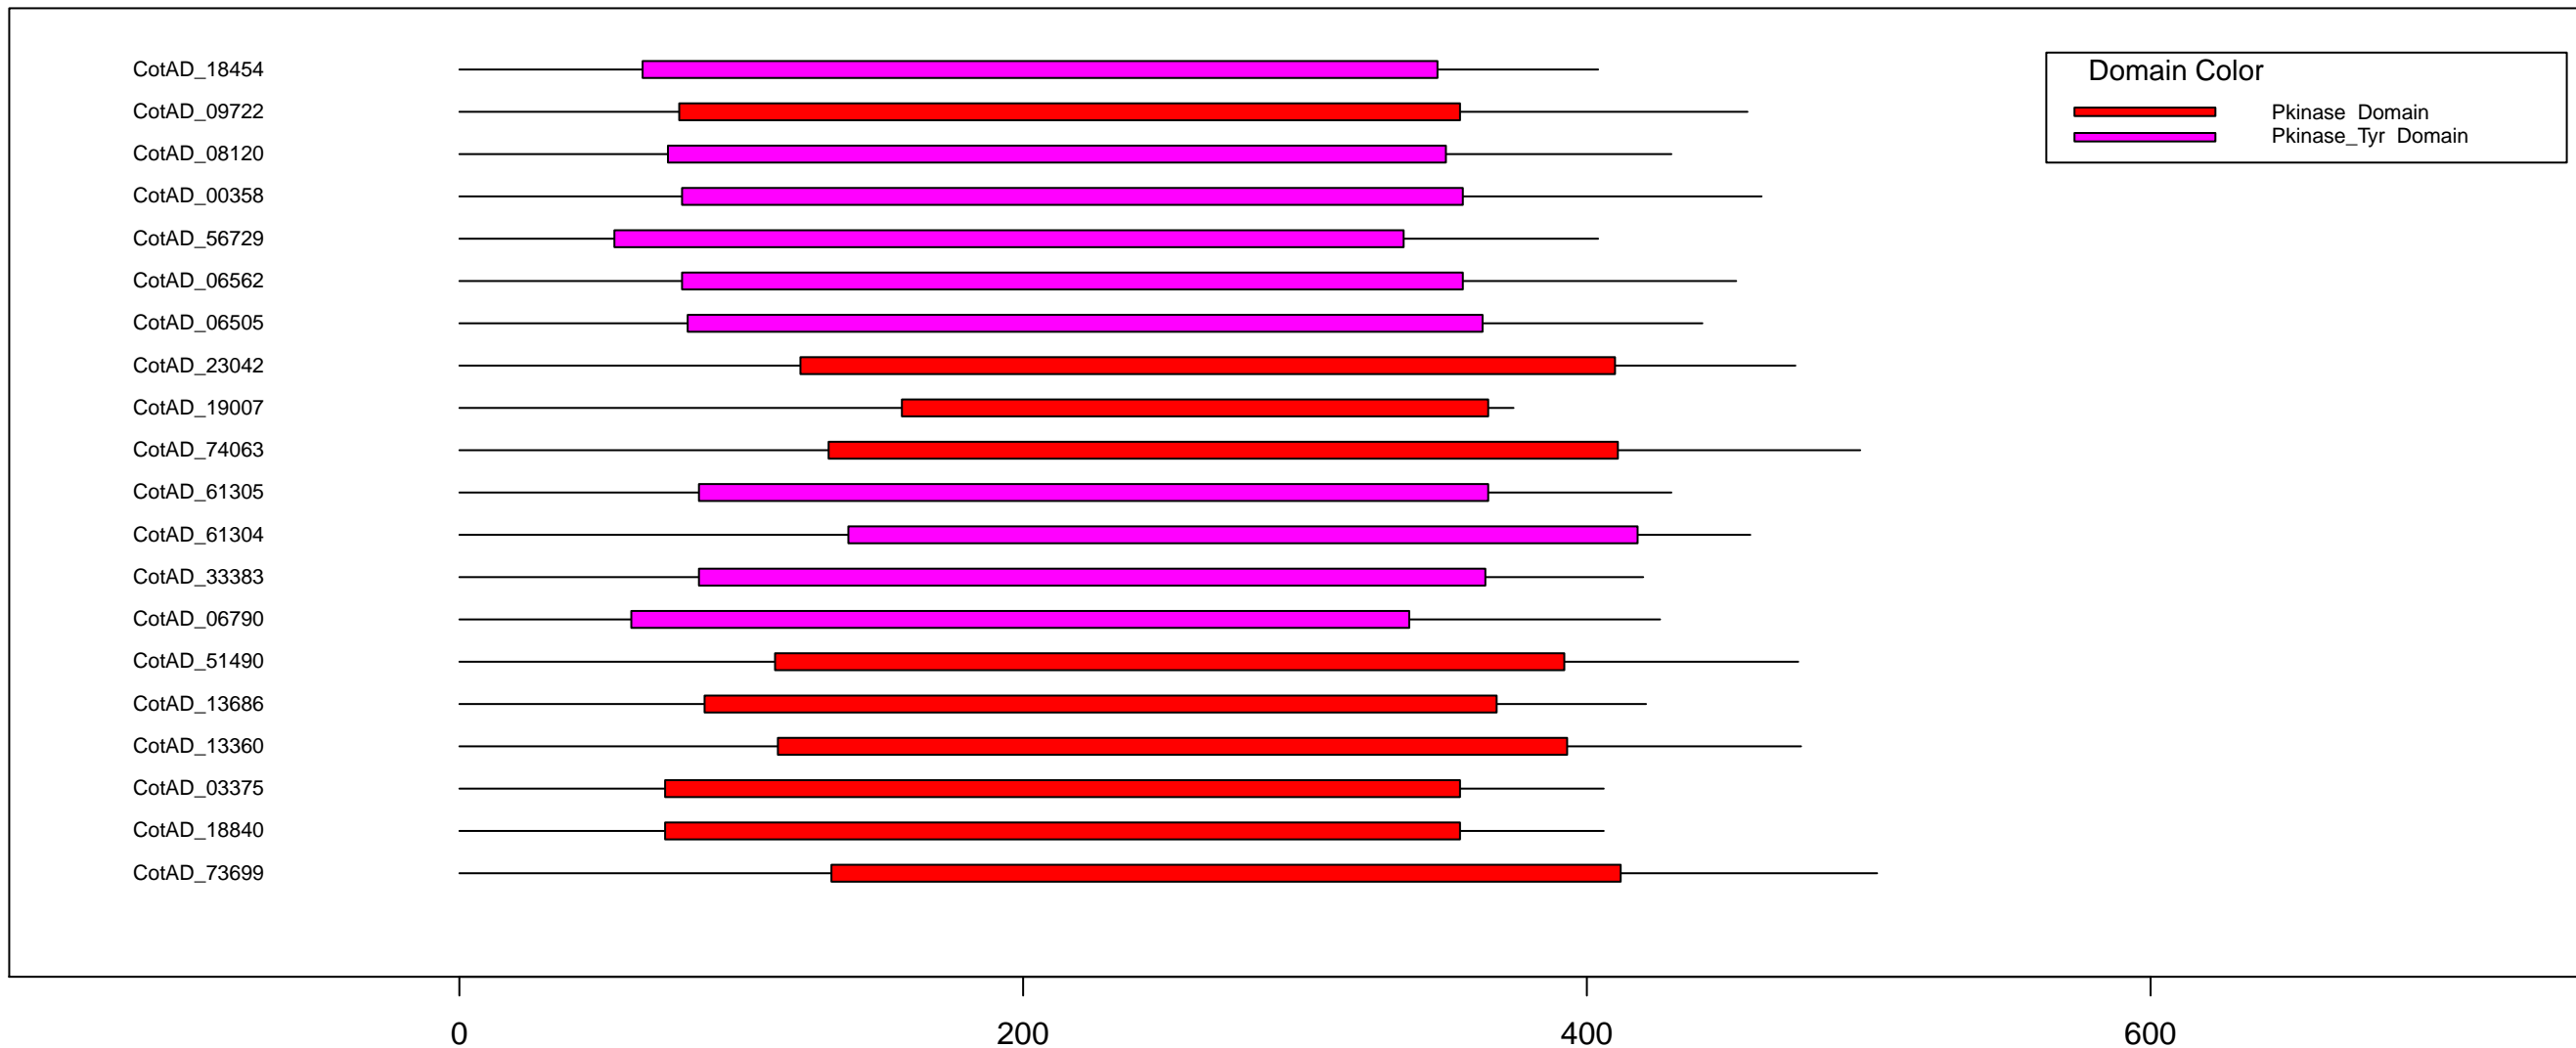

### G.hi RLK-Pelle\_RLCK-VIIa-2 domain diagram (part 3)

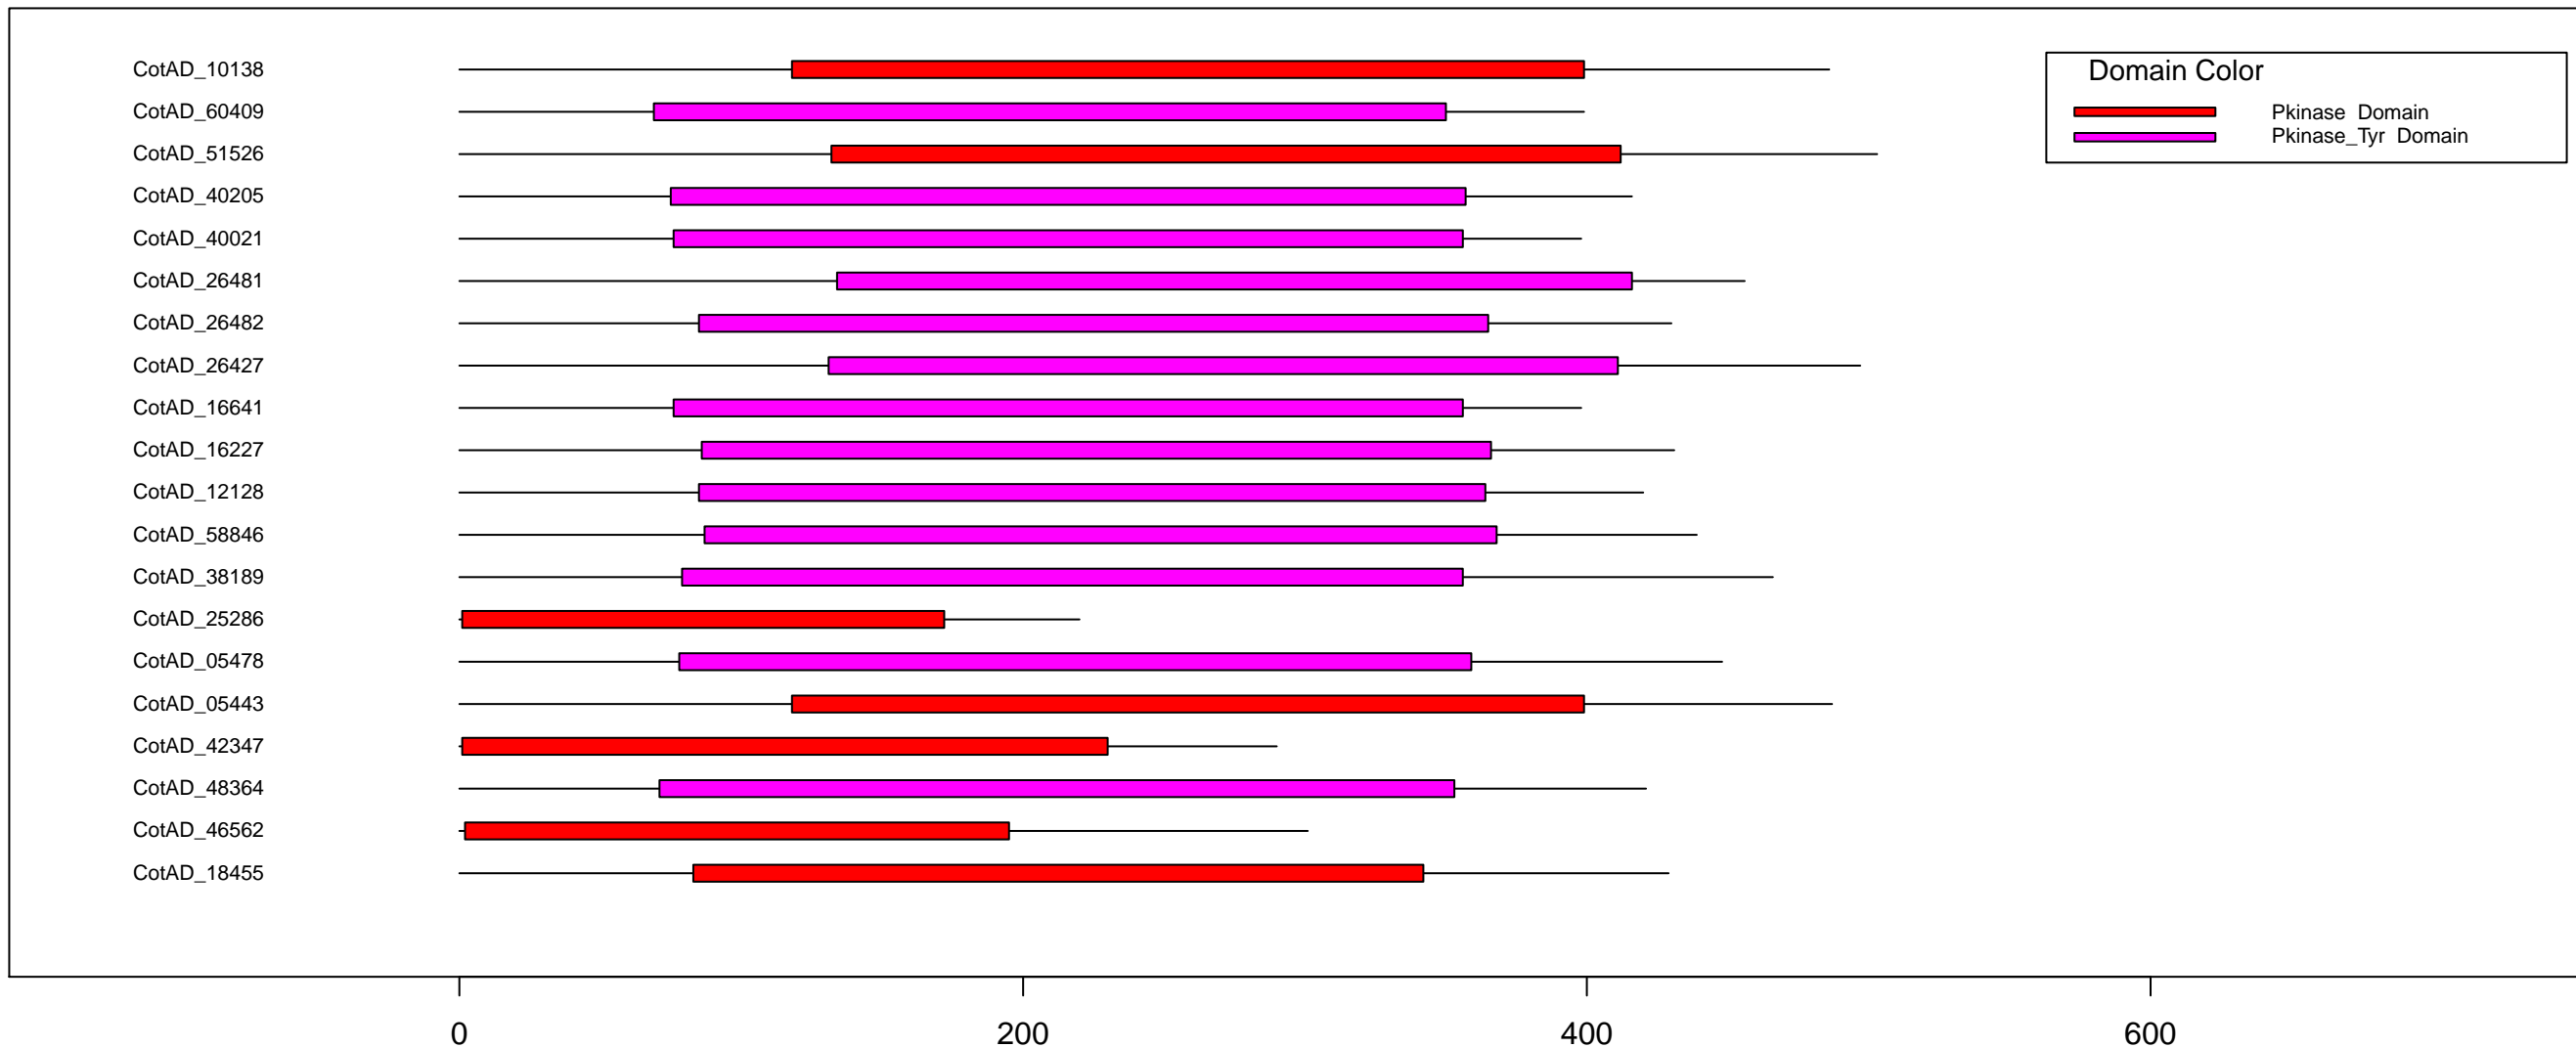



### G.hi RLK-Pelle\_RLCK-VIIa-2 domain diagram (part 4)

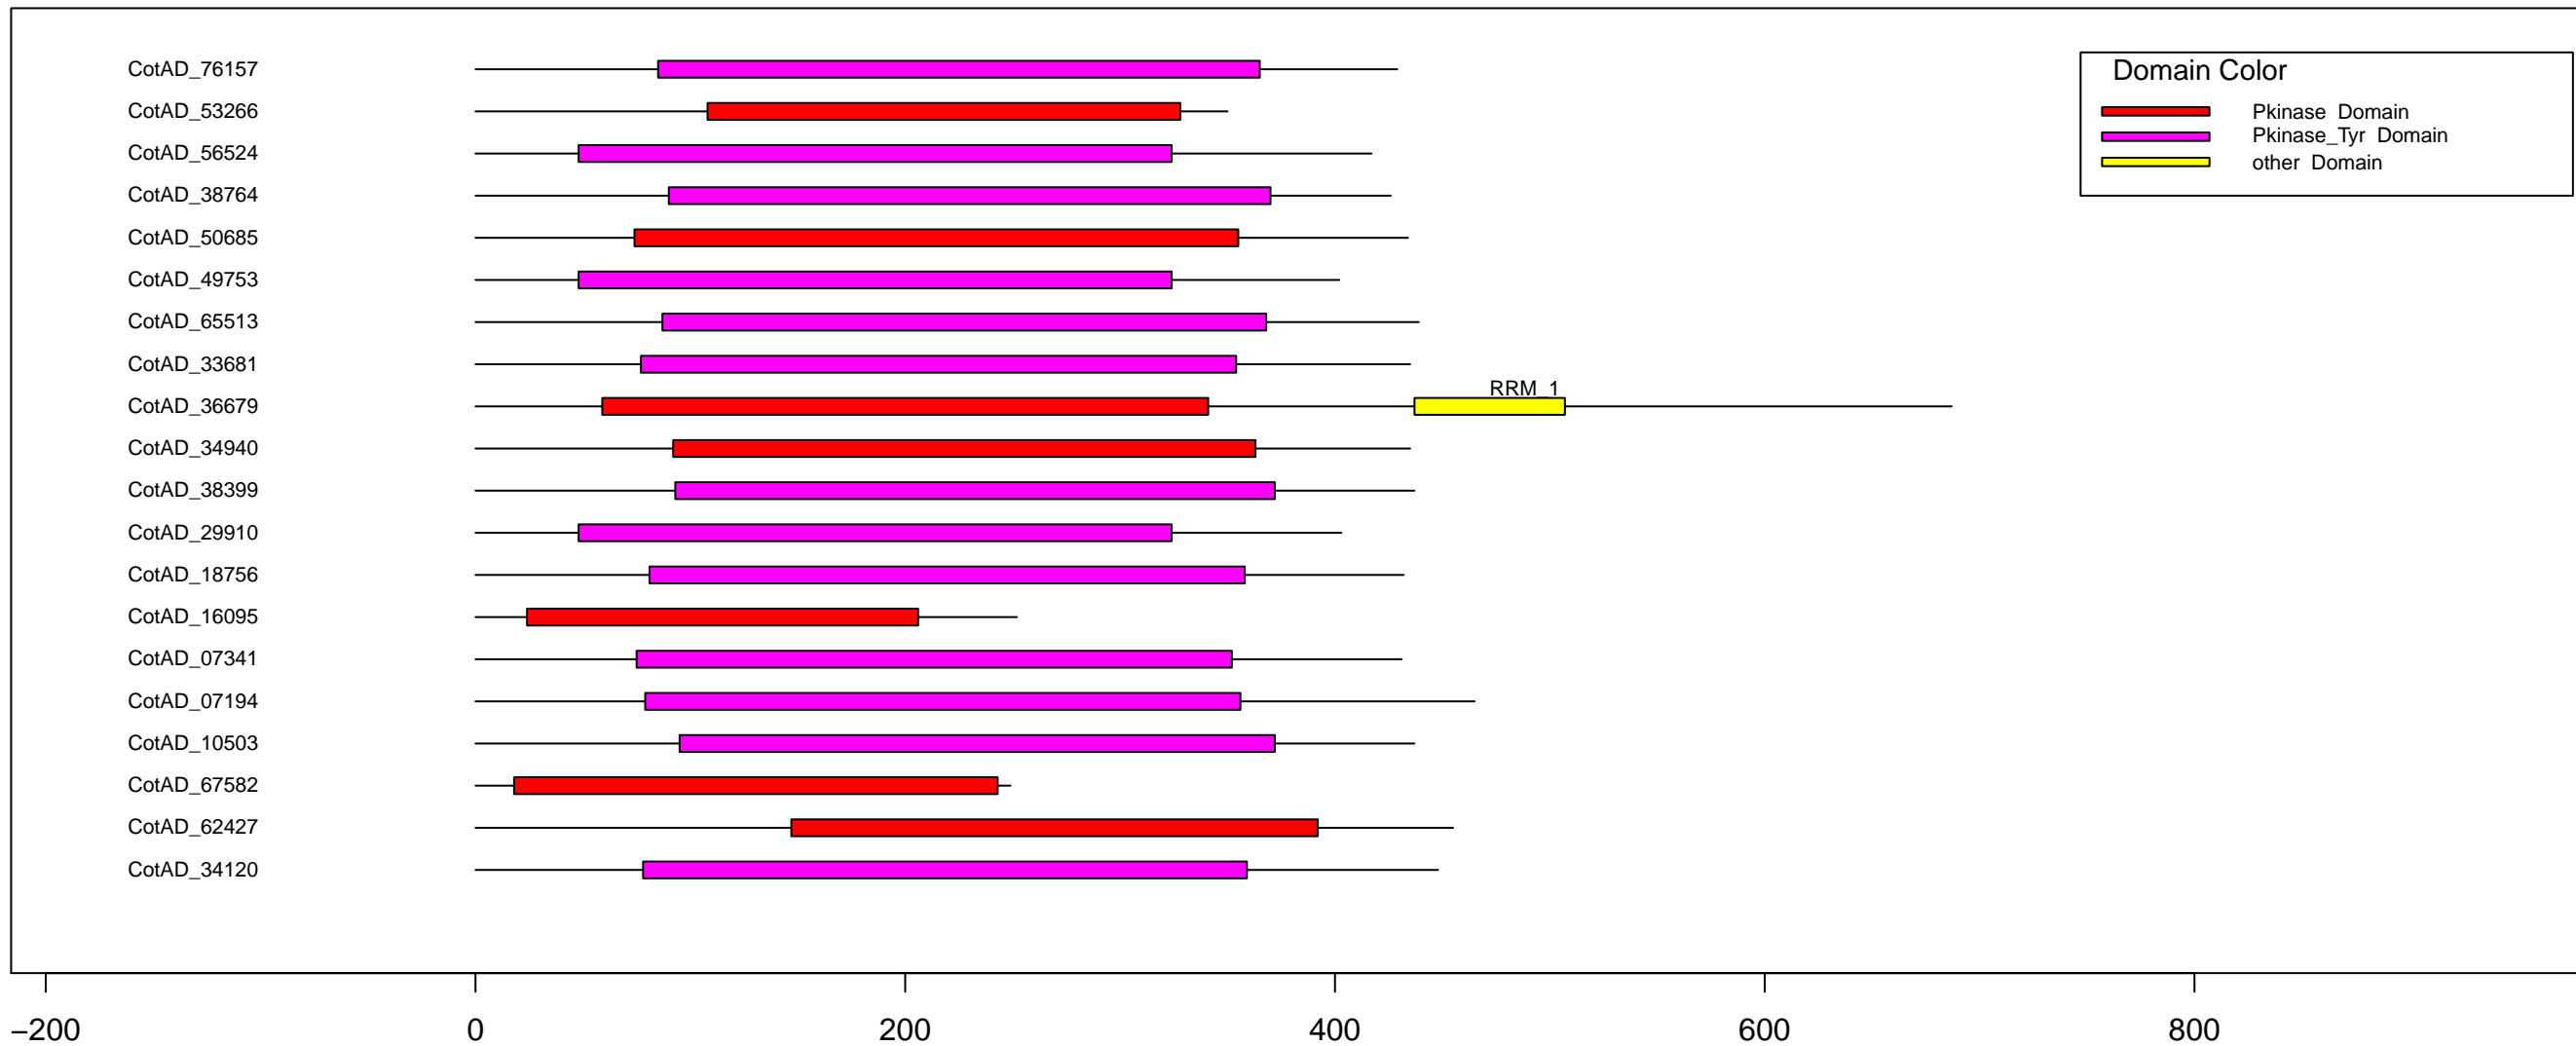

### G.hi RLK-Pelle\_RLCK-VIIa-2 domain diagram (part 5)

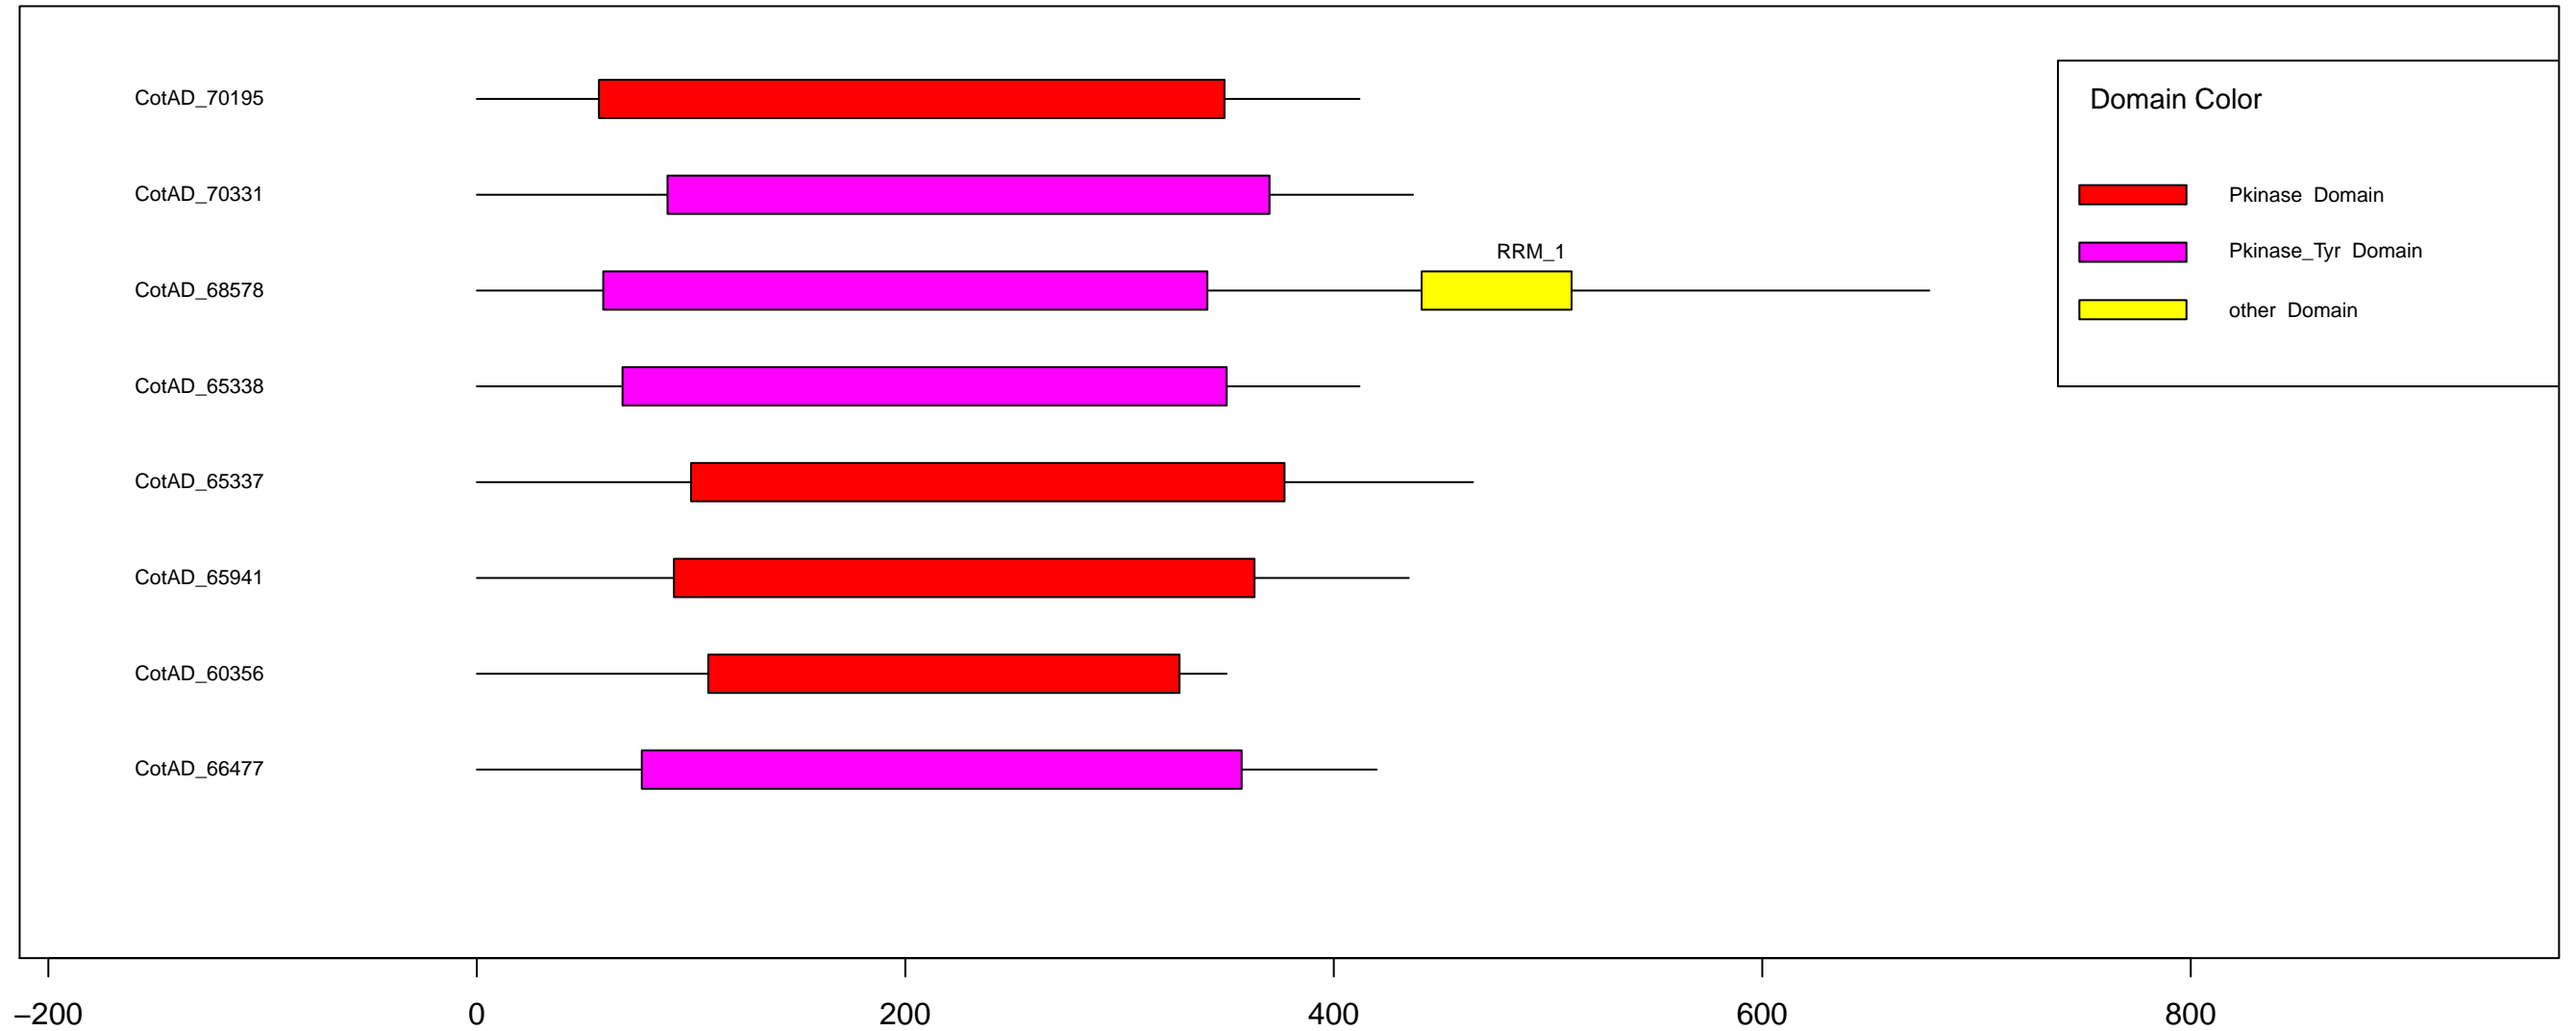

# G.hi RLK-Pelle\_RLCK-VIIb domain diagram (all)

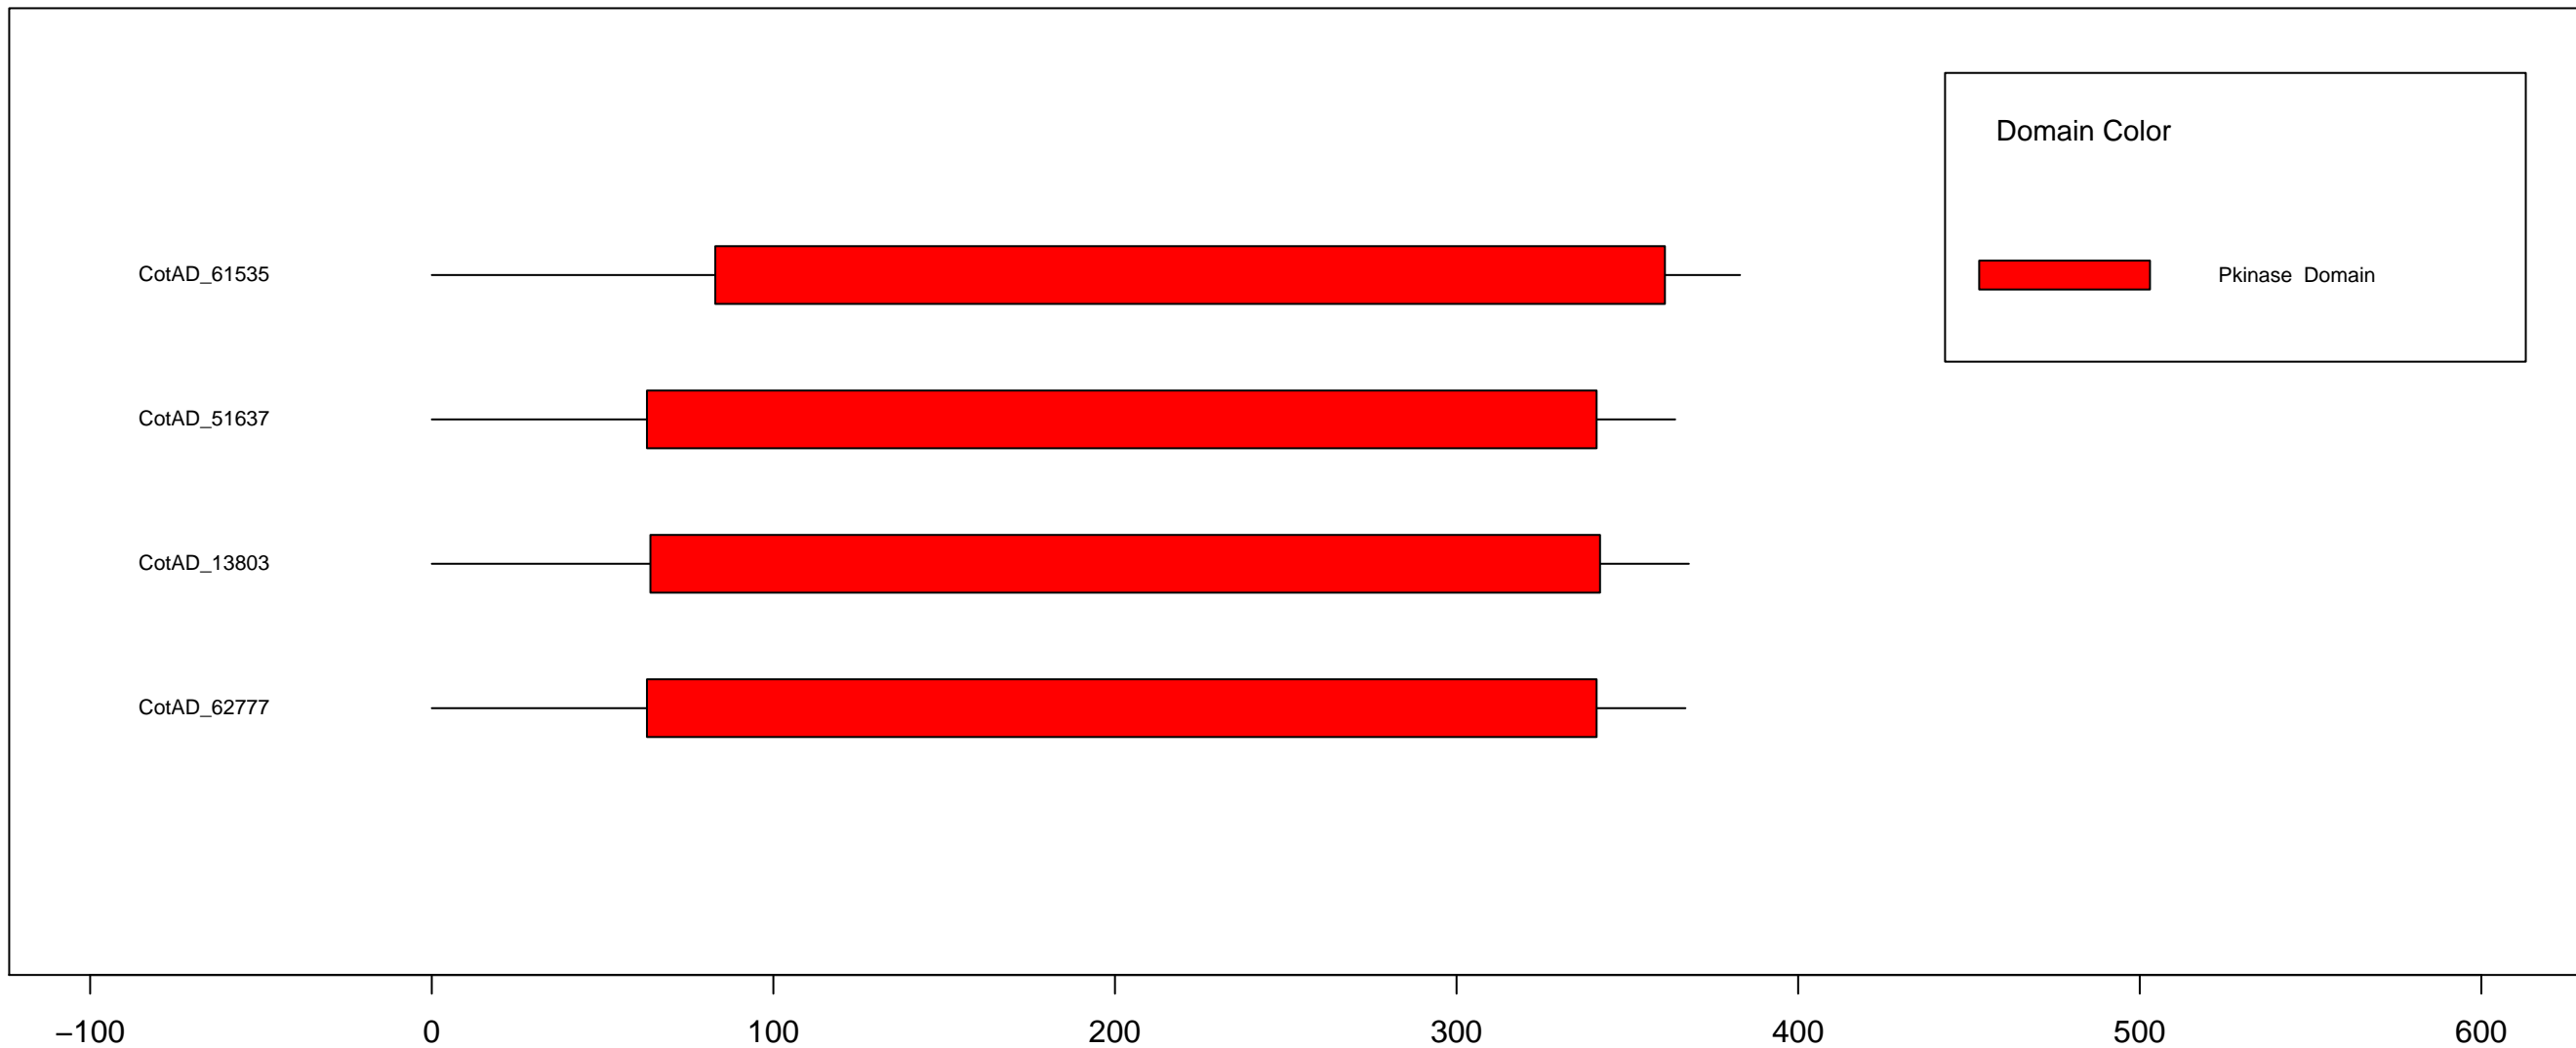

# G.hi RLK-Pelle\_RLCK-VIII domain diagram (all)

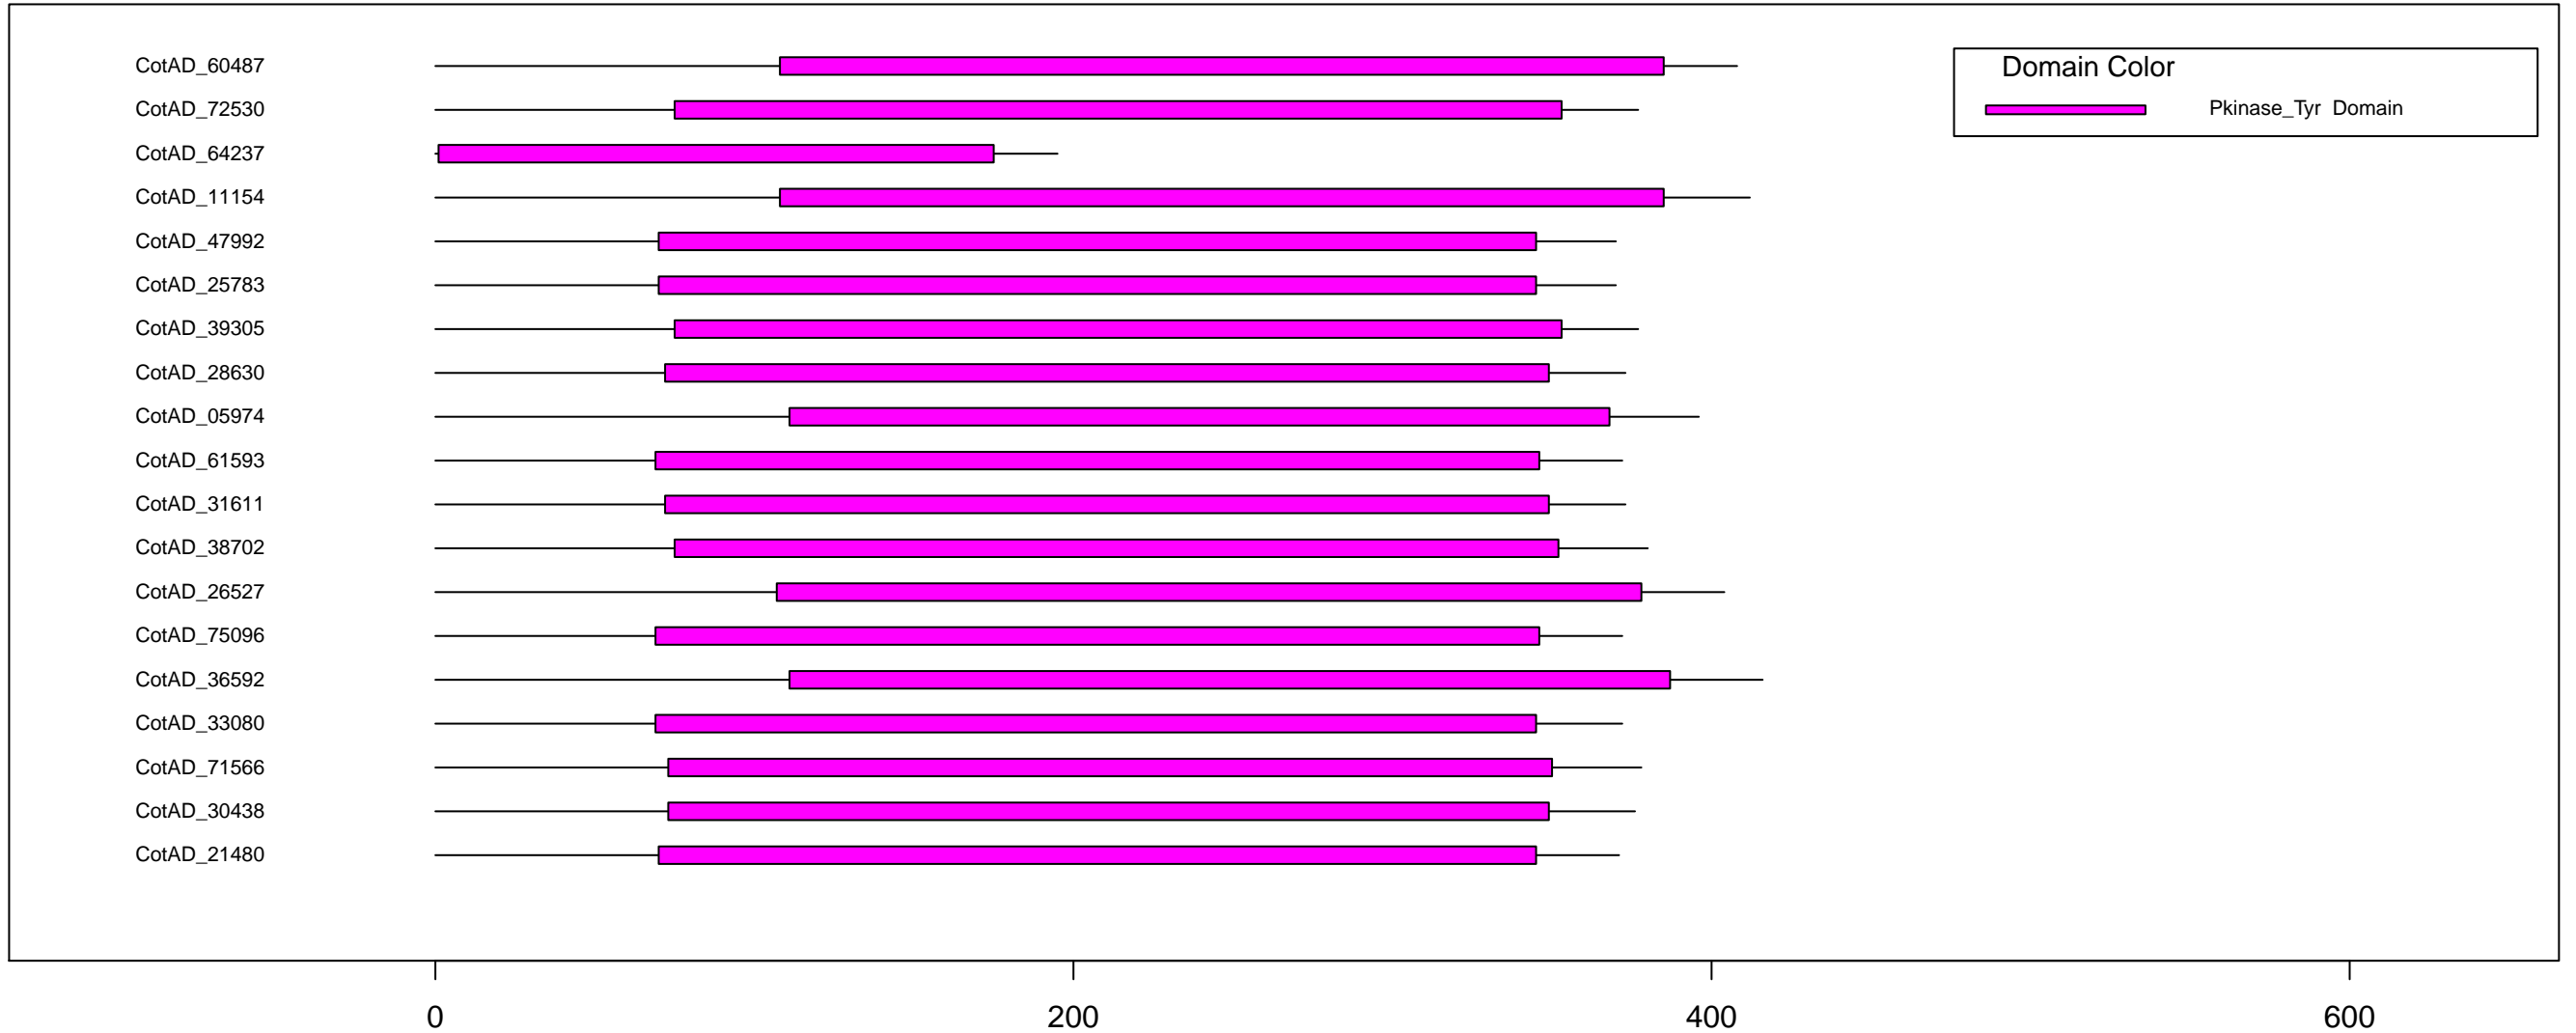

# G.hi RLK-Pelle\_RLCK-VI domain diagram (part 1)

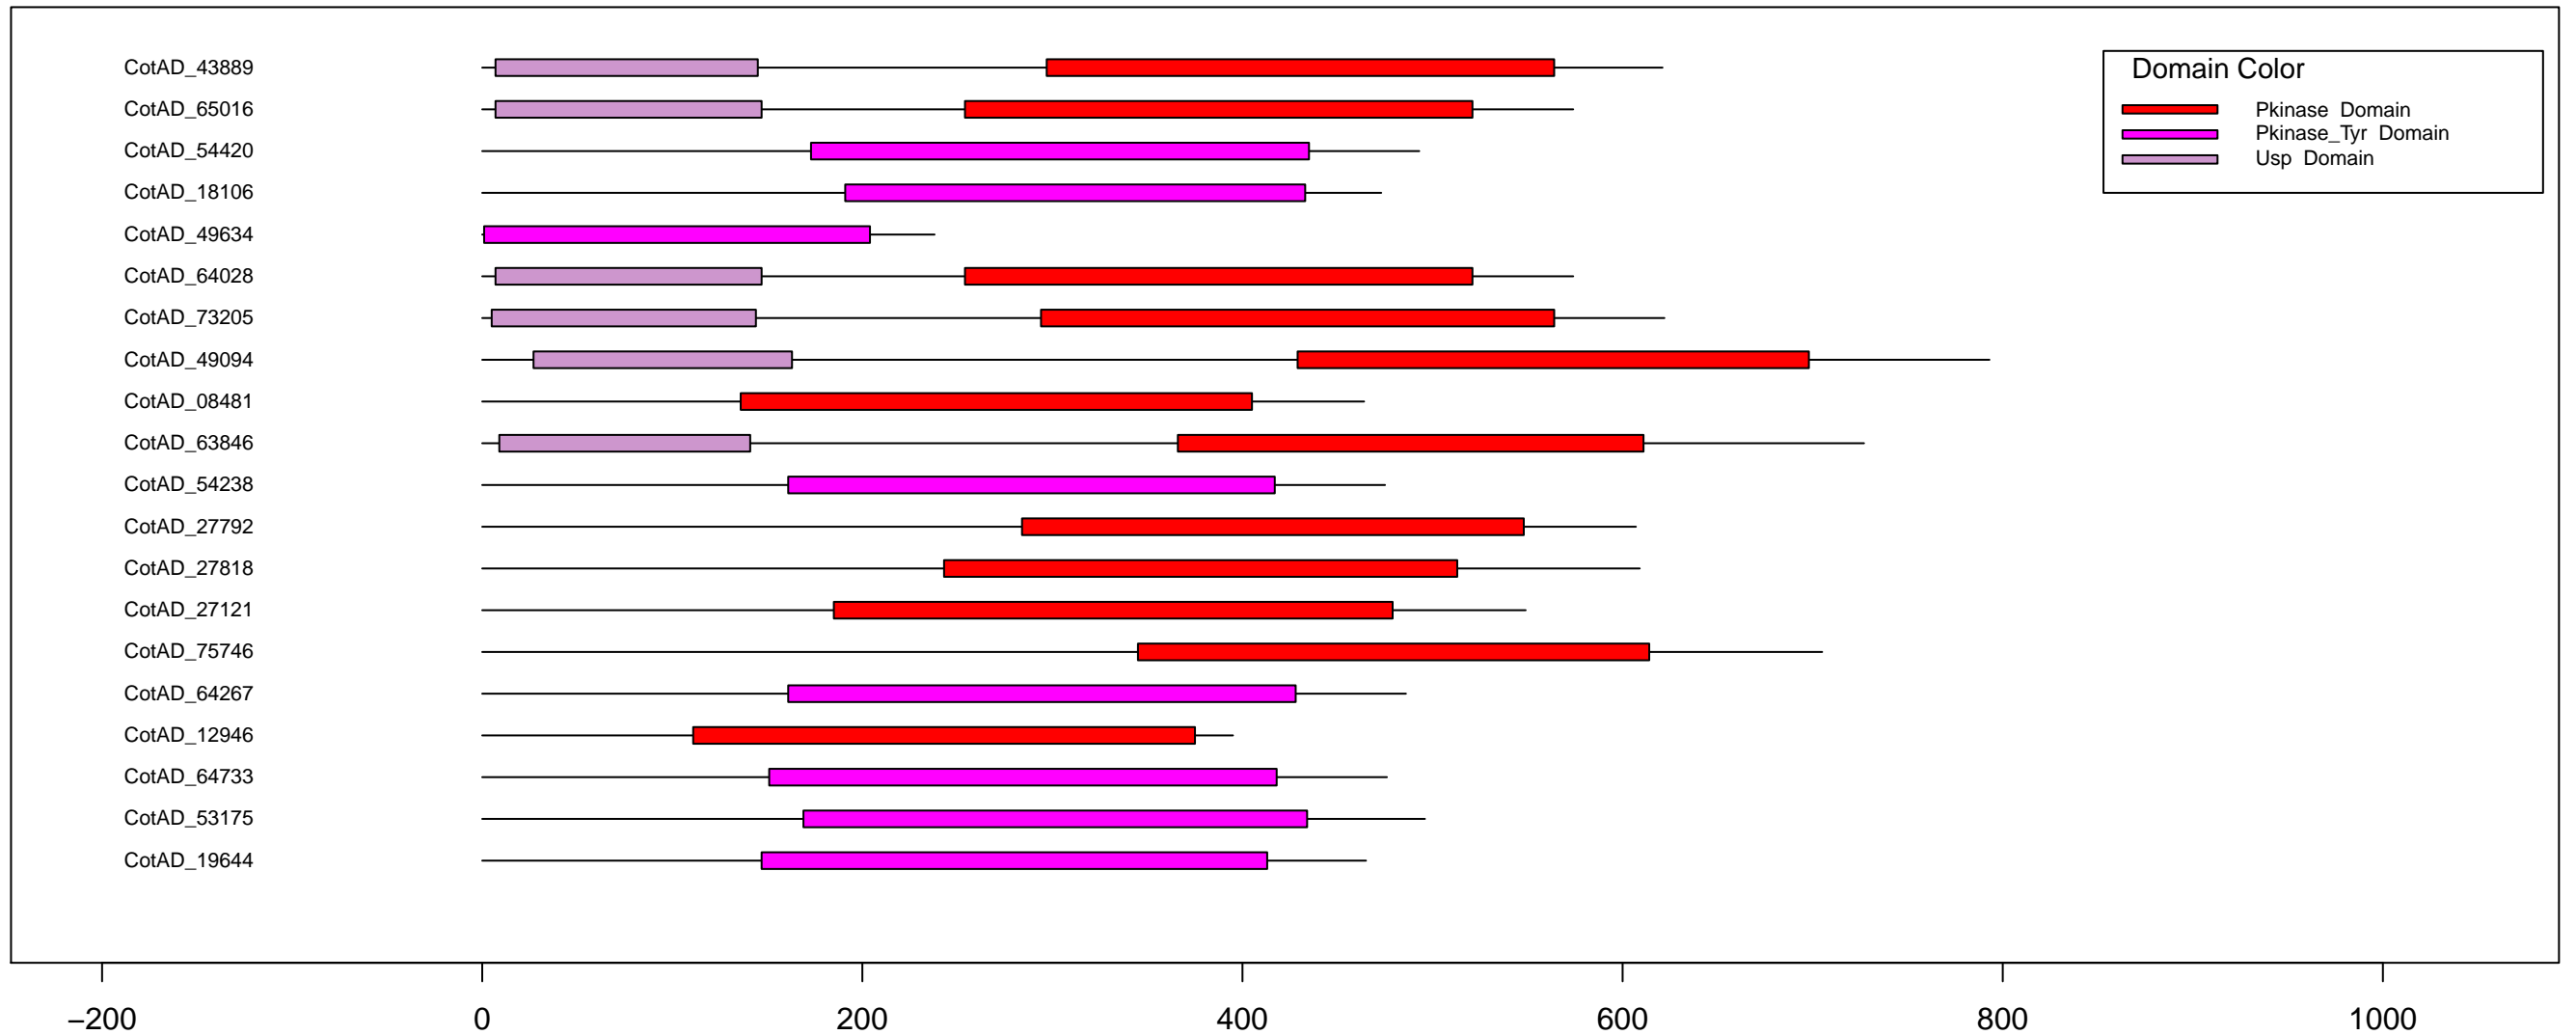

### G.hi RLK-Pelle\_RLCK-VI domain diagram (part 2)

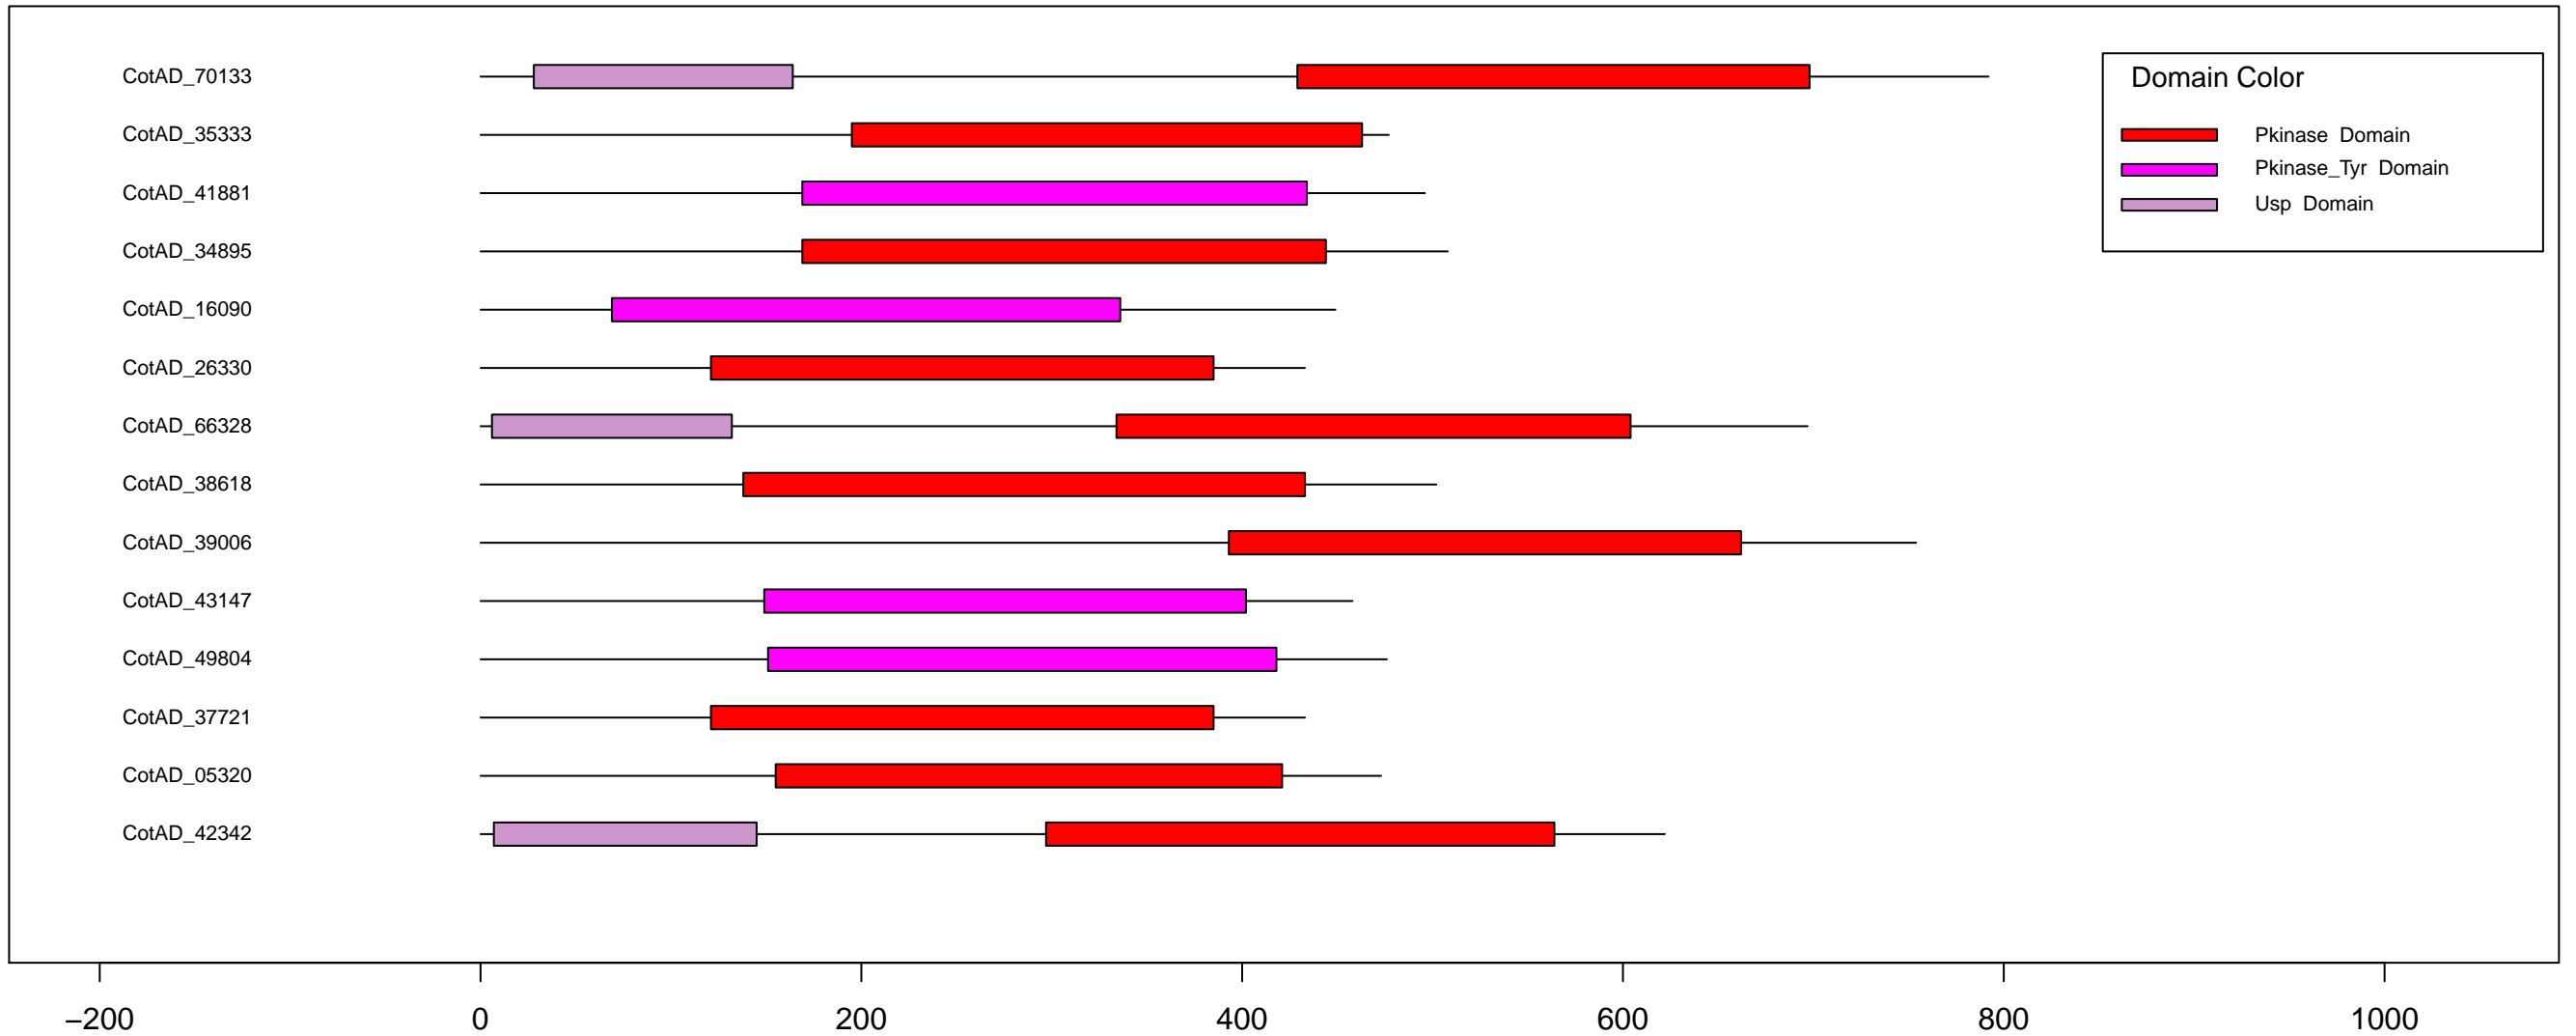

### G.hi RLK-Pelle\_RLCK-V domain diagram (part 1)

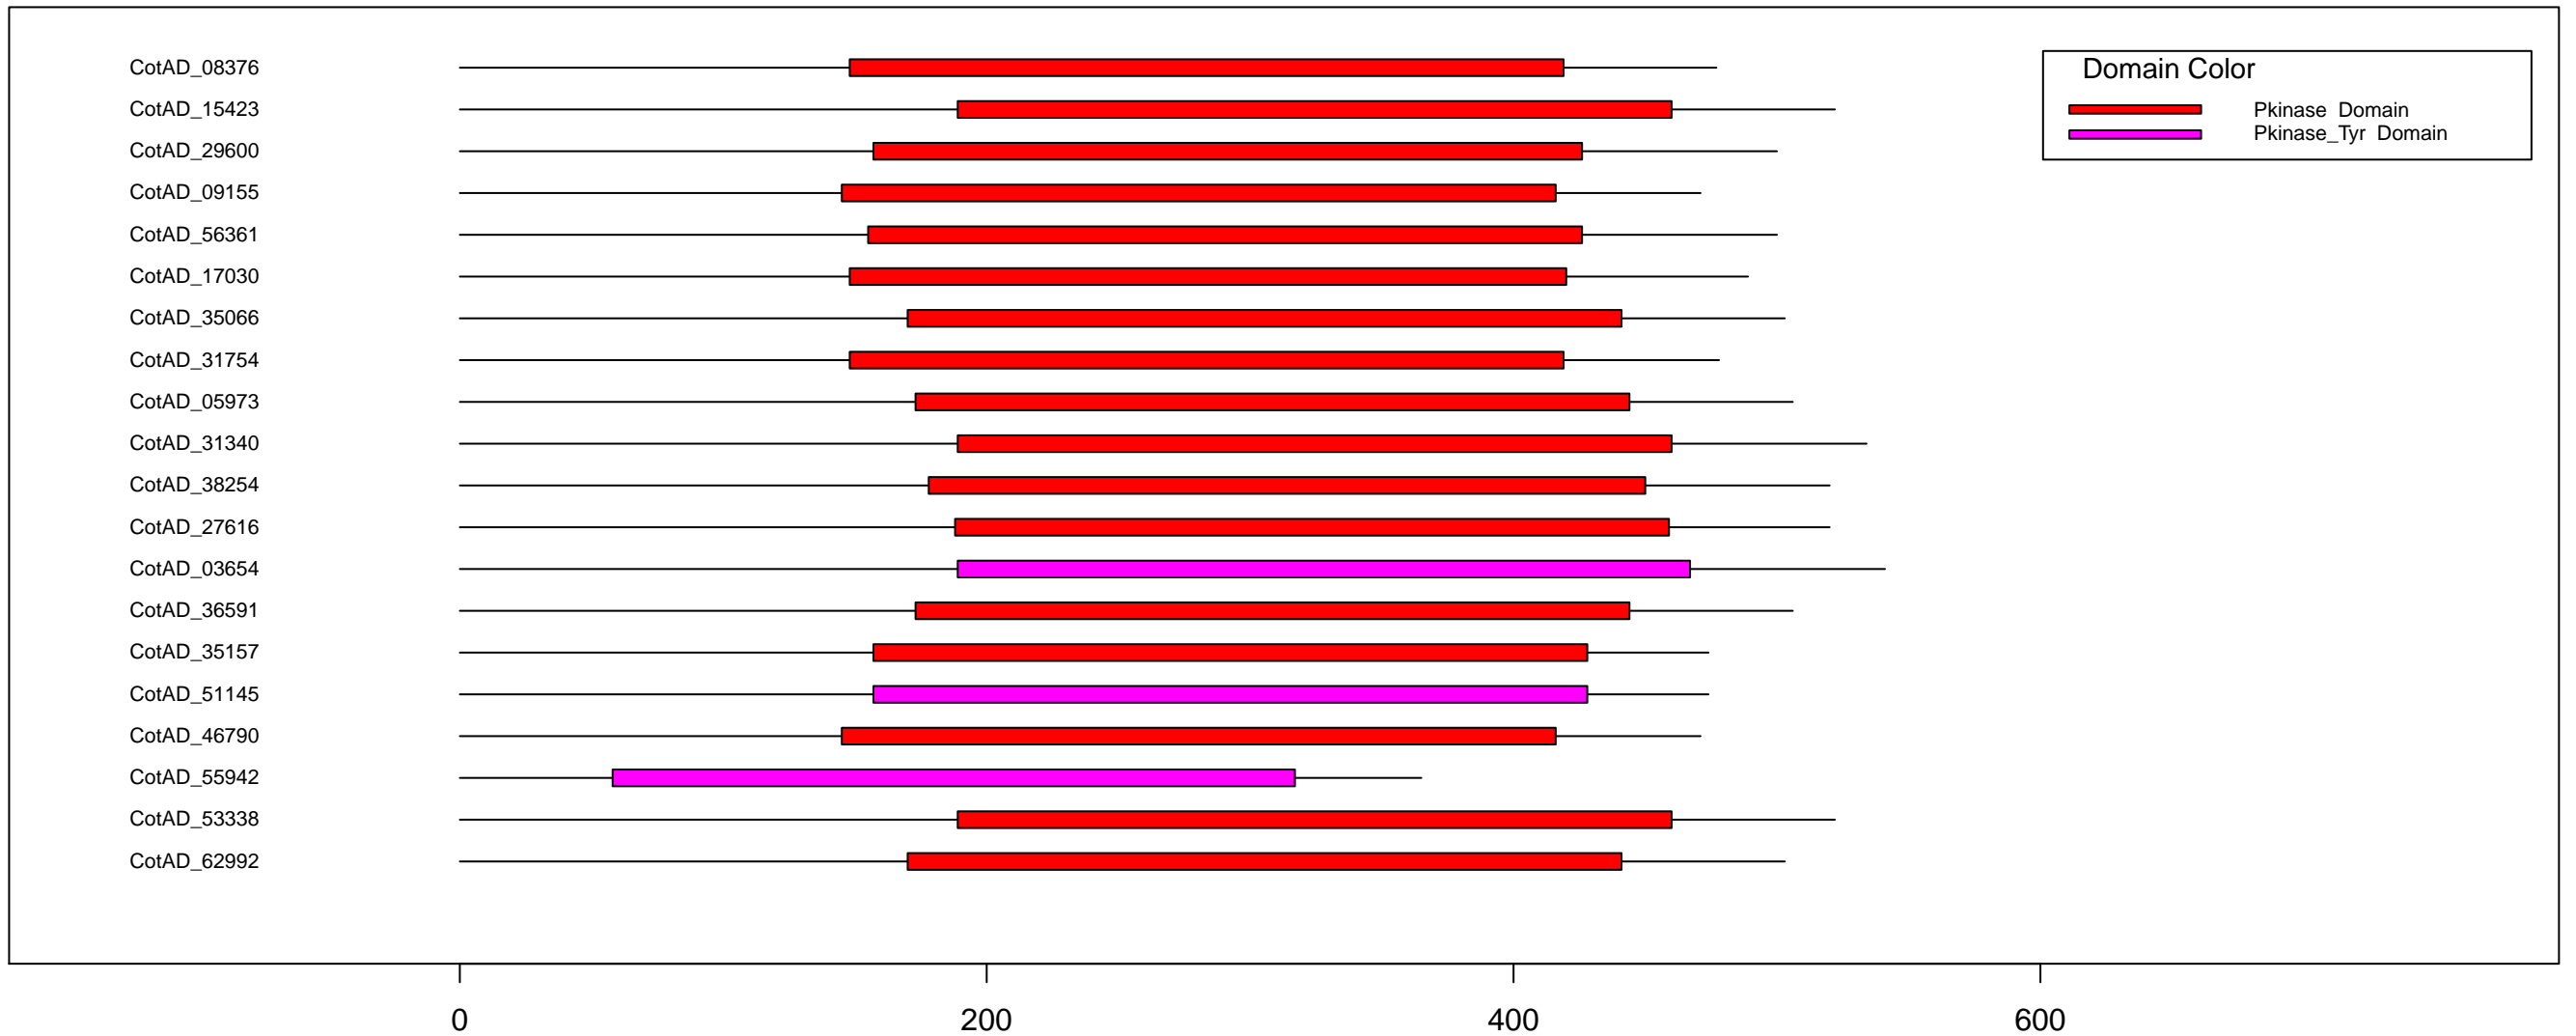

# G.hi RLK-Pelle\_RLCK-V domain diagram (part 2)

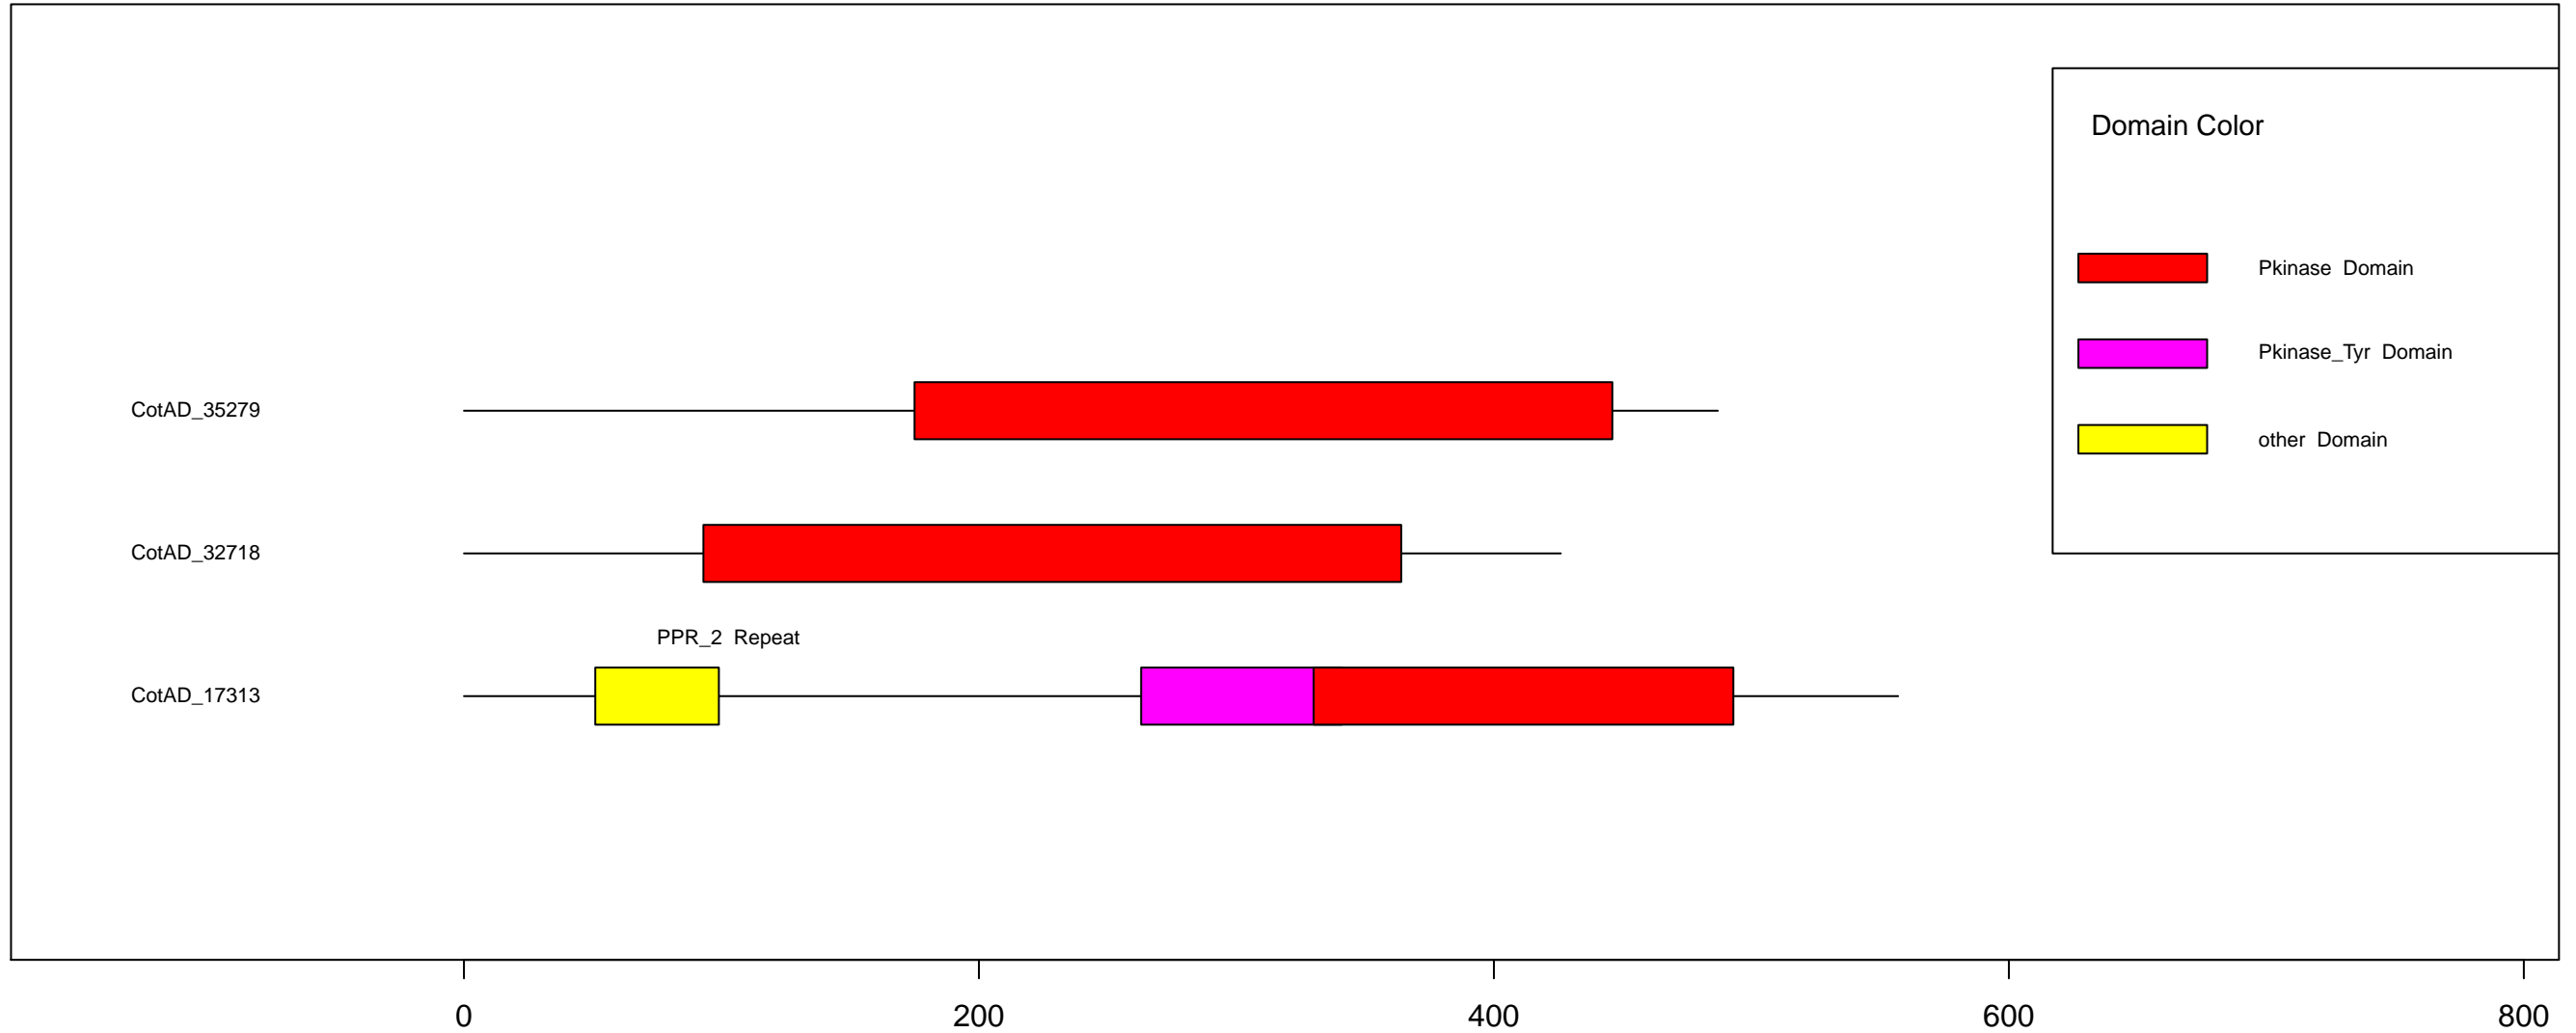



# G.hi RLK-Pelle\_RLCK-XII-1 domain diagram (part 1)

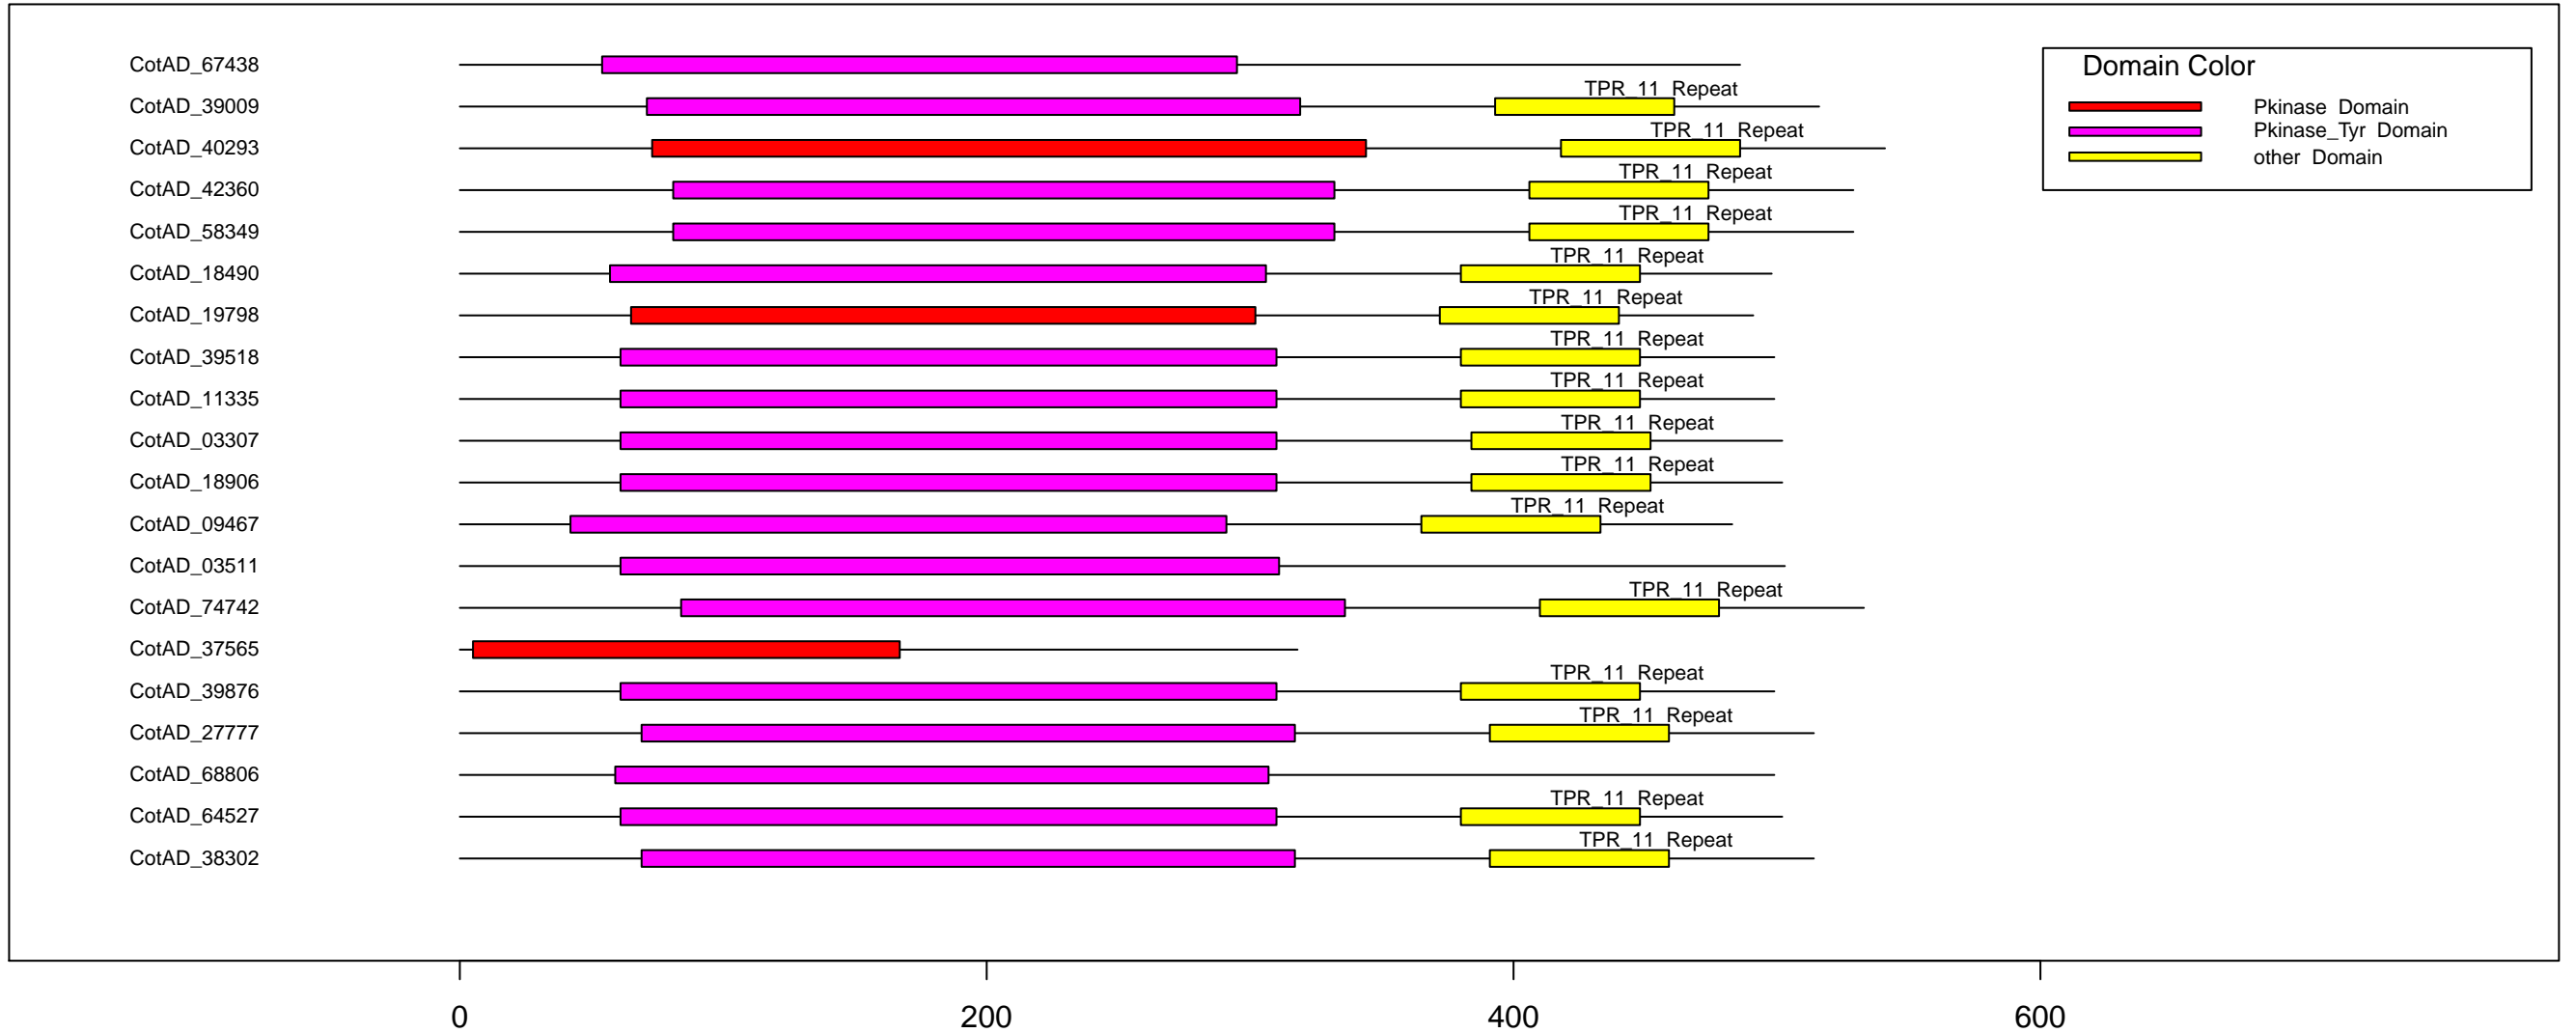

# G.hi RLK-Pelle\_RLCK-XII-1 domain diagram (part 2)

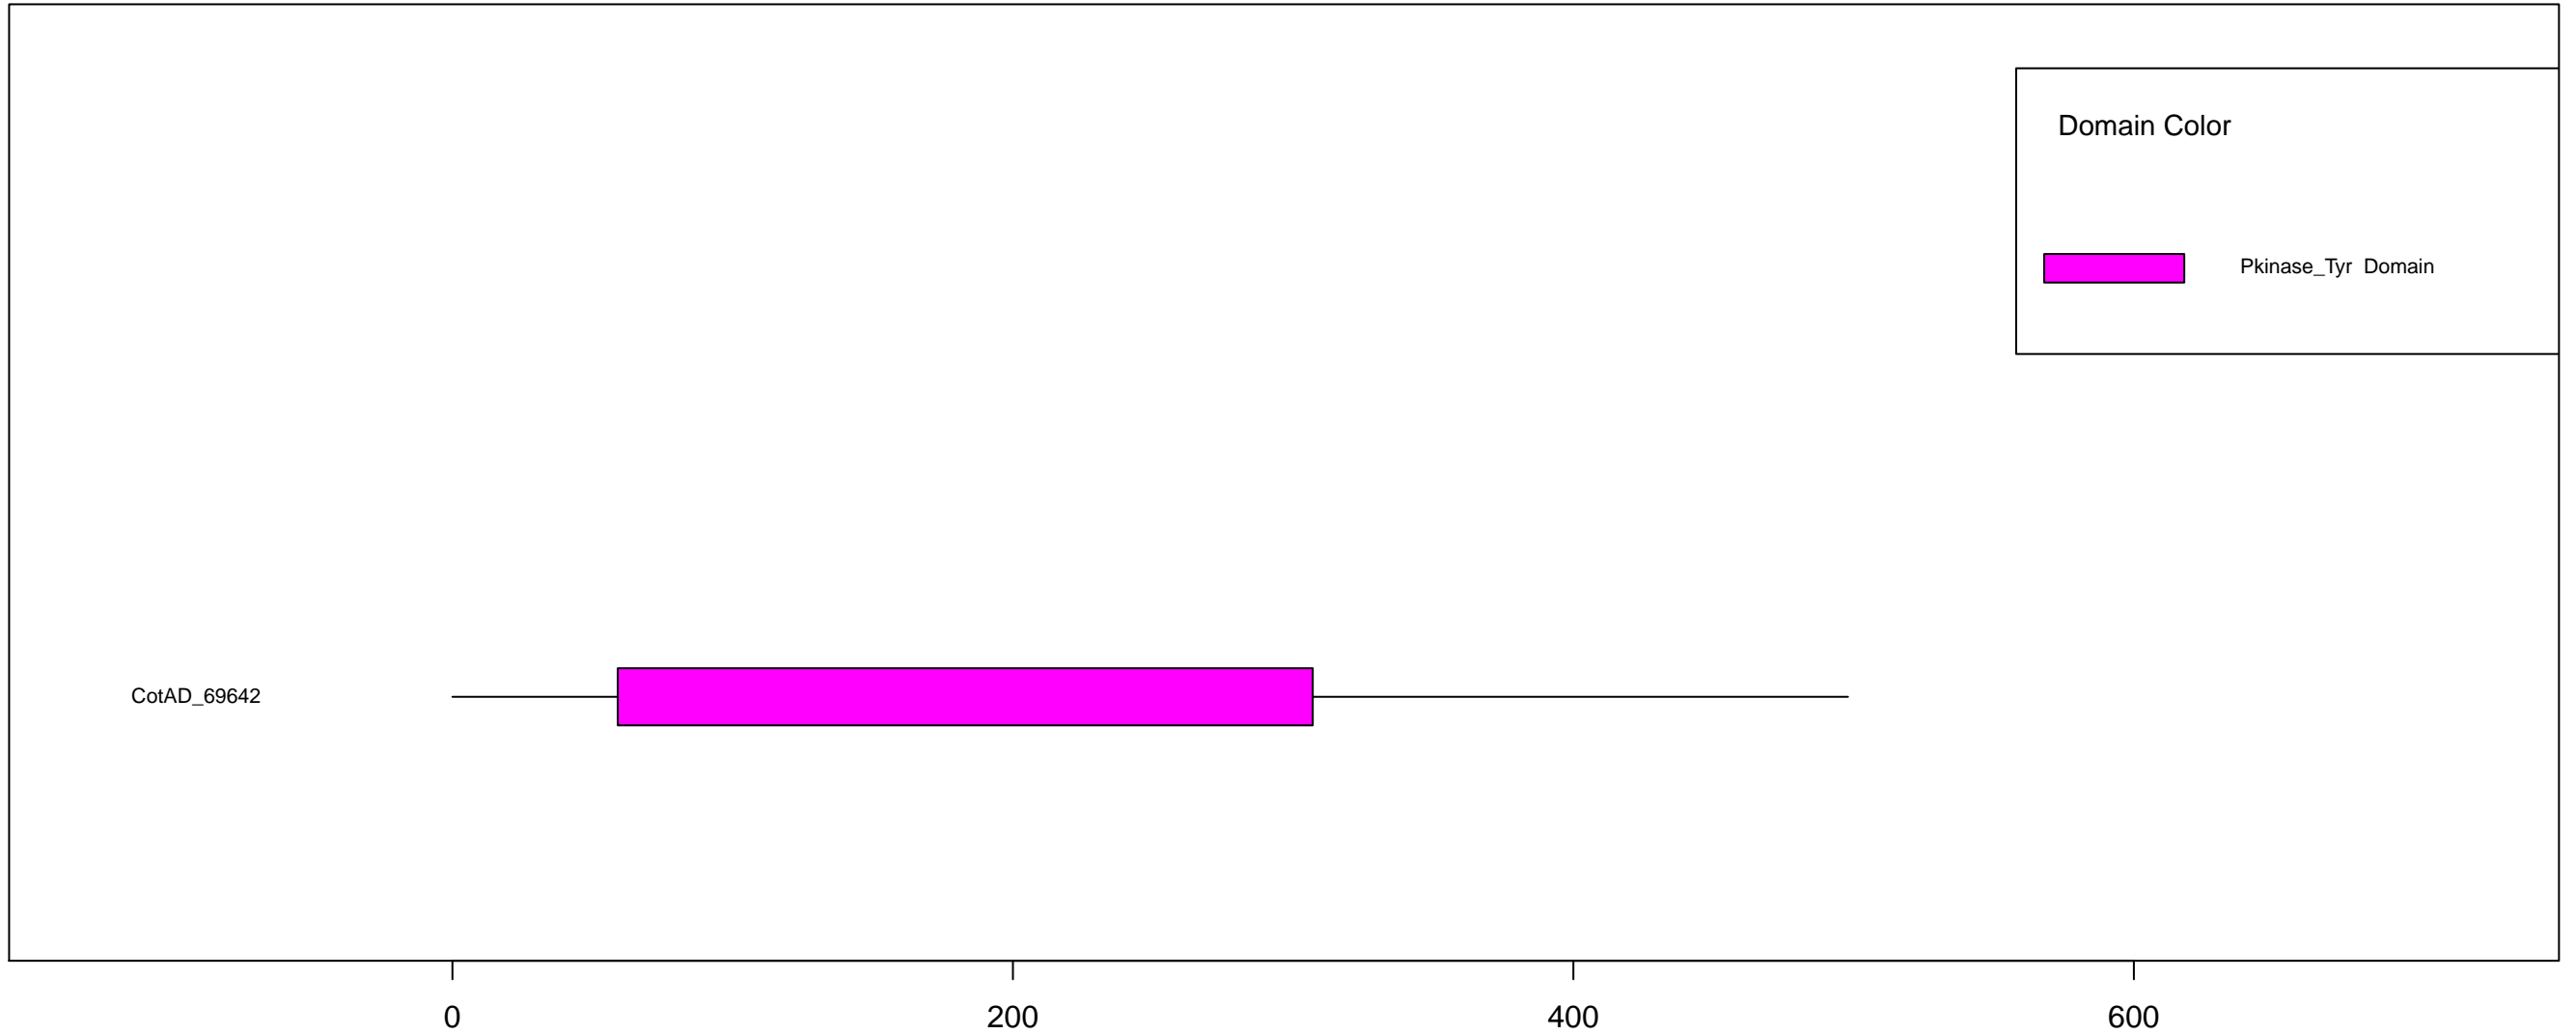

# G.hi RLK-Pelle\_RLCK-XII-2 domain diagram (all)

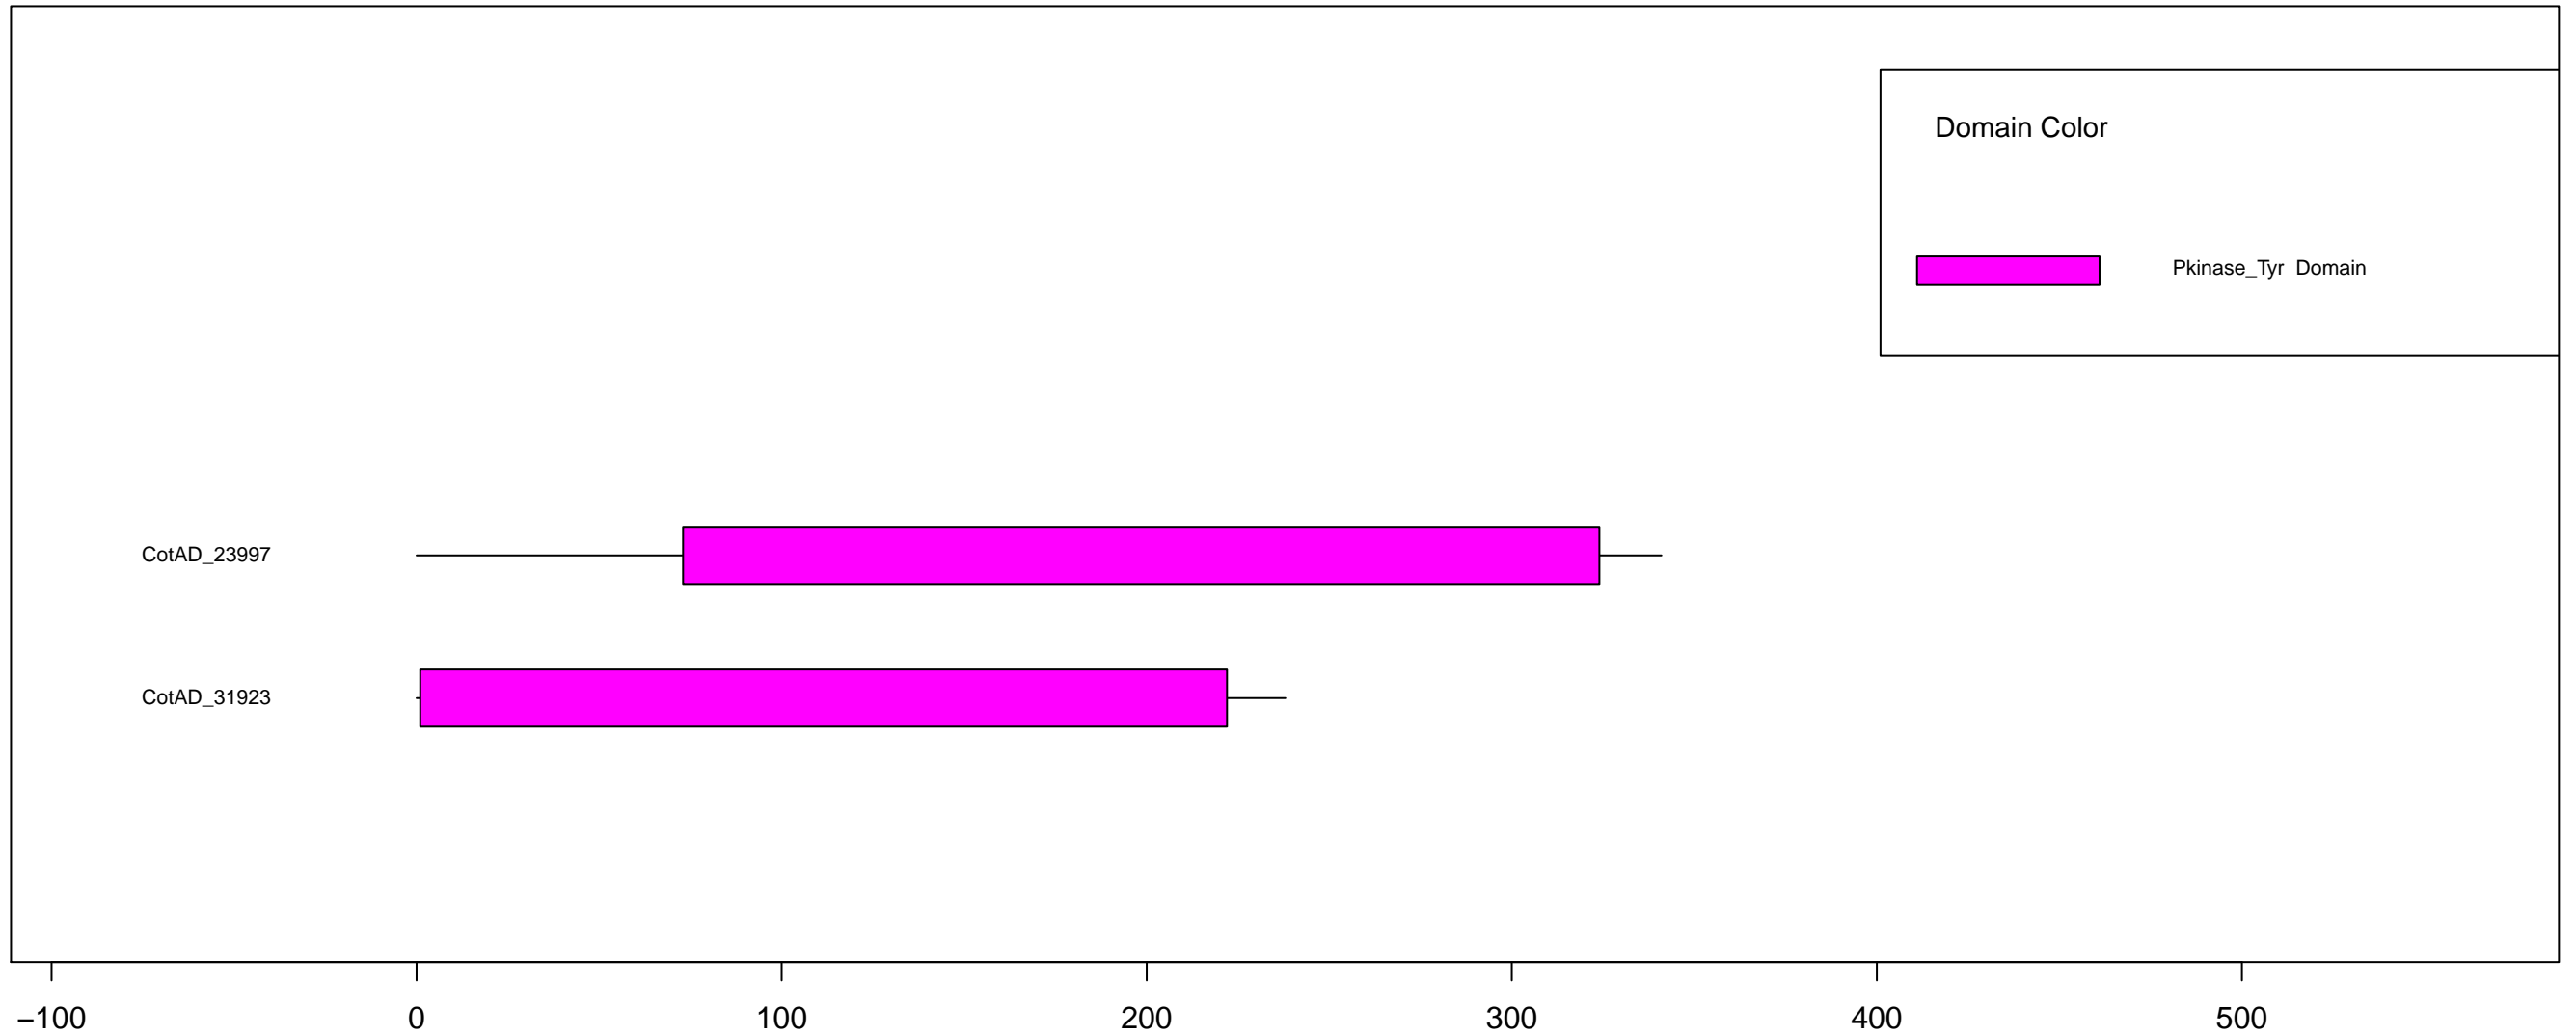

# G.hi RLK-Pelle\_RLCK-XIII domain diagram (all)

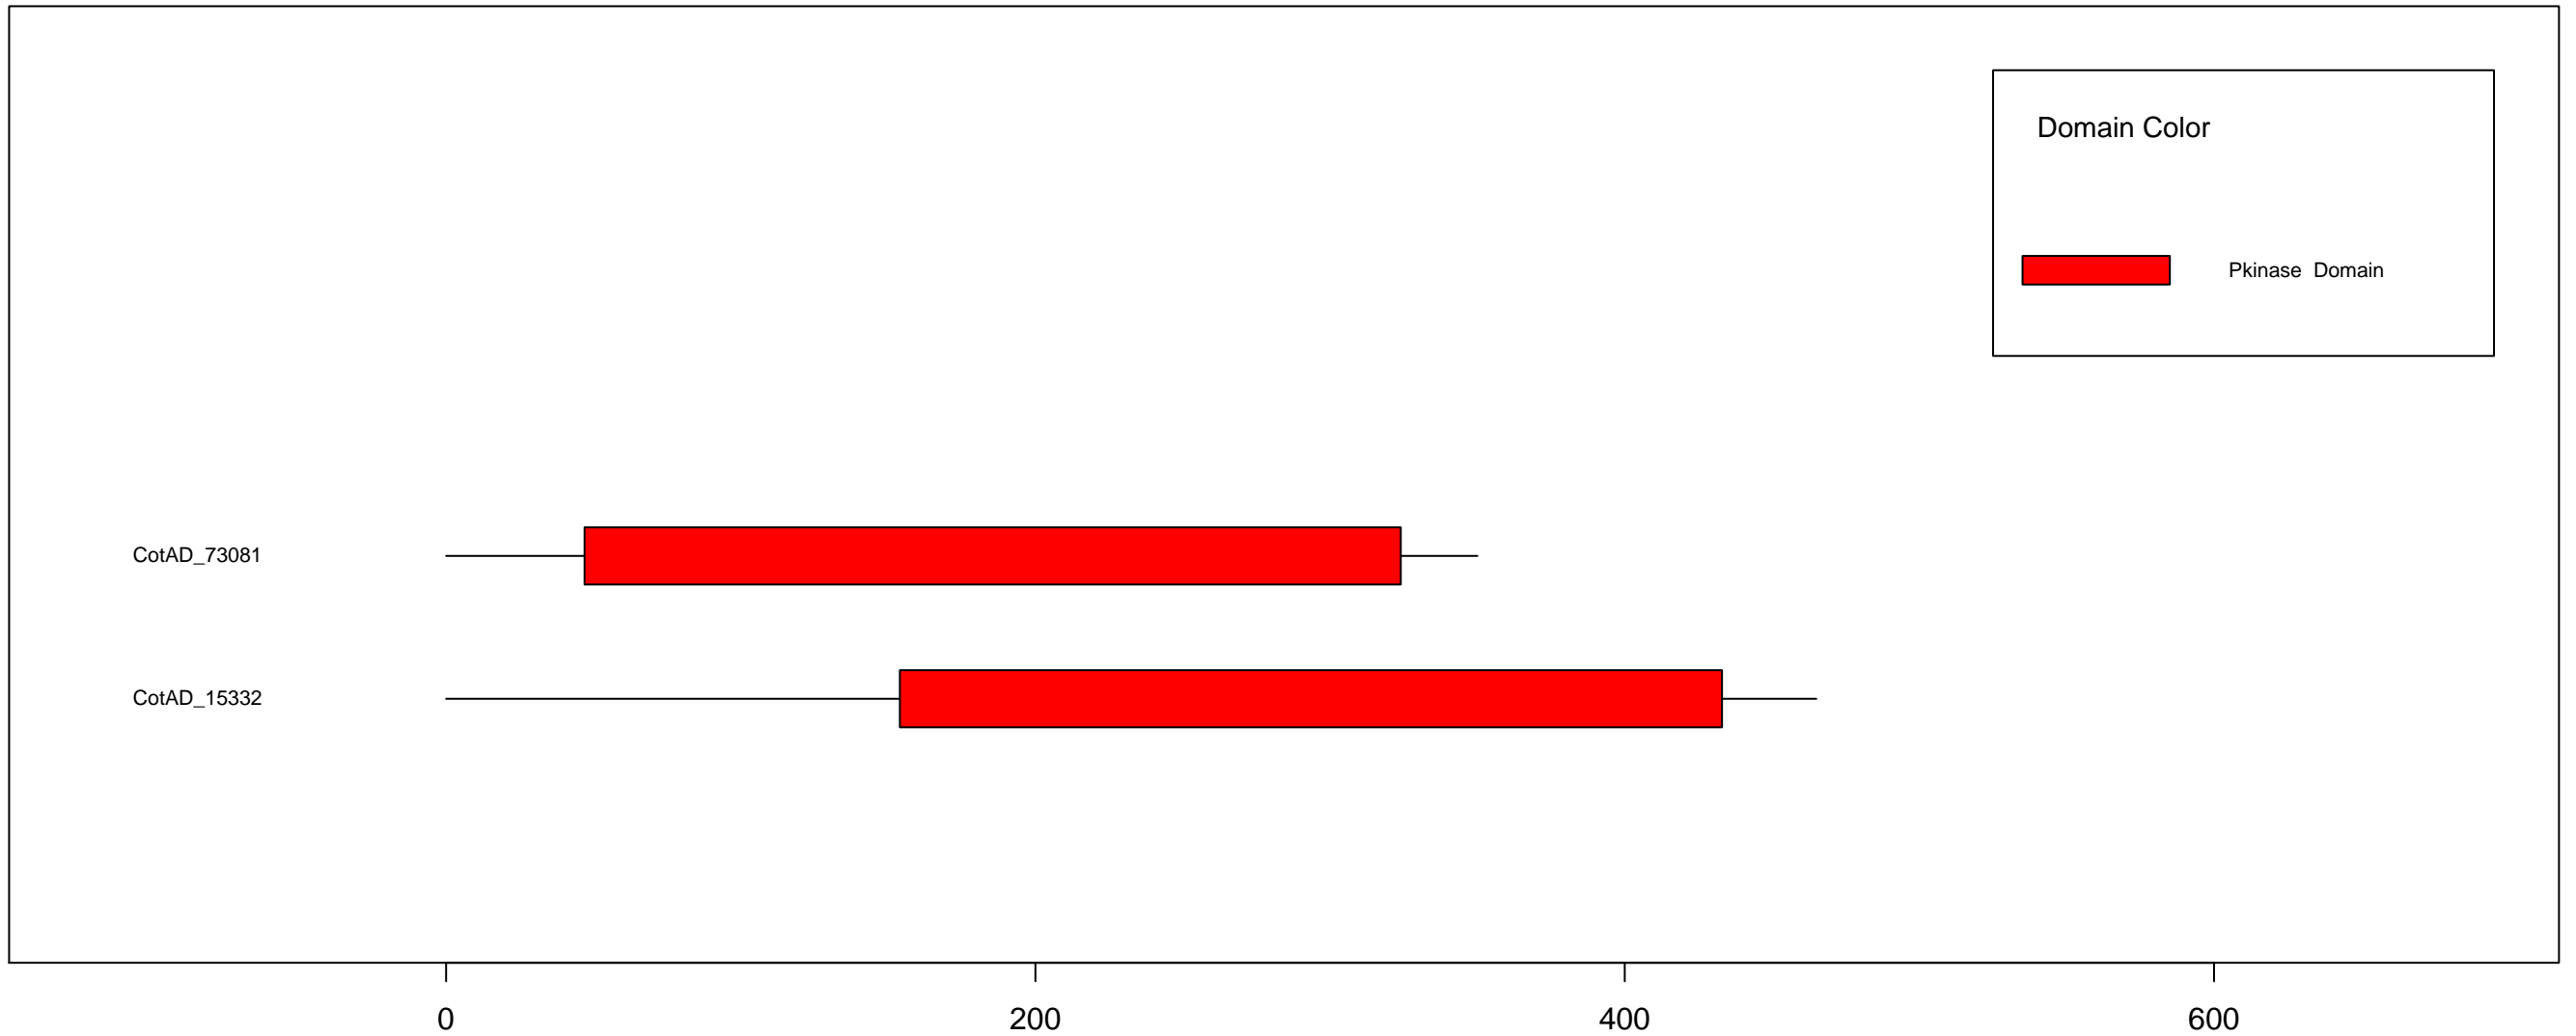

### G.hi RLK-Pelle\_RLCK-XI domain diagram (all)

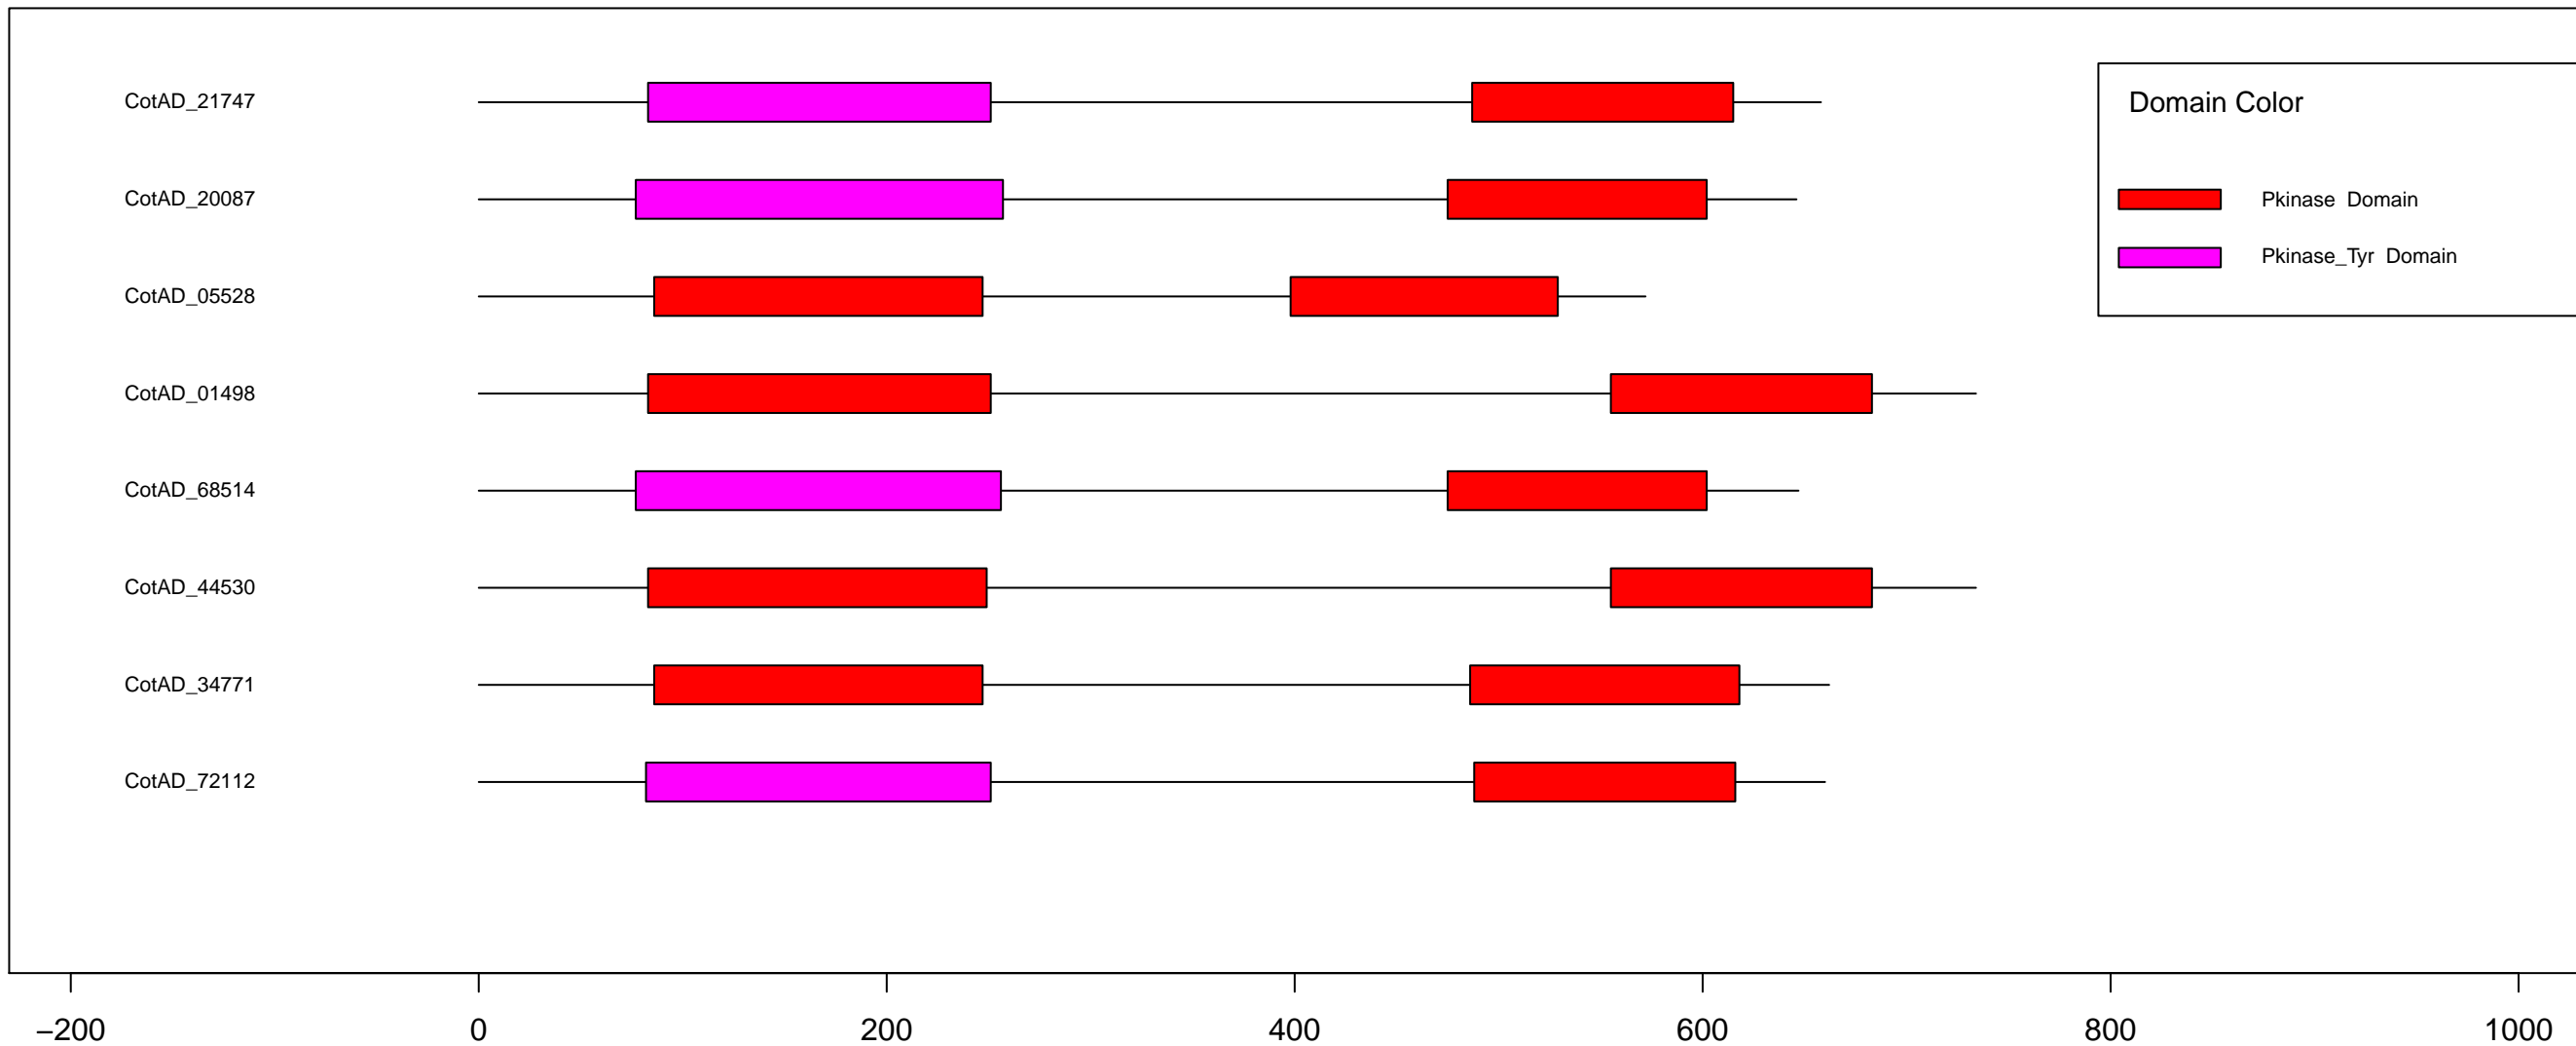

# G.hi RLK-Pelle\_RLCK-X domain diagram (all)

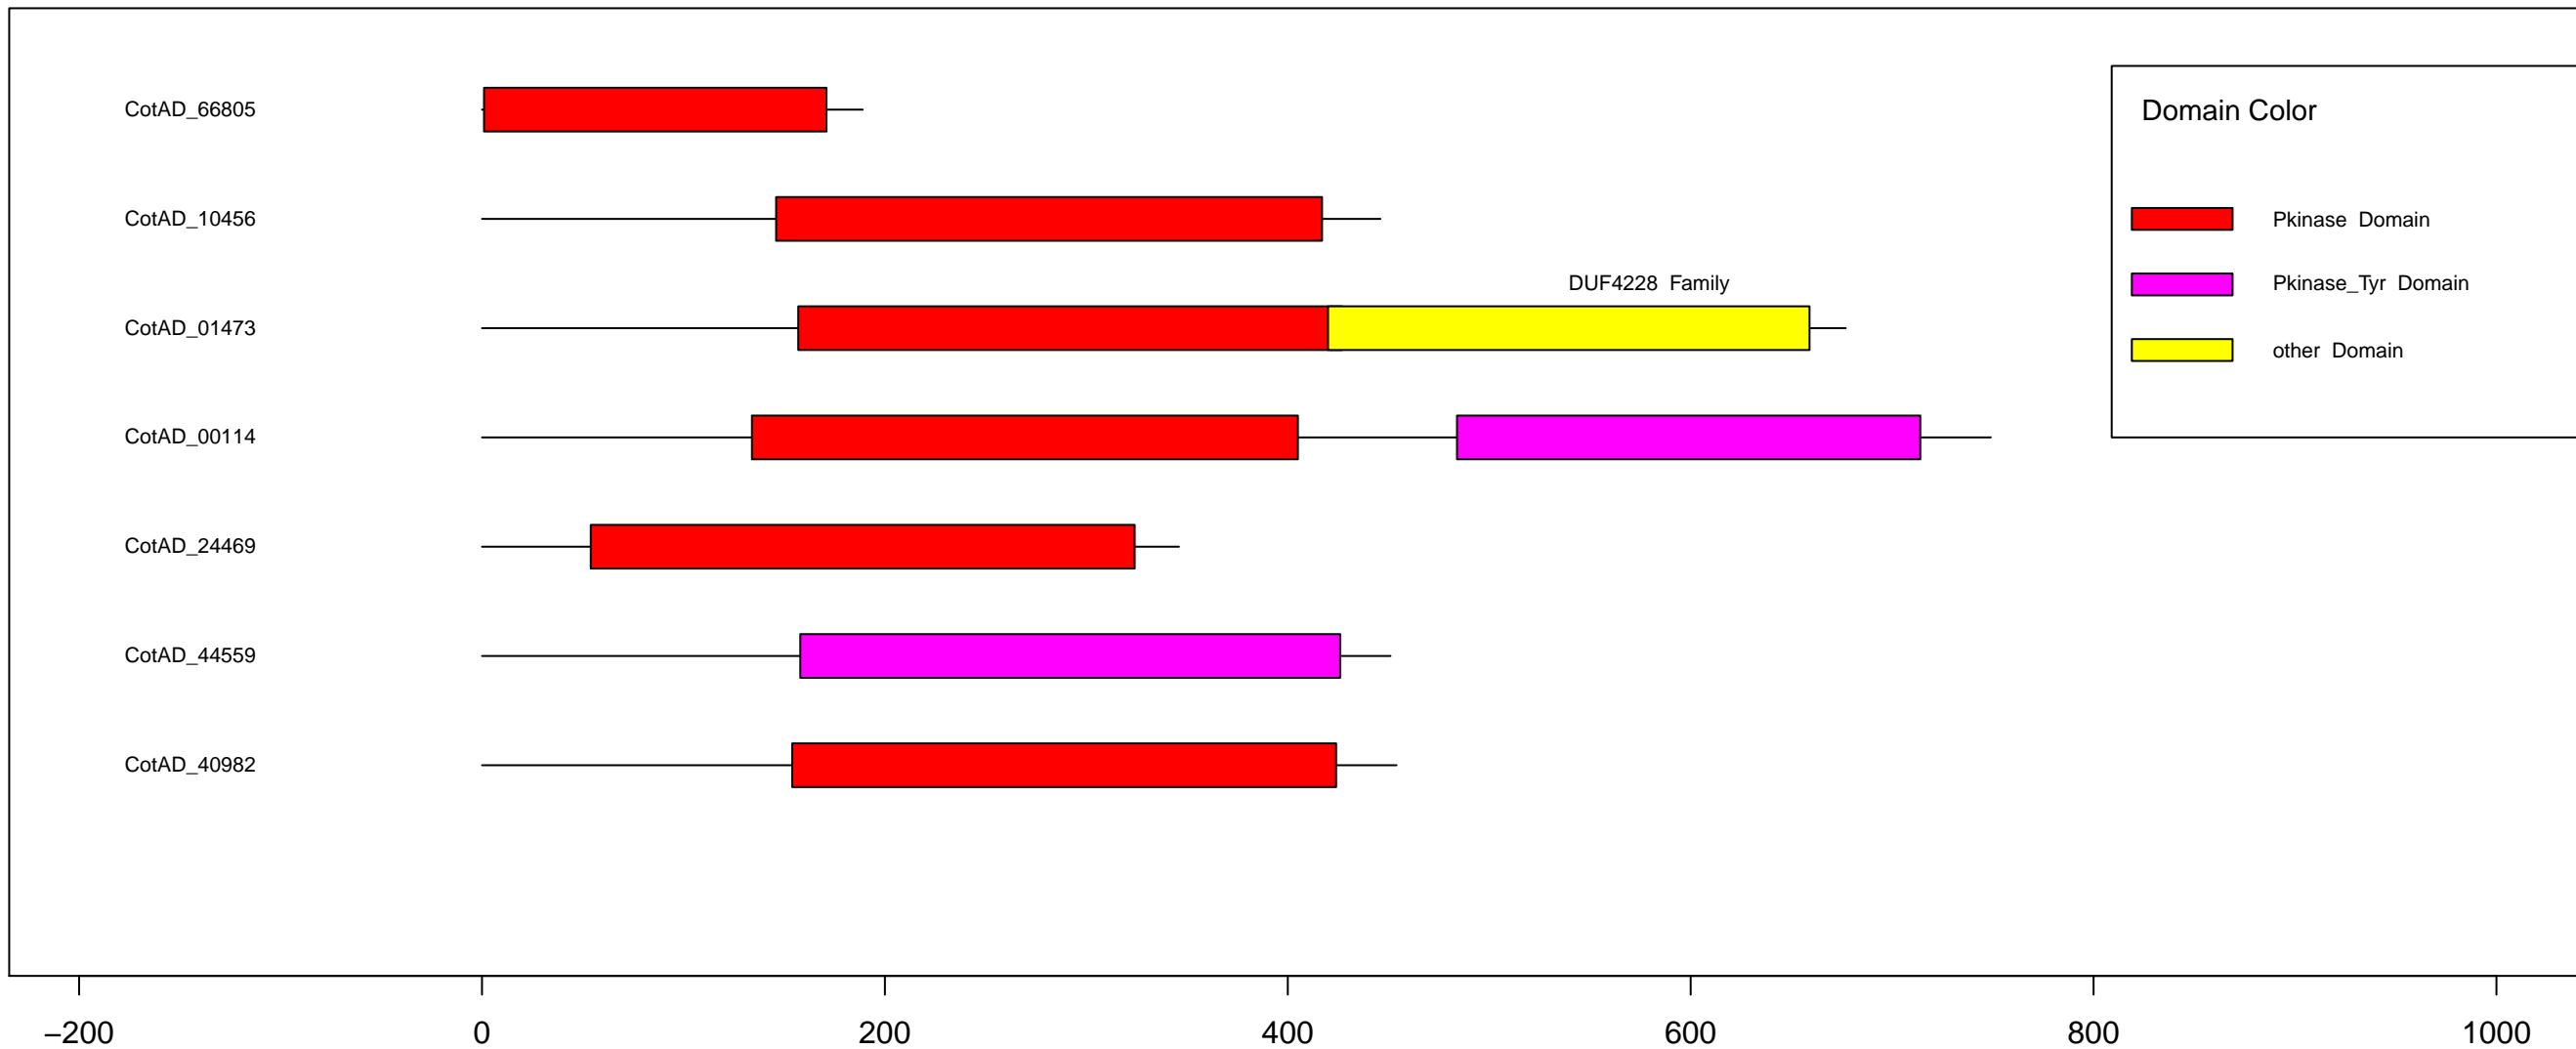

# G.hi RLK-Pelle\_RLCK-XVI domain diagram (all)

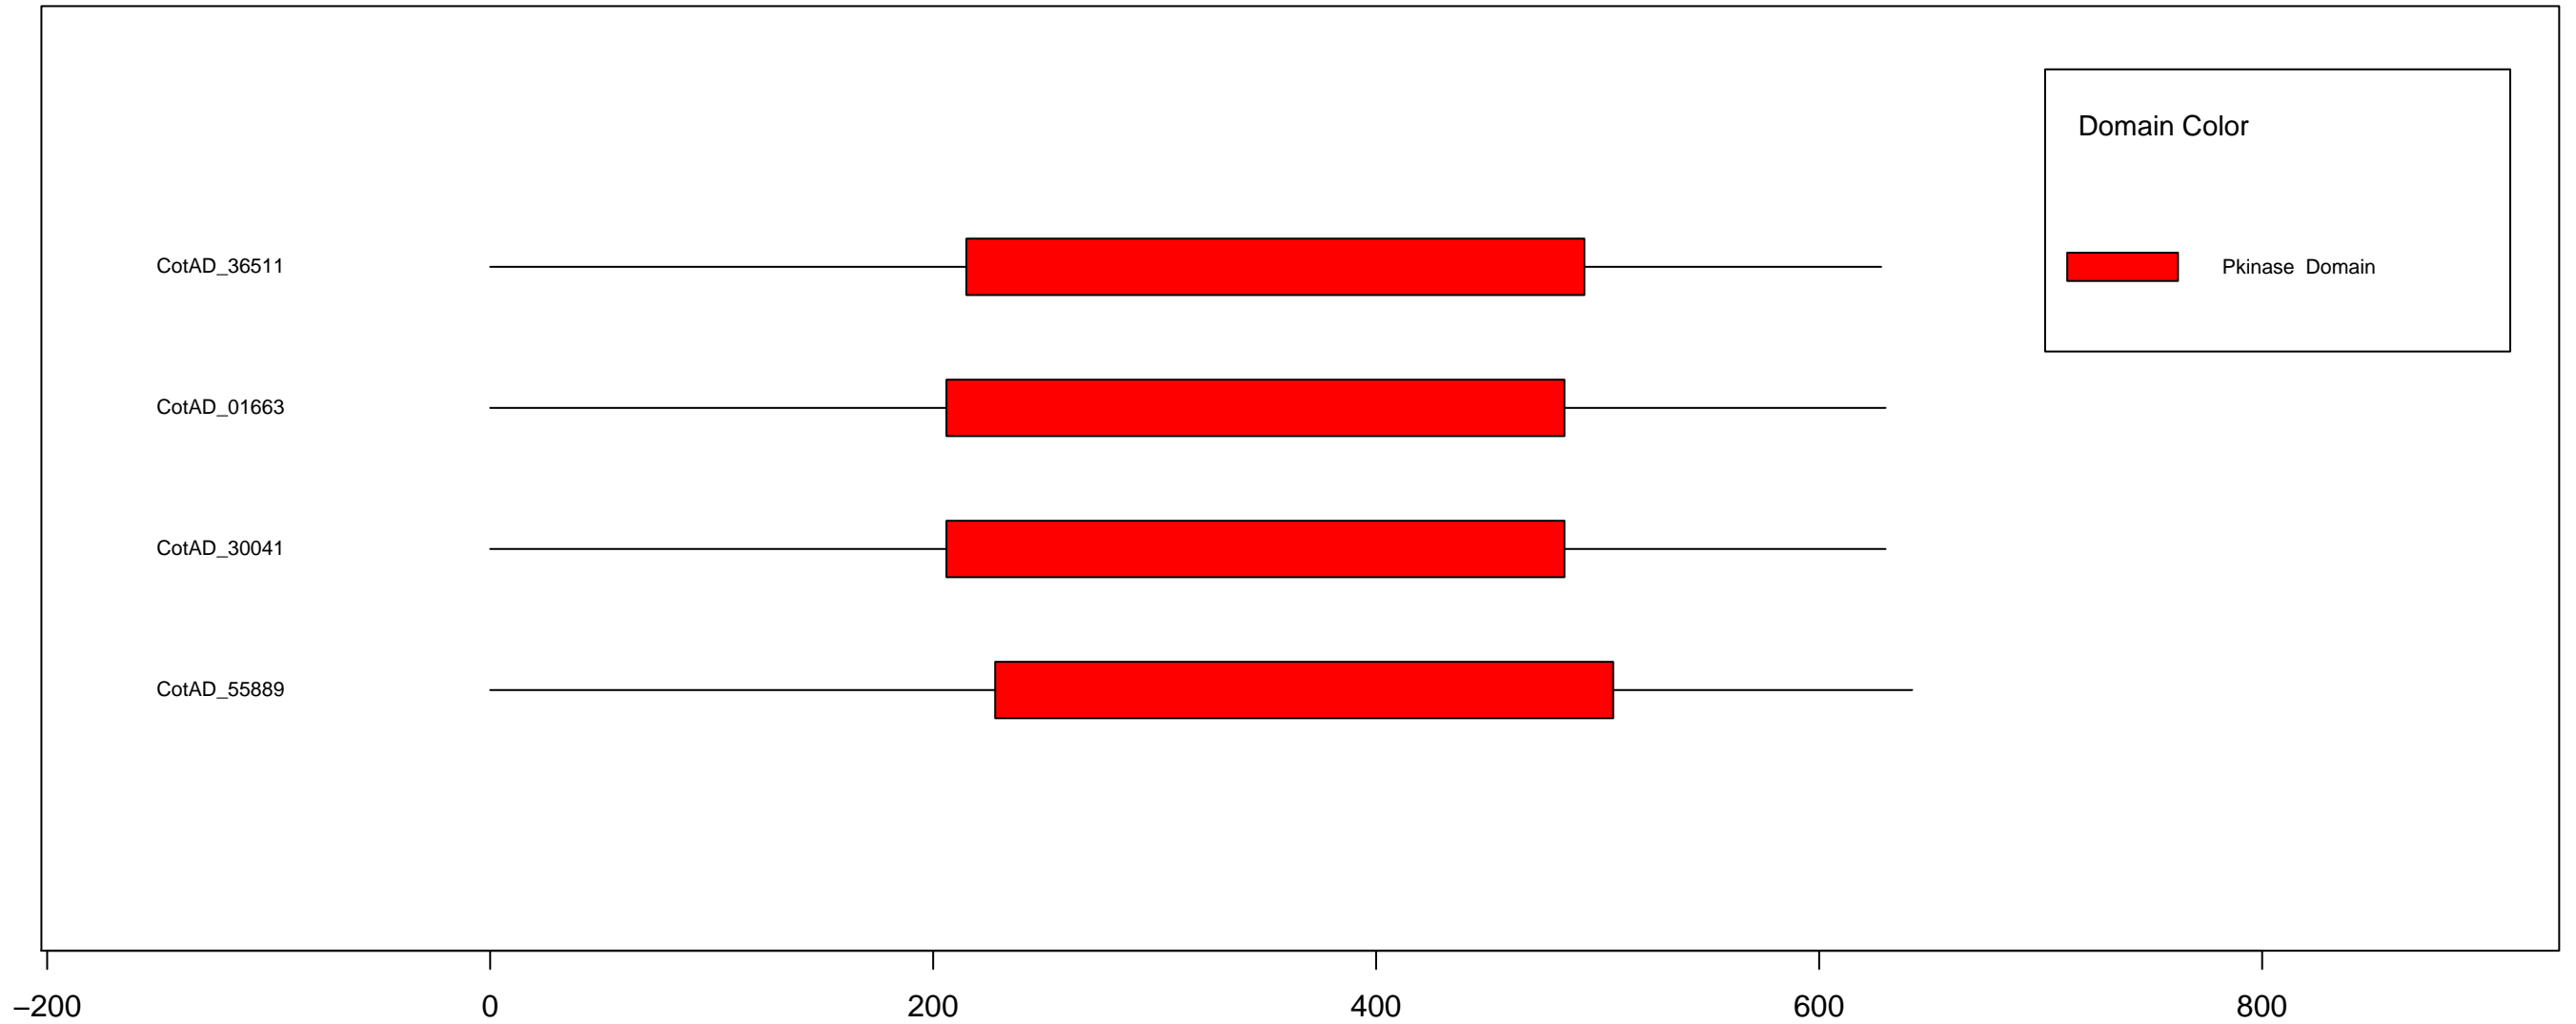

# G.hi RLK-Pelle\_RLCK-XV domain diagram (all)

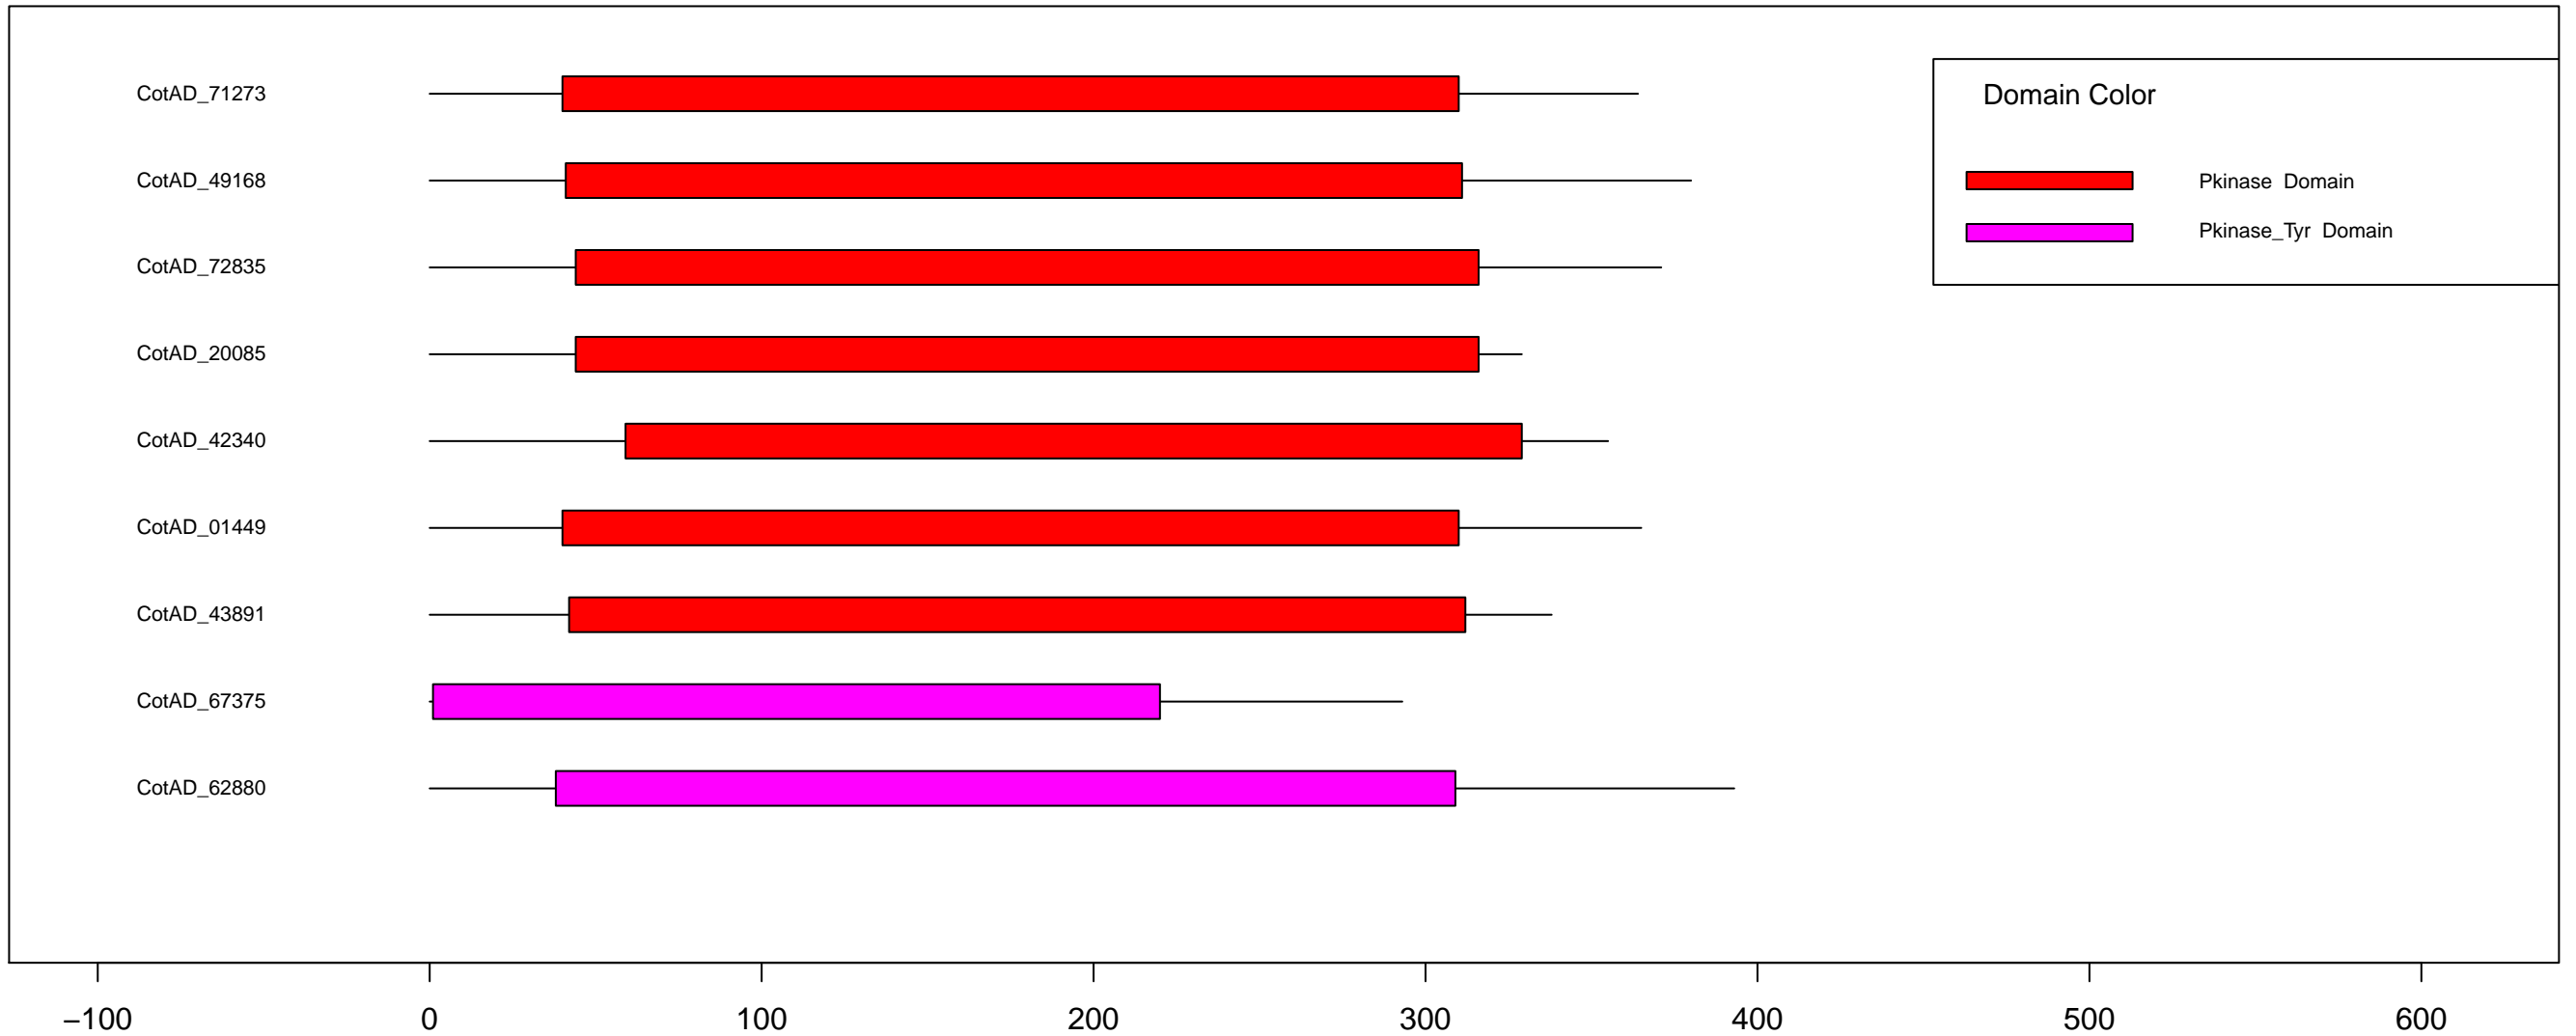



### G.hi RLK-Pelle\_SD-2b domain diagram (part 1)

CotAD\_28570  
CotAD\_28566  
CotAD\_28564  
CotAD\_28565  
CotAD\_28563  
CotAD\_28561  
CotAD\_28560  
CotAD\_12507  
CotAD\_12506  
CotAD\_03678  
CotAD\_03679  
CotAD\_60403  
CotAD\_55457  
CotAD\_36542  
CotAD\_30361  
CotAD\_37570  
CotAD\_70271  
CotAD\_35166  
CotAD\_13093  
CotAD\_12719

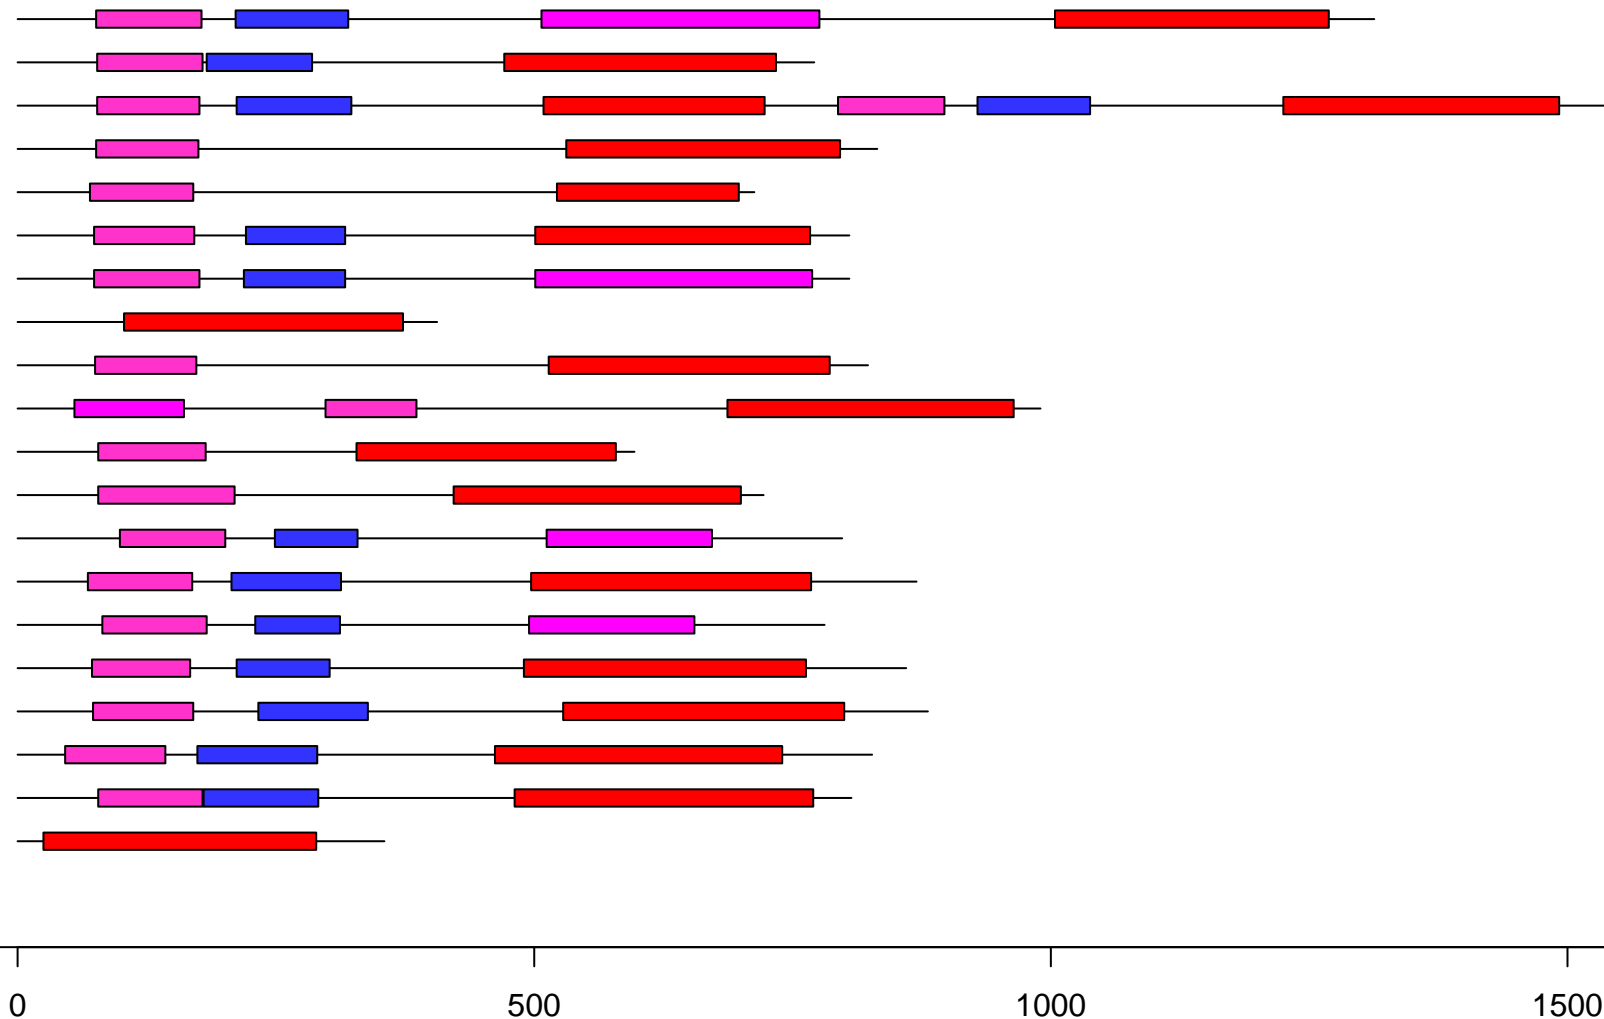

Domain Color

- B\_lectin Domain
- Pkinase Domain
- Pkinase\_Tyr Domain
- S\_locus\_glycop Domain

### G.hi RLK-Pelle\_SD-2b domain diagram (part 2)

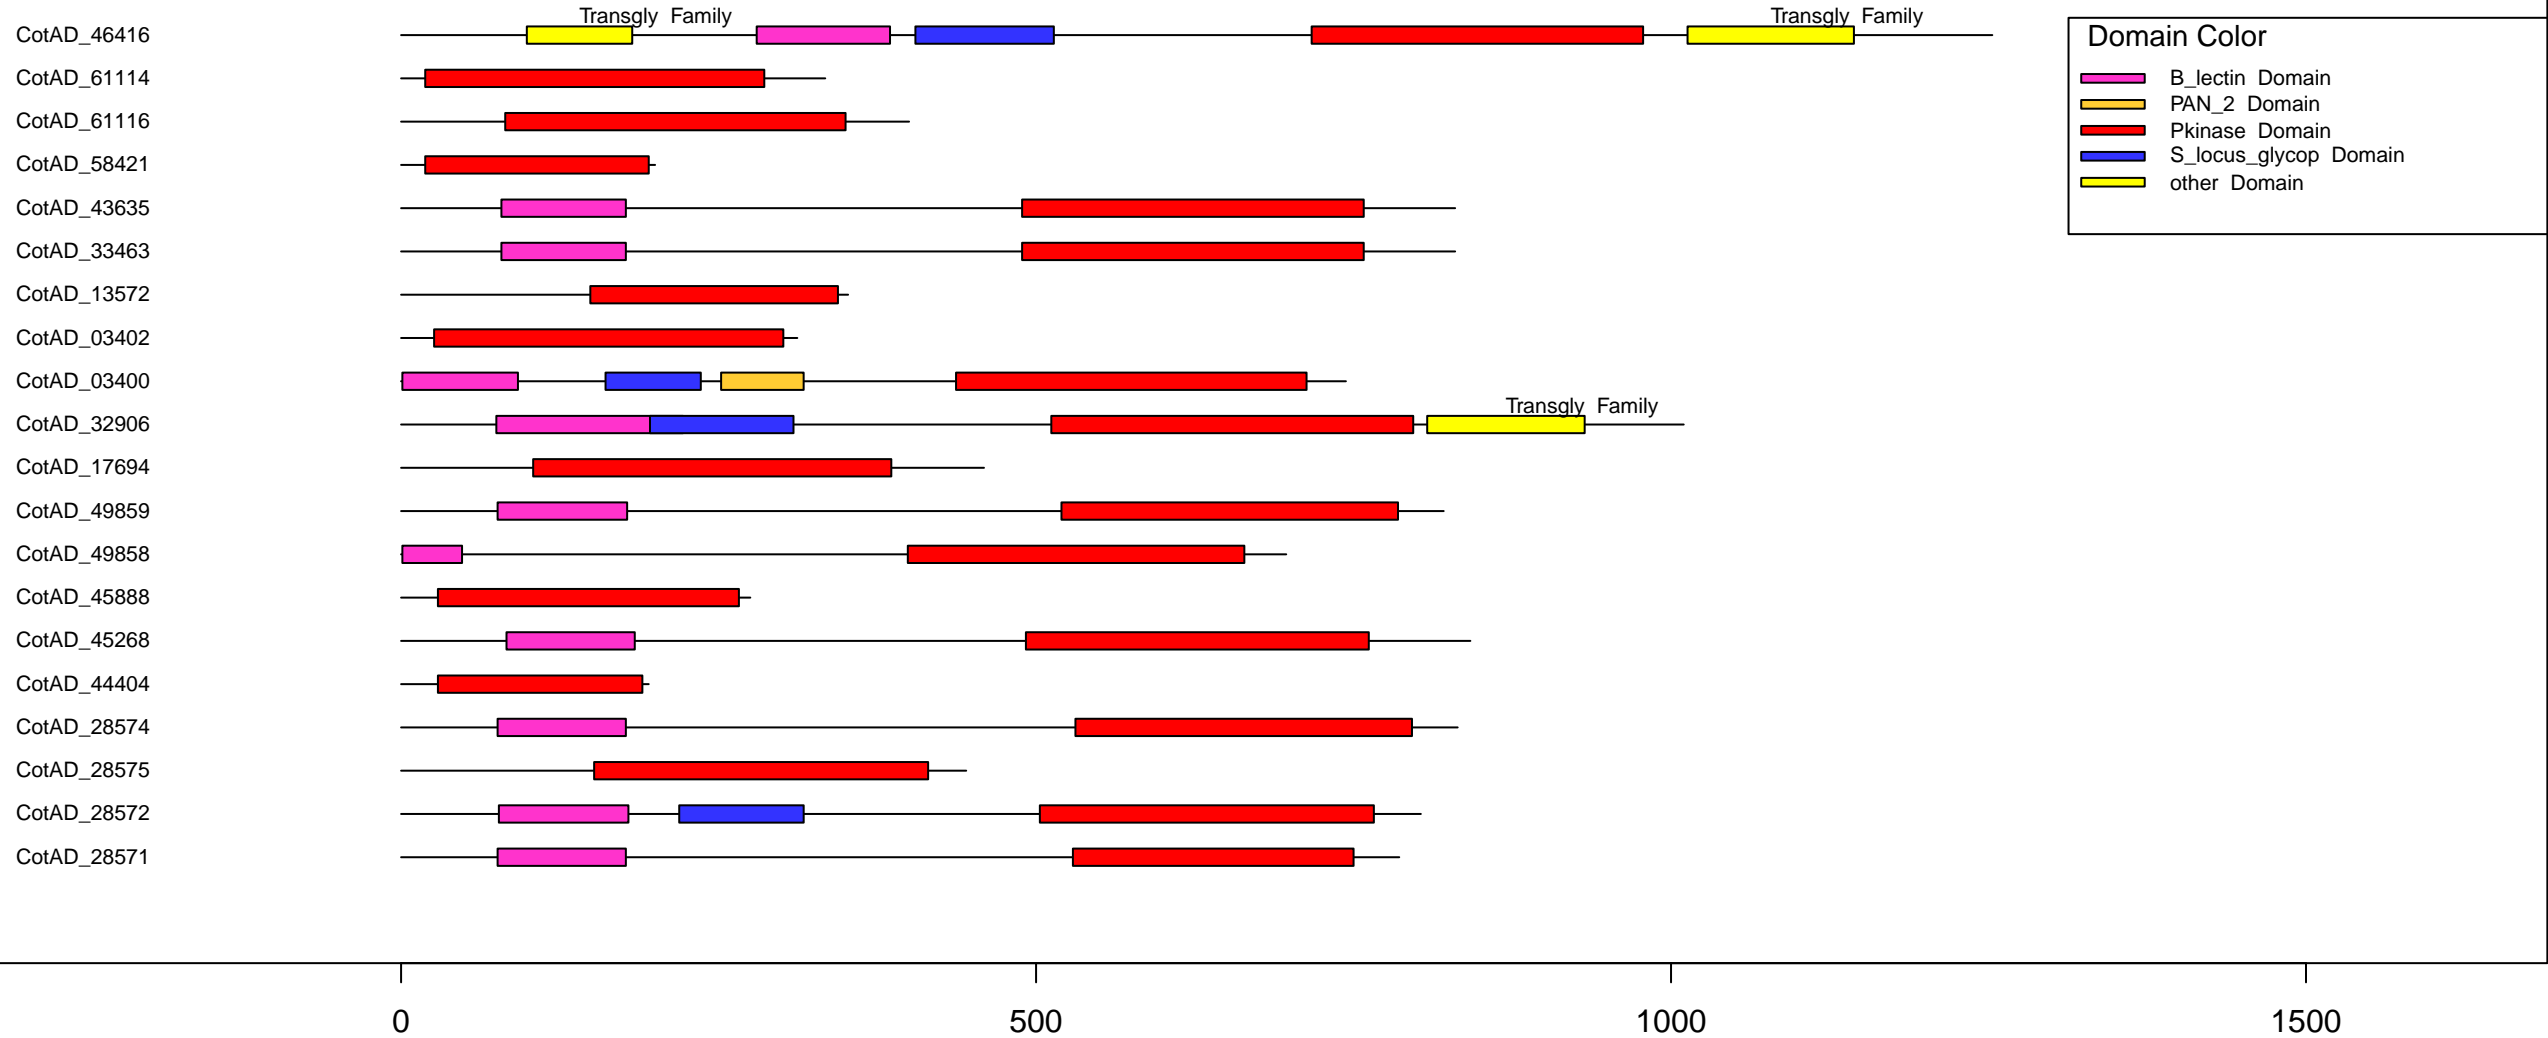

### G.hi RLK-Pelle\_SD-2b domain diagram (part 3)

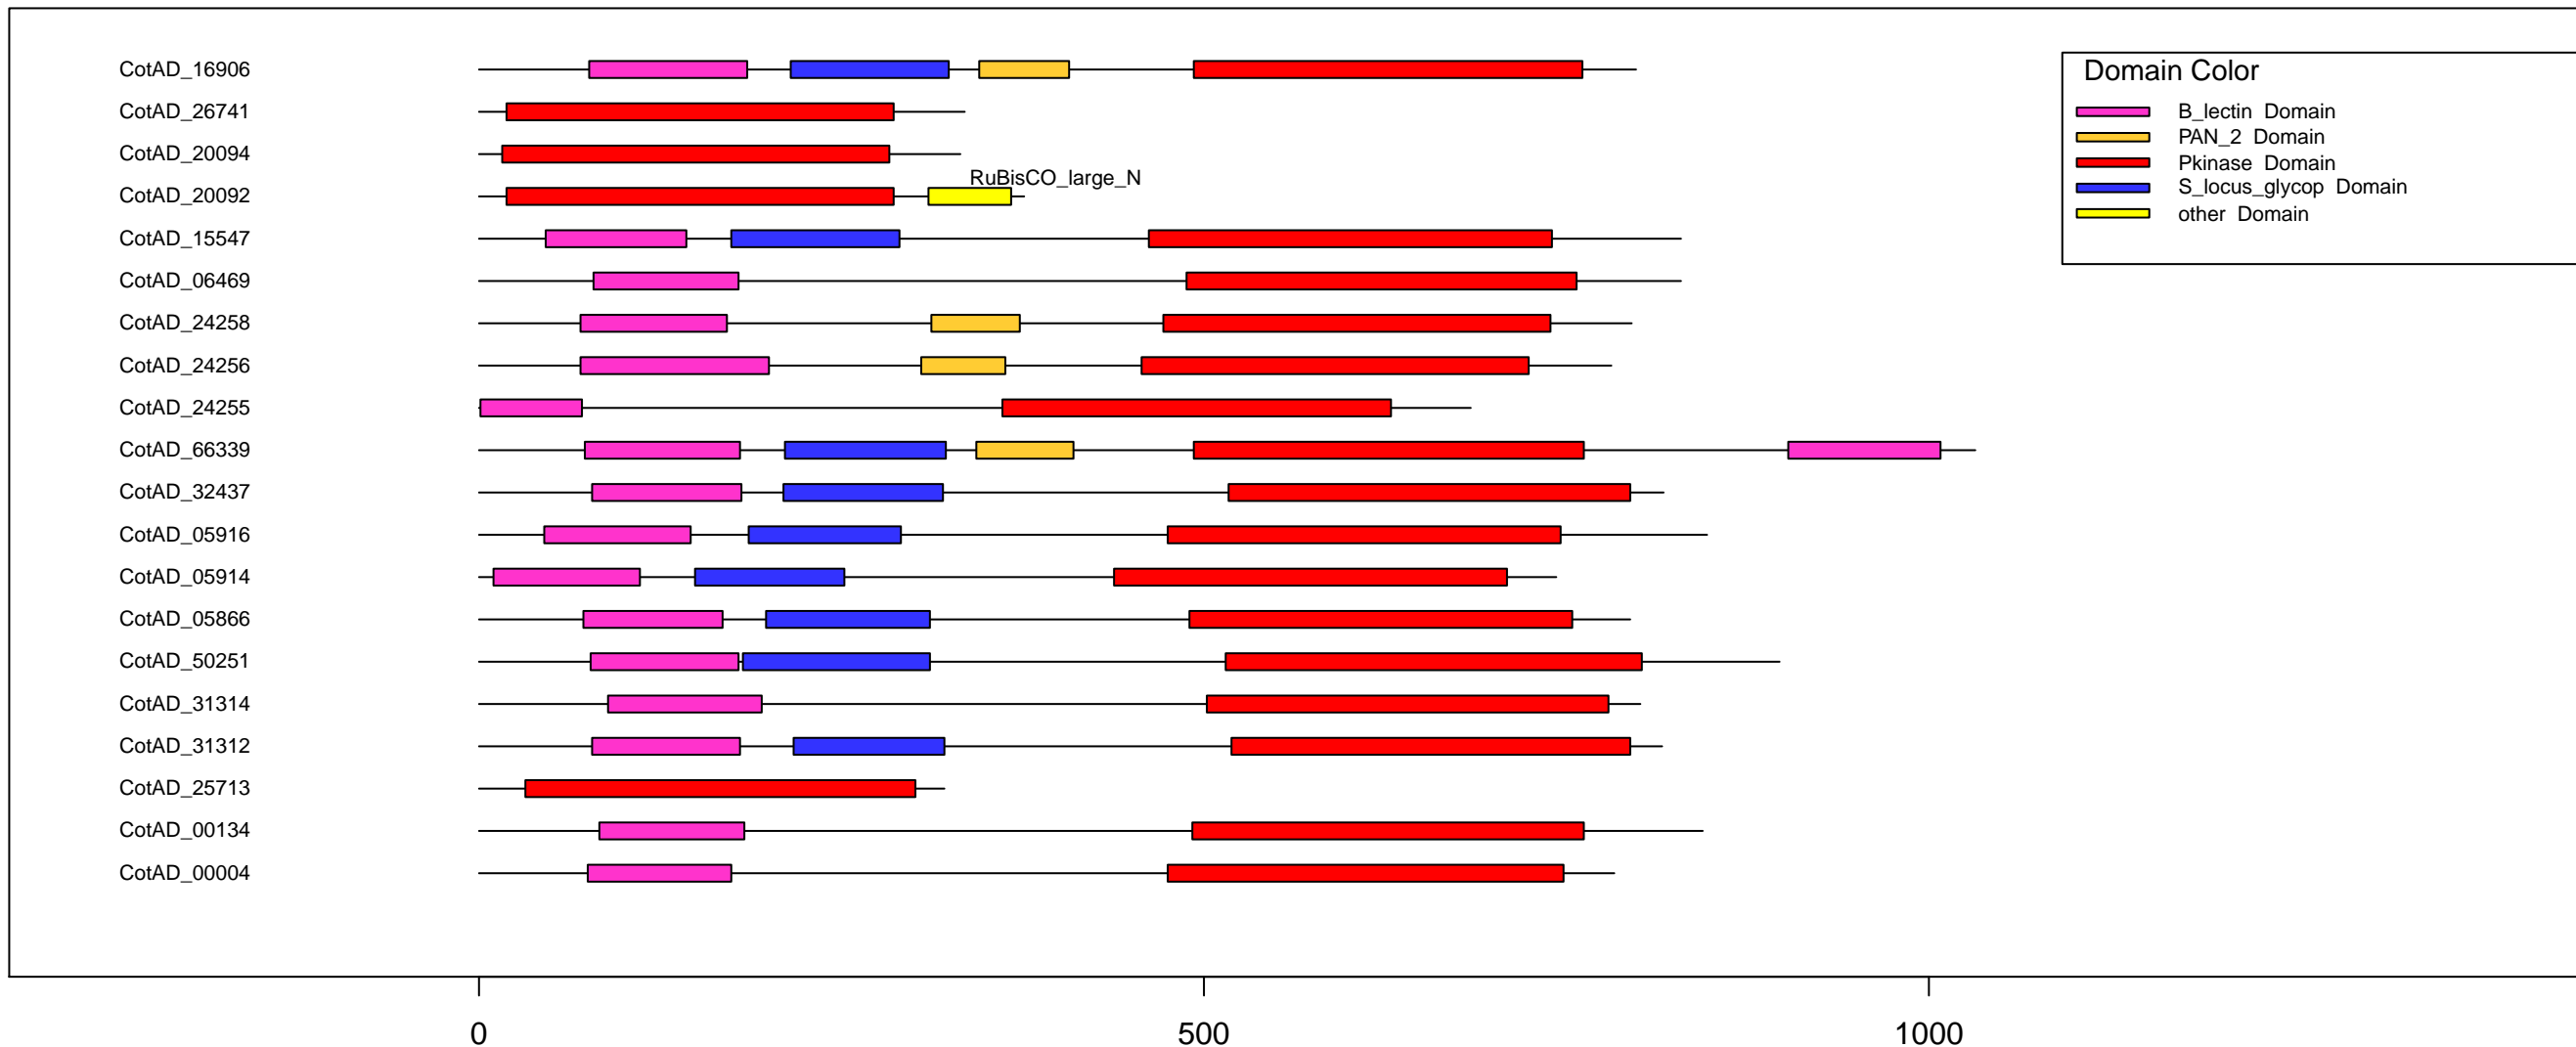

### G.hi RLK-Pelle\_SD-2b domain diagram (part 4)

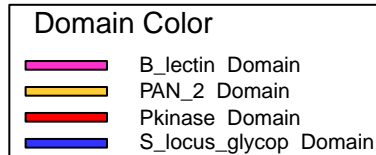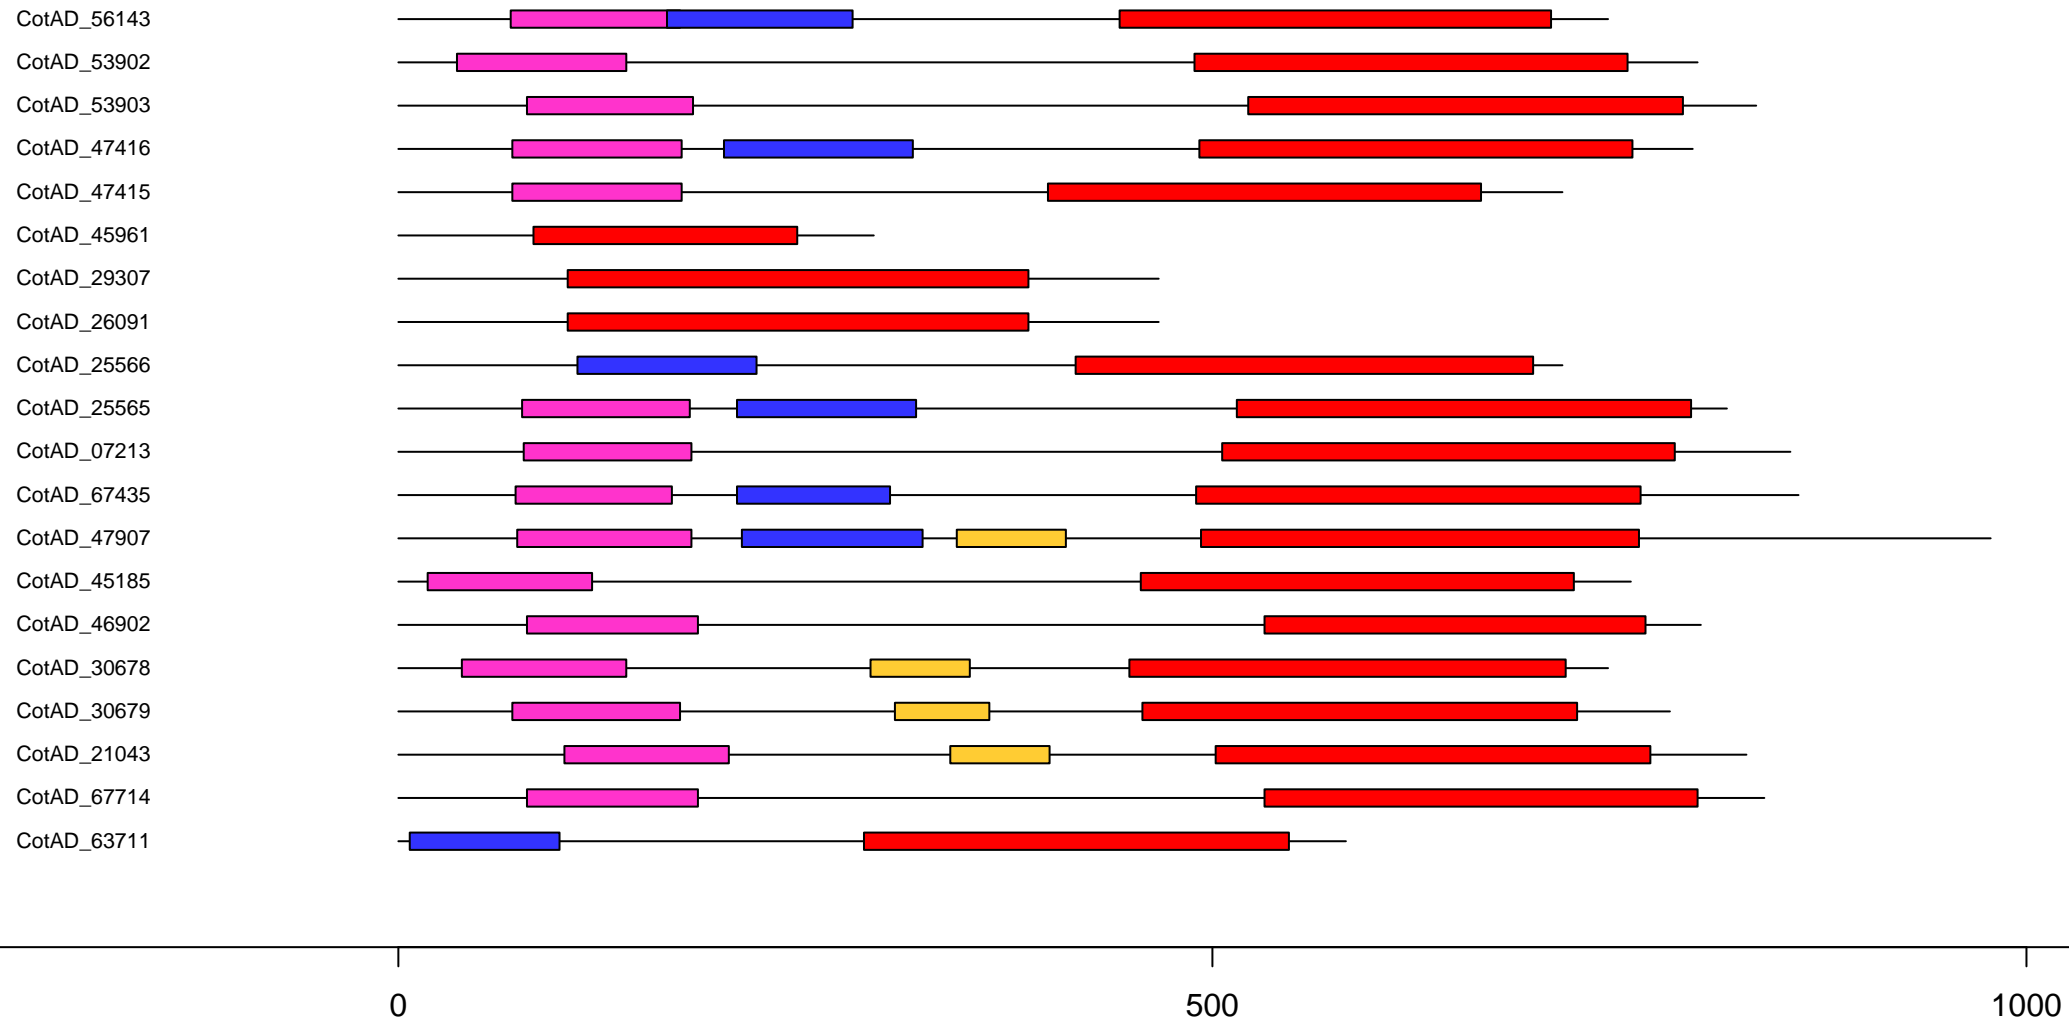

### G.hi RLK-Pelle\_SD-2b domain diagram (part 5)

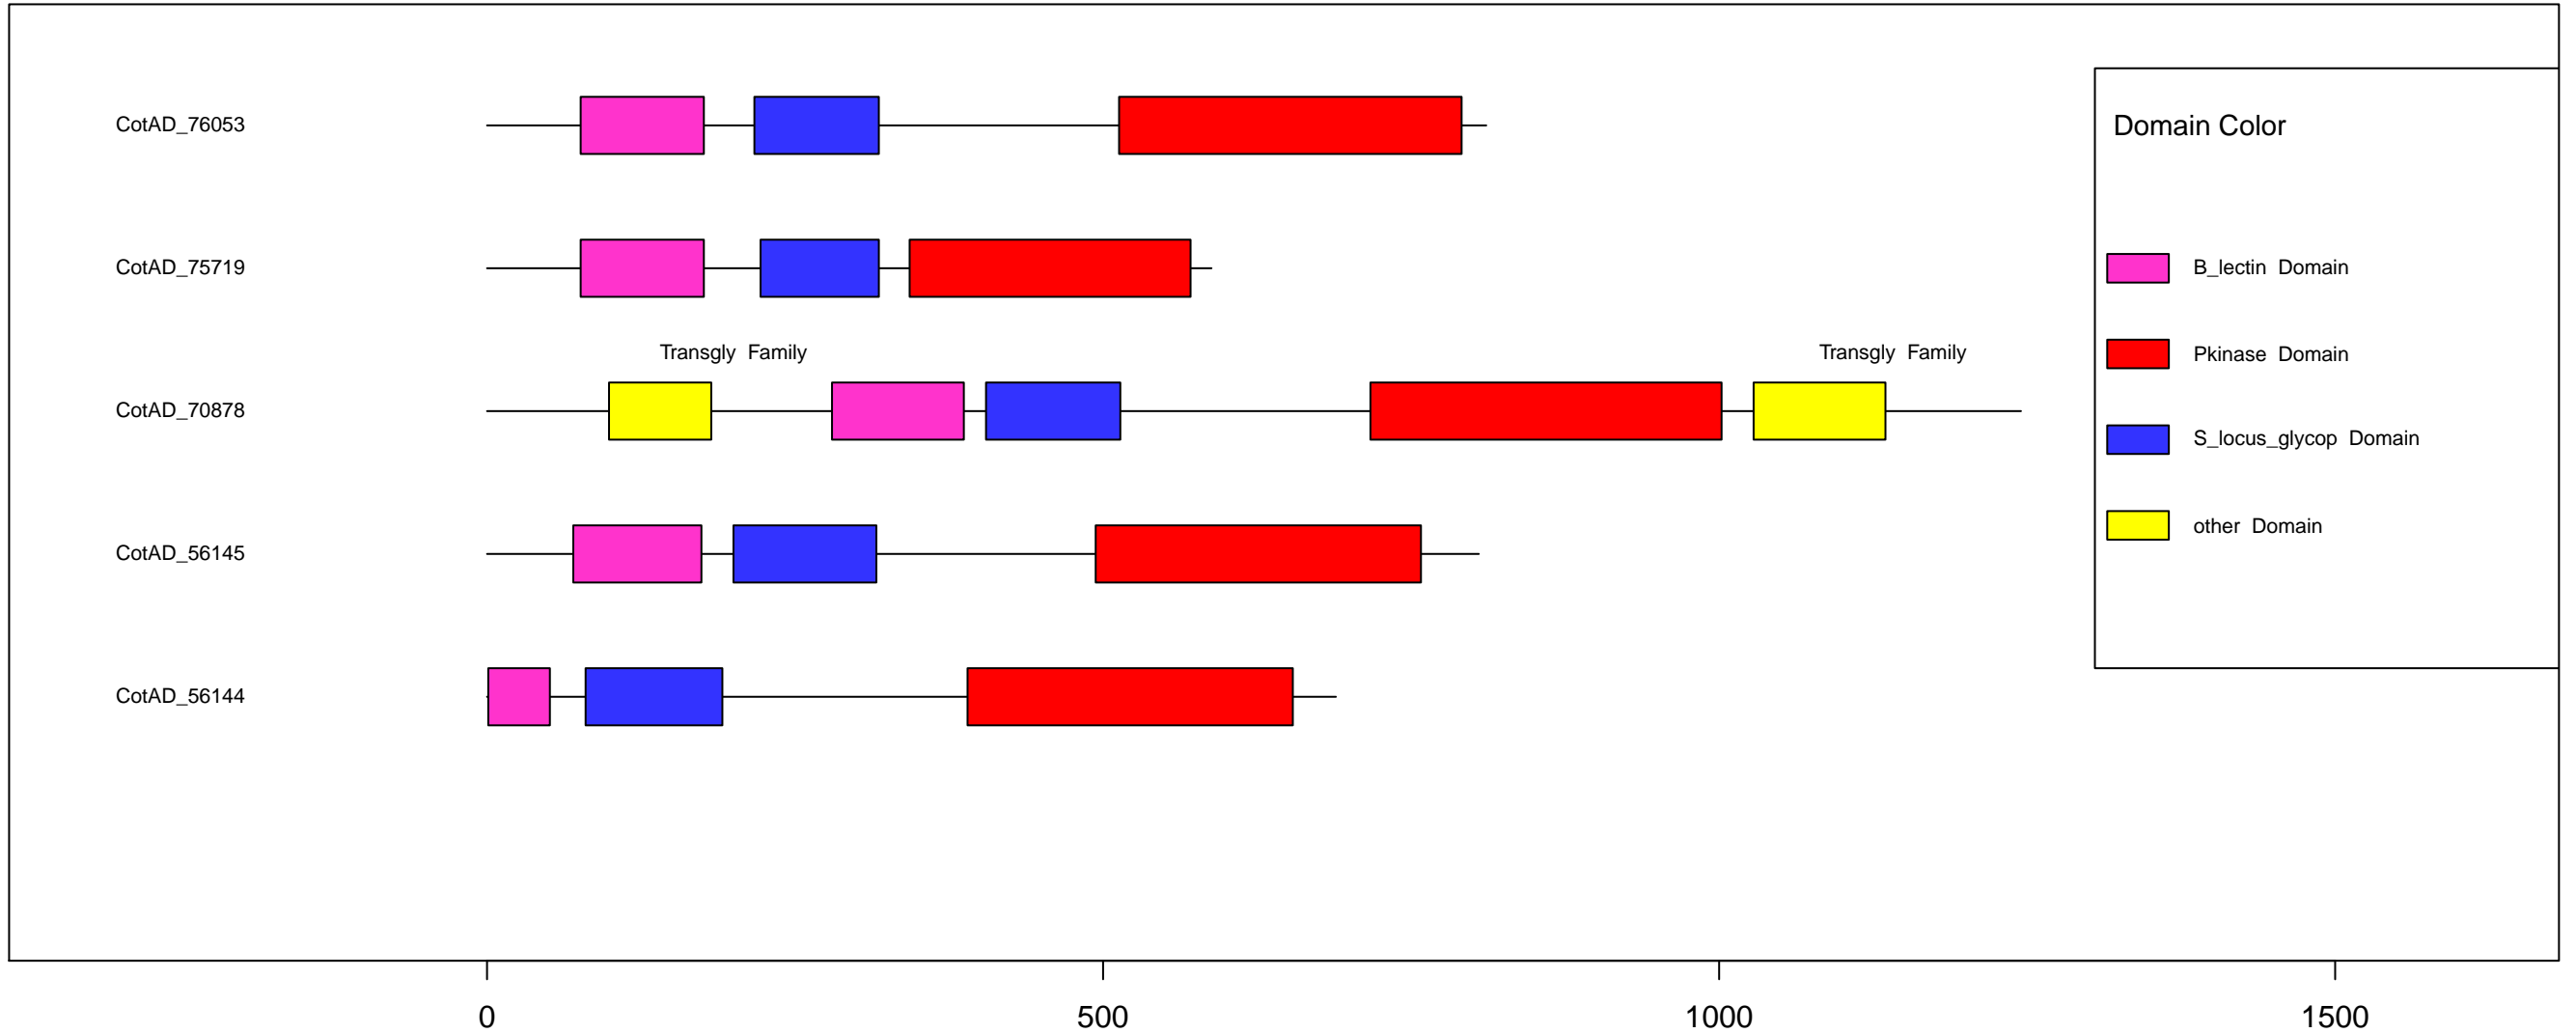

# G.hi RLK-Pelle\_Singleton domain diagram (all)

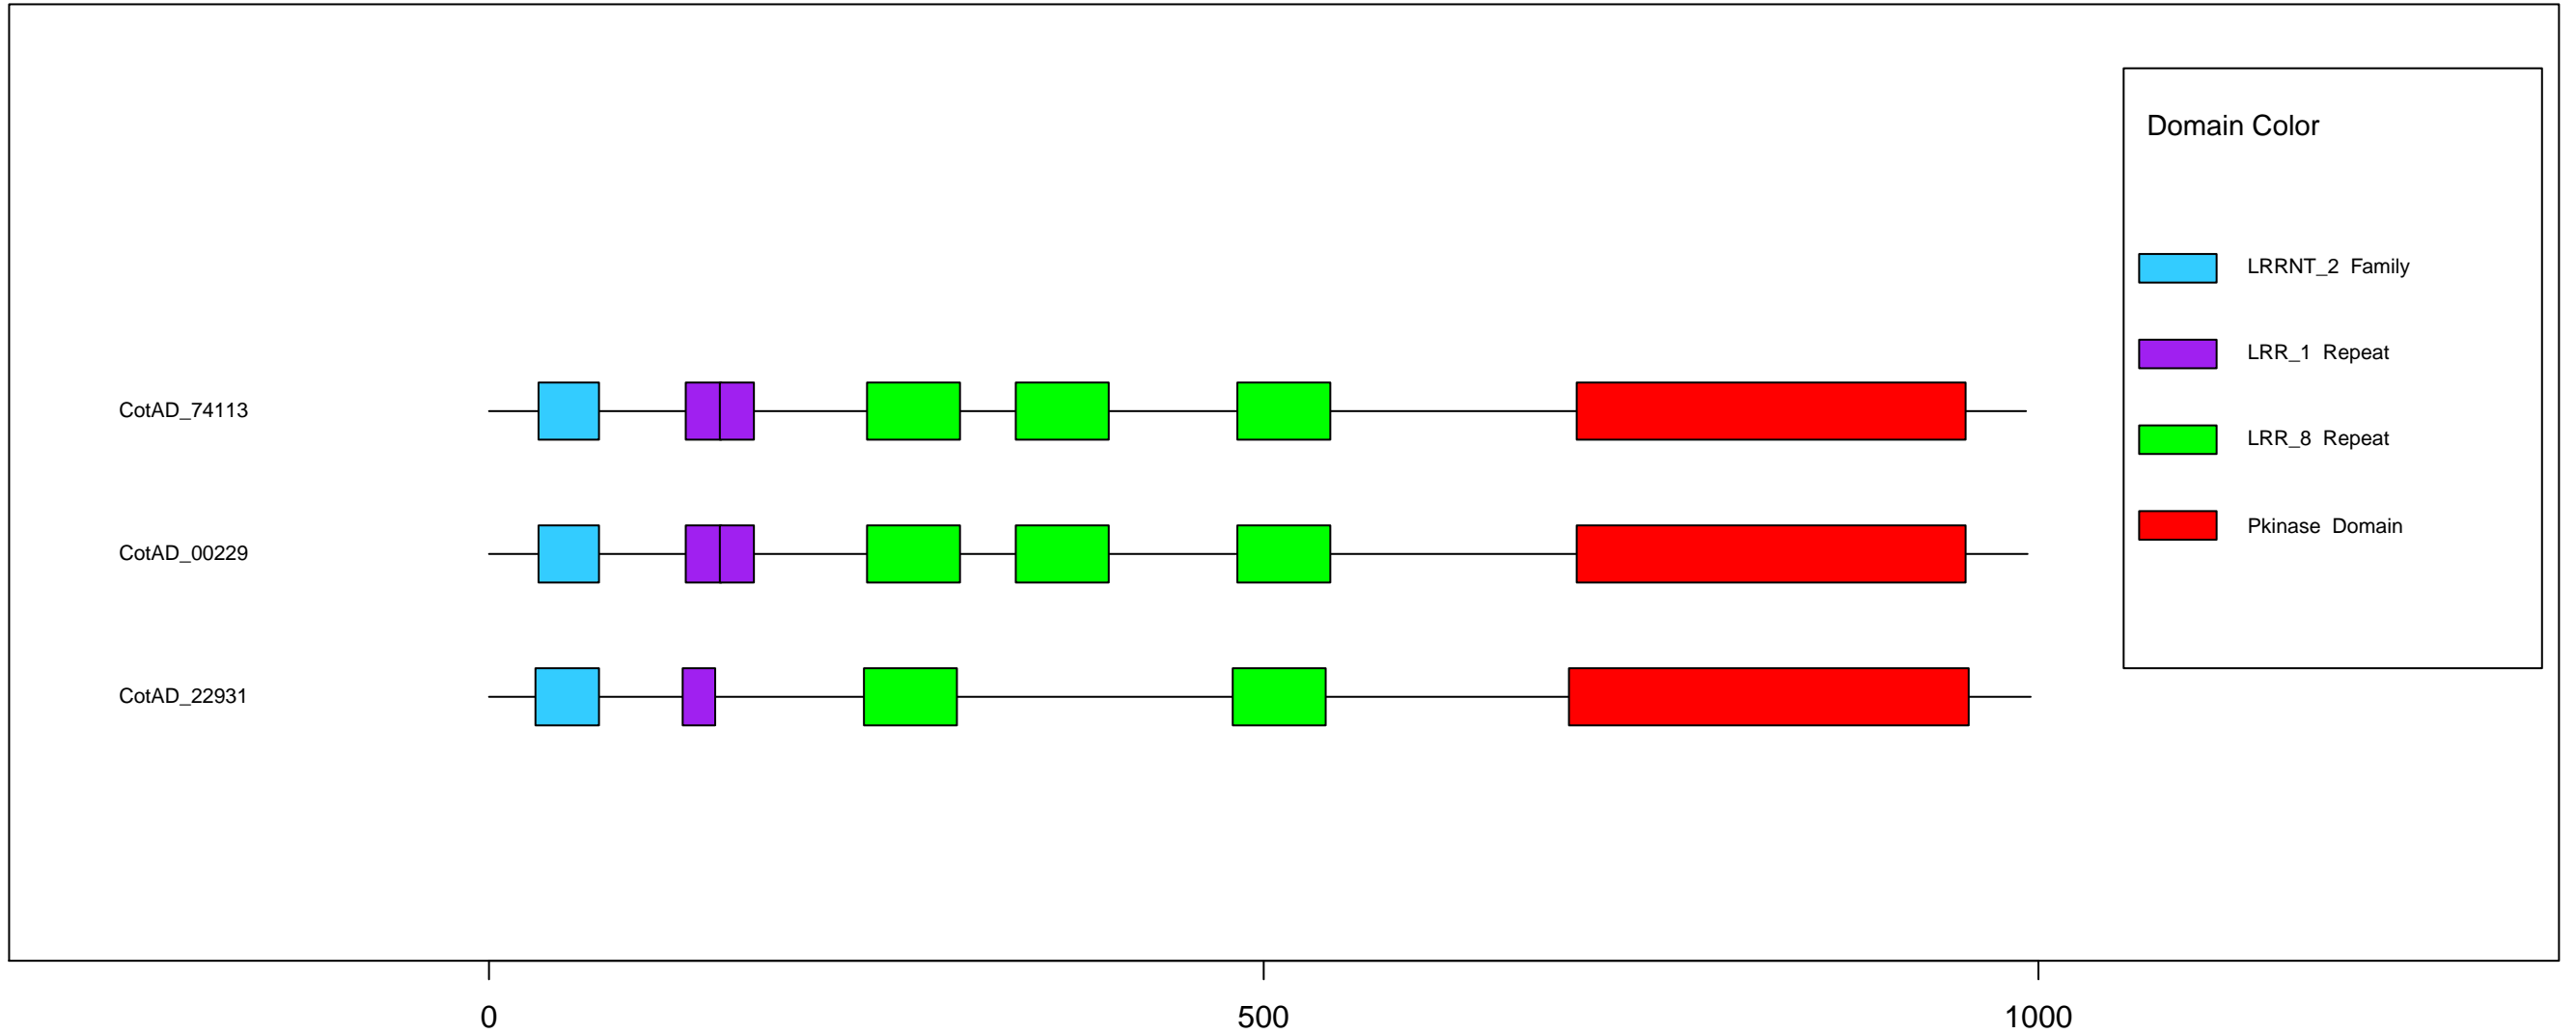

# G.hi RLK-Pelle\_URK-1 domain diagram (all)

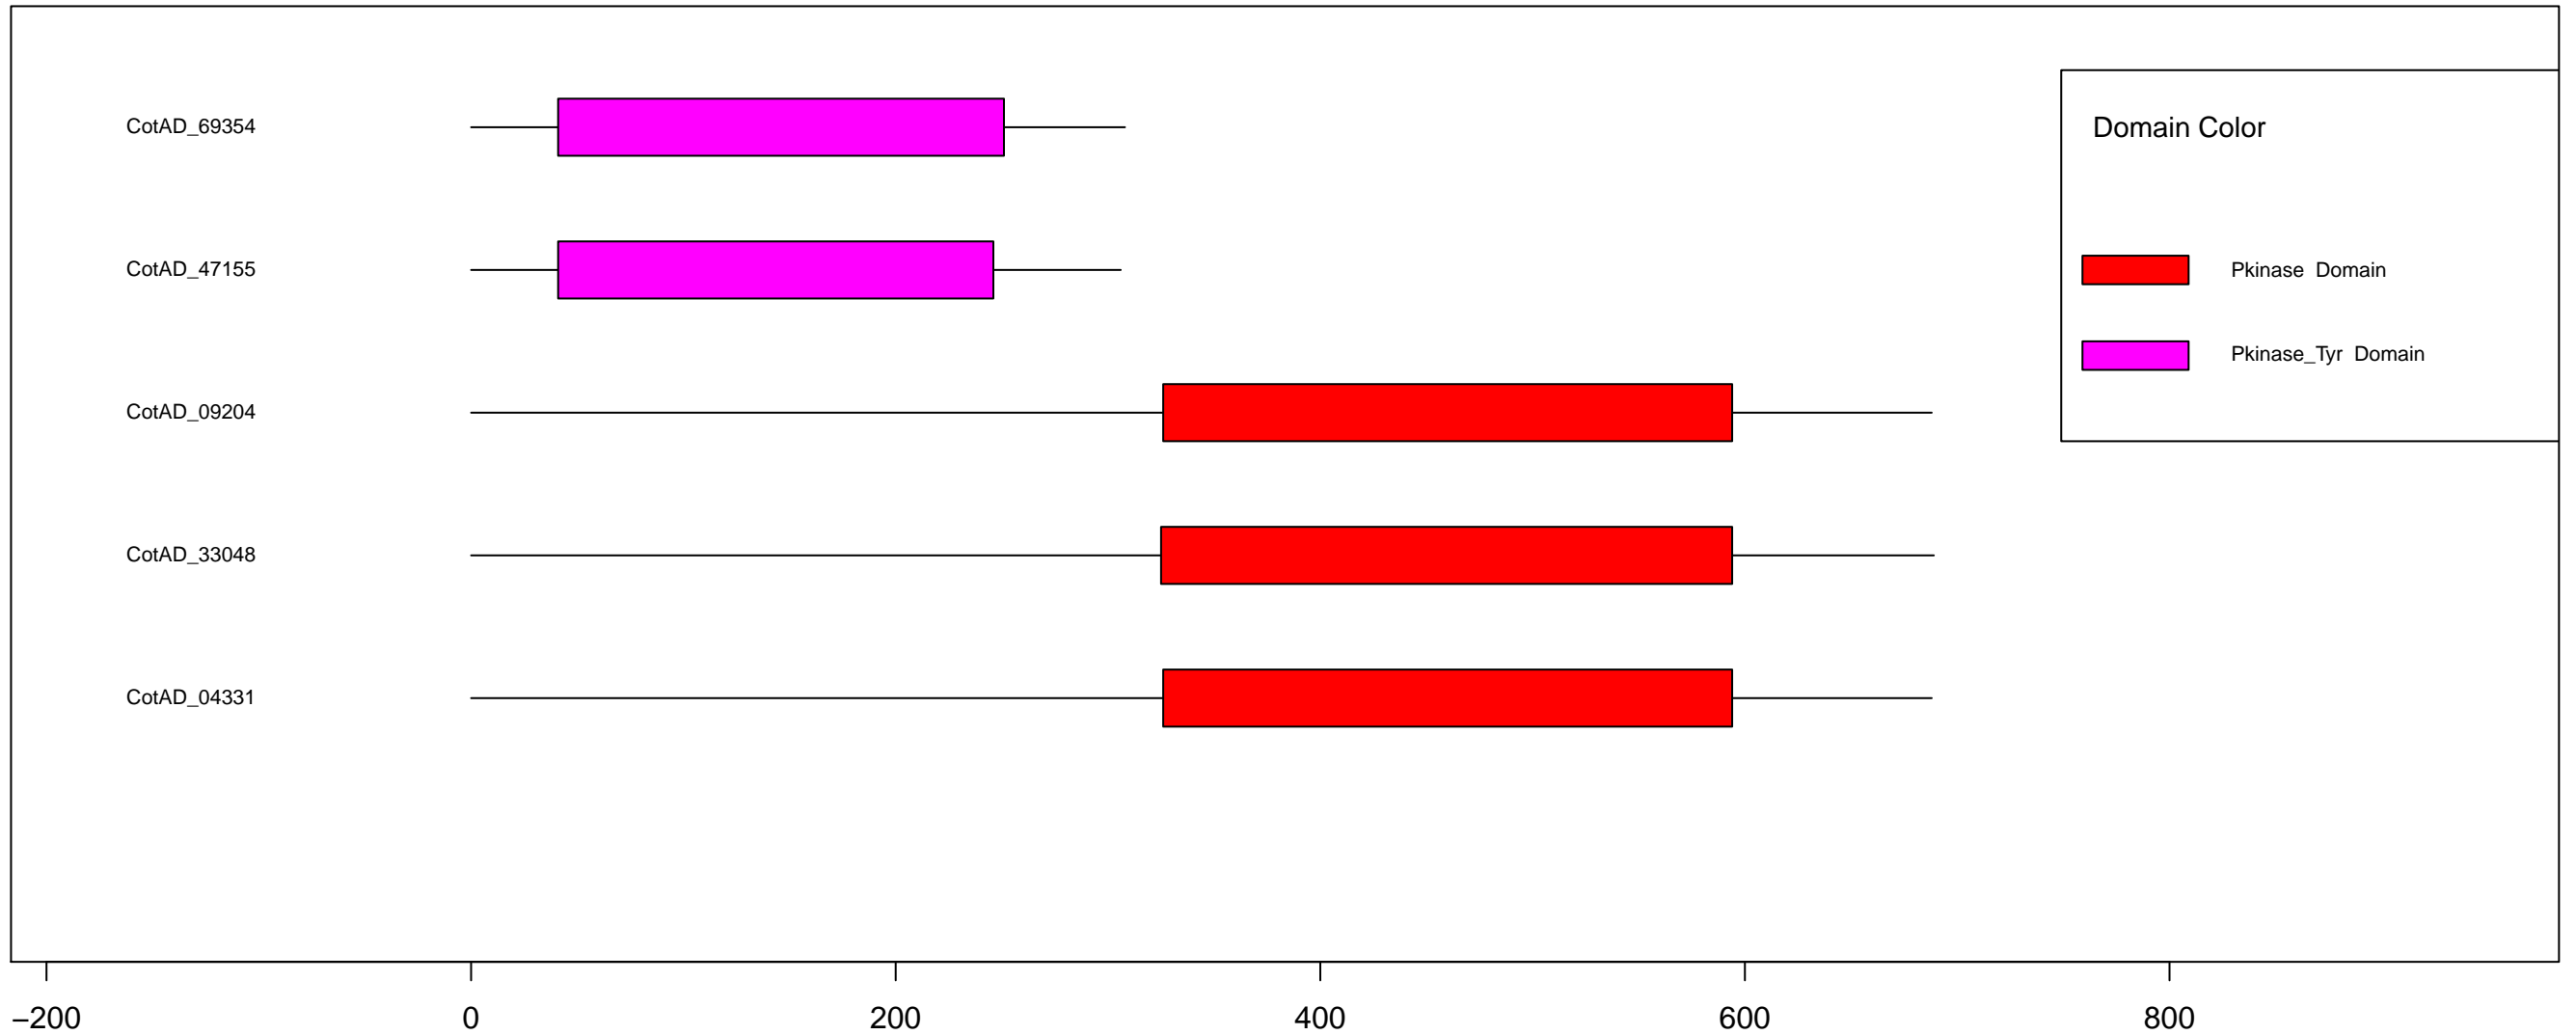

# G.hi RLK-Pelle\_URK-2 domain diagram (all)

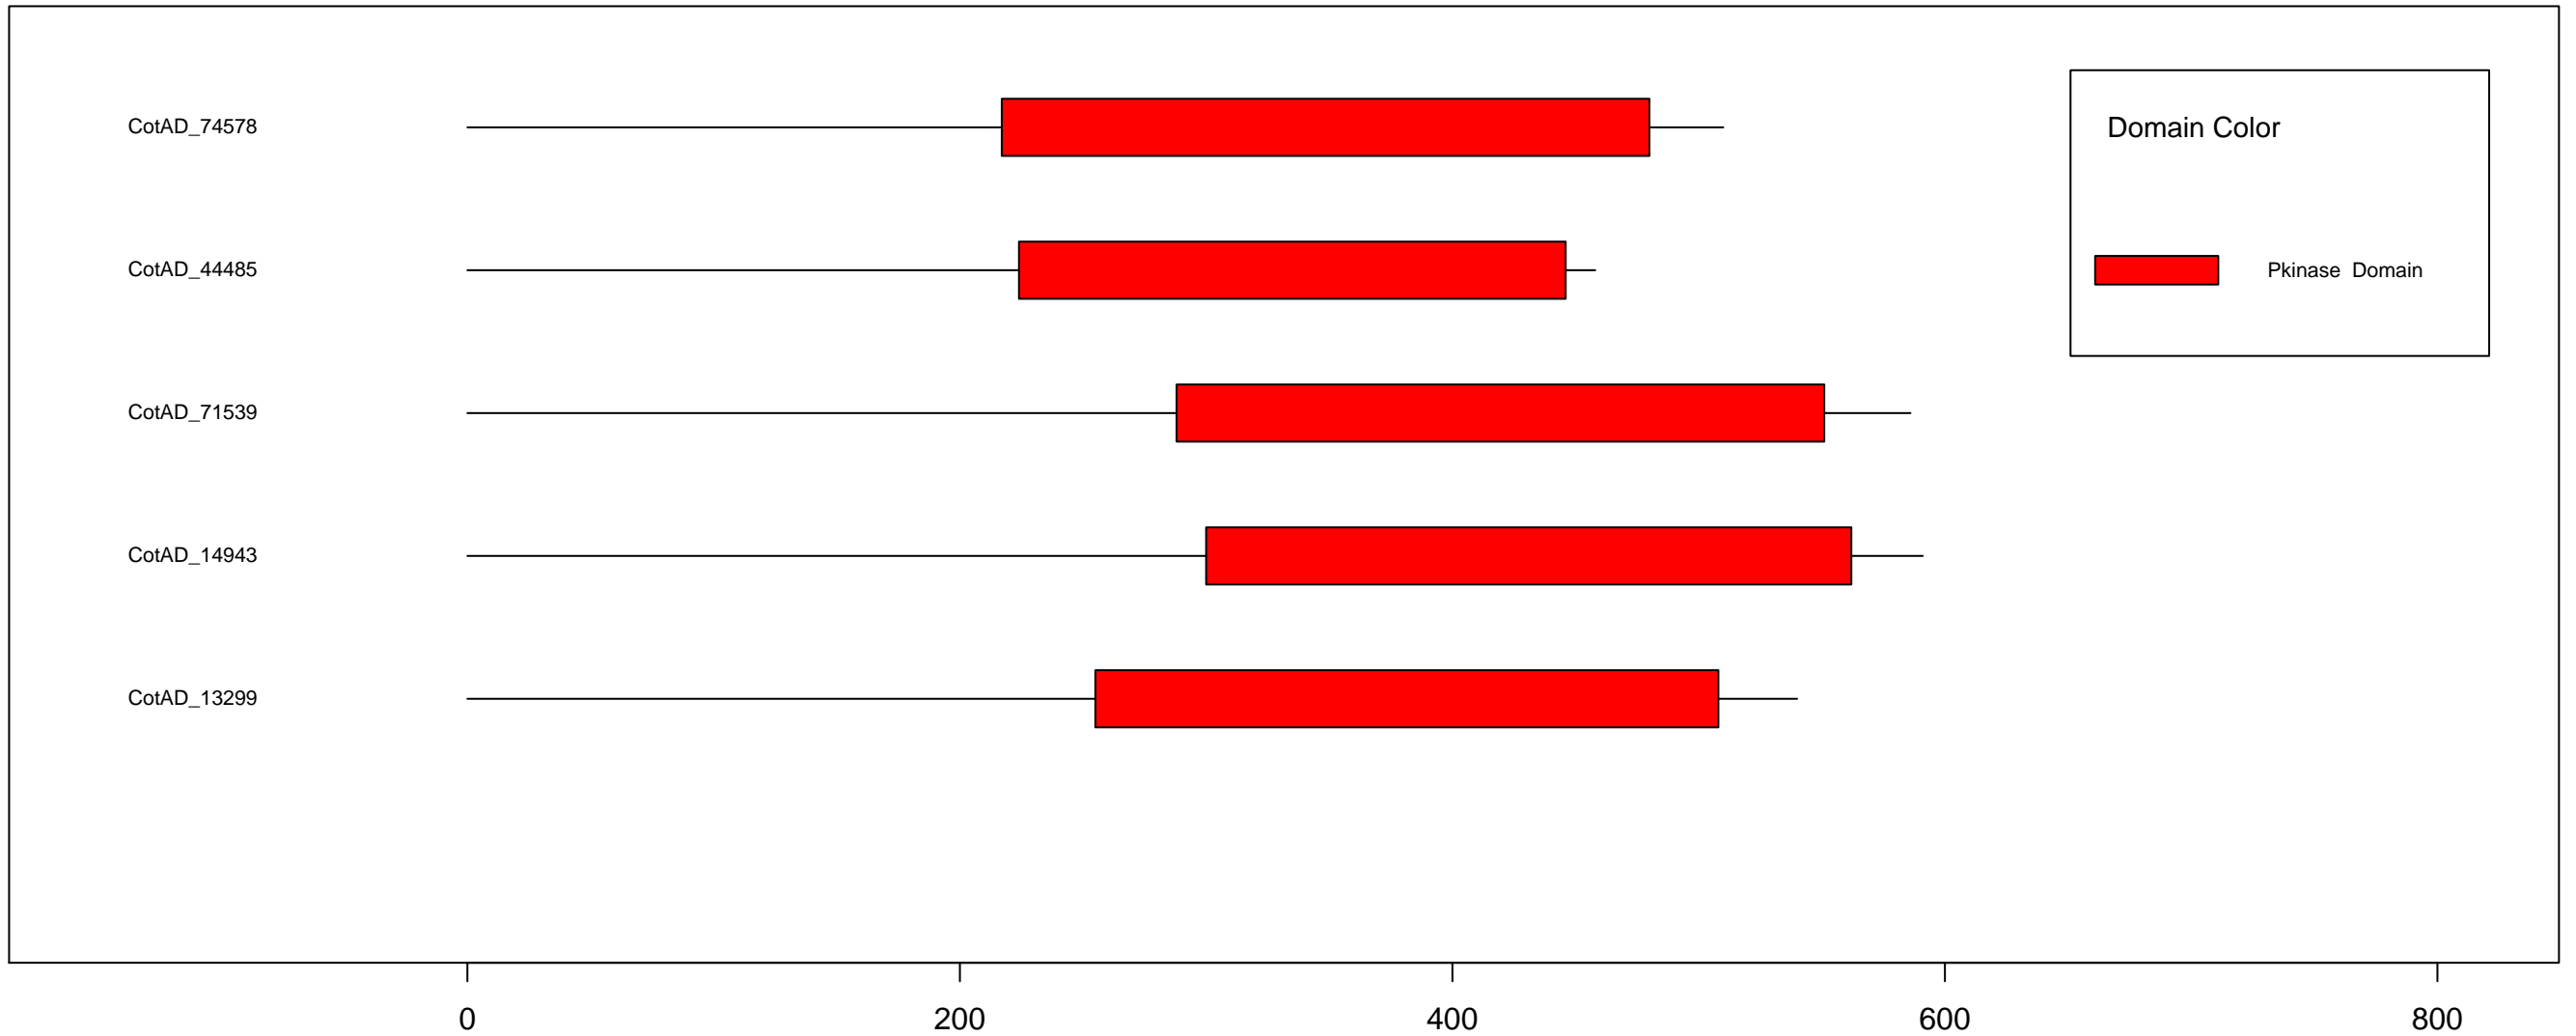



# G.hi RLK-Pelle\_URK-3 domain diagram (all)

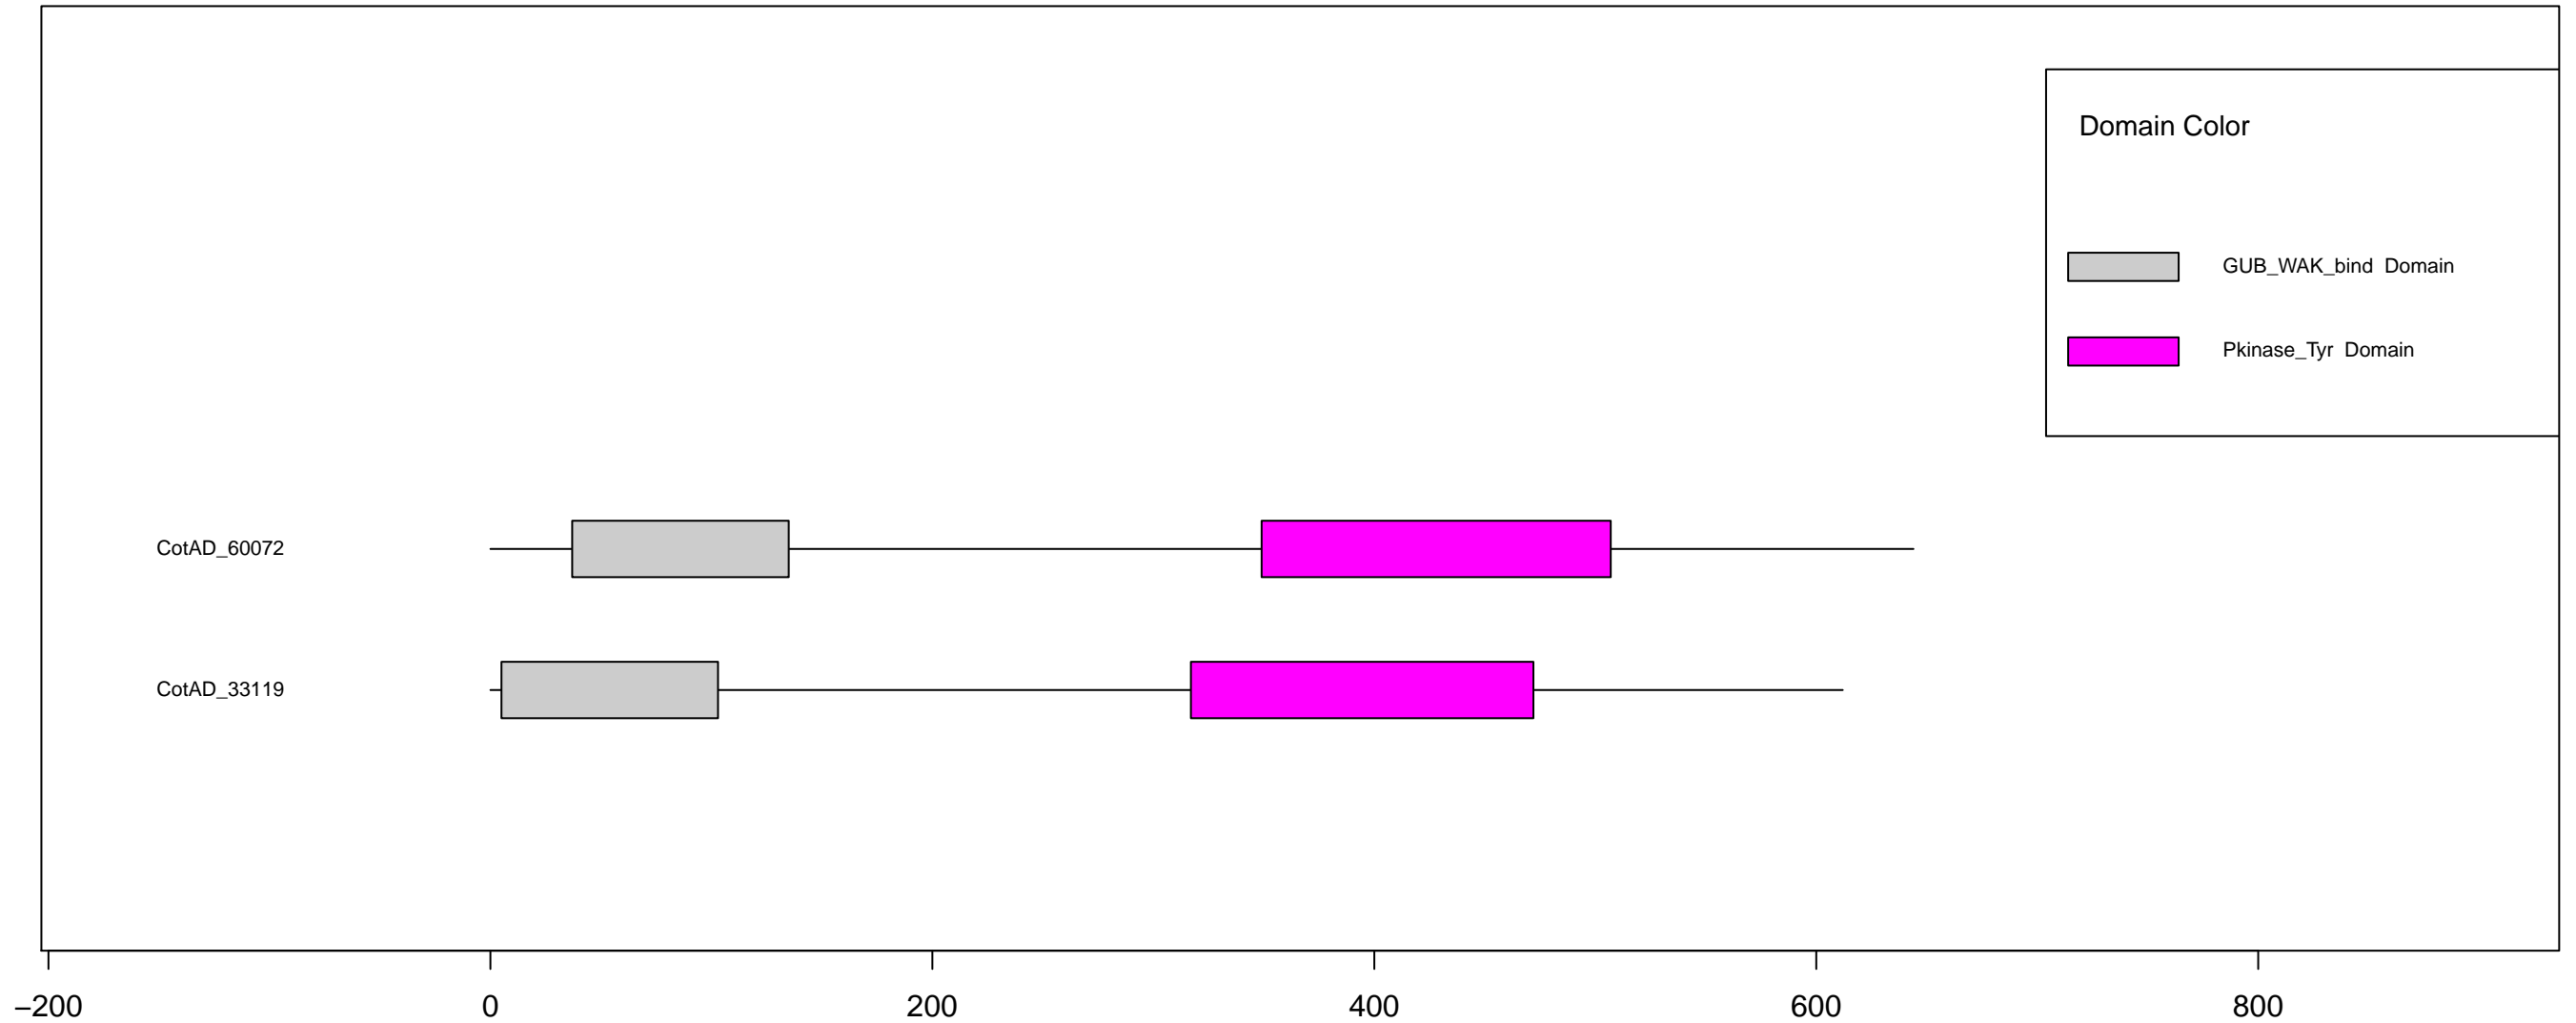

### G.hi RLK-Pelle\_WAK\_LRK10L-1 domain diagram (part 1)

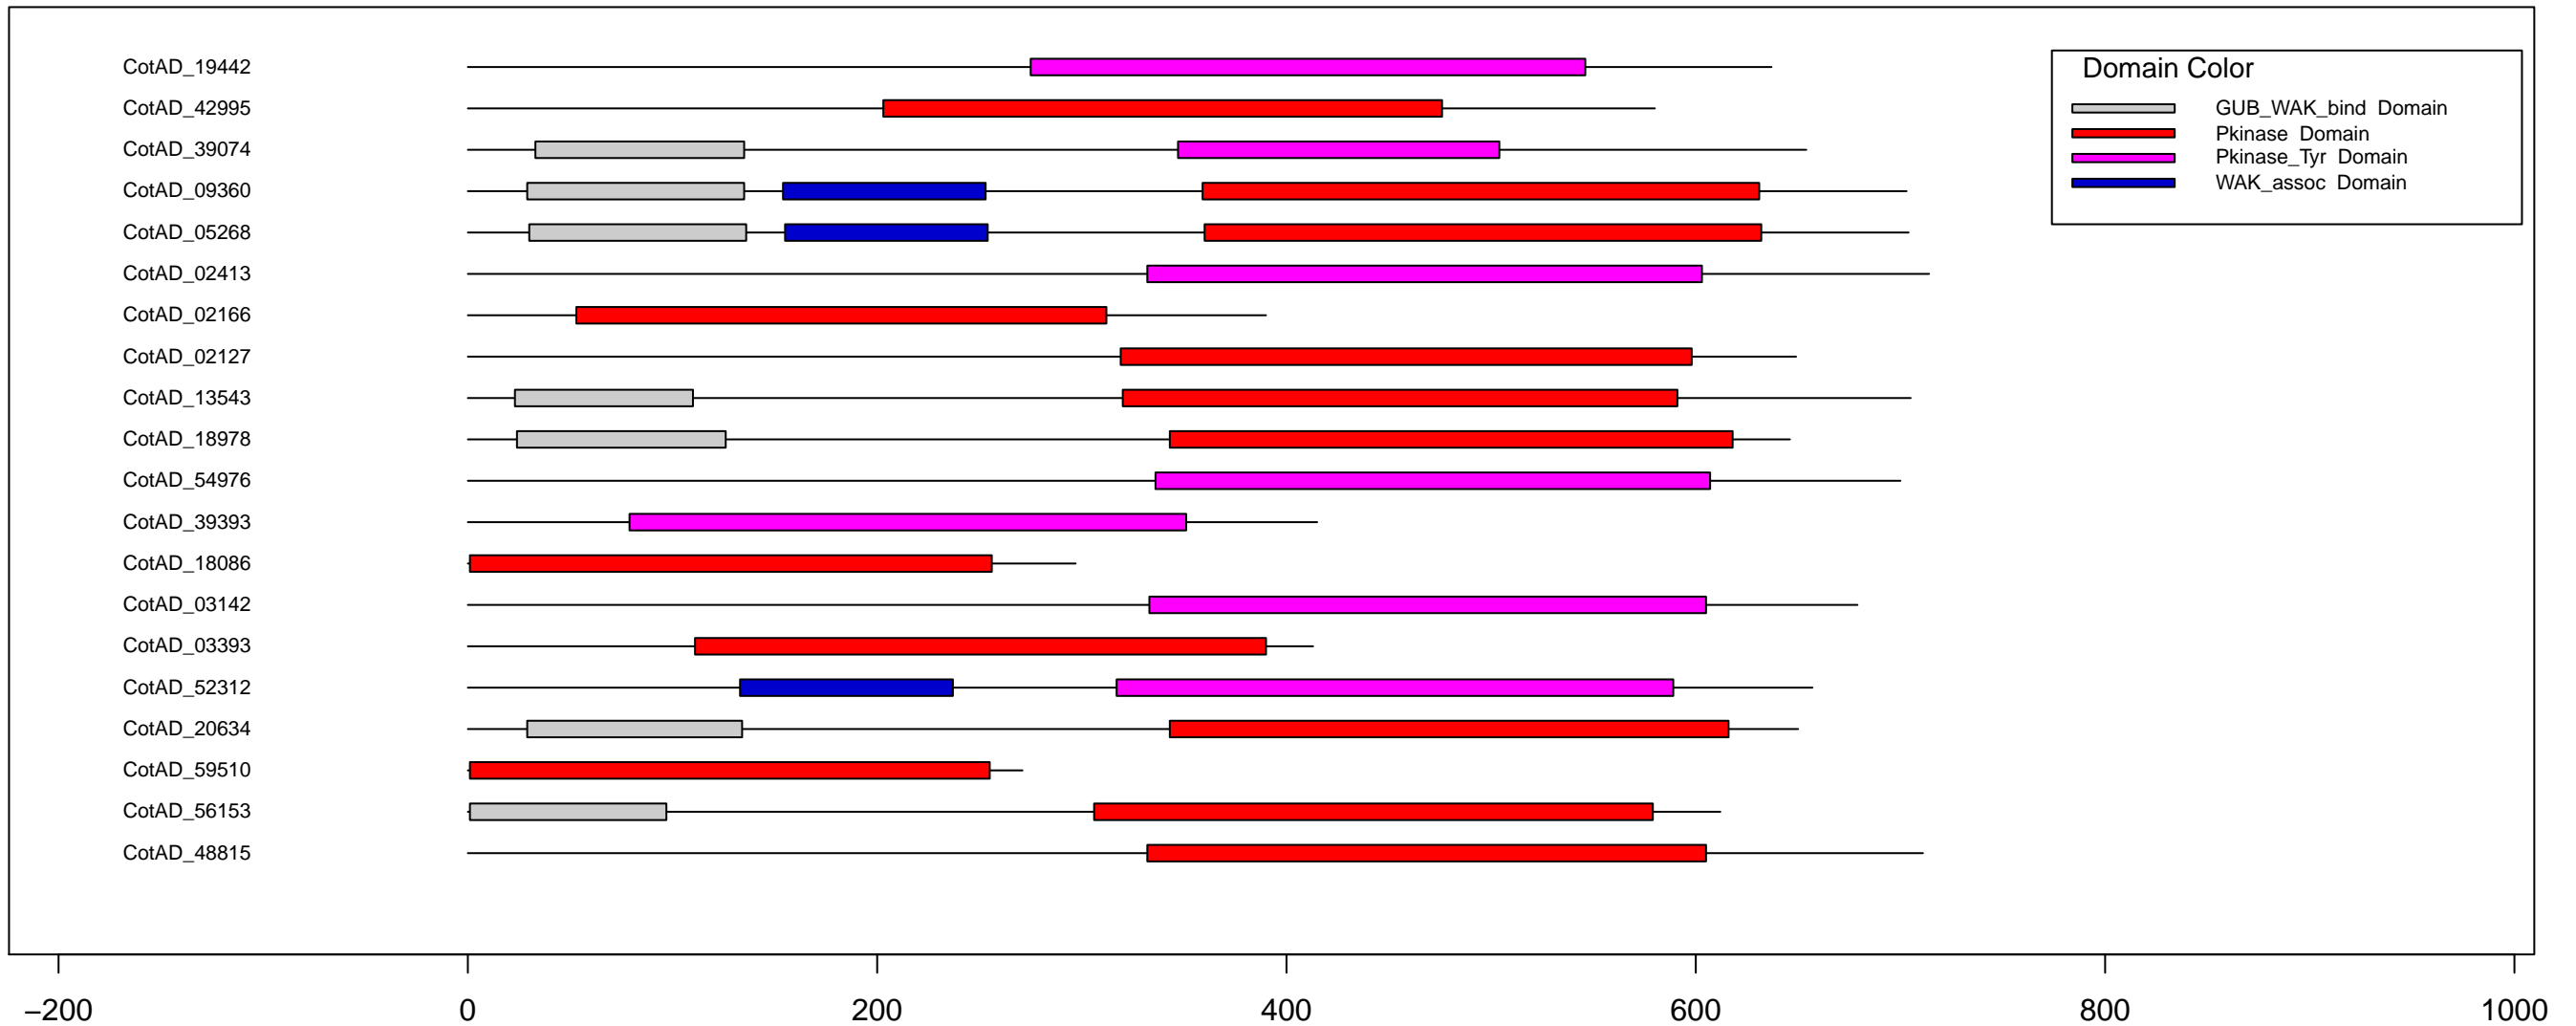

### G.hi RLK-Pelle\_WAK\_LRK10L-1 domain diagram (part 2)

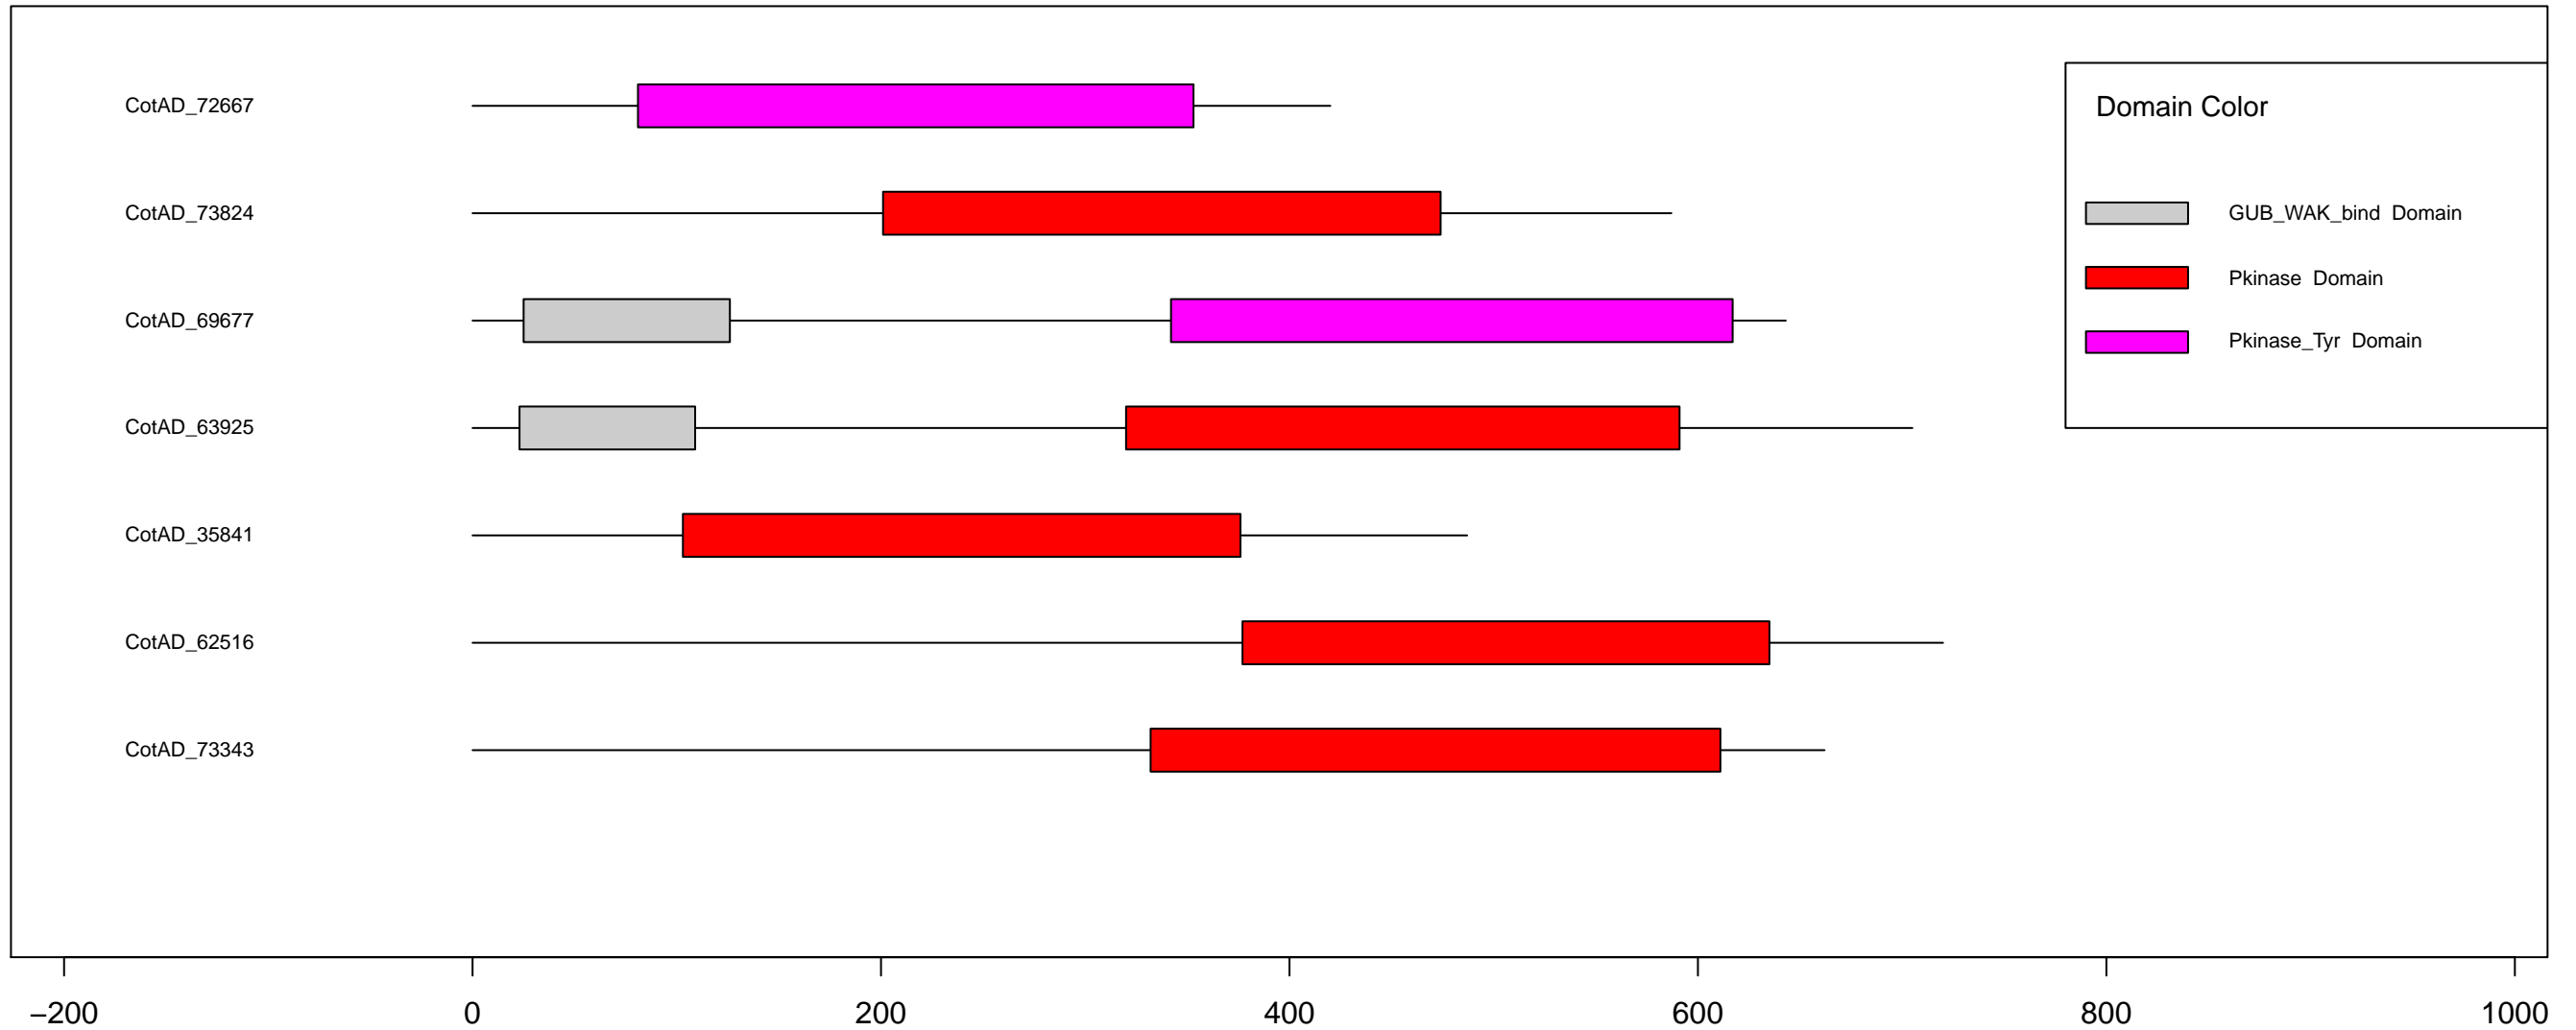

### G.hi RLK-Pelle\_WAK domain diagram (part 1)

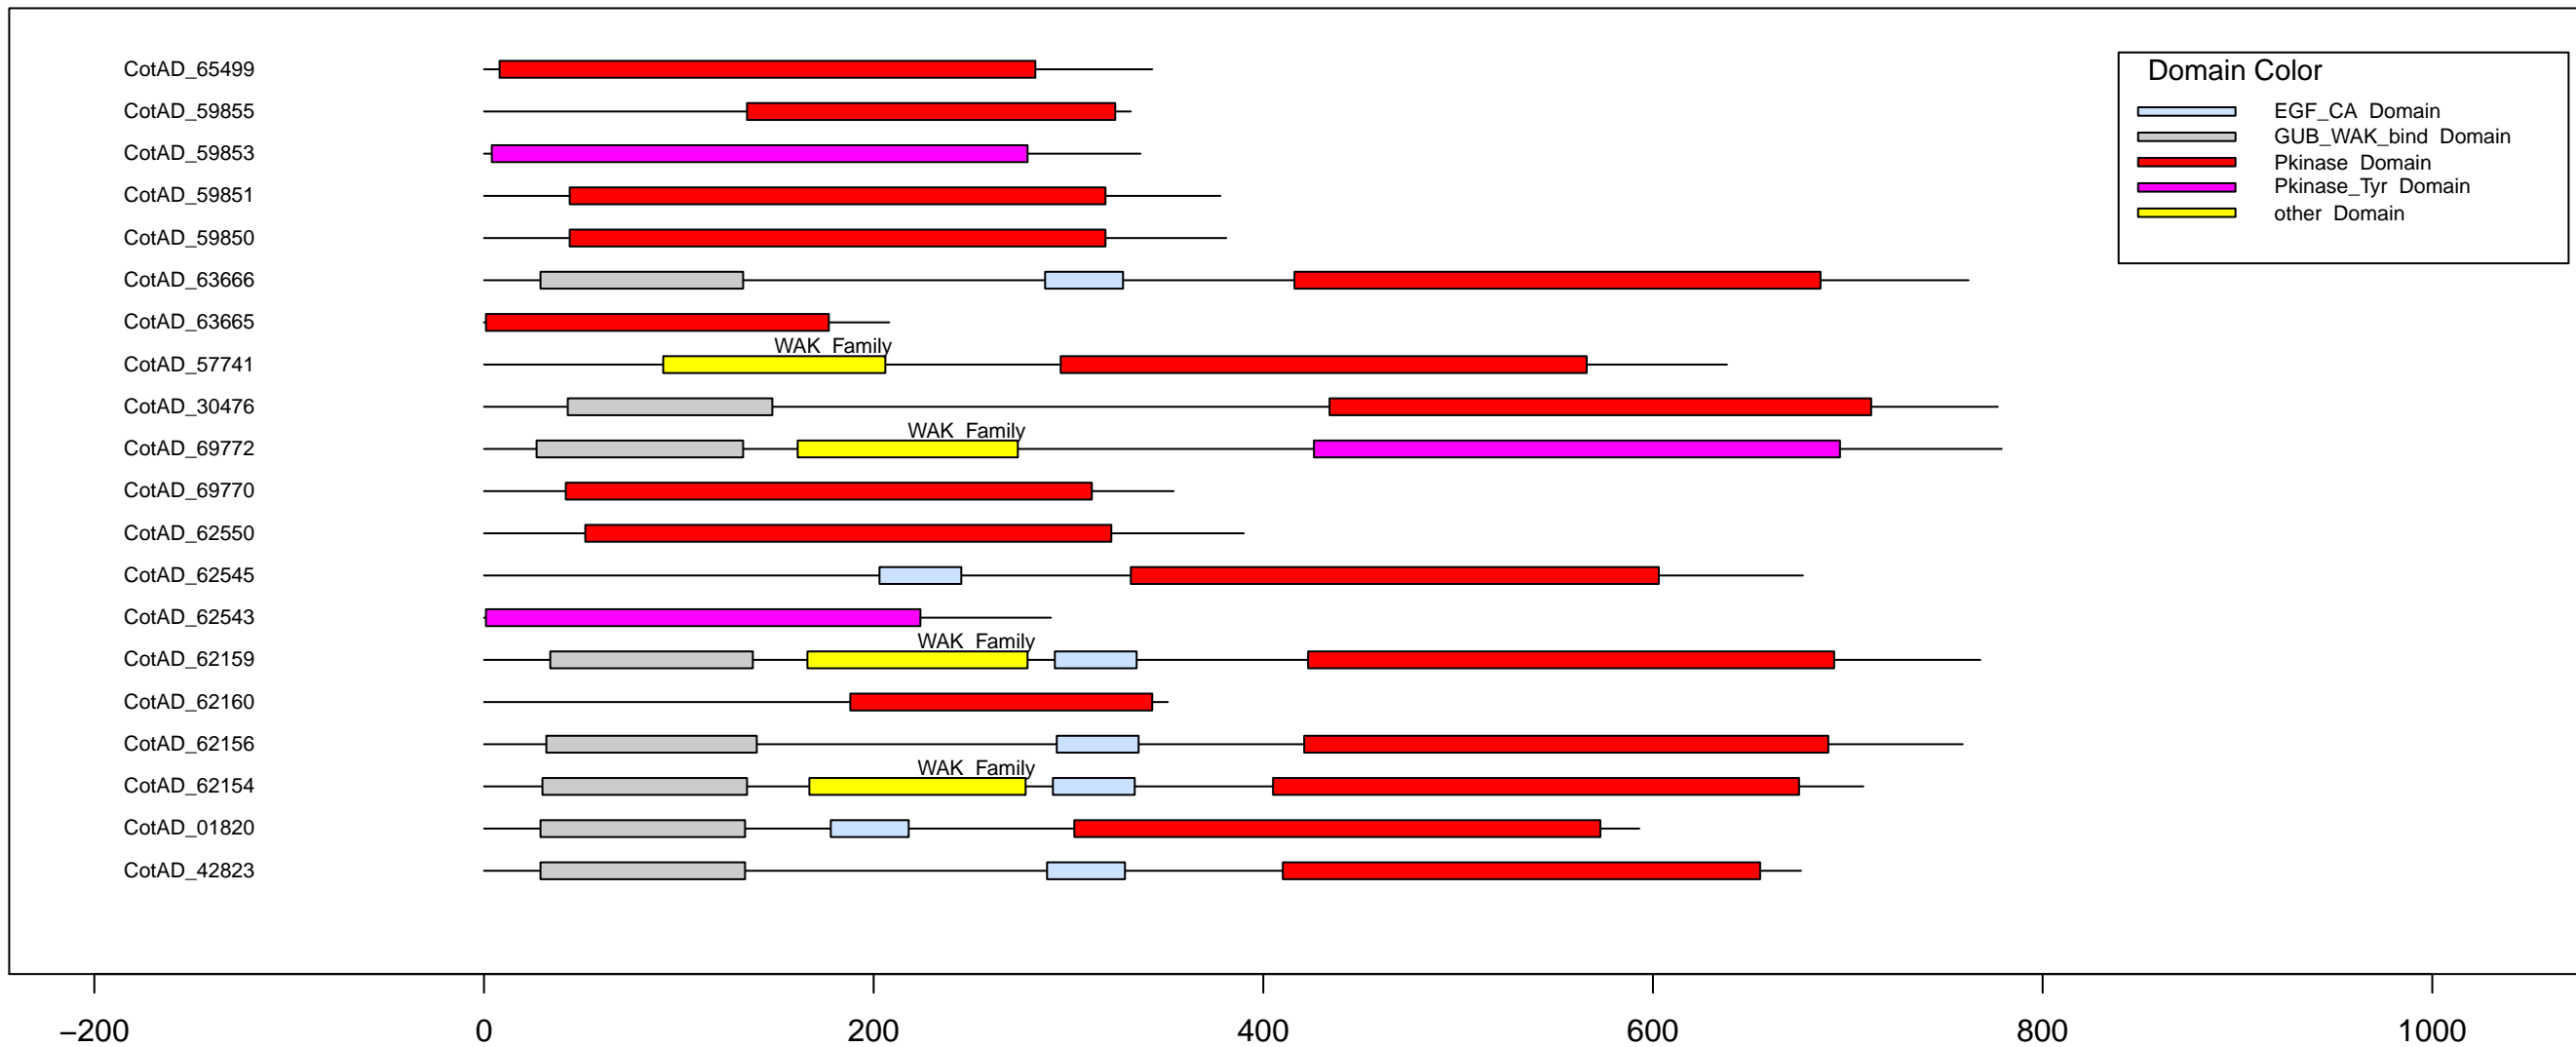

# G.hi RLK-Pelle\_WAK domain diagram (part 2)

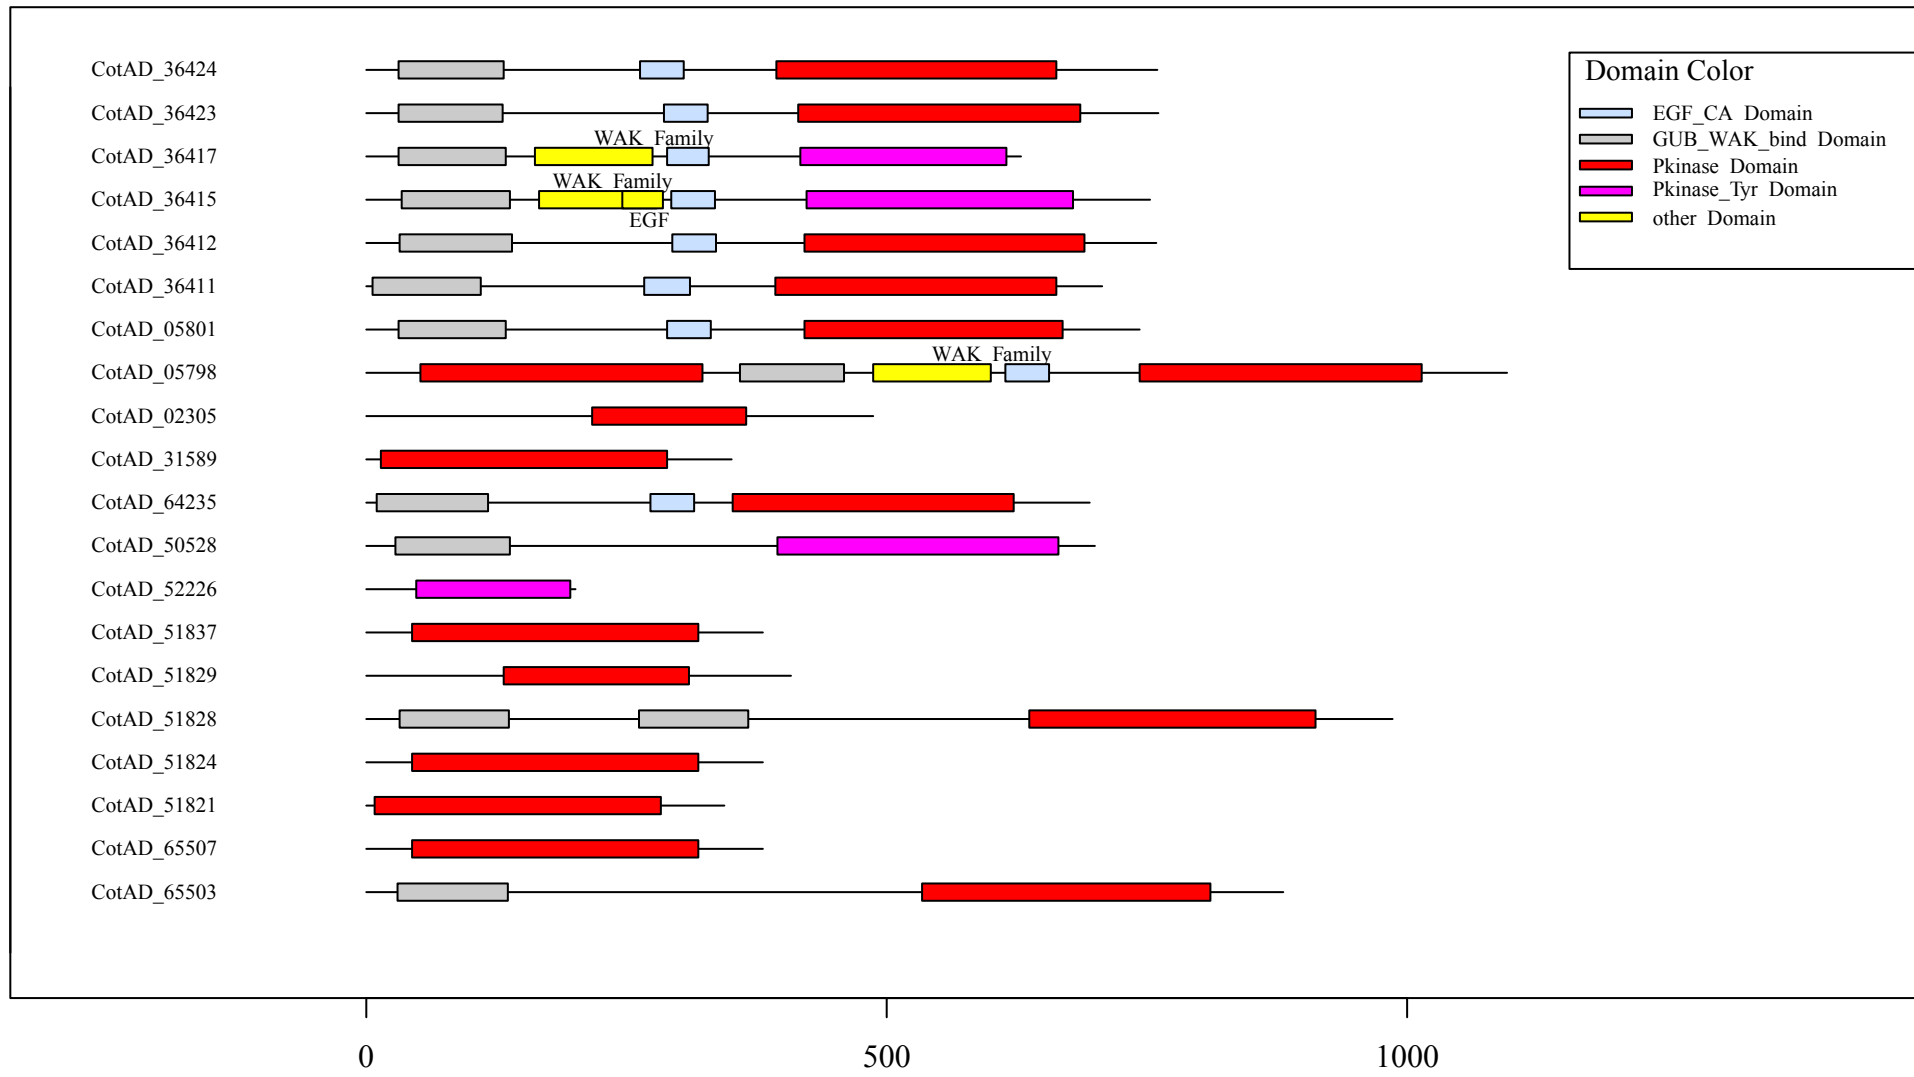

### G.hi RLK-Pelle\_WAK domain diagram (part 3)

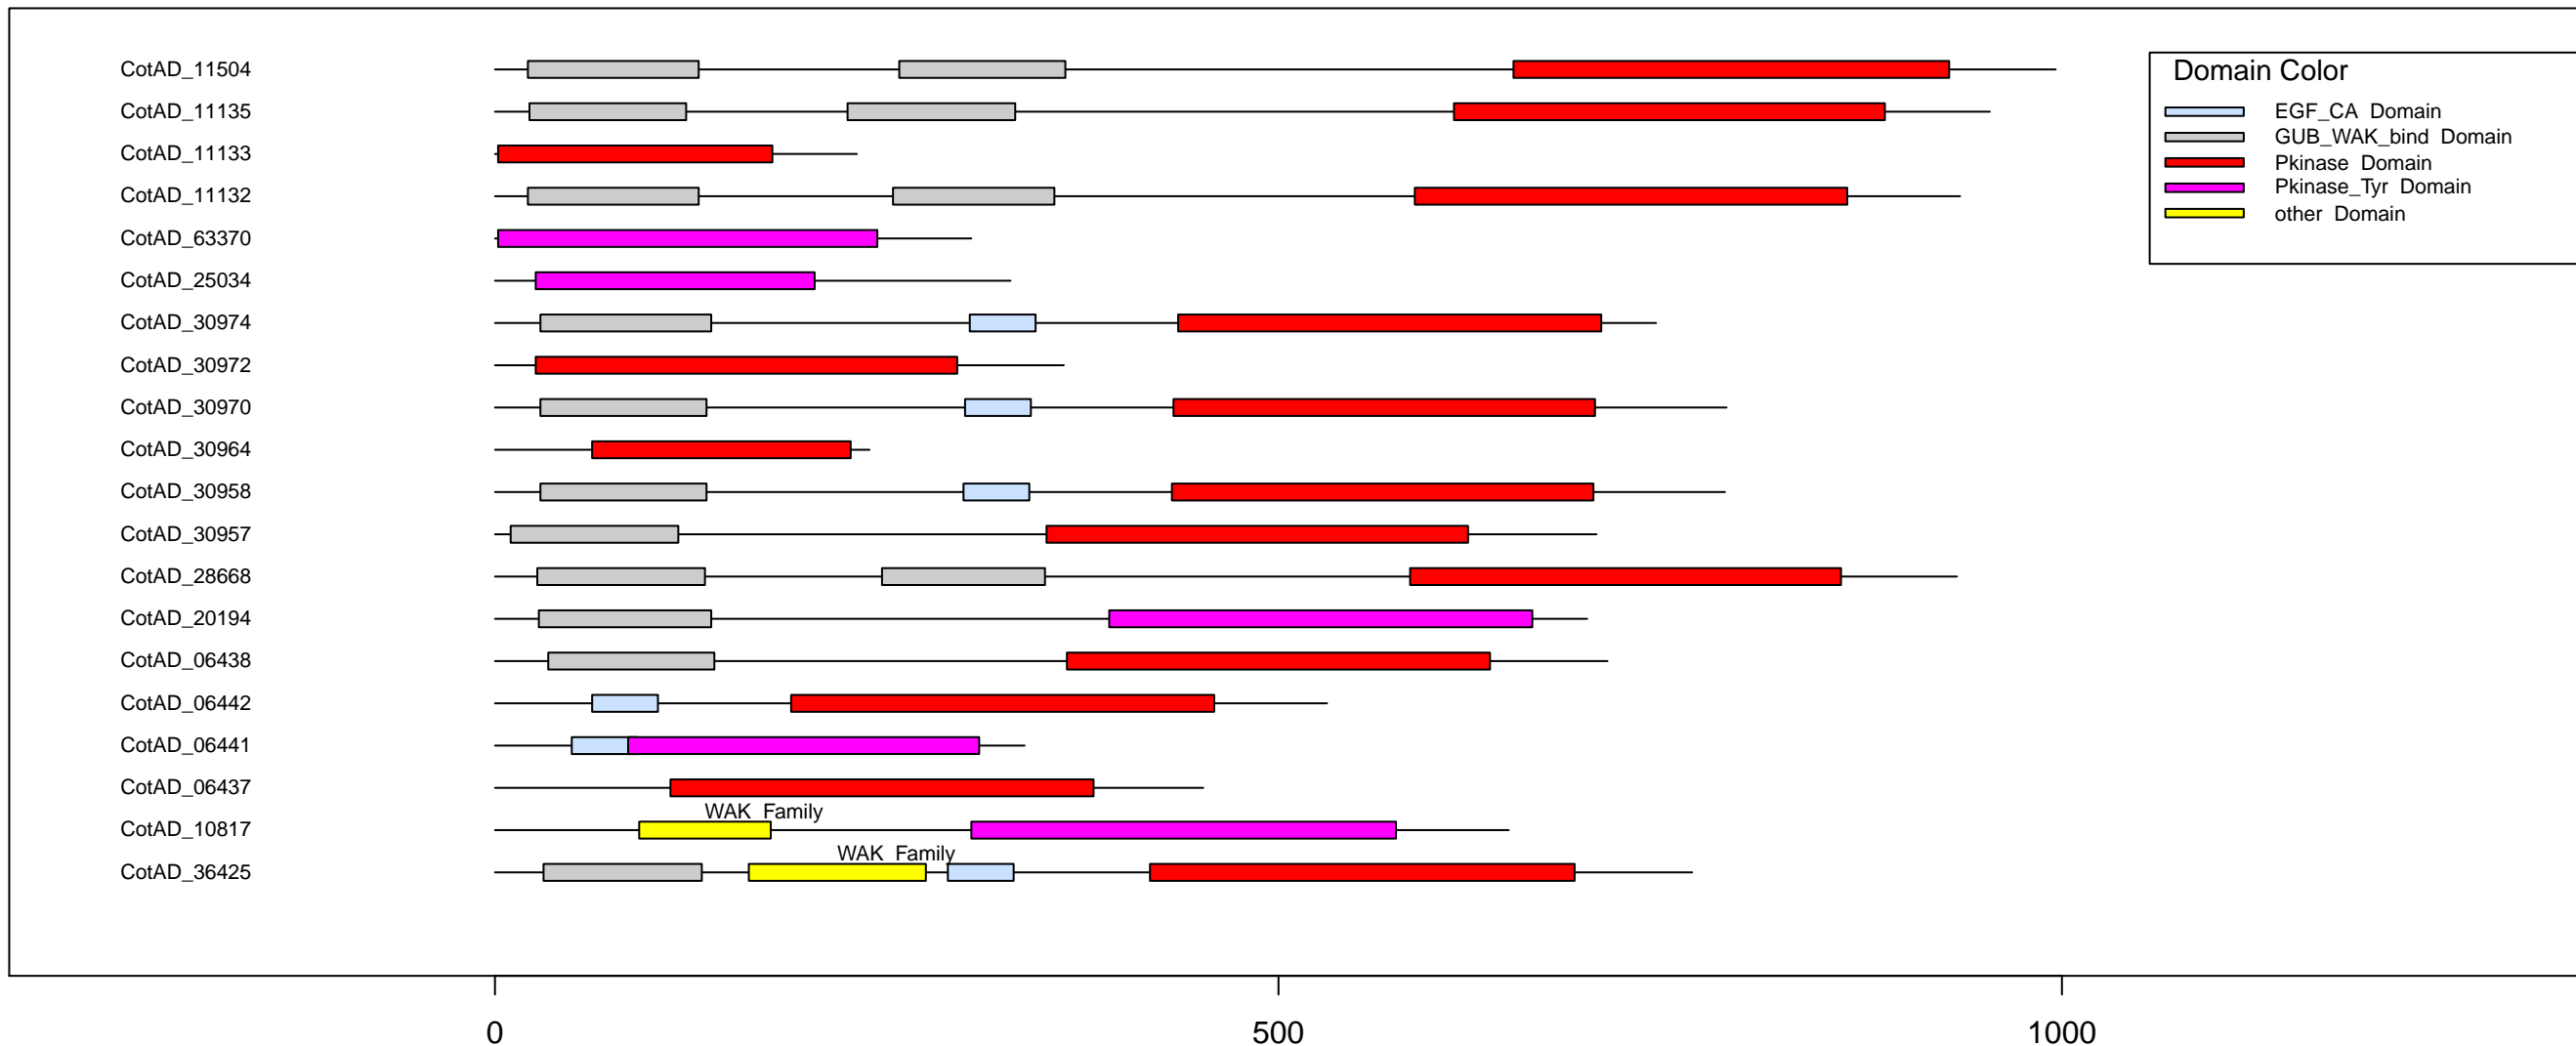

### G.hi RLK-Pelle\_WAK domain diagram (part 4)

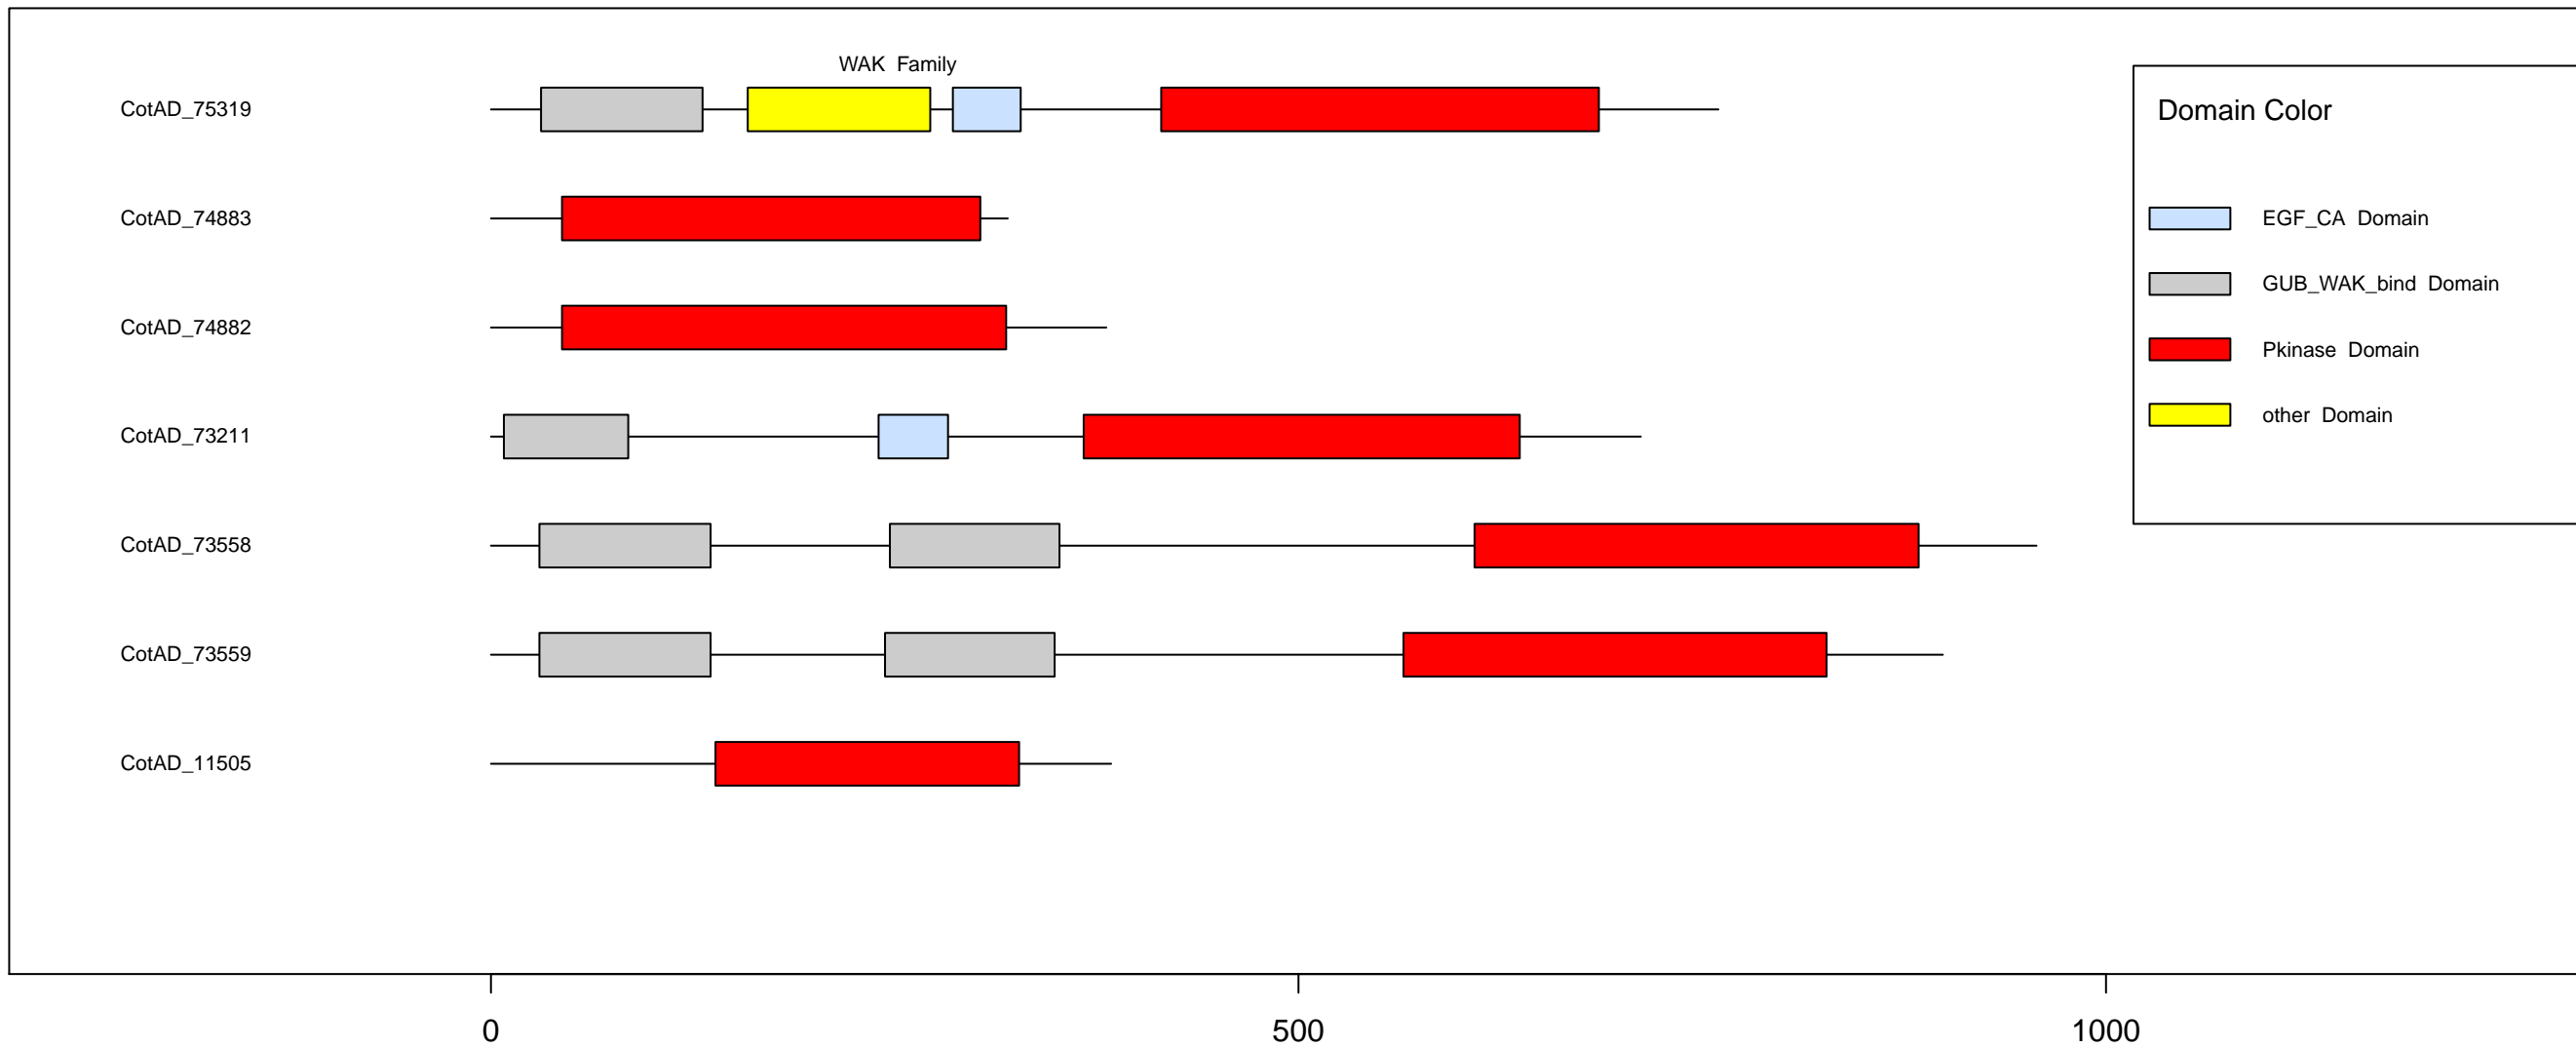

# G.hi SCY1\_SCYL1 domain diagram (all)

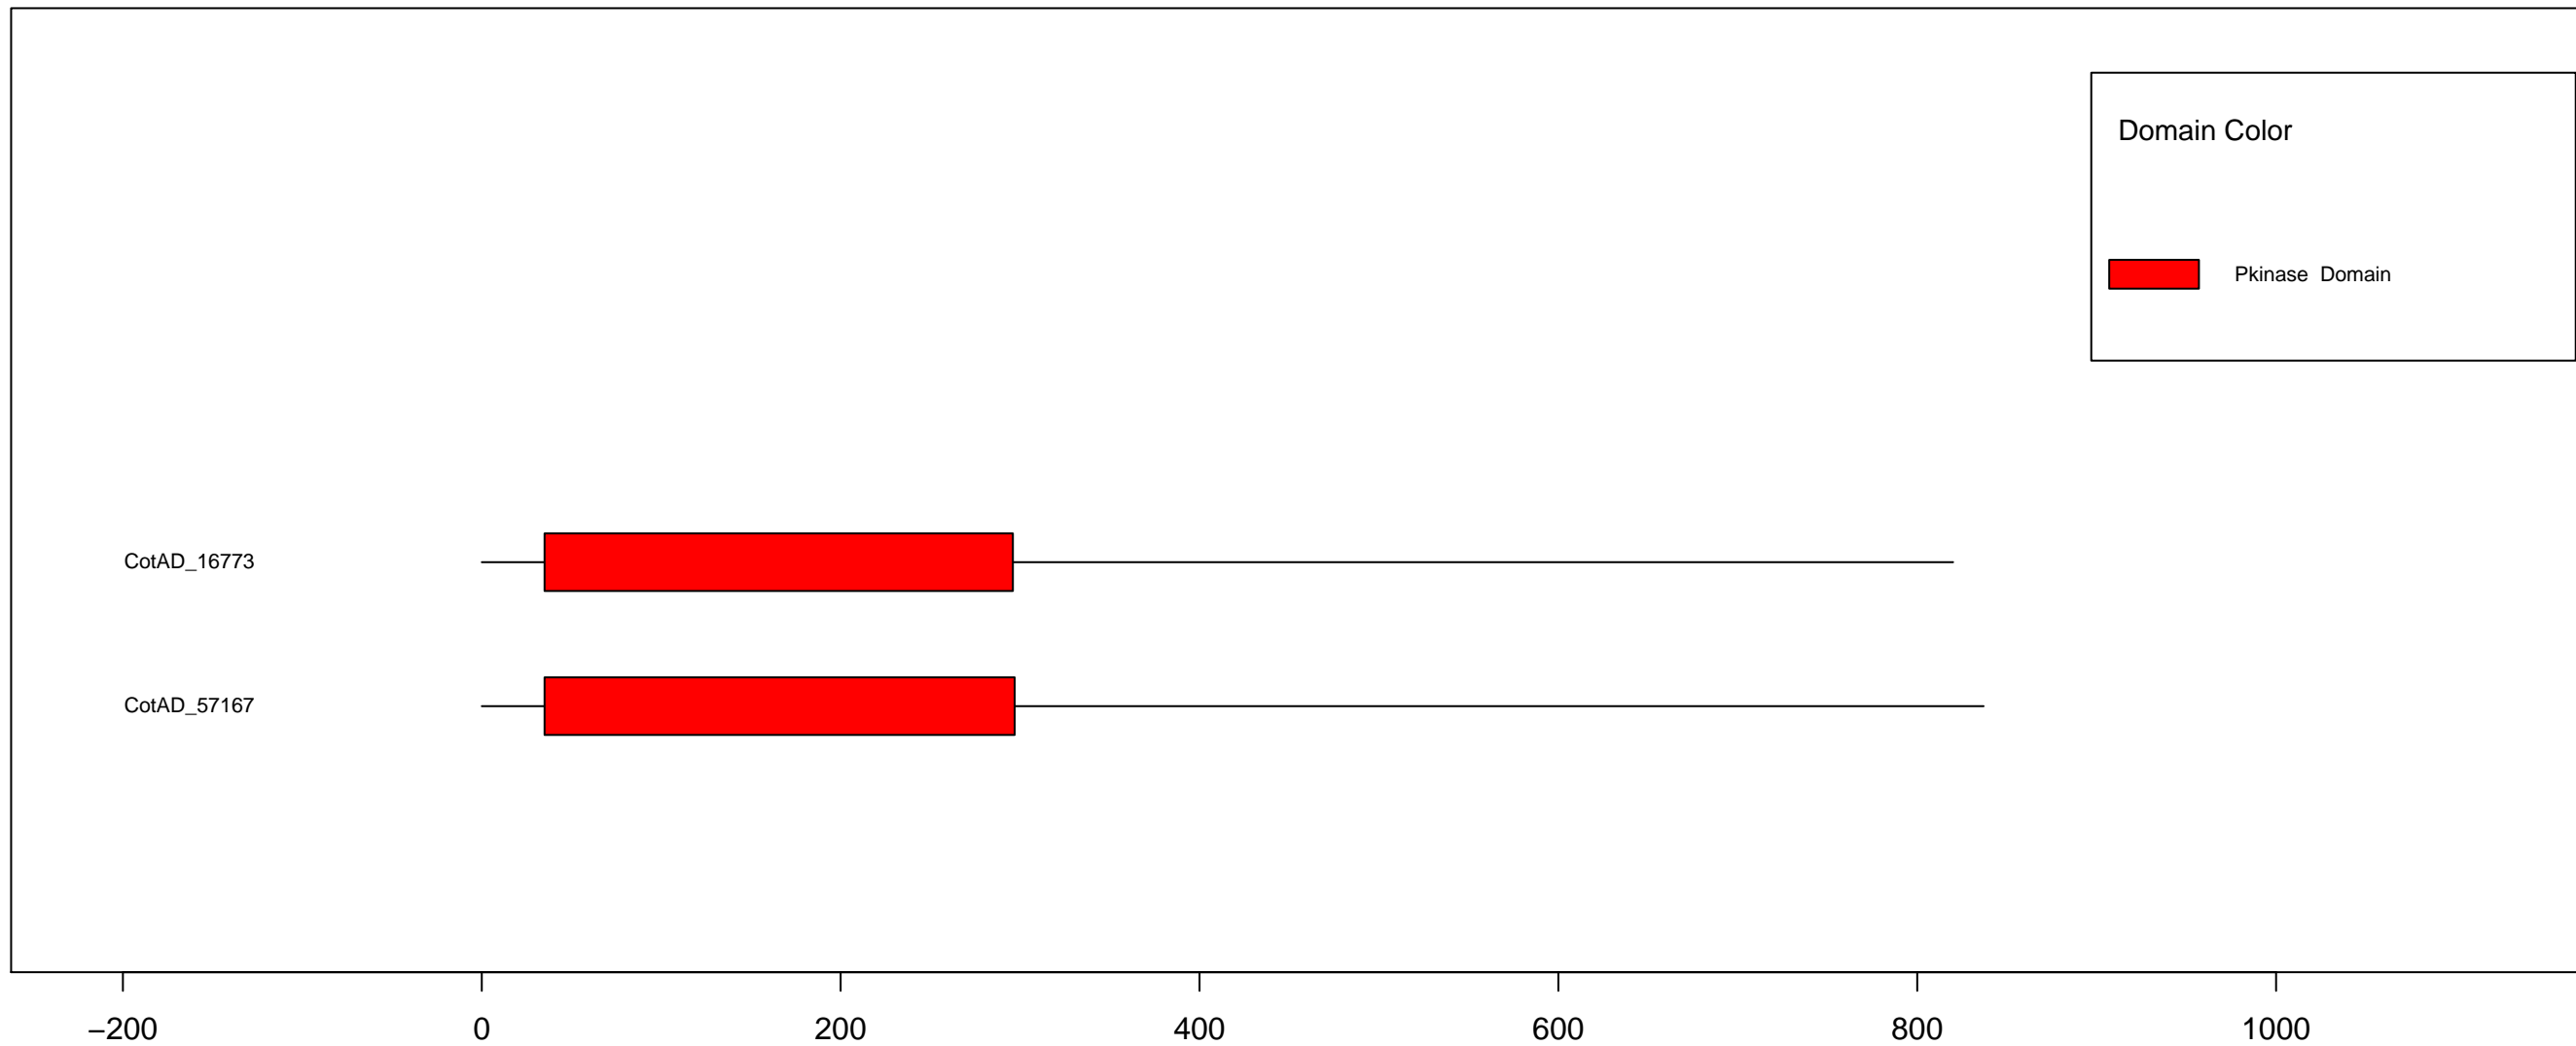



# G.hi SCY1\_SCYL2 domain diagram (all)

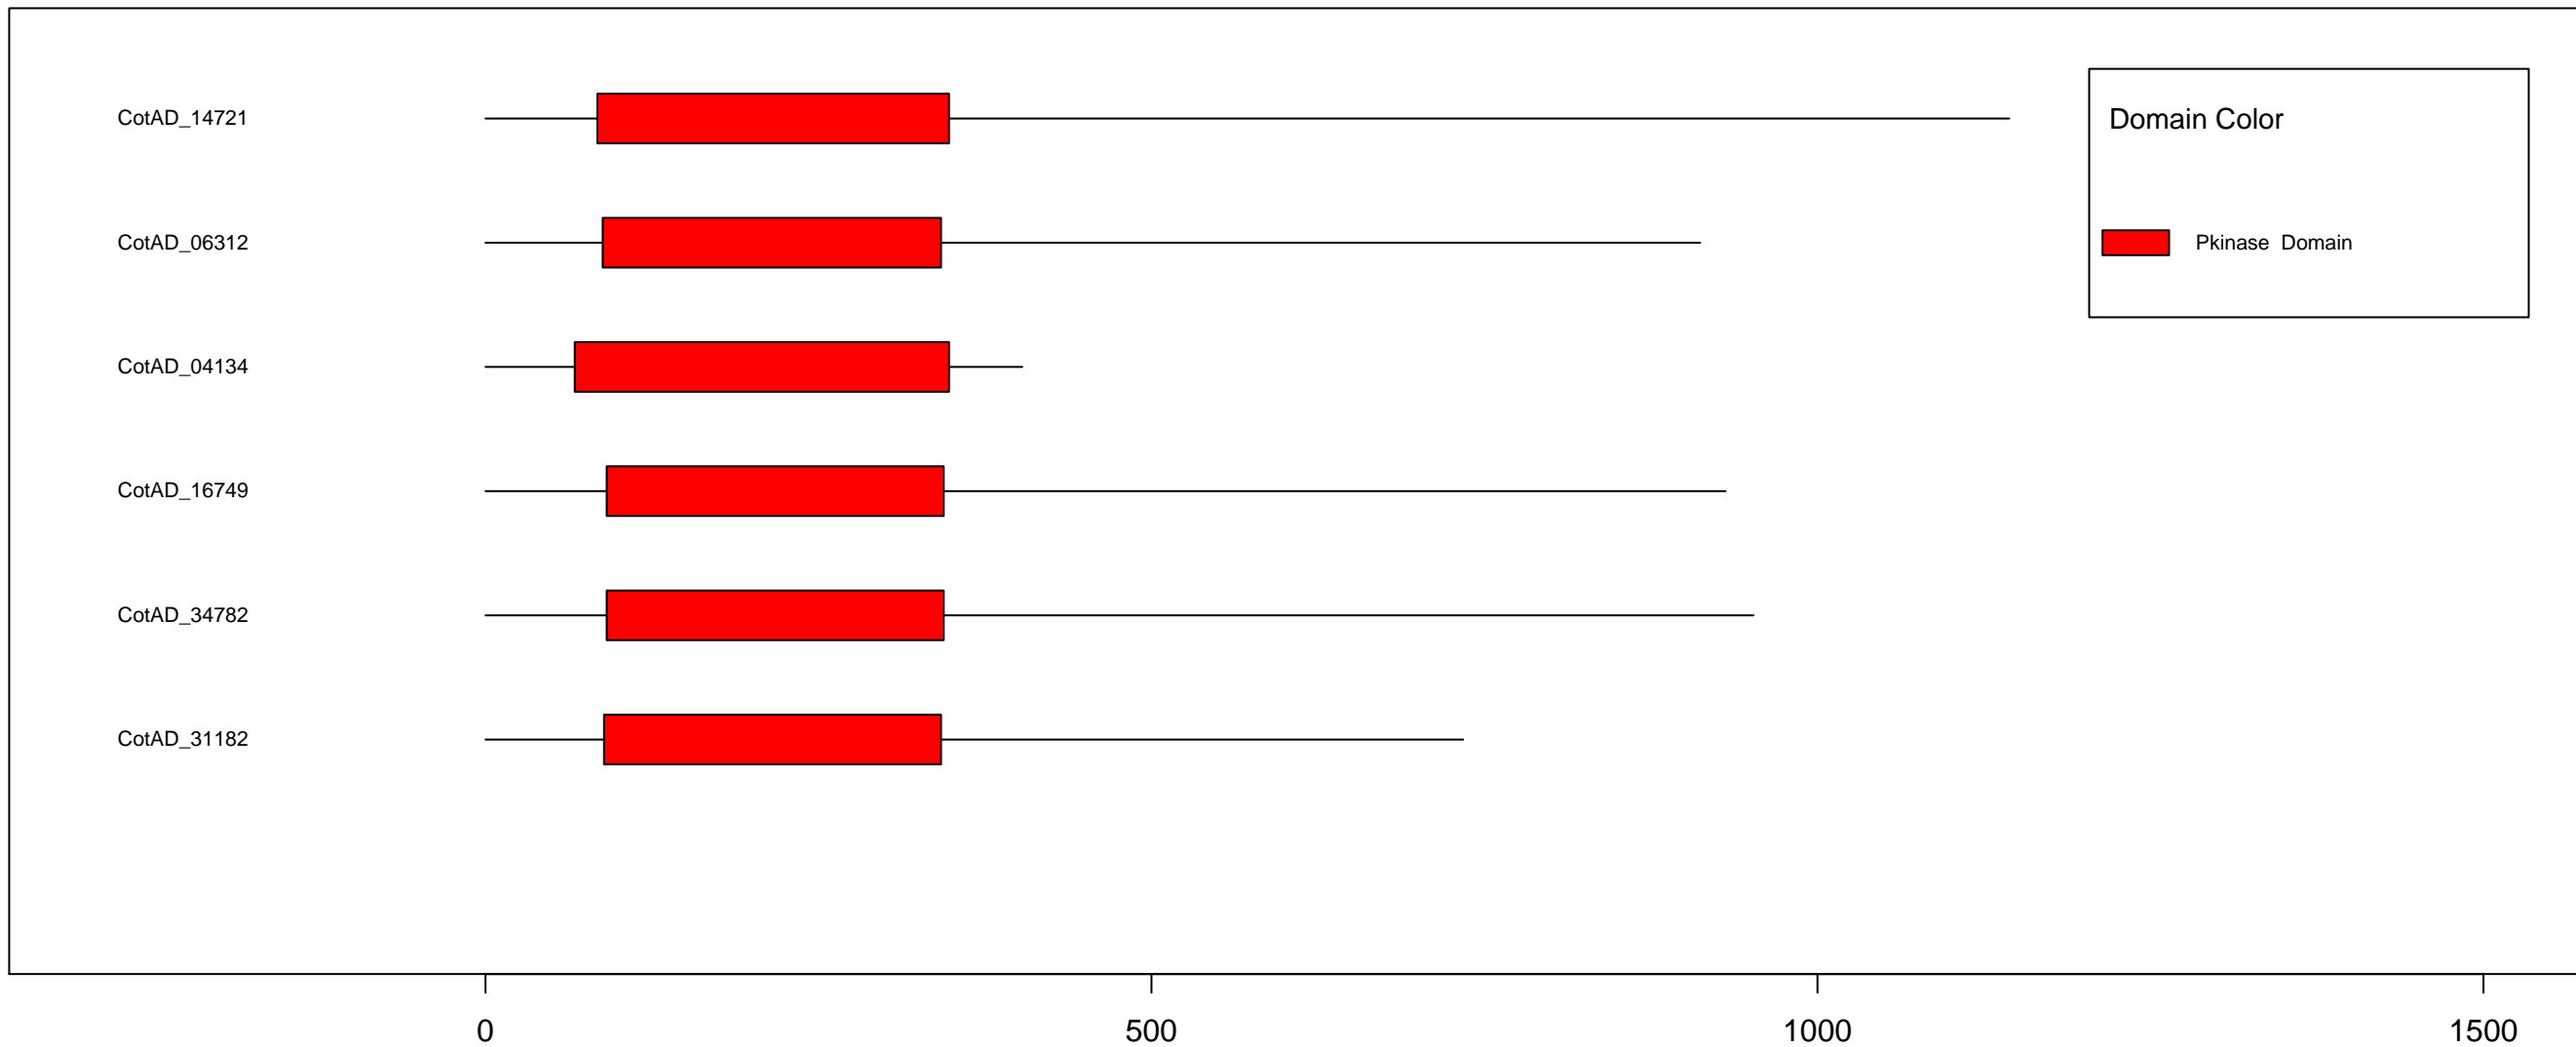

# G.hi STE\_STE11 domain diagram (part 1)

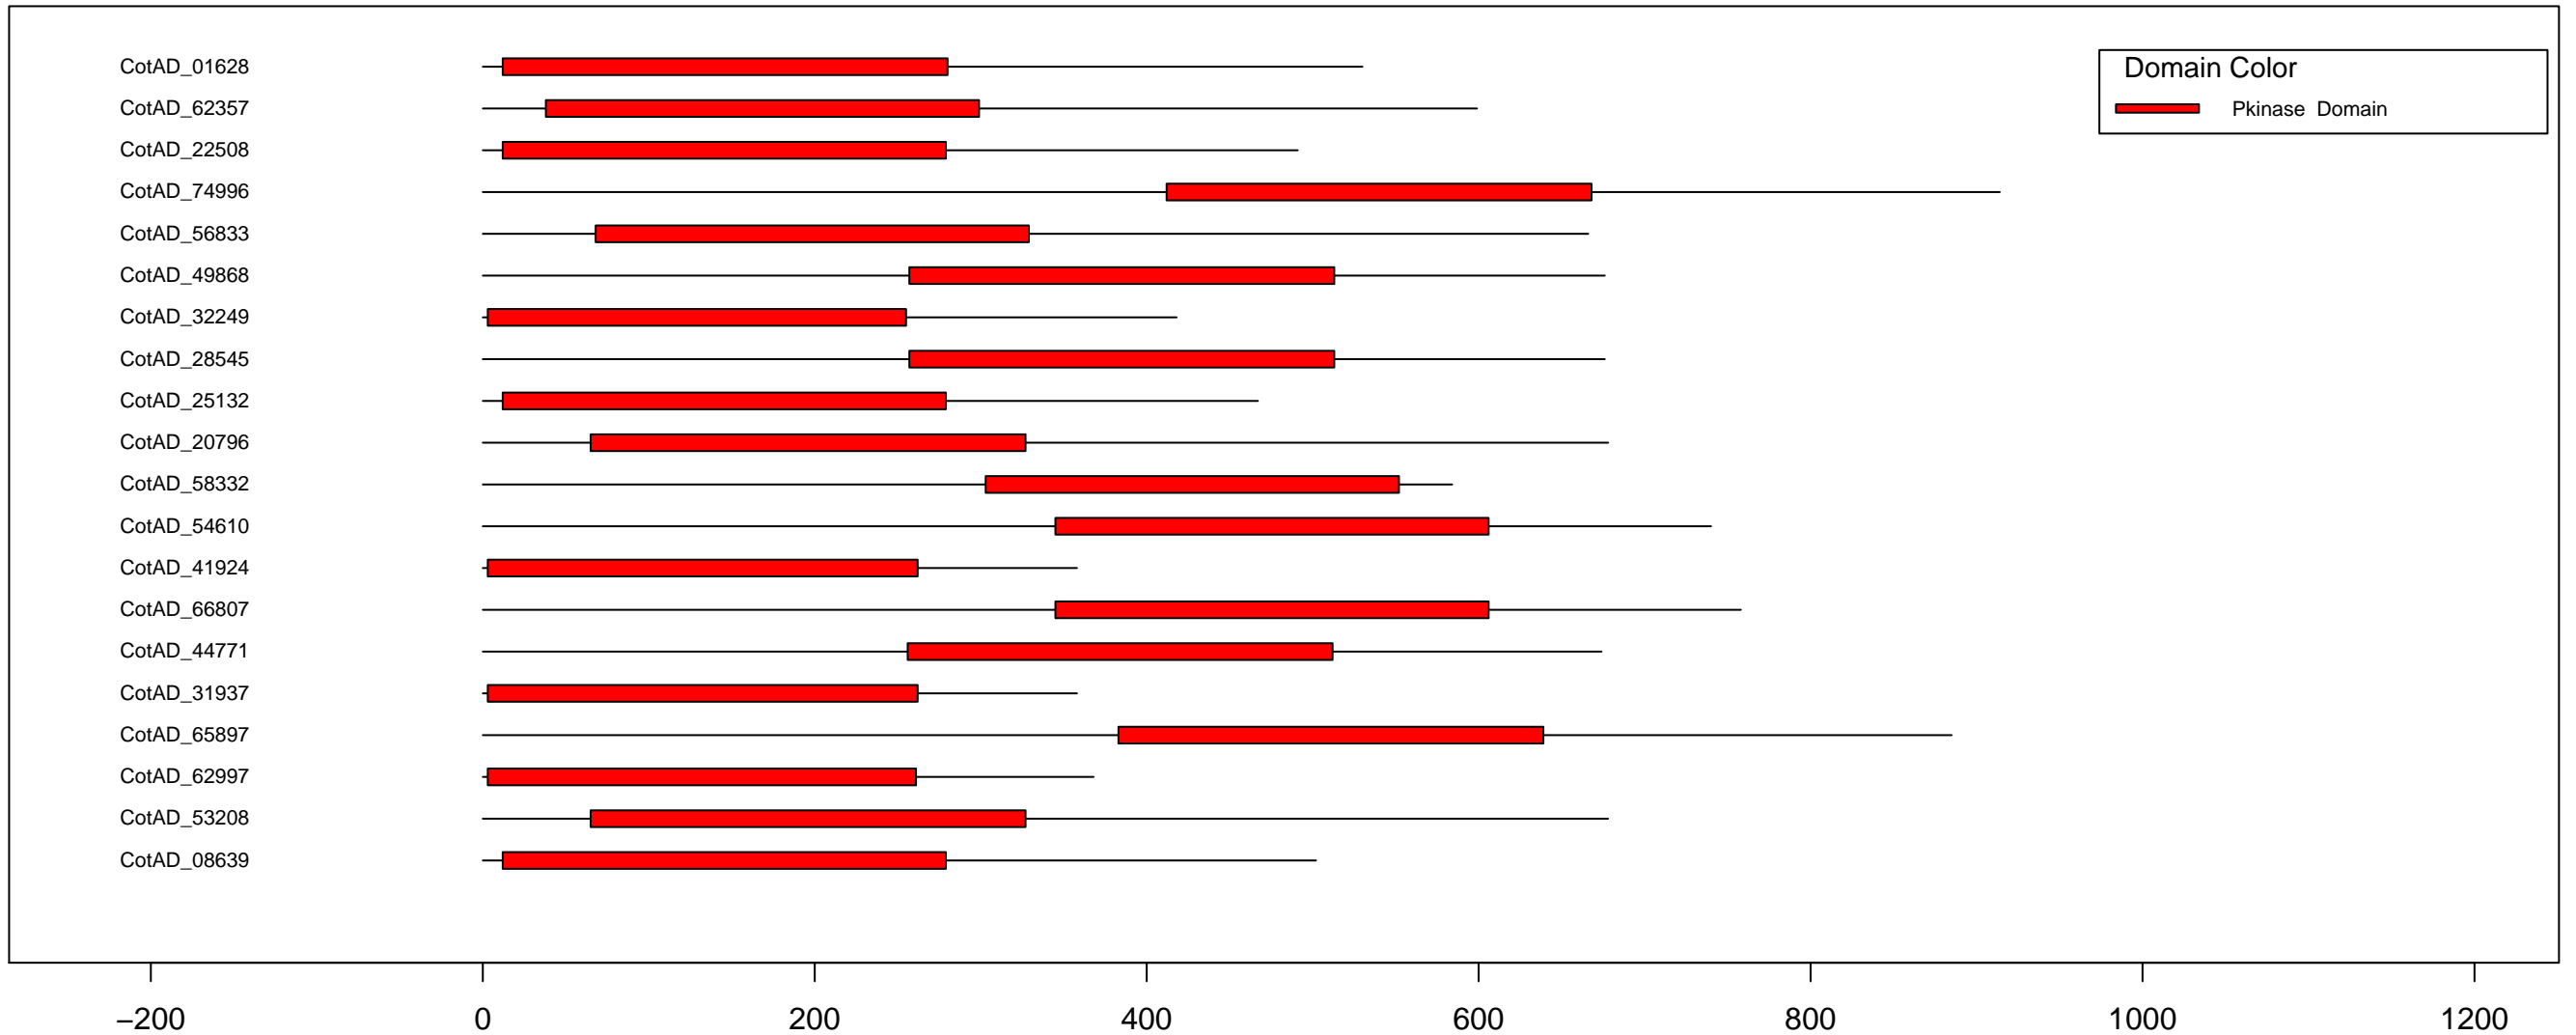

# G.hi STE\_STE11 domain diagram (part 2)

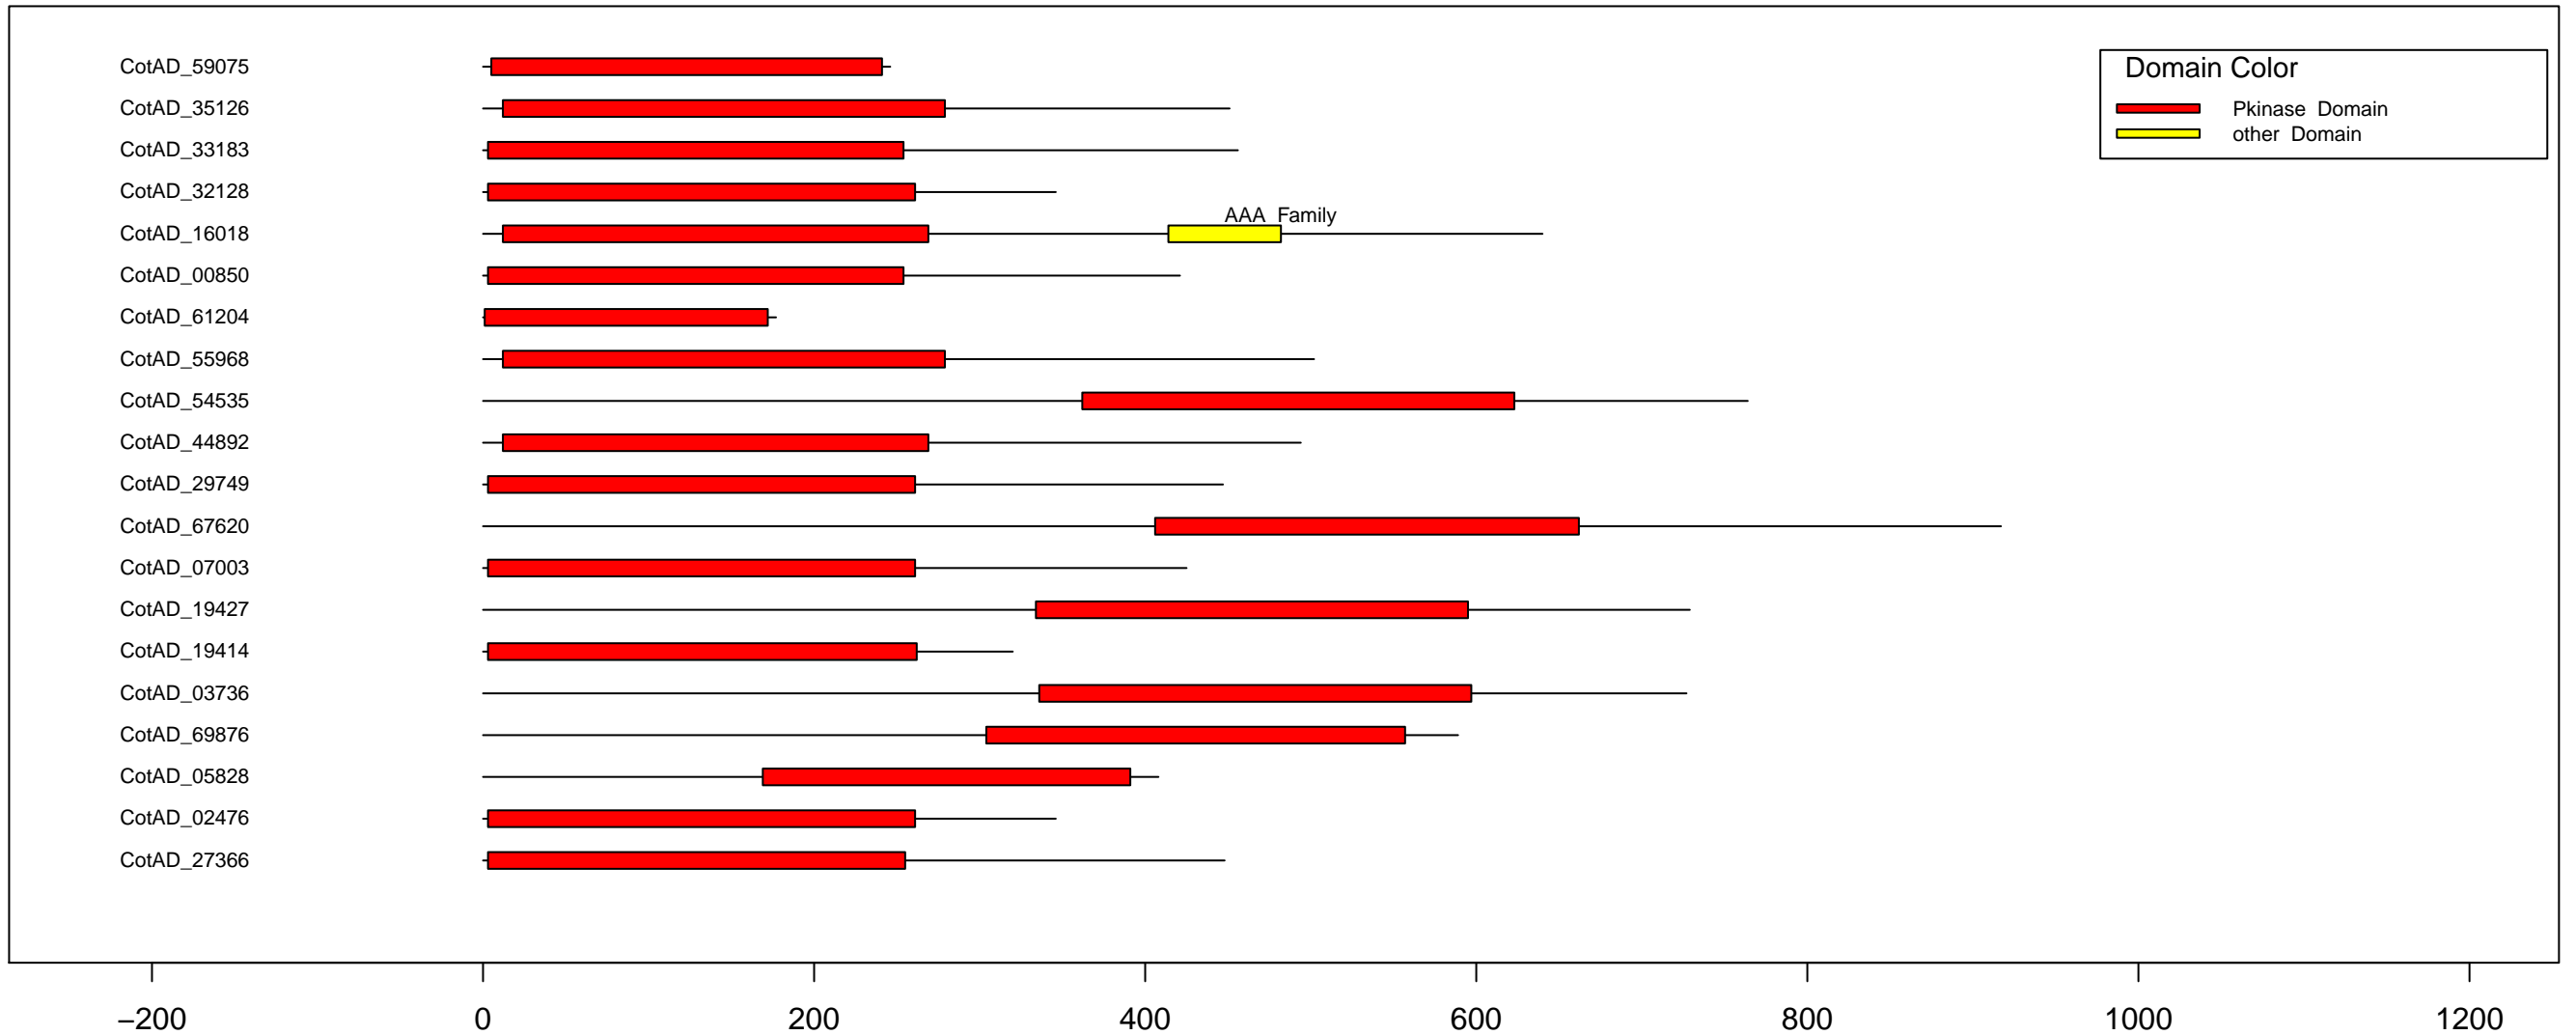

### G.hi STE\_STE11 domain diagram (part 3)

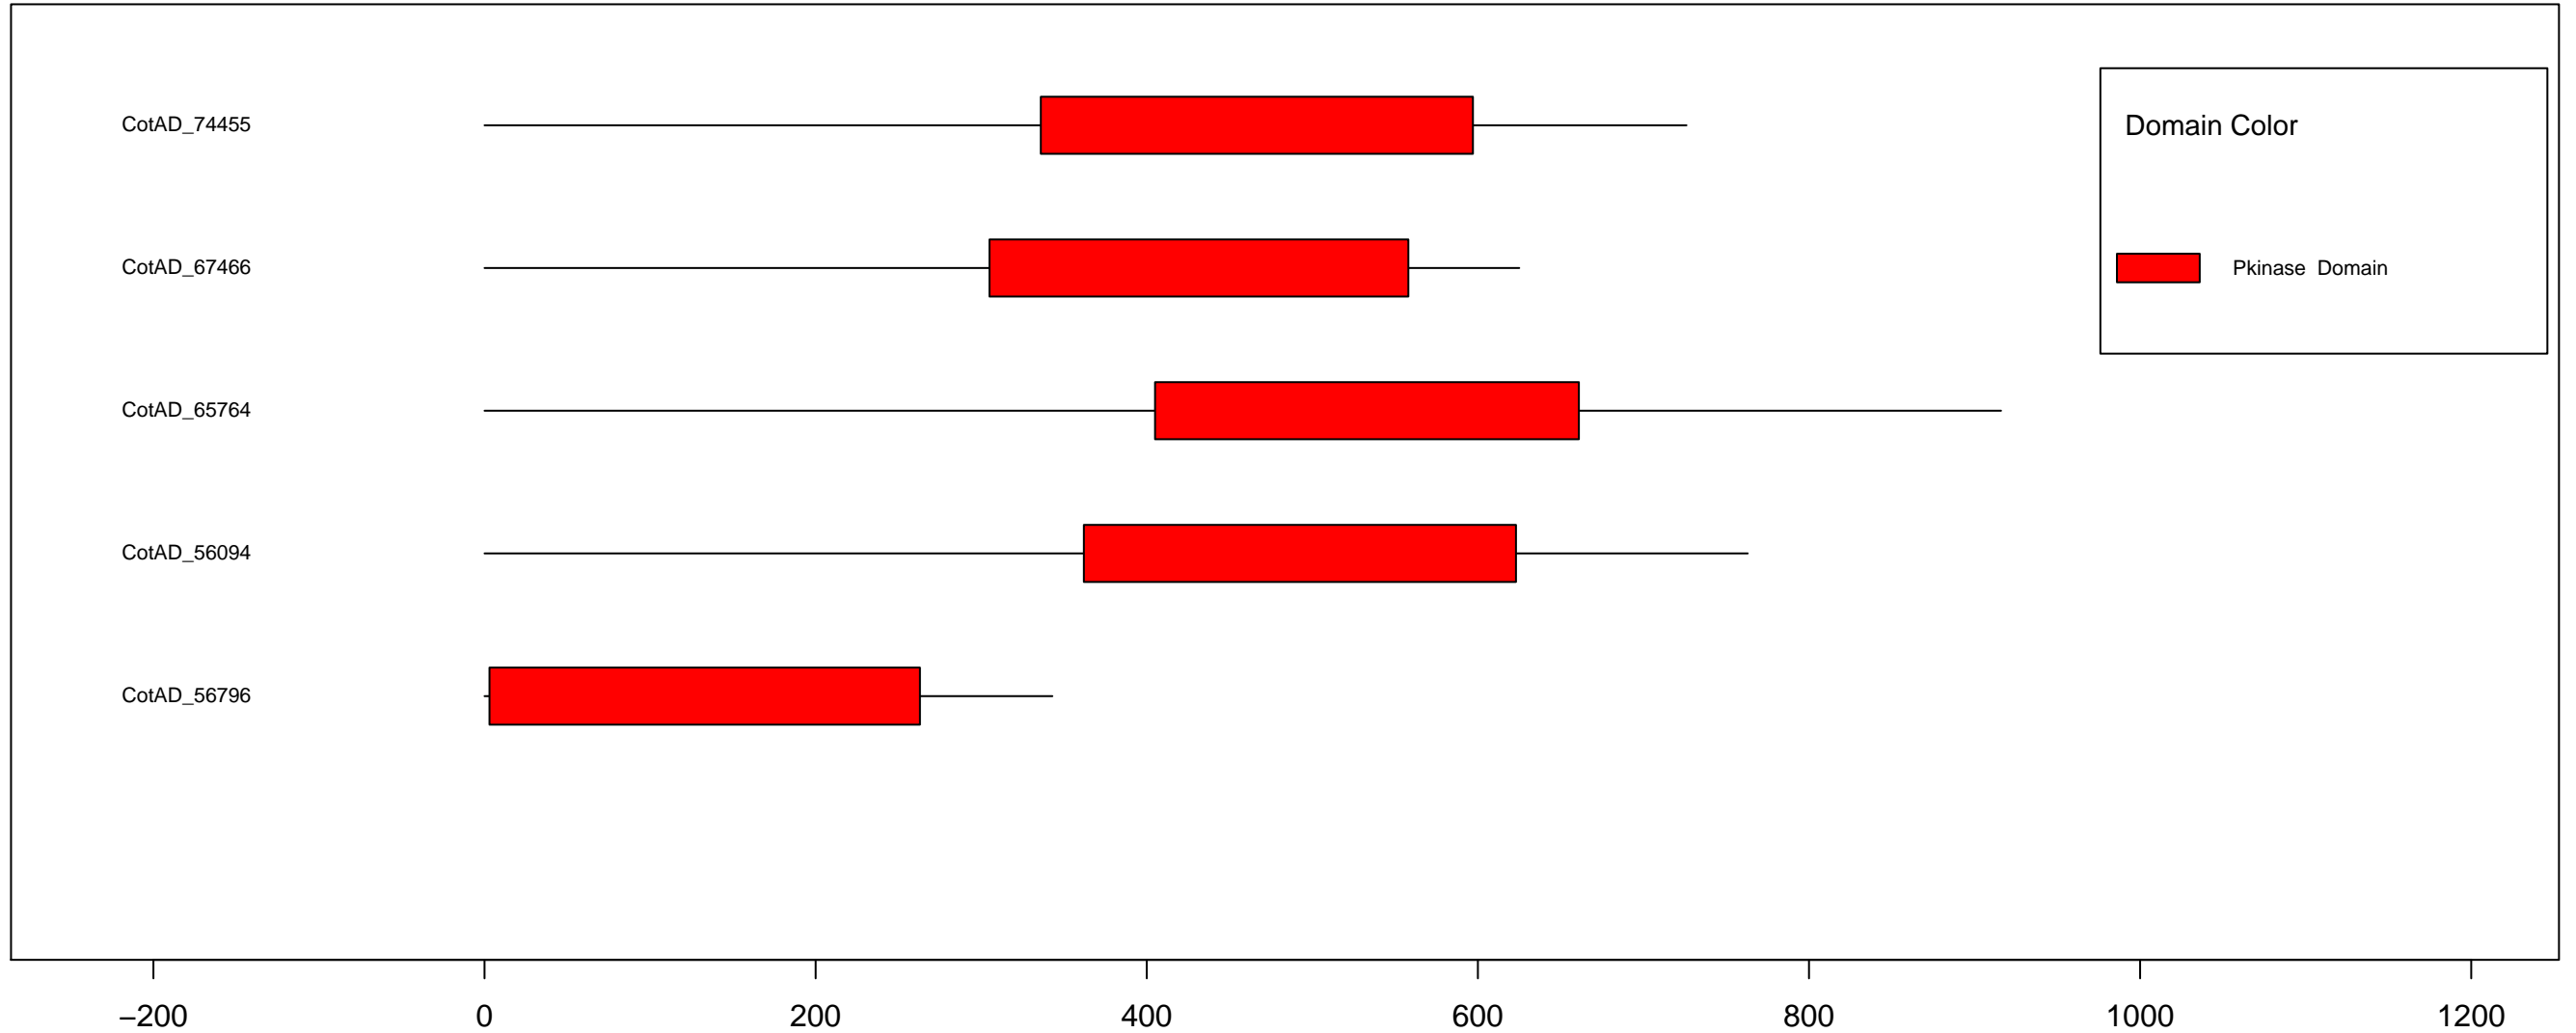

# G.hi STE\_STE20-Fray domain diagram (part 1)

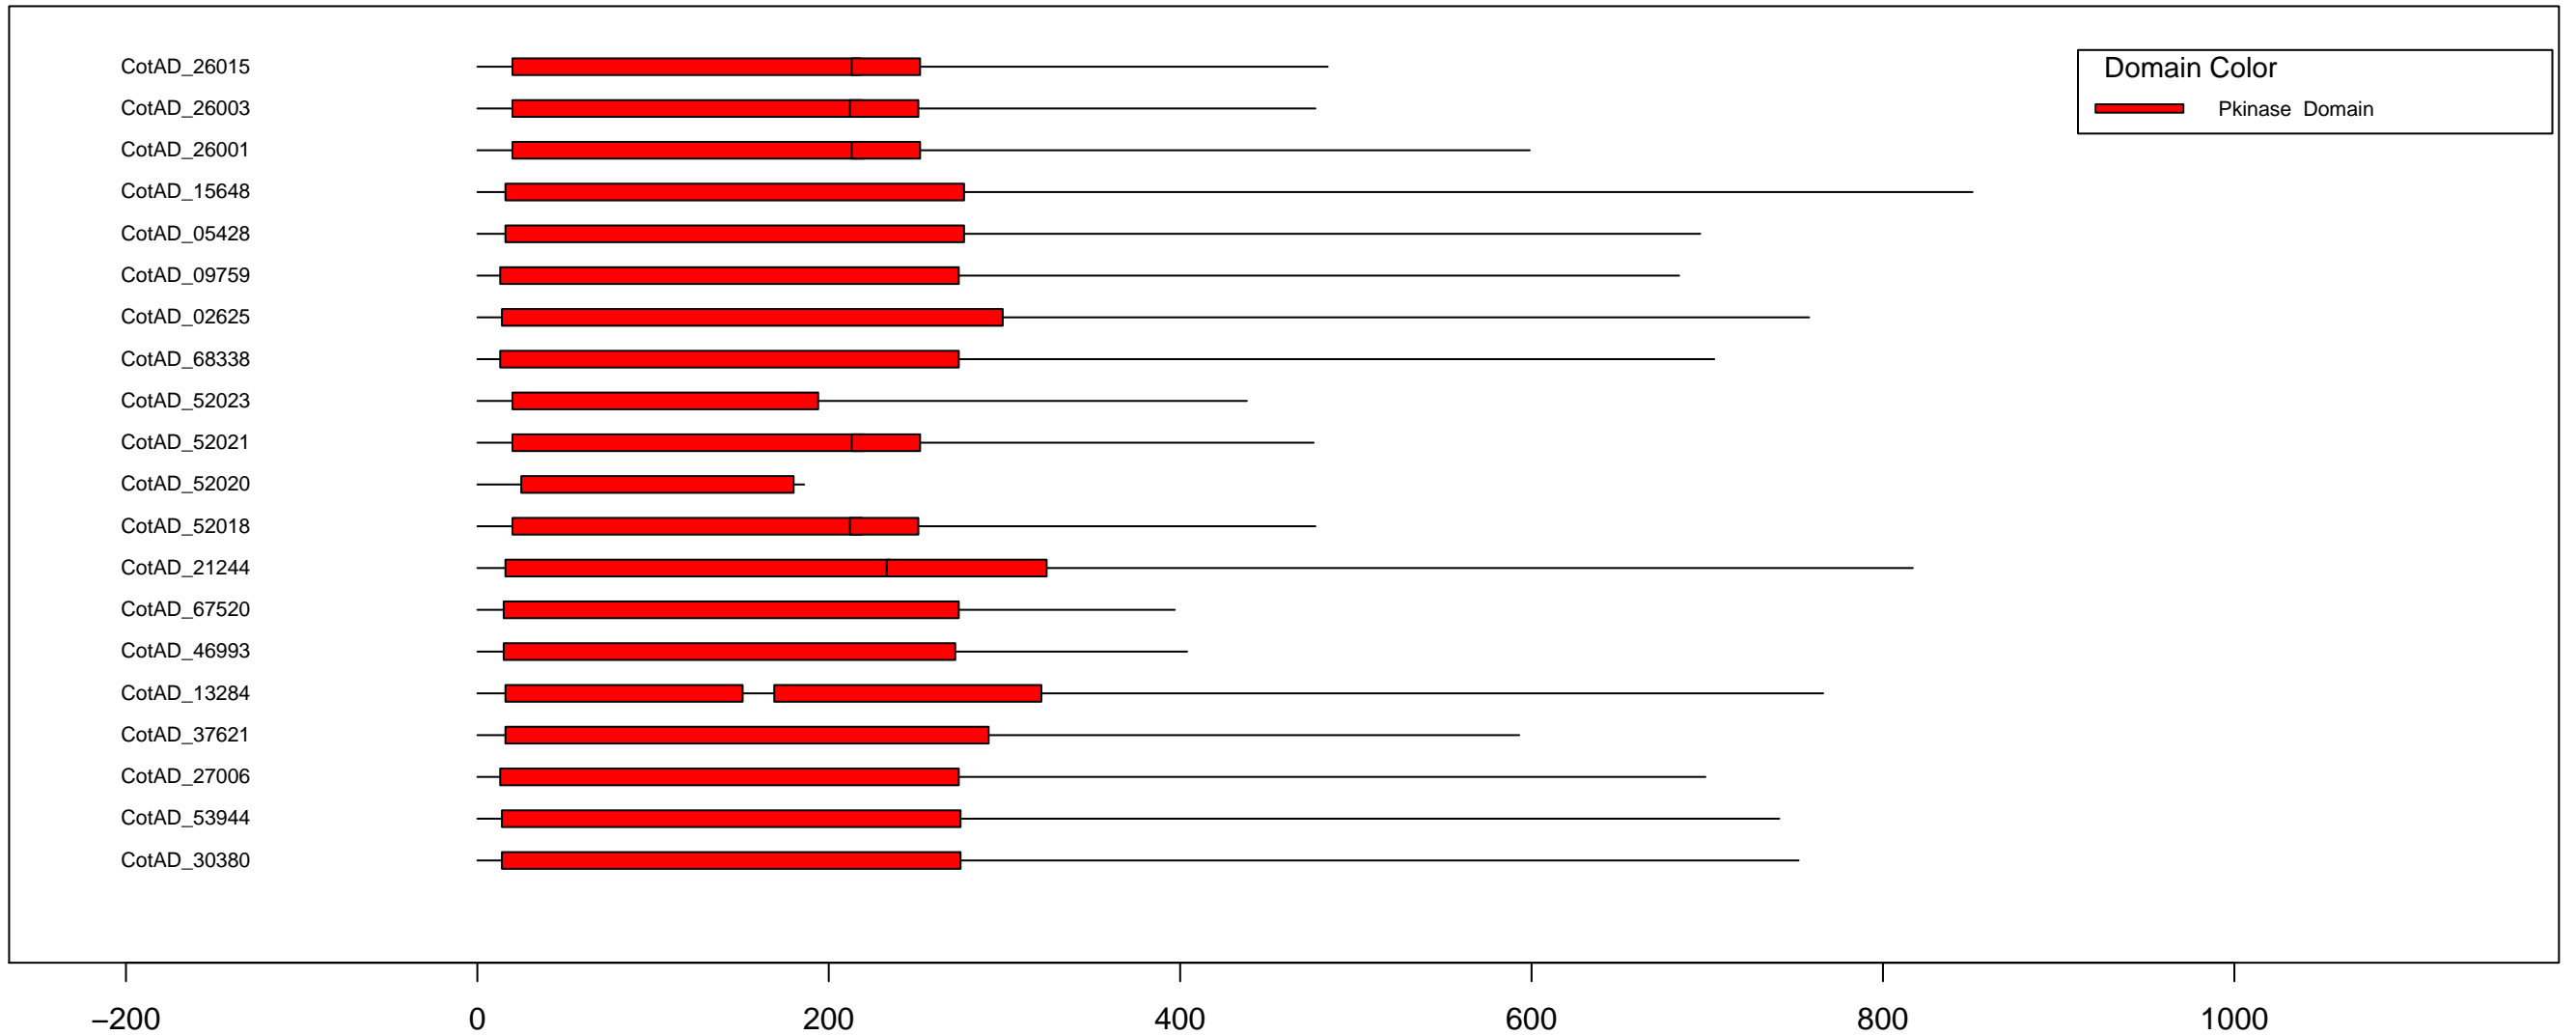

### G.hi STE\_STE20-Fray domain diagram (part 2)

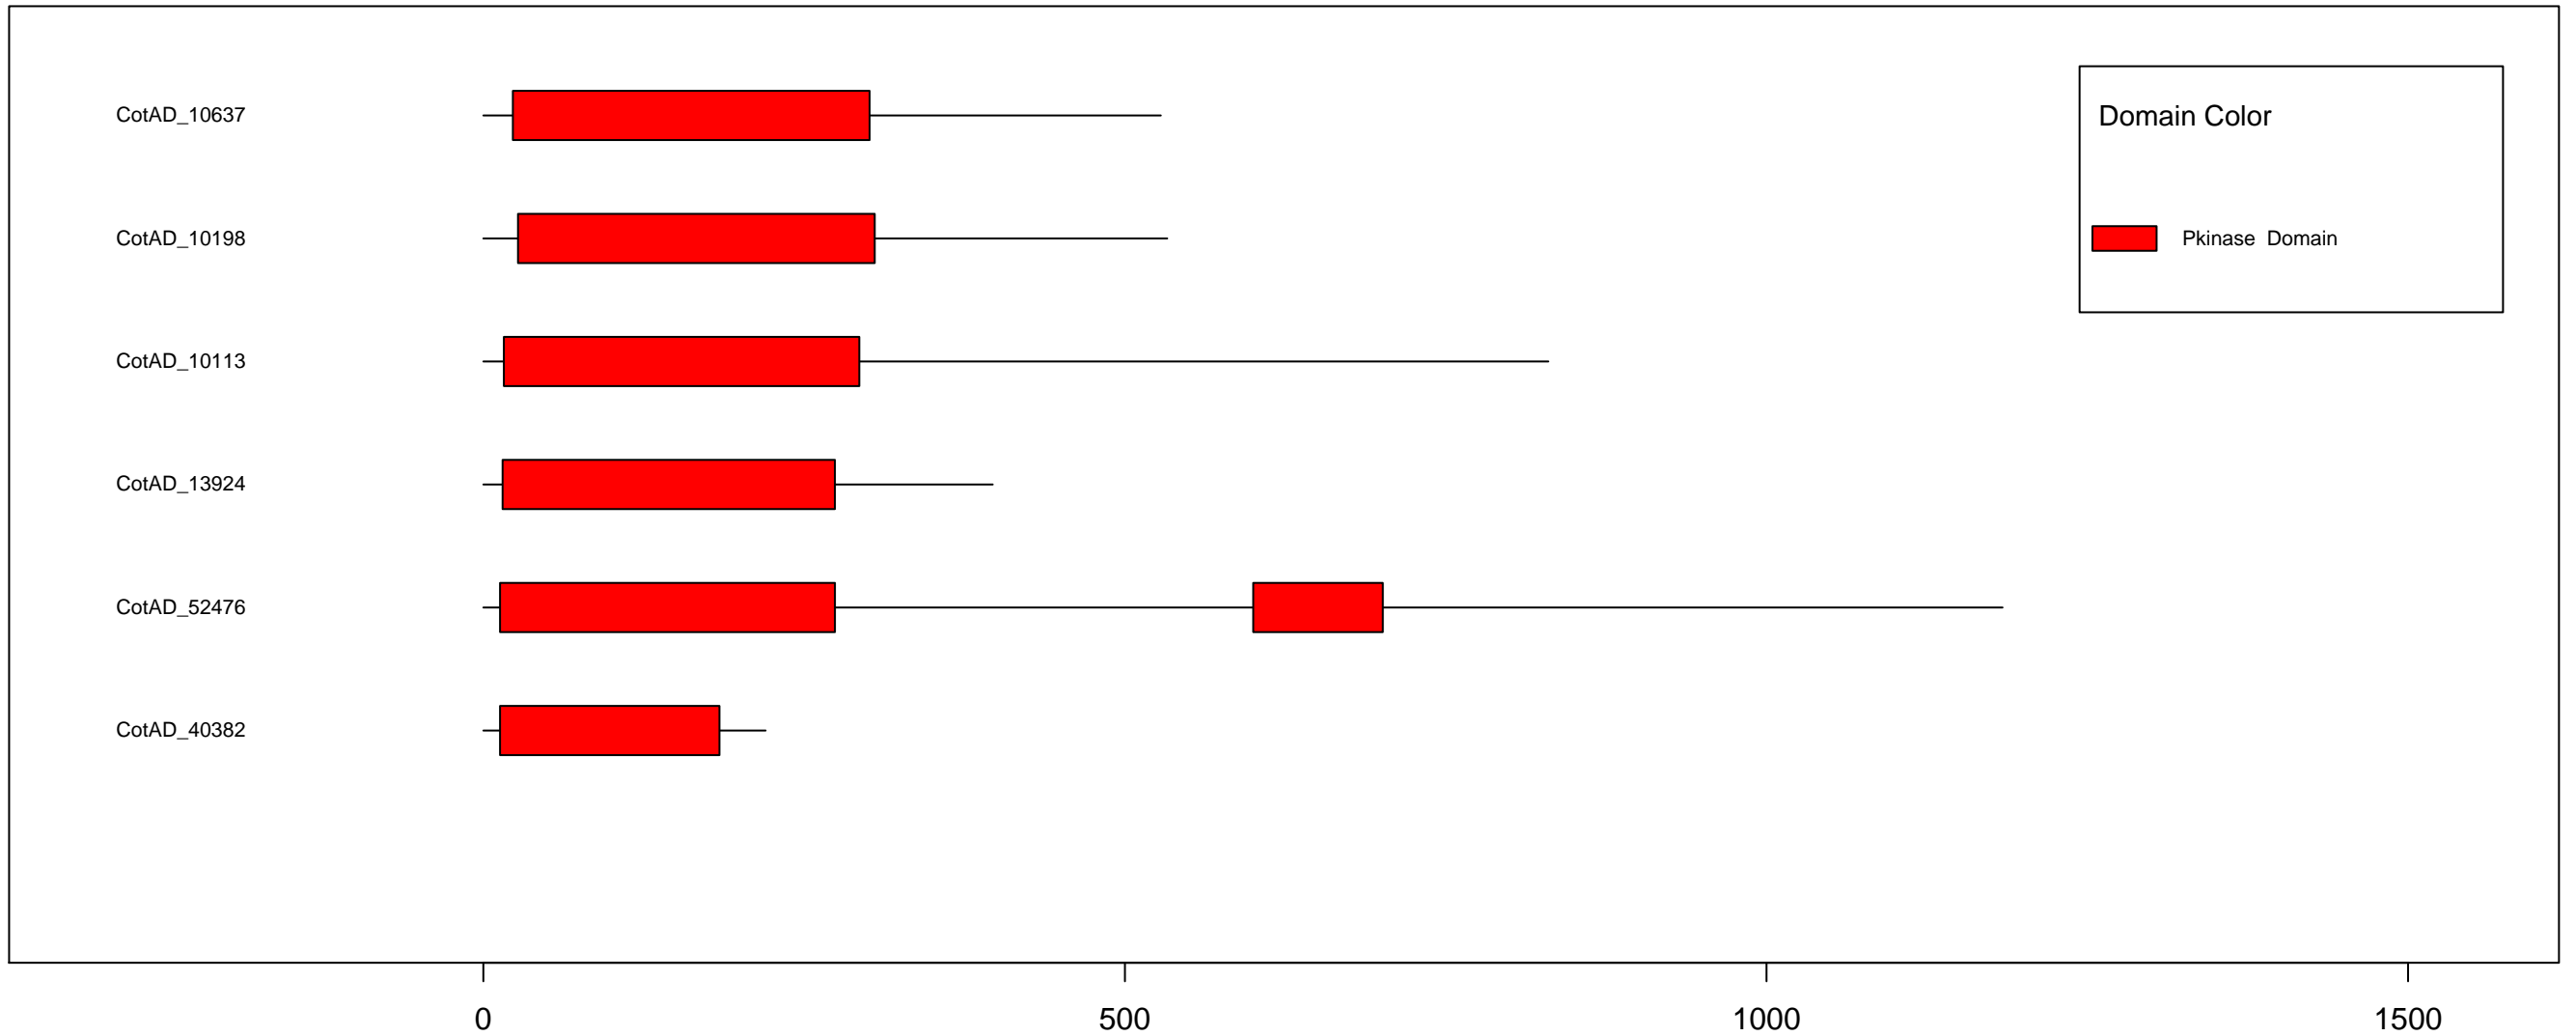

# G.hi STE\_STE20-PI domain diagram (all)

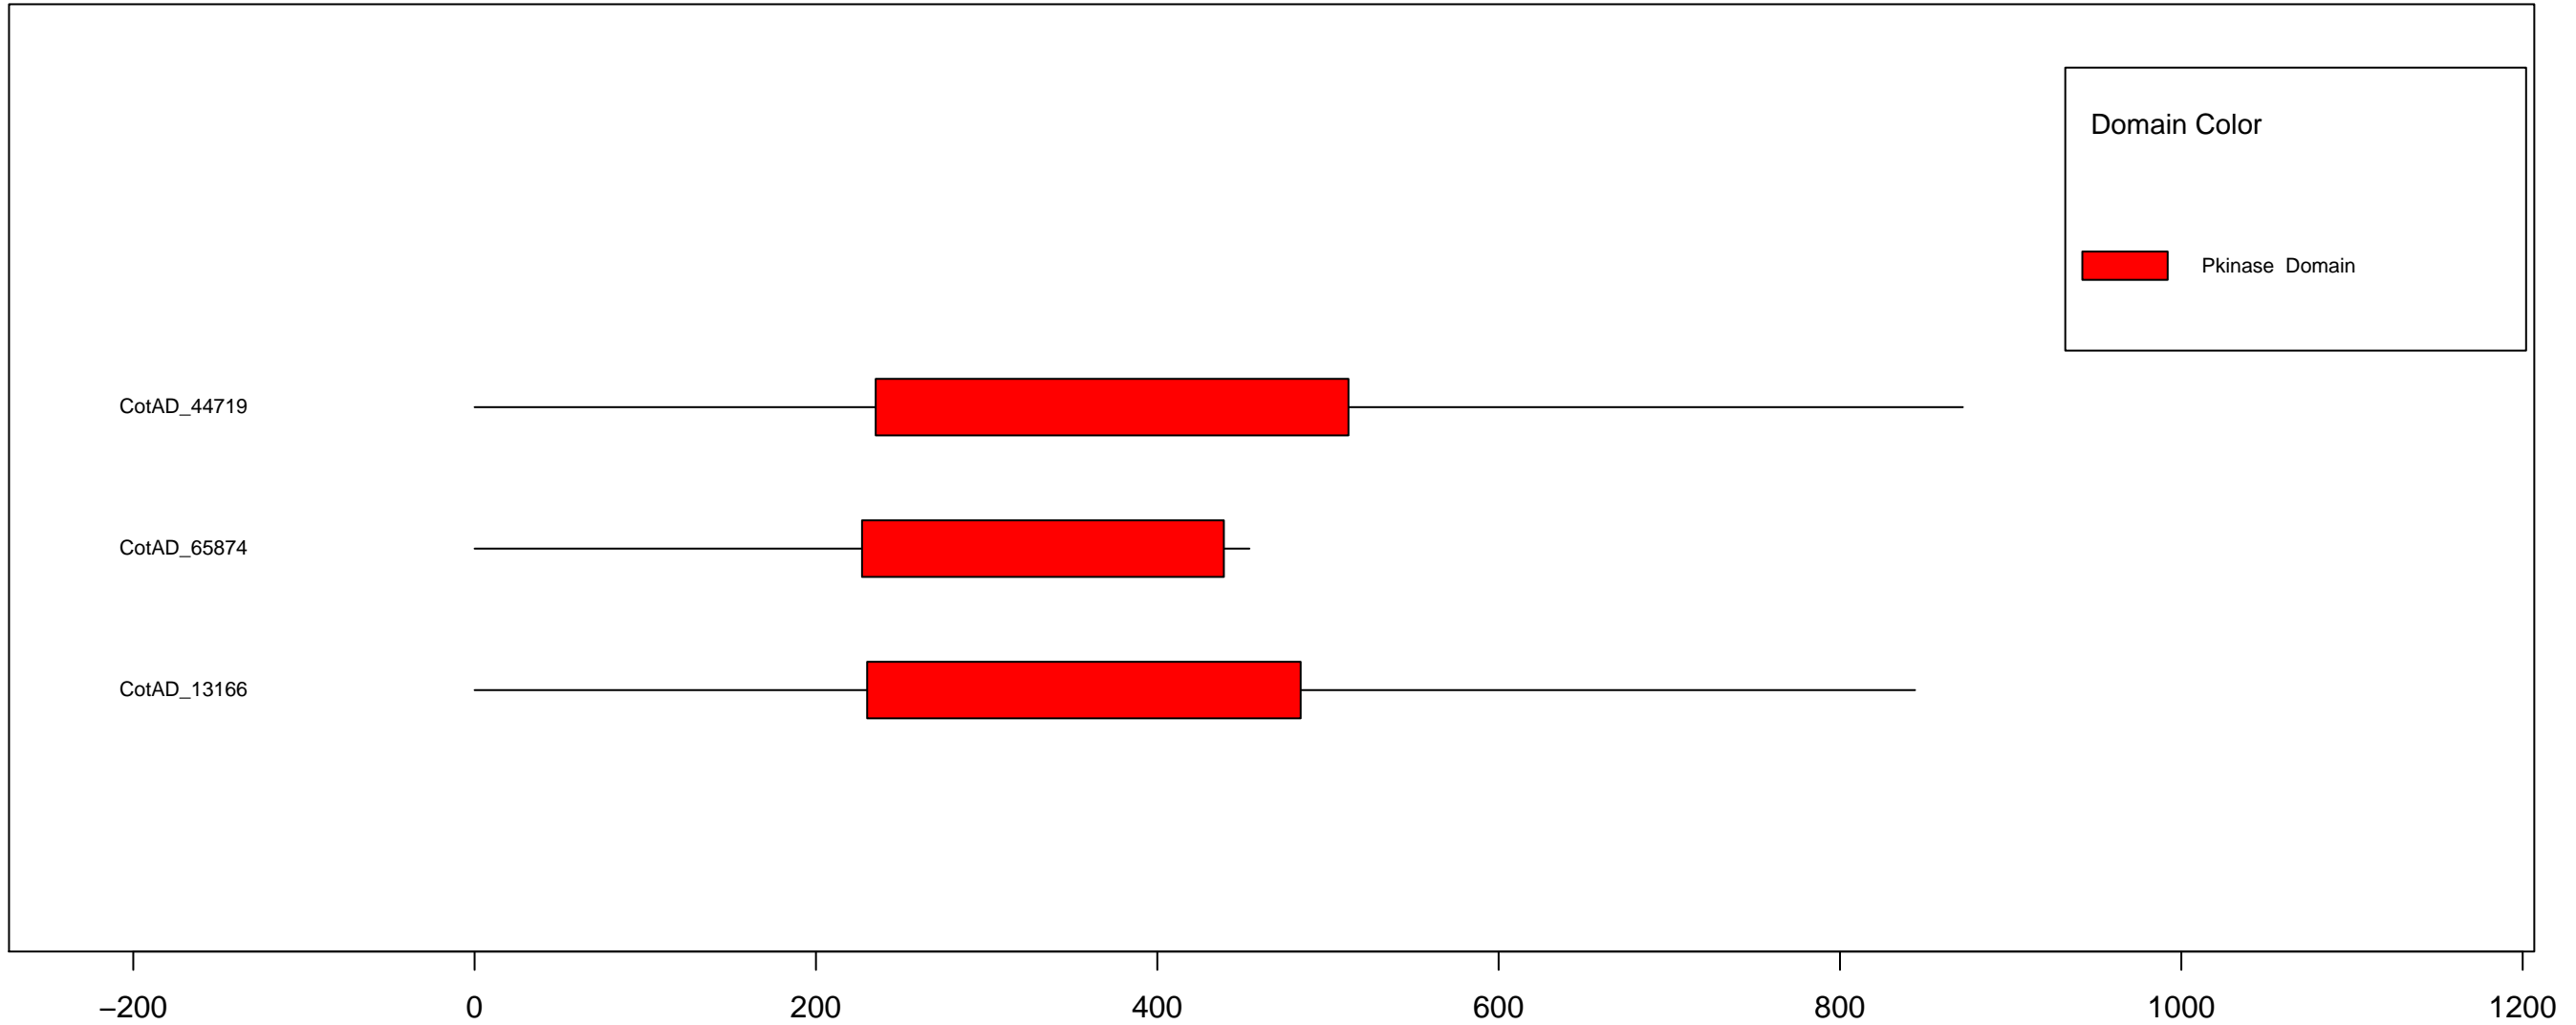

# G.hi STE\_STE20-YSK domain diagram (all)

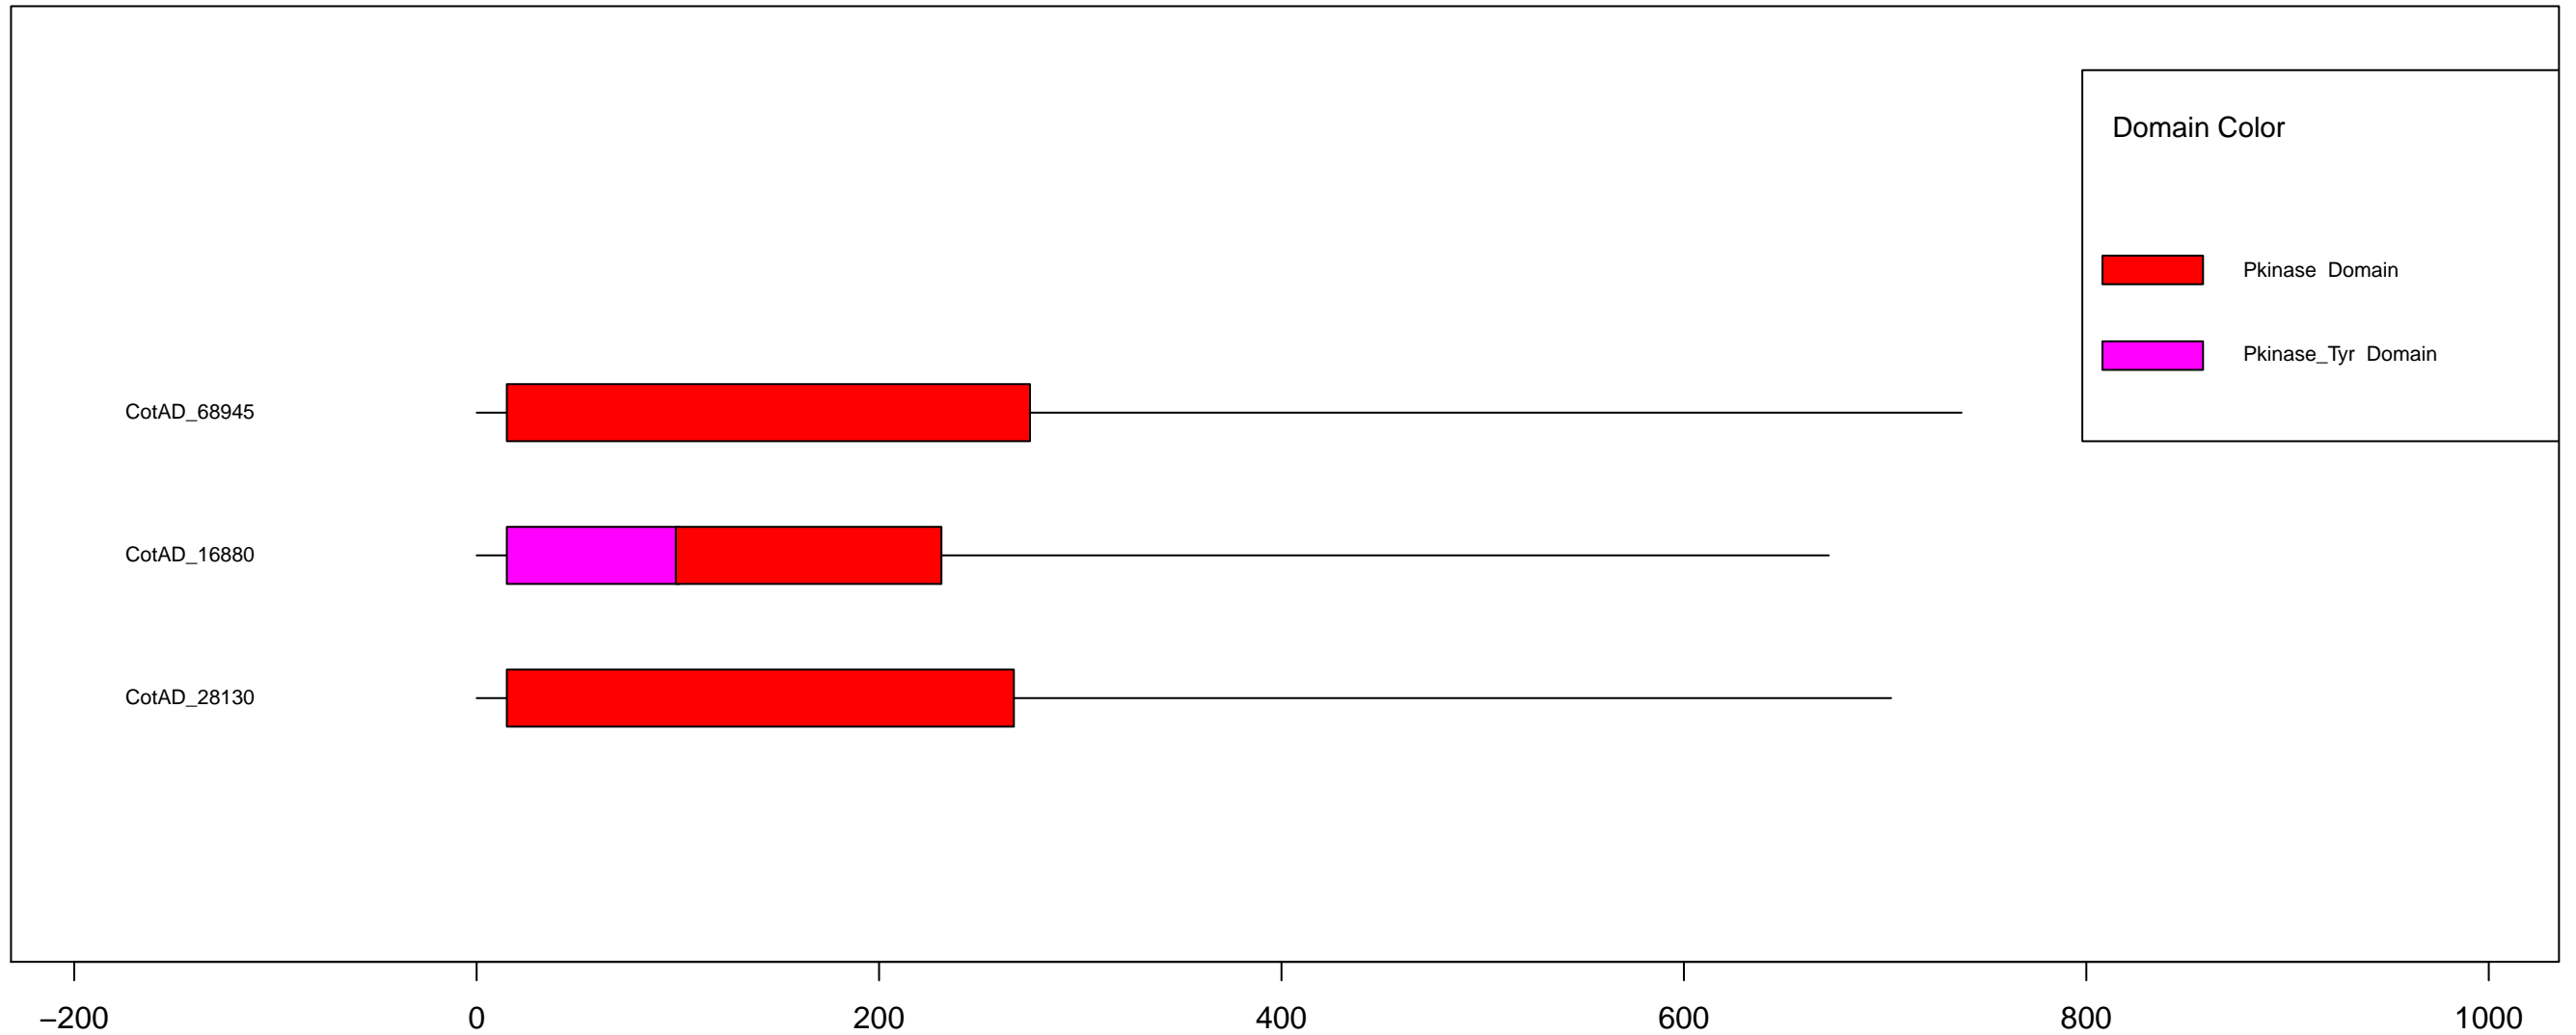



# G.hi STE\_STE7 domain diagram (all)

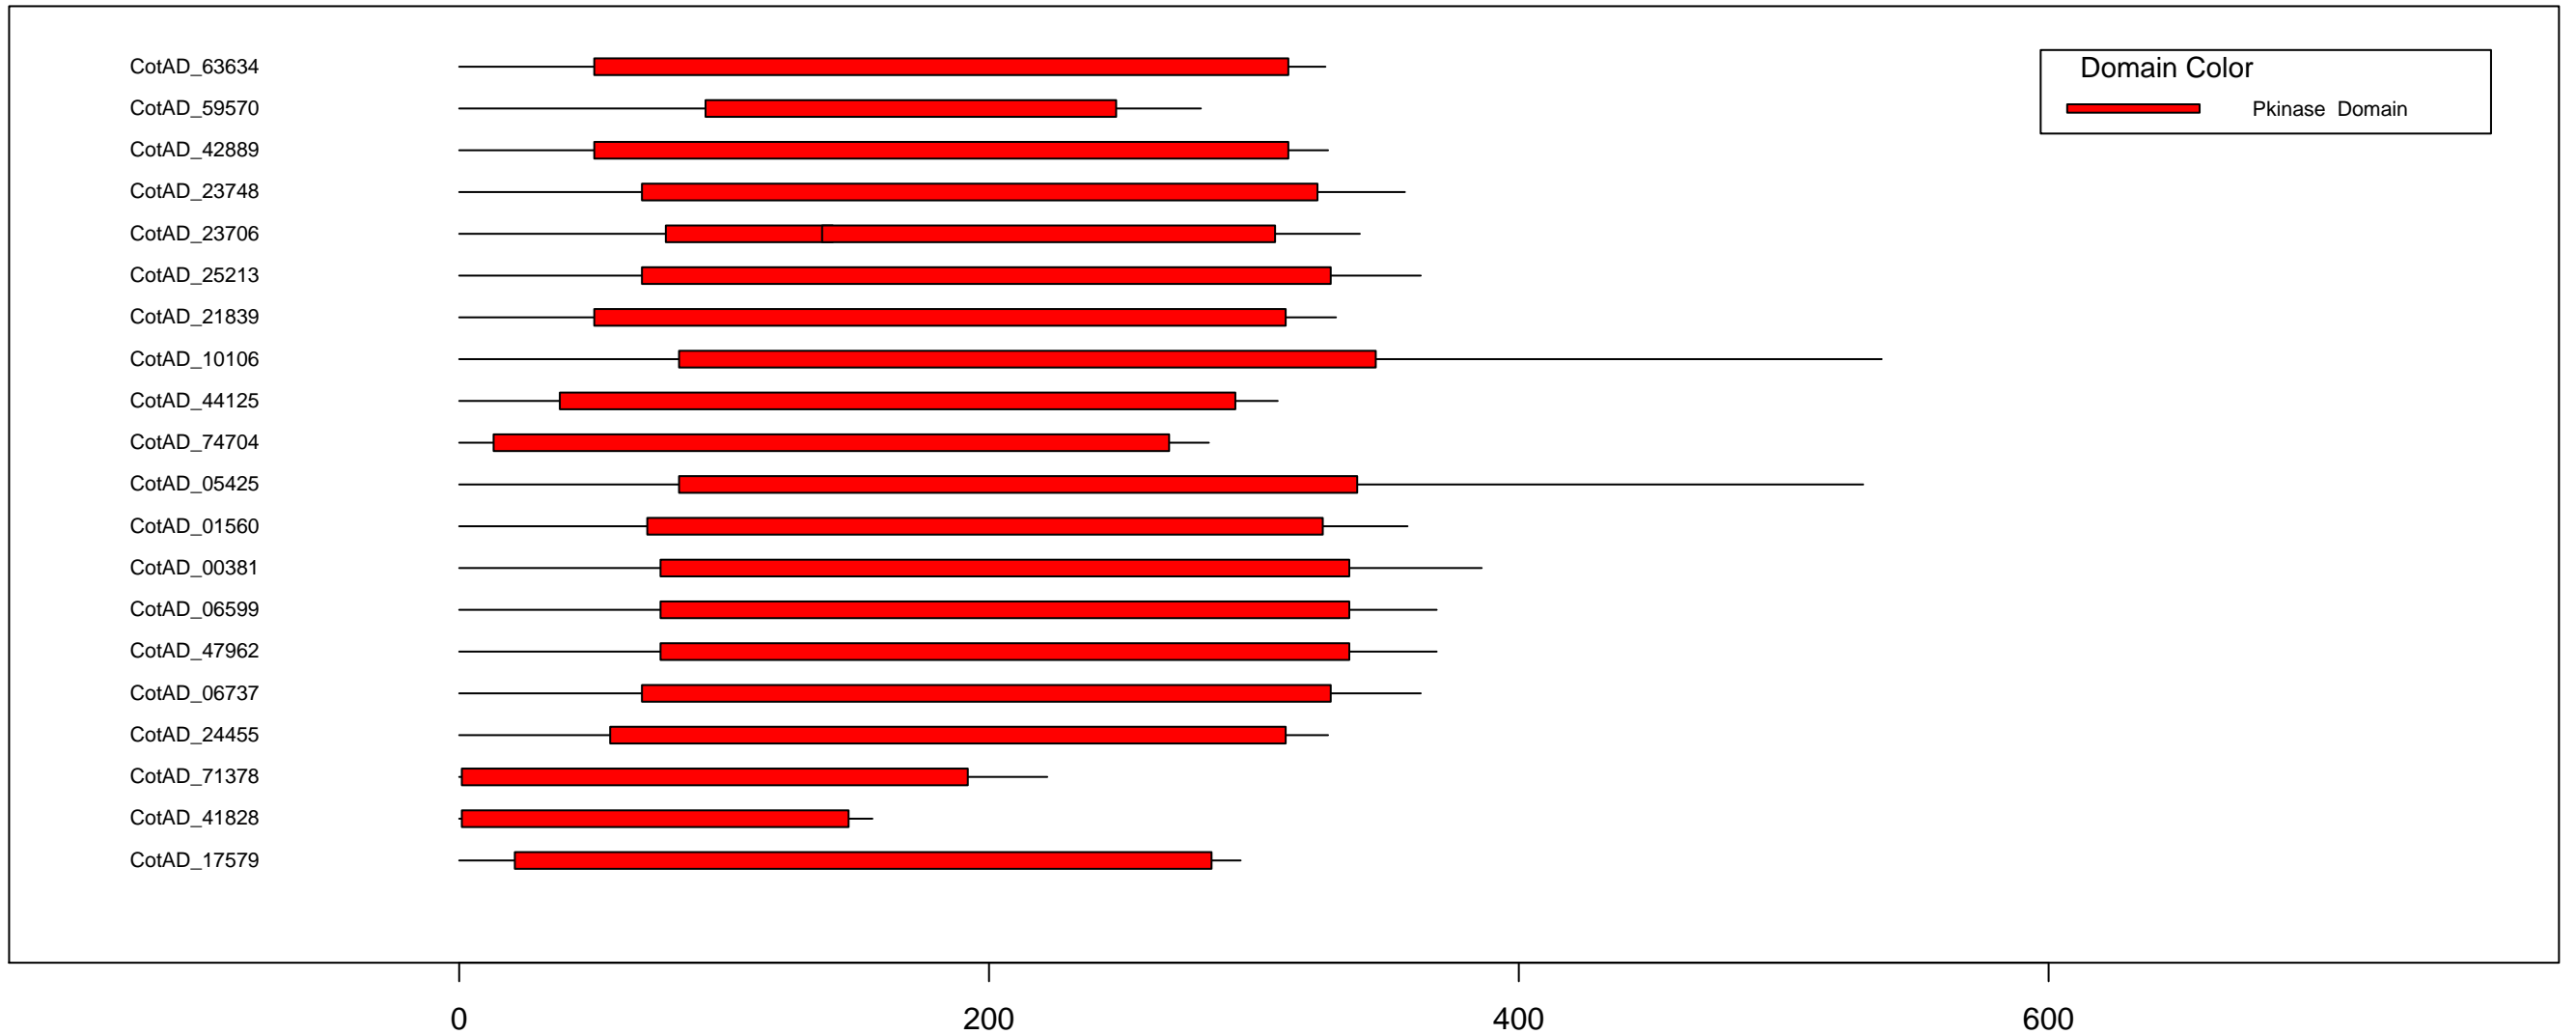

# G.hi STE\_STE-PI domain diagram (all)

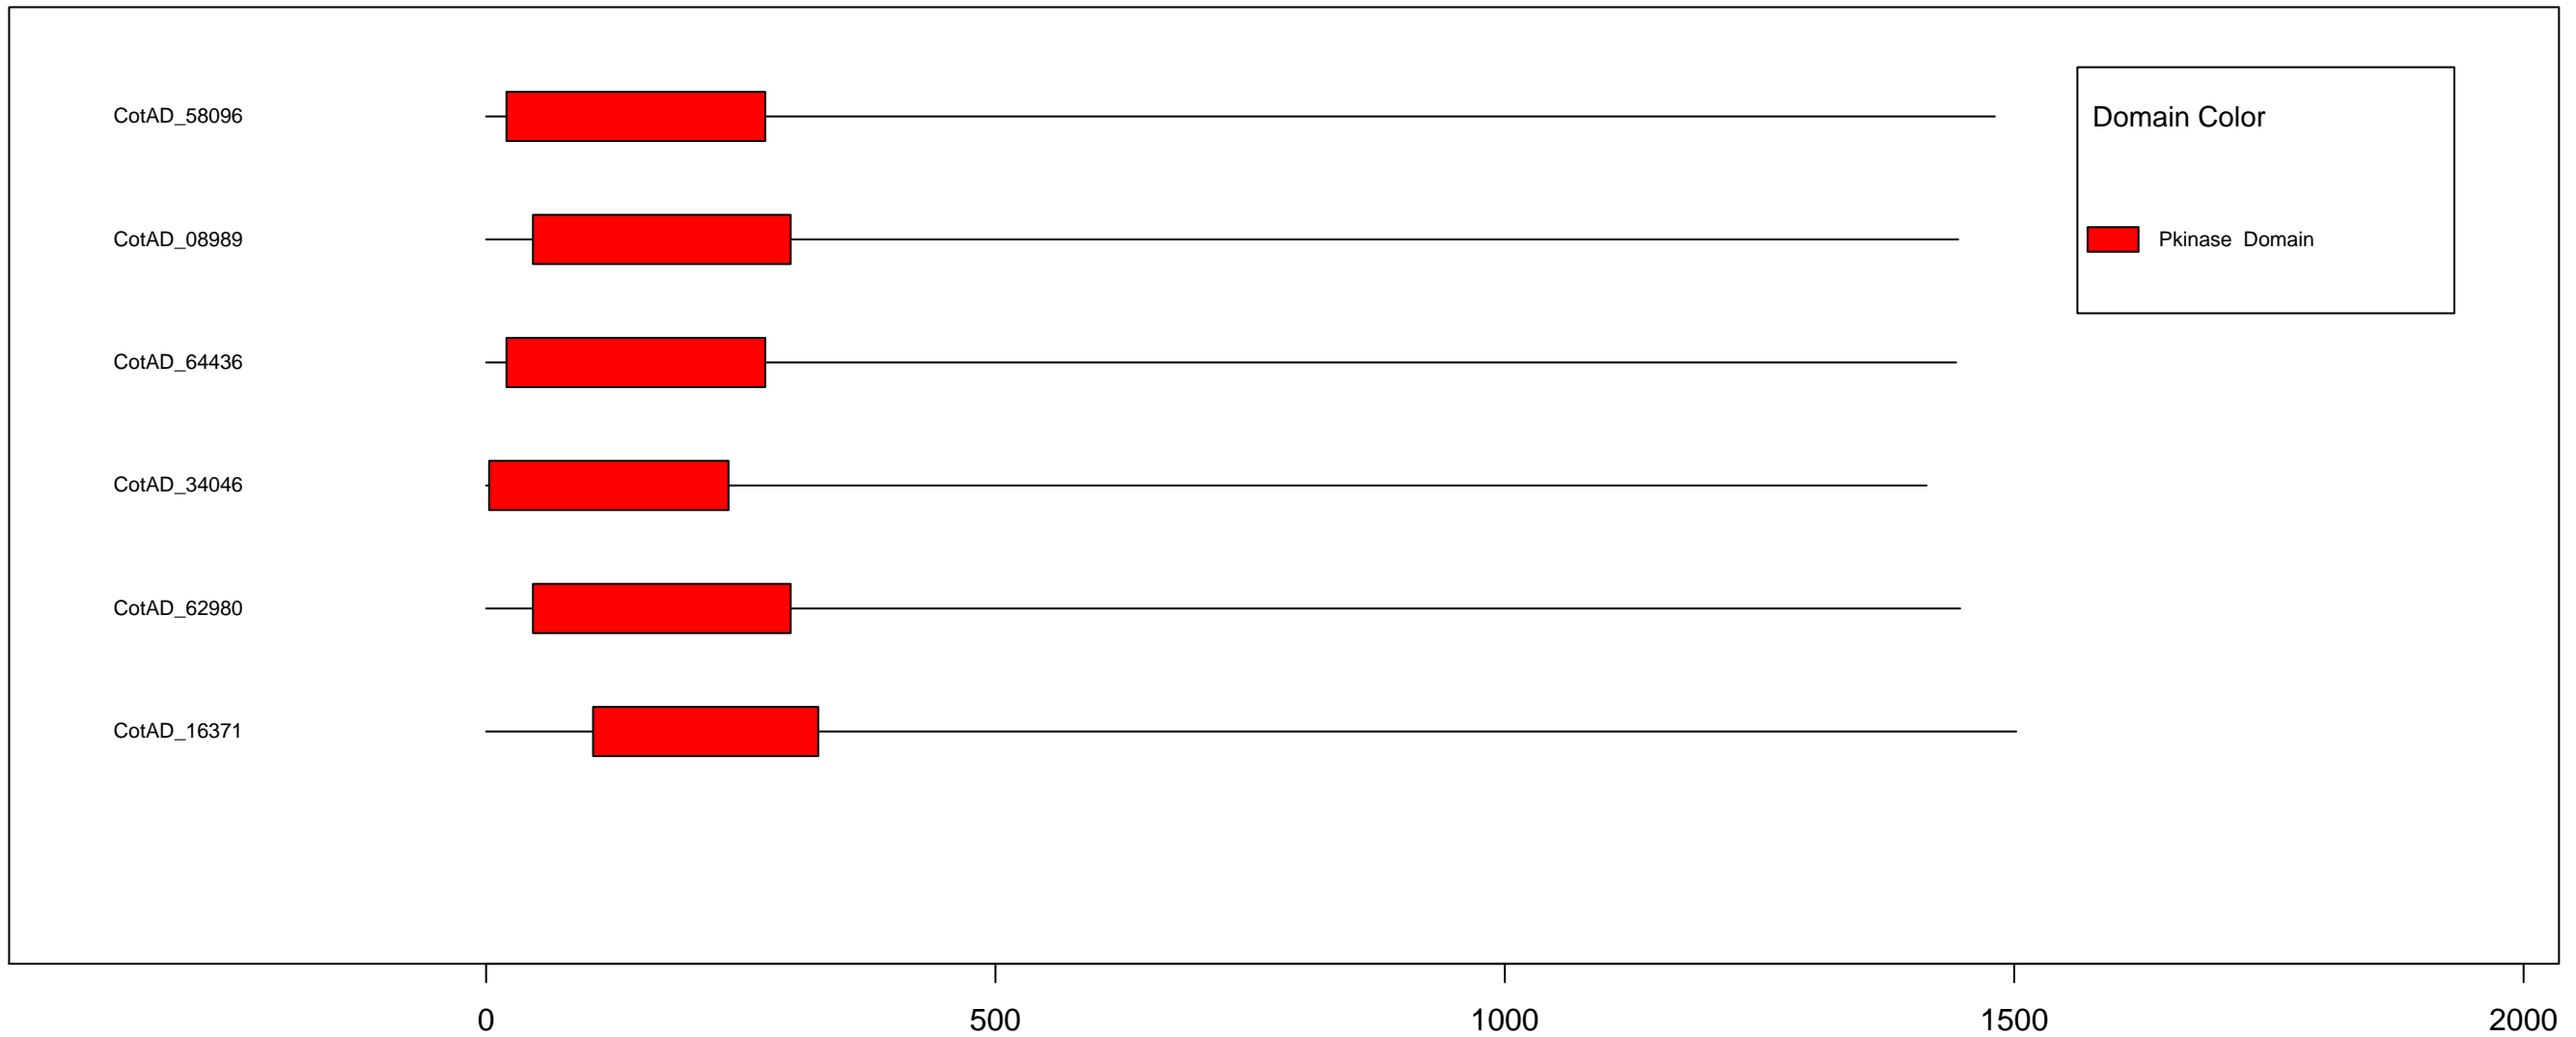

# G.hi TKL\_CTR1-DRK-1 domain diagram (all)

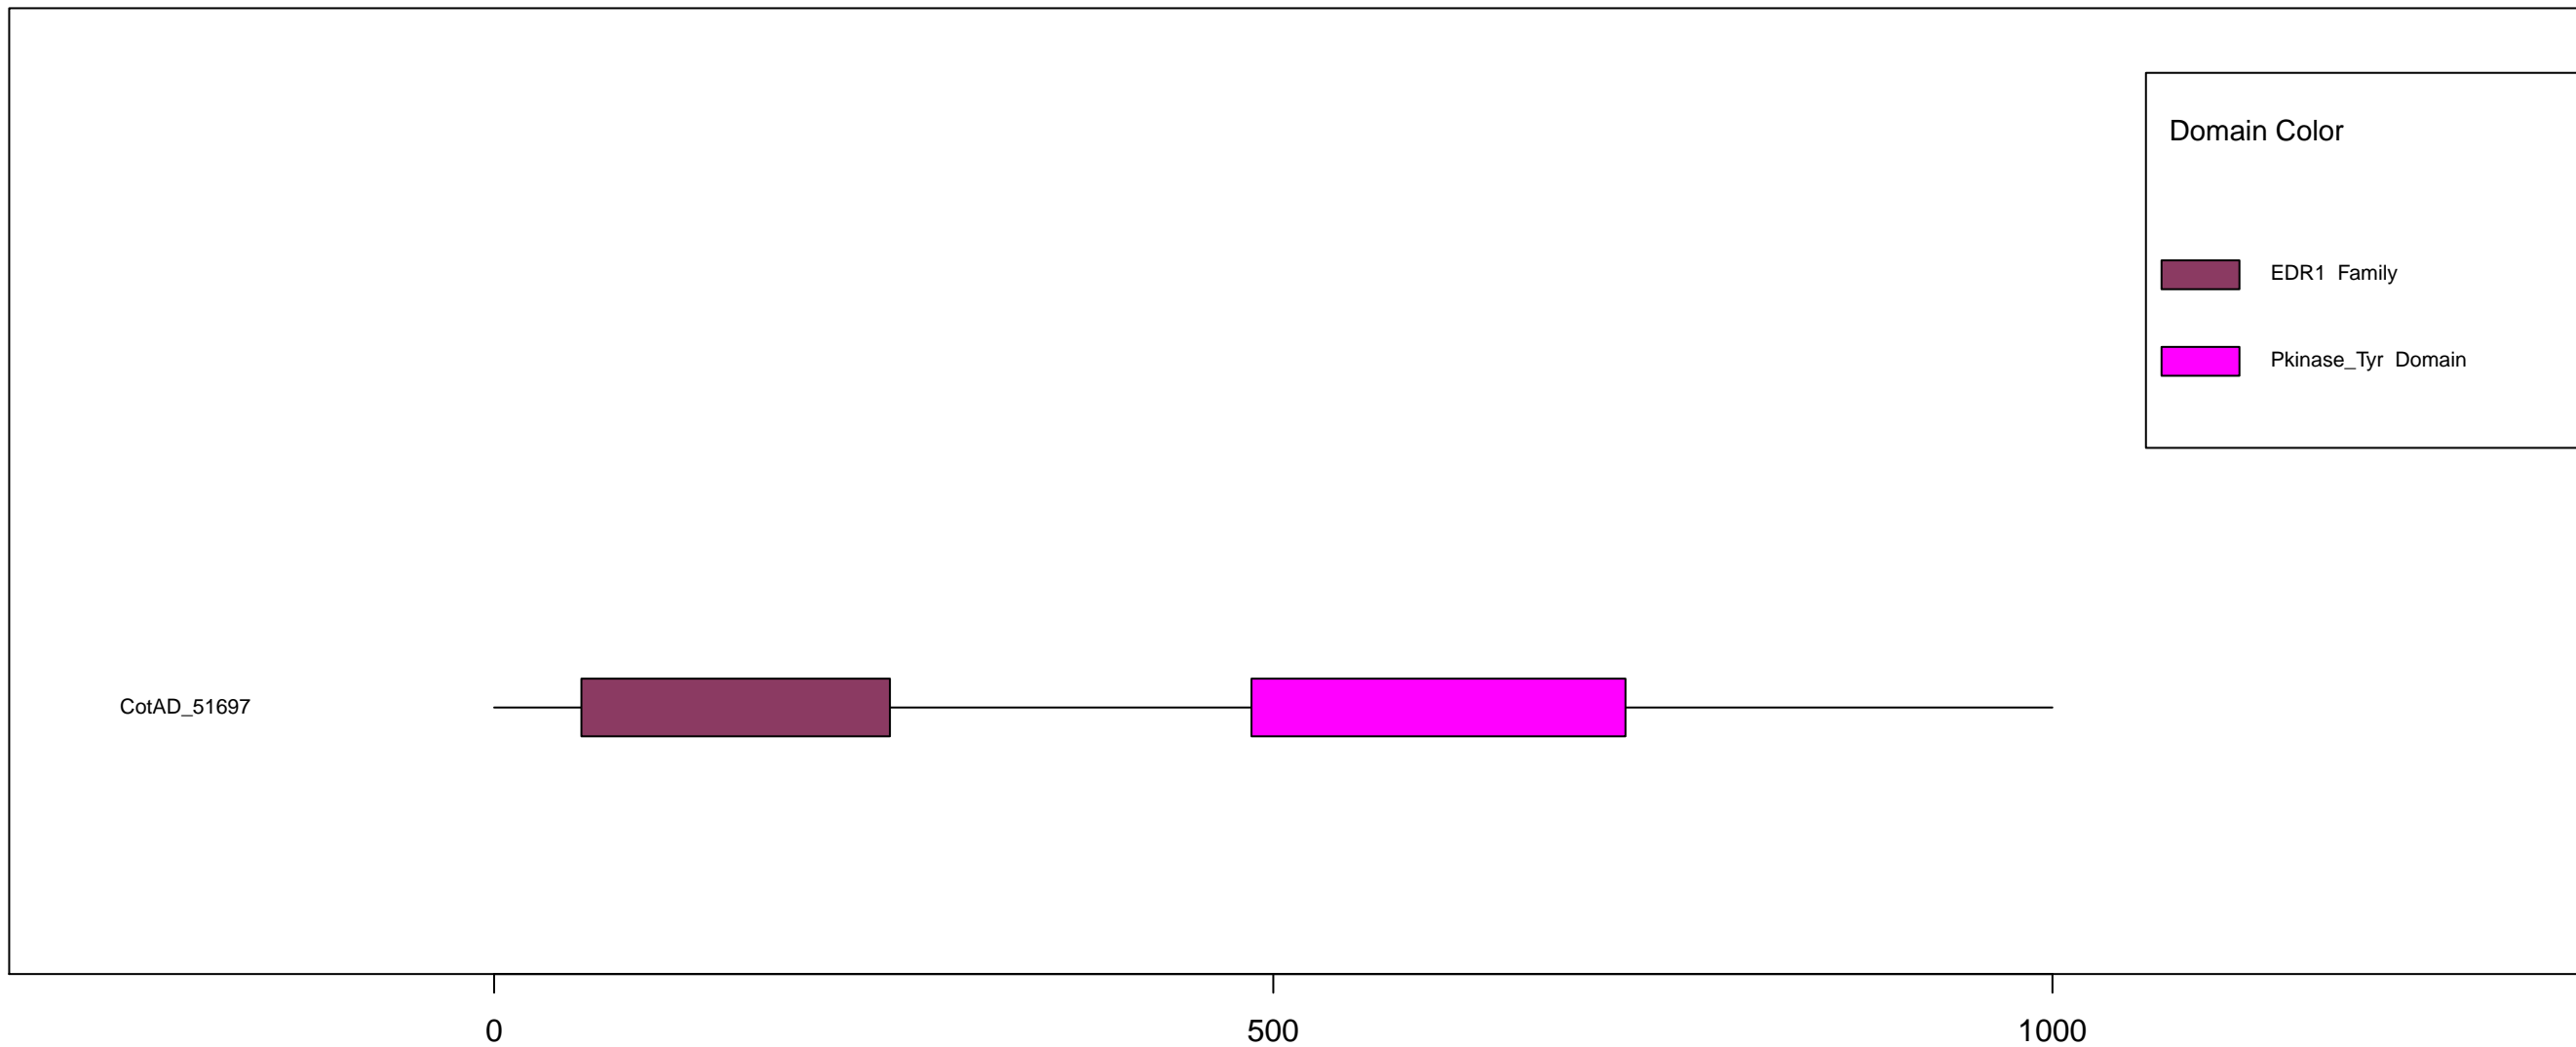

### G.hi TKL\_CTRL1-DRK-2 domain diagram (part 1)

CotAD\_42043  
 CotAD\_06022  
 CotAD\_06023  
 CotAD\_02887  
 CotAD\_60248  
 CotAD\_46540  
 CotAD\_00270  
 CotAD\_14893  
 CotAD\_58654  
 CotAD\_72647  
 CotAD\_62031  
 CotAD\_45670  
 CotAD\_39355  
 CotAD\_75767  
 CotAD\_07502  
 CotAD\_45253  
 CotAD\_71190  
 CotAD\_64289  
 CotAD\_12299  
 CotAD\_08780

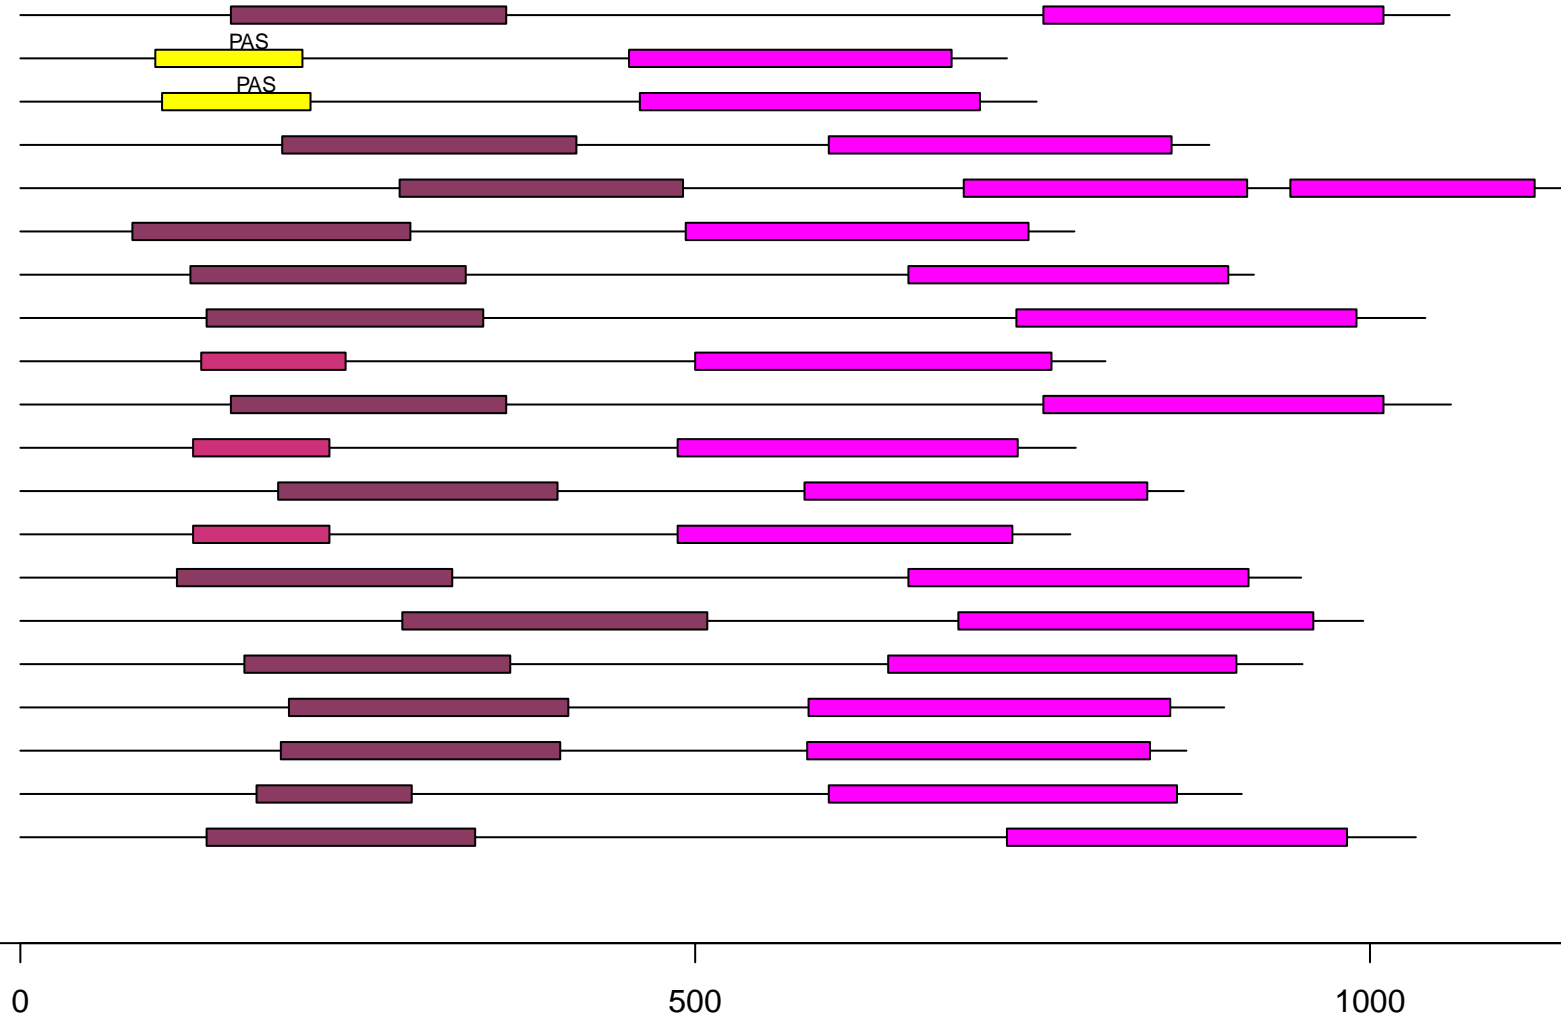

**Domain Color**

- EDR1 Family
- PAS\_9 Domain
- Pkinase\_Tyr Domain
- other Domain

### G.hi TKL\_CTRL1-DRK-2 domain diagram (part 2)

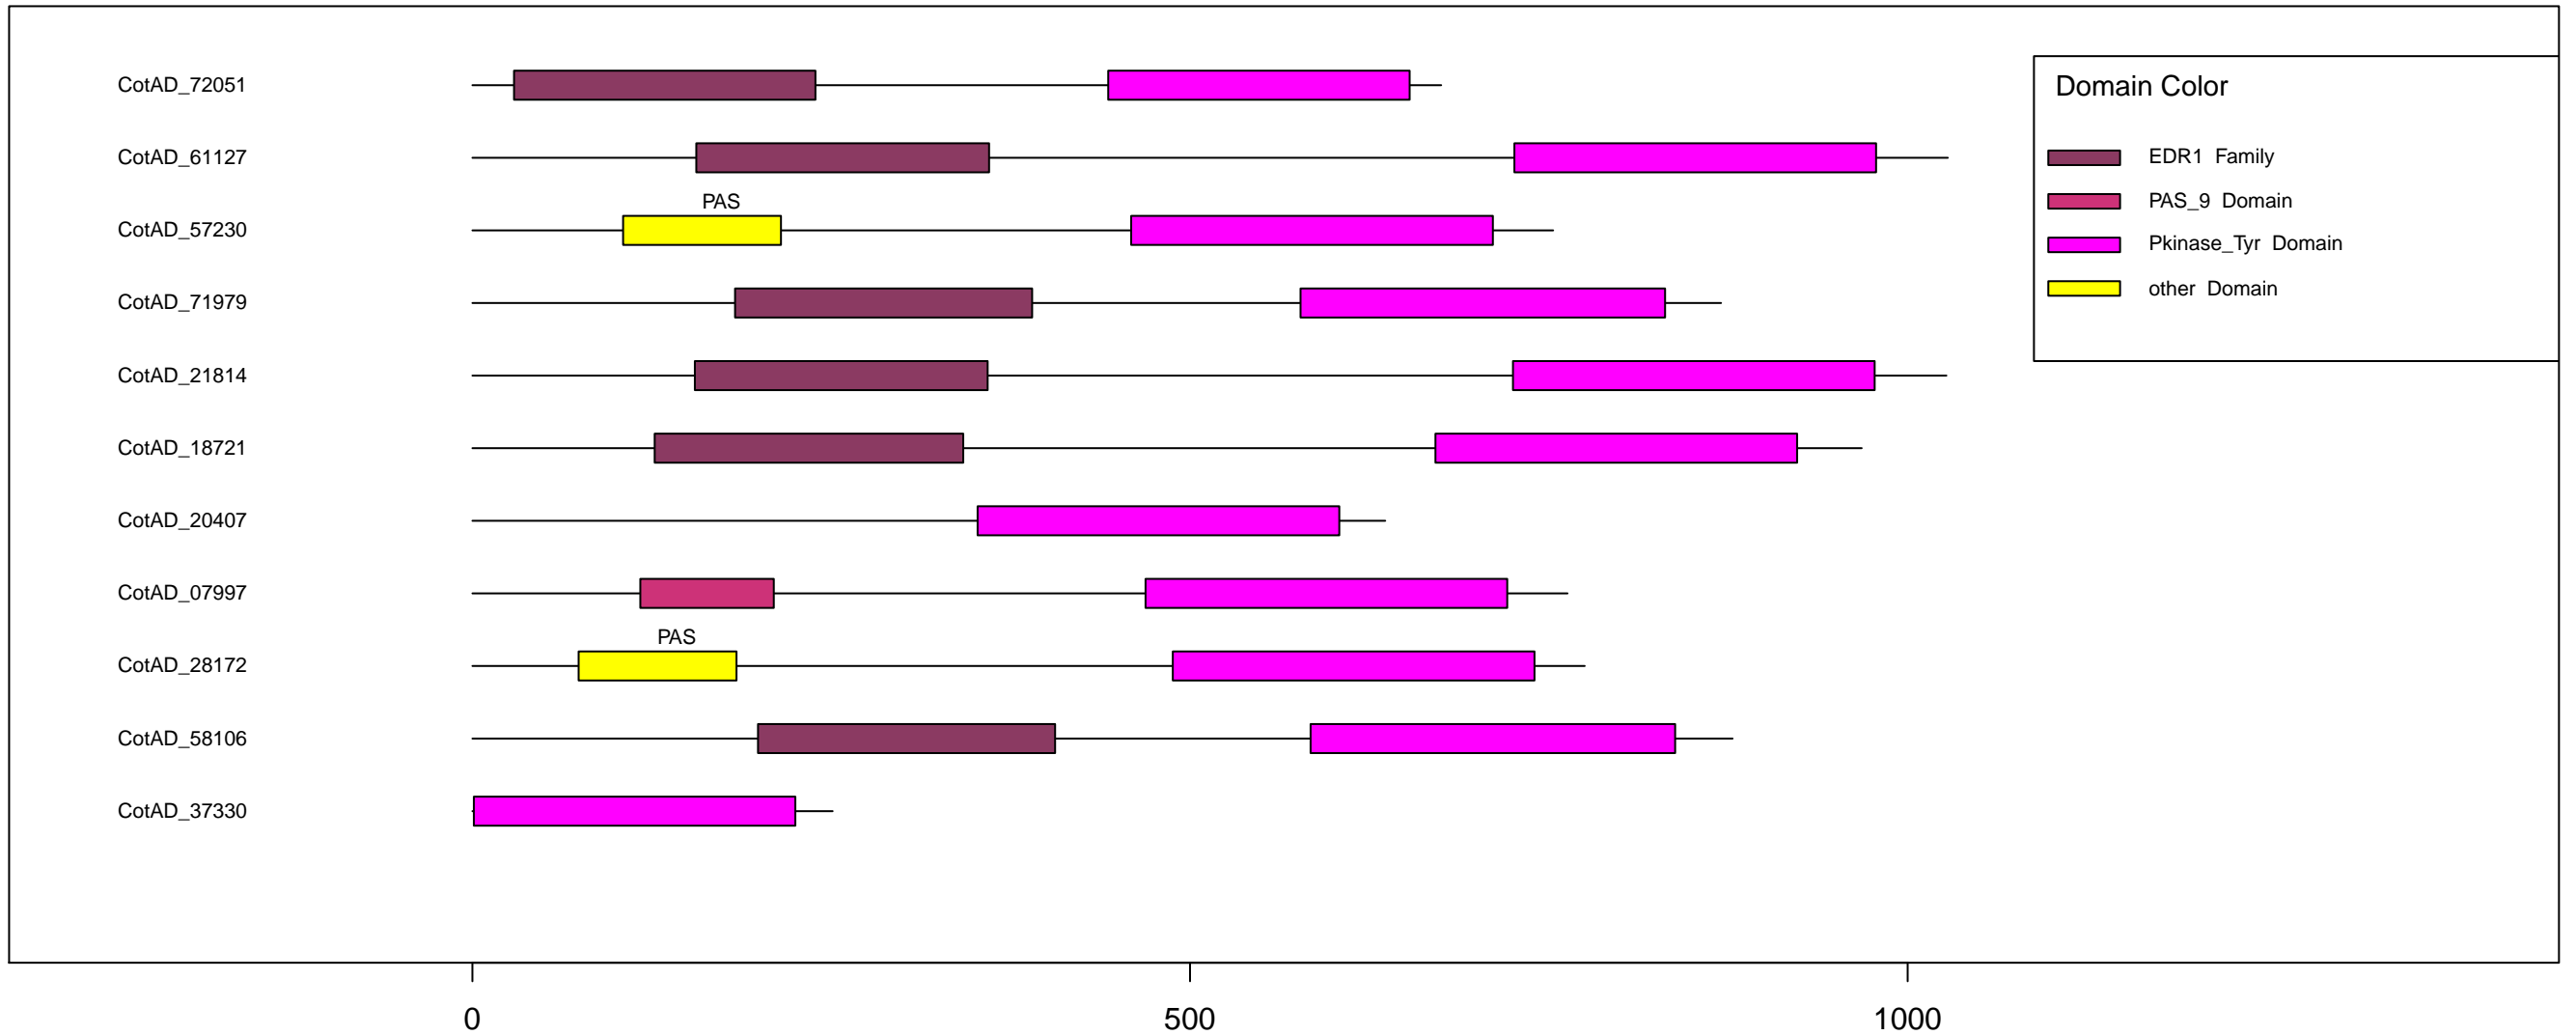

# G.hi TKL\_Gdt domain diagram (all)

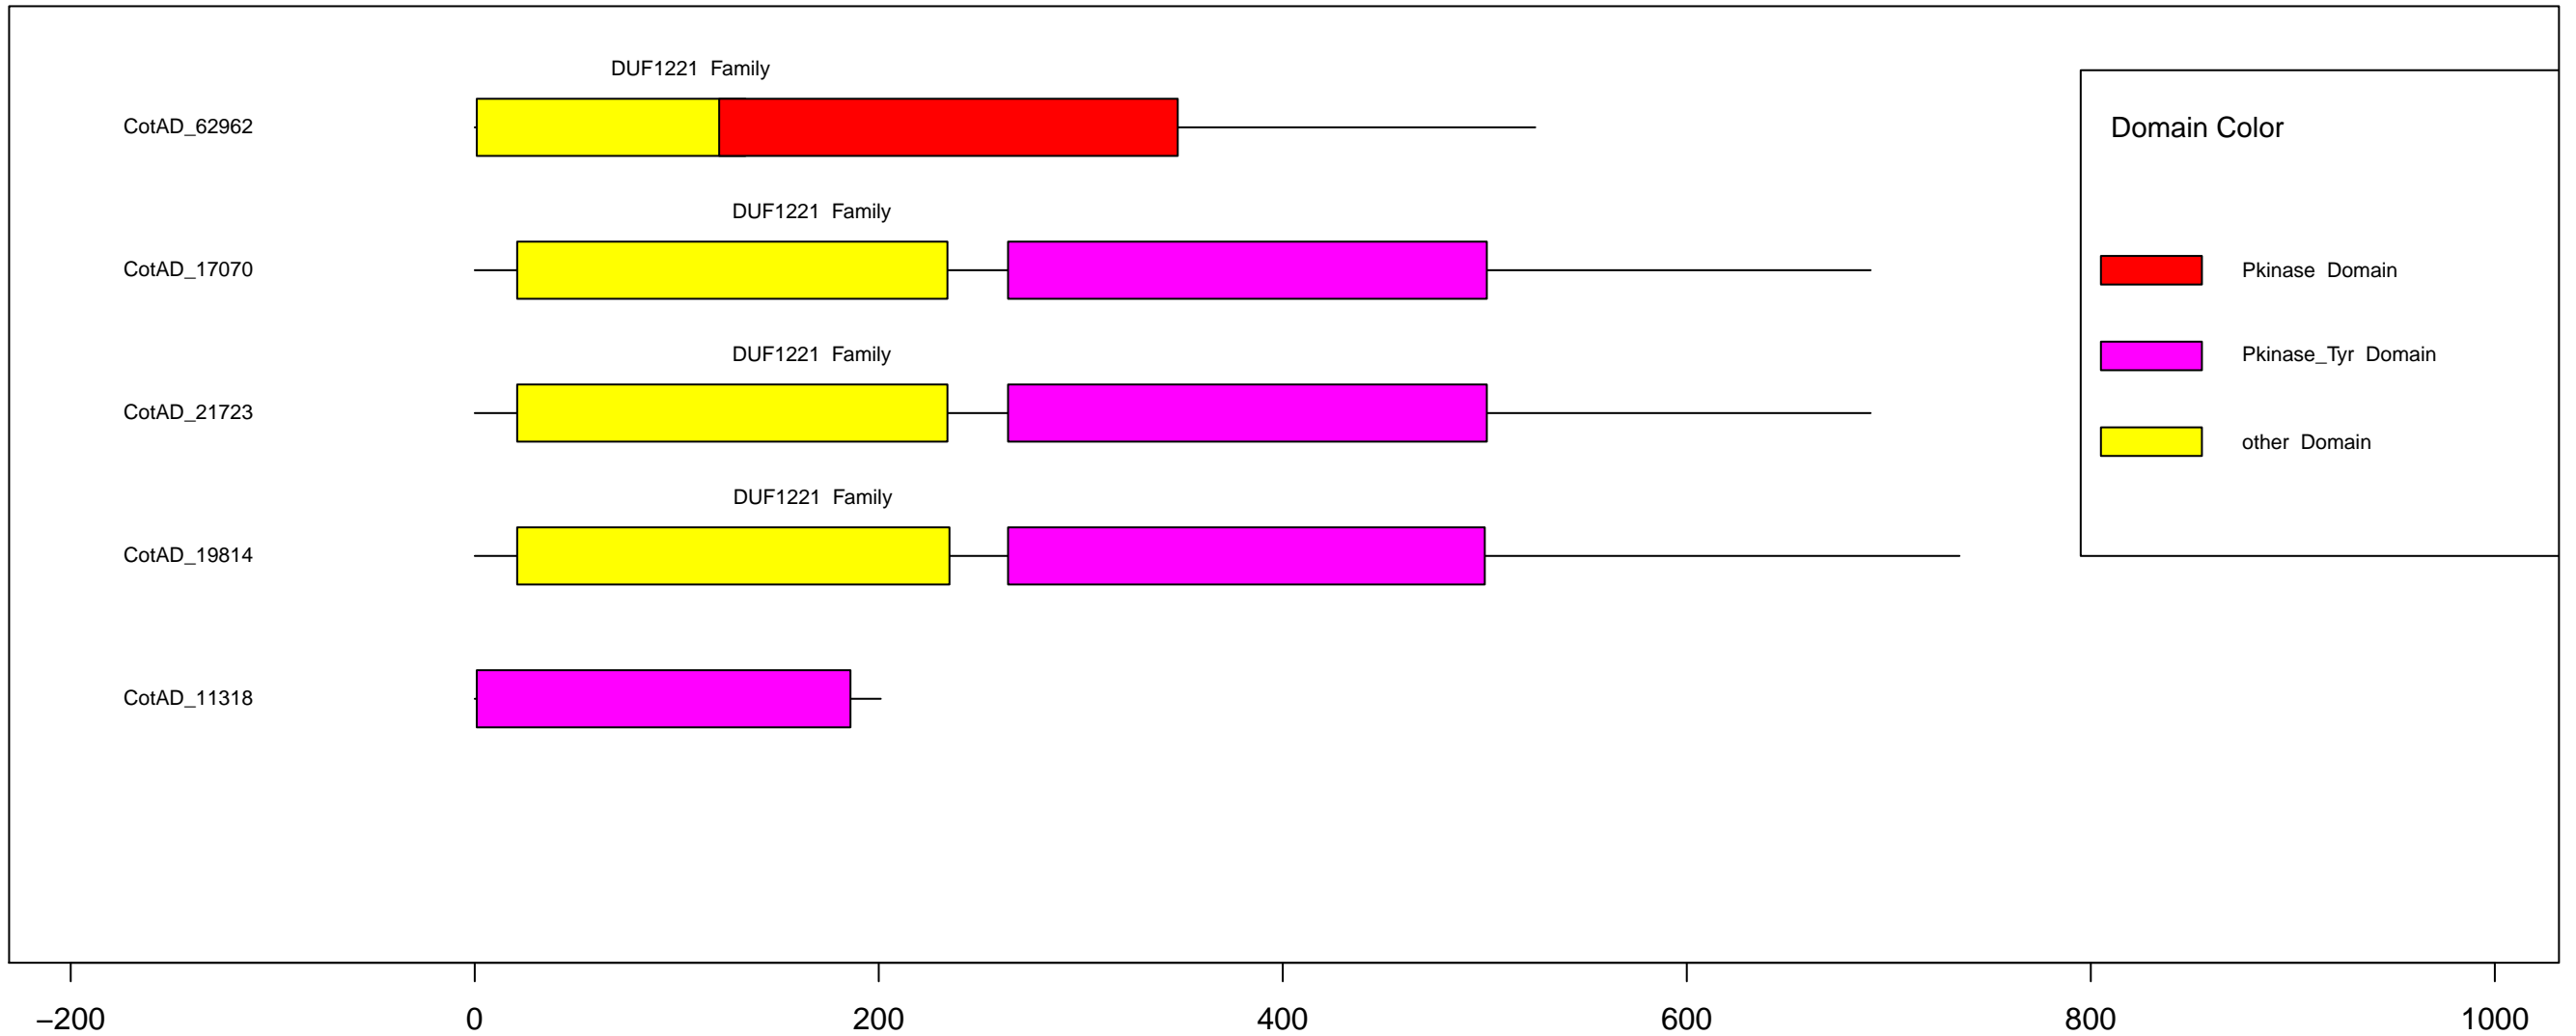

# G.hi TKL-PI-1 domain diagram (part 1)

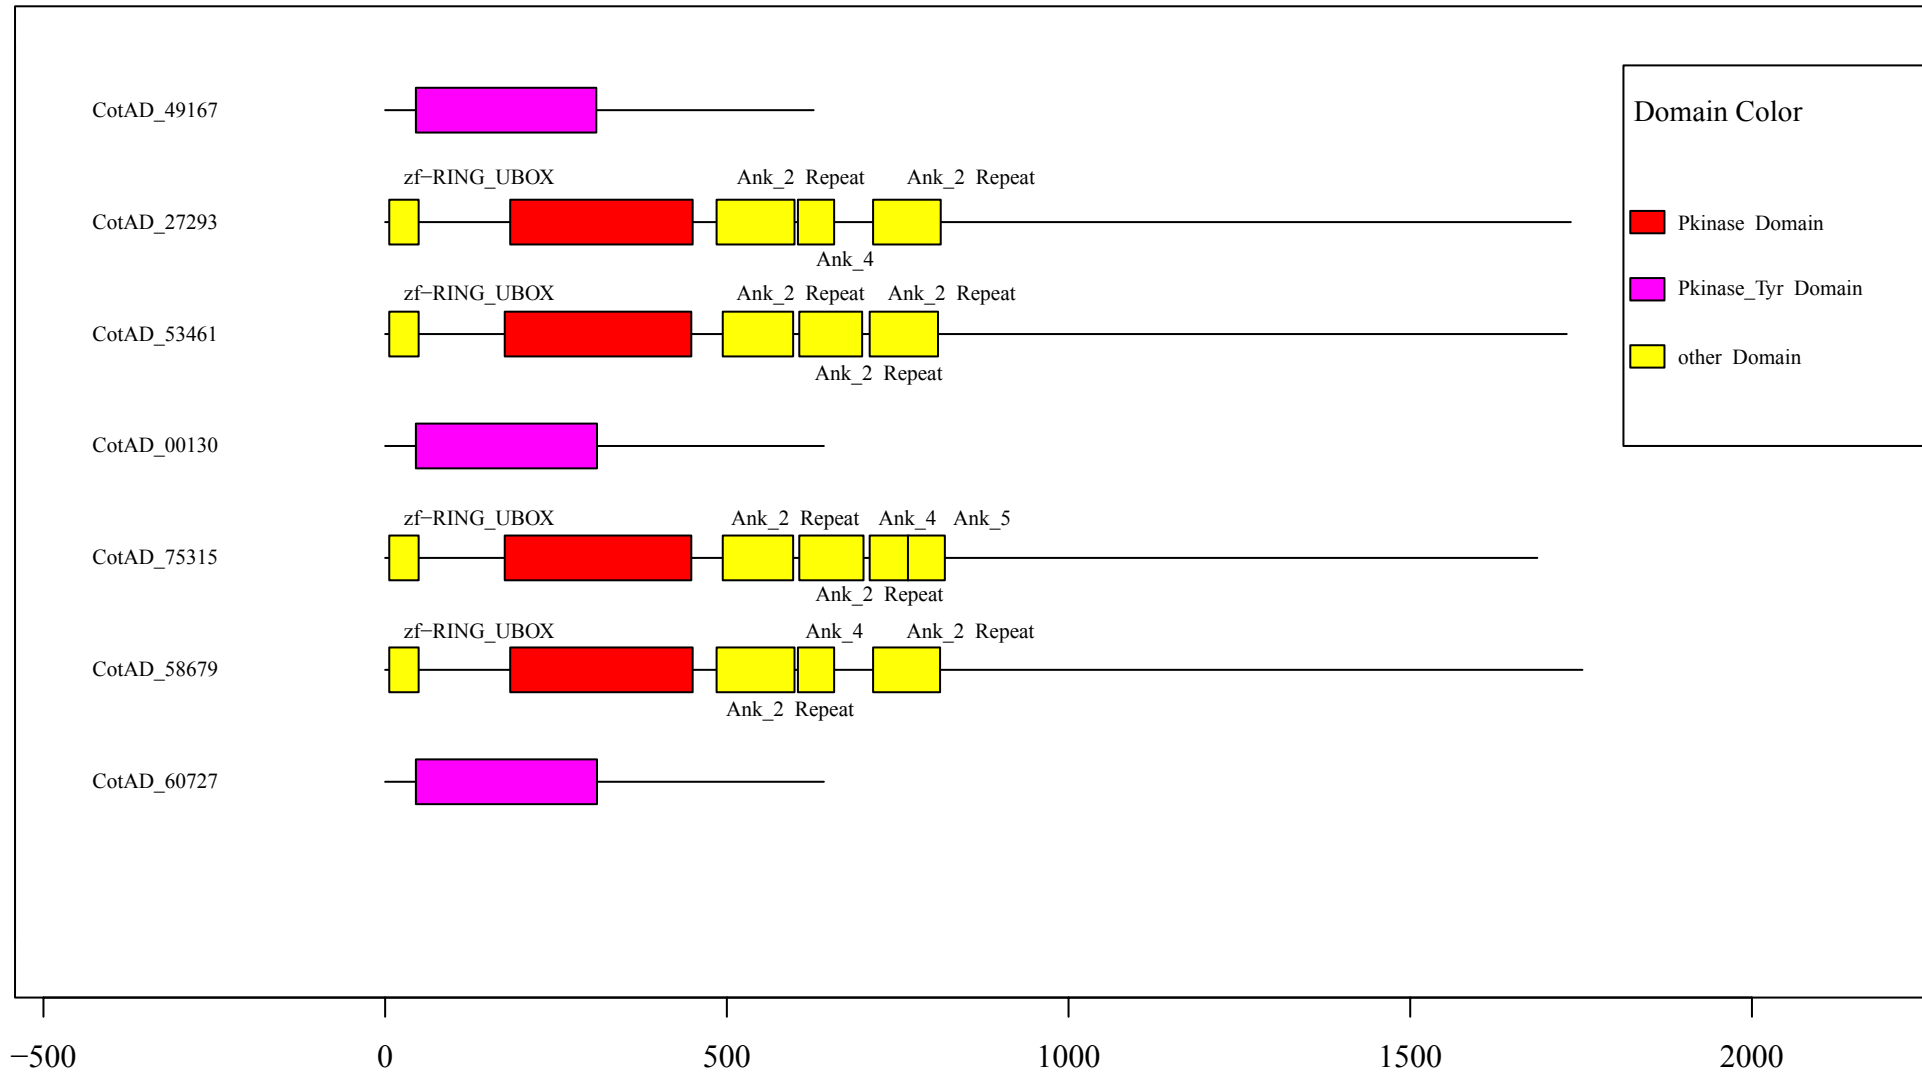

# G.hi TKL-PI-2 domain diagram (all)

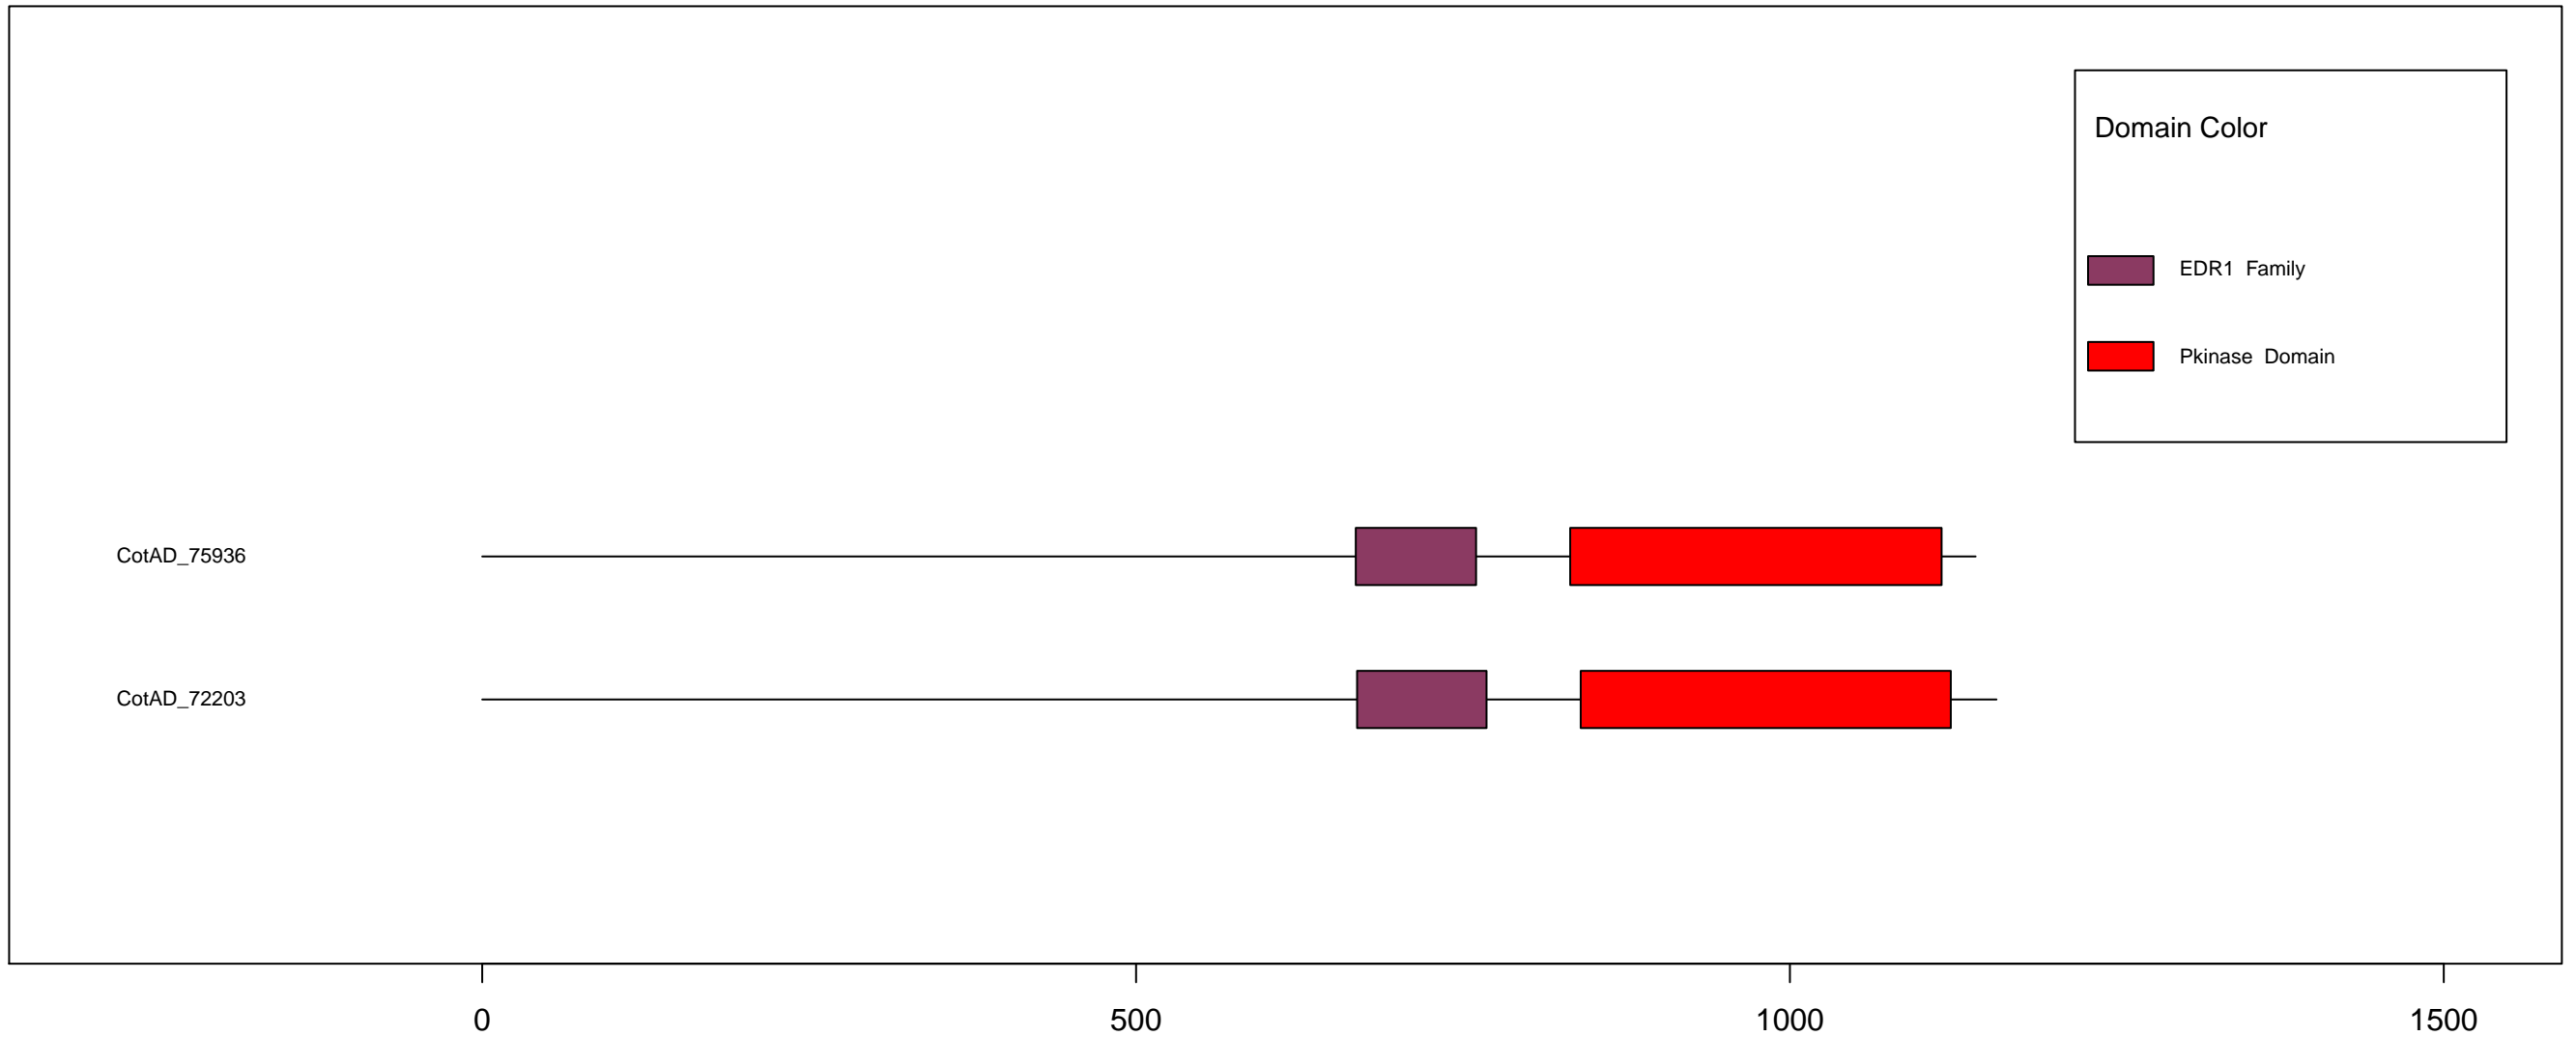



# G.hi TKL-PI-3 domain diagram (all)

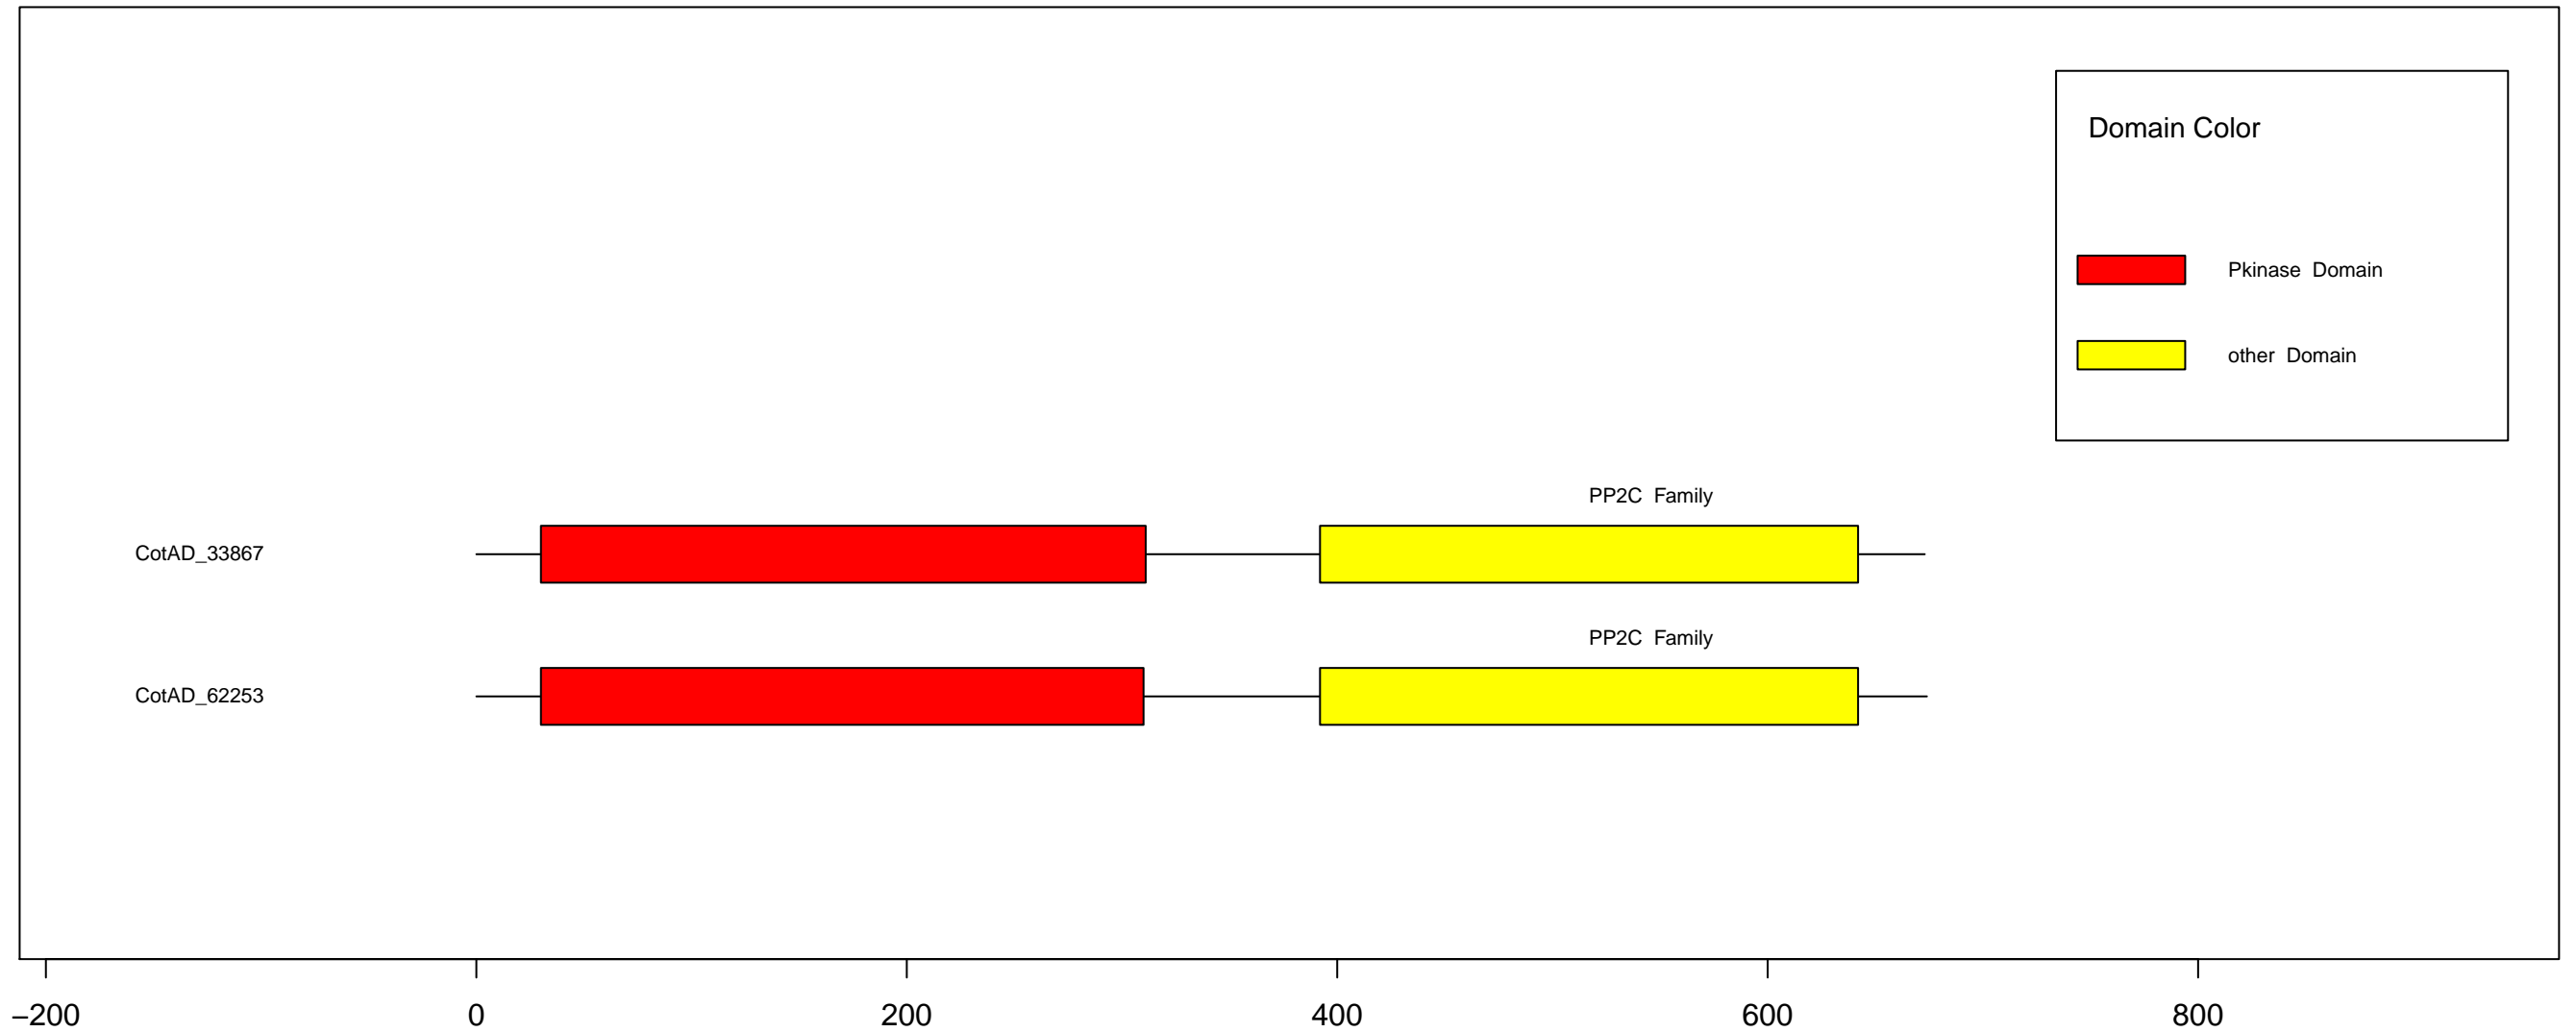

# G.hi TKL-PI-4 domain diagram (part 1)

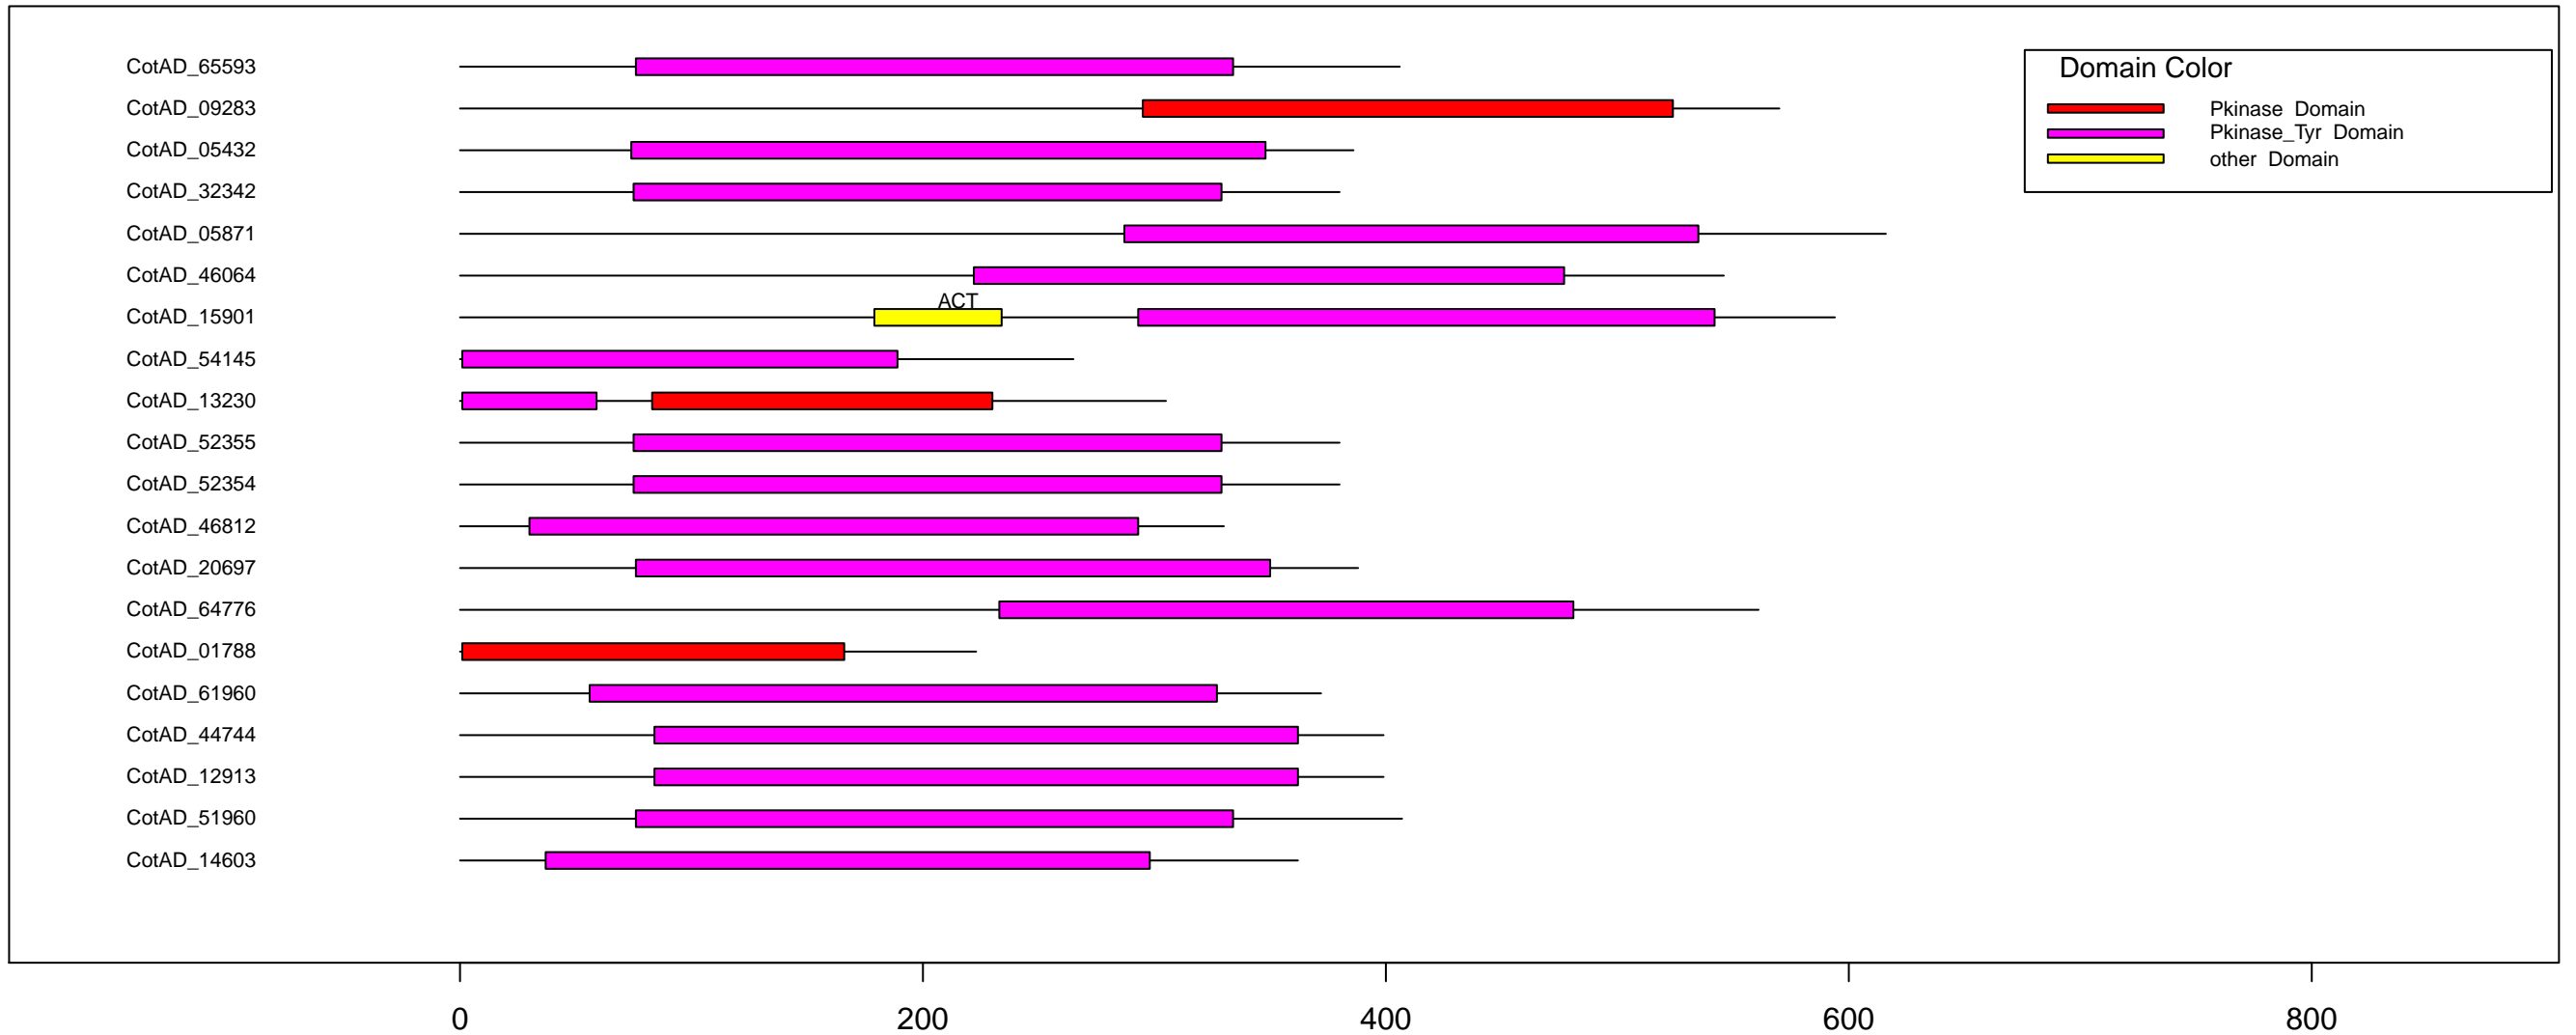

# G.hi TKL-PI-4 domain diagram (part 2)

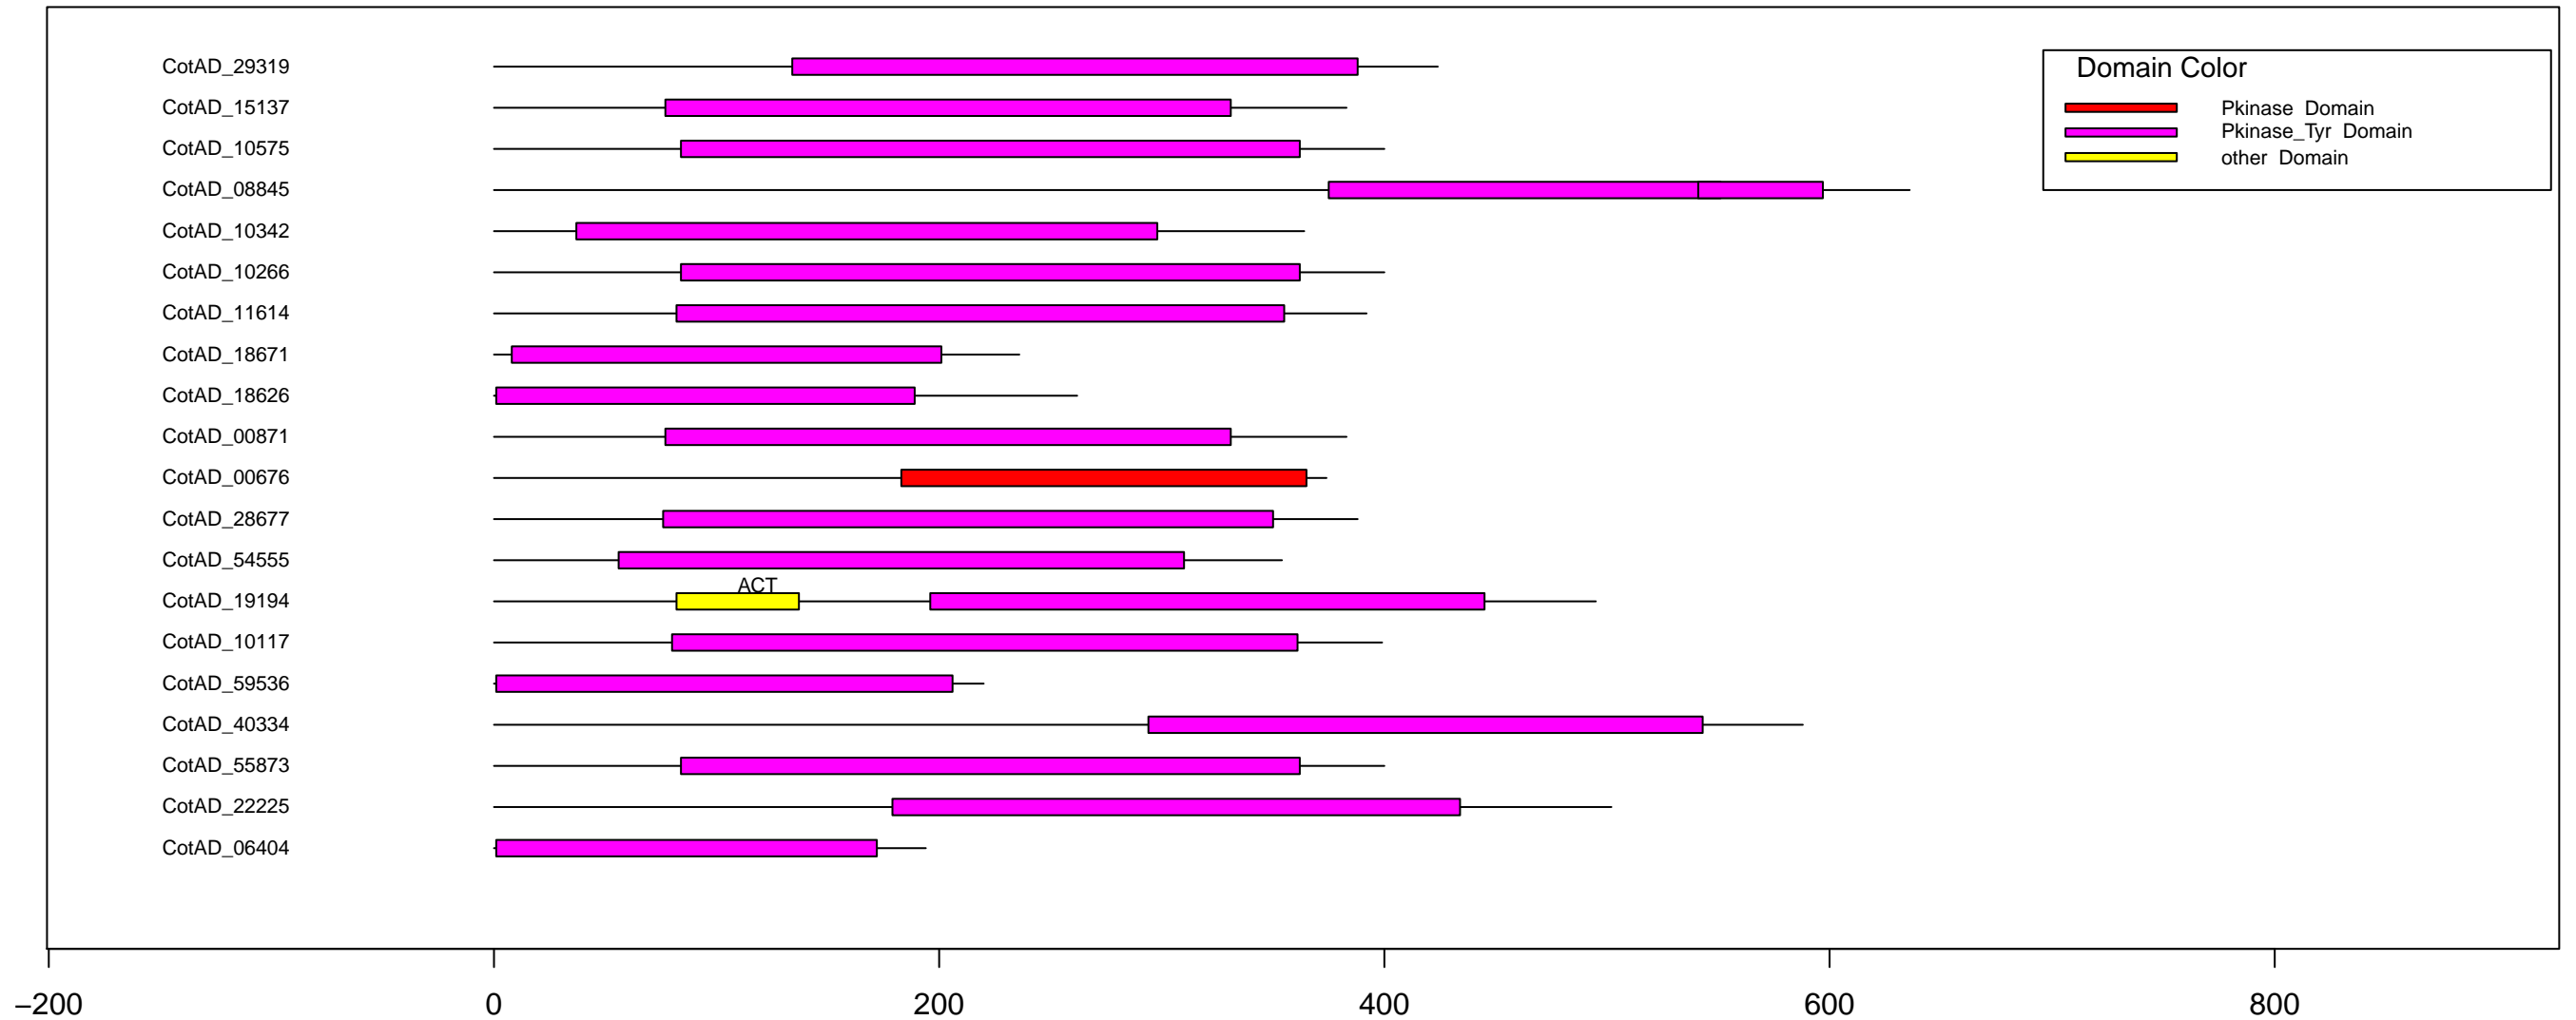

### G.hi TKL-PI-4 domain diagram (part 3)

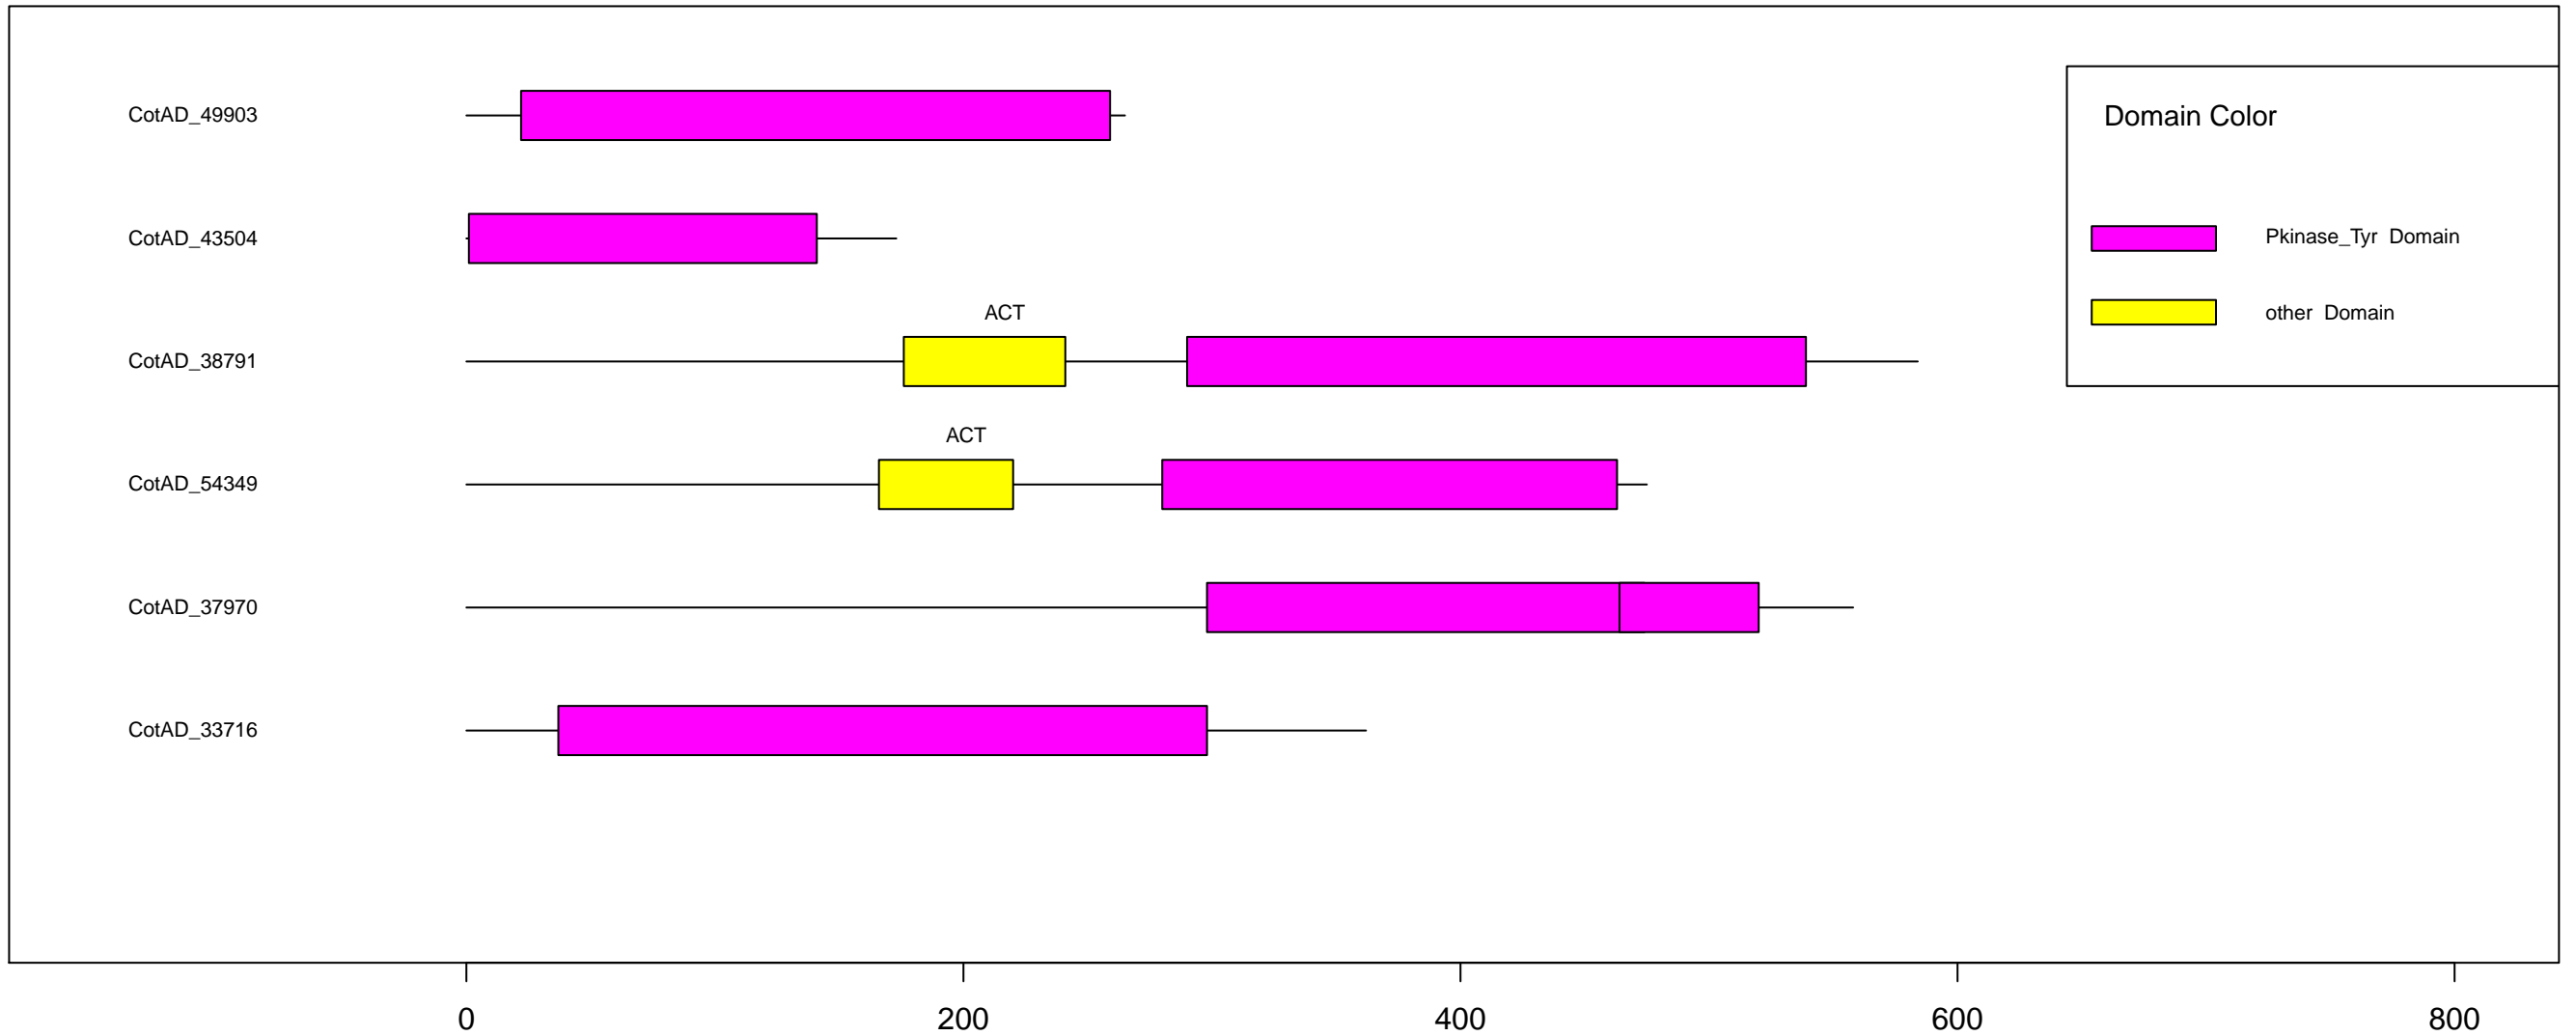

# G.hi TKL-PI-5 domain diagram (all)

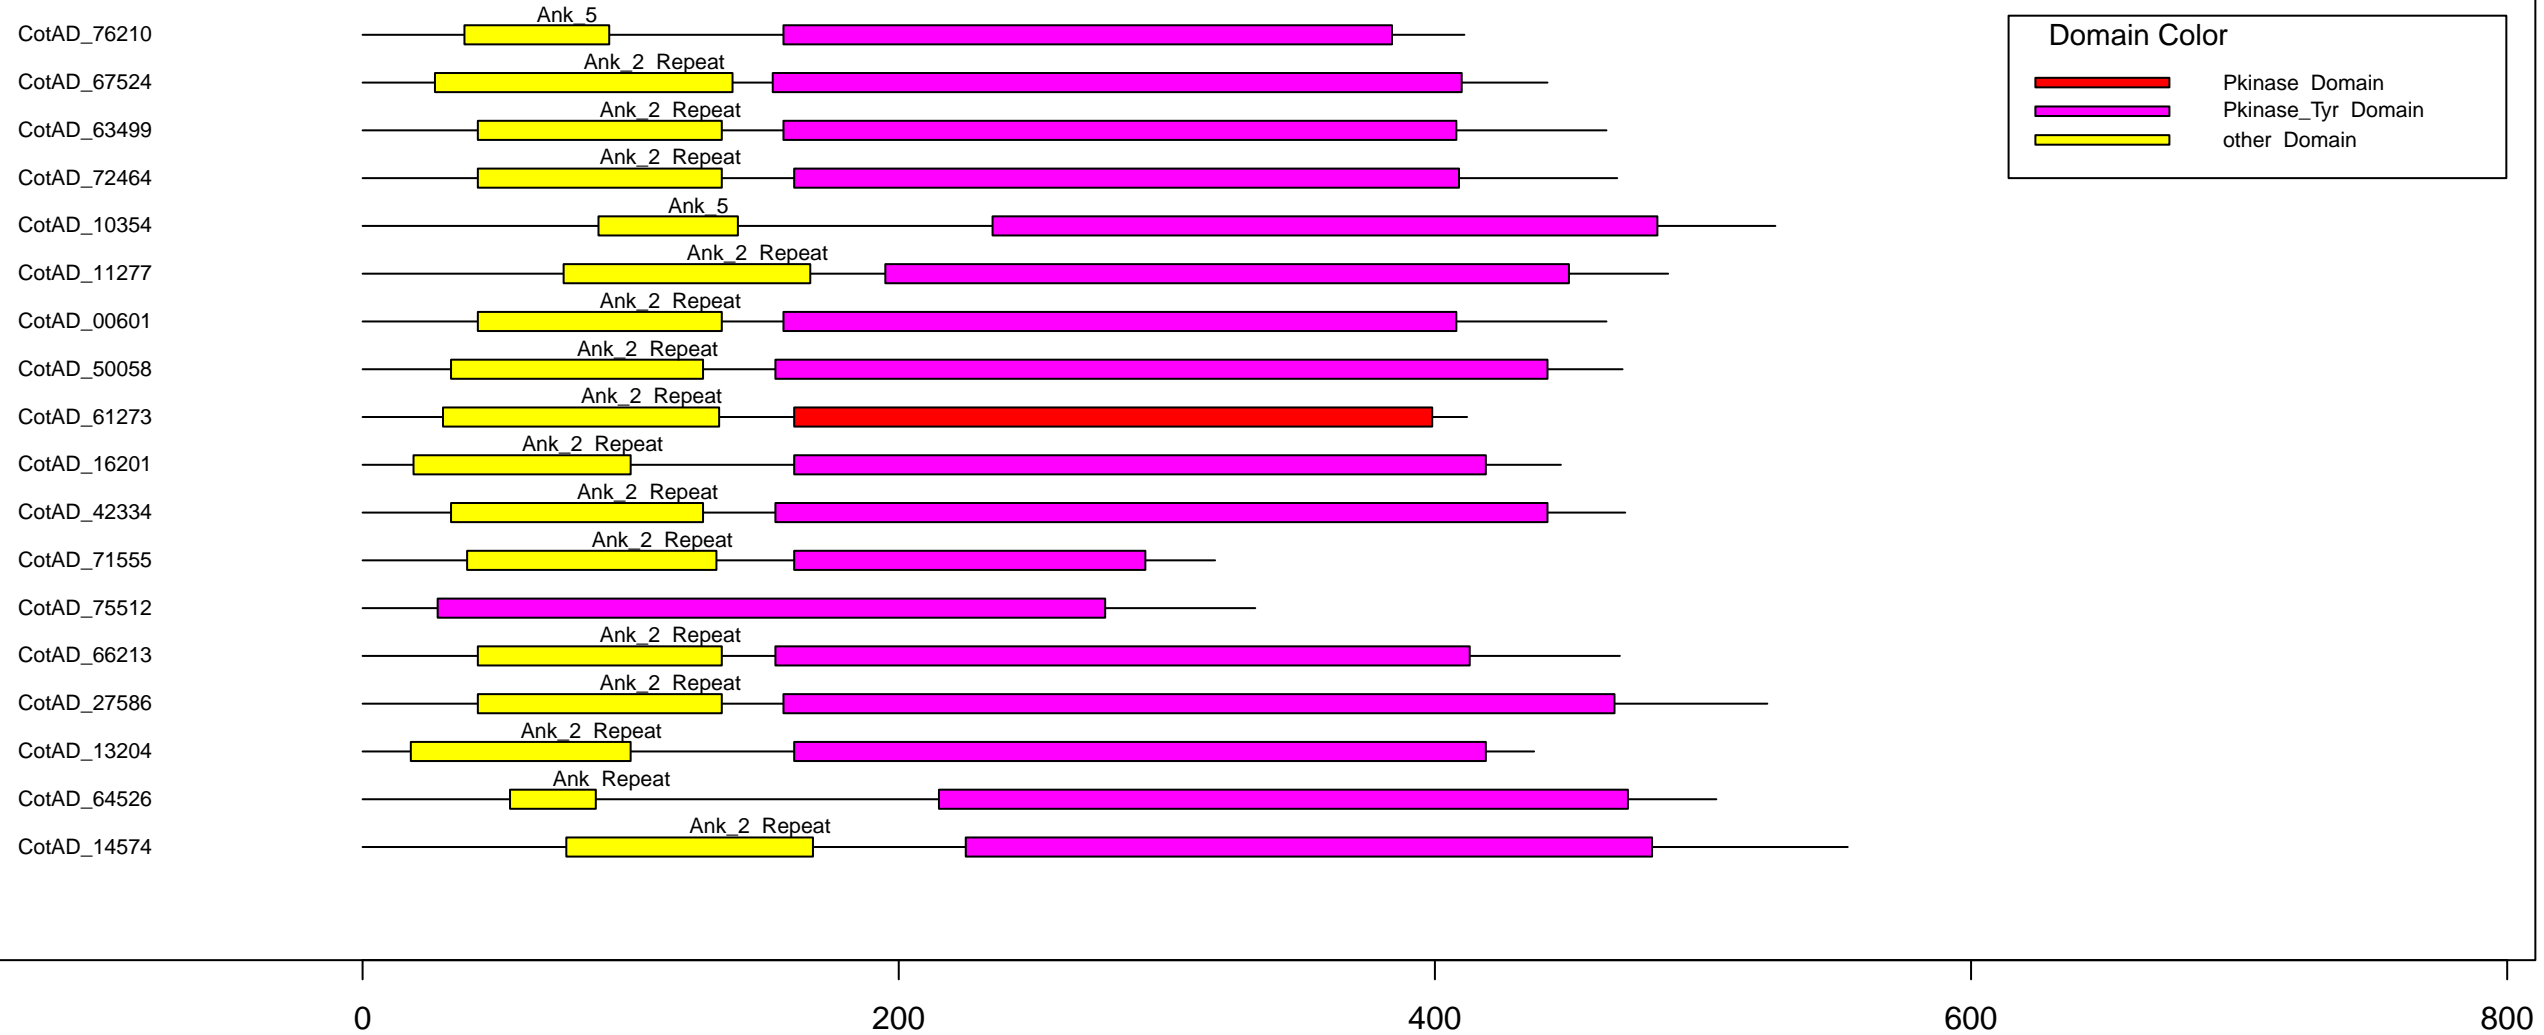

# G.hi TKL-PI-6 domain diagram (all)

Domain Color

- Pkinase\_Tyr Domain
- other Domain

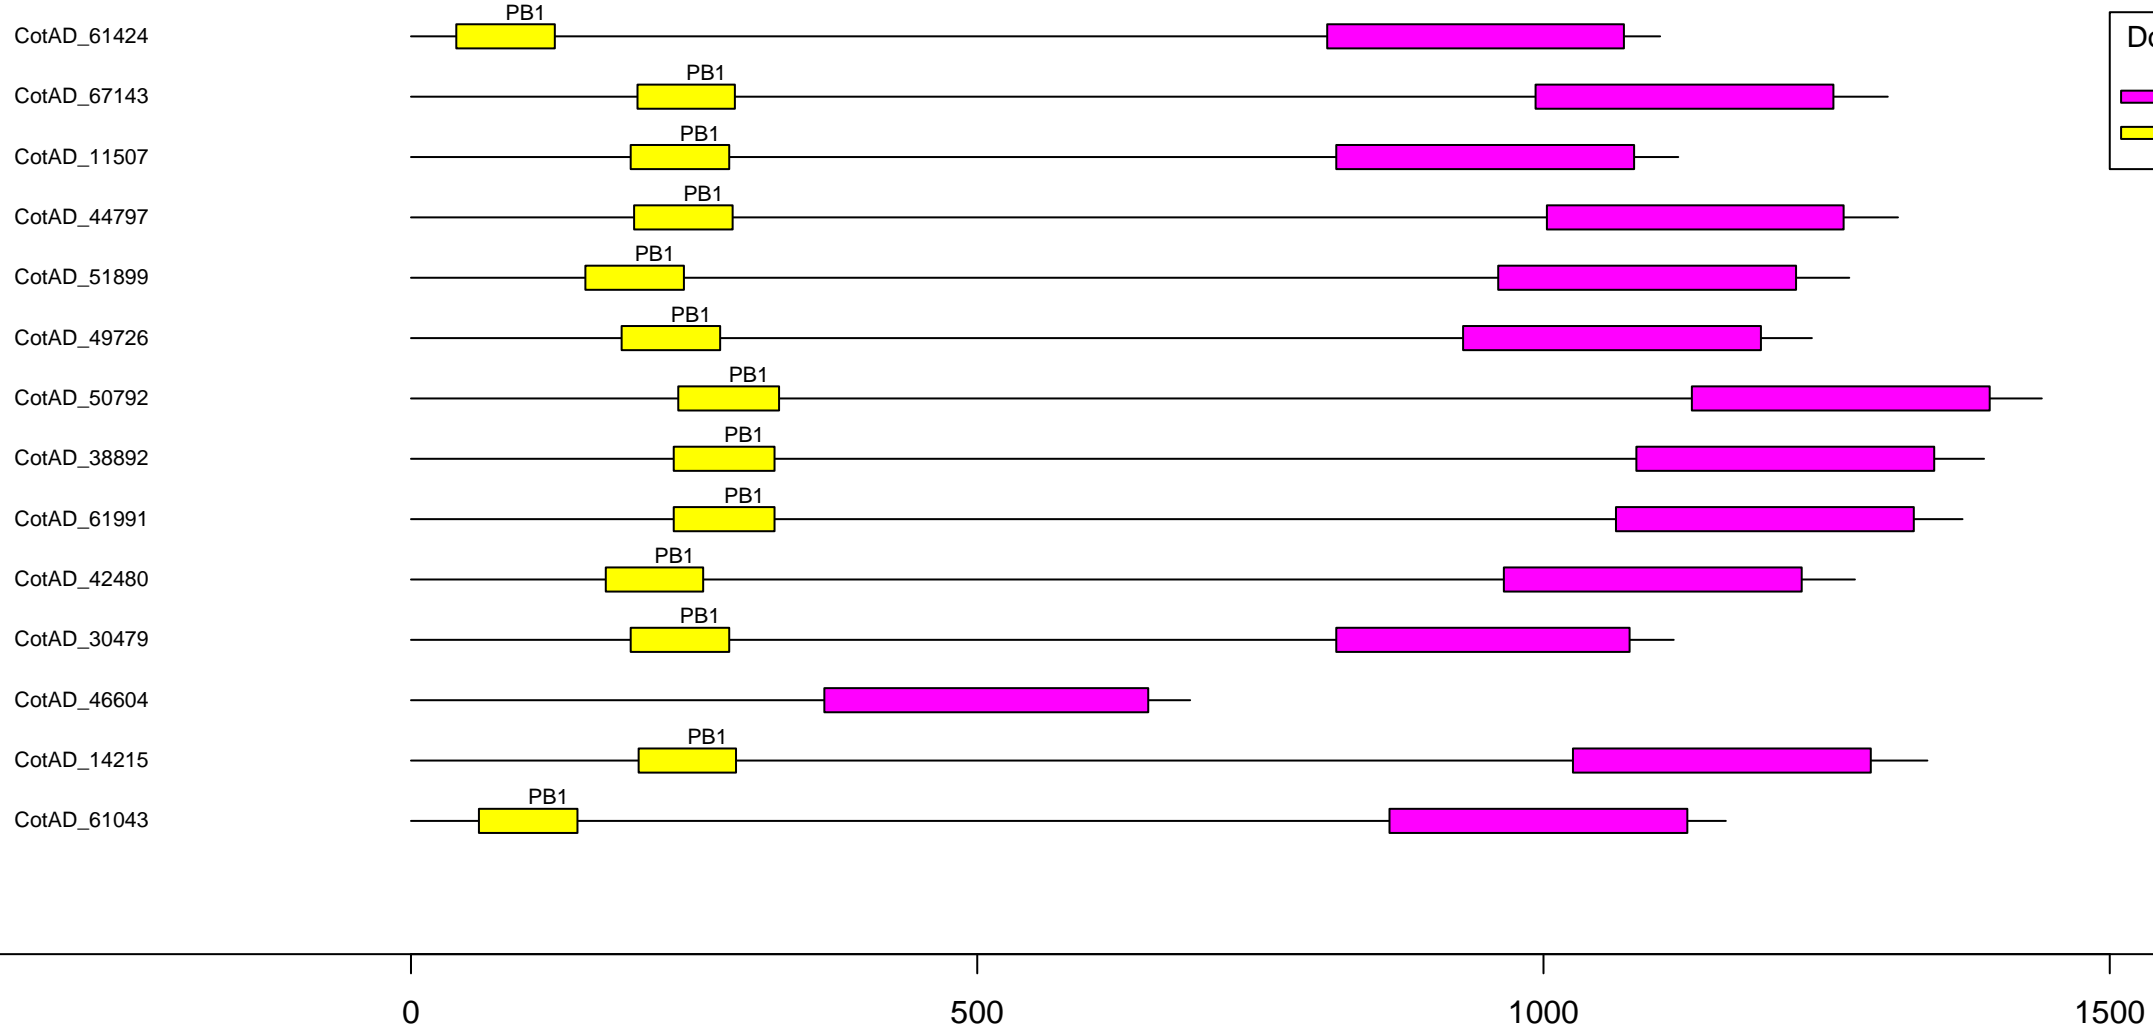

# G.hi TKL-PI-7 domain diagram (all)

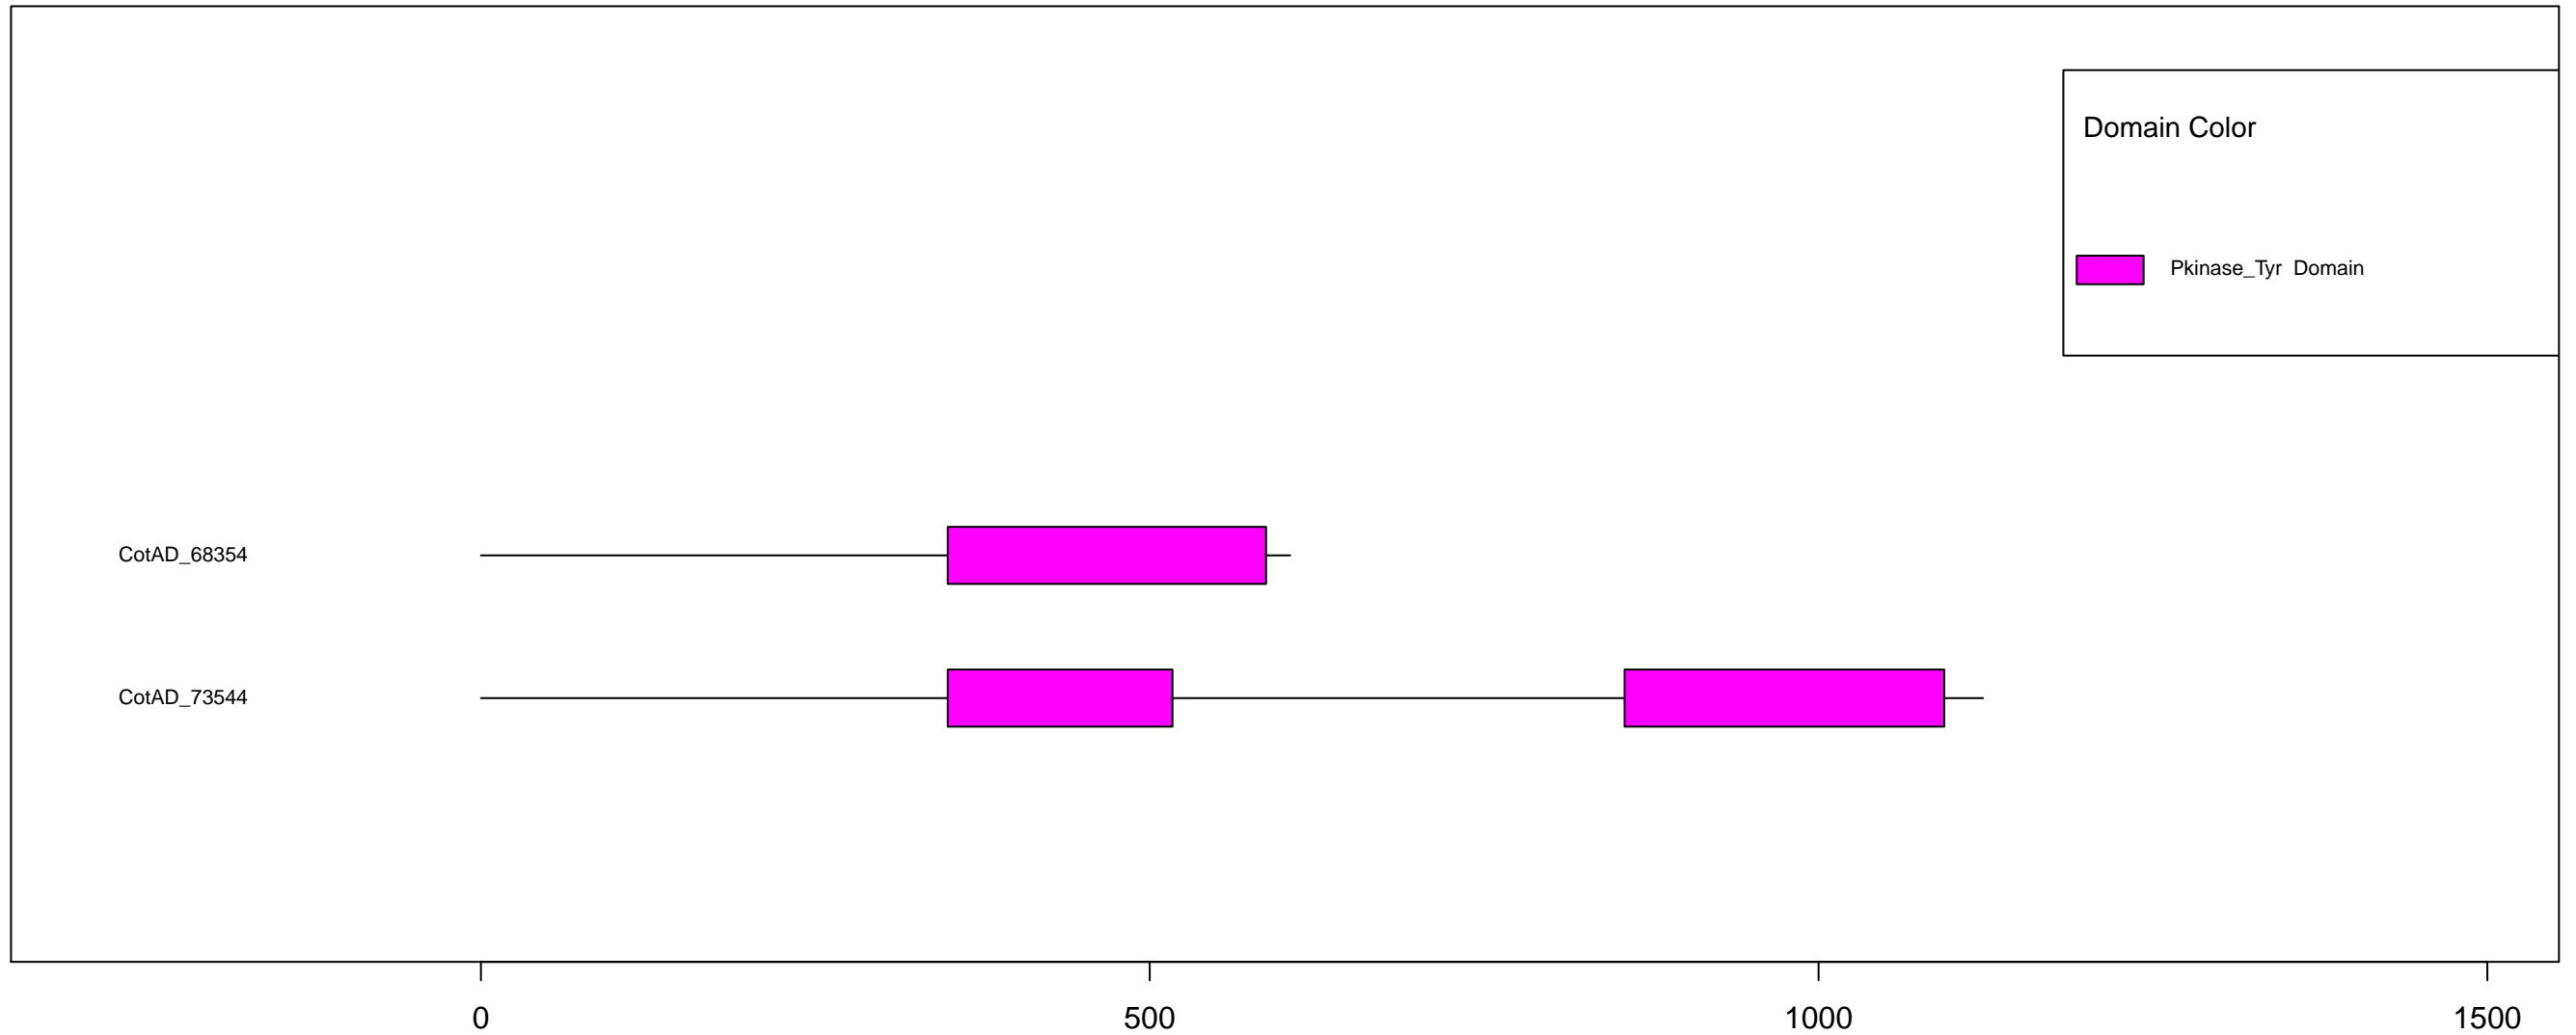

# G.hi TKL-PI-8 domain diagram (all)

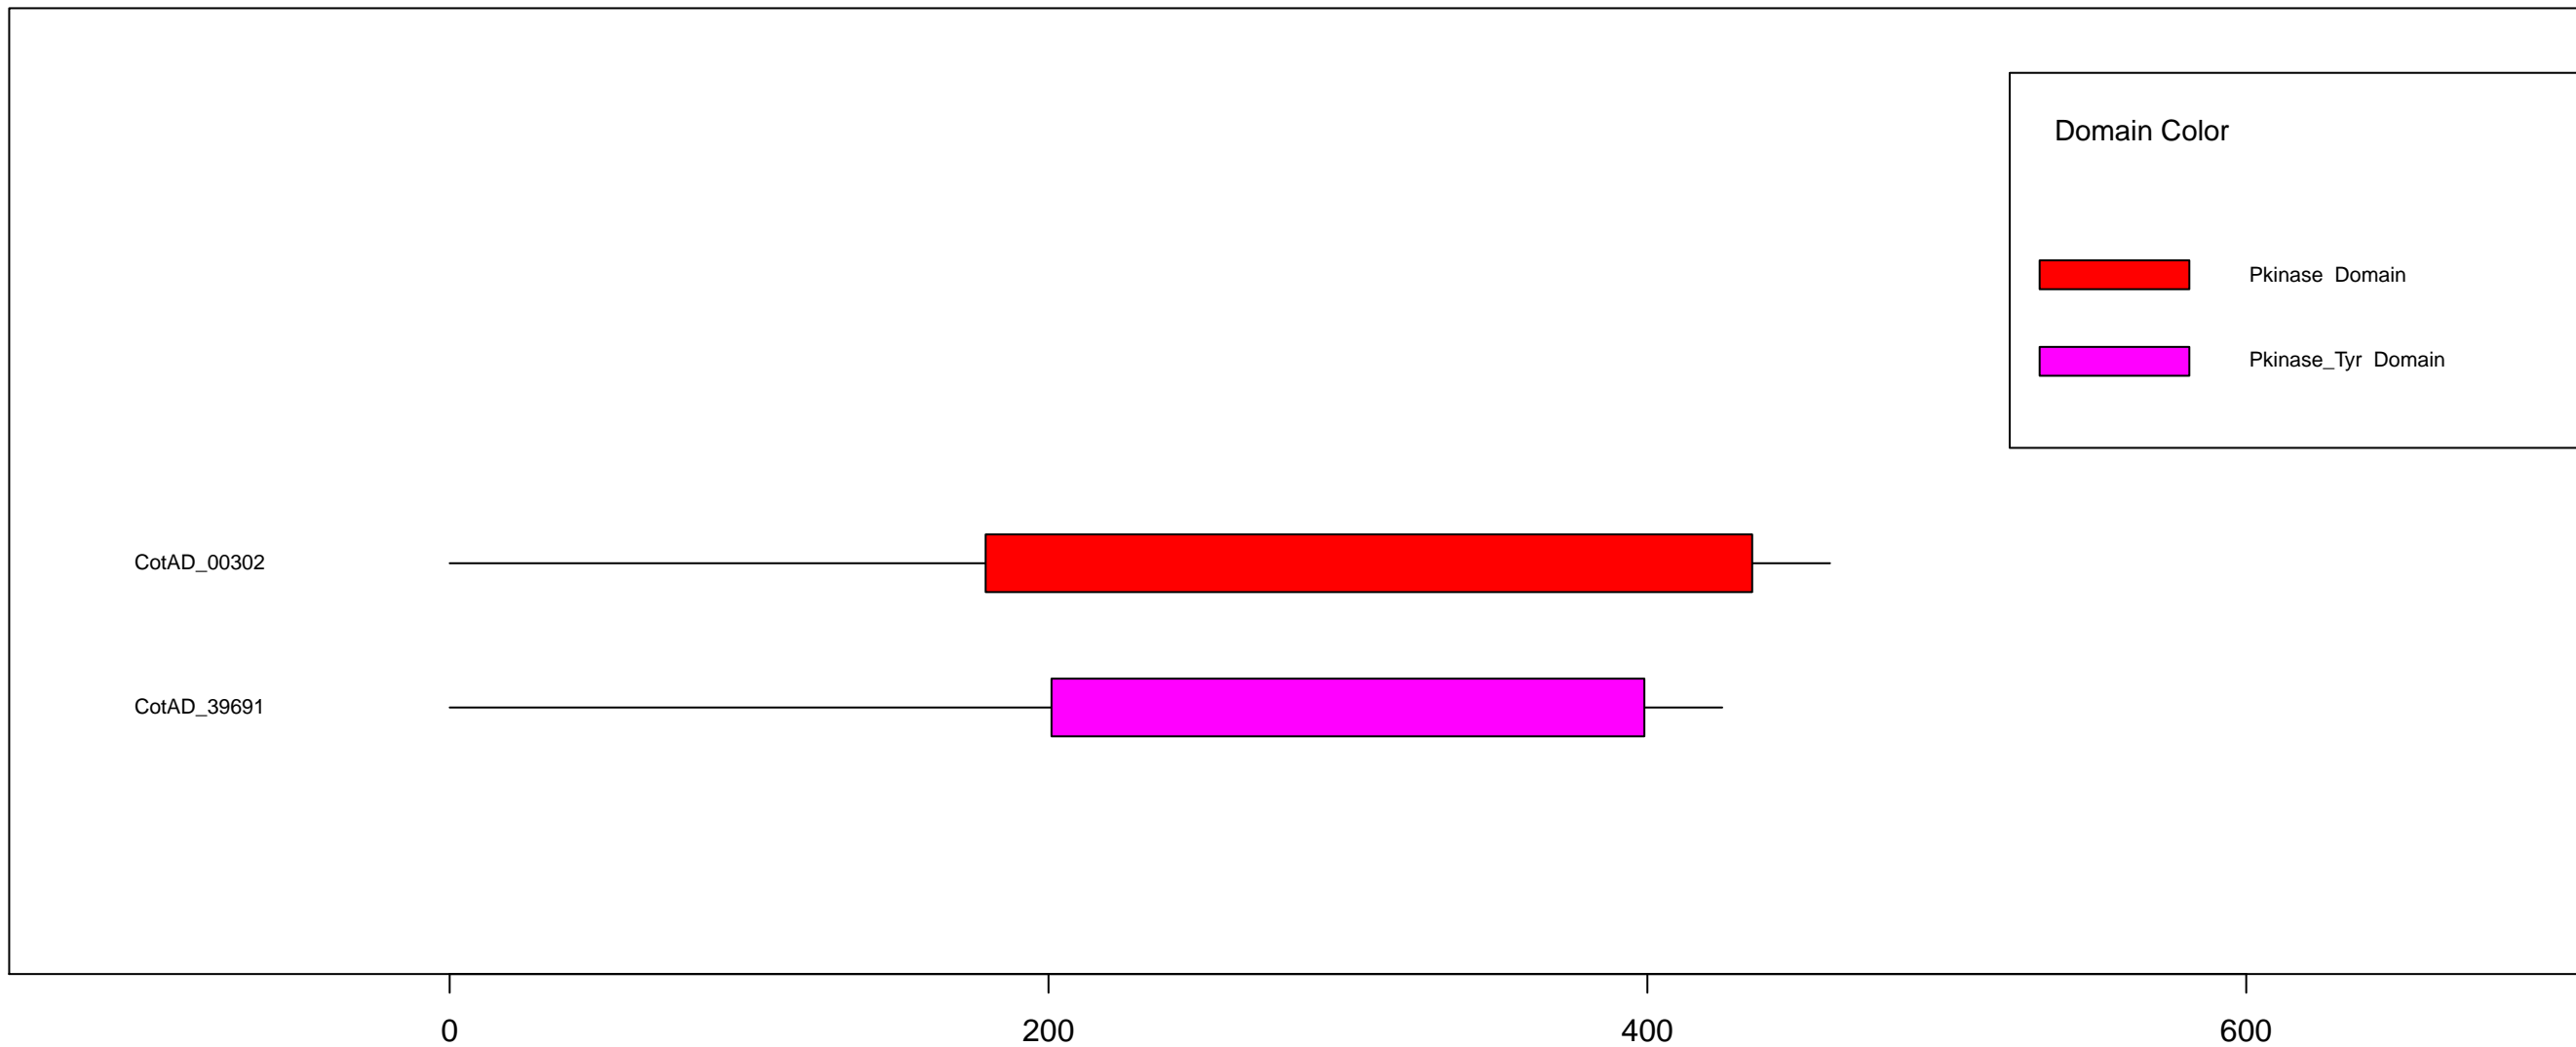



# G.hi TLK domain diagram (all)

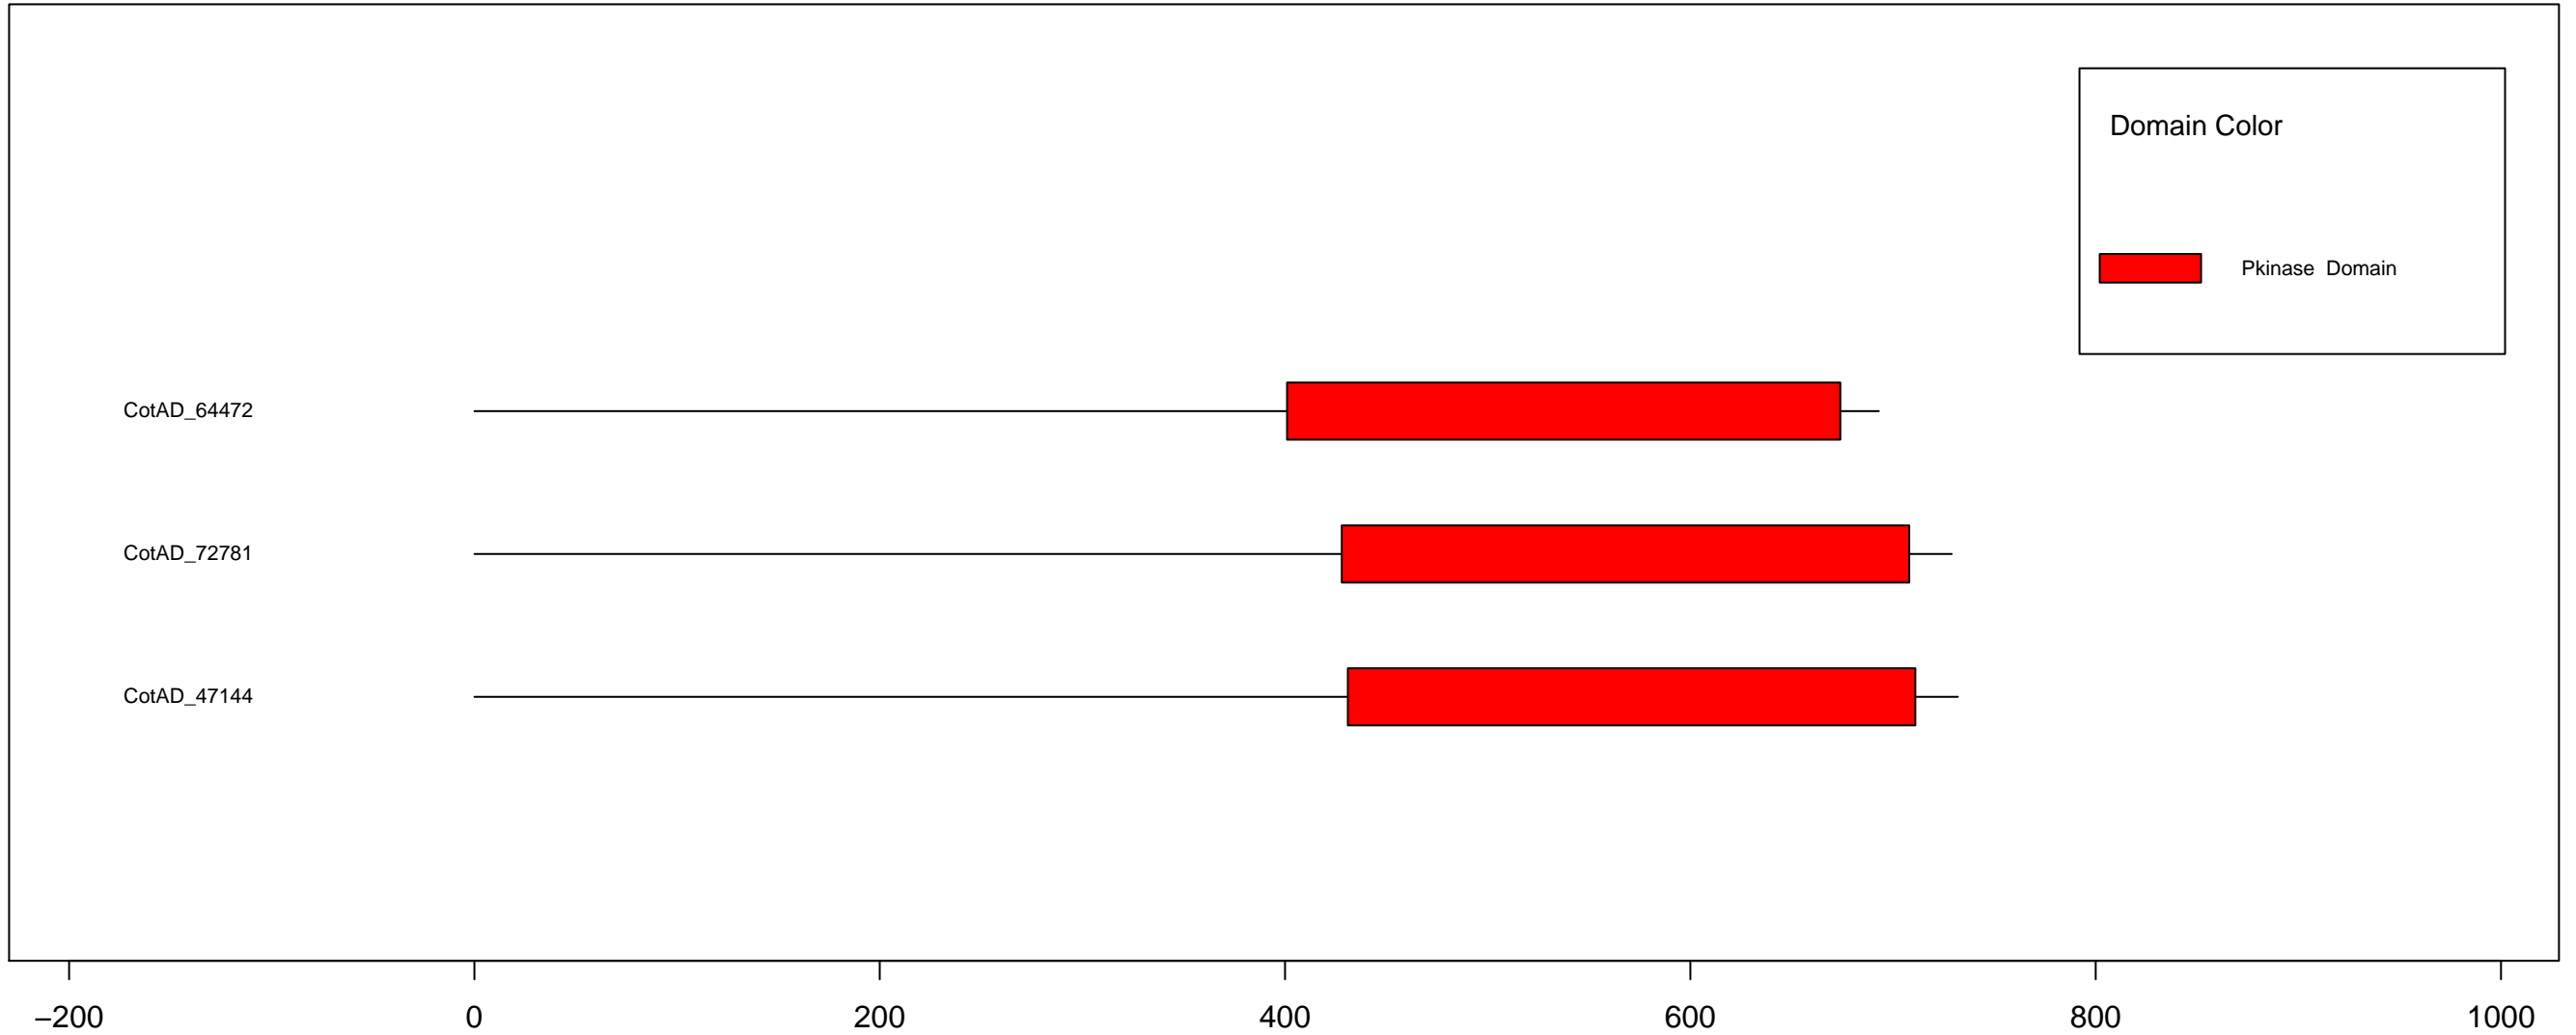

# G.hi TTK domain diagram (all)

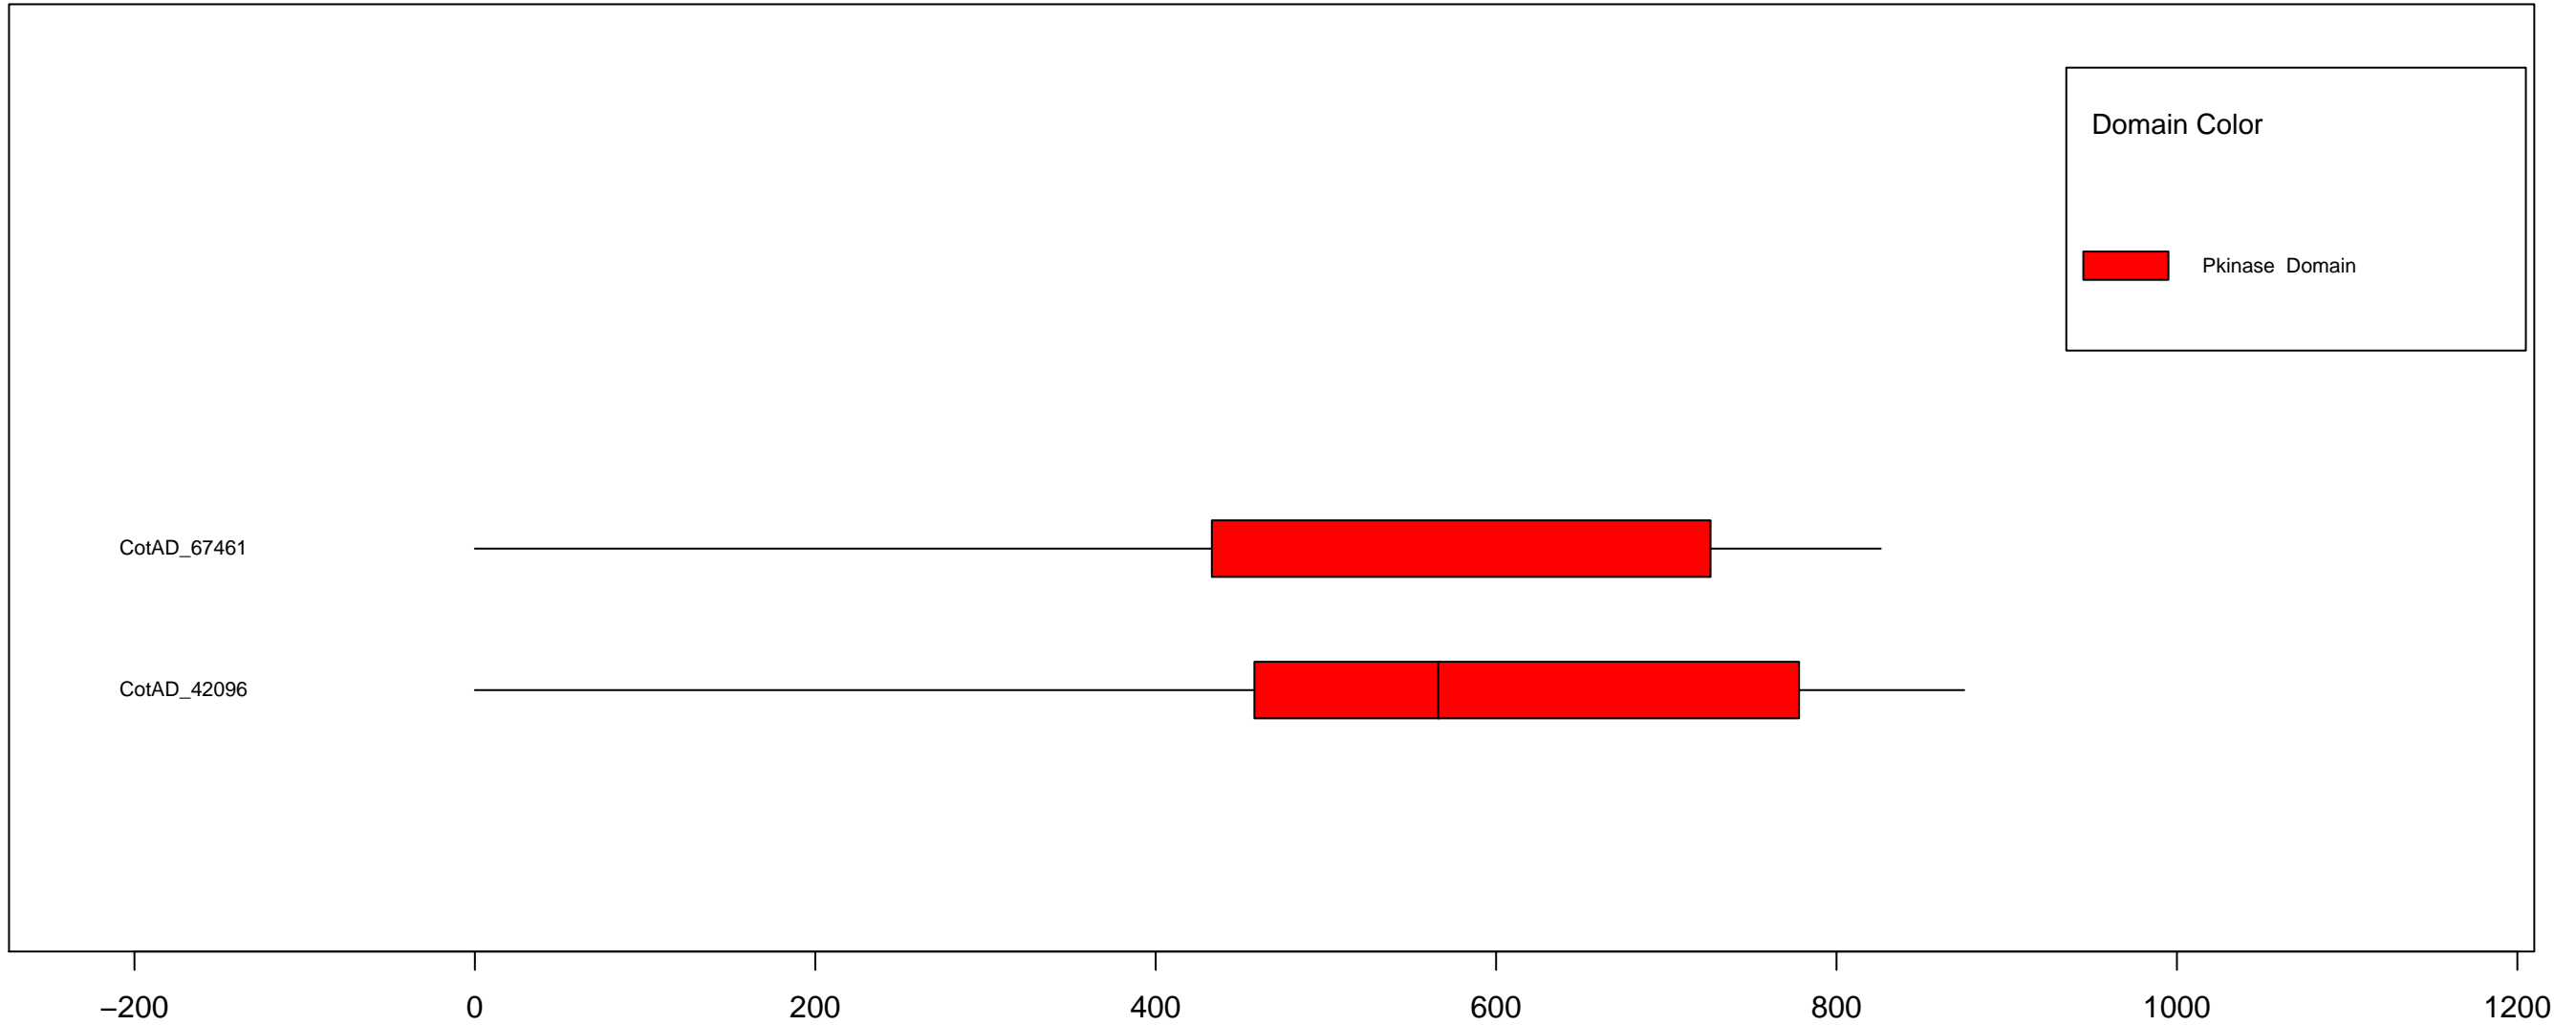

# G.hi ULK\_Fused domain diagram (all)

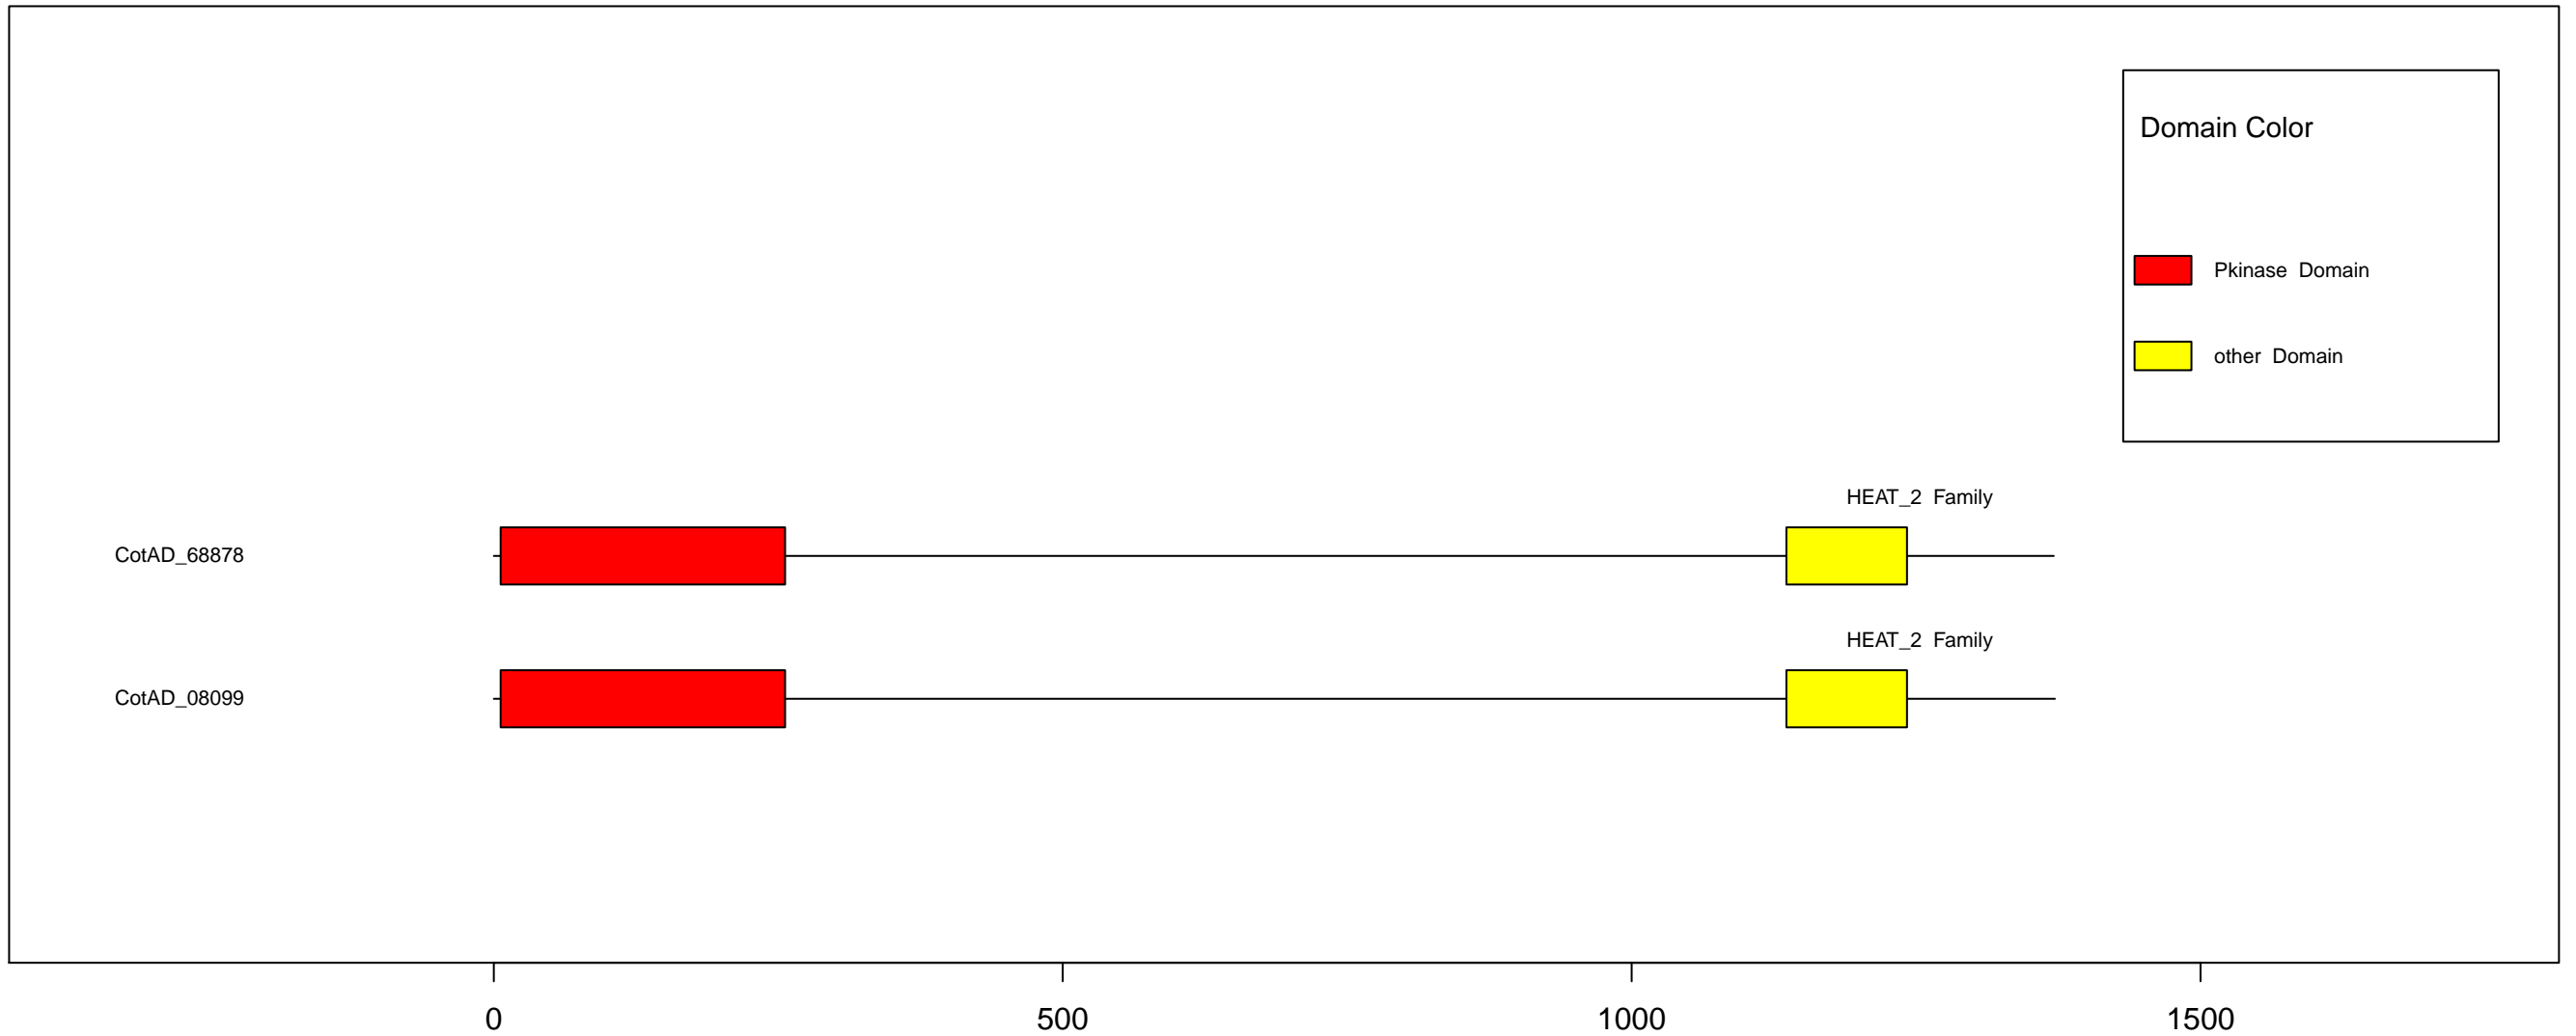

# G.hi ULK\_ULK4 domain diagram (all)

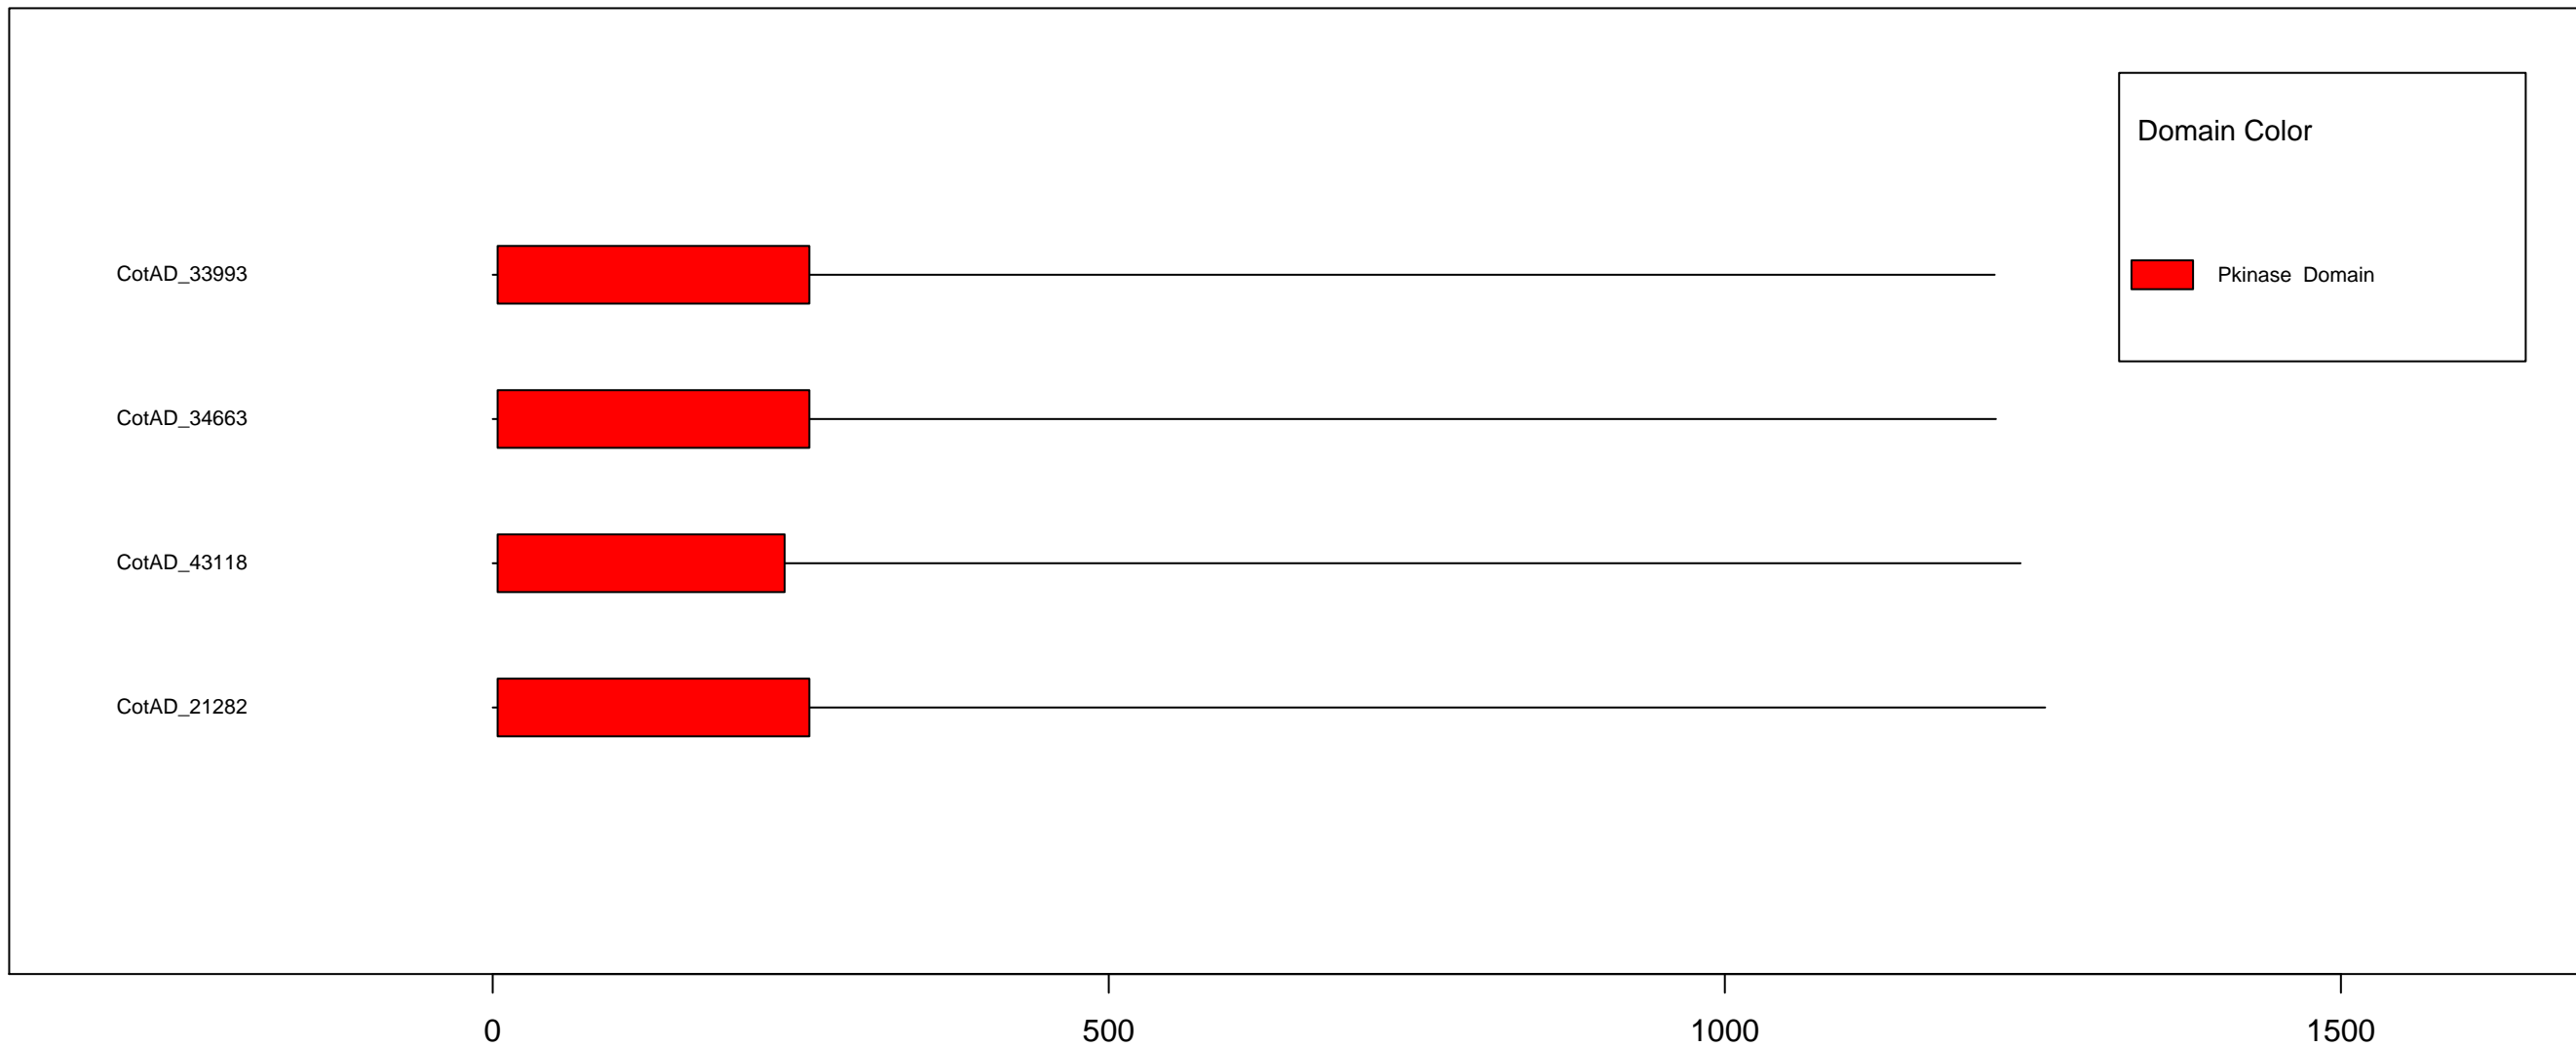

# G.hi WEE domain diagram (all)

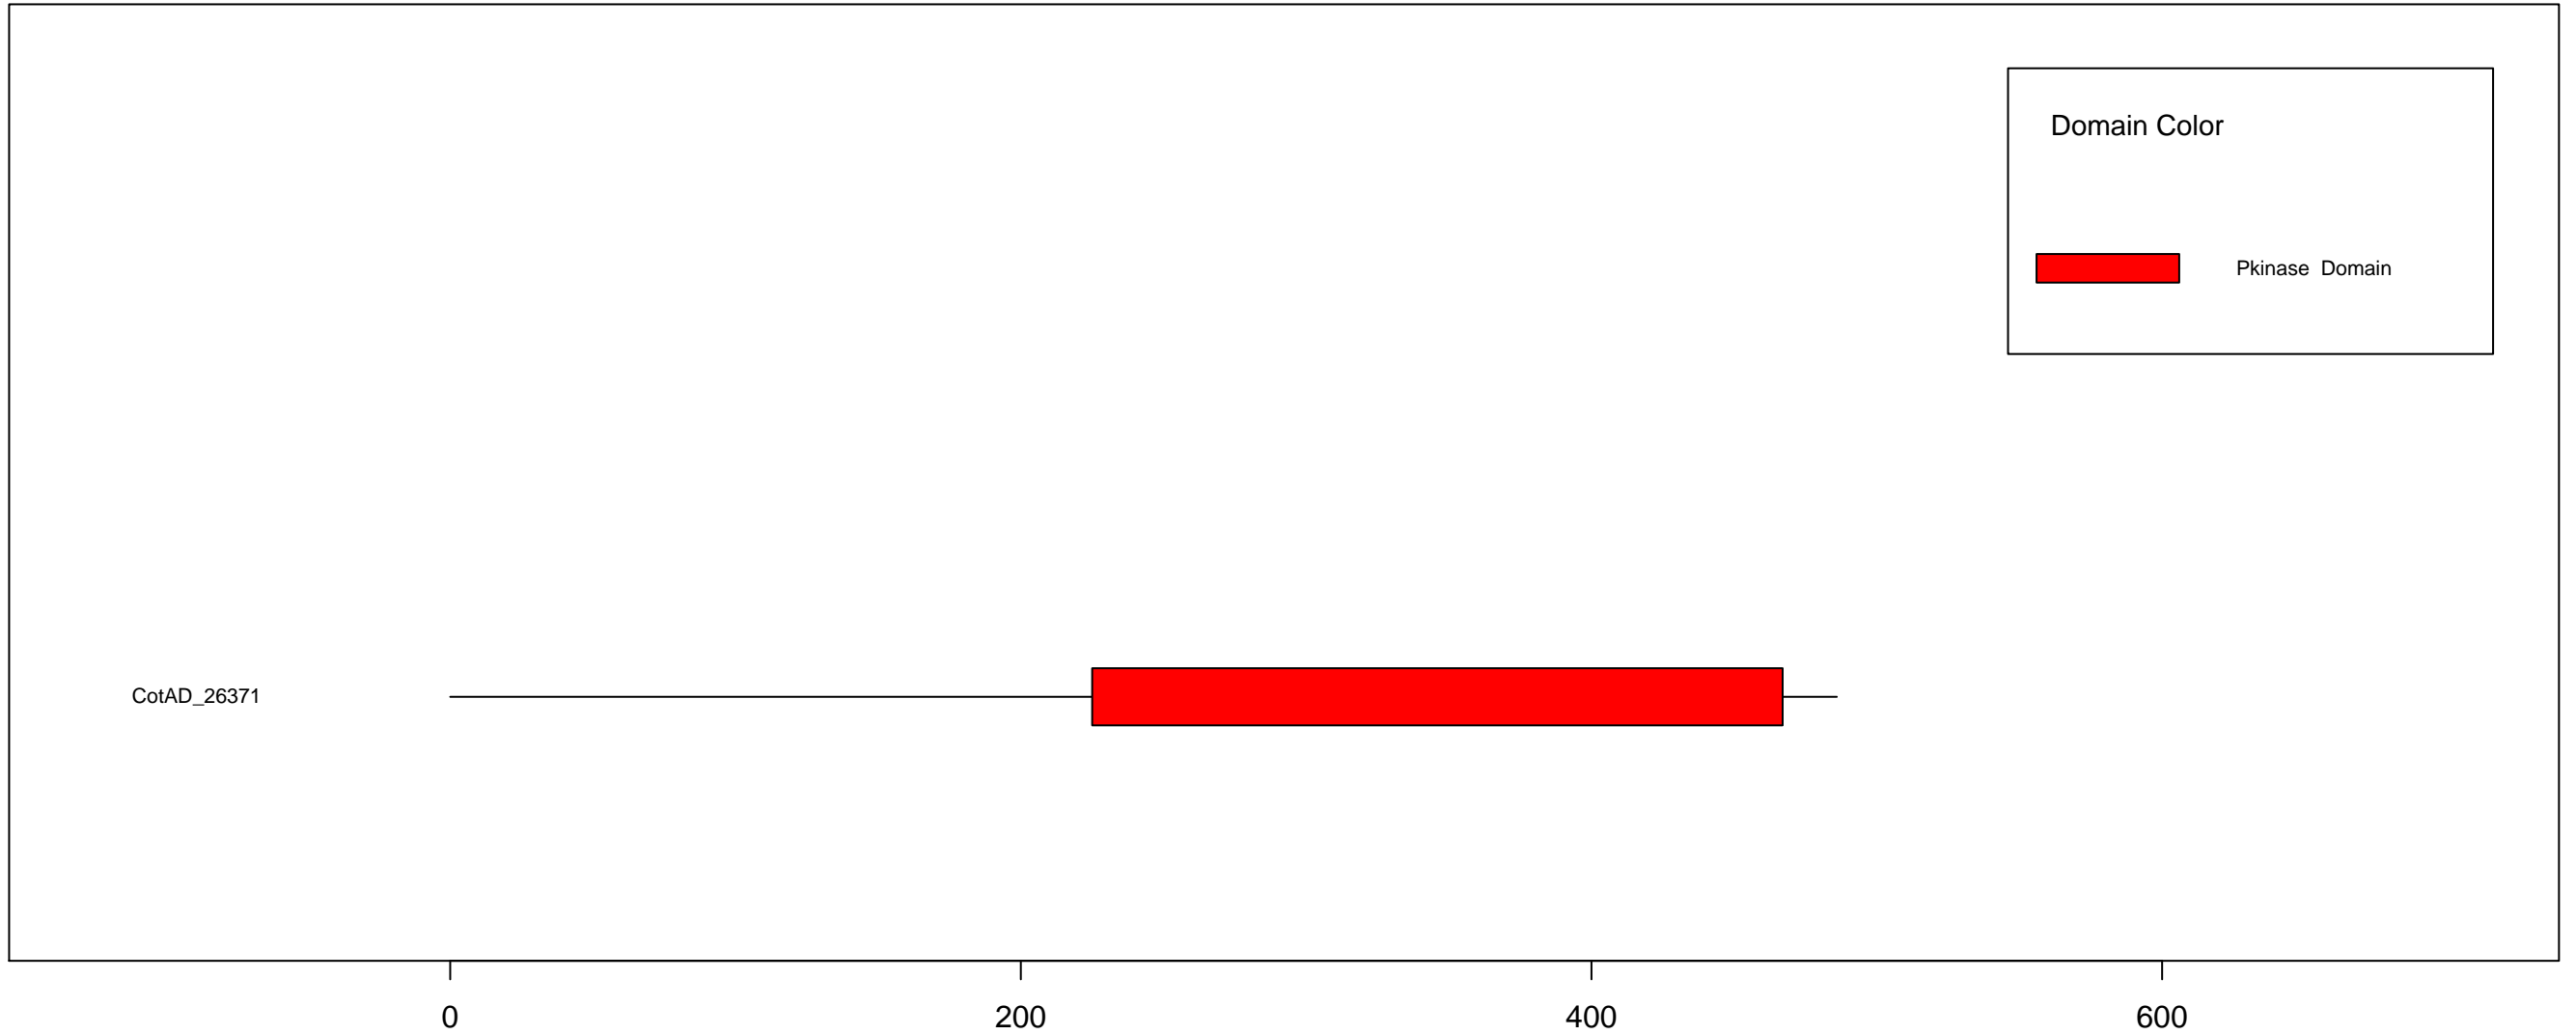

# G.hi WNK\_NRBP domain diagram (part 1)

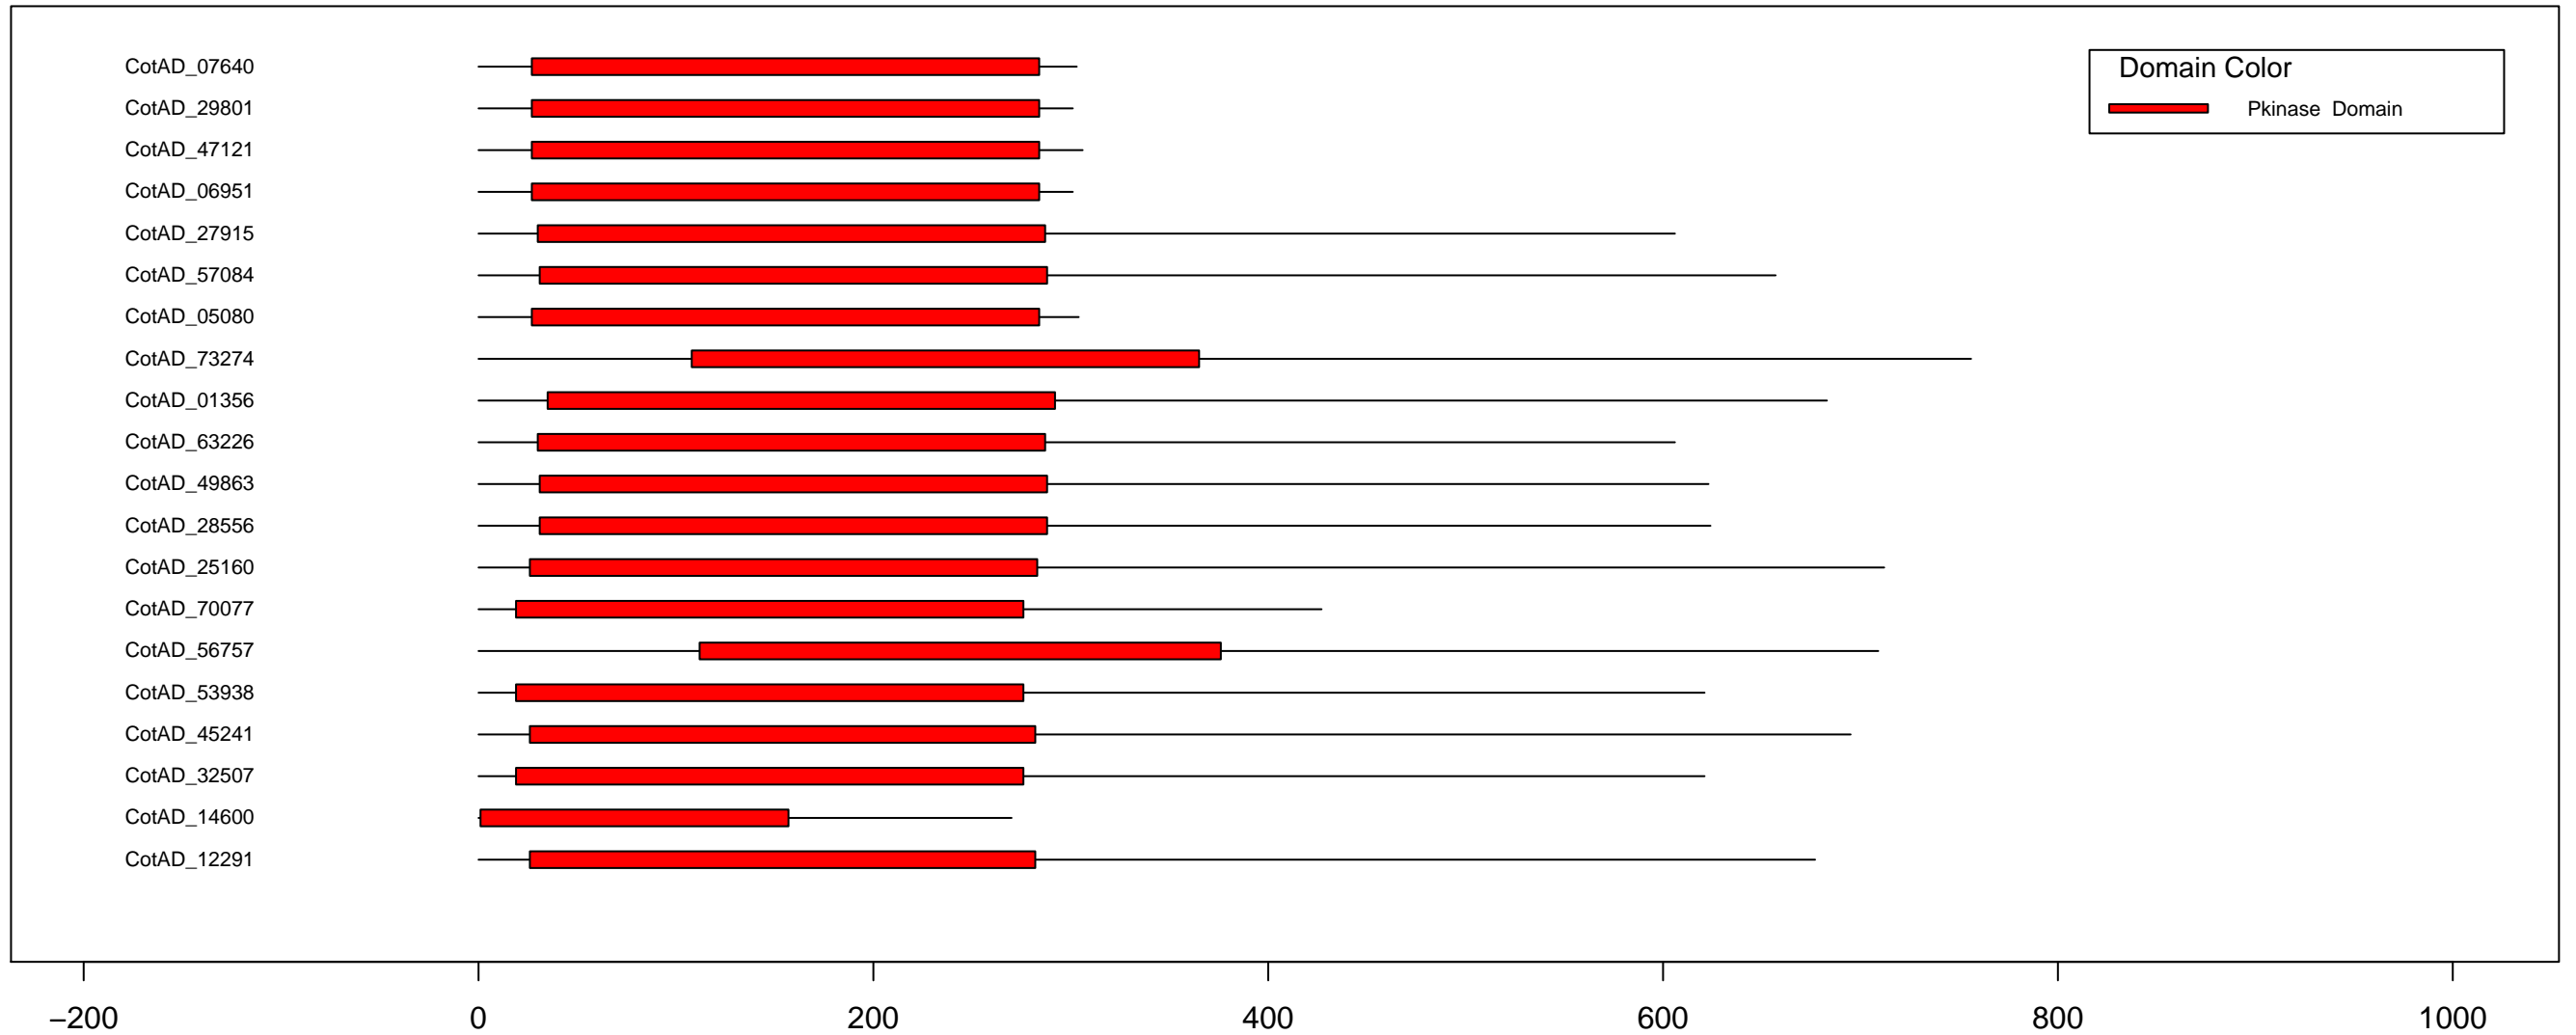

## G.hi WNK\_NRBP domain diagram (part 2)

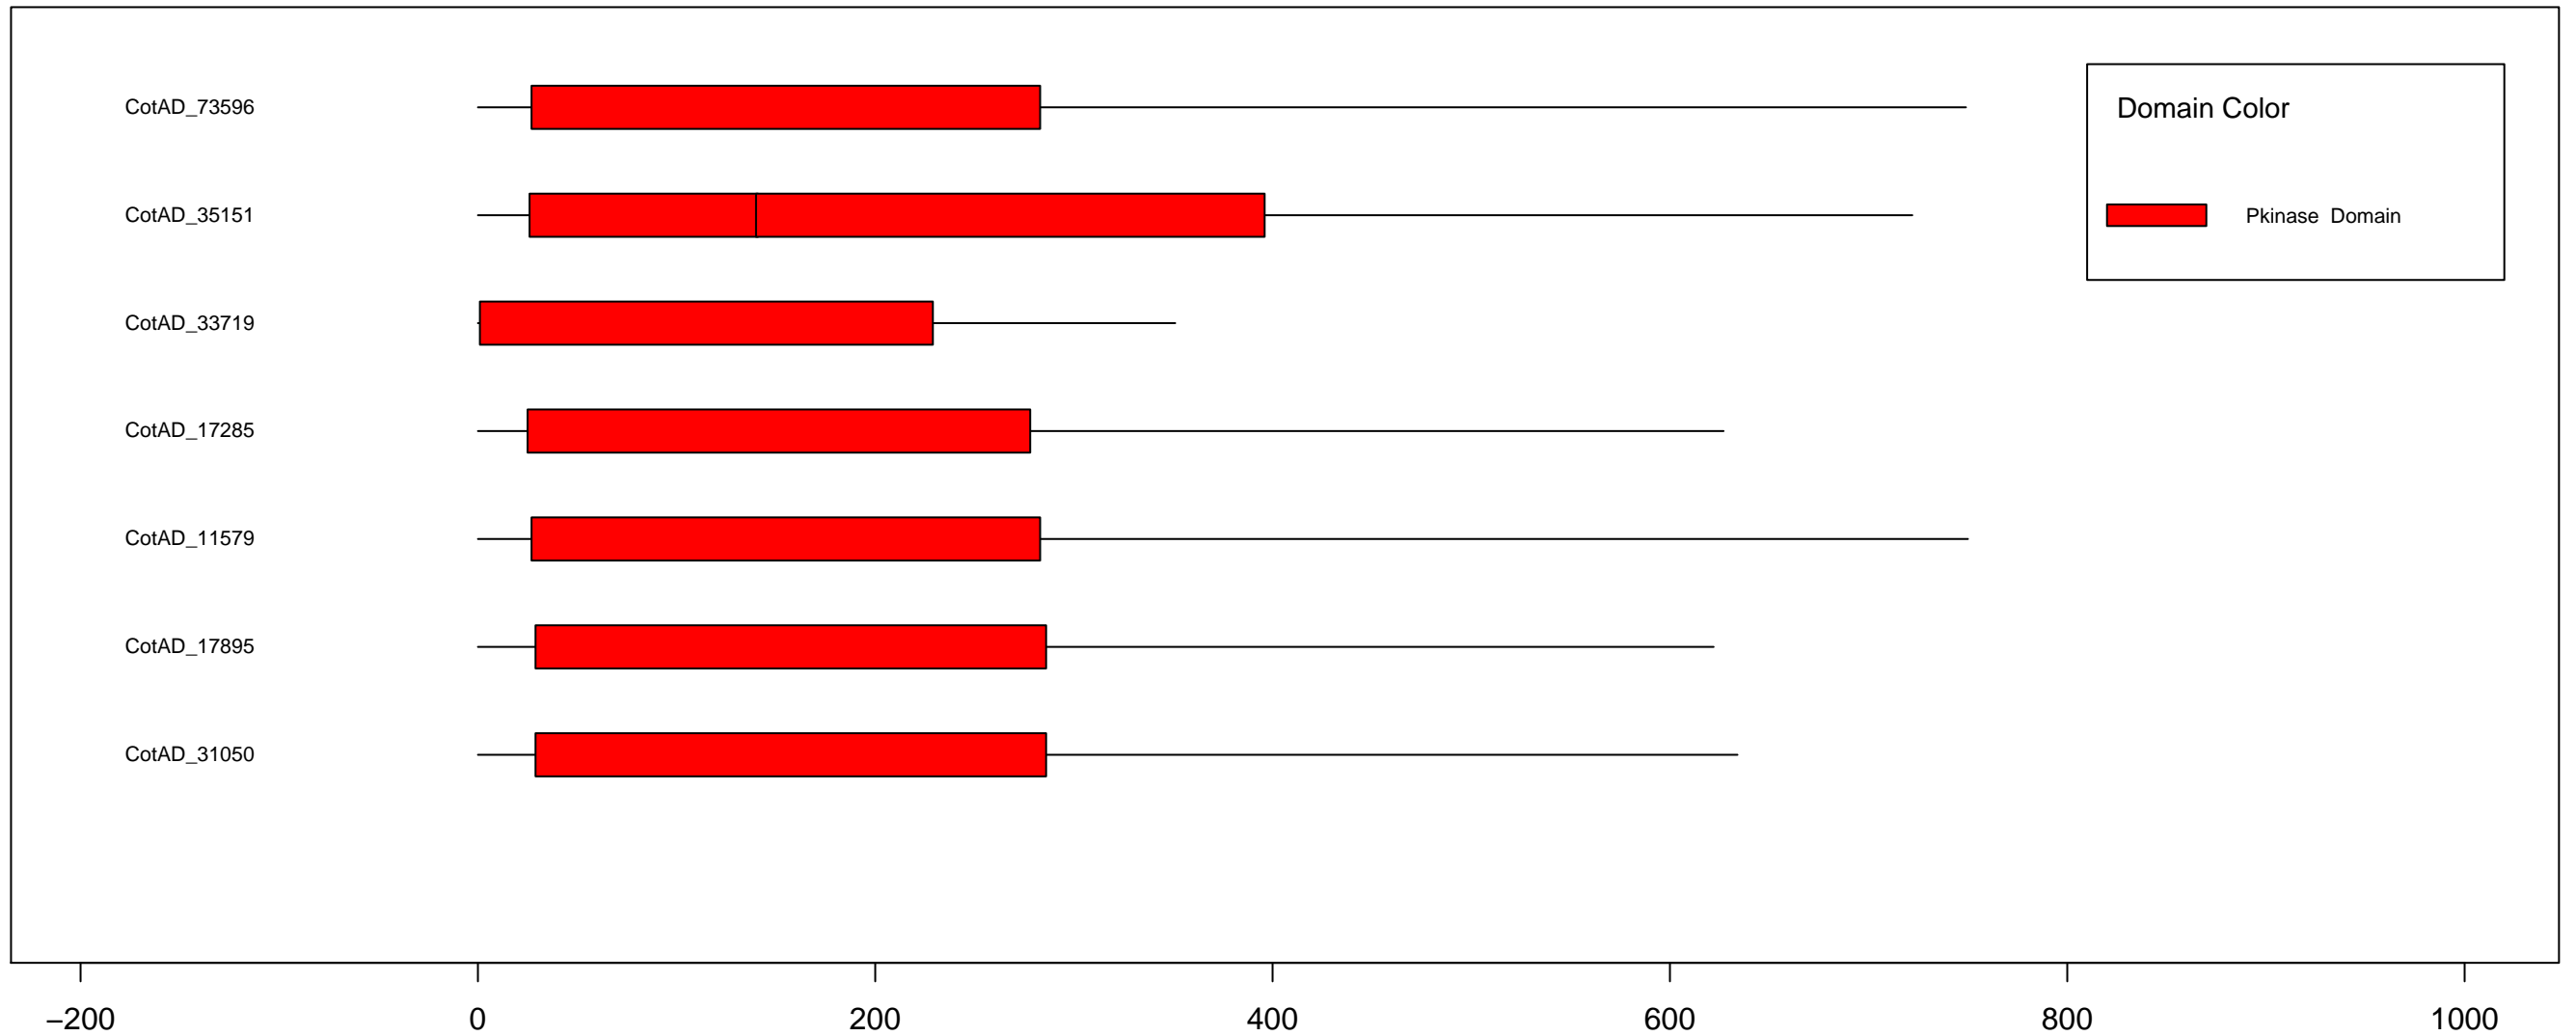

# G.ba AGC\_MAST domain diagram (all)

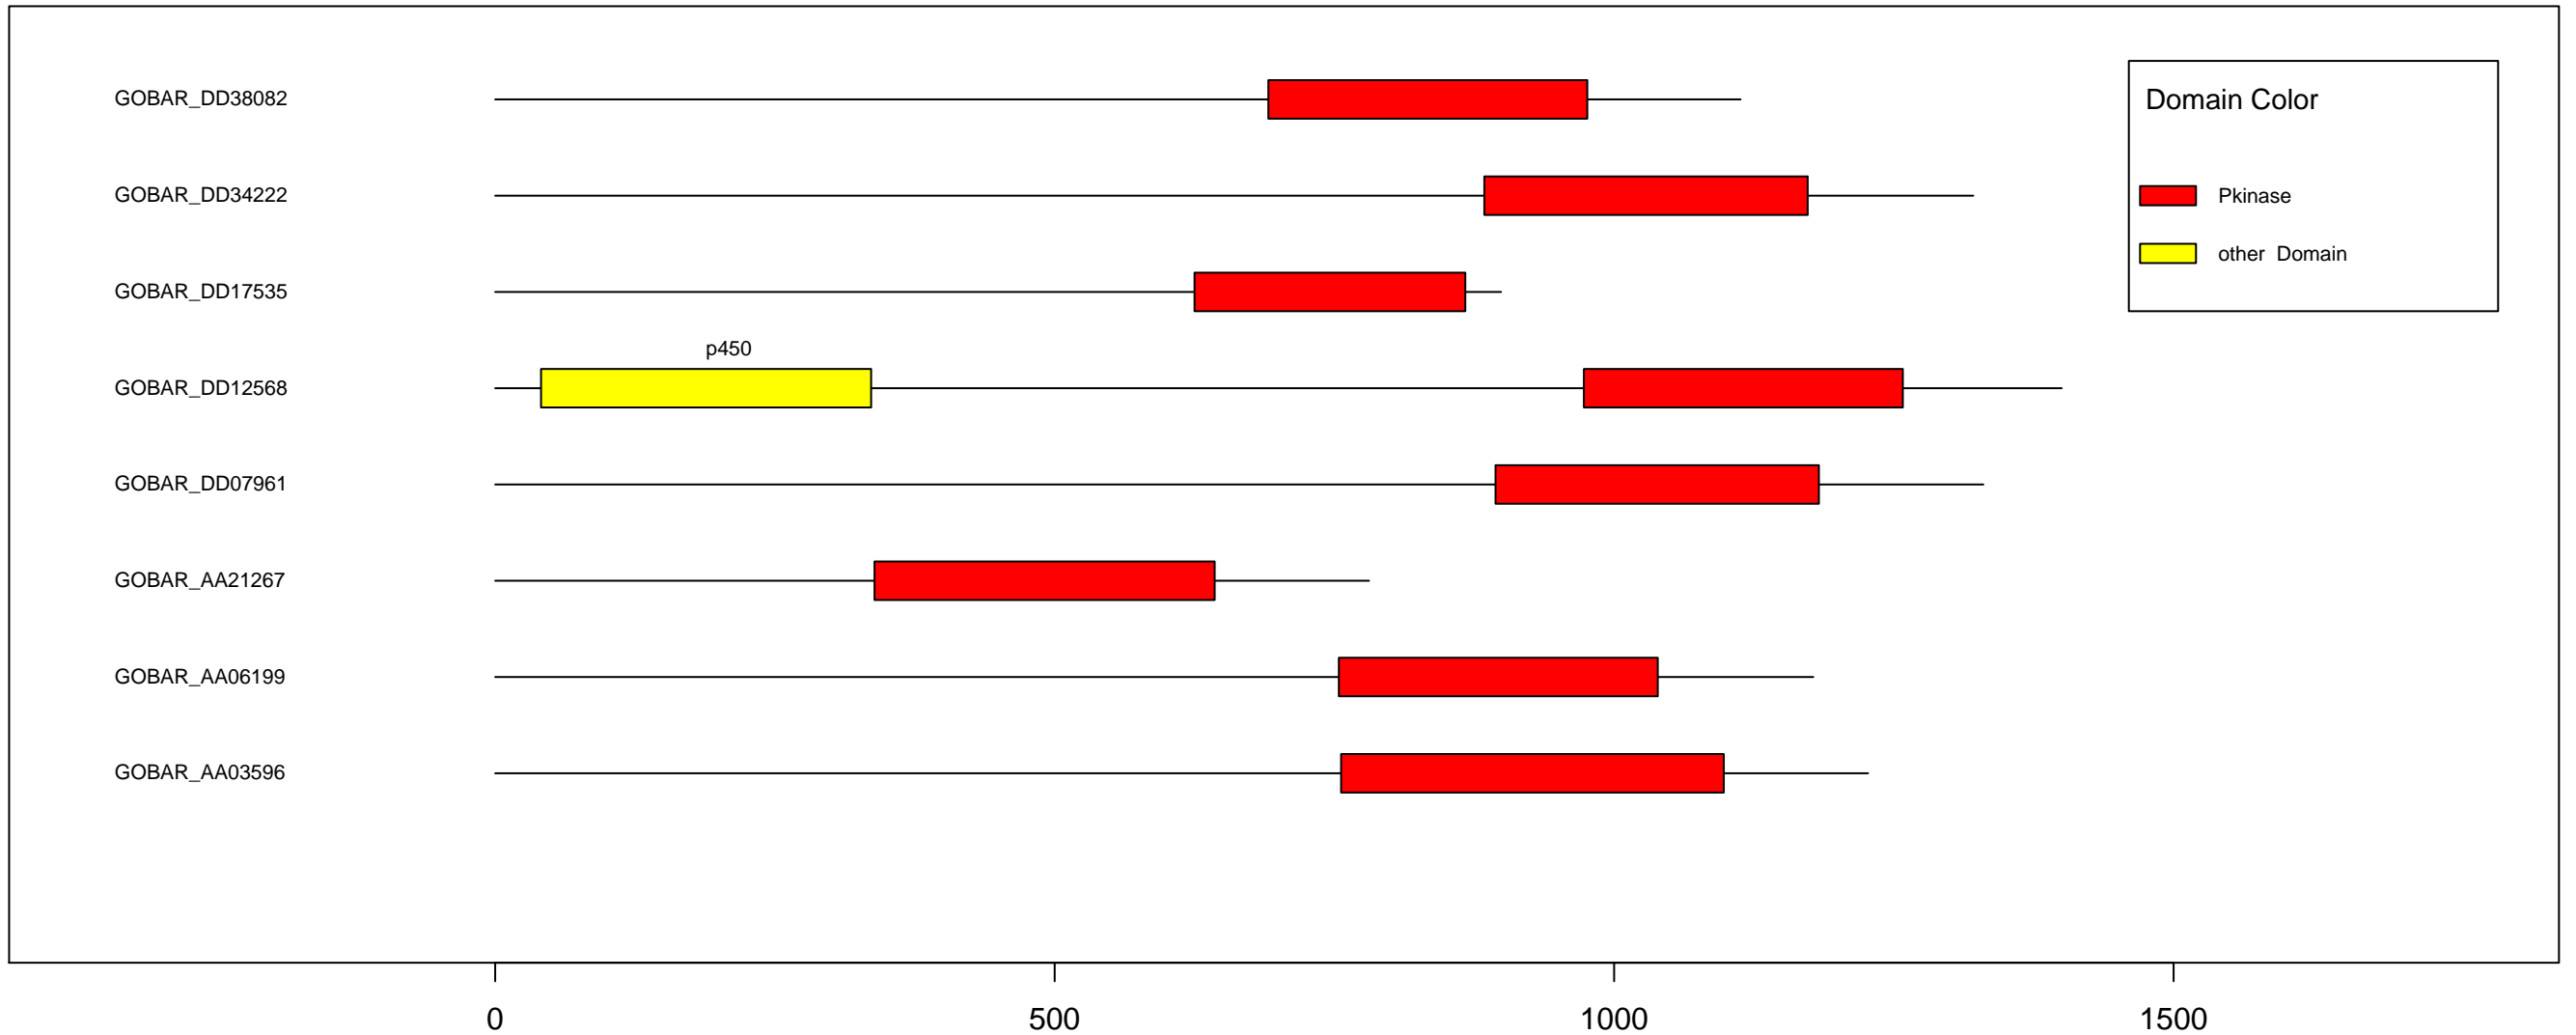



# G.ba AGC\_NDR domain diagram (all)

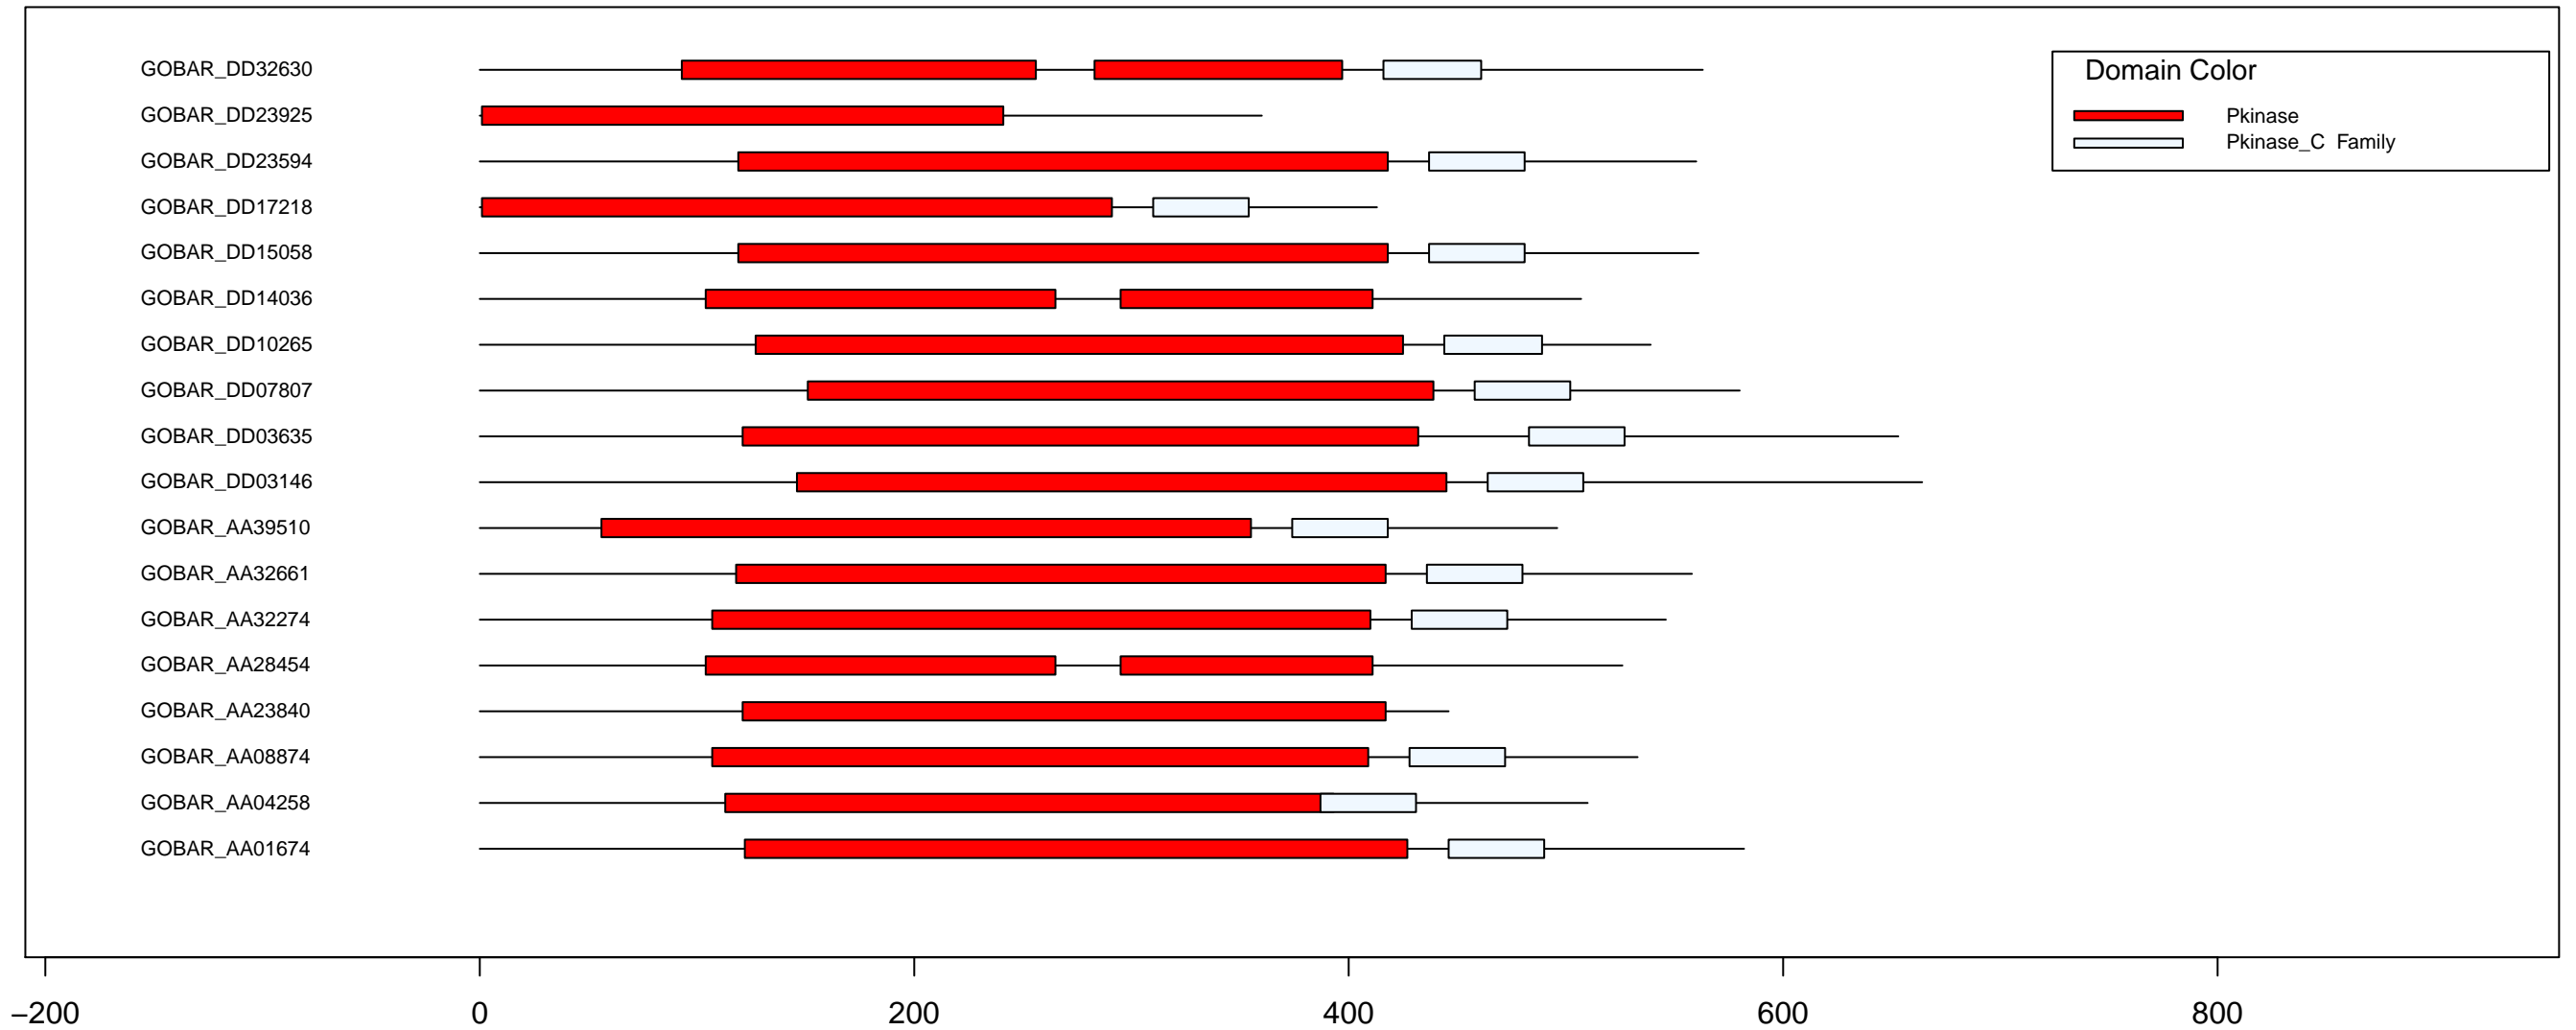

# G.ba AGC\_PDK1 domain diagram (all)

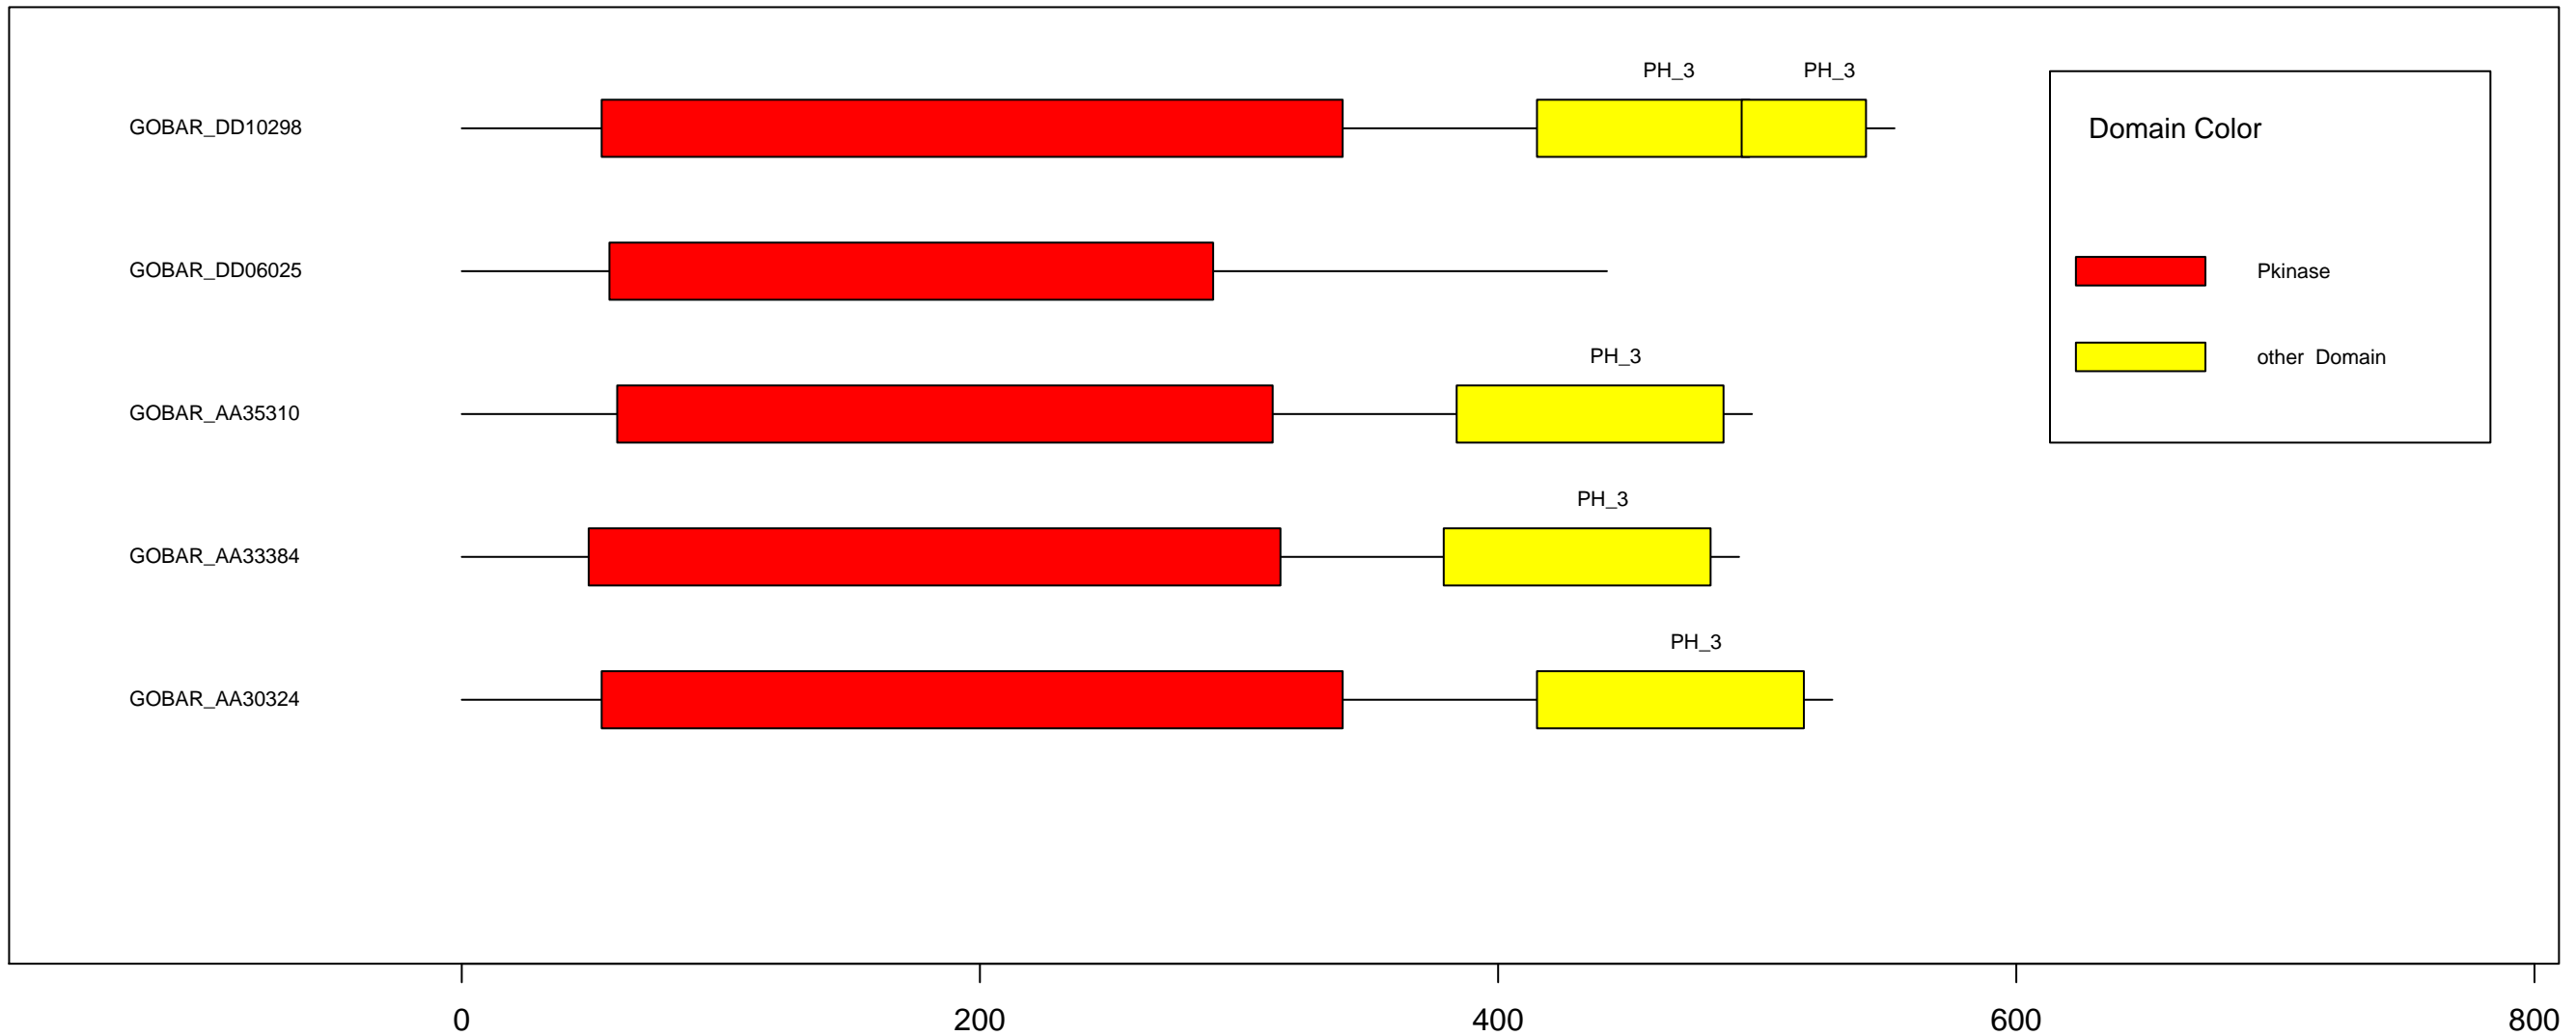

# G.ba AGC\_PKA-PKG domain diagram (all)

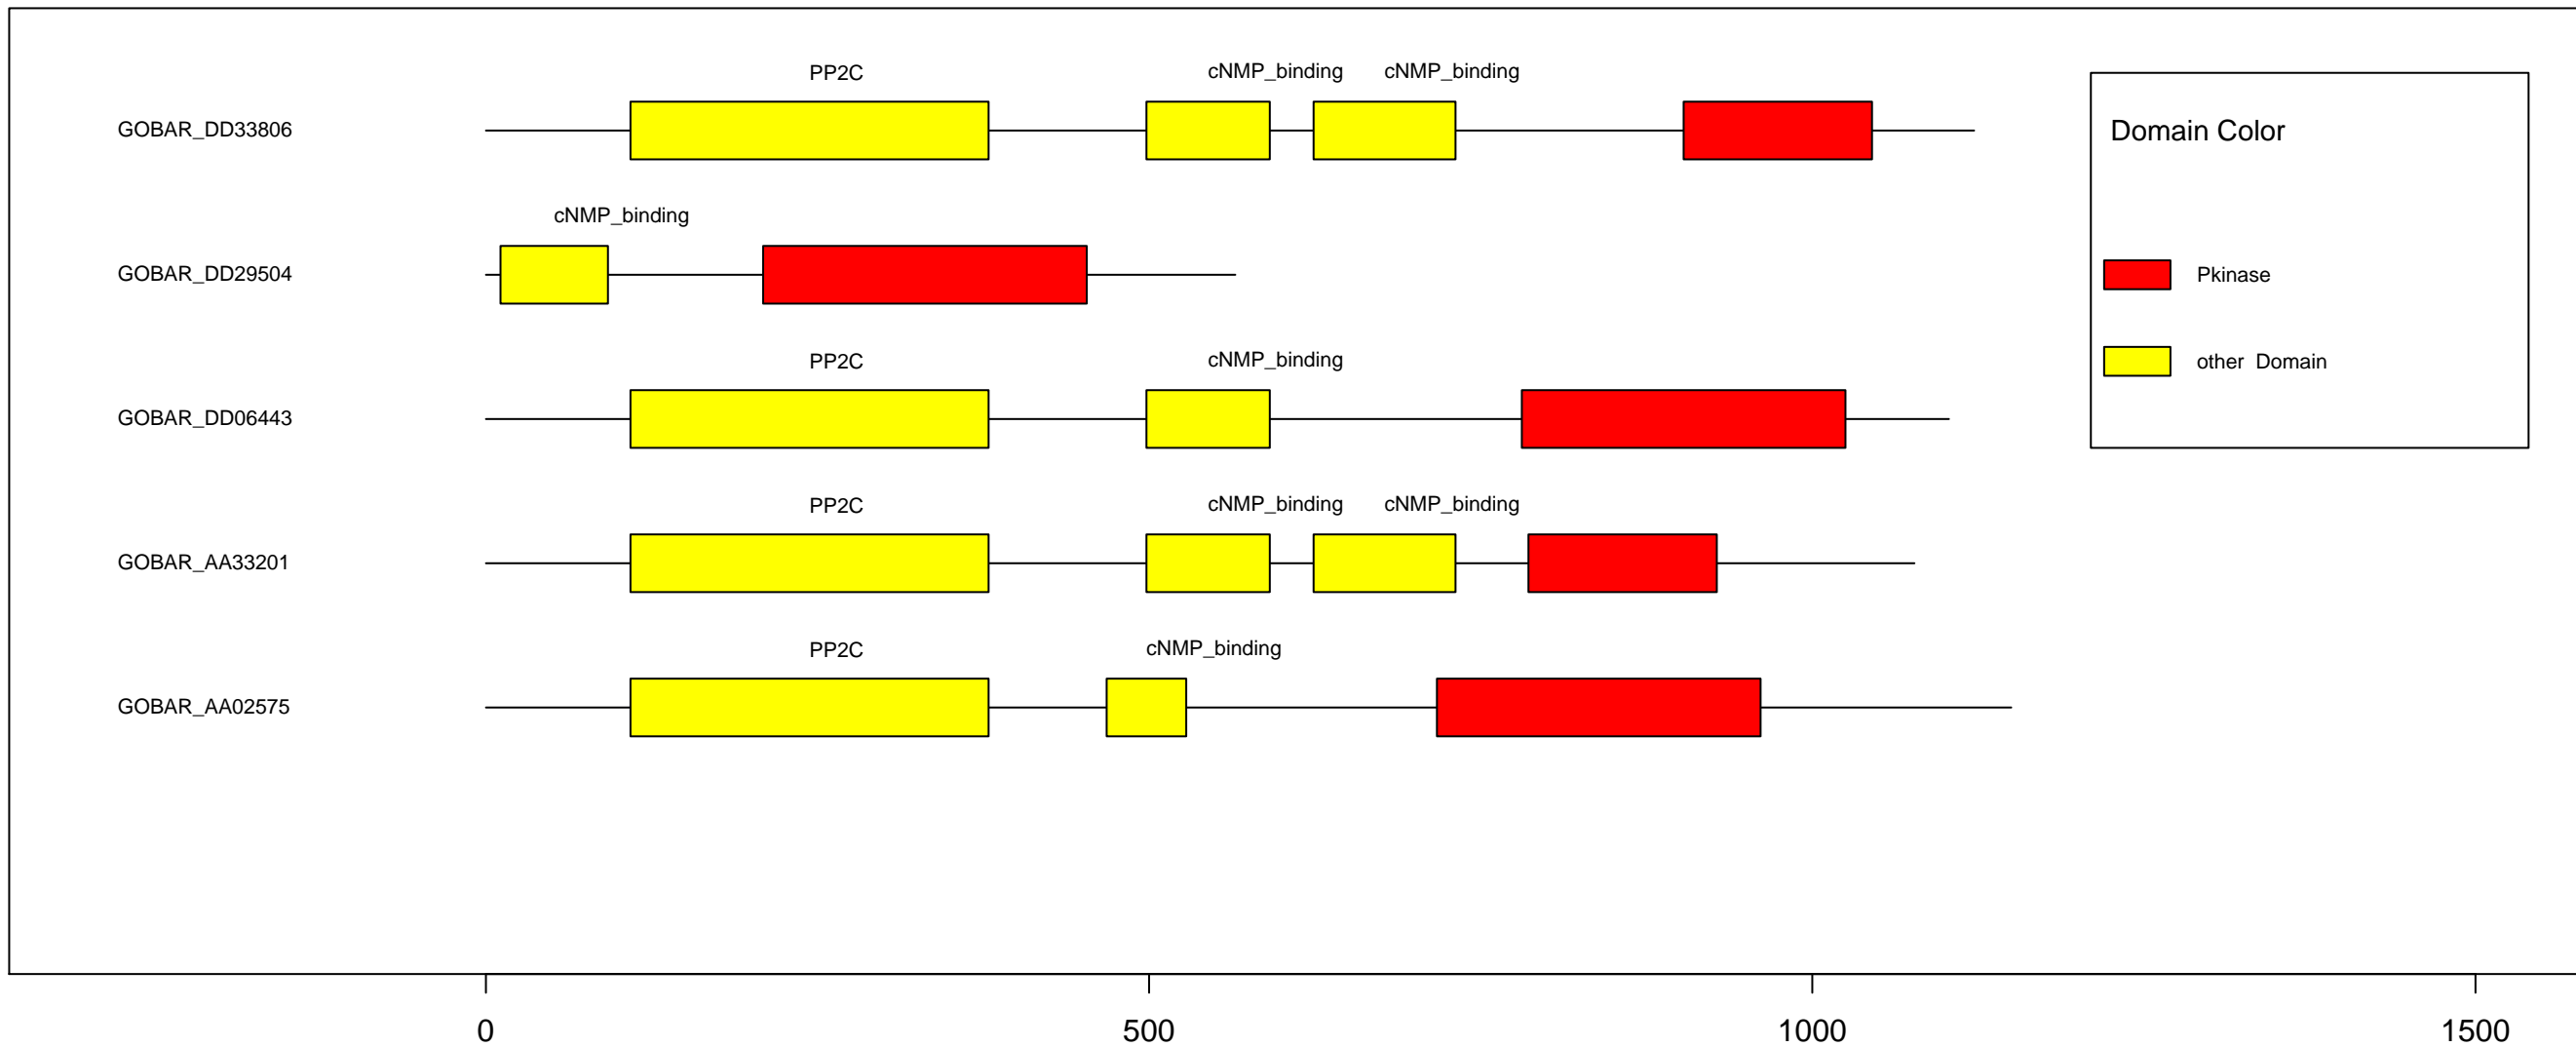

# G.ba AGC\_RSK-2 domain diagram (part 1)

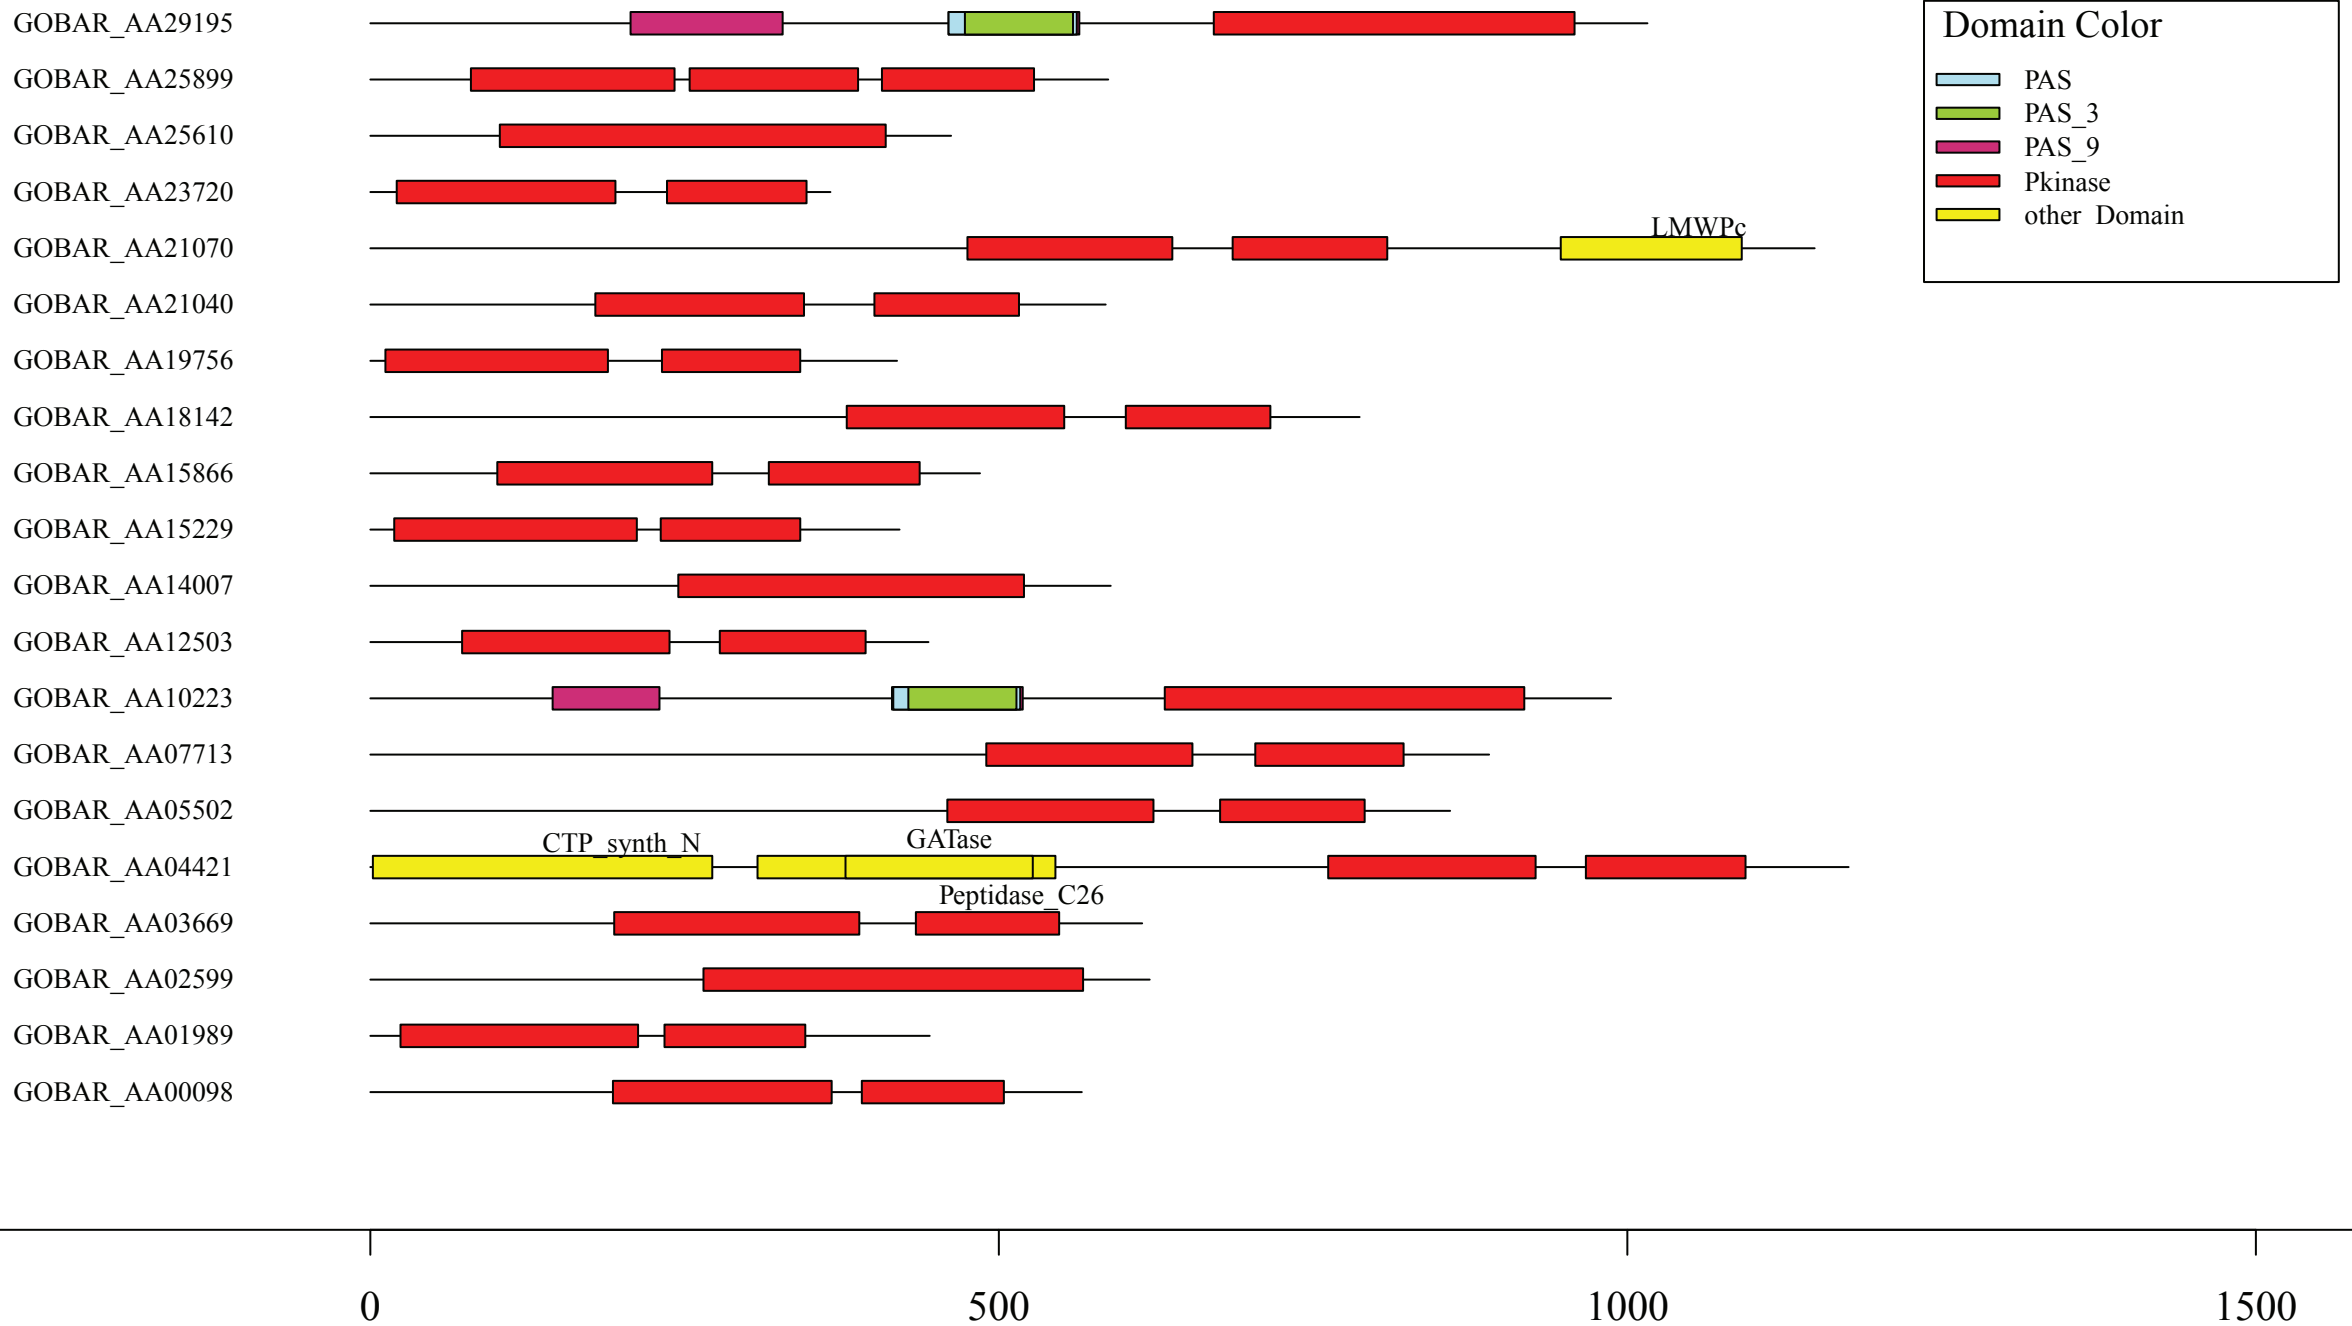

### G.ba AGC\_RSK-2 domain diagram (part 2)

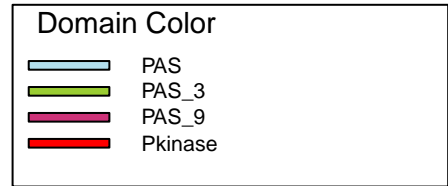

GOBAR\_DD14988  
GOBAR\_DD14634  
GOBAR\_DD14598  
GOBAR\_DD14112  
GOBAR\_DD10320  
GOBAR\_DD09890  
GOBAR\_DD09495  
GOBAR\_DD07932  
GOBAR\_DD06887  
GOBAR\_DD06326  
GOBAR\_DD06179  
GOBAR\_DD04882  
GOBAR\_DD02940  
GOBAR\_DD02345  
GOBAR\_AA38802  
GOBAR\_AA38054  
GOBAR\_AA35332  
GOBAR\_AA33373  
GOBAR\_AA30886  
GOBAR\_AA30162

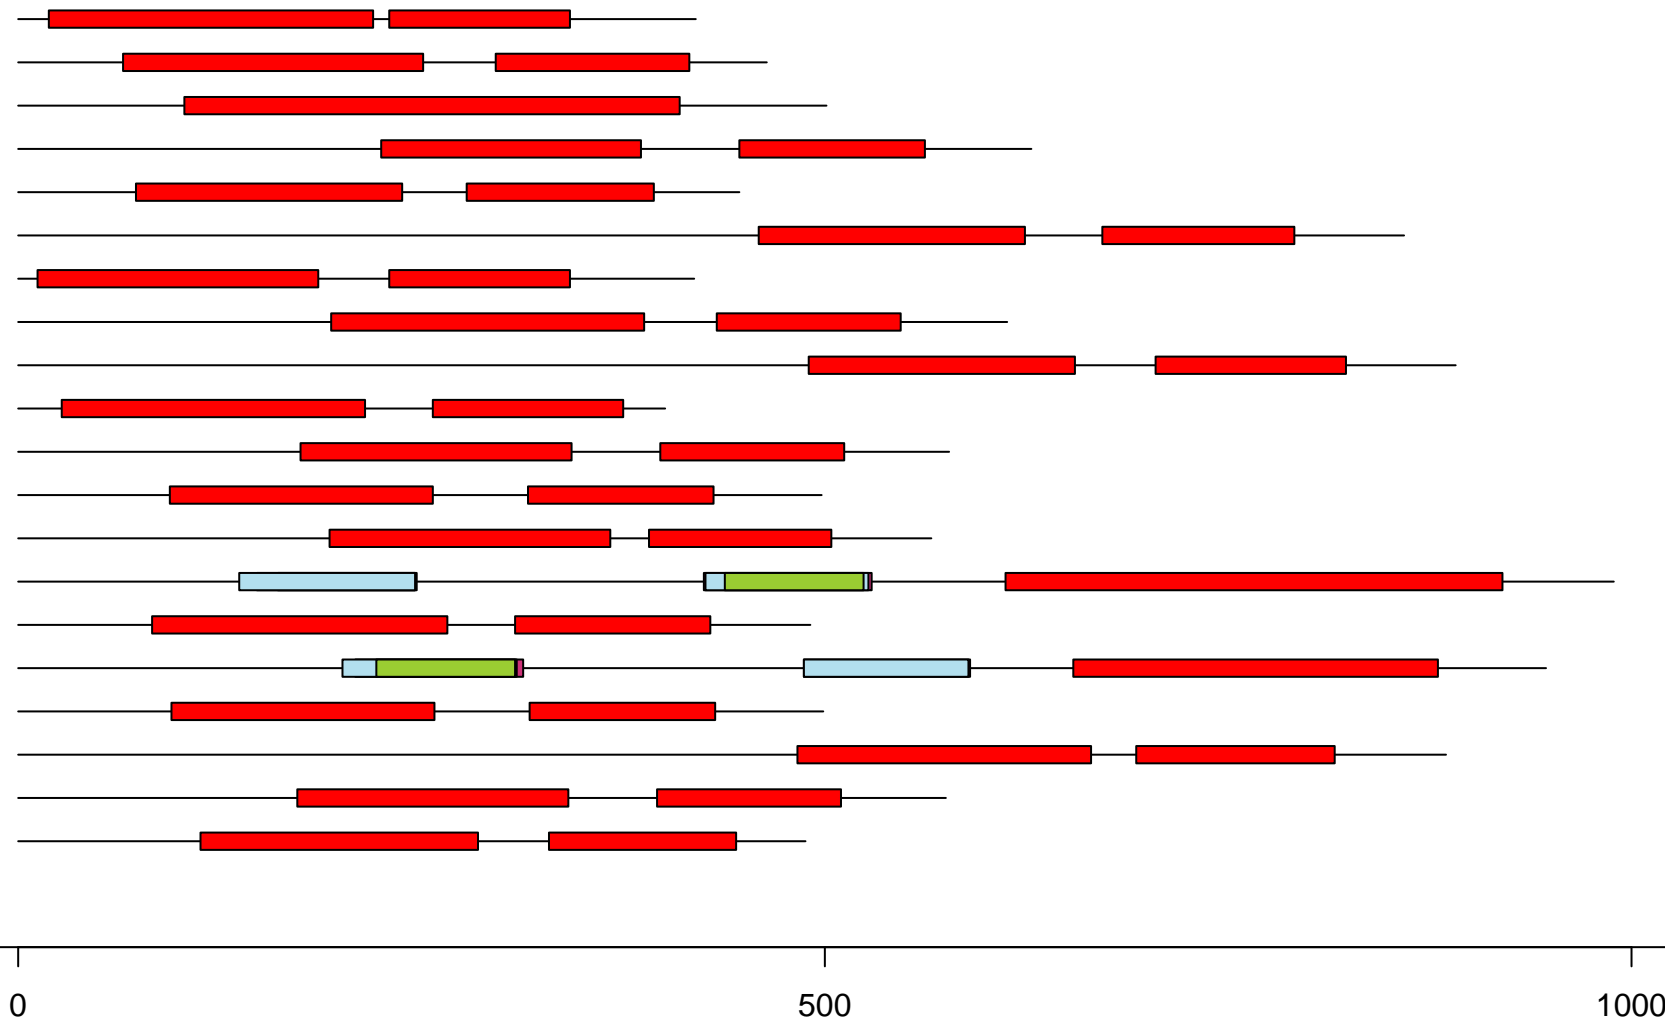

### G.ba AGC\_RSK-2 domain diagram (part 3)

GOBAR\_DD38171  
 GOBAR\_DD37007  
 GOBAR\_DD35739  
 GOBAR\_DD34688  
 GOBAR\_DD33422  
 GOBAR\_DD32908  
 GOBAR\_DD31587  
 GOBAR\_DD30203  
 GOBAR\_DD29810  
 GOBAR\_DD27861  
 GOBAR\_DD24925  
 GOBAR\_DD22935  
 GOBAR\_DD20711  
 GOBAR\_DD20618  
 GOBAR\_DD16668

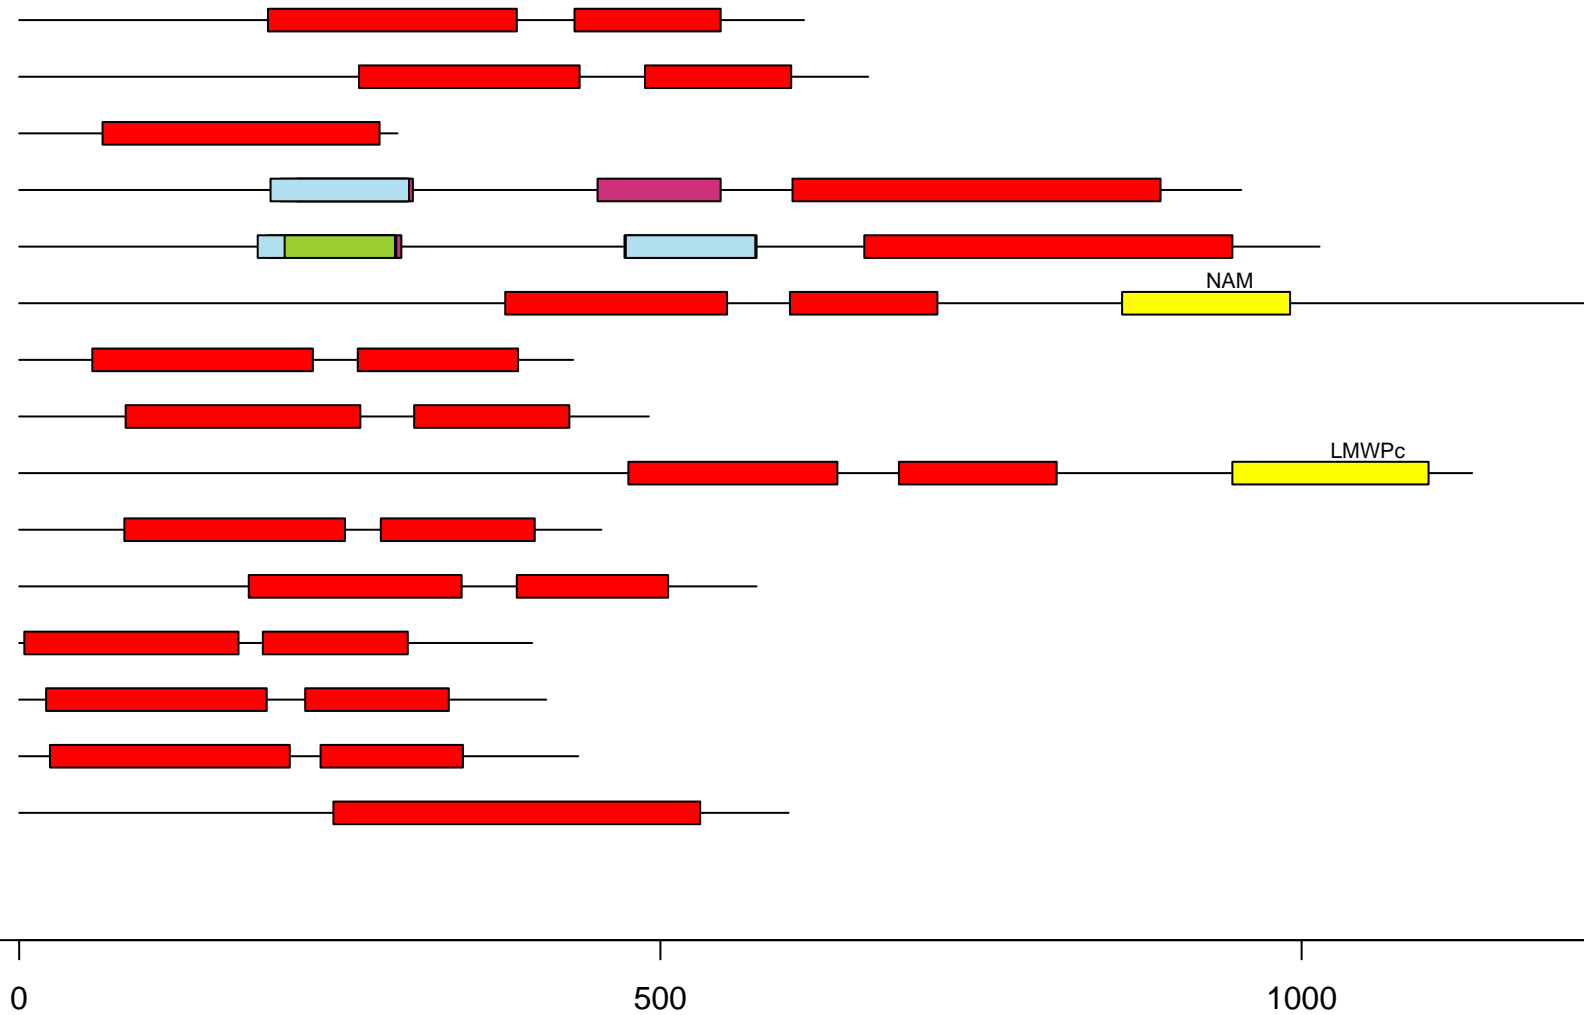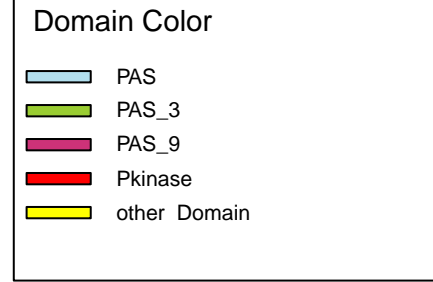

# G.ba AGC-PI domain diagram (all)

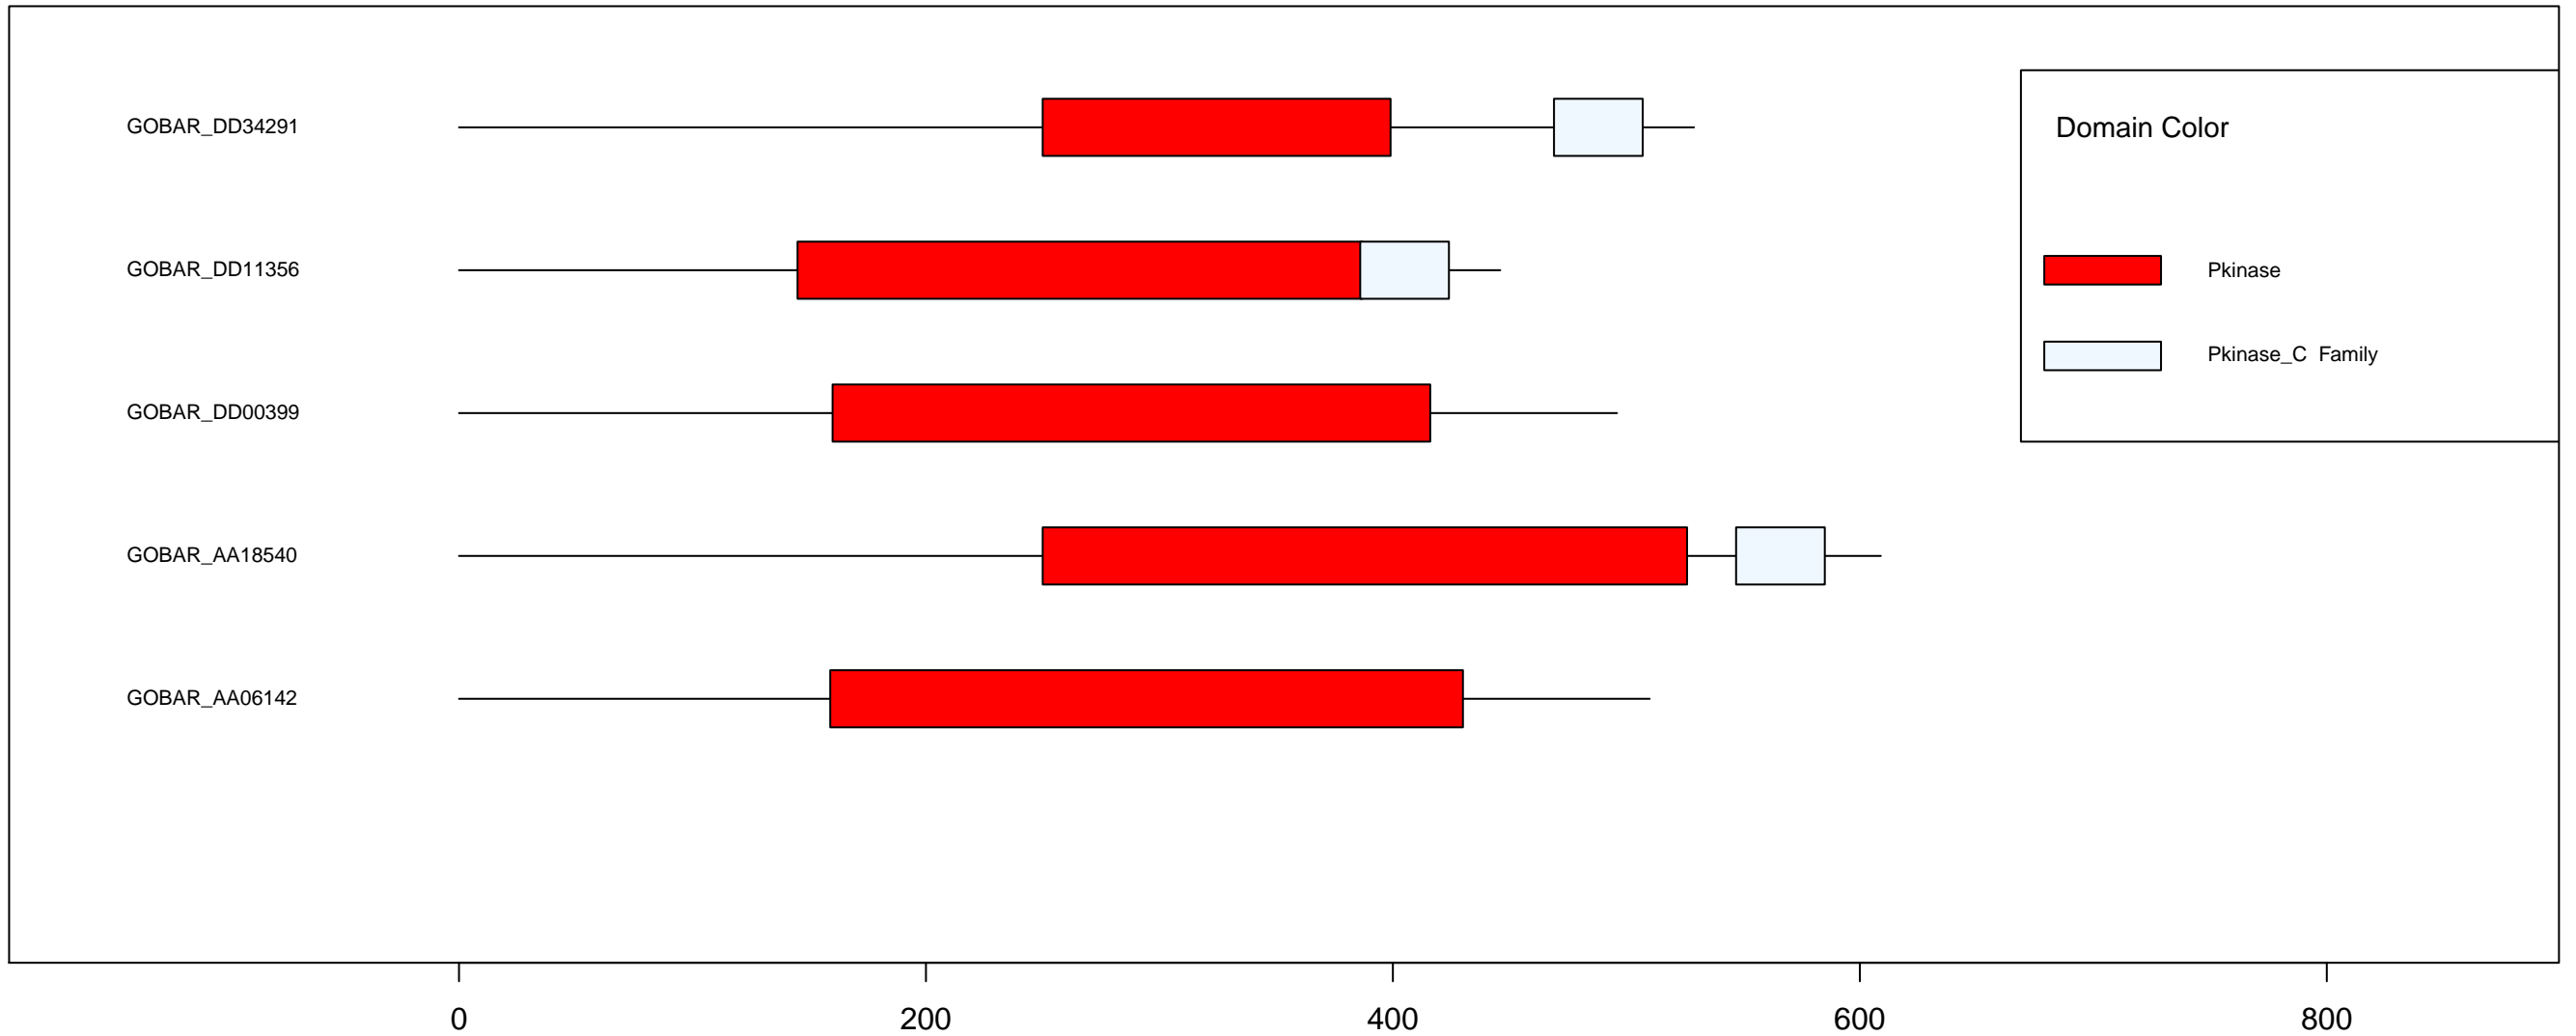

# G.ba Aur domain diagram (all)

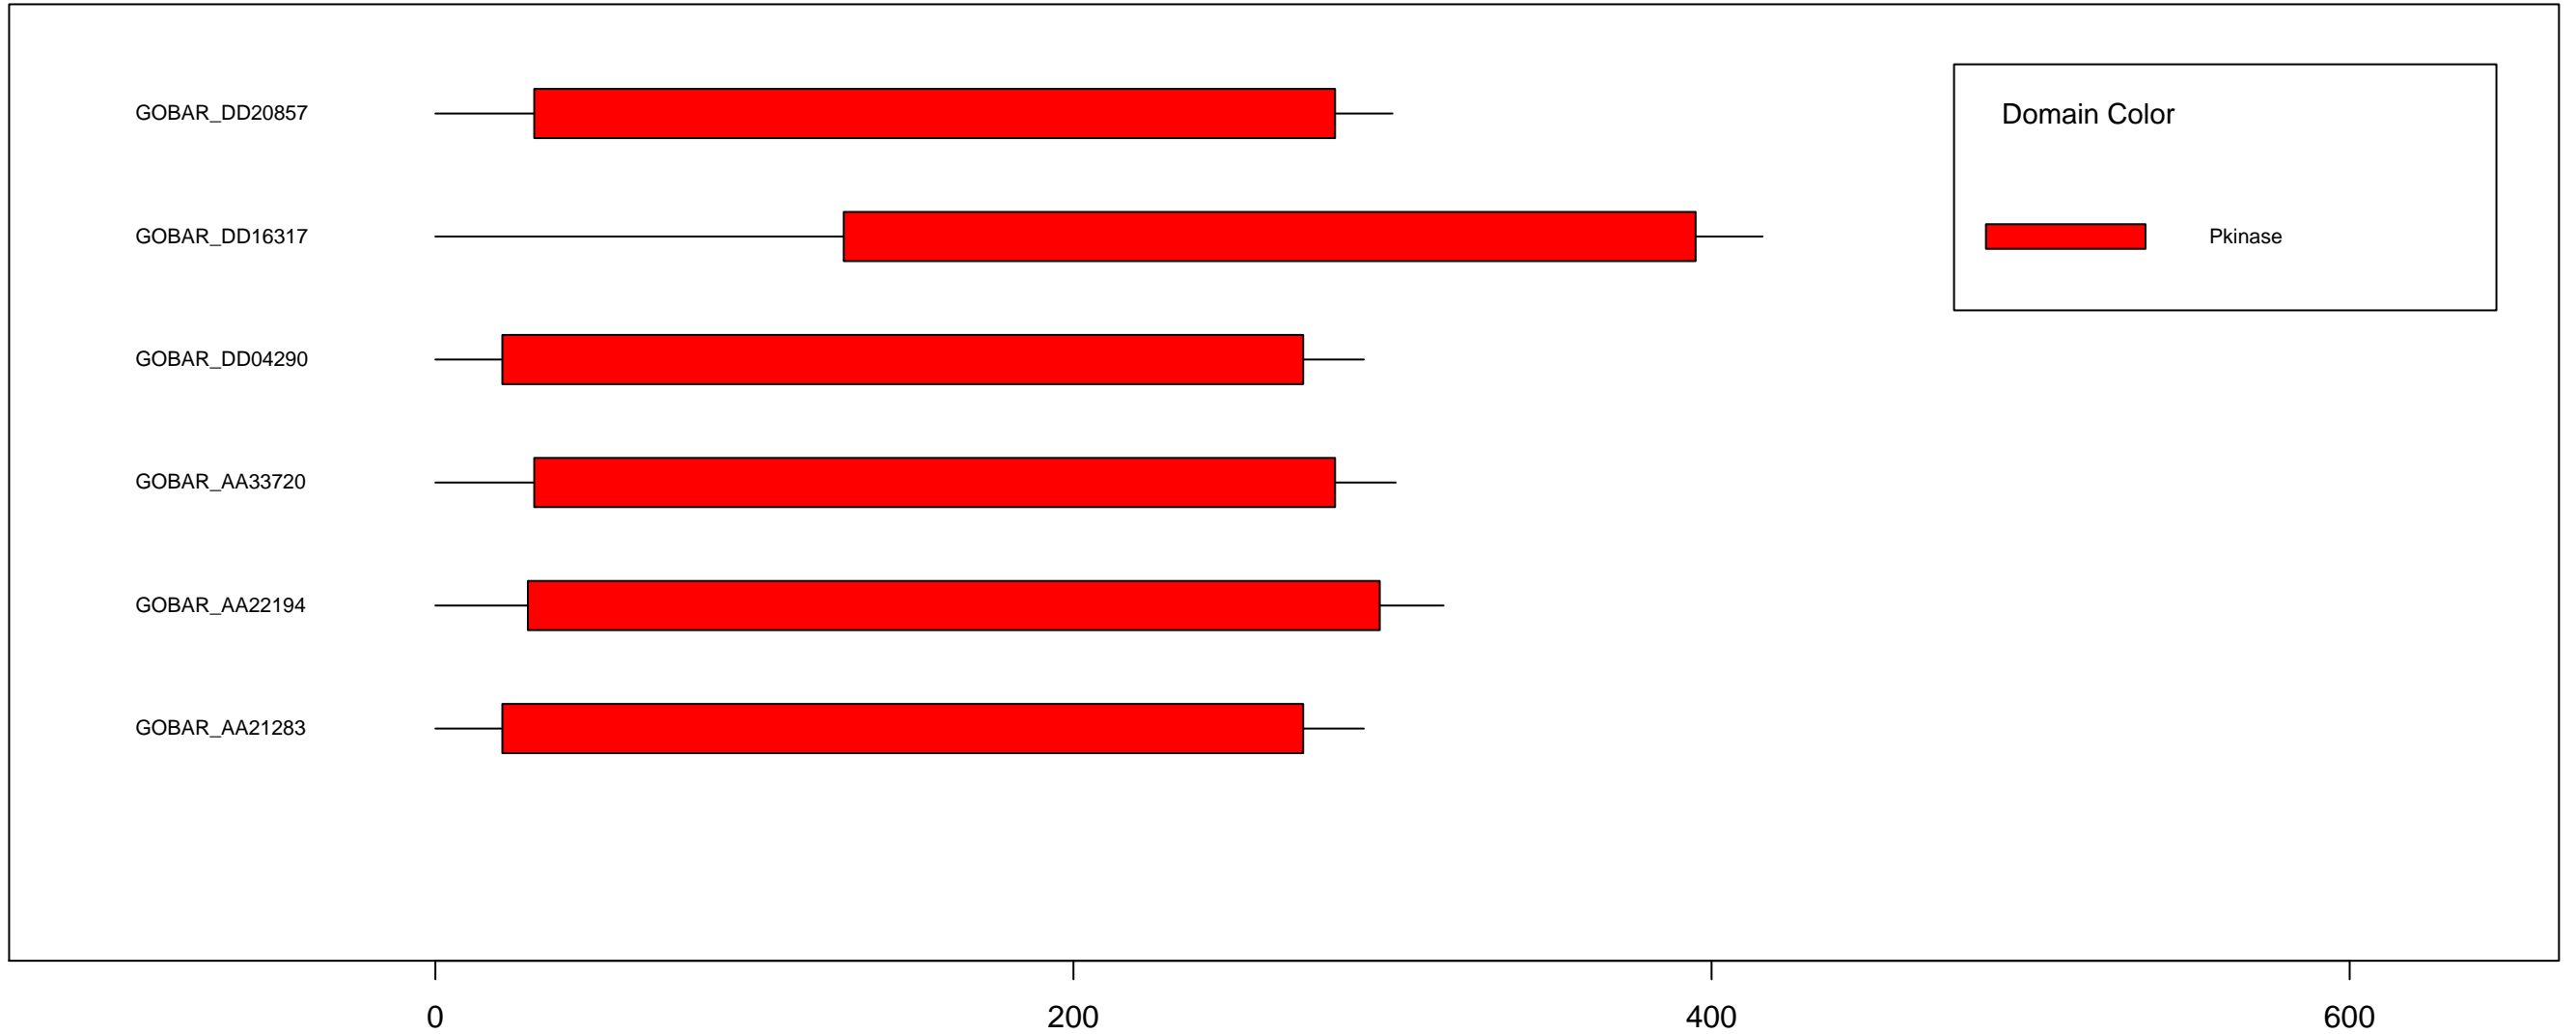



# G.ba BUB domain diagram (all)

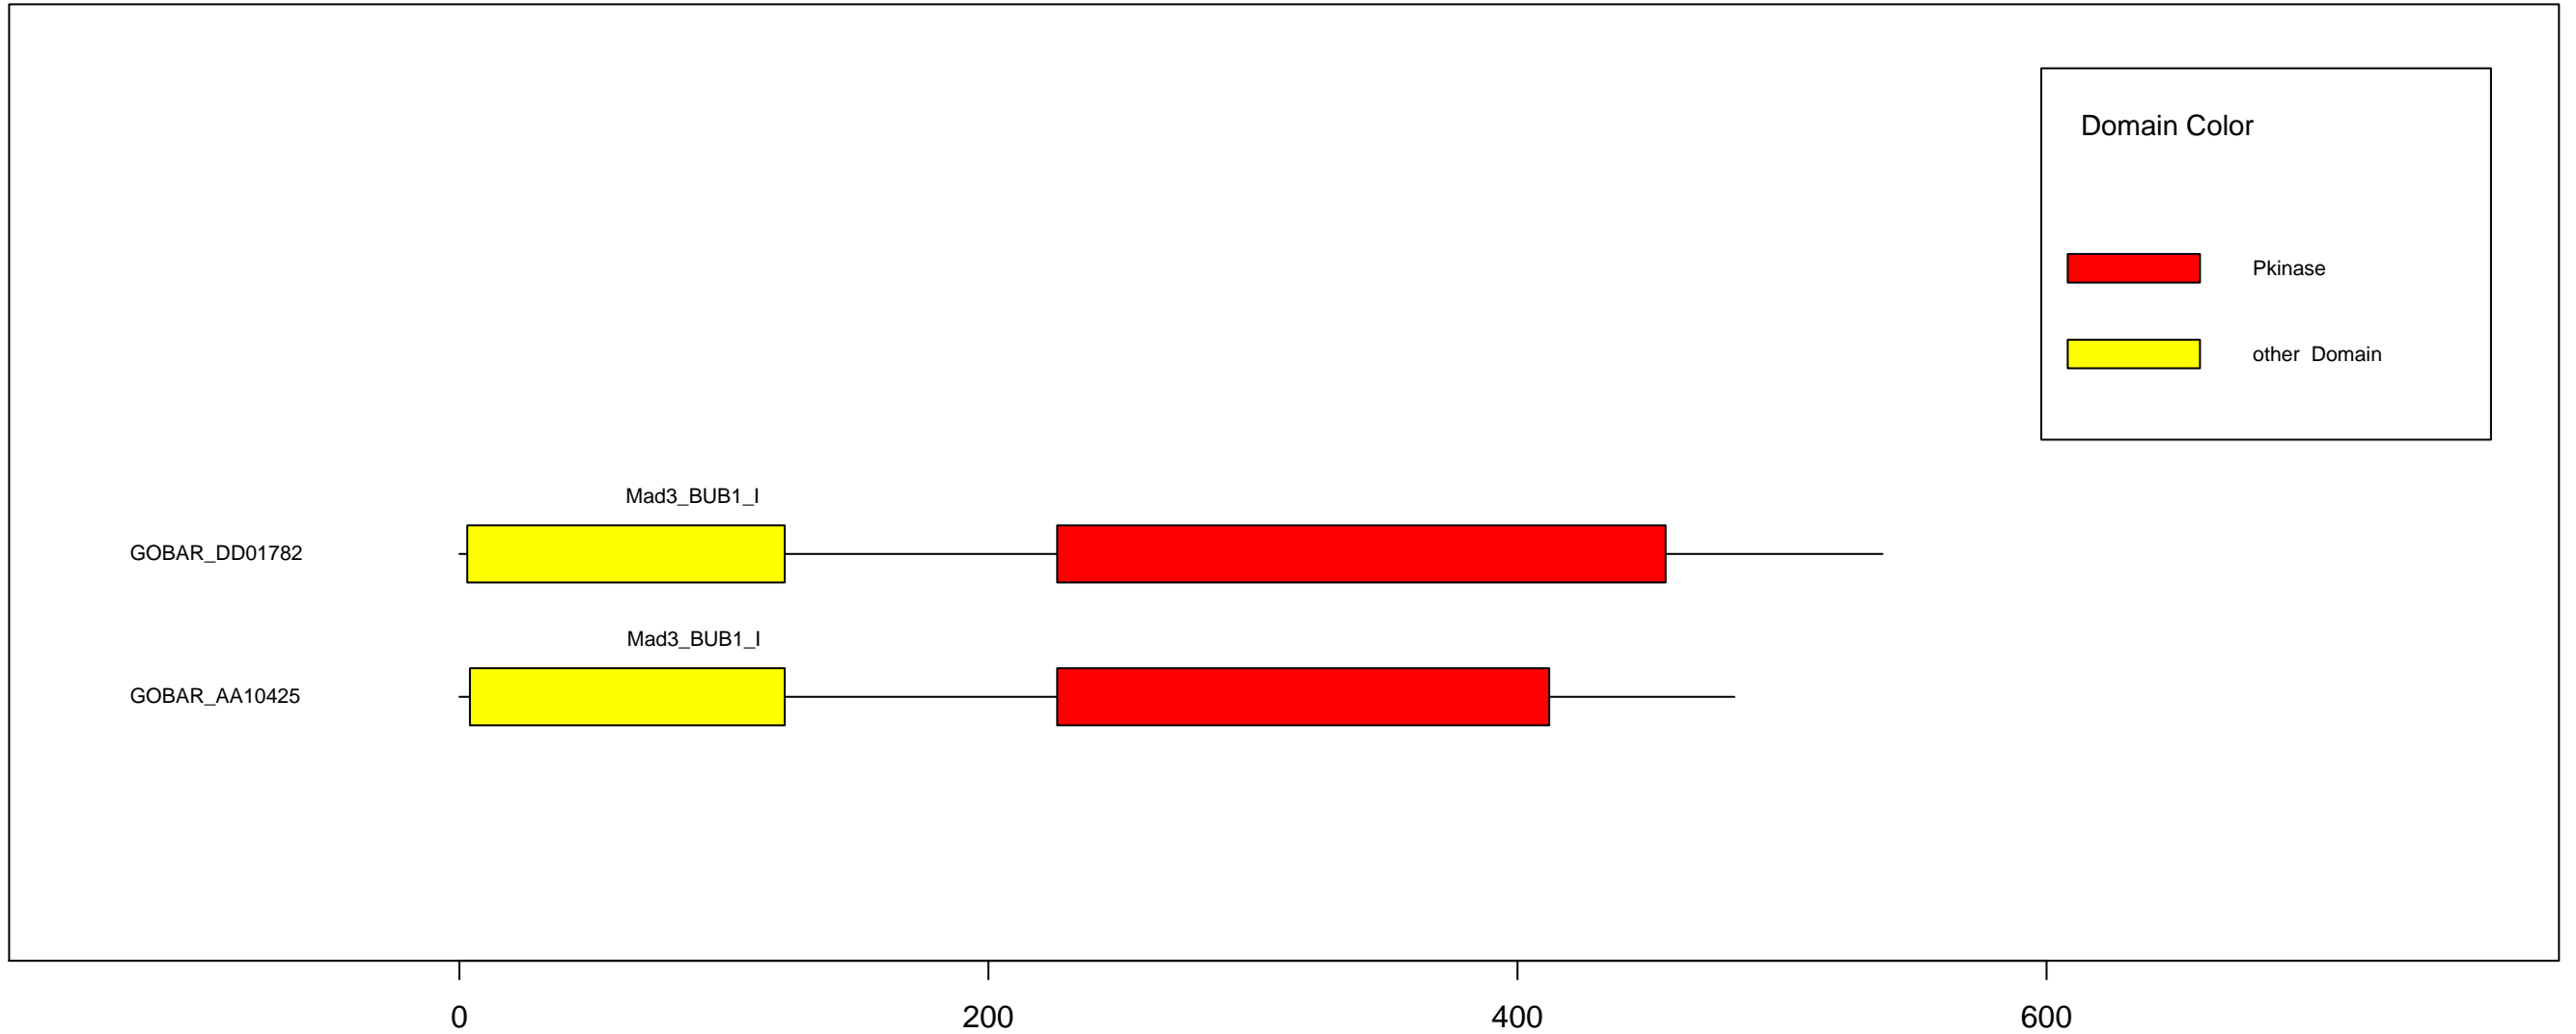

### G.ba CAMK\_AMPK domain diagram (all)

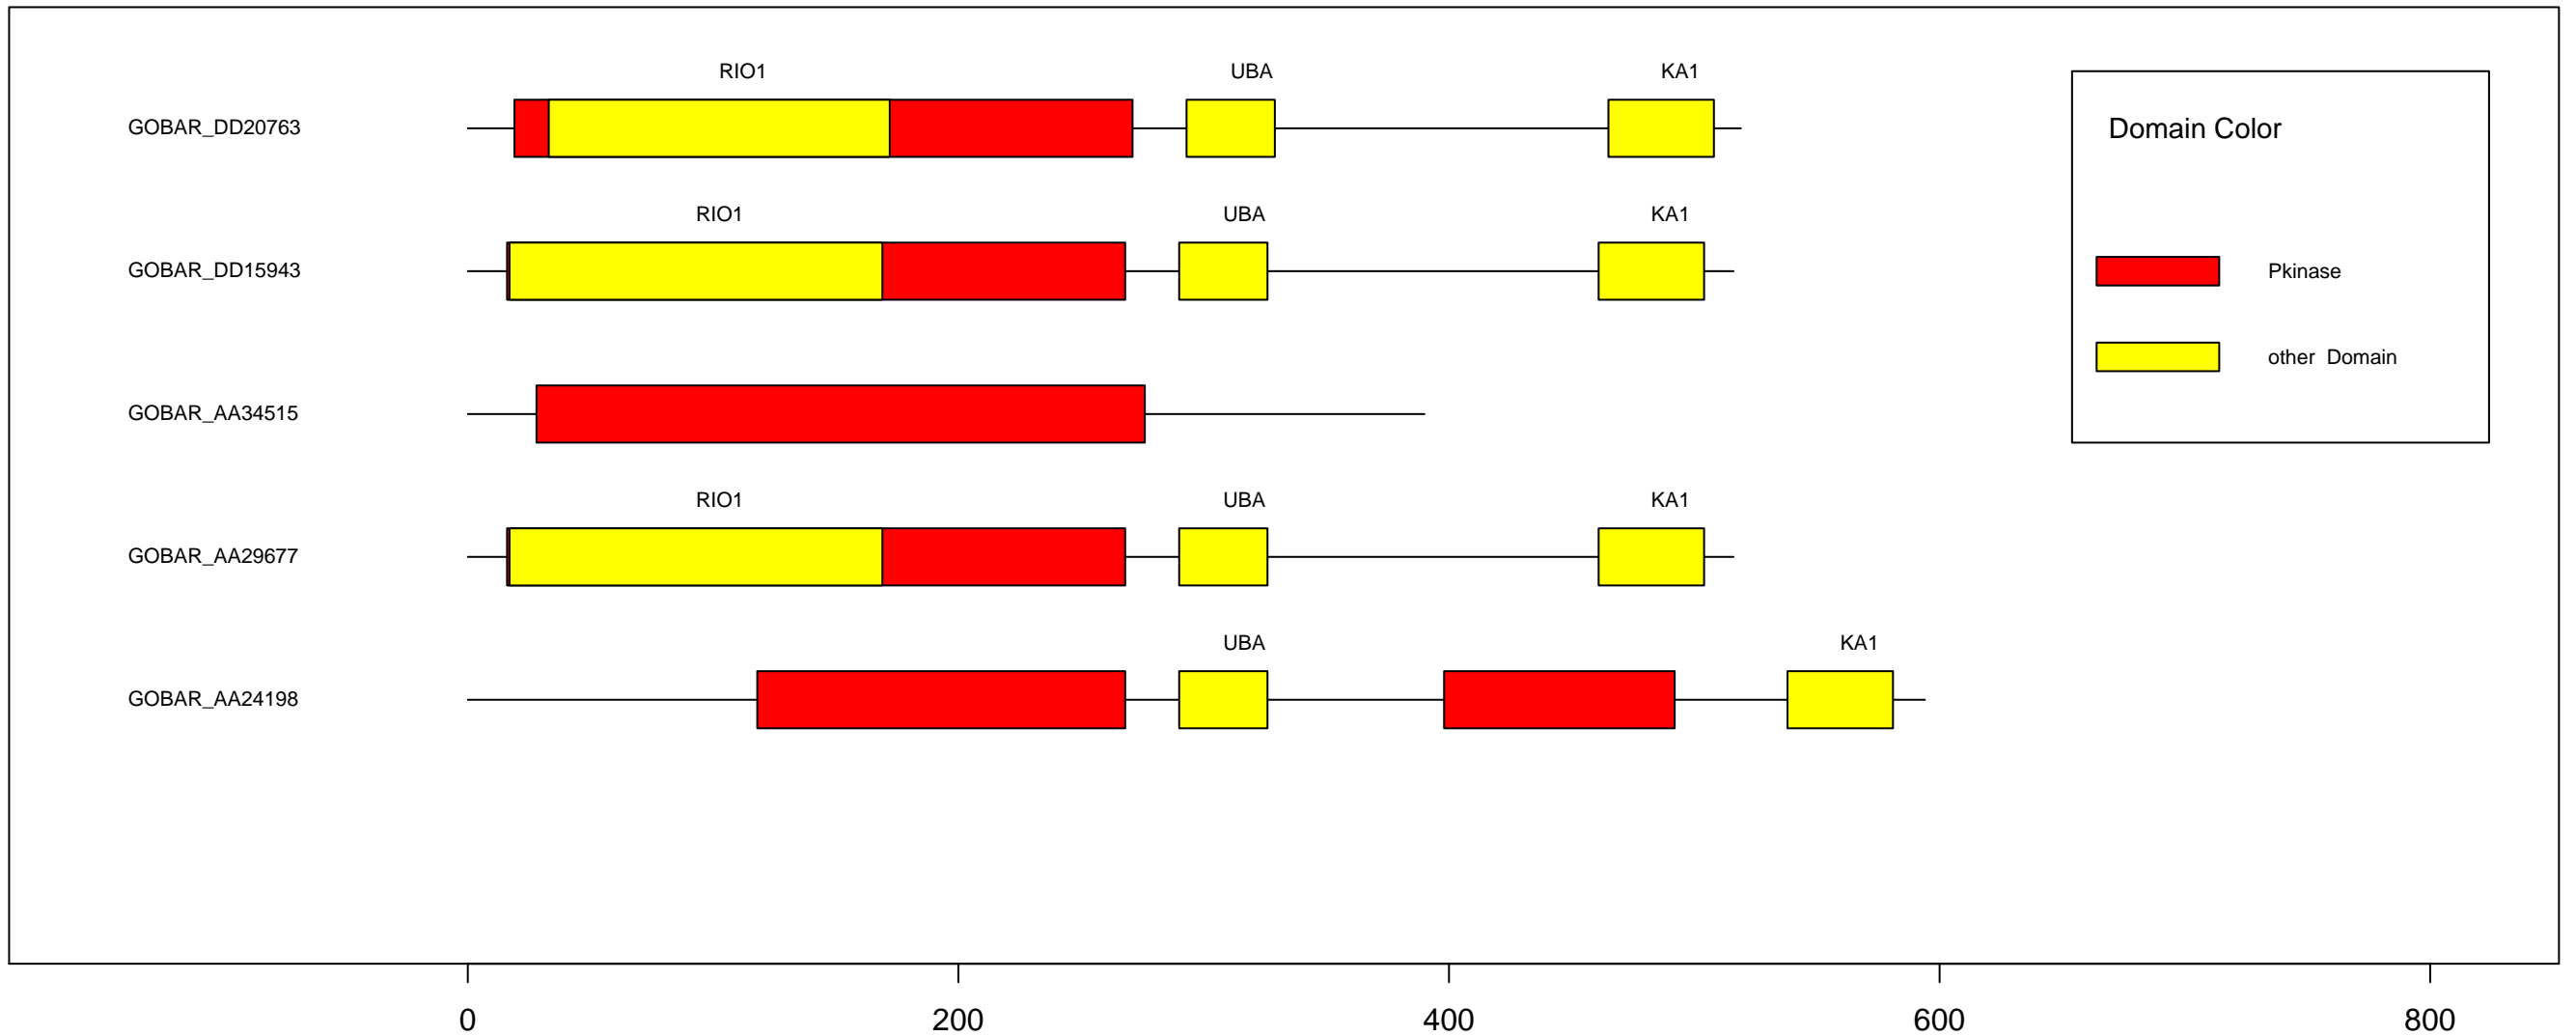

# G.ba CAMK\_CAMK1-DCAMKL domain diagram (all)

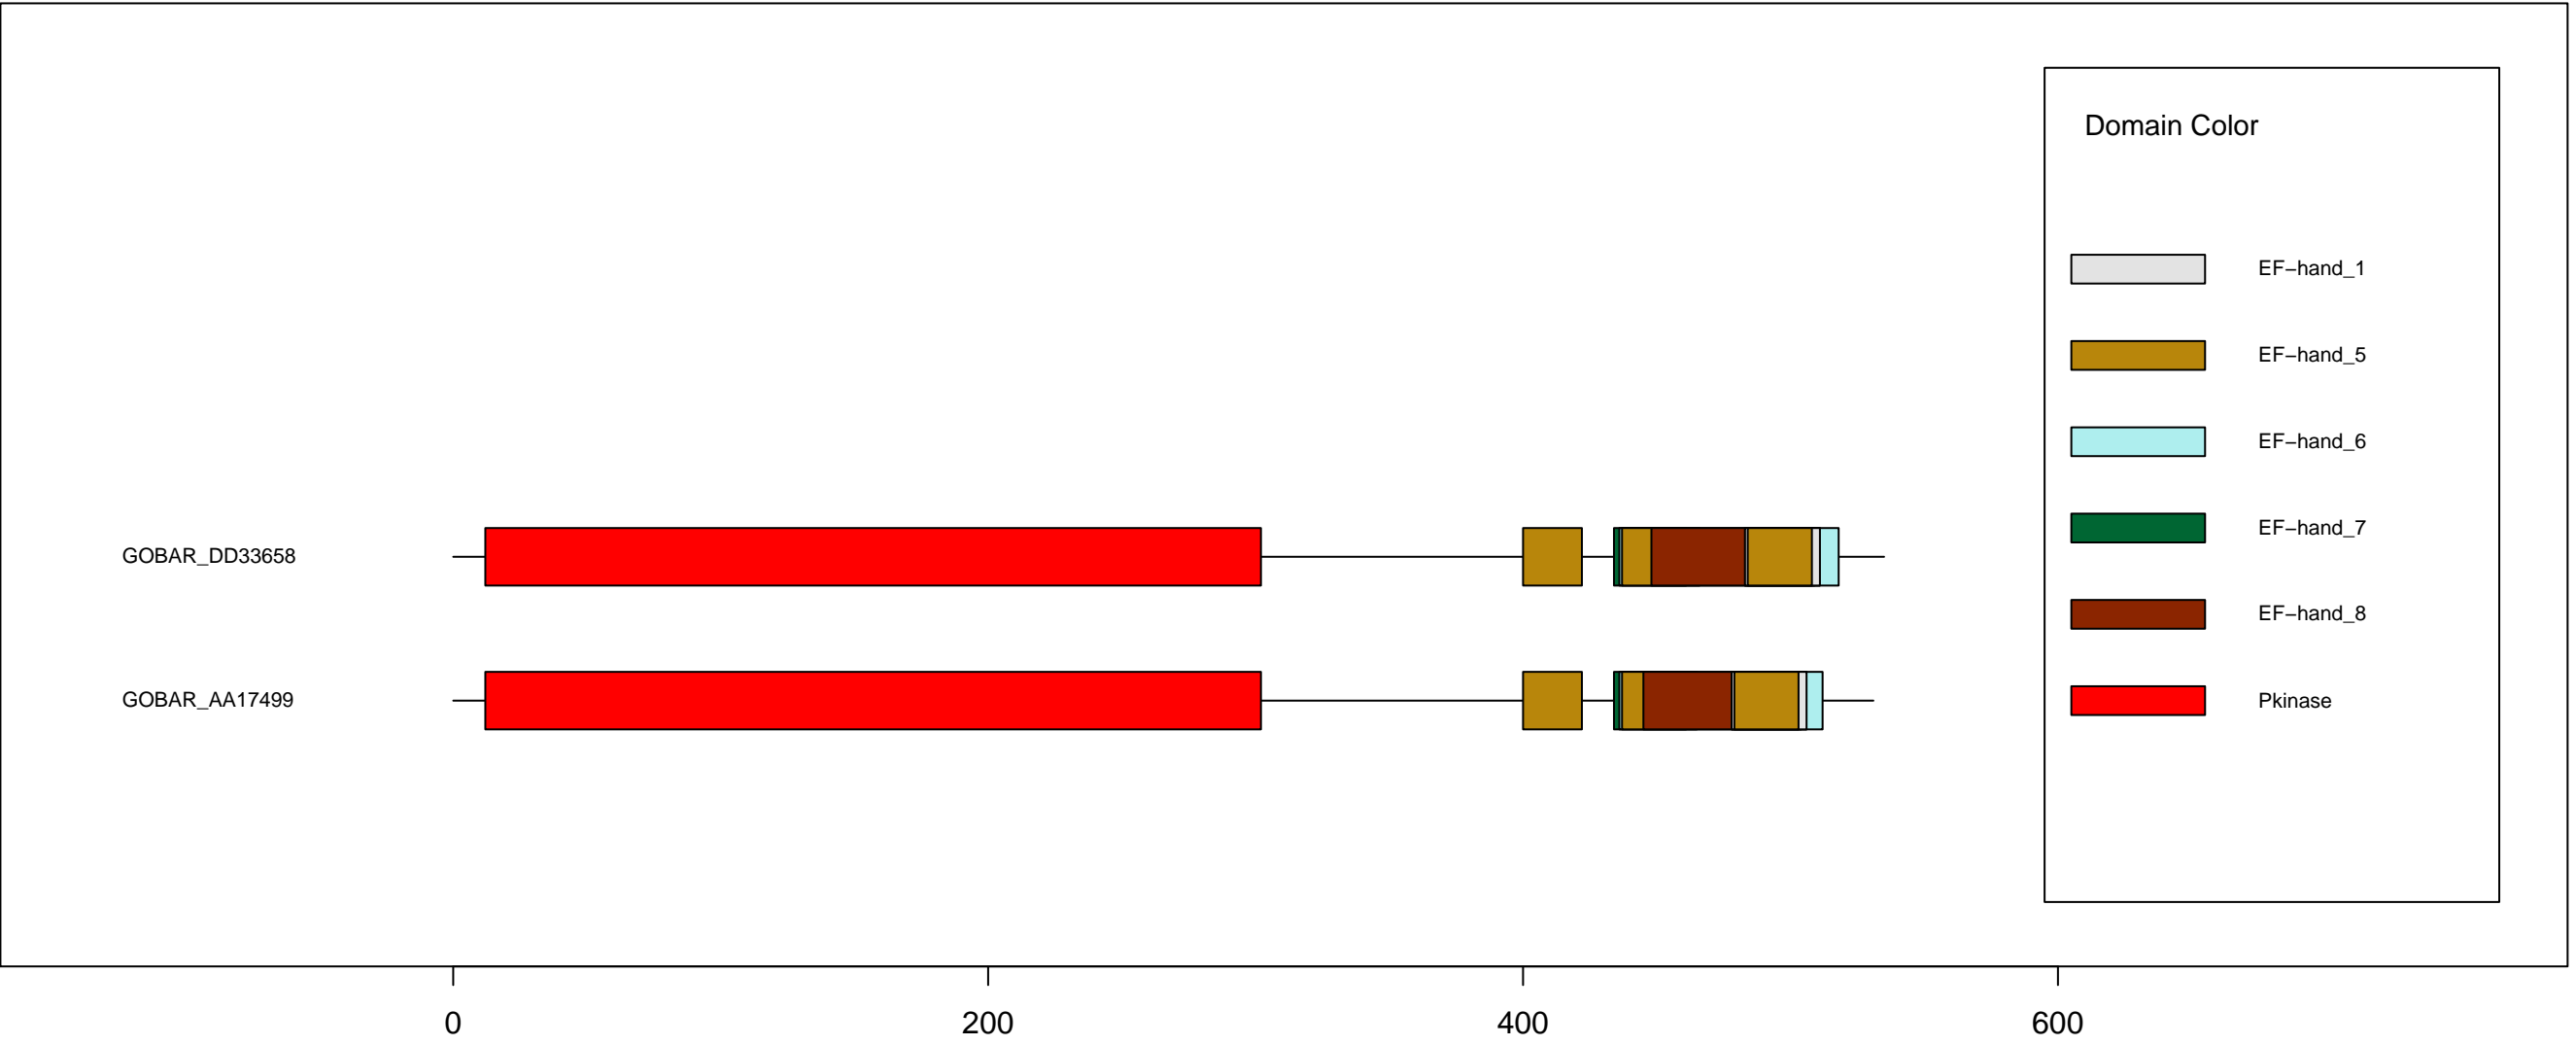

# G.ba CAMK\_CAMKL-CHK1 domain diagram (part 1)

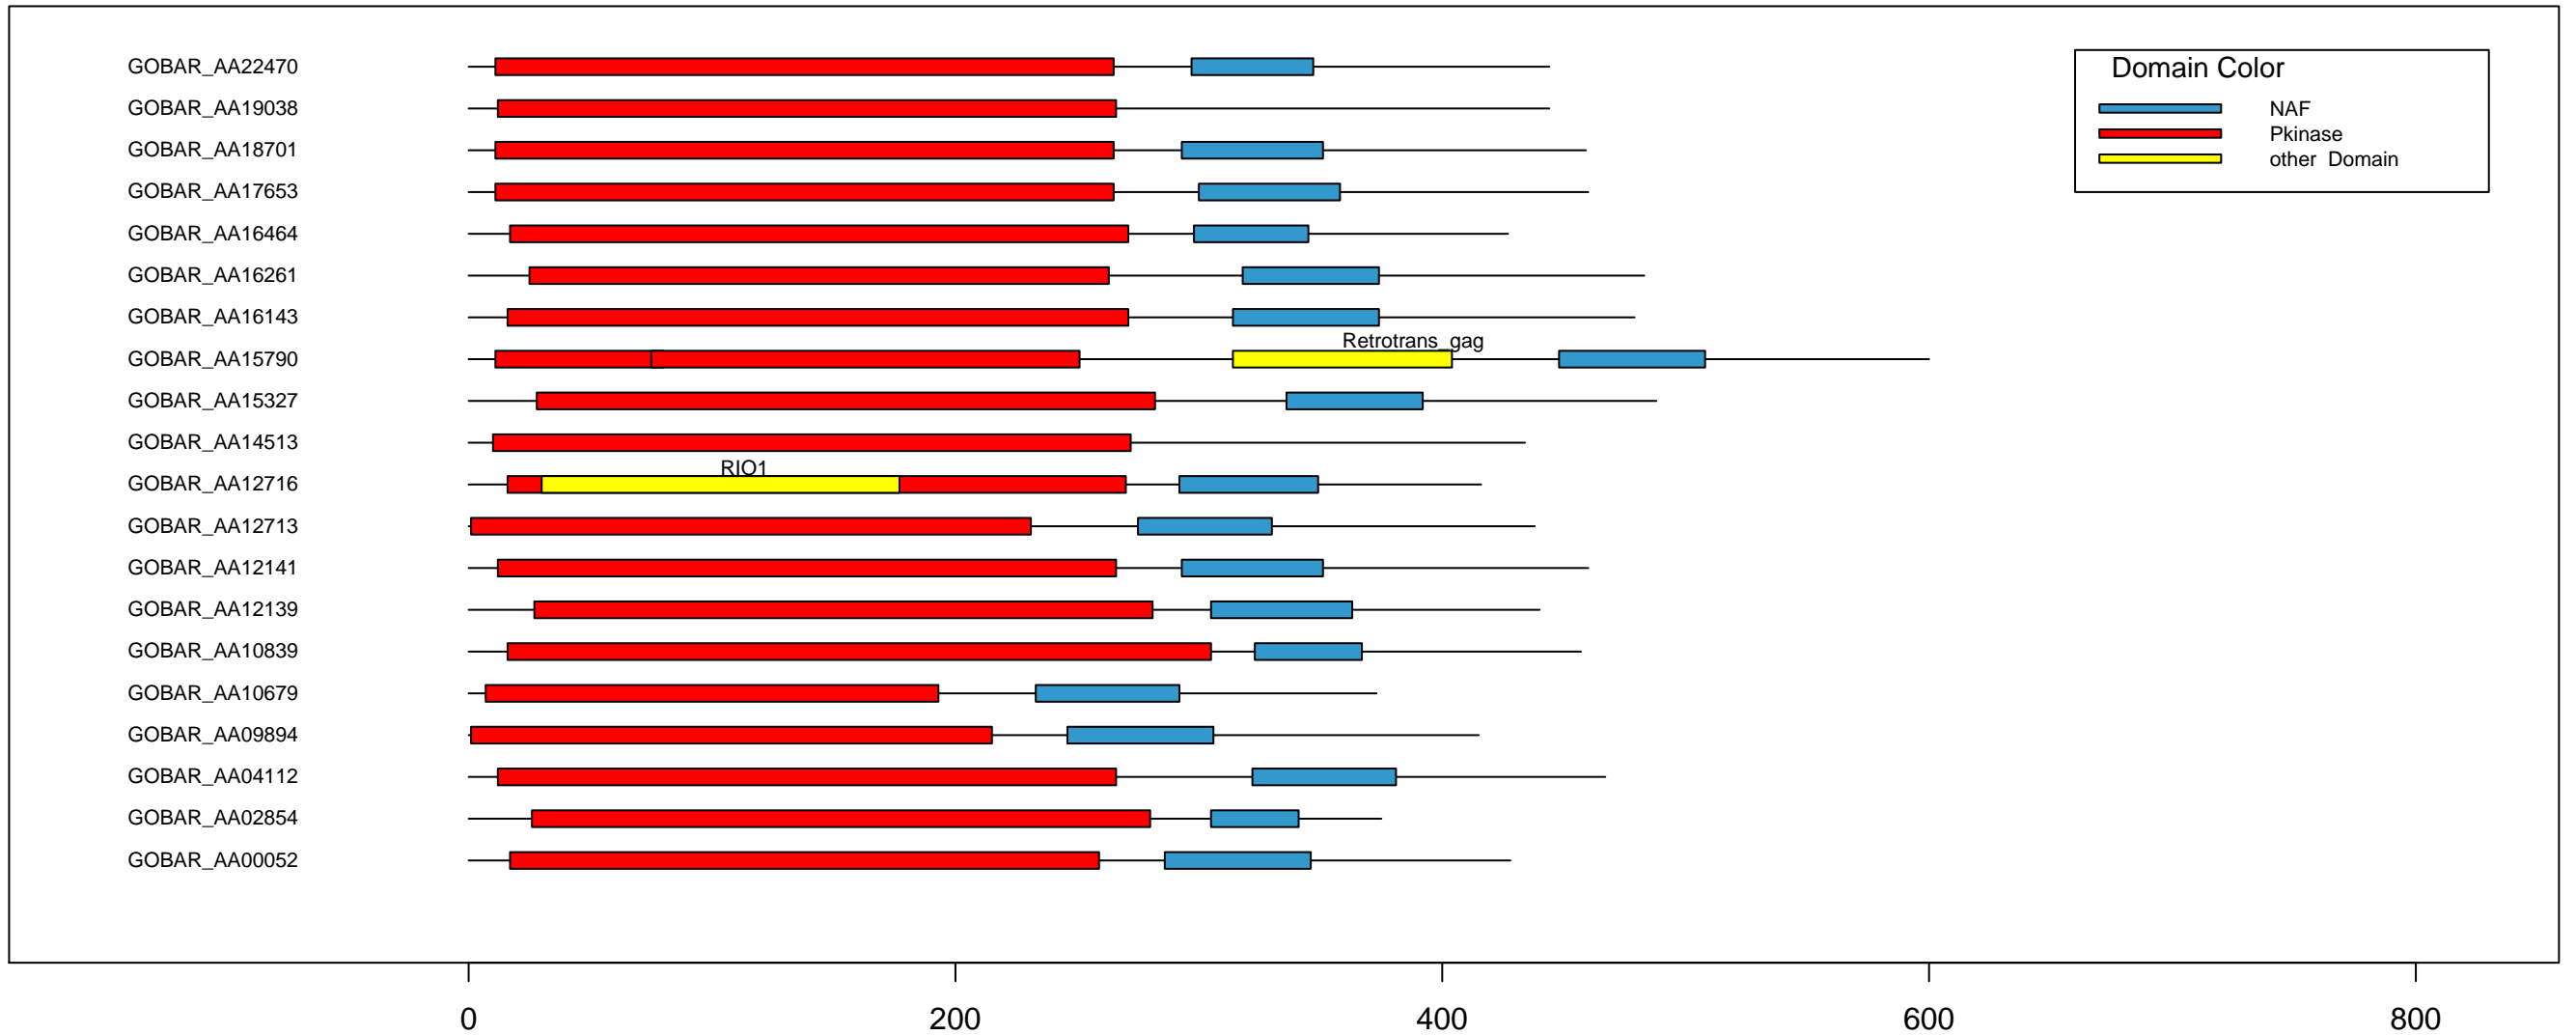

### G.ba CAMK\_CAMKL-CHK1 domain diagram (part 2)

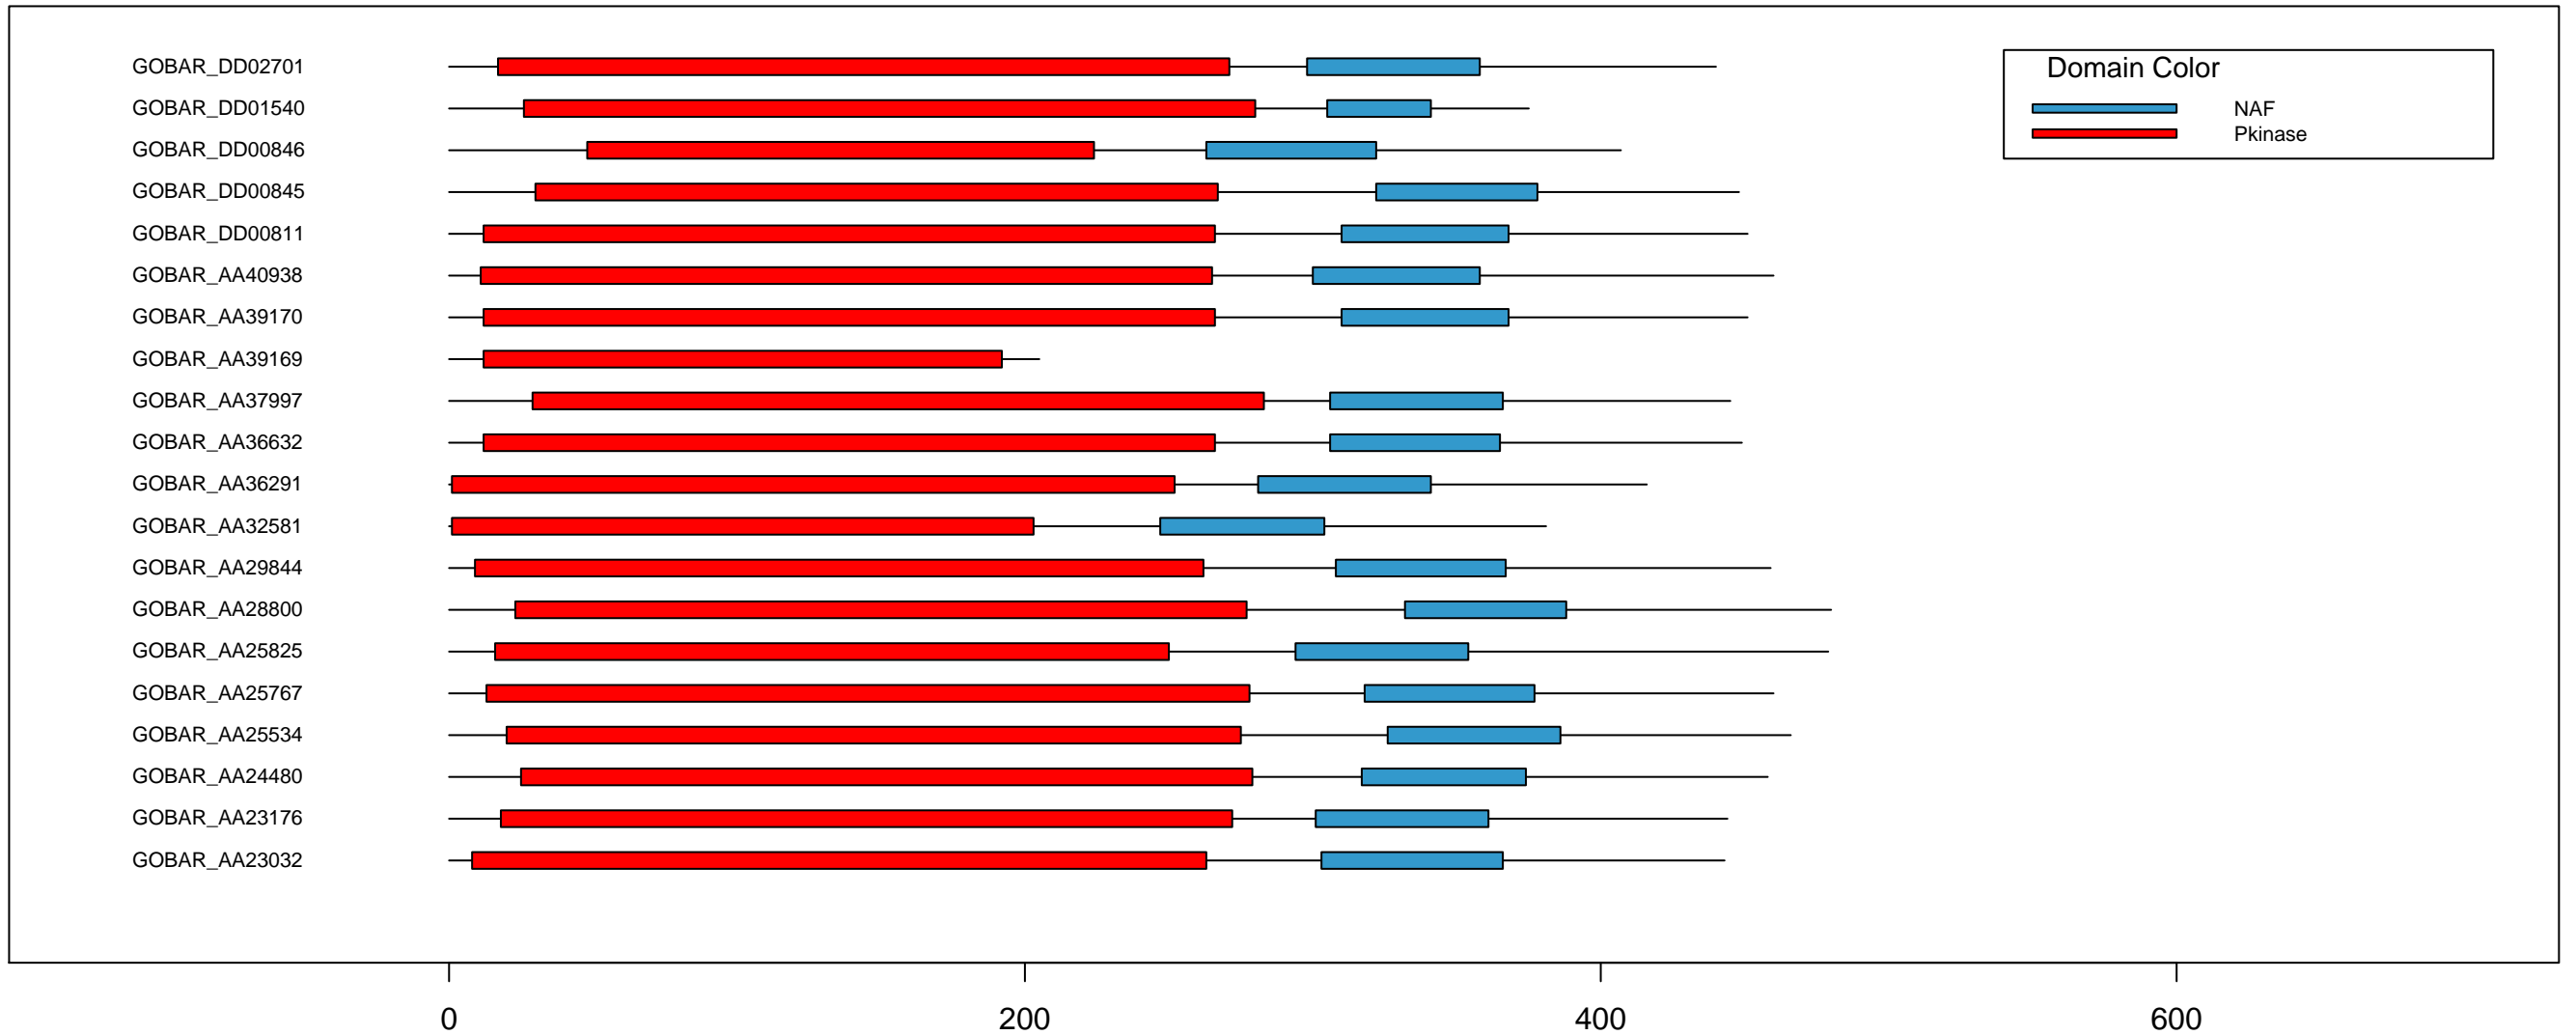

### G.ba CAMK\_CAMKL-CHK1 domain diagram (part 3)

GOBAR\_DD22637  
GOBAR\_DD22634  
GOBAR\_DD22301  
GOBAR\_DD19234  
GOBAR\_DD18772  
GOBAR\_DD17502  
GOBAR\_DD15120  
GOBAR\_DD13596  
GOBAR\_DD13379  
GOBAR\_DD13378  
GOBAR\_DD12927  
GOBAR\_DD12925  
GOBAR\_DD11604  
GOBAR\_DD11603  
GOBAR\_DD11261  
GOBAR\_DD10237  
GOBAR\_DD07303  
GOBAR\_DD06387  
GOBAR\_DD06270  
GOBAR\_DD04318

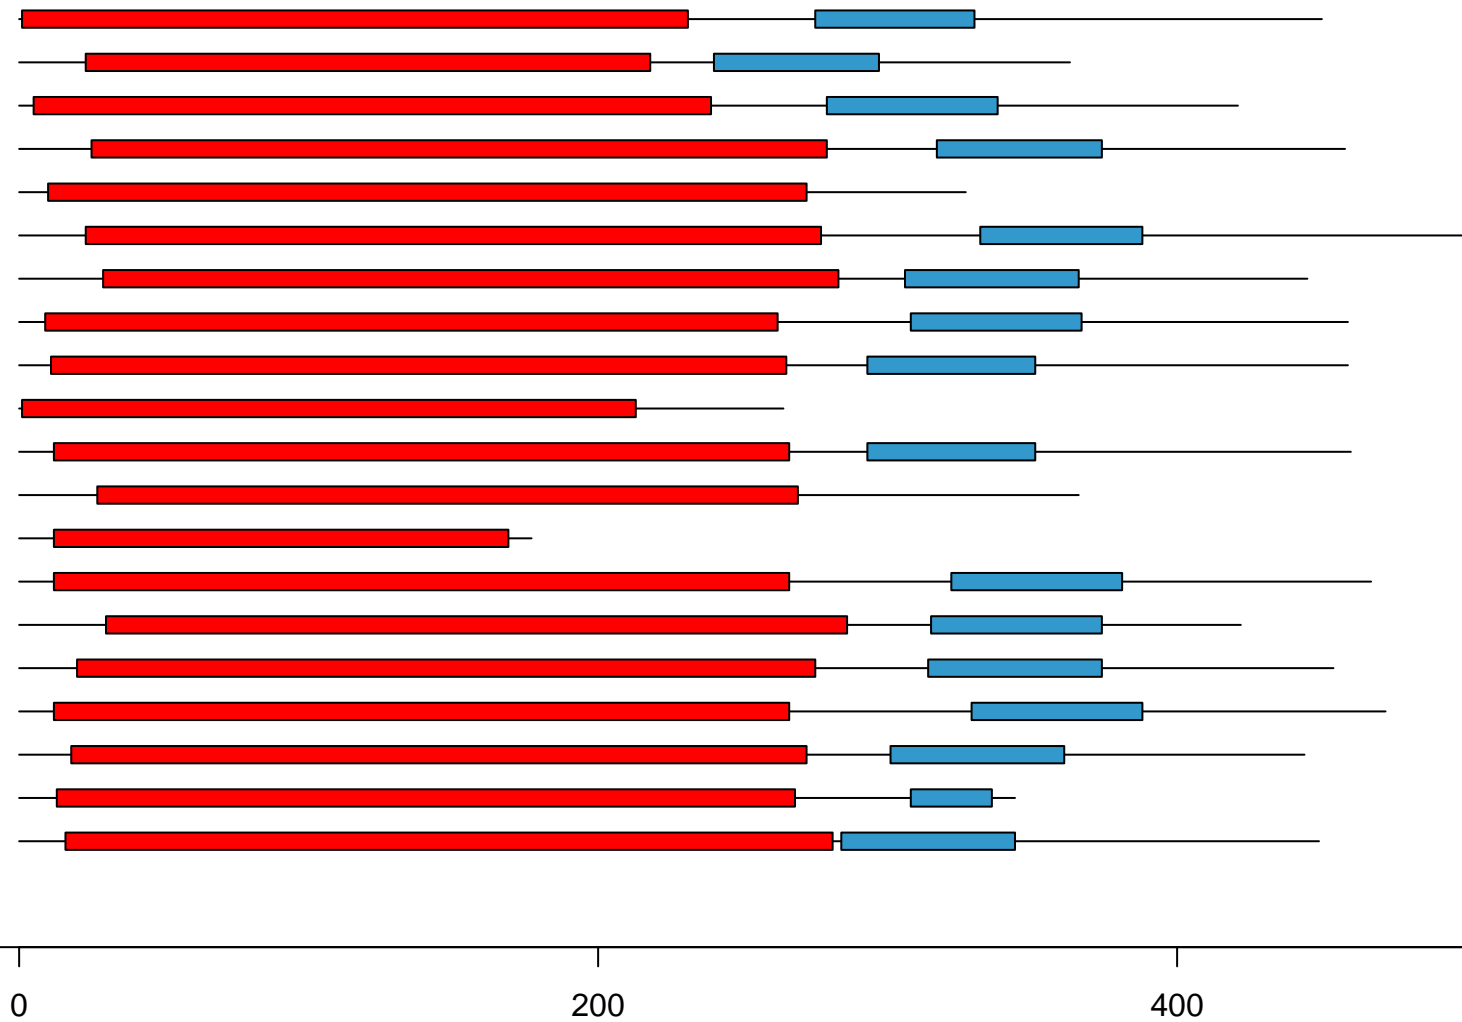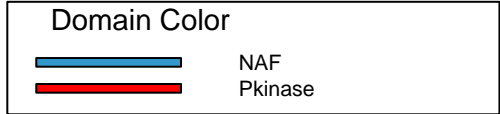

### G.ba CAMK\_CAMKL-CHK1 domain diagram (part 4)

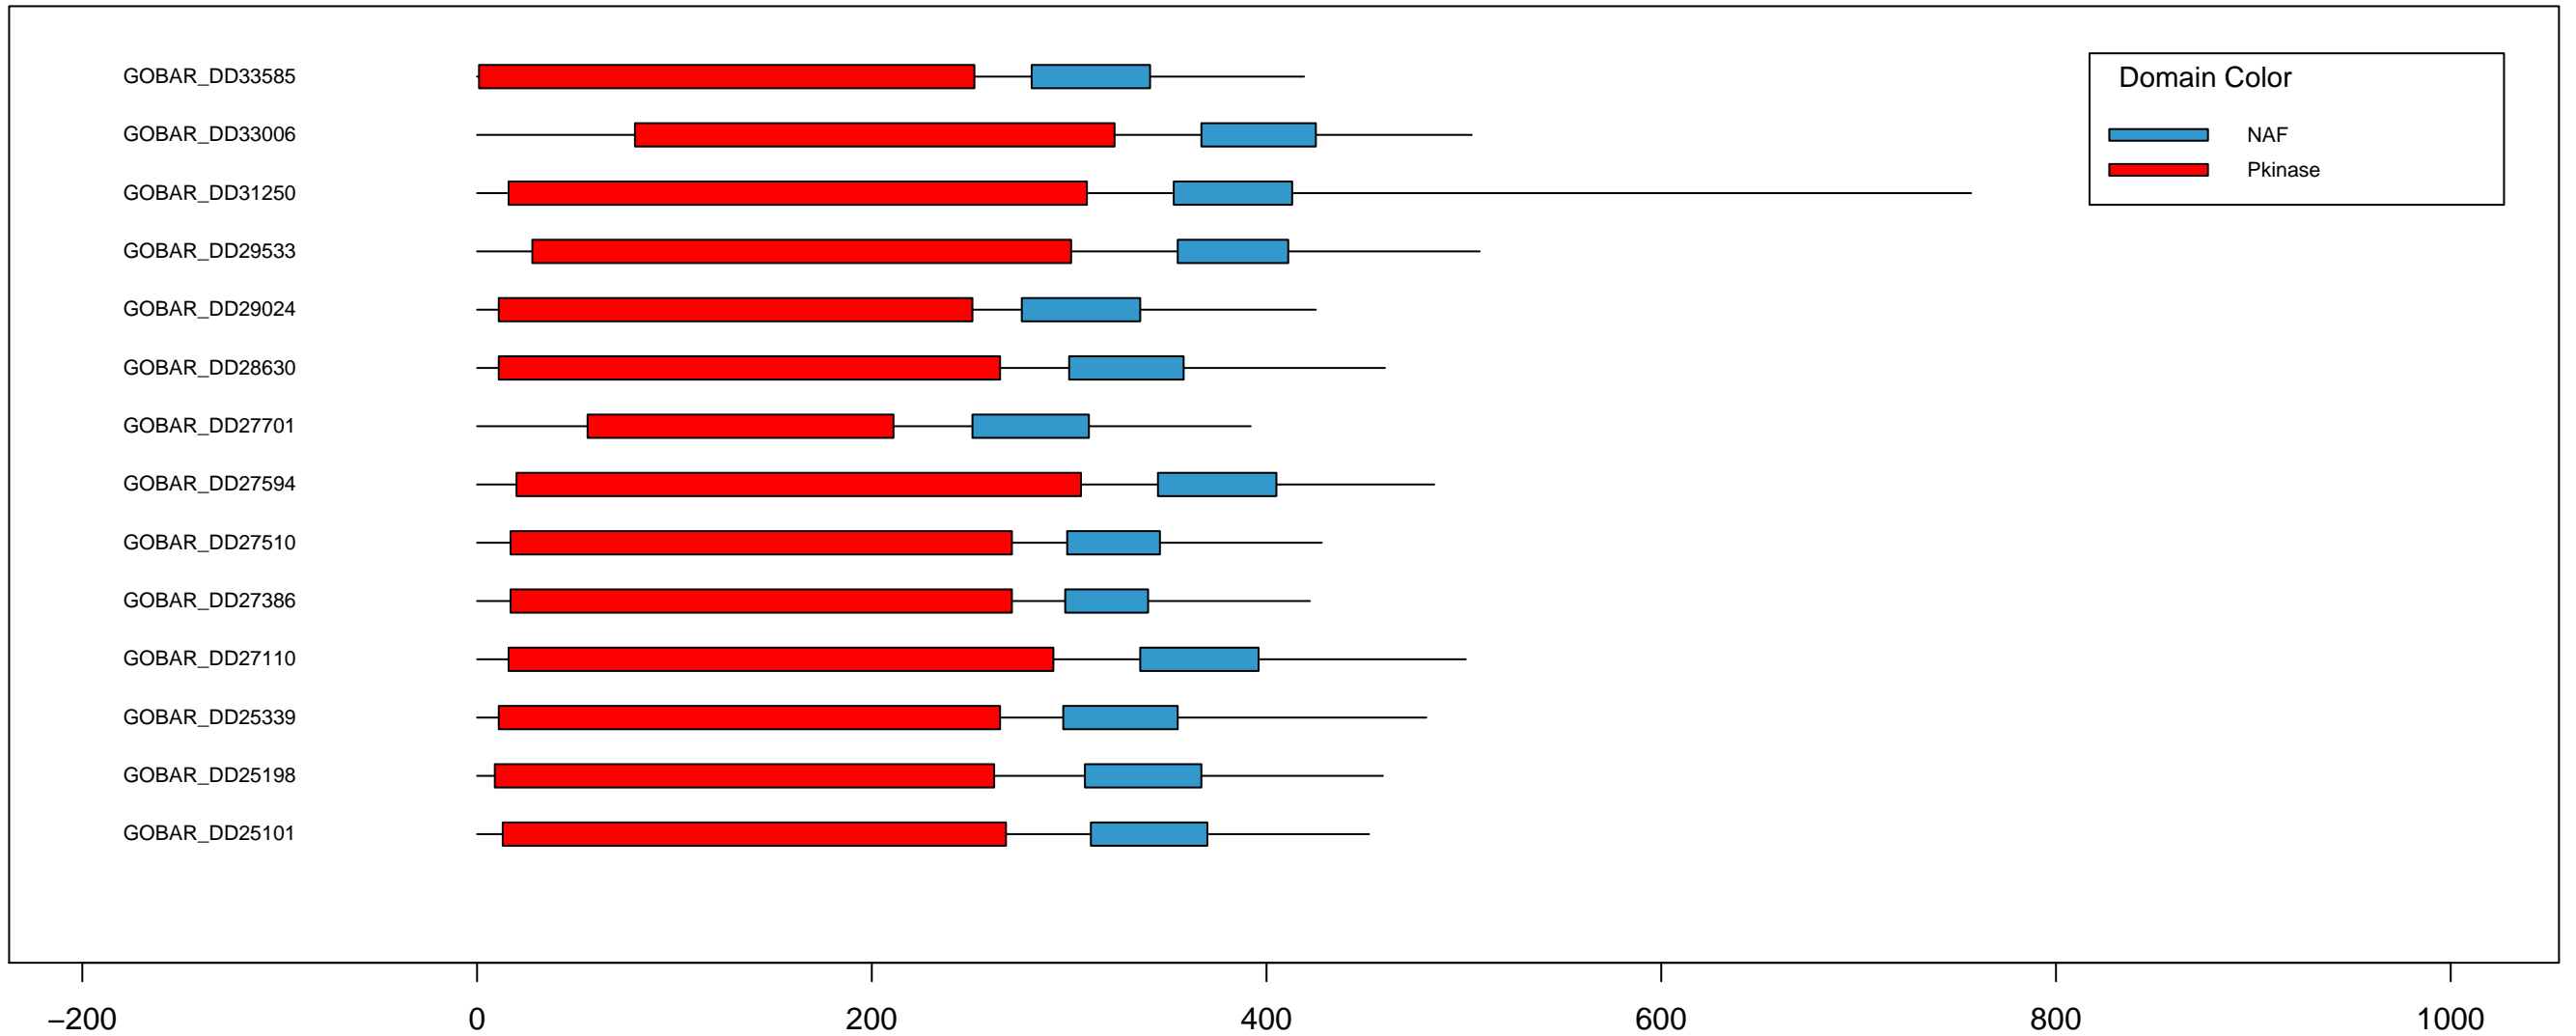

# G.ba CAMK\_CAMKL-LKB domain diagram (all)

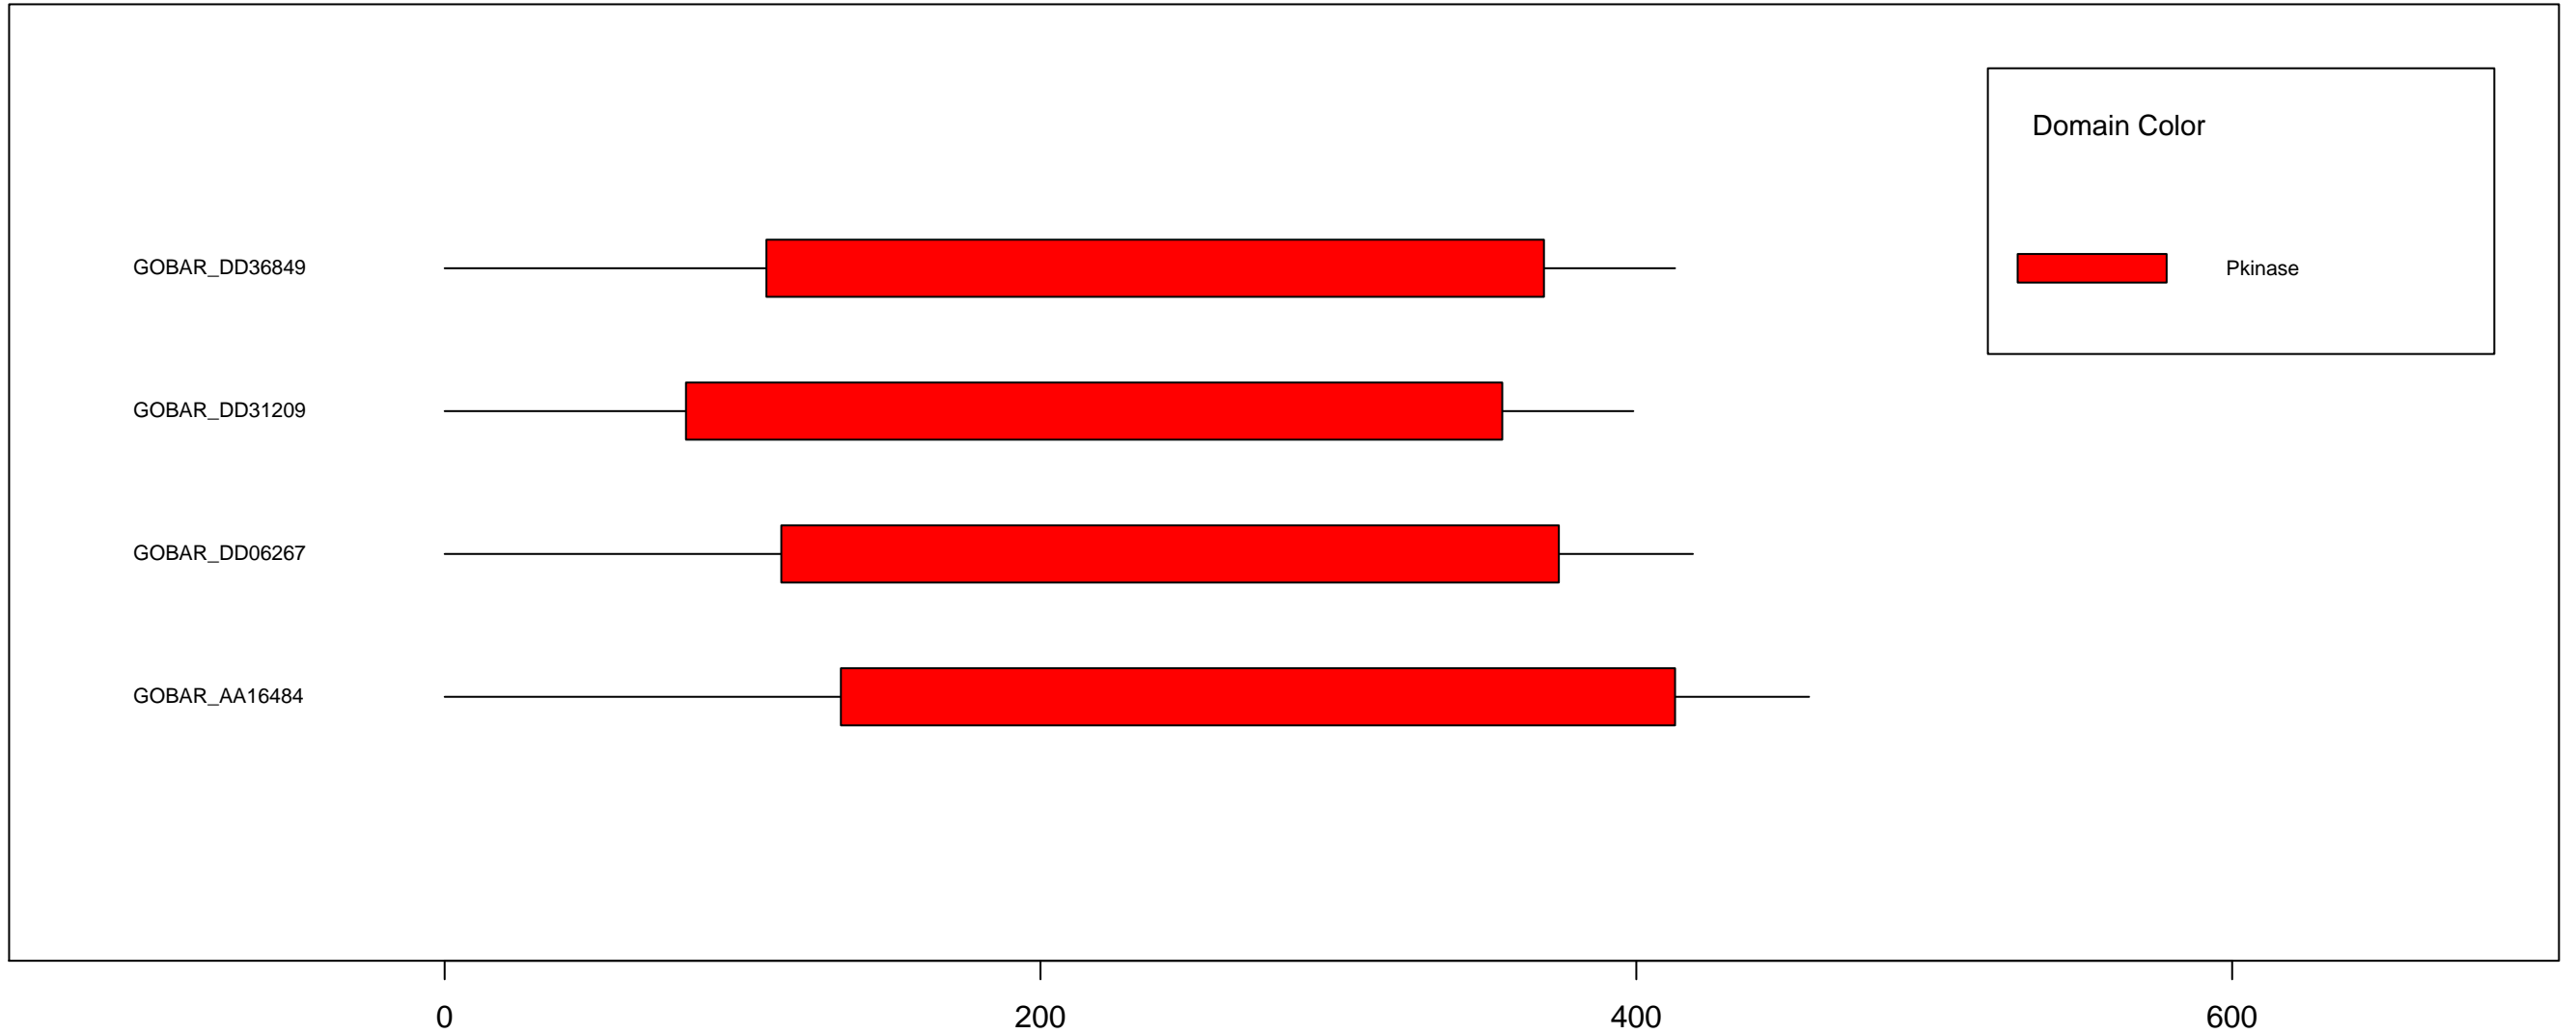



### G.ba CAMK\_CDPK domain diagram (part 1)

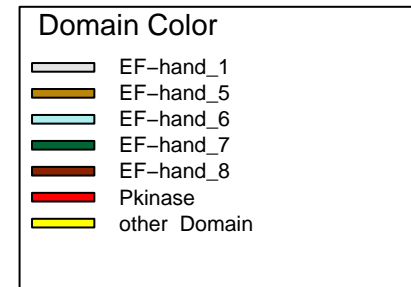

GOBAR\_AA15143  
 GOBAR\_AA13350  
 GOBAR\_AA13300  
 GOBAR\_AA10971  
 GOBAR\_AA09804  
 GOBAR\_AA08995  
 GOBAR\_AA08522  
 GOBAR\_AA08082  
 GOBAR\_AA07734  
 GOBAR\_AA07184  
 GOBAR\_AA06778  
 GOBAR\_AA04163  
 GOBAR\_AA03888  
 GOBAR\_AA03886  
 GOBAR\_AA02498  
 GOBAR\_AA02107  
 GOBAR\_AA01311  
 GOBAR\_AA00845  
 GOBAR\_AA00421  
 GOBAR\_AA00347

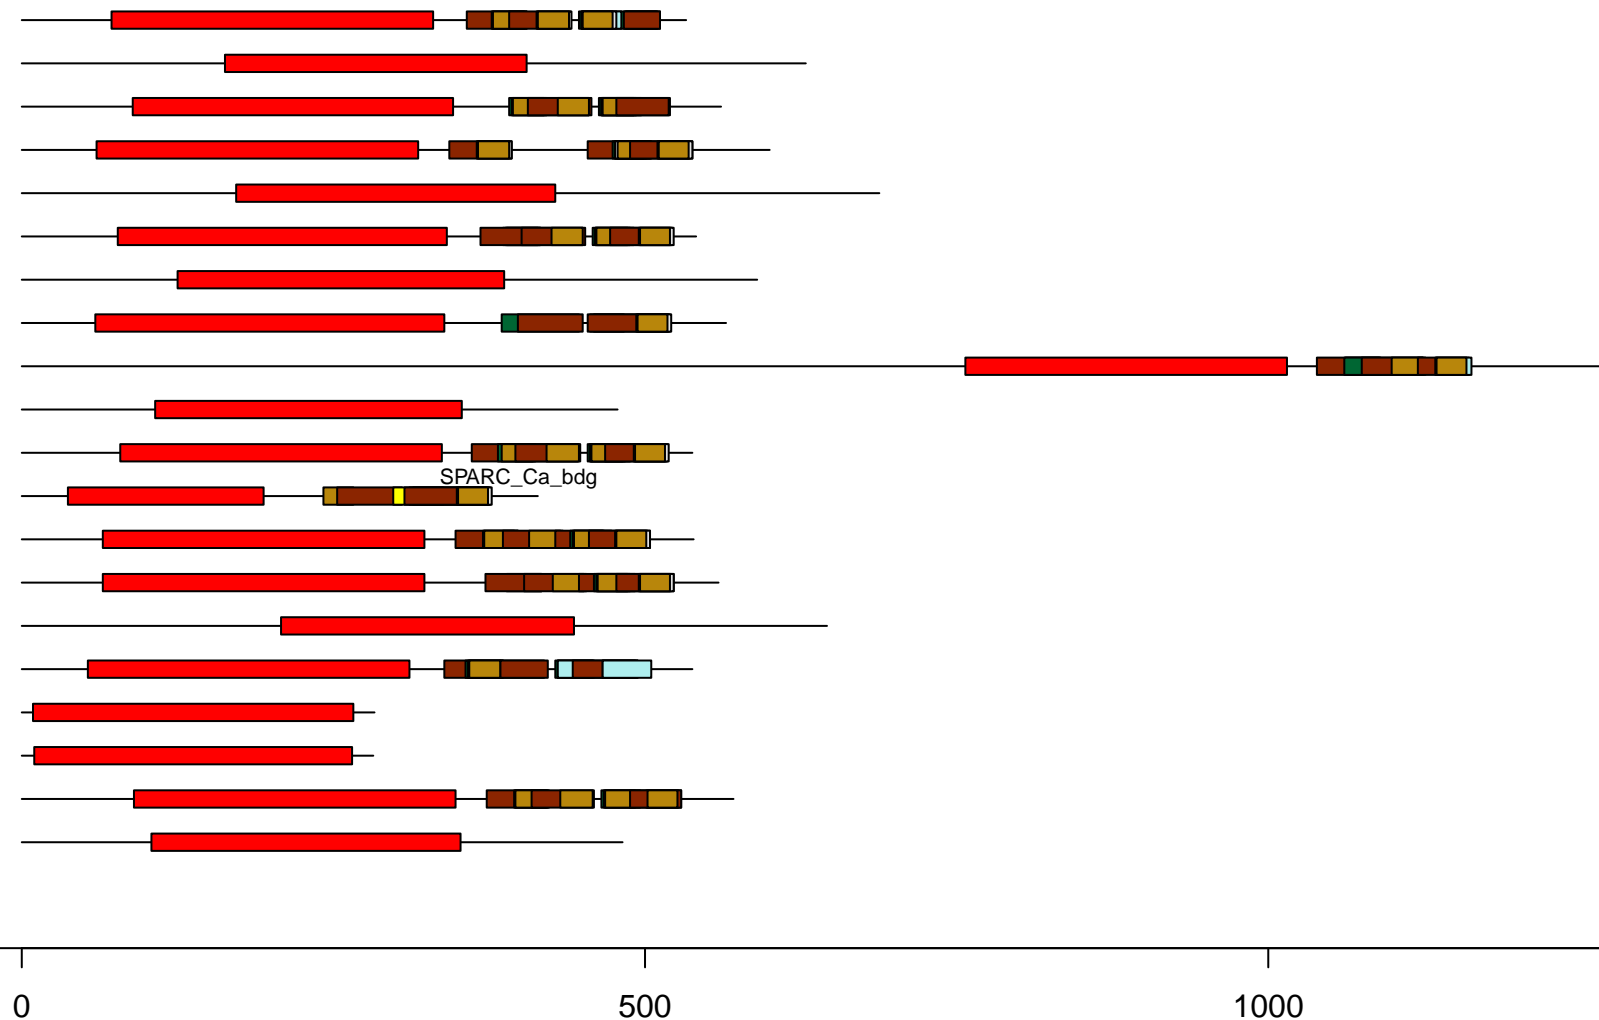

## G.ba CAMK\_CDPK domain diagram (part 2)

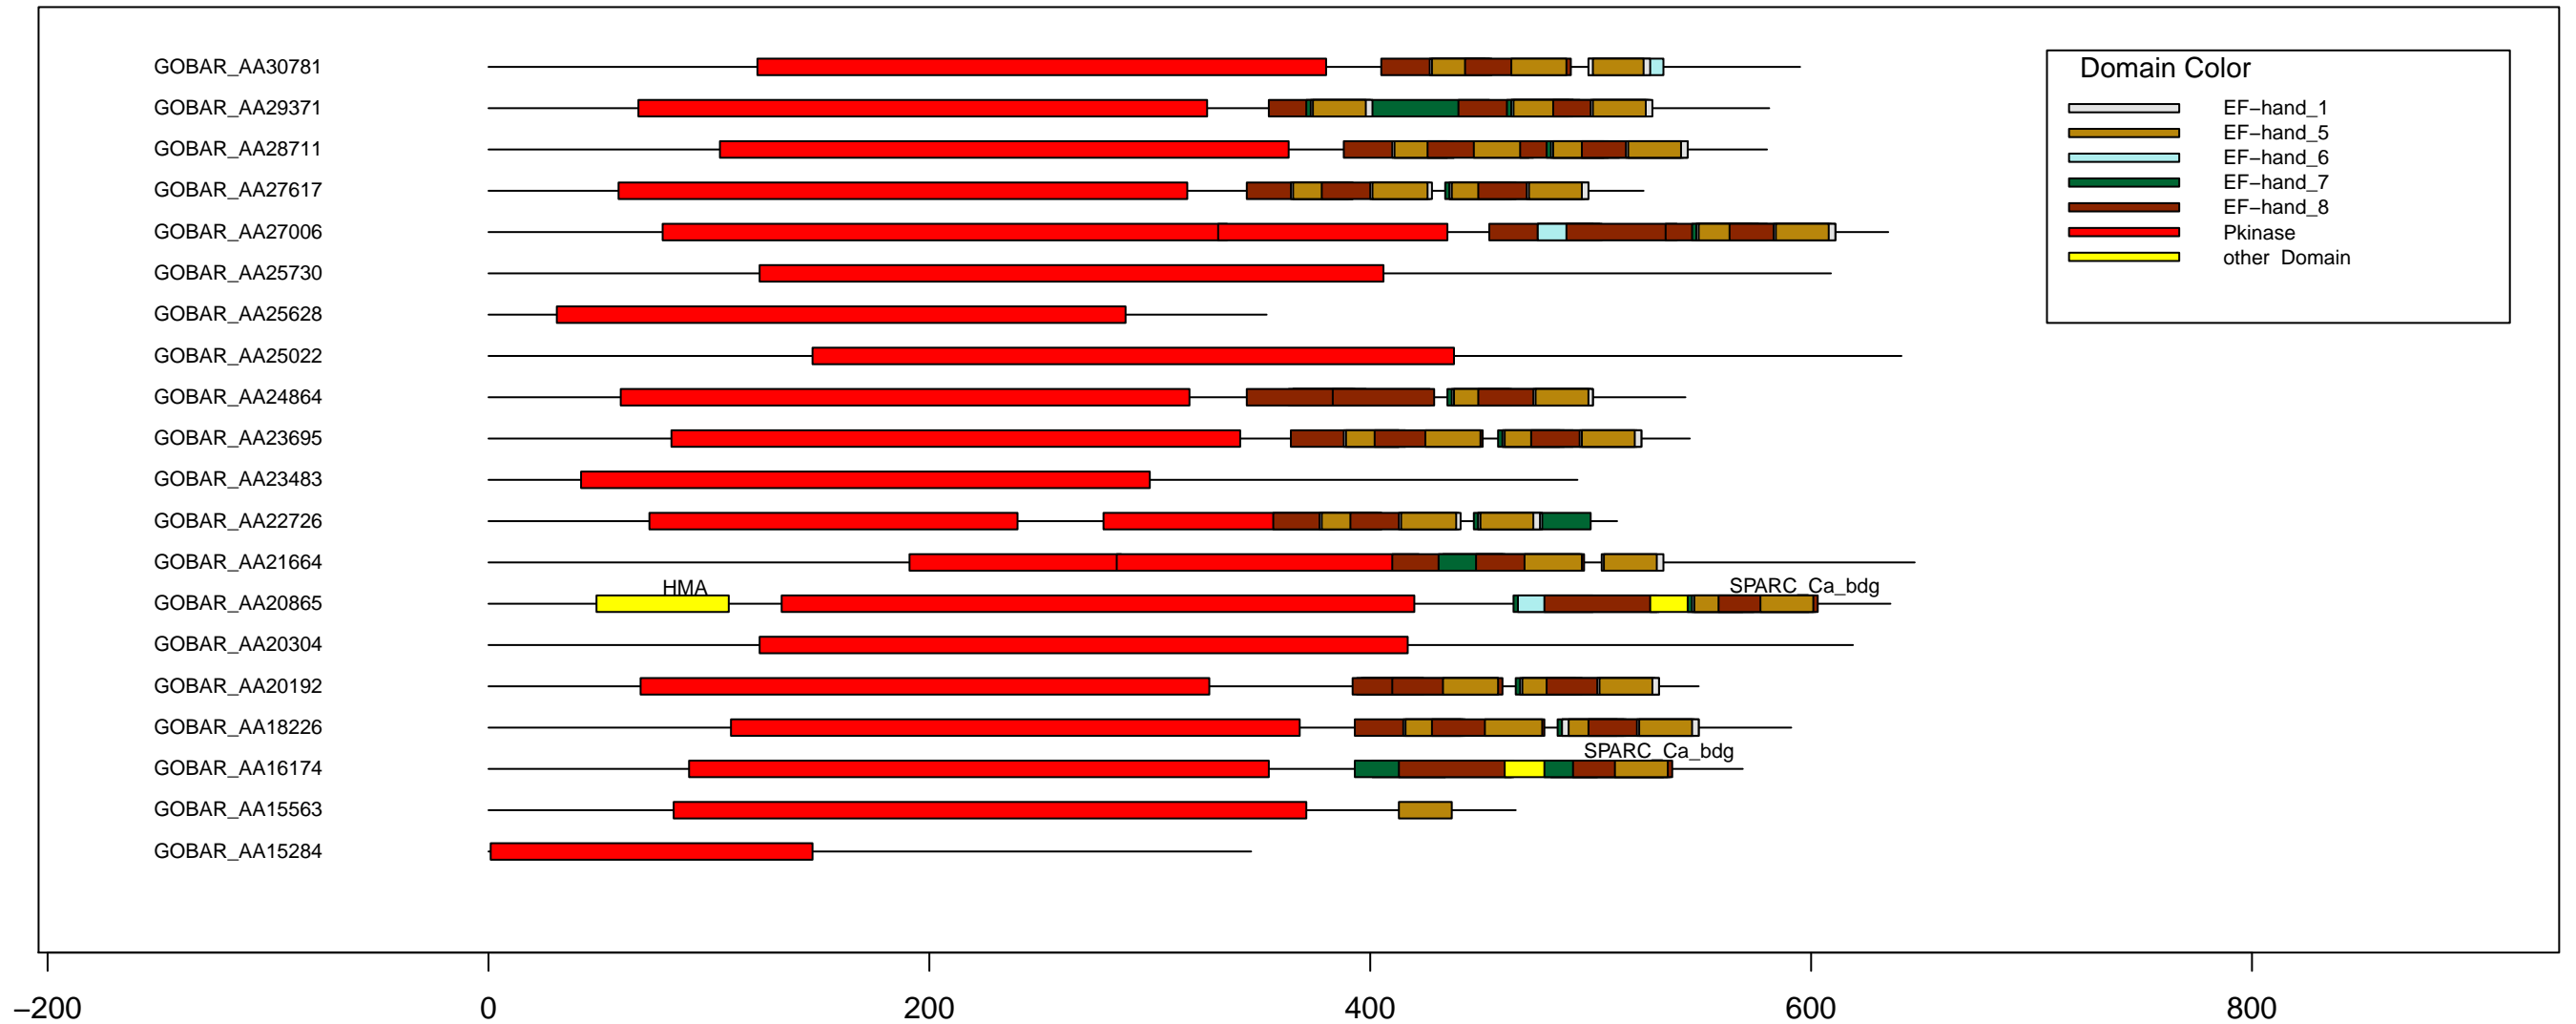

### G.ba CAMK\_CDPK domain diagram (part 3)

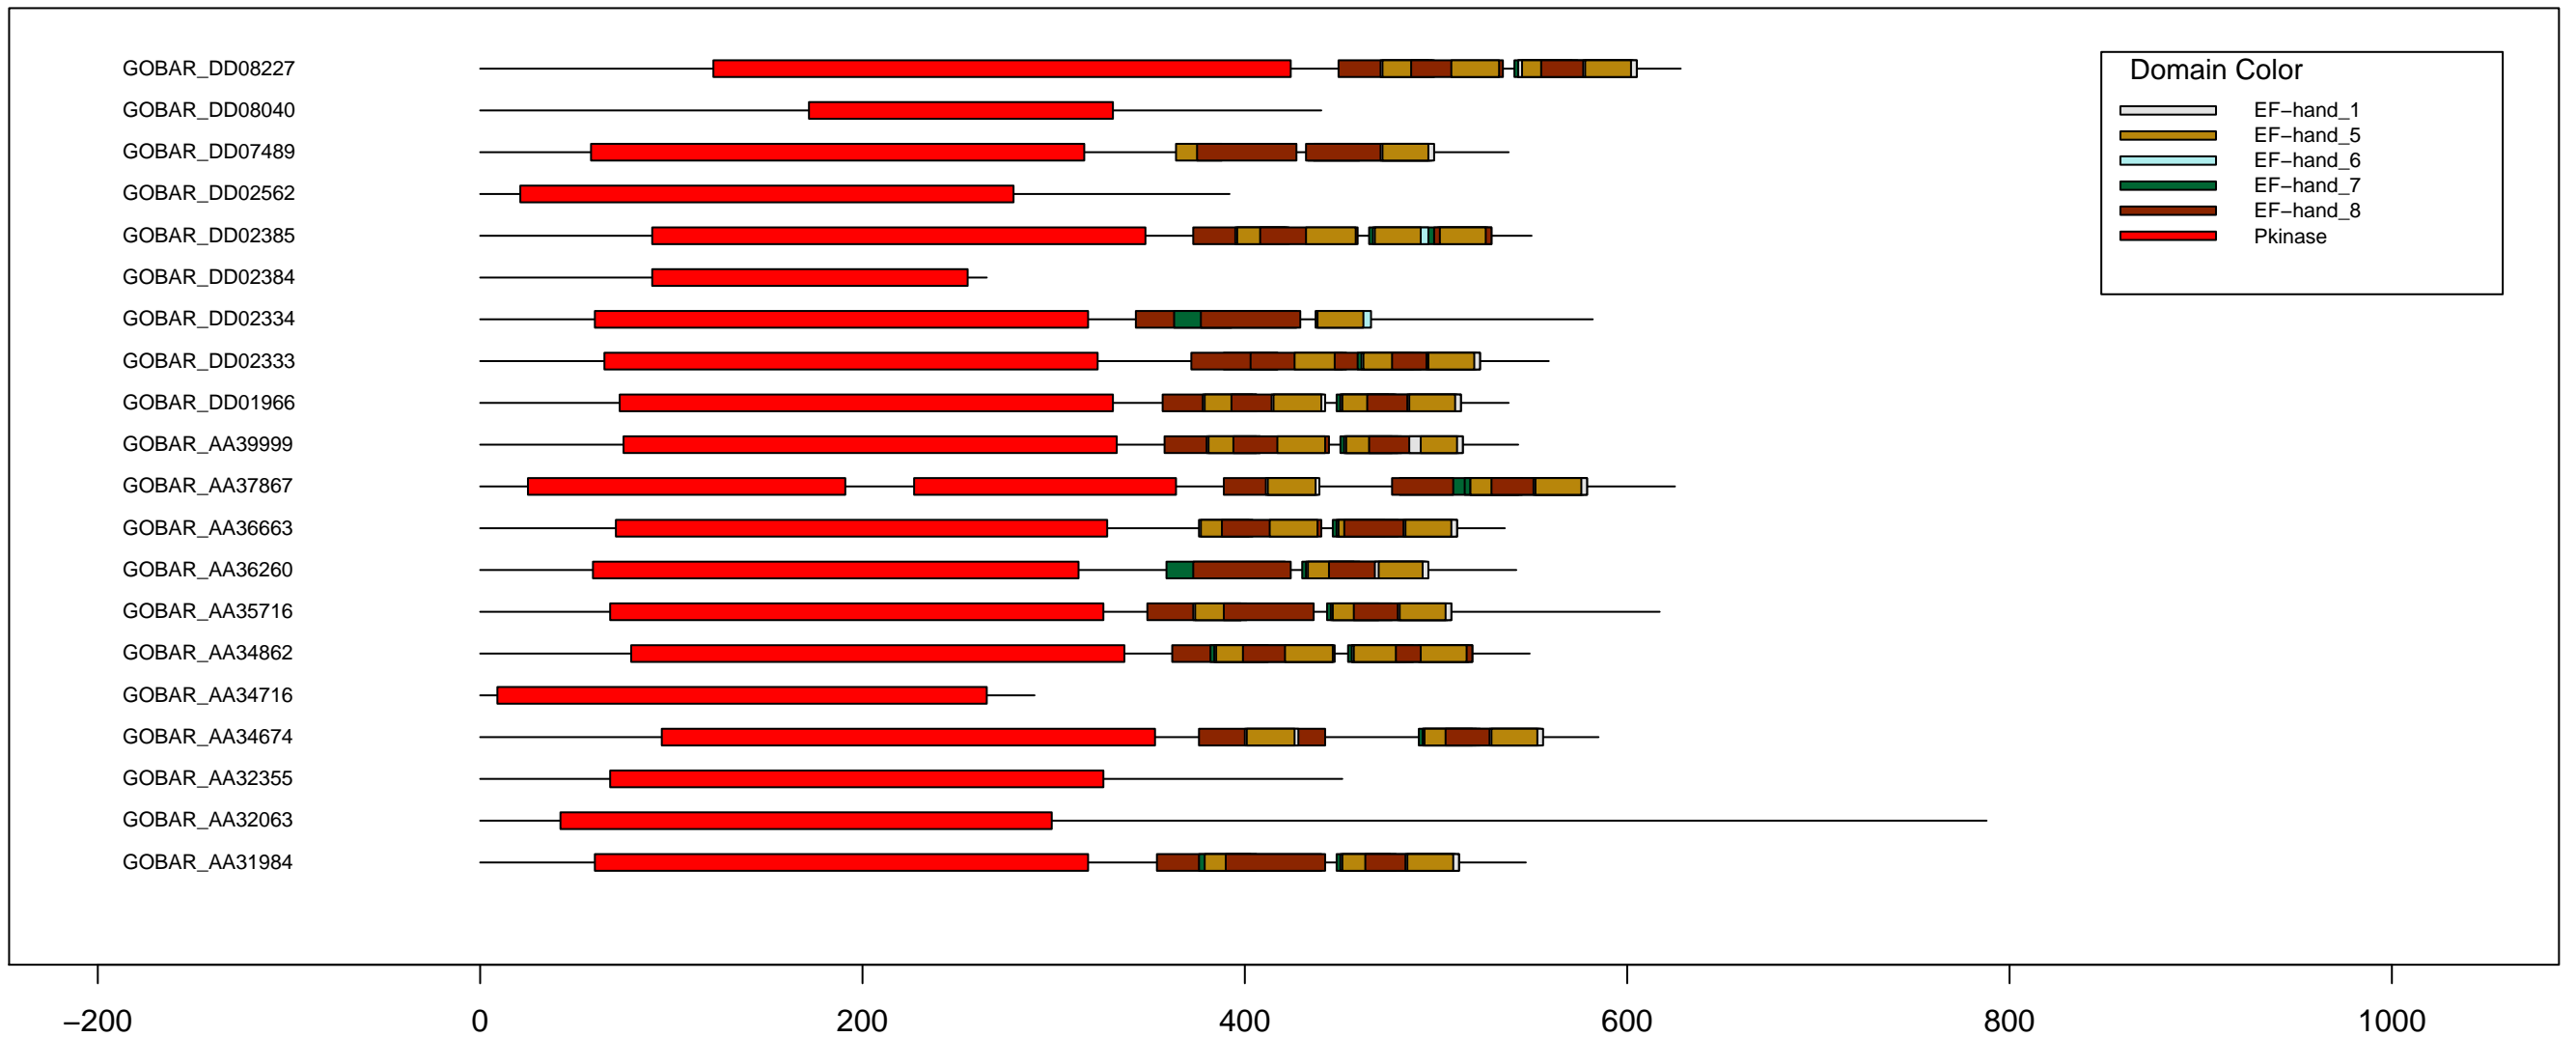

### G.ba CAMK\_CDPK domain diagram (part 4)

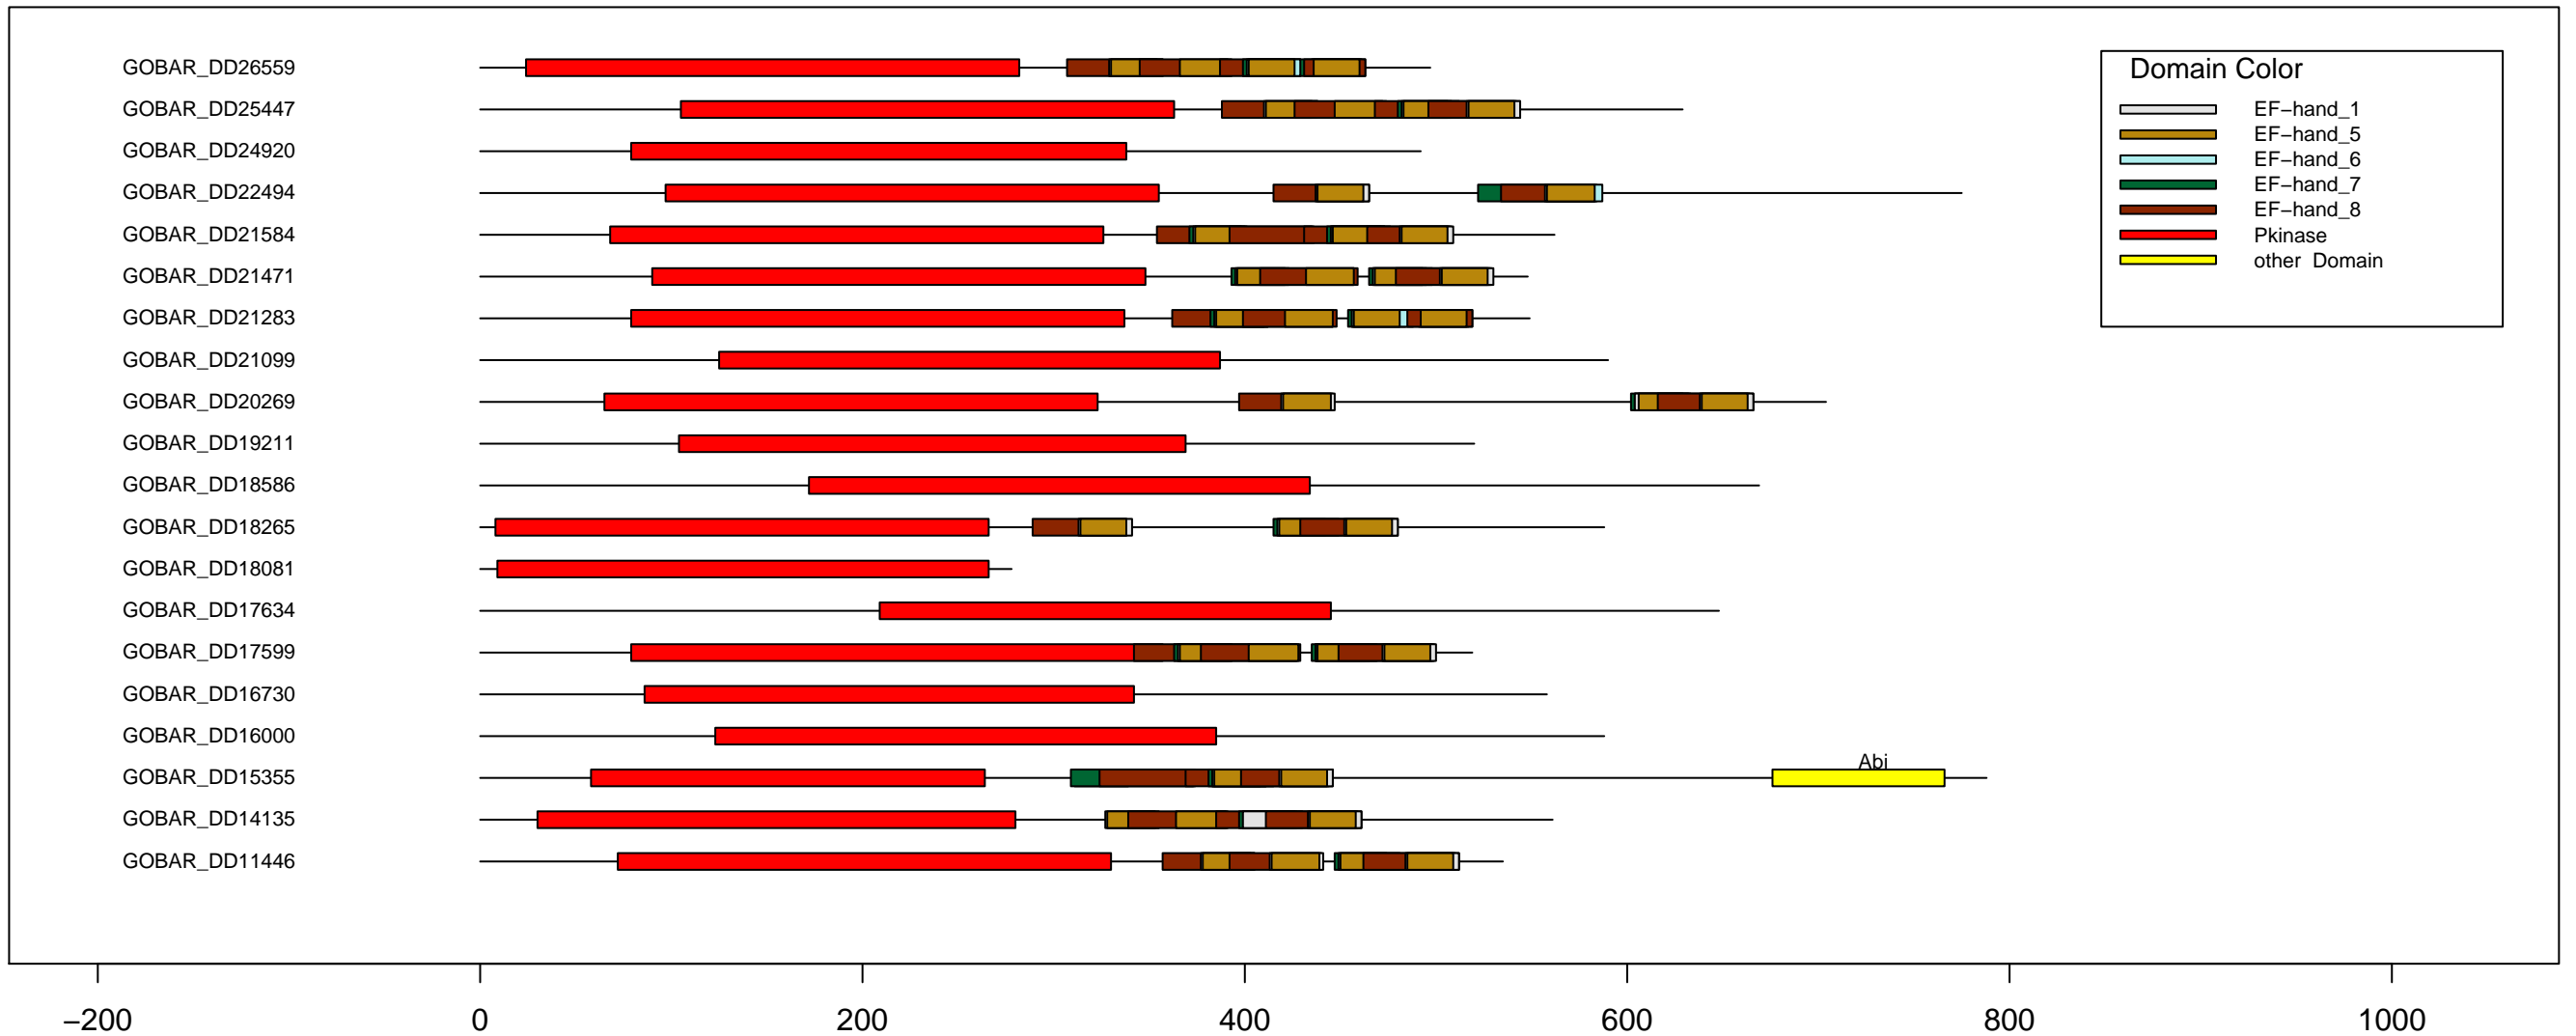

### G.ba CAMK\_CDPK domain diagram (part 5)

GOBAR\_DD36847  
 GOBAR\_DD36634  
 GOBAR\_DD35999  
 GOBAR\_DD35840  
 GOBAR\_DD34427  
 GOBAR\_DD33381  
 GOBAR\_DD32777  
 GOBAR\_DD32134  
 GOBAR\_DD32106  
 GOBAR\_DD30716  
 GOBAR\_DD30683  
 GOBAR\_DD29634  
 GOBAR\_DD28847  
 GOBAR\_DD28452  
 GOBAR\_DD28087  
 GOBAR\_DD27892  
 GOBAR\_DD27891  
 GOBAR\_DD27412  
 GOBAR\_DD26903  
 GOBAR\_DD26669

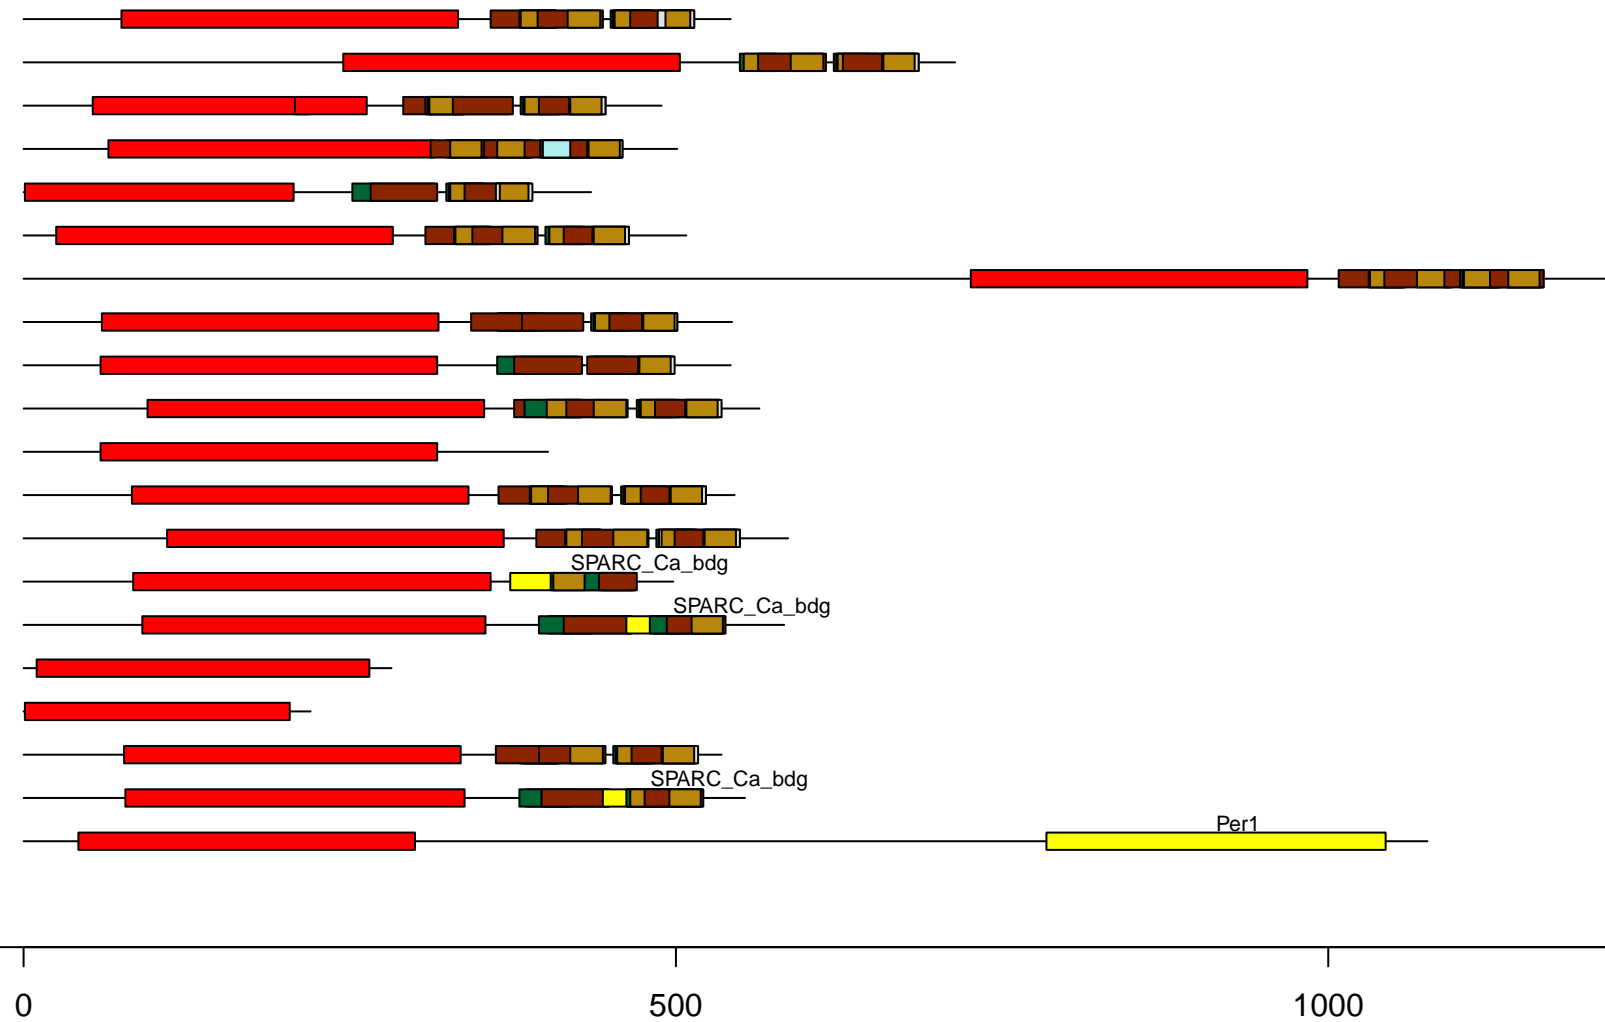

**Domain Color**

- EF-hand\_1
- EF-hand\_5
- EF-hand\_6
- EF-hand\_7
- EF-hand\_8
- Pkinase
- other Domain

### G.ba CAMK\_CDPK domain diagram (part 6)

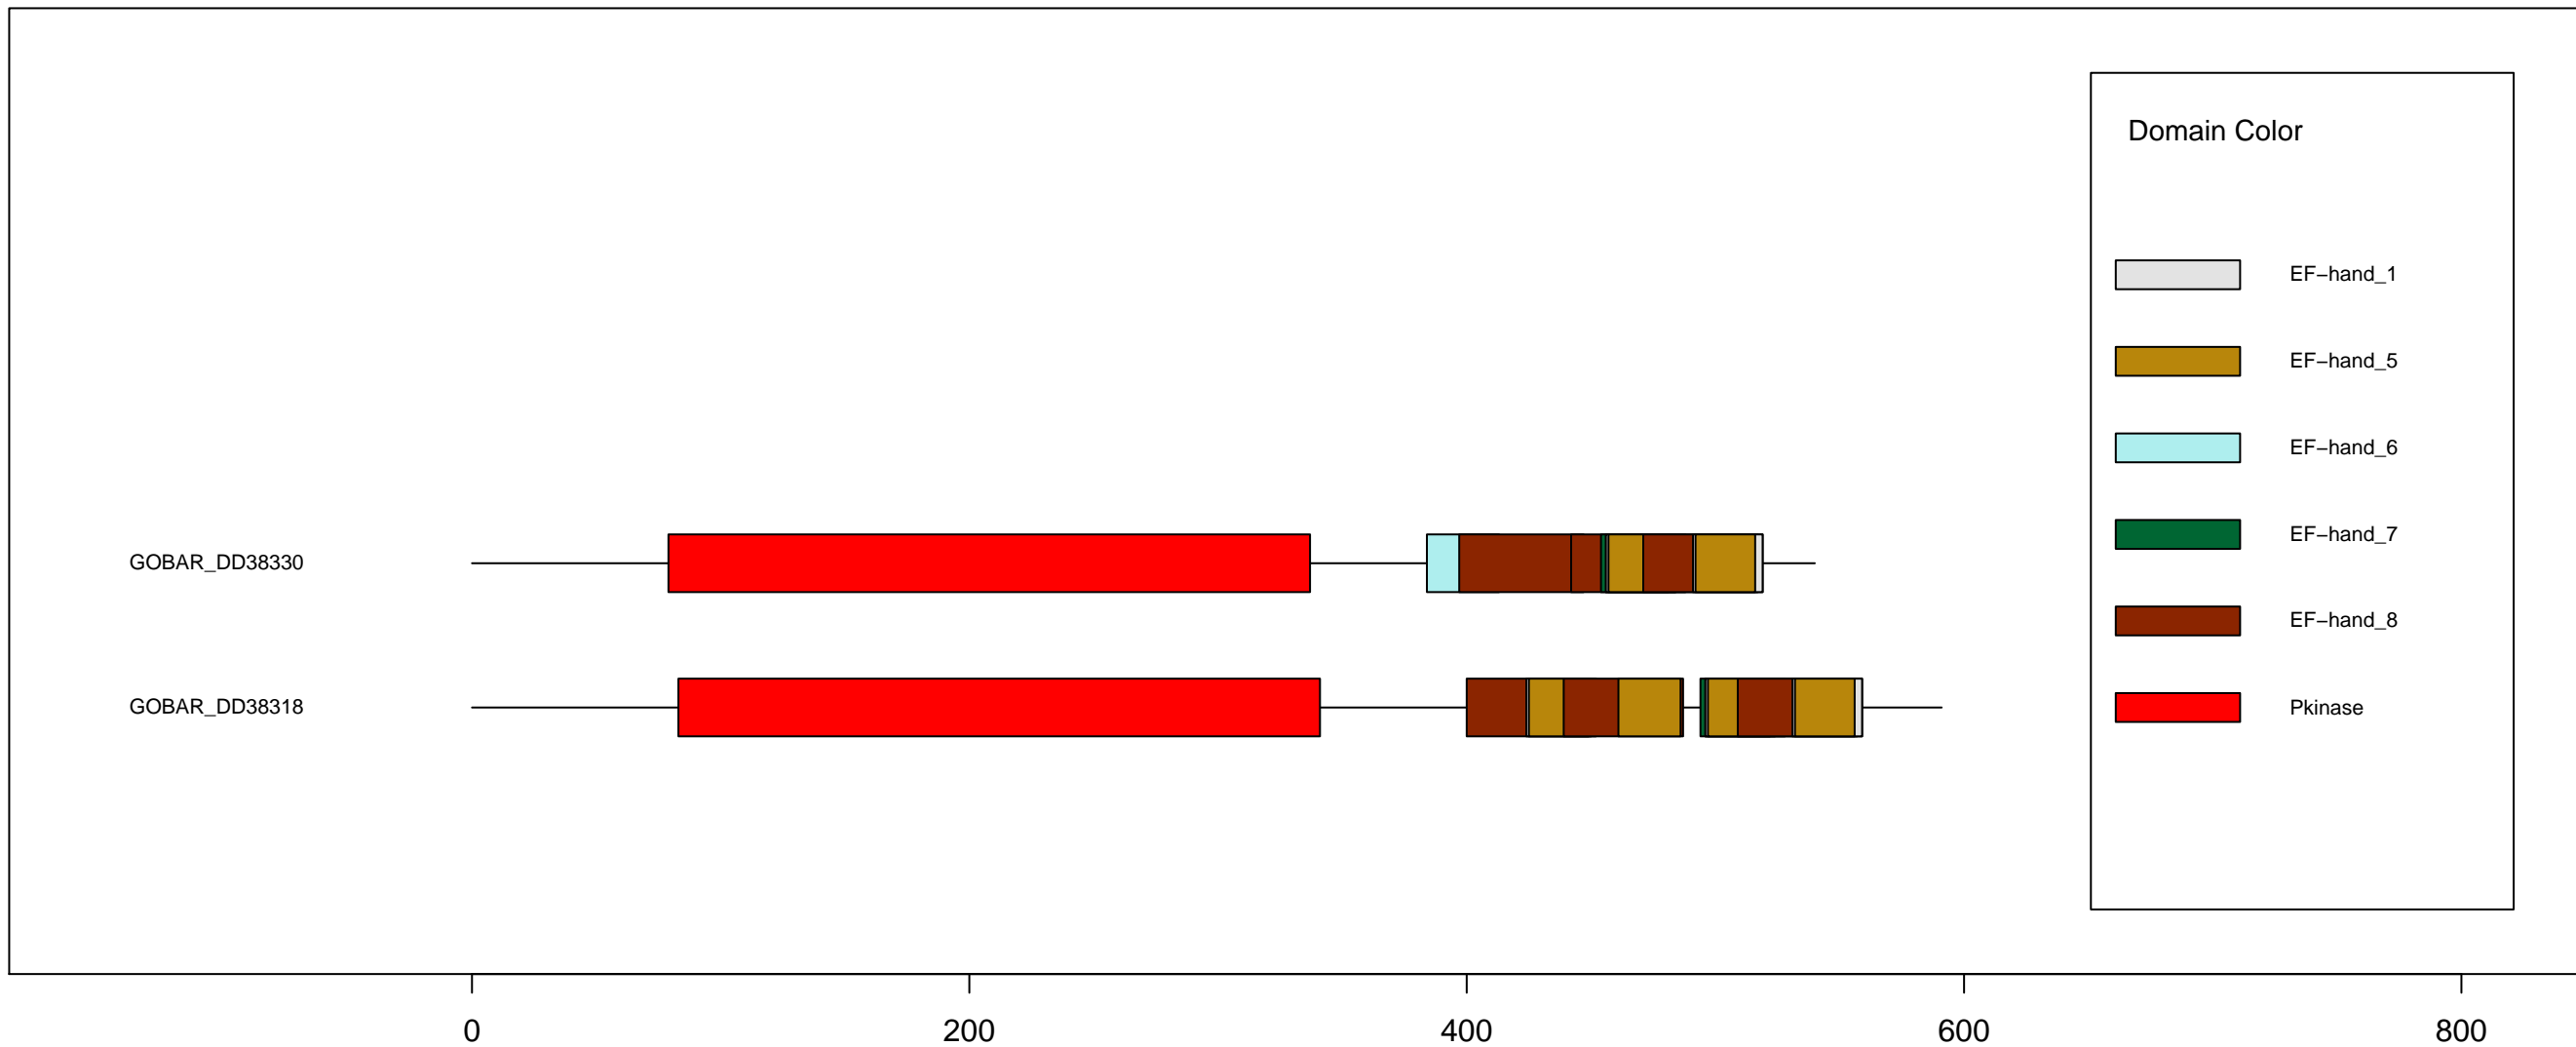

# G.ba CAMK\_OST1L domain diagram (all)

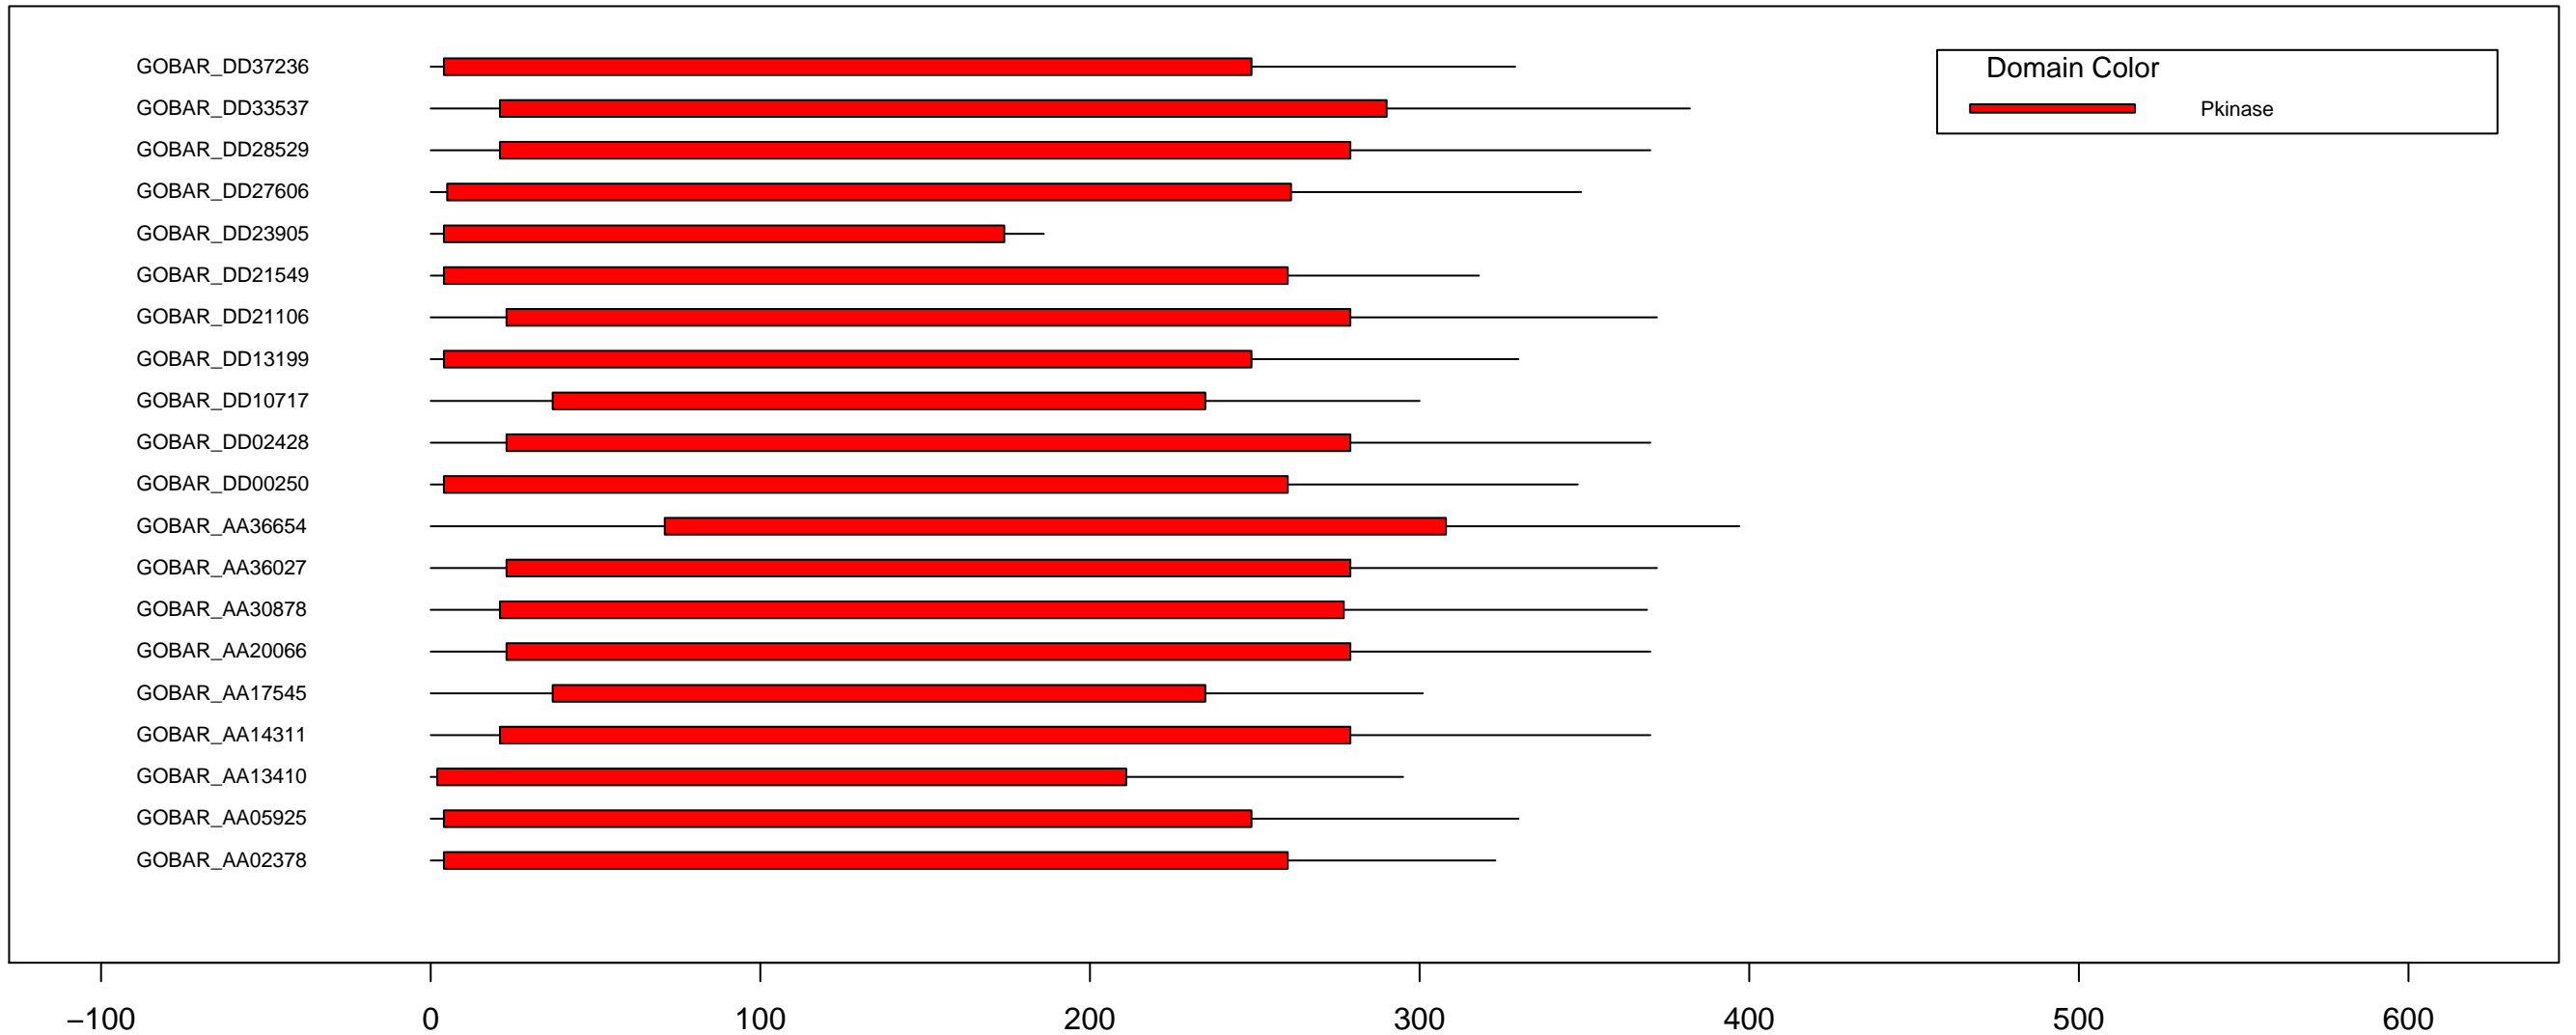

# G.ba CK1\_CK1 domain diagram (part 1)

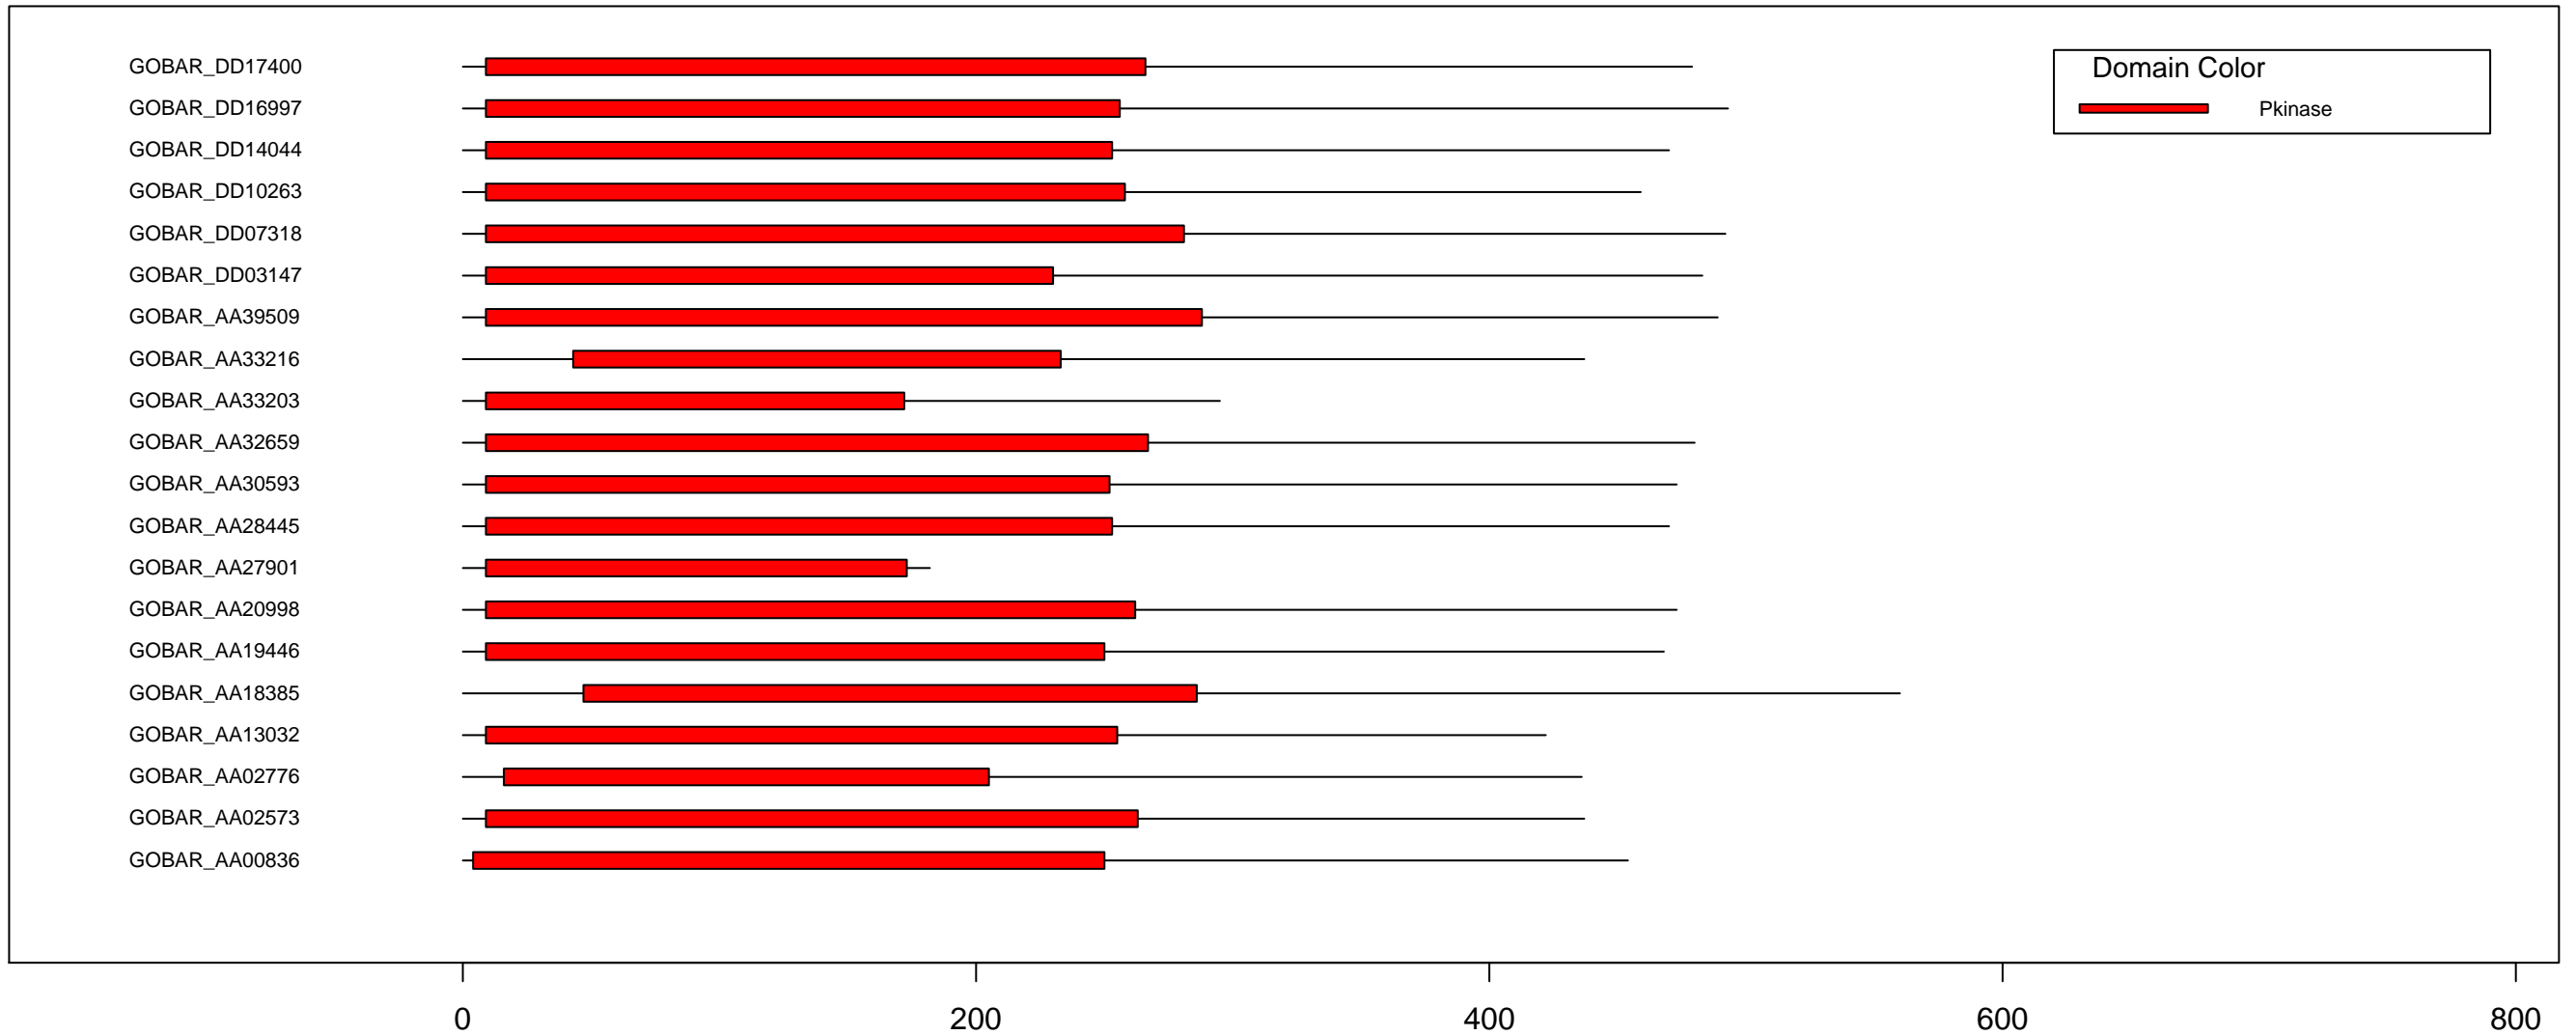



## G.ba CK1\_CK1 domain diagram (part 2)

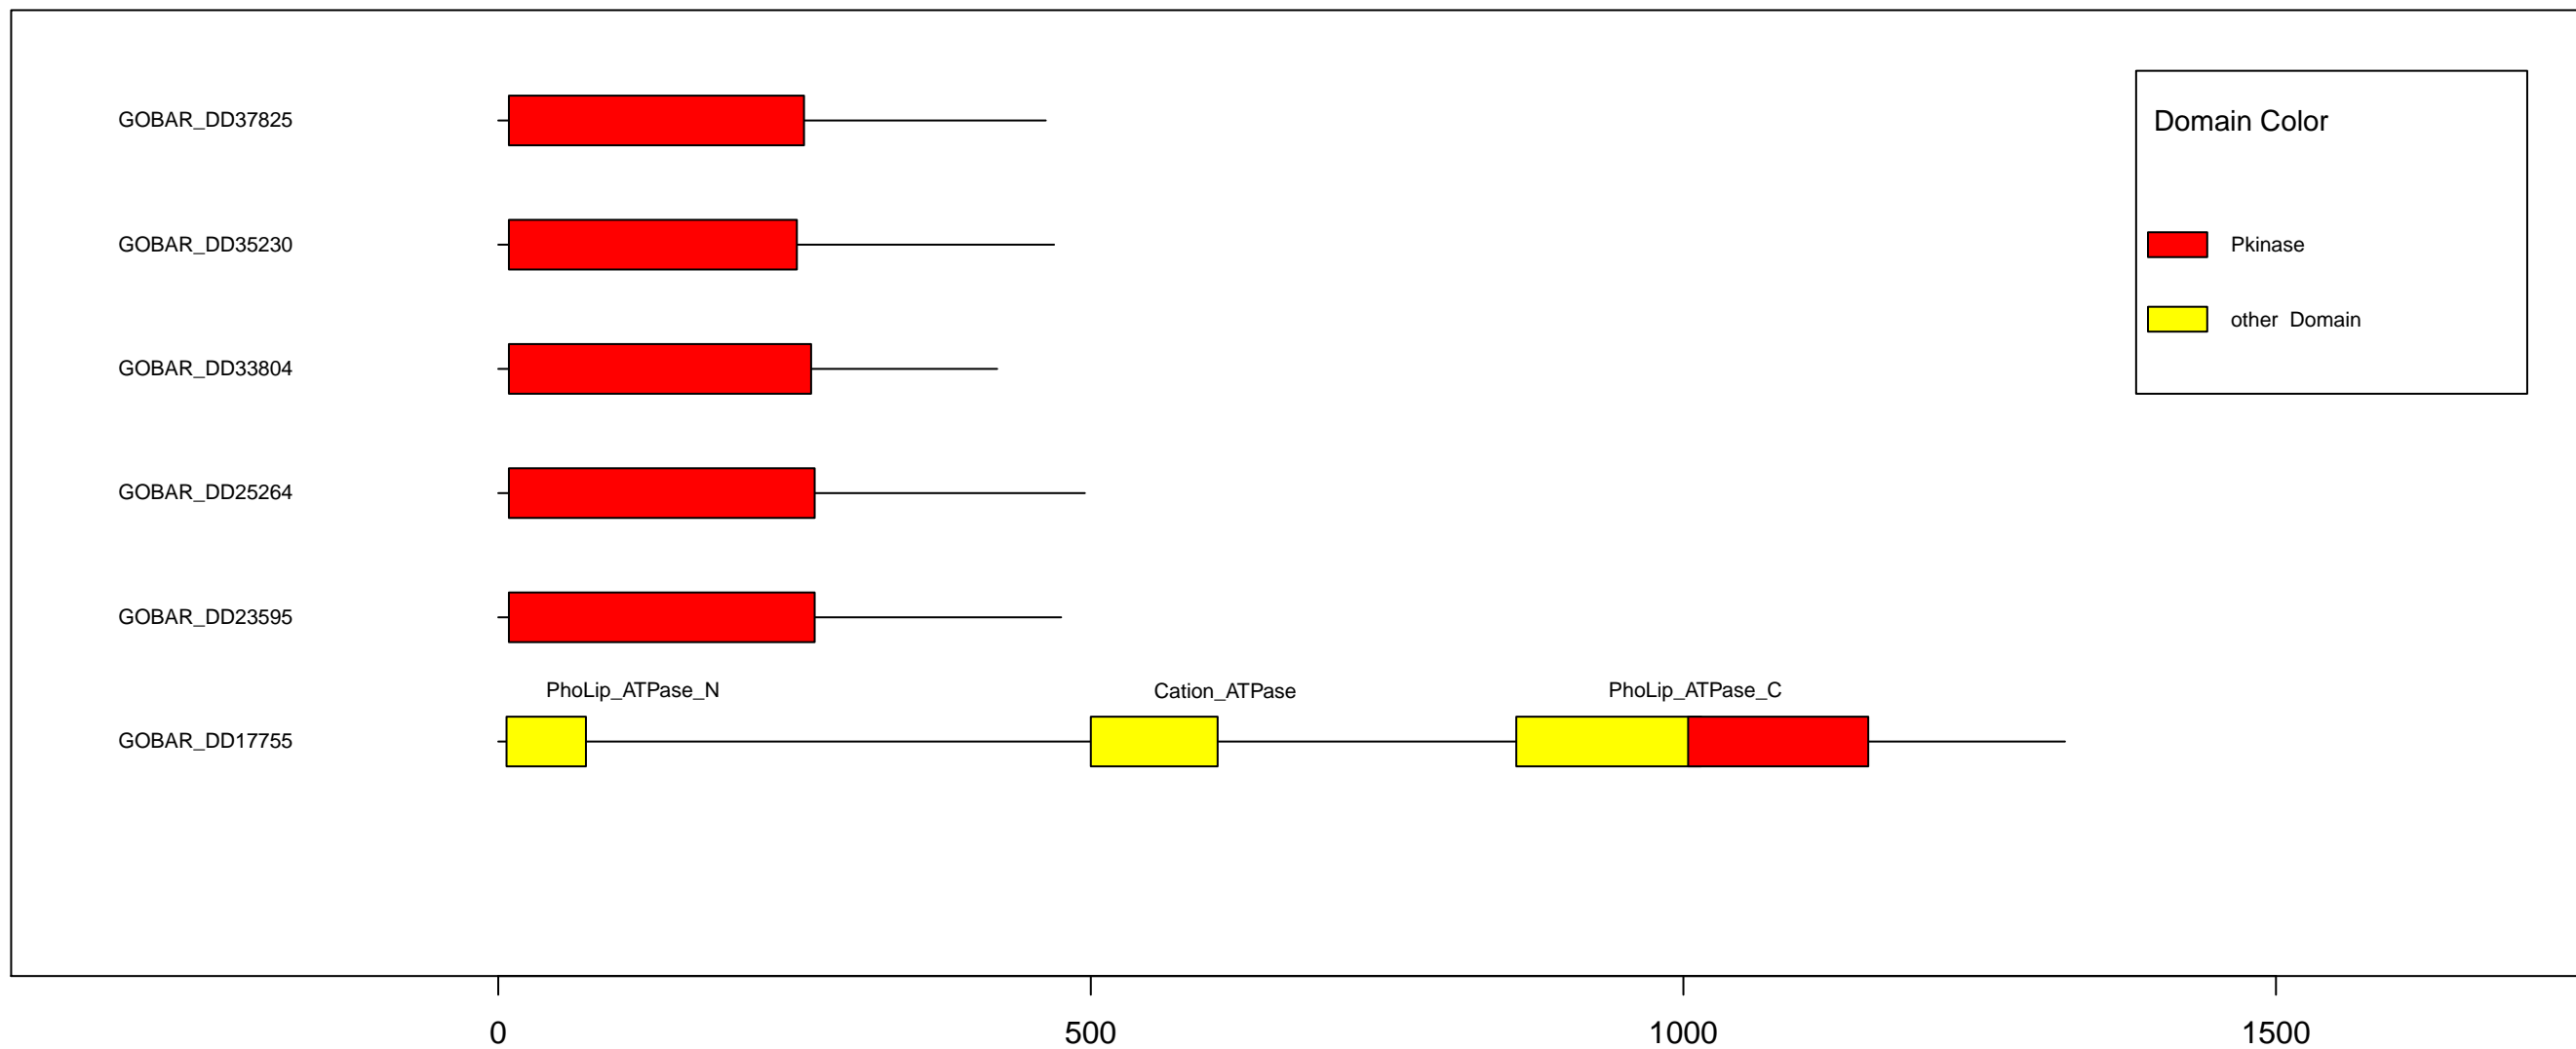

### G.ba CK1\_CK1-PI domain diagram (all)

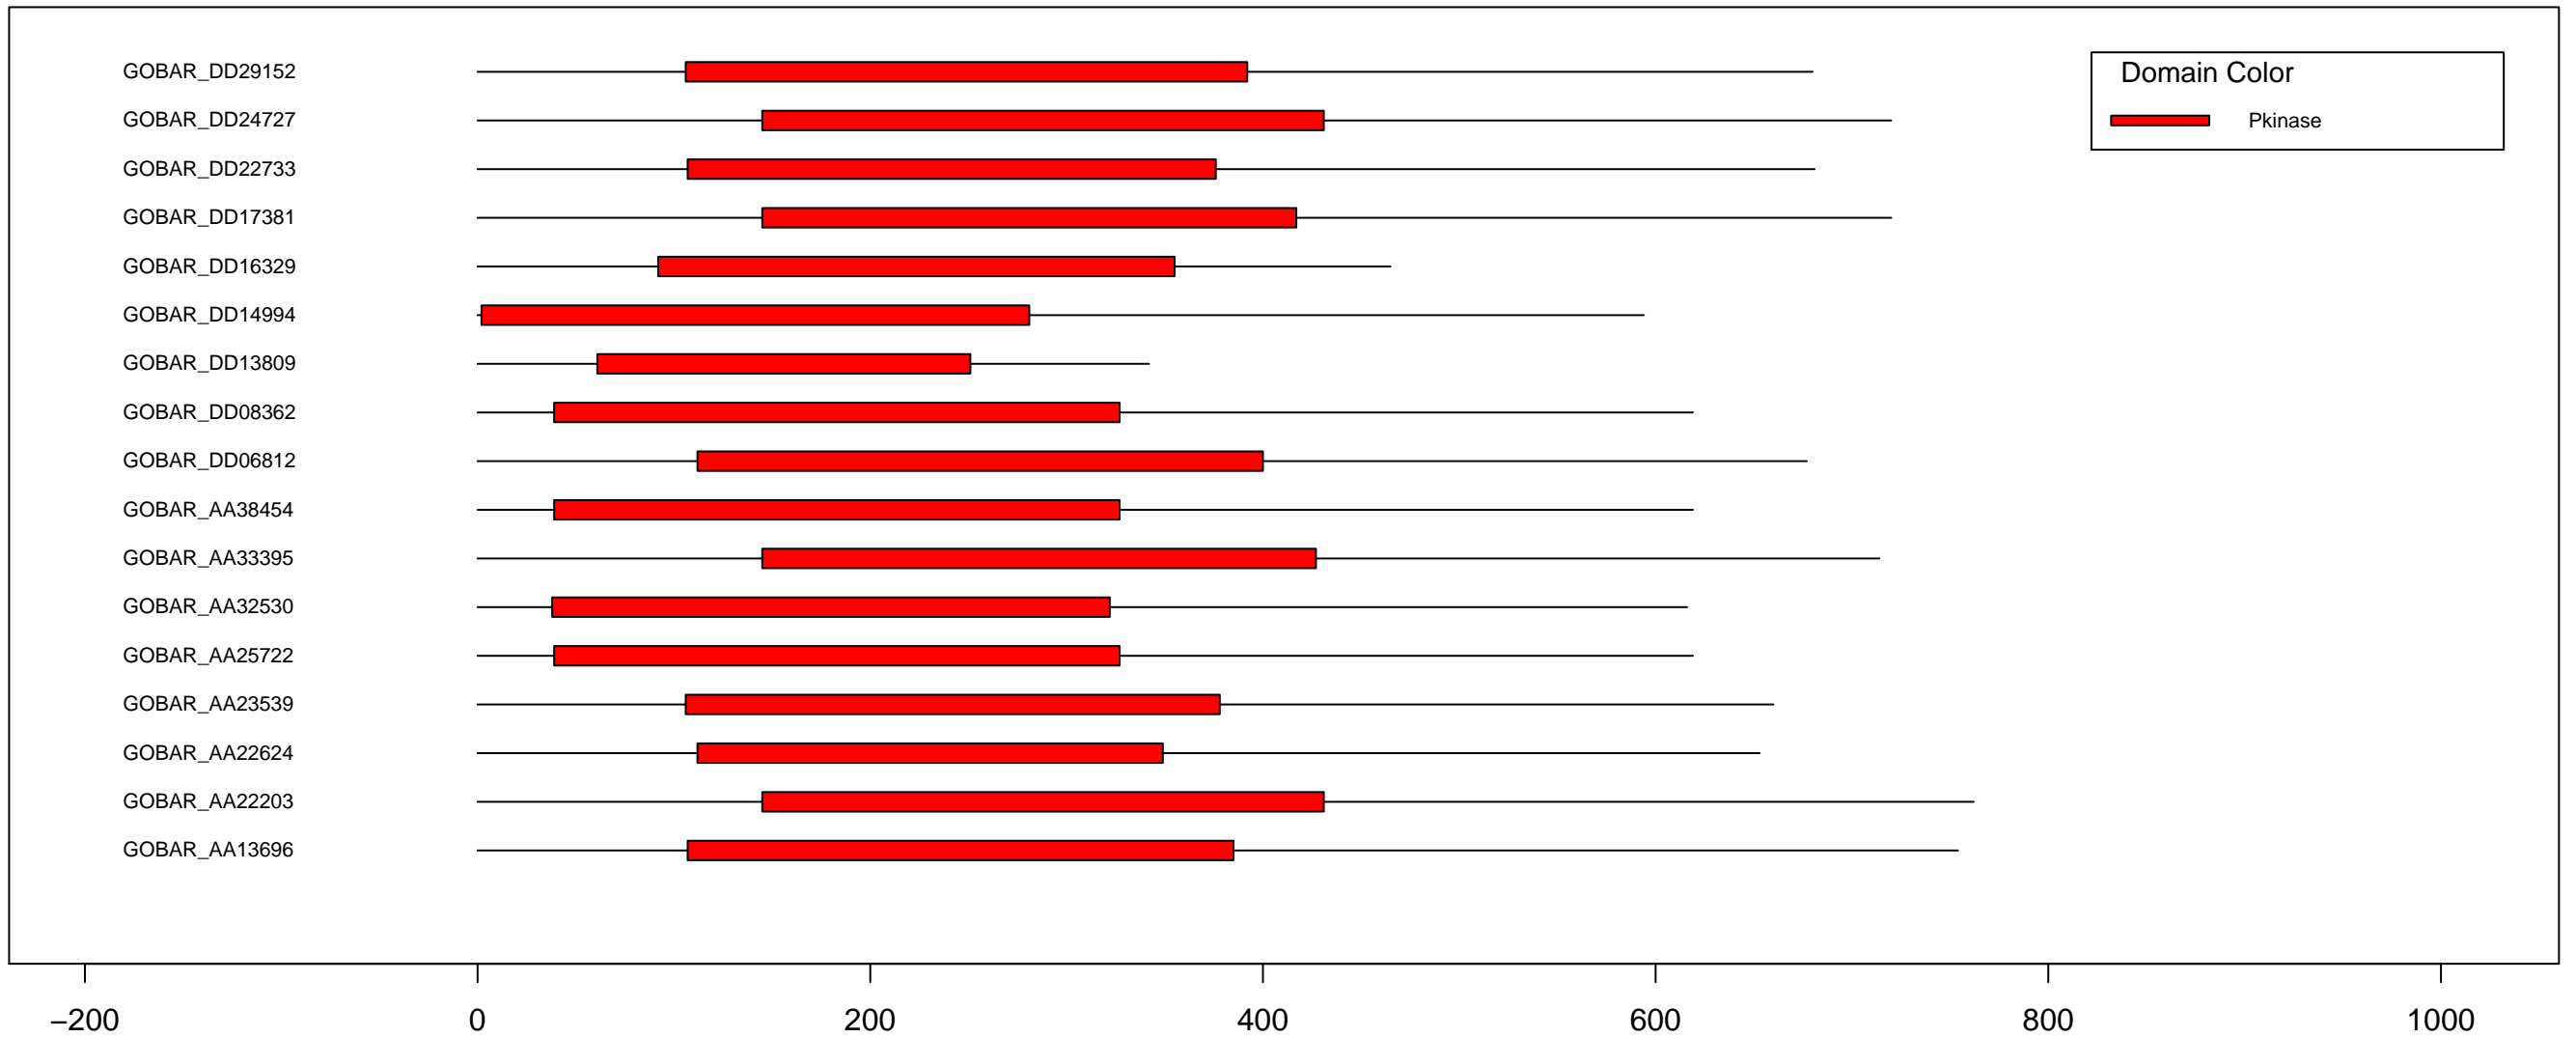

# G.ba CMGC\_CDK-CCRK domain diagram (all)

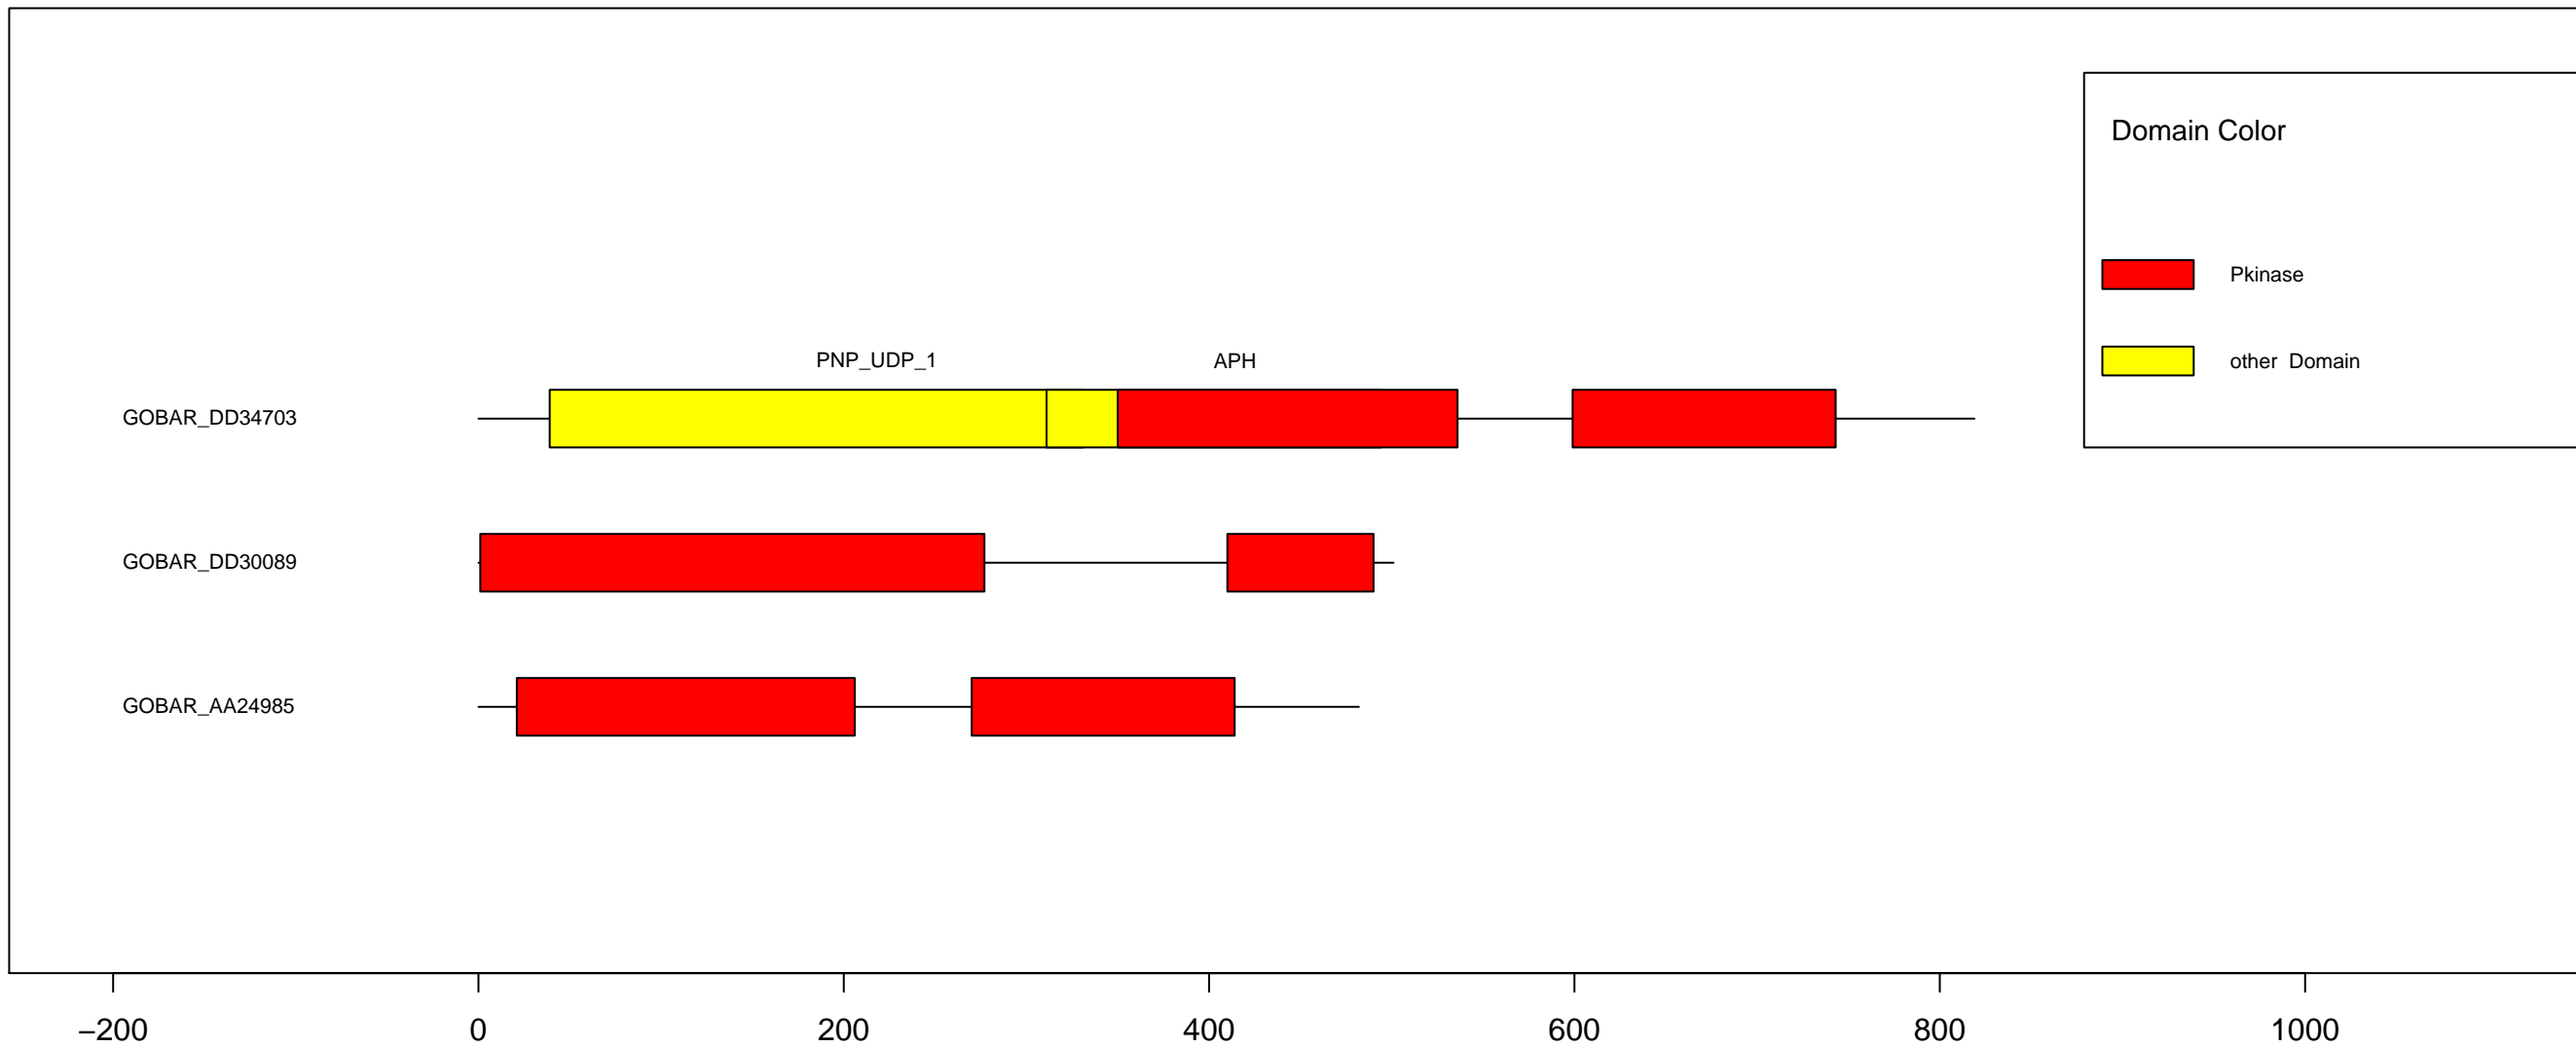

# G.ba CMGC\_CDK-CDK7 domain diagram (all)

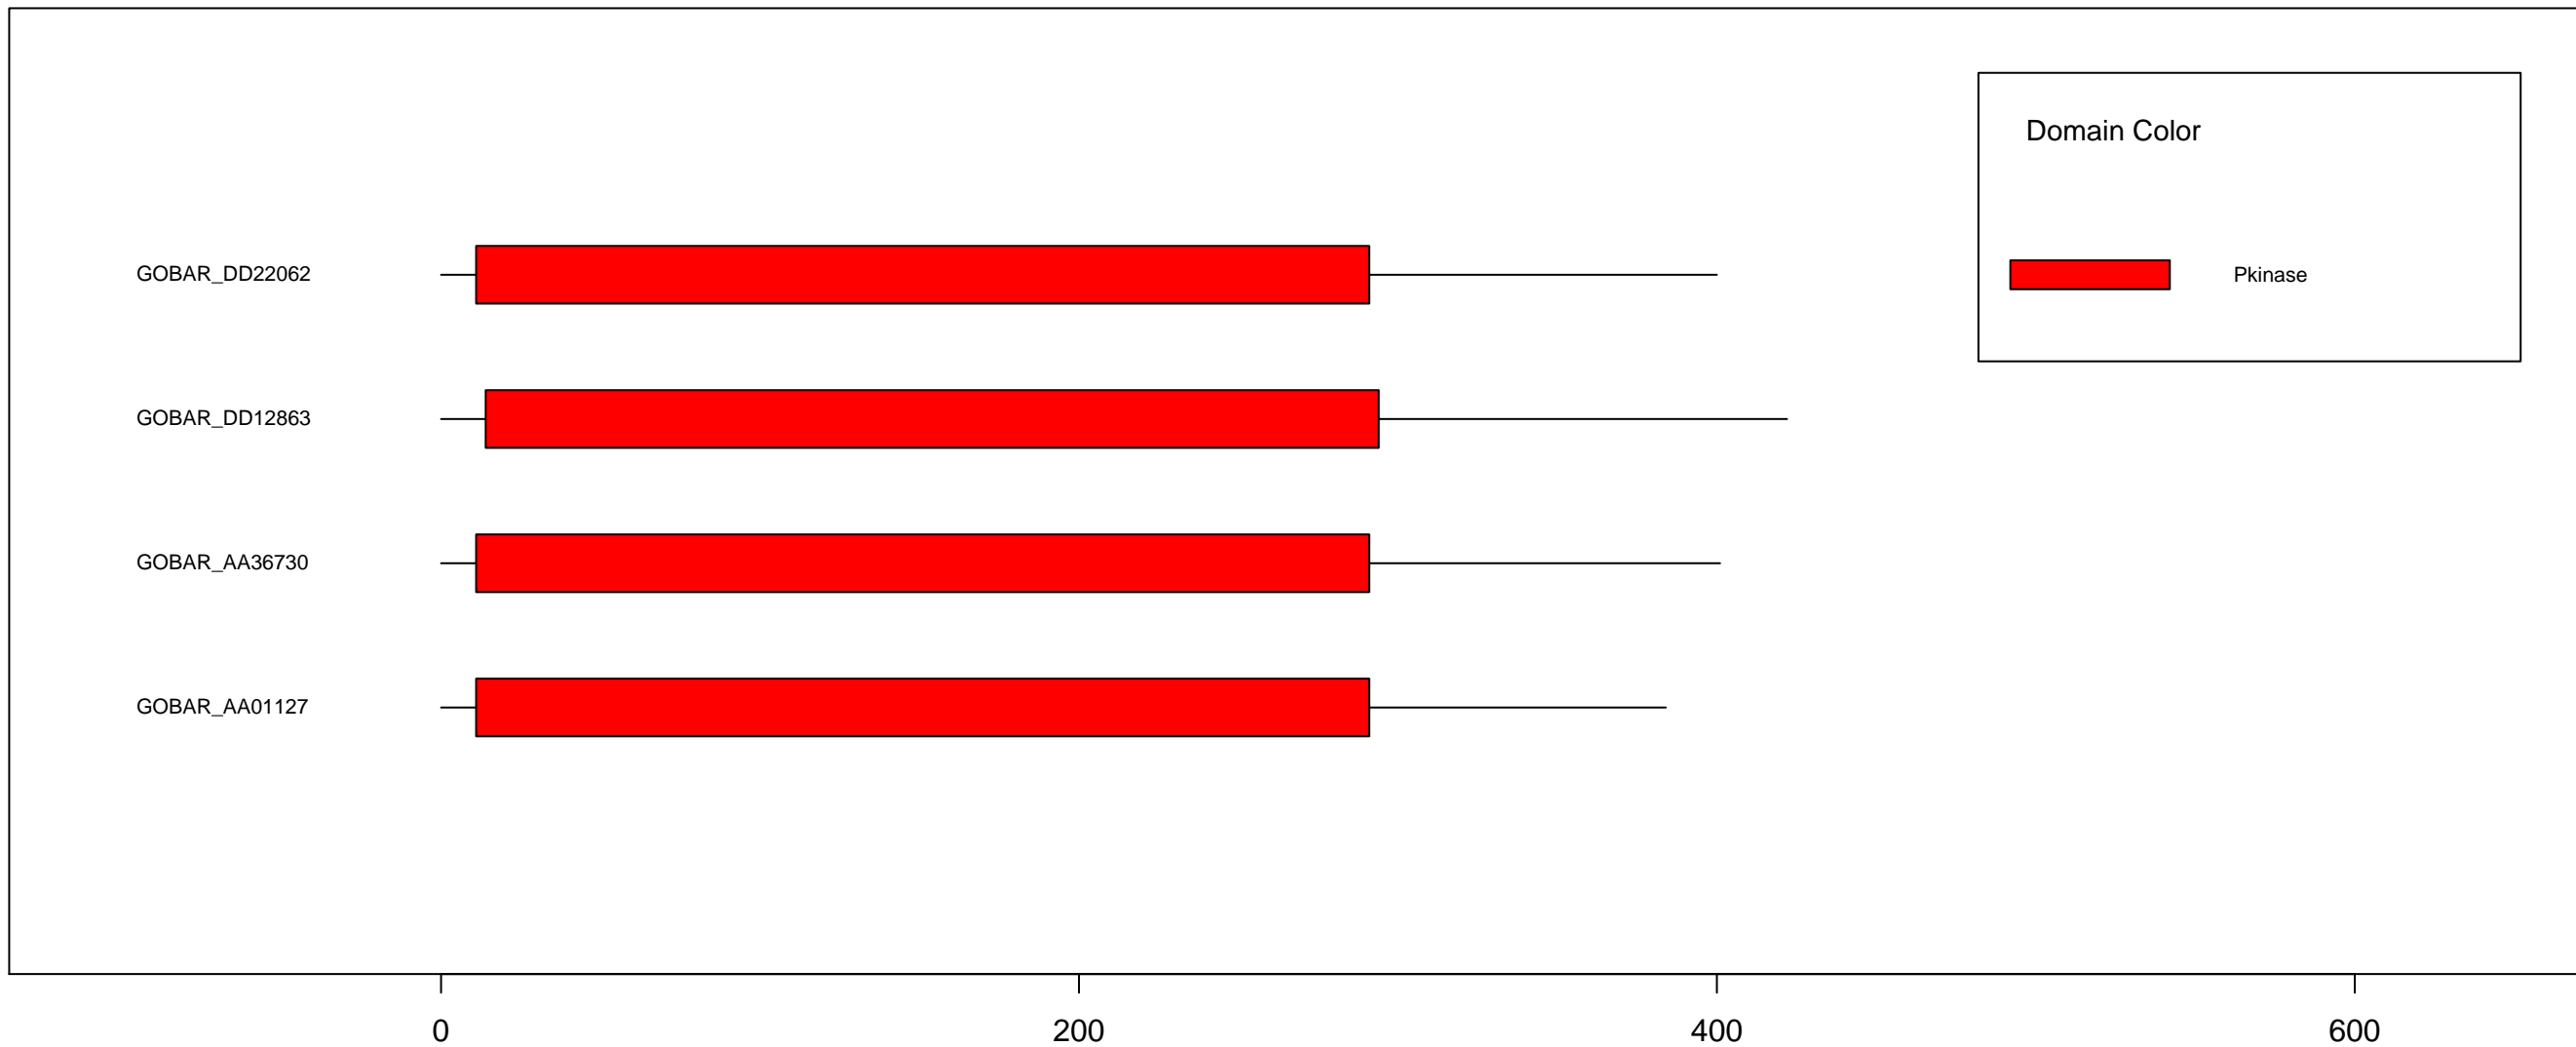

# G.ba CMGC\_CDK-CDK8 domain diagram (all)

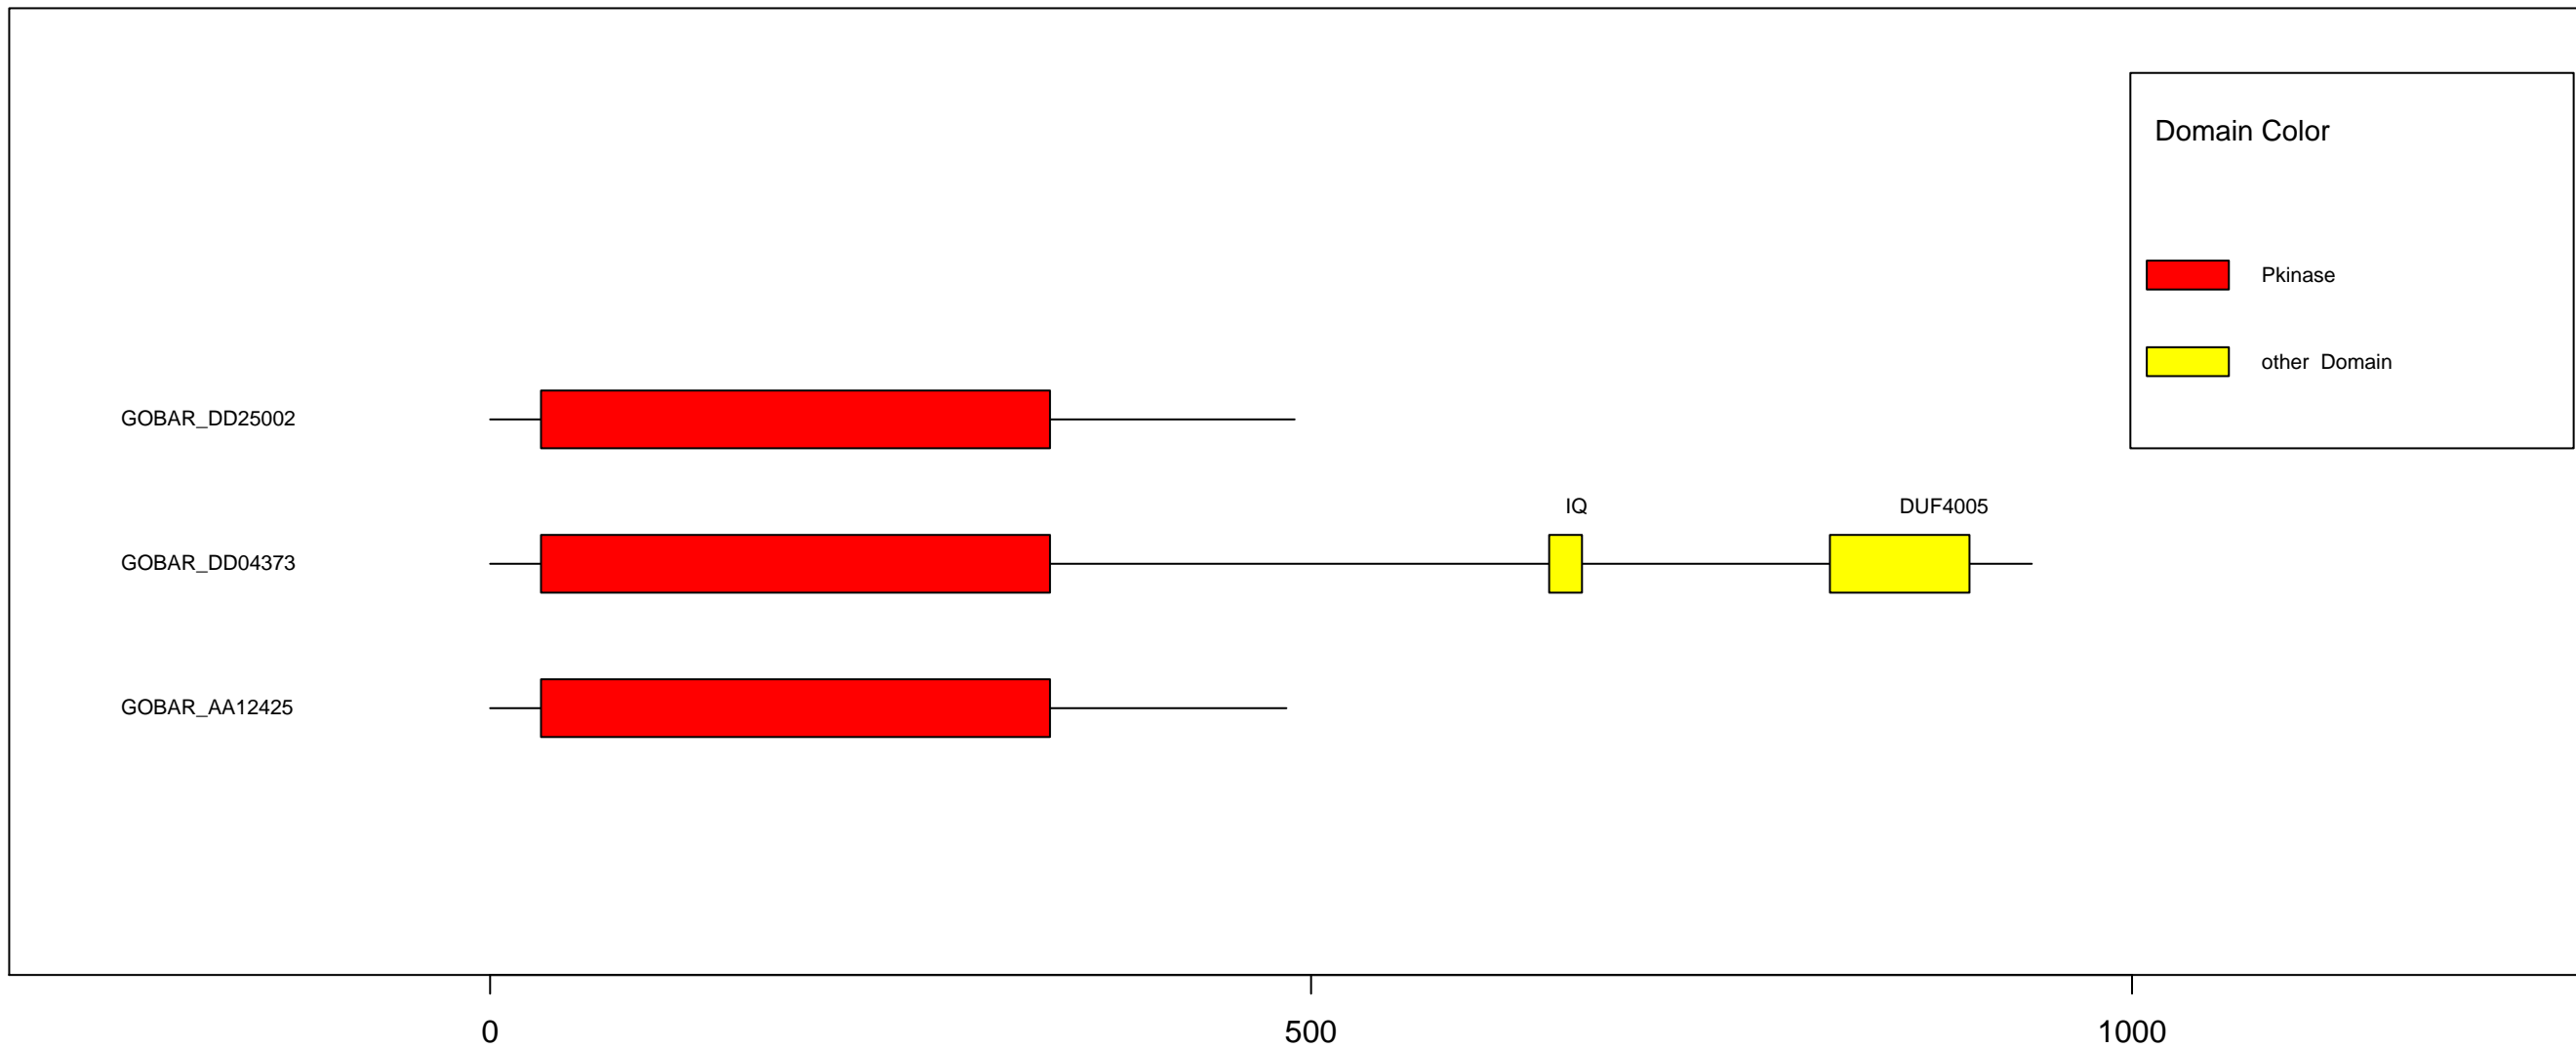

### G.ba CMGC\_CDK-CRK7-CDK9 domain diagram (part 1)

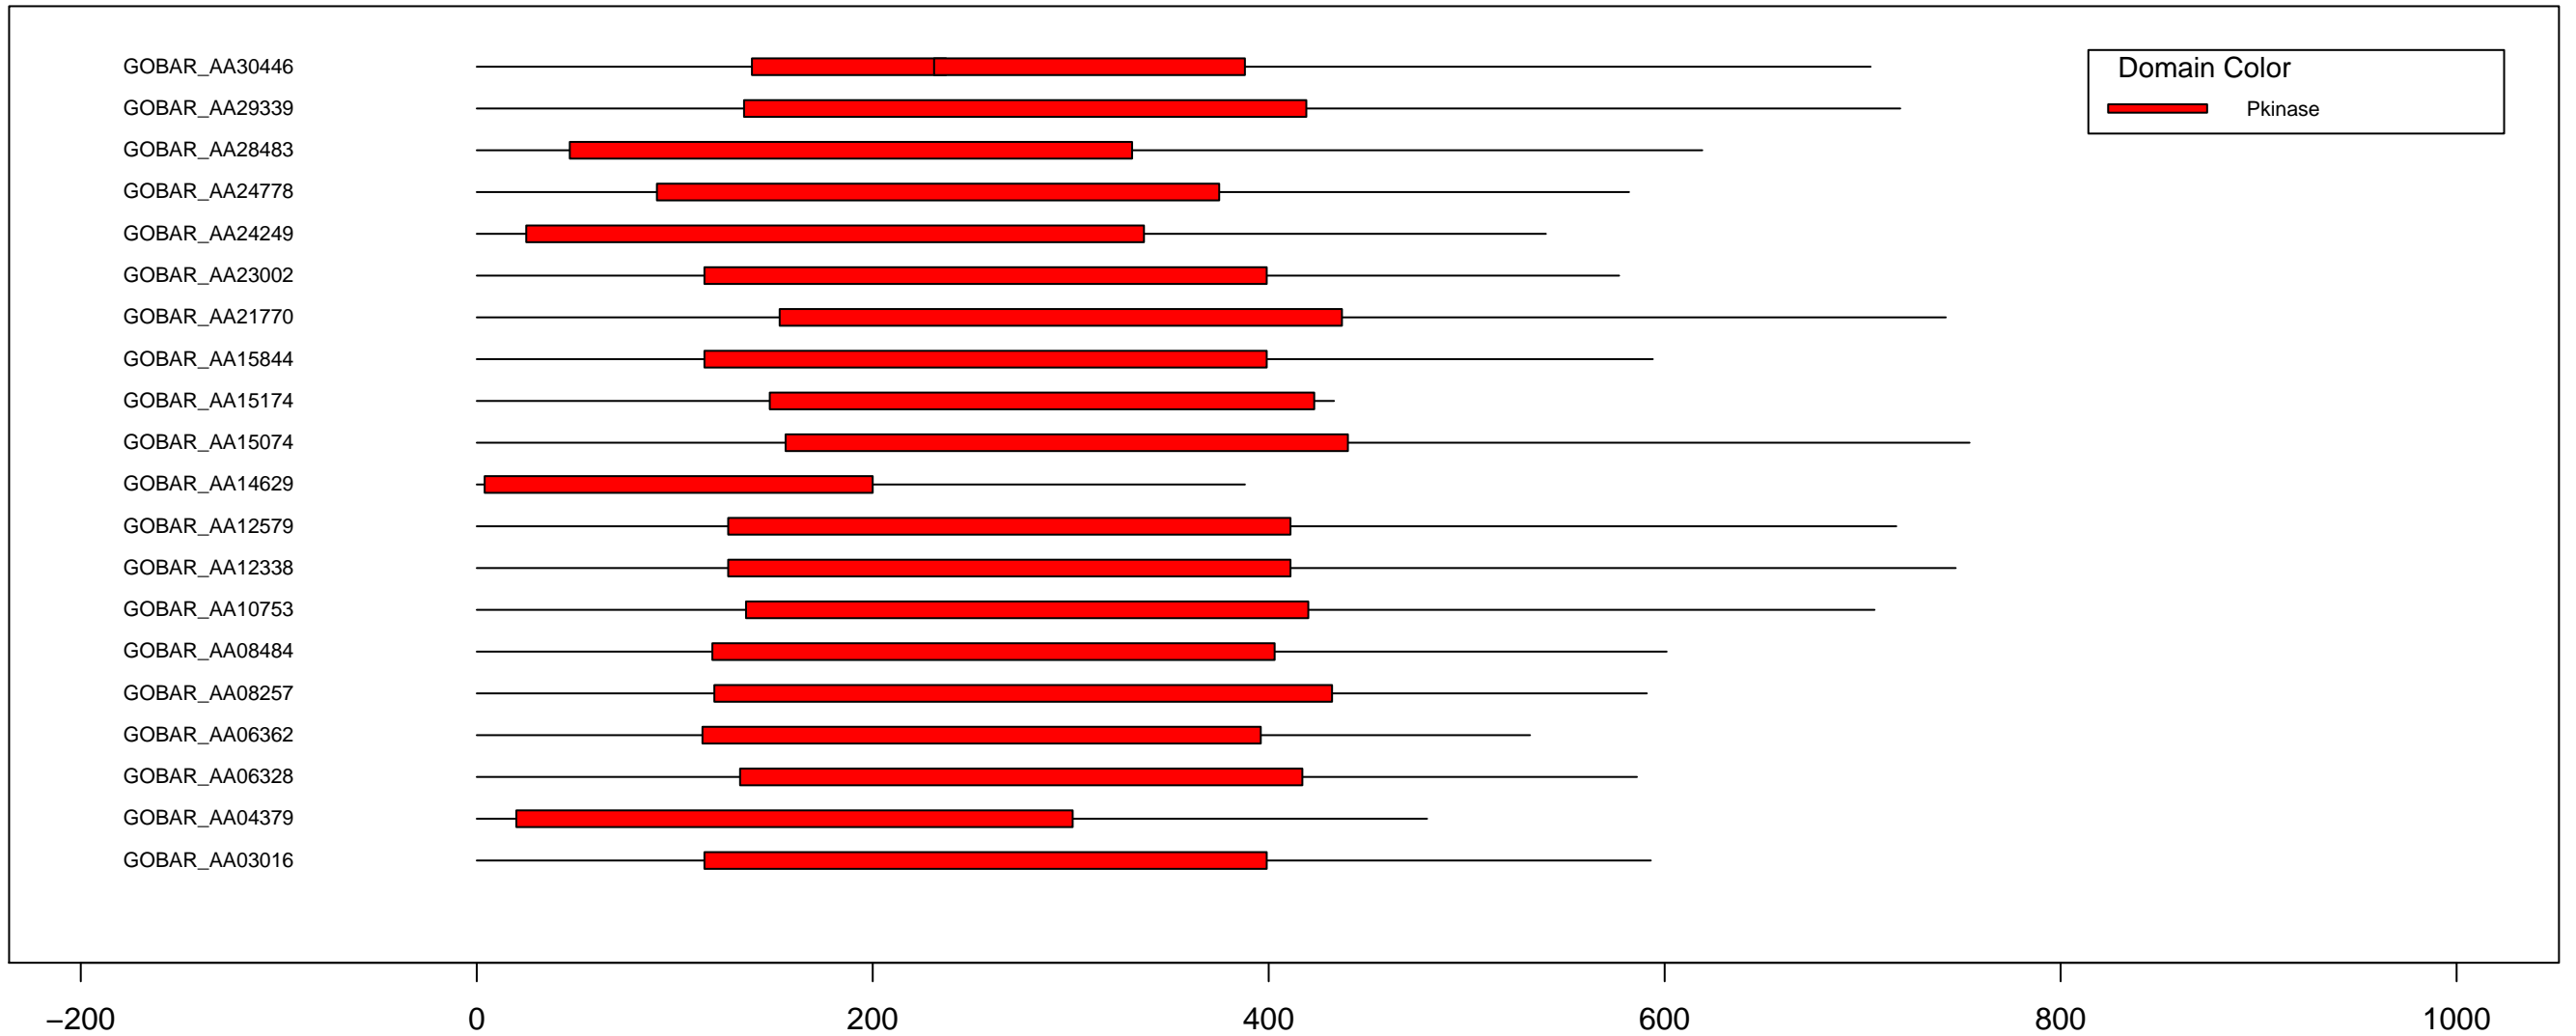

### G.ba CMGC\_CDK-CRK7-CDK9 domain diagram (part 2)

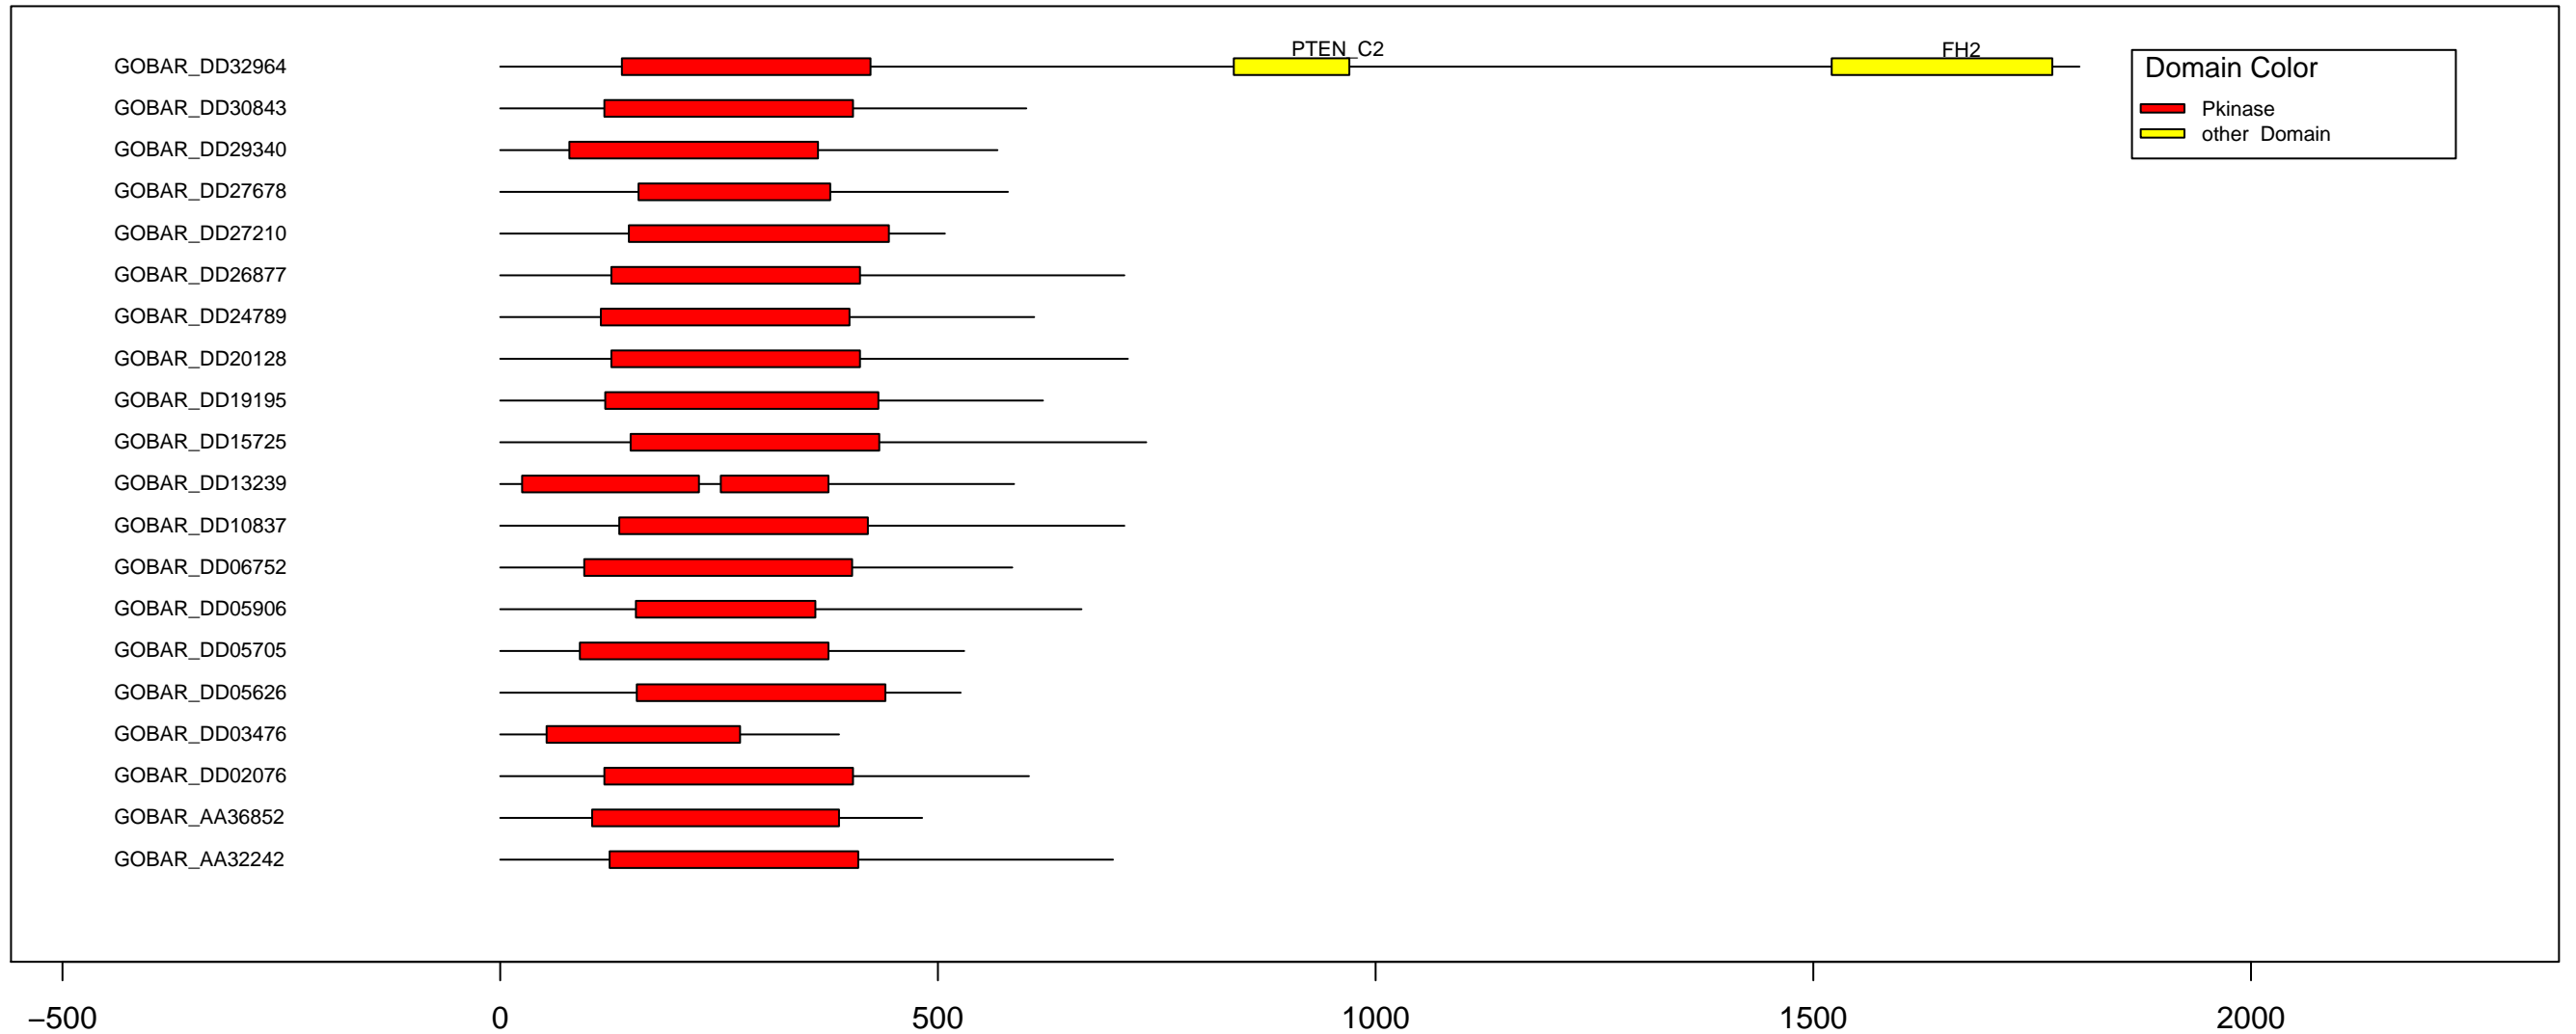

### G.ba CMGC\_CDK-CRK7-CDK9 domain diagram (part 3)

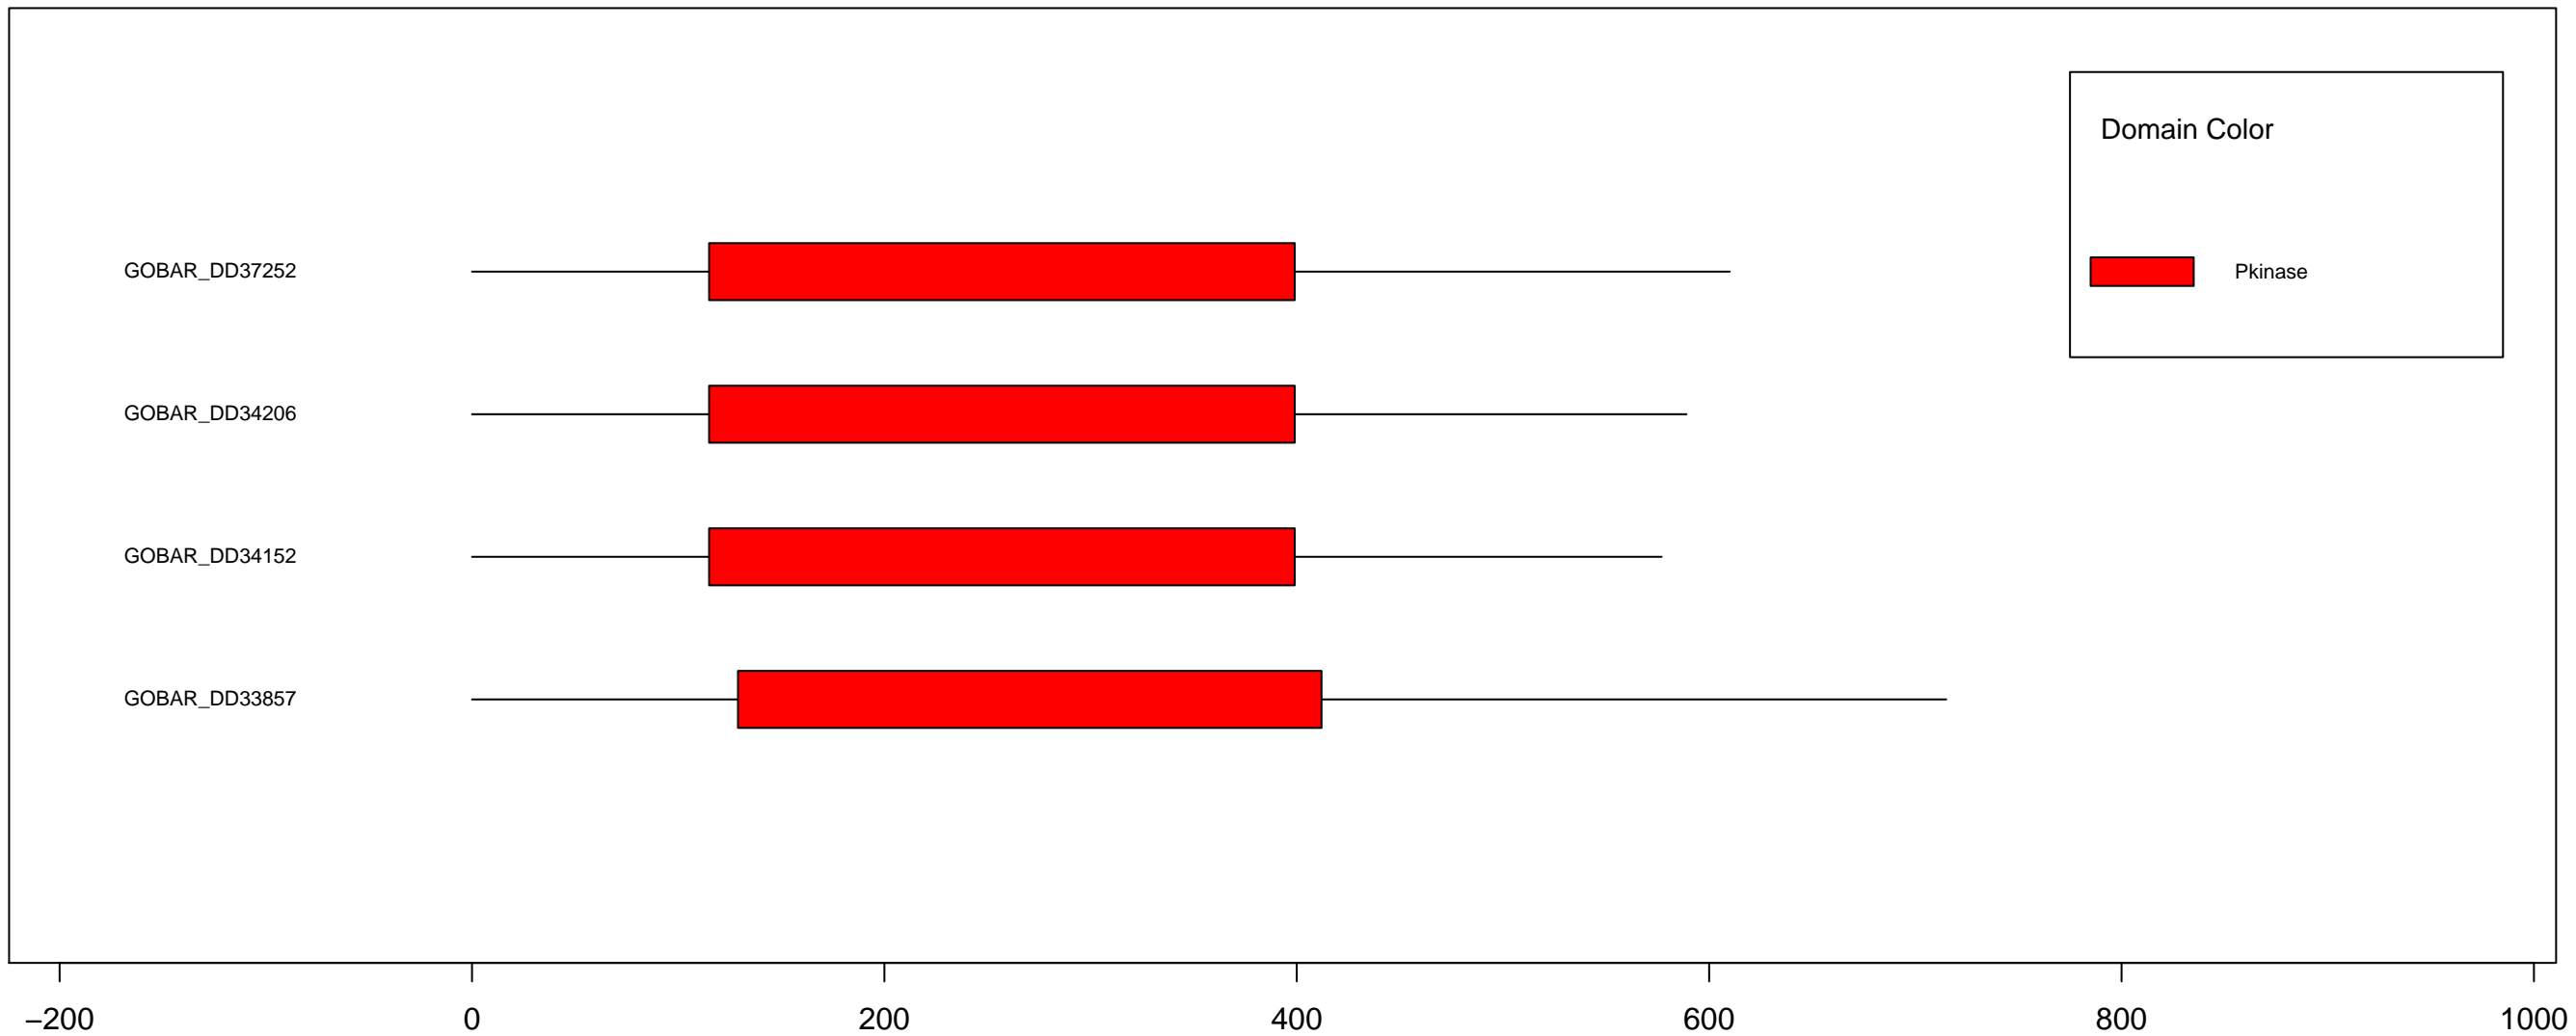



### G.ba CMGC\_CDK-PITSLRE domain diagram (all)

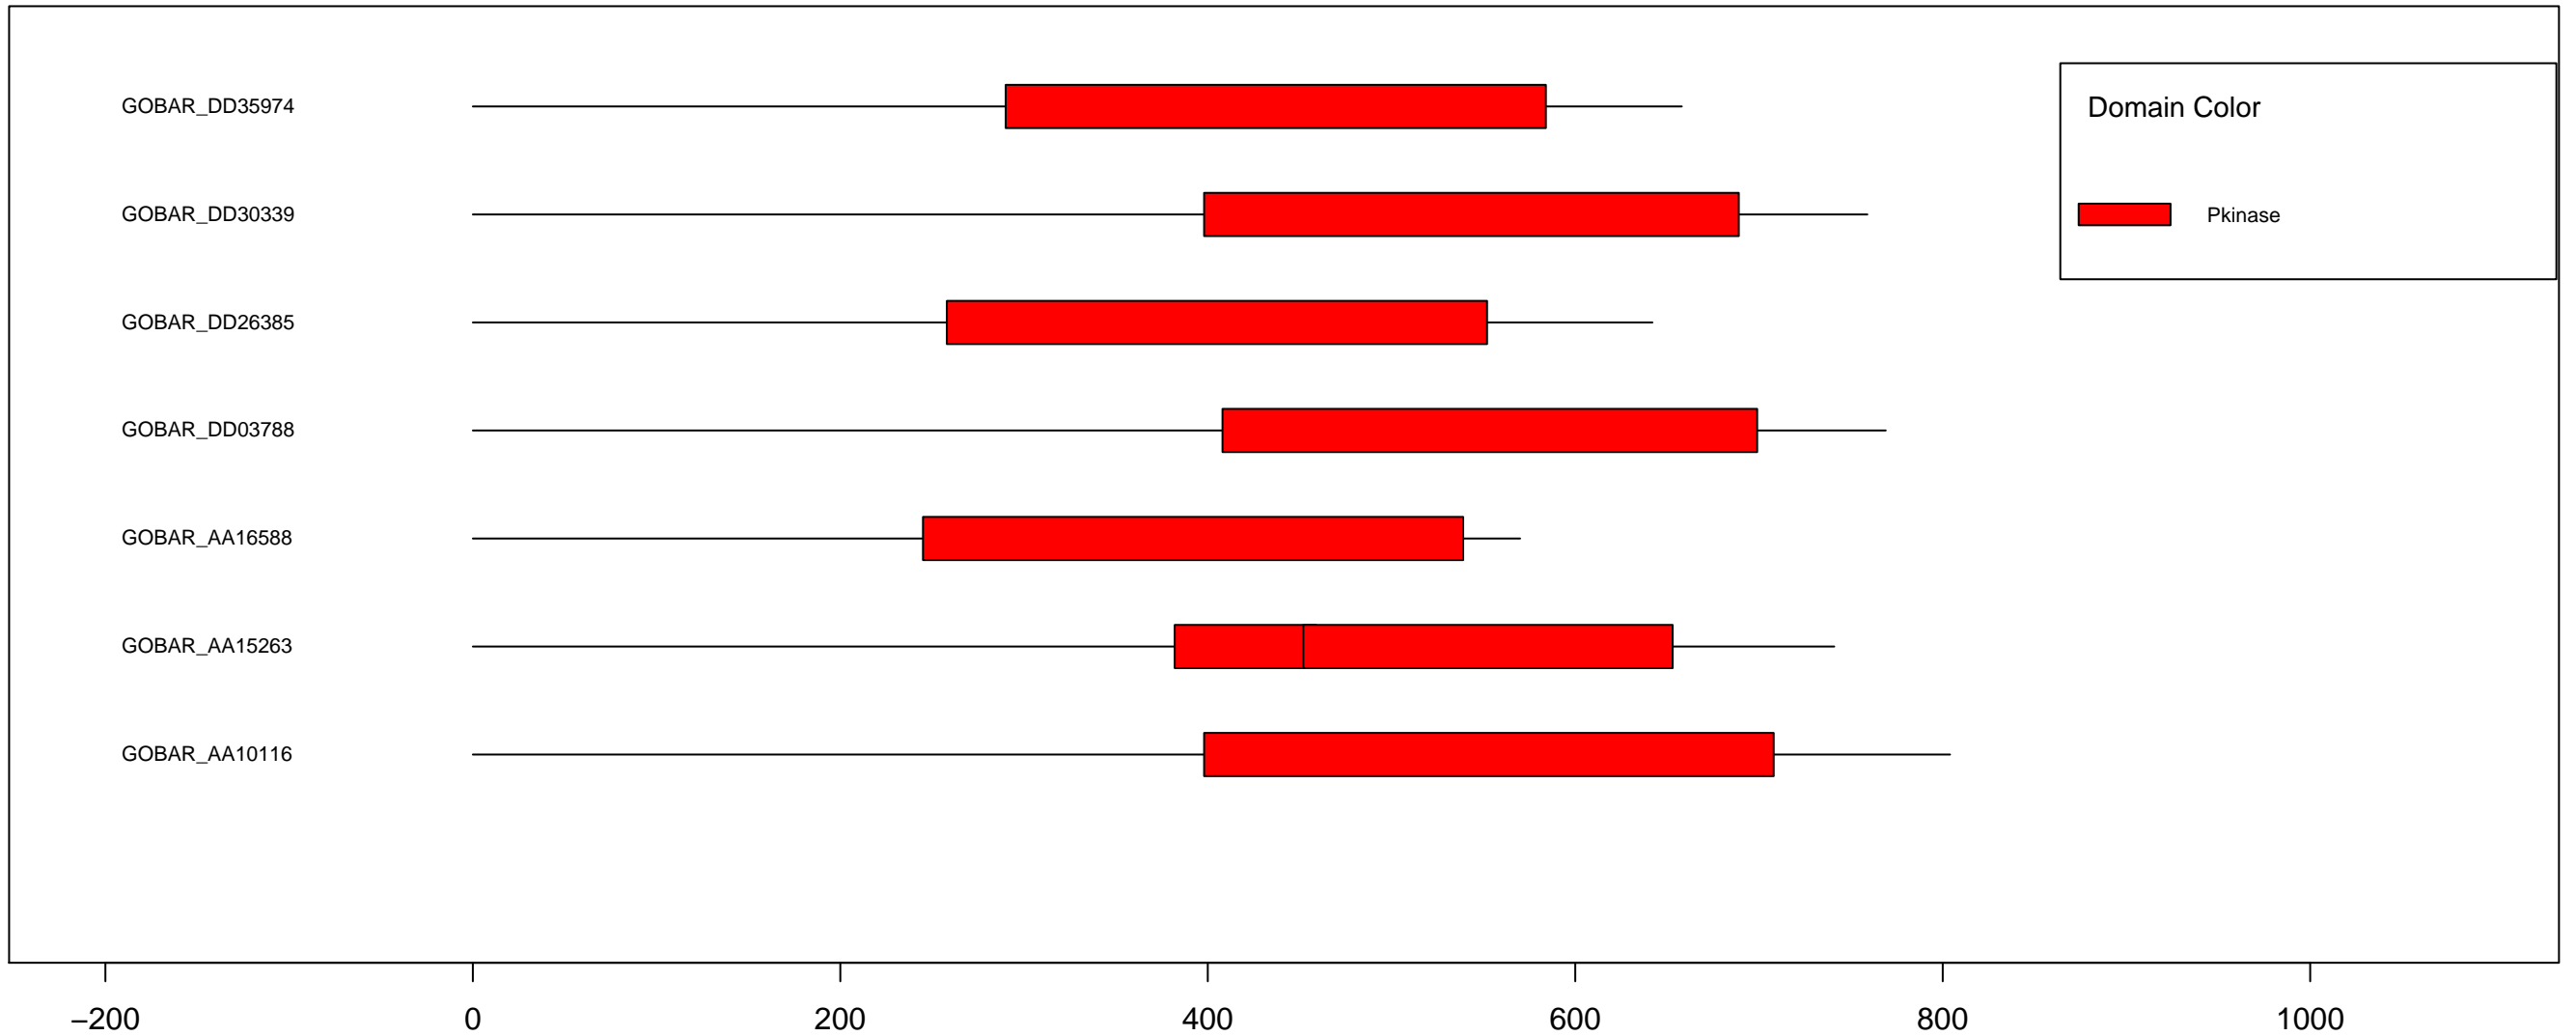

### G.ba CMGC\_CDK-PI domain diagram (all)

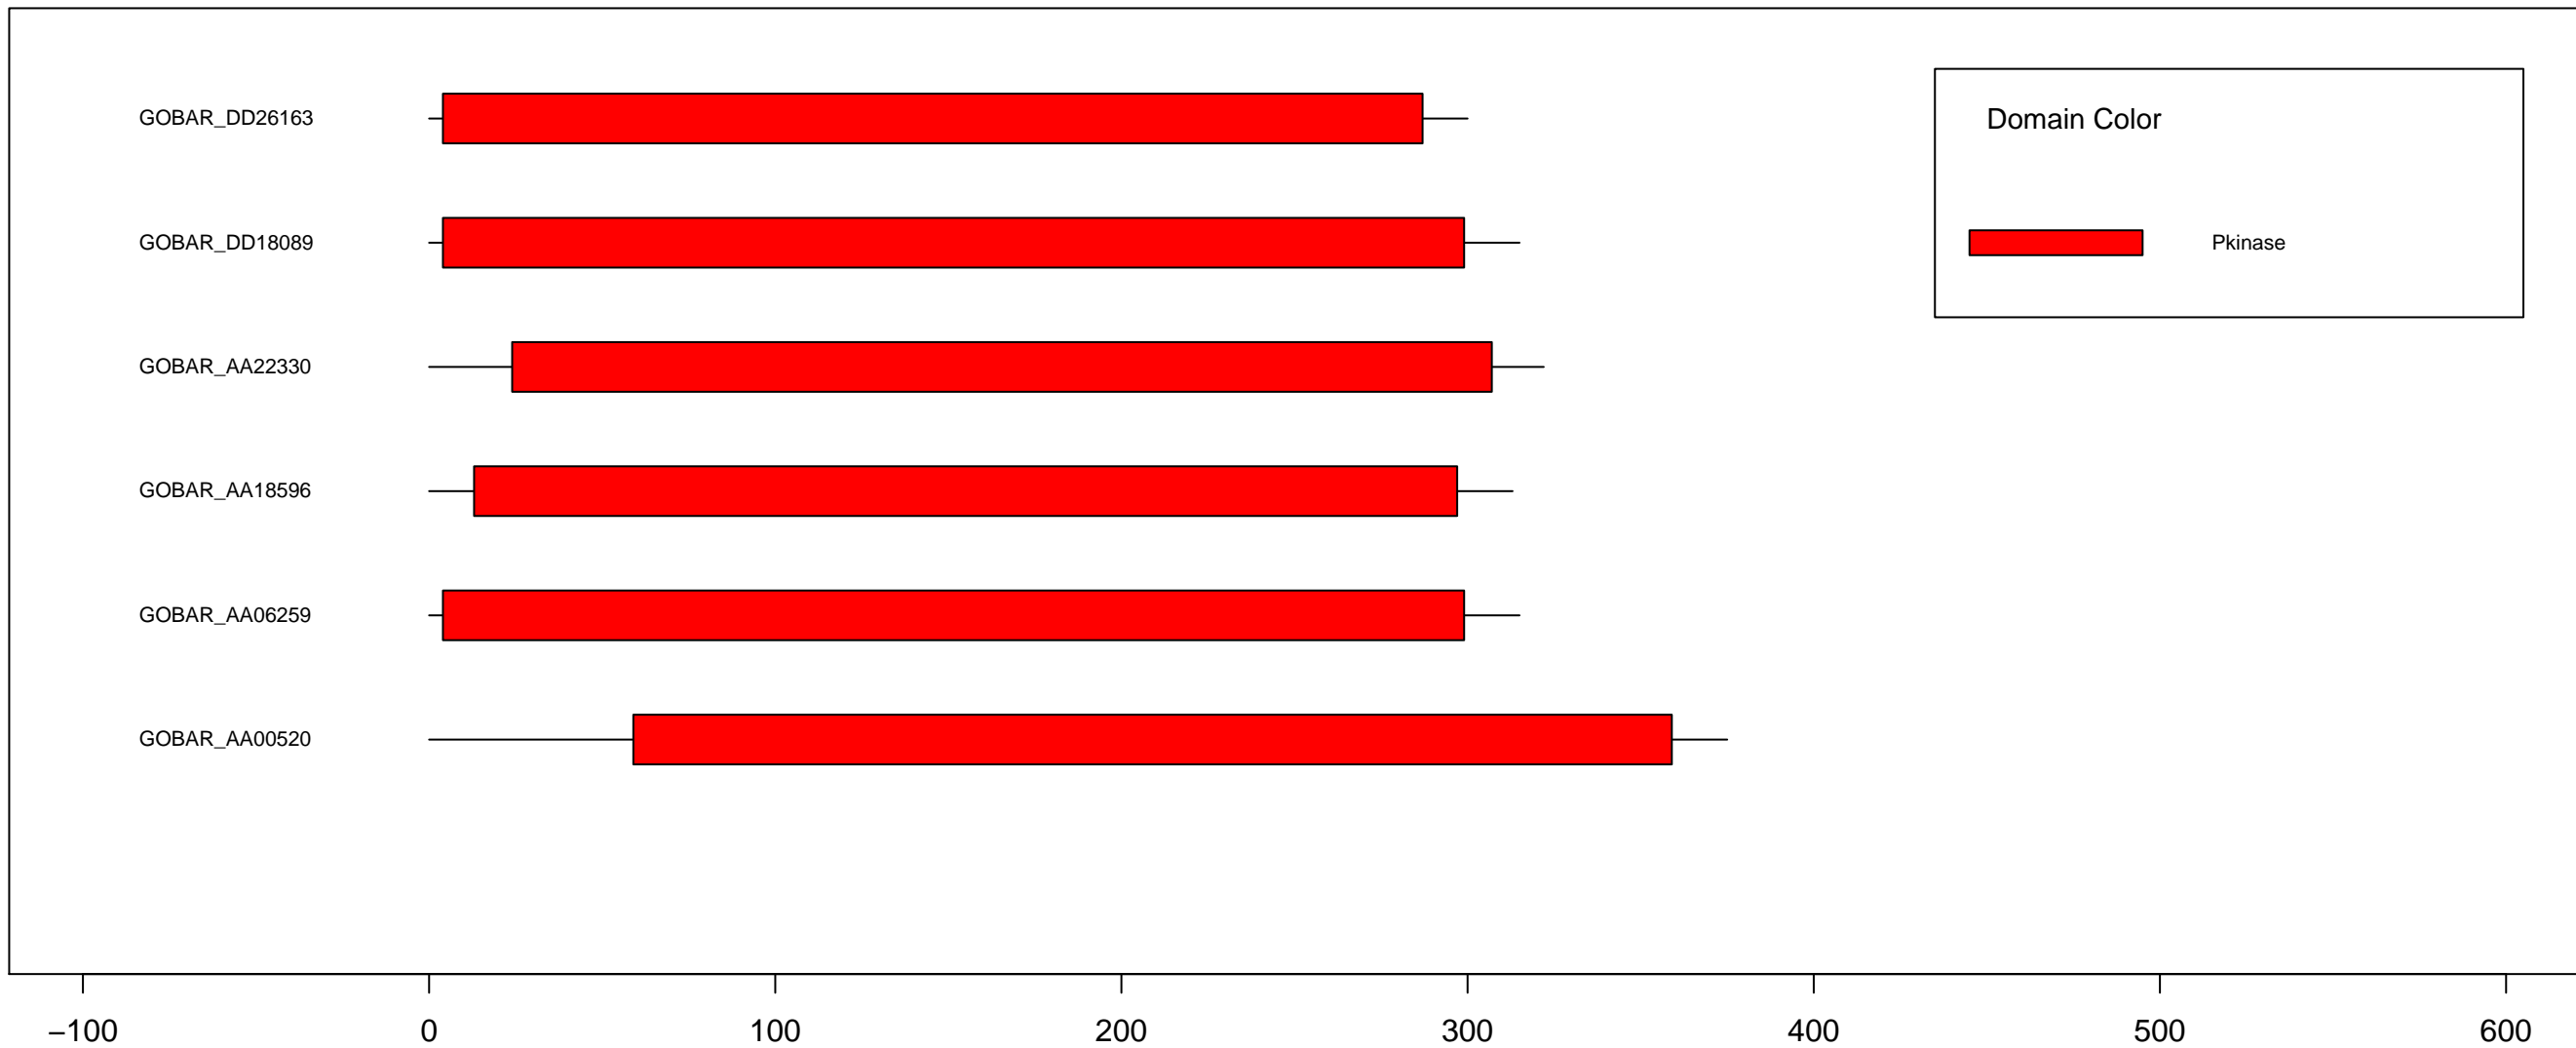

# G.ba CMGC\_CK2 domain diagram (all)

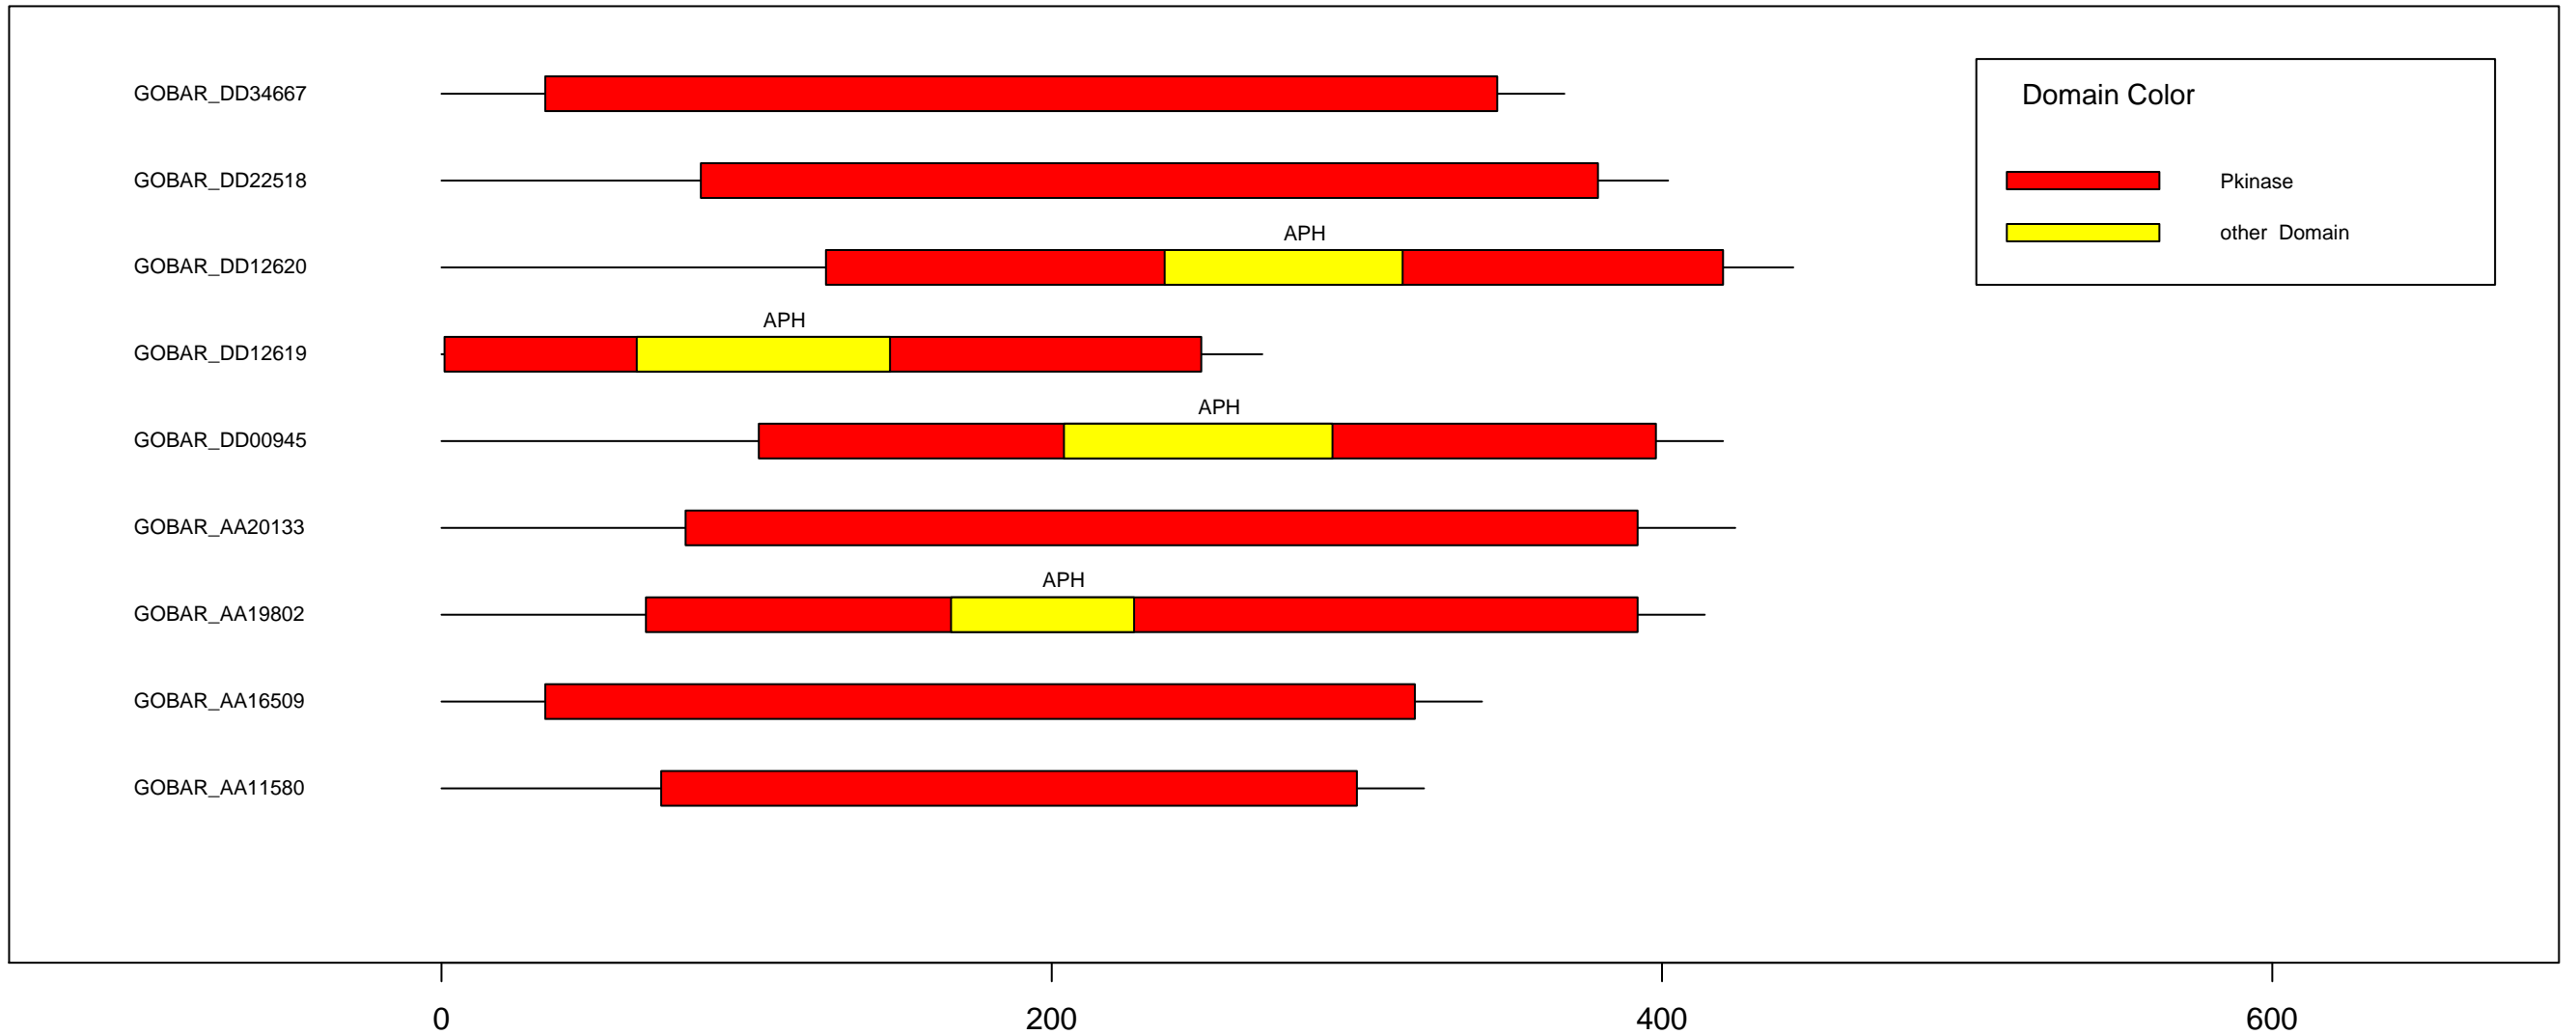

# G.ba CMGC\_CLK domain diagram (all)

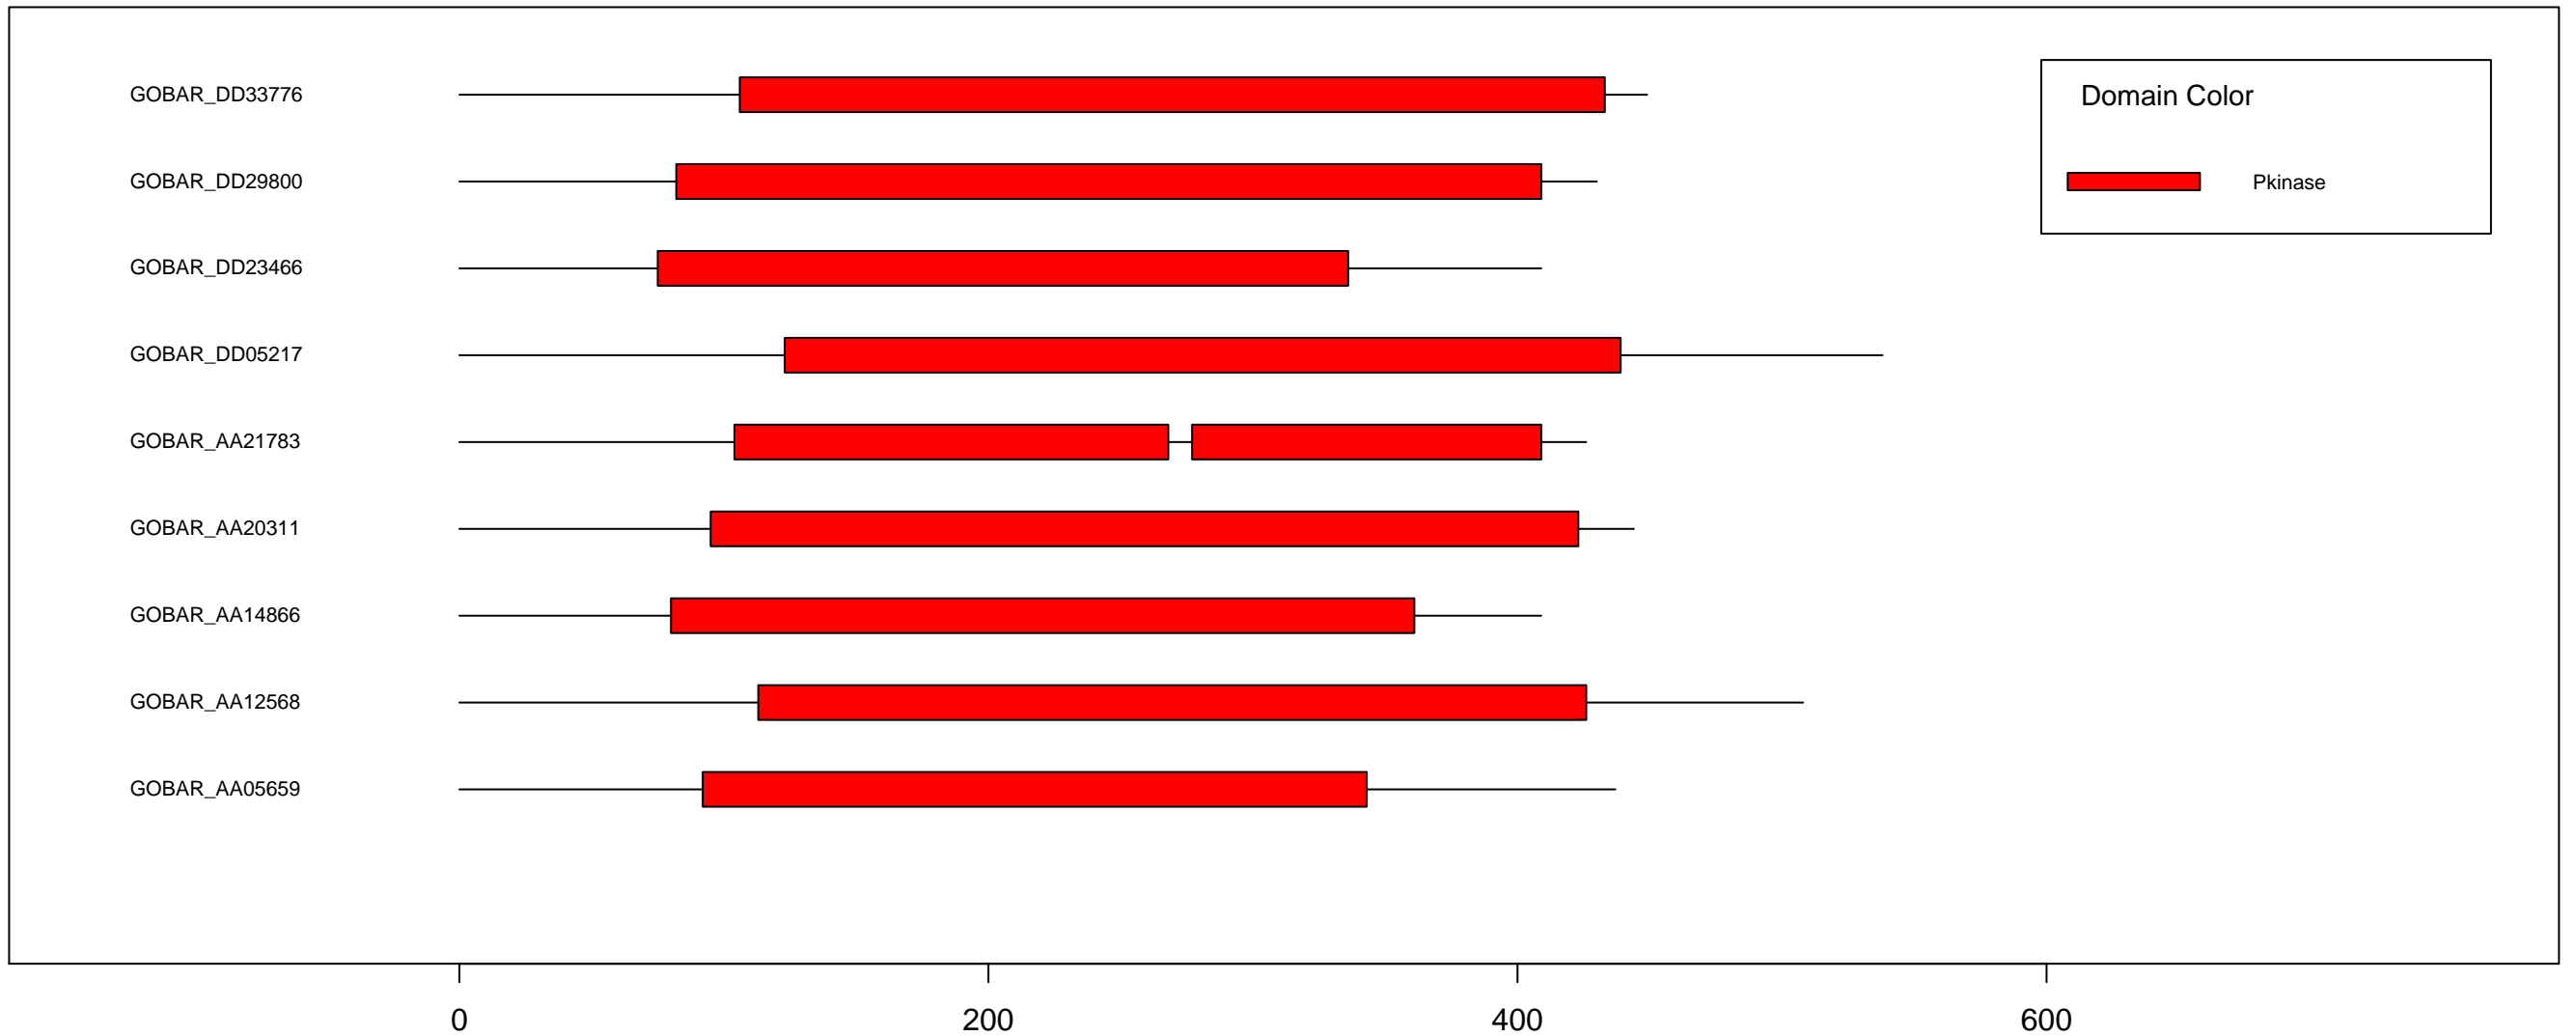

# G.ba CMGC\_DYRK-PRP4 domain diagram (all)

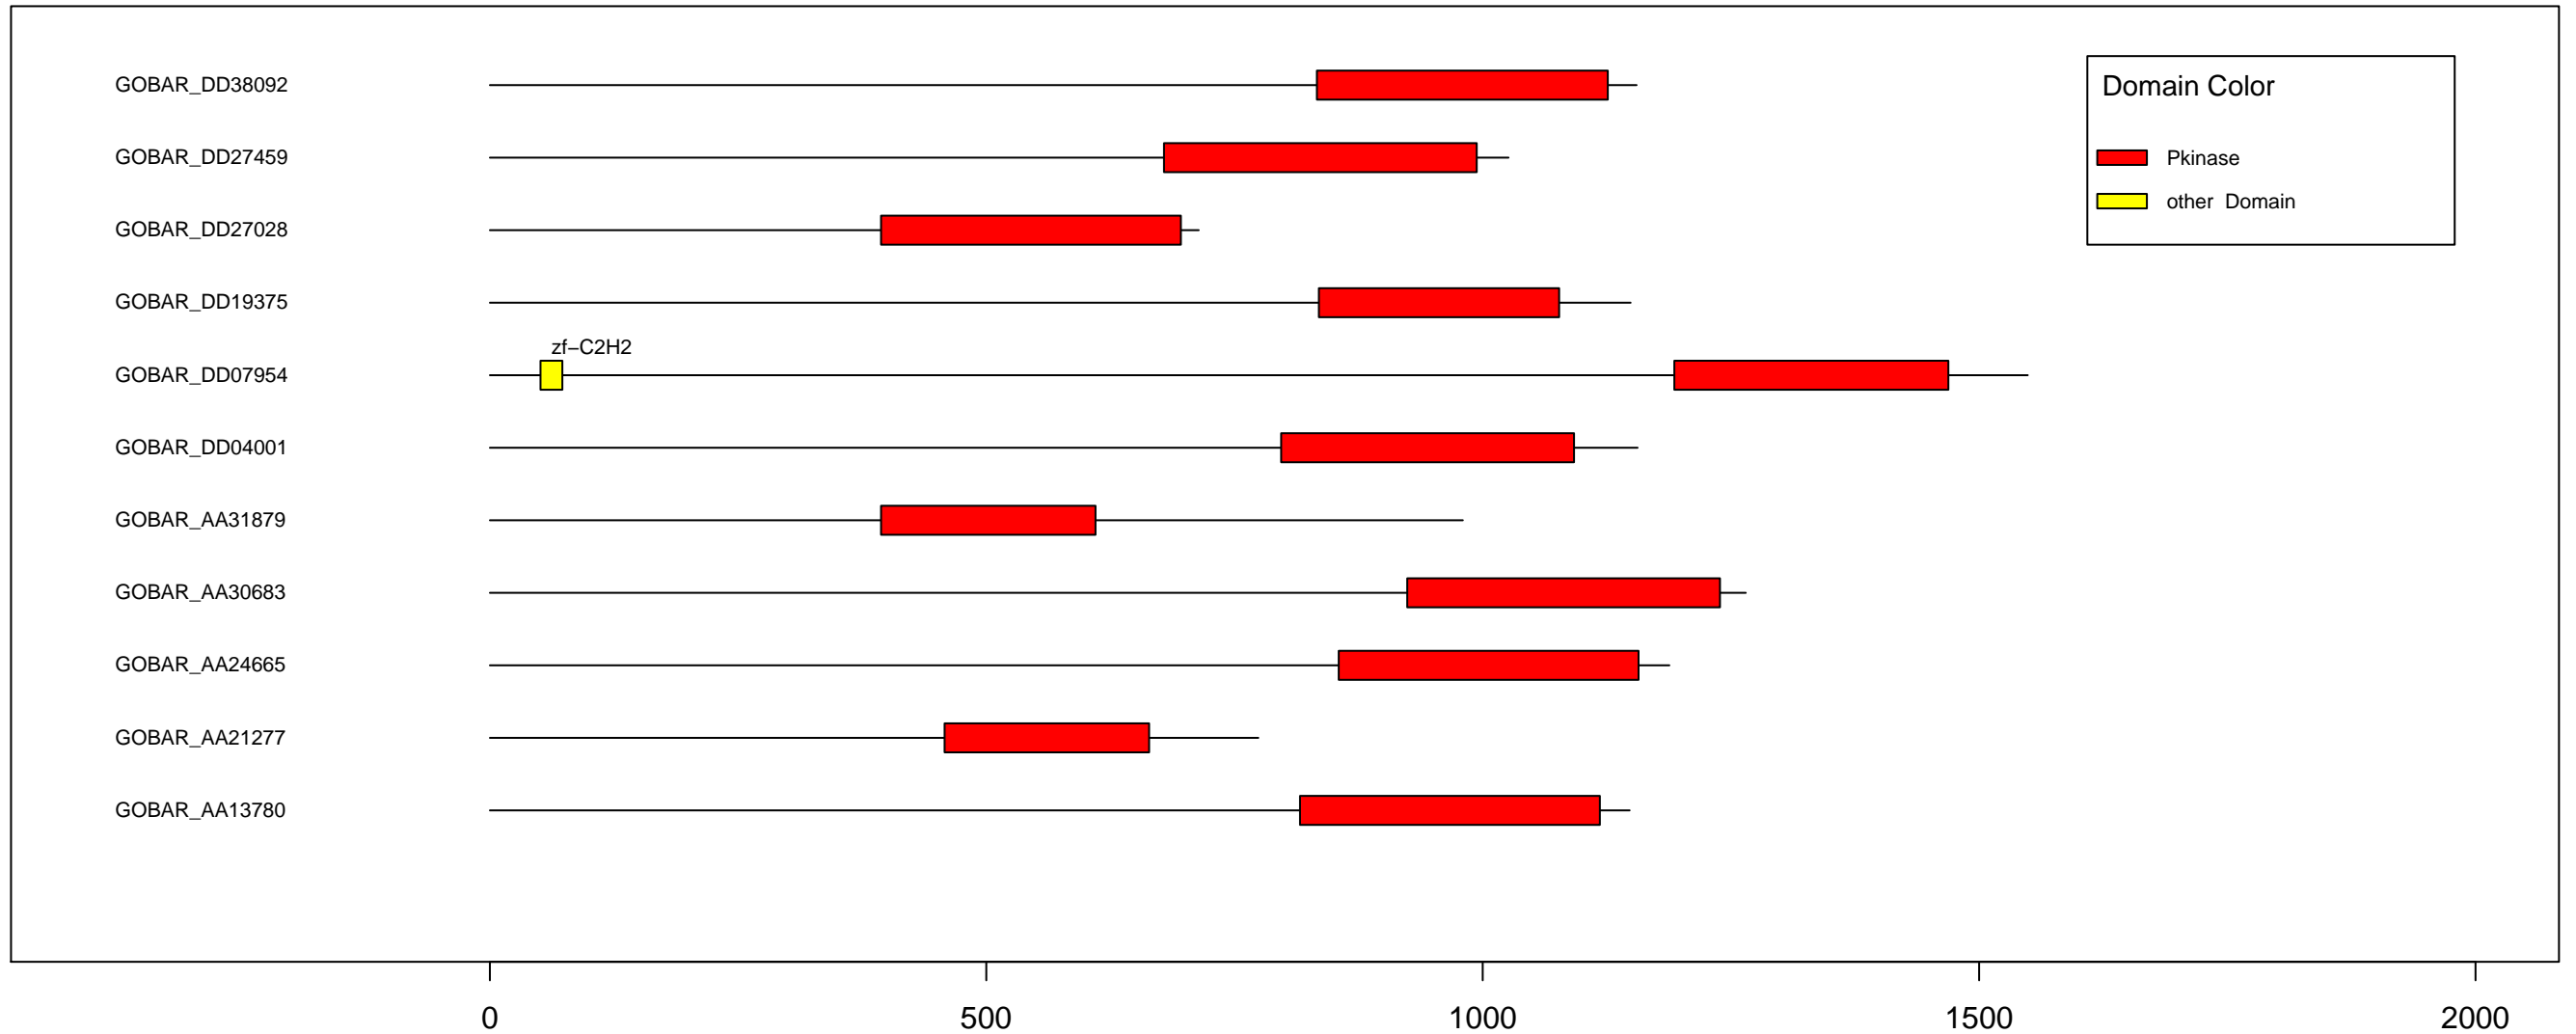

# G.ba CMGC\_DYRK-YAK domain diagram (all)

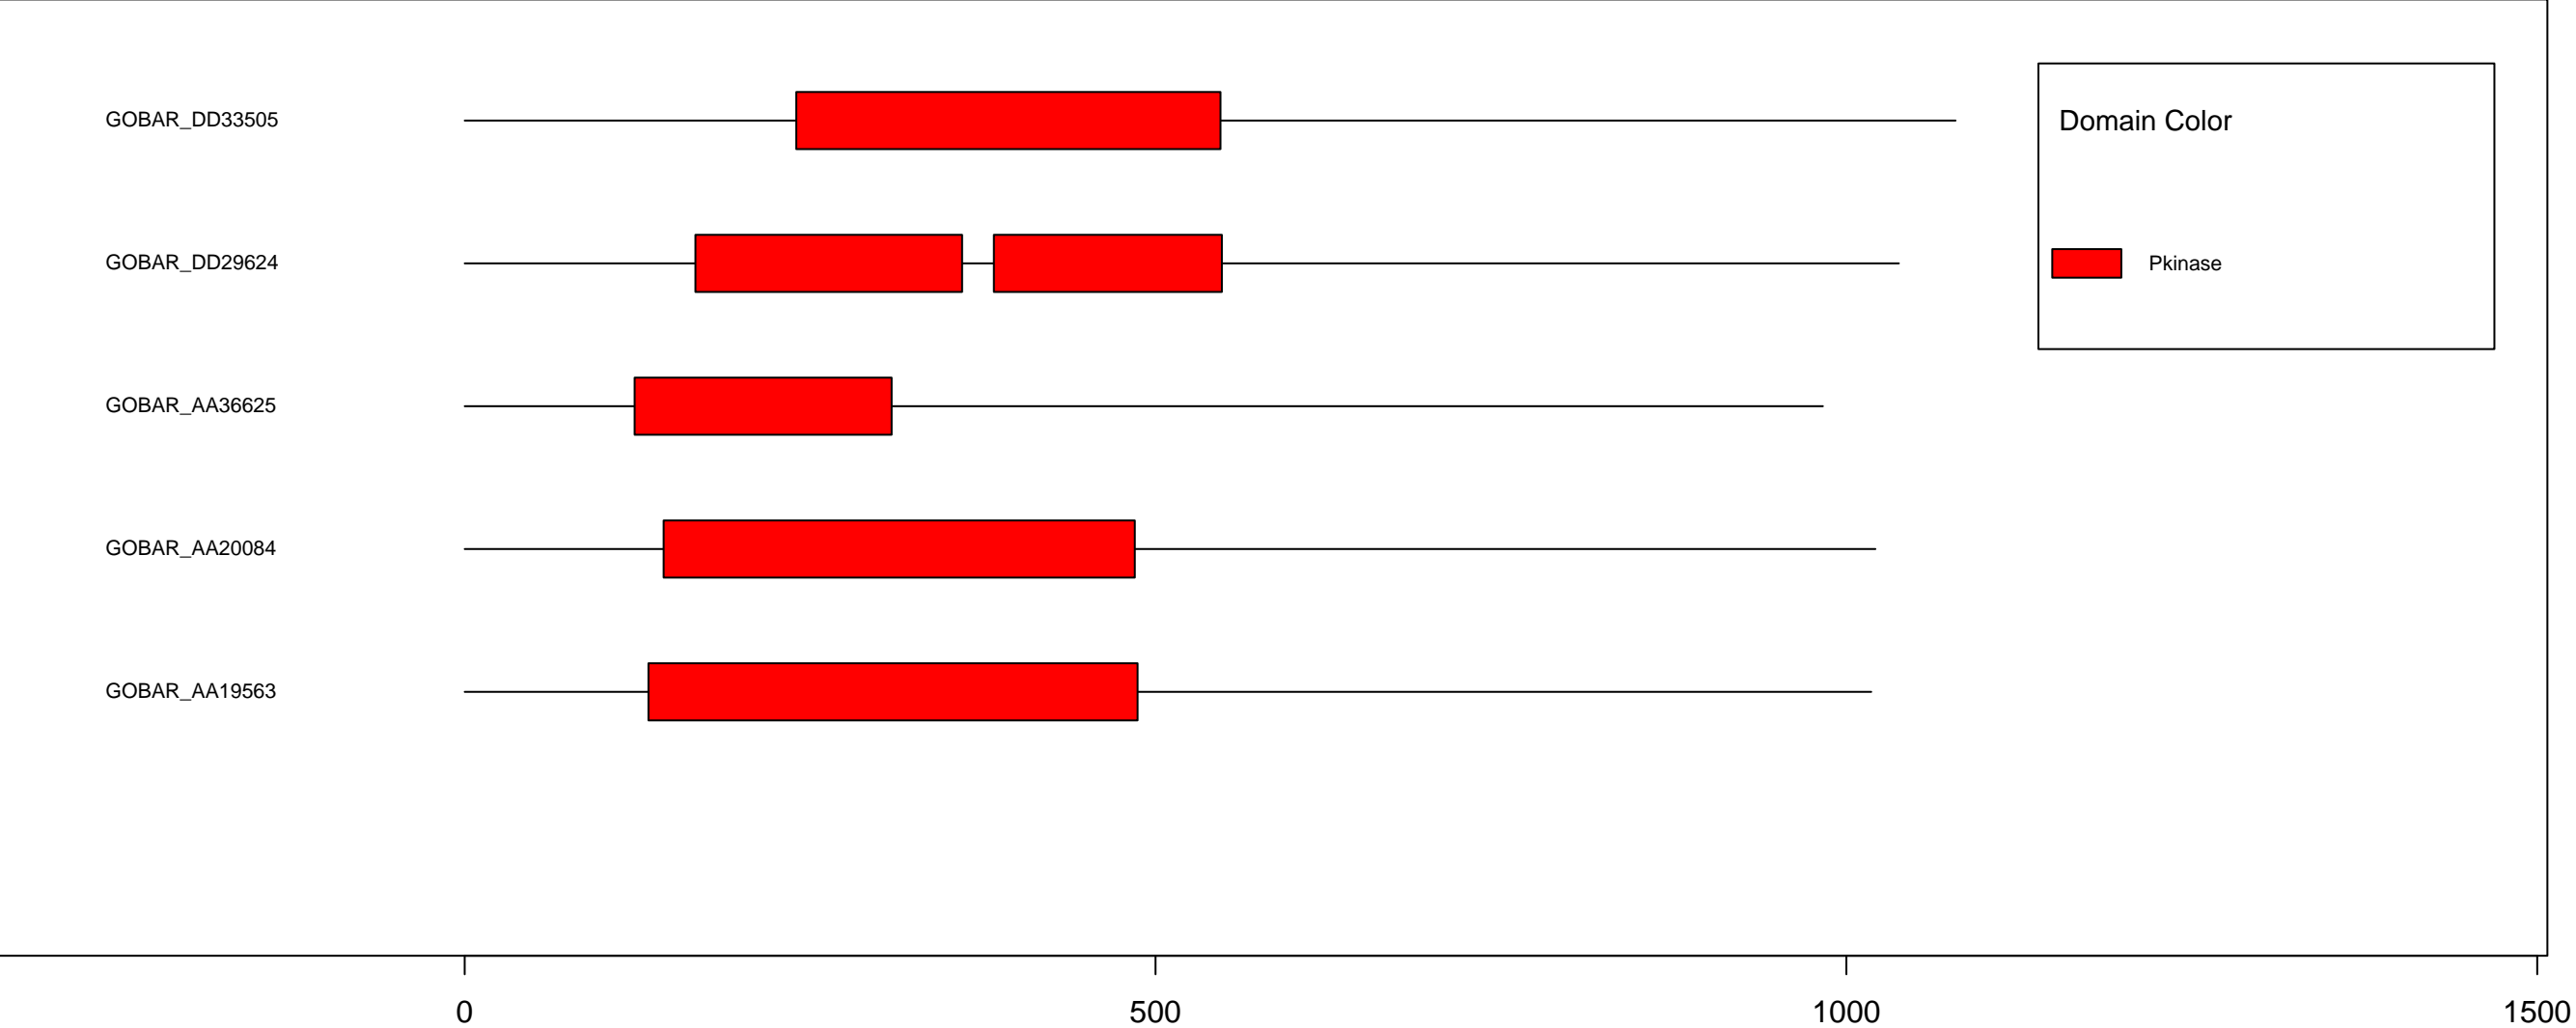

# G.ba CMGC\_GSK domain diagram (all)

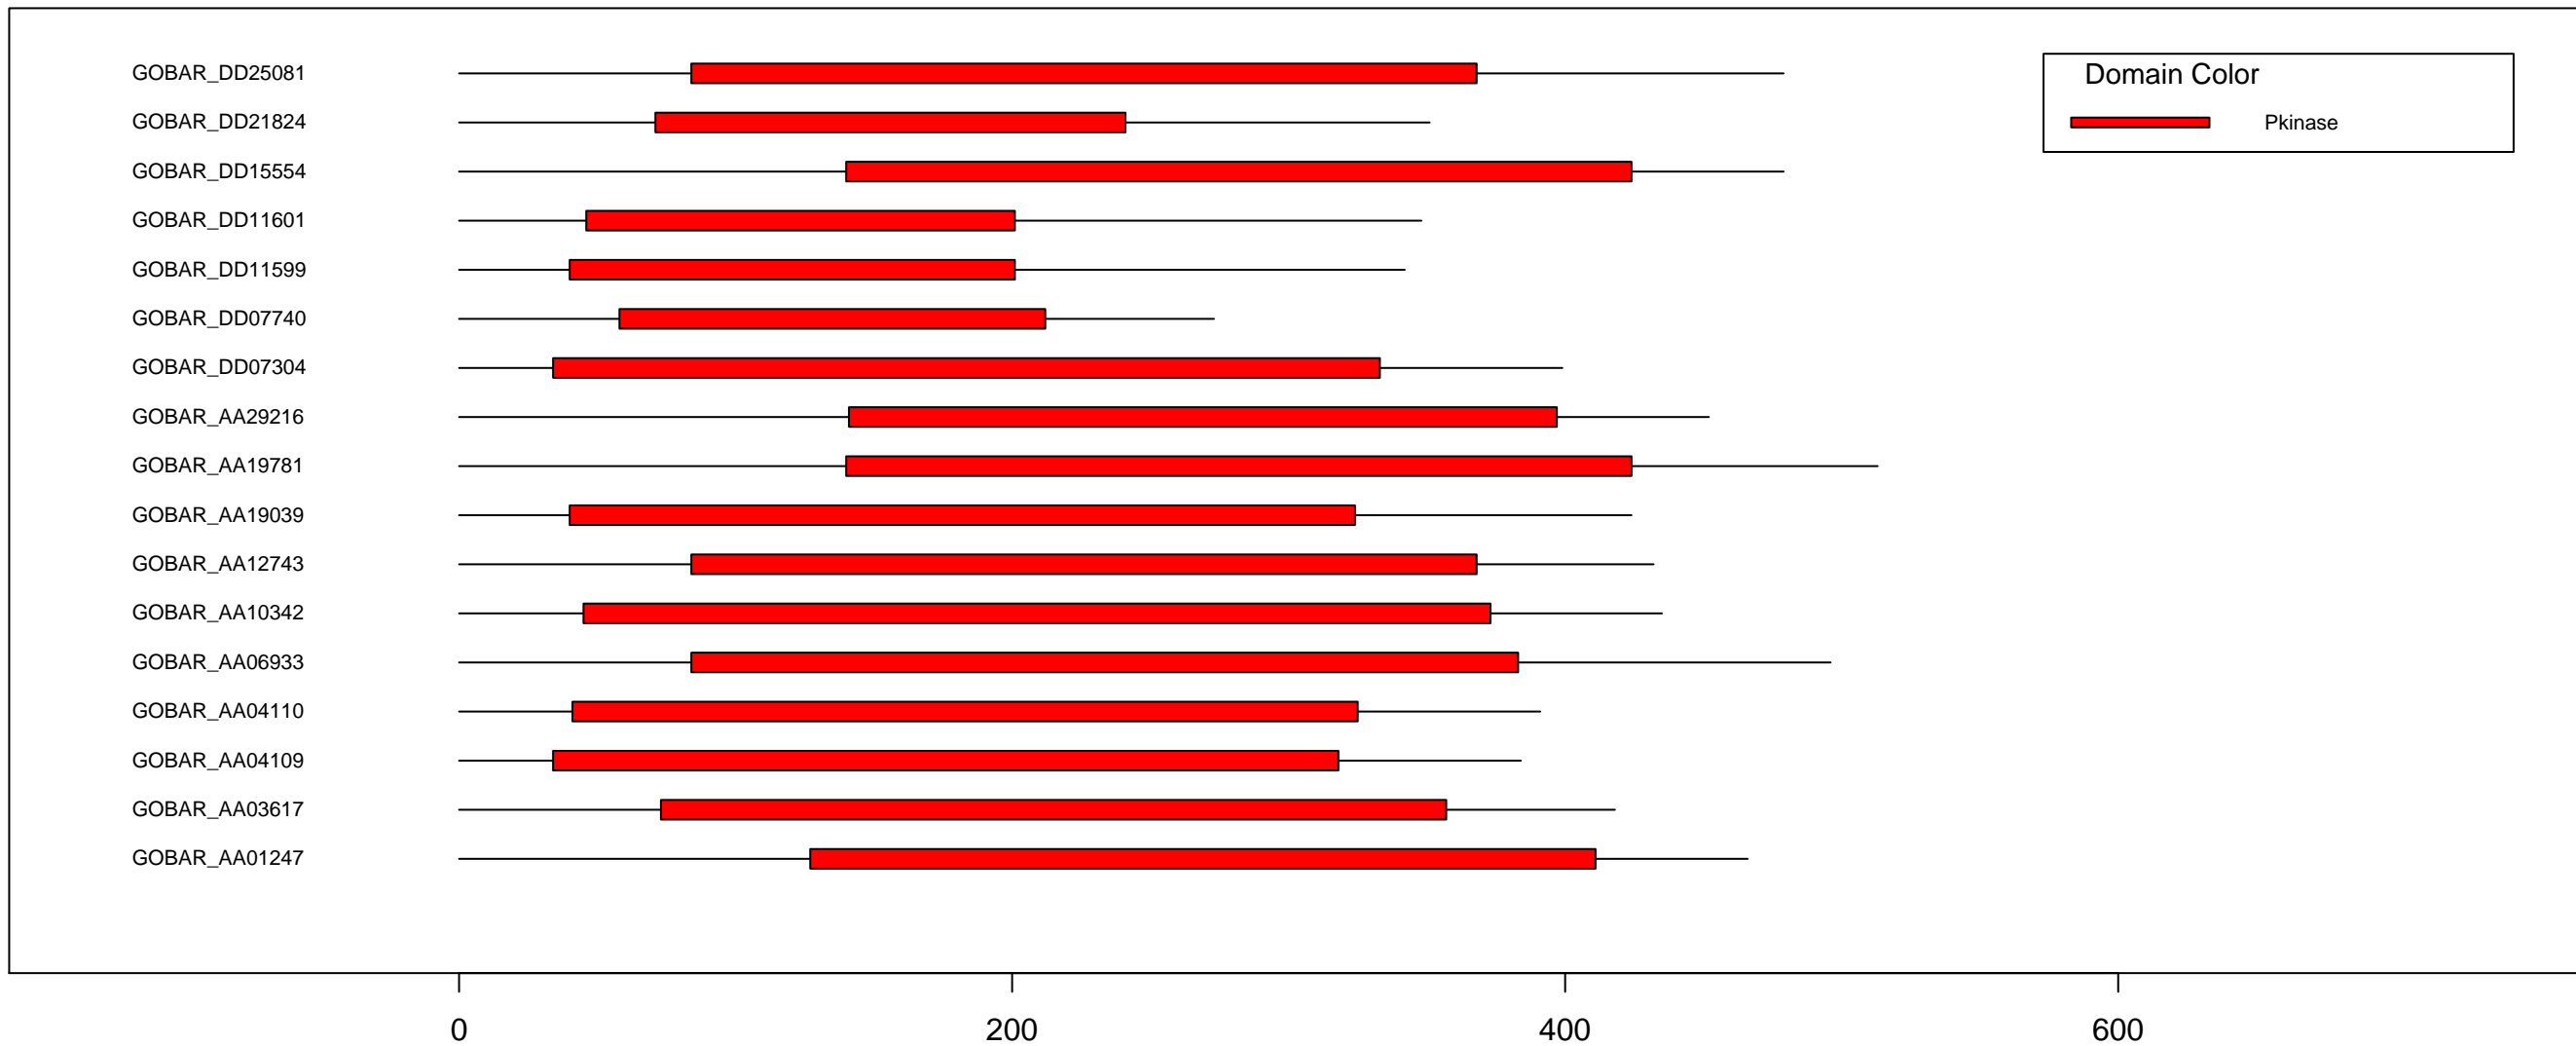

# G.ba CMGC\_MAPK domain diagram (part 1)

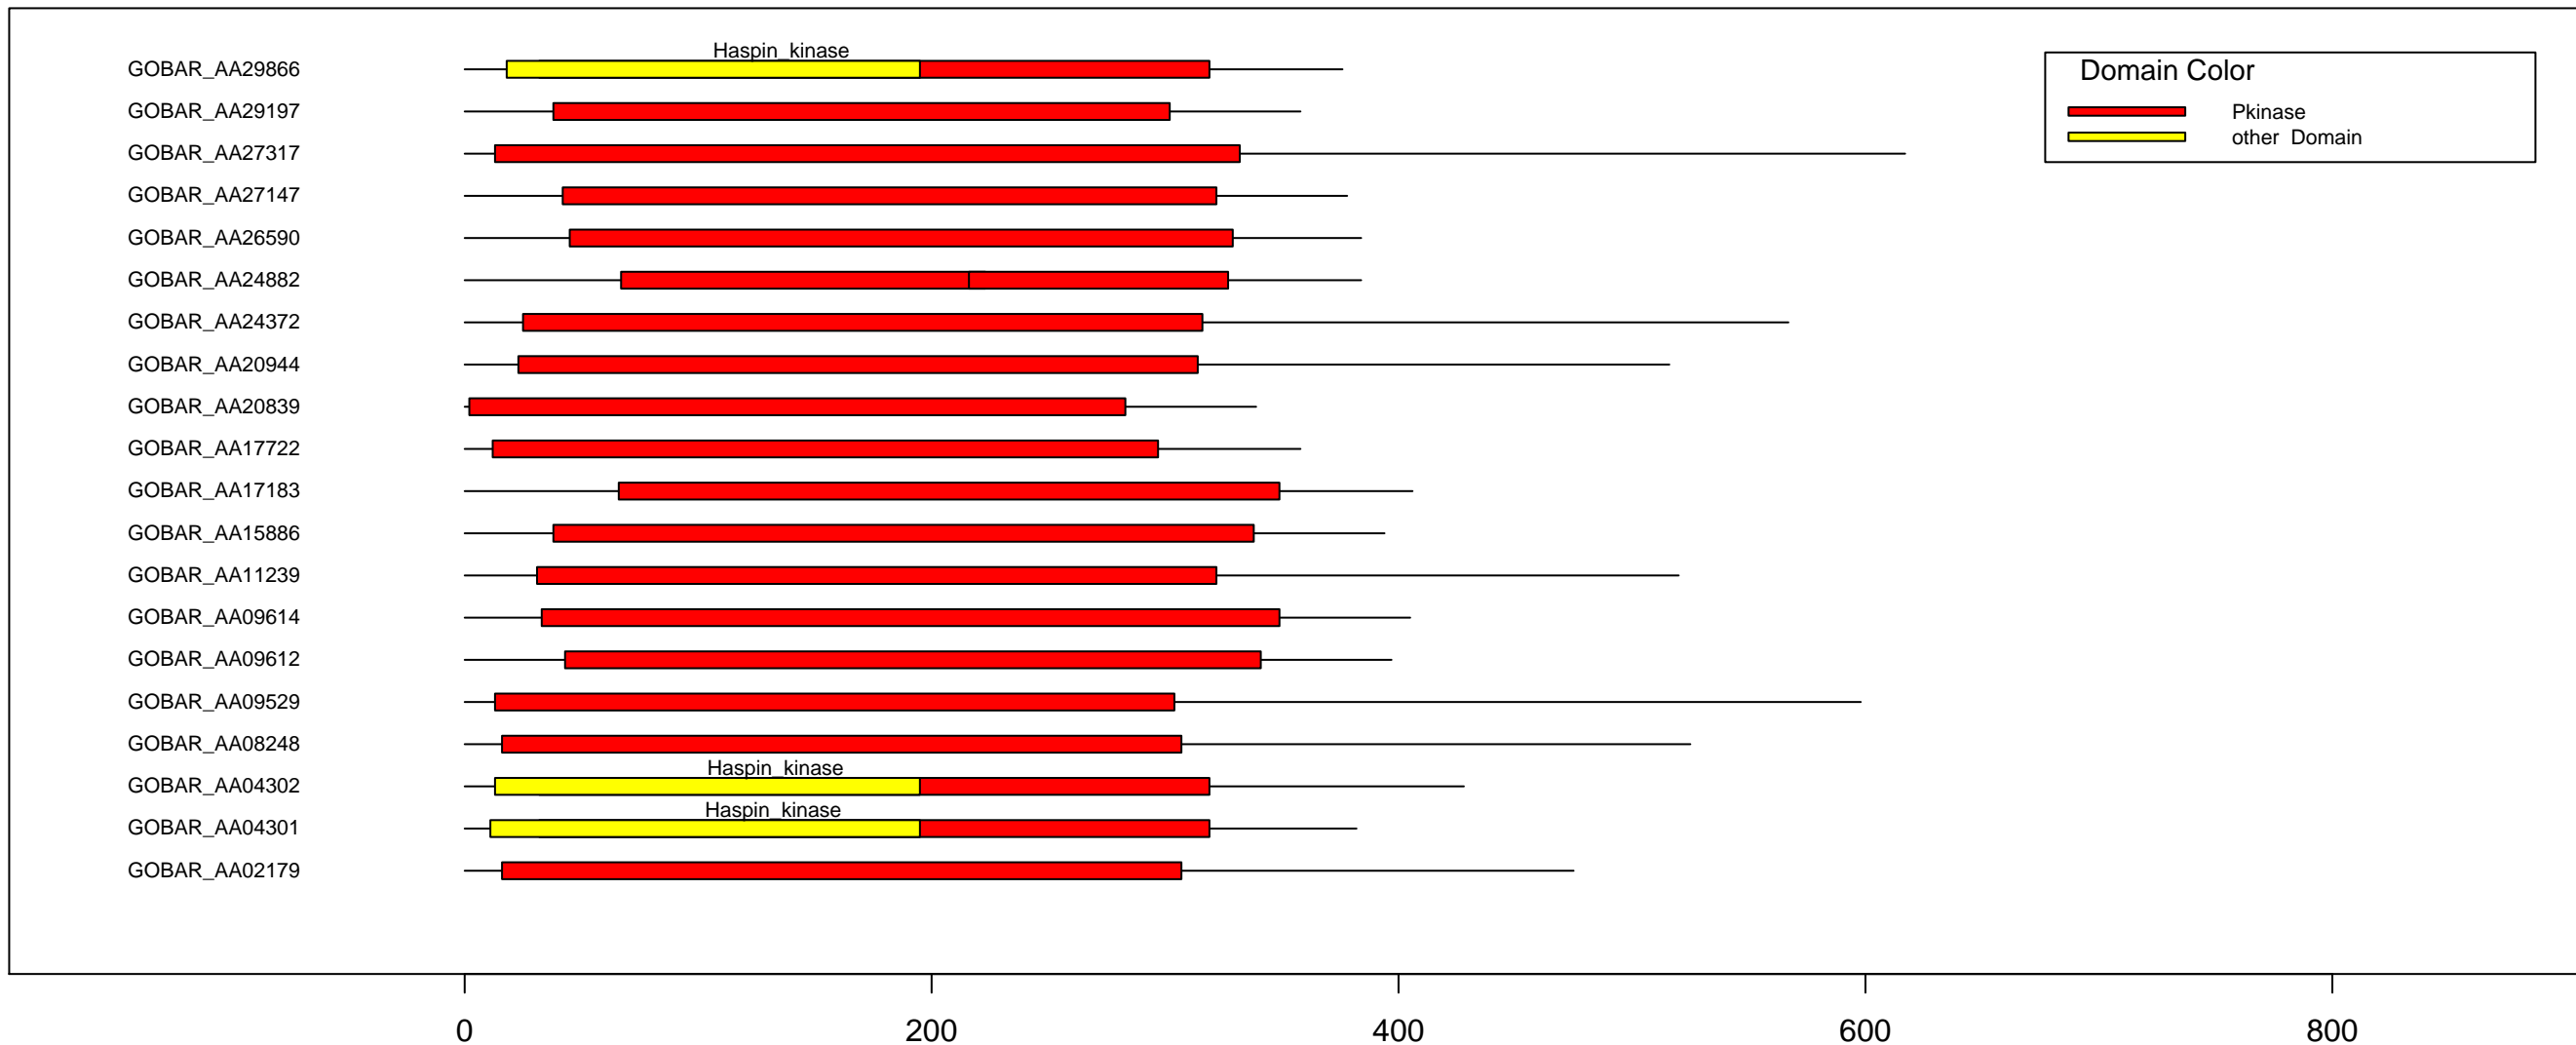



## G.ba CMGC\_MAPK domain diagram (part 2)

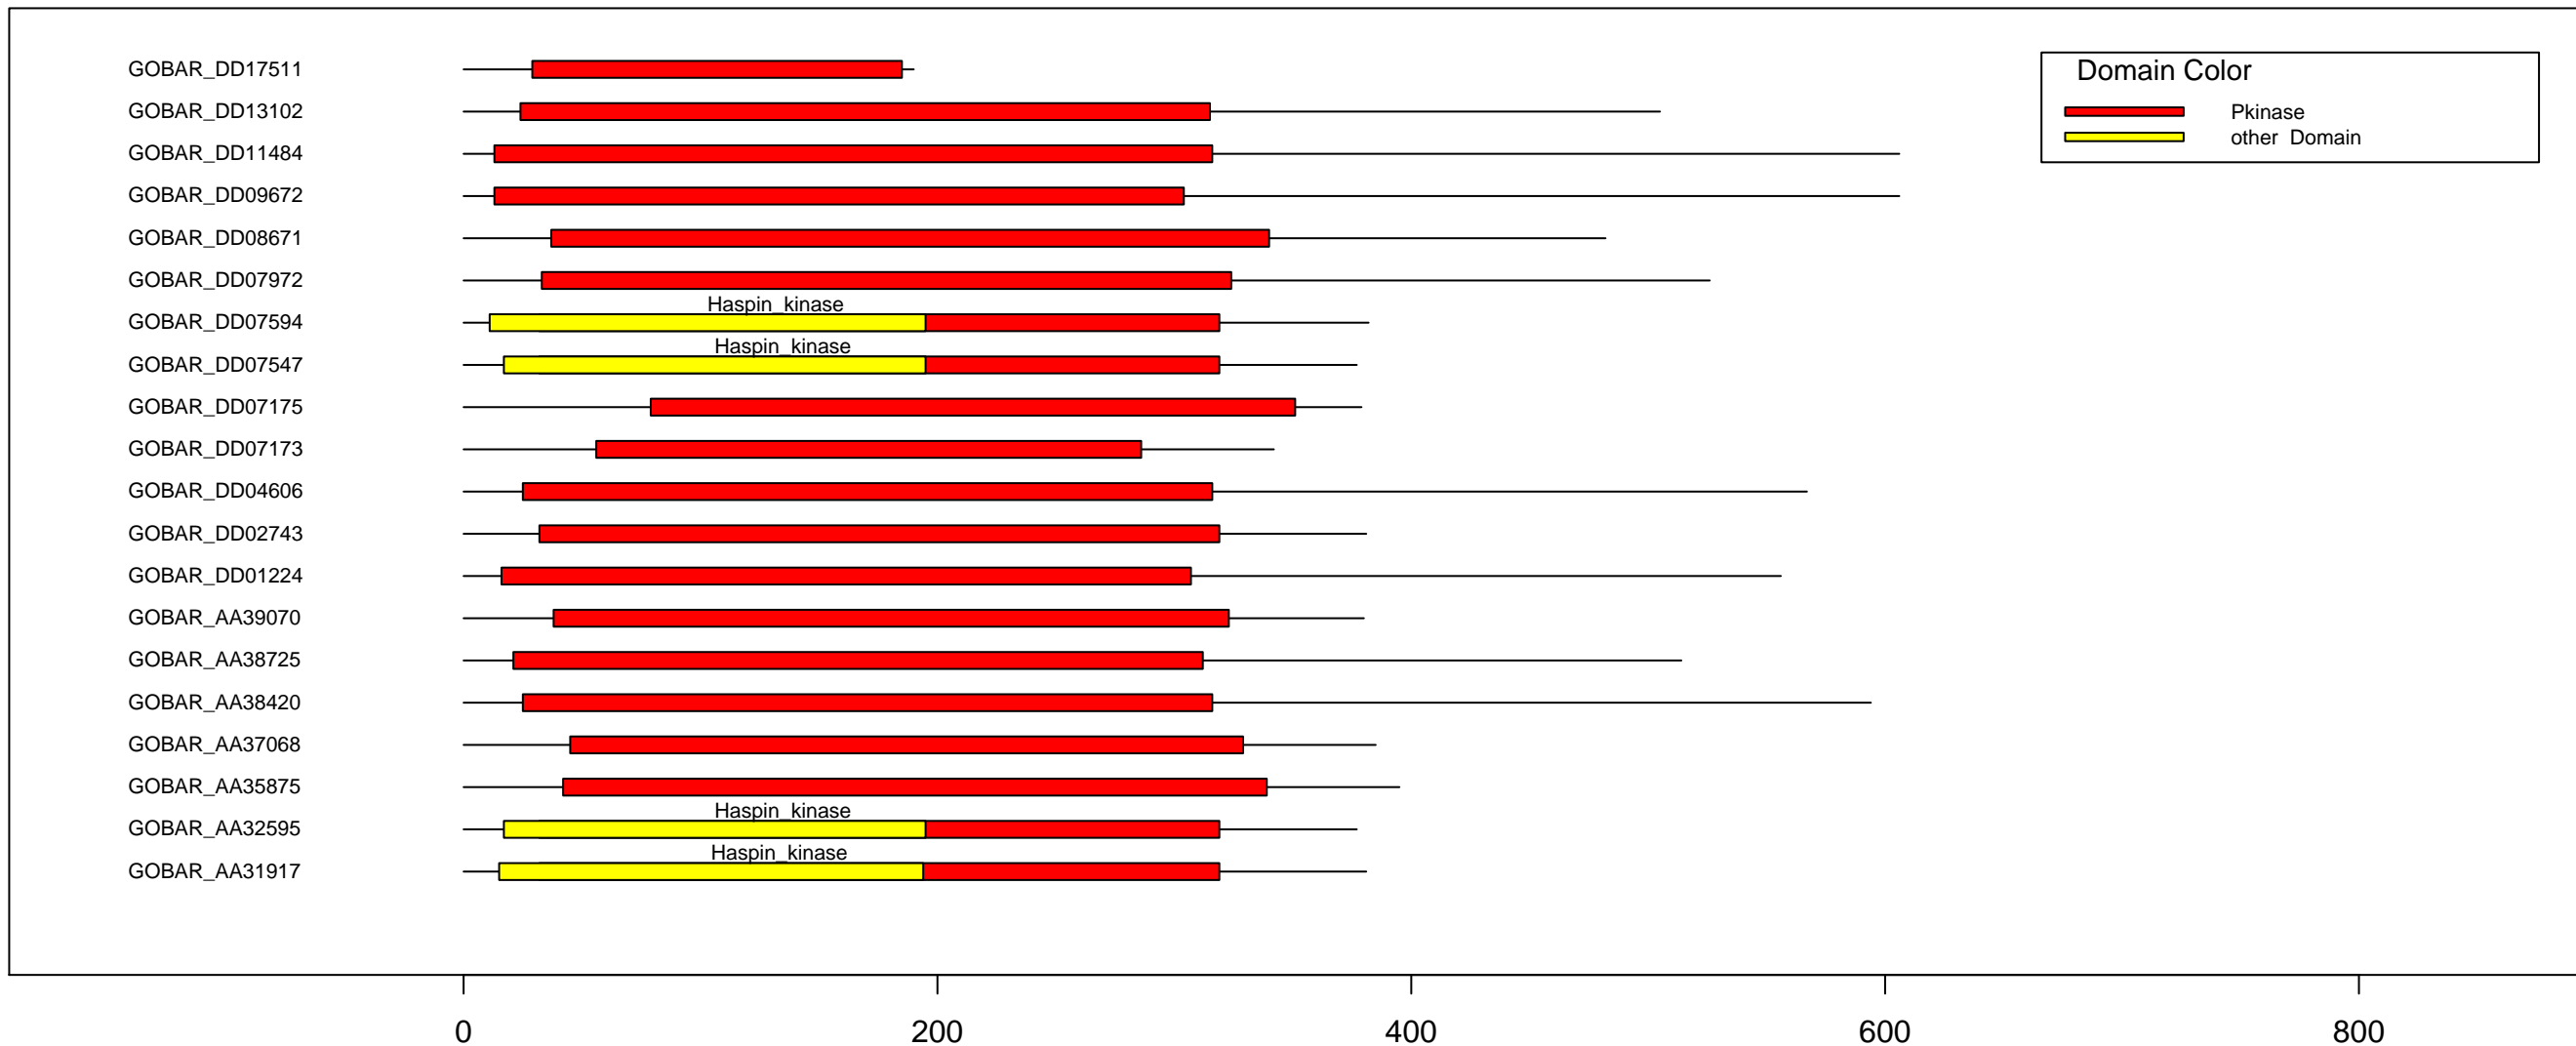

### G.ba CMGC\_MAPK domain diagram (part 3)

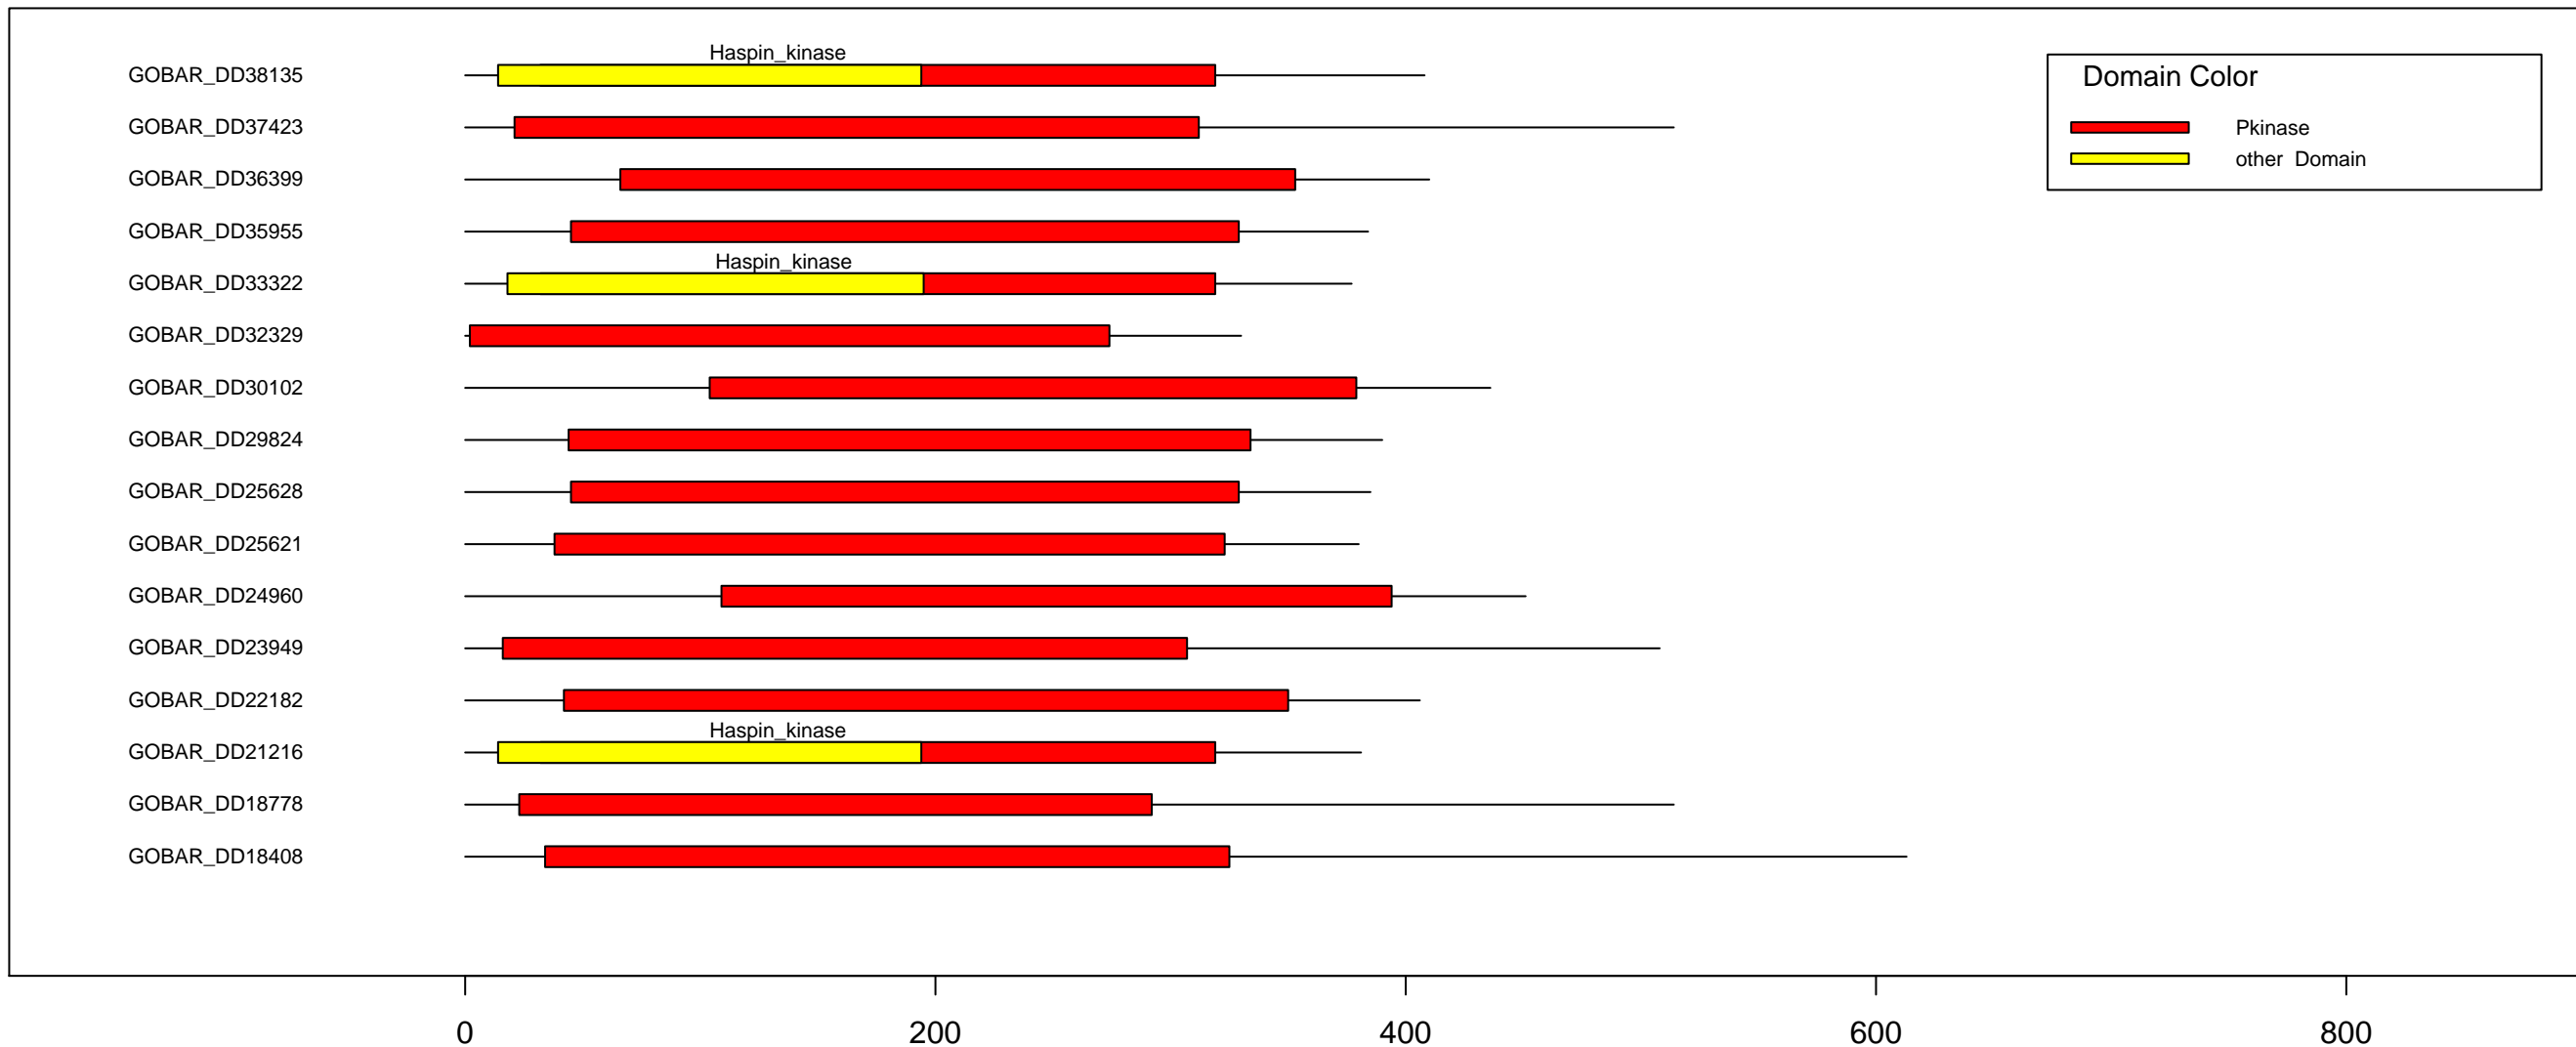

# G.ba CMGC\_PI-Tthe domain diagram (all)

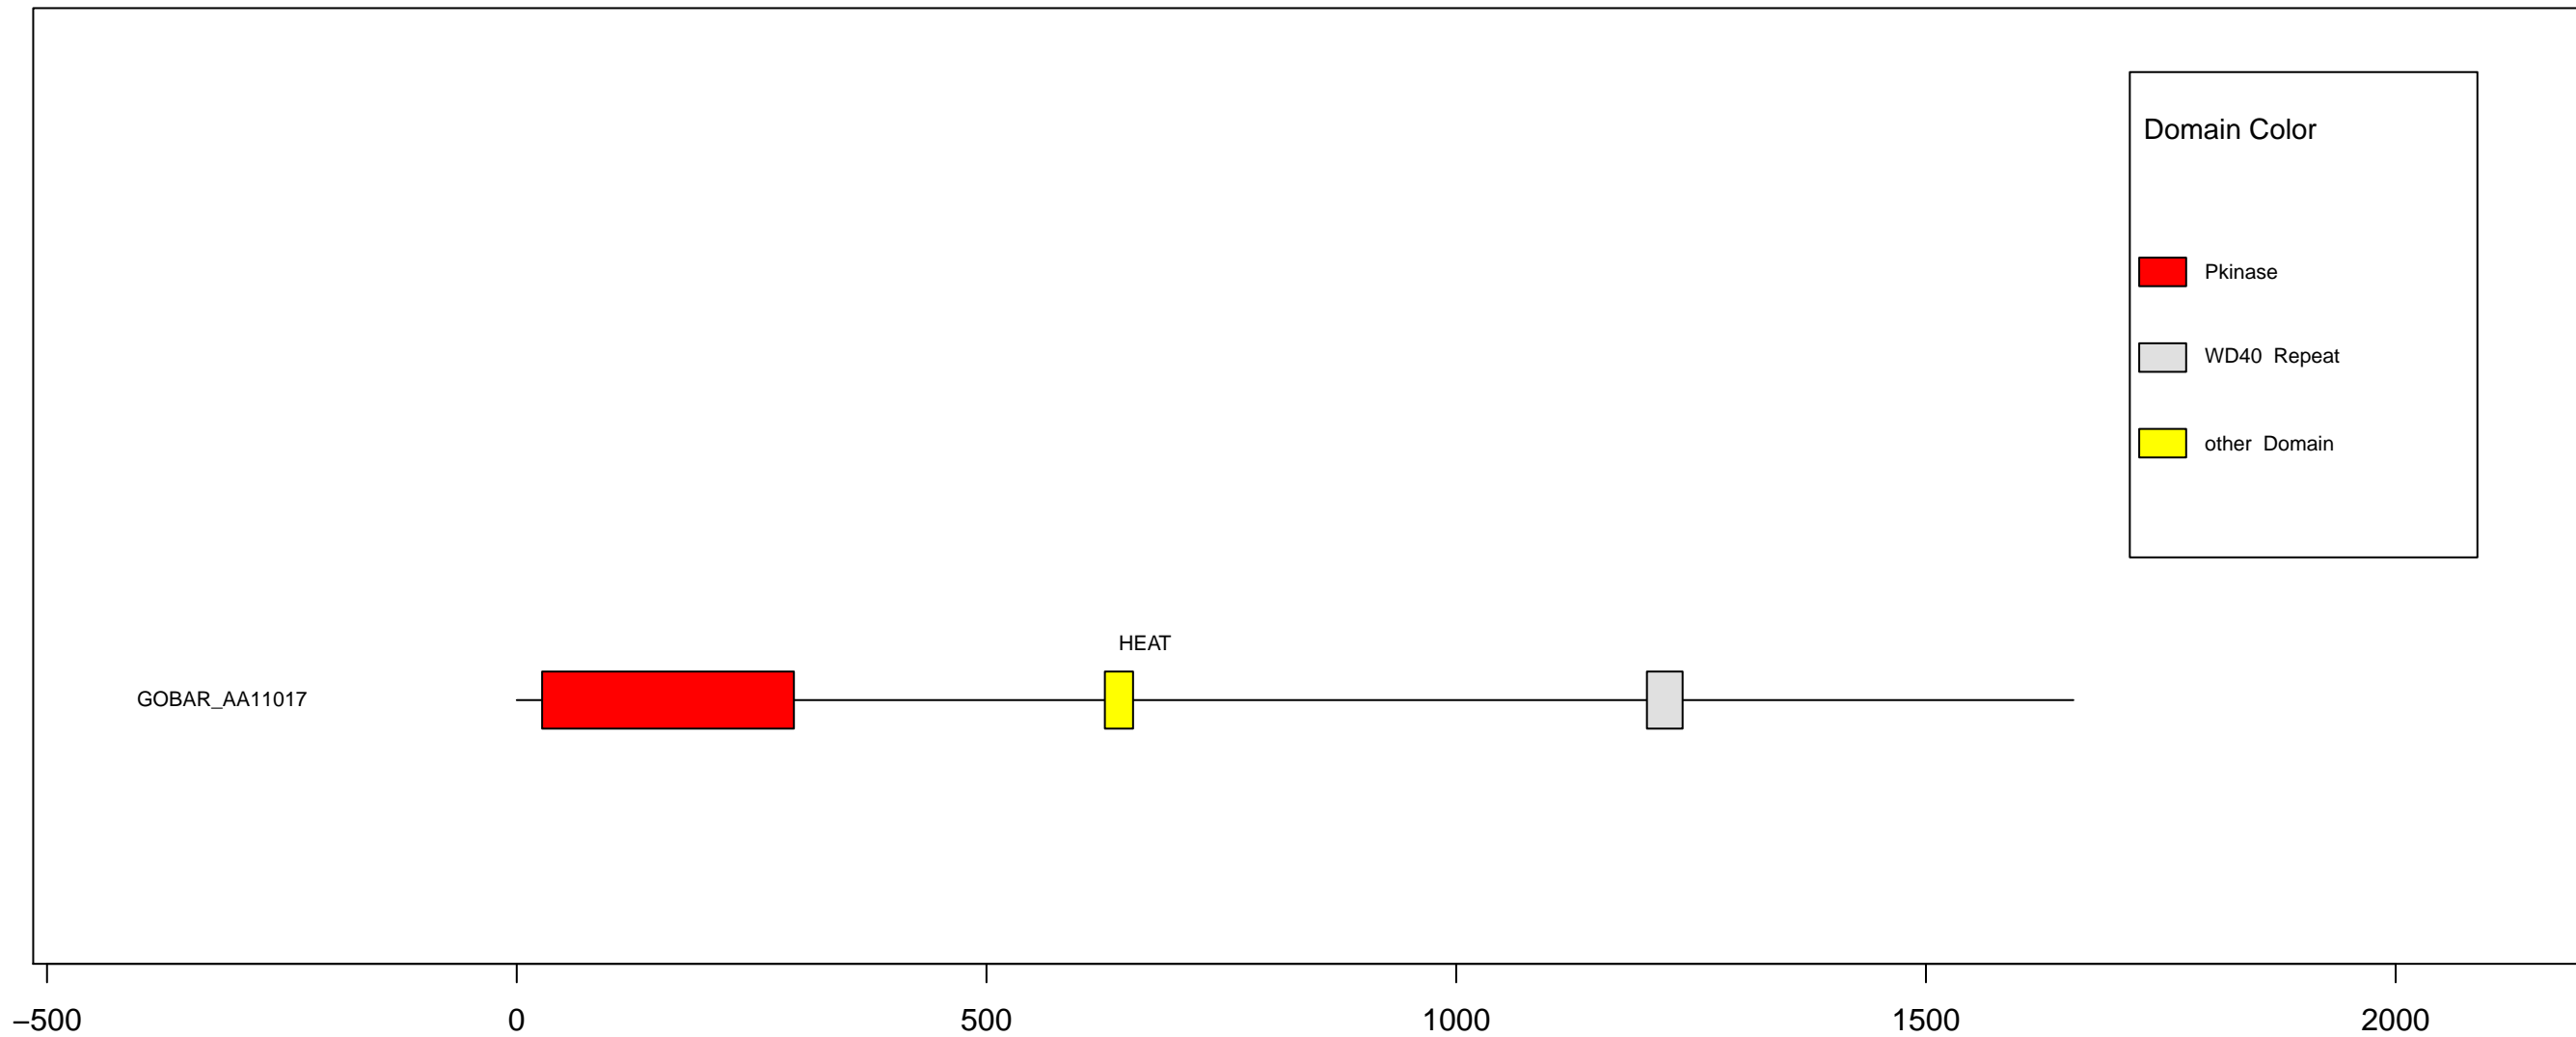

### G.ba CMGC\_RCK domain diagram (all)

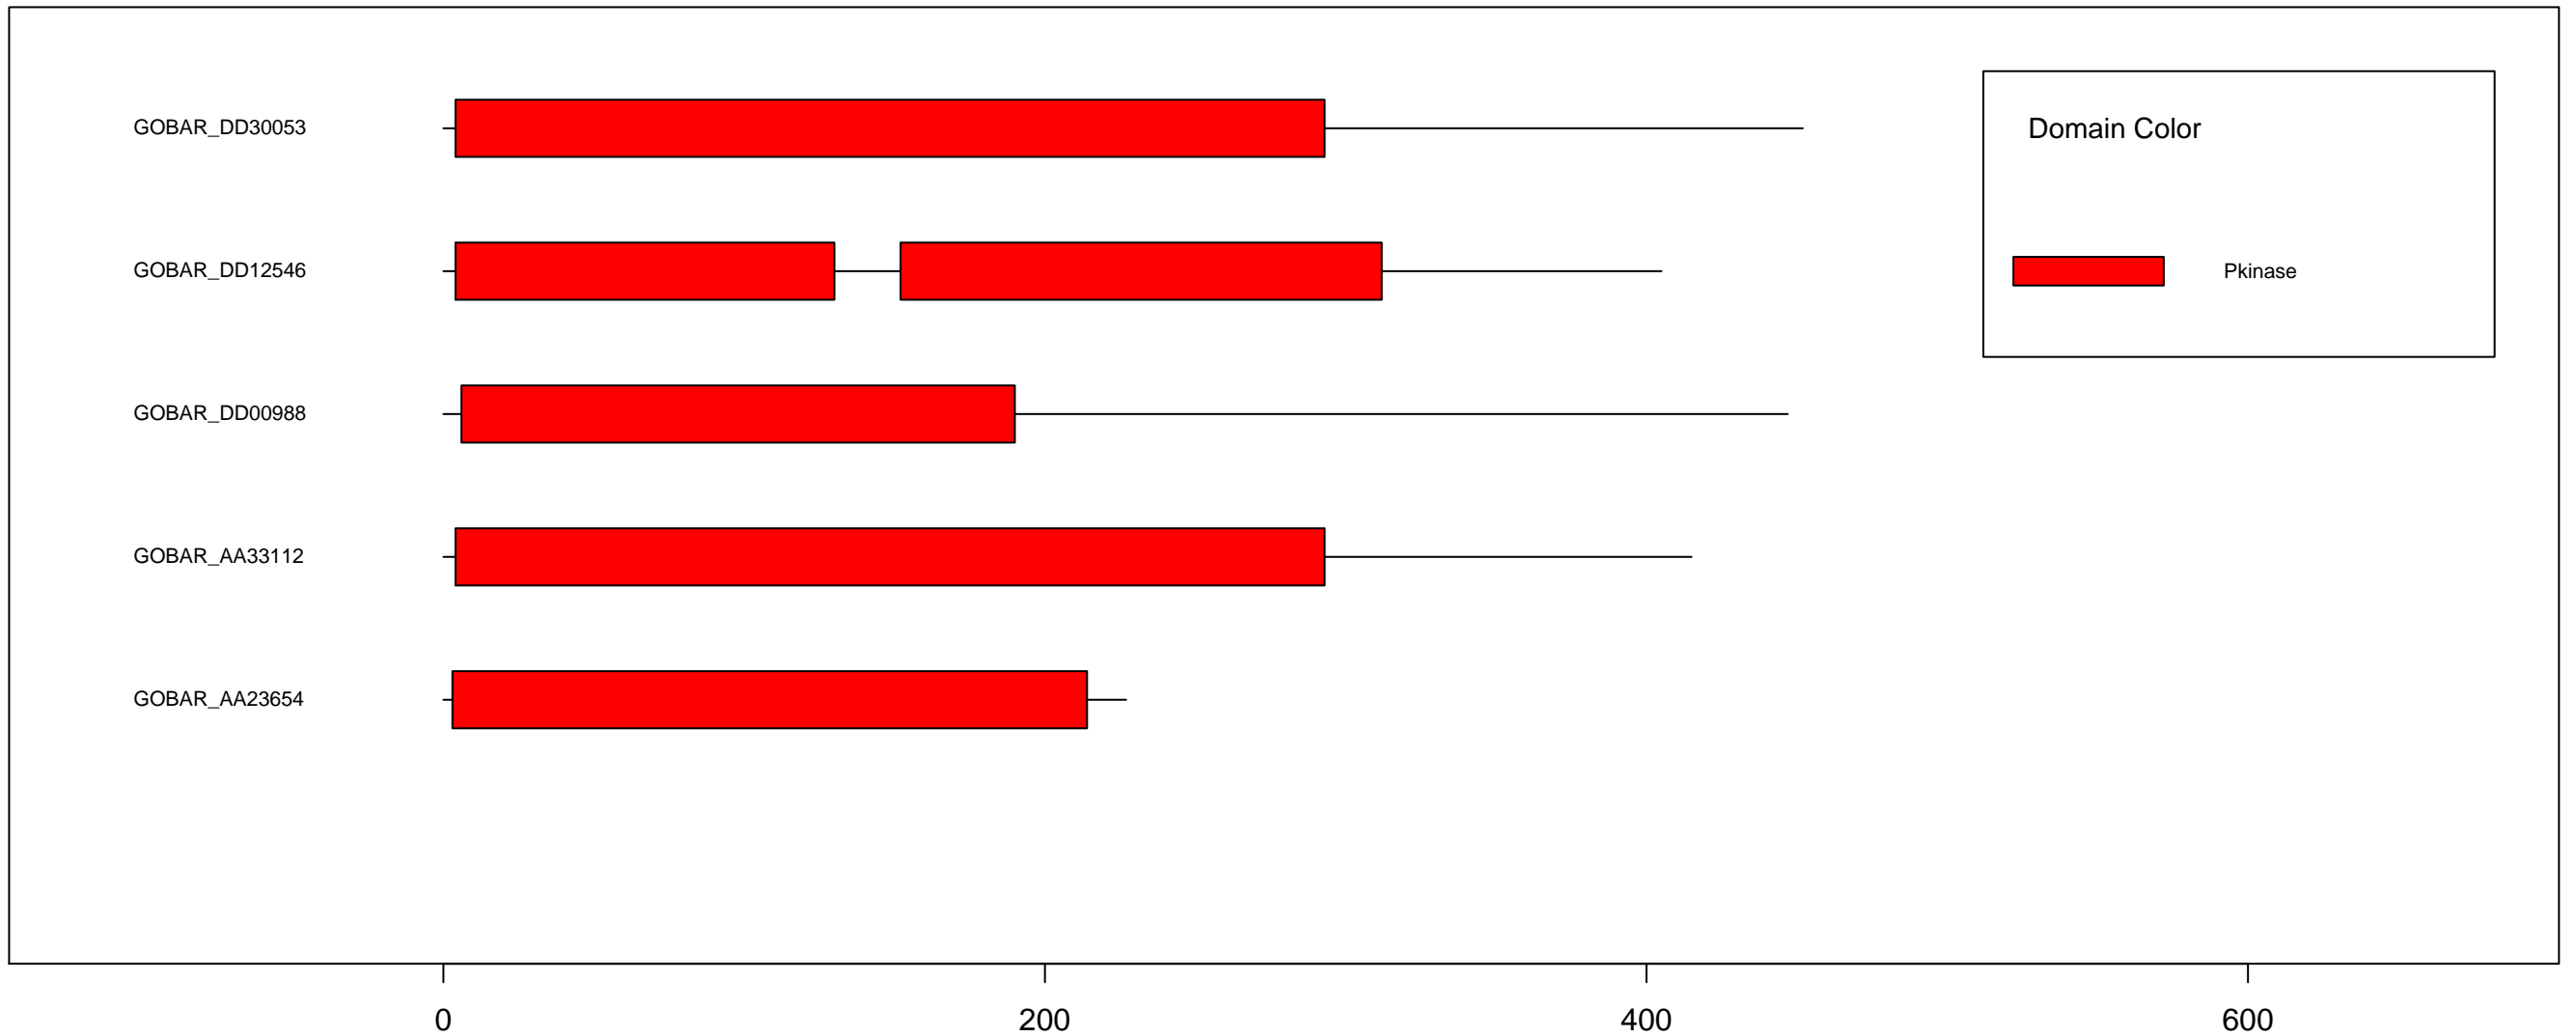

# G.ba CMGC\_SRPK domain diagram (all)

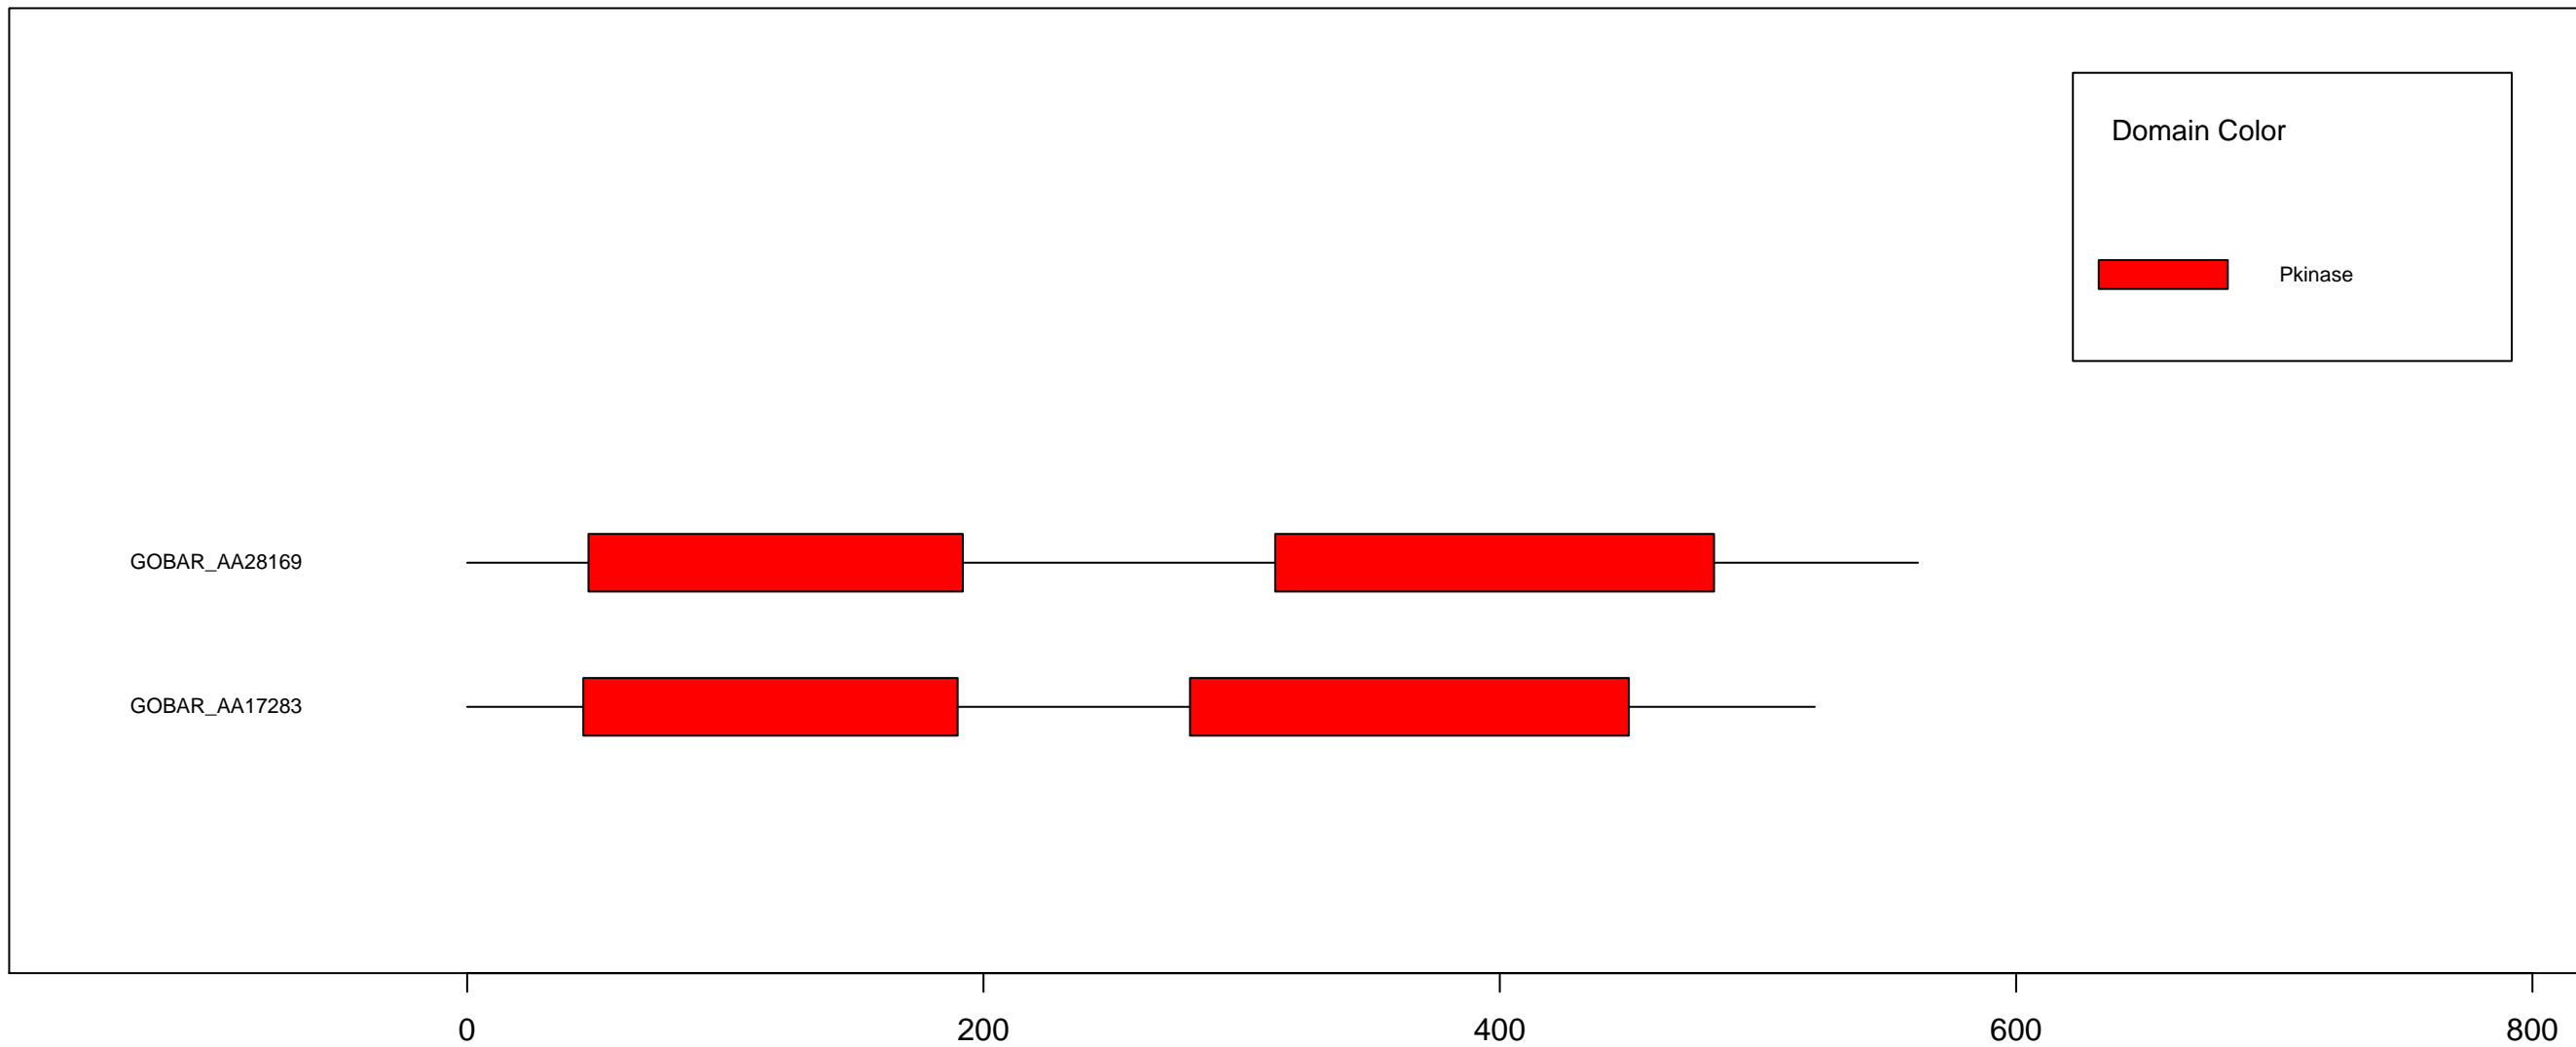

# G.ba Group-PI-2 domain diagram (all)

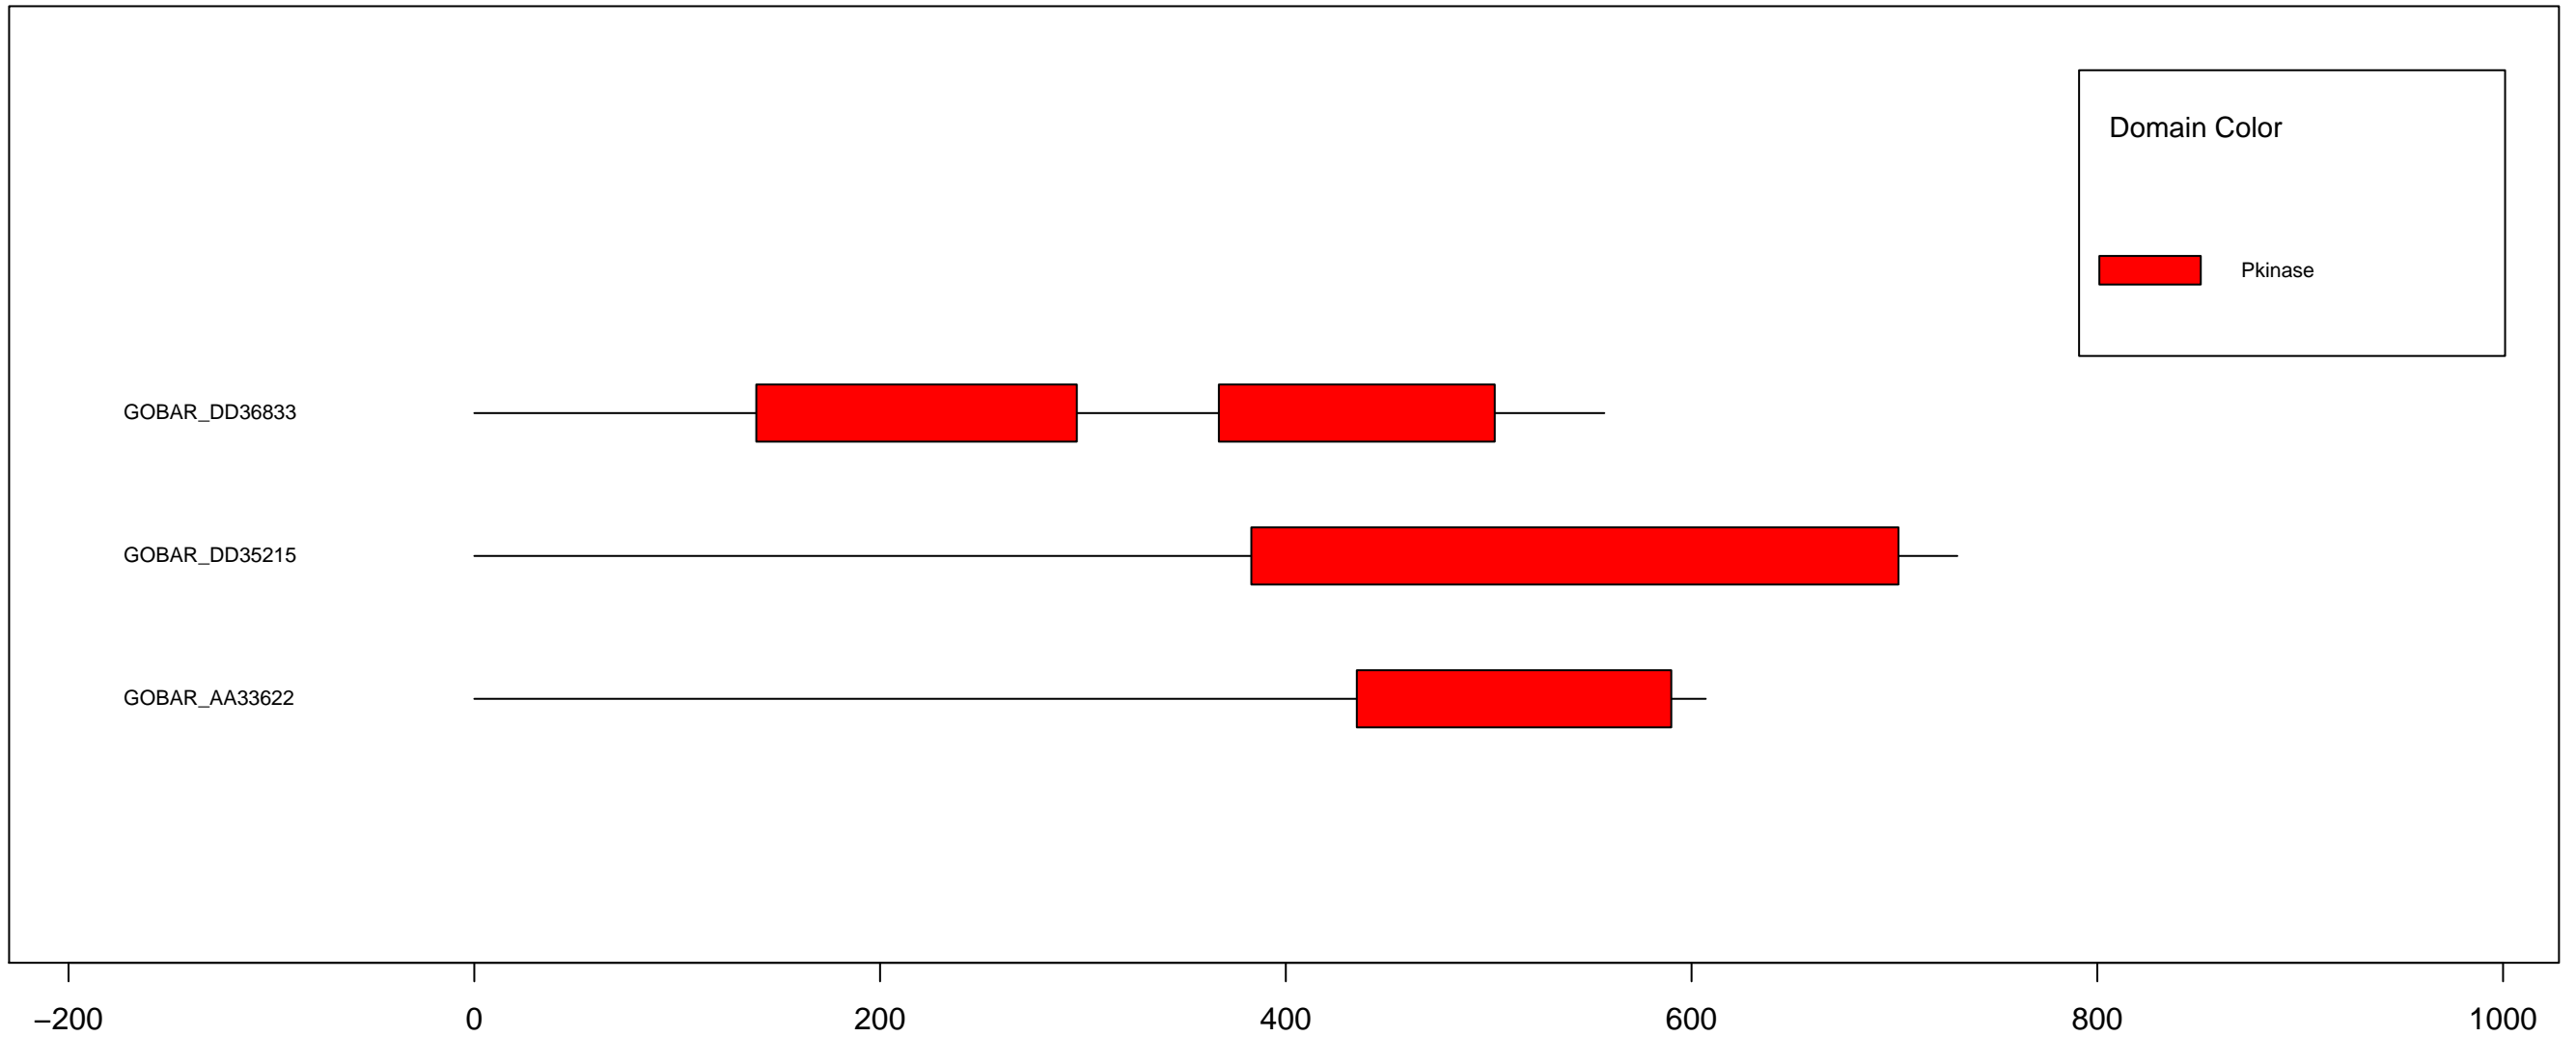

### G.ba Group-PI-3 domain diagram (all)

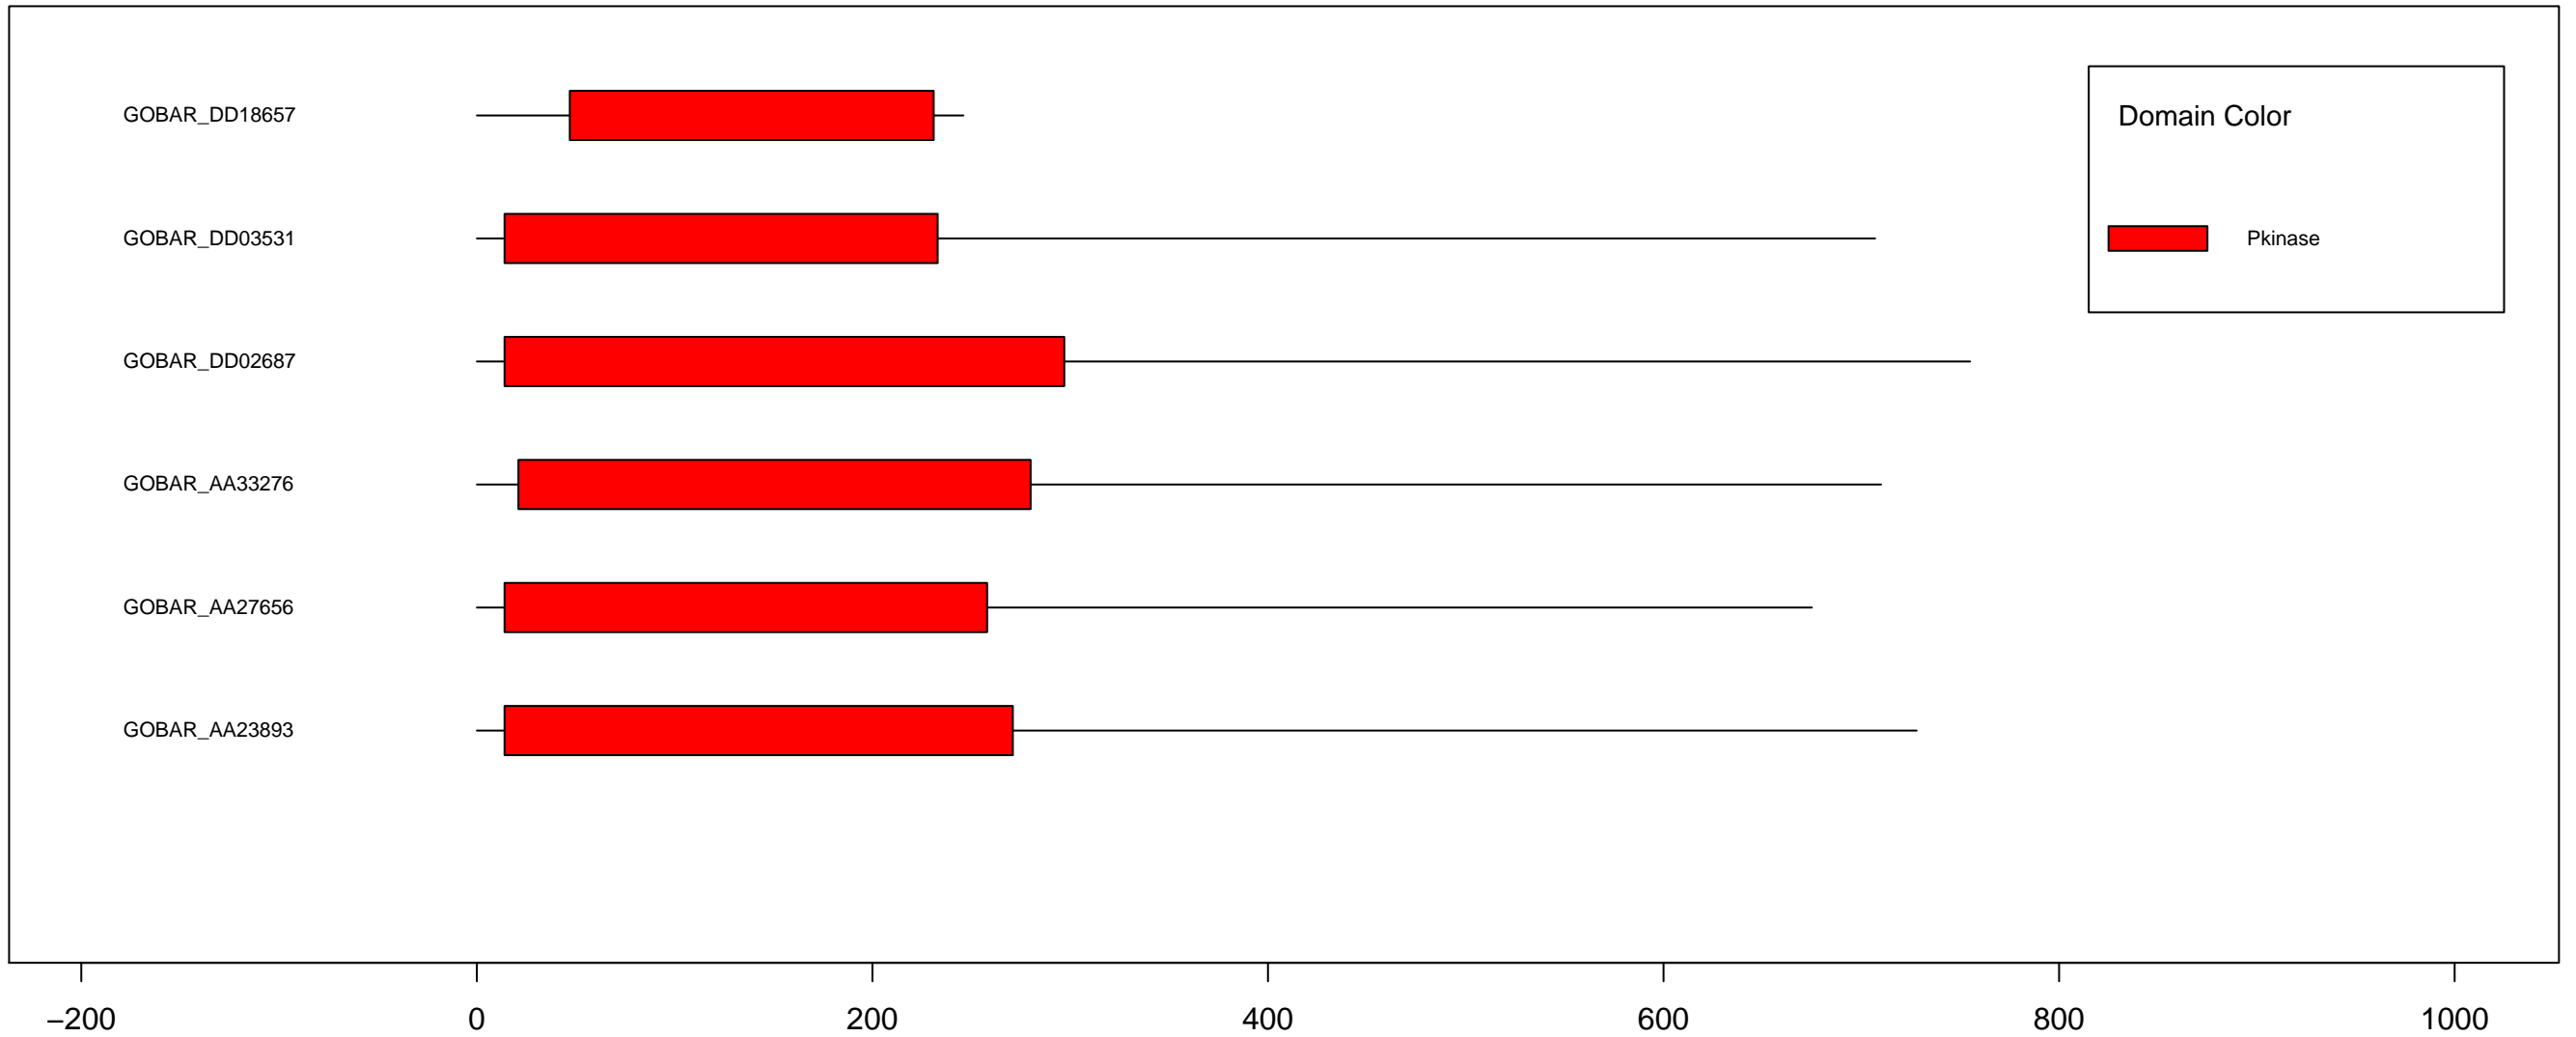

# G.ba Group-PI-4 domain diagram (all)

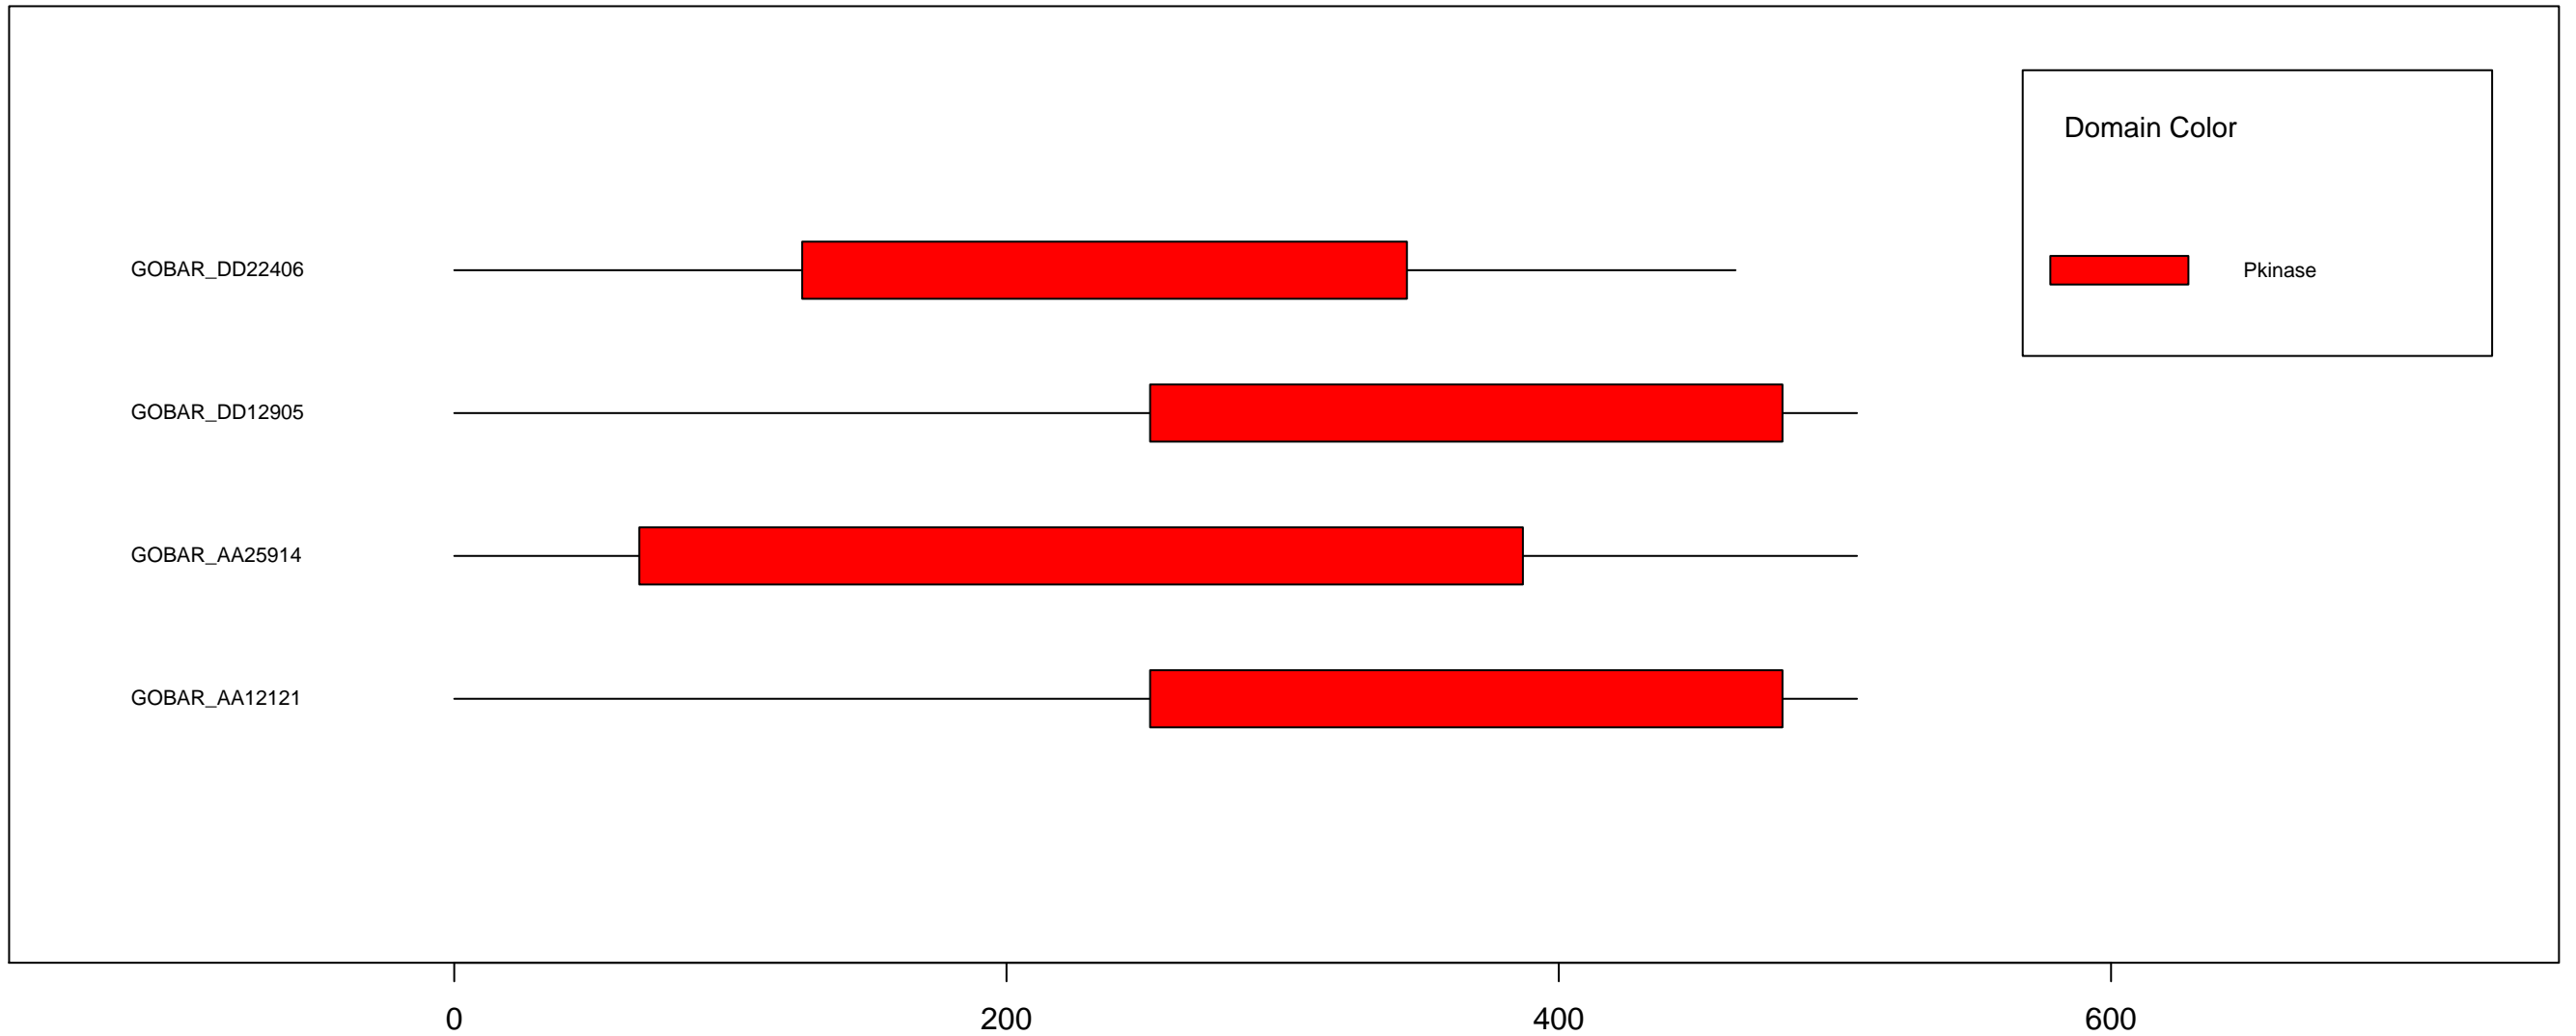



# G.ba IRE1 domain diagram (all)

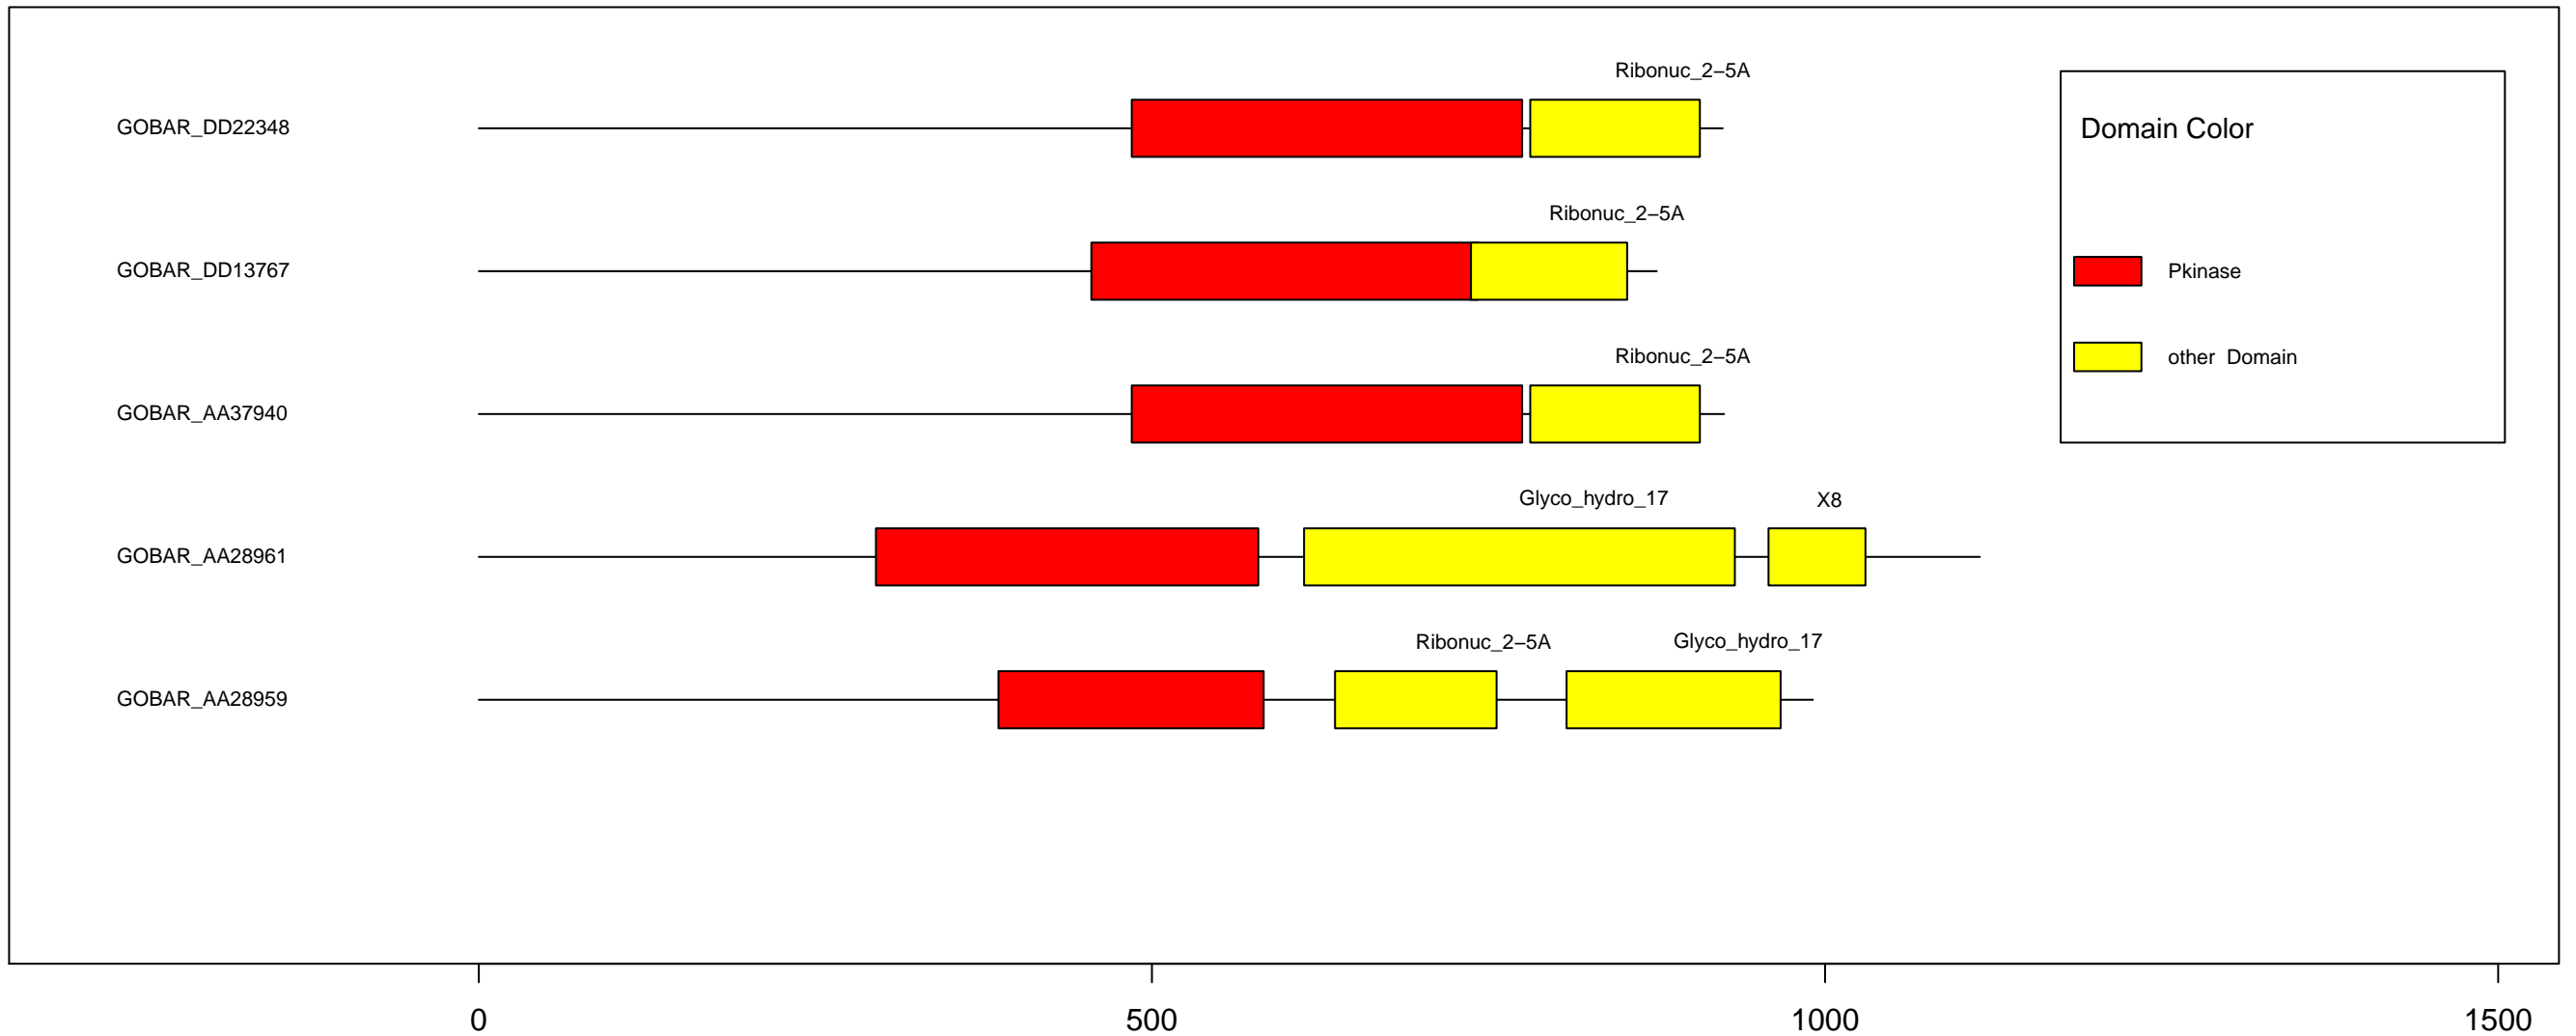

# G.ba NAK domain diagram (all)

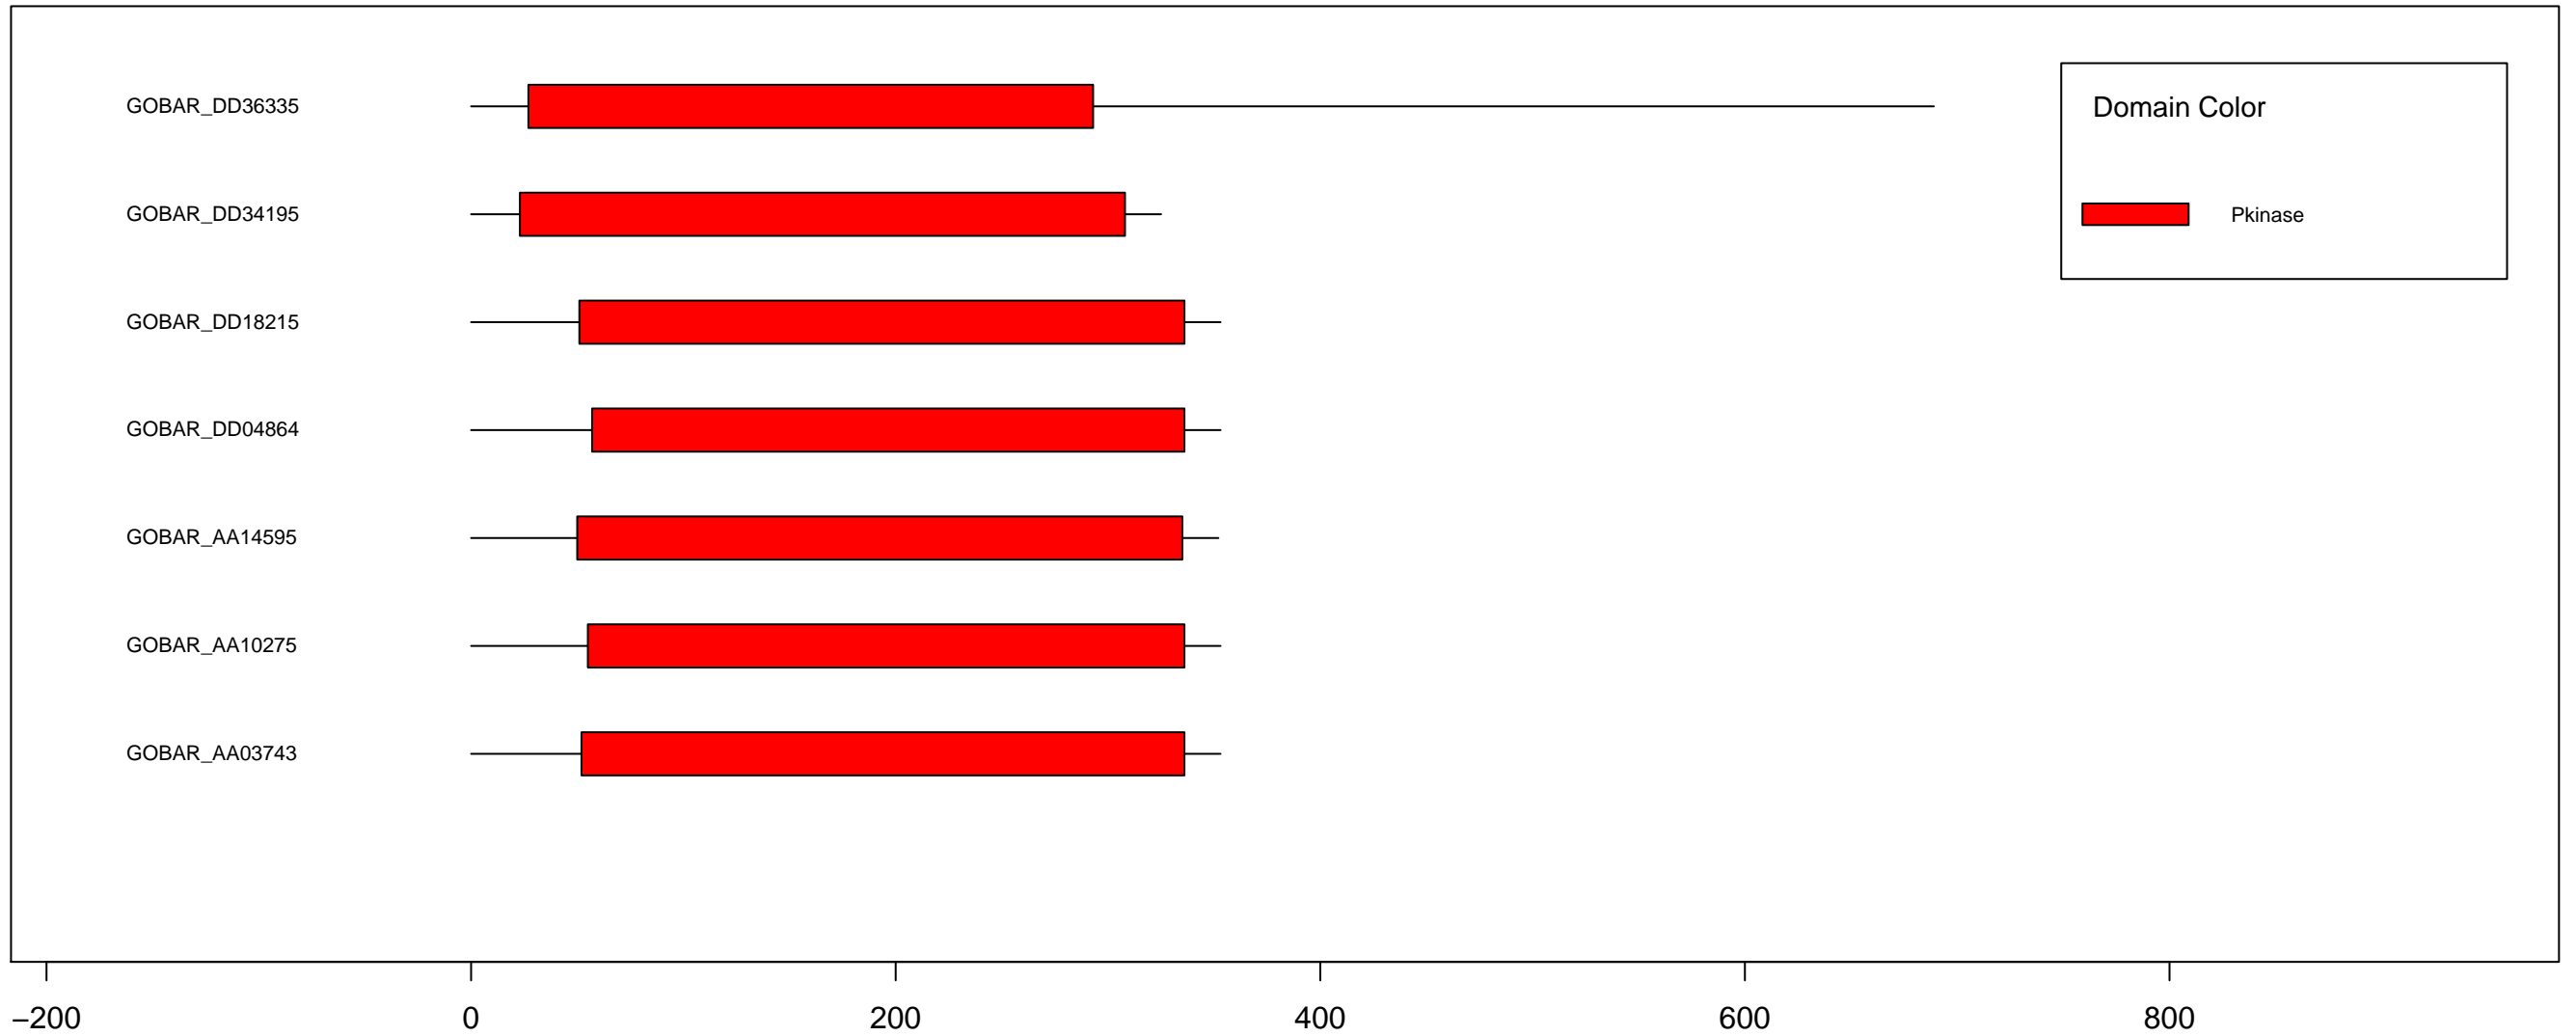

# G.ba NEK domain diagram (all)

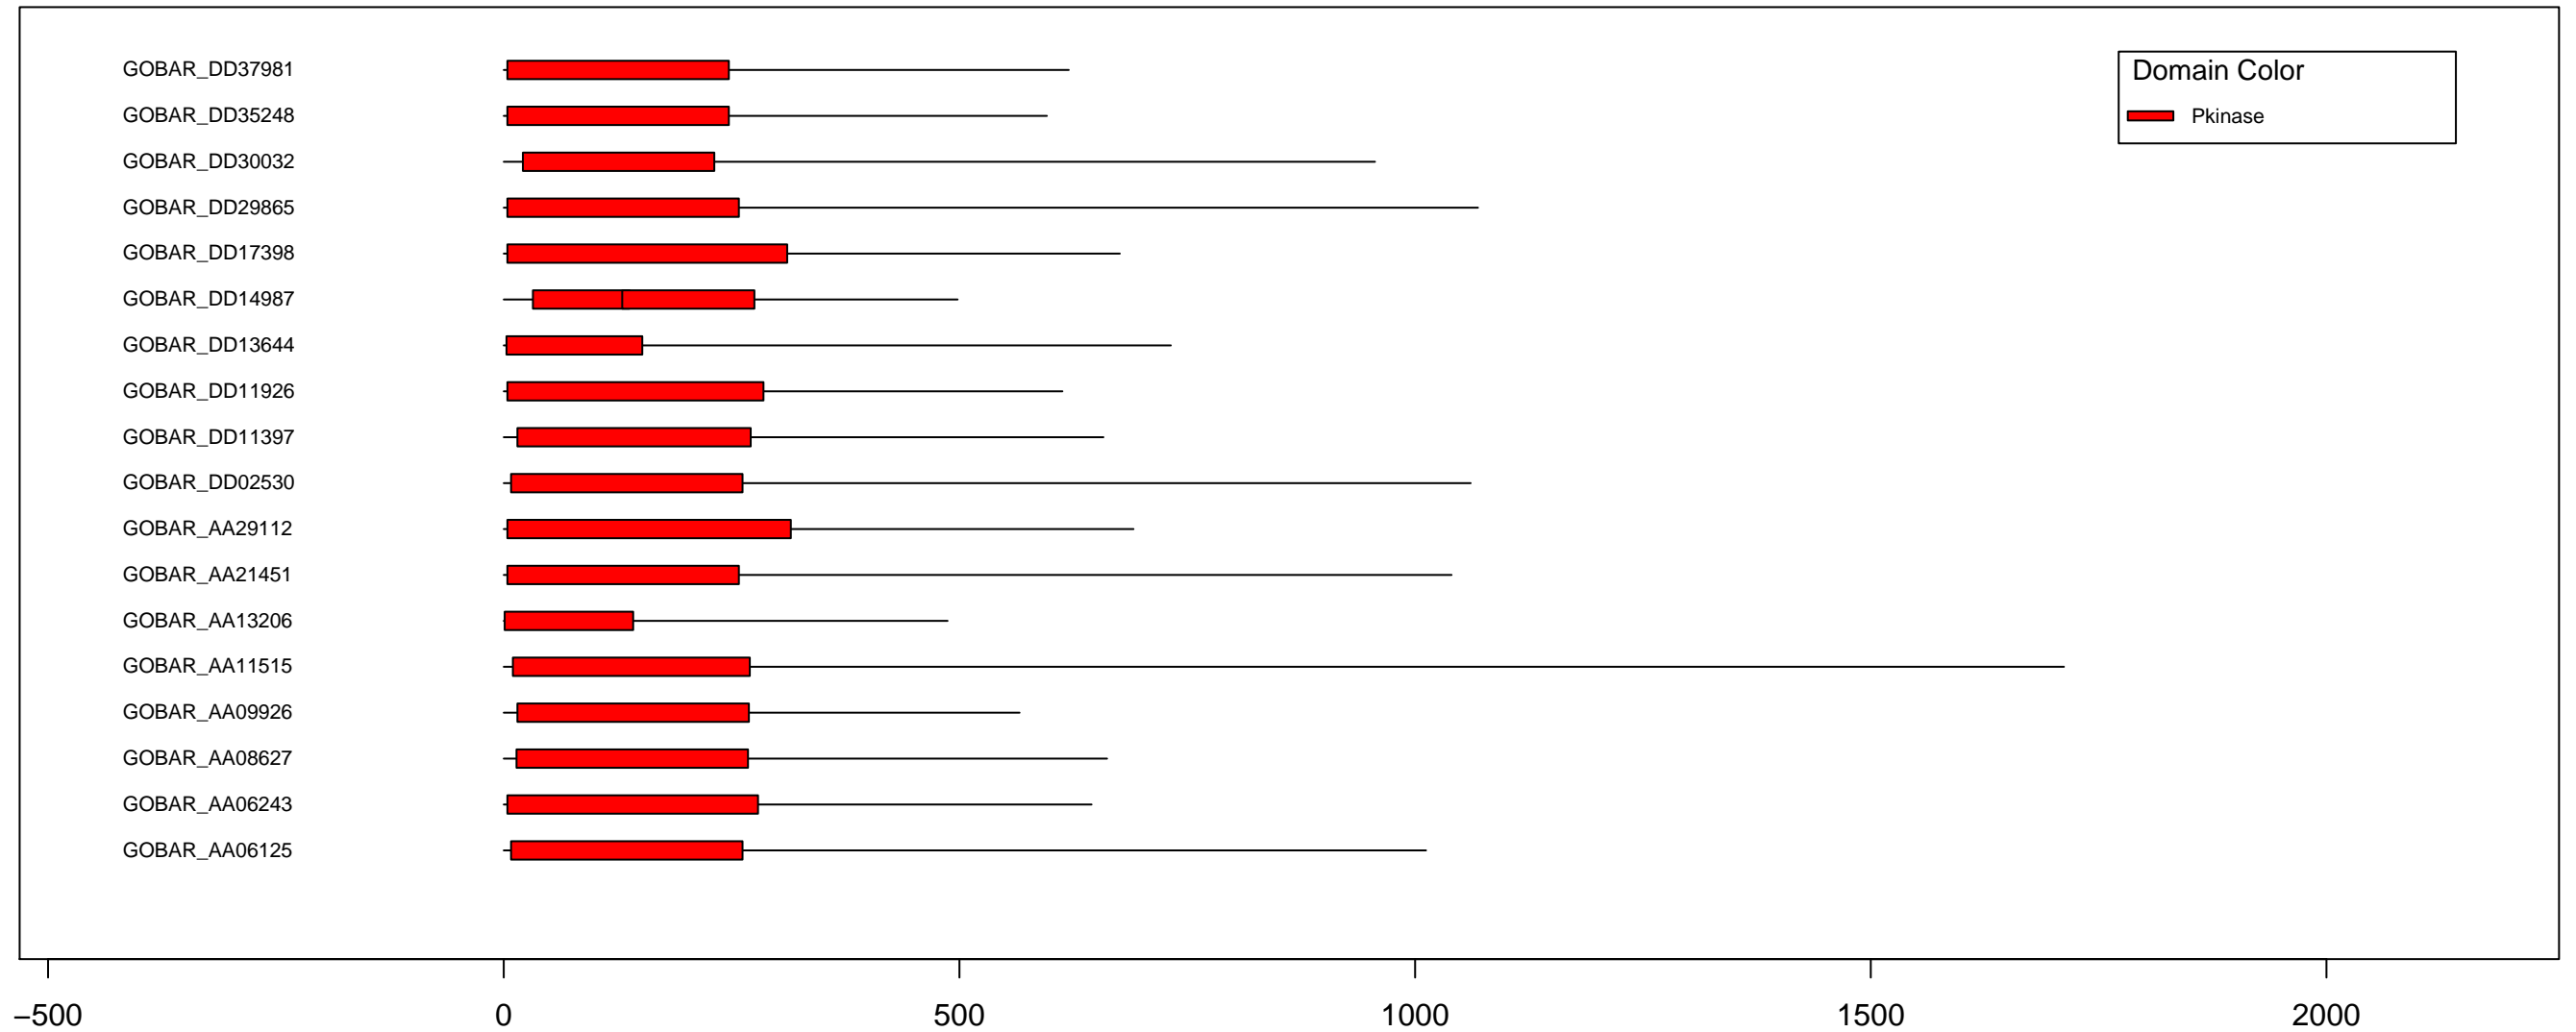

# G.ba PEK\_GCIN2 domain diagram (all)

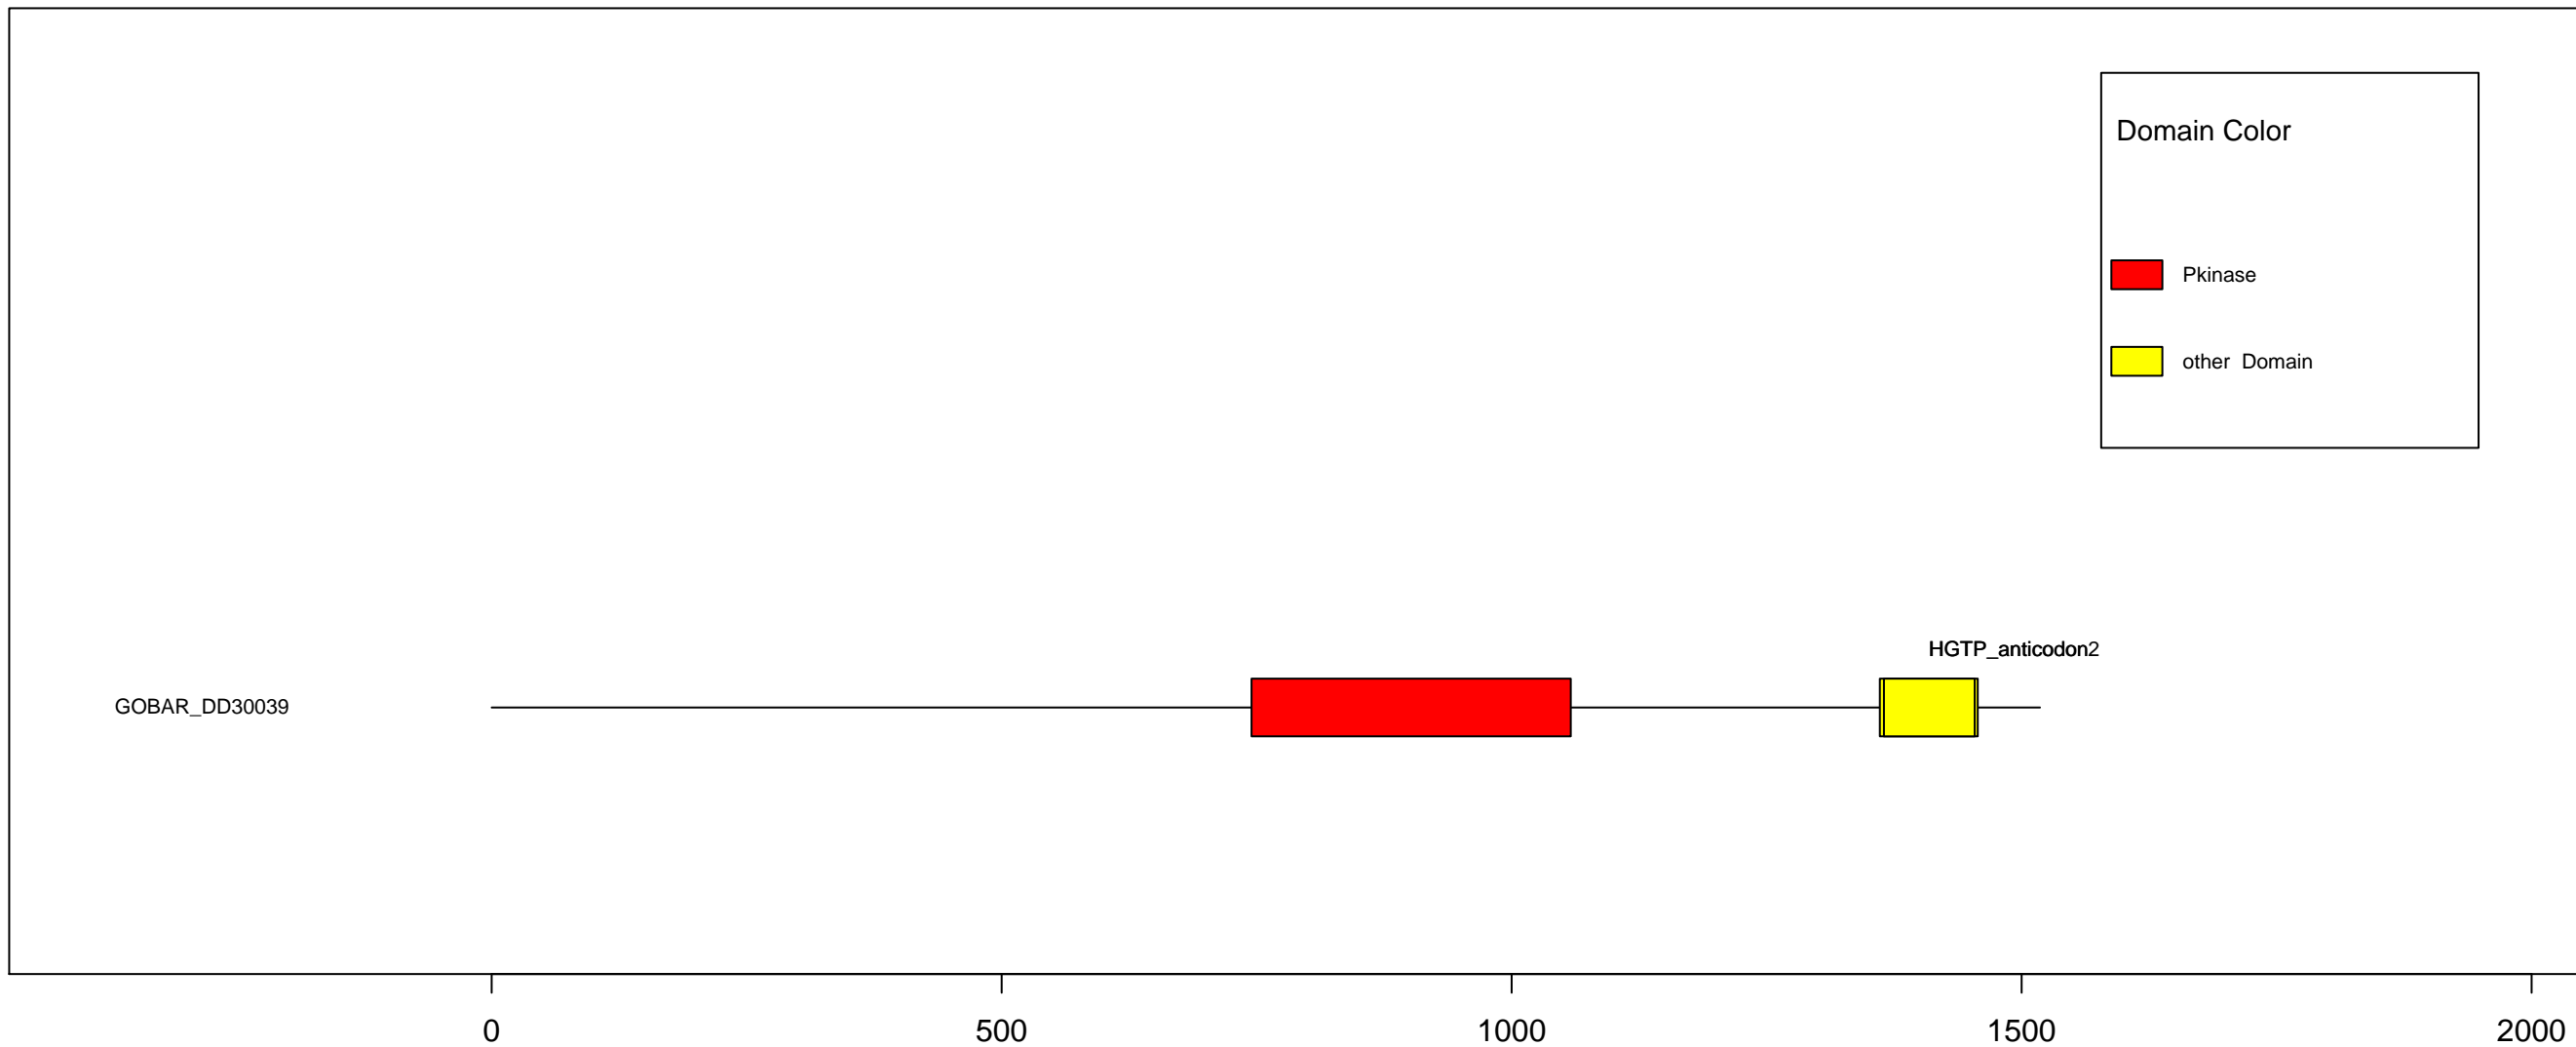

# G.ba PEK\_PEK domain diagram (all)

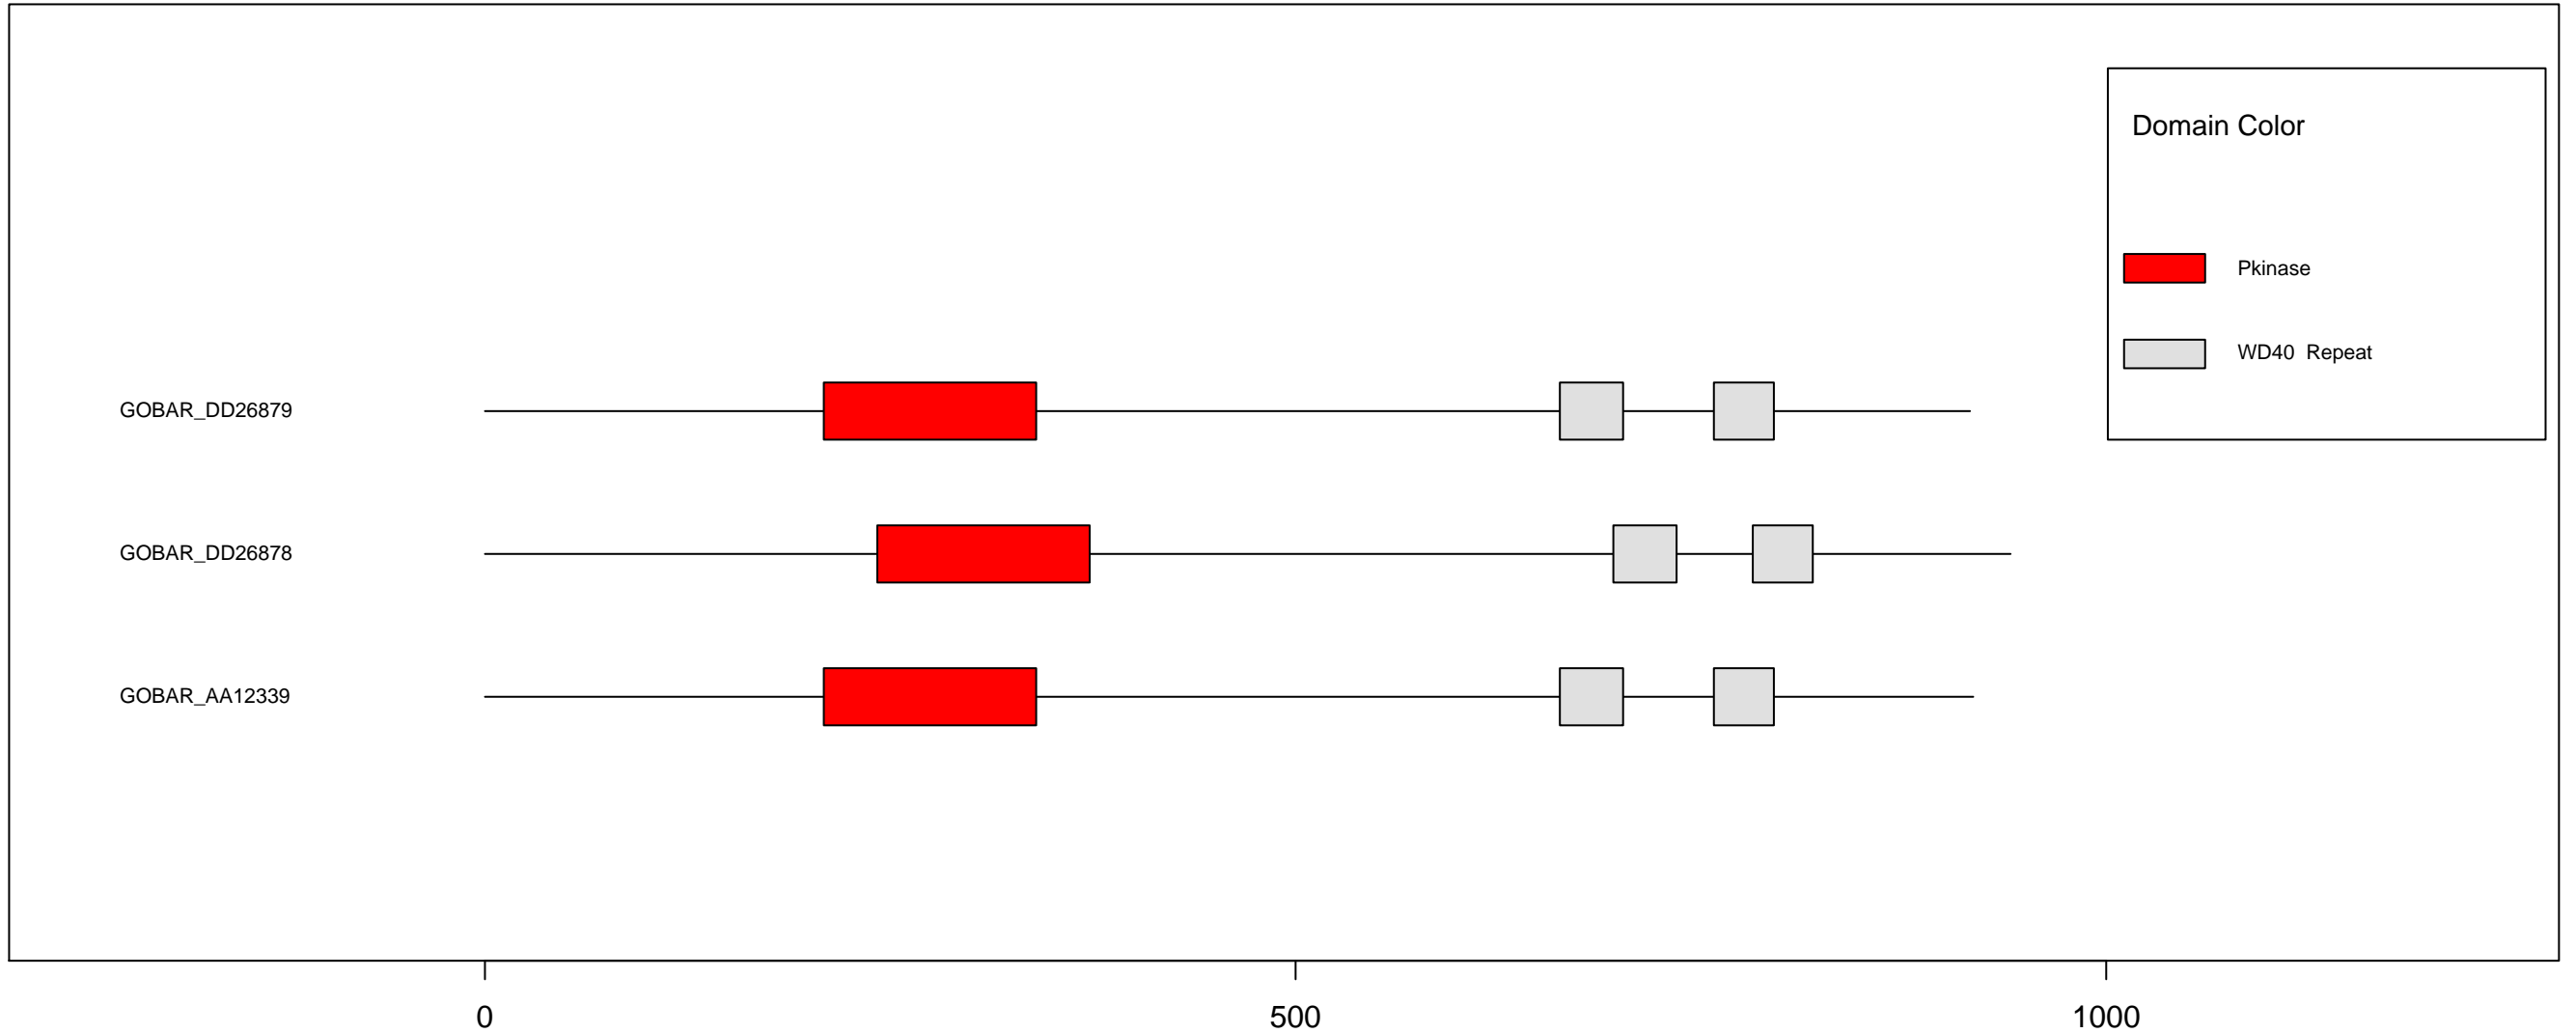

# G.ba RLK-Pelle\_C-LEC domain diagram (all)

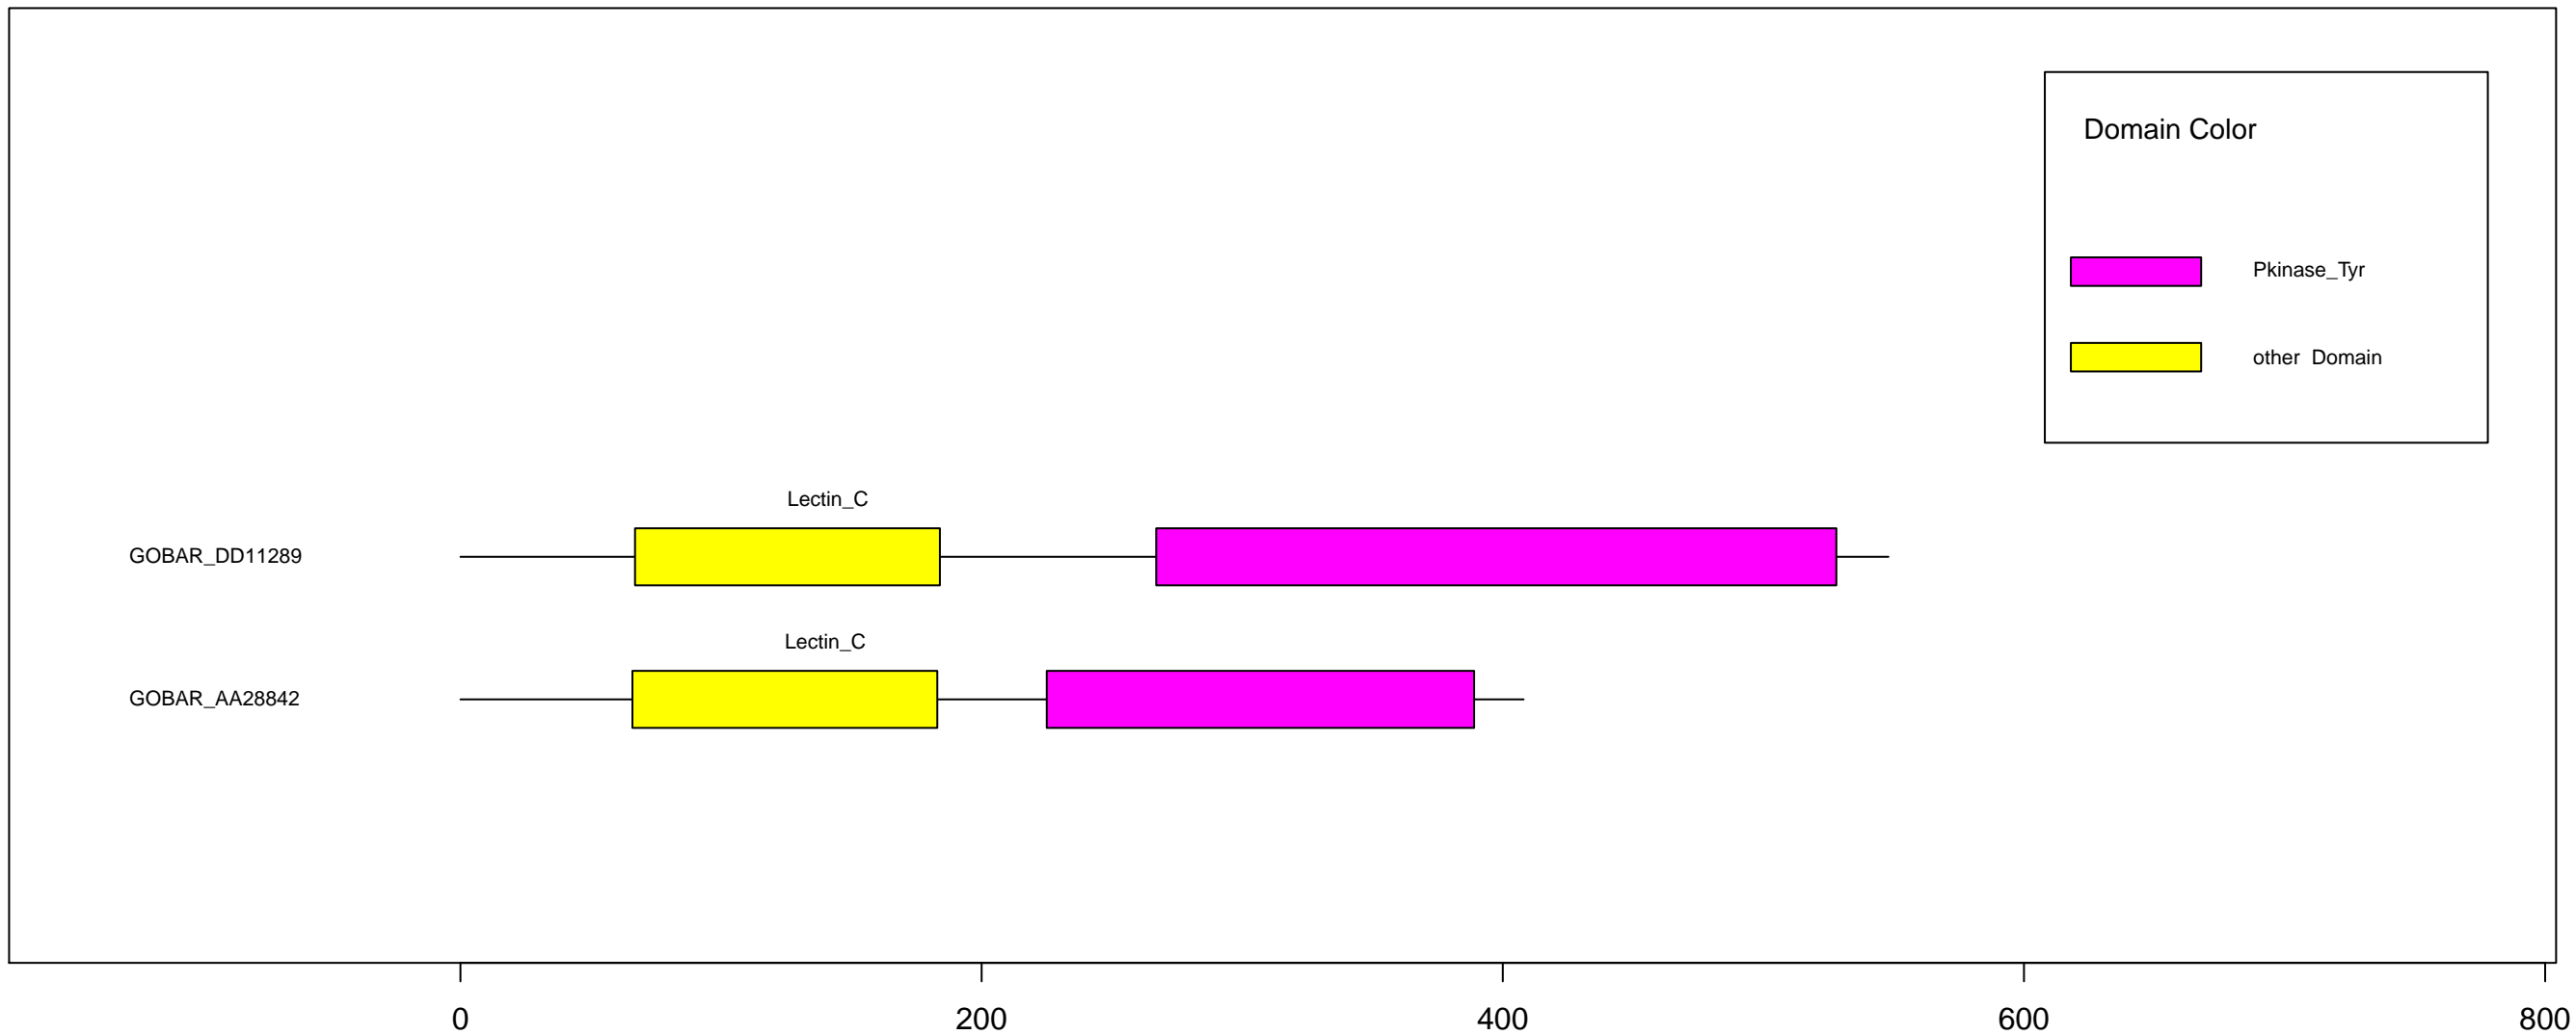

# G.ba RLK-Pelle\_CR4L domain diagram (part 1)

GOBAR\_DD22898  
 GOBAR\_DD21376  
 GOBAR\_DD20278  
 GOBAR\_DD14532  
 GOBAR\_DD07660  
 GOBAR\_DD06163  
 GOBAR\_DD04513  
 GOBAR\_DD04419  
 GOBAR\_DD01054  
 GOBAR\_AA33978  
 GOBAR\_AA31885  
 GOBAR\_AA29749  
 GOBAR\_AA27940  
 GOBAR\_AA23779  
 GOBAR\_AA21775  
 GOBAR\_AA18916  
 GOBAR\_AA17902  
 GOBAR\_AA17136  
 GOBAR\_AA10706  
 GOBAR\_AA07192

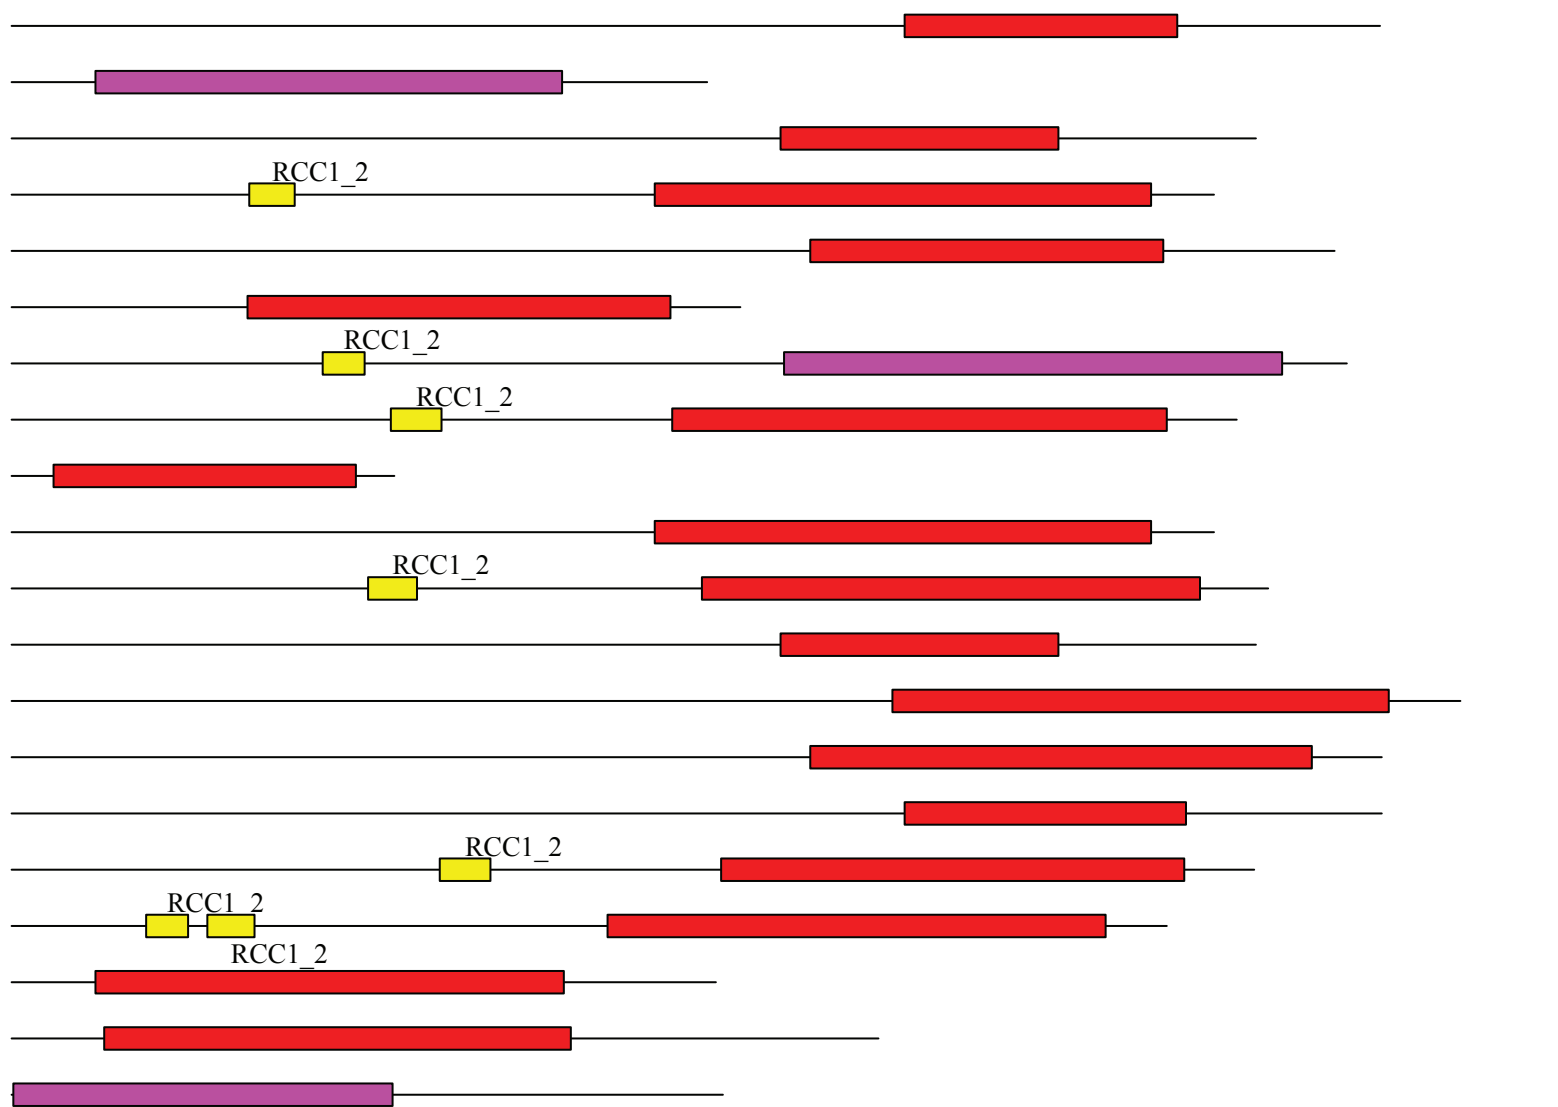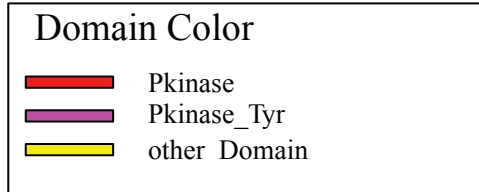

-200

0

200

400

600

800

1000

G.ba RLK-Pelle\_CR4L domain diagram (part 2)

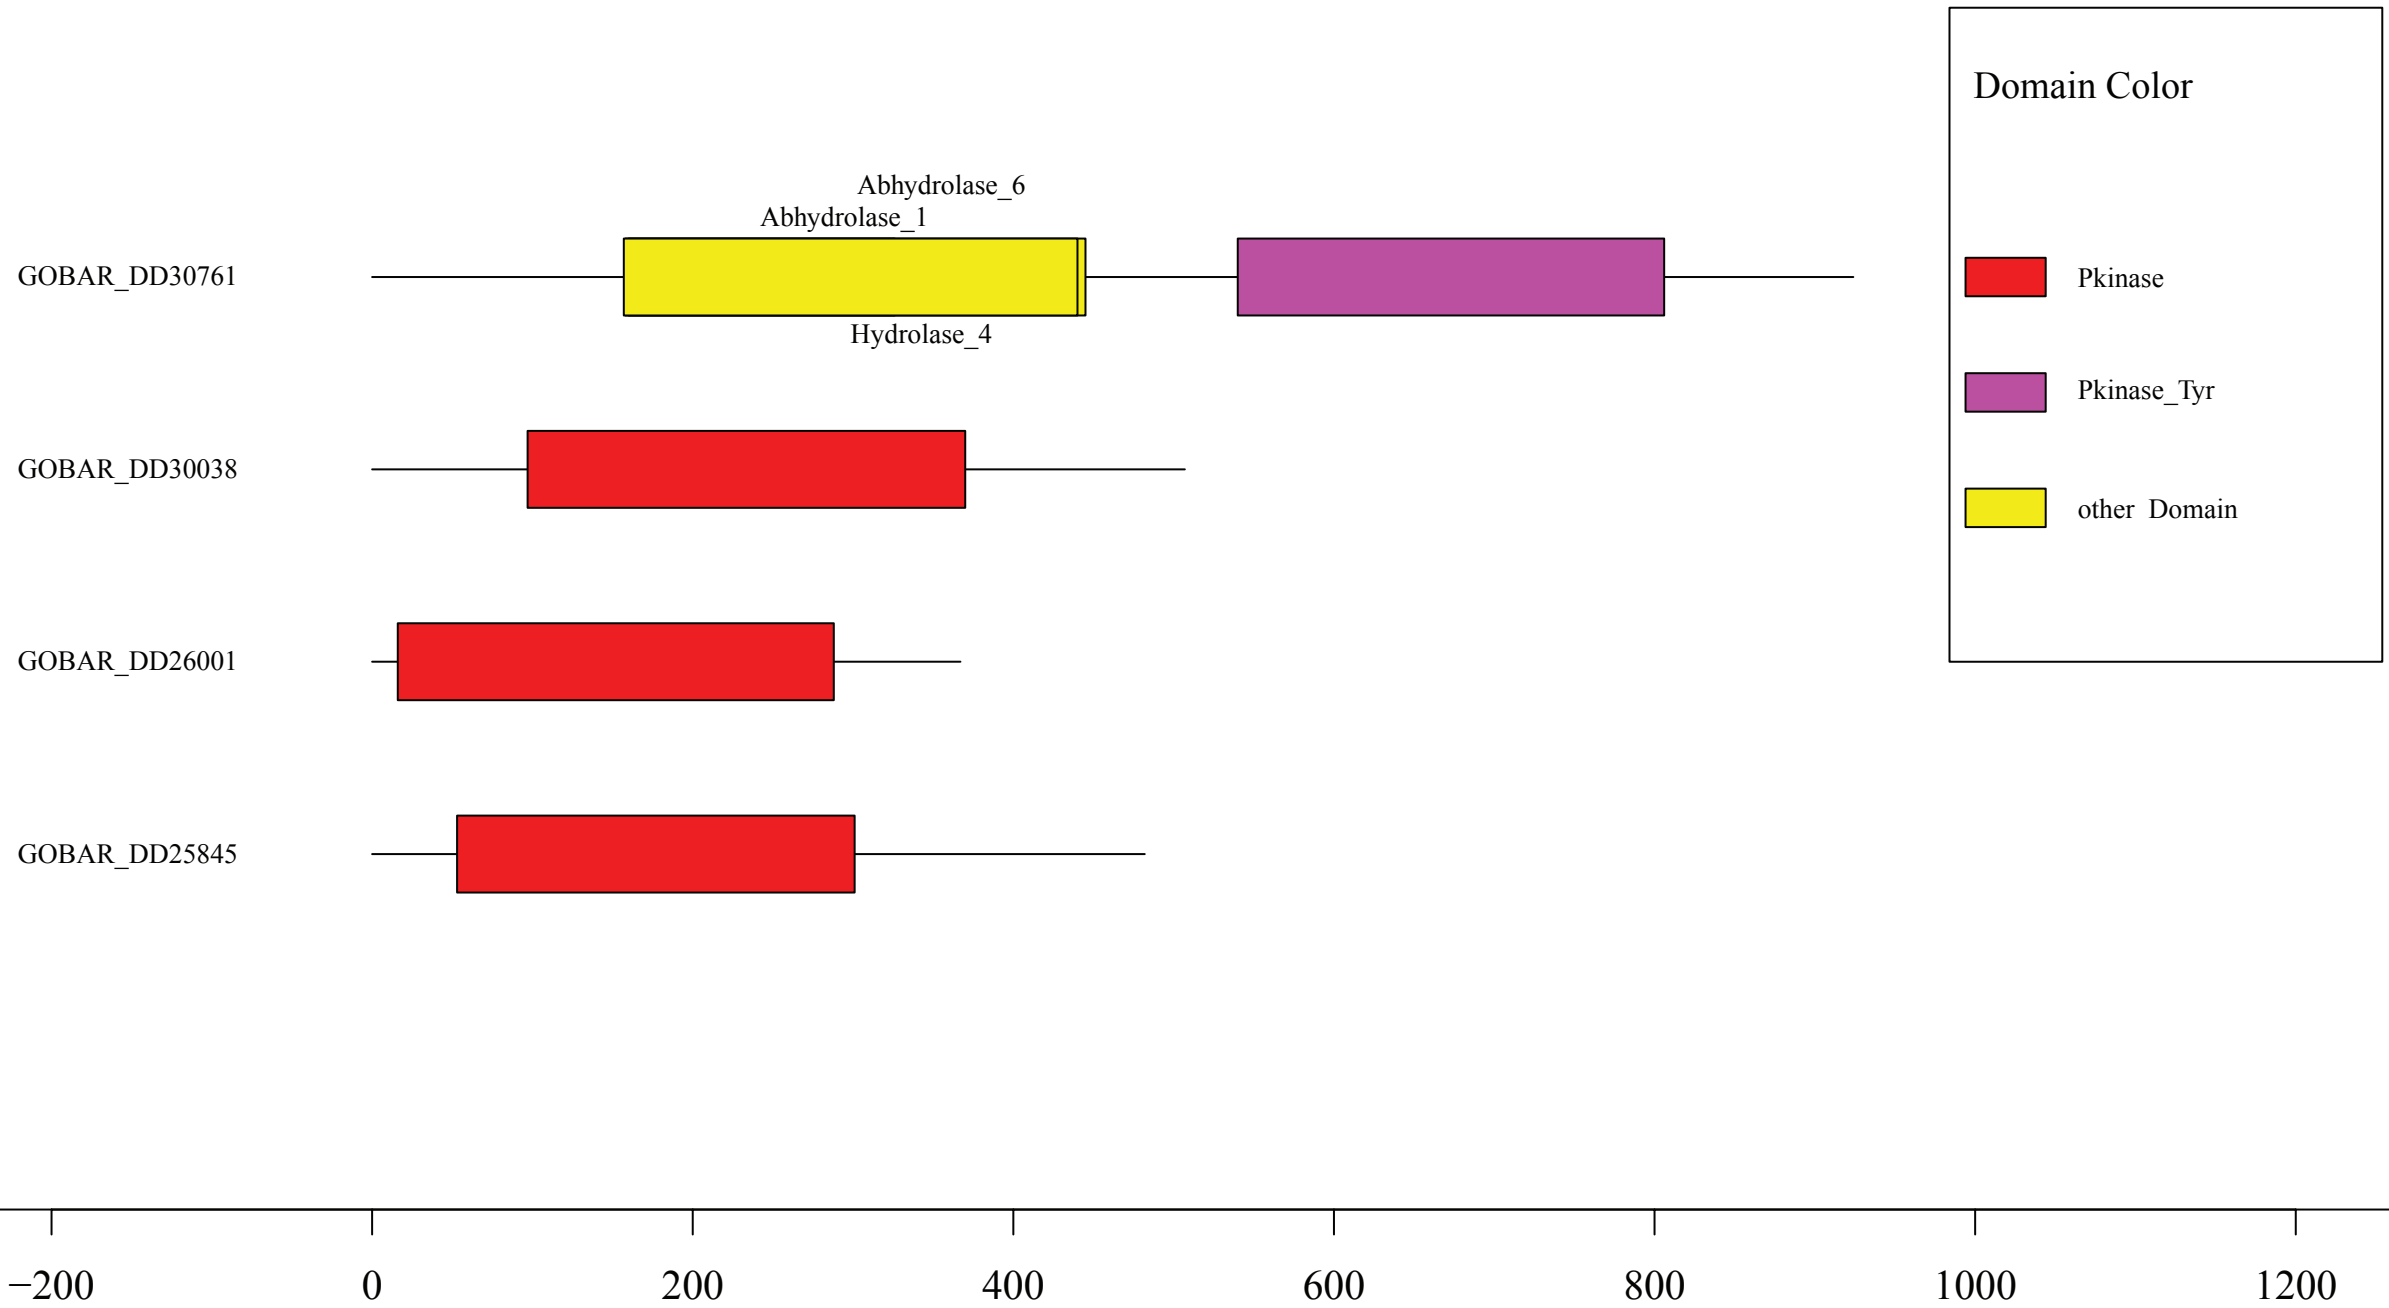



### G.ba RLK-Pelle\_CrRLK1L-1 domain diagram (part 1)

GOBAR\_AA10620  
 GOBAR\_AA10189  
 GOBAR\_AA08667  
 GOBAR\_AA08664  
 GOBAR\_AA08663  
 GOBAR\_AA08283  
 GOBAR\_AA08281  
 GOBAR\_AA08280  
 GOBAR\_AA07659  
 GOBAR\_AA07054  
 GOBAR\_AA06144  
 GOBAR\_AA05850  
 GOBAR\_AA05849  
 GOBAR\_AA04828  
 GOBAR\_AA04825  
 GOBAR\_AA04819  
 GOBAR\_AA04818  
 GOBAR\_AA02861  
 GOBAR\_AA02860  
 GOBAR\_AA02332

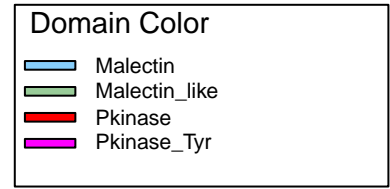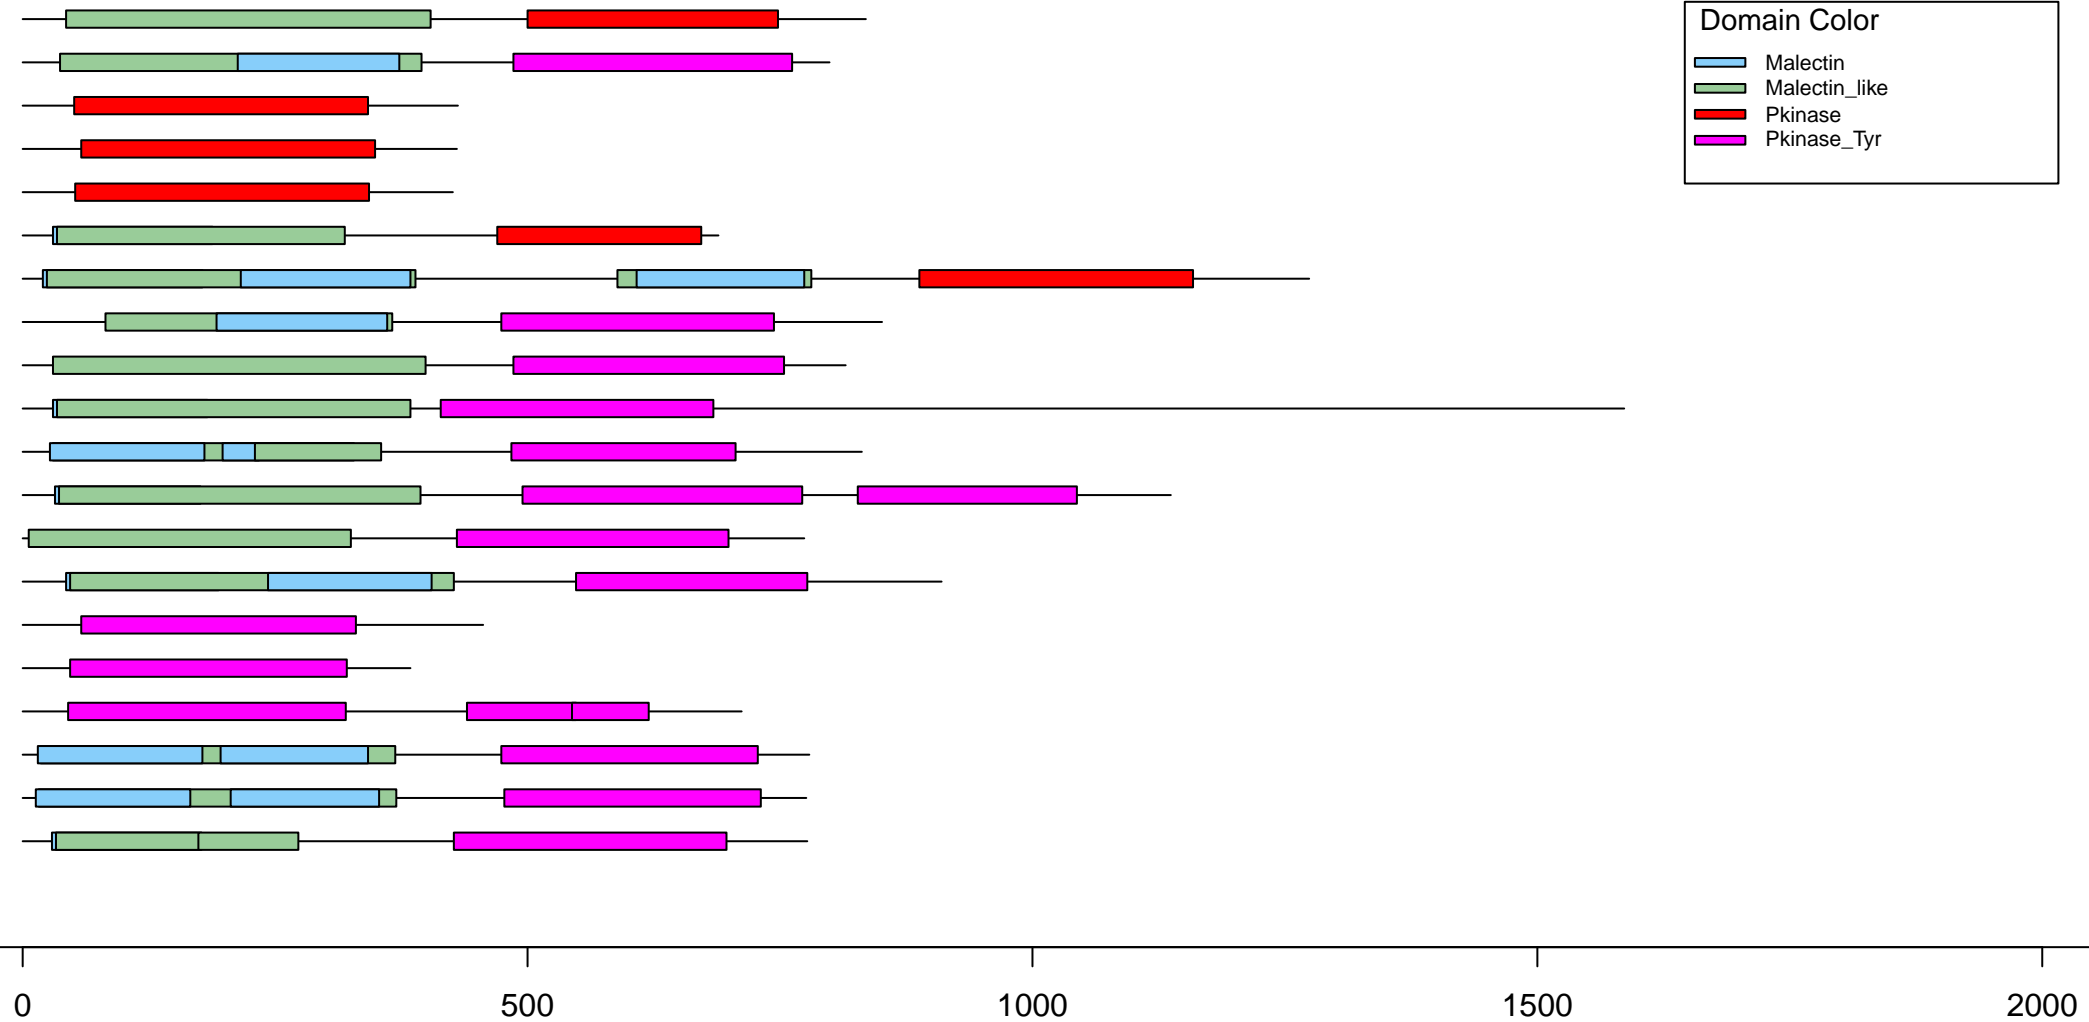

### G.ba RLK-Pelle\_CrRLK1L-1 domain diagram (part 2)

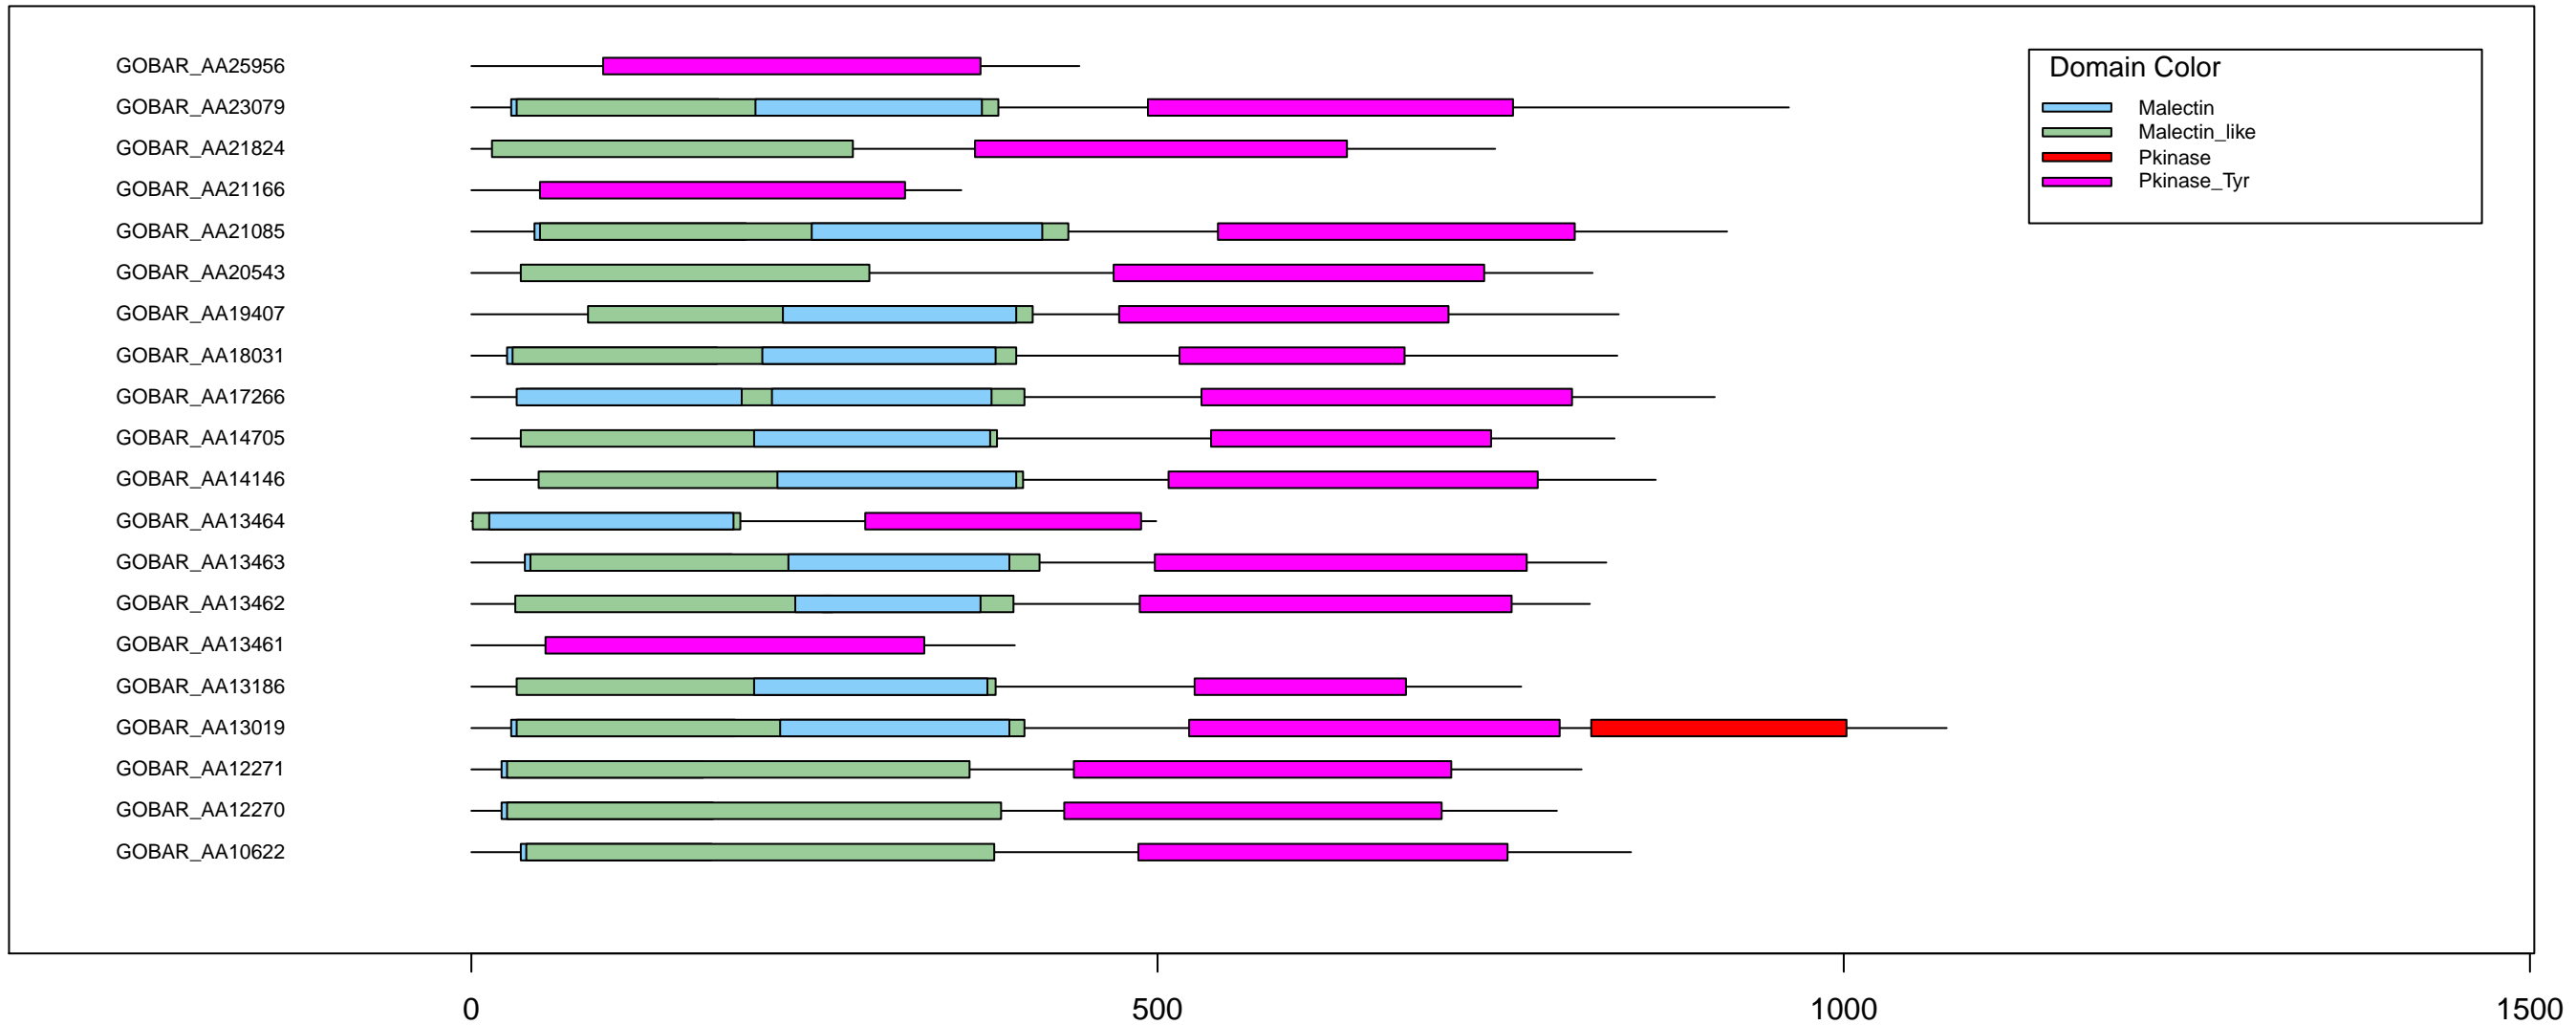

### G.ba RLK-Pelle\_CrRLK1L-1 domain diagram (part 3)

GOBAR\_DD03848  
GOBAR\_DD03748  
GOBAR\_DD03746  
GOBAR\_DD03745  
GOBAR\_DD03742  
GOBAR\_DD03741  
GOBAR\_DD03342  
GOBAR\_DD03077  
GOBAR\_DD02849  
GOBAR\_DD00397  
GOBAR\_AA40598  
GOBAR\_AA37645  
GOBAR\_AA37193  
GOBAR\_AA36907  
GOBAR\_AA35692  
GOBAR\_AA32608  
GOBAR\_AA29592  
GOBAR\_AA28570  
GOBAR\_AA28140  
GOBAR\_AA27626

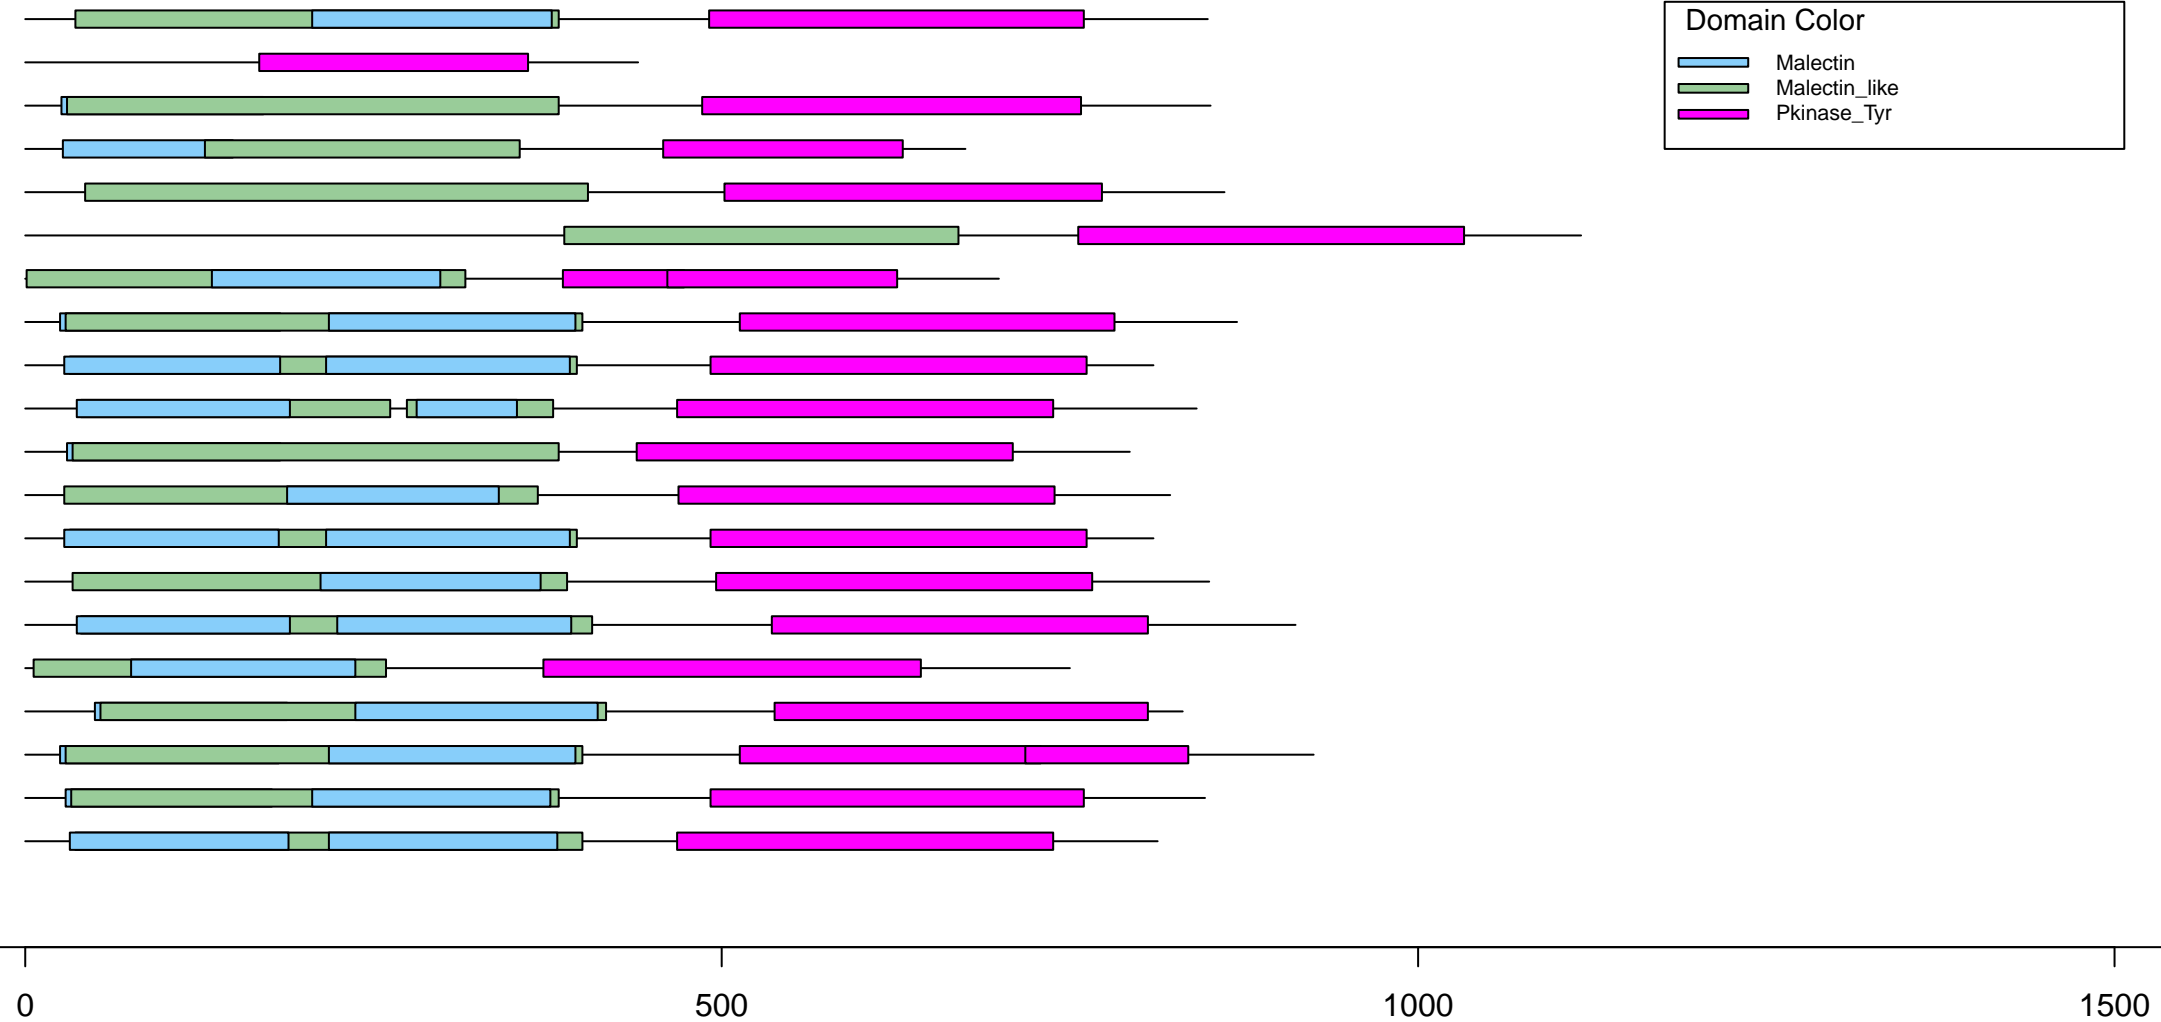

### G.ba RLK-Pelle\_CrRLK1L-1 domain diagram (part 4)

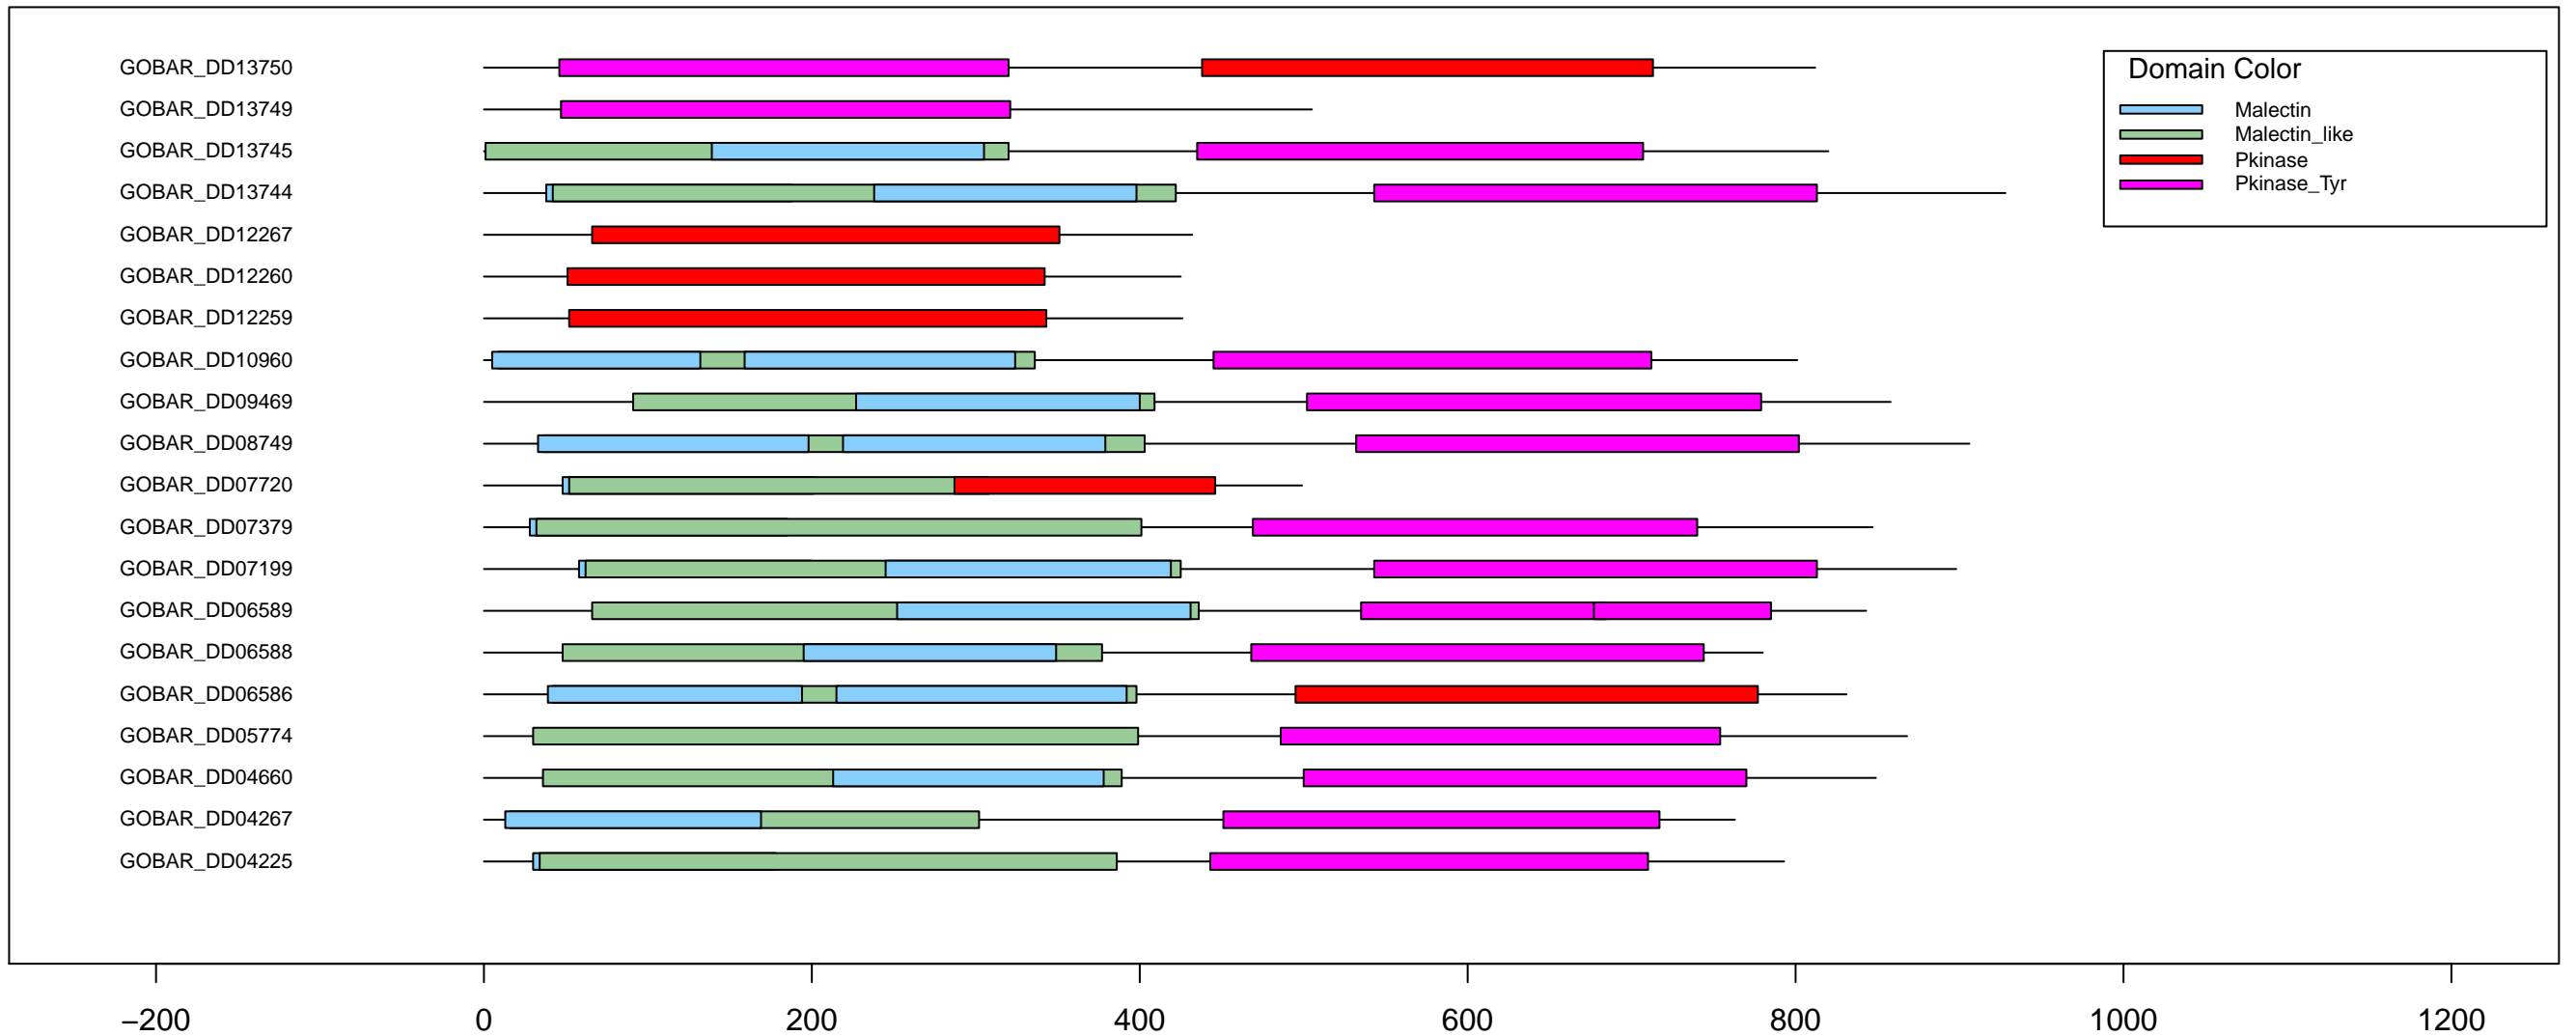

### G.ba RLK-Pelle\_CrRLK1L-1 domain diagram (part 5)

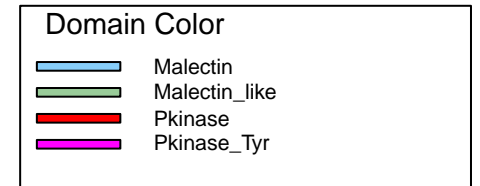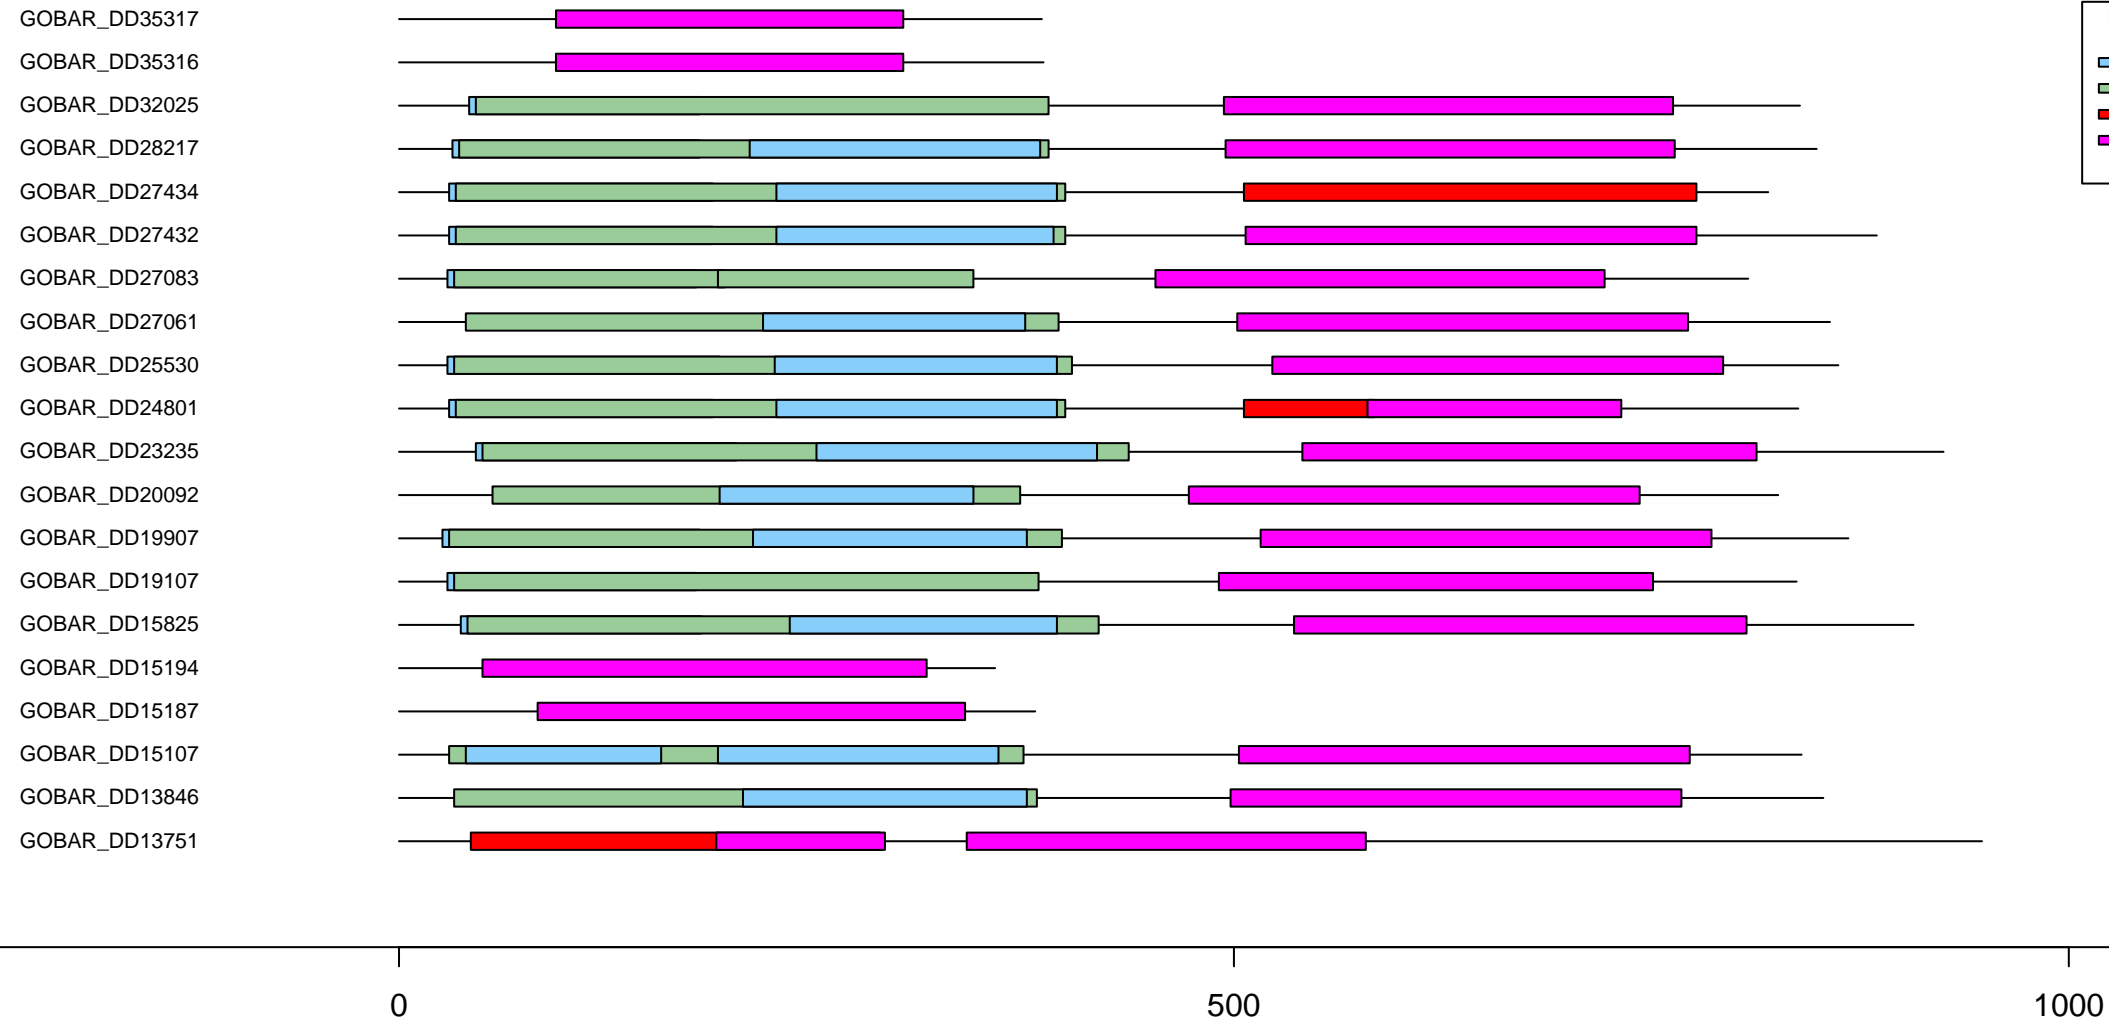

### G.ba RLK-Pelle\_CrRLK1L-1 domain diagram (part 6)

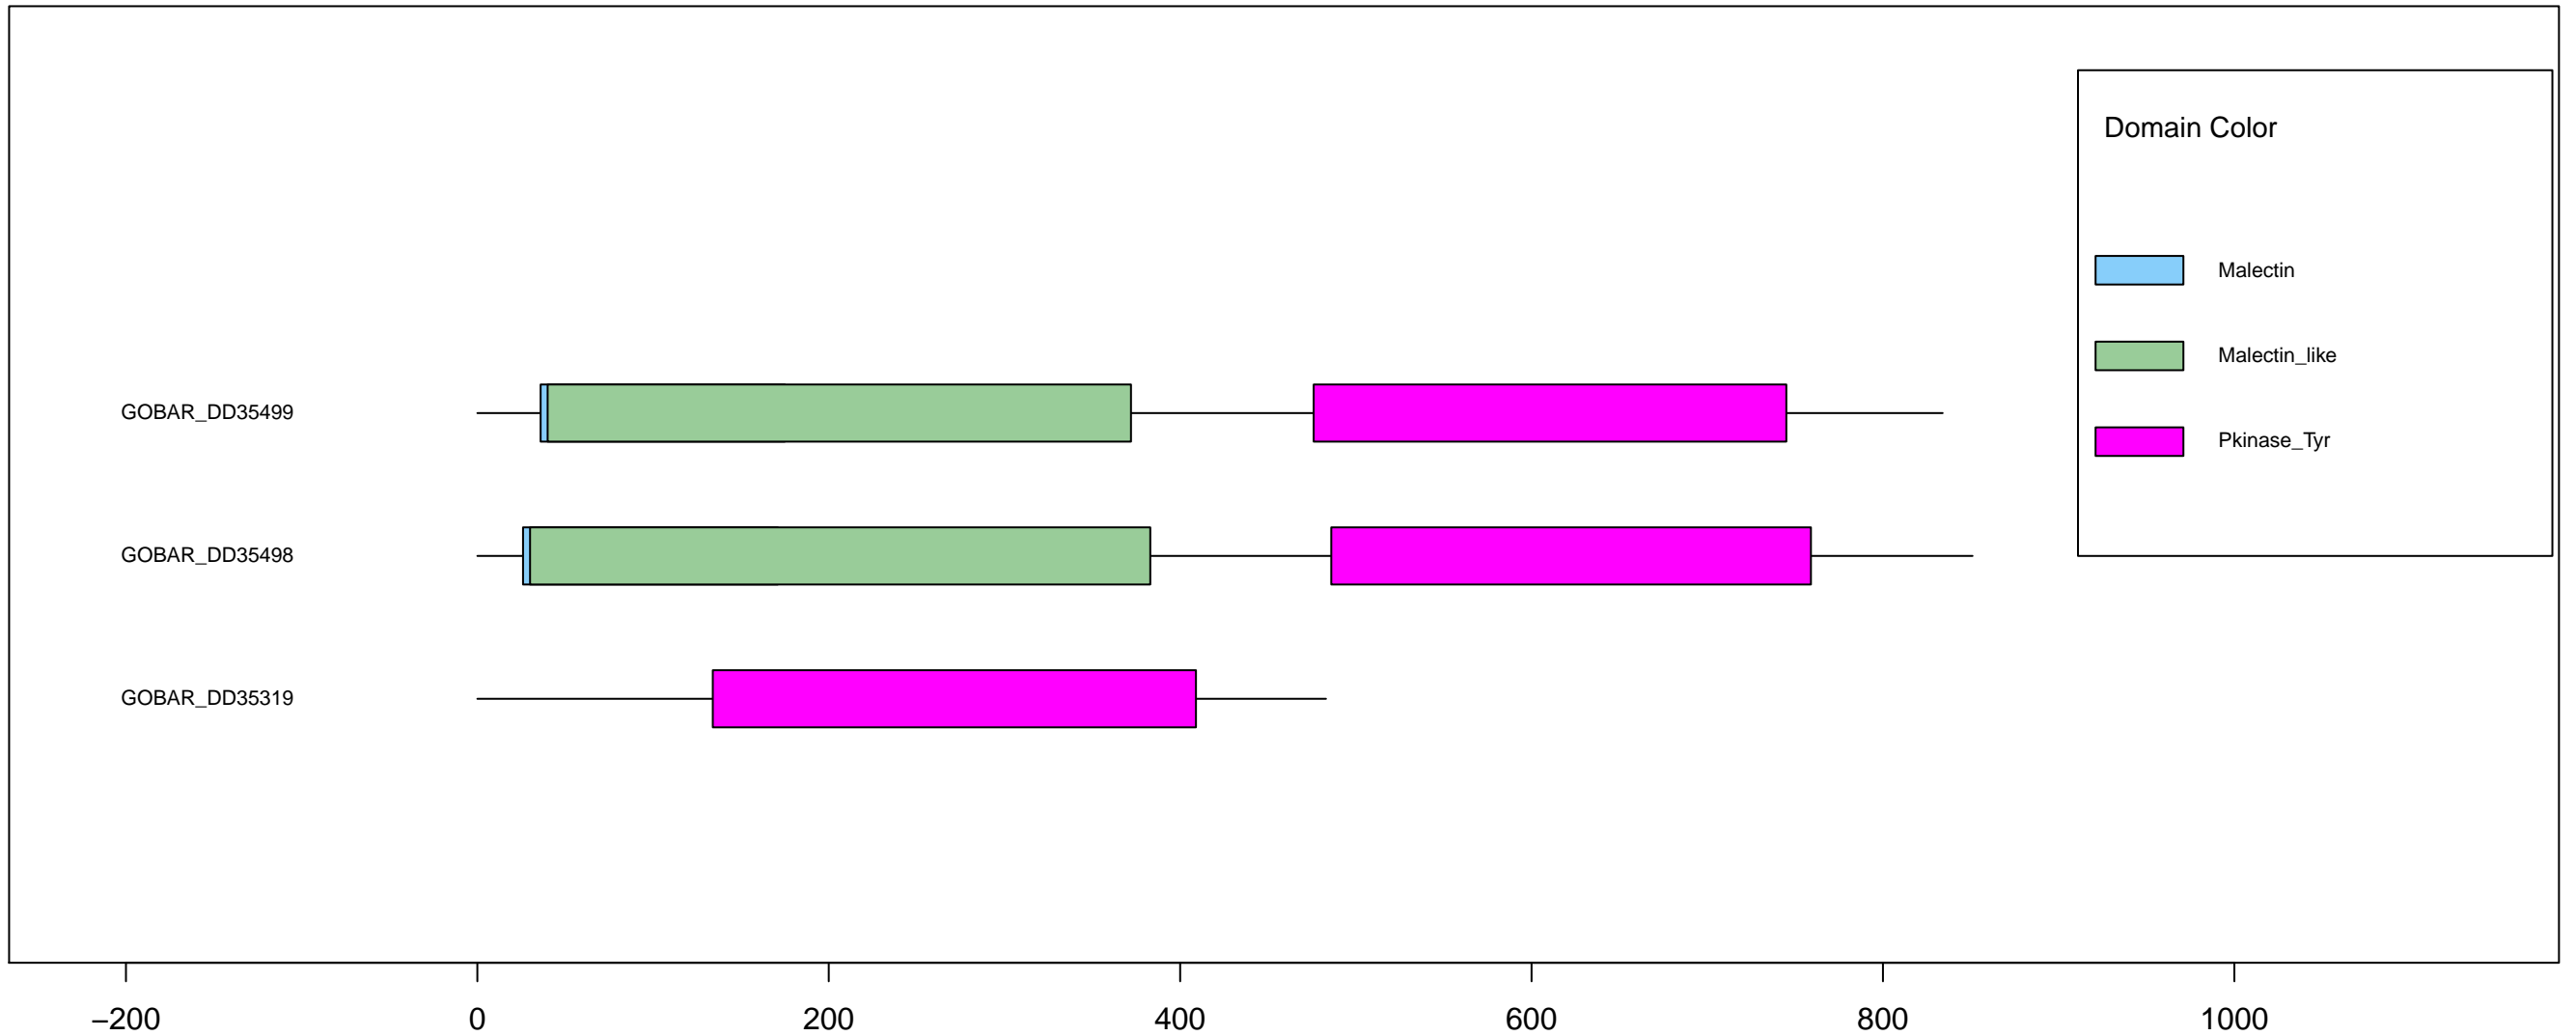

### G.ba RLK-Pelle\_DLSV domain diagram (part 1)

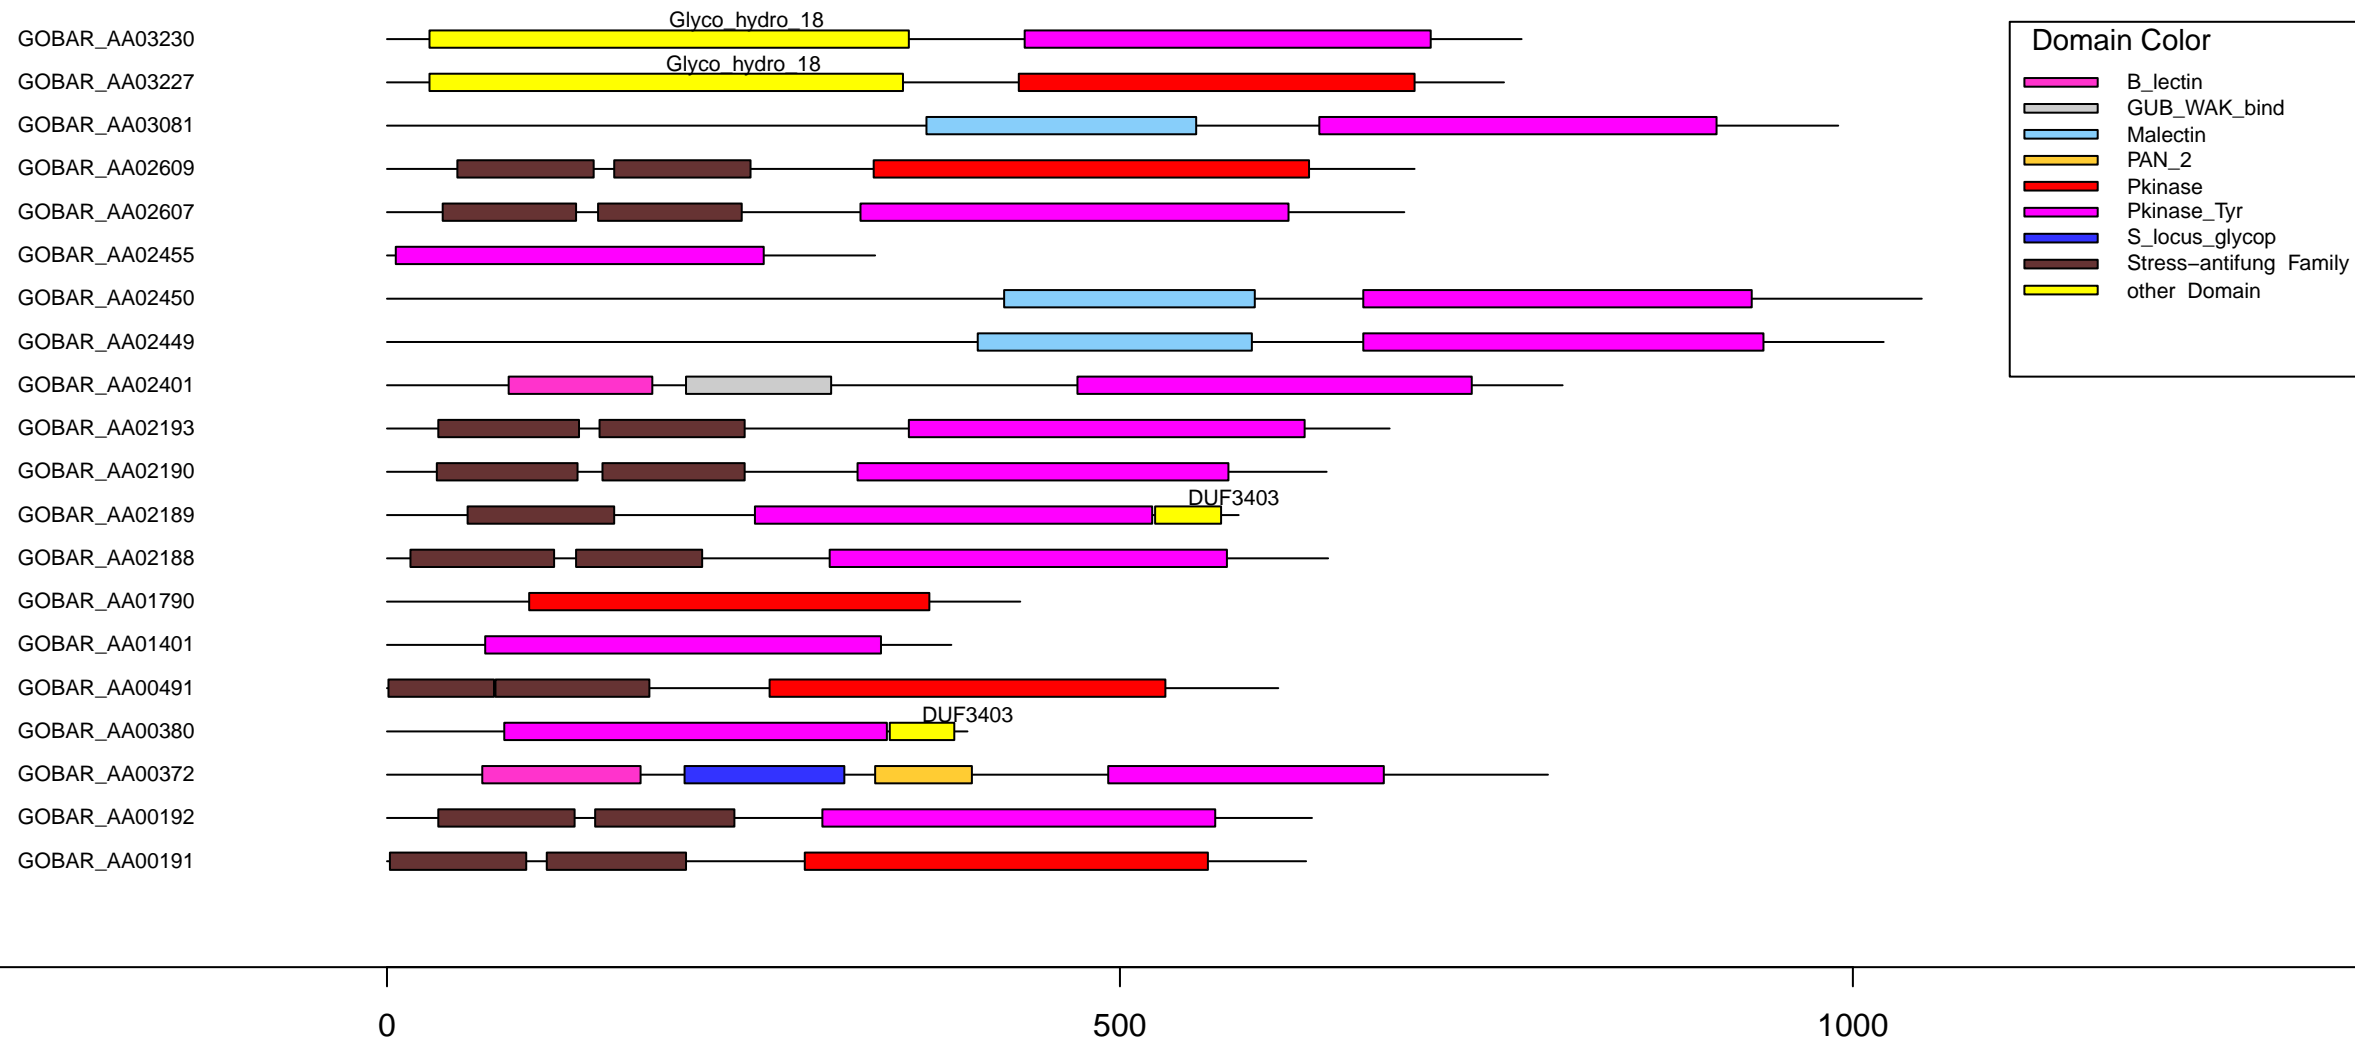

### G.ba RLK-Pelle\_DLSV domain diagram (part 2)

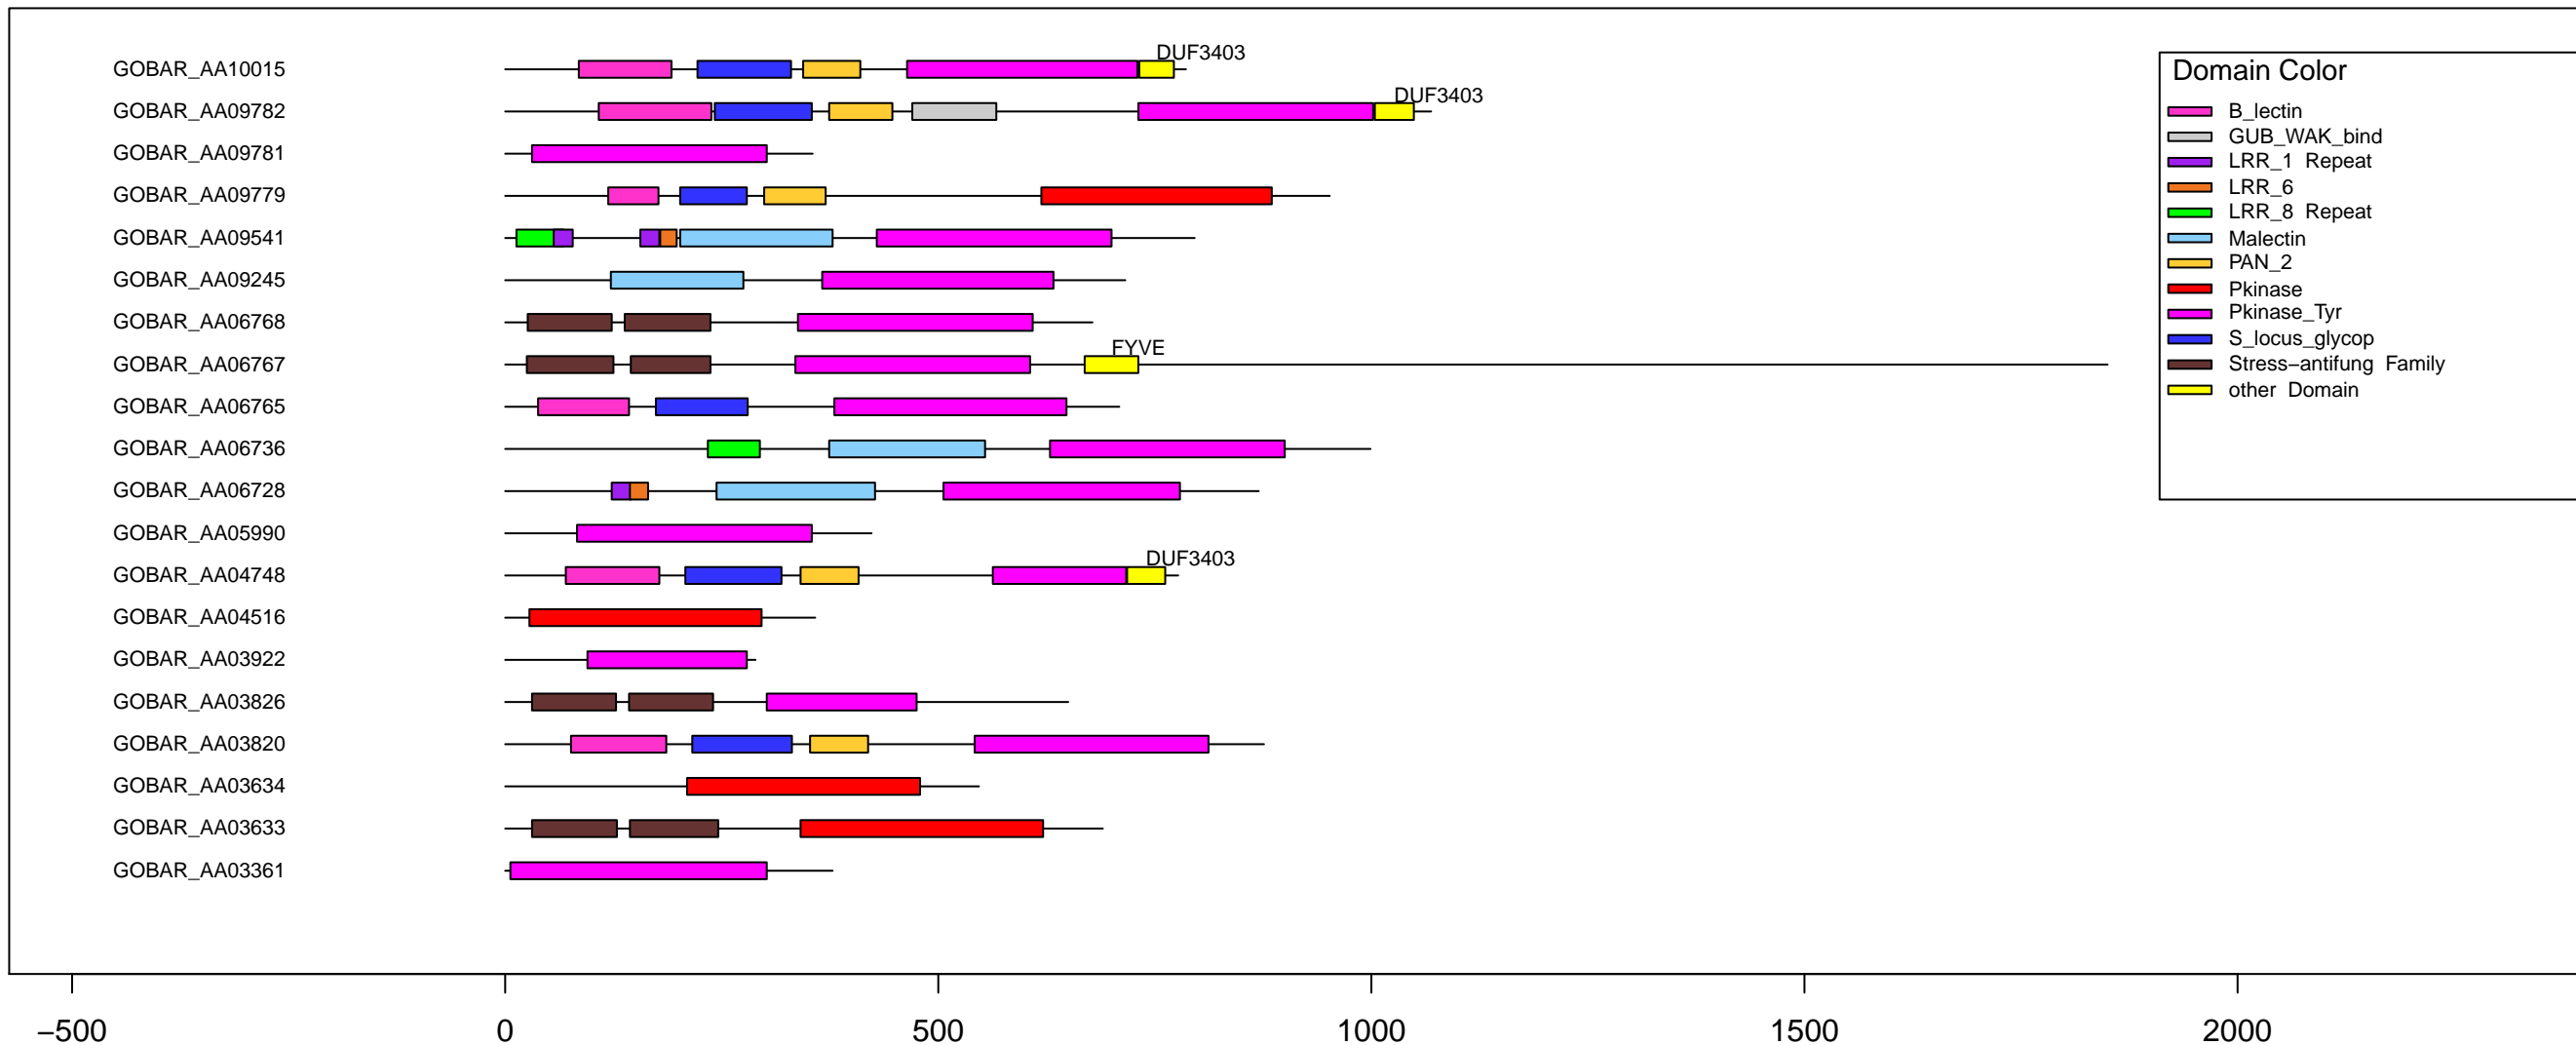



### G.ba RLK-Pelle\_DLSV domain diagram (part 3)

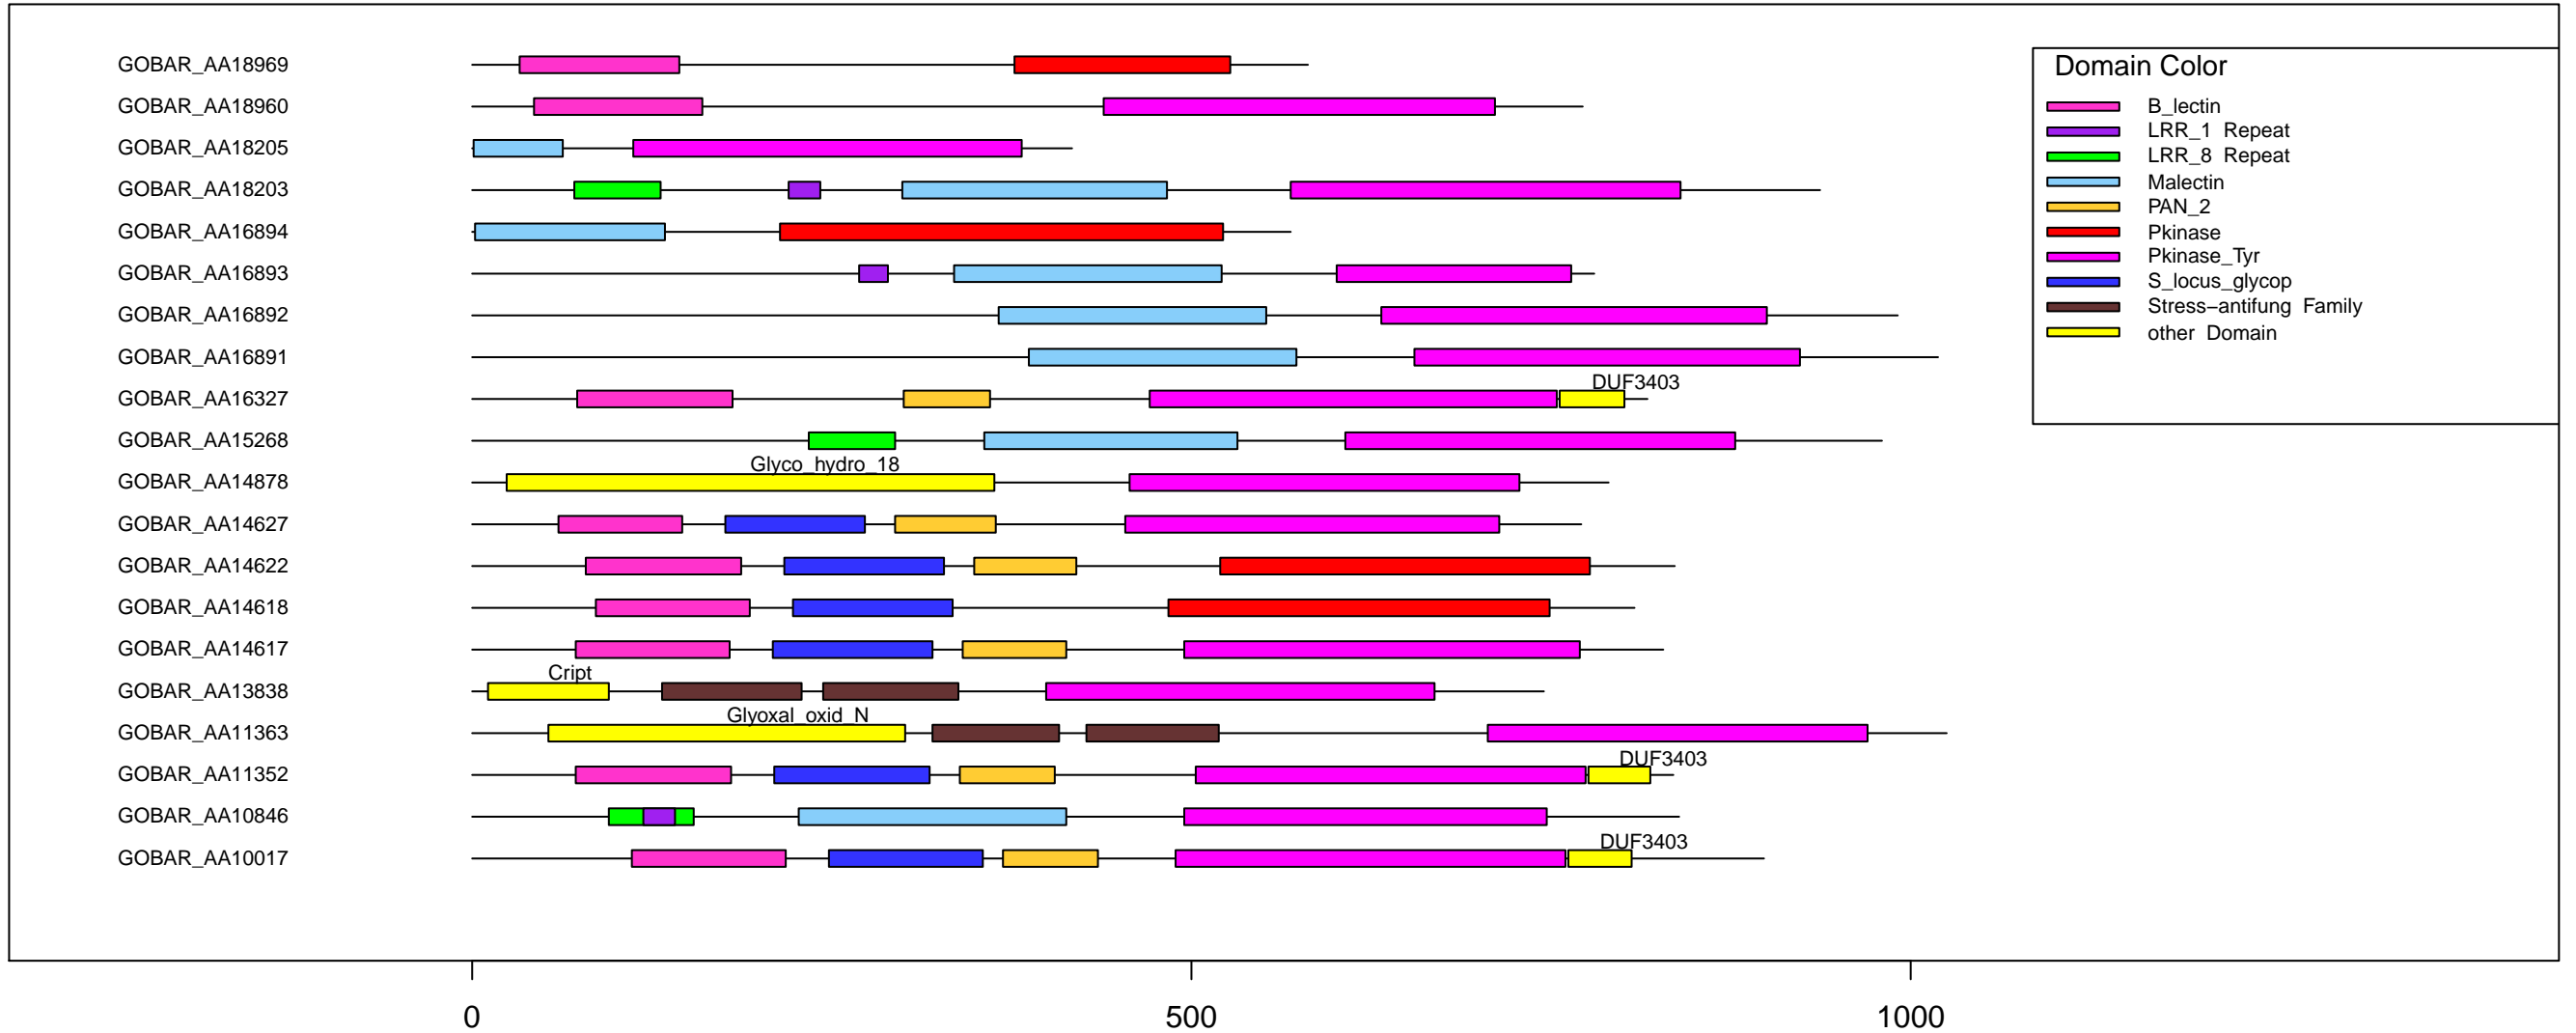

### G.ba RLK-Pelle\_DLSV domain diagram (part 4)

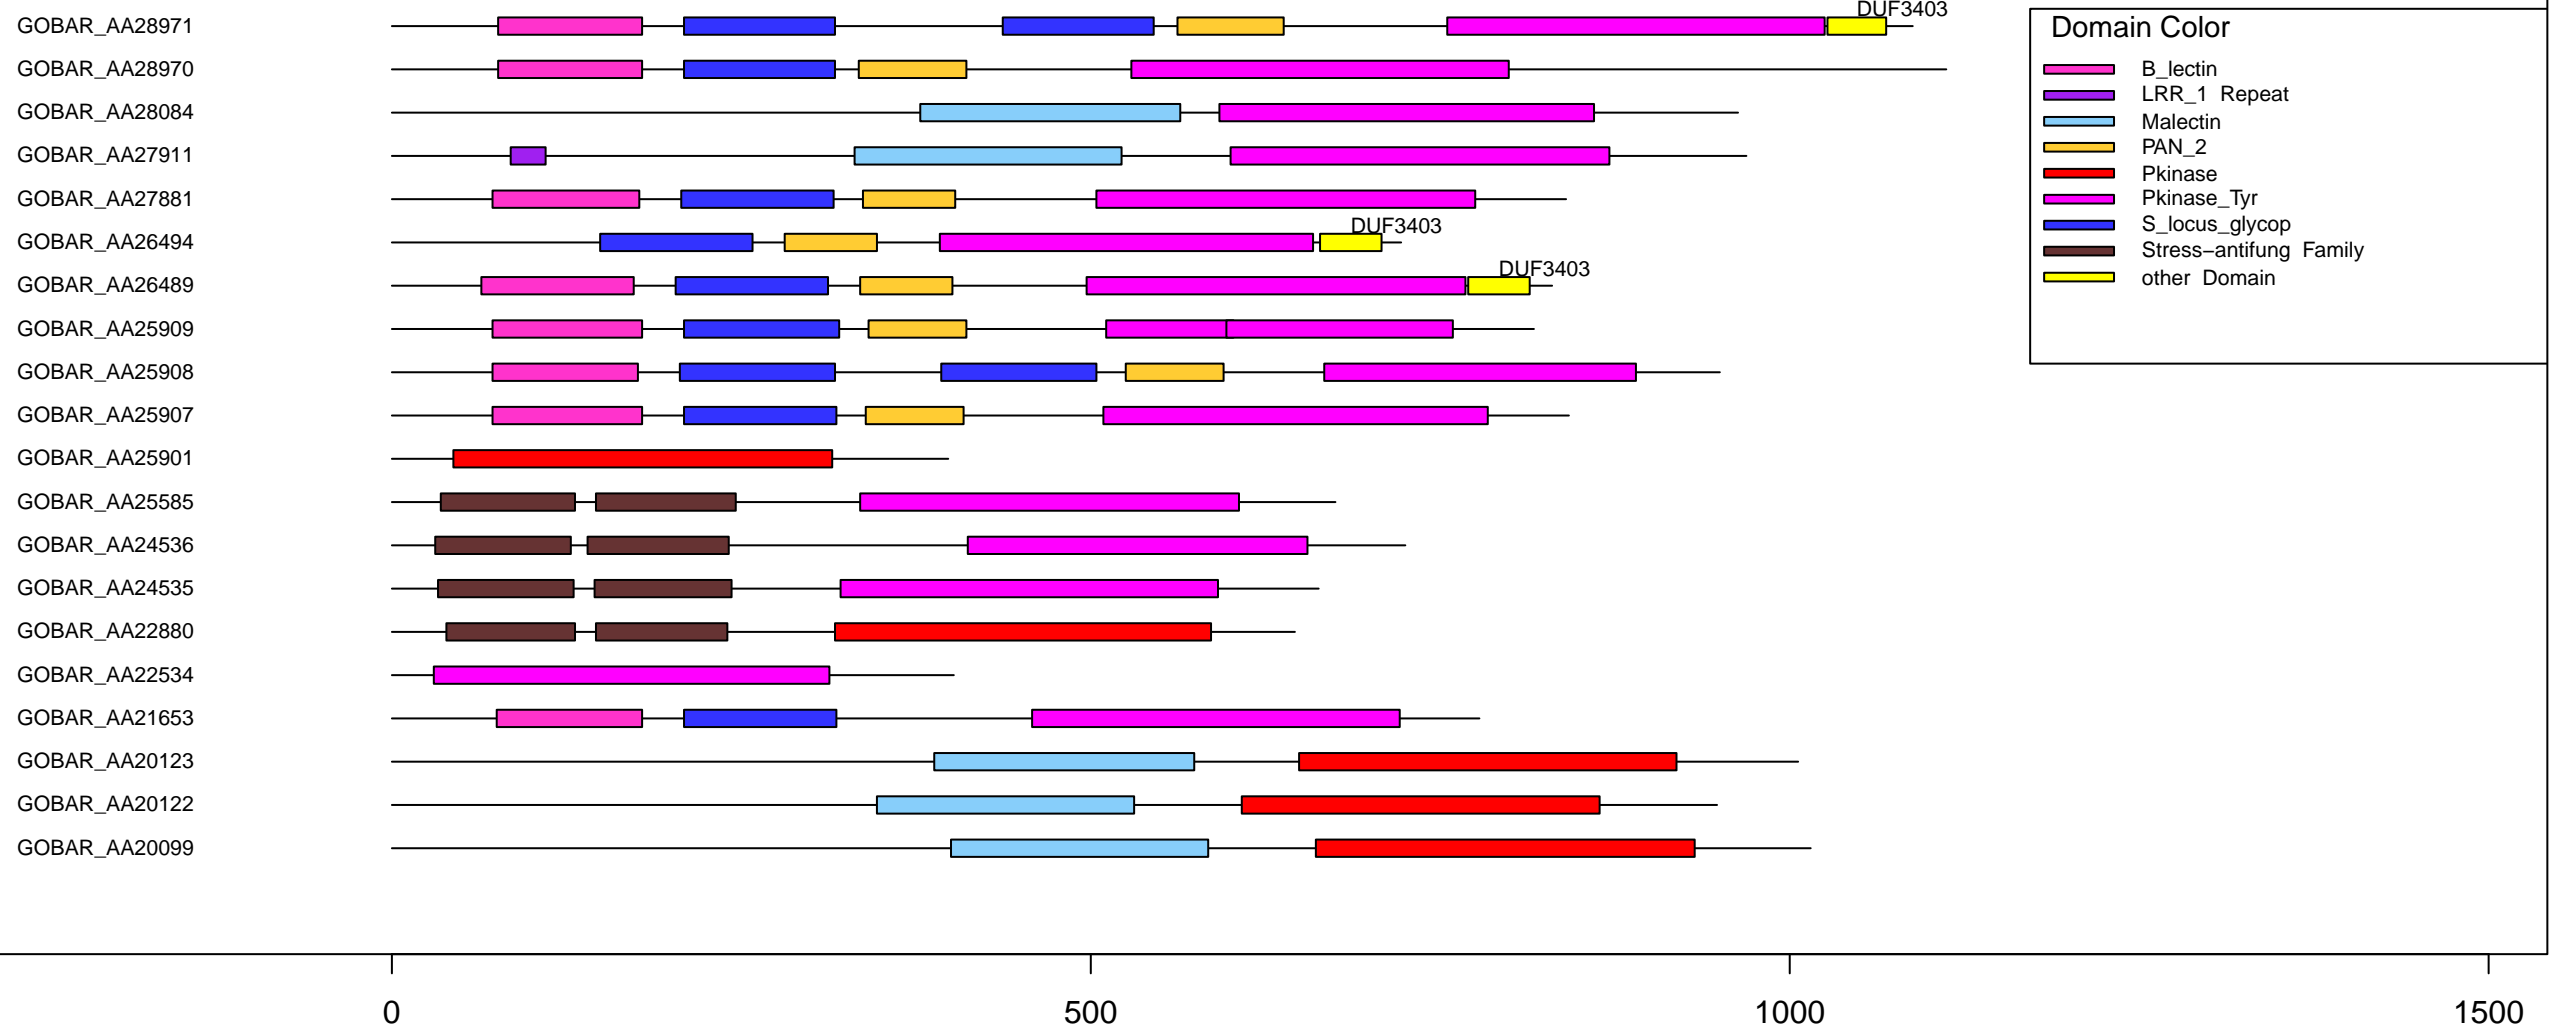

### G.ba RLK-Pelle\_DLSV domain diagram (part 5)

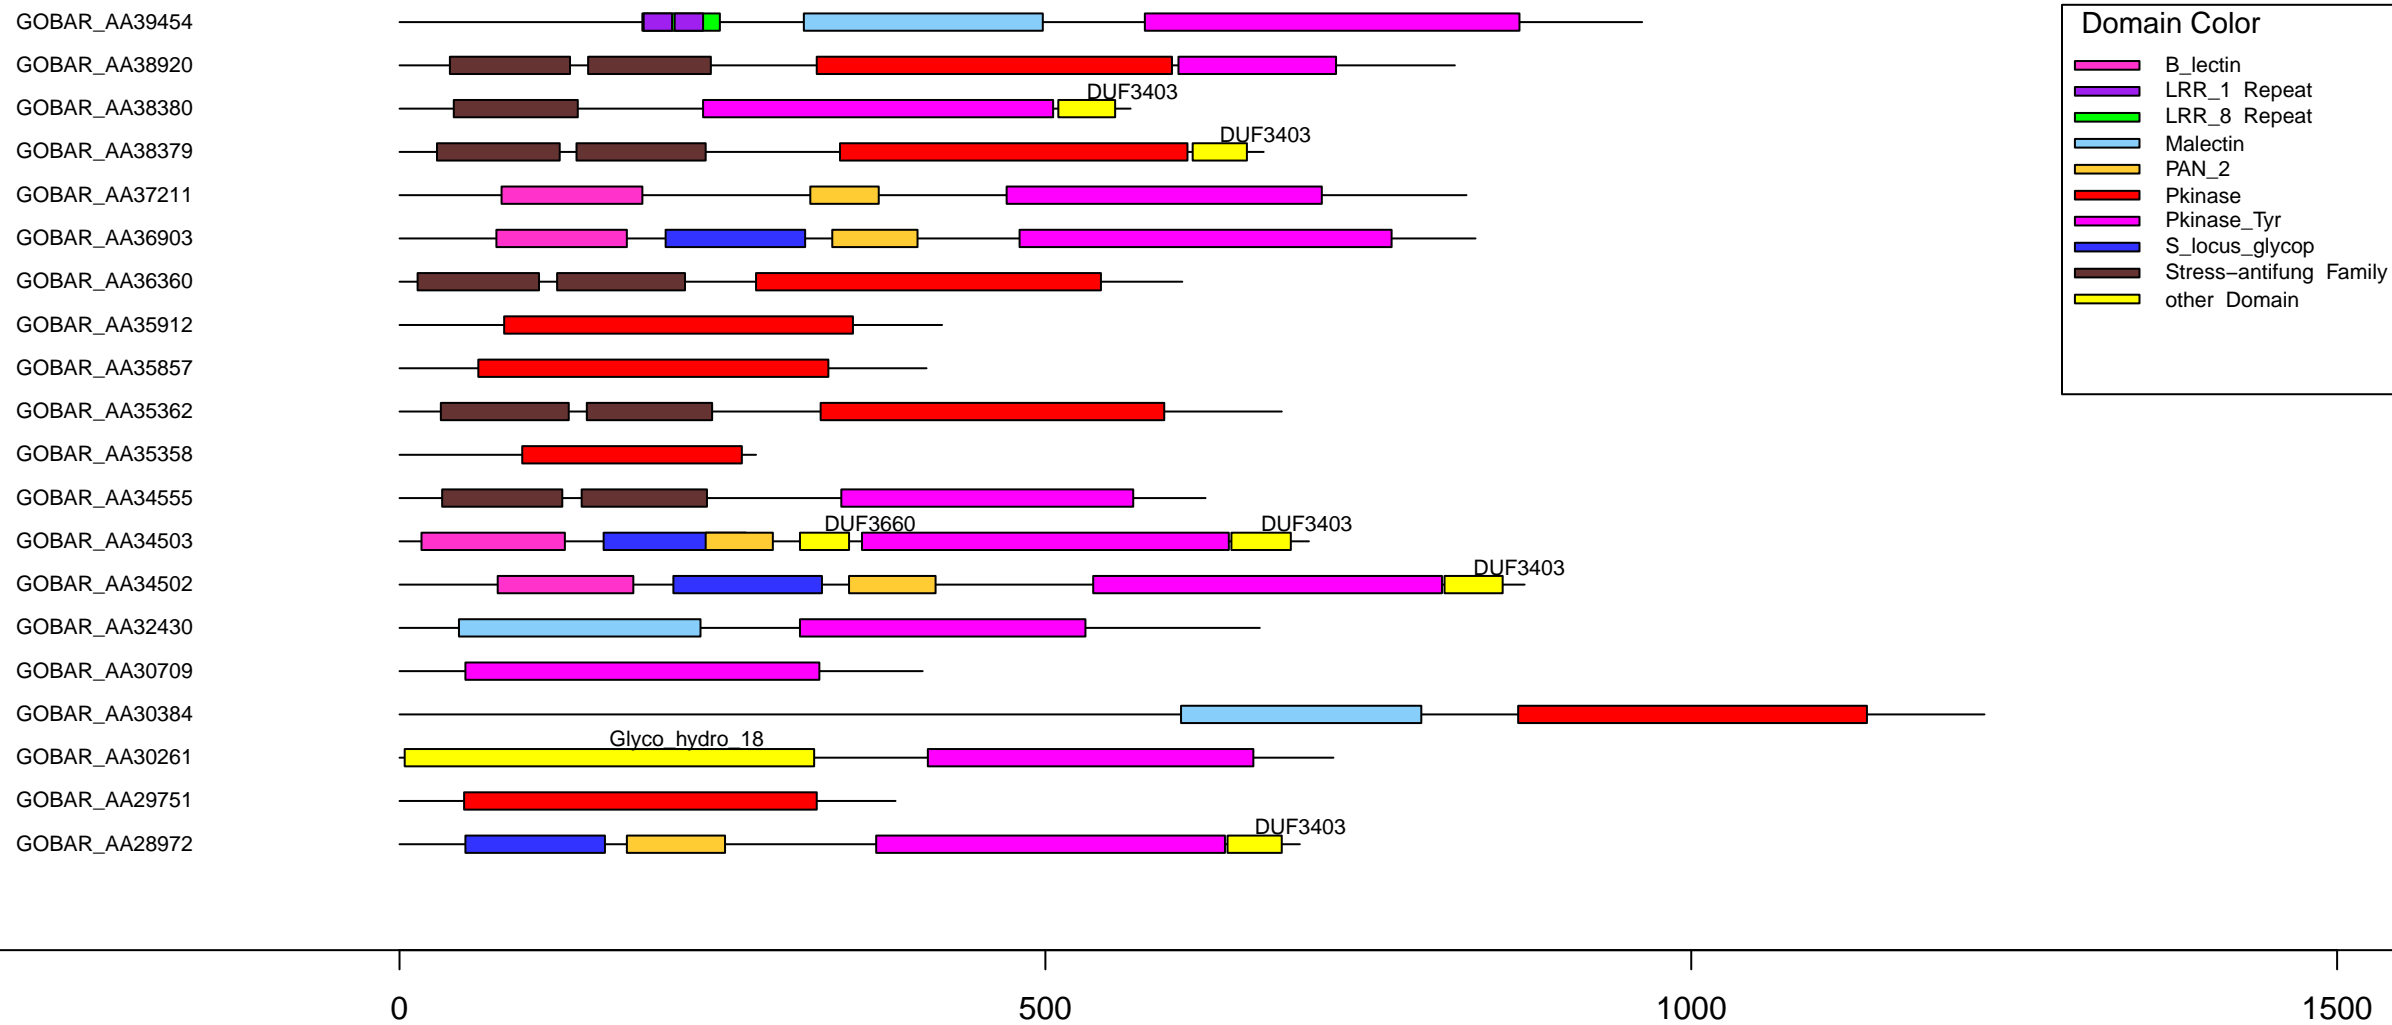

### G.ba RLK-Pelle\_DLSV domain diagram (part 6)

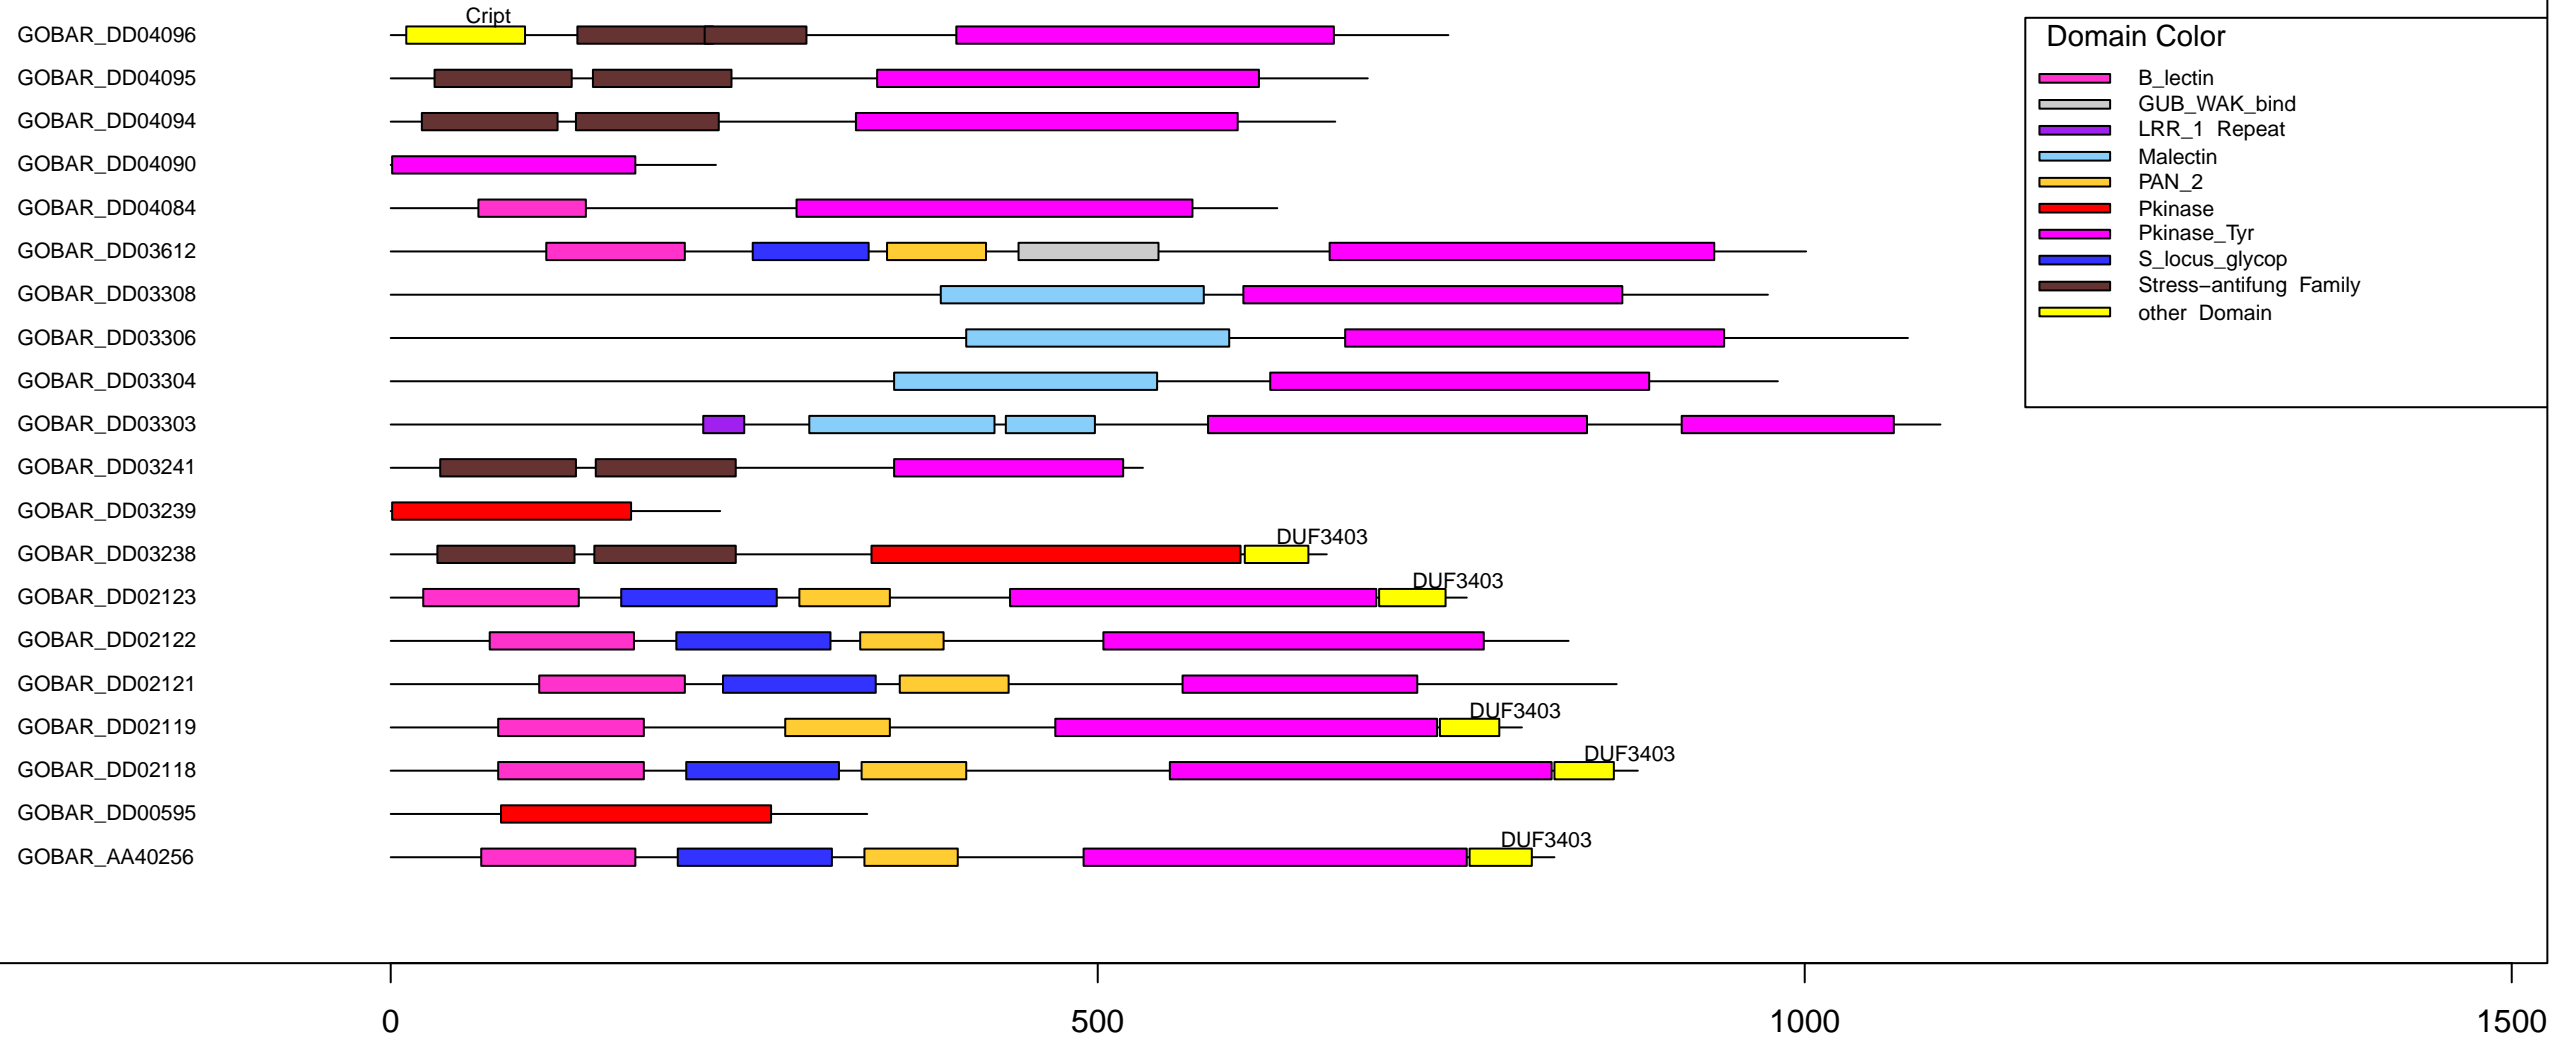

### G.ba RLK-Pelle\_DLSV domain diagram (part 7)

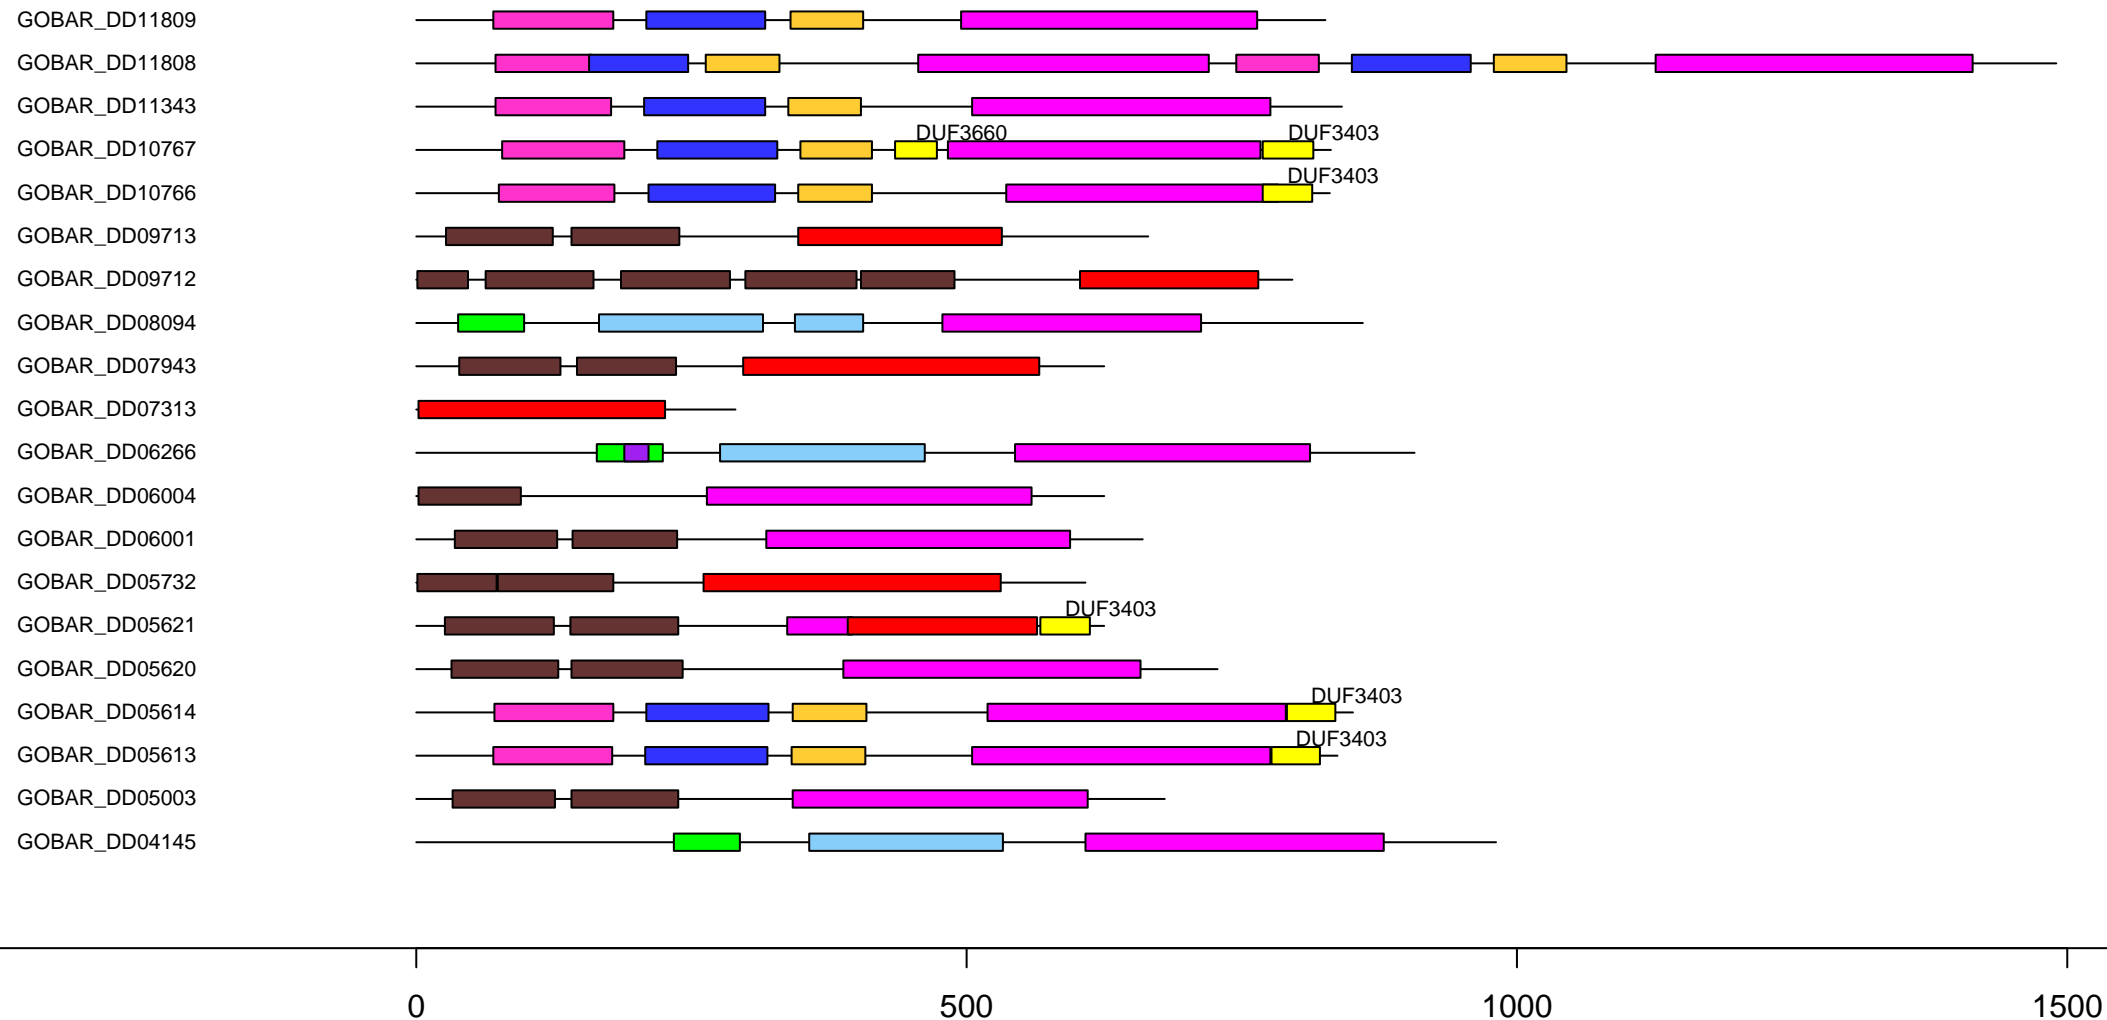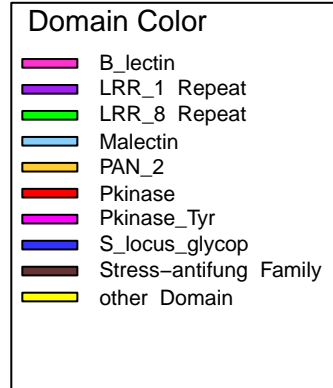

### G.ba RLK-Pelle\_DLSV domain diagram (part 8)

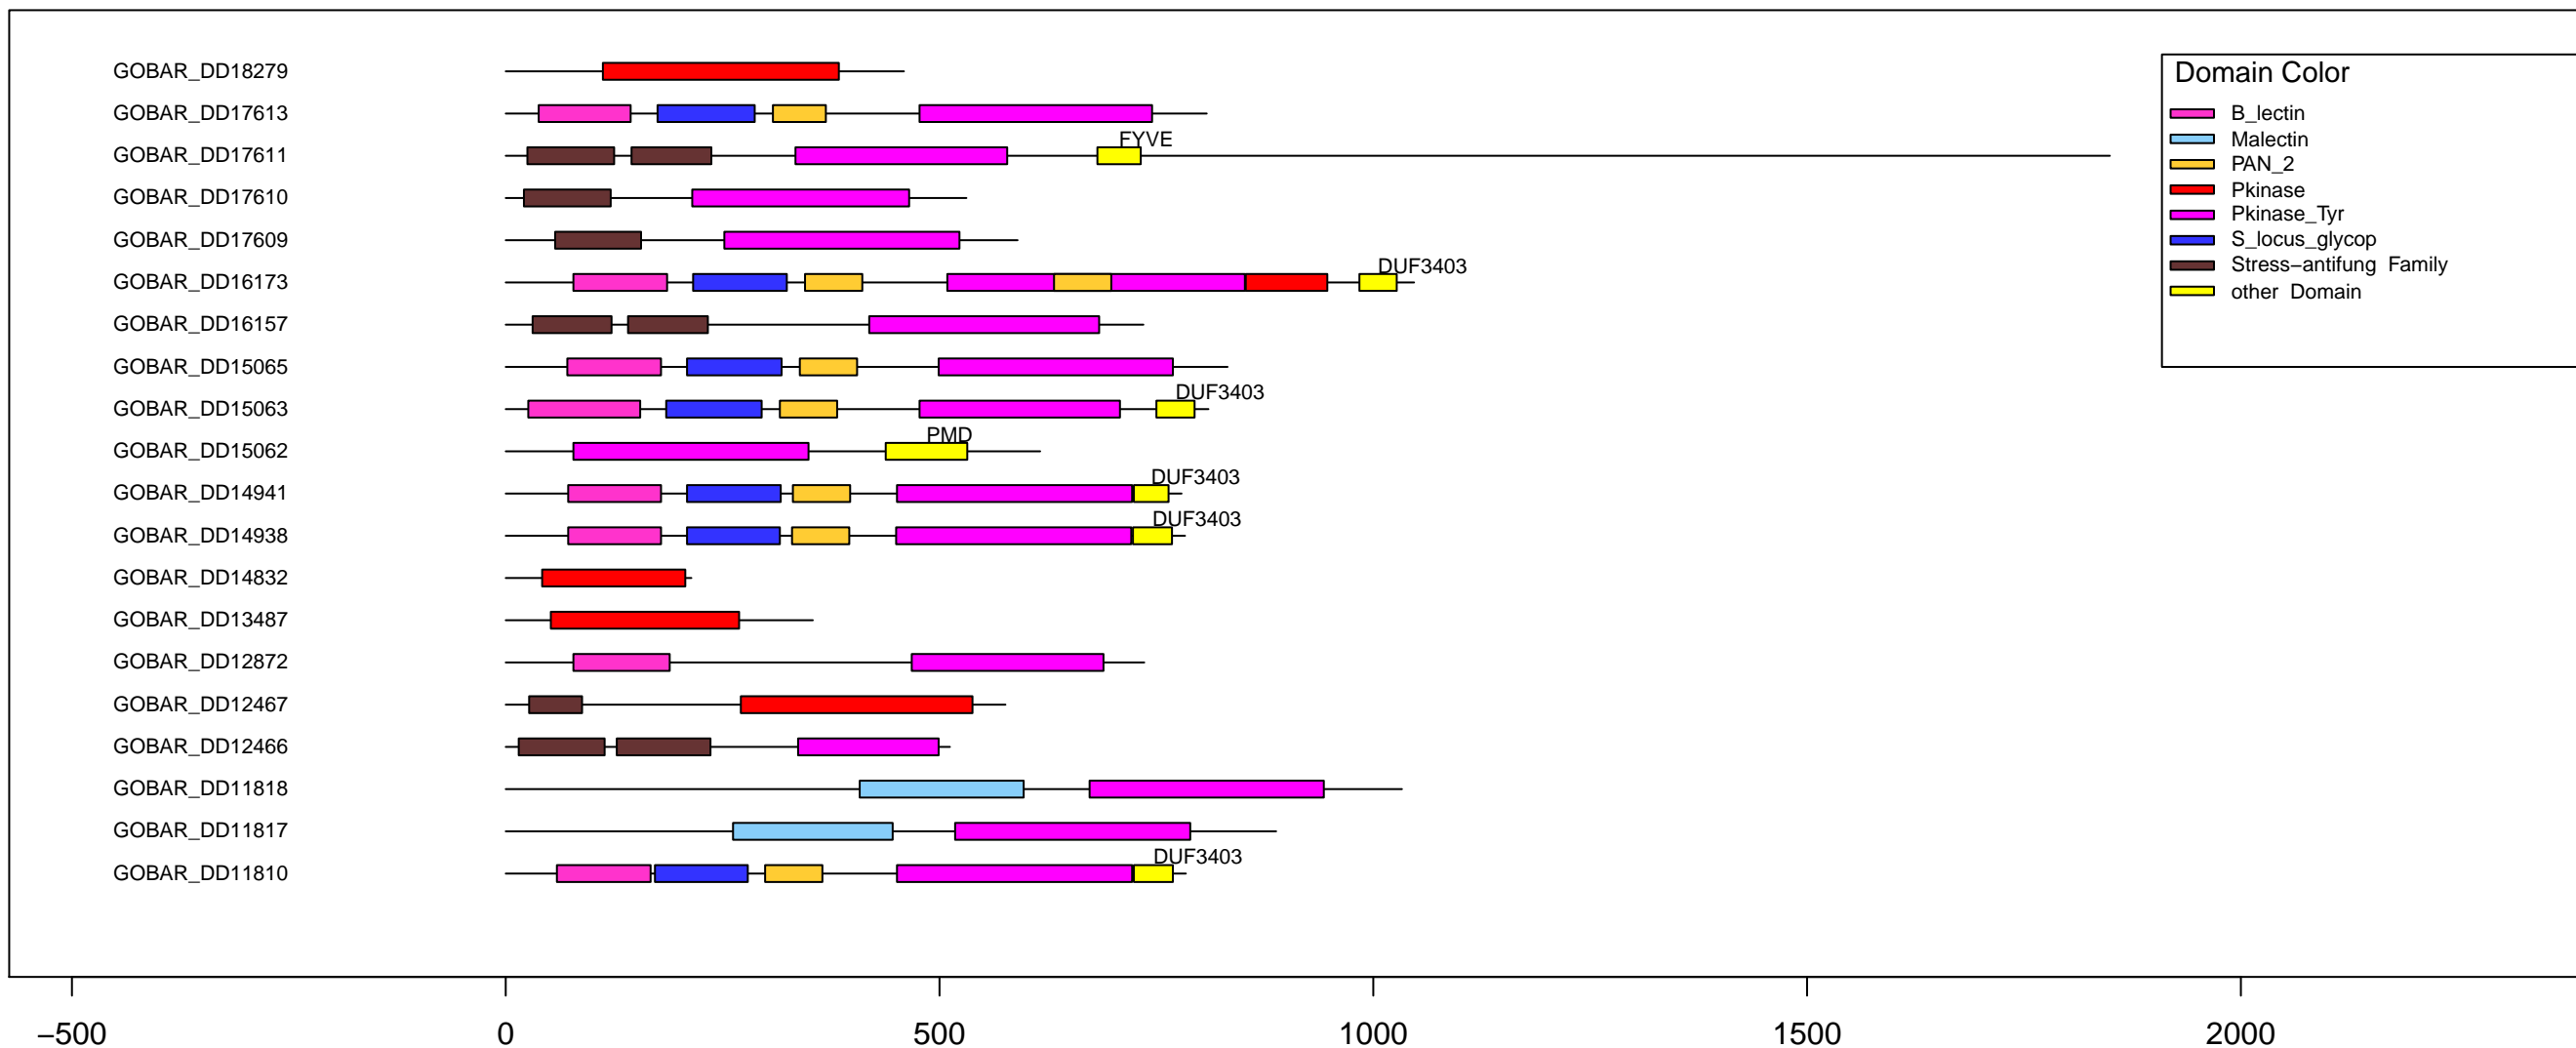

### G.ba RLK-Pelle\_DLSV domain diagram (part 9)

GOBAR\_DD23653  
 GOBAR\_DD23434  
 GOBAR\_DD23071  
 GOBAR\_DD22750  
 GOBAR\_DD22749  
 GOBAR\_DD21842  
 GOBAR\_DD21201  
 GOBAR\_DD21199  
 GOBAR\_DD21042  
 GOBAR\_DD20575  
 GOBAR\_DD20369  
 GOBAR\_DD20368  
 GOBAR\_DD20366  
 GOBAR\_DD20363  
 GOBAR\_DD20362  
 GOBAR\_DD20361  
 GOBAR\_DD20280  
 GOBAR\_DD19647  
 GOBAR\_DD18986  
 GOBAR\_DD18631

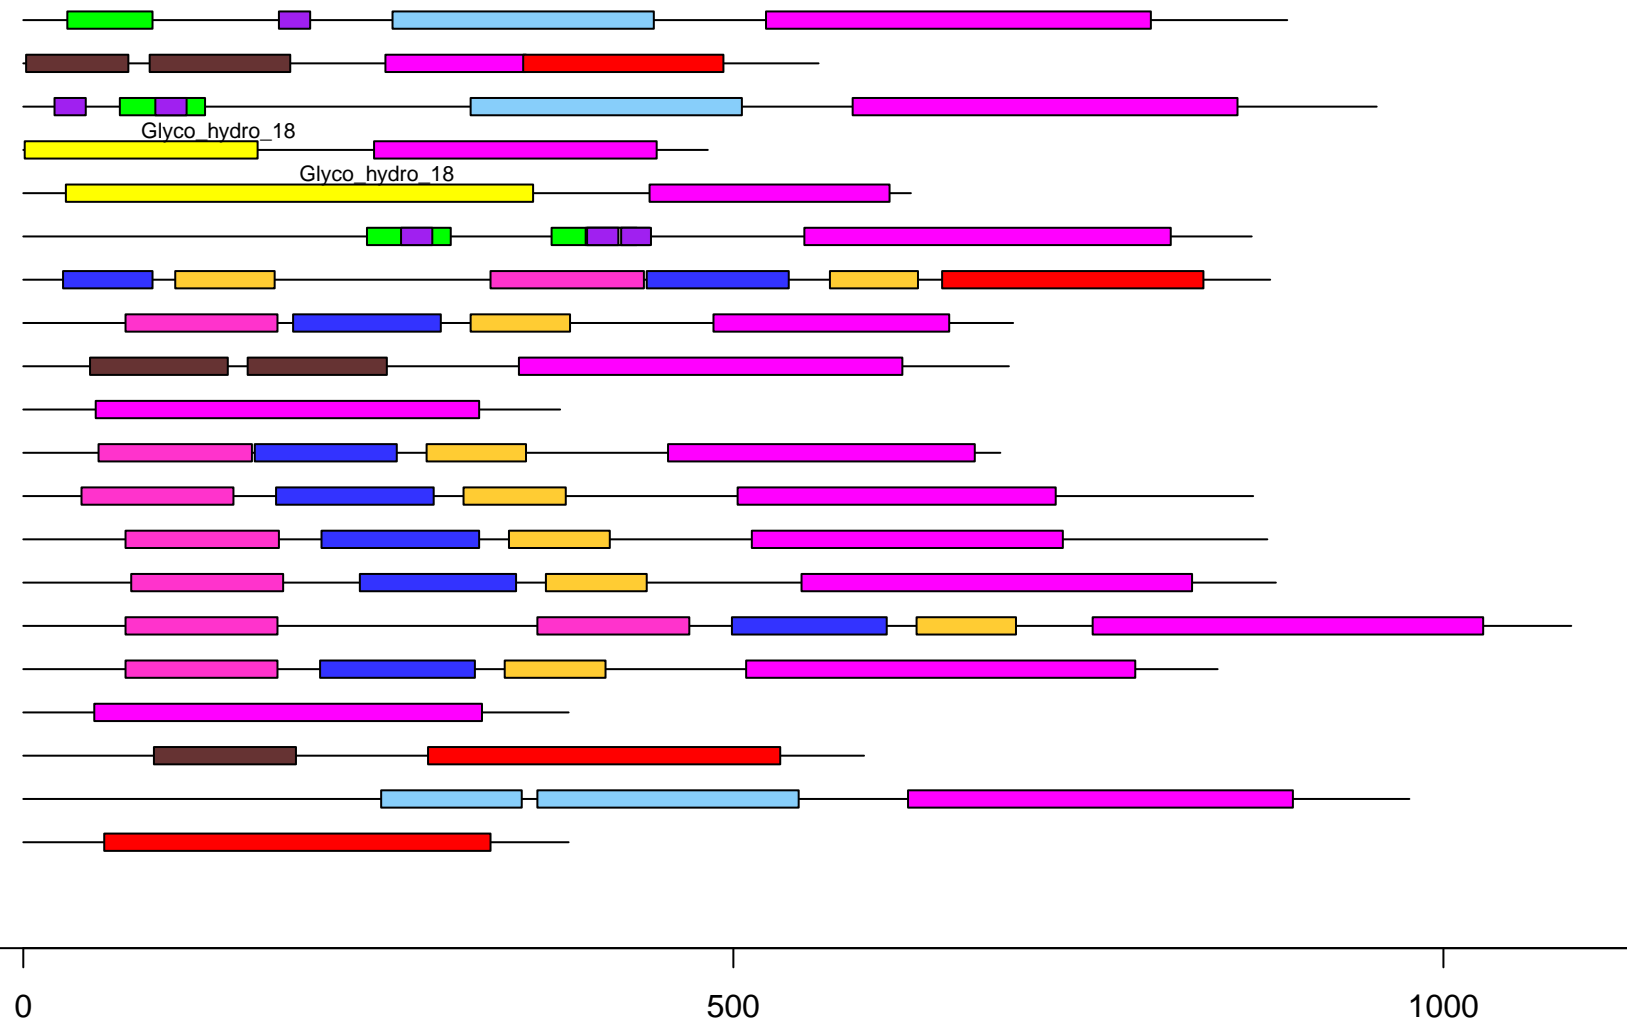

**Domain Color**

- █ B\_lectin
- █ LRR\_1 Repeat
- █ LRR\_4
- █ LRR\_8 Repeat
- █ Malectin
- █ PAN\_2
- █ Pkinase
- █ Pkinase\_Tyr
- █ S\_locus\_glycop
- █ Stress-antifung Family
- █ other Domain

### G.ba RLK-Pelle\_DLSV domain diagram (part 10)

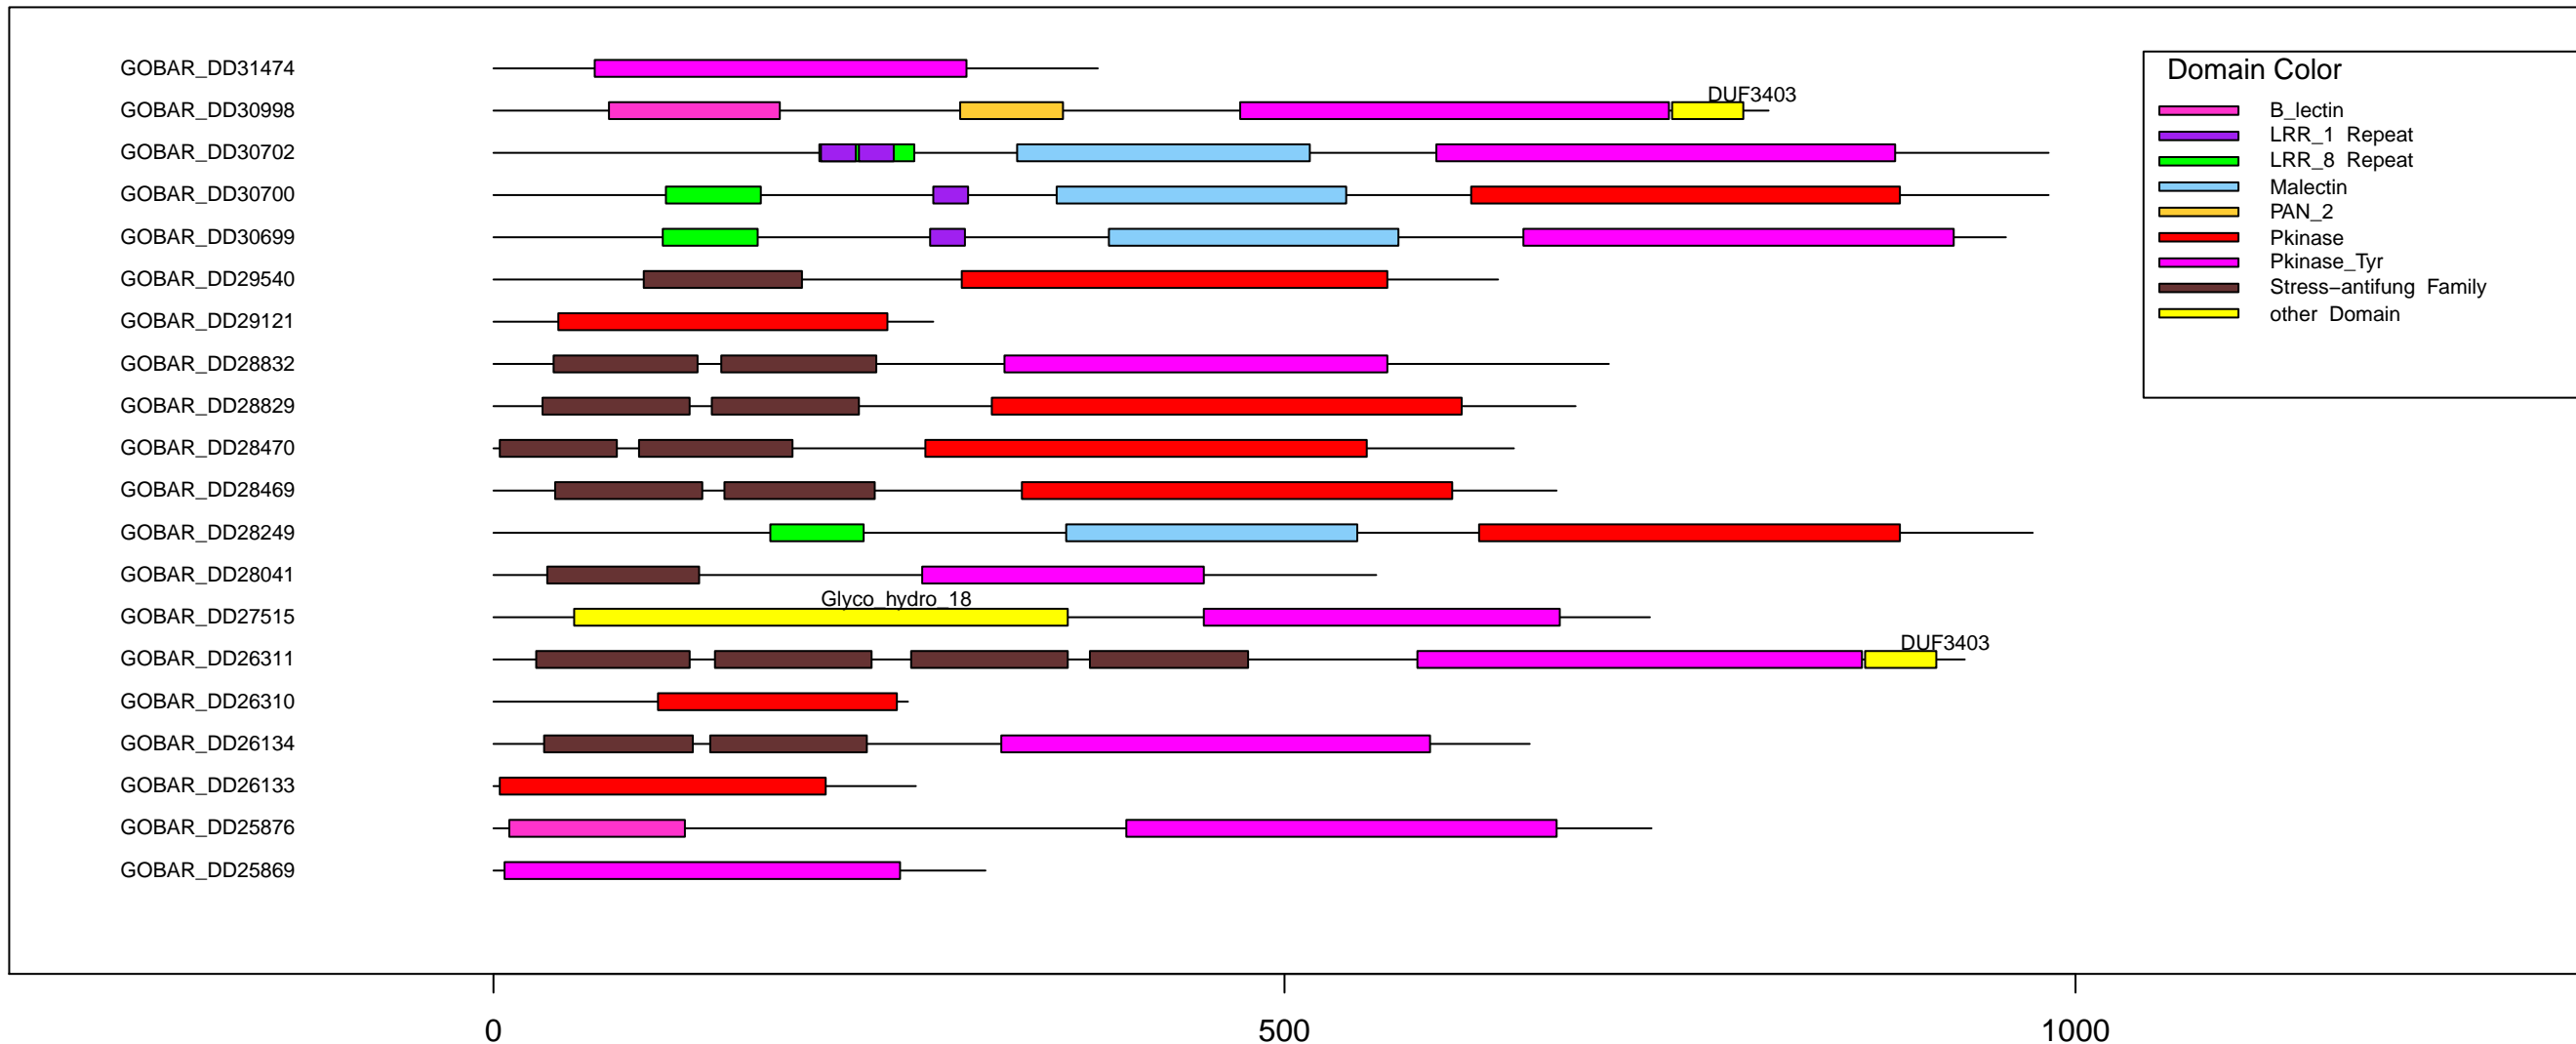



### G.ba RLK-Pelle\_DLSV domain diagram (part 11)

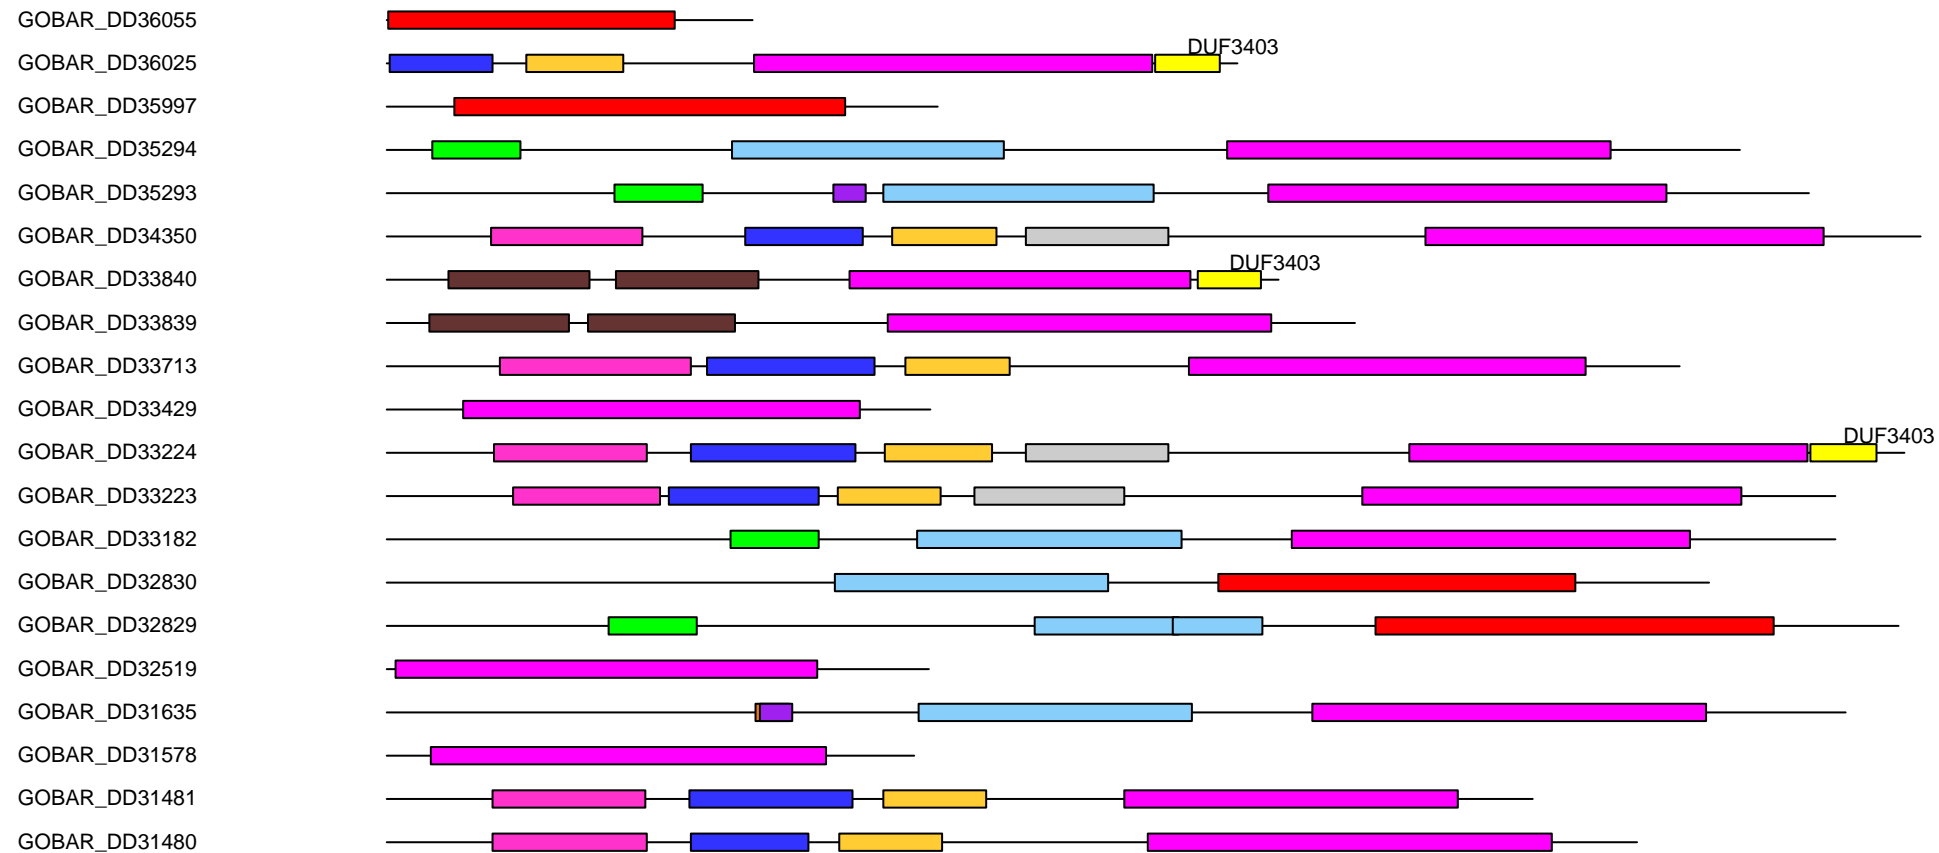

### G.ba RLK-Pelle\_DLSV domain diagram (part 12)

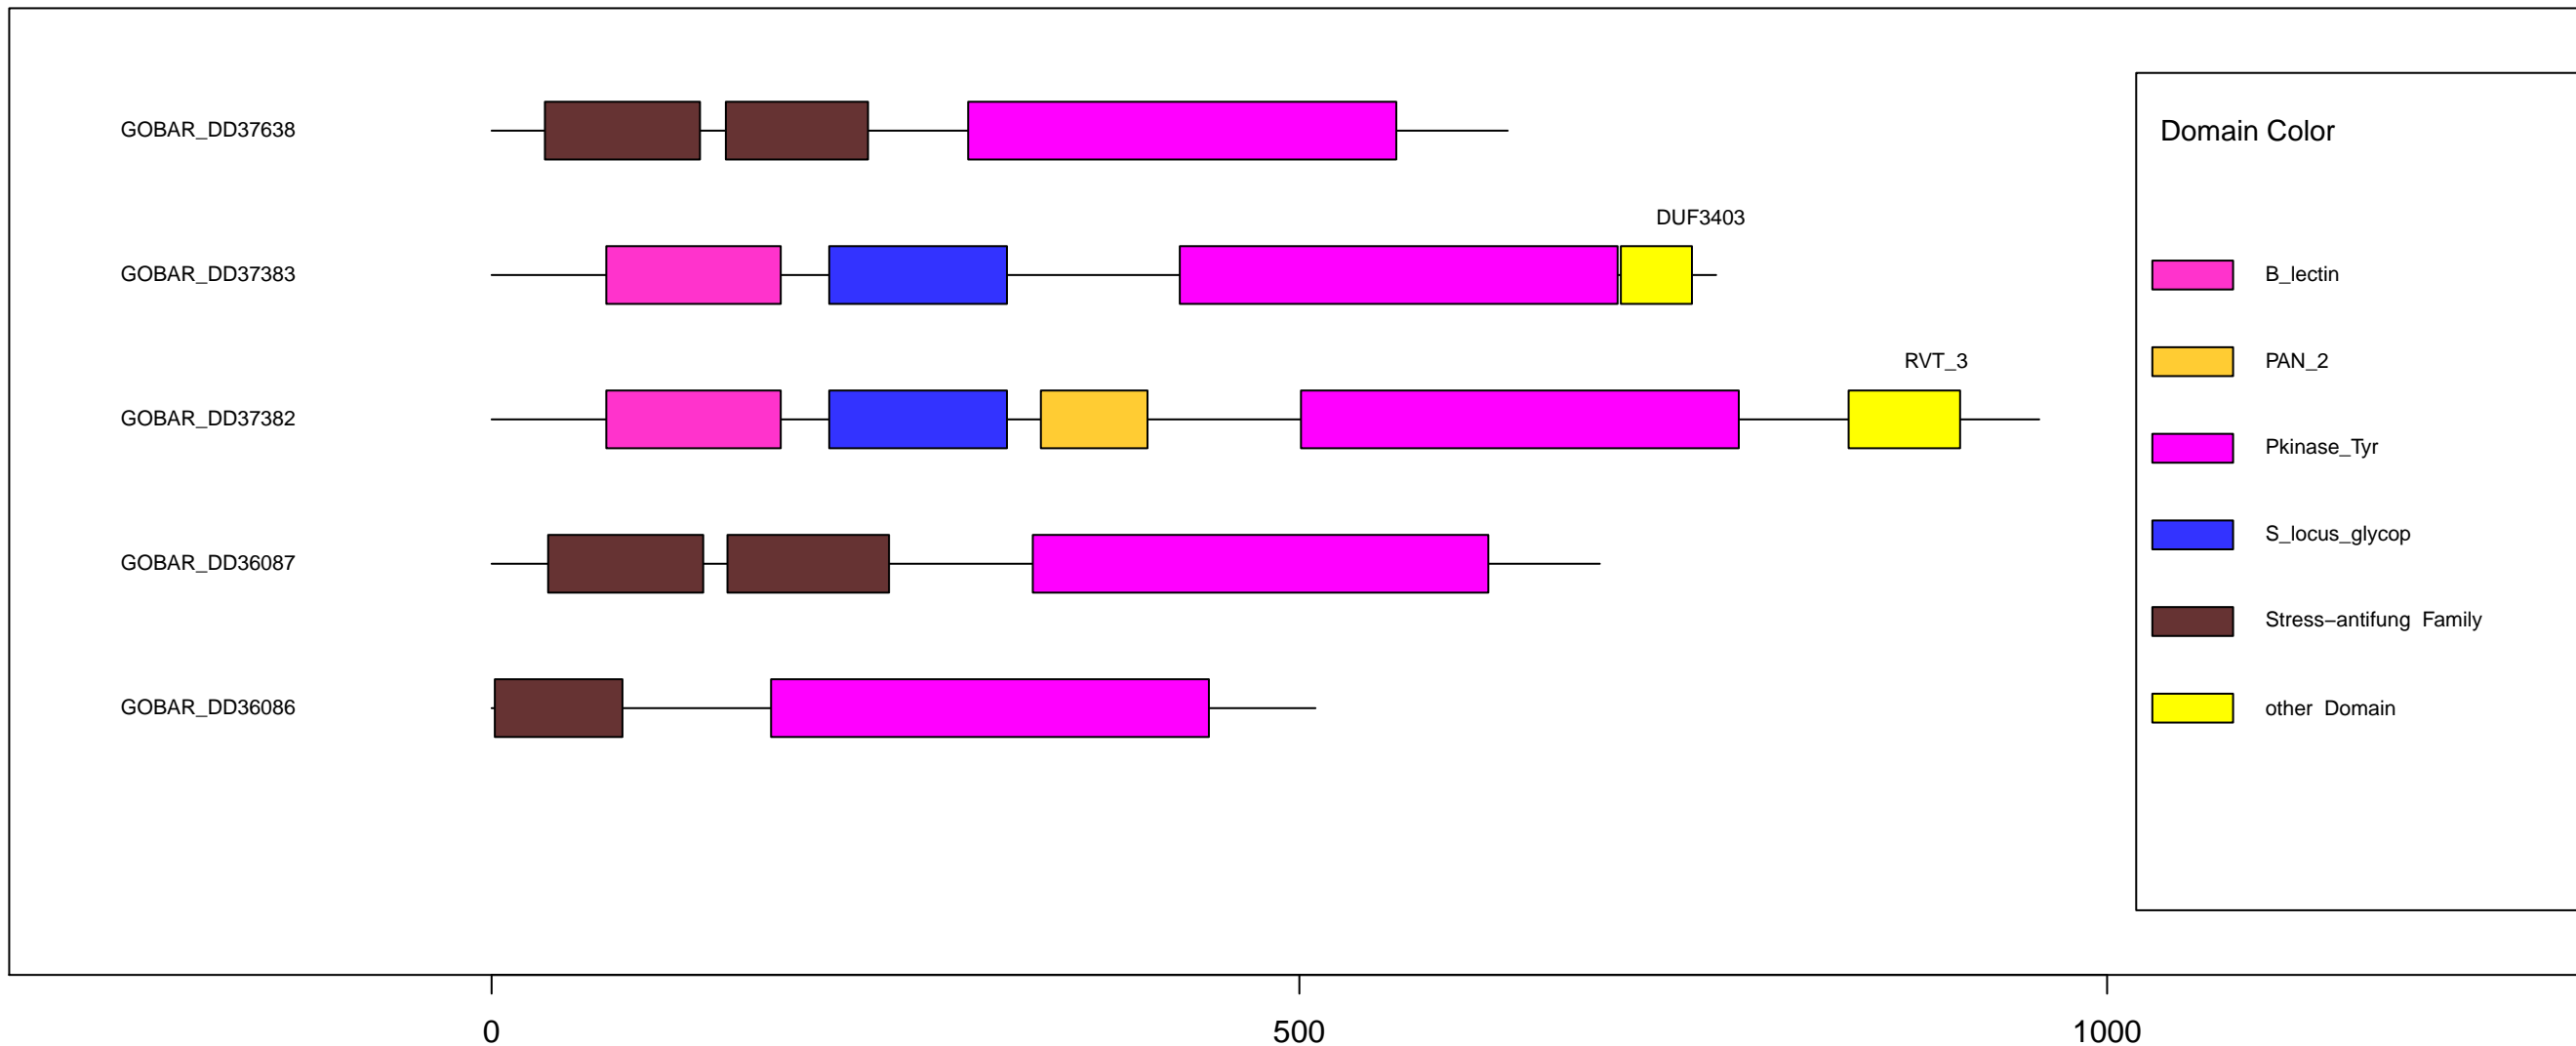

### G.ba RLK-Pelle\_Extensin domain diagram (all)

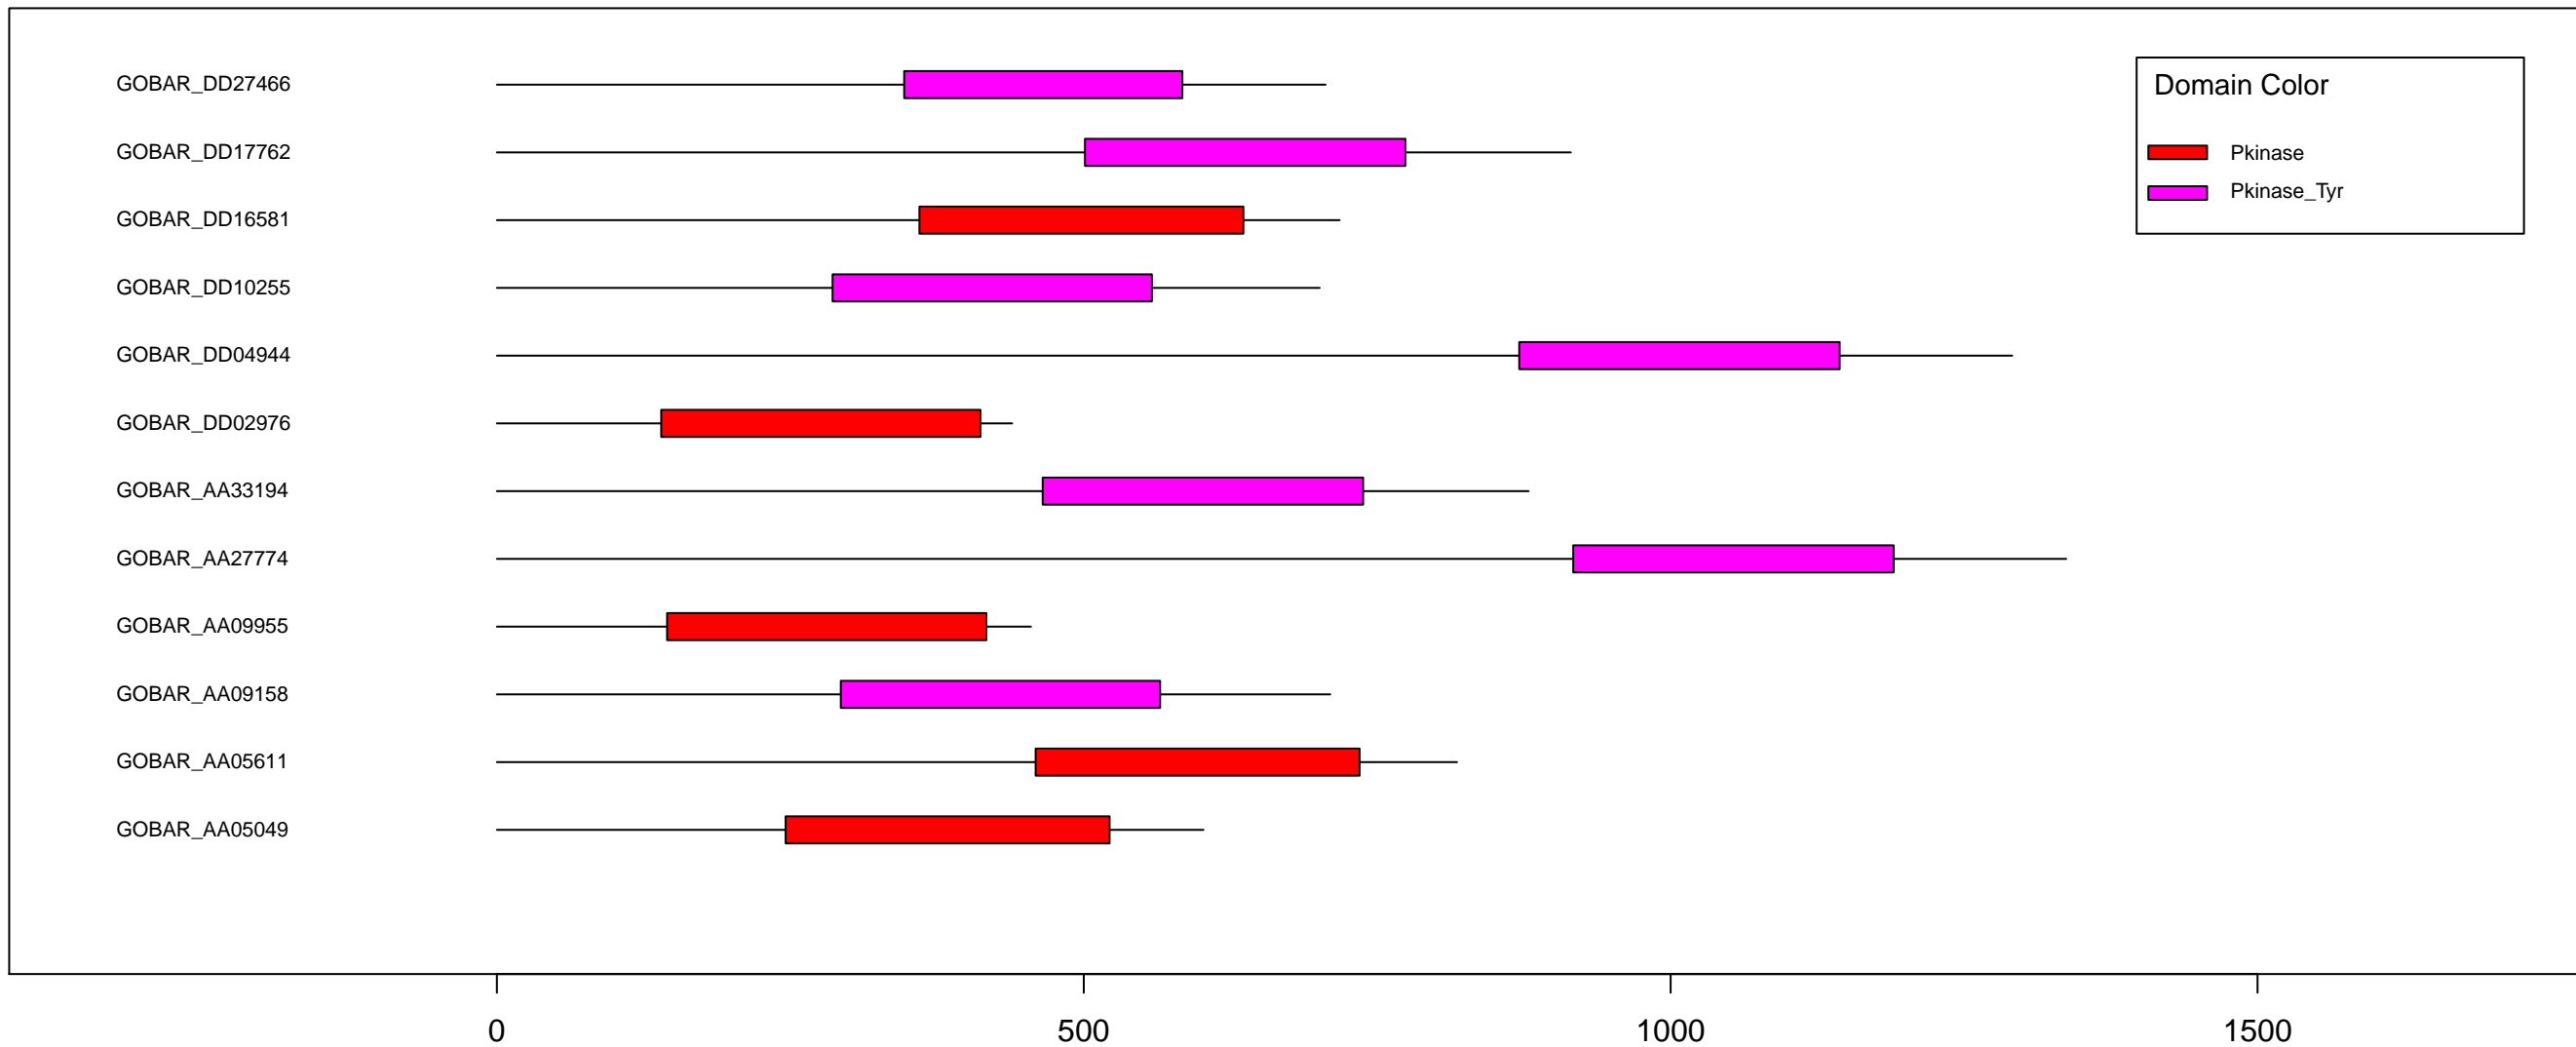

### G.ba RLK-Pelle\_L-LEC domain diagram (part 1)

GOBAR\_AA15689  
 GOBAR\_AA14782  
 GOBAR\_AA14234  
 GOBAR\_AA13097  
 GOBAR\_AA10919  
 GOBAR\_AA10830  
 GOBAR\_AA08950  
 GOBAR\_AA08305  
 GOBAR\_AA08105  
 GOBAR\_AA08104  
 GOBAR\_AA08103  
 GOBAR\_AA08098  
 GOBAR\_AA03262  
 GOBAR\_AA02884  
 GOBAR\_AA02883  
 GOBAR\_AA02199  
 GOBAR\_AA02198  
 GOBAR\_AA01383  
 GOBAR\_AA01382  
 GOBAR\_AA01299

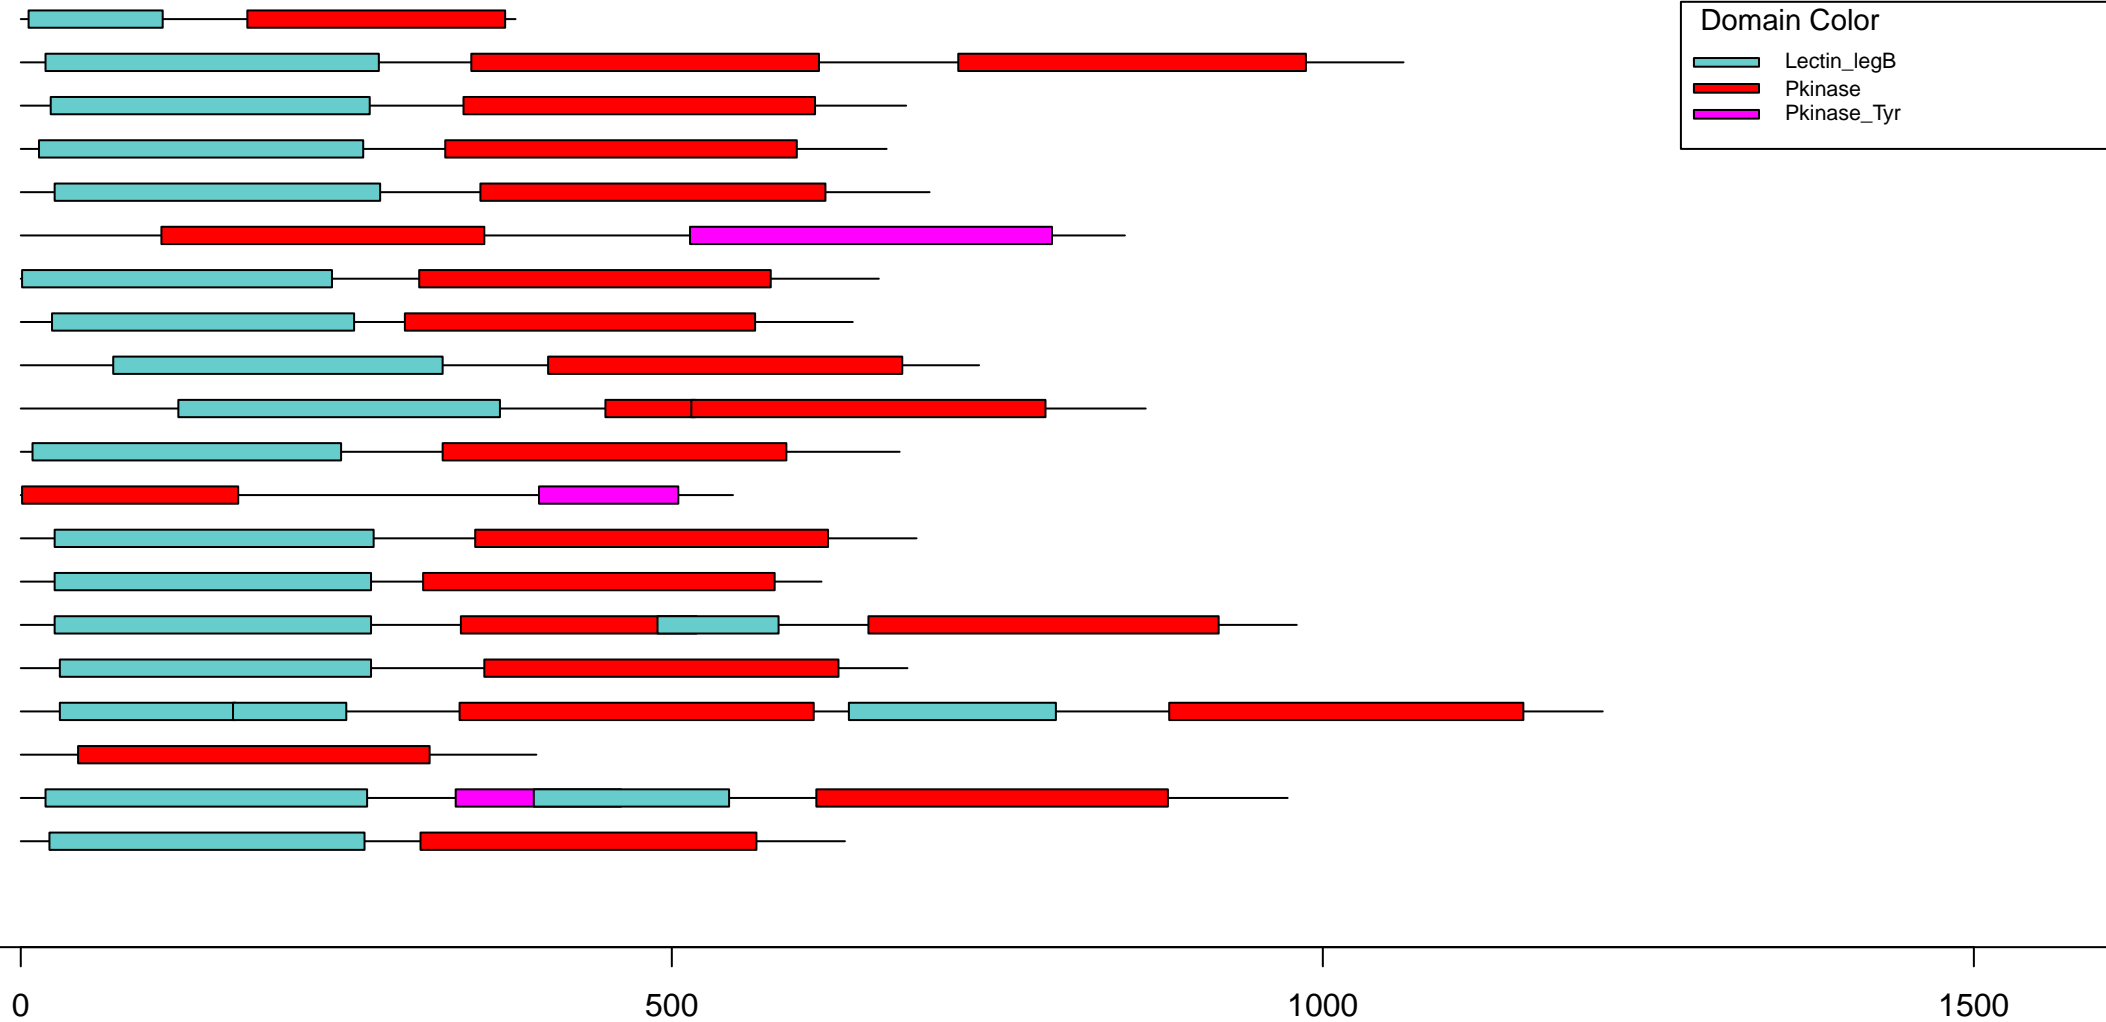

# G.ba RLK-Pelle\_L-LEC domain diagram (part 2)

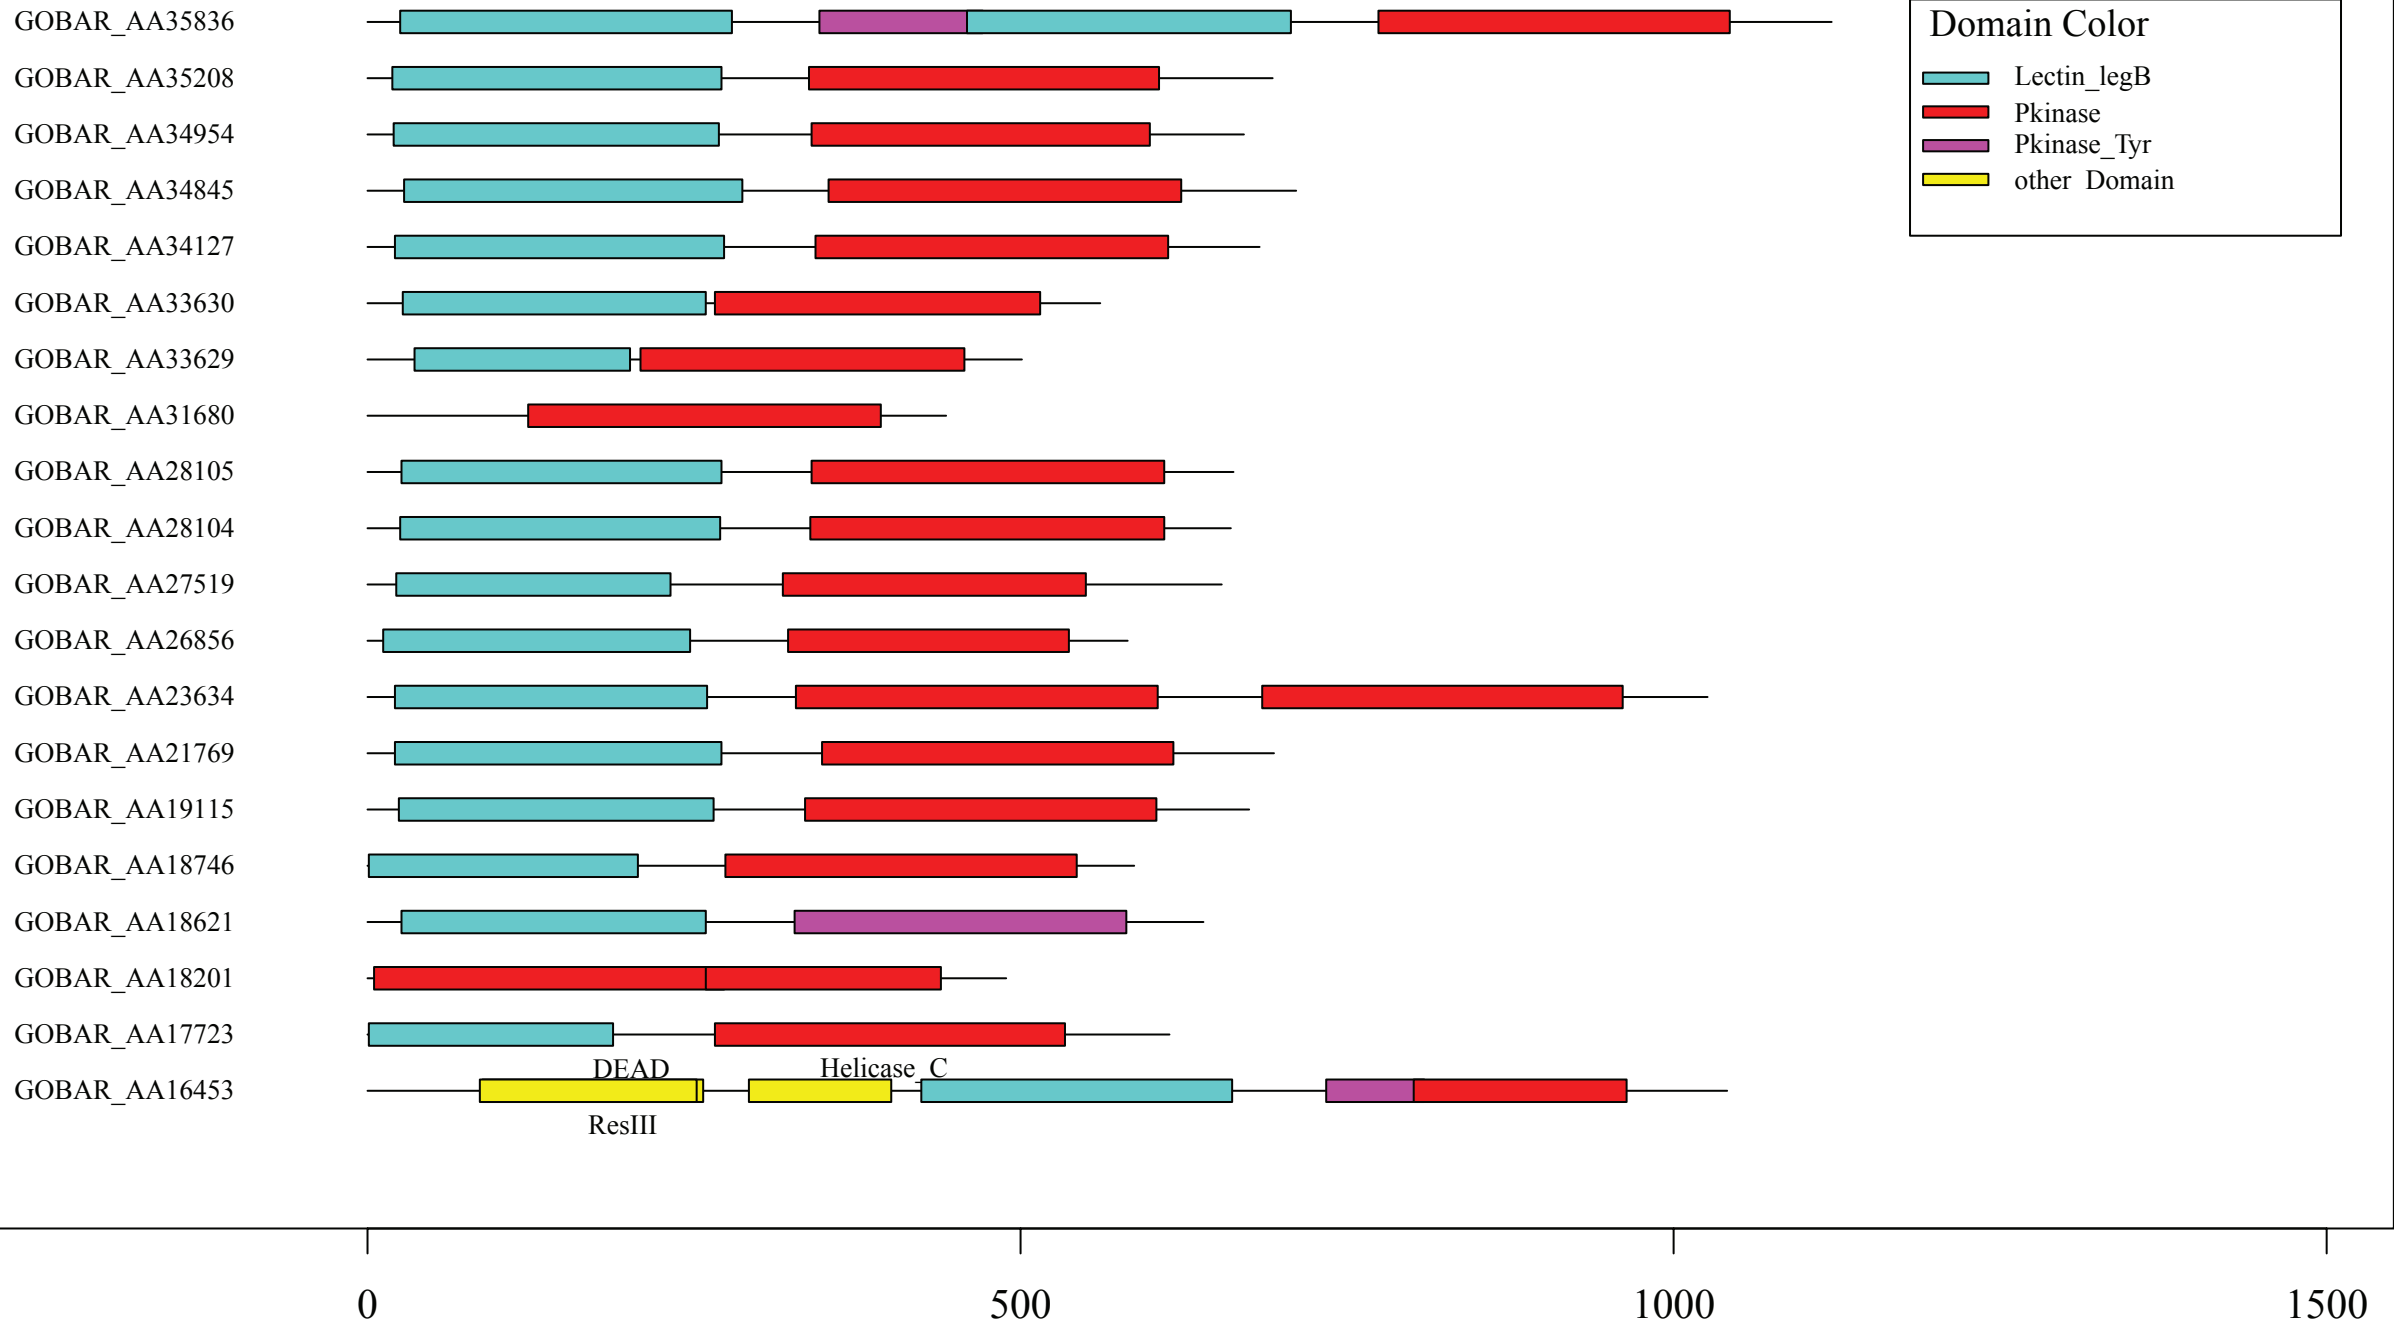

### G.ba RLK-Pelle\_L-LEC domain diagram (part 3)

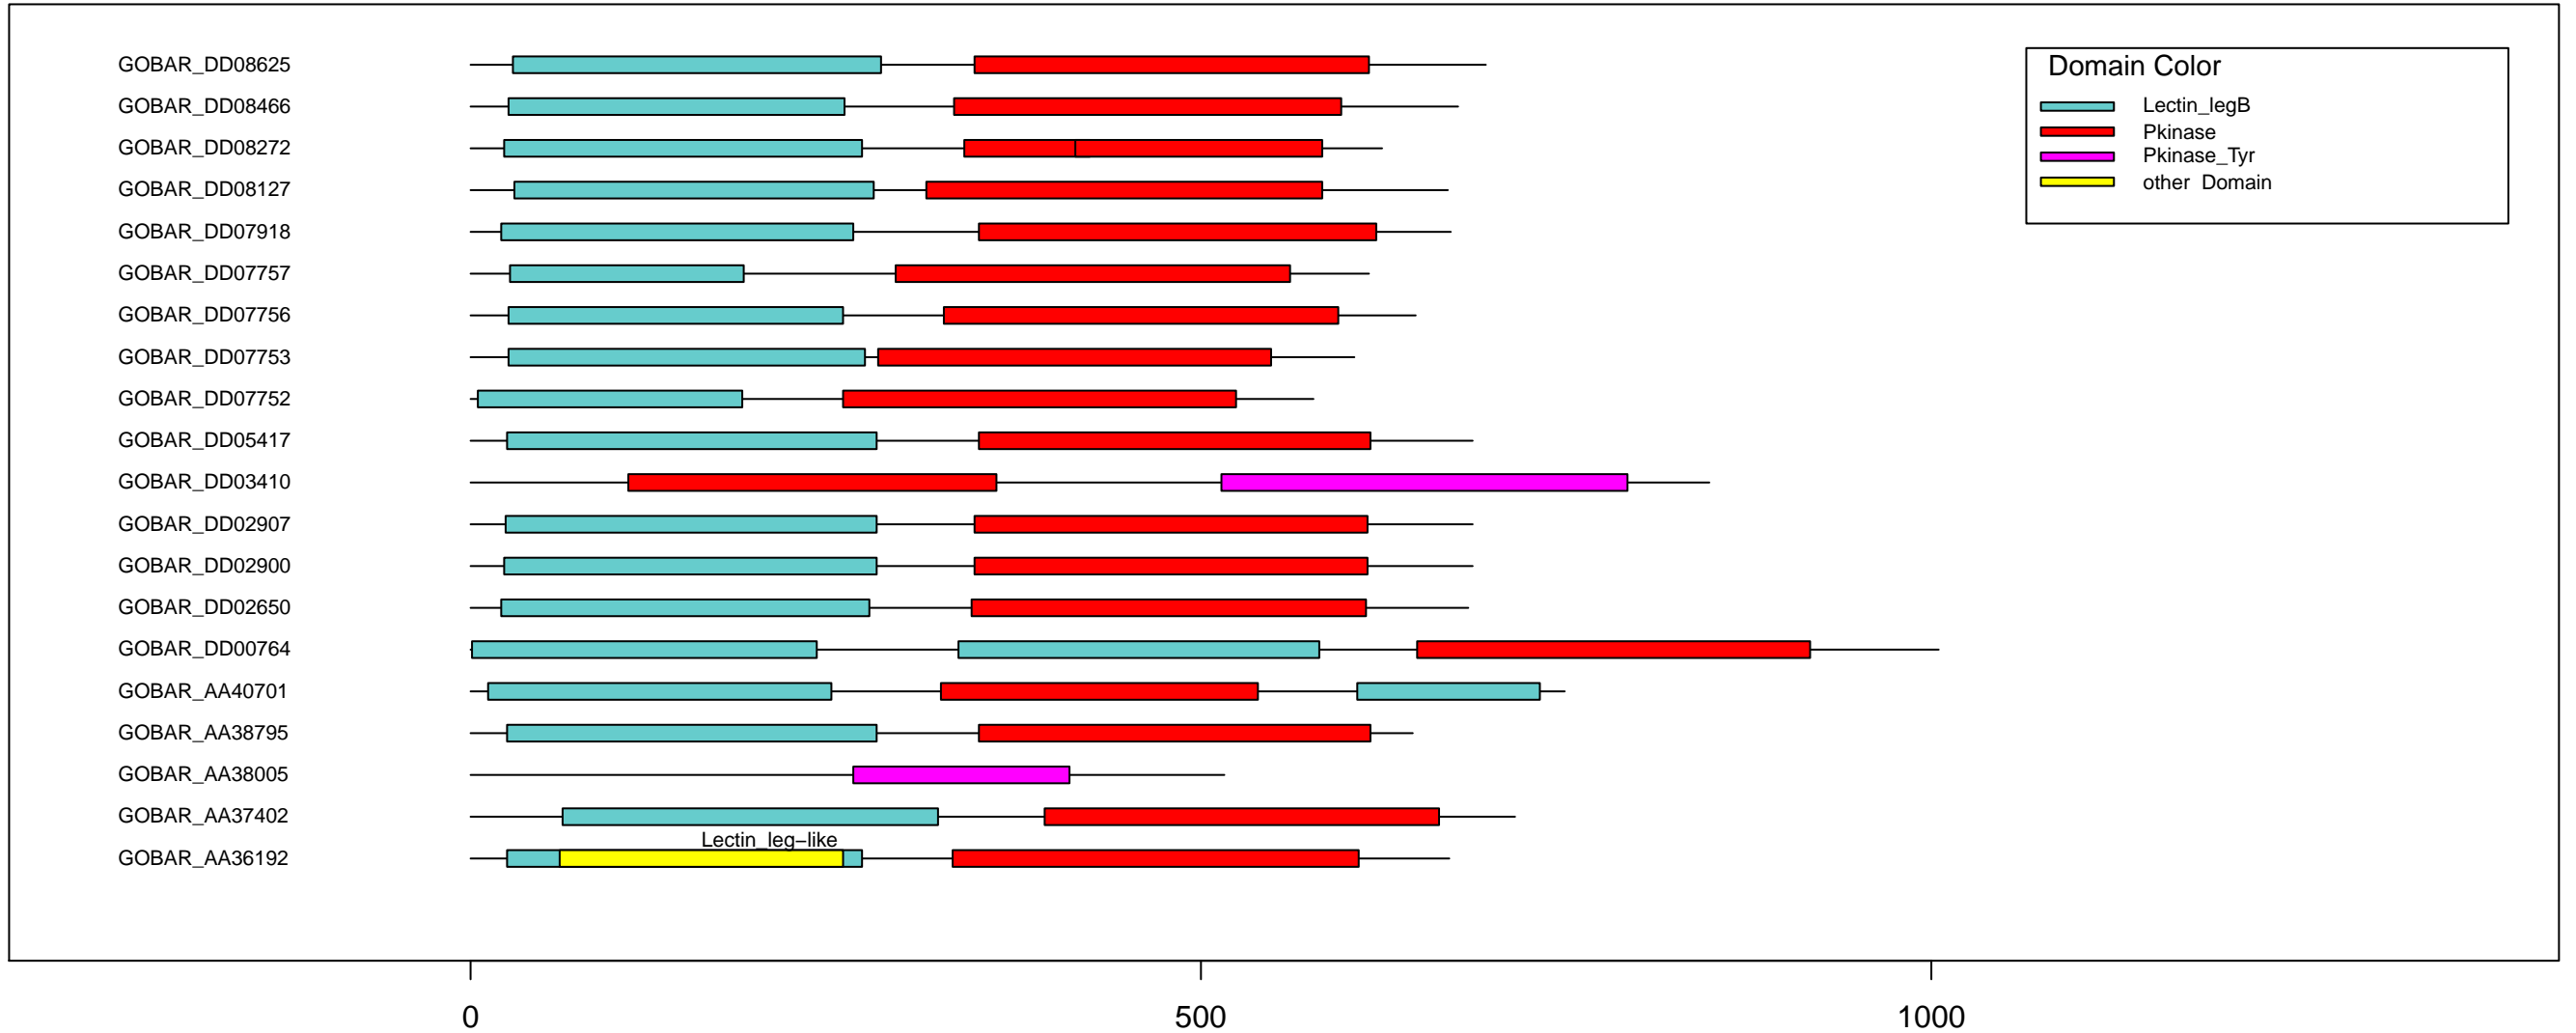

### G.ba RLK-Pelle\_L-LEC domain diagram (part 4)

GOBAR\_DD25150  
 GOBAR\_DD24721  
 GOBAR\_DD24720  
 GOBAR\_DD24717  
 GOBAR\_DD24712  
 GOBAR\_DD23848  
 GOBAR\_DD23261  
 GOBAR\_DD23254  
 GOBAR\_DD21968  
 GOBAR\_DD20307  
 GOBAR\_DD18422  
 GOBAR\_DD15726  
 GOBAR\_DD15525  
 GOBAR\_DD15469  
 GOBAR\_DD14767  
 GOBAR\_DD14484  
 GOBAR\_DD14483  
 GOBAR\_DD11655  
 GOBAR\_DD10693  
 GOBAR\_DD10690

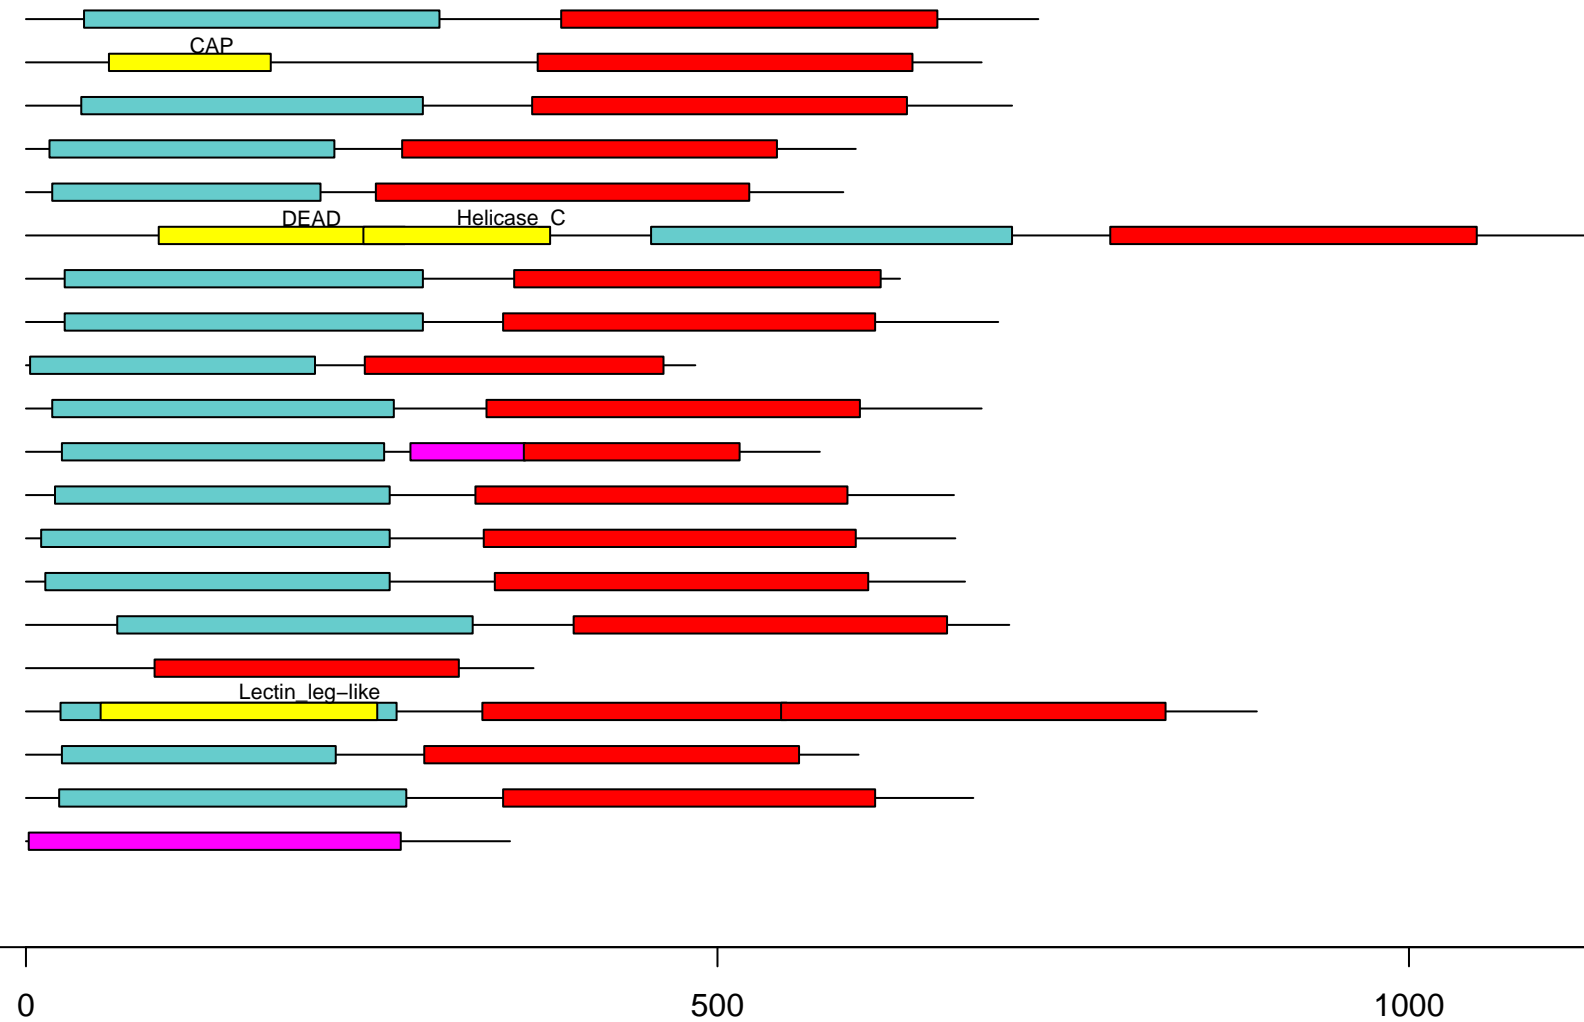

**Domain Color**

- █ Lectin\_legB
- █ Pkinase
- █ Pkinase\_Tyr
- █ other Domain

### G.ba RLK-Pelle\_L-LEC domain diagram (part 5)

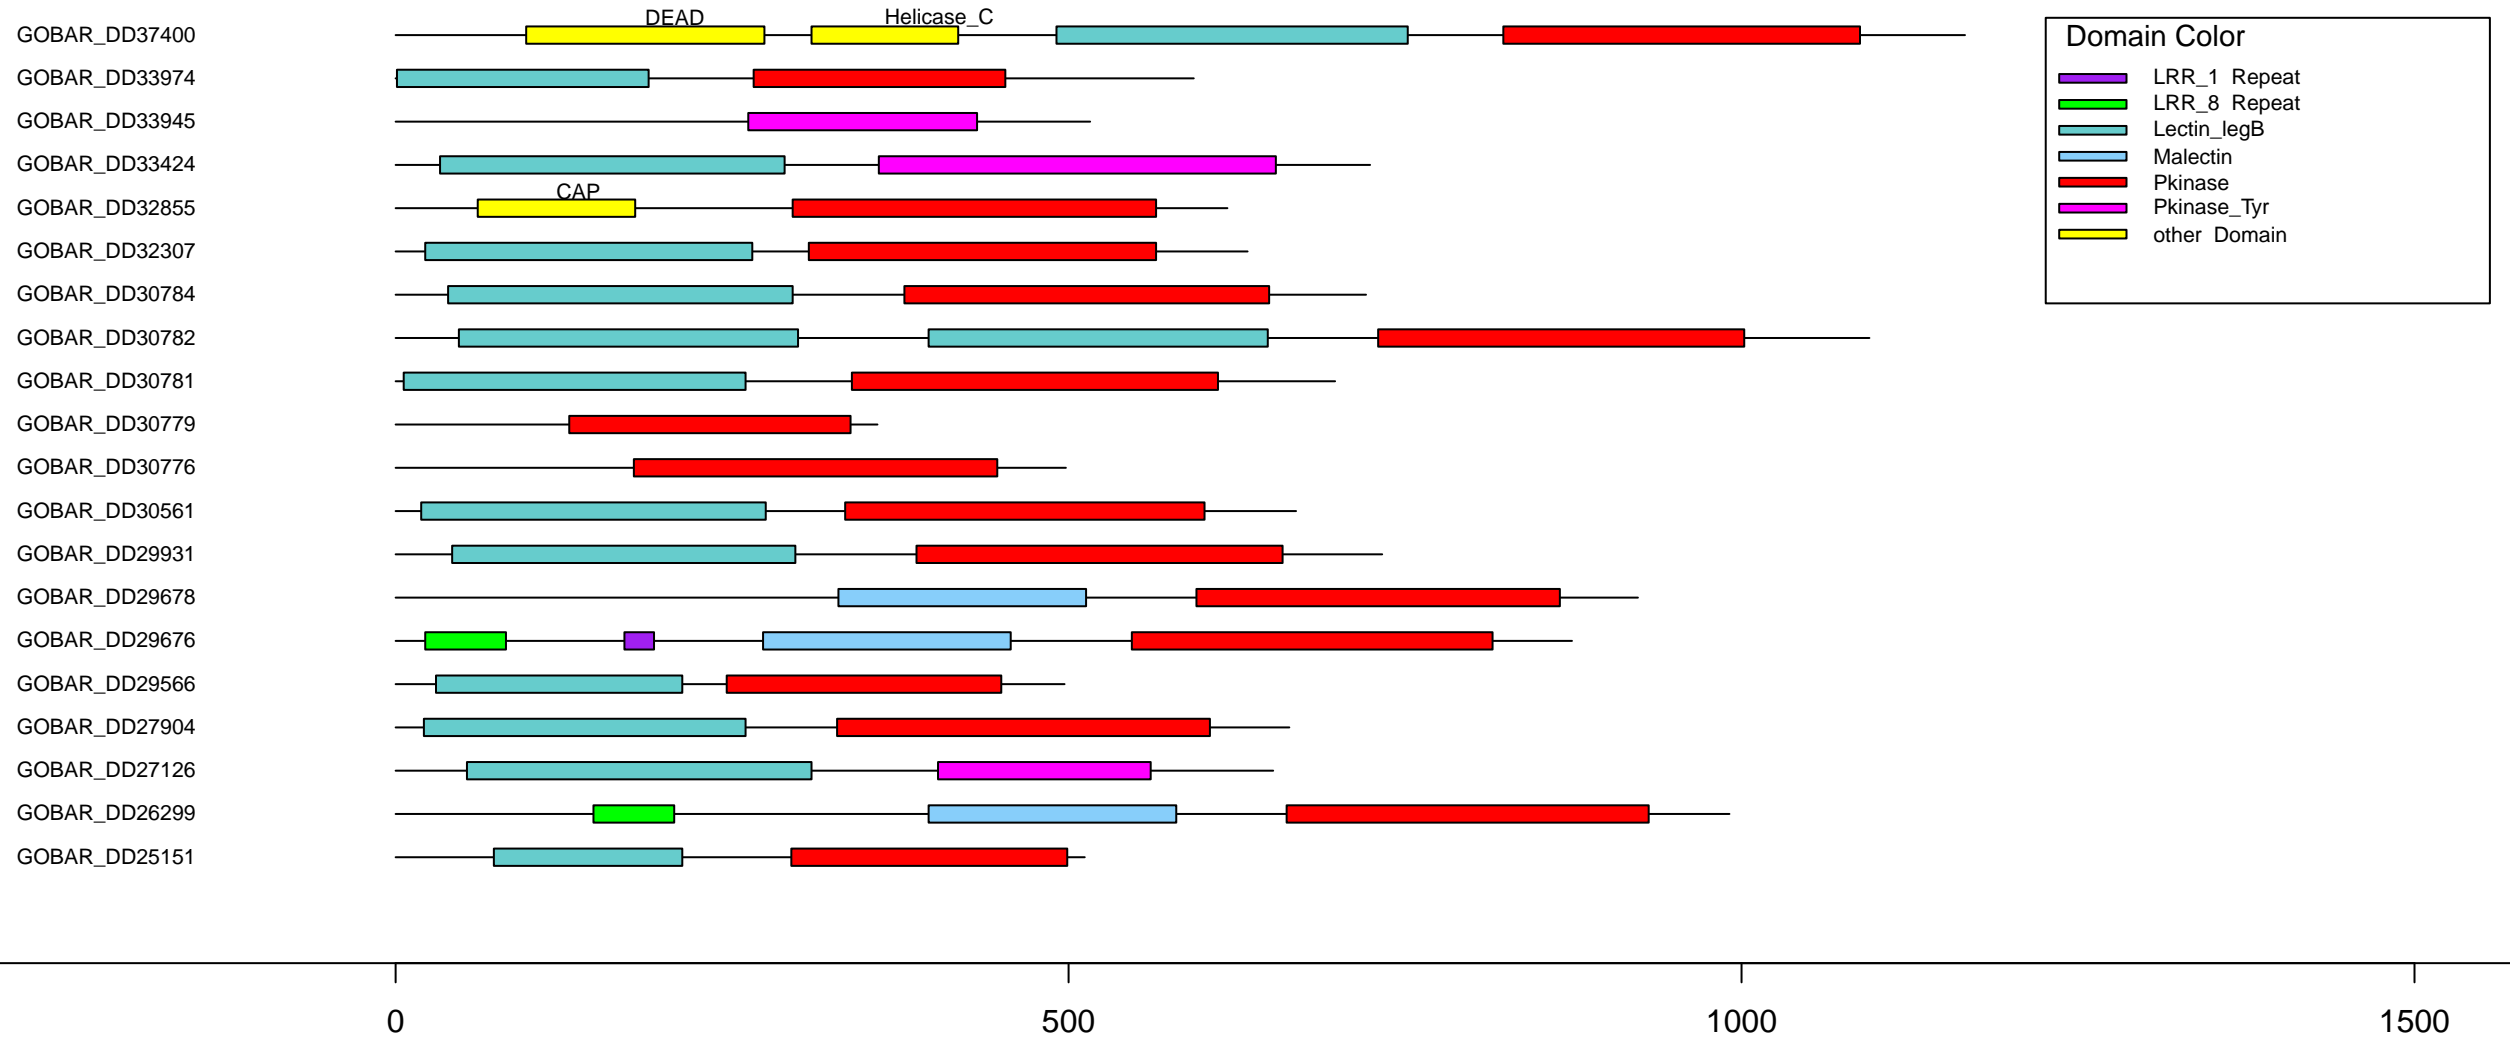



# G.ba RLK-Pelle\_L-LEC domain diagram (part 6)

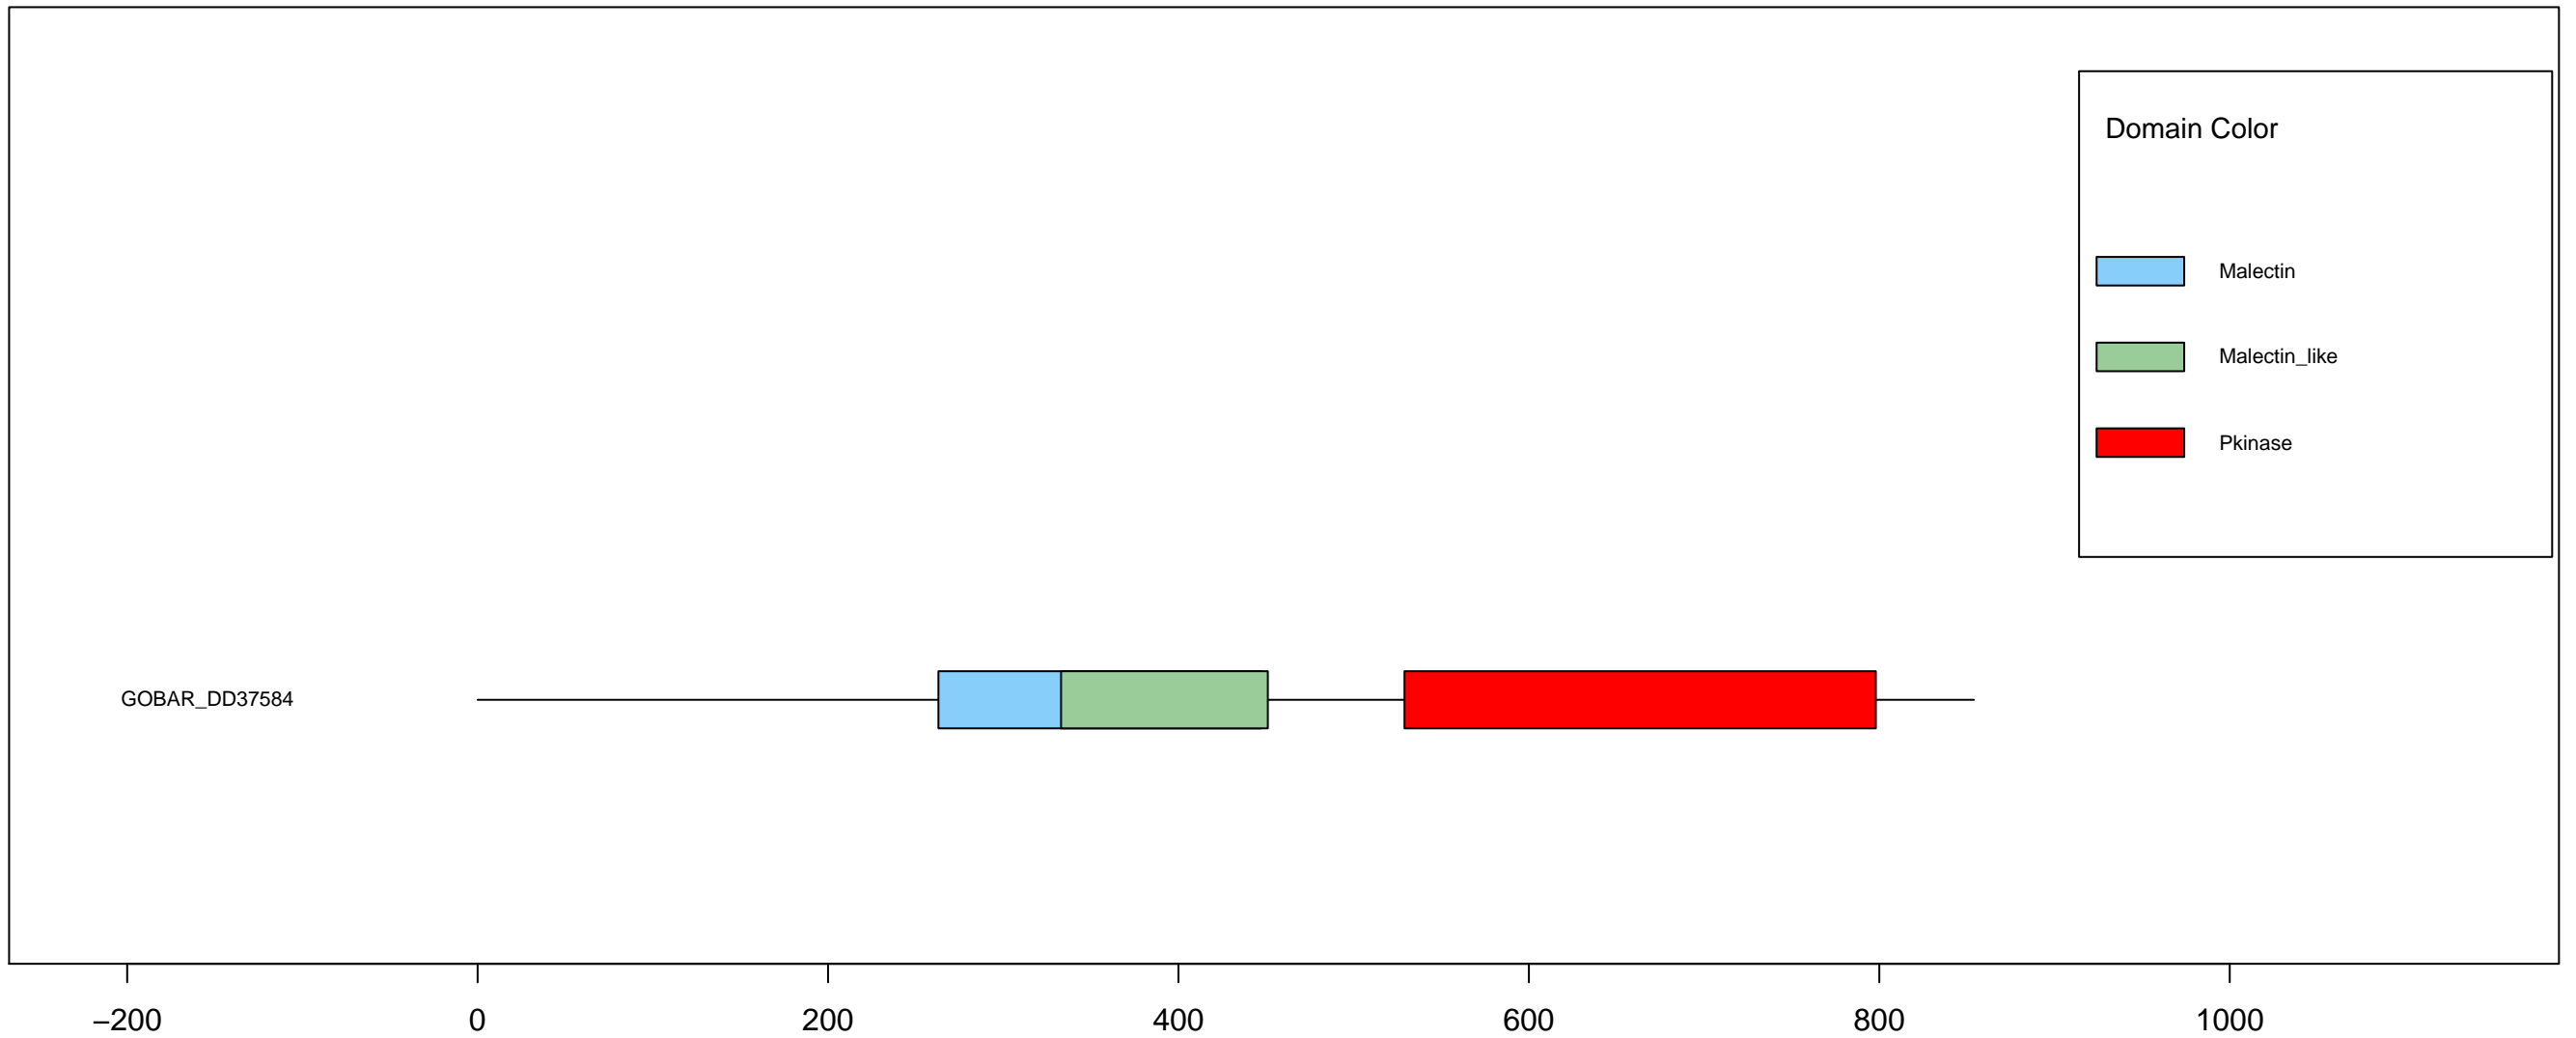

### G.ba RLK-Pelle\_LRK10L-2 domain diagram (part 1)

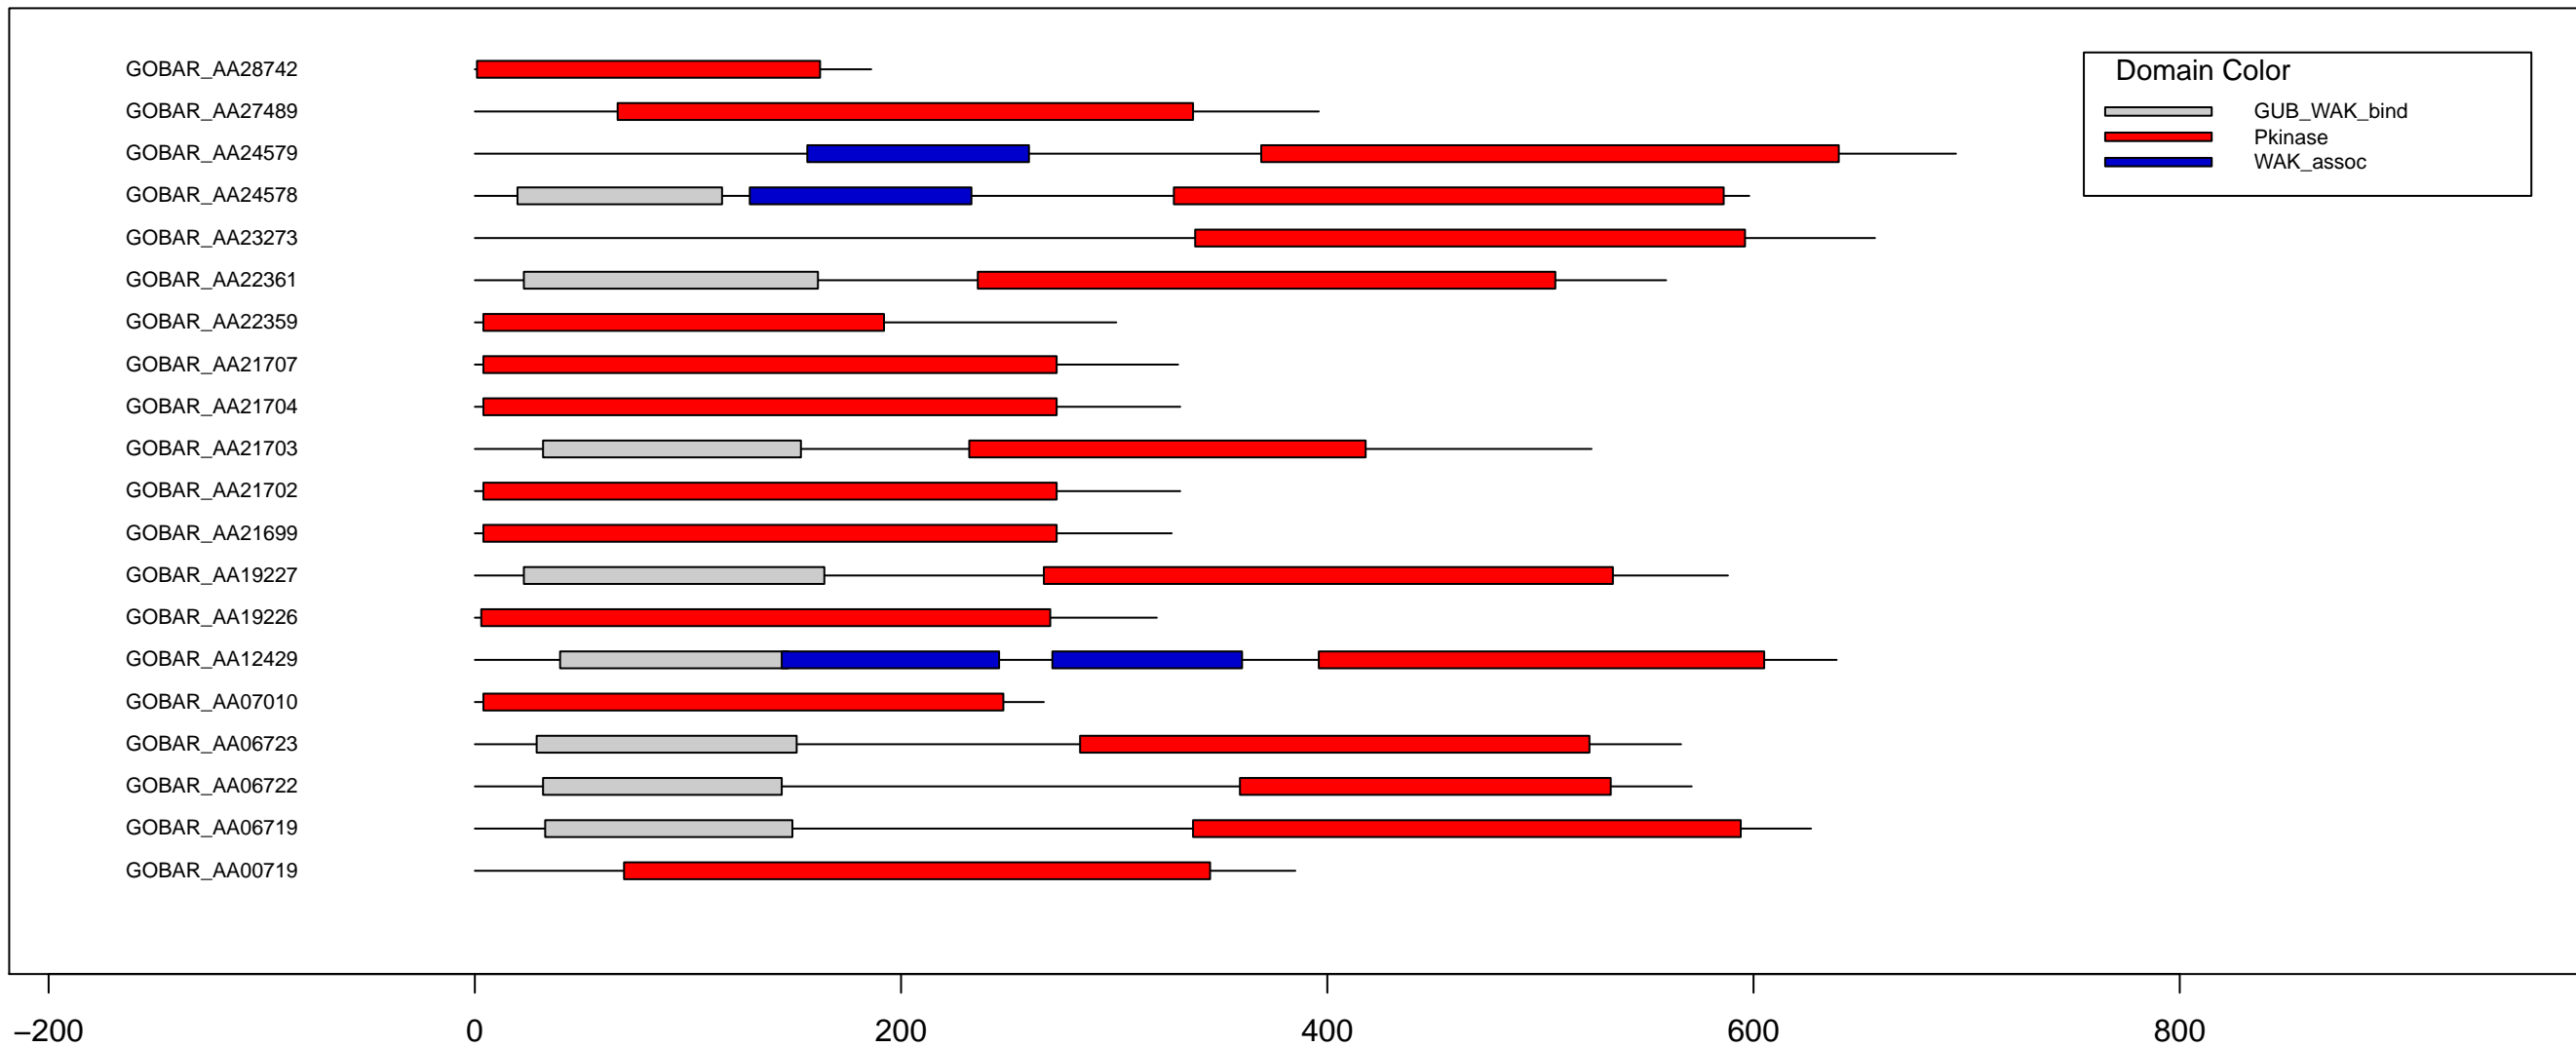

### G.ba RLK-Pelle\_LRK10L-2 domain diagram (part 2)

**Domain Color**

- GUB\_WAK\_bind
- Pkinase
- WAK\_assoc
- other Domain

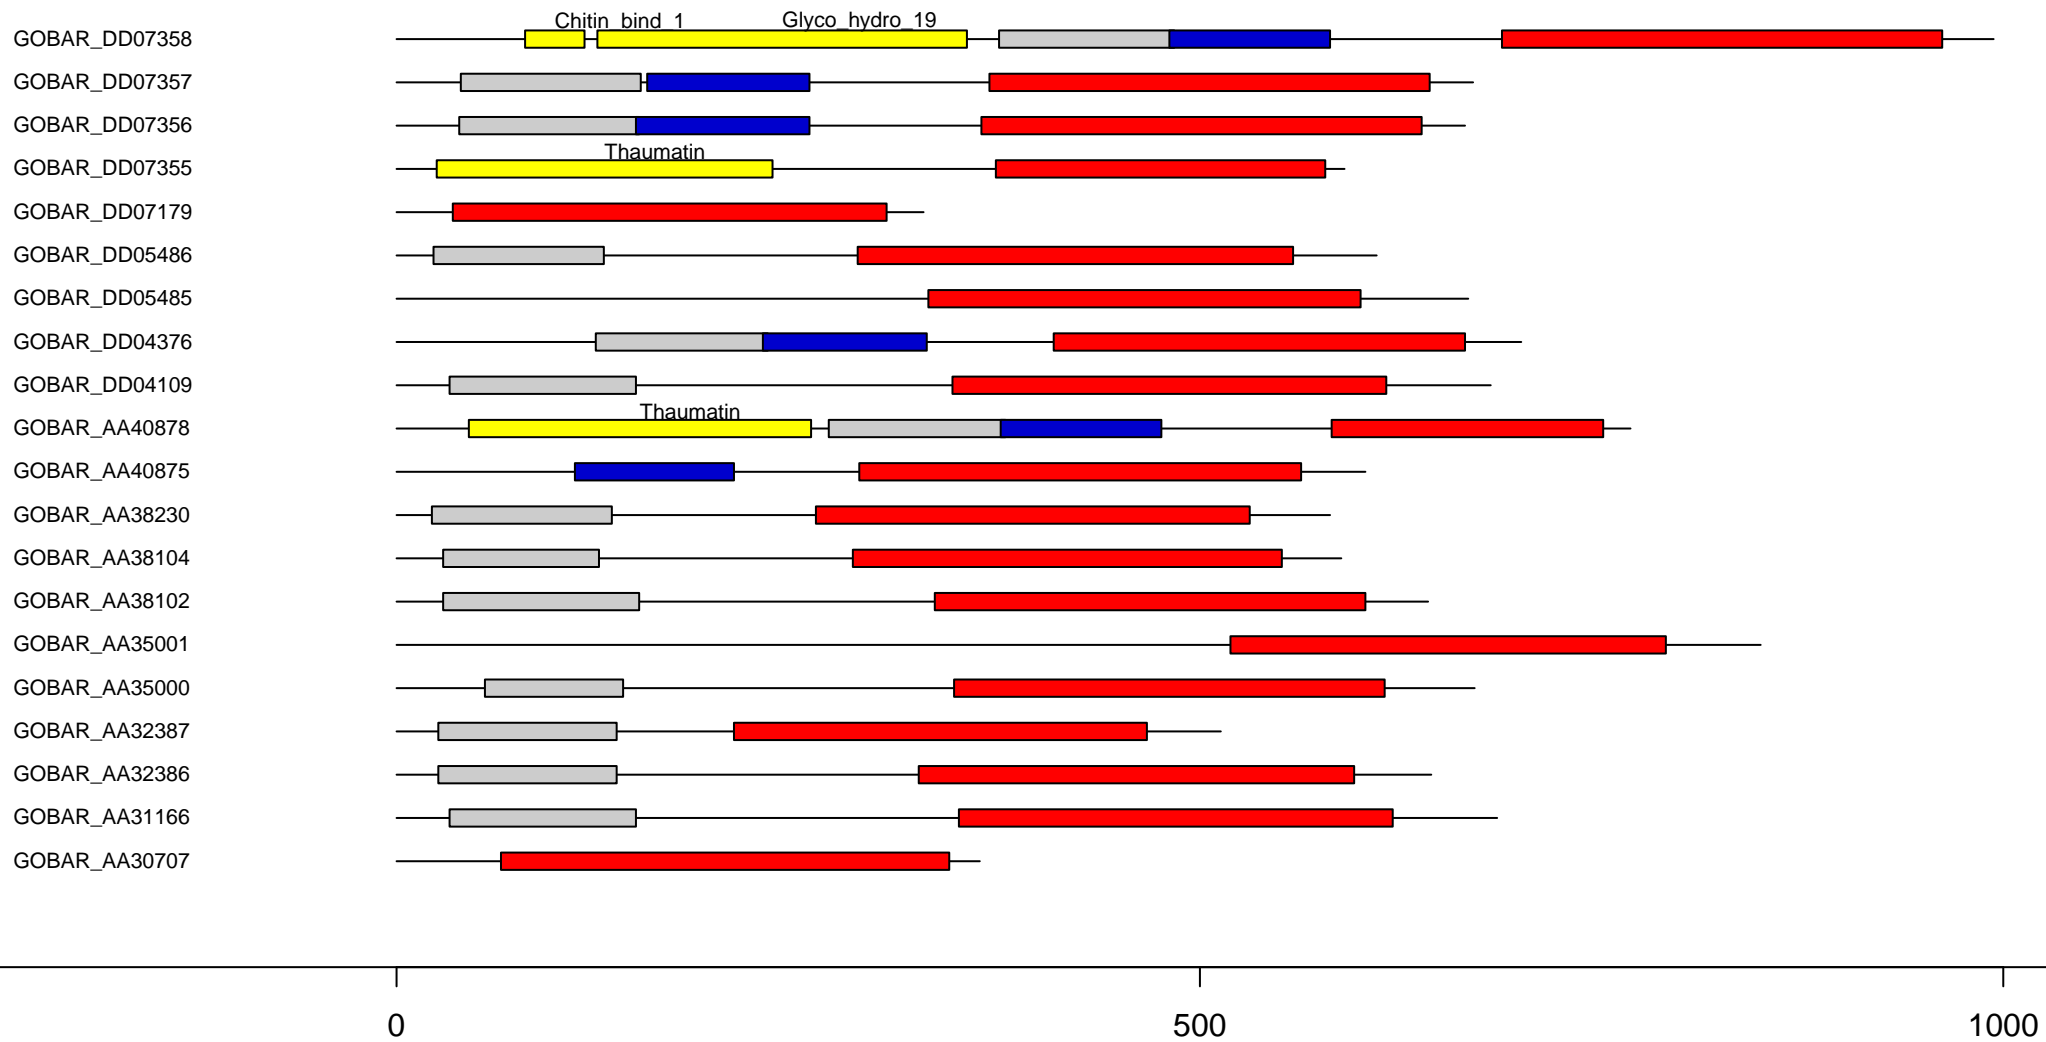

### G.ba RLK-Pelle\_LRK10L-2 domain diagram (part 3)

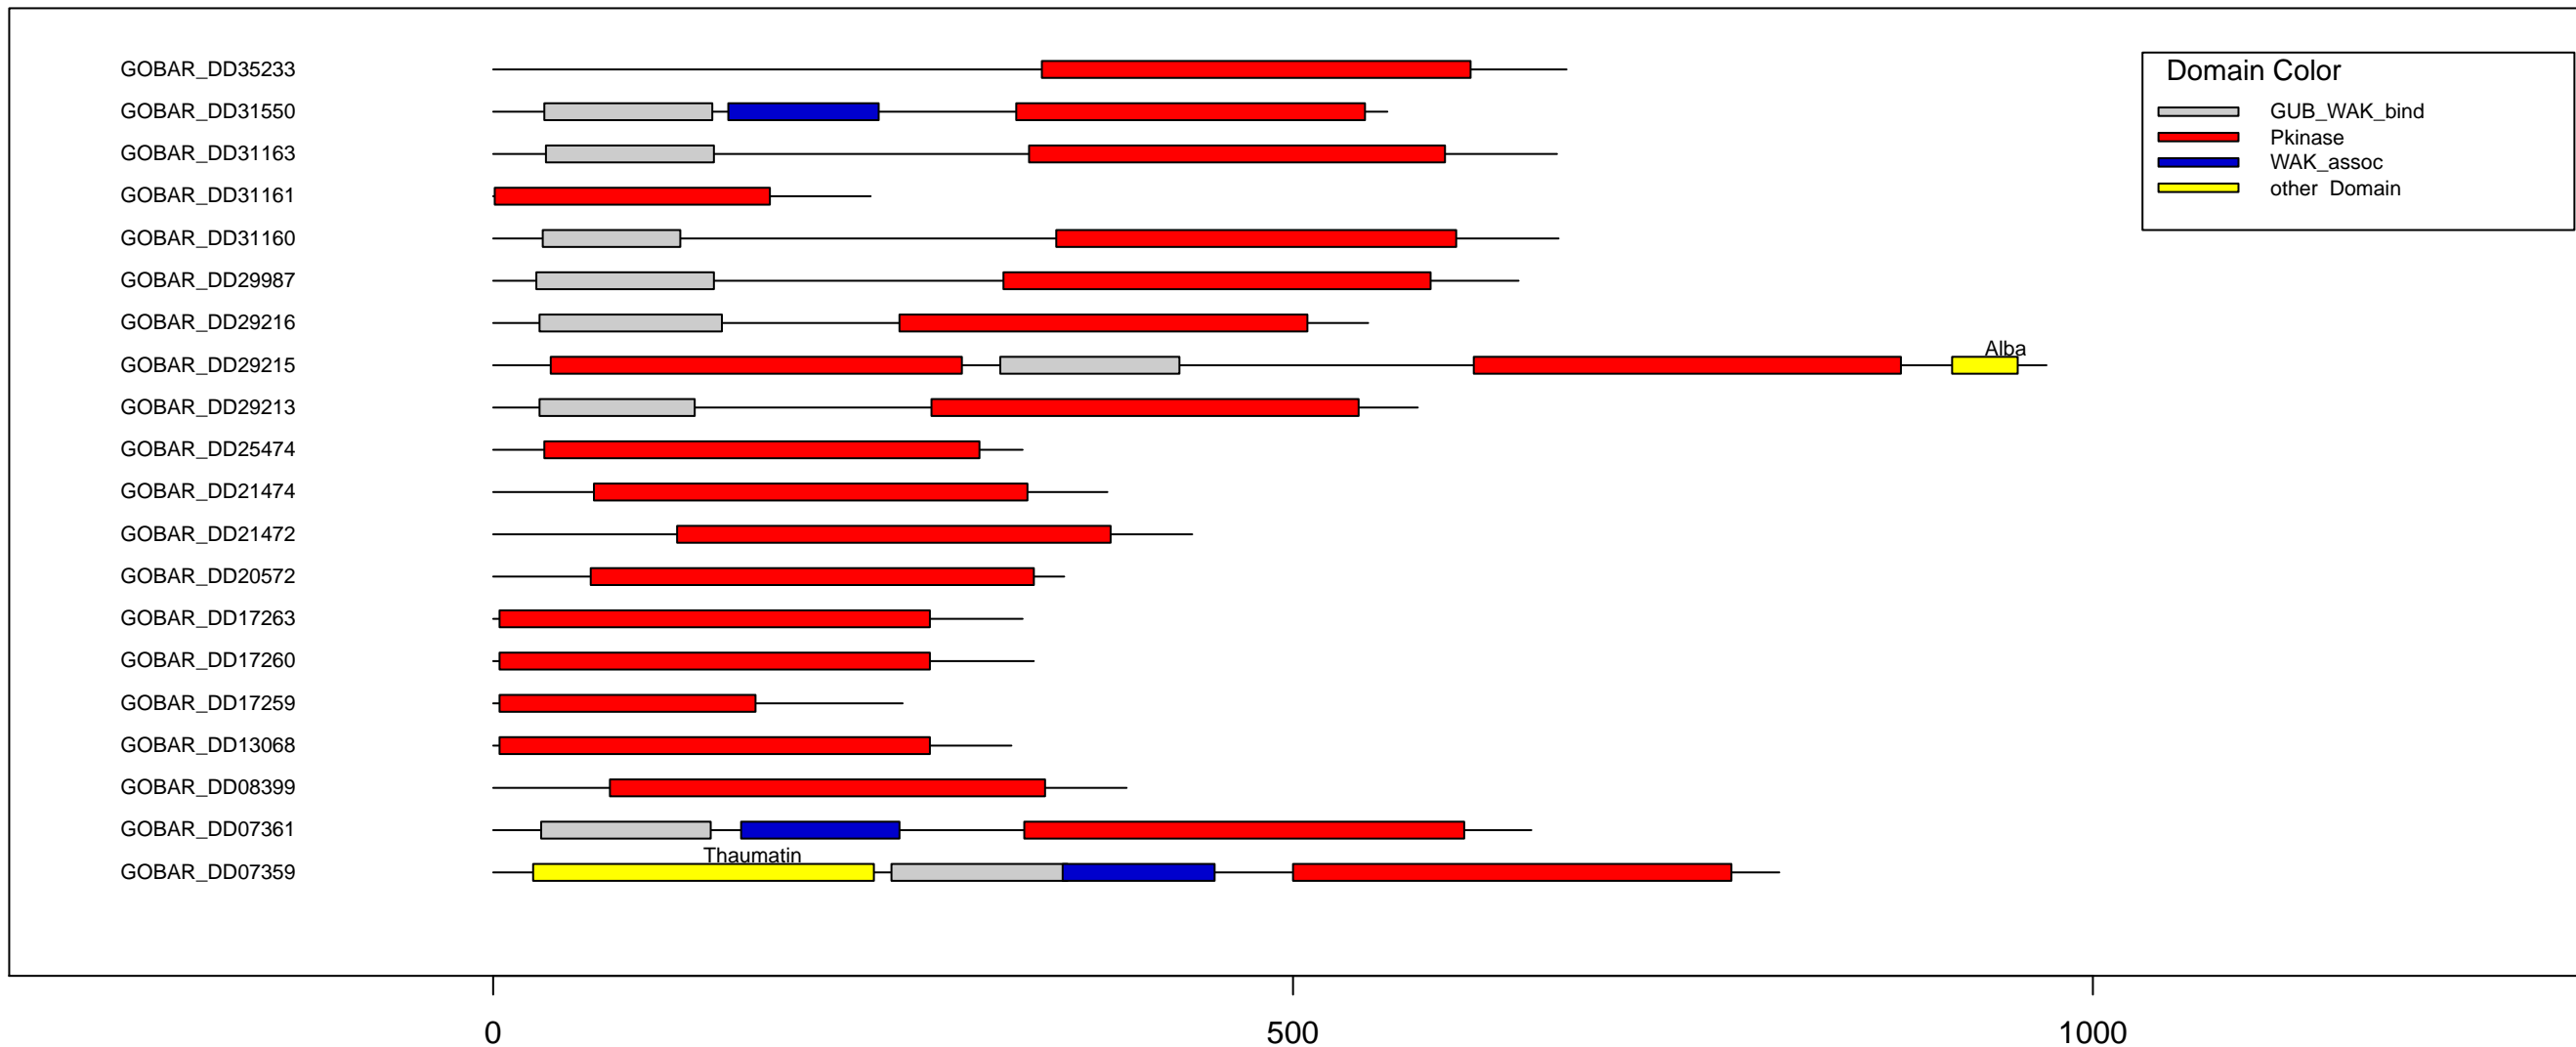

# G.ba RLK-Pelle\_LRK10L-2 domain diagram (part 4)

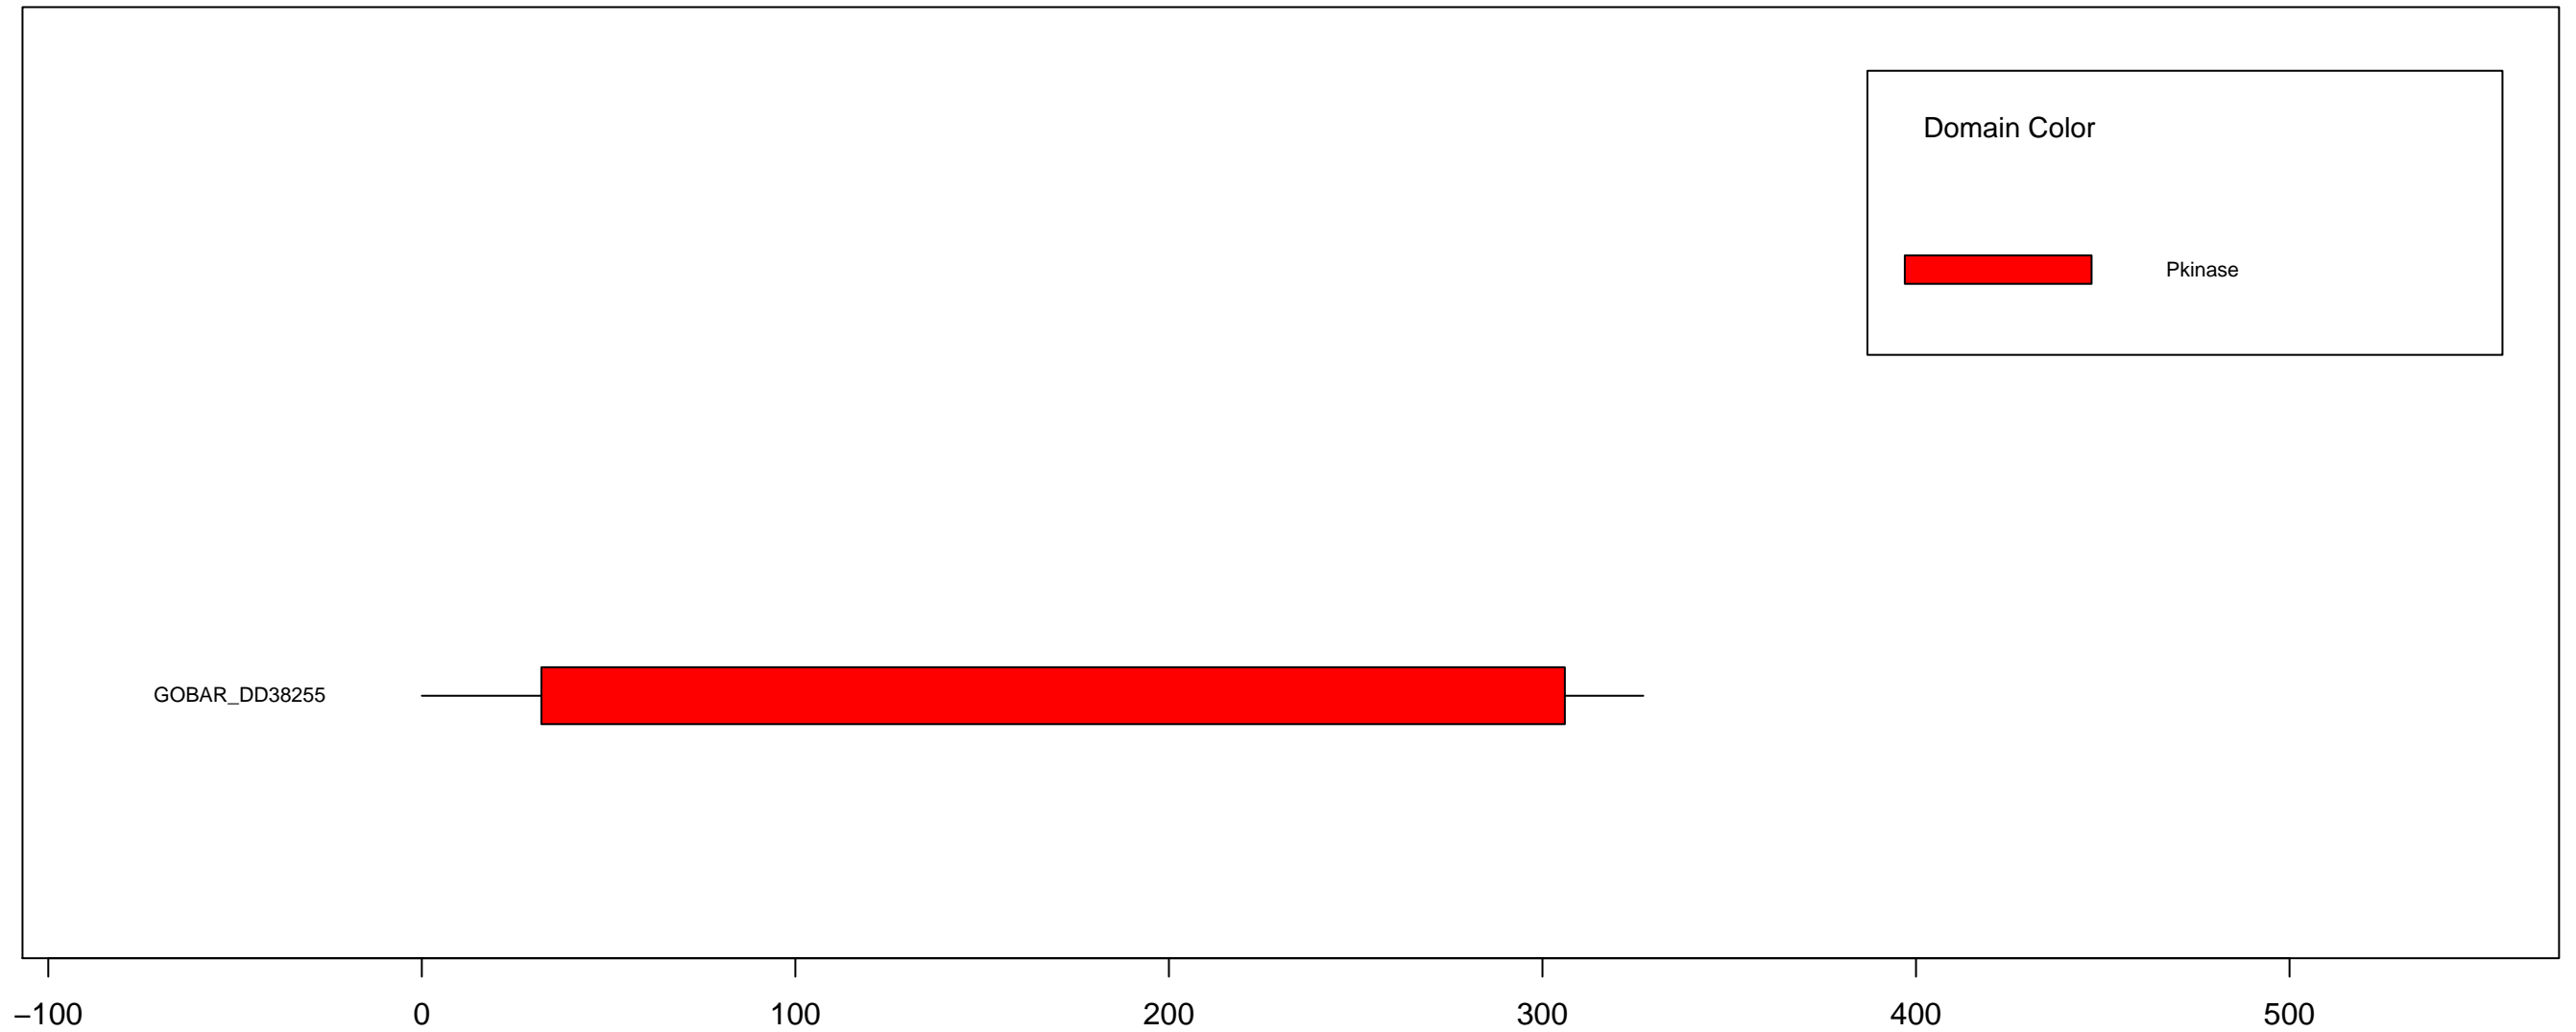

# G.ba RLK-Pelle\_LRR-I-1 domain diagram (all)

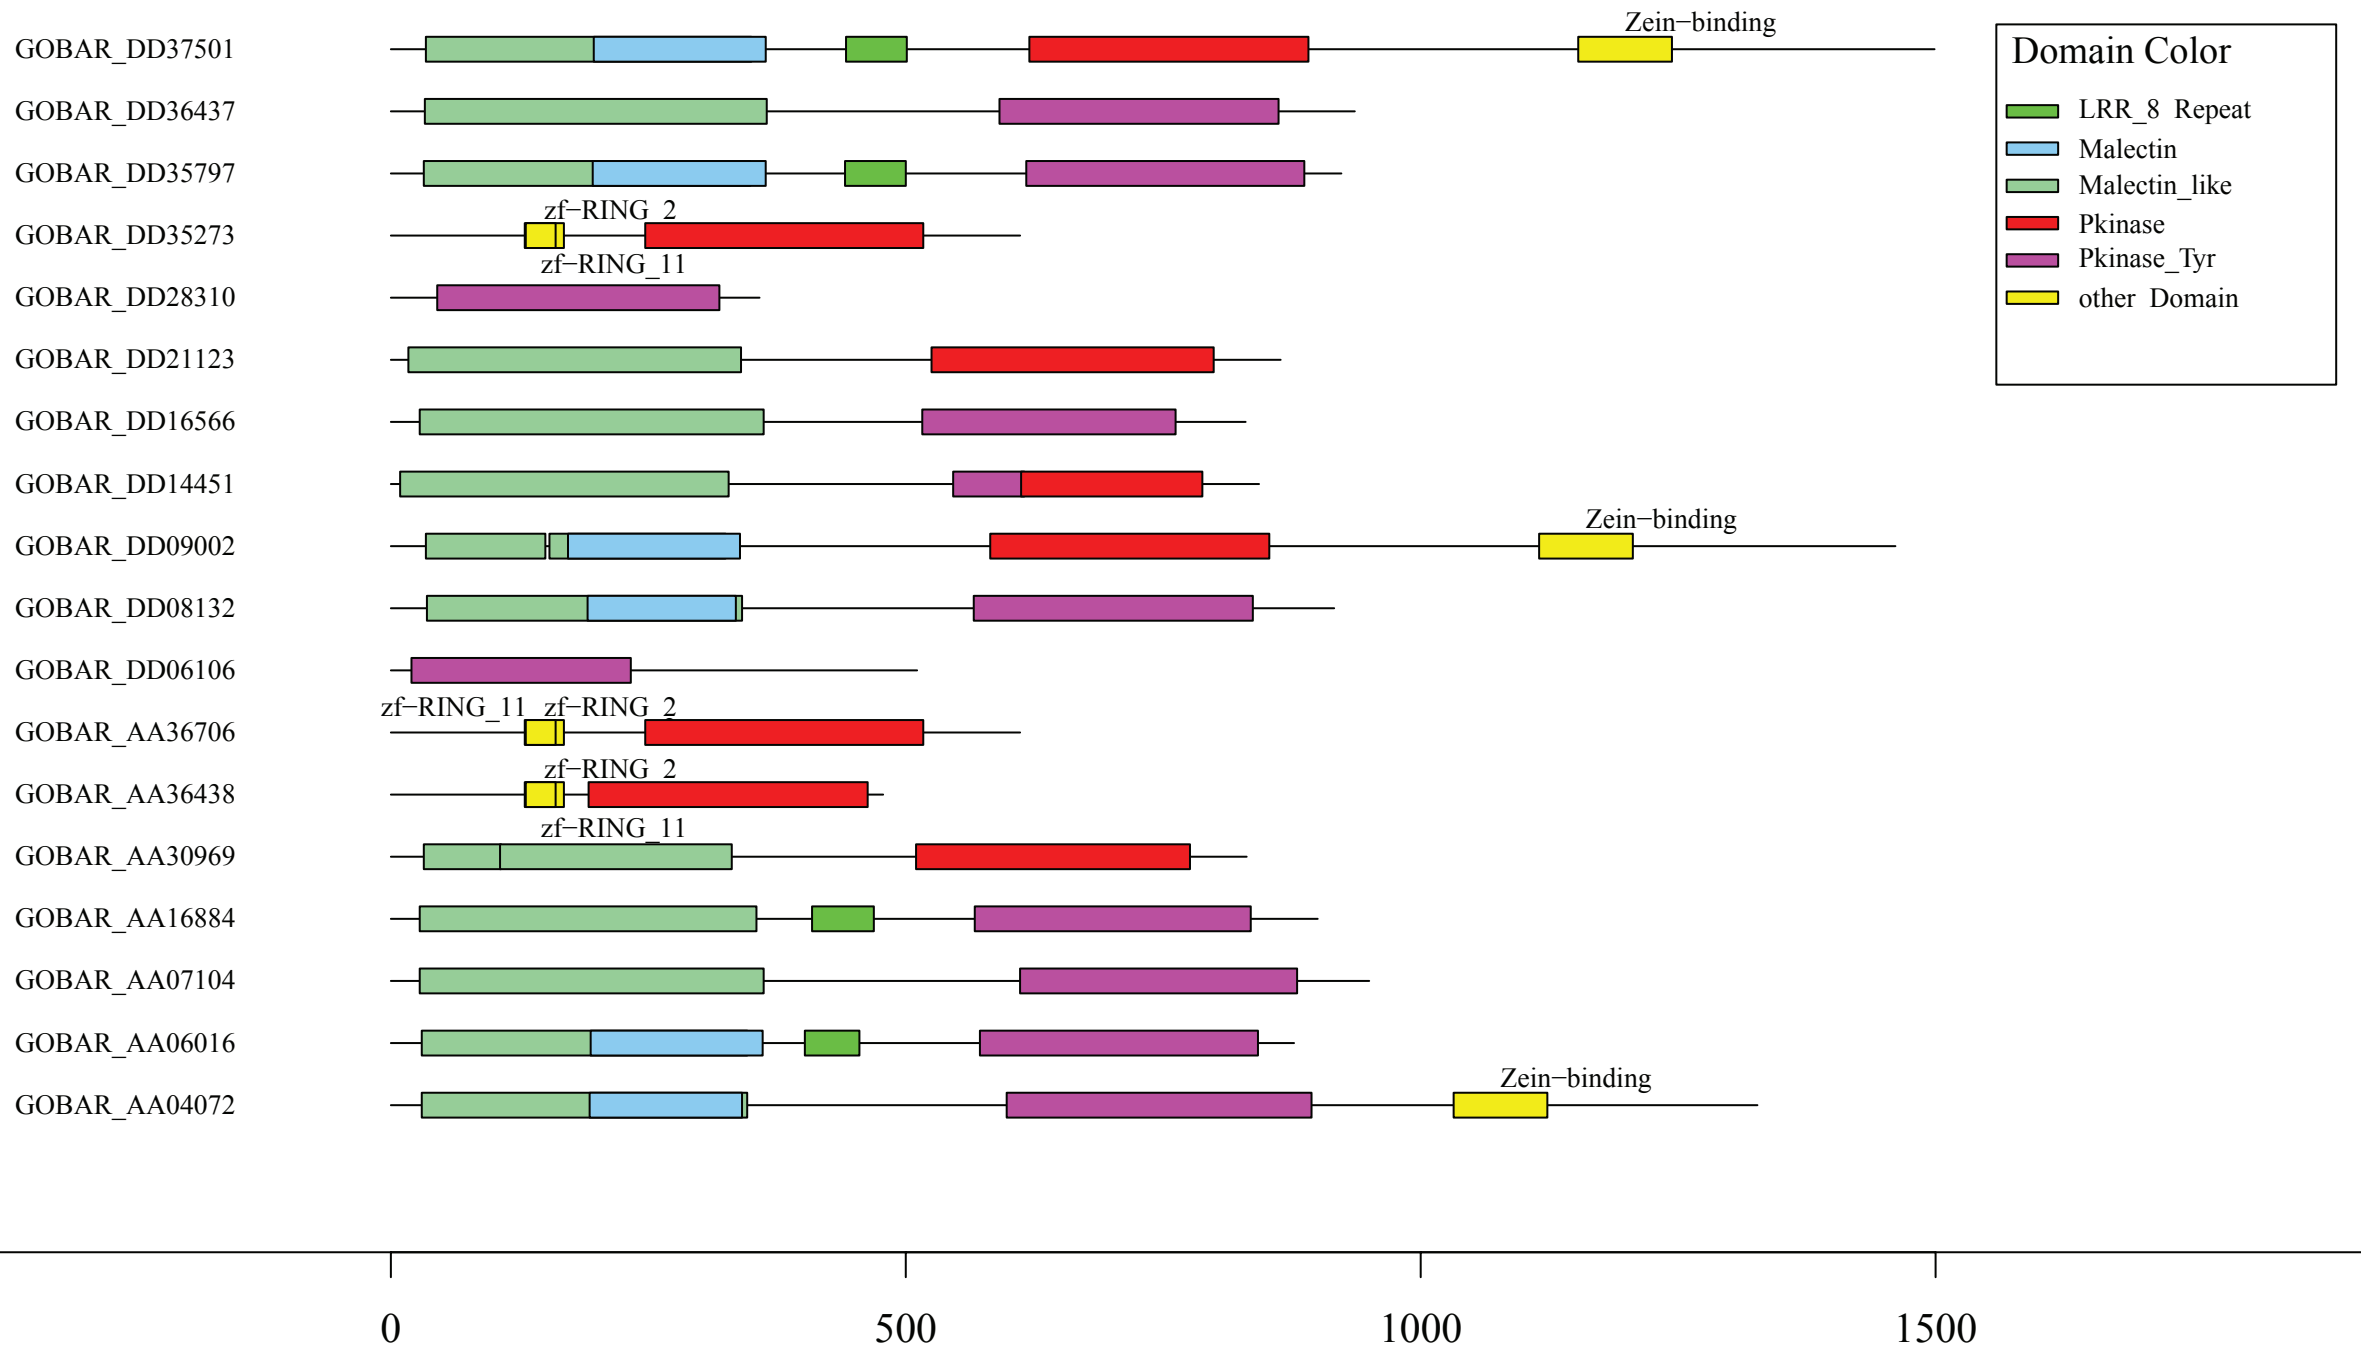

### G.ba RLK-Pelle\_LRR-I-2 domain diagram (all)

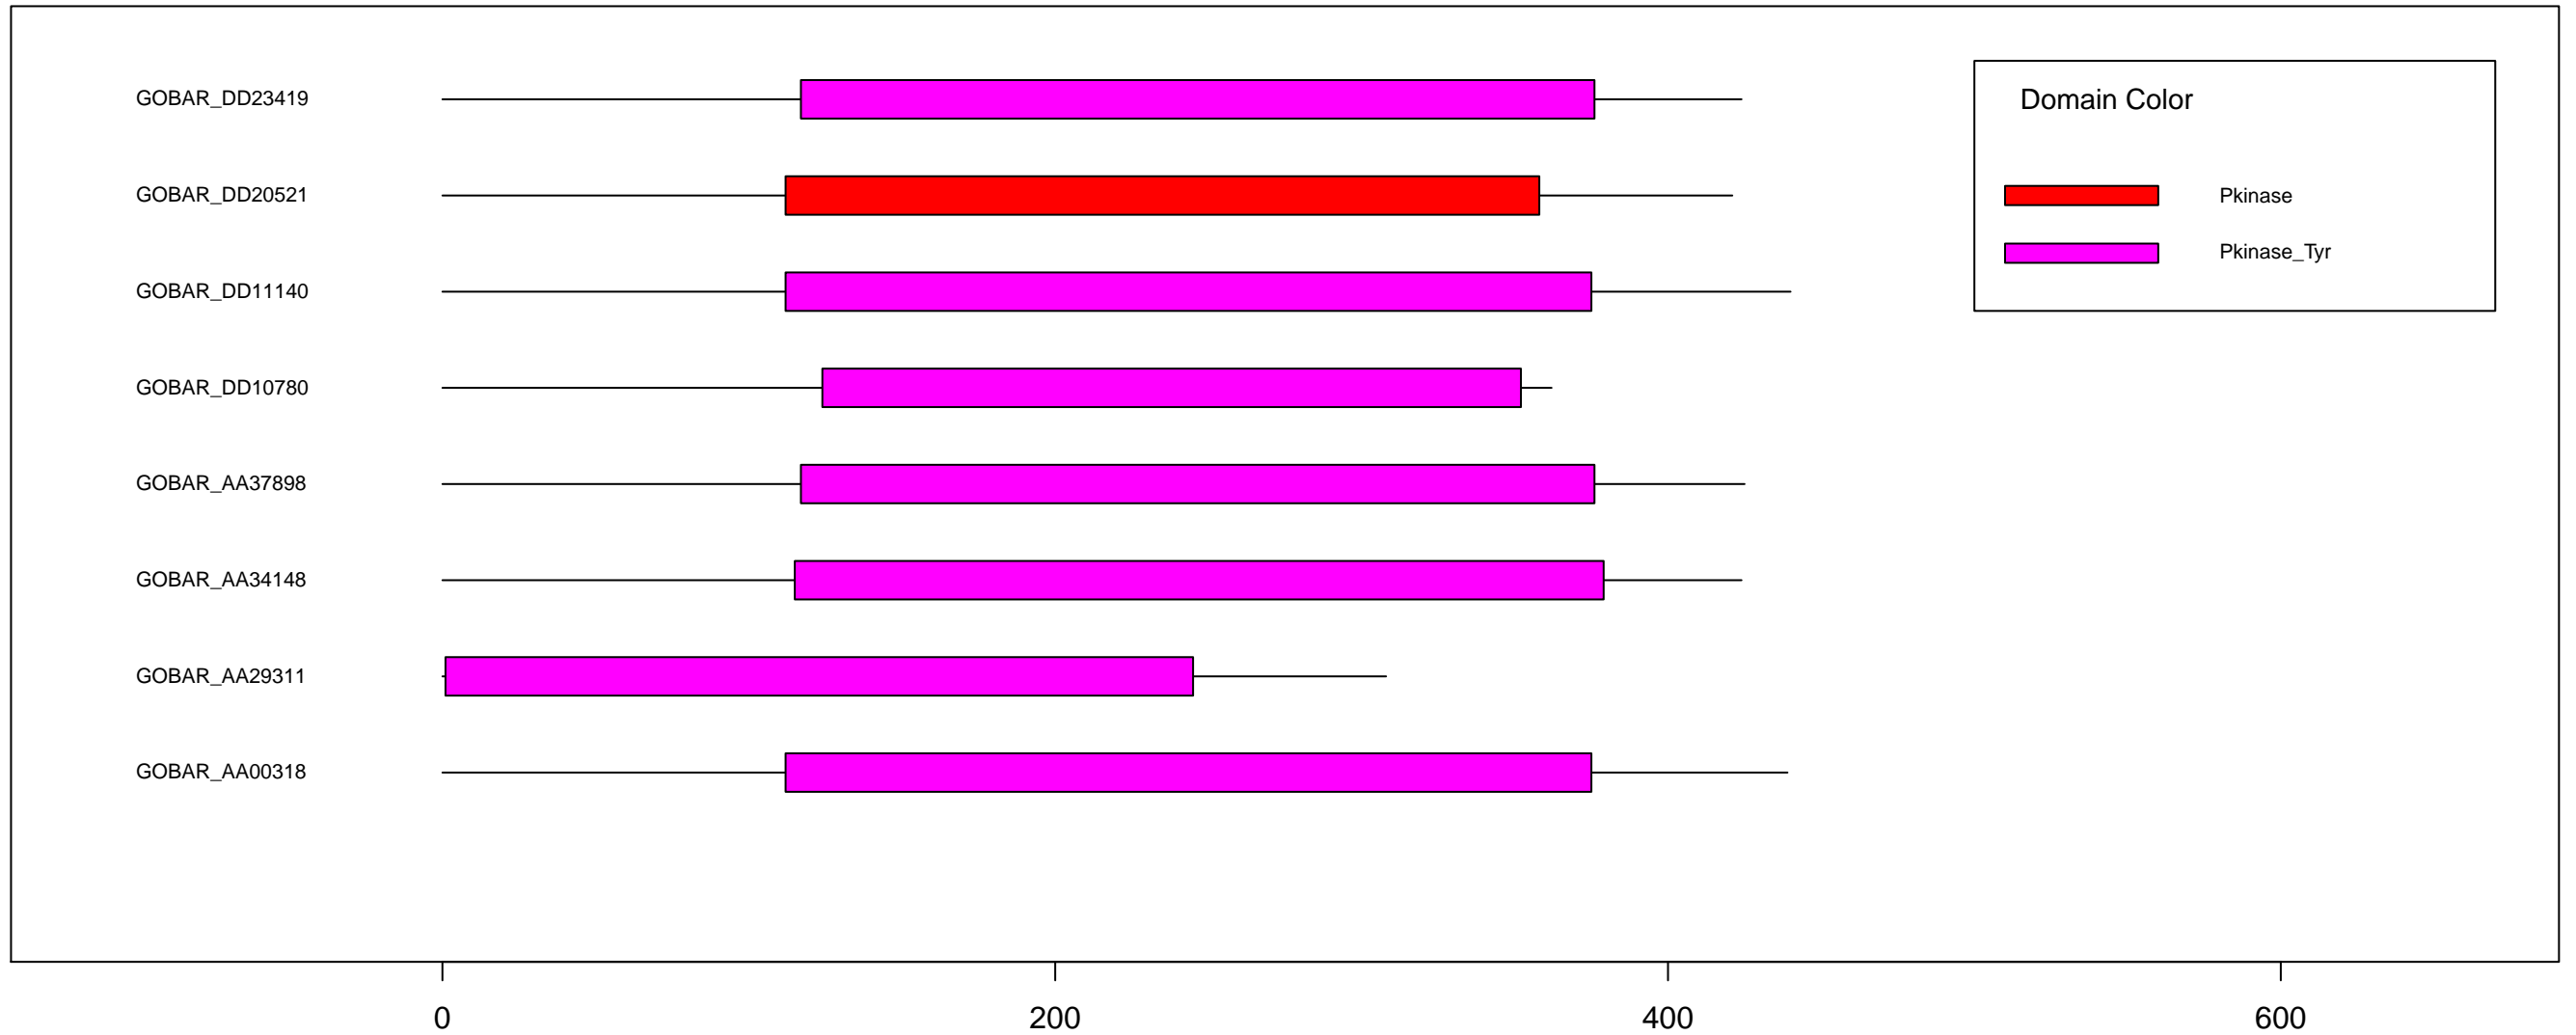

### G.ba RLK-Pelle\_LRR-III domain diagram (part 1)

GOBAR\_AA13939  
 GOBAR\_AA13424  
 GOBAR\_AA13178  
 GOBAR\_AA13142  
 GOBAR\_AA12723  
 GOBAR\_AA12384  
 GOBAR\_AA12283  
 GOBAR\_AA12272  
 GOBAR\_AA10037  
 GOBAR\_AA09931  
 GOBAR\_AA09778  
 GOBAR\_AA09640  
 GOBAR\_AA08526  
 GOBAR\_AA07101  
 GOBAR\_AA04771  
 GOBAR\_AA04295  
 GOBAR\_AA02586  
 GOBAR\_AA01897  
 GOBAR\_AA01179  
 GOBAR\_AA00064

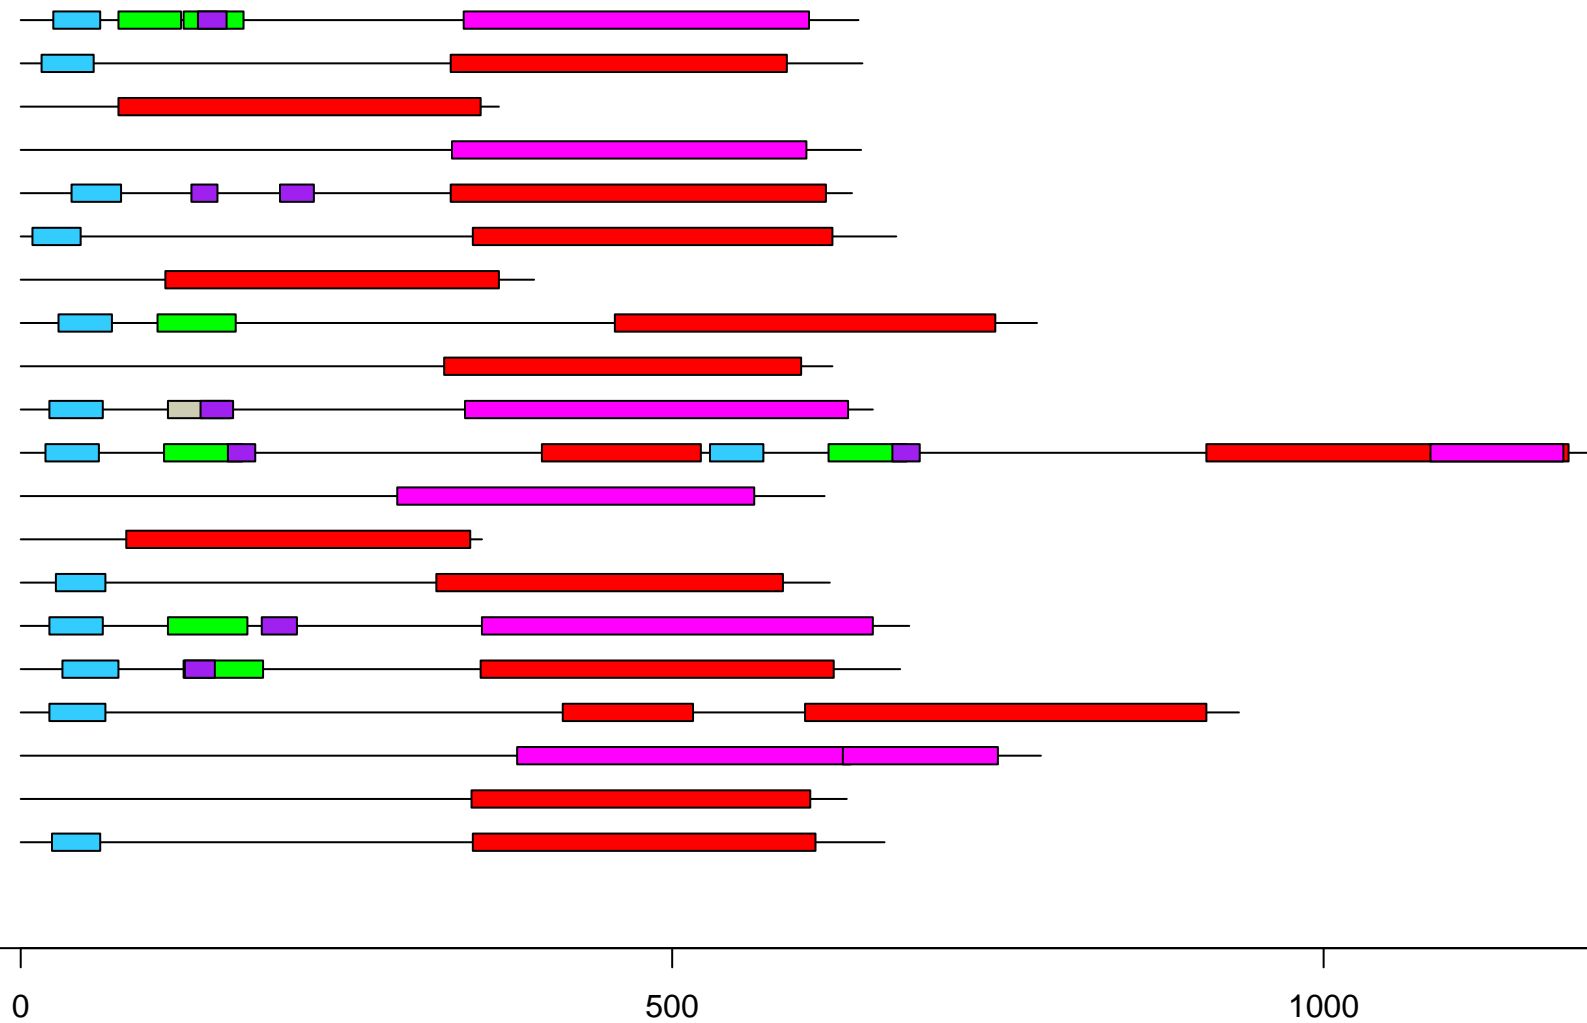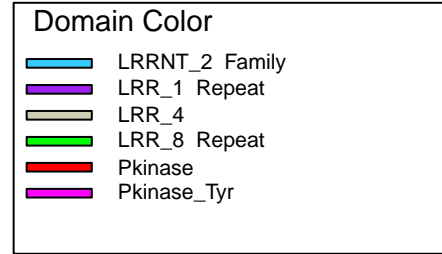



### G.ba RLK-Pelle\_LRR-III domain diagram (part 2)

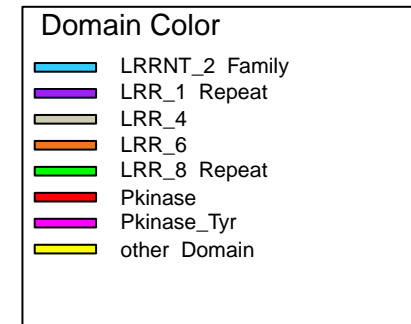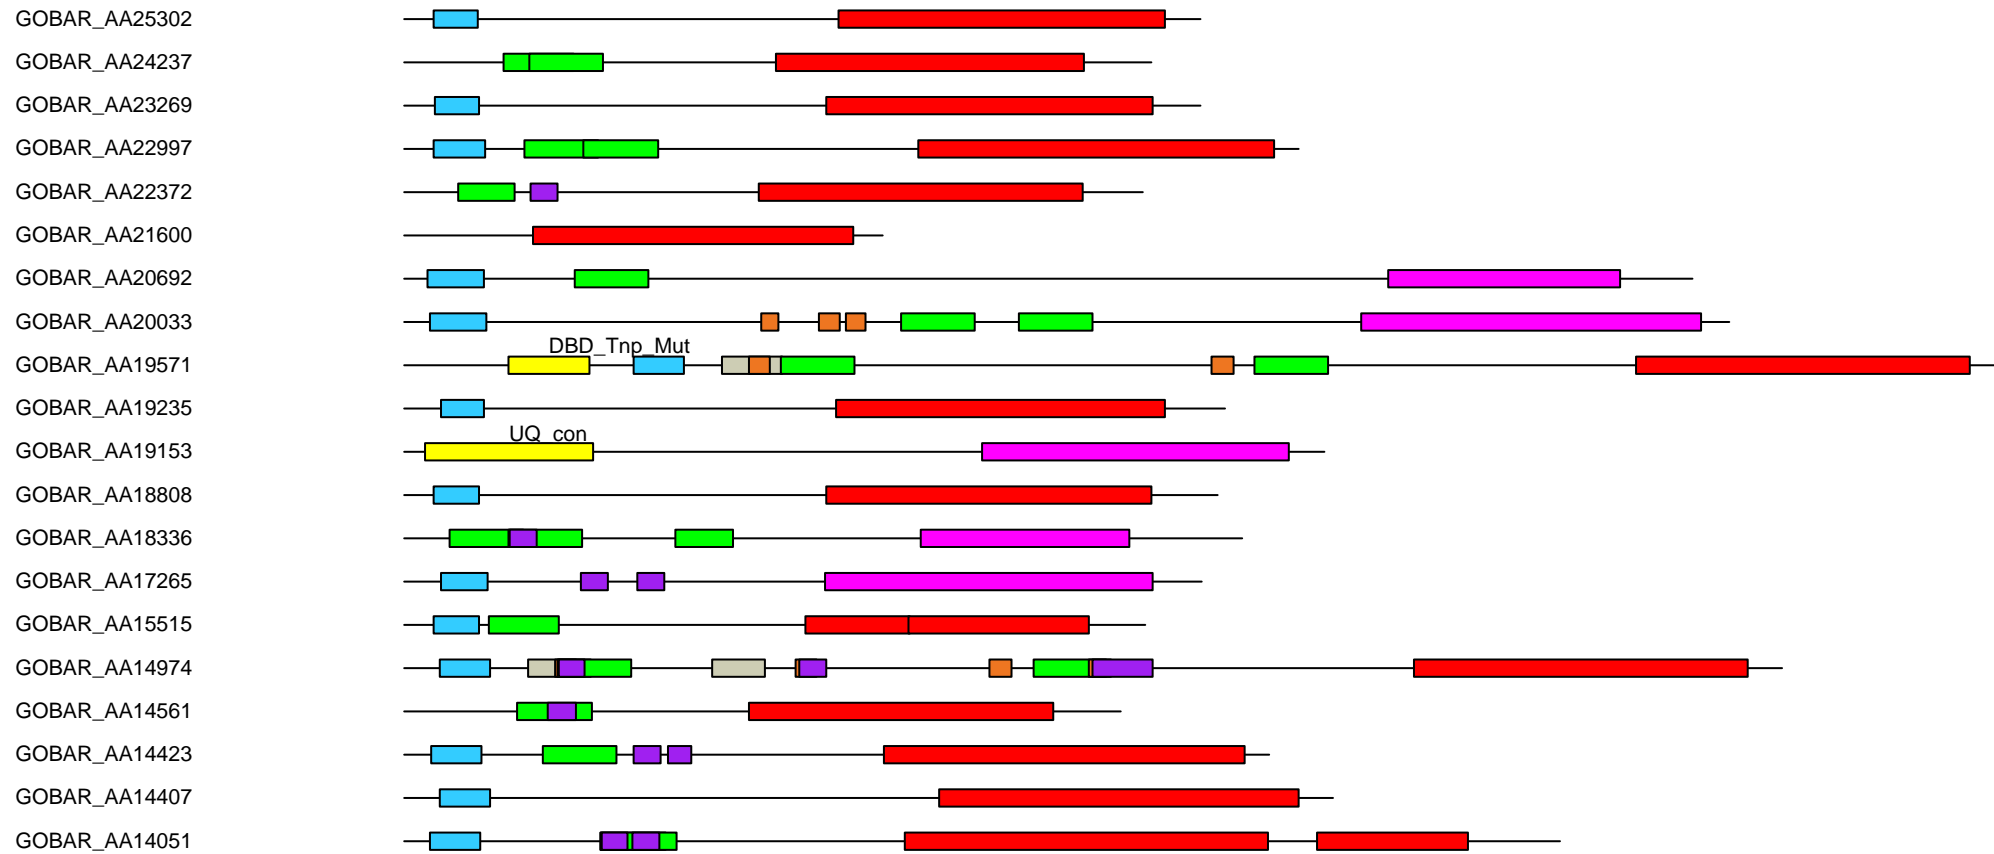

### G.ba RLK-Pelle\_LRR-III domain diagram (part 3)

GOBAR\_DD03453  
 GOBAR\_DD02308  
 GOBAR\_DD01901  
 GOBAR\_AA40789  
 GOBAR\_AA37526  
 GOBAR\_AA36721  
 GOBAR\_AA35240  
 GOBAR\_AA35239  
 GOBAR\_AA33587  
 GOBAR\_AA33303  
 GOBAR\_AA33222  
 GOBAR\_AA31846  
 GOBAR\_AA31571  
 GOBAR\_AA30083  
 GOBAR\_AA29546  
 GOBAR\_AA28465  
 GOBAR\_AA28017  
 GOBAR\_AA27574  
 GOBAR\_AA27216  
 GOBAR\_AA26383

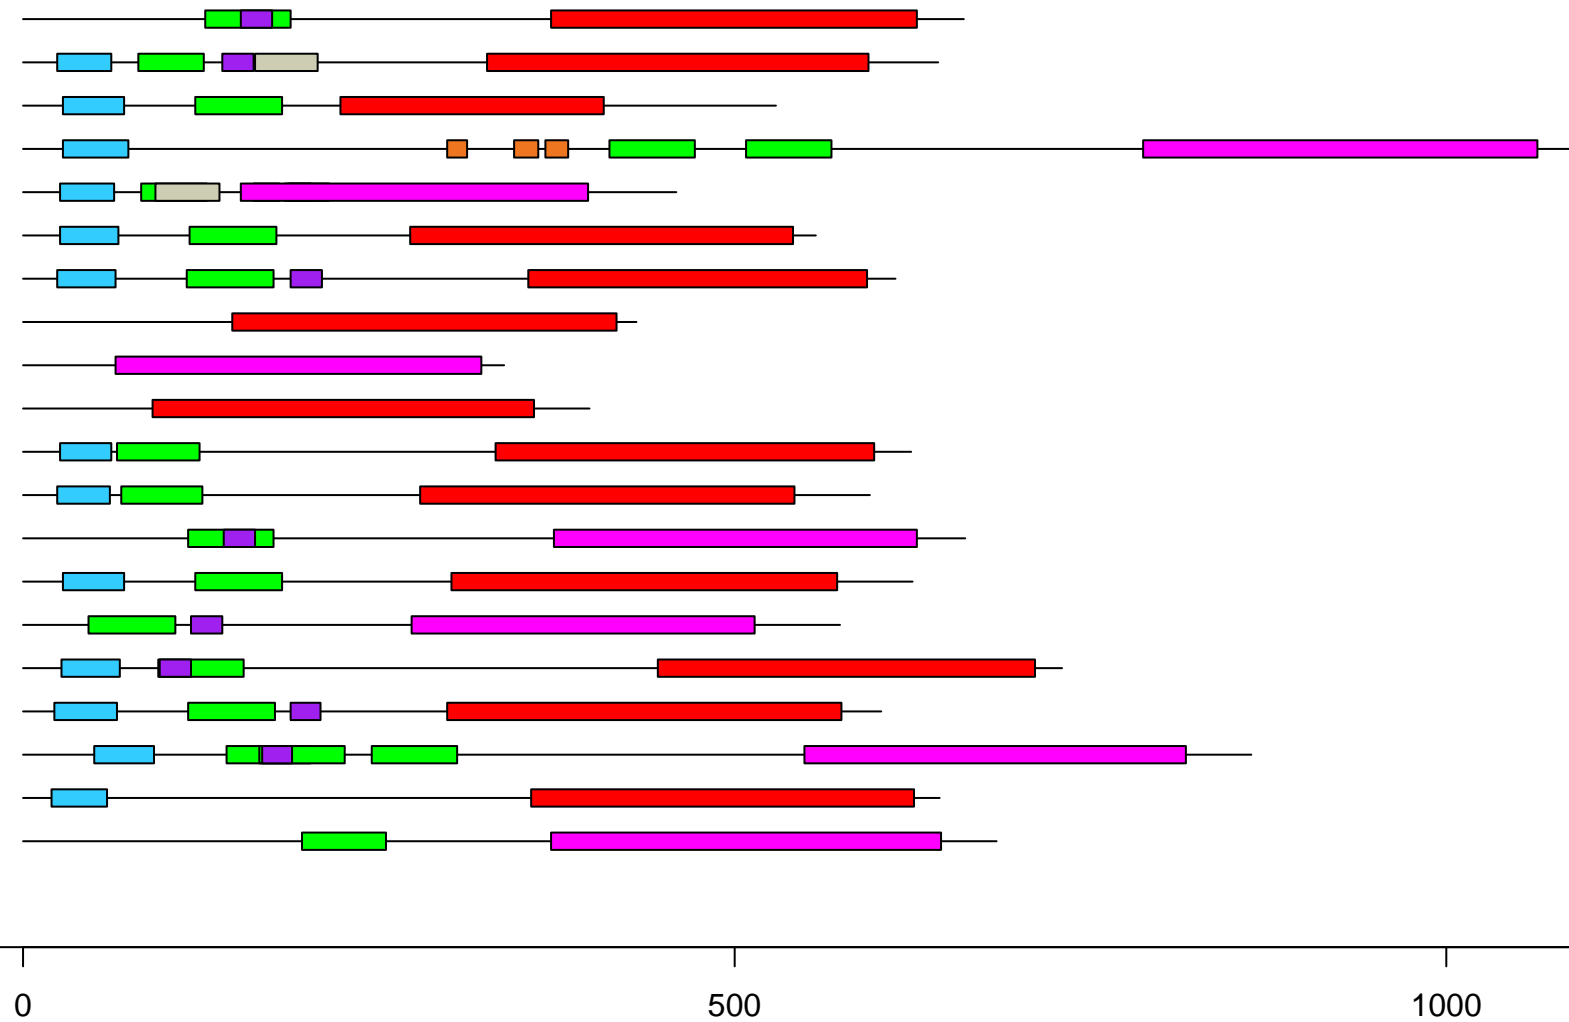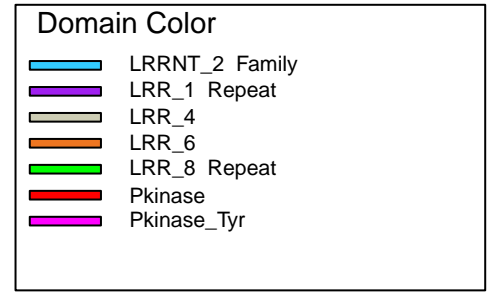

### G.ba RLK-Pelle\_LRR-III domain diagram (part 4)

GOBAR\_DD17143  
 GOBAR\_DD16051  
 GOBAR\_DD14211  
 GOBAR\_DD13965  
 GOBAR\_DD13016  
 GOBAR\_DD12763  
 GOBAR\_DD11401  
 GOBAR\_DD11354  
 GOBAR\_DD11353  
 GOBAR\_DD10653  
 GOBAR\_DD10573  
 GOBAR\_DD10419  
 GOBAR\_DD09415  
 GOBAR\_DD08747  
 GOBAR\_DD07132  
 GOBAR\_DD06970  
 GOBAR\_DD05964  
 GOBAR\_DD05719  
 GOBAR\_DD04489  
 GOBAR\_DD03791

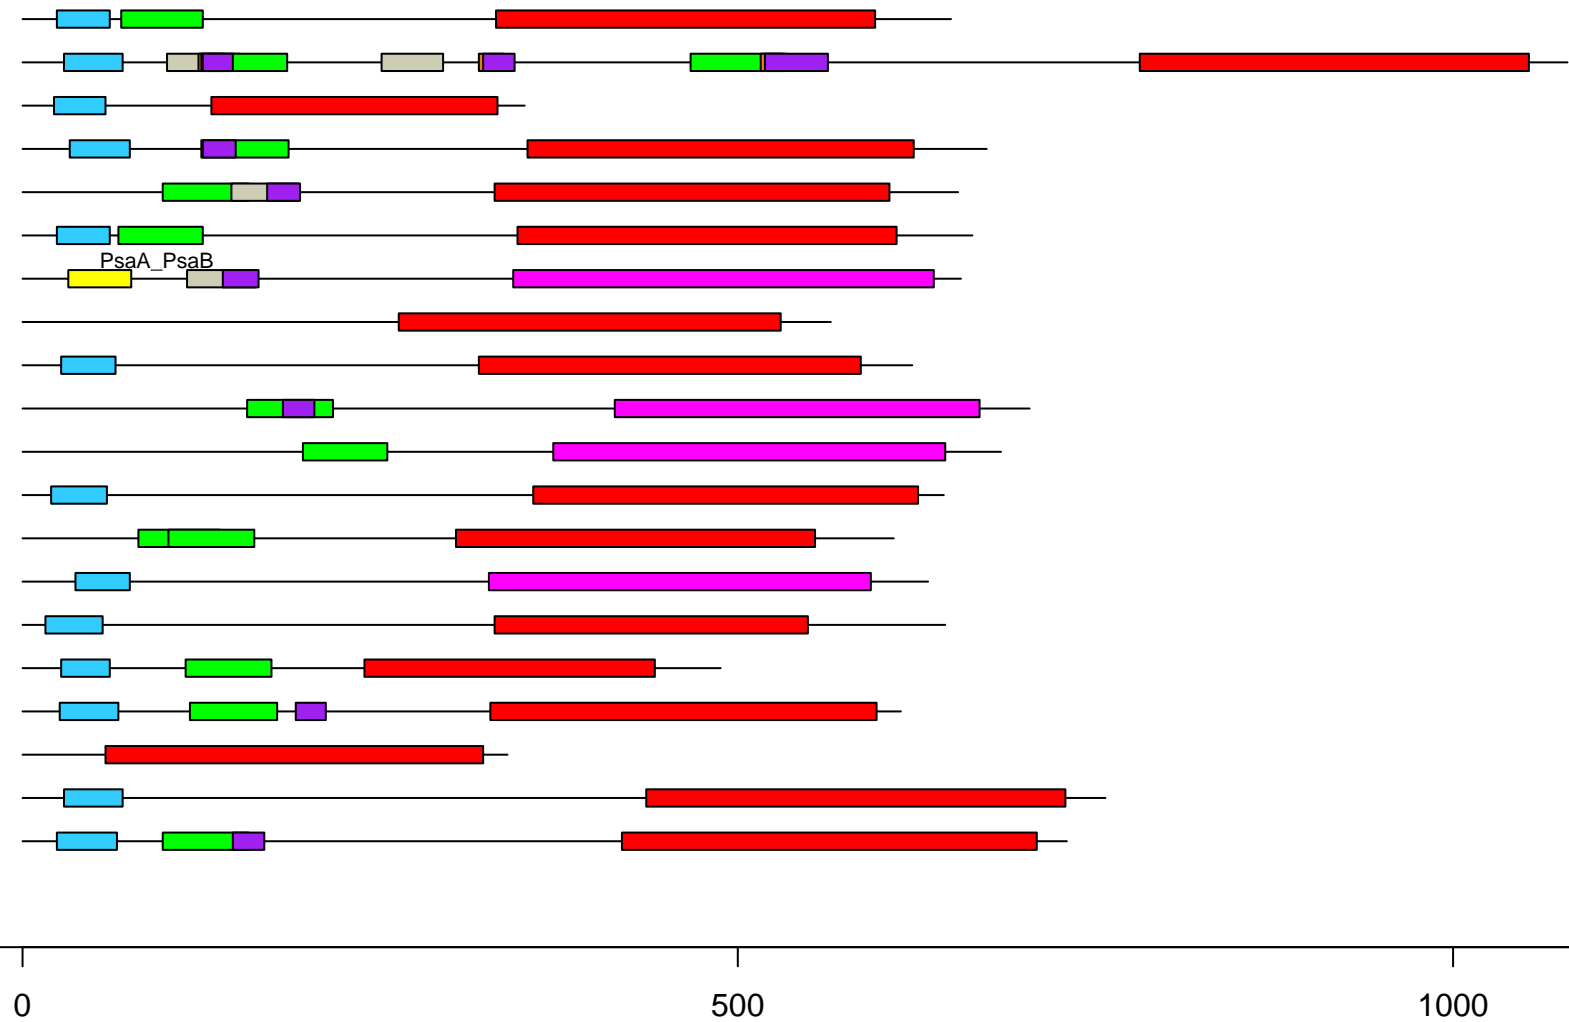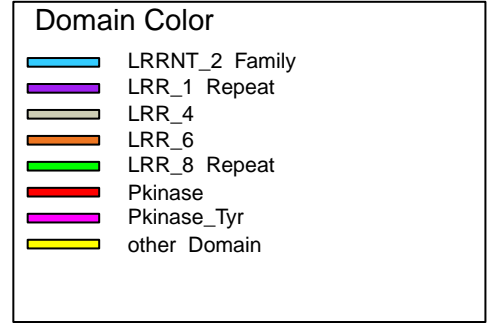

### G.ba RLK-Pelle\_LRR-III domain diagram (part 5)

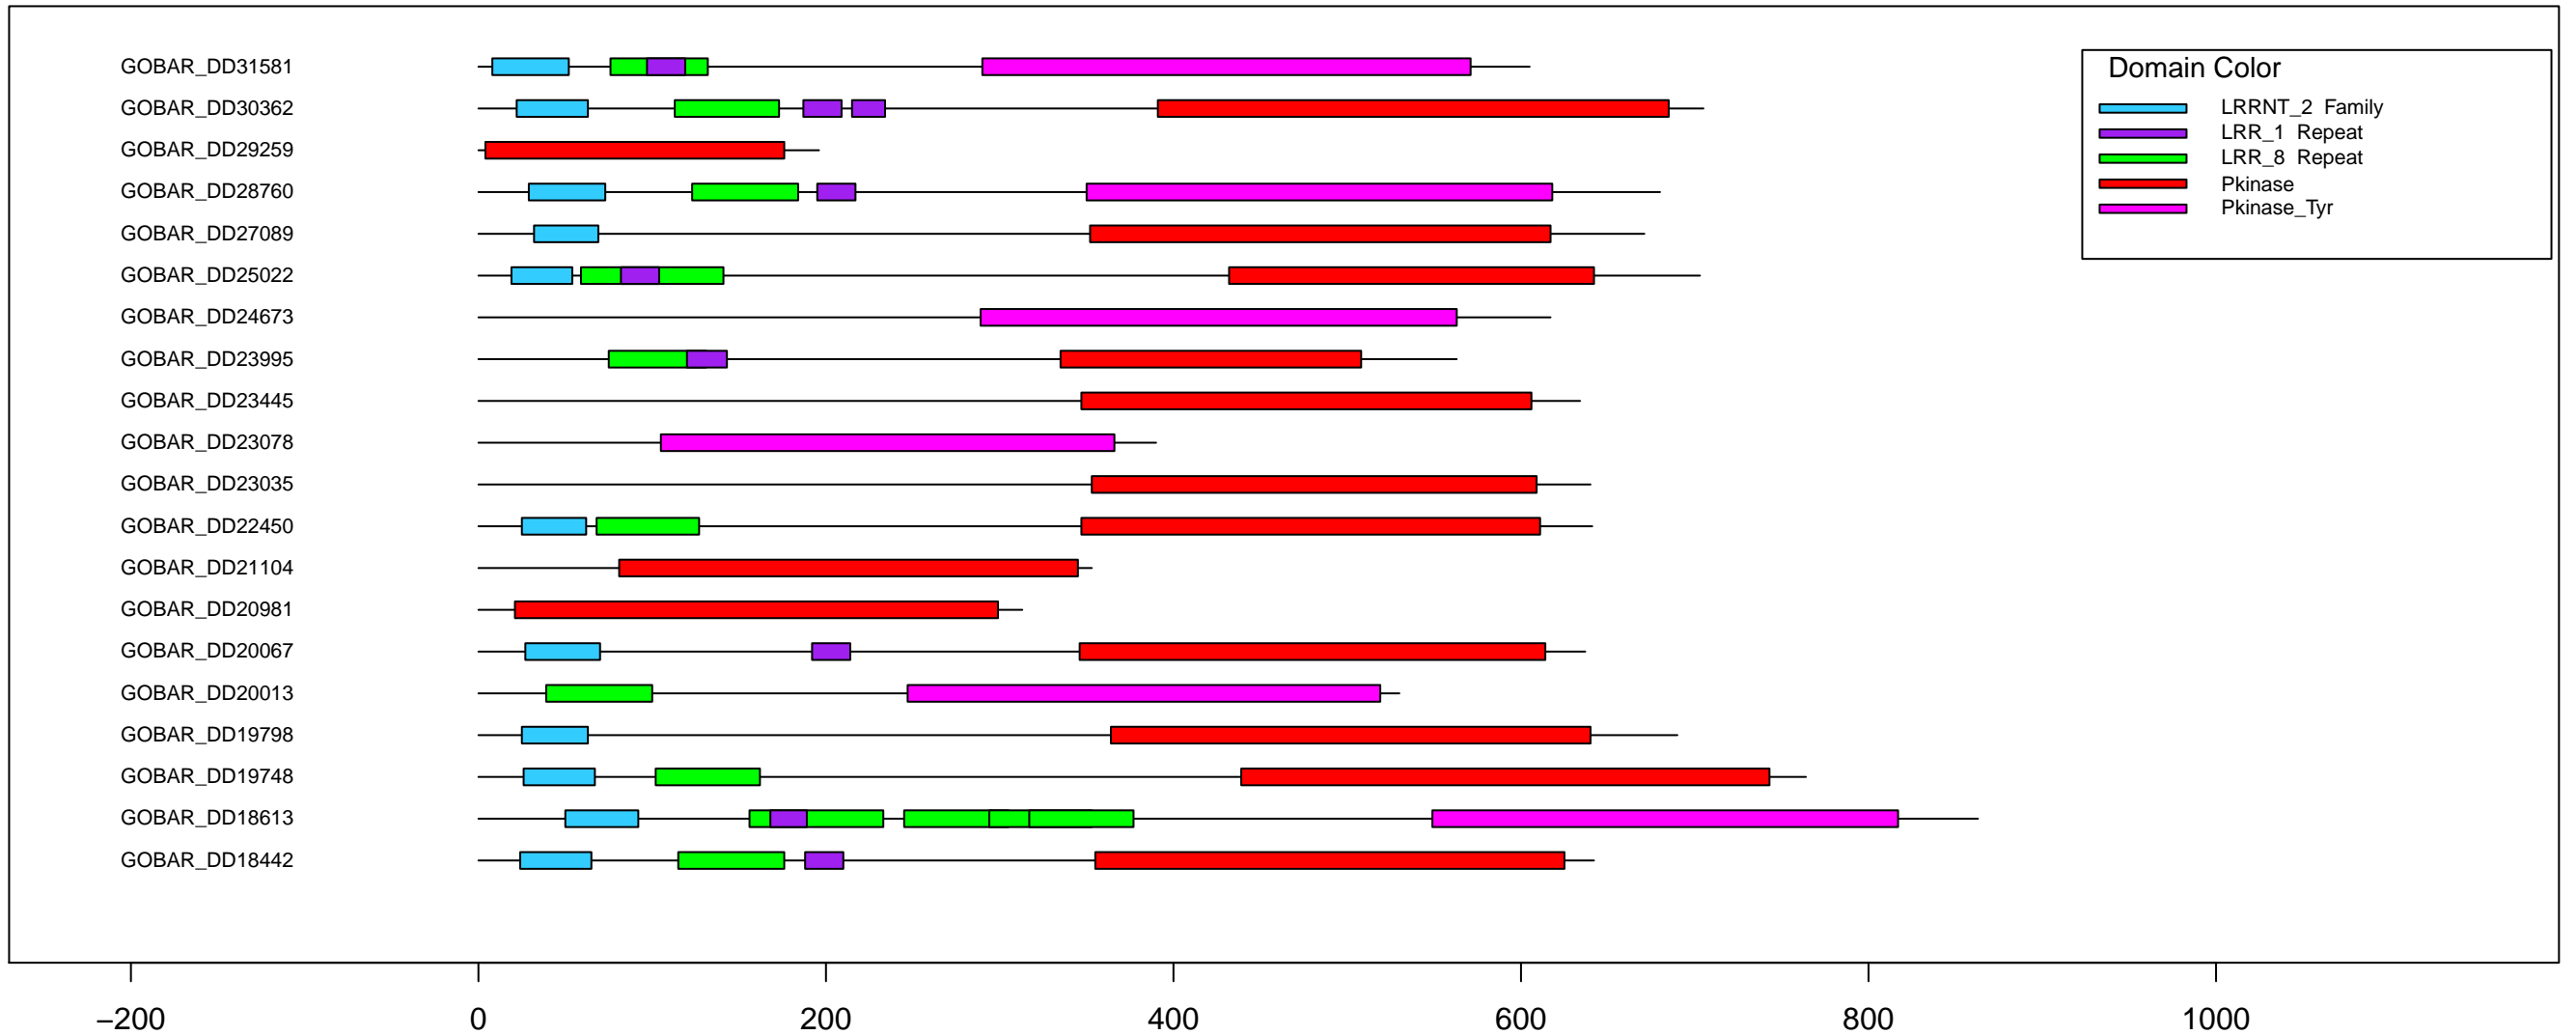

### G.ba RLK-Pelle\_LRR-III domain diagram (part 6)

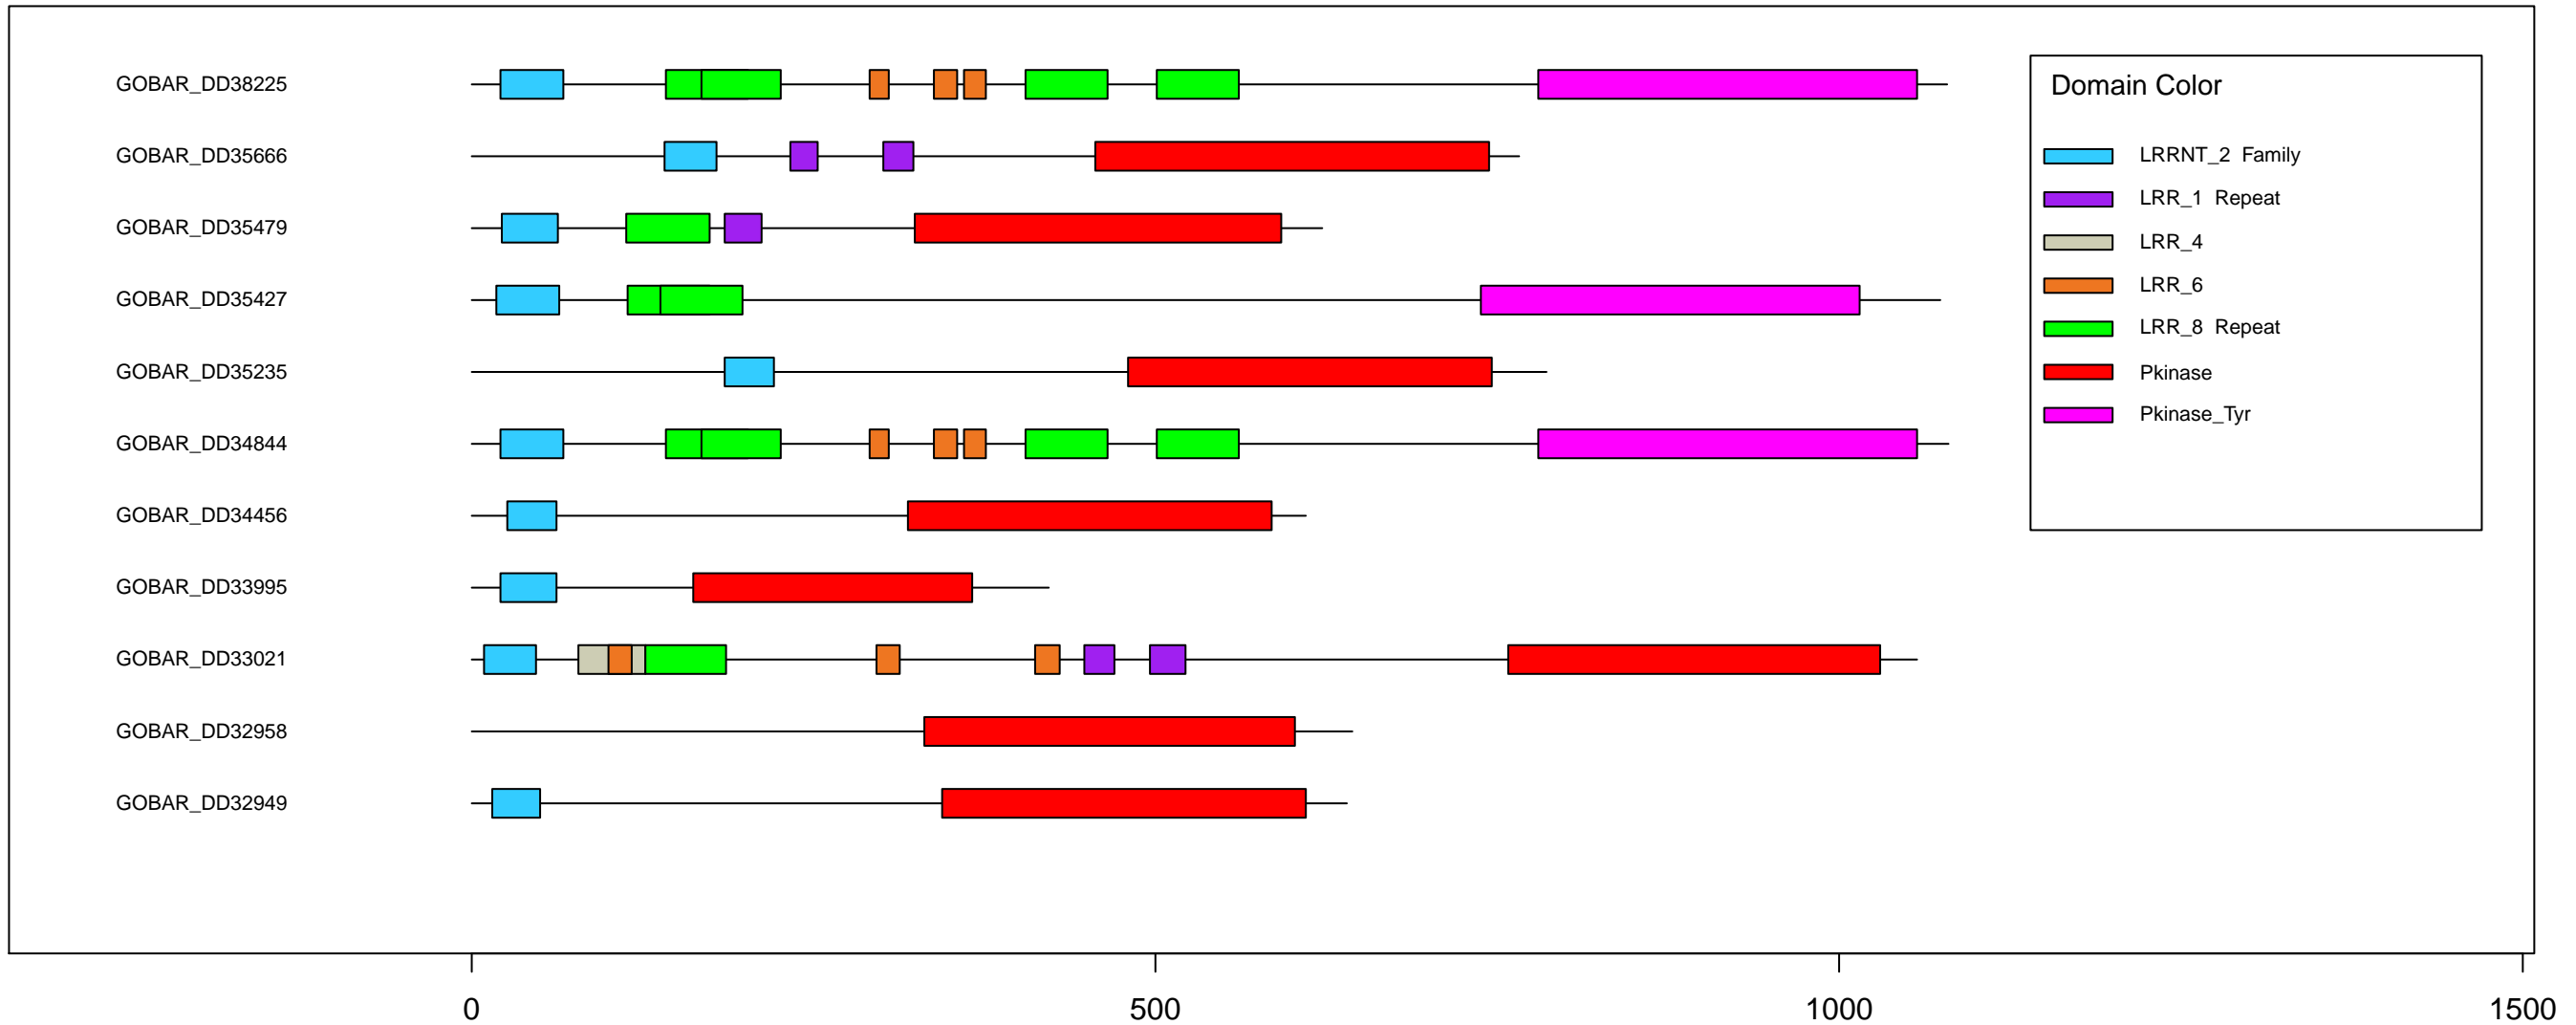

### G.ba RLK-Pelle\_LRR-II domain diagram (part 1)

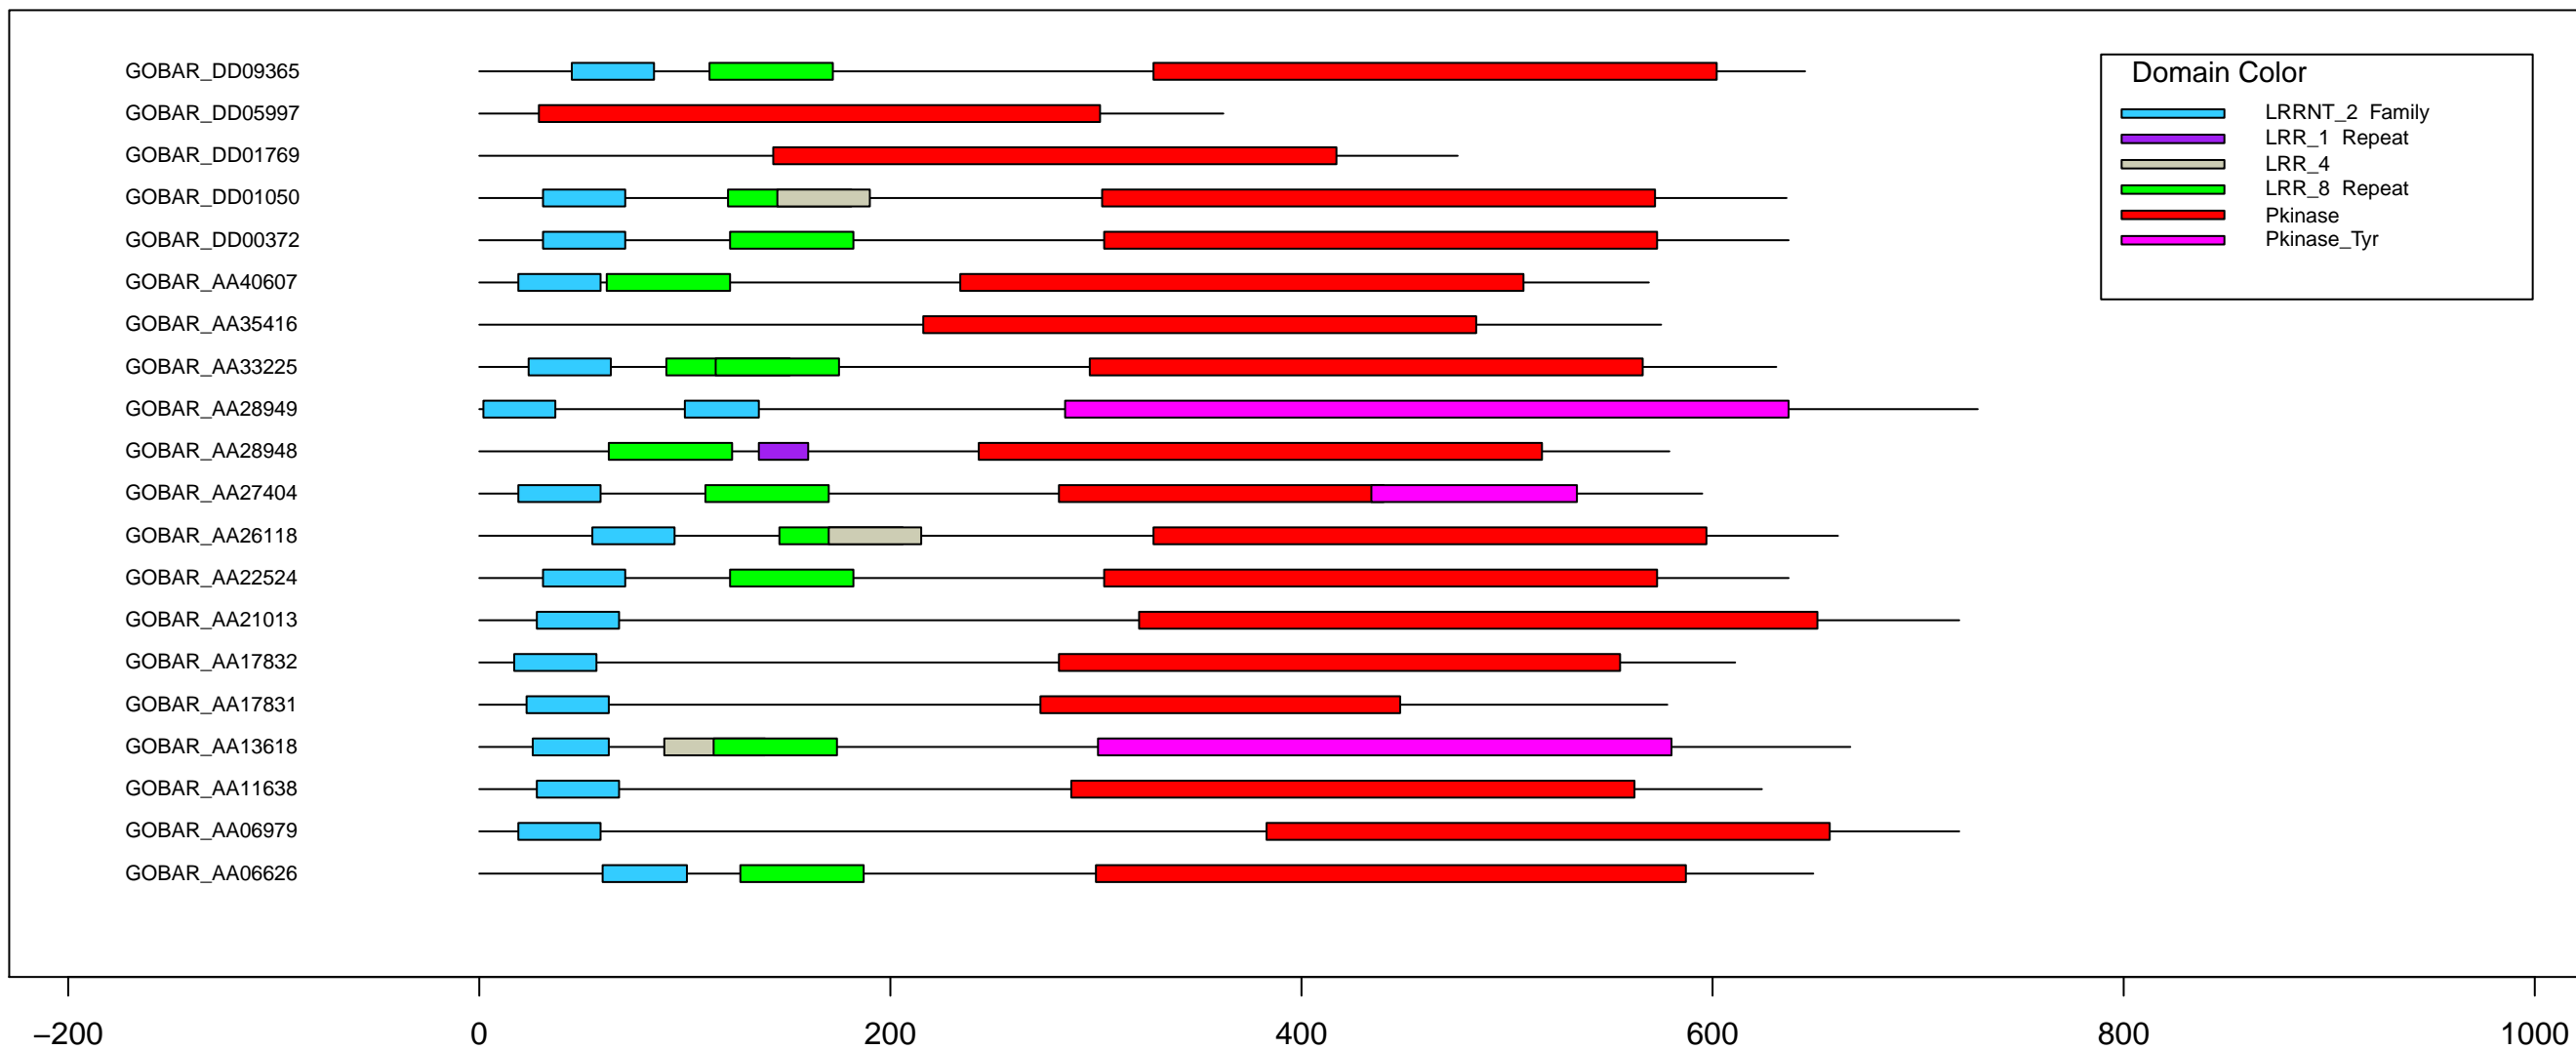

### G.ba RLK-Pelle\_LRR-II domain diagram (part 2)

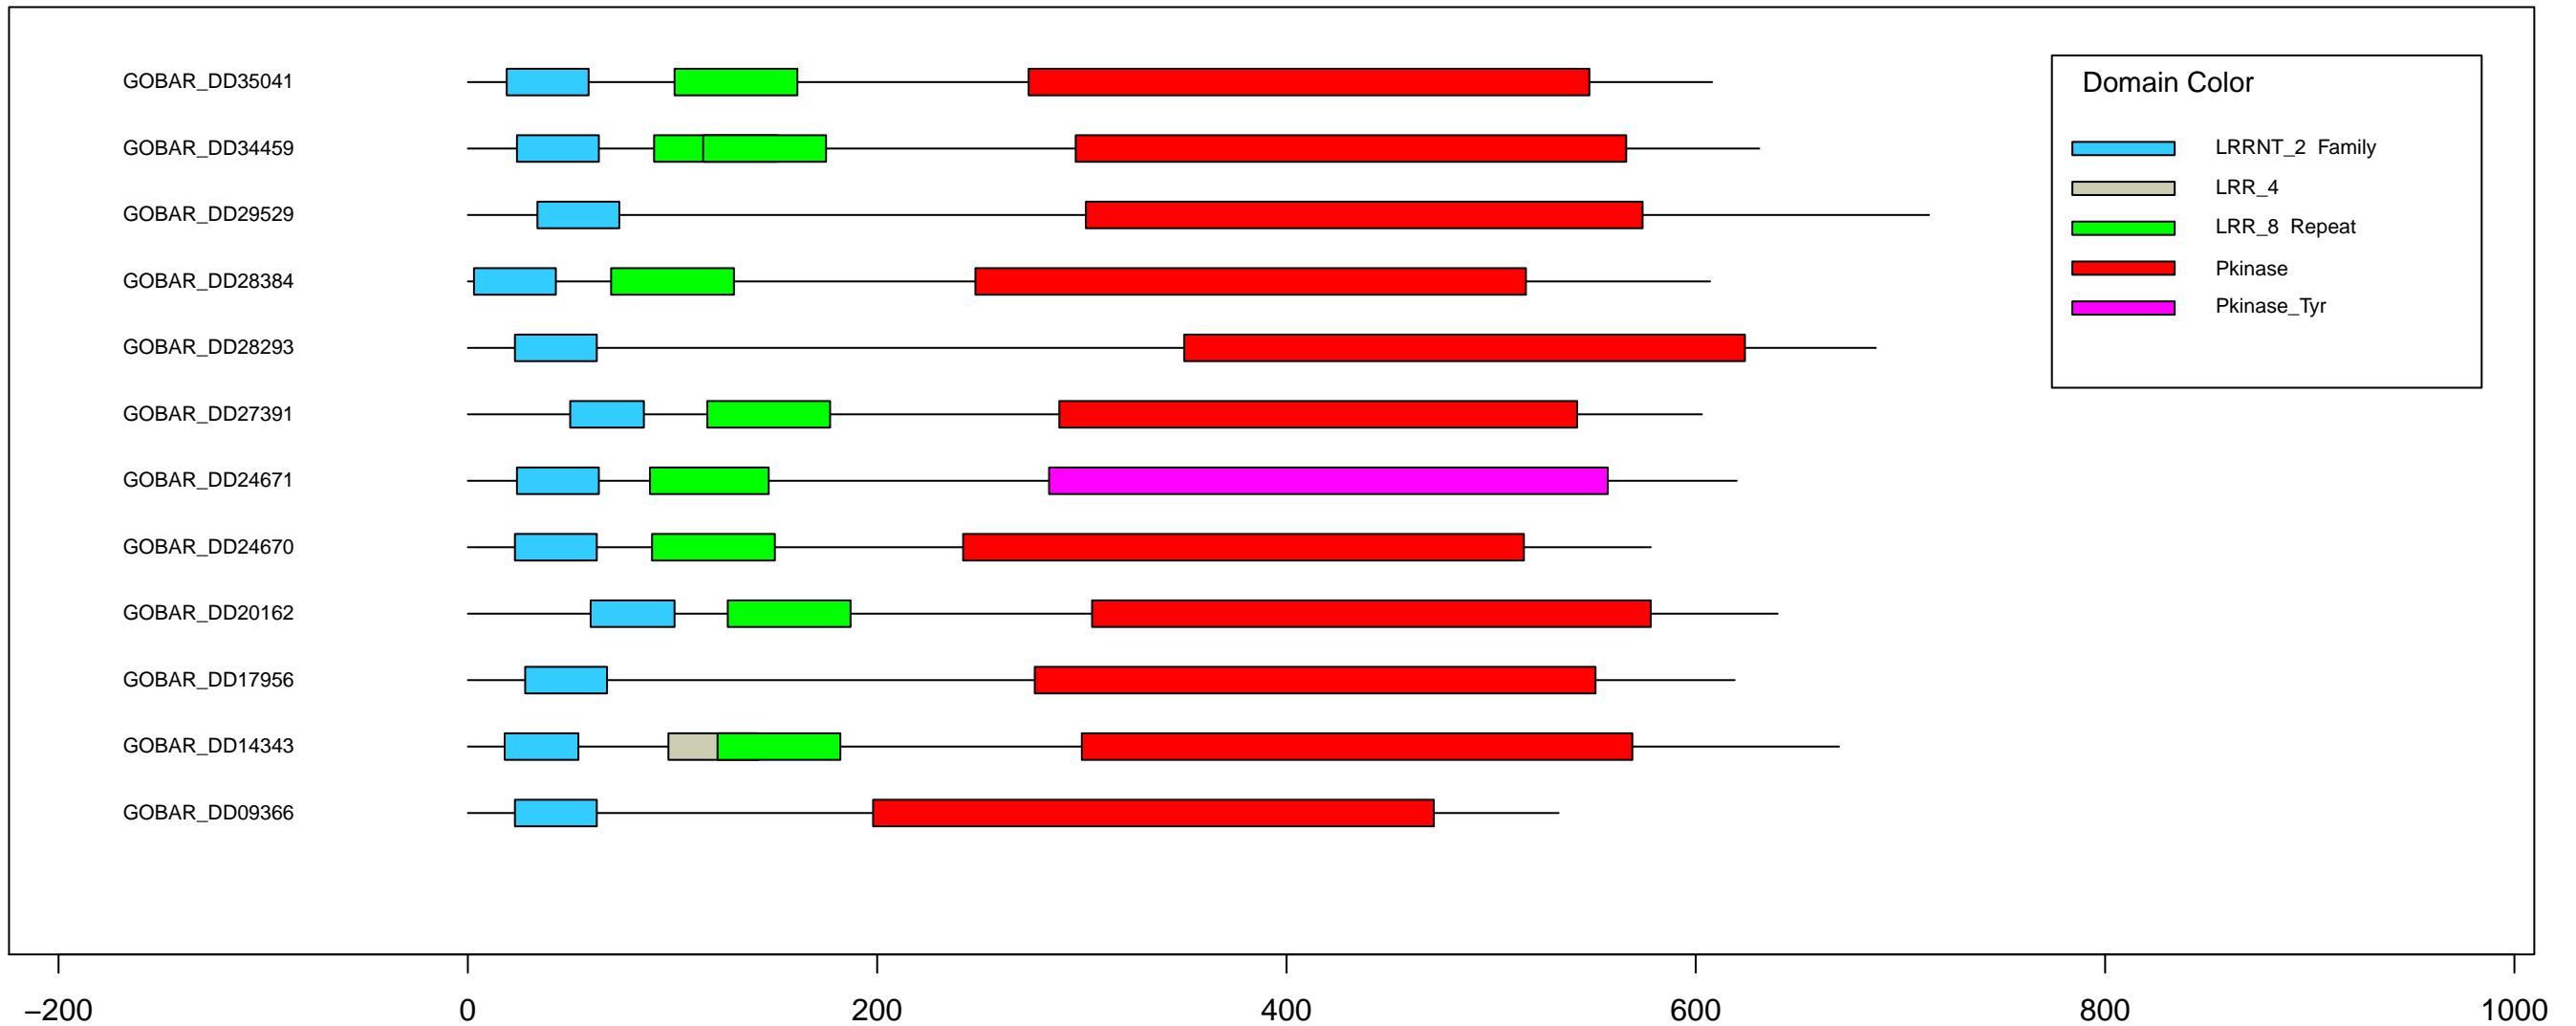

### G.ba RLK-Pelle\_LRR-IV domain diagram (all)

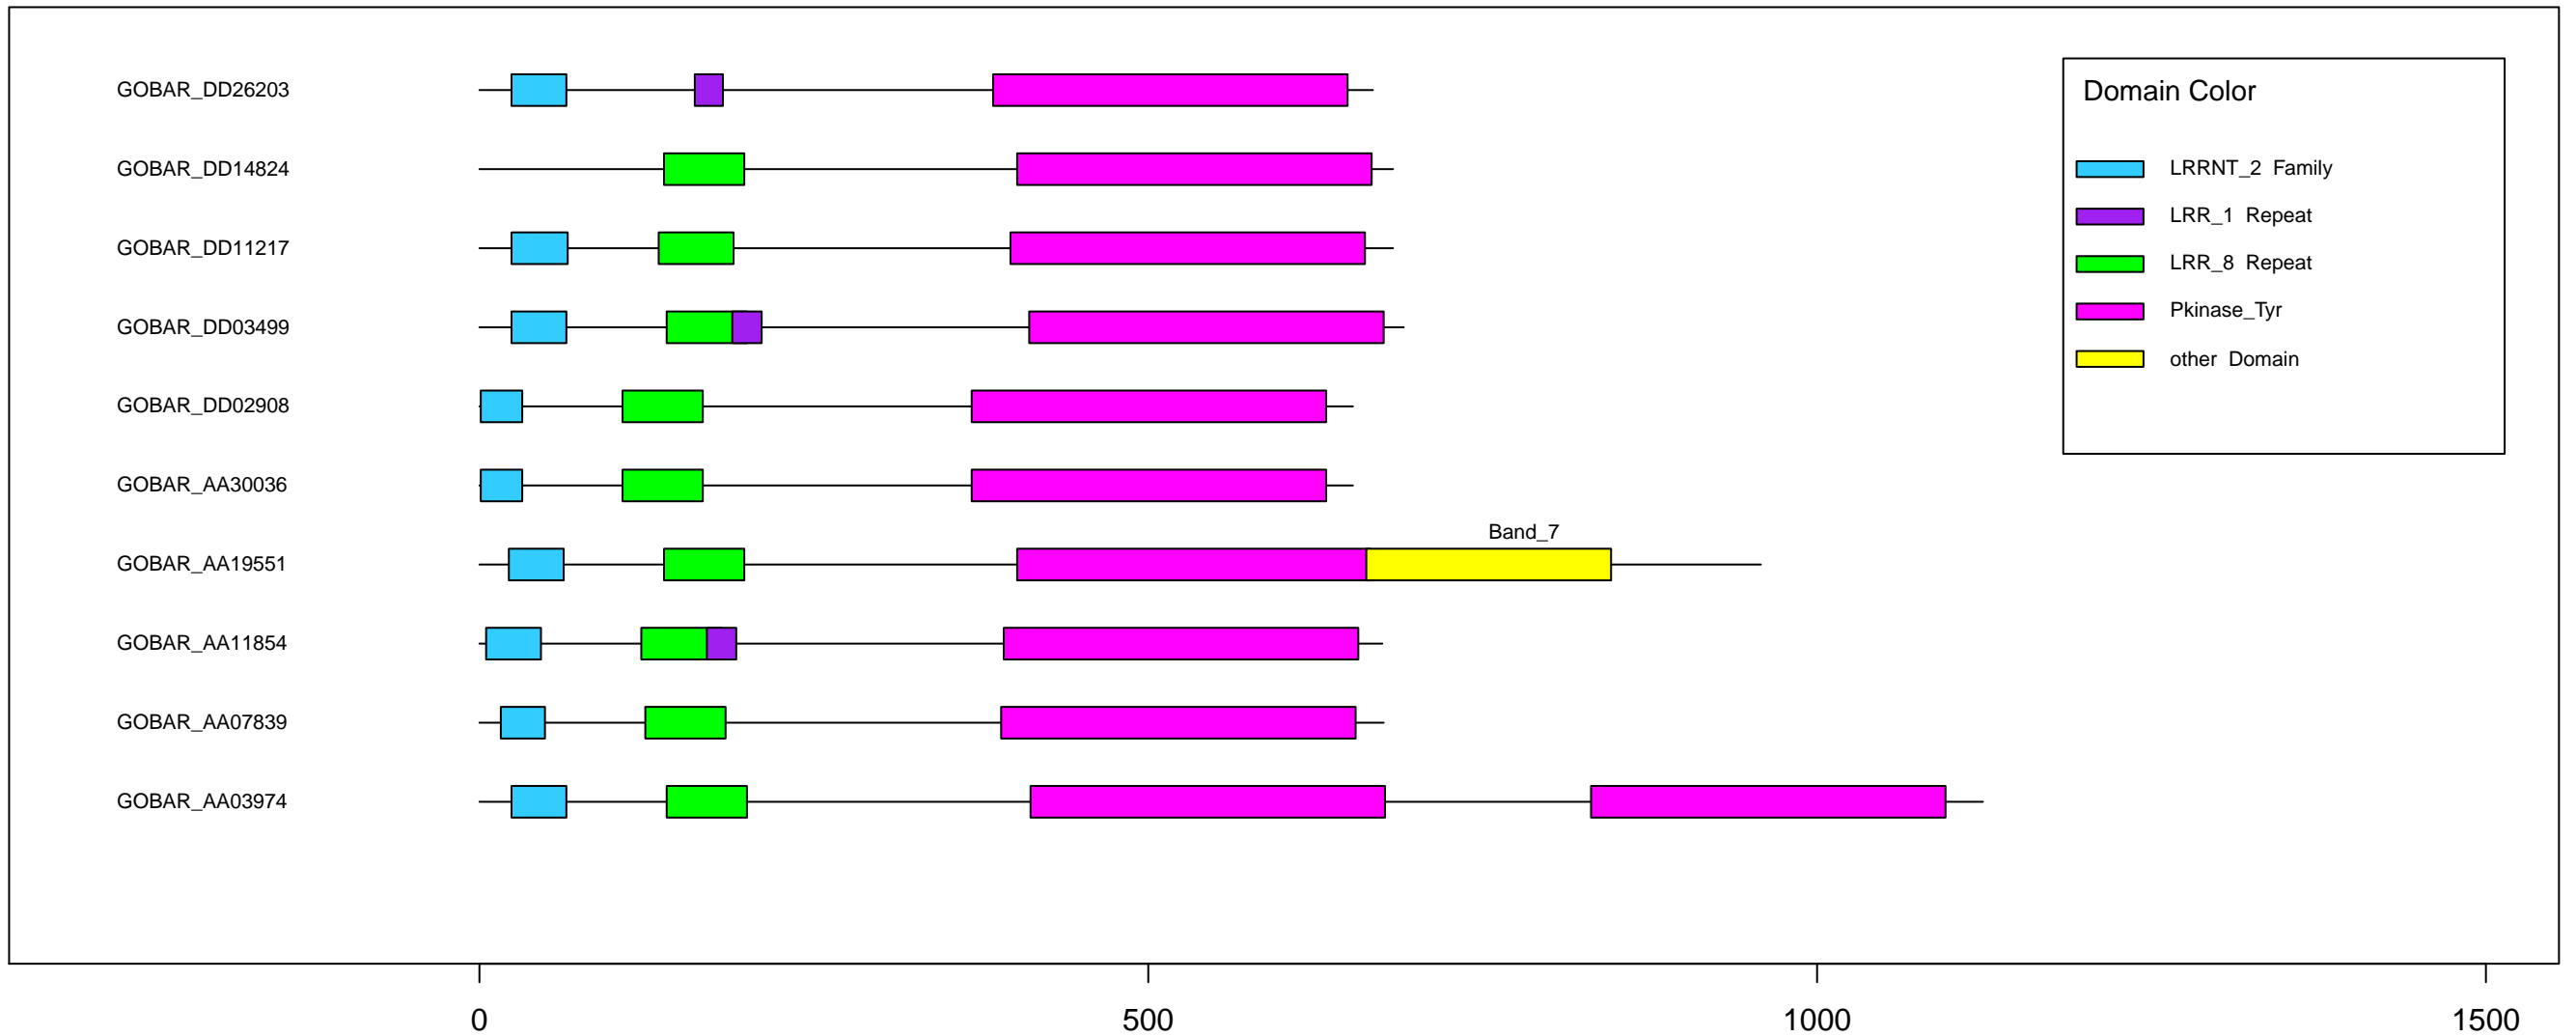



### G.ba RLK-Pelle\_LRR-IX domain diagram (all)

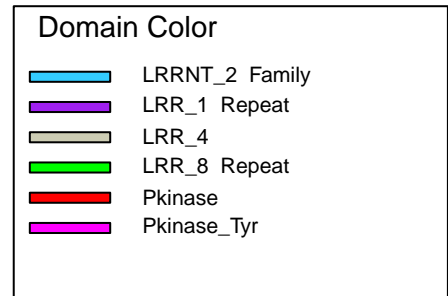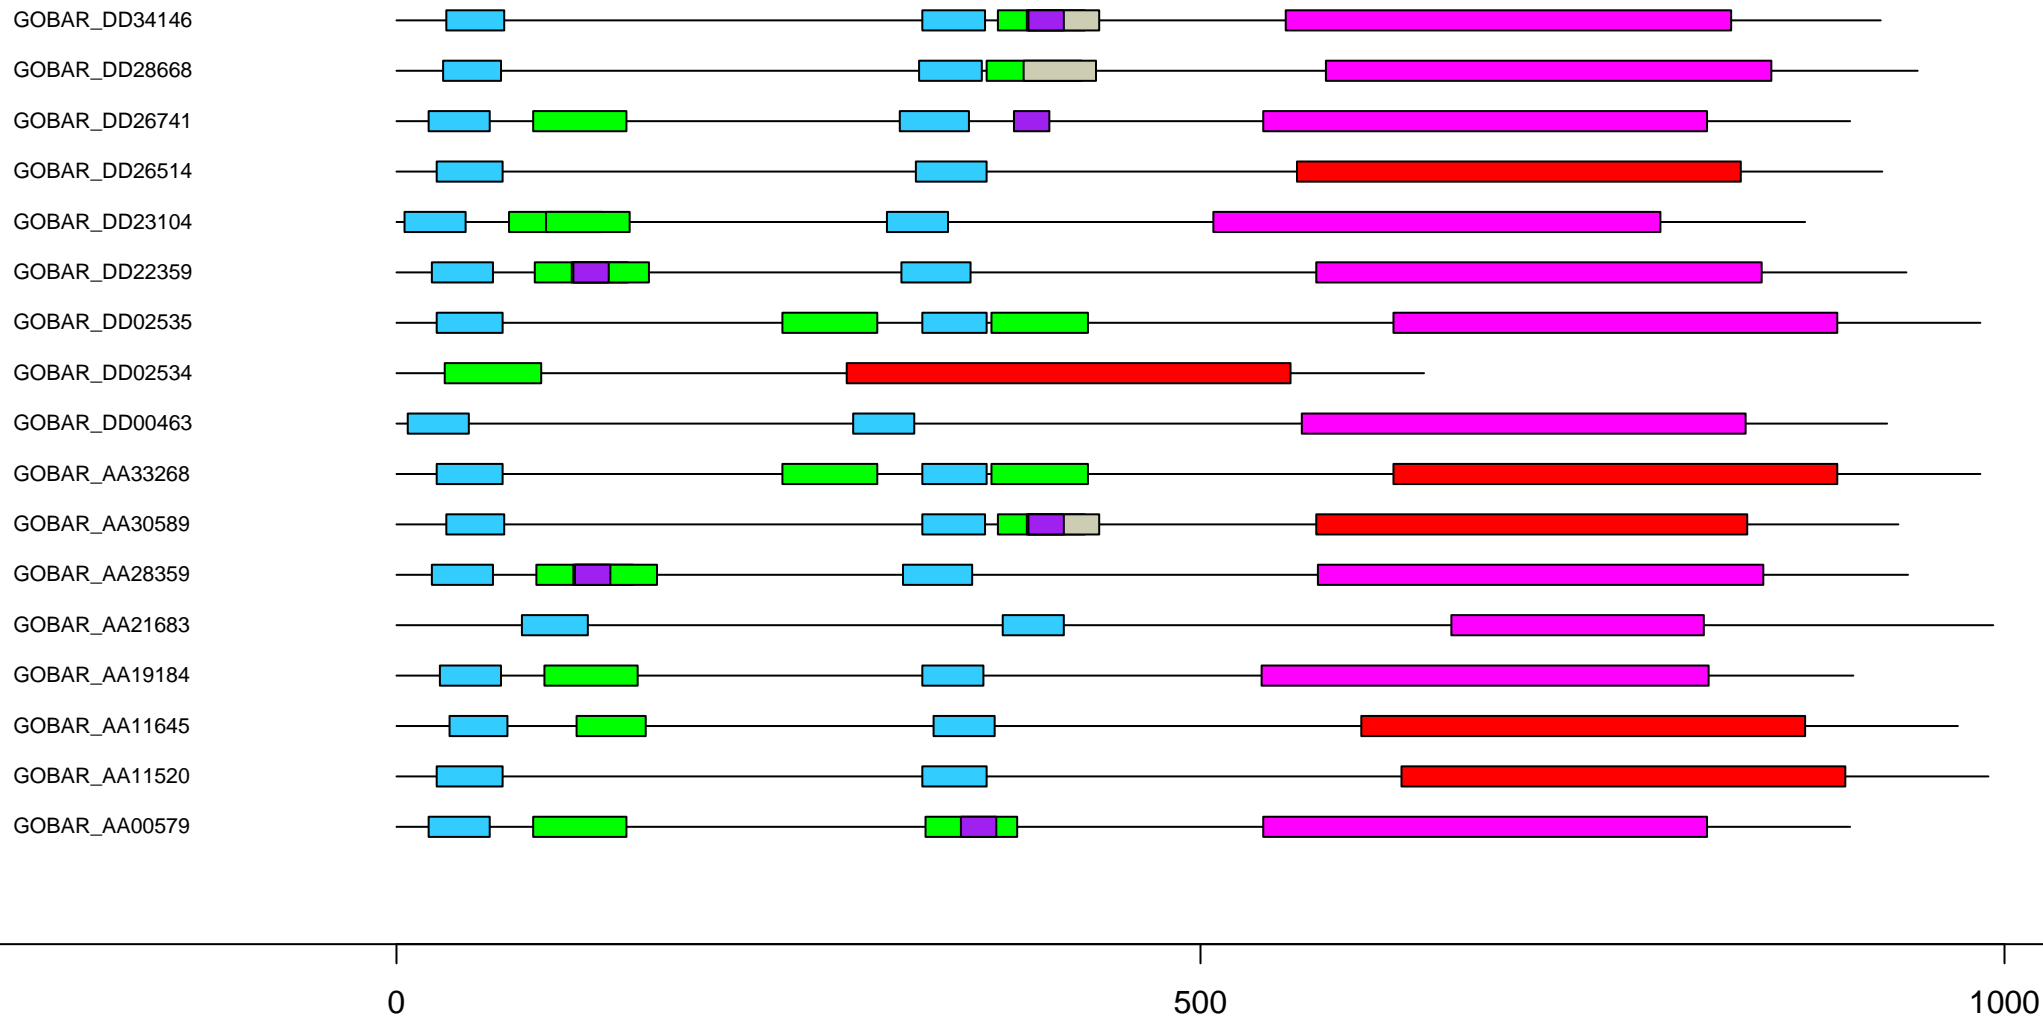

# G.ba RLK-Pelle\_LRR-VI-1 domain diagram (all)

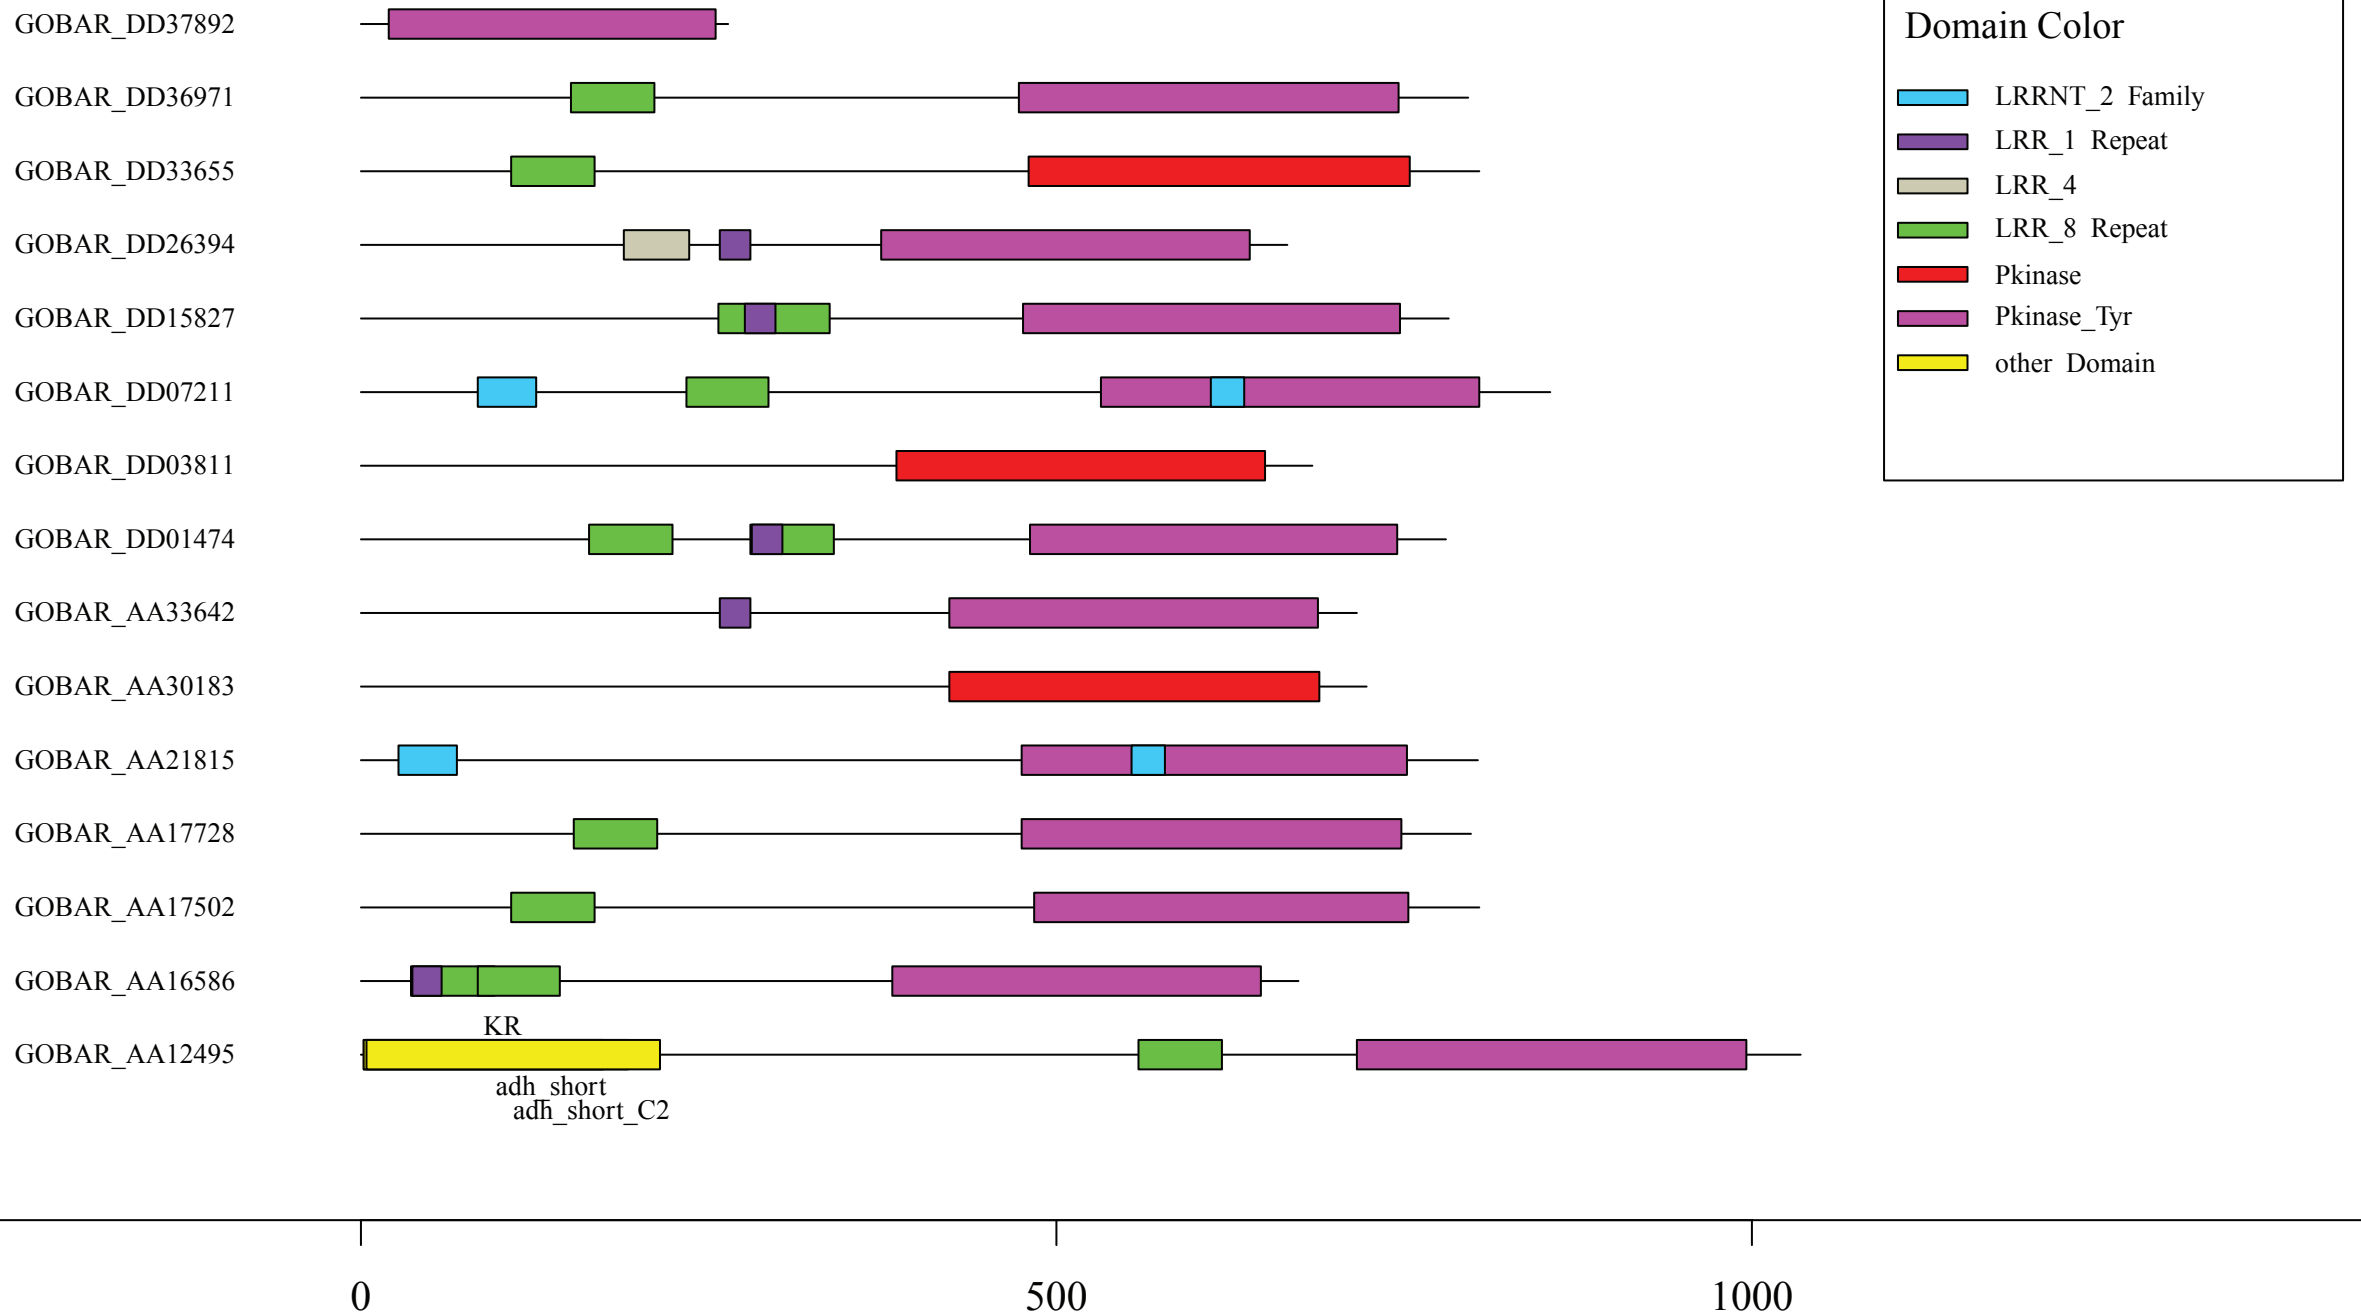

### G.ba RLK-Pelle\_LRR-VI-2 domain diagram (all)

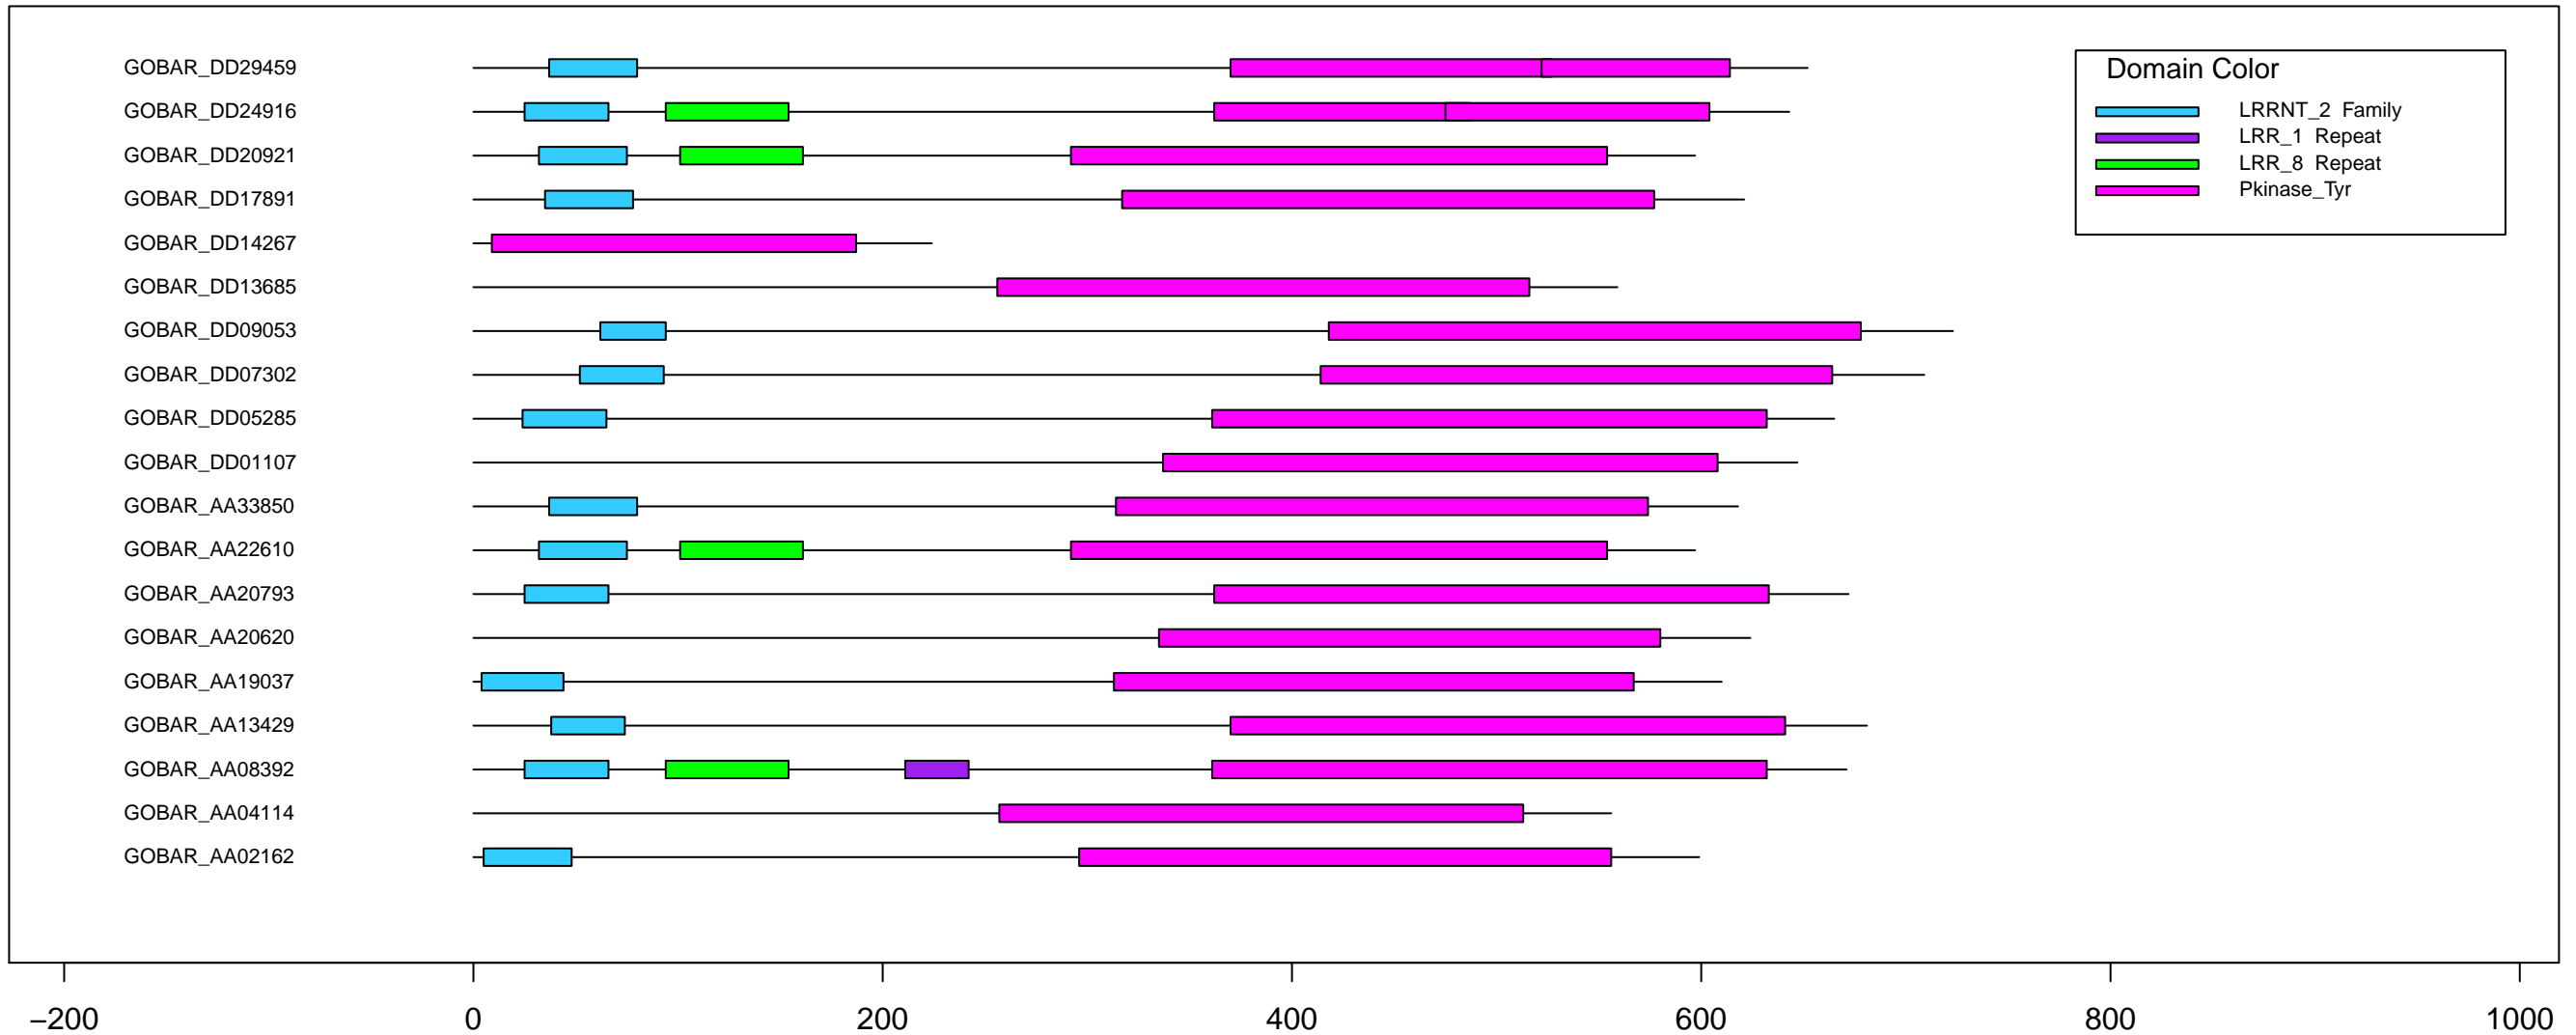

### G.ba RLK-Pelle\_LRR-VII-1 domain diagram (all)

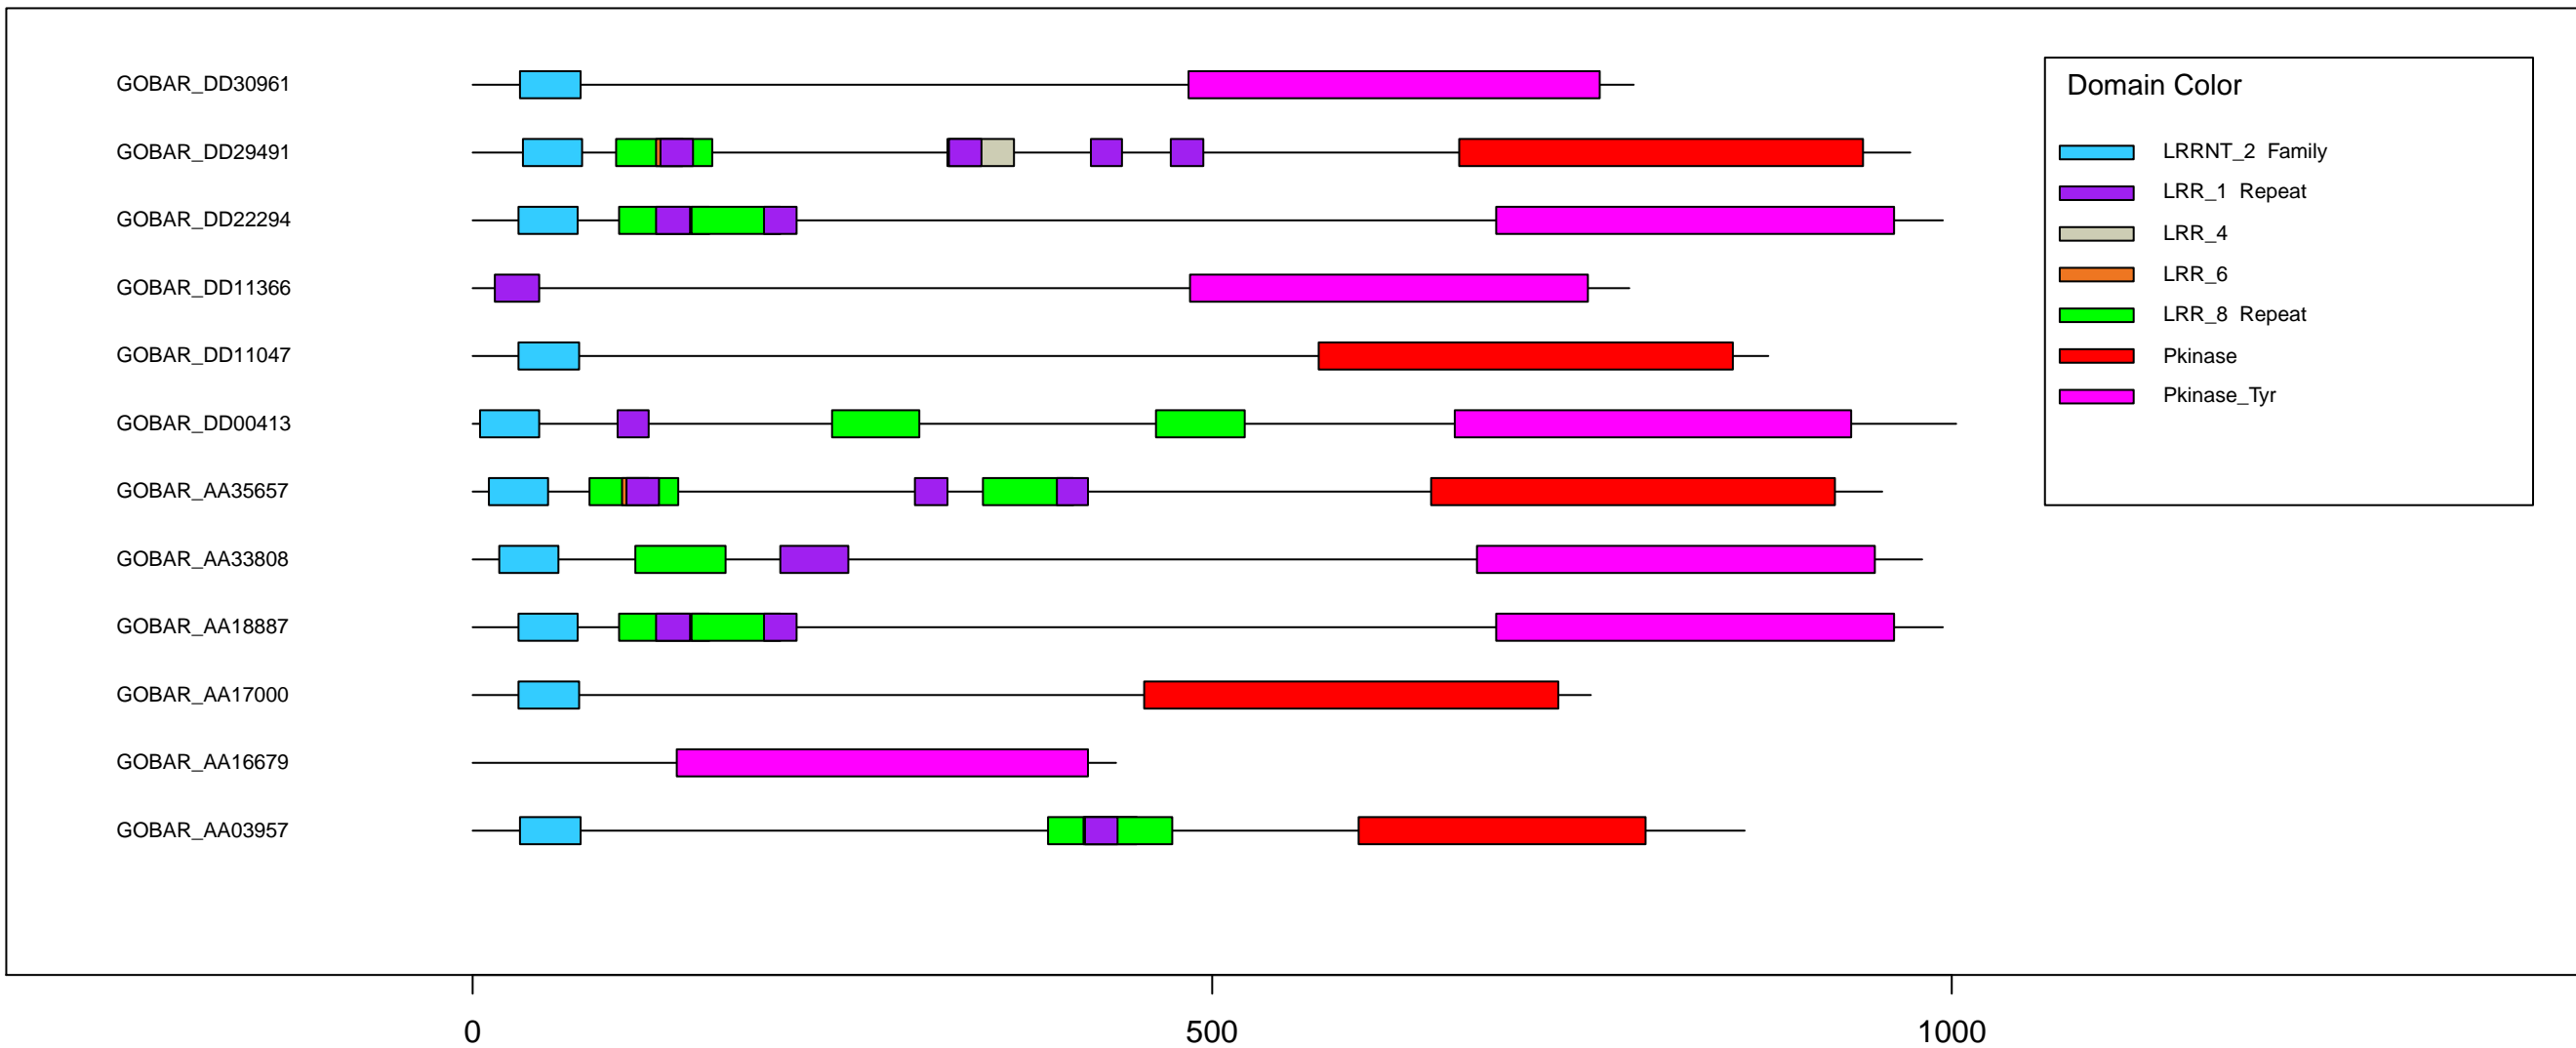

### G.ba RLK-Pelle\_LRR-VII-2 domain diagram (all)

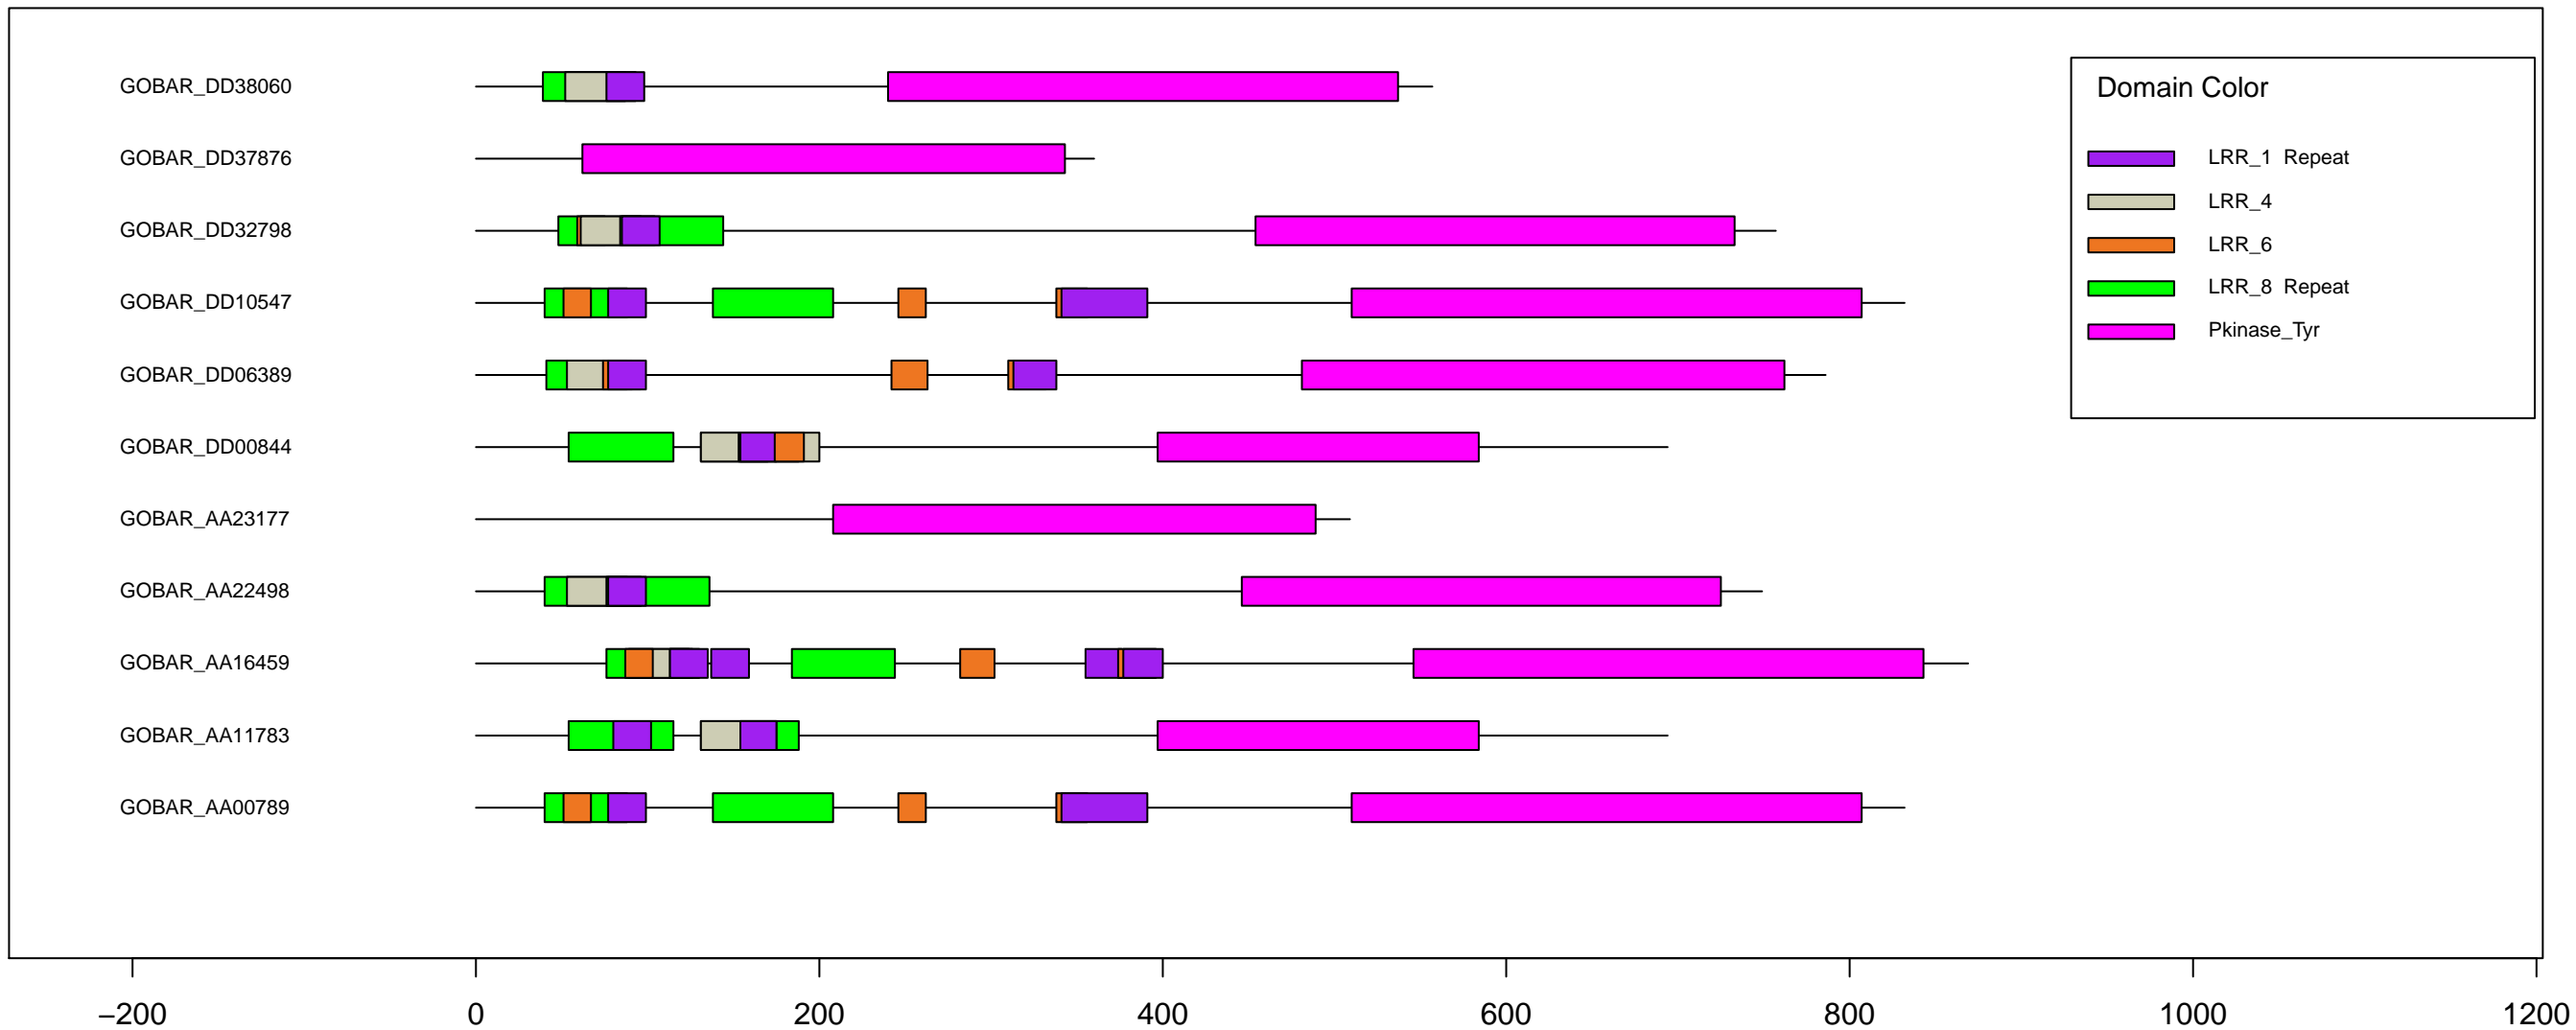

### G.ba RLK-Pelle\_LRR-VII-3 domain diagram (all)

GOBAR\_DD37192

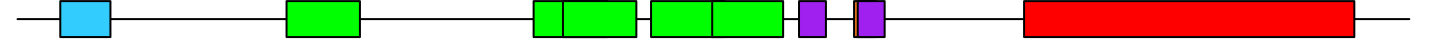

GOBAR\_DD14192

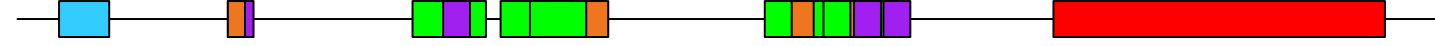

GOBAR\_DD05180

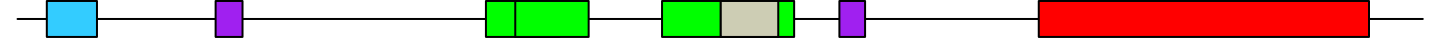

GOBAR\_AA31412

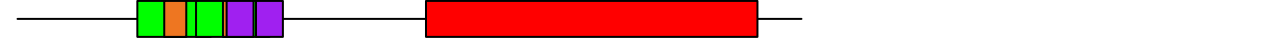

GOBAR\_AA23346

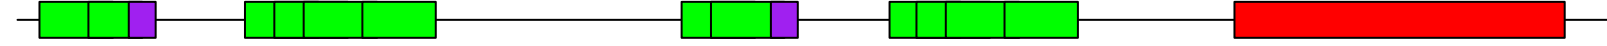

GOBAR\_AA15481

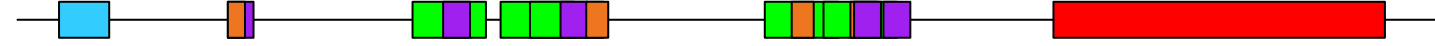

GOBAR\_AA12819

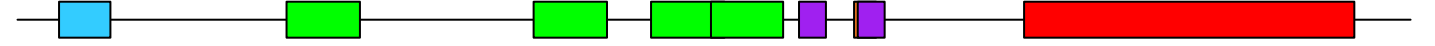

GOBAR\_AA12818

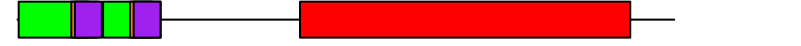

GOBAR\_AA05718

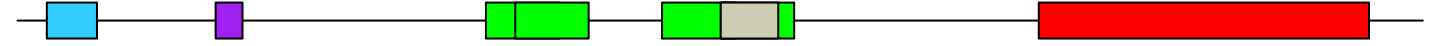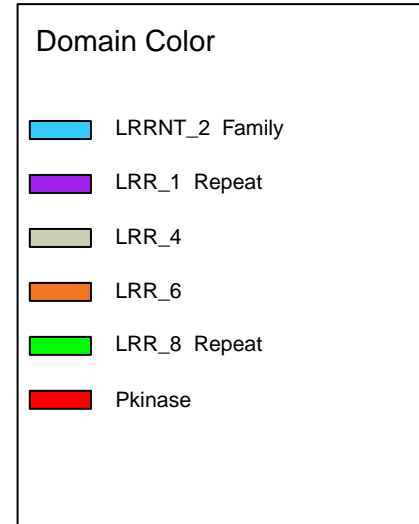

0

500

1000

1500

### G.ba RLK-Pelle\_LRR-VIII-1 domain diagram (all)

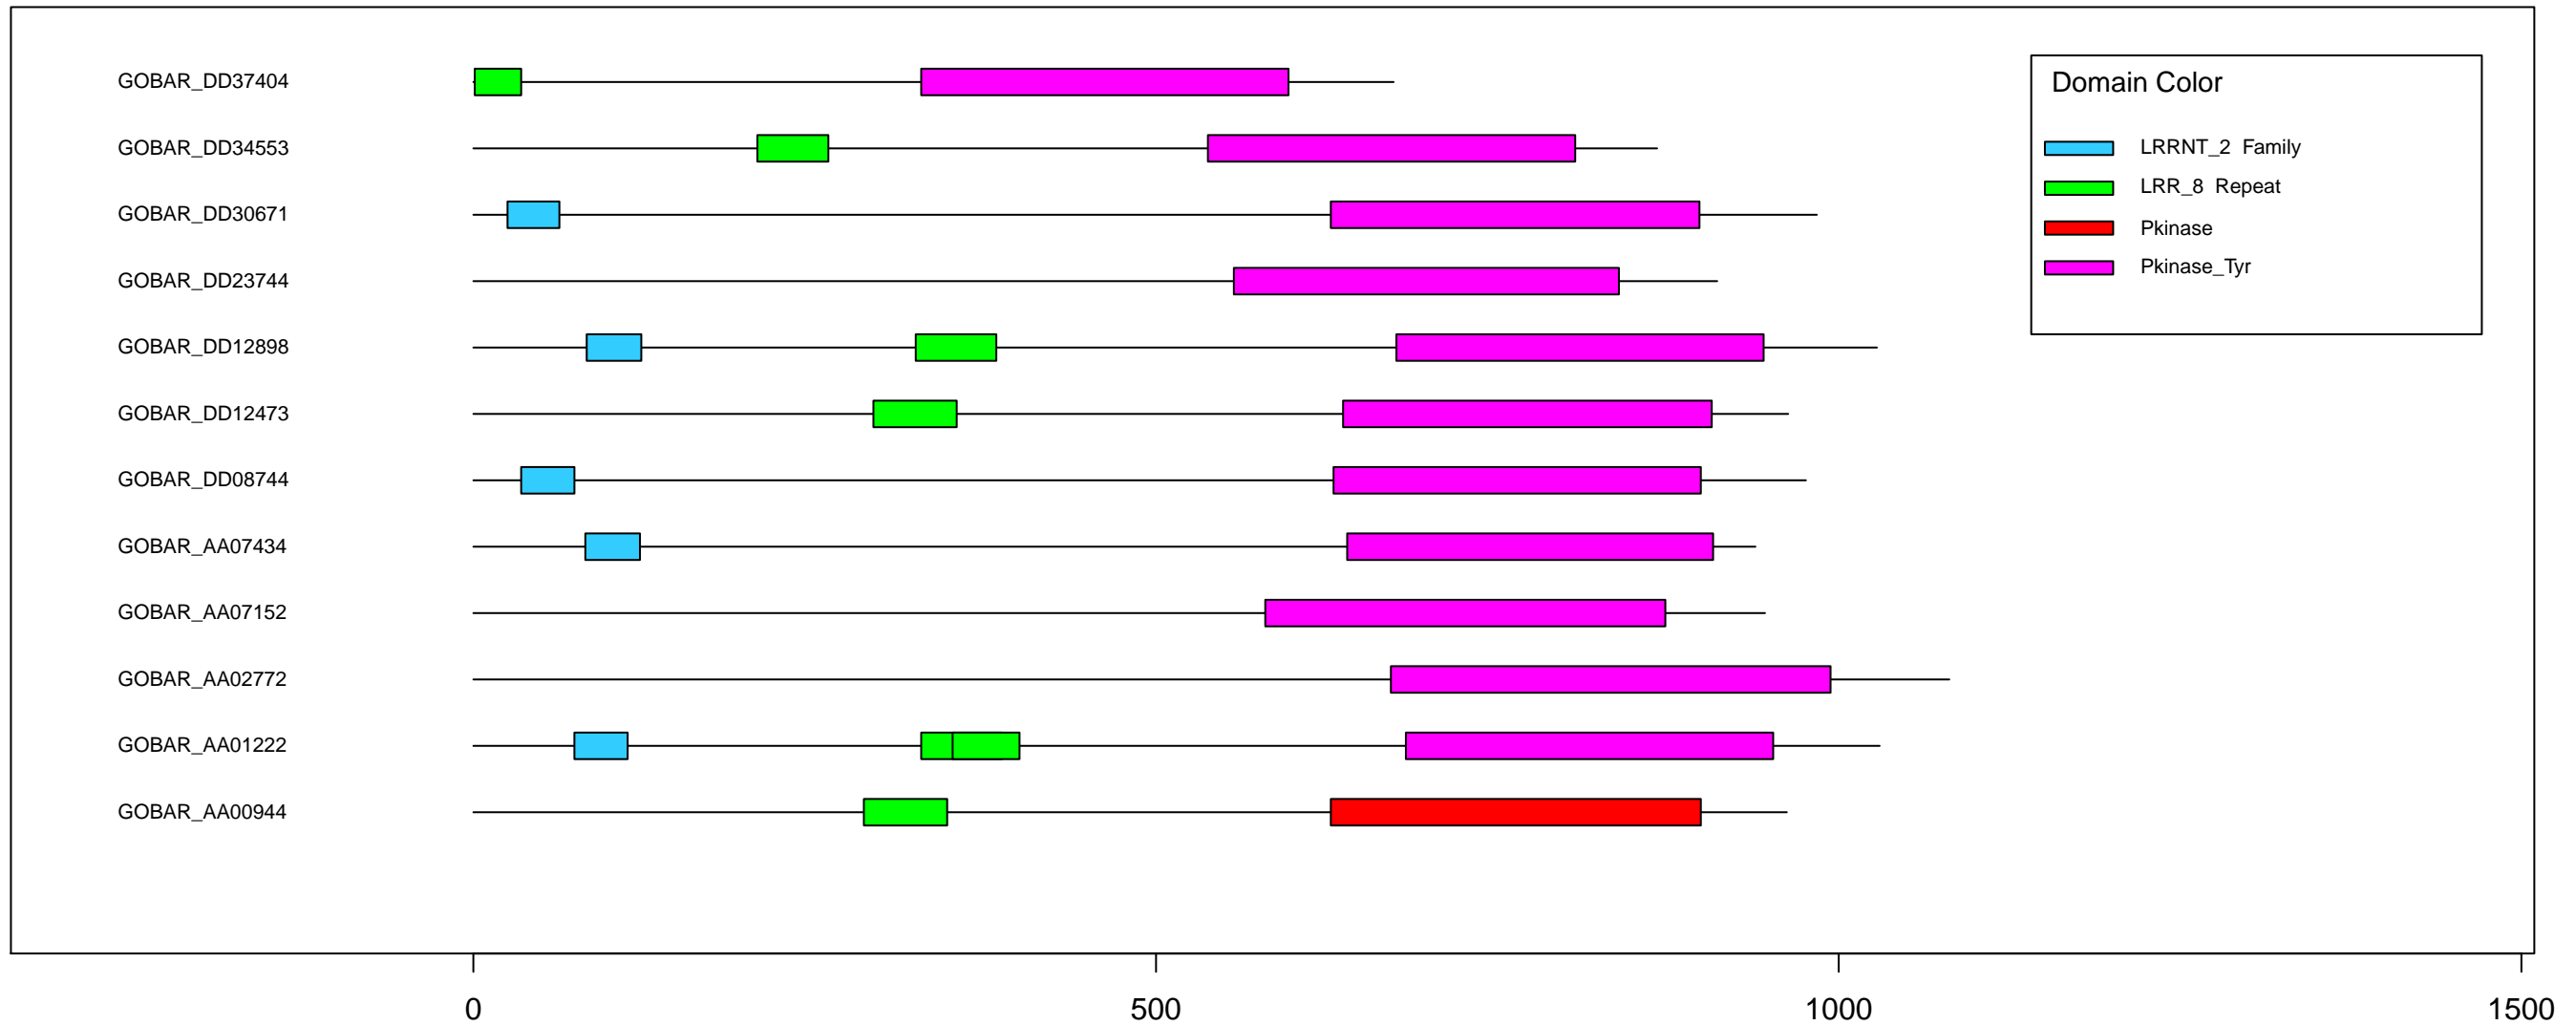

### G.ba RLK-Pelle\_LRR-V domain diagram (all)

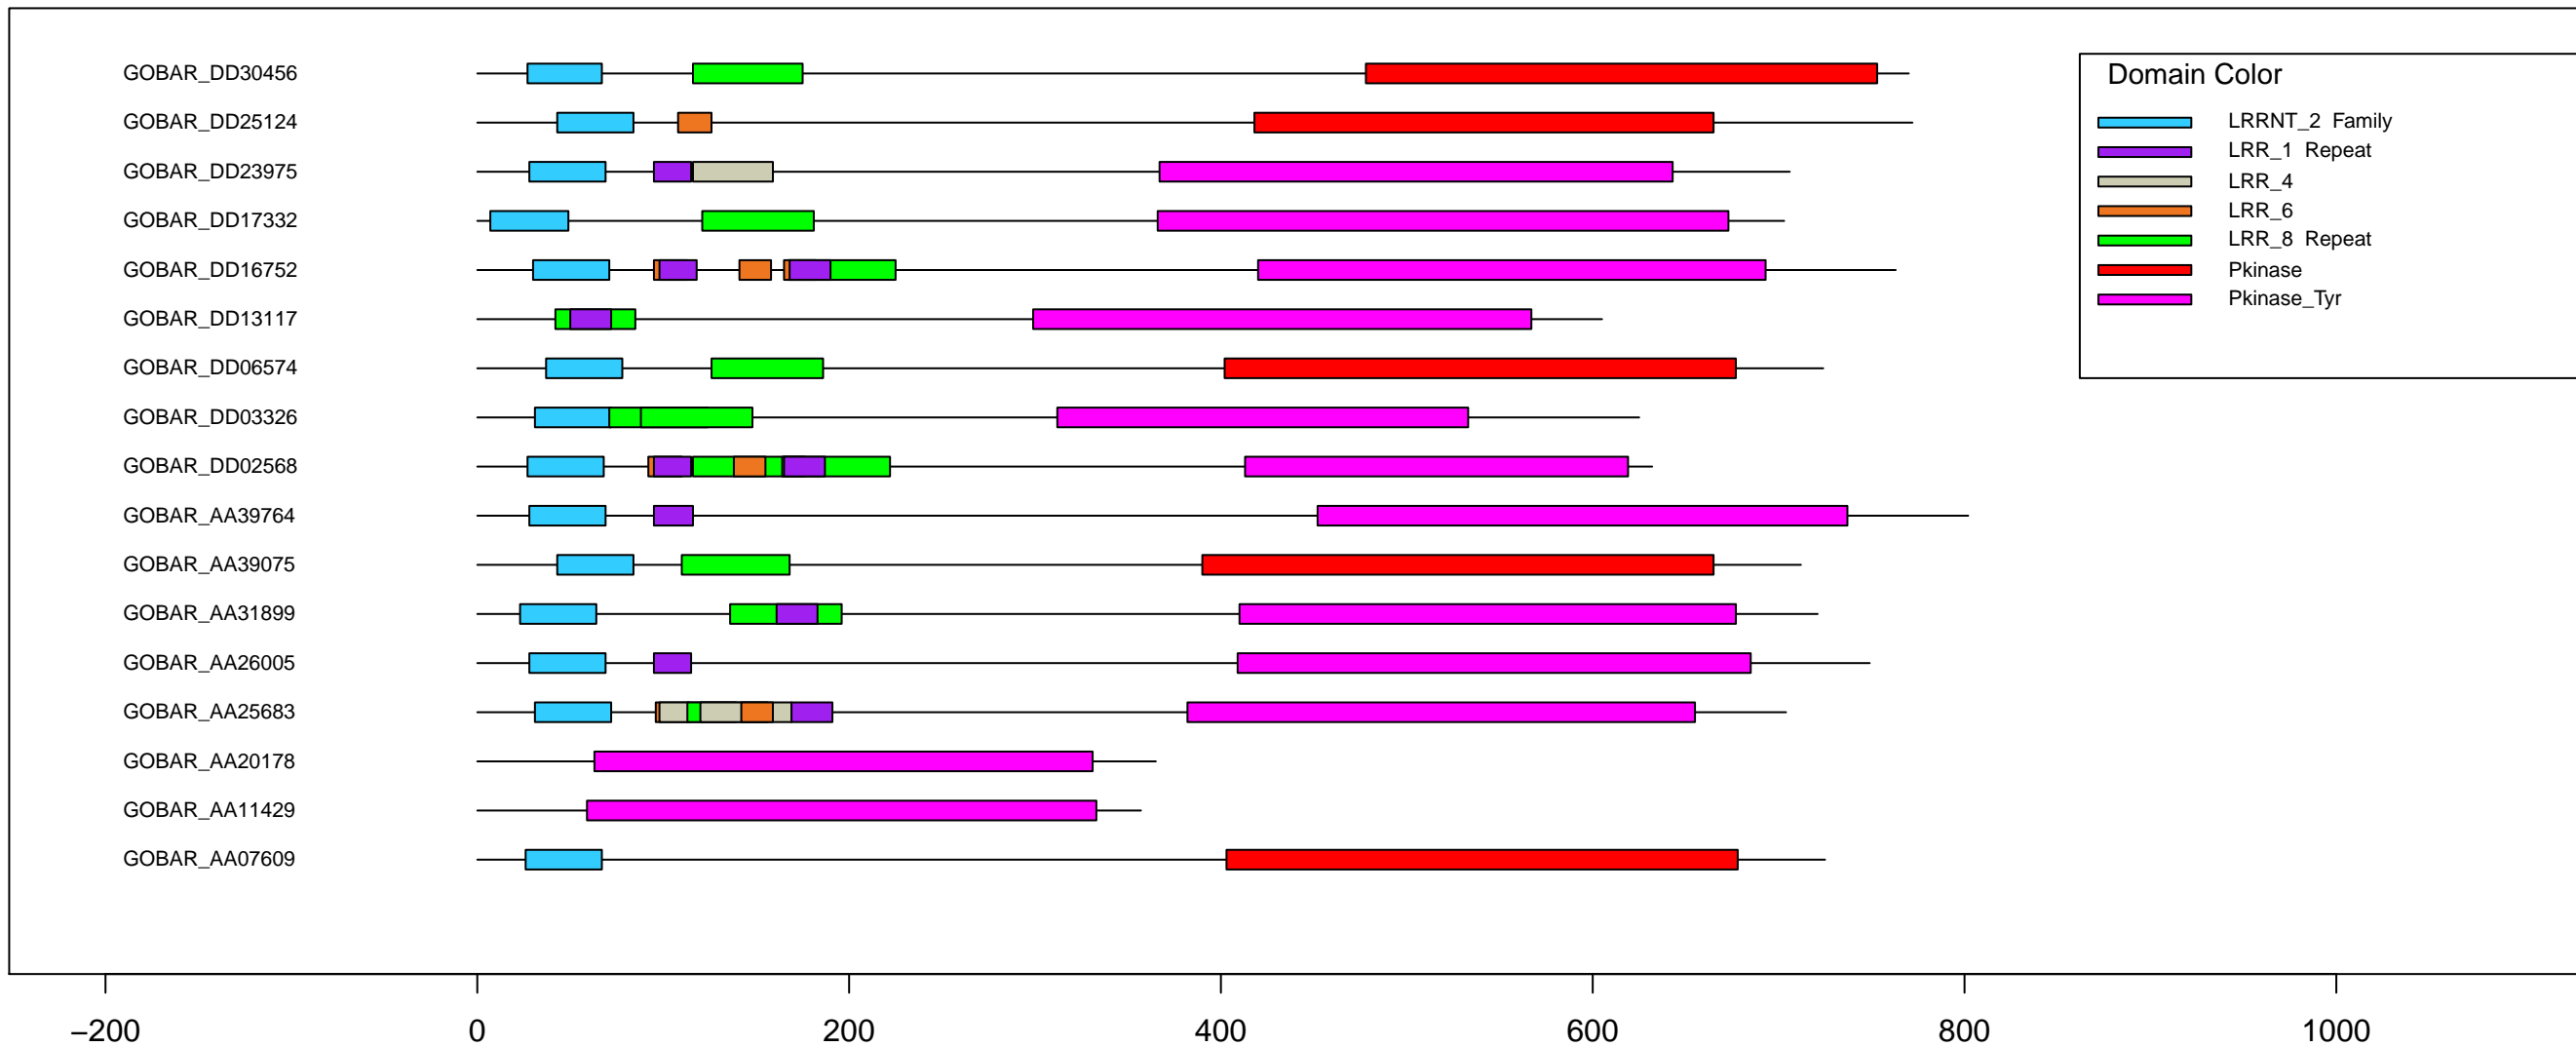



### G.ba RLK-Pelle\_LRR-Xa domain diagram (all)

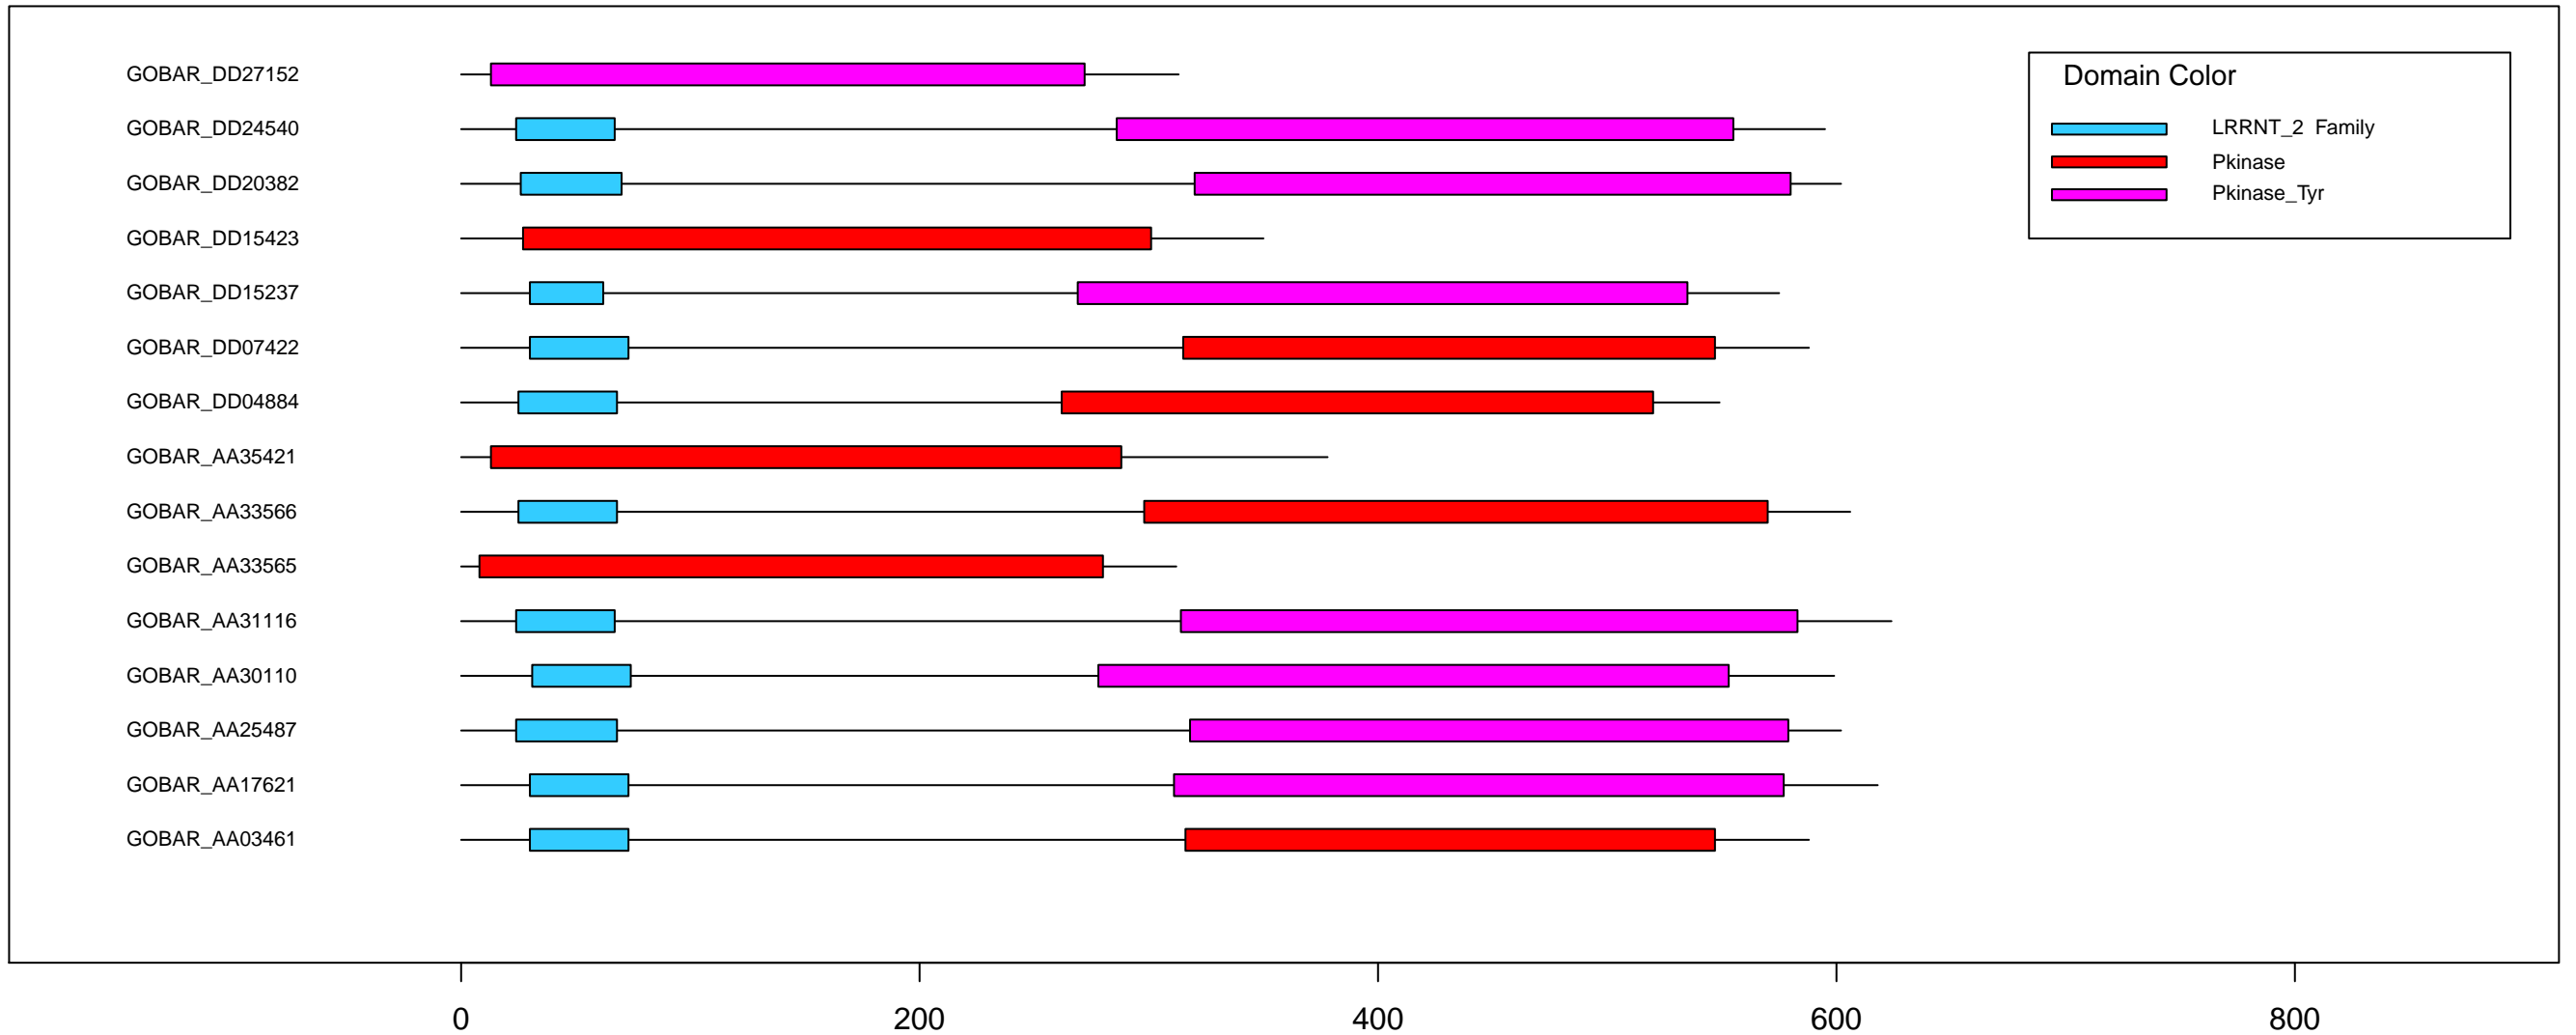

### G.ba RLK-Pelle\_LRR-Xb-1 domain diagram (part 1)

GOBAR\_DD19192  
 GOBAR\_DD18646  
 GOBAR\_DD16632  
 GOBAR\_DD14819  
 GOBAR\_DD05380  
 GOBAR\_DD03950  
 GOBAR\_AA39947  
 GOBAR\_AA39092  
 GOBAR\_AA37869  
 GOBAR\_AA35519  
 GOBAR\_AA33659  
 GOBAR\_AA31550  
 GOBAR\_AA29564  
 GOBAR\_AA29046  
 GOBAR\_AA27368  
 GOBAR\_AA22717  
 GOBAR\_AA18512  
 GOBAR\_AA17207  
 GOBAR\_AA07141  
 GOBAR\_AA04671

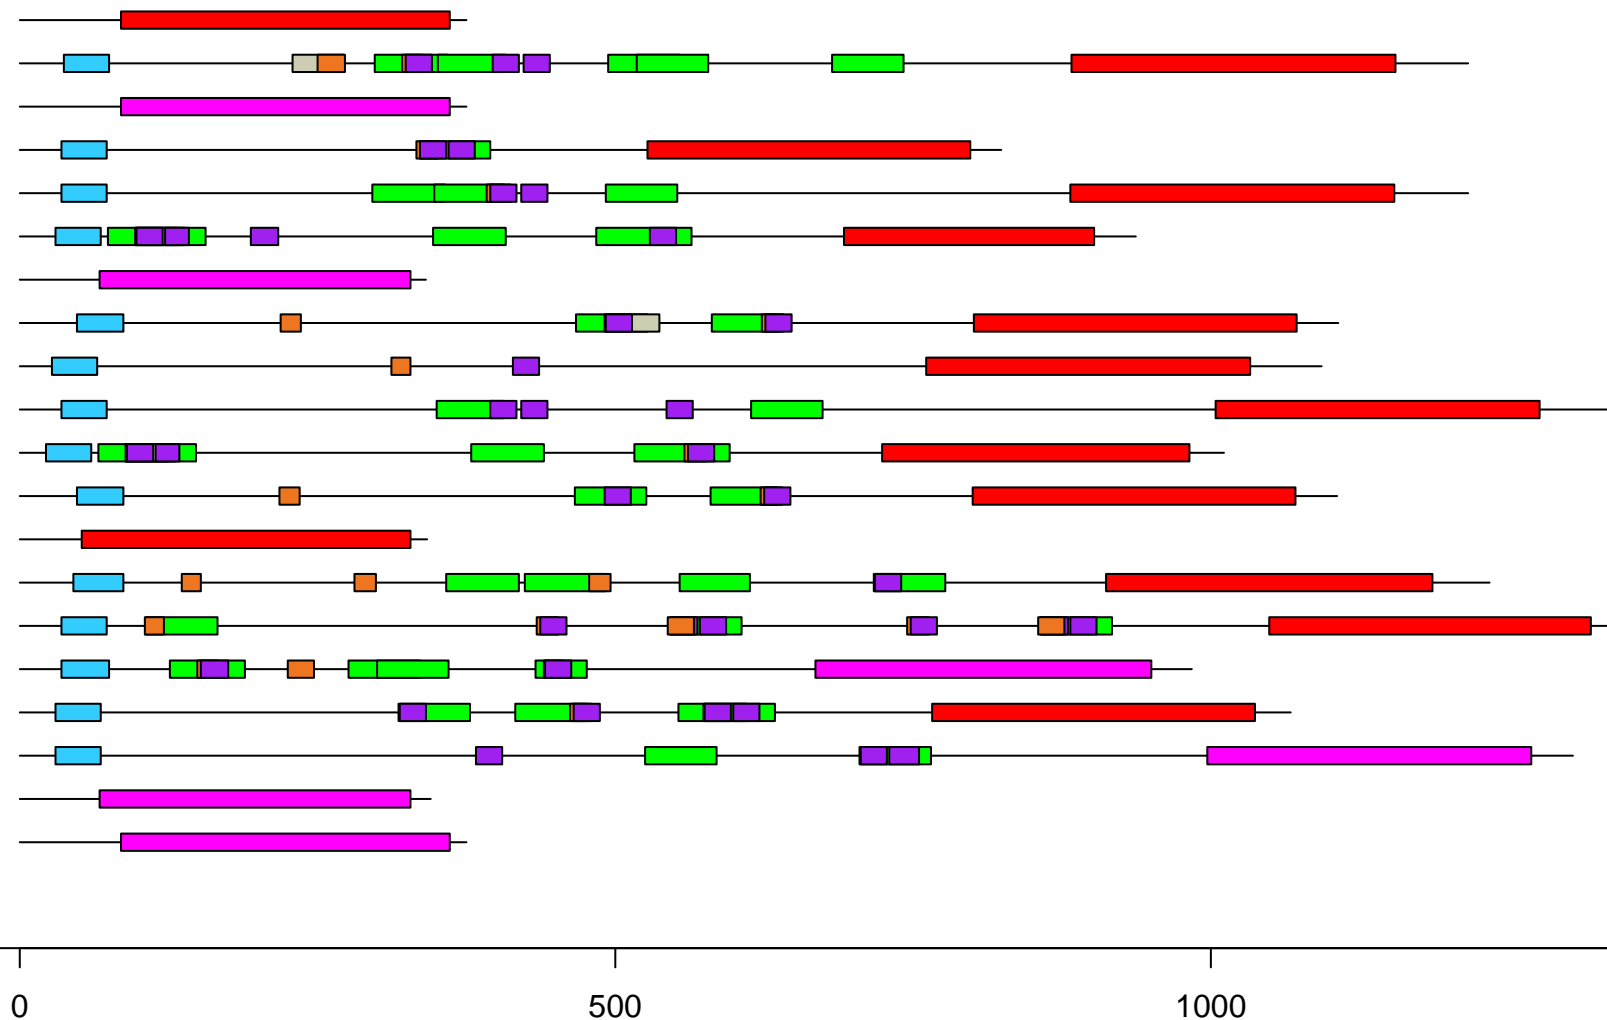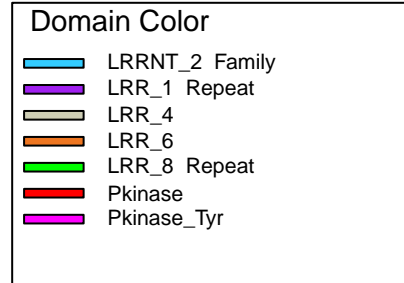

### G.ba RLK-Pelle\_LRR-Xb-1 domain diagram (part 2)

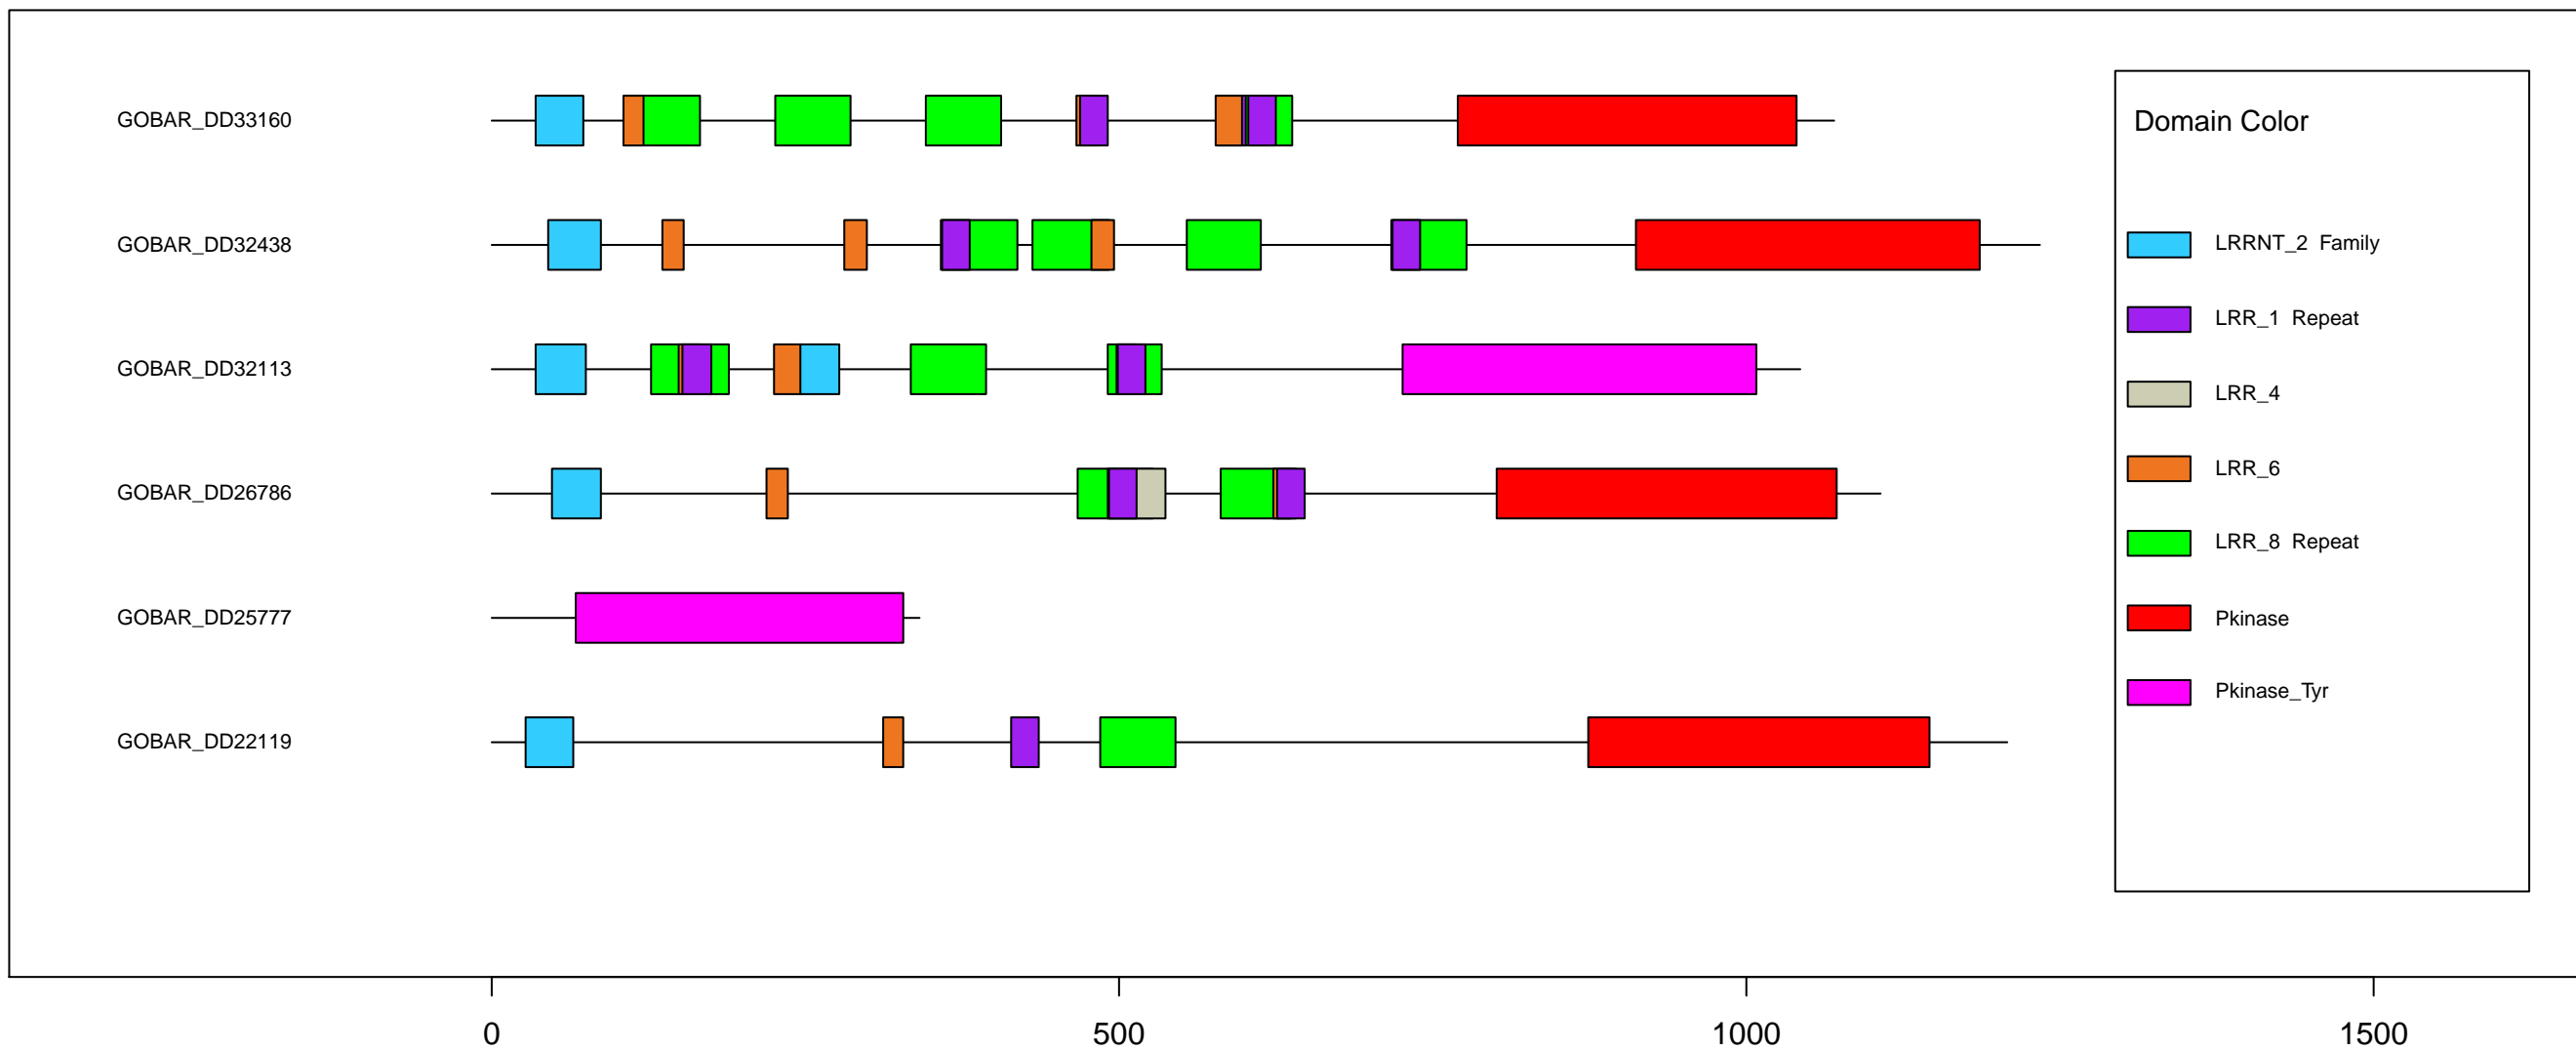

G.ba RLK-Pelle\_LRR-Xb-2 domain diagram (all)

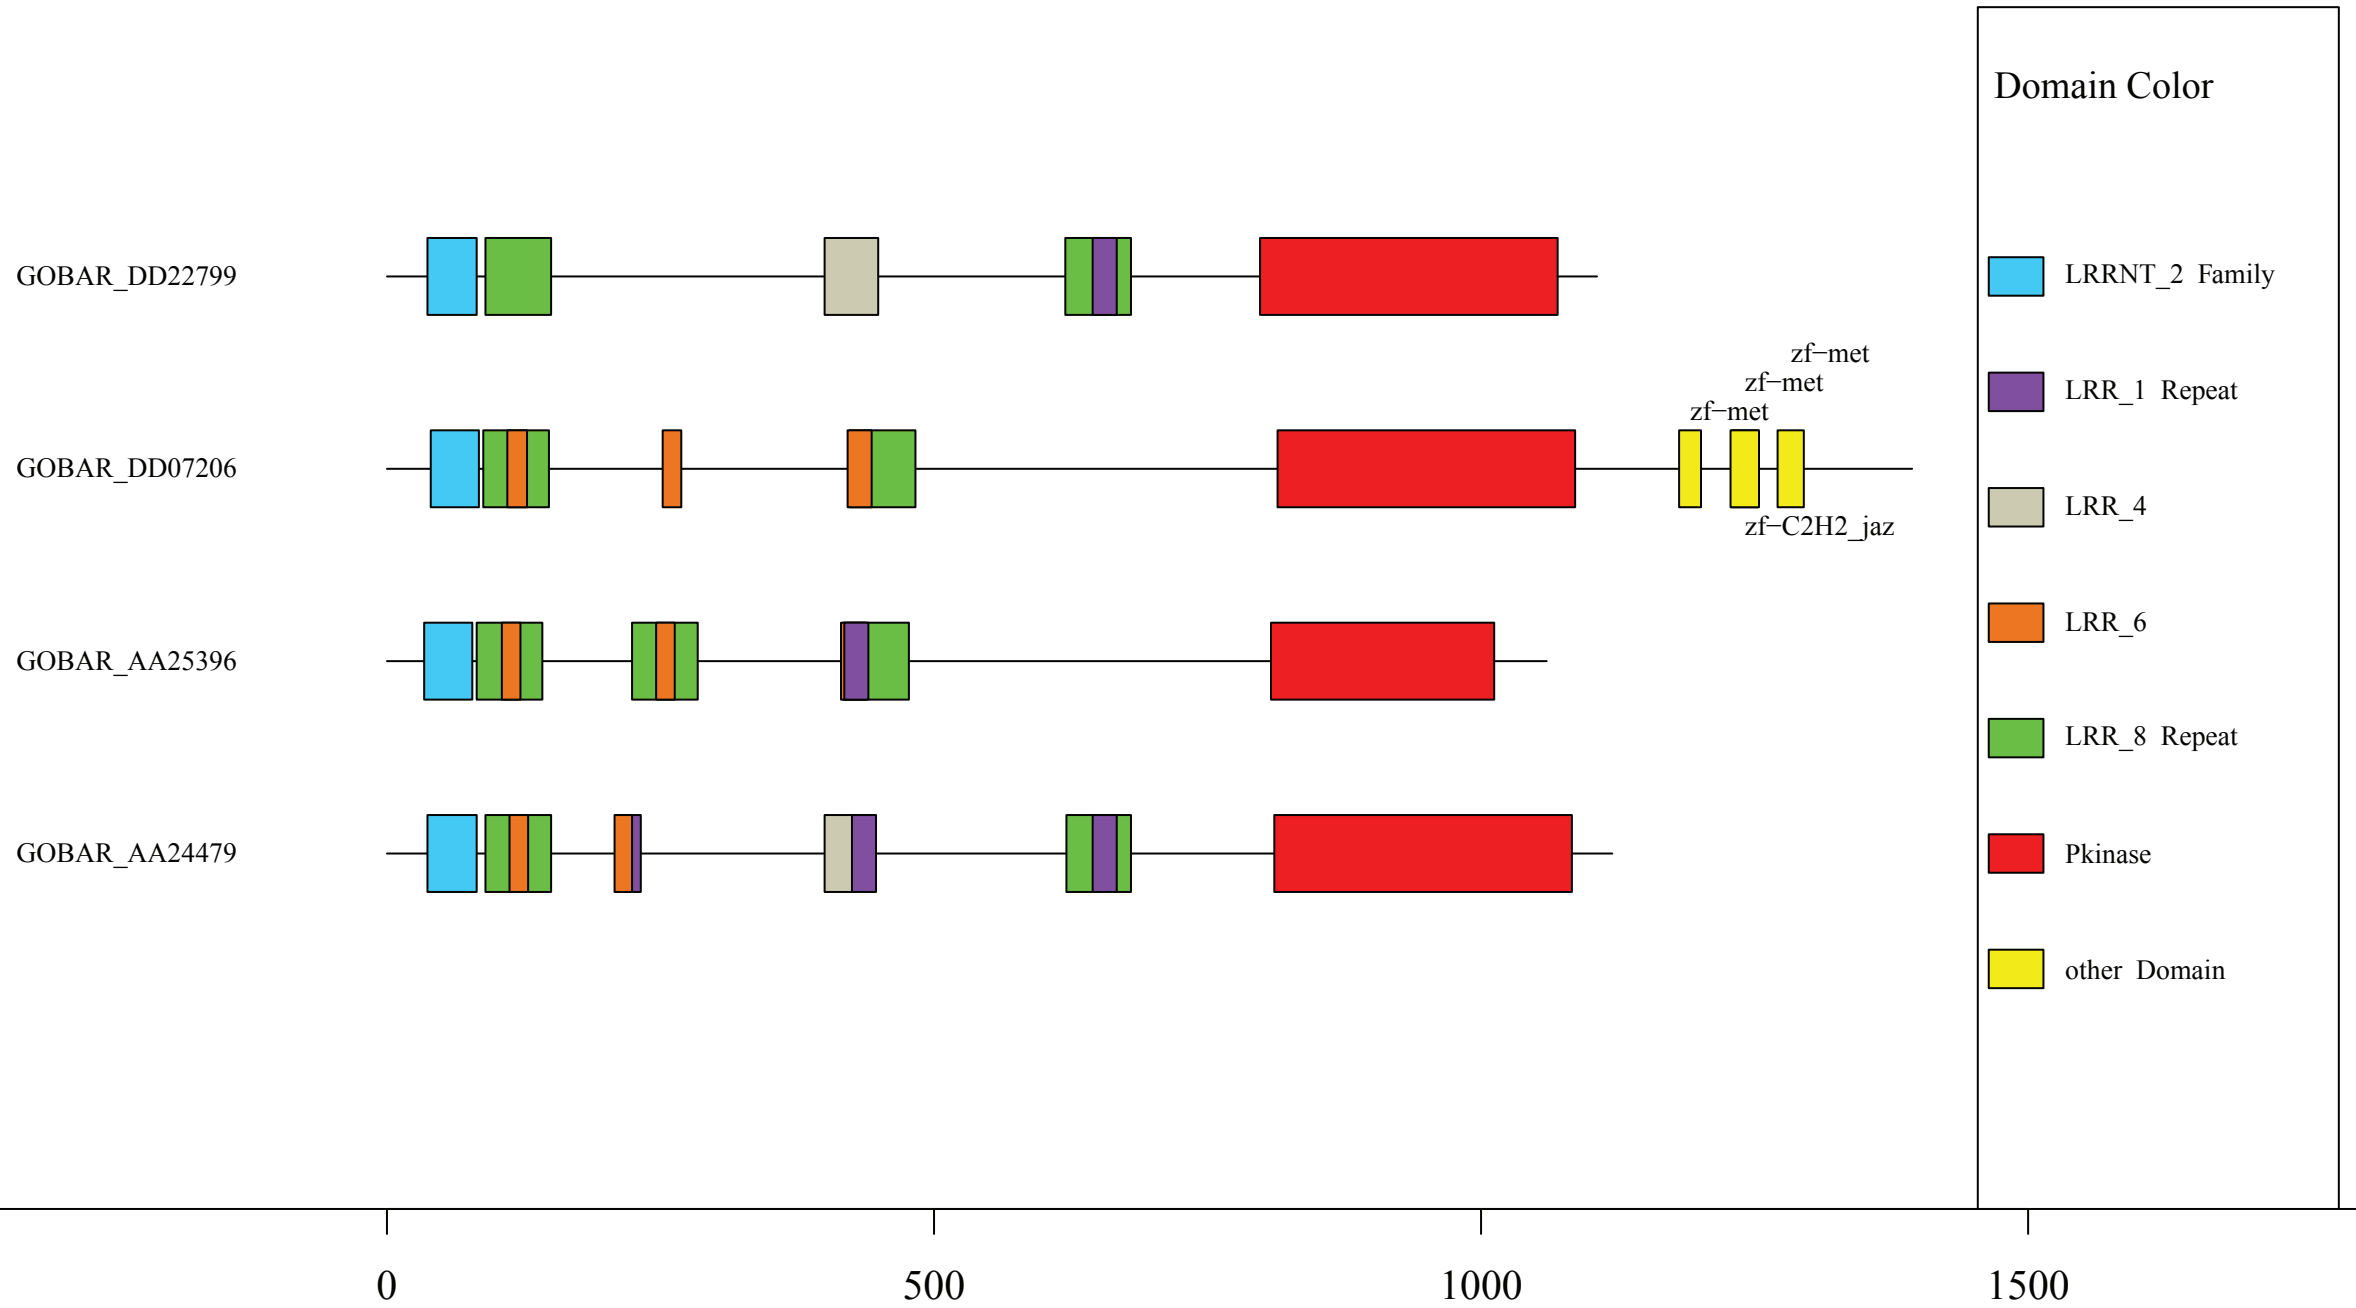

### G.ba RLK-Pelle\_LRR-XI-1 domain diagram (part 1)

GOBAR\_AA11958  
 GOBAR\_AA11882  
 GOBAR\_AA11881  
 GOBAR\_AA11141  
 GOBAR\_AA10985  
 GOBAR\_AA10938  
 GOBAR\_AA10737  
 GOBAR\_AA09505  
 GOBAR\_AA08625  
 GOBAR\_AA08312  
 GOBAR\_AA08311  
 GOBAR\_AA08308  
 GOBAR\_AA07952  
 GOBAR\_AA07948  
 GOBAR\_AA07946  
 GOBAR\_AA07944  
 GOBAR\_AA06609  
 GOBAR\_AA06475  
 GOBAR\_AA03653  
 GOBAR\_AA03496

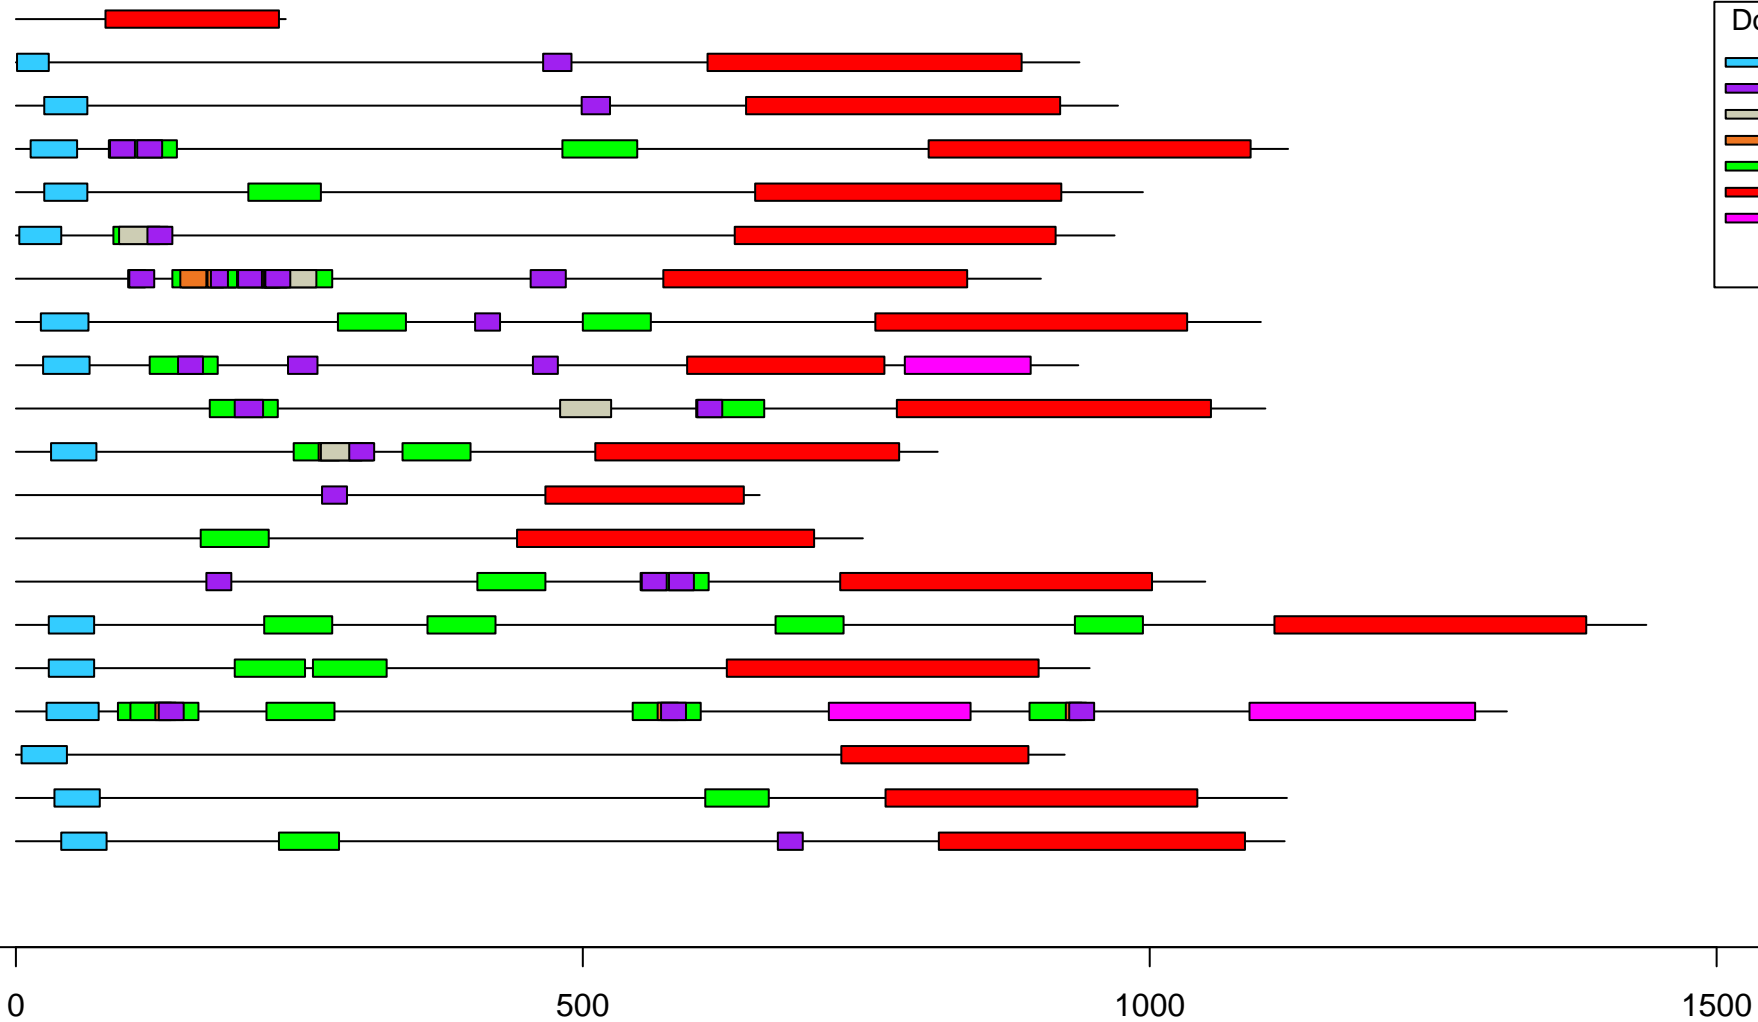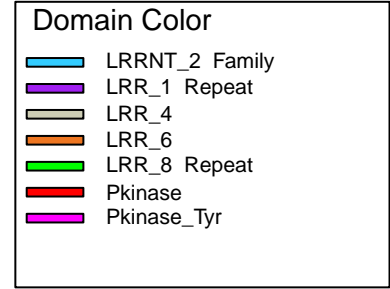

### G.ba RLK-Pelle\_LRR-XI-1 domain diagram (part 2)

GOBAR\_AA22434  
 GOBAR\_AA22433  
 GOBAR\_AA22200  
 GOBAR\_AA21433  
 GOBAR\_AA21025  
 GOBAR\_AA19704  
 GOBAR\_AA19559  
 GOBAR\_AA19174  
 GOBAR\_AA18044  
 GOBAR\_AA17903  
 GOBAR\_AA14870  
 GOBAR\_AA13899  
 GOBAR\_AA13853  
 GOBAR\_AA13073  
 GOBAR\_AA13072  
 GOBAR\_AA13070  
 GOBAR\_AA12940  
 GOBAR\_AA12939  
 GOBAR\_AA12938  
 GOBAR\_AA12603

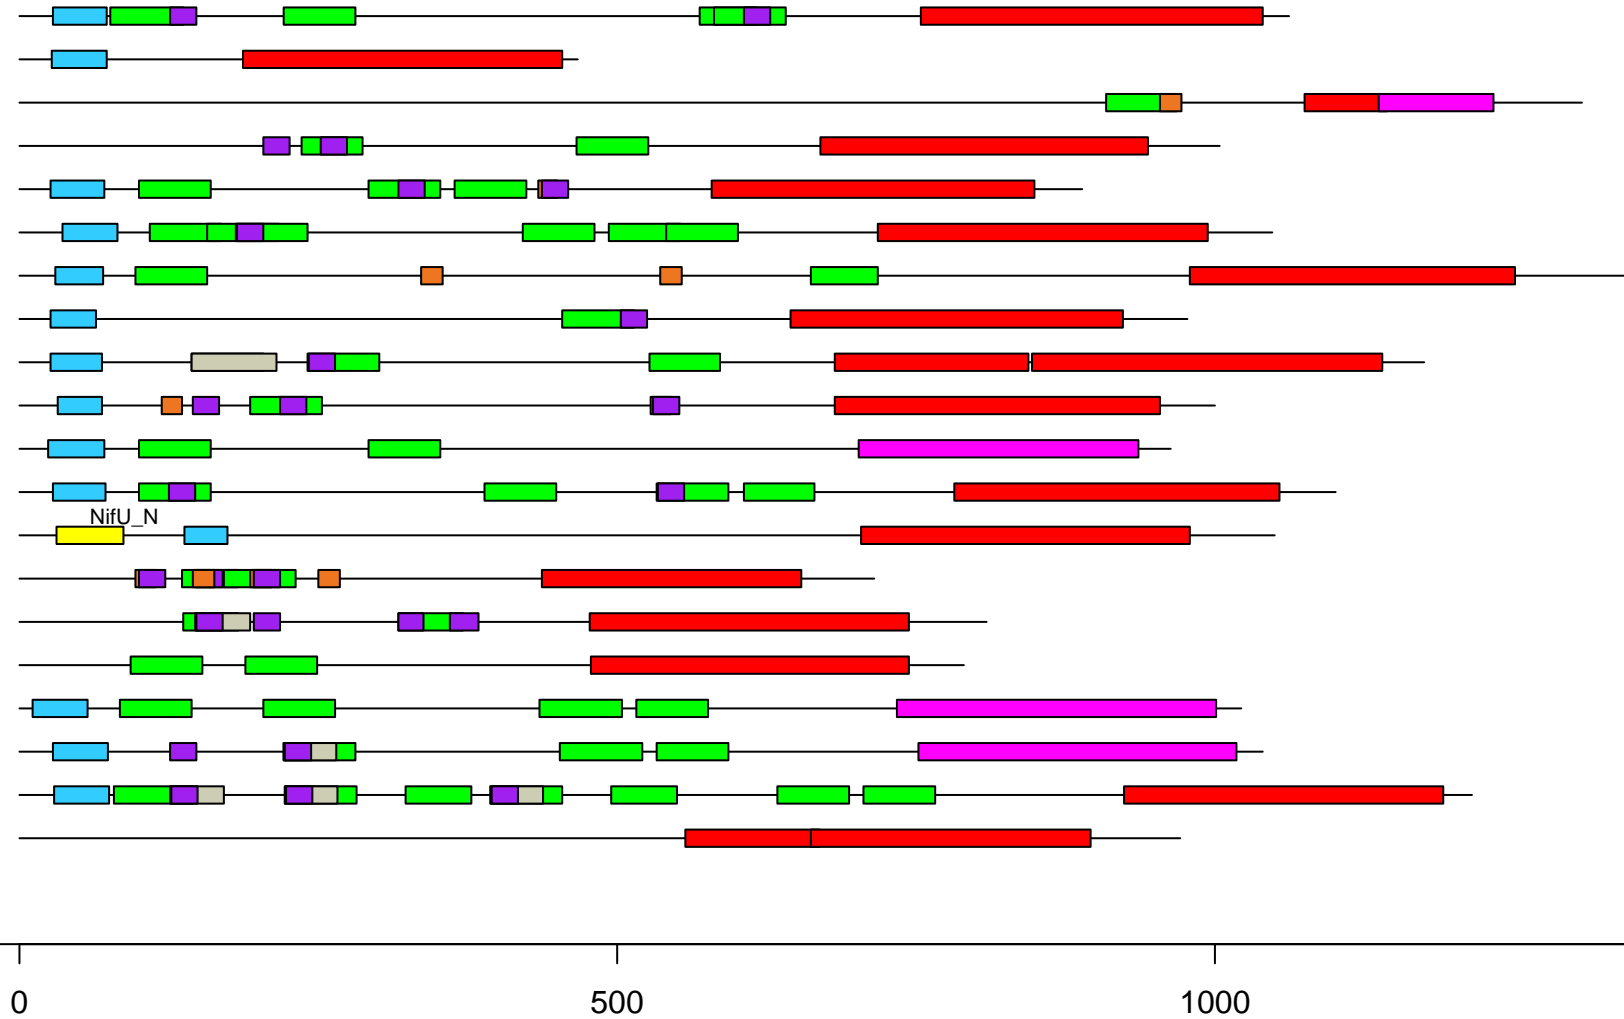

**Domain Color**

- █ LRRNT\_2 Family
- █ LRR\_1 Repeat
- █ LRR\_4
- █ LRR\_6
- █ LRR\_8 Repeat
- █ Pkinase
- █ Pkinase\_Tyr
- █ other Domain

### G.ba RLK-Pelle\_LRR-XI-1 domain diagram (part 3)

GOBAR\_AA34905  
 GOBAR\_AA34228  
 GOBAR\_AA34201  
 GOBAR\_AA33717  
 GOBAR\_AA32338  
 GOBAR\_AA32172  
 GOBAR\_AA32171  
 GOBAR\_AA31242  
 GOBAR\_AA31173  
 GOBAR\_AA31172  
 GOBAR\_AA30141  
 GOBAR\_AA29835  
 GOBAR\_AA29606  
 GOBAR\_AA29605  
 GOBAR\_AA27071  
 GOBAR\_AA25862  
 GOBAR\_AA24839  
 GOBAR\_AA23839  
 GOBAR\_AA22436  
 GOBAR\_AA22435

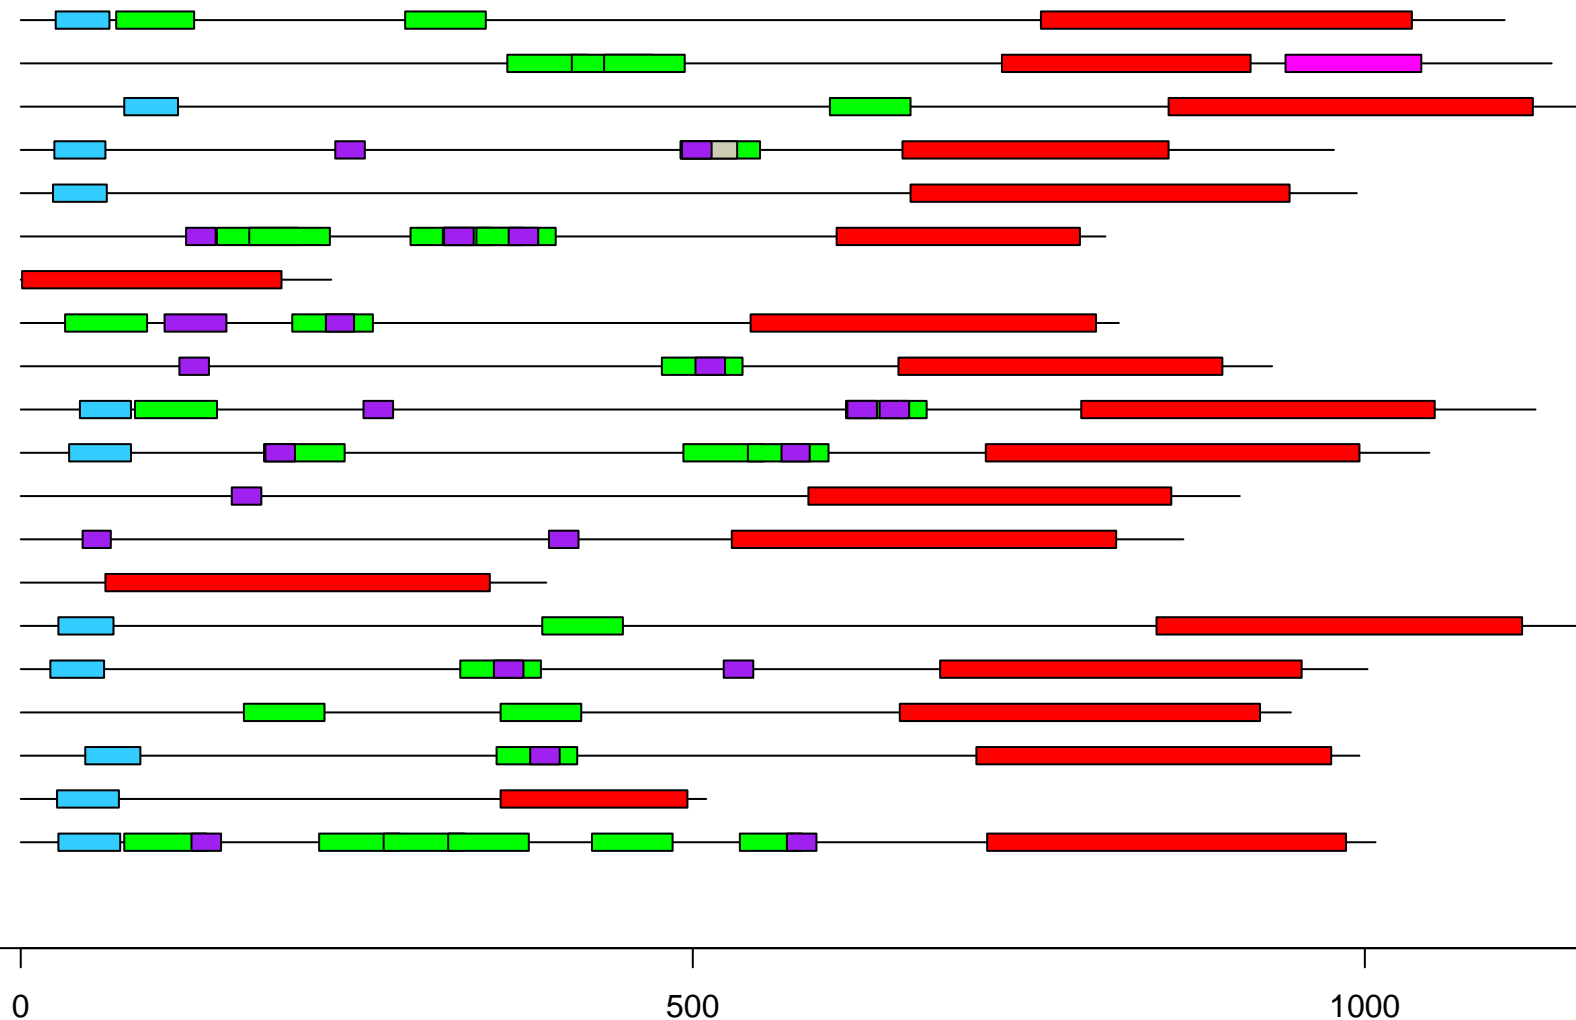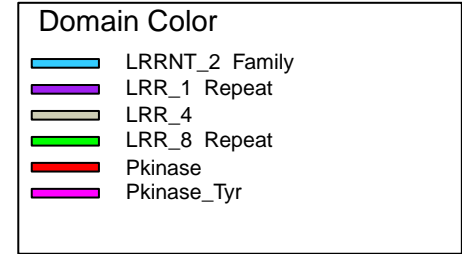

### G.ba RLK-Pelle\_LRR-XI-1 domain diagram (part 4)

GOBAR\_DD02711  
 GOBAR\_DD02282  
 GOBAR\_DD02092  
 GOBAR\_DD01734  
 GOBAR\_DD01733  
 GOBAR\_DD00005  
 GOBAR\_DD00003  
 GOBAR\_AA40857  
 GOBAR\_AA40366  
 GOBAR\_AA40214  
 GOBAR\_AA40063  
 GOBAR\_AA39946  
 GOBAR\_AA39781  
 GOBAR\_AA37640  
 GOBAR\_AA37572  
 GOBAR\_AA37571  
 GOBAR\_AA37429  
 GOBAR\_AA36842  
 GOBAR\_AA36837  
 GOBAR\_AA35019

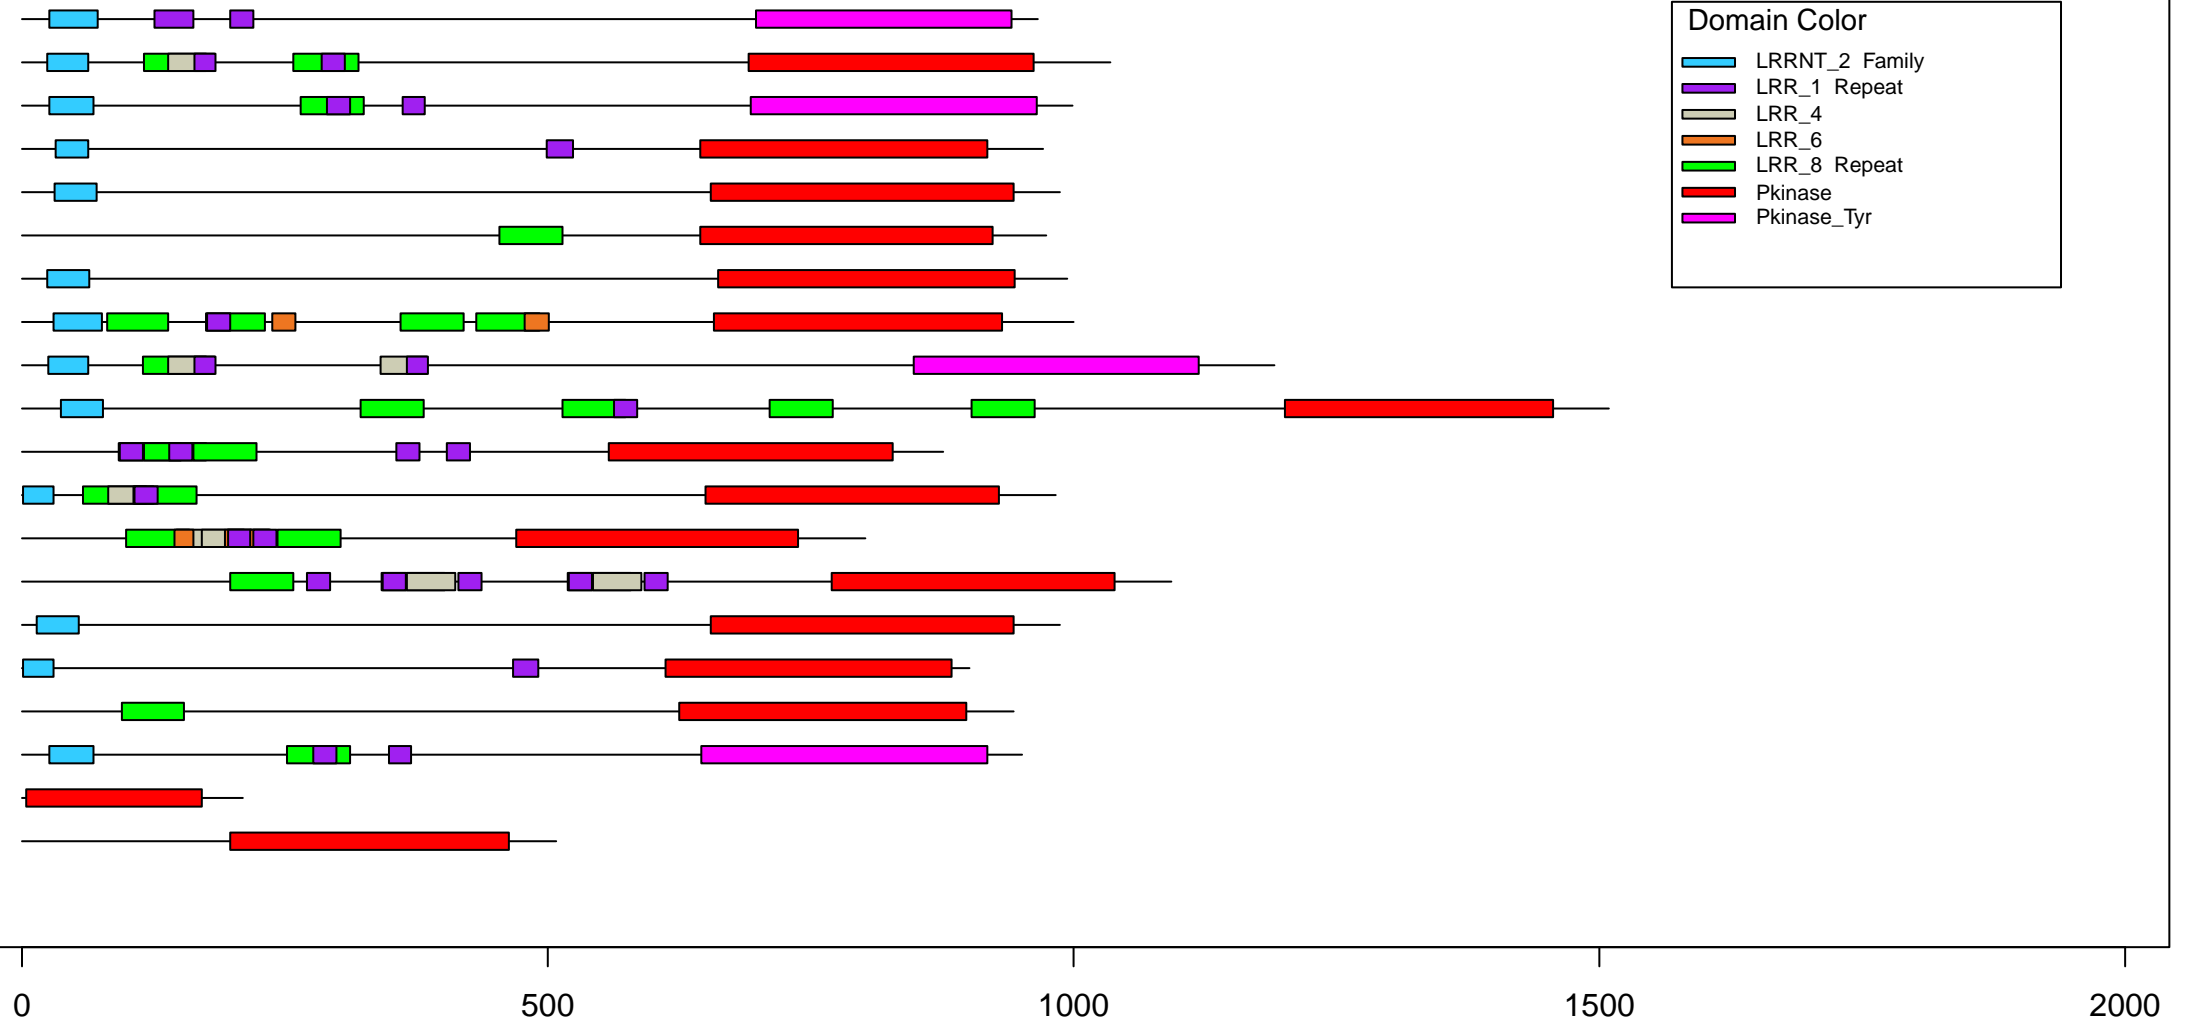



### G.ba RLK-Pelle\_LRR-XI-1 domain diagram (part 5)

GOBAR\_DD11688  
 GOBAR\_DD11685  
 GOBAR\_DD10462  
 GOBAR\_DD10329  
 GOBAR\_DD09695  
 GOBAR\_DD07118  
 GOBAR\_DD06858  
 GOBAR\_DD06857  
 GOBAR\_DD06855  
 GOBAR\_DD06854  
 GOBAR\_DD06852  
 GOBAR\_DD06849  
 GOBAR\_DD06848  
 GOBAR\_DD06693  
 GOBAR\_DD06691  
 GOBAR\_DD06690  
 GOBAR\_DD06185  
 GOBAR\_DD05650  
 GOBAR\_DD04512  
 GOBAR\_DD04499

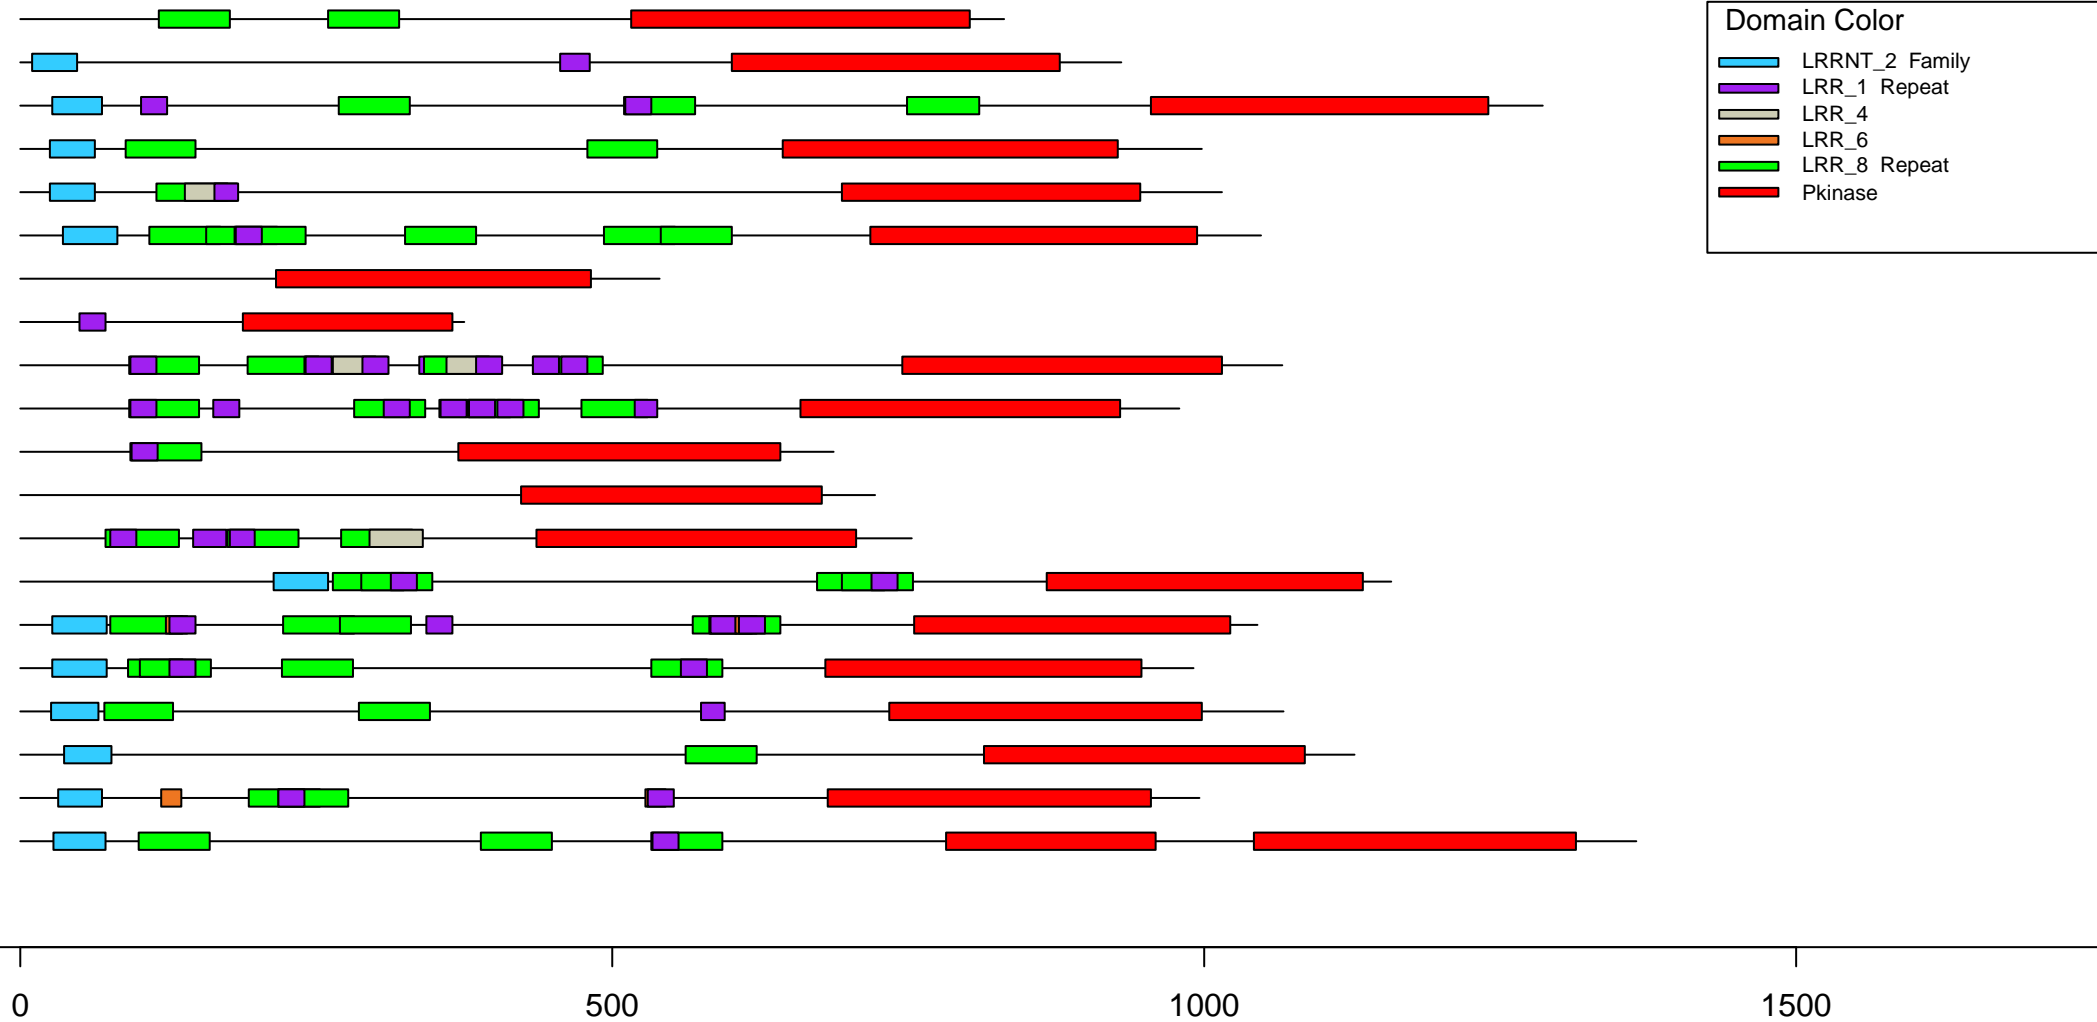

### G.ba RLK-Pelle\_LRR-XI-1 domain diagram (part 6)

GOBAR\_DD20854  
 GOBAR\_DD20631  
 GOBAR\_DD19037  
 GOBAR\_DD18730  
 GOBAR\_DD17870  
 GOBAR\_DD17201  
 GOBAR\_DD17106  
 GOBAR\_DD16712  
 GOBAR\_DD16434  
 GOBAR\_DD16433  
 GOBAR\_DD16325  
 GOBAR\_DD15472  
 GOBAR\_DD15435  
 GOBAR\_DD15434  
 GOBAR\_DD15433  
 GOBAR\_DD15432  
 GOBAR\_DD15105  
 GOBAR\_DD14531  
 GOBAR\_DD13423  
 GOBAR\_DD13422

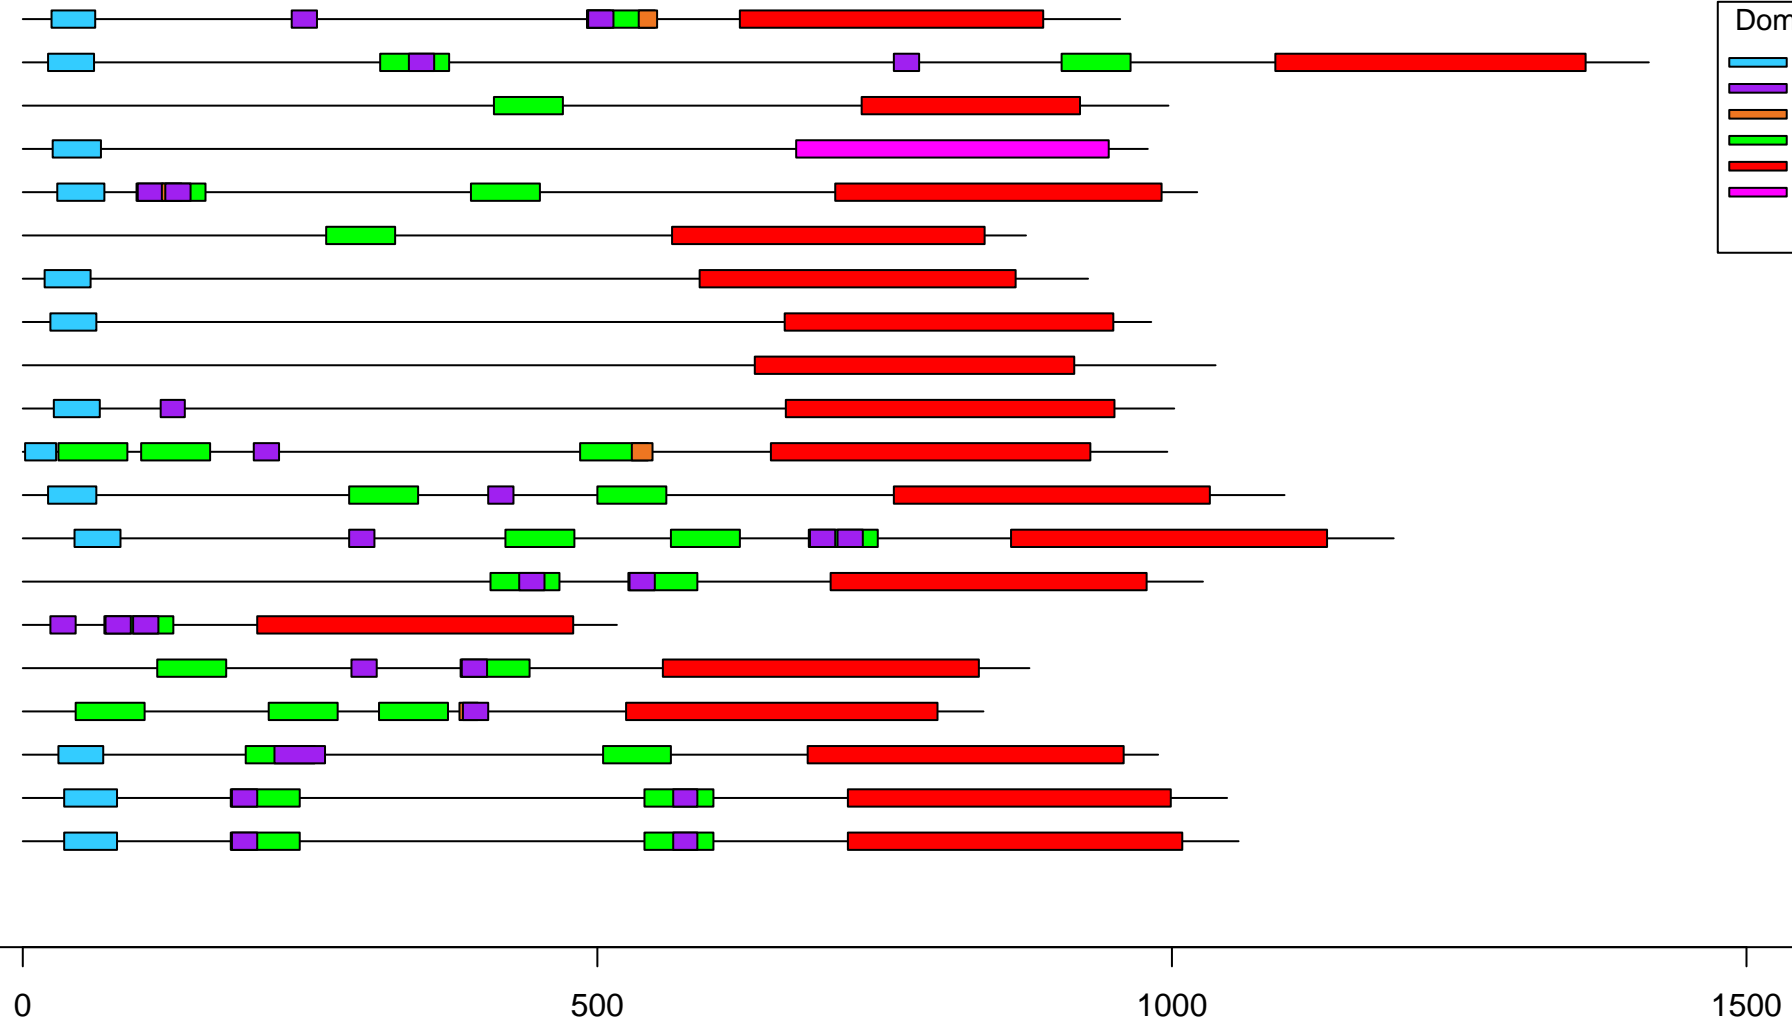

### G.ba RLK-Pelle\_LRR-XI-1 domain diagram (part 7)

GOBAR\_DD29900  
 GOBAR\_DD27998  
 GOBAR\_DD27855  
 GOBAR\_DD27821  
 GOBAR\_DD27426  
 GOBAR\_DD27423  
 GOBAR\_DD27421  
 GOBAR\_DD26345  
 GOBAR\_DD26344  
 GOBAR\_DD26121  
 GOBAR\_DD25962  
 GOBAR\_DD25935  
 GOBAR\_DD25778  
 GOBAR\_DD24609  
 GOBAR\_DD23834  
 GOBAR\_DD23263  
 GOBAR\_DD22993  
 GOBAR\_DD22853  
 GOBAR\_DD21848  
 GOBAR\_DD21847

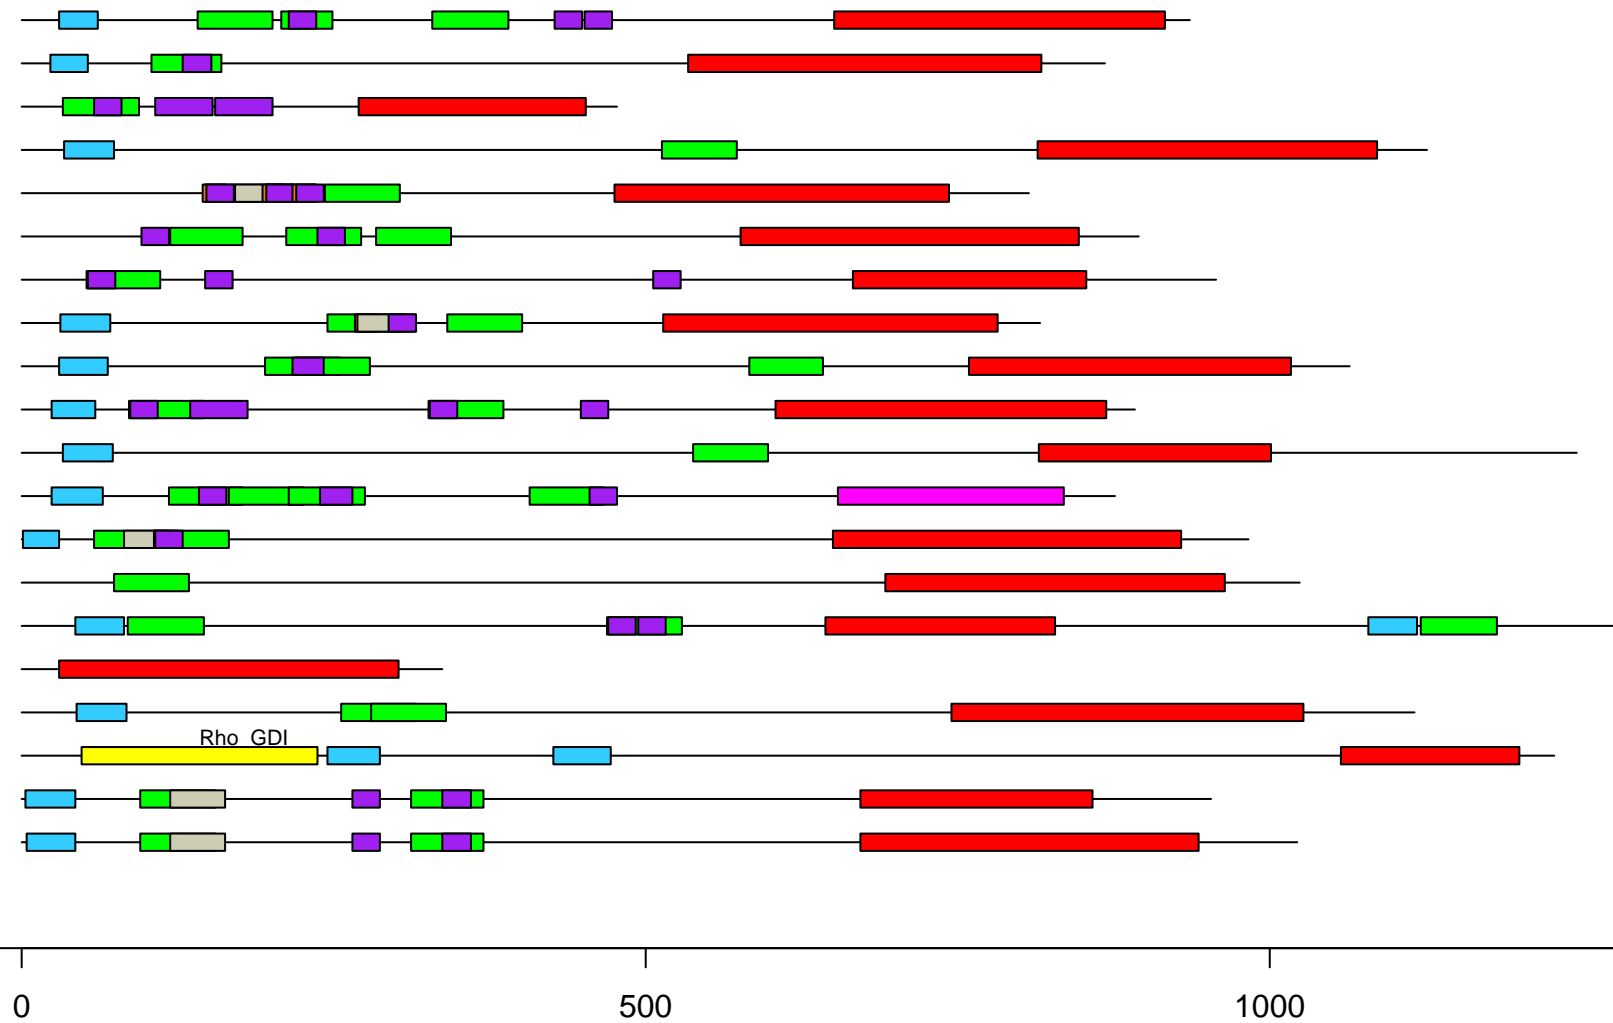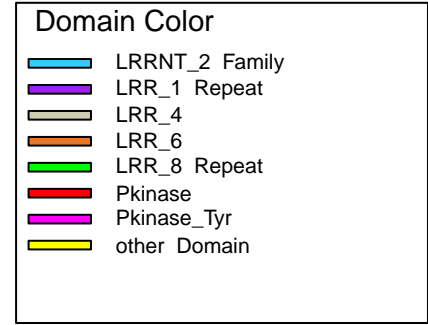

### G.ba RLK-Pelle\_LRR-XI-1 domain diagram (part 8)

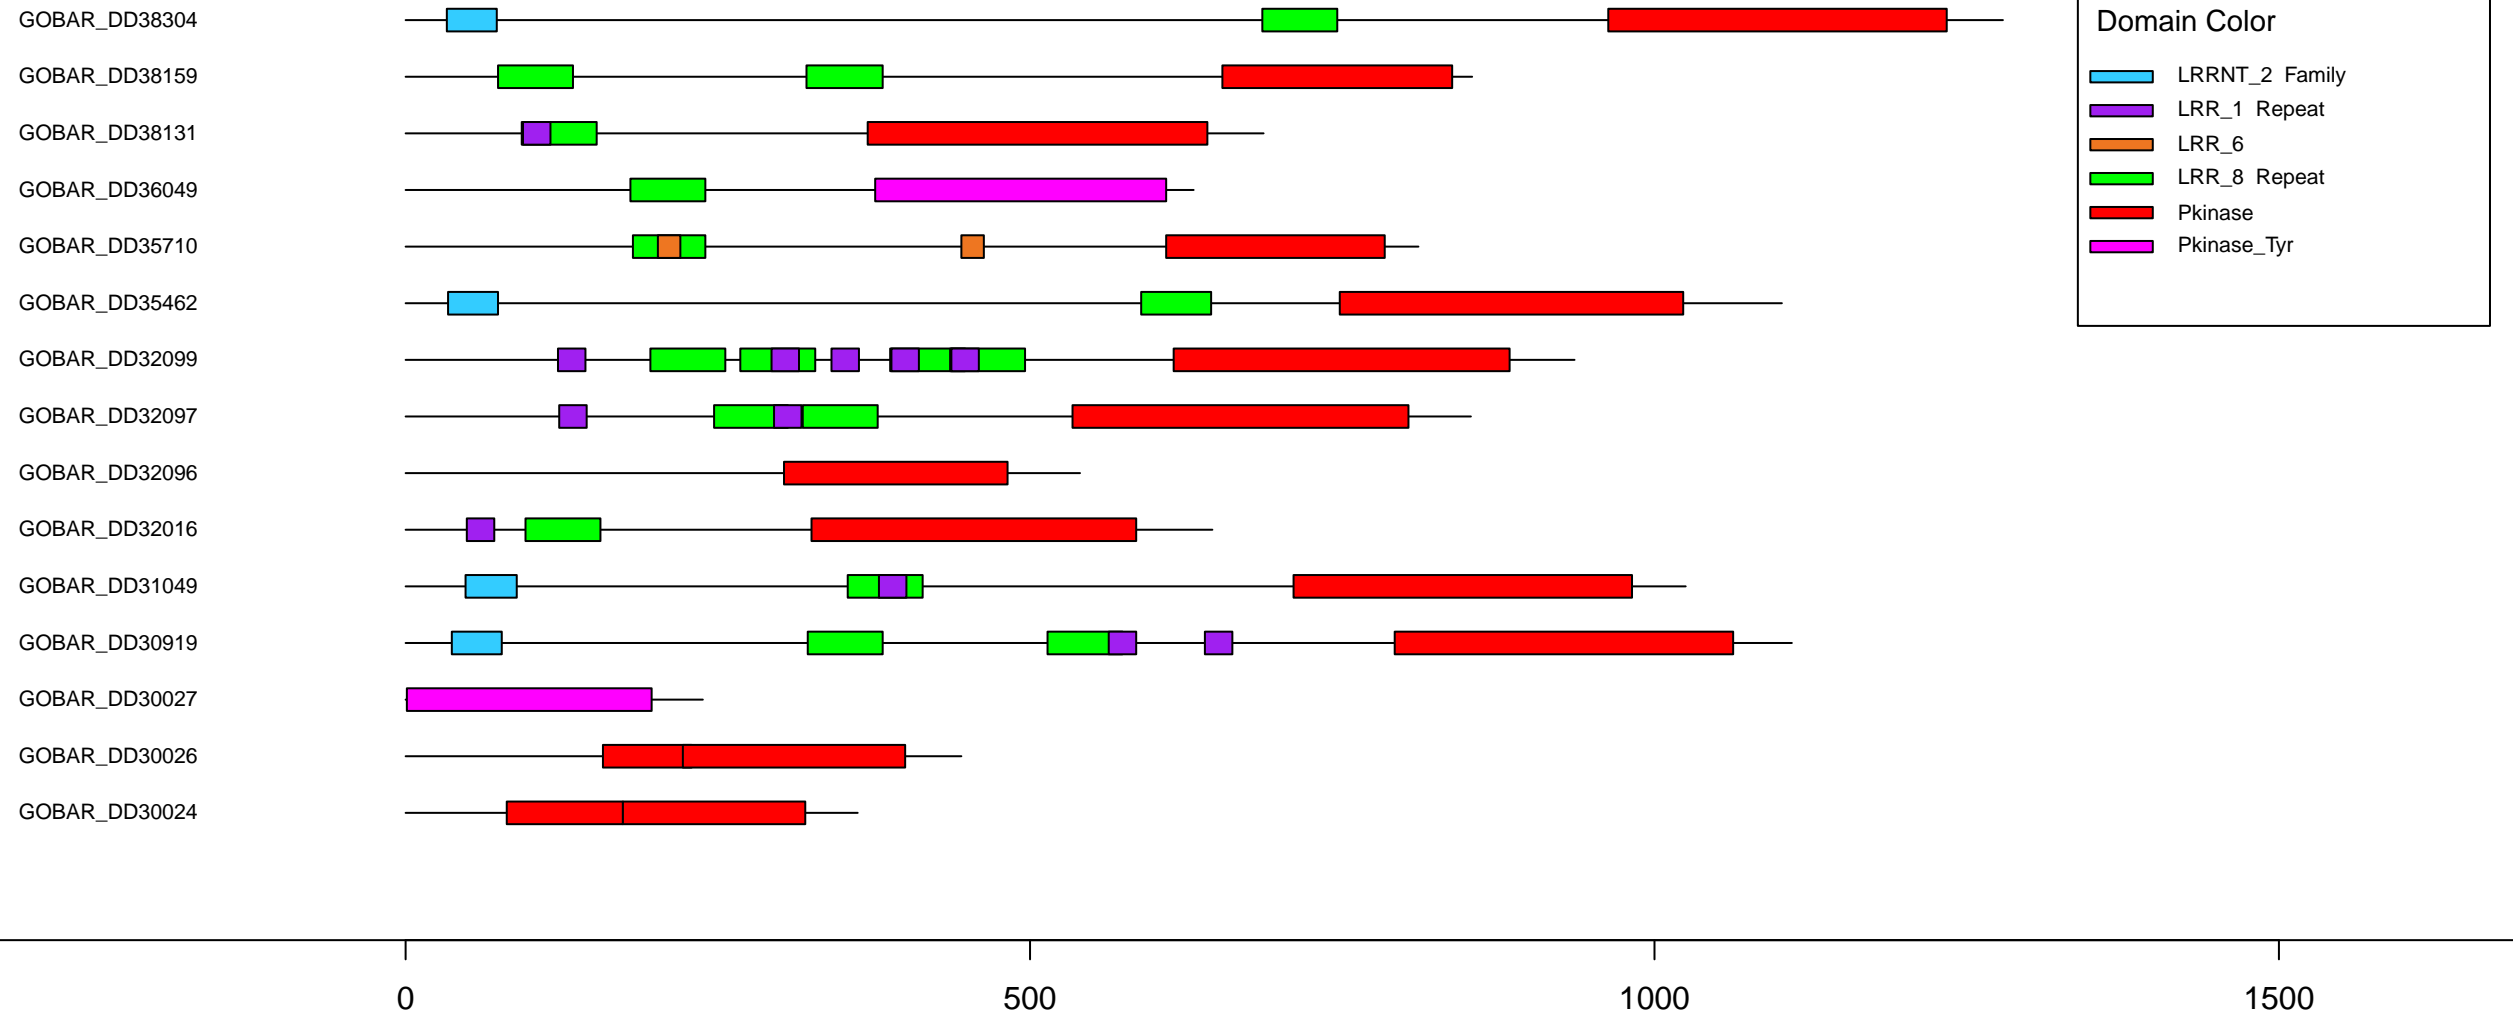

# G.ba RLK-Pelle\_LRR-XI-2 domain diagram (all)

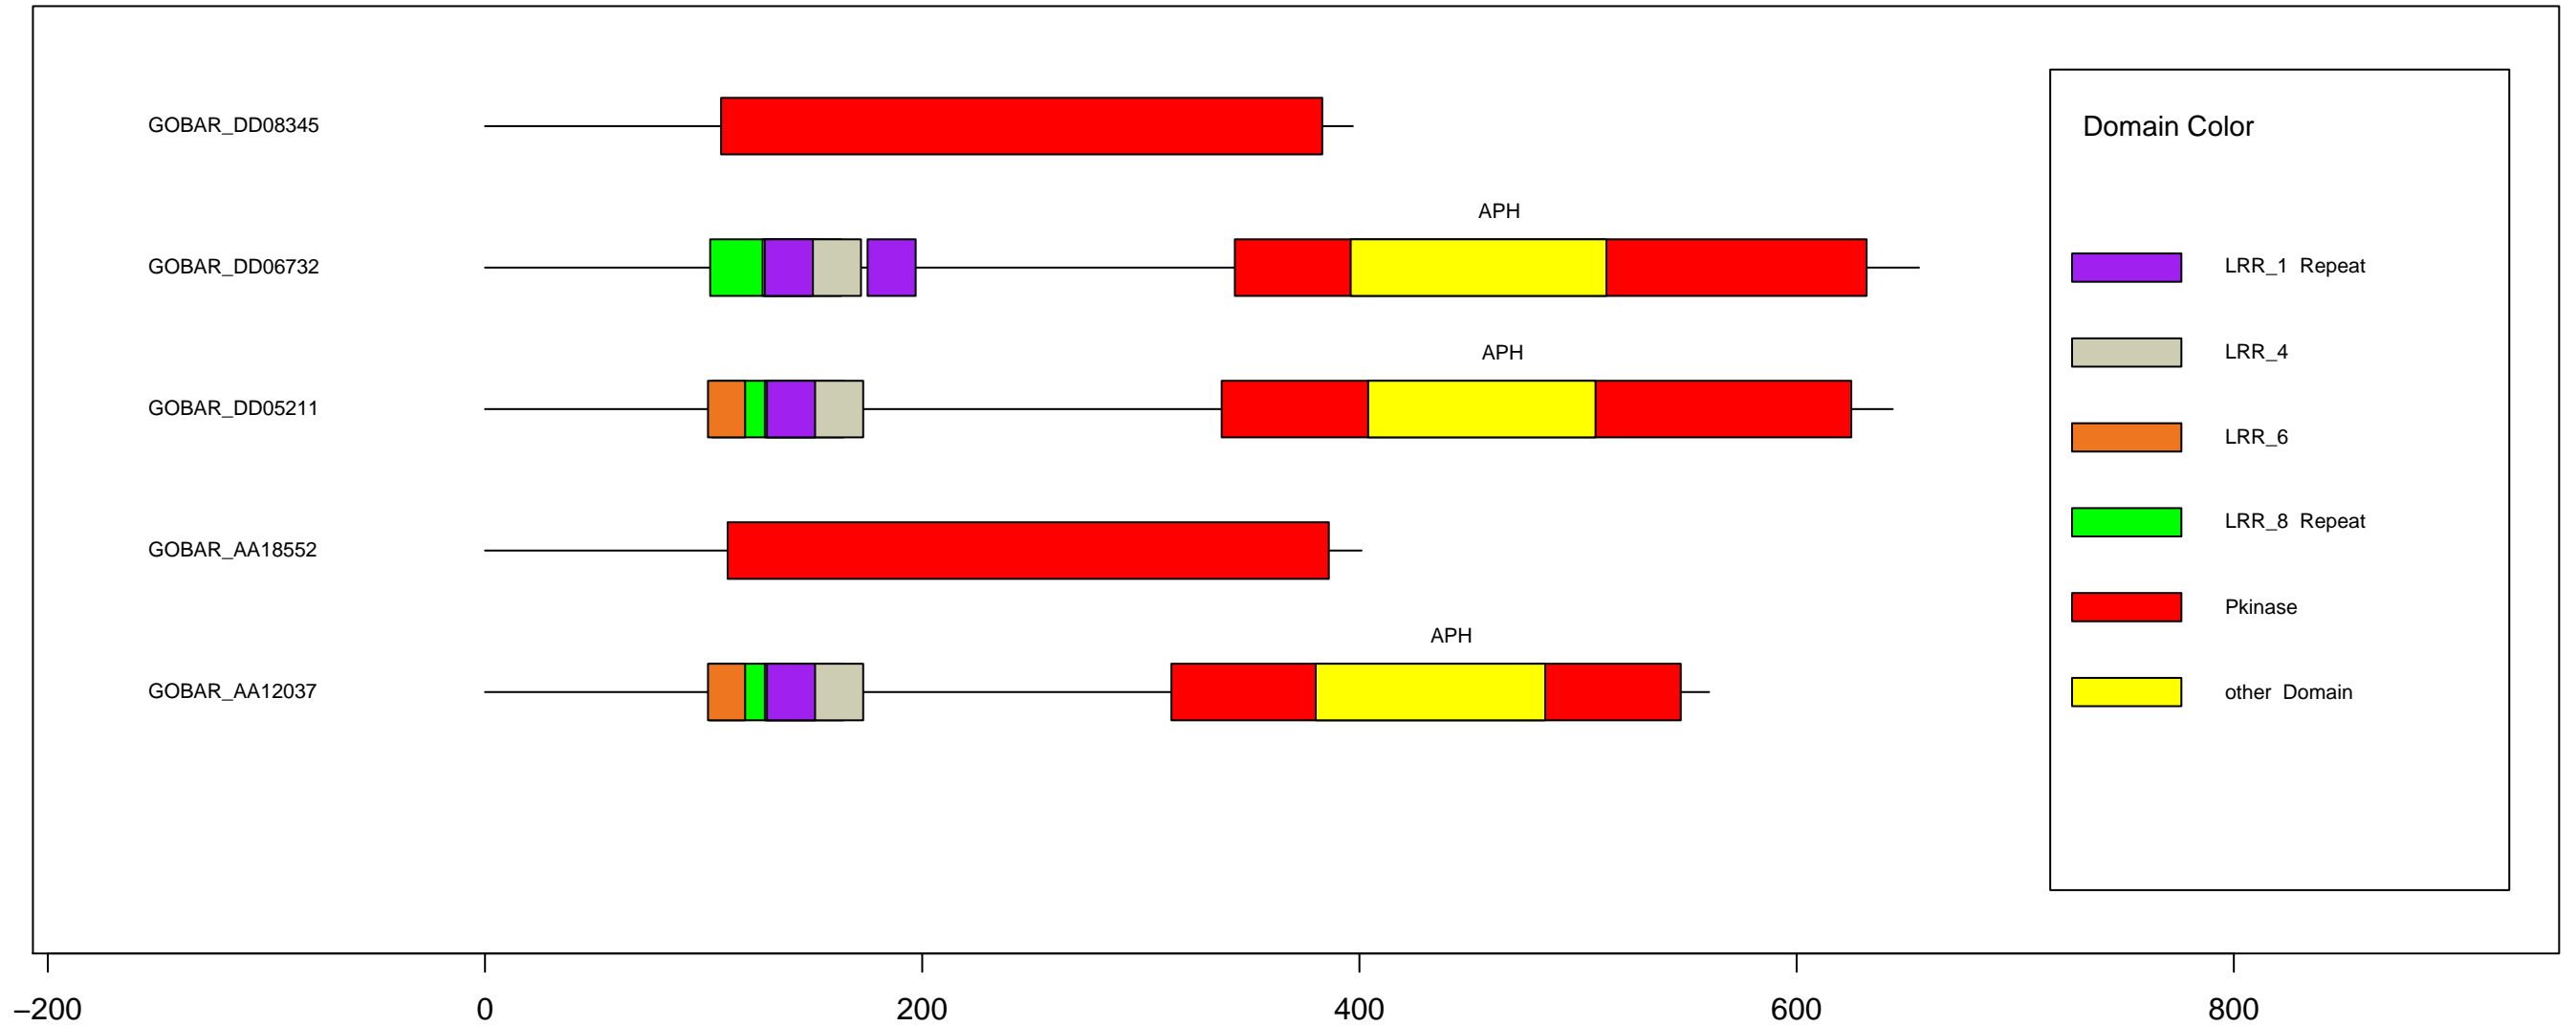

### G.ba RLK-Pelle\_LRR-XII-1 domain diagram (part 1)

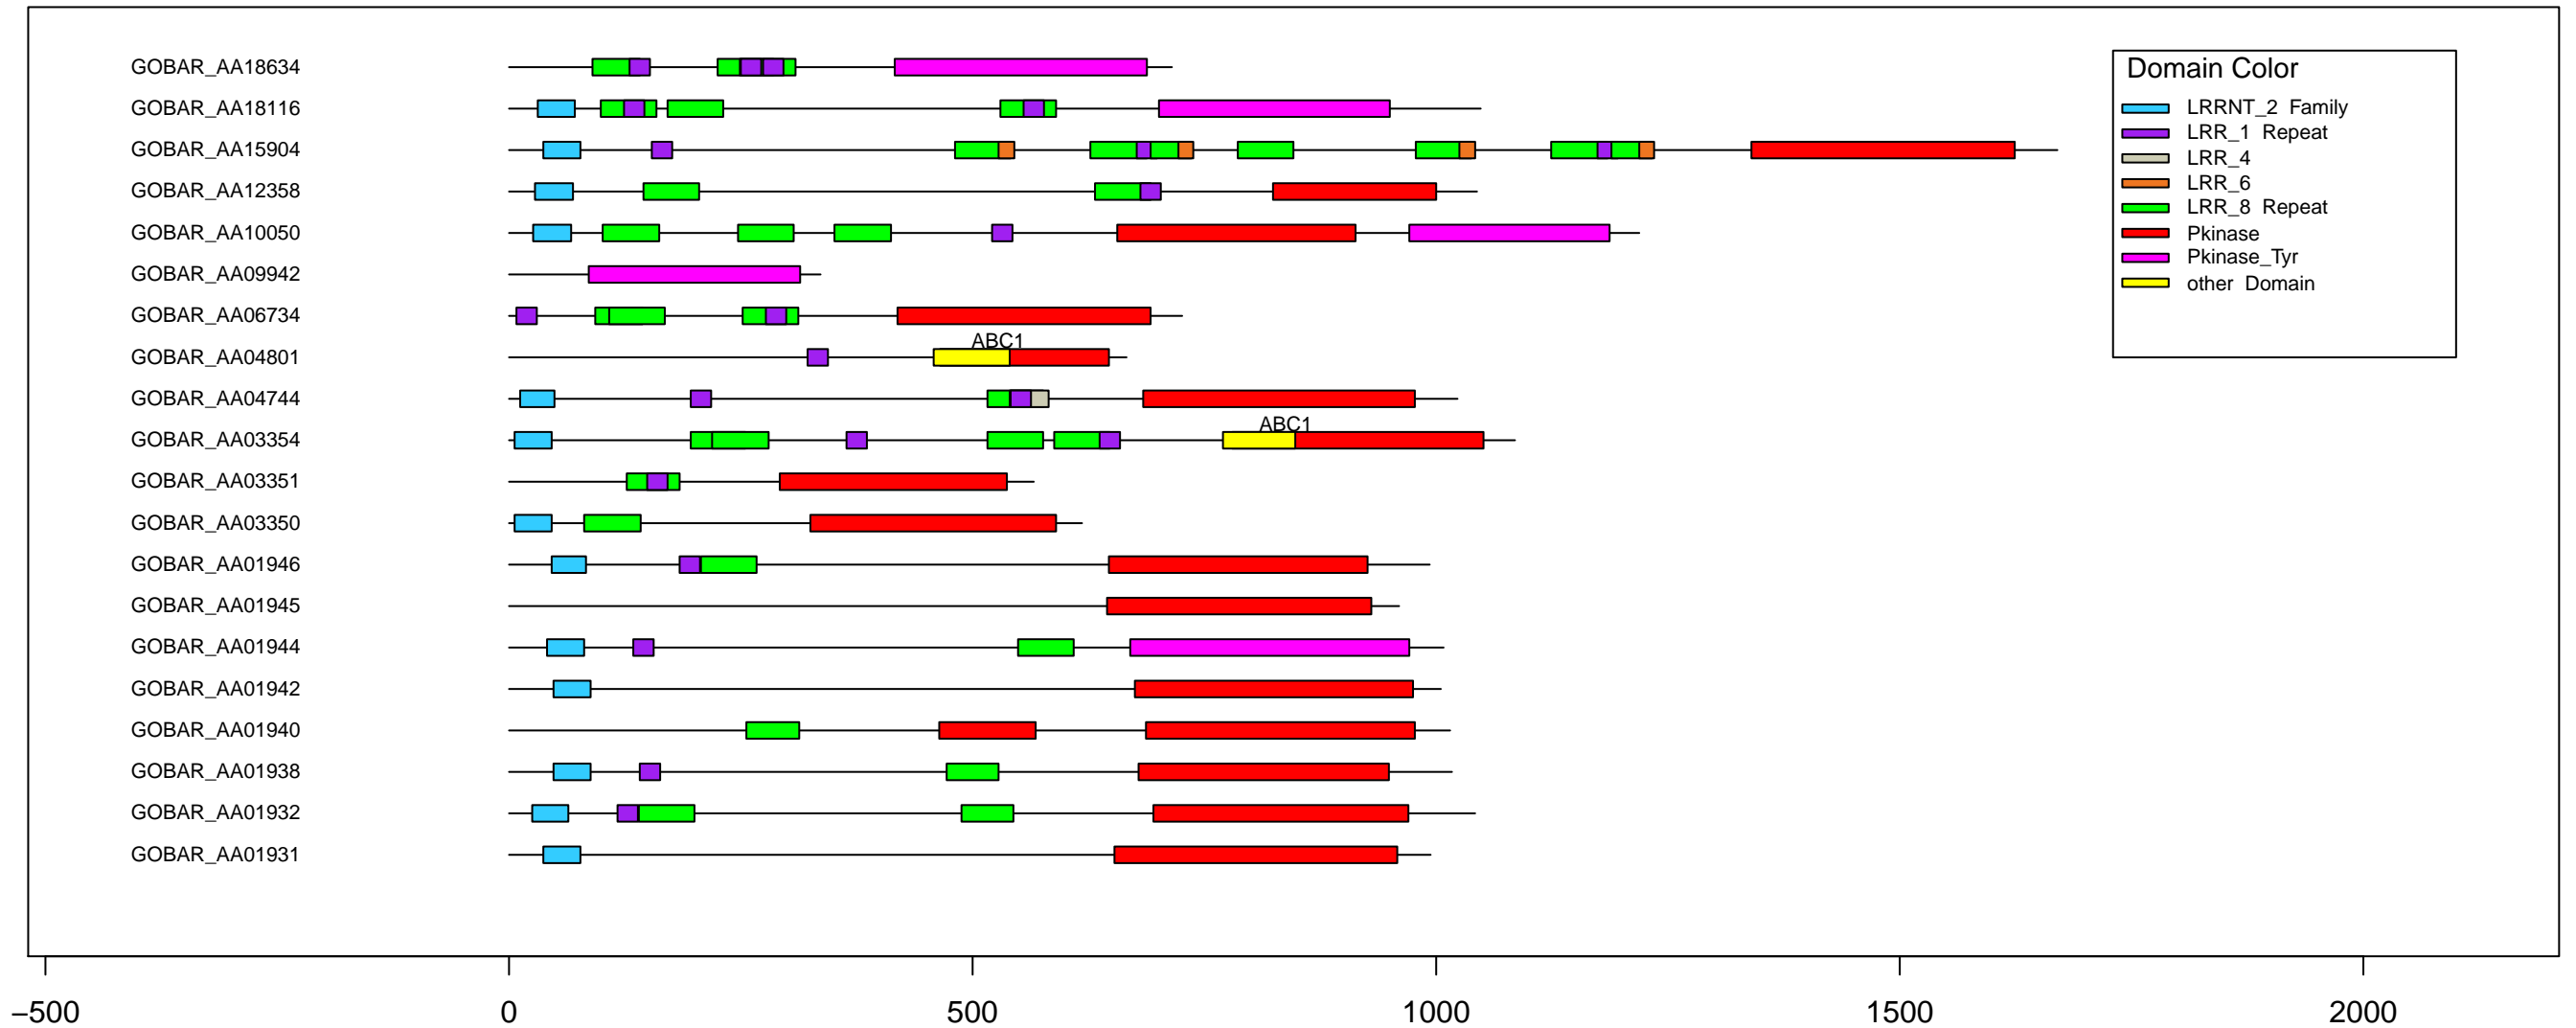

### G.ba RLK-Pelle\_LRR-XII-1 domain diagram (part 2)

GOBAR\_AA32487  
 GOBAR\_AA32009  
 GOBAR\_AA32008  
 GOBAR\_AA32006  
 GOBAR\_AA31998  
 GOBAR\_AA31997  
 GOBAR\_AA31100  
 GOBAR\_AA31096  
 GOBAR\_AA29975  
 GOBAR\_AA24583  
 GOBAR\_AA23965  
 GOBAR\_AA23806  
 GOBAR\_AA22404  
 GOBAR\_AA22384  
 GOBAR\_AA22075  
 GOBAR\_AA22072  
 GOBAR\_AA21772  
 GOBAR\_AA20954  
 GOBAR\_AA20233  
 GOBAR\_AA19796

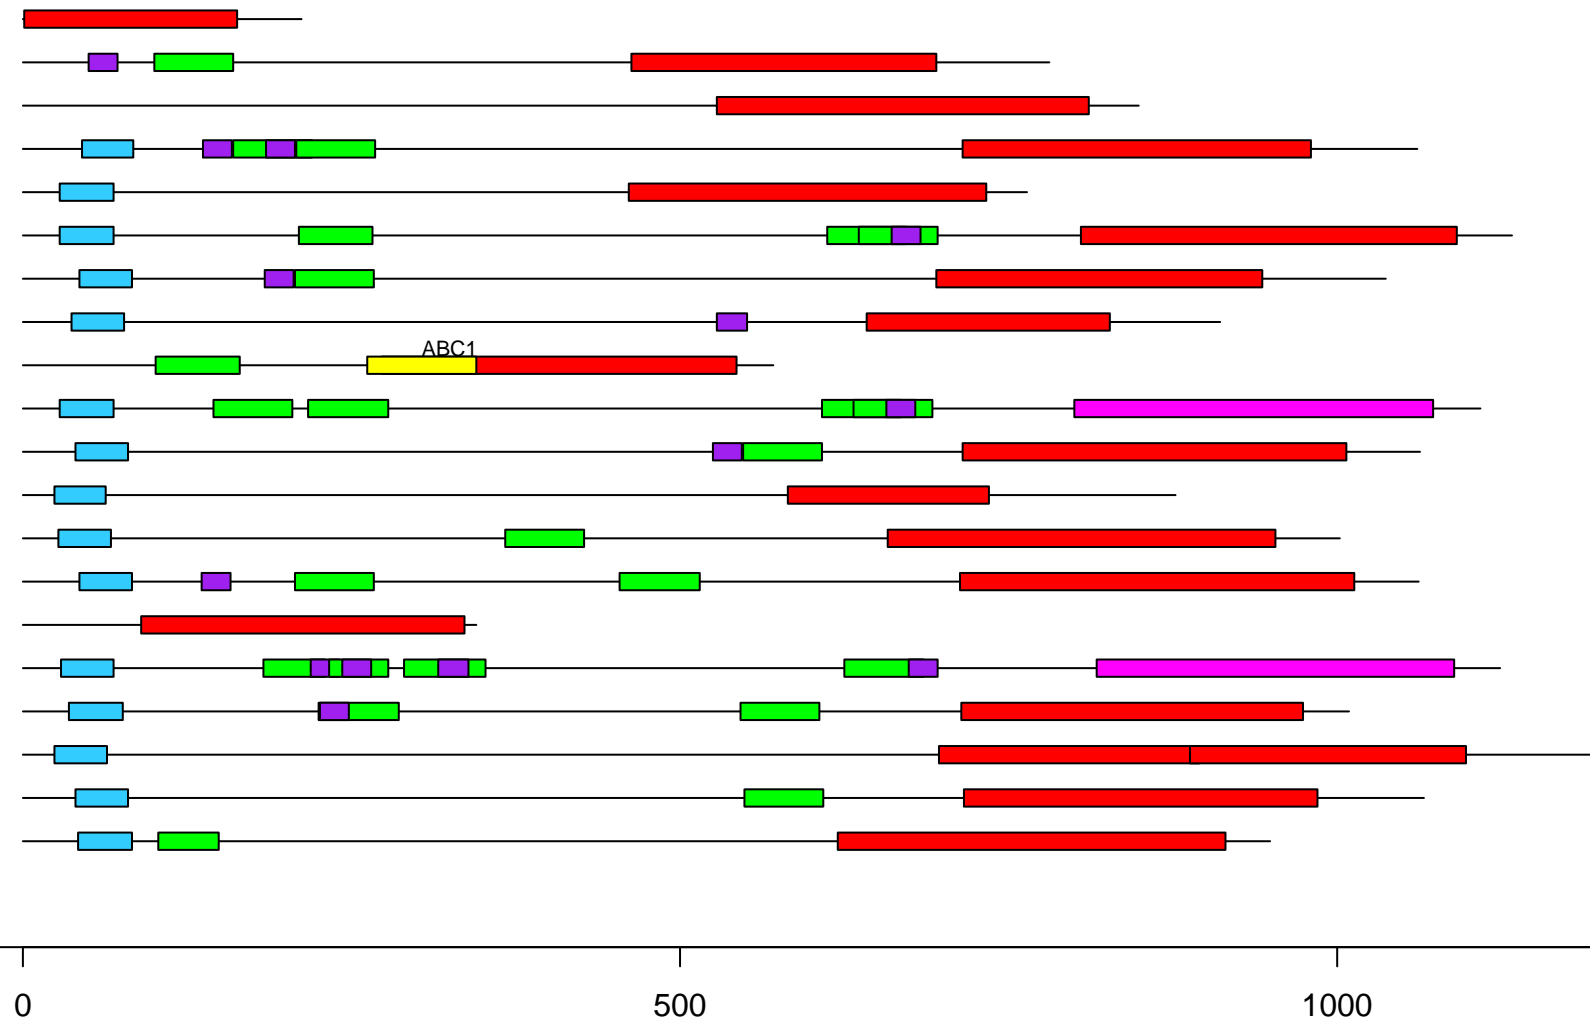

**Domain Color**

- █ LRRNT\_2 Family
- █ LRR\_1 Repeat
- █ LRR\_8 Repeat
- █ Pkinase
- █ Pkinase\_Tyr
- █ other Domain

# G.ba RLK-Pelle\_LRR-XII-1 domain diagram (part 3)

GOBAR\_DD01401  
 GOBAR\_DD01159  
 GOBAR\_DD01141  
 GOBAR\_AA40712  
 GOBAR\_AA40711  
 GOBAR\_AA40710  
 GOBAR\_AA40708  
 GOBAR\_AA40653  
 GOBAR\_AA40652  
 GOBAR\_AA40648  
 GOBAR\_AA40301  
 GOBAR\_AA37964  
 GOBAR\_AA36264  
 GOBAR\_AA36263  
 GOBAR\_AA36262  
 GOBAR\_AA36259  
 GOBAR\_AA35311  
 GOBAR\_AA34940  
 GOBAR\_AA32525  
 GOBAR\_AA32488

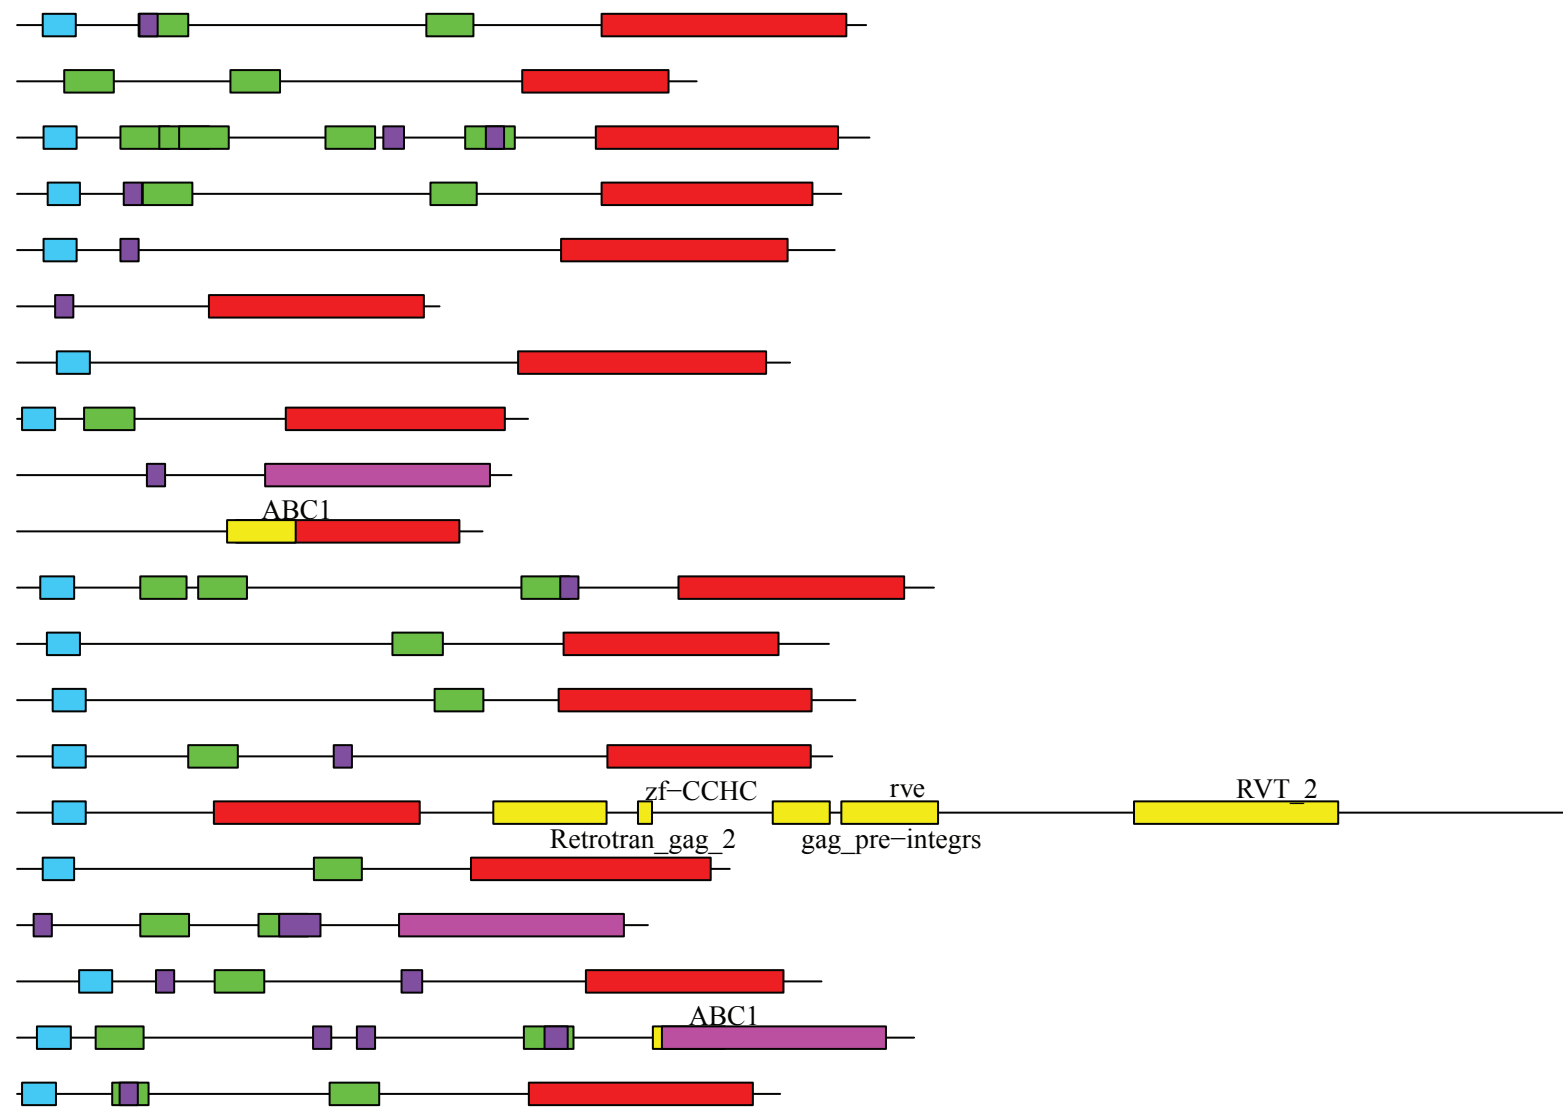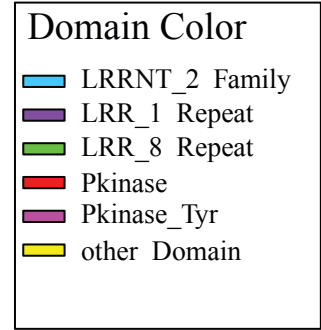

-500                      0                      500                      1000                      1500                      2000



### G.ba RLK-Pelle\_LRR-XII-1 domain diagram (part 4)

GOBAR\_DD16061  
 GOBAR\_DD14277  
 GOBAR\_DD13798  
 GOBAR\_DD13791  
 GOBAR\_DD13790  
 GOBAR\_DD13788  
 GOBAR\_DD13785  
 GOBAR\_DD13226  
 GOBAR\_DD13225  
 GOBAR\_DD13224  
 GOBAR\_DD13223  
 GOBAR\_DD13219  
 GOBAR\_DD13217  
 GOBAR\_DD10689  
 GOBAR\_DD08115  
 GOBAR\_DD08114  
 GOBAR\_DD06552  
 GOBAR\_DD06238  
 GOBAR\_DD06059  
 GOBAR\_DD04536

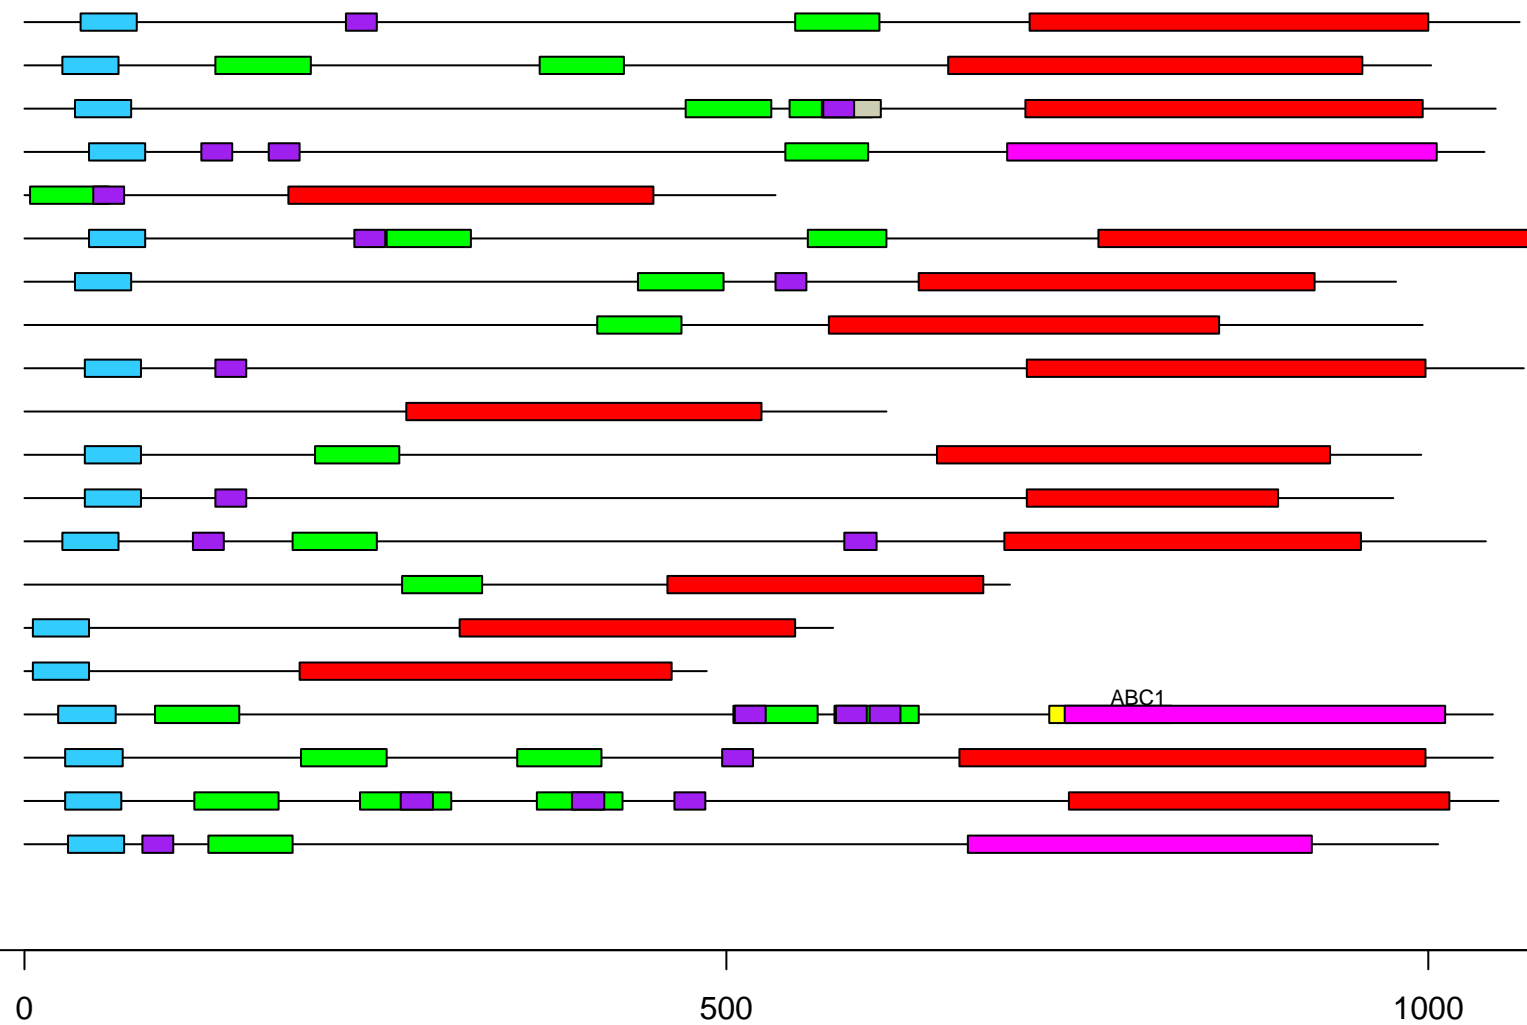

**Domain Color**

- LRRNT\_2 Family
- LRR\_1 Repeat
- LRR\_4
- LRR\_8 Repeat
- Pkinase
- Pkinase\_Tyr
- other Domain

ABC1

0 500 1000 1500

### G.ba RLK-Pelle\_LRR-XII-1 domain diagram (part 5)

GOBAR\_DD24038  
 GOBAR\_DD24037  
 GOBAR\_DD24035  
 GOBAR\_DD23406  
 GOBAR\_DD23068  
 GOBAR\_DD23067  
 GOBAR\_DD23066  
 GOBAR\_DD23064  
 GOBAR\_DD23061  
 GOBAR\_DD22895  
 GOBAR\_DD21612  
 GOBAR\_DD21606  
 GOBAR\_DD21228  
 GOBAR\_DD20399  
 GOBAR\_DD20172  
 GOBAR\_DD20171  
 GOBAR\_DD18286  
 GOBAR\_DD18283  
 GOBAR\_DD18273  
 GOBAR\_DD17816

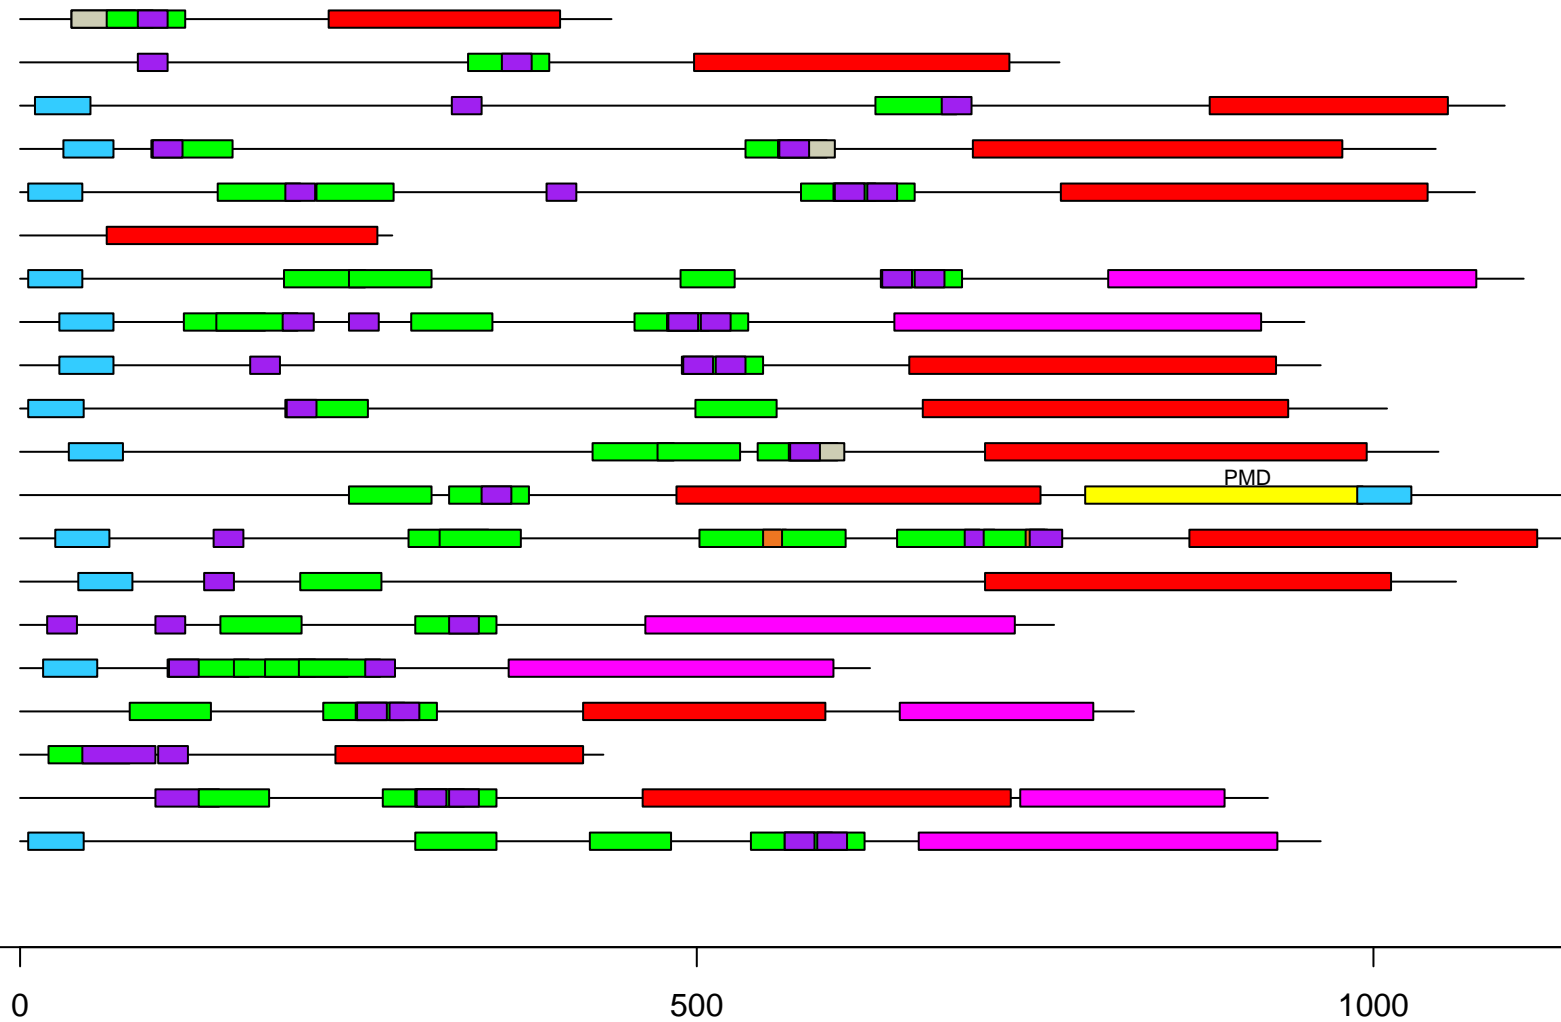

**Domain Color**

- █ LRRNT\_2 Family
- █ LRR\_1 Repeat
- █ LRR\_4
- █ LRR\_6
- █ LRR\_8 Repeat
- █ Pkinase
- █ Pkinase\_Tyr
- █ other Domain

### G.ba RLK-Pelle\_LRR-XII-1 domain diagram (part 6)

GOBAR\_DD32622  
 GOBAR\_DD32621  
 GOBAR\_DD32620  
 GOBAR\_DD32619  
 GOBAR\_DD32616  
 GOBAR\_DD30453  
 GOBAR\_DD30452  
 GOBAR\_DD30211  
 GOBAR\_DD29843  
 GOBAR\_DD29328  
 GOBAR\_DD29224  
 GOBAR\_DD29204  
 GOBAR\_DD26790  
 GOBAR\_DD25564  
 GOBAR\_DD25391  
 GOBAR\_DD25388  
 GOBAR\_DD24596  
 GOBAR\_DD24595  
 GOBAR\_DD24044  
 GOBAR\_DD24040

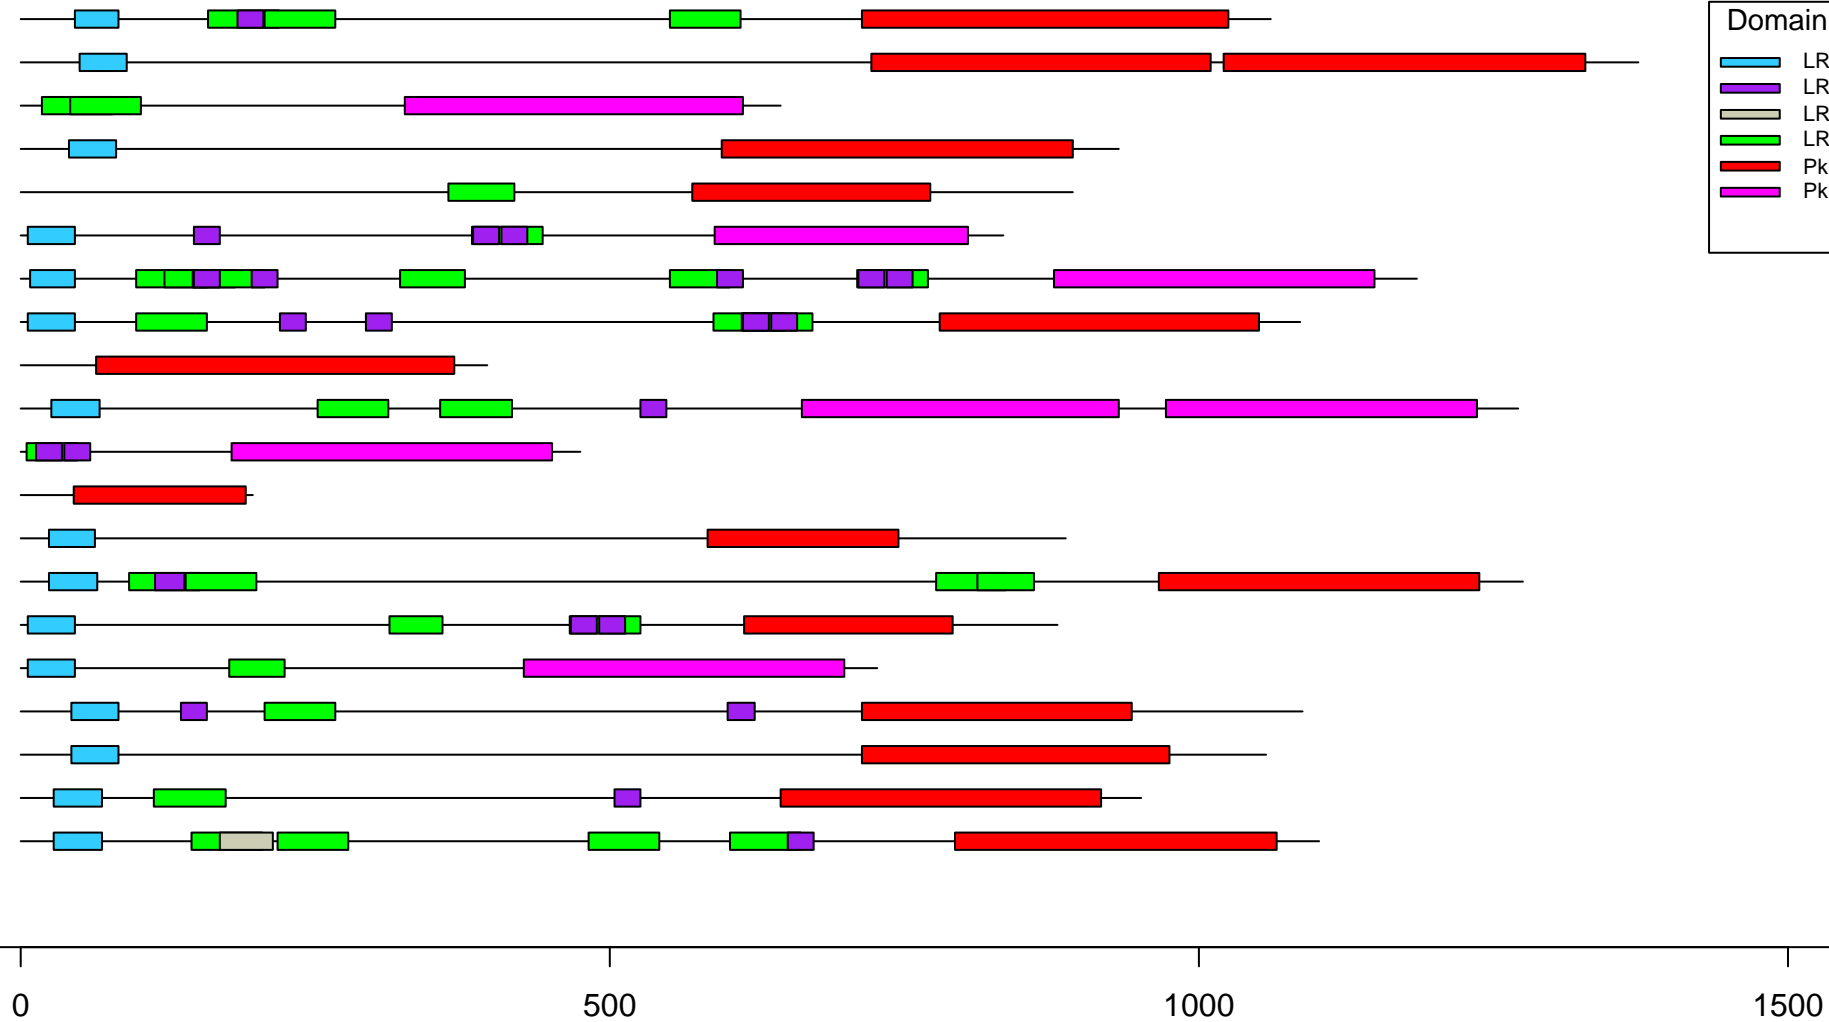

### G.ba RLK-Pelle\_LRR-XII-1 domain diagram (part 7)

GOBAR\_DD37202

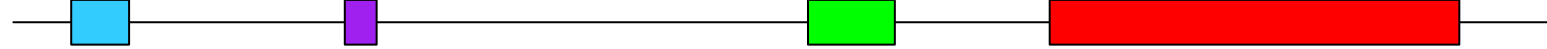

GOBAR\_DD36796

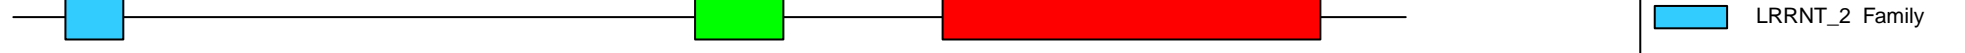

GOBAR\_DD36620

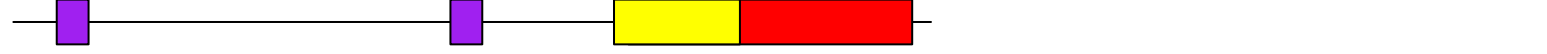

GOBAR\_DD35196

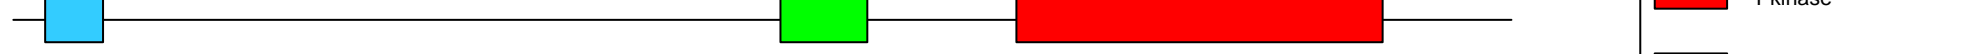

GOBAR\_DD34040

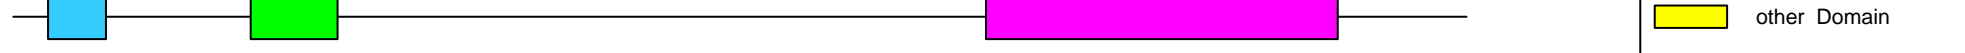

GOBAR\_DD33183

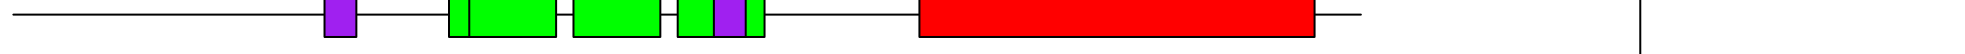

GOBAR\_DD32633

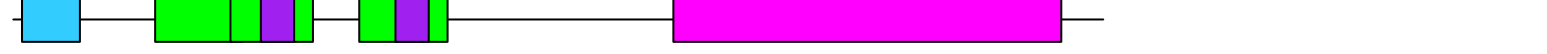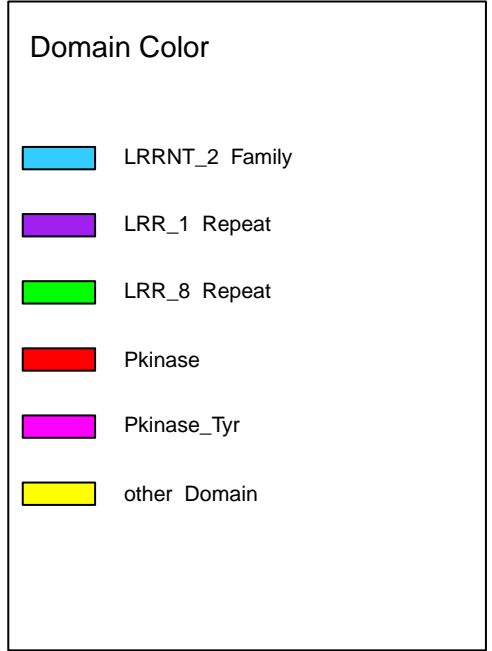

0

500

1000

# G.ba RLK-Pelle\_LRR-XIIIa domain diagram (all)

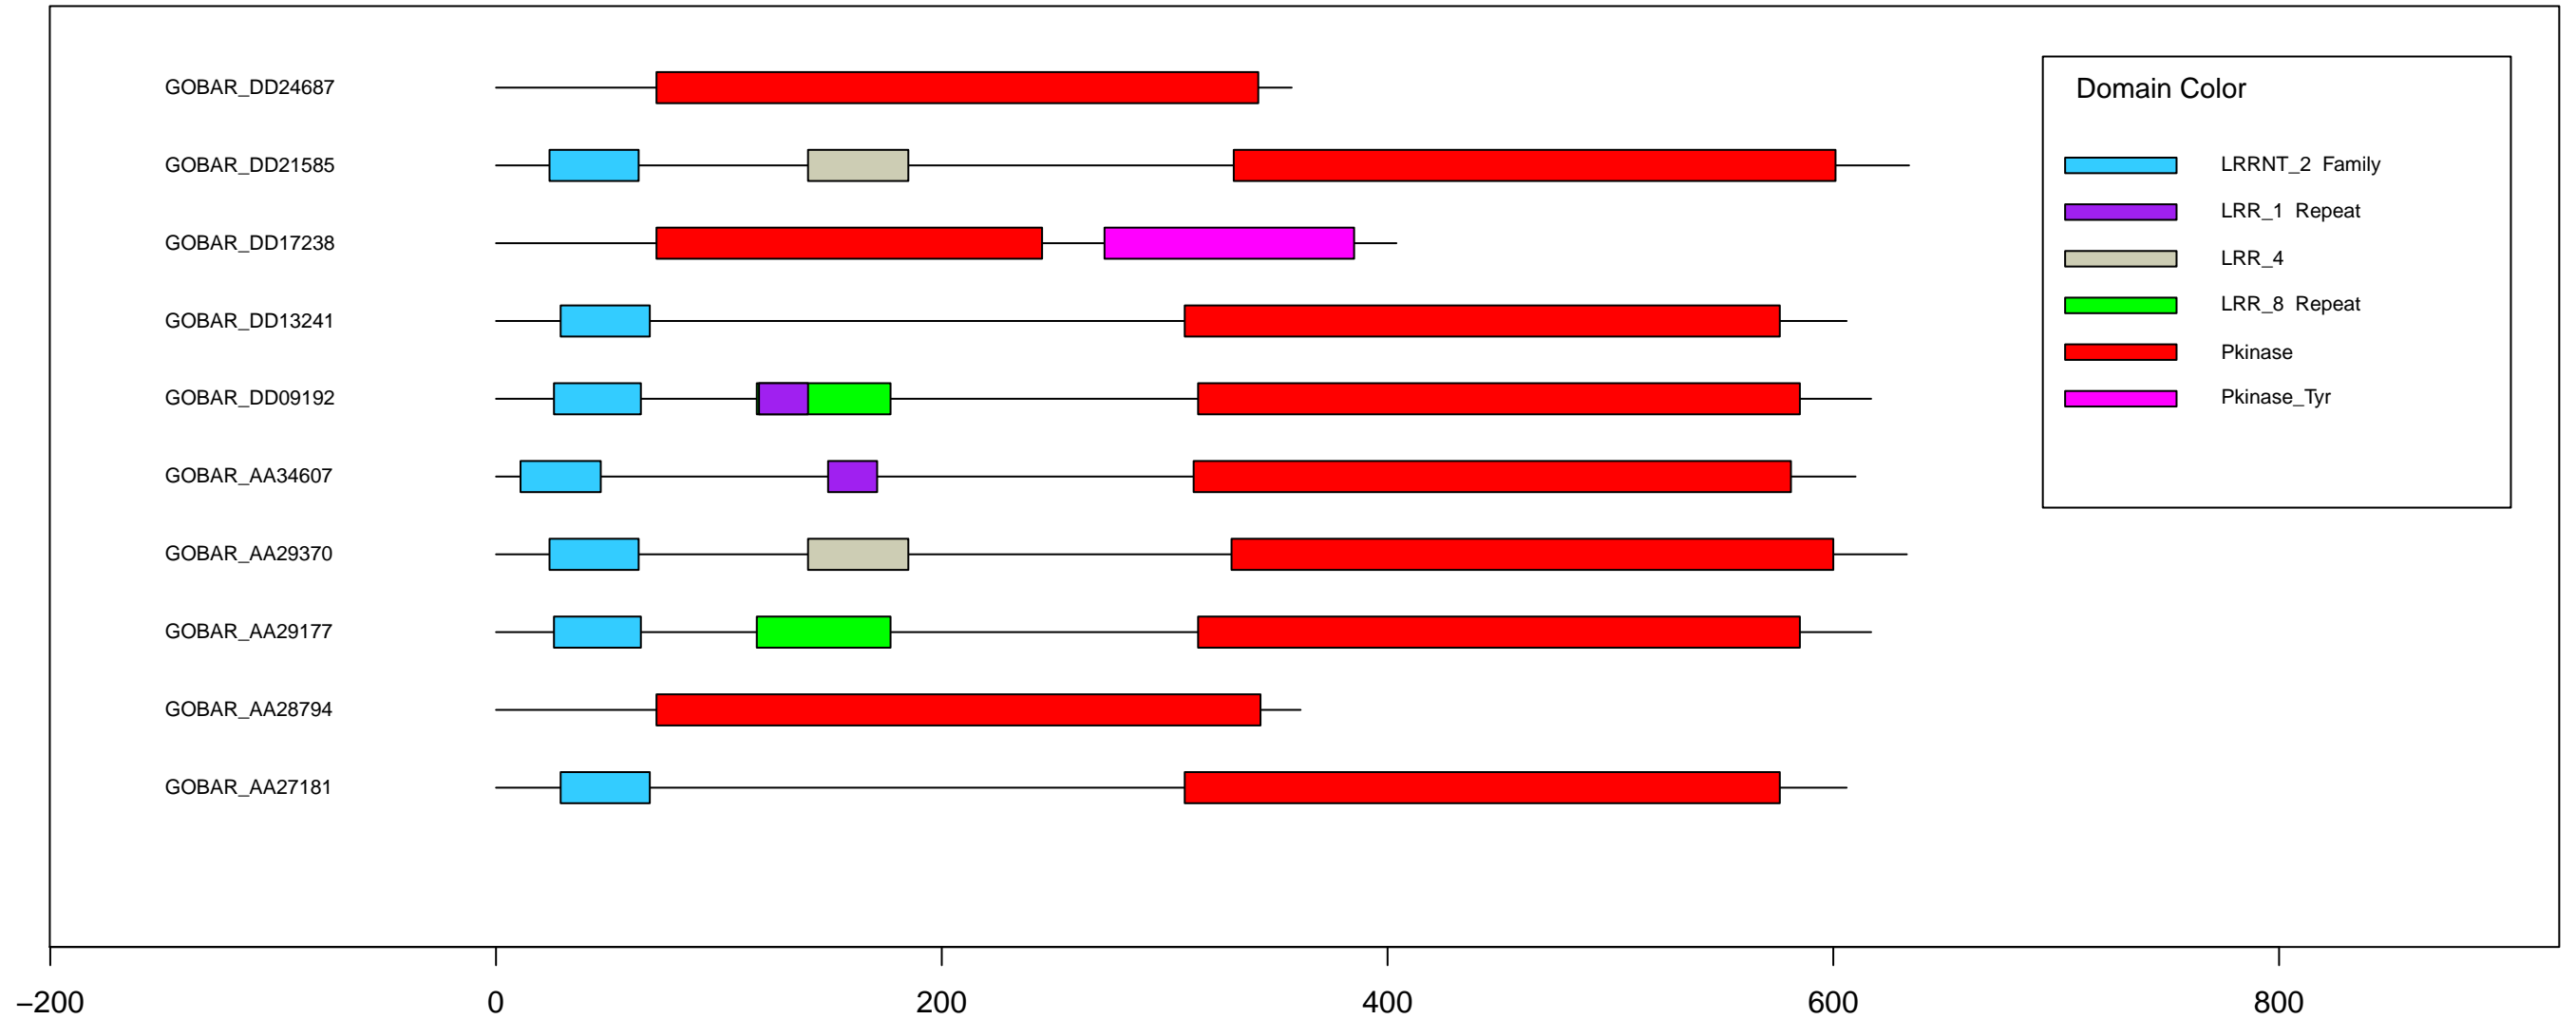

### G.ba RLK-Pelle\_LRR-XIIIb domain diagram (all)

GOBAR\_DD25858

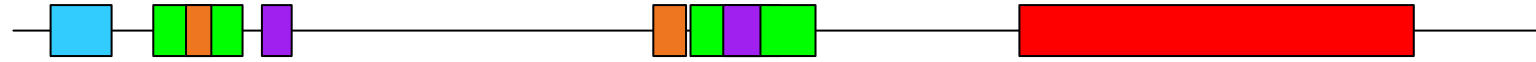

GOBAR\_DD20603

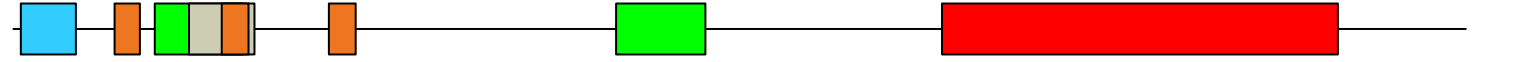

GOBAR\_DD04068

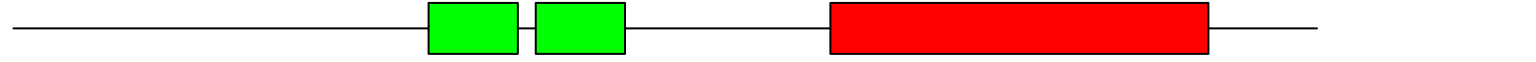

GOBAR\_AA36304

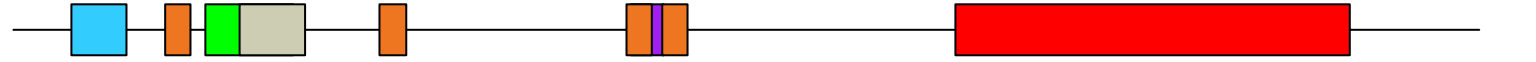

GOBAR\_AA18091

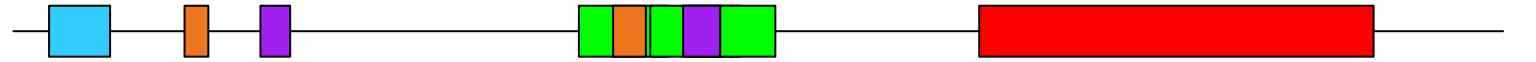

GOBAR\_AA11772

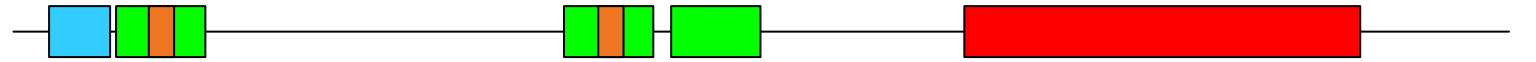

Domain Color

LRRNT\_2 Family

LRR\_1 Repeat

LRR\_4

LRR\_6

LRR\_8 Repeat

Pkinase

### G.ba RLK-Pelle\_LRR-XIV domain diagram (all)

GOBAR\_DD24411

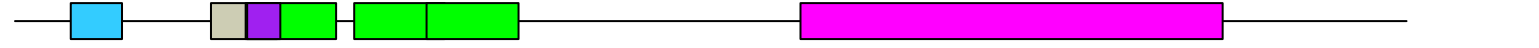

GOBAR\_DD19141

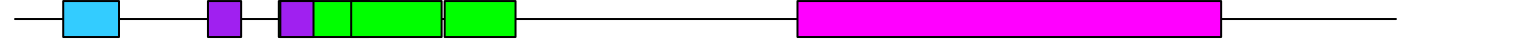

GOBAR\_DD03868

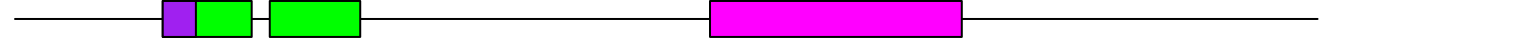

GOBAR\_DD00263

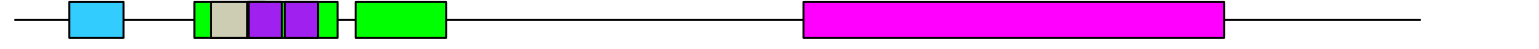

GOBAR\_AA29303

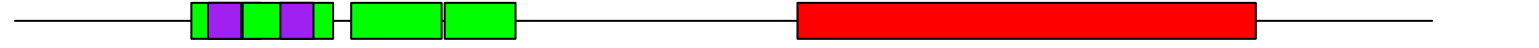

GOBAR\_AA25693

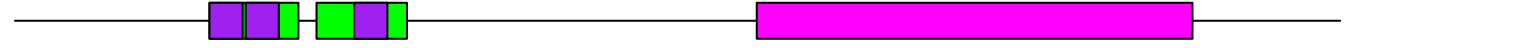

GOBAR\_AA17358

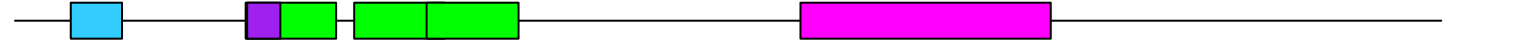

GOBAR\_AA02674

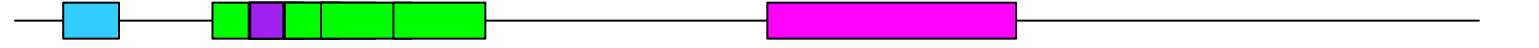

GOBAR\_AA02368

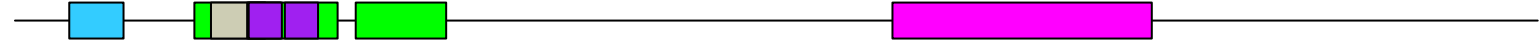

#### Domain Color

- LRRNT\_2 Family
- LRR\_1 Repeat
- LRR\_4
- LRR\_8 Repeat
- Pkinase
- Pkinase\_Tyr

### G.ba RLK-Pelle\_LRR-XV domain diagram (all)

GOBAR\_DD28441

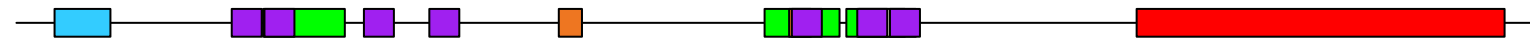

GOBAR\_DD28204

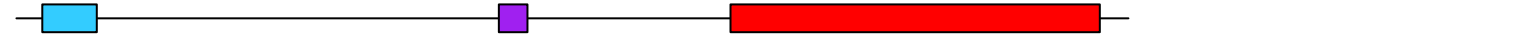

GOBAR\_DD21385

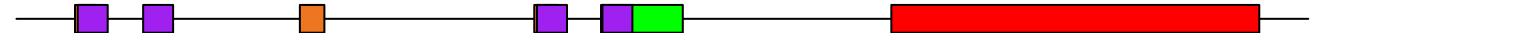

GOBAR\_DD11376

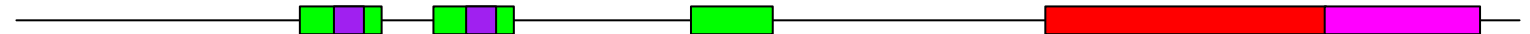

GOBAR\_DD06254

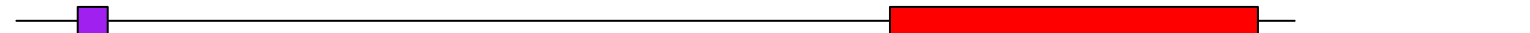

GOBAR\_DD06253

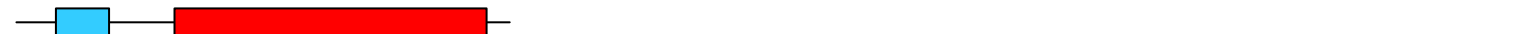

GOBAR\_DD01583

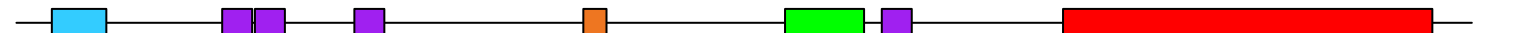

GOBAR\_AA36270

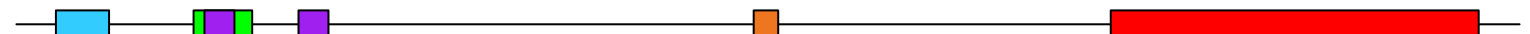

GOBAR\_AA27335

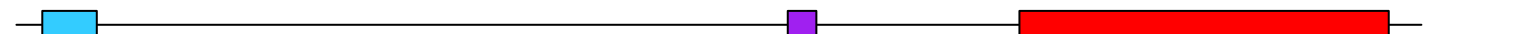

GOBAR\_AA20166

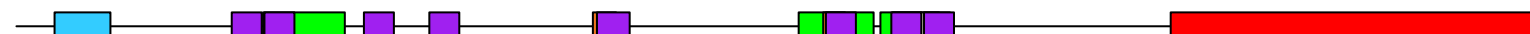

GOBAR\_AA15875

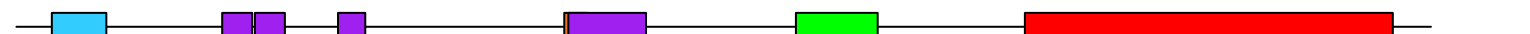

GOBAR\_AA01855

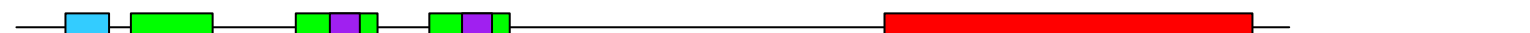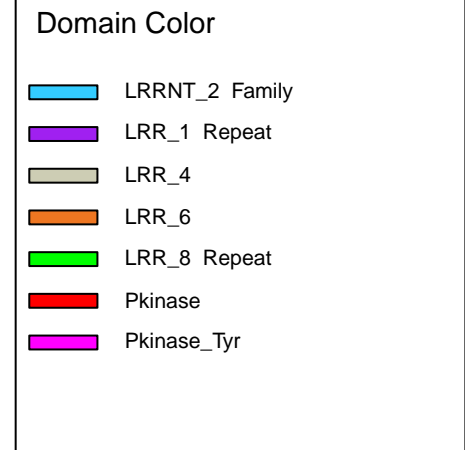

0

500

1000

1500



### G.ba RLK-Pelle\_LysM domain diagram (part 1)

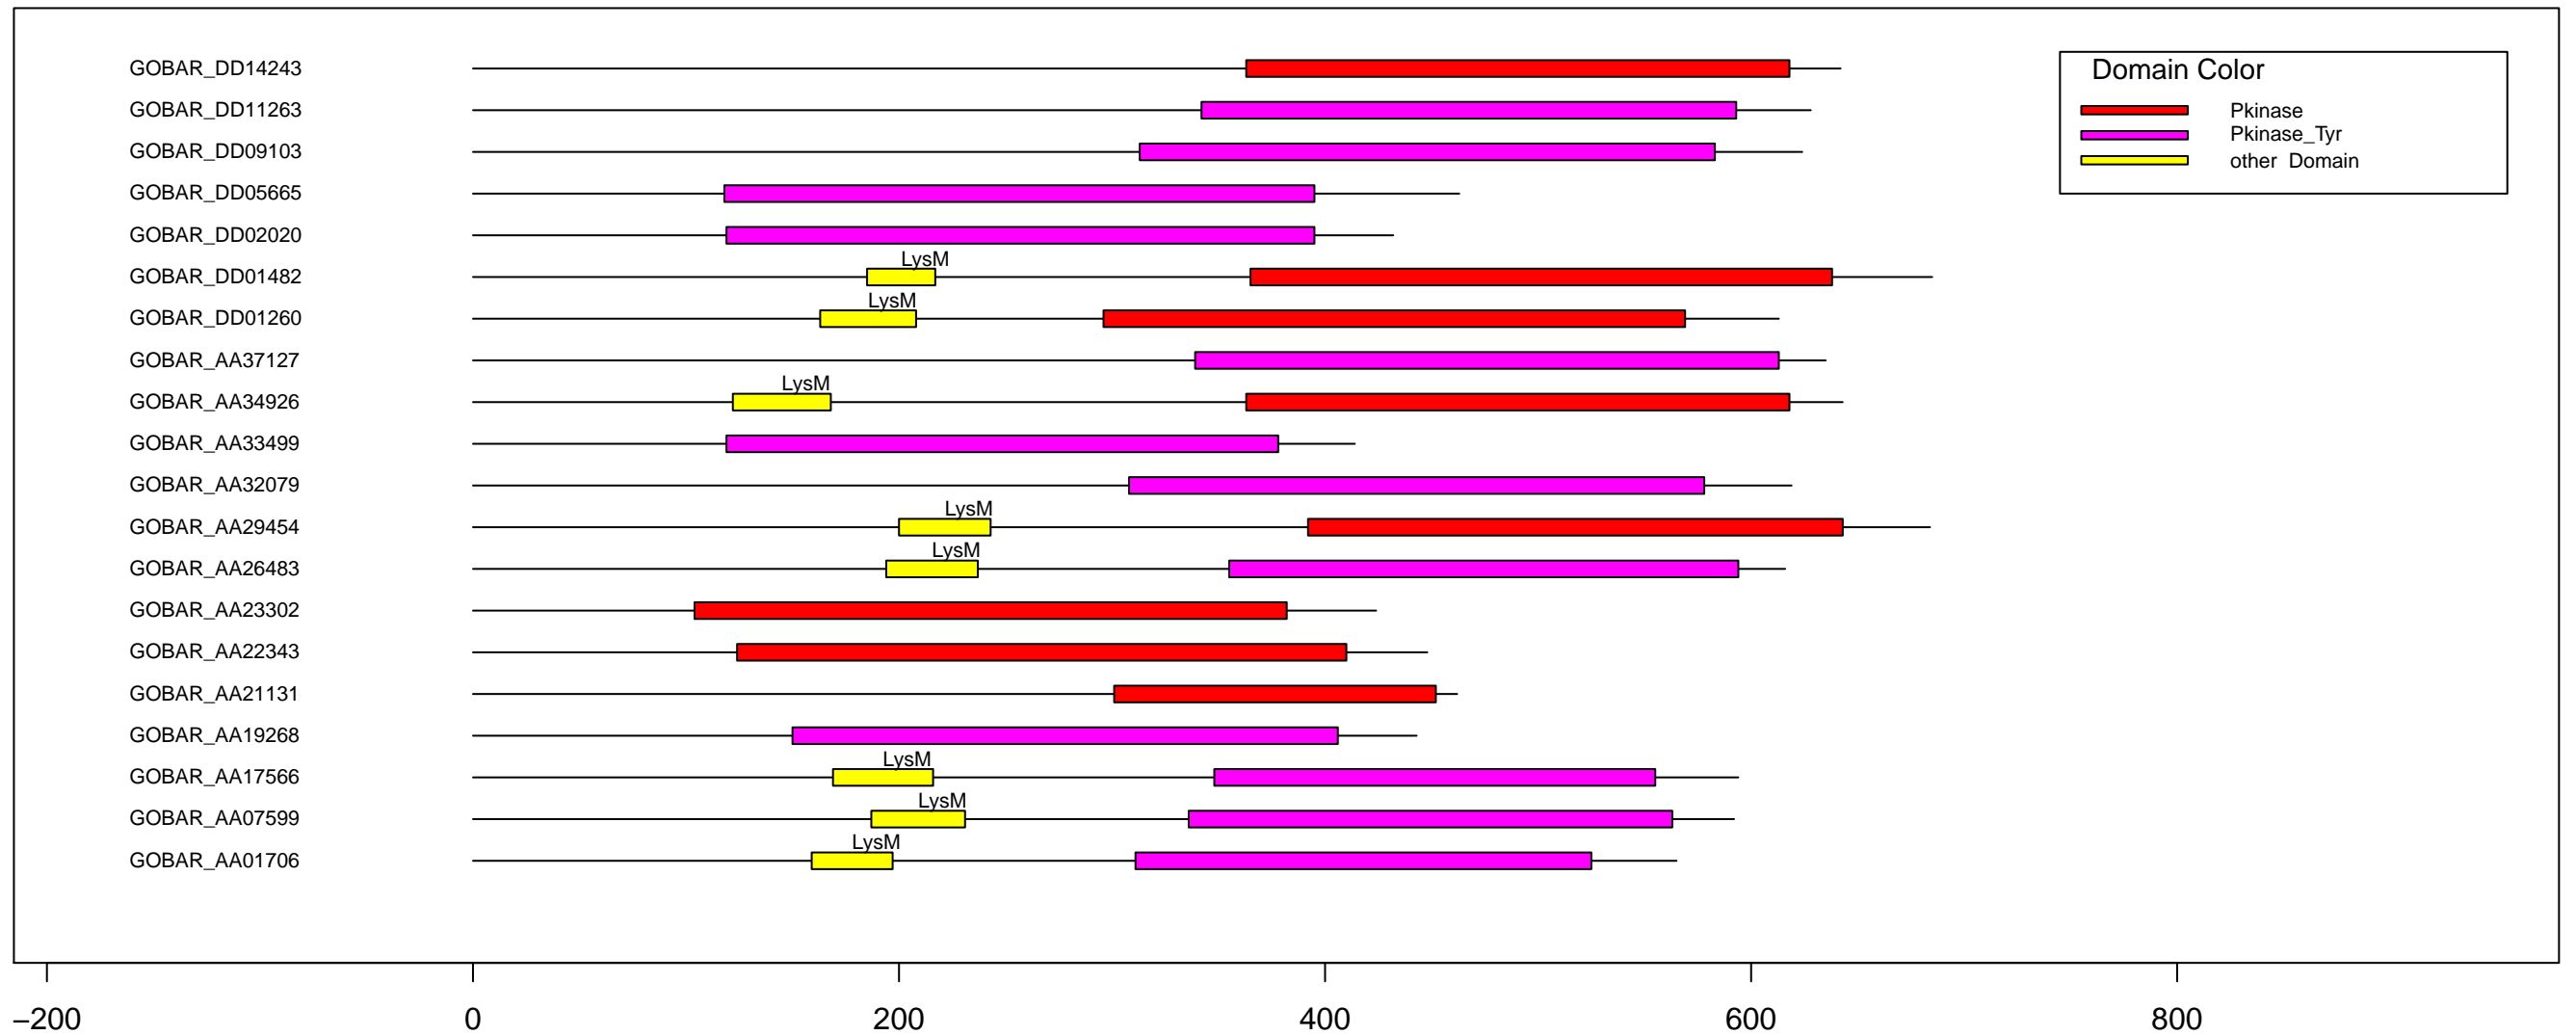

### G.ba RLK-Pelle\_LysM domain diagram (part 2)

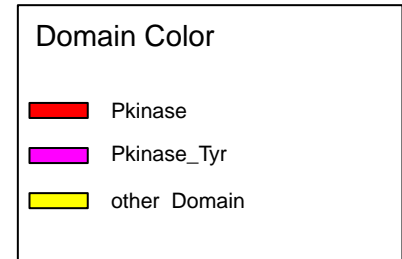

GOBAR\_DD36474

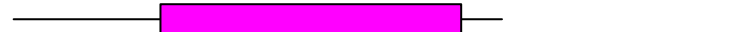

GOBAR\_DD34804

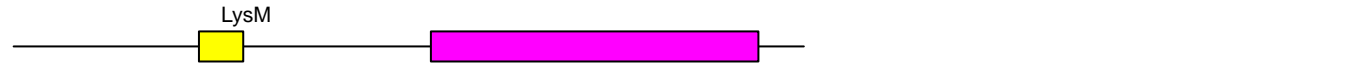

GOBAR\_DD34485

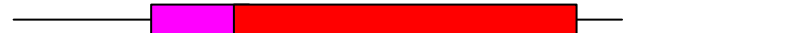

GOBAR\_DD33581

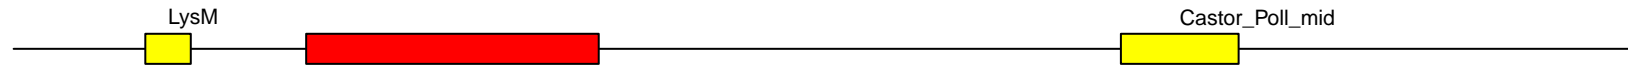

GOBAR\_DD33368

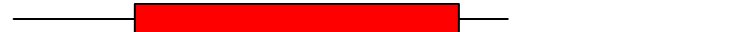

GOBAR\_DD28861

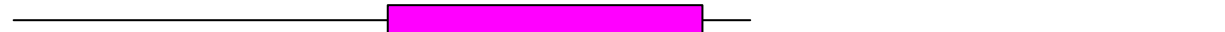

GOBAR\_DD27747

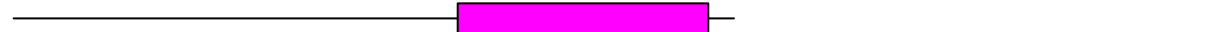

GOBAR\_DD25122

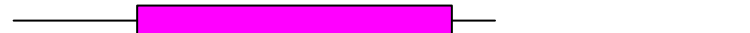

GOBAR\_DD22547

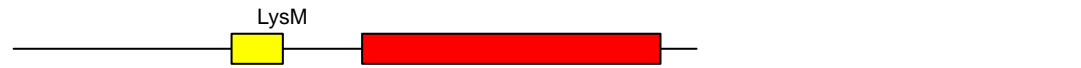

GOBAR\_DD17792

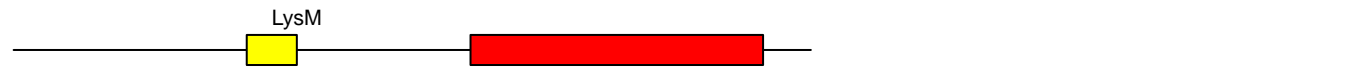

GOBAR\_DD14244

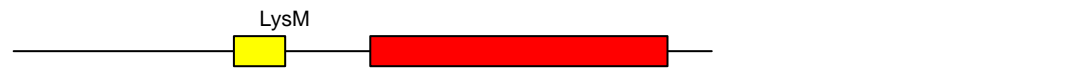

0

500

1000

1500

### G.ba RLK-Pelle\_PERK-1 domain diagram (part 1)

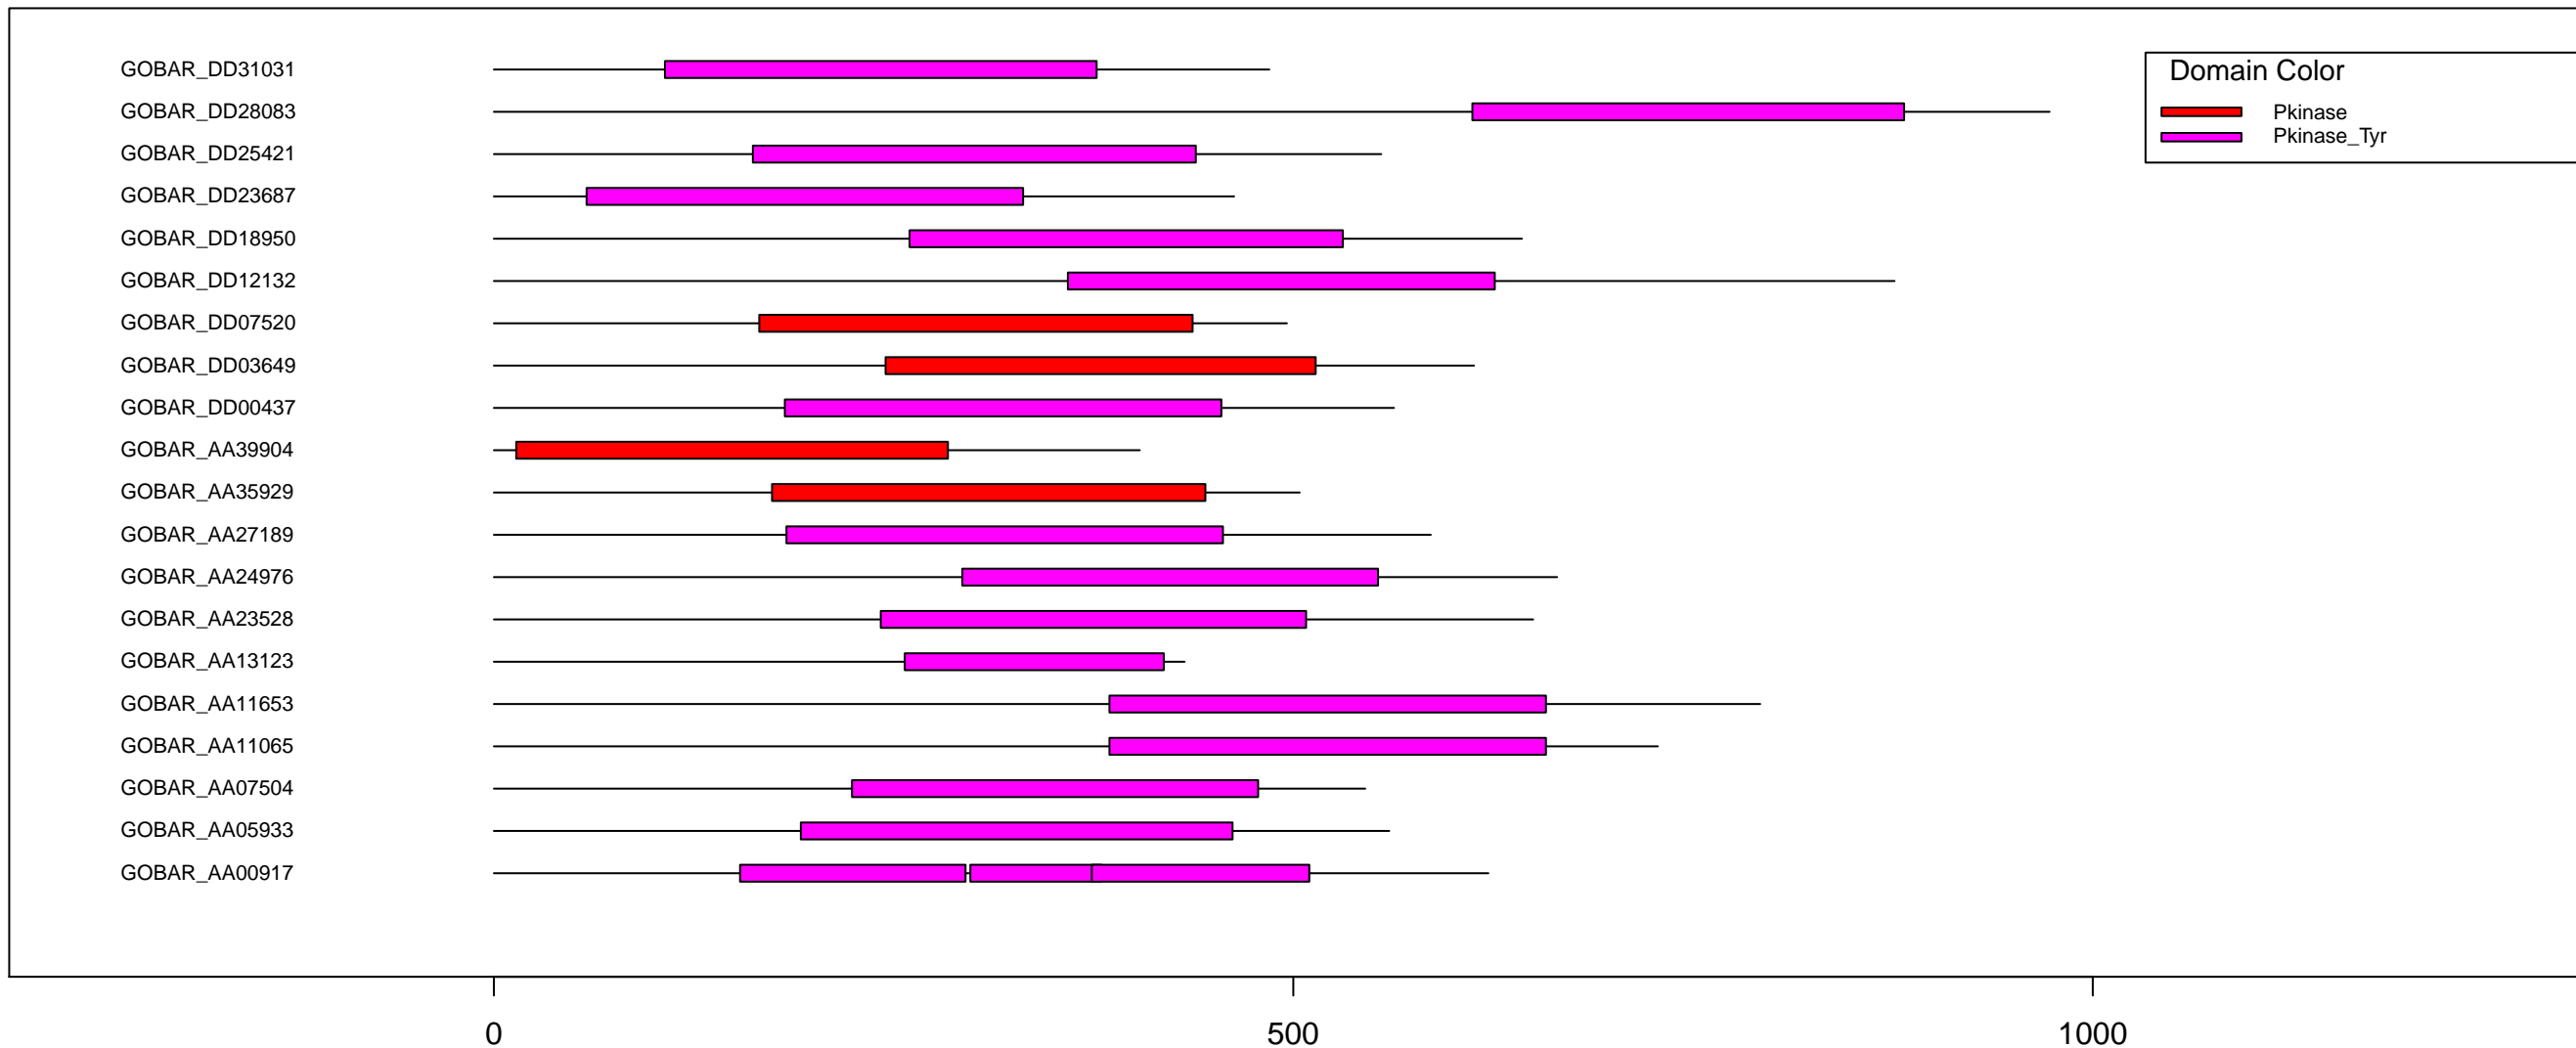

# G.ba RLK-Pelle\_PERK-1 domain diagram (part 2)

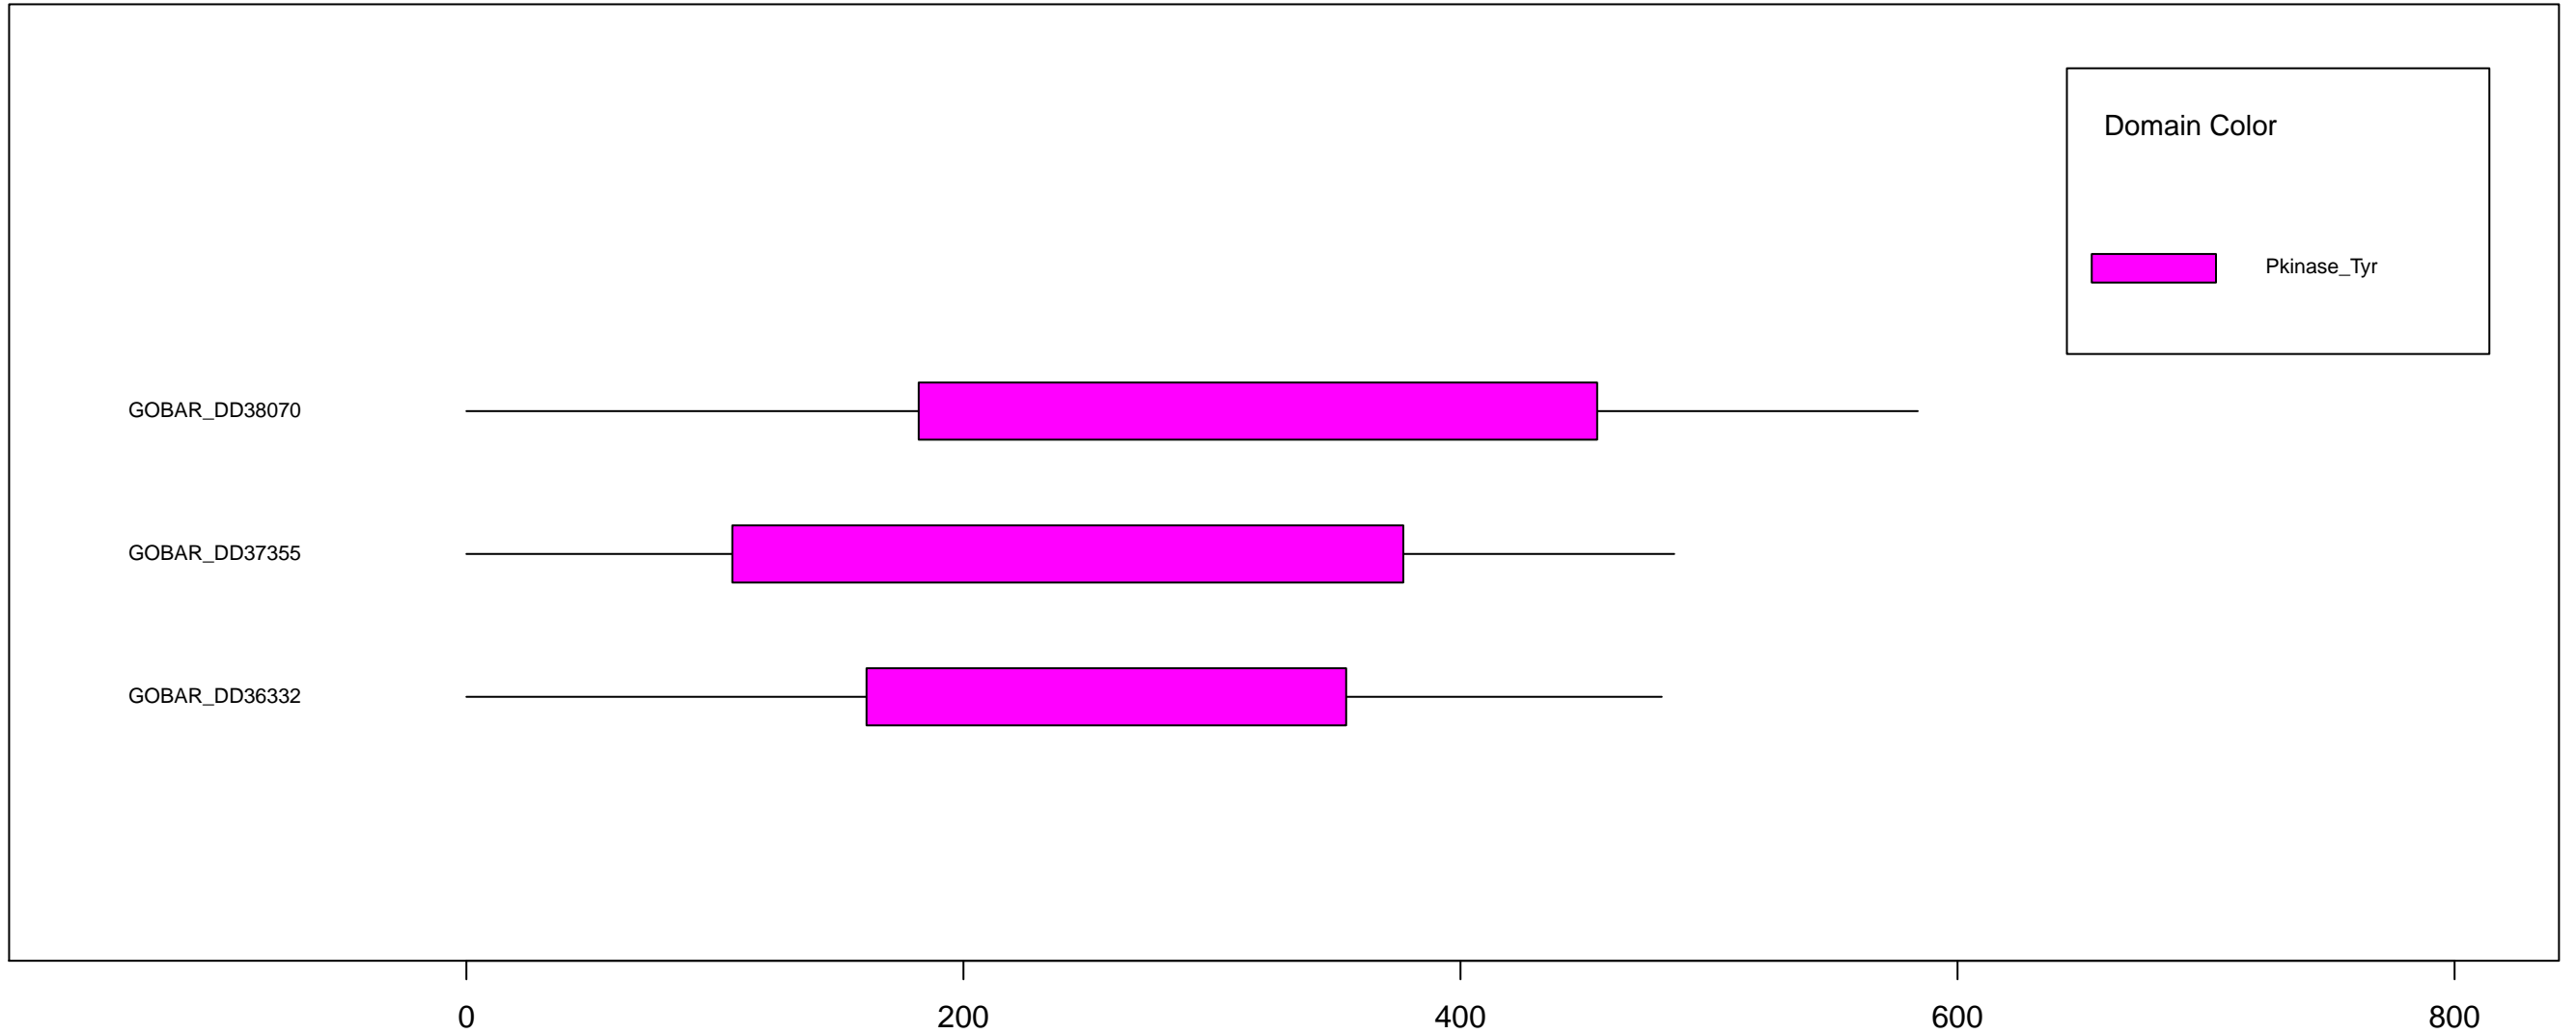

### G.ba RLK-Pelle\_PERK-2 domain diagram (all)

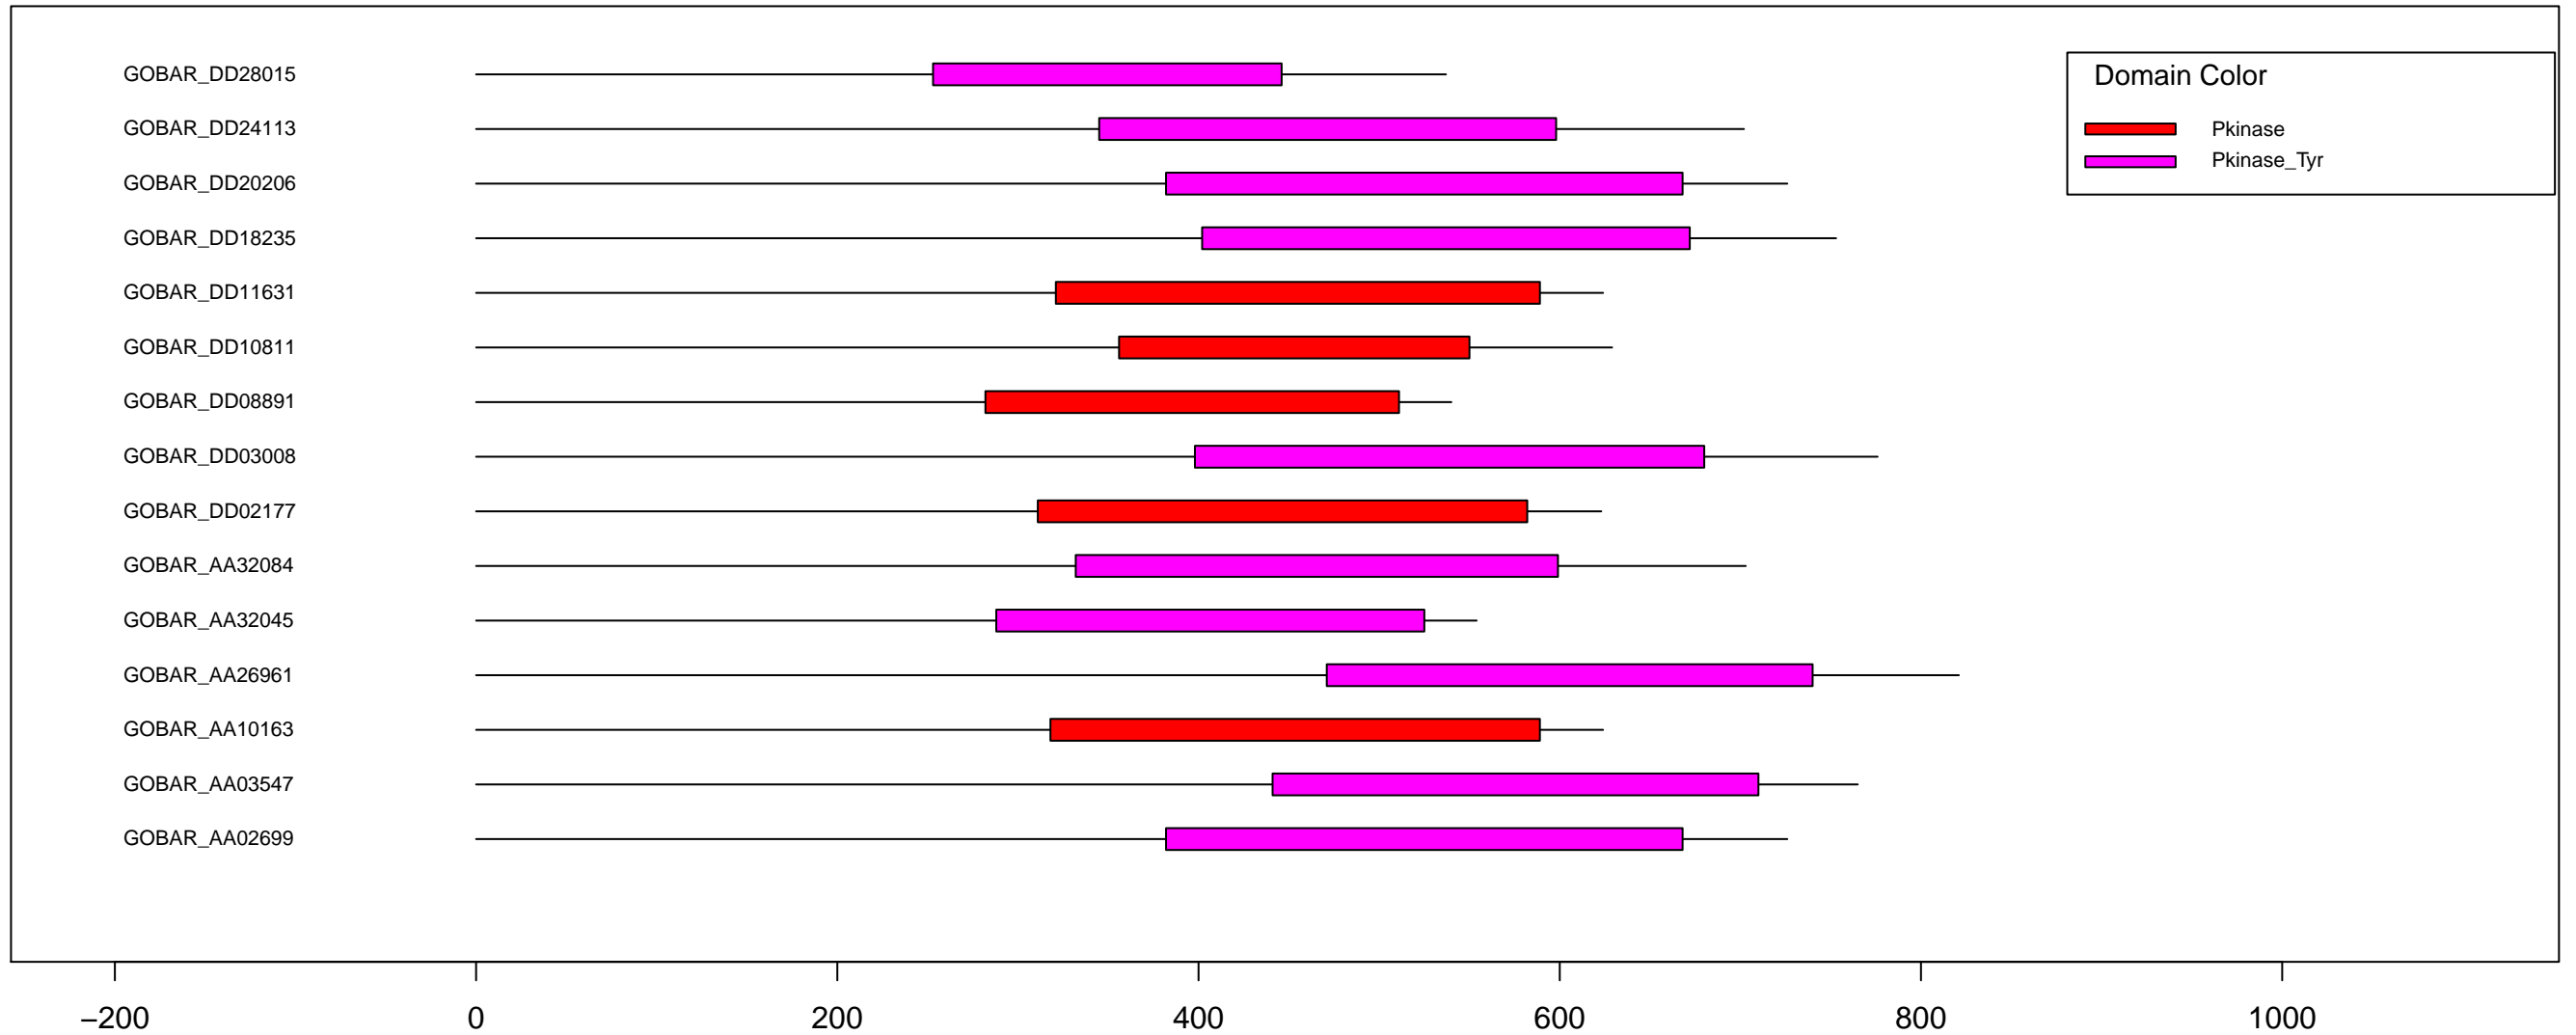

### G.ba RLK-Pelle\_RKF3 domain diagram (all)

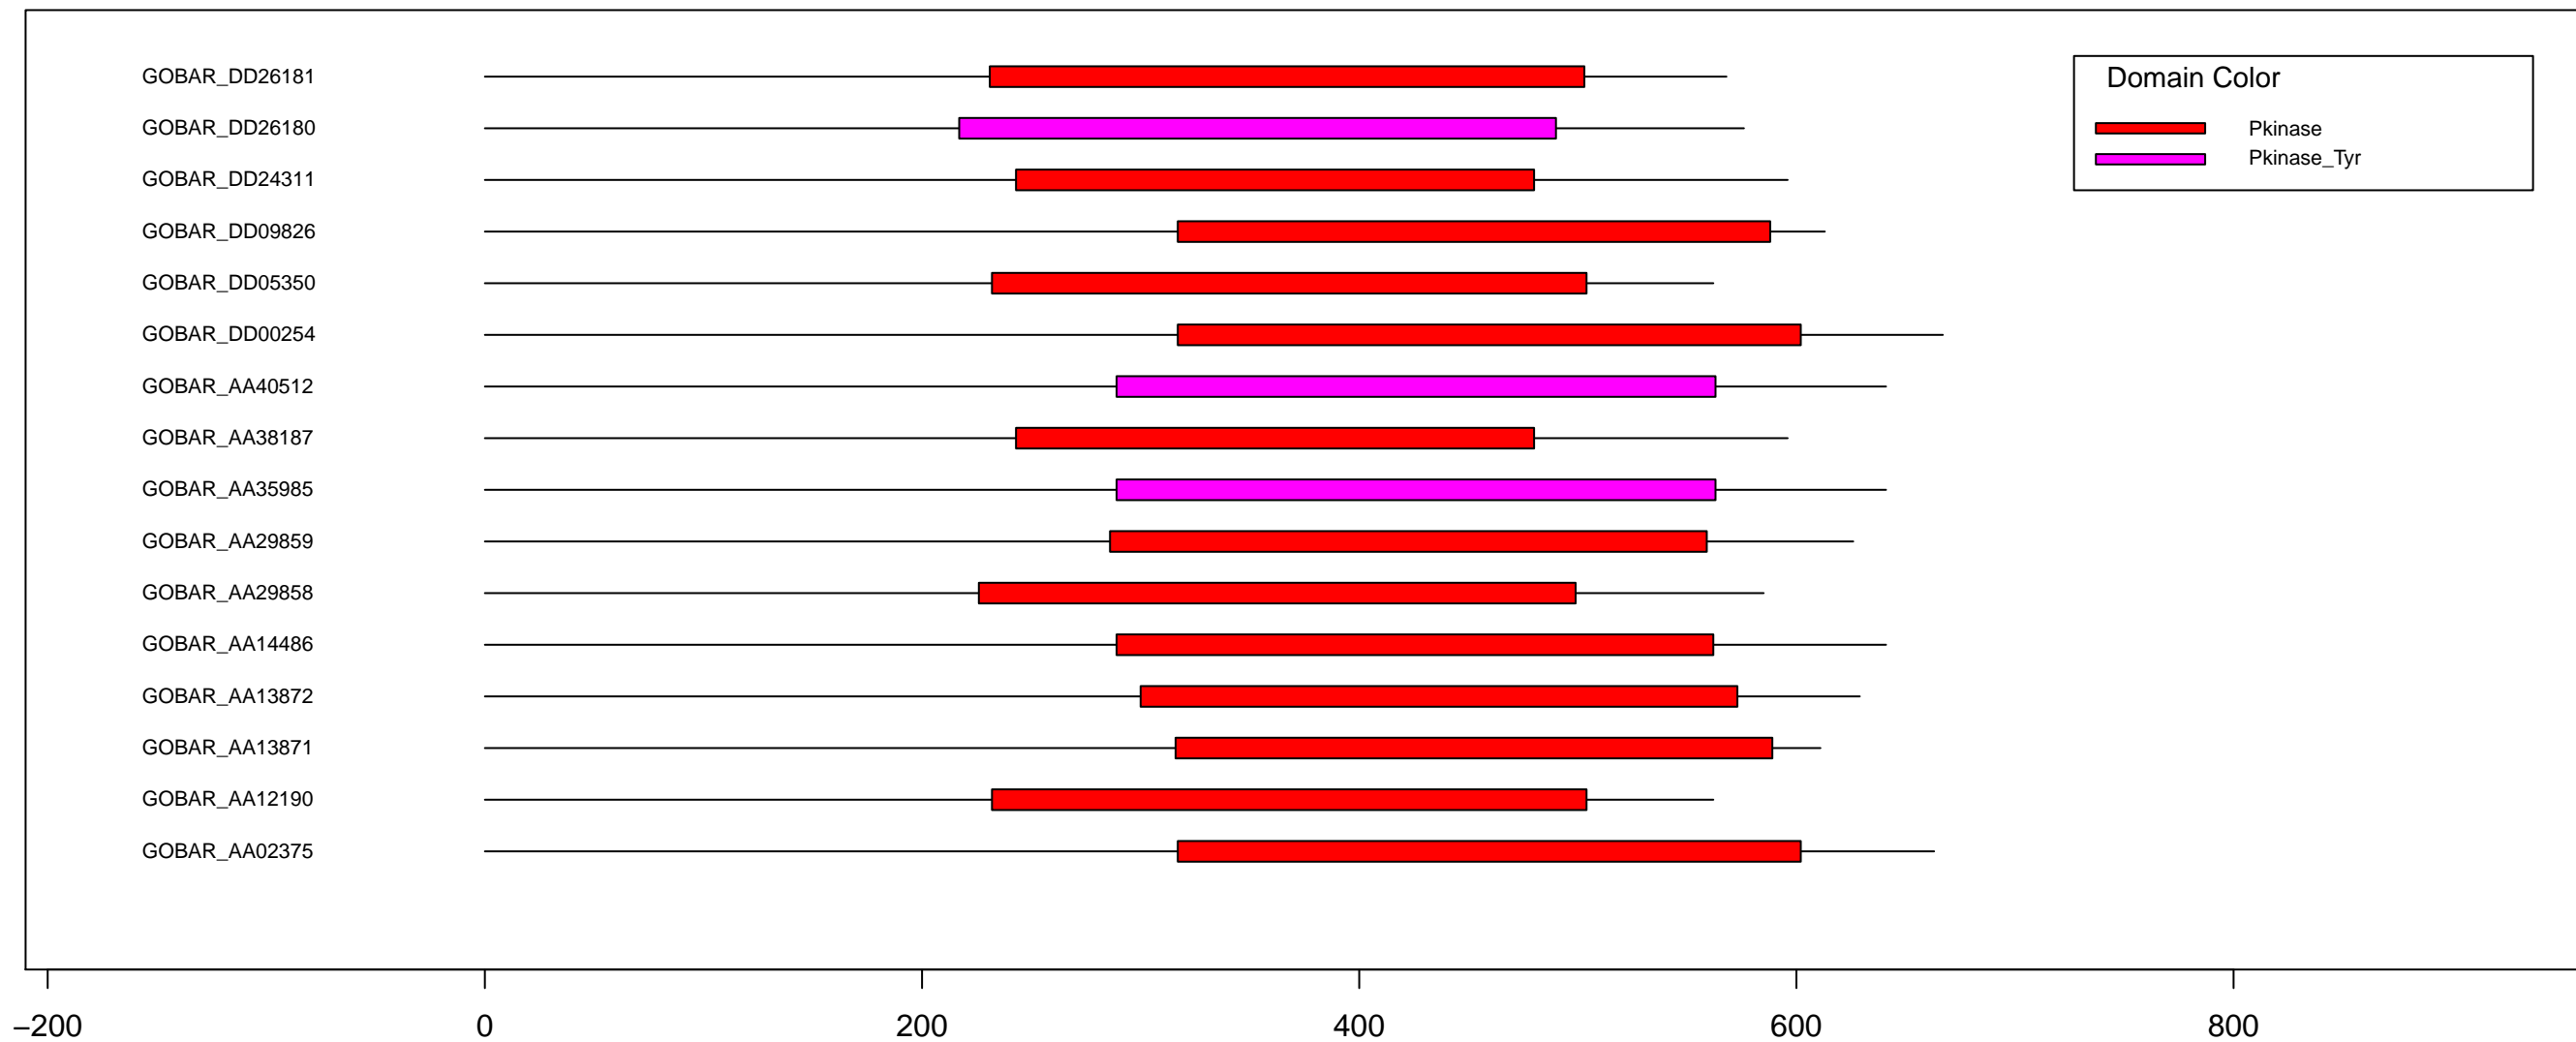

### G.ba RLK-Pelle\_RLCK-II domain diagram (all)

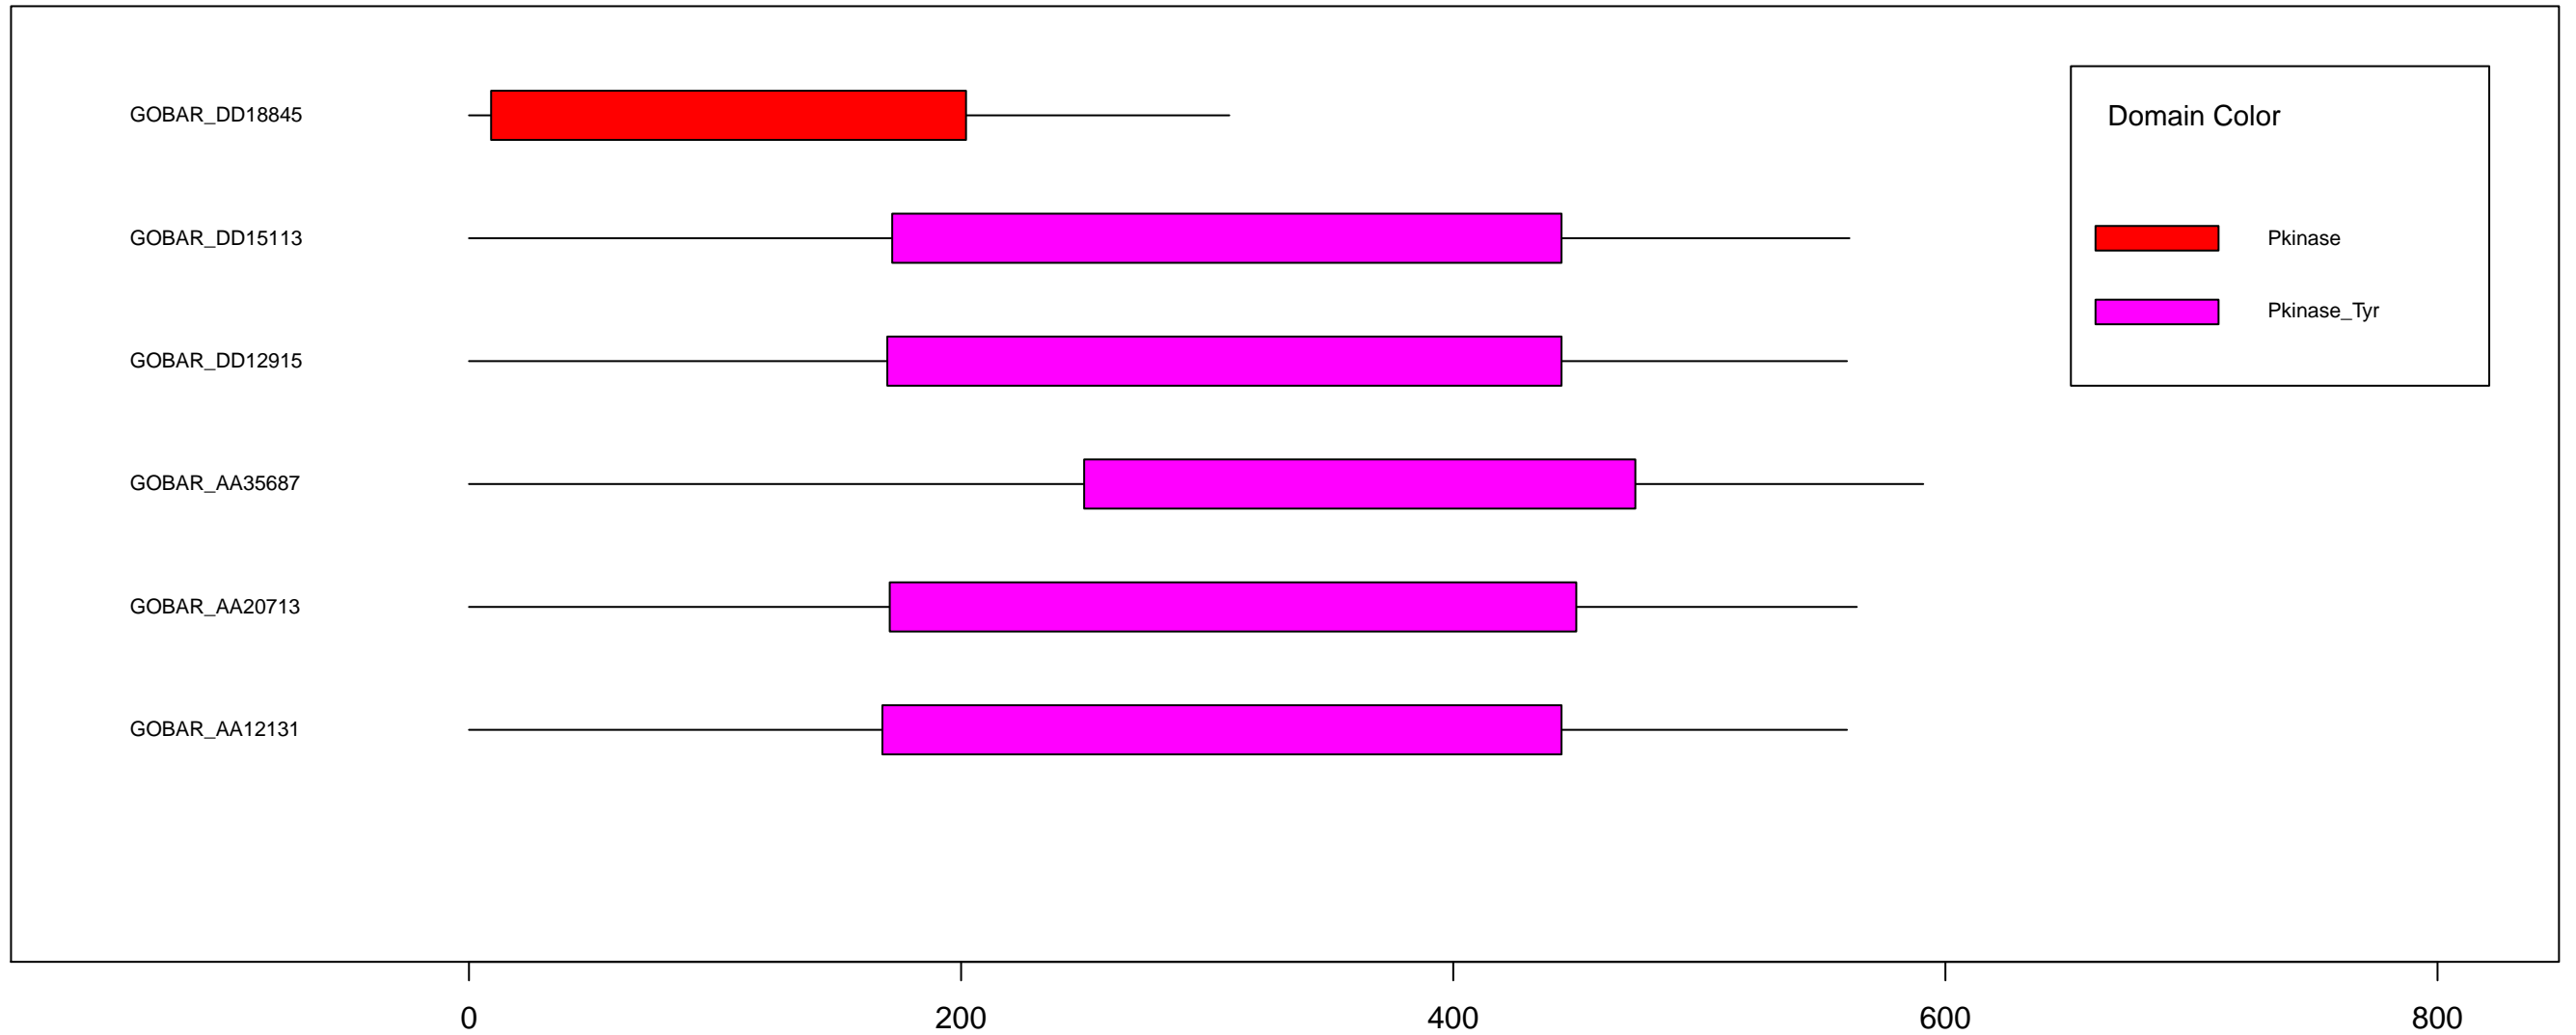

# G.ba RLK-Pelle\_RLCK-IV domain diagram (all)

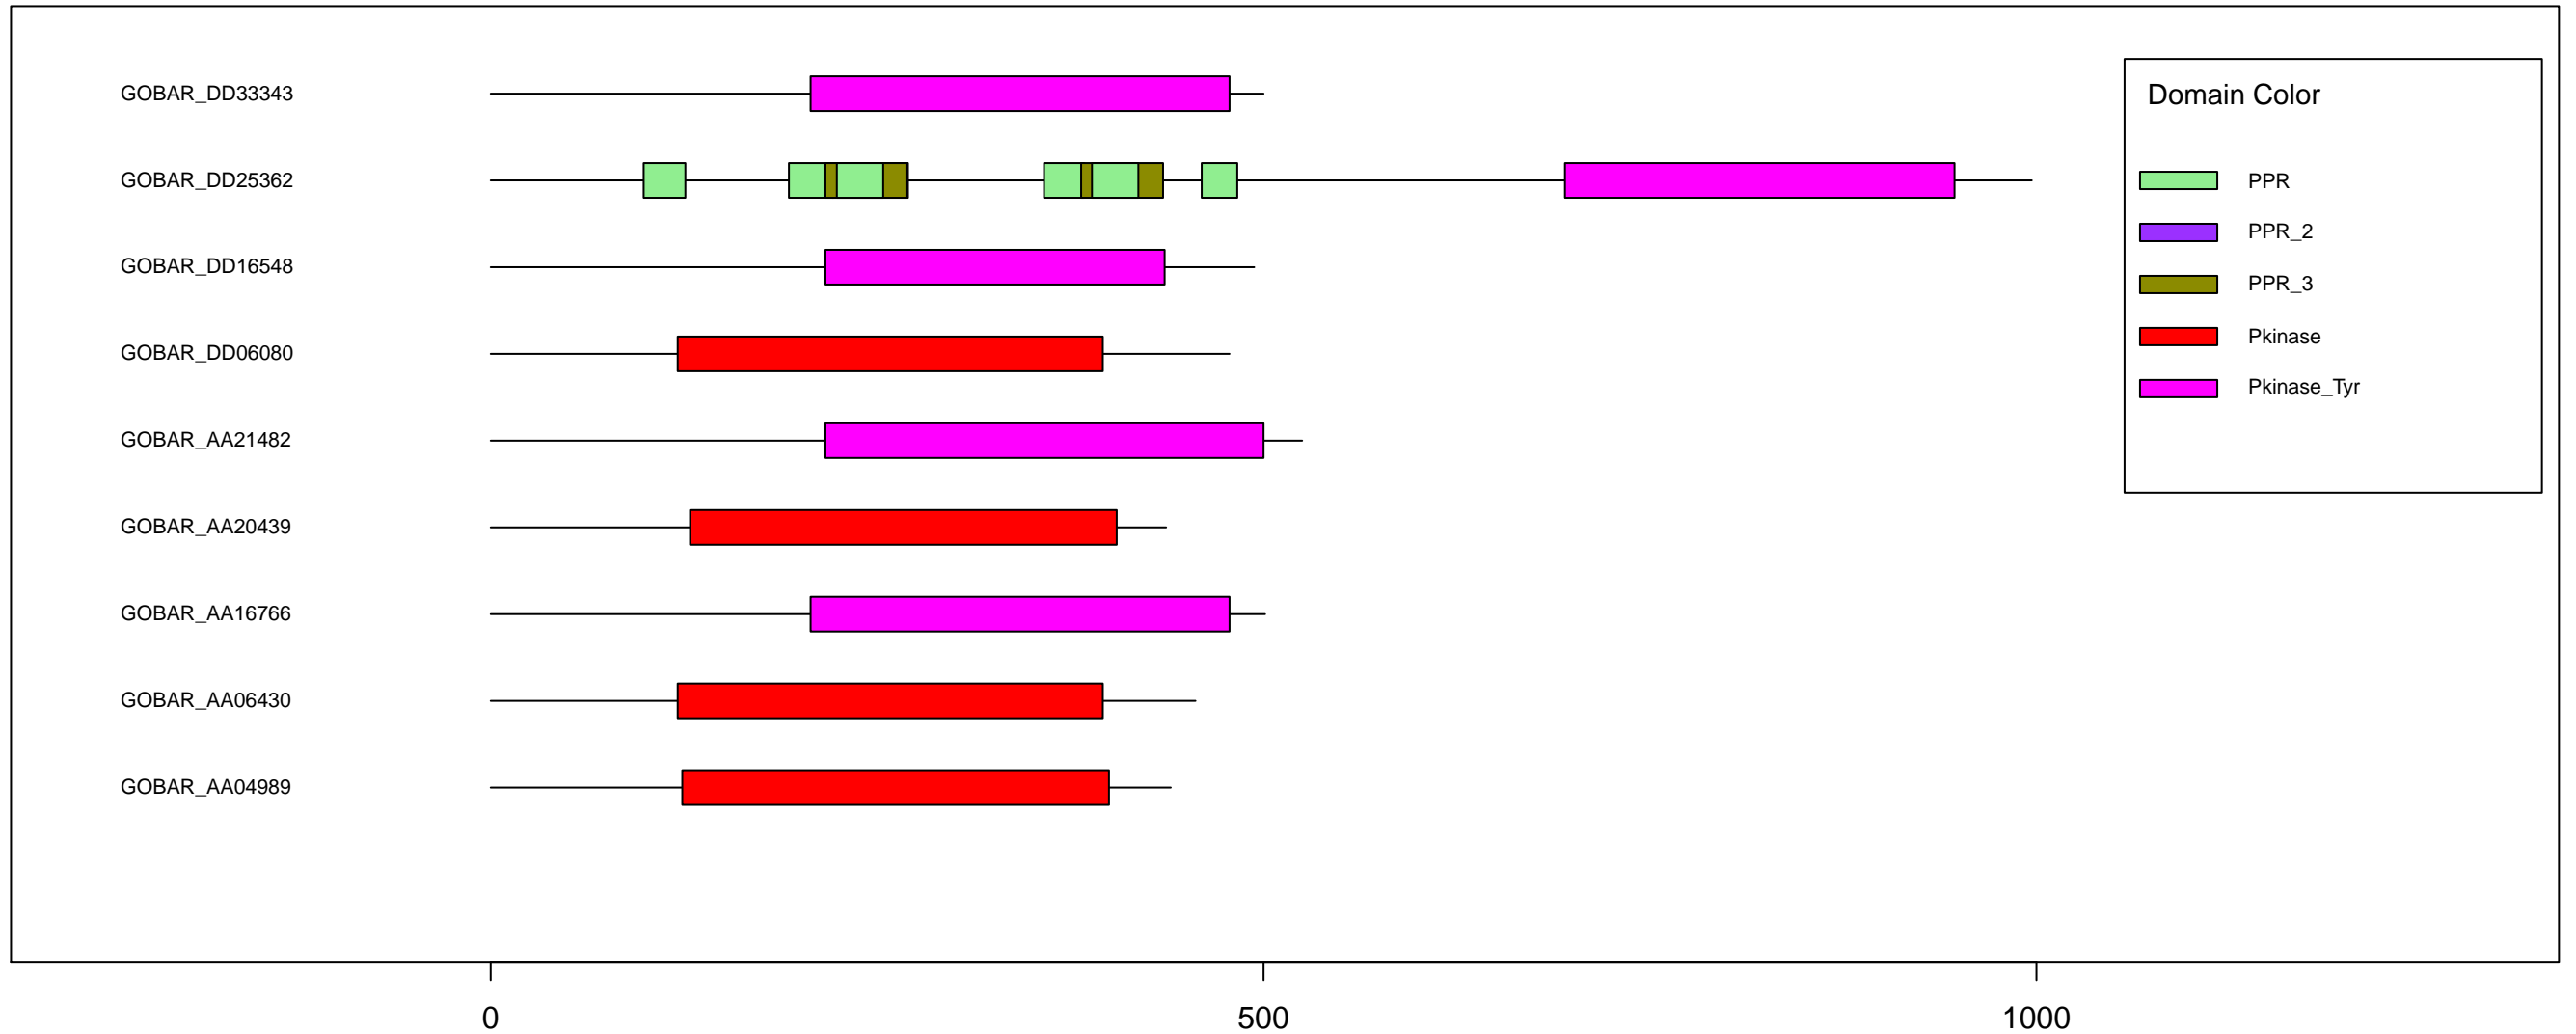



# G.ba RLK-Pelle\_RLCK-IXa domain diagram (all)

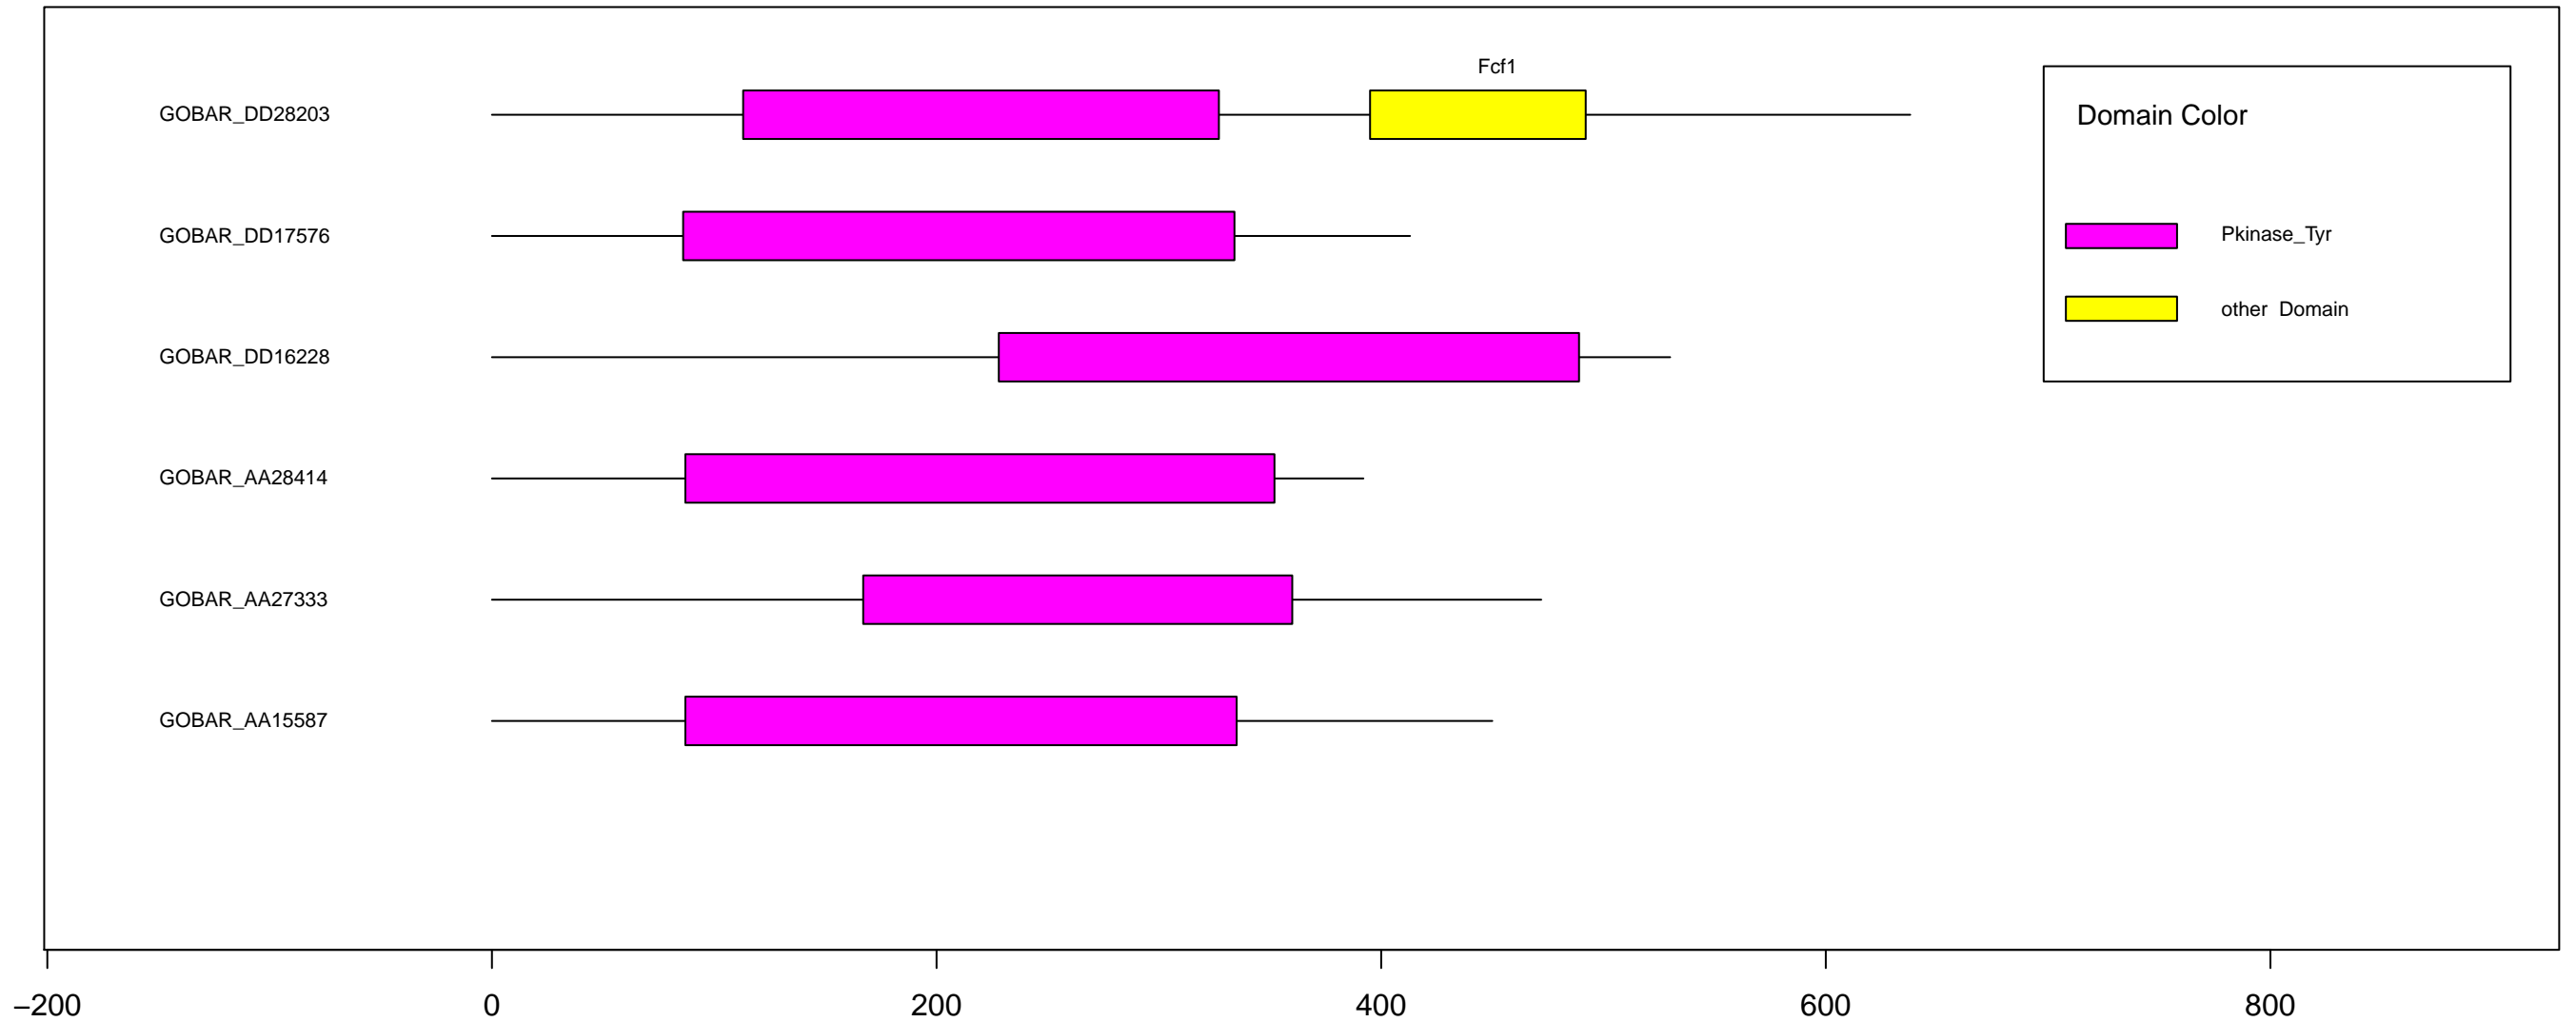

### G.ba RLK-Pelle\_RLCK-IXb domain diagram (part 1)

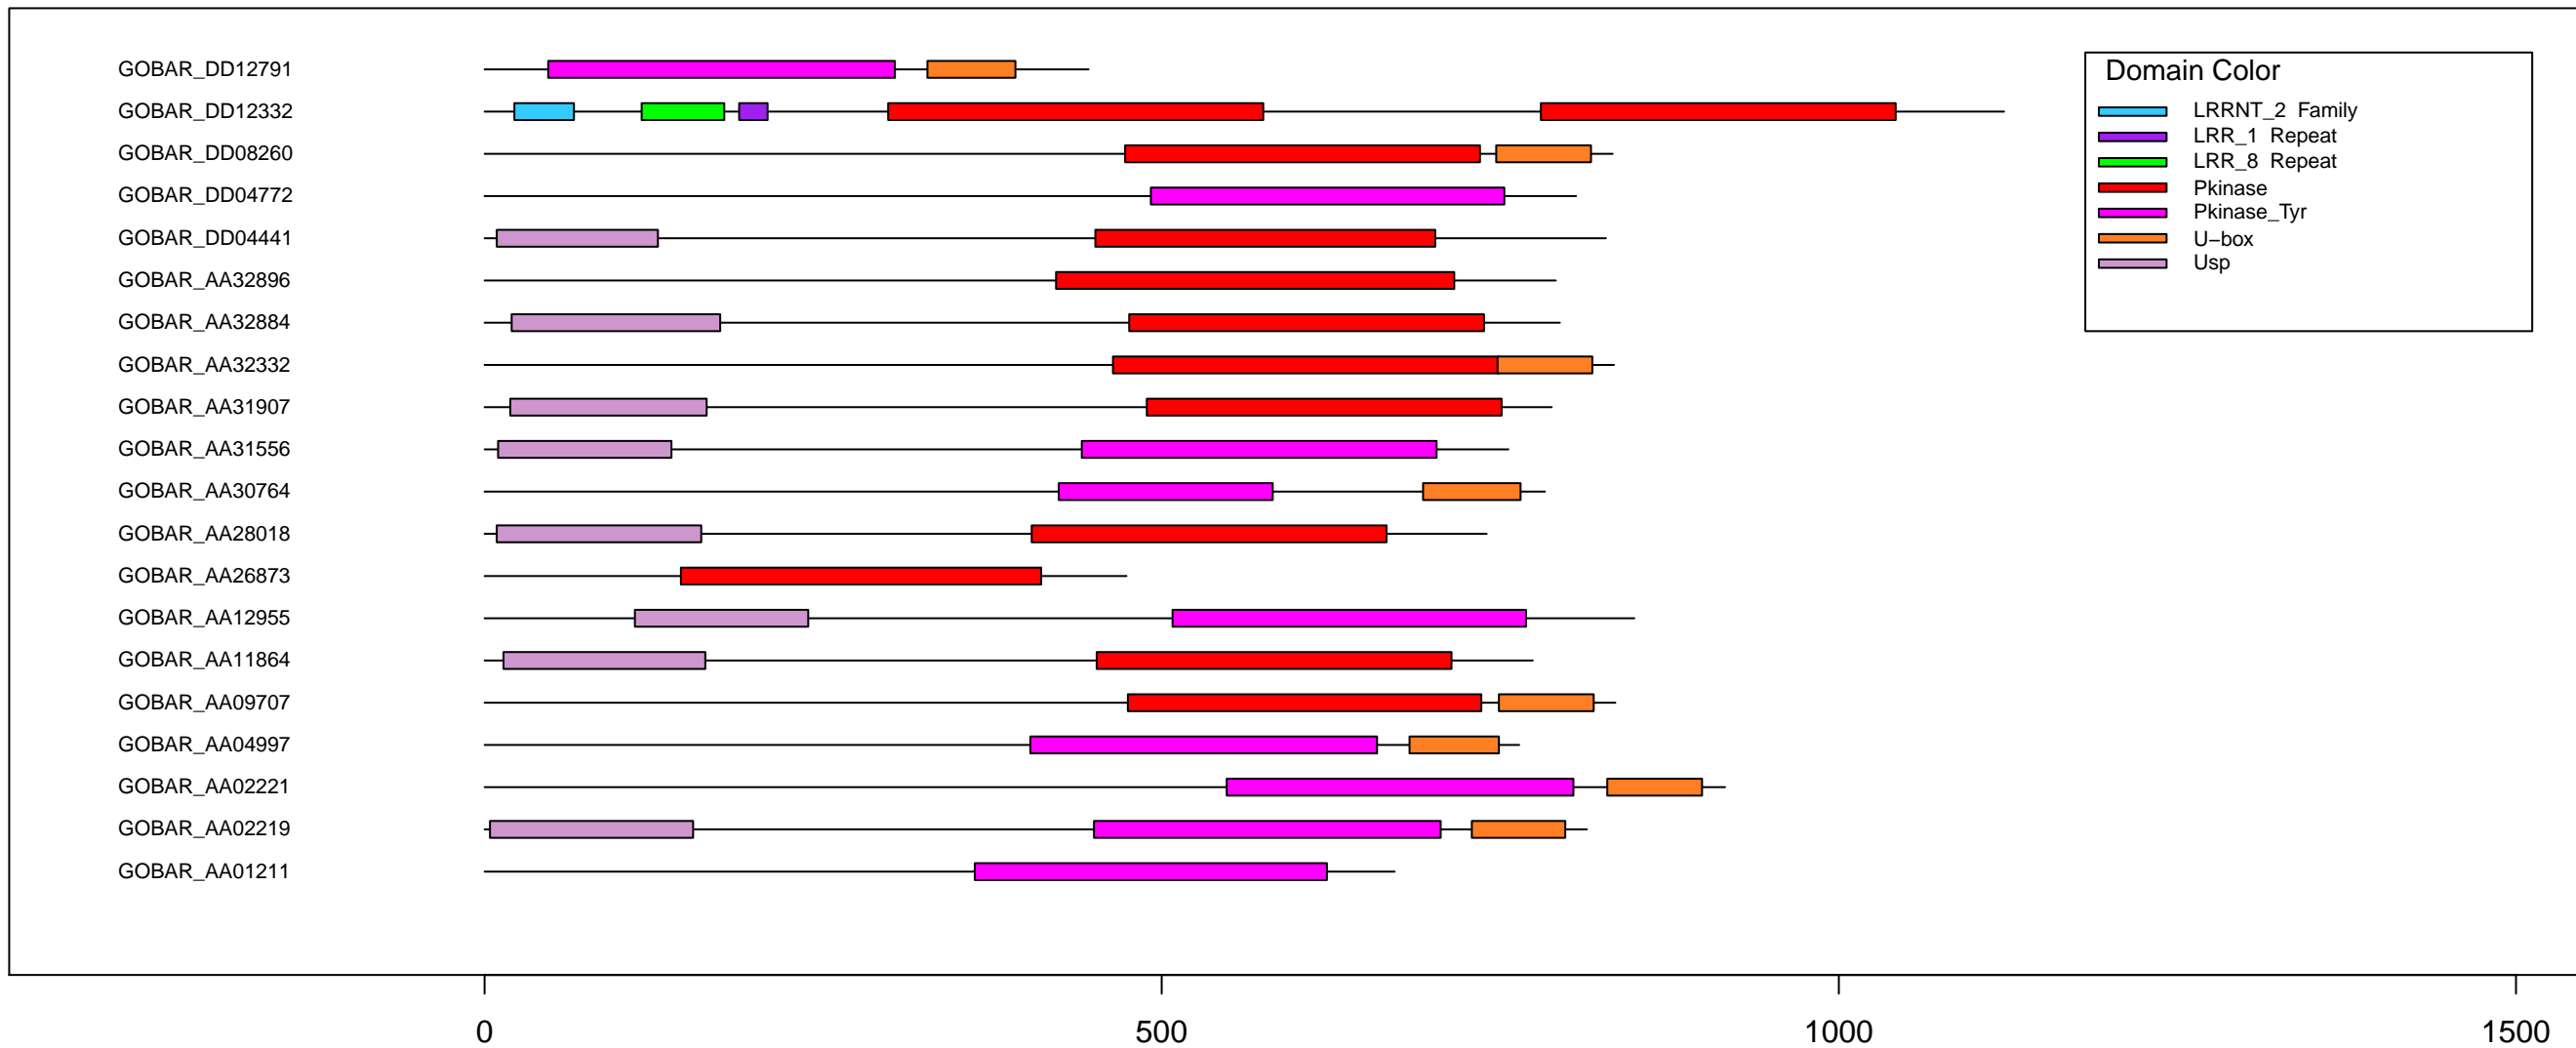

G.ba RLK-Pelle\_RLCK-IXb domain diagram (part 2)

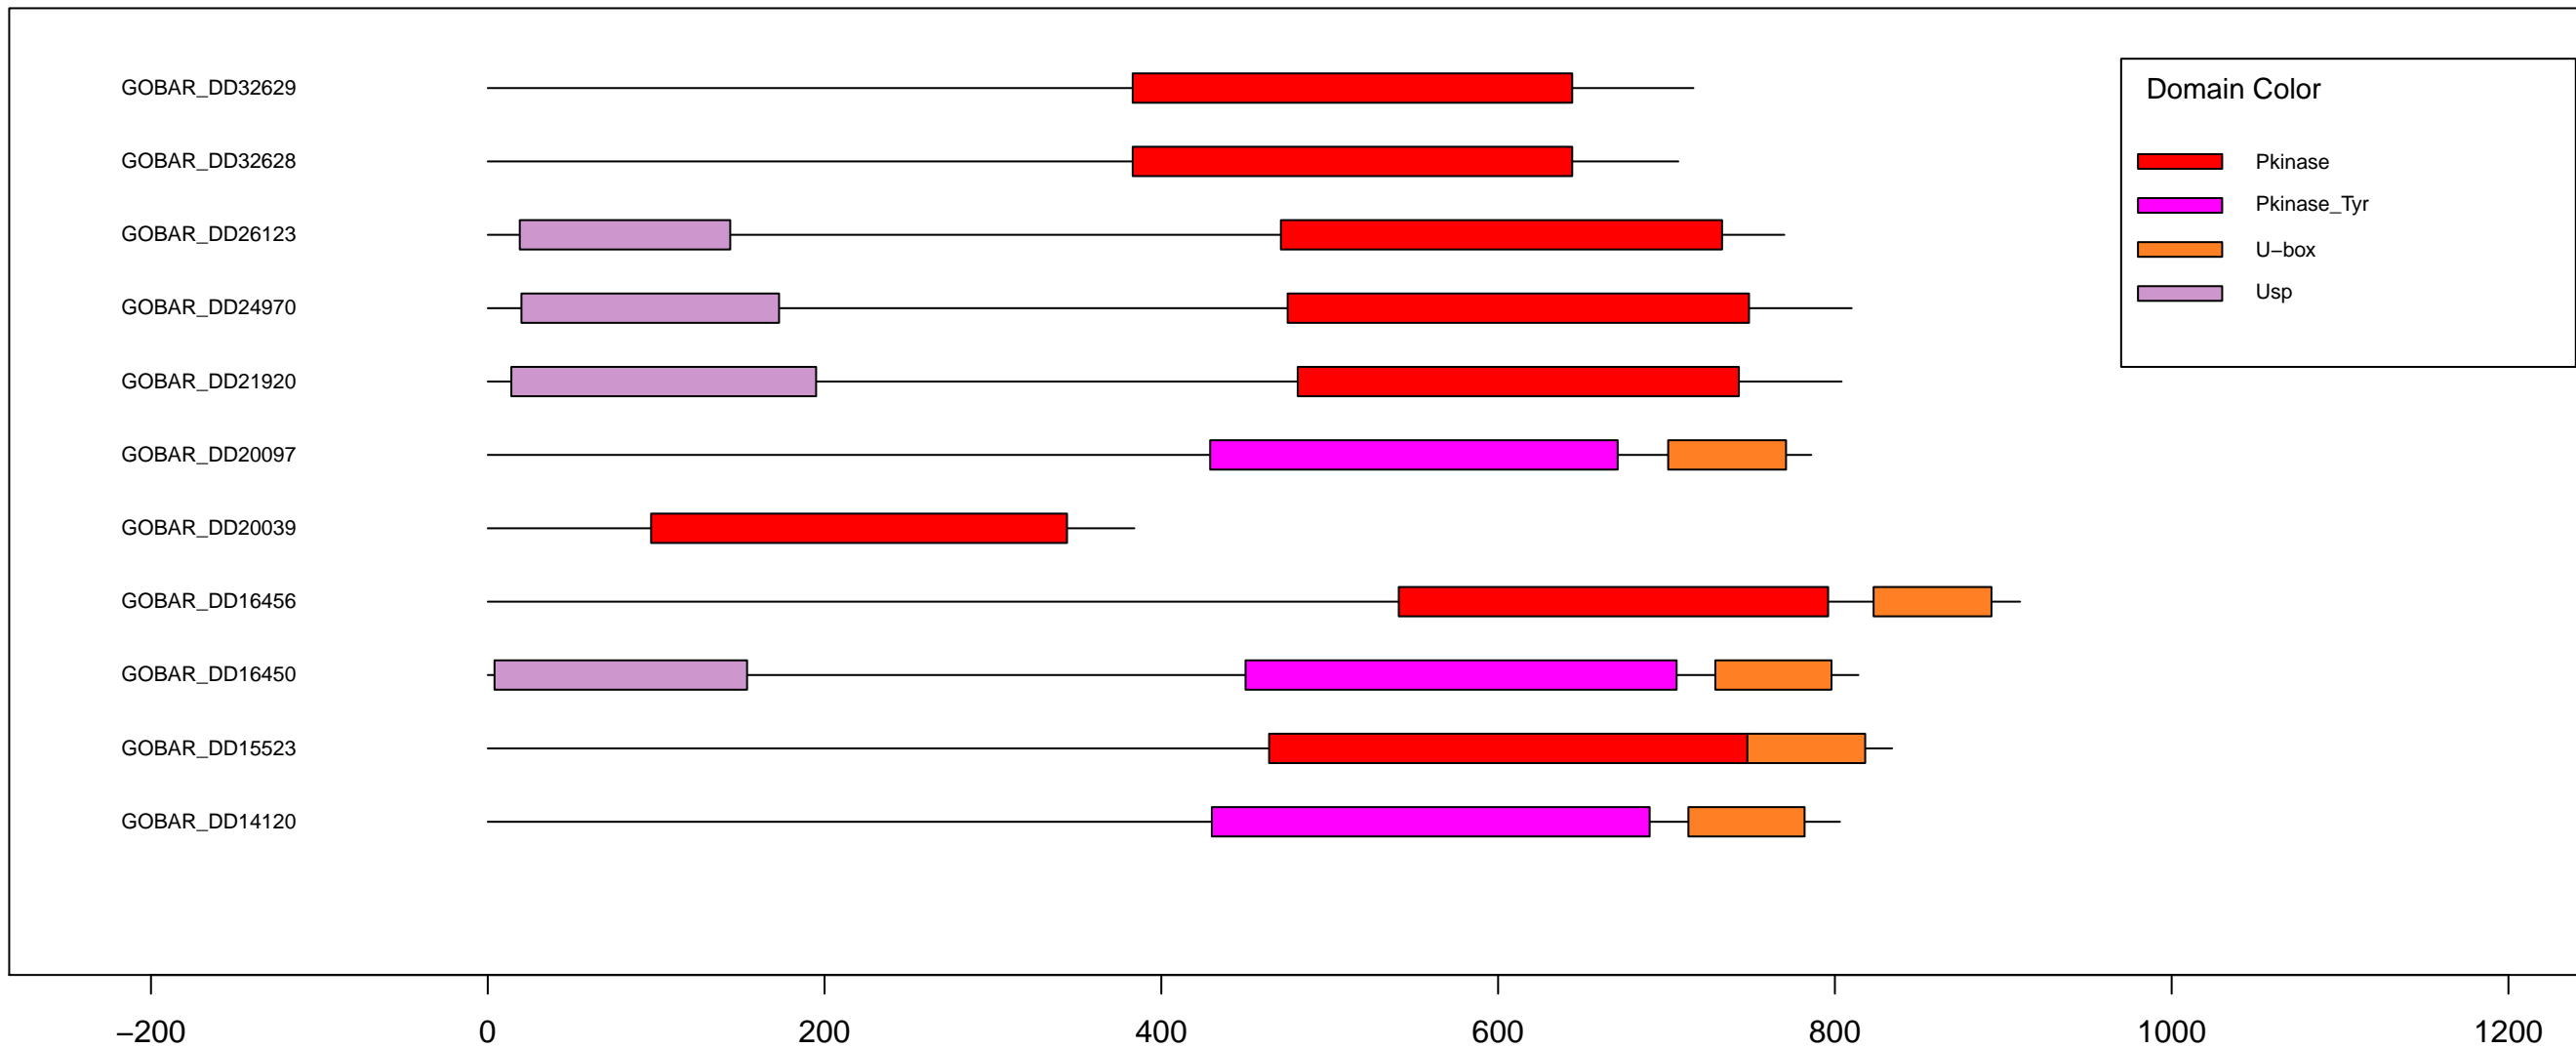

# G.ba RLK-Pelle\_RLCK-Os domain diagram (all)

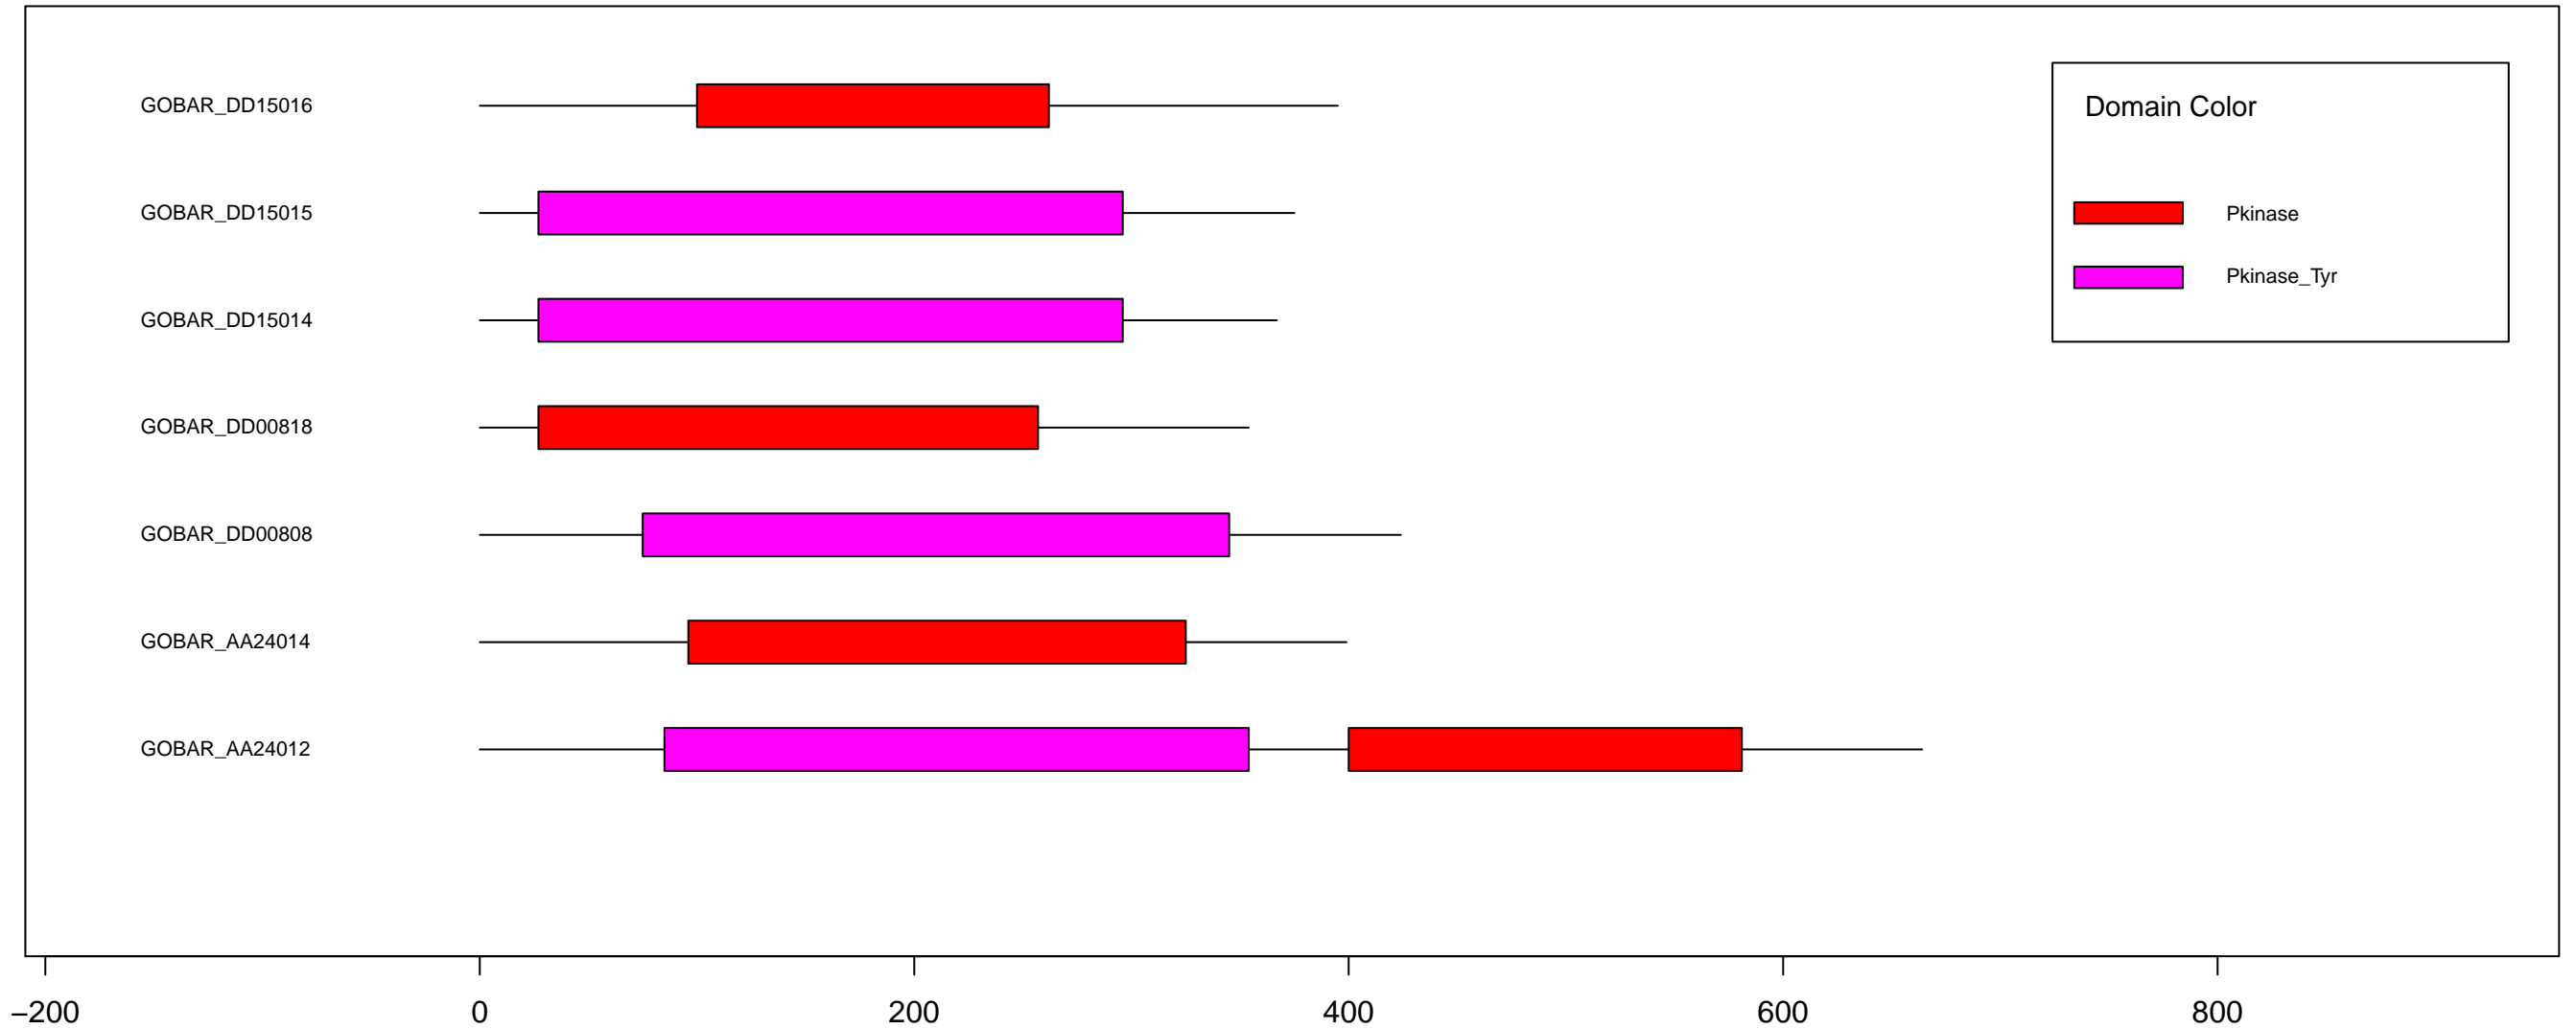

# G.ba RLK-Pelle\_RLCK-VIIa-1 domain diagram (part 1)

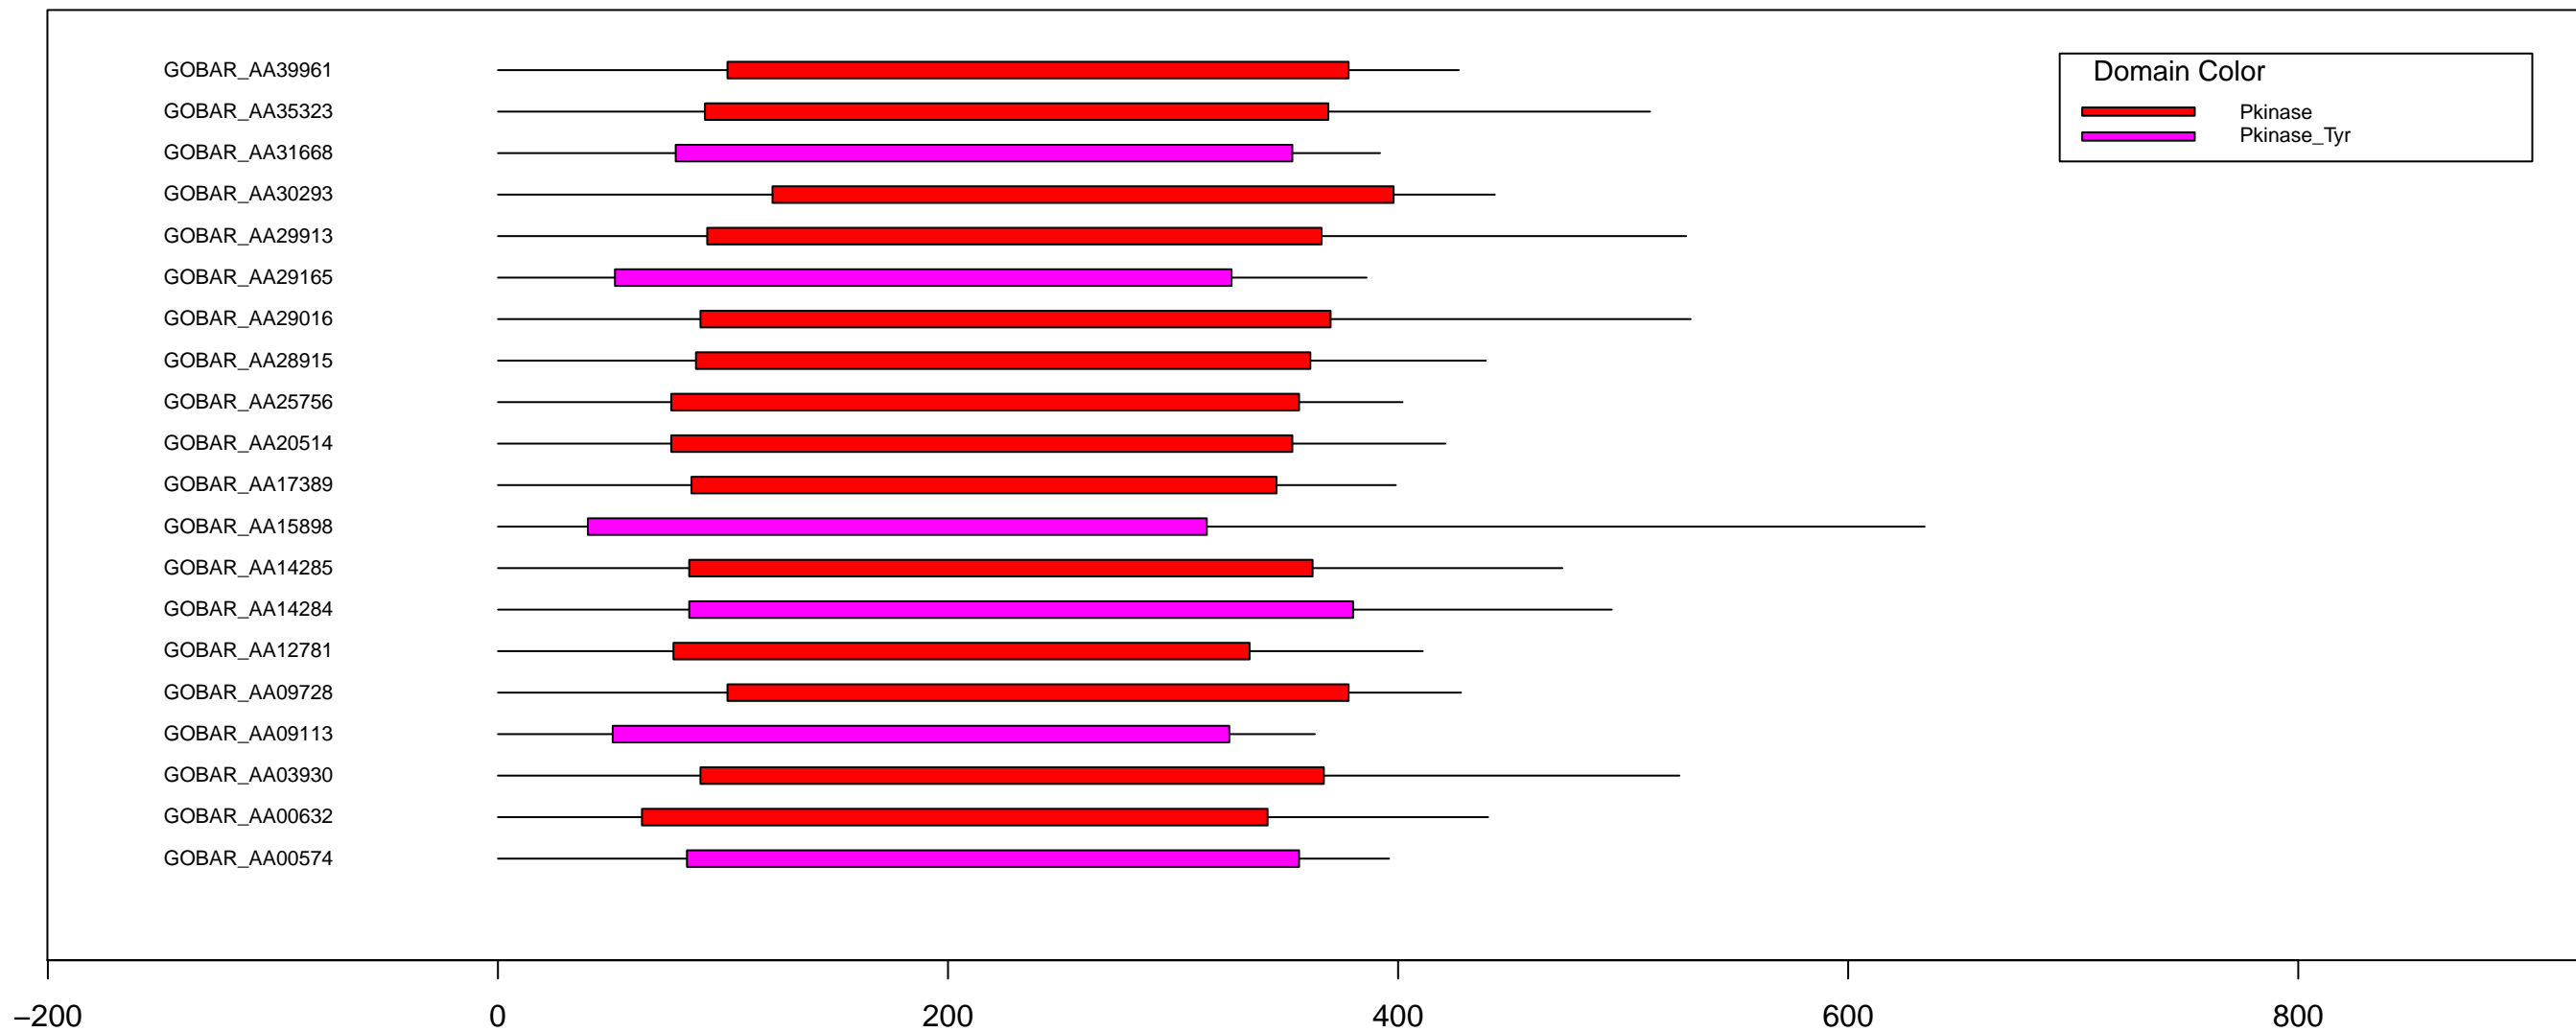

### G.ba RLK-Pelle\_RLCK-VIIa-1 domain diagram (part 2)

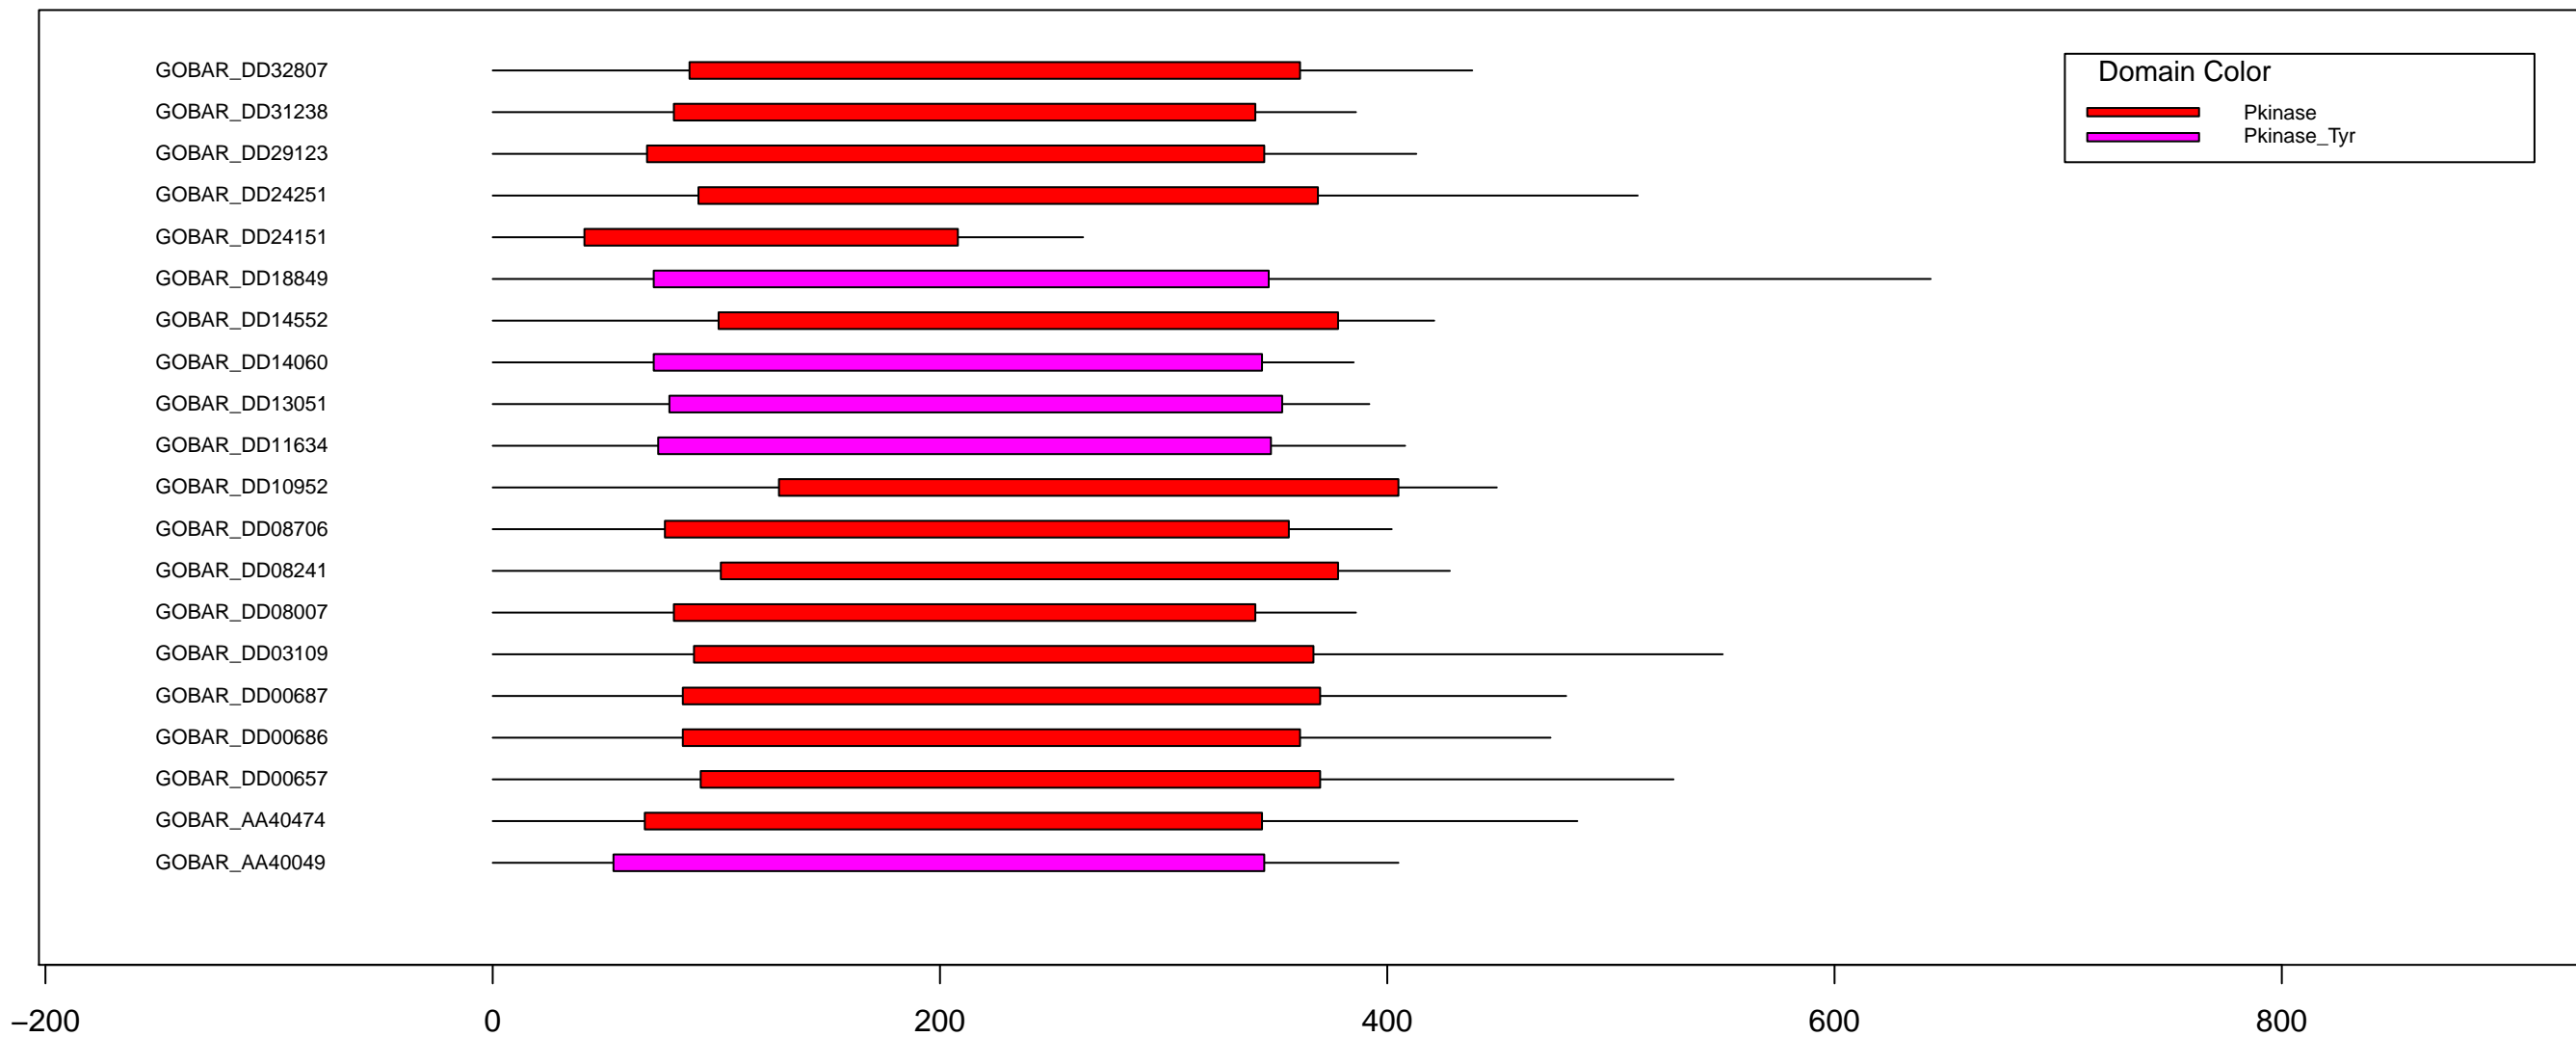

### G.ba RLK-Pelle\_RLCK-VIIa-1 domain diagram (part 3)

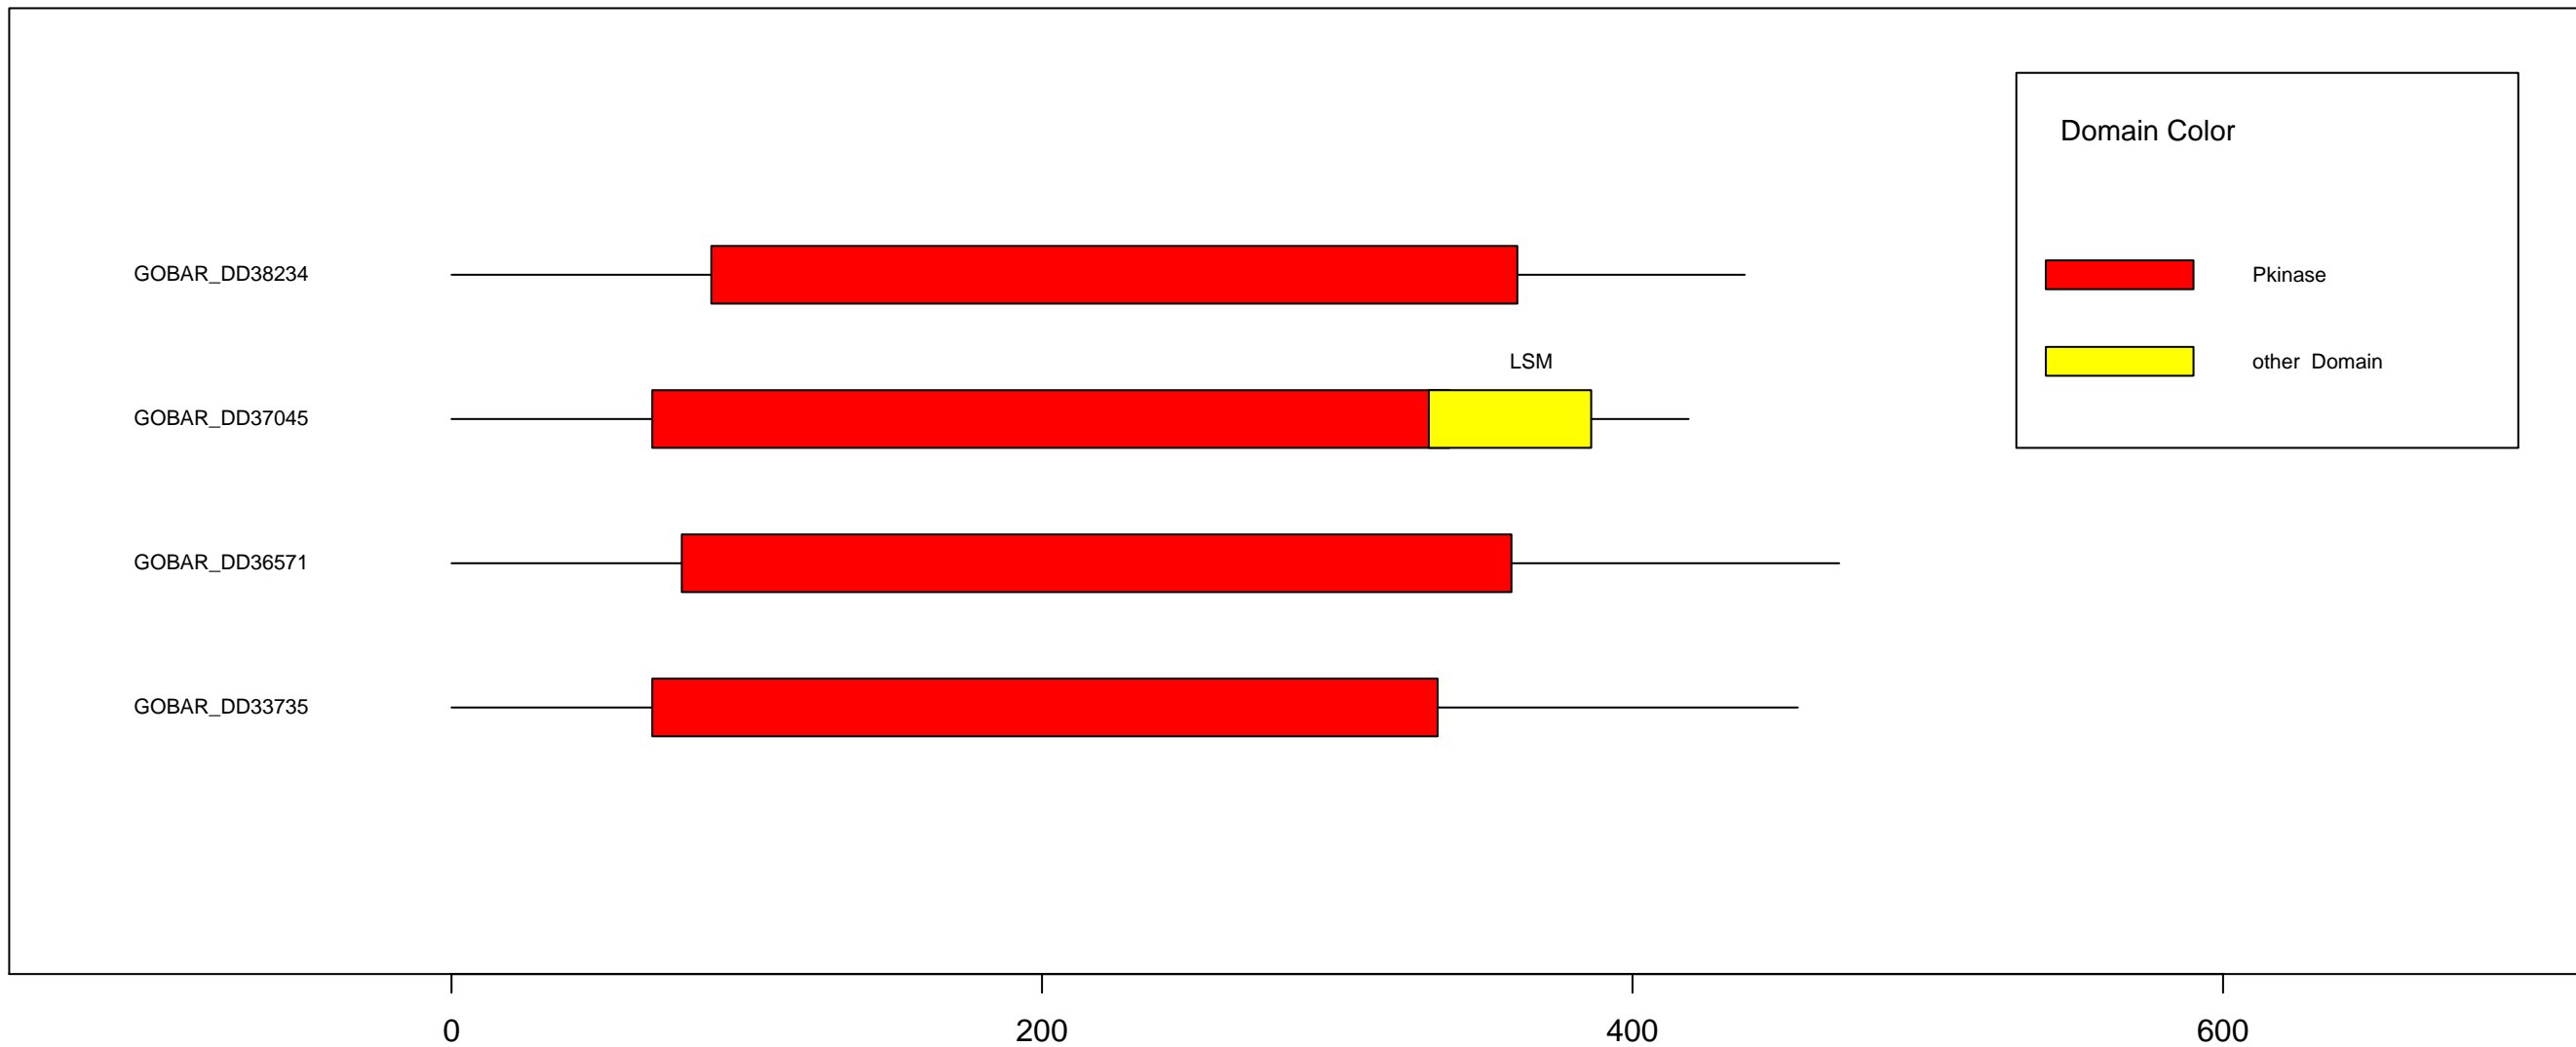

### G.ba RLK-Pelle\_RLCK-VIIa-2 domain diagram (part 1)

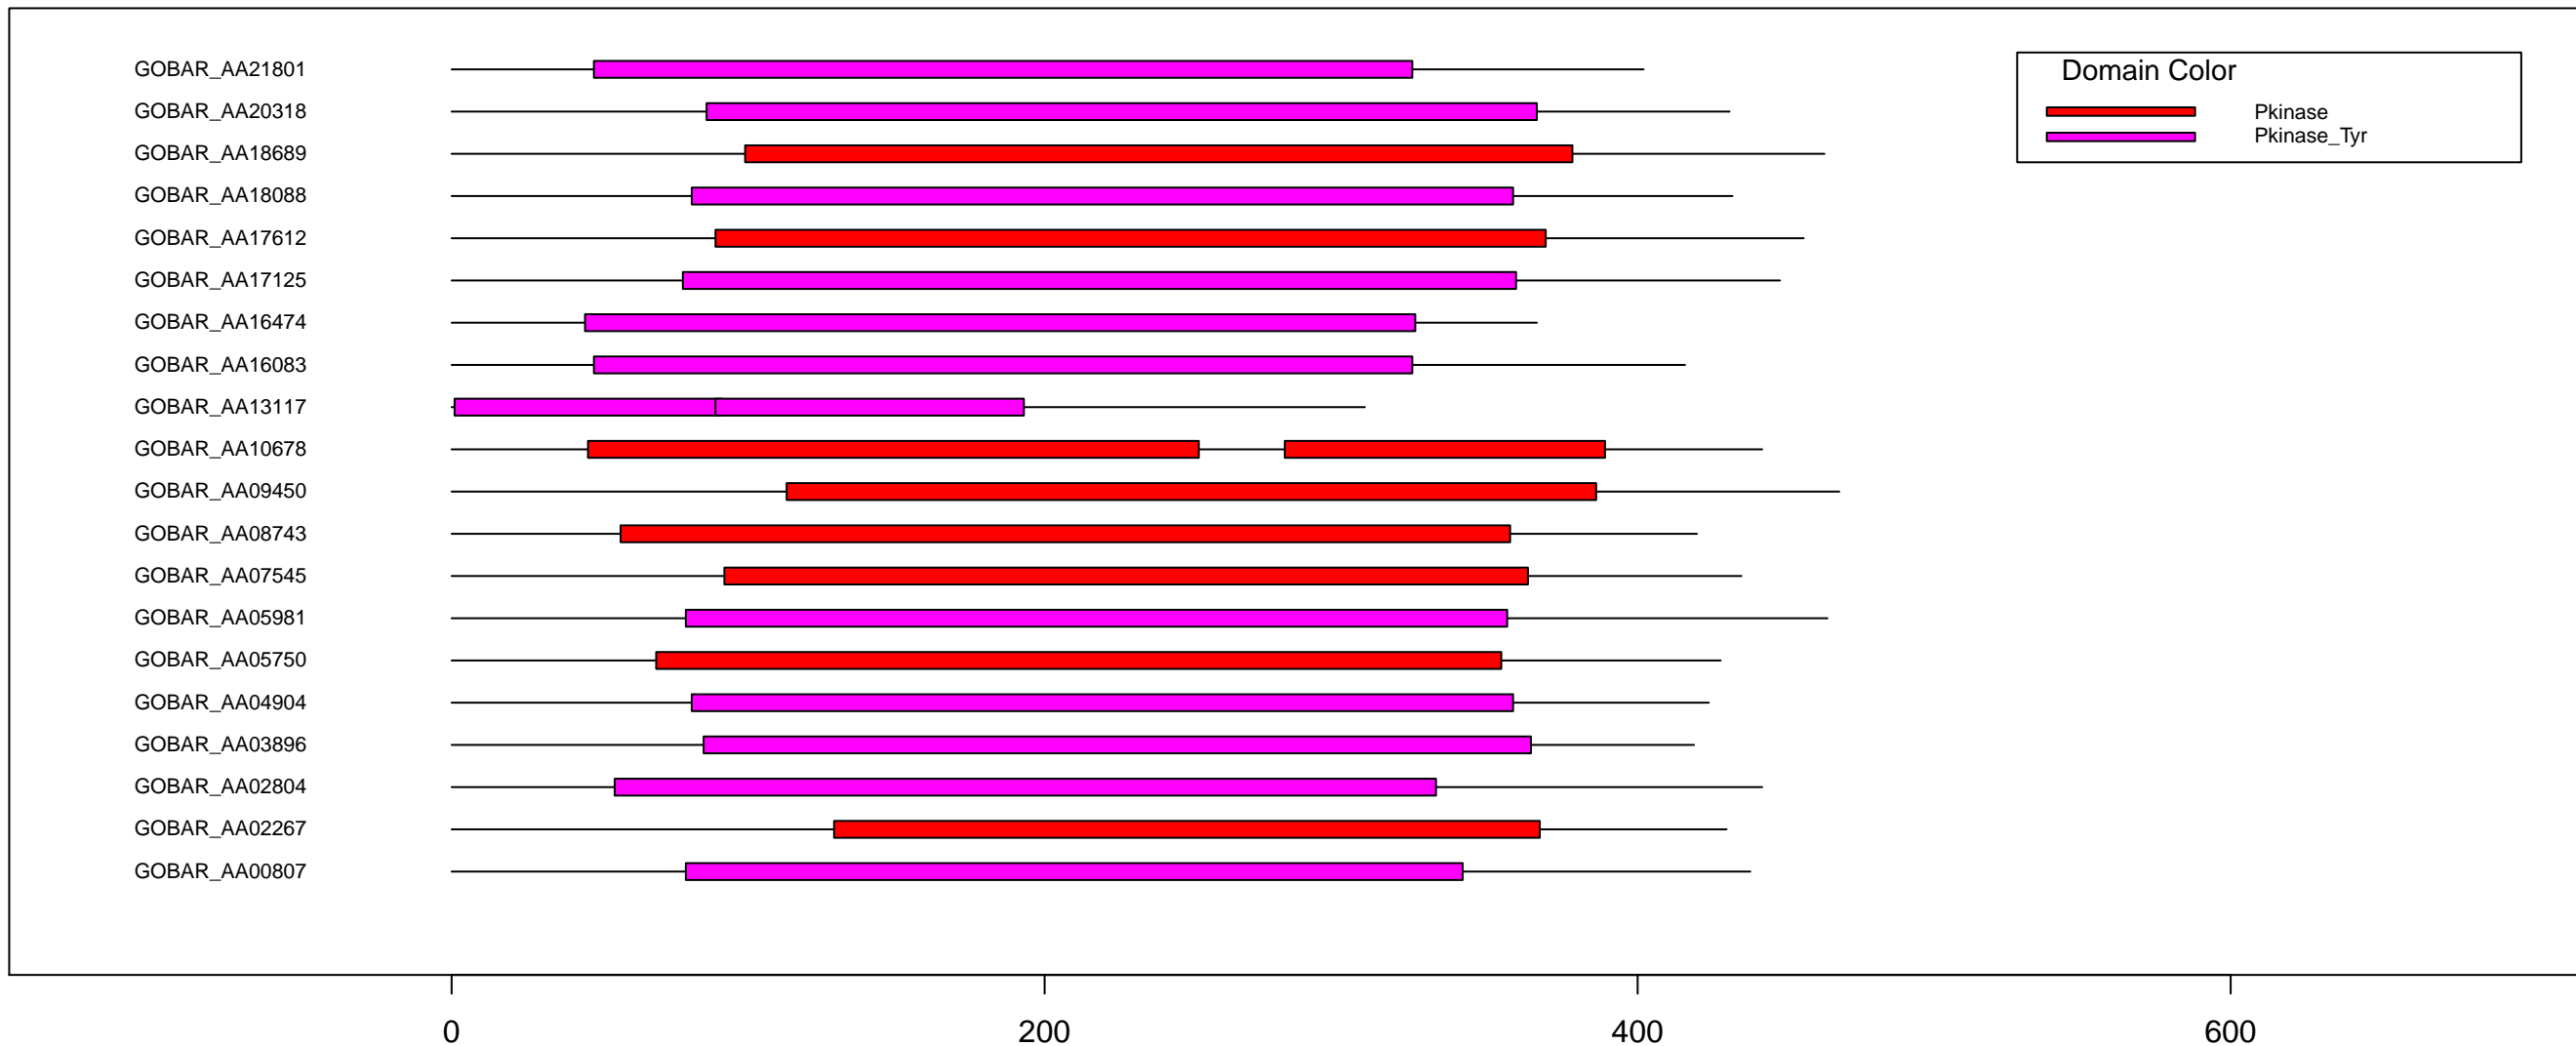



### G.ba RLK-Pelle\_RLCK-VIIa-2 domain diagram (part 2)

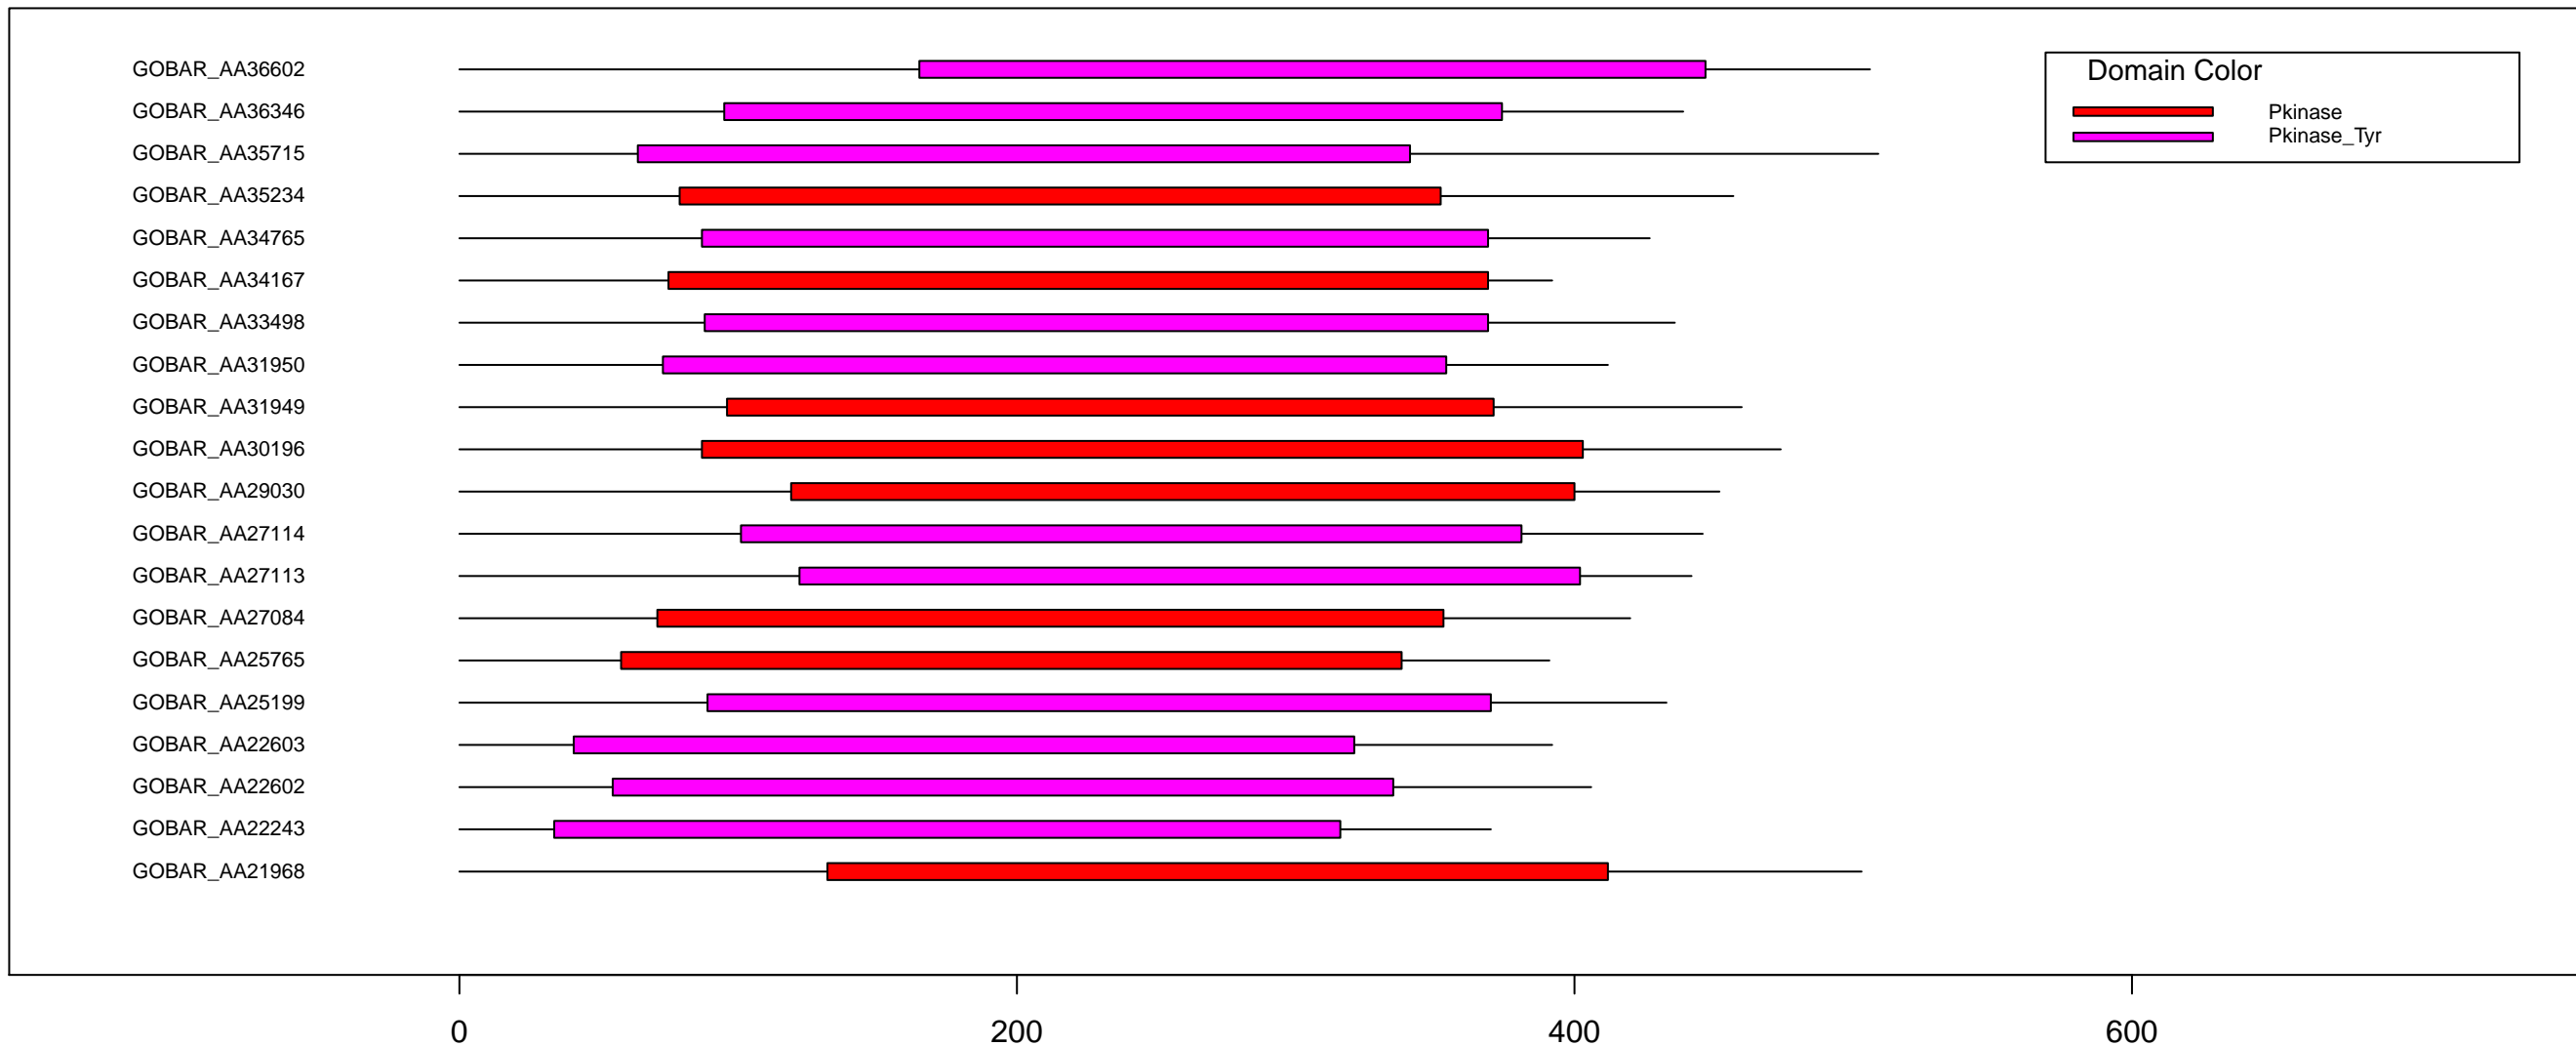

### G.ba RLK-Pelle\_RLCK-VIIa-2 domain diagram (part 3)

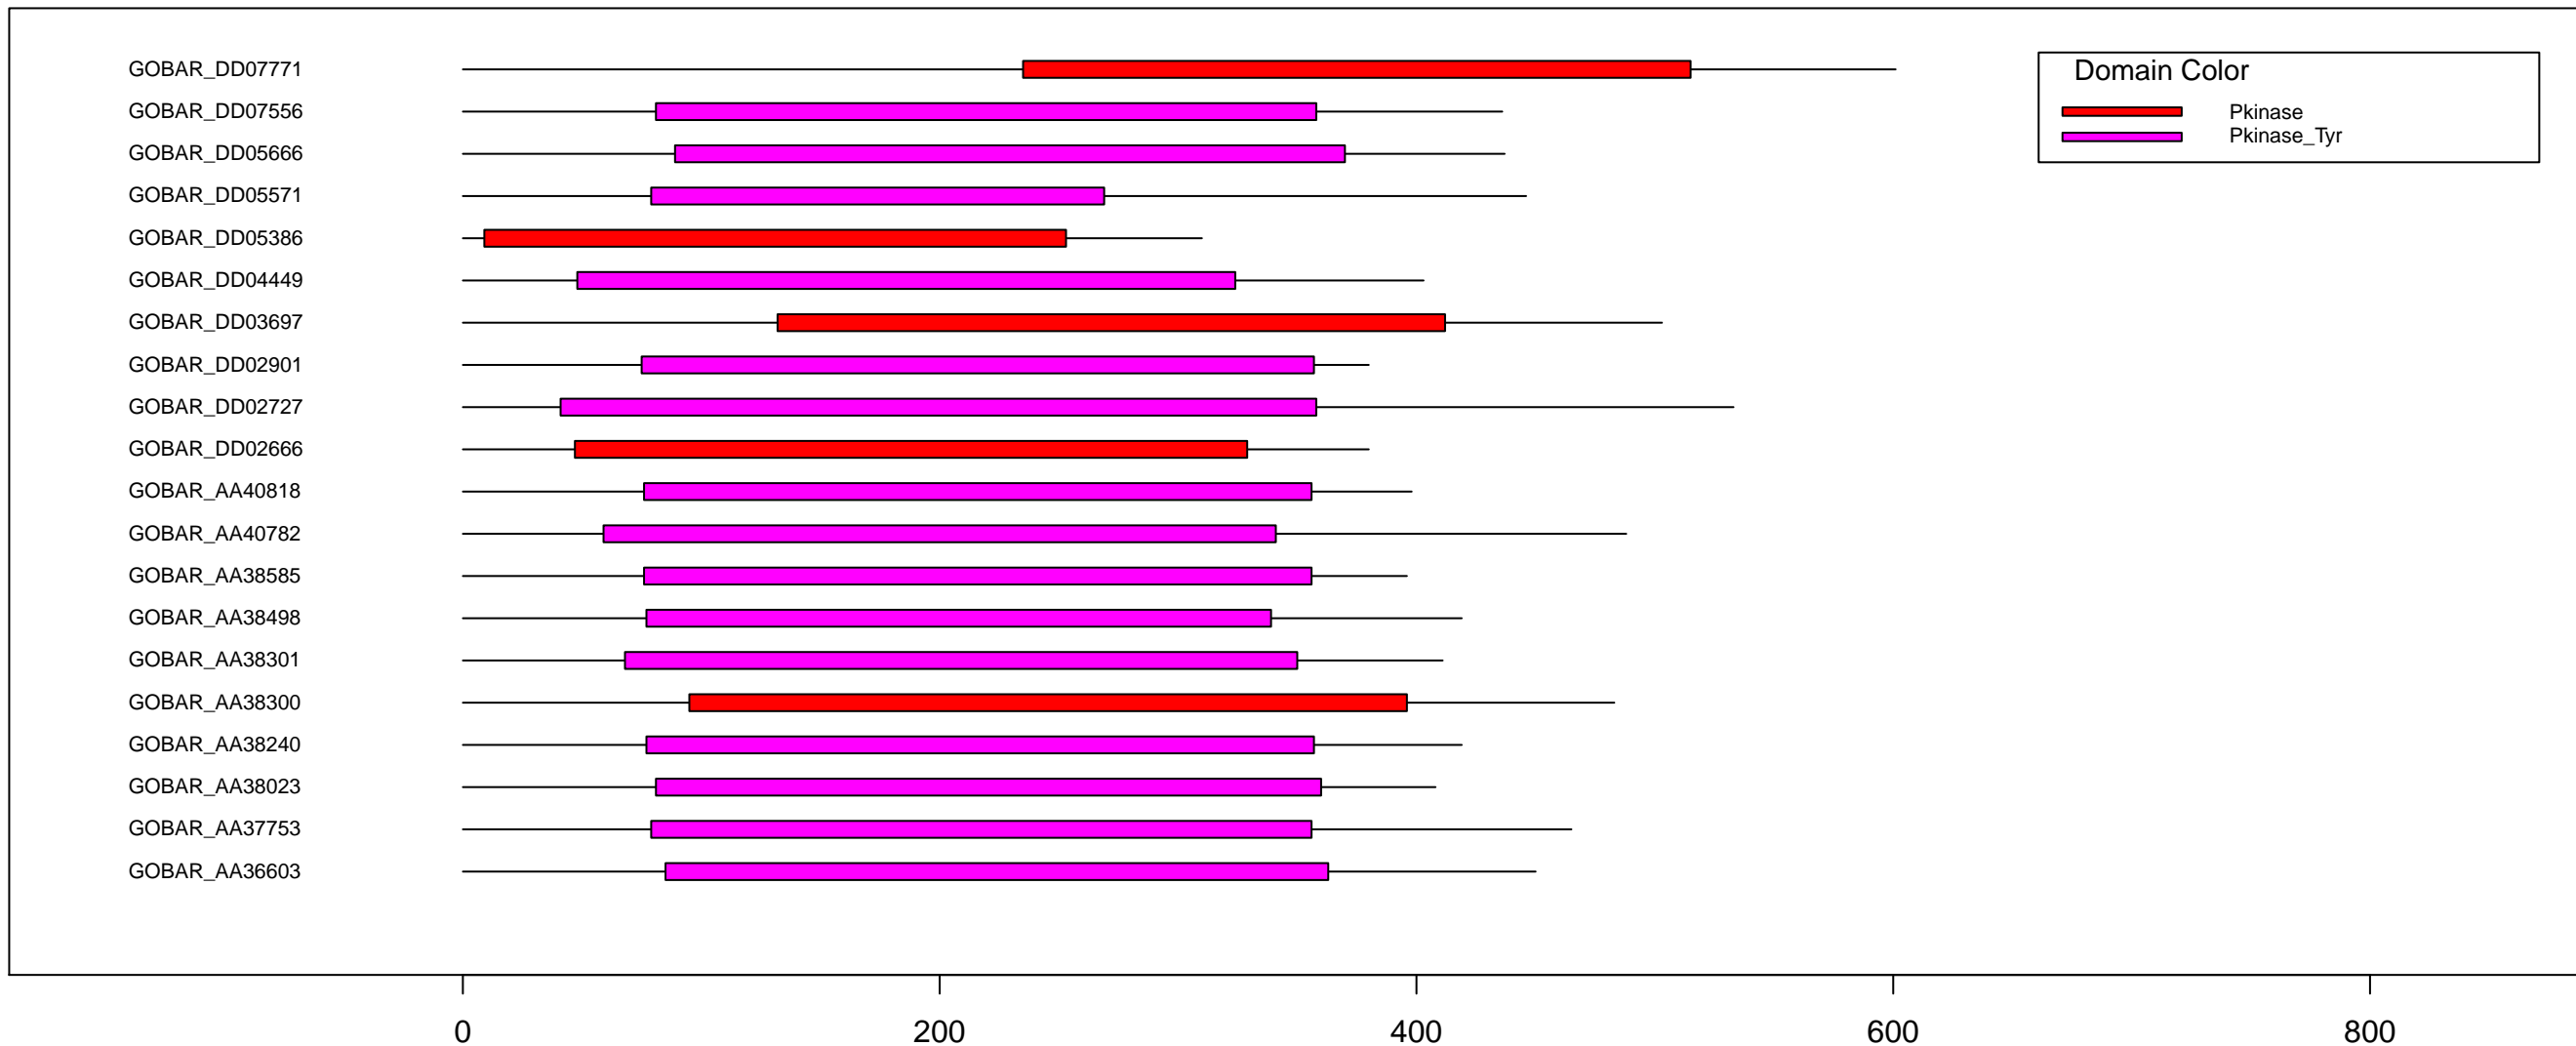

### G.ba RLK-Pelle\_RLCK-VIIa-2 domain diagram (part 4)

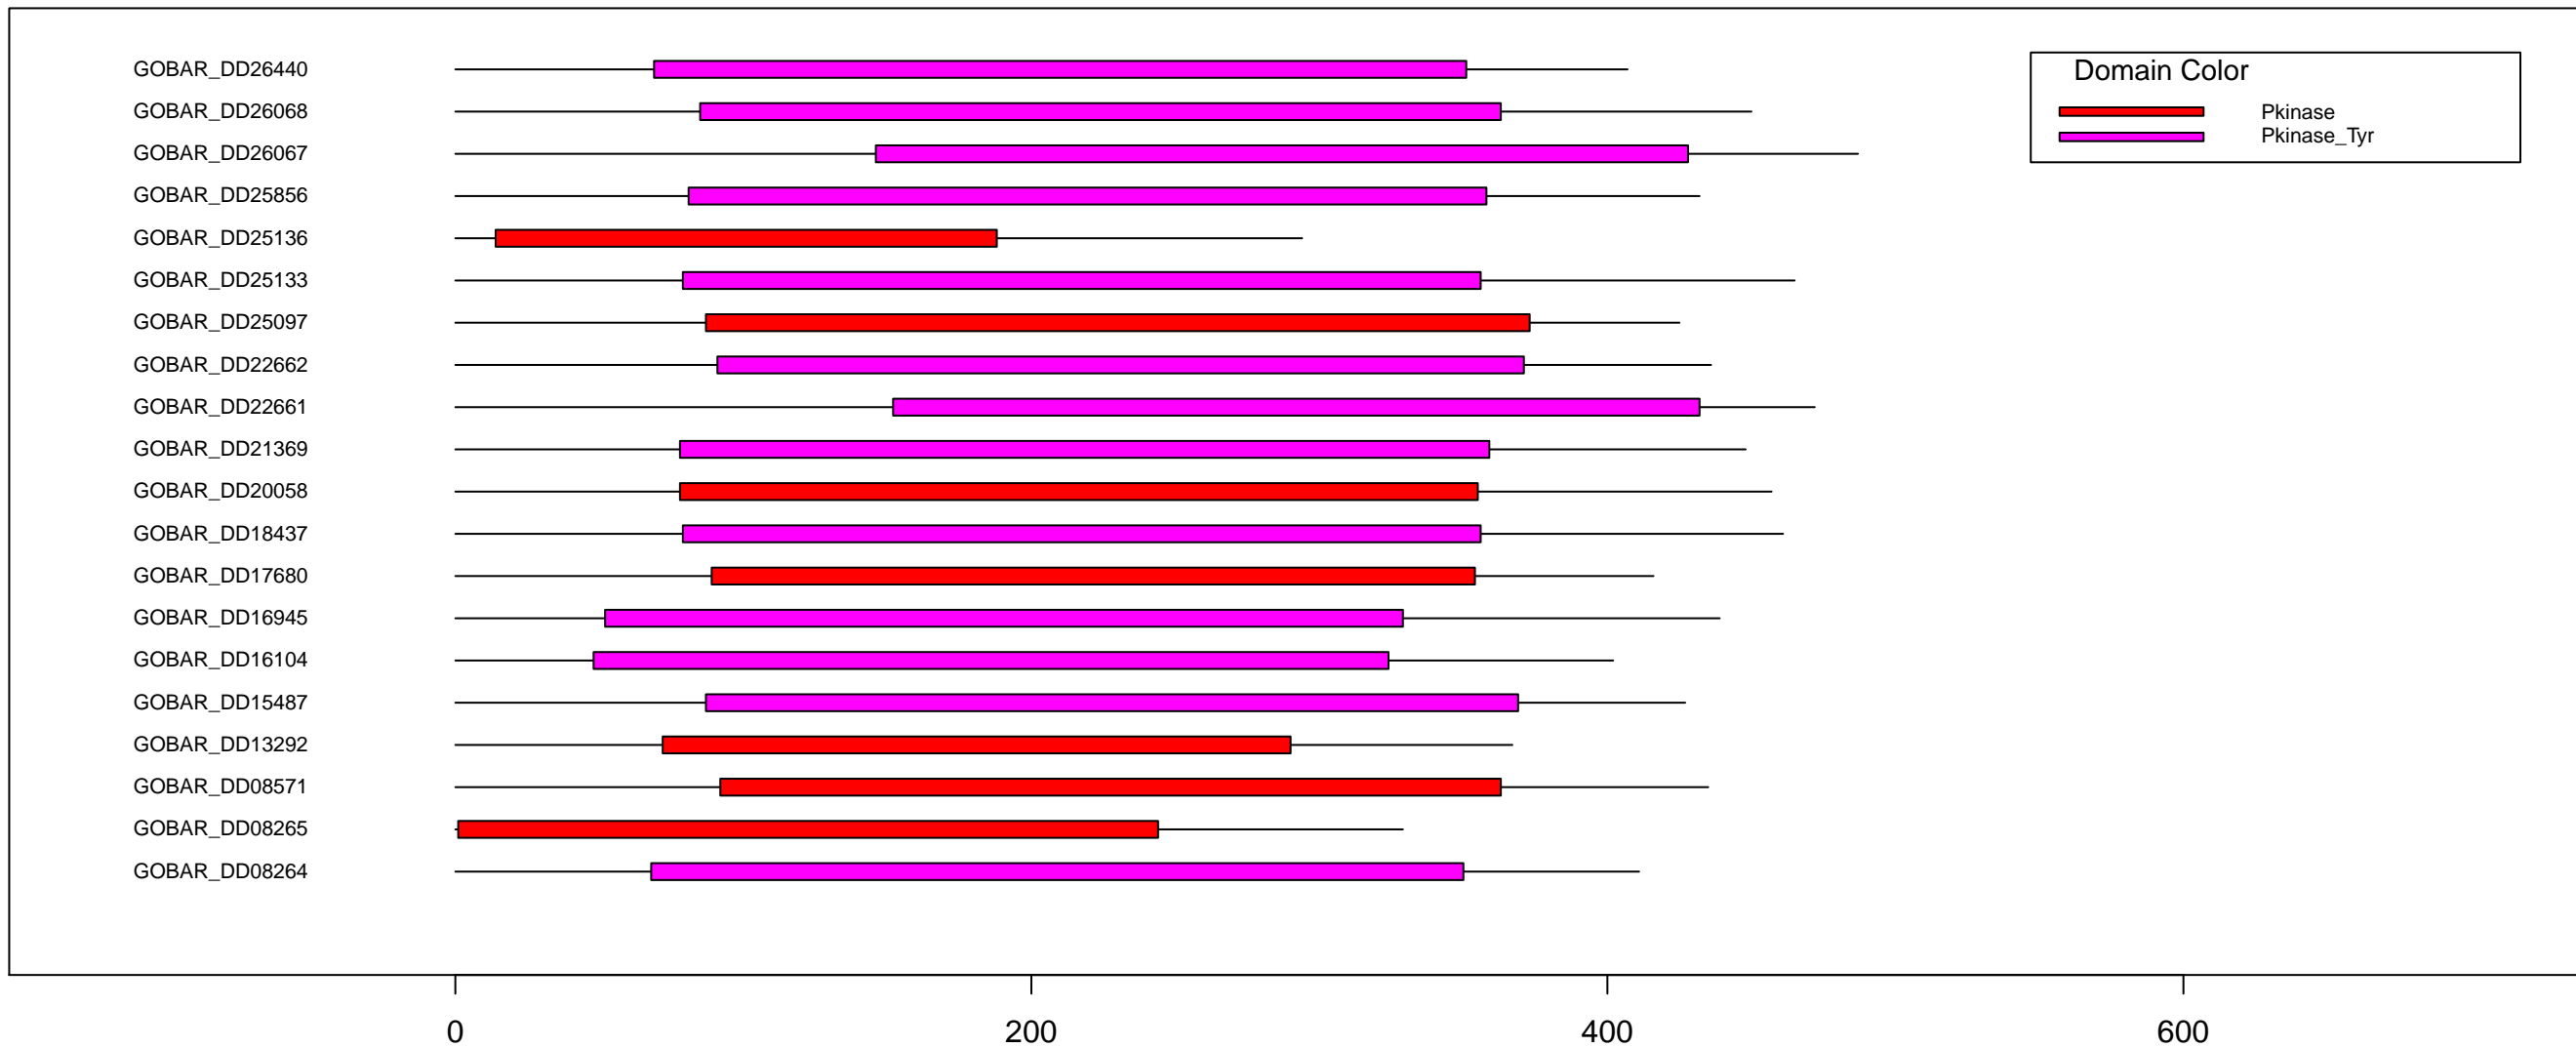

### G.ba RLK-Pelle\_RLCK-VIIa-2 domain diagram (part 5)

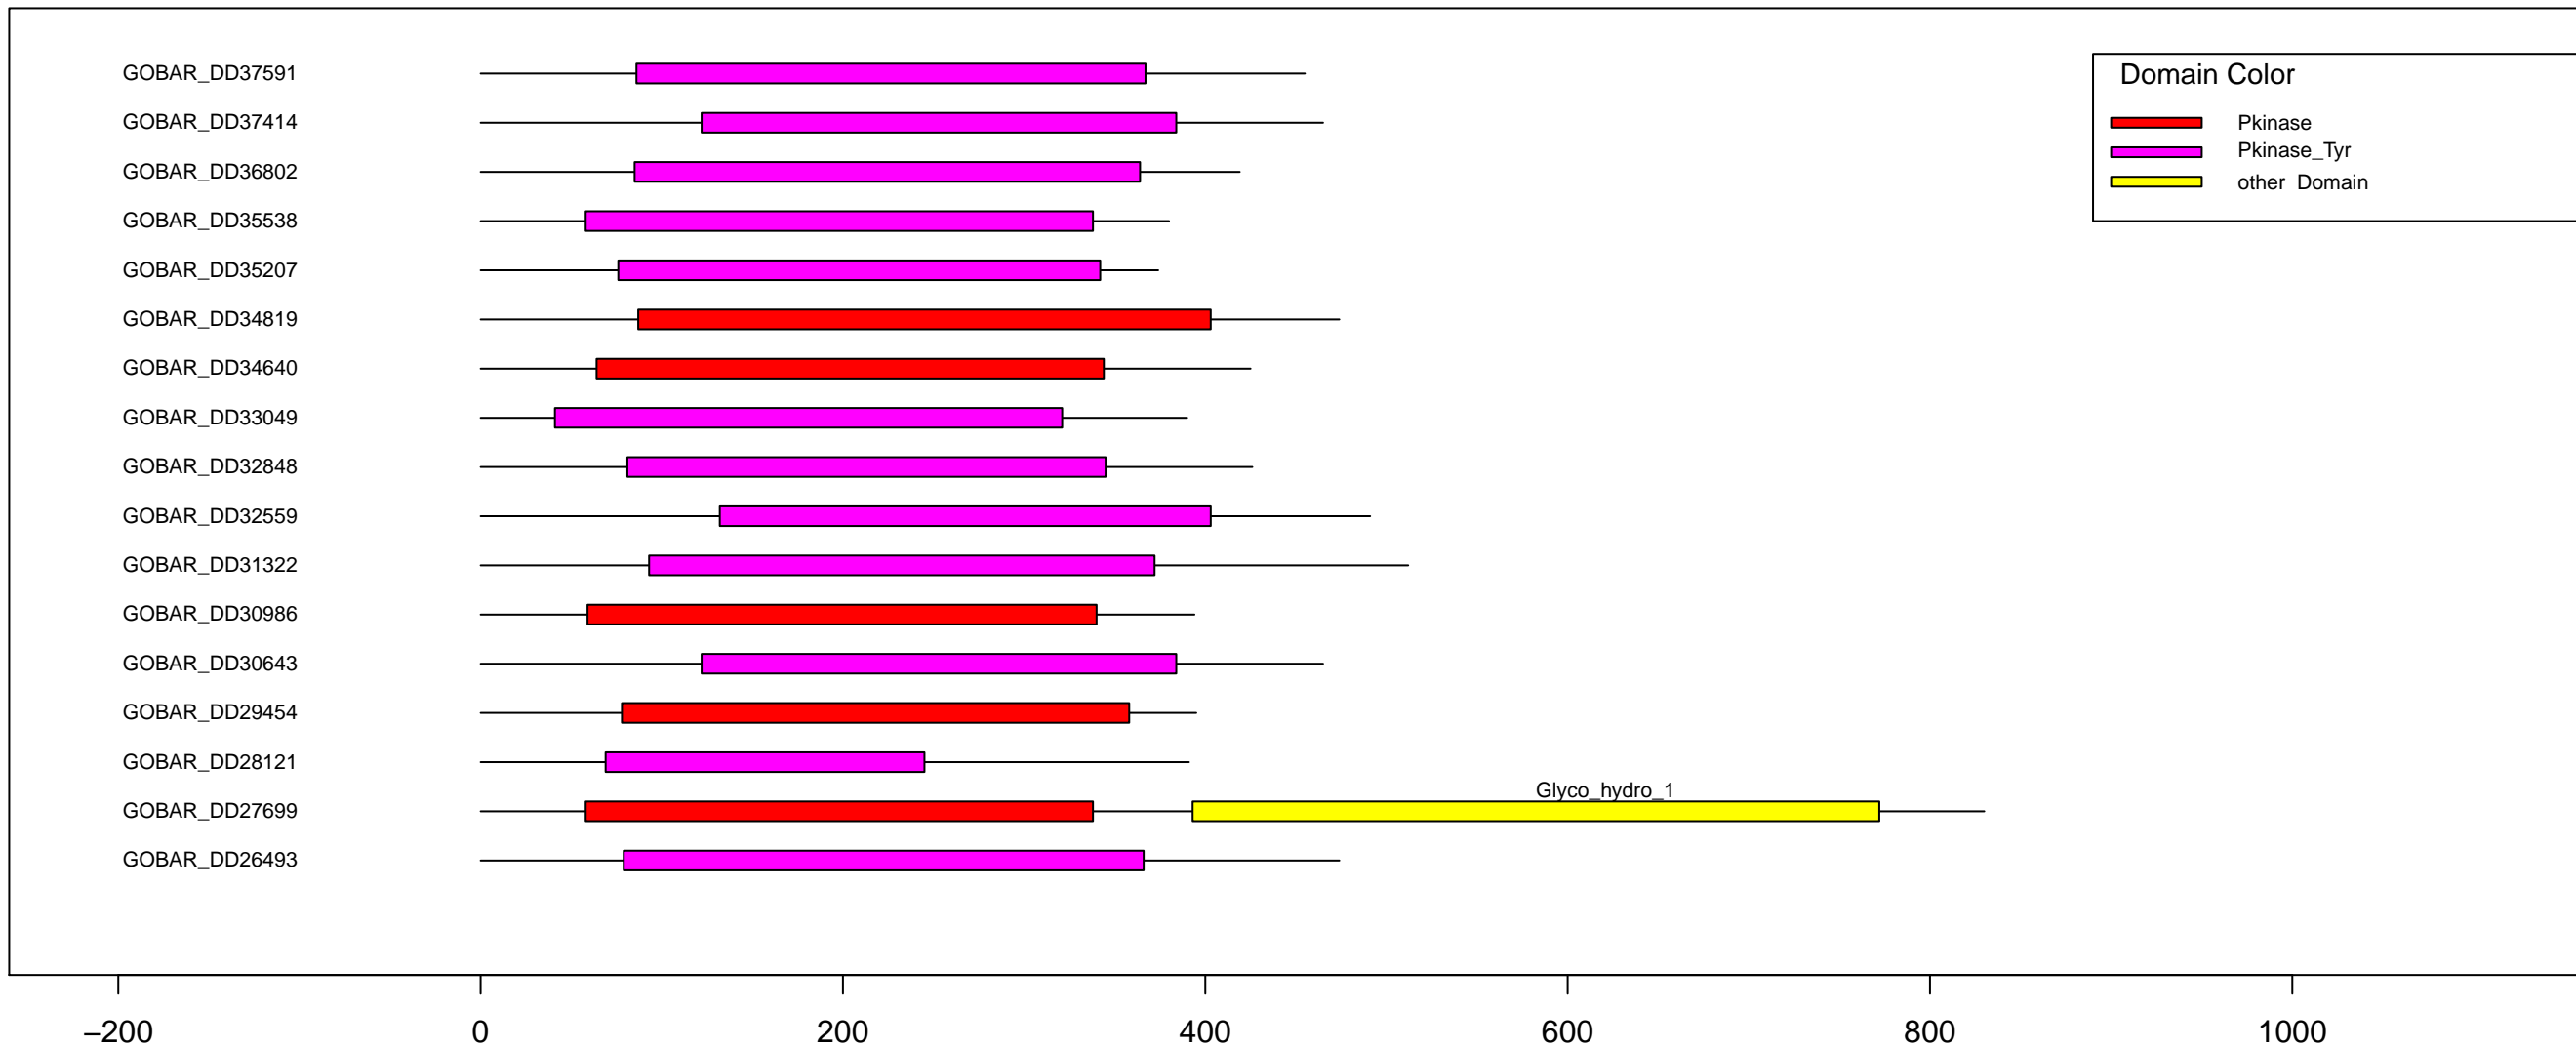

# G.ba RLK-Pelle\_RLCK-VIIb domain diagram (all)

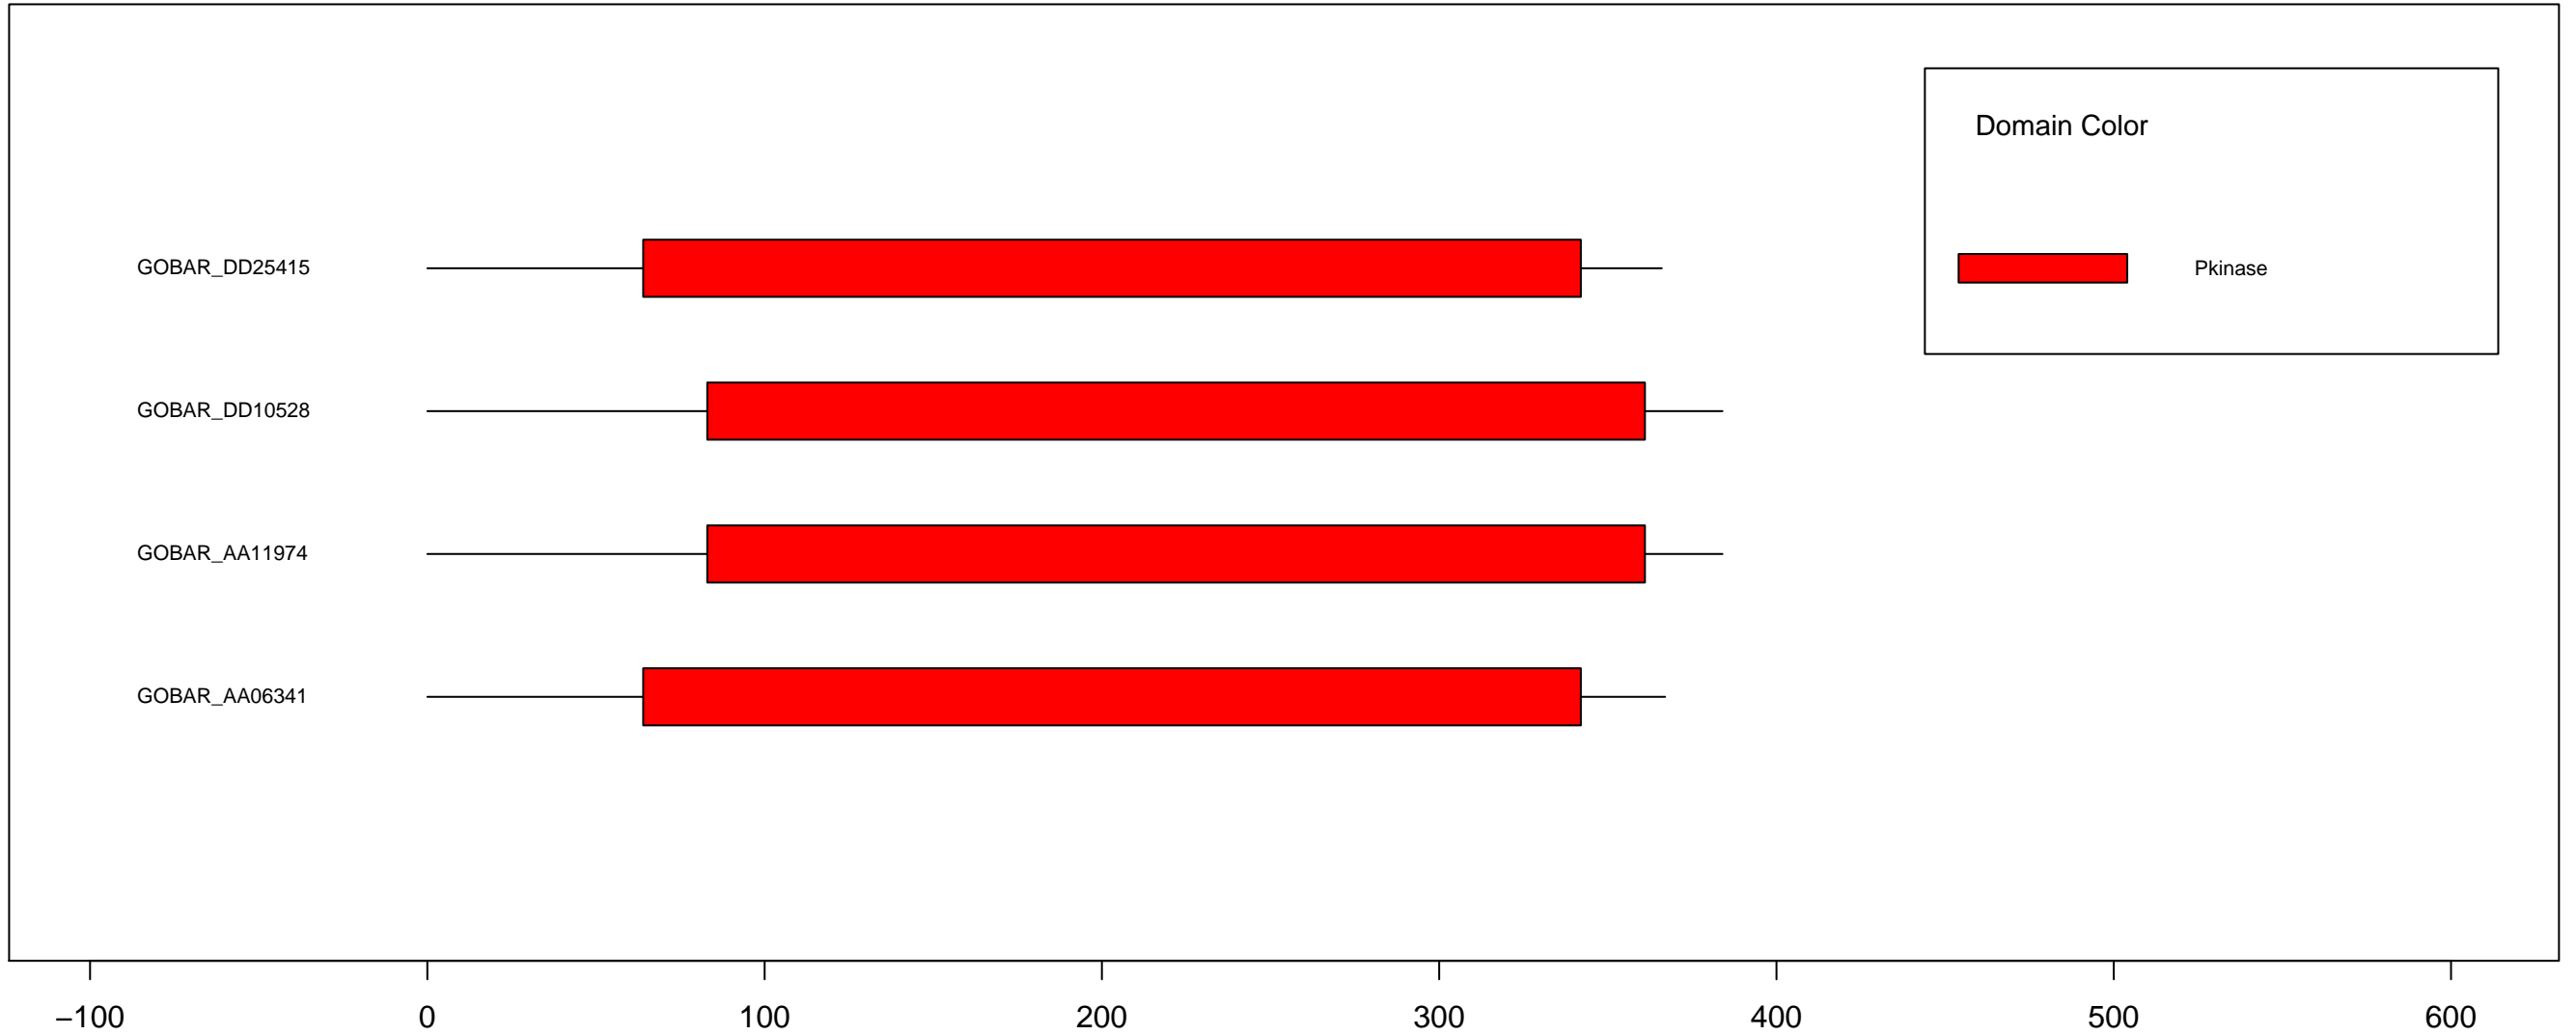

### G.ba RLK-Pelle\_RLCK-VIII domain diagram (all)

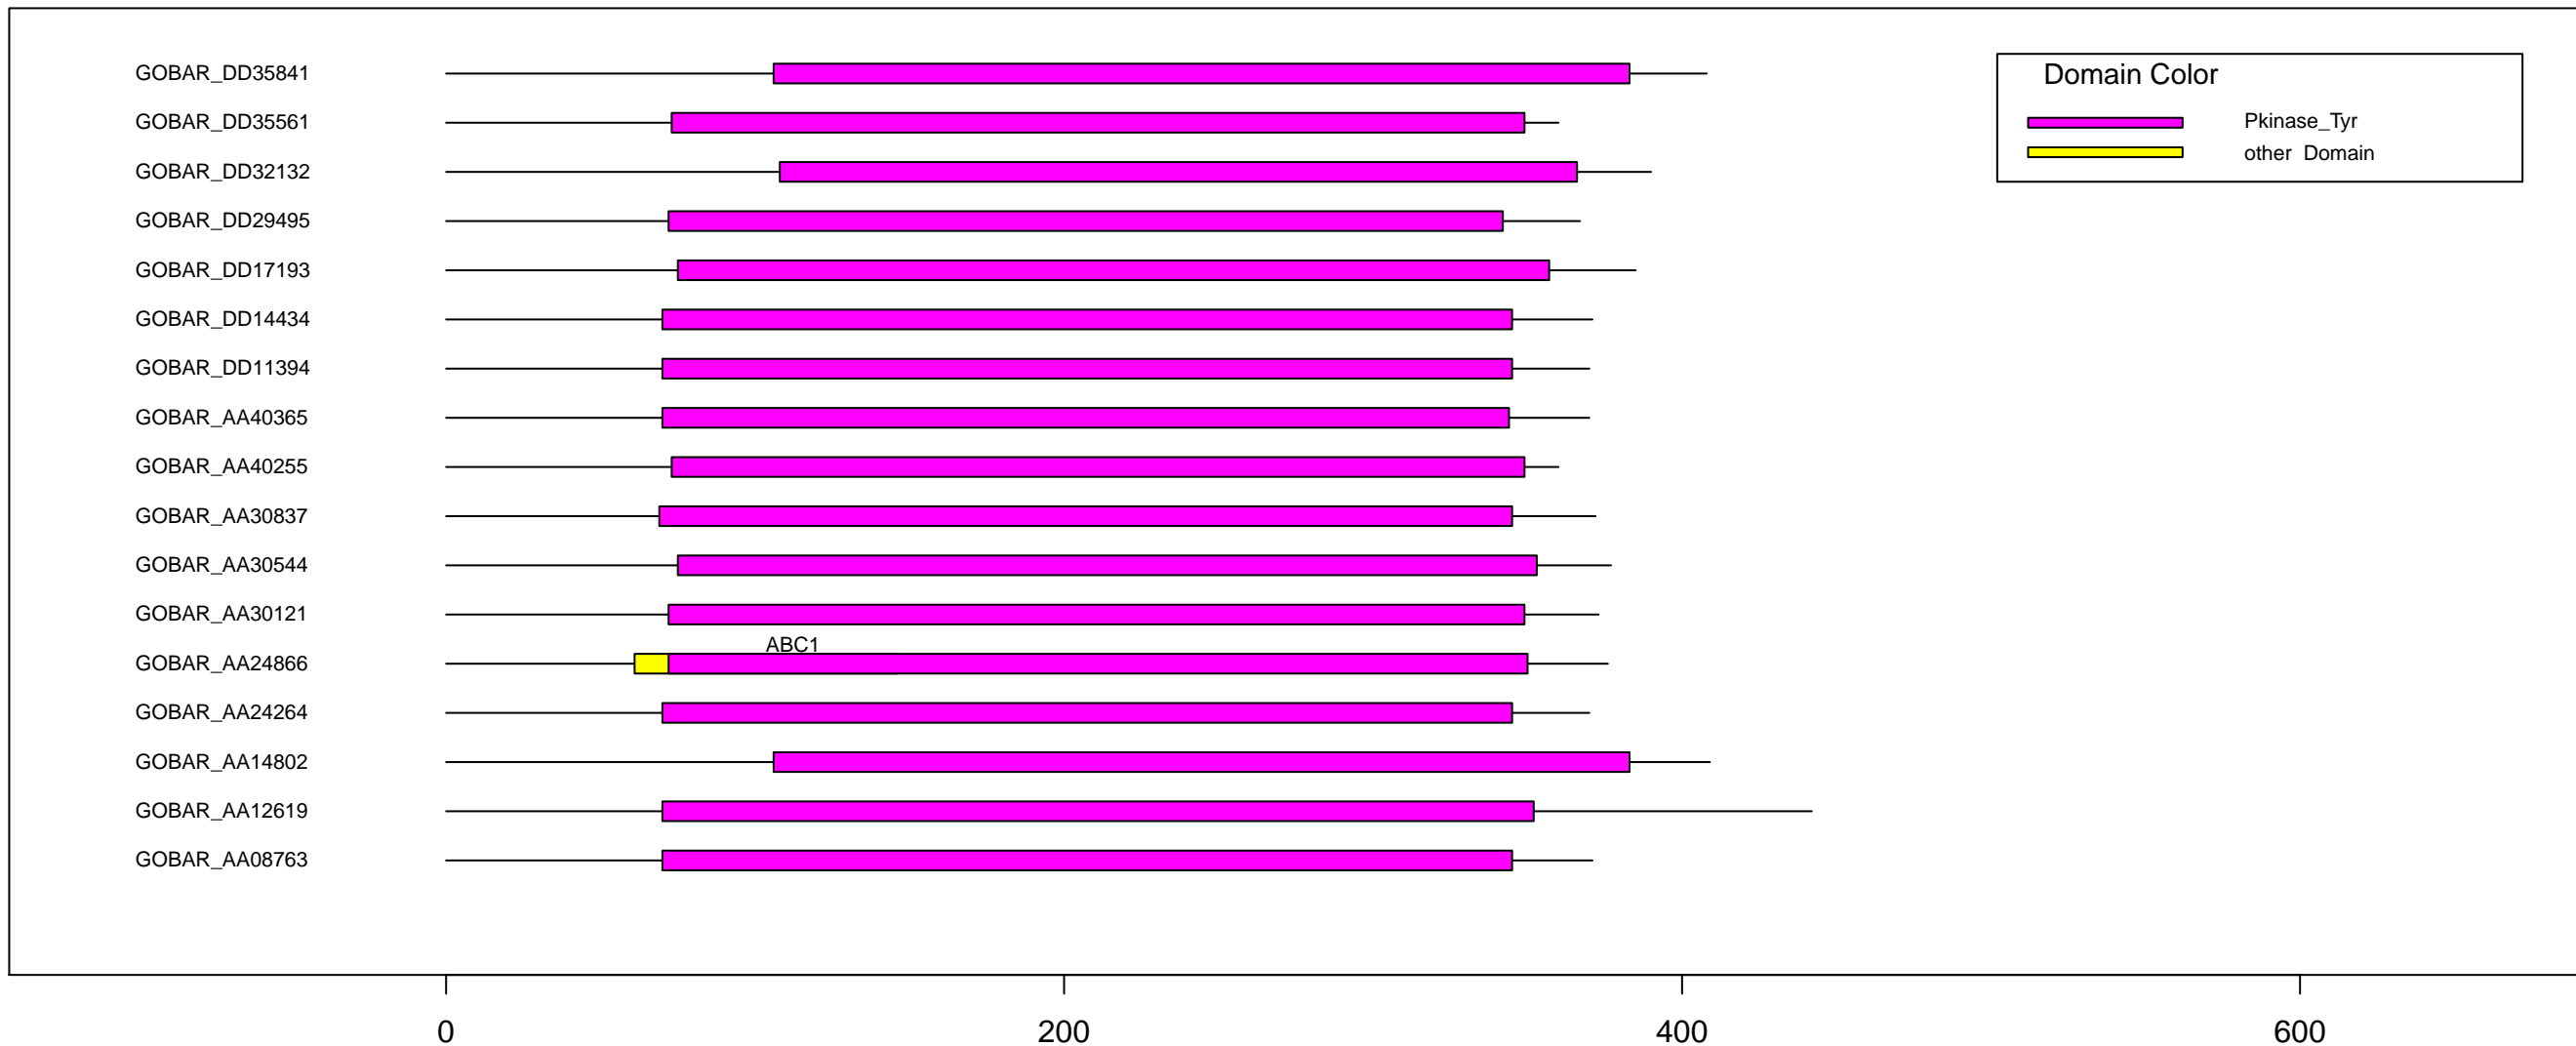

# G.ba RLK-Pelle\_RLCK-VI domain diagram (part 1)

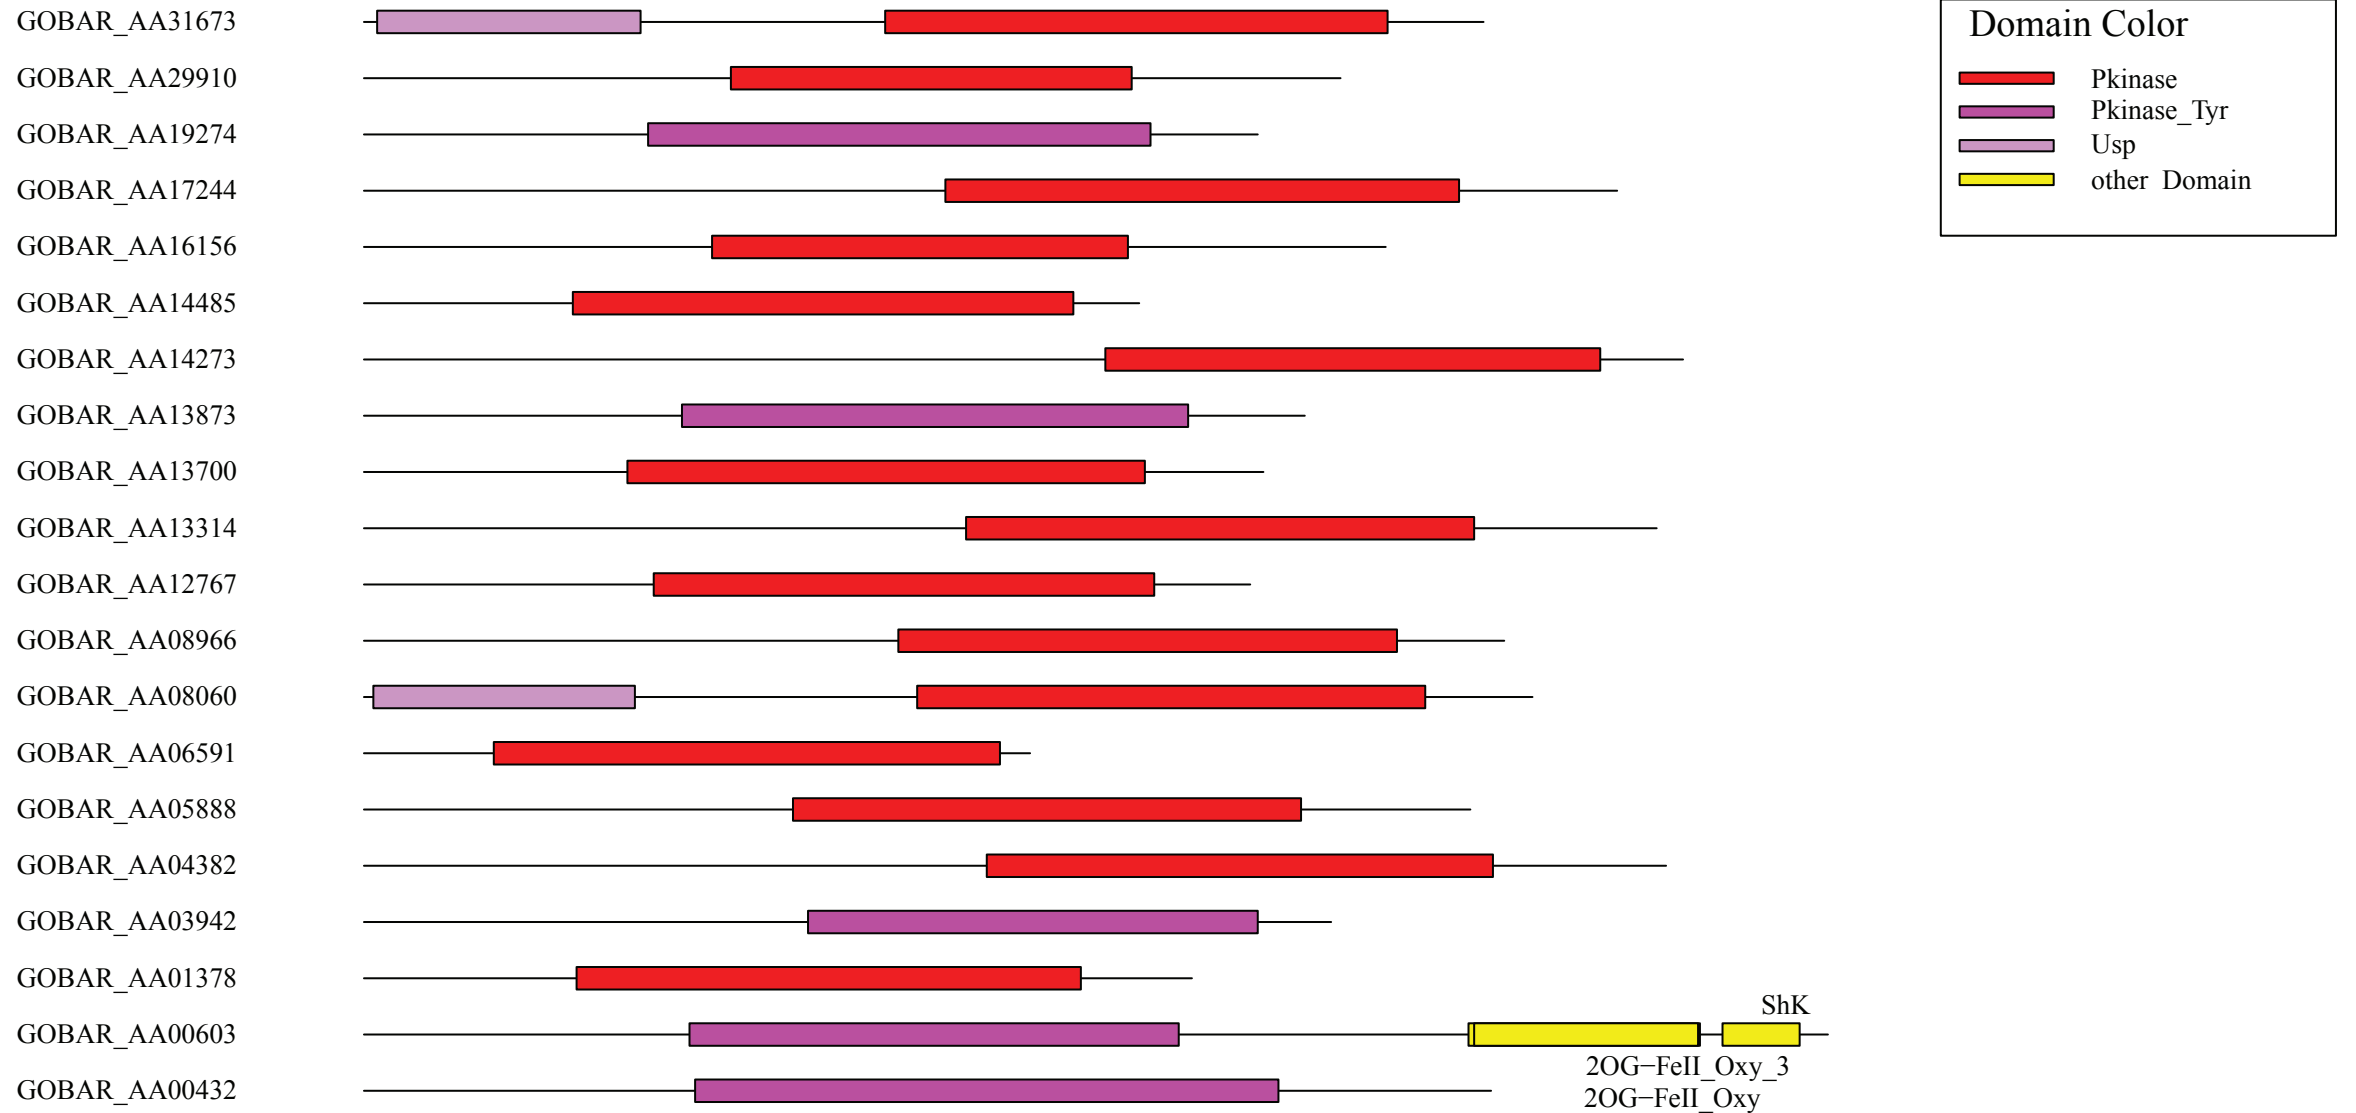

-200

0

200

400

600

800

1000

ShK

2OG-FeII\_Oxy\_3

2OG-FeII\_Oxy

### G.ba RLK-Pelle\_RLCK-VI domain diagram (part 2)

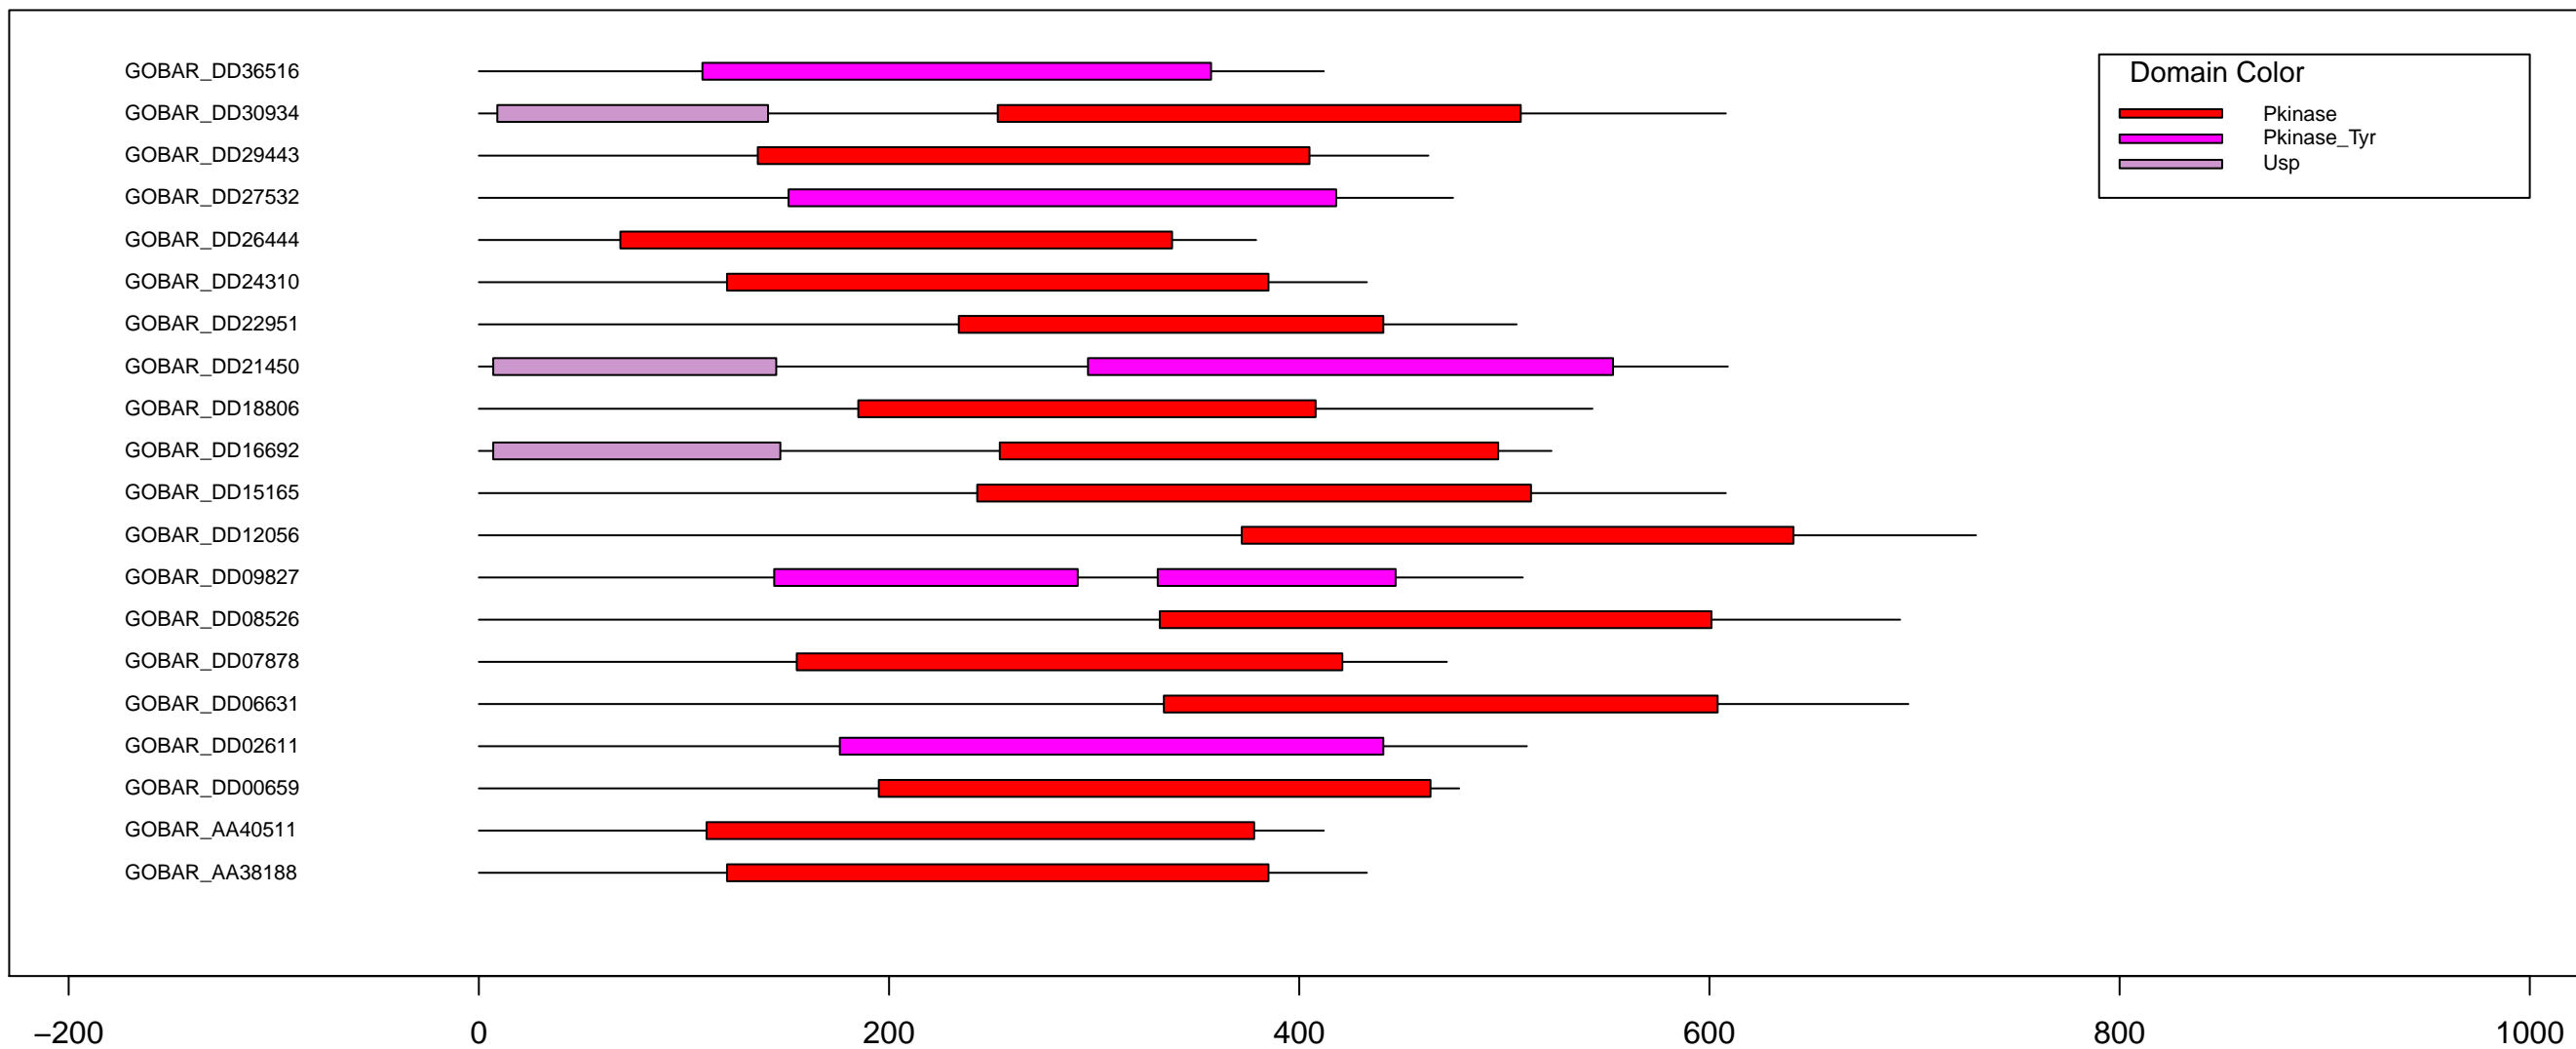



# G.ba RLK-Pelle\_RLCK-V domain diagram (part 1)

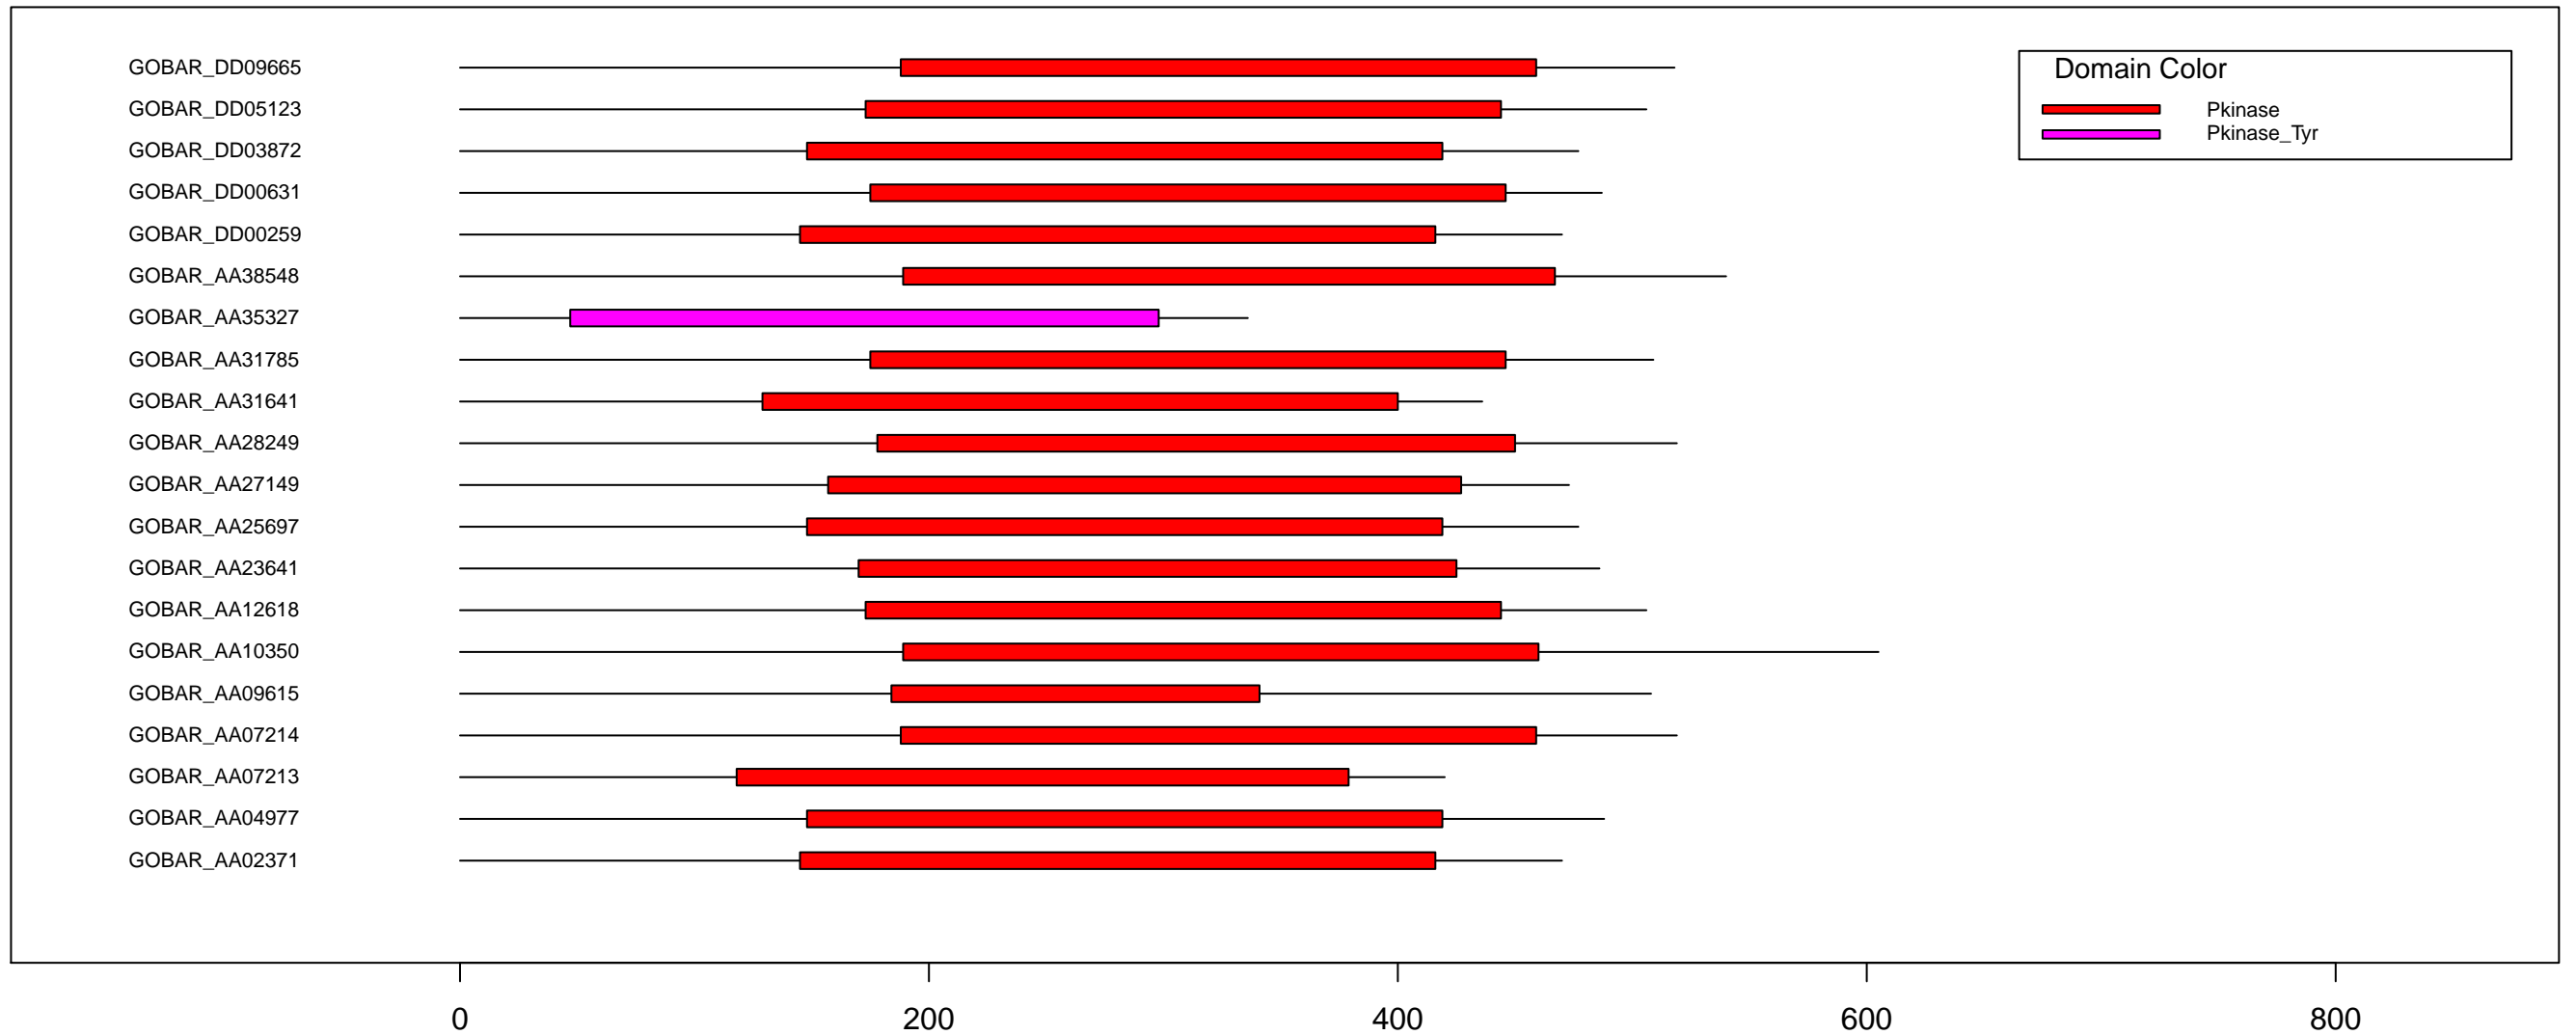

### G.ba RLK-Pelle\_RLCK-V domain diagram (part 2)

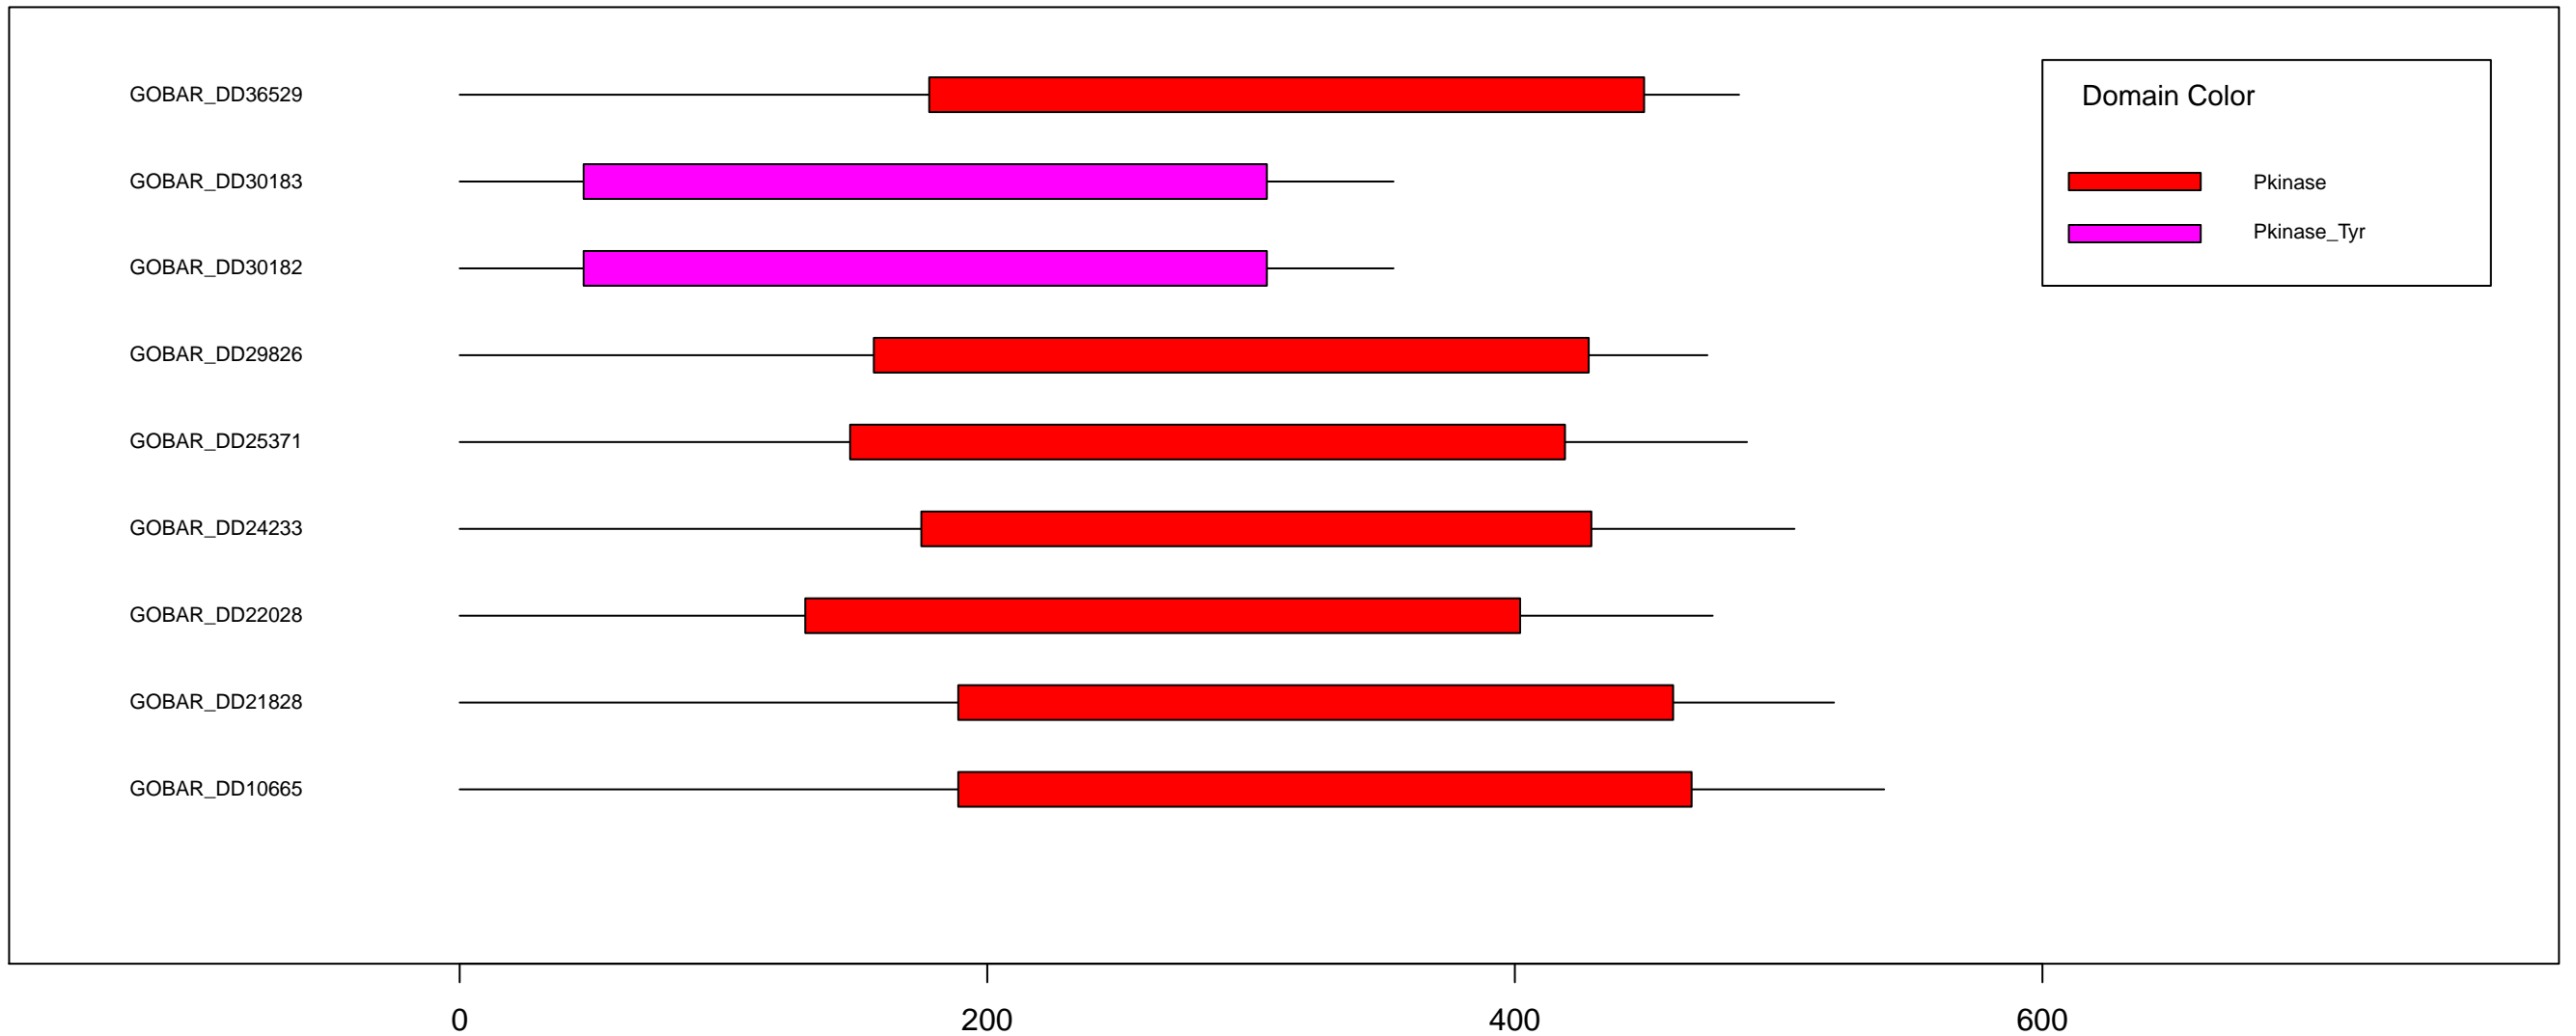

### G.ba RLK-Pelle\_RLCK-XII-1 domain diagram (part 1)

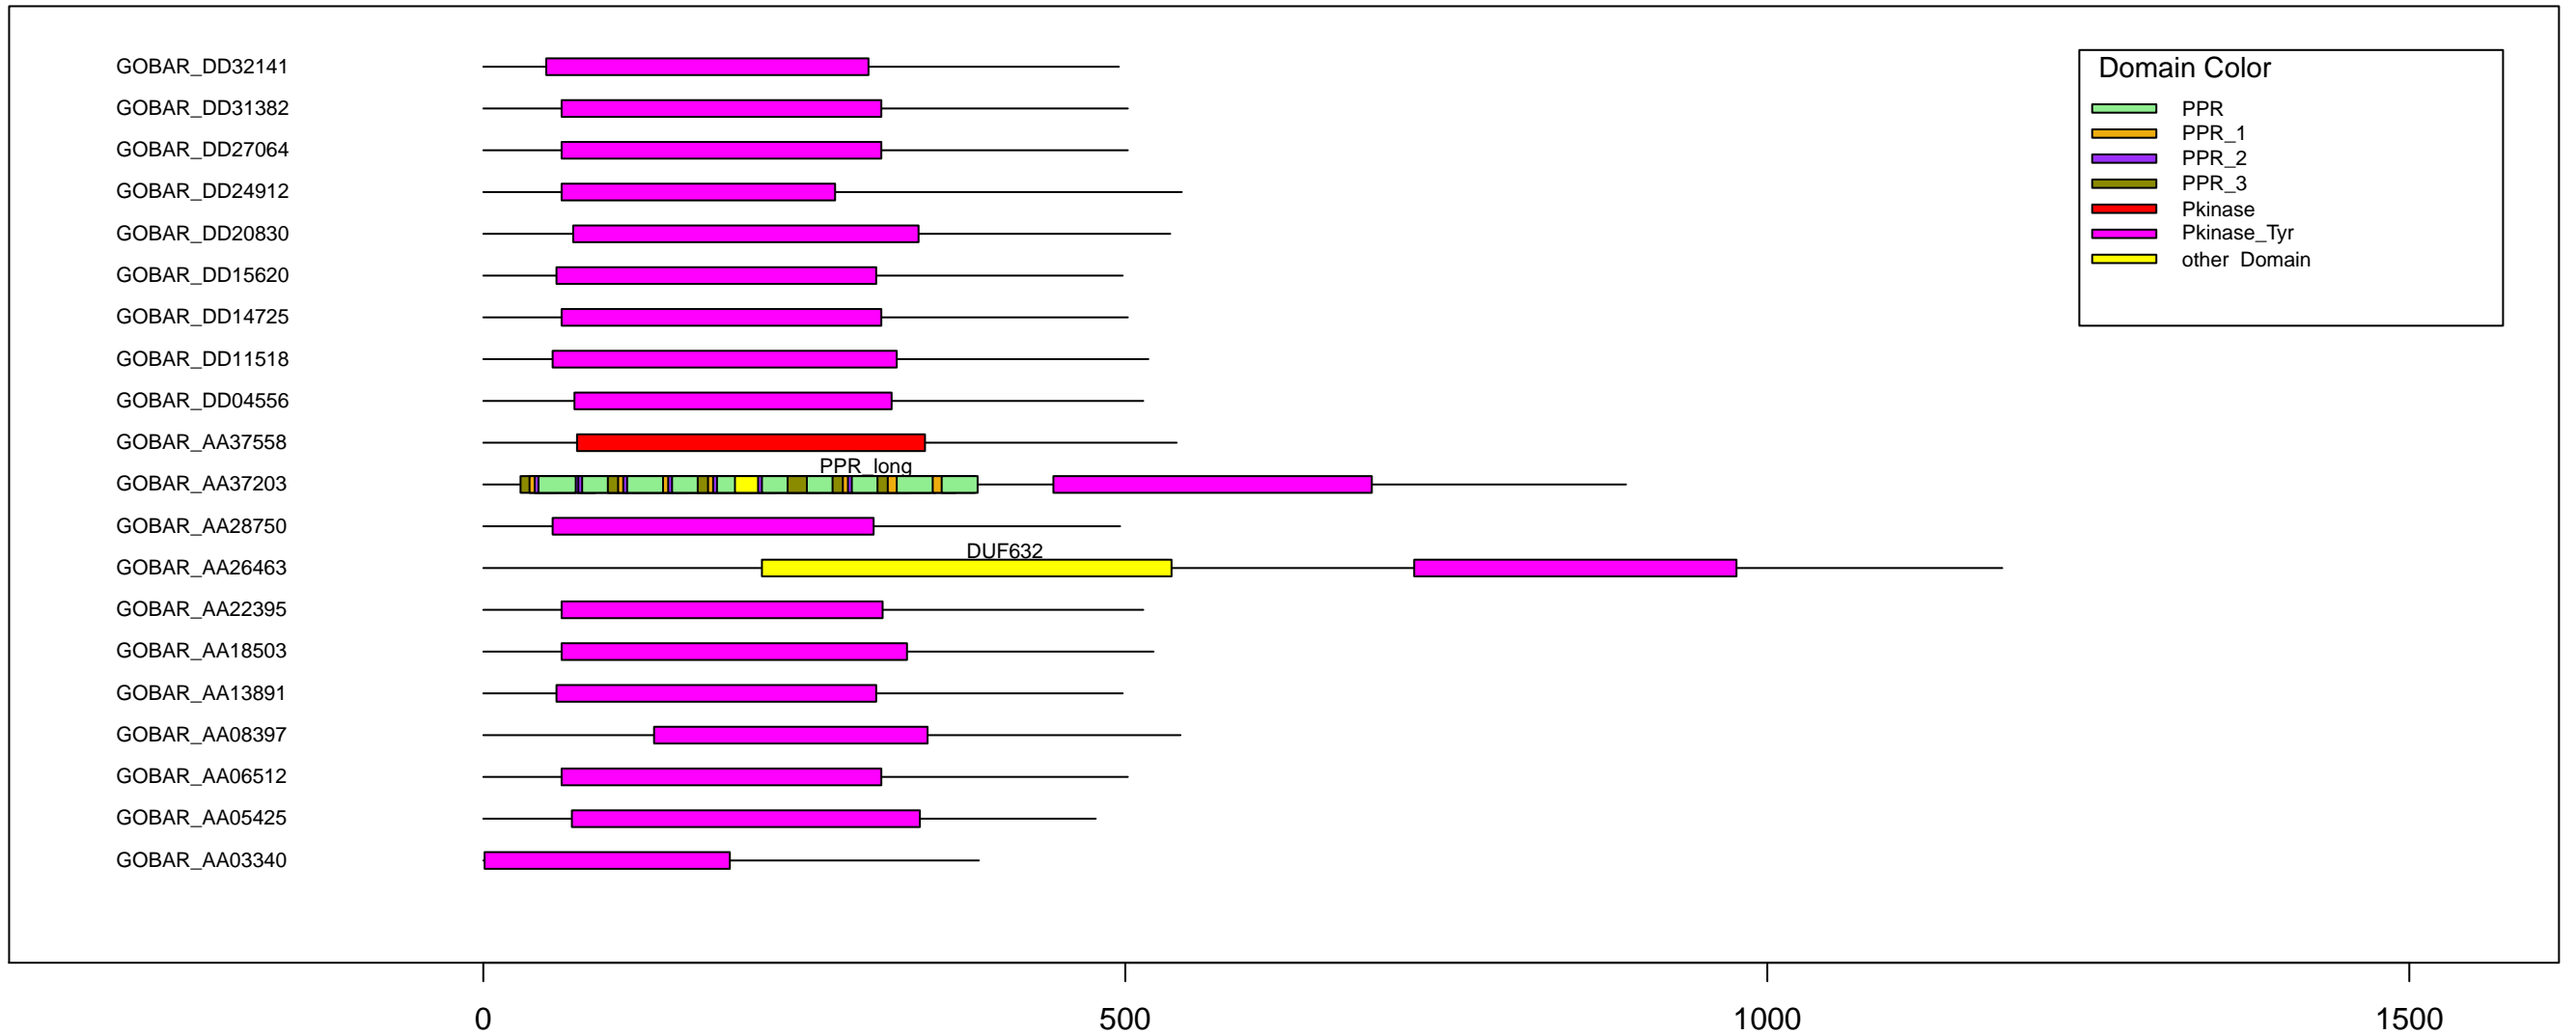

# G.ba RLK-Pelle\_RLCK-XII-1 domain diagram (part 2)

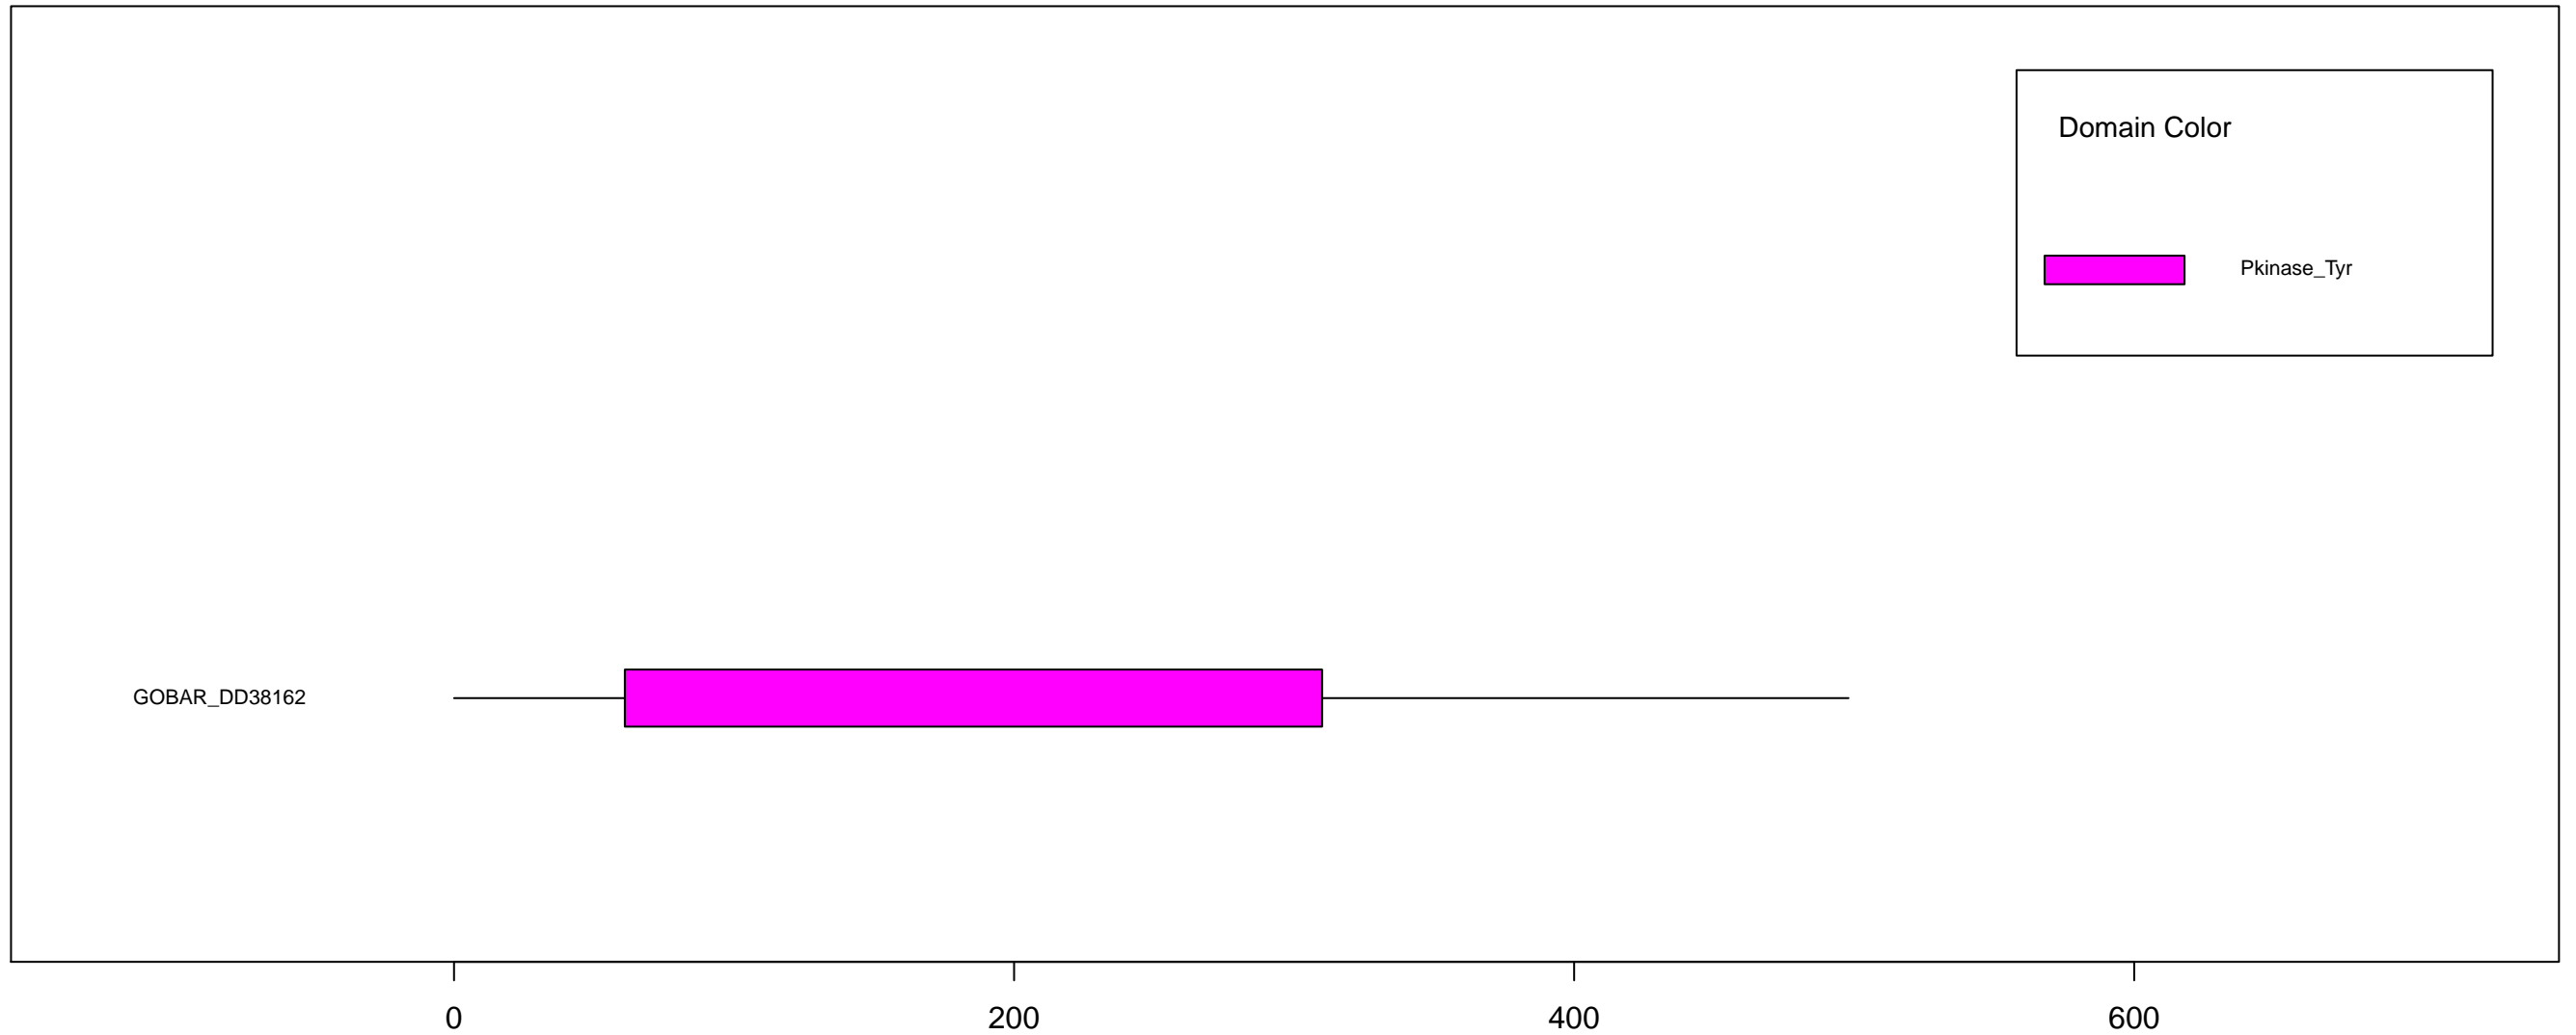

# G.ba RLK-Pelle\_RLCK-XII-2 domain diagram (all)

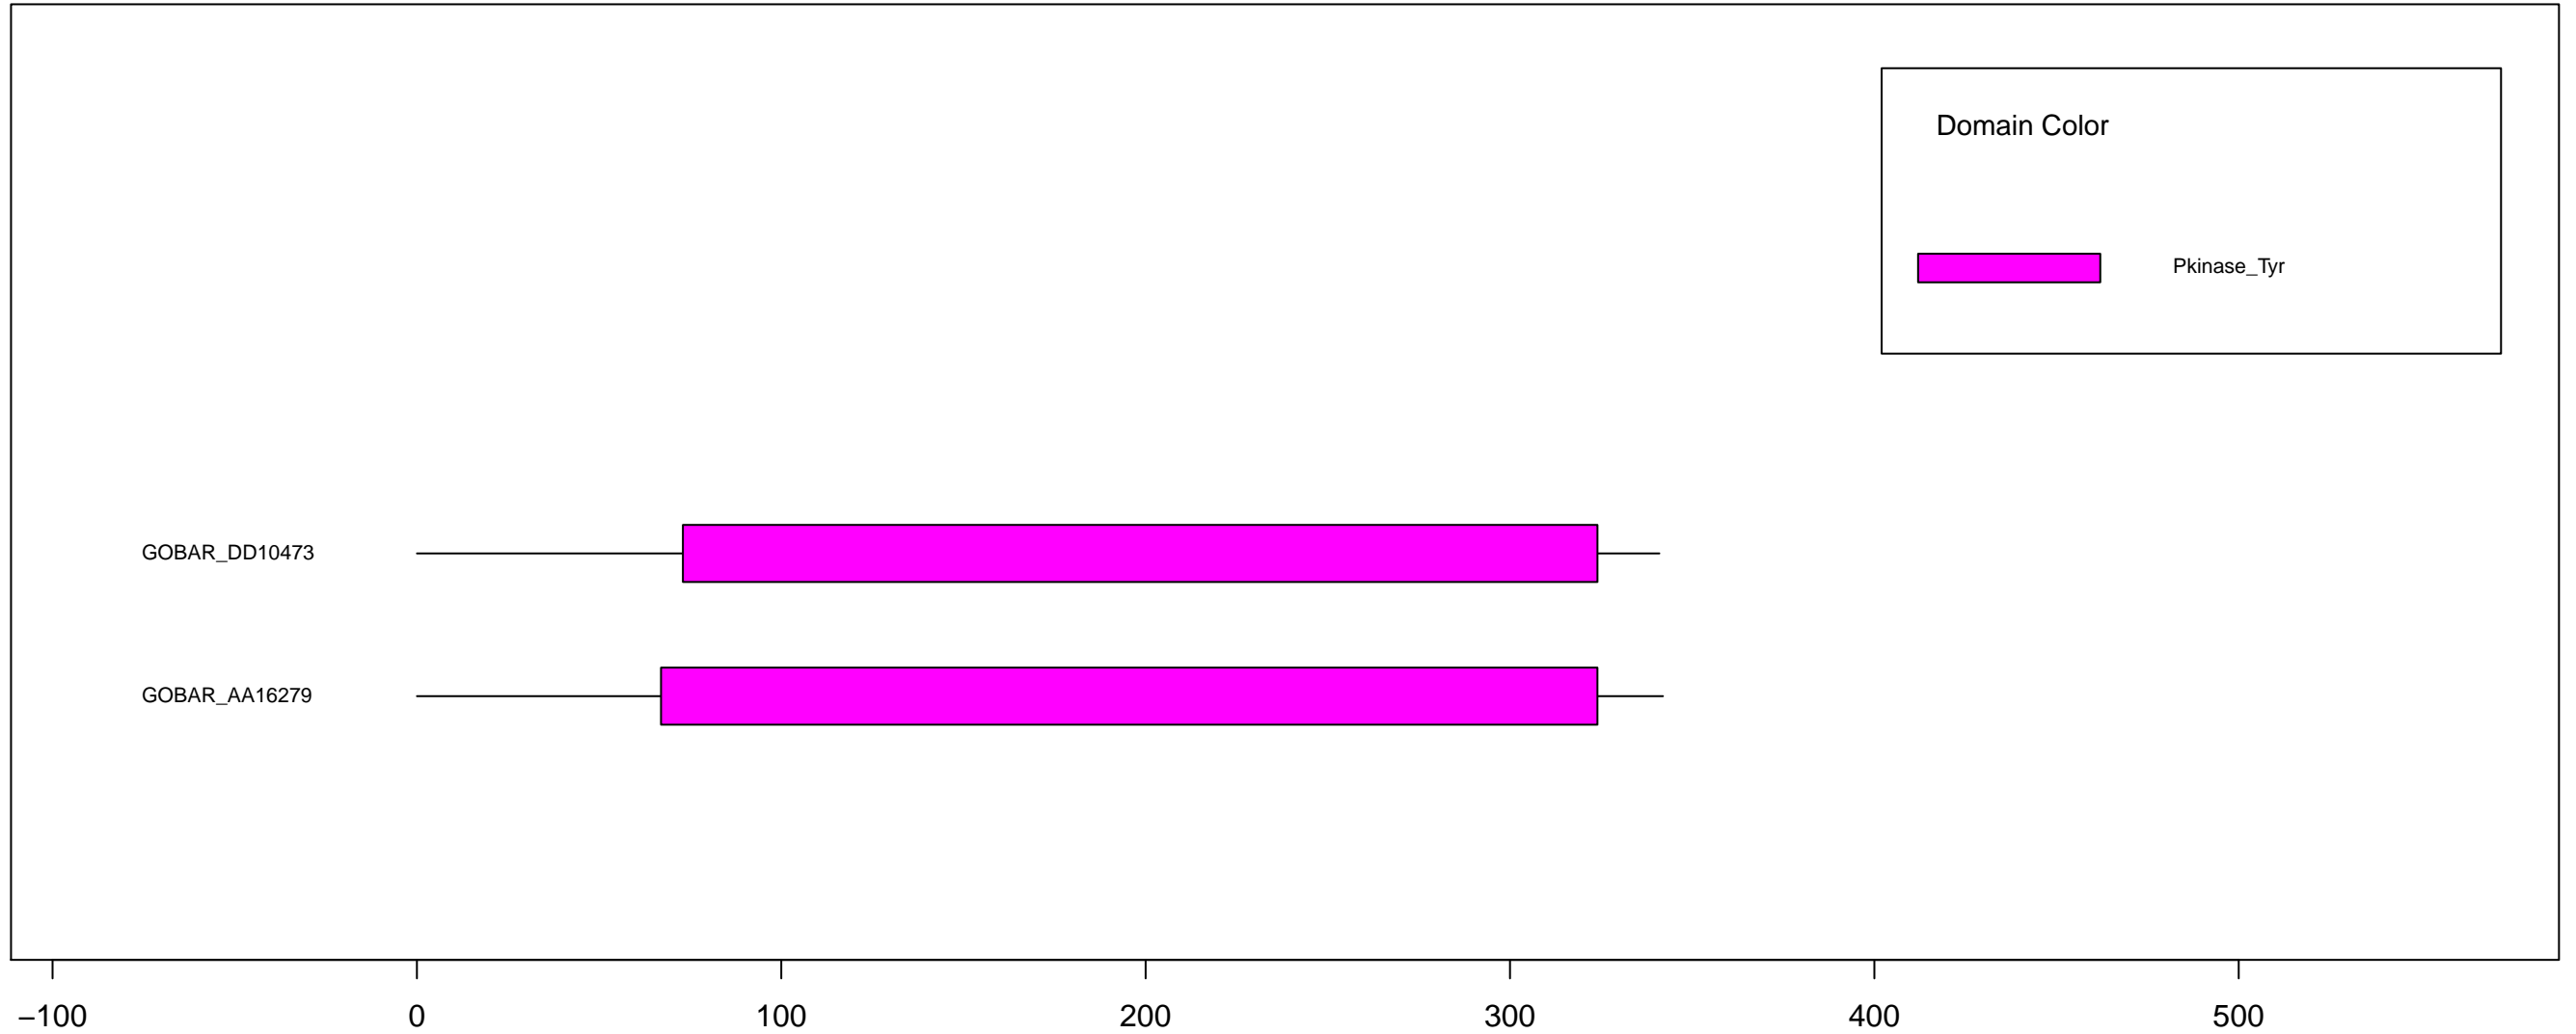

### G.ba RLK-Pelle\_RLCK-XIII domain diagram (all)

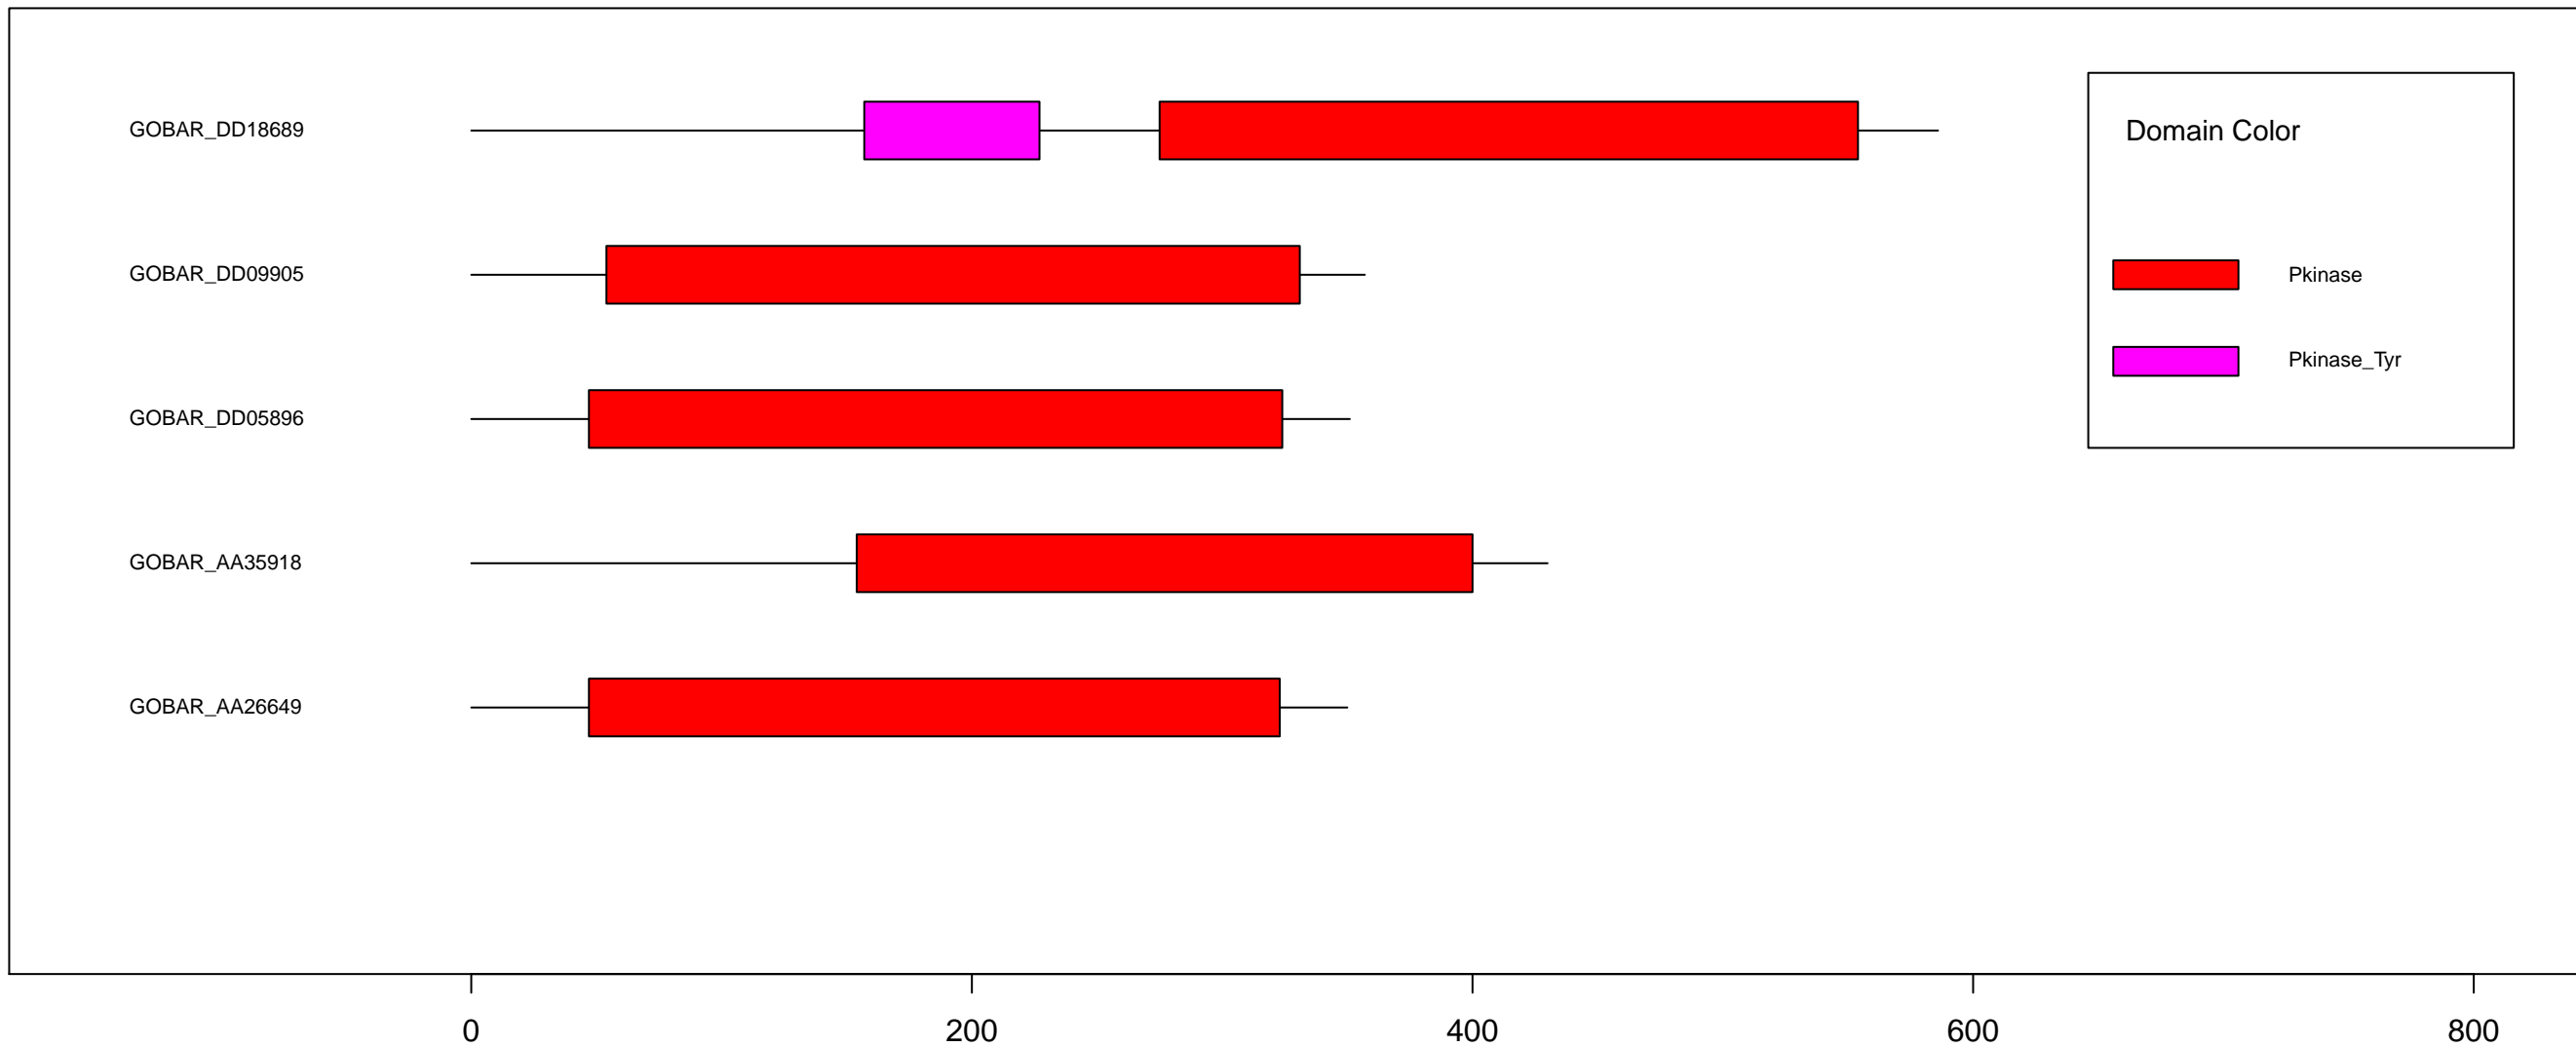

# G.ba RLK-Pelle\_RLCK-XI domain diagram (all)

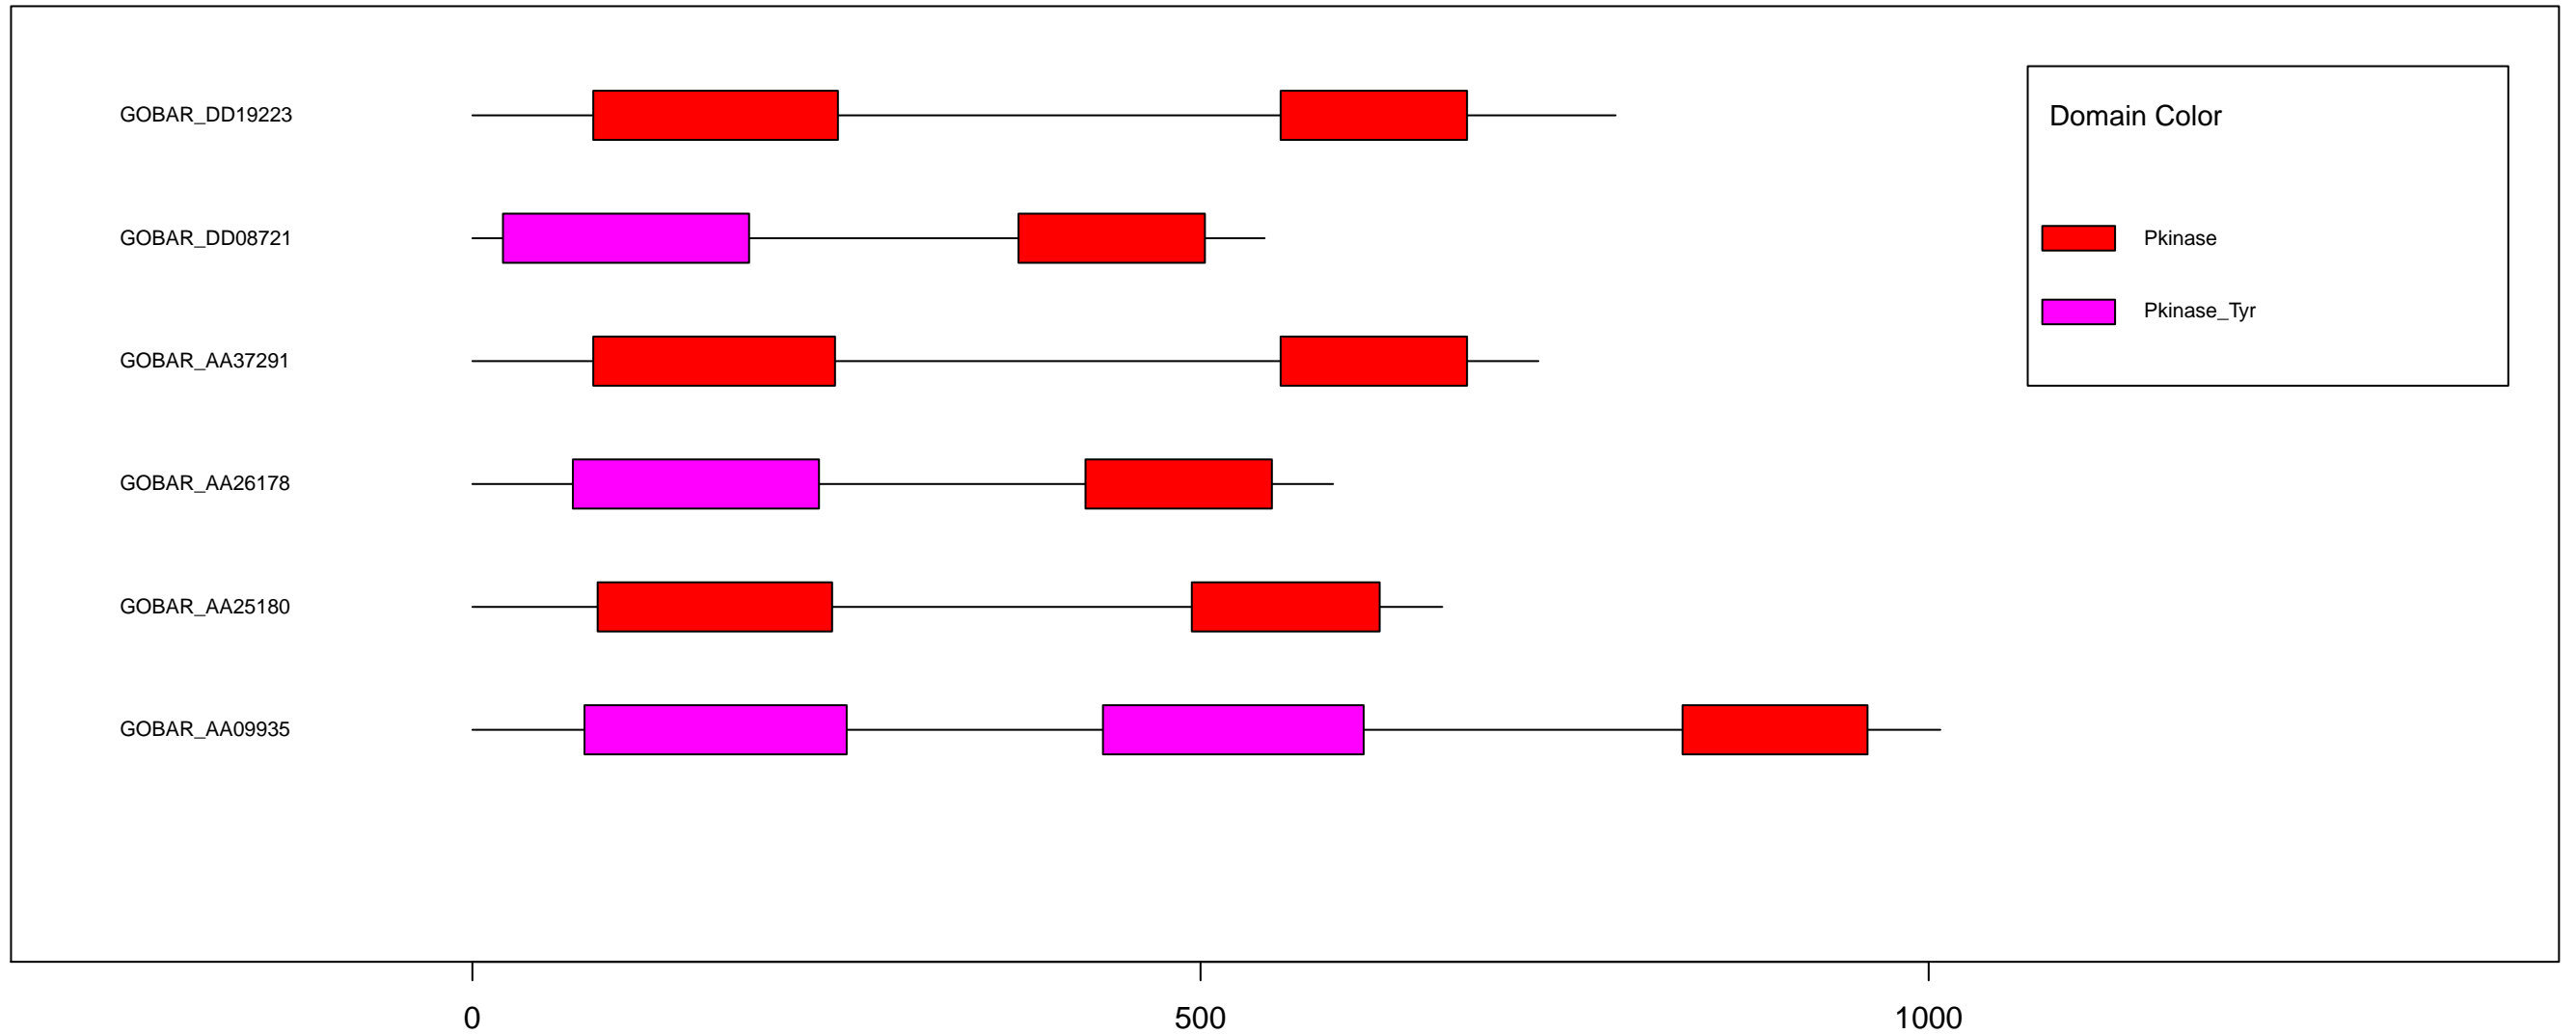

### G.ba RLK-Pelle\_RLCK-X domain diagram (all)

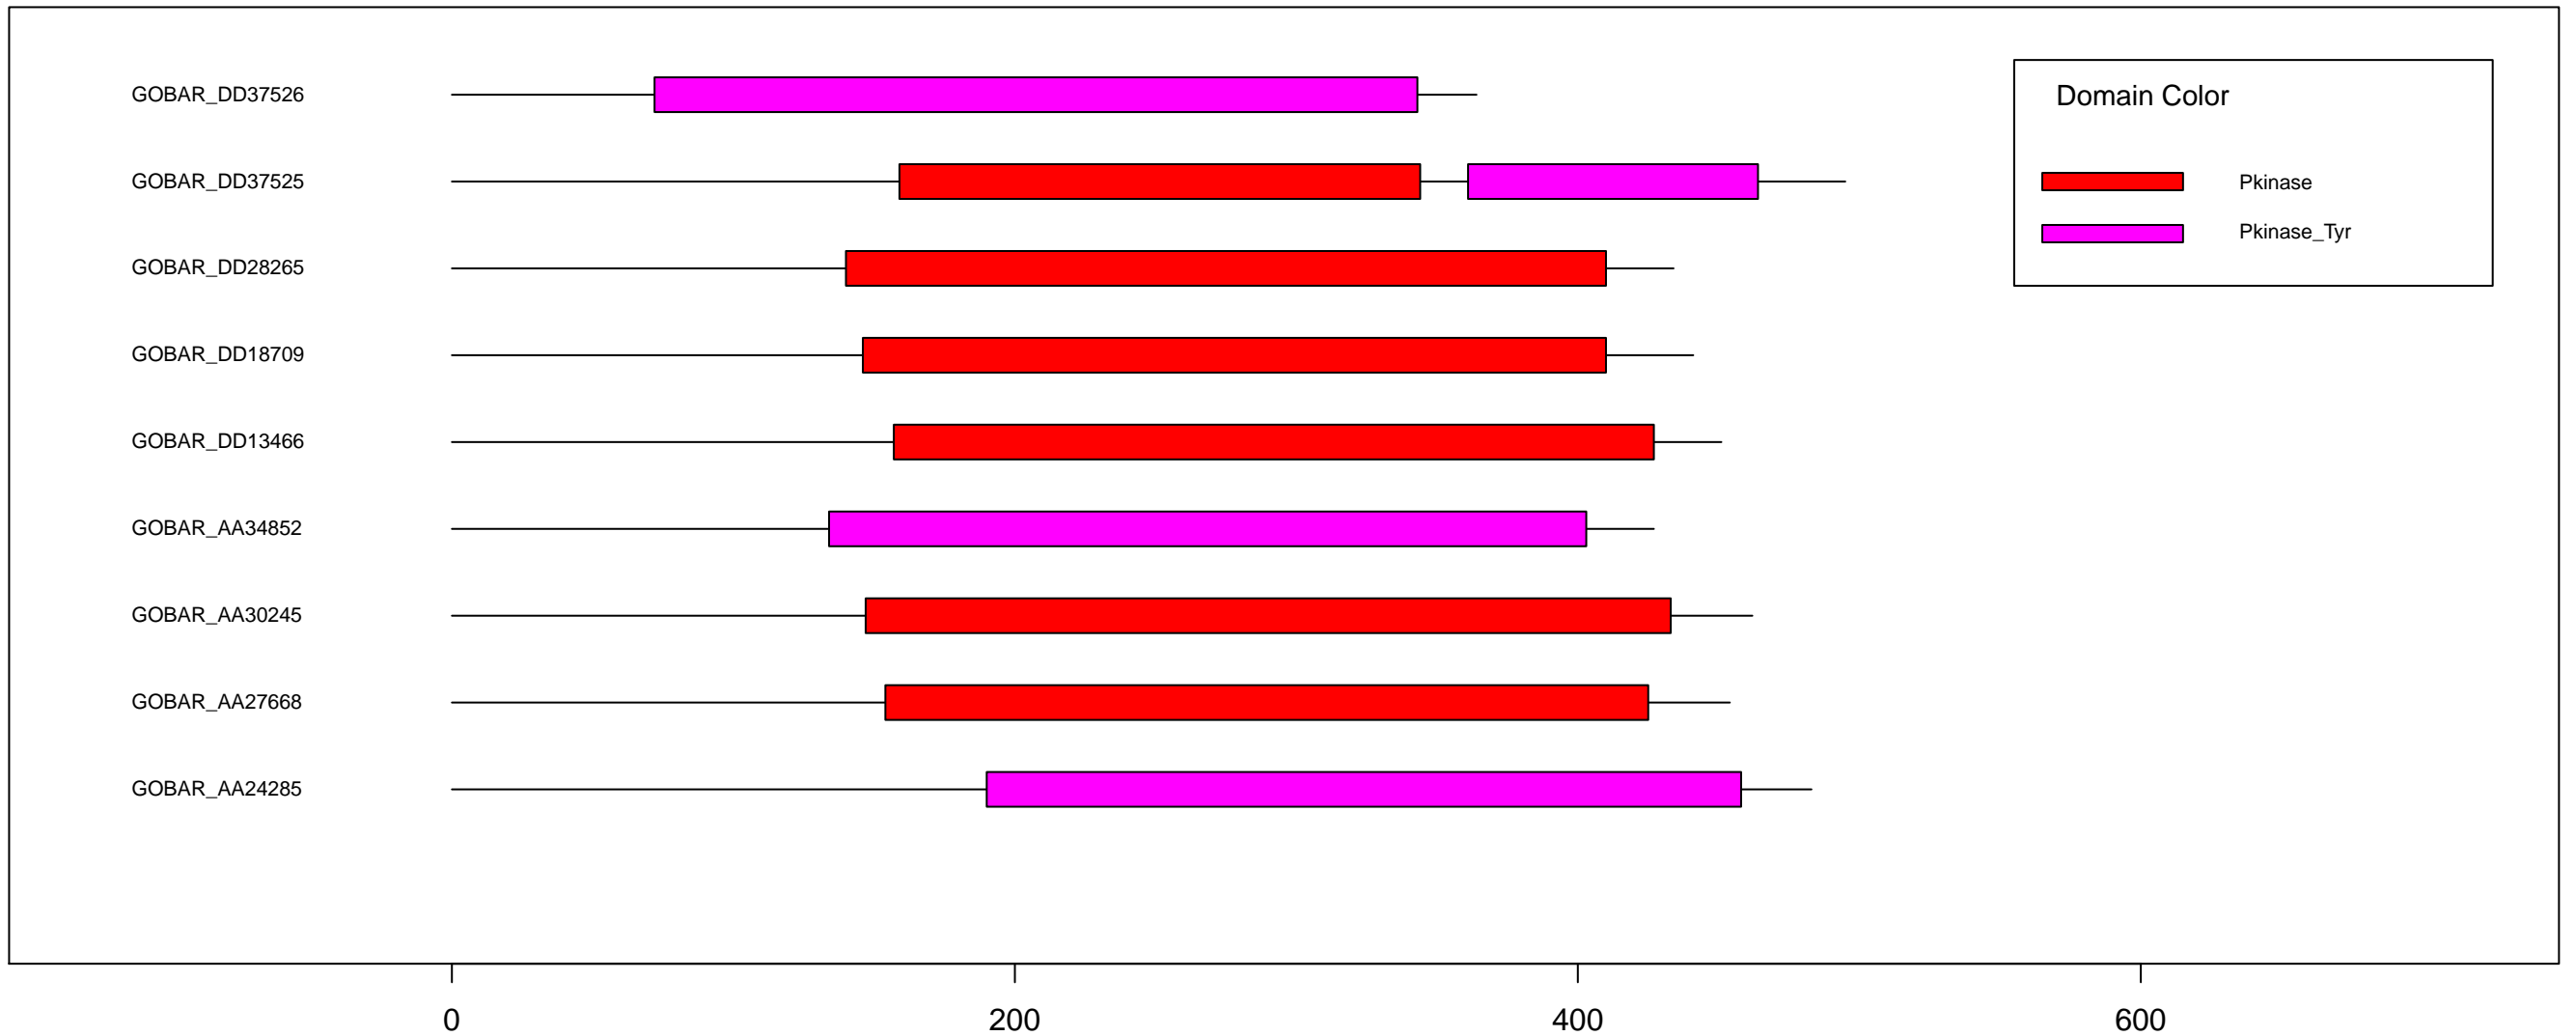



# G.ba RLK-Pelle\_RLCK-XVI domain diagram (all)

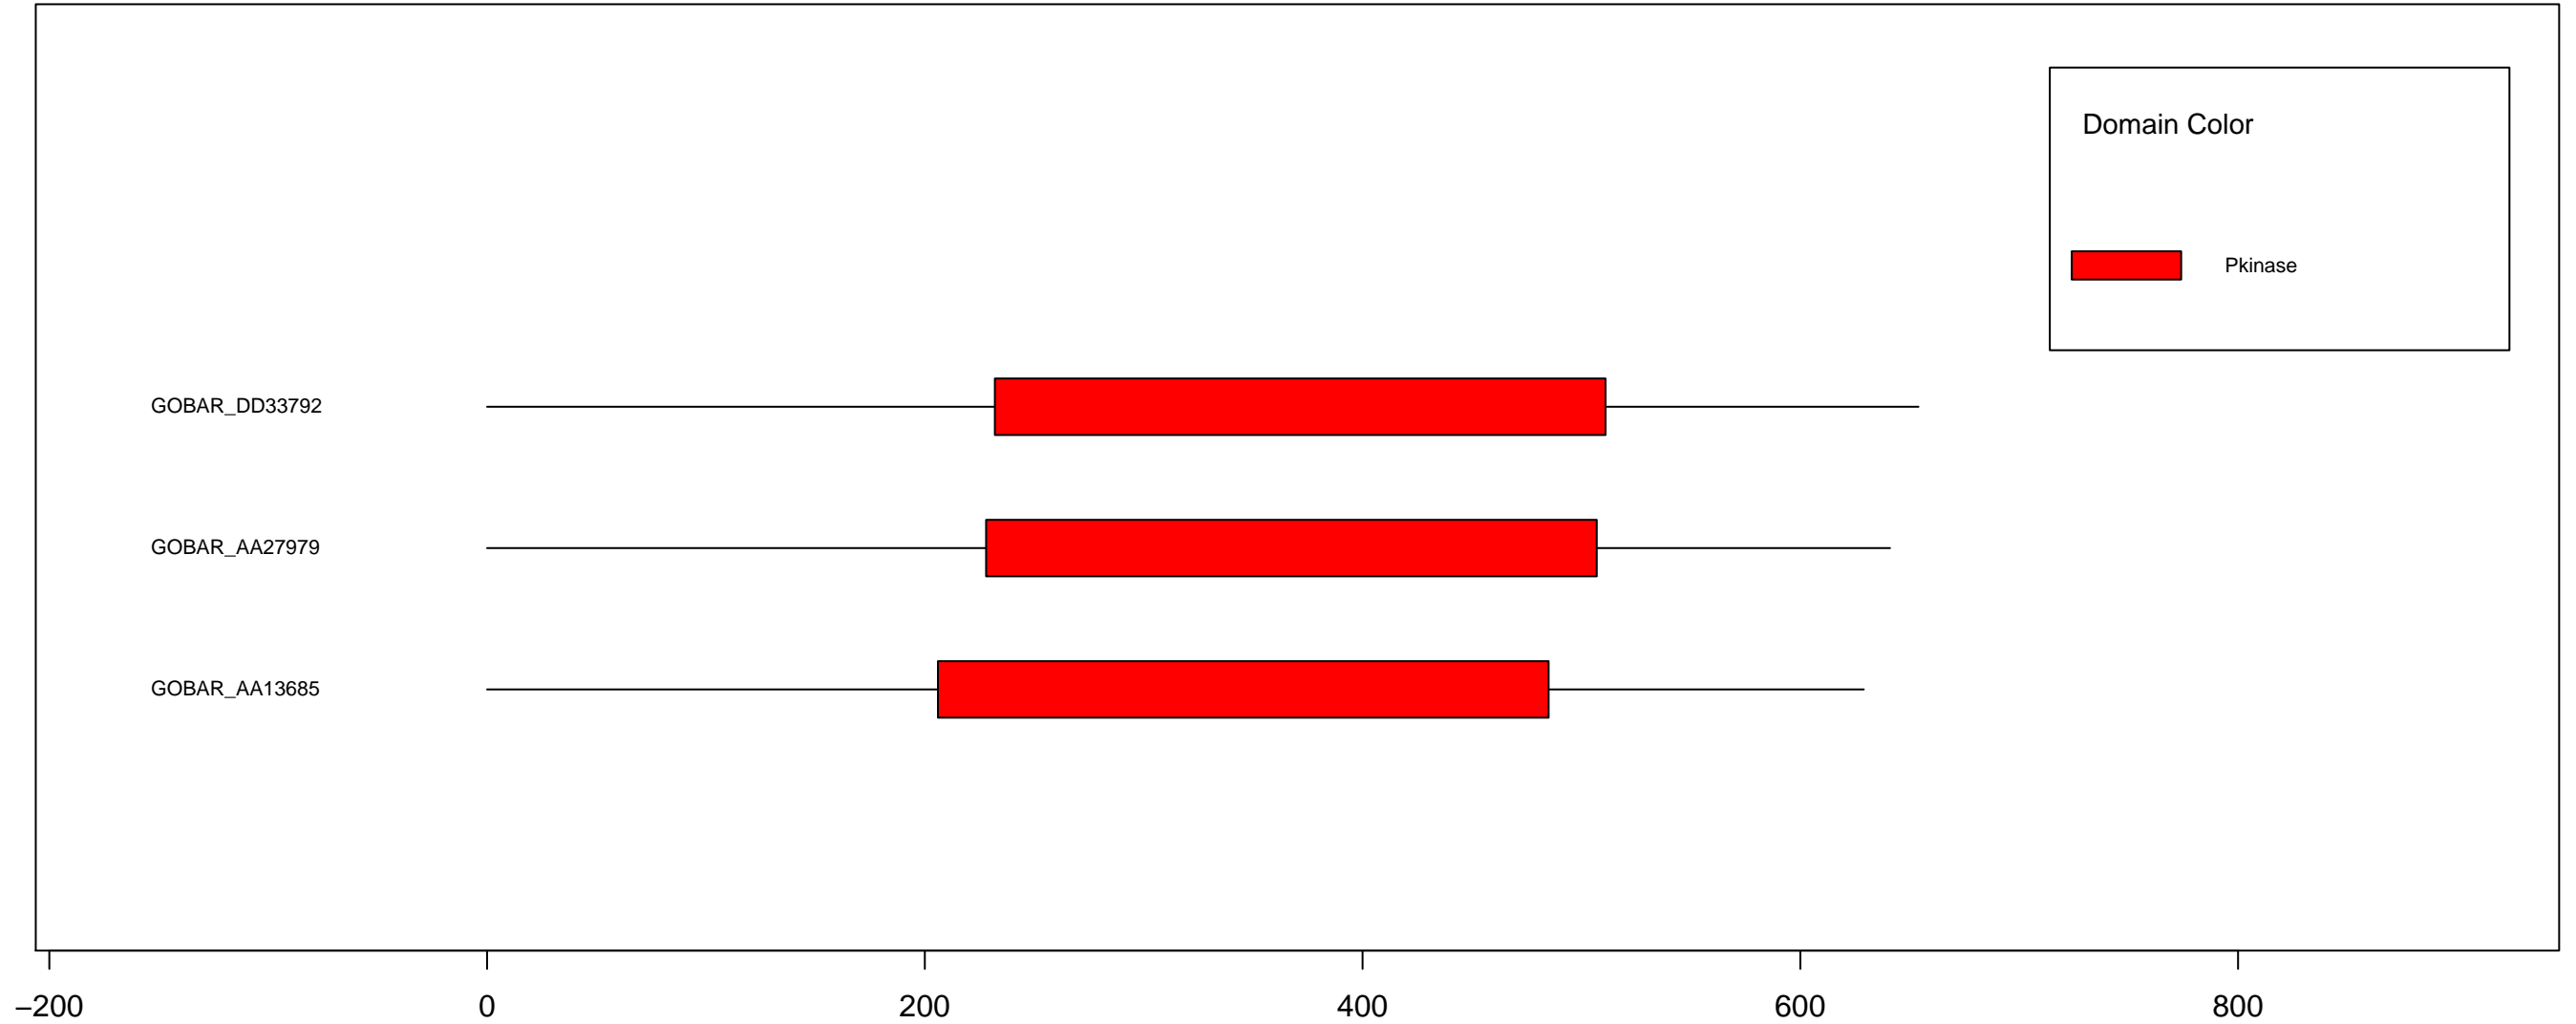

# G.ba RLK-Pelle\_RLCK-XV domain diagram (all)

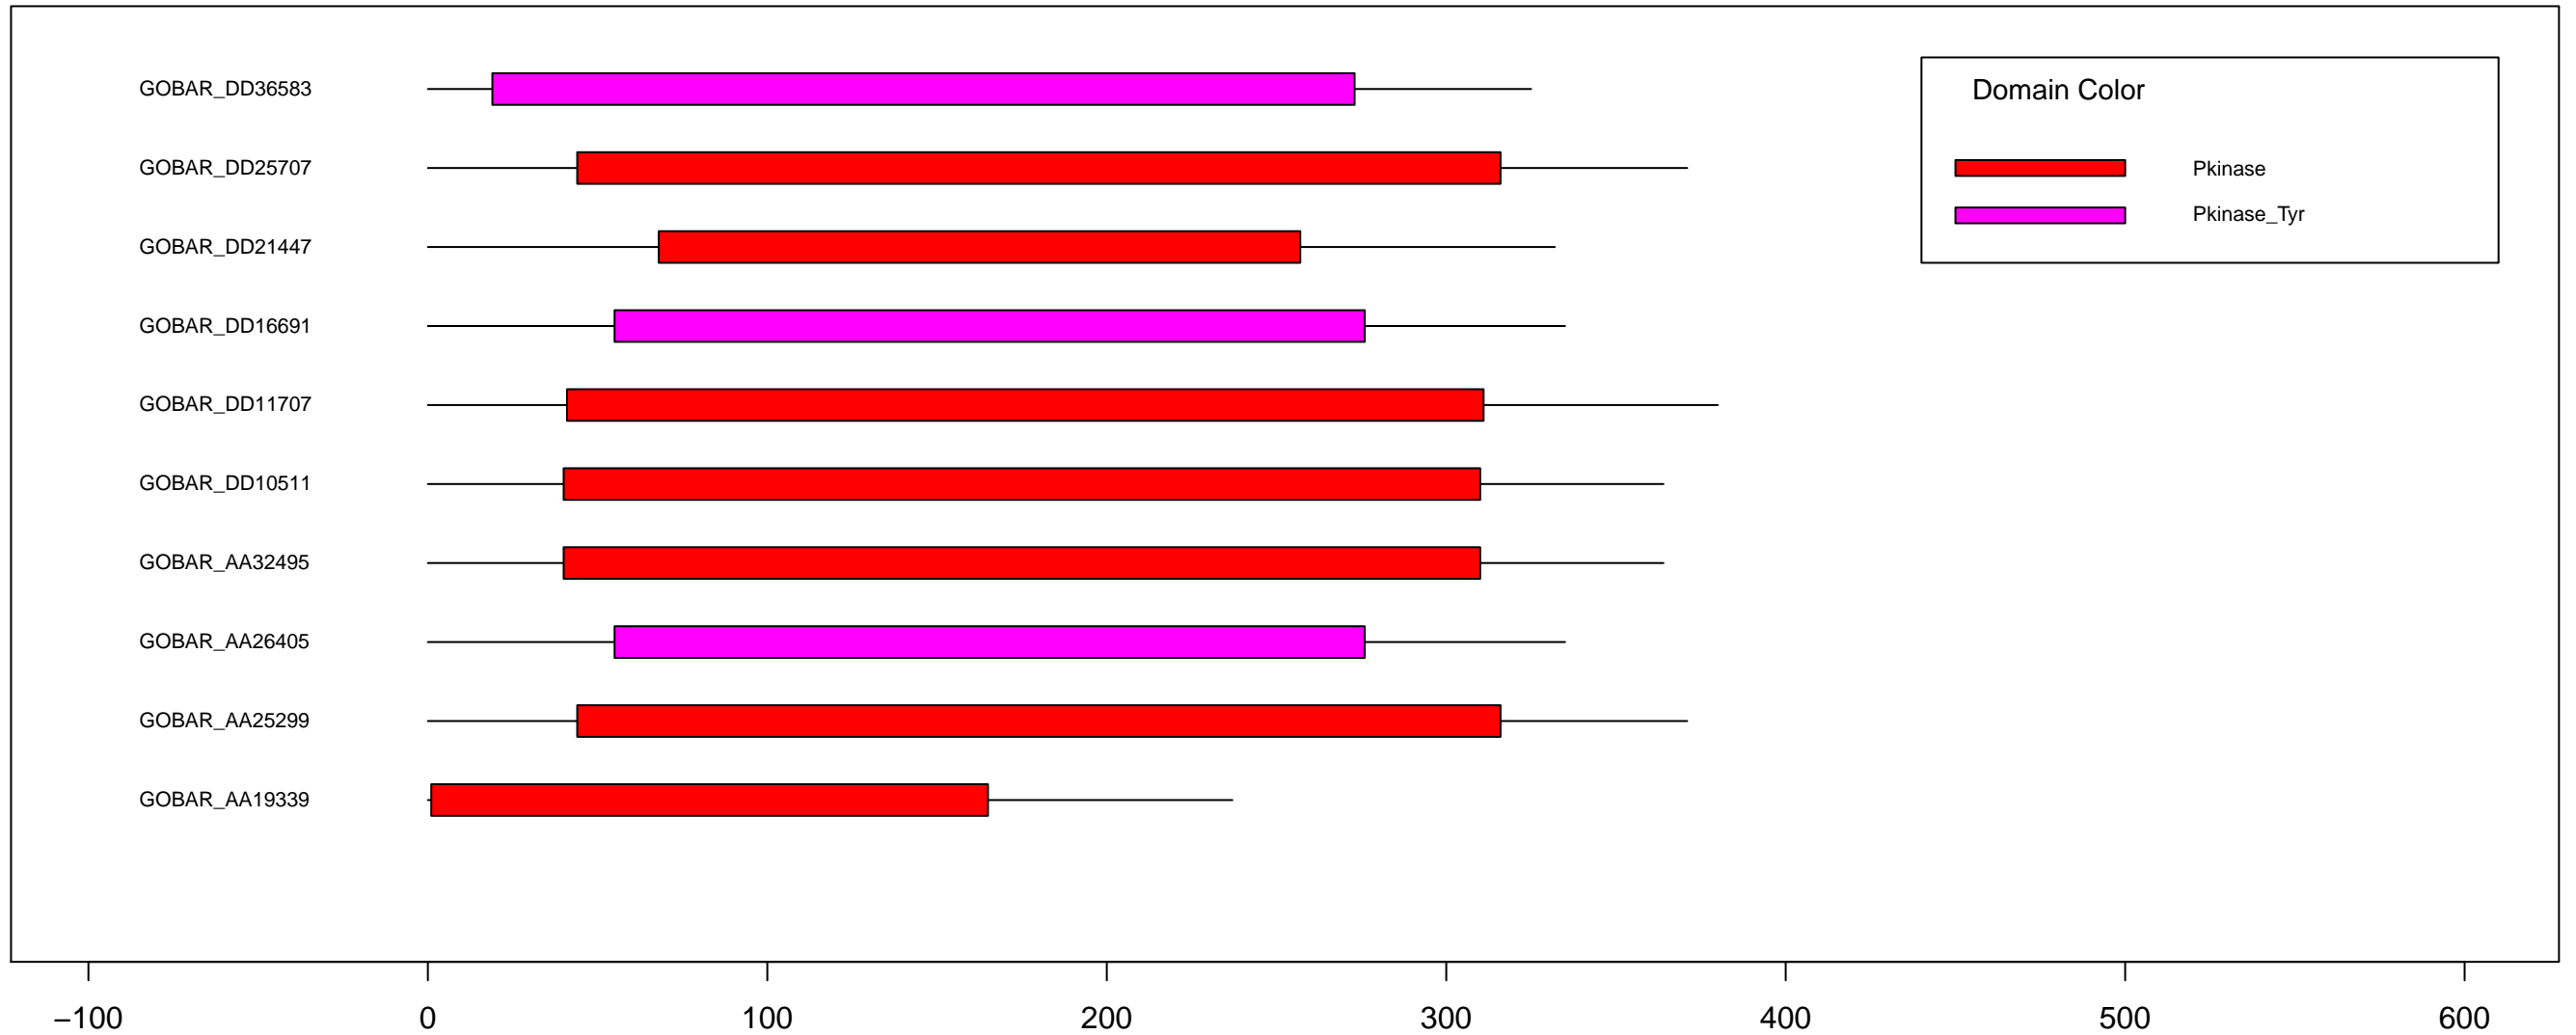

### G.ba RLK-Pelle\_SD-2b domain diagram (part 1)

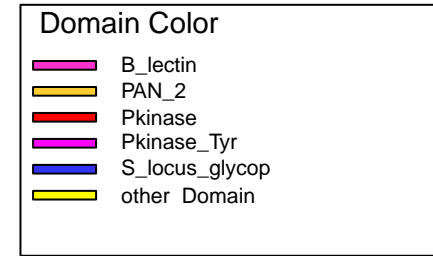

GOBAR\_AA15523  
 GOBAR\_AA14661  
 GOBAR\_AA14142  
 GOBAR\_AA14140  
 GOBAR\_AA13271  
 GOBAR\_AA13093  
 GOBAR\_AA13088  
 GOBAR\_AA12855  
 GOBAR\_AA12087  
 GOBAR\_AA11531  
 GOBAR\_AA11265  
 GOBAR\_AA09329  
 GOBAR\_AA09328  
 GOBAR\_AA08385  
 GOBAR\_AA07824  
 GOBAR\_AA07823  
 GOBAR\_AA02691  
 GOBAR\_AA02690  
 GOBAR\_AA01818  
 GOBAR\_AA00077

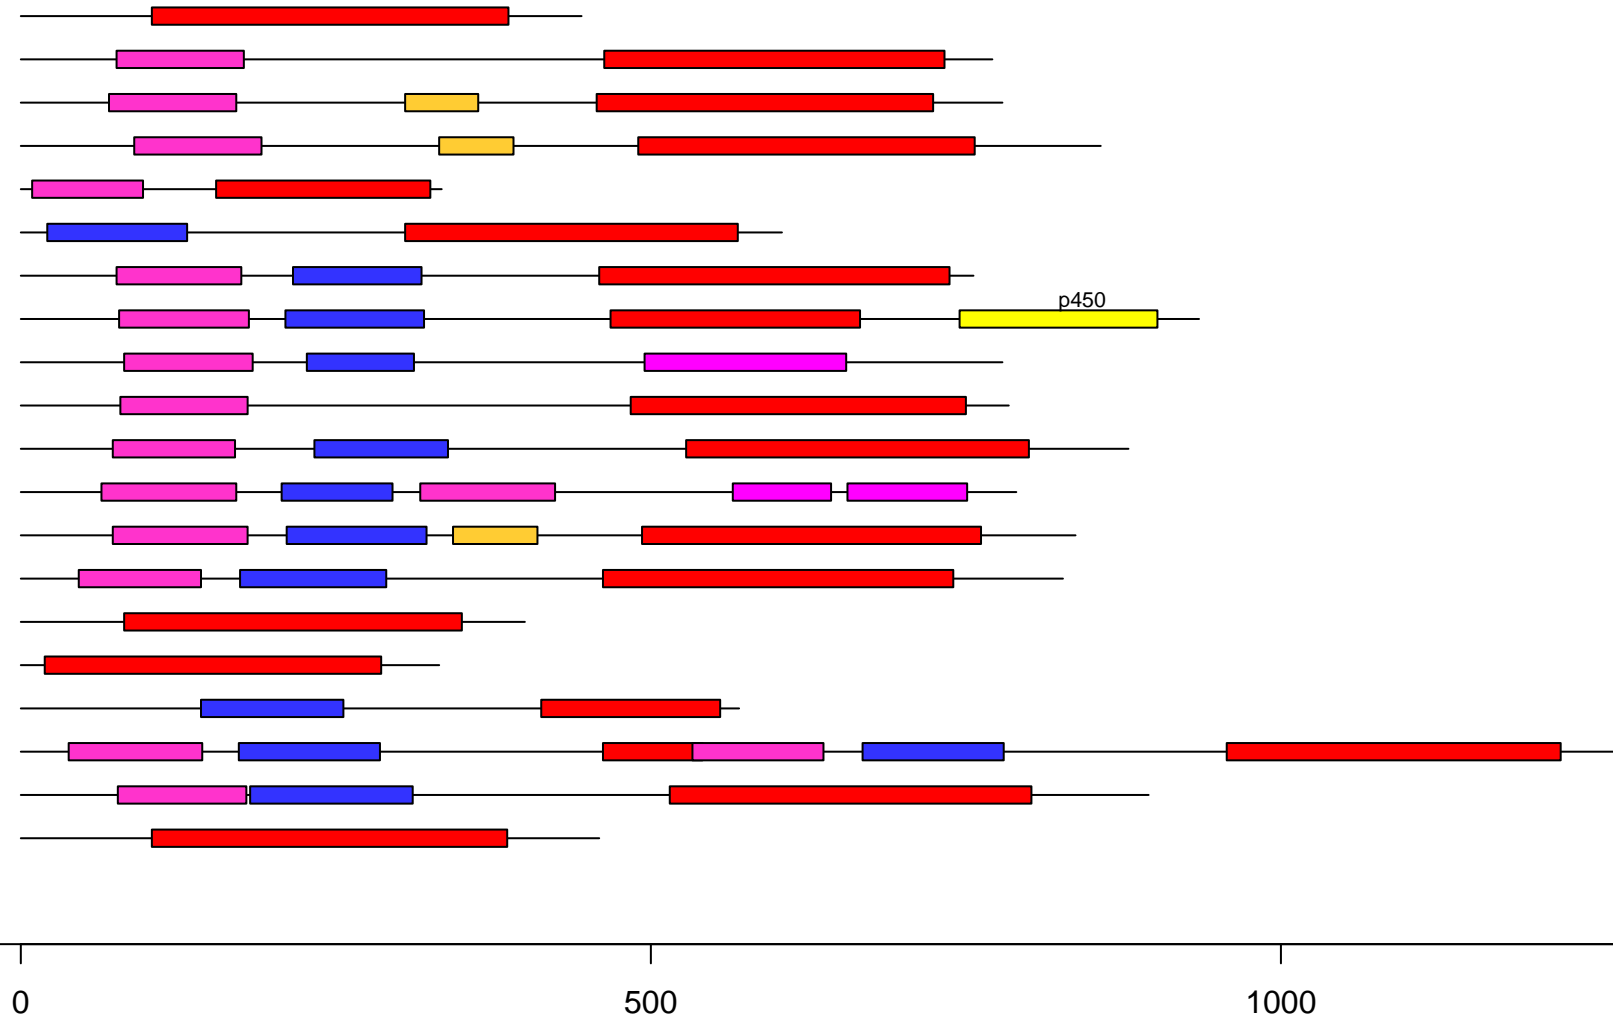

### G.ba RLK-Pelle\_SD-2b domain diagram (part 2)

GOBAR\_AA33754  
 GOBAR\_AA33553  
 GOBAR\_AA33552  
 GOBAR\_AA30632  
 GOBAR\_AA30579  
 GOBAR\_AA30578  
 GOBAR\_AA29765  
 GOBAR\_AA28756  
 GOBAR\_AA28563  
 GOBAR\_AA23138  
 GOBAR\_AA19459  
 GOBAR\_AA18618  
 GOBAR\_AA18617  
 GOBAR\_AA18614  
 GOBAR\_AA18610  
 GOBAR\_AA18608  
 GOBAR\_AA17506  
 GOBAR\_AA16721  
 GOBAR\_AA16719  
 GOBAR\_AA16449

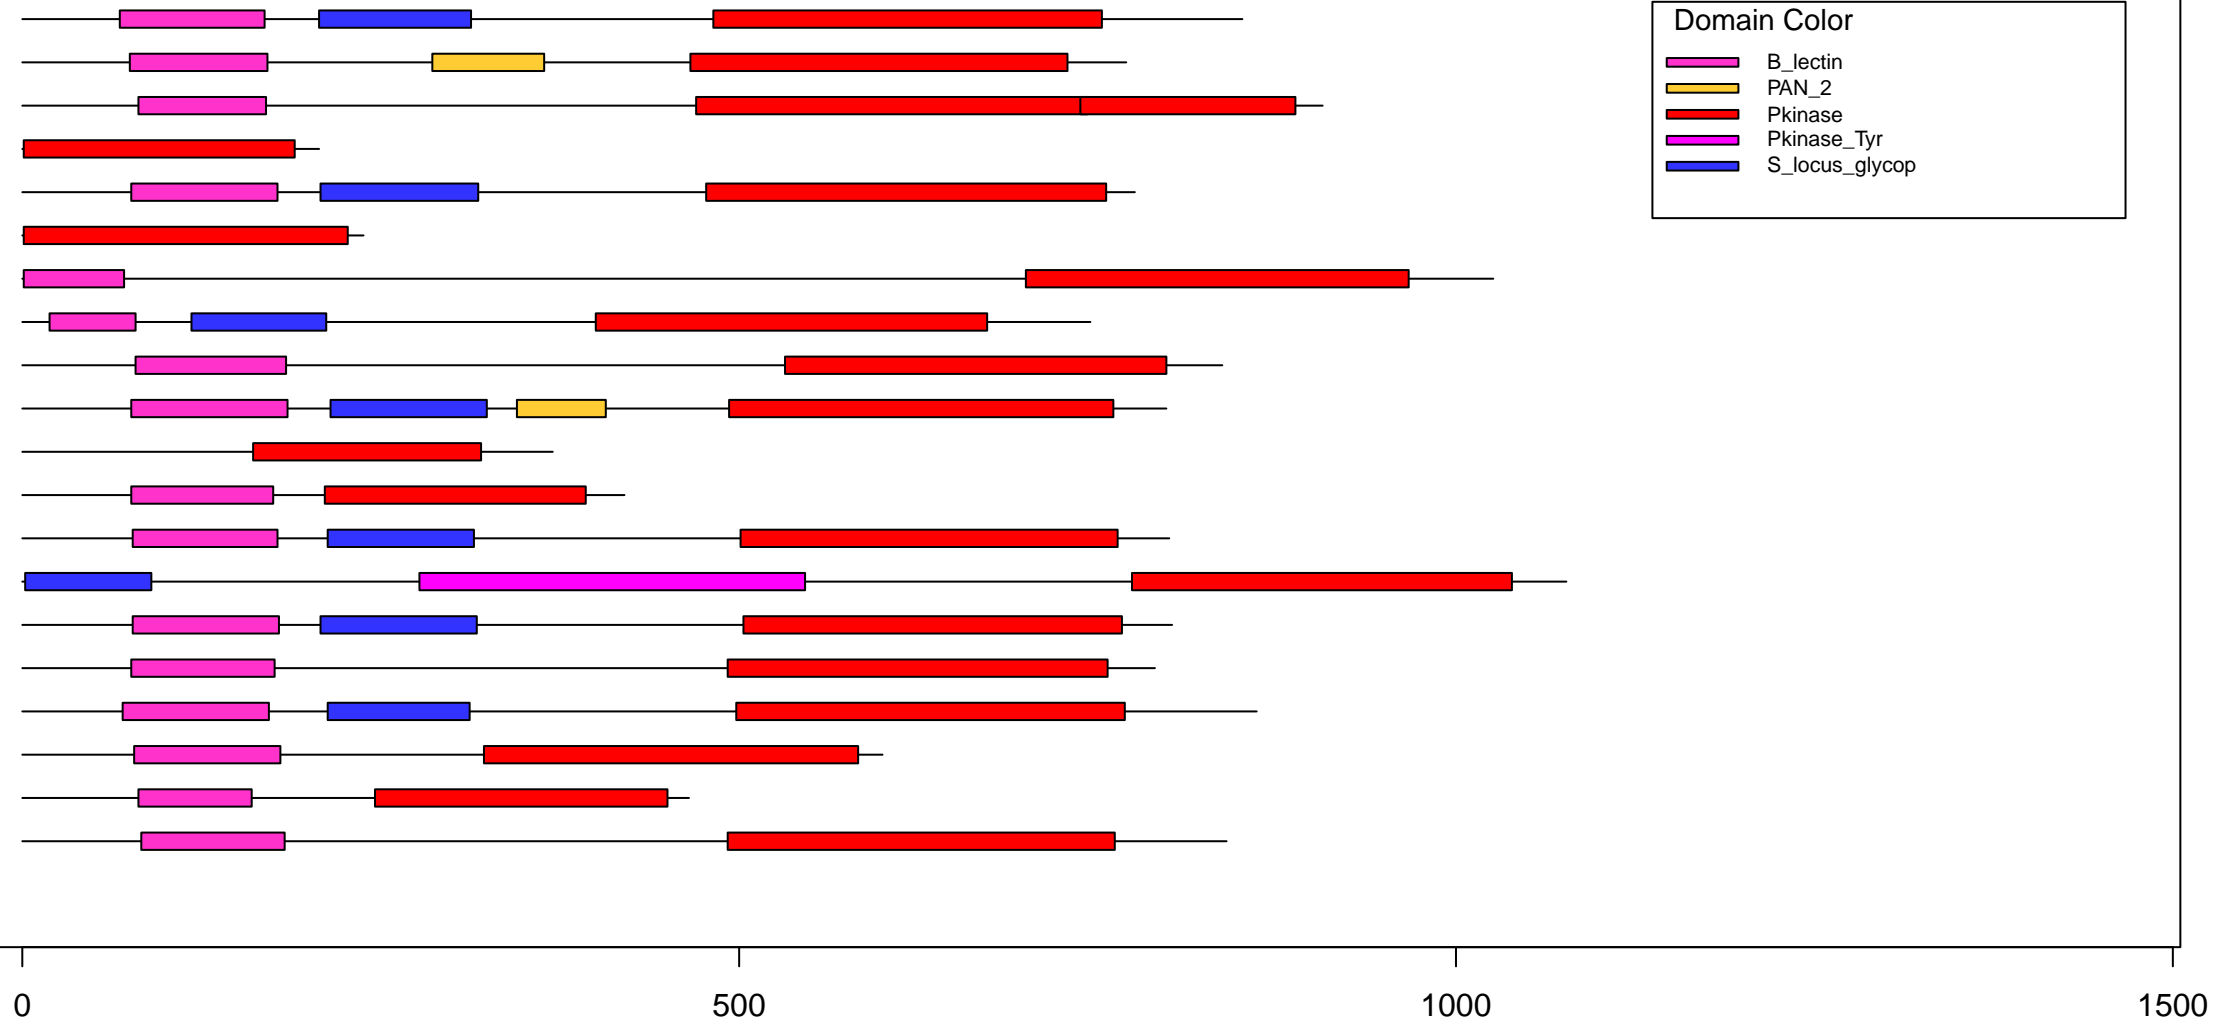

### G.ba RLK-Pelle\_SD-2b domain diagram (part 3)

GOBAR\_DD09507  
 GOBAR\_DD09152  
 GOBAR\_DD02641  
 GOBAR\_DD01917  
 GOBAR\_DD01037  
 GOBAR\_DD00193  
 GOBAR\_DD00037  
 GOBAR\_AA40973  
 GOBAR\_AA39745  
 GOBAR\_AA39574  
 GOBAR\_AA36424  
 GOBAR\_AA36018  
 GOBAR\_AA36017  
 GOBAR\_AA35939  
 GOBAR\_AA35938  
 GOBAR\_AA35935  
 GOBAR\_AA35891  
 GOBAR\_AA35515  
 GOBAR\_AA35514  
 GOBAR\_AA33919

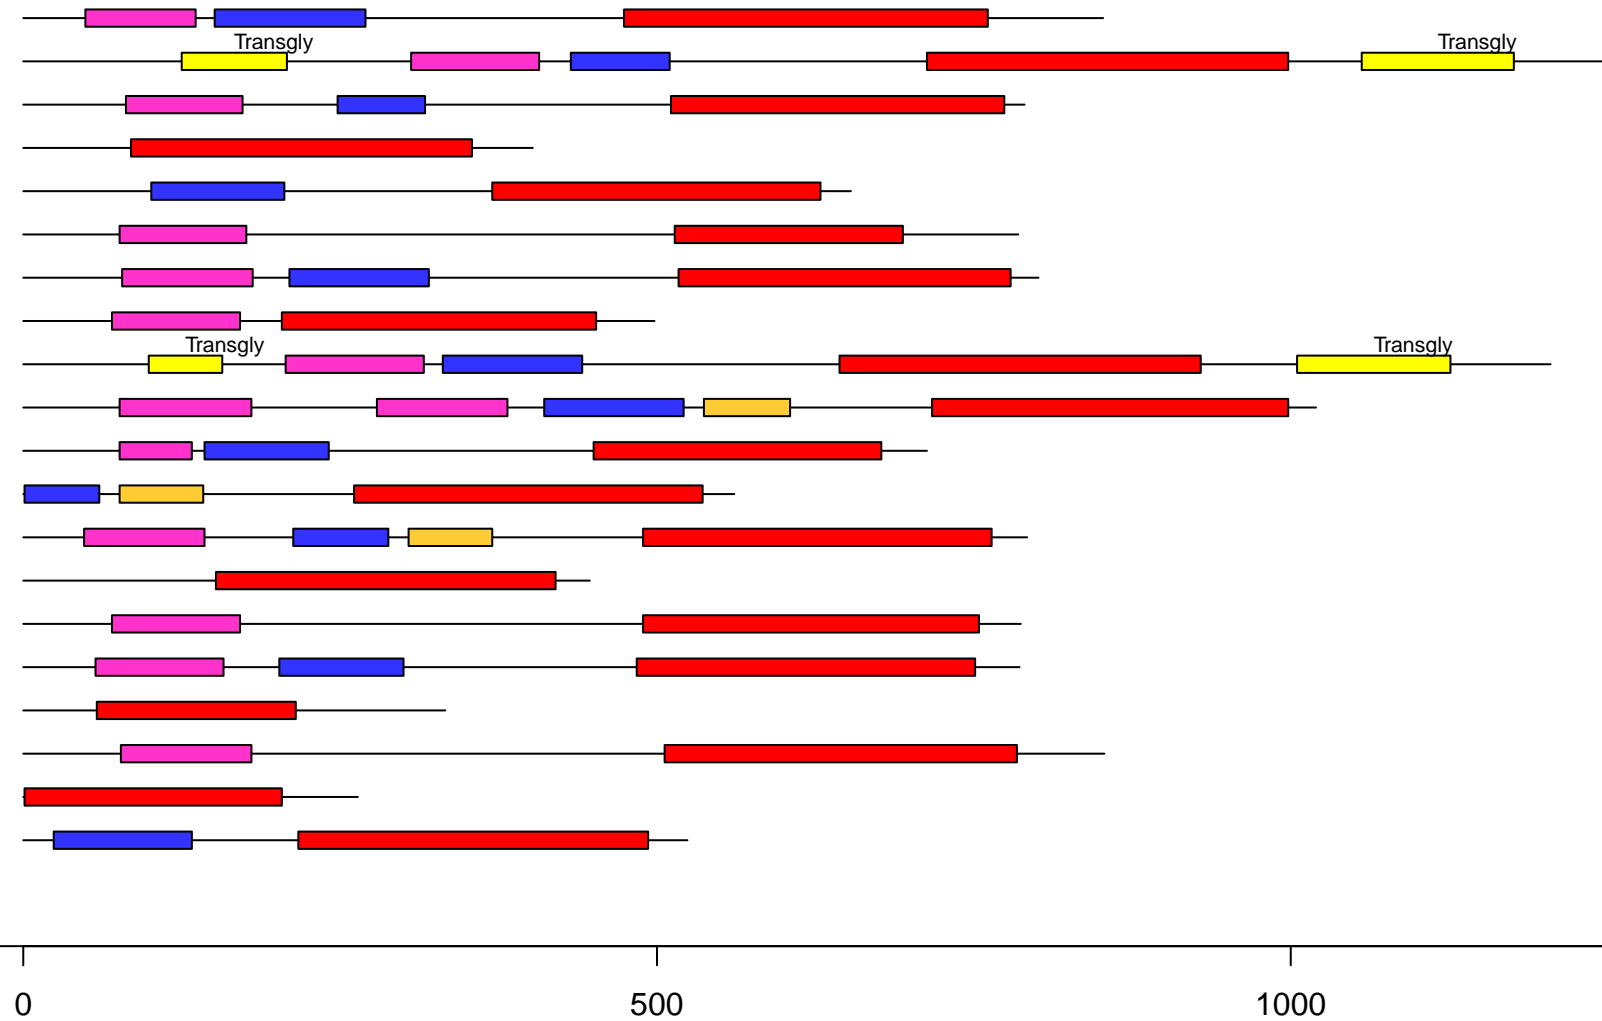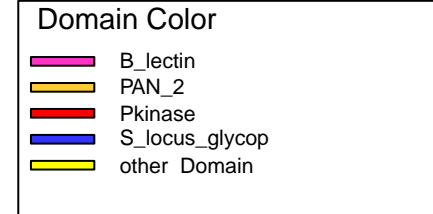

### G.ba RLK-Pelle\_SD-2b domain diagram (part 4)

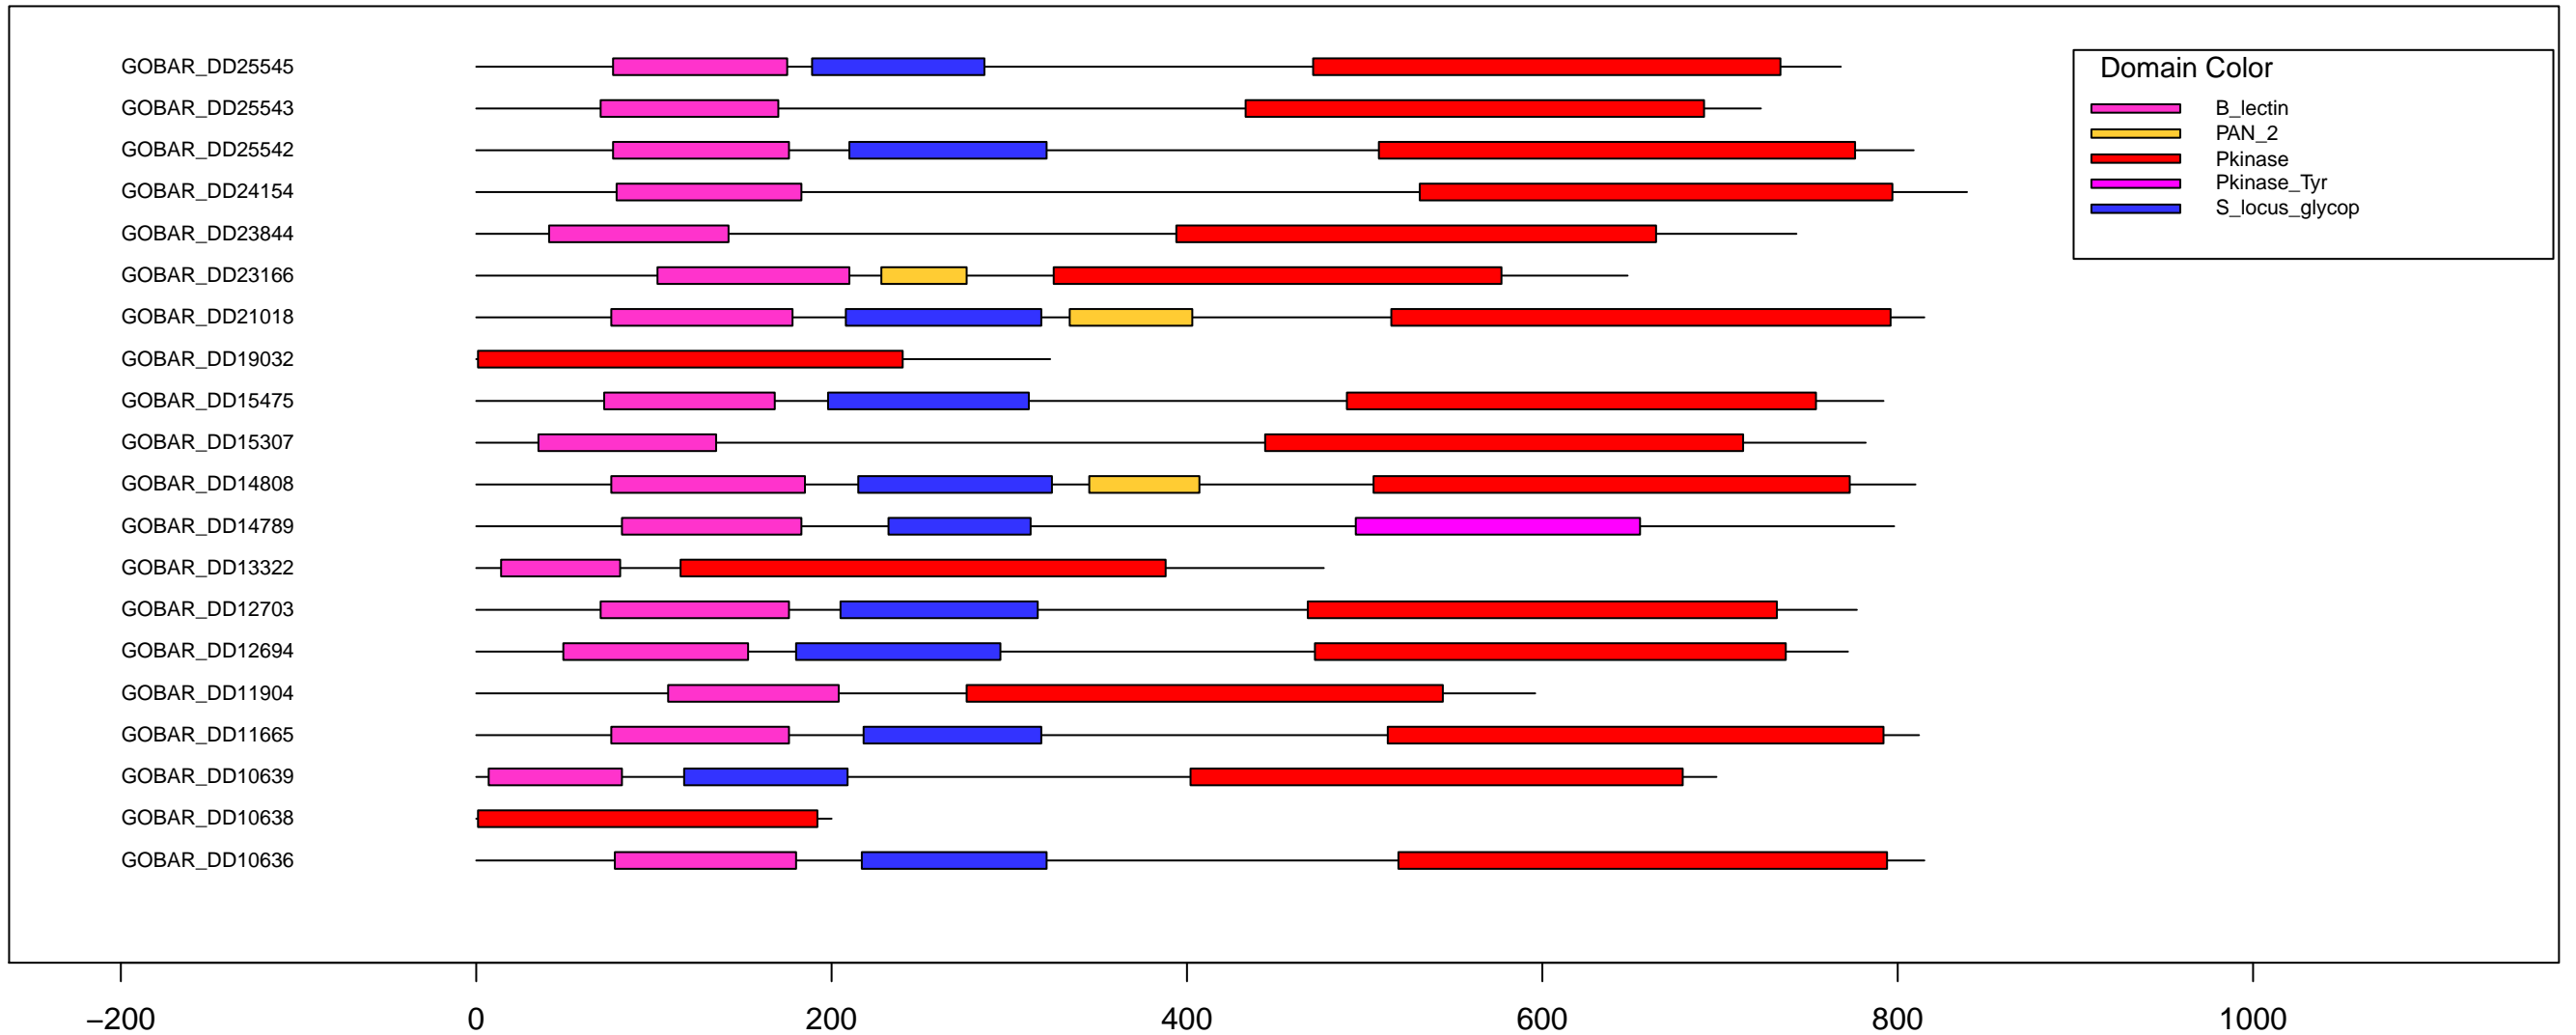

### G.ba RLK-Pelle\_SD-2b domain diagram (part 5)

GOBAR\_DD32461  
 GOBAR\_DD31651  
 GOBAR\_DD31579  
 GOBAR\_DD29906  
 GOBAR\_DD28344  
 GOBAR\_DD28256  
 GOBAR\_DD28221  
 GOBAR\_DD28220  
 GOBAR\_DD27784  
 GOBAR\_DD27365  
 GOBAR\_DD27326  
 GOBAR\_DD27325  
 GOBAR\_DD27324  
 GOBAR\_DD26810  
 GOBAR\_DD25705  
 GOBAR\_DD25704  
 GOBAR\_DD25552  
 GOBAR\_DD25550  
 GOBAR\_DD25547  
 GOBAR\_DD25546

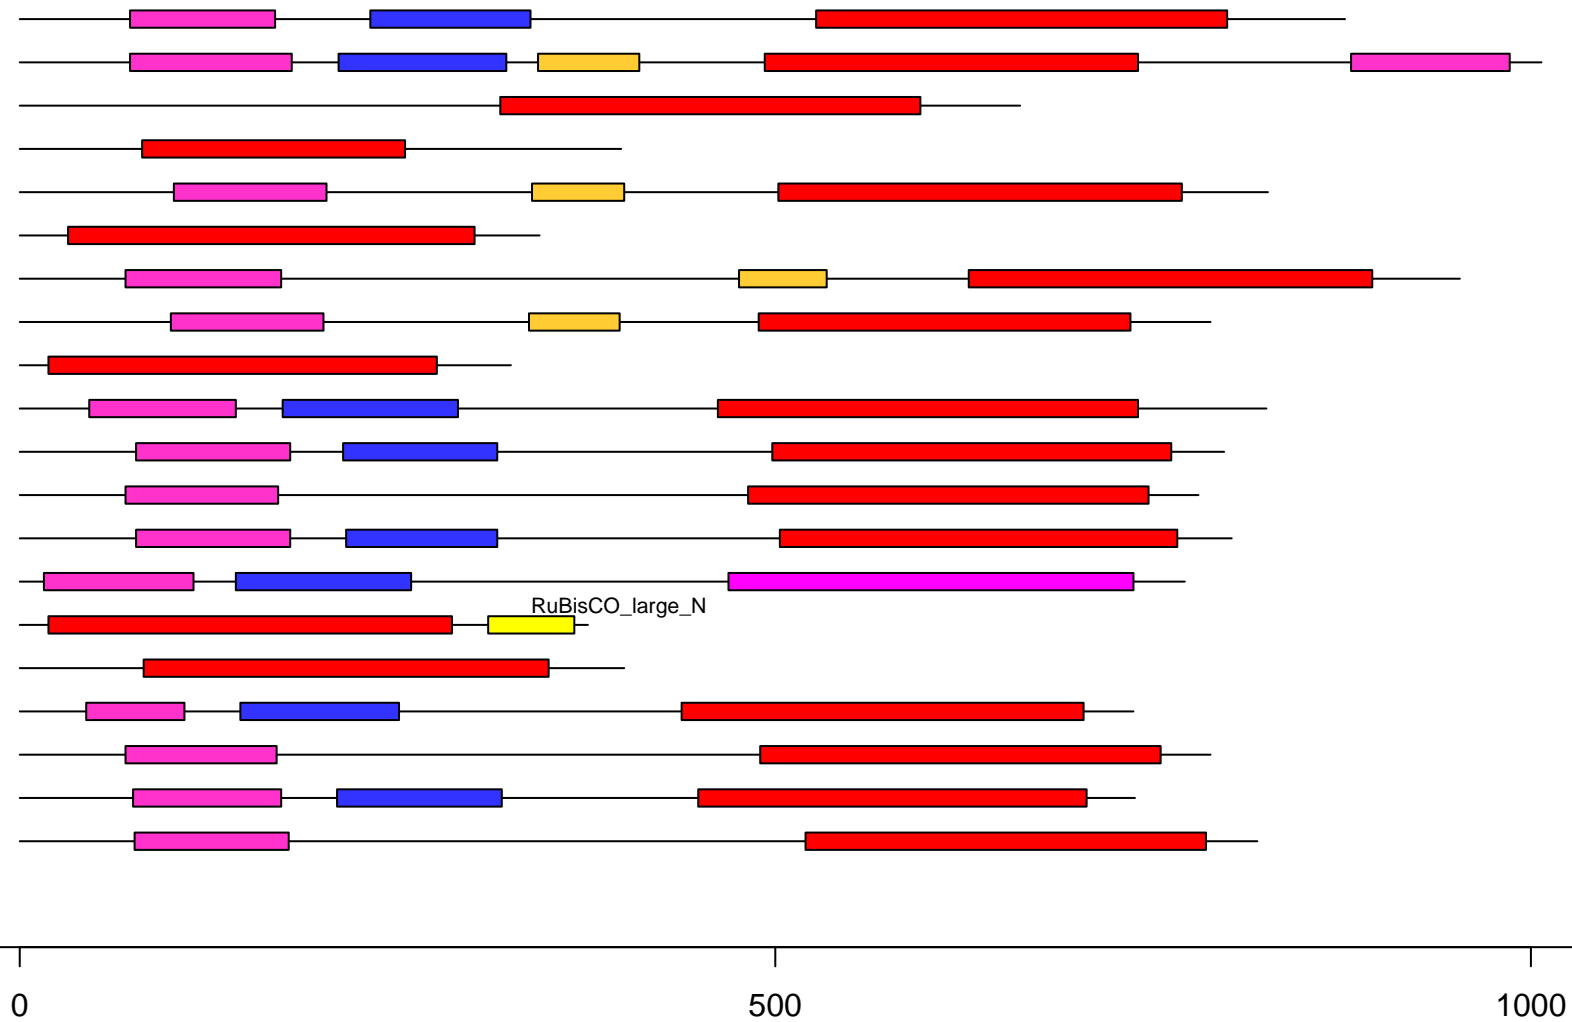

**Domain Color**

- B\_lectin
- PAN\_2
- Pkinase
- Pkinase\_Tyr
- S\_locus\_glycop
- other Domain

G.ba RLK-Pelle\_SD-2b domain diagram (part 6)

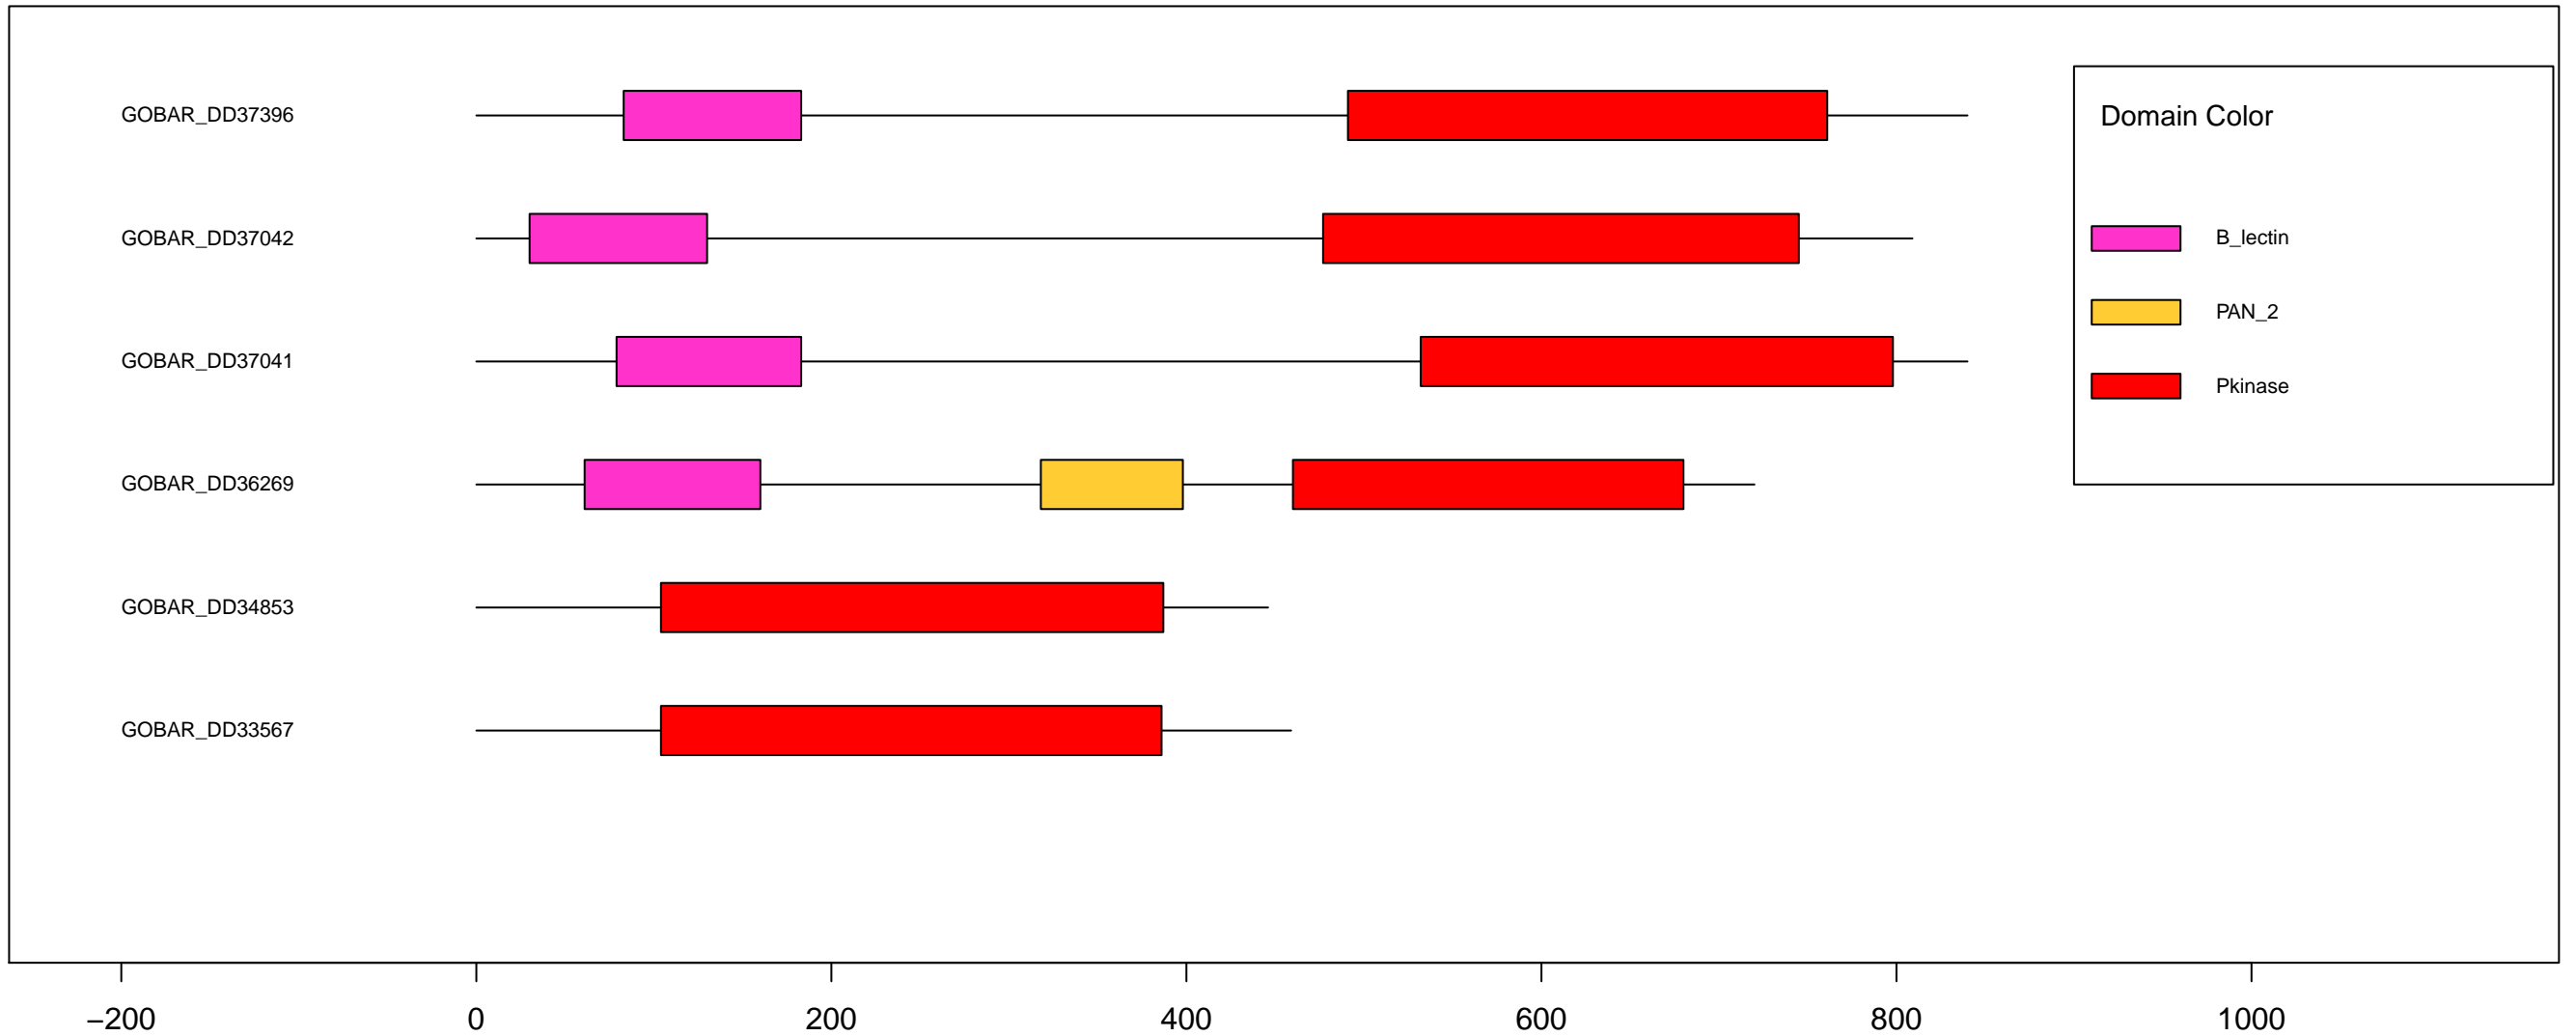



# G.ba RLK-Pelle\_Singleton domain diagram (all)

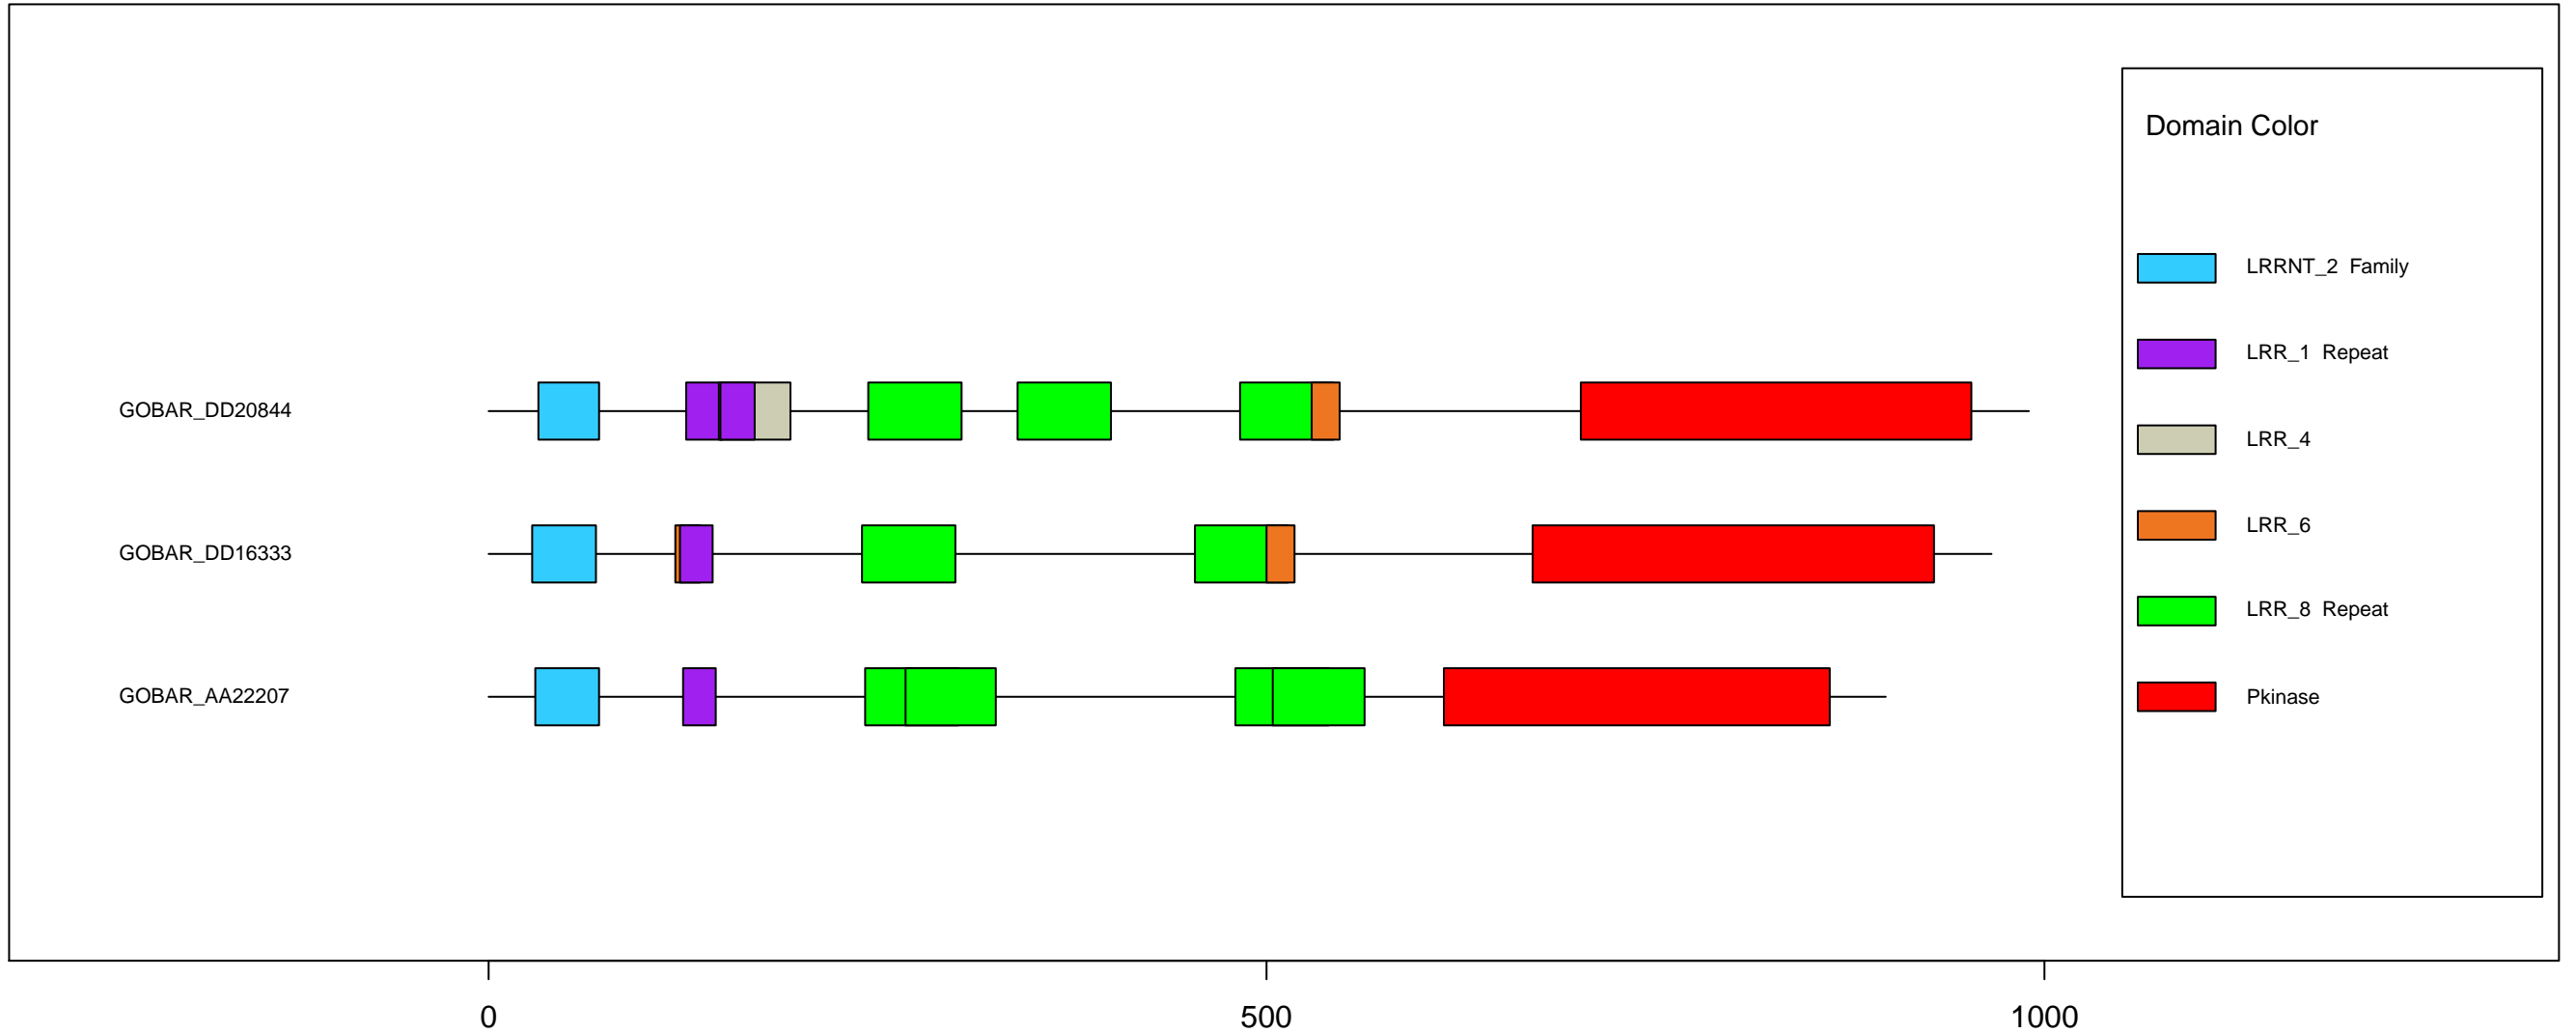

# G.ba RLK-Pelle\_URK-1 domain diagram (all)

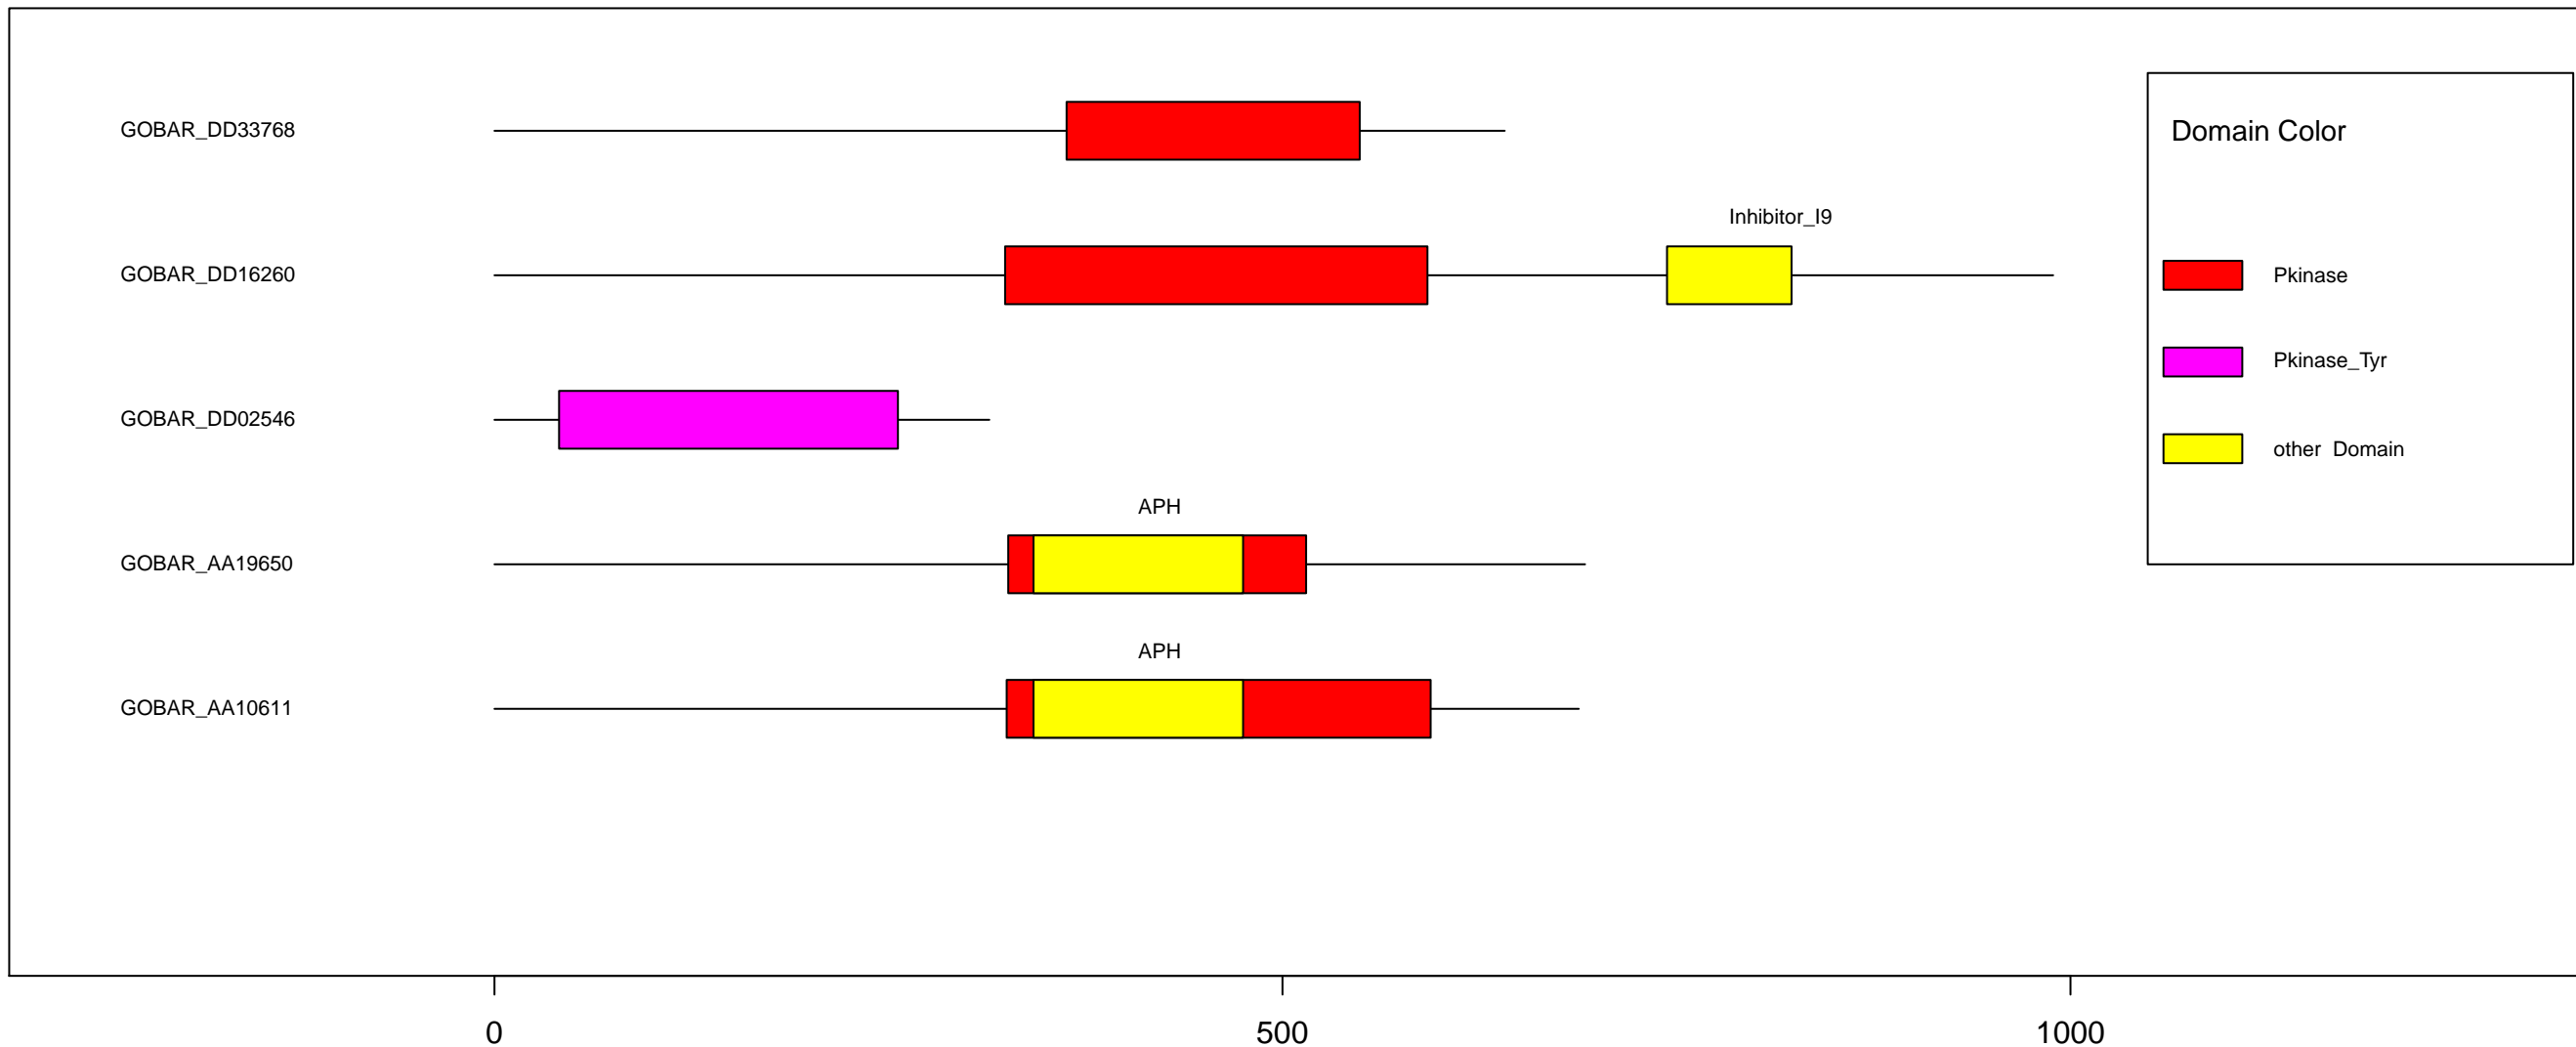

### G.ba RLK-Pelle\_URK-2 domain diagram (all)

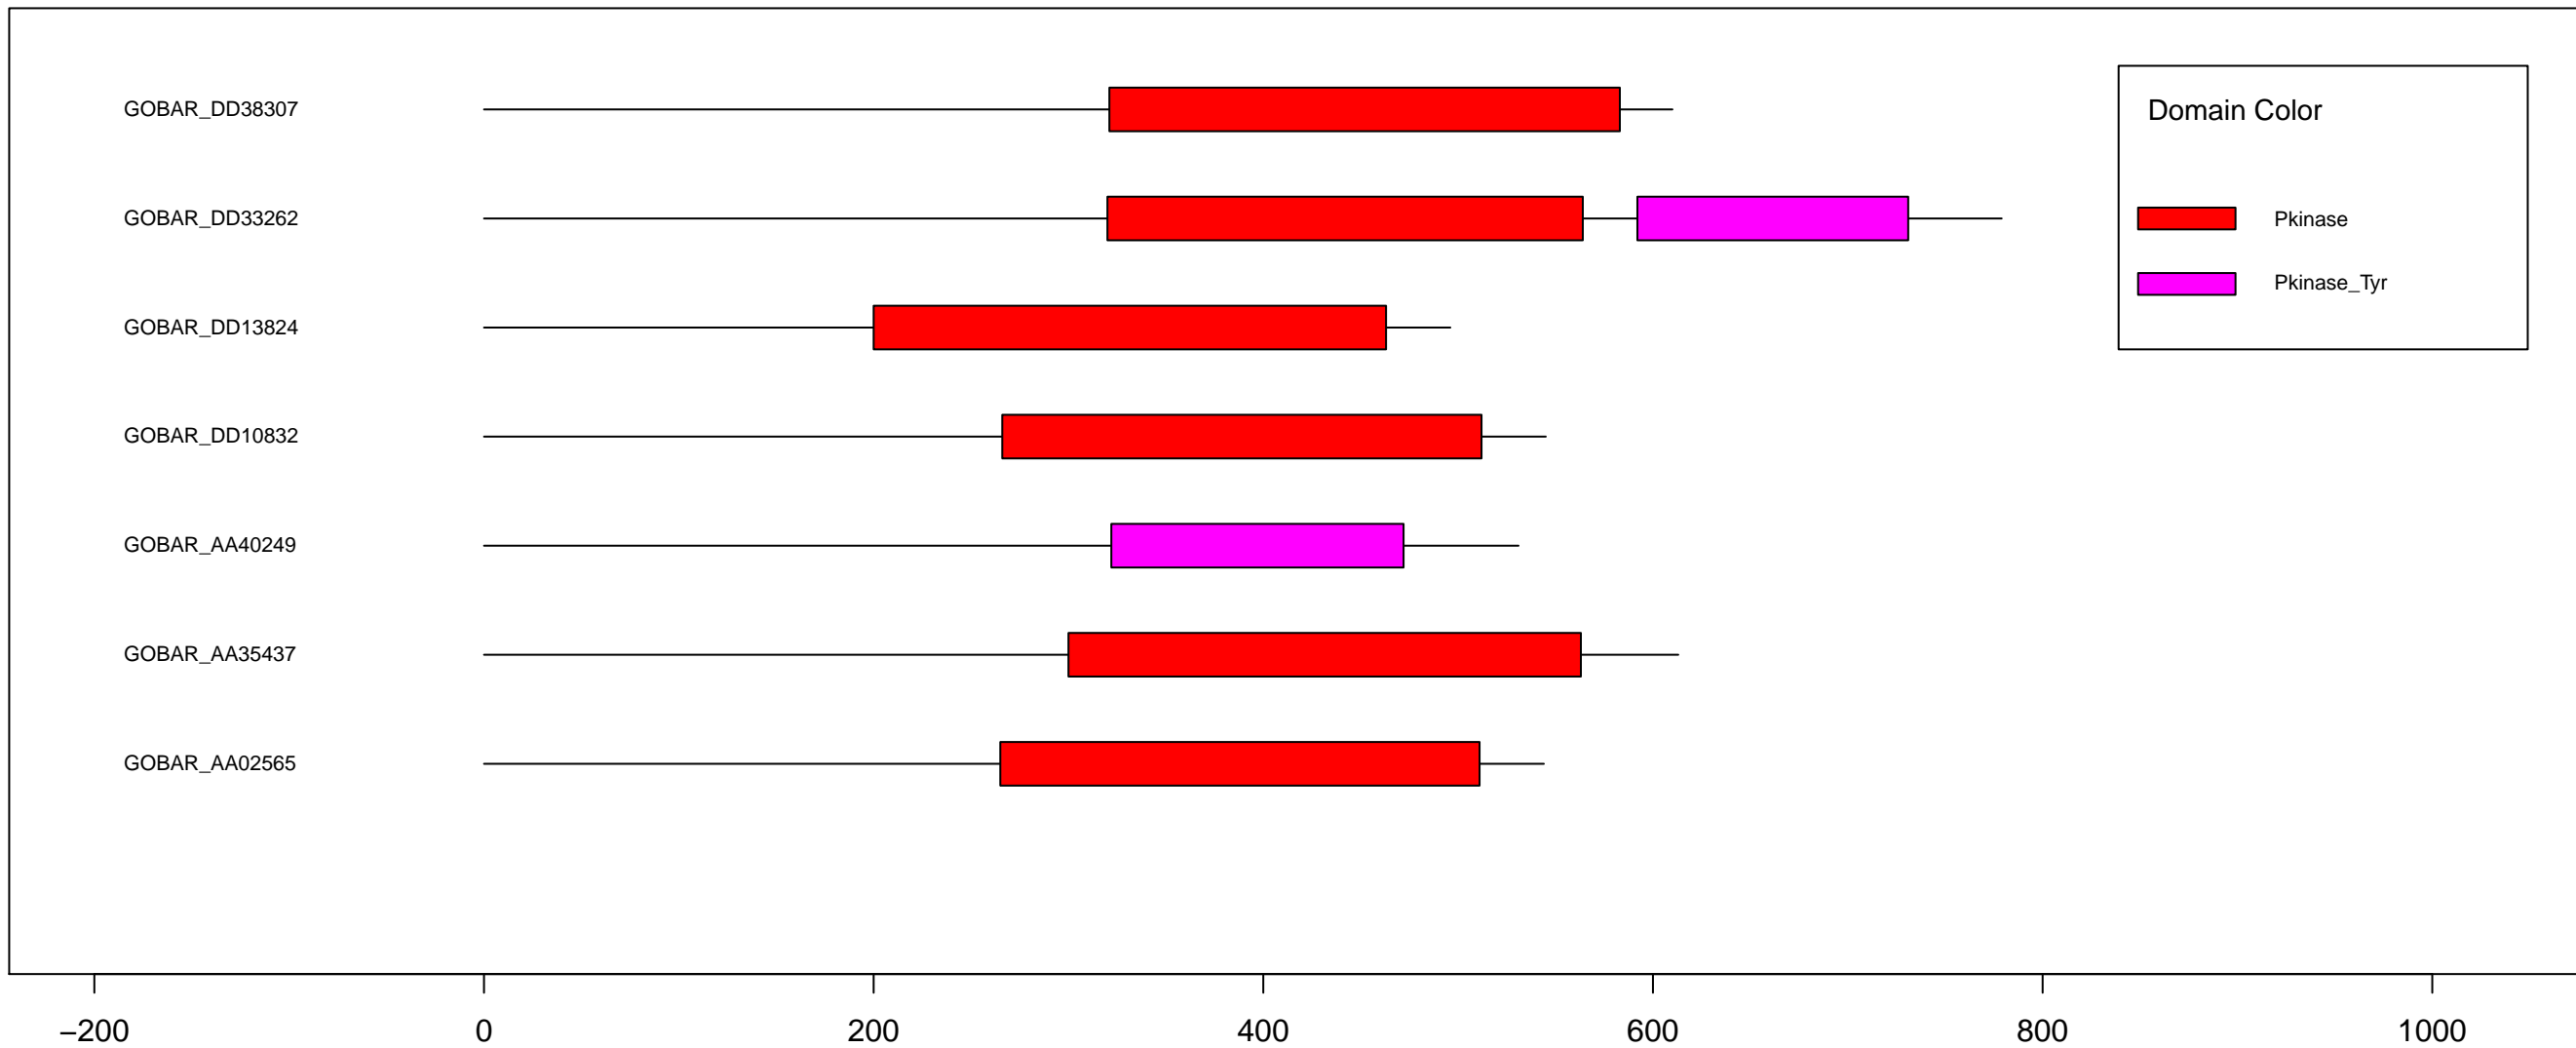

### G.ba RLK-Pelle\_URK-3 domain diagram (all)

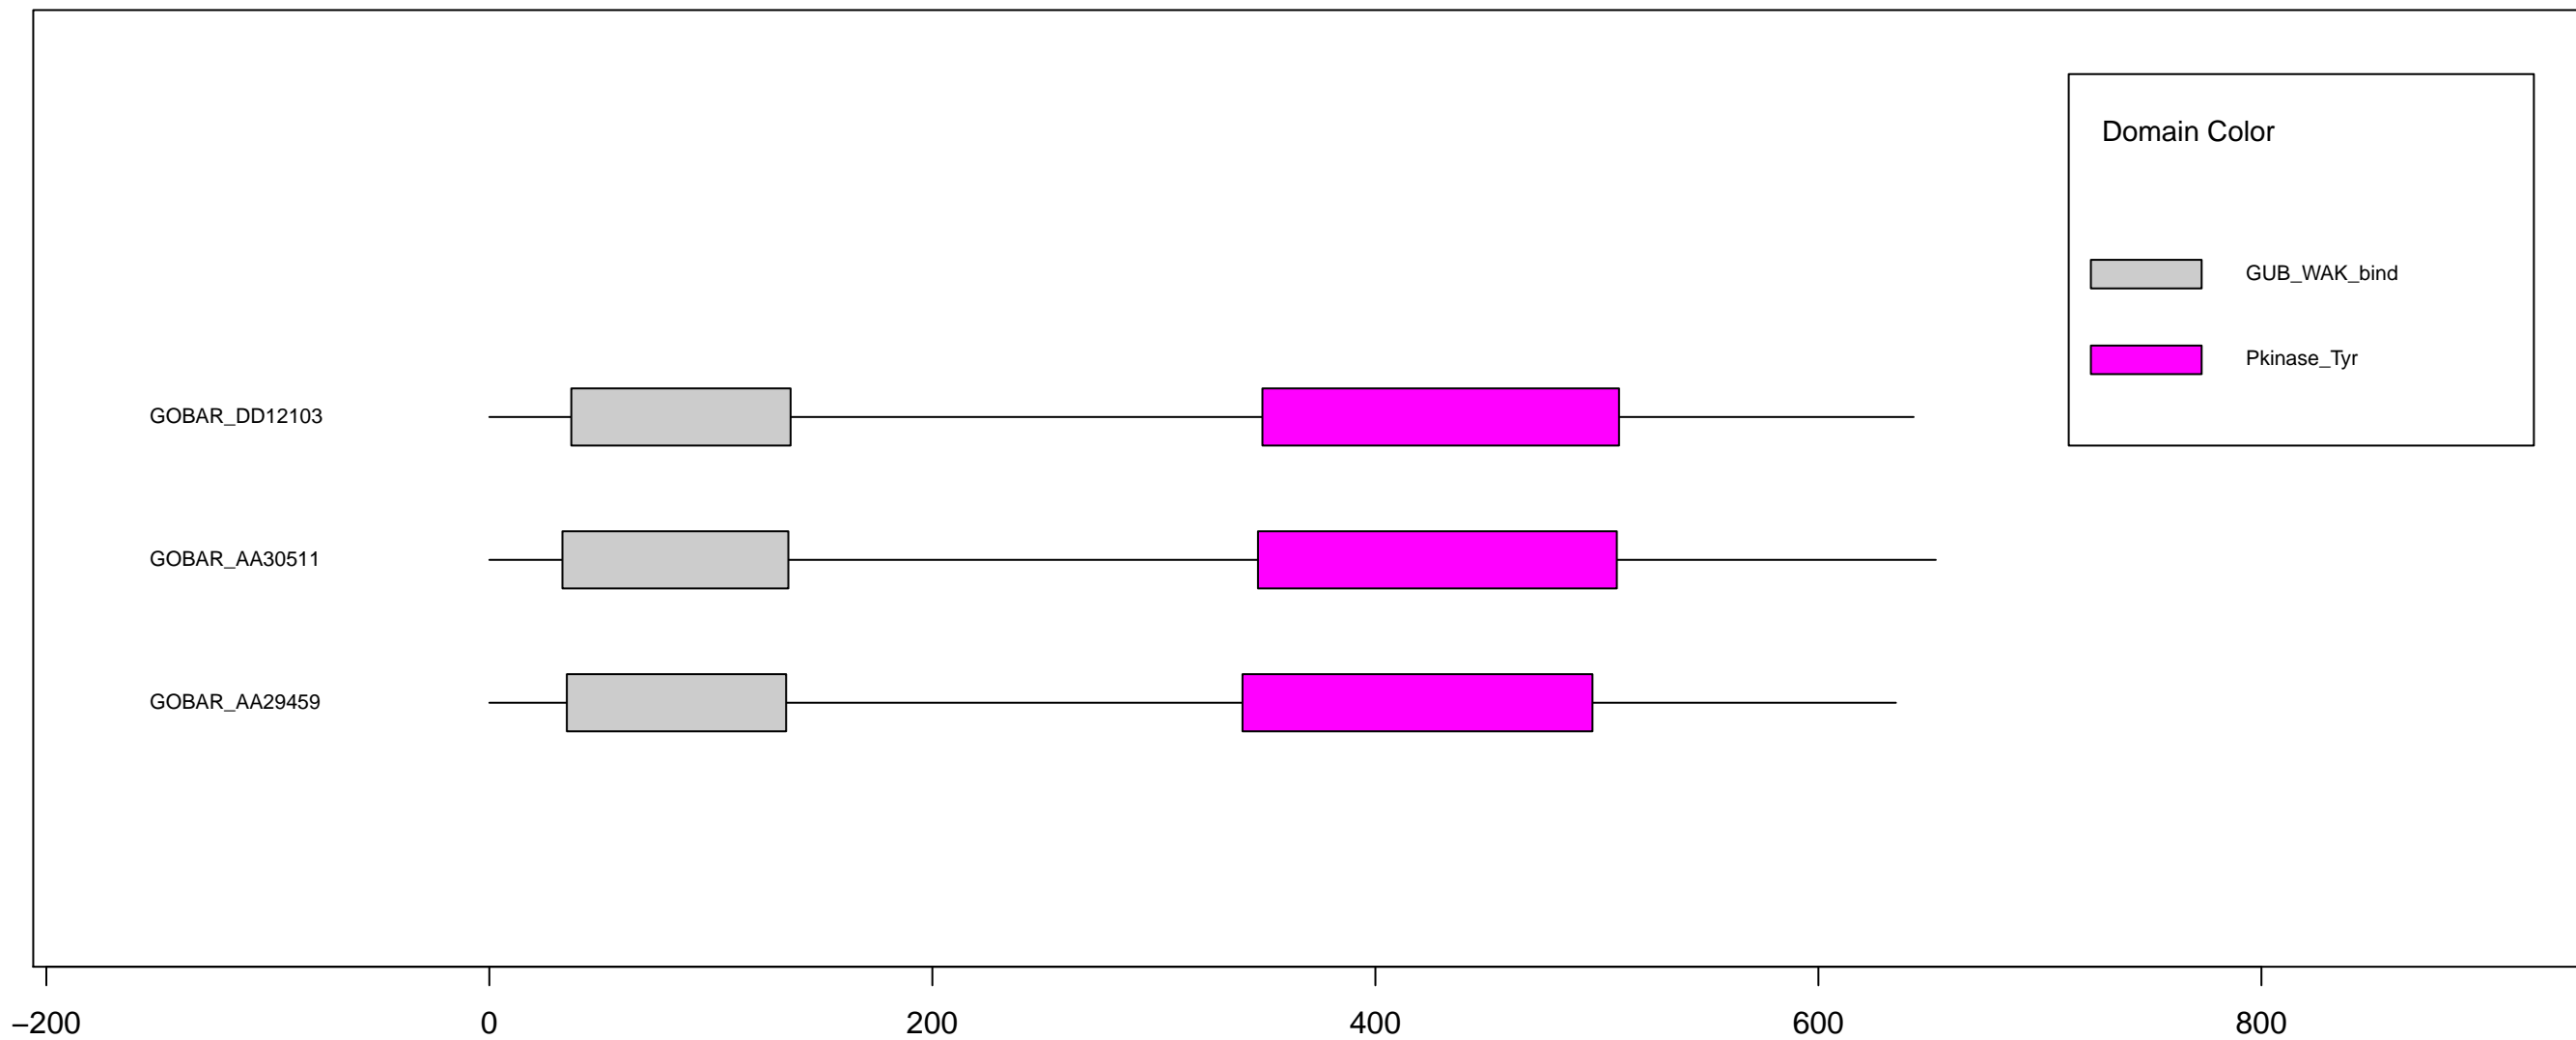

### G.ba RLK-Pelle\_WAK\_LRK10L-1 domain diagram (part 1)

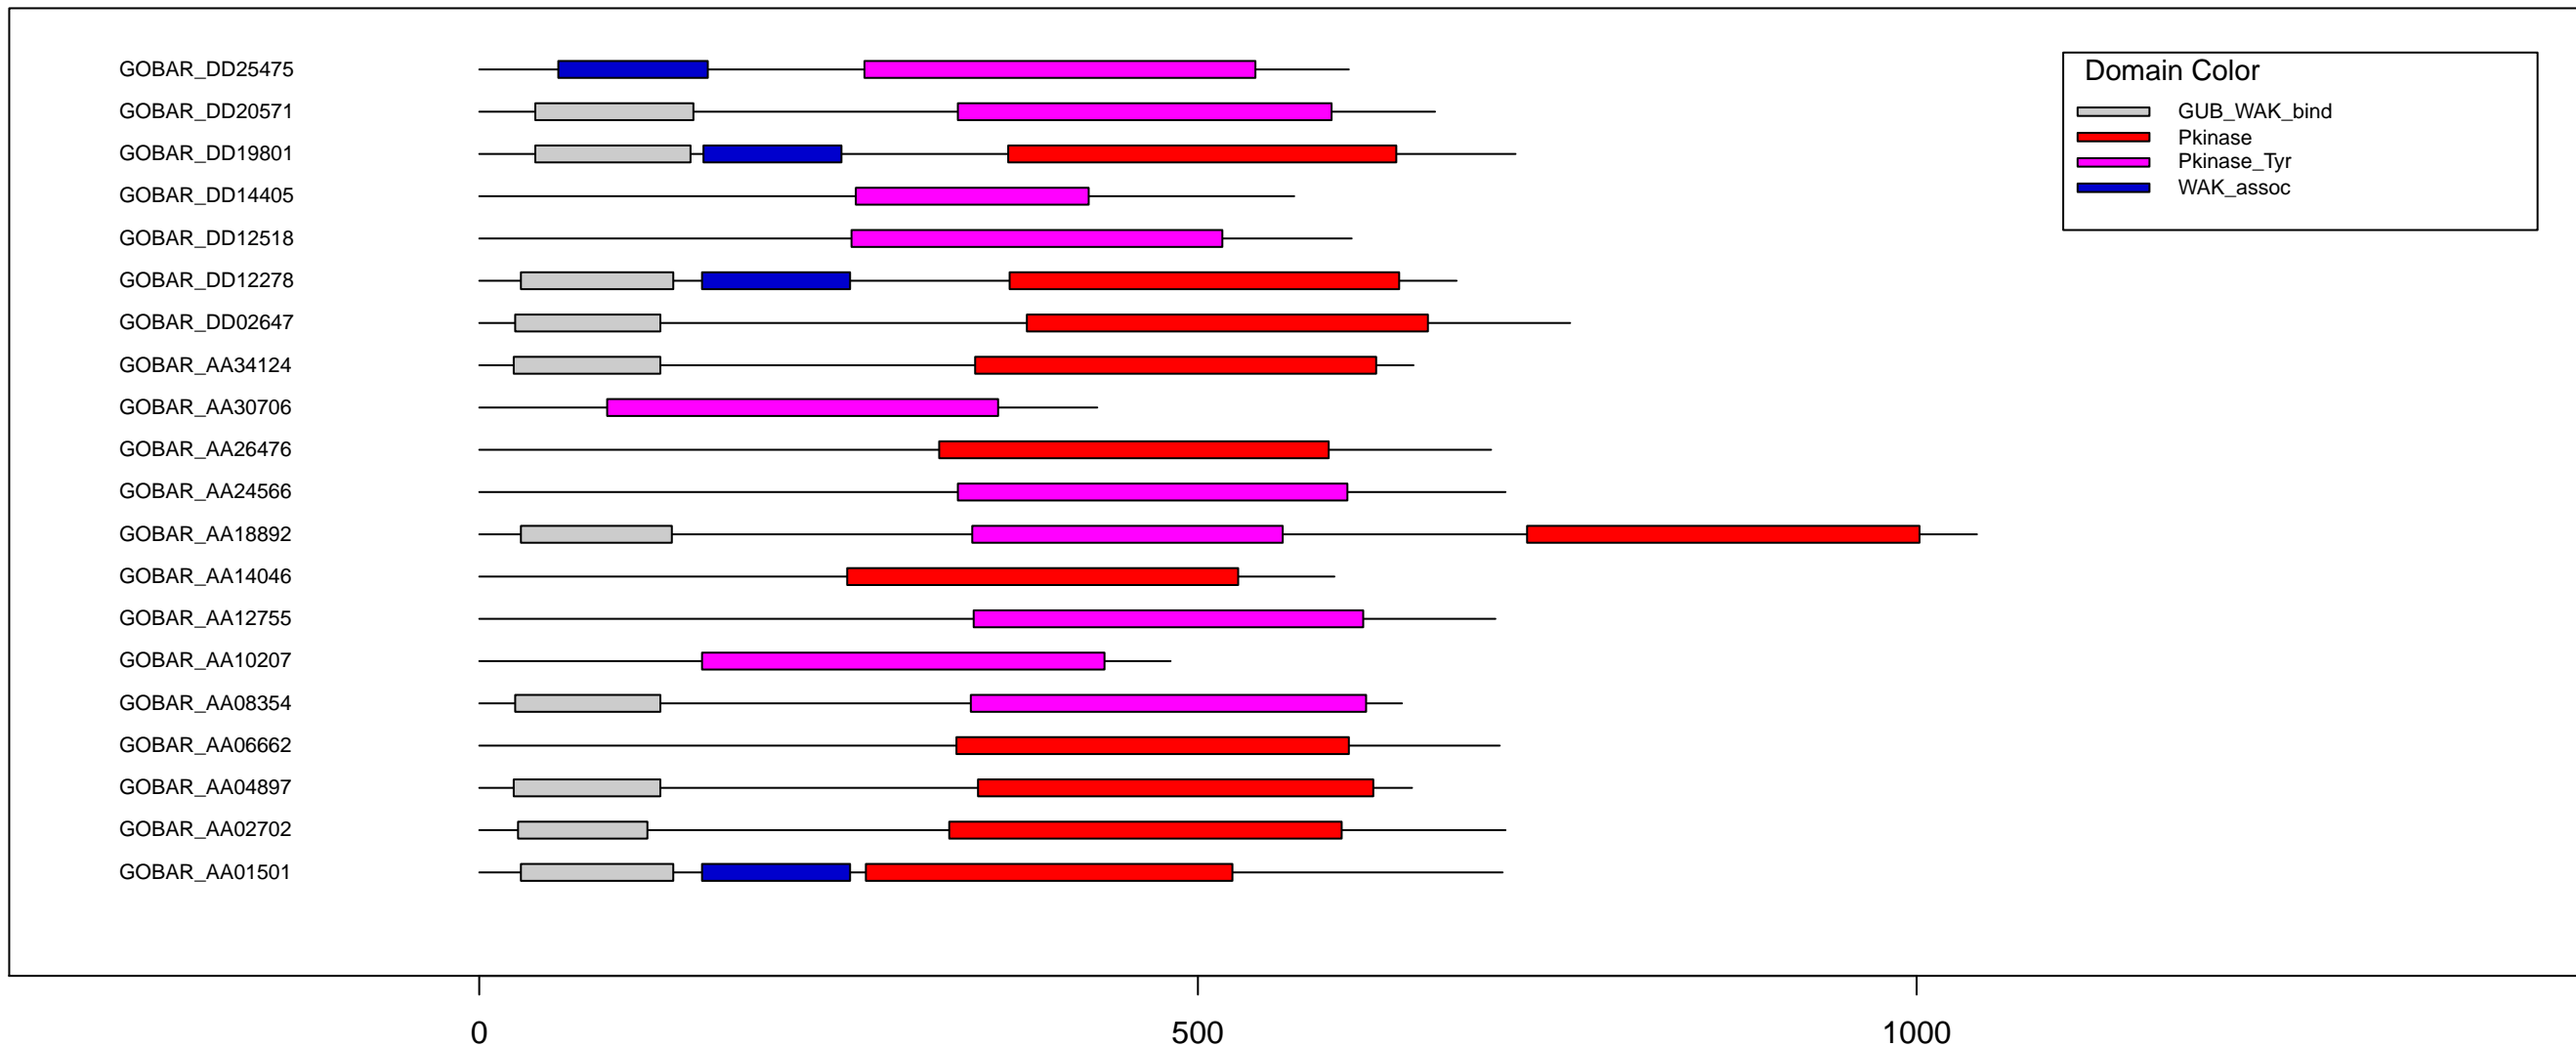

### G.ba RLK-Pelle\_WAK\_LRK10L-1 domain diagram (part 2)

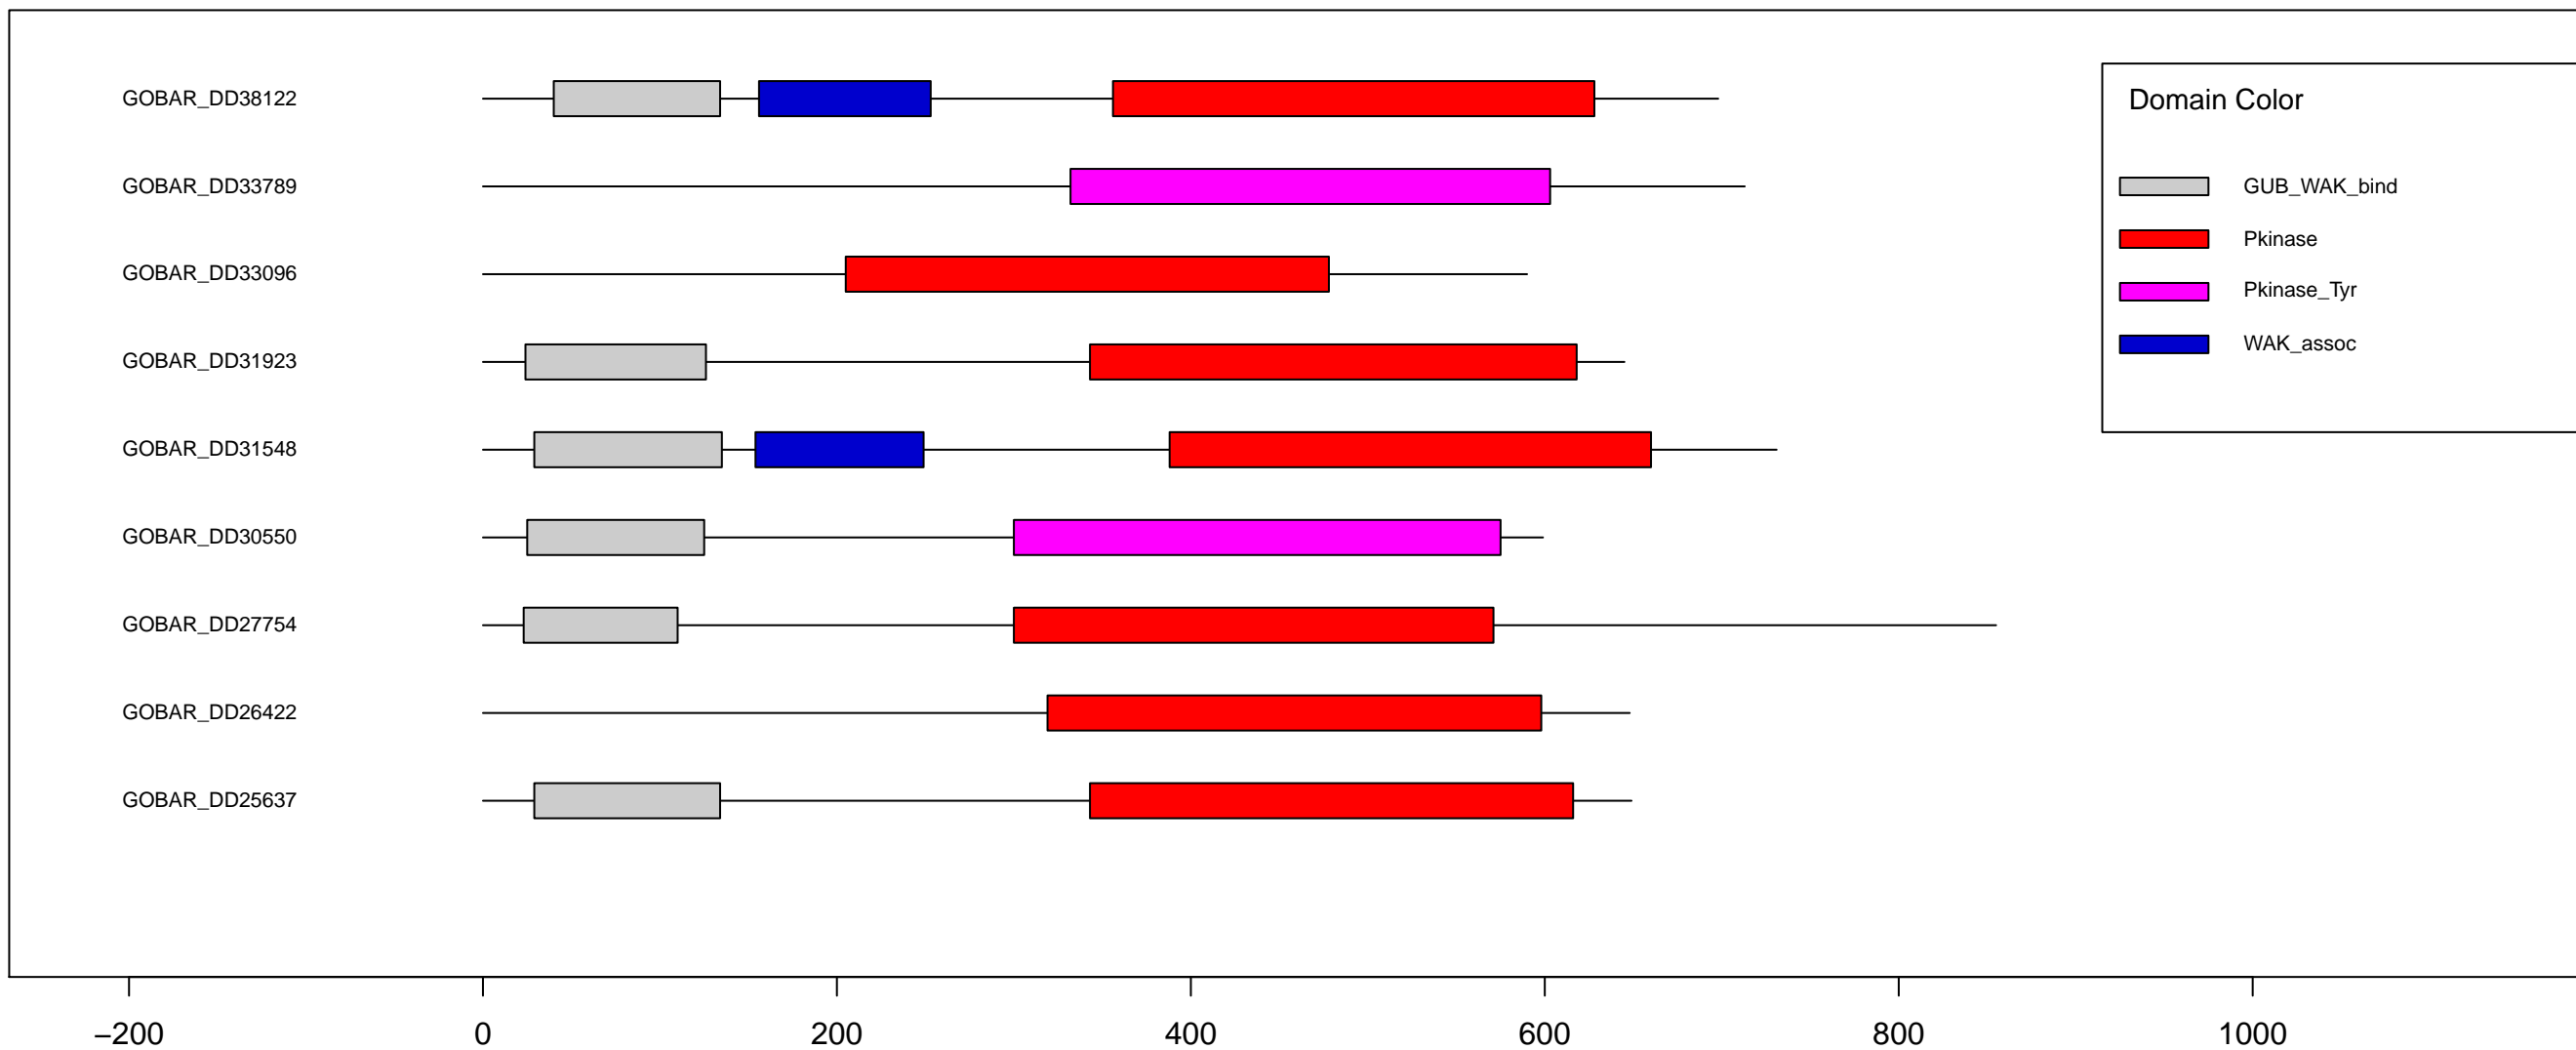

### G.ba RLK-Pelle\_WAK domain diagram (part 1)

GOBAR\_AA08340  
 GOBAR\_AA08334  
 GOBAR\_AA07942  
 GOBAR\_AA07324  
 GOBAR\_AA07323  
 GOBAR\_AA07322  
 GOBAR\_AA07315  
 GOBAR\_AA07314  
 GOBAR\_AA07313  
 GOBAR\_AA06490  
 GOBAR\_AA06073  
 GOBAR\_AA06070  
 GOBAR\_AA06069  
 GOBAR\_AA06038  
 GOBAR\_AA04389  
 GOBAR\_AA04387  
 GOBAR\_AA02097  
 GOBAR\_AA02096  
 GOBAR\_AA02092  
 GOBAR\_AA02089

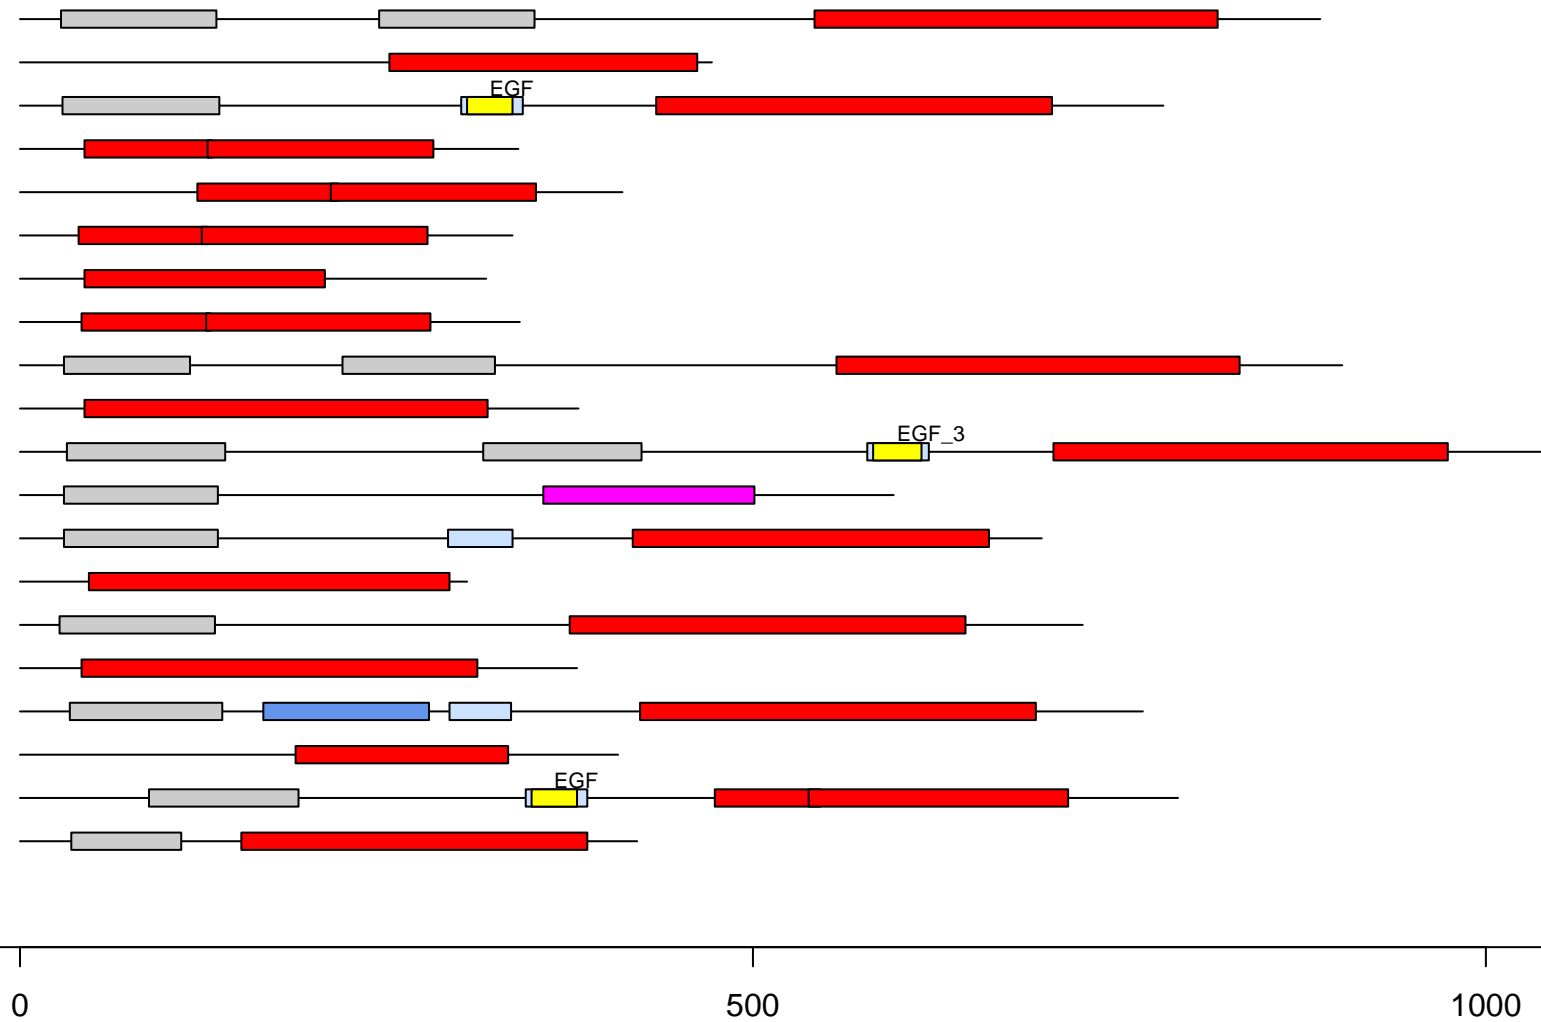

**Domain Color**

- EGF\_CA
- GUB\_WAK\_bind
- Pkinase
- Pkinase\_Tyr
- WAK
- other Domain

### G.ba RLK-Pelle\_WAK domain diagram (part 2)

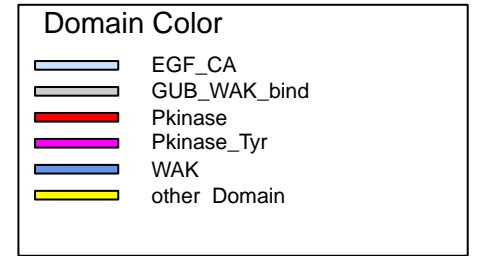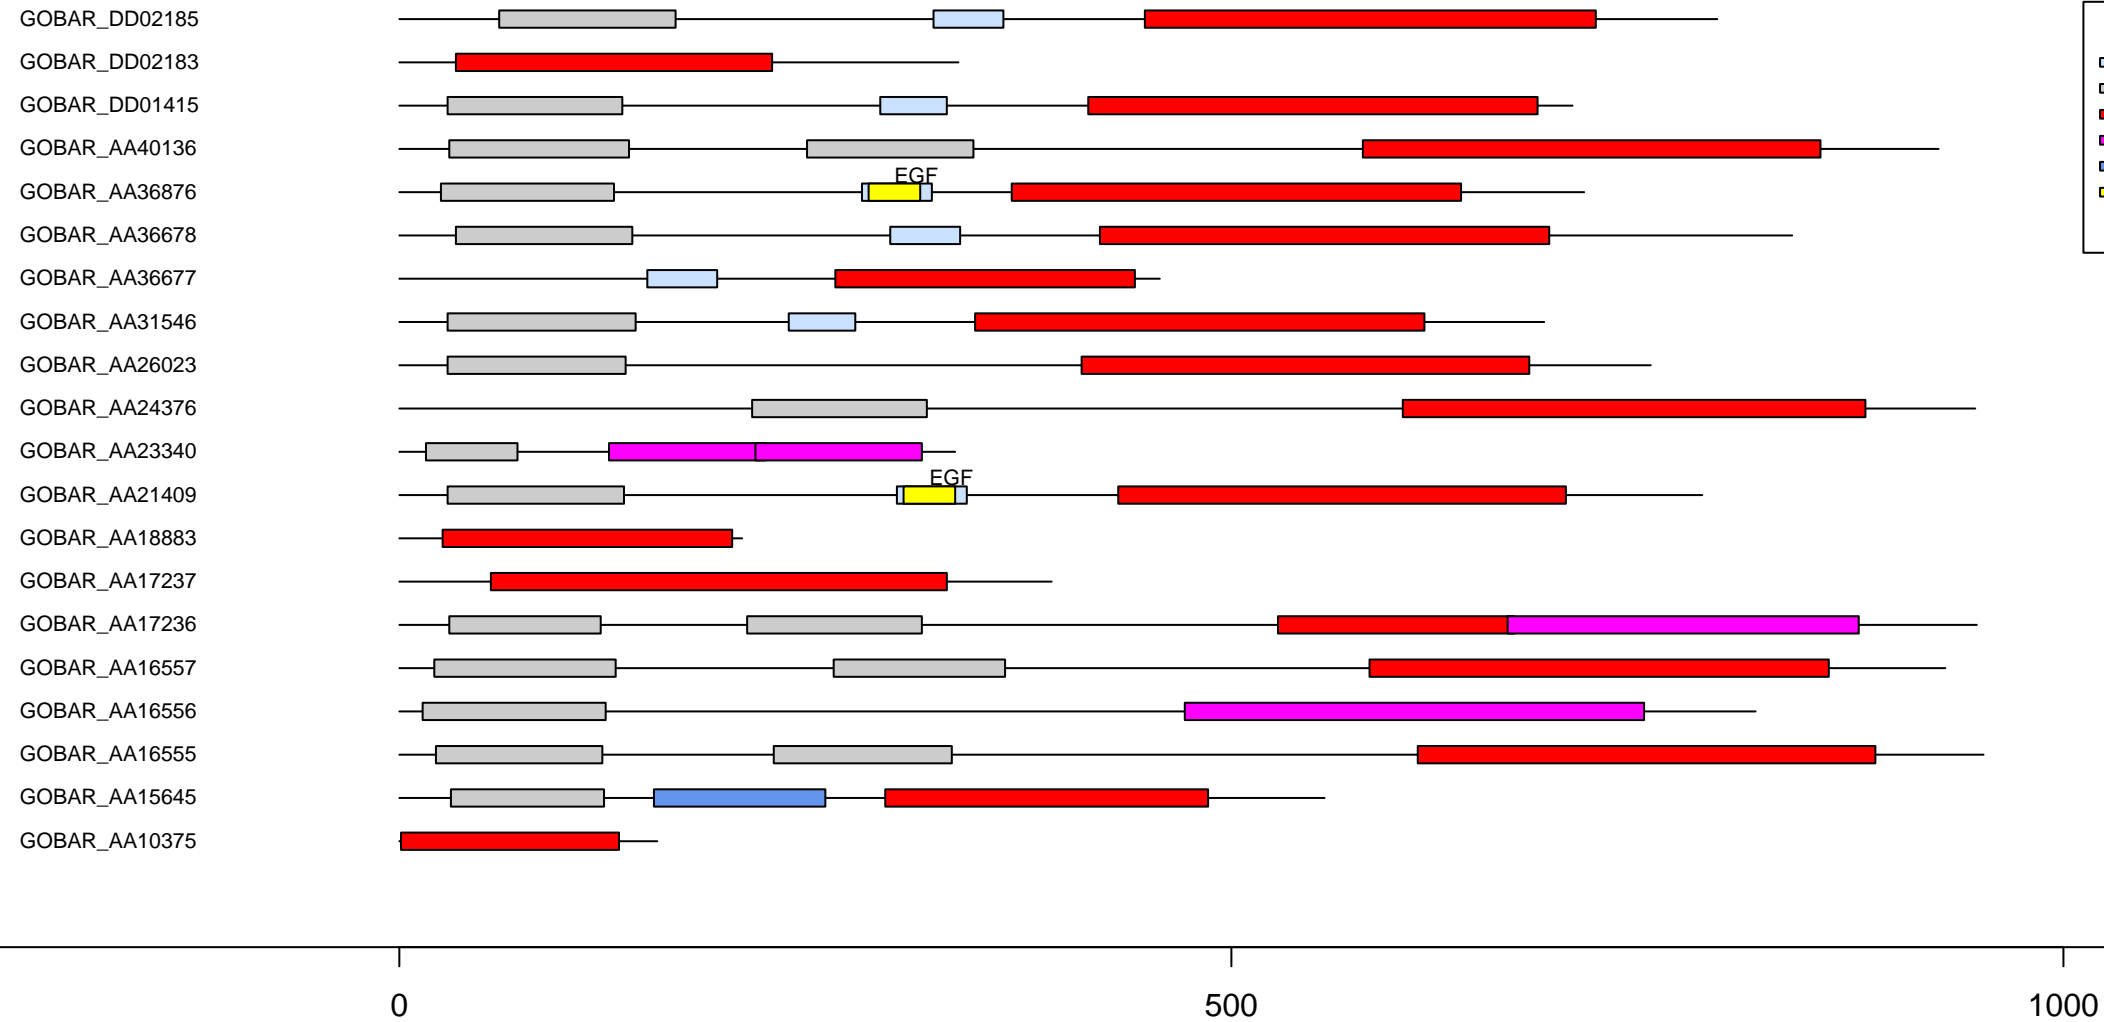



### G.ba RLK-Pelle\_WAK domain diagram (part 3)

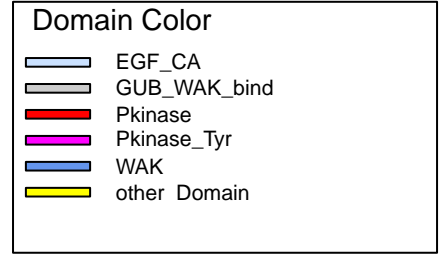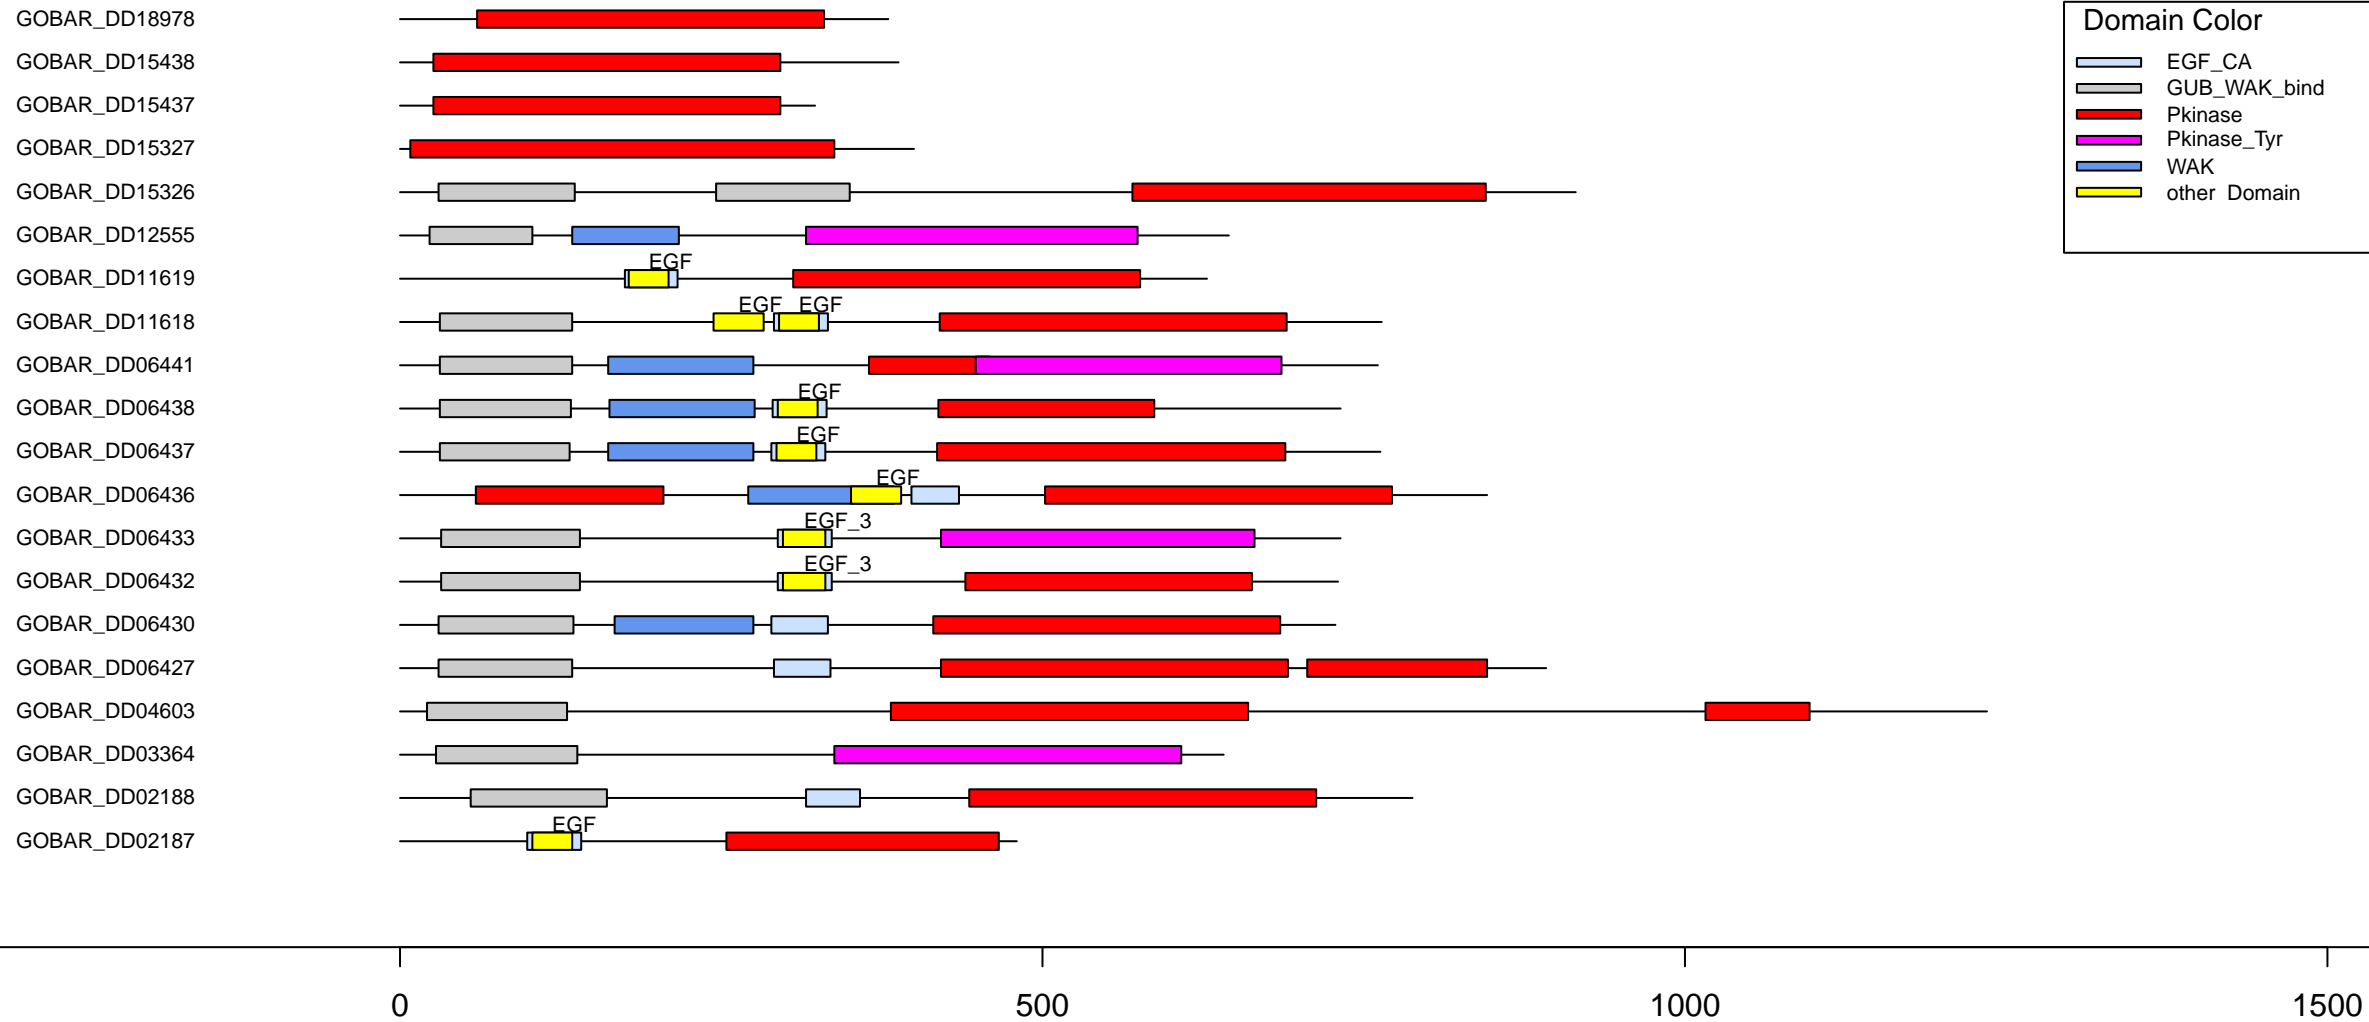

### G.ba RLK-Pelle\_WAK domain diagram (part 4)

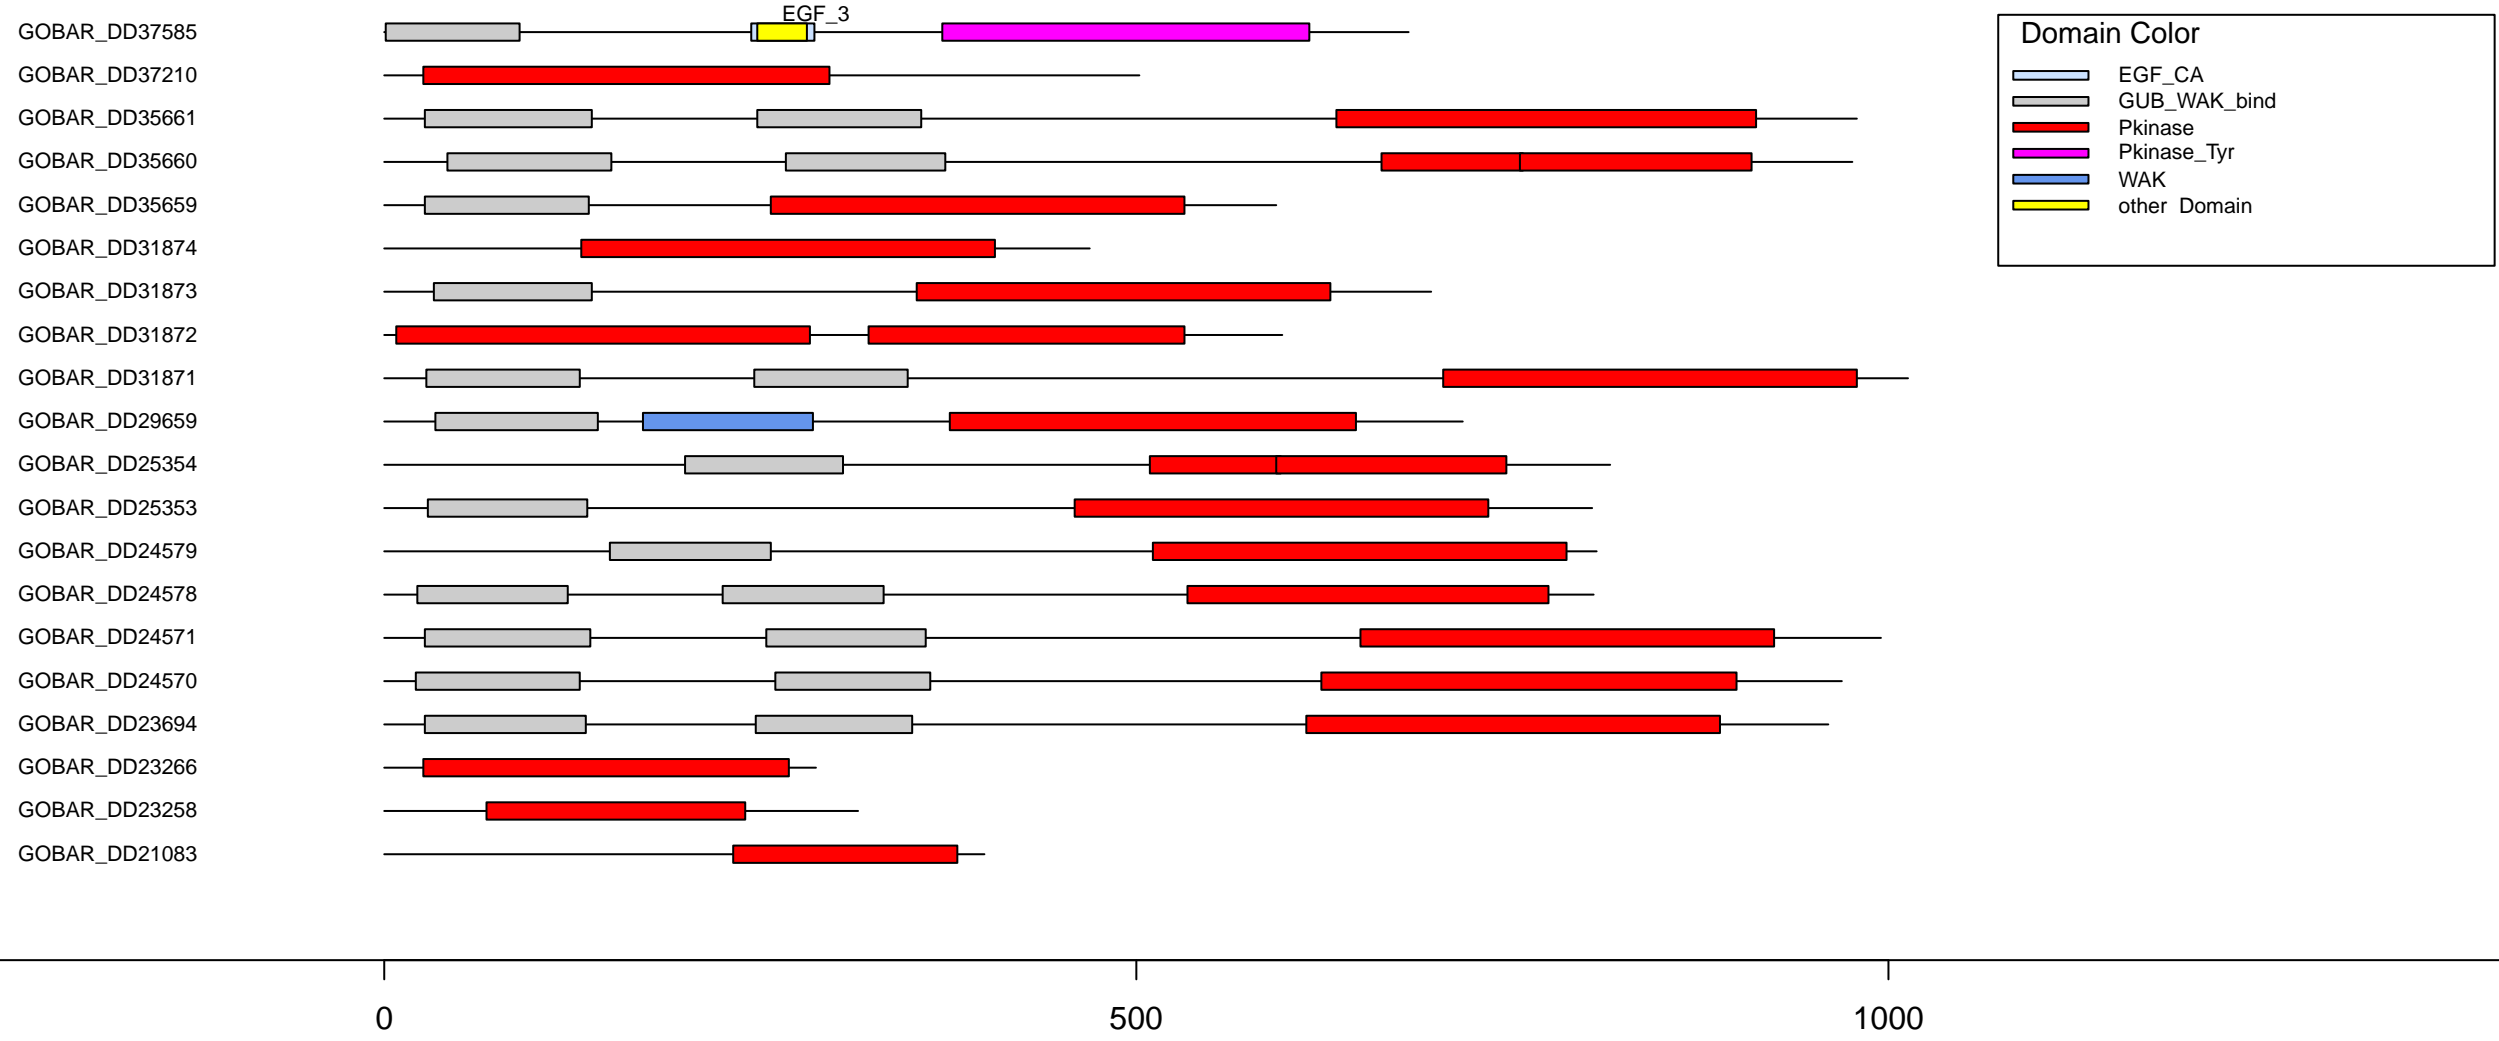

# G.ba RLK-Pelle\_WAK domain diagram (part 5)

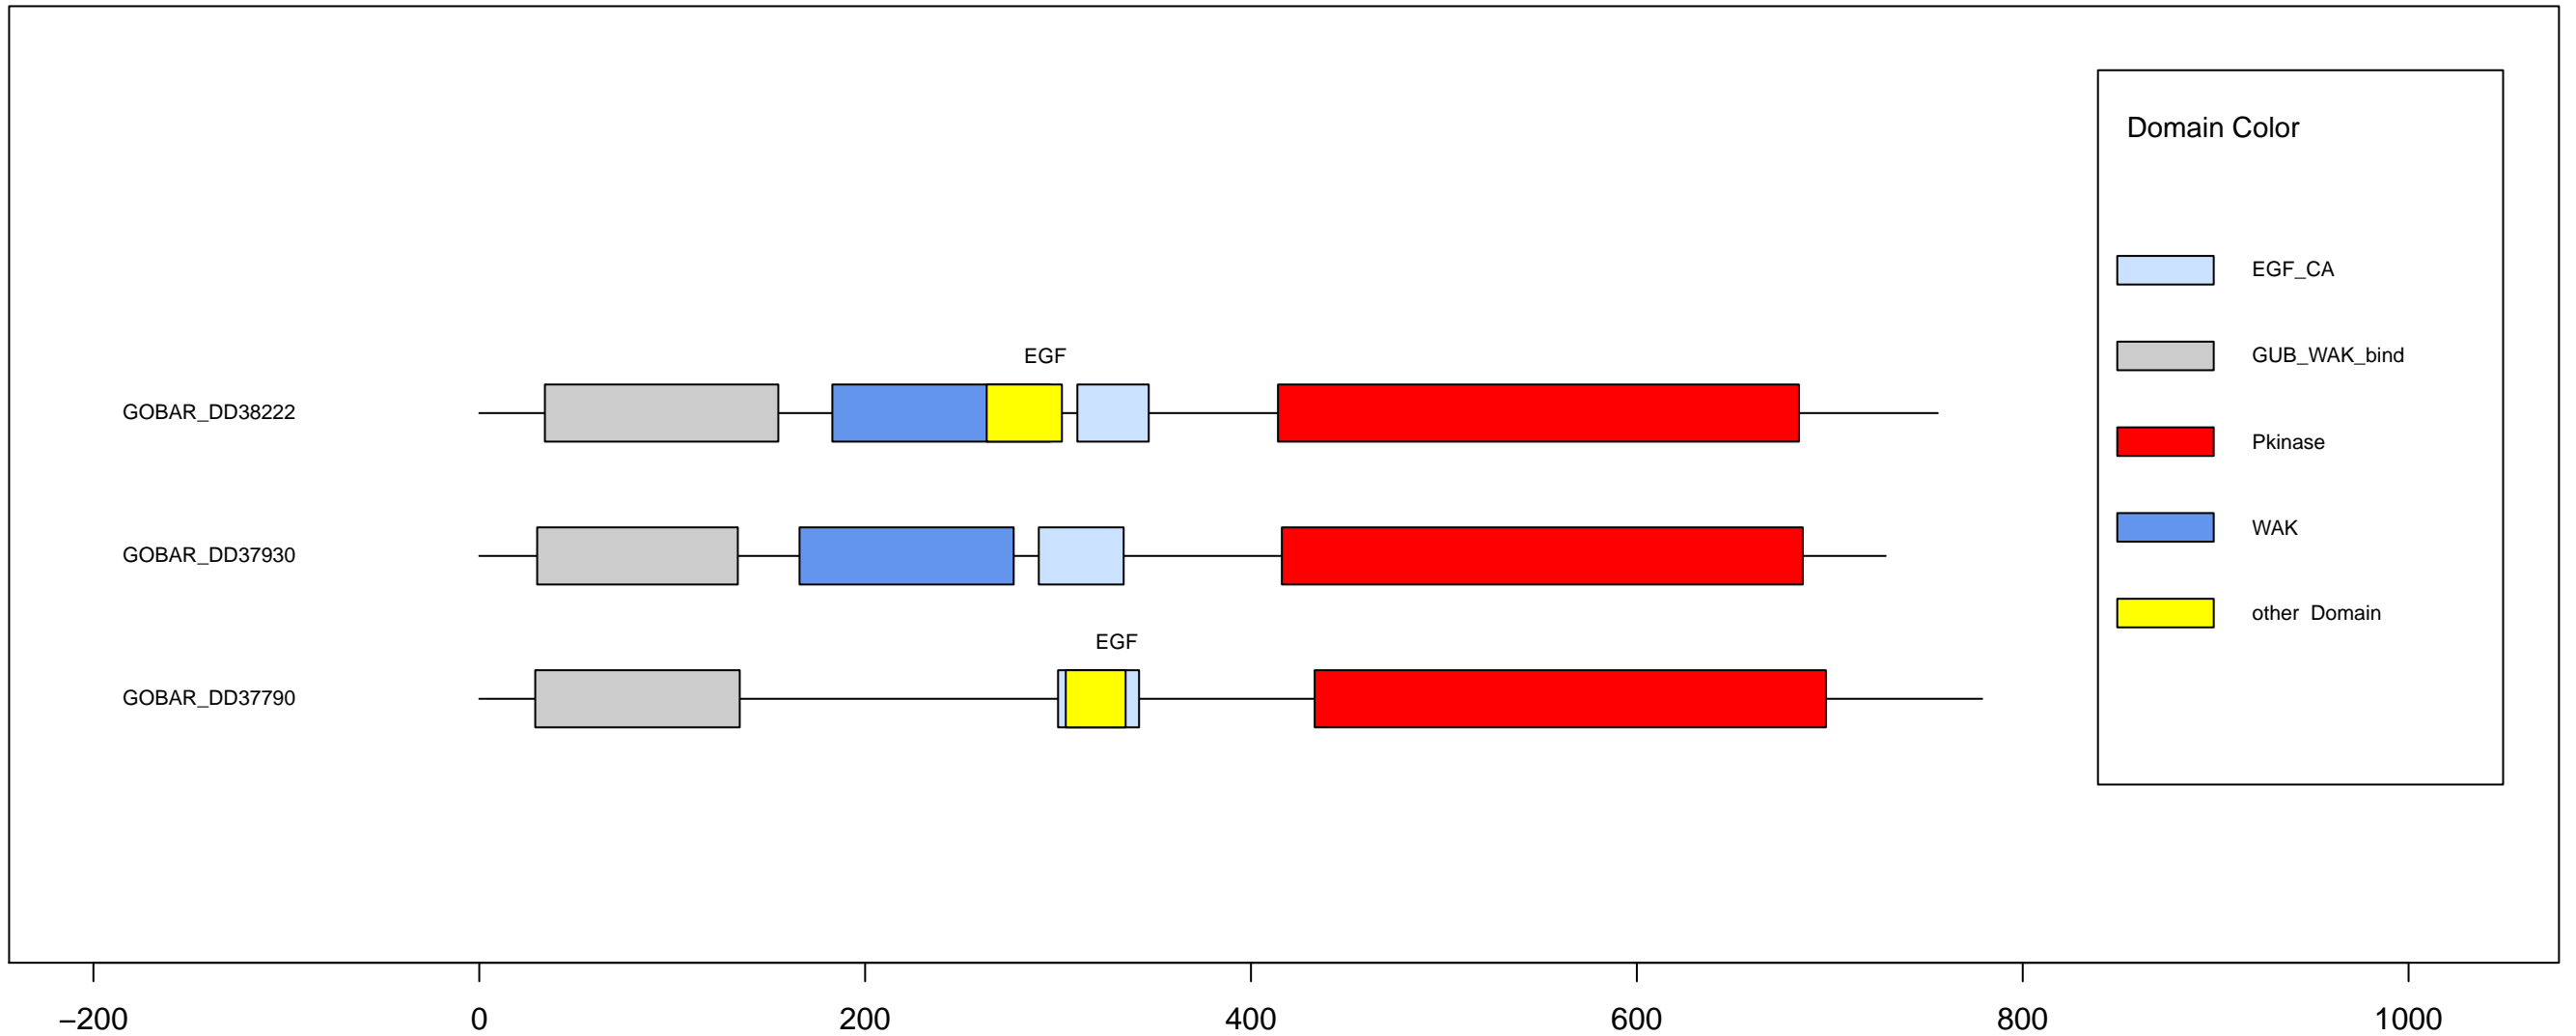

# G.ba SCY1\_SCYL1 domain diagram (all)

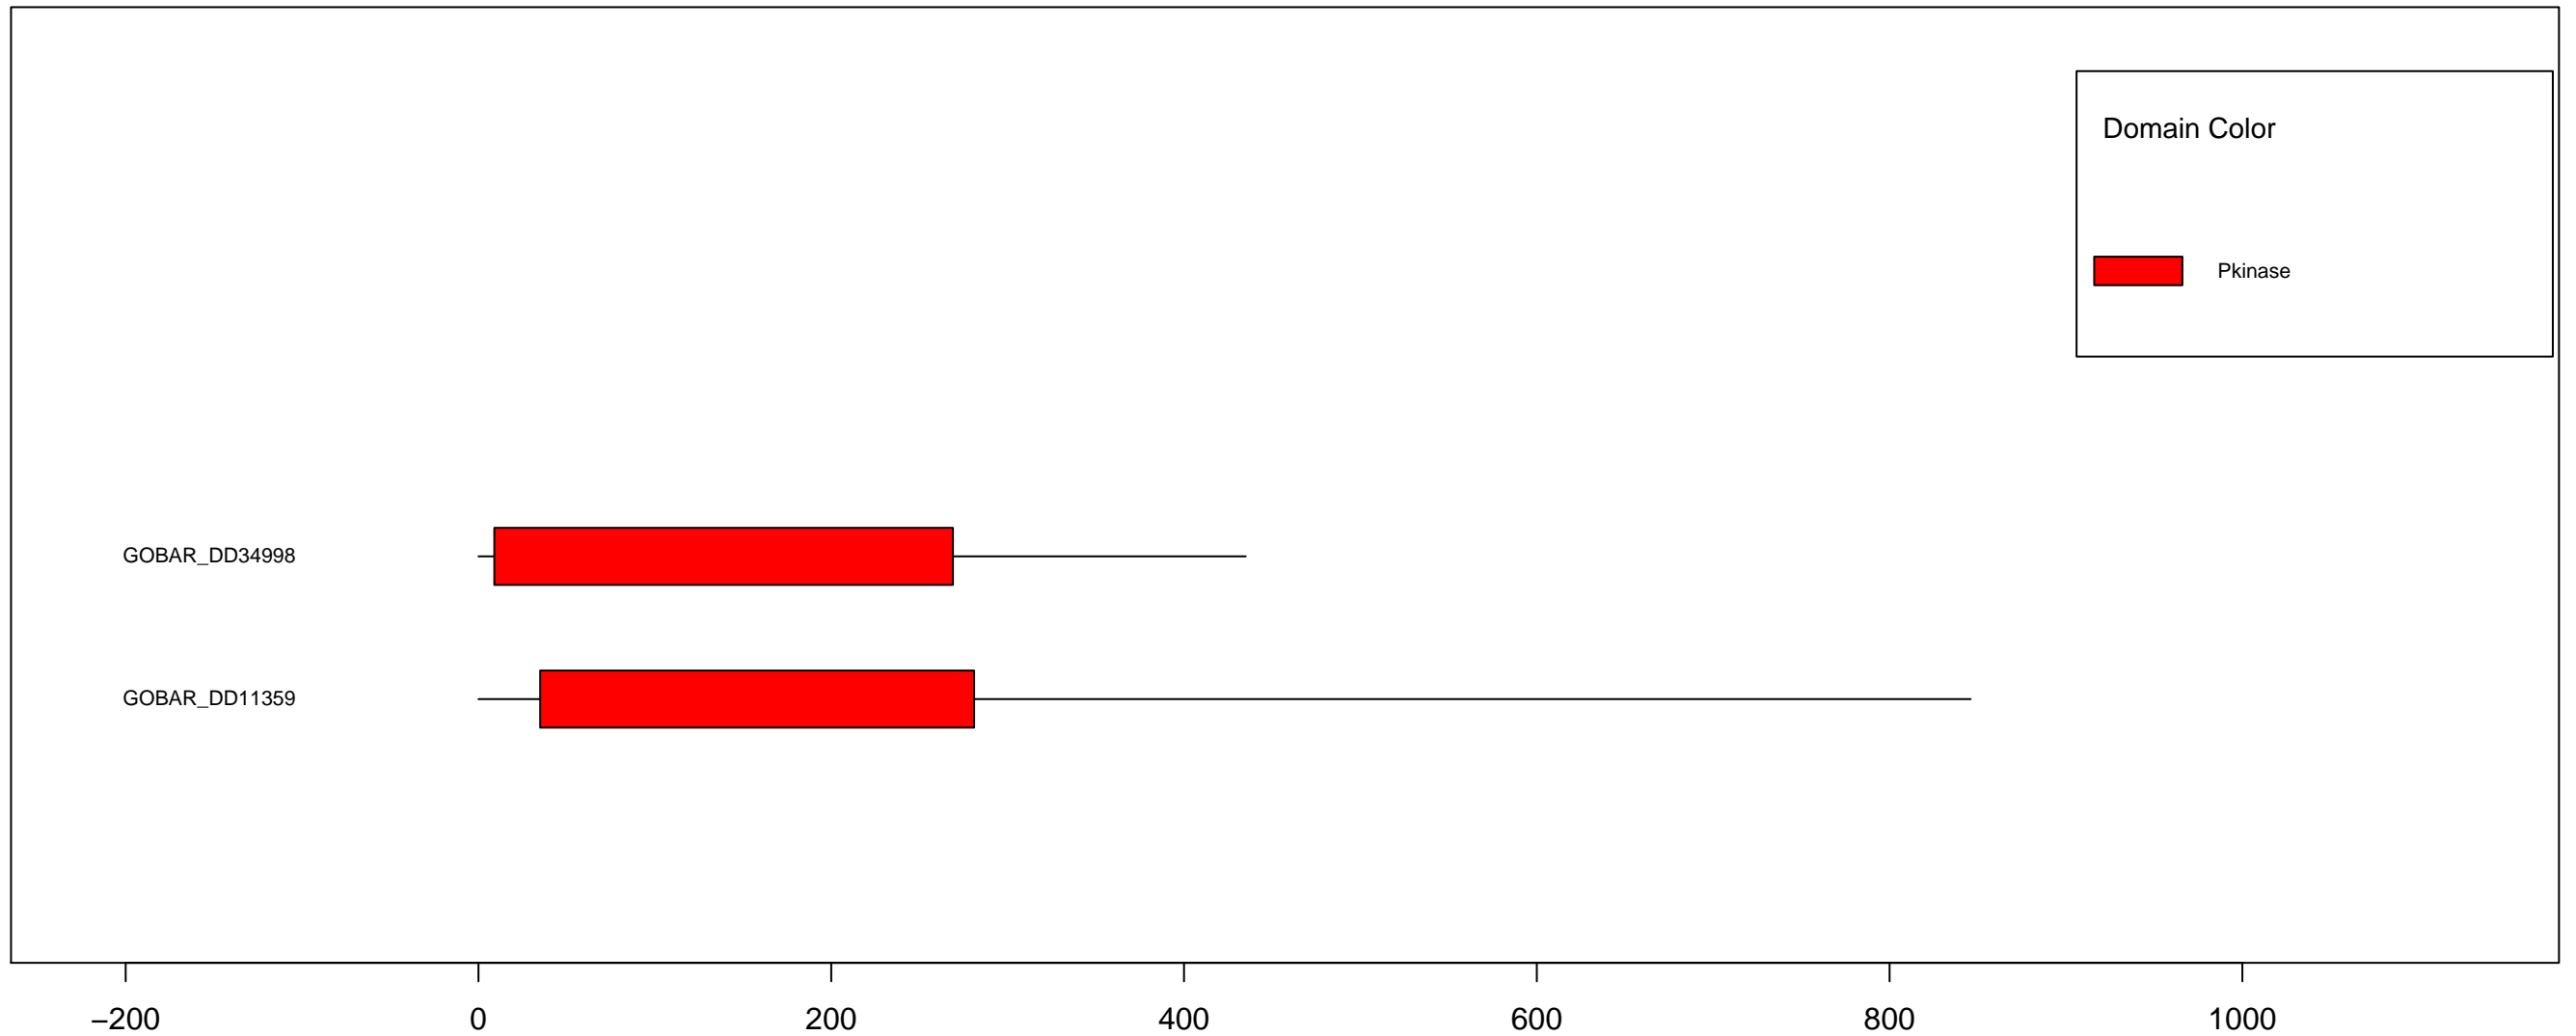

# G.ba SCY1\_SCYL2 domain diagram (all)

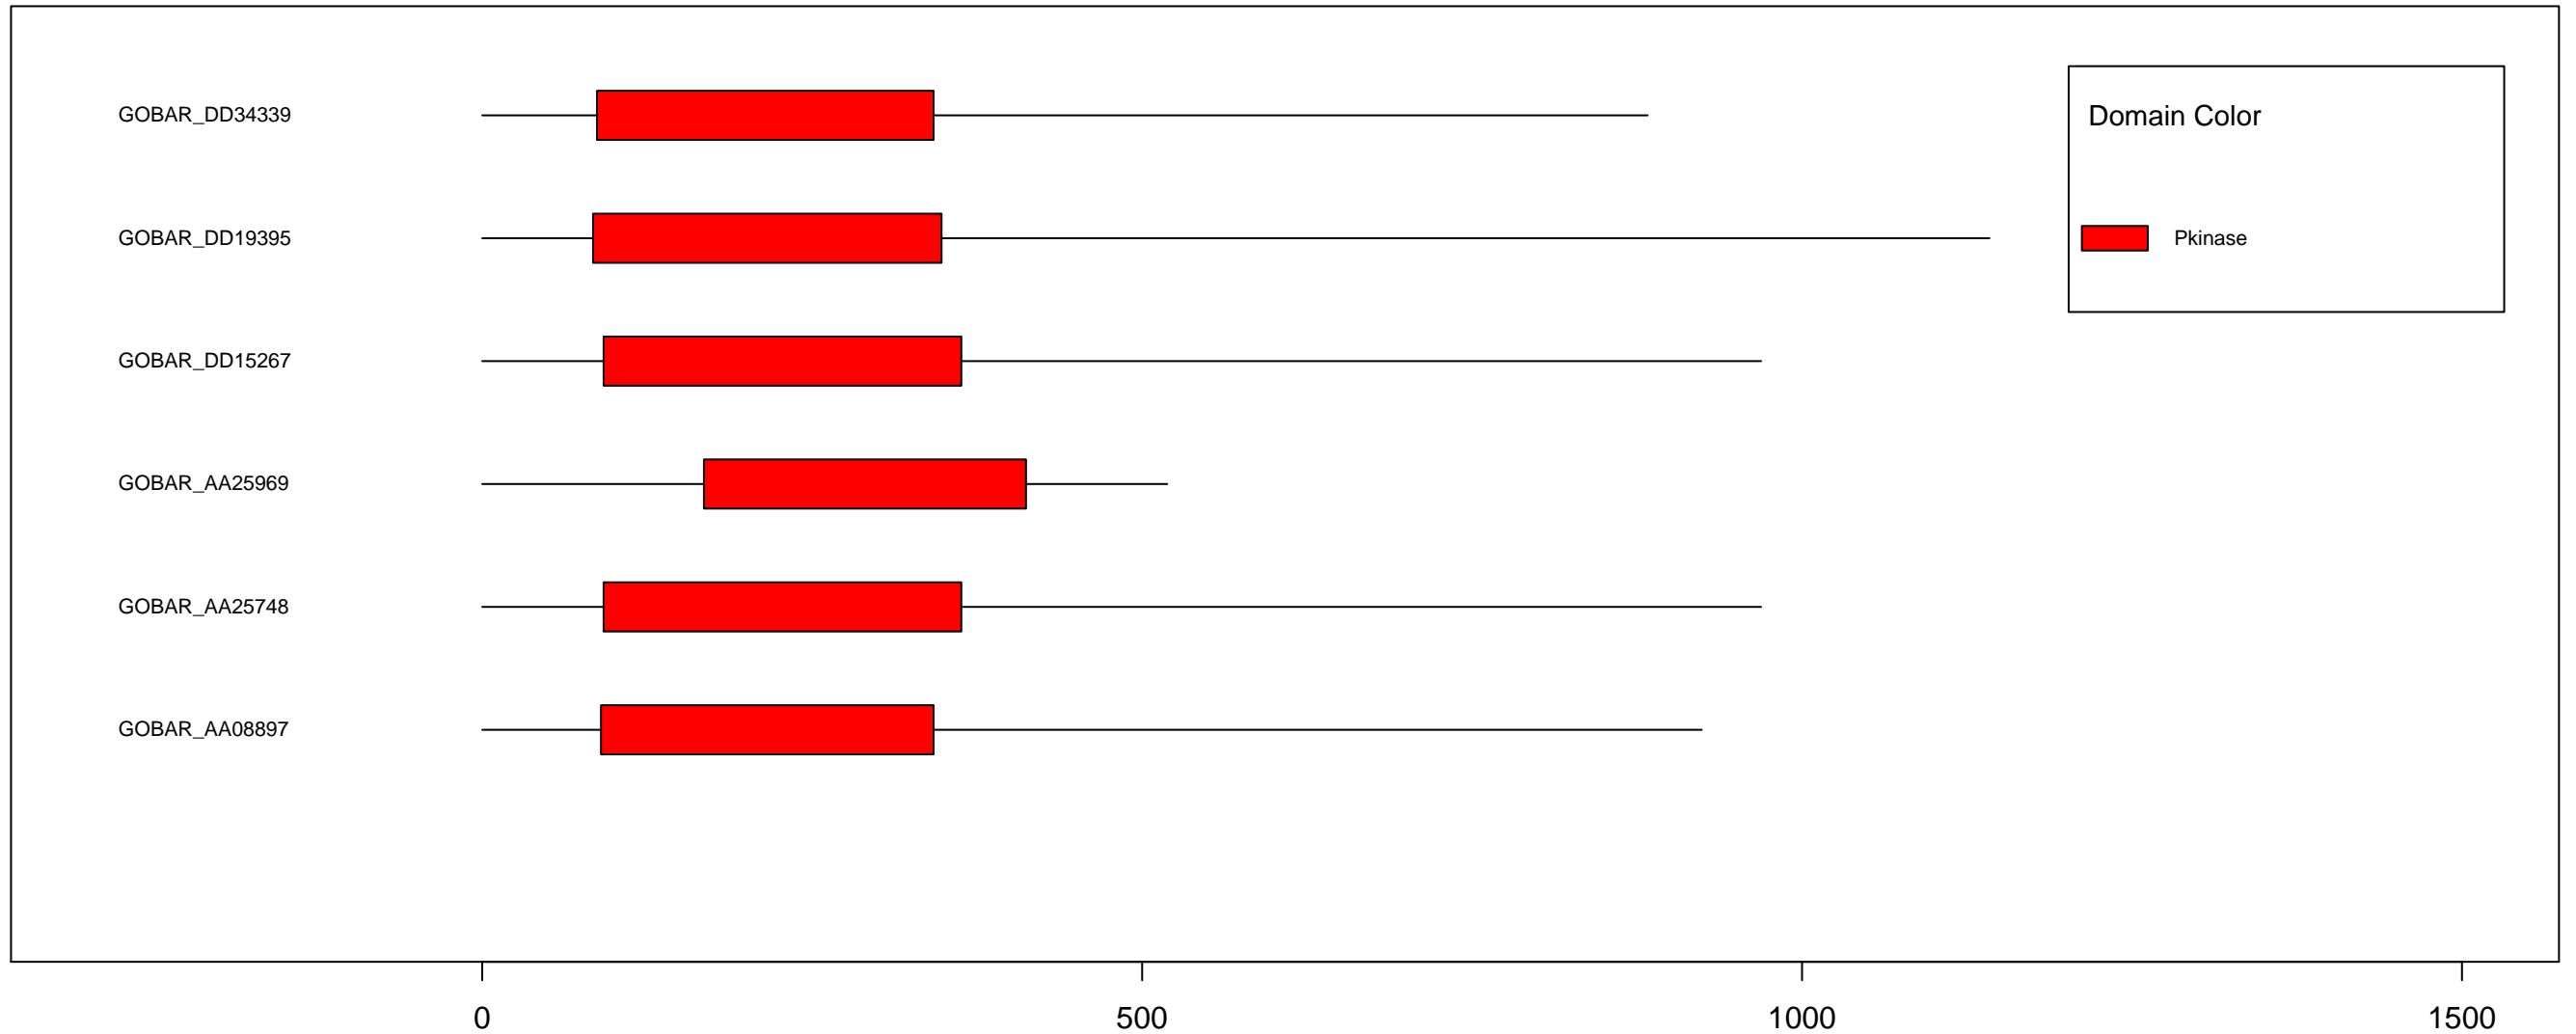

# G.ba STE\_STE11 domain diagram (part 1)

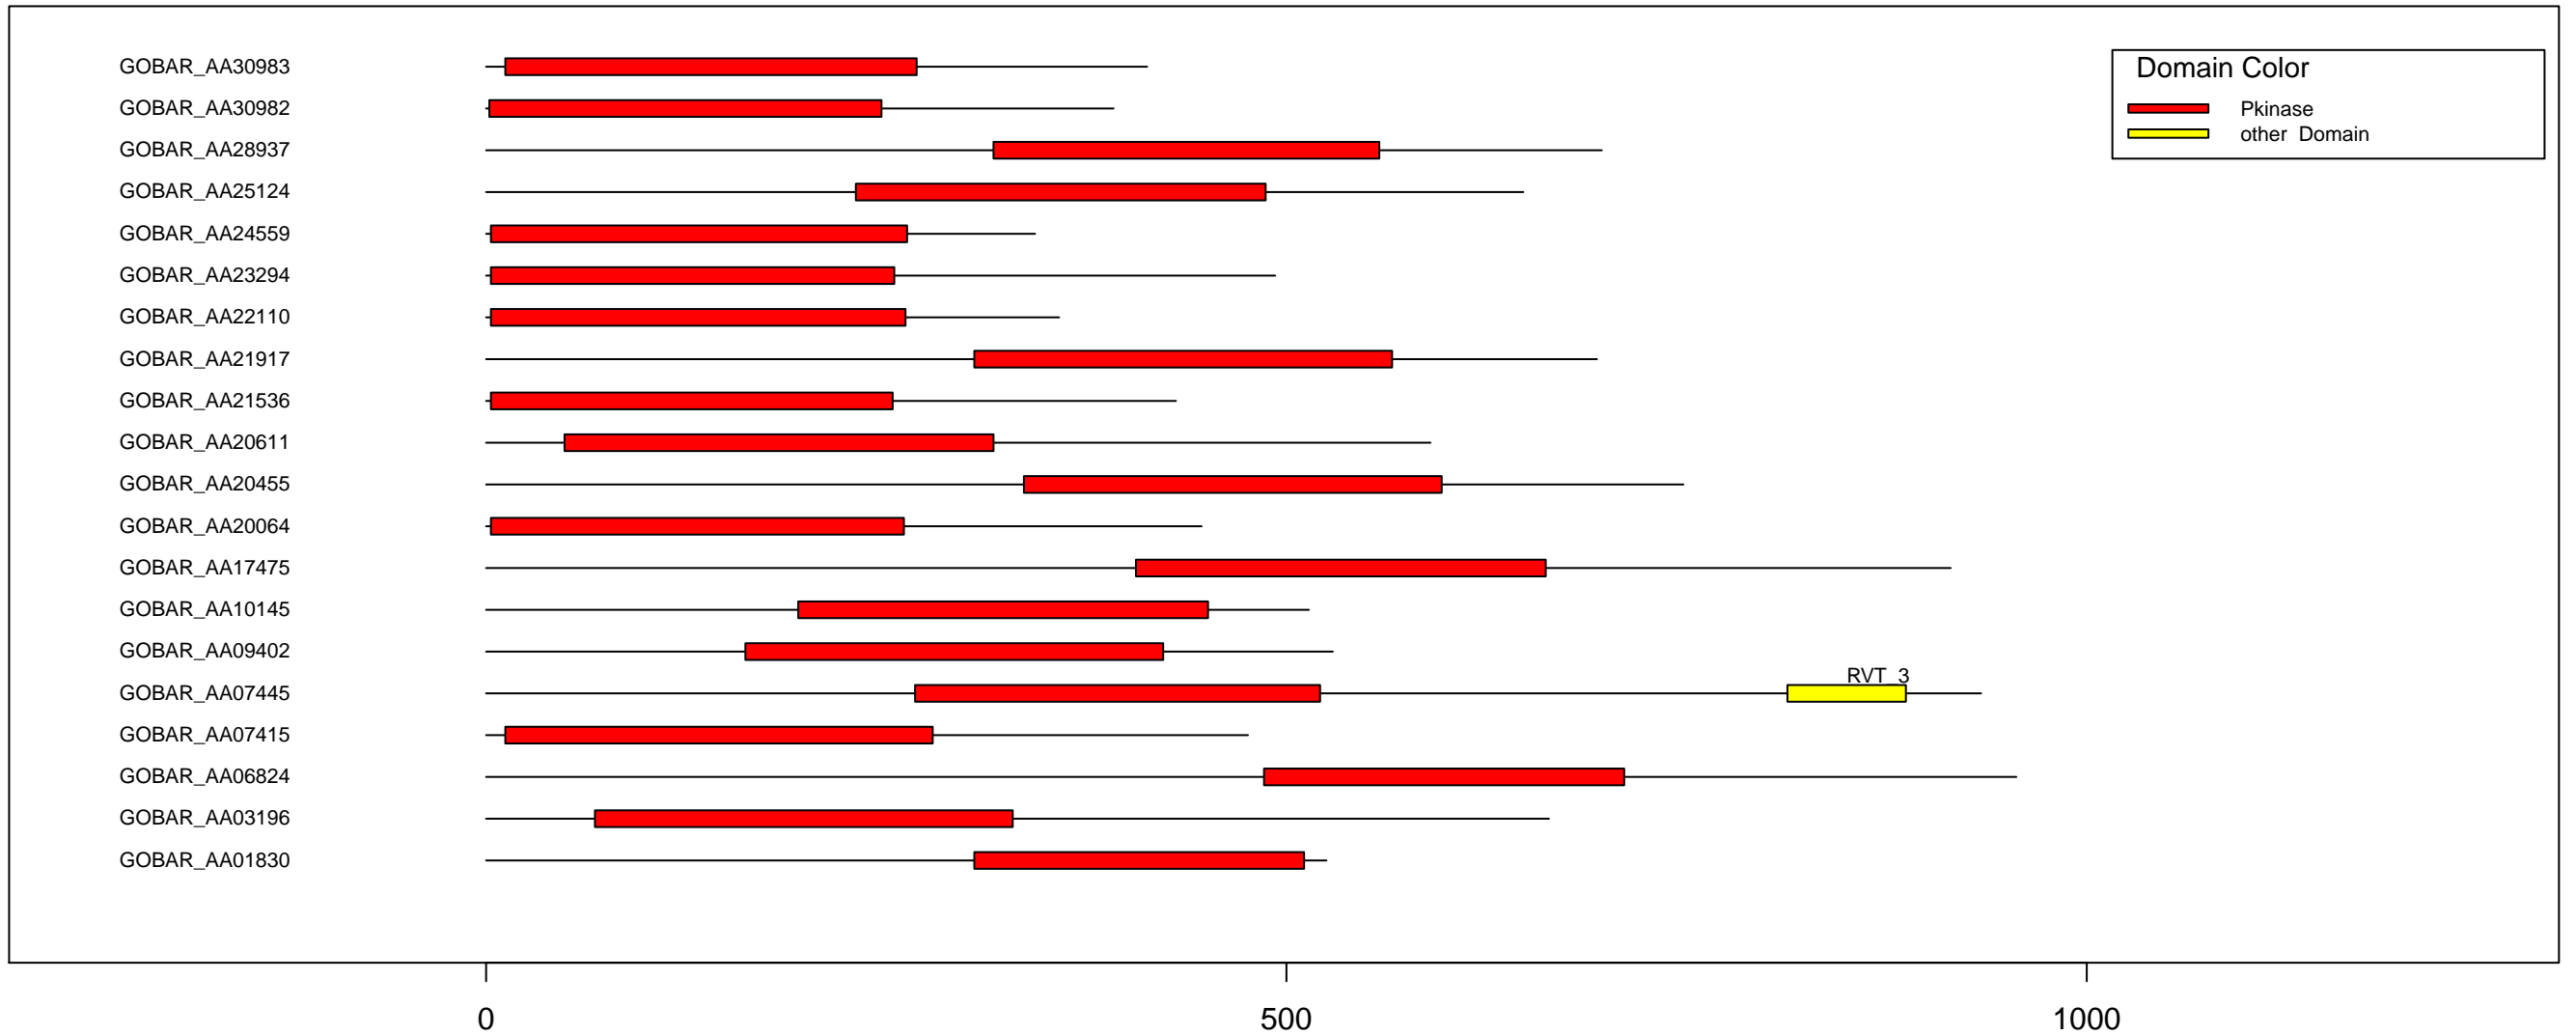

## G.ba STE\_STE11 domain diagram (part 2)

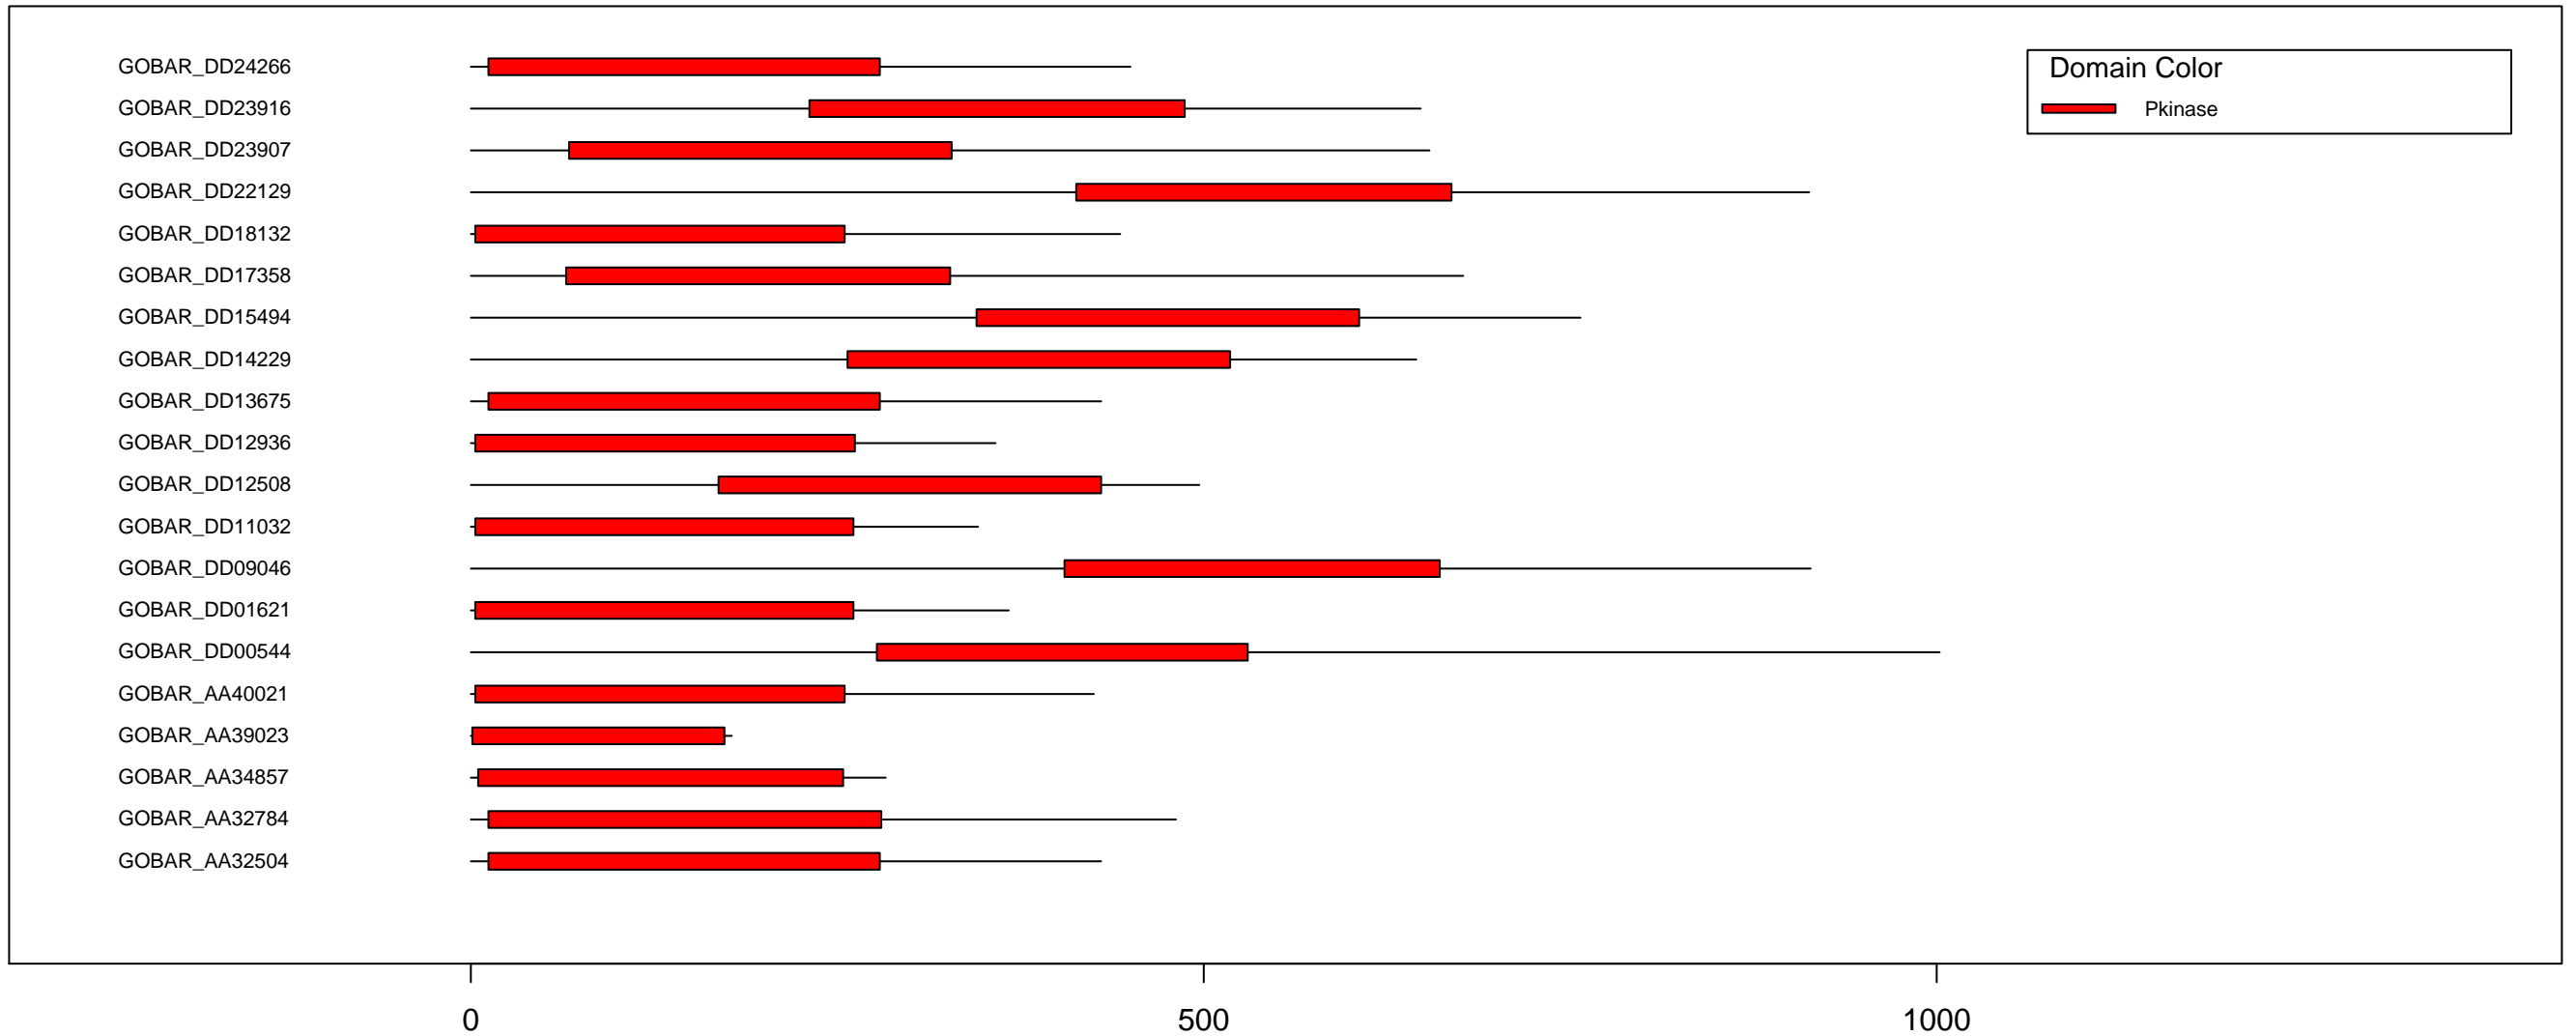

### G.ba STE\_STE11 domain diagram (part 3)

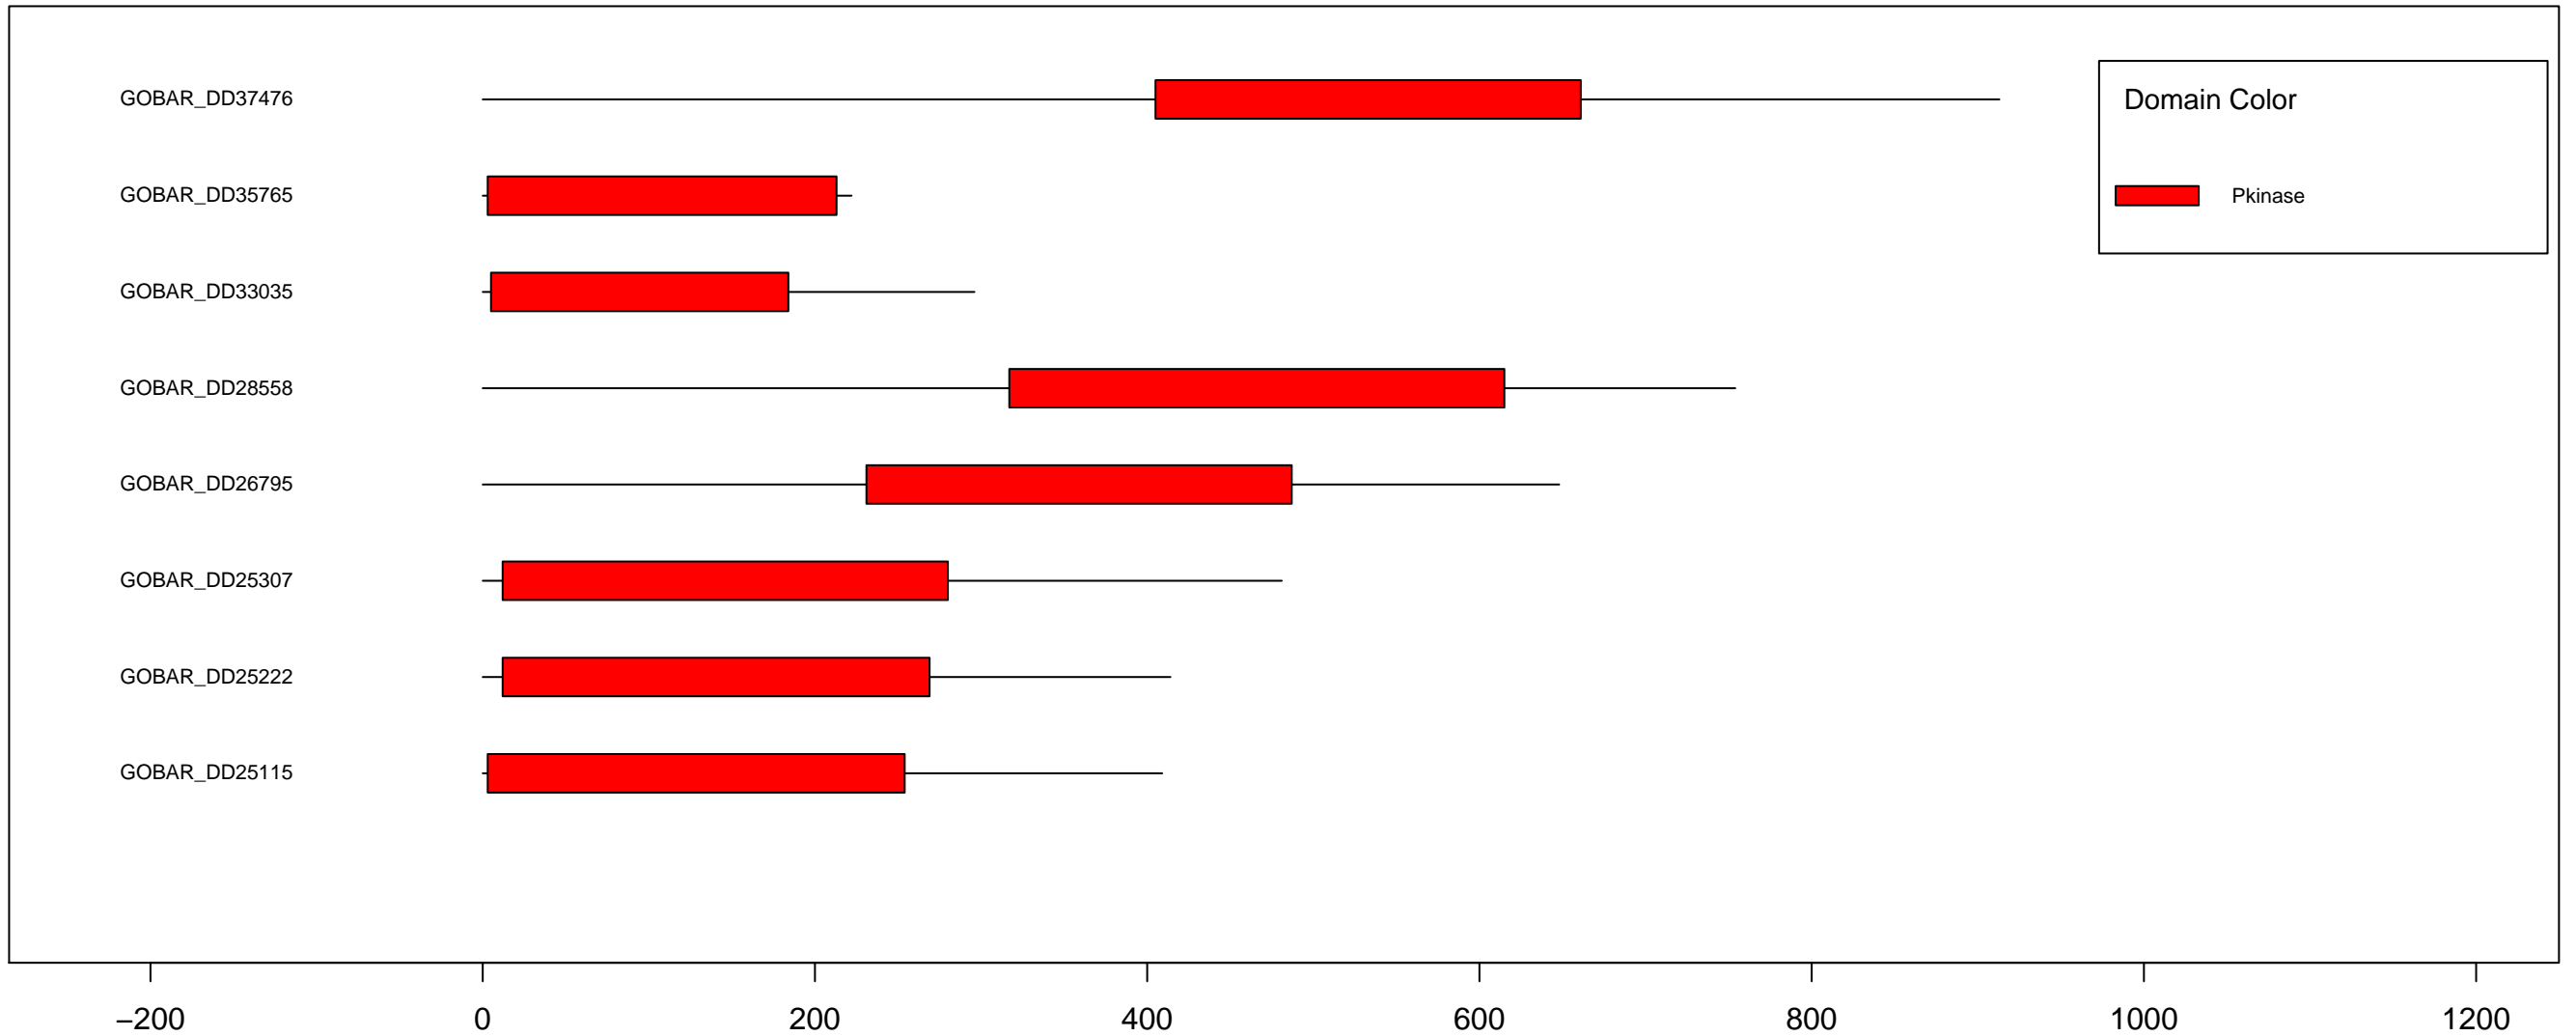



### G.ba STE\_STE20-Fray domain diagram (part 1)

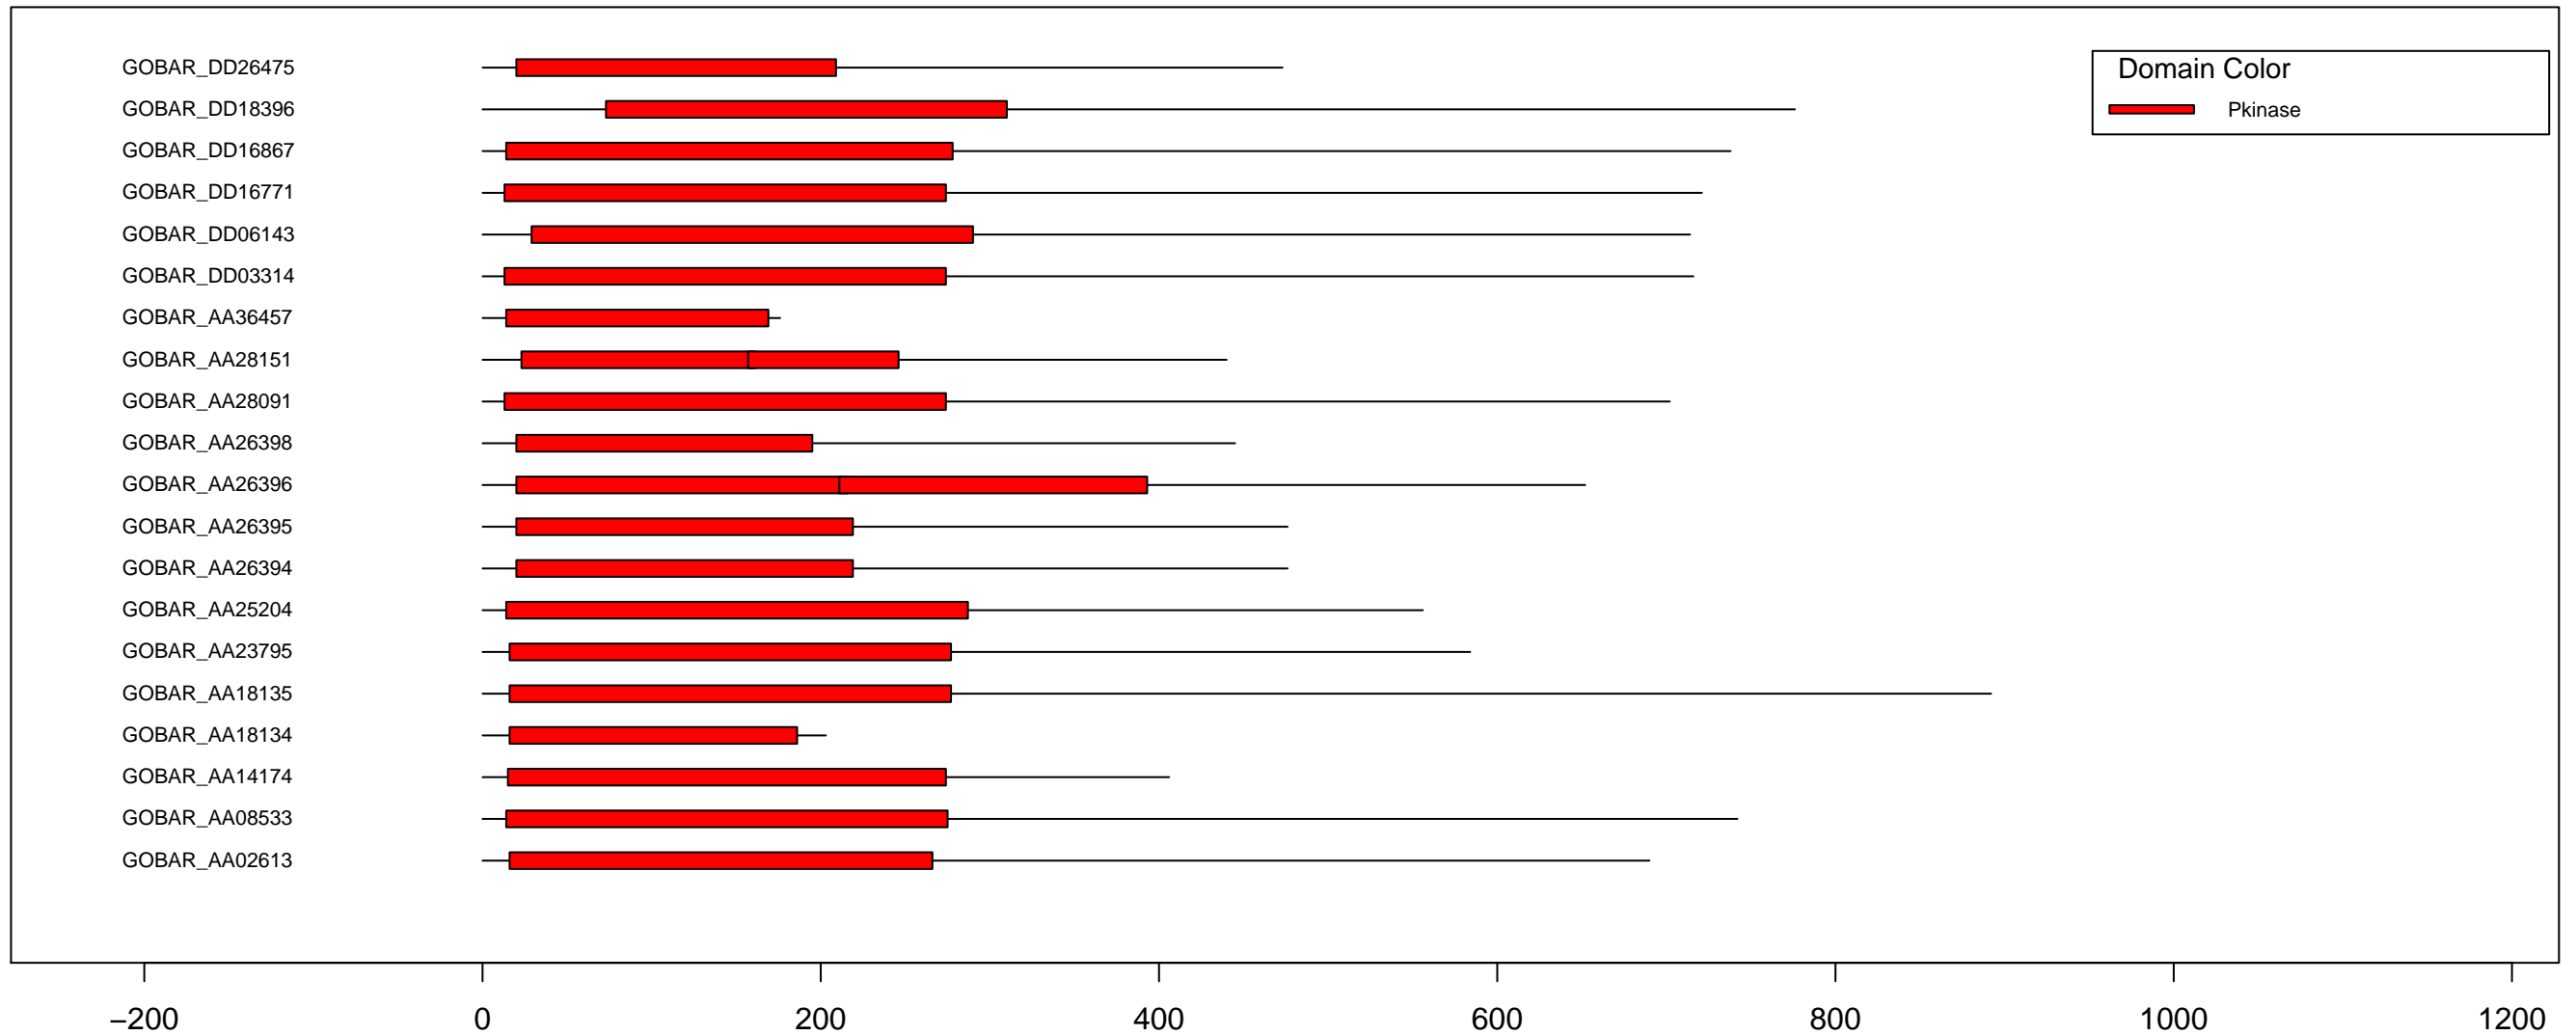

### G.ba STE\_STE20-Fray domain diagram (part 2)

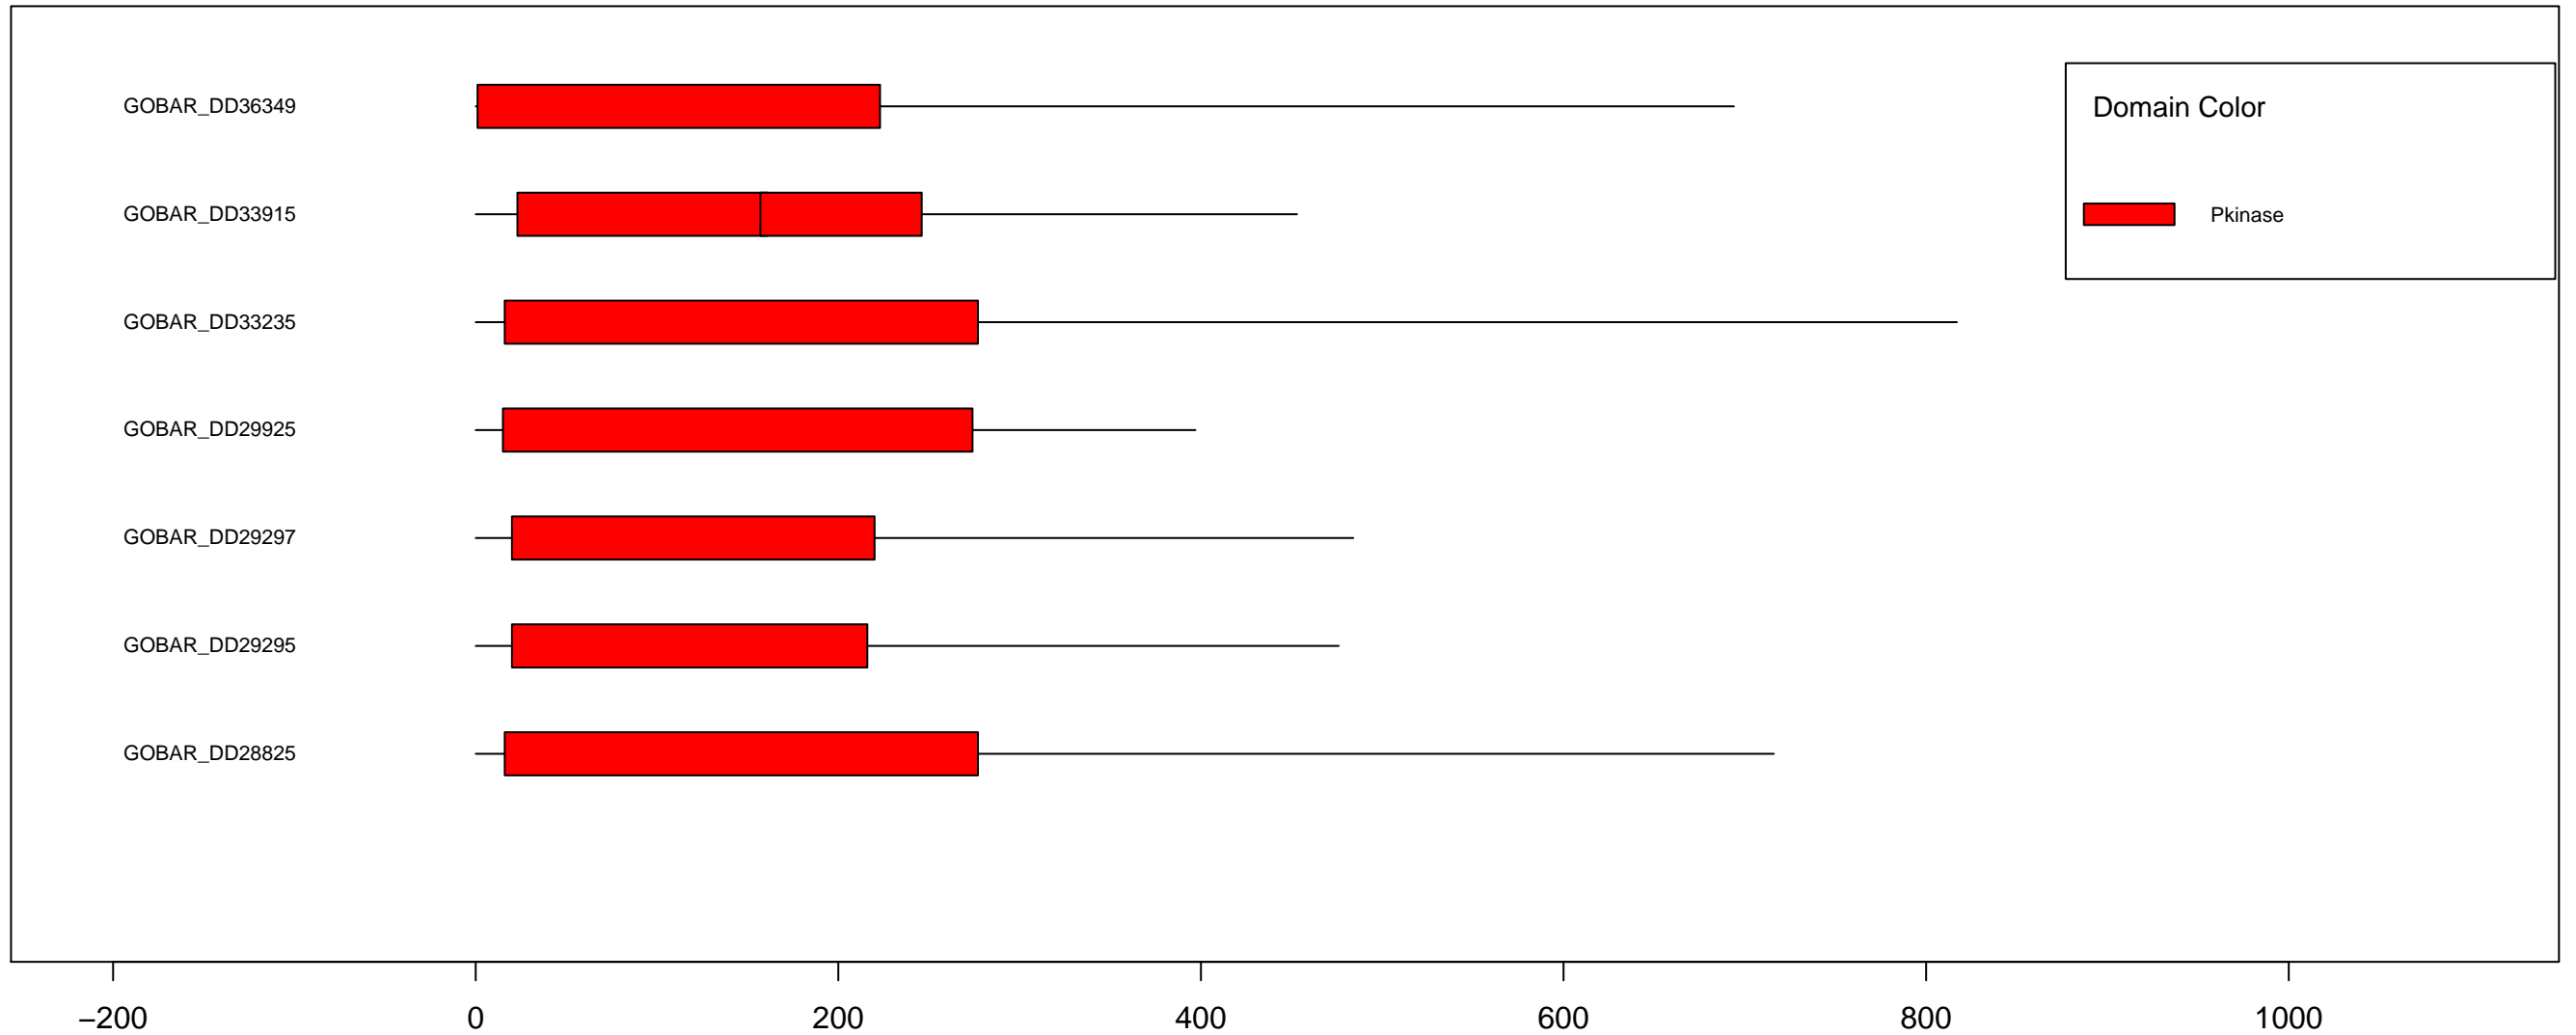

# G.ba STE\_STE20-PI domain diagram (all)

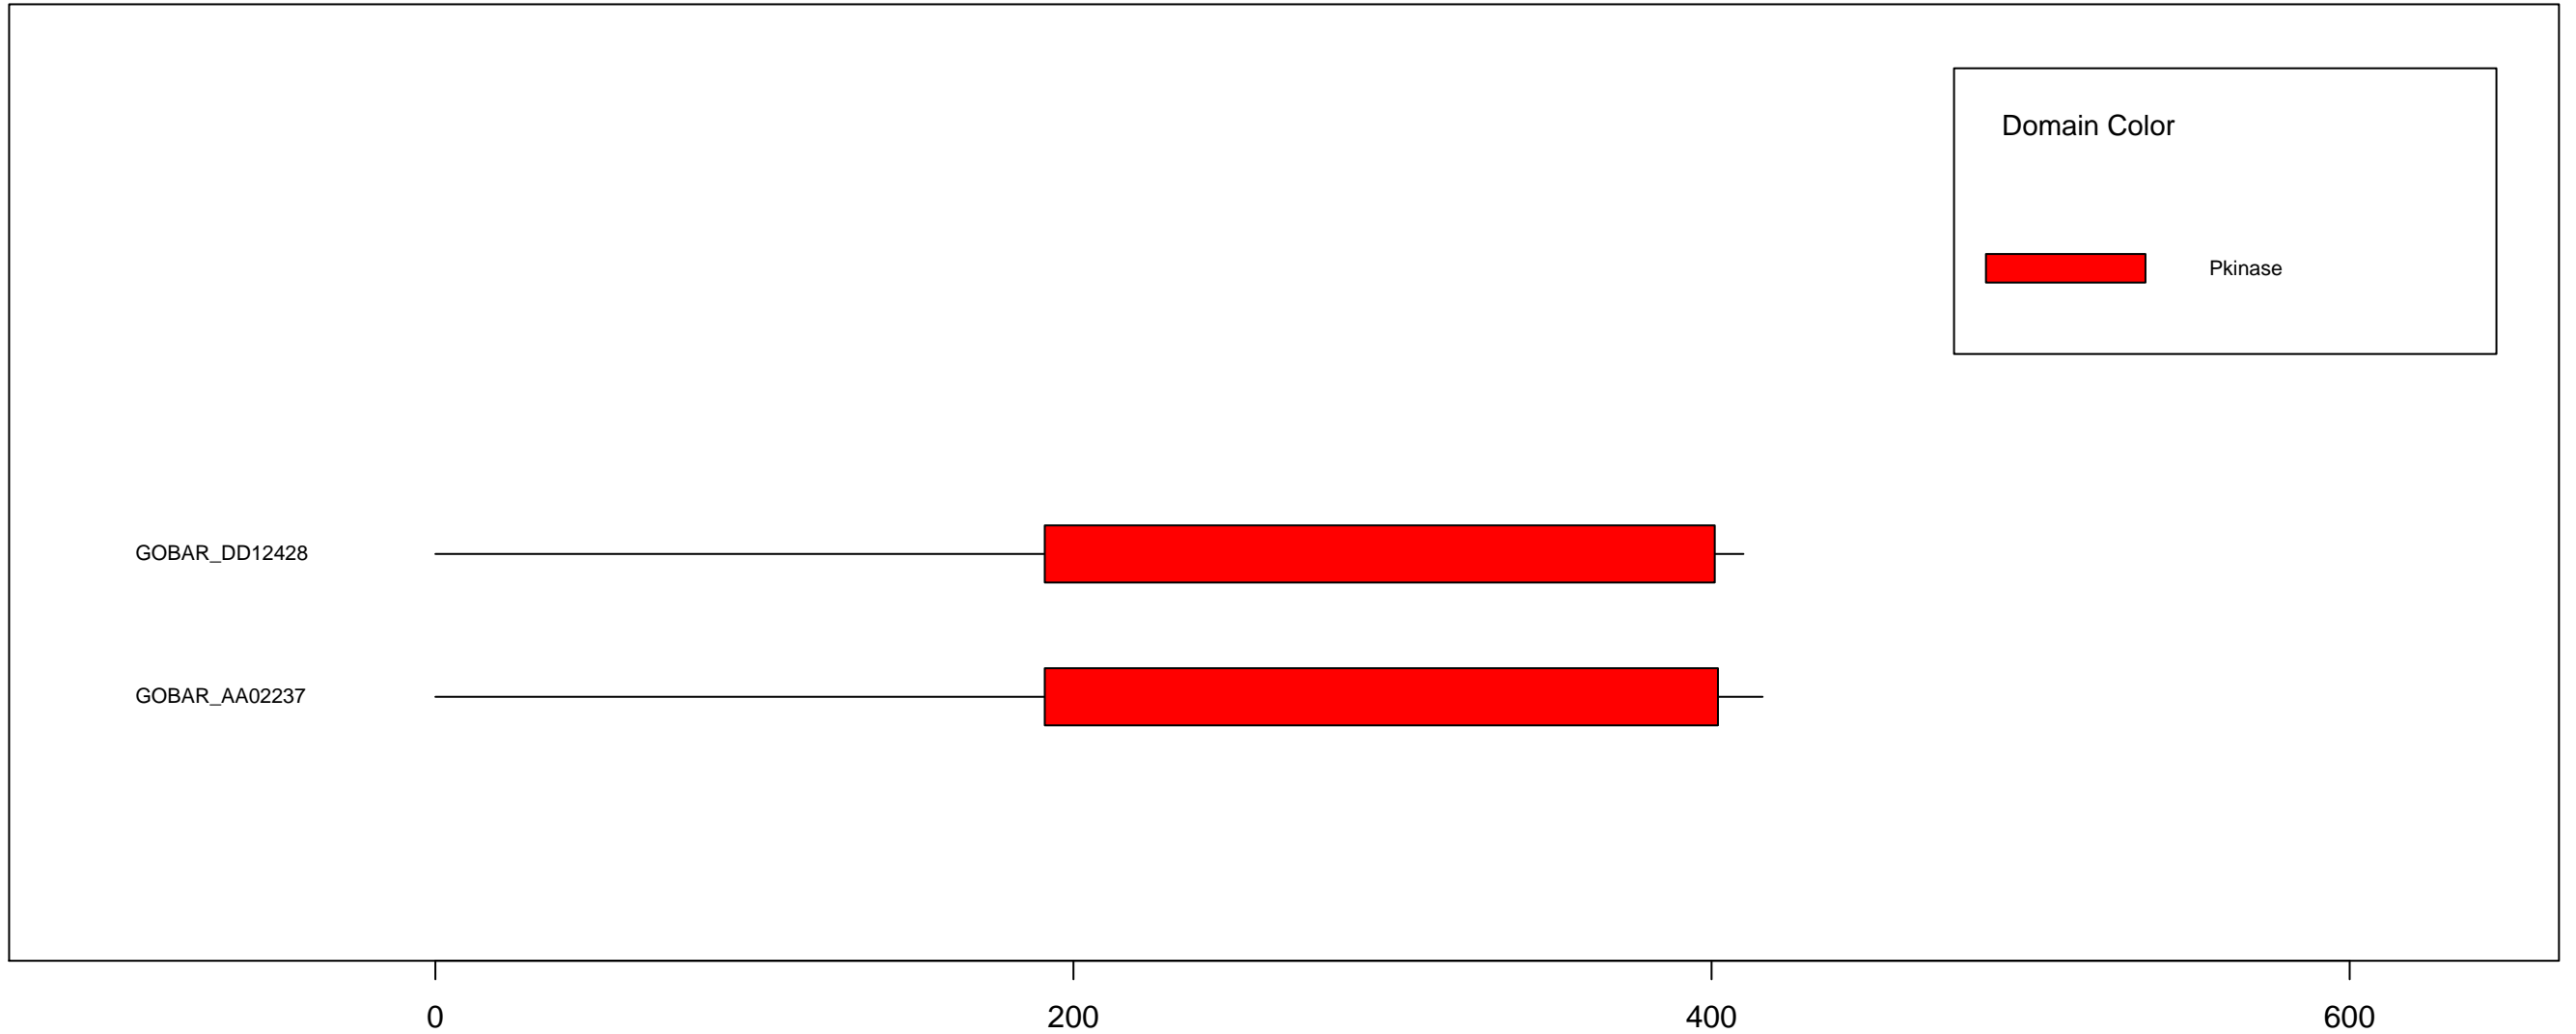

# G.ba STE\_STE20-YSK domain diagram (all)

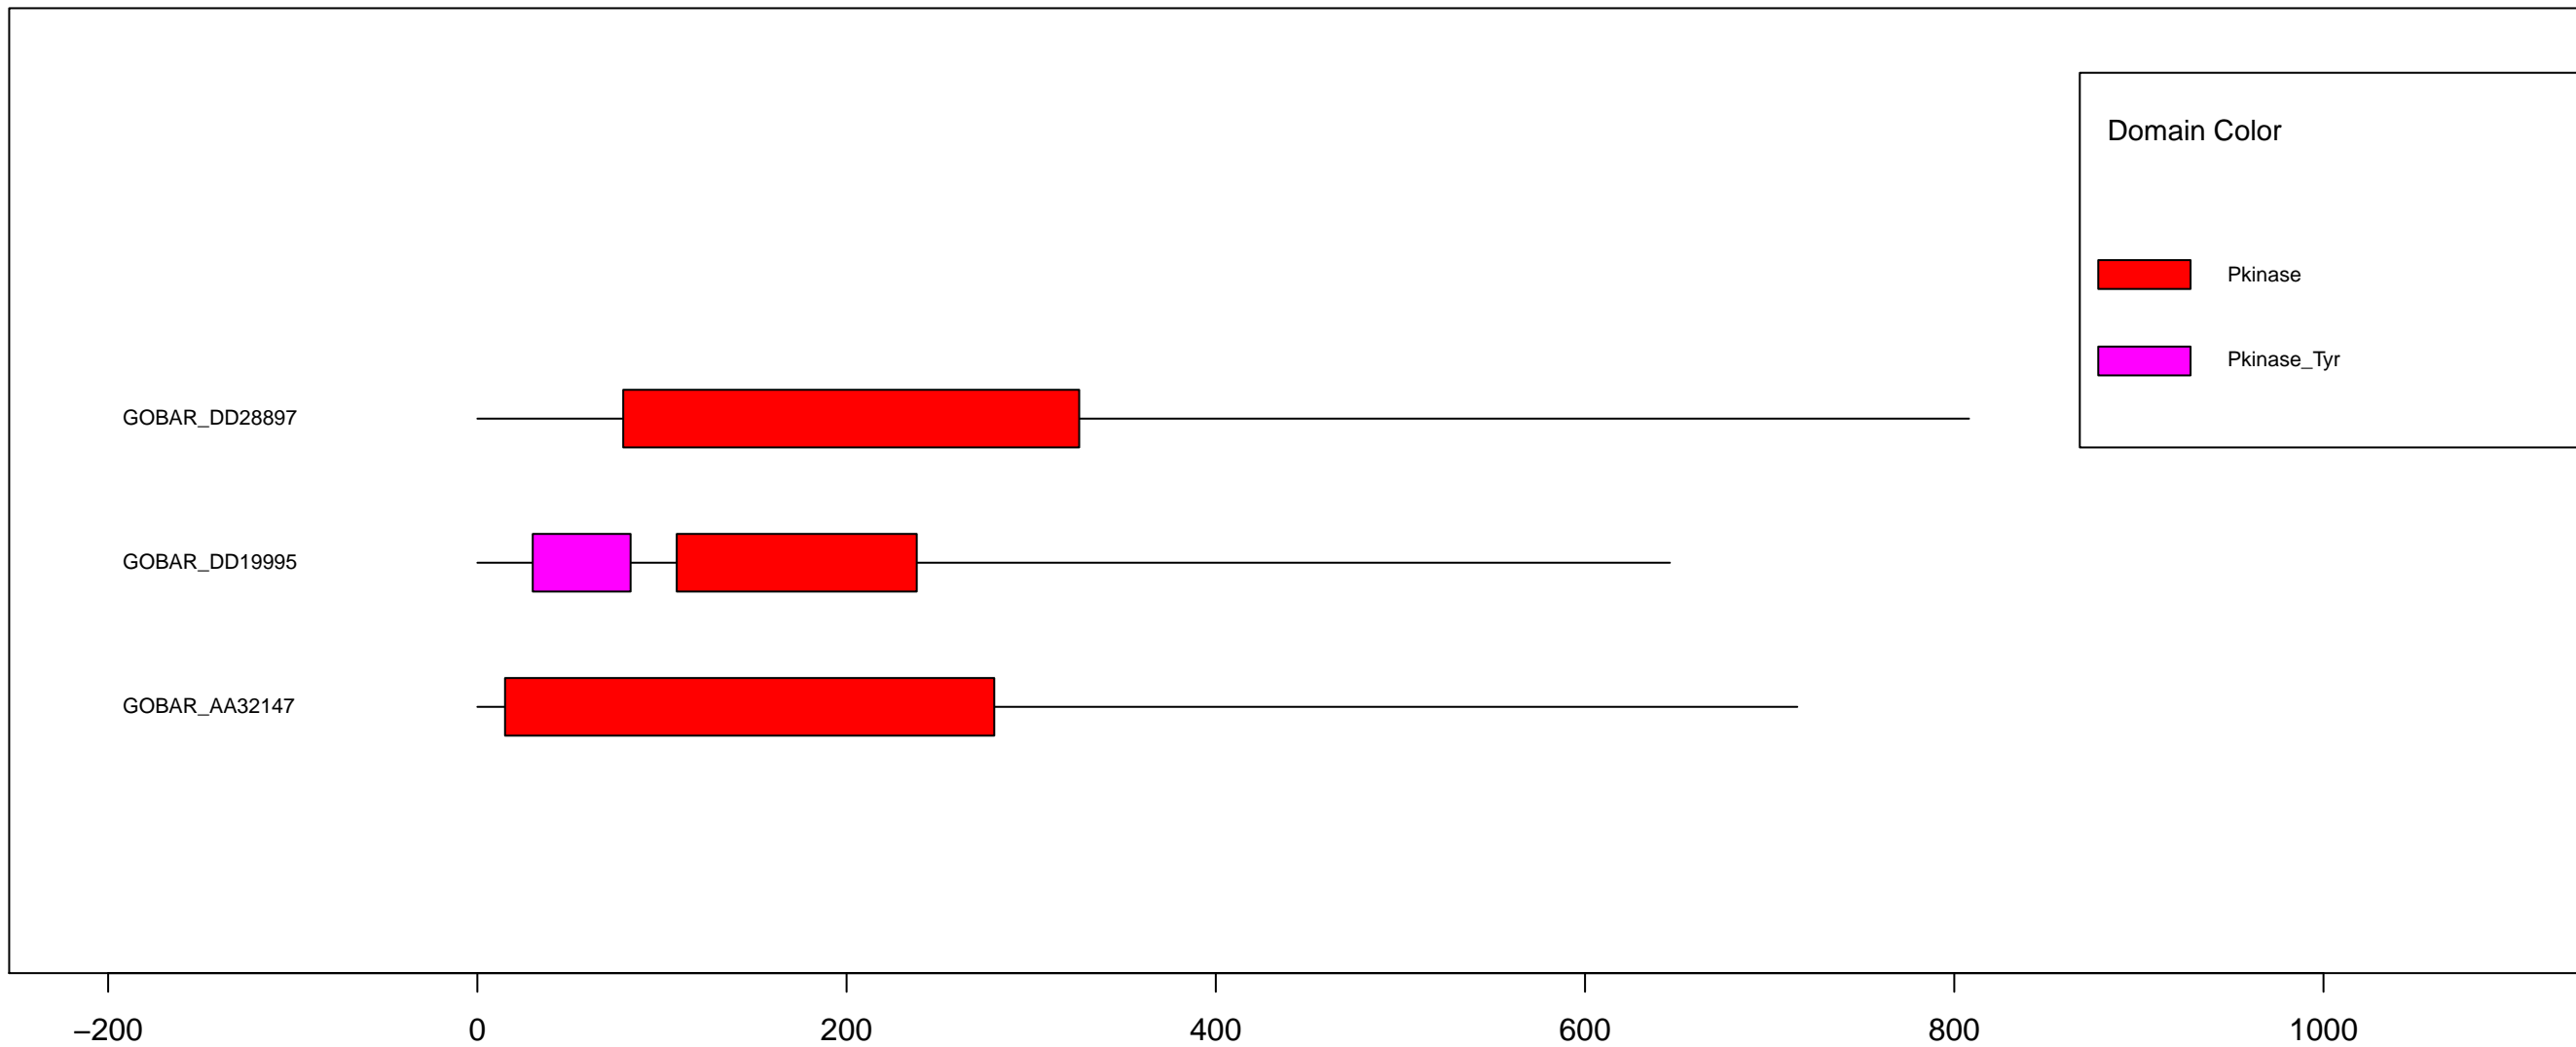

# G.ba STE\_STE7 domain diagram (part 1)

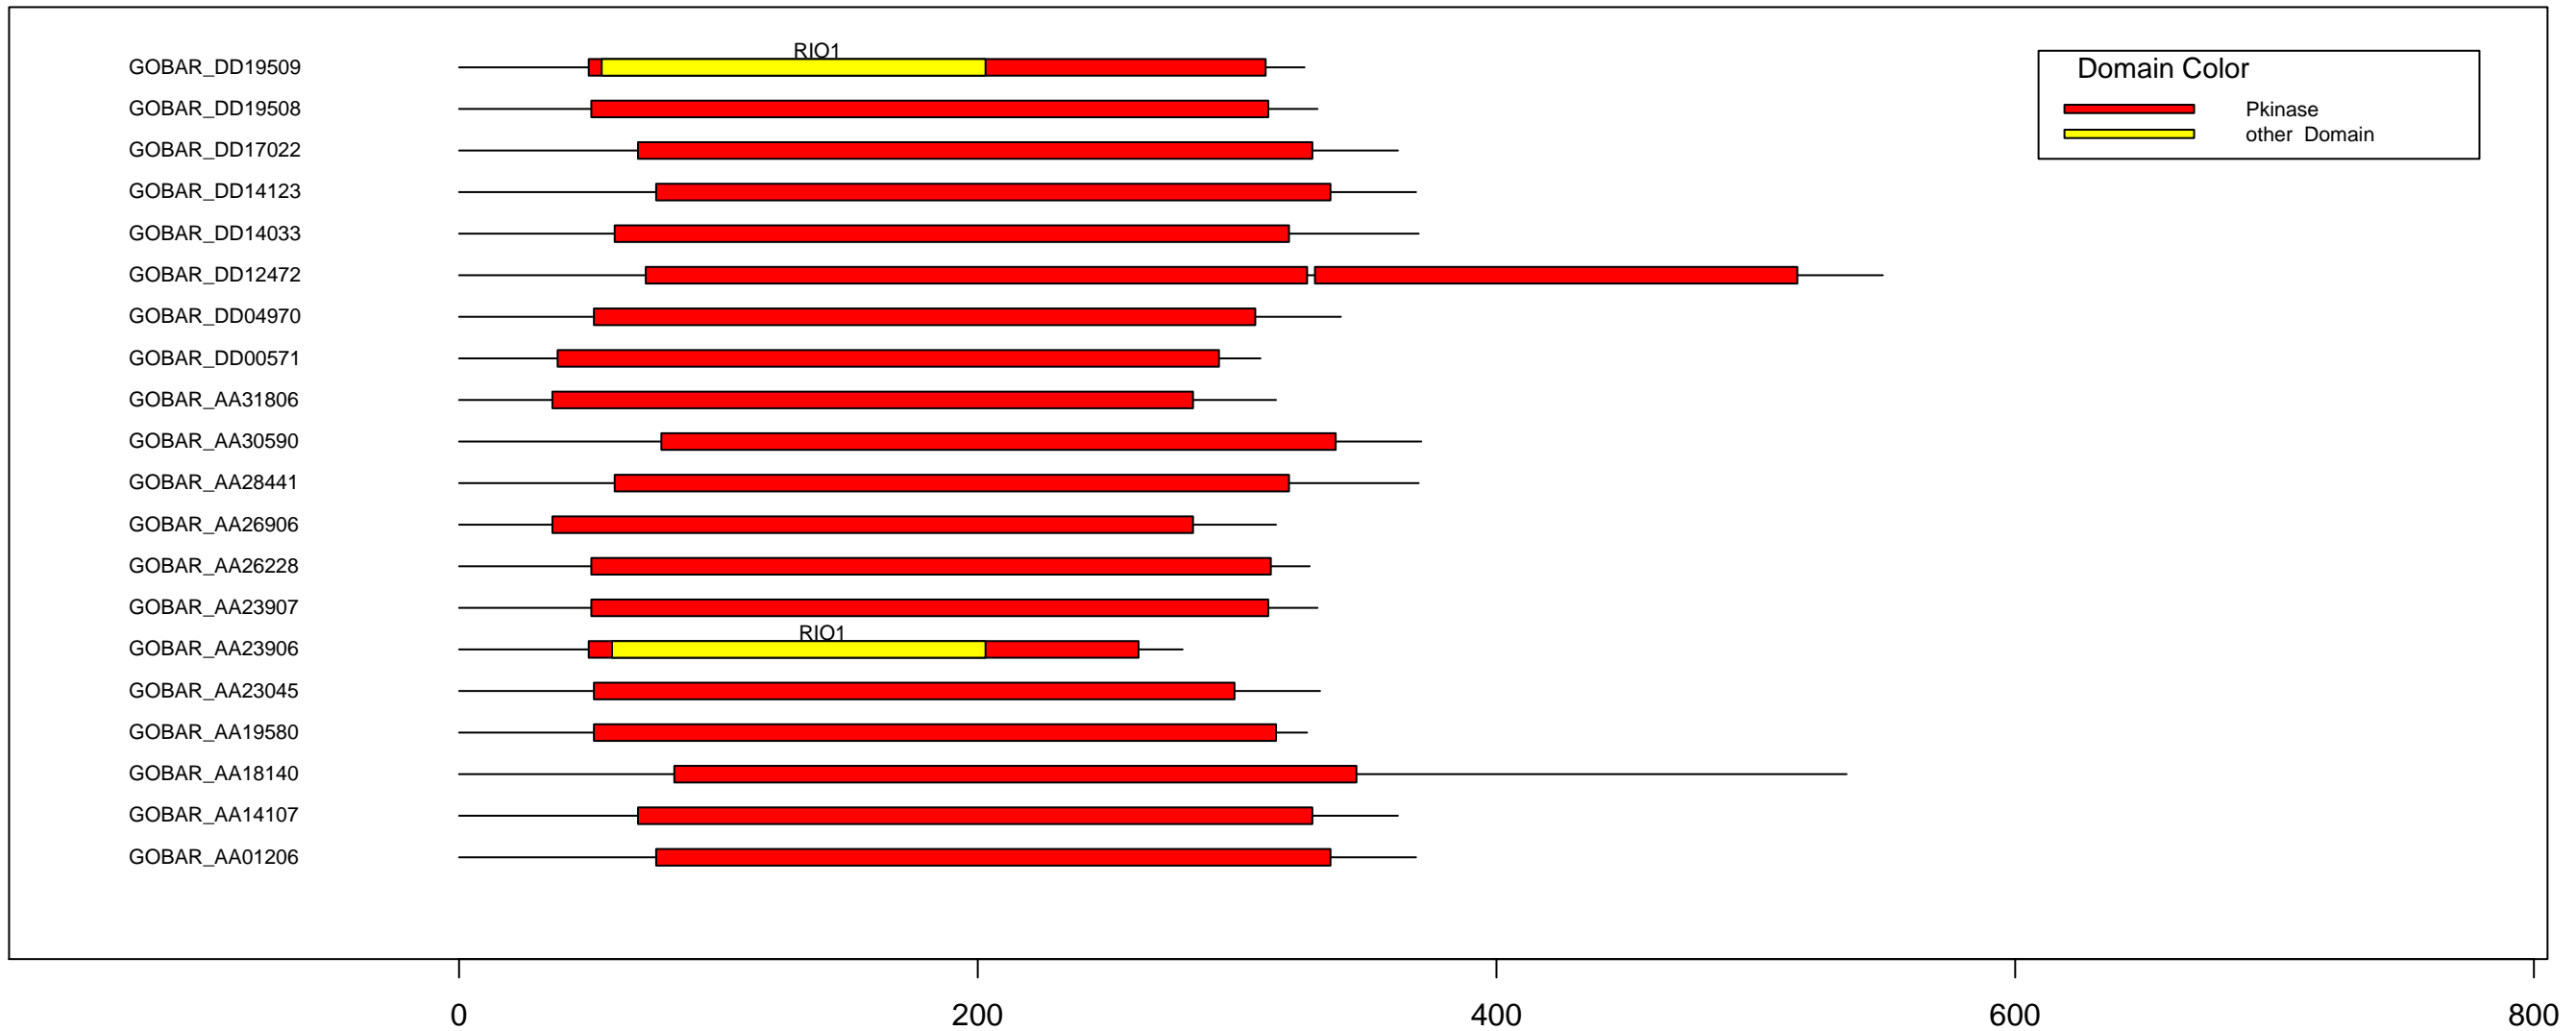

## G.ba STE\_STE7 domain diagram (part 2)

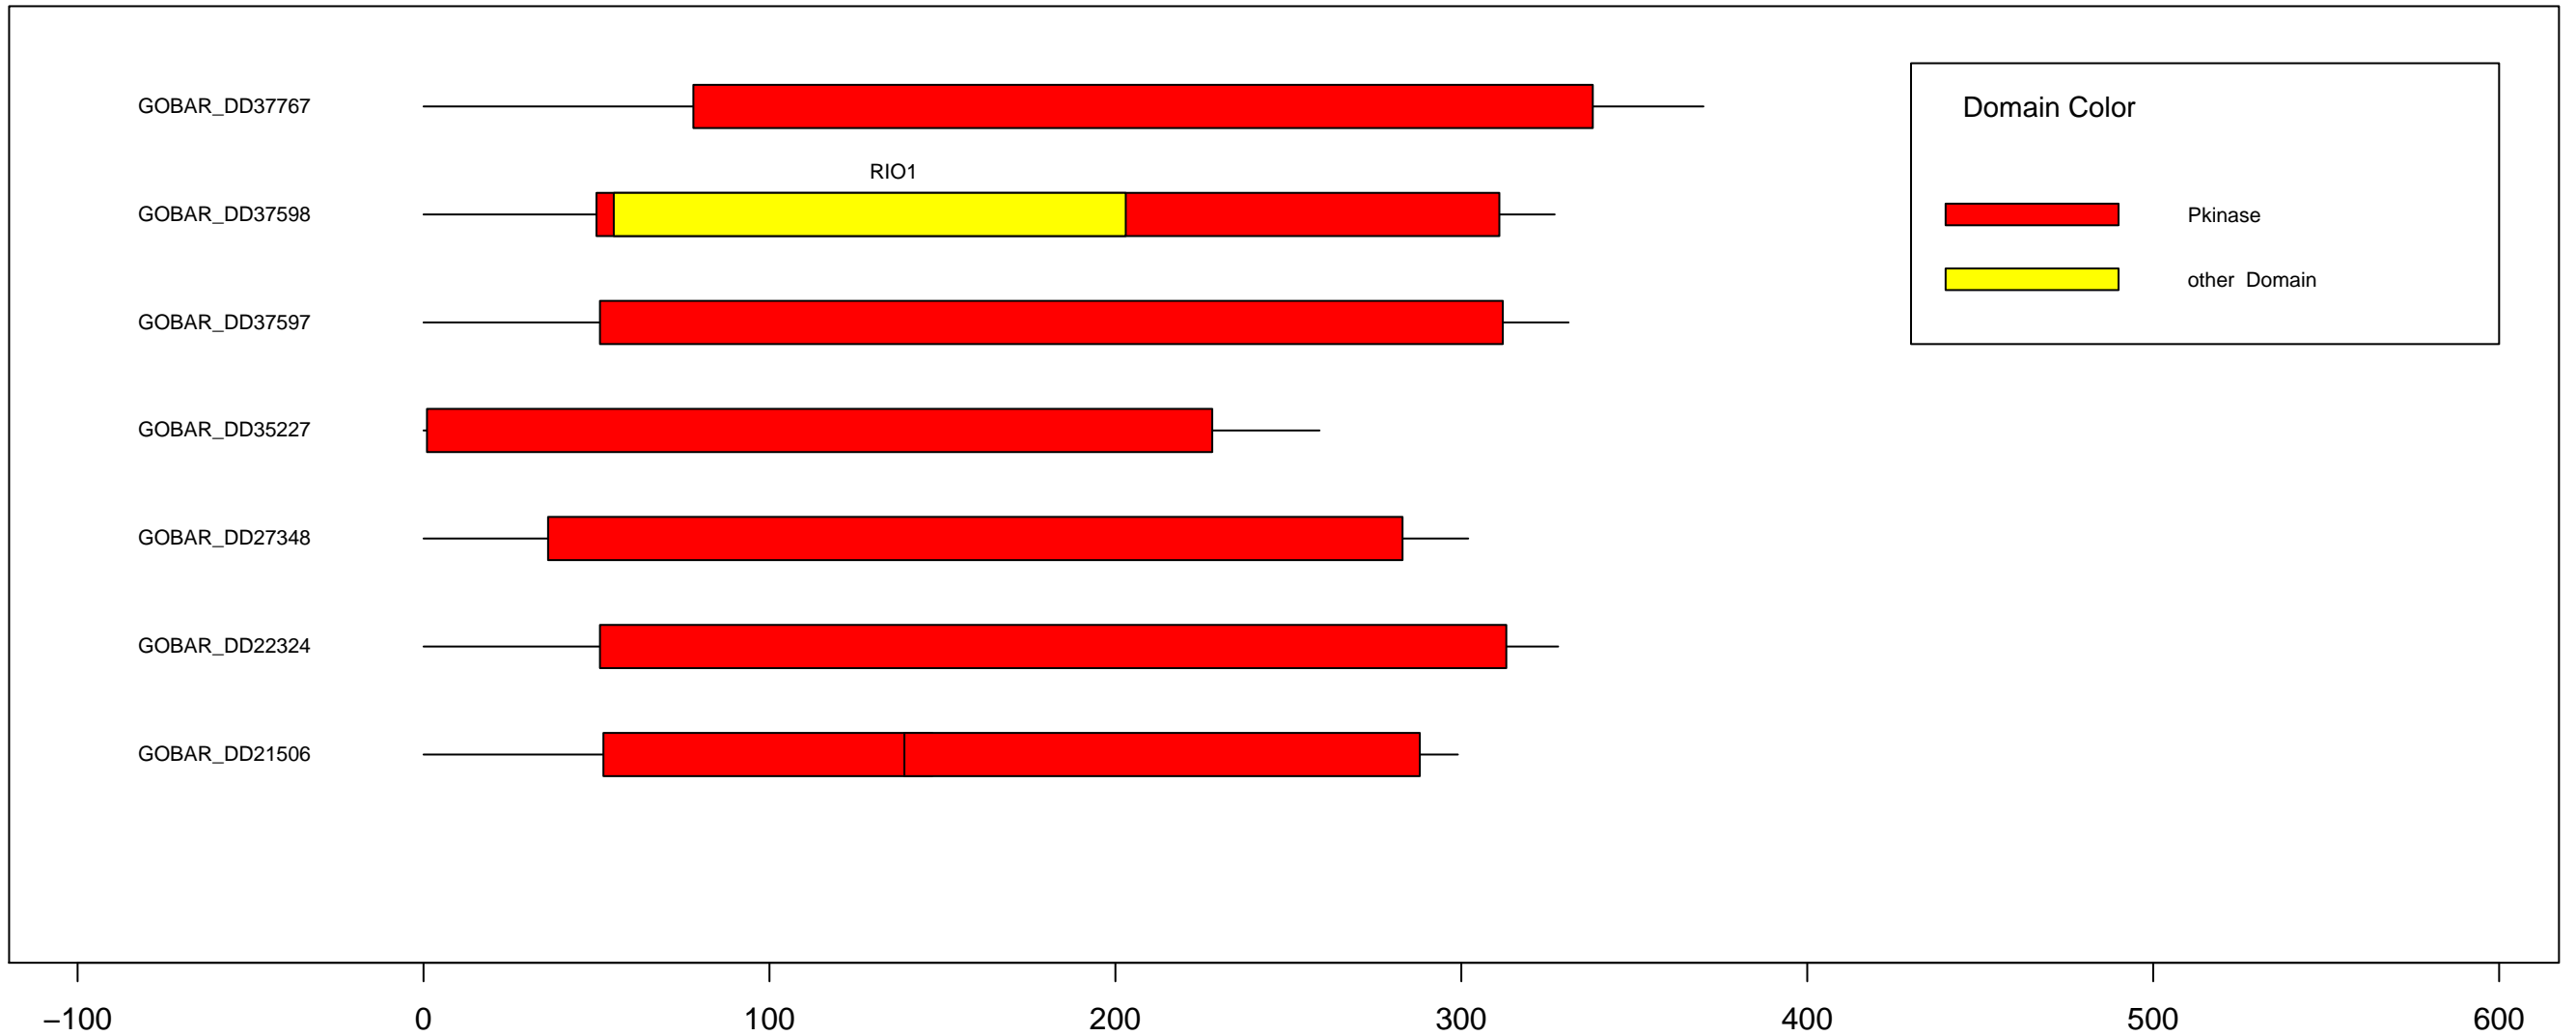

# G.ba STE\_STE-PI domain diagram (all)

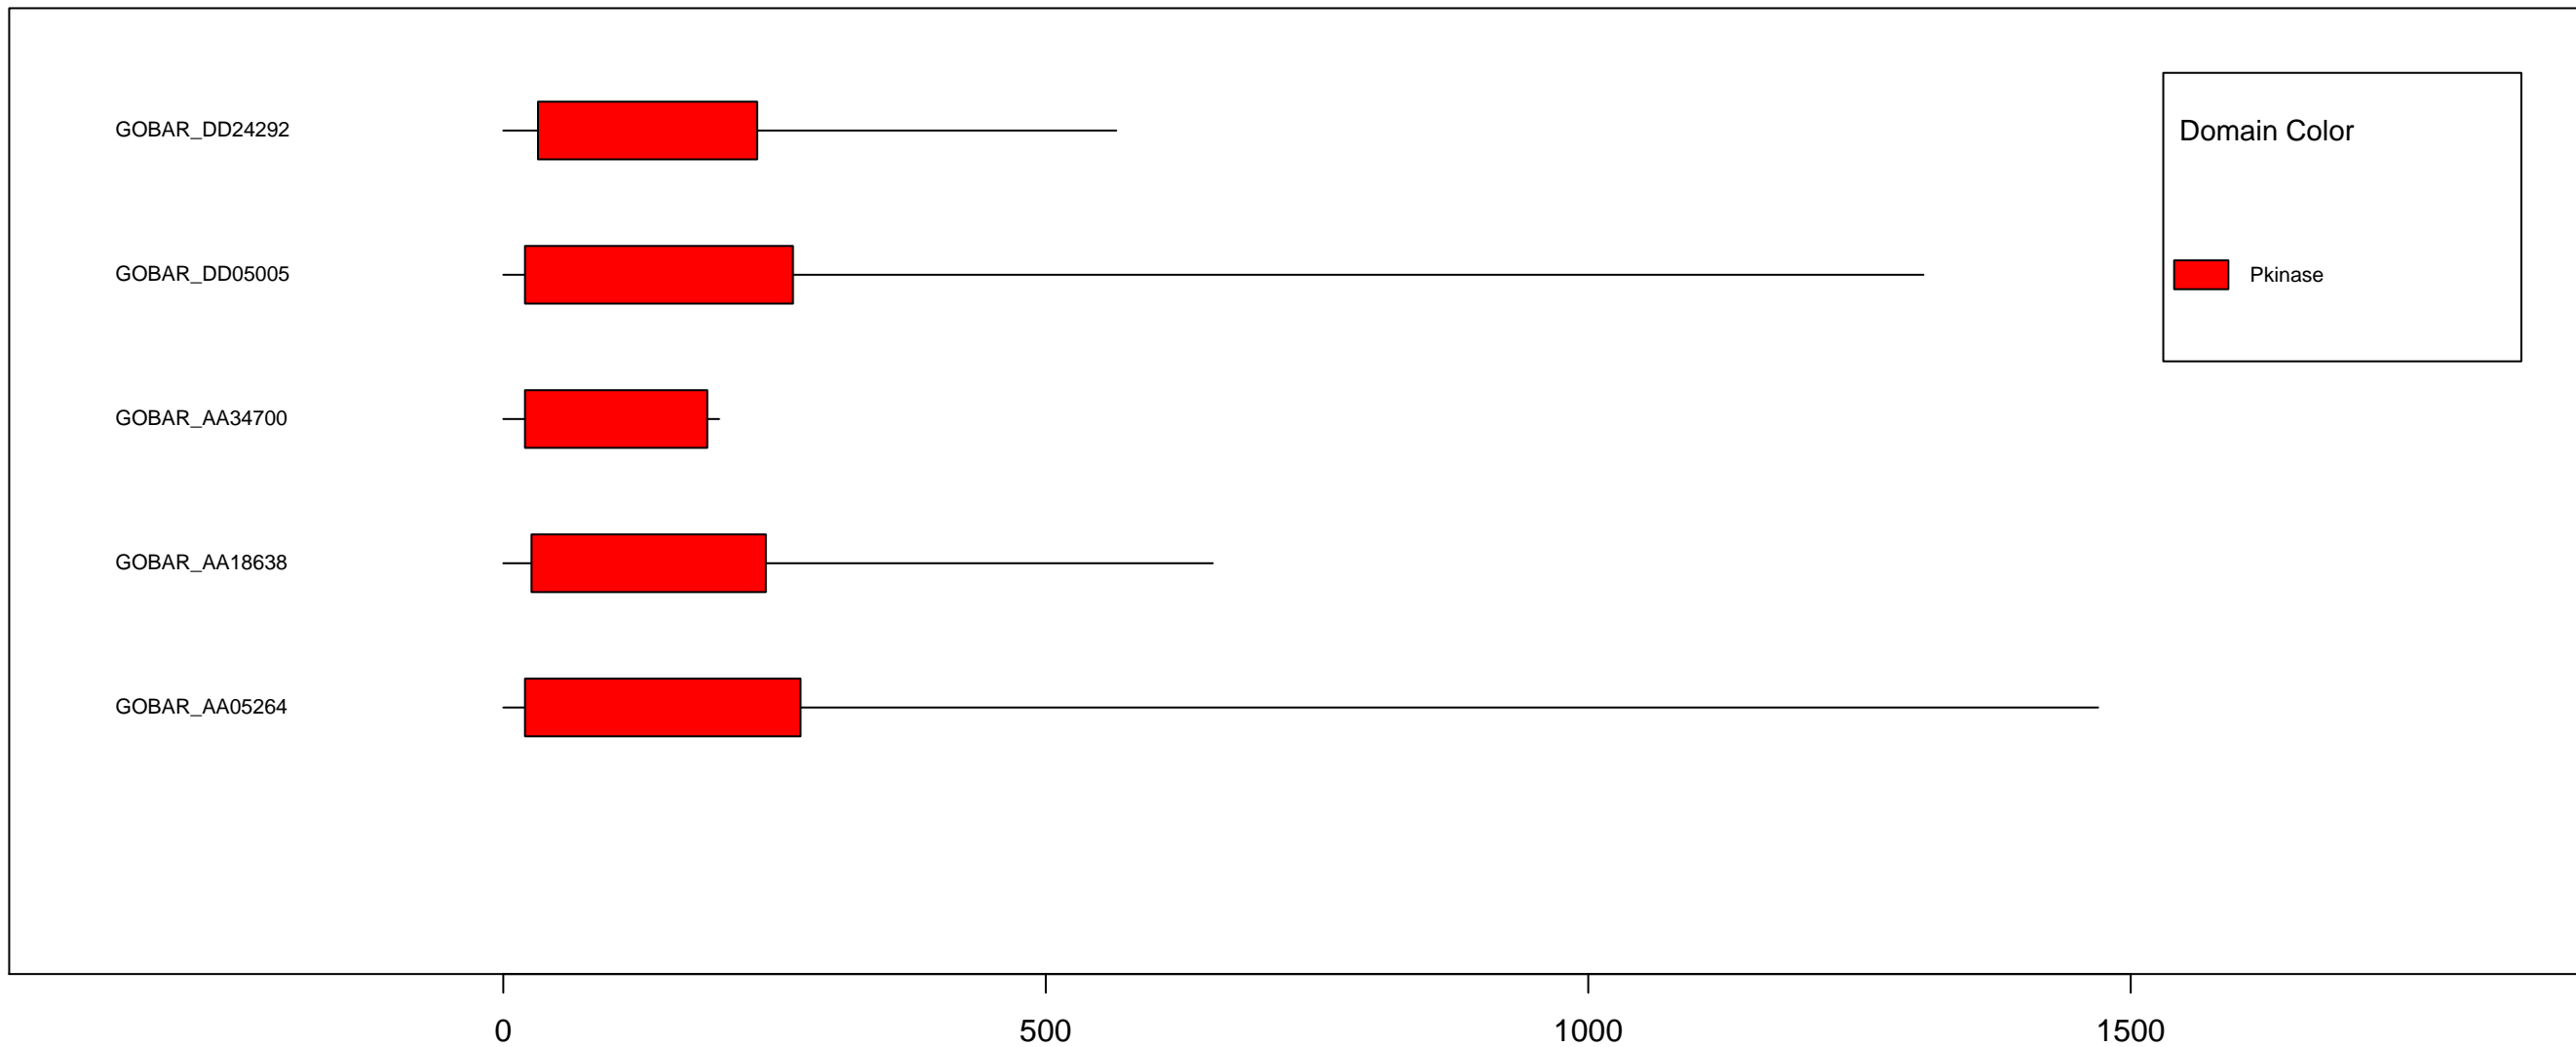

# G.ba TKL\_CTR1-DRK-1 domain diagram (all)

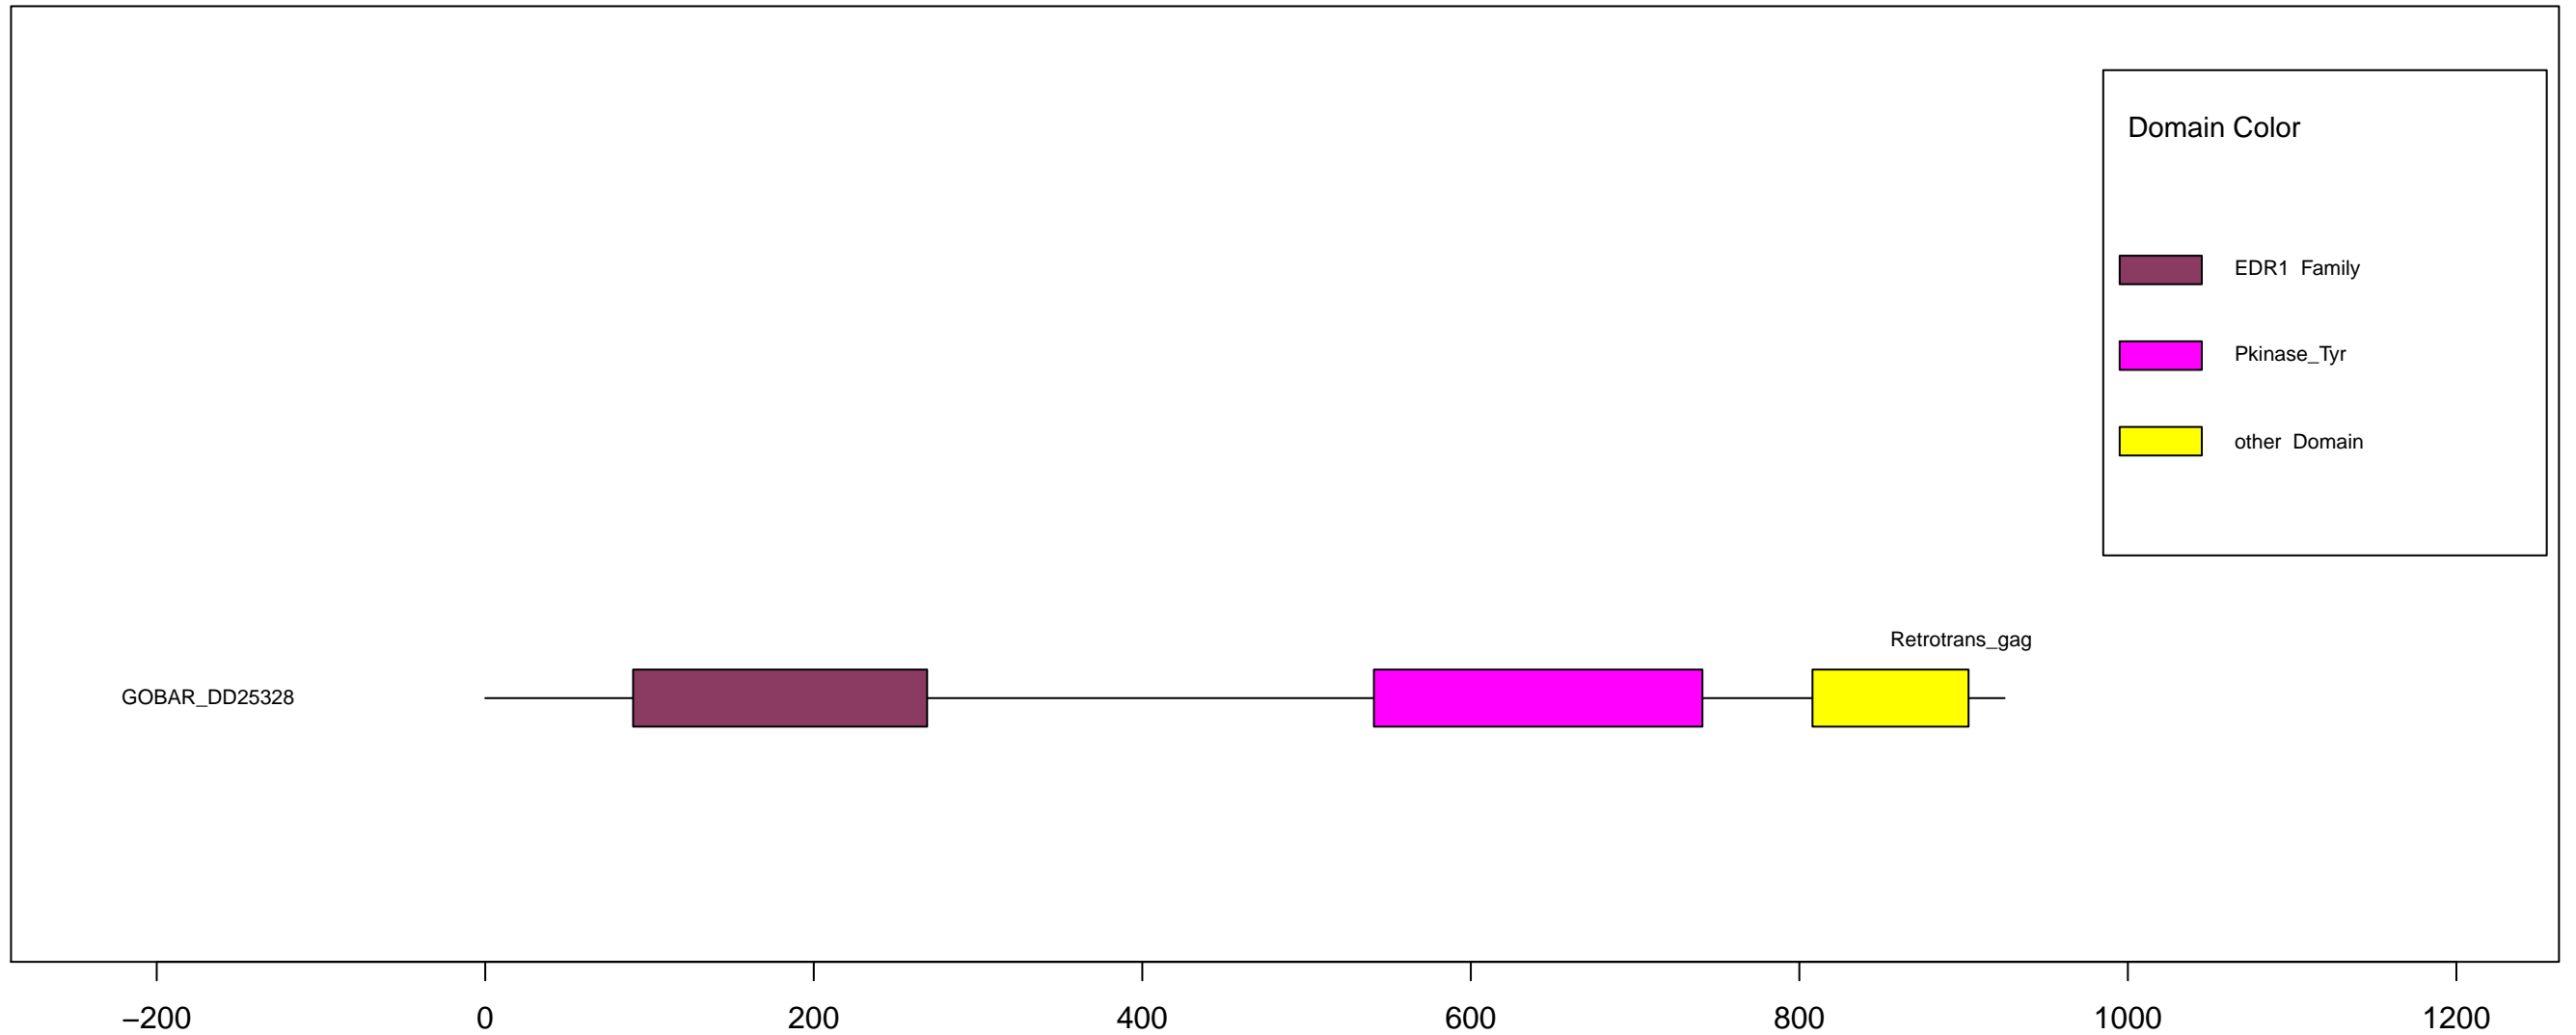



### G.ba TKL\_CTR1-DRK-2 domain diagram (part 1)

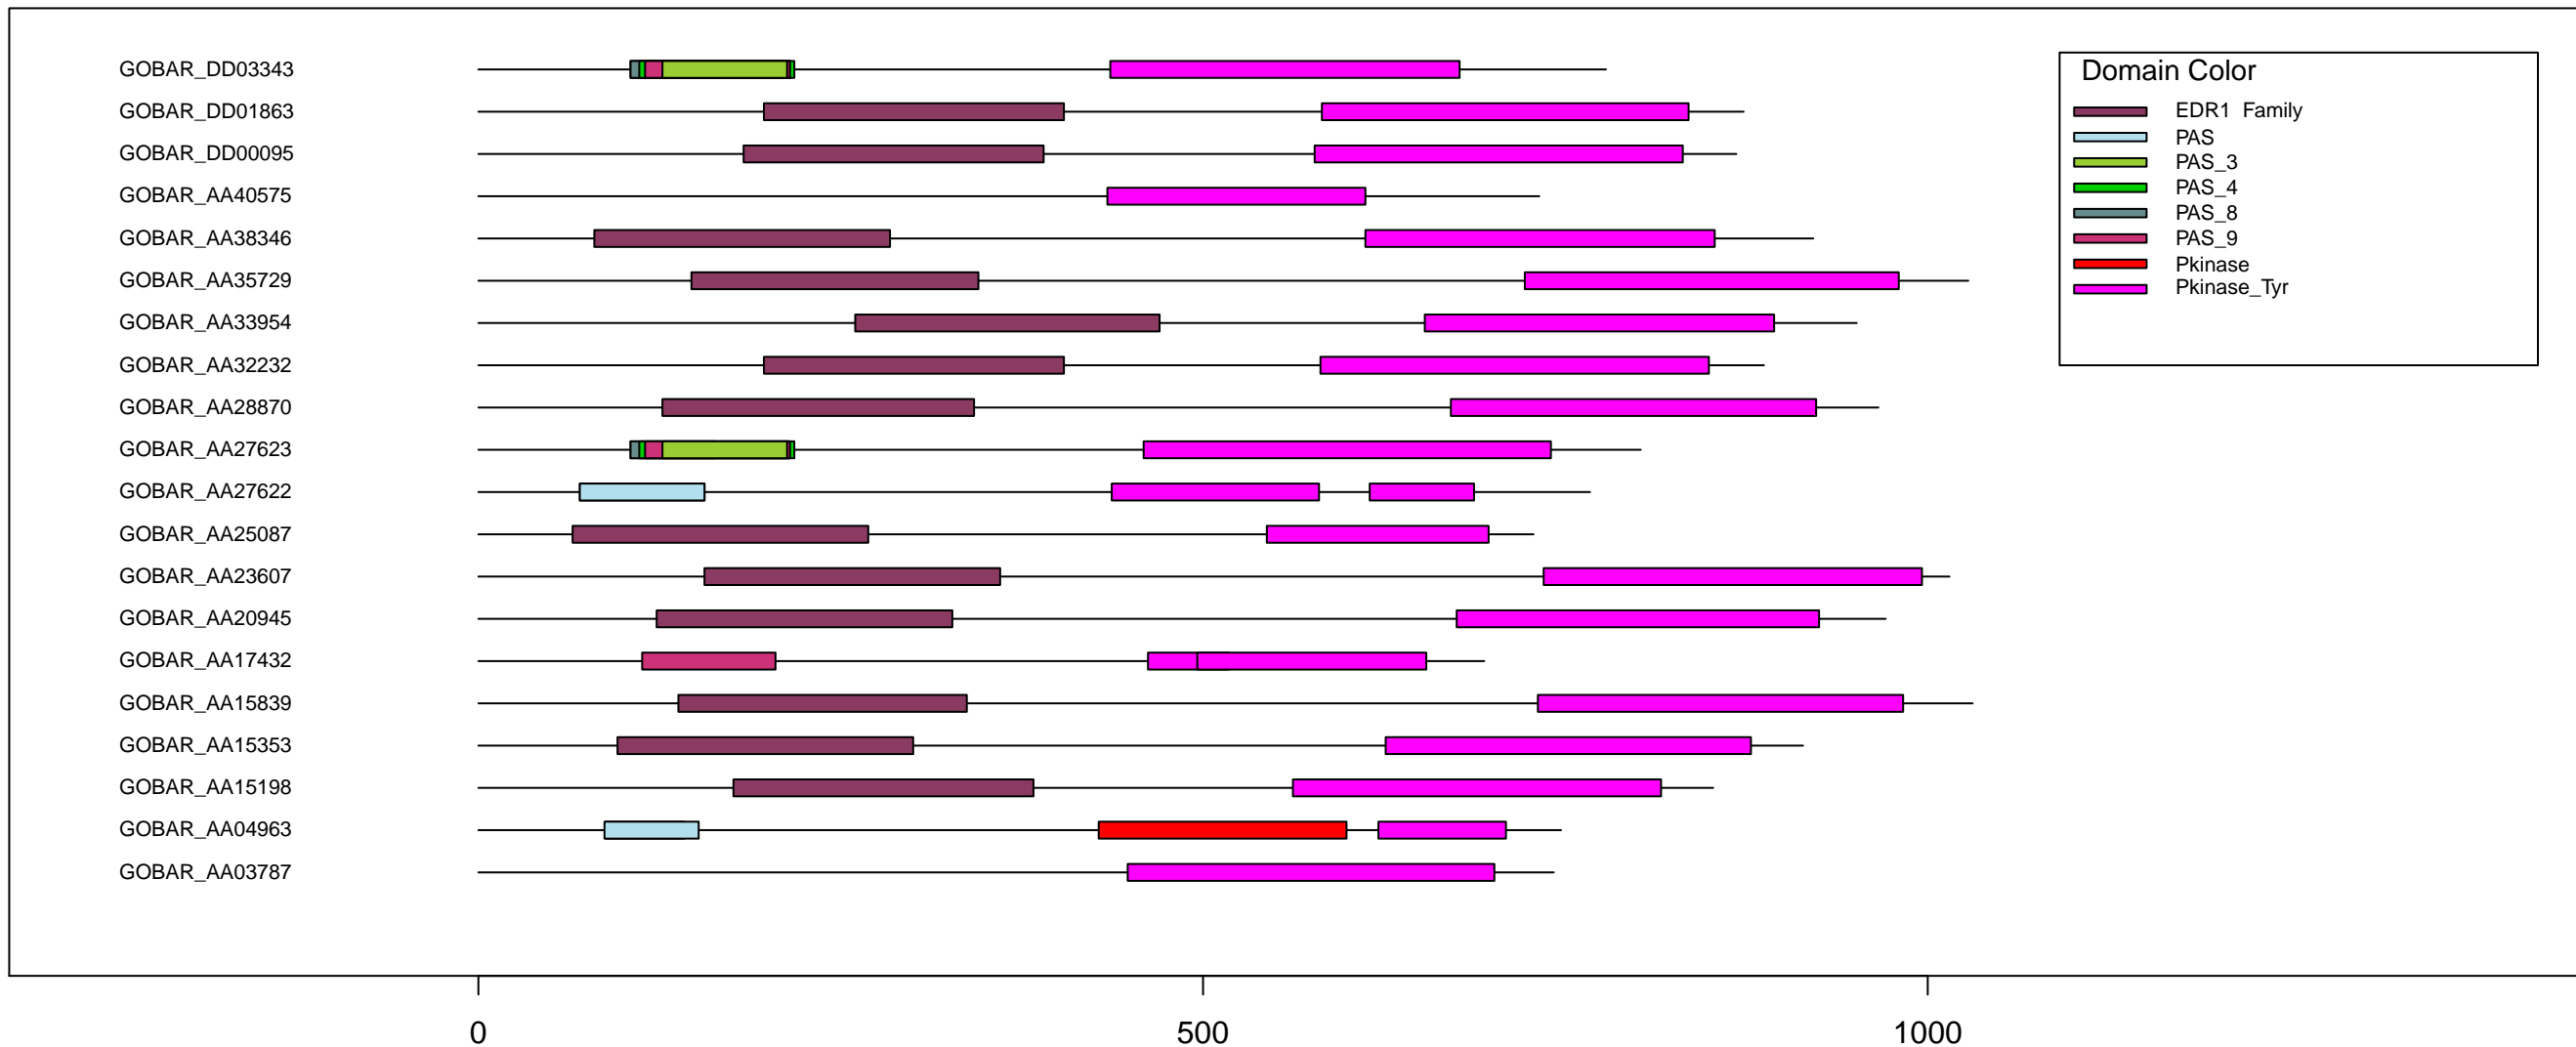

### G.ba TKL\_CTRL1-DRK-2 domain diagram (part 2)

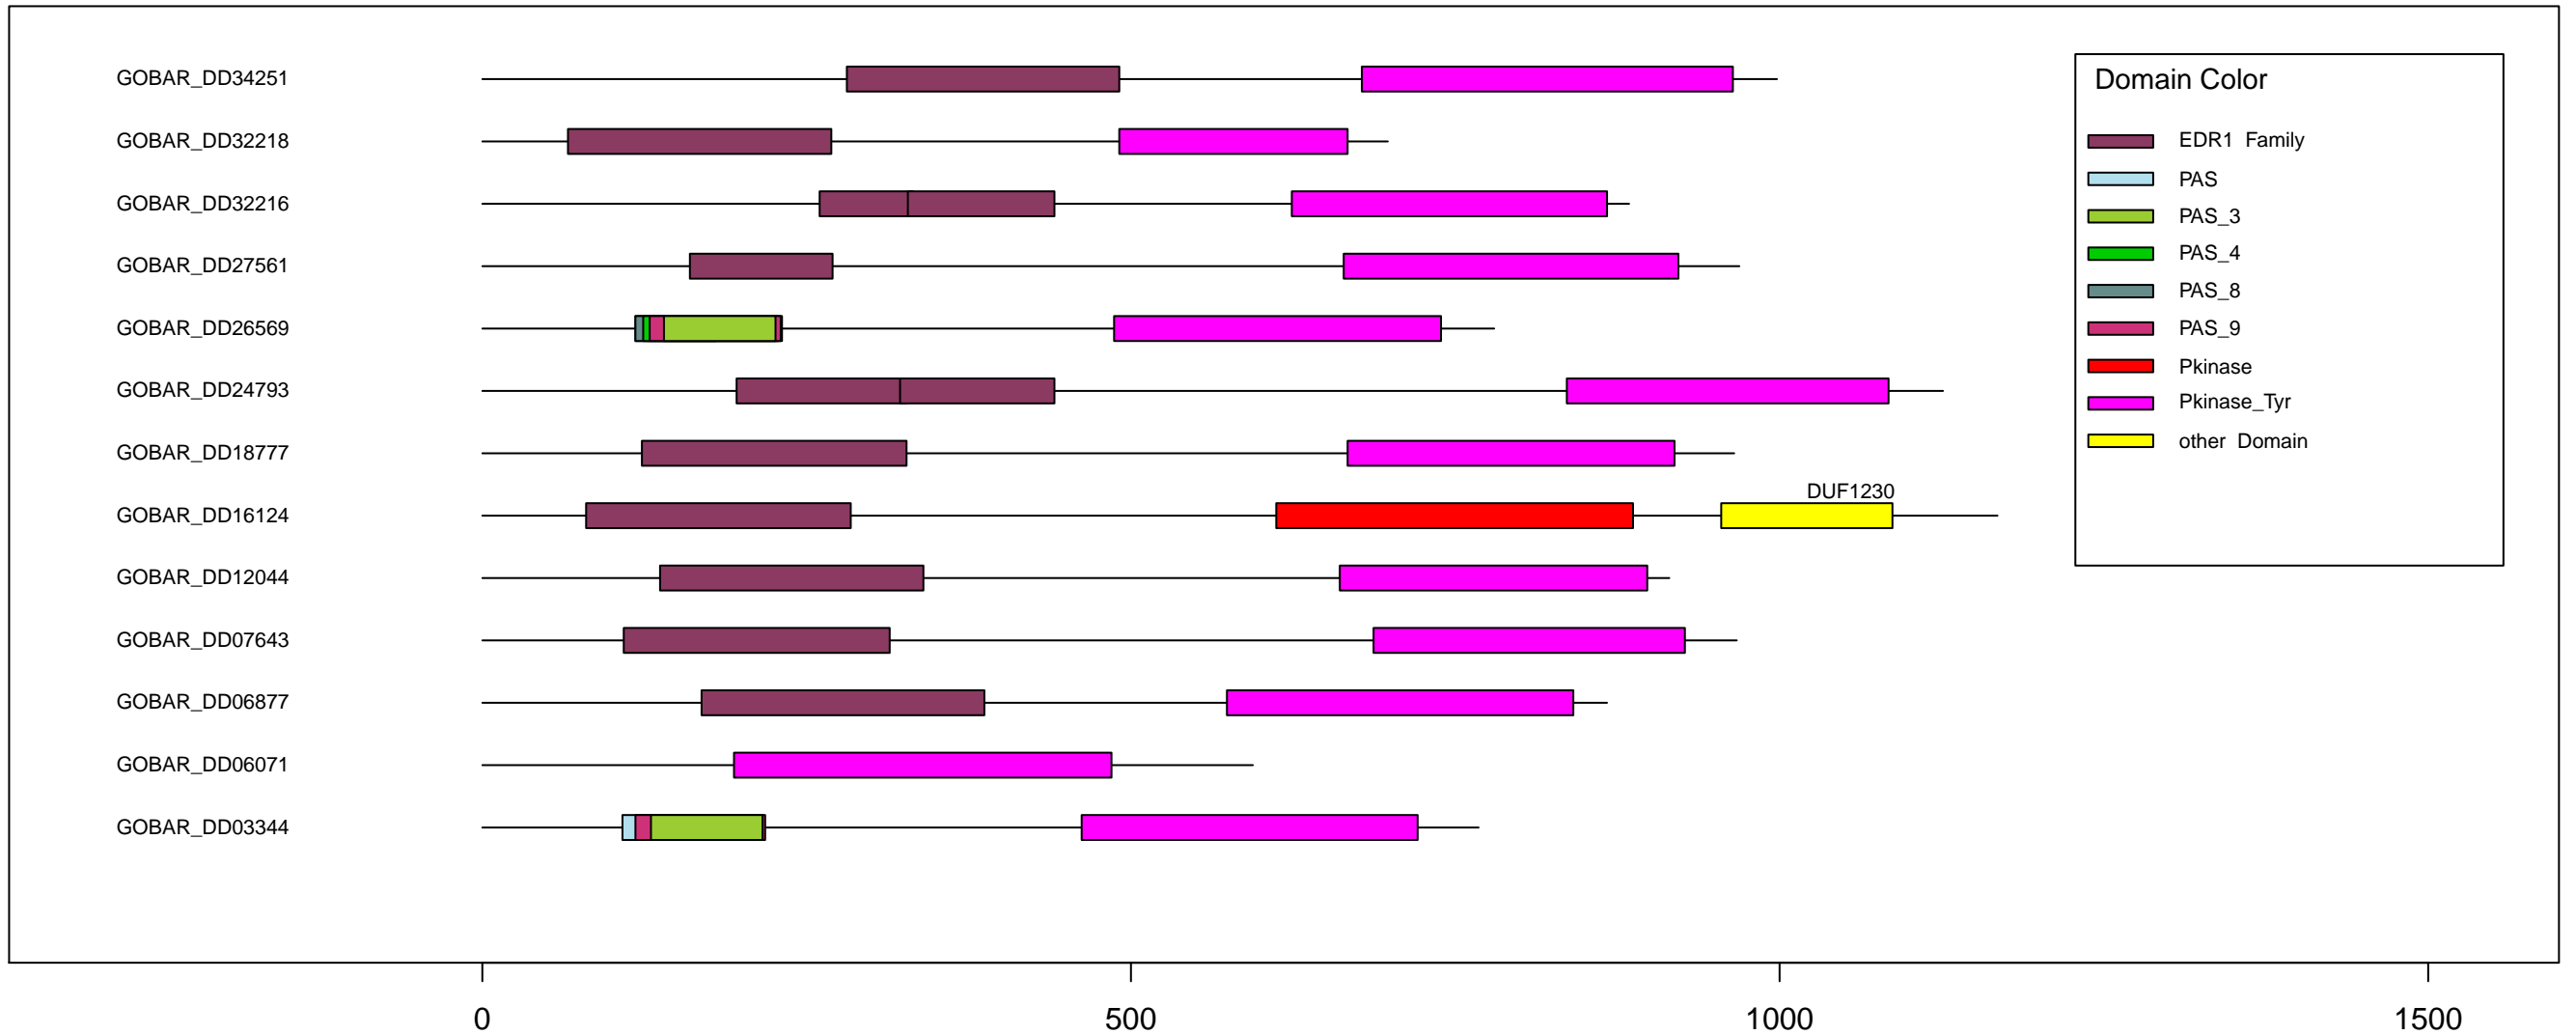

# G.ba TKL\_Gdt domain diagram (all)

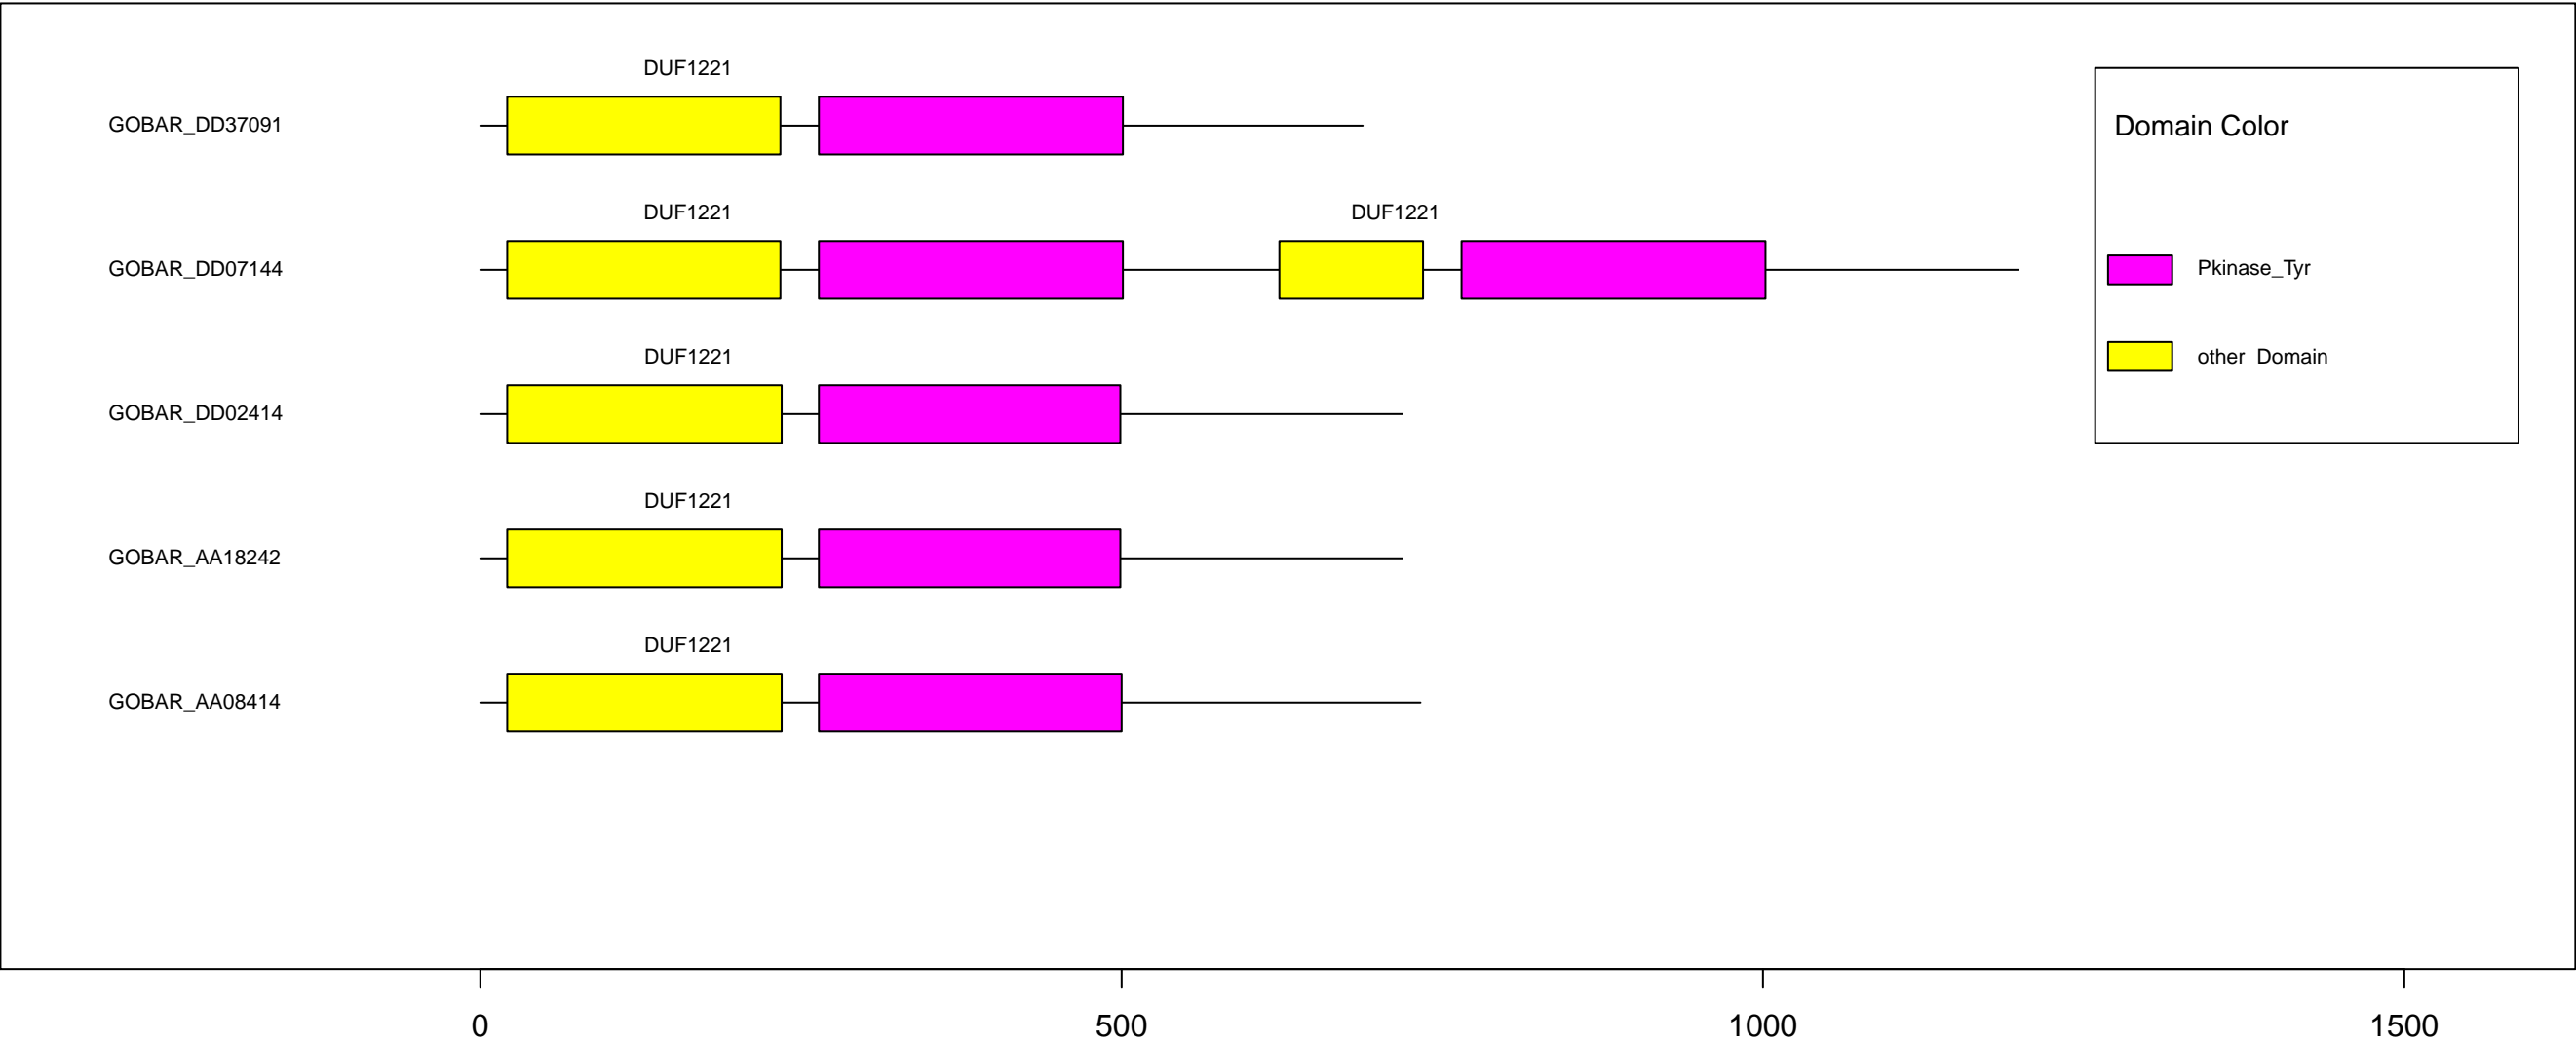

### G.ba TKL-PI-1 domain diagram (all)

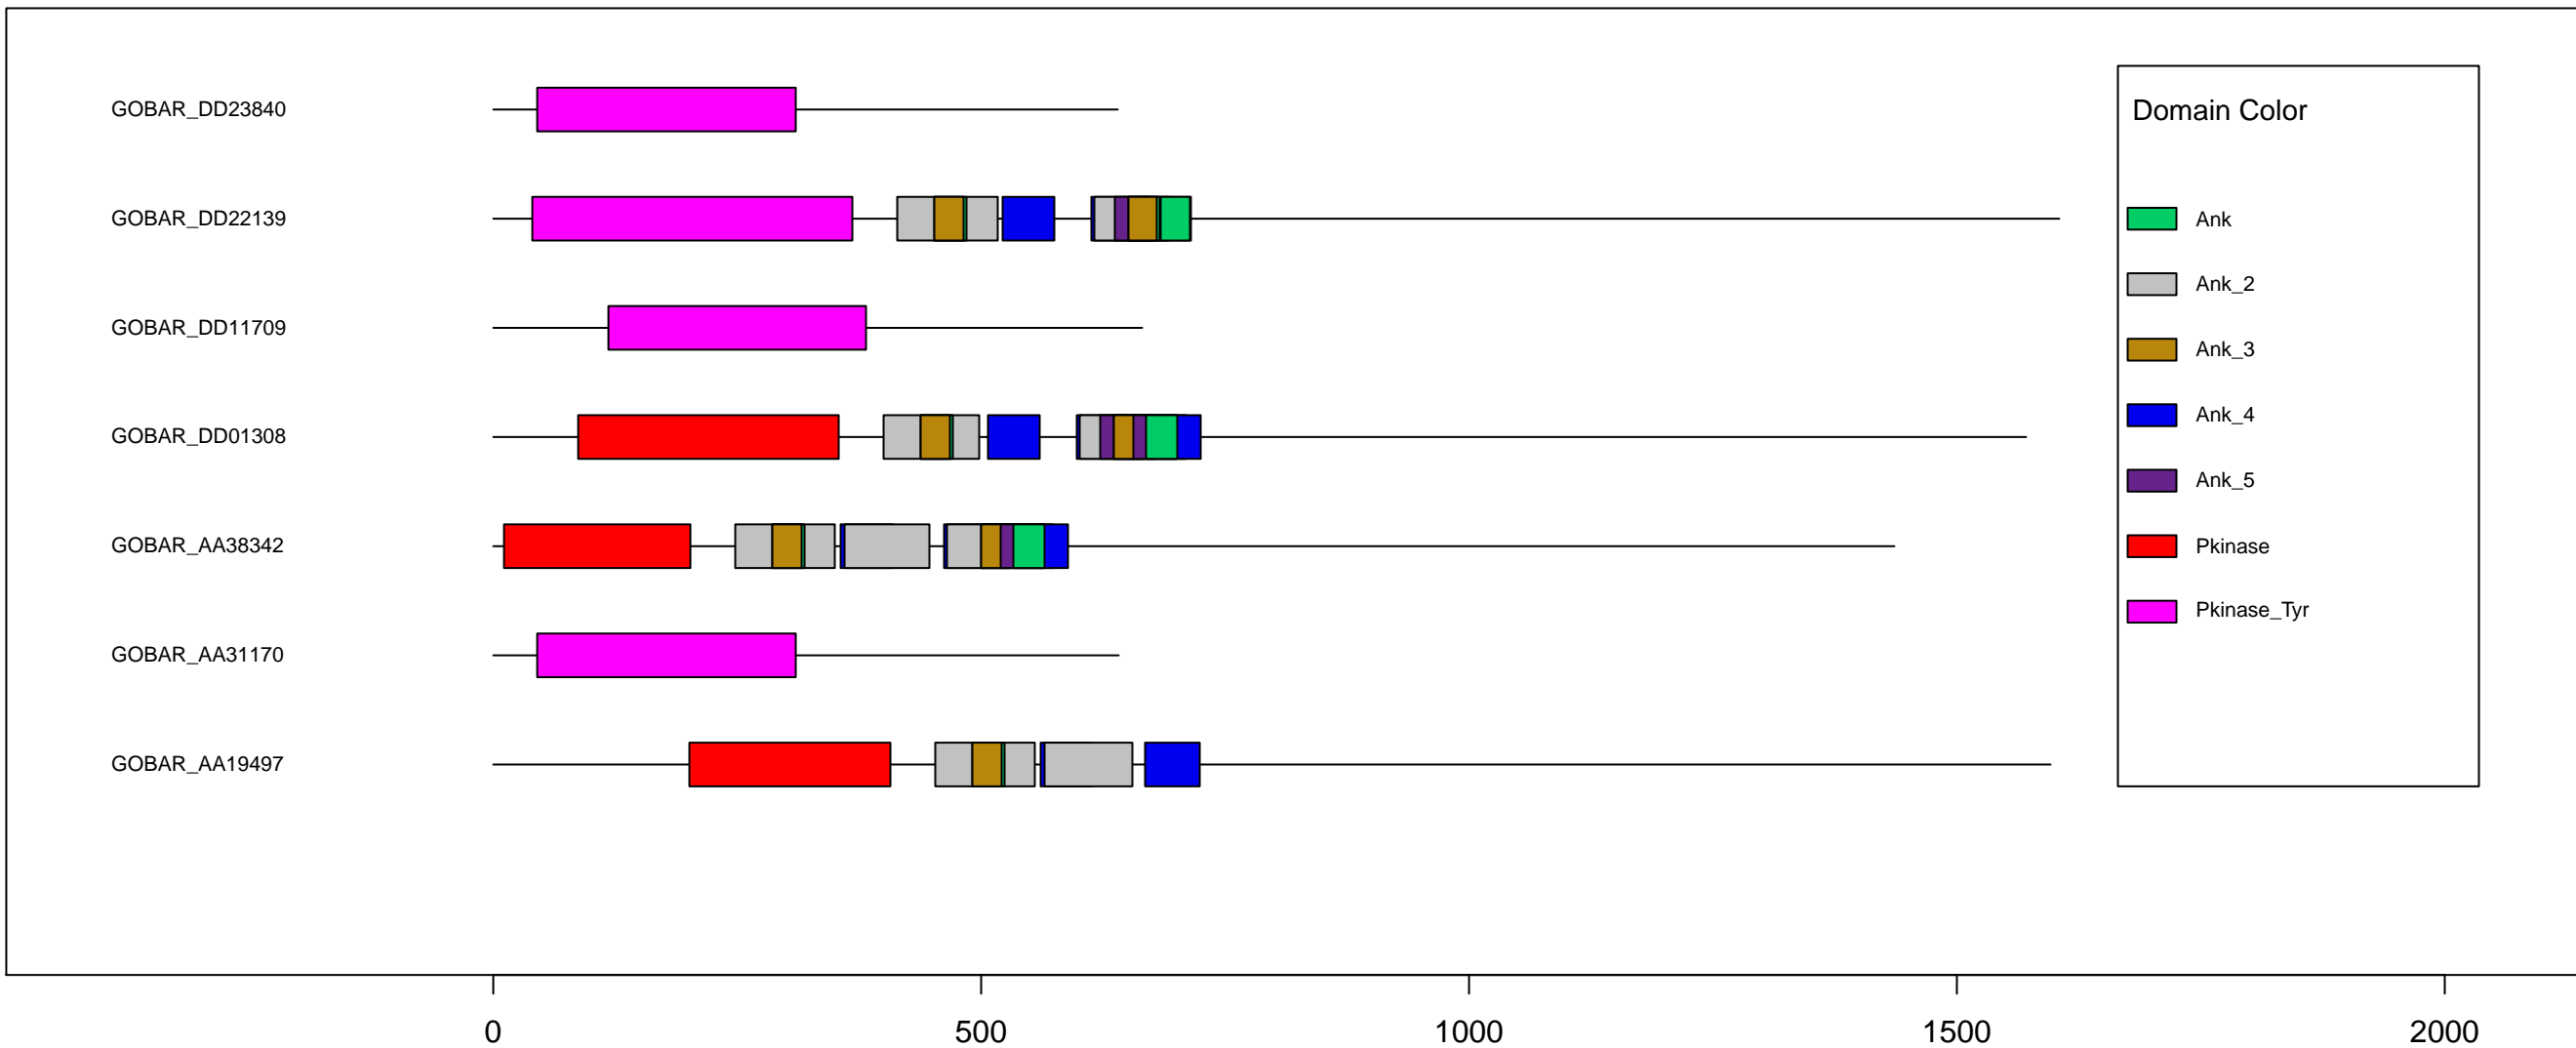

# G.ba TKL-PI-2 domain diagram (all)

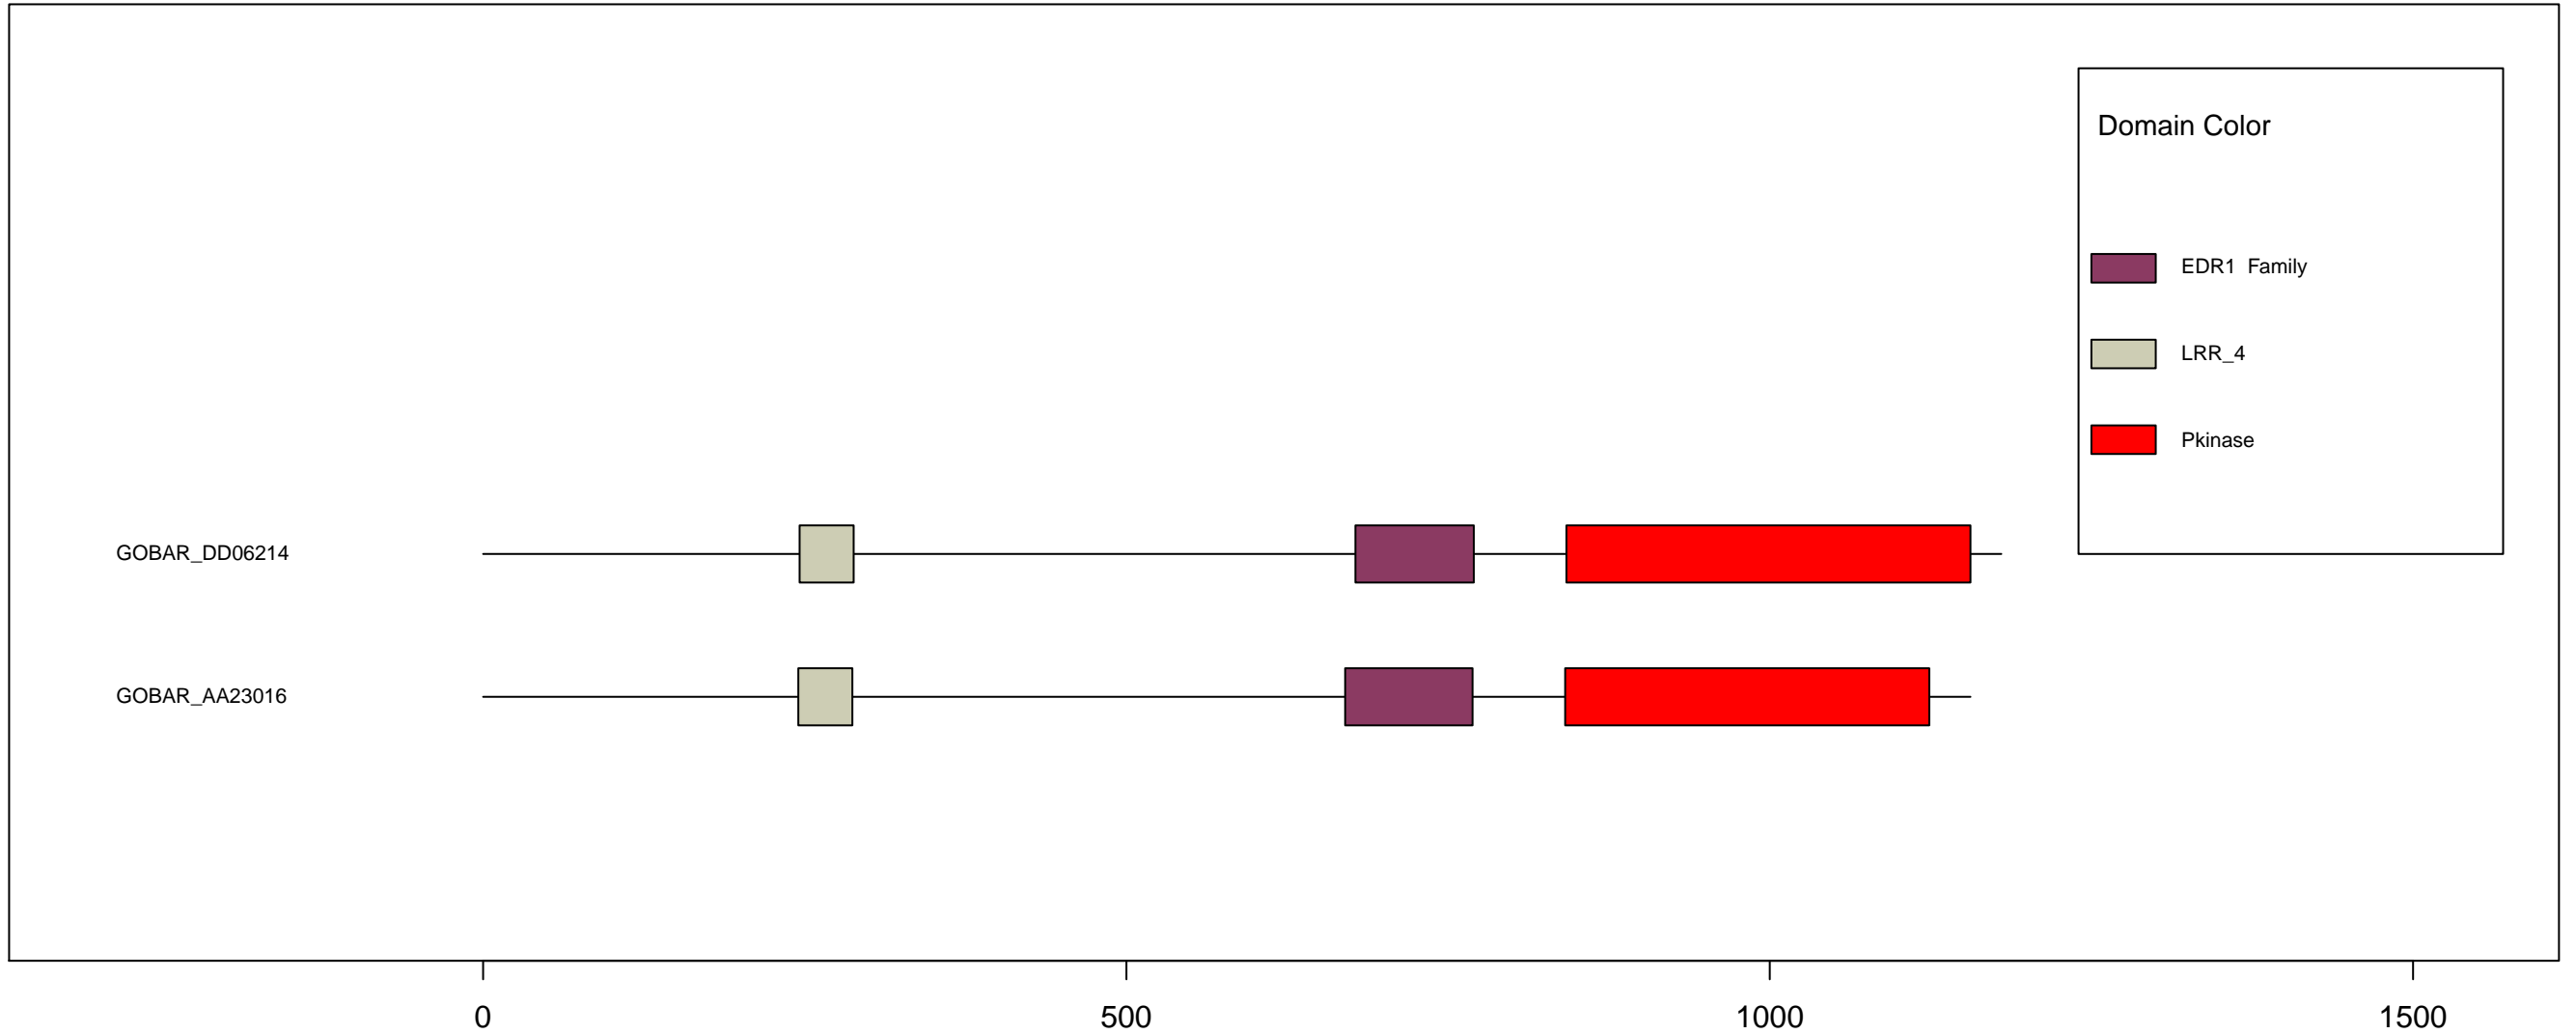

# G.ba TKL-PI-3 domain diagram (all)

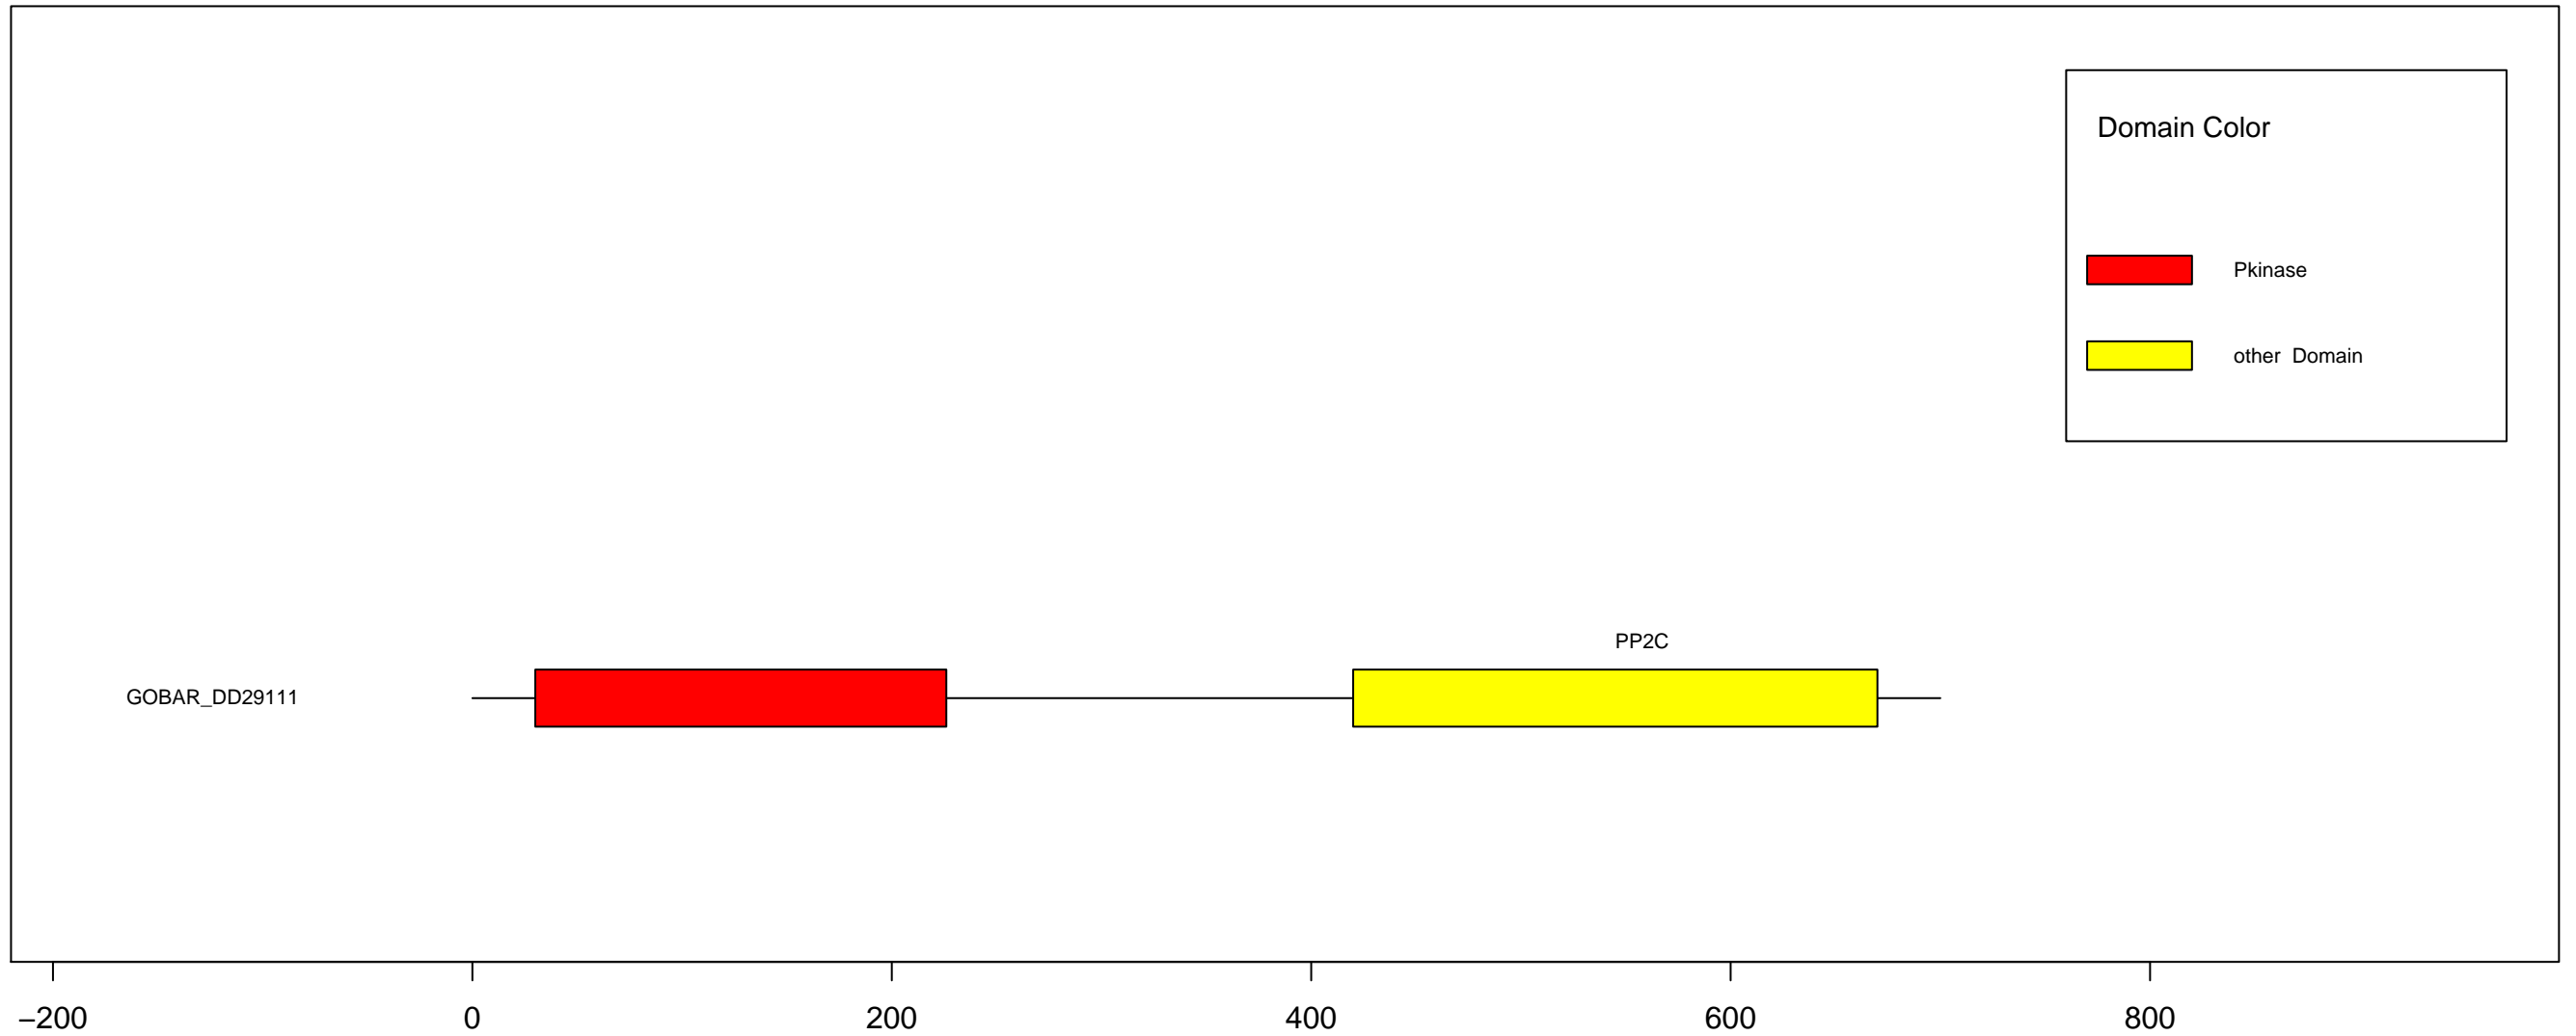

# G.ba TKL-PI-4 domain diagram (part 1)

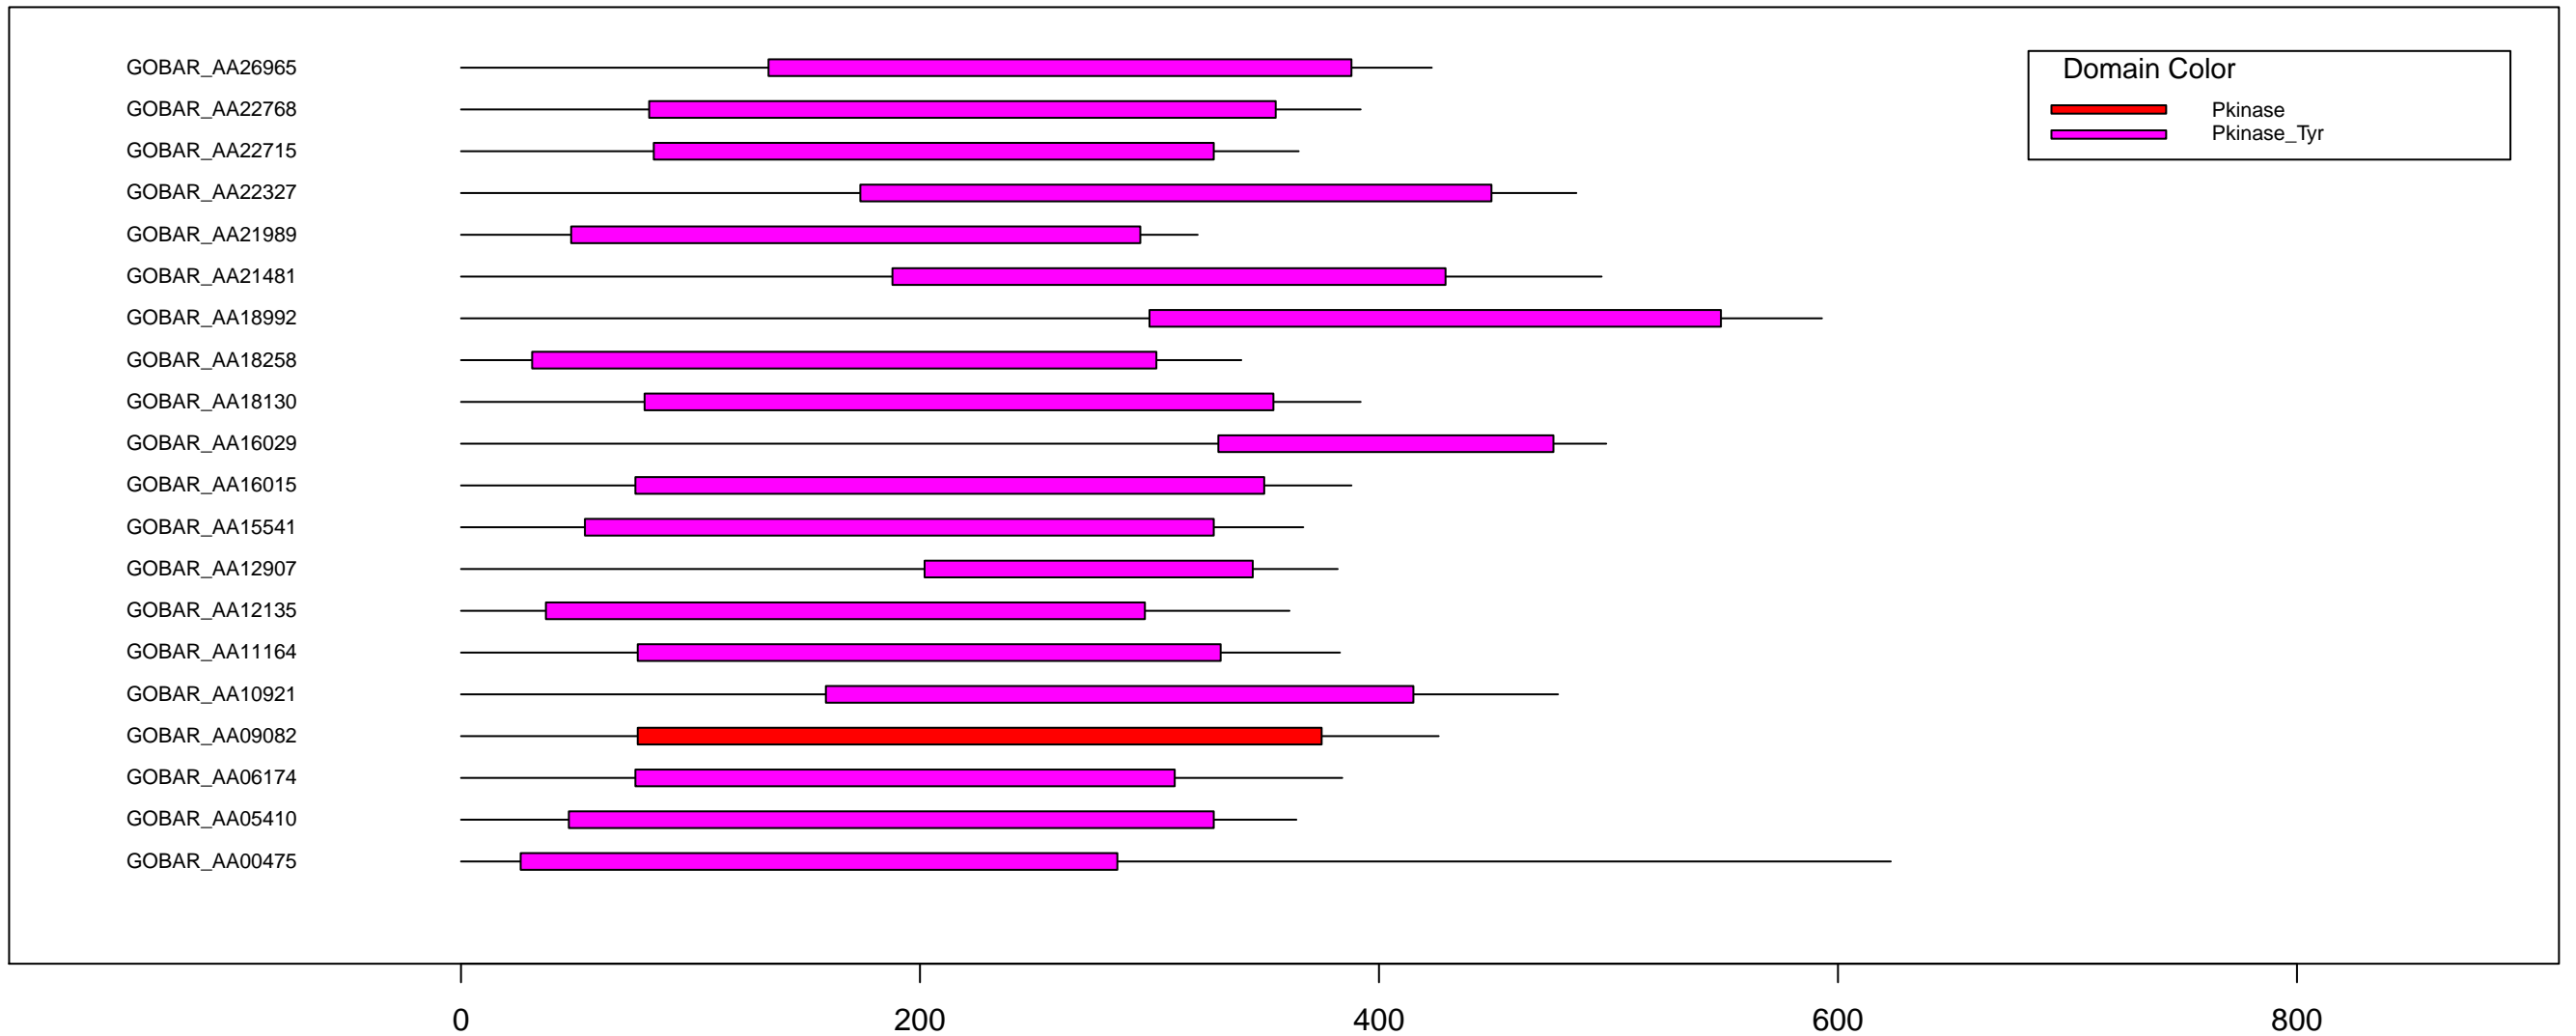

### G.ba TKL-PI-4 domain diagram (part 2)

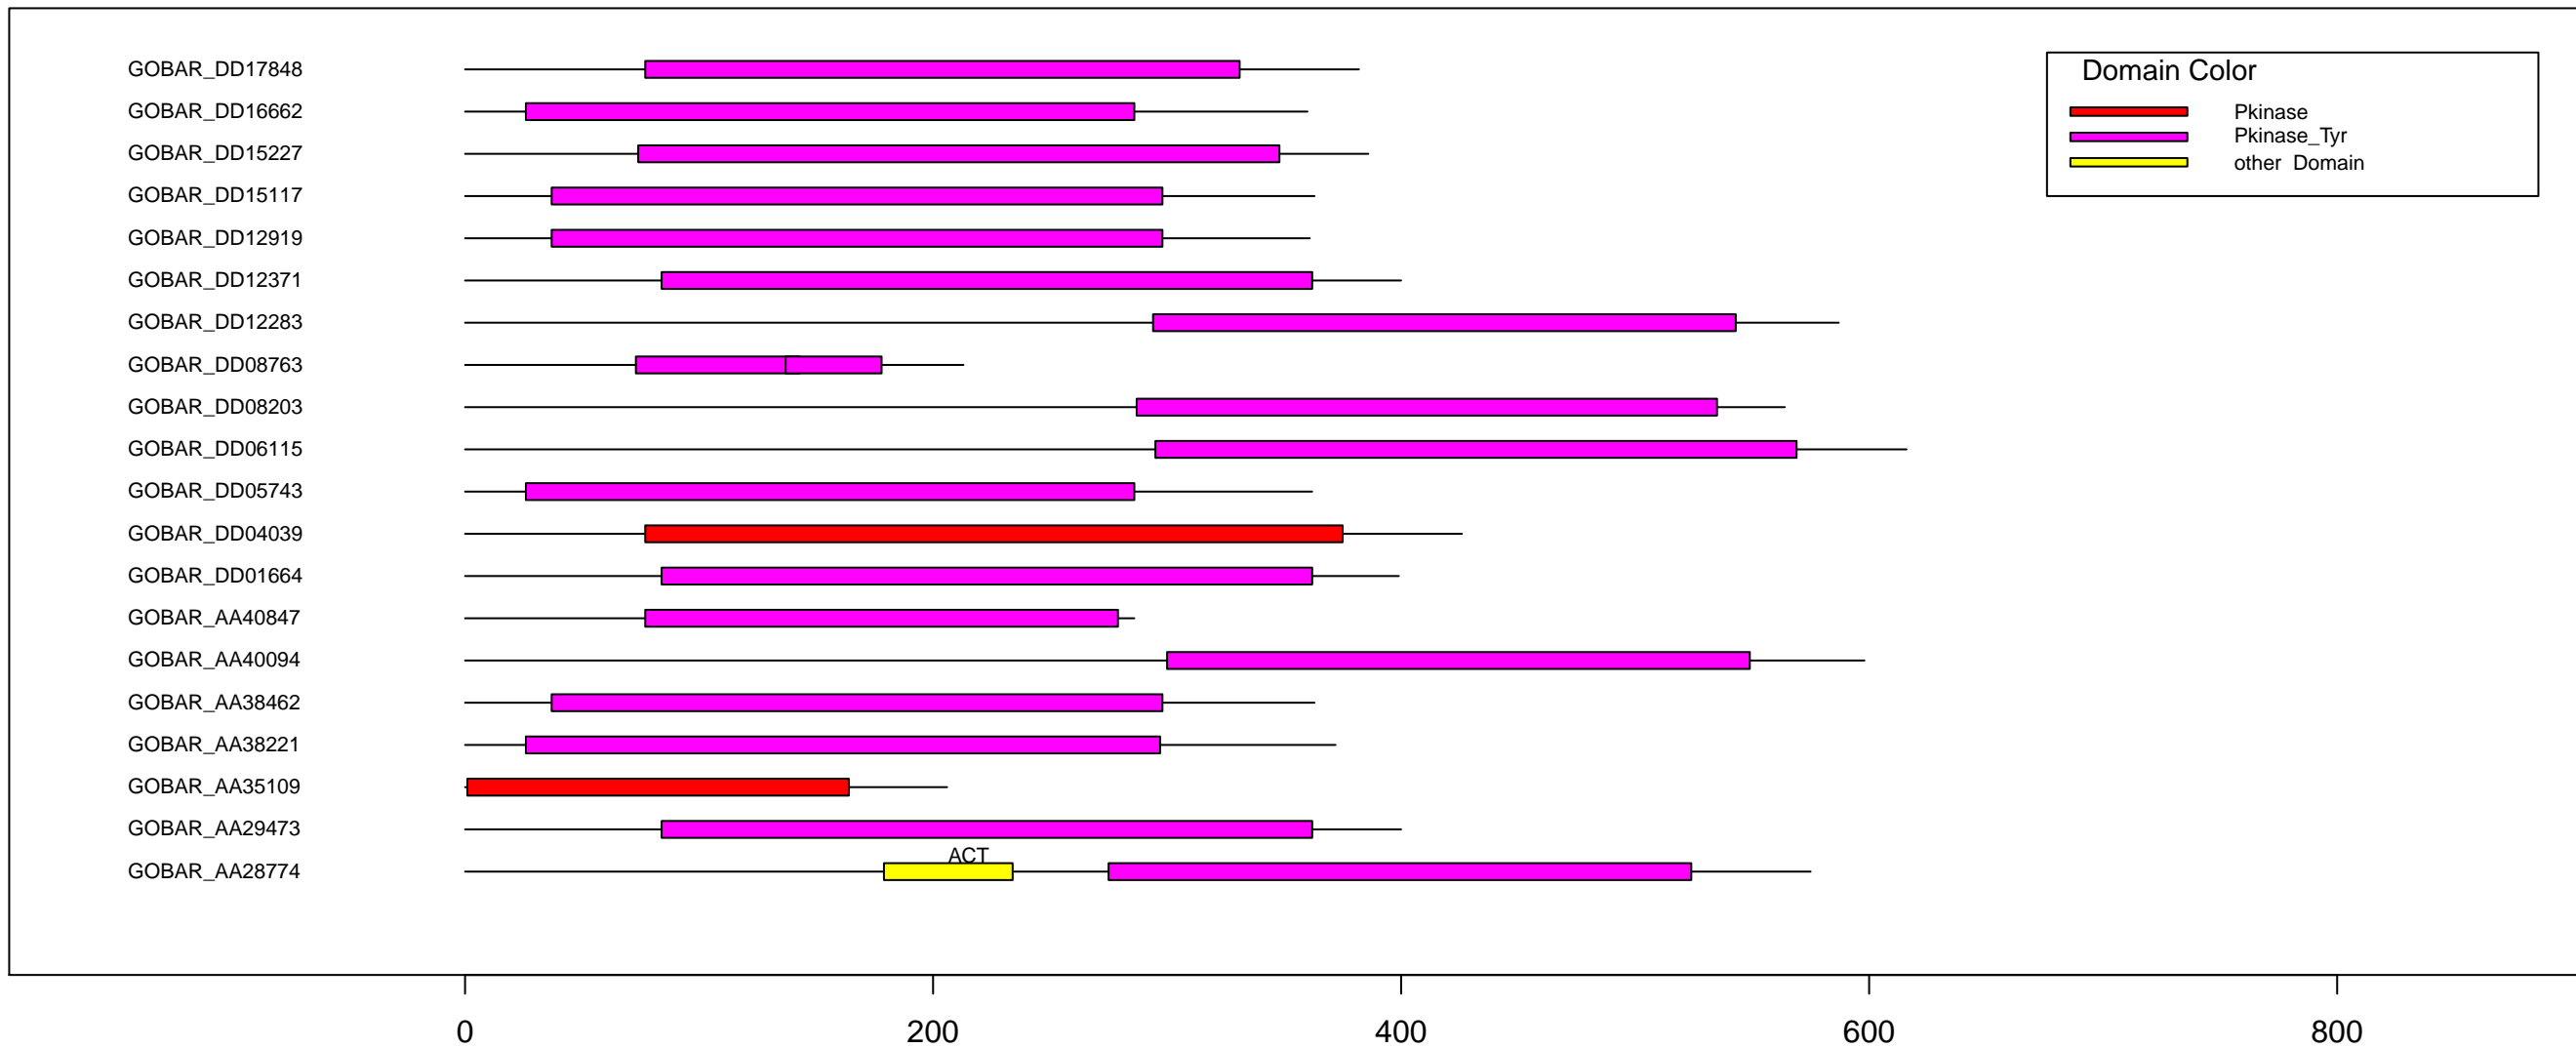



### G.ba TKL-PI-4 domain diagram (part 3)

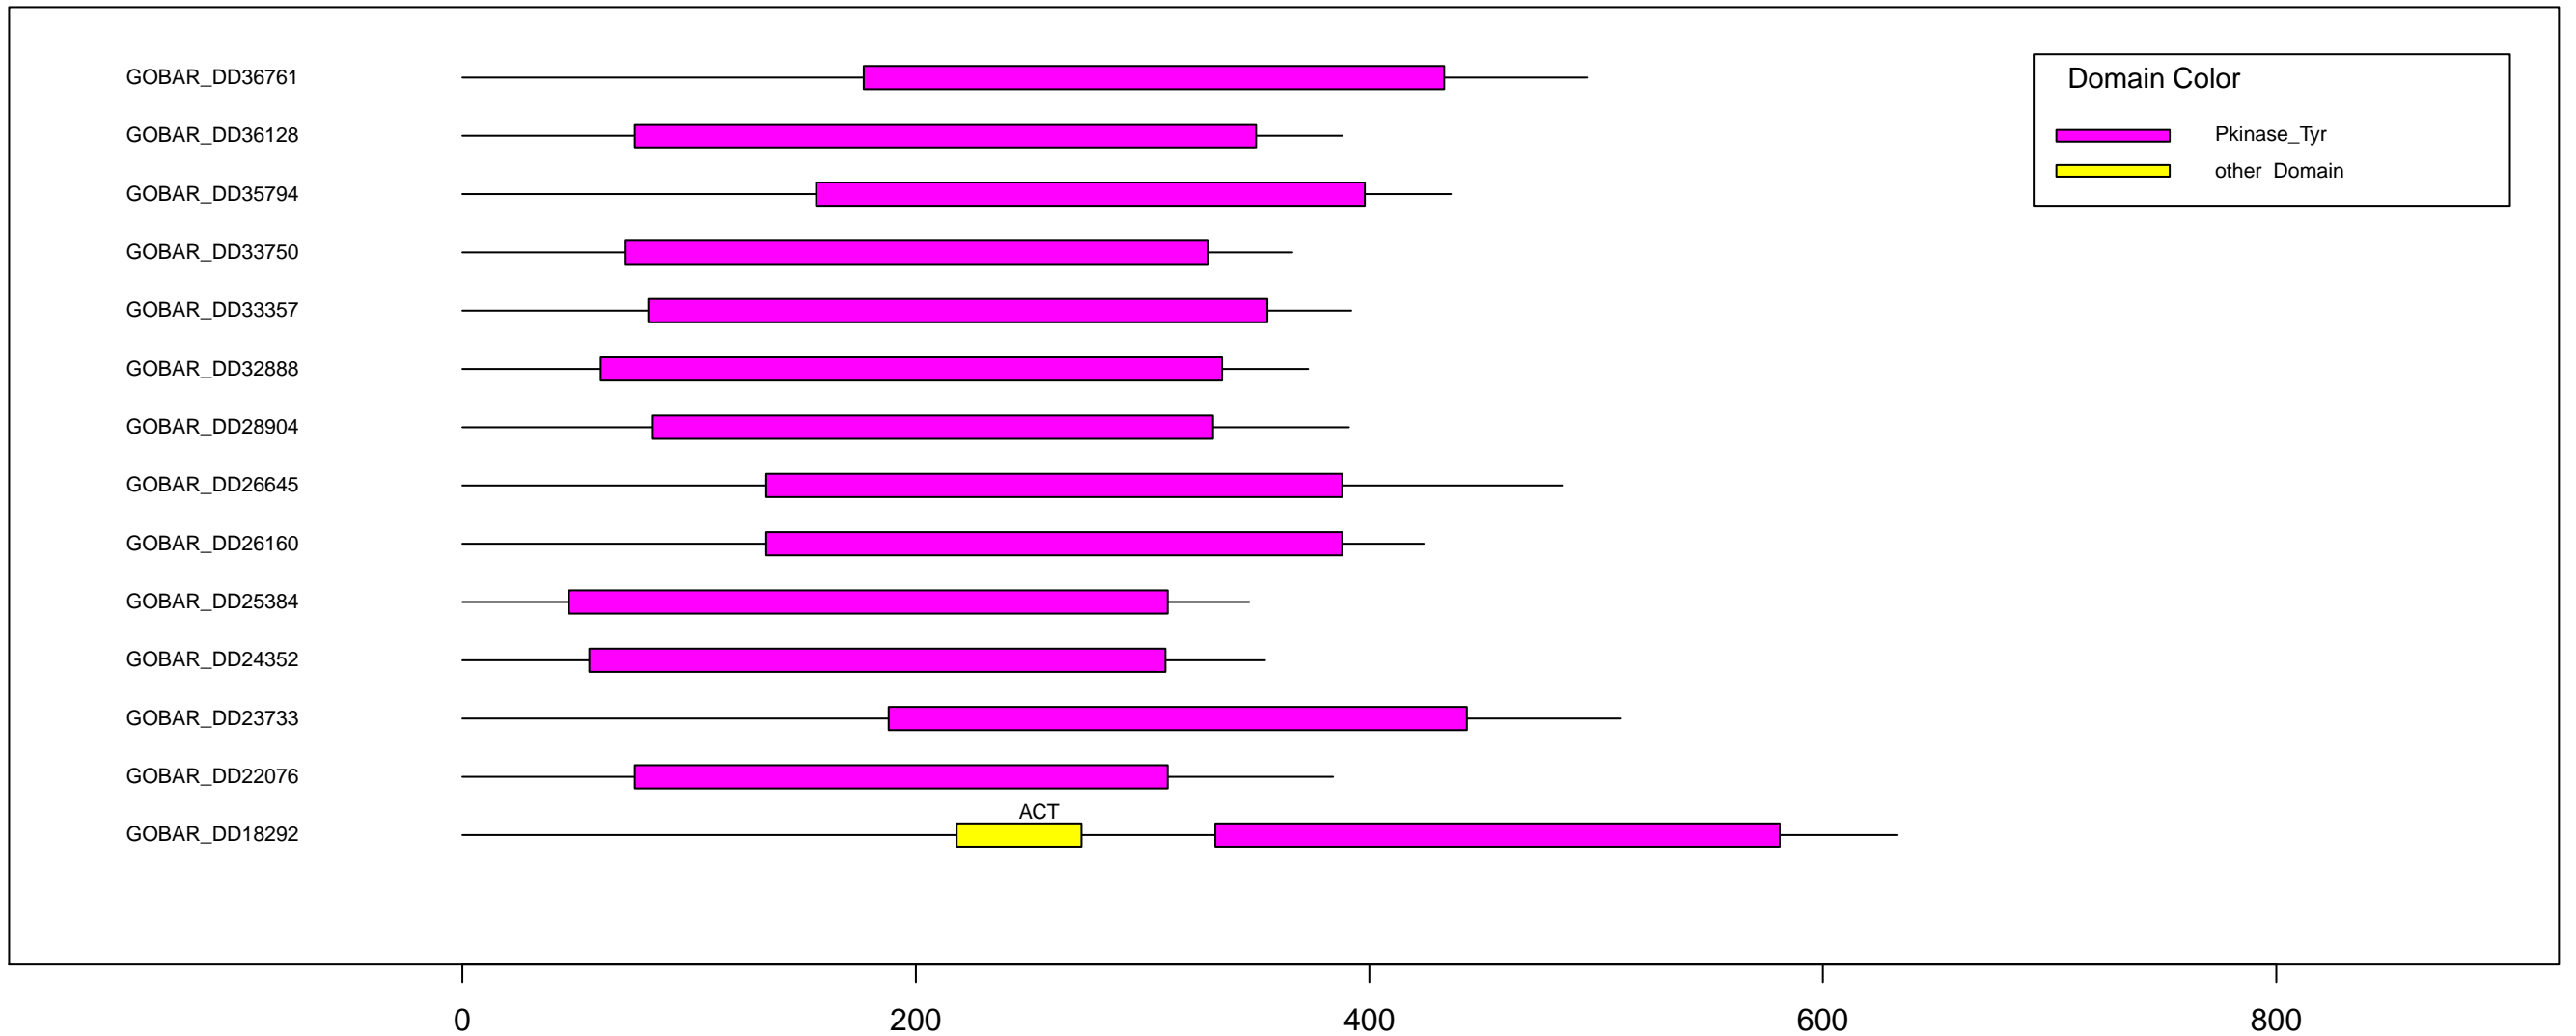

### G.ba TKL-PI-5 domain diagram (all)

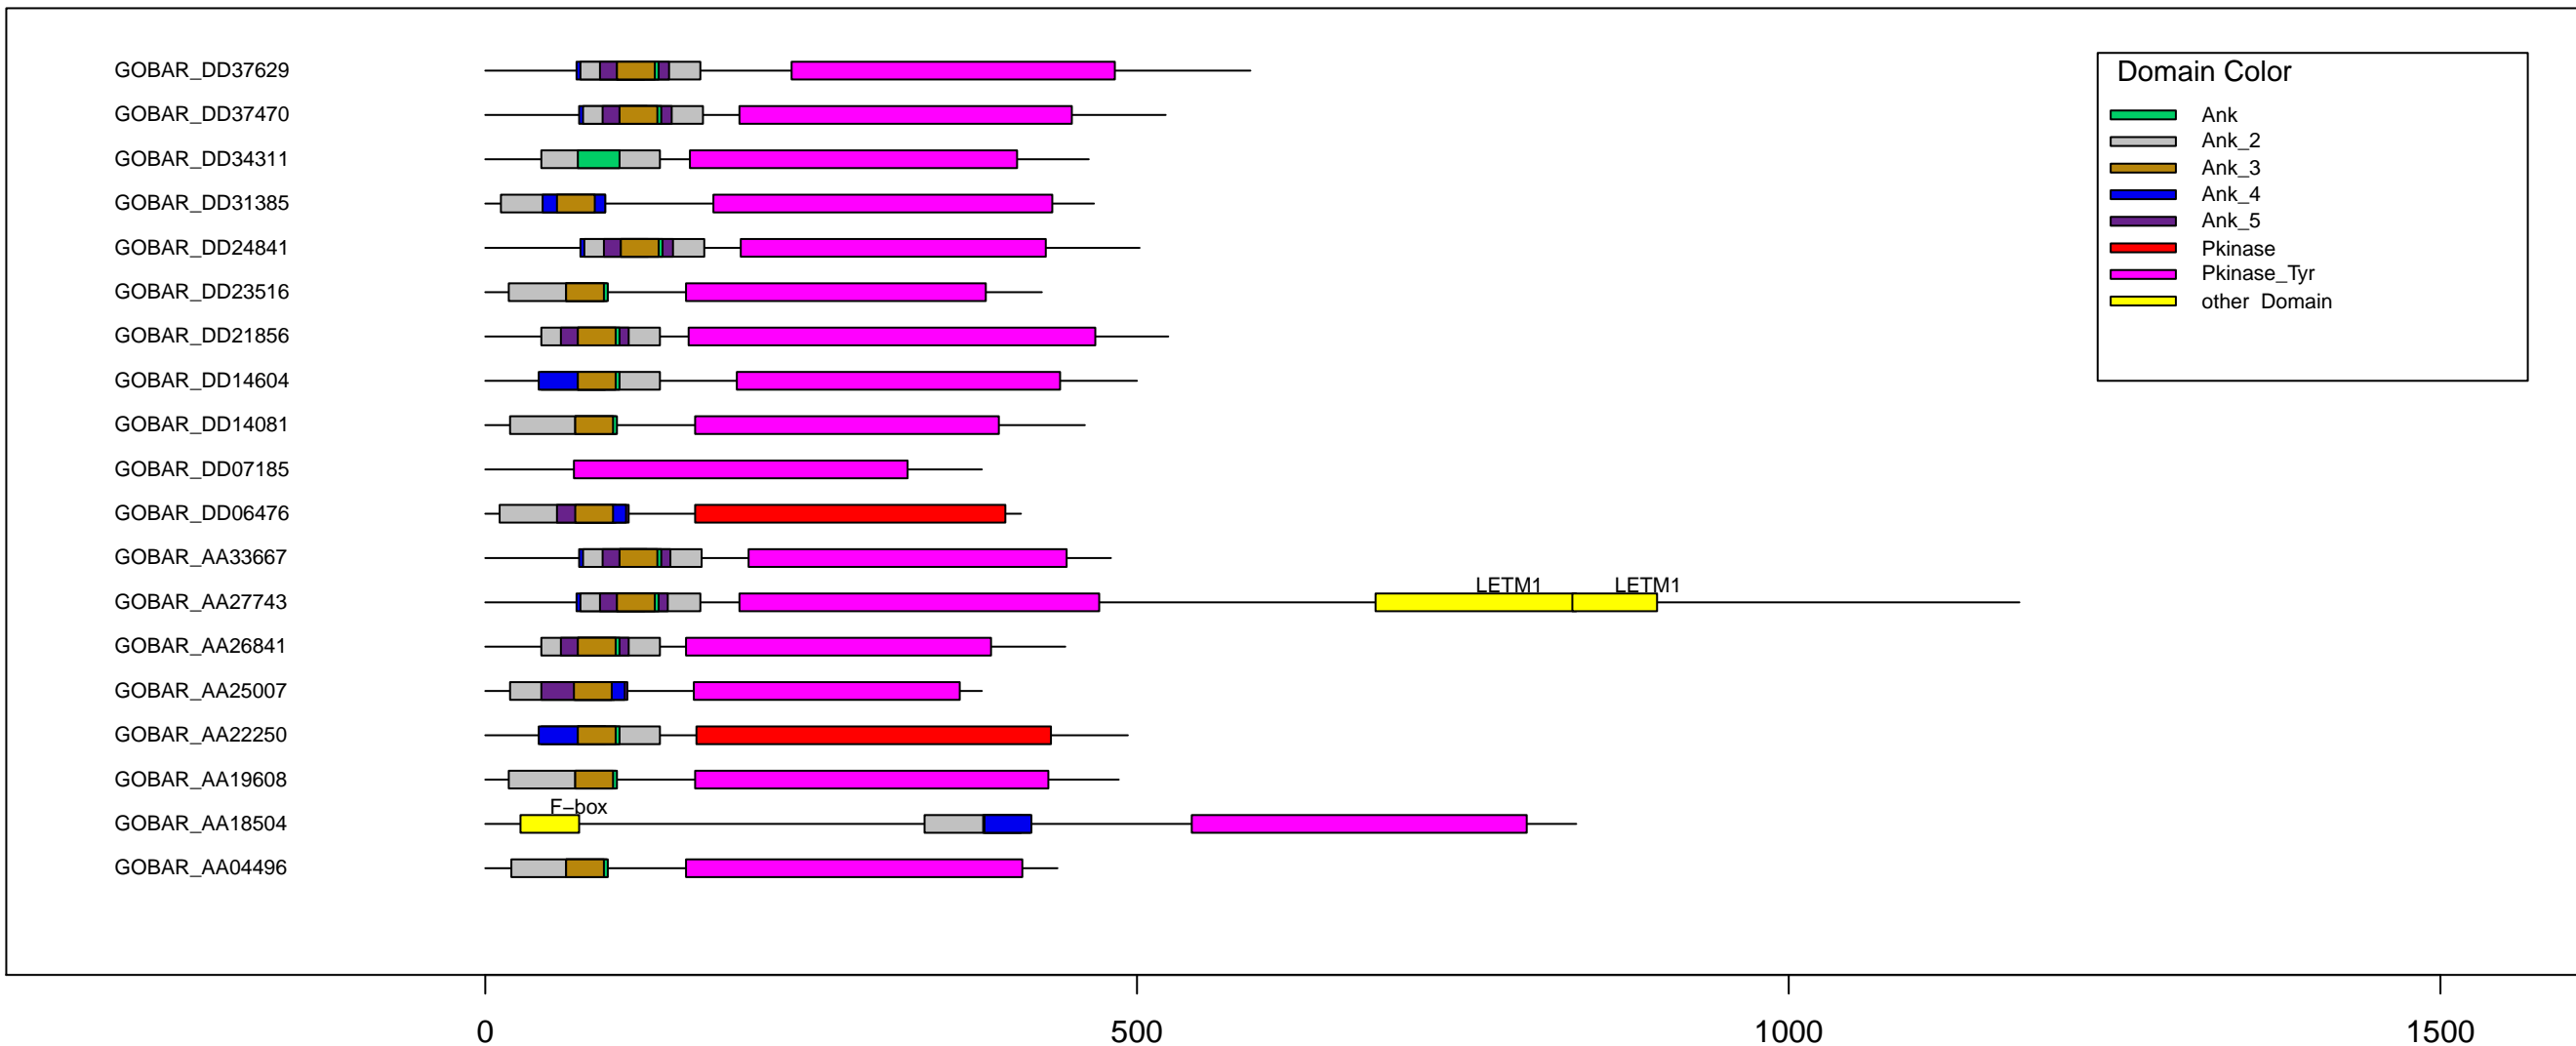

### G.ba TKL-PI-6 domain diagram (all)

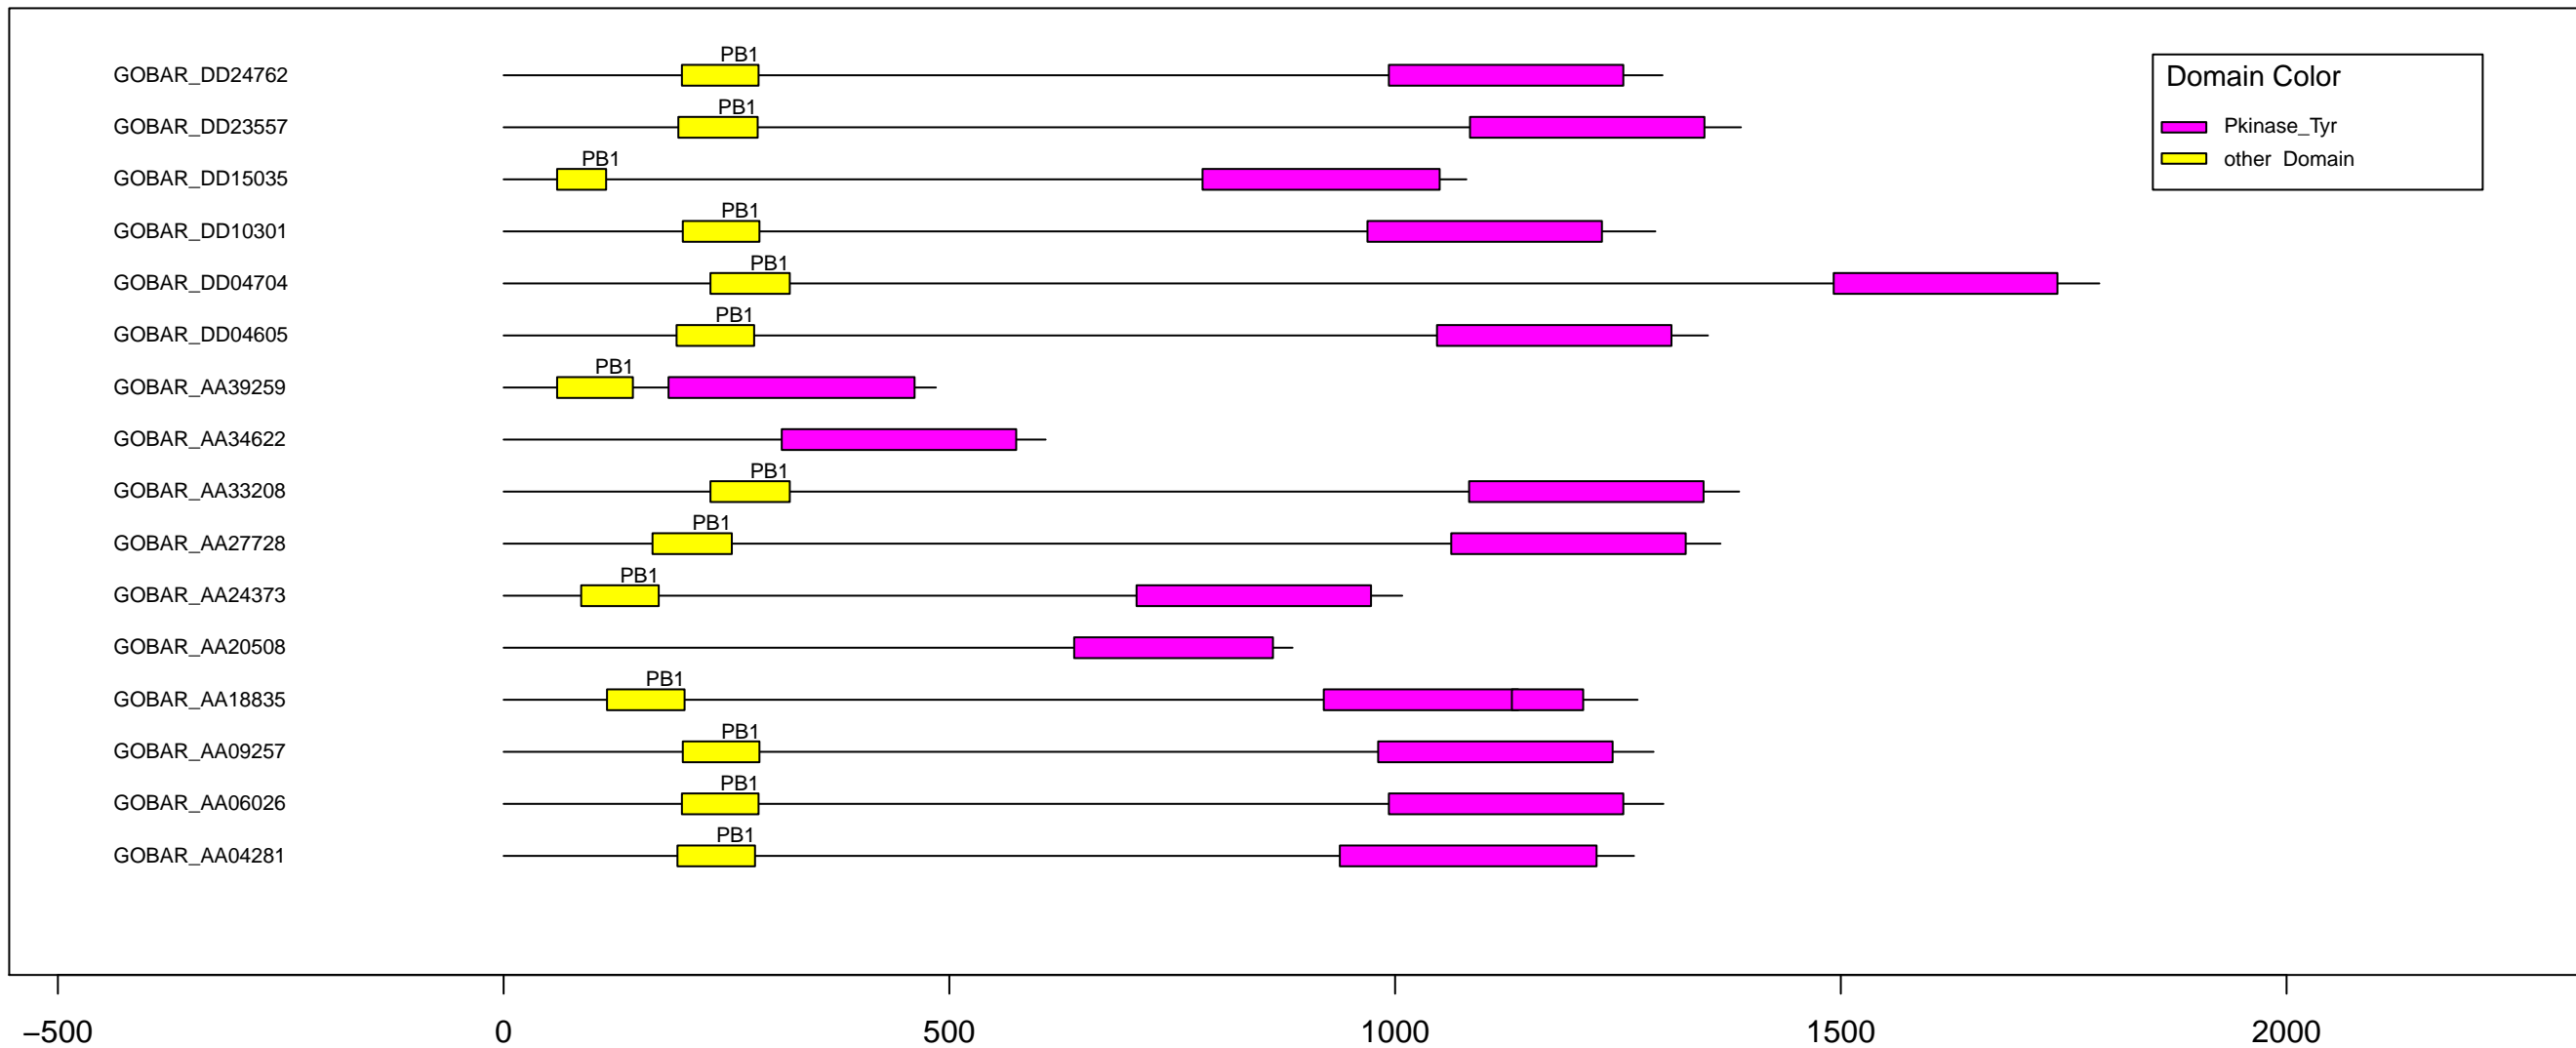

# G.ba TKL-PI-7 domain diagram (all)

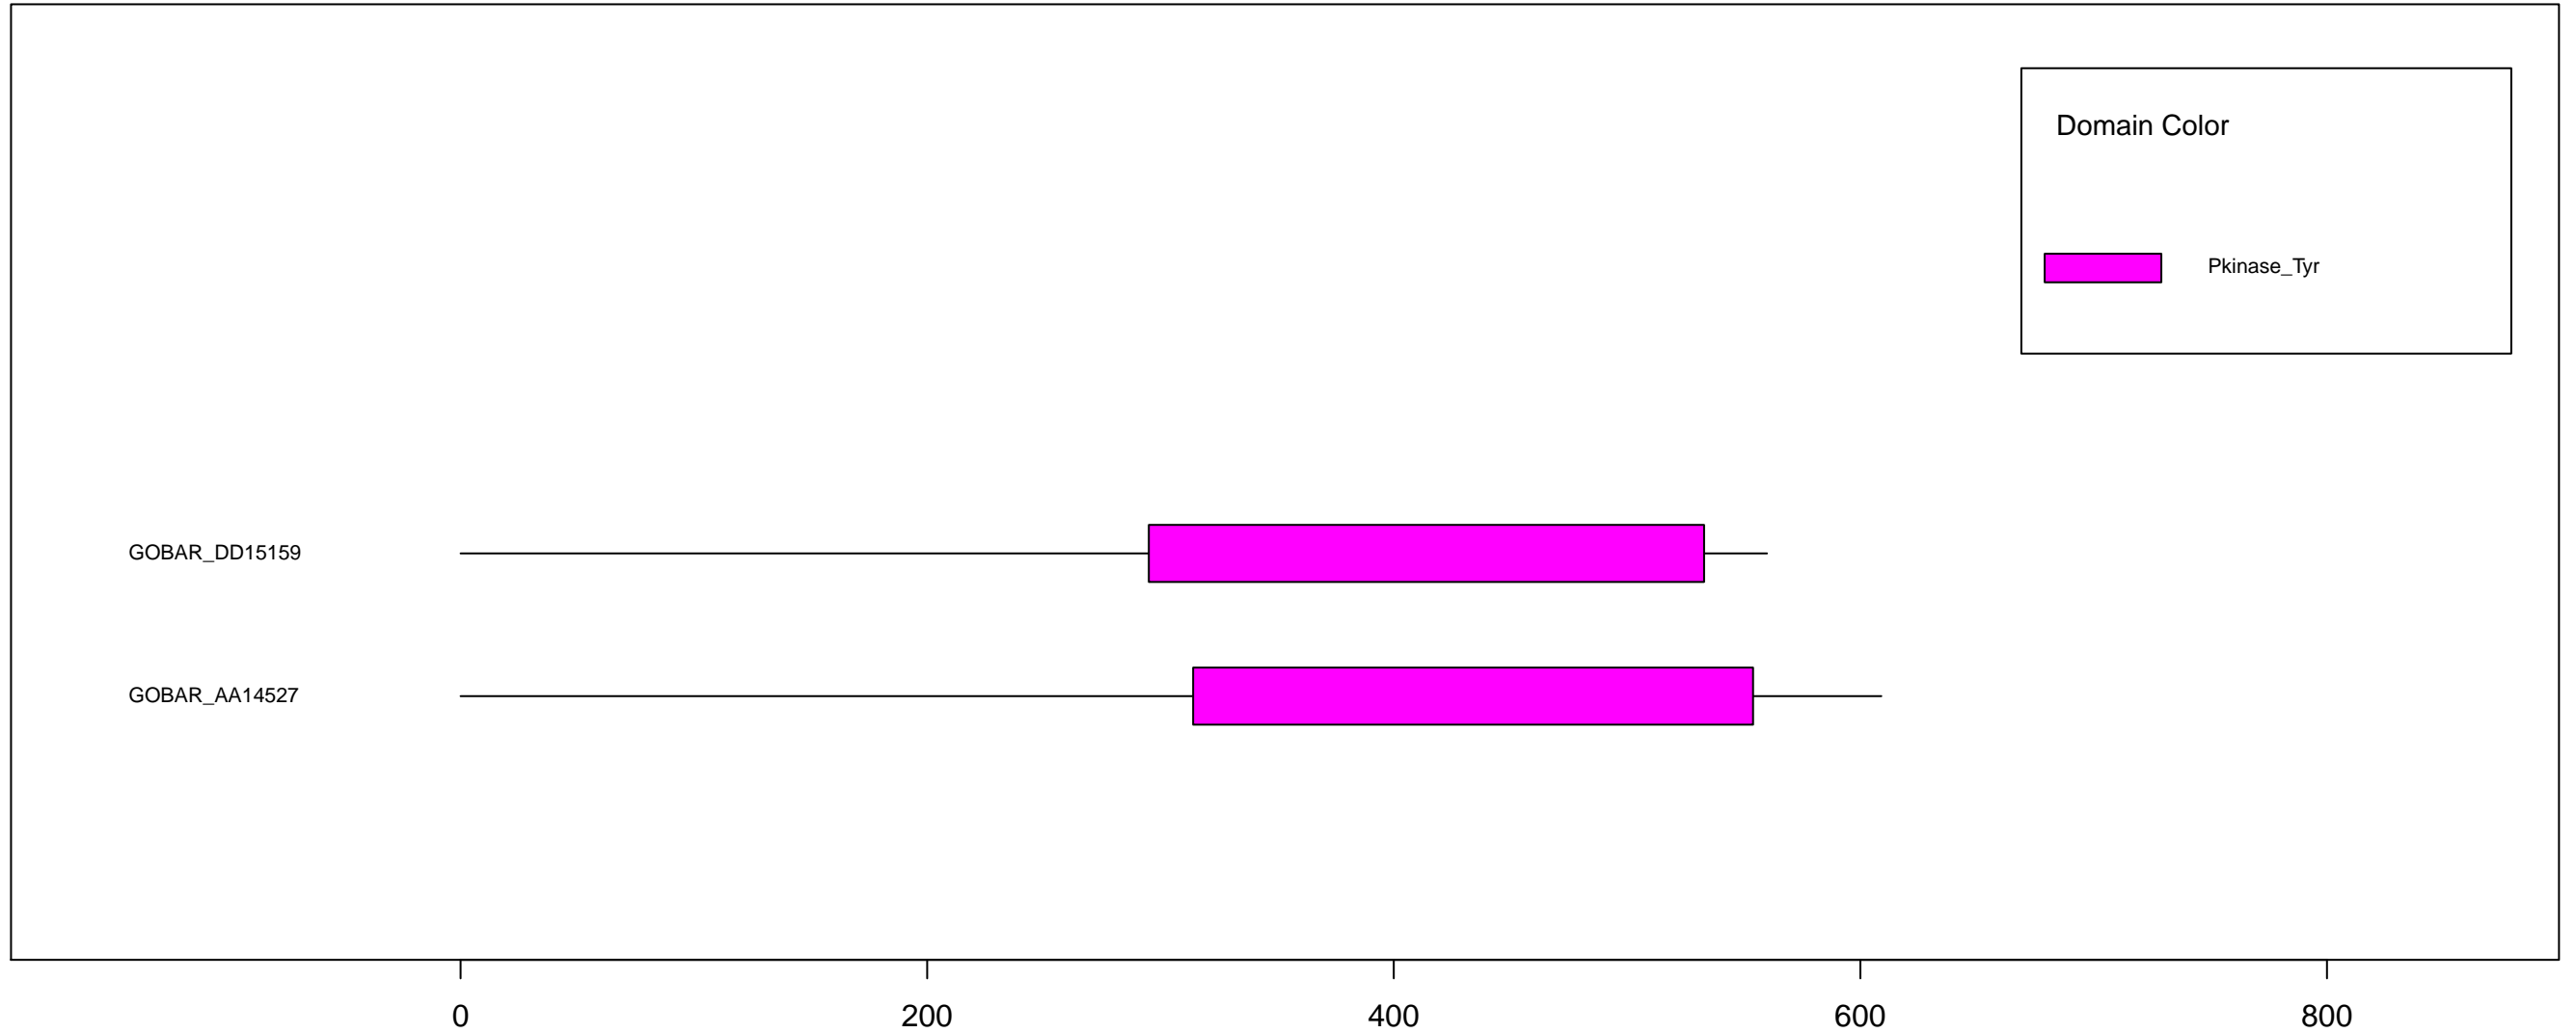

# G.ba TKL-PI-8 domain diagram (all)

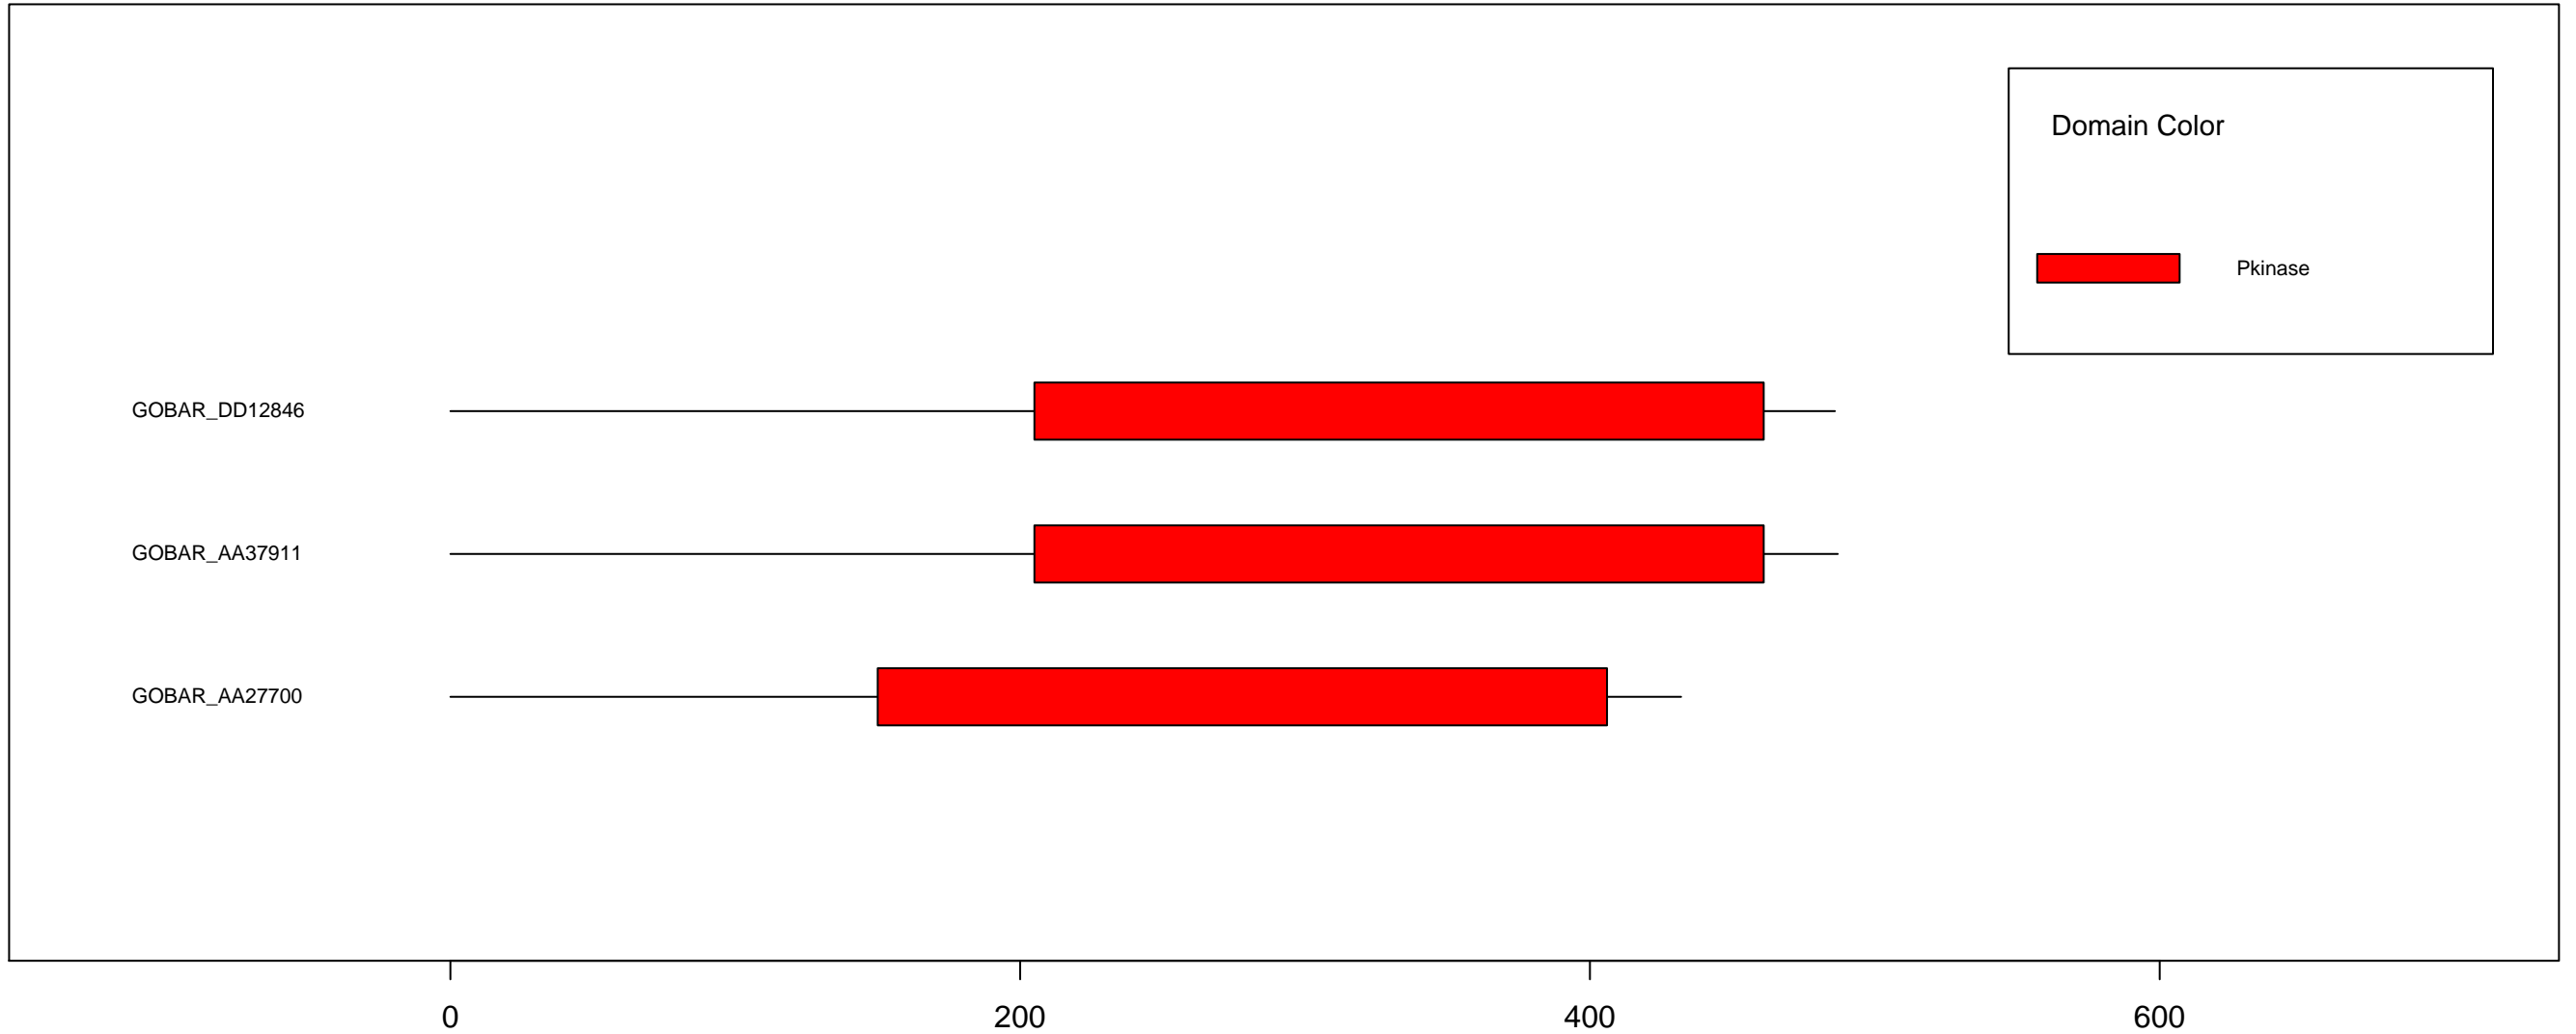

# G.ba TLK domain diagram (all)

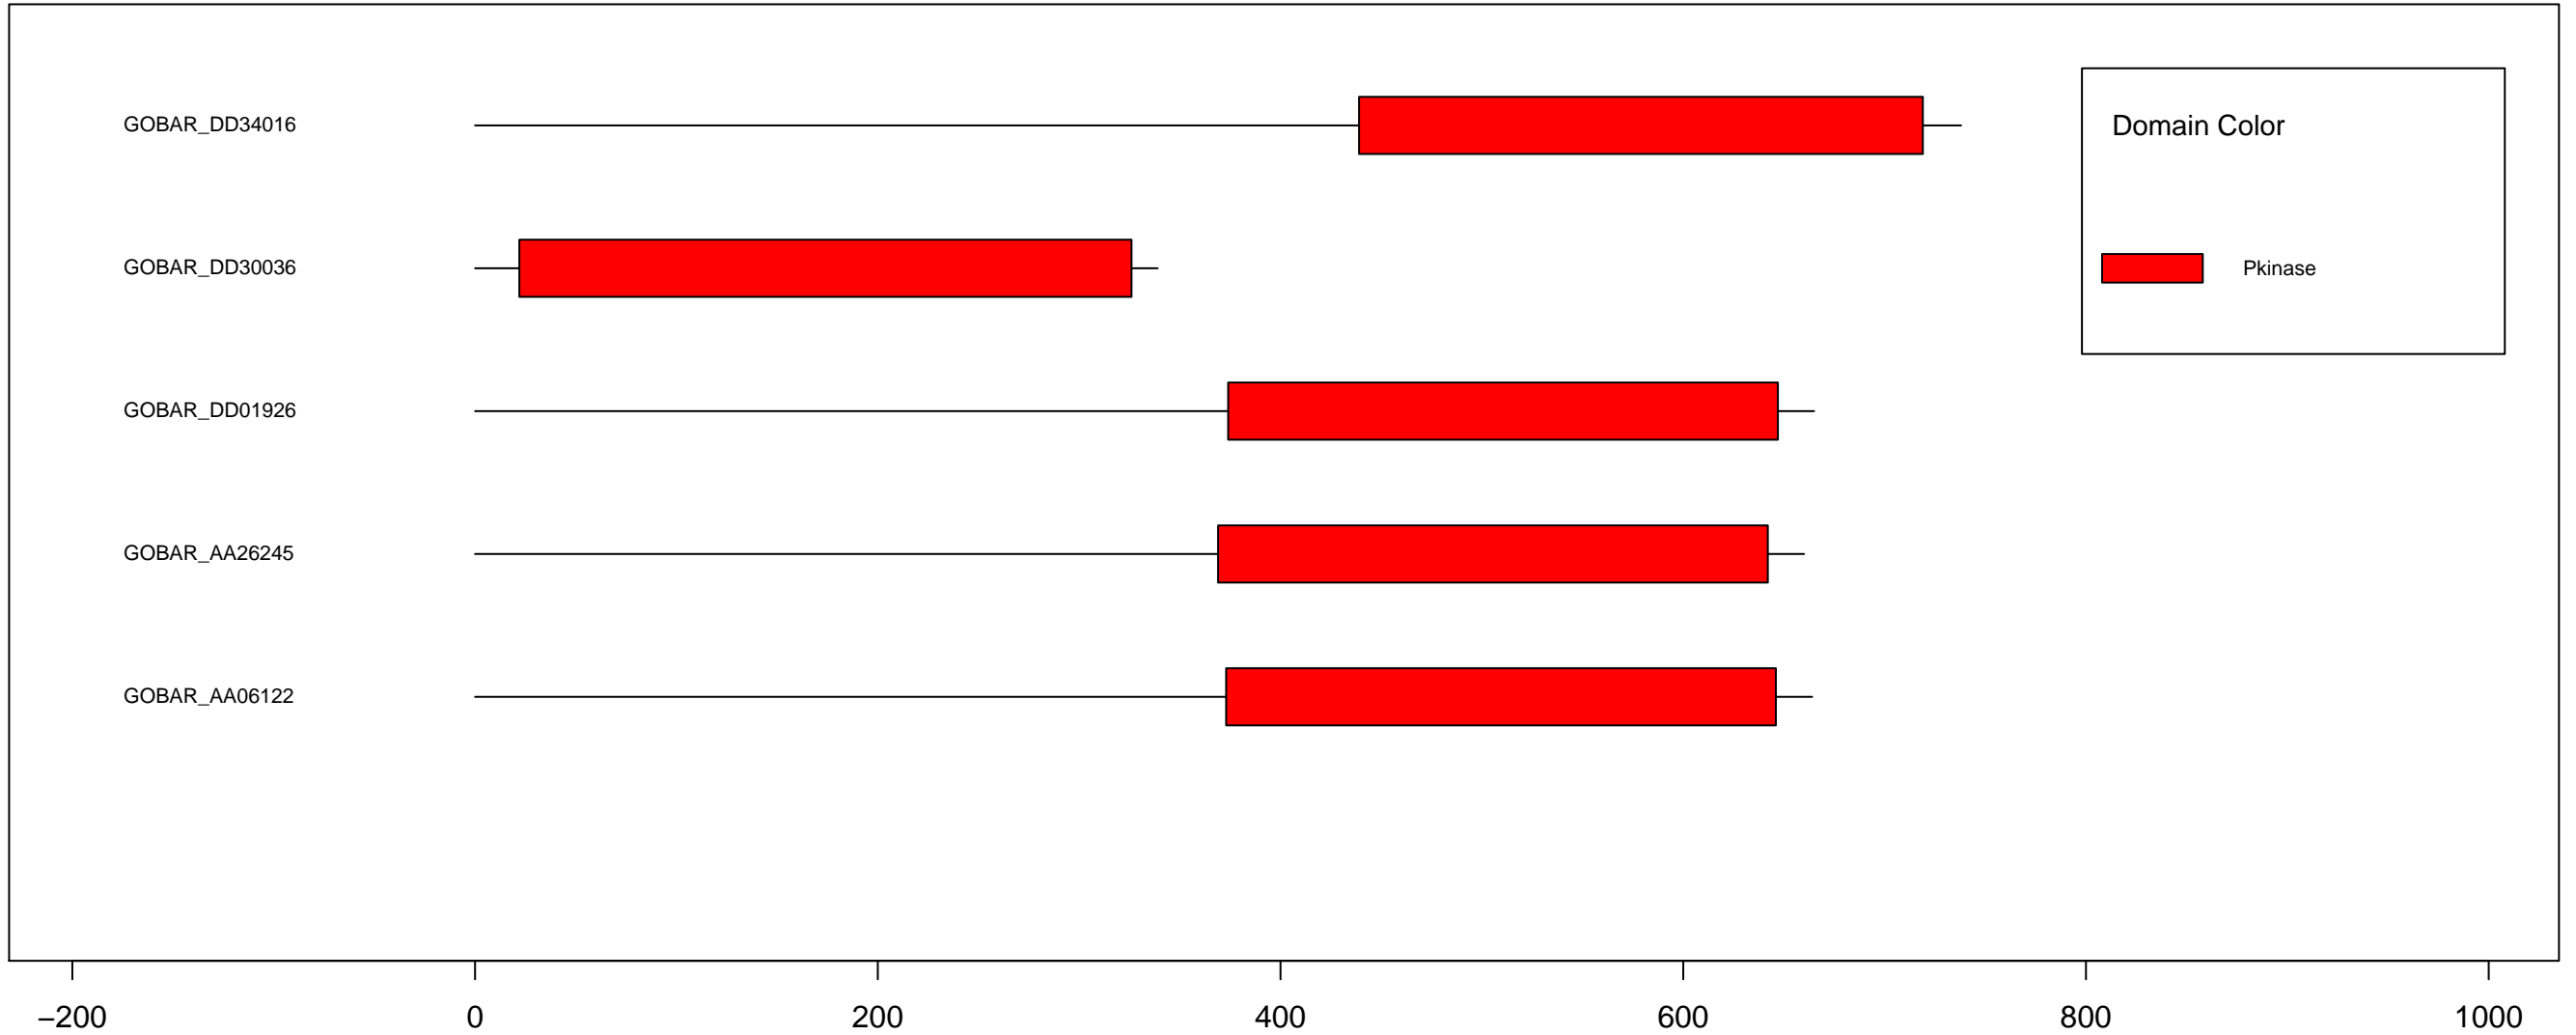

# G.ba TTK domain diagram (all)

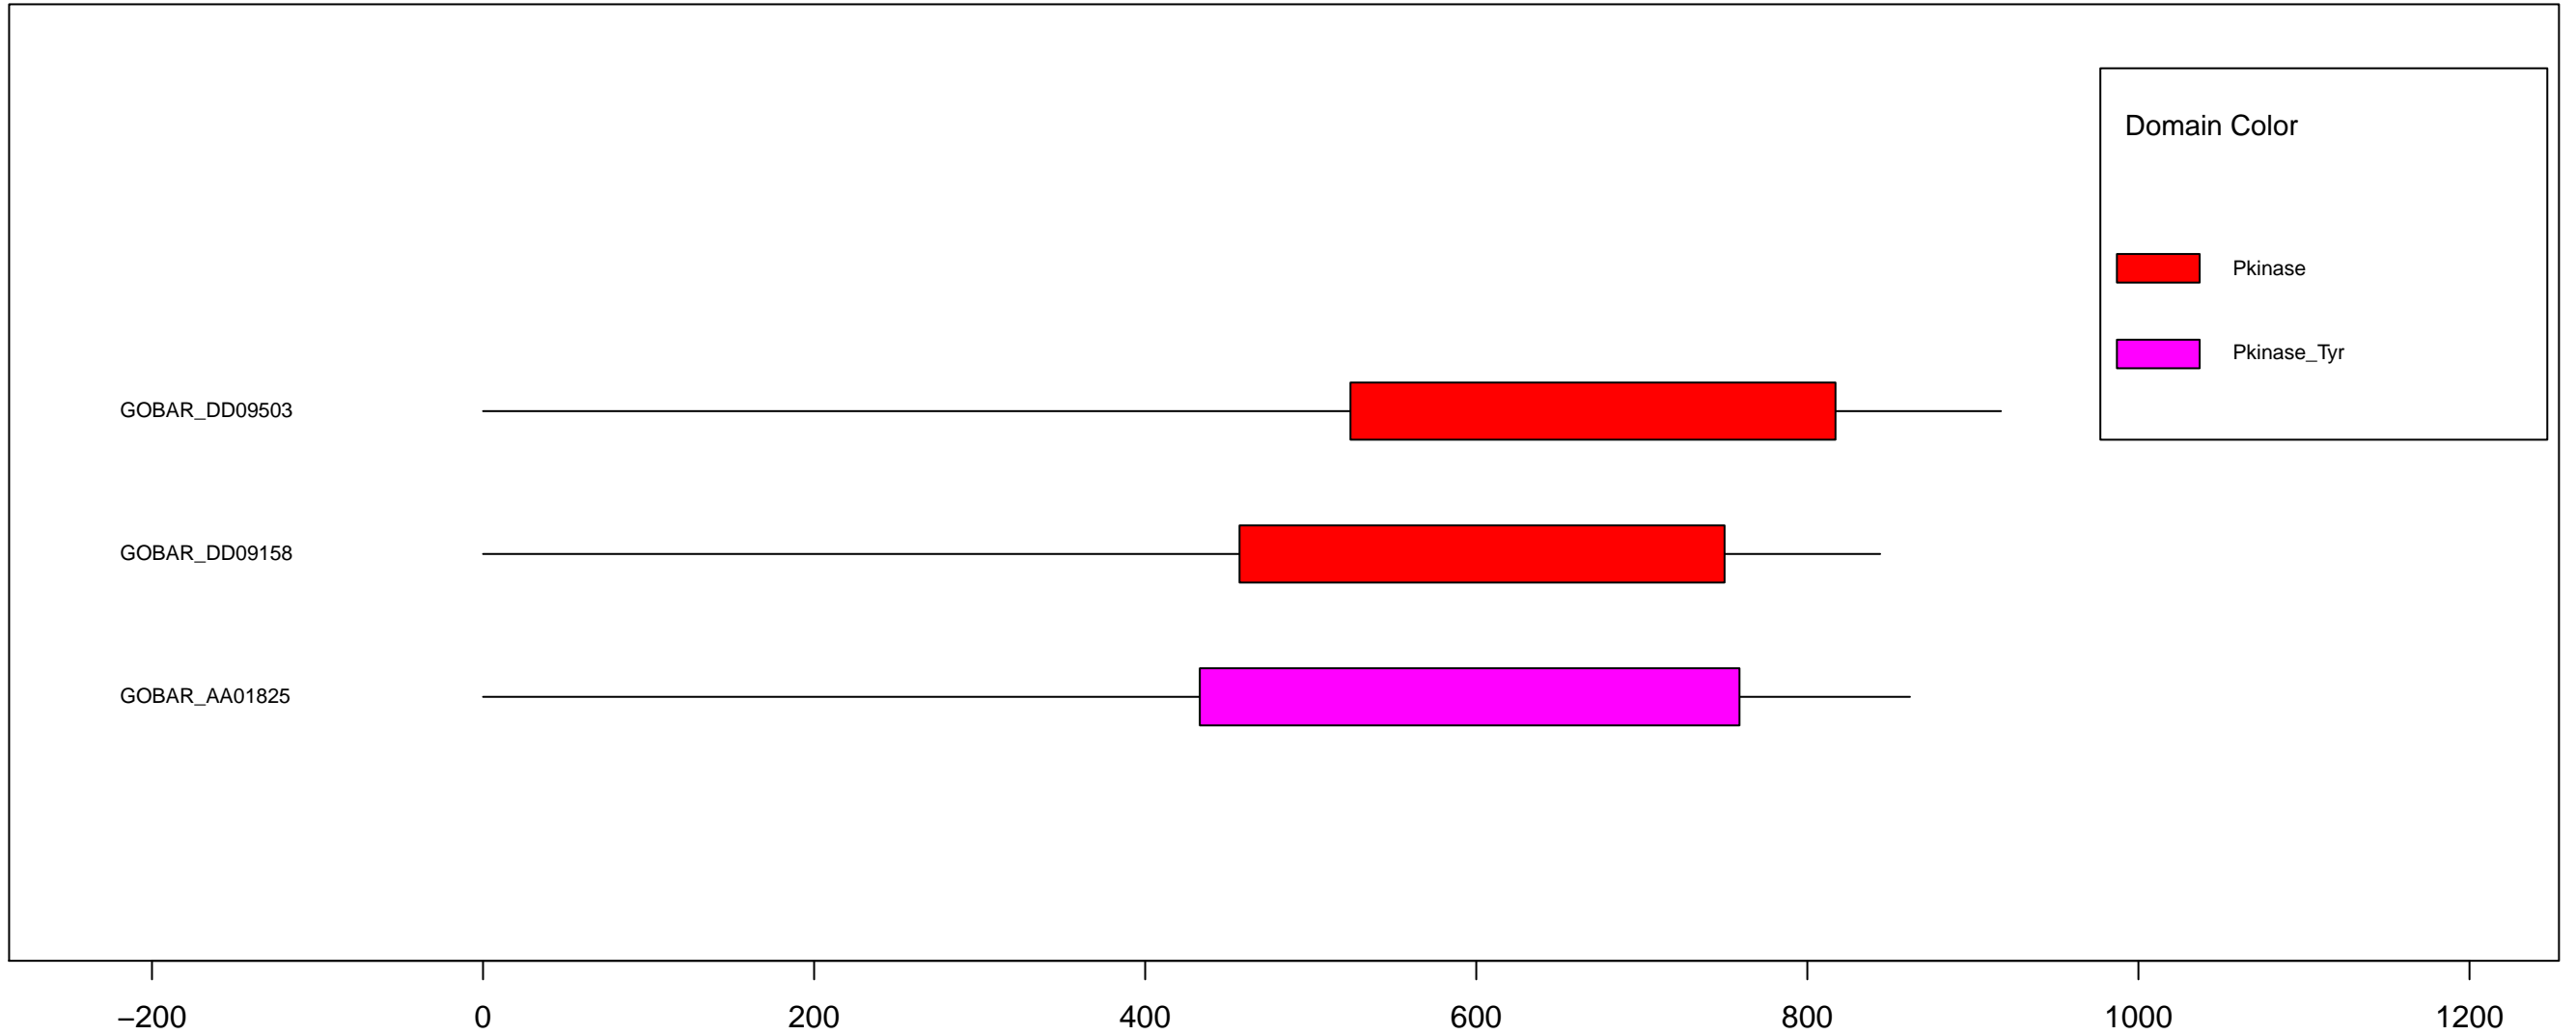

# G.ba ULK\_Fused domain diagram (all)

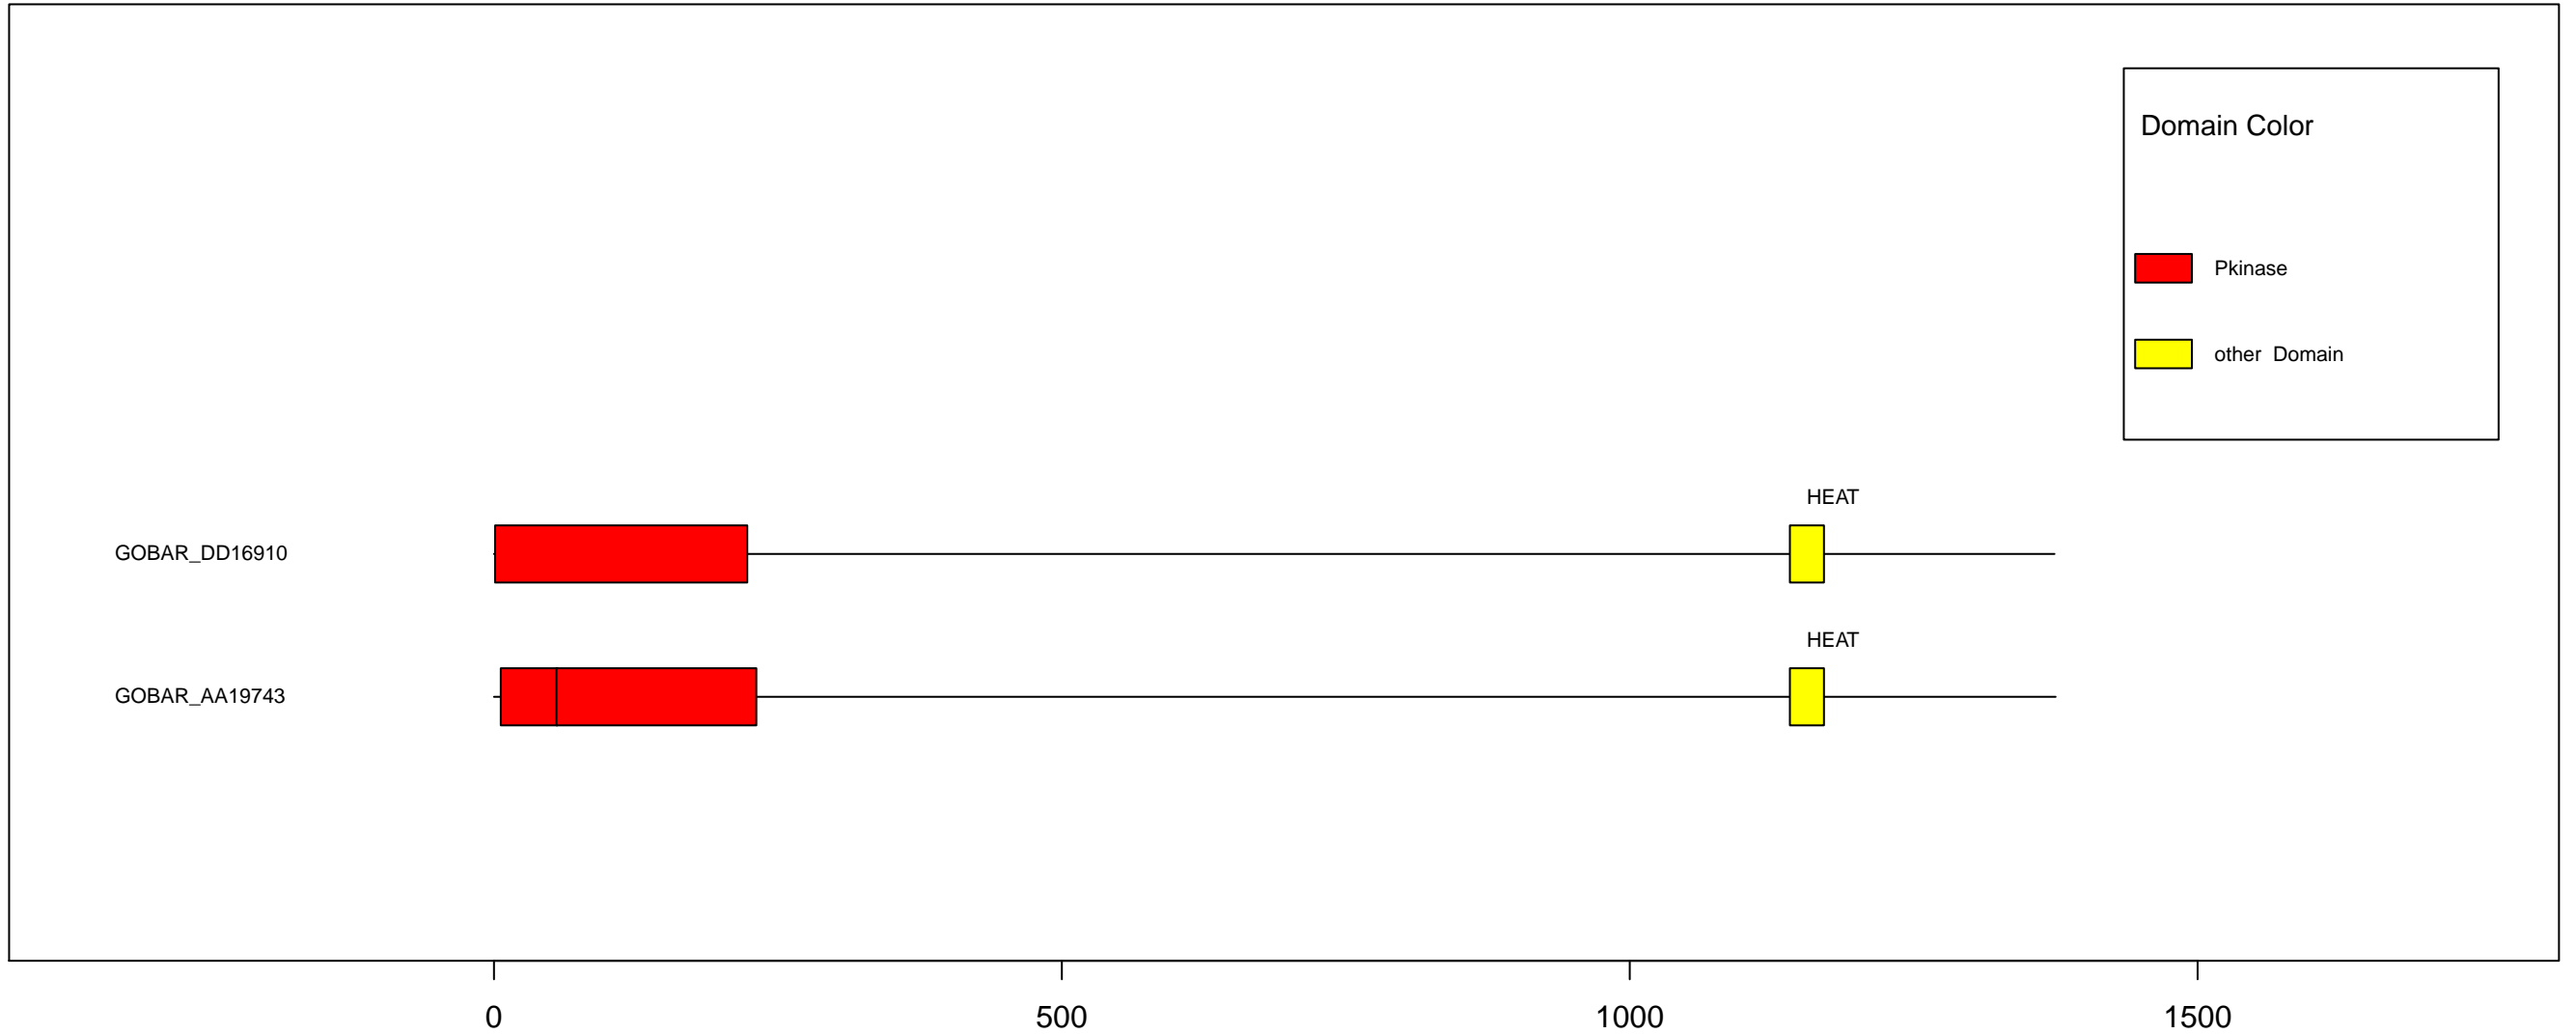



# G.ba ULK\_ULK4 domain diagram (all)

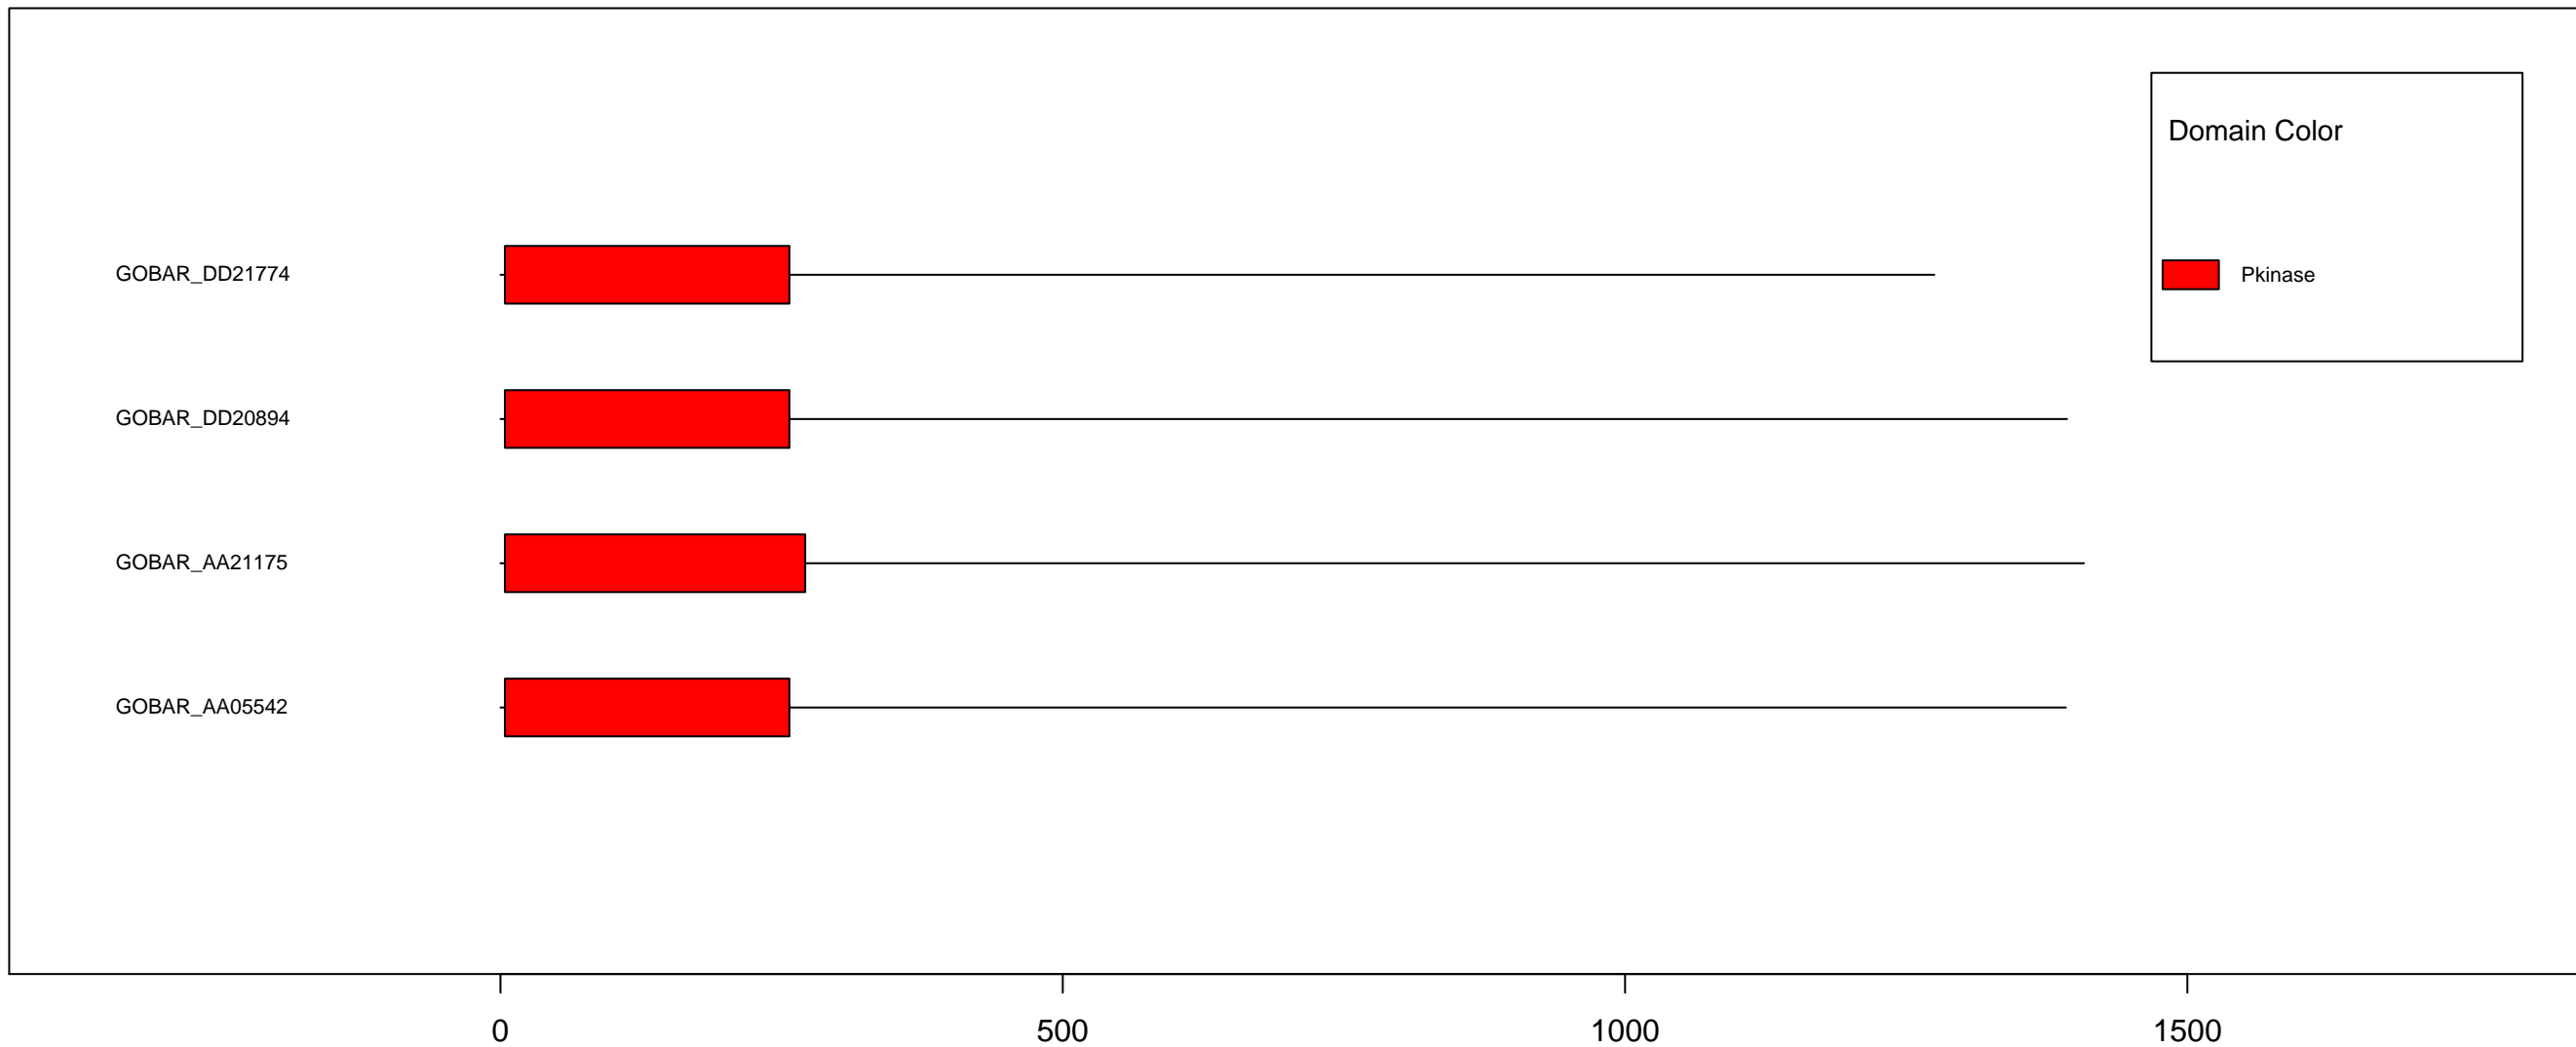

# G.ba WEE domain diagram (all)

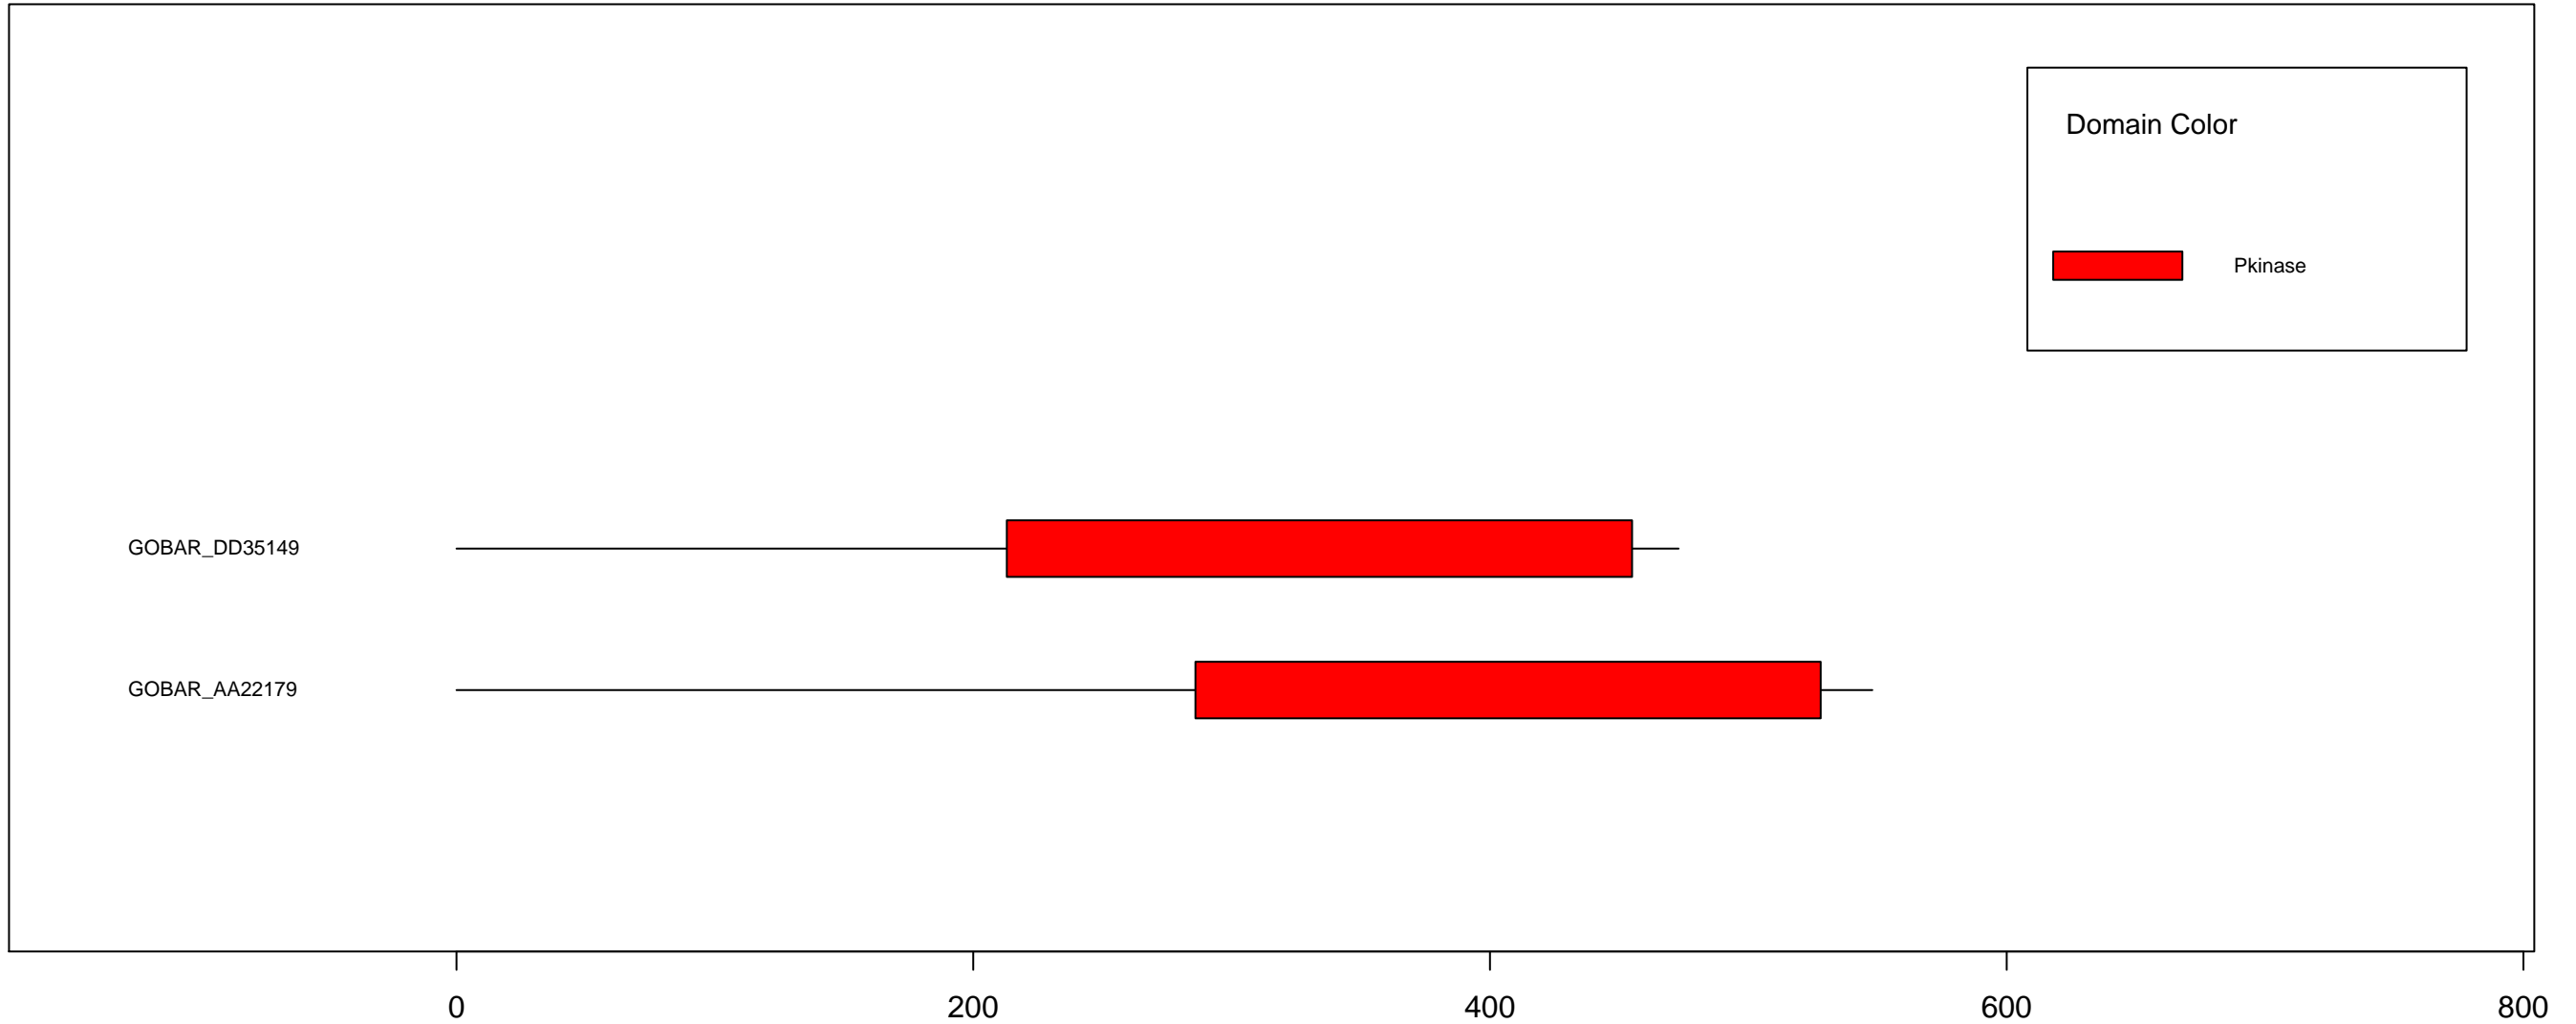

# G.ba WNK\_NRBP domain diagram (part 1)

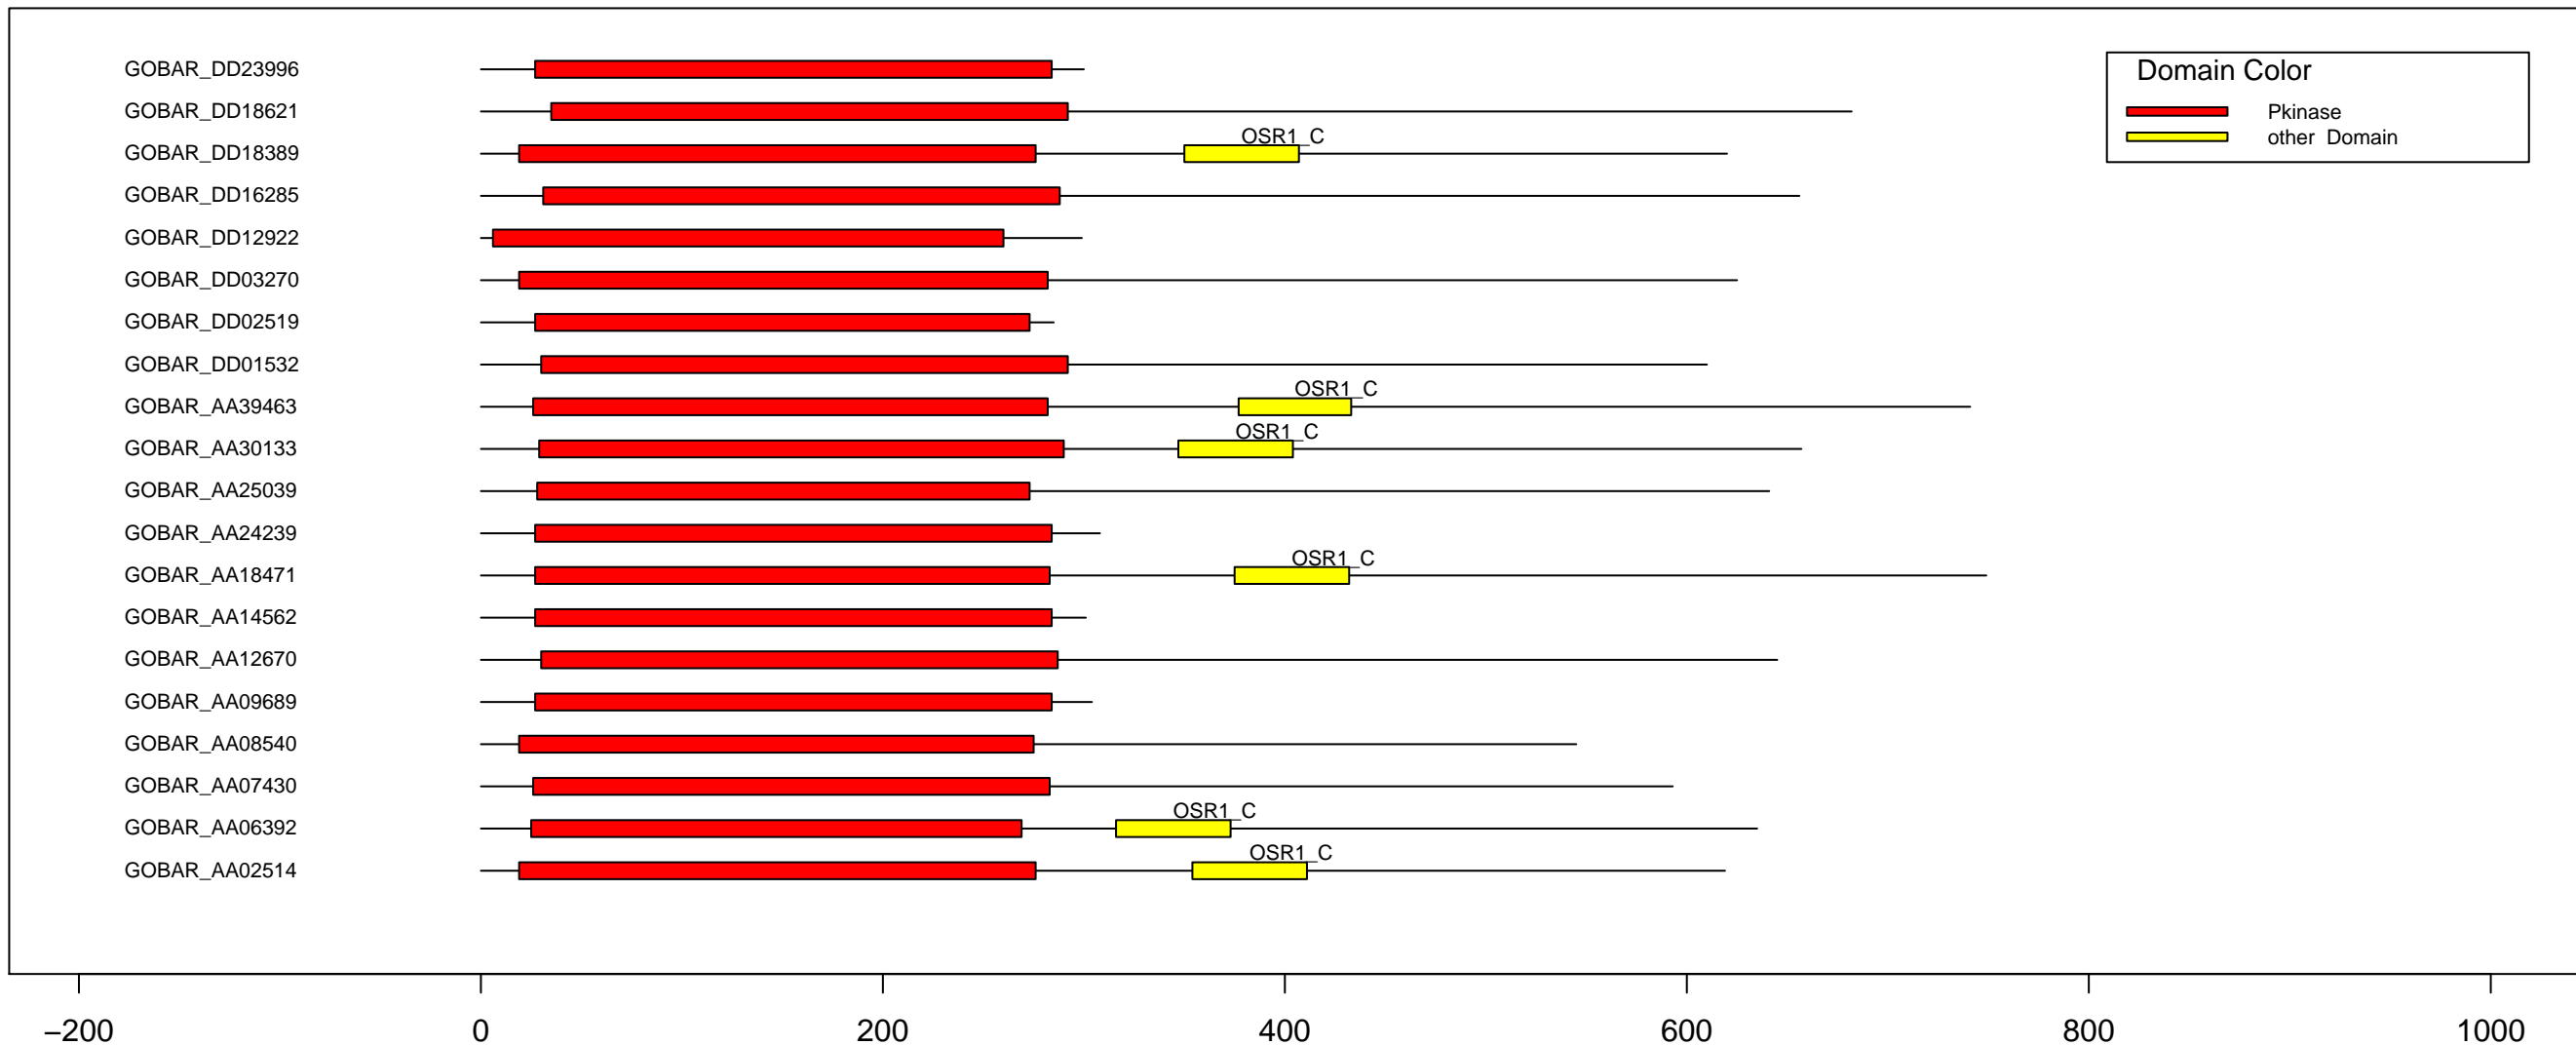

### G.ba WNK\_NRBP domain diagram (part 2)

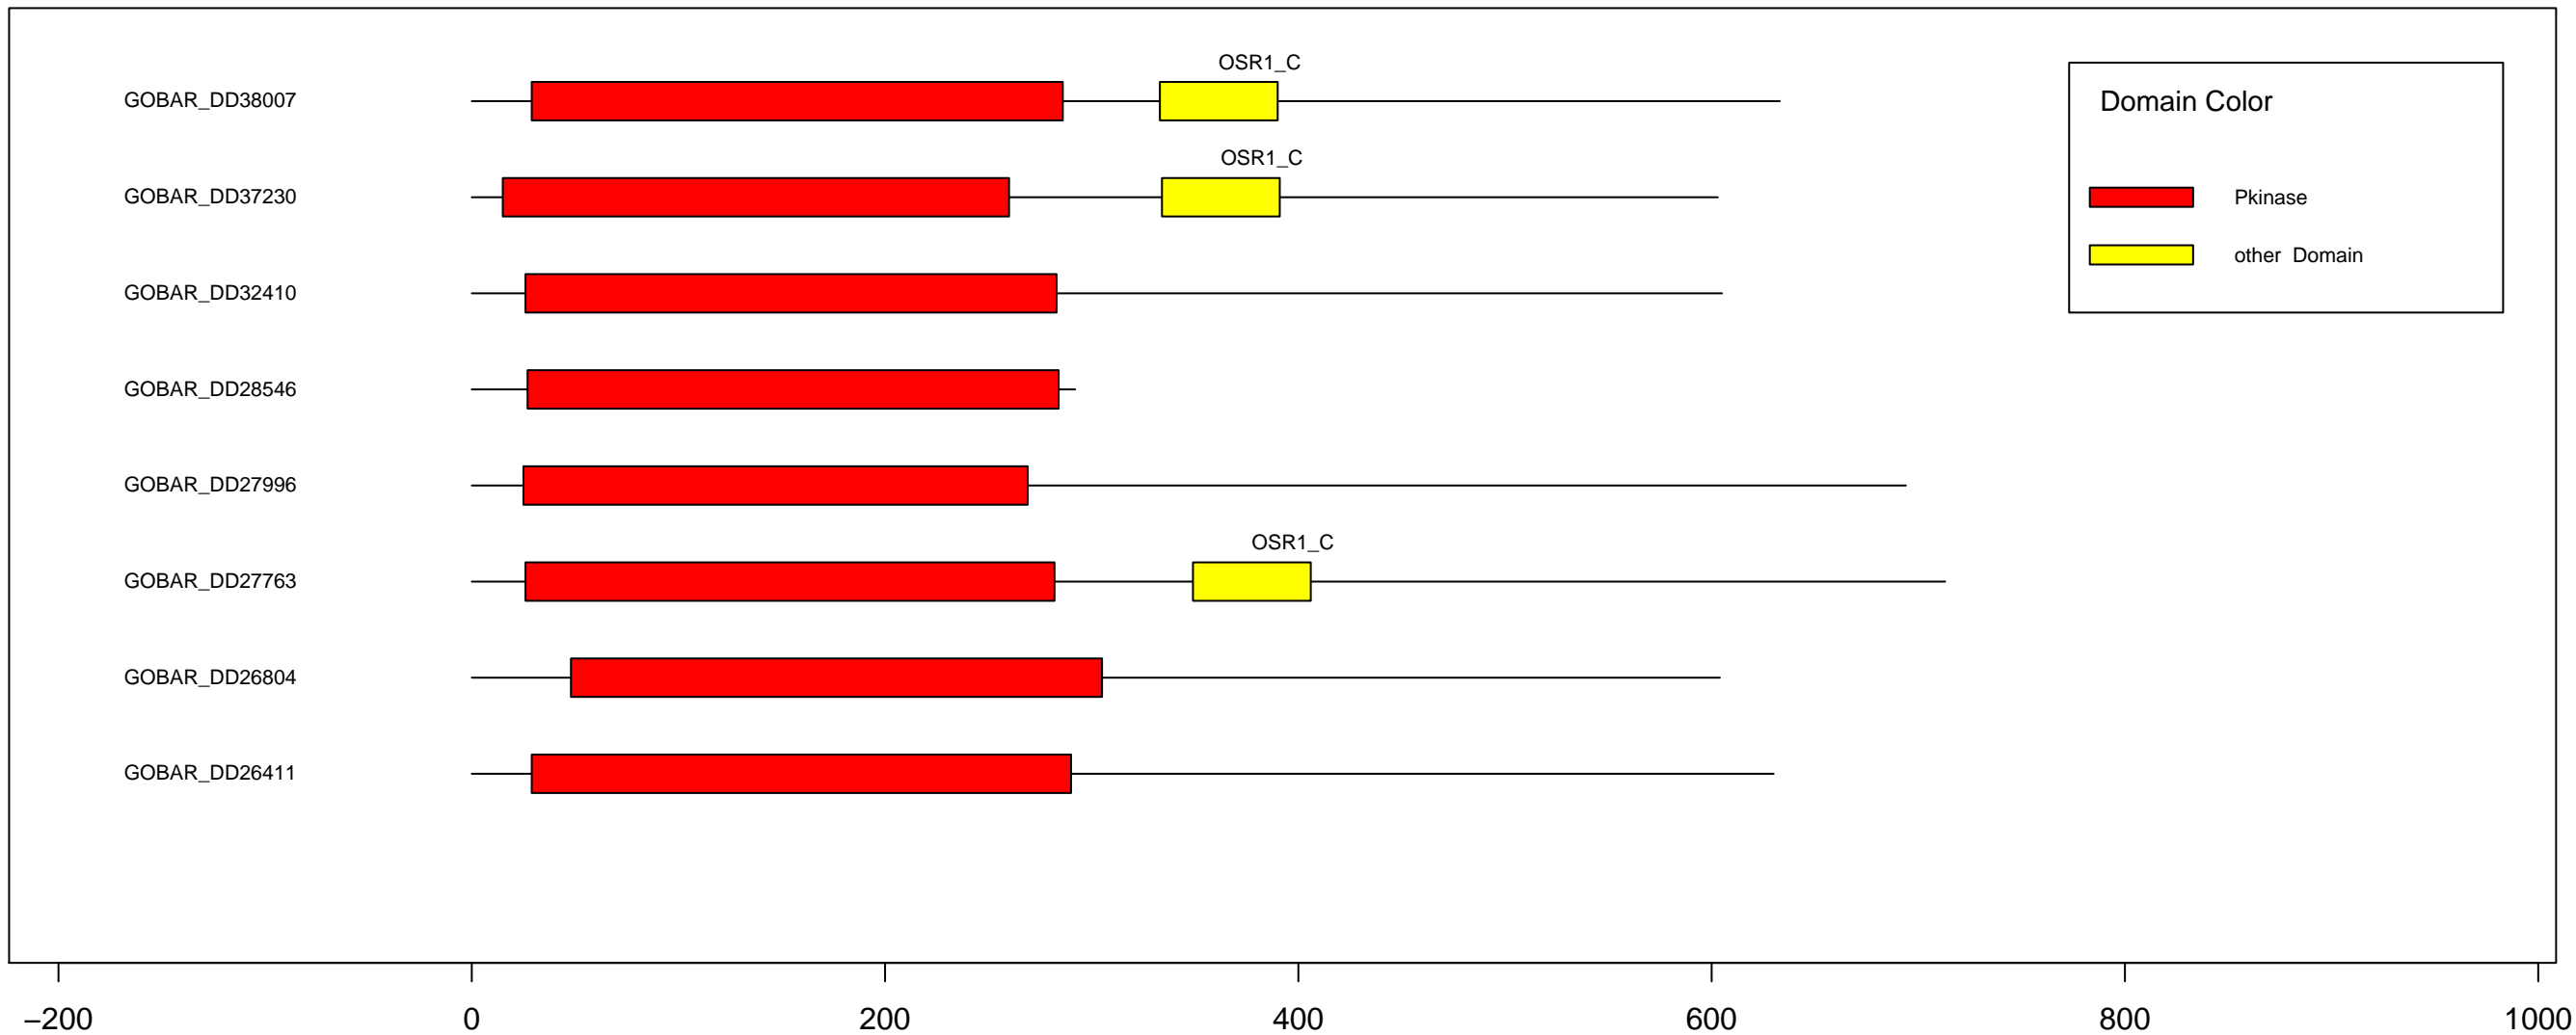

Supplement: pone.0197392.s002.pdf [file pone.0197392.s002.pdf]
