# Supplementary material for: Genome-wide classification, evolutionary analysis and gene expression patterns of the kinome in Gossypium
Source: PubMed Central journal article supplement (PMC5955557; doi:10.1371/journal.pone.0197392), 2018-05-16

# G.hi AGC\_MAST exon-intron and domain diagram (all)

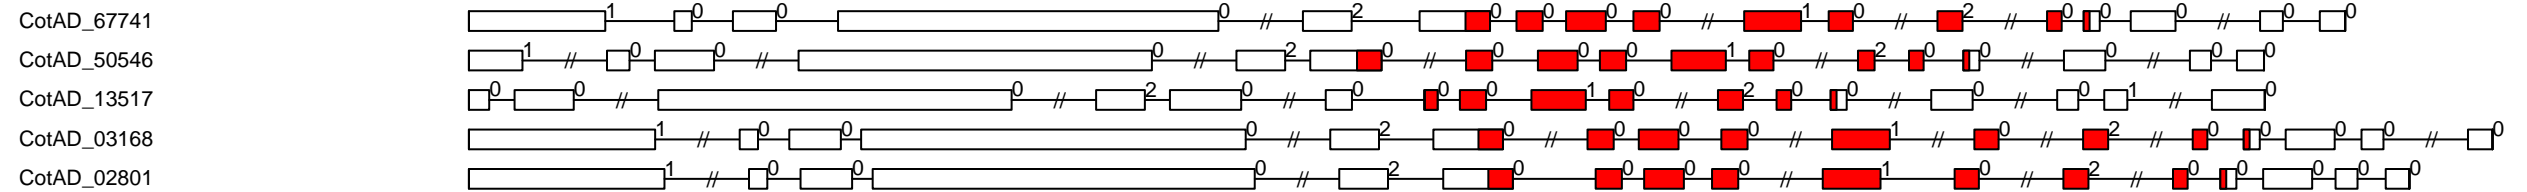

0

2000

4000

6000

# G.hi AGC\_NDR exon-intron and domain diagram (all)

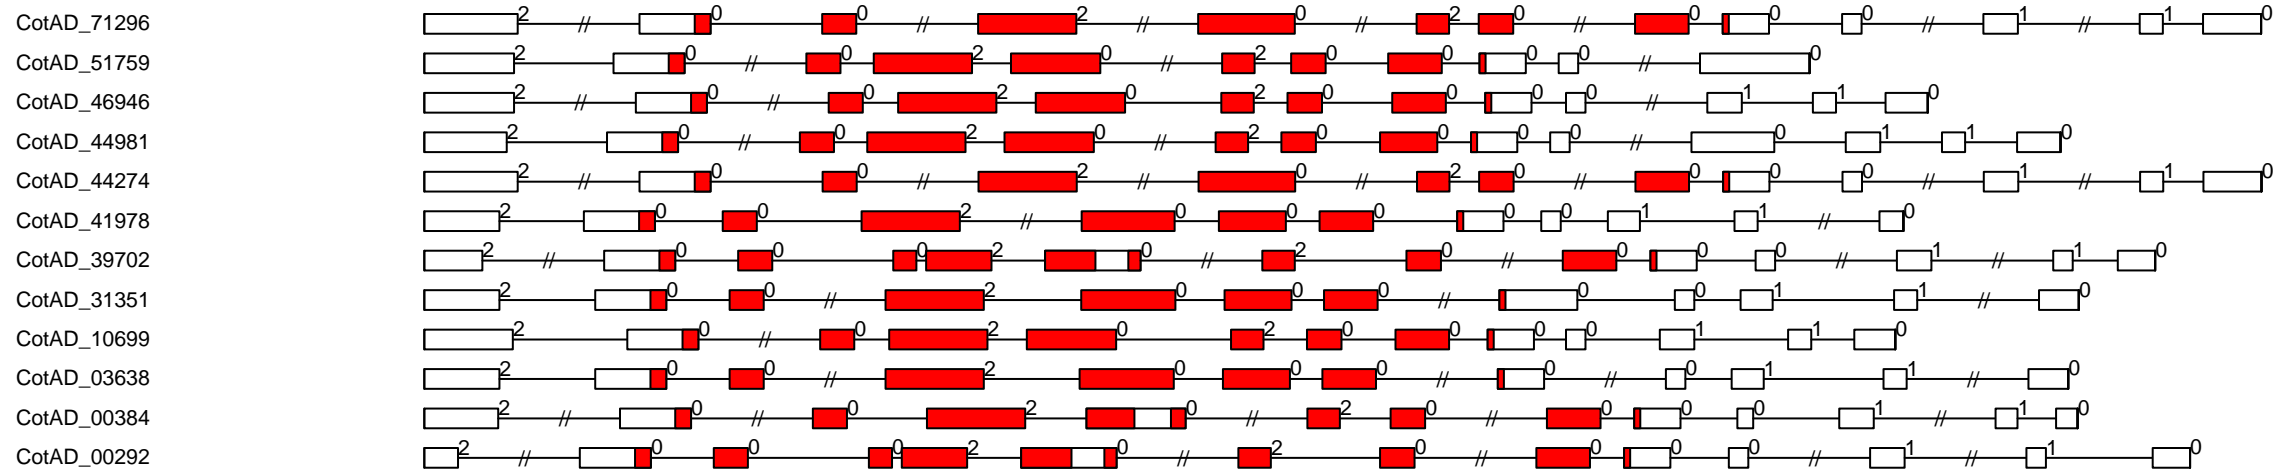

-1000

0

1000

2000

3000

4000

# G.hi AGC\_PDK1 exon-intron and domain diagram (all)

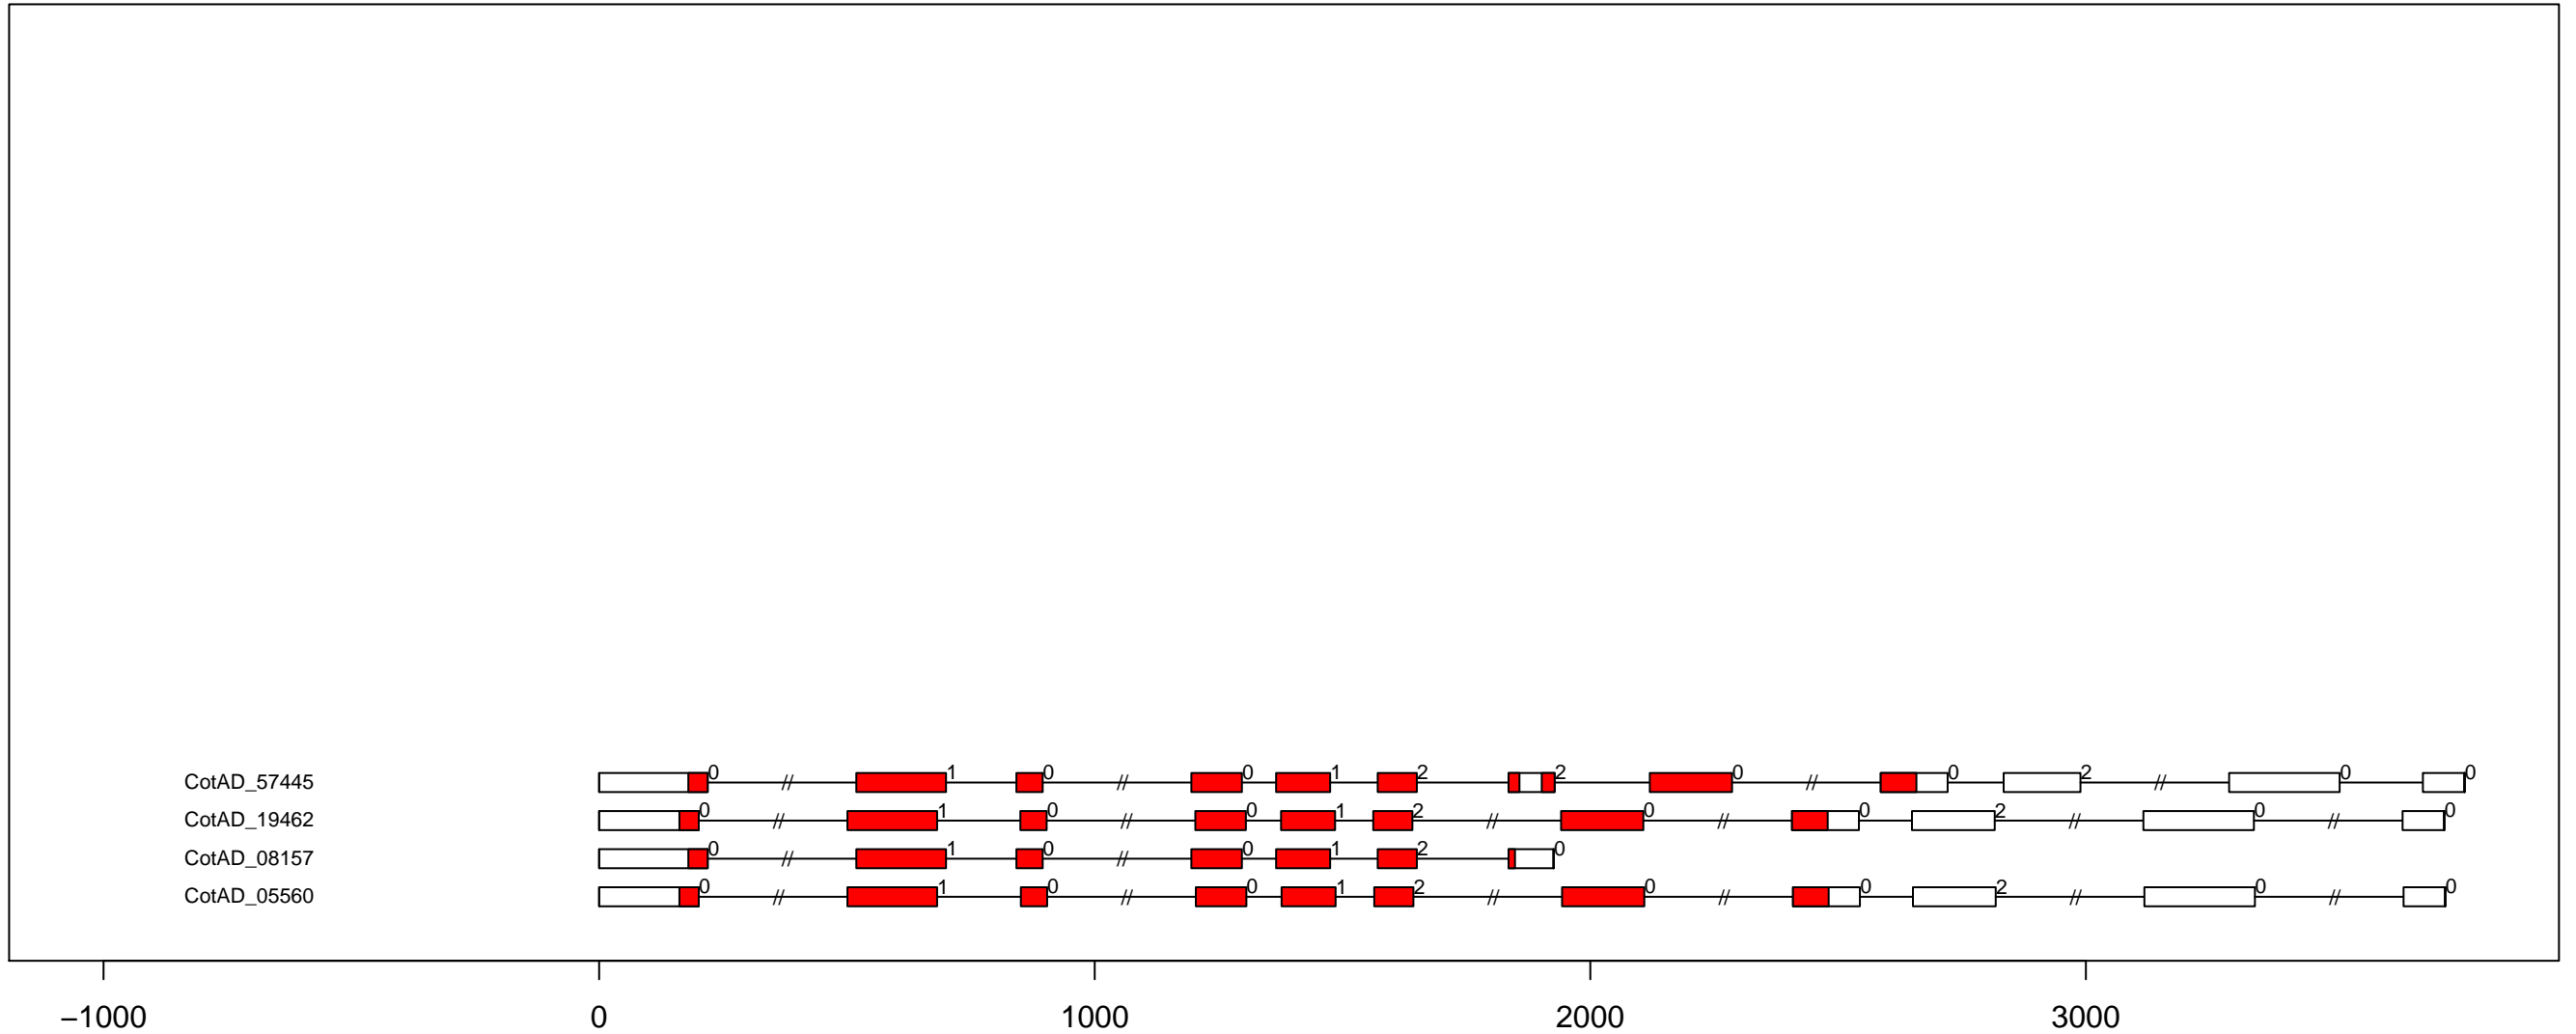

# G.hi AGC\_PKA-PKG exon-intron and domain diagram (all)

CotAD\_29250

CotAD\_23771

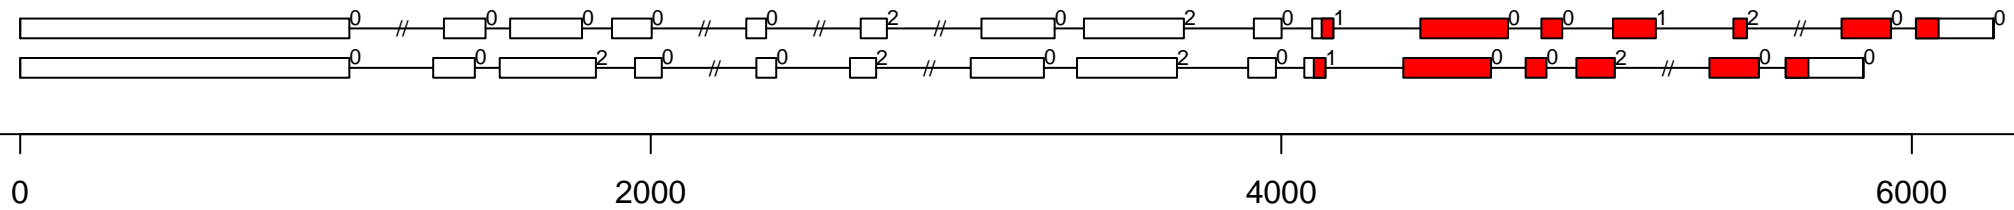

### G.hi AGC\_RSK-2 exon-intron and domain diagram (part 1)

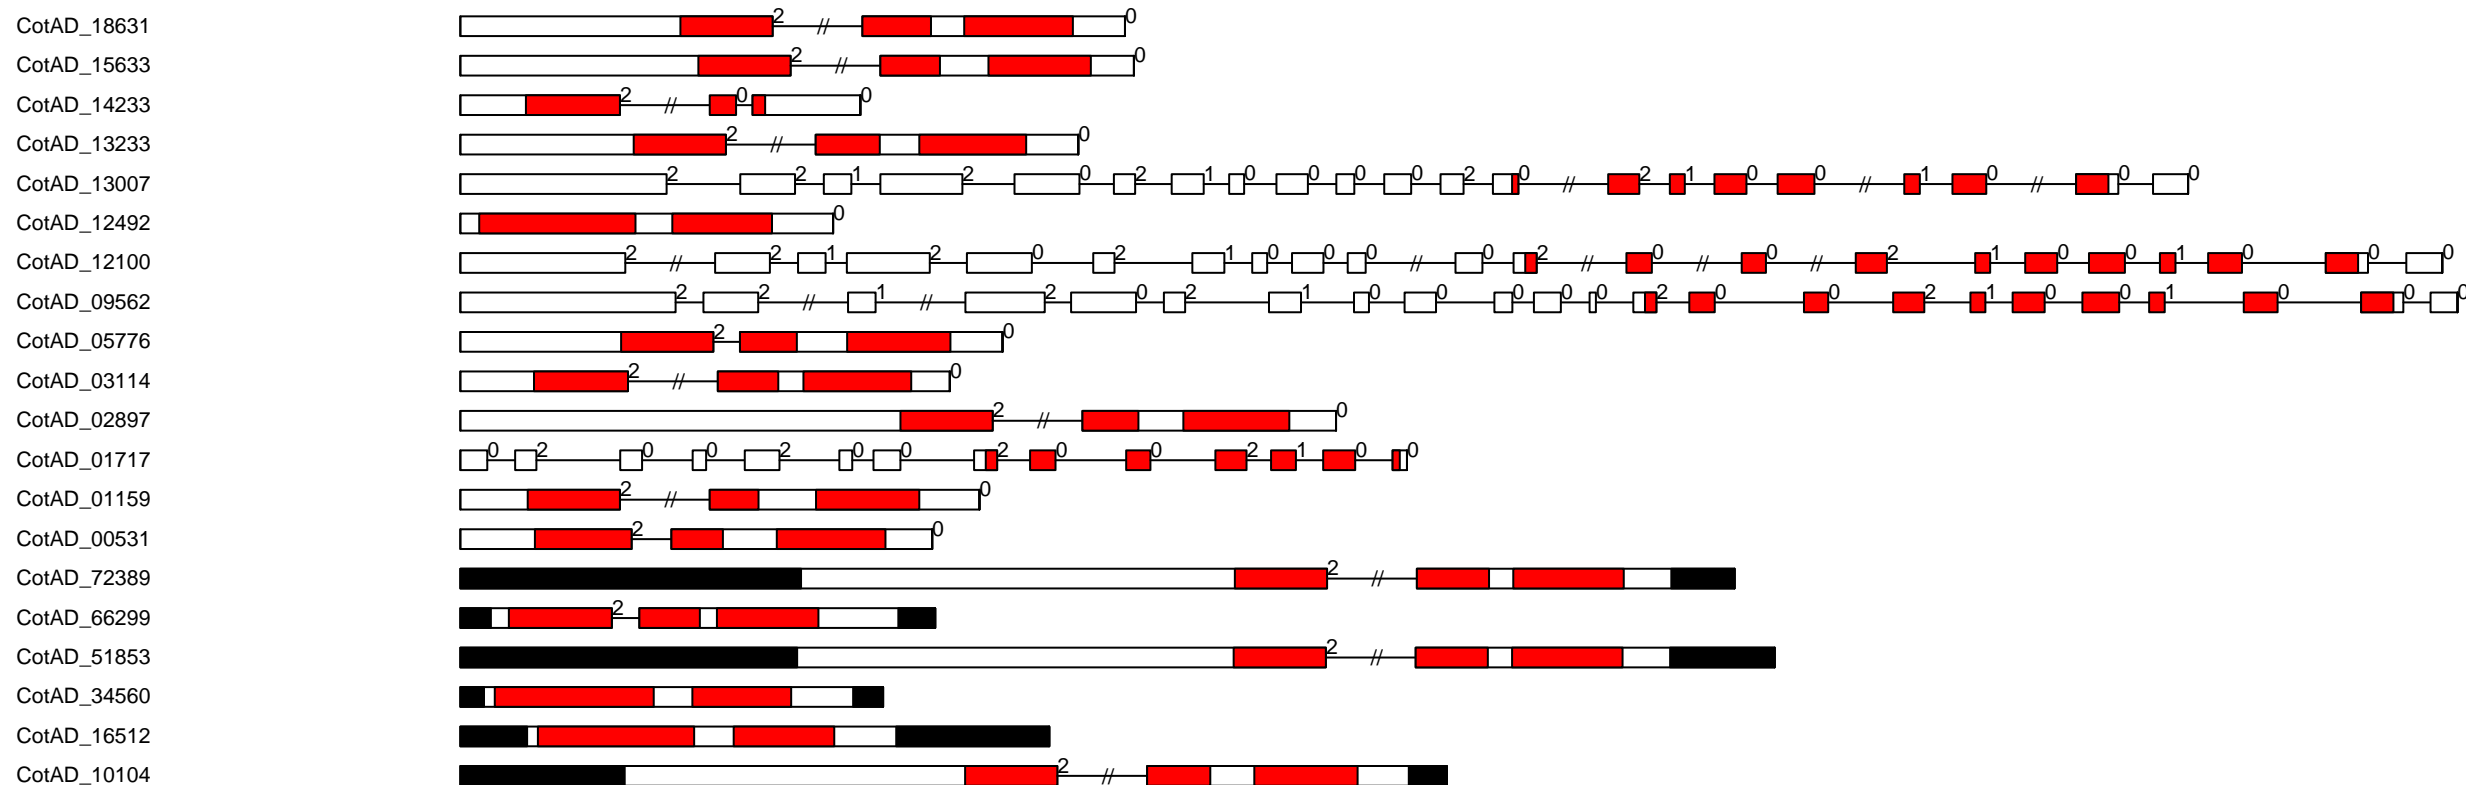

### G.hi AGC\_RSK-2 exon-intron and domain diagram (part 2)

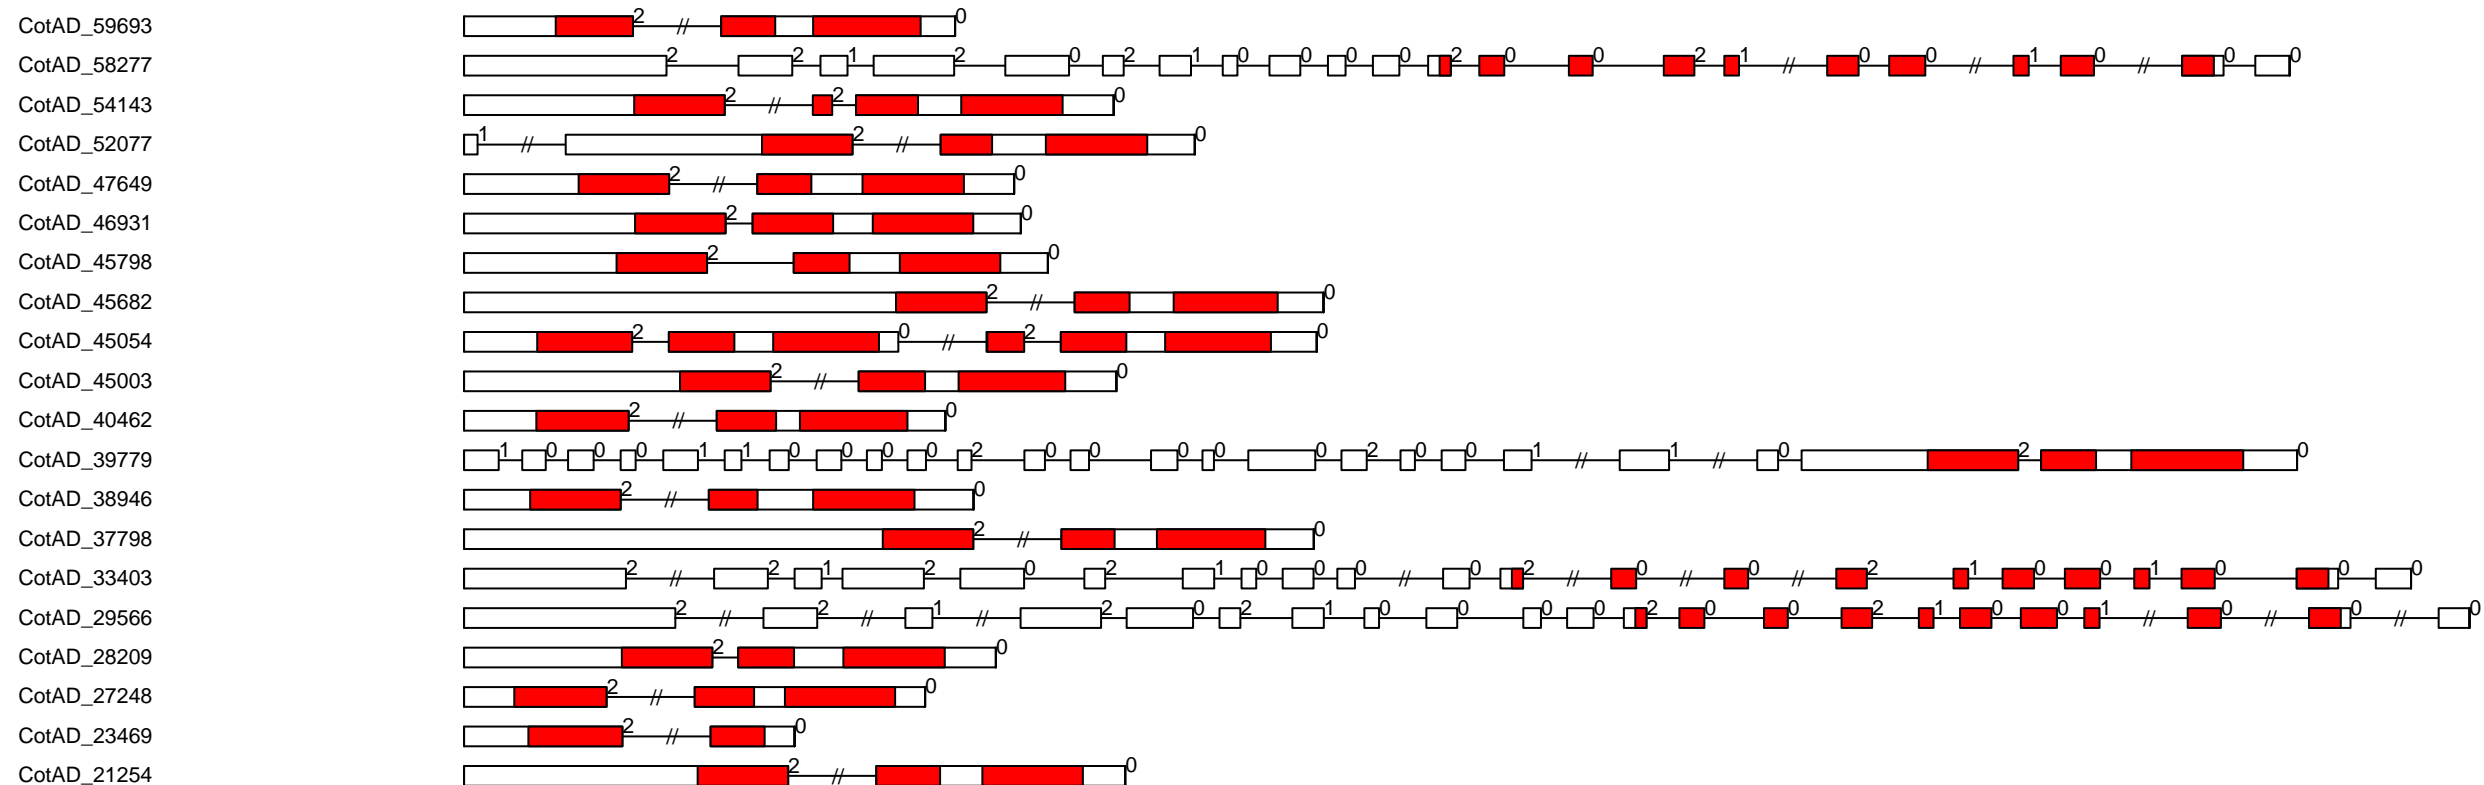

### G.hi AGC\_RSK-2 exon-intron and domain diagram (part 3)

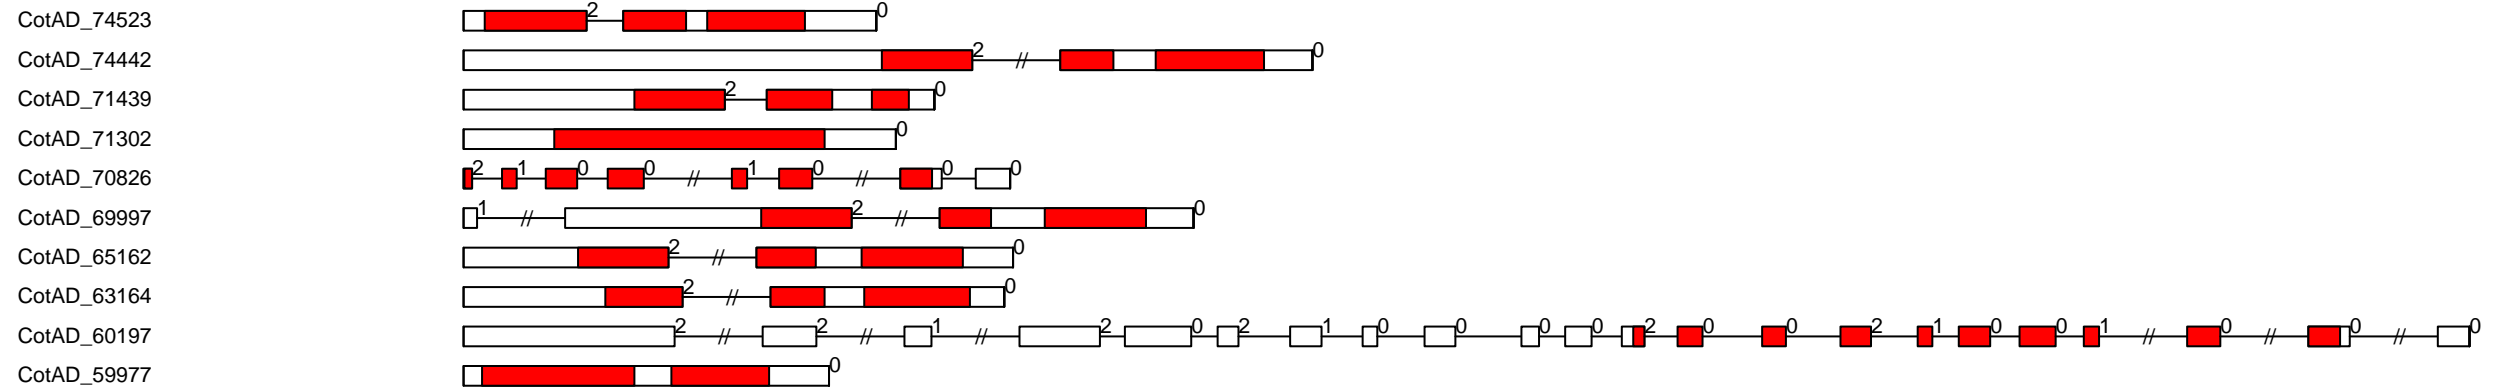

# G.hi AGC-PI exon-intron and domain diagram (all)

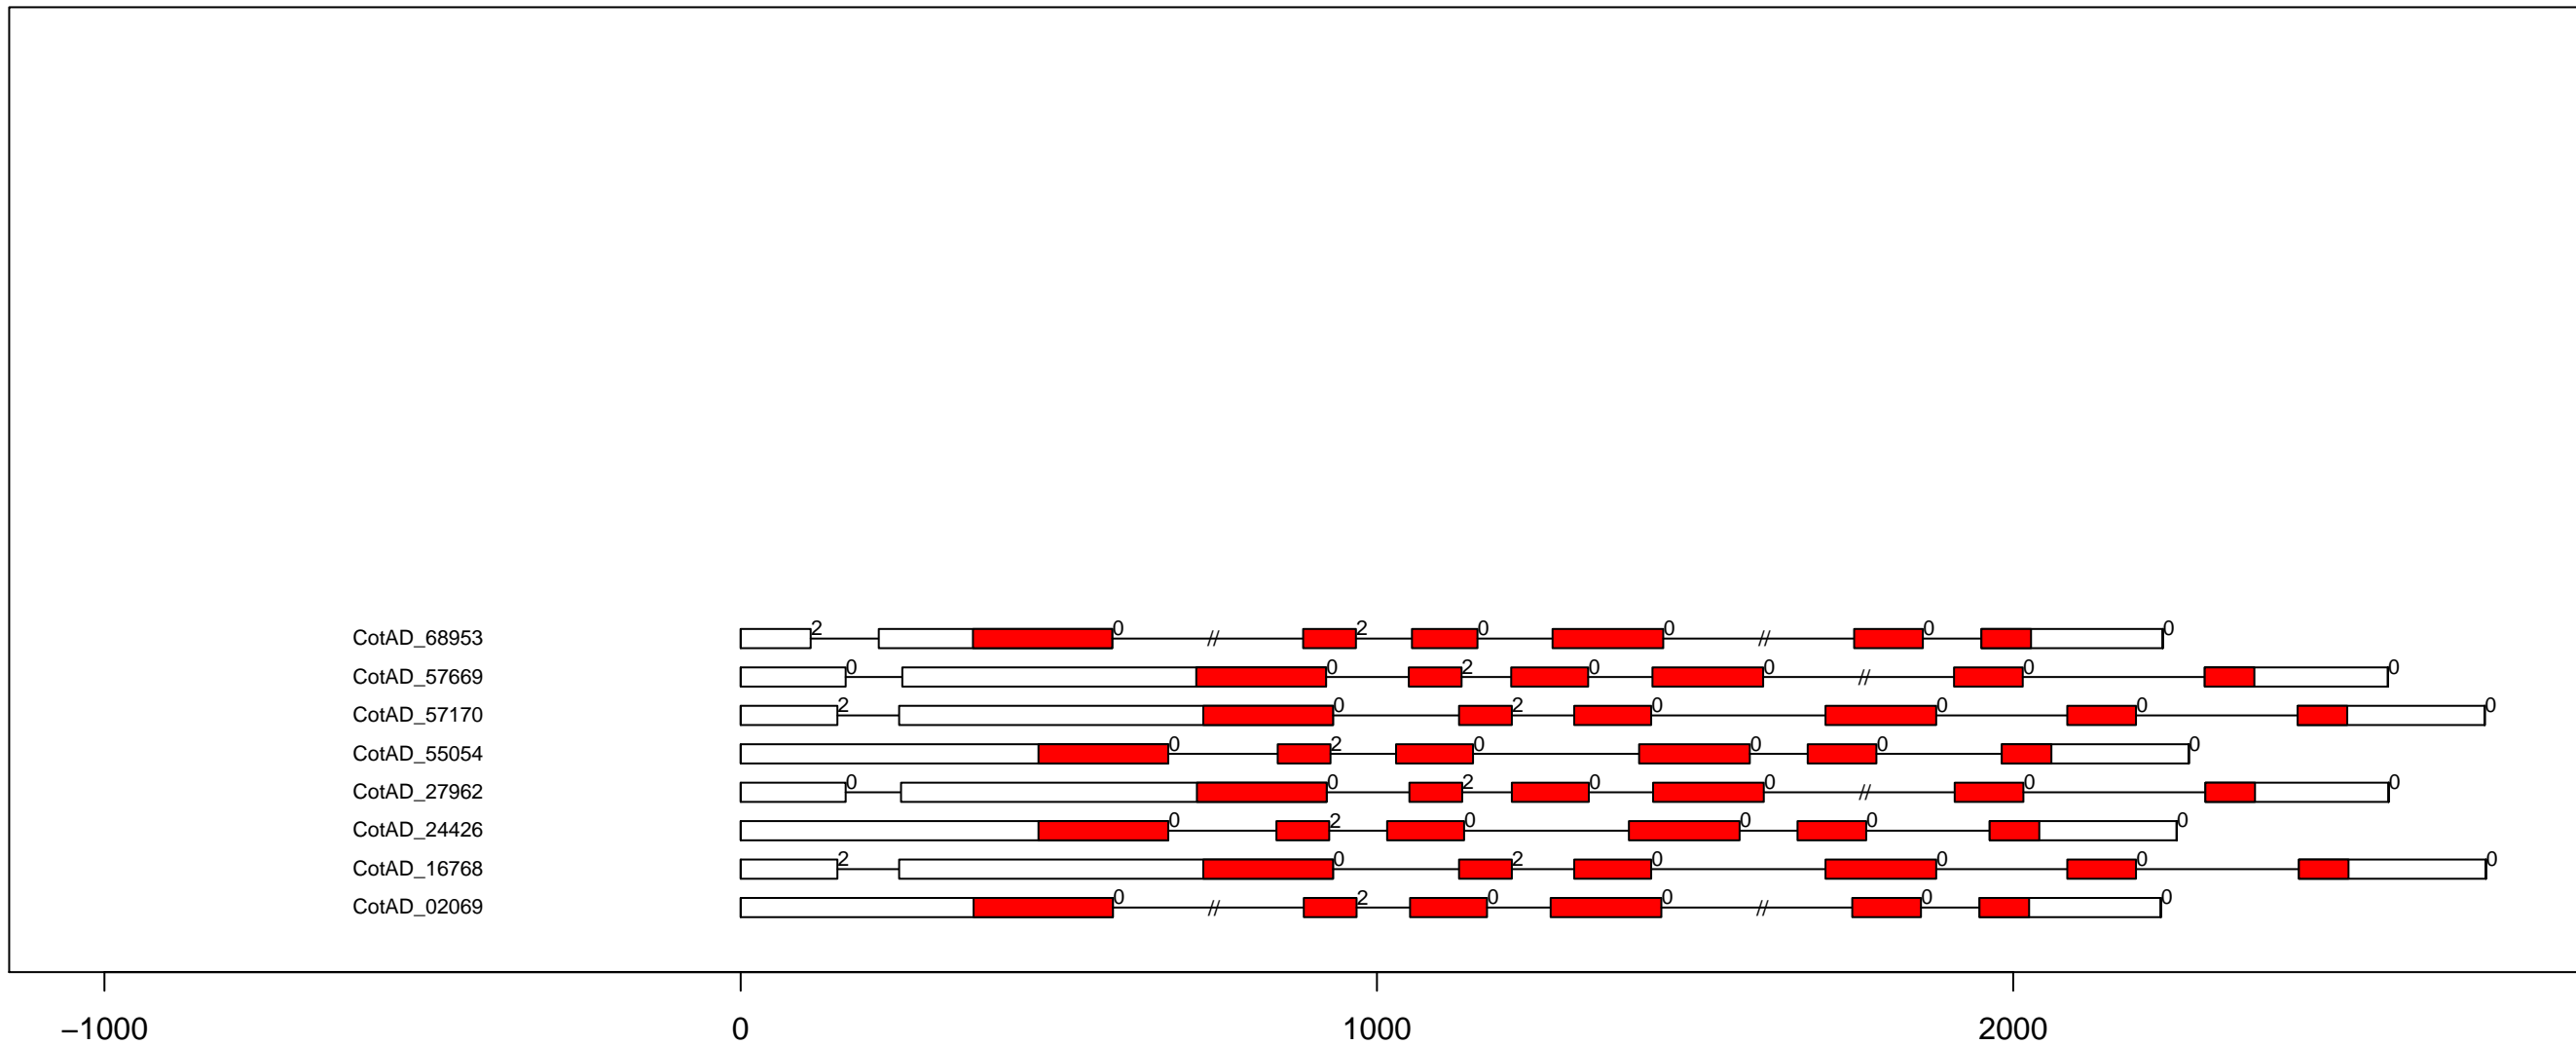



# G.hi Aur exon-intron and domain diagram (all)

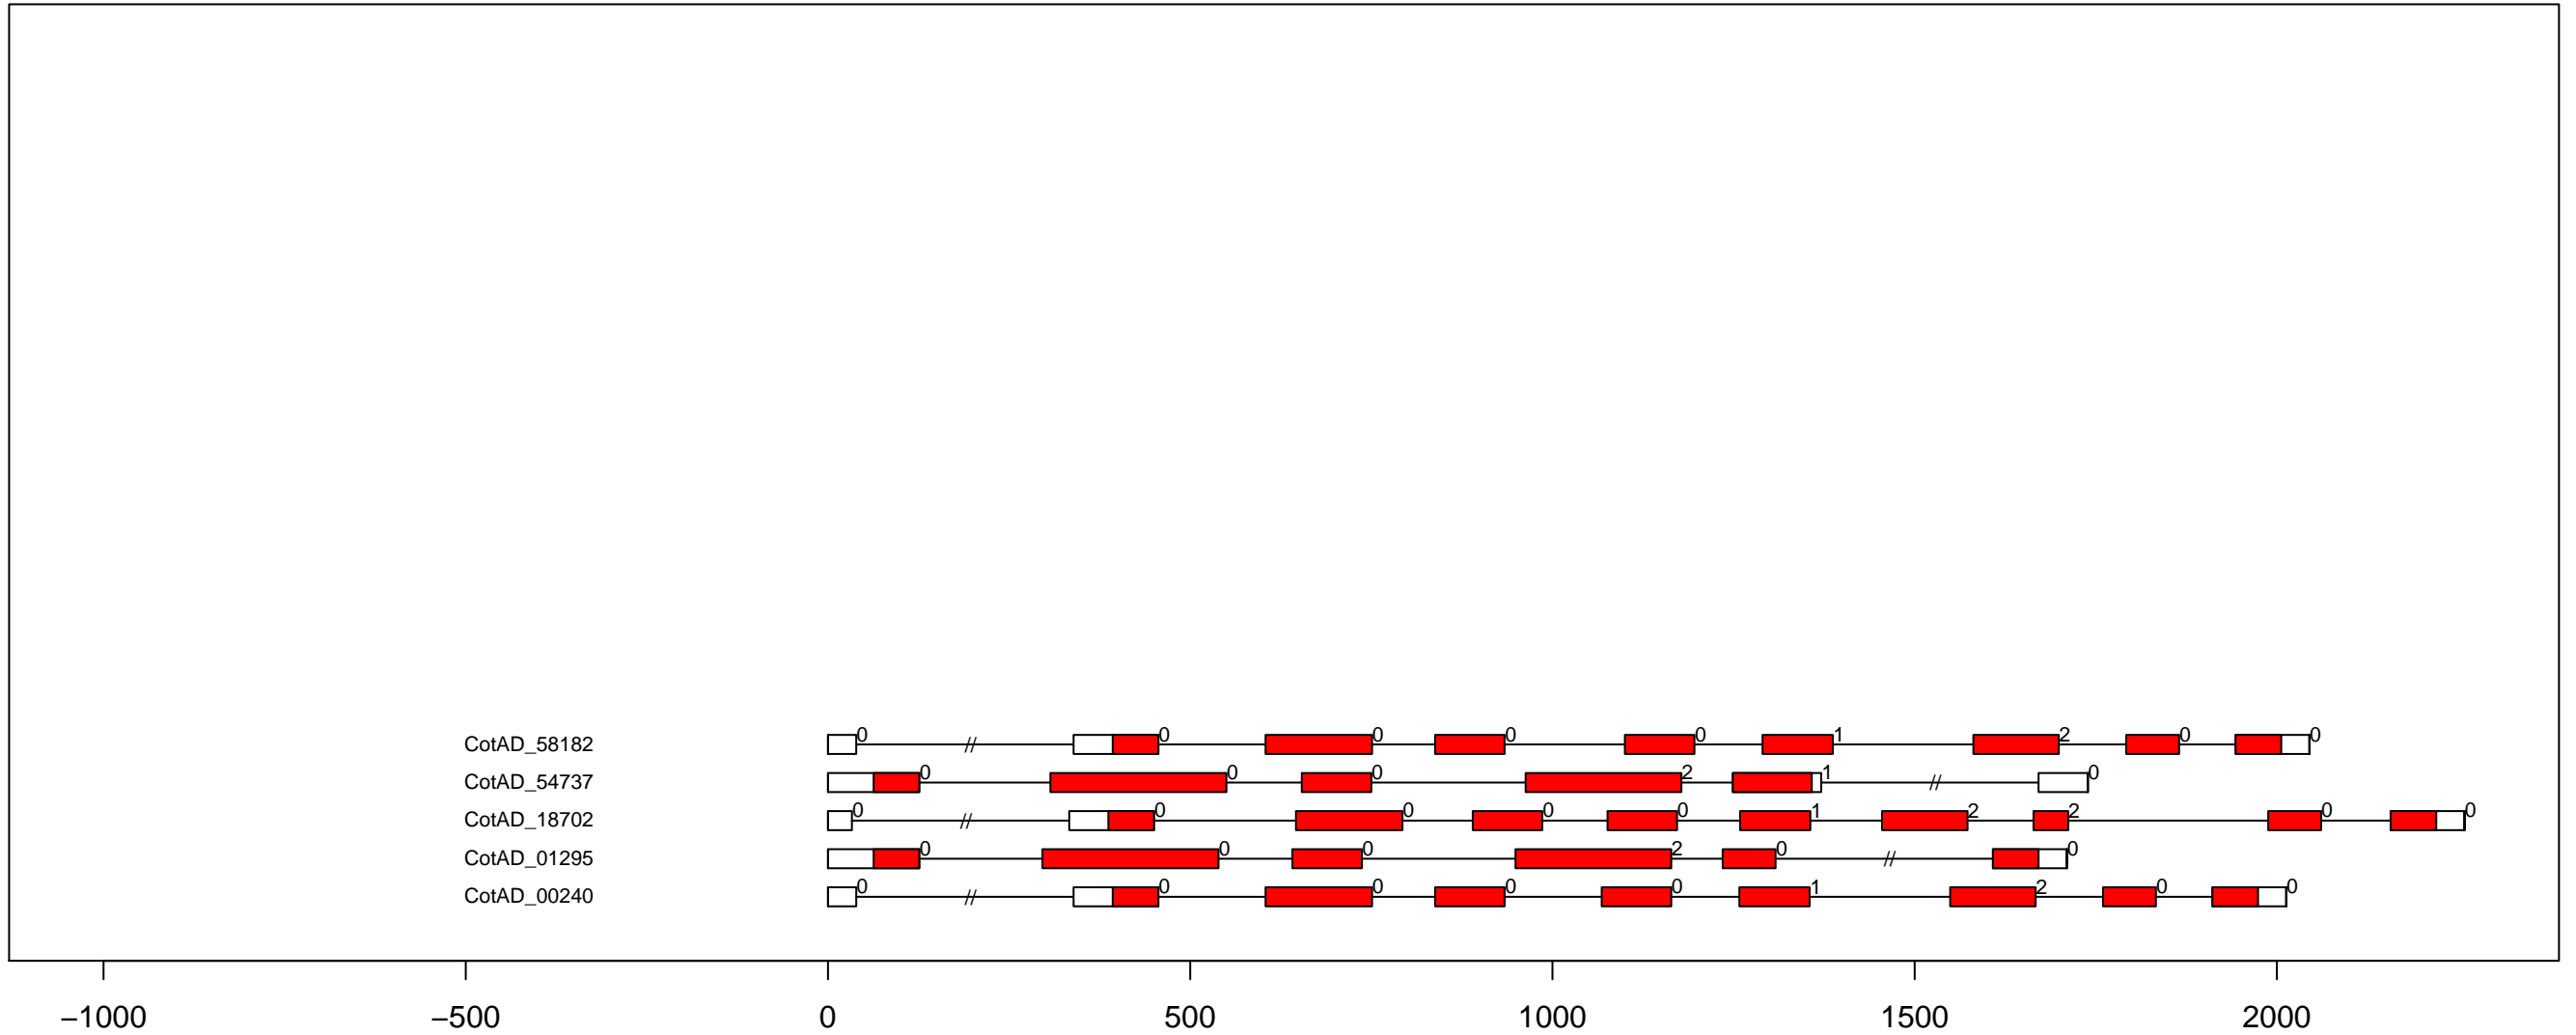

# G.hi BUB exon-intron and domain diagram (all)

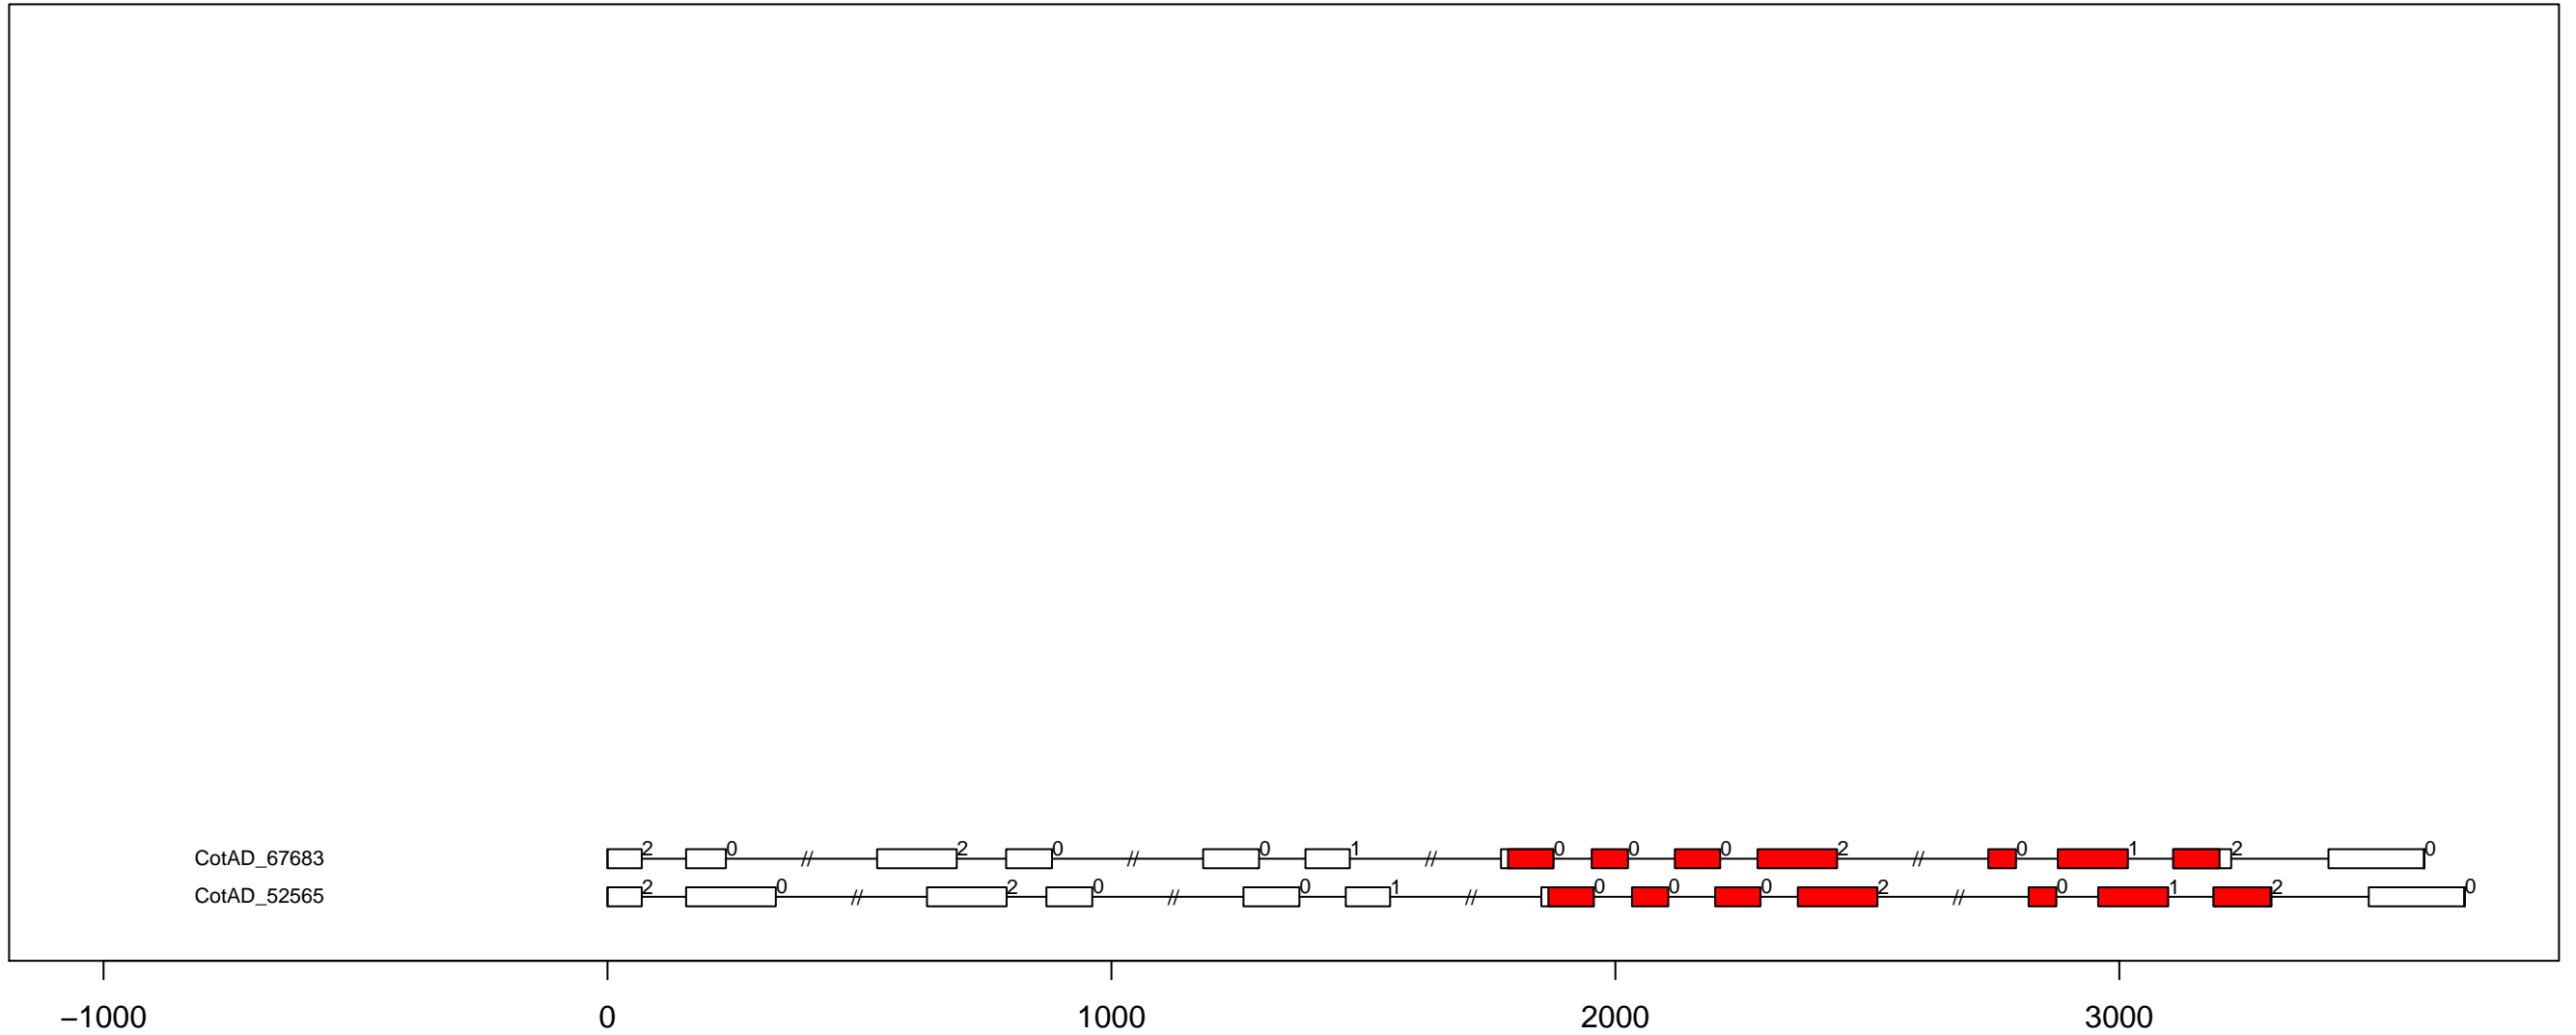

# G.hi CAMK\_AMPK exon-intron and domain diagram (all)

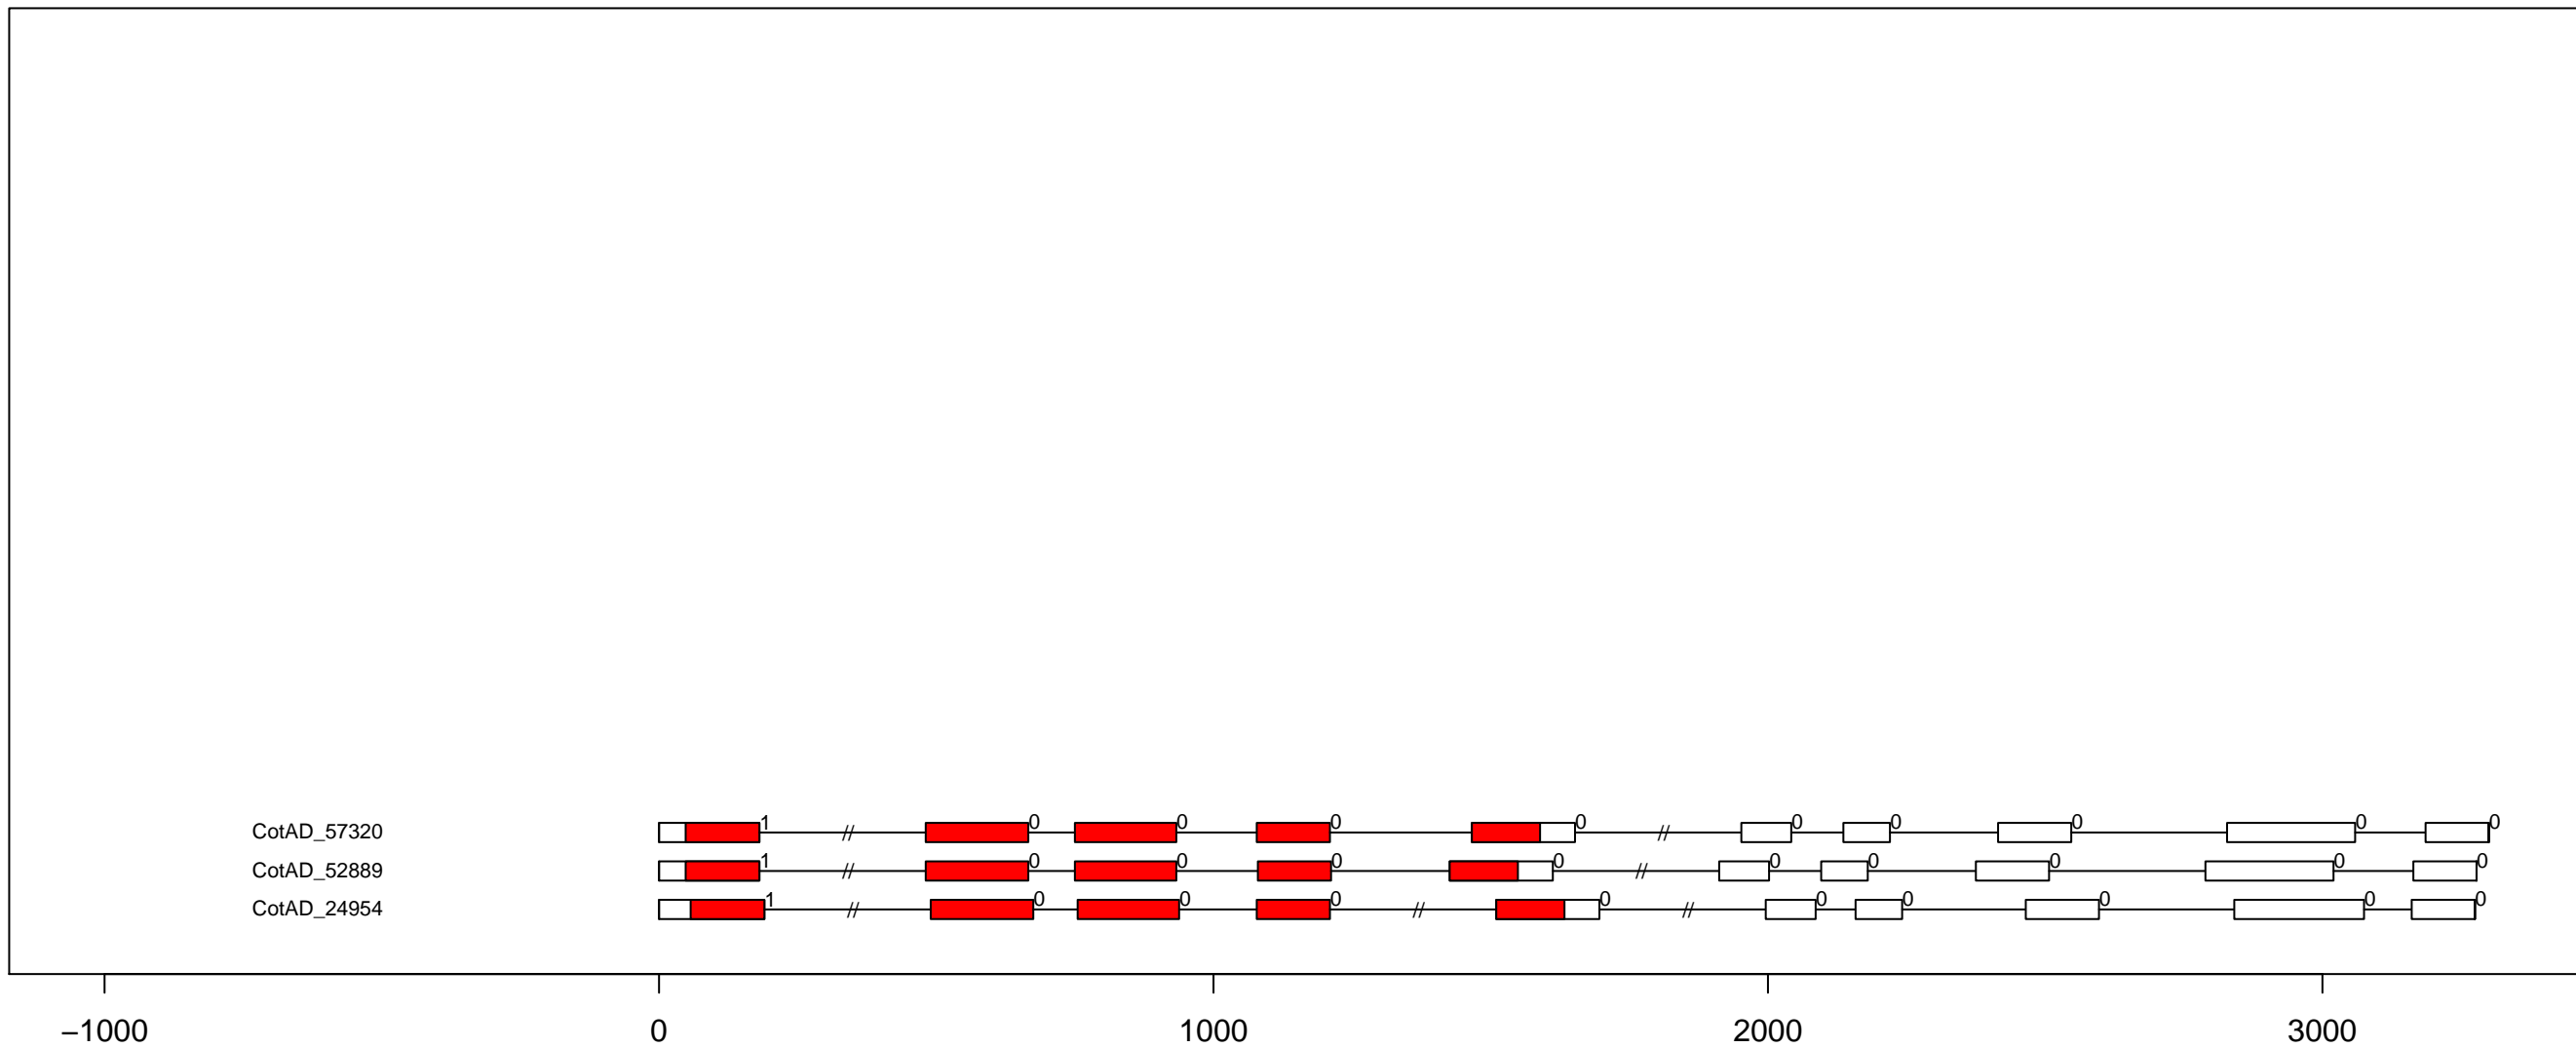

# G.hi CAMK\_CAMK1-DCAMKL exon-intron and domain diagram (all)

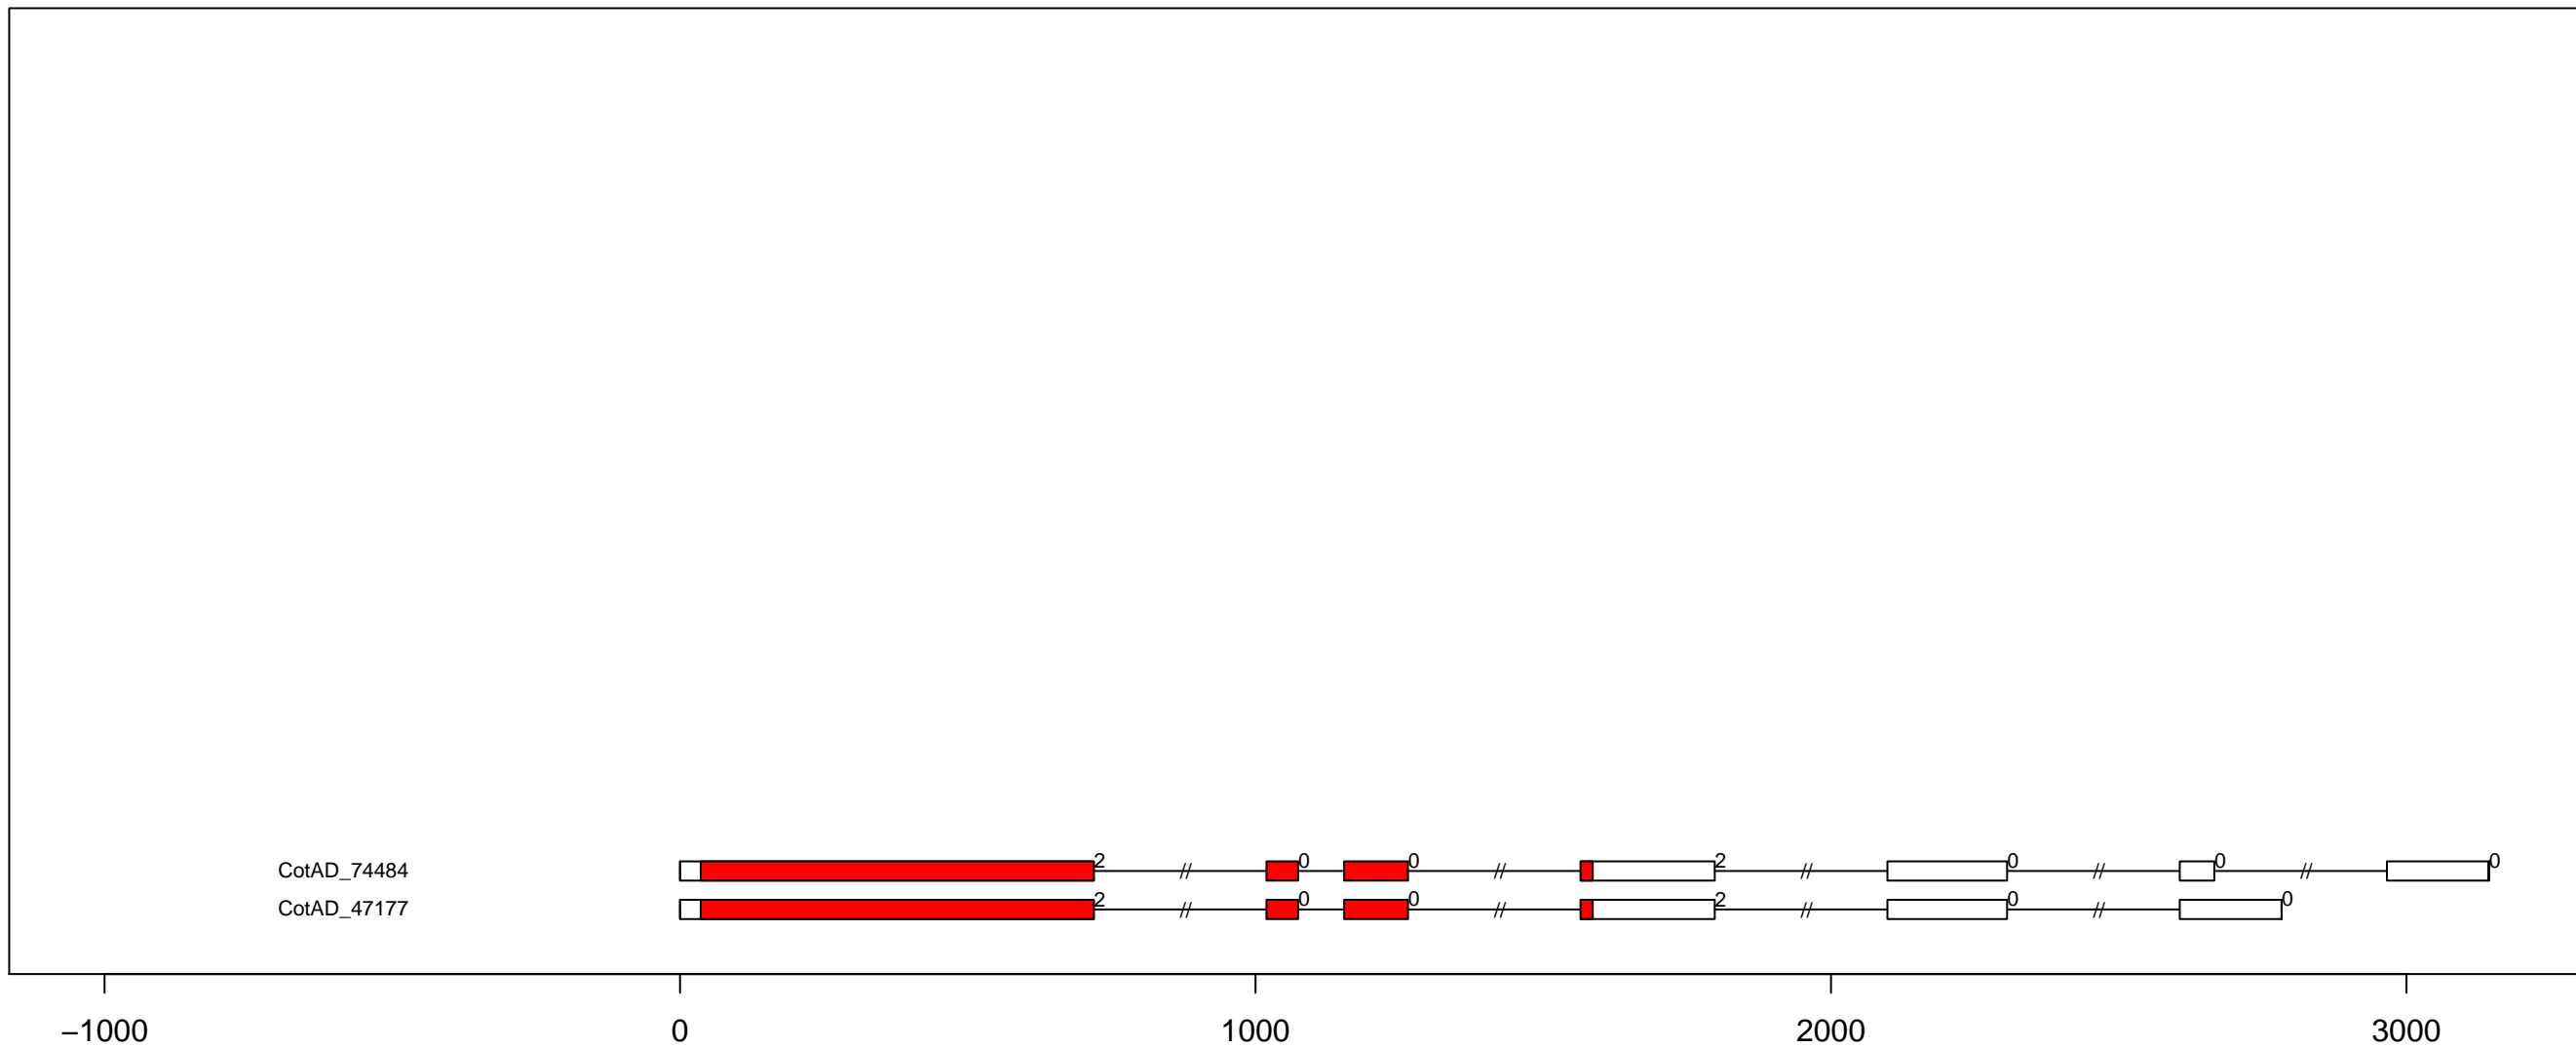

### G.hi CAMK\_CAMKL-CHK1 exon-intron and domain diagram (part 1)

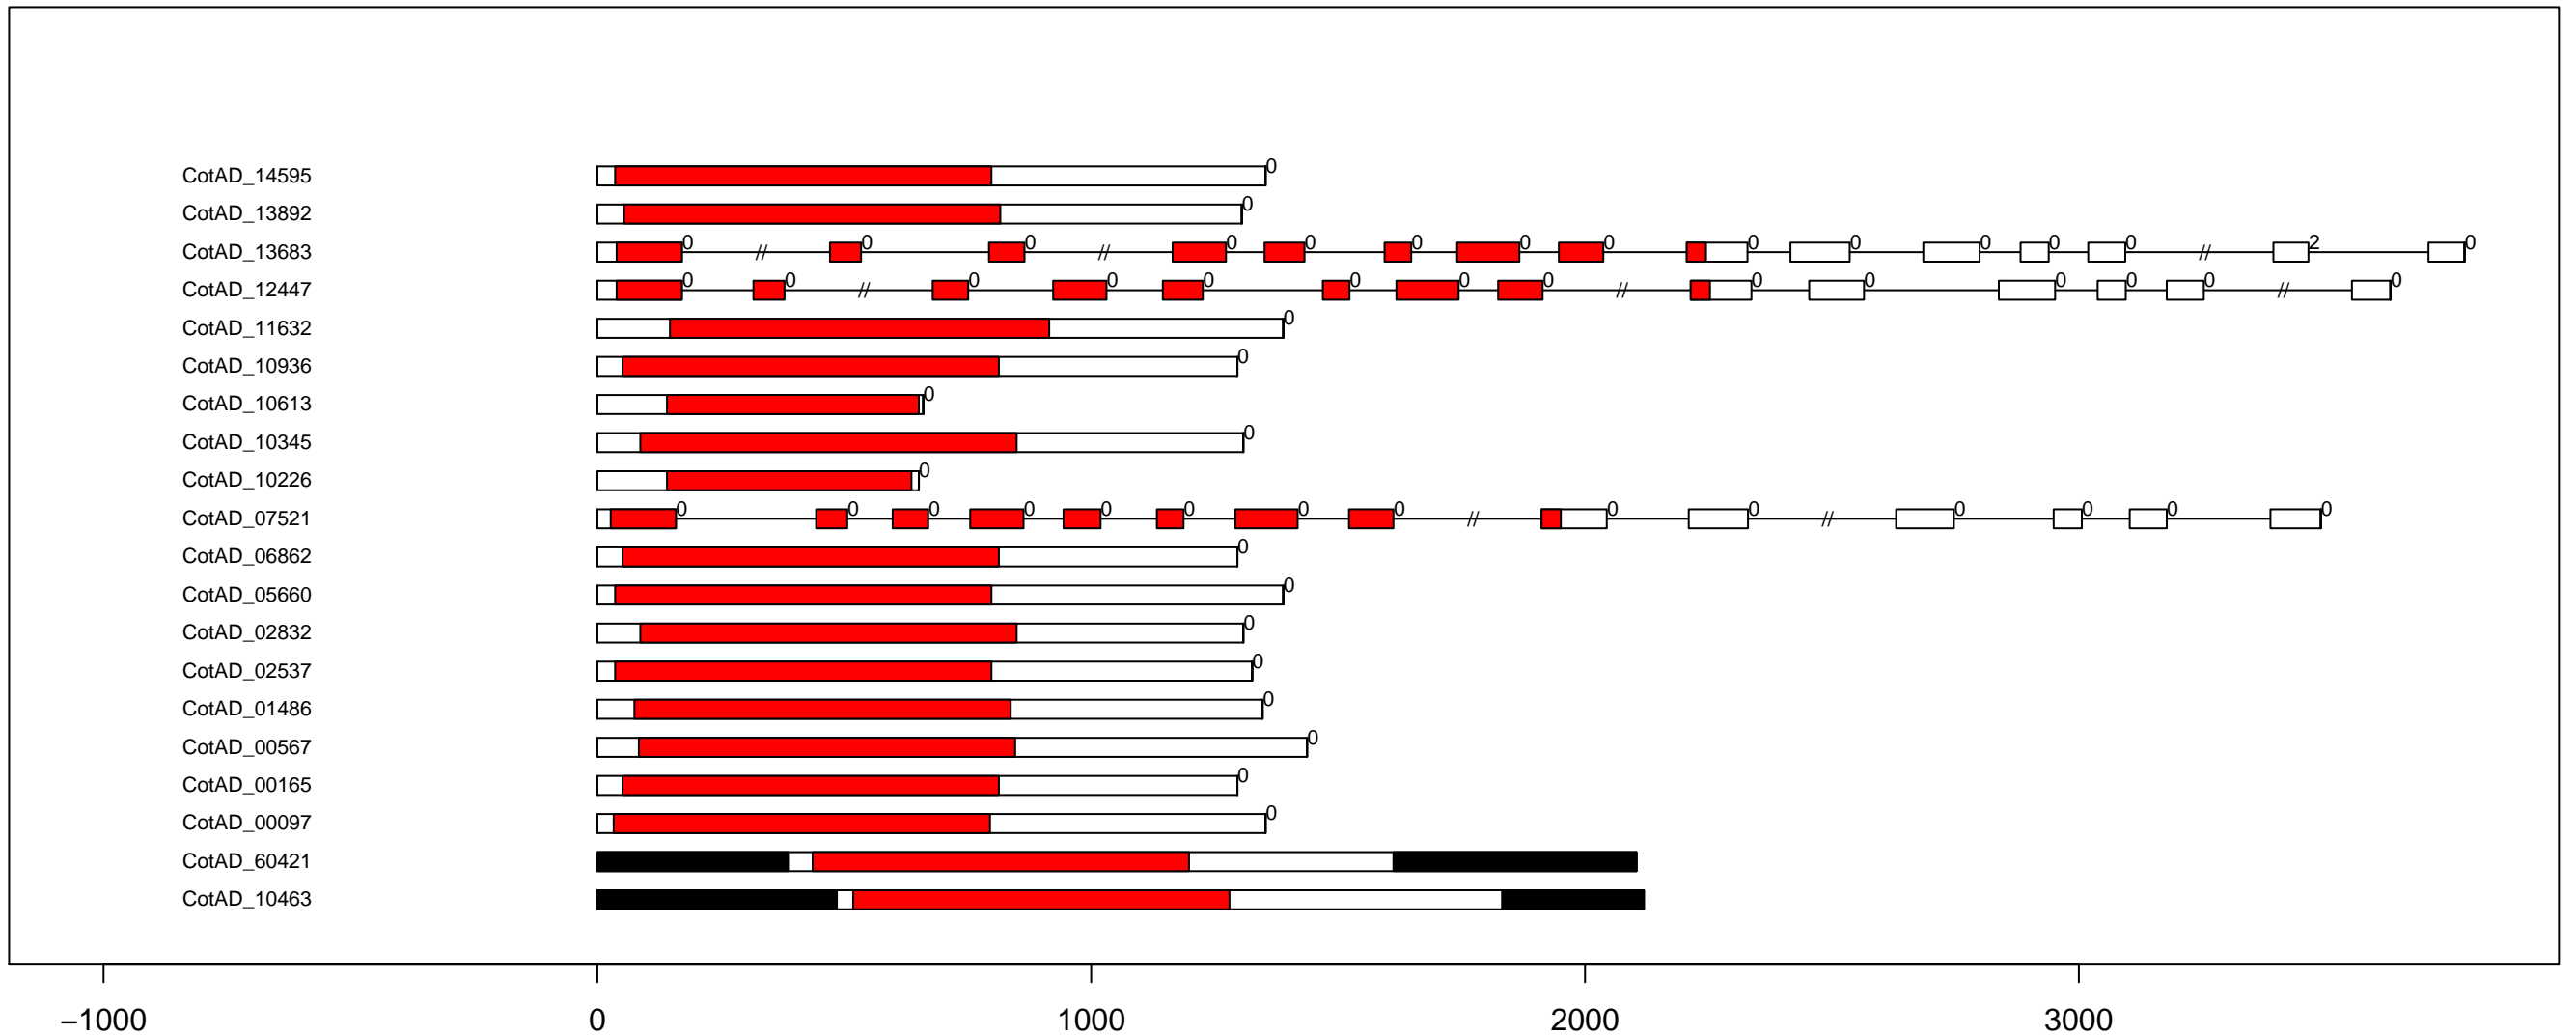

### G.hi CAMK\_CAMKL-CHK1 exon-intron and domain diagram (part 2)

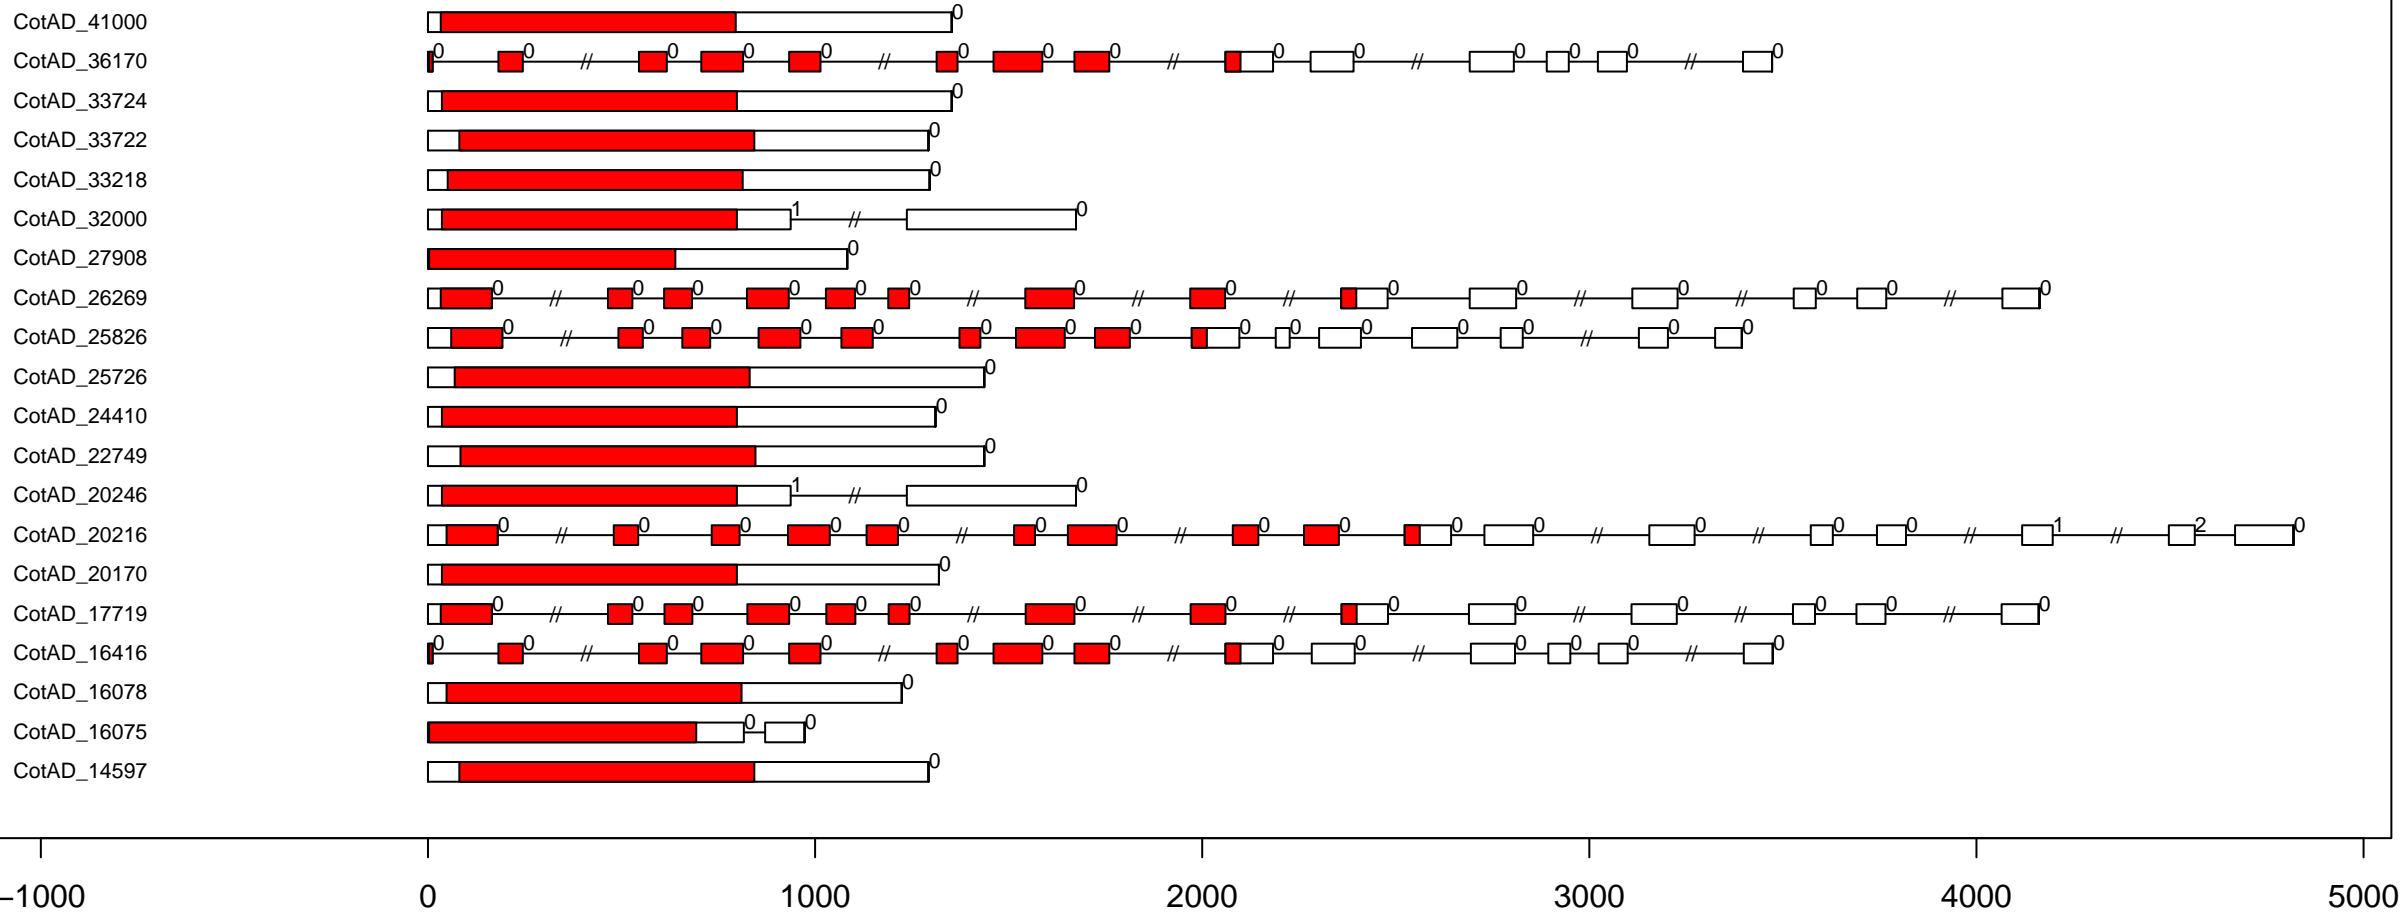

### G.hi CAMK\_CAMKL-CHK1 exon-intron and domain diagram (part 3)

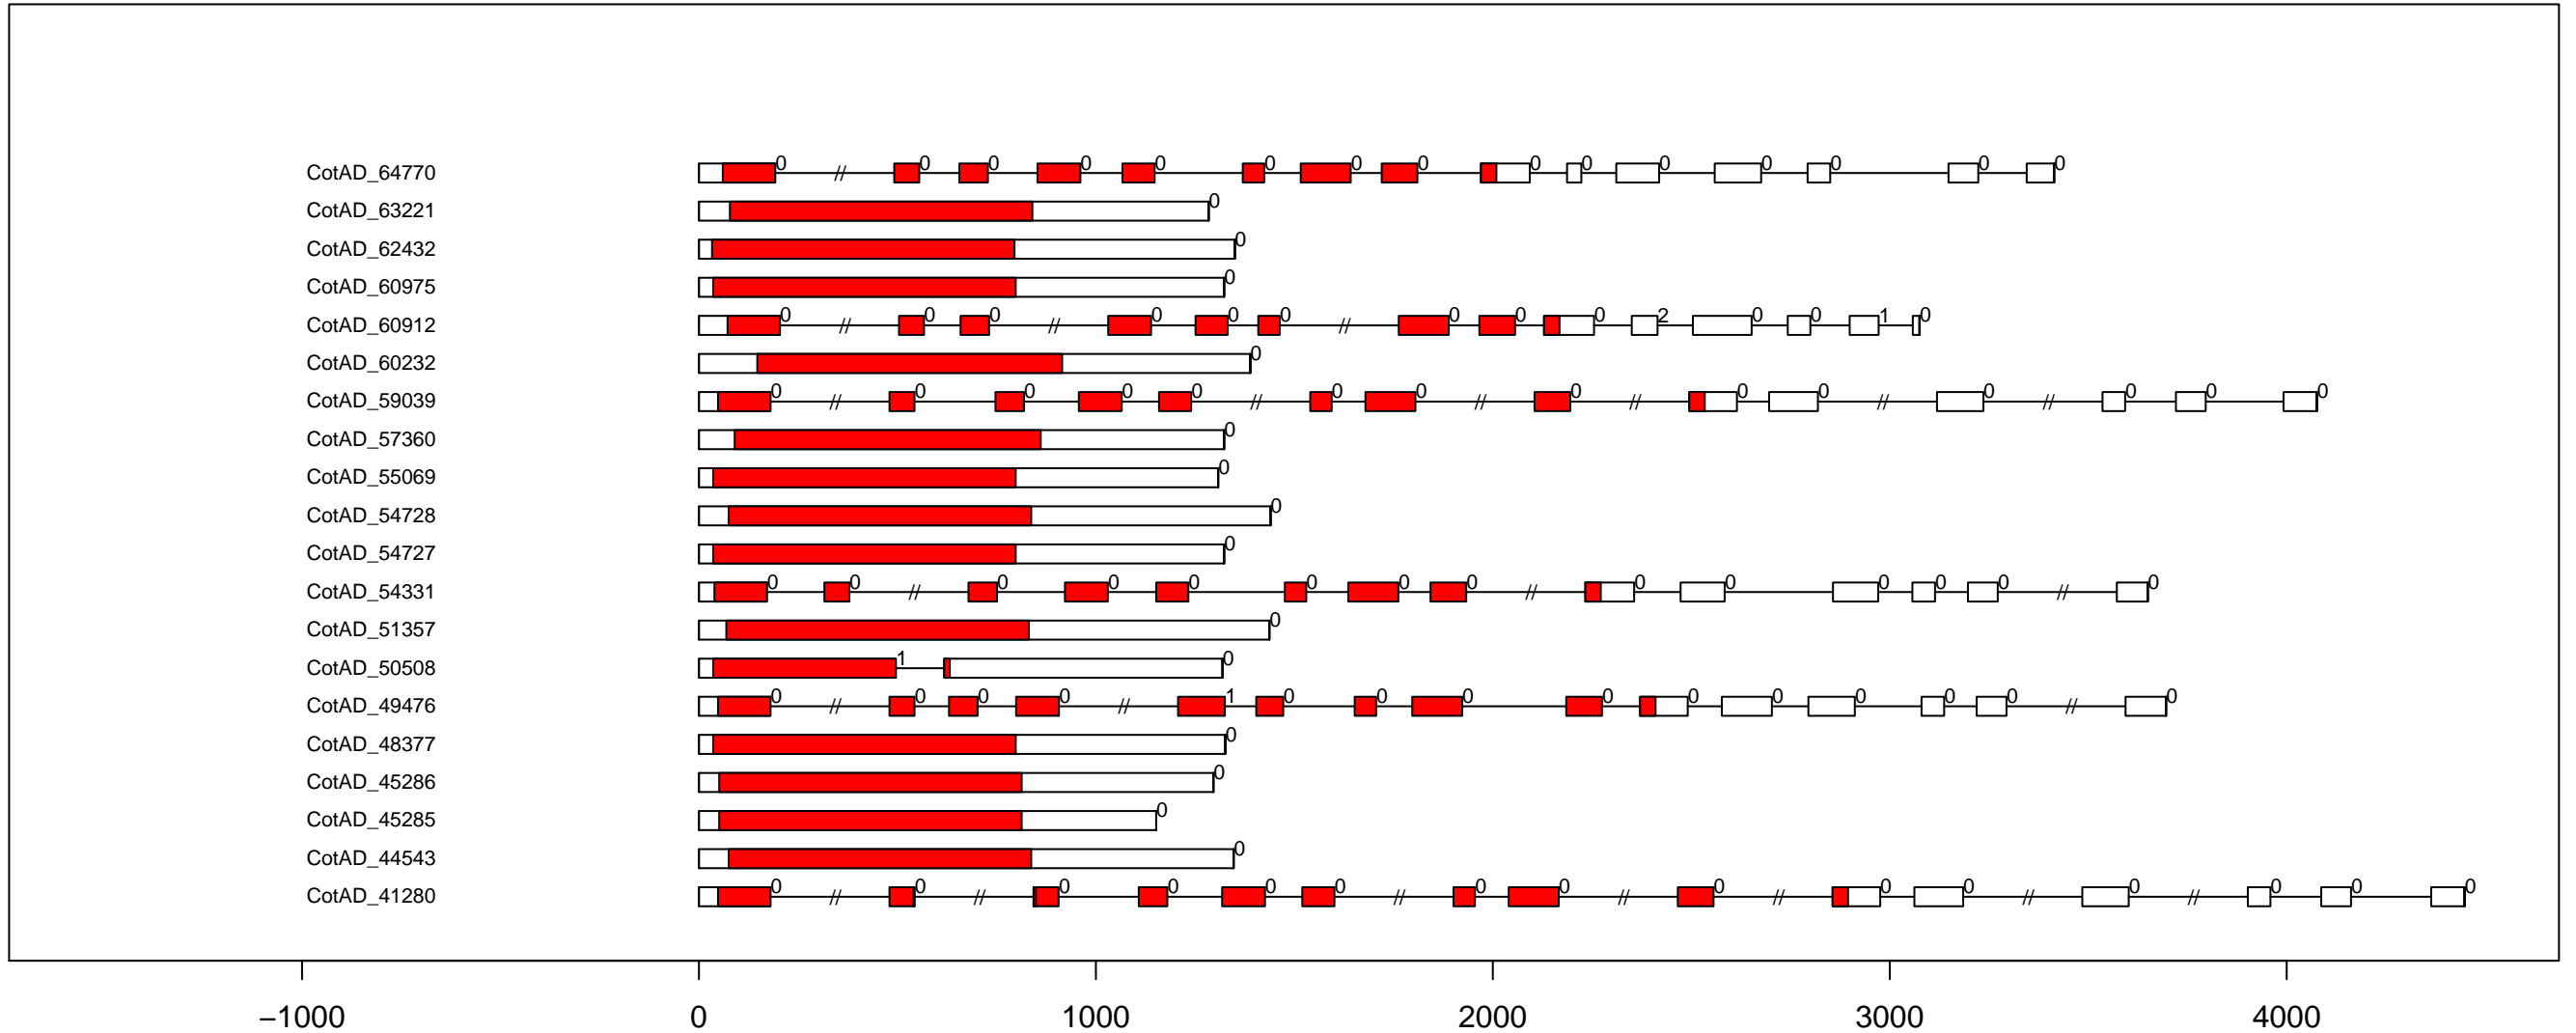

# G.hi CAMK\_CAMKL-CHK1 exon-intron and domain diagram (part 4)

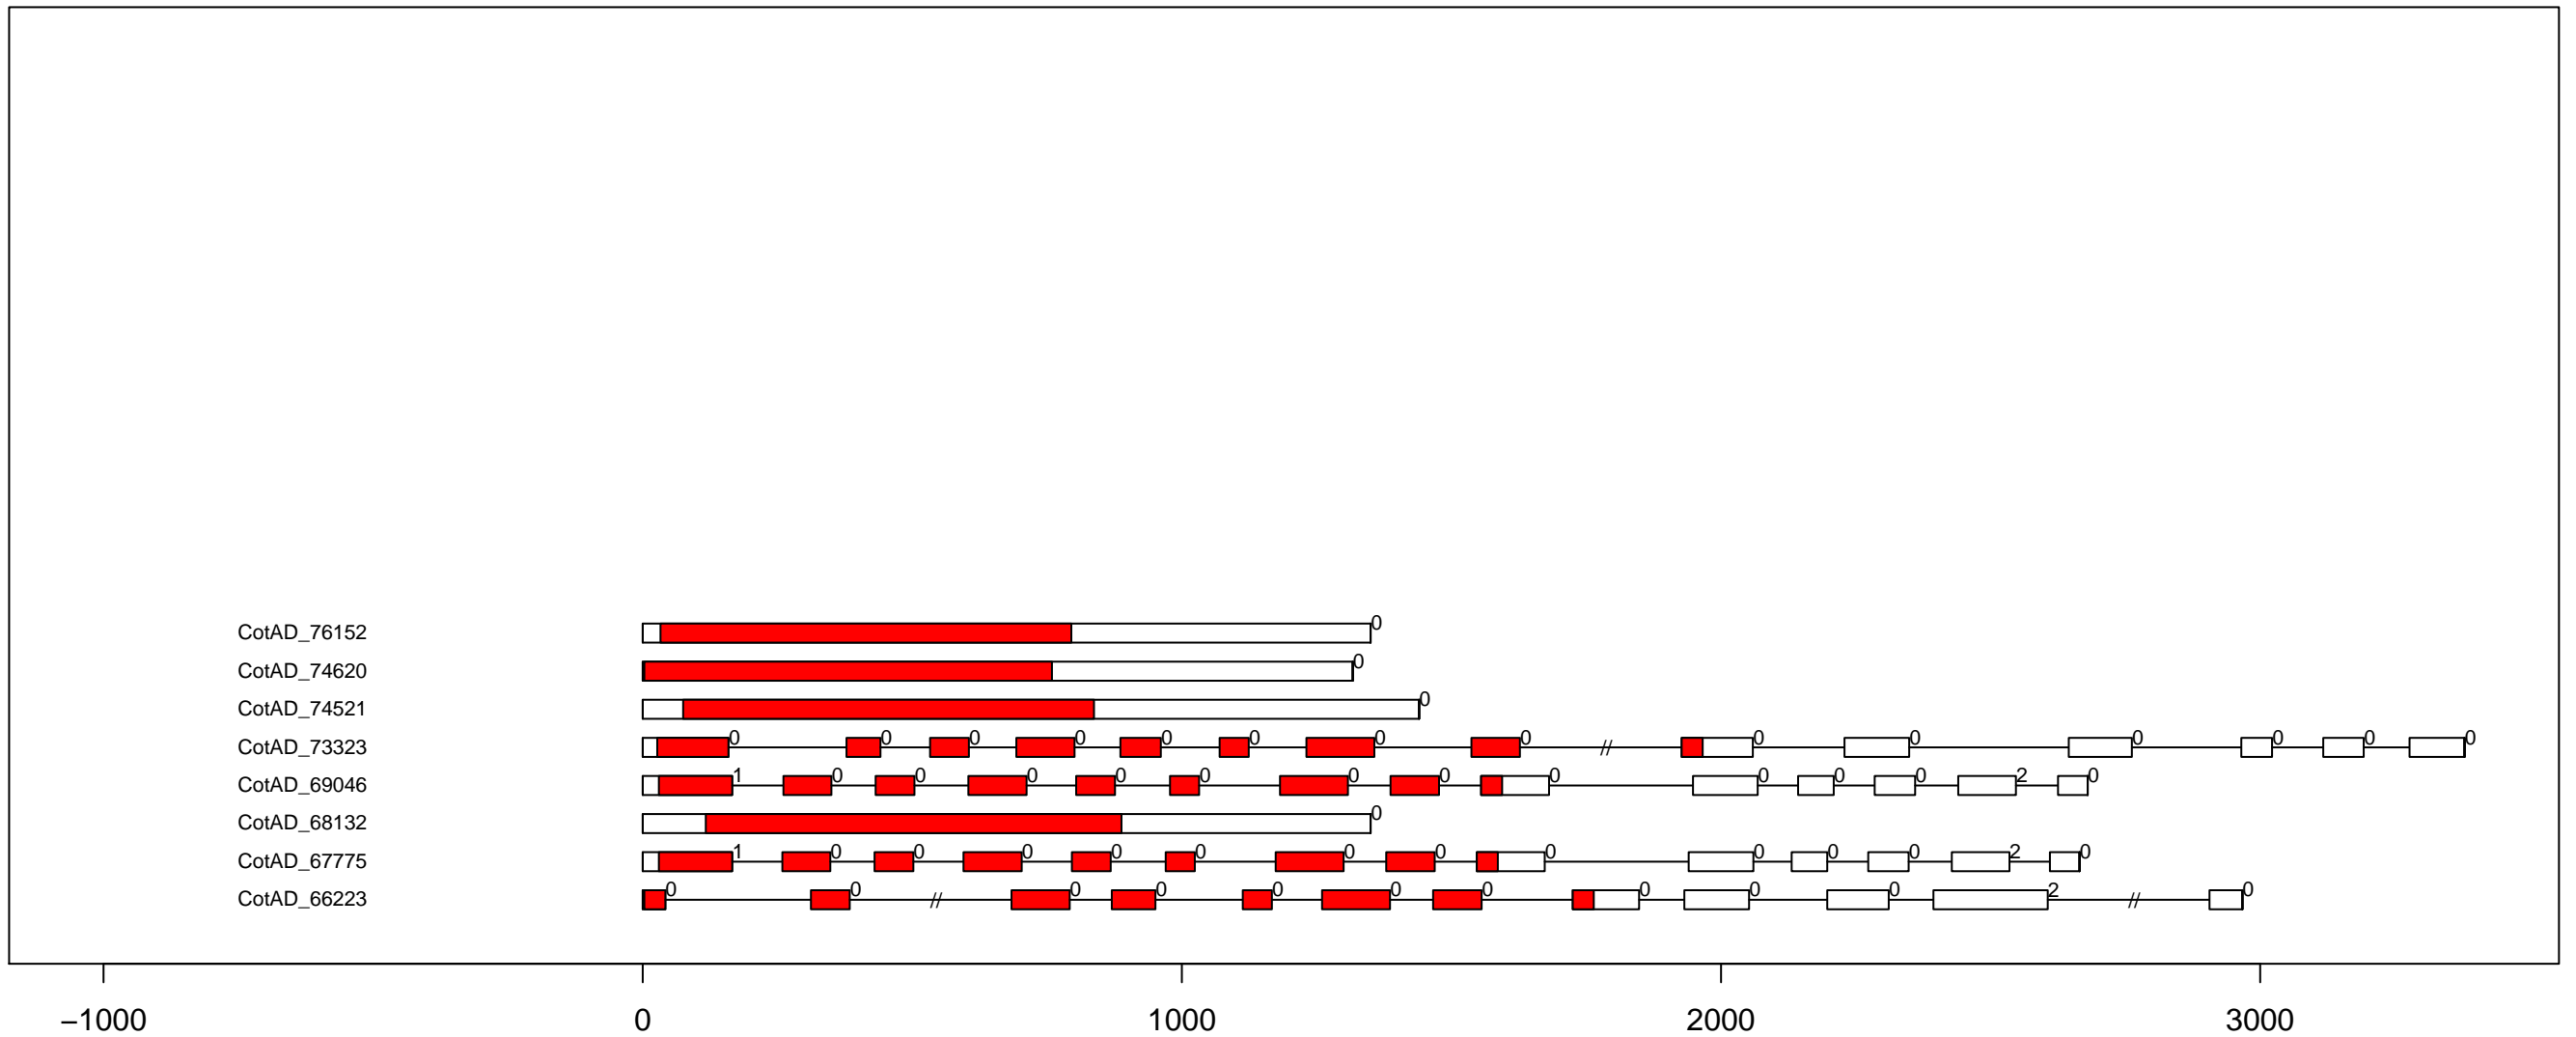



# G.hi CAMK\_CAMKL-LKB exon-intron and domain diagram (all)

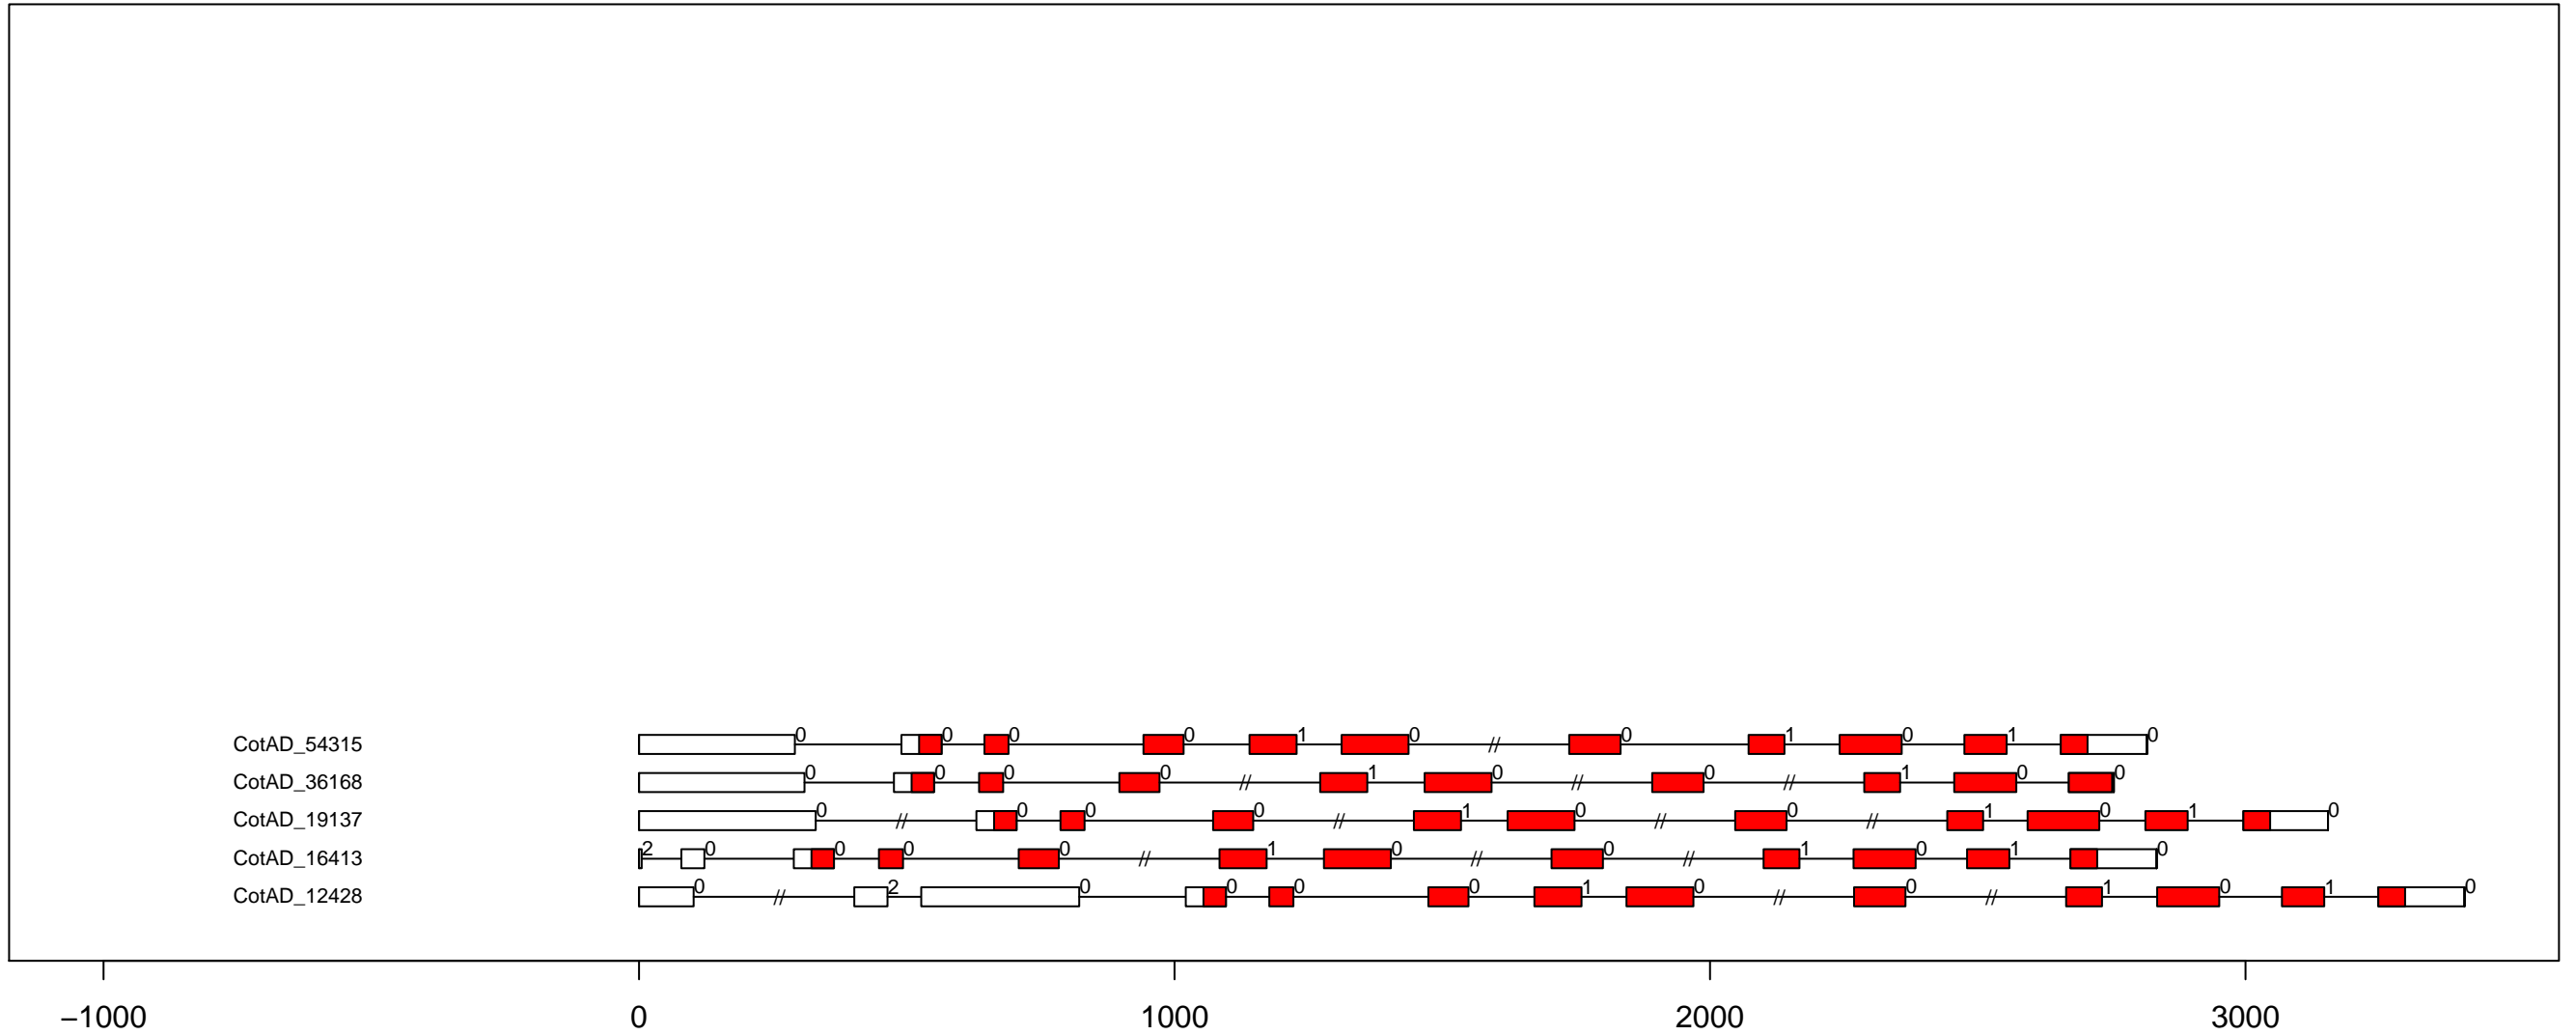

### G.hi CAMK\_CDPK exon-intron and domain diagram (part 1)

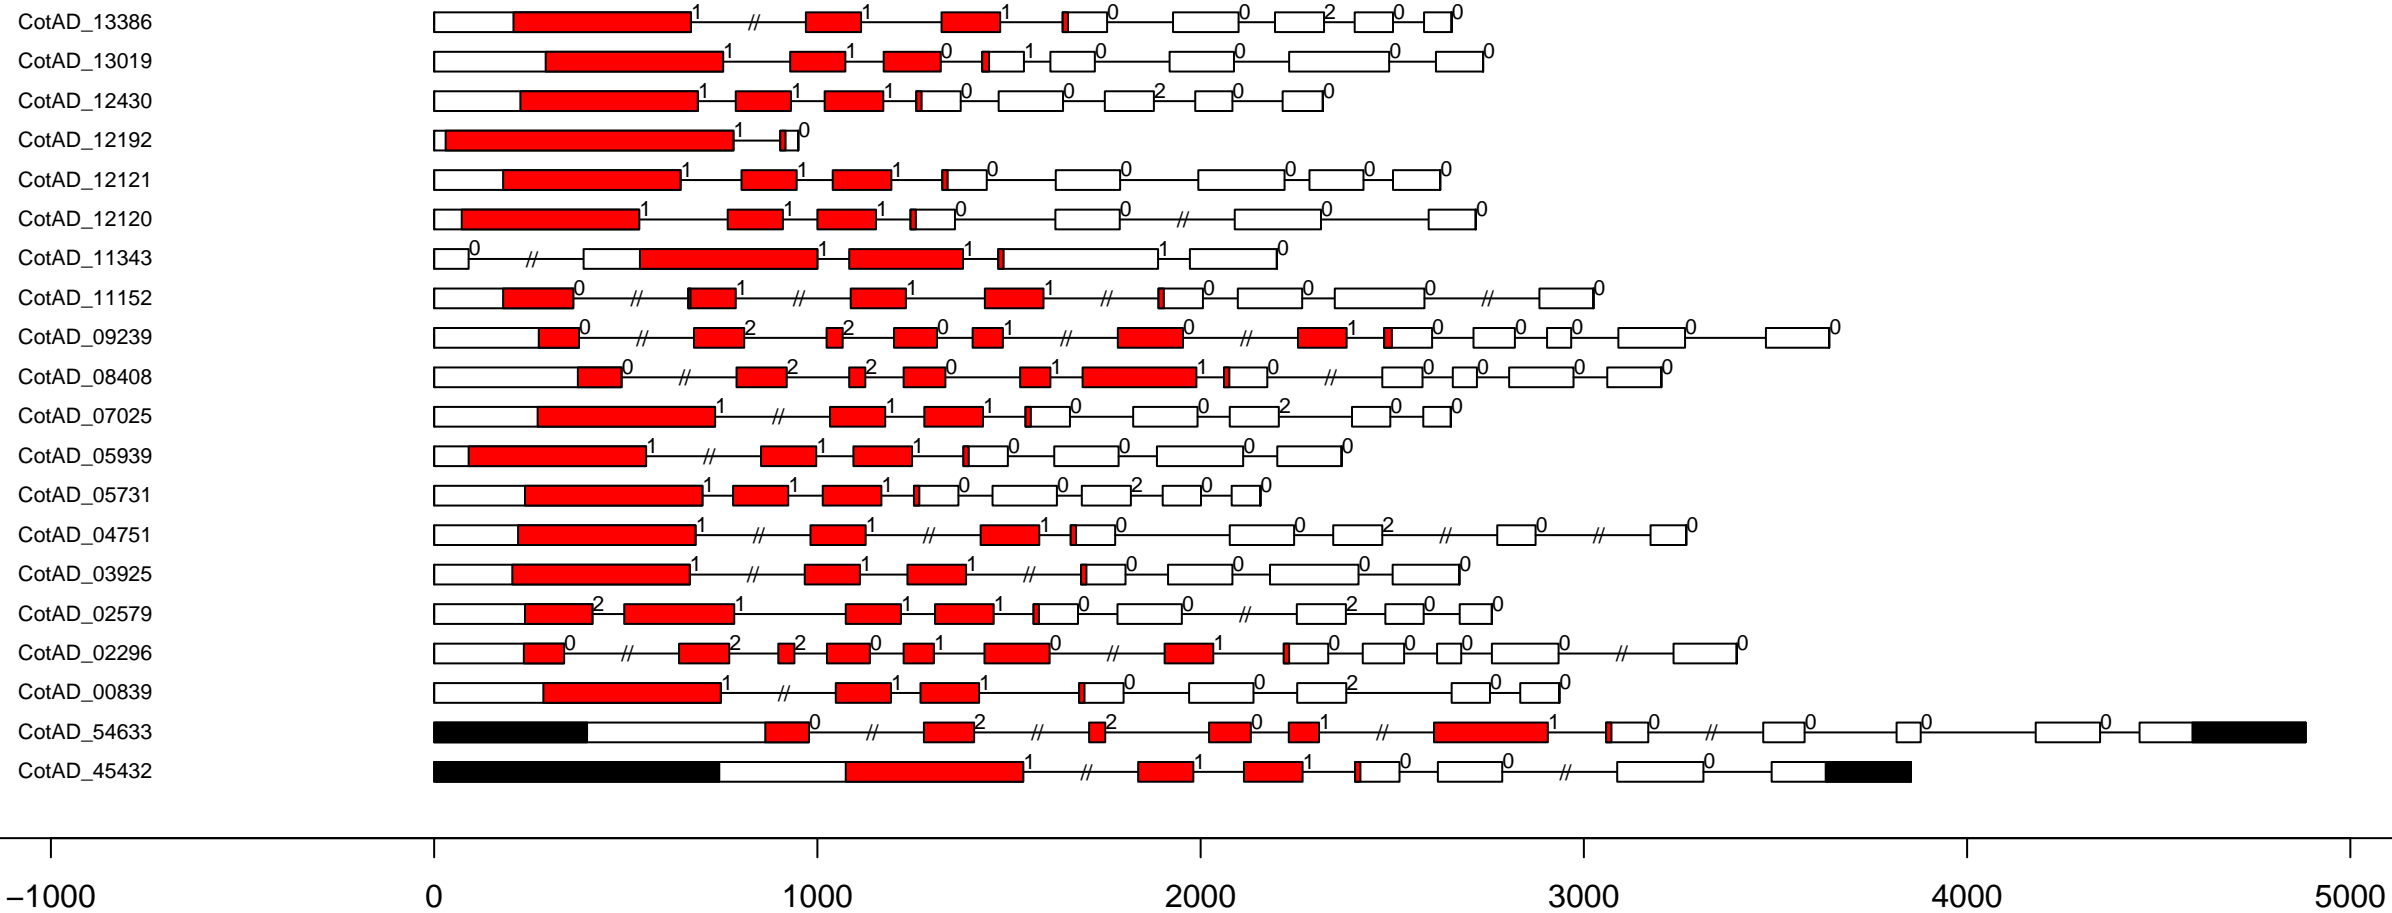

### G.hi CAMK\_CDPK exon-intron and domain diagram (part 2)

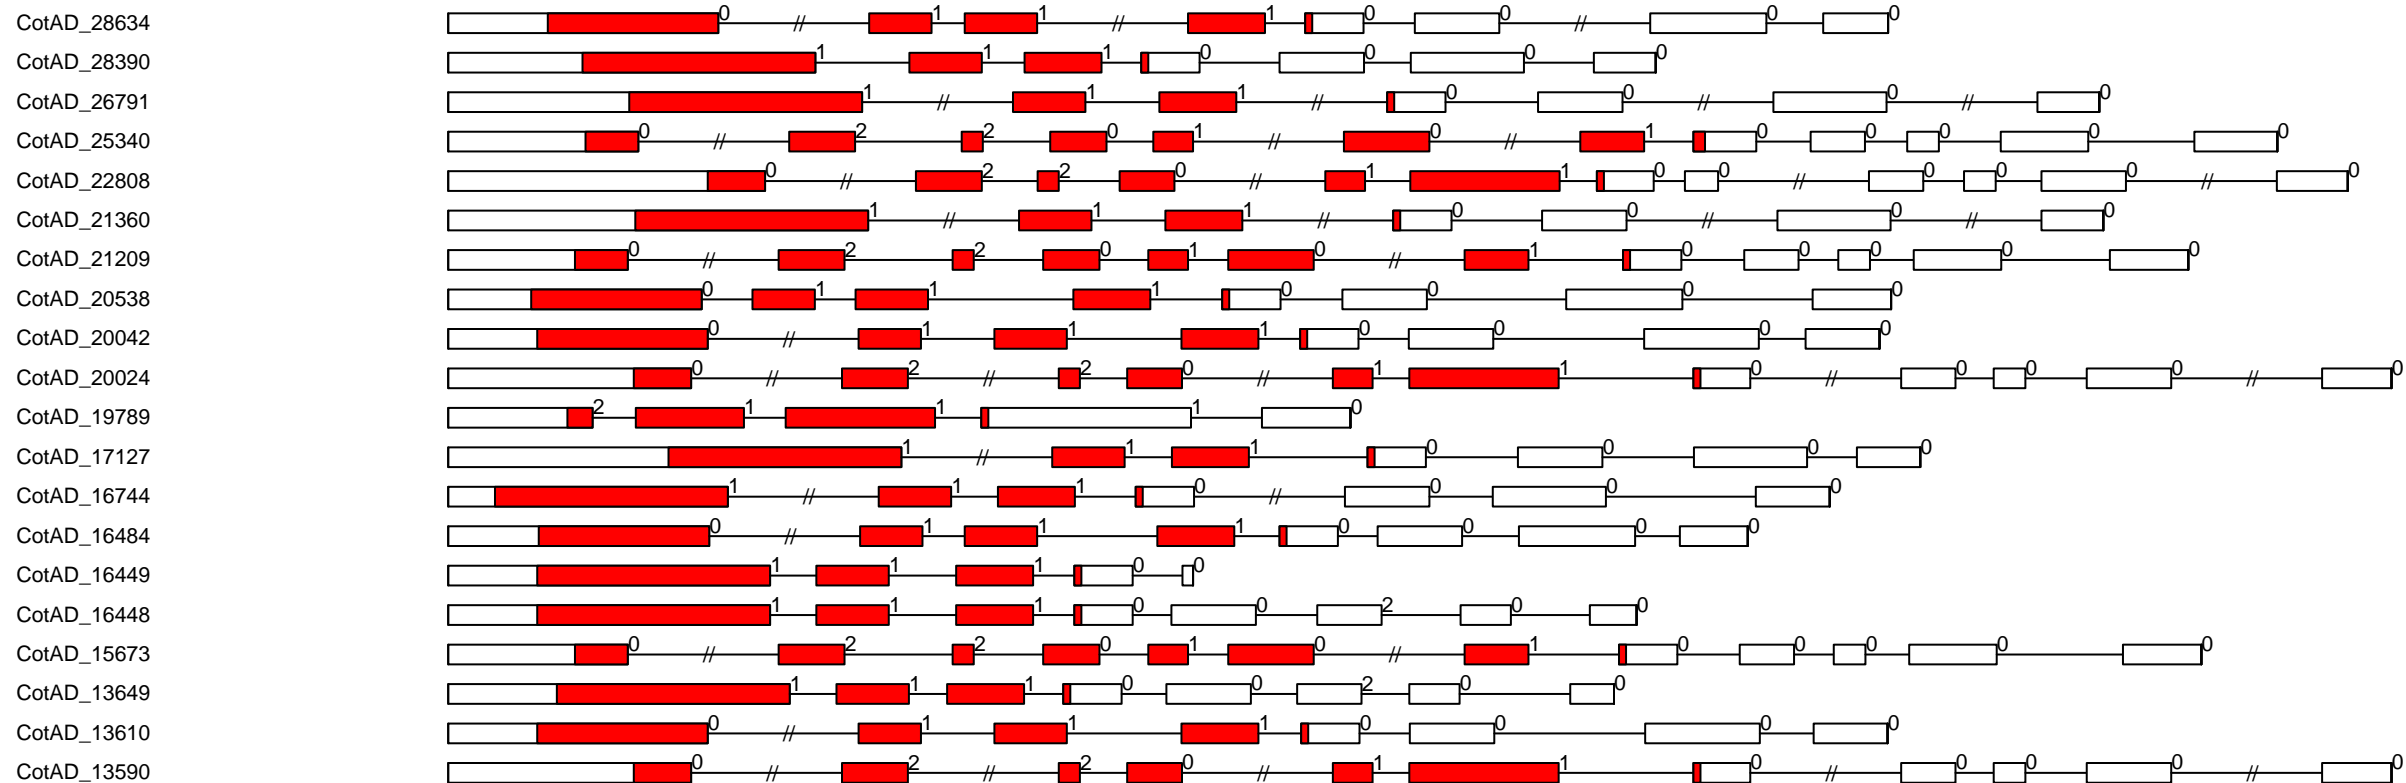

-1000

0

1000

2000

3000

4000

### G.hi CAMK\_CDPK exon-intron and domain diagram (part 3)

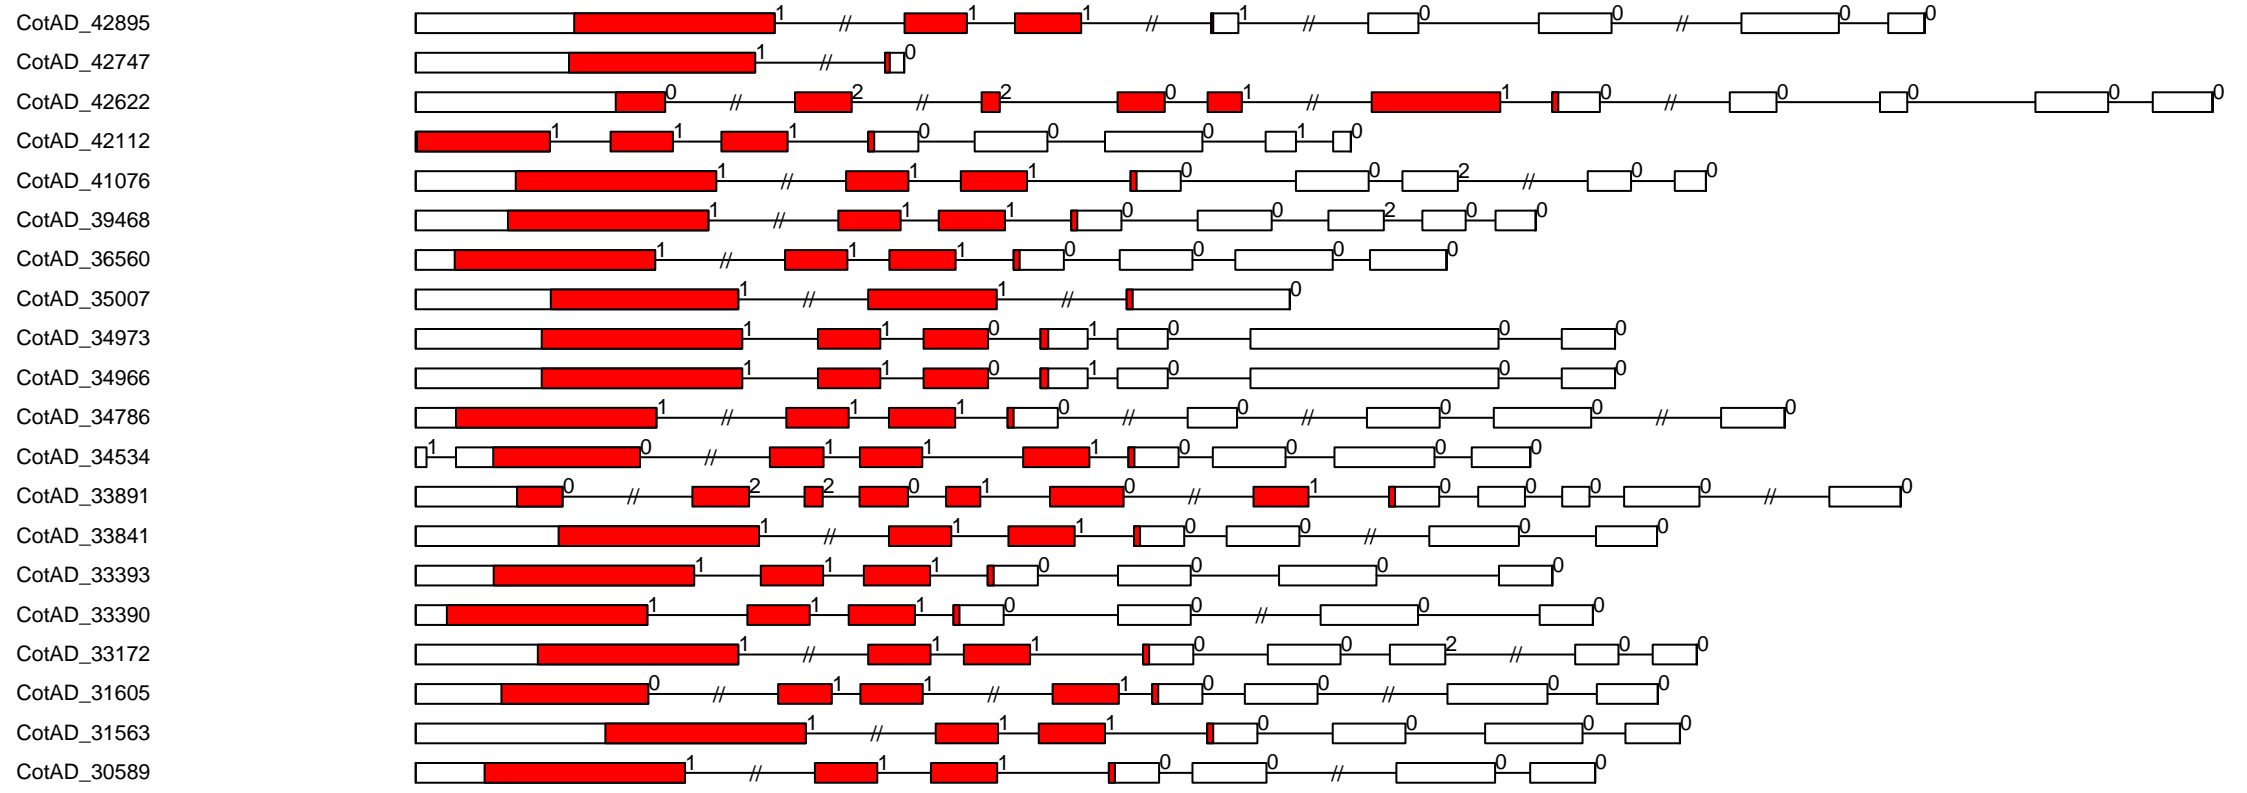

-1000

0

1000

2000

3000

4000

### G.hi CAMK\_CDPK exon-intron and domain diagram (part 4)

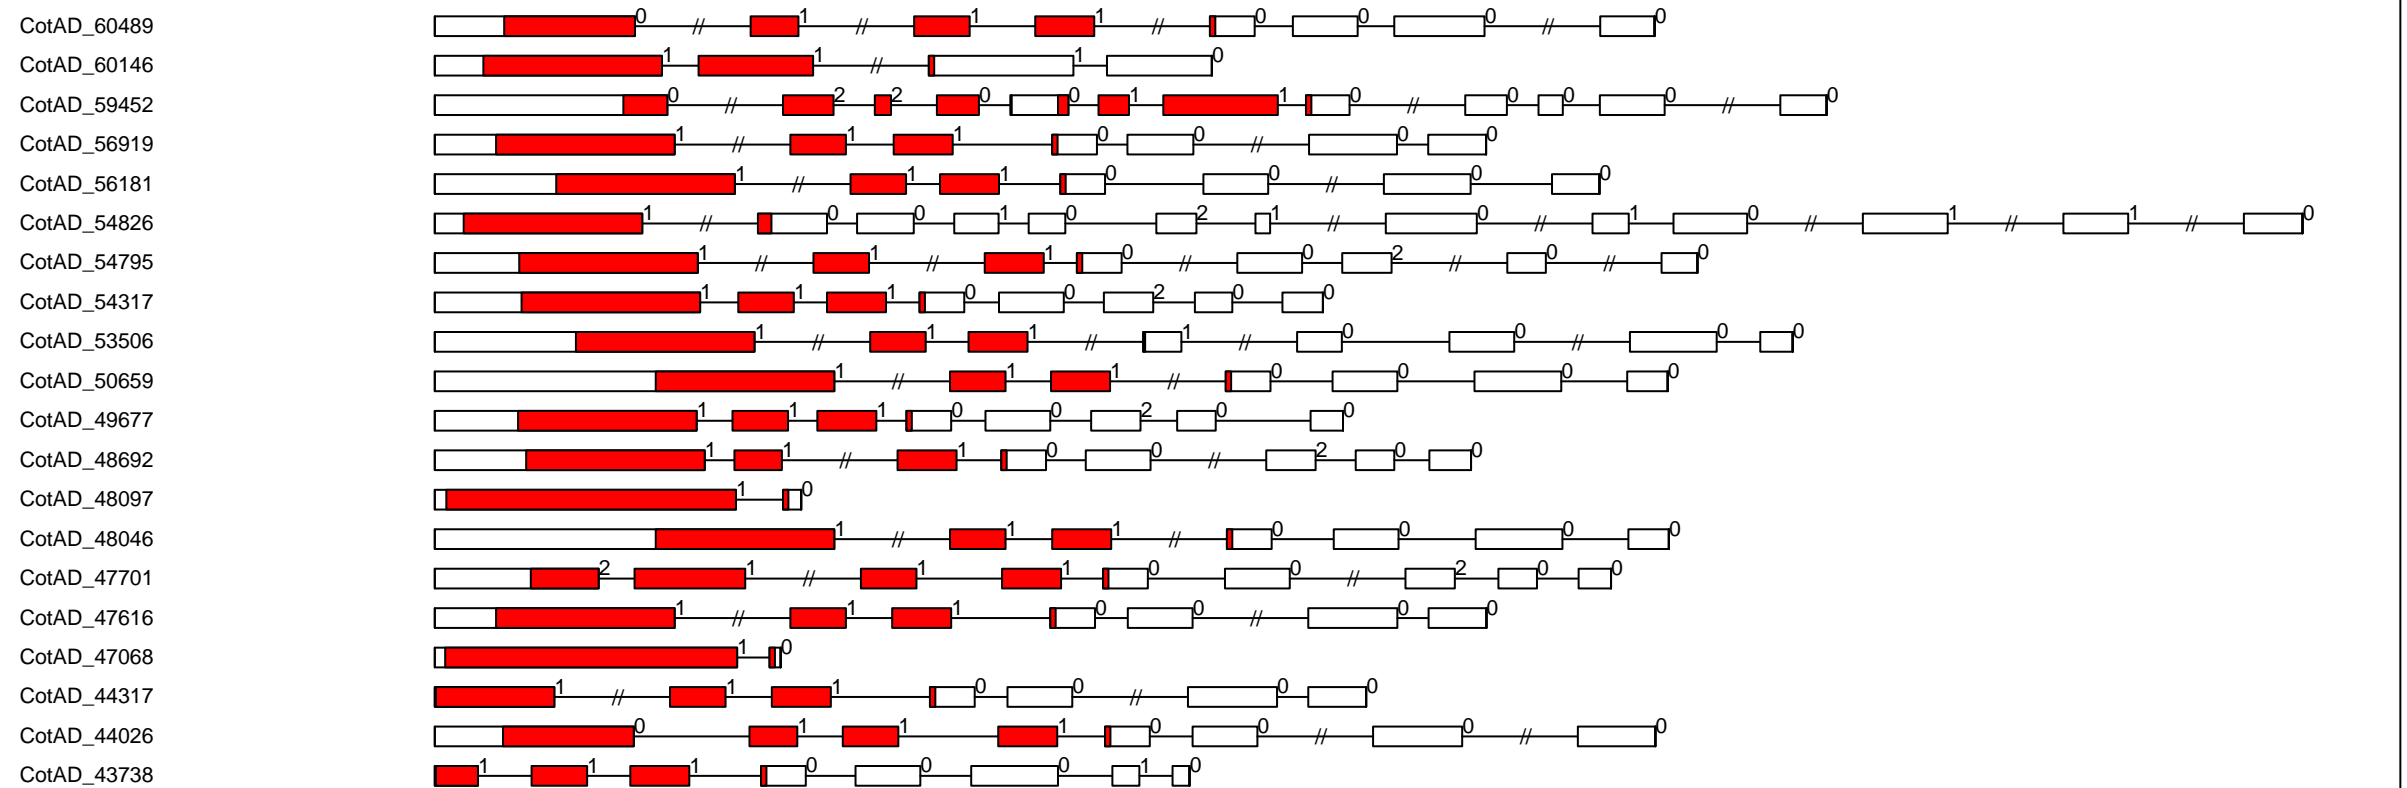

### G.hi CAMK\_CDPK exon-intron and domain diagram (part 5)

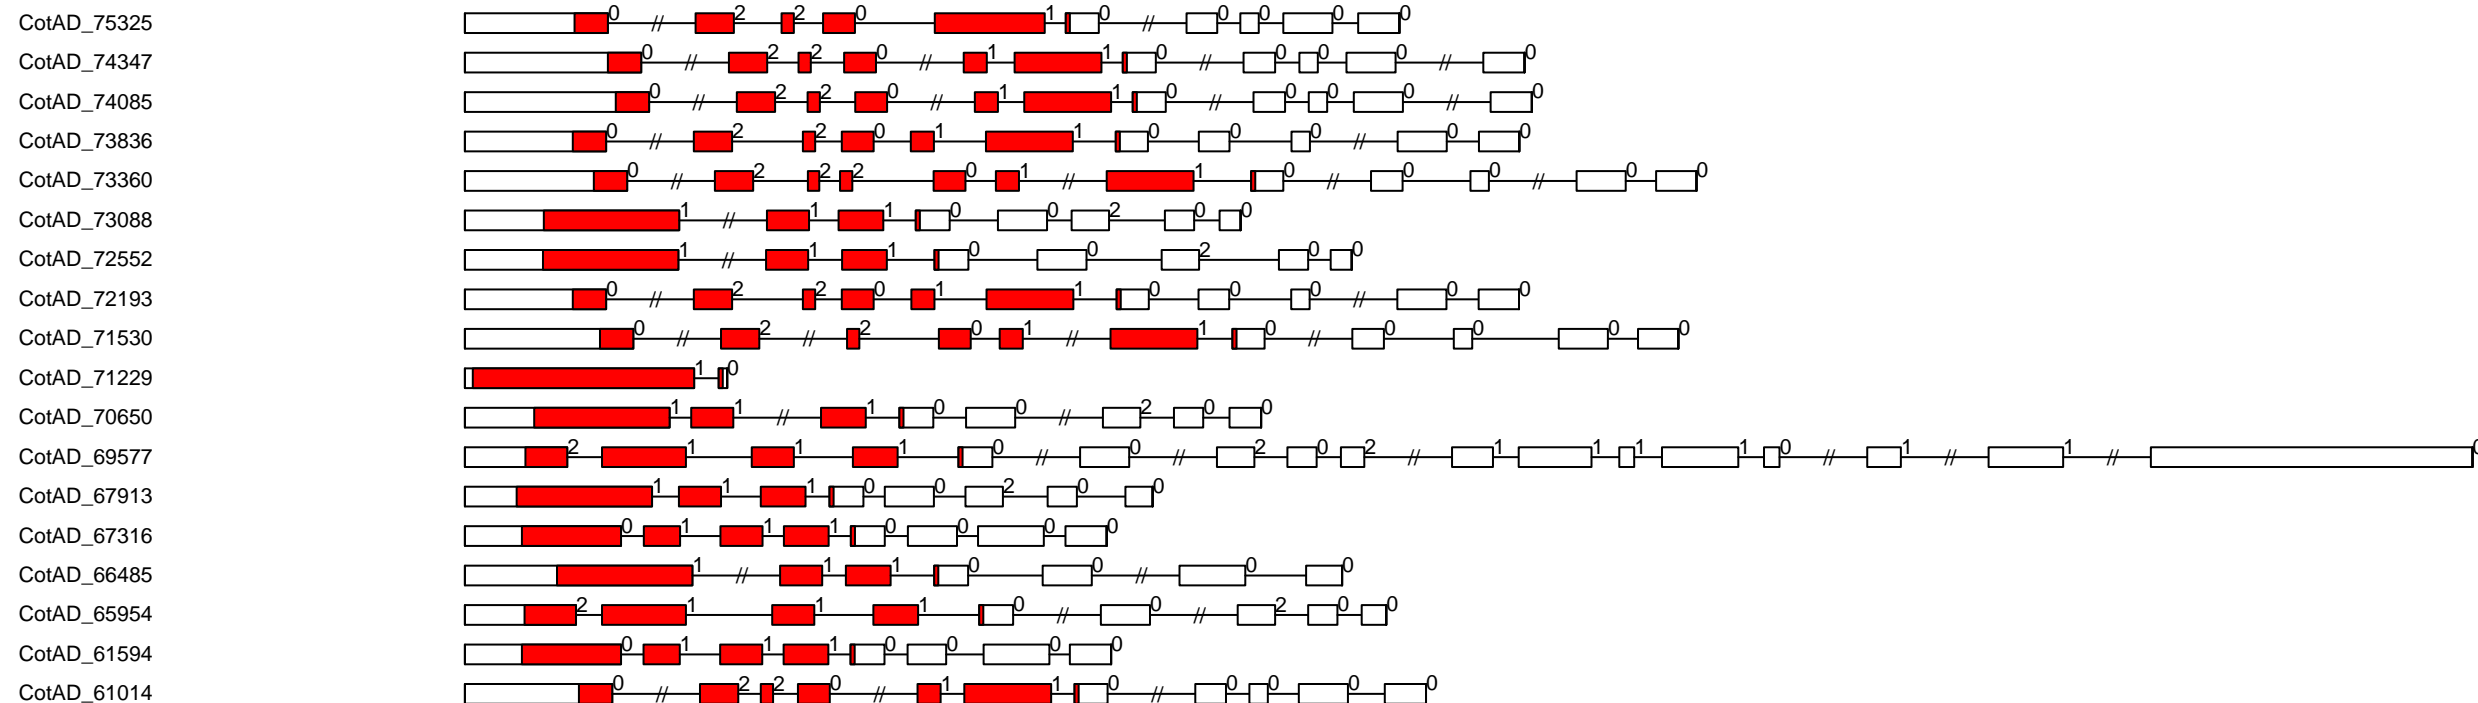

# G.hi CAMK\_OST1L exon-intron and domain diagram (all)

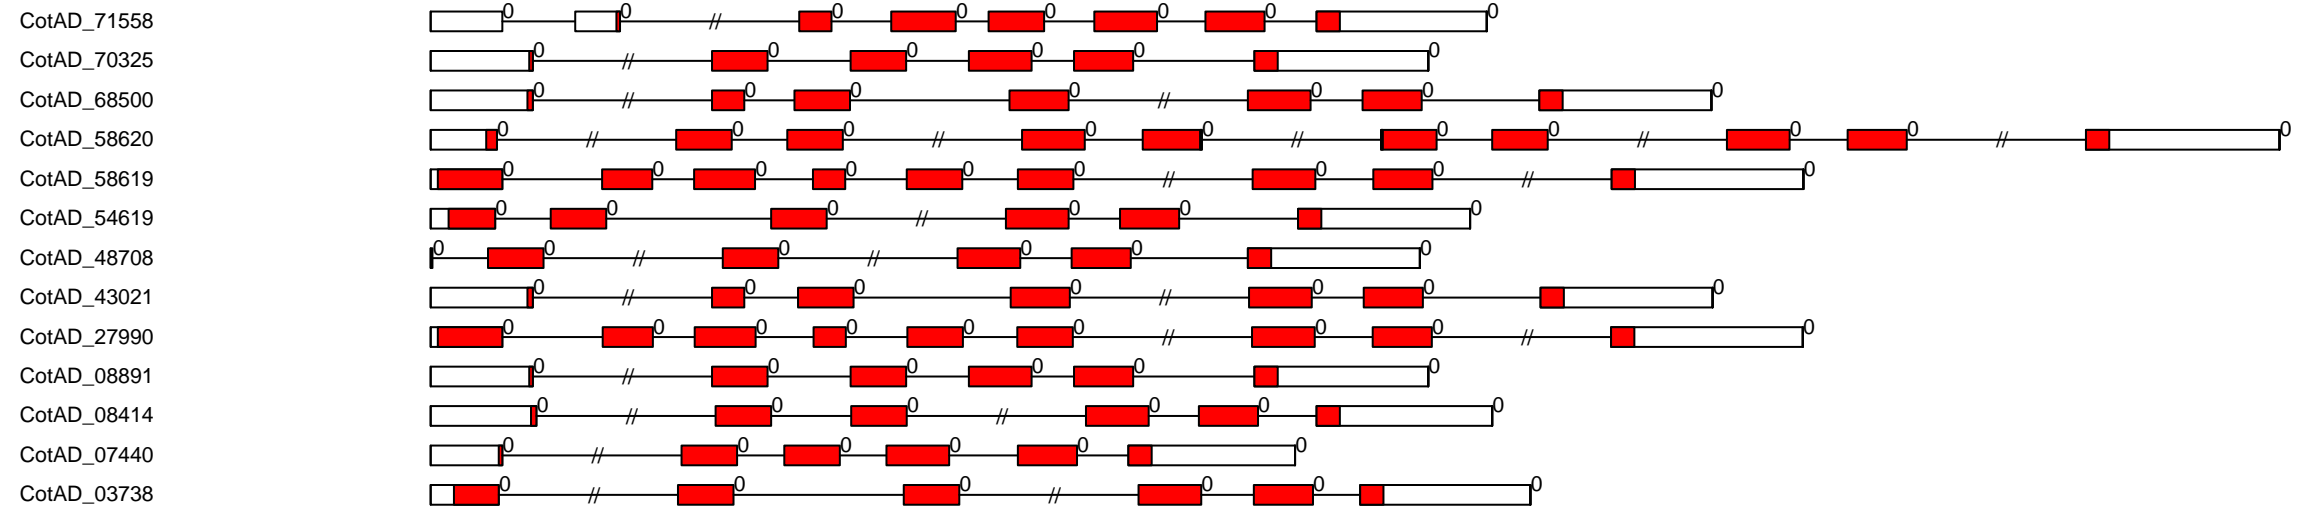

-1000

0

1000

2000

3000

### G.hi CK1\_CK1 exon-intron and domain diagram (part 1)

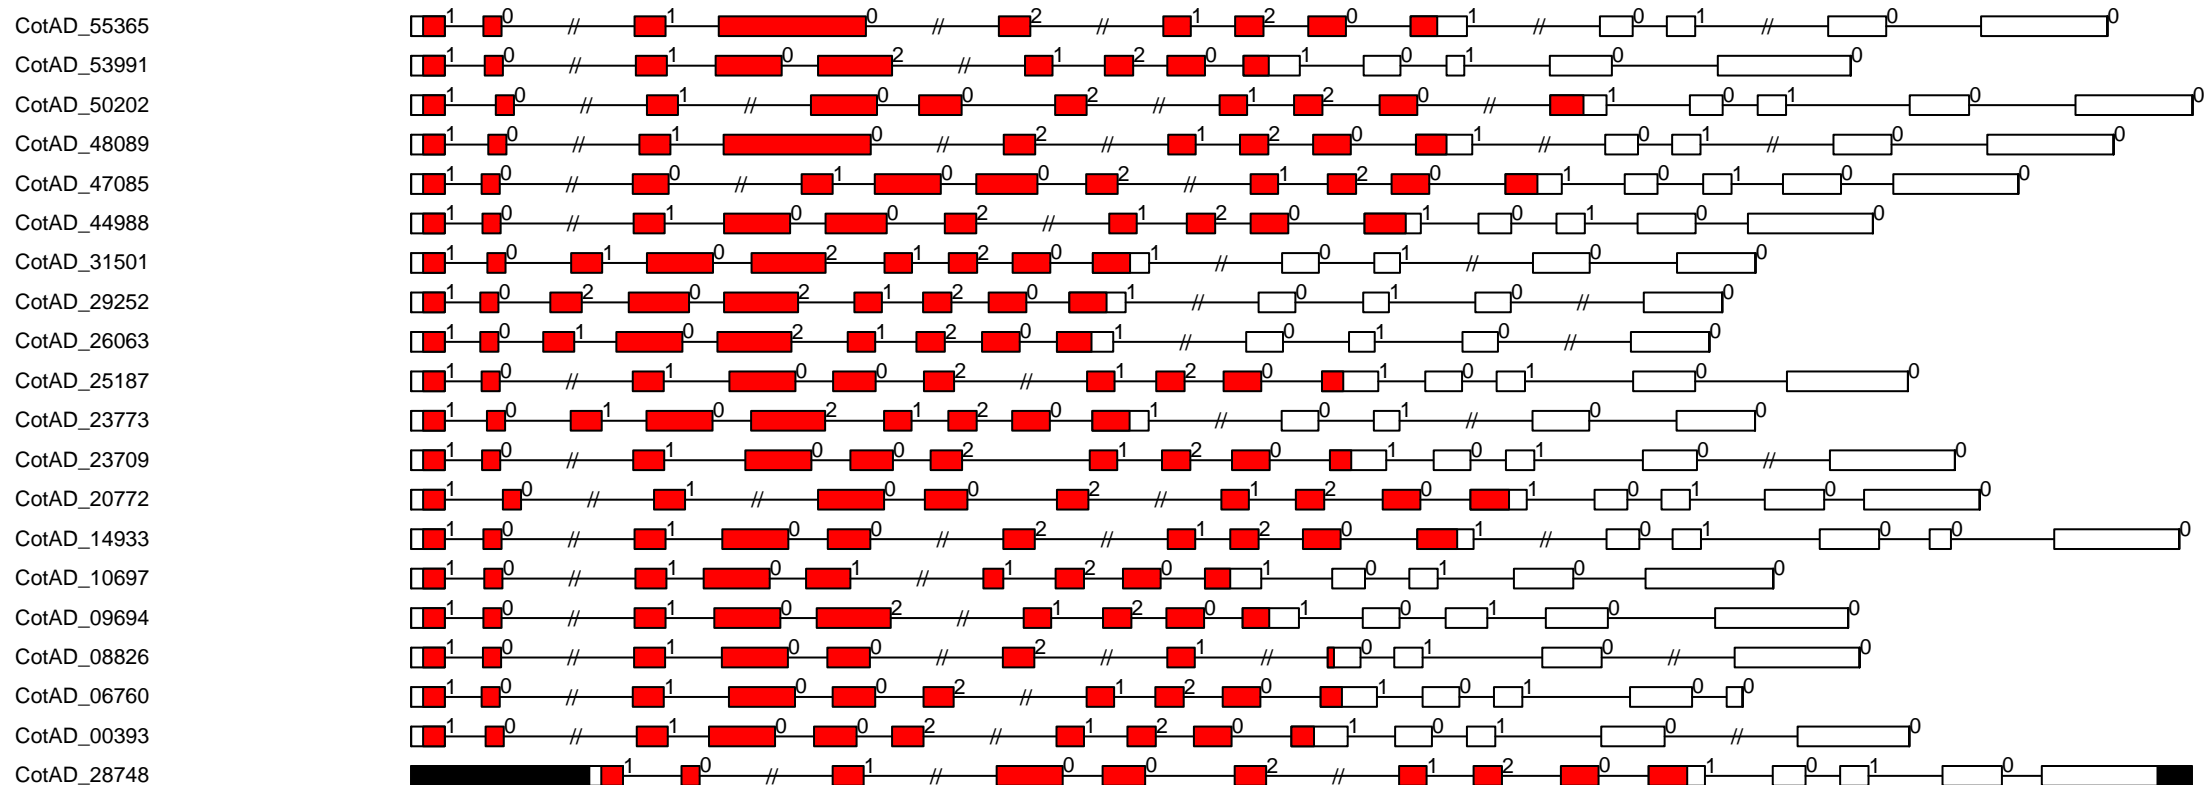



# G.hi CK1\_CK1 exon-intron and domain diagram (part 2)

CotAD\_70399  
CotAD\_62242  
CotAD\_61768

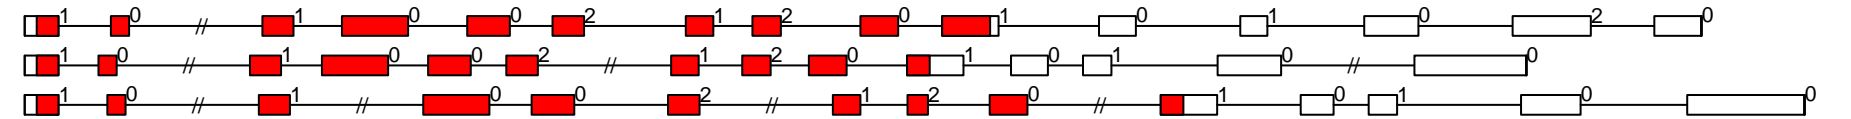

### G.hi CK1\_CK1-PI exon-intron and domain diagram (part 1)

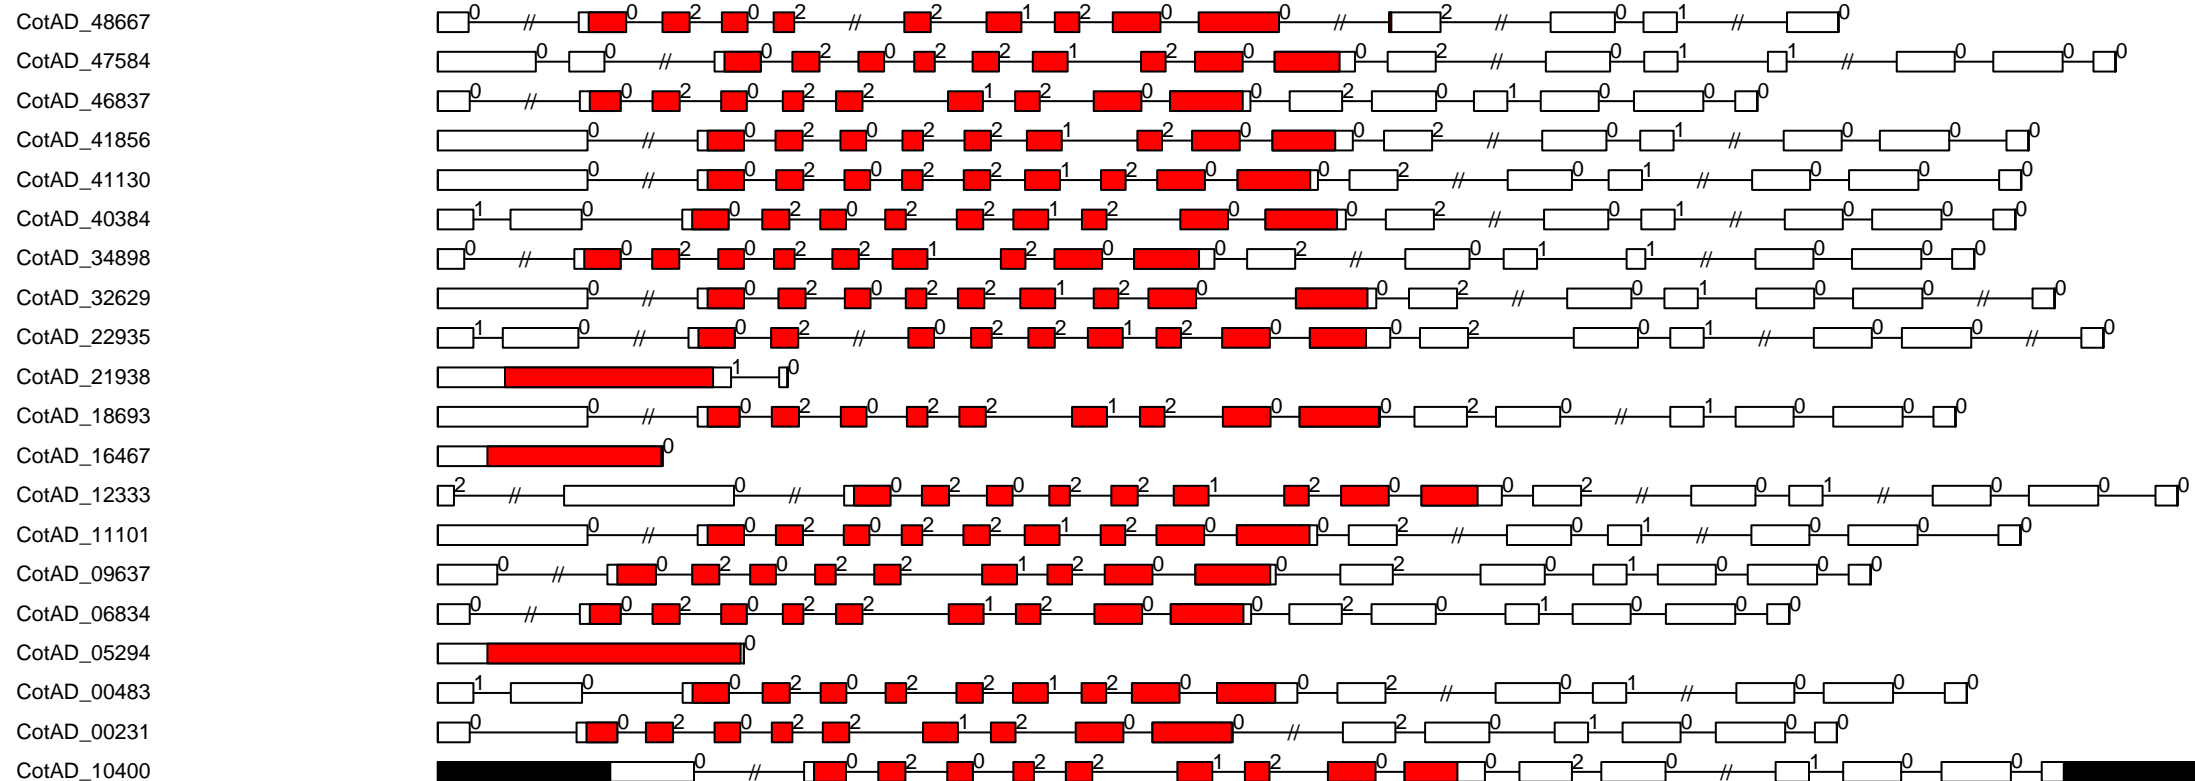

# G.hi CK1\_CK1-PI exon-intron and domain diagram (part 2)

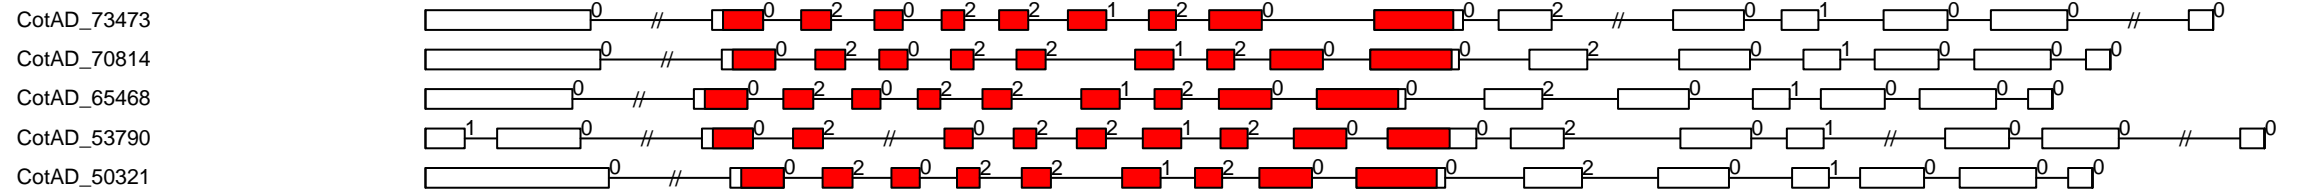

# G.hi CMGC\_CDK-CCRK exon-intron and domain diagram (all)

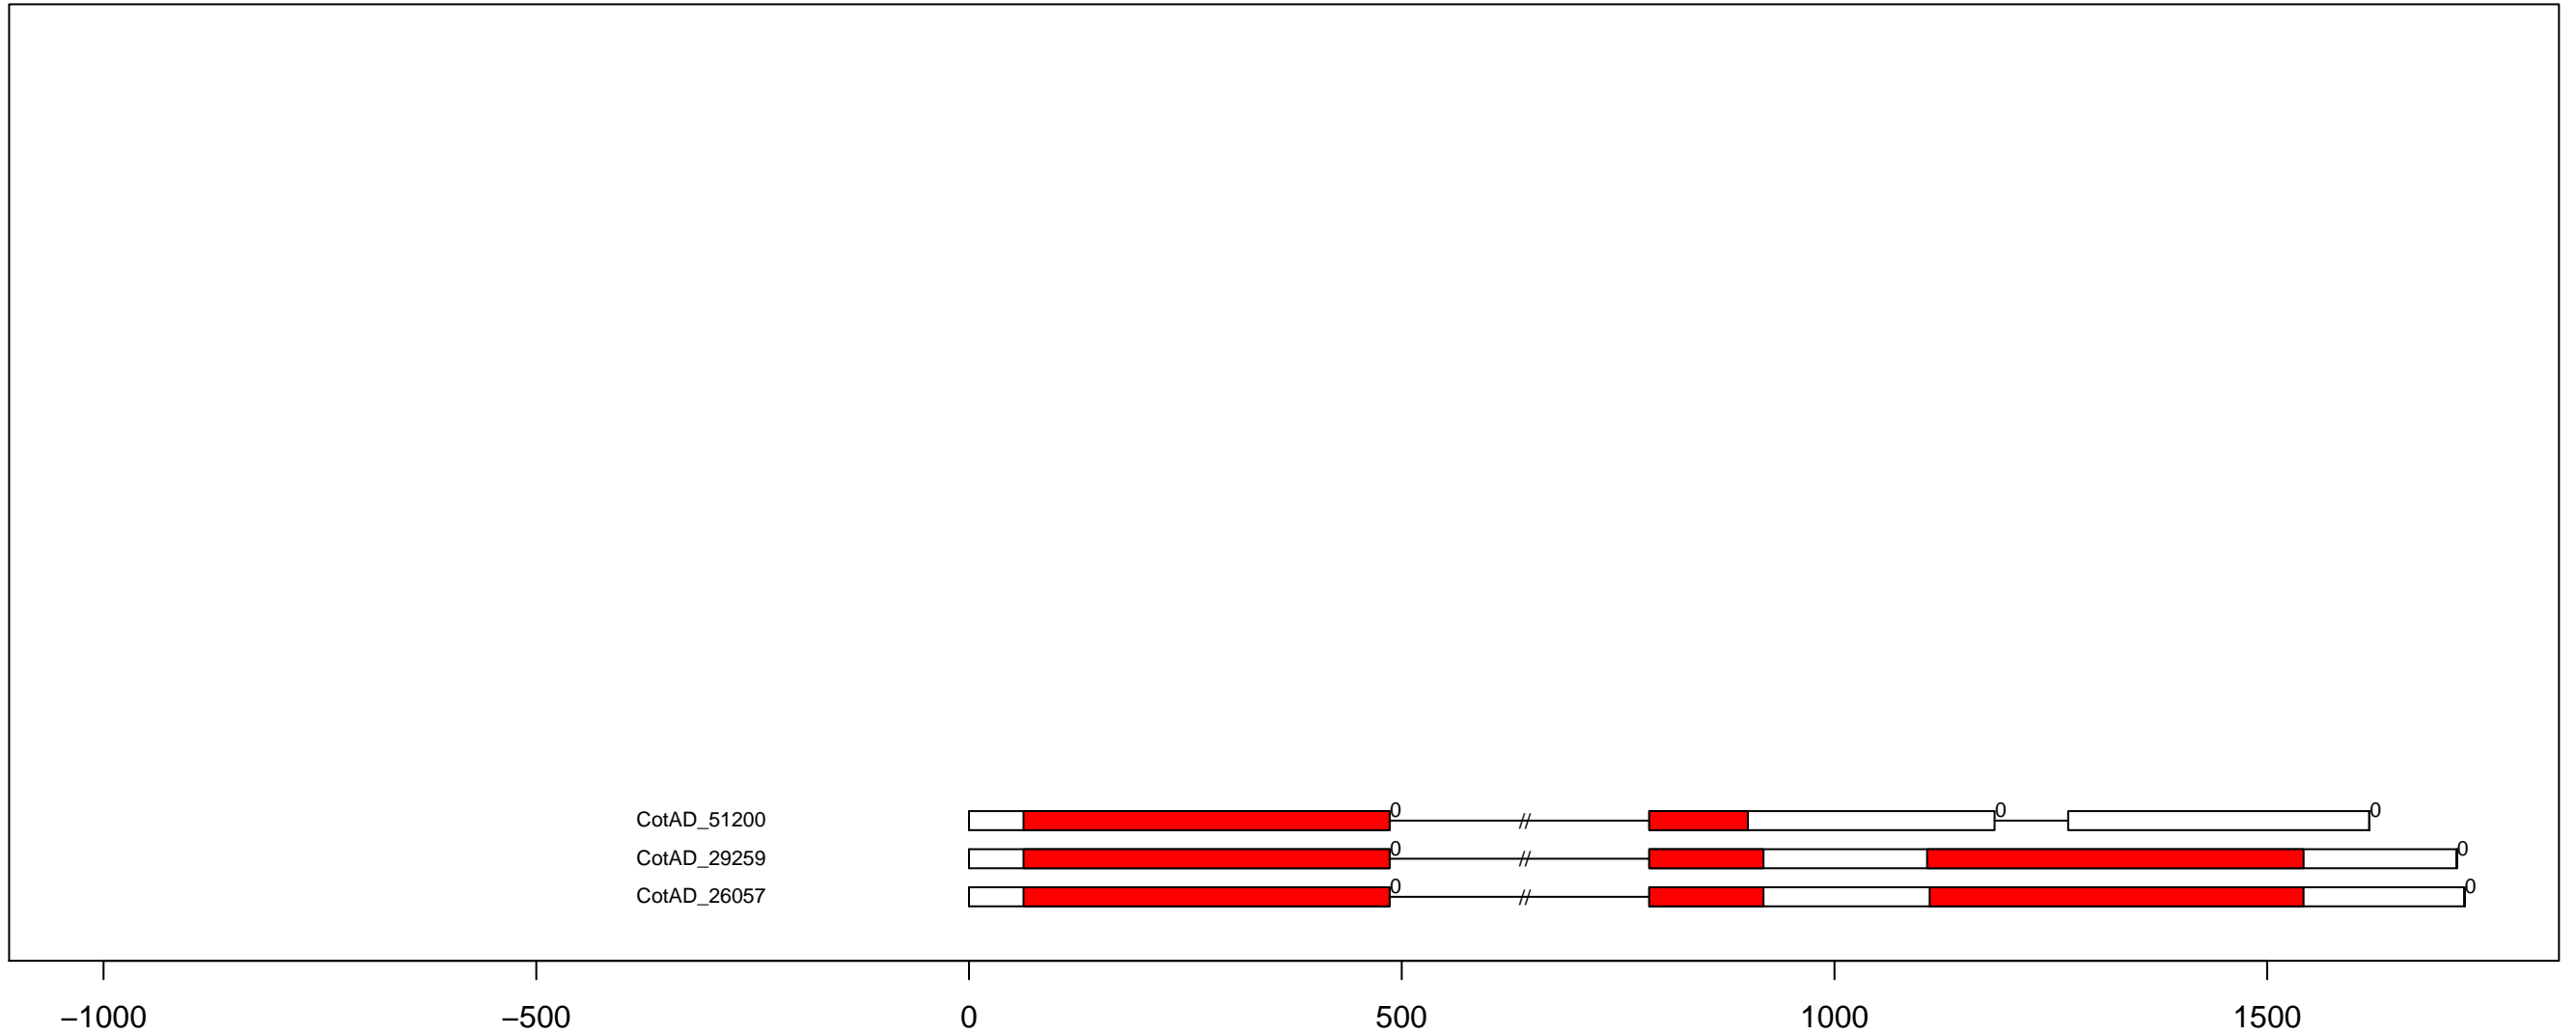

# G.hi CMGC\_CDK-CDK7 exon-intron and domain diagram (all)

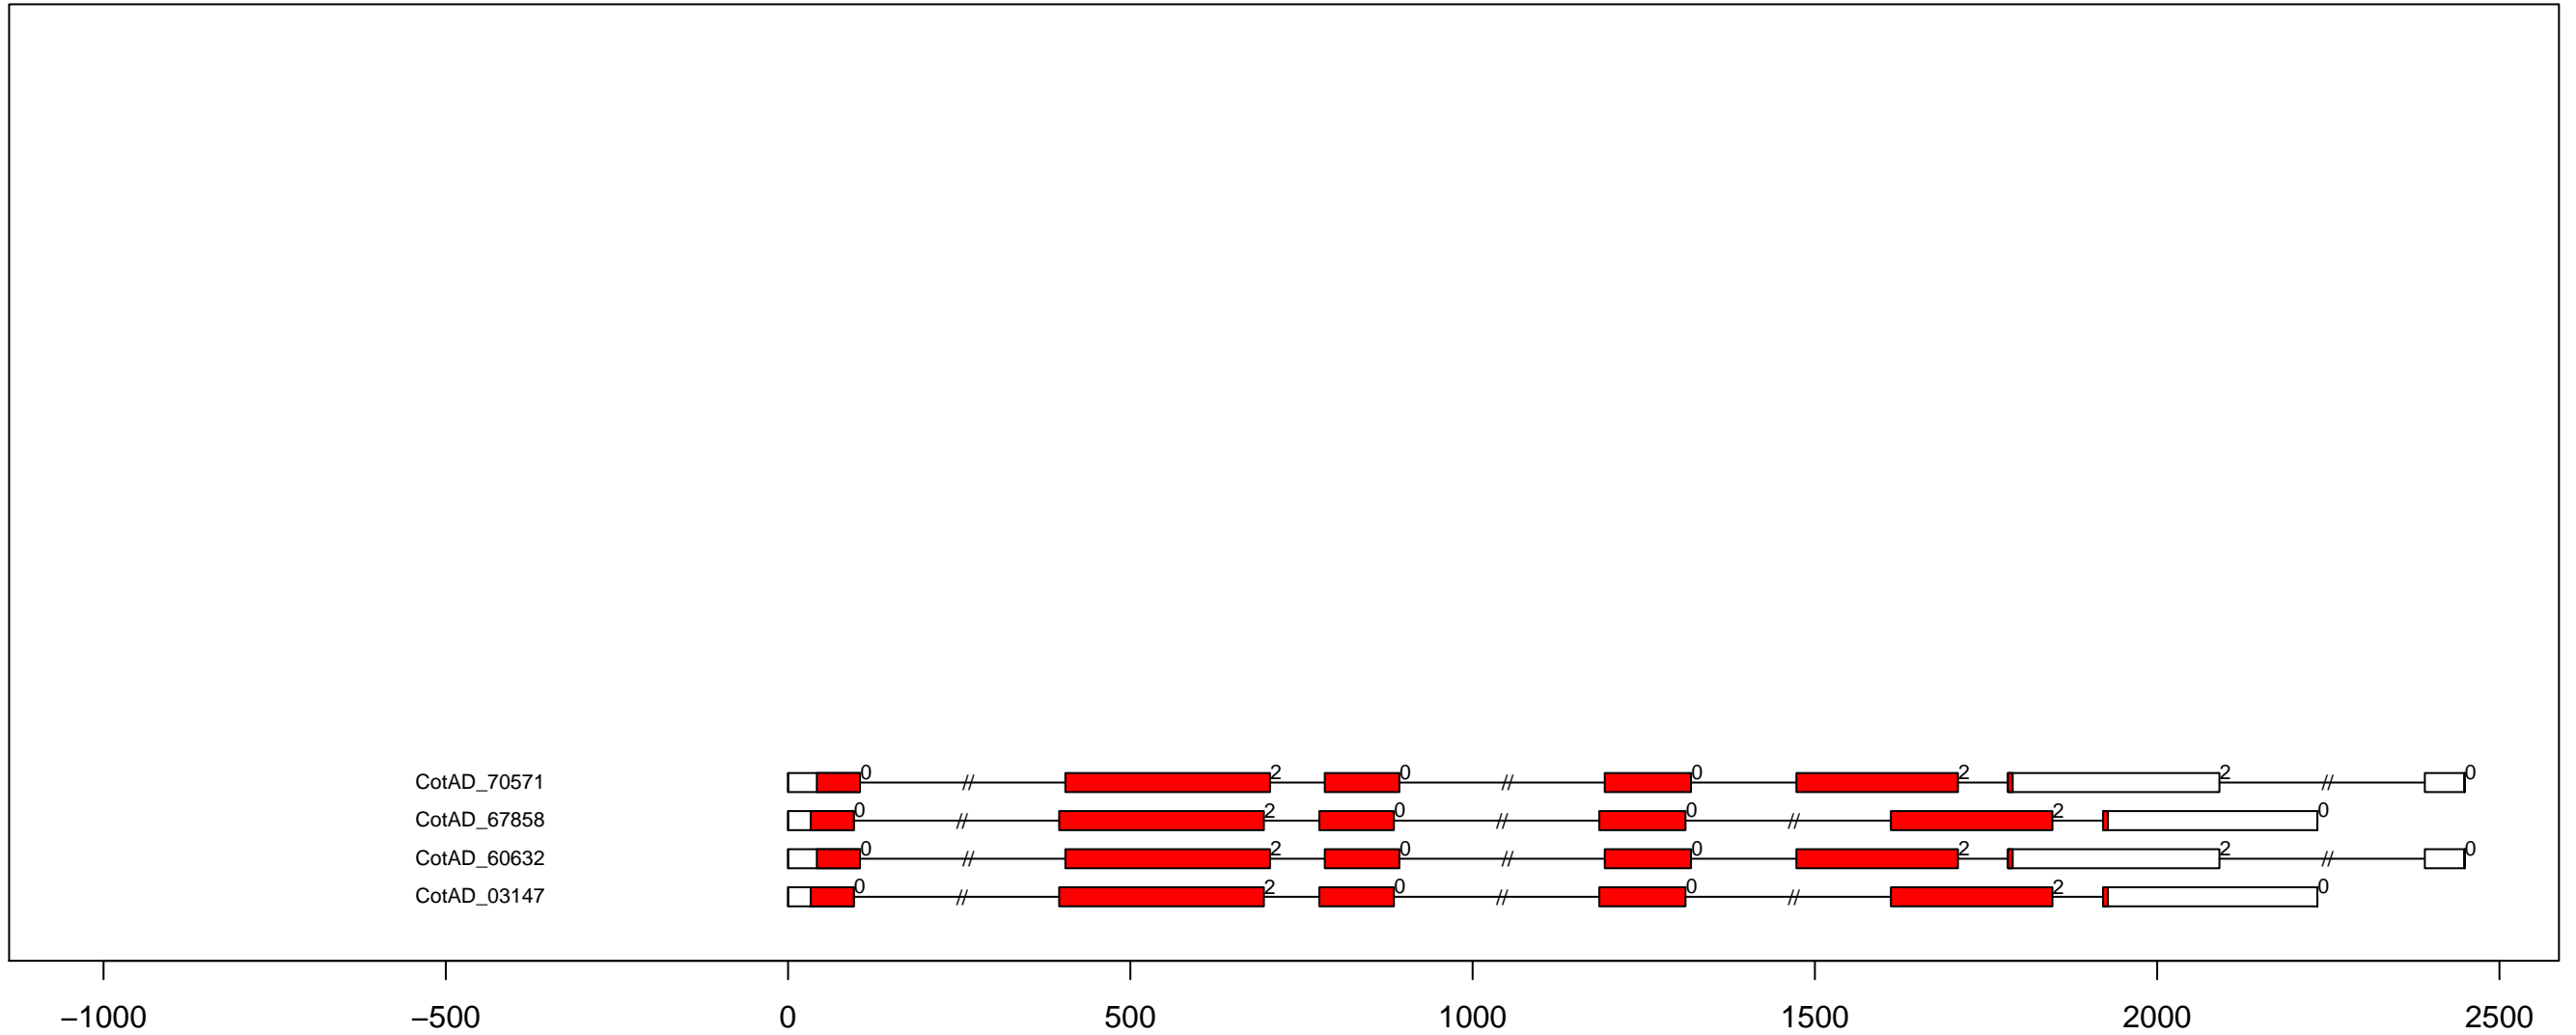

# G.hi CMGC\_CDK-CDK8 exon-intron and domain diagram (all)

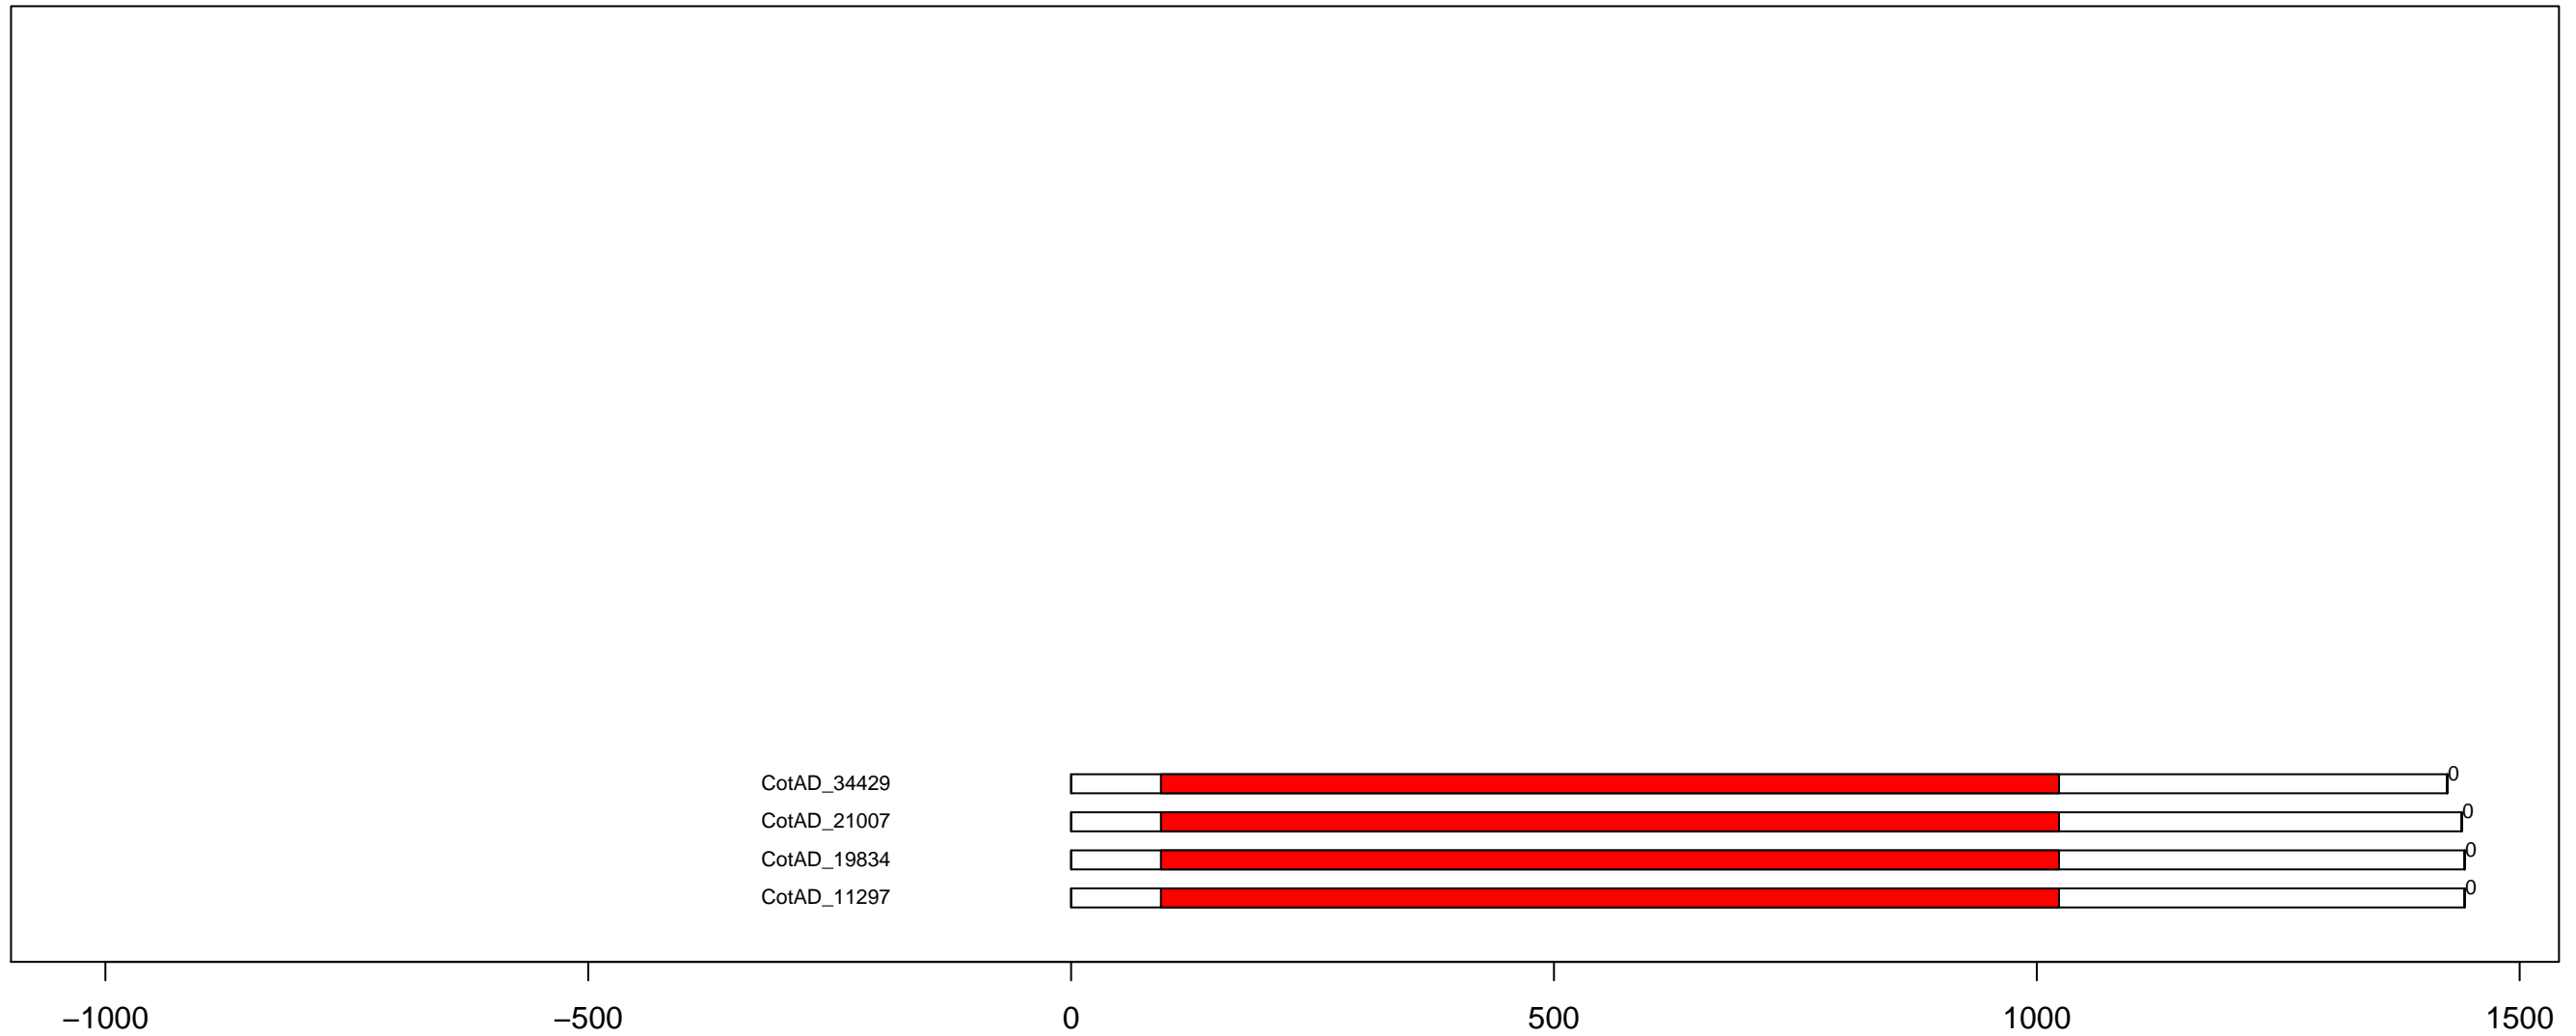

### G.hi CMGC\_CDK-CRK7-CDK9 exon-intron and domain diagram (part 1)

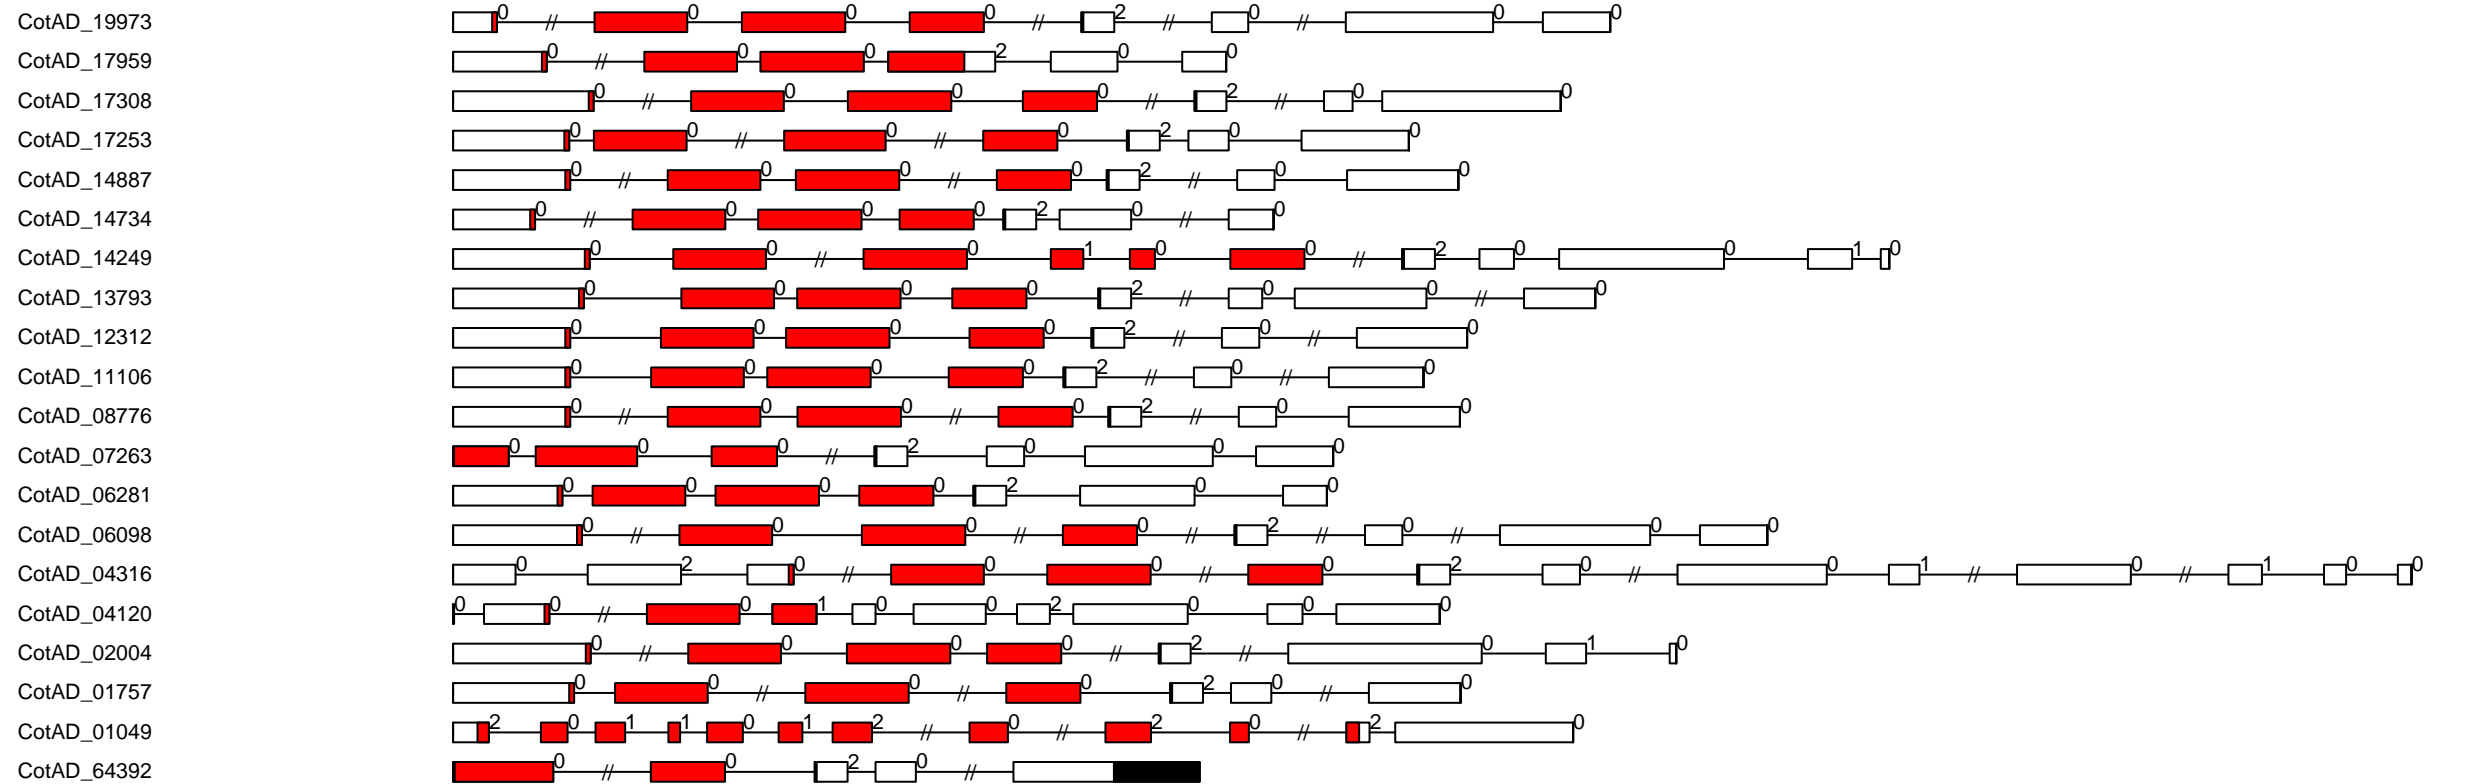





### G.hi CMGC\_CDK-CRK7-CDK9 exon-intron and domain diagram (part 3)

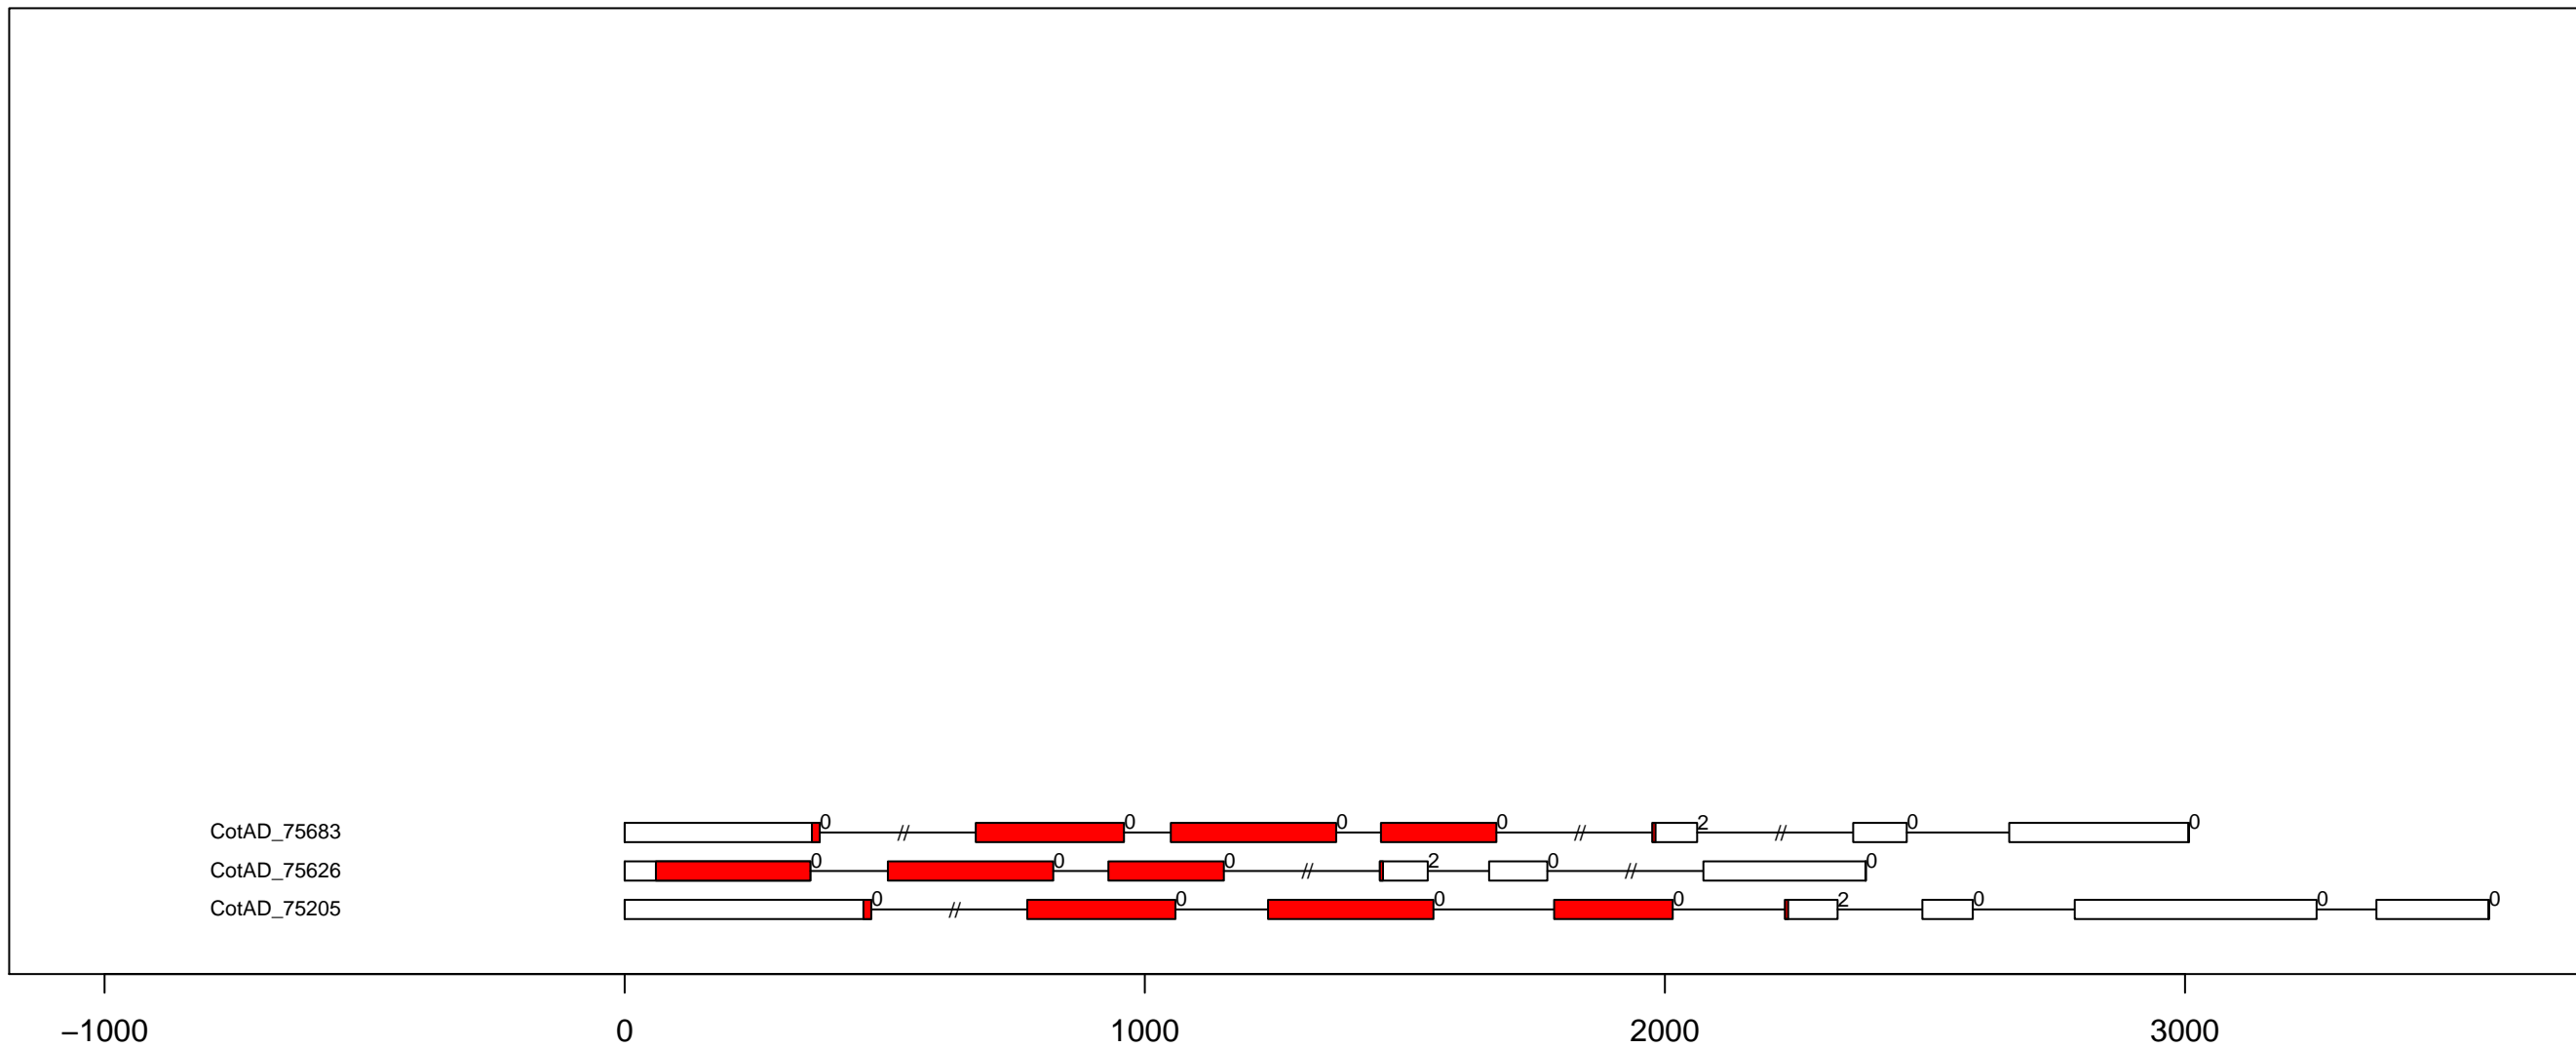

# G.hi CMGC\_CDK-PITSLRE exon-intron and domain diagram (all)

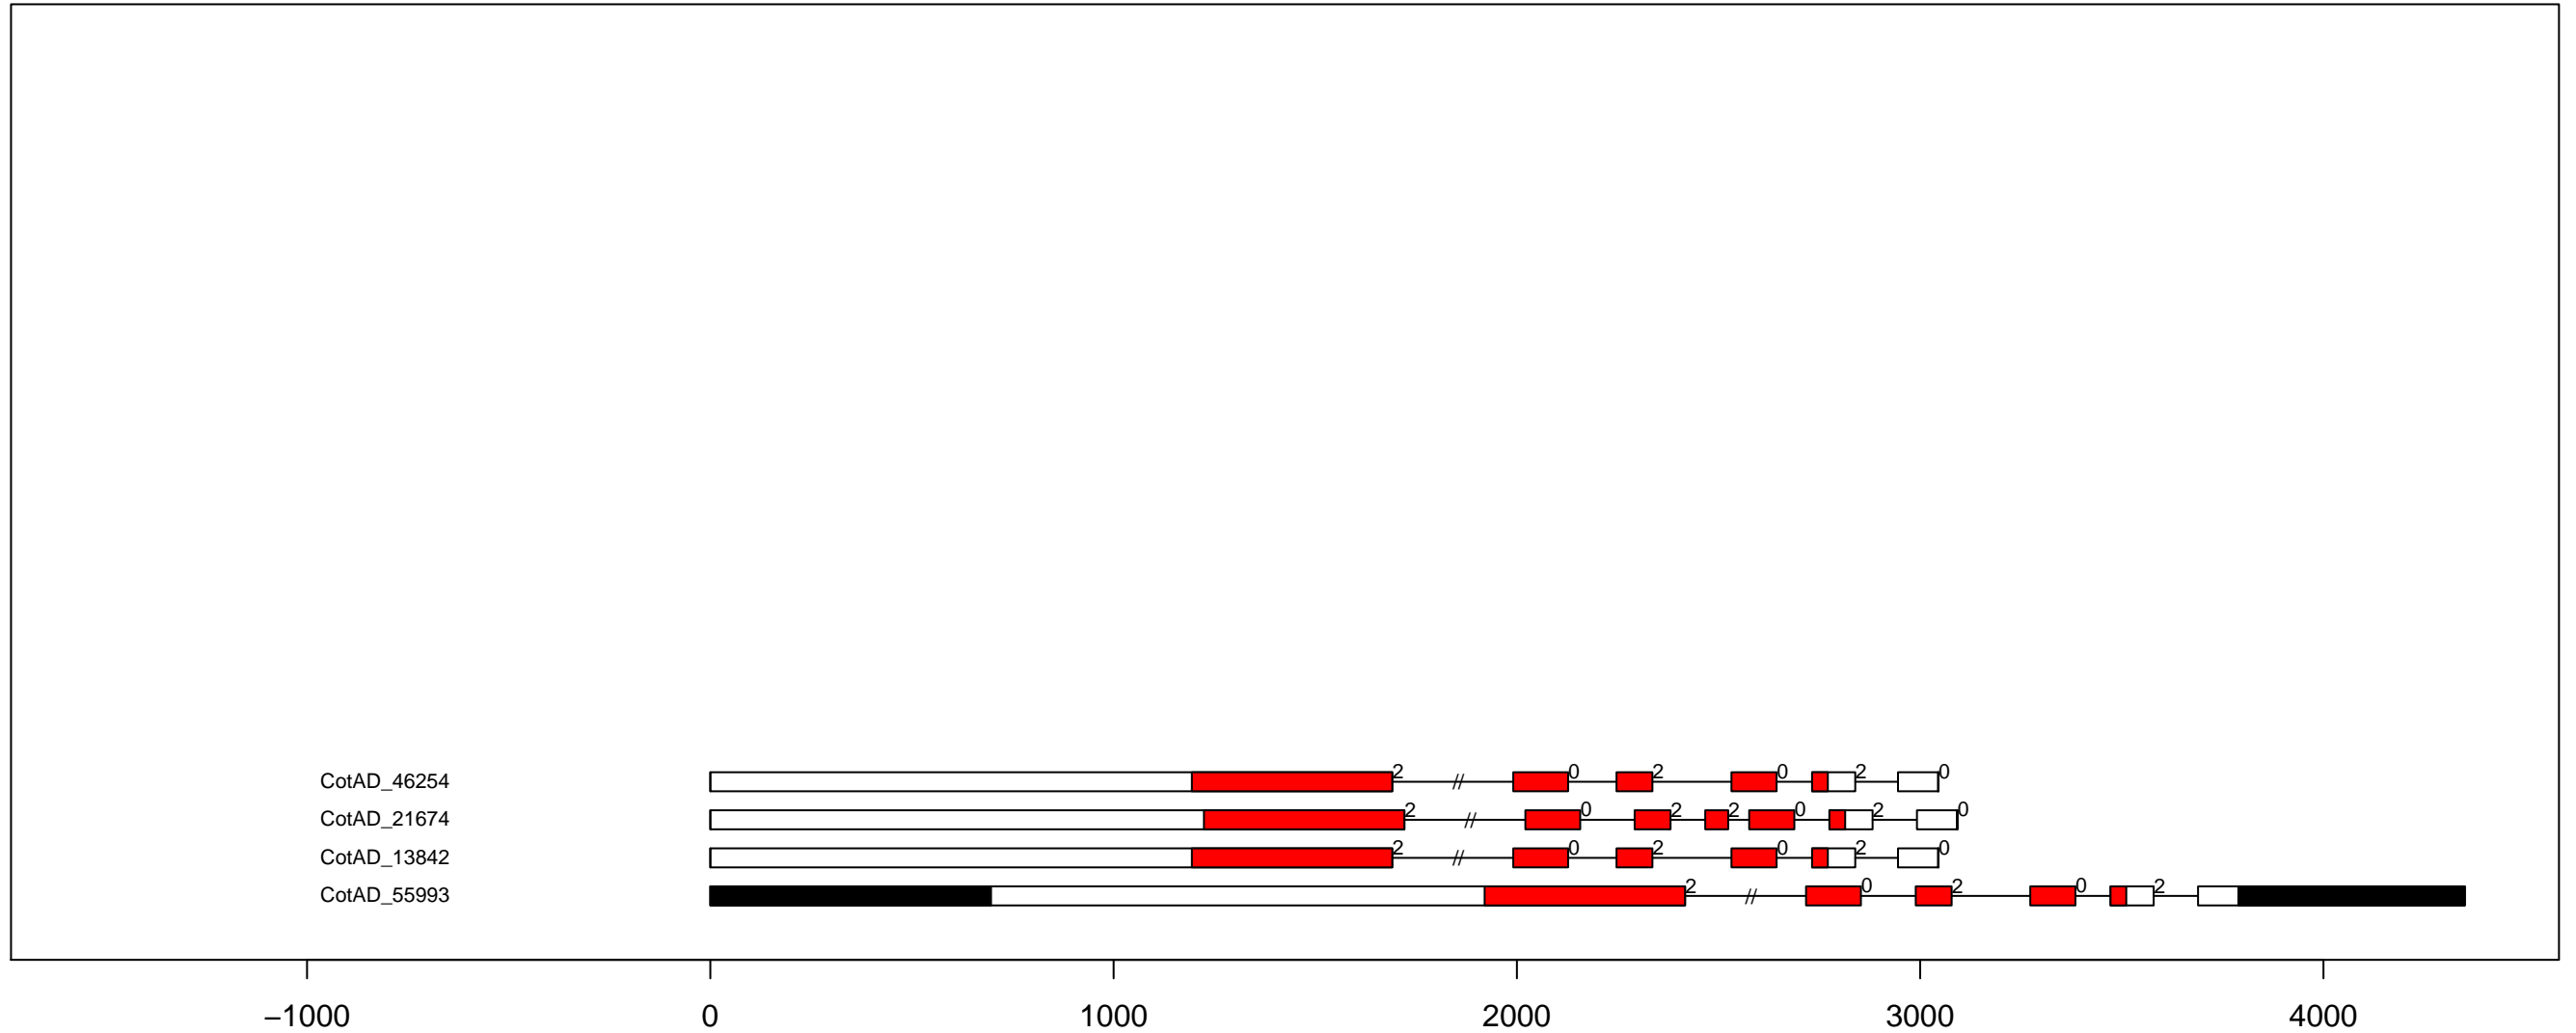

### G.hi CMGC\_CDK-PI exon-intron and domain diagram (all)

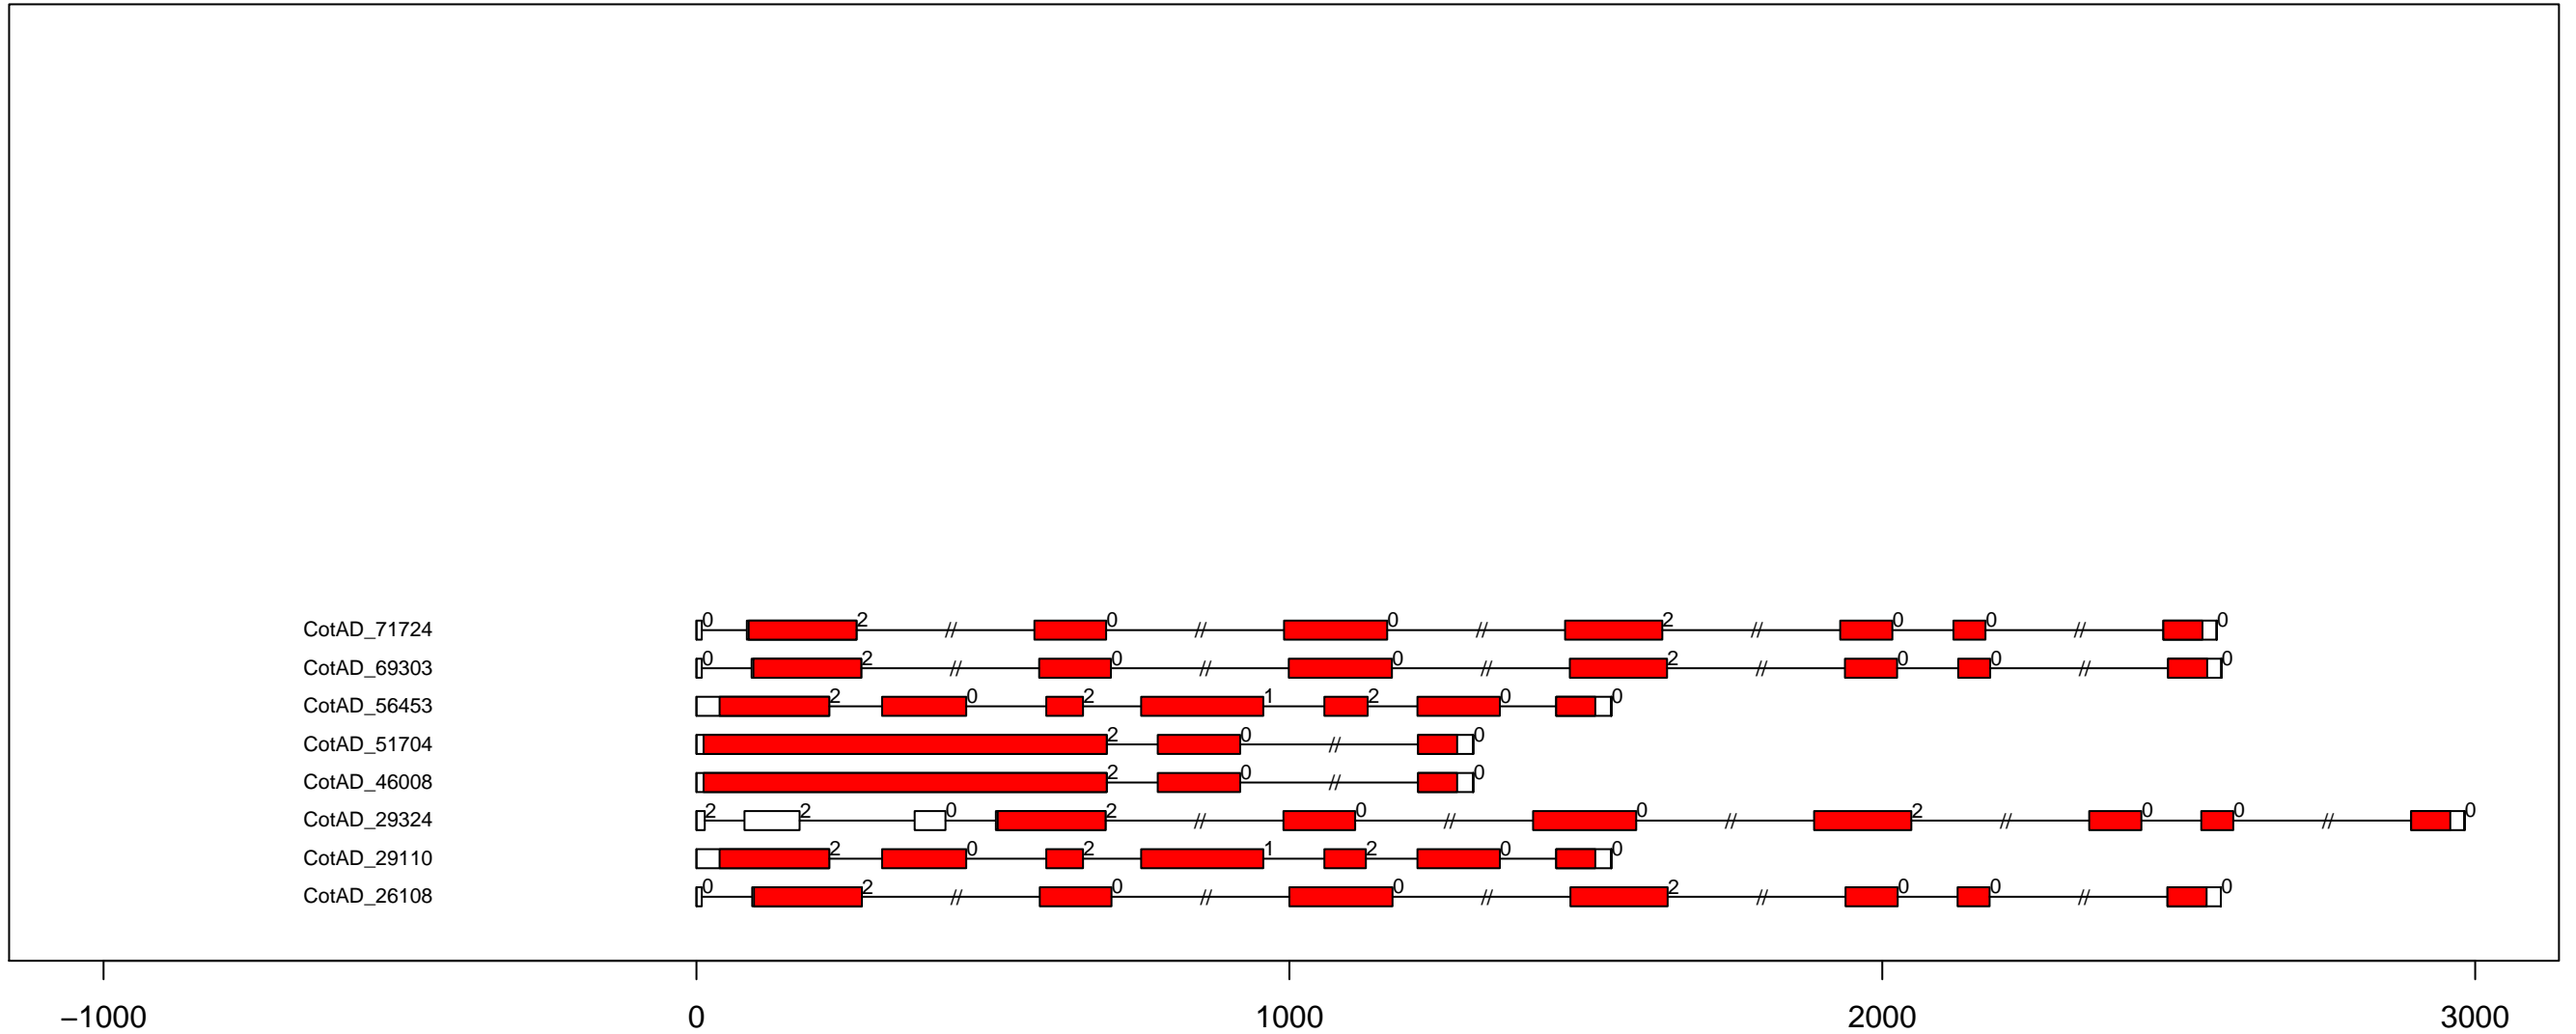

# G.hi CMGC\_CK2 exon-intron and domain diagram (all)

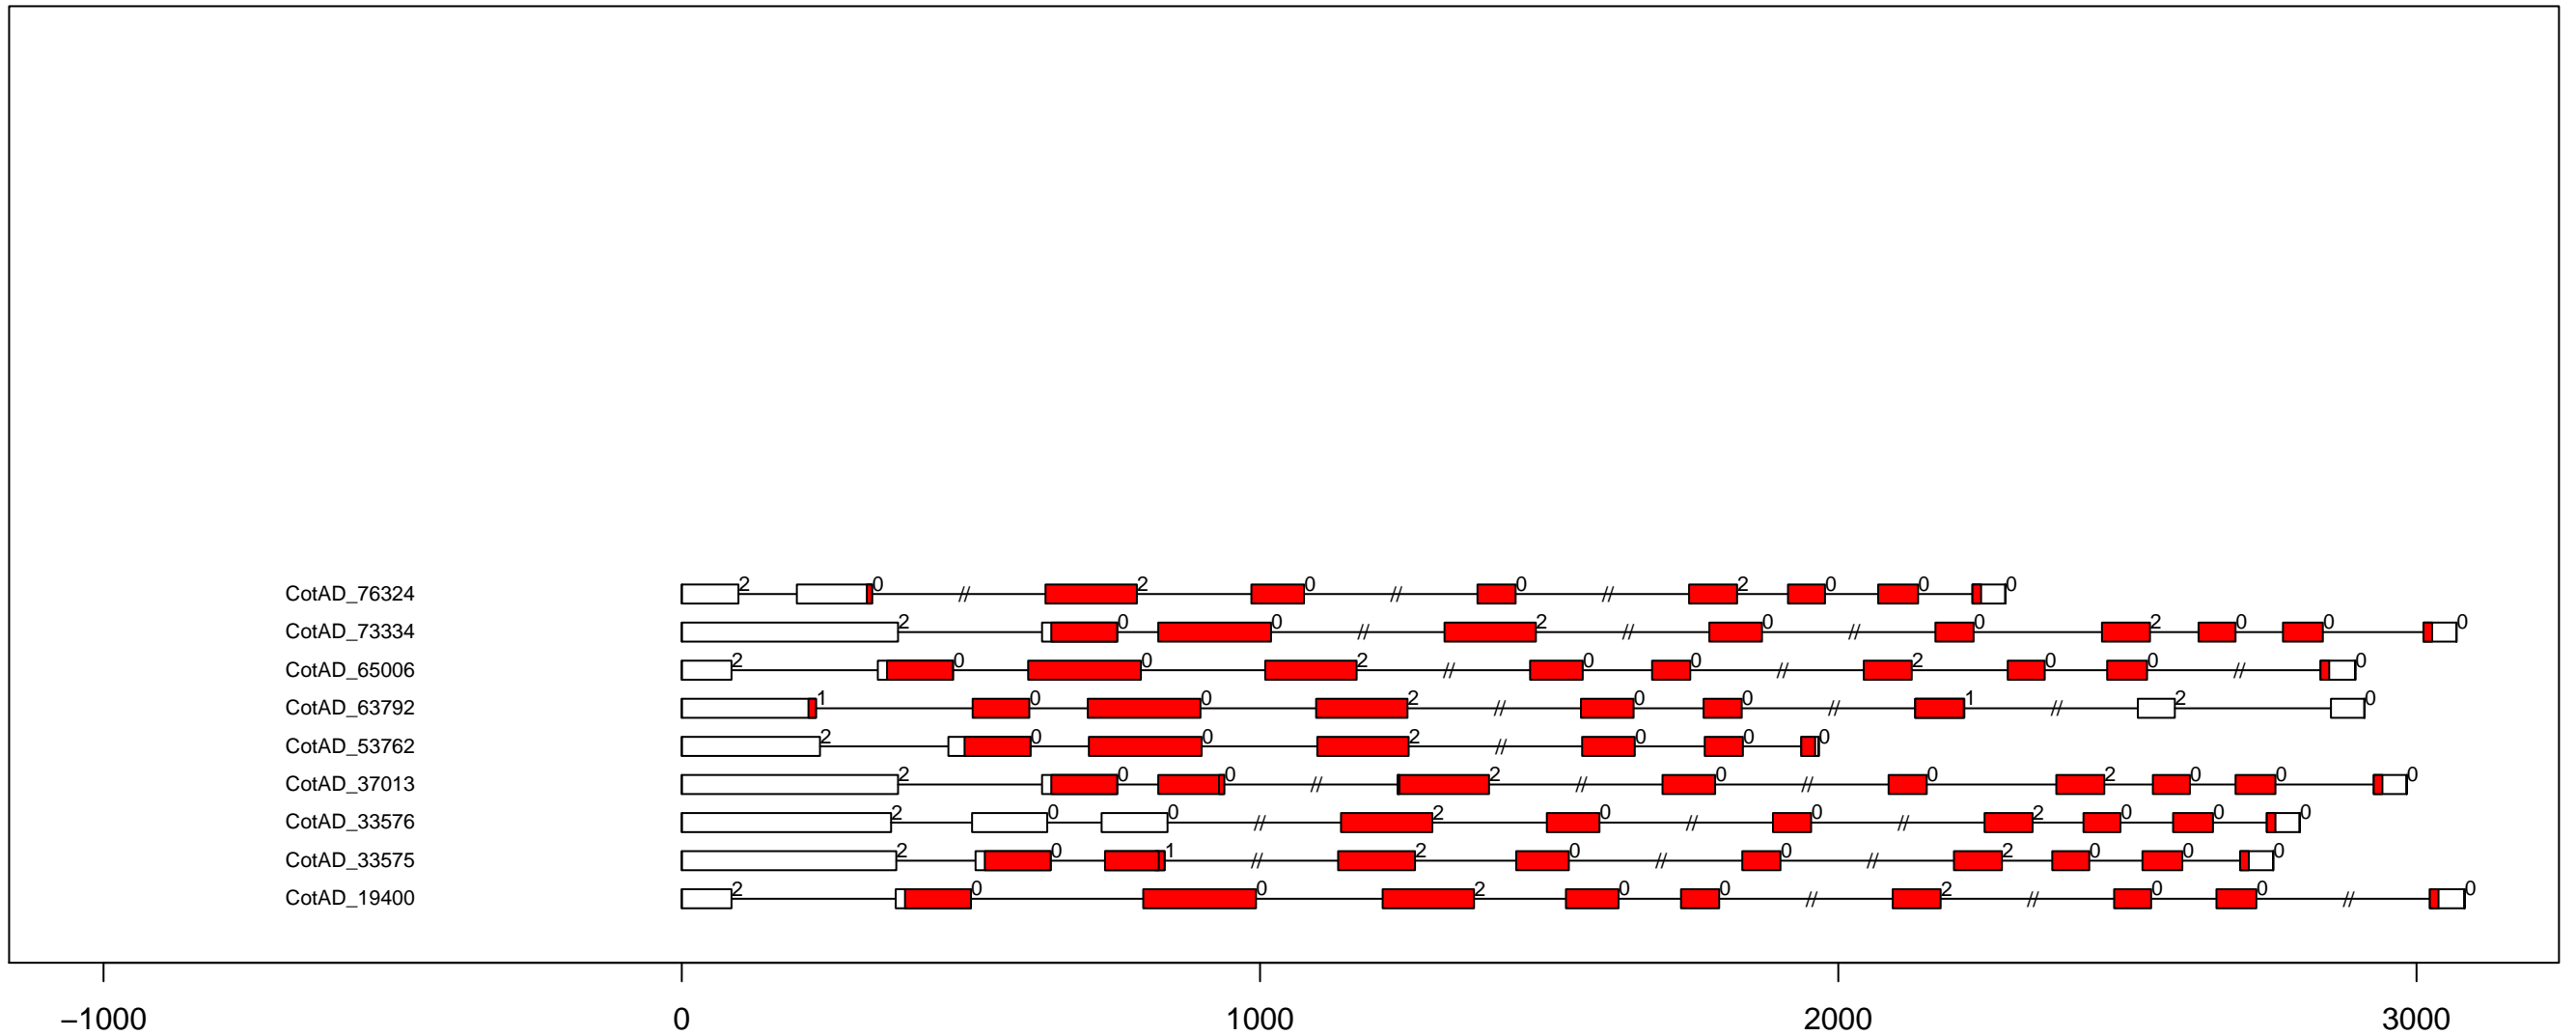

# G.hi CMGC\_CLK exon-intron and domain diagram (all)

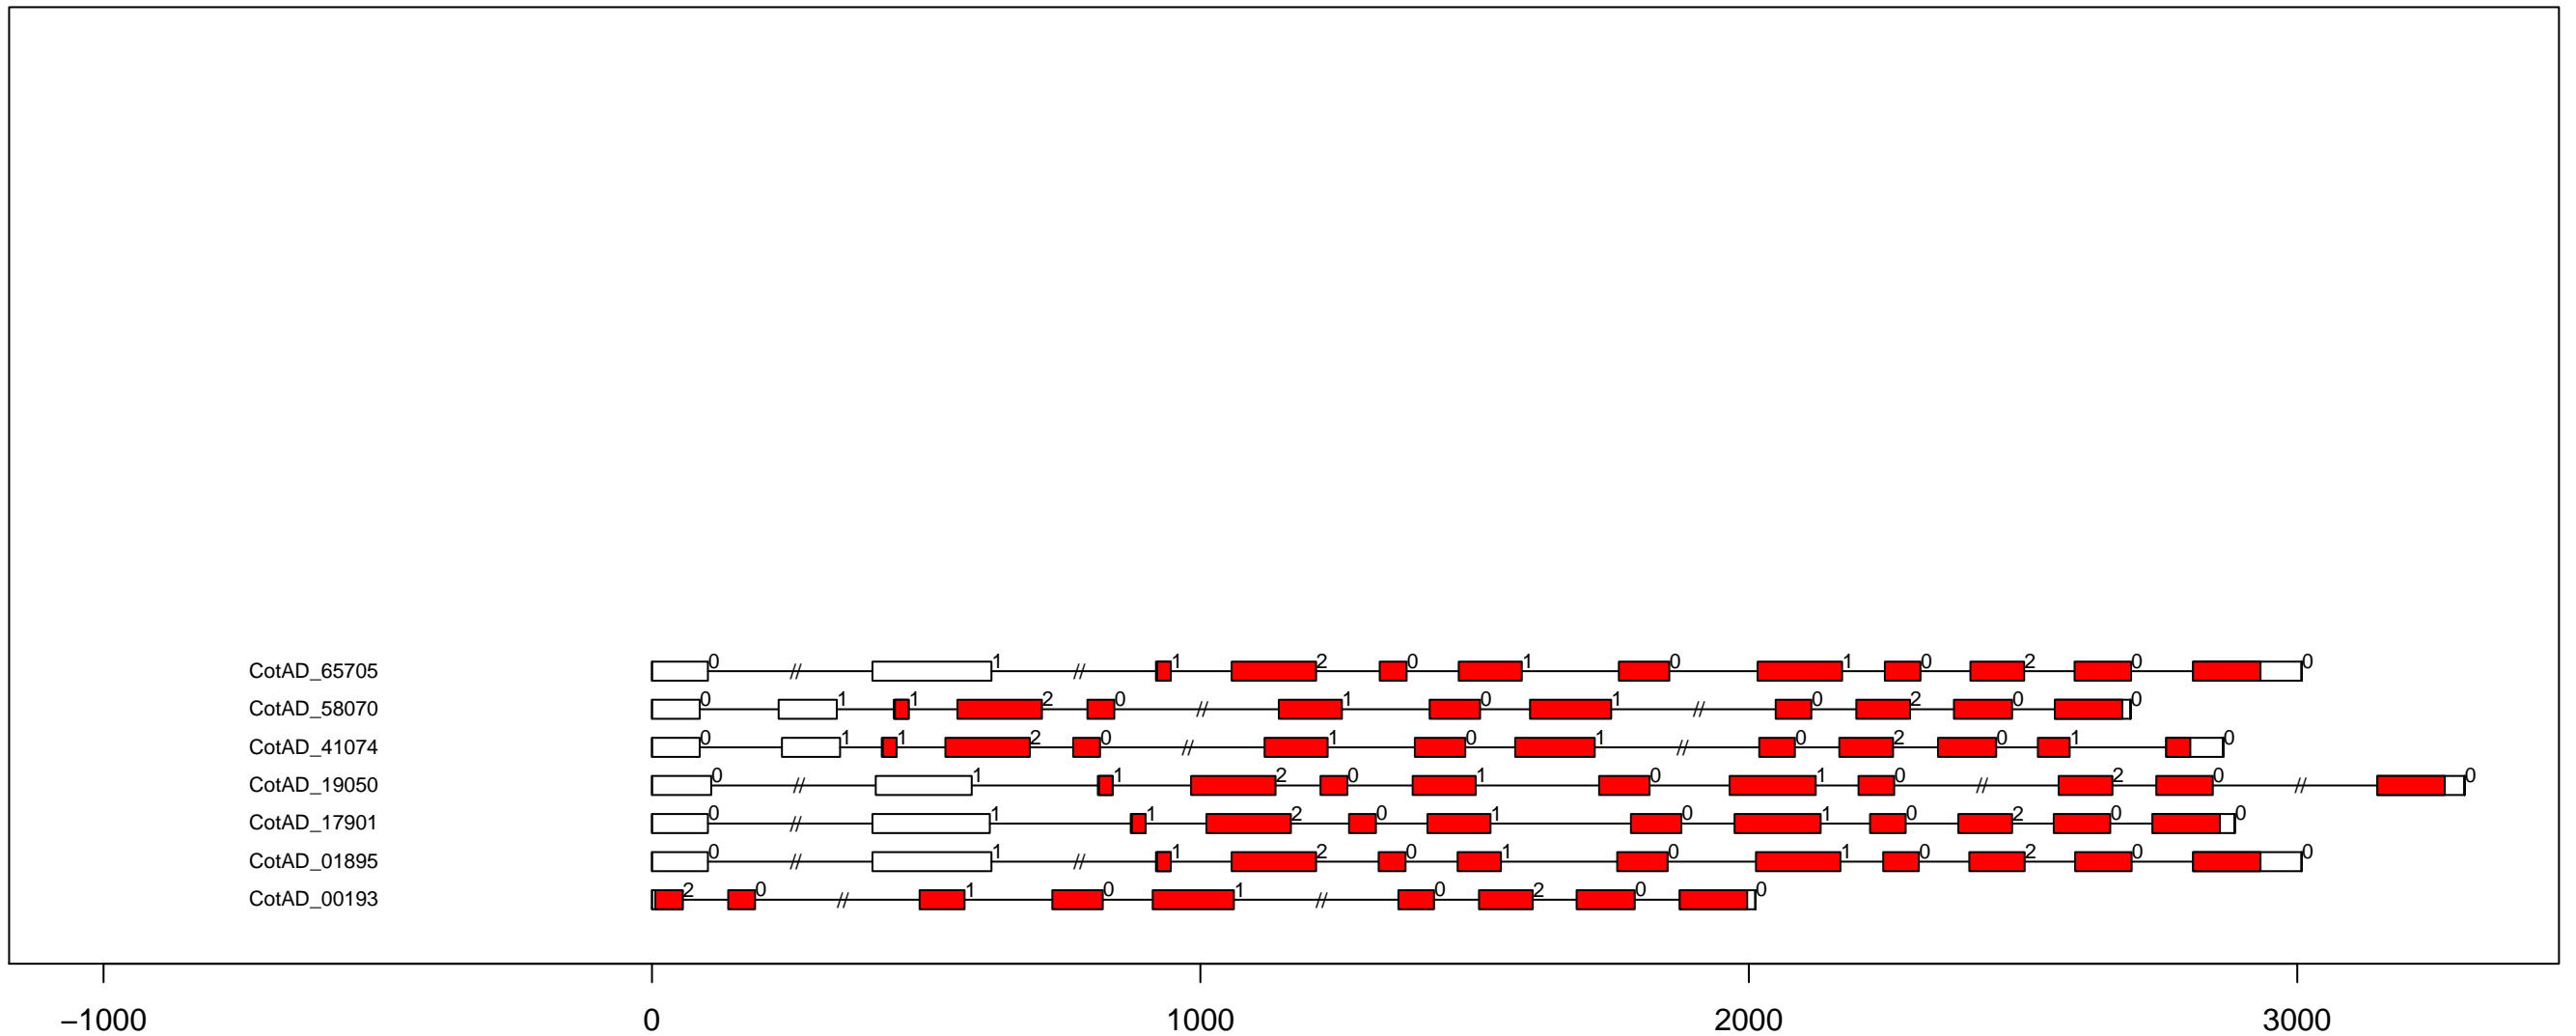

### G.hi CMGC\_DYRK-PRP4 exon-intron and domain diagram (all)

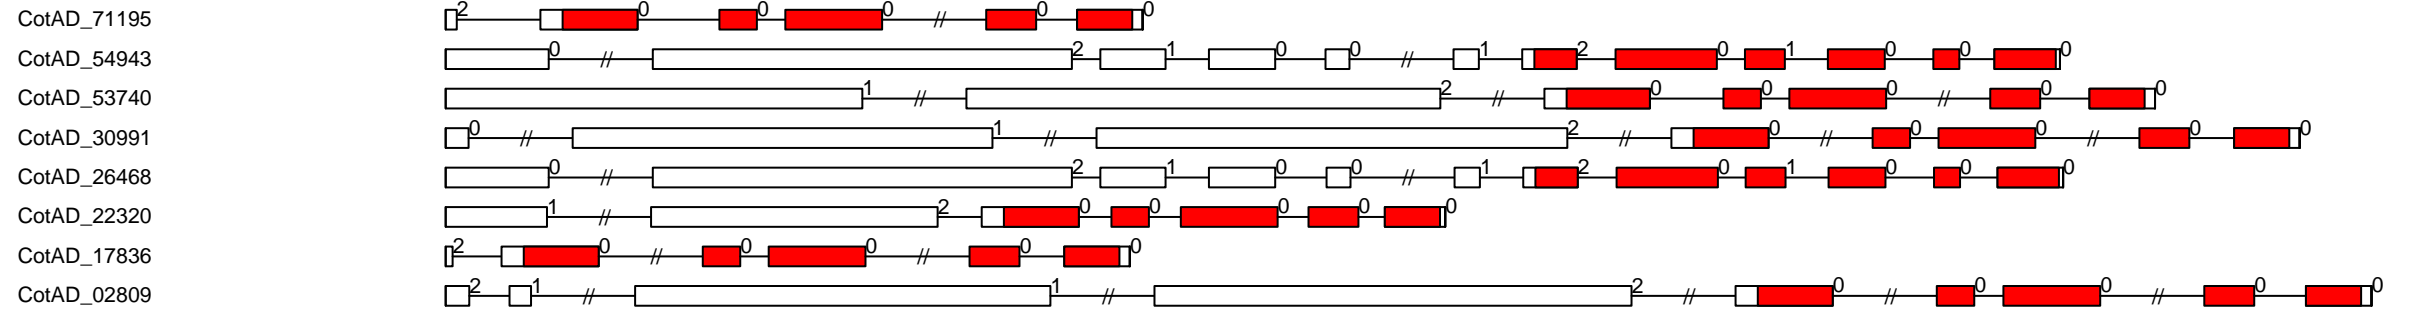

# G.hi CMGC\_DYRK–YAK exon–intron and domain diagram (all)

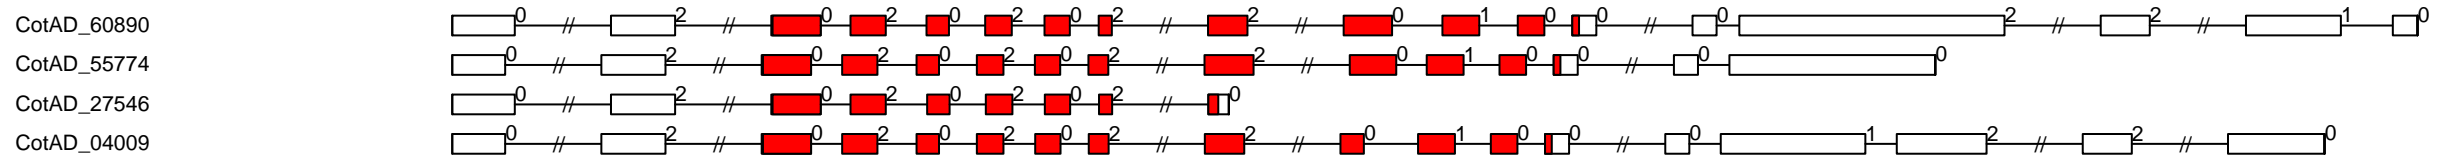

0

2000

4000

6000

# G.hi CMGC\_GSKL exon-intron and domain diagram (all)

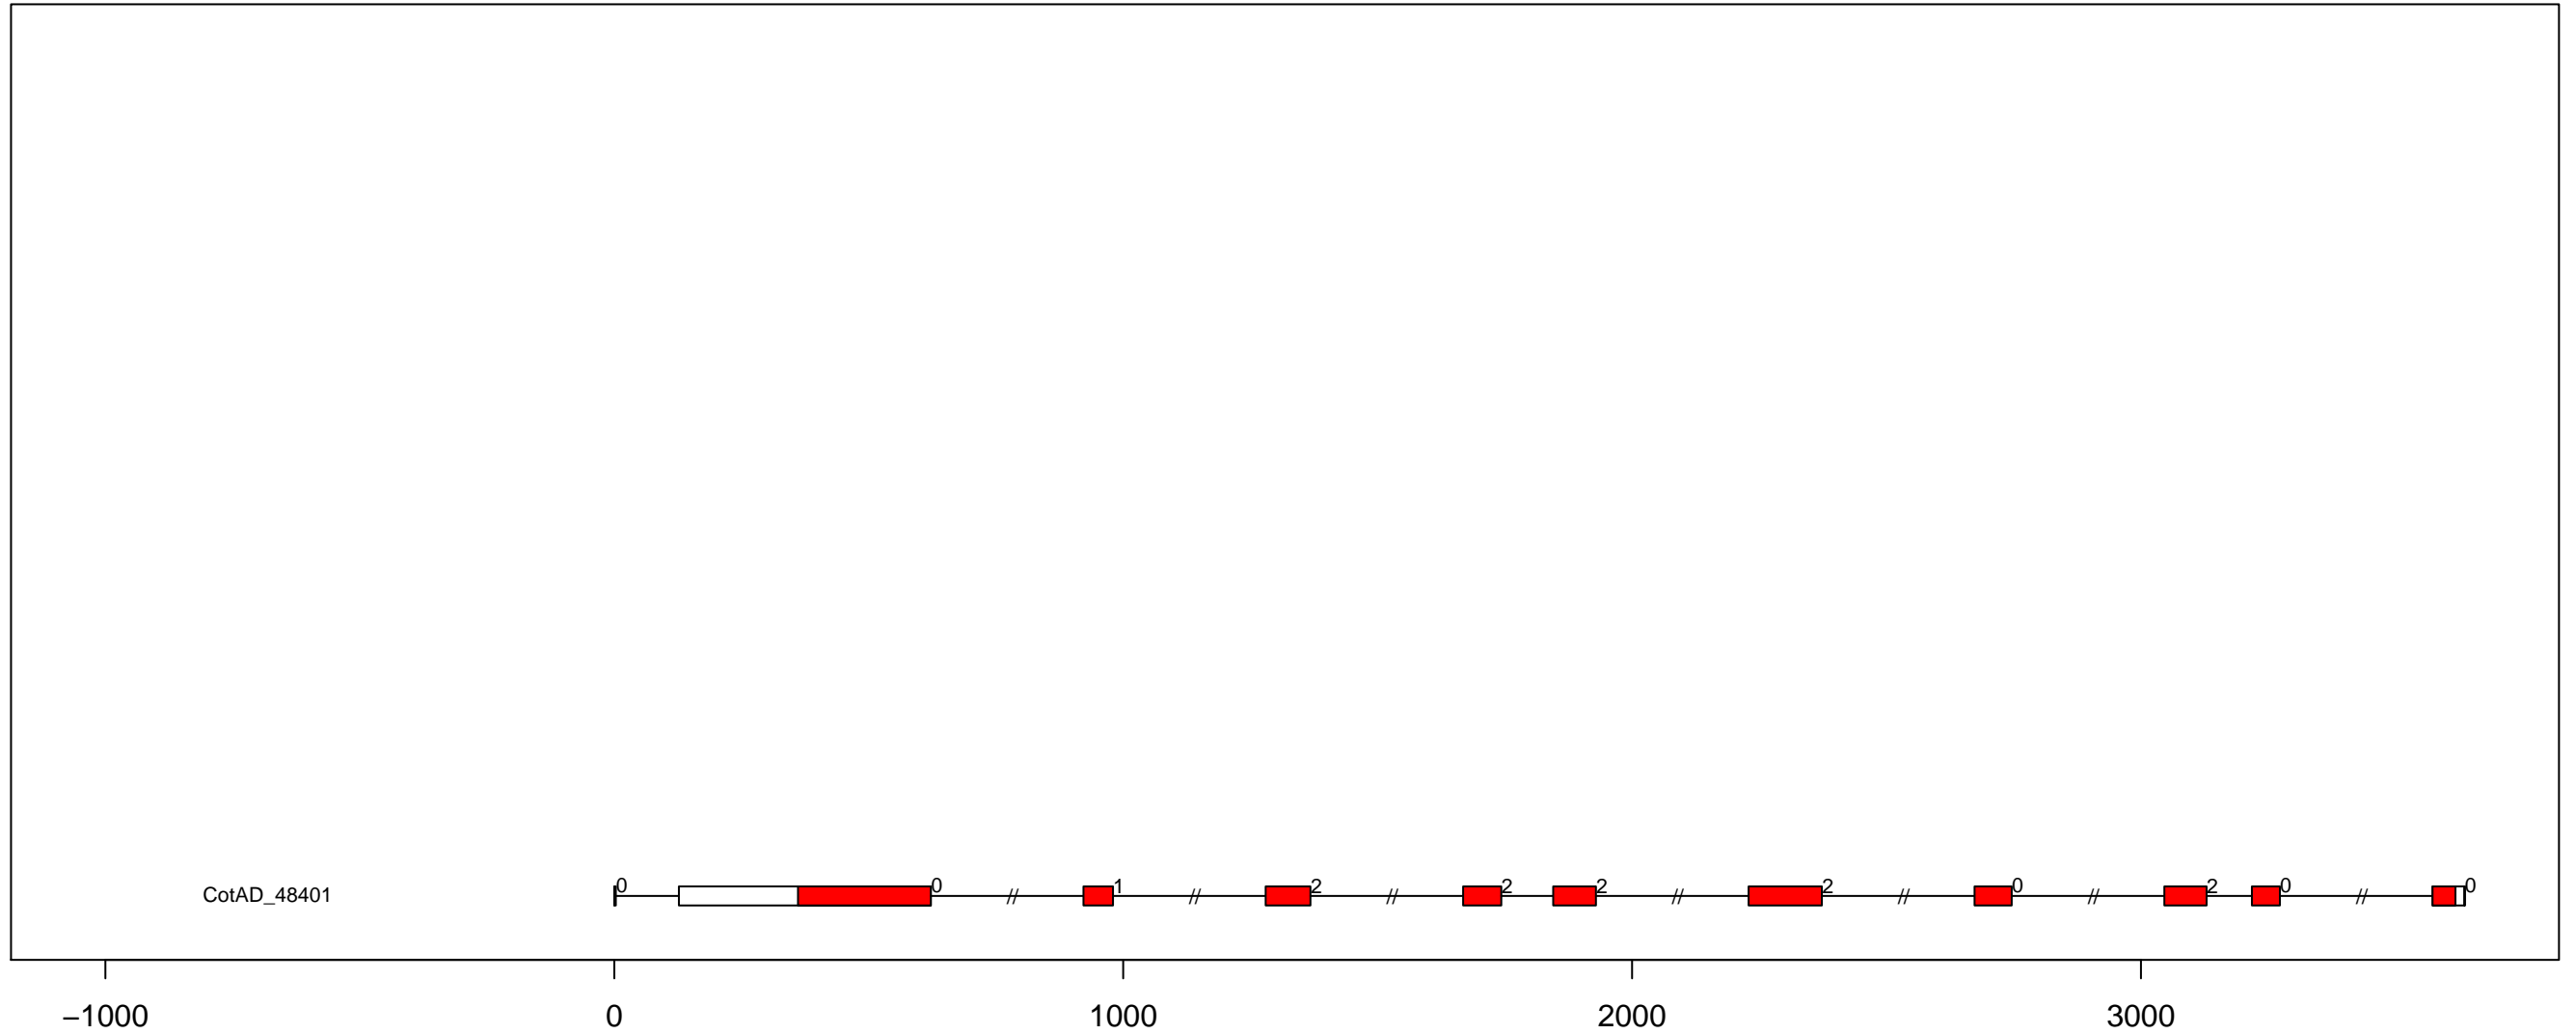



G.hi CMGC\_GSK exon-intron and domain diagram (all)

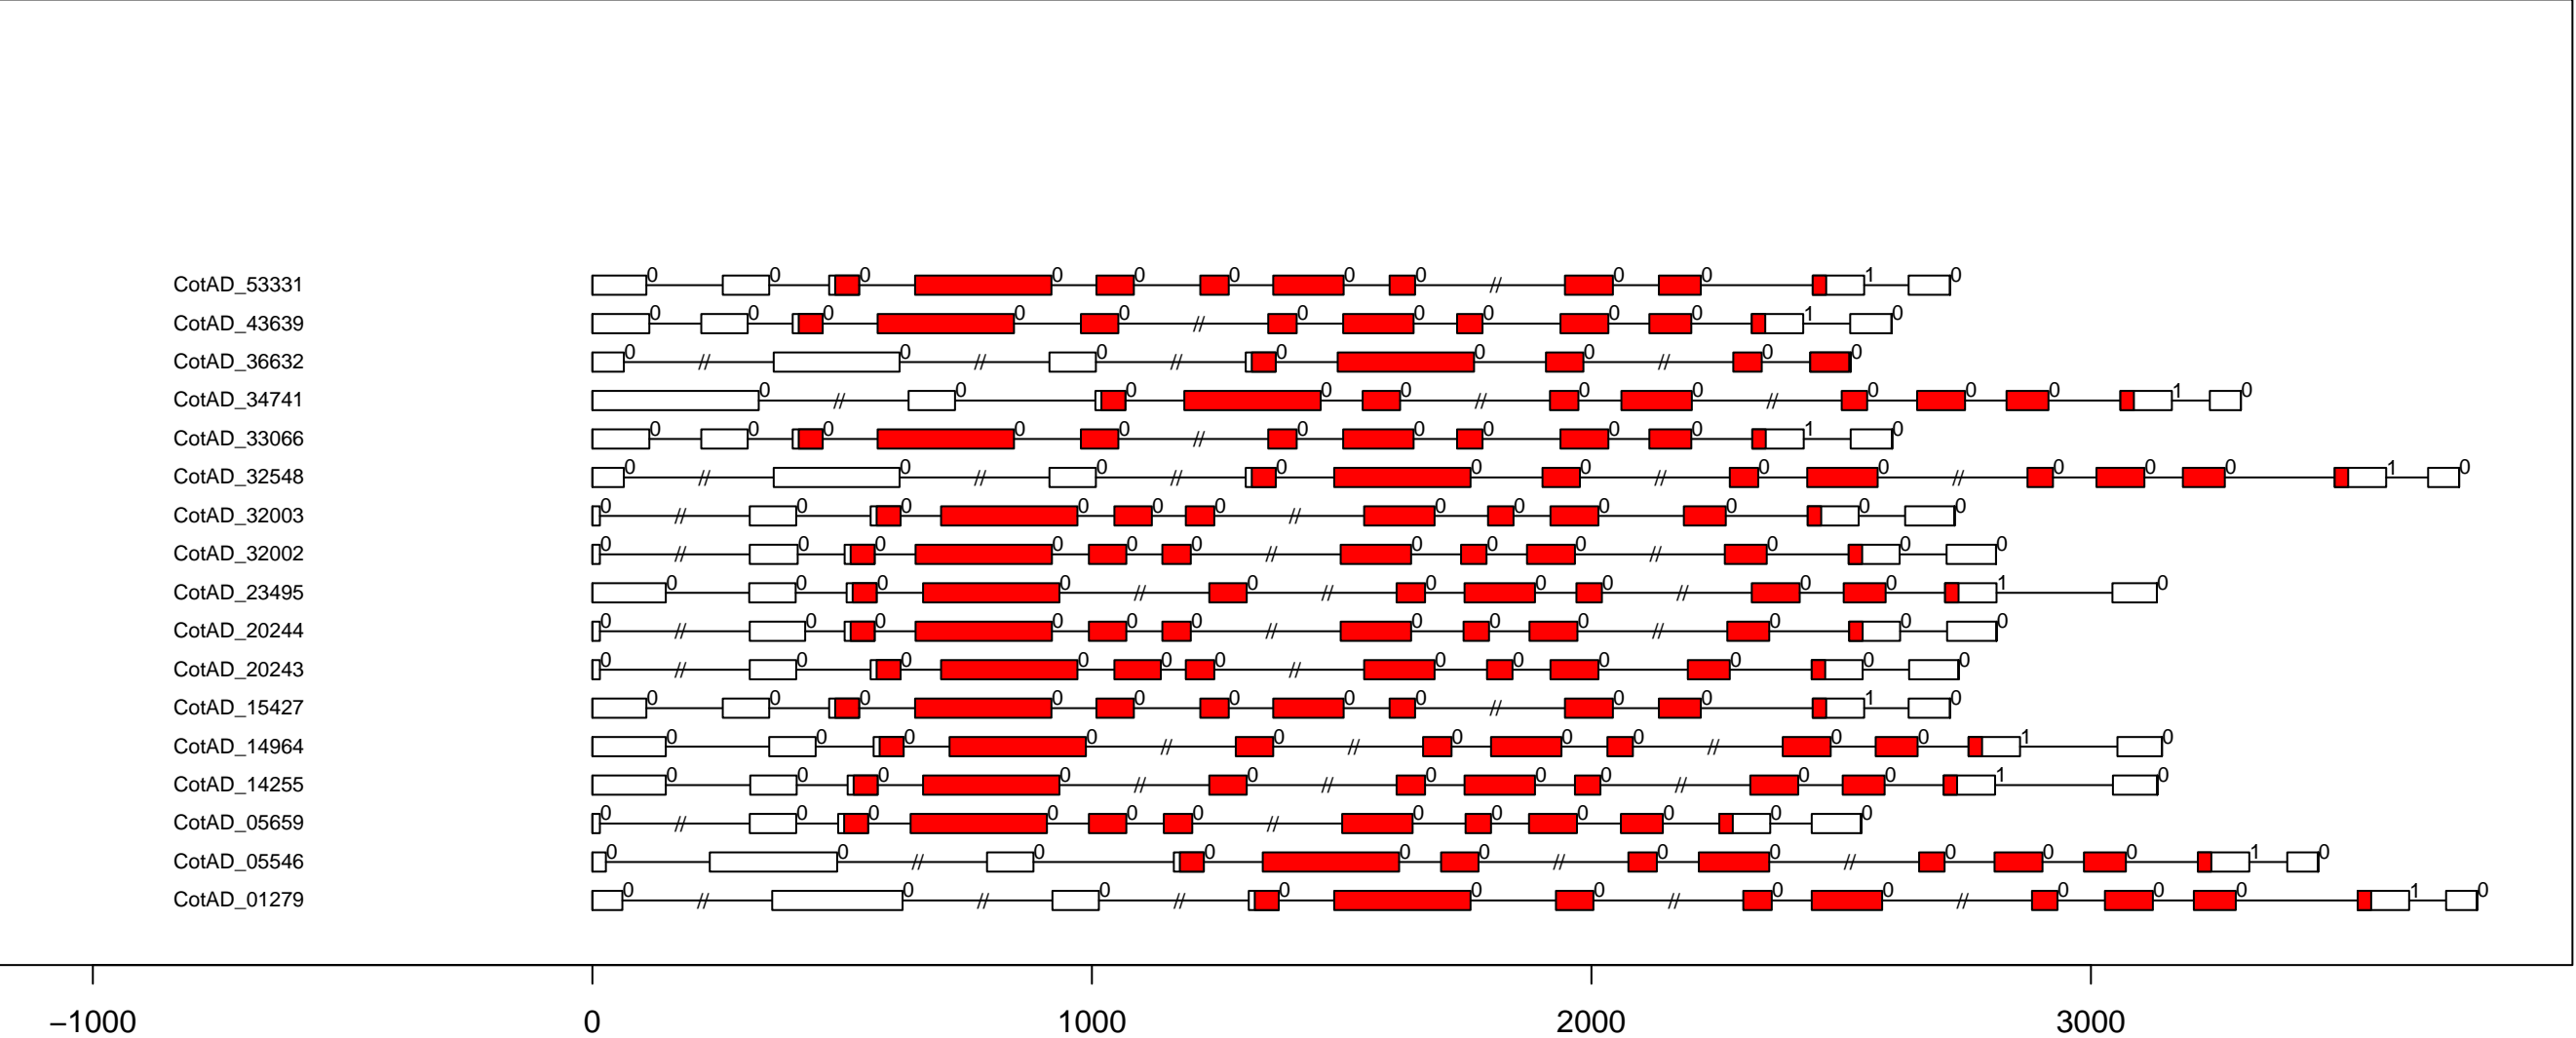

### G.hi CMGC\_MAPK exon-intron and domain diagram (part 1)

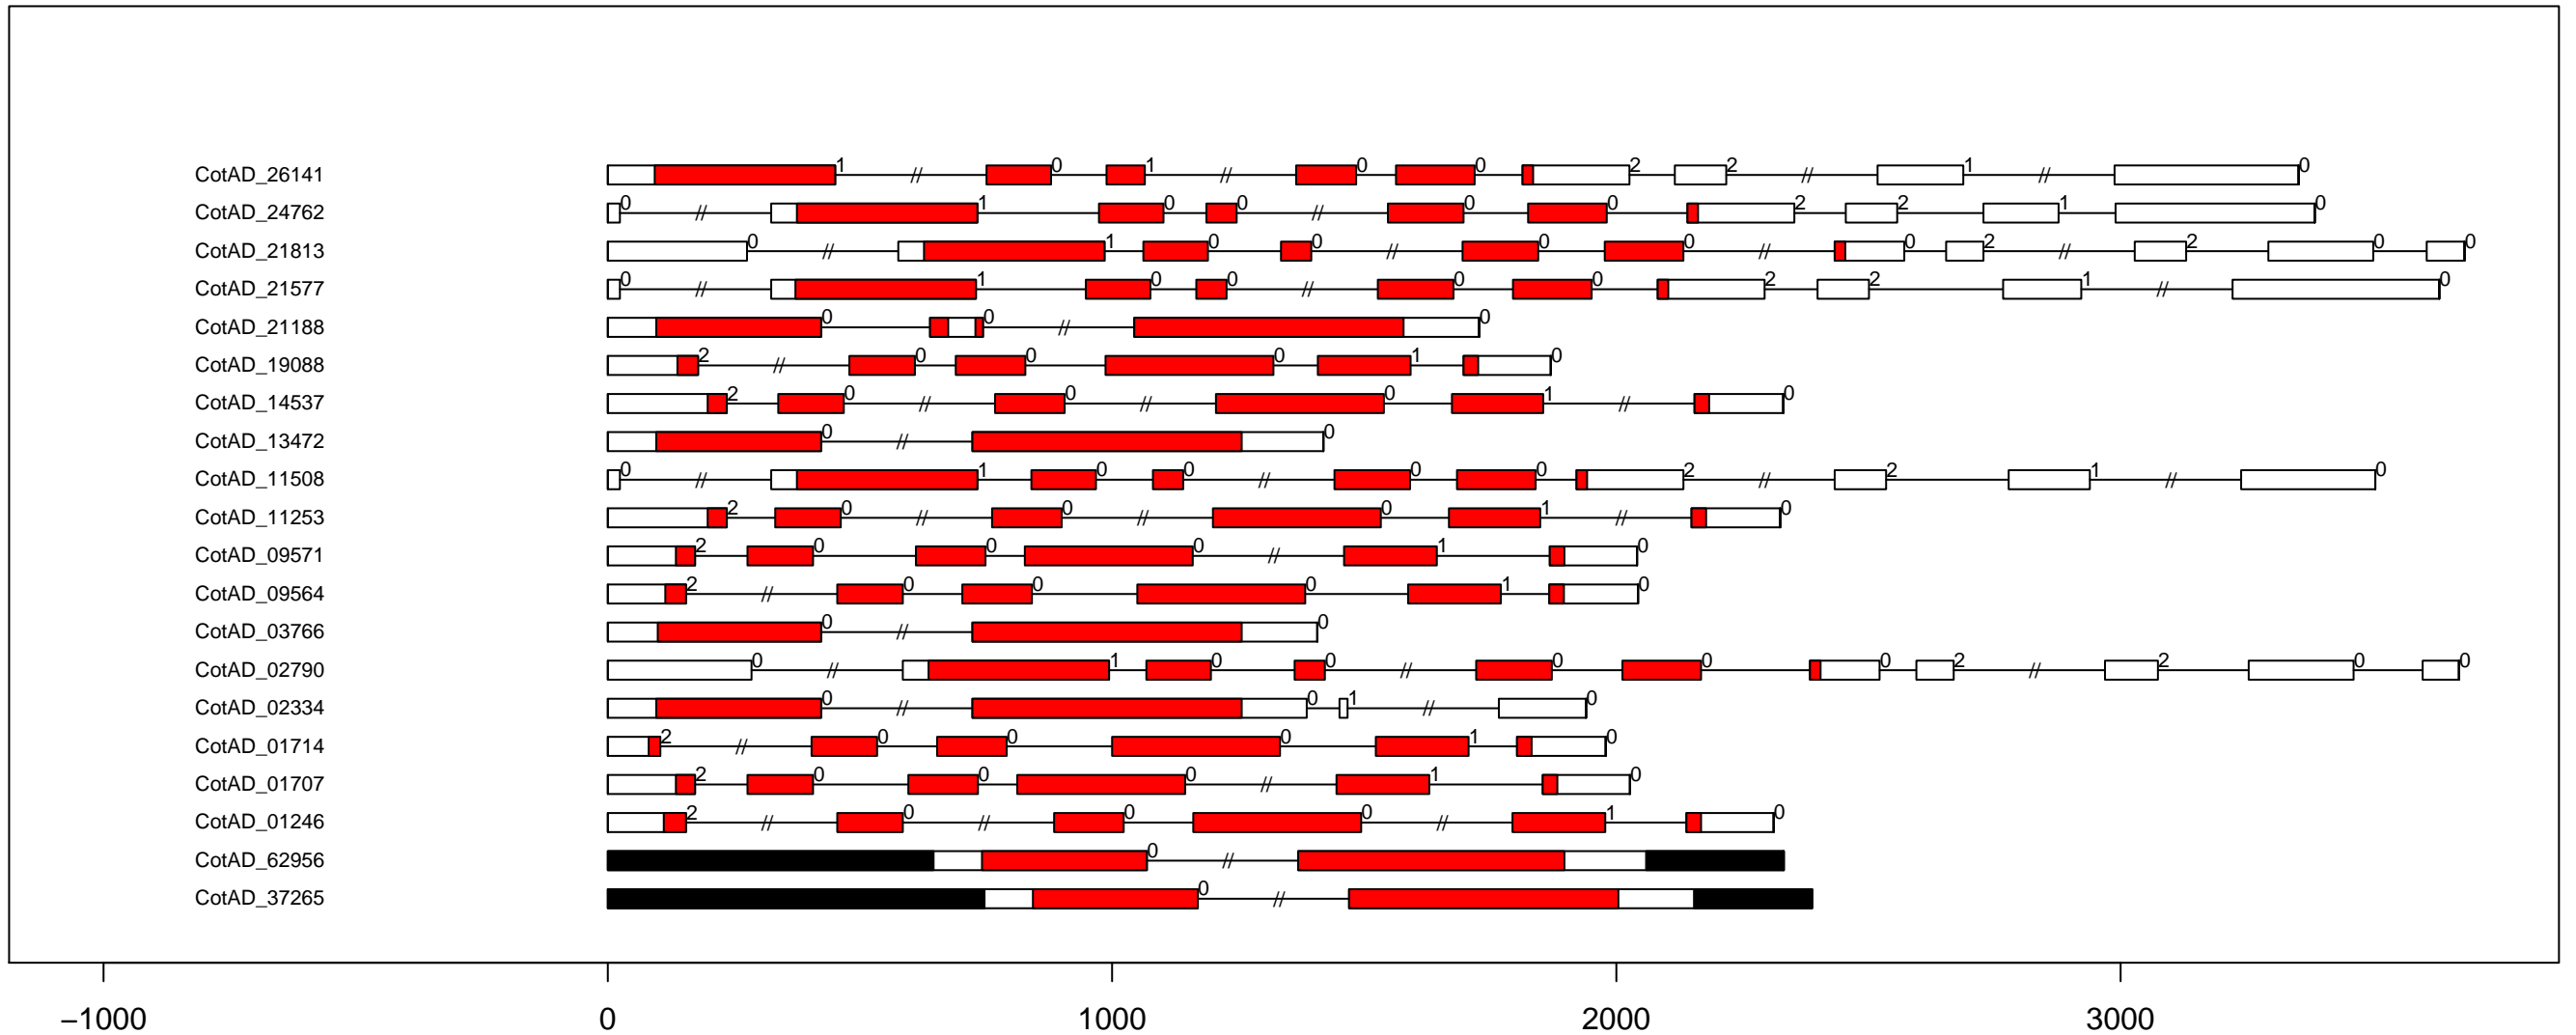



### G.hi CMGC\_MAPK exon-intron and domain diagram (part 3)

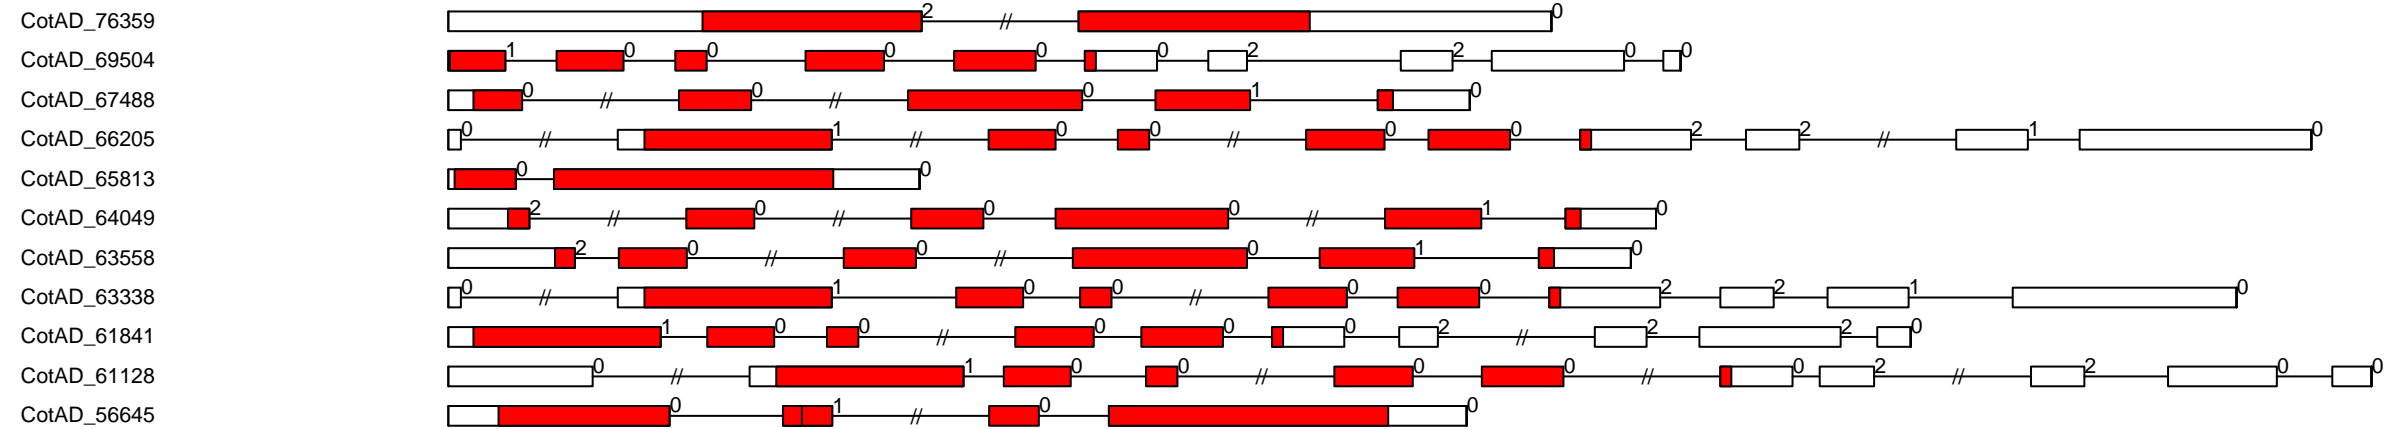

-1000

0

1000

2000

3000

# G.hi CMGC\_PI-Tthe exon-intron and domain diagram (all)

CotAD\_52759

CotAD\_00441

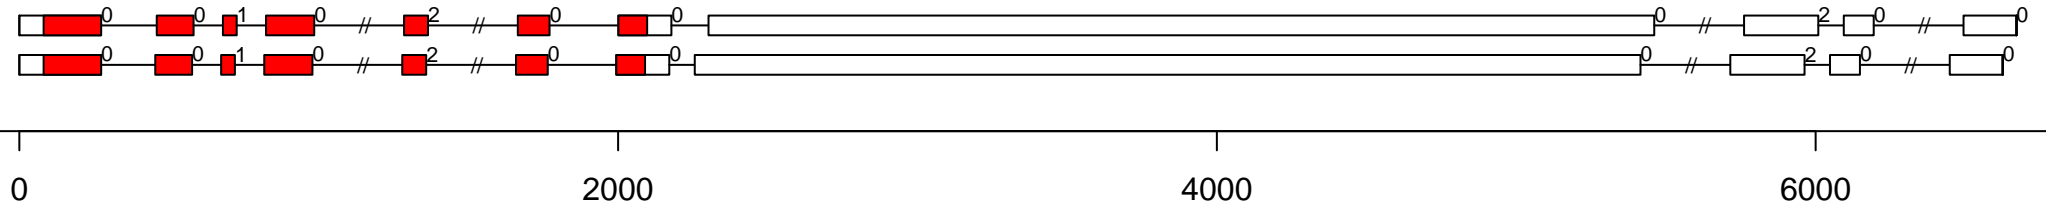

G.hi CMGC\_RCK exon-intron and domain diagram (all)

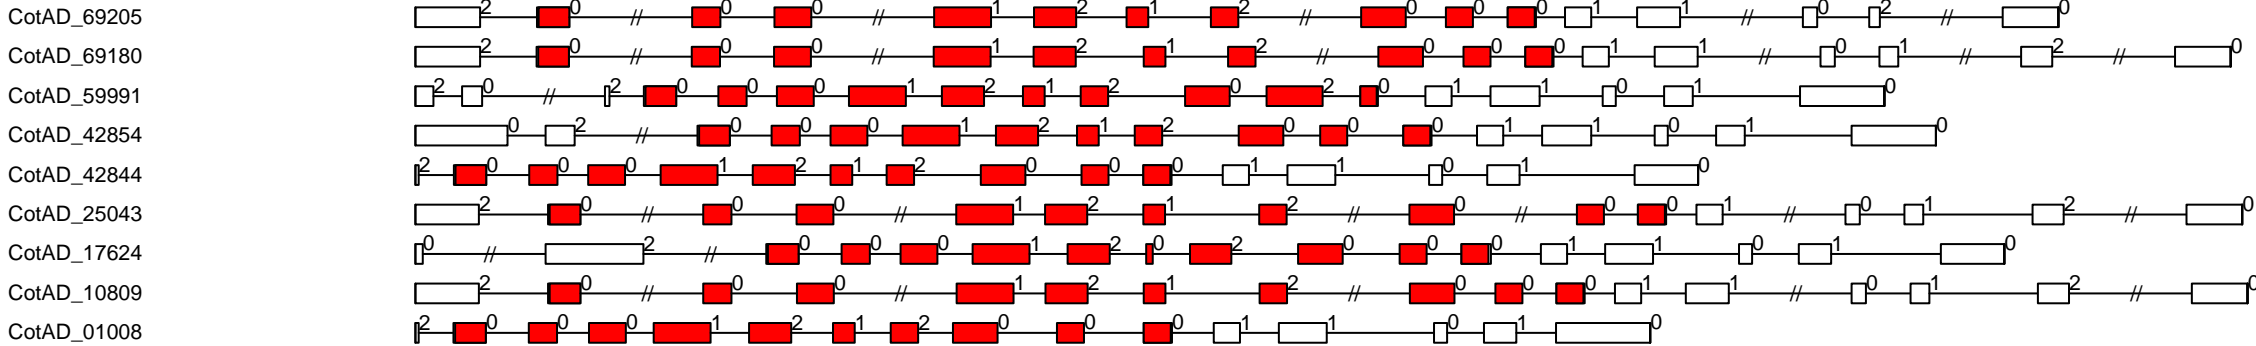

-1000

0

1000

2000

3000

4000

# G.hi CMGC\_SRPK exon-intron and domain diagram (all)

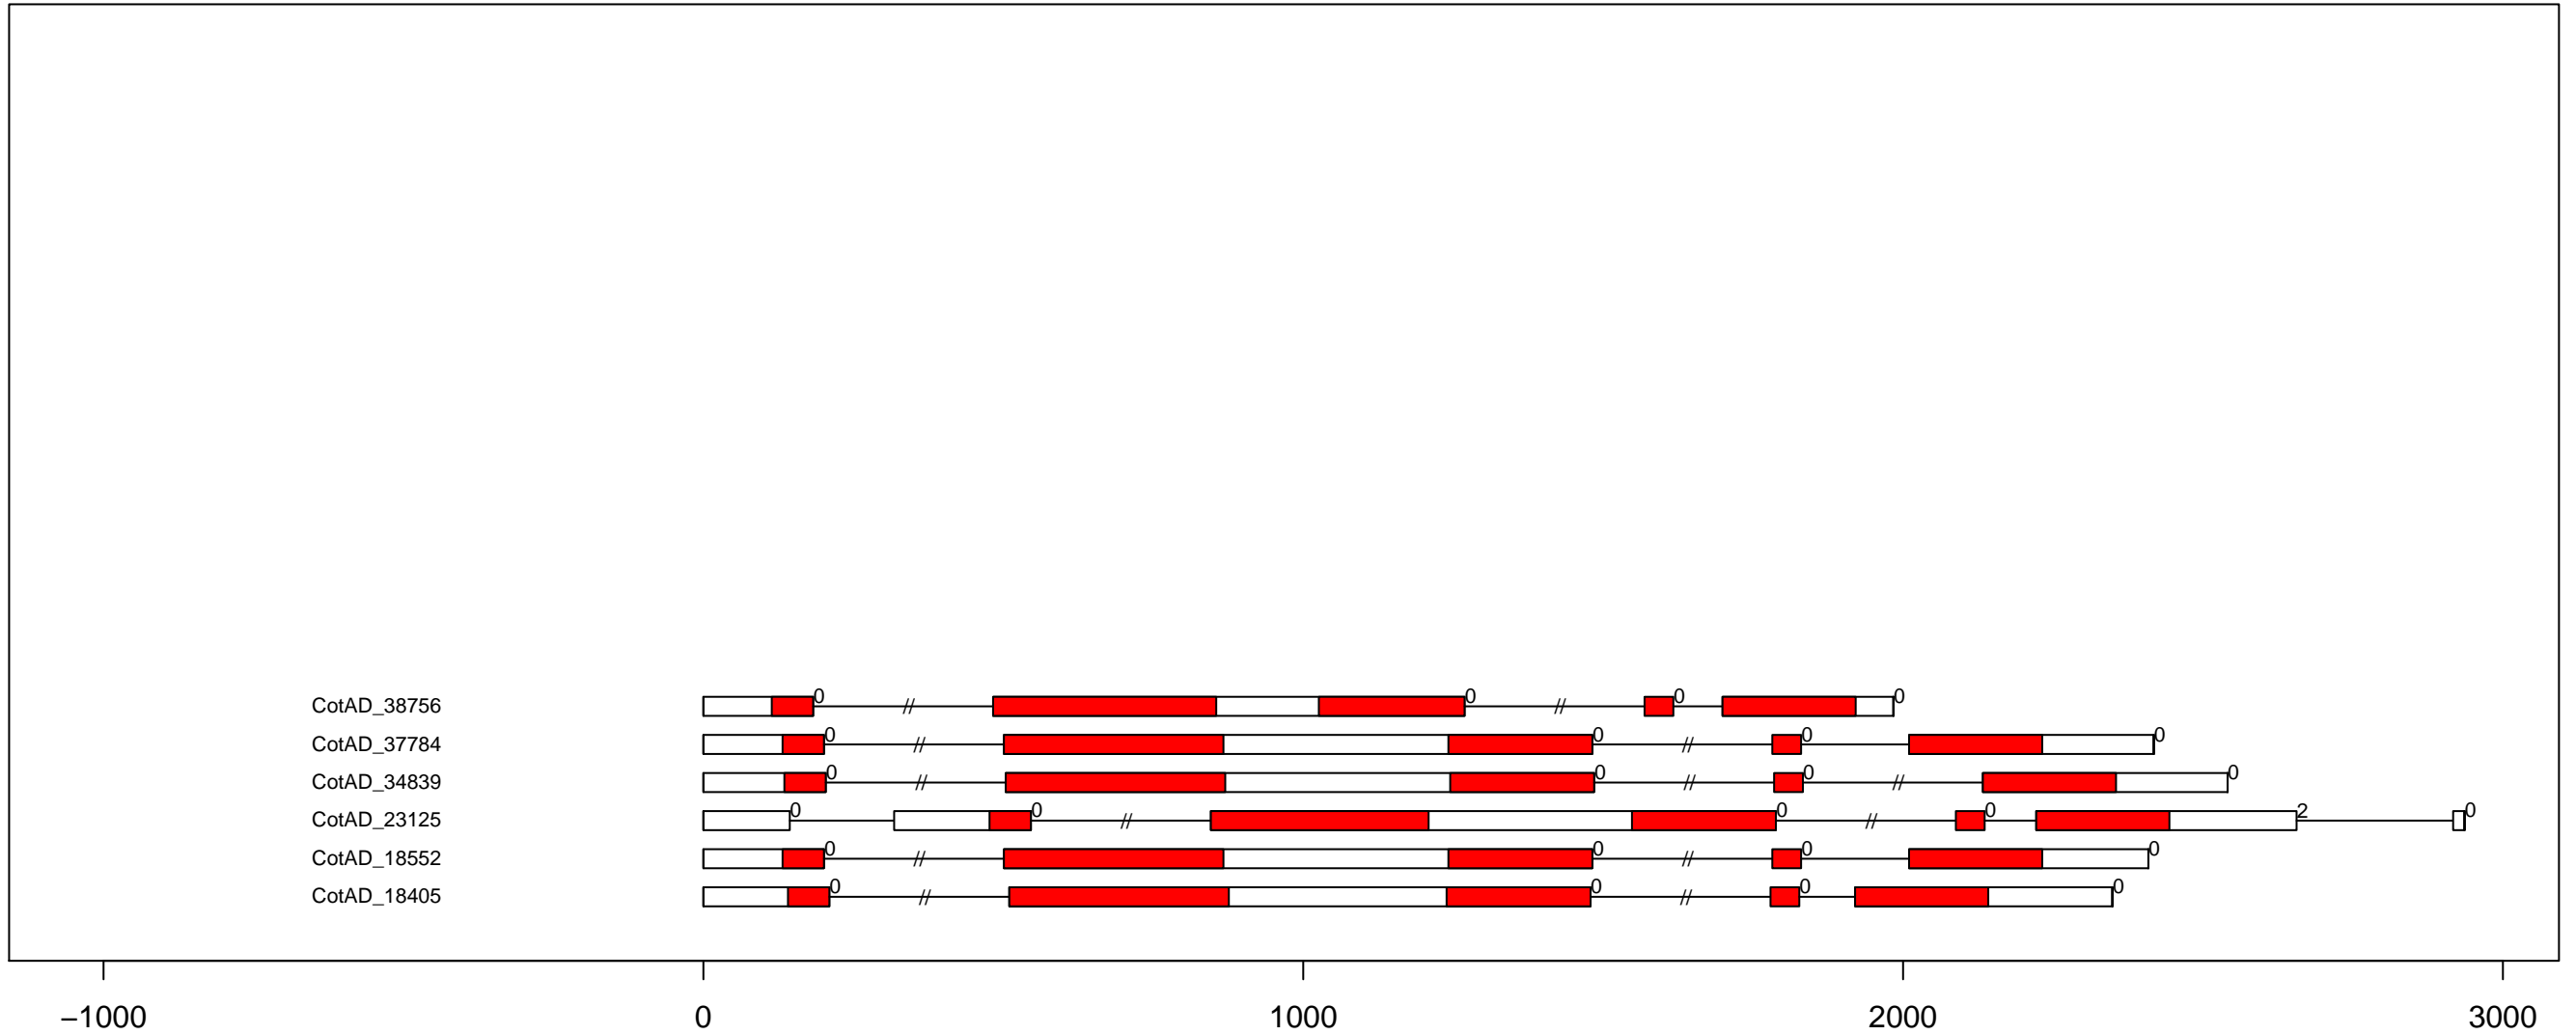

# G.hi Group-PI-2 exon-intron and domain diagram (all)

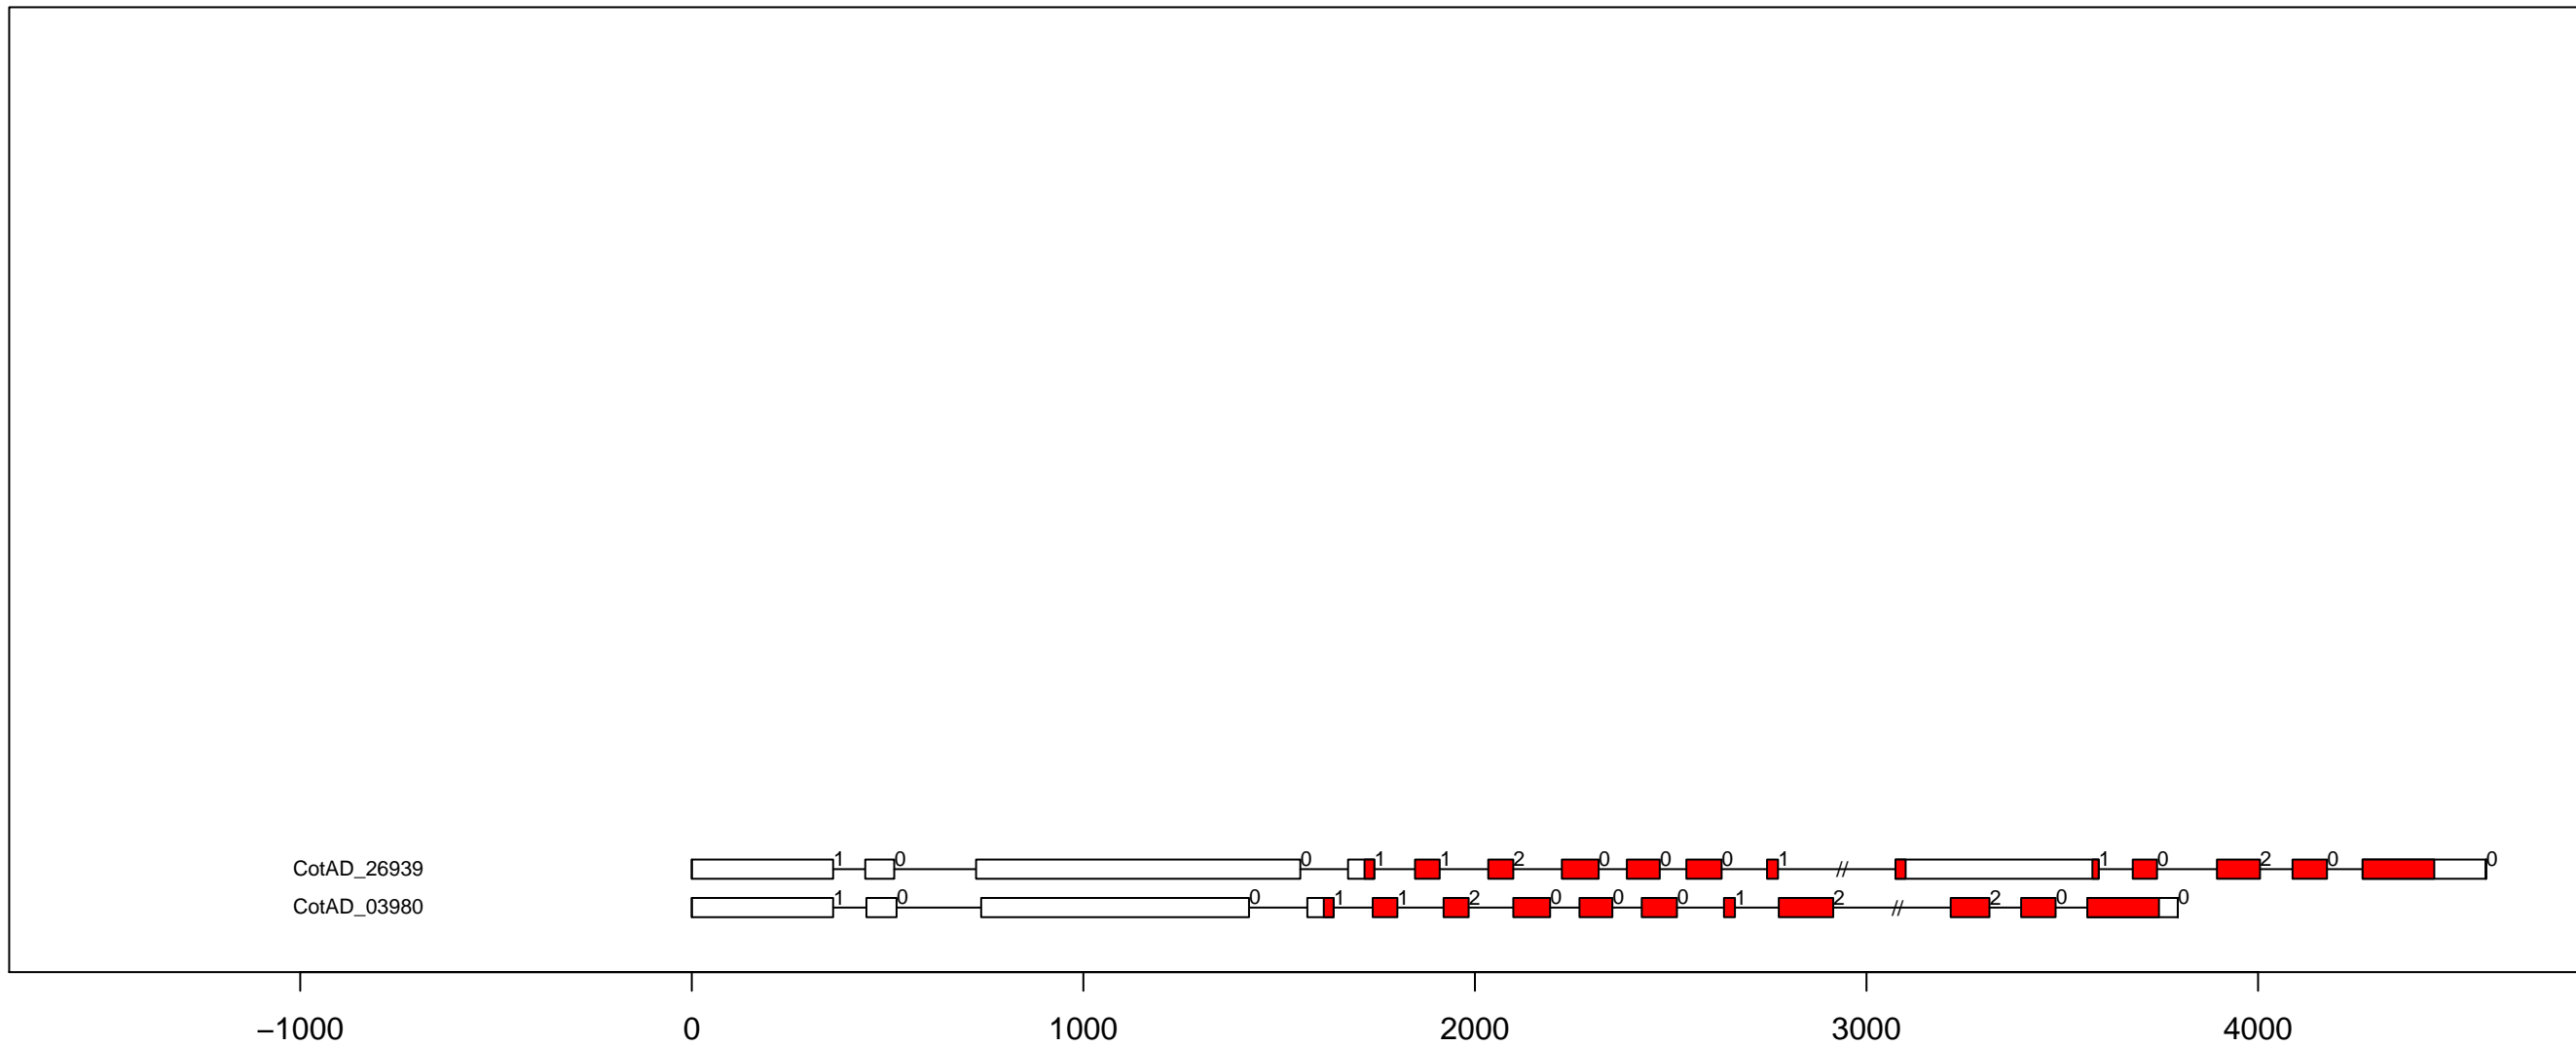



# G.hi Group-PI-3 exon-intron and domain diagram (all)

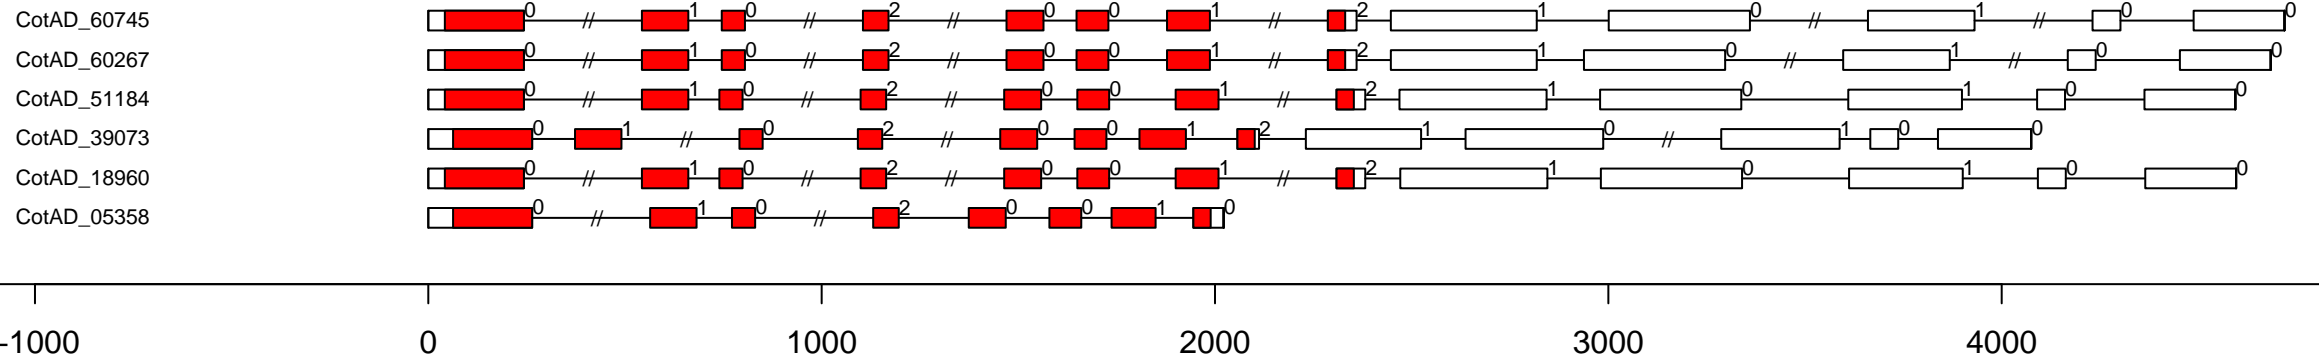



# G.hi IRE1 exon-intron and domain diagram (all)

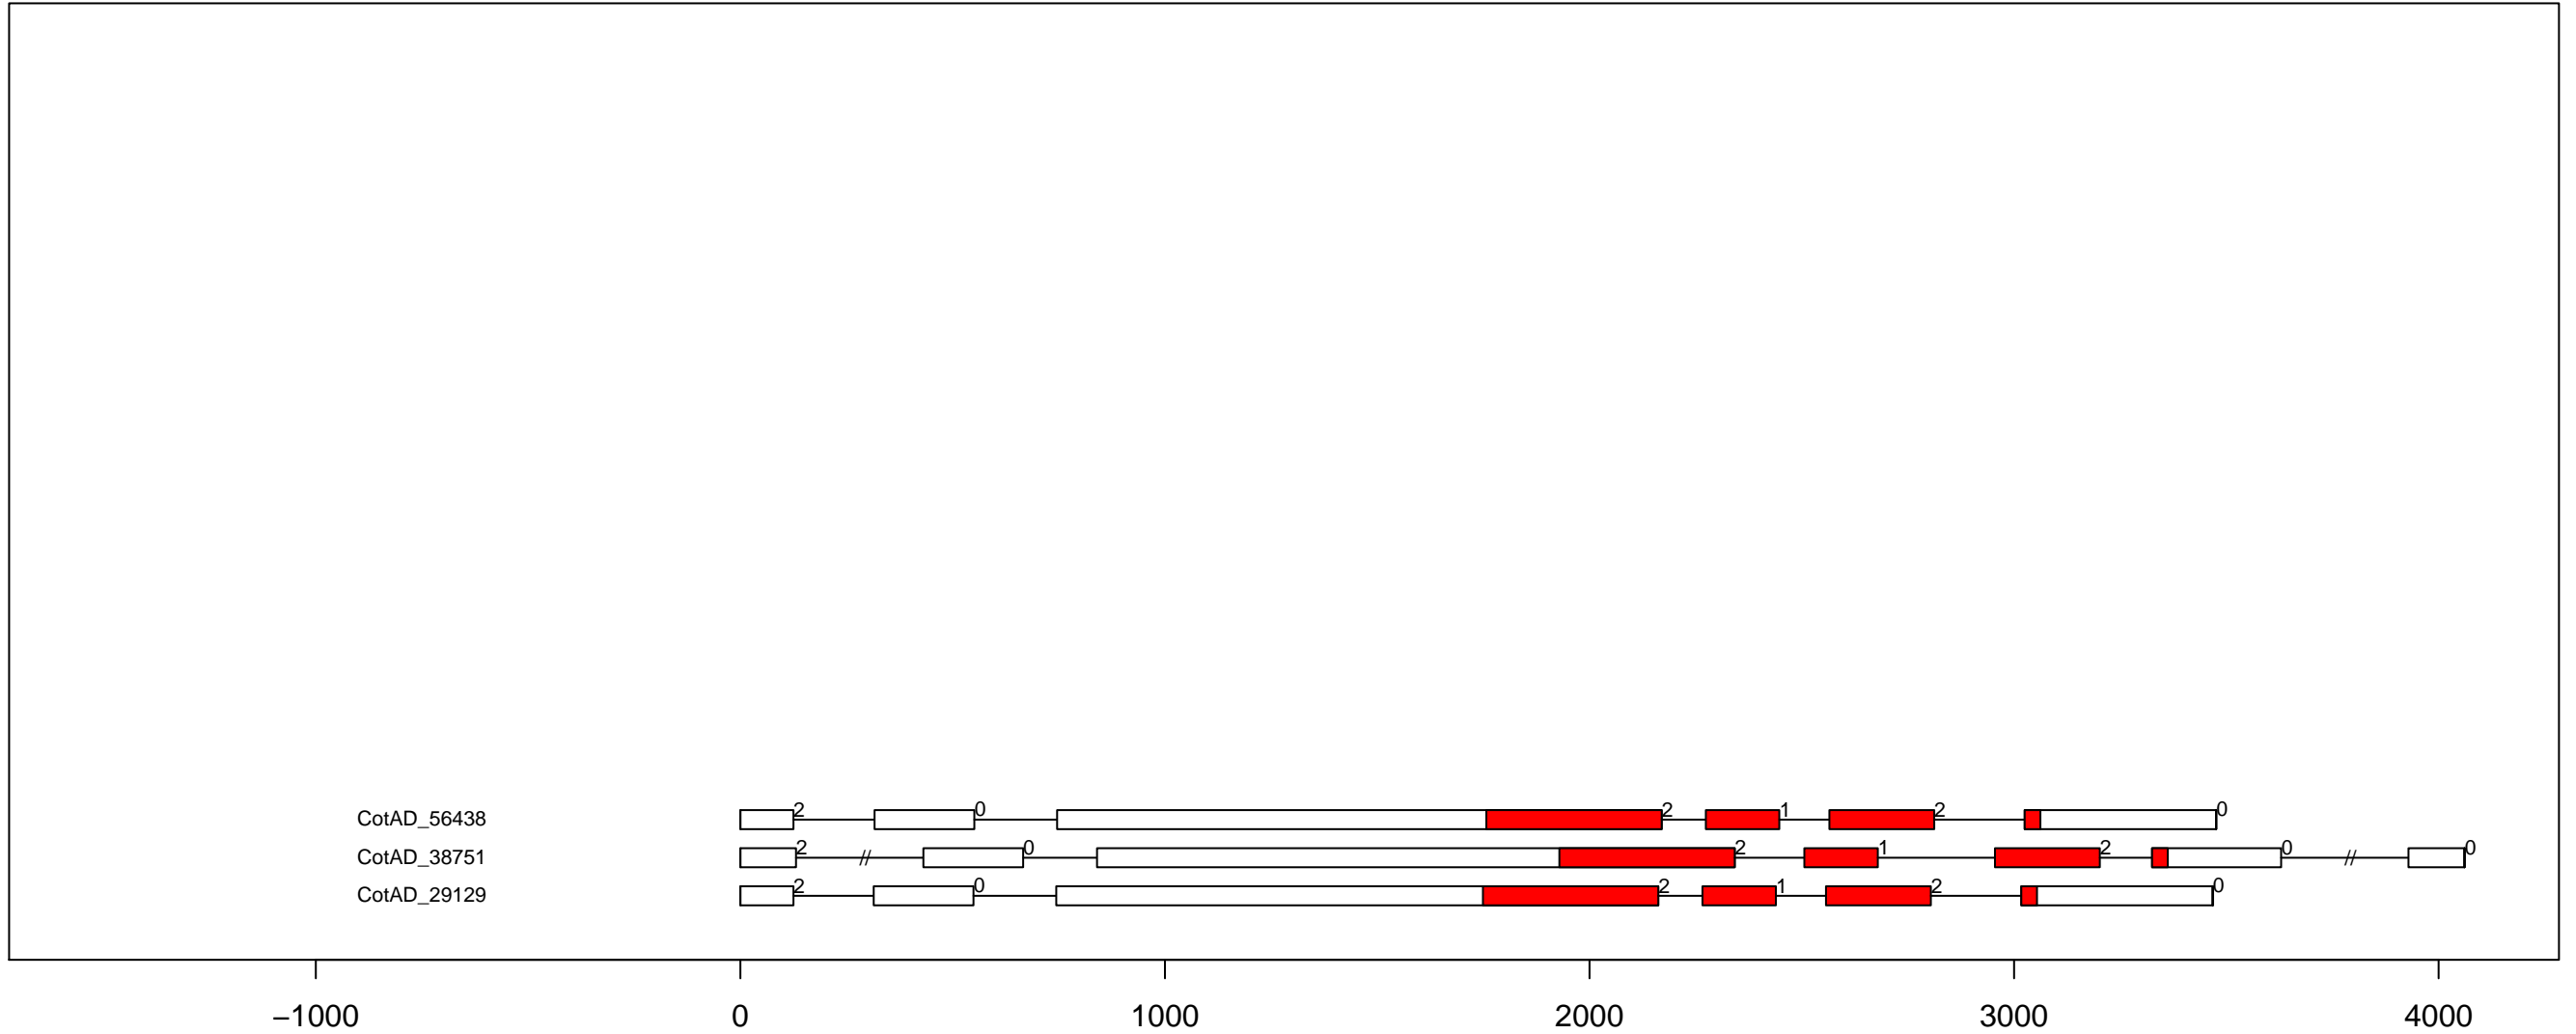

# G.hi NAK exon-intron and domain diagram (all)

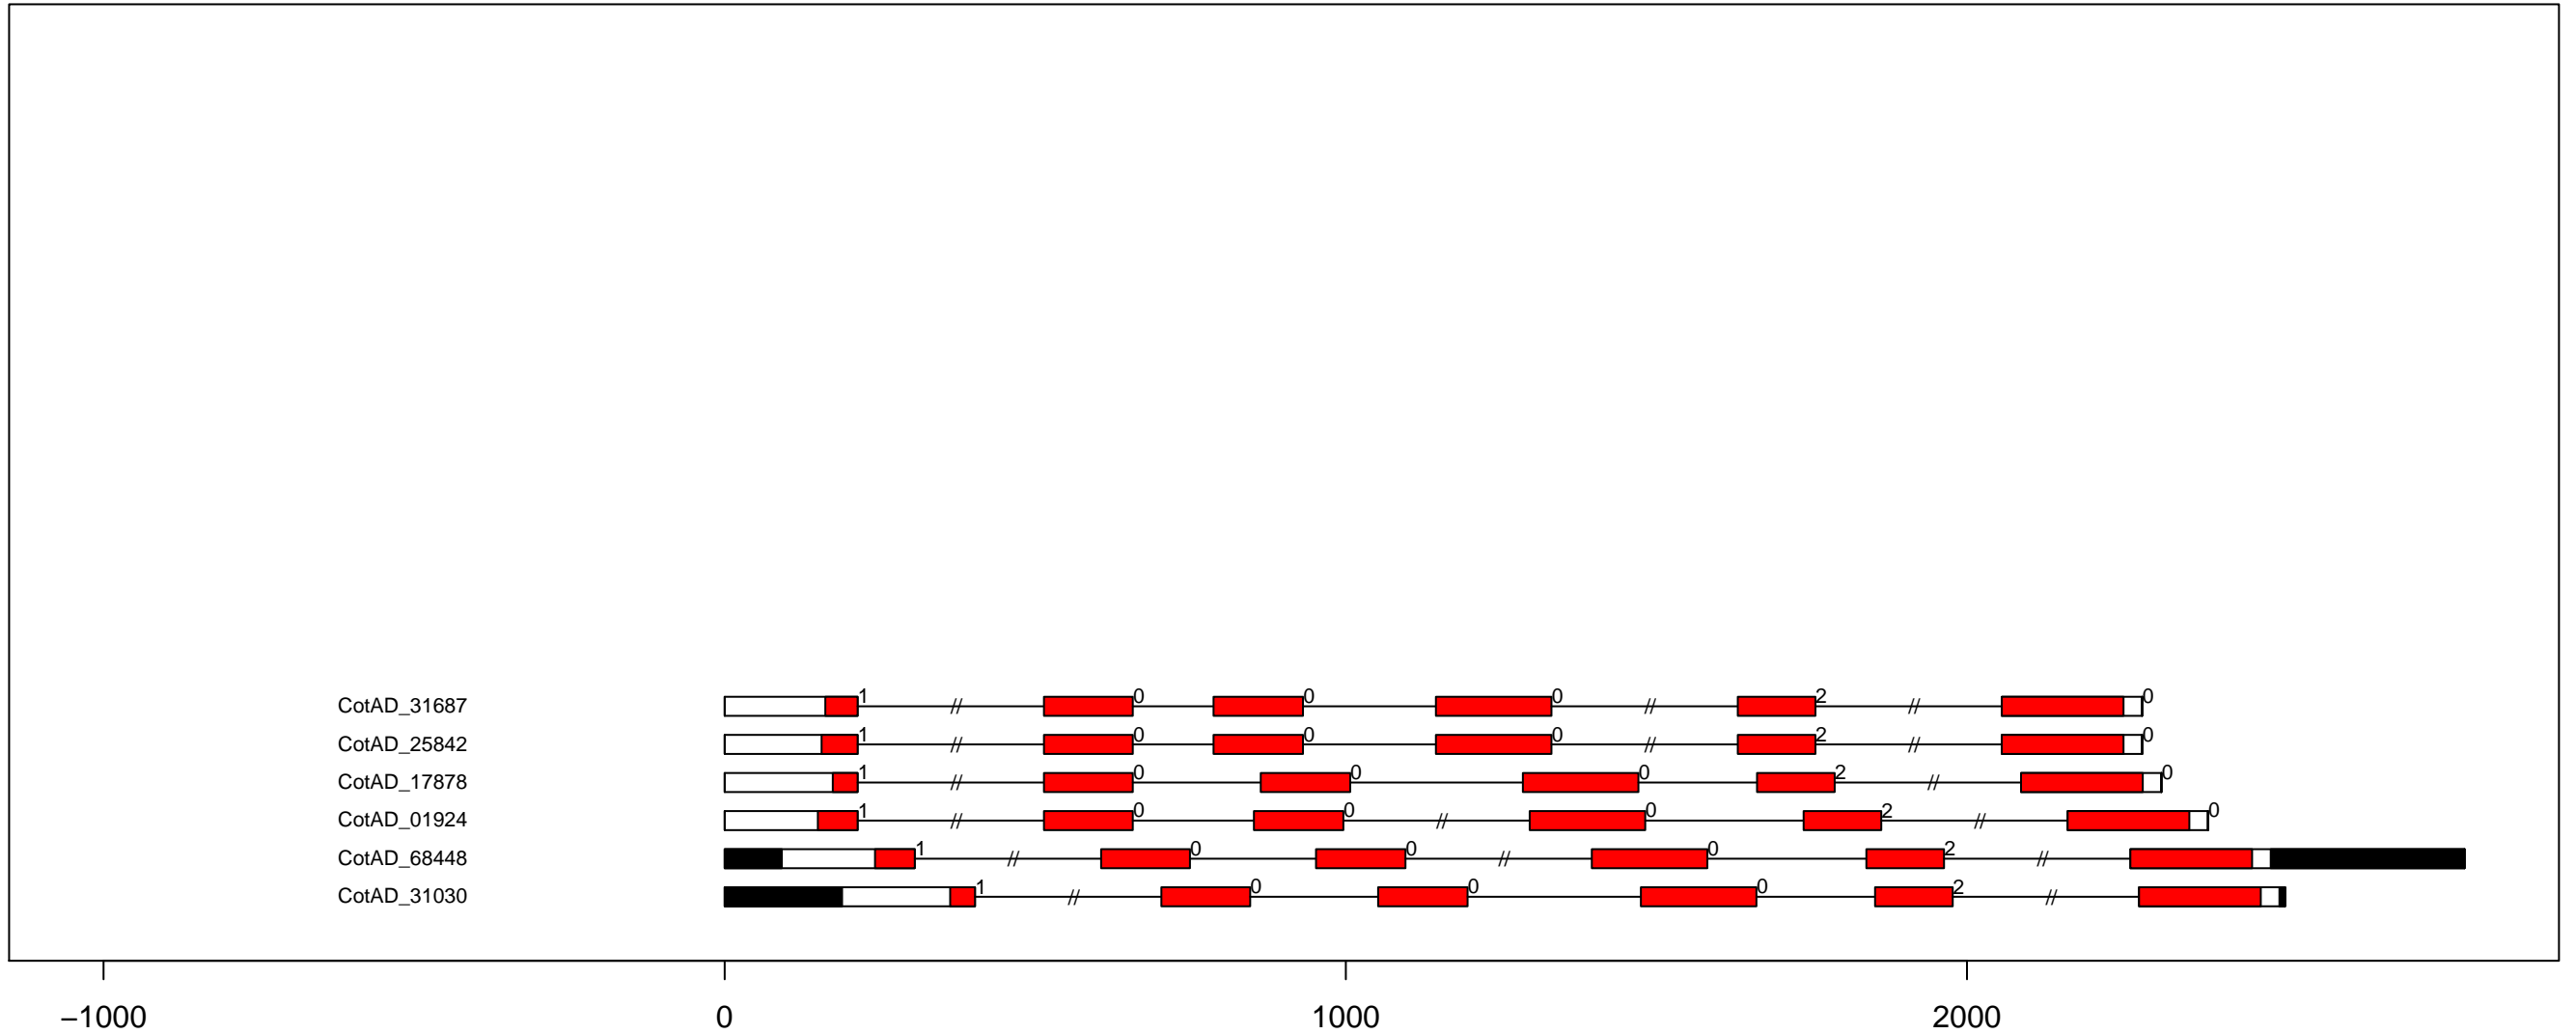

### G.hi NEK exon-intron and domain diagram (all)

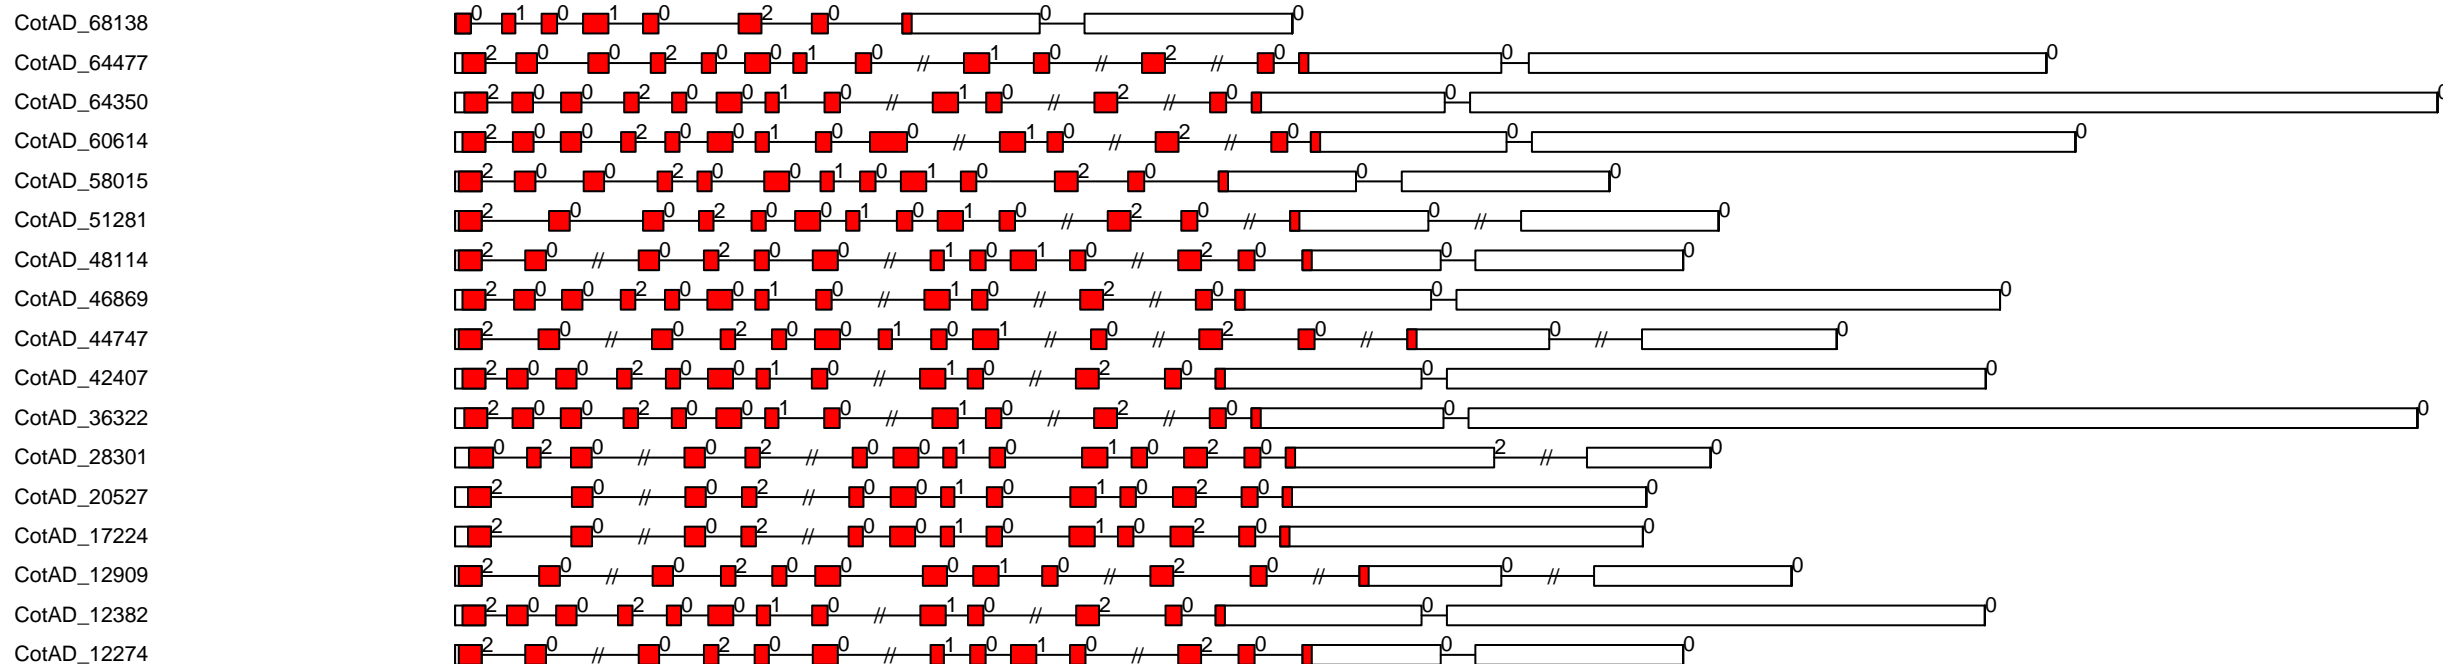

# G.hi PEK\_GCIN2 exon-intron and domain diagram (all)

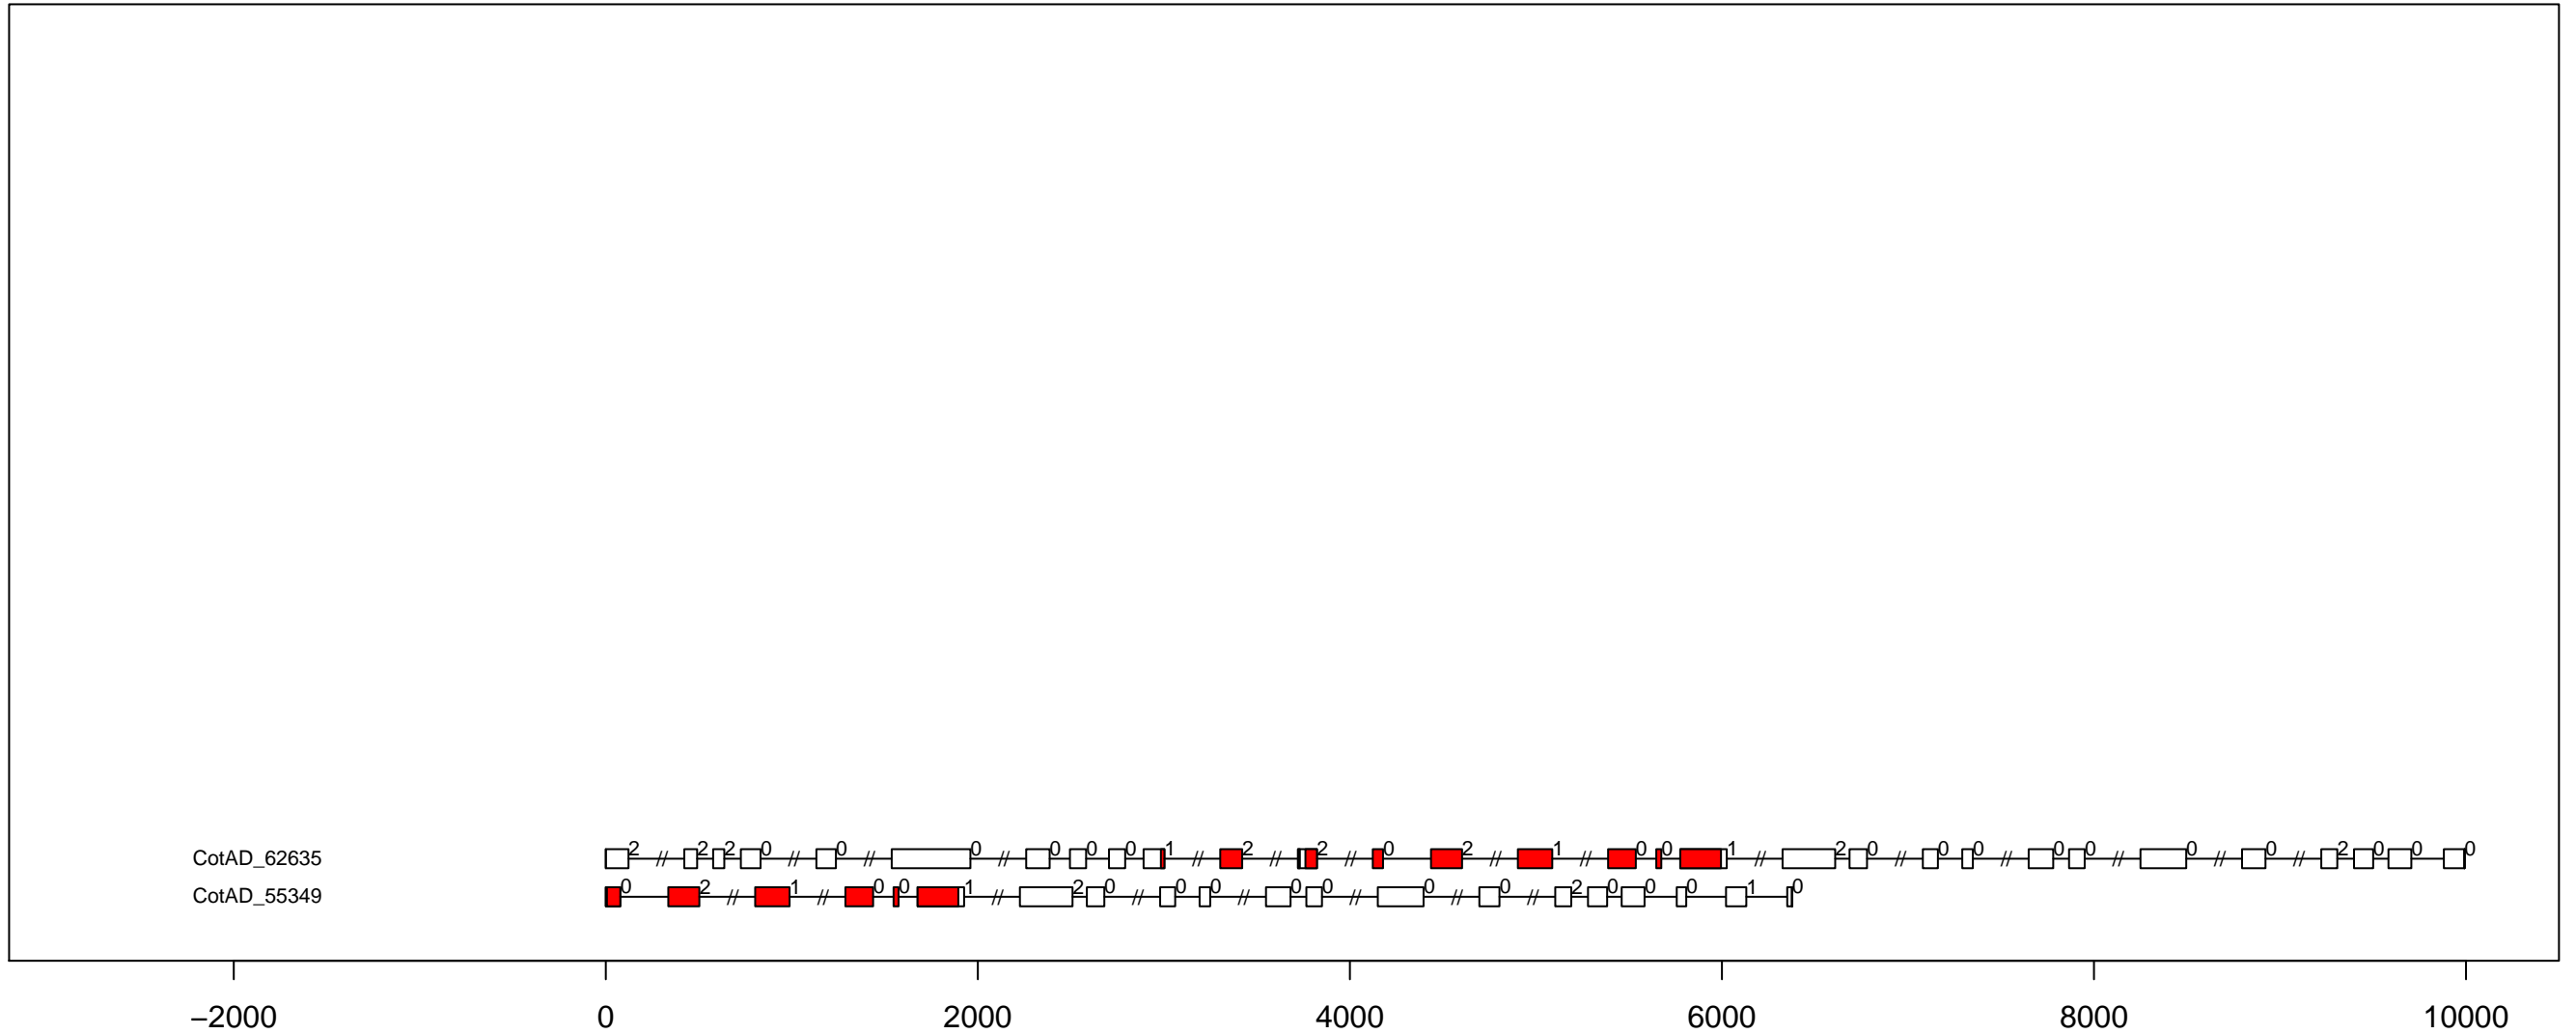

# G.hi PEK\_PEK exon-intron and domain diagram (all)

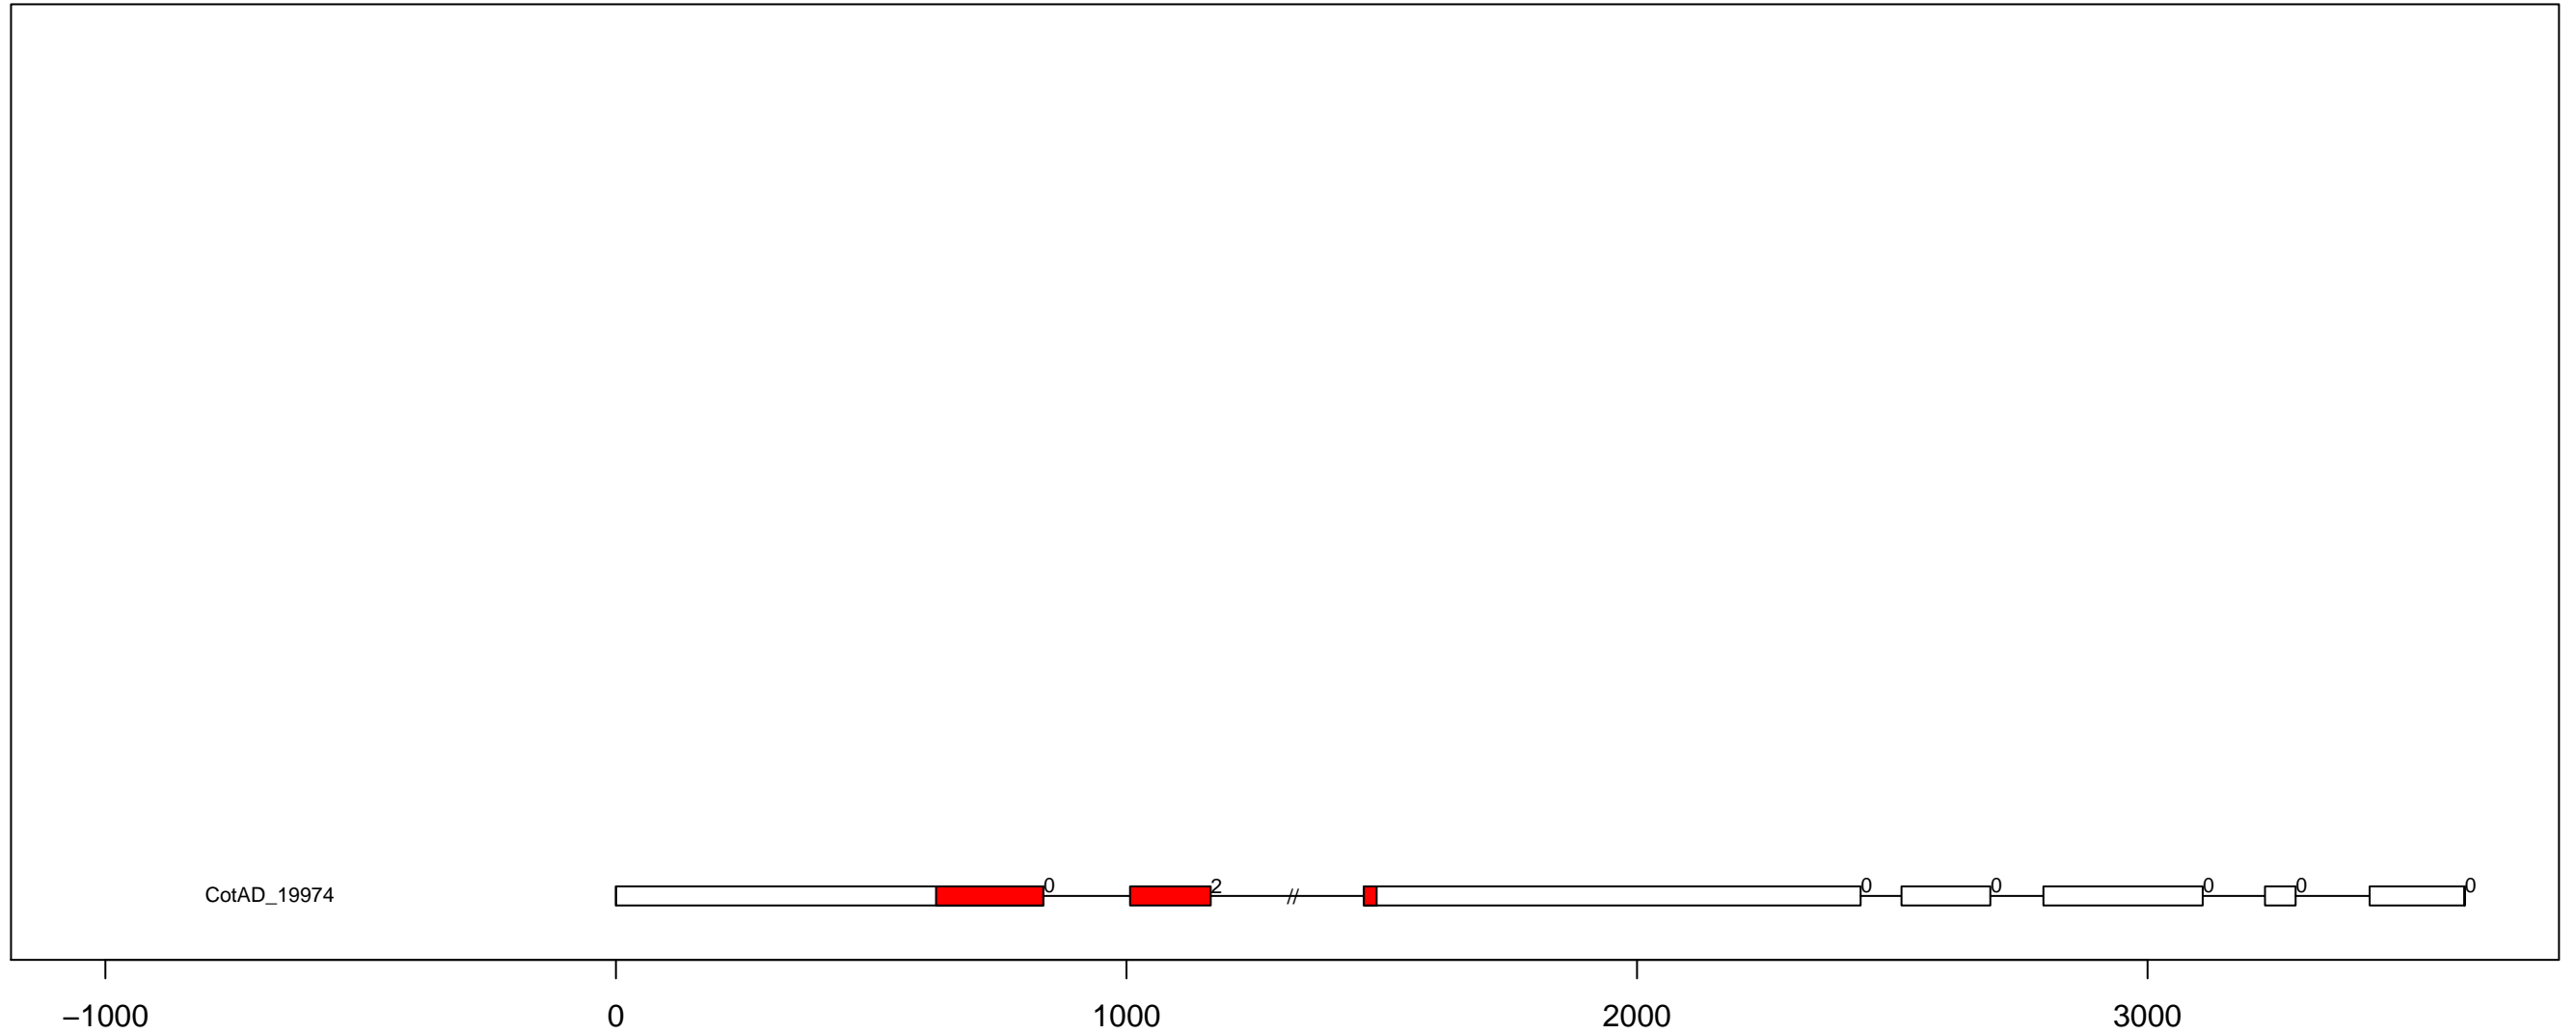

# G.hi RLK-Pelle\_C-LEC exon-intron and domain diagram (all)

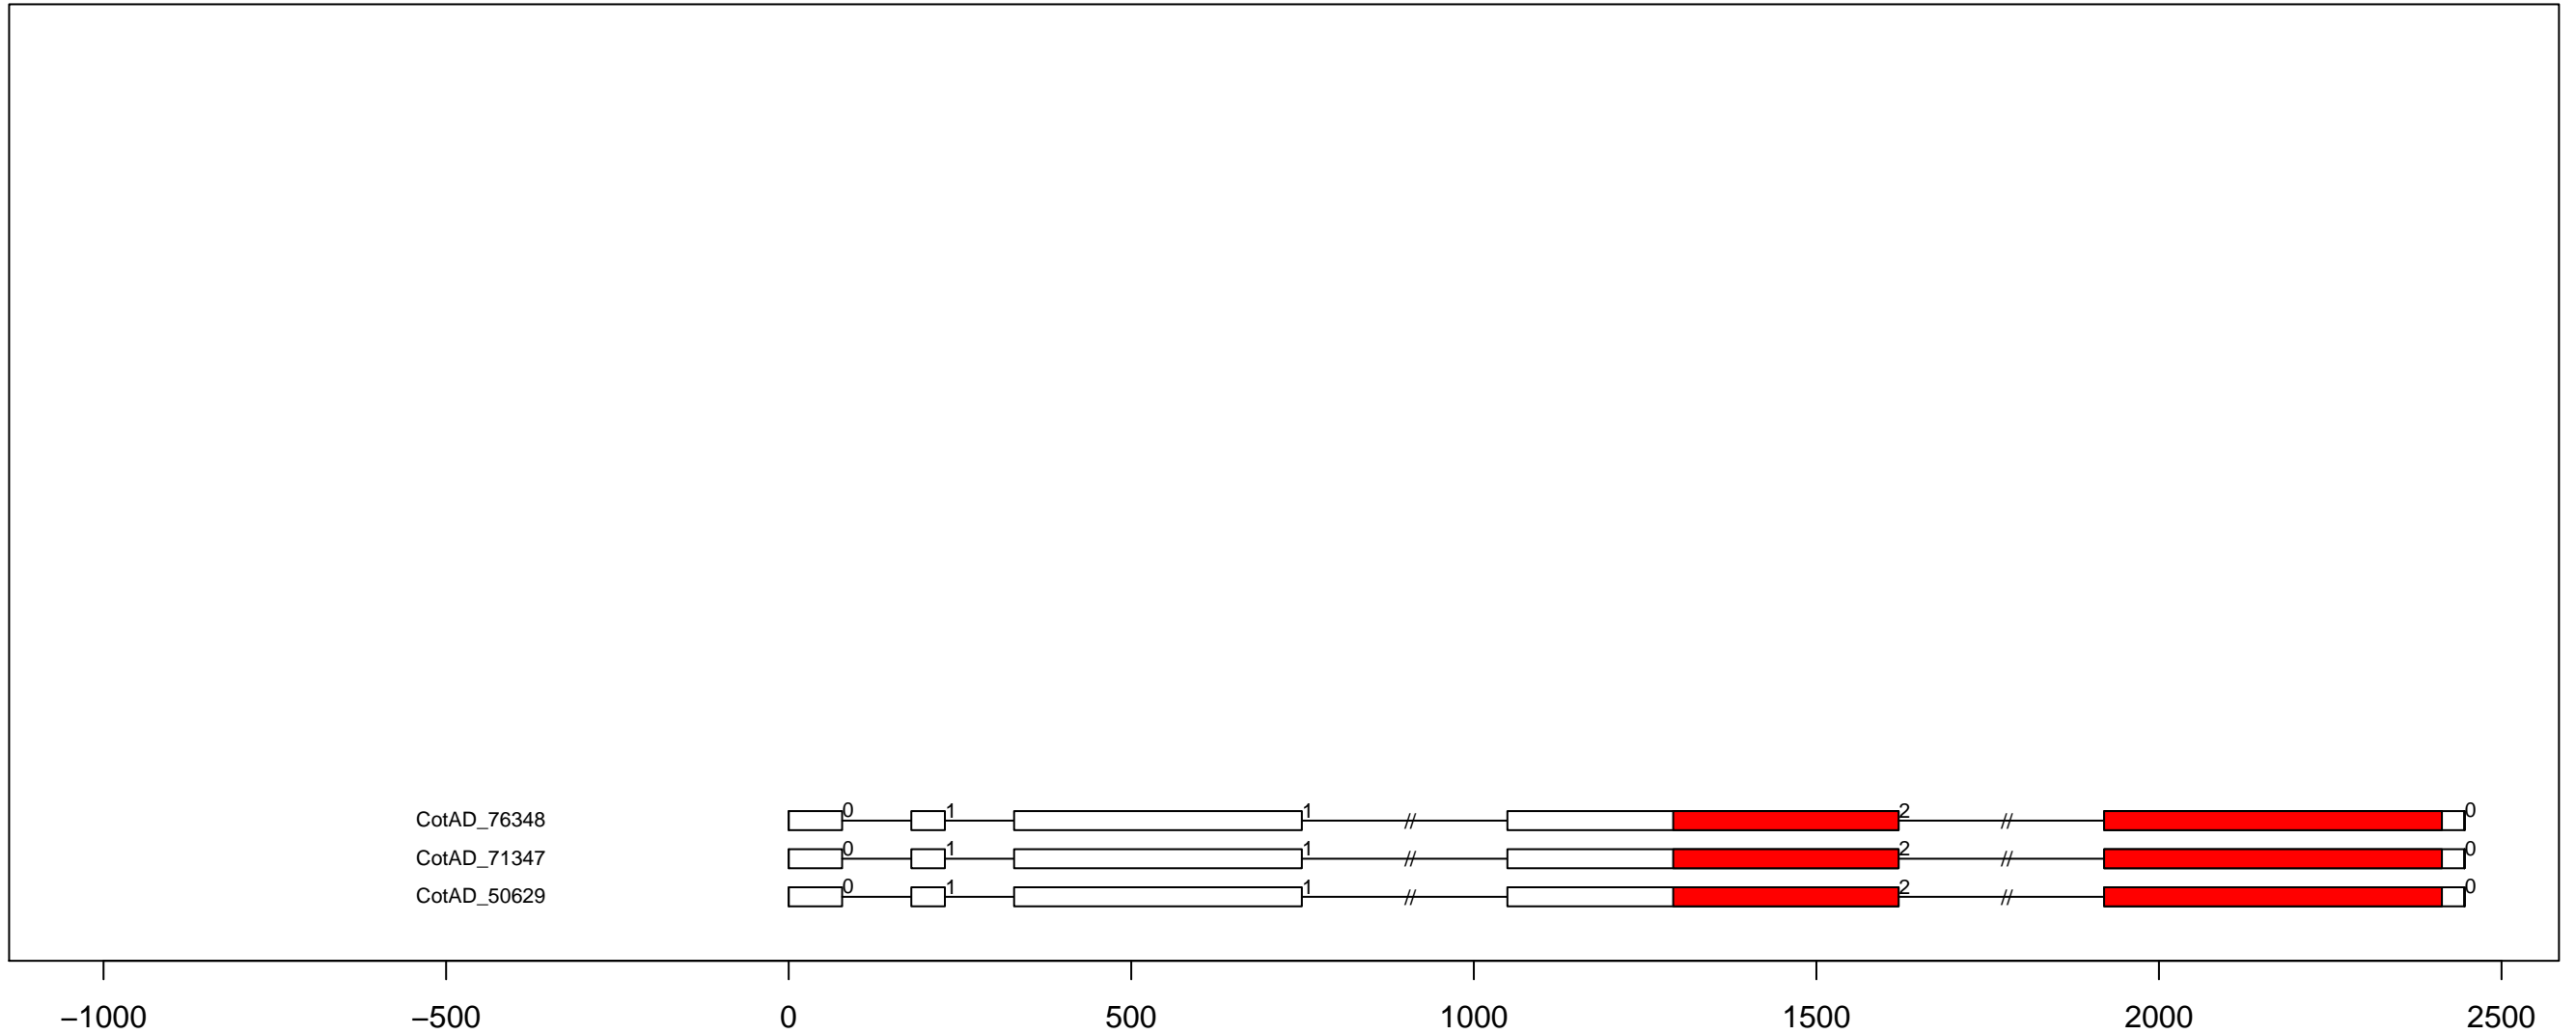



### G.hi RLK-Pelle\_CR4L exon-intron and domain diagram (part 1)

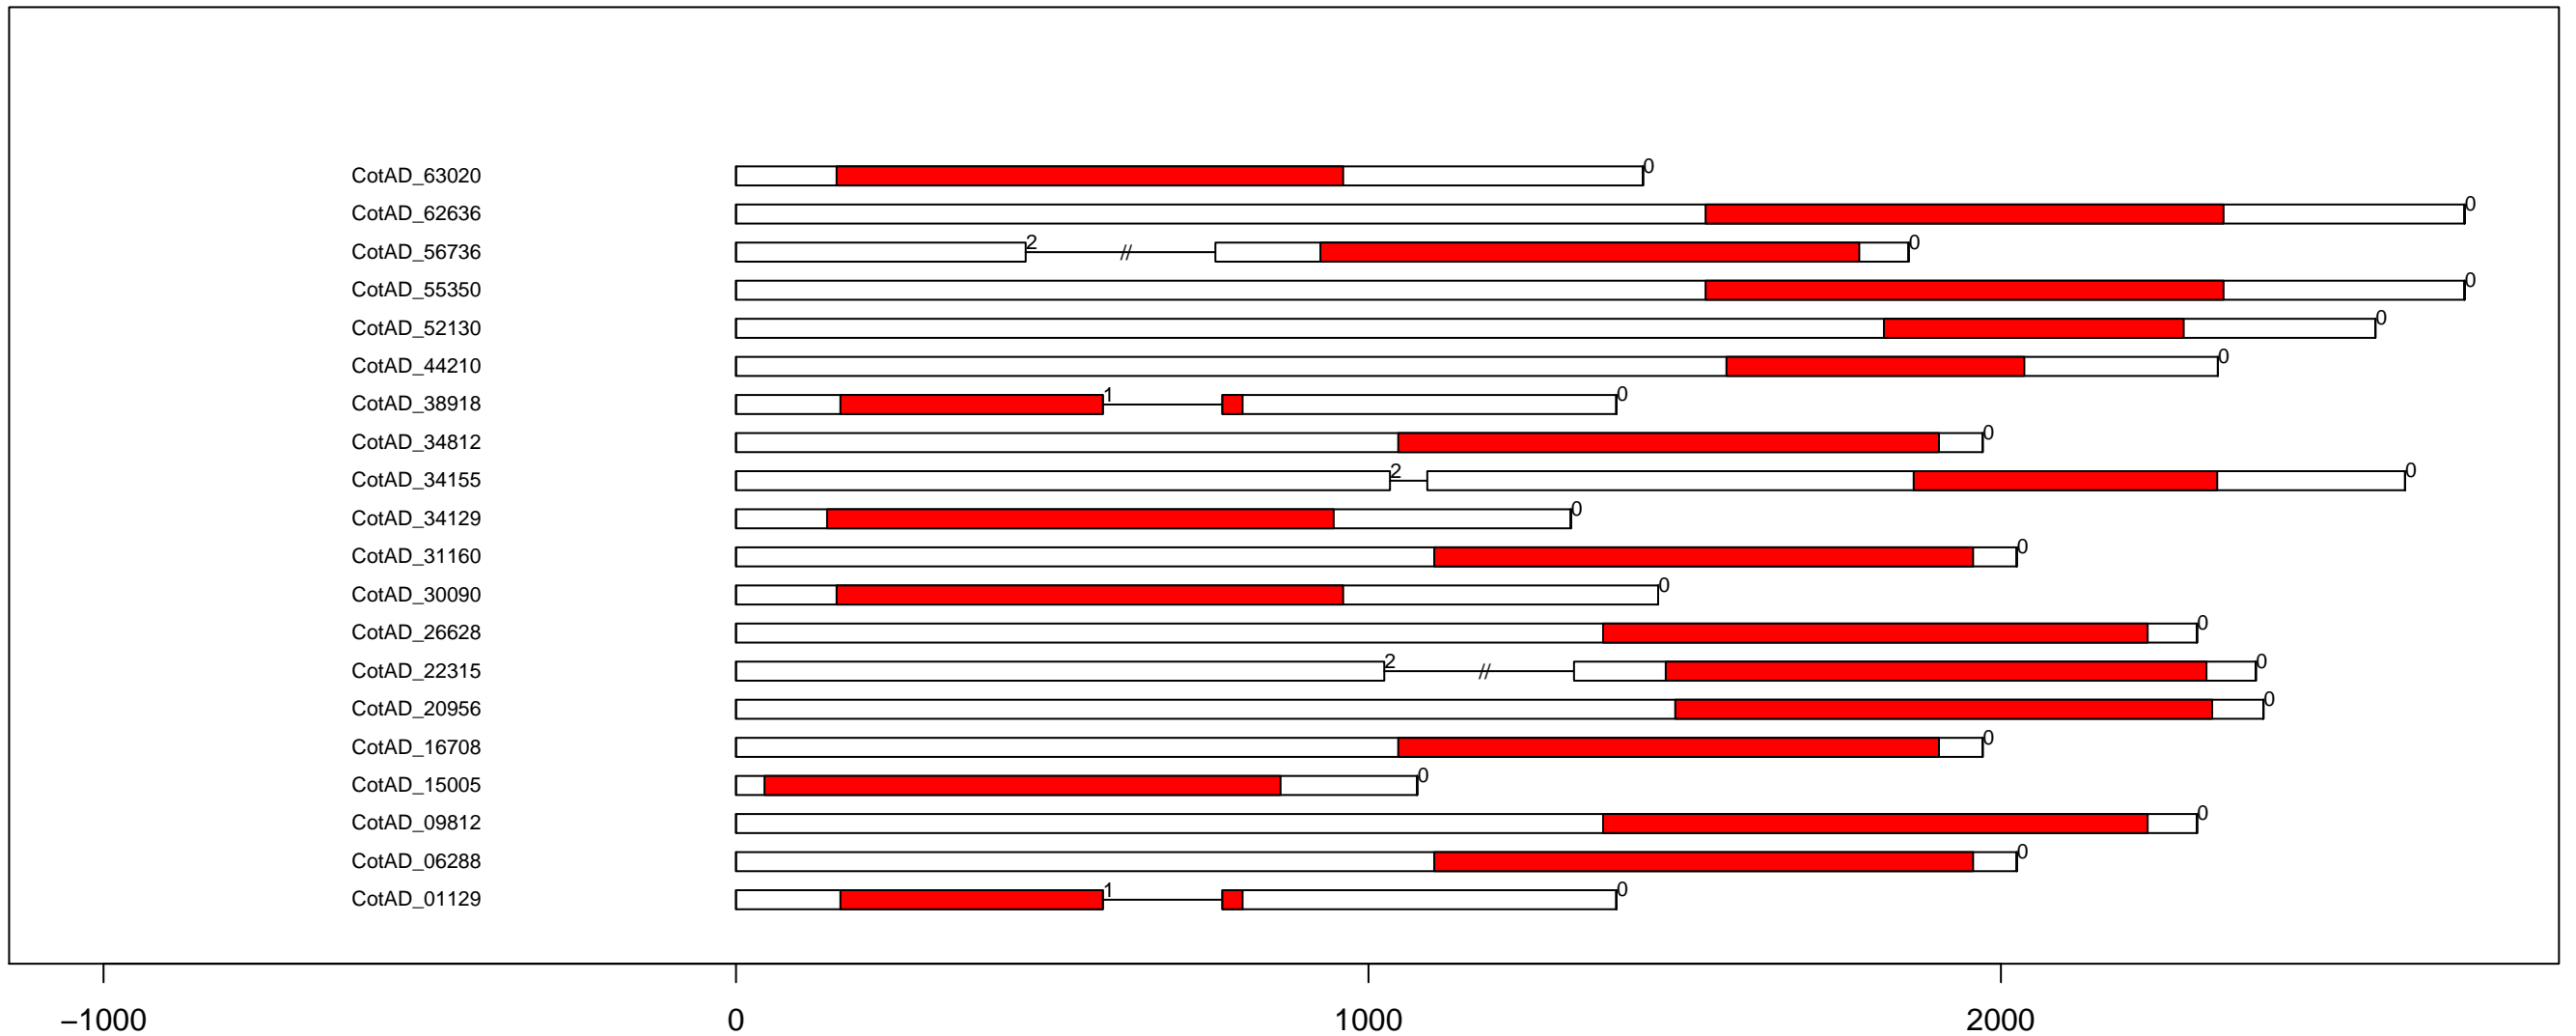

# G.hi RLK-Pelle\_CR4L exon-intron and domain diagram (part 2)

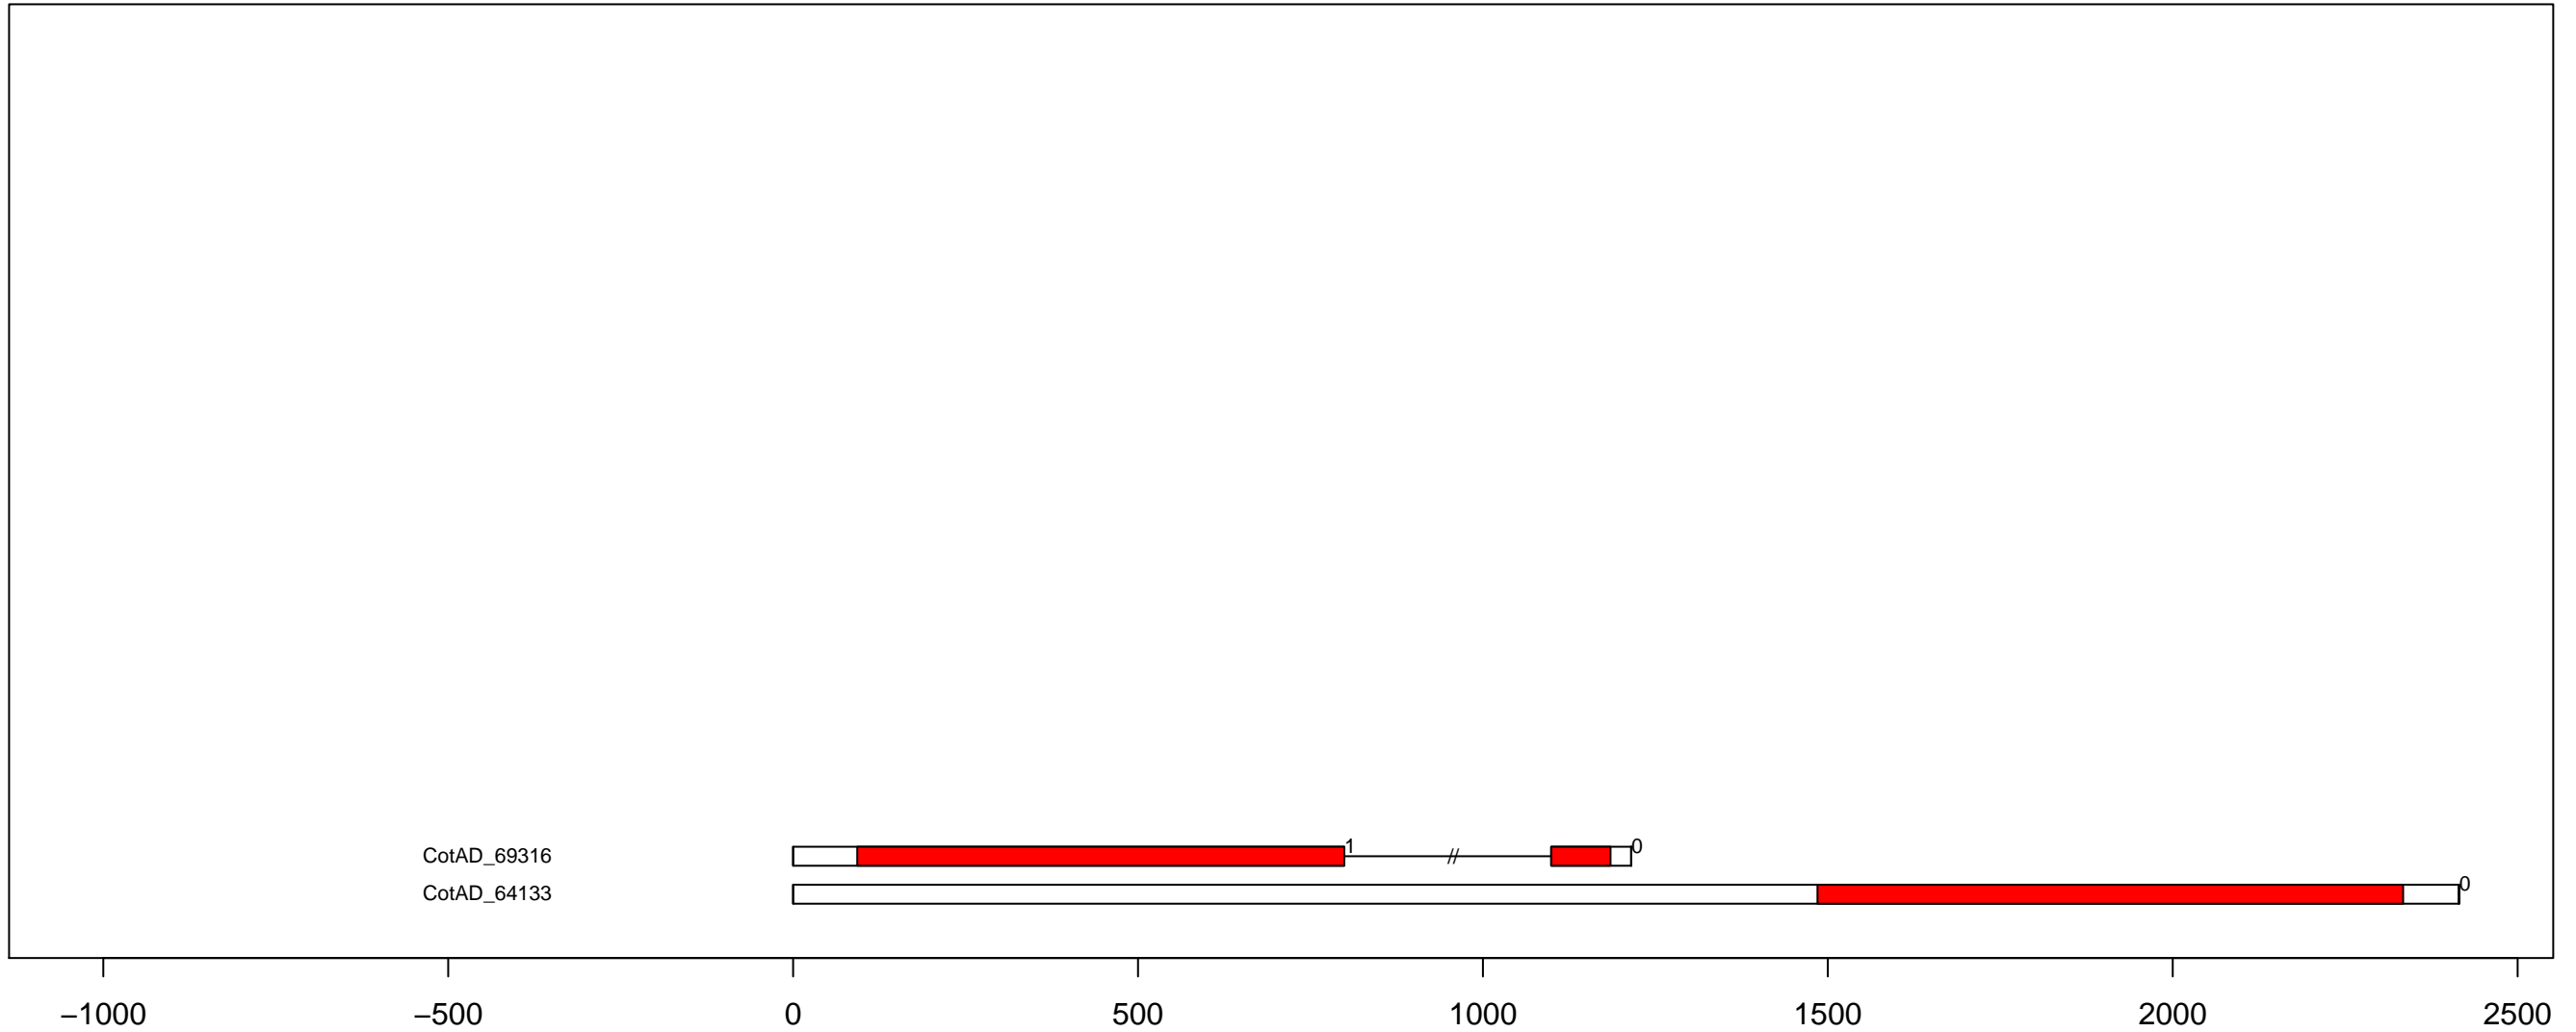

### G.hi RLK-Pelle\_CrRLK1L-1 exon-intron and domain diagram (part 1)

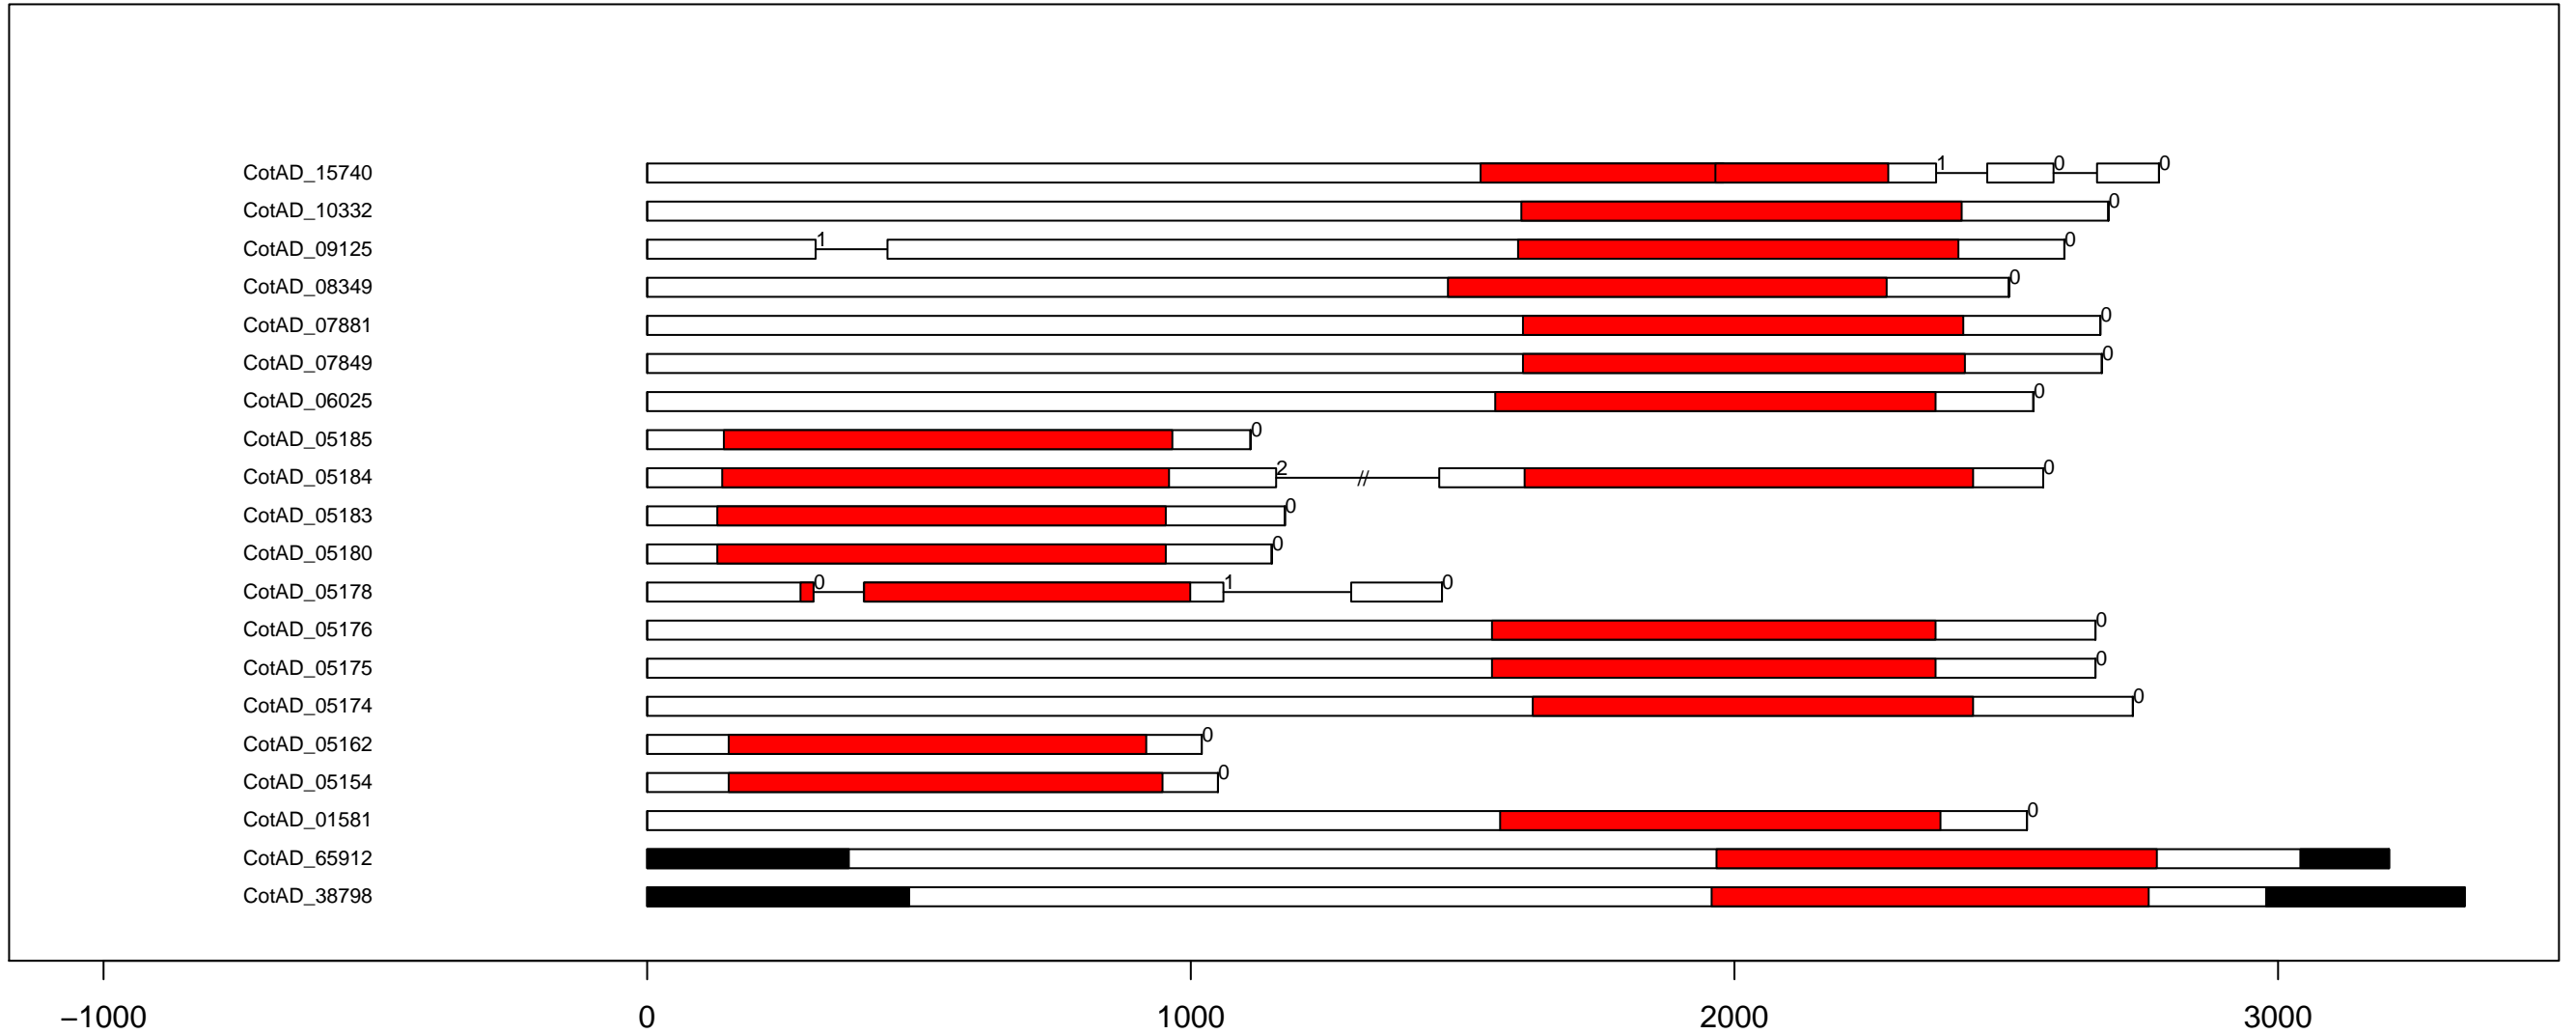

# G.hi RLK-Pelle\_CrRLK1L-1 exon-intron and domain diagram (part 2)

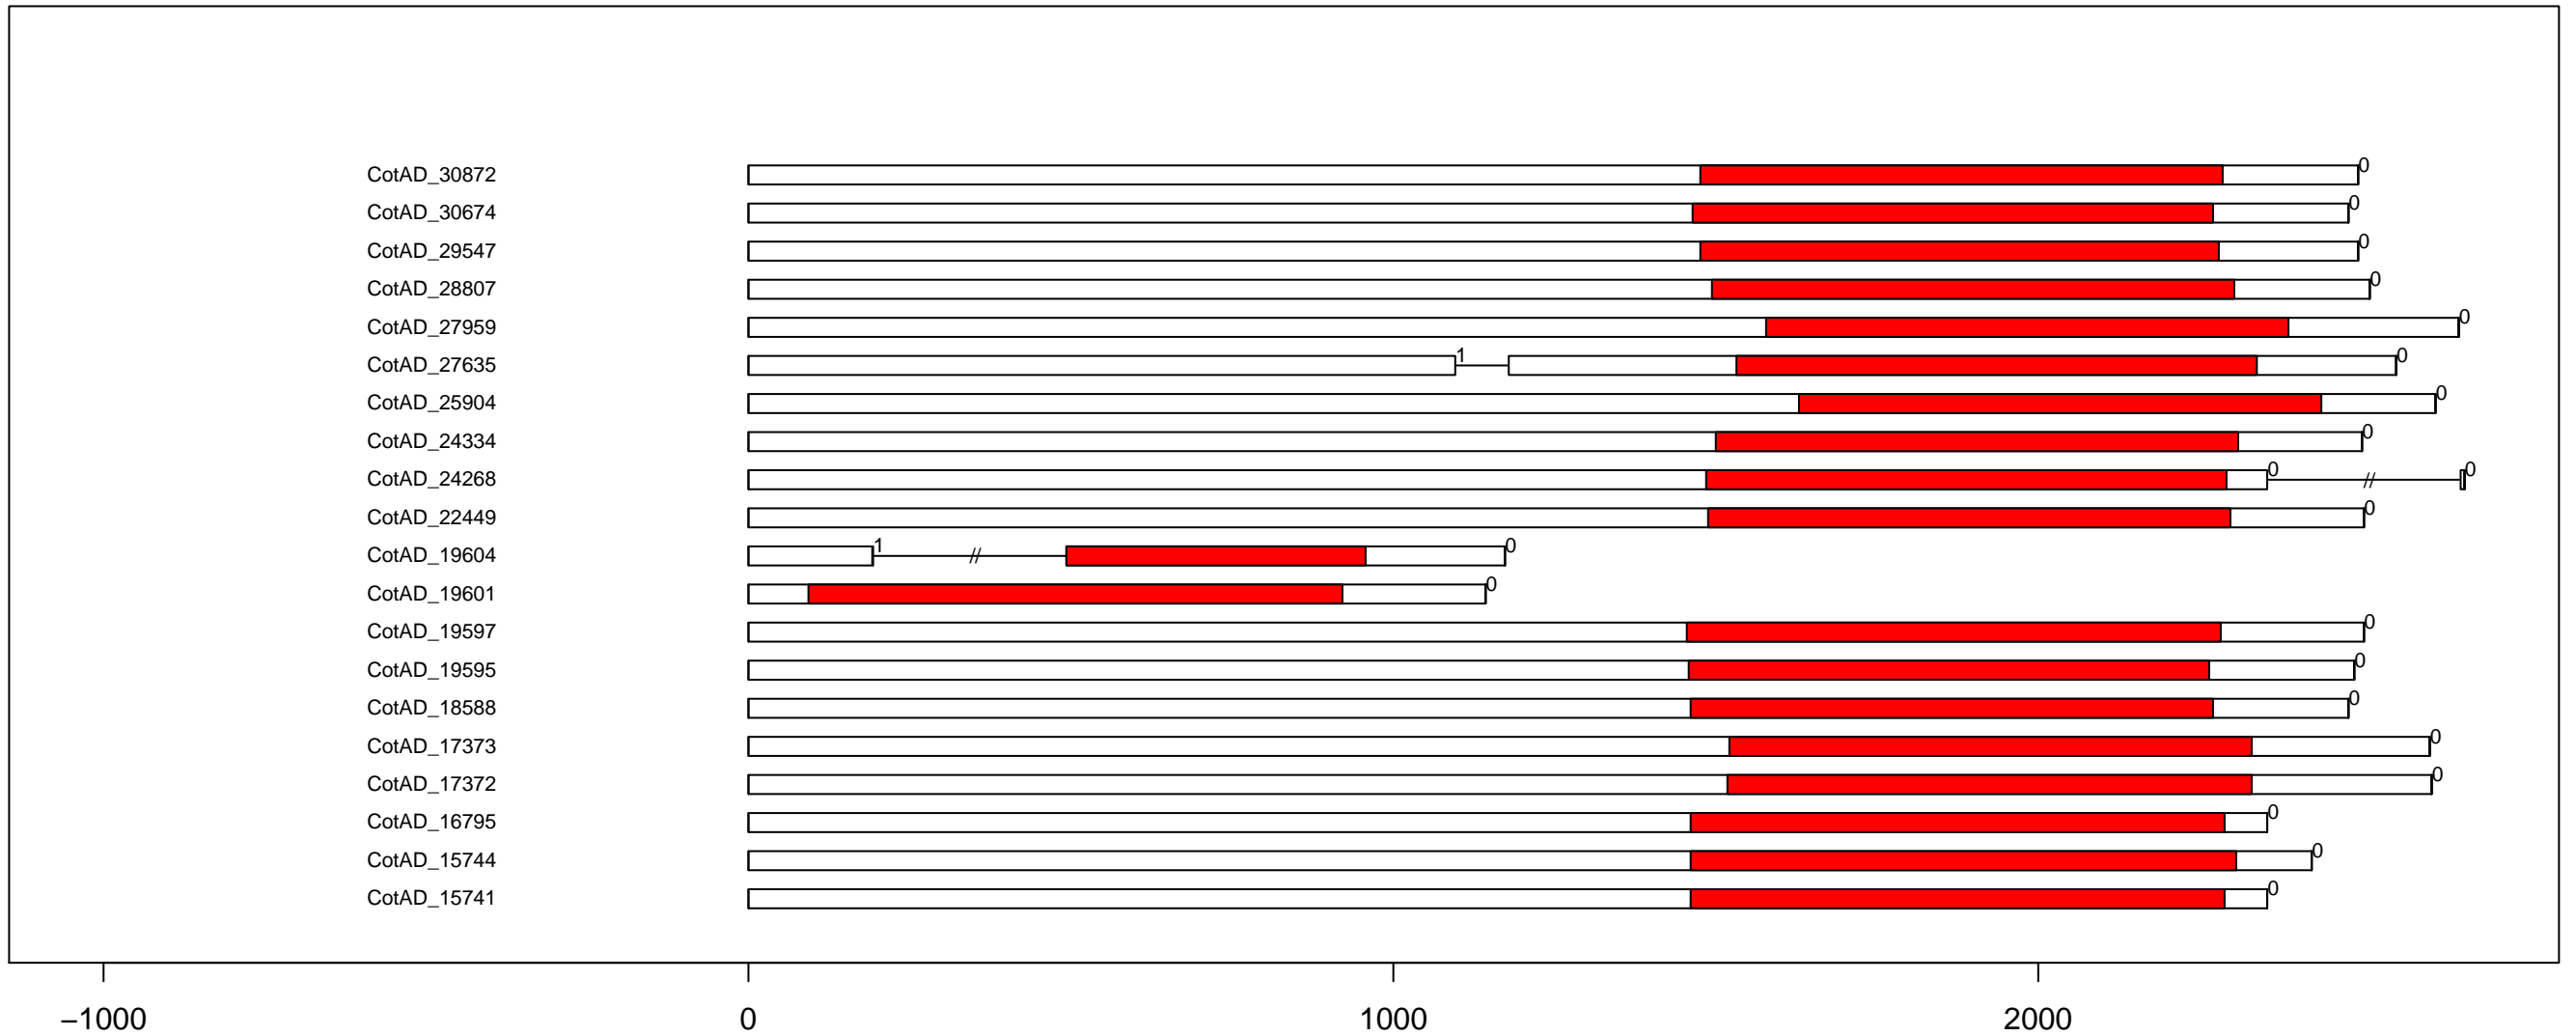

### G.hi RLK-Pelle\_CrRLK1L-1 exon-intron and domain diagram (part 3)

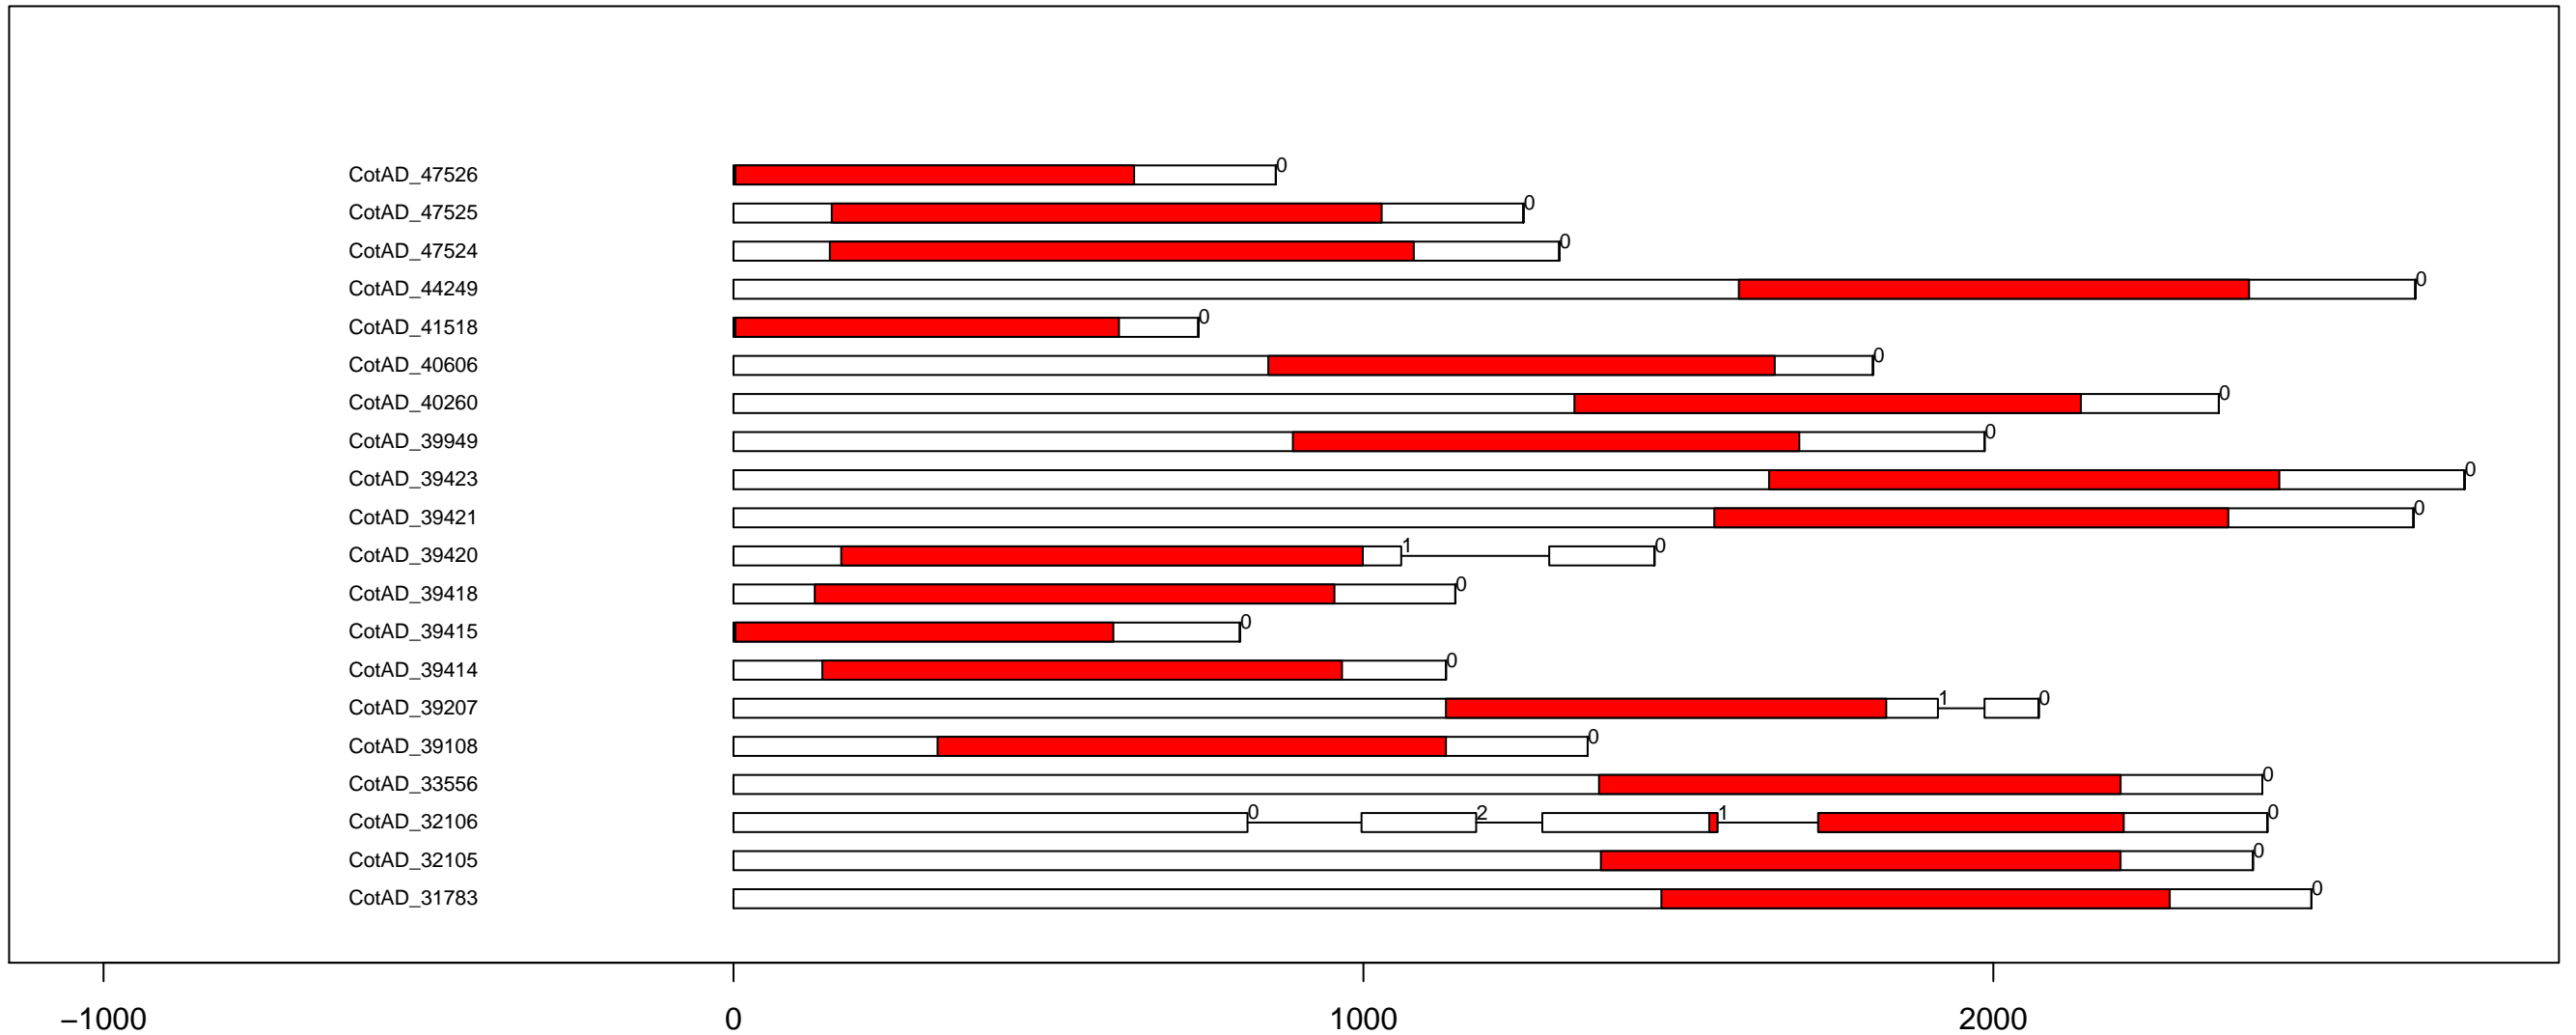

### G.hi RLK-Pelle\_CrRLK1L-1 exon-intron and domain diagram (part 4)

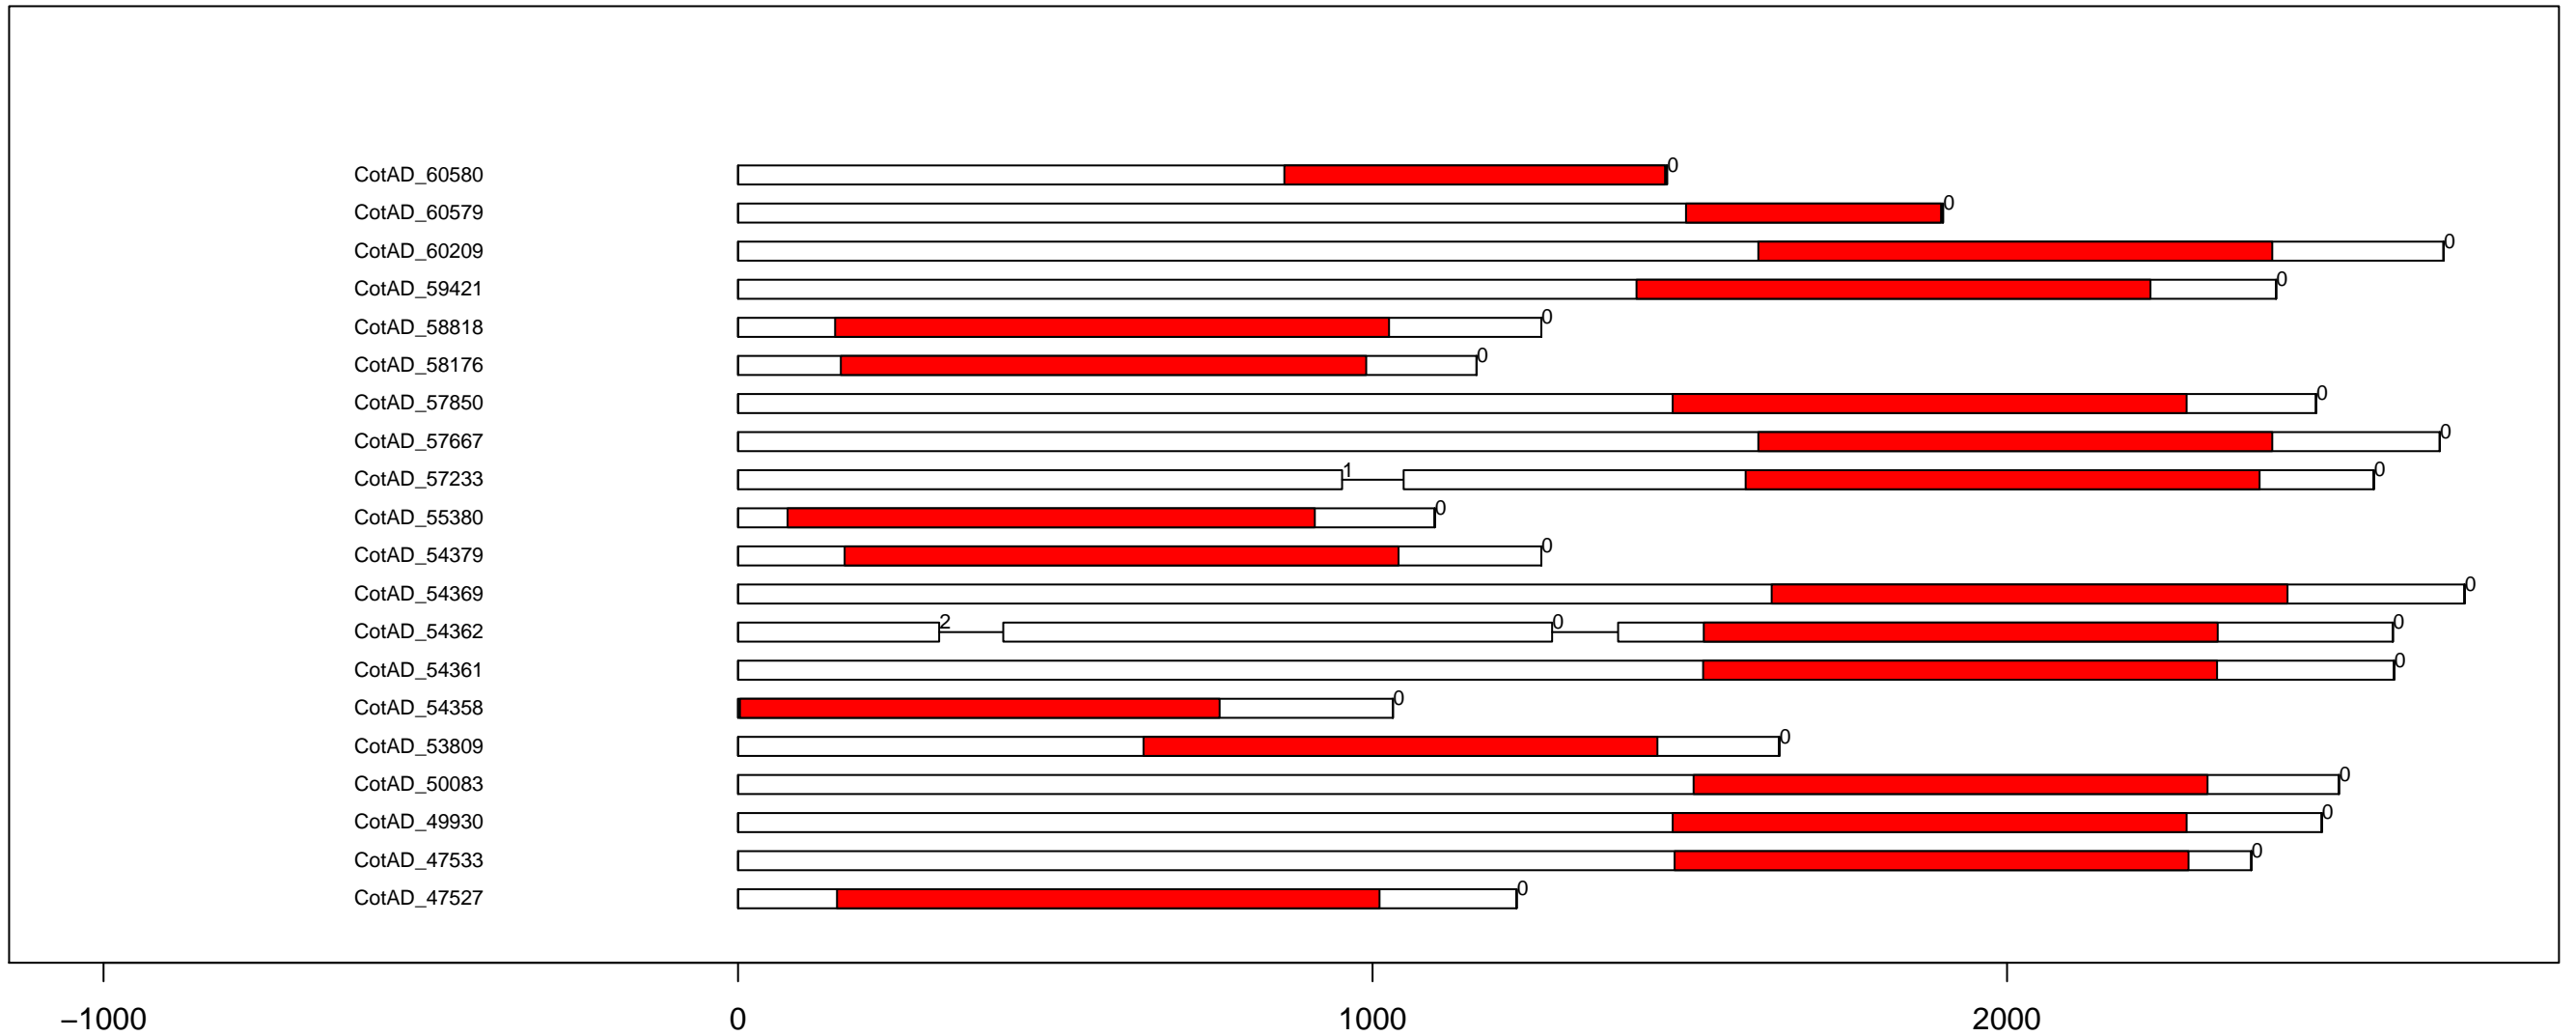

# G.hi RLK-Pelle\_CrRLK1L-1 exon-intron and domain diagram (part 5)

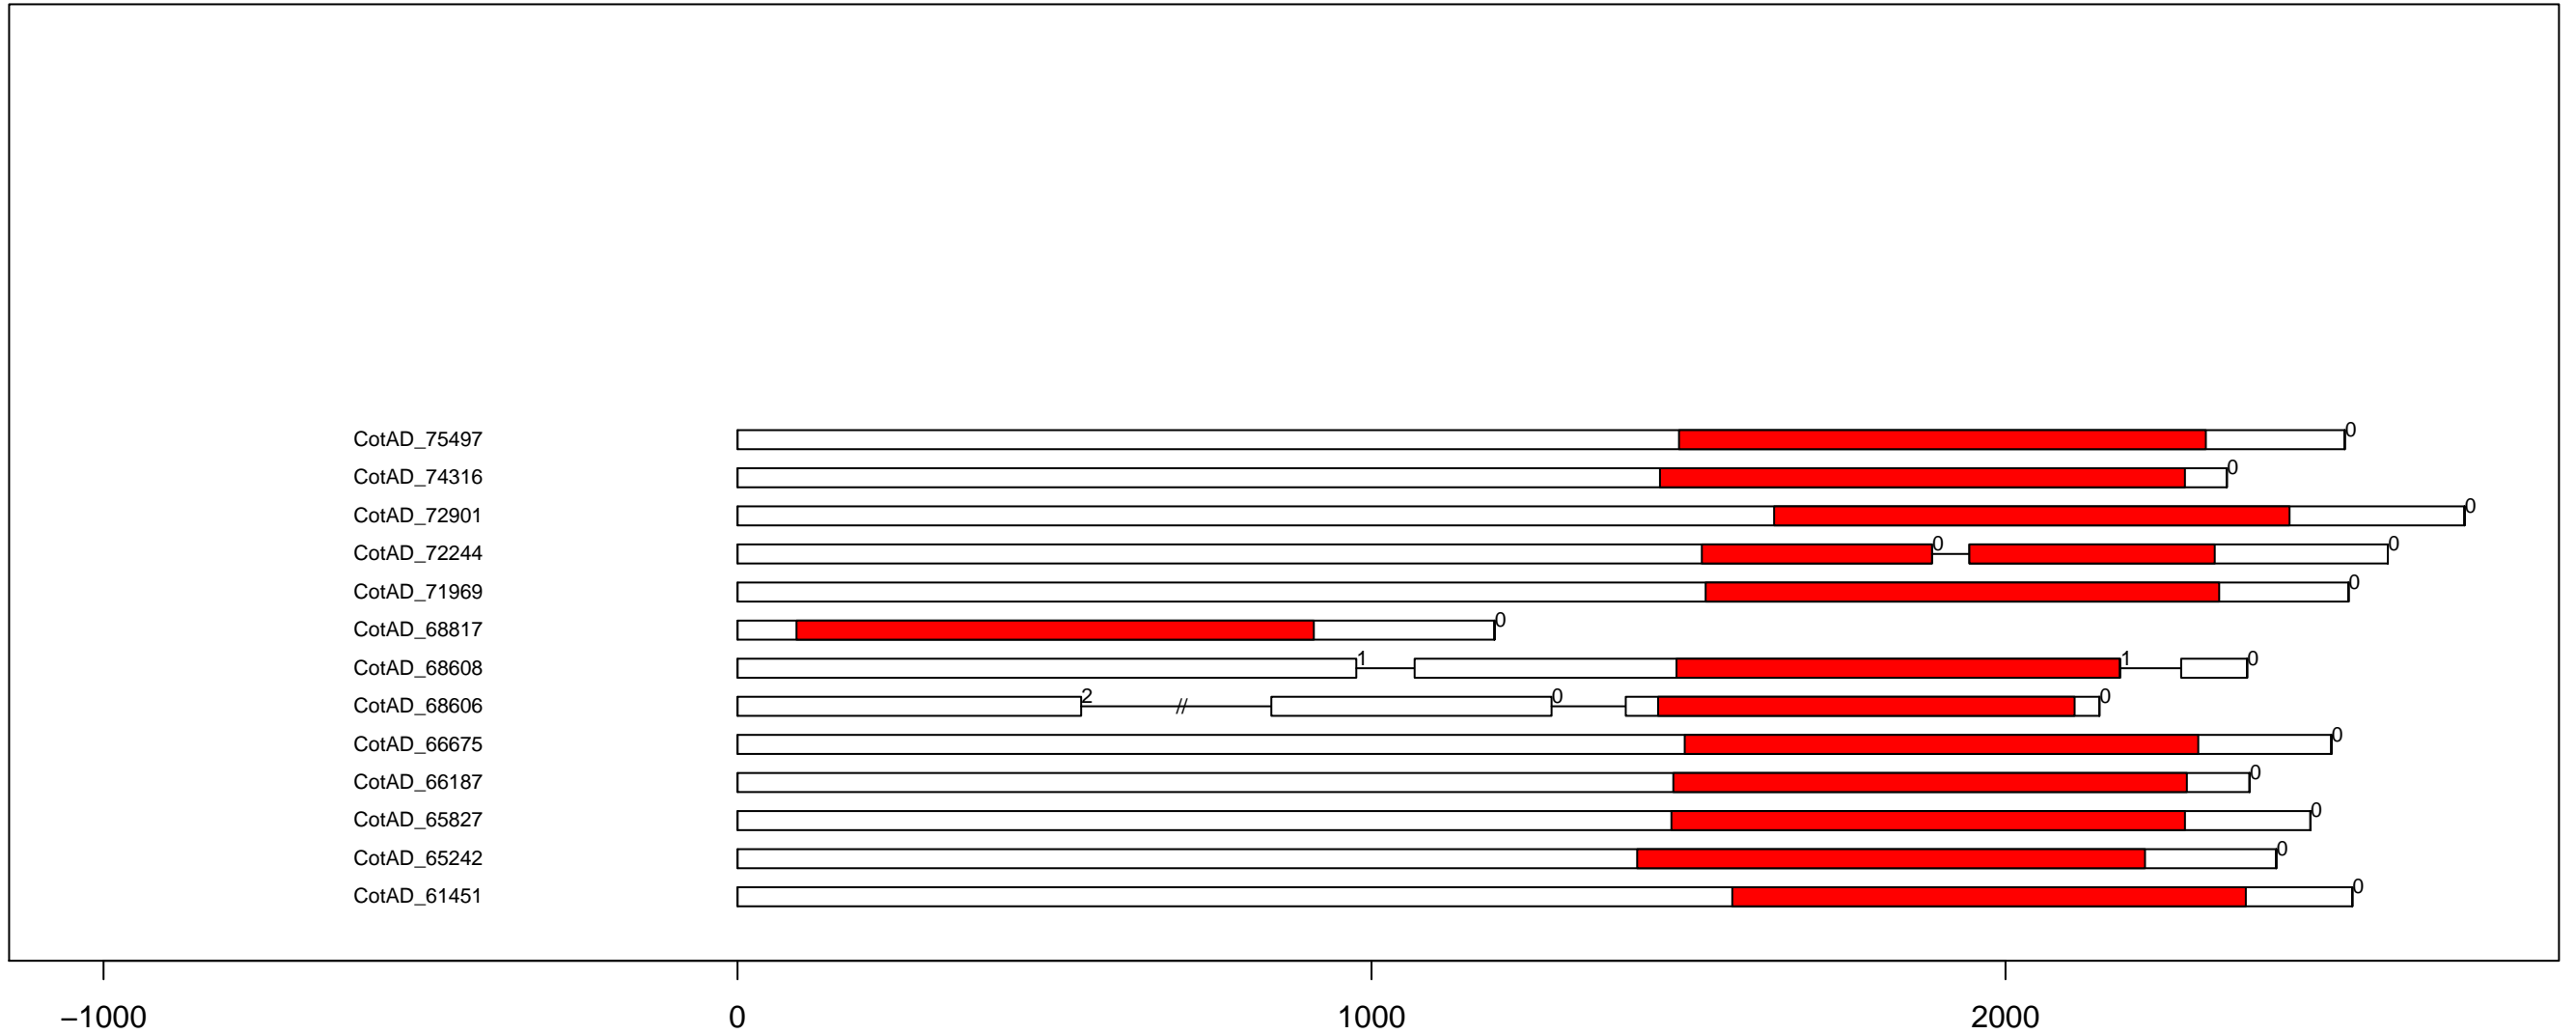

### G.hi RLK-Pelle\_DLSV exon-intron and domain diagram (part 1)

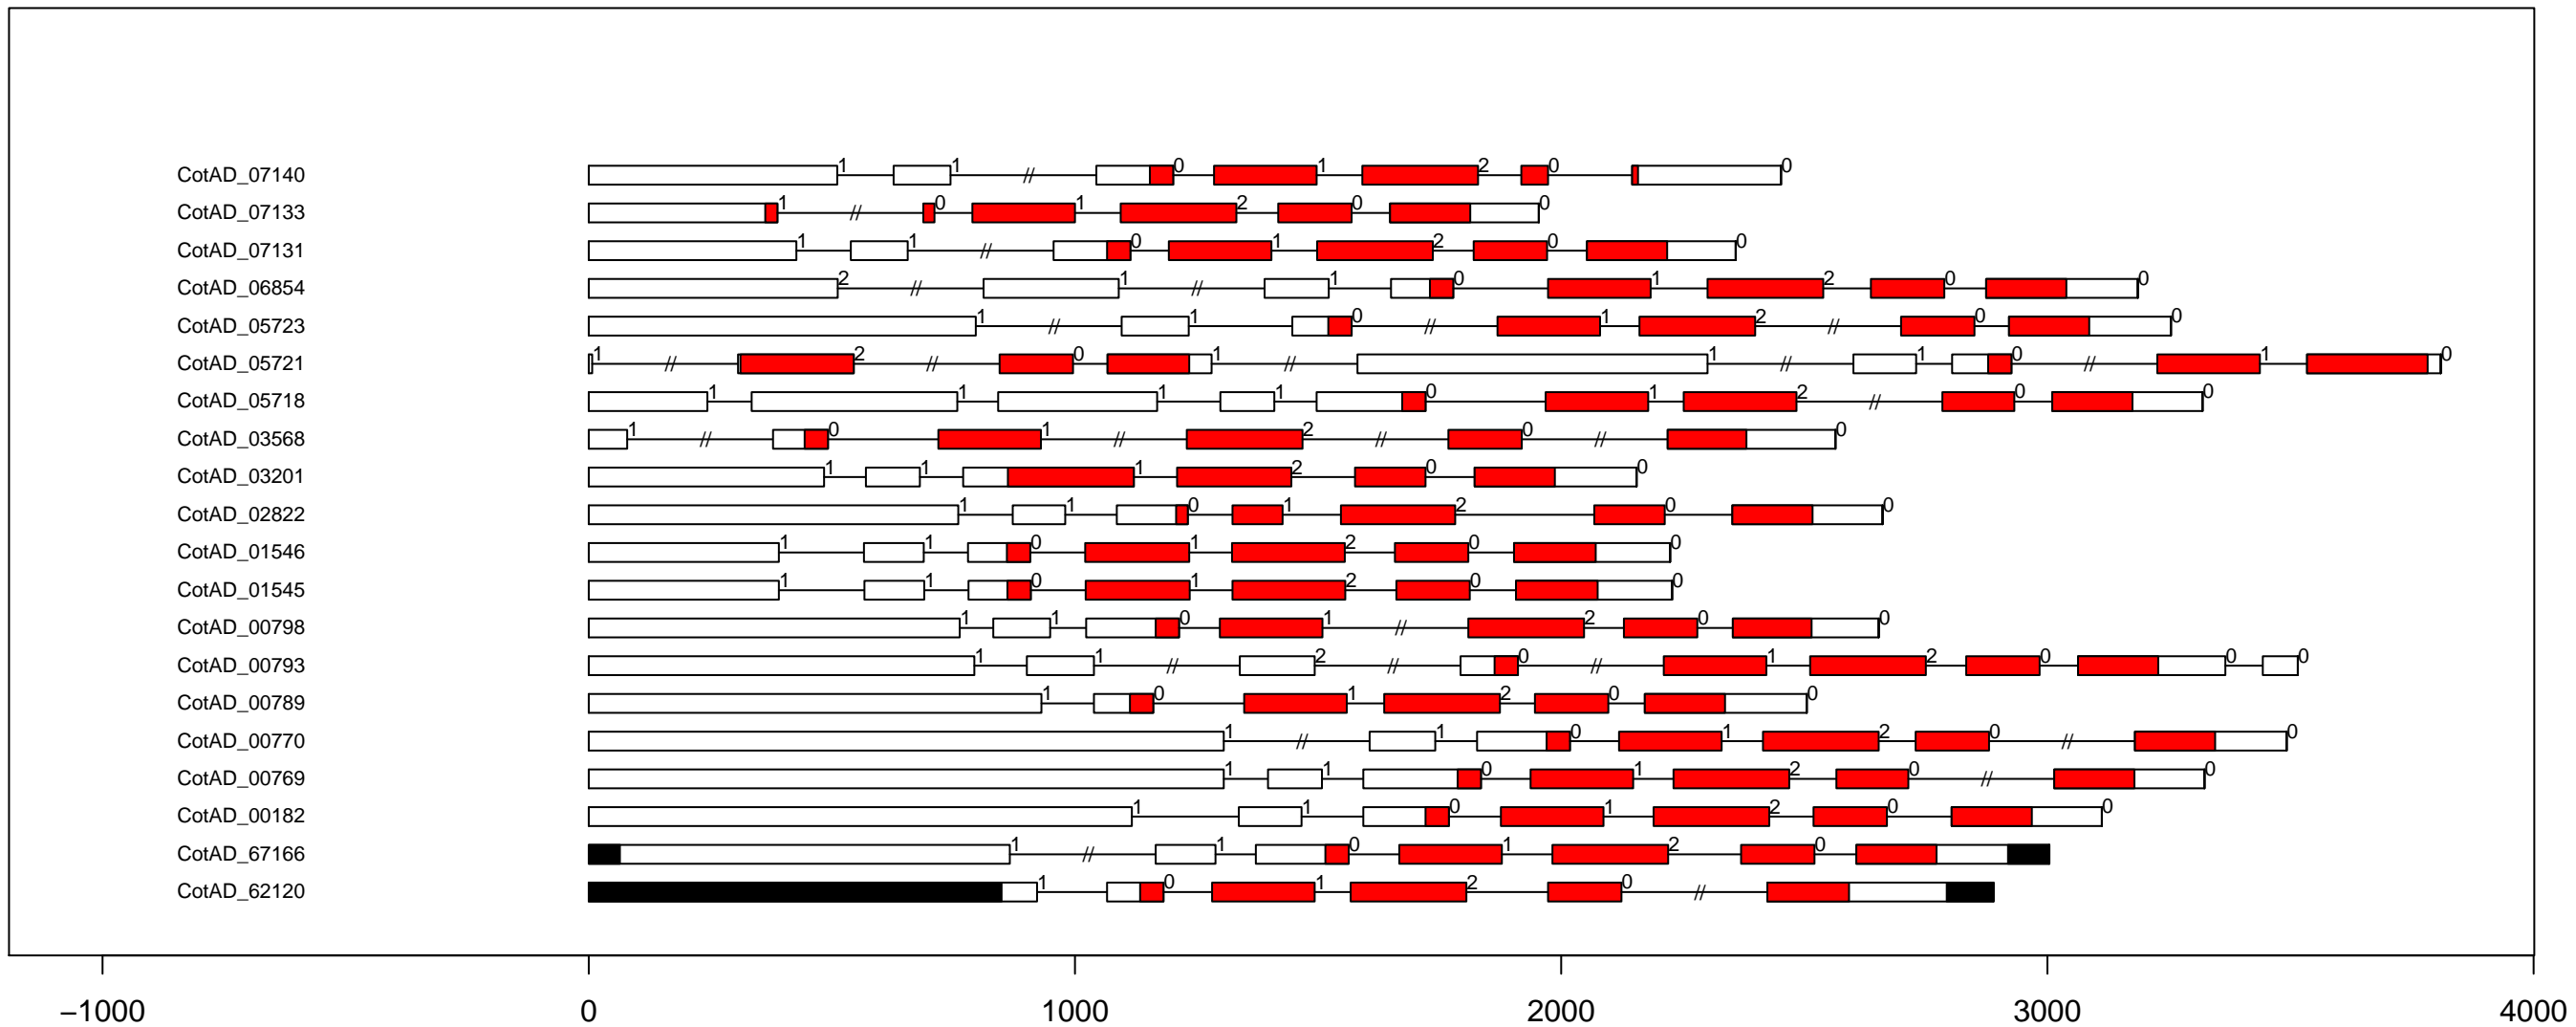



### G.hi RLK-Pelle\_DLSV exon-intron and domain diagram (part 2)

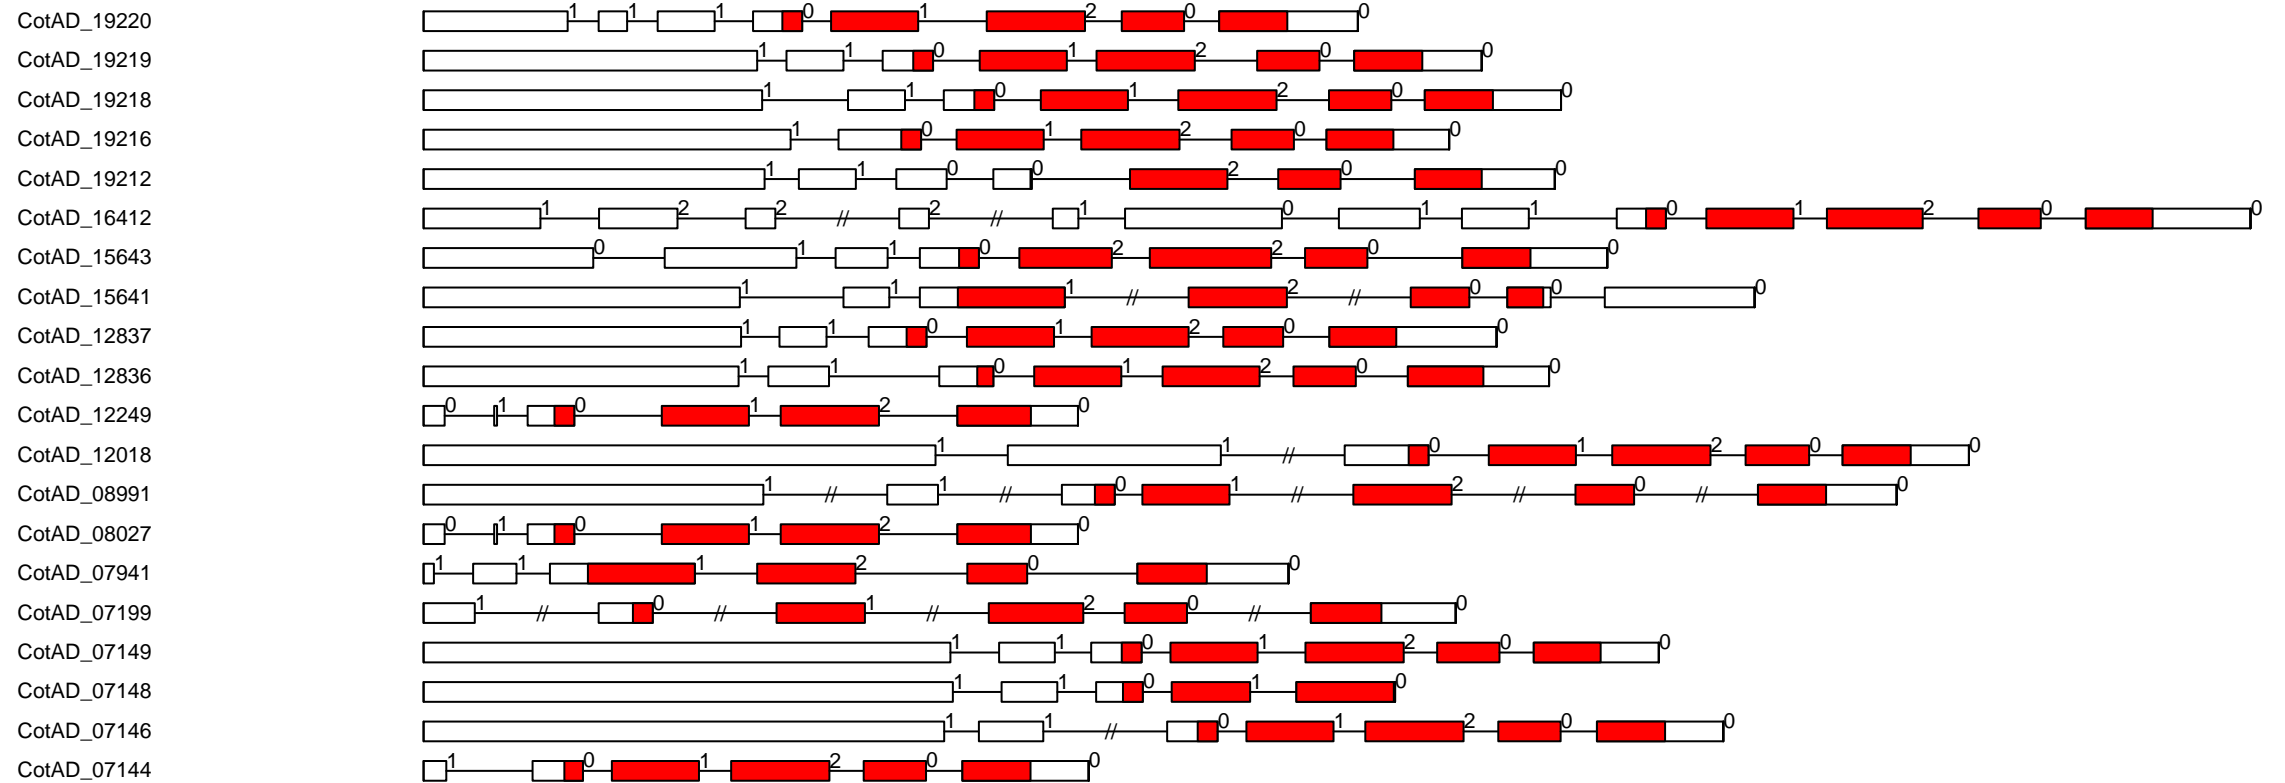

### G.hi RLK-Pelle\_DLSV exon-intron and domain diagram (part 3)

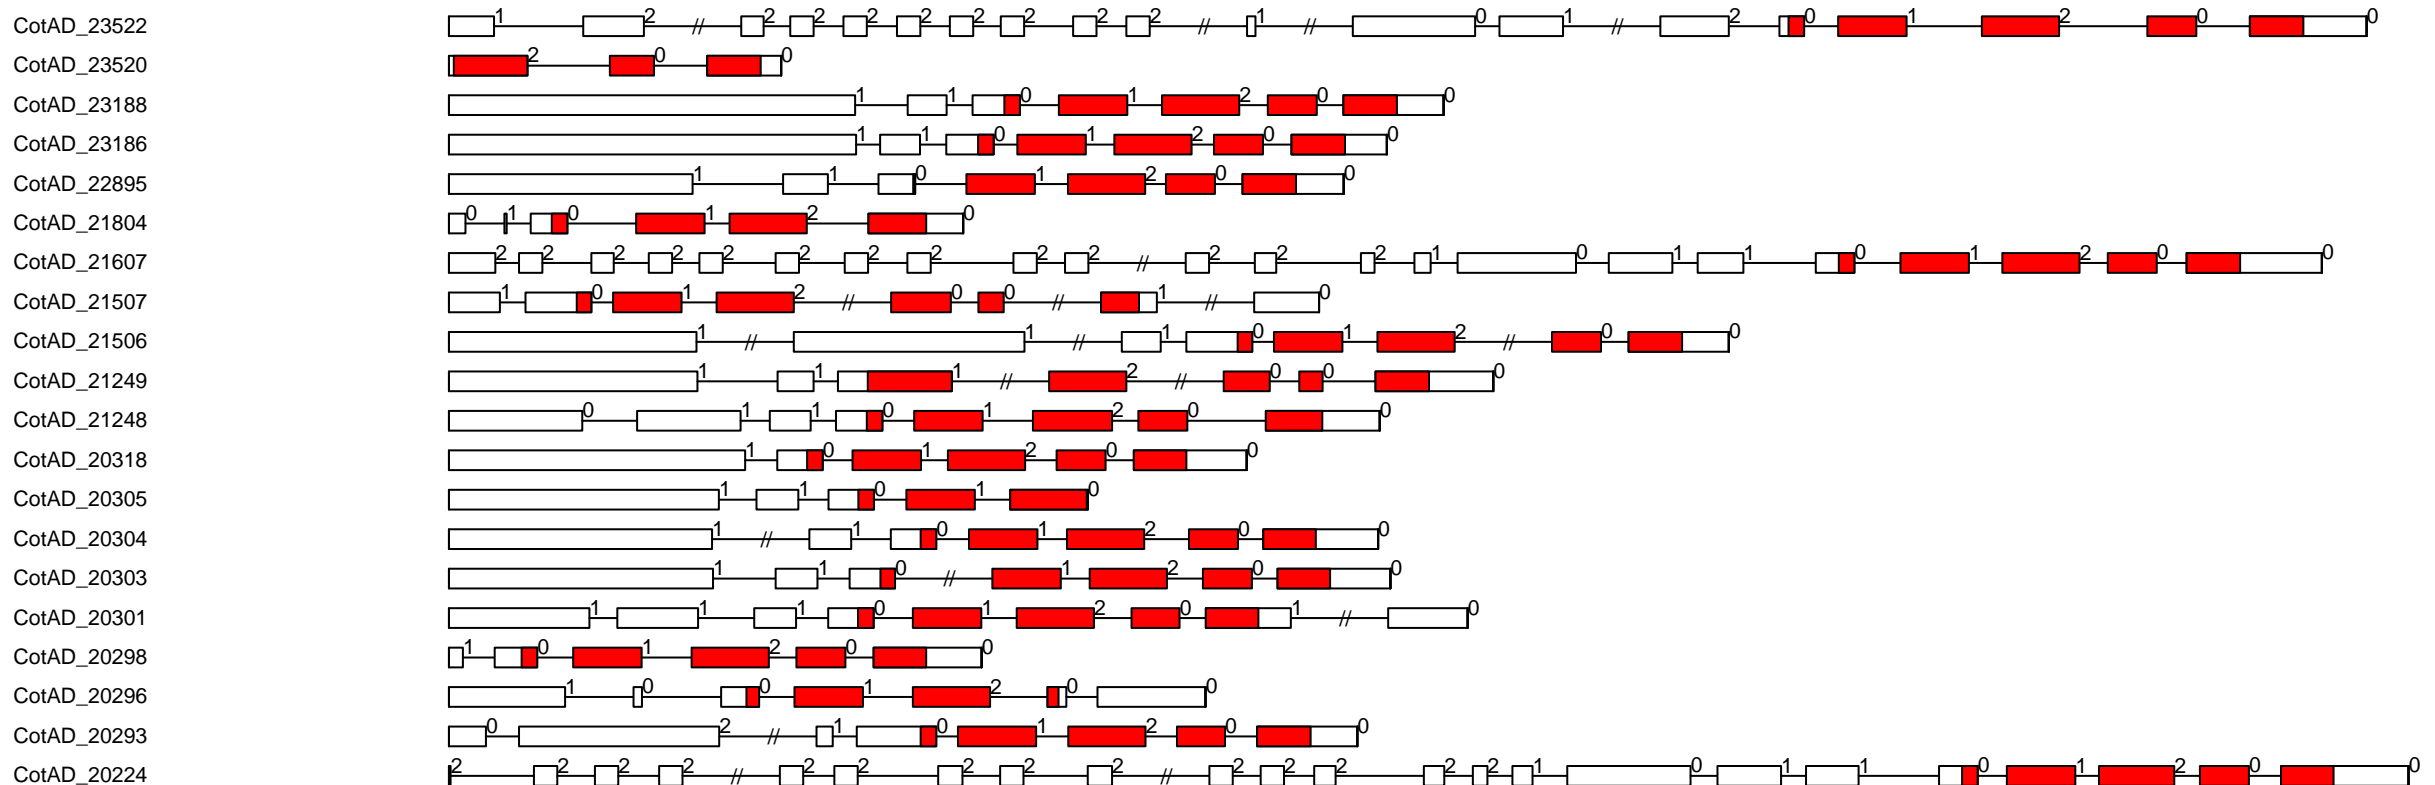

0

2000

4000

6000

### G.hi RLK-Pelle\_DLSV exon-intron and domain diagram (part 4)

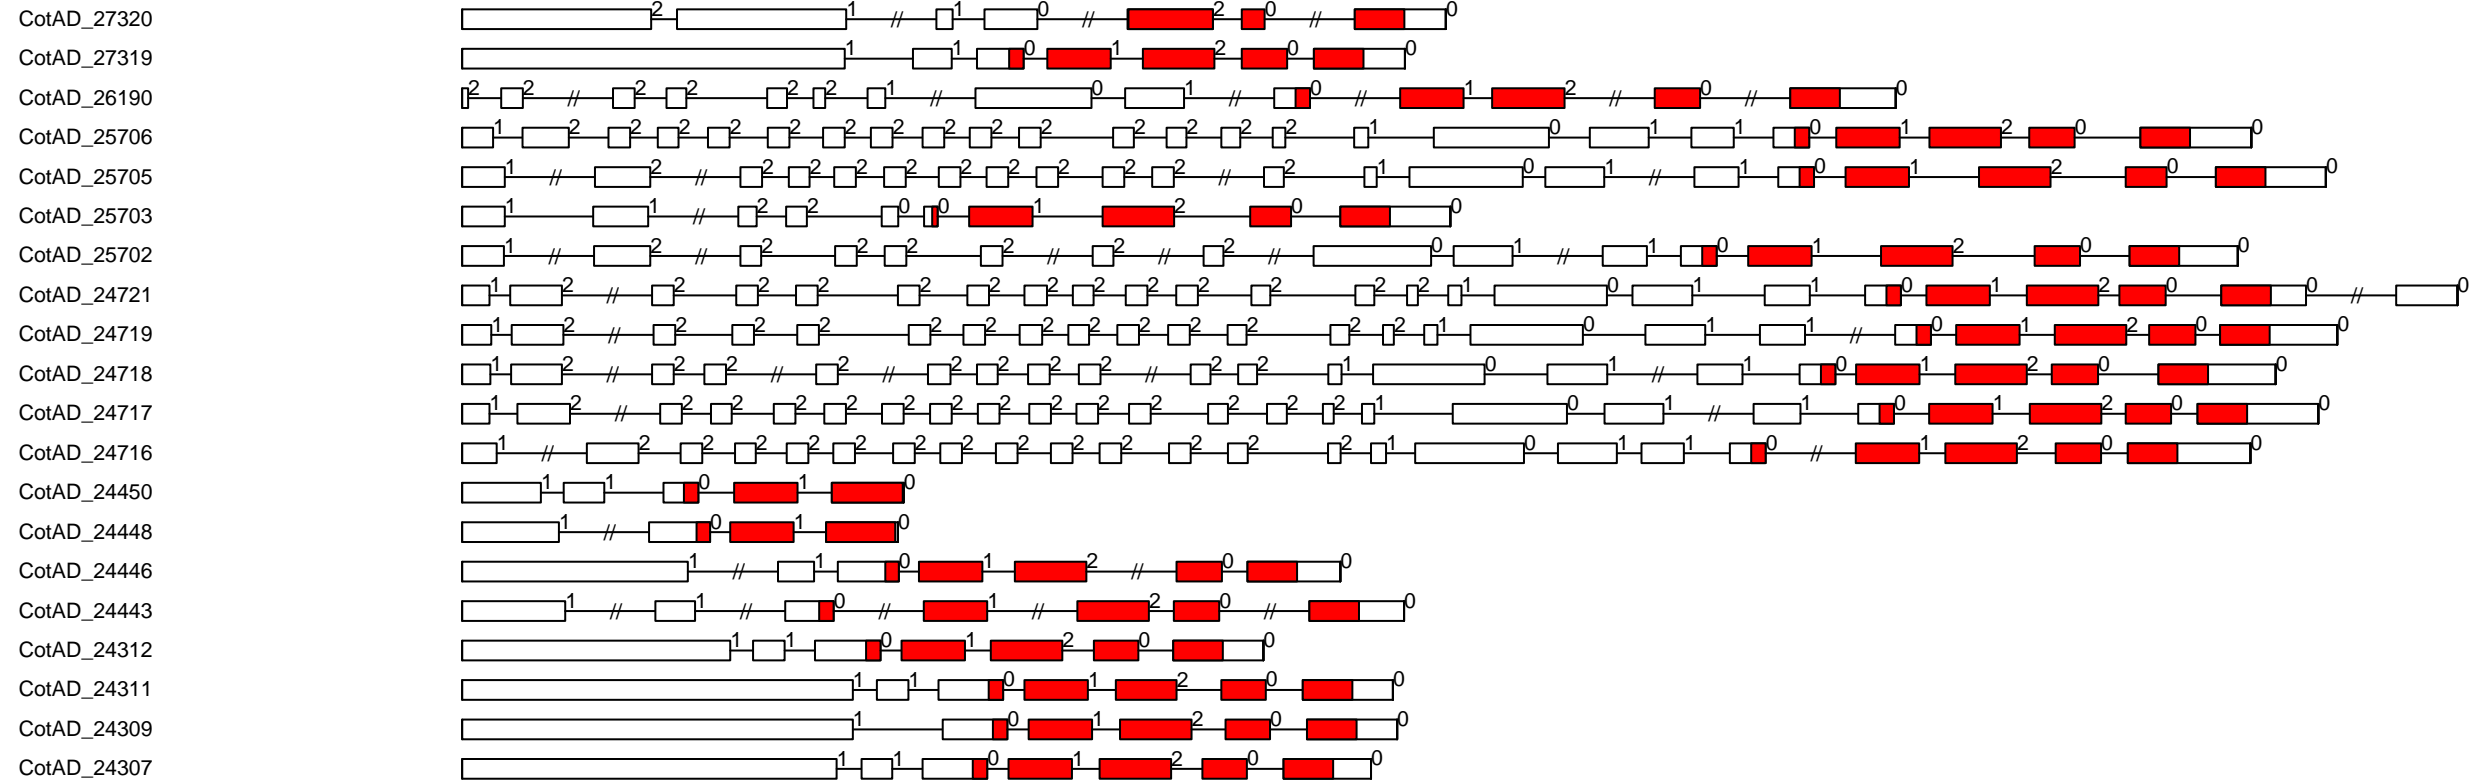

### G.hi RLK-Pelle\_DLSV exon-intron and domain diagram (part 5)

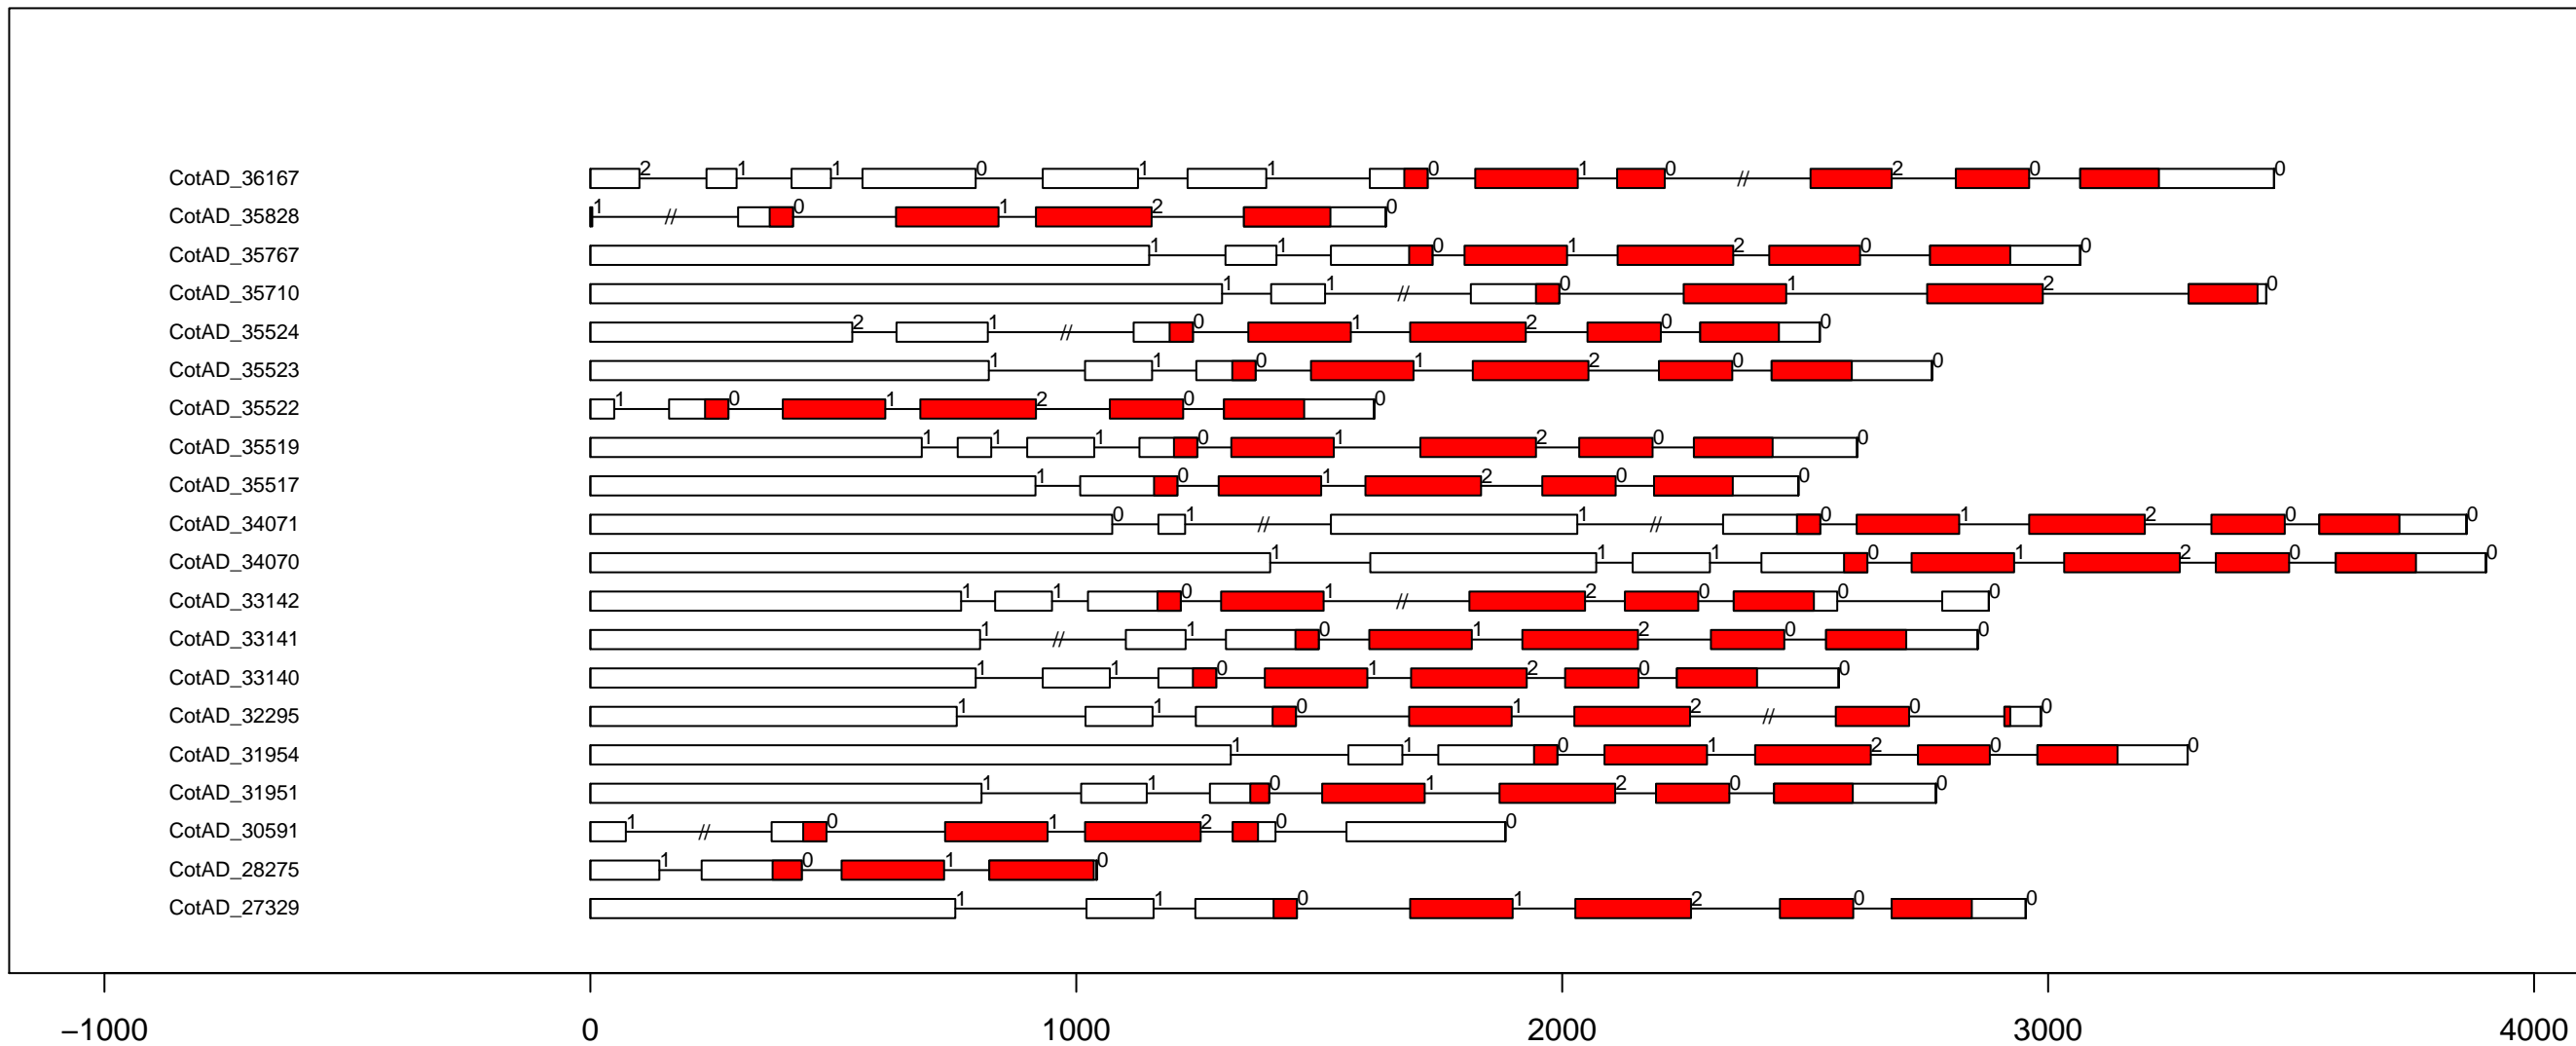

### G.hi RLK-Pelle\_DLSV exon-intron and domain diagram (part 6)

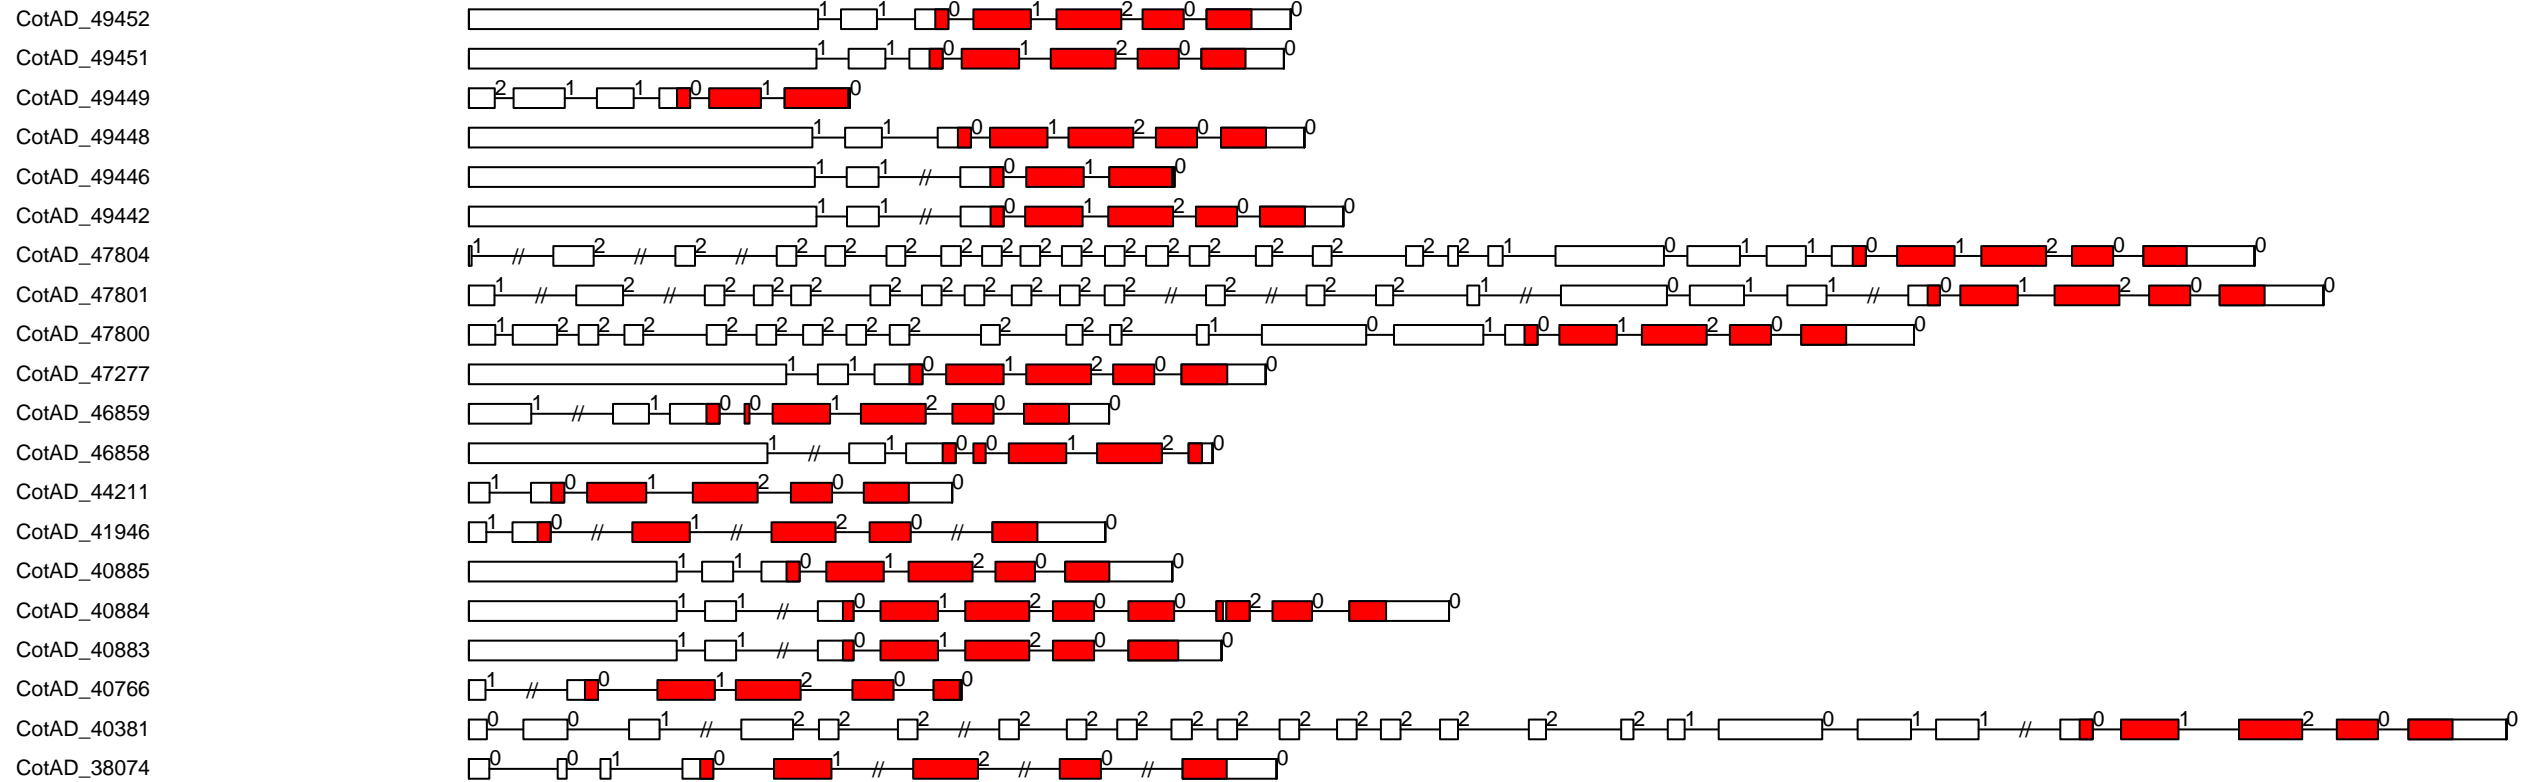

# G.hi RLK-Pelle\_DLSV exon-intron and domain diagram (part 7)

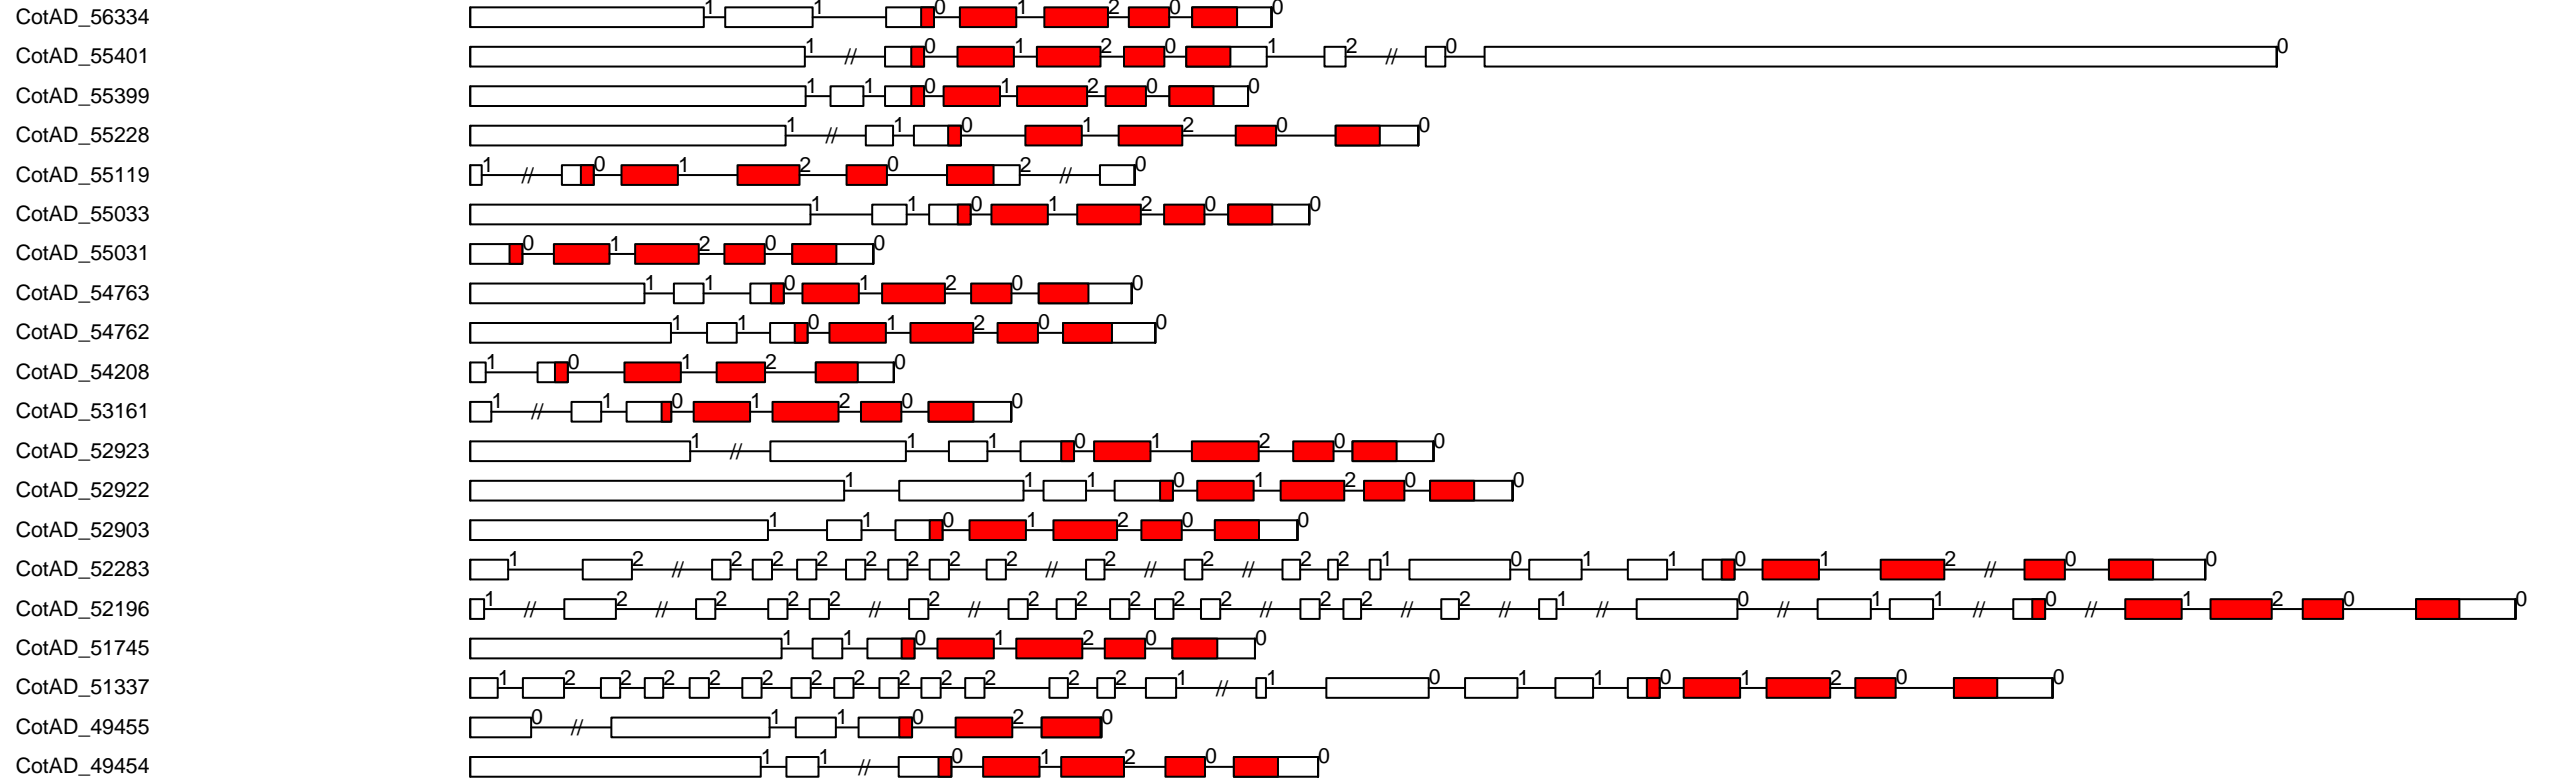

### G.hi RLK-Pelle\_DLSV exon-intron and domain diagram (part 8)

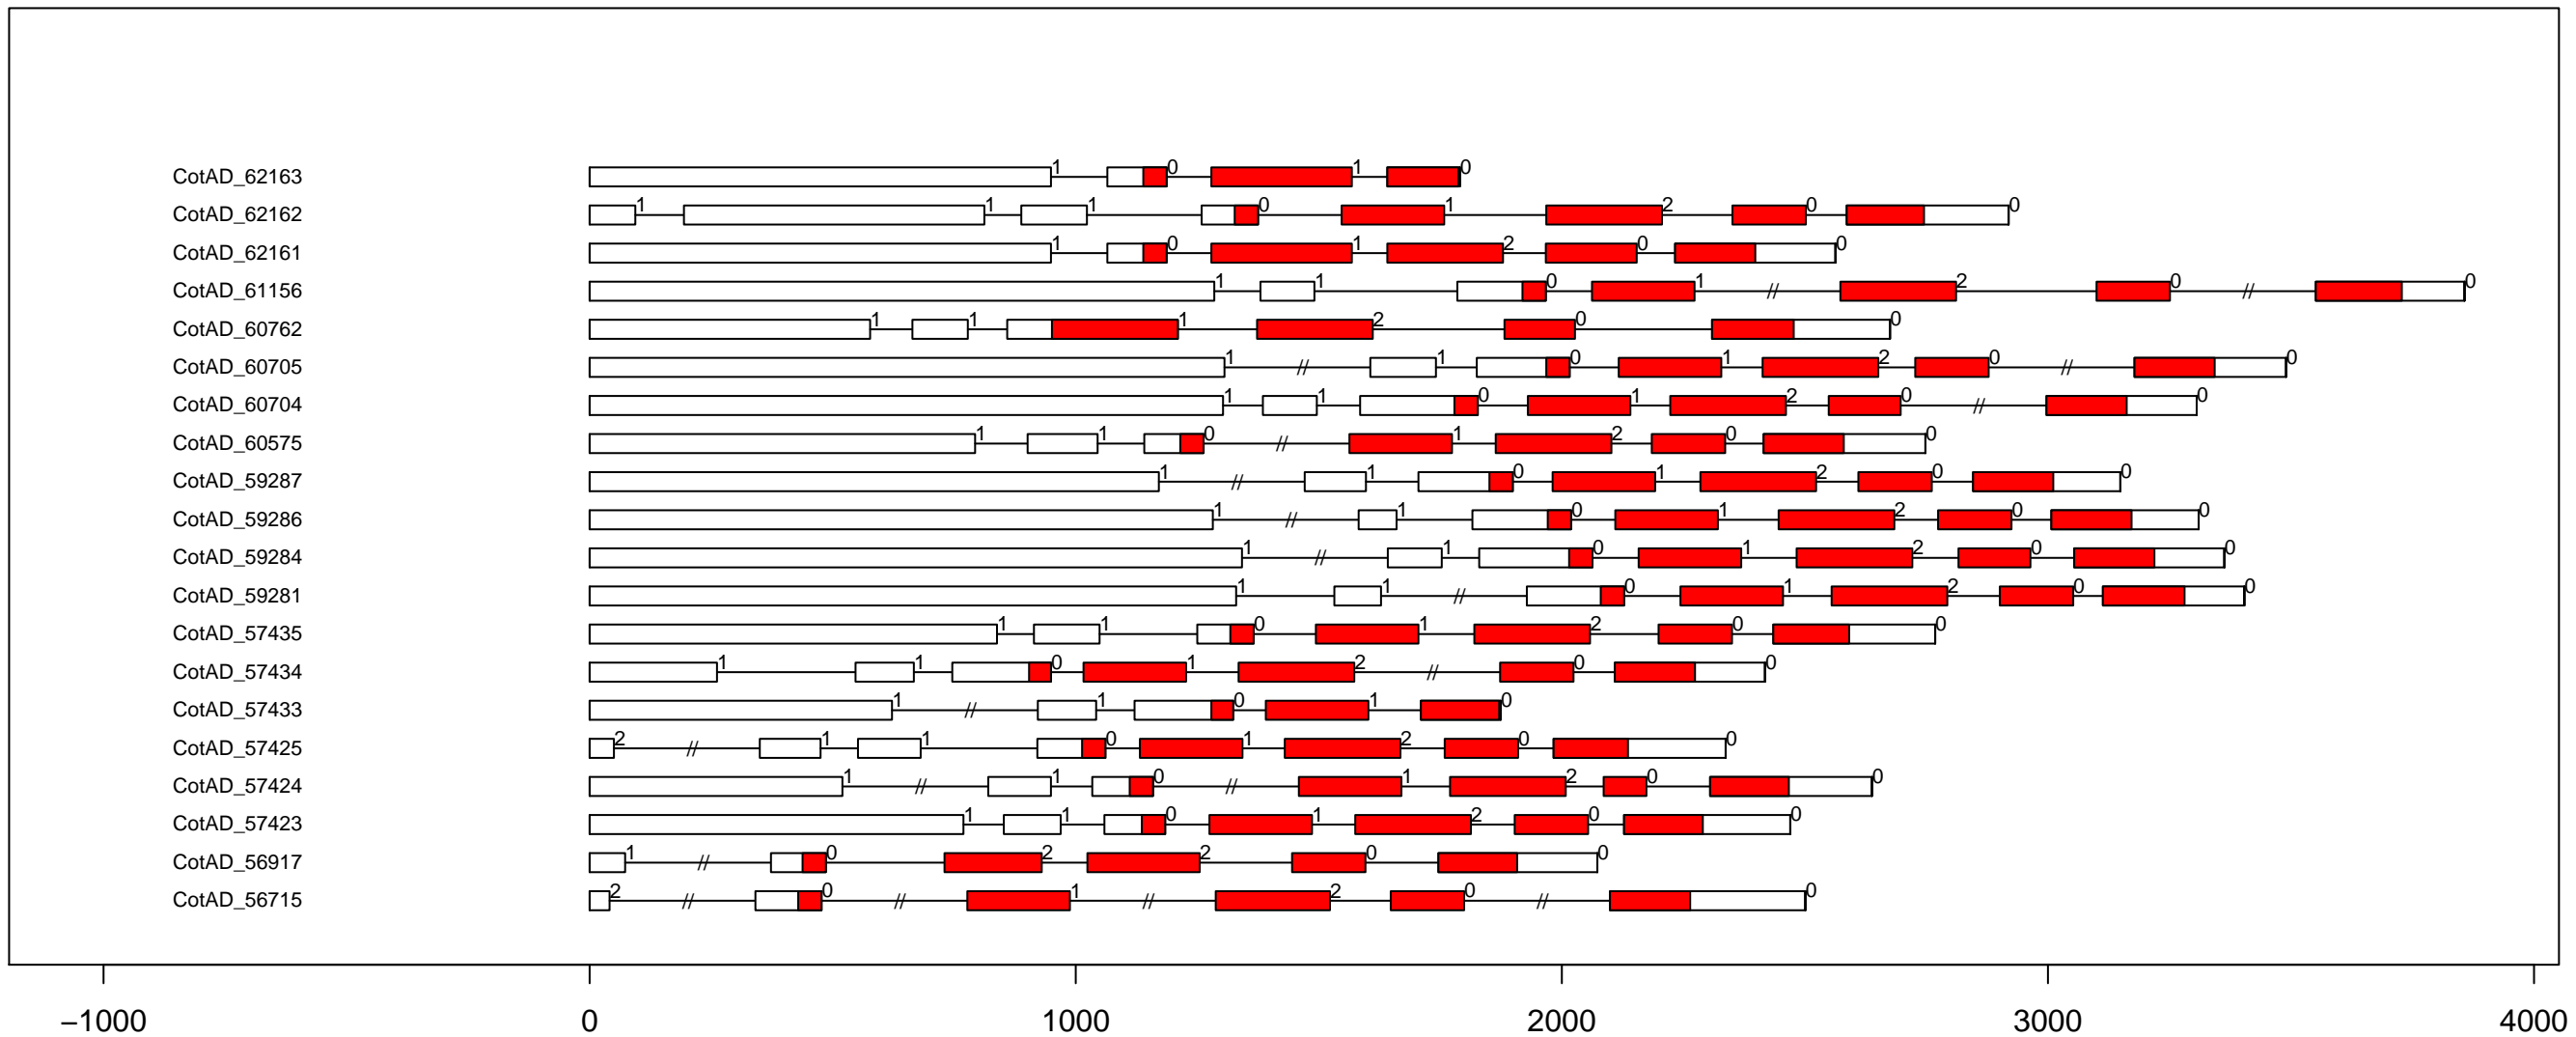

### G.hi RLK-Pelle\_DLSV exon-intron and domain diagram (part 9)

CotAD\_67647  
 CotAD\_67426  
 CotAD\_67284  
 CotAD\_67167  
 CotAD\_67069  
 CotAD\_66465  
 CotAD\_66464  
 CotAD\_66462  
 CotAD\_66459  
 CotAD\_66457  
 CotAD\_63757  
 CotAD\_63303  
 CotAD\_62988  
 CotAD\_62987  
 CotAD\_62986  
 CotAD\_62978  
 CotAD\_62169  
 CotAD\_62168  
 CotAD\_62167  
 CotAD\_62165

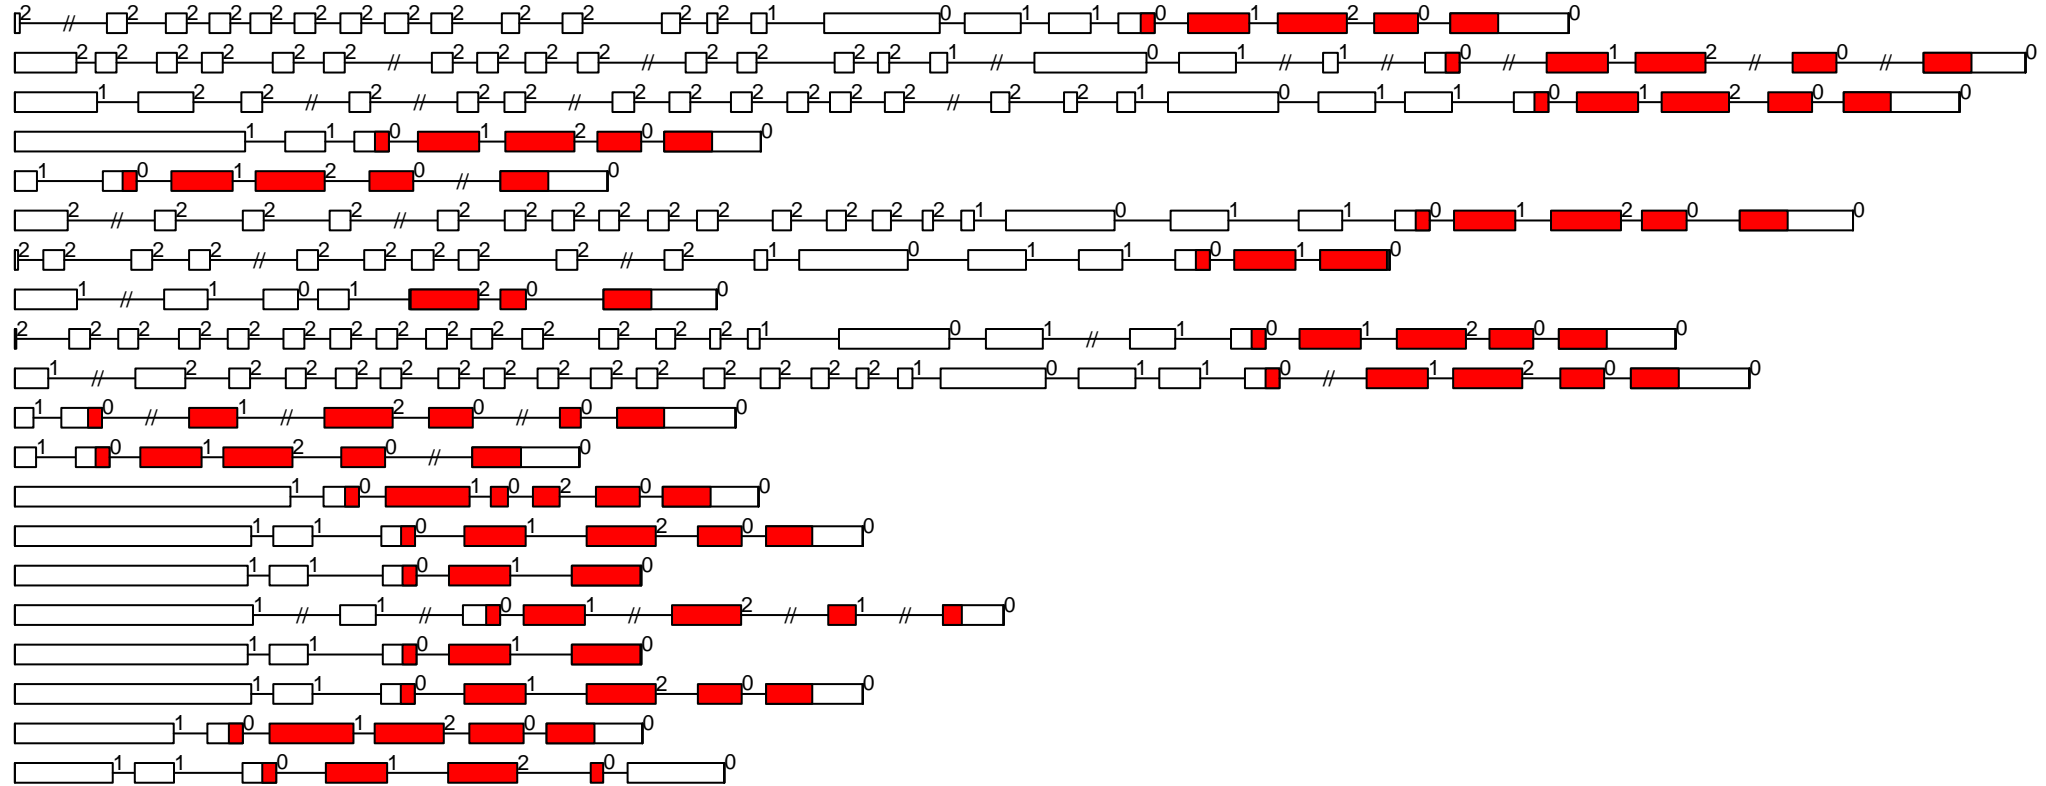



### G.hi RLK-Pelle\_DLSV exon-intron and domain diagram (part 10)

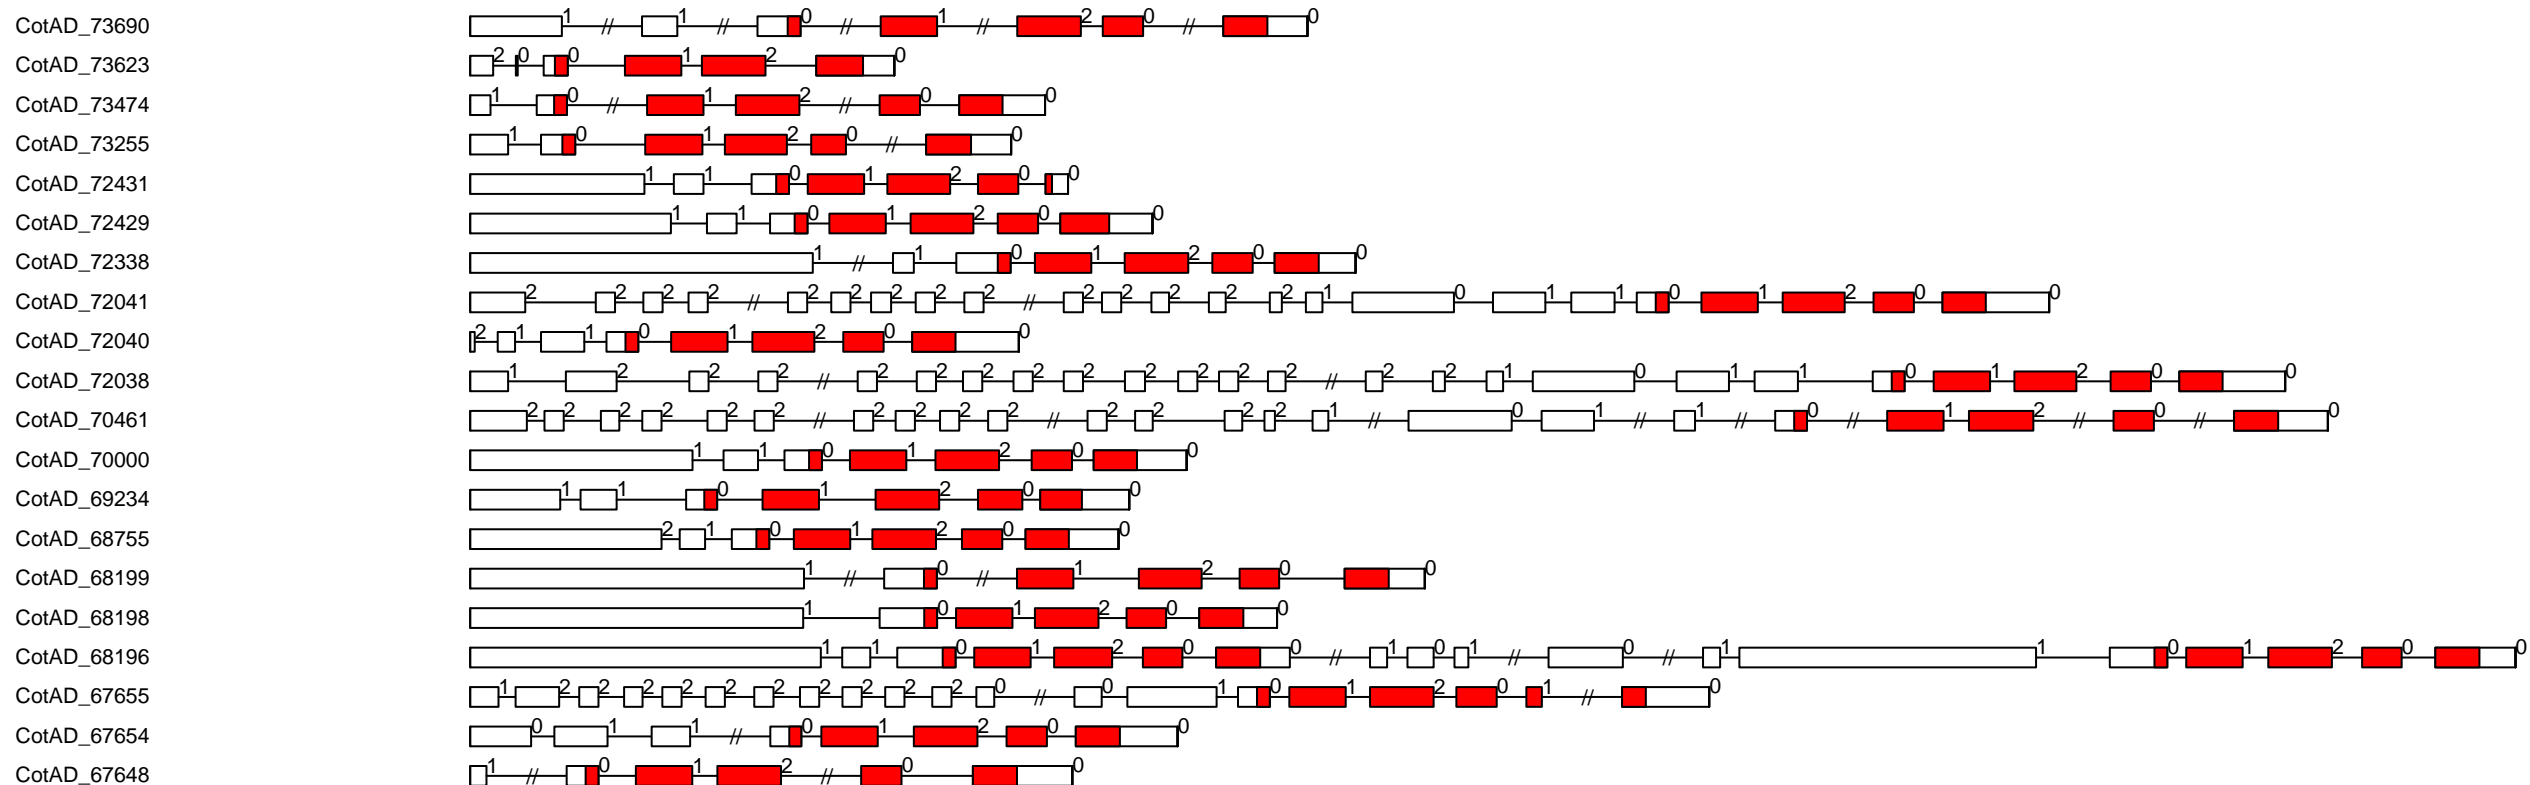

### G.hi RLK-Pelle\_DLSV exon-intron and domain diagram (part 11)

CotAD\_76650

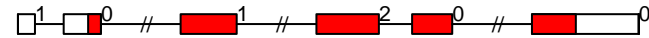

CotAD\_75181

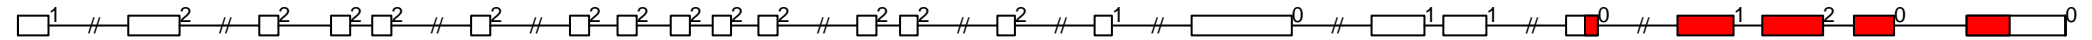

CotAD\_73762

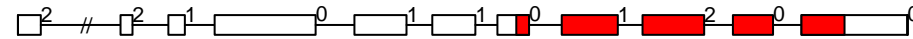

CotAD\_73761

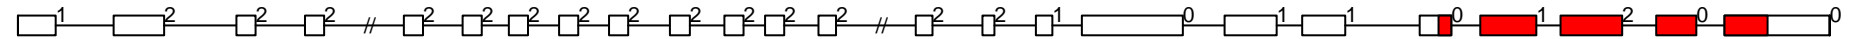

CotAD\_73760

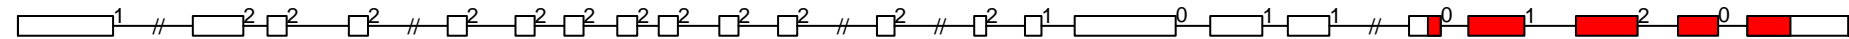

0

2000

4000

6000

8000

### G.hi RLK-Pelle\_Extensin exon-intron and domain diagram (all)

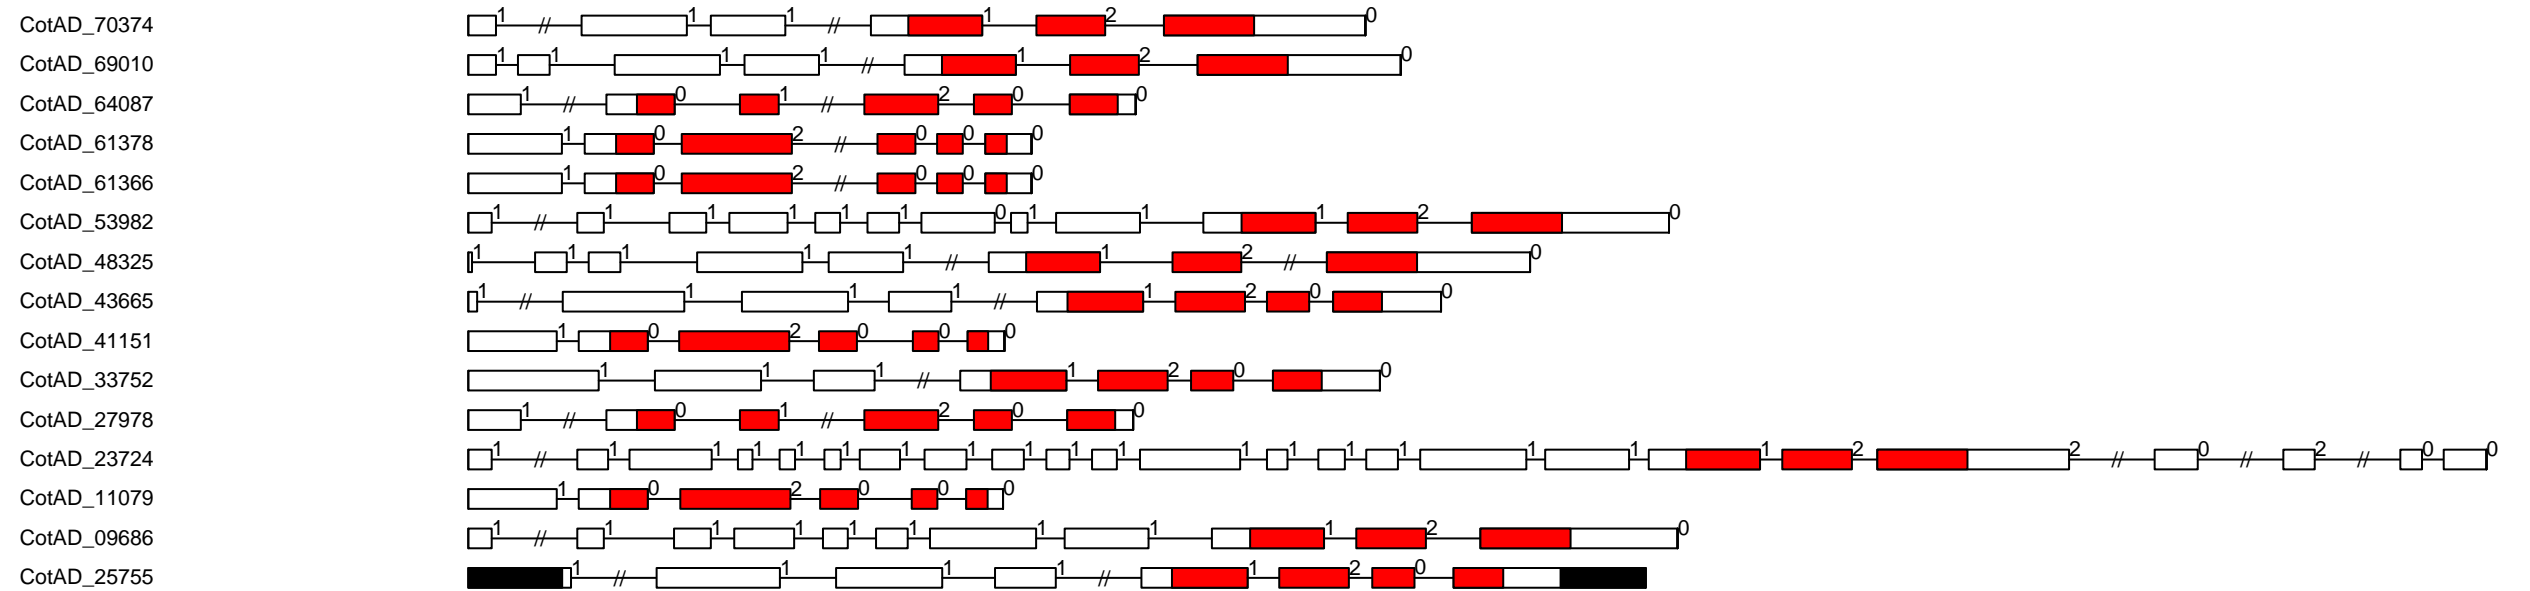

### G.hi RLK-Pelle\_L-LEC exon-intron and domain diagram (part 1)

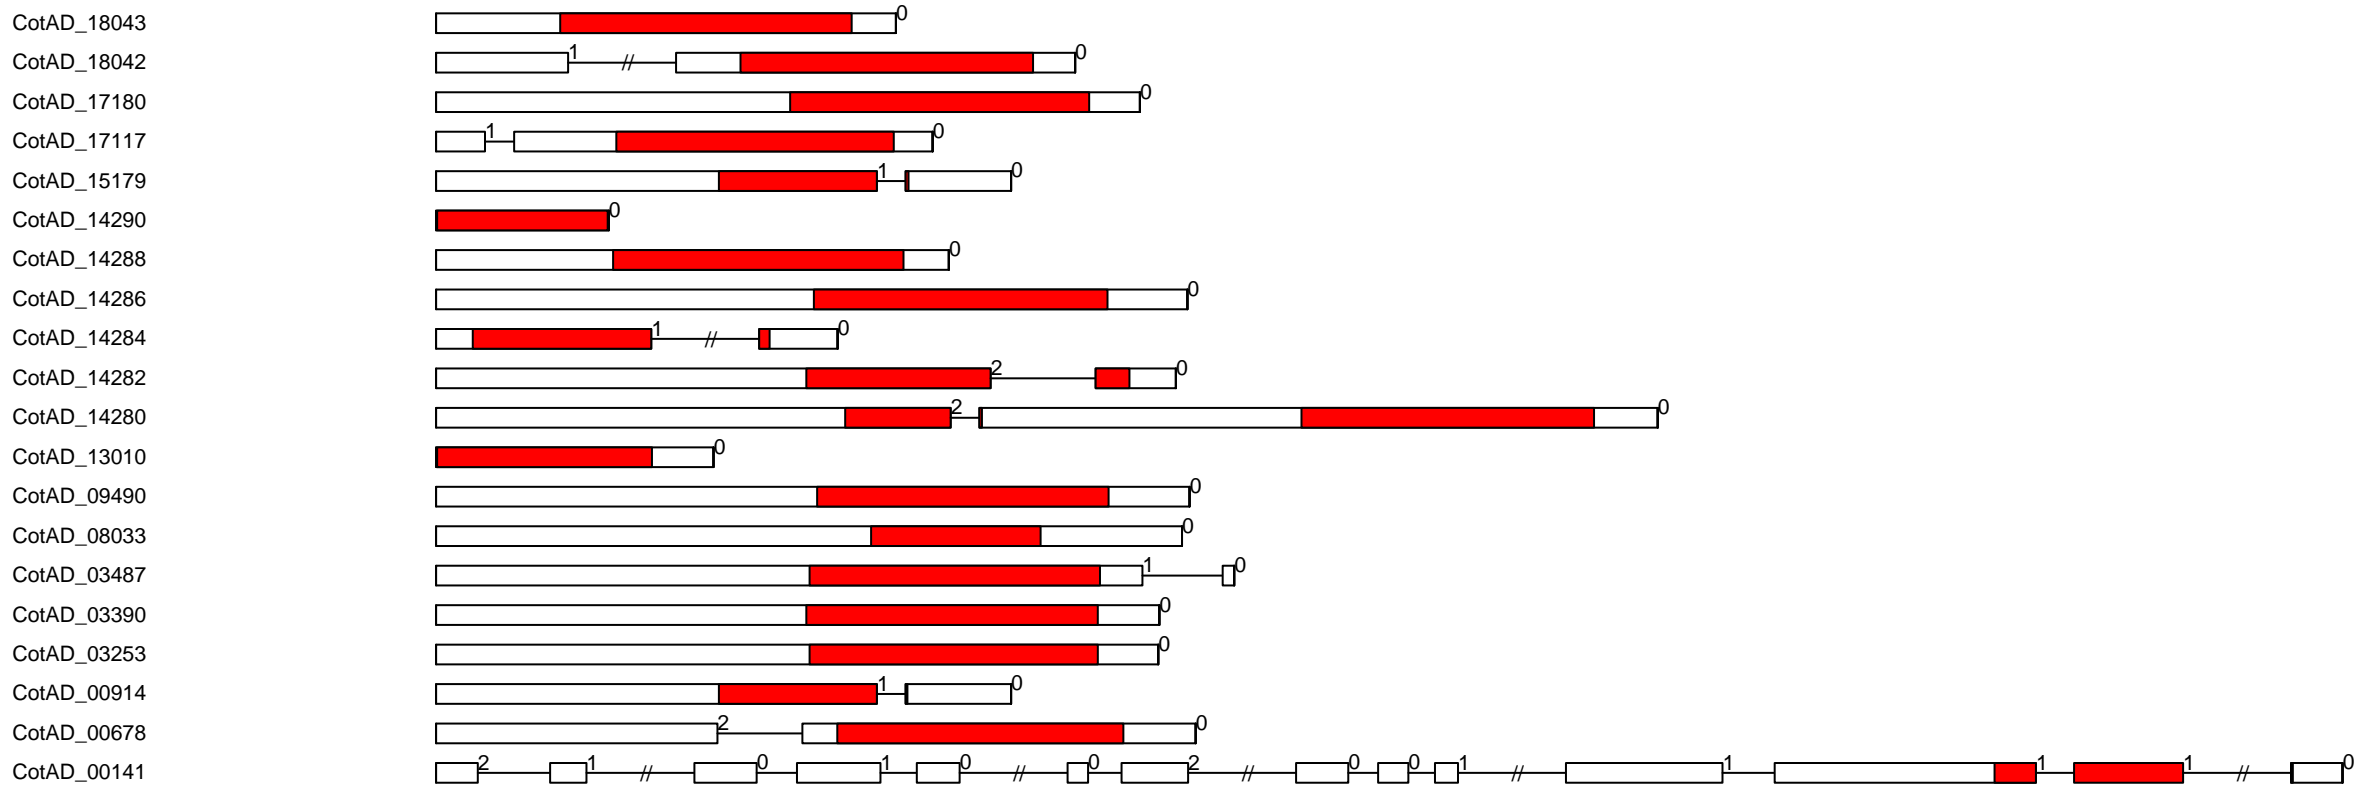

### G.hi RLK-Pelle\_L-LEC exon-intron and domain diagram (part 2)

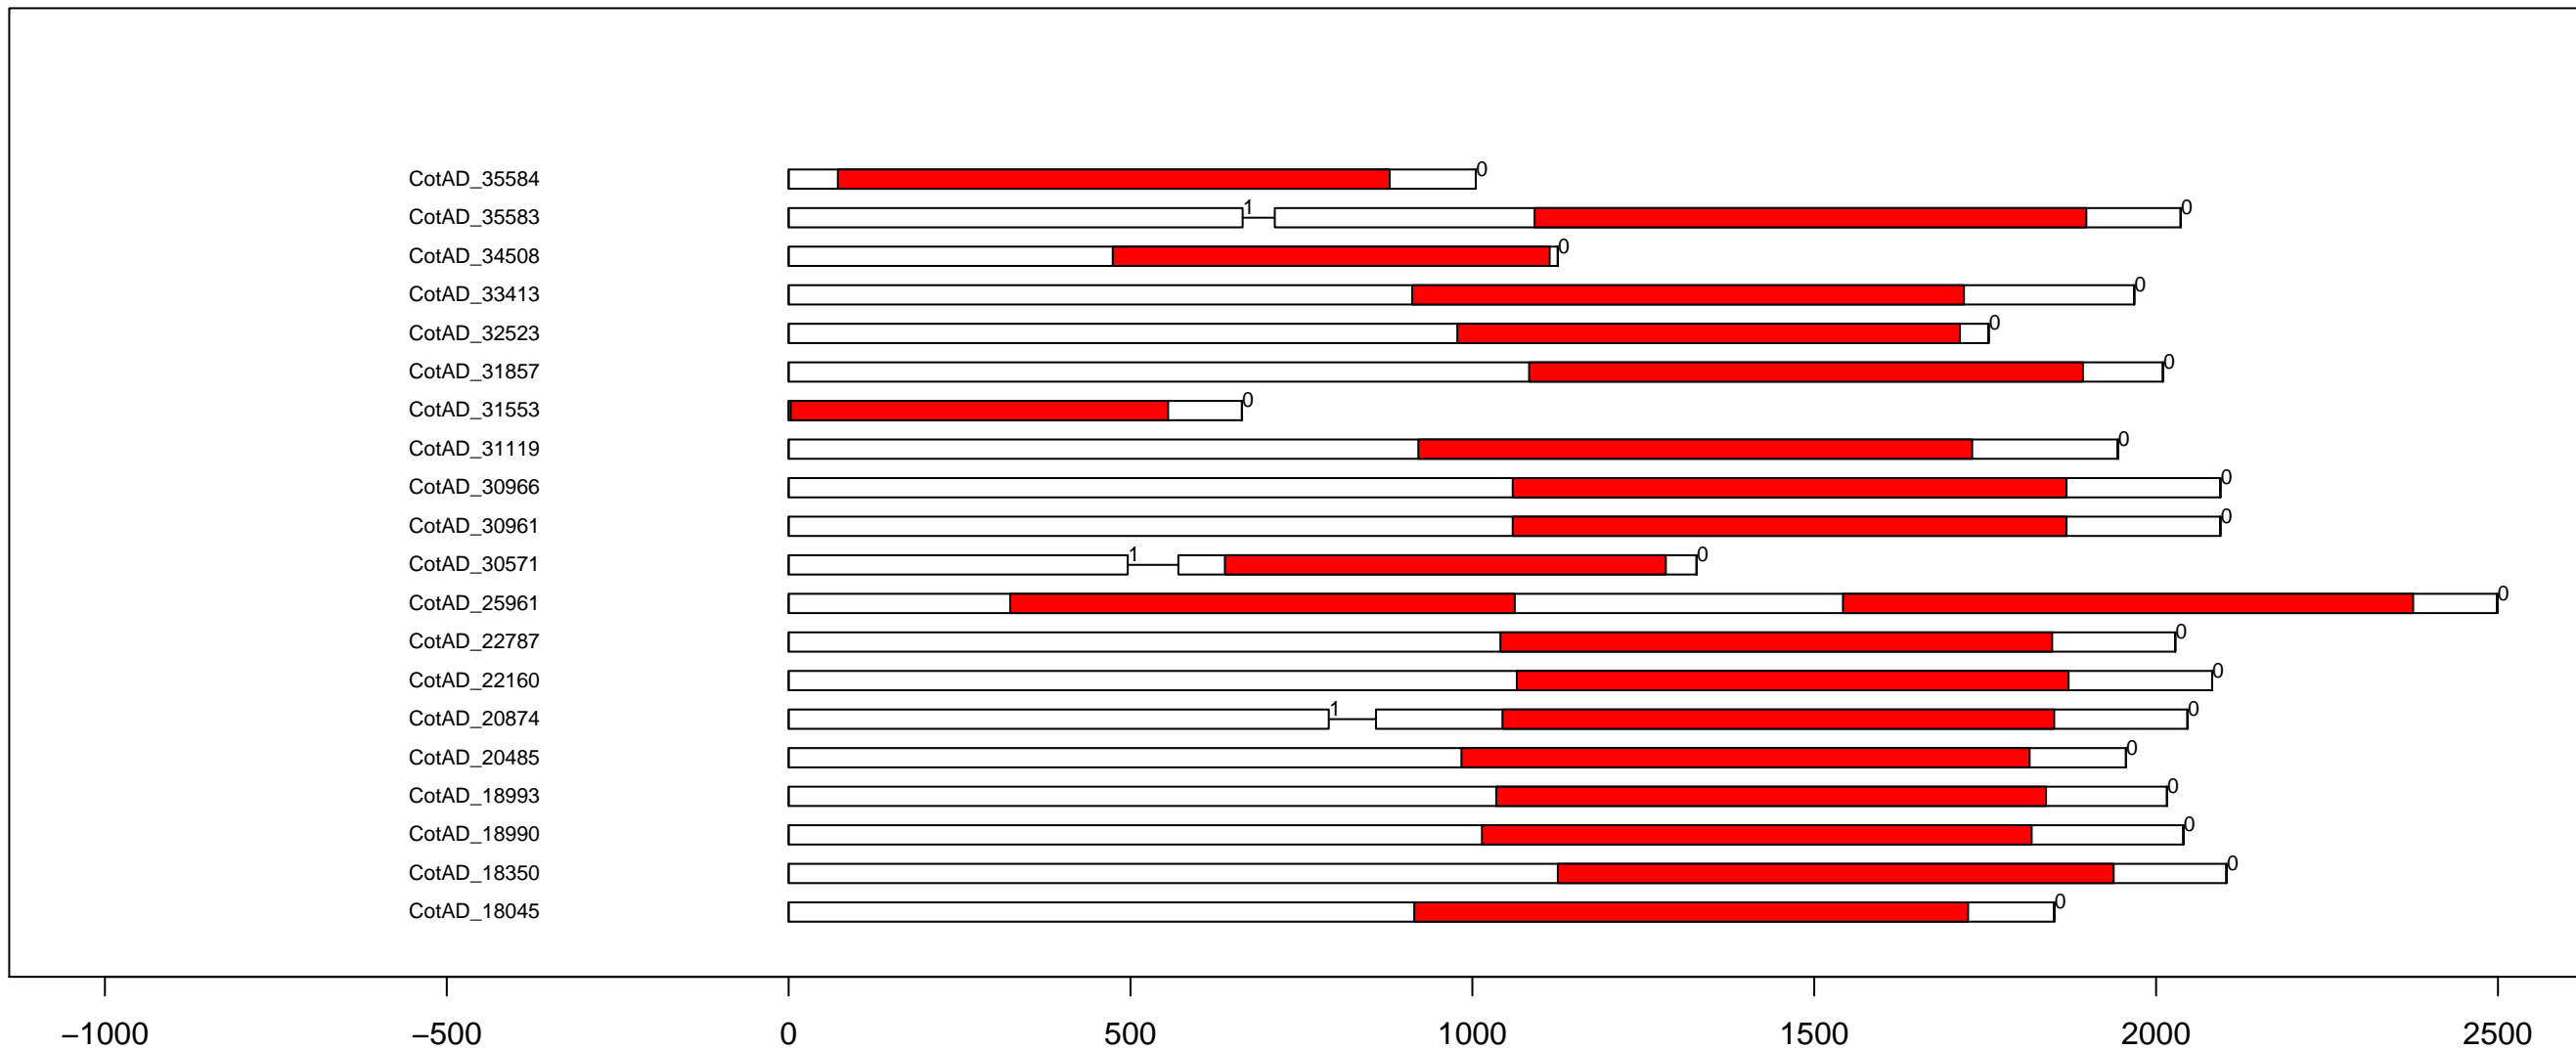

### G.hi RLK-Pelle\_L-LEC exon-intron and domain diagram (part 3)

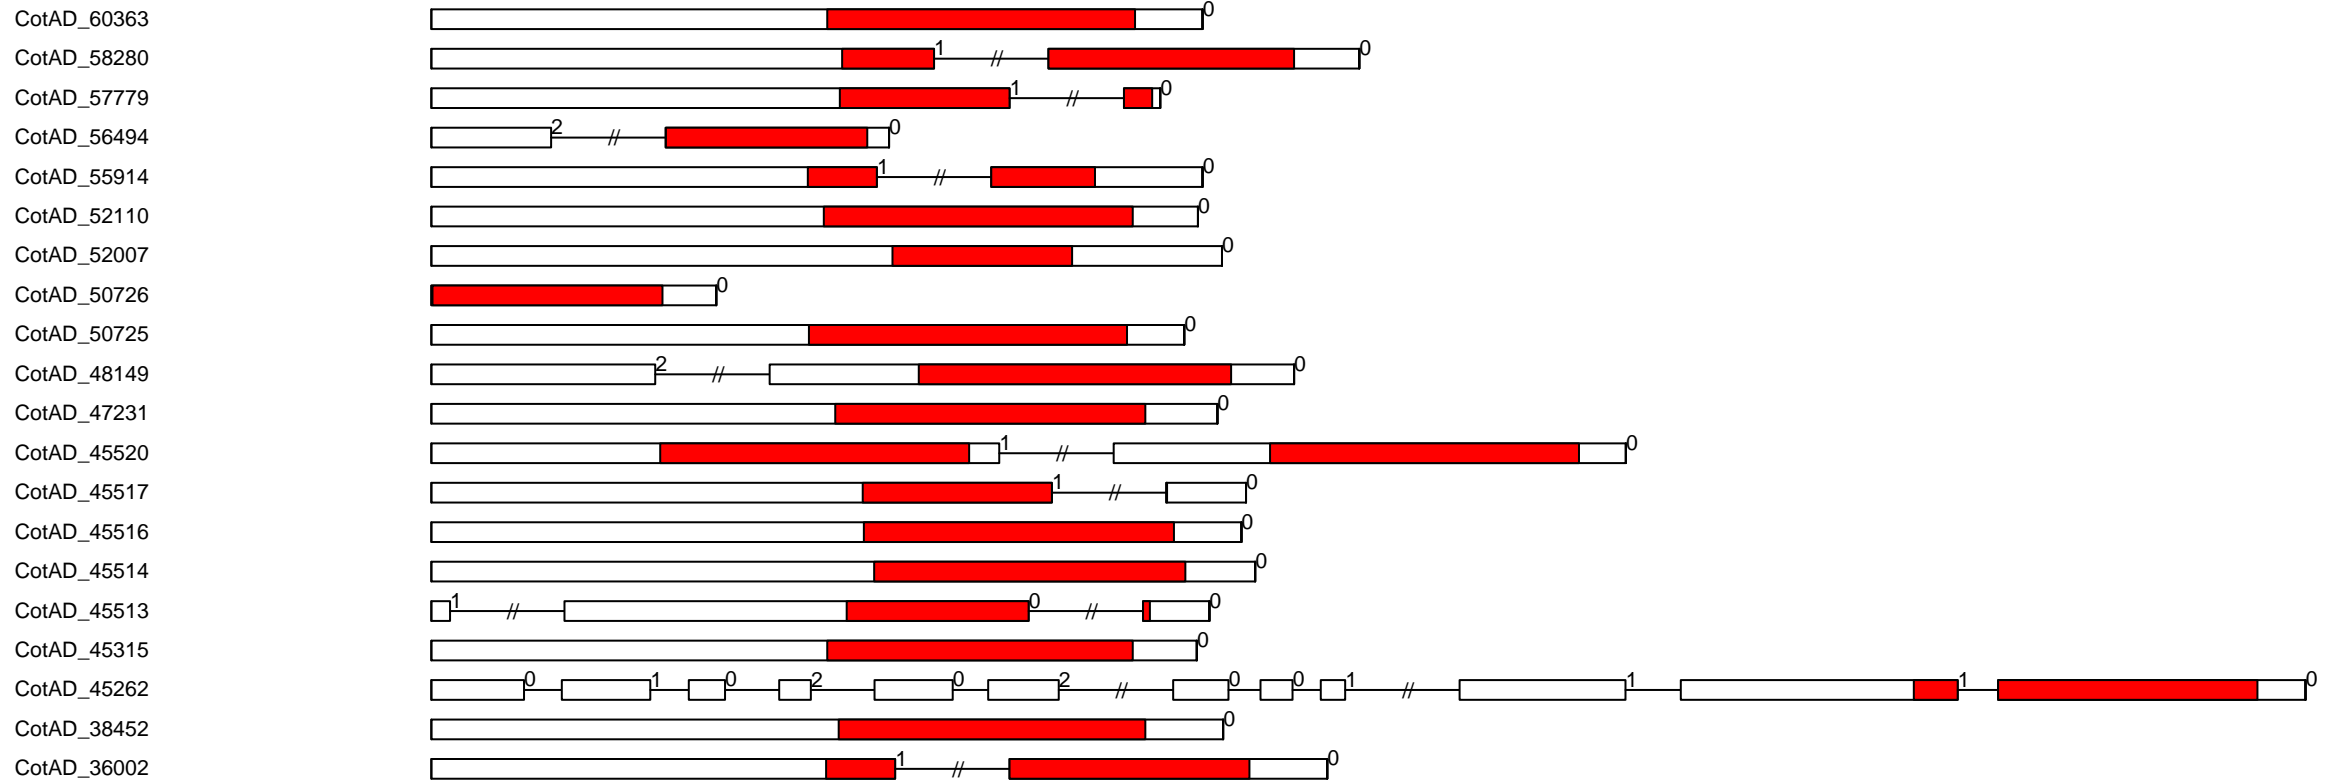

### G.hi RLK-Pelle\_L-LEC exon-intron and domain diagram (part 4)

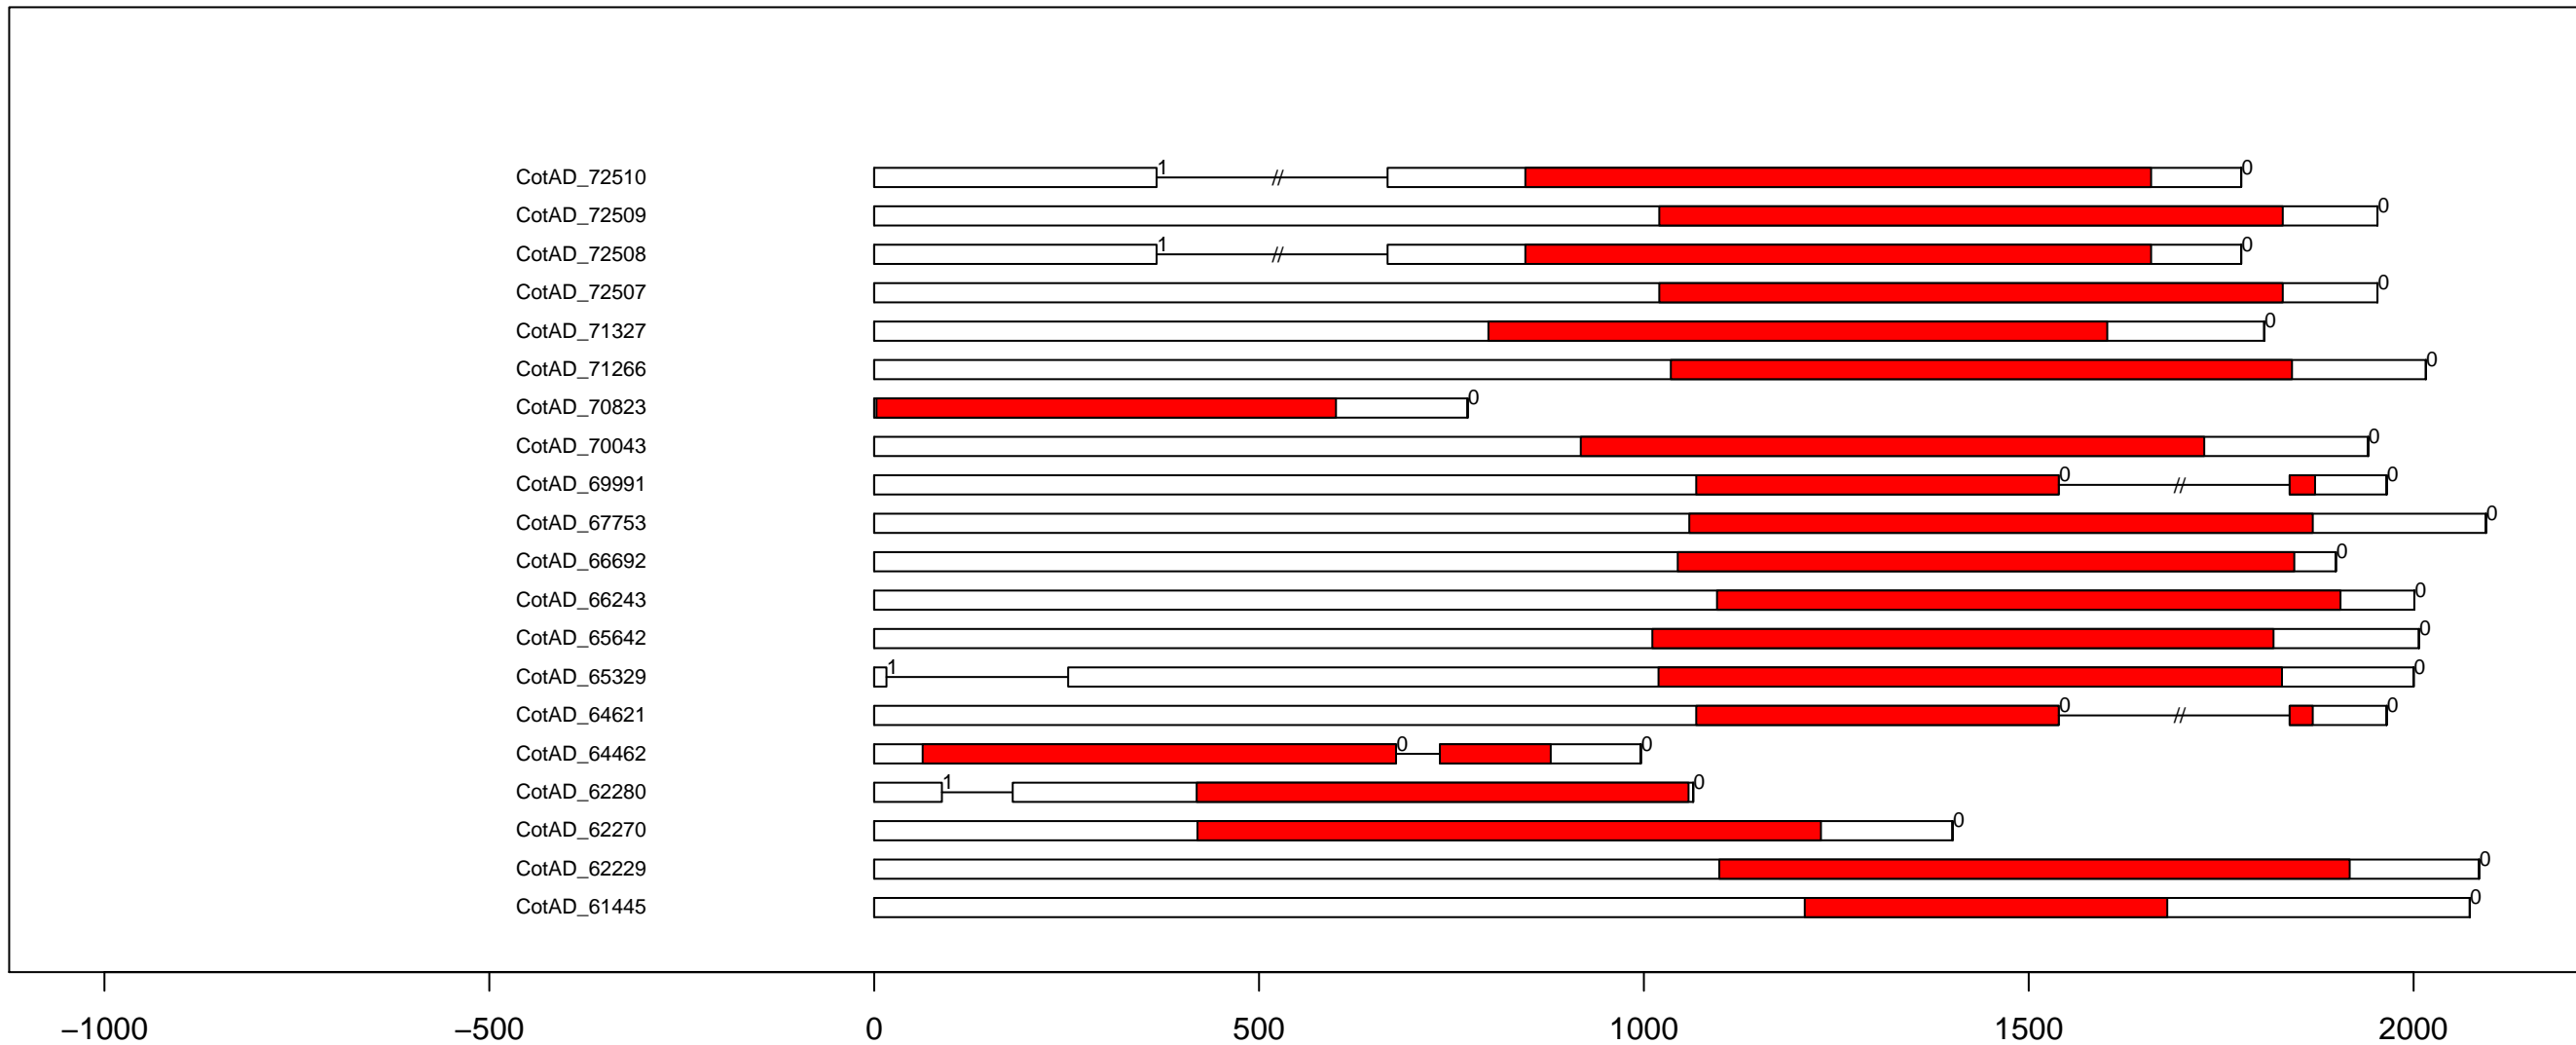

G.hi RLK-Pelle\_L-LEC exon-intron and domain diagram (part 5)

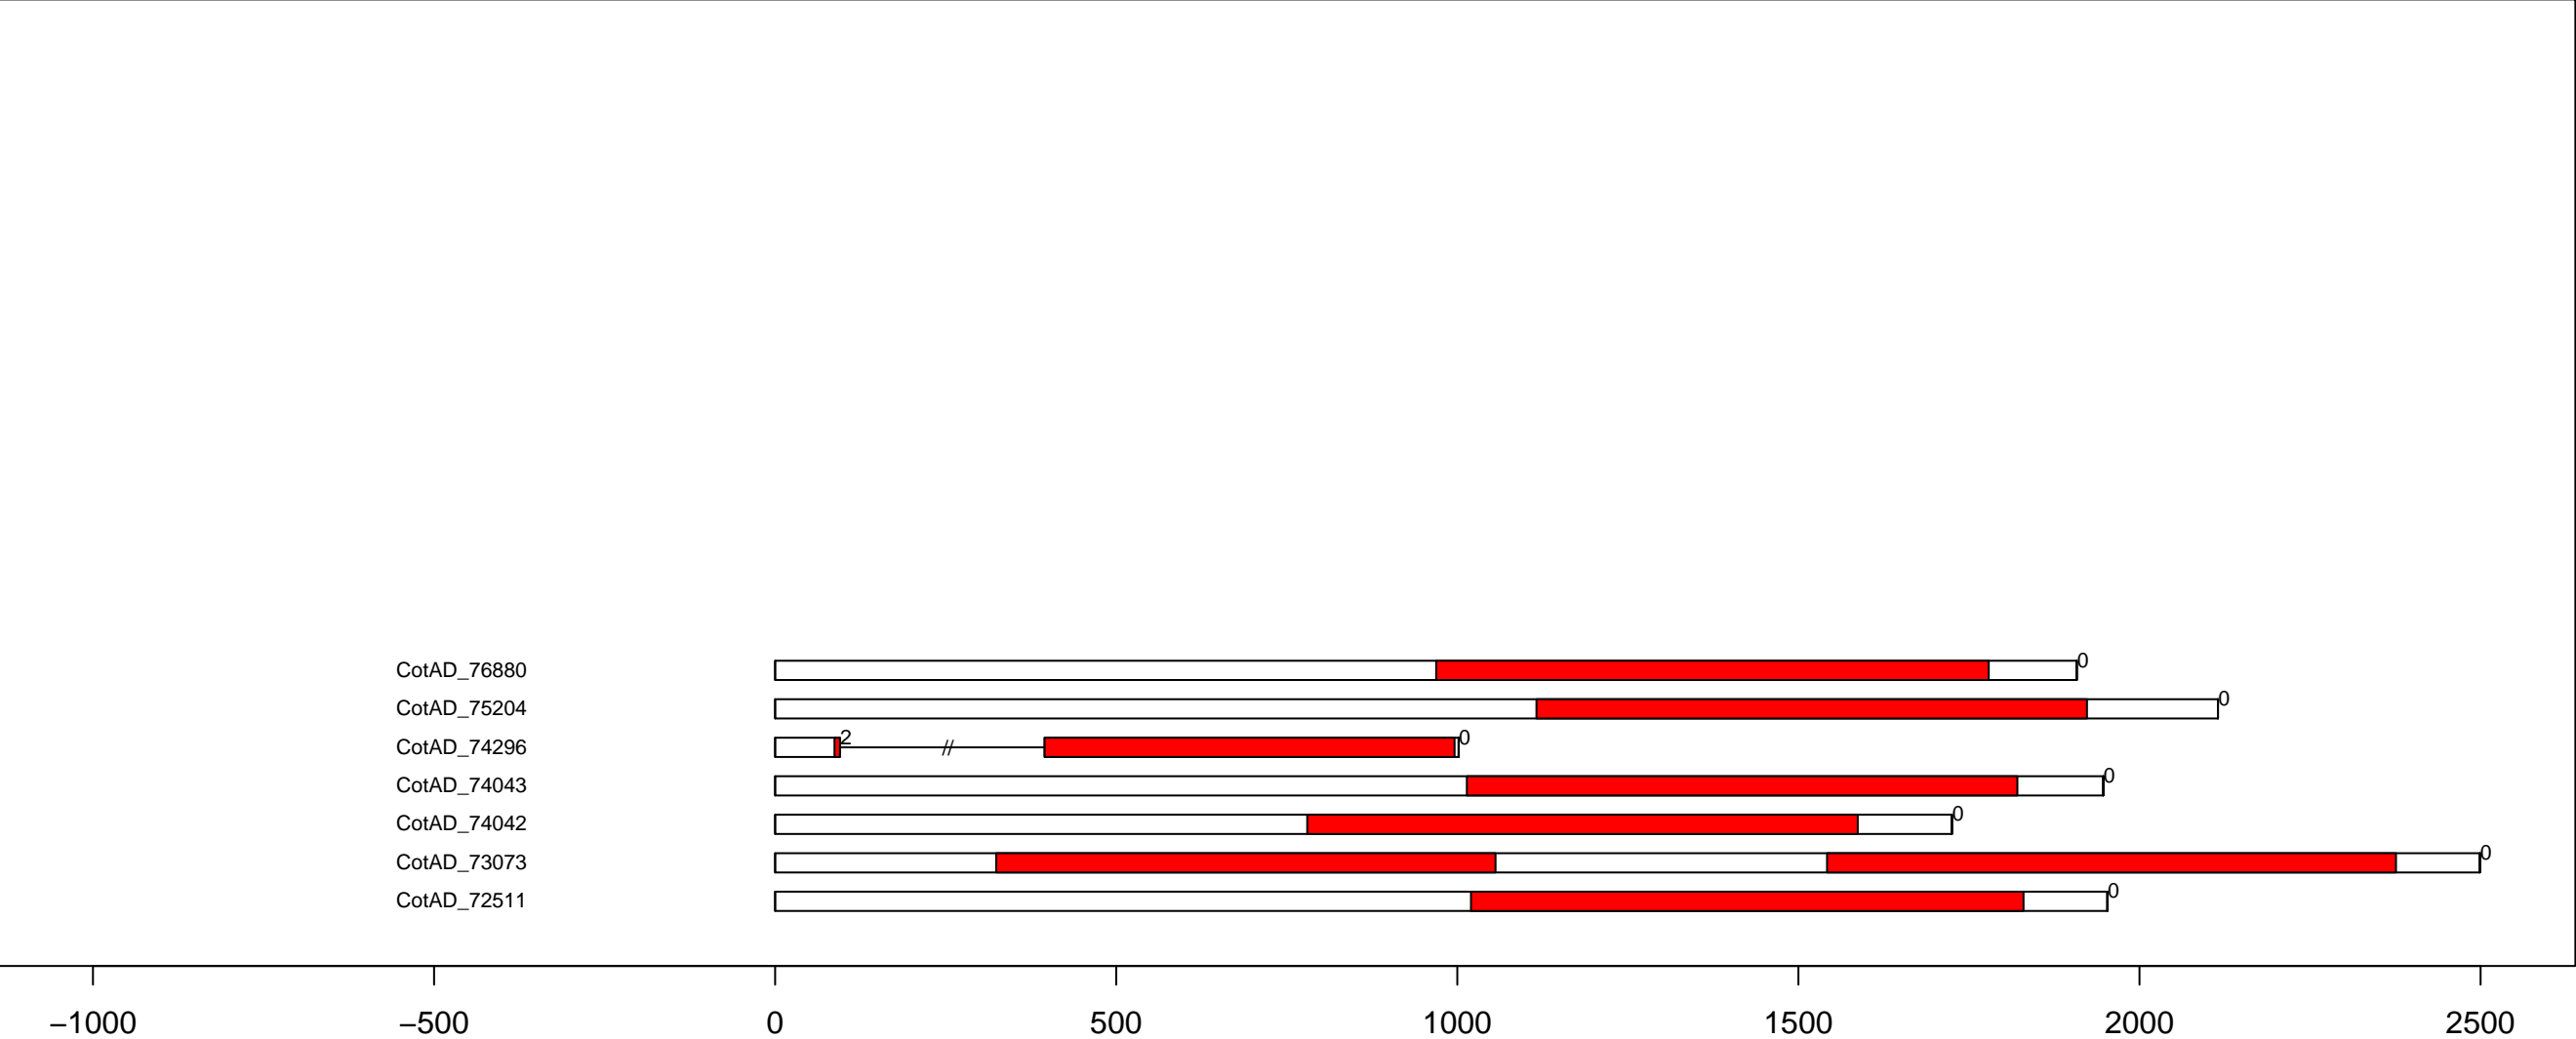





### G.hi RLK-Pelle\_LRK10L-2 exon-intron and domain diagram (part 2)

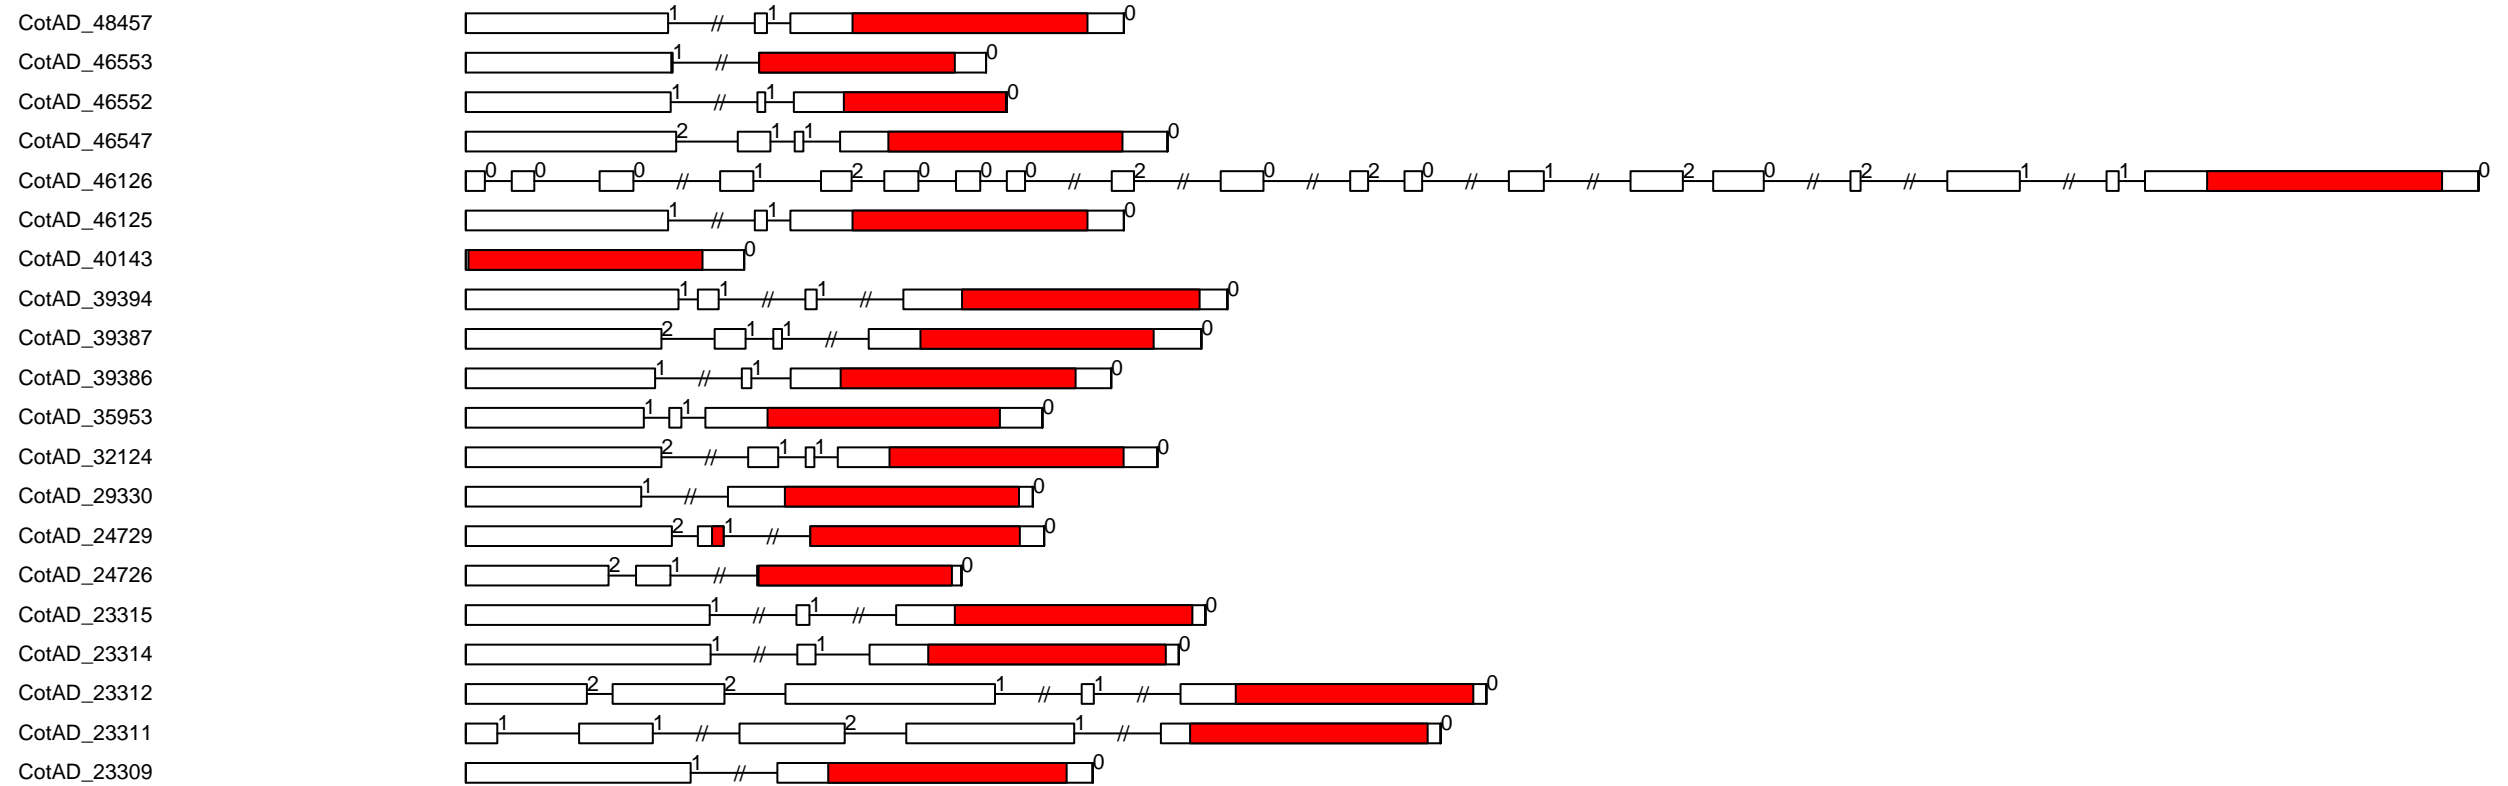

### G.hi RLK-Pelle\_LRK10L-2 exon-intron and domain diagram (part 3)

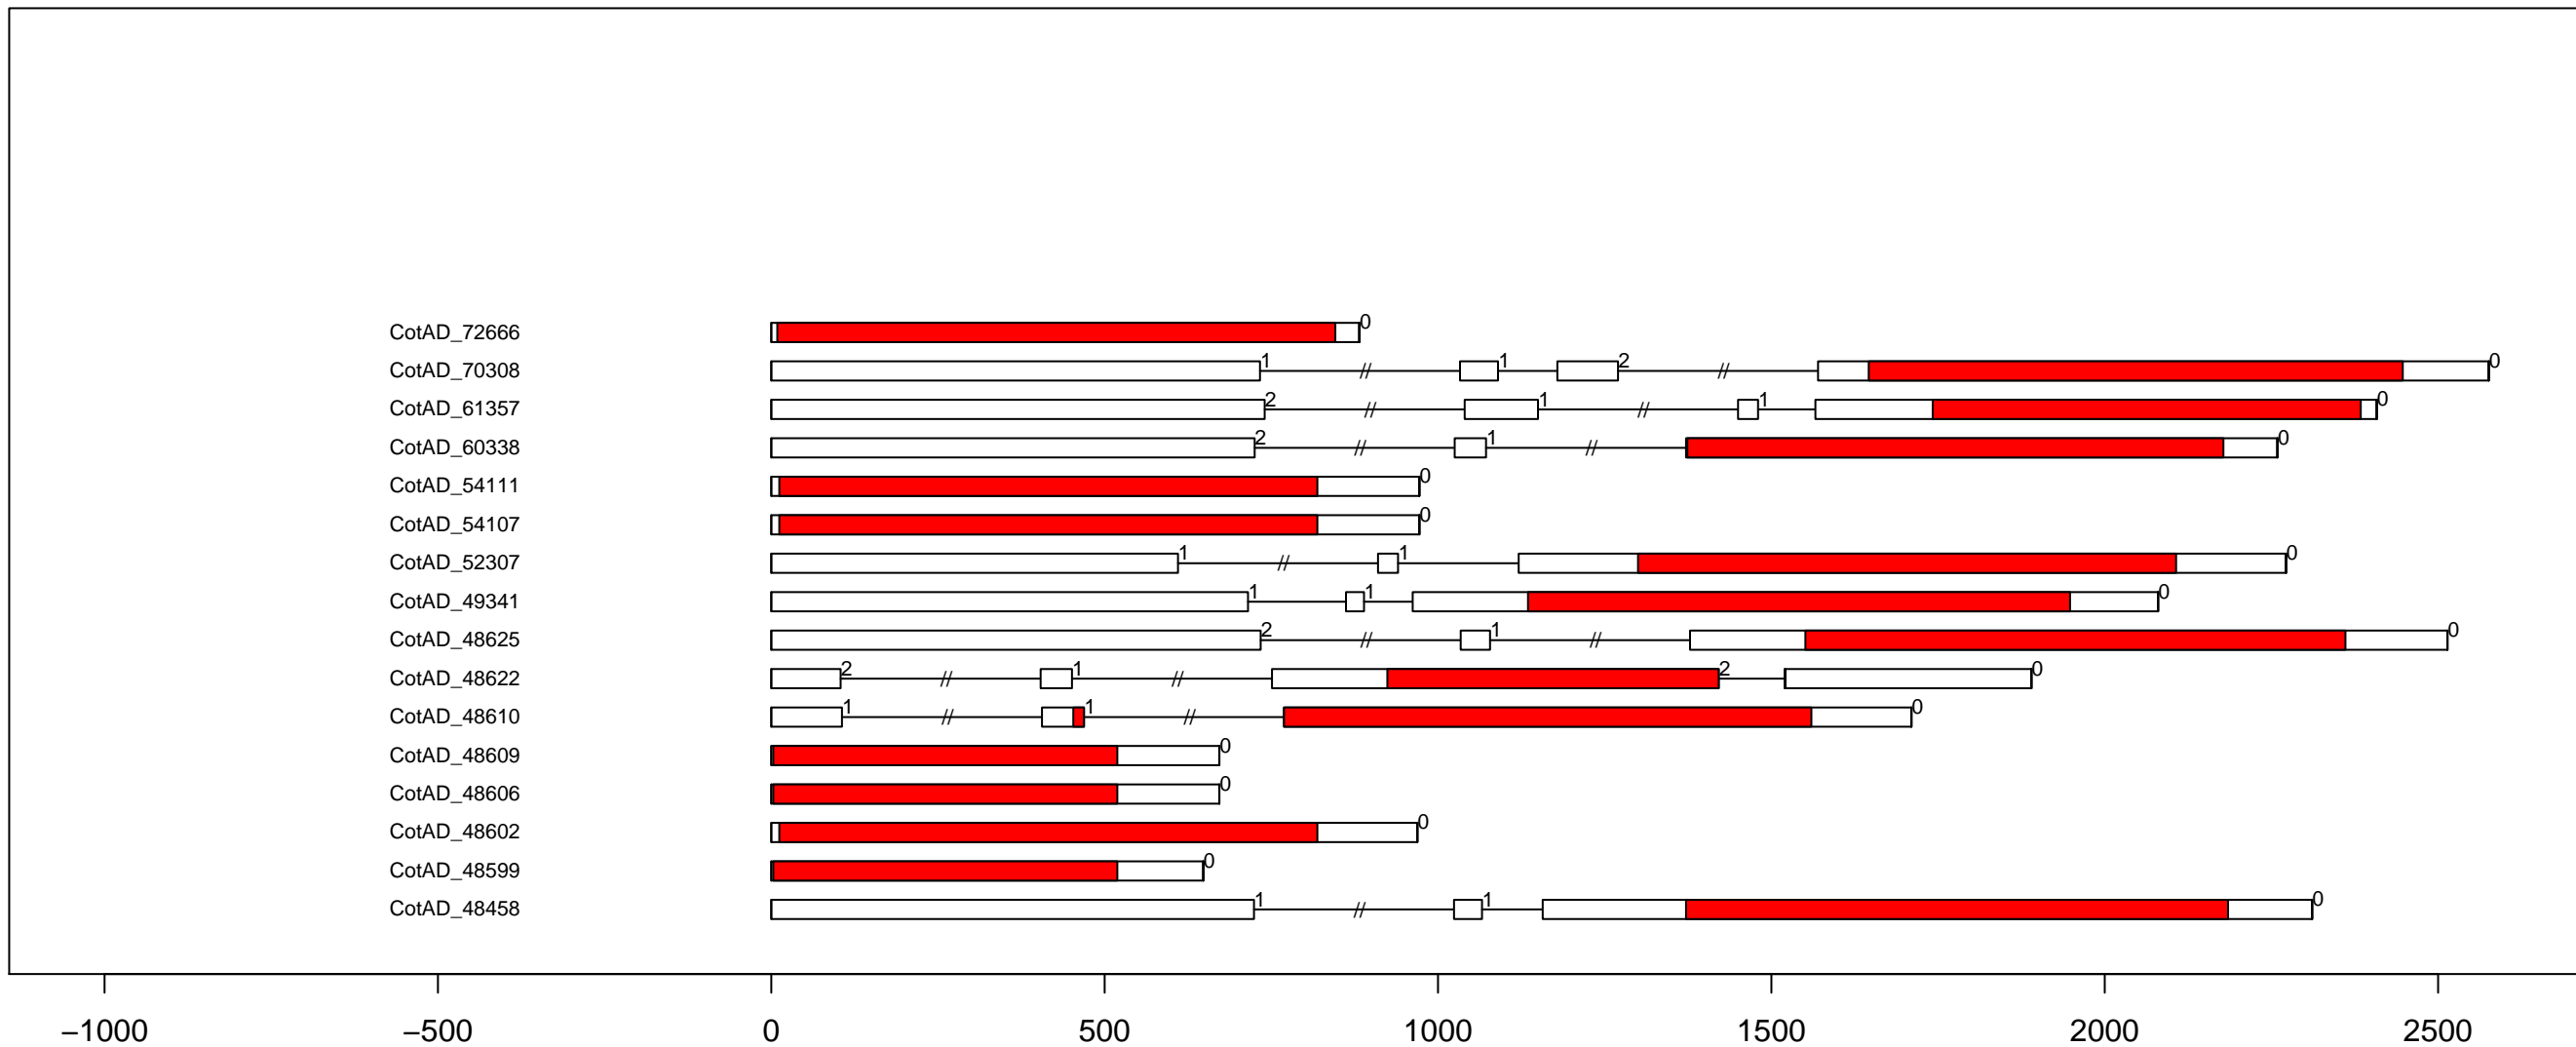

### G.hi RLK-Pelle\_LRR-I-1 exon-intron and domain diagram (all)

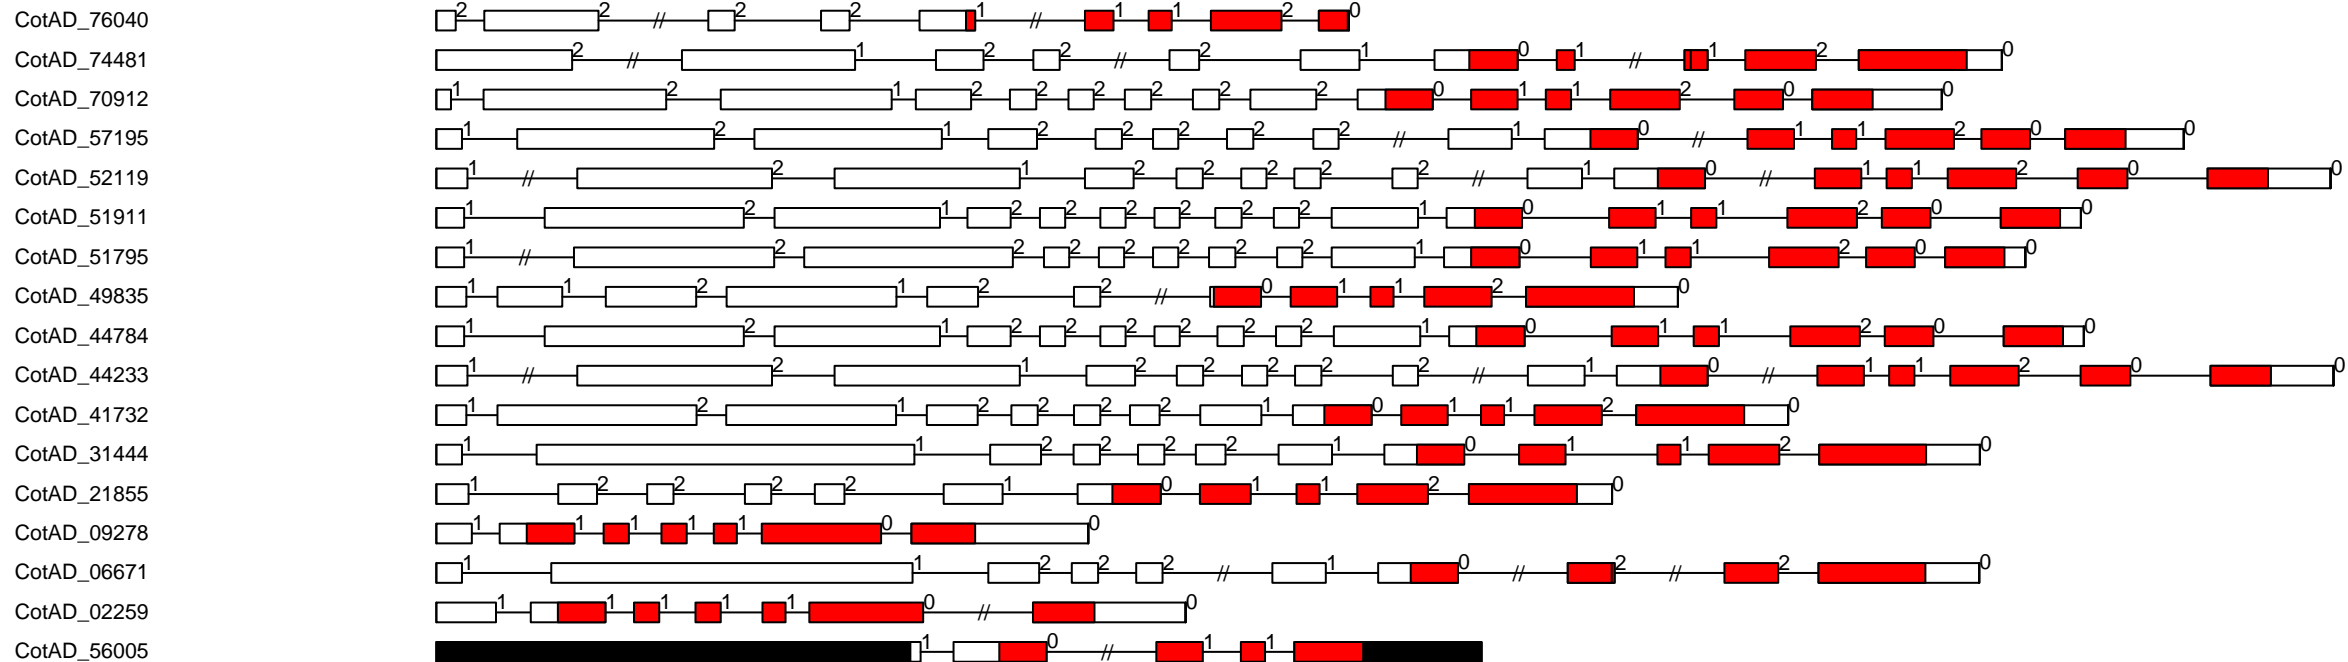

# G.hi RLK-Pelle\_LRR-I-2 exon-intron and domain diagram (all)

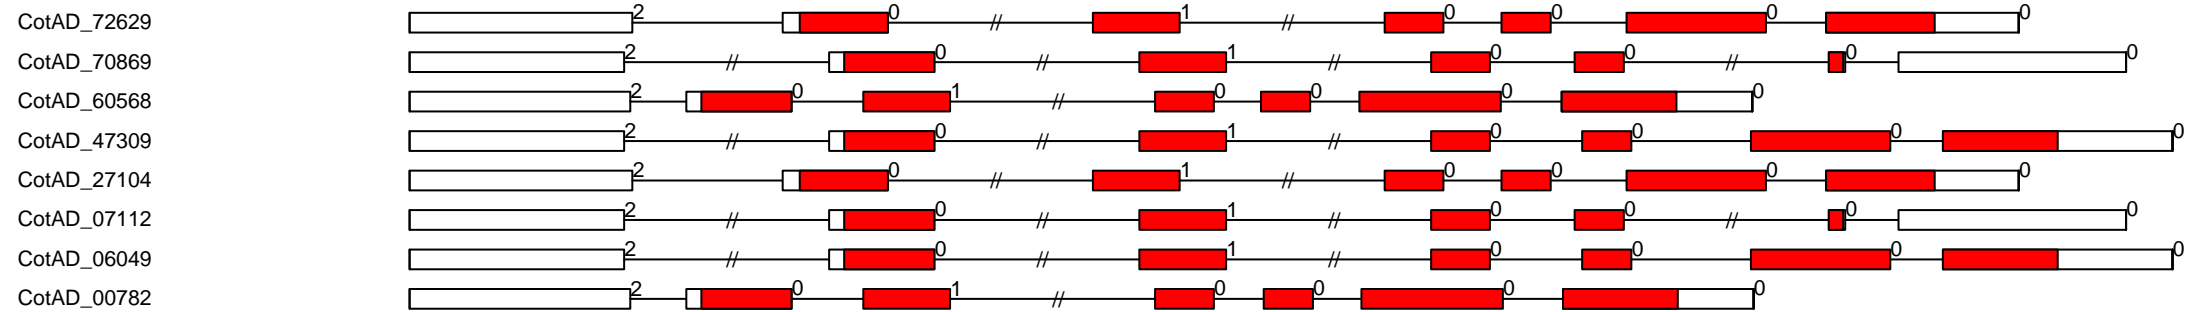





### G.hi RLK-Pelle\_LRR-III exon-intron and domain diagram (part 3)

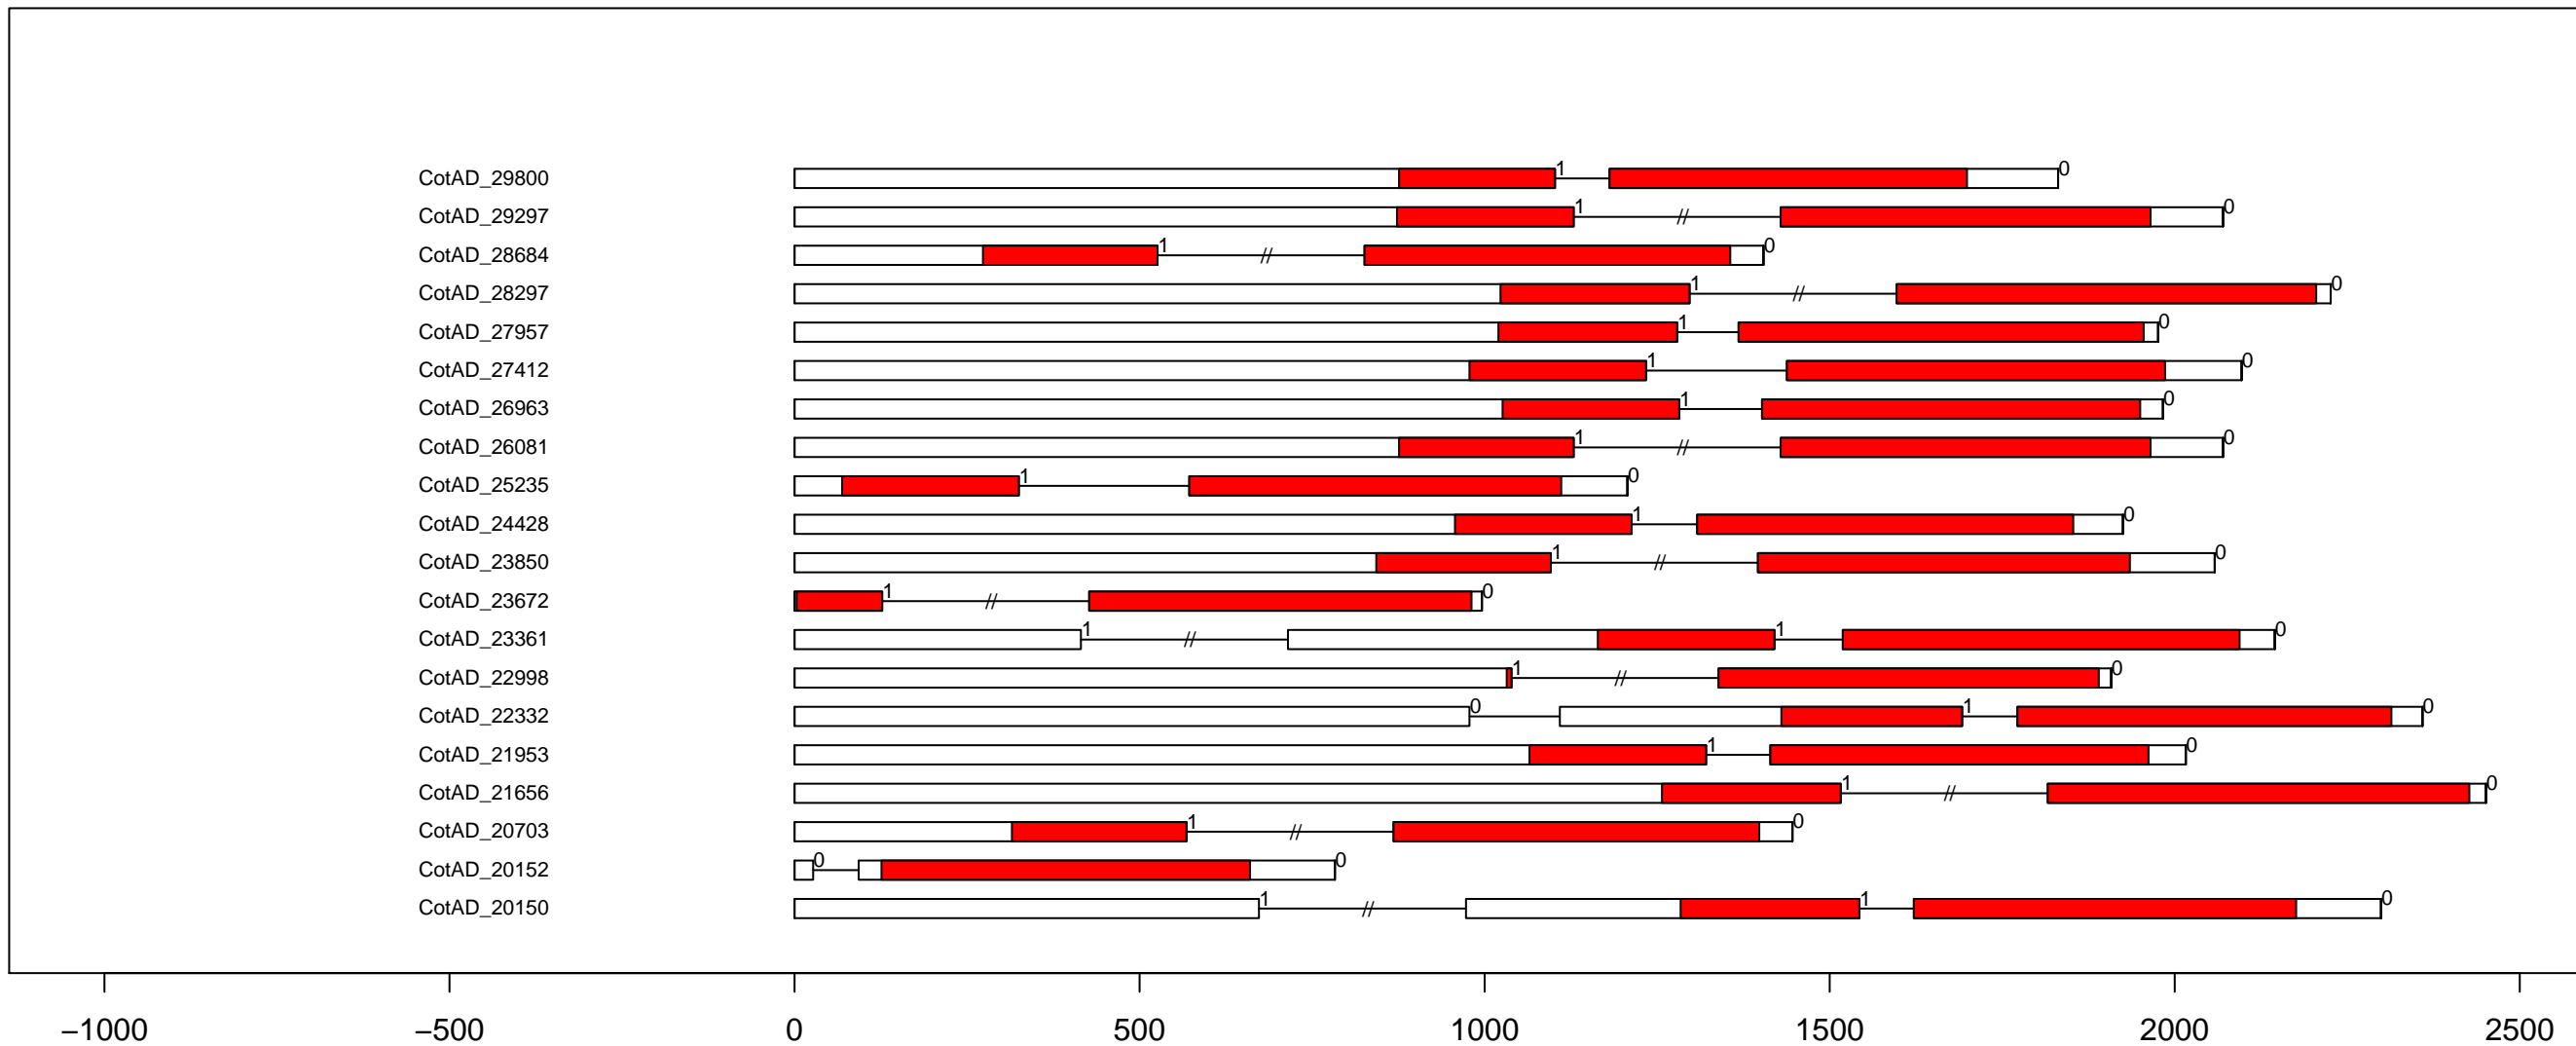



### G.hi RLK-Pelle\_LRR-III exon-intron and domain diagram (part 4)

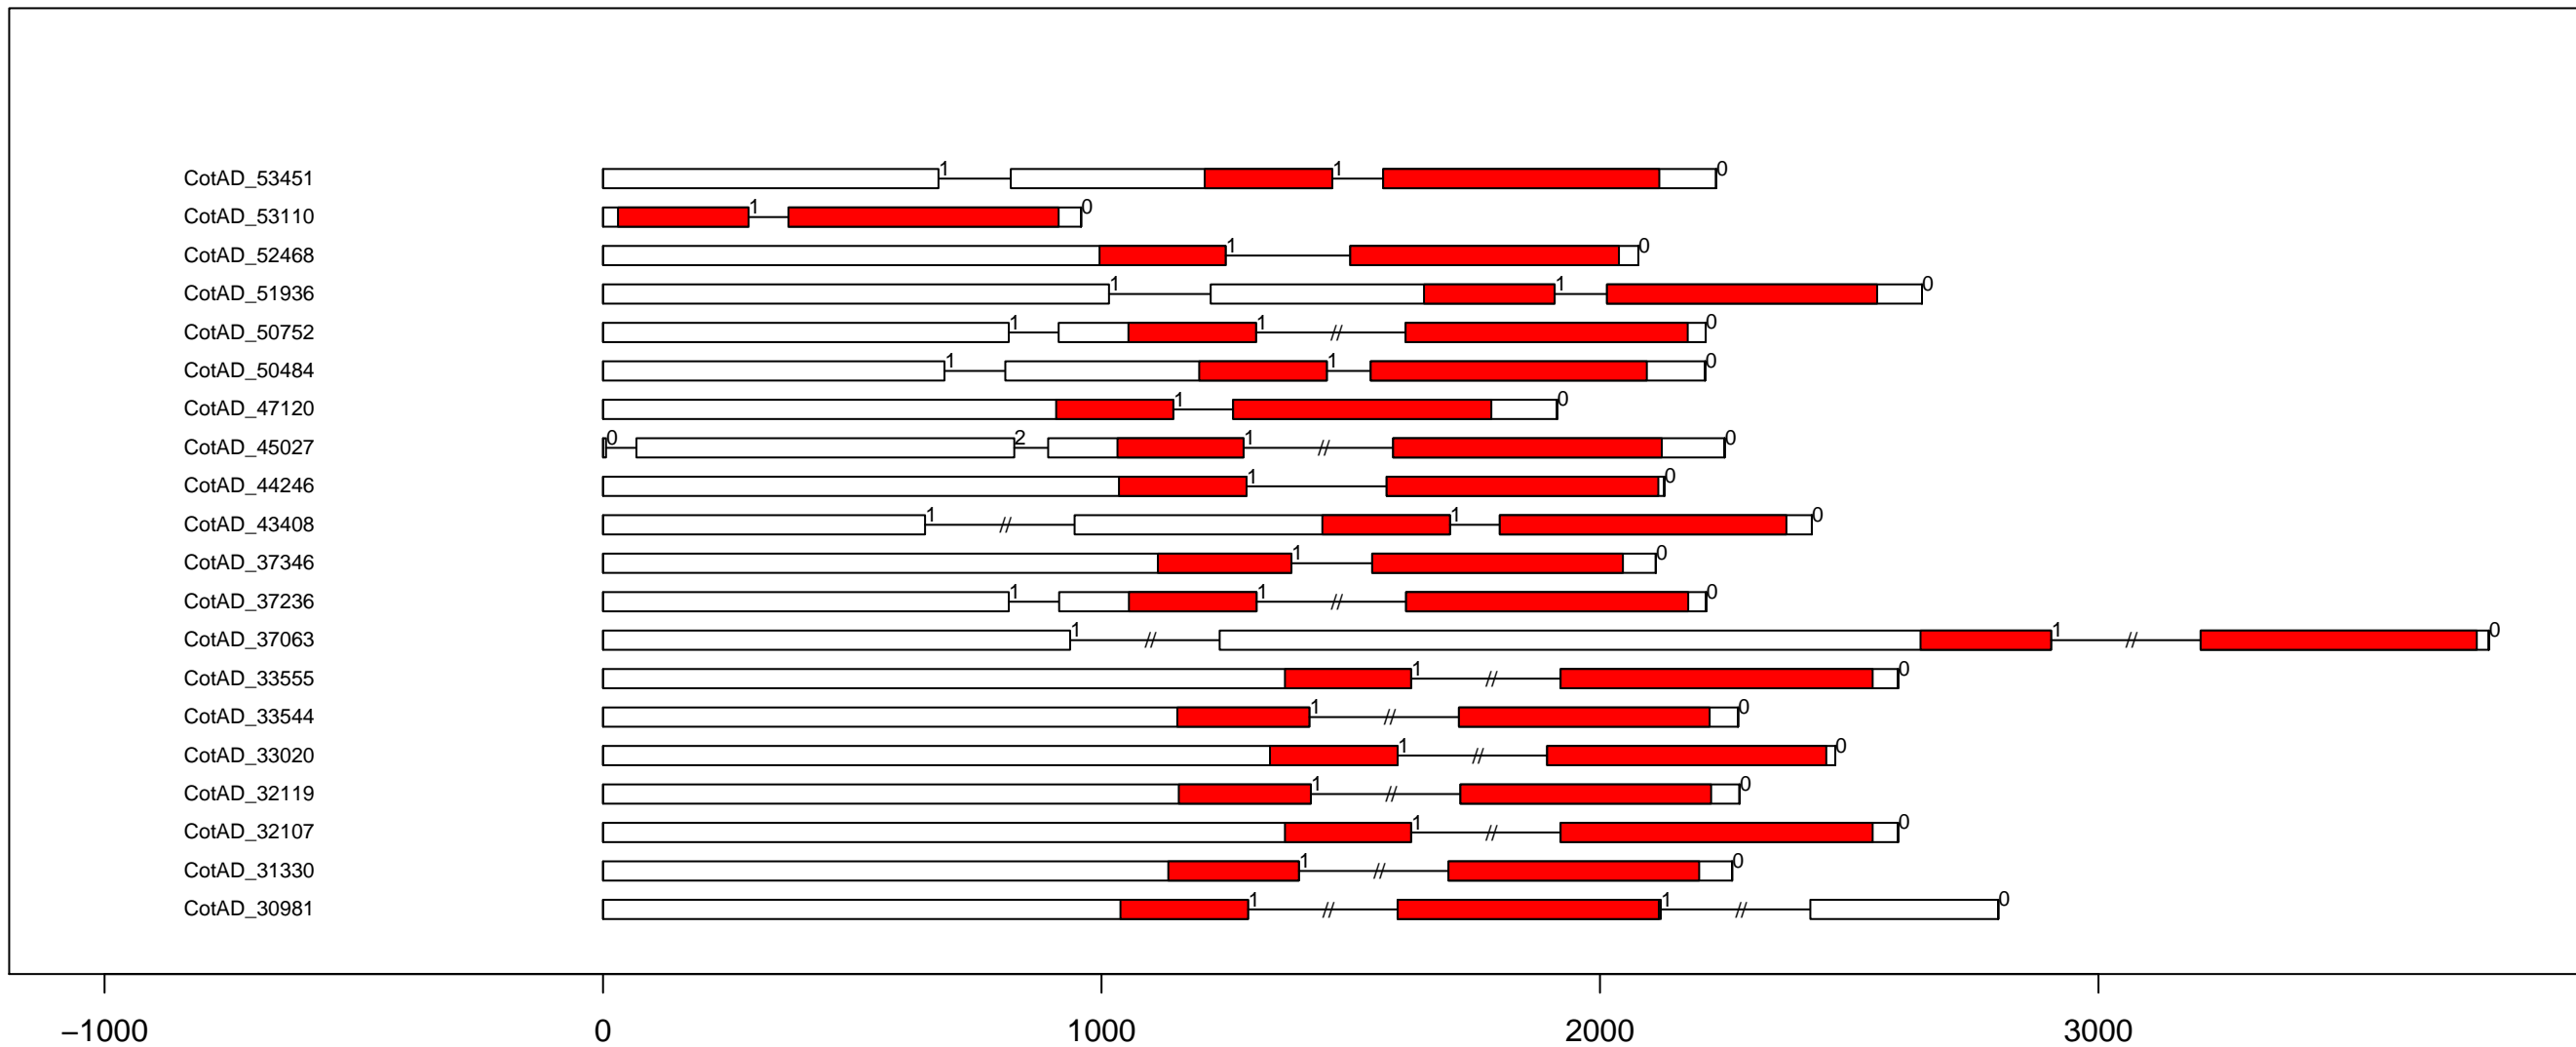

### G.hi RLK-Pelle\_LRR-III exon-intron and domain diagram (part 5)

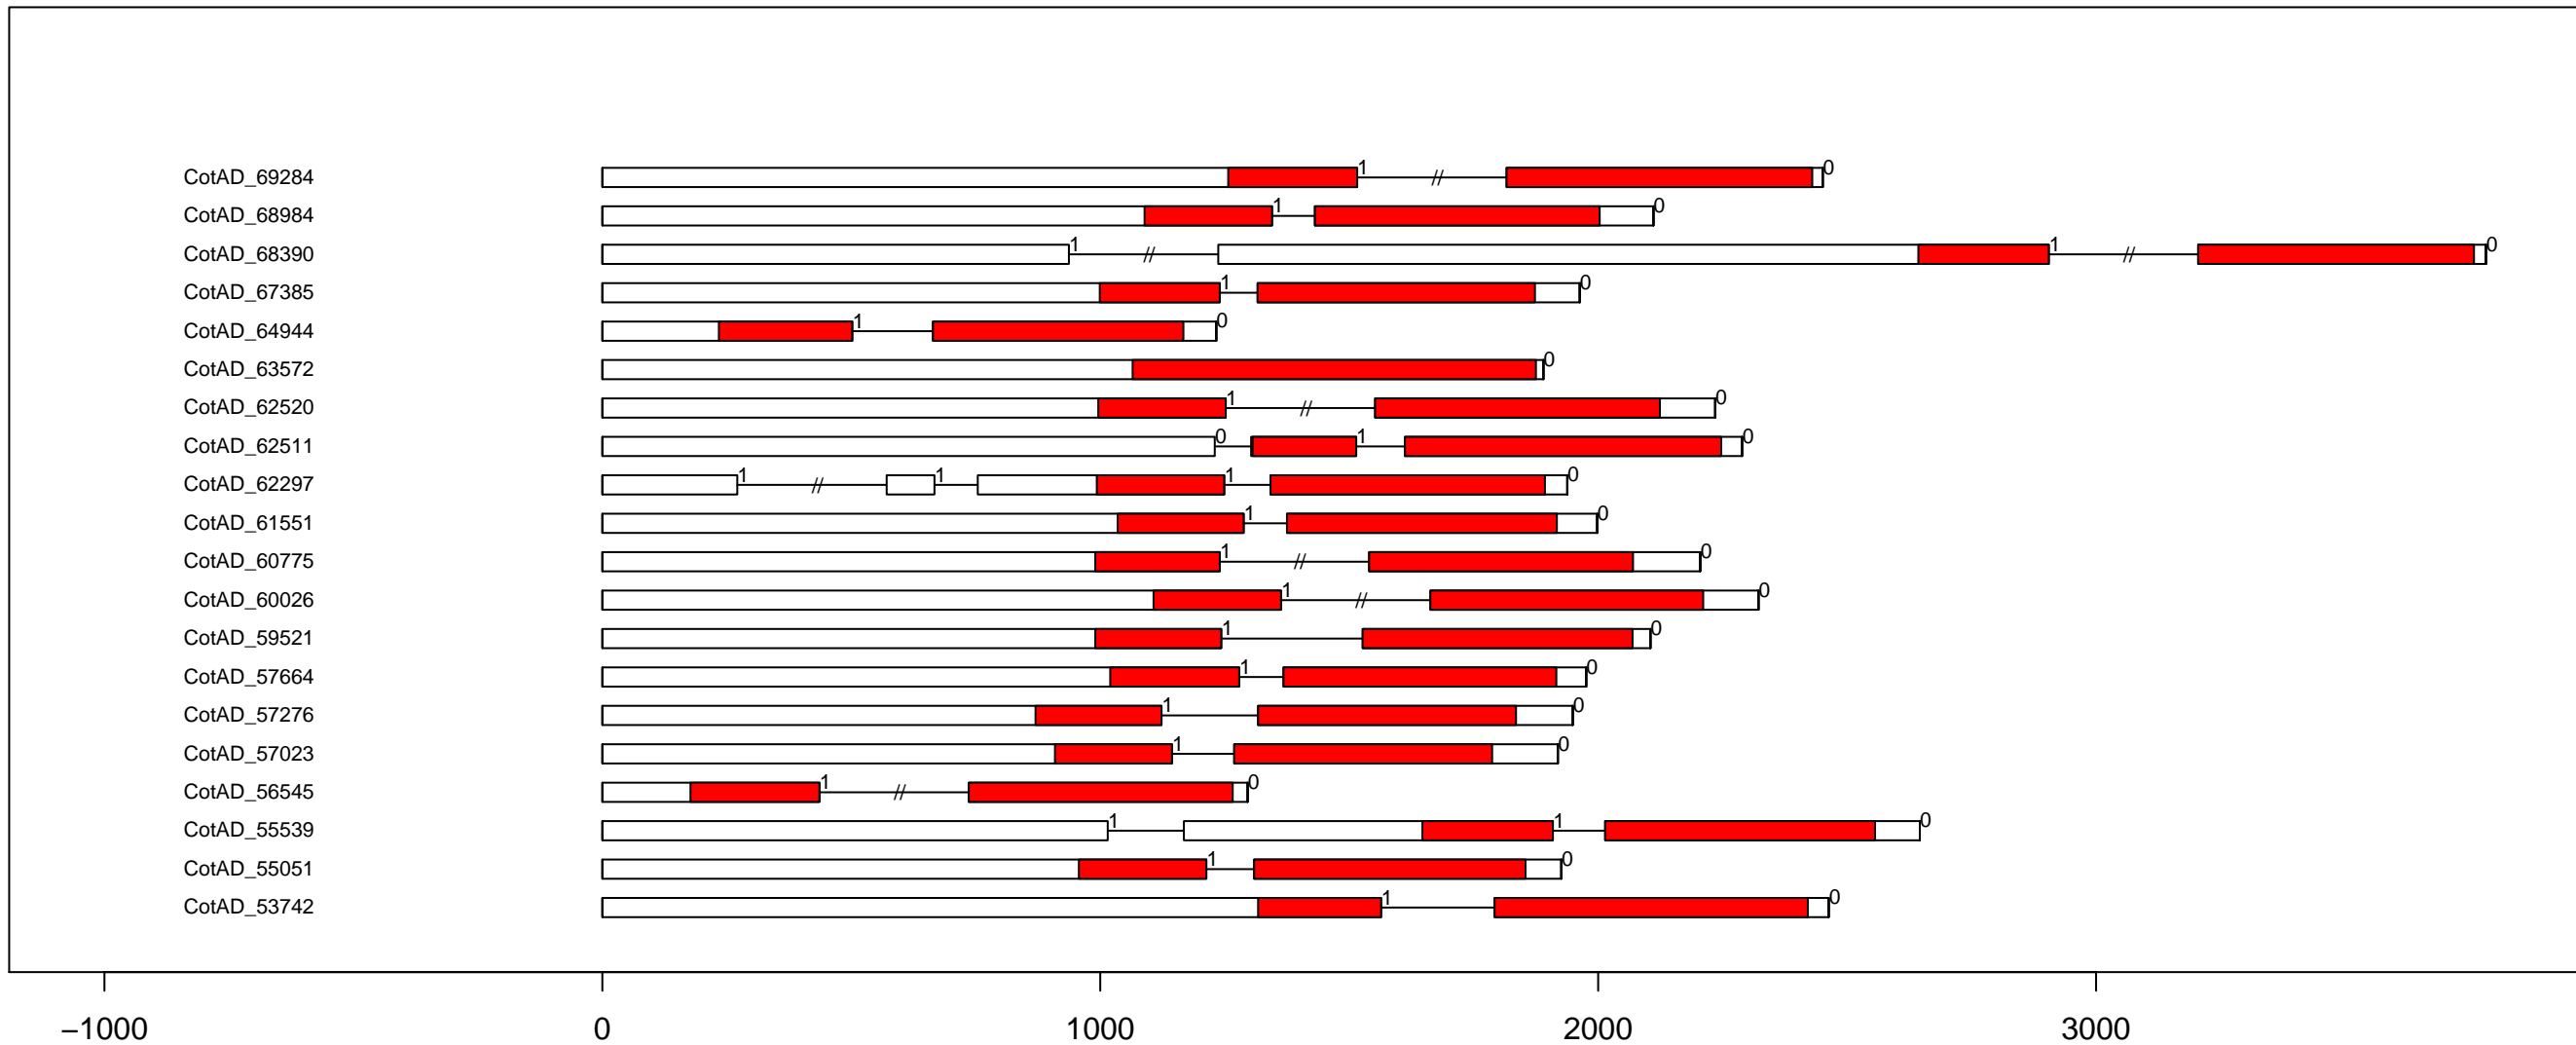

# G.hi RLK-Pelle\_LRR-III exon-intron and domain diagram (part 6)

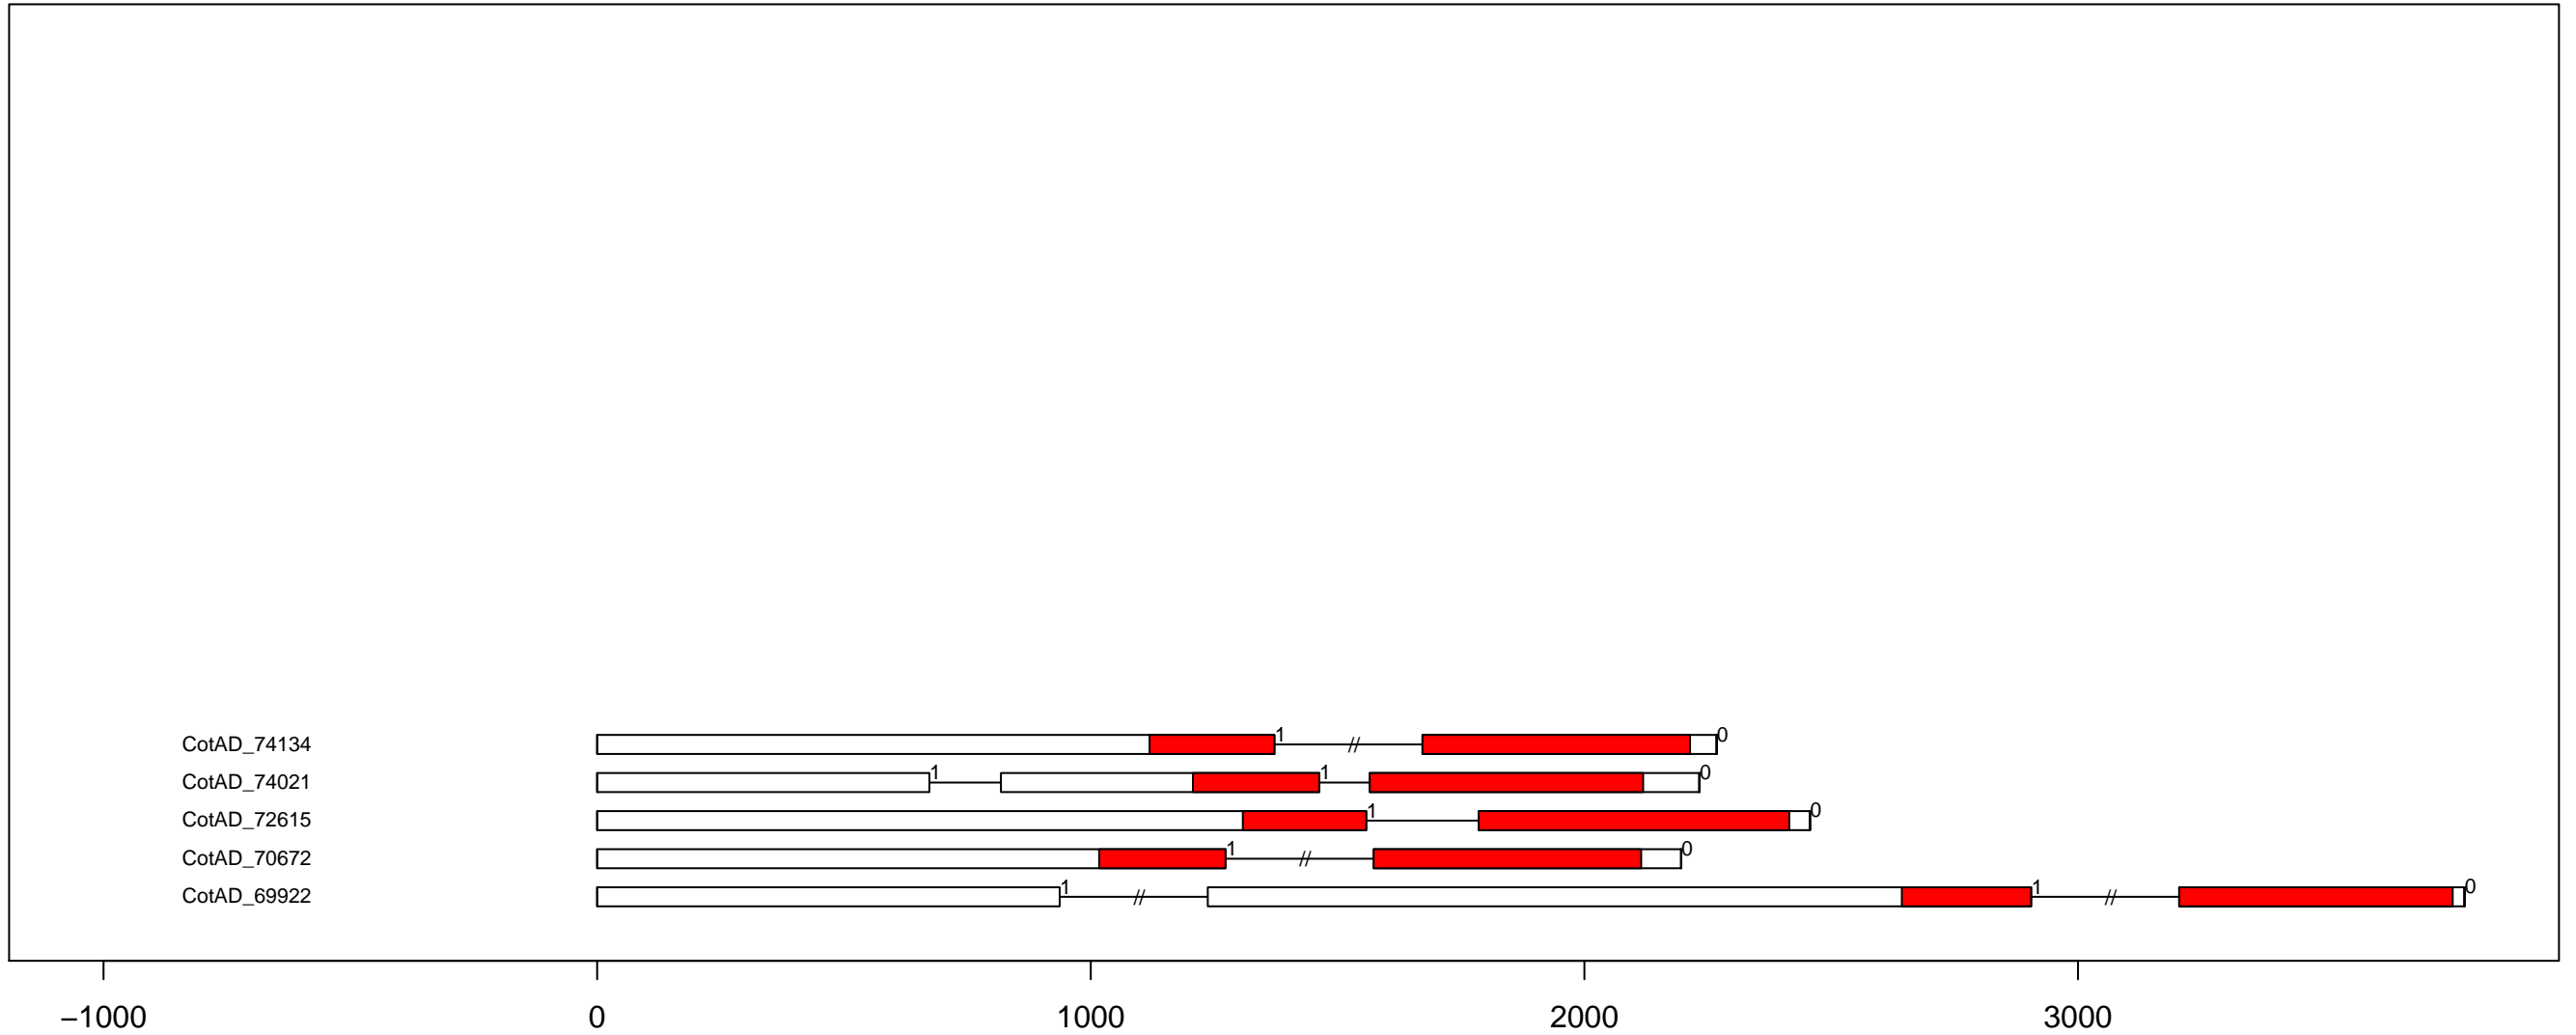

### G.hi RLK-Pelle\_LRR-II exon-intron and domain diagram (part 1)

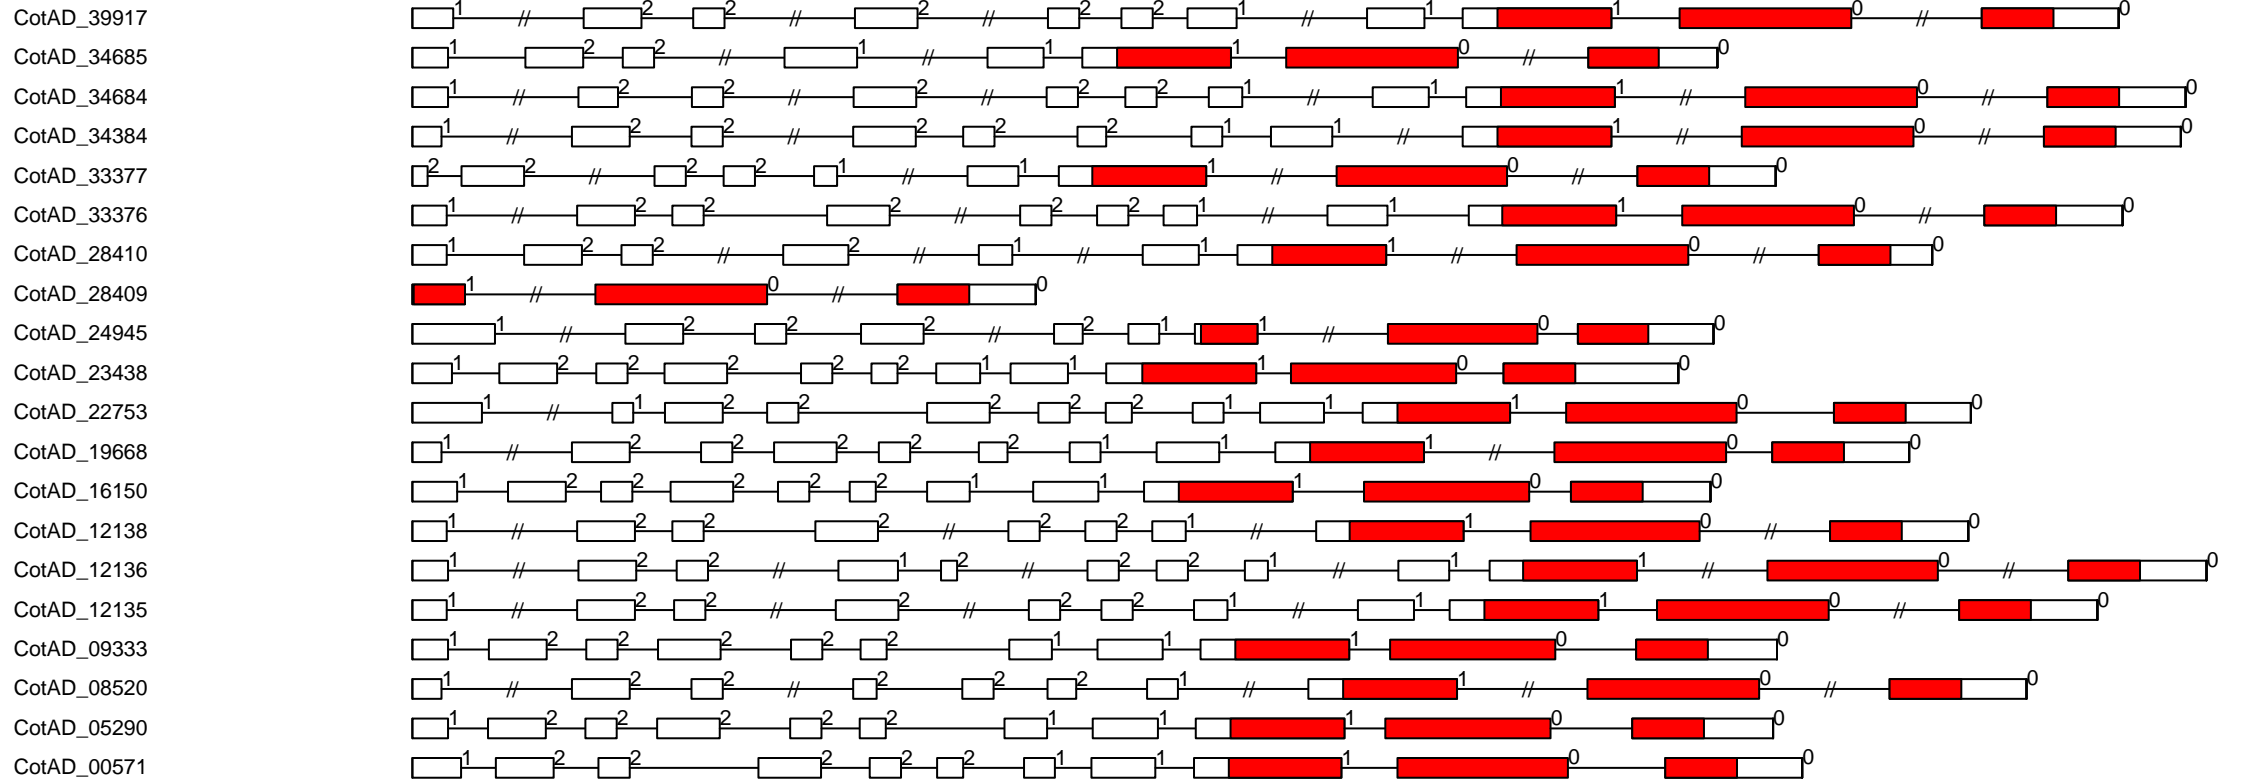

-1000

0

1000

2000

3000

4000

### G.hi RLK-Pelle\_LRR-II exon-intron and domain diagram (part 2)

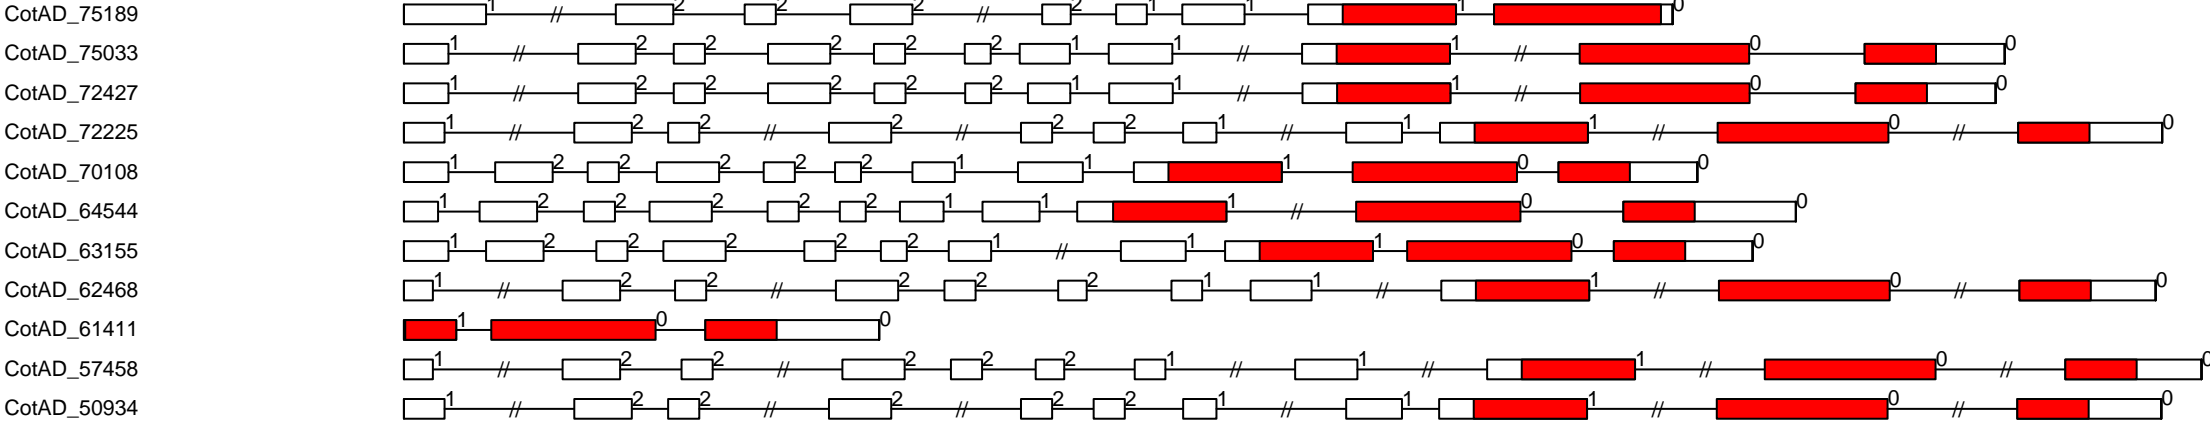

### G.hi RLK-Pelle\_LRR-IV exon-intron and domain diagram (all)

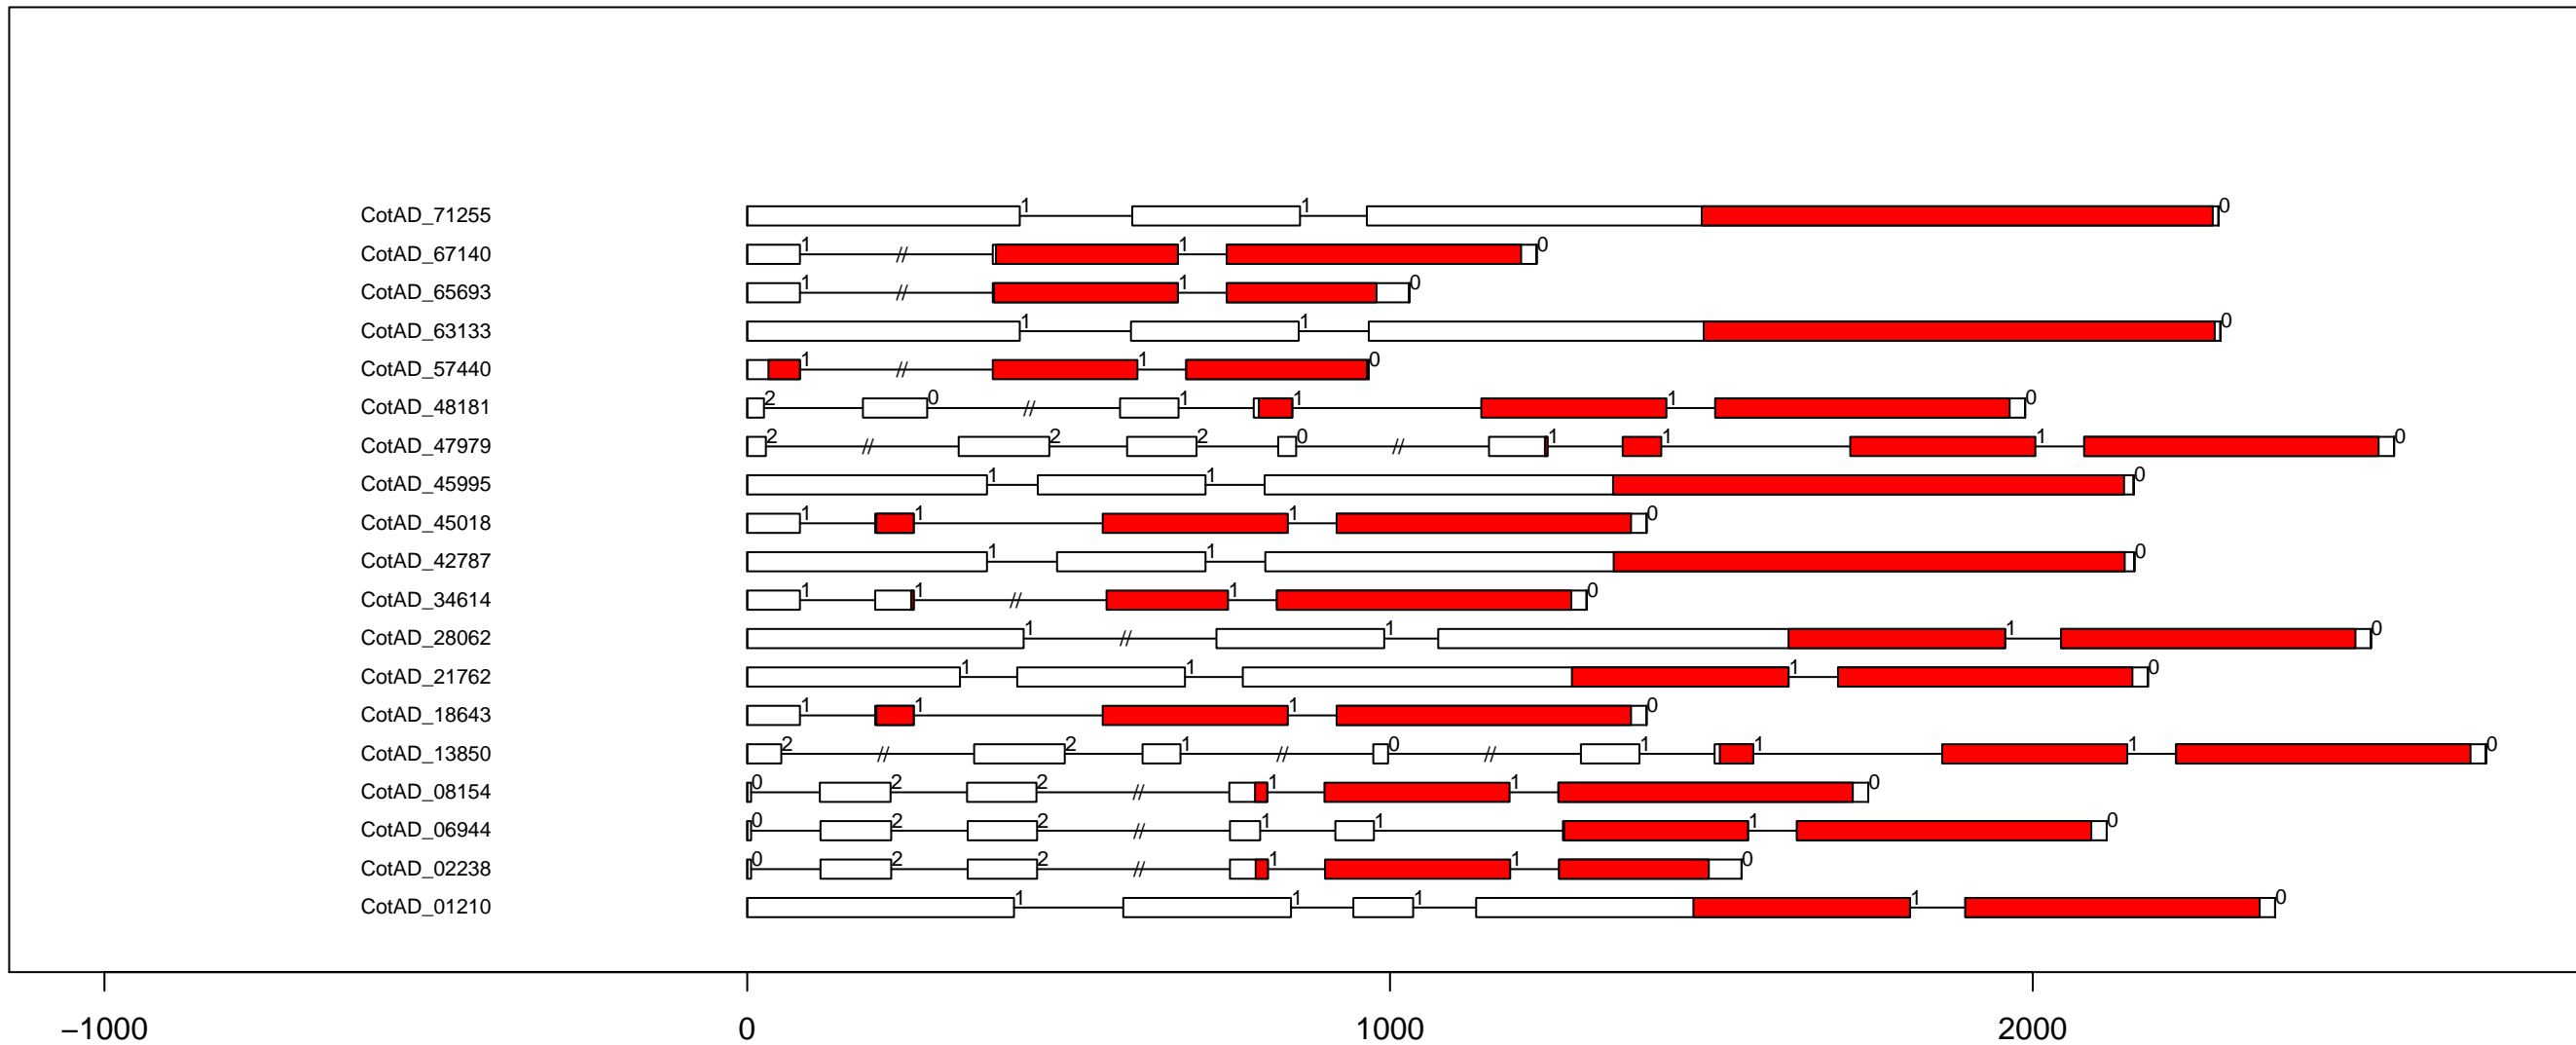

### G.hi RLK-Pelle\_LRR-IX exon-intron and domain diagram (all)

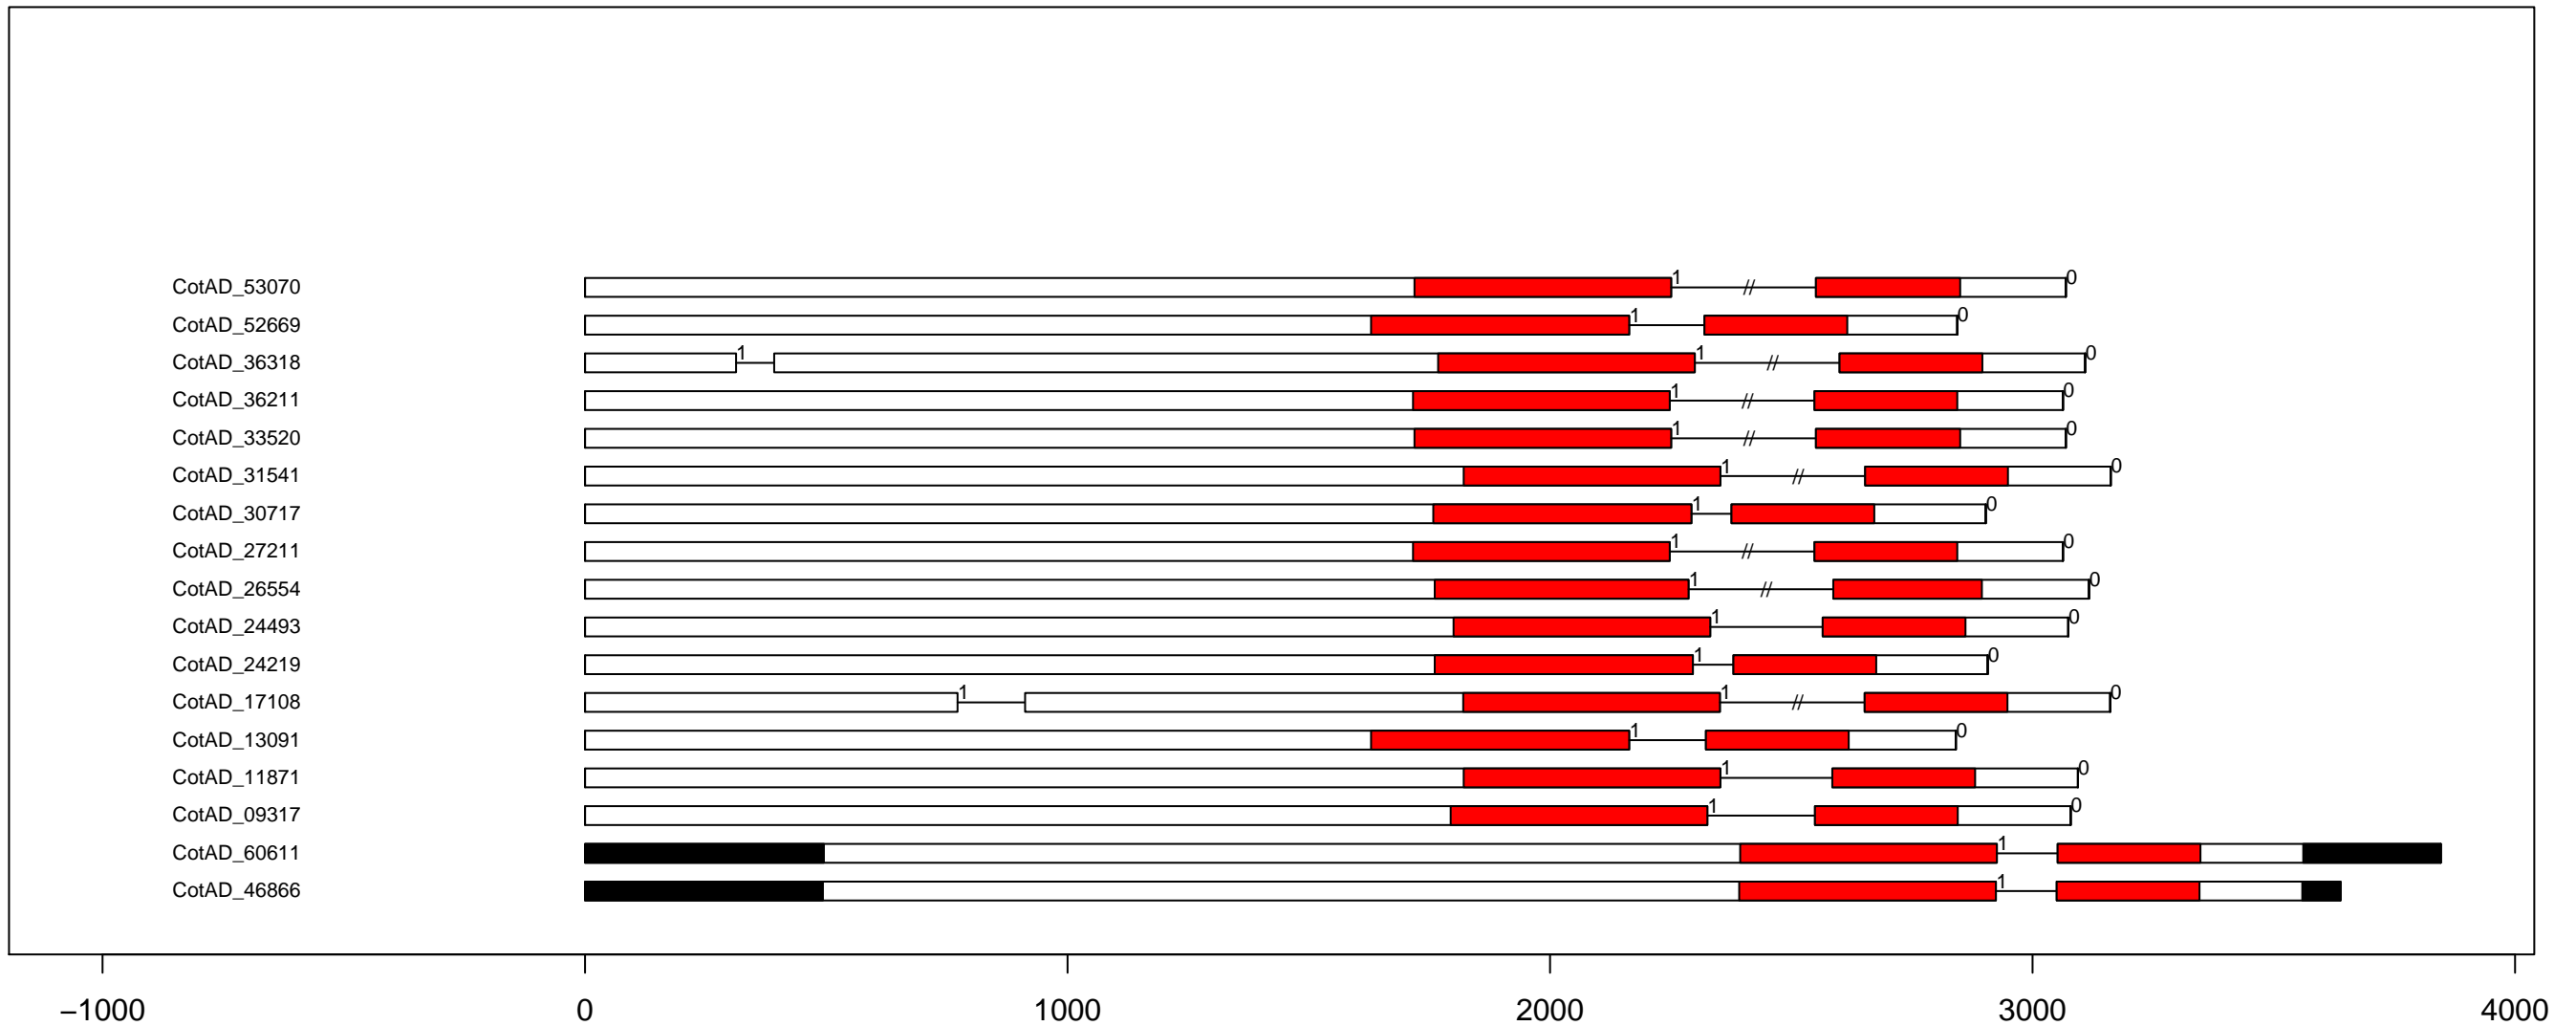

# G.hi RLK-Pelle\_LRR-VI-1 exon-intron and domain diagram (all)

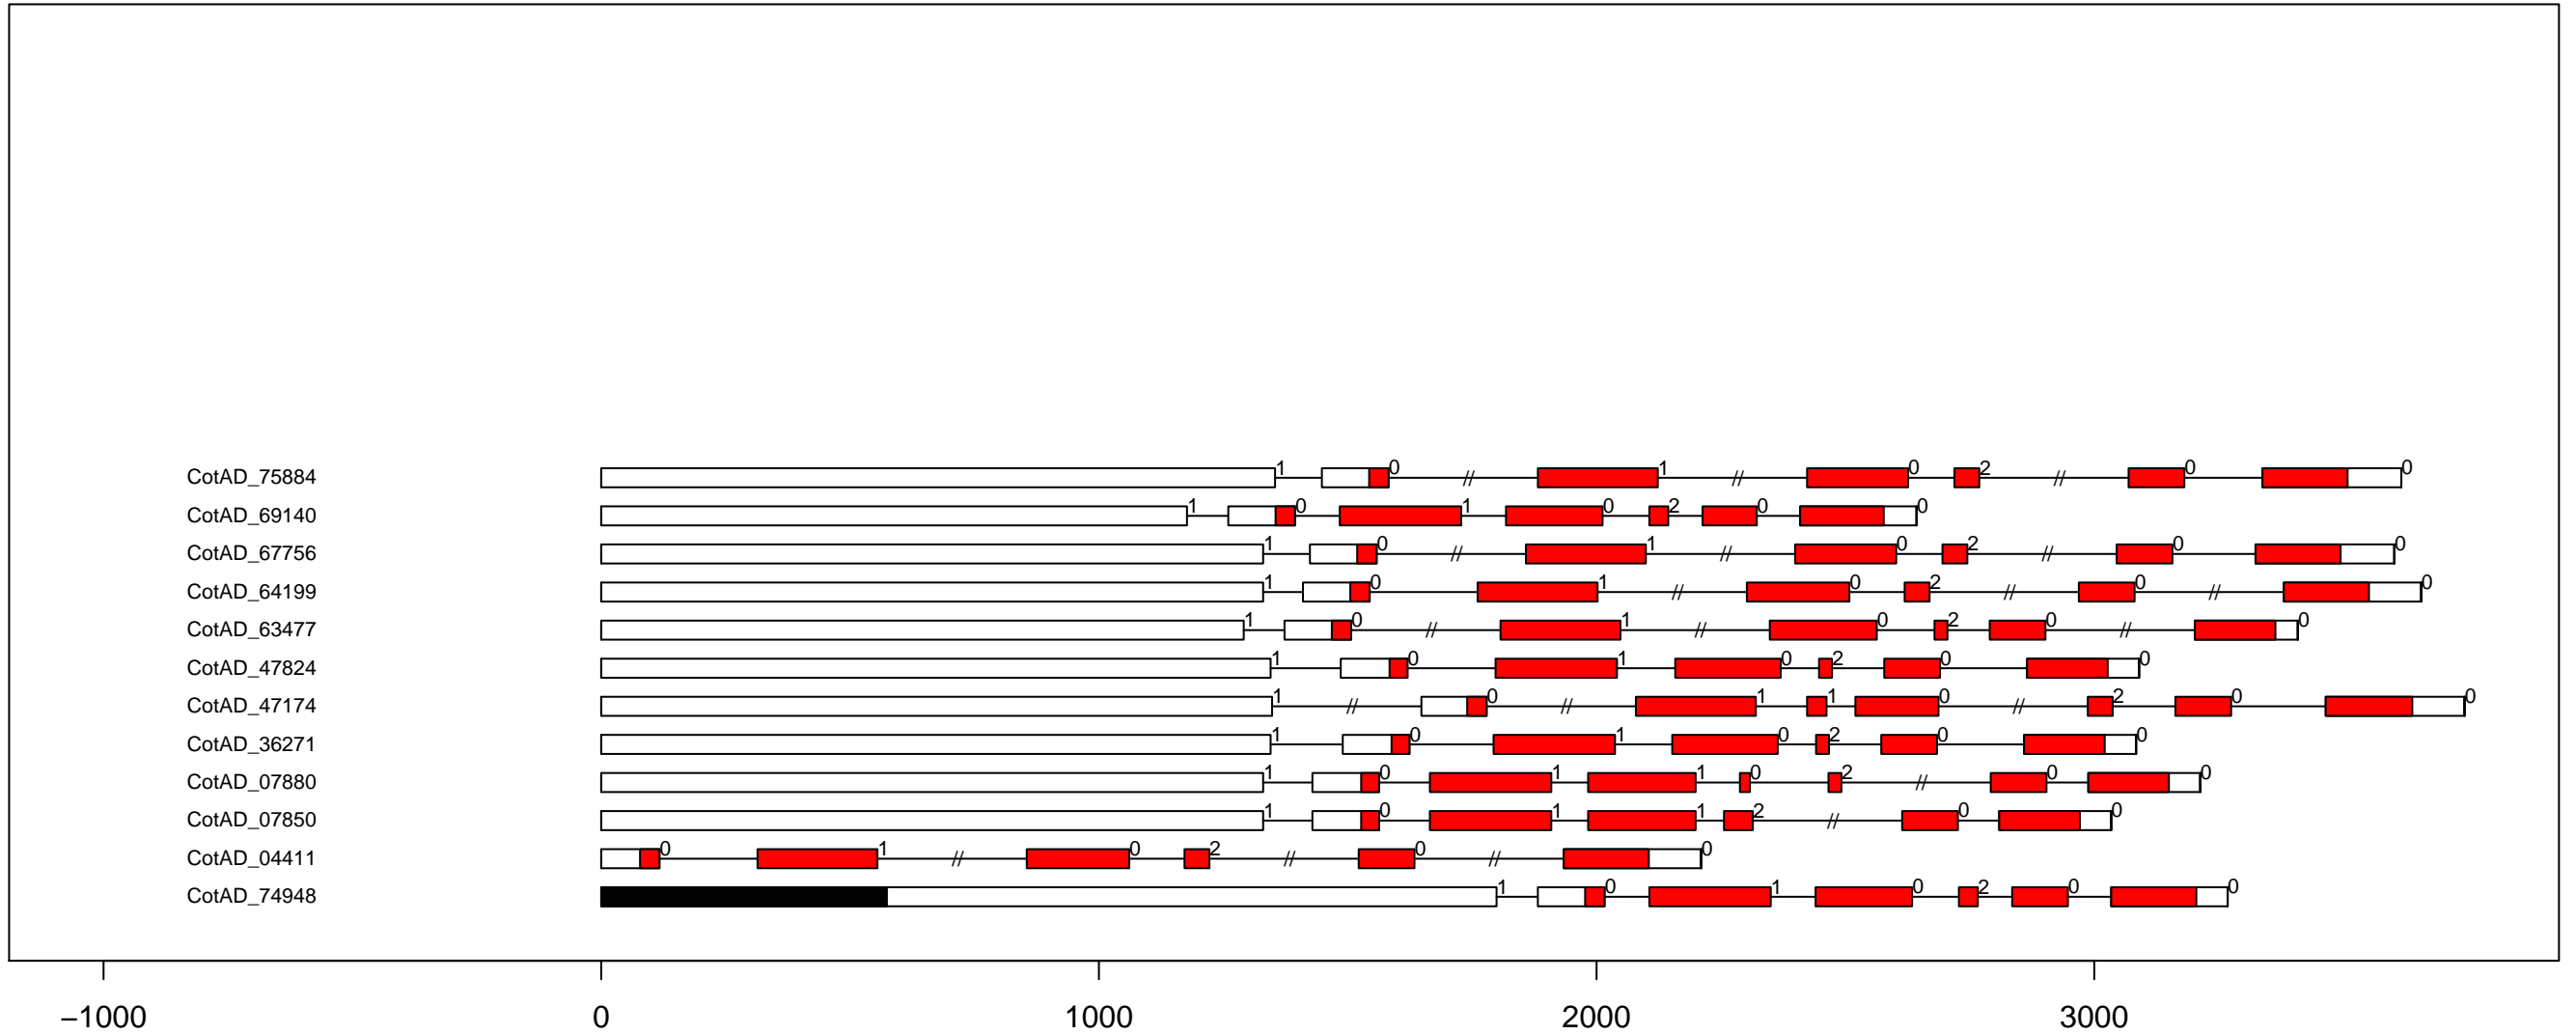



### G.hi RLK-Pelle\_LRR-VI-2 exon-intron and domain diagram (all)

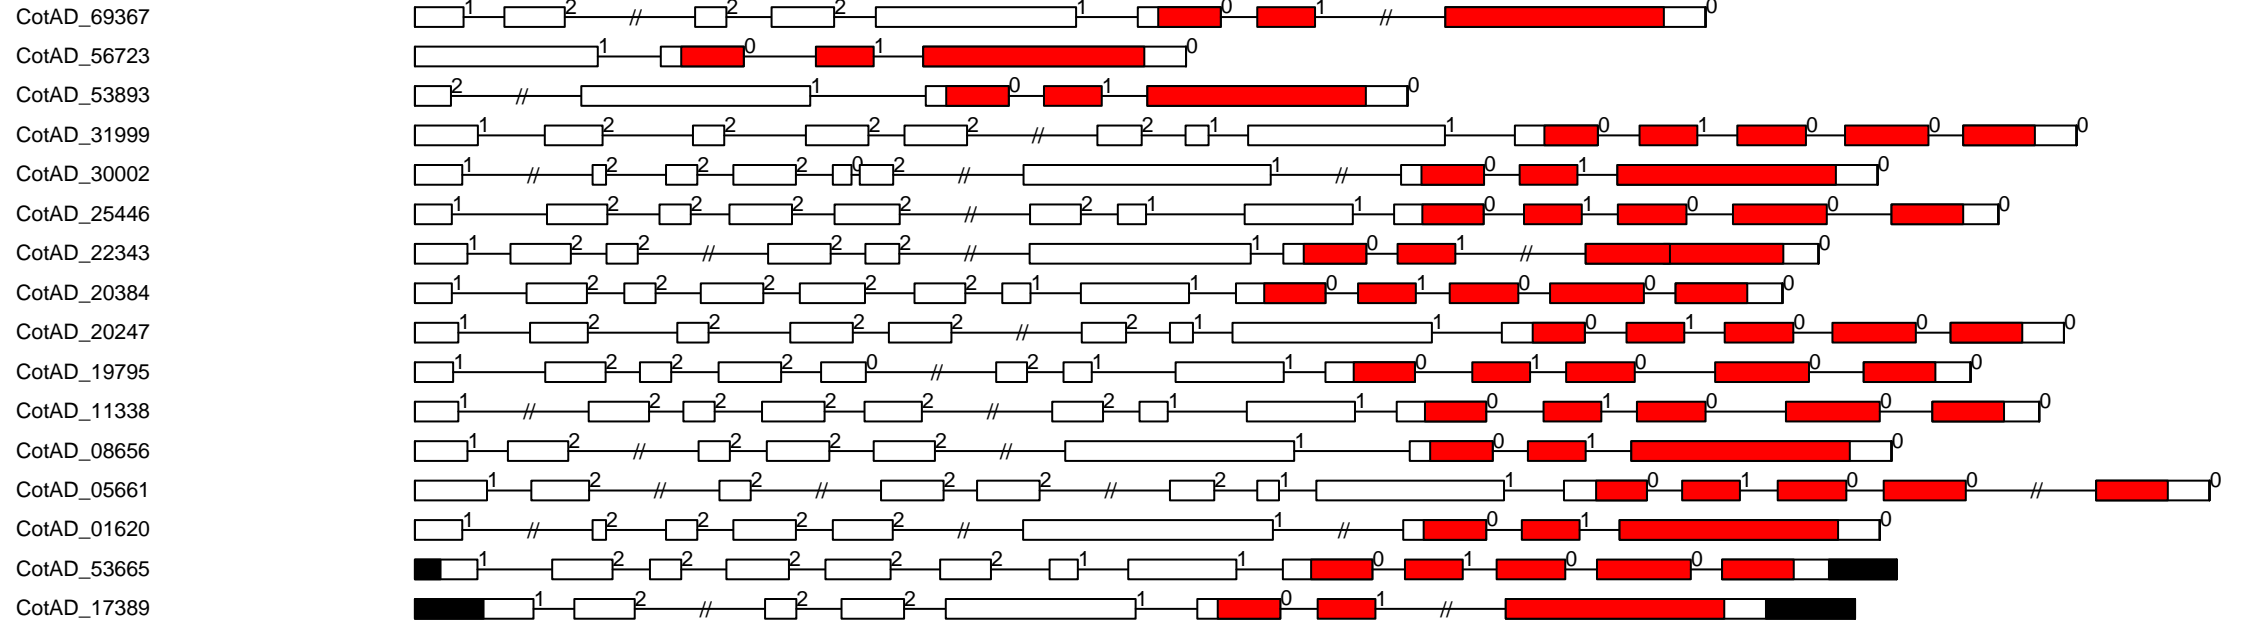

-1000

0

1000

2000

3000

4000

# G.hi RLK-Pelle\_LRR-VII-1 exon-intron and domain diagram (all)

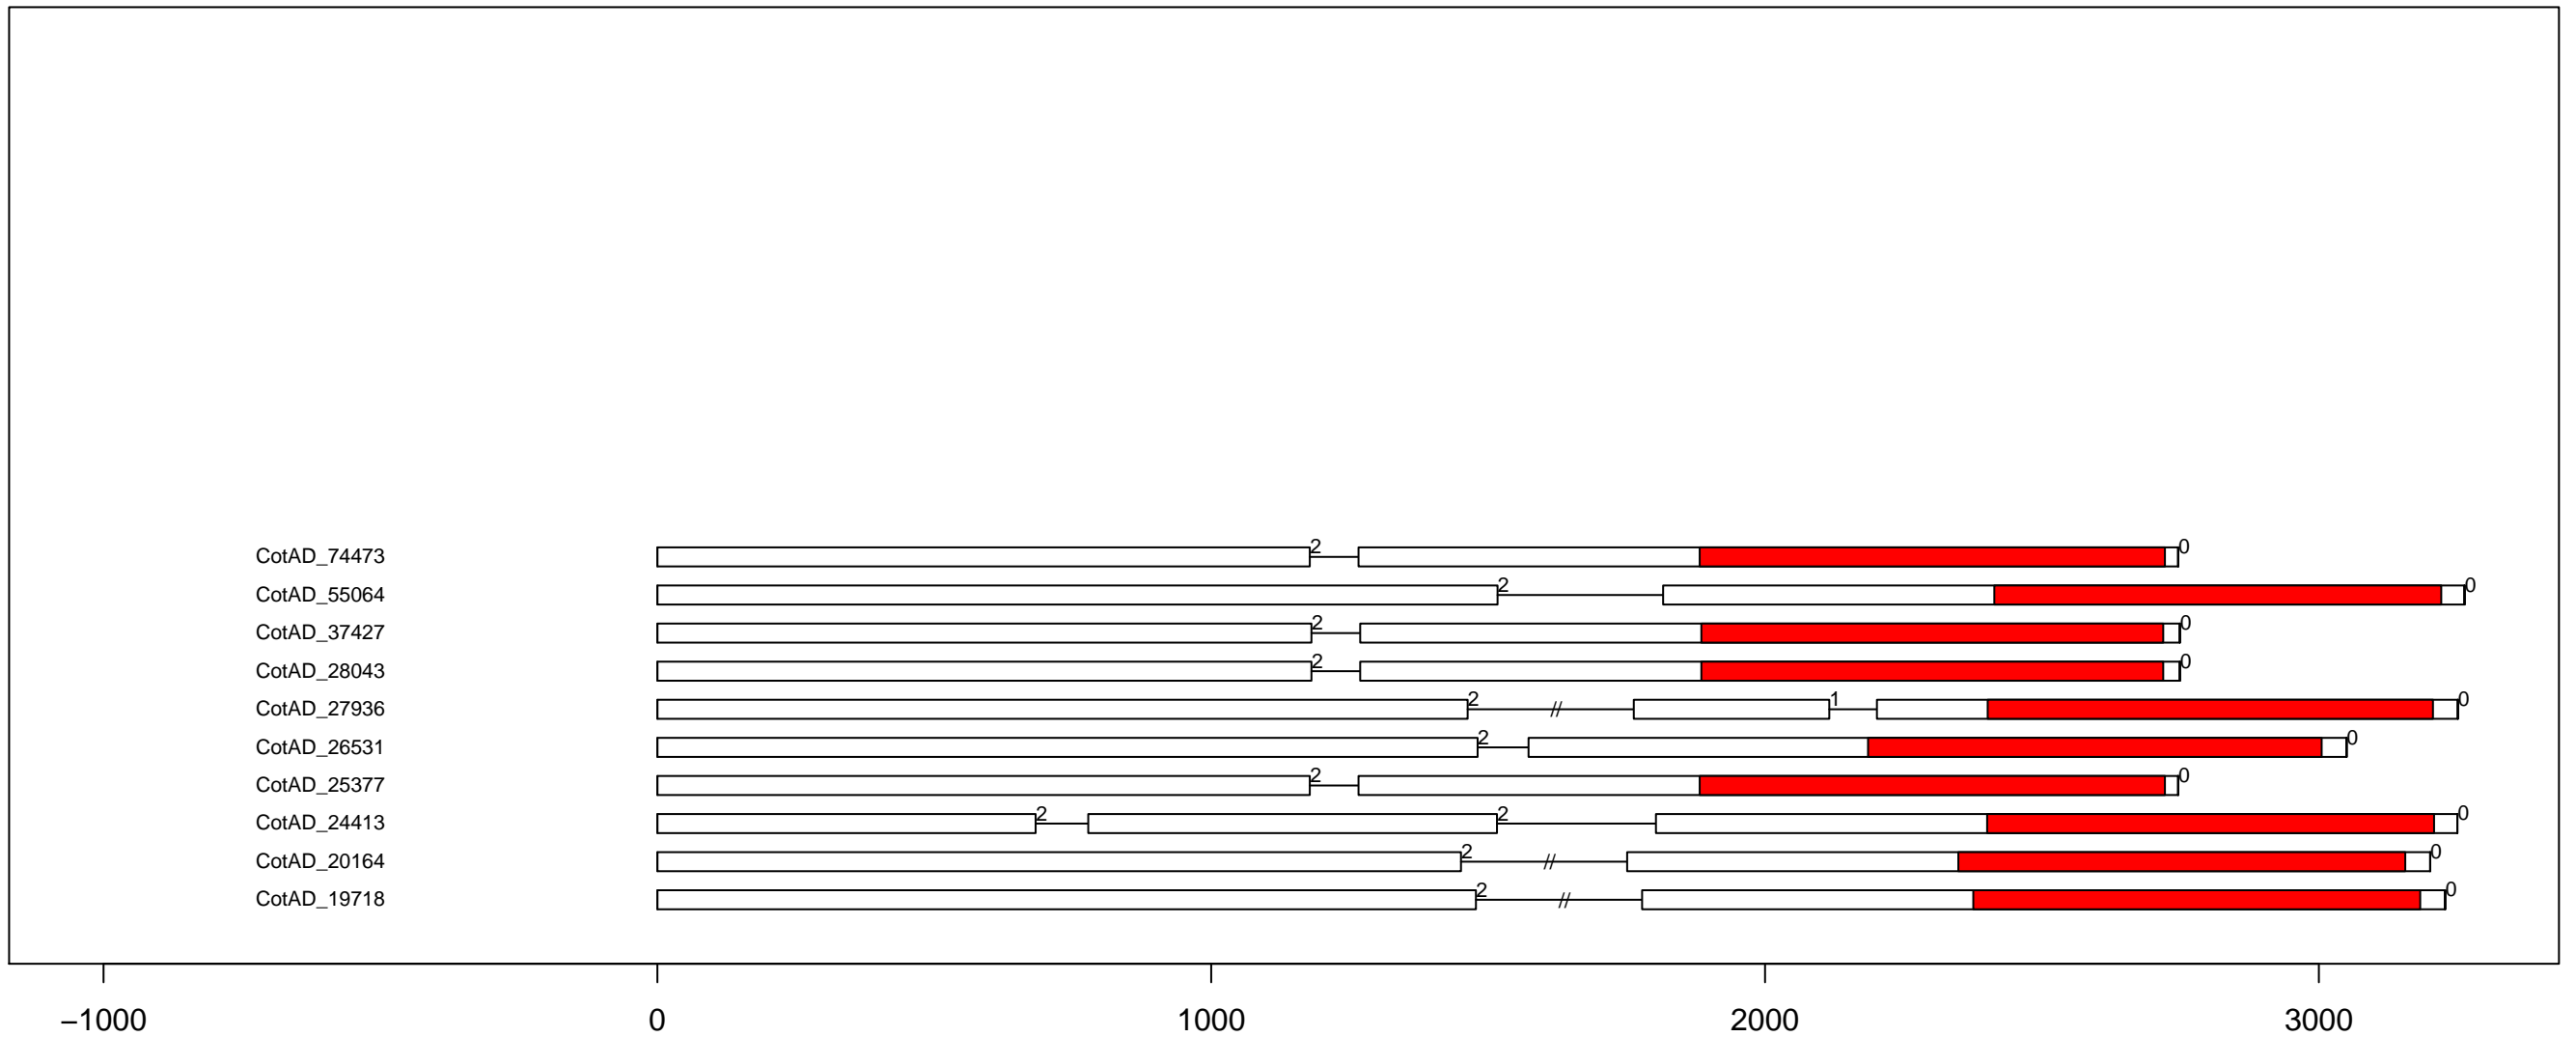

# G.hi RLK-Pelle\_LRR-VII-2 exon-intron and domain diagram (all)

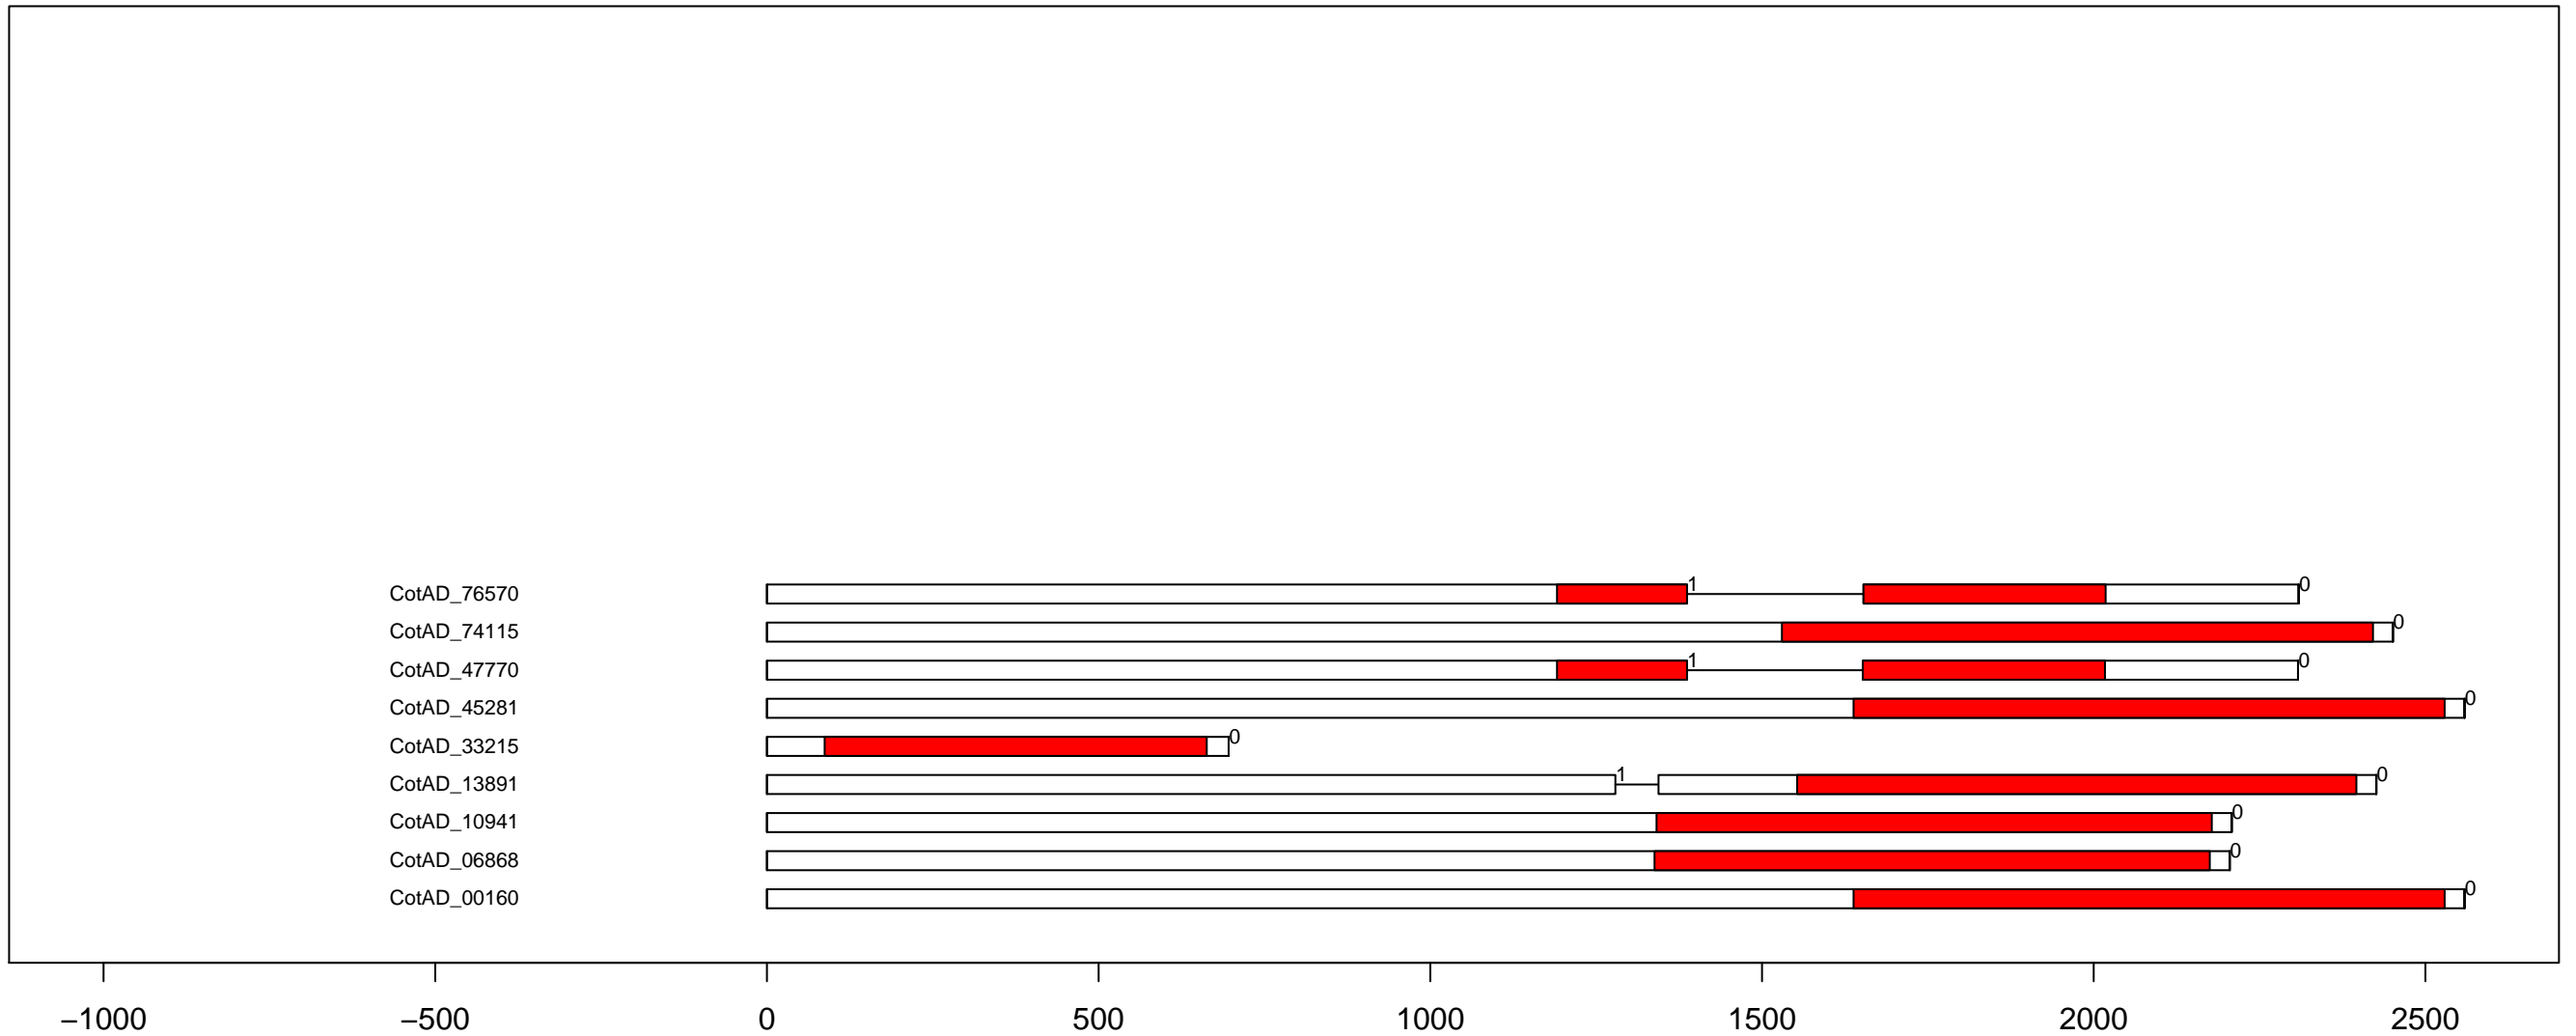

### G.hi RLK-Pelle\_LRR-VII-3 exon-intron and domain diagram (all)

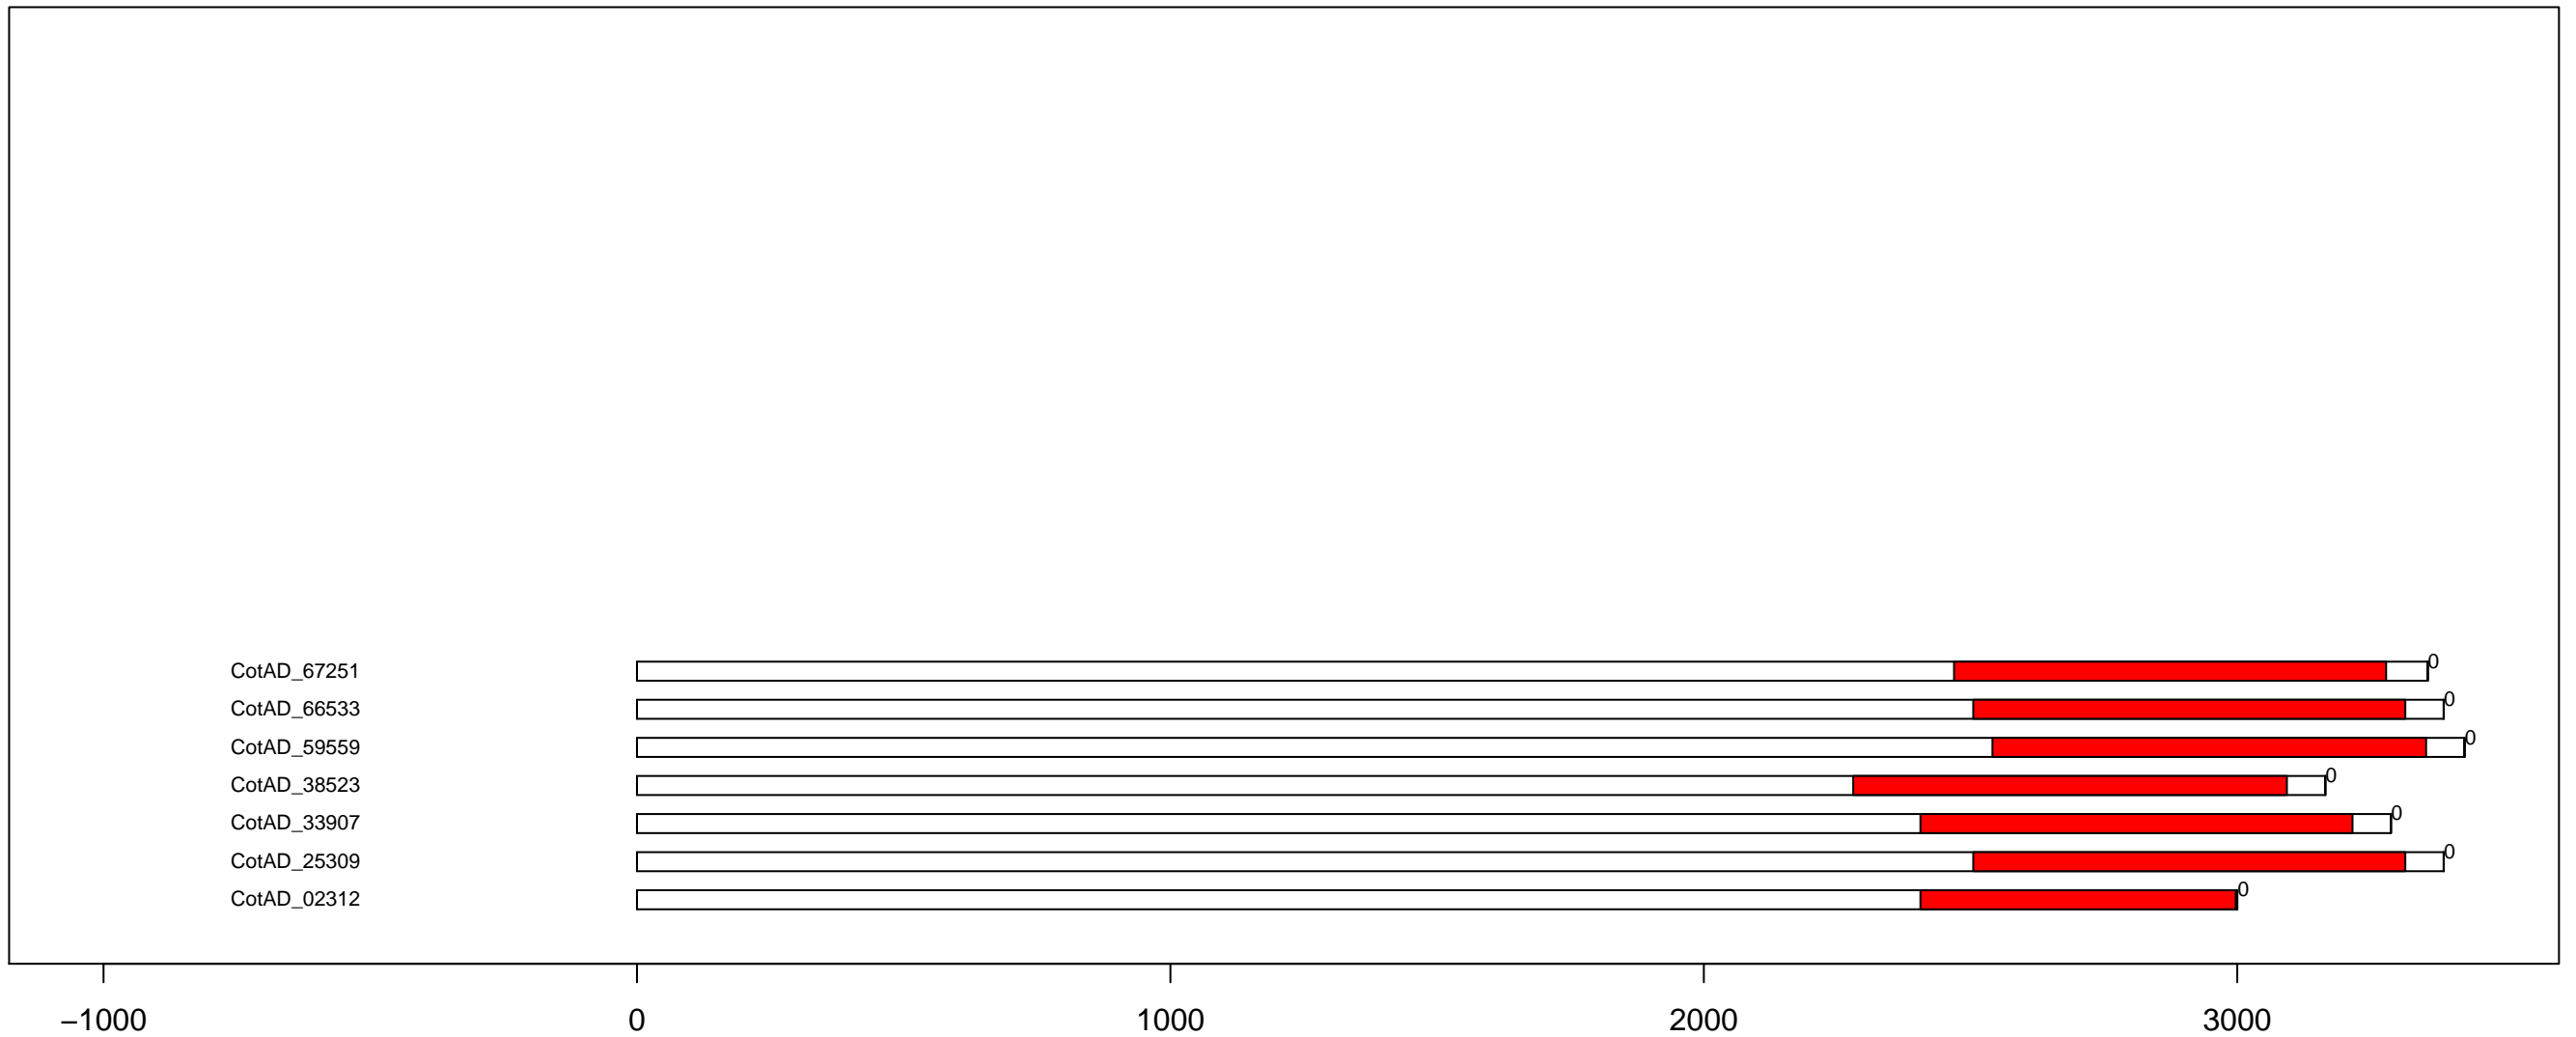

# G.hi RLK-Pelle\_LRR-VIII-1 exon-intron and domain diagram (all)

CotAD\_69673  
CotAD\_62571  
CotAD\_61336  
CotAD\_47228  
CotAD\_46053  
CotAD\_37459  
CotAD\_35146  
CotAD\_33692  
CotAD\_27954  
CotAD\_25154  
CotAD\_24456  
CotAD\_22235  
CotAD\_18948  
CotAD\_14628

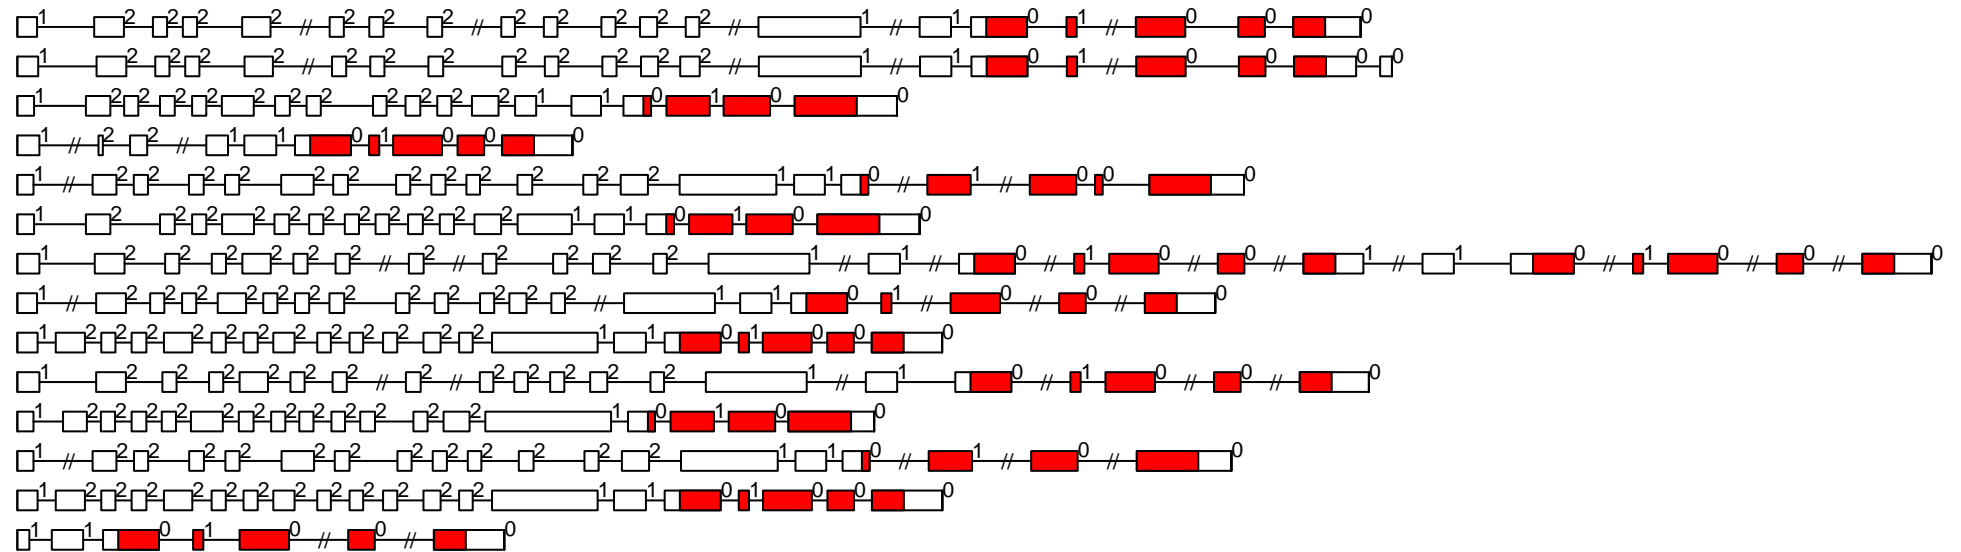

-2000

0

2000

4000

6000

8000

10000

### G.hi RLK-Pelle\_LRR-V exon-intron and domain diagram (all)

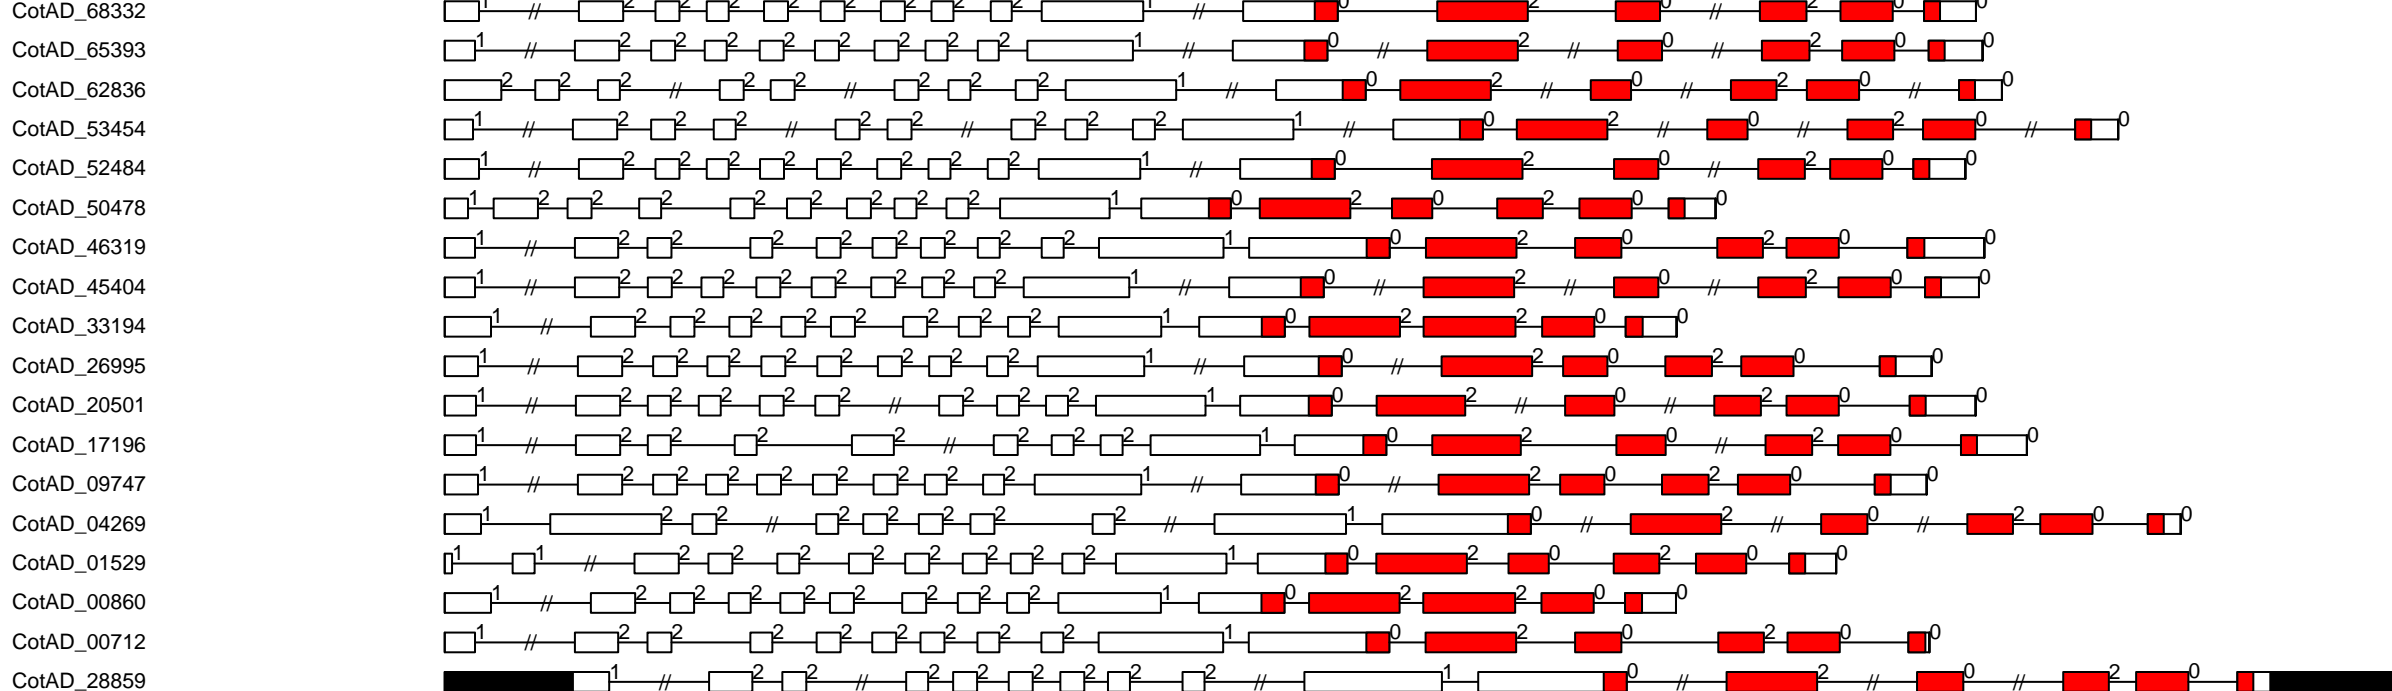

0

2000

4000

6000

# G.hi RLK-Pelle\_LRR-Xa exon-intron and domain diagram (all)

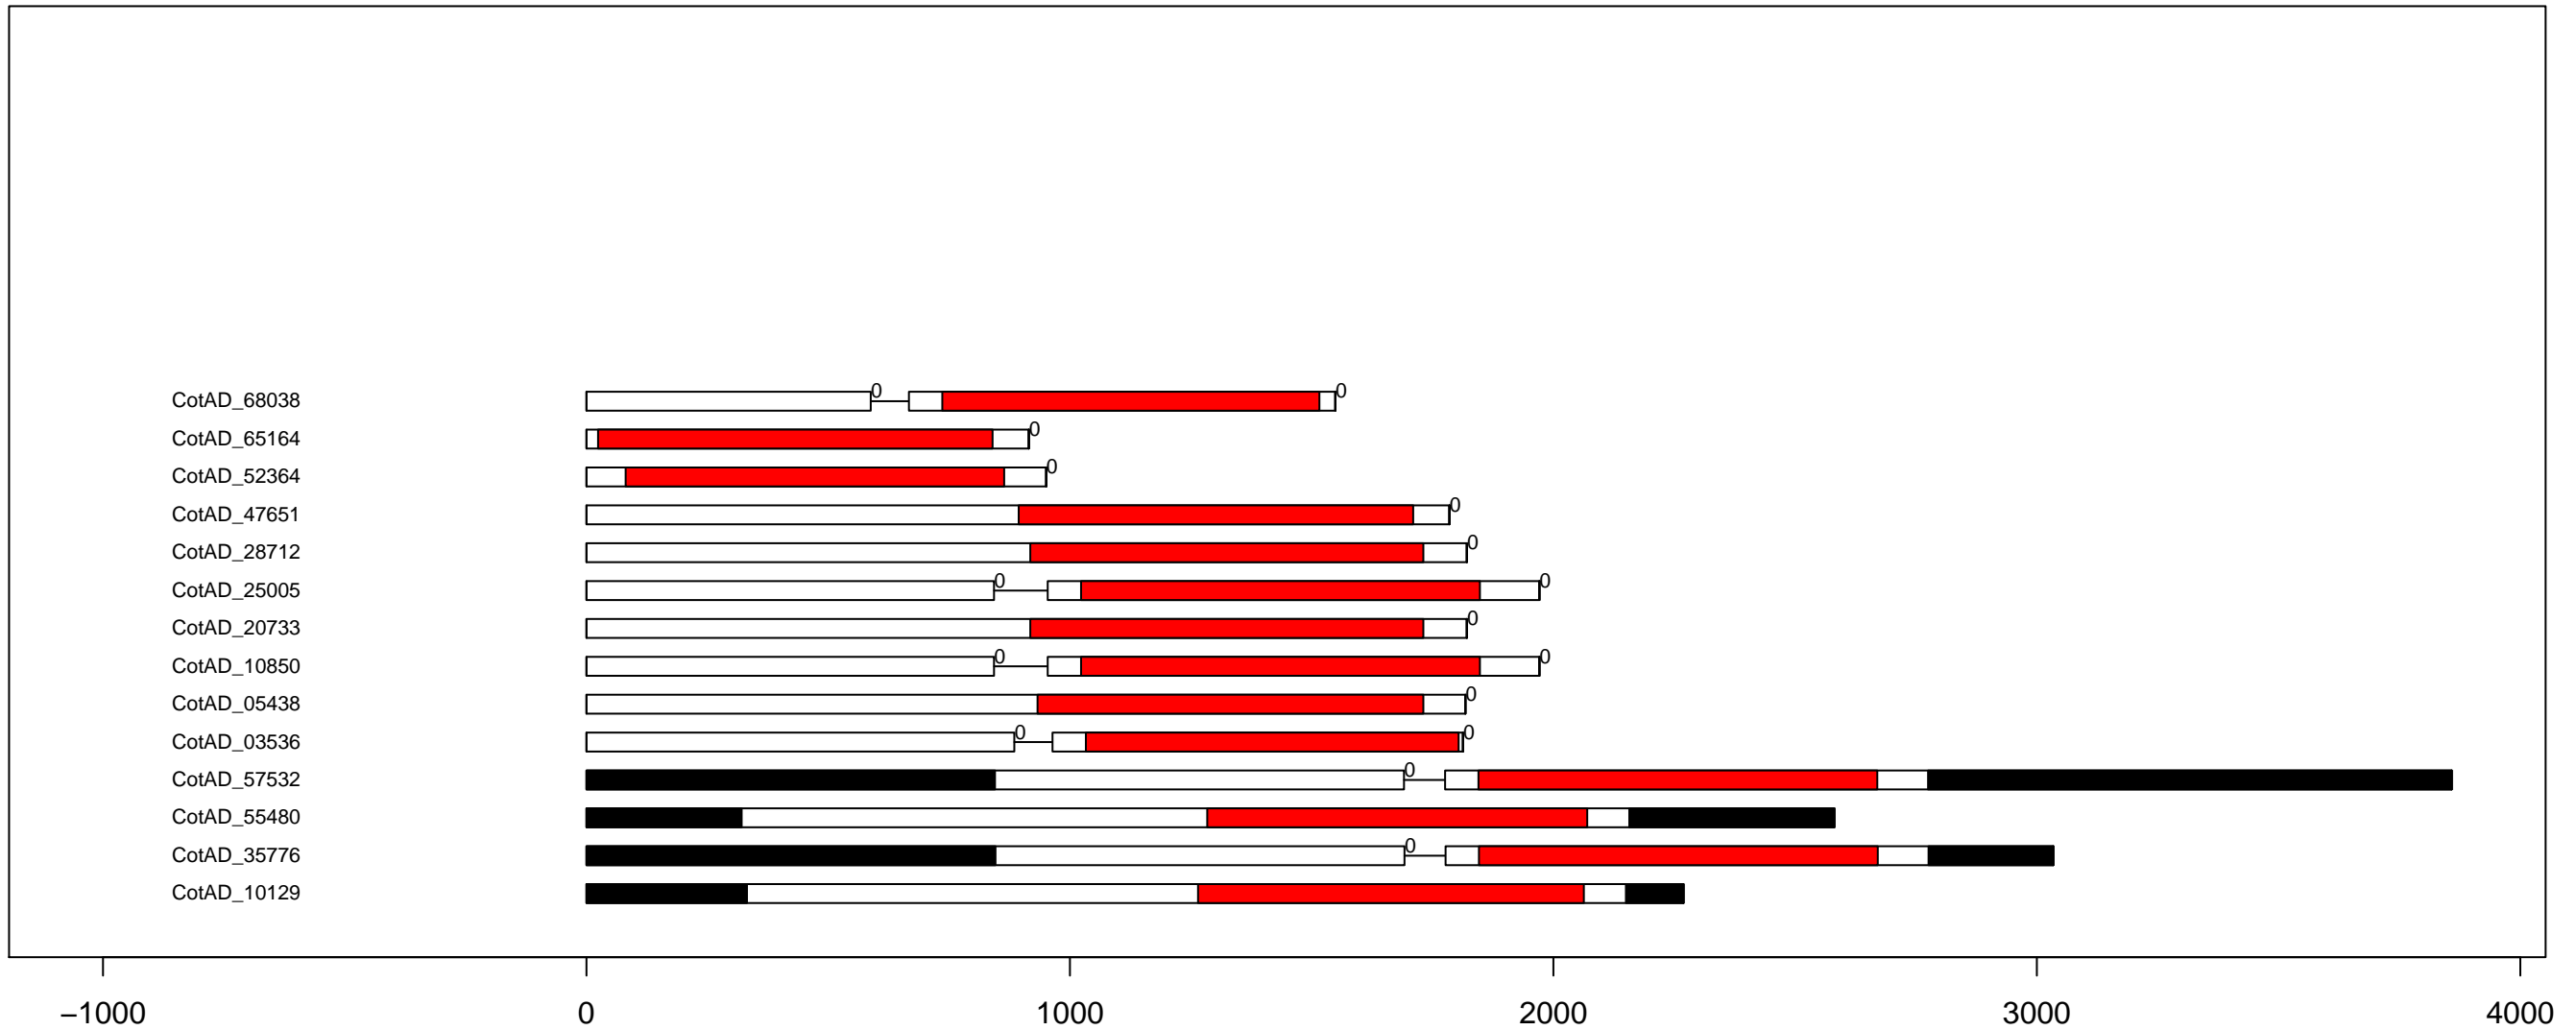

### G.hi RLK-Pelle\_LRR-Xb-1 exon-intron and domain diagram (all)

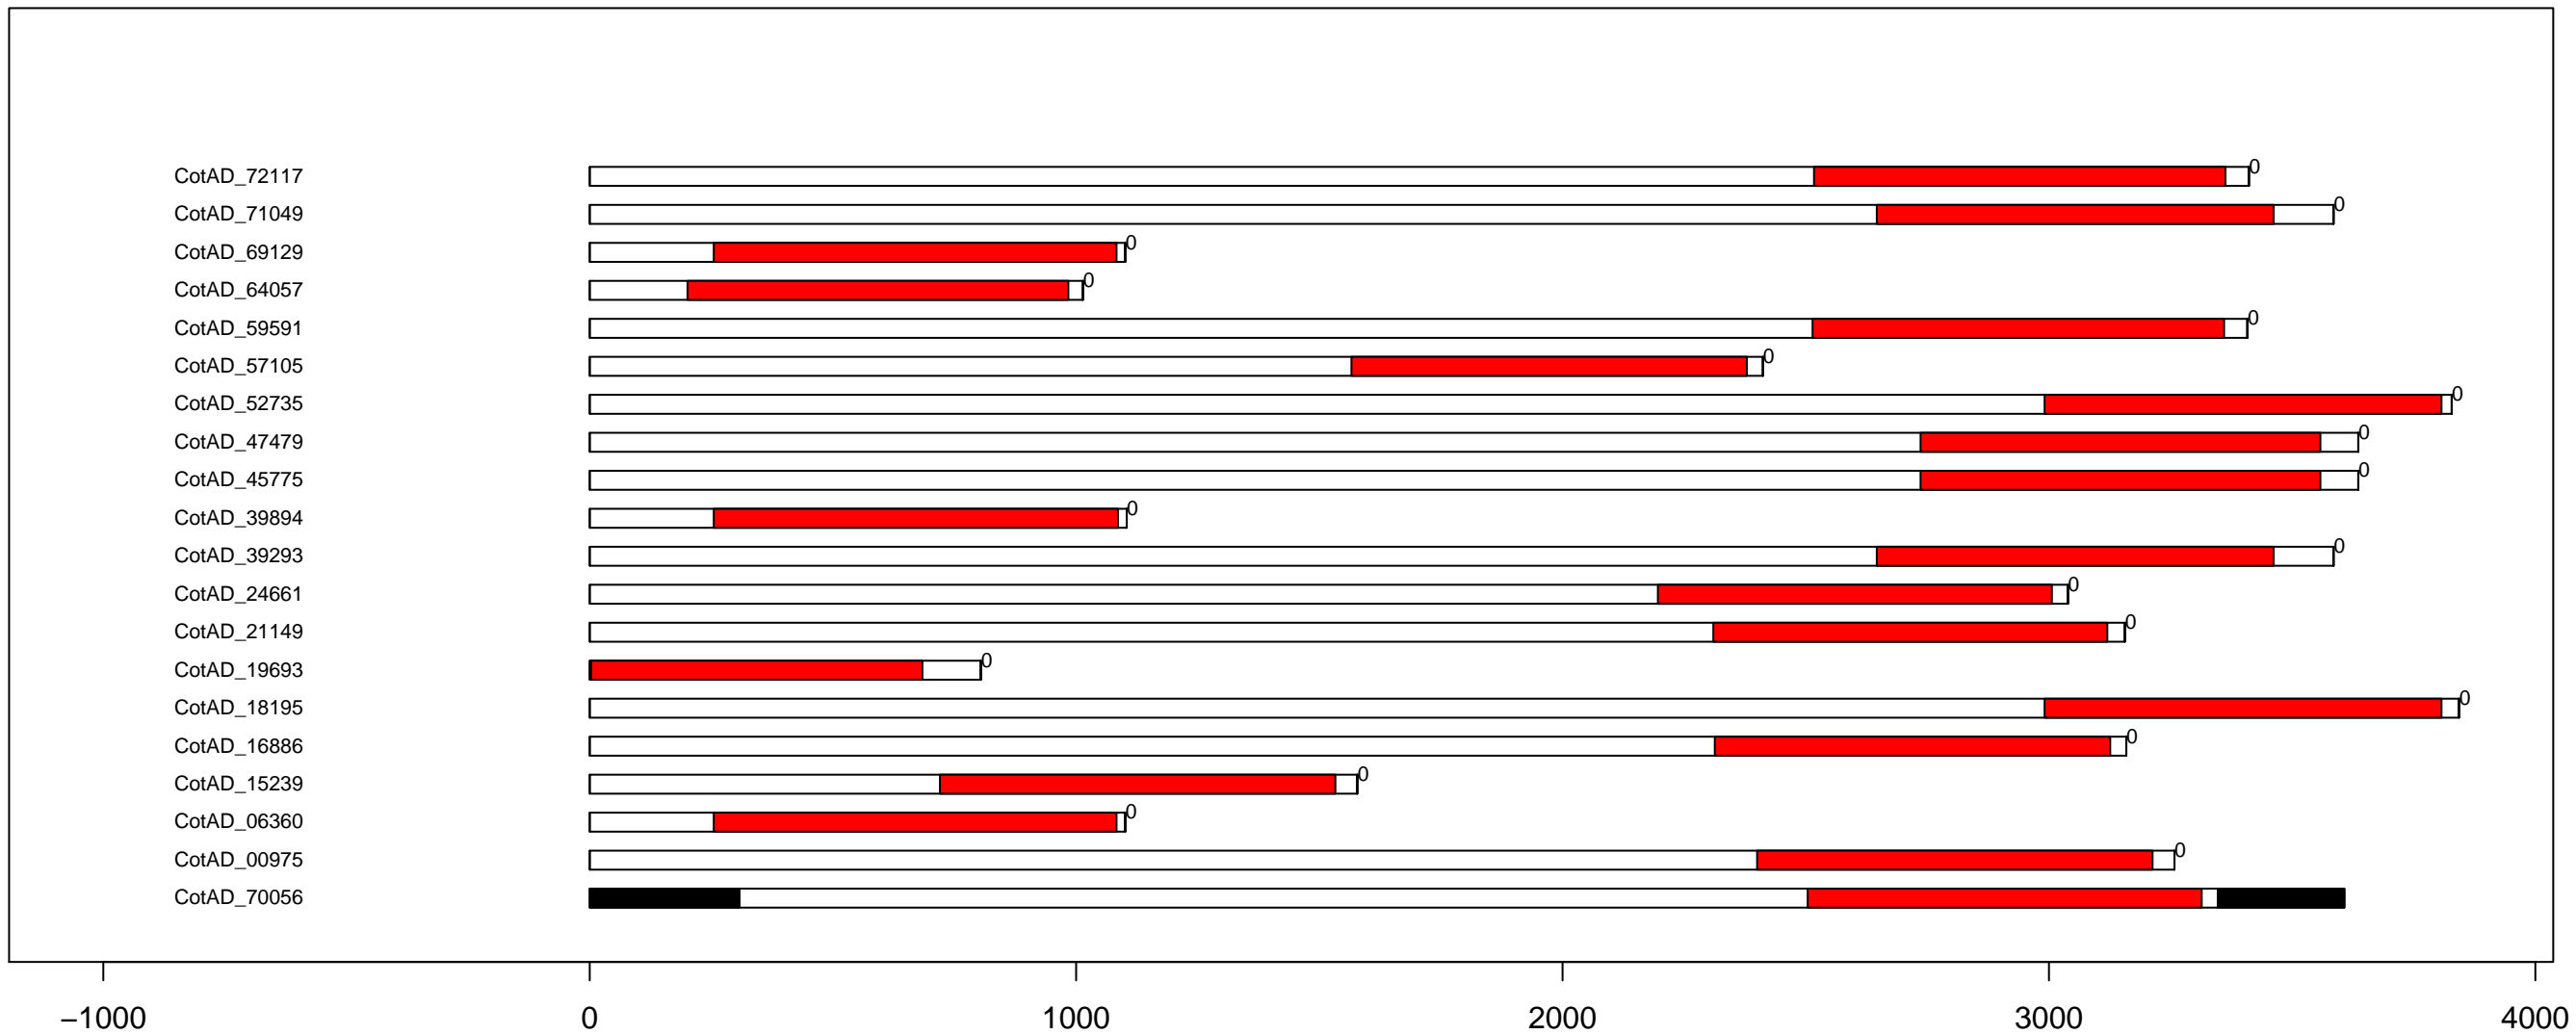



# G.hi RLK-Pelle\_LRR-Xb-2 exon-intron and domain diagram (all)

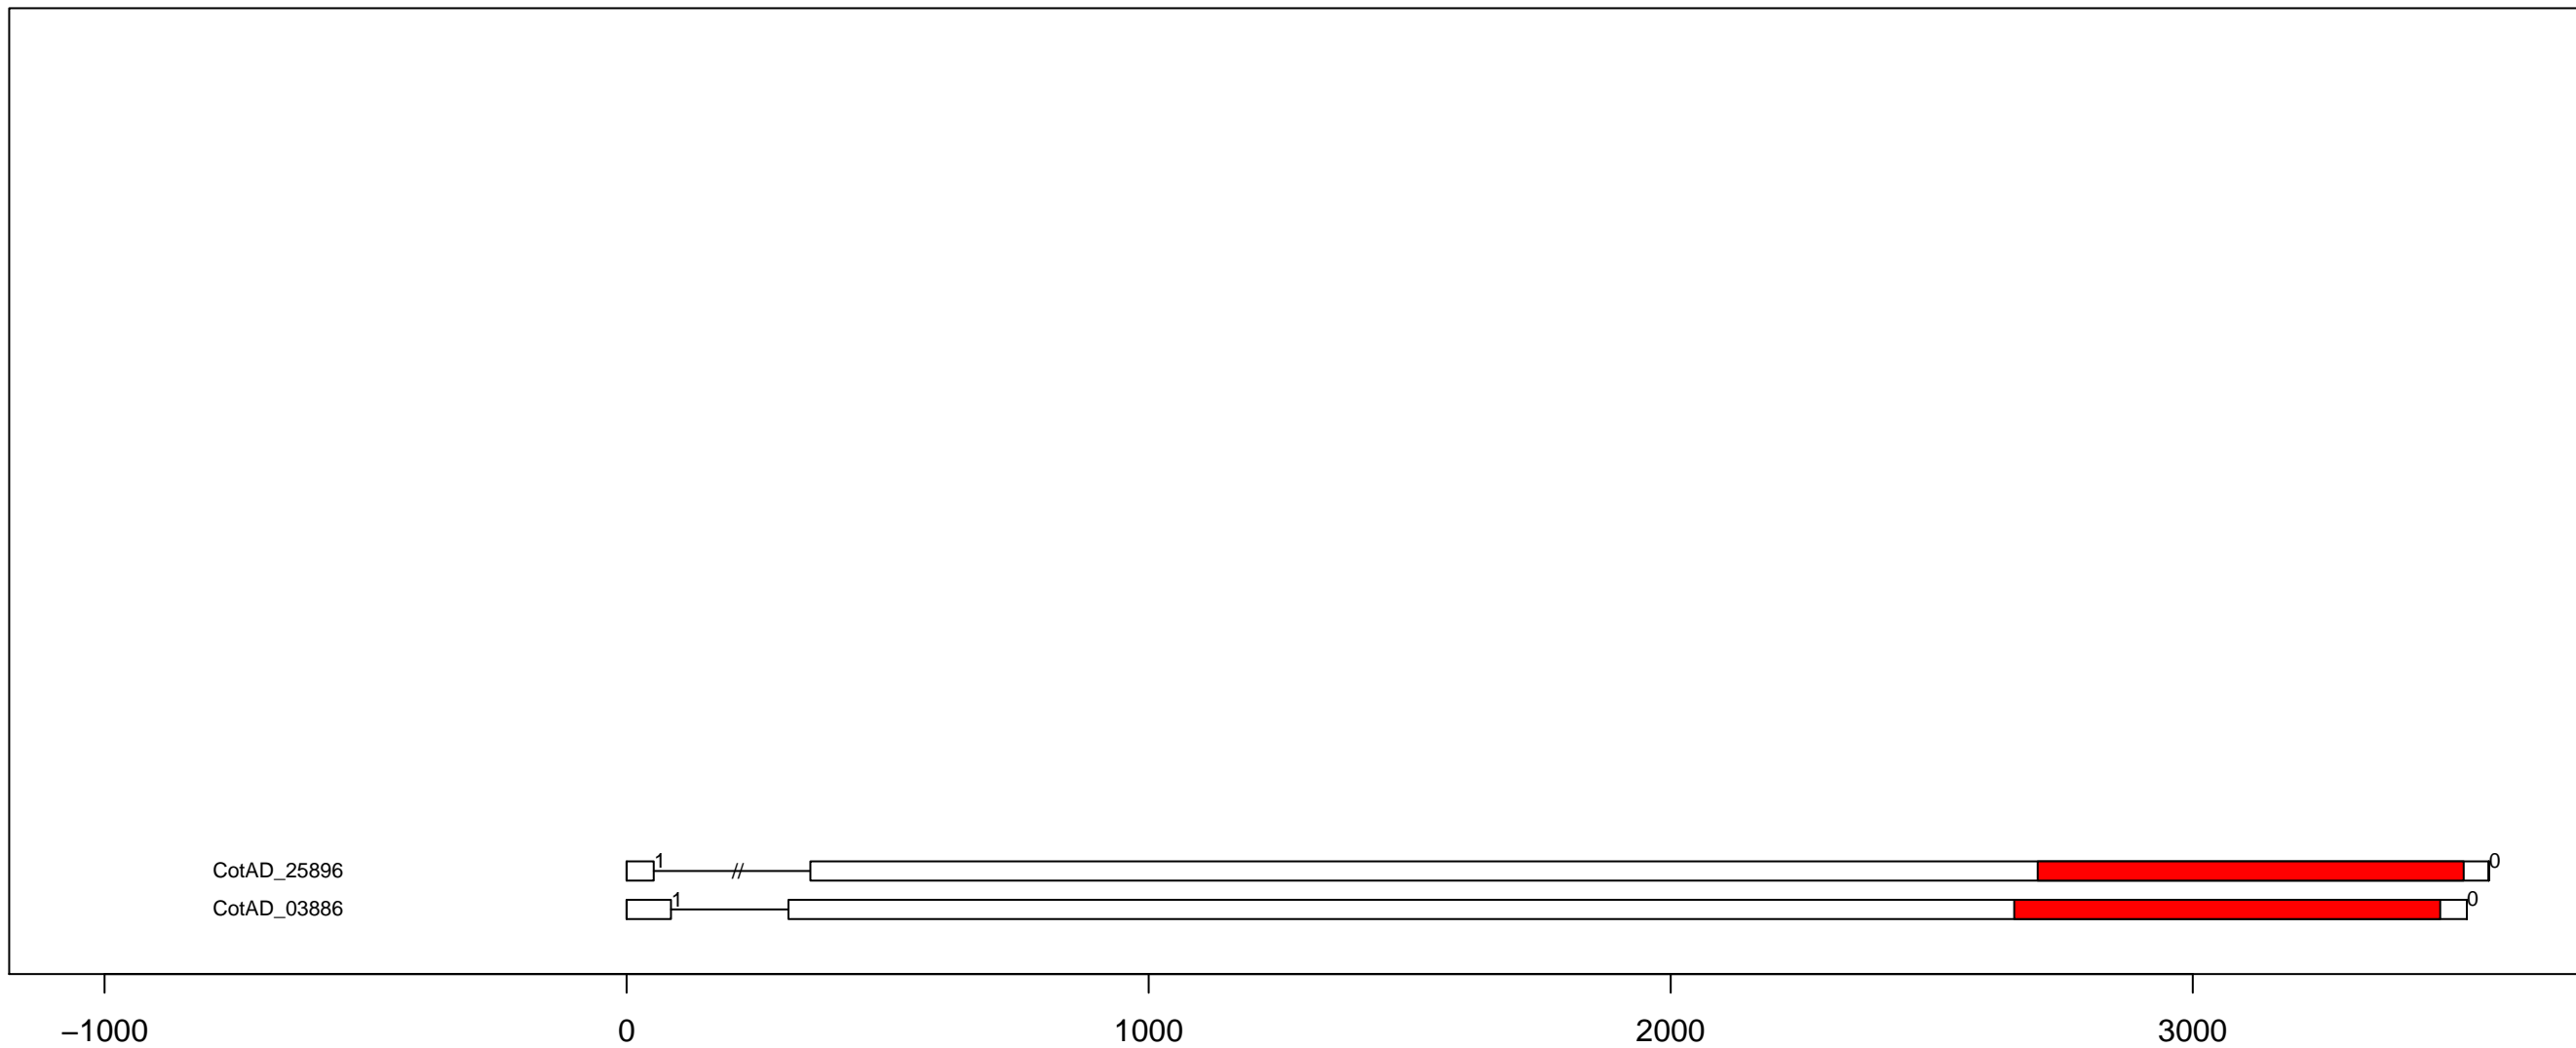

### G.hi RLK-Pelle\_LRR-XI-1 exon-intron and domain diagram (part 1)

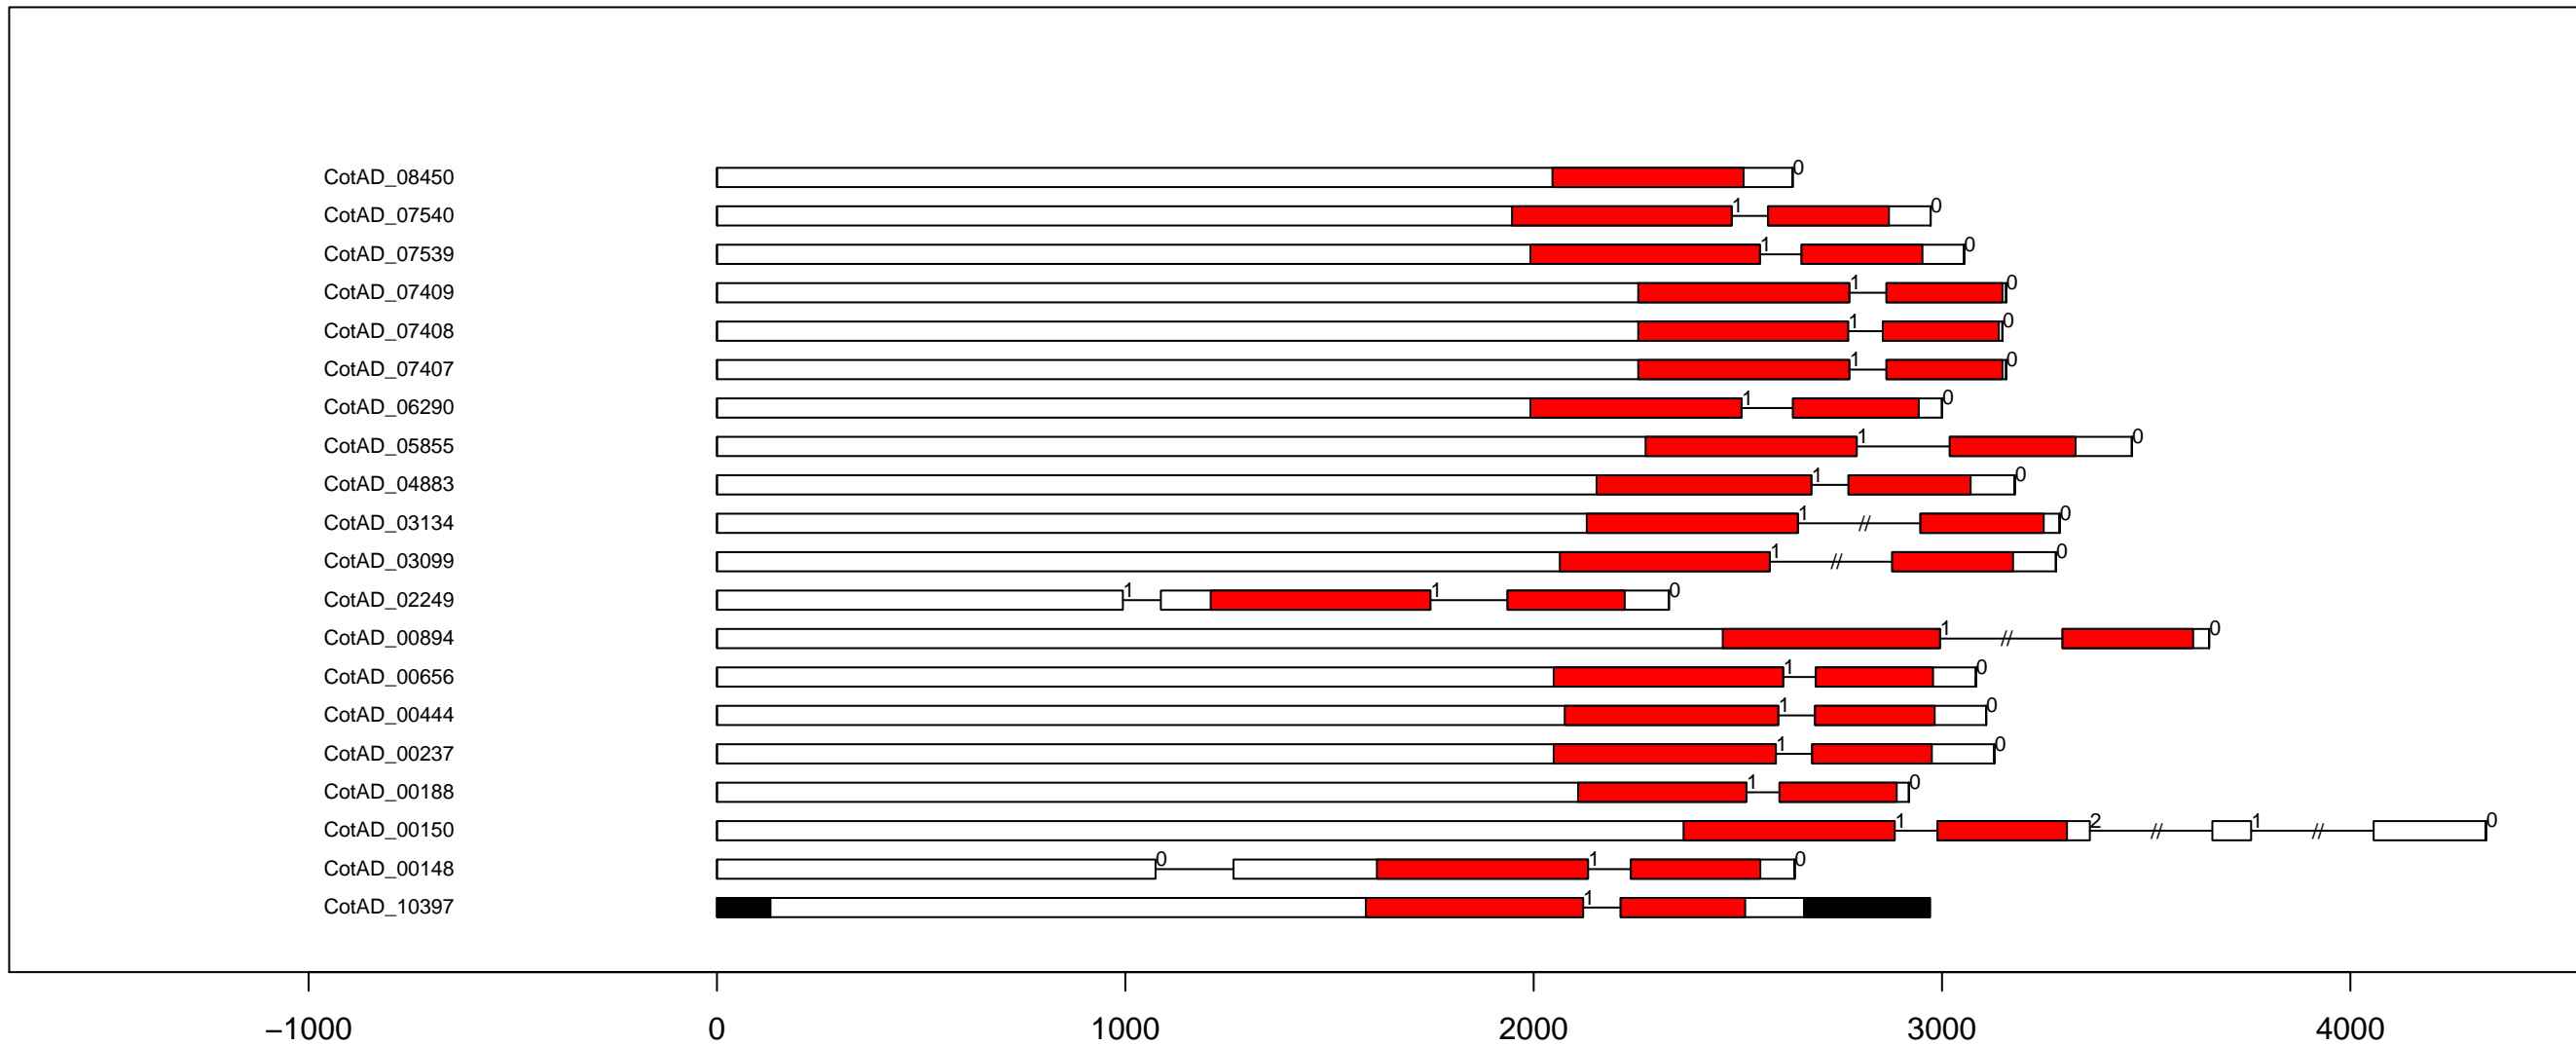

### G.hi RLK-Pelle\_LRR-XI-1 exon-intron and domain diagram (part 2)

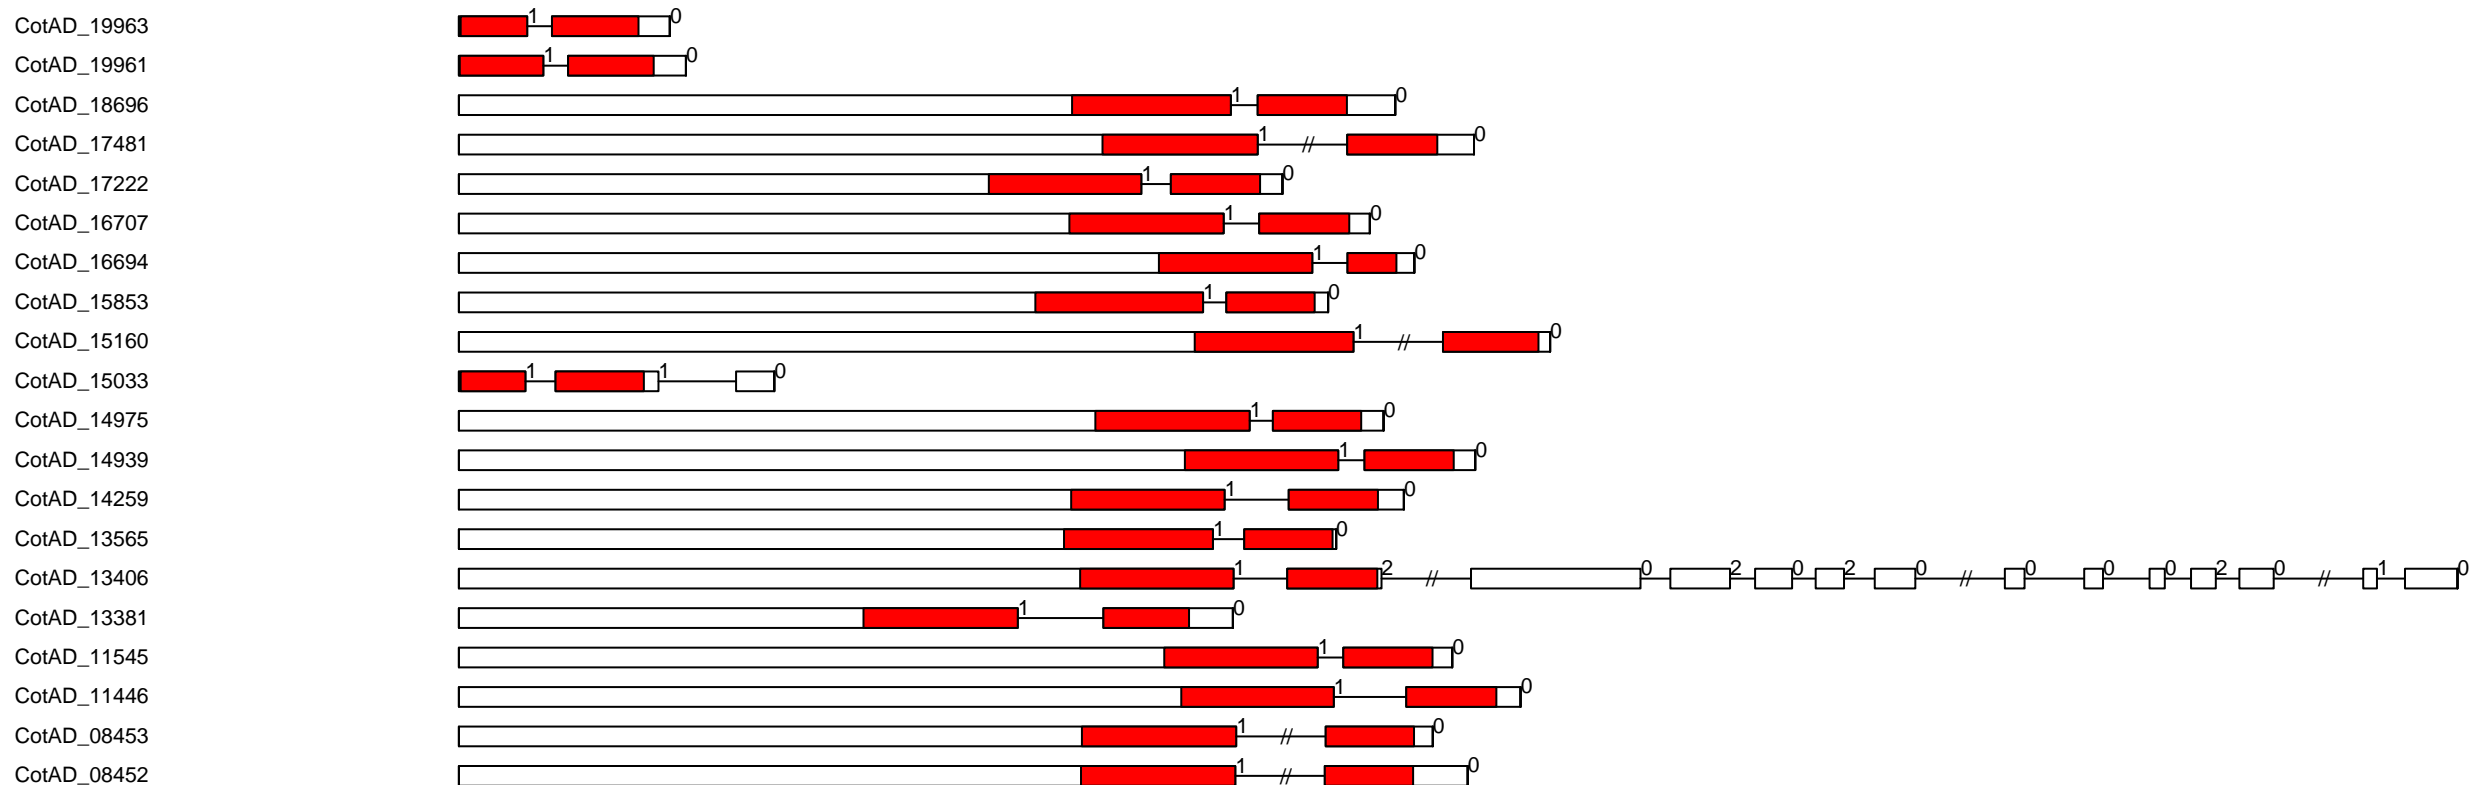

### G.hi RLK-Pelle\_LRR-XI-1 exon-intron and domain diagram (part 3)

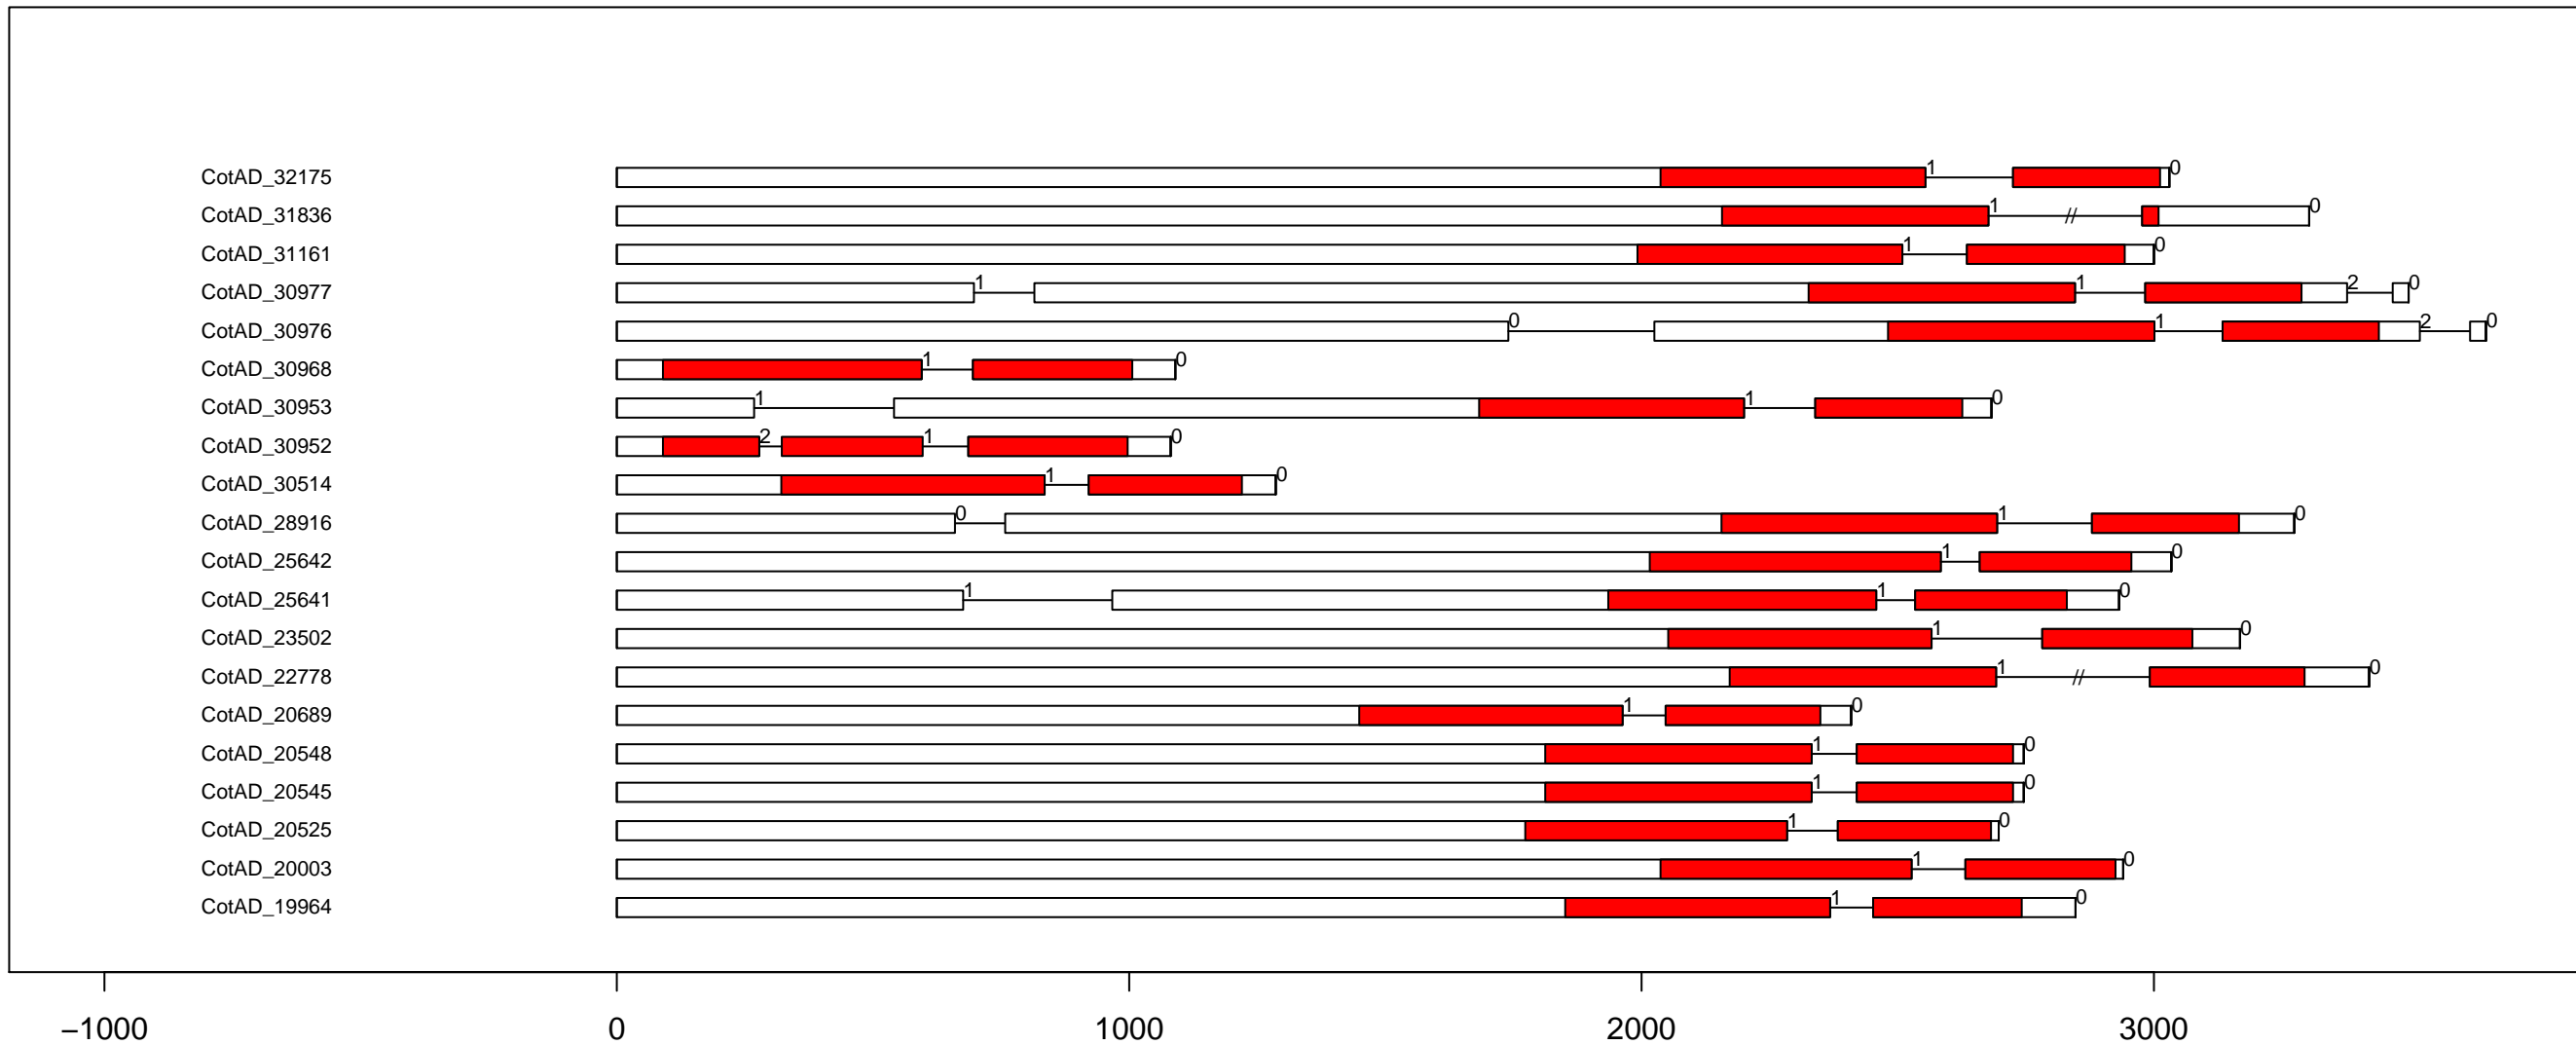

### G.hi RLK-Pelle\_LRR-XI-1 exon-intron and domain diagram (part 4)

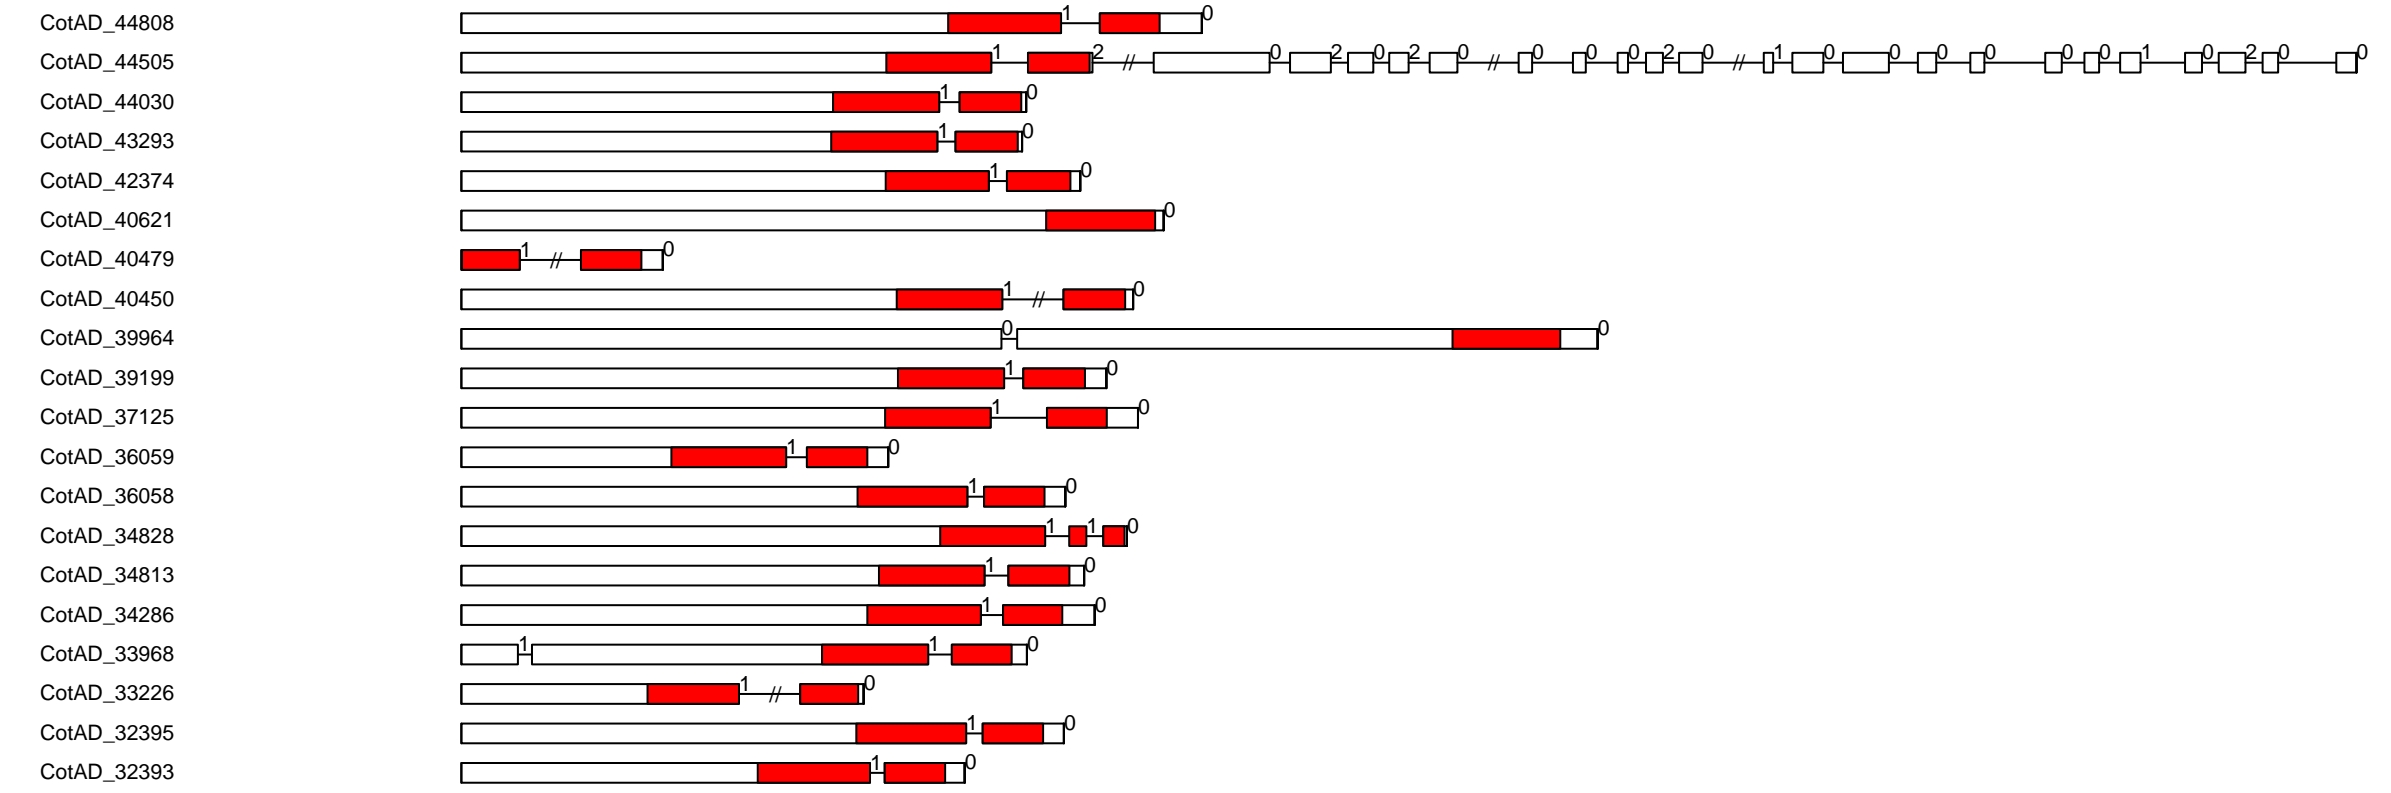

### G.hi RLK-Pelle\_LRR-XI-1 exon-intron and domain diagram (part 5)

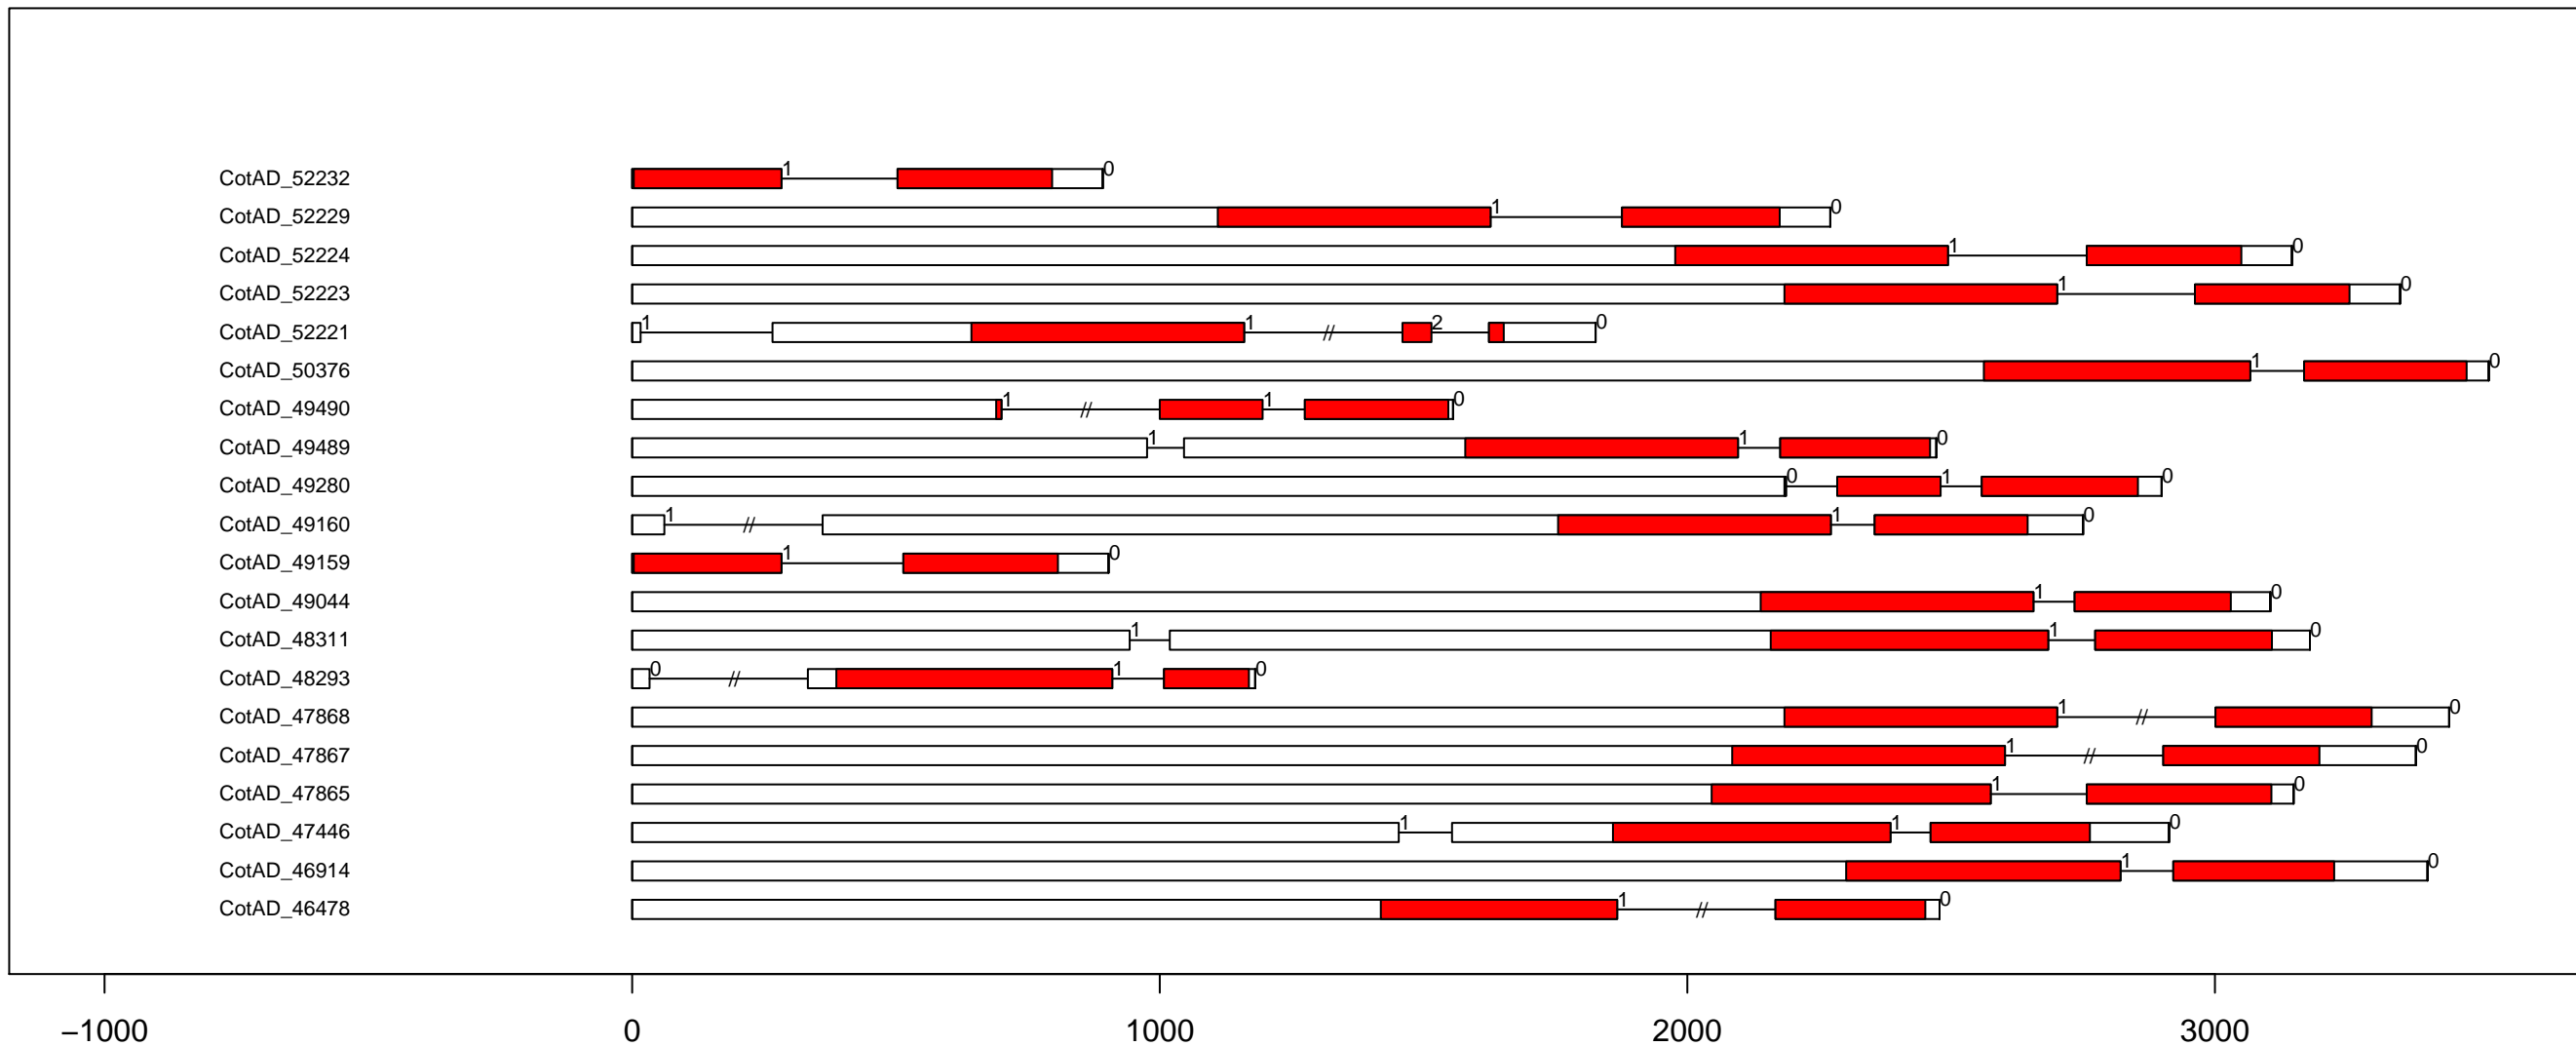

### G.hi RLK-Pelle\_LRR-XI-1 exon-intron and domain diagram (part 6)

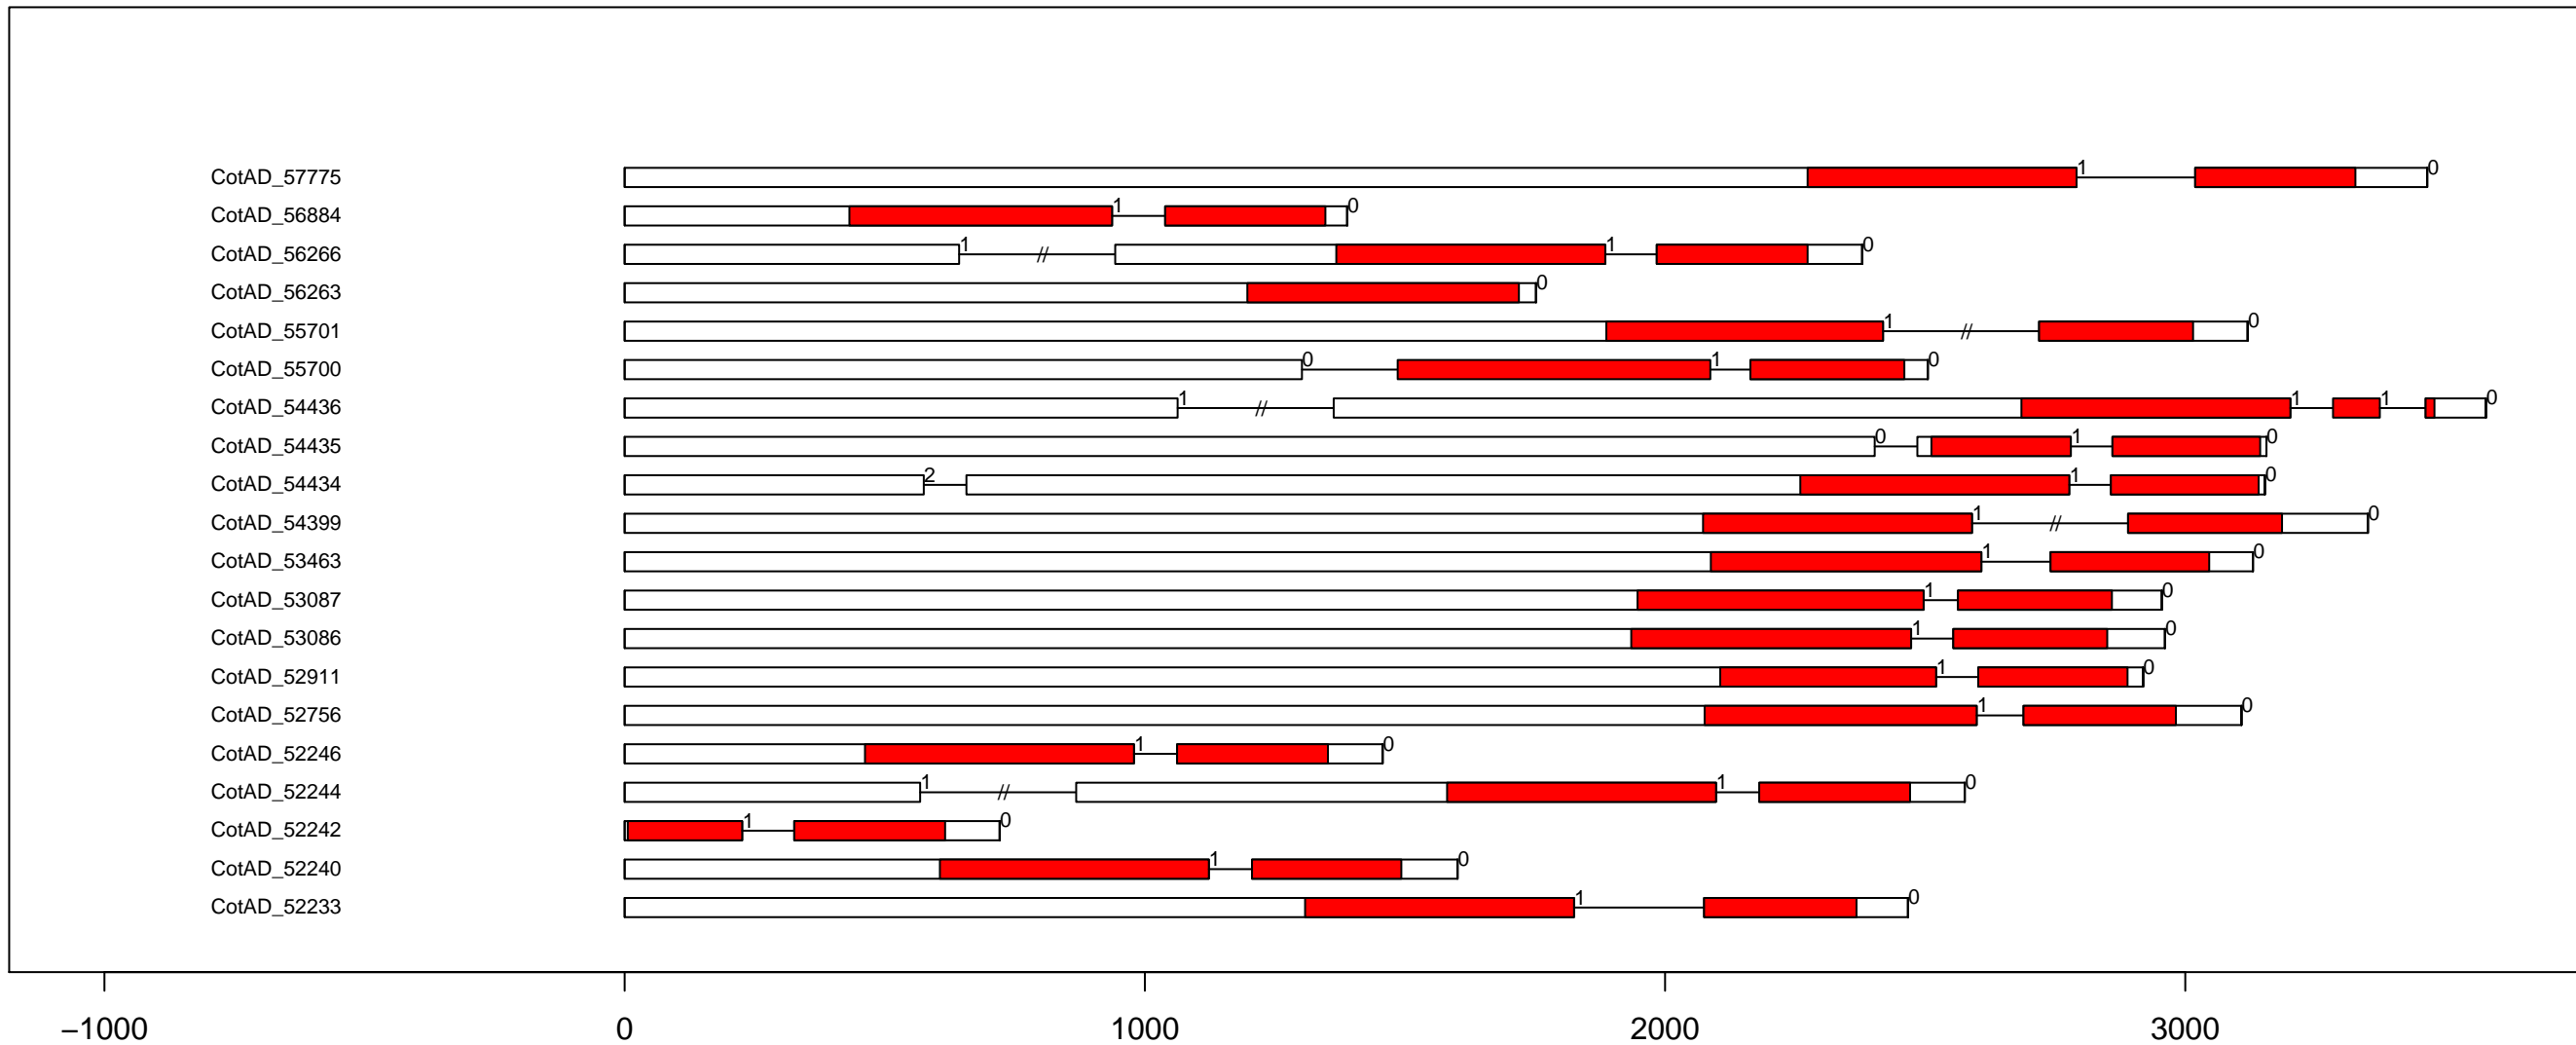

### G.hi RLK-Pelle\_LRR-XI-1 exon-intron and domain diagram (part 7)

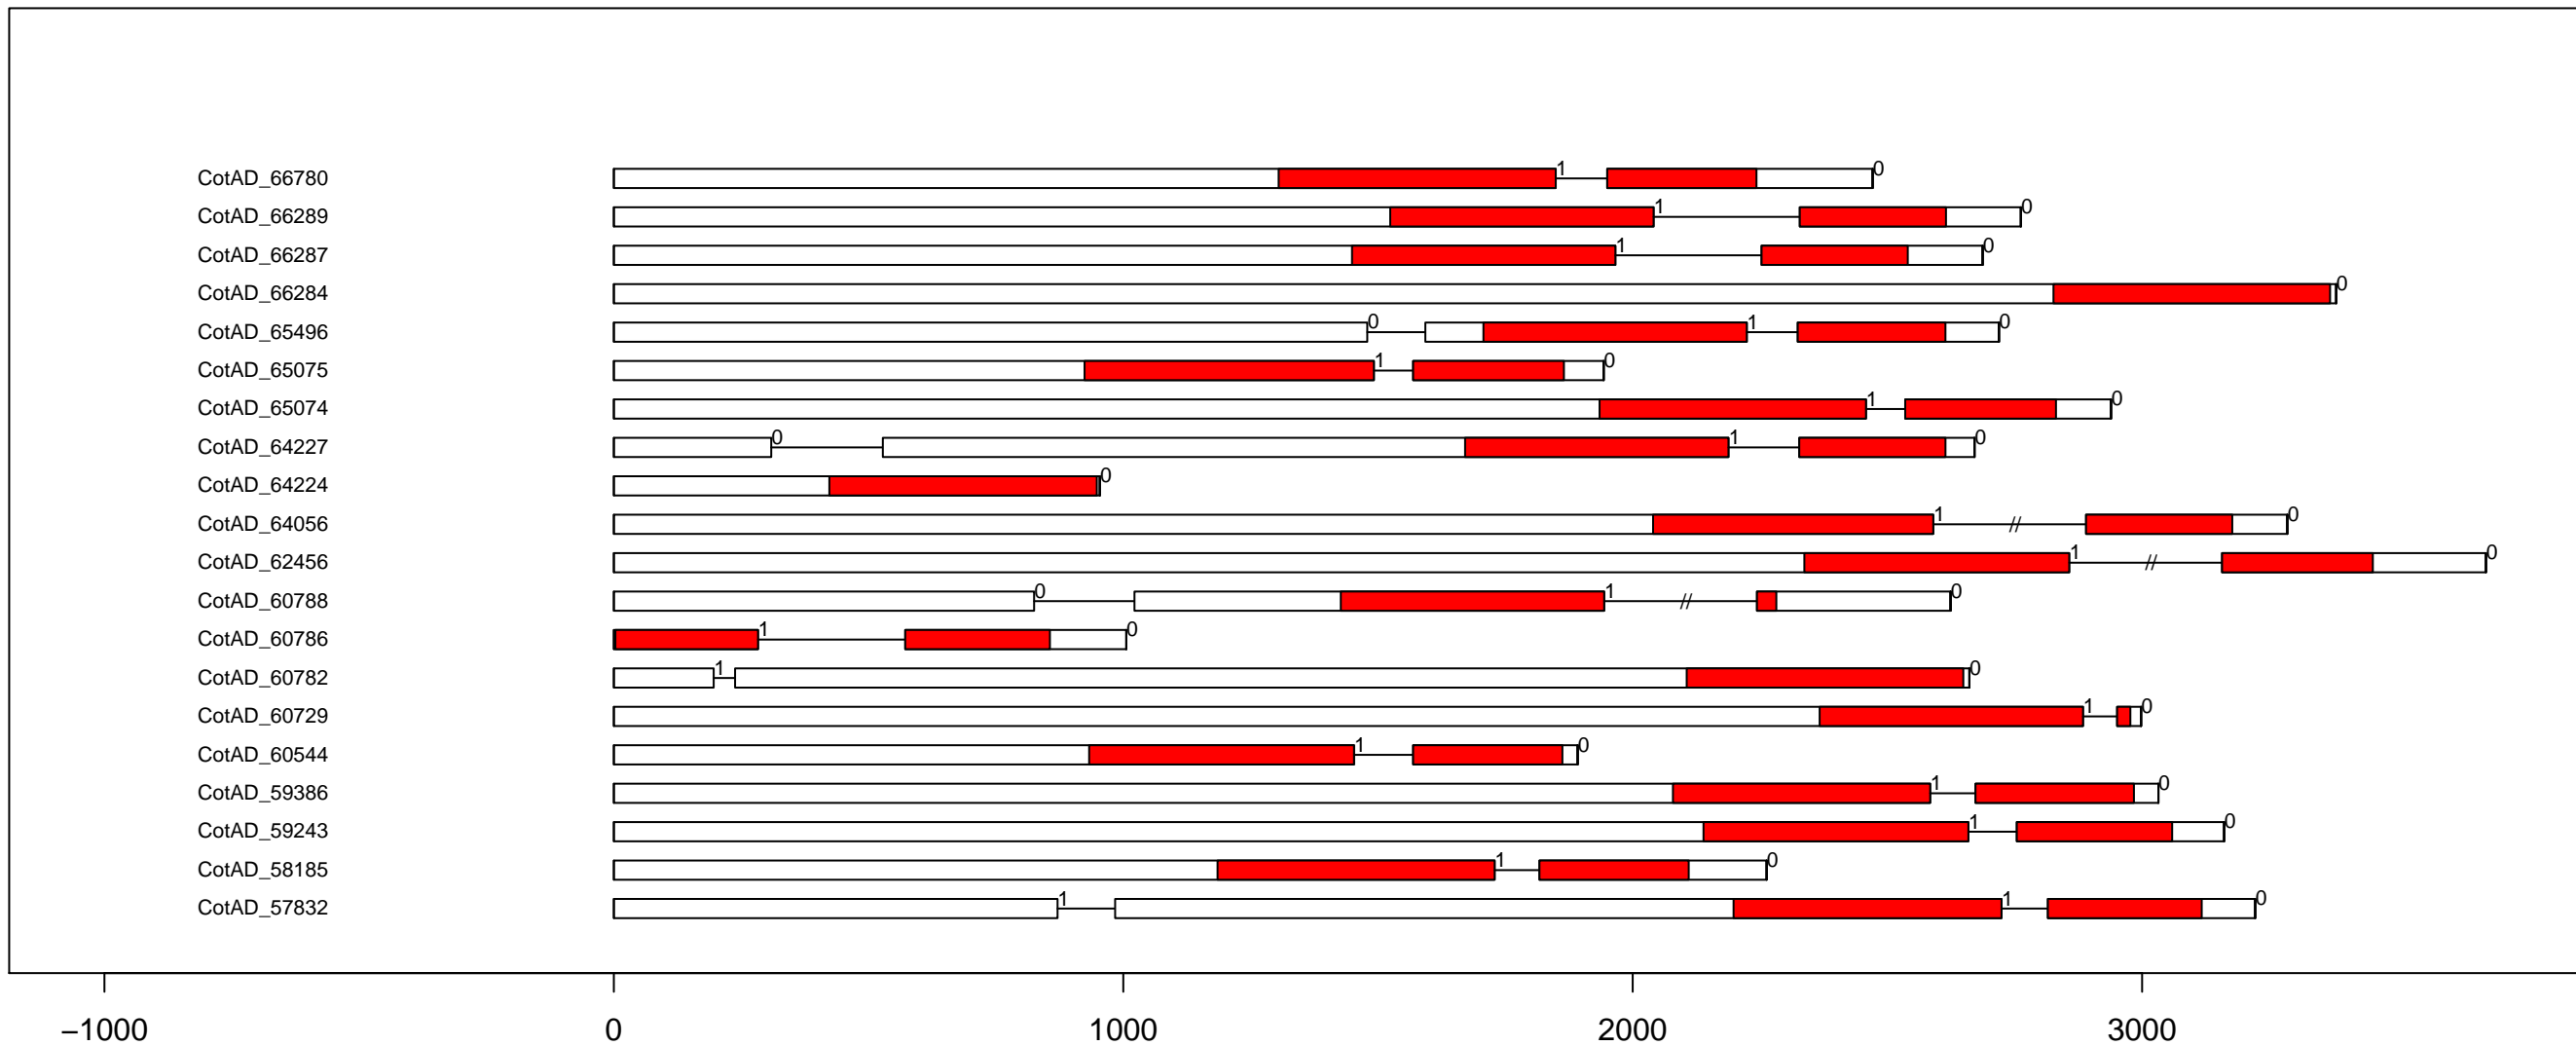



### G.hi RLK-Pelle\_LRR-XI-1 exon-intron and domain diagram (part 8)

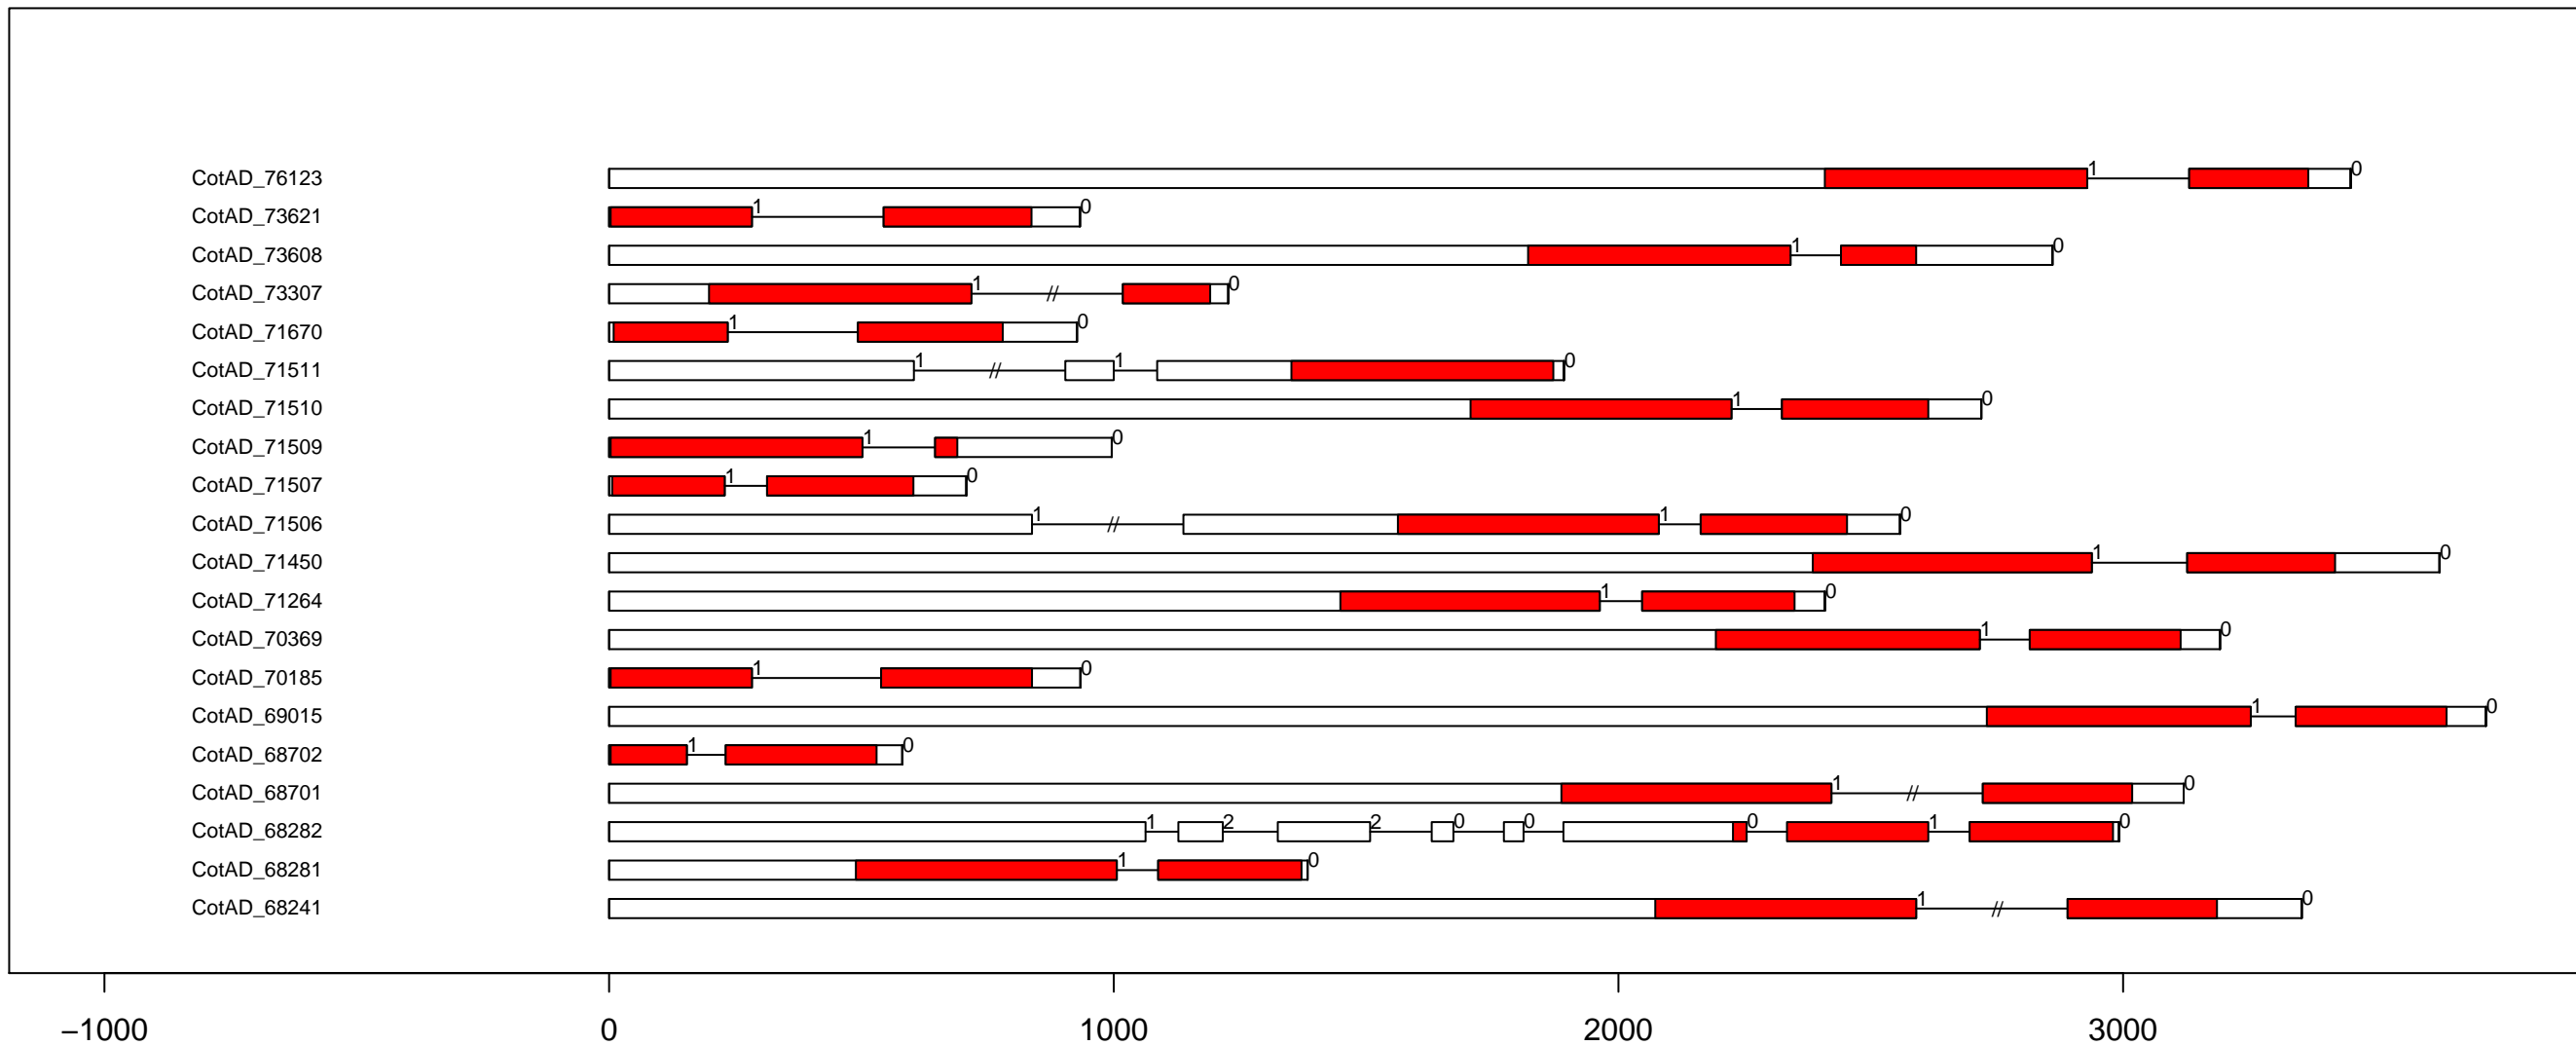

G.hi RLK-Pelle\_LRR-XI-1 exon-intron and domain diagram (part 9)

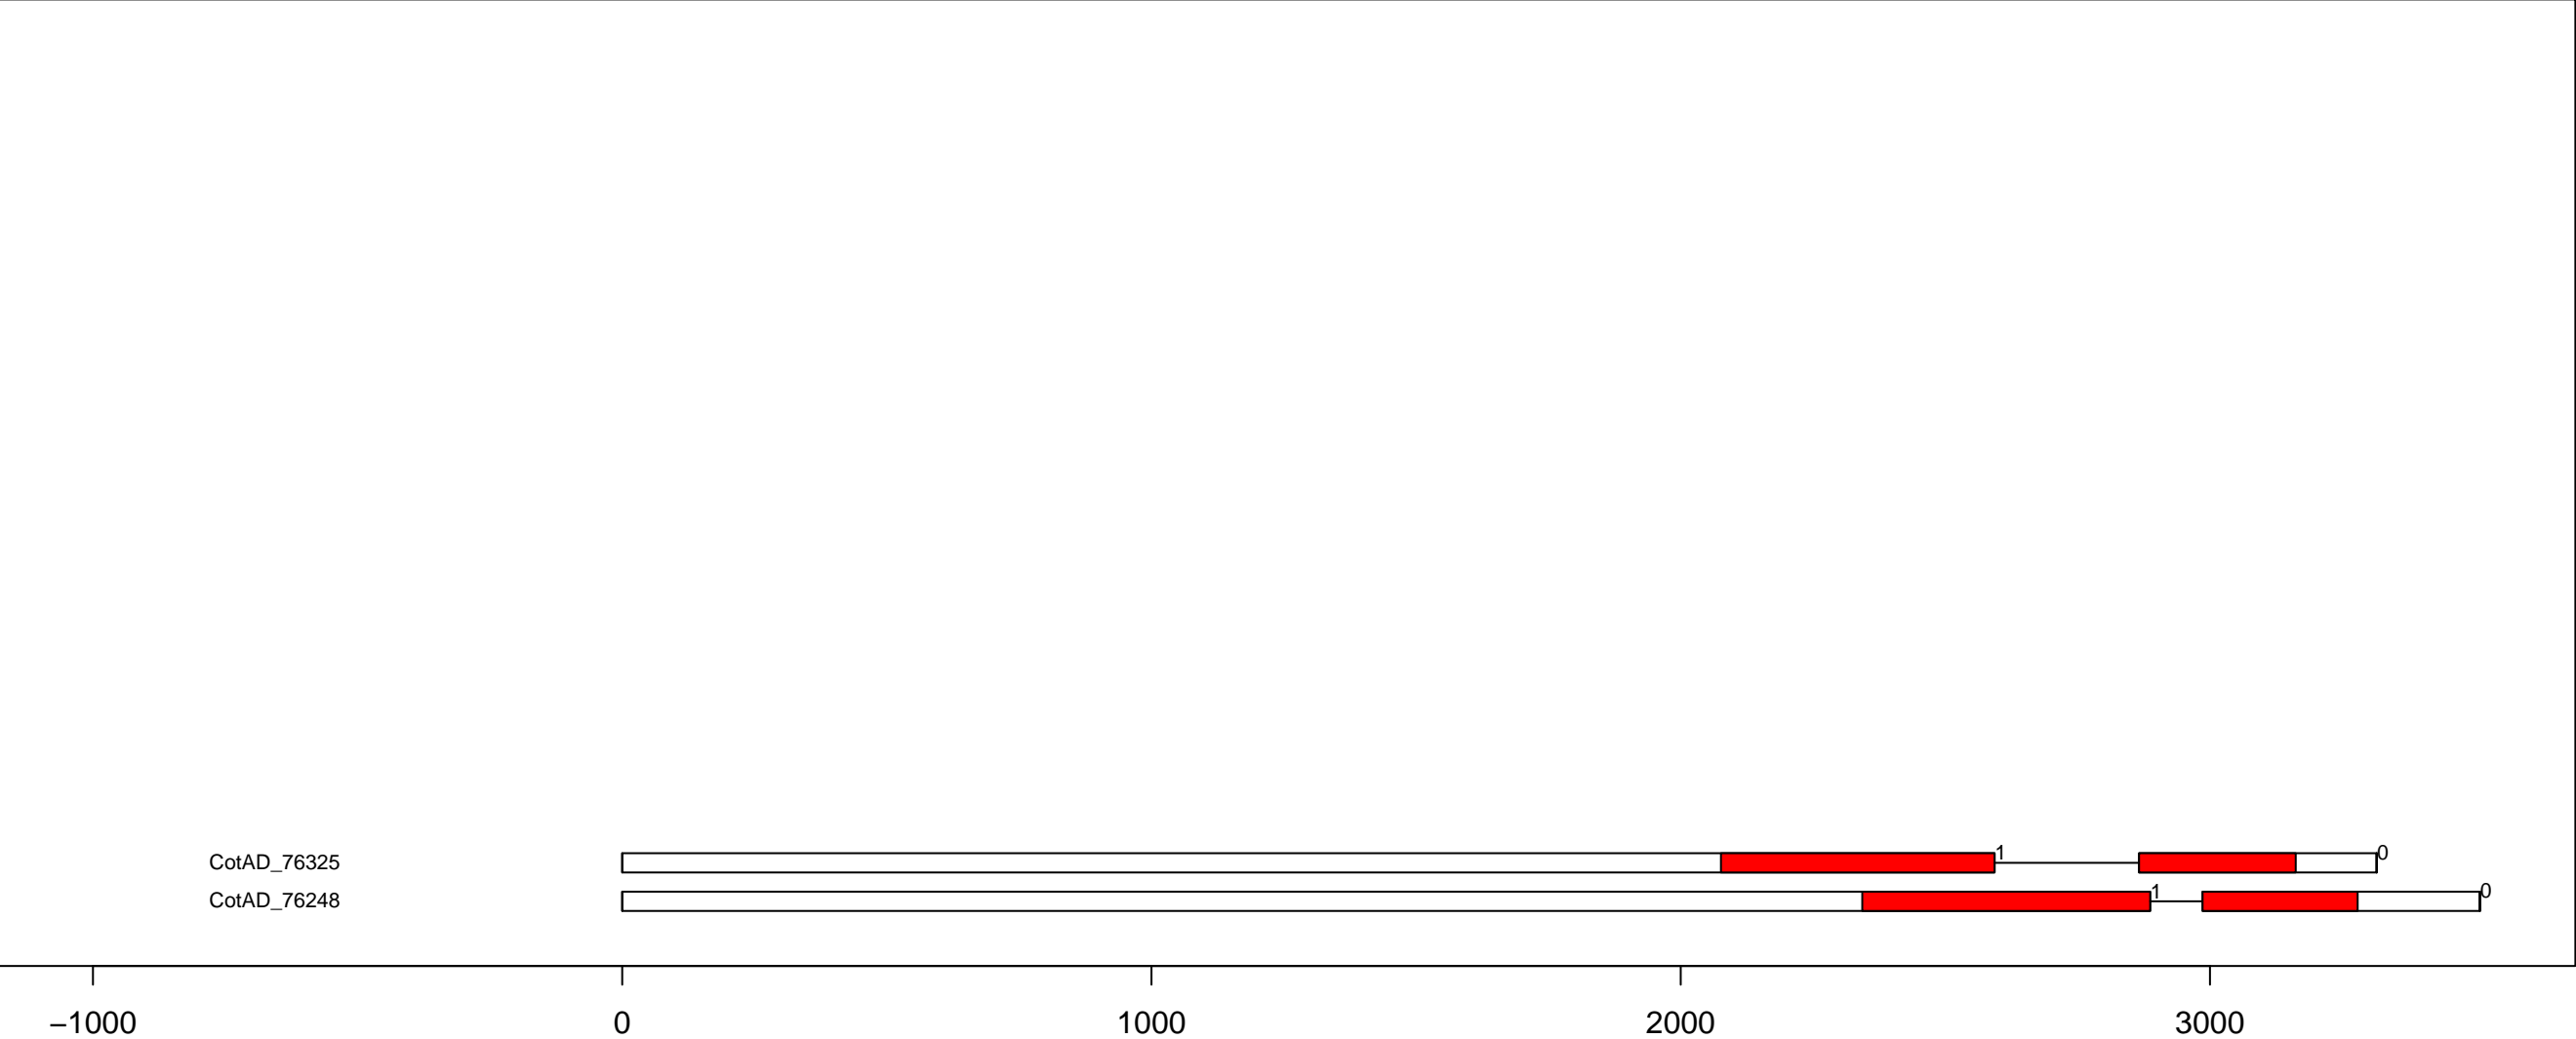

# G.hi RLK-Pelle\_LRR-XI-2 exon-intron and domain diagram (all)

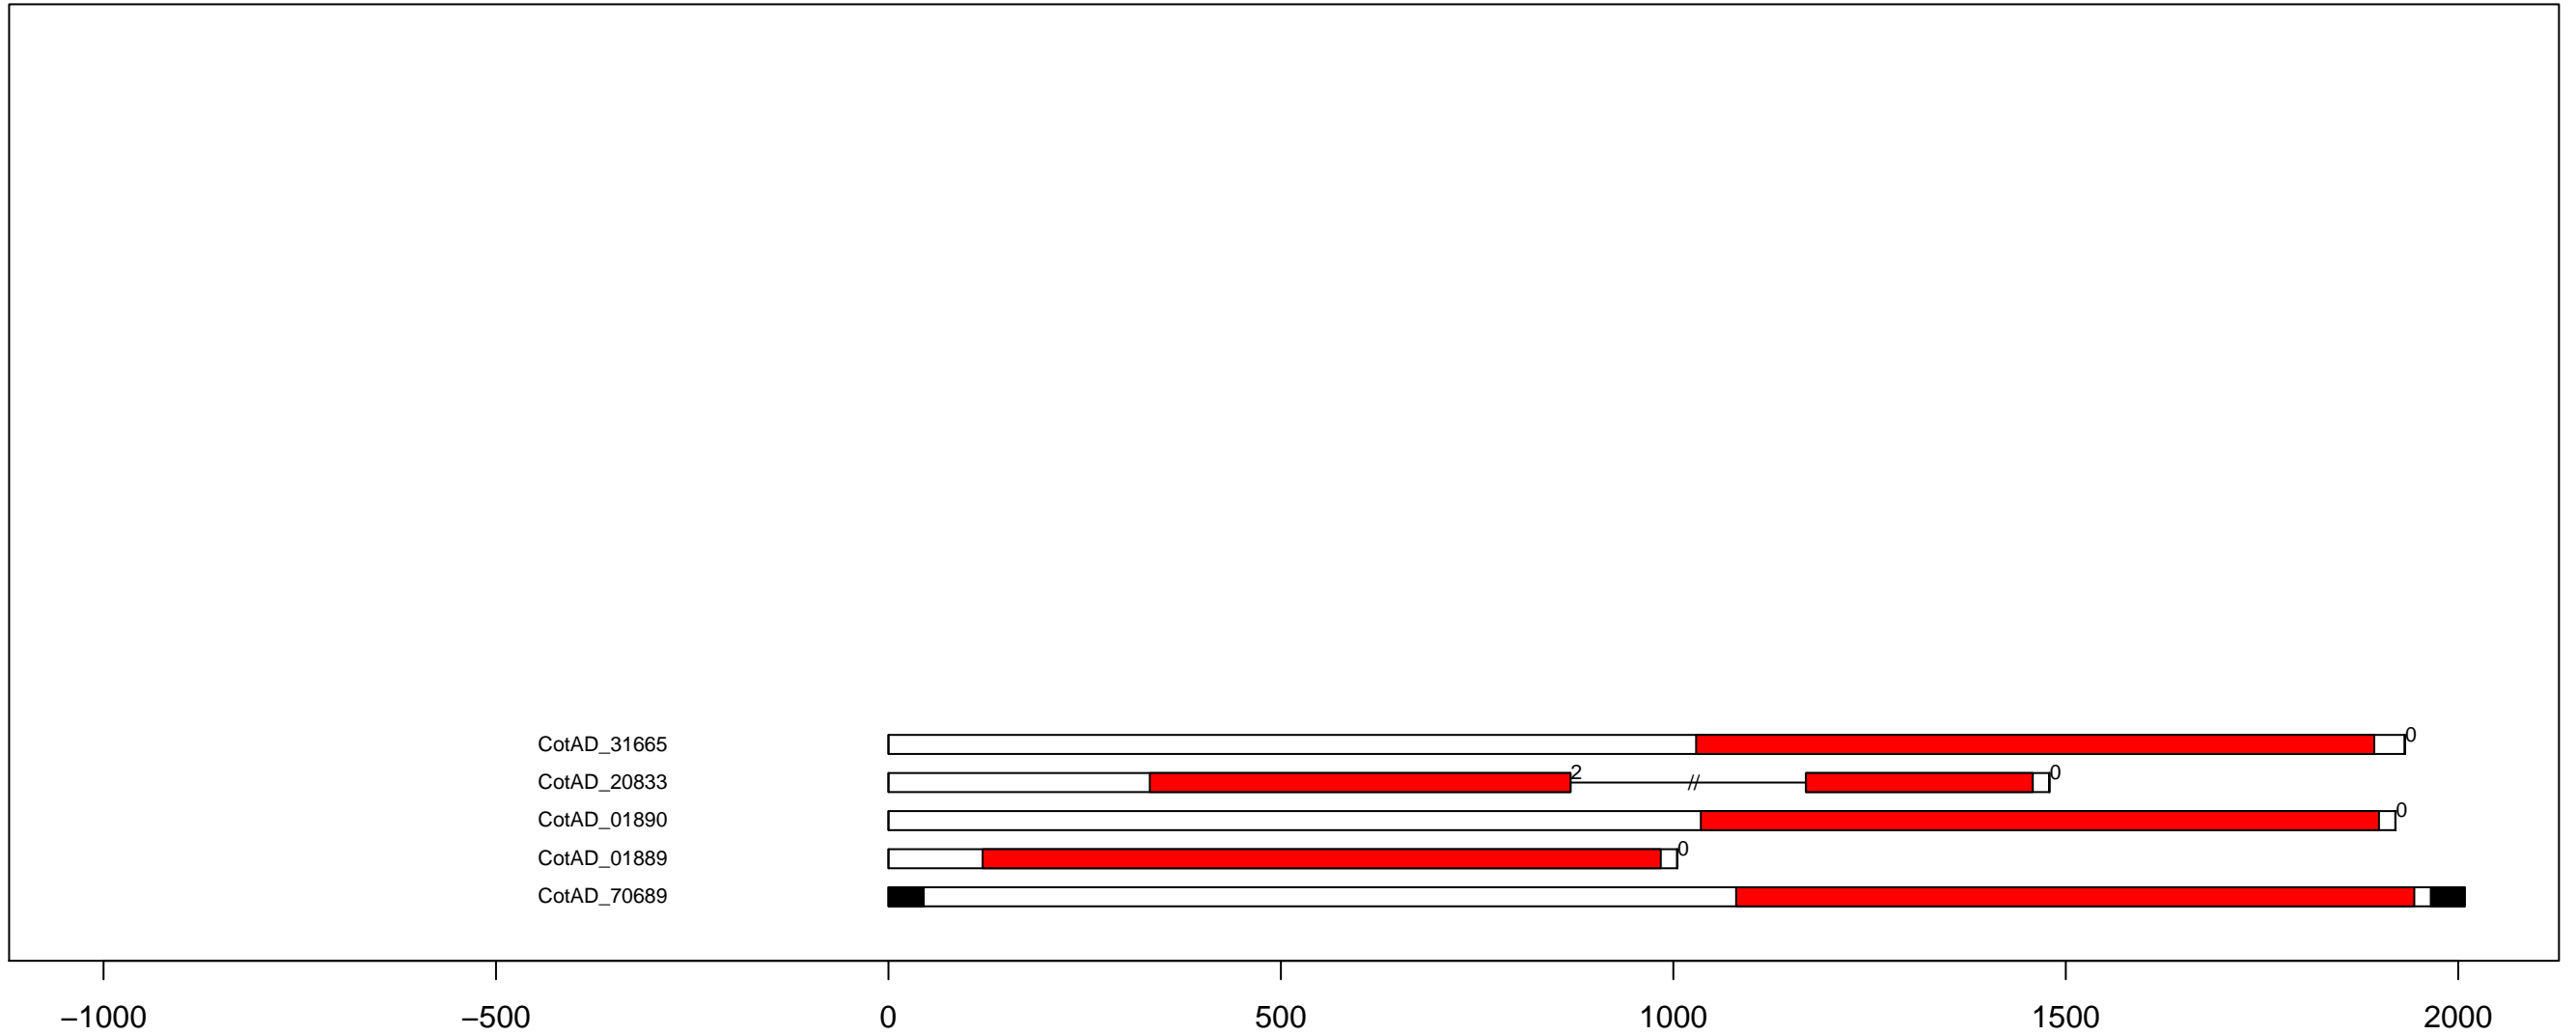

### G.hi RLK-Pelle\_LRR-XII-1 exon-intron and domain diagram (part 1)

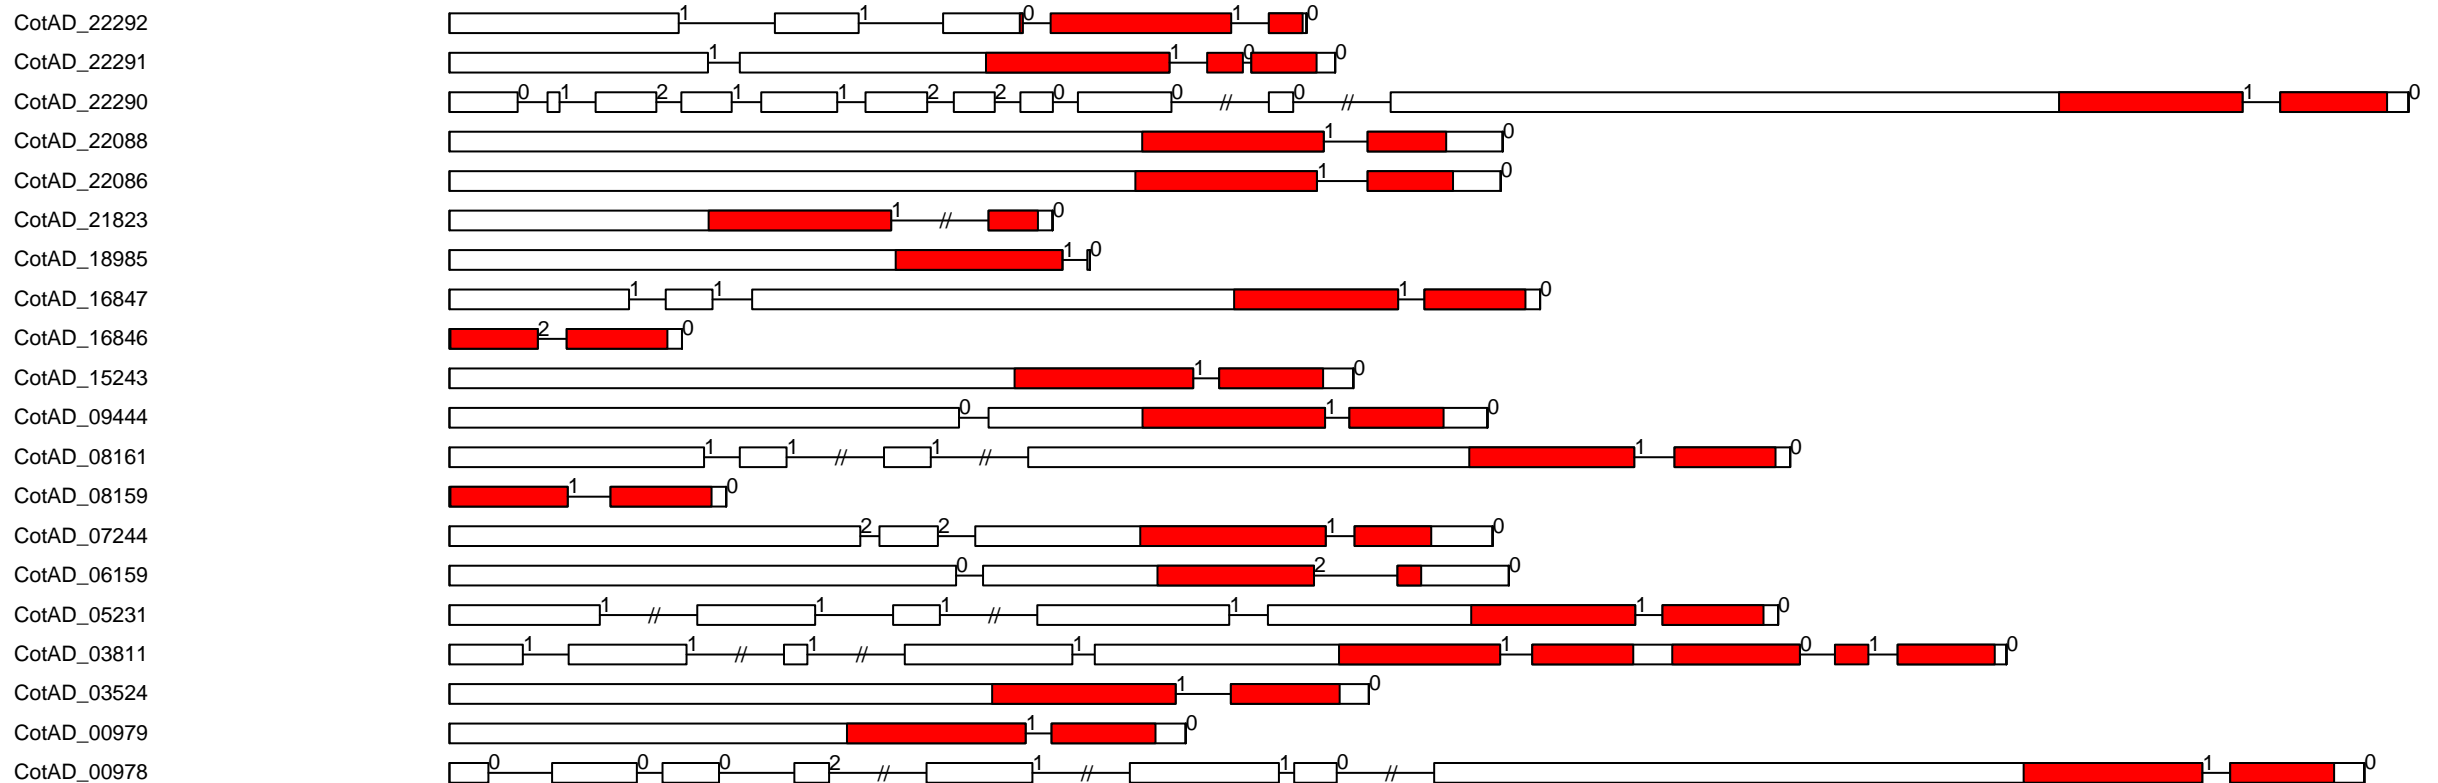

### G.hi RLK-Pelle\_LRR-XII-1 exon-intron and domain diagram (part 2)

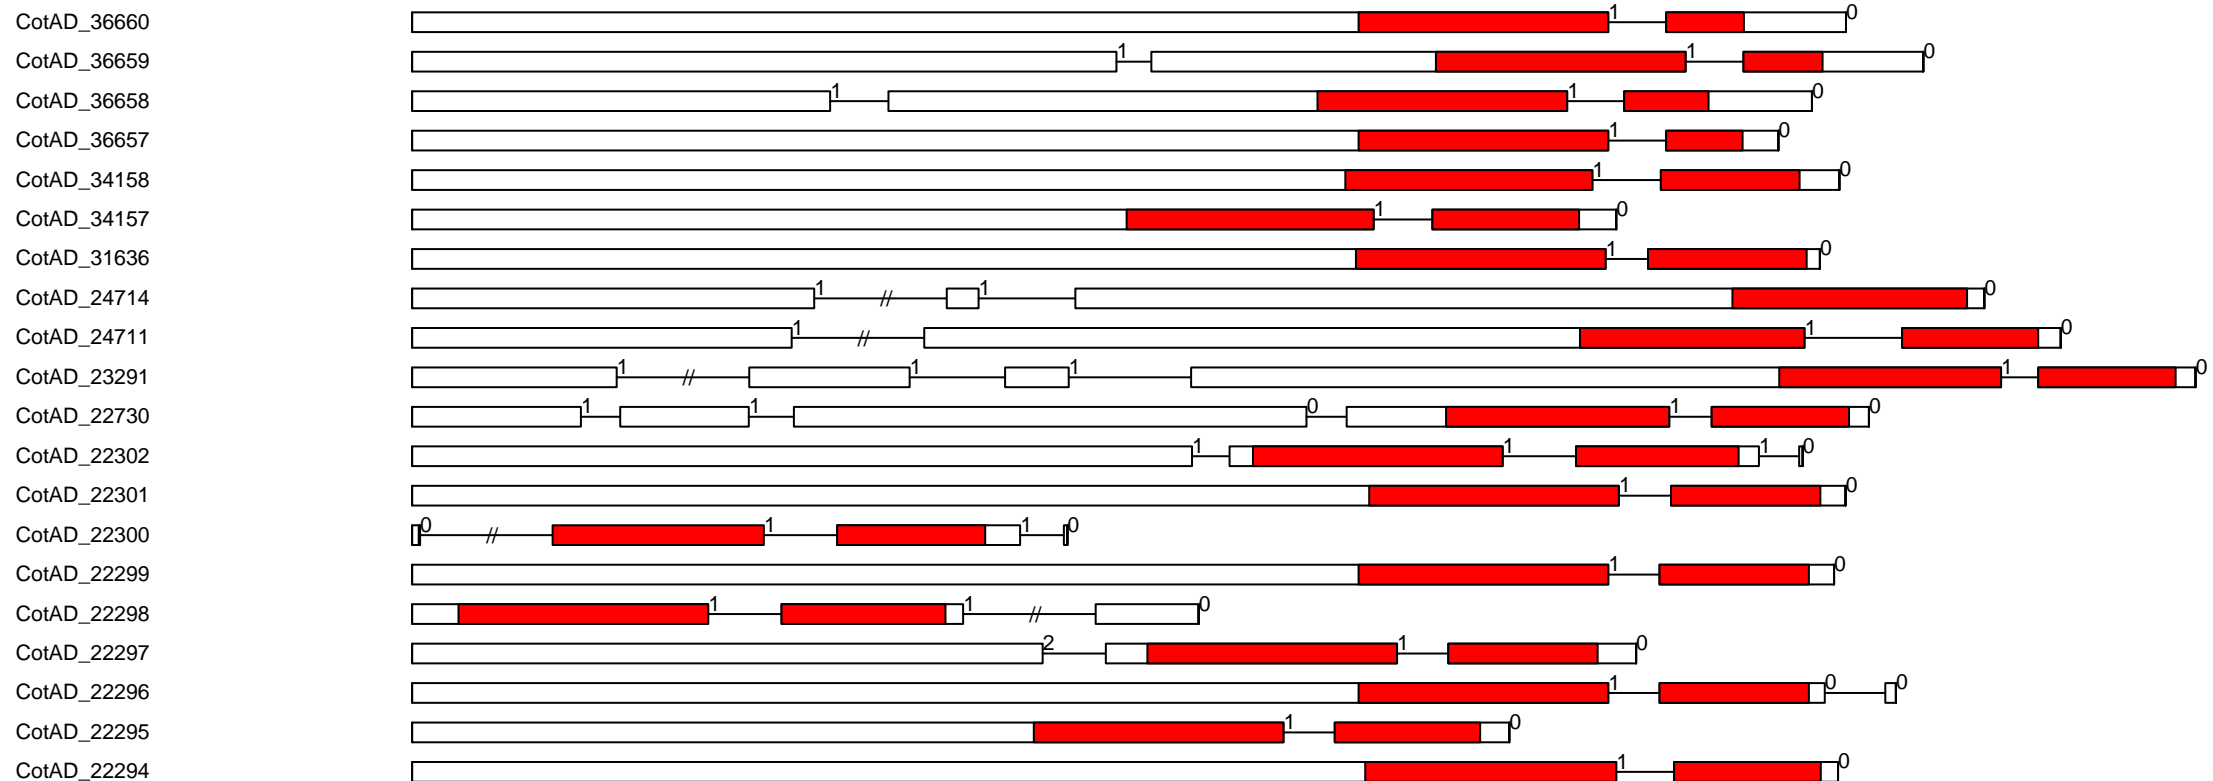









### G.hi RLK-Pelle\_LRR-XIIIa exon-intron and domain diagram (all)

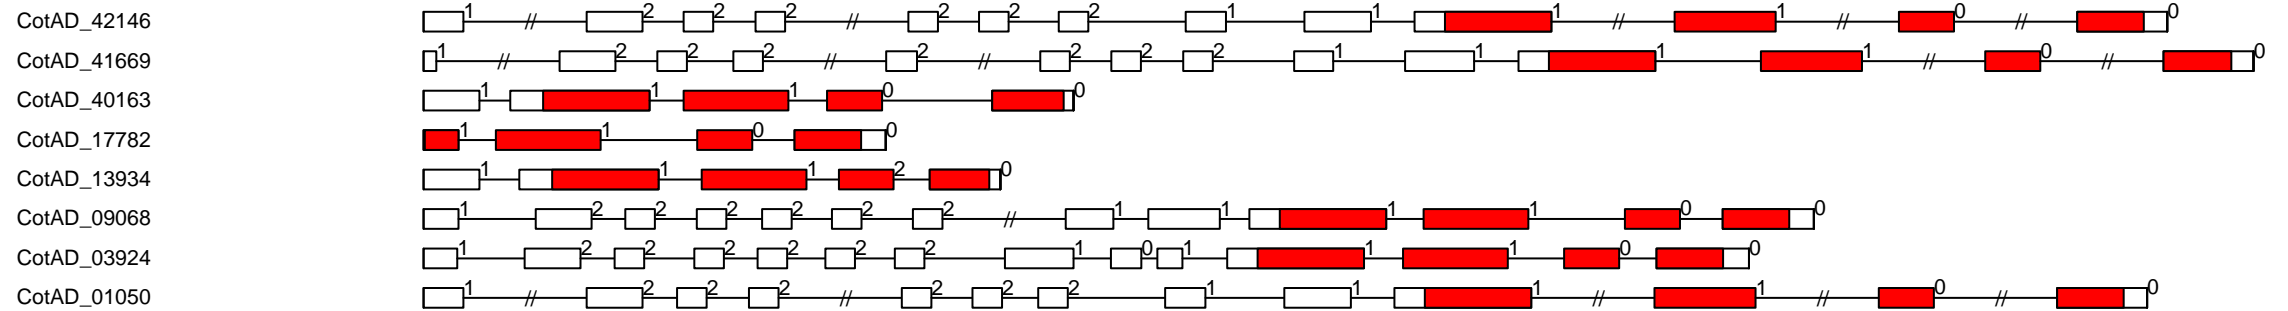

G.hi RLK-Pelle\_LRR-XIIIb exon-intron and domain diagram (all)

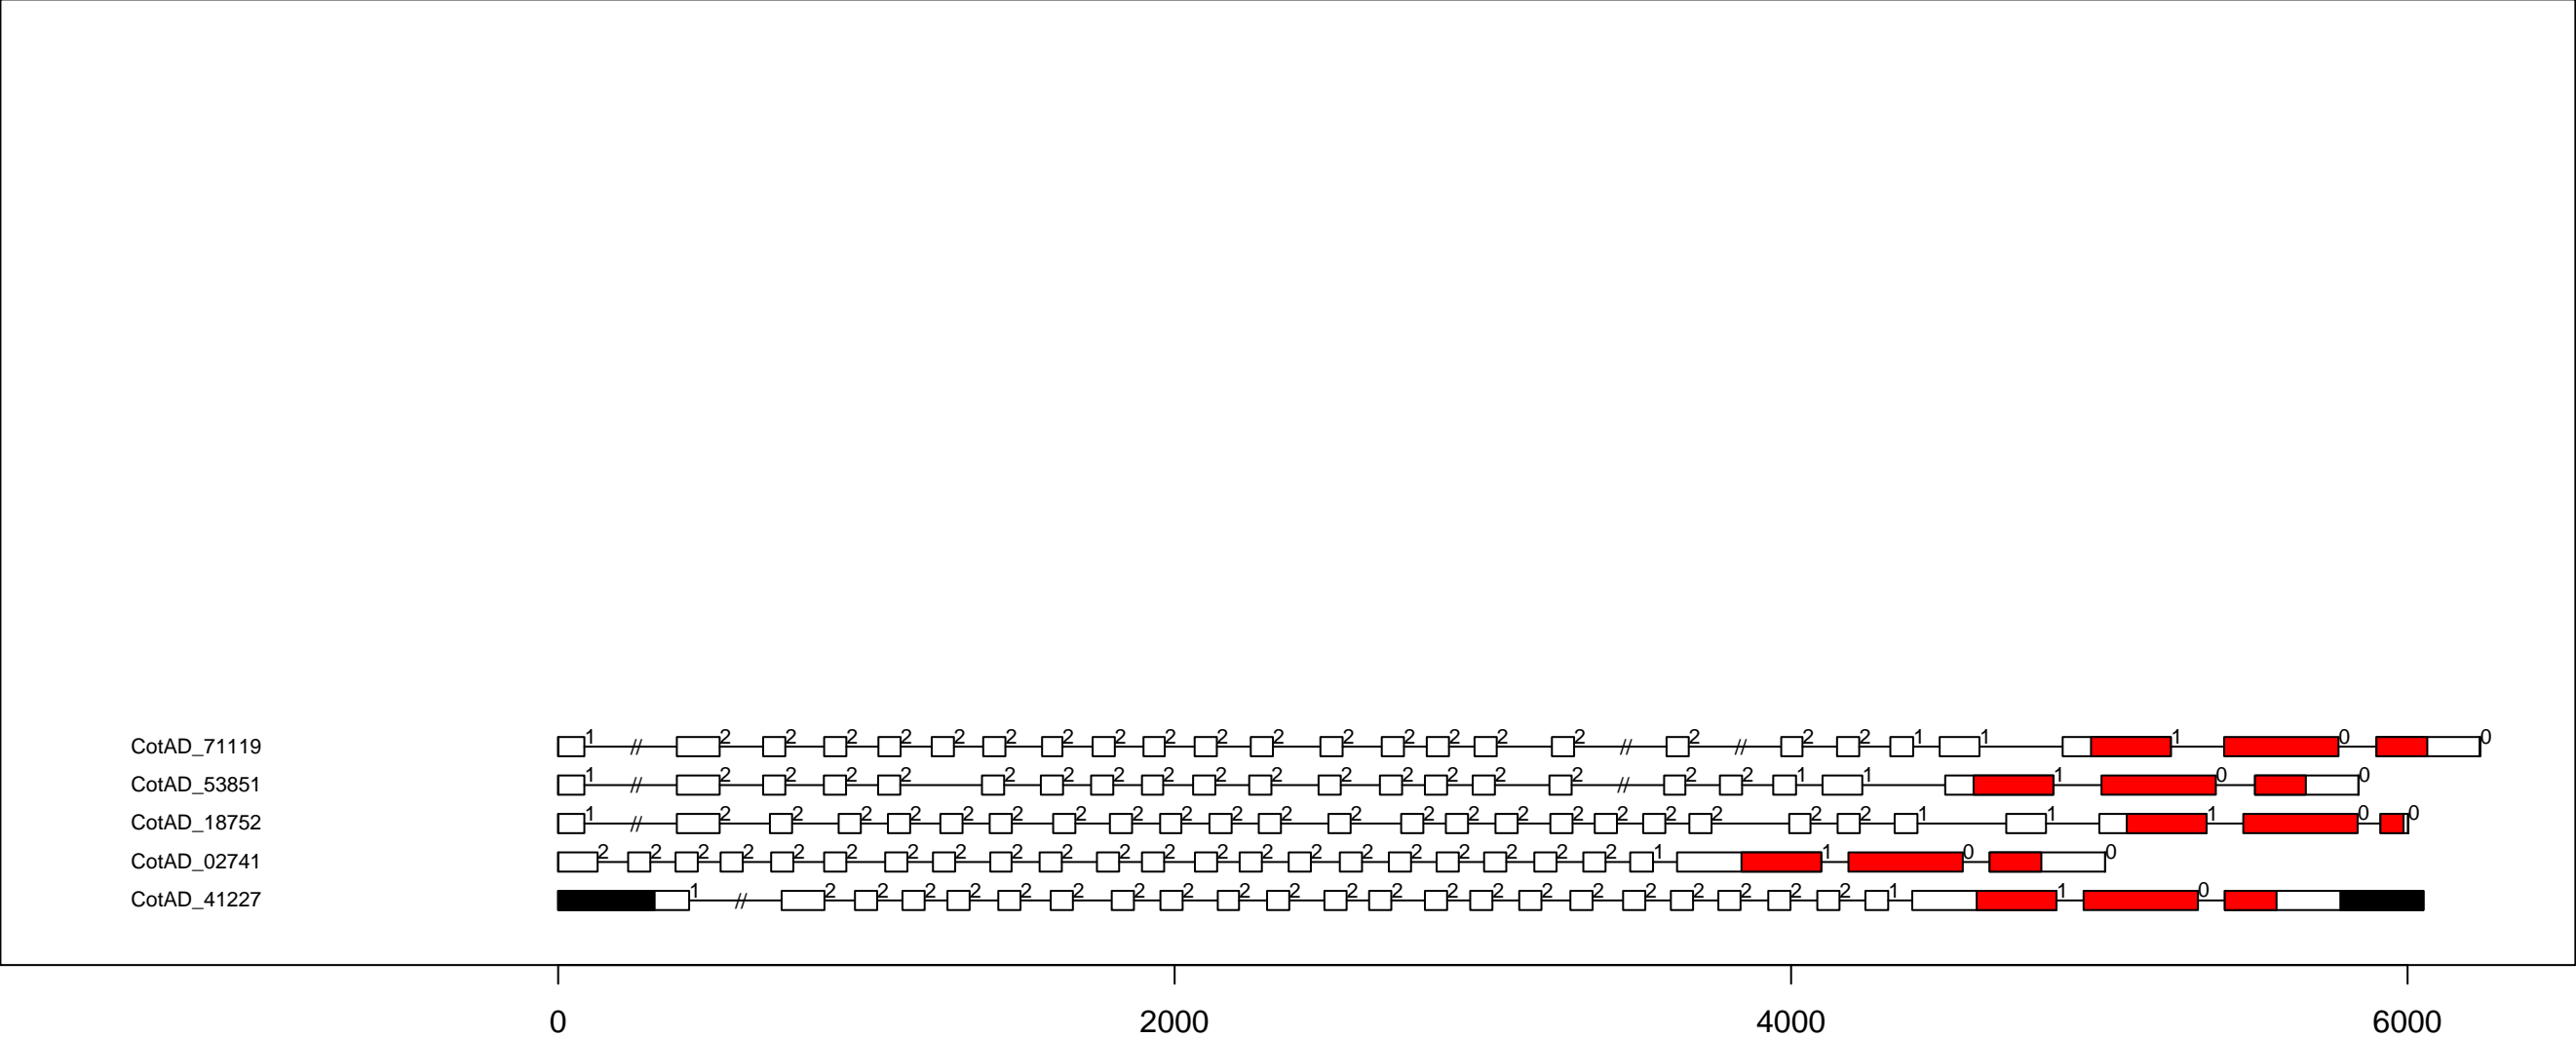

# G.hi RLK-Pelle\_LRR-XIV exon-intron and domain diagram (all)

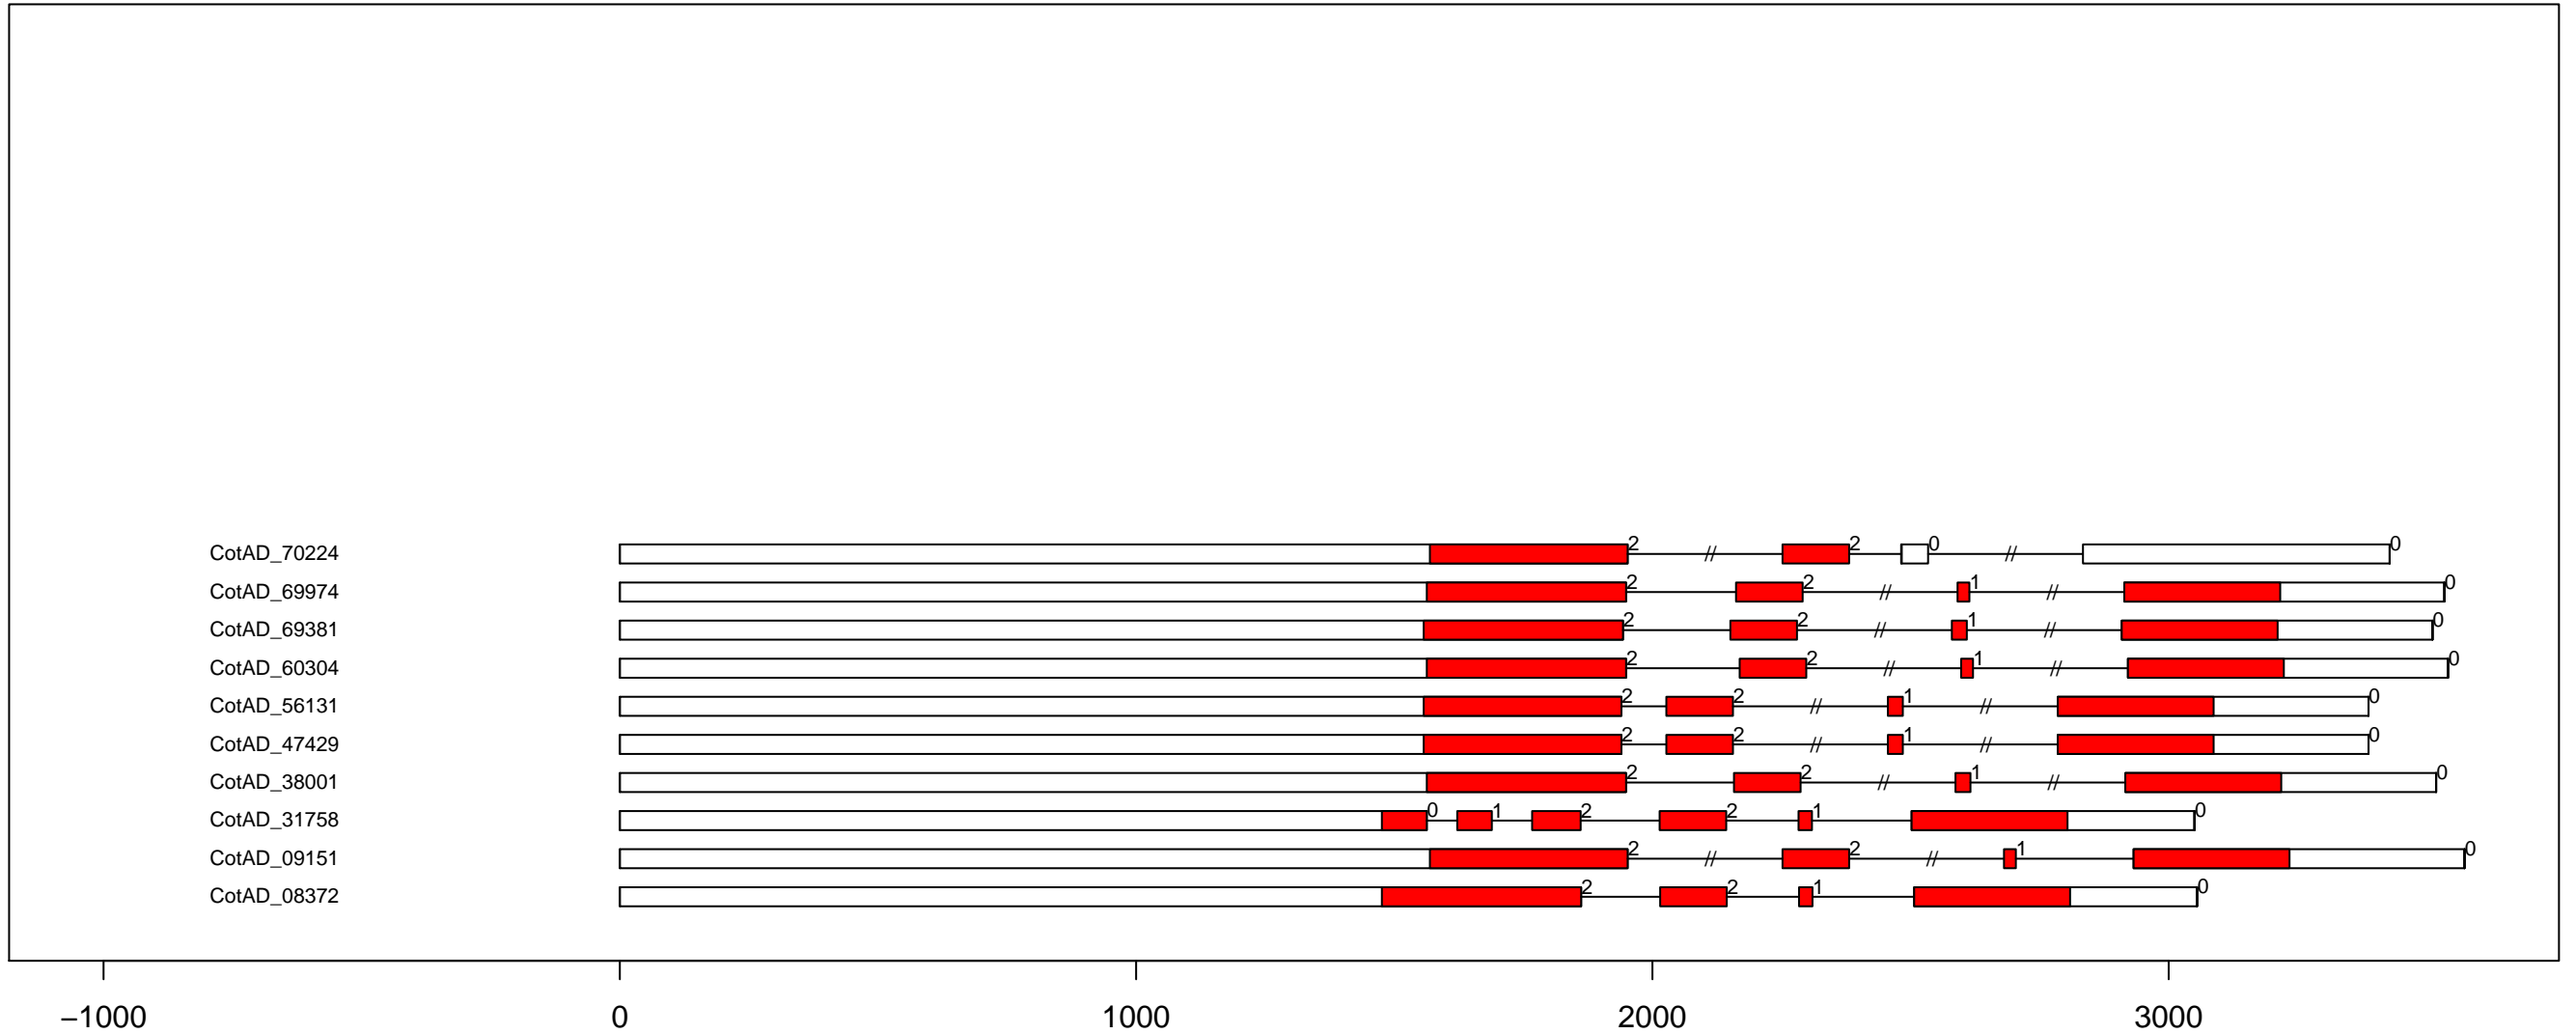

# G.hi RLK-Pelle\_LRR-XV exon-intron and domain diagram (all)

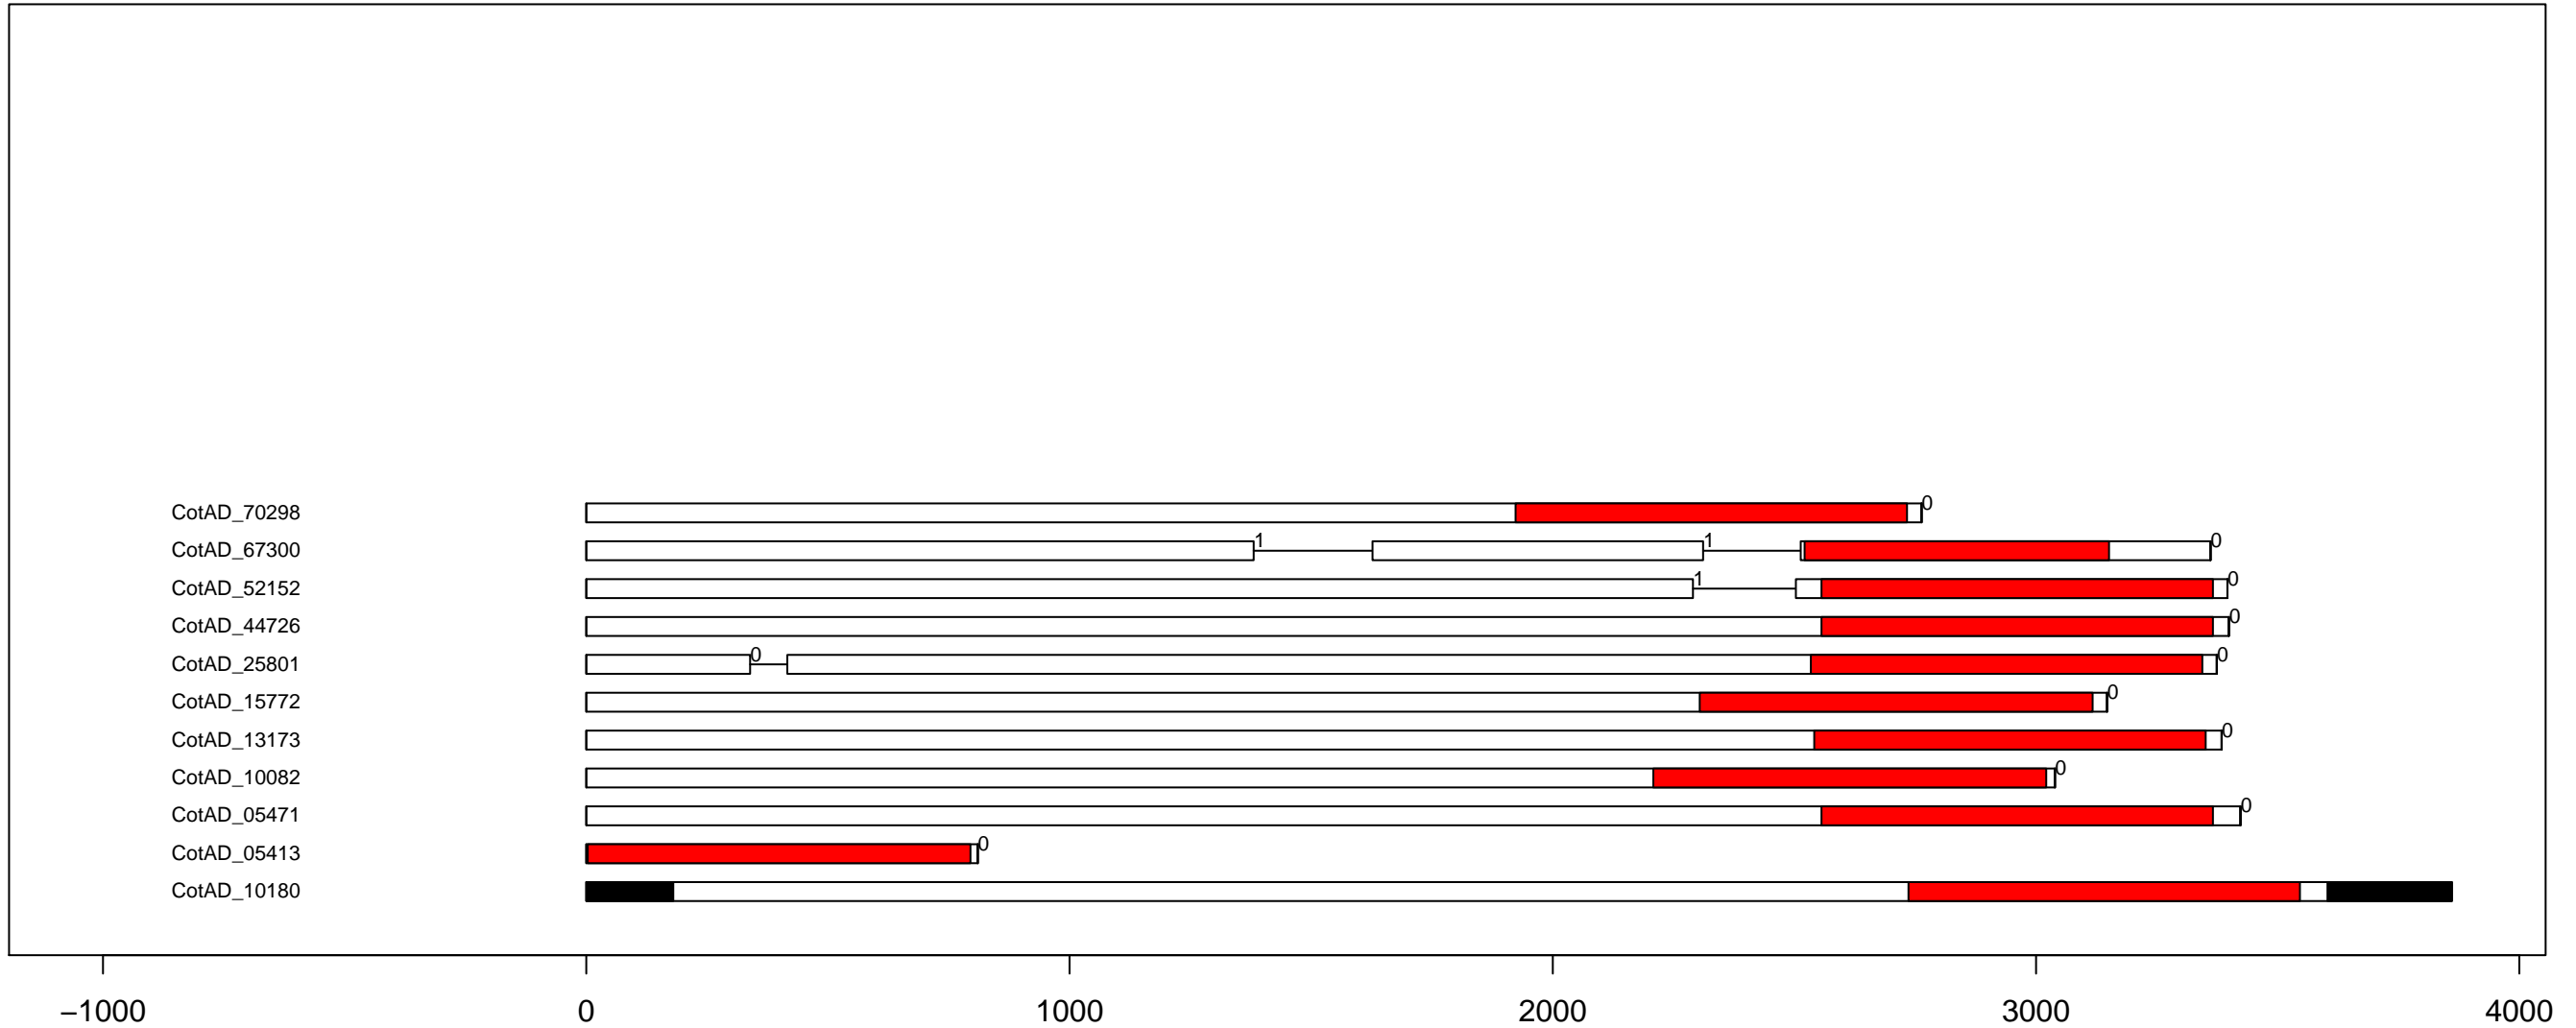

### G.hi RLK-Pelle\_LysM exon-intron and domain diagram (part 1)

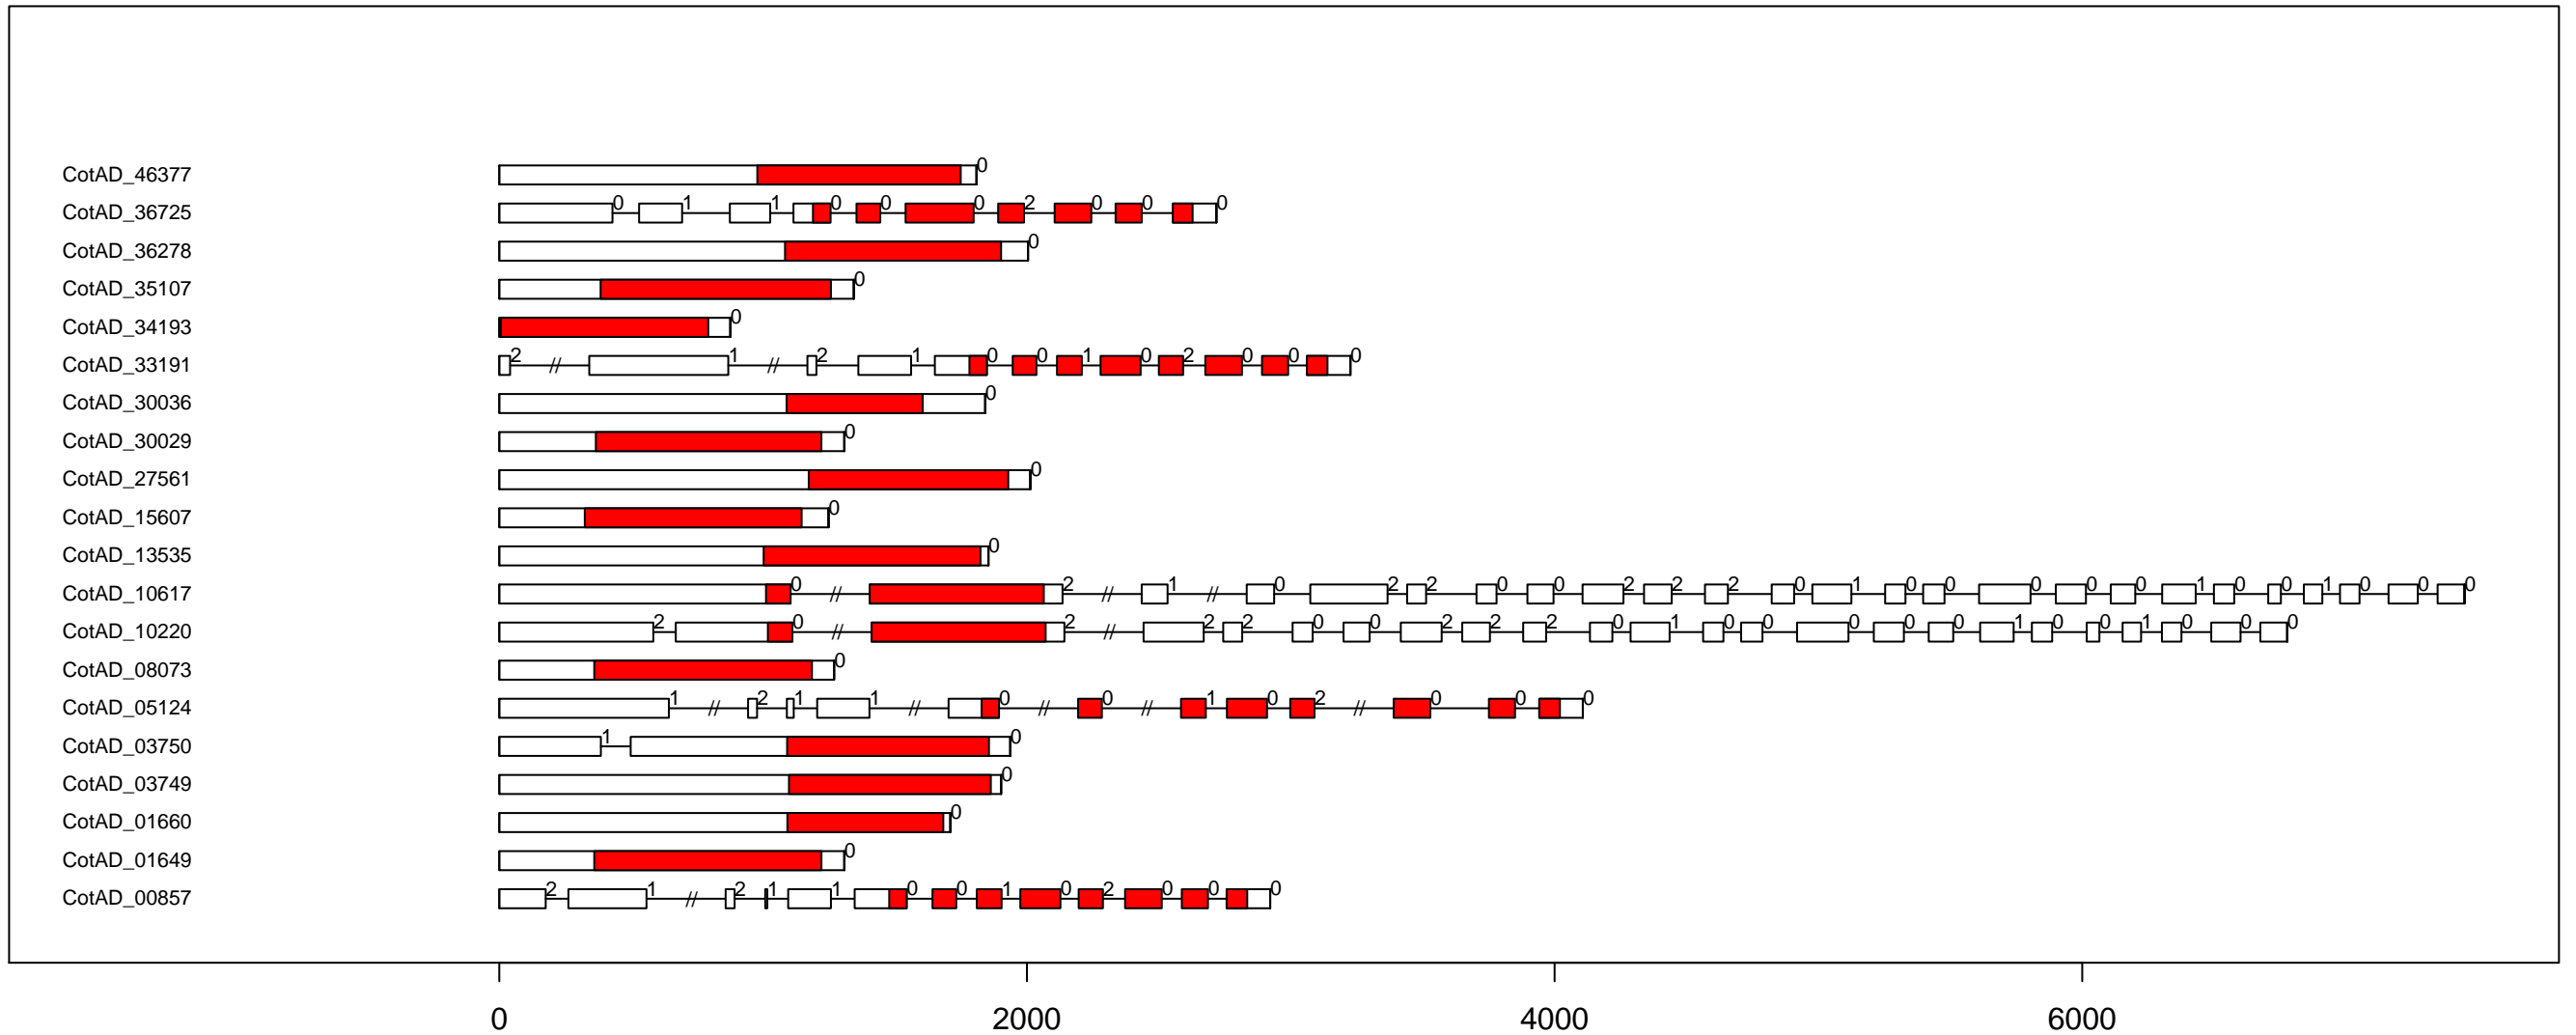

# G.hi RLK-Pelle\_LysM exon-intron and domain diagram (part 2)

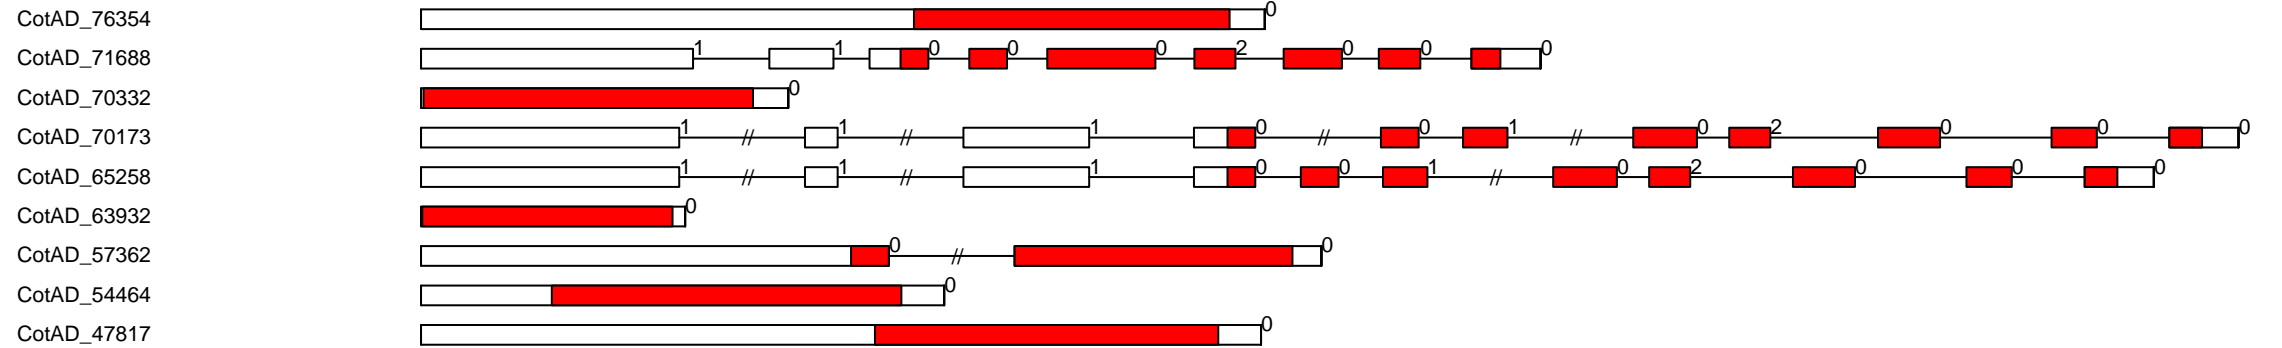

### G.hi RLK-Pelle\_PERK-1 exon-intron and domain diagram (part 1)

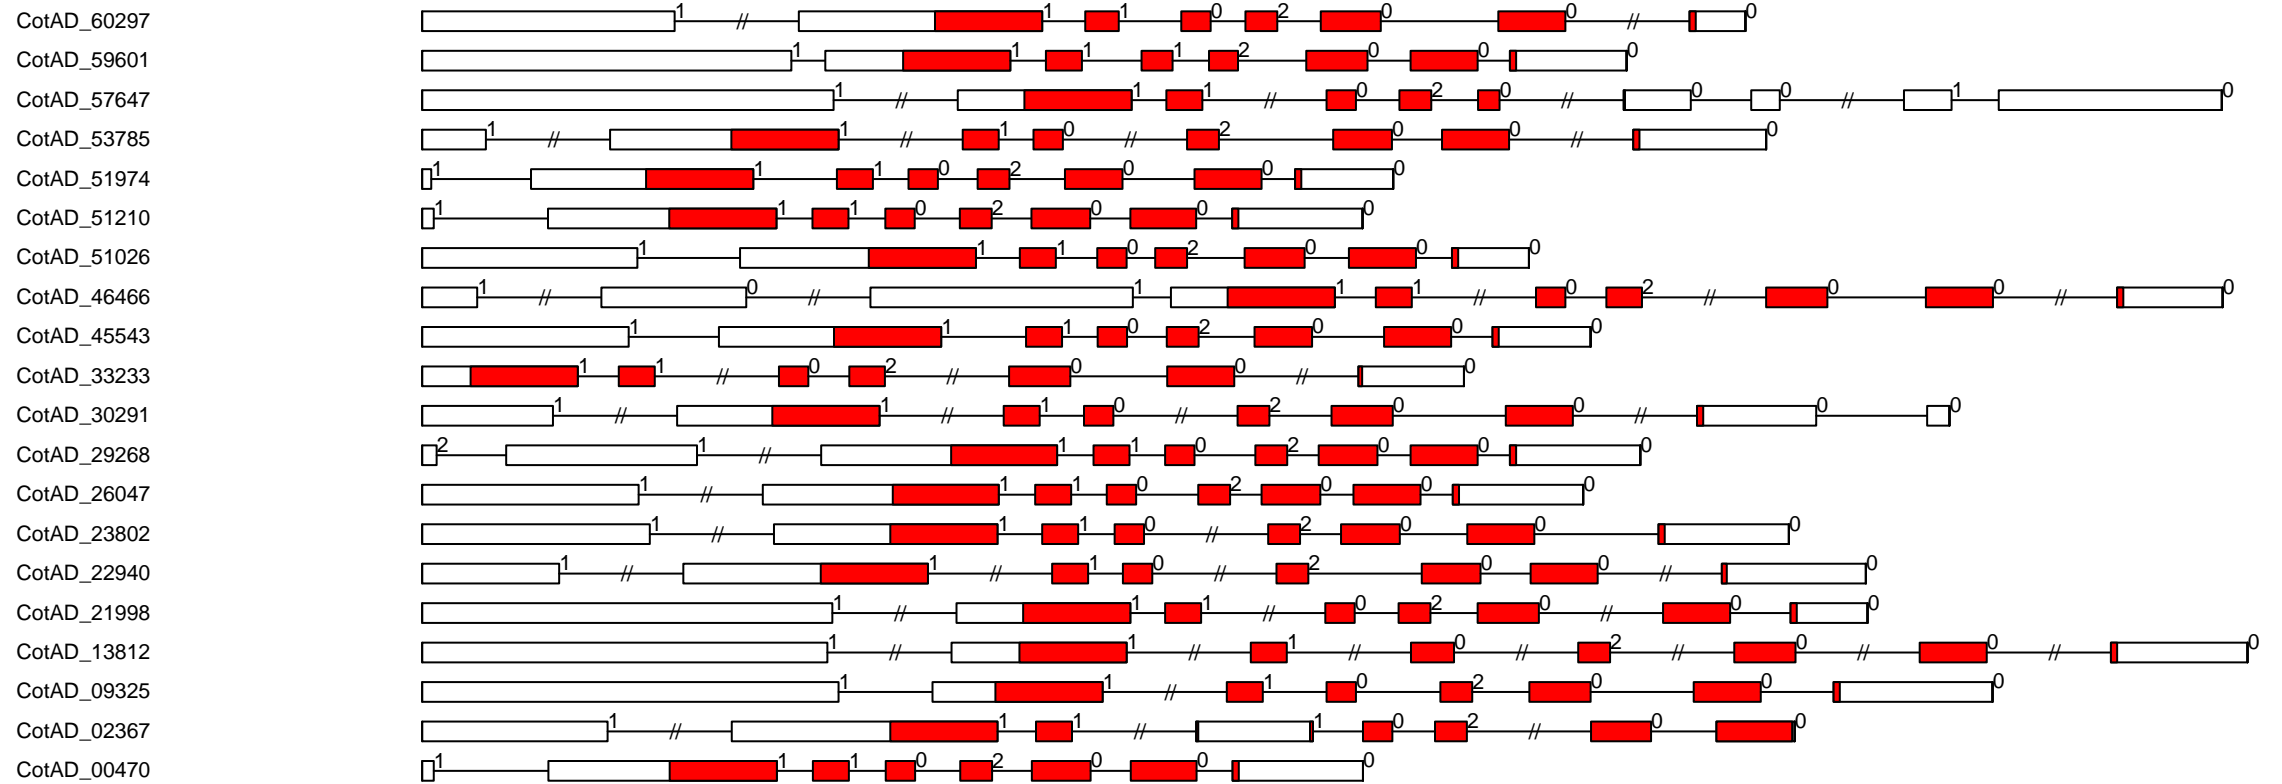

# G.hi RLK-Pelle\_PERK-1 exon-intron and domain diagram (part 2)

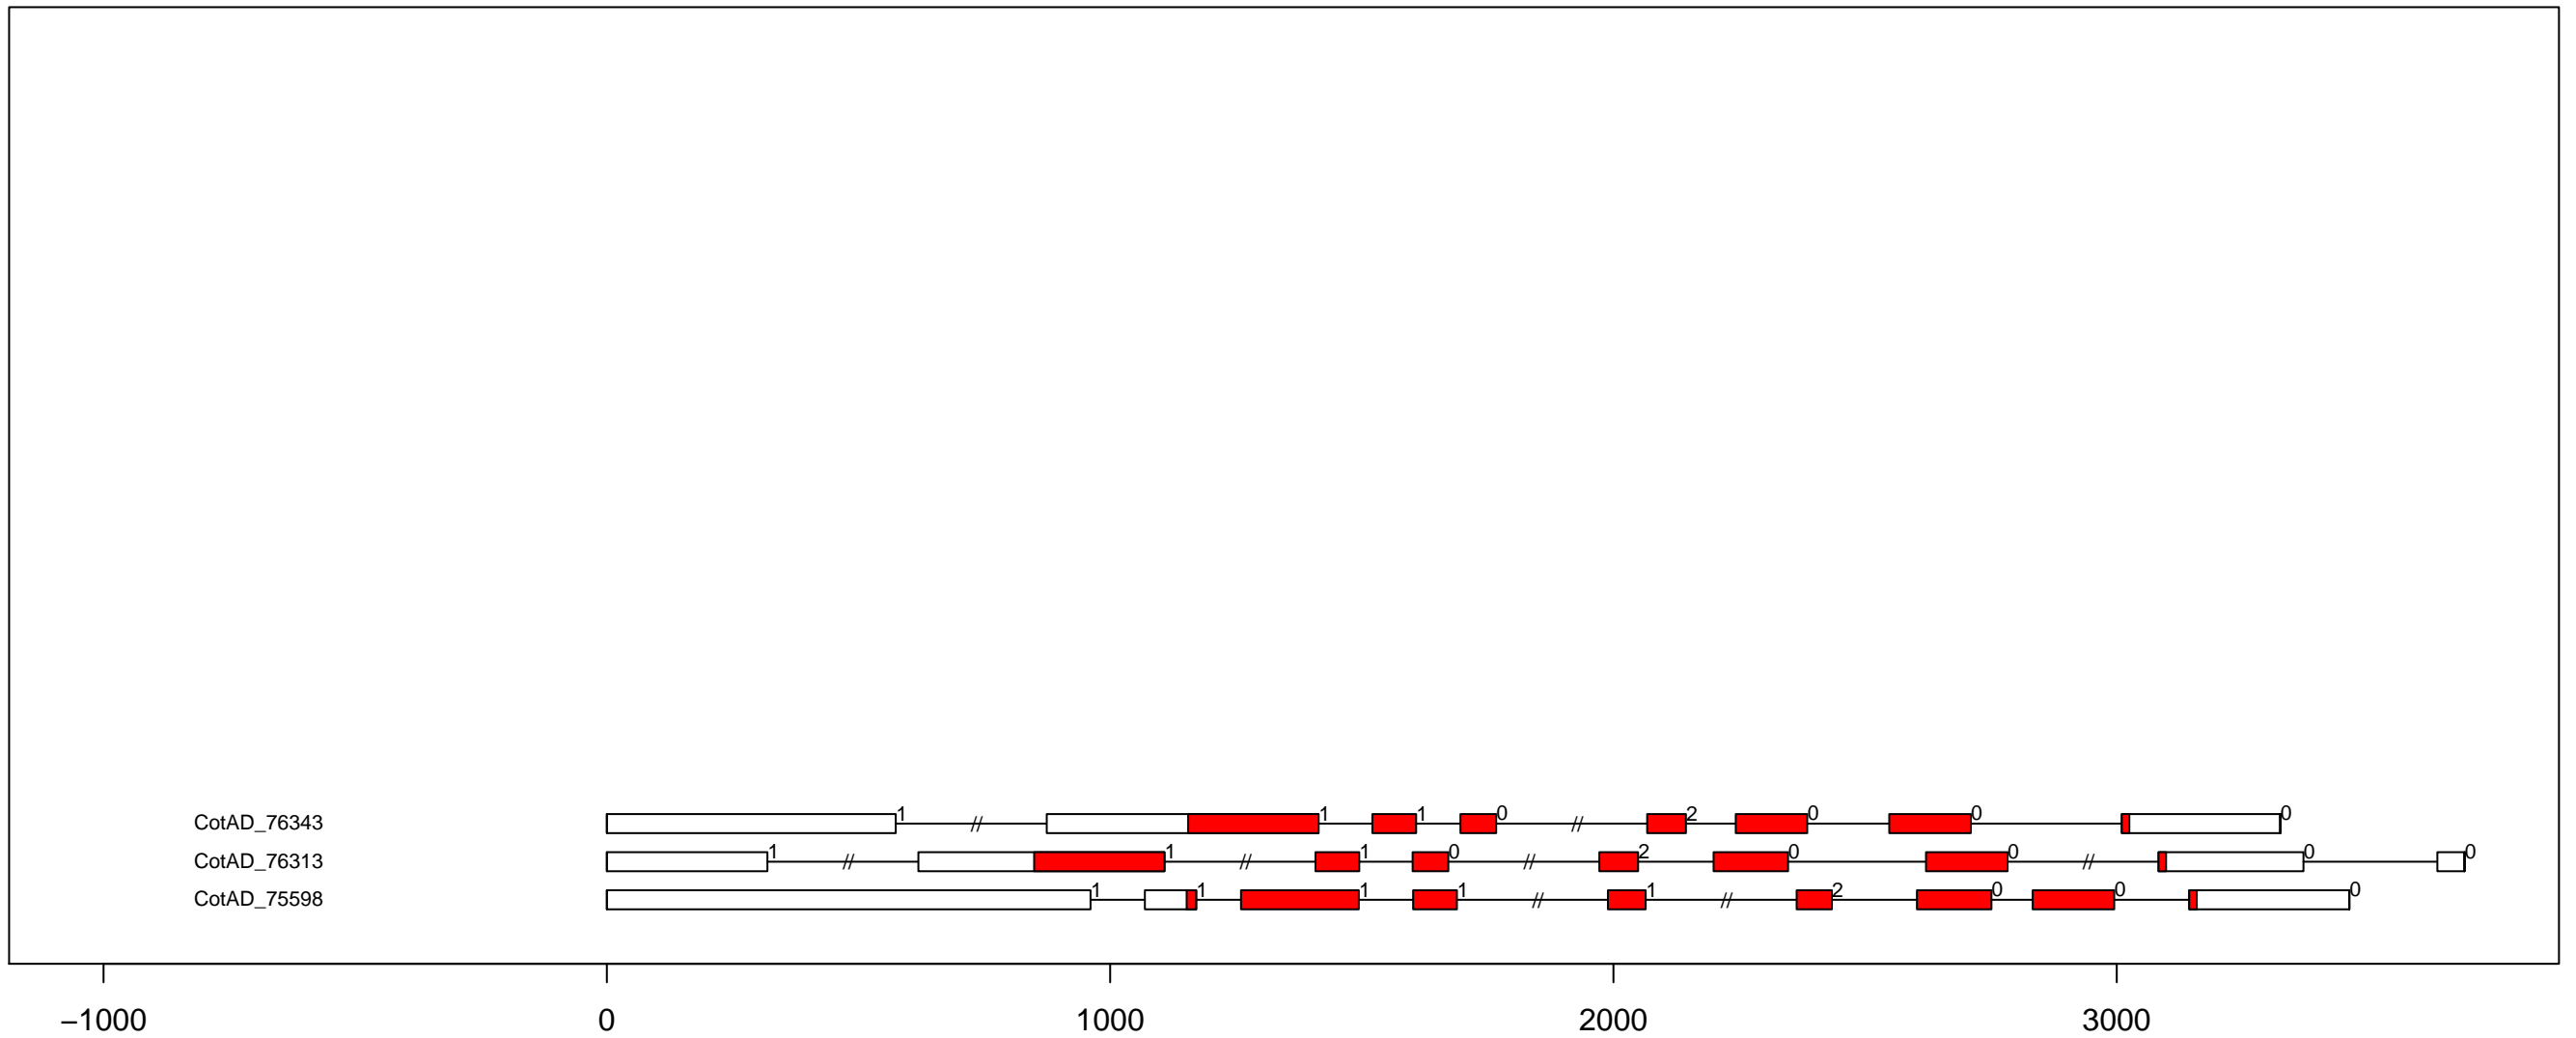



### G.hi RLK-Pelle\_PERK-2 exon-intron and domain diagram (all)

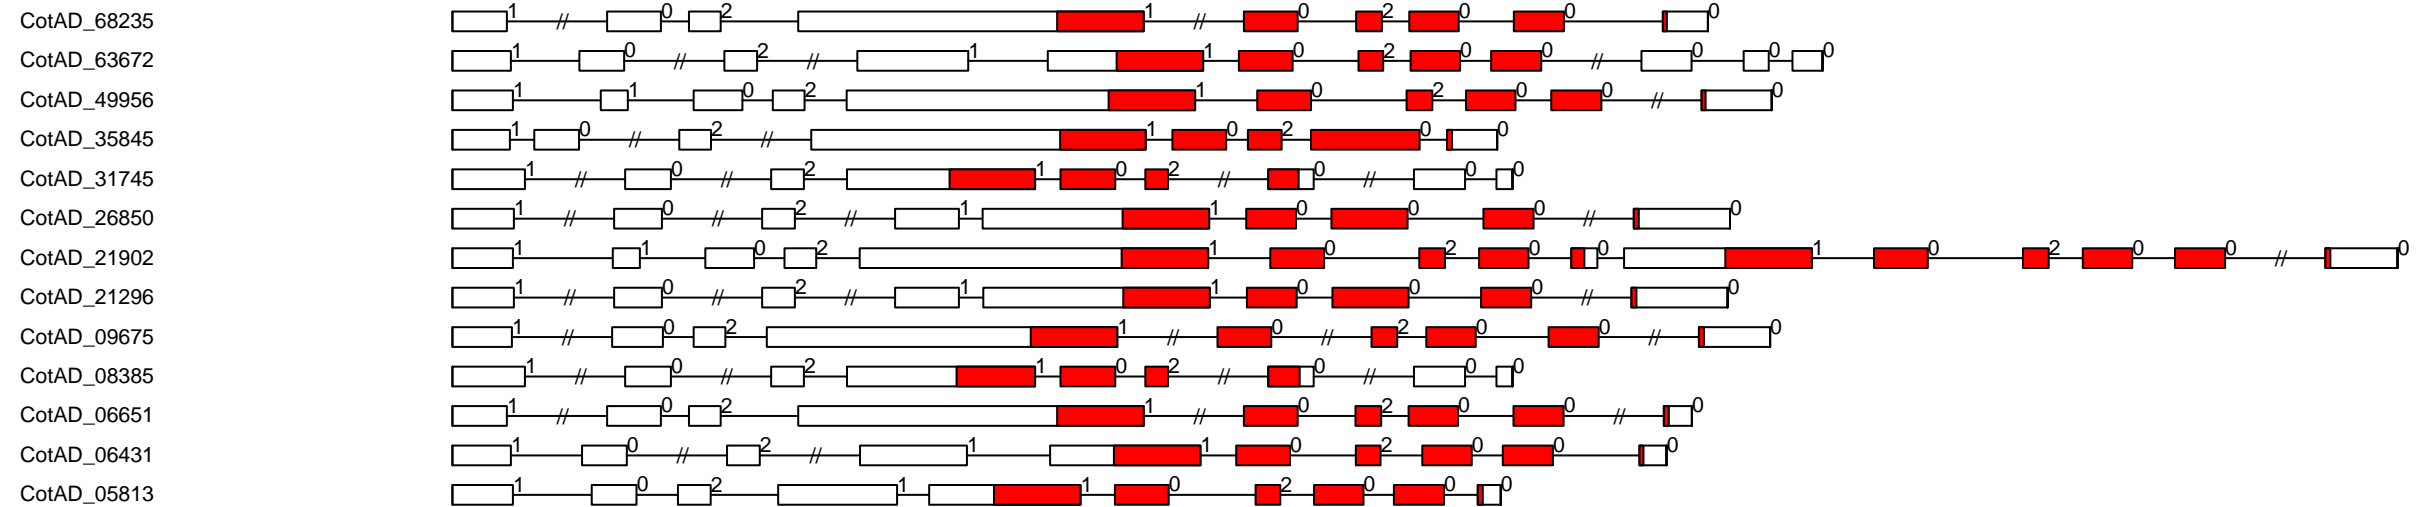

0

2000

4000

6000

# G.hi RLK-Pelle\_RKF3 exon-intron and domain diagram (all)

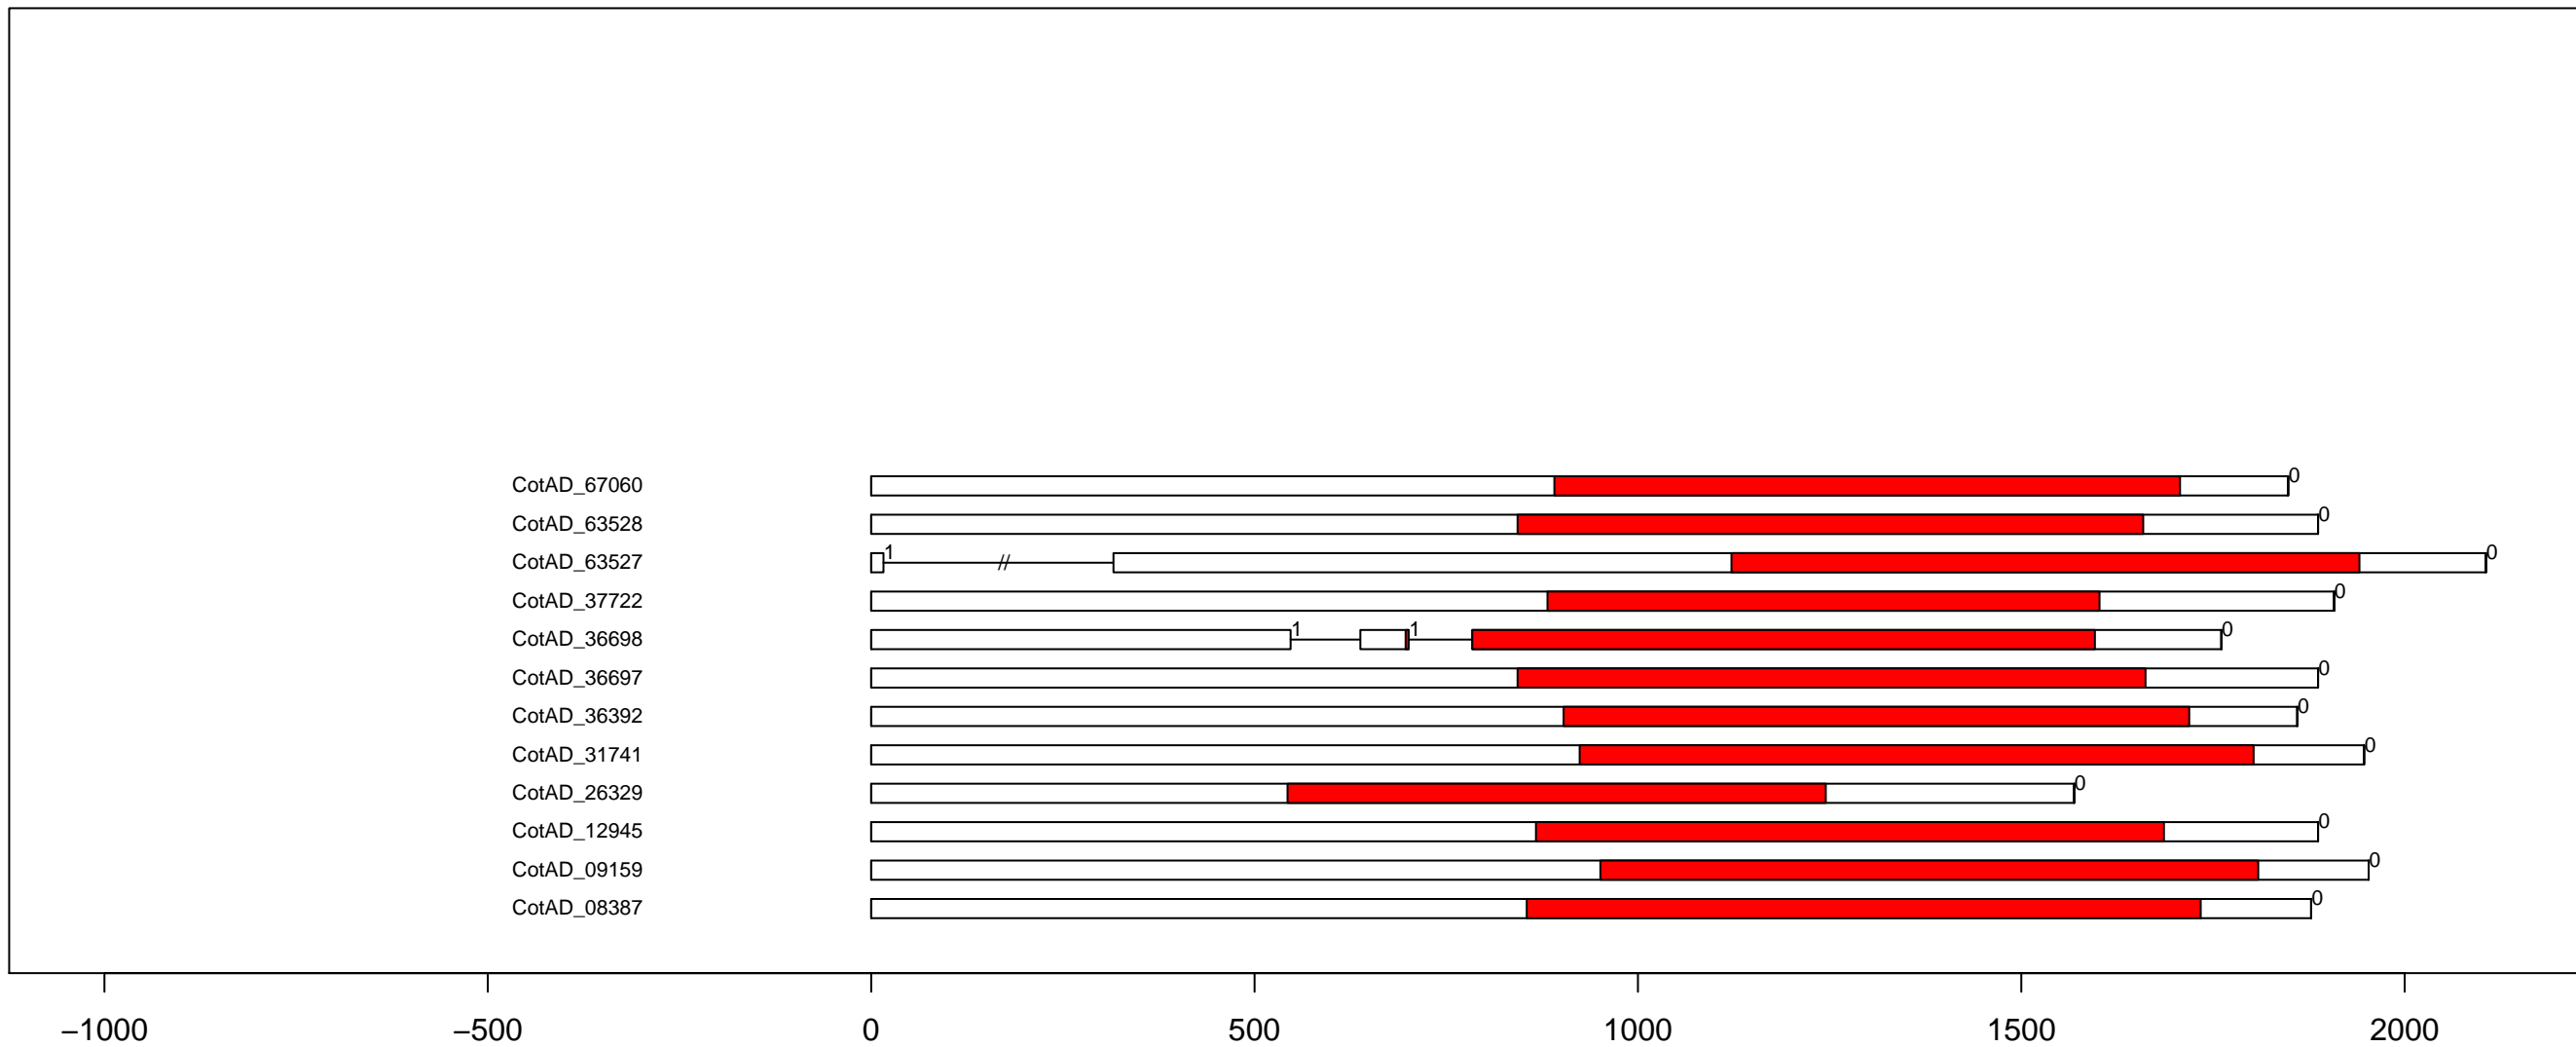

# G.hi RLK-Pelle\_RLCK-II exon-intron and domain diagram (all)

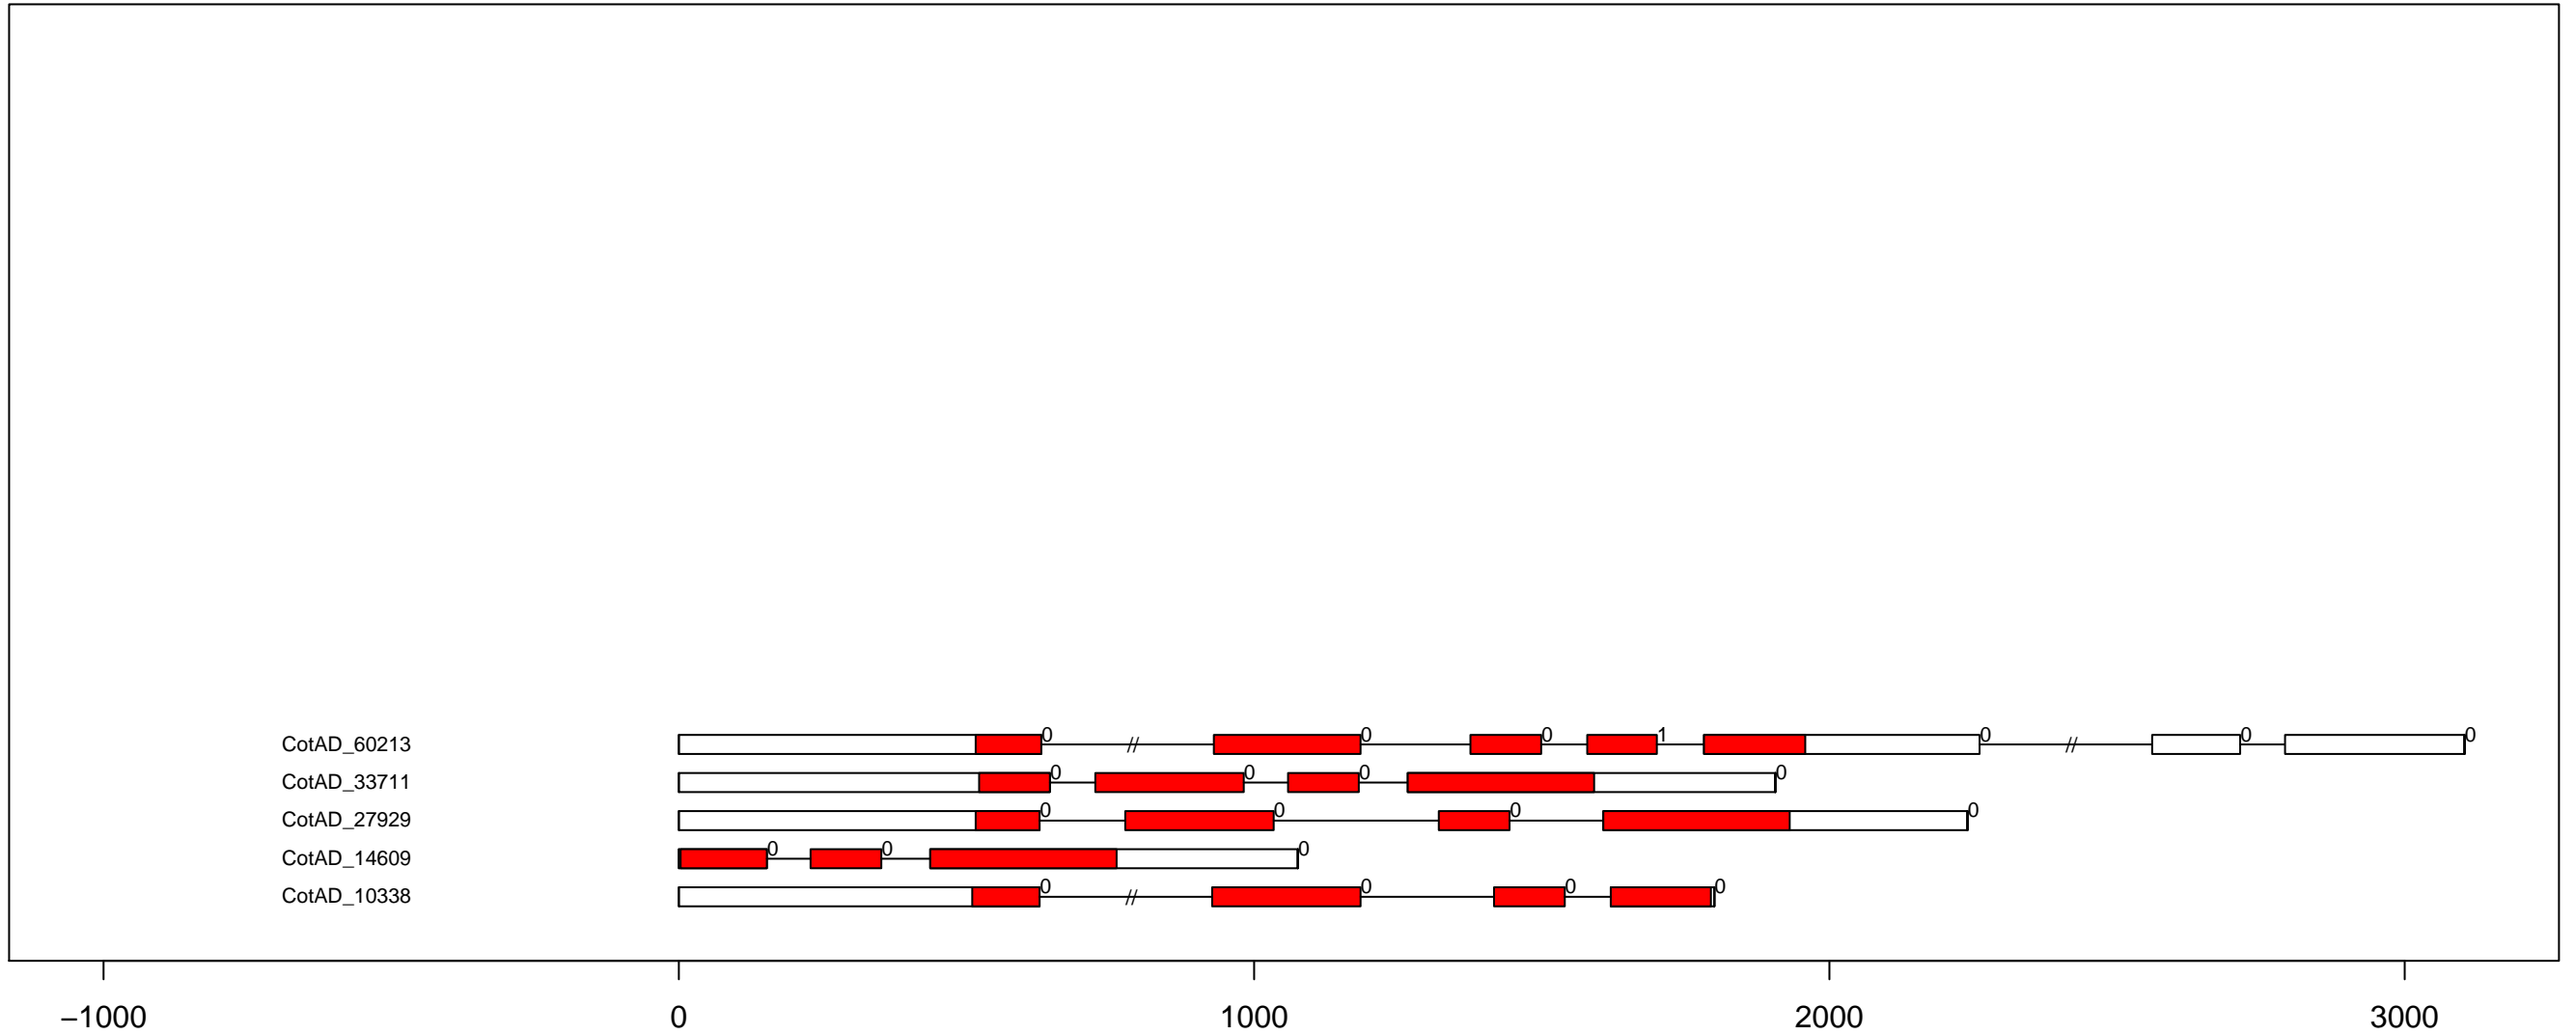

# G.hi RLK-Pelle\_RLCK-IV exon-intron and domain diagram (all)

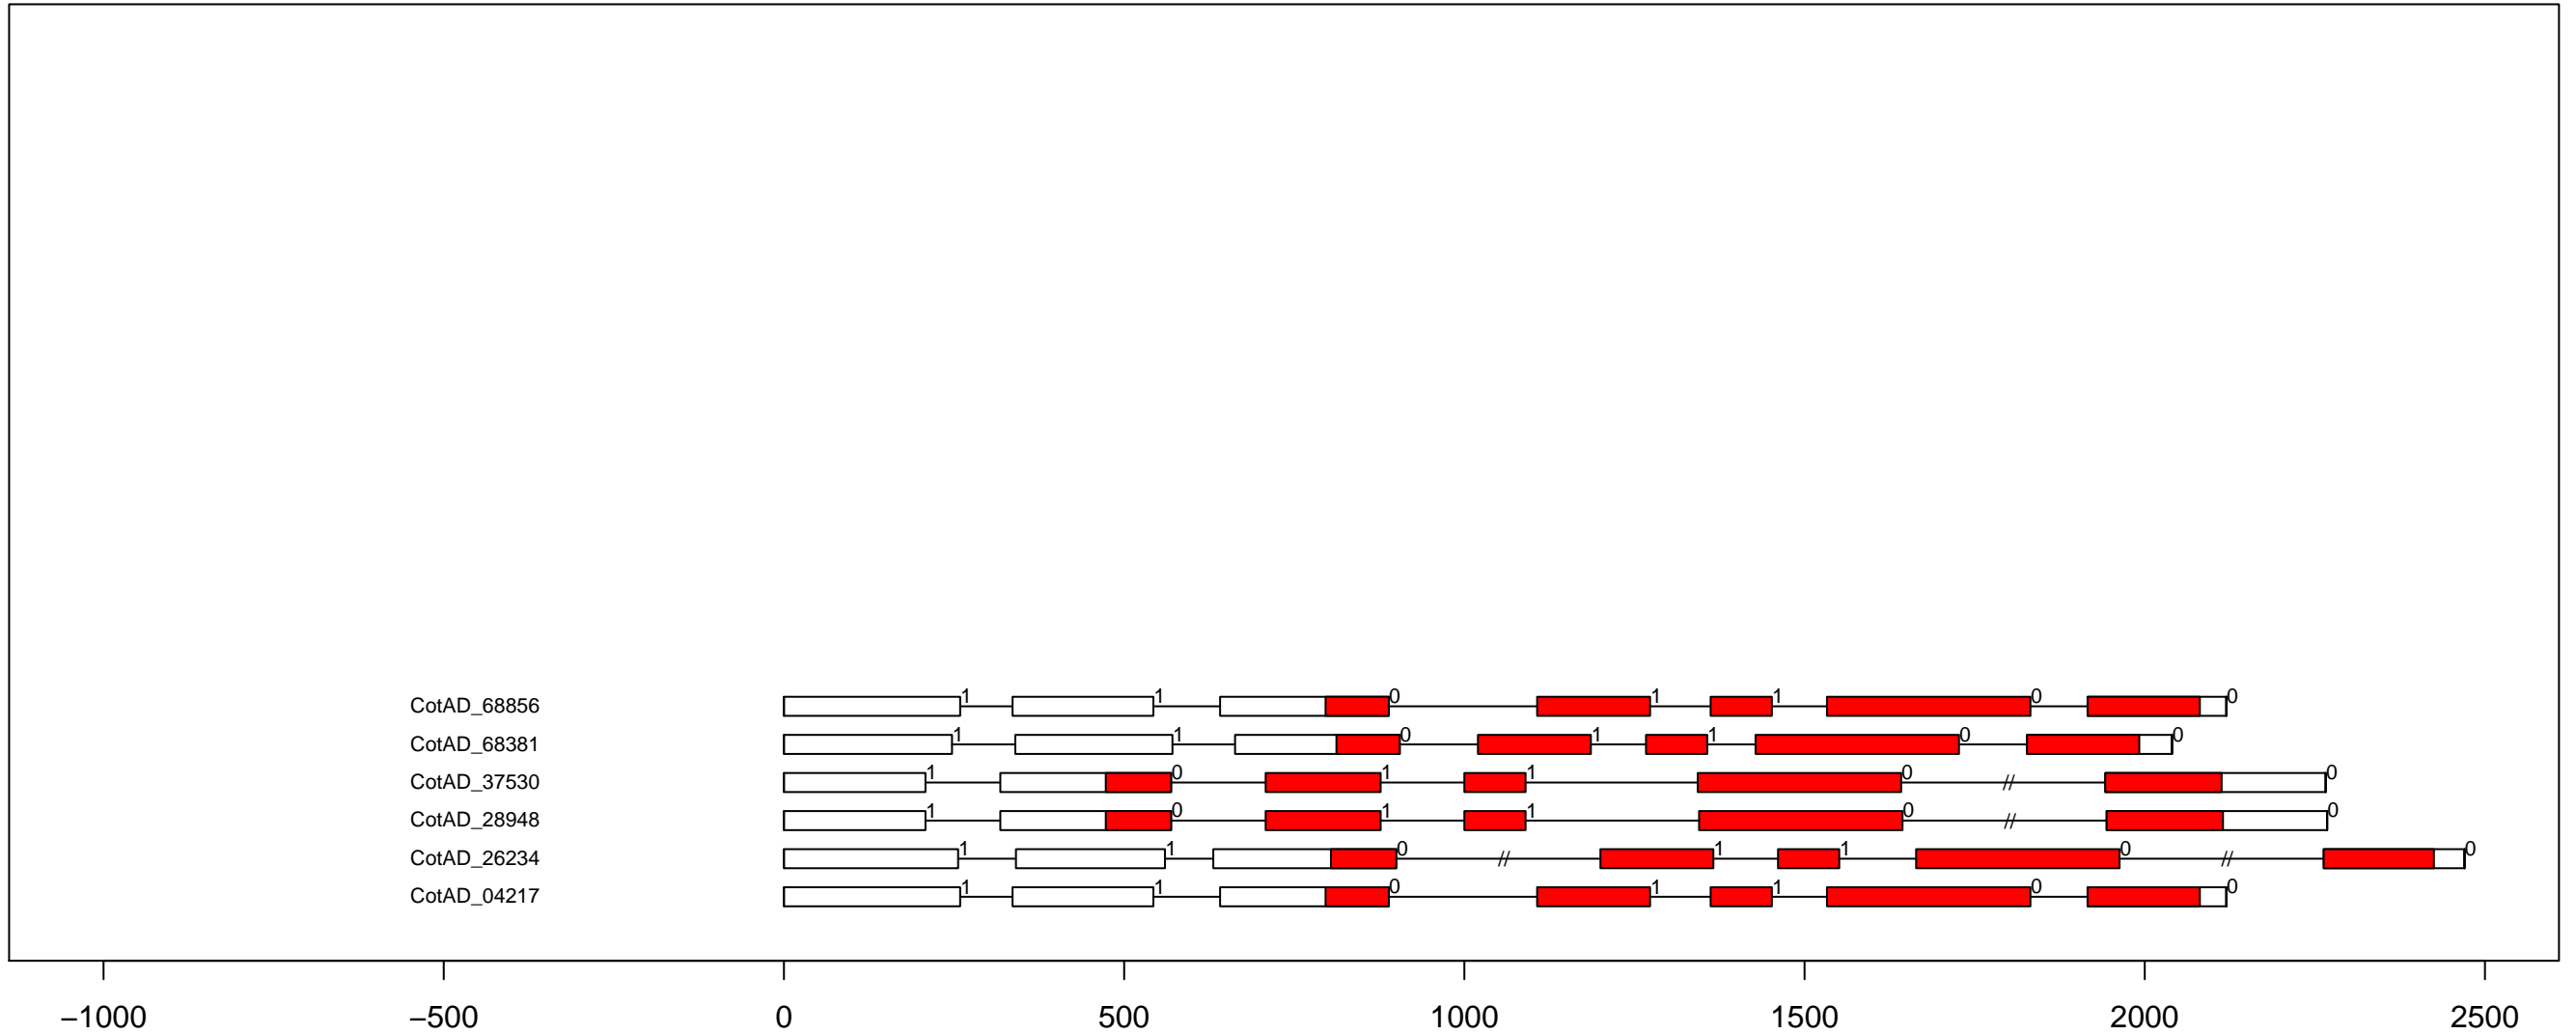

G.hi RLK-Pelle\_RLCK-IXa exon-intron and domain diagram (all)

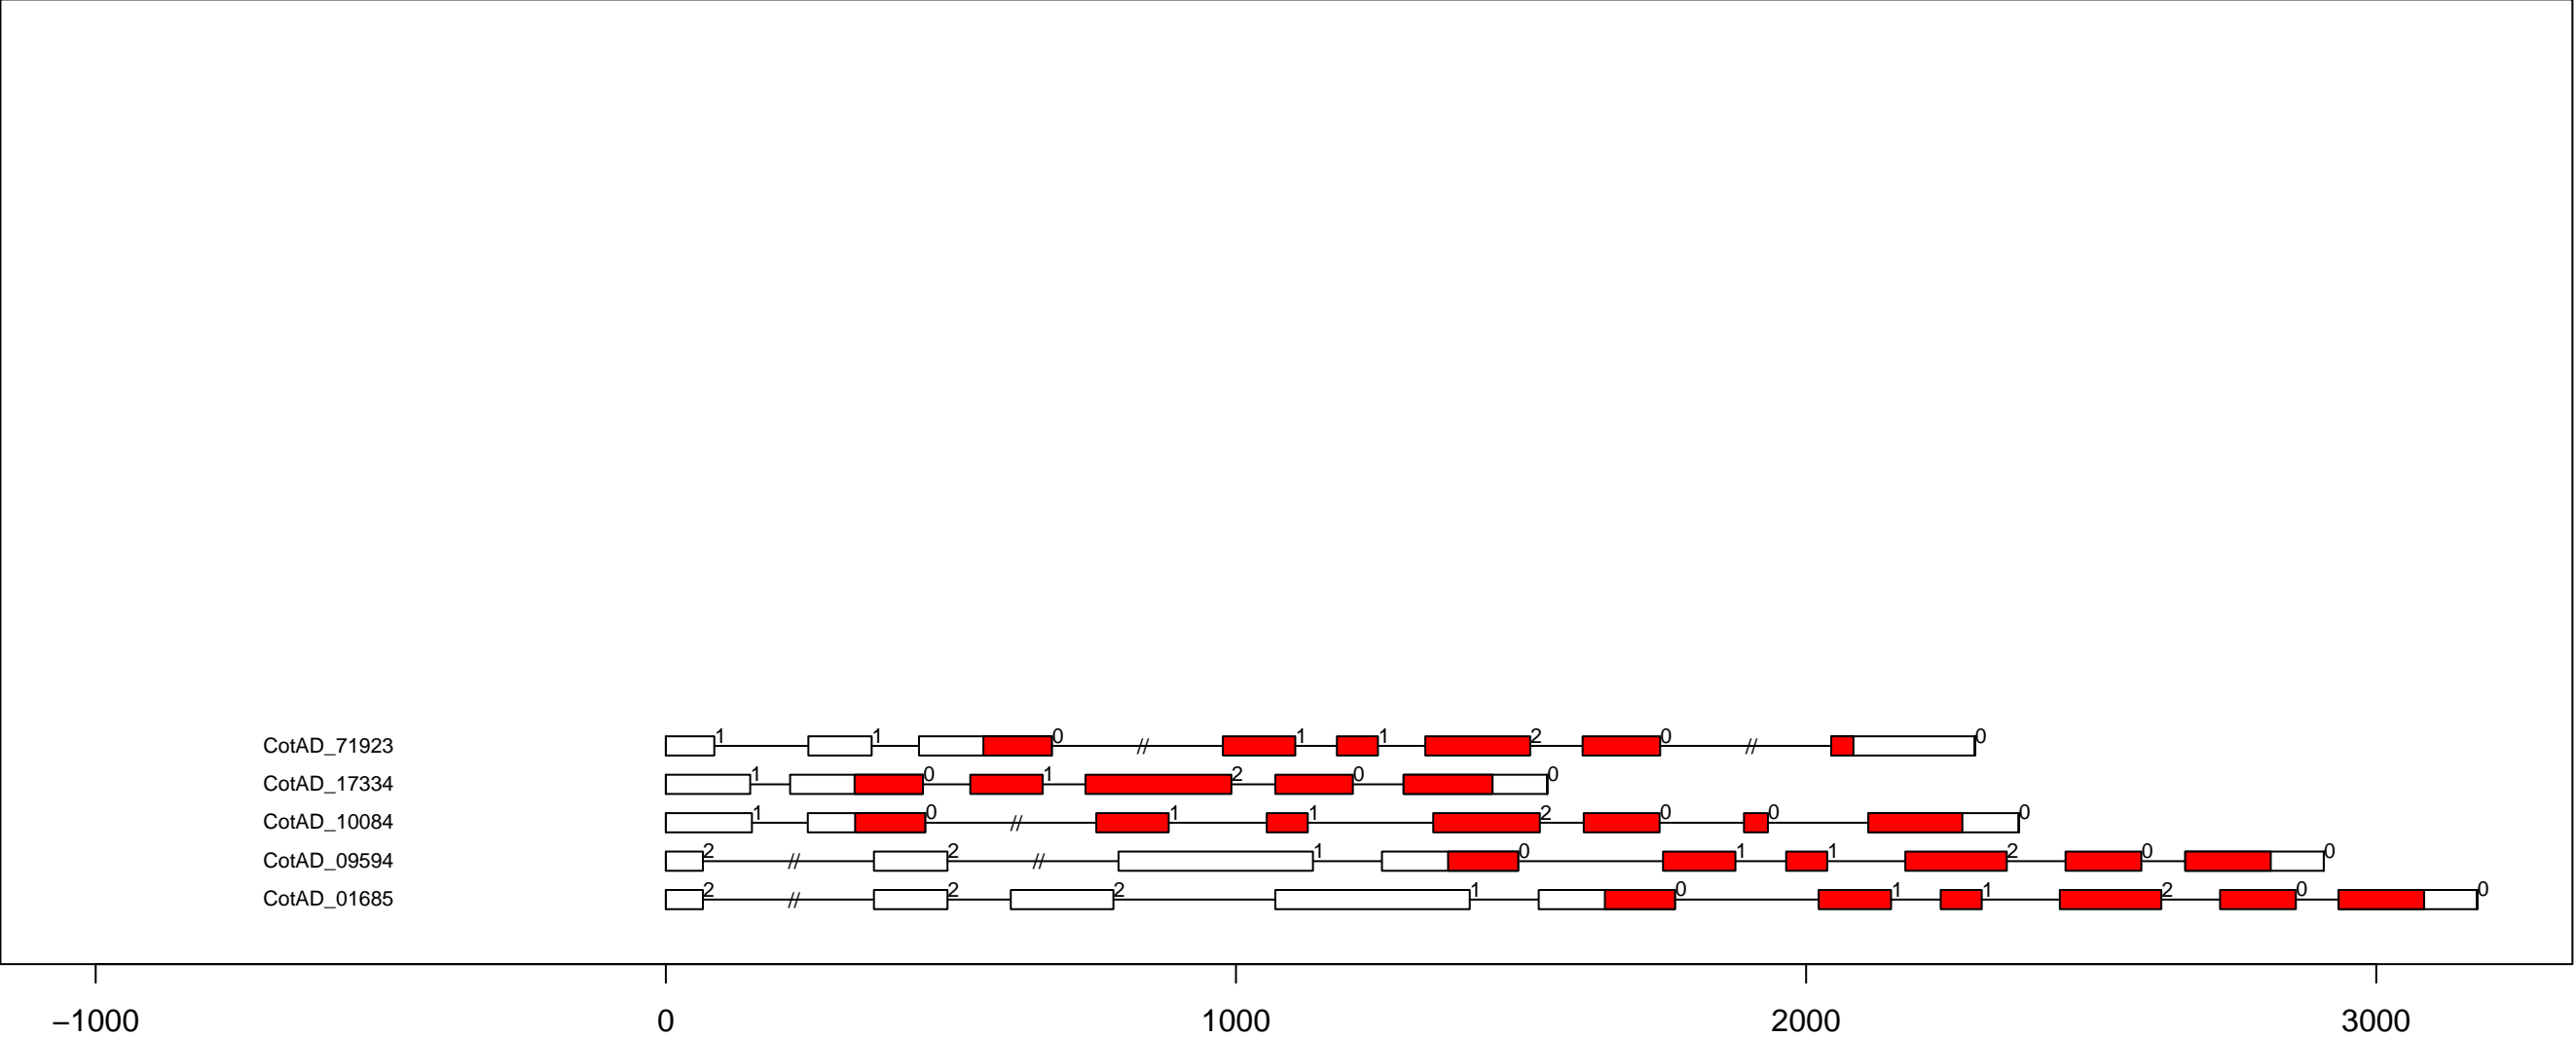

# G.hi RLK-Pelle\_RLCK-IXb exon-intron and domain diagram (part 1)

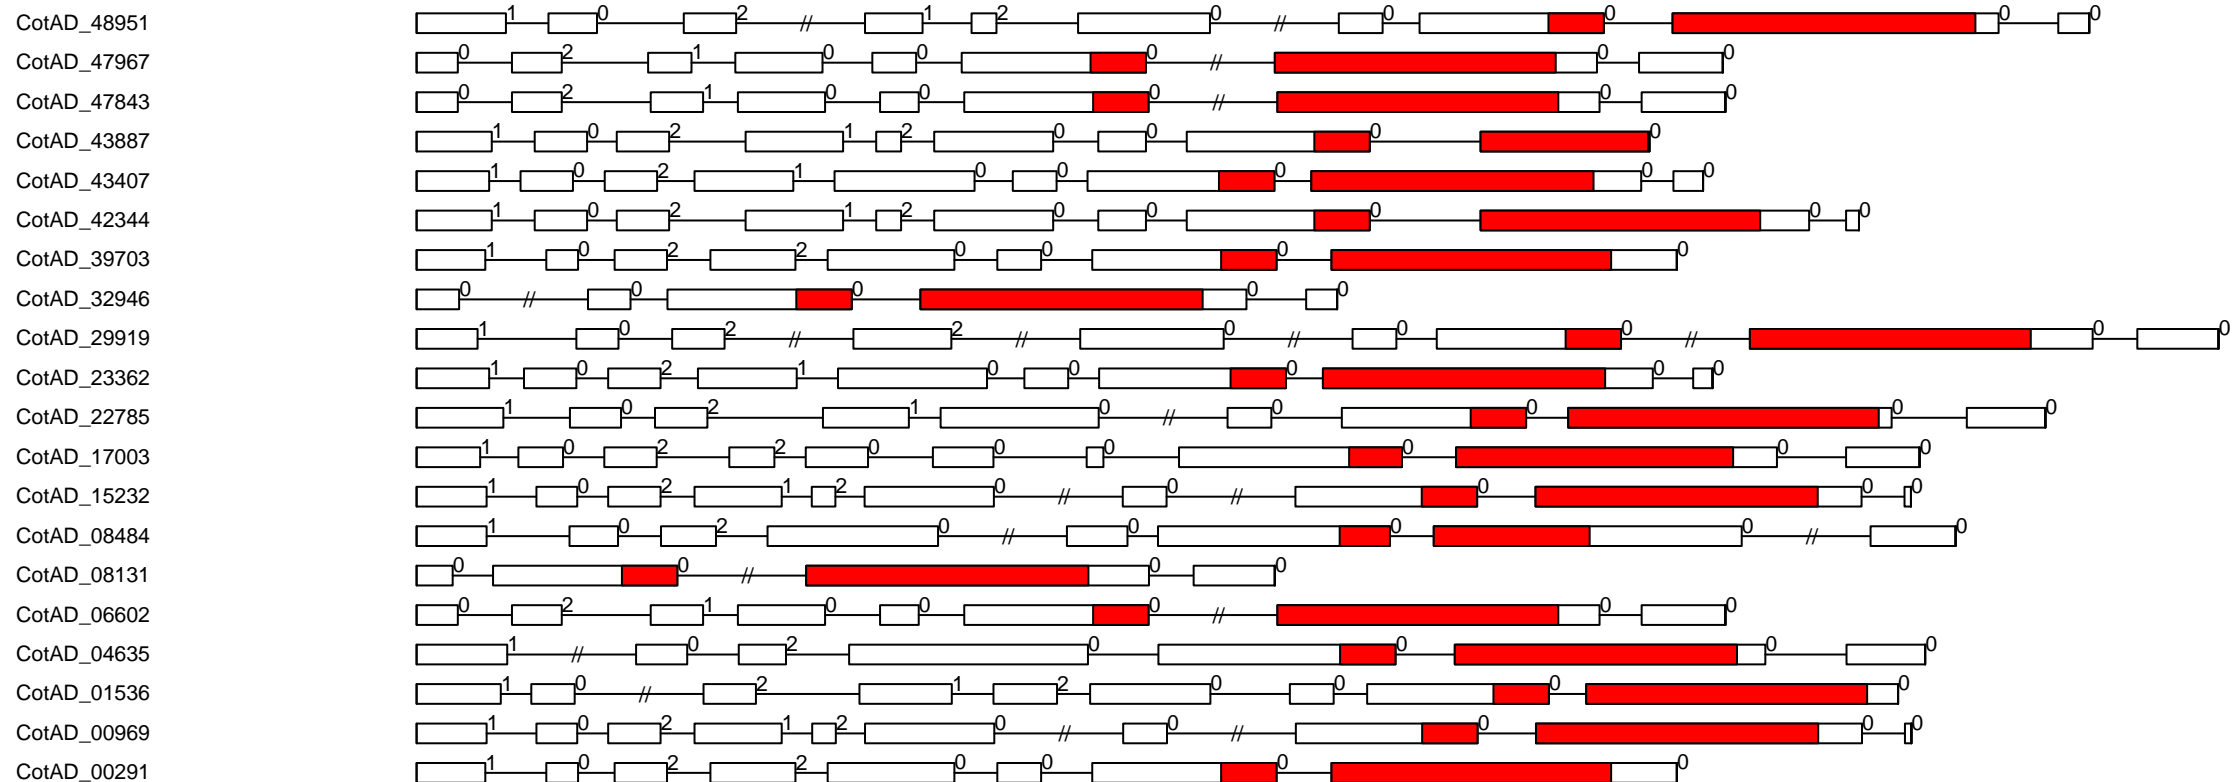

-1000

0

1000

2000

3000

4000

# G.hi RLK-Pelle\_RLCK-IXb exon-intron and domain diagram (part 2)

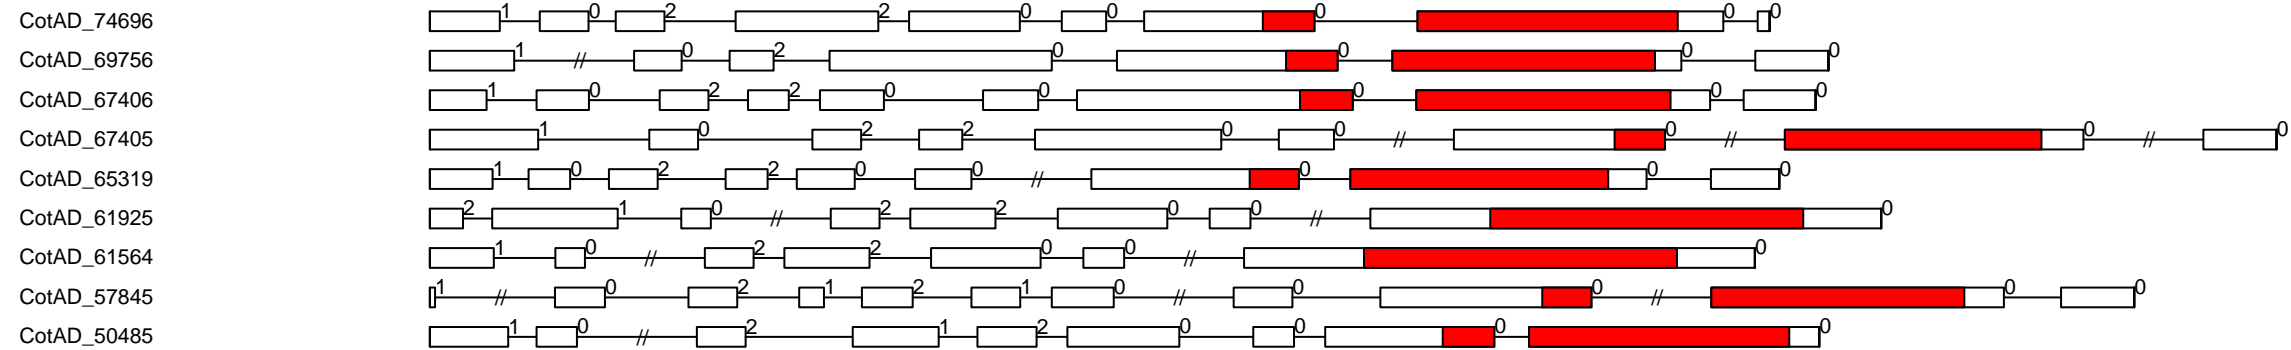

# G.hi RLK-Pelle\_RLCK-Os exon-intron and domain diagram (all)

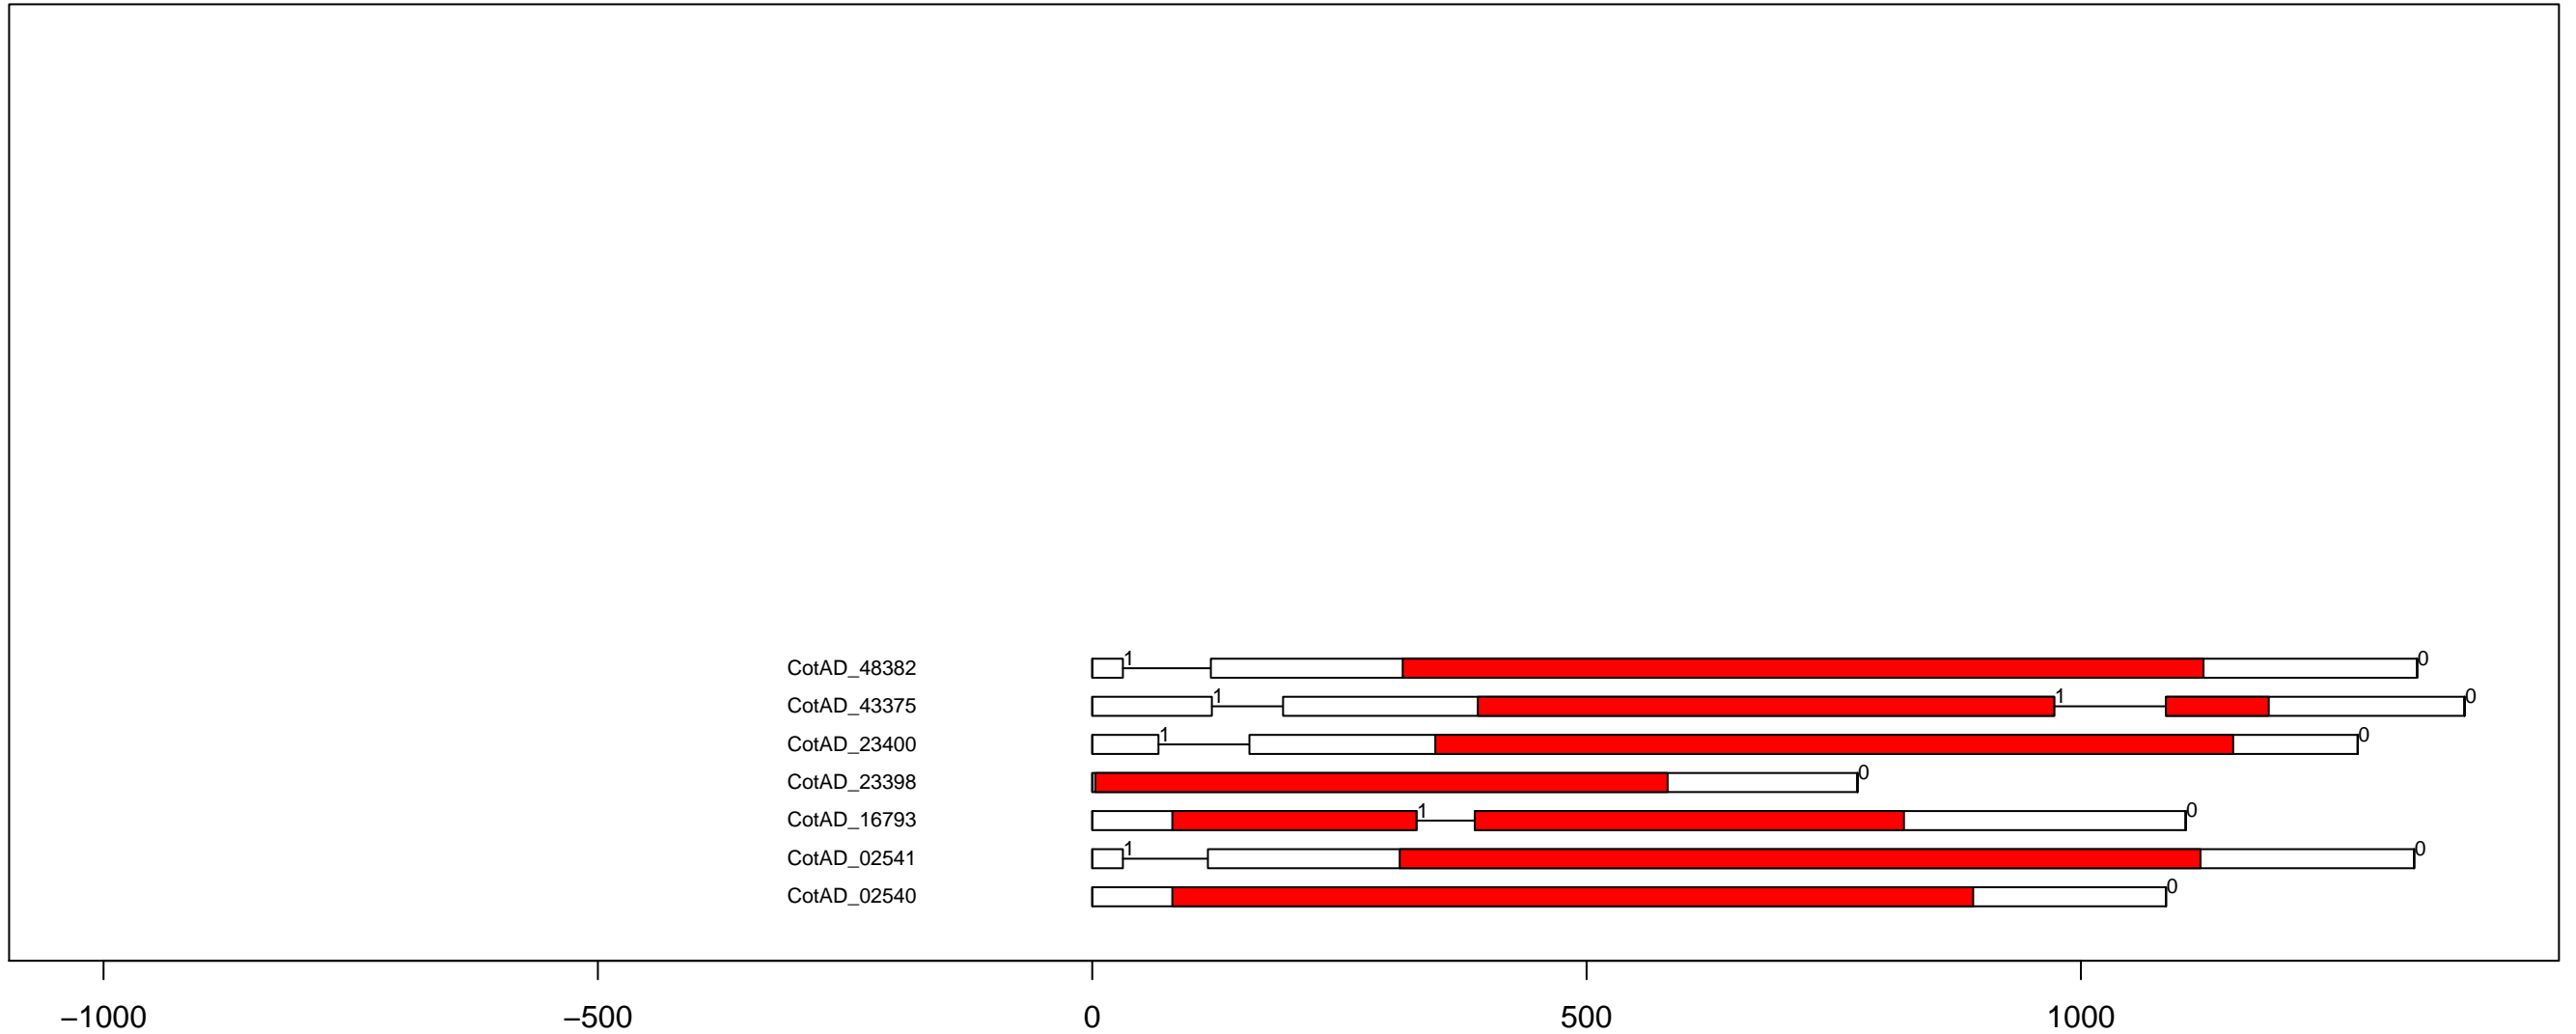



G.hi RLK-Pelle\_RLCK-VIIa-1 exon-intron and domain diagram (part 1)

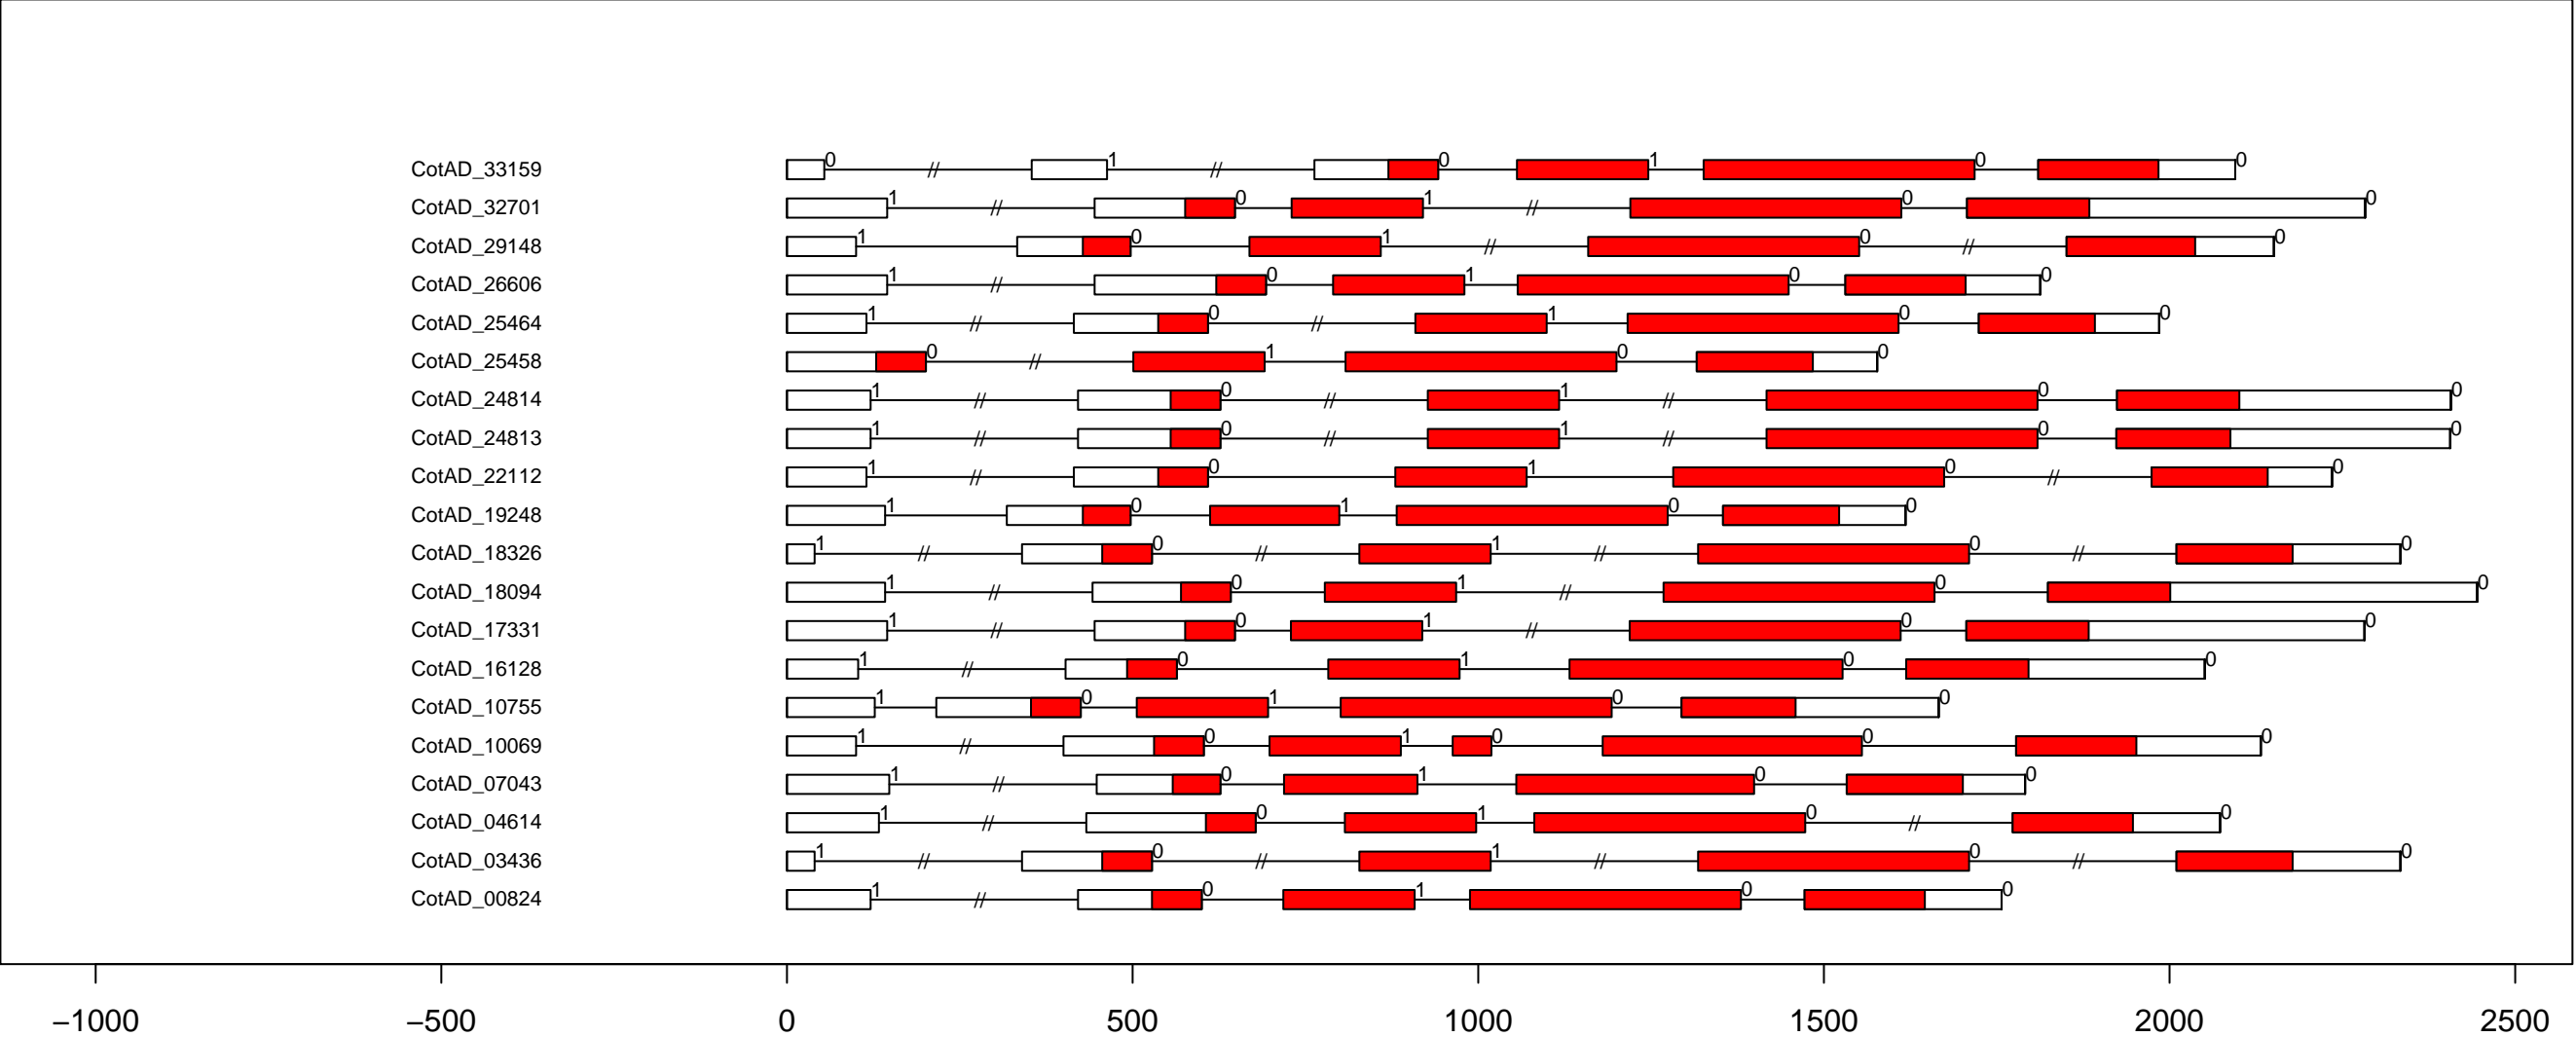

G.hi RLK-Pelle\_RLCK-VIIa-1 exon-intron and domain diagram (part 2)

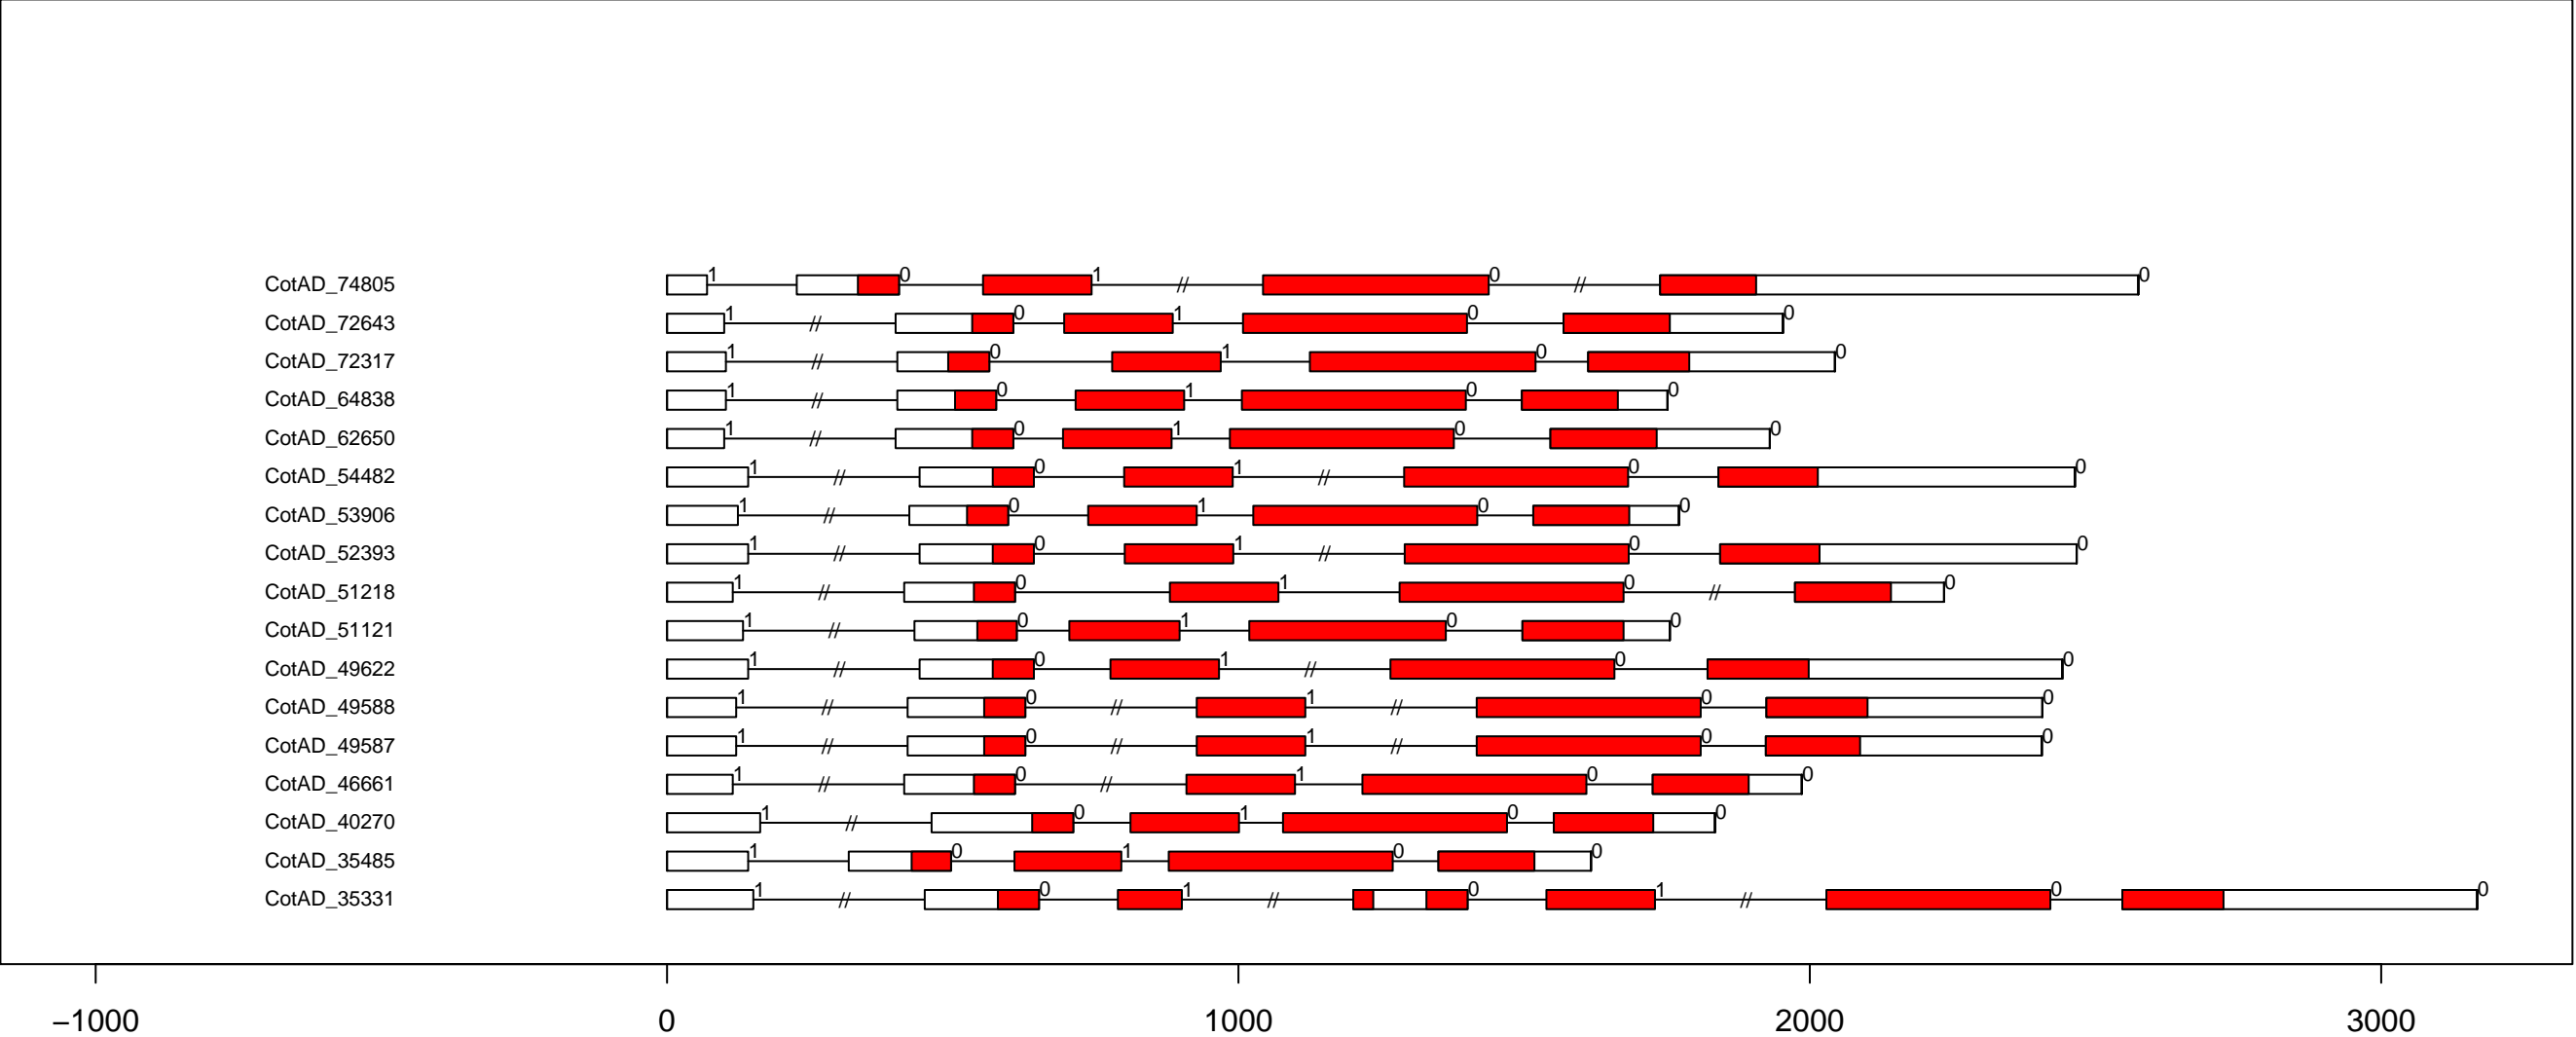

G.hi RLK-Pelle\_RLCK-VIIa-2 exon-intron and domain diagram (part 1)

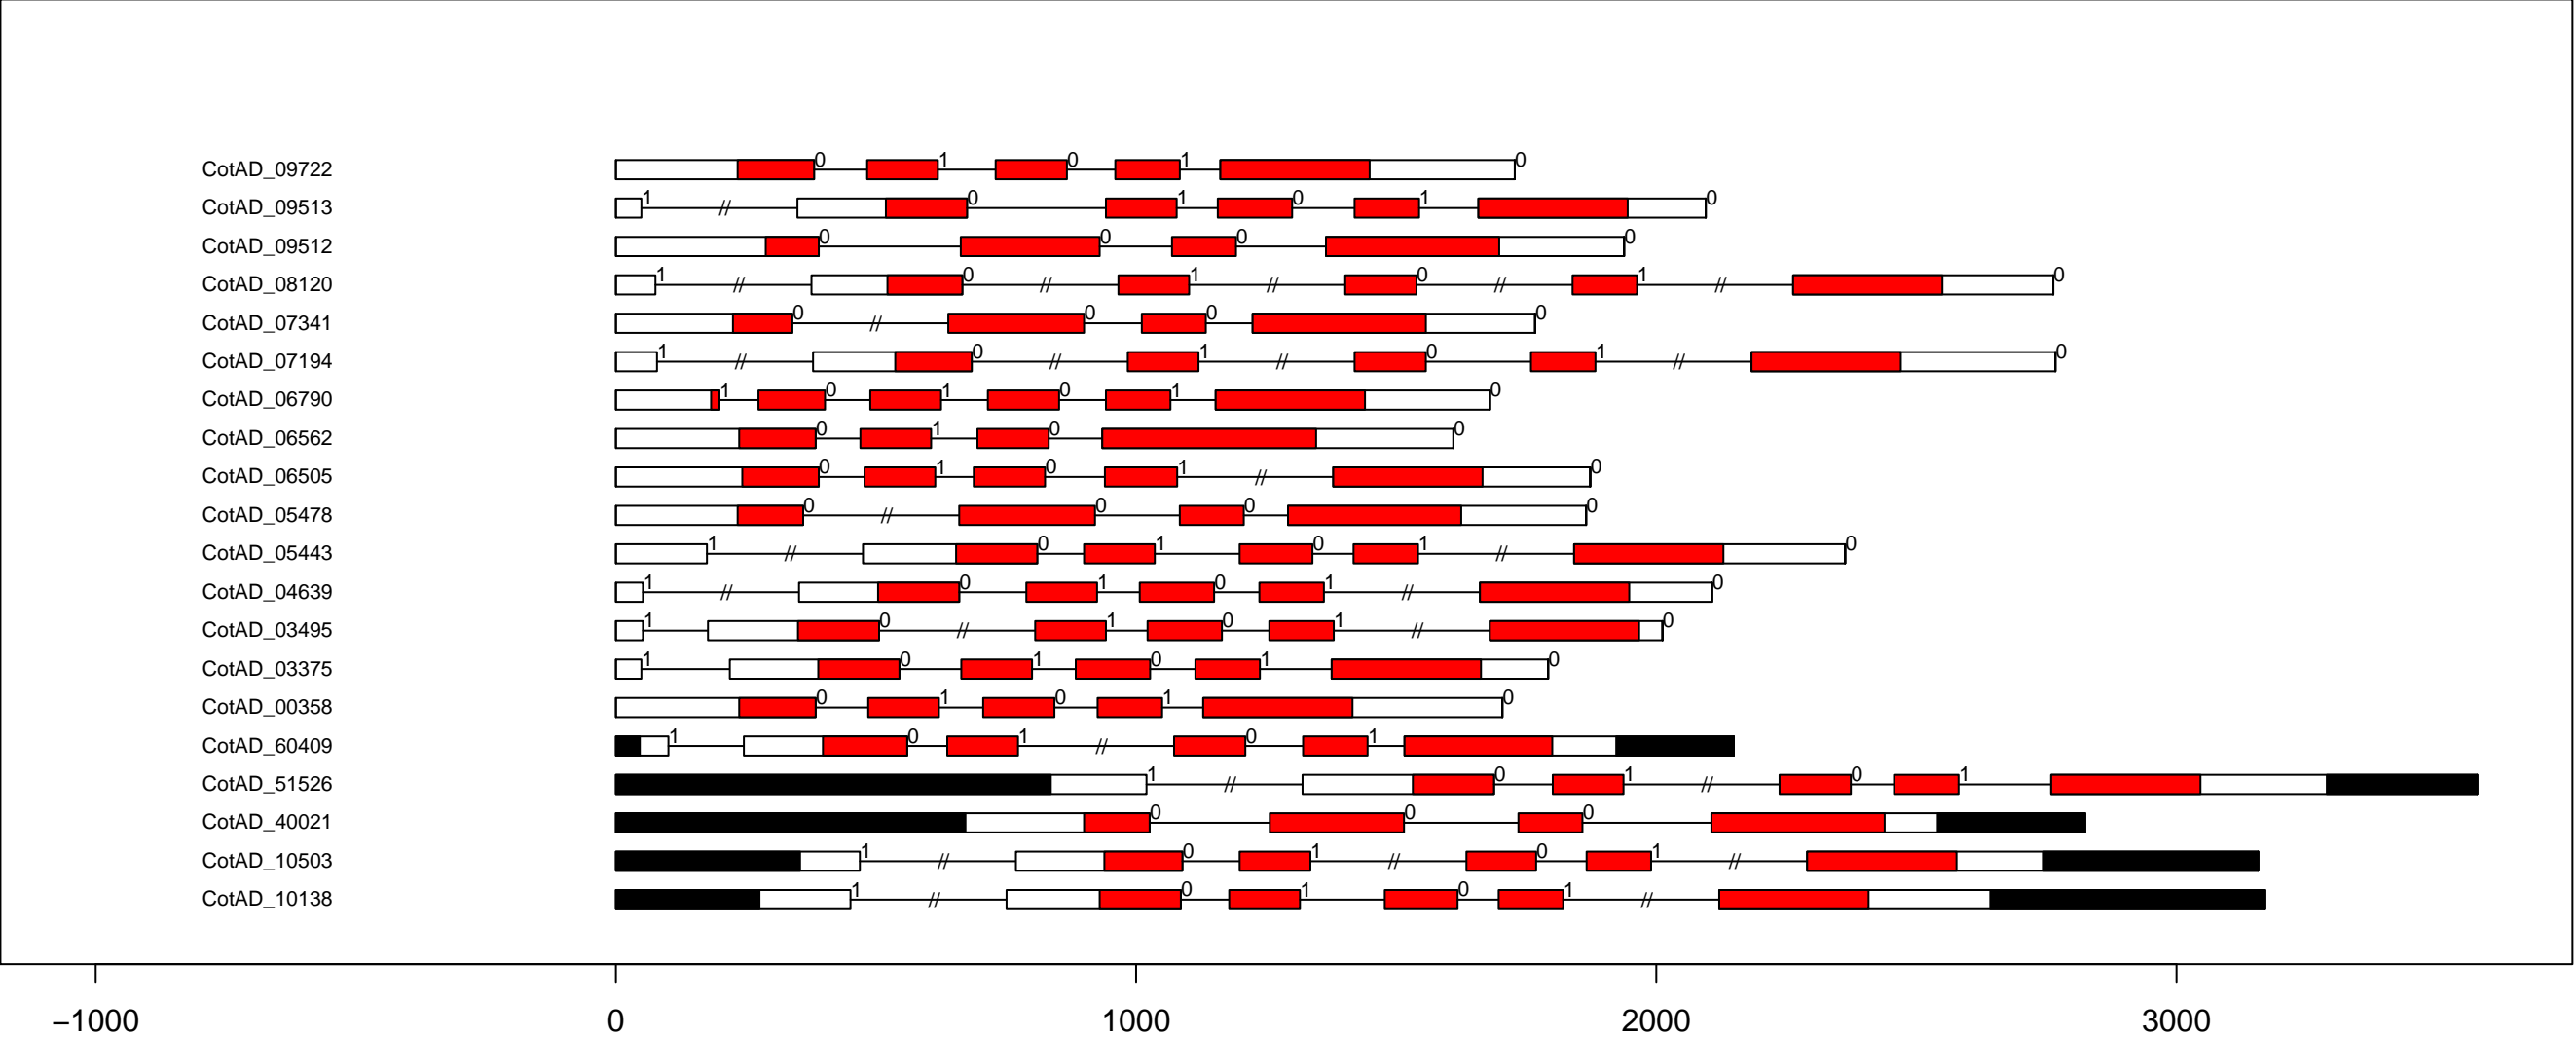

G.hi RLK-Pelle\_RLCK-VIIa-2 exon-intron and domain diagram (part 2)

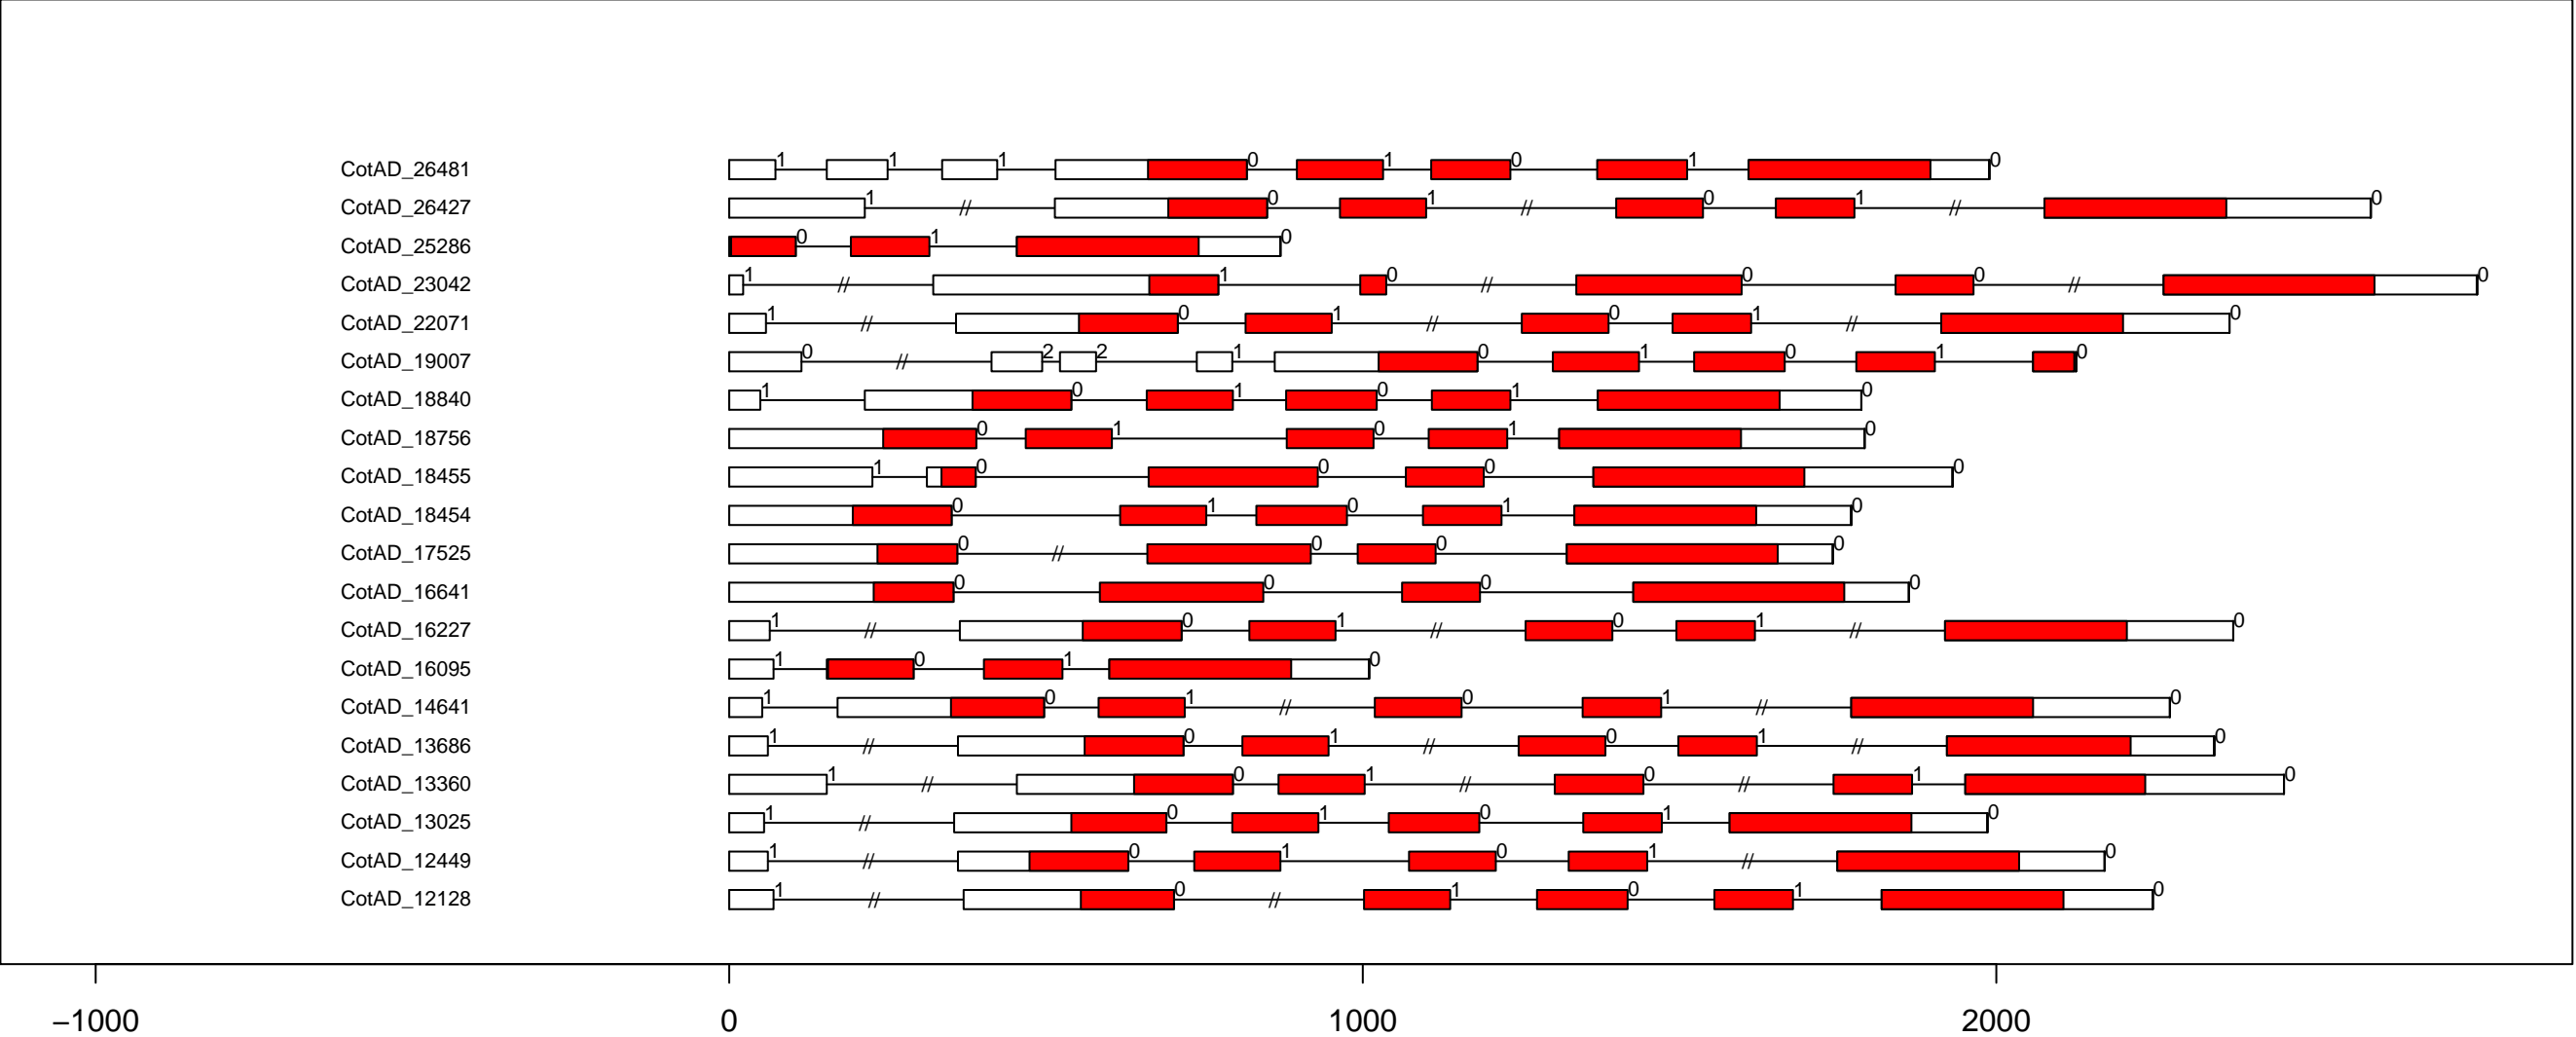

G.hi RLK-Pelle\_RLCK-VIIa-2 exon-intron and domain diagram (part 3)

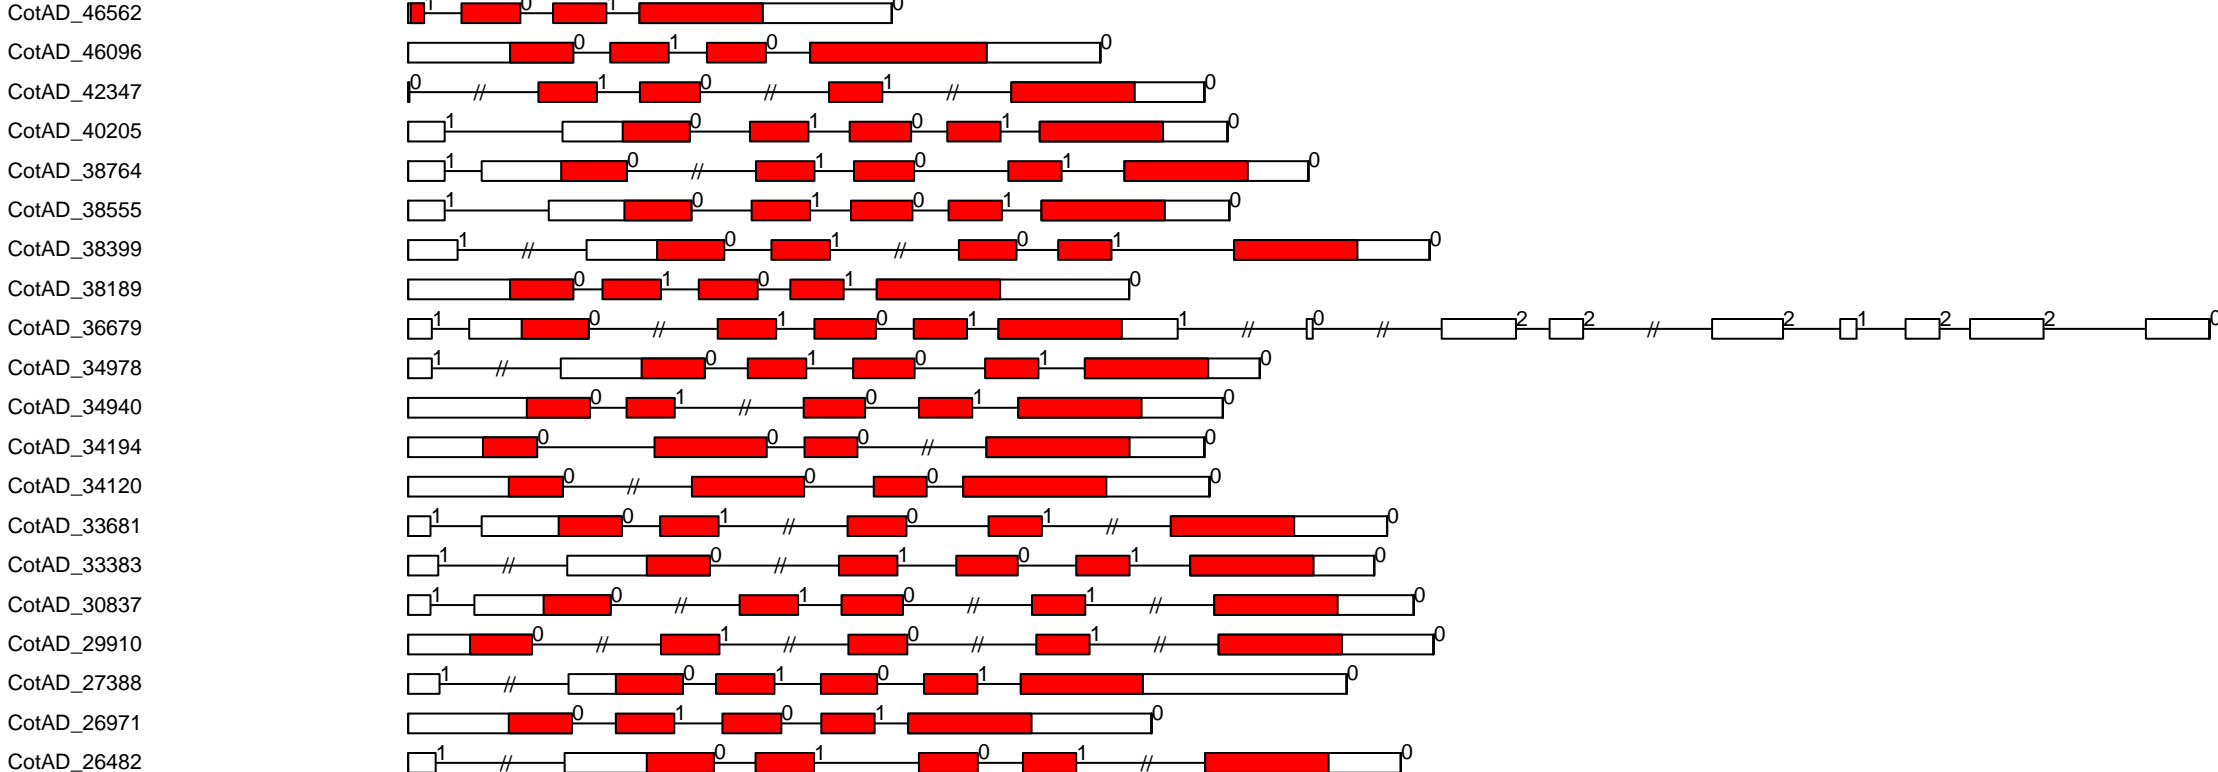

G.hi RLK-Pelle\_RLCK-VIIa-2 exon-intron and domain diagram (part 4)

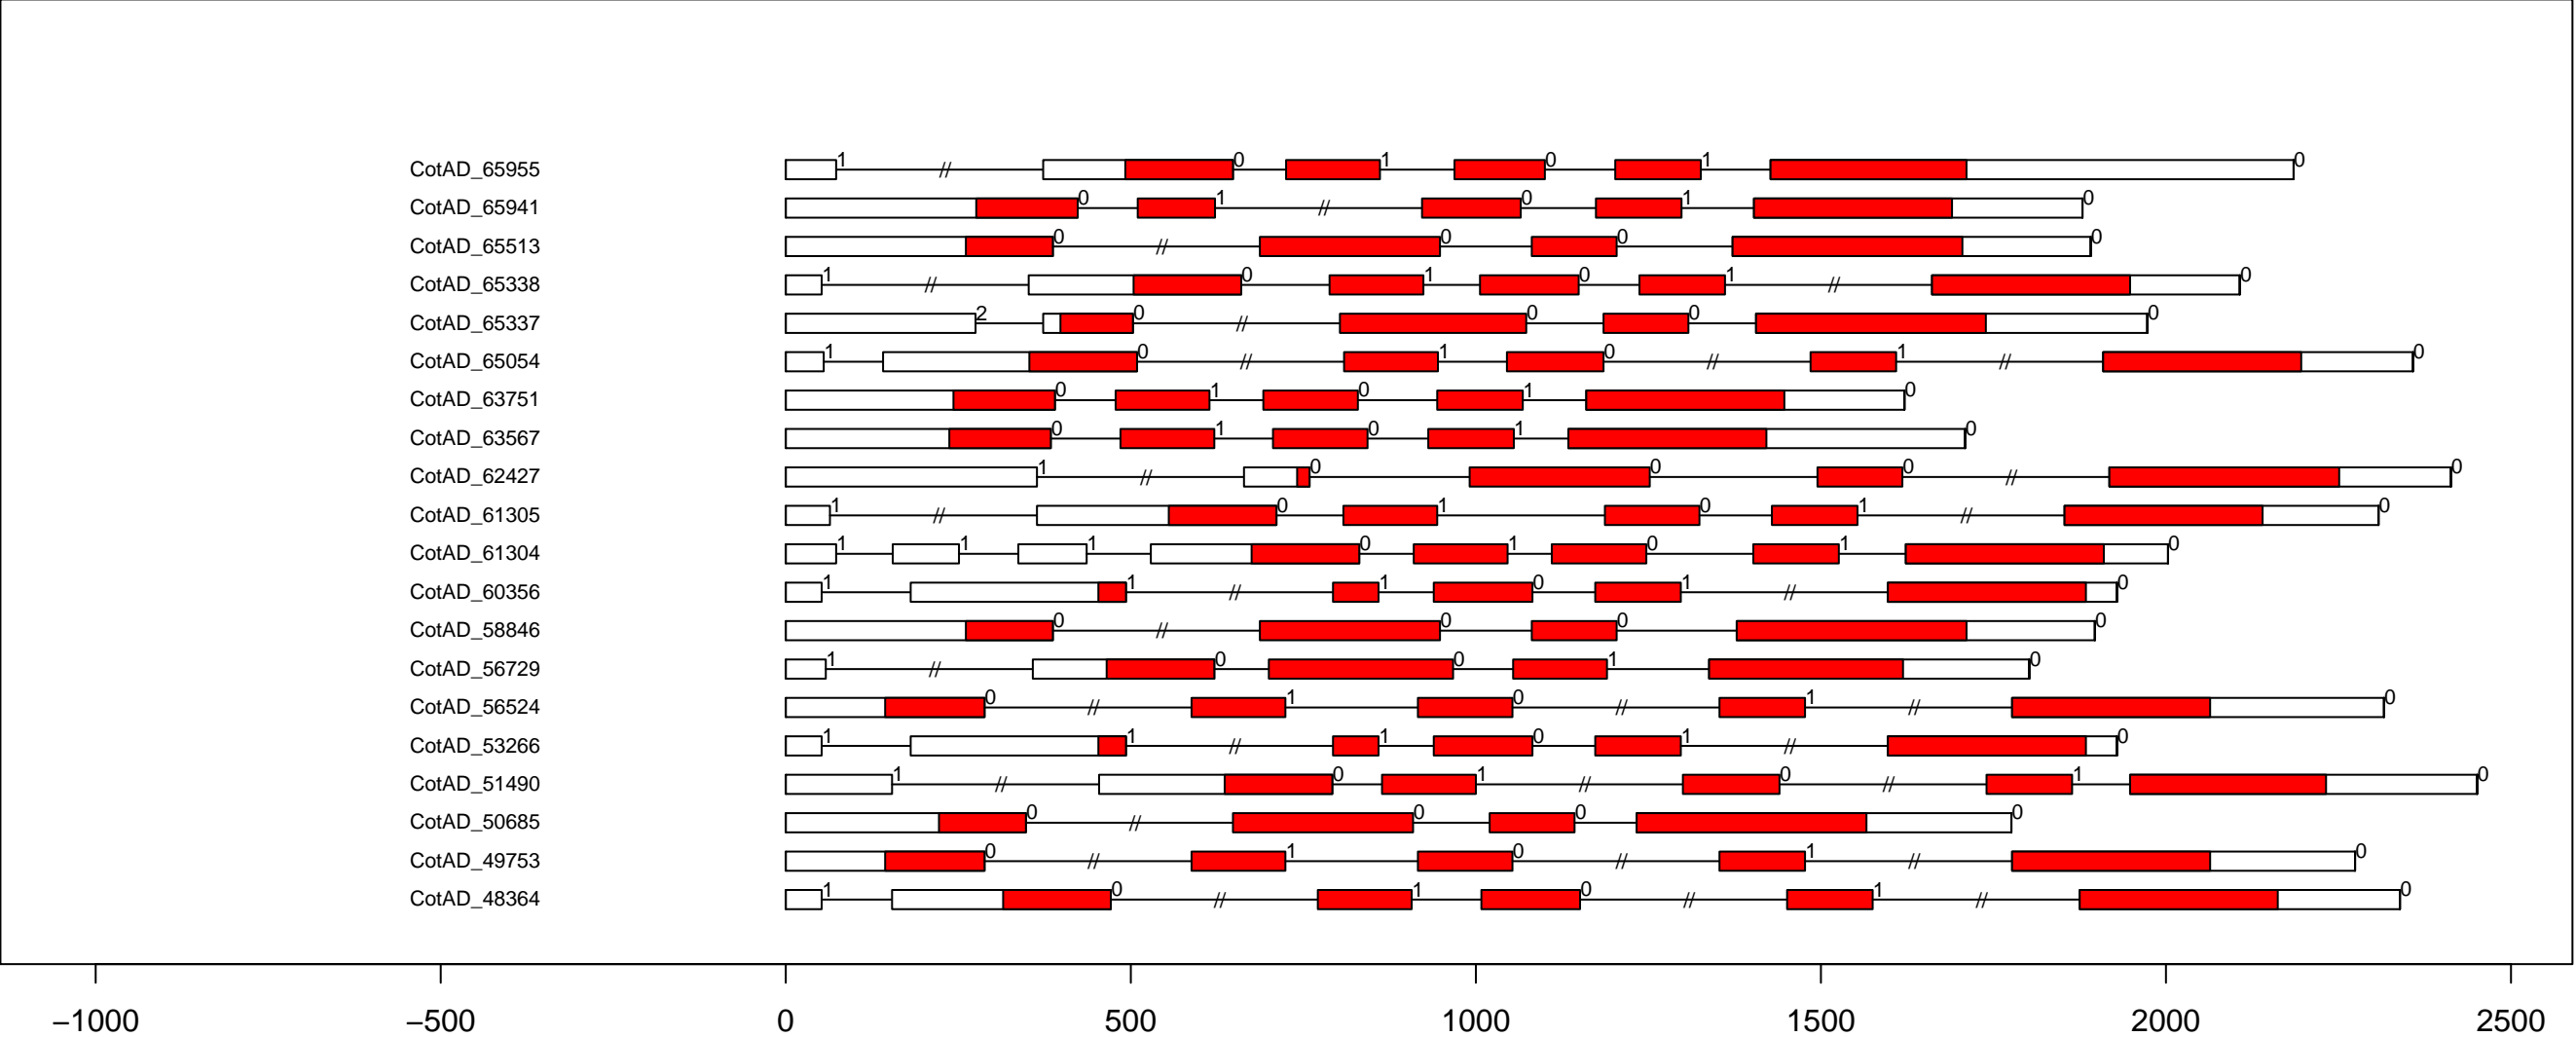

G.hi RLK-Pelle\_RLCK-VIIa-2 exon-intron and domain diagram (part 5)

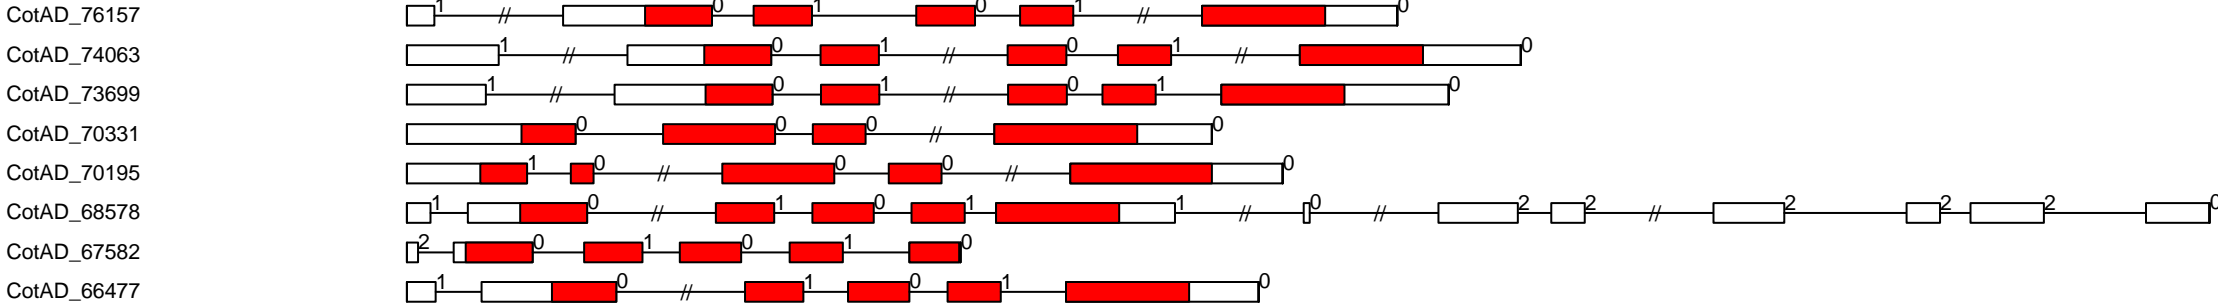

-1000

0

1000

2000

3000

4000

# G.hi RLK-Pelle\_RLCK-VIIb exon-intron and domain diagram (all)

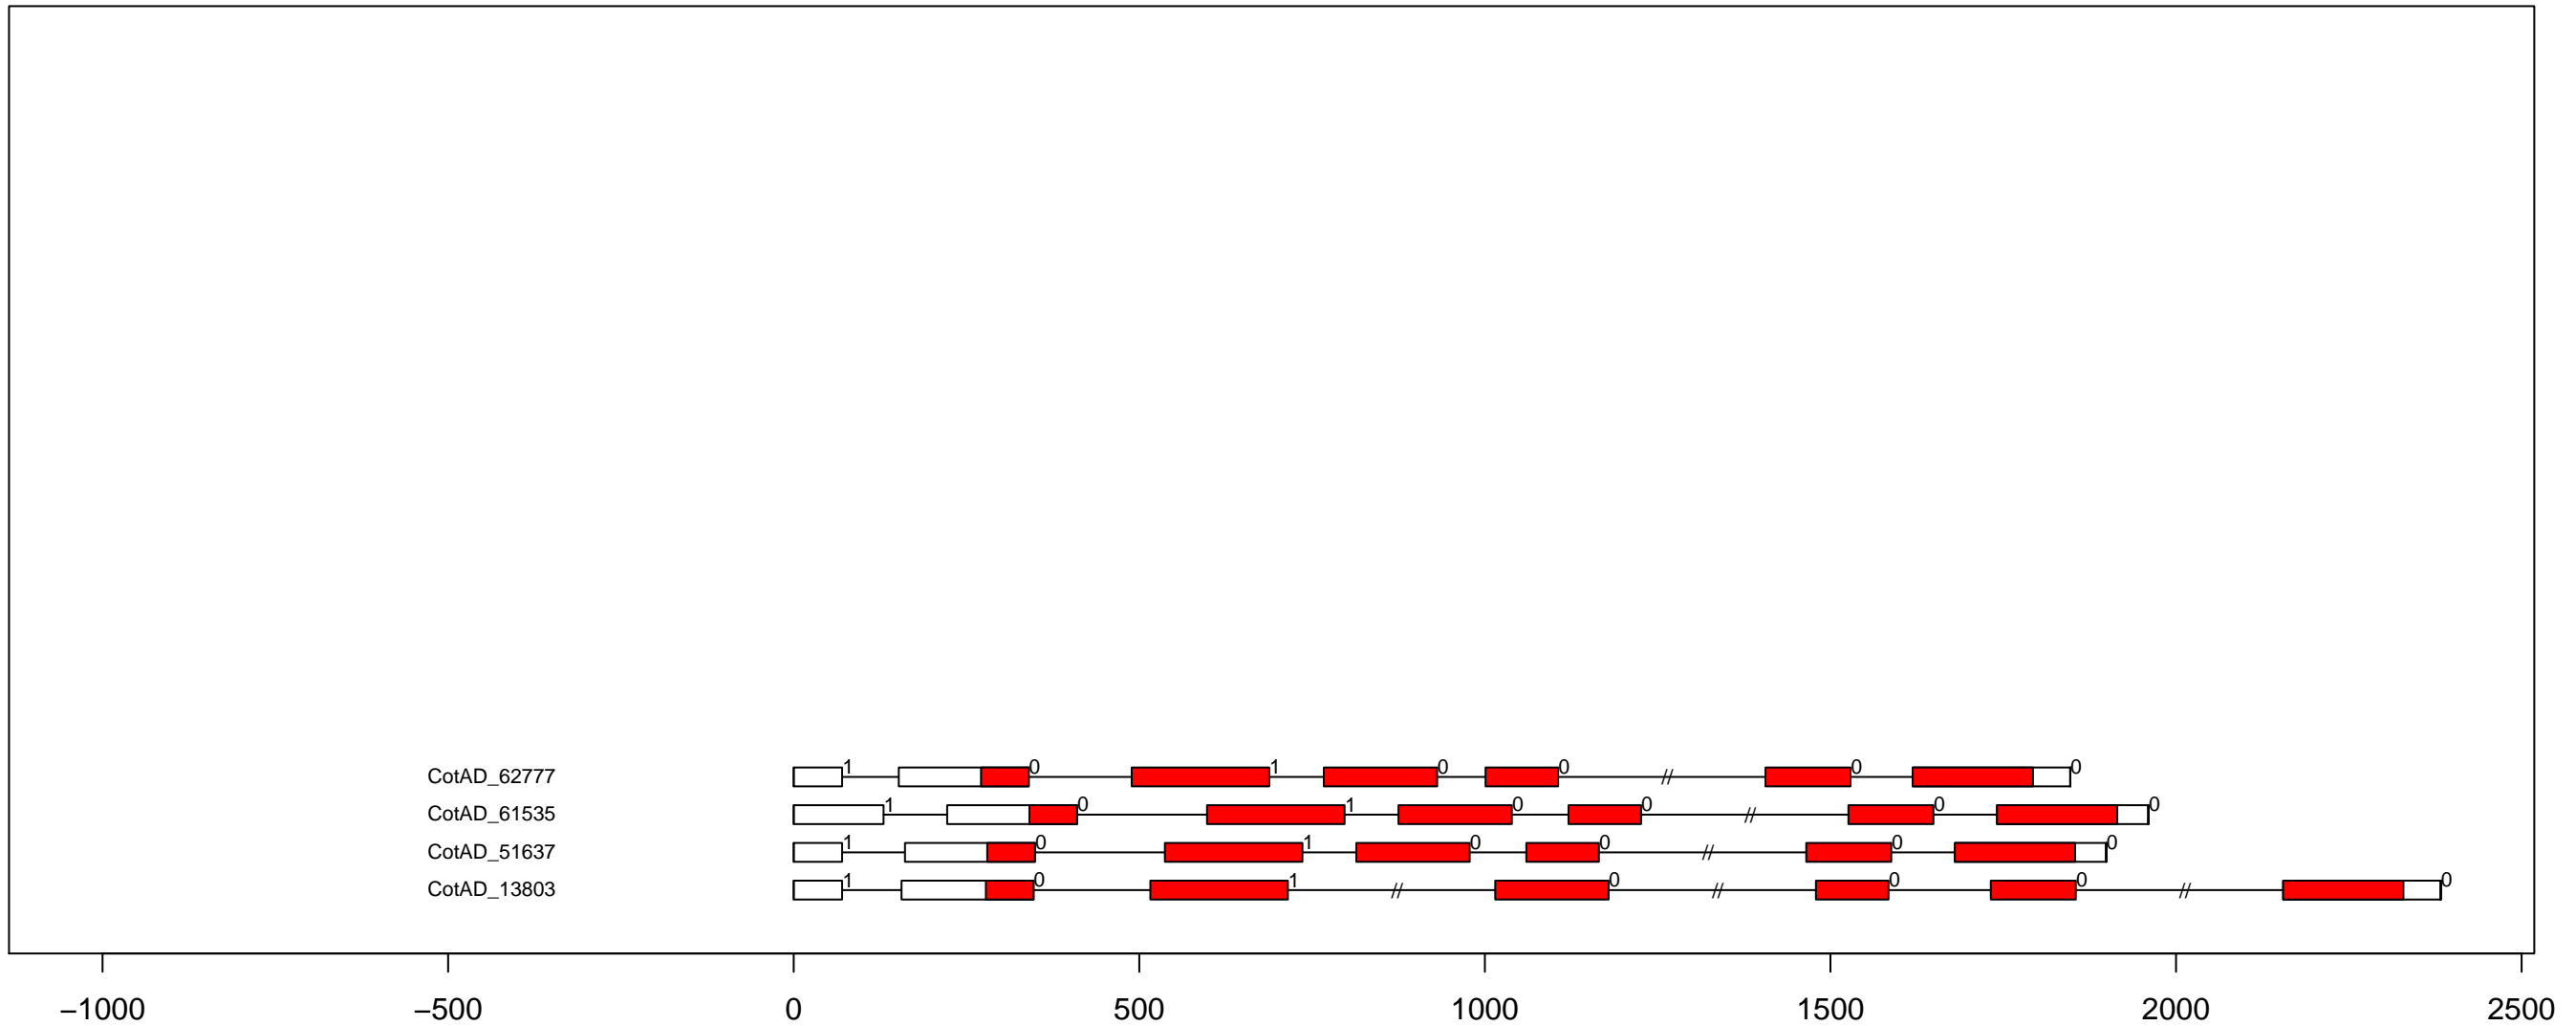



### G.hi RLK-Pelle\_RLCK-VIII exon-intron and domain diagram (all)

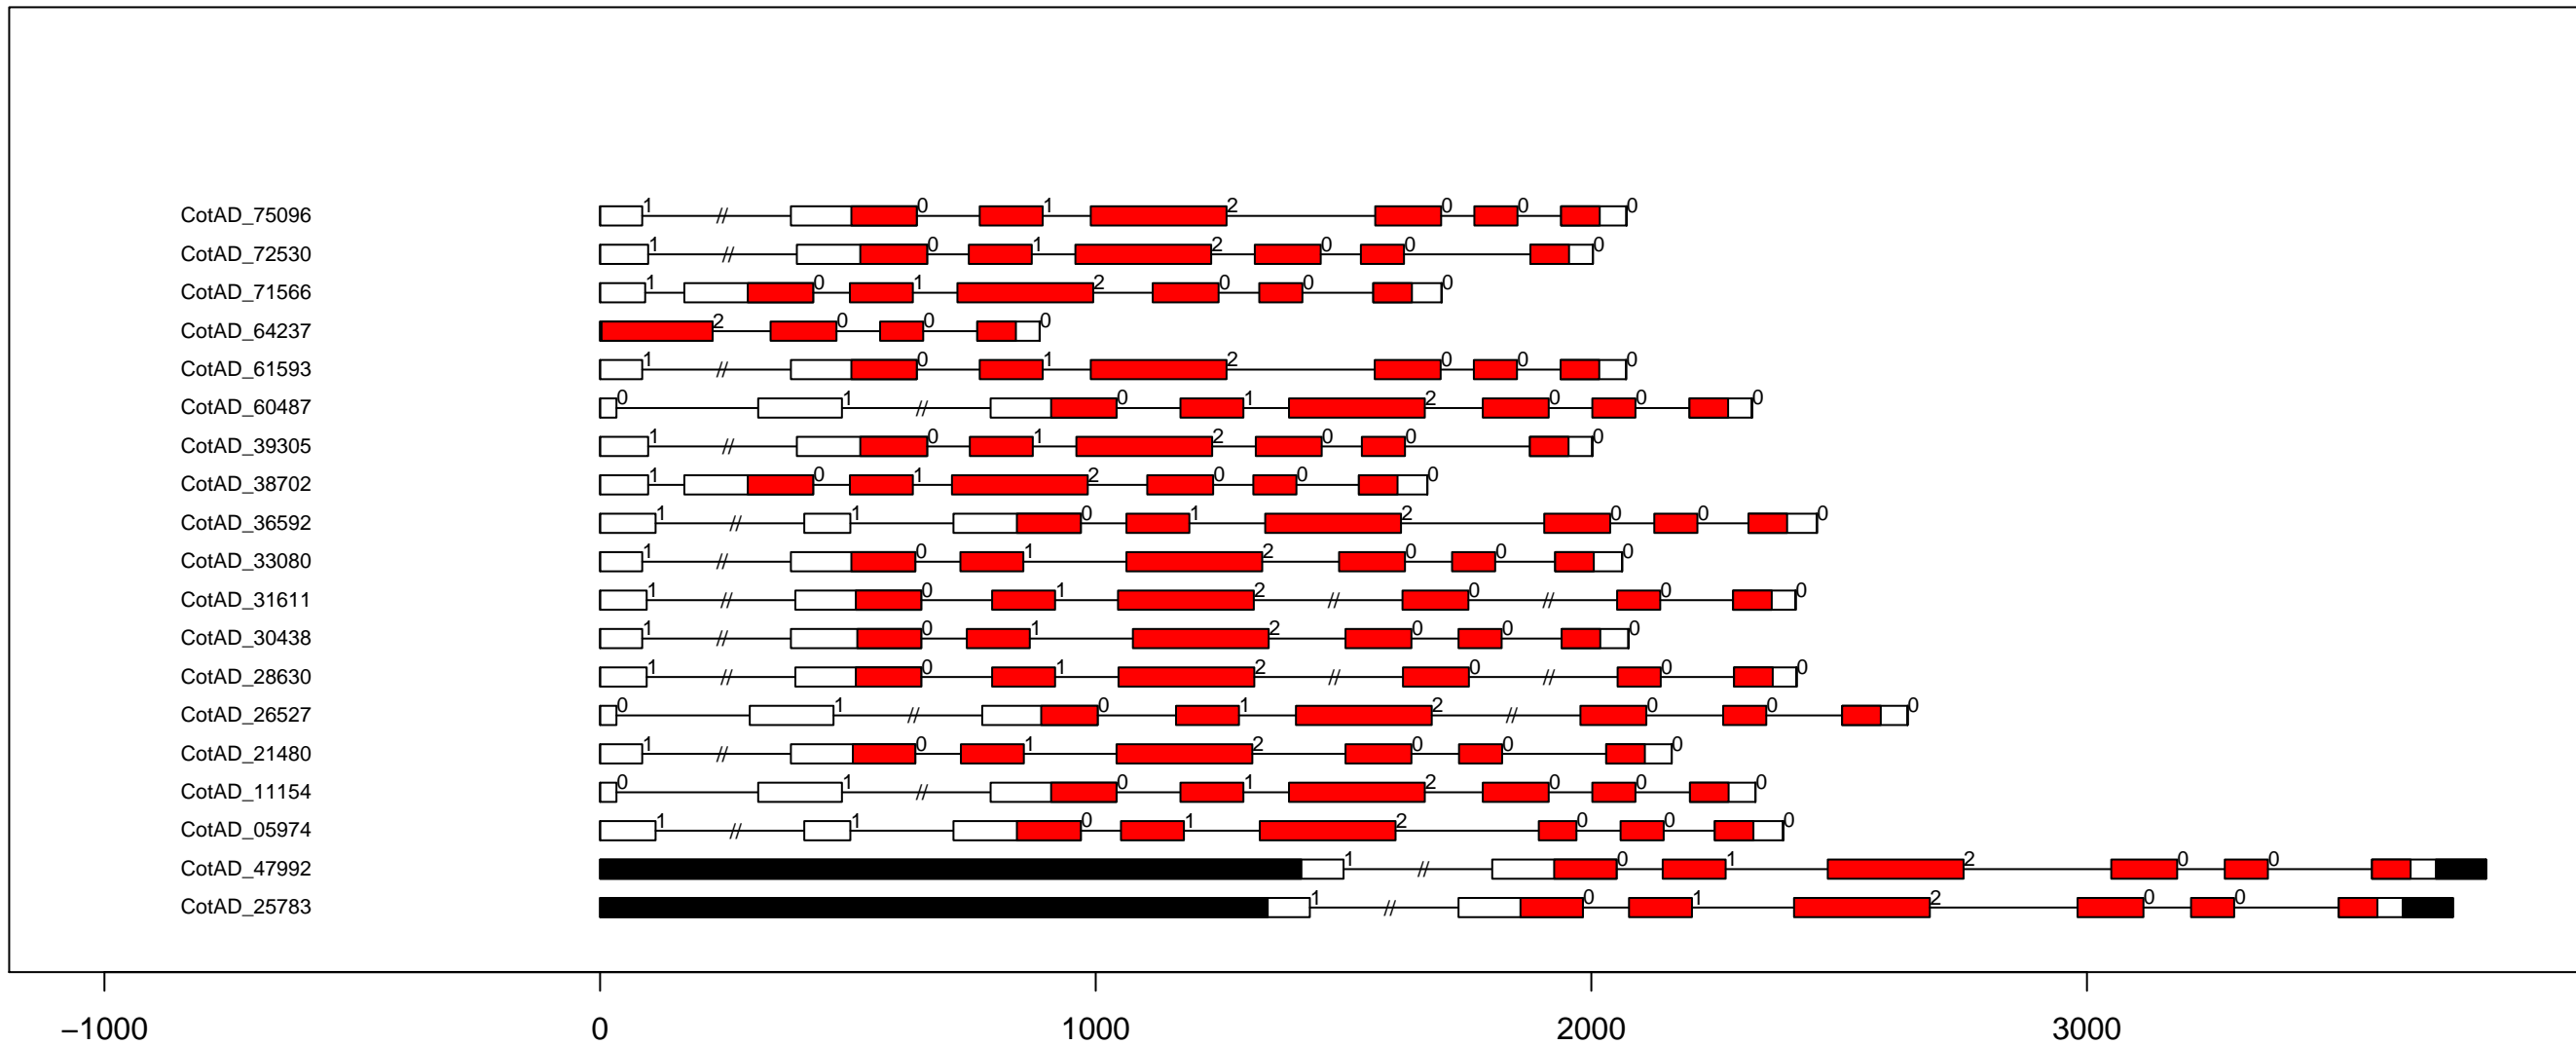



### G.hi RLK-Pelle\_RLCK-VI exon-intron and domain diagram (part 2)

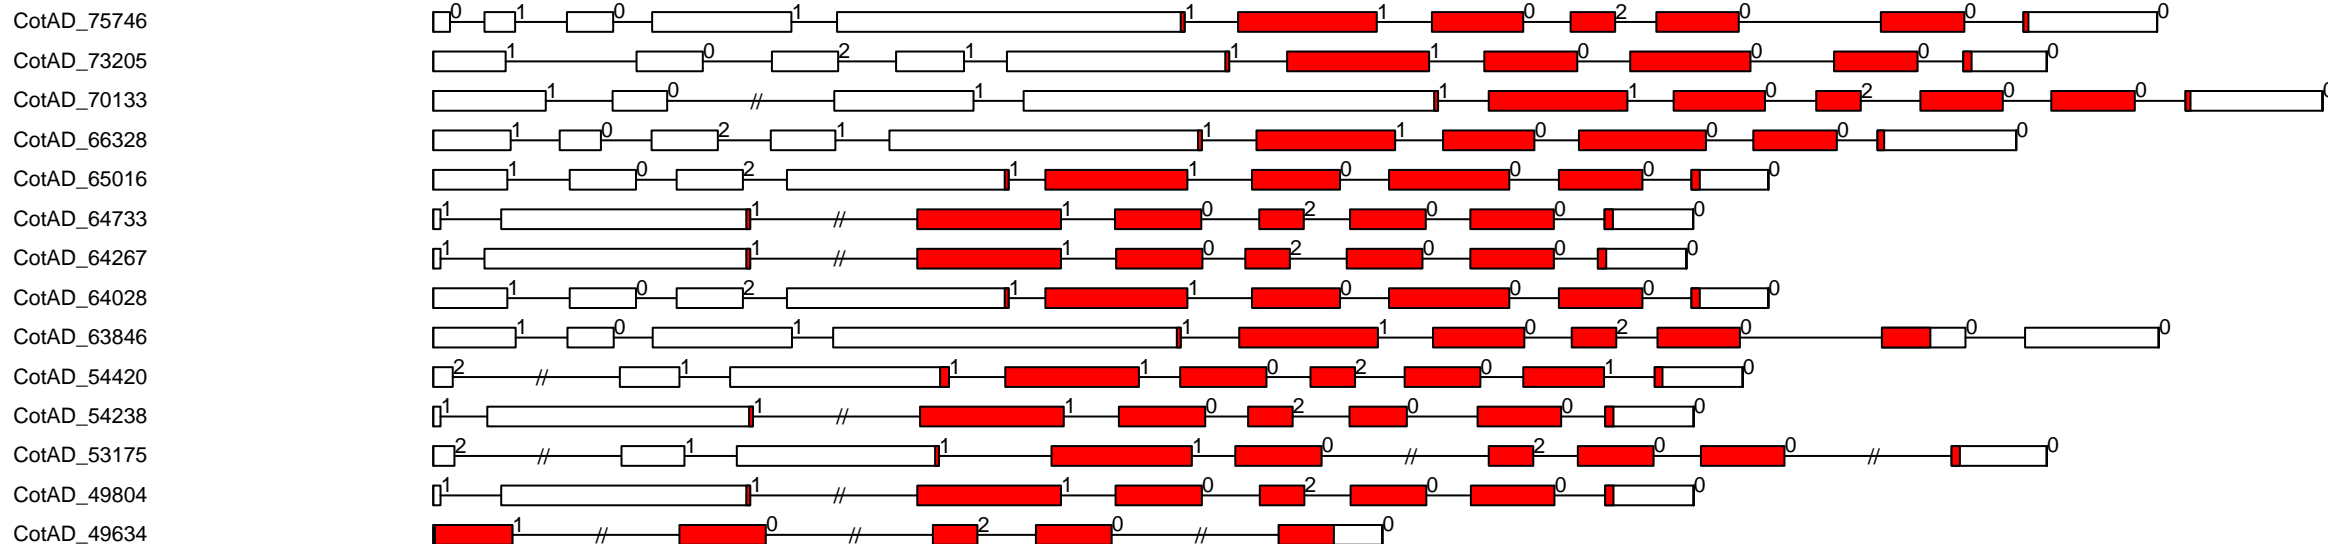

-1000

0

1000

2000

3000

### G.hi RLK-Pelle\_RLCK-V exon-intron and domain diagram (part 1)

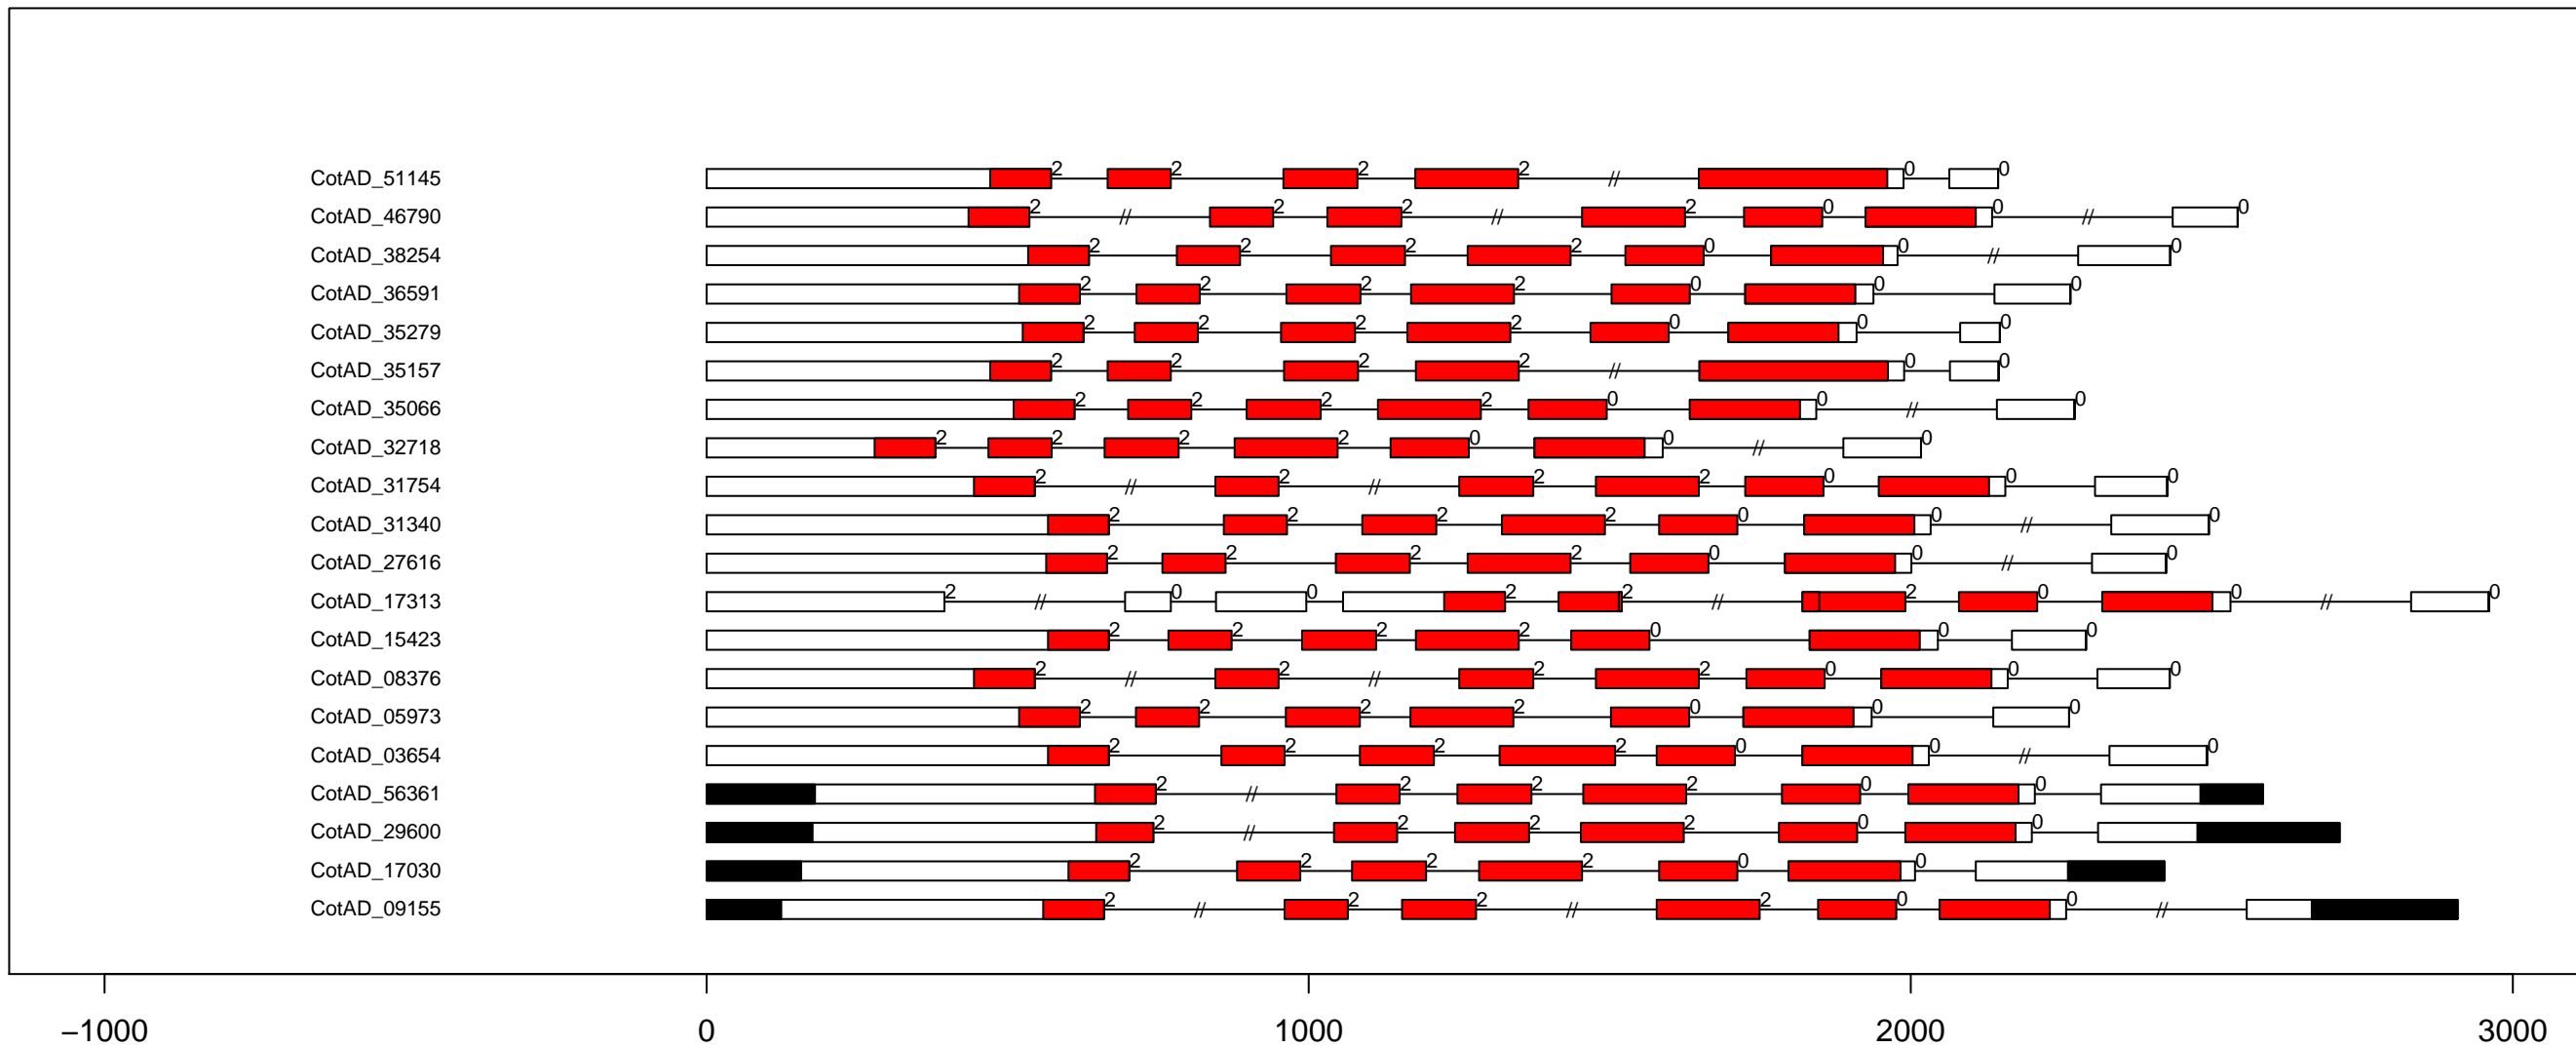

### G.hi RLK-Pelle\_RLCK-V exon-intron and domain diagram (part 2)

CotAD\_62992

CotAD\_55942

CotAD\_53338

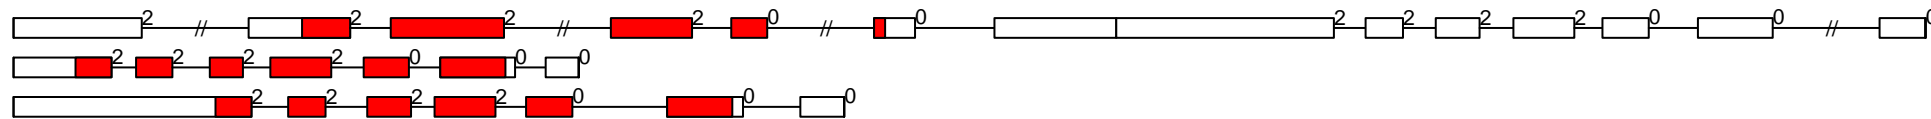

### G.hi RLK-Pelle\_RLCK-XII-1 exon-intron and domain diagram (part 1)

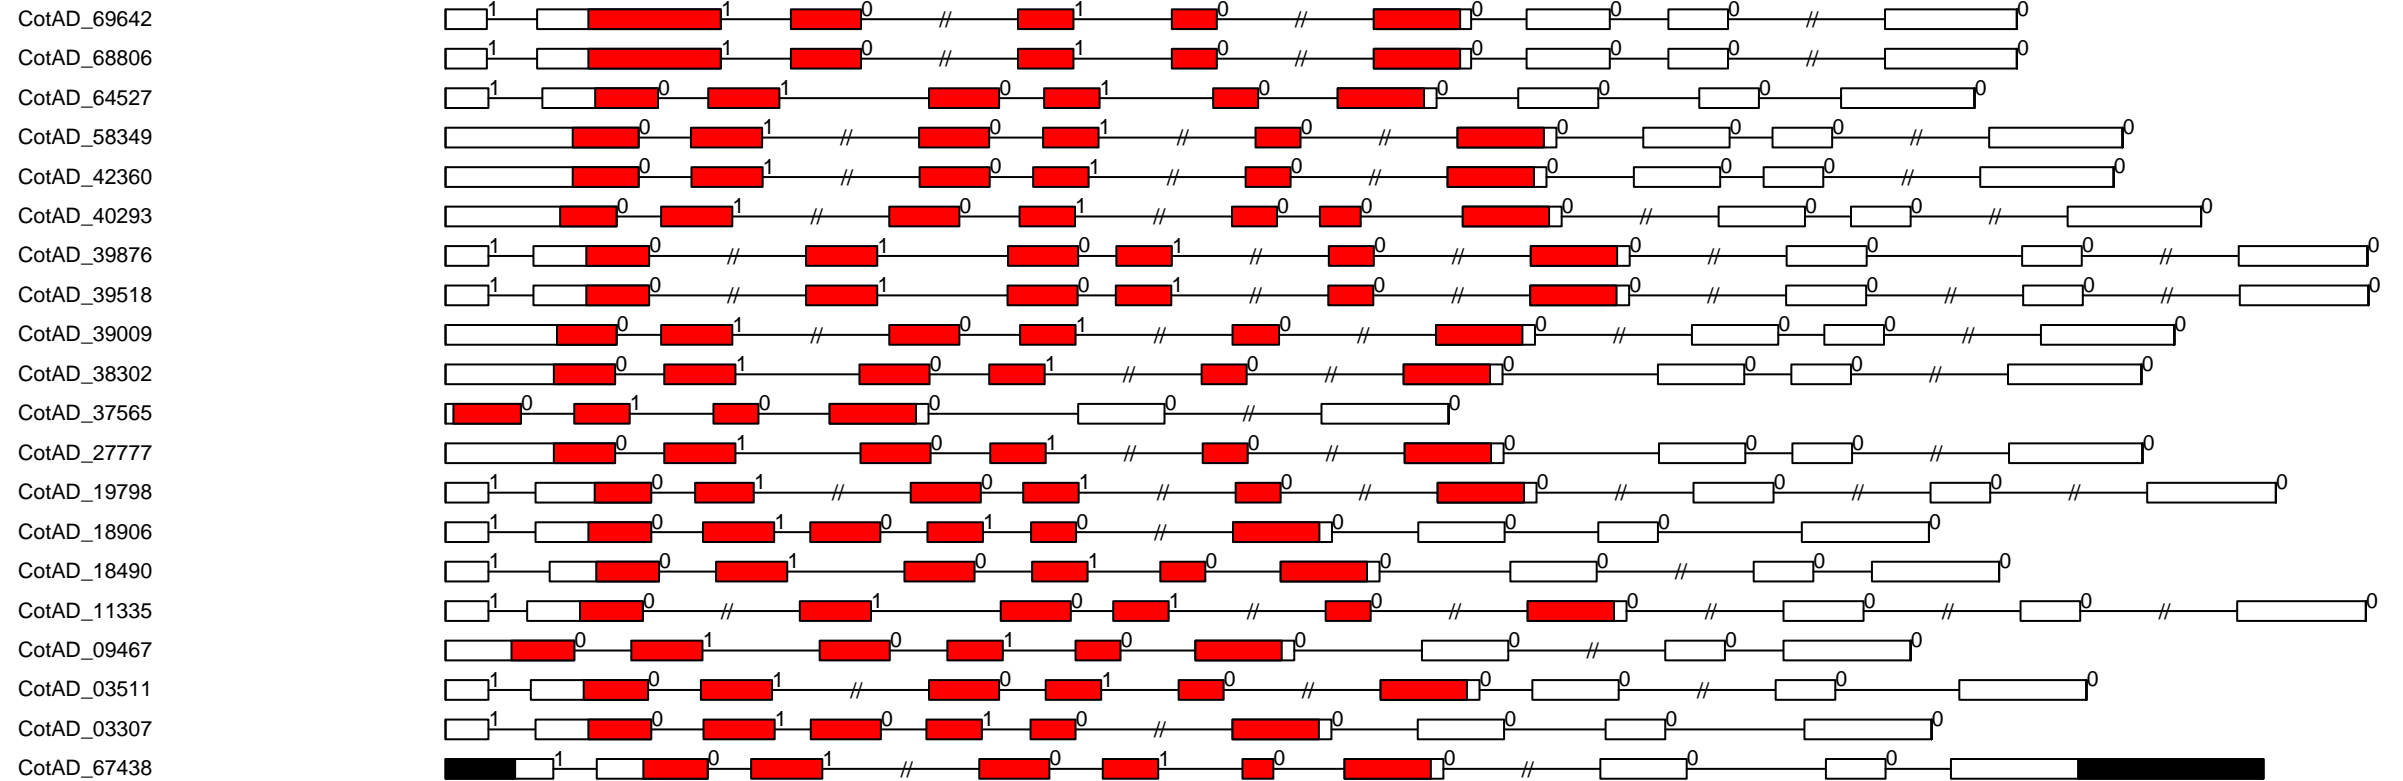

-1000

0

1000

2000

3000

# G.hi RLK-Pelle\_RLCK-XII-1 exon-intron and domain diagram (part 2)

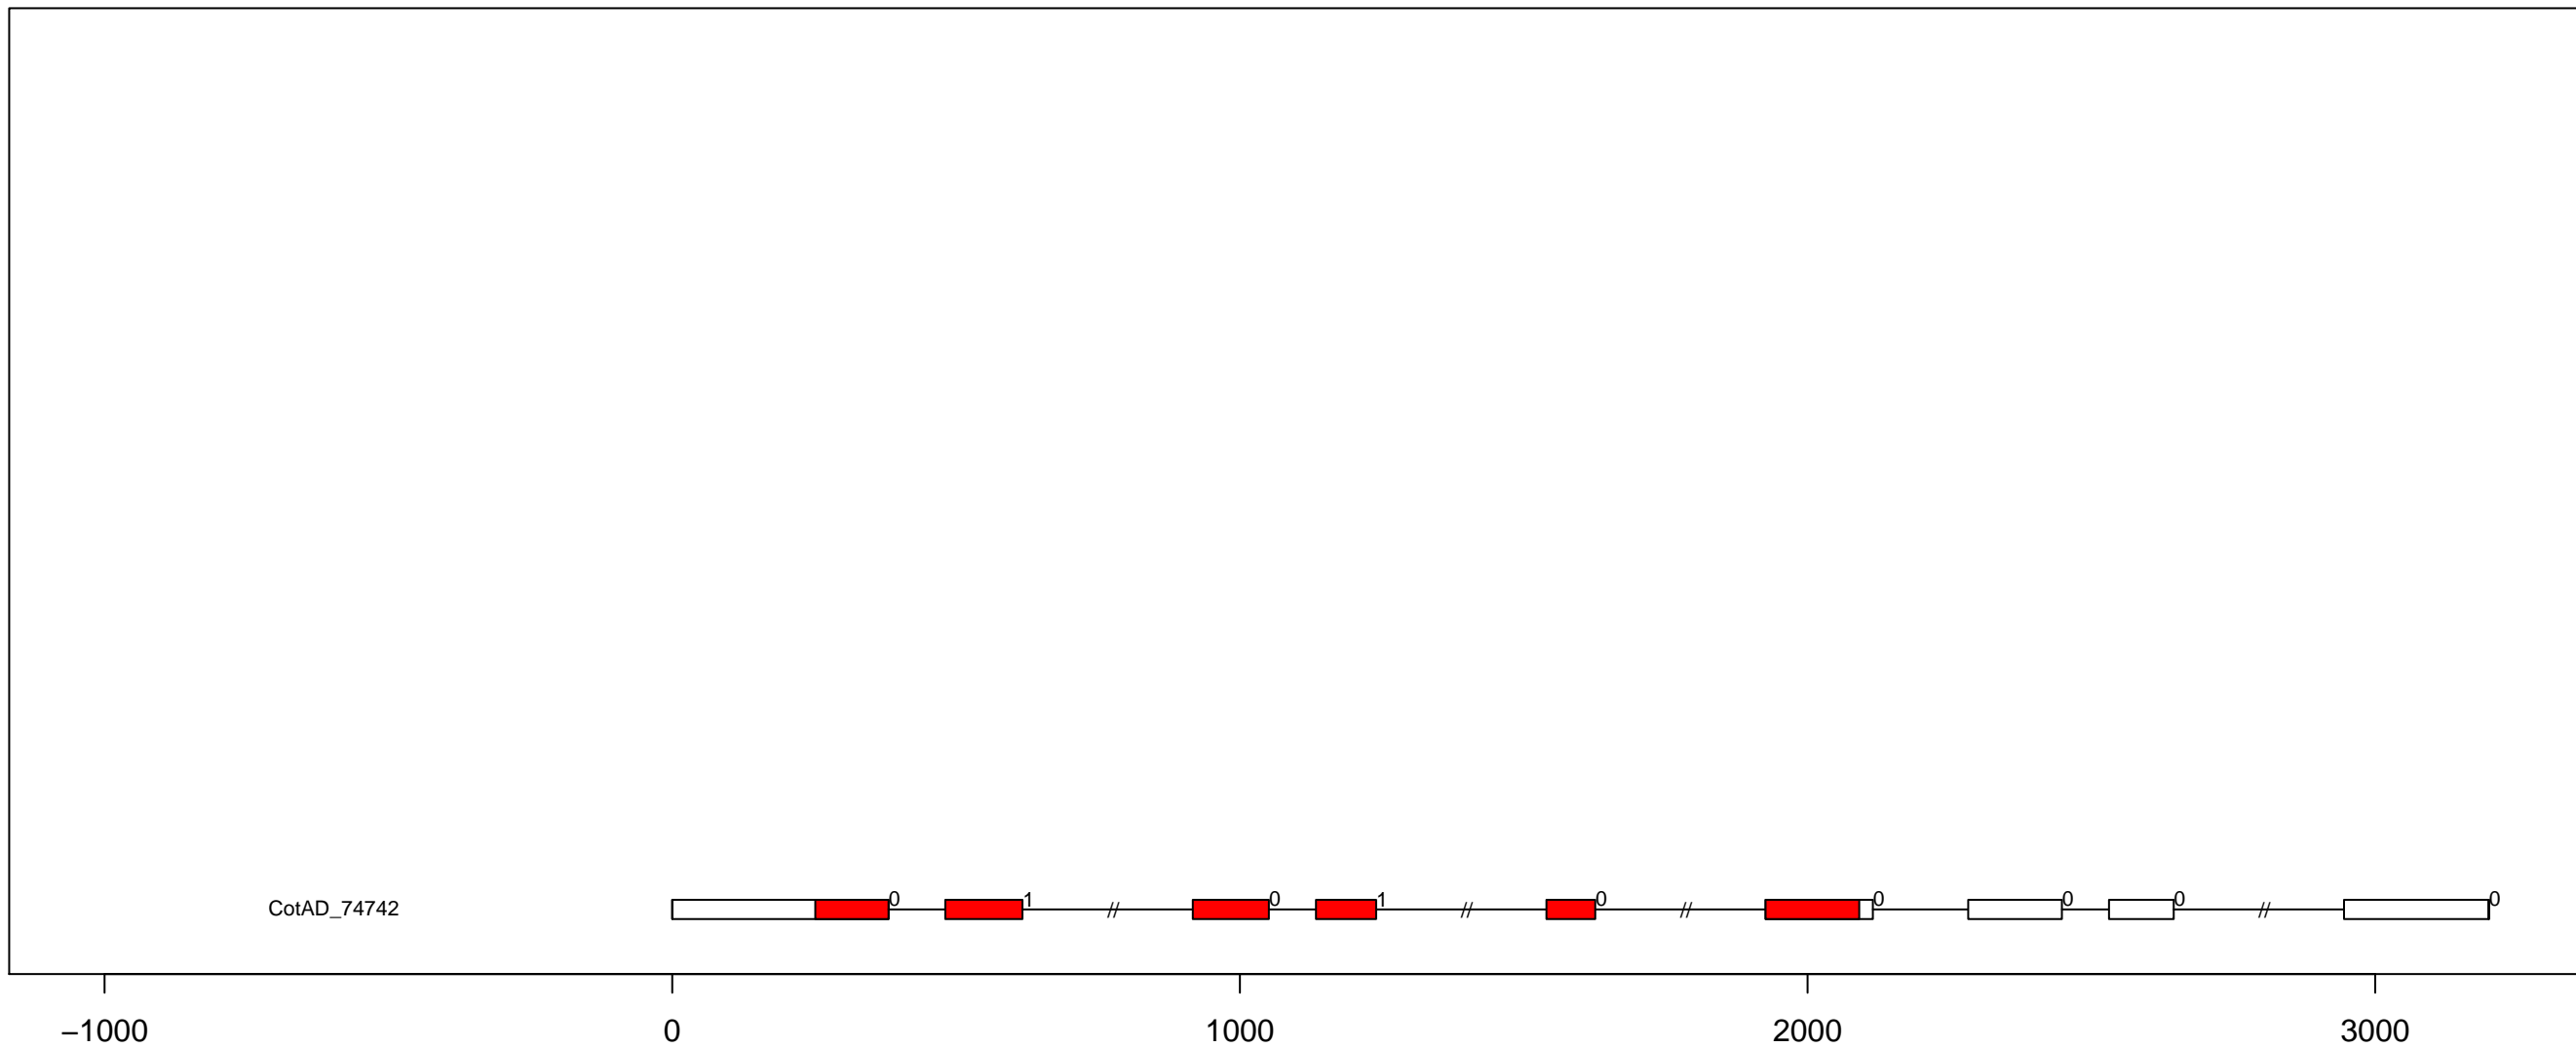

# G.hi RLK-Pelle\_RLCK-XII-2 exon-intron and domain diagram (all)

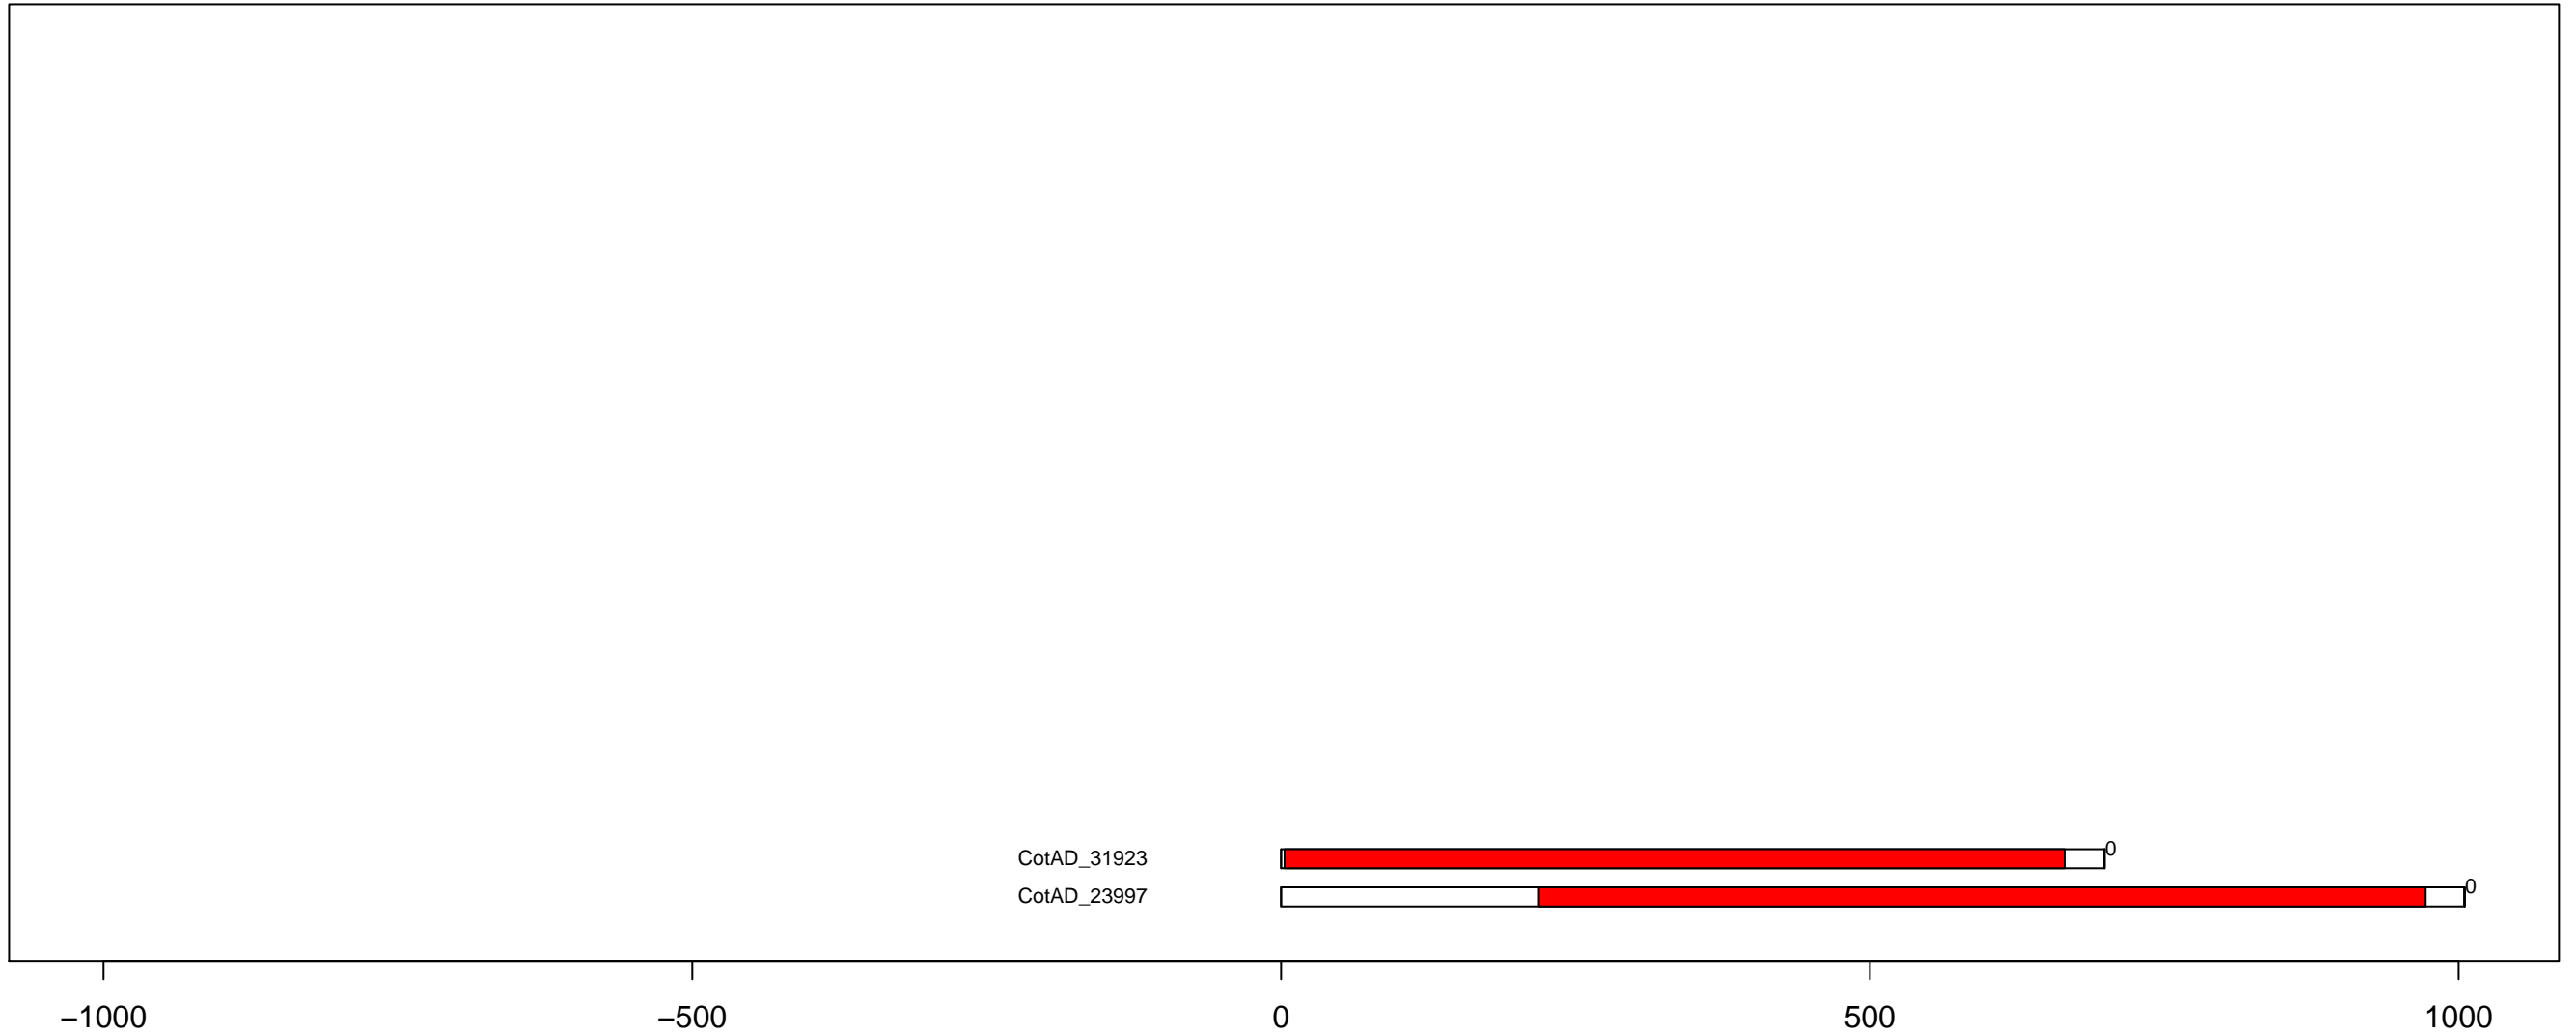



G.hi RLK-Pelle\_RLCK-XIII exon-intron and domain diagram (all)

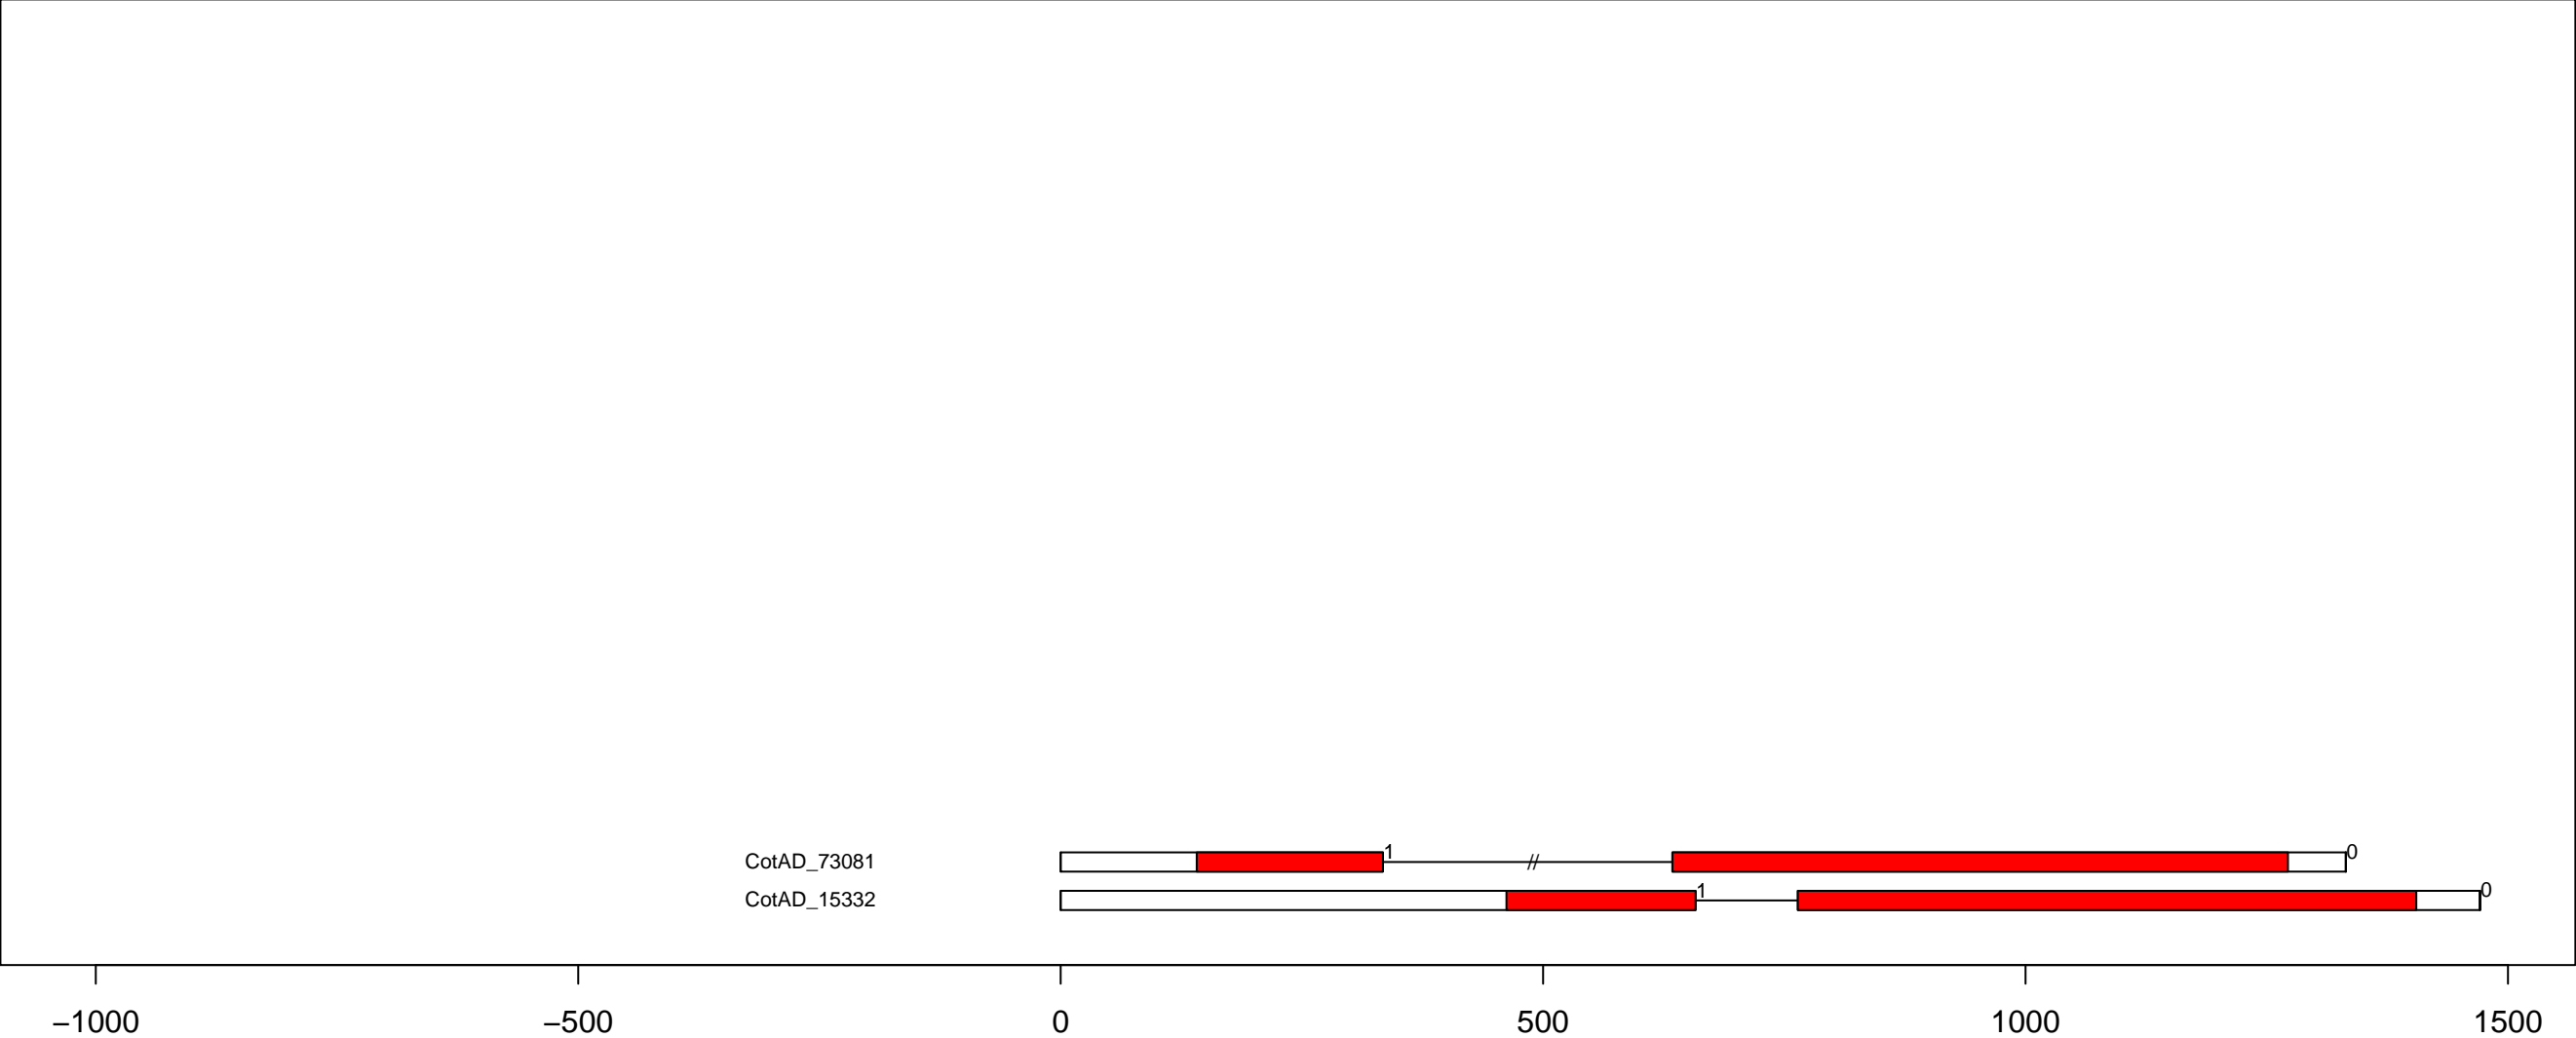

# G.hi RLK-Pelle\_RLCK-XI exon-intron and domain diagram (all)

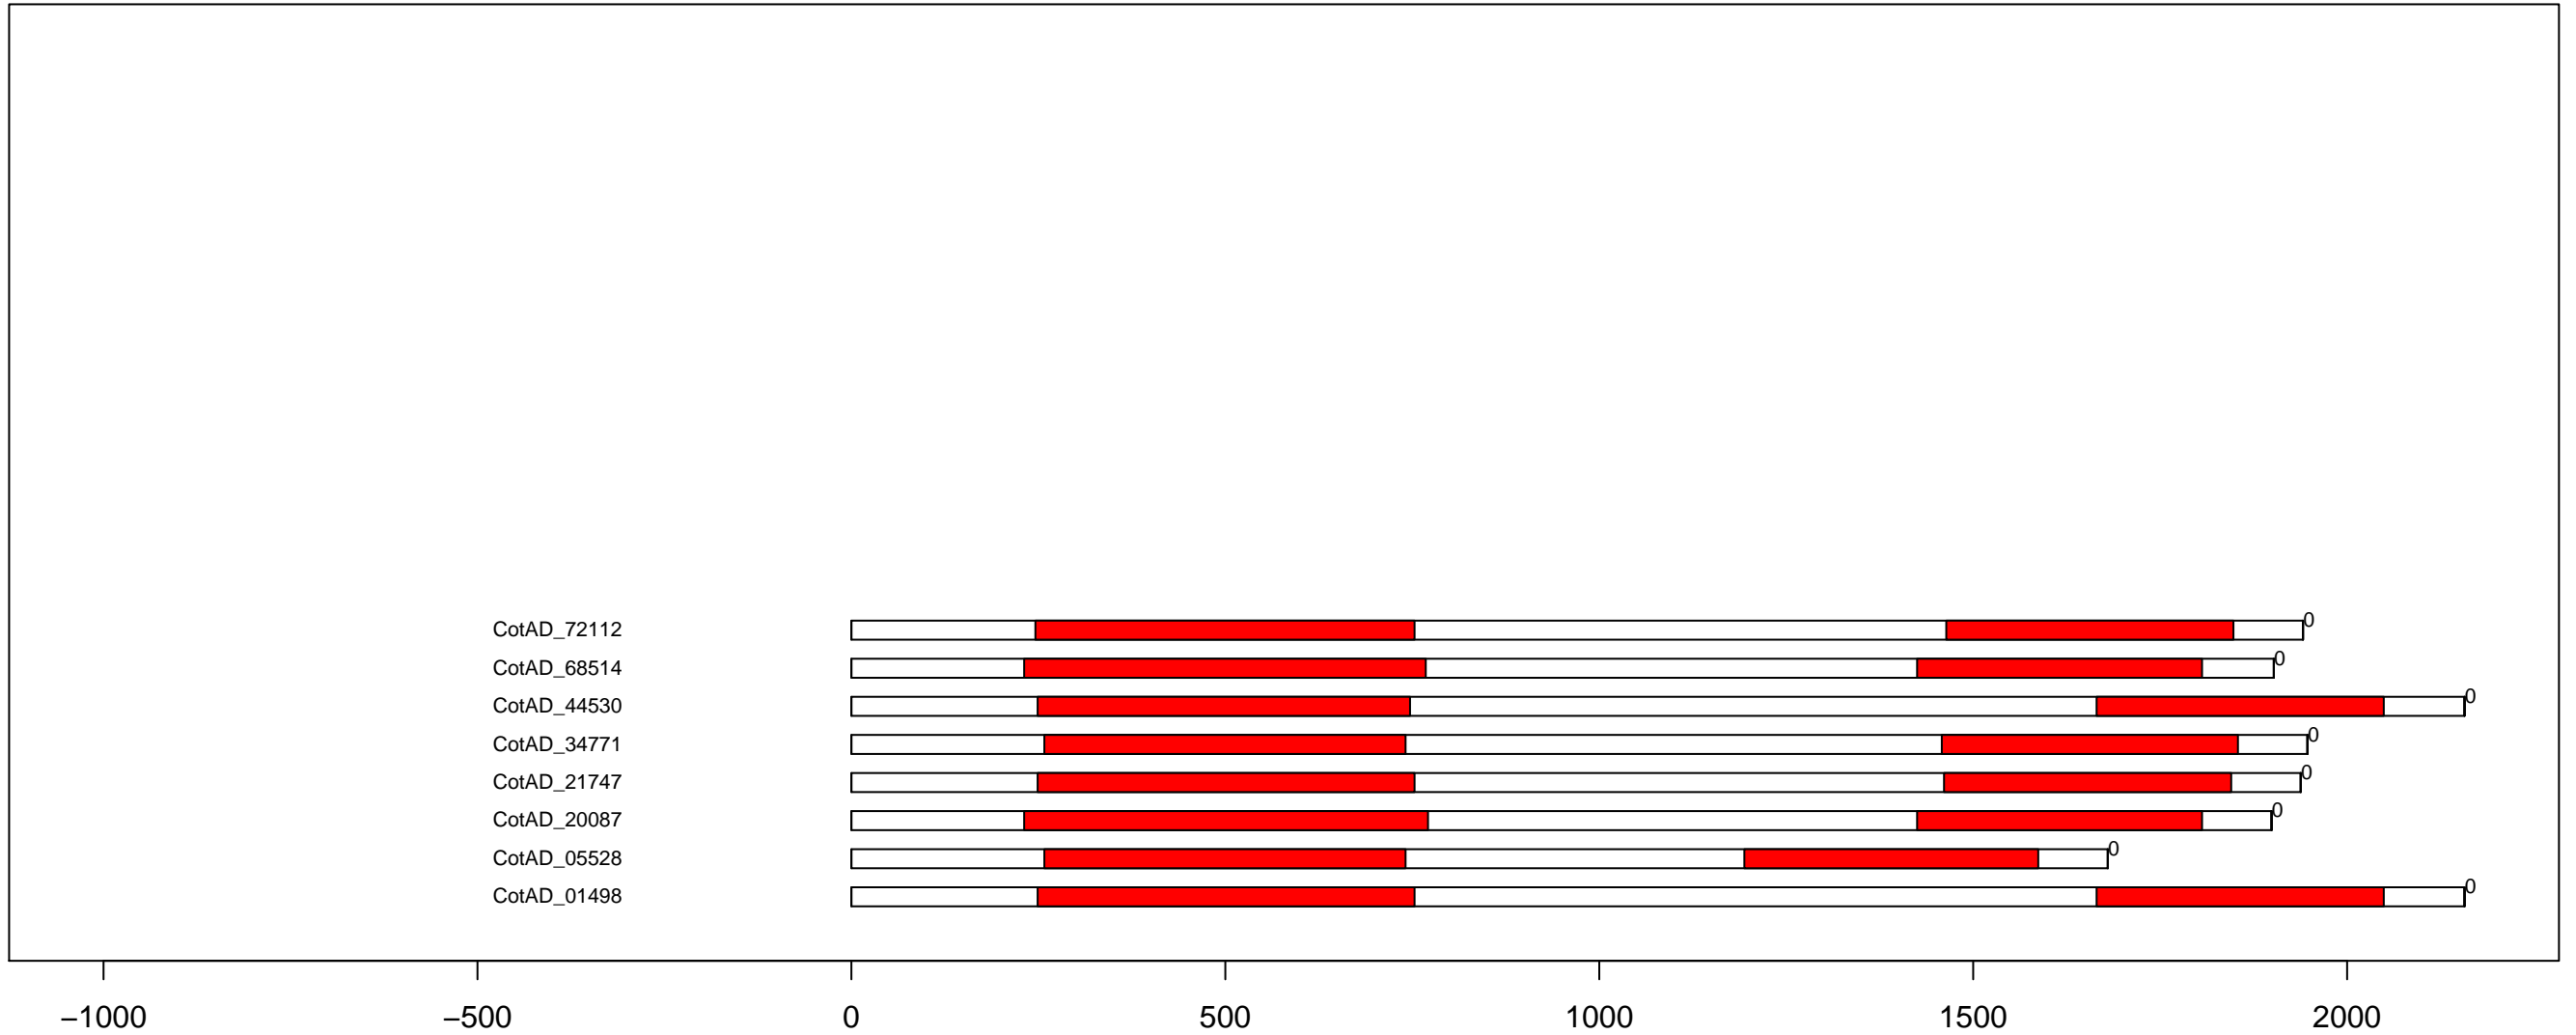

### G.hi RLK-Pelle\_RLCK-X exon-intron and domain diagram (all)

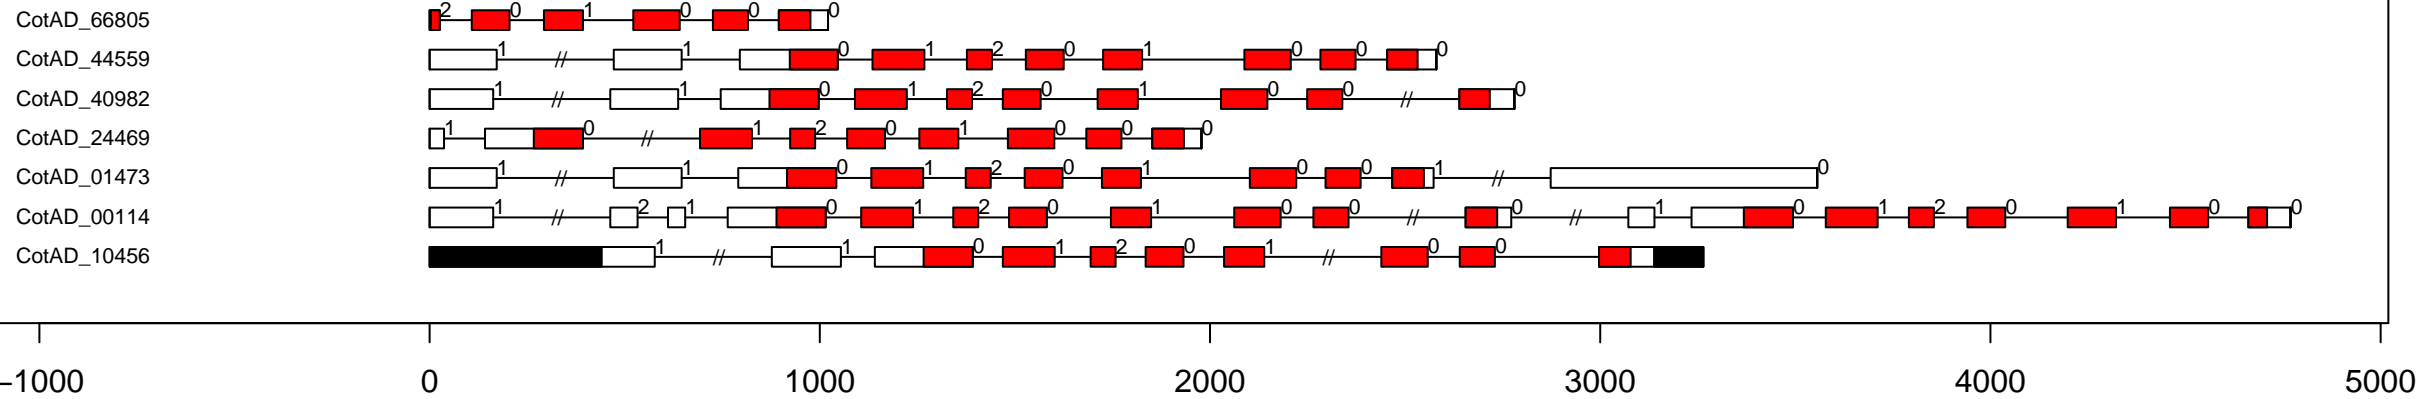

# G.hi RLK-Pelle\_RLCK-XVI exon-intron and domain diagram (all)

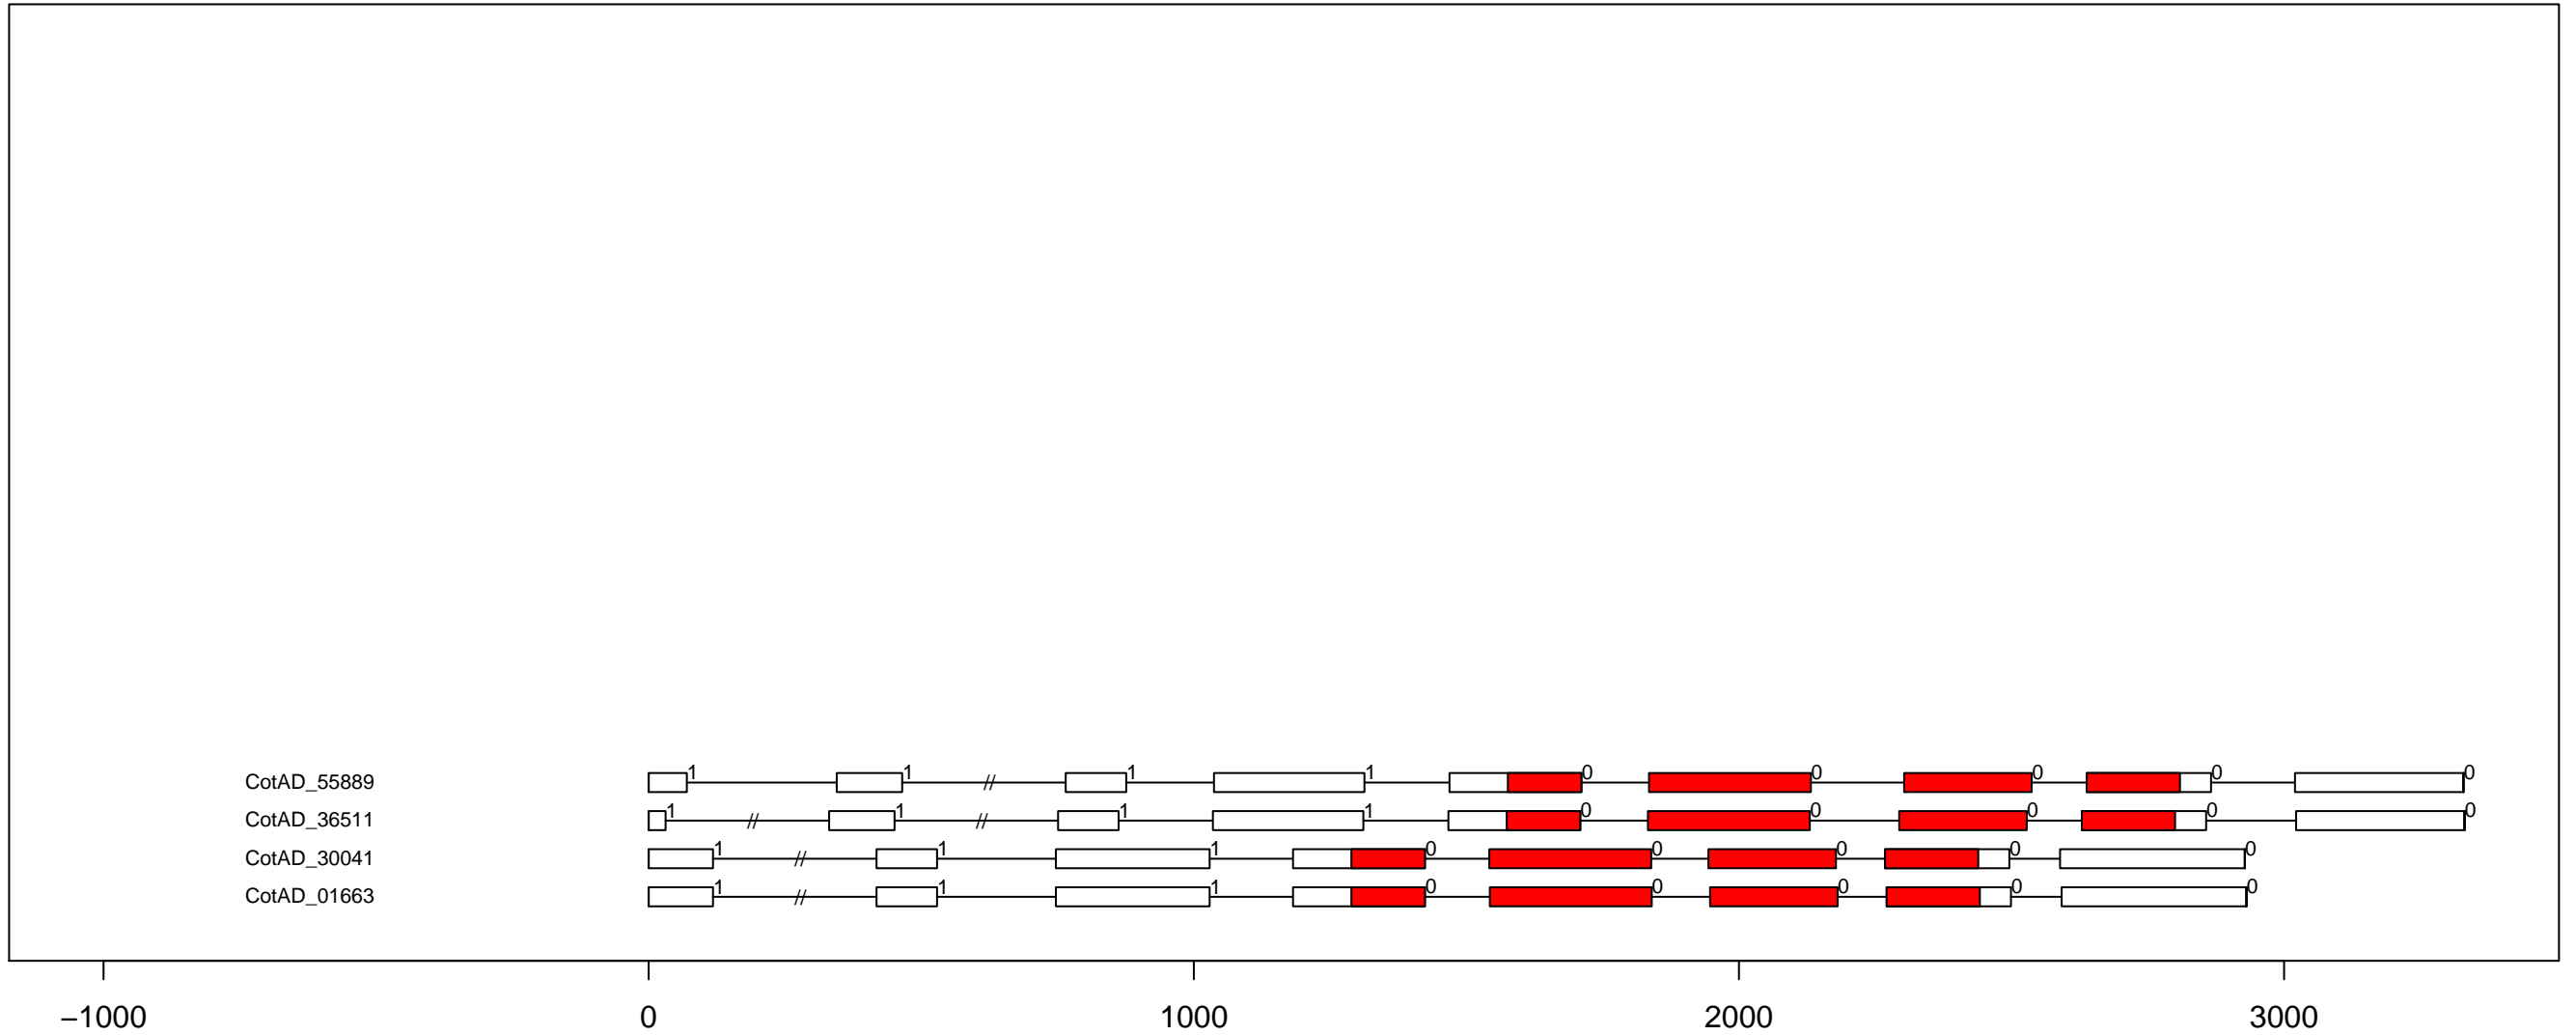

### G.hi RLK-Pelle\_RLCK-XV exon-intron and domain diagram (all)

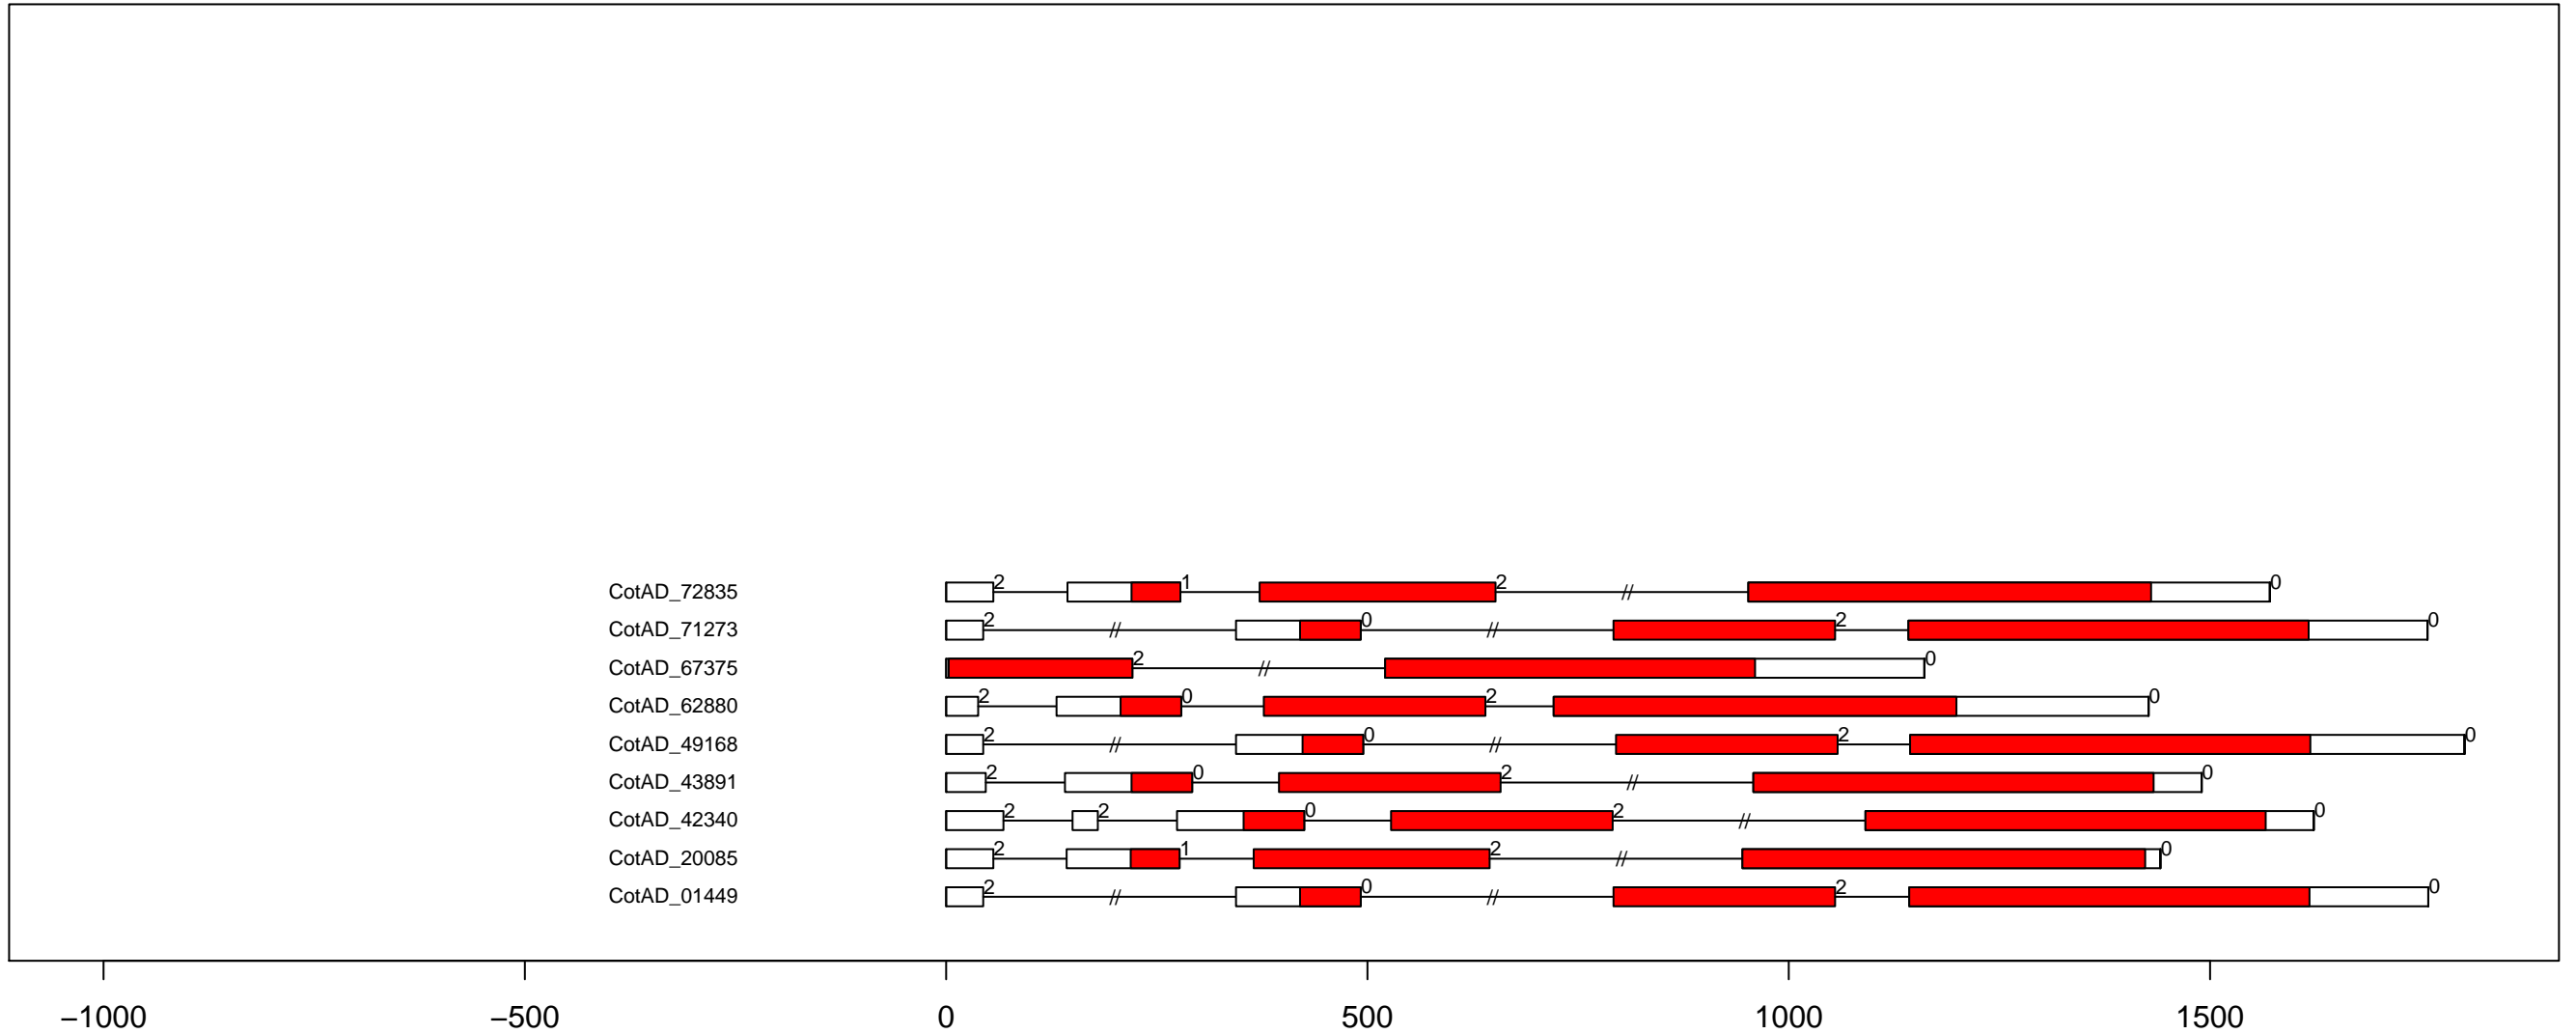

### G.hi RLK-Pelle\_SD-2b exon-intron and domain diagram (part 1)

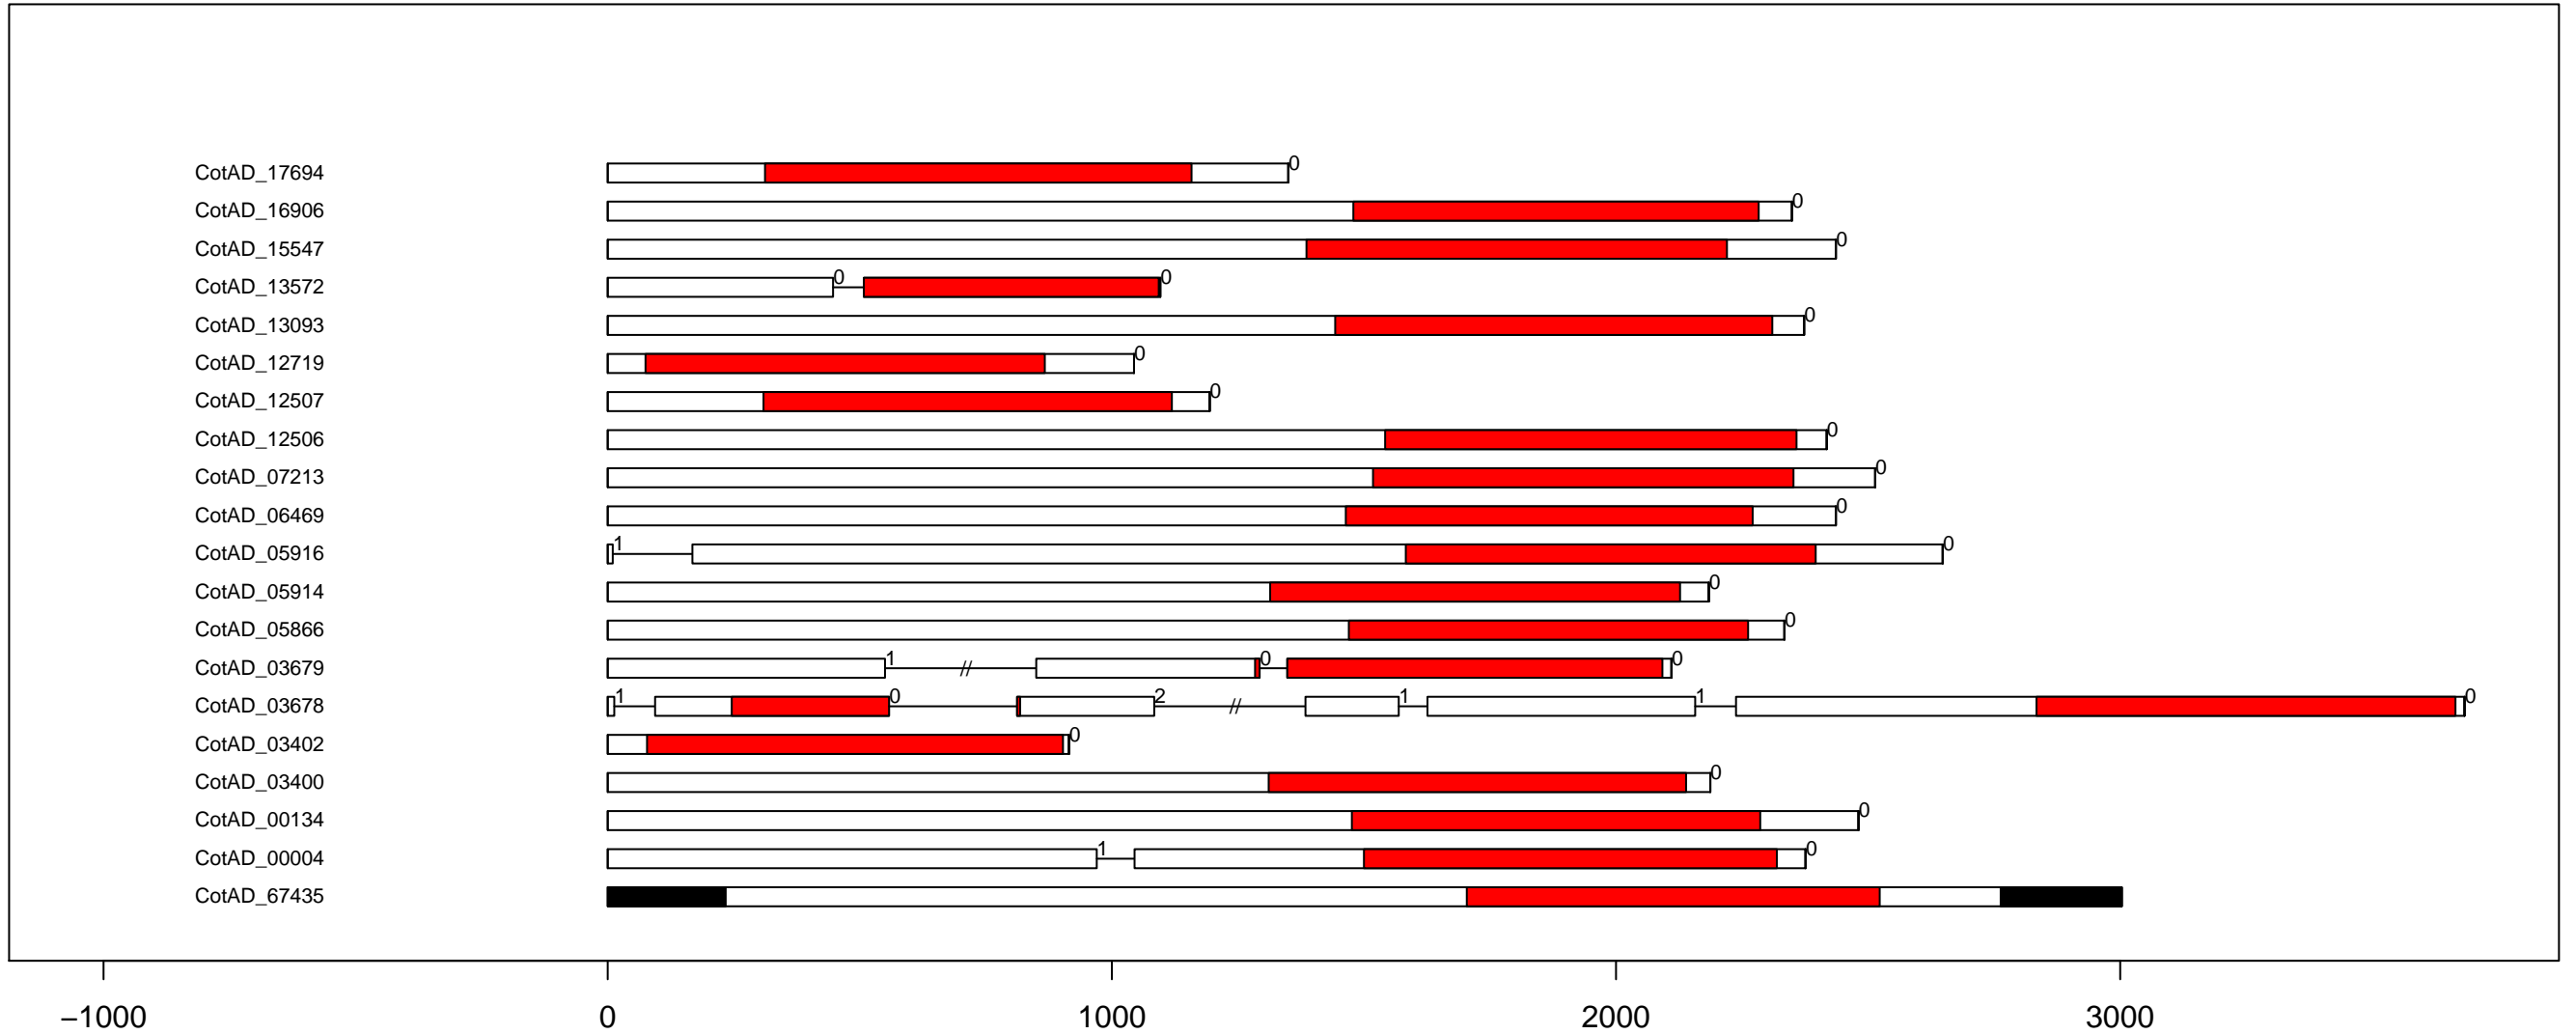

### G.hi RLK-Pelle\_SD-2b exon-intron and domain diagram (part 2)

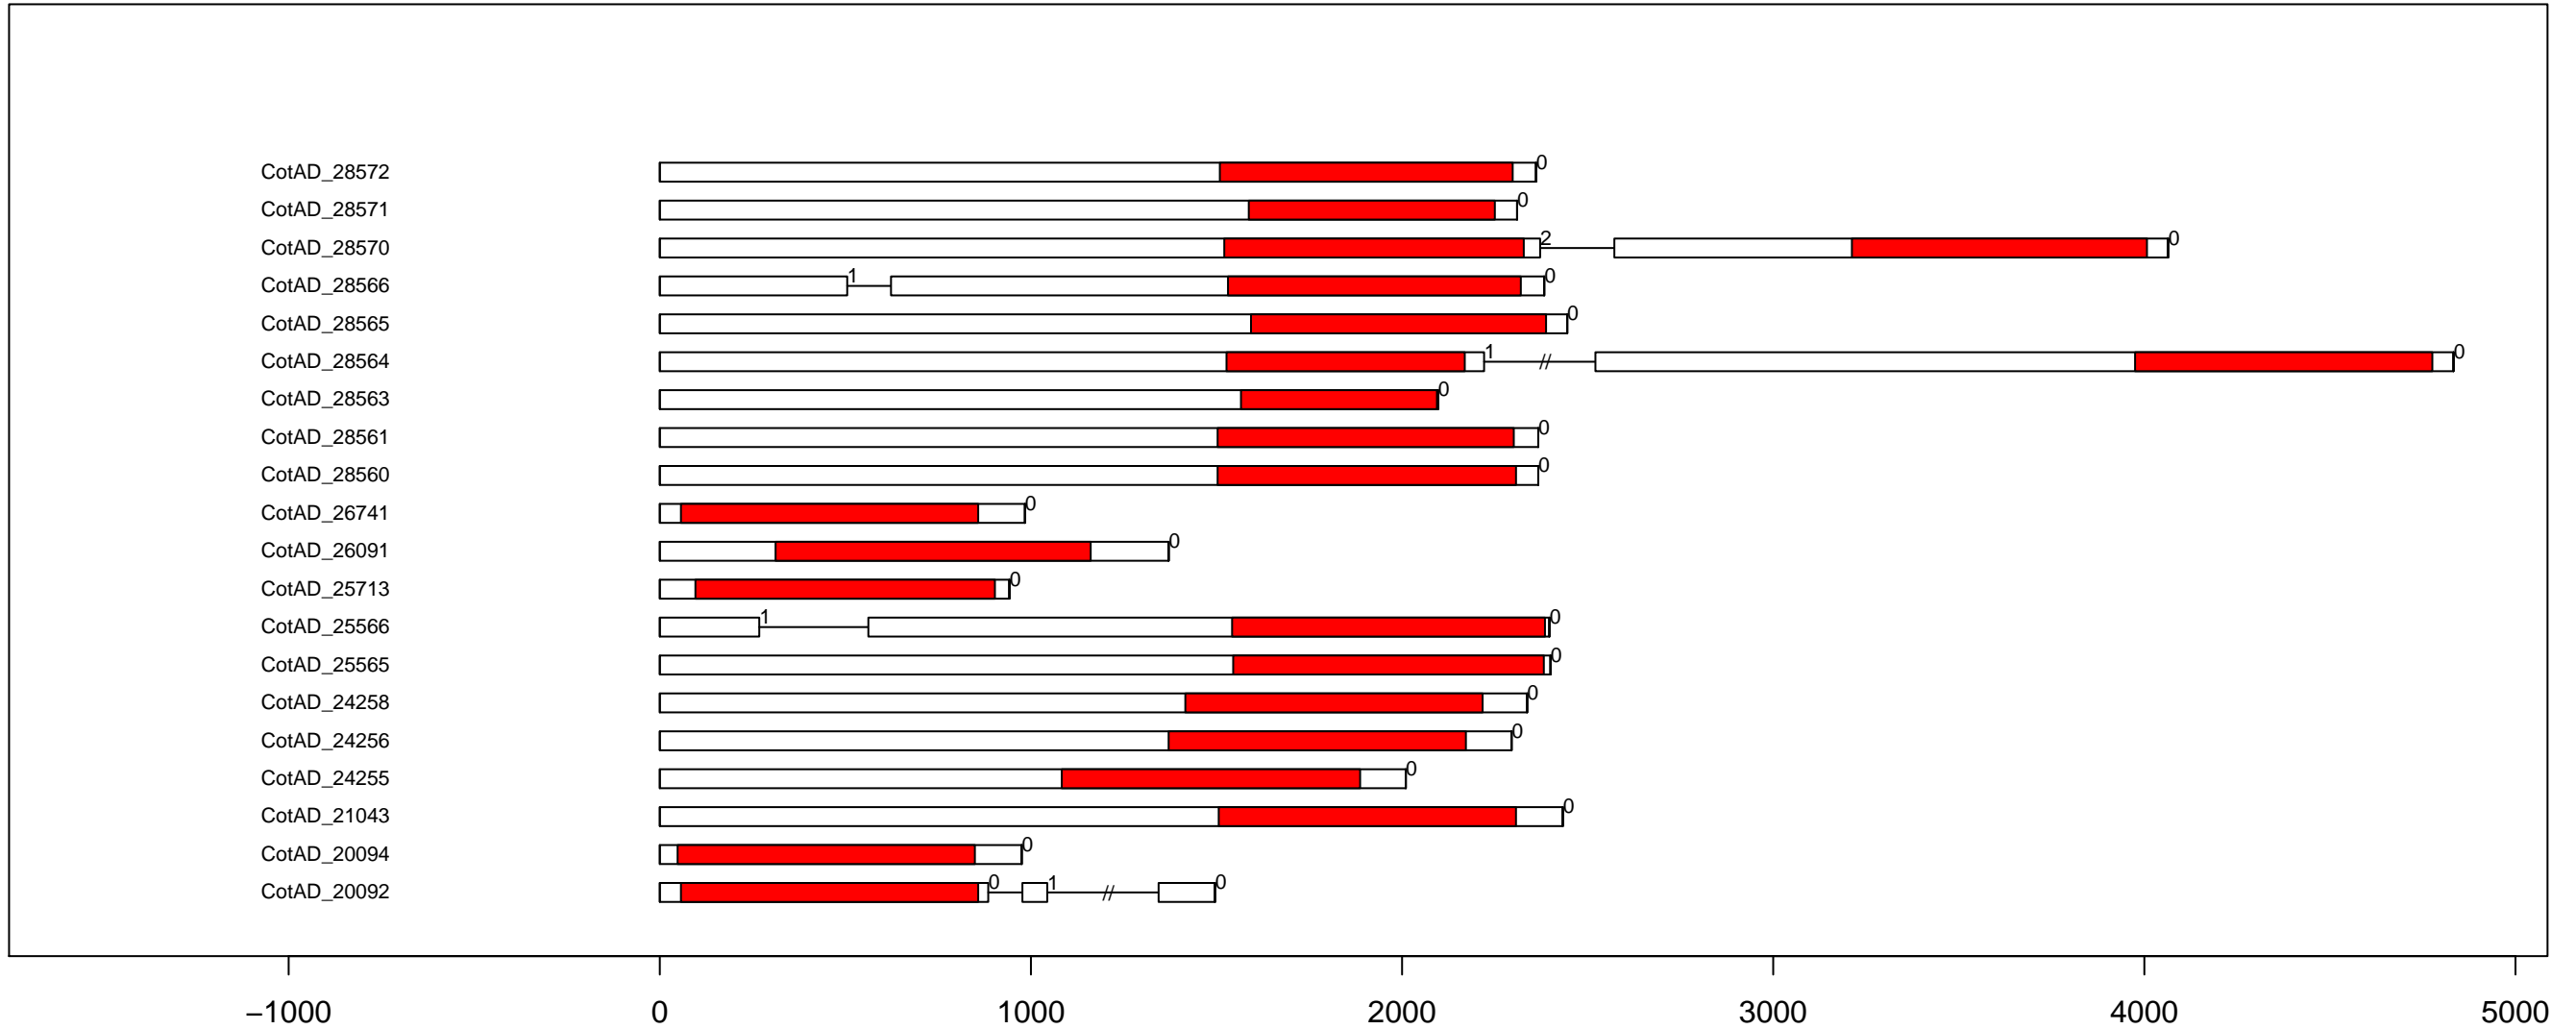

### G.hi RLK-Pelle\_SD-2b exon-intron and domain diagram (part 3)

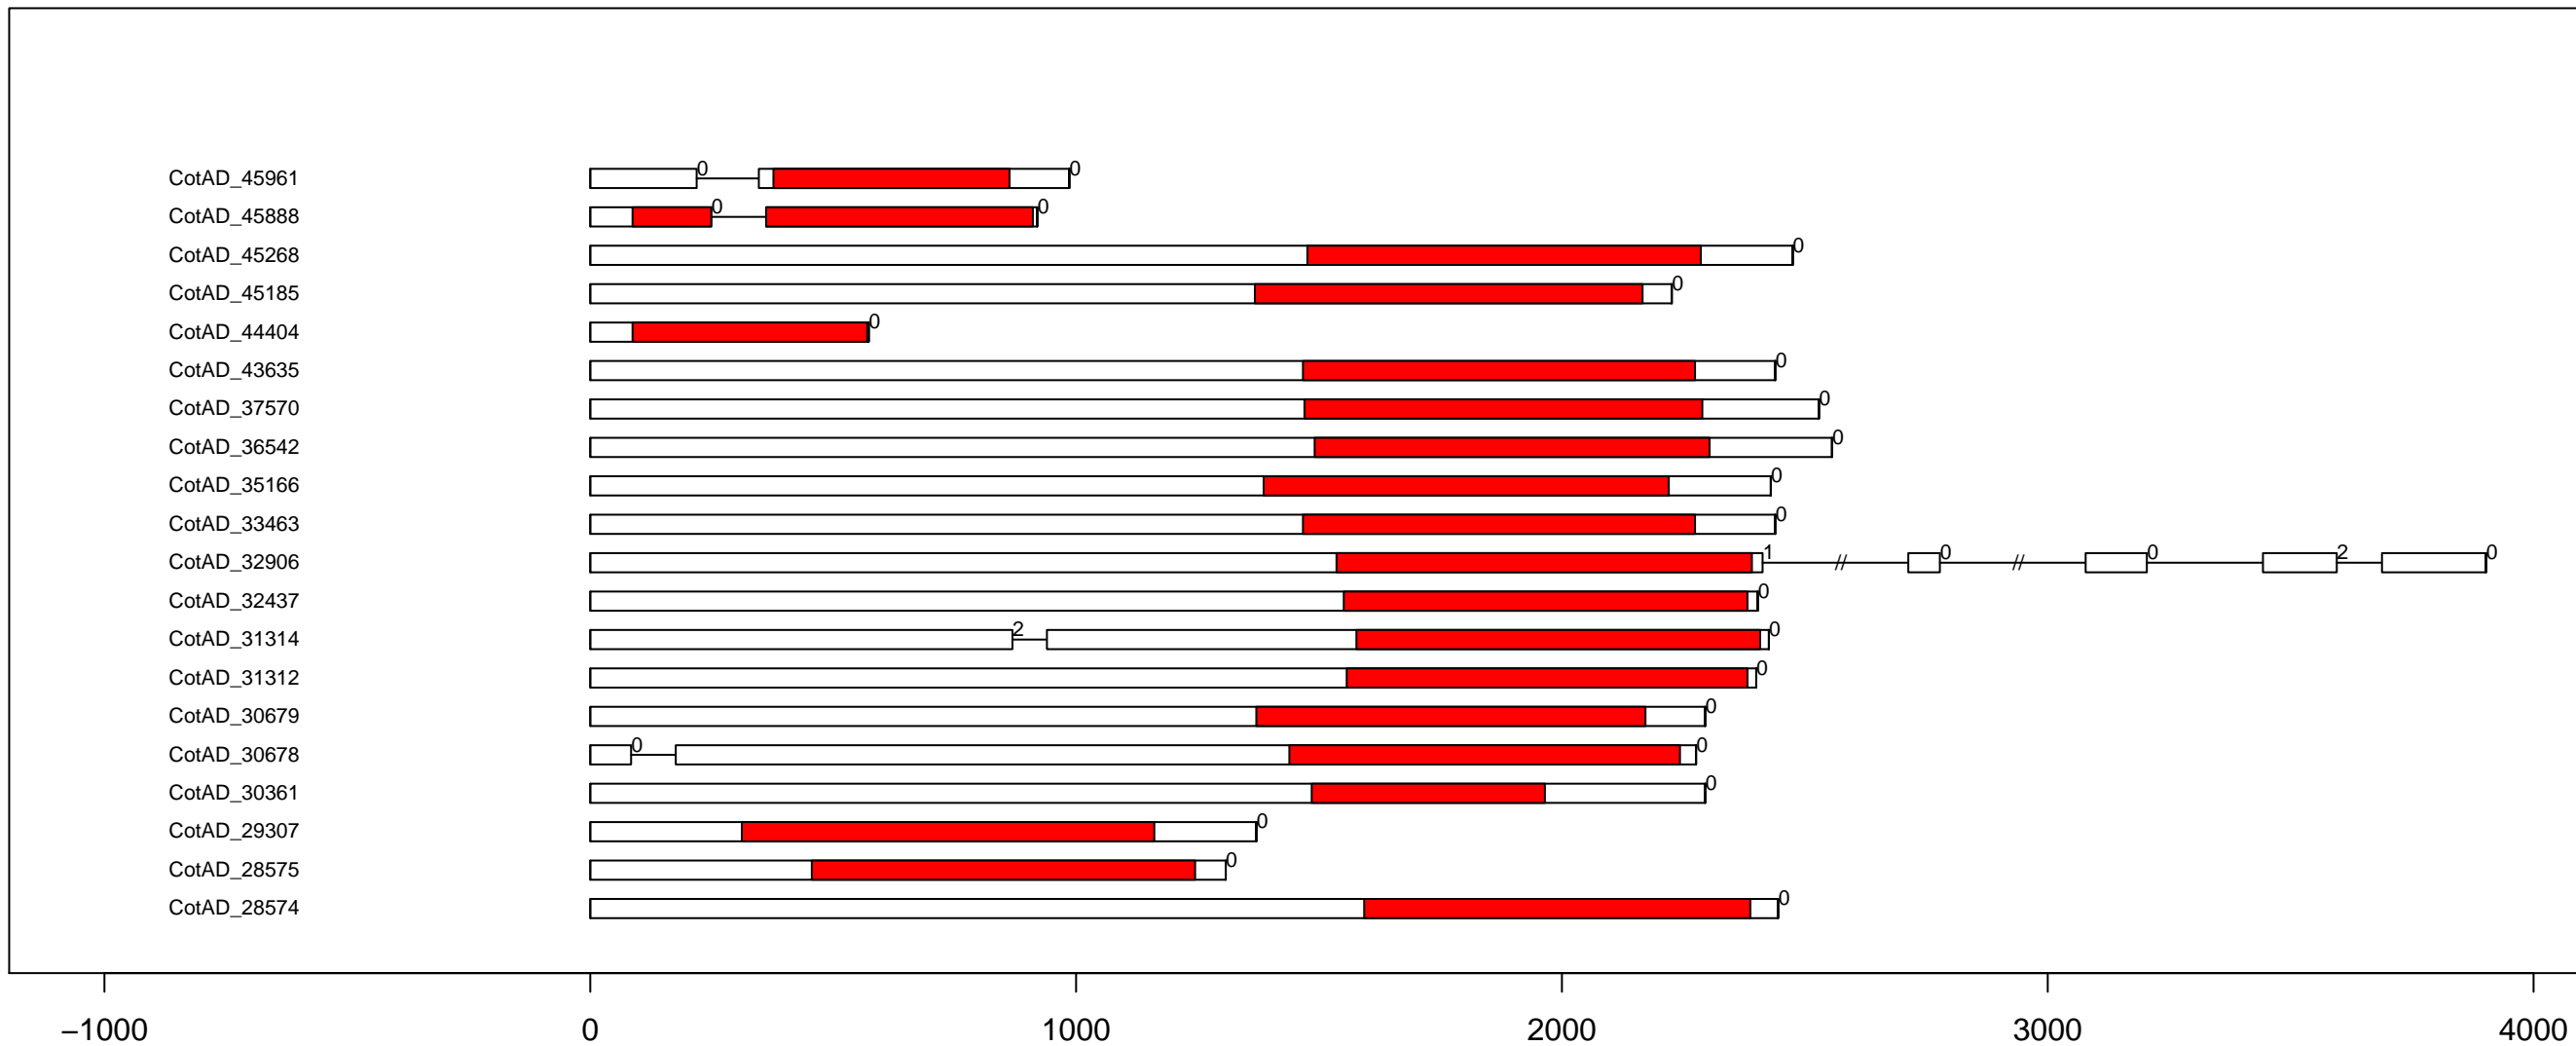



### G.hi RLK-Pelle\_SD-2b exon-intron and domain diagram (part 4)

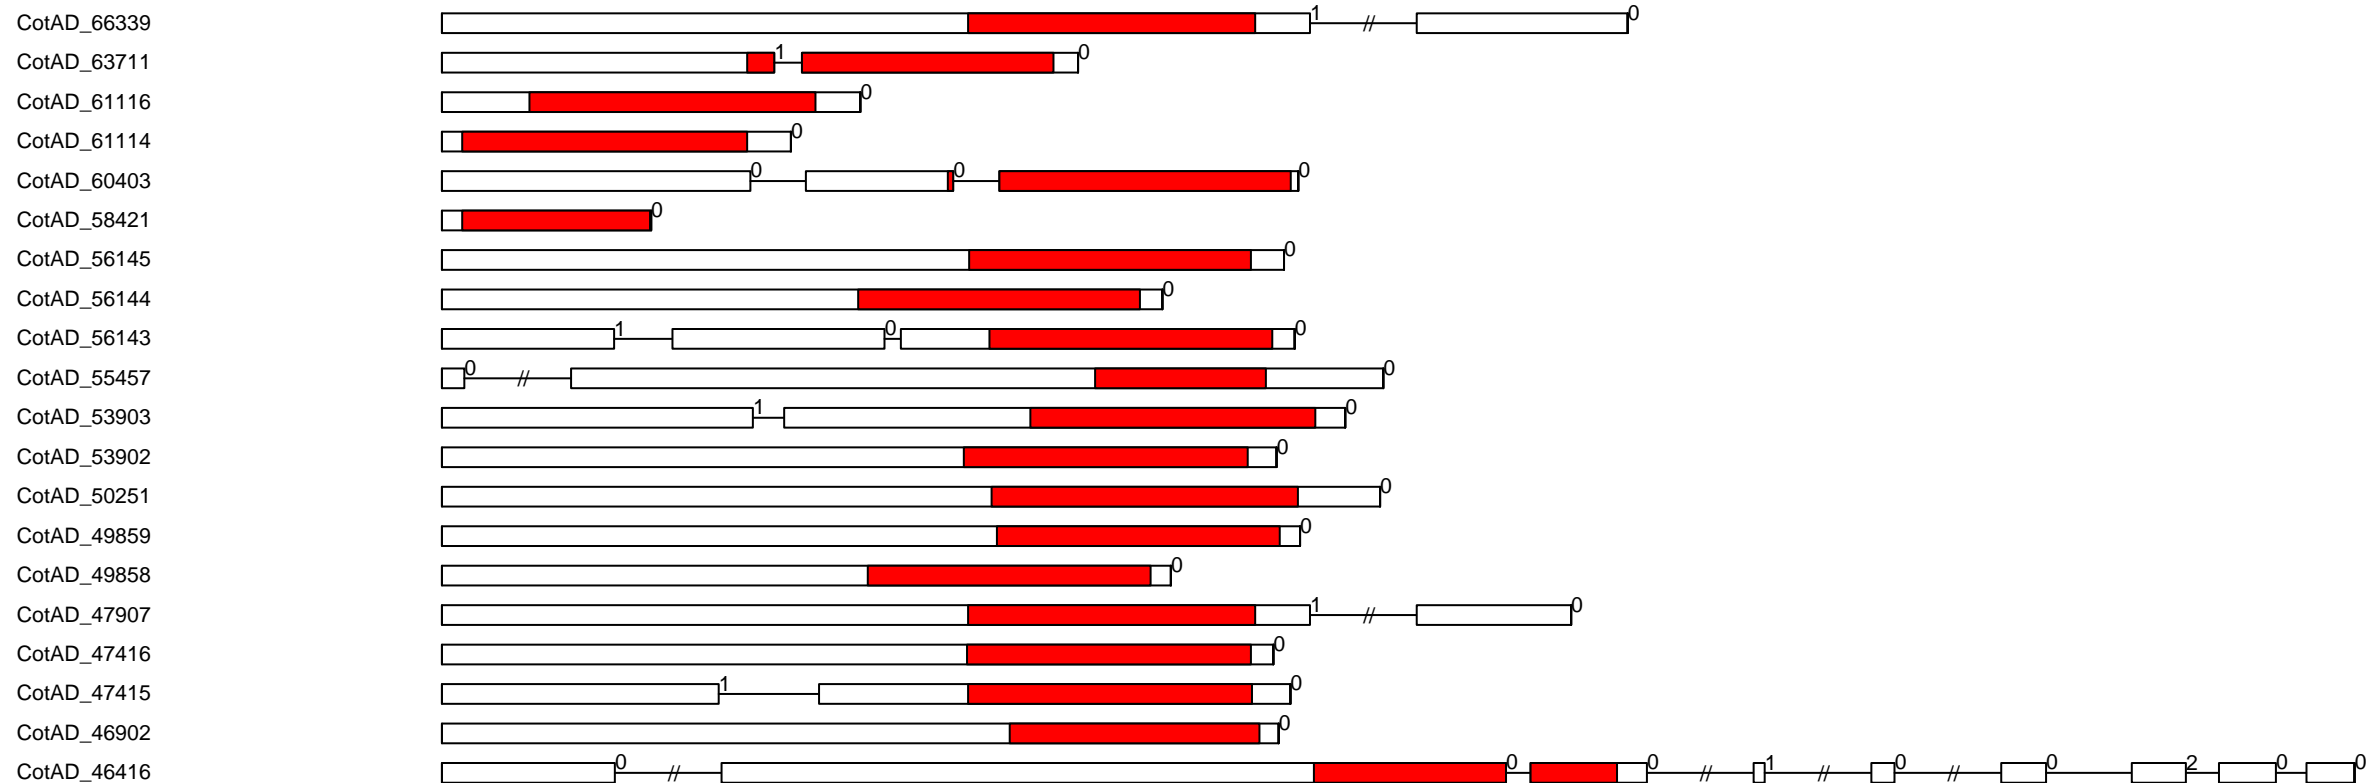

**G.hi RLK-Pelle\_SD-2b exon-intron and domain diagram (part 5)**

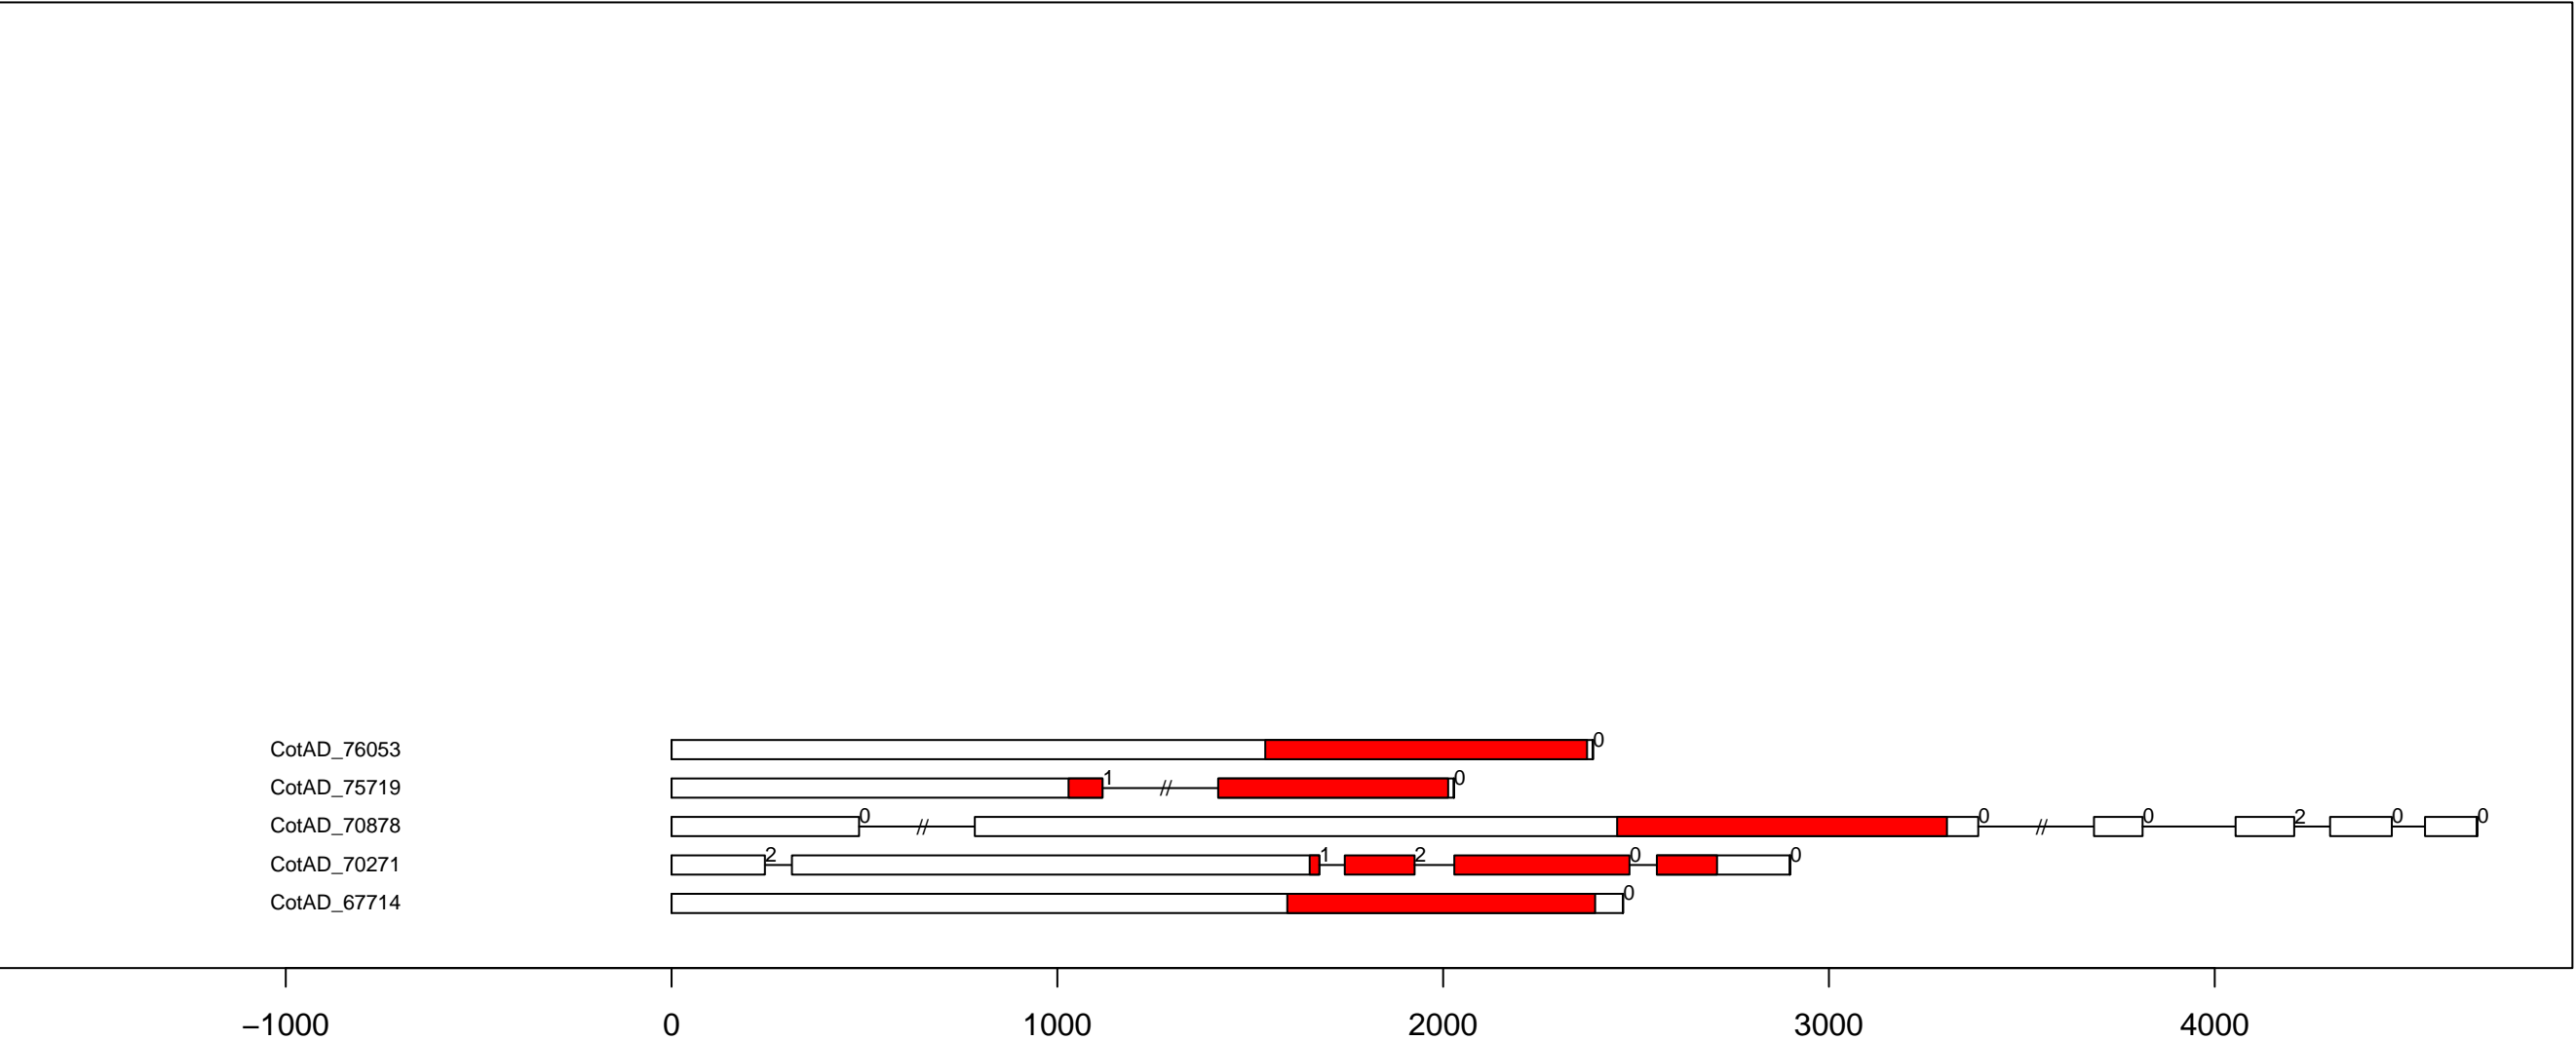

# G.hi RLK-Pelle\_Singleton exon-intron and domain diagram (all)

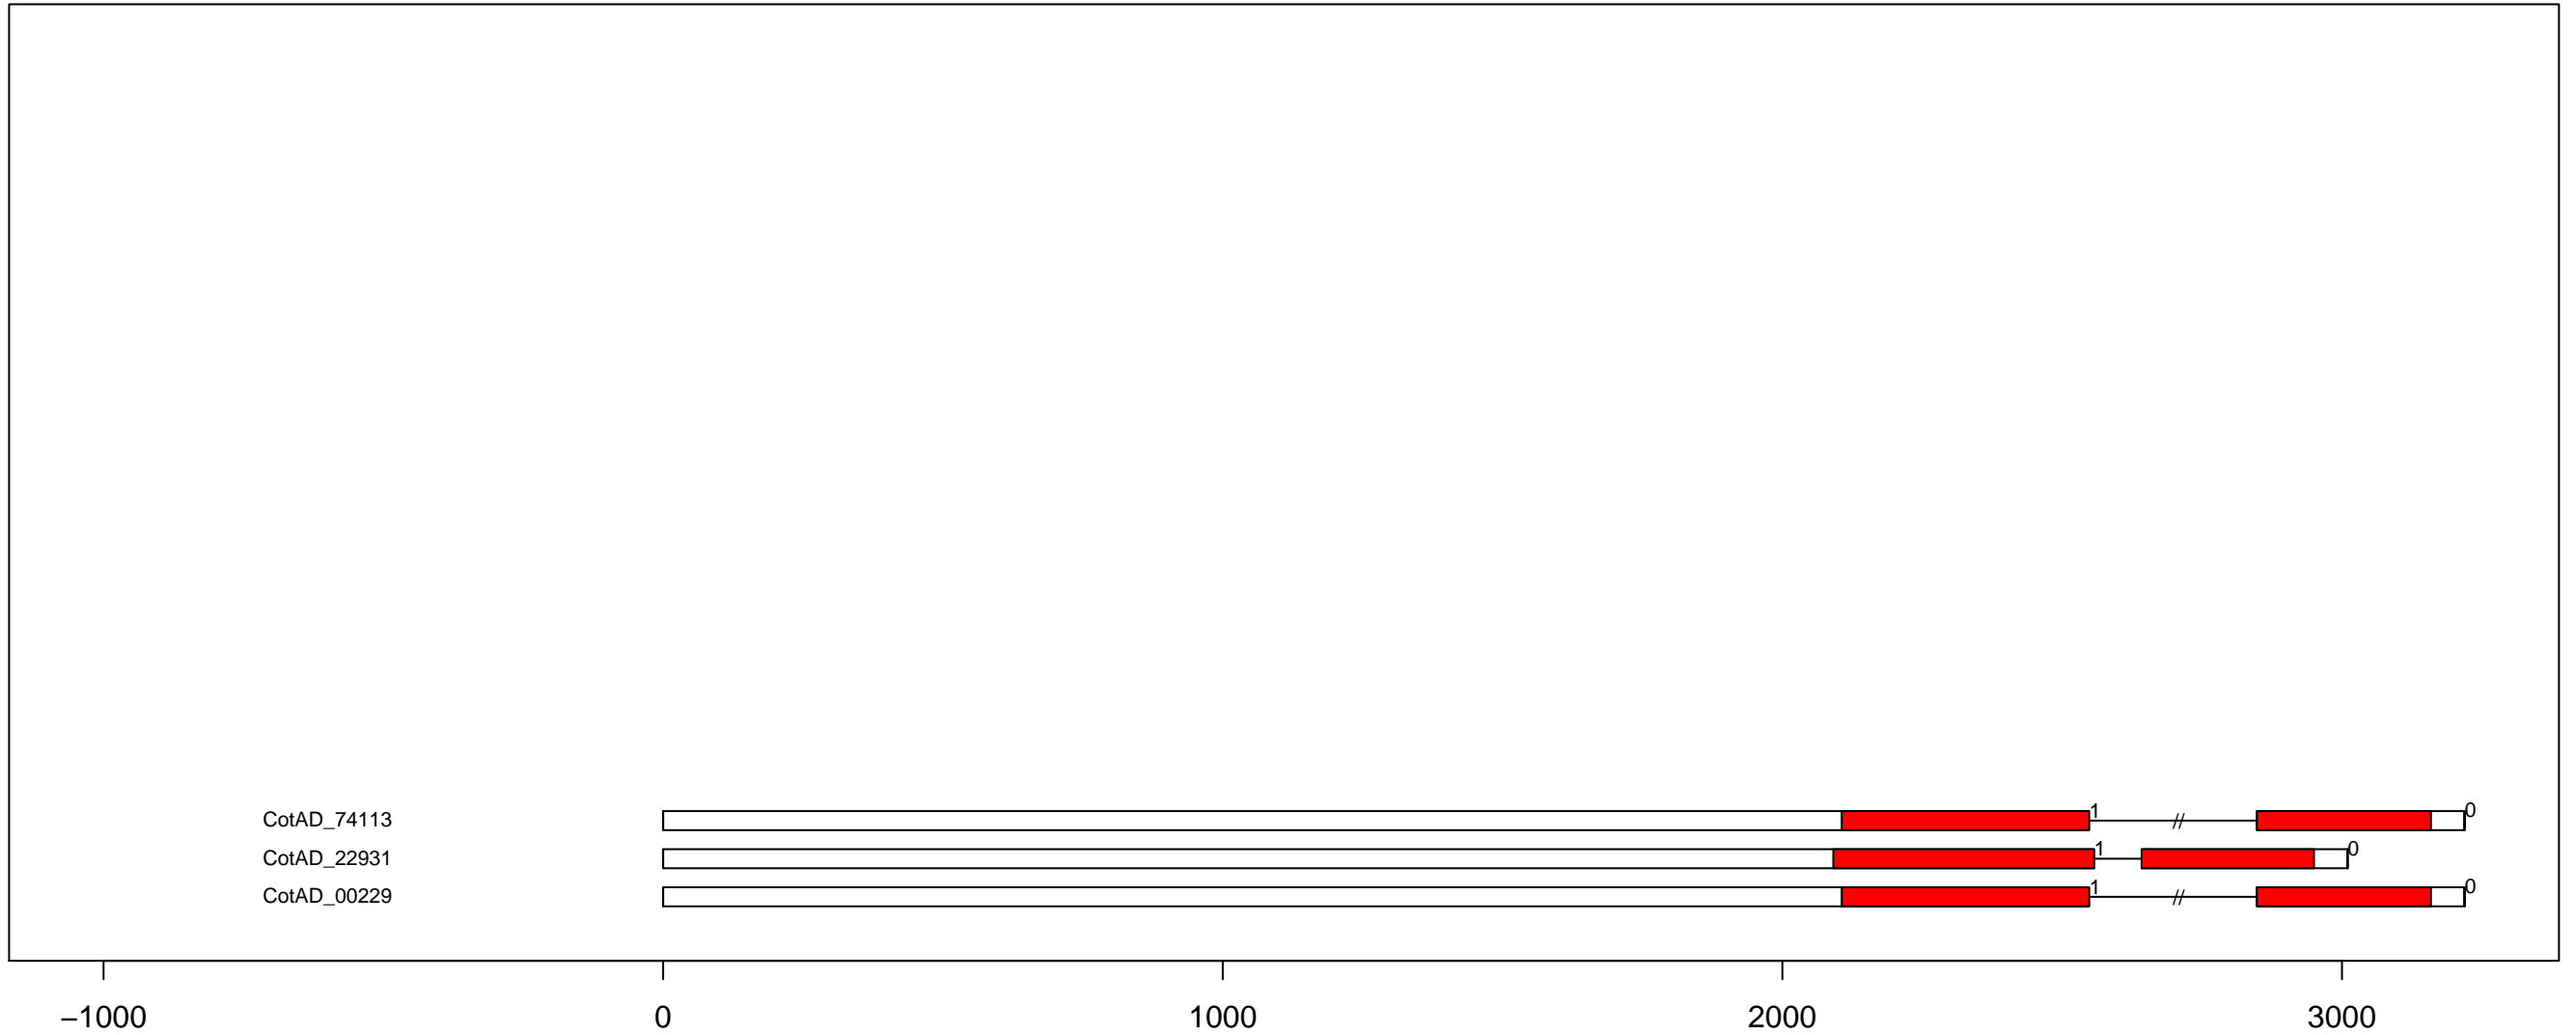

### G.hi RLK-Pelle\_URK-1 exon-intron and domain diagram (all)

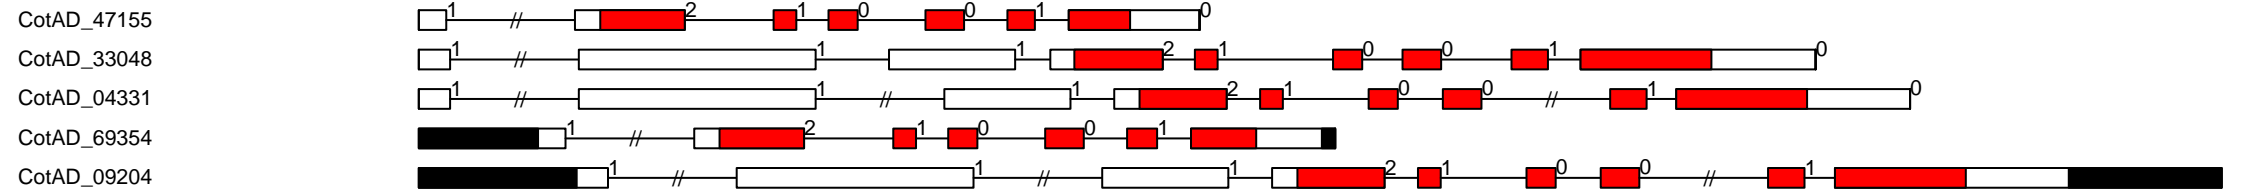

# G.hi RLK-Pelle\_URK-2 exon-intron and domain diagram (all)

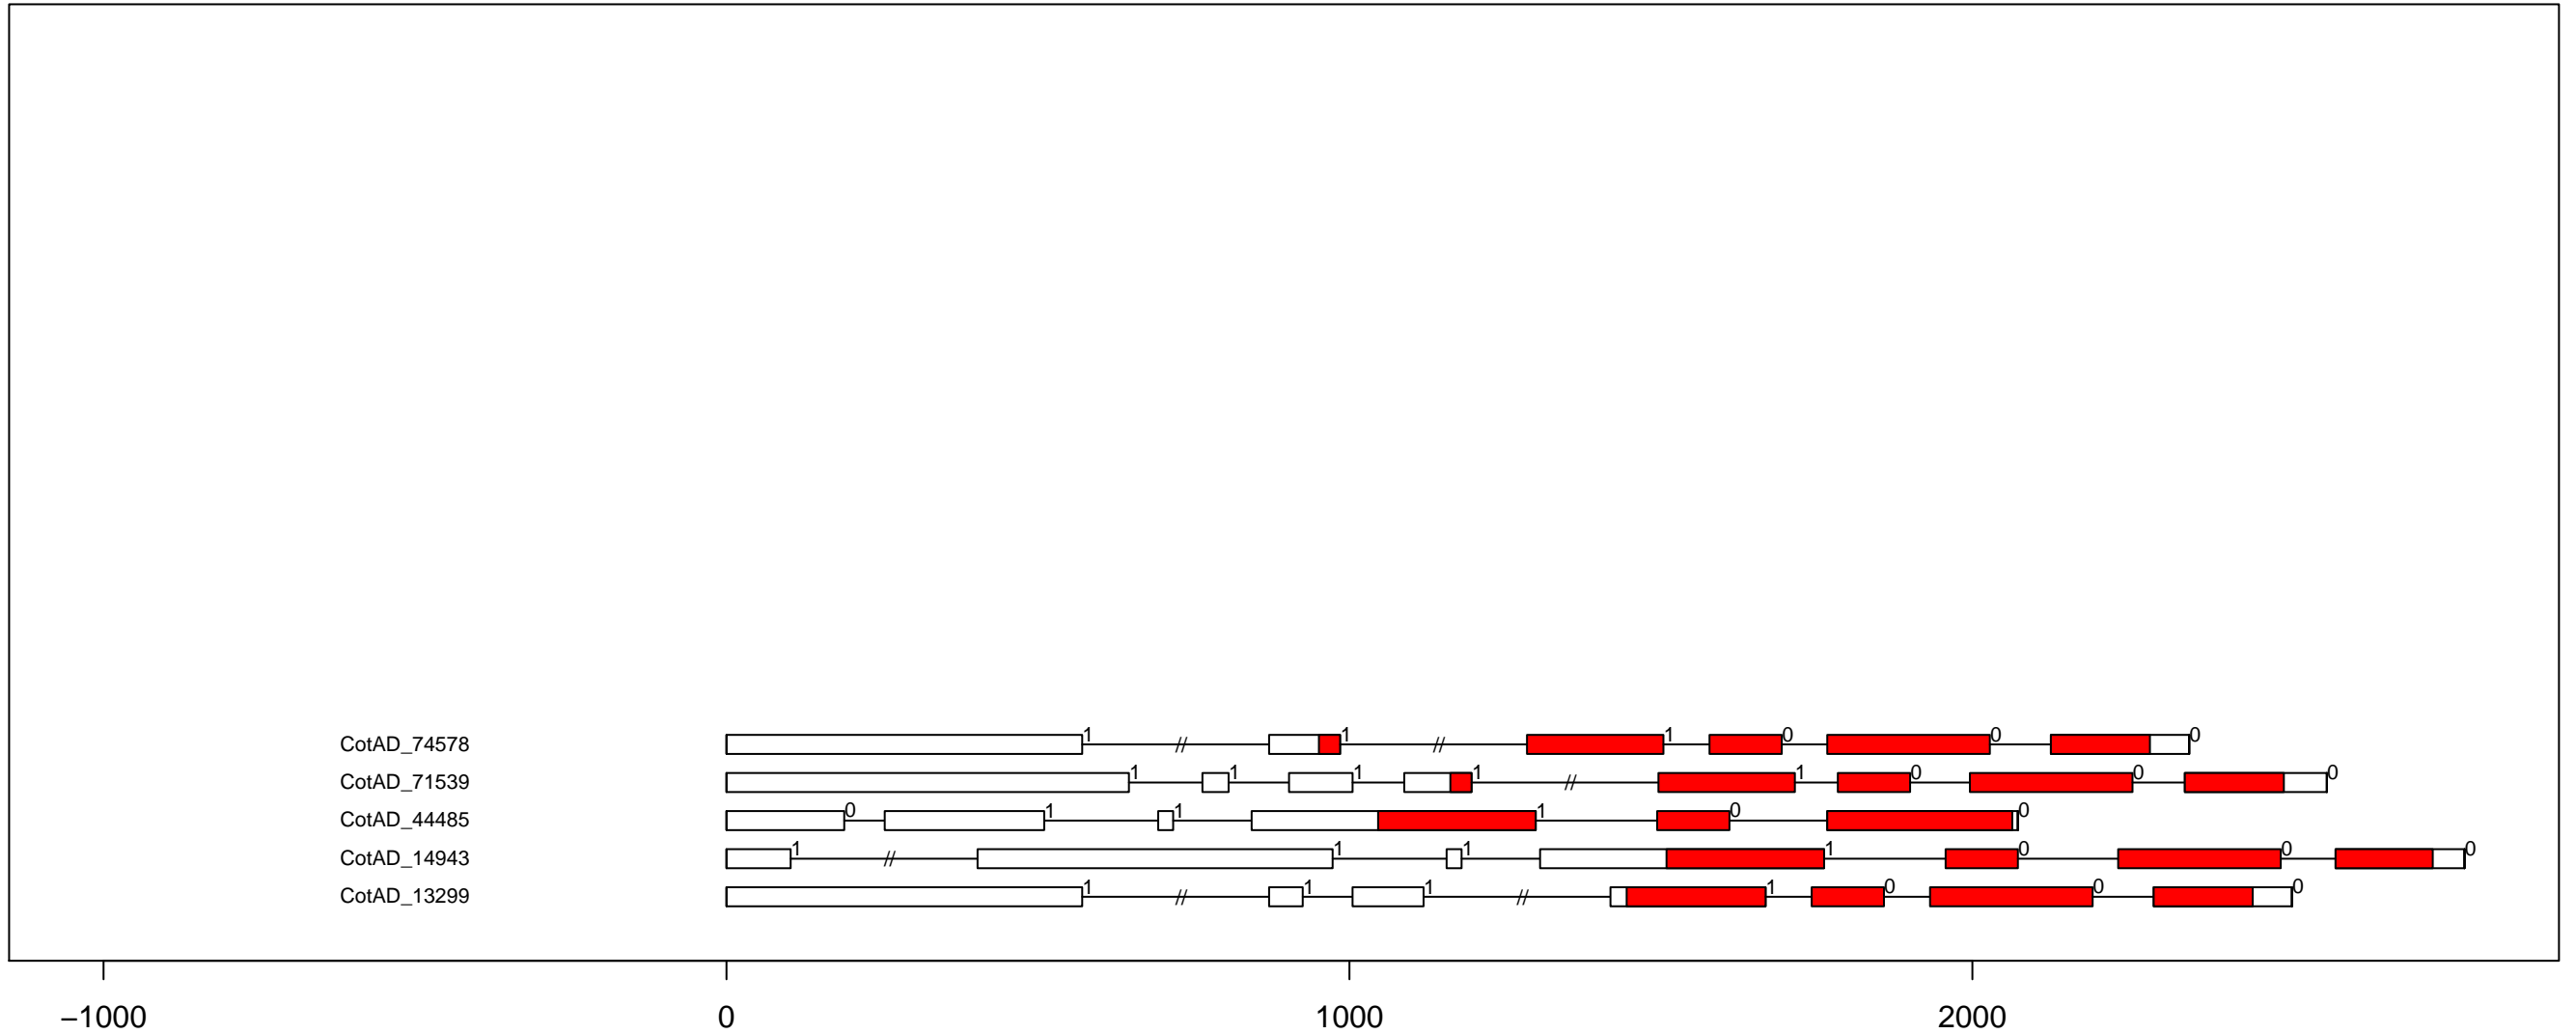

# G.hi RLK-Pelle\_URK-3 exon-intron and domain diagram (all)

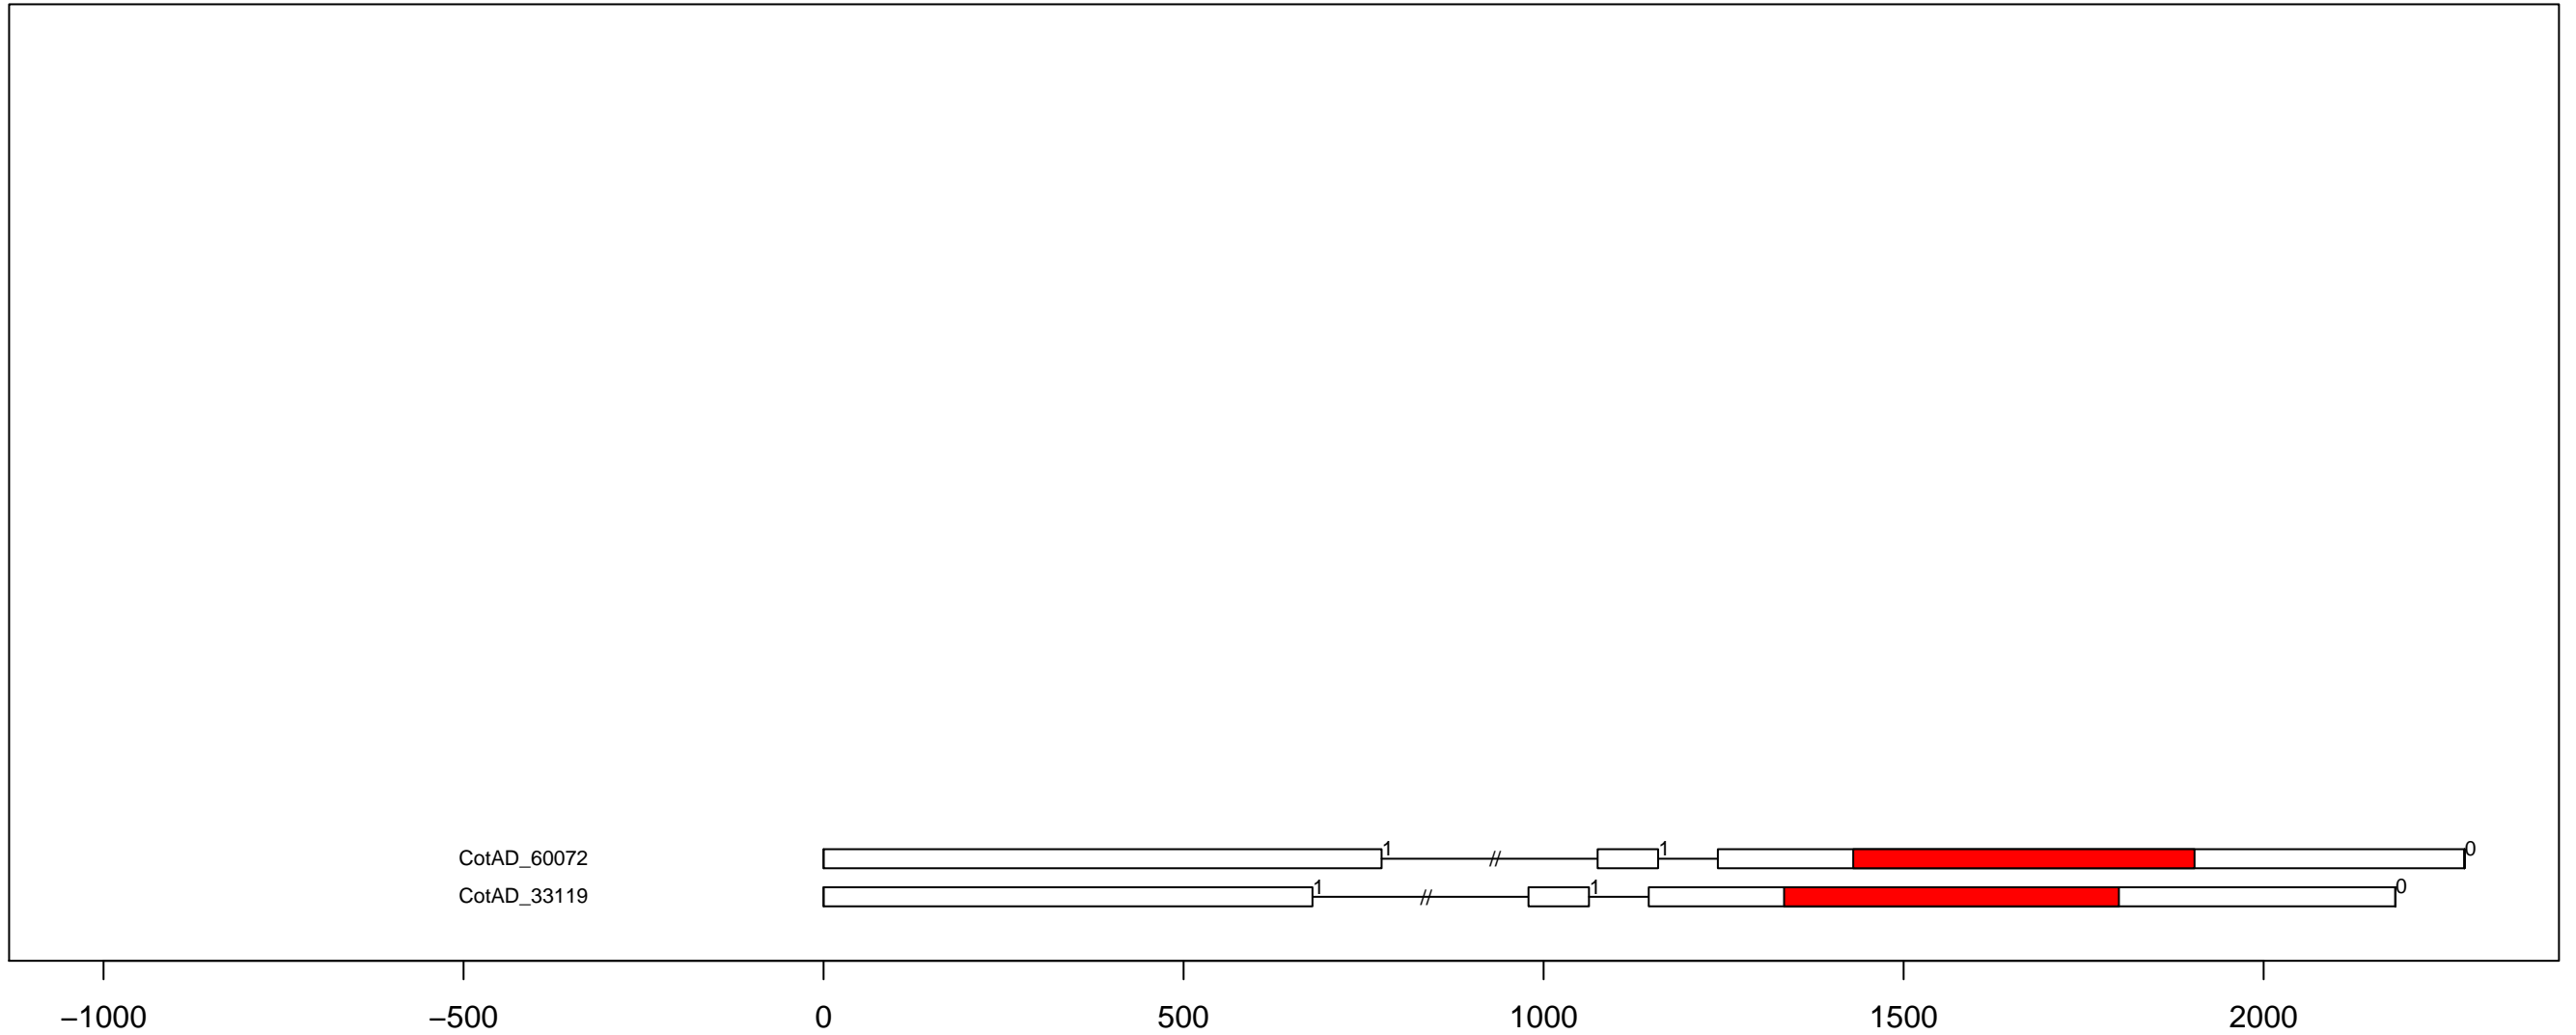

### G.hi RLK-Pelle\_WAK\_LRK10L-1 exon-intron and domain diagram (part 1)

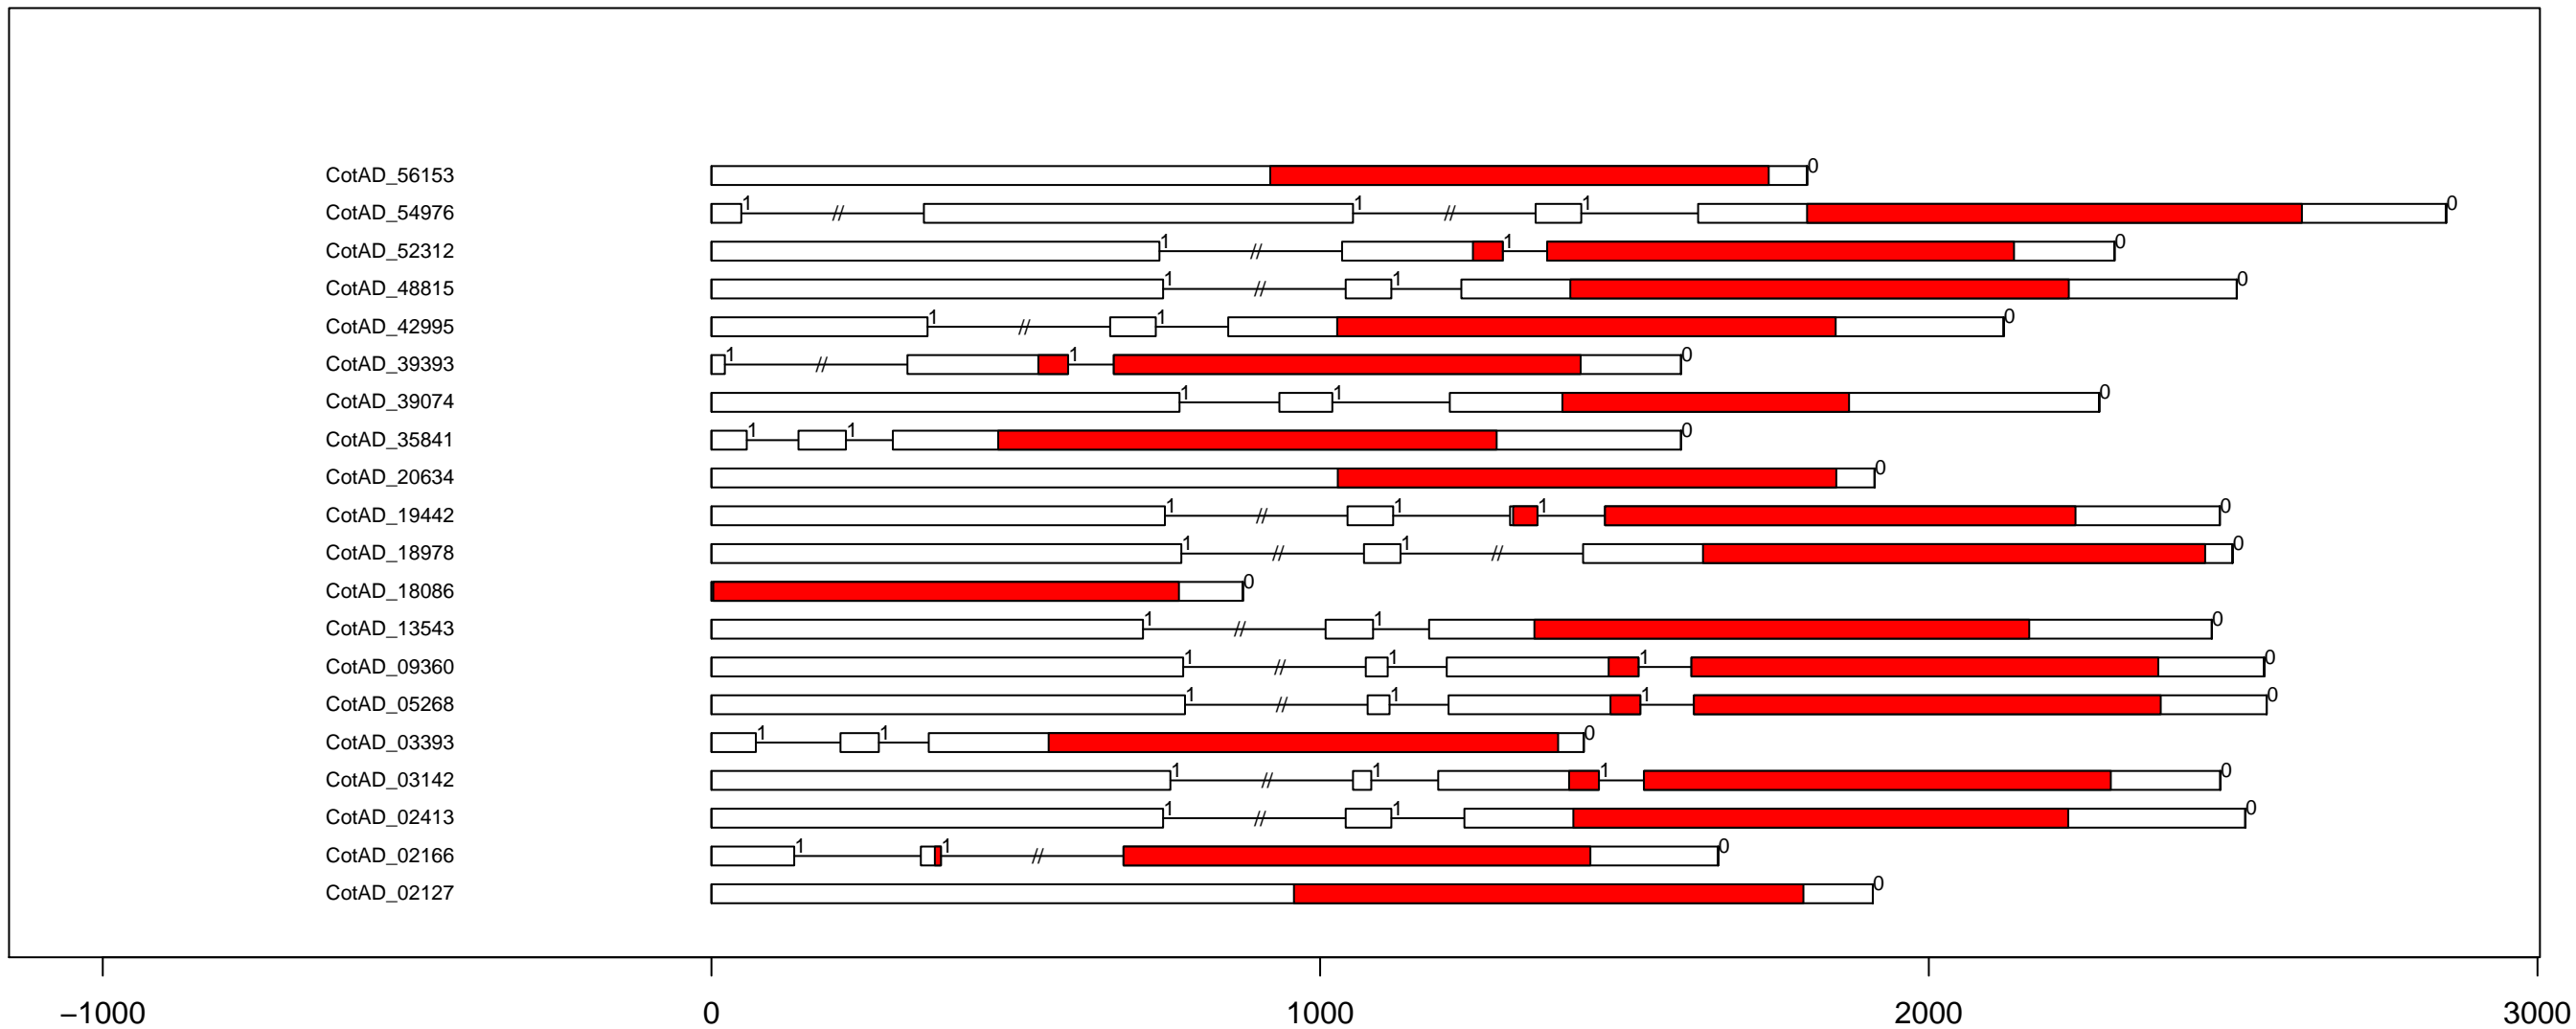

G.hi RLK-Pelle\_WAK\_LRK10L-1 exon-intron and domain diagram (part 2)

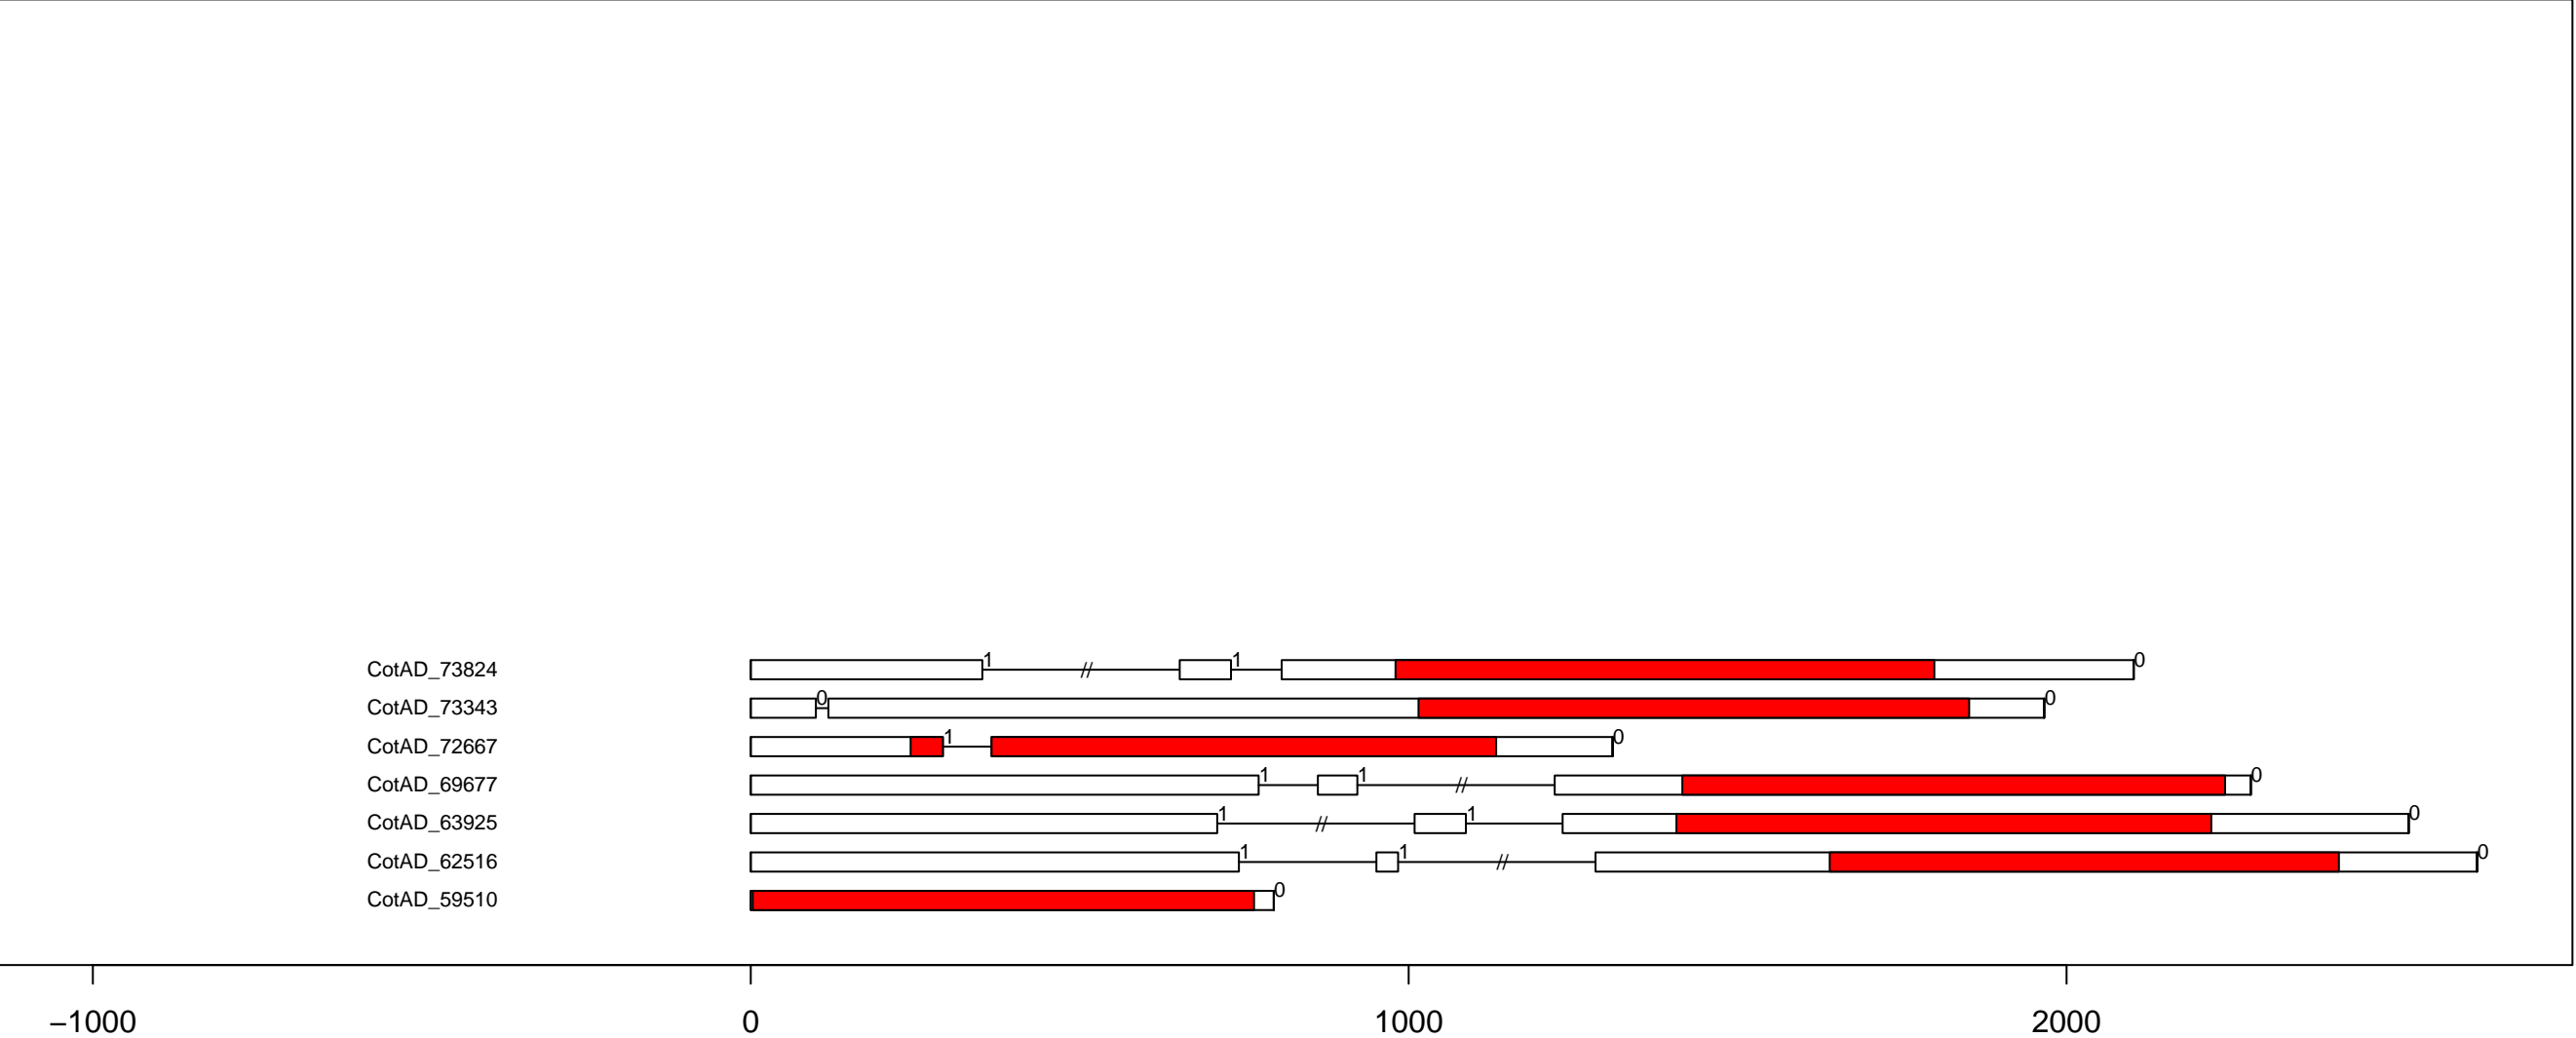







### G.hi RLK-Pelle\_WAK exon-intron and domain diagram (part 3)

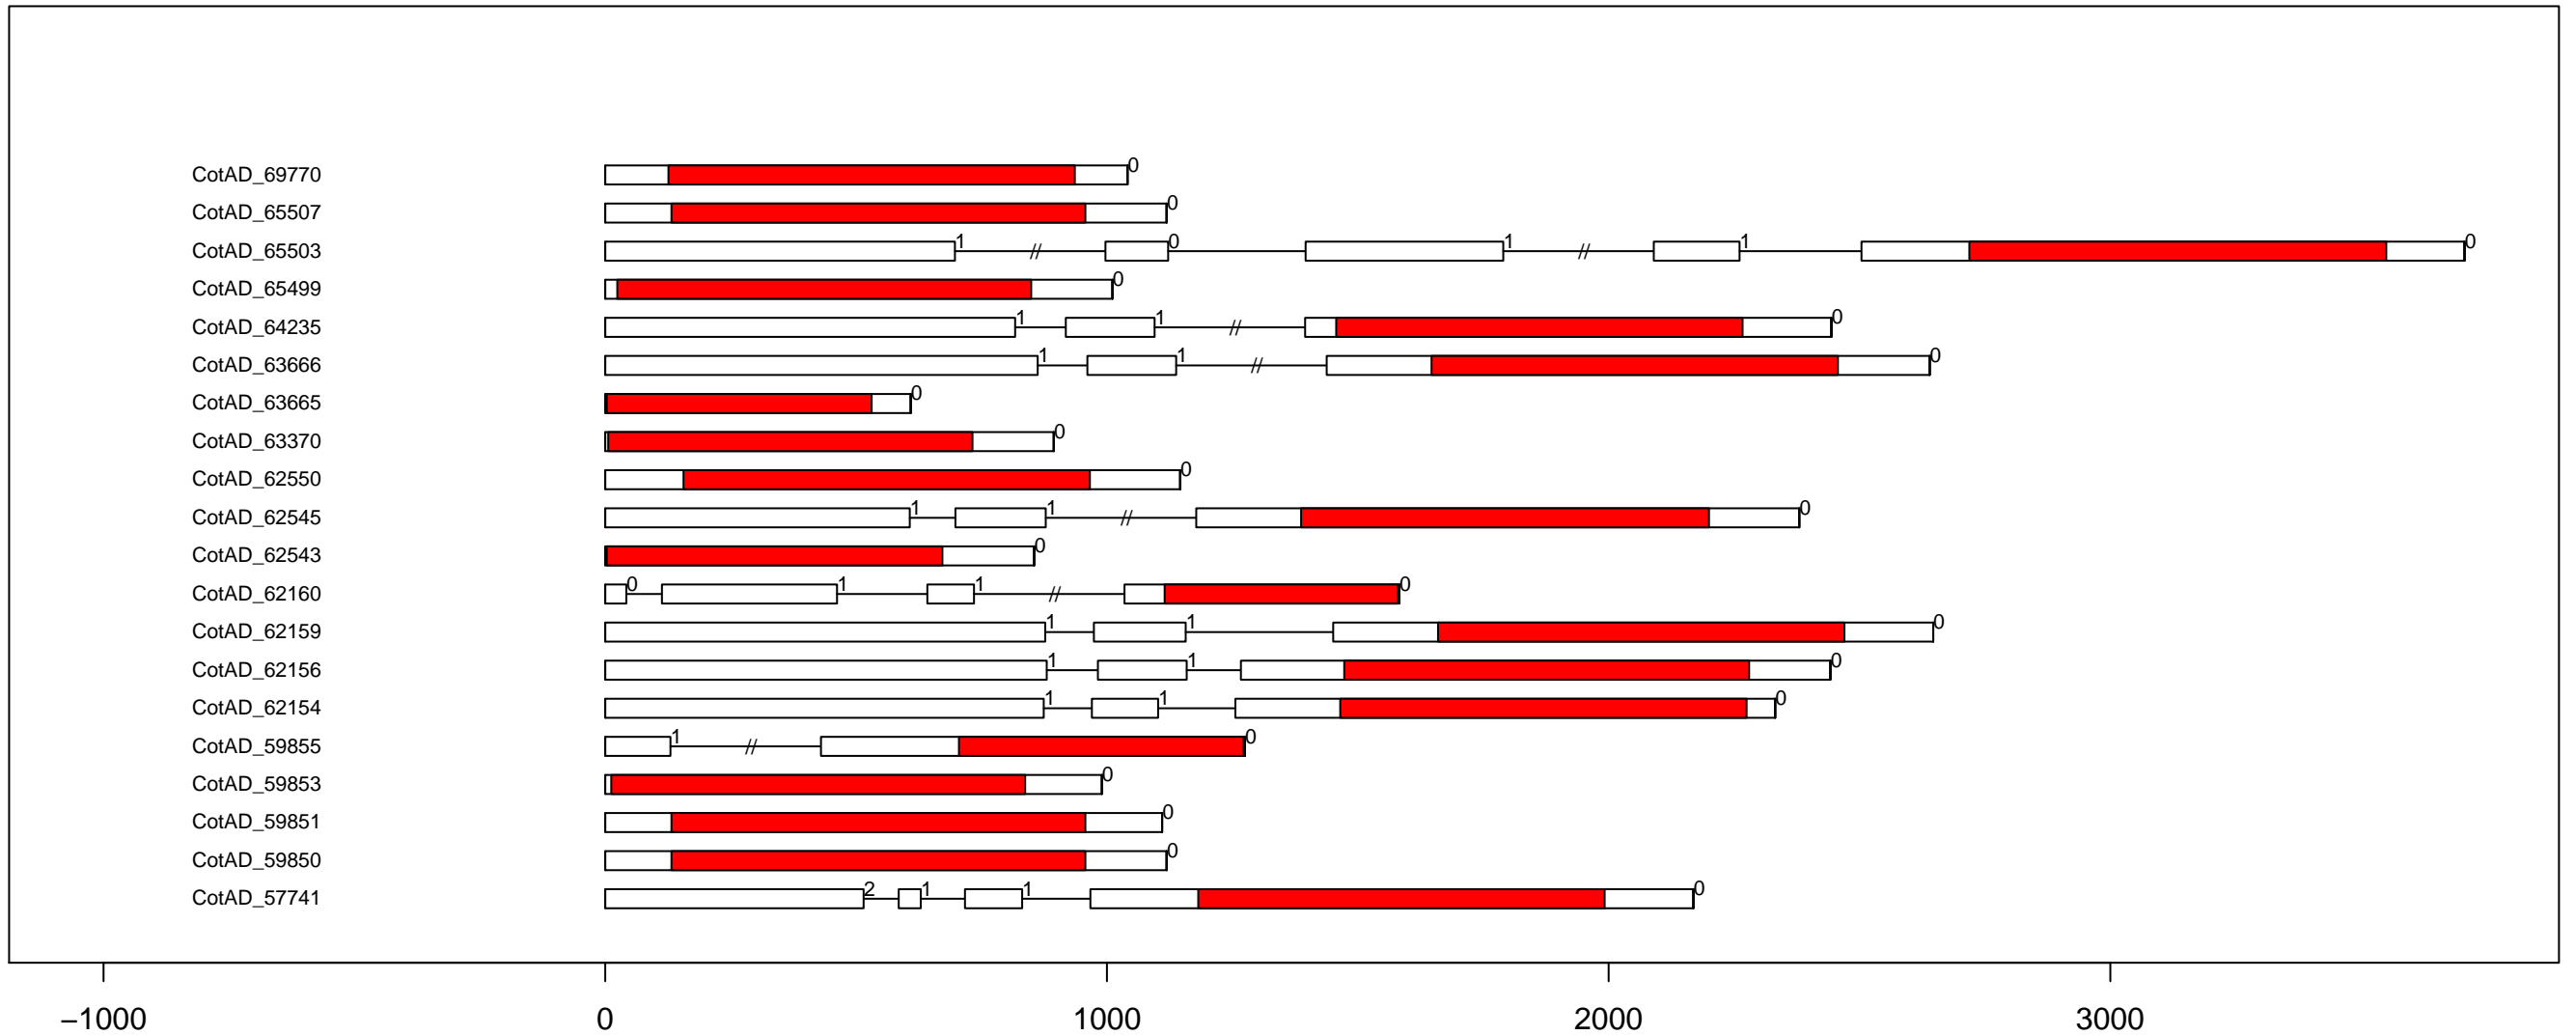

### G.hi RLK-Pelle\_WAK exon-intron and domain diagram (part 4)

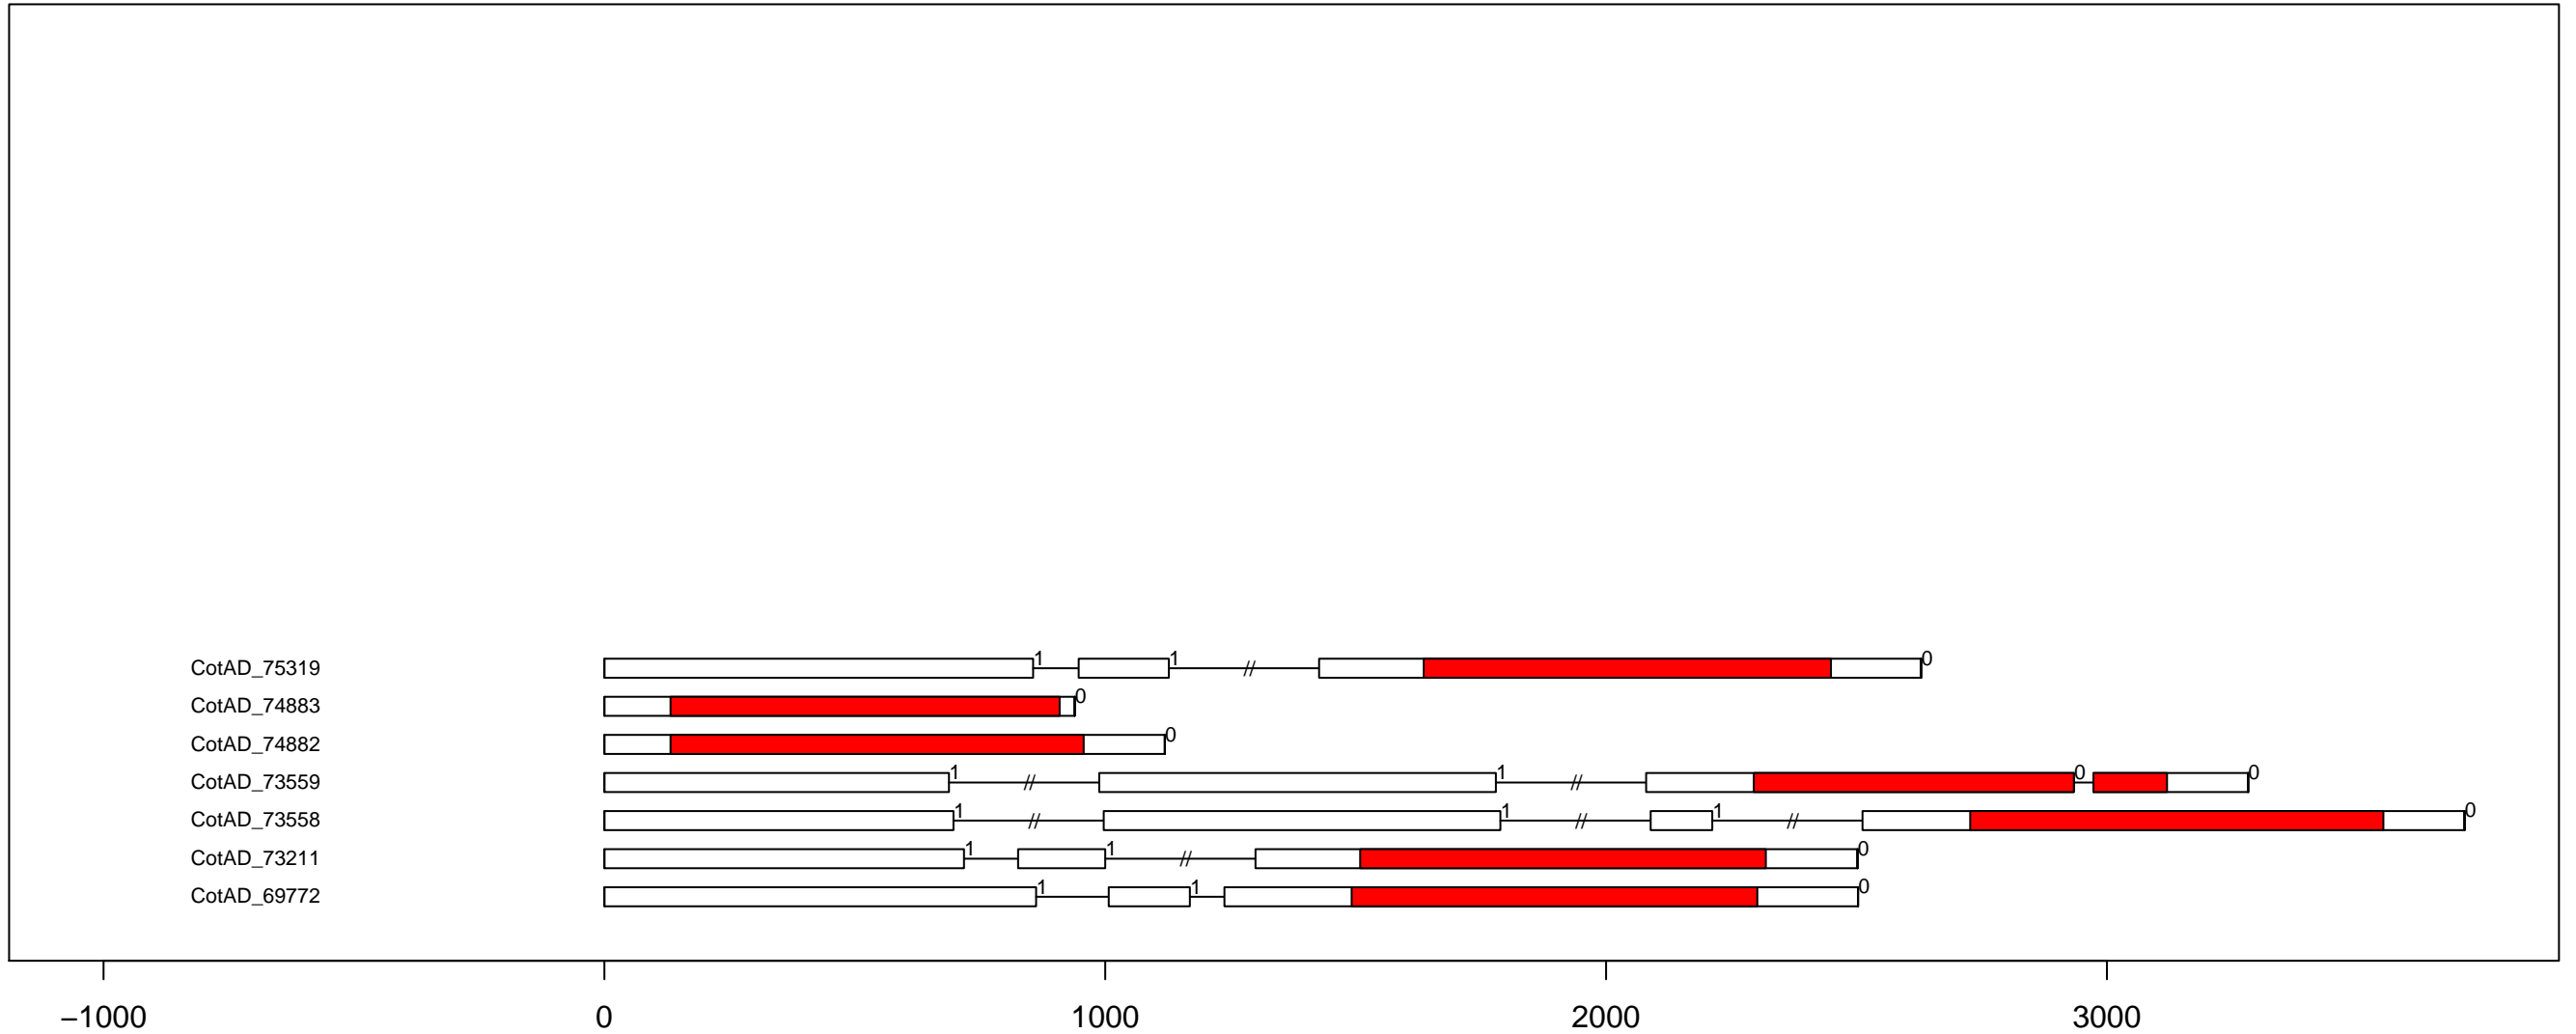

# G.hi SCY1\_SCYL1 exon-intron and domain diagram (all)

CotAD\_57167

CotAD\_16773

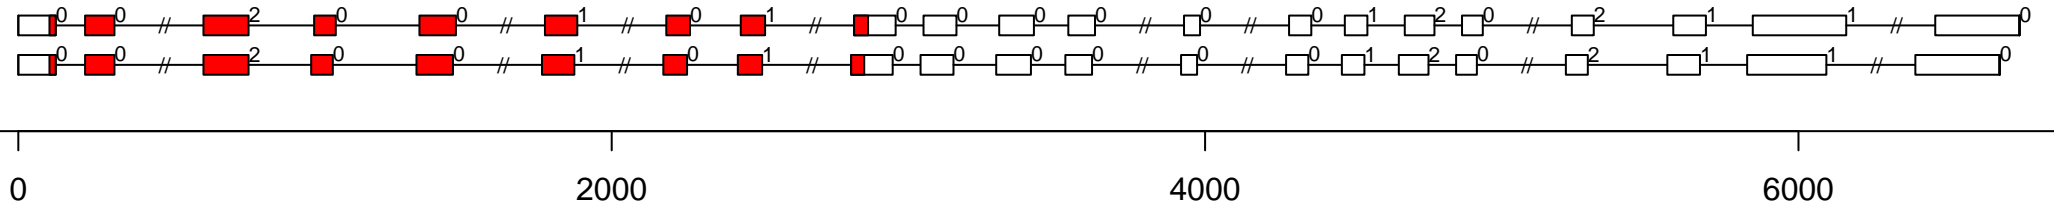

# G.hi SCY1\_SCYL2 exon-intron and domain diagram (all)

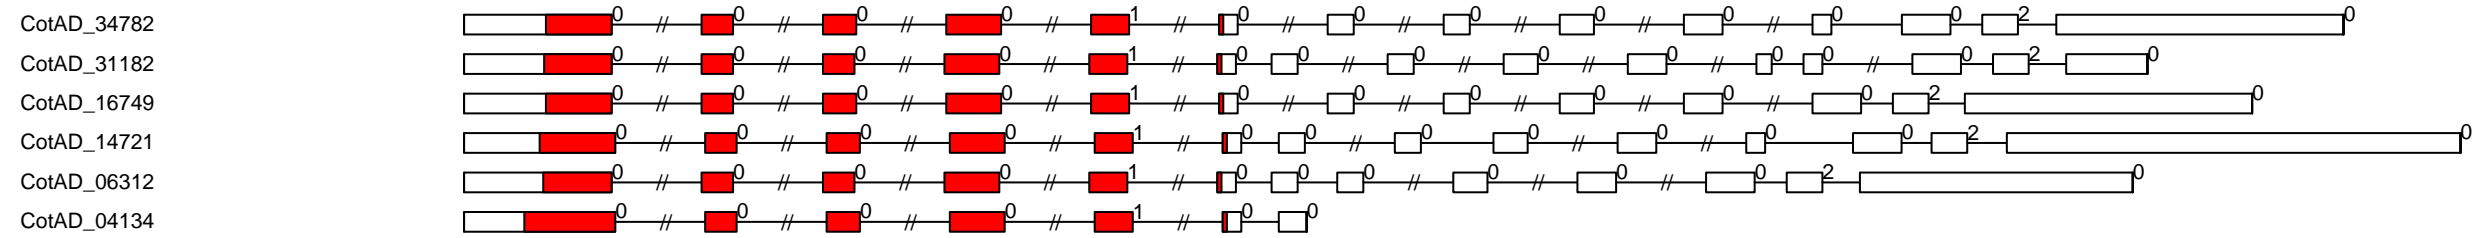

0

2000

4000

6000



### G.hi STE\_STE11 exon-intron and domain diagram (part 2)

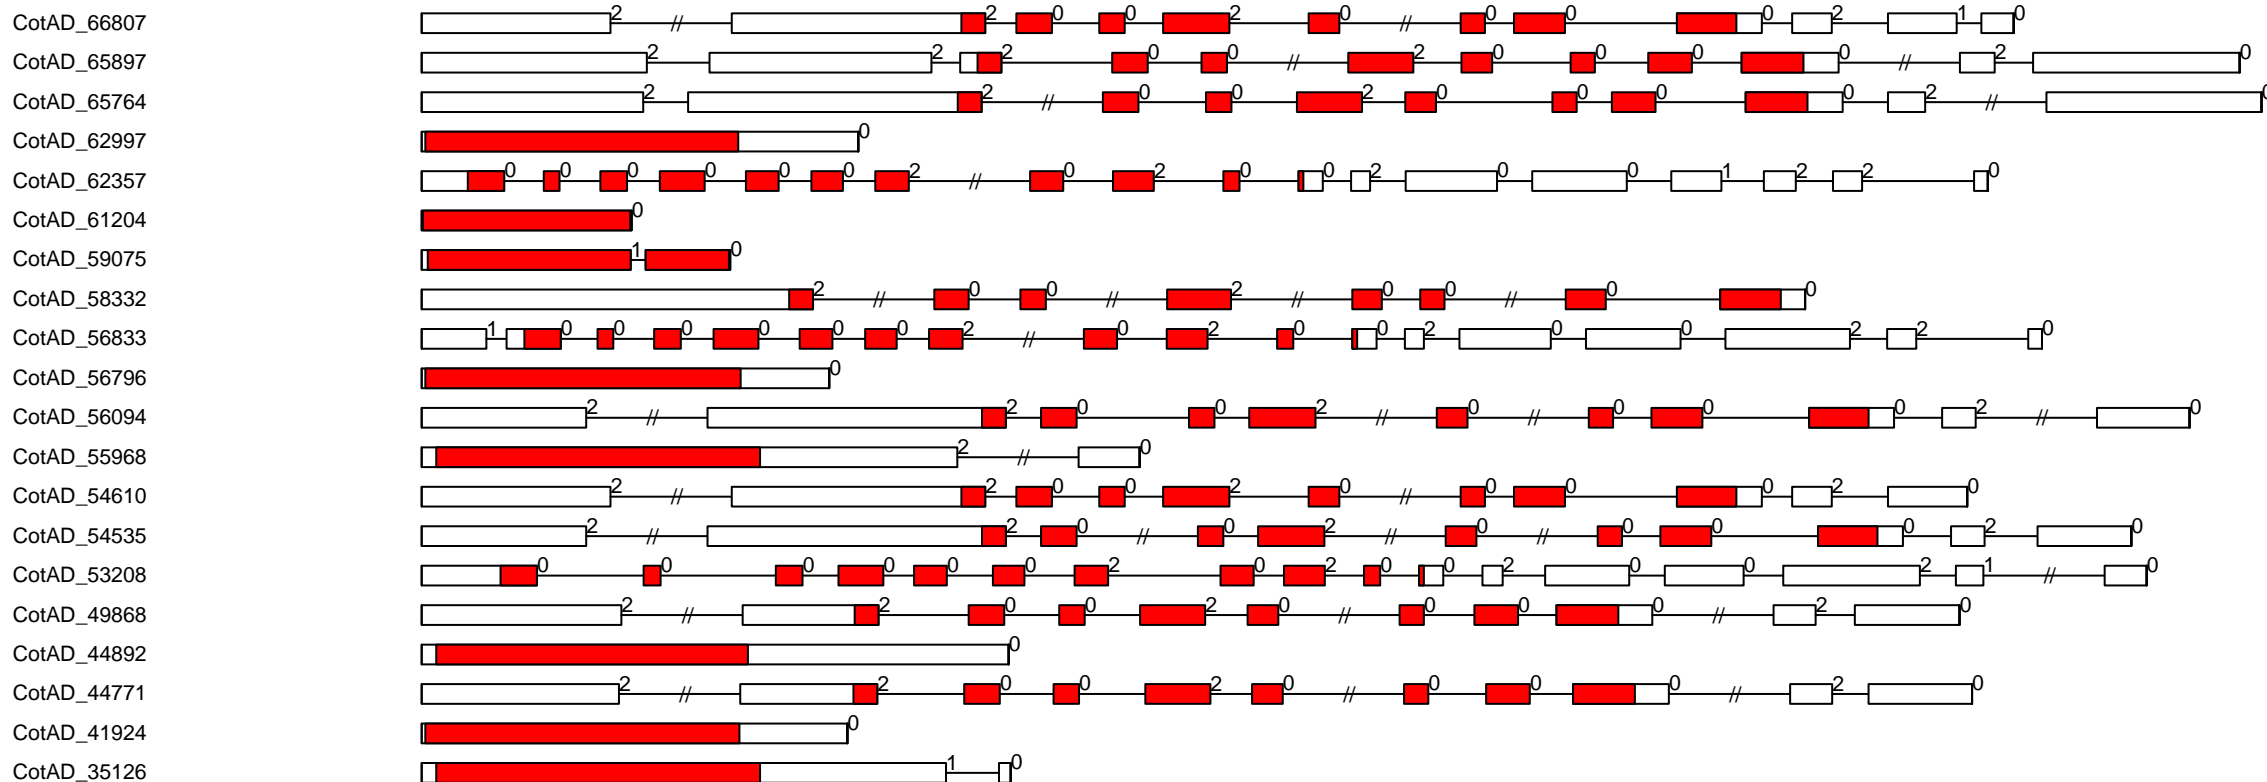

-1000

0

1000

2000

3000

4000



G.hi STE\_STE11 exon-intron and domain diagram (part 3)

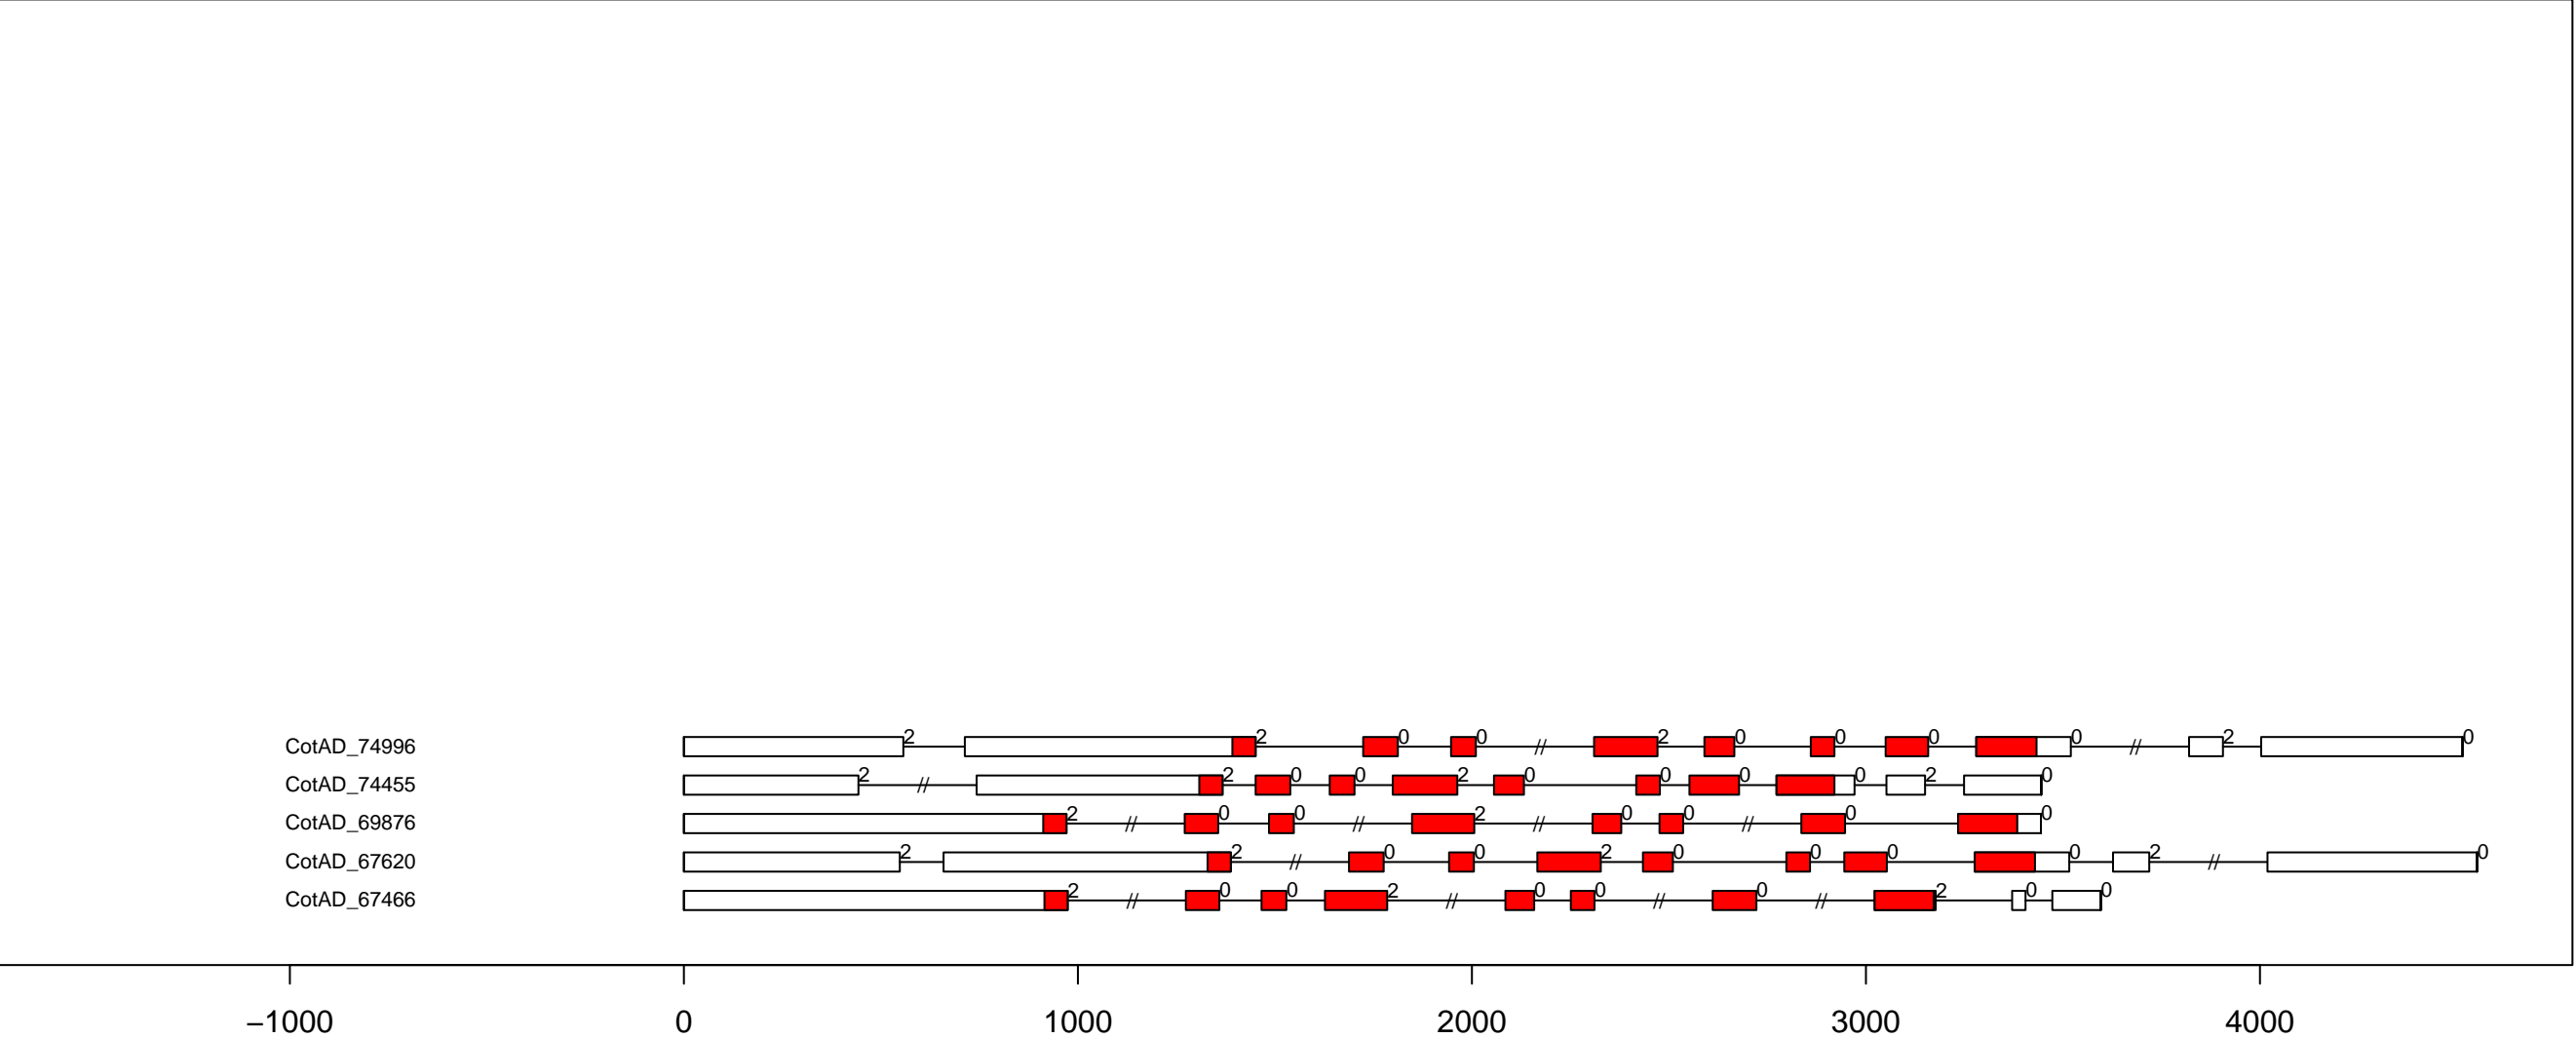

# G.hi STE\_STE20-Fray exon-intron and domain diagram (part 1)

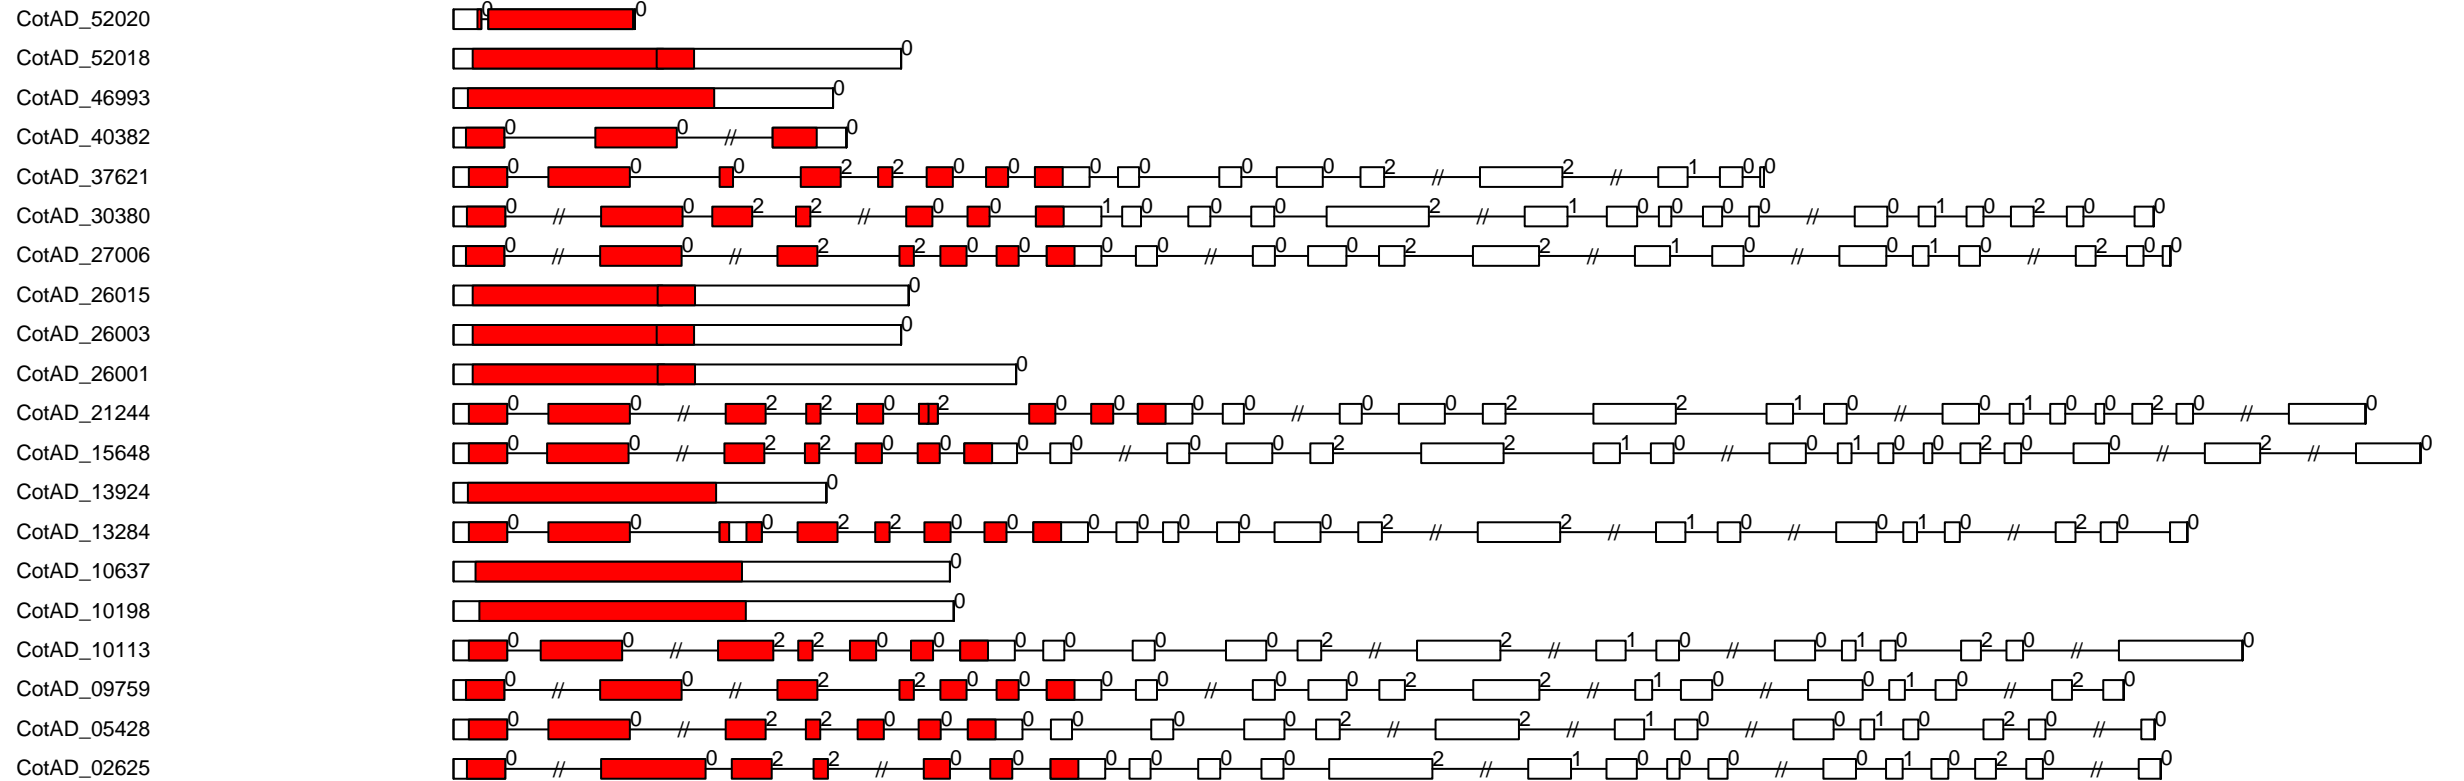

0

2000

4000

6000

# G.hi STE\_STE20-Fray exon-intron and domain diagram (part 2)

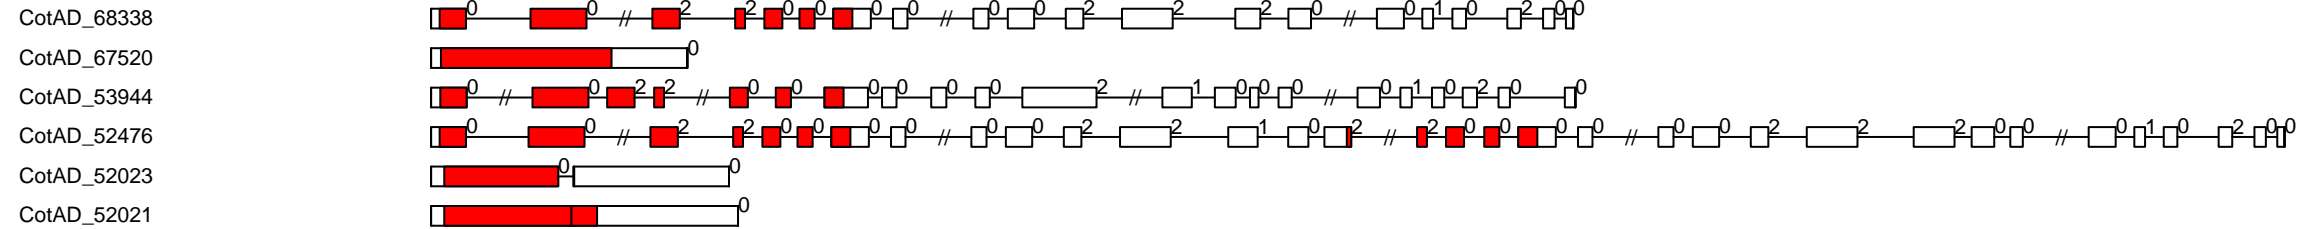

# G.hi STE\_STE20-PI exon-intron and domain diagram (all)

CotAD\_65874  
CotAD\_44719  
CotAD\_13166

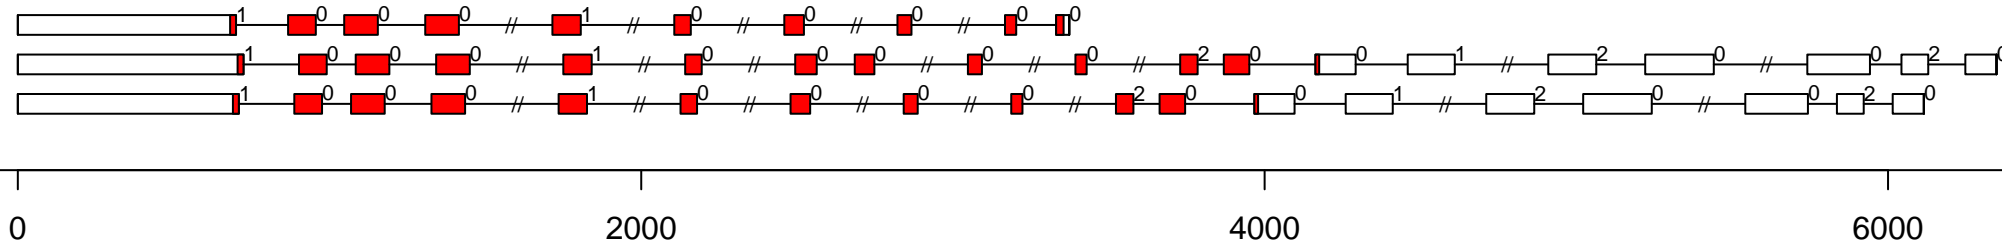

# G.hi STE\_STE20-YSK exon-intron and domain diagram (all)

CotAD\_68945  
 CotAD\_28130  
 CotAD\_16880

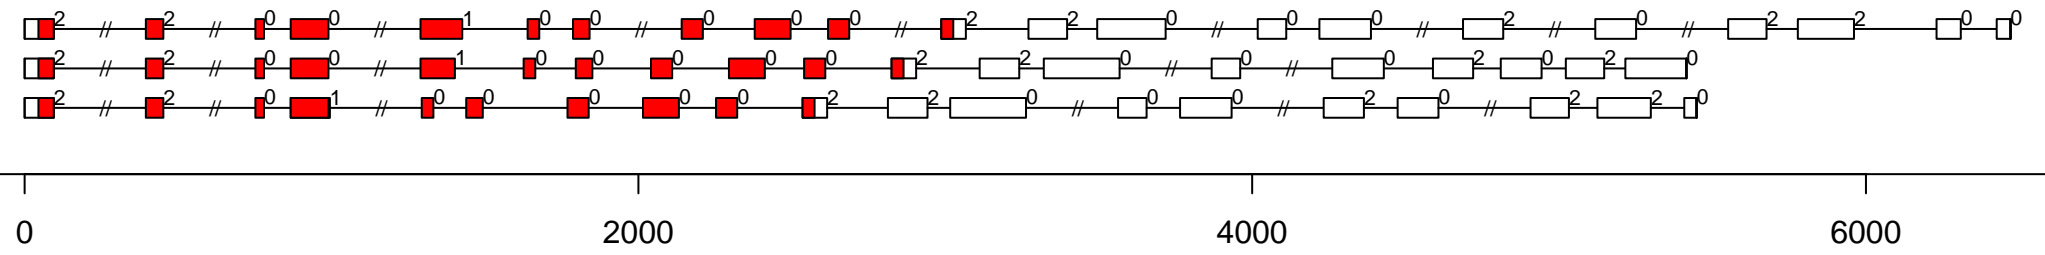

### G.hi STE\_STE7 exon-intron and domain diagram (all)

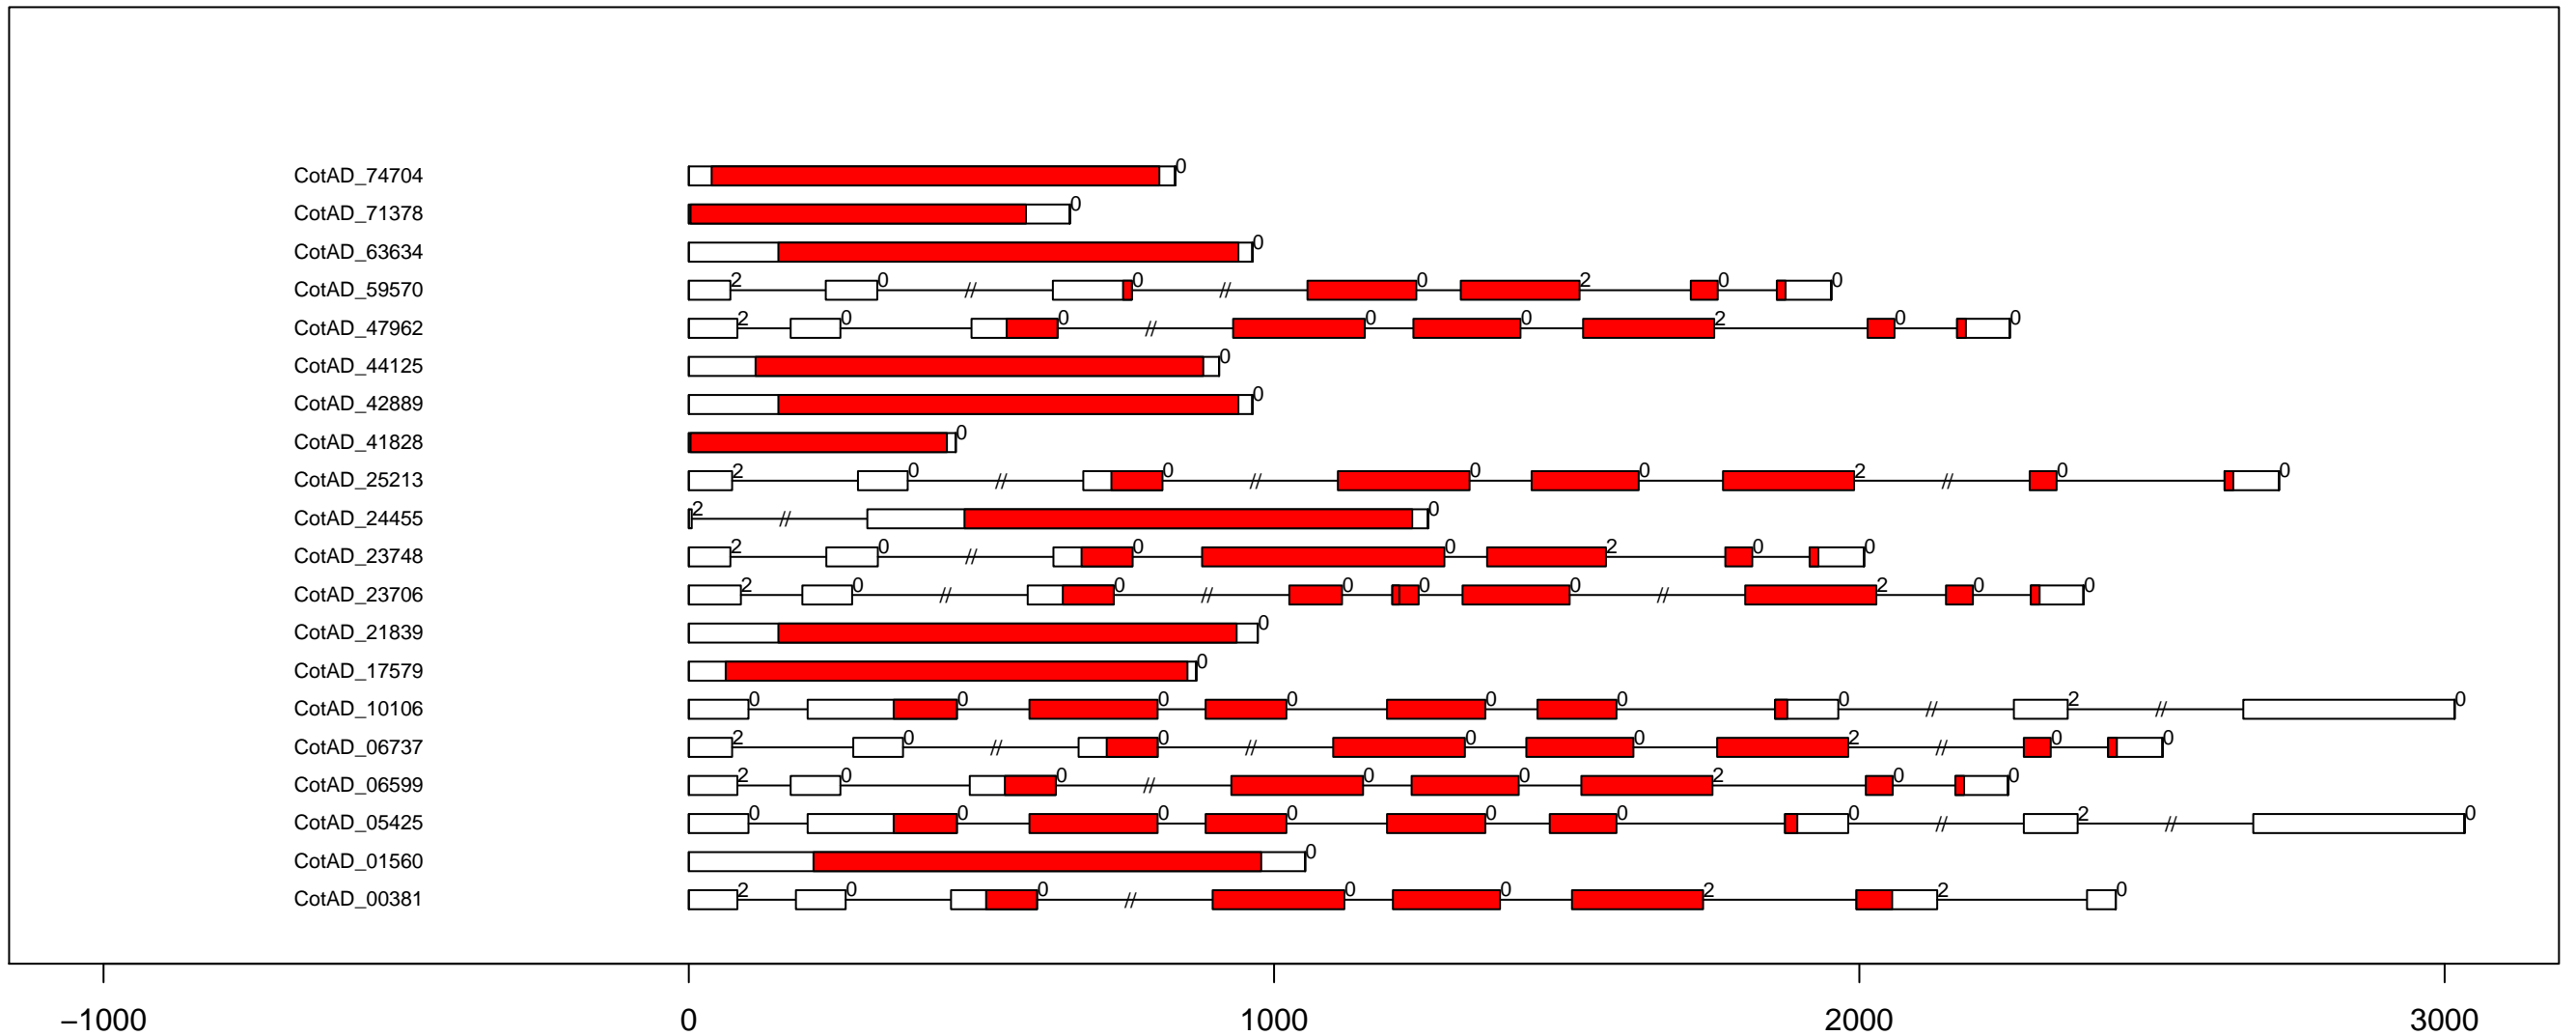

# G.hi STE\_STE-PI exon-intron and domain diagram (all)

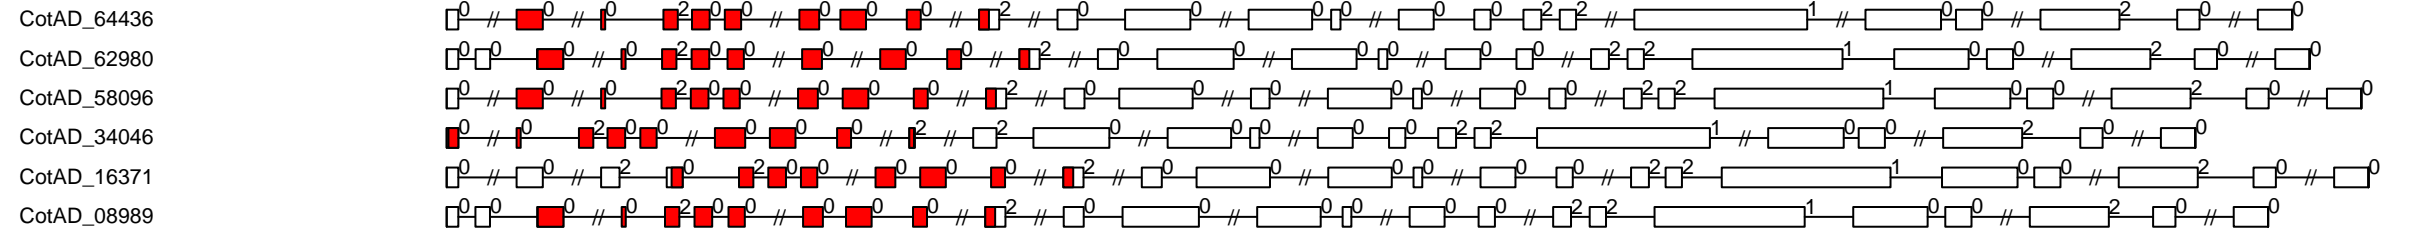

-2000

0

2000

4000

6000

8000

10000

# G.hi TKL\_CTRL1-DRK-1 exon-intron and domain diagram (all)

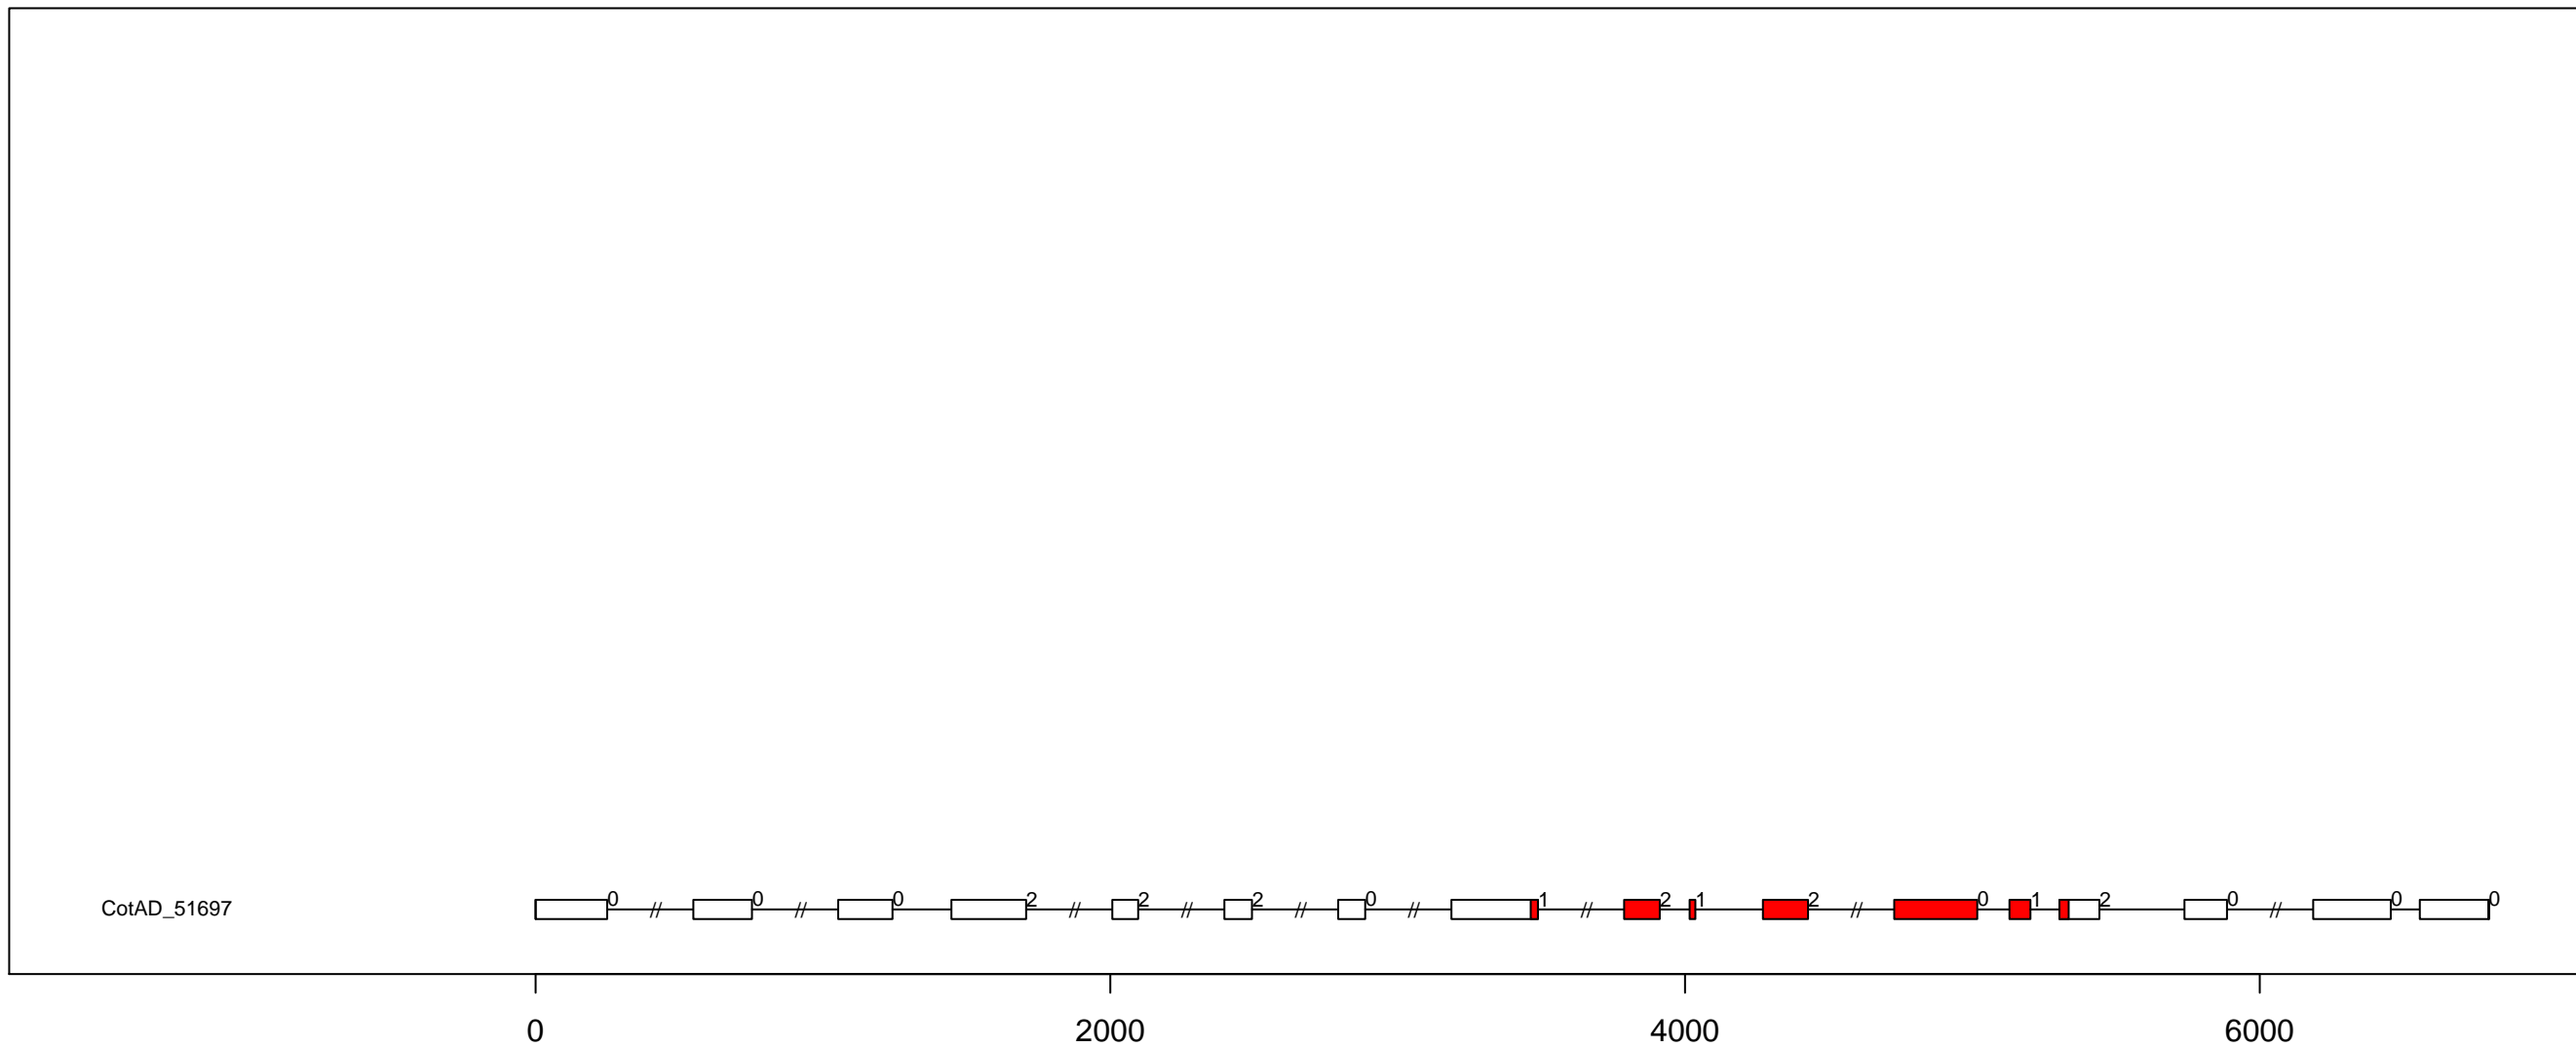



### G.hi TKL\_CTR1-DRK-2 exon-intron and domain diagram (part 1)

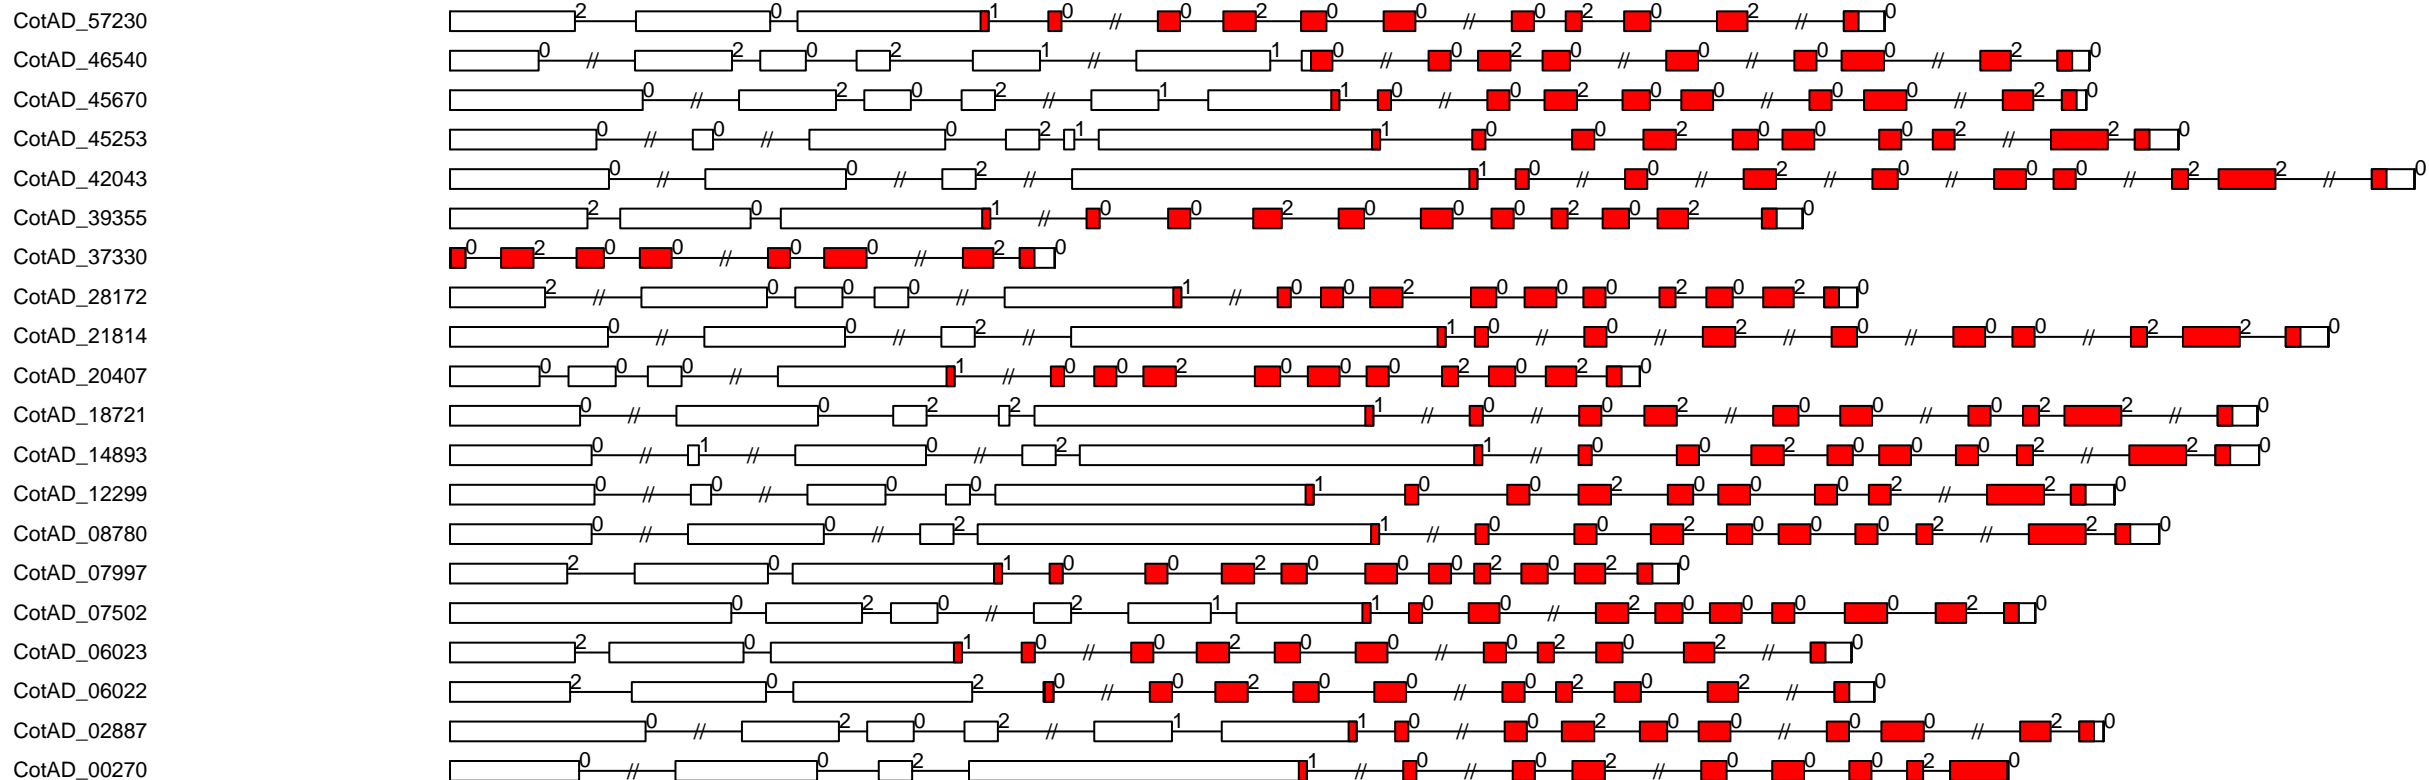

# G.hi TKL\_CTR1-DRK-2 exon-intron and domain diagram (part 2)

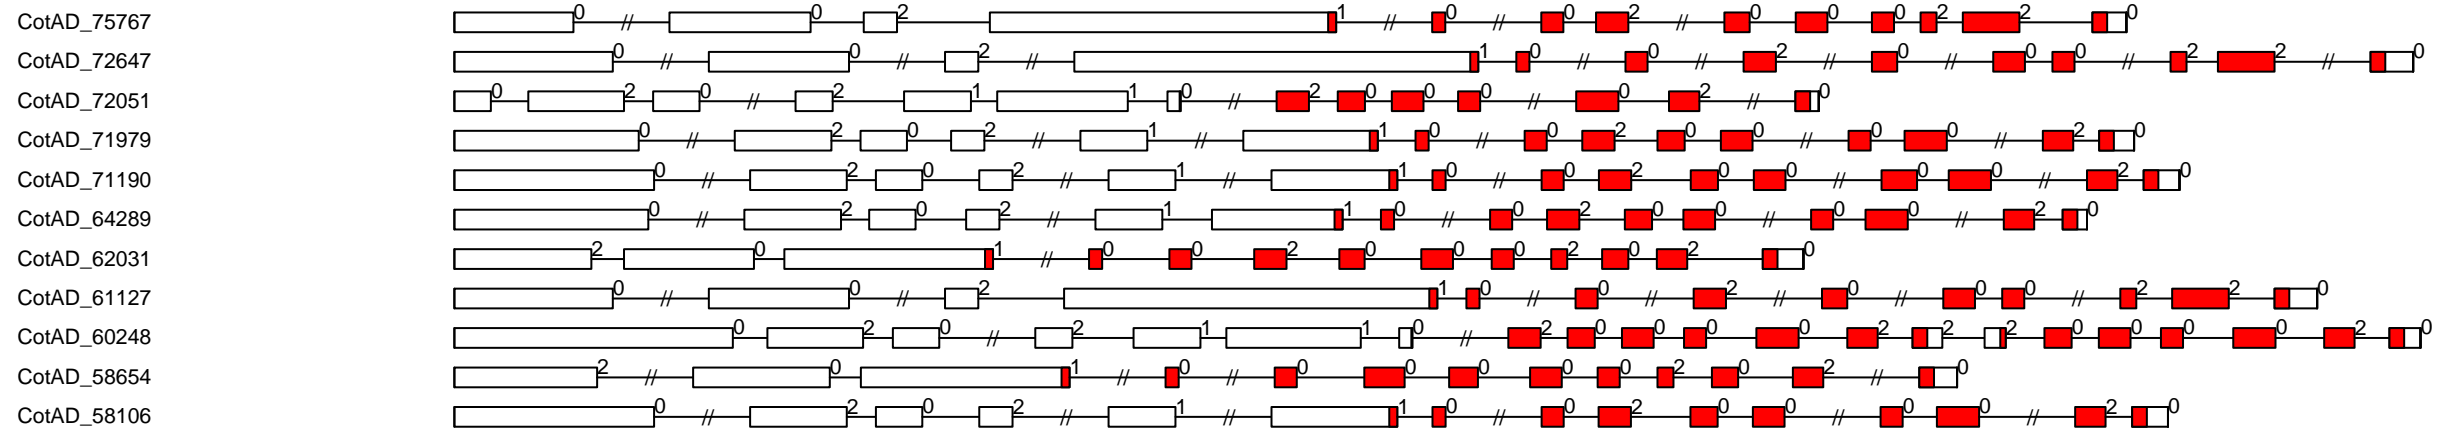

0

2000

4000

6000

# G.hi TKL\_Gdt exon-intron and domain diagram (all)

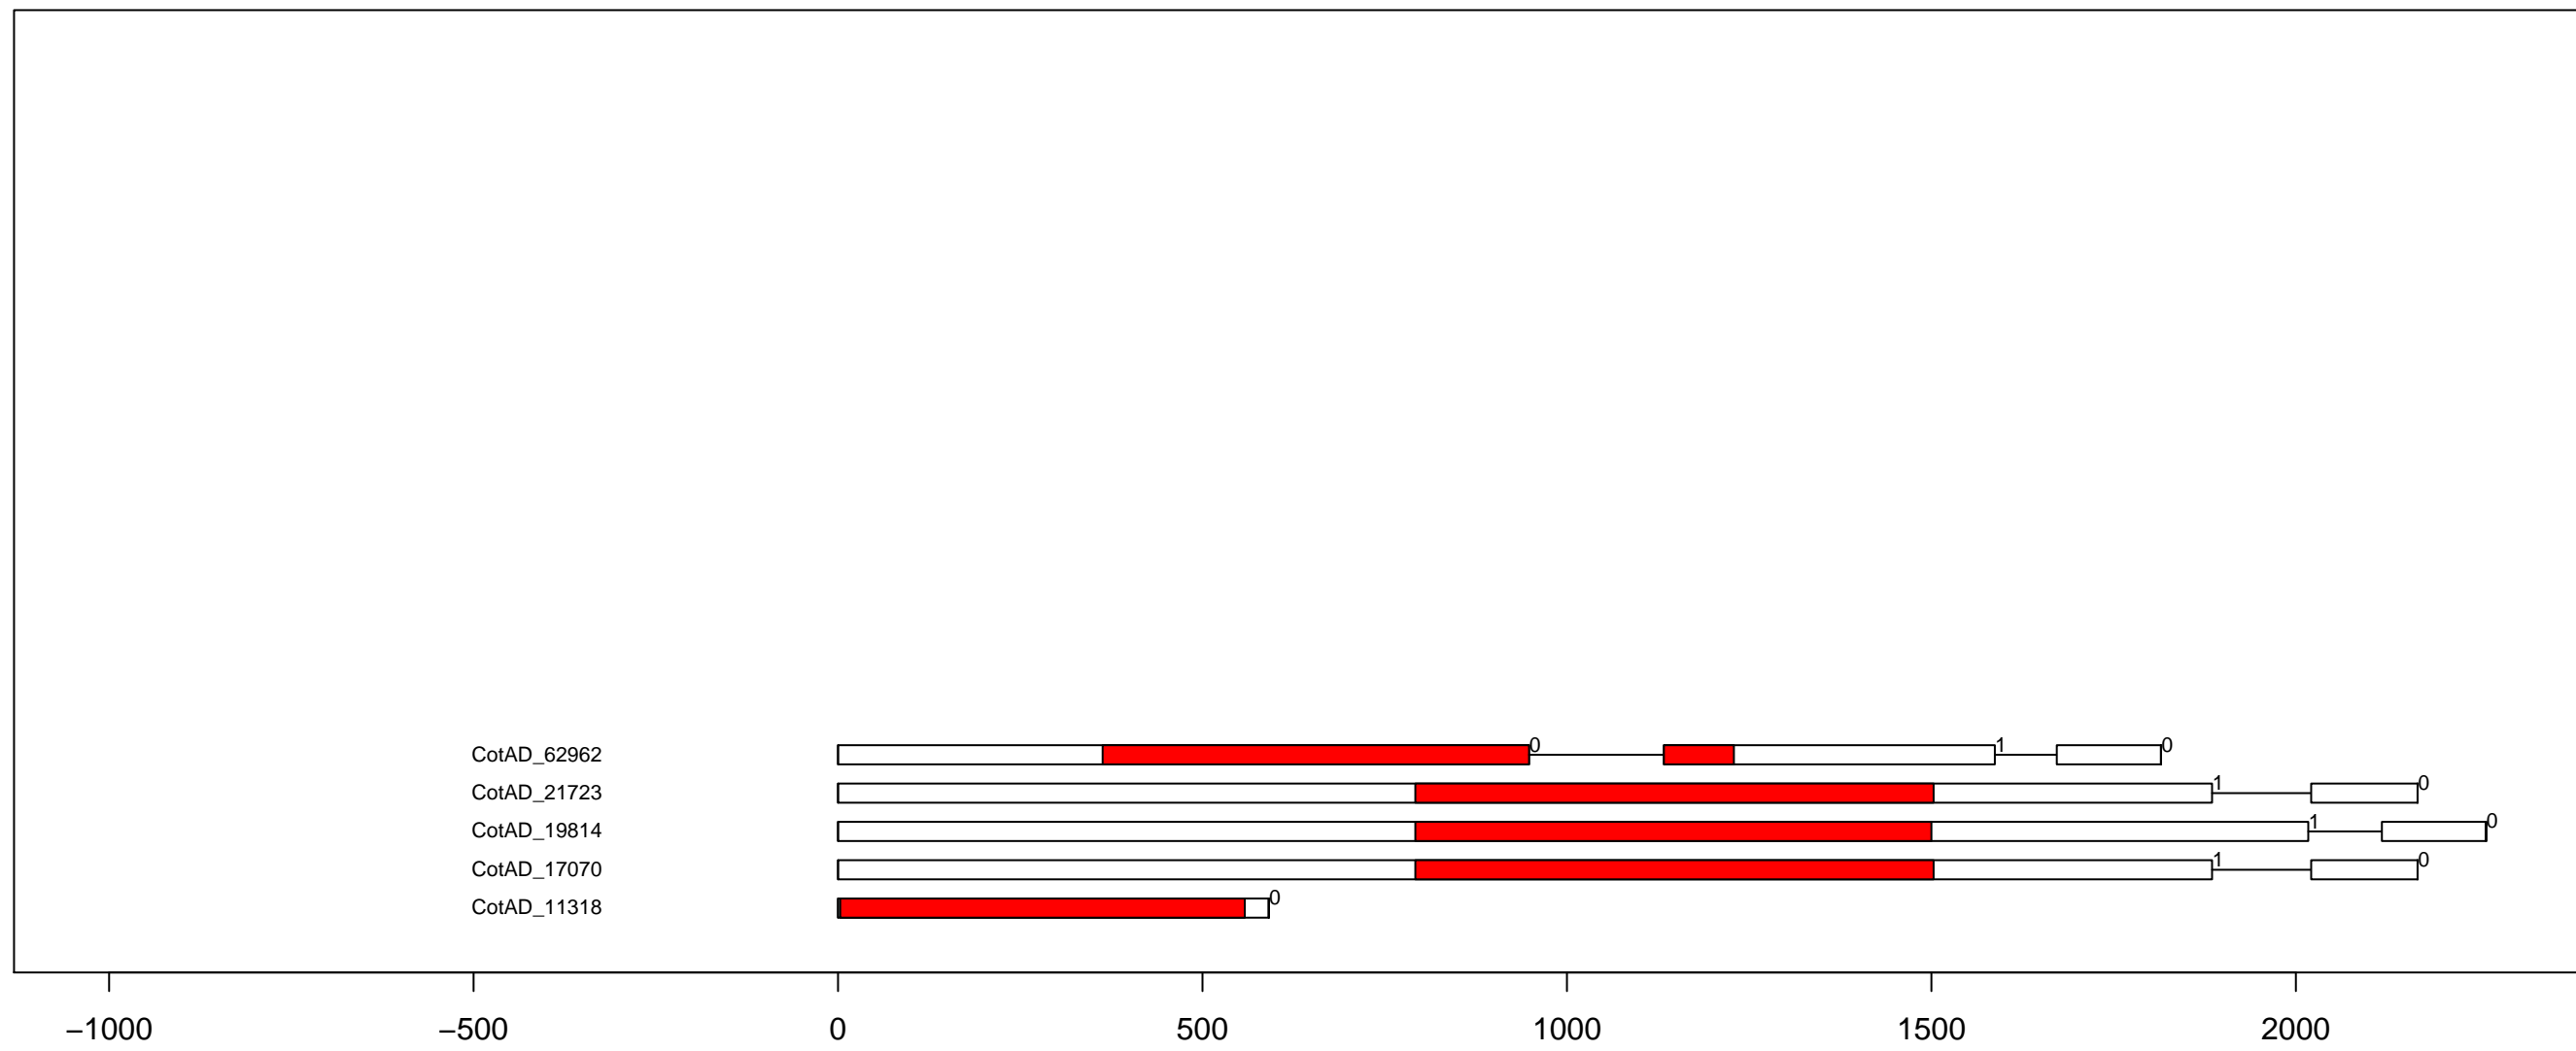

# G.hi TKL-PI-1 exon-intron and domain diagram (all)

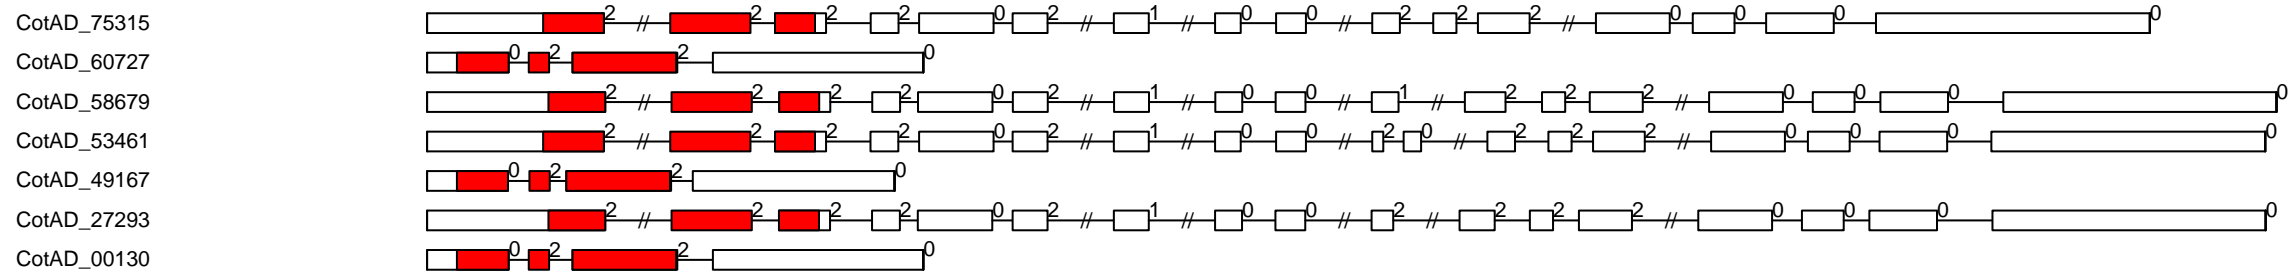

# G.hi TKL-PI-2 exon-intron and domain diagram (all)

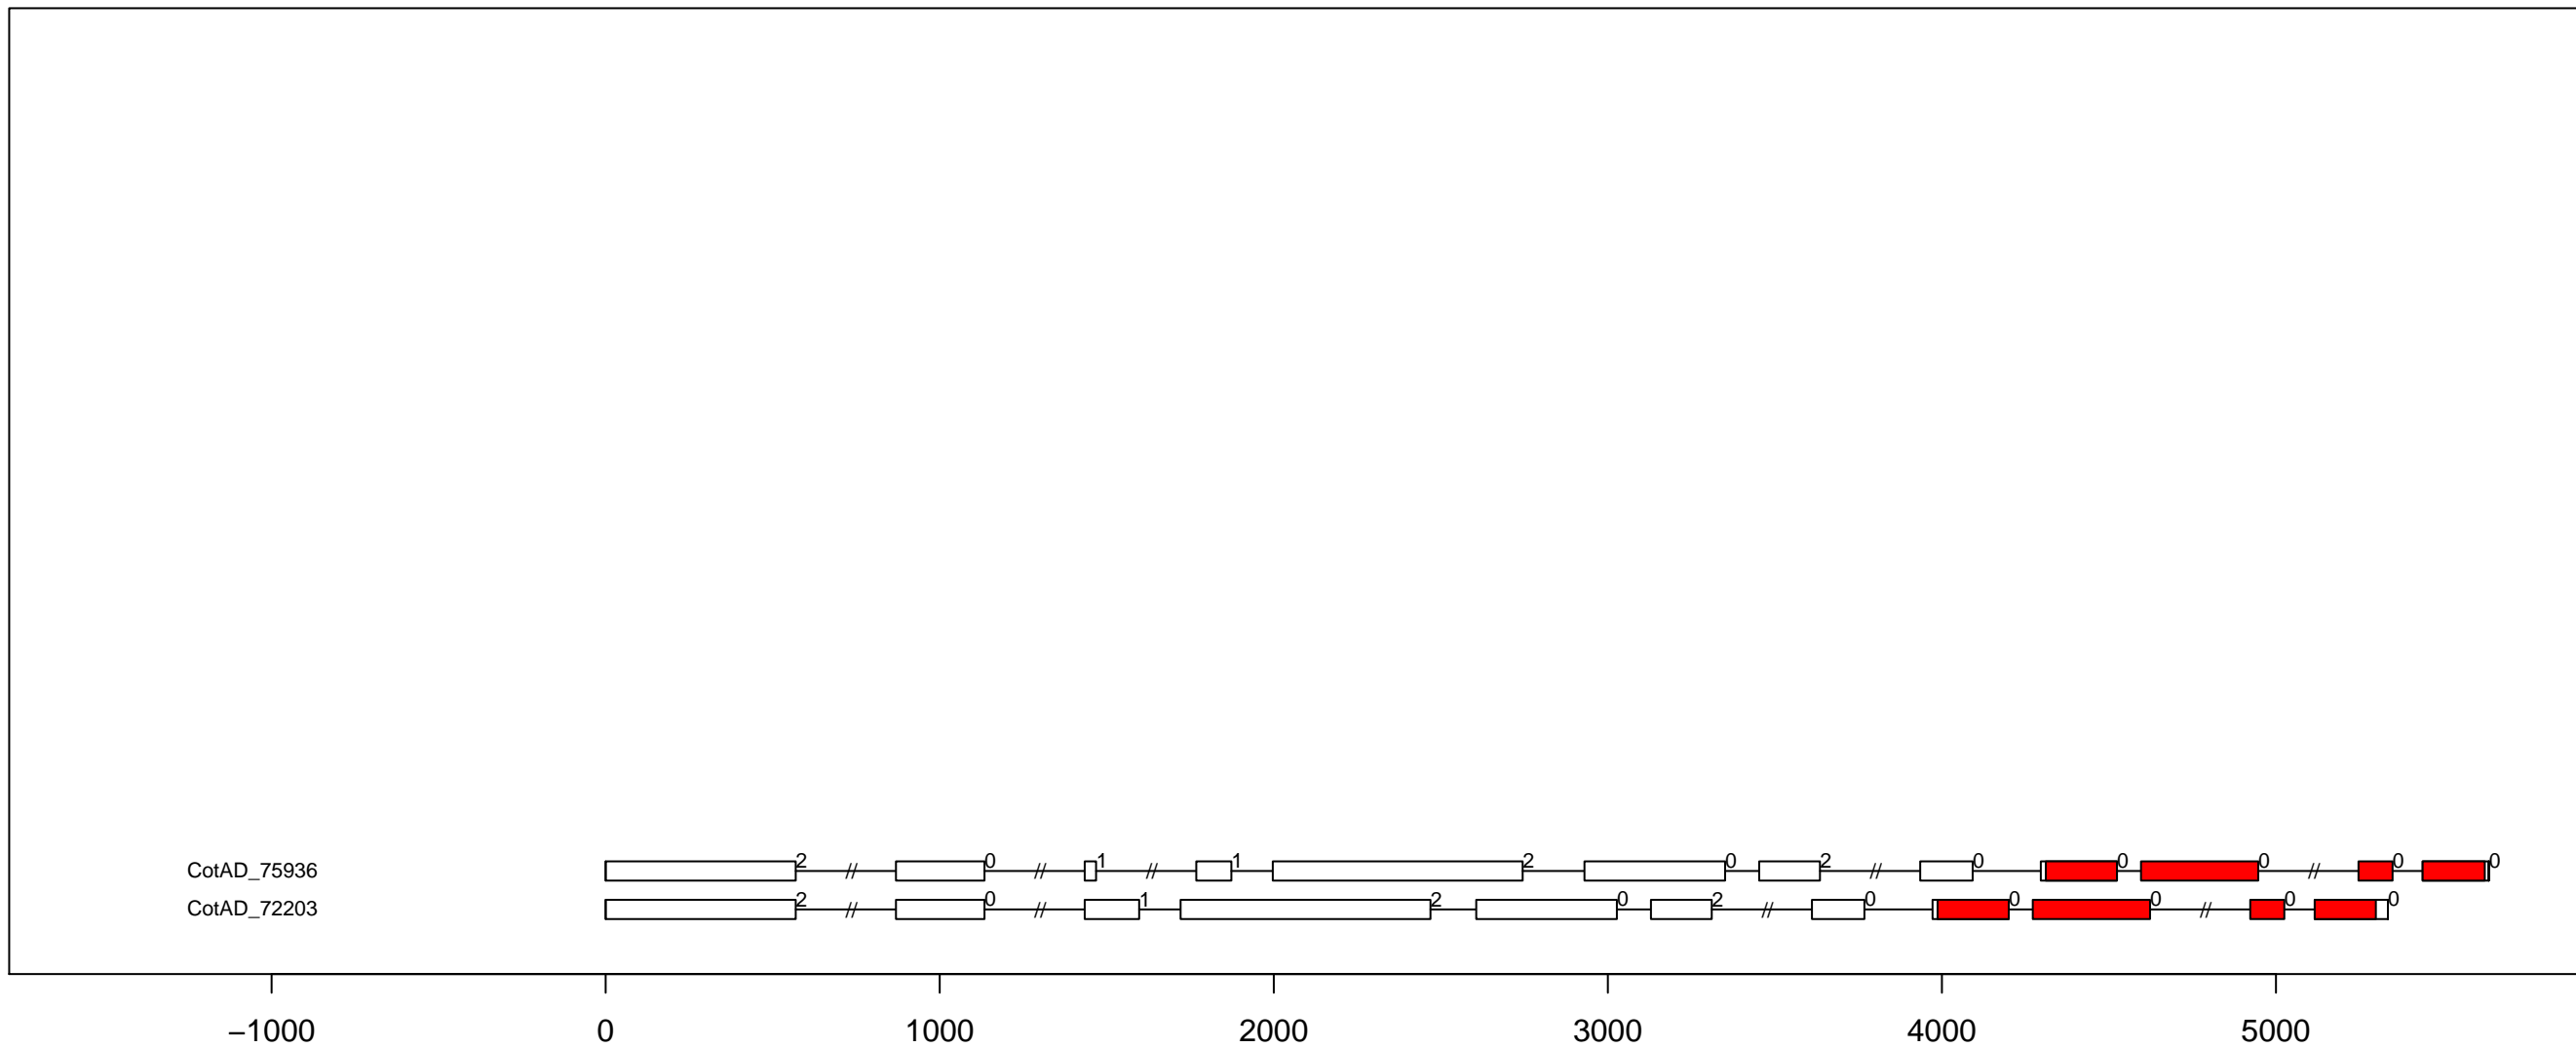

# G.hi TKL-PI-3 exon-intron and domain diagram (all)

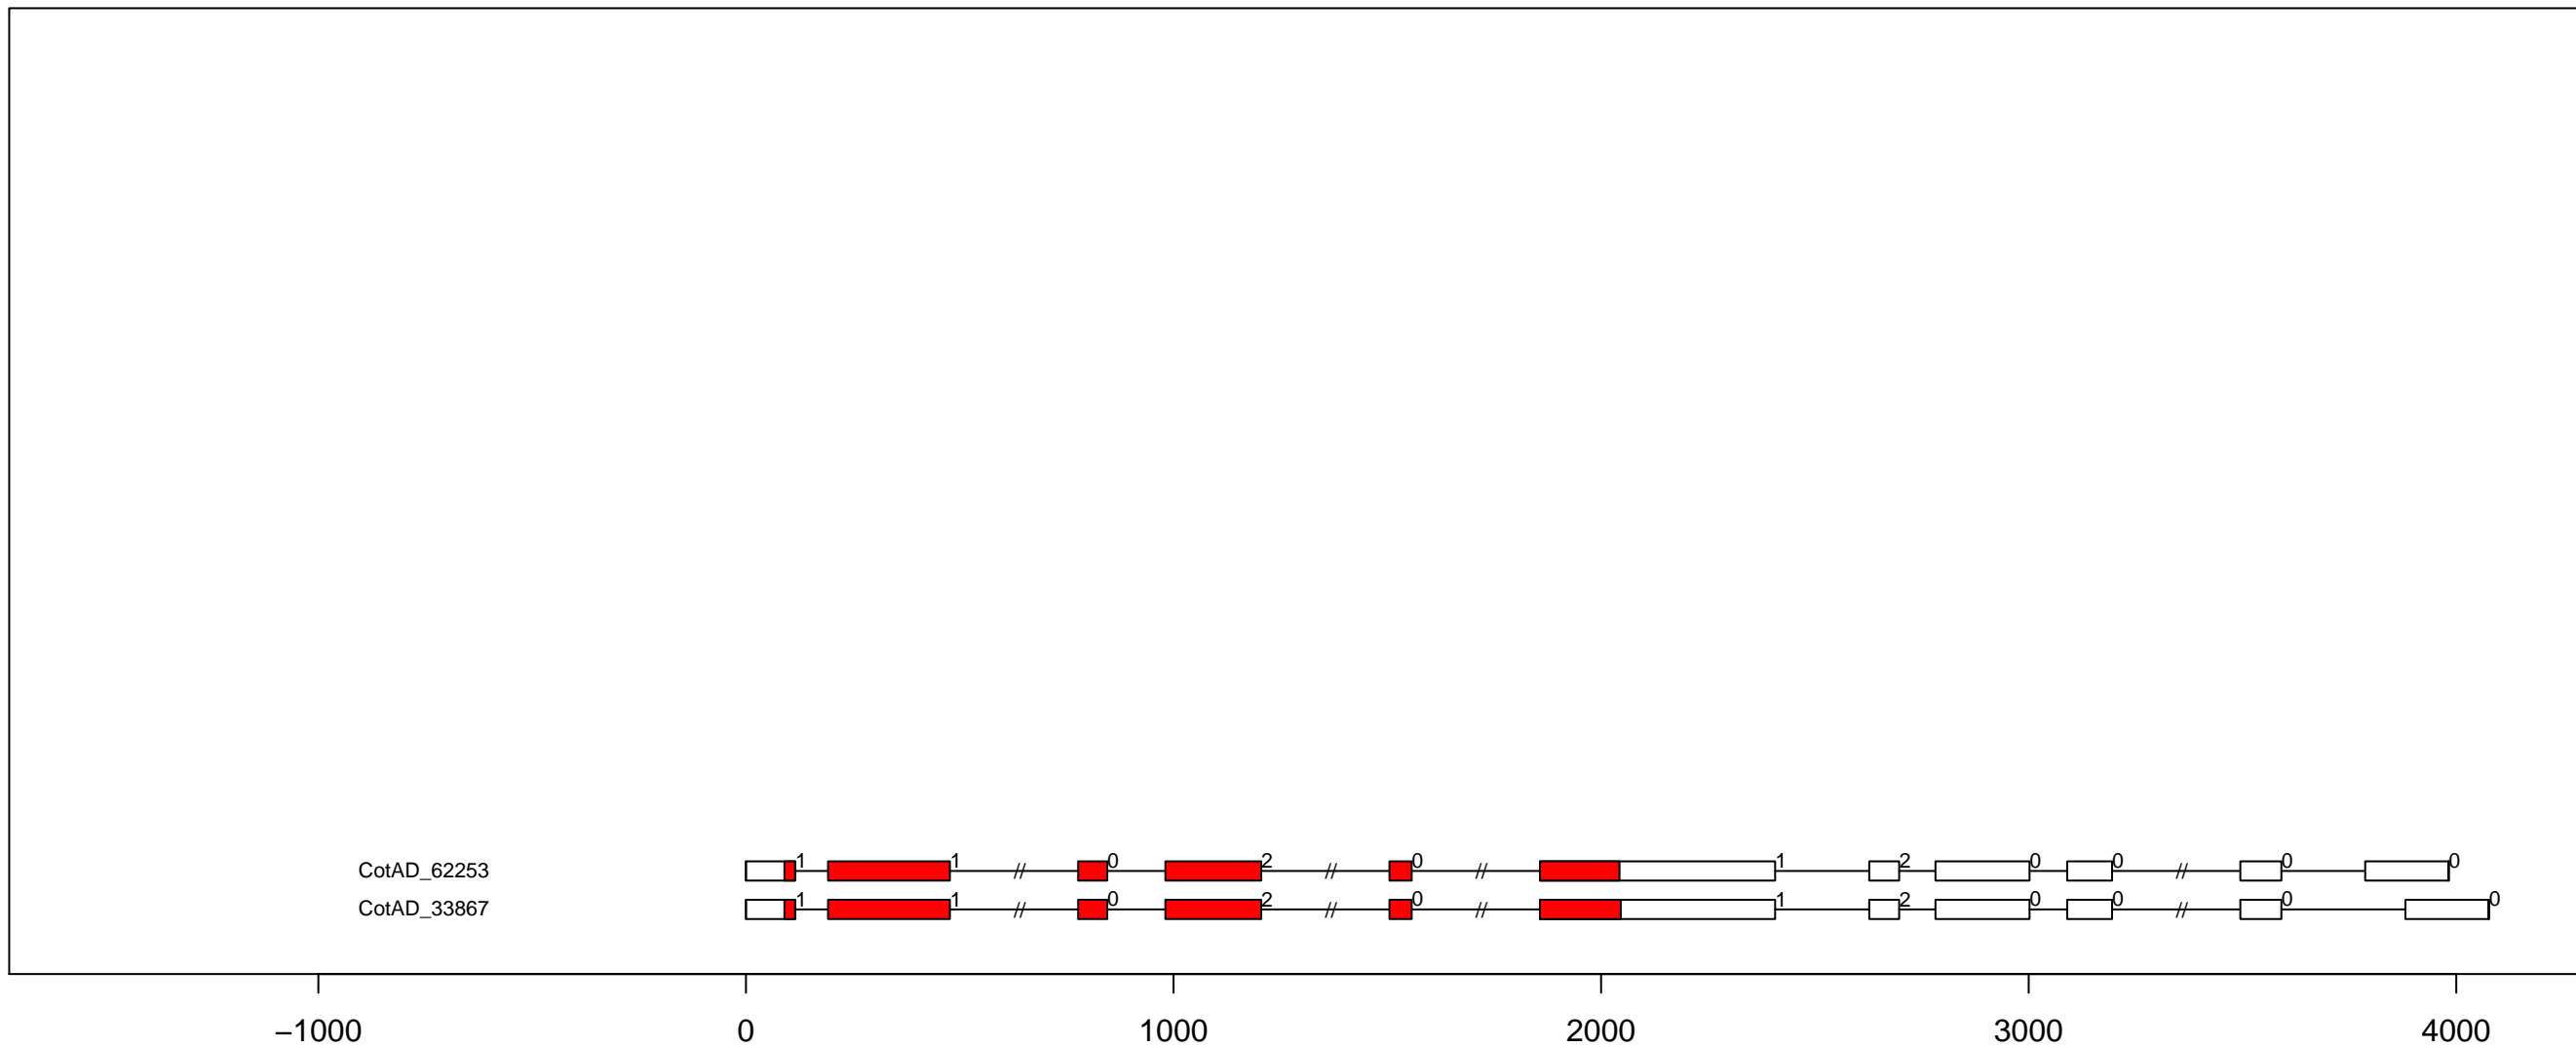

### G.hi TKL-PI-4 exon-intron and domain diagram (part 1)

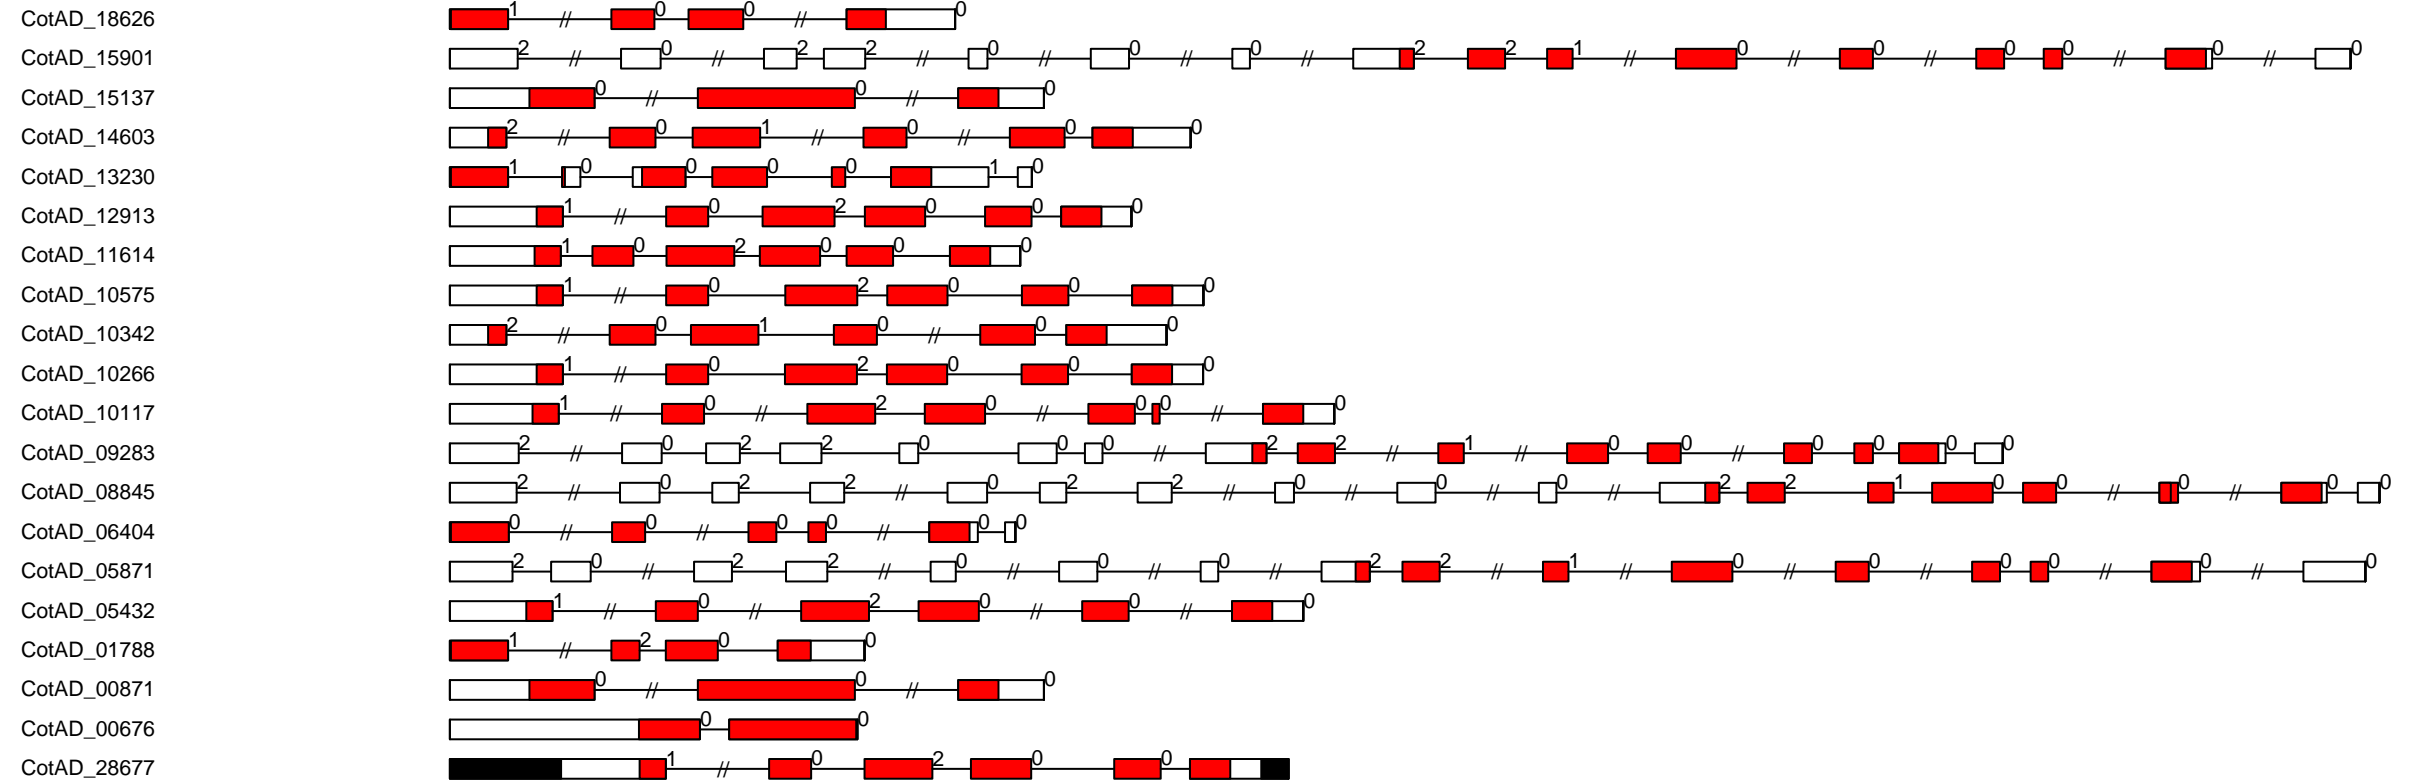





### G.hi TKL-PI-4 exon-intron and domain diagram (part 3)

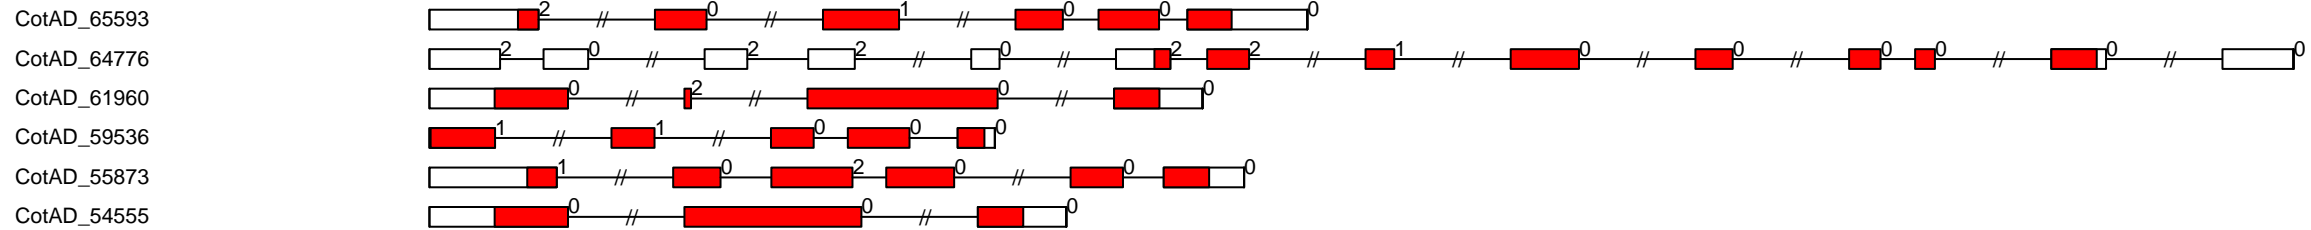

-1000

0

1000

2000

3000

4000

5000

### G.hi TKL-PI-5 exon-intron and domain diagram (all)

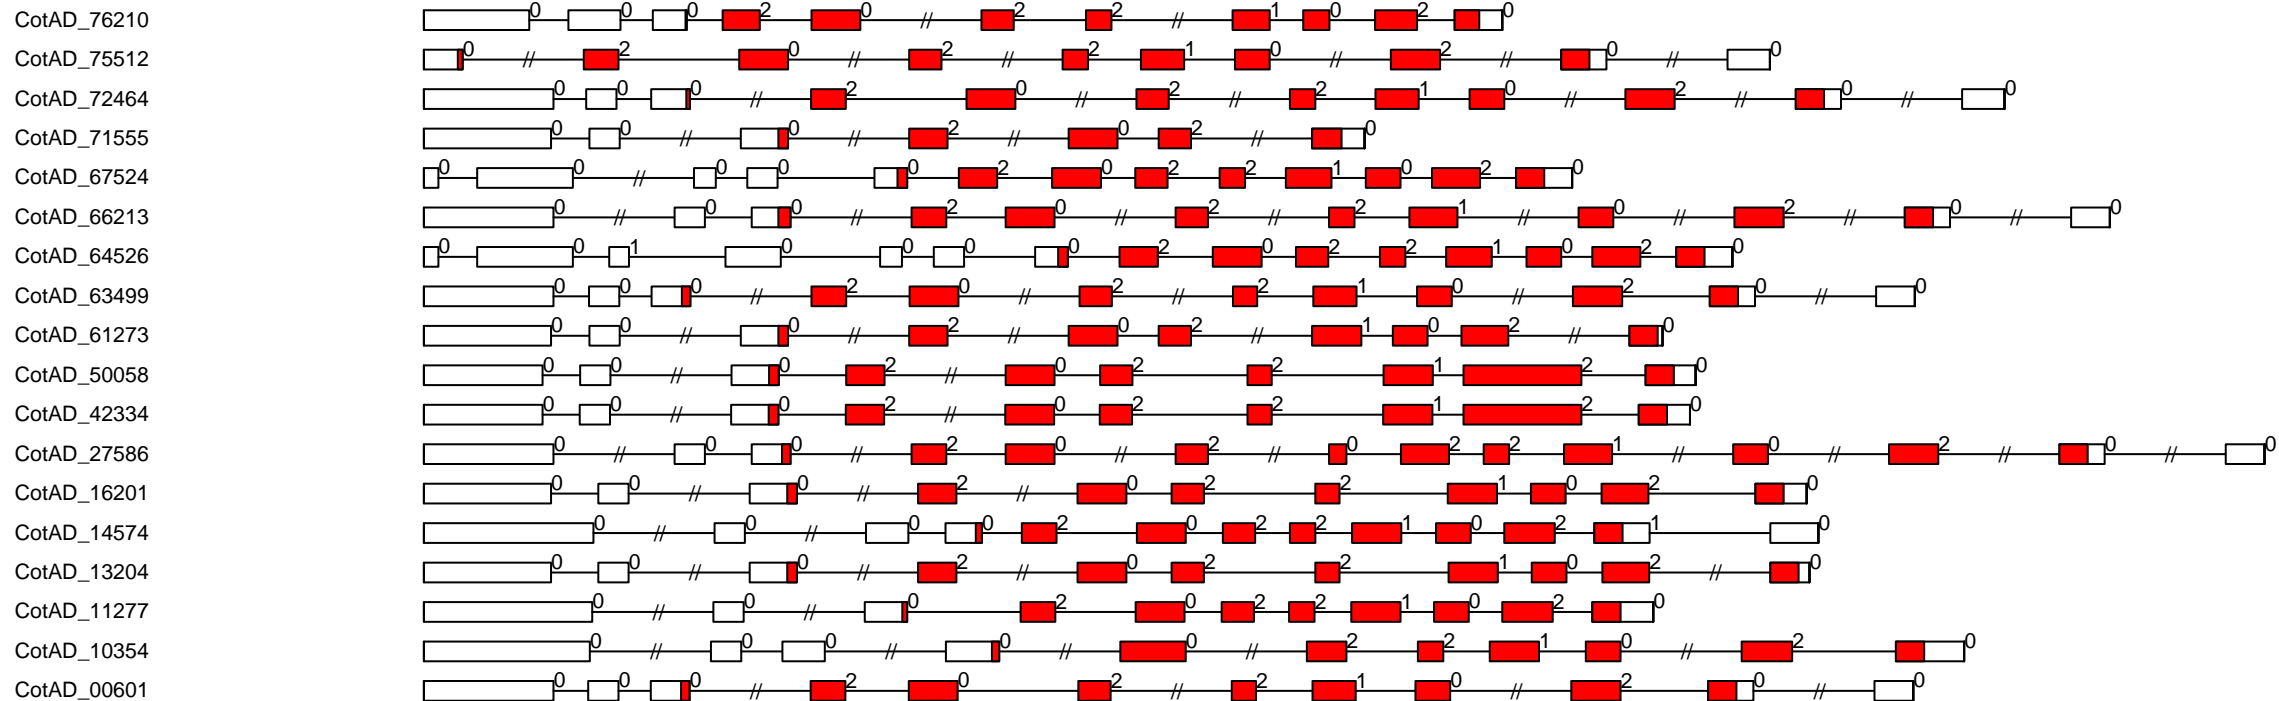

### G.hi TKL-PI-6 exon-intron and domain diagram (all)

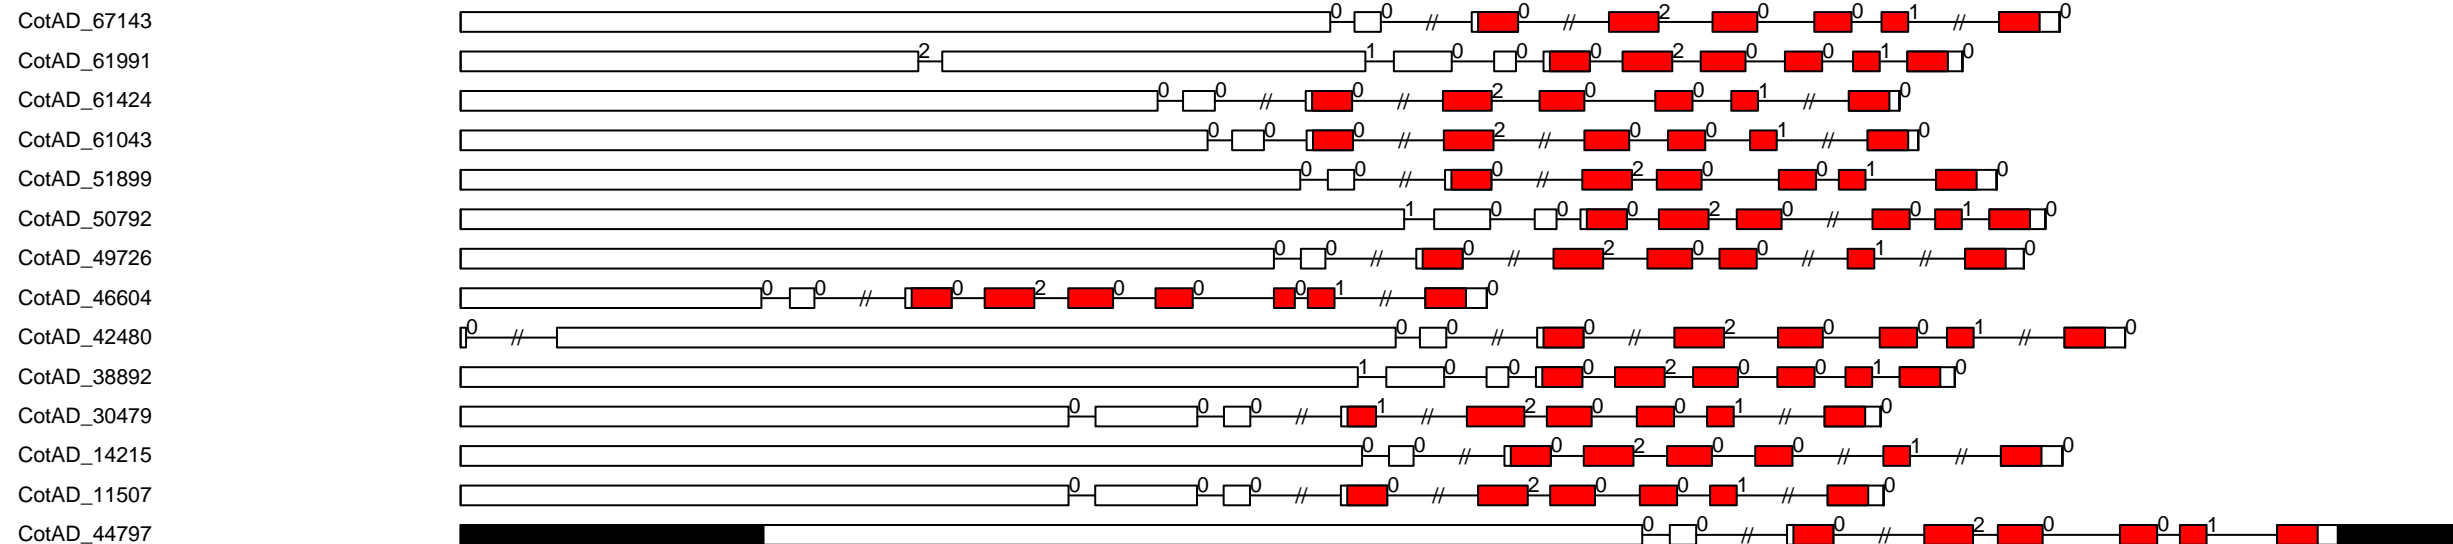

# G.hi TKL-PI-7 exon-intron and domain diagram (all)

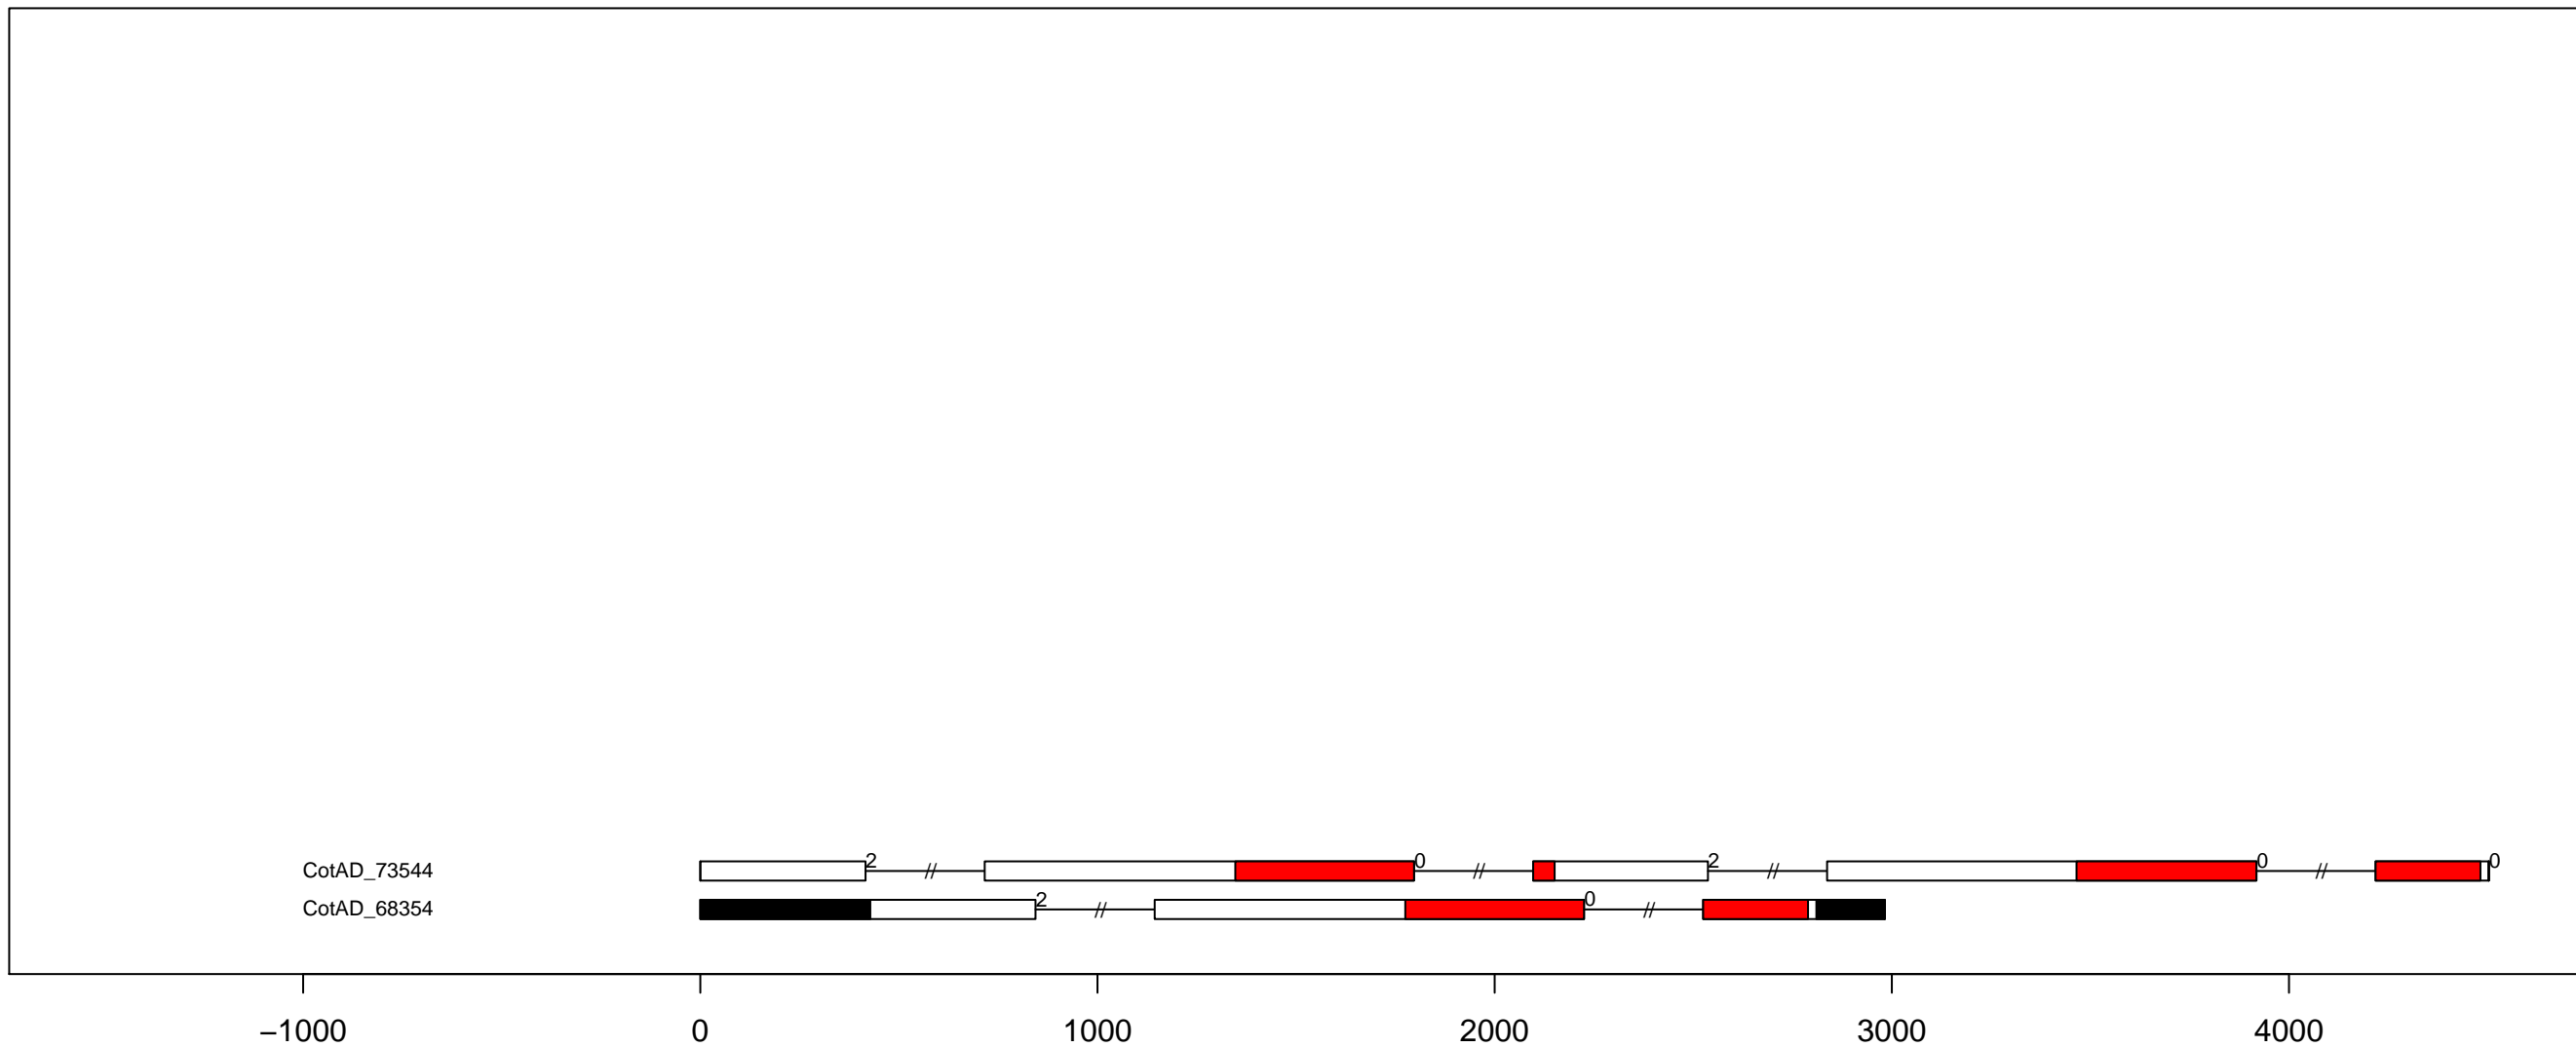

# G.hi TKL-PI-8 exon-intron and domain diagram (all)

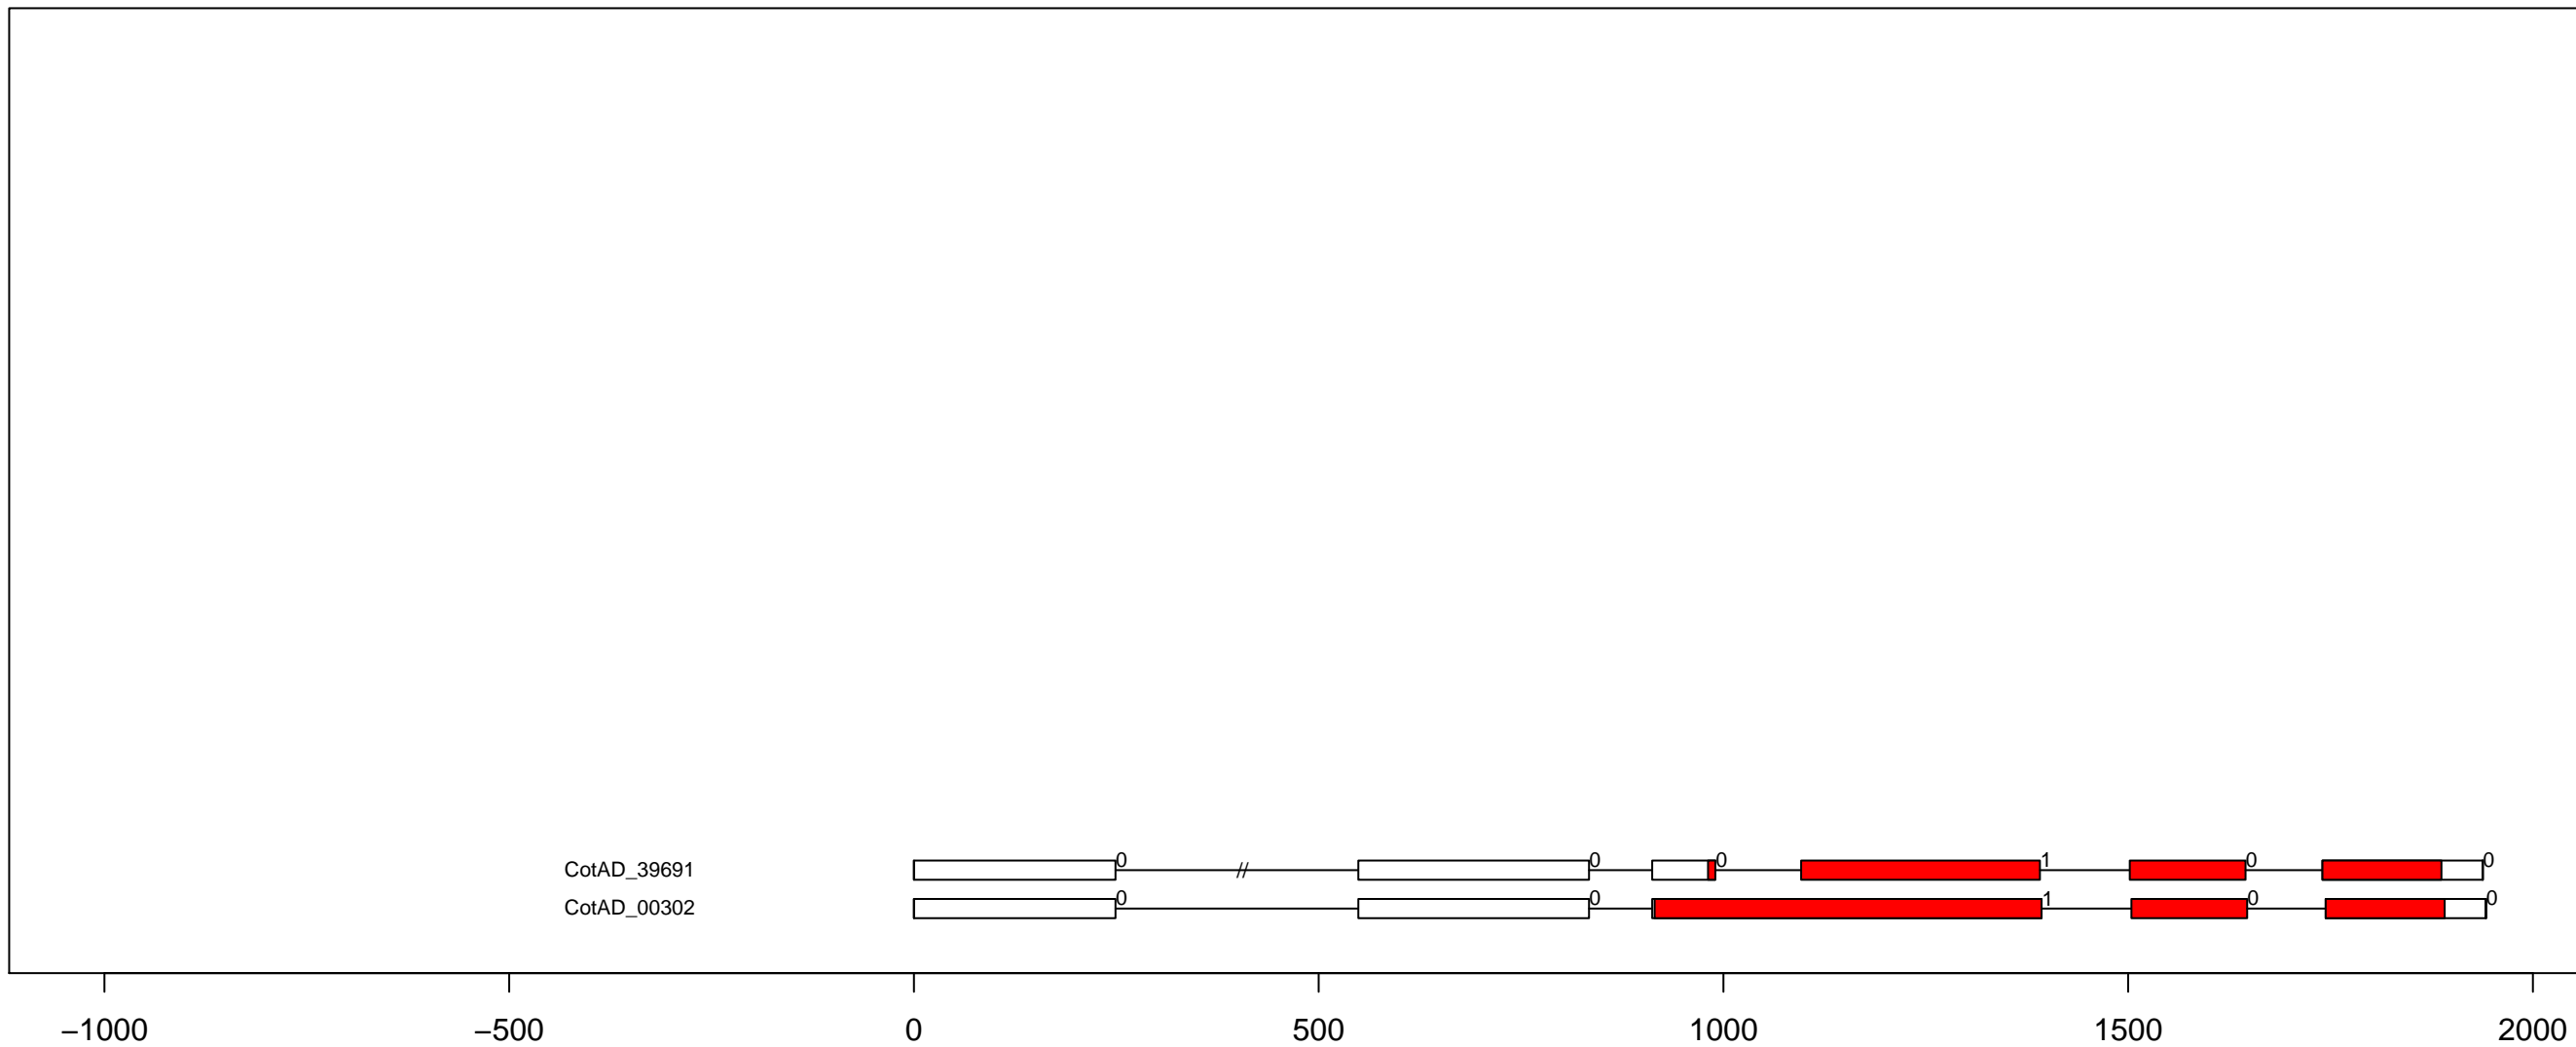

# G.hi TLK exon-intron and domain diagram (all)

CotAD\_72781

CotAD\_64472

CotAD\_47144

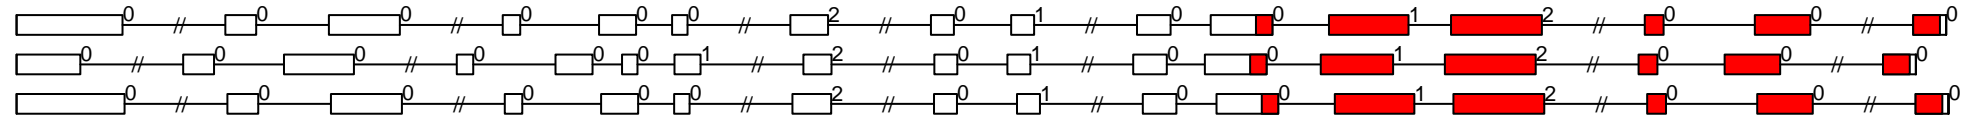

# G.hi TTK exon-intron and domain diagram (all)

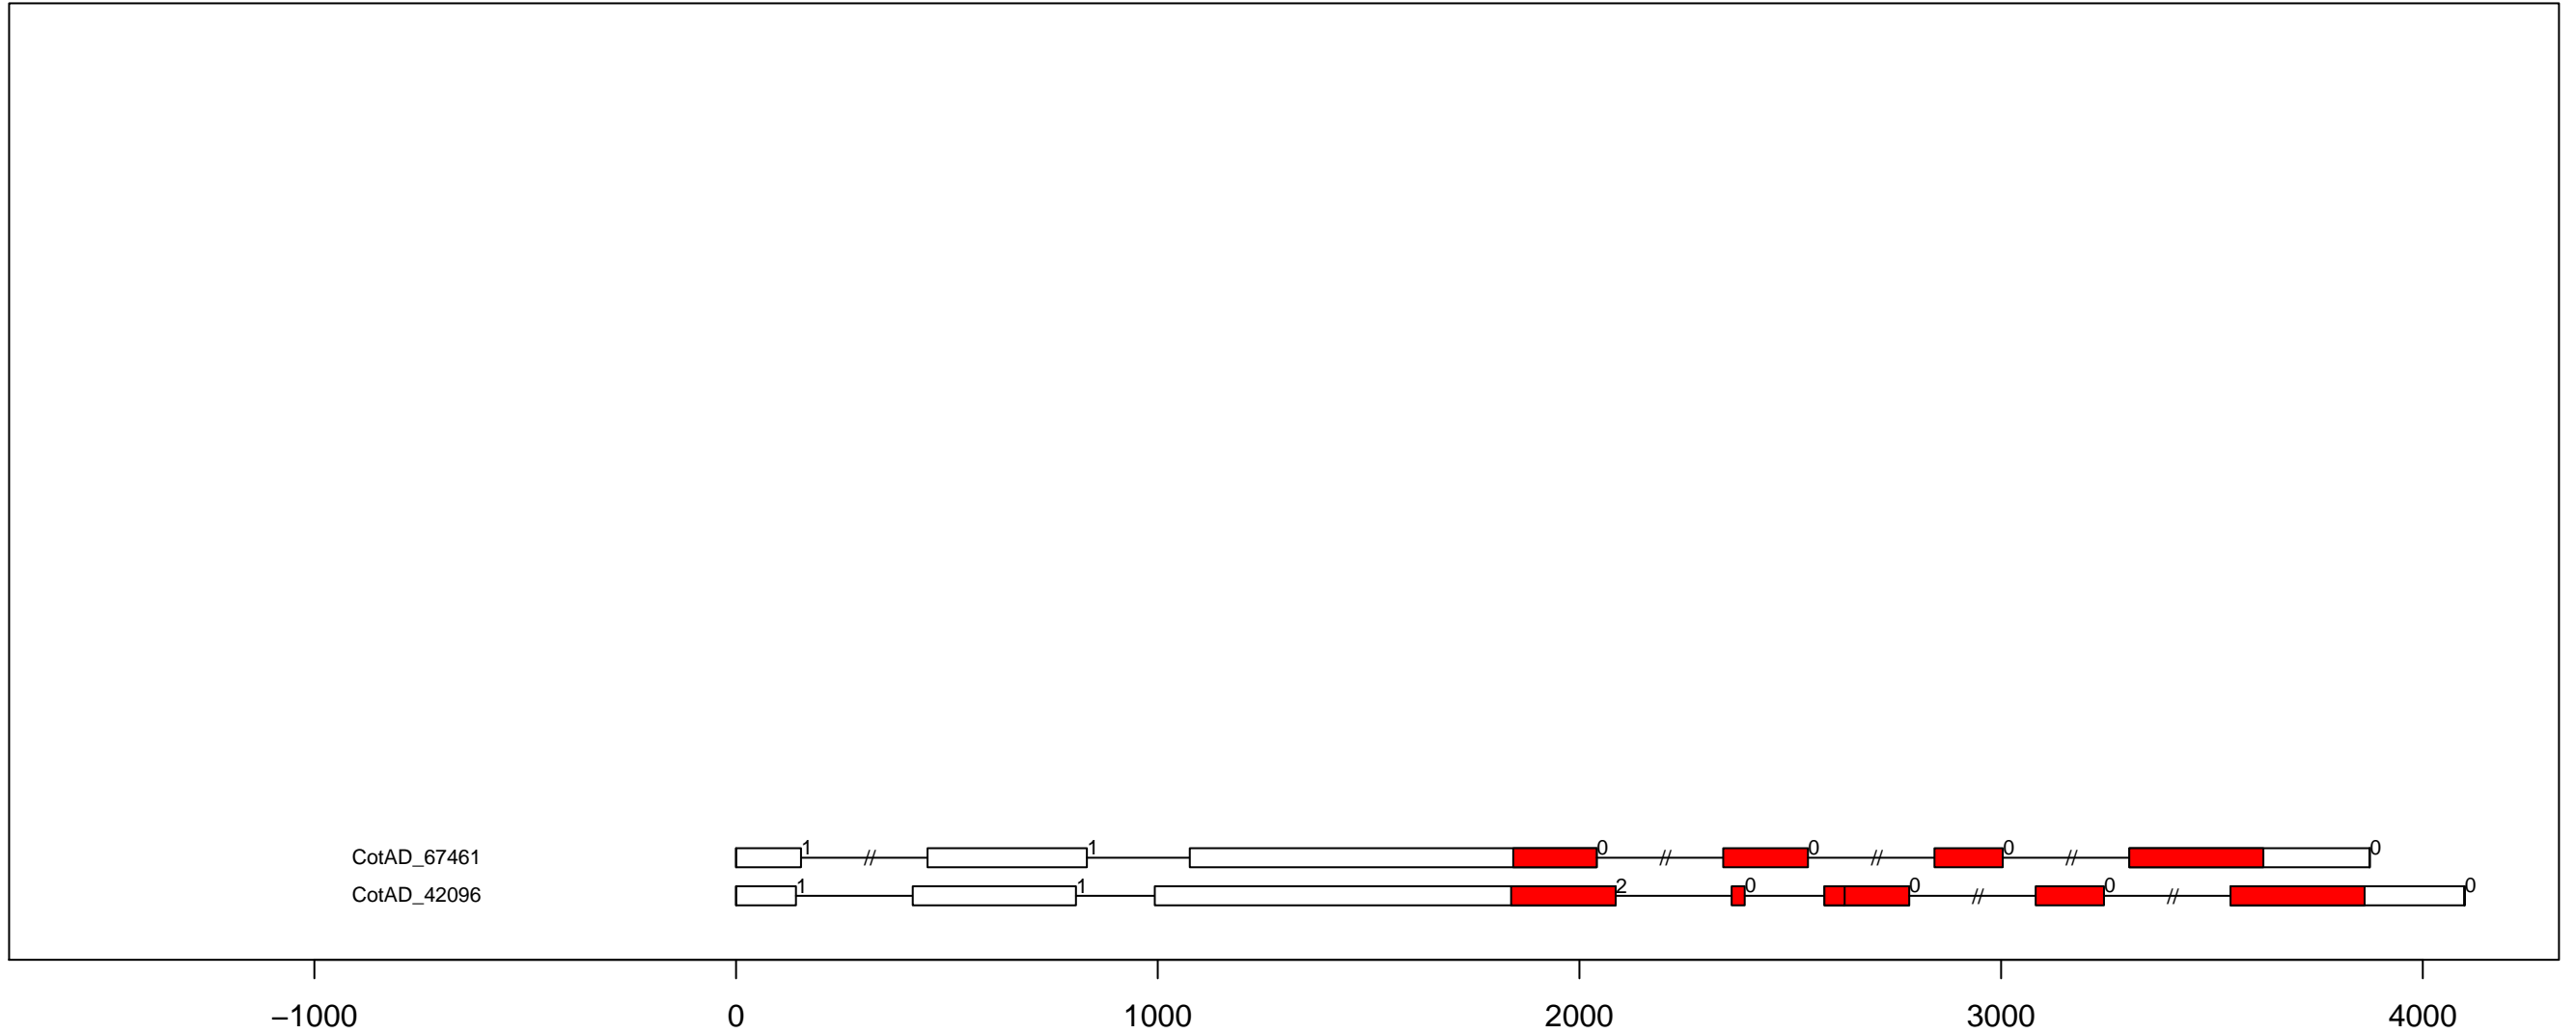

# G.hi ULK\_Fused exon-intron and domain diagram (all)

CotAD\_68878

CotAD\_08099

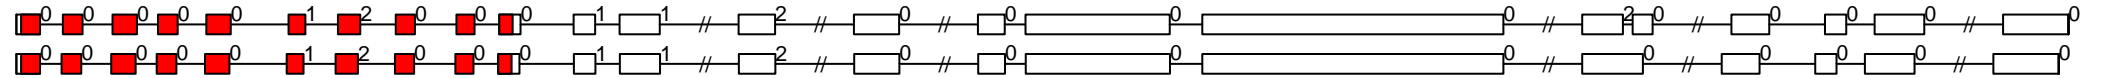

0

2000

4000

6000

8000



G.hi ULK\_ULK4 exon-intron and domain diagram (all)

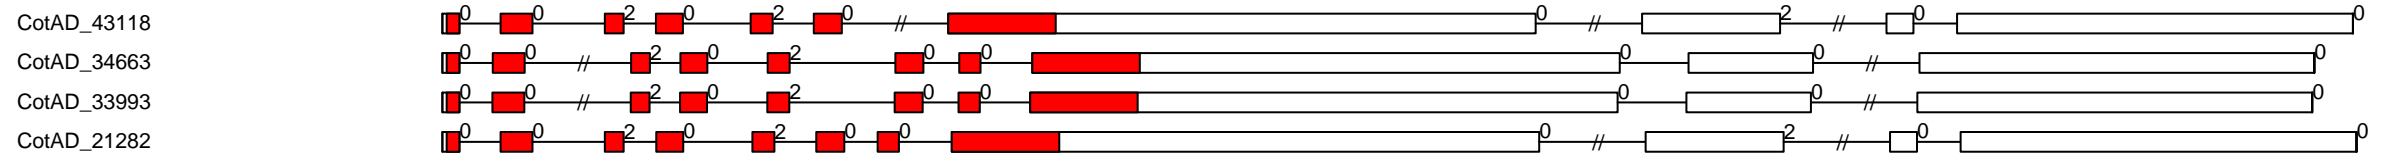

# G.hi WEE exon-intron and domain diagram (all)

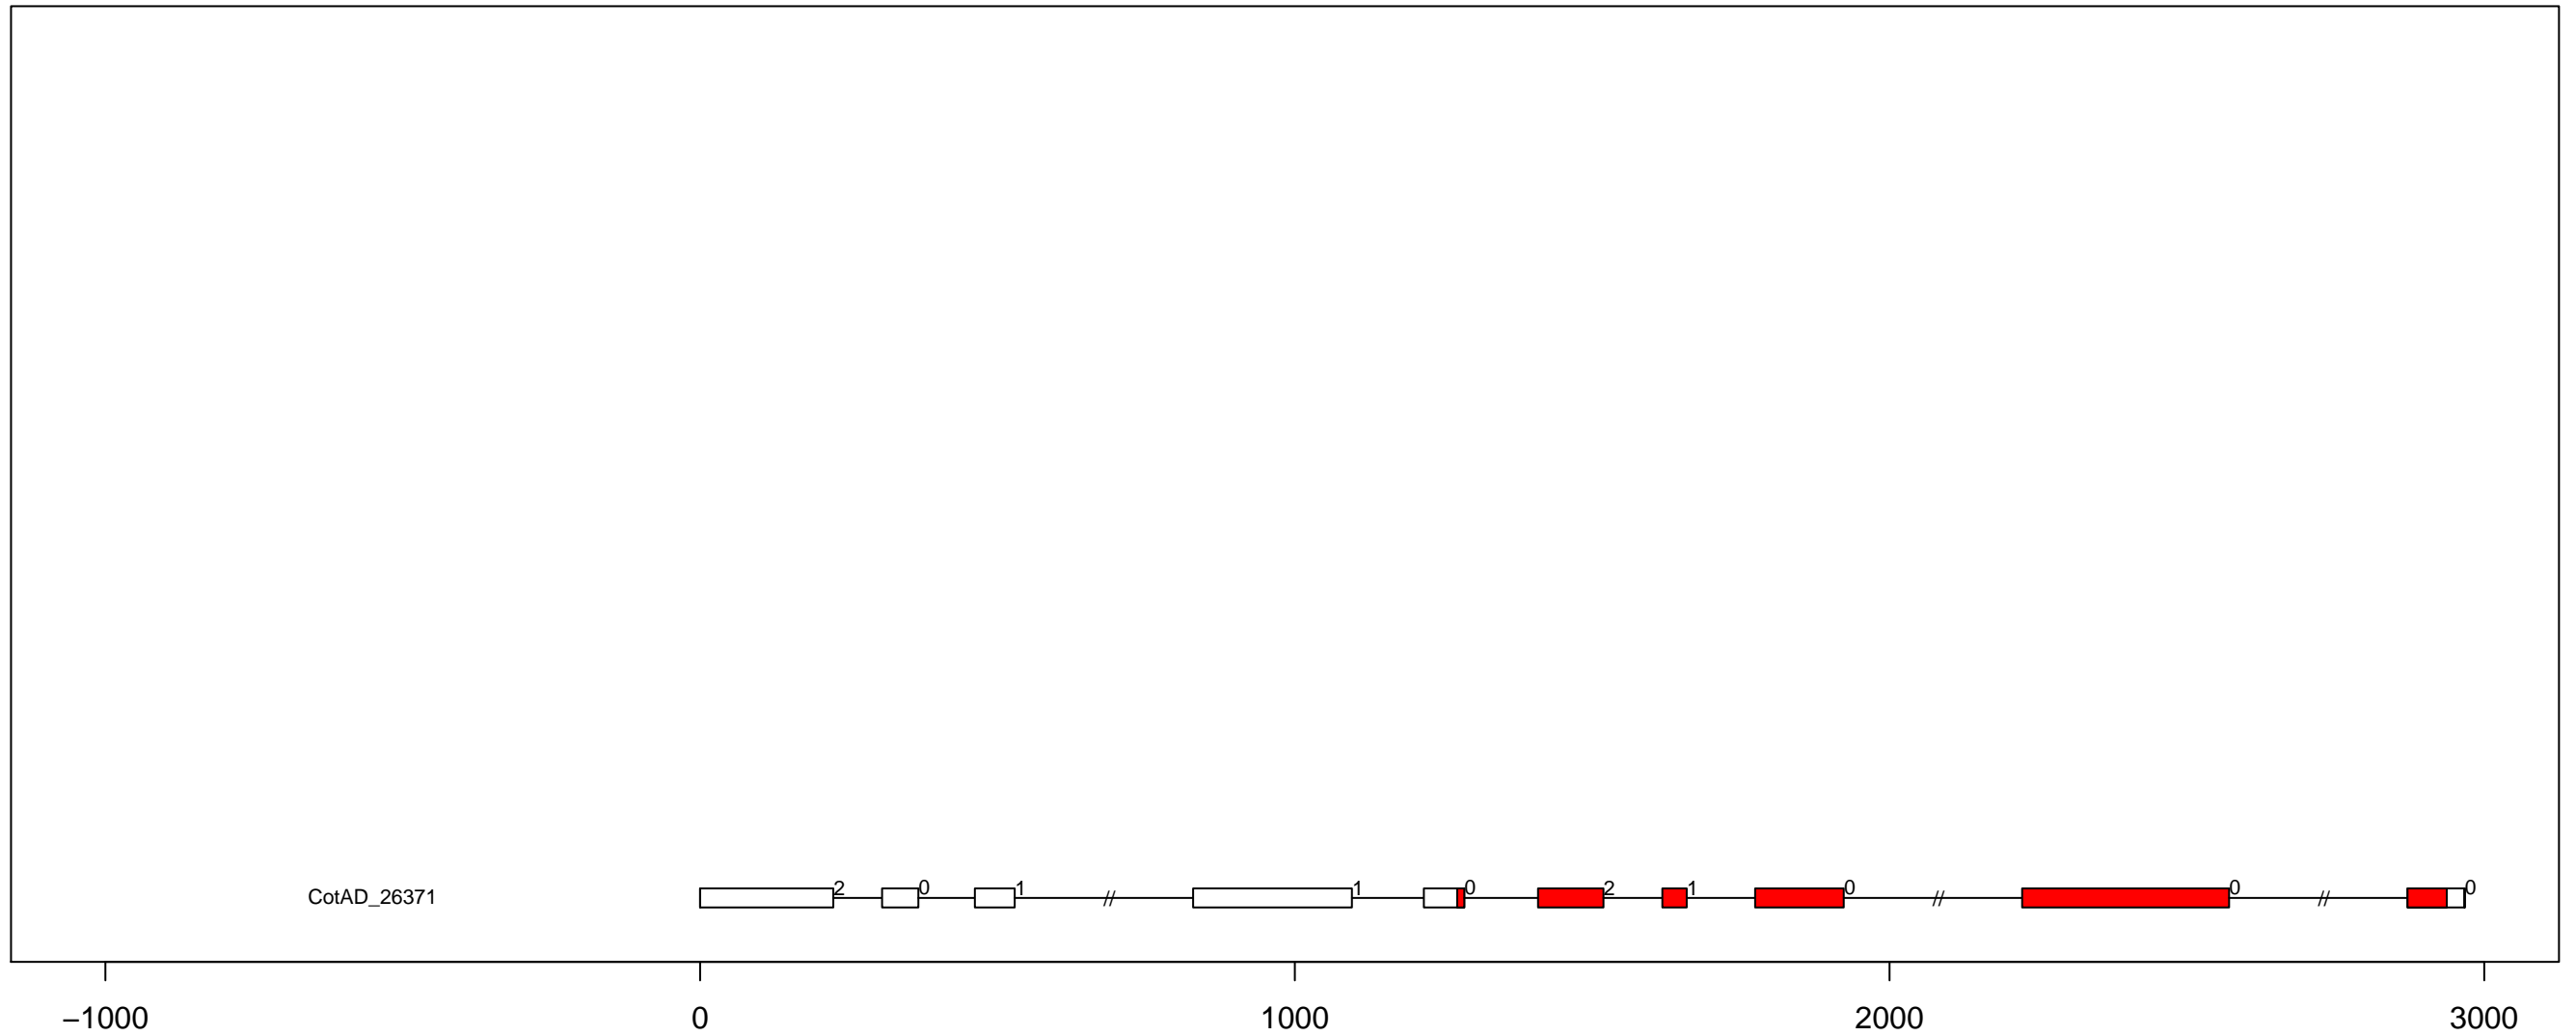

### G.hi WNK\_NRBP exon-intron and domain diagram (part 1)

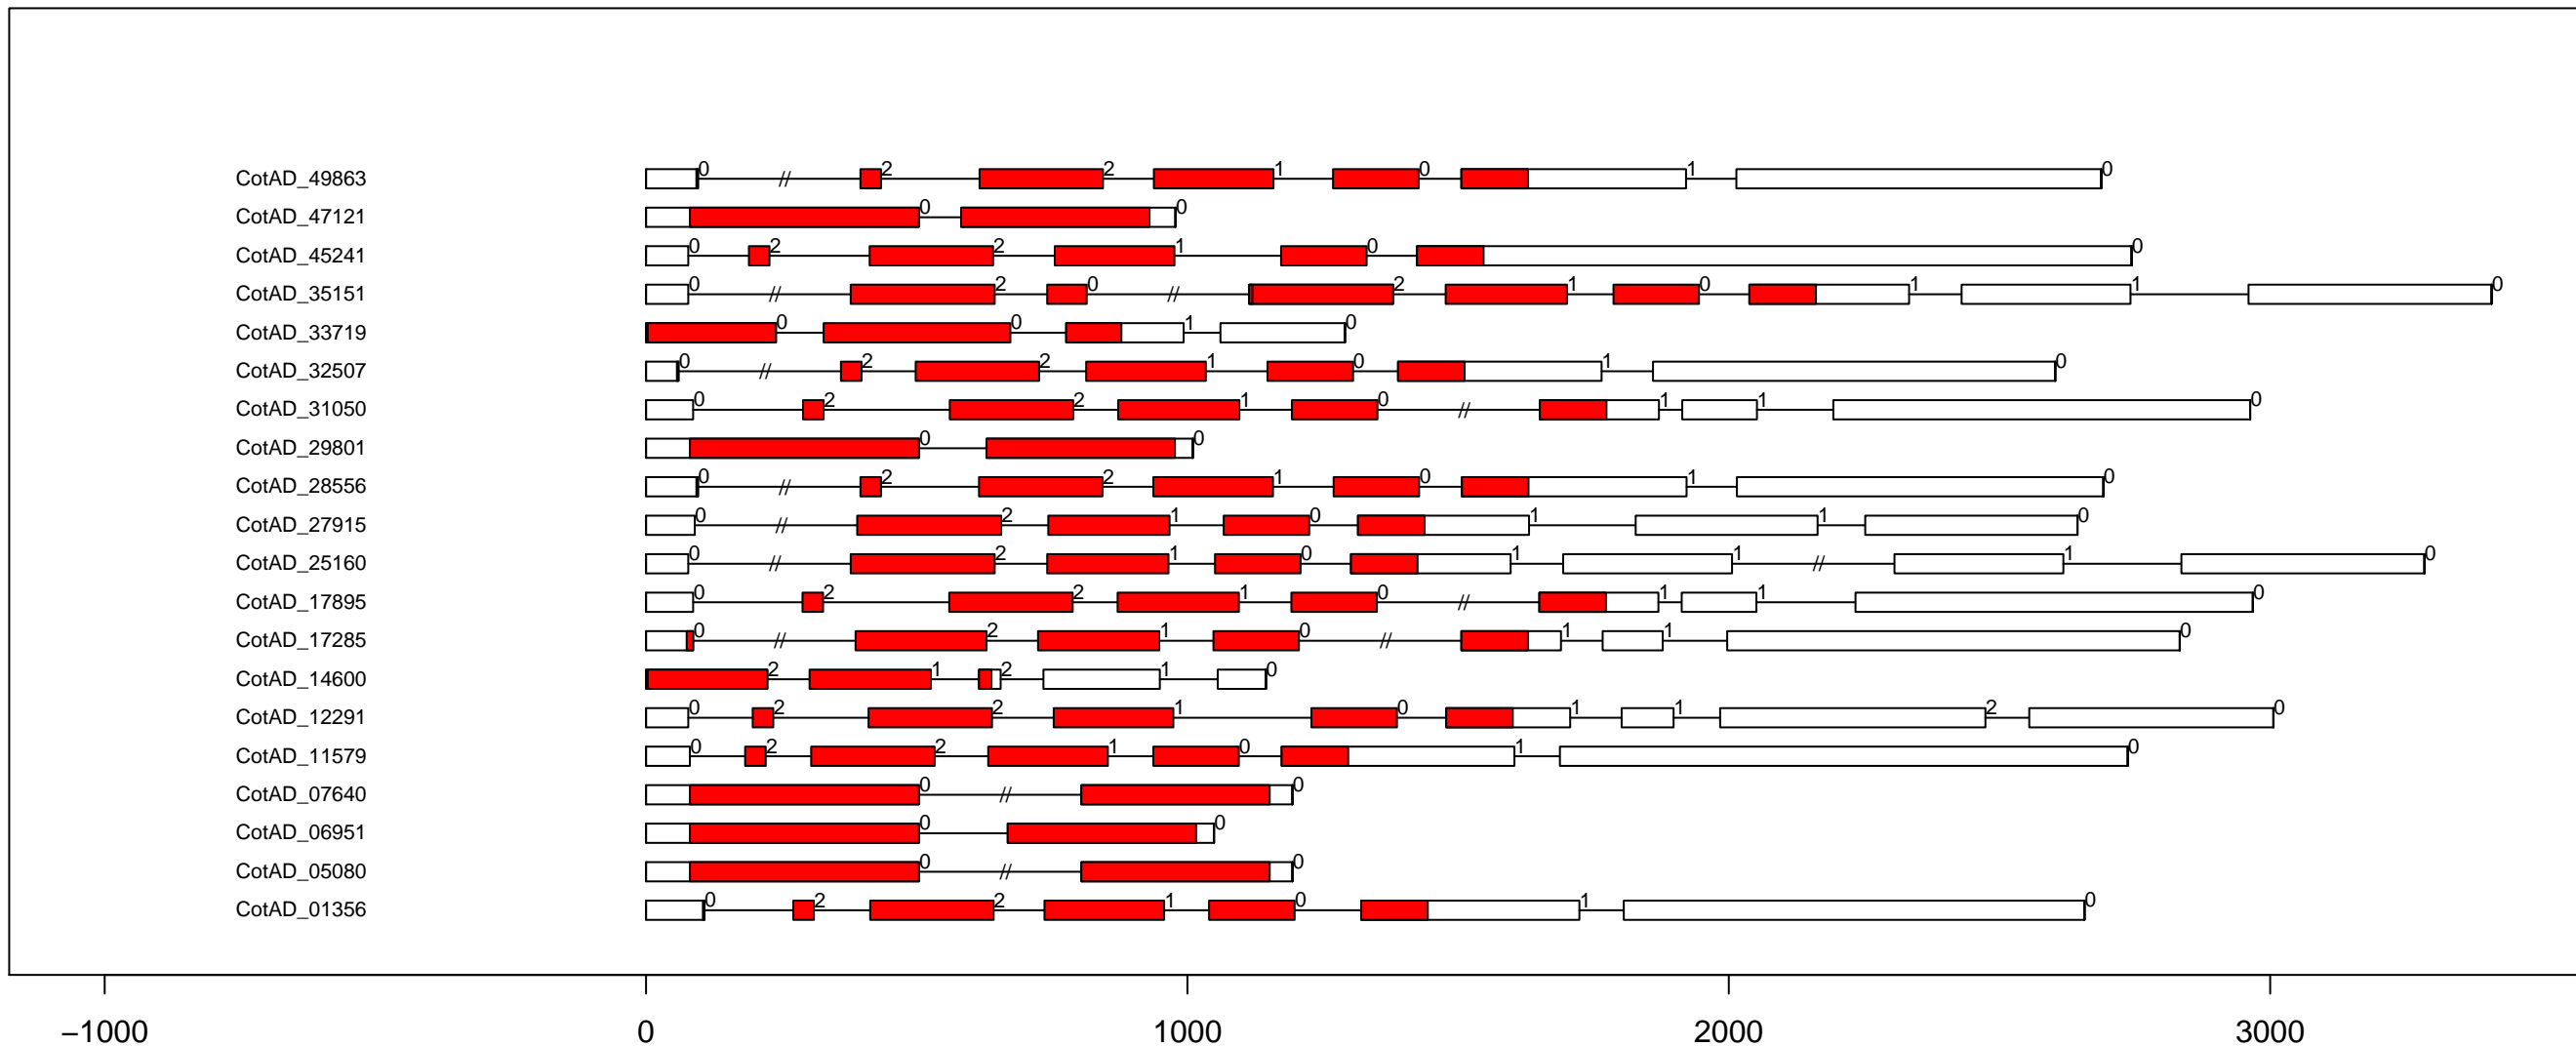

# G.hi WNK\_NRBP exon-intron and domain diagram (part 2)

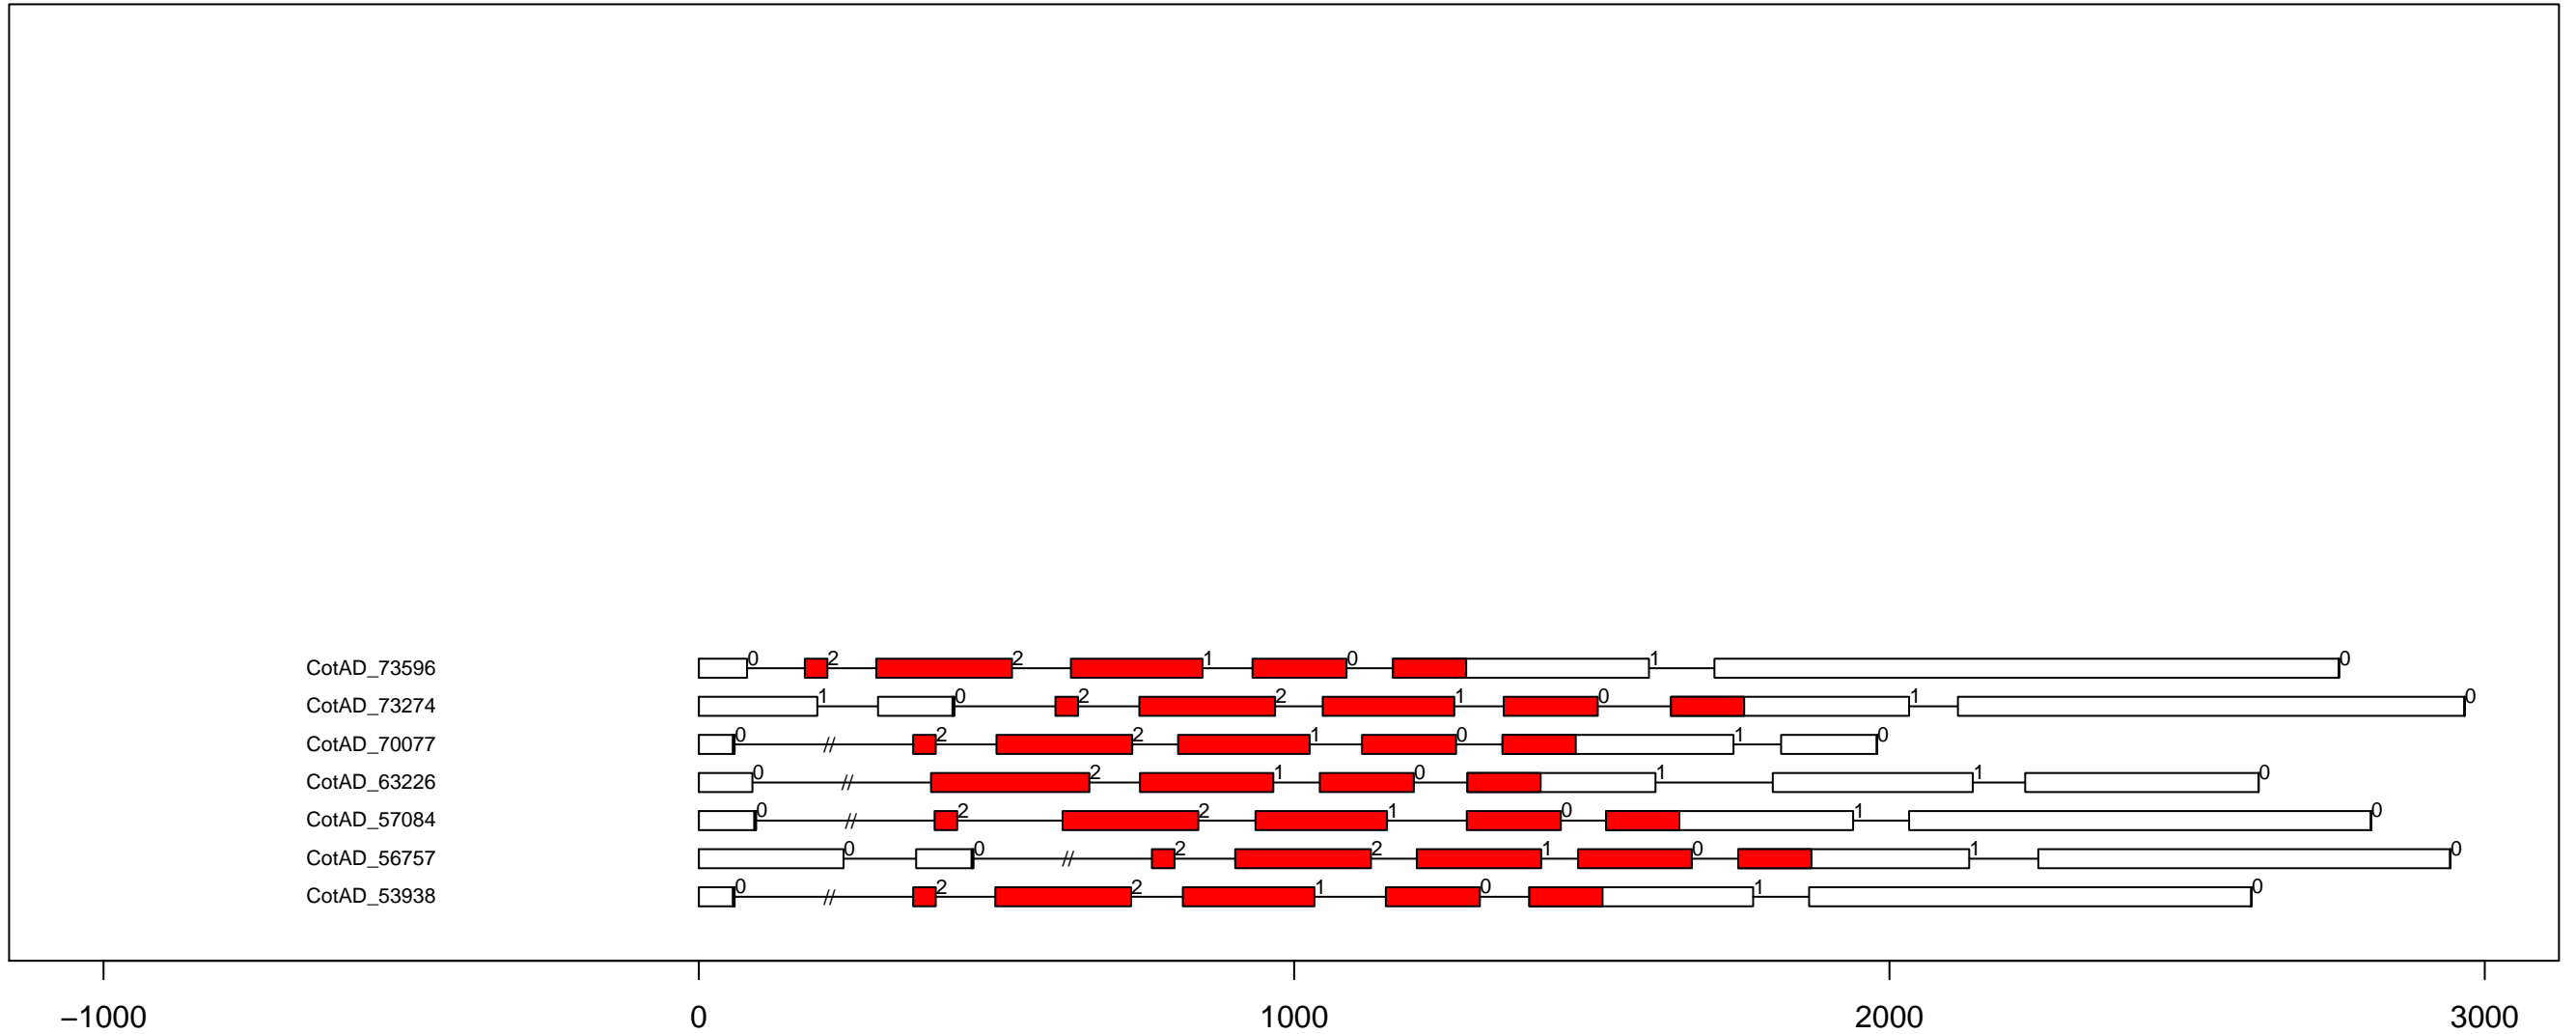

# G.ba AGC\_MAST exon-intron and domain diagram (all)

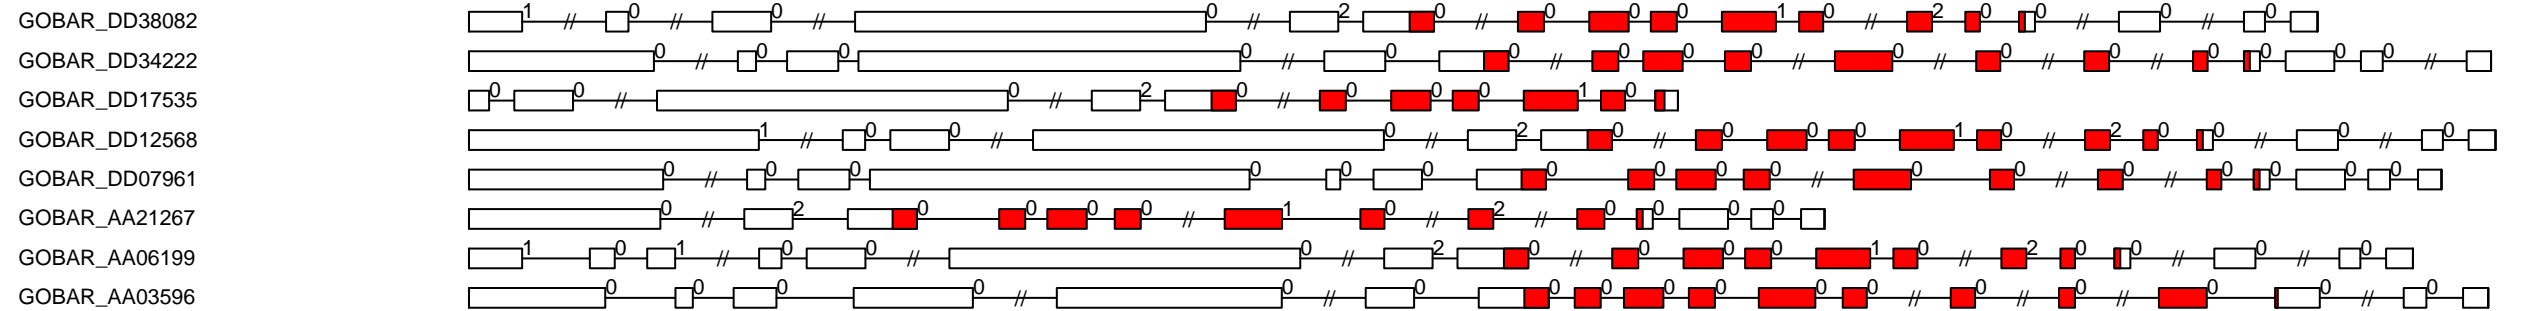

0

2000

4000

6000

### G.ba AGC\_NDR exon-intron and domain diagram (all)

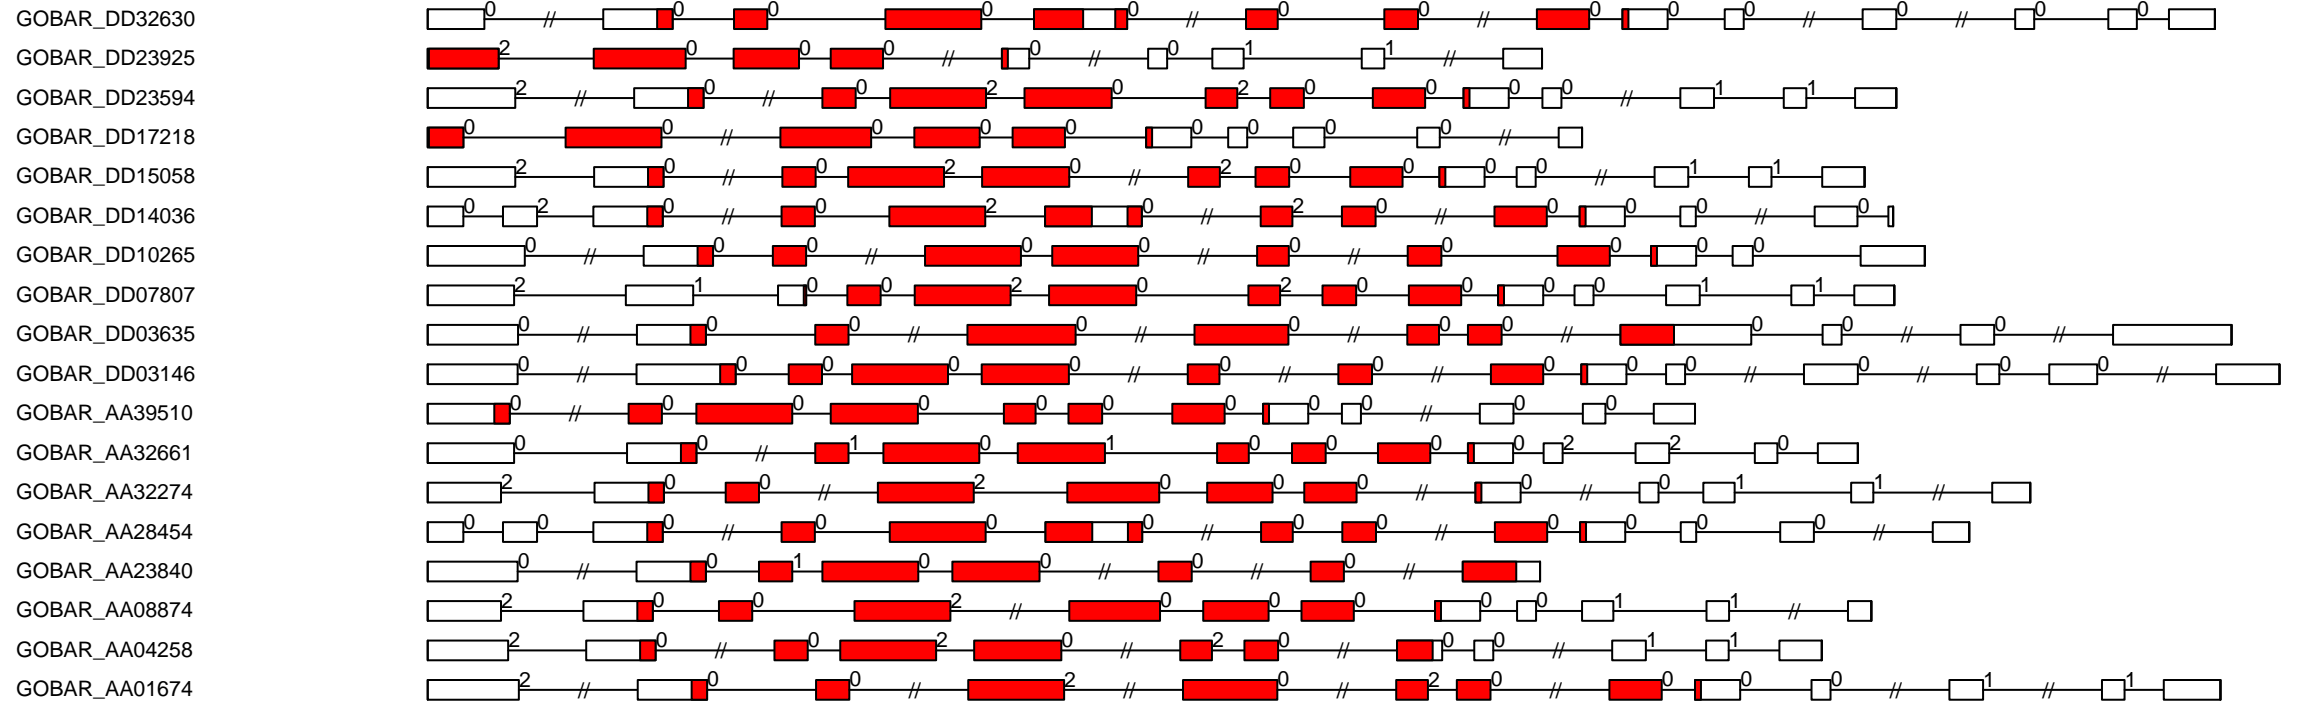

-1000

0

1000

2000

3000

4000

G.ba AGC\_PDK1 exon-intron and domain diagram (all)

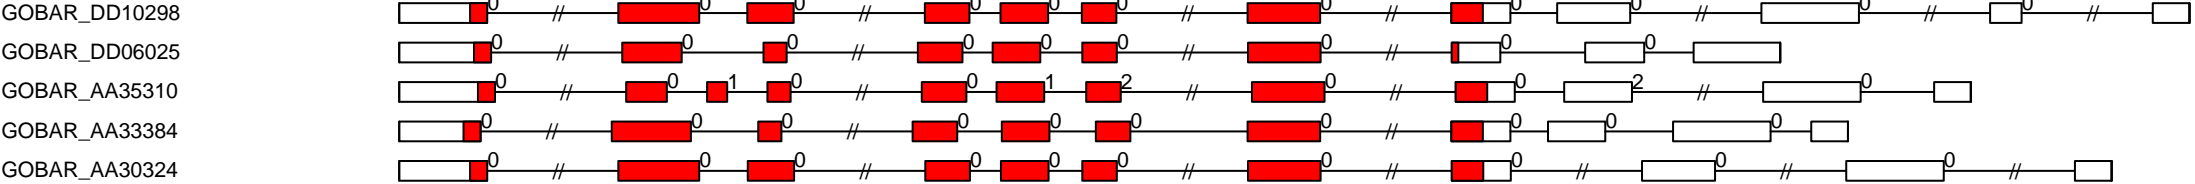

-1000

0

1000

2000

3000

4000

# G.ba AGC\_PKA-PKG exon-intron and domain diagram (all)

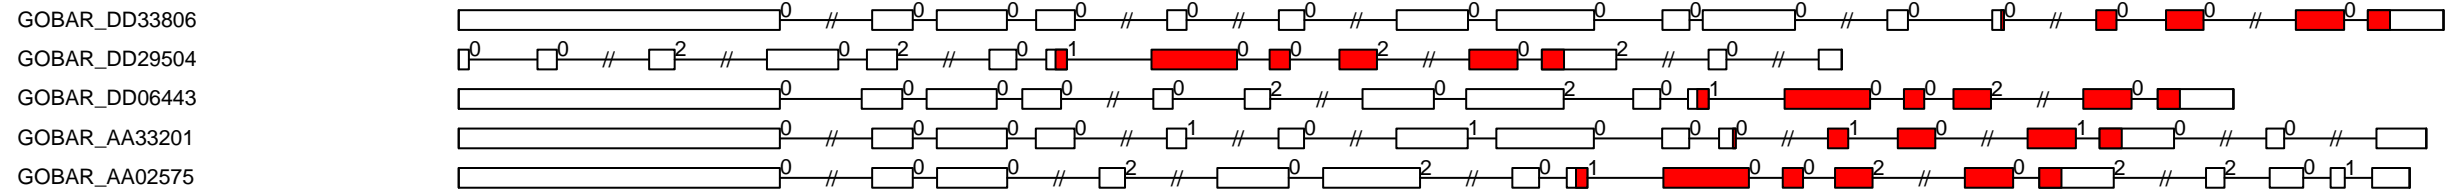



### G.ba AGC\_RSK-2 exon-intron and domain diagram (part 1)

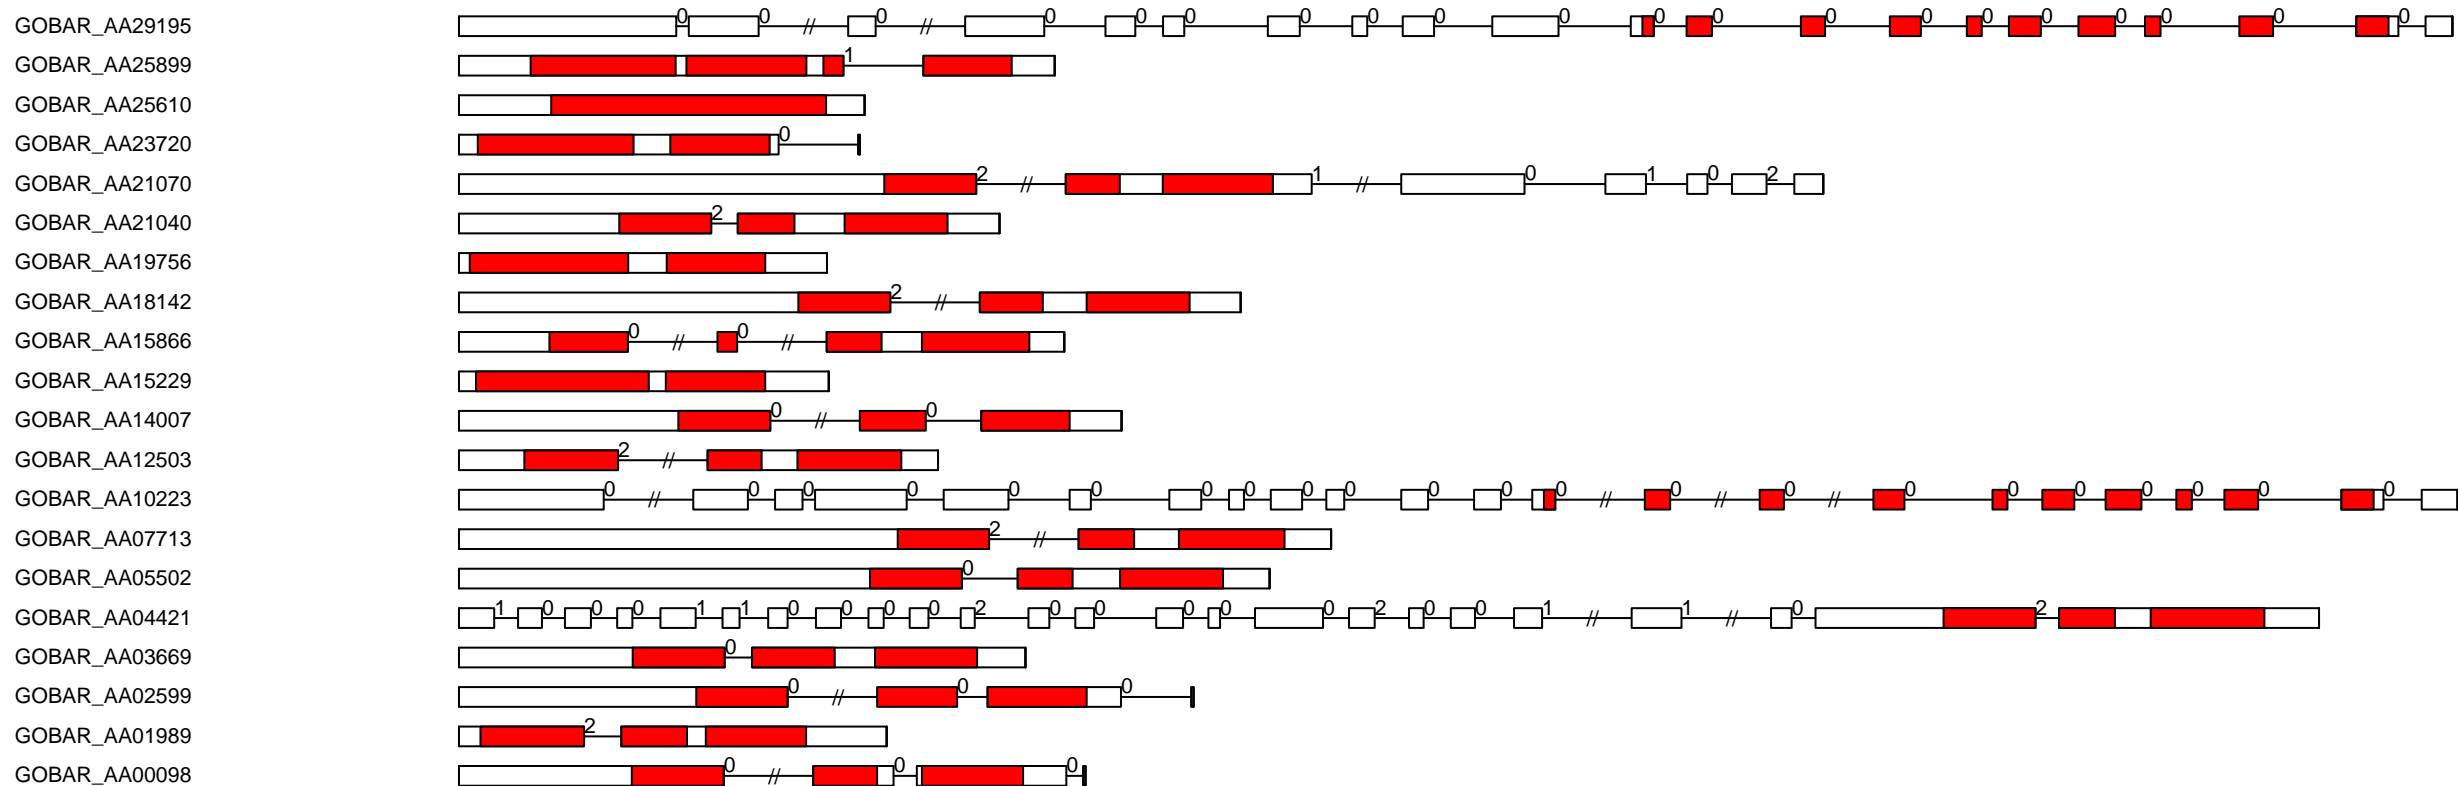

### G.ba AGC\_RSK-2 exon-intron and domain diagram (part 2)

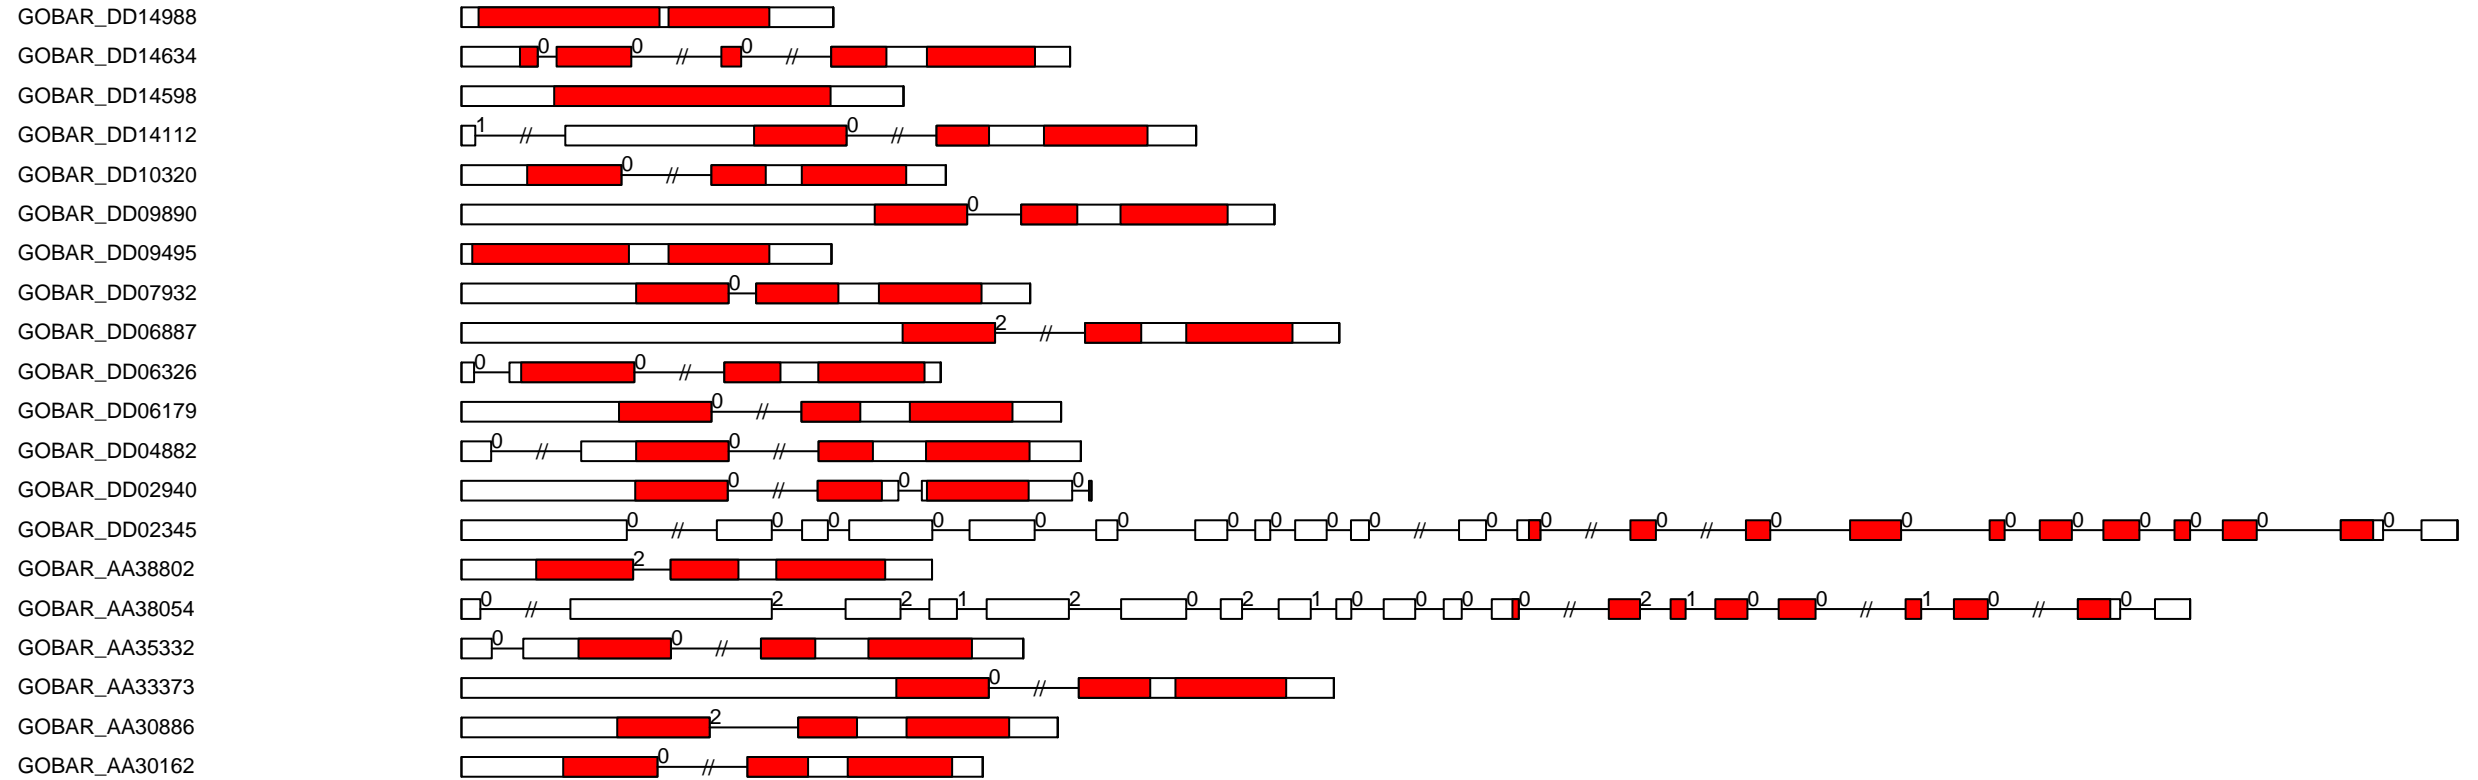

### G.ba AGC\_RSK-2 exon-intron and domain diagram (part 3)

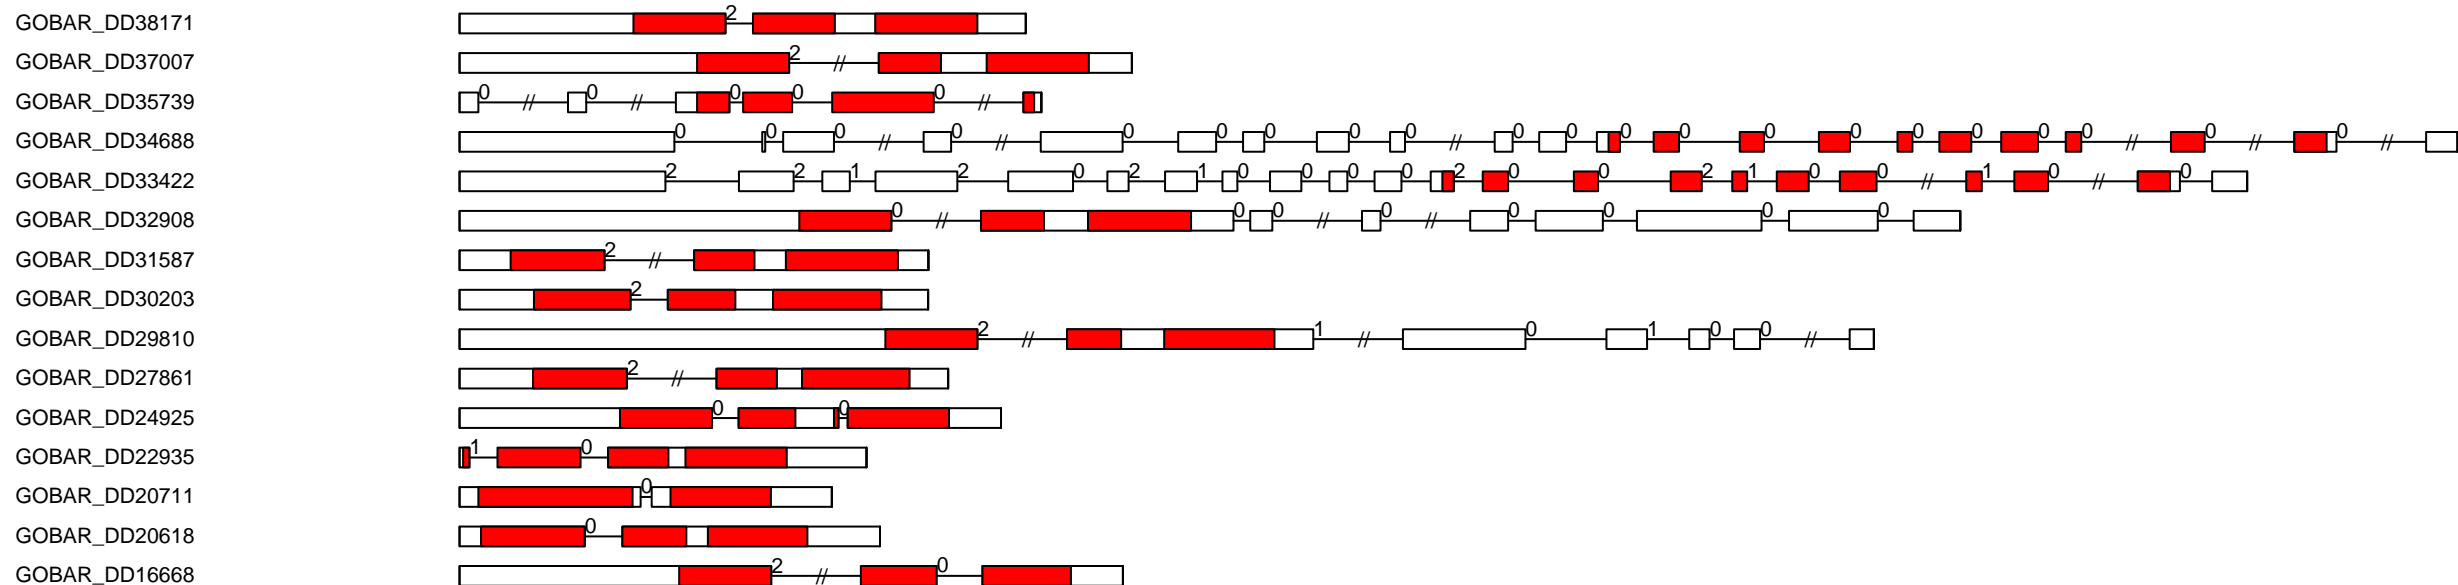

# G.ba AGC-PI exon-intron and domain diagram (all)

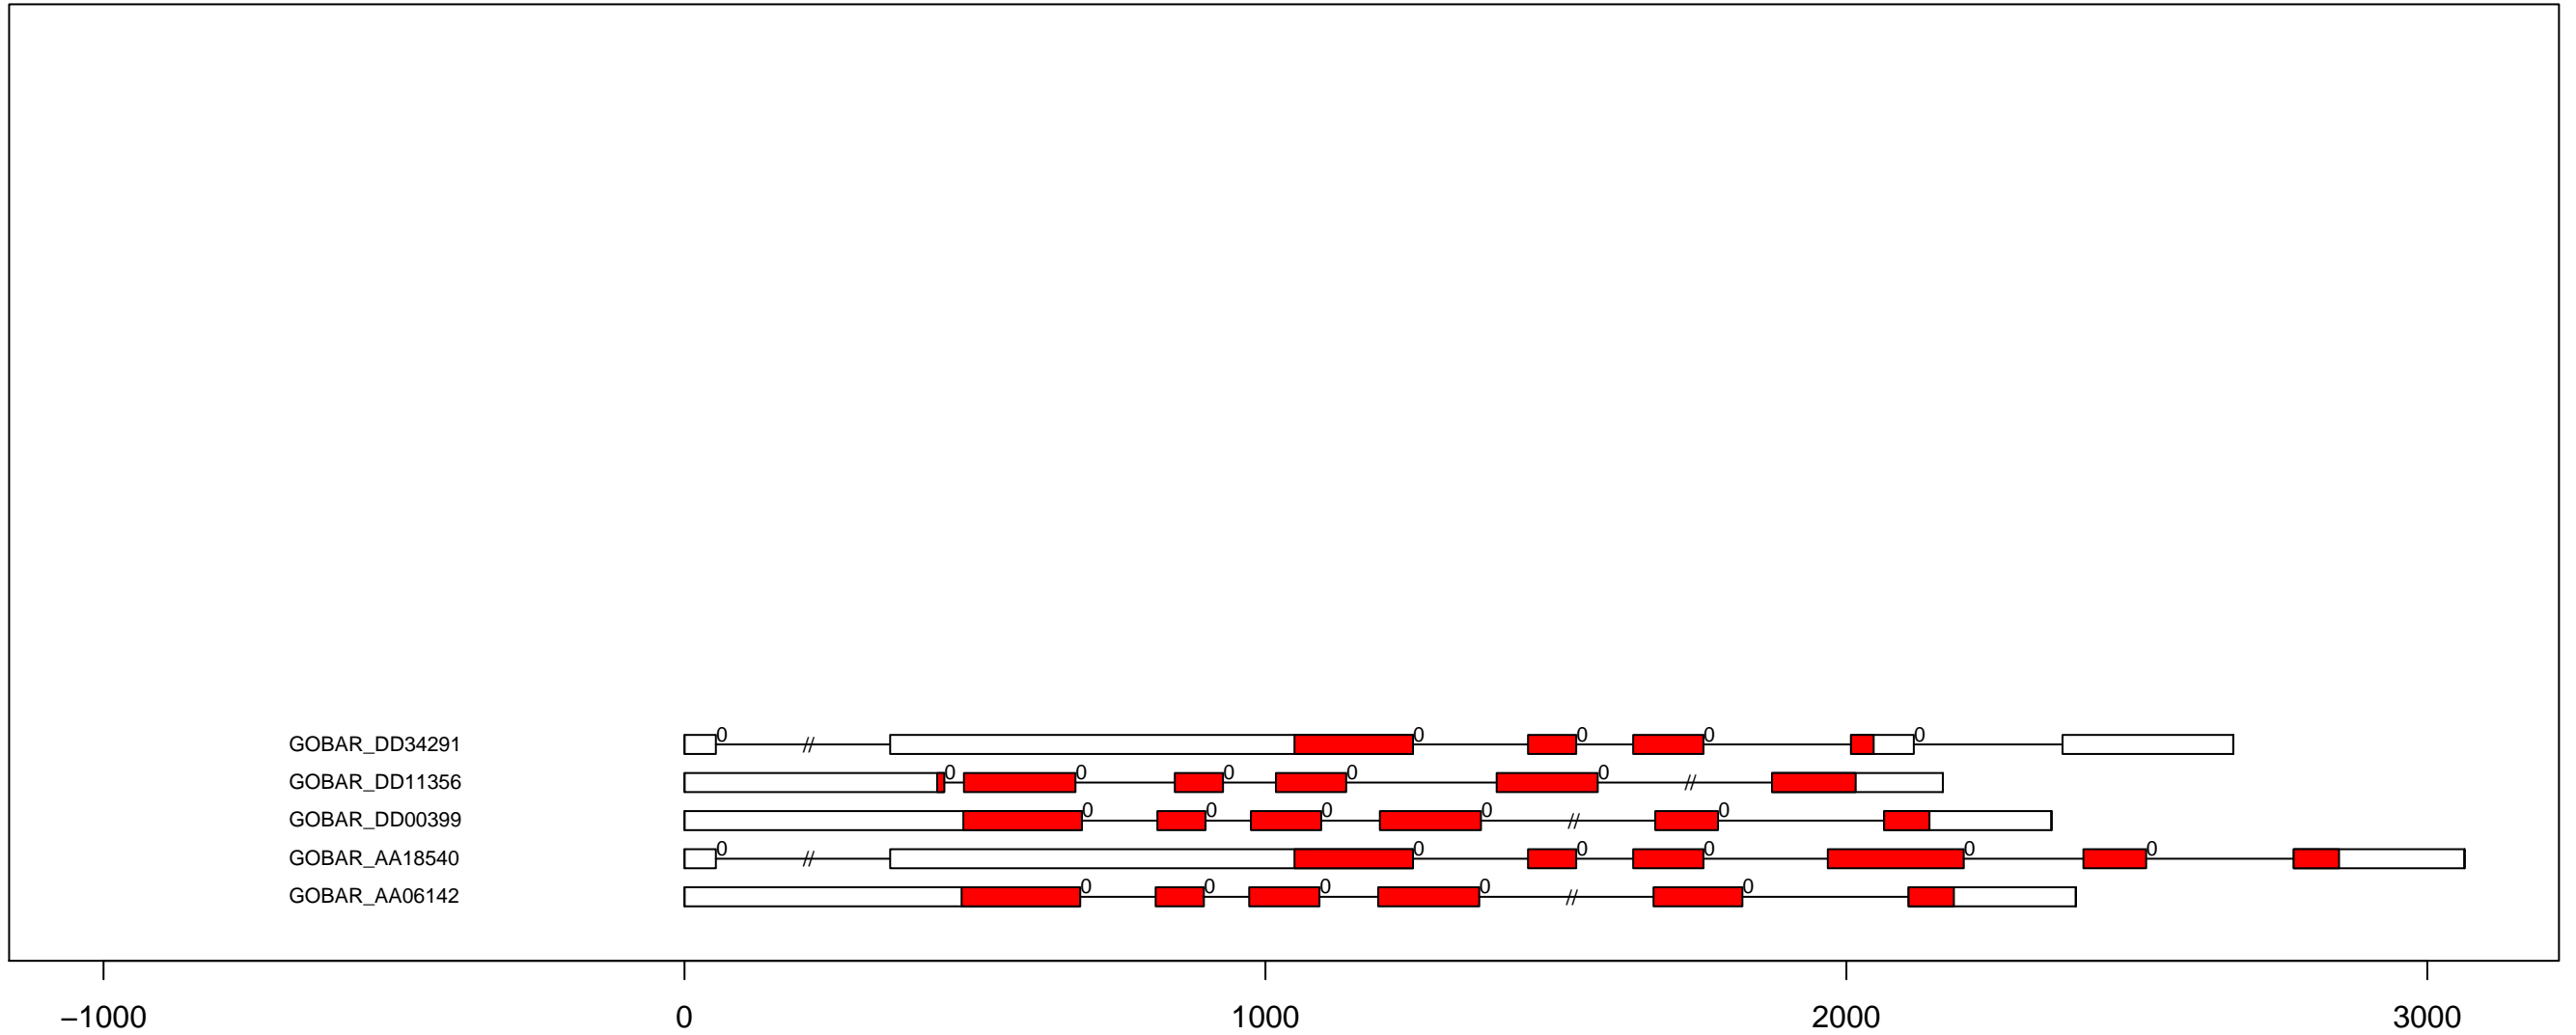



# G.ba BUB exon-intron and domain diagram (all)

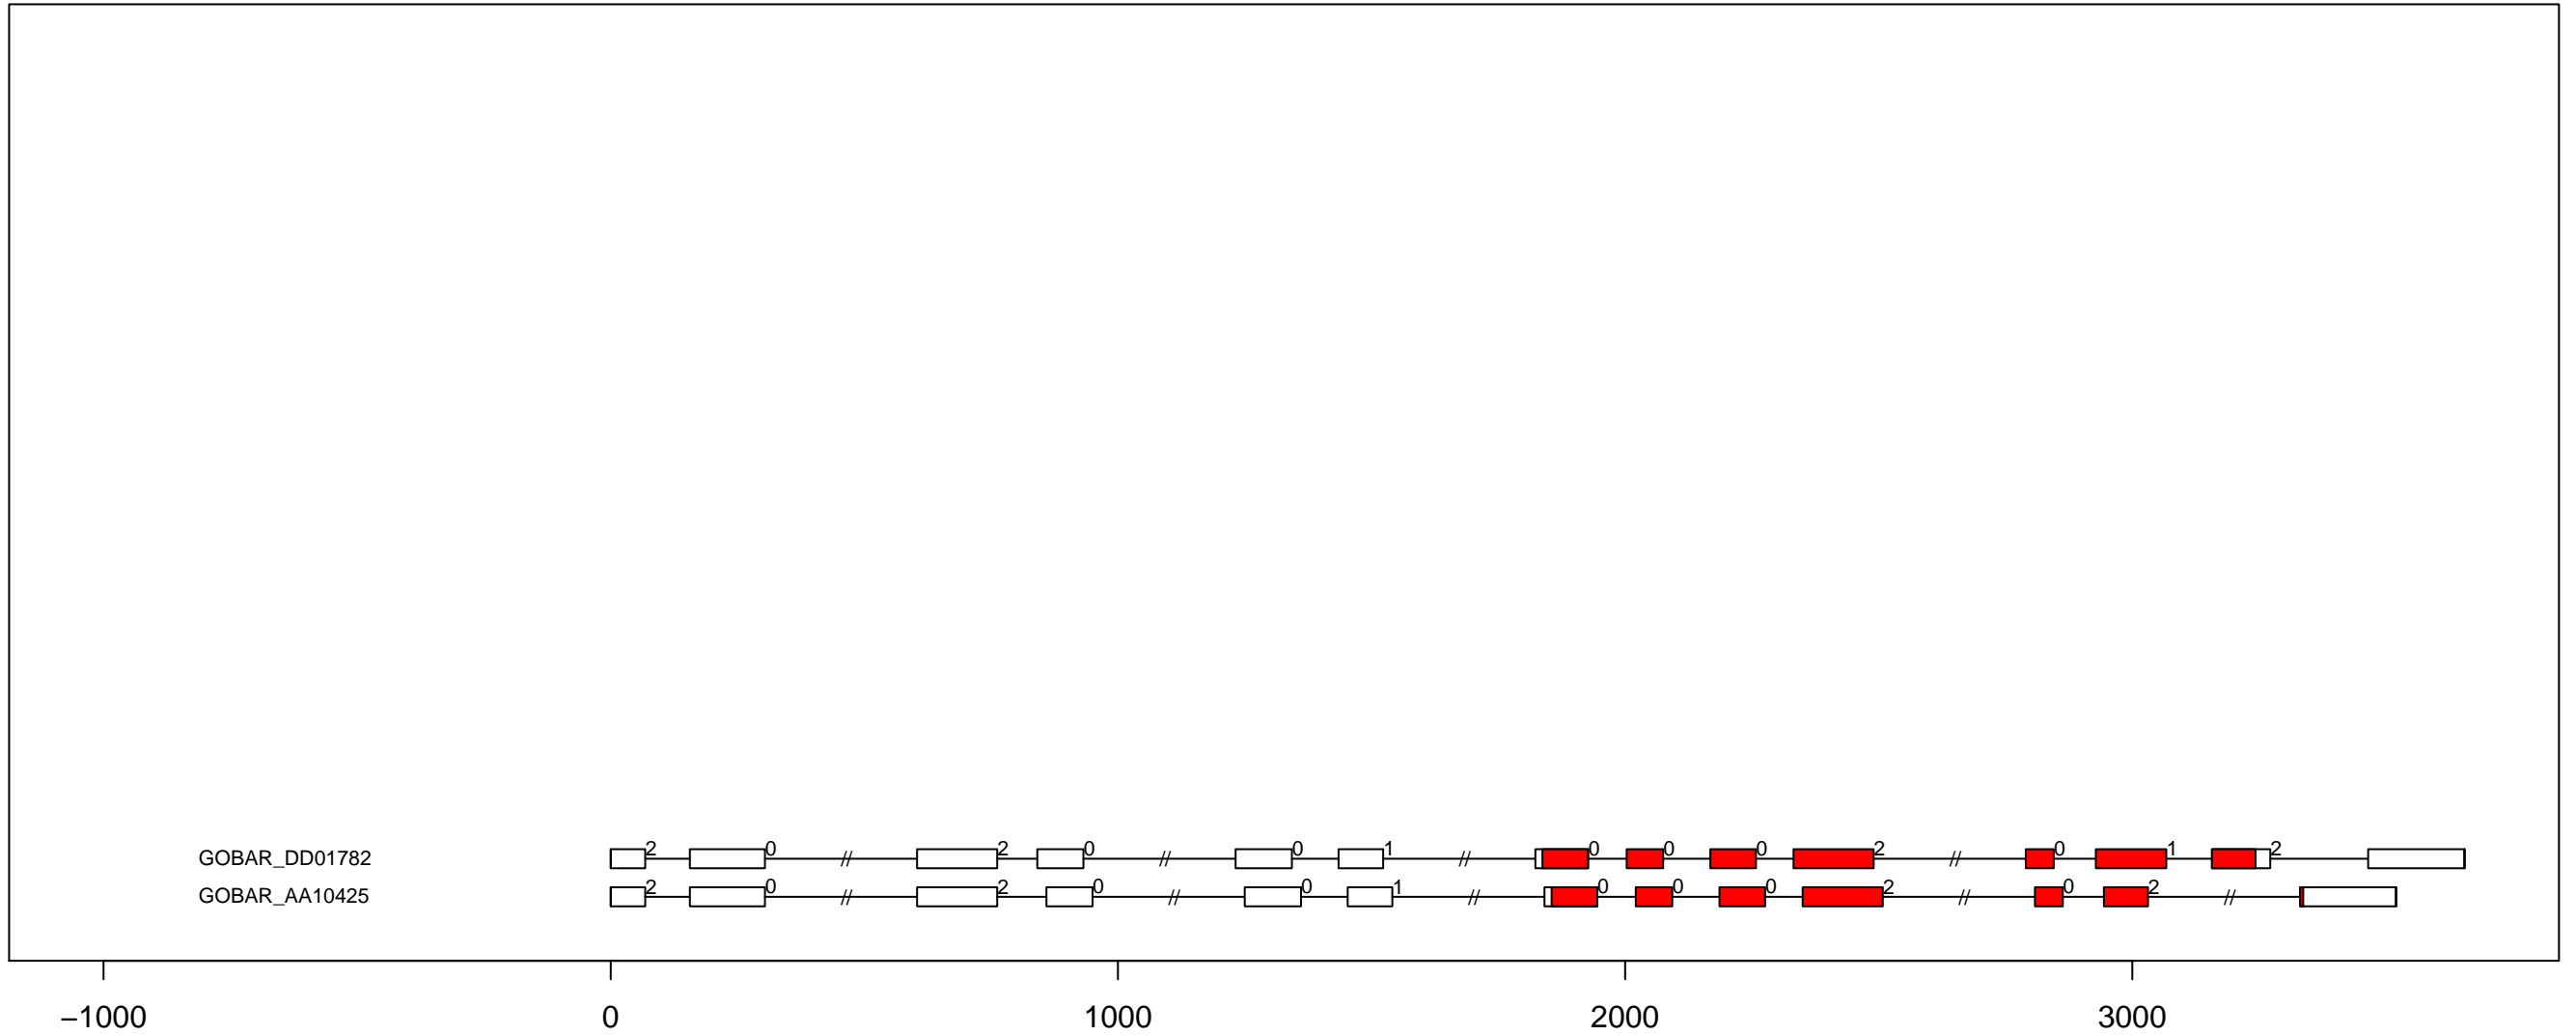

# G.ba CAMK\_AMPK exon-intron and domain diagram (all)

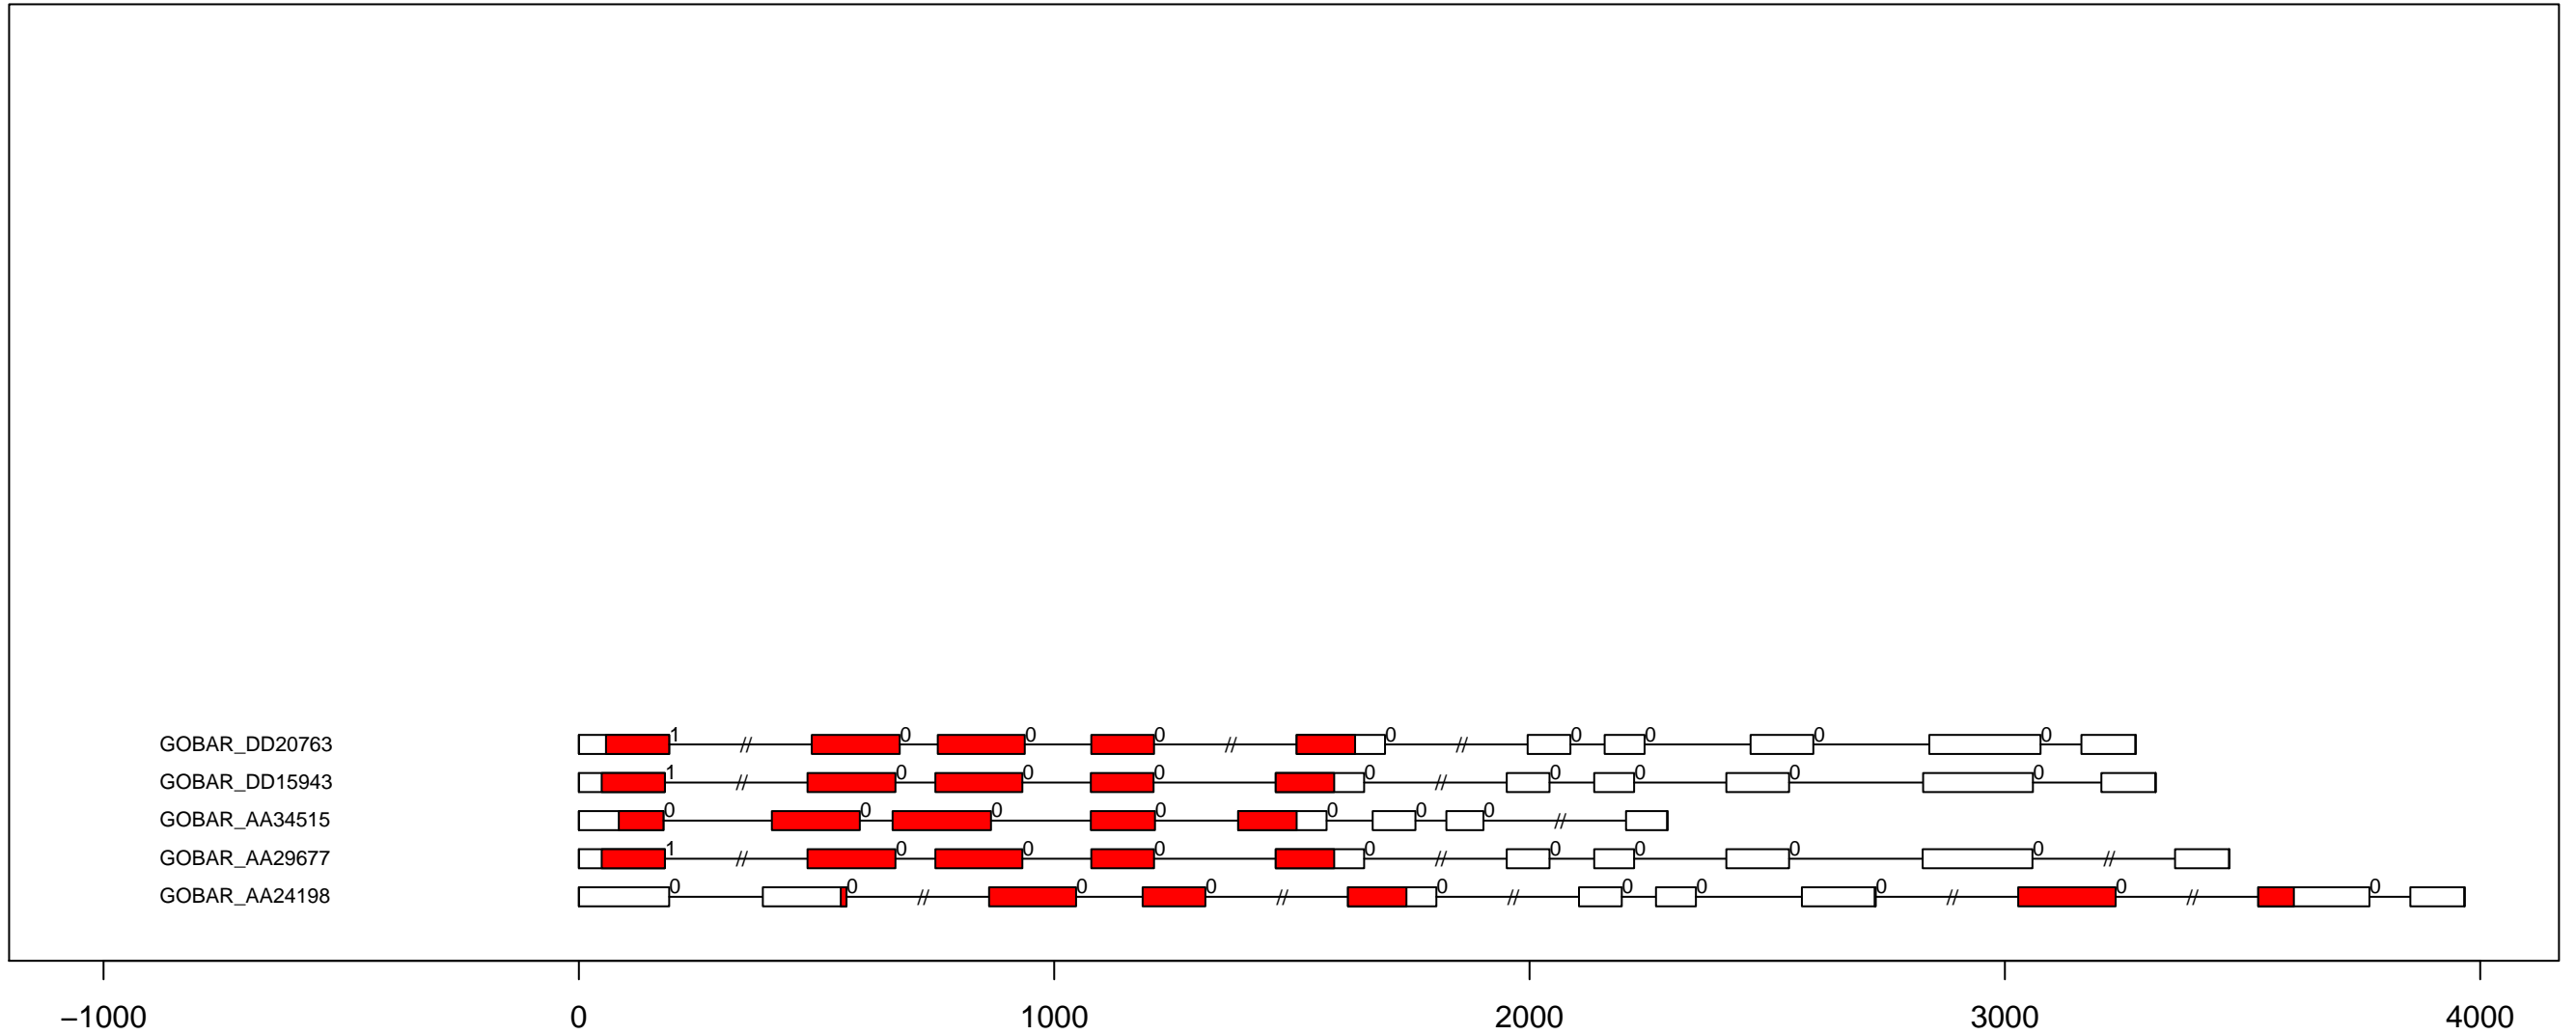

# G.ba CAMK\_CAMK1-DCAMKL exon-intron and domain diagram (all)

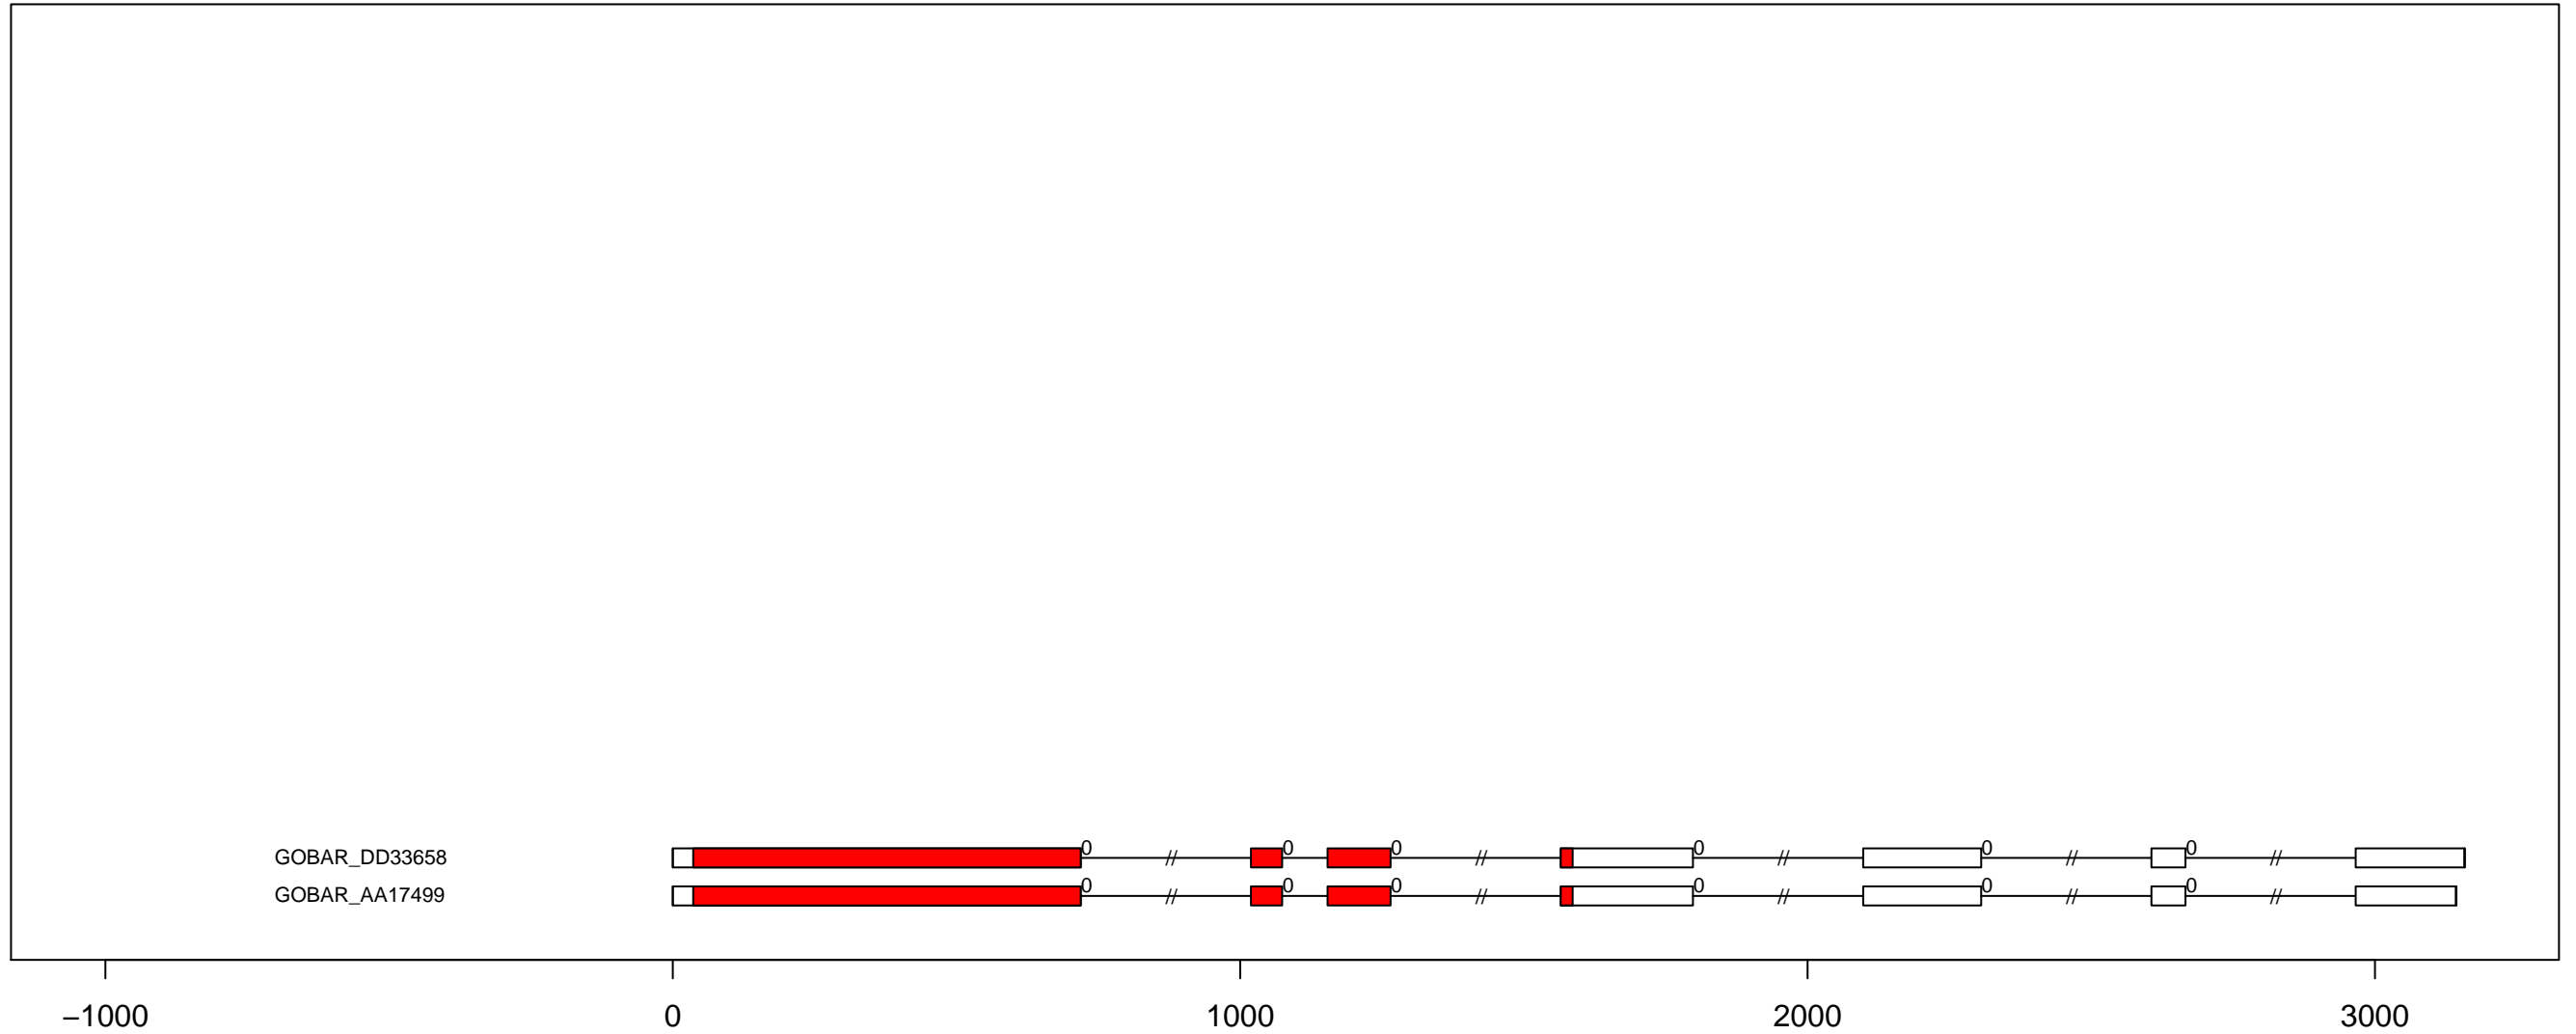



### G.ba CAMK\_CAMKL-CHK1 exon-intron and domain diagram (part 1)

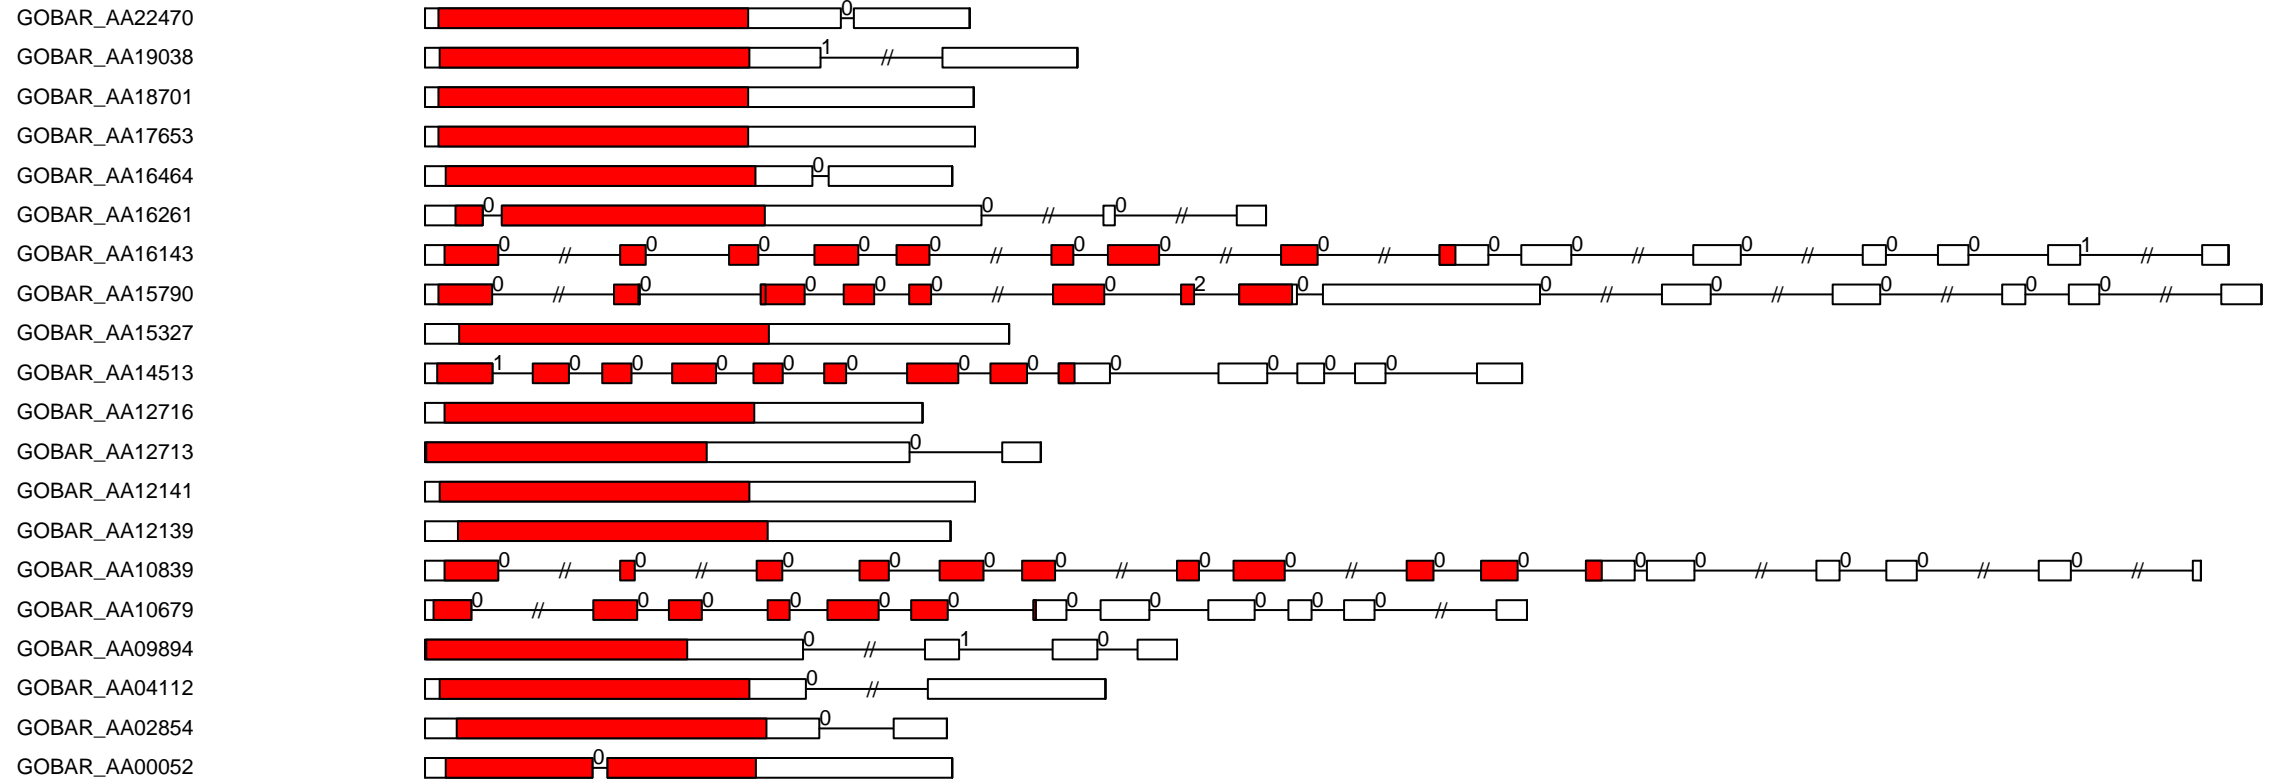

### G.ba CAMK\_CAMKL-CHK1 exon-intron and domain diagram (part 2)

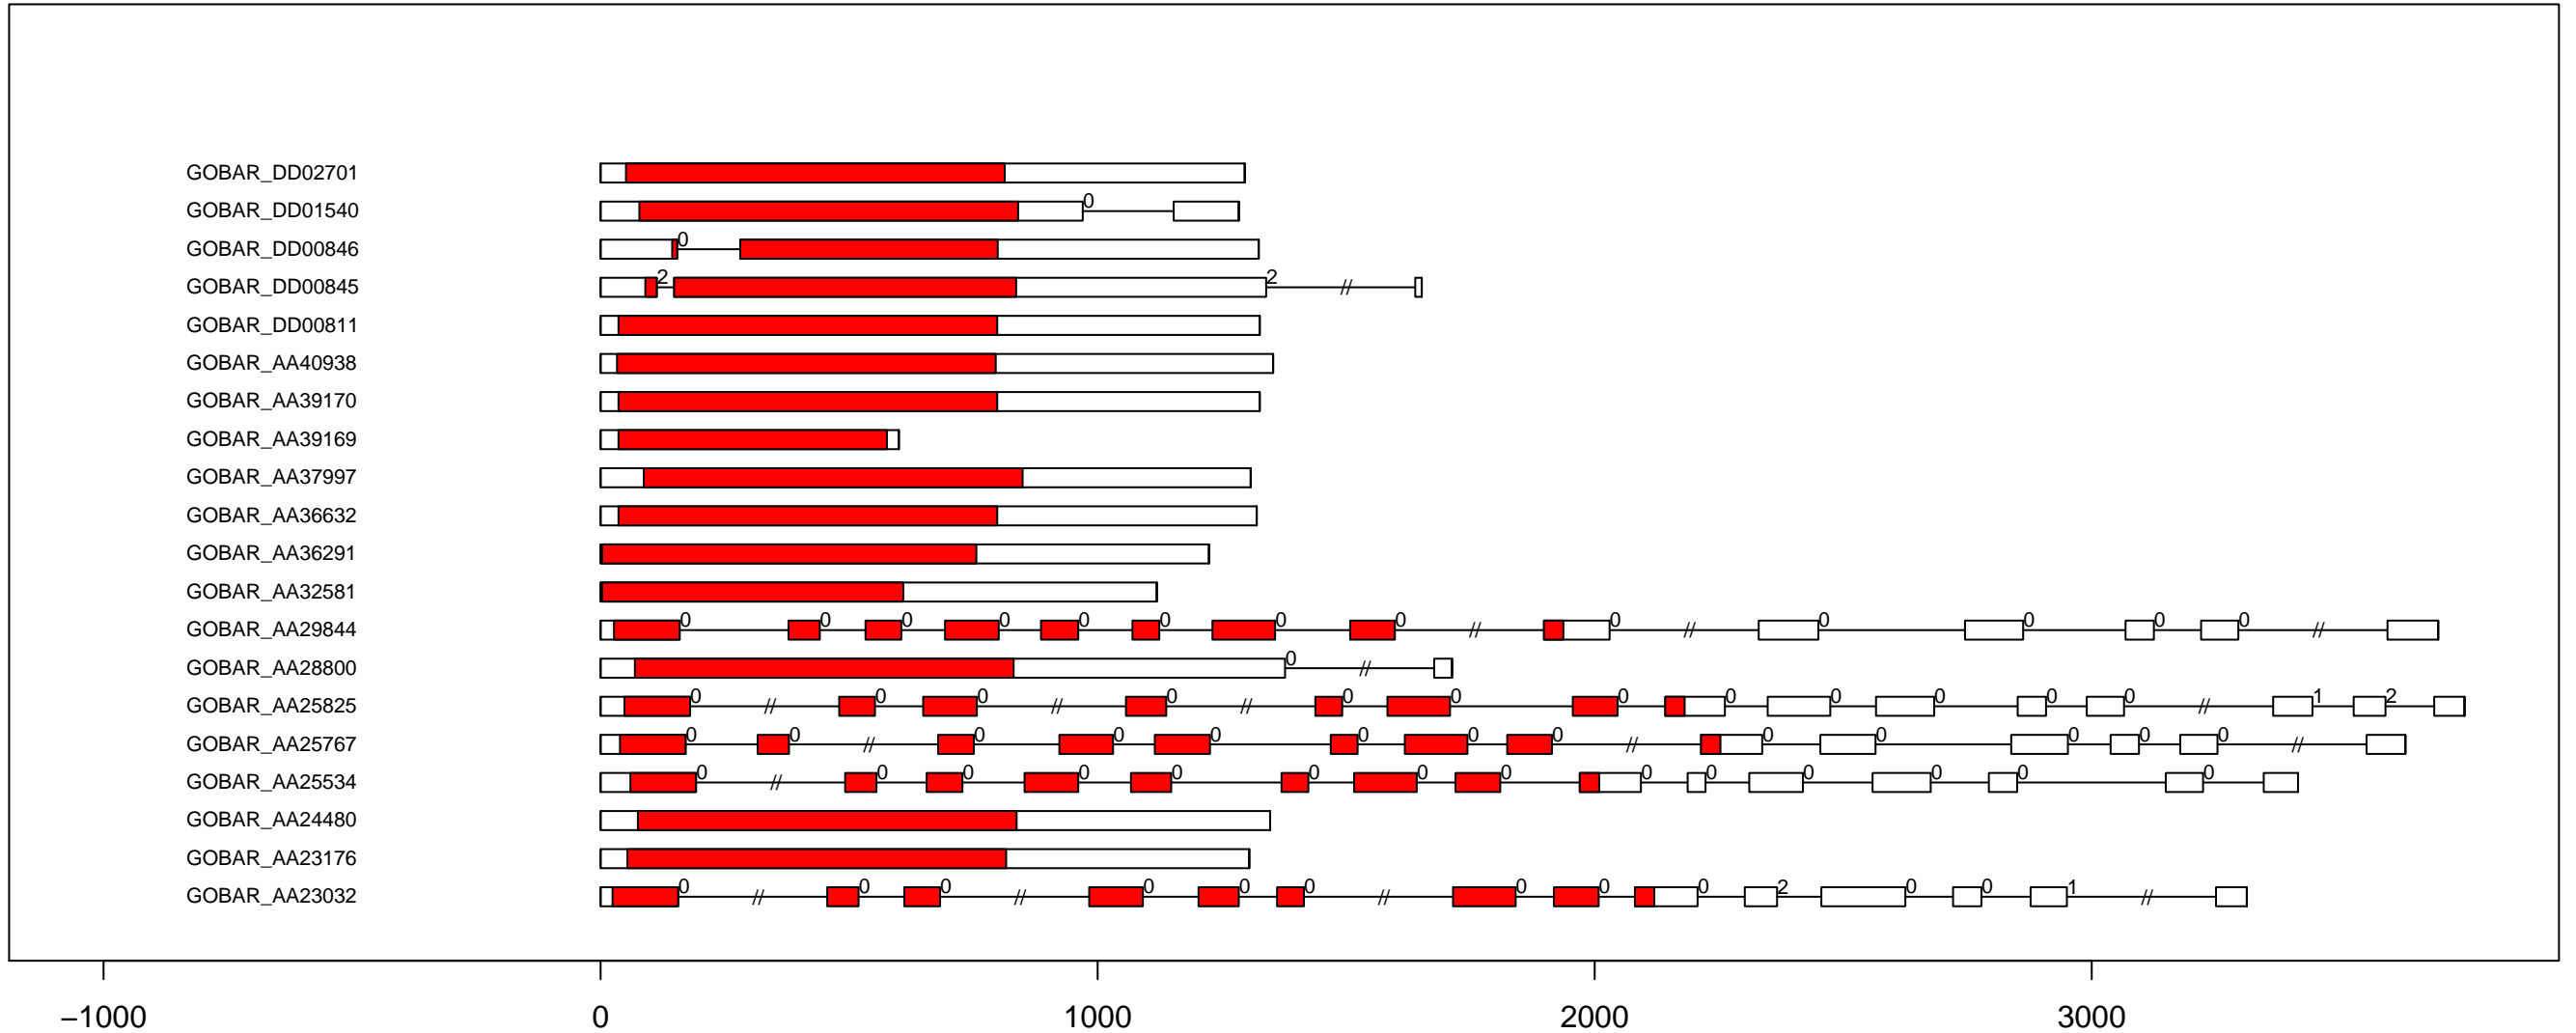

### G.ba CAMK\_CAMKL-CHK1 exon-intron and domain diagram (part 3)

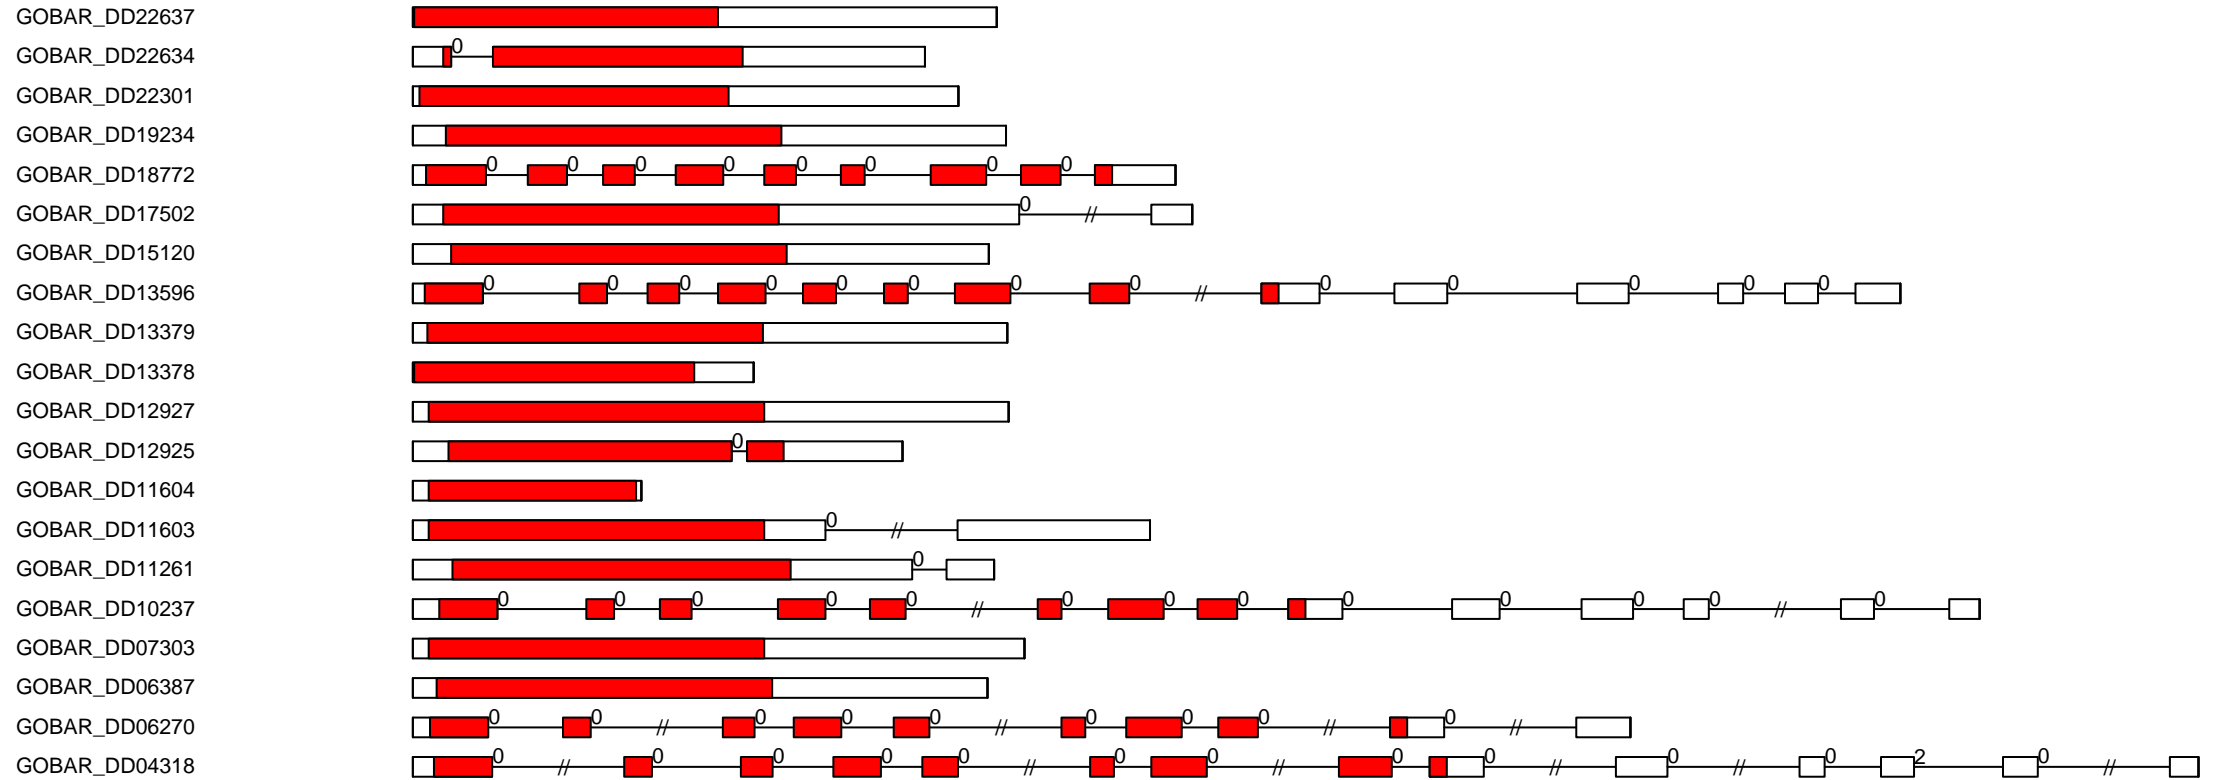

### G.ba CAMK\_CAMKL-CHK1 exon-intron and domain diagram (part 4)

GOBAR\_DD33585  
GOBAR\_DD33006  
GOBAR\_DD31250  
GOBAR\_DD29533  
GOBAR\_DD29024  
GOBAR\_DD28630  
GOBAR\_DD27701  
GOBAR\_DD27594  
GOBAR\_DD27510  
GOBAR\_DD27386  
GOBAR\_DD27110  
GOBAR\_DD25339  
GOBAR\_DD25198  
GOBAR\_DD25101

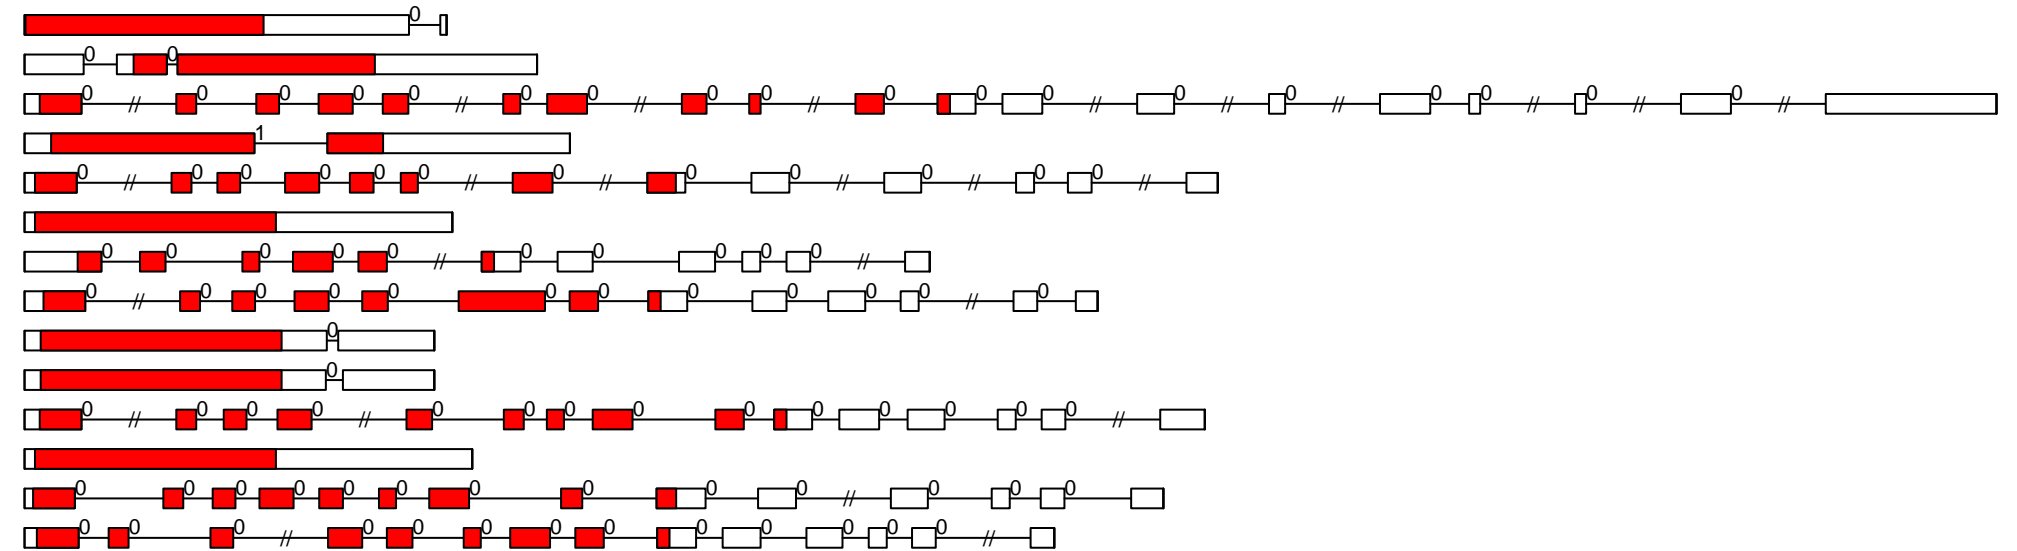

0

2000

4000

6000

# G.ba CAMK\_CAMKL-LKB exon-intron and domain diagram (all)

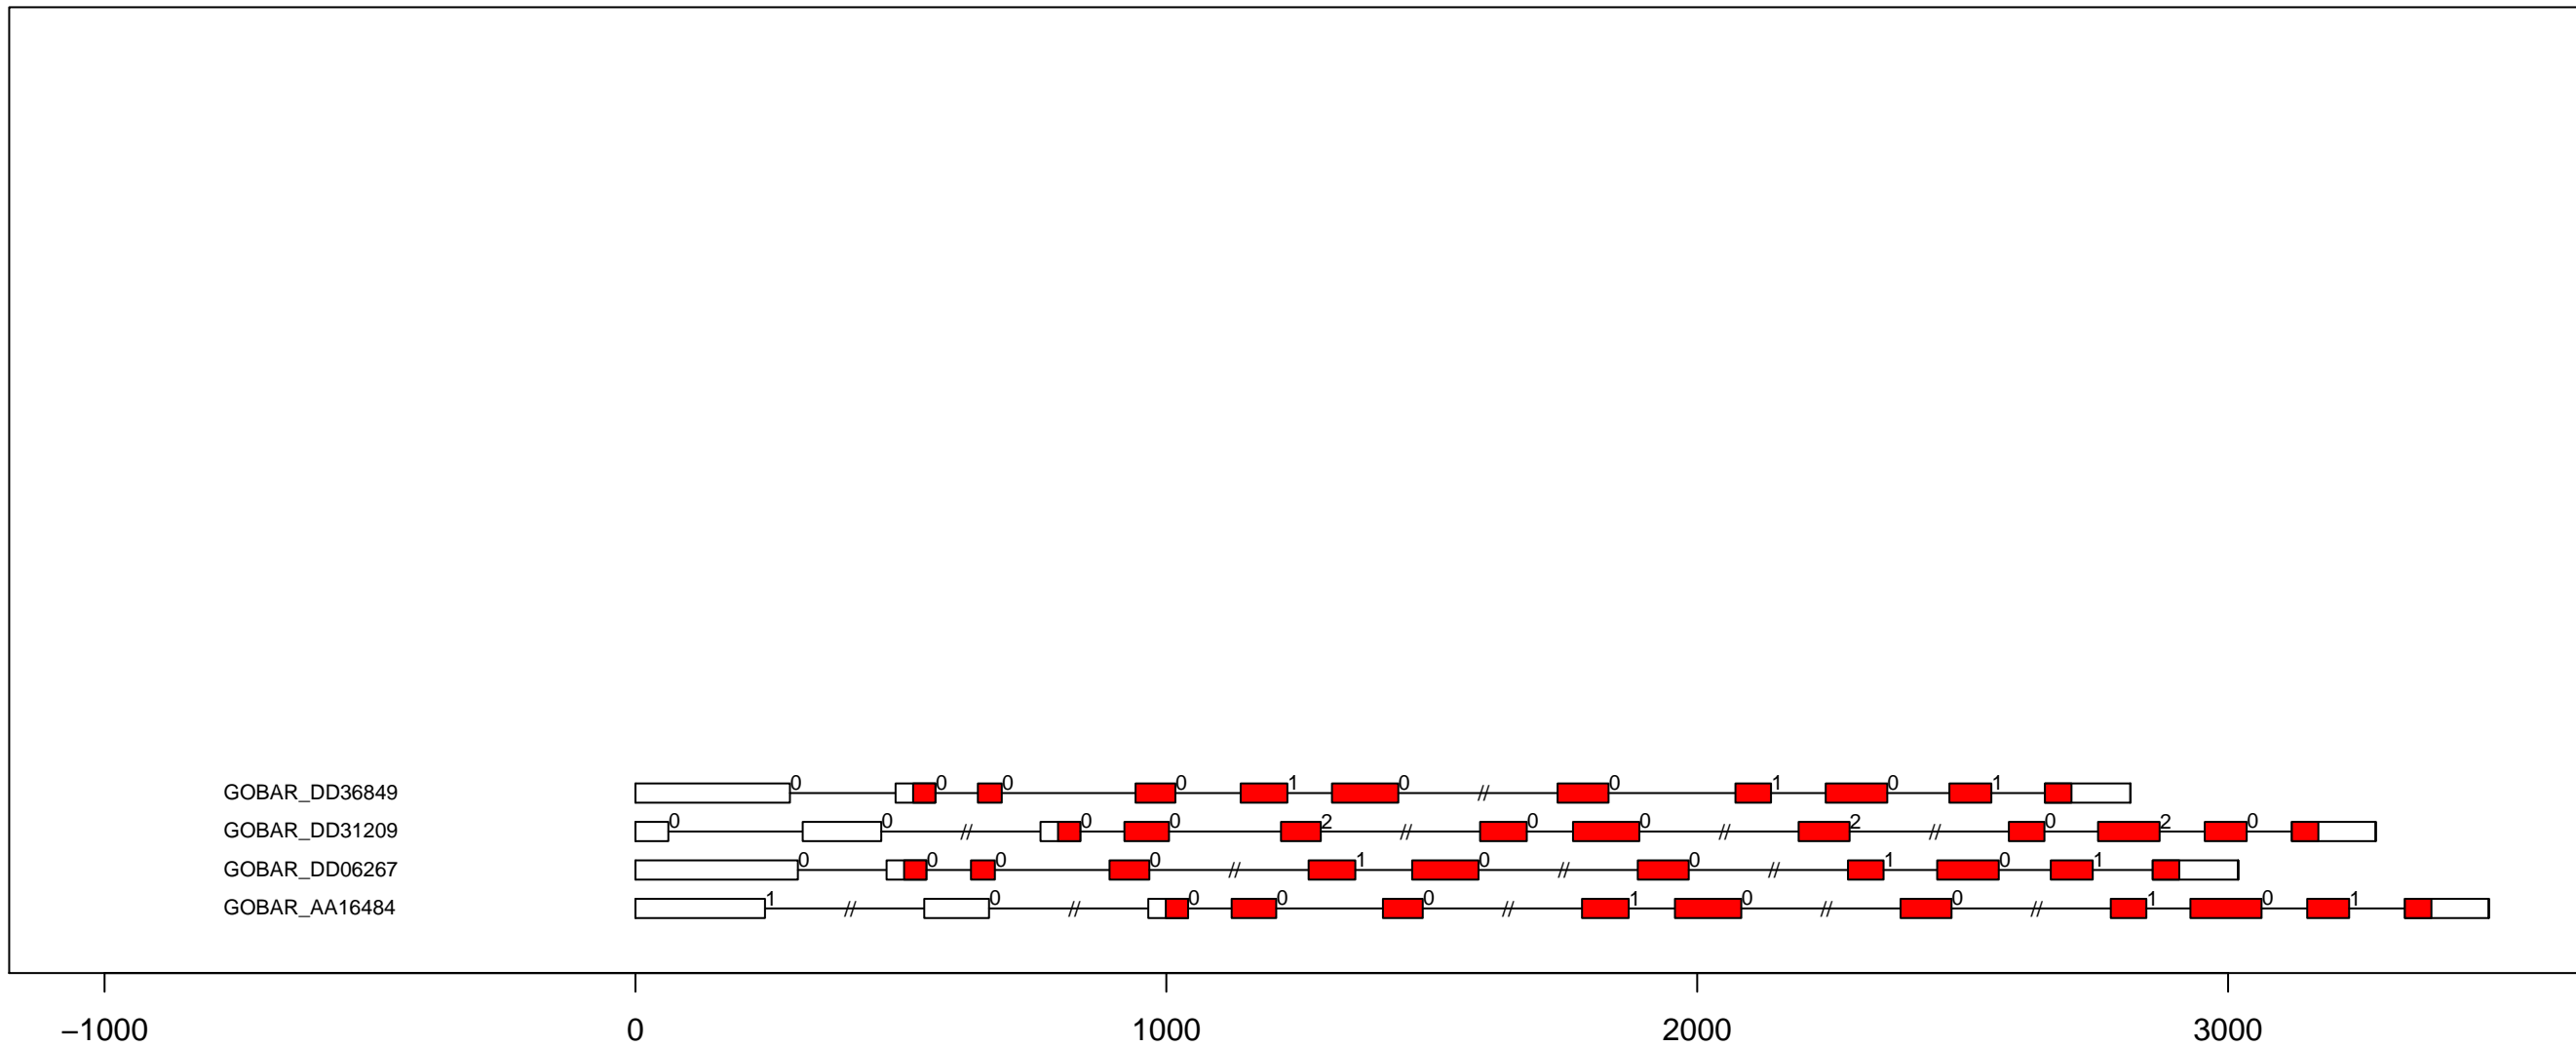

### G.ba CAMK\_CDPK exon-intron and domain diagram (part 1)

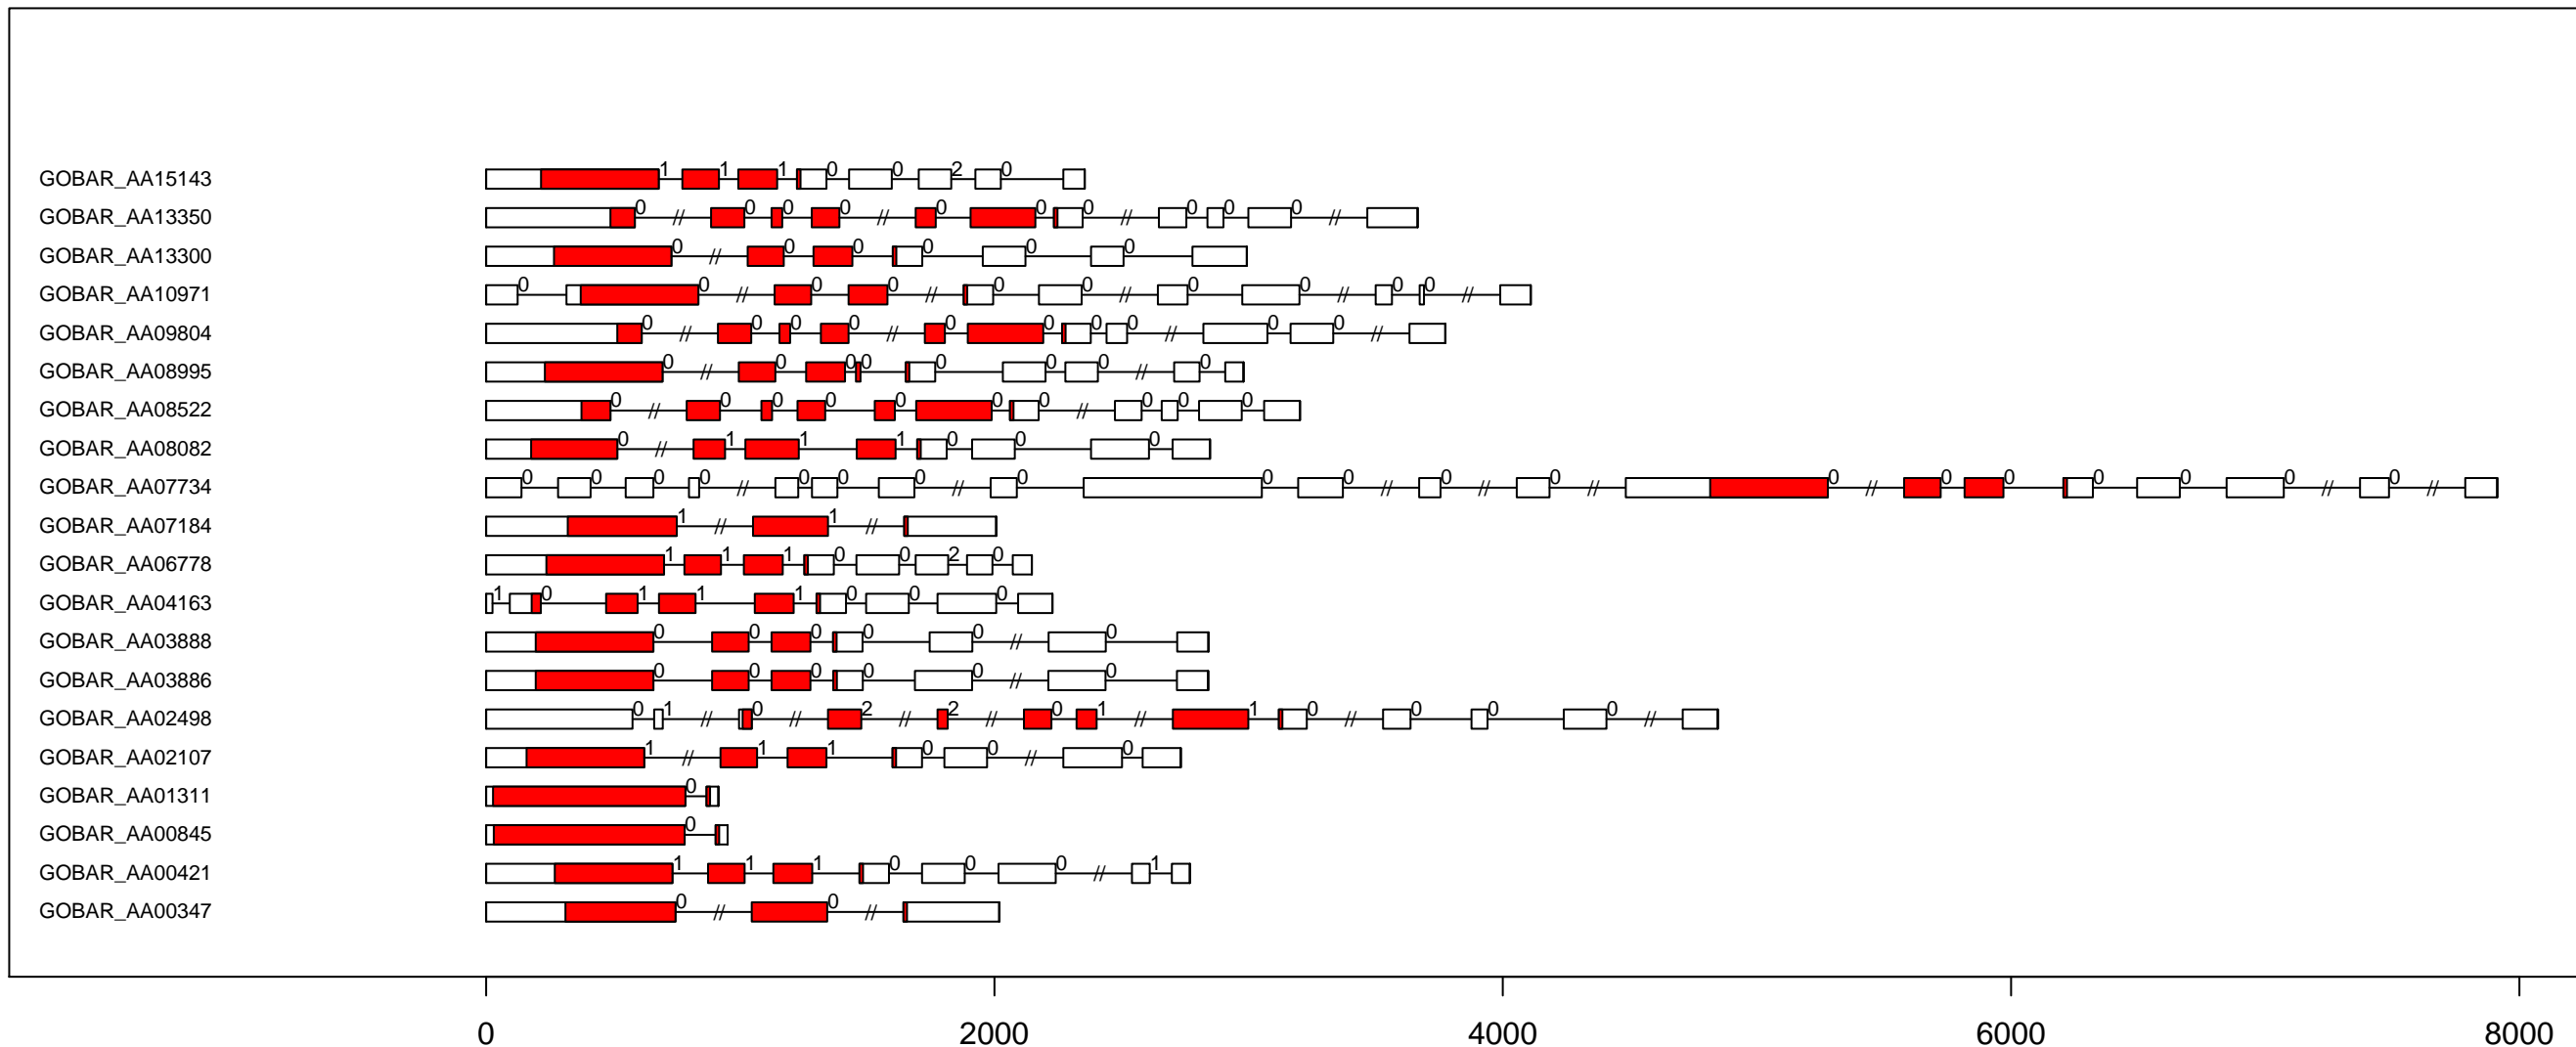

### G.ba CAMK\_CDPK exon-intron and domain diagram (part 2)

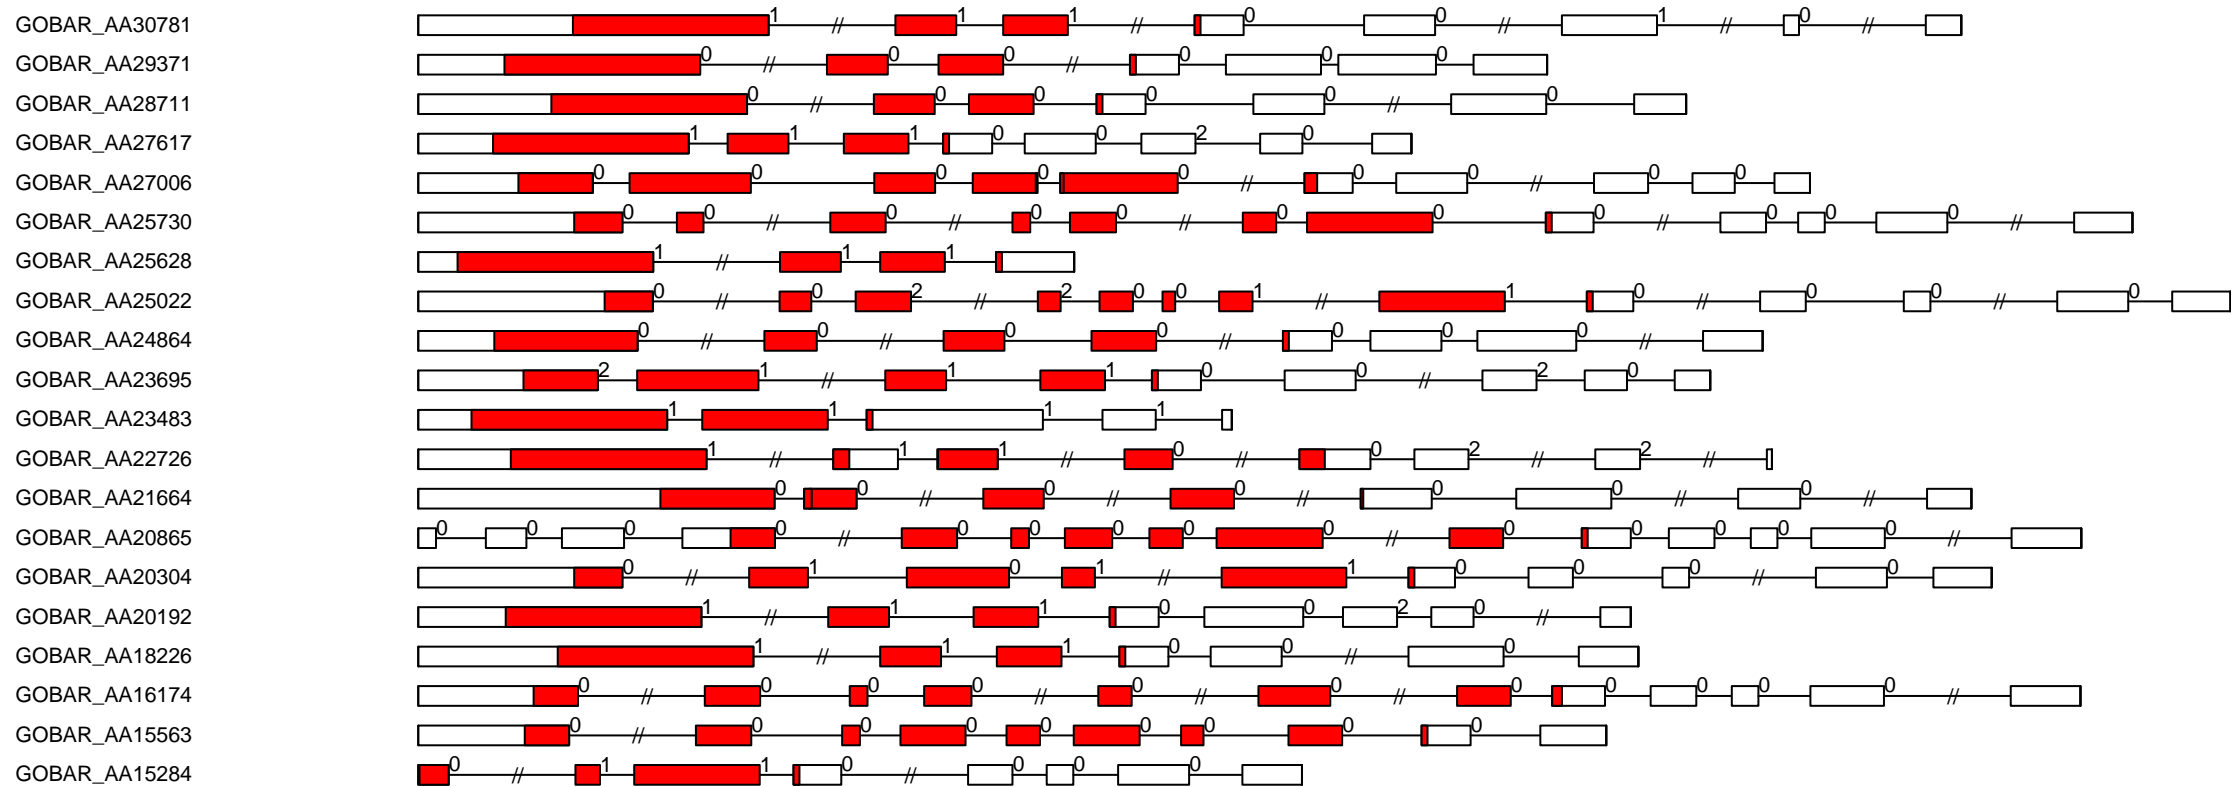

### G.ba CAMK\_CDPK exon-intron and domain diagram (part 3)

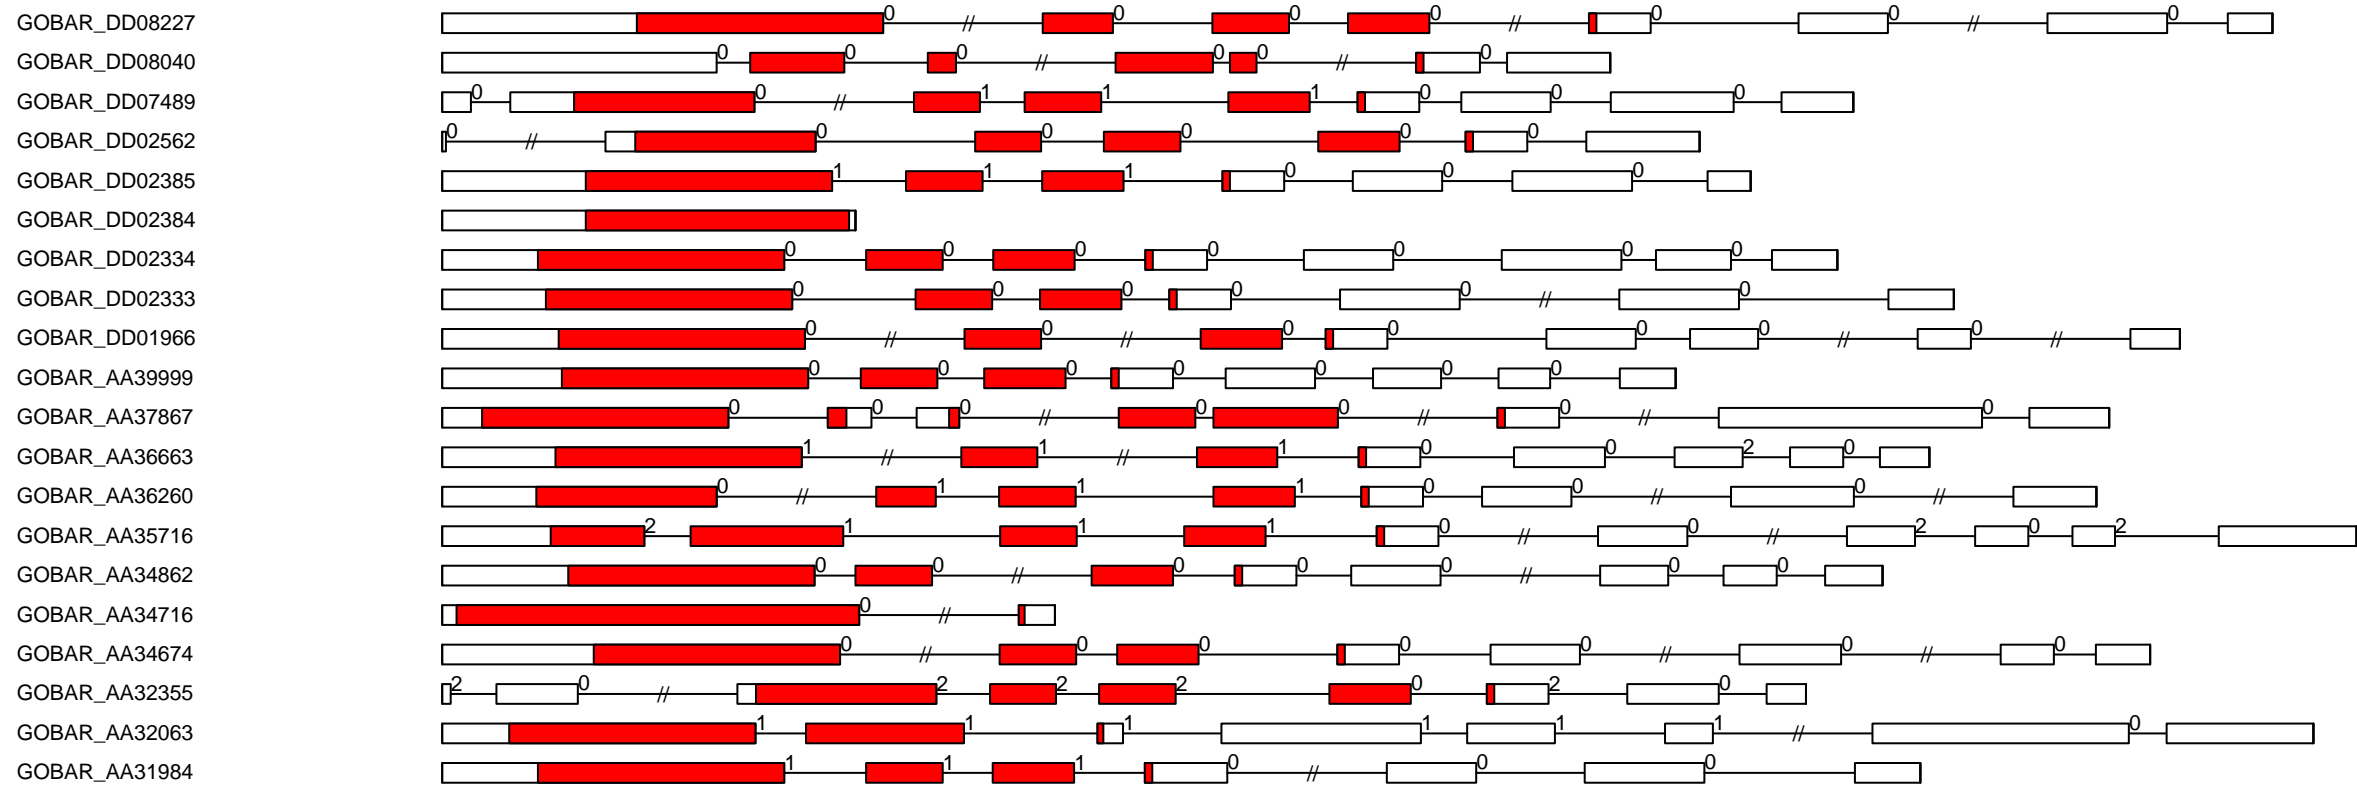

-1000

0

1000

2000

3000



### G.ba CAMK\_CDPK exon-intron and domain diagram (part 4)

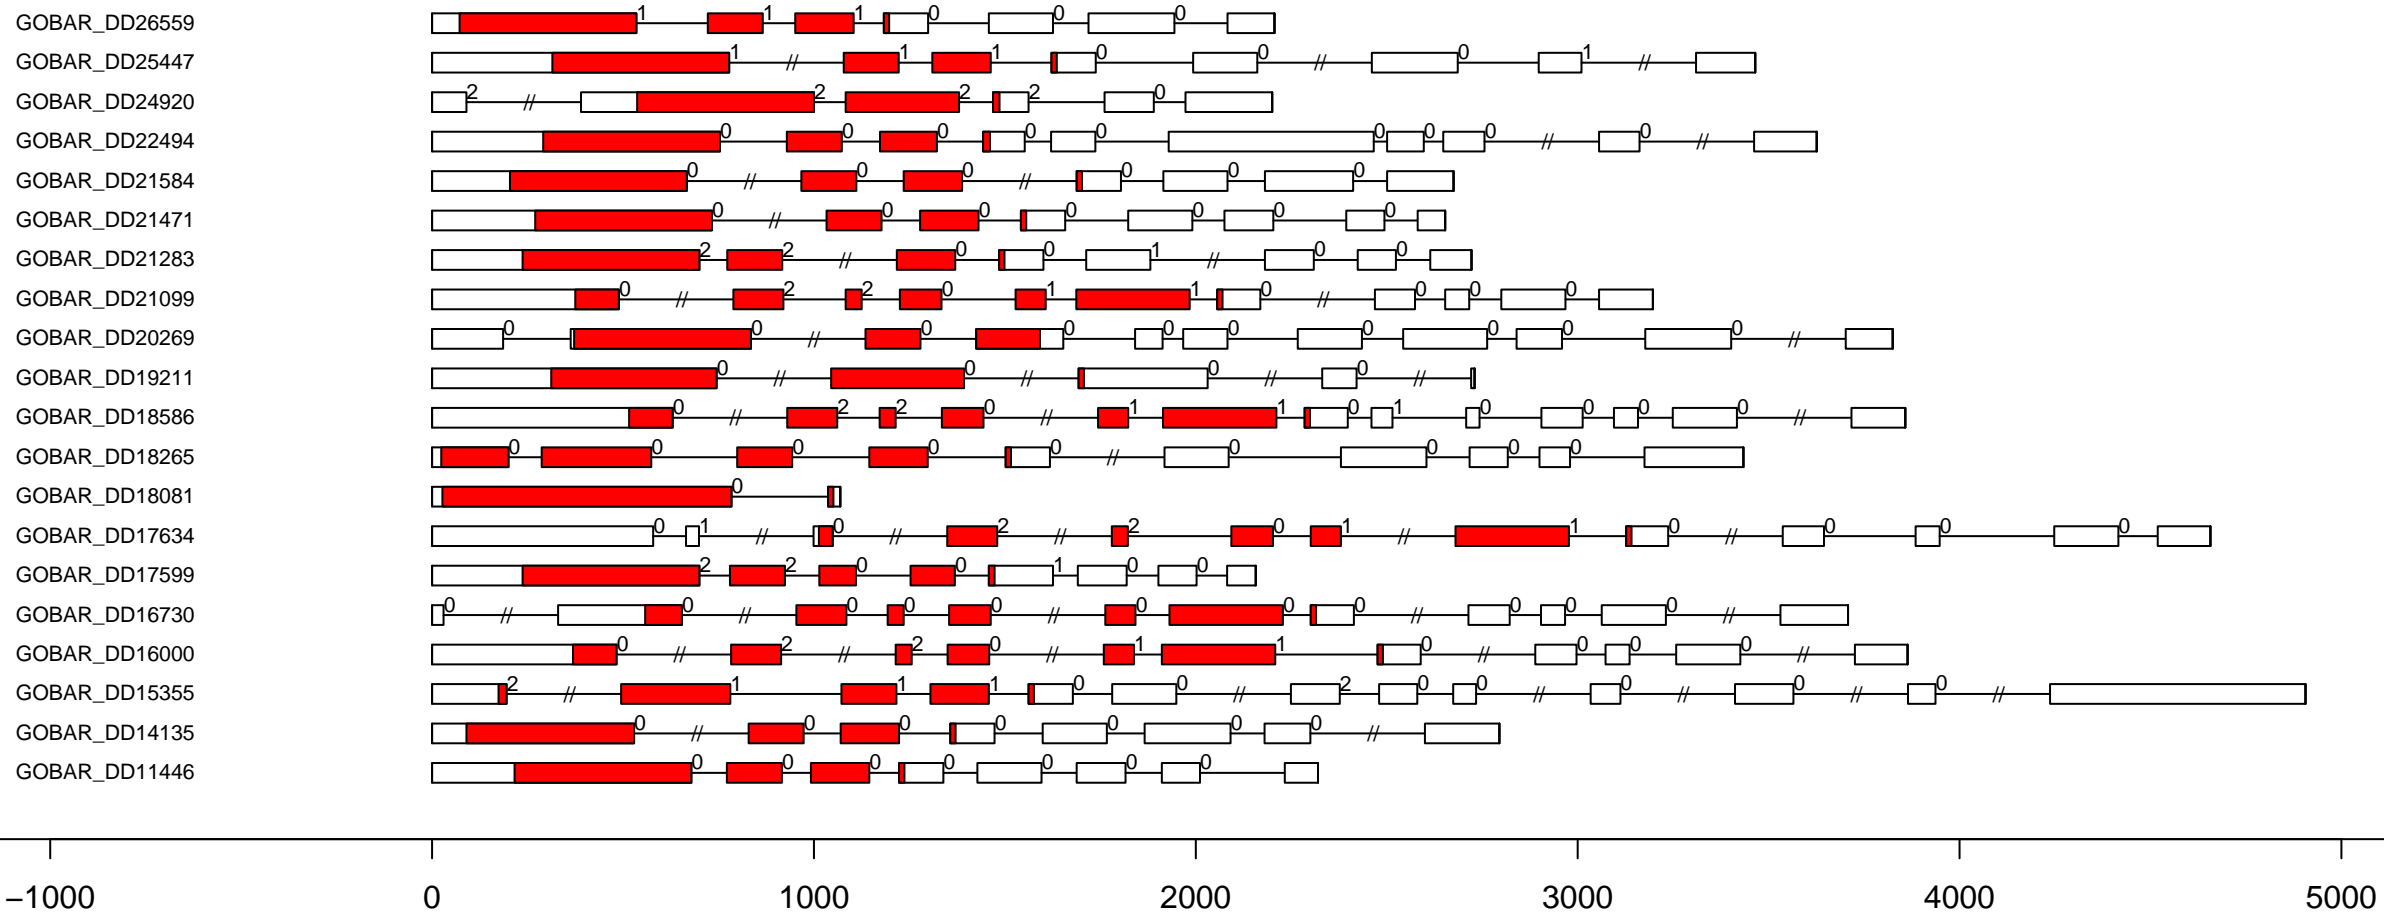

### G.ba CAMK\_CDPK exon-intron and domain diagram (part 5)

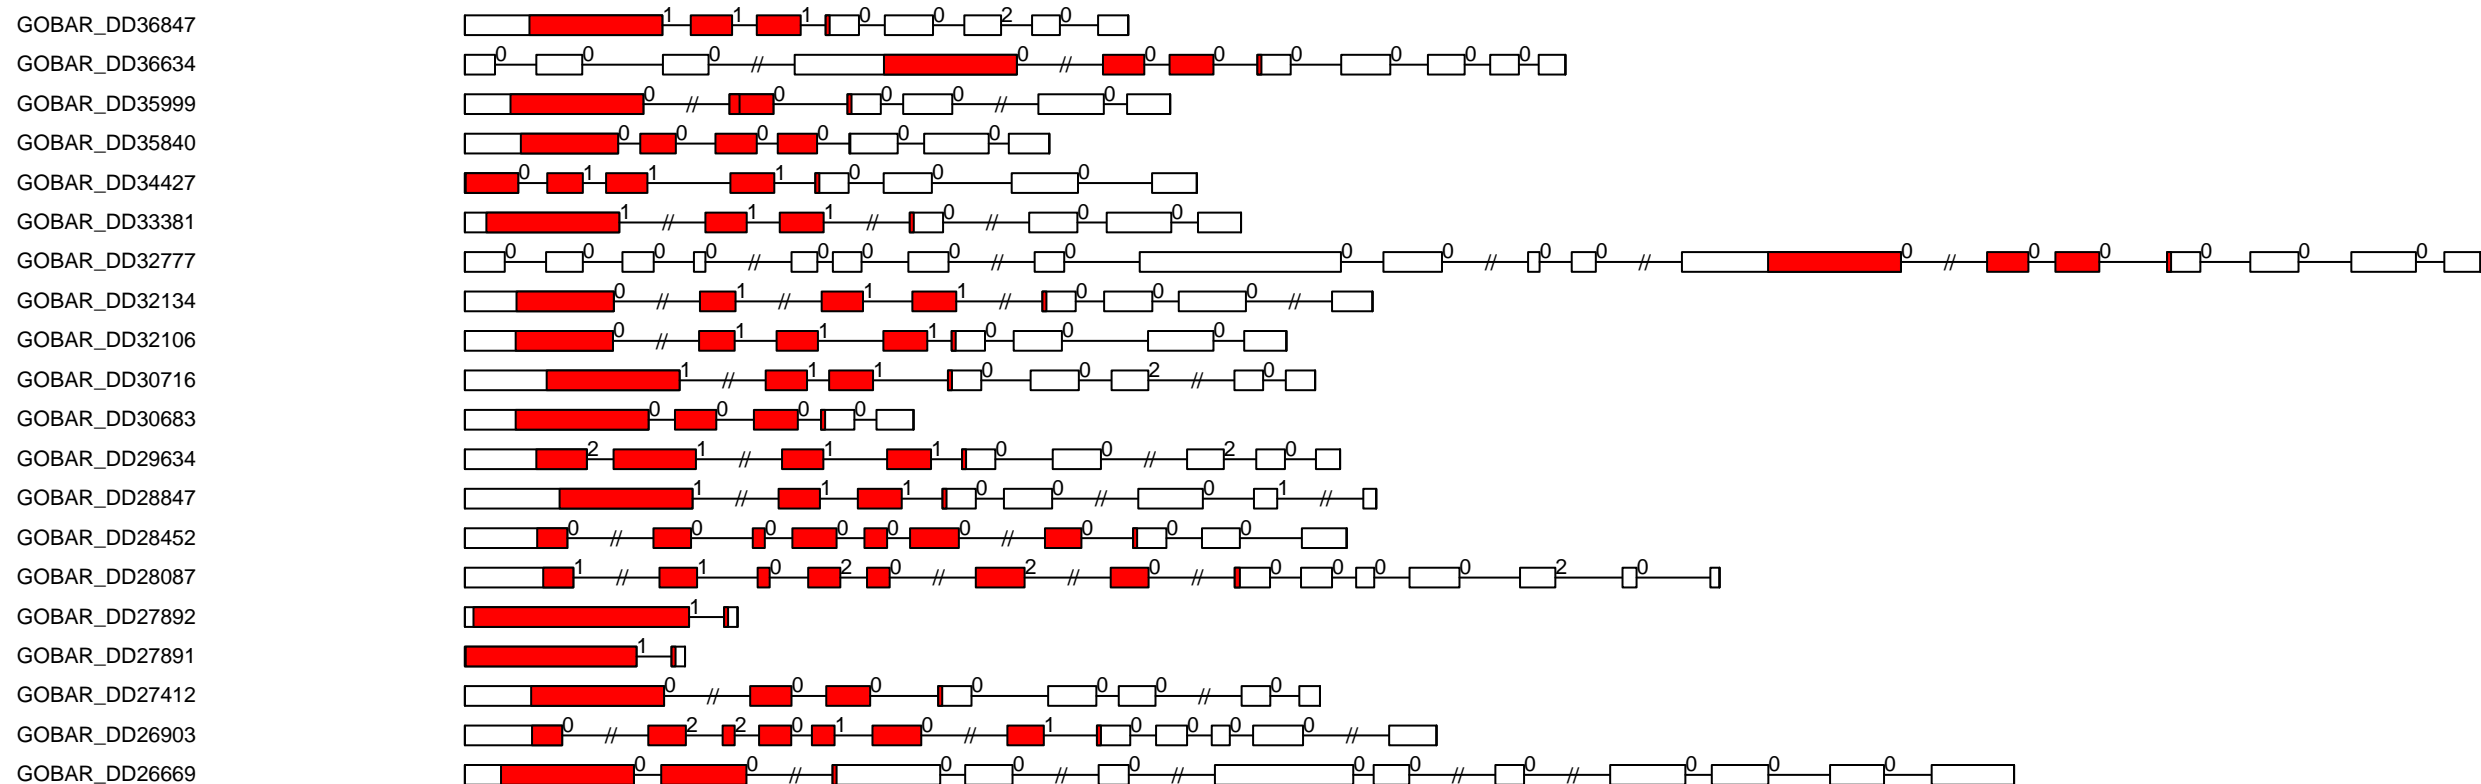

# G.ba CAMK\_CDPK exon-intron and domain diagram (part 6)

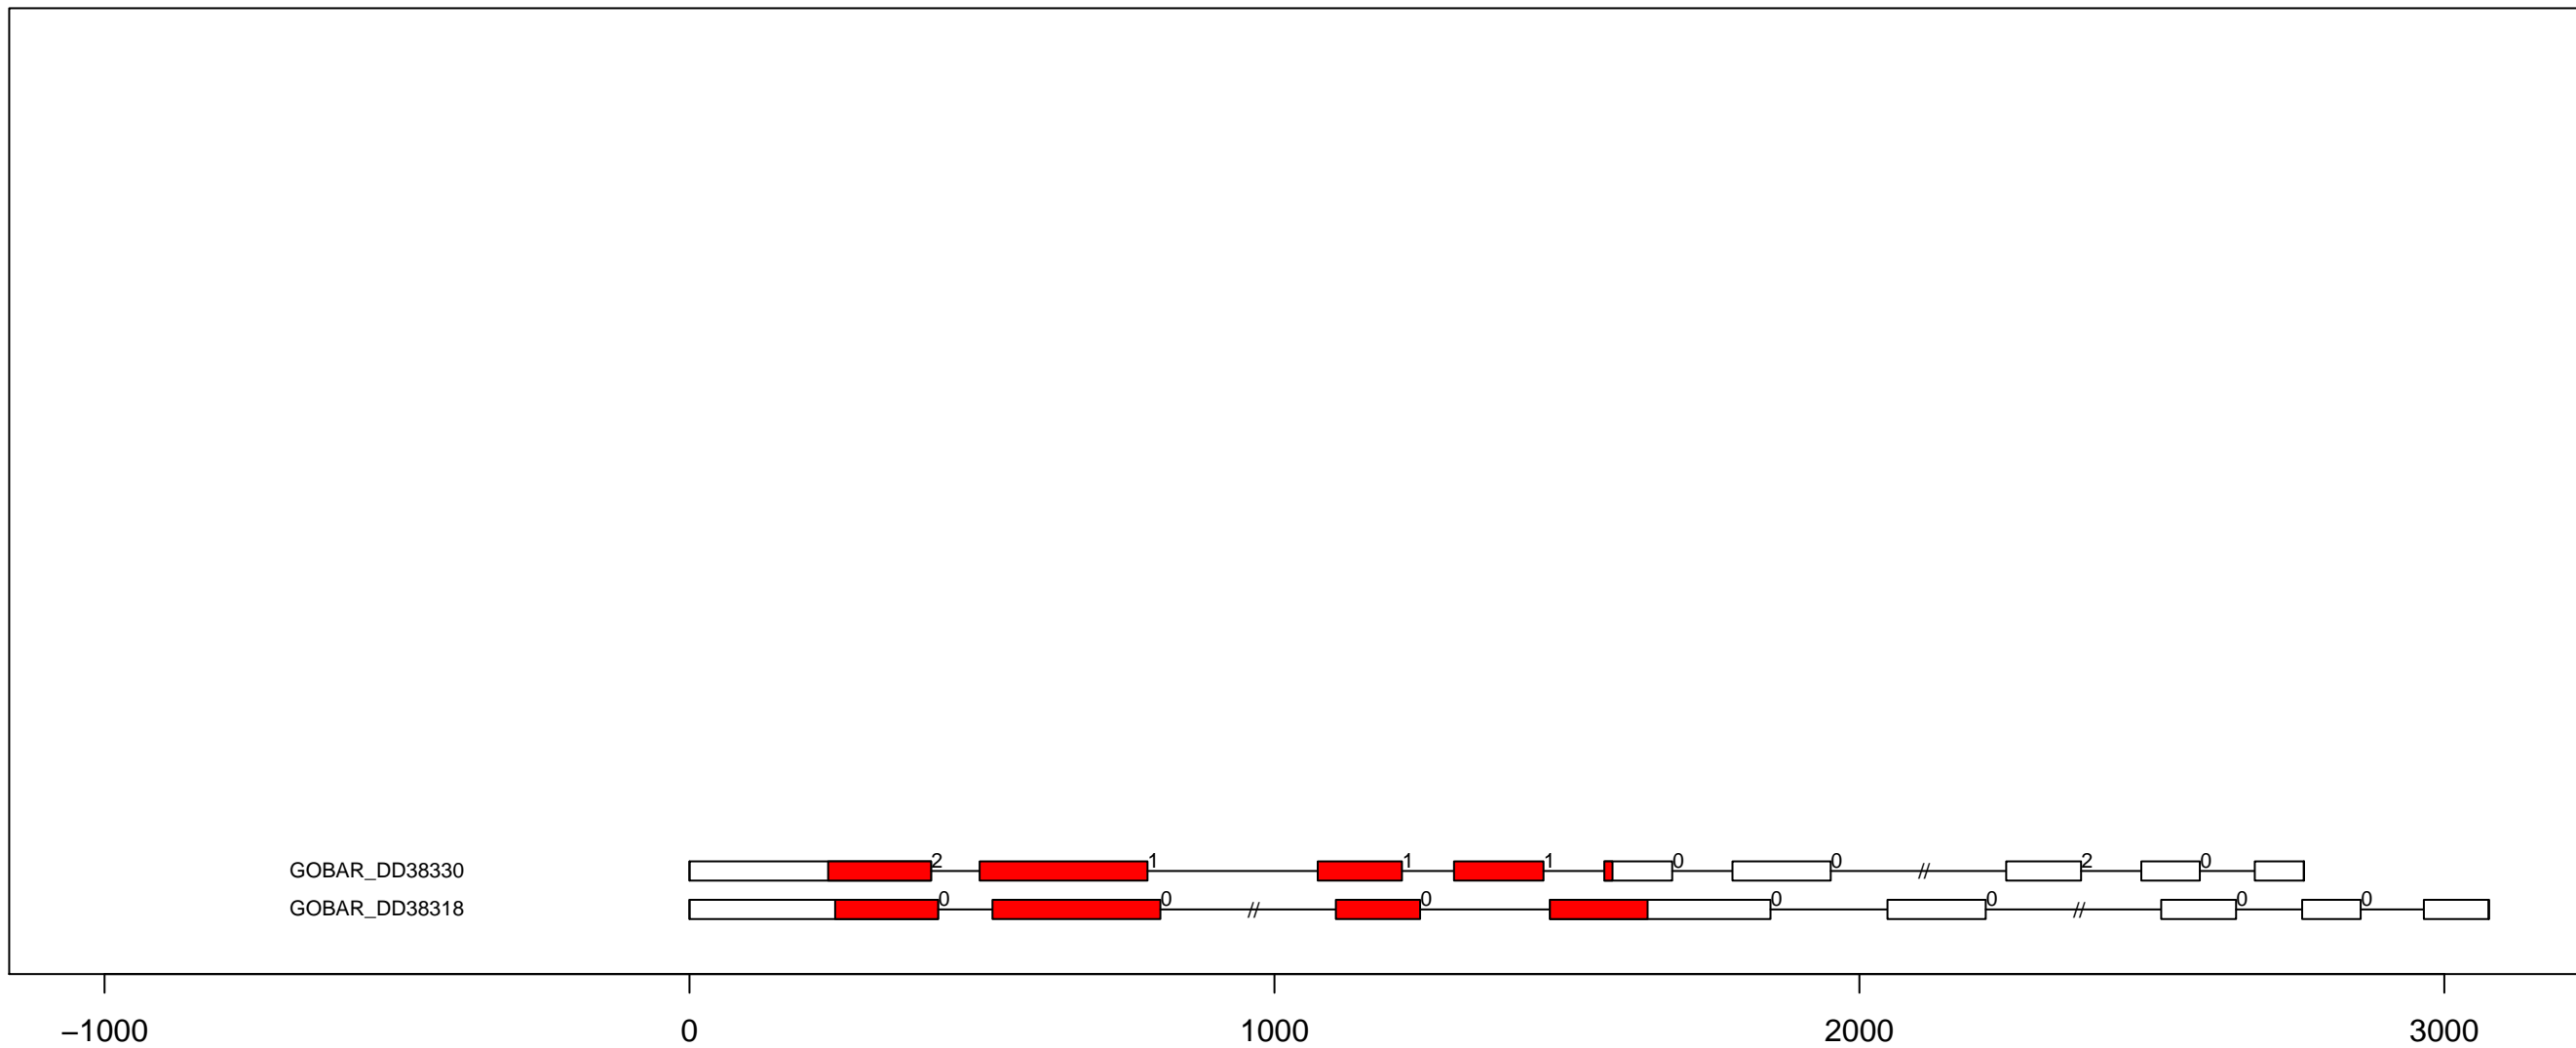

### G.ba CAMK\_OST1L exon-intron and domain diagram (all)

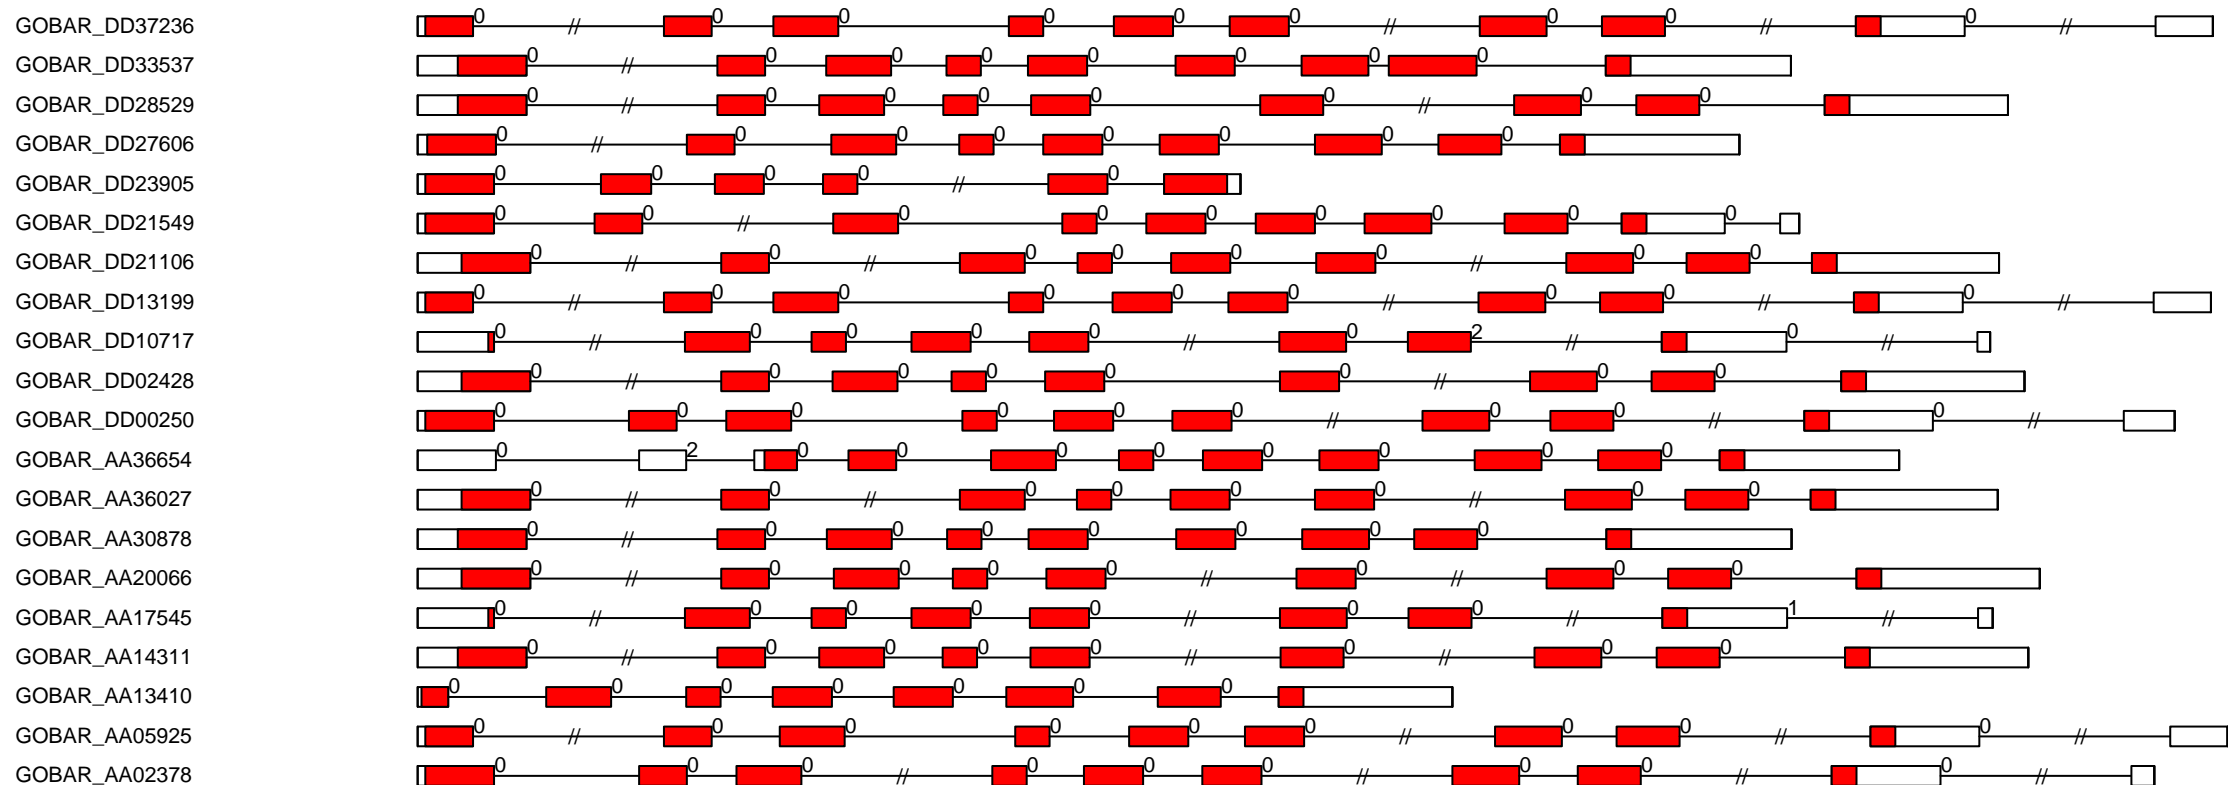

-1000

0

1000

2000

### G.ba CK1\_CK1 exon-intron and domain diagram (part 1)

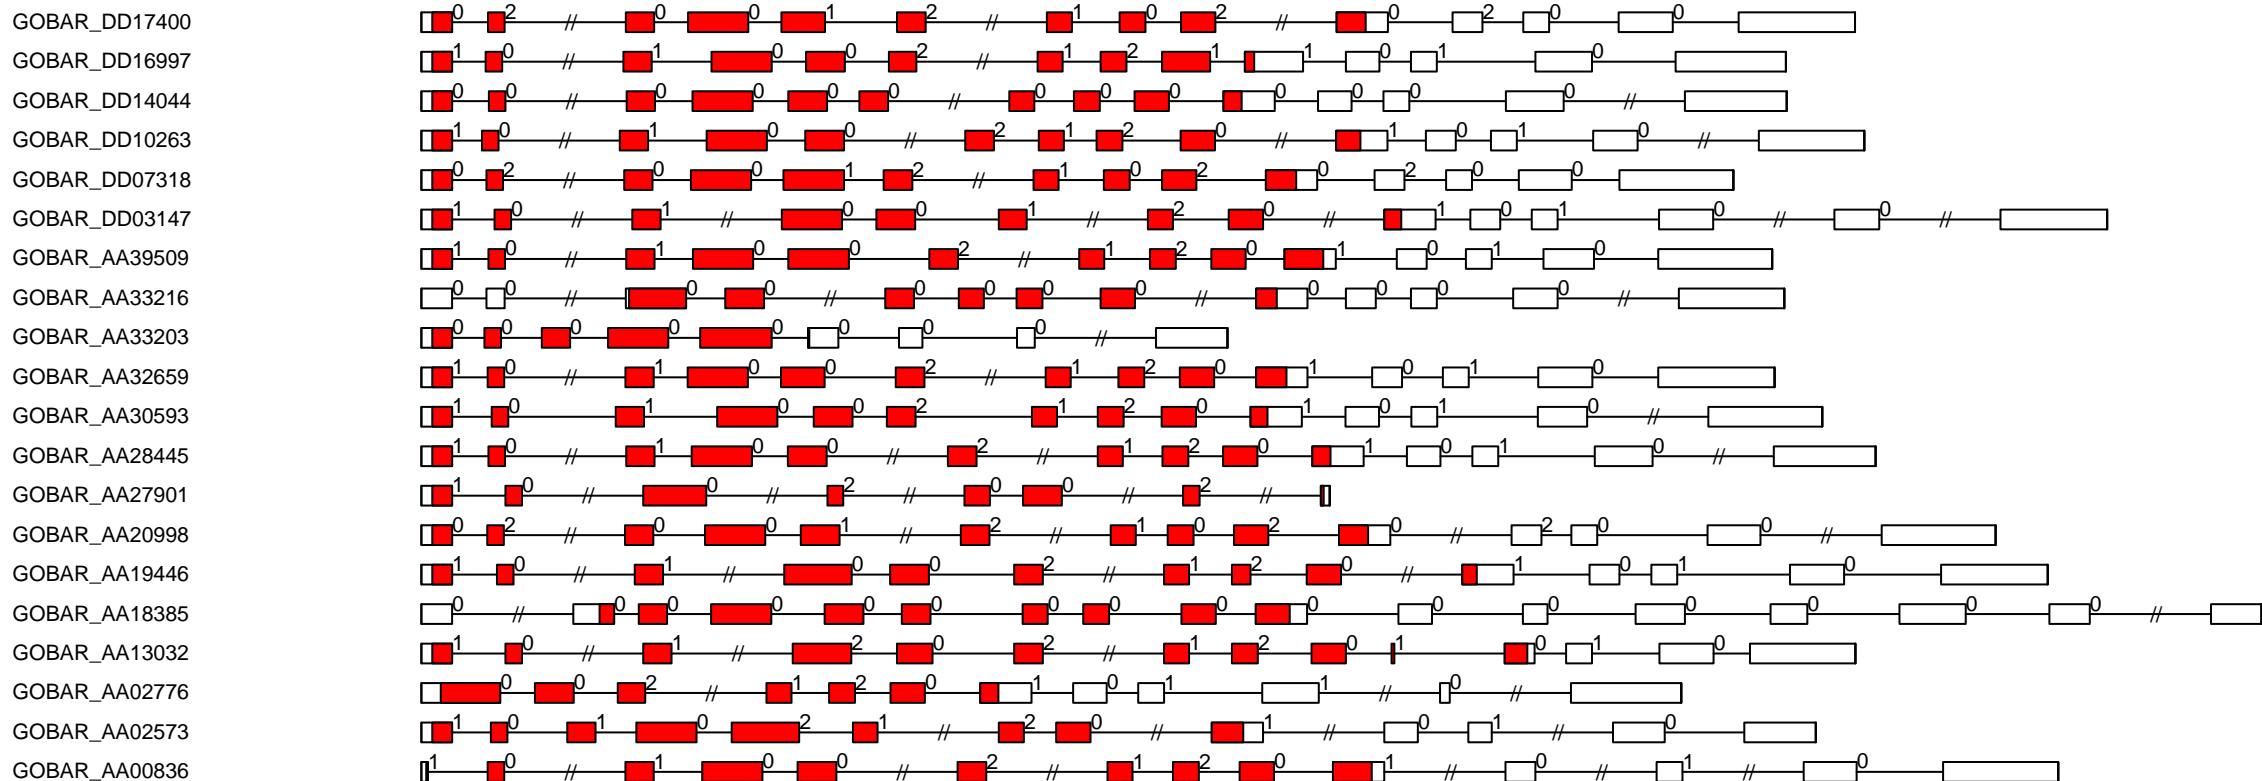

-1000

0

1000

2000

3000

4000

# G.ba CK1\_CK1 exon-intron and domain diagram (part 2)

GOBAR\_DD37825

GOBAR\_DD35230

GOBAR\_DD33804

GOBAR\_DD25264

GOBAR\_DD23595

GOBAR\_DD17755

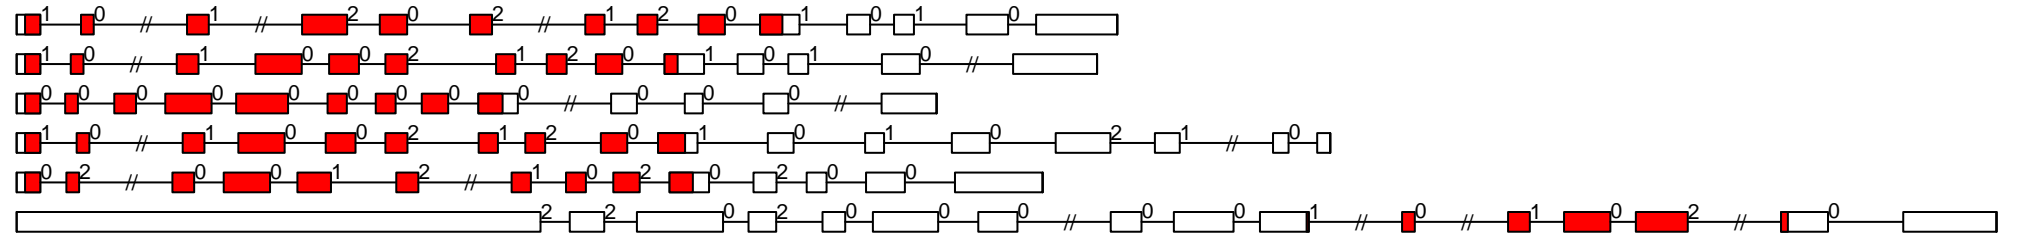

0

2000

4000

6000

### G.ba CK1-CK1-PI exon-intron and domain diagram (all)

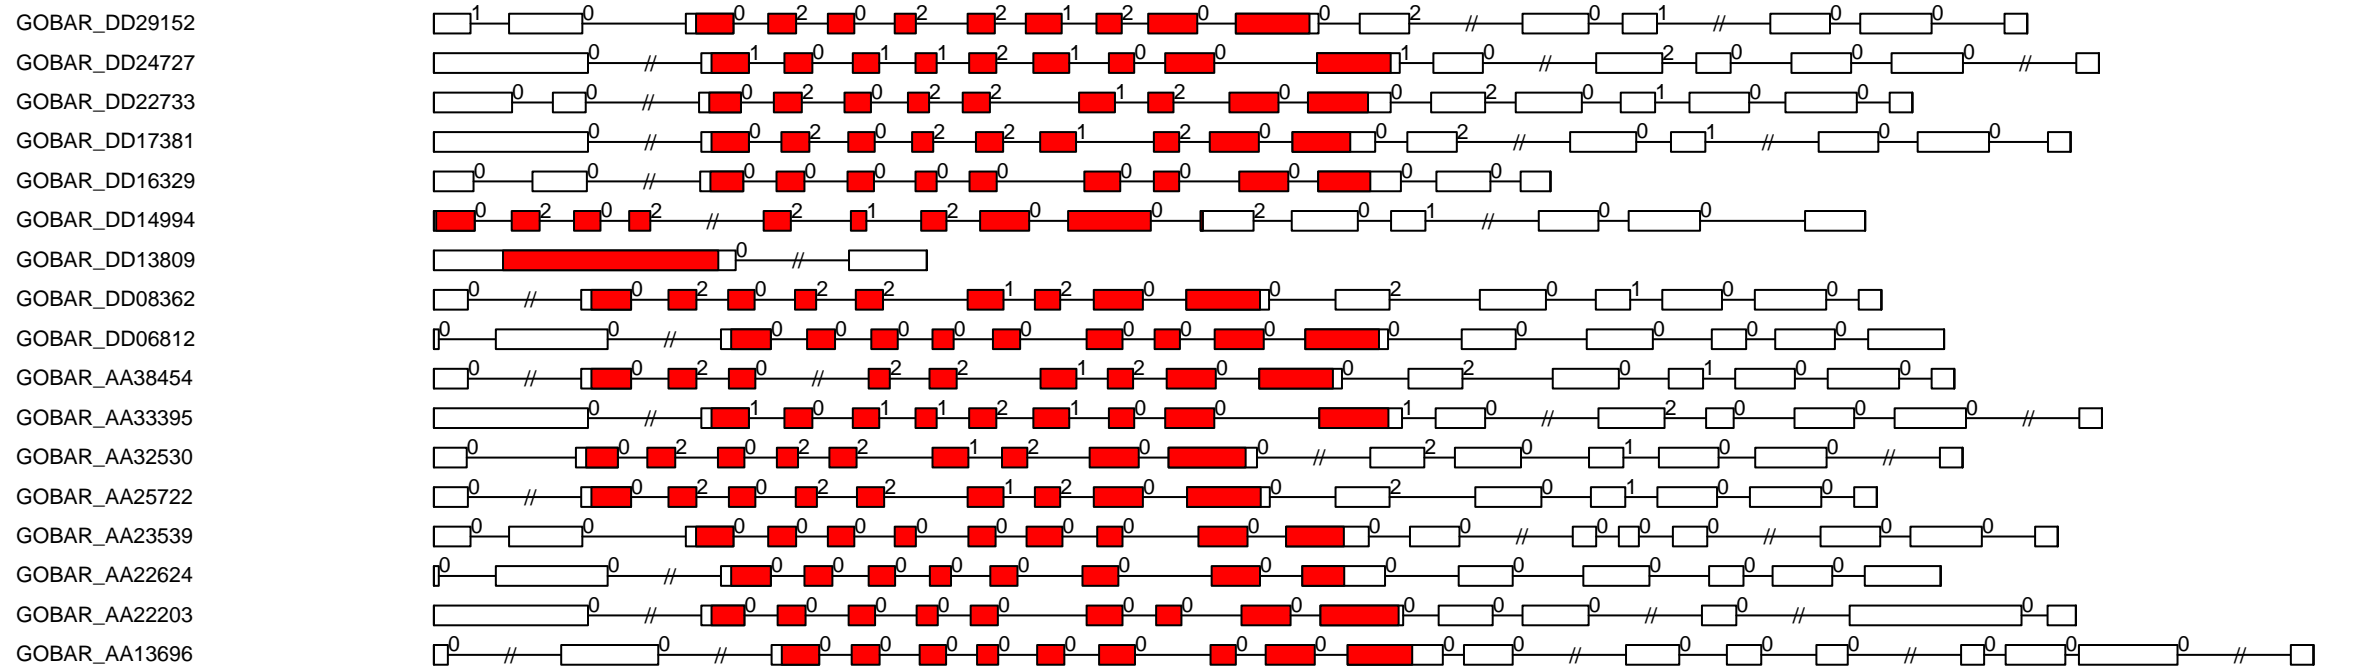

# G.ba CMGC\_CDK-CCRK exon-intron and domain diagram (all)

GOBAR\_DD34703  
GOBAR\_DD30089  
GOBAR\_AA24985

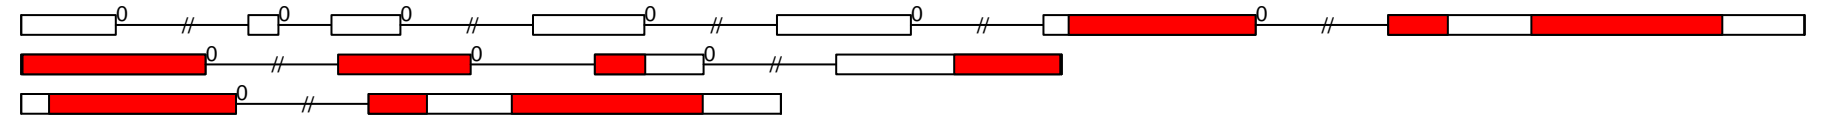

-1000

0

1000

2000

3000

4000



# G.ba CMGC\_CDK-CDK7 exon-intron and domain diagram (all)

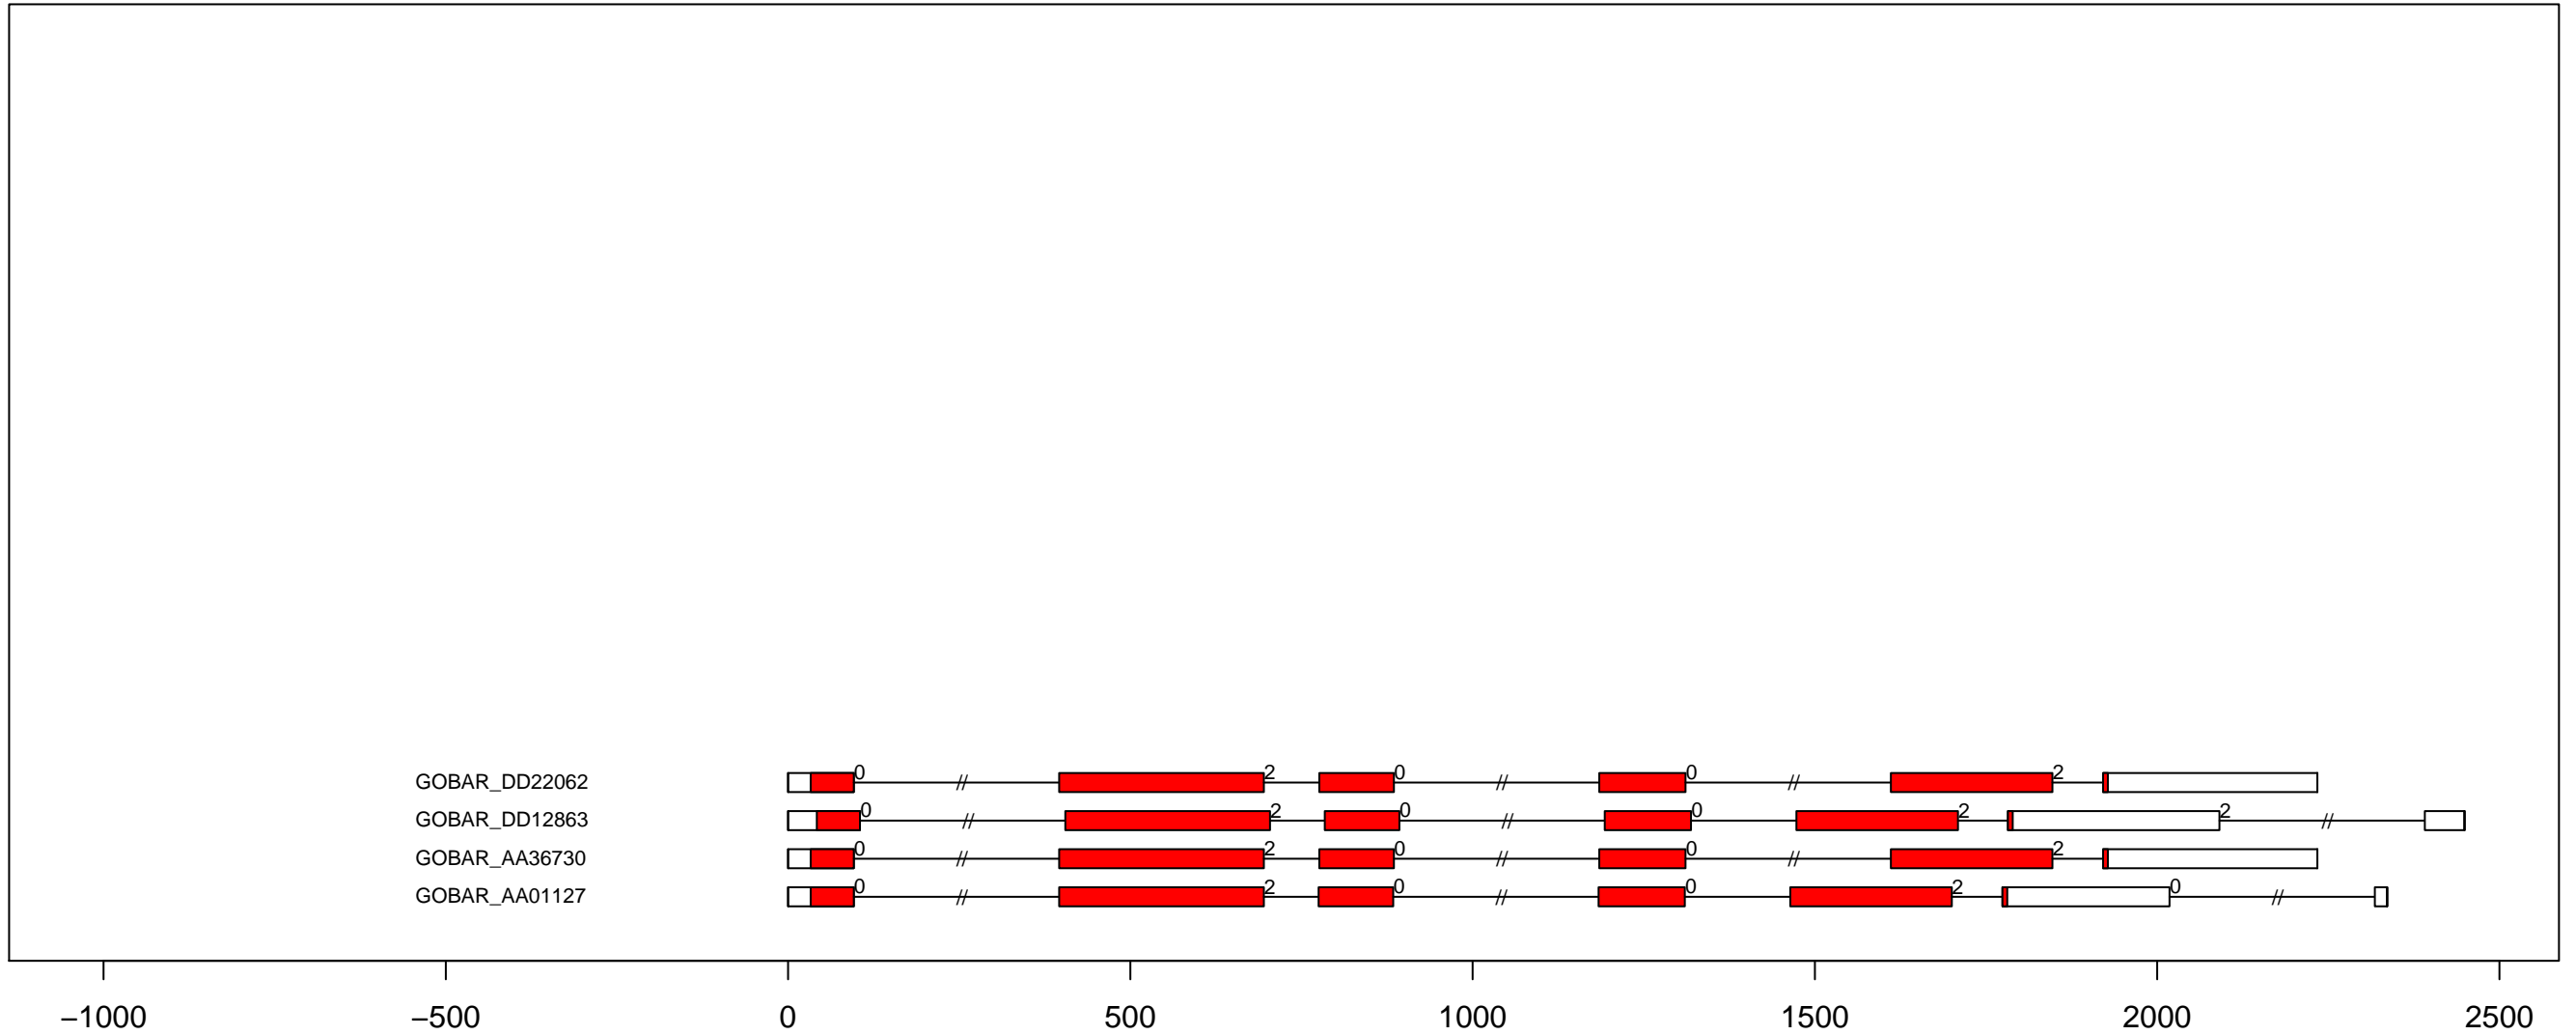

# G.ba CMGC\_CDK-CDK8 exon-intron and domain diagram (all)

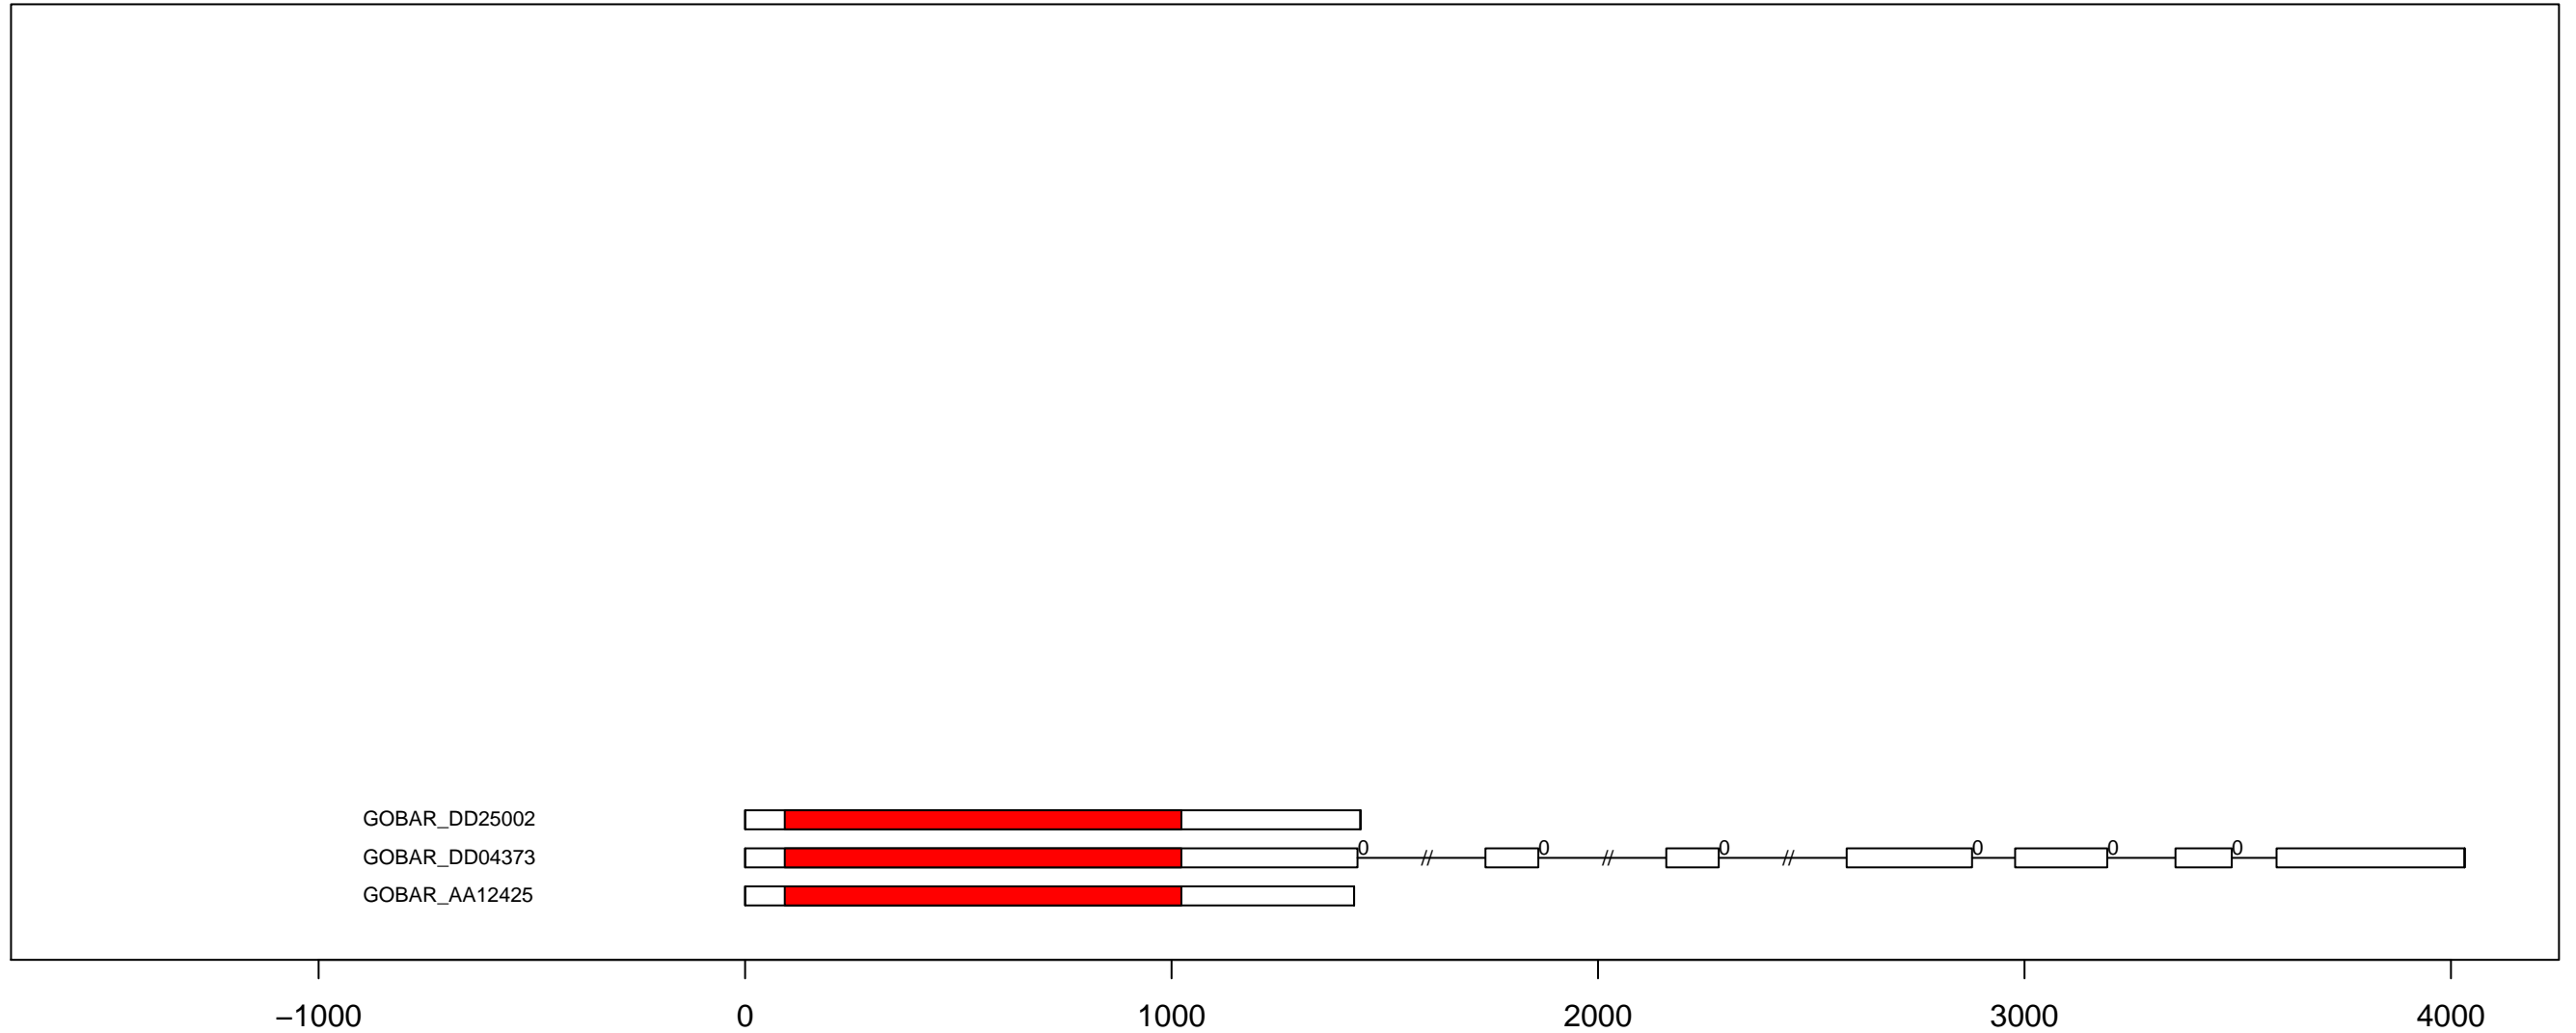

### G.ba CMGC\_CDK-CRK7-CDK9 exon-intron and domain diagram (part 1)

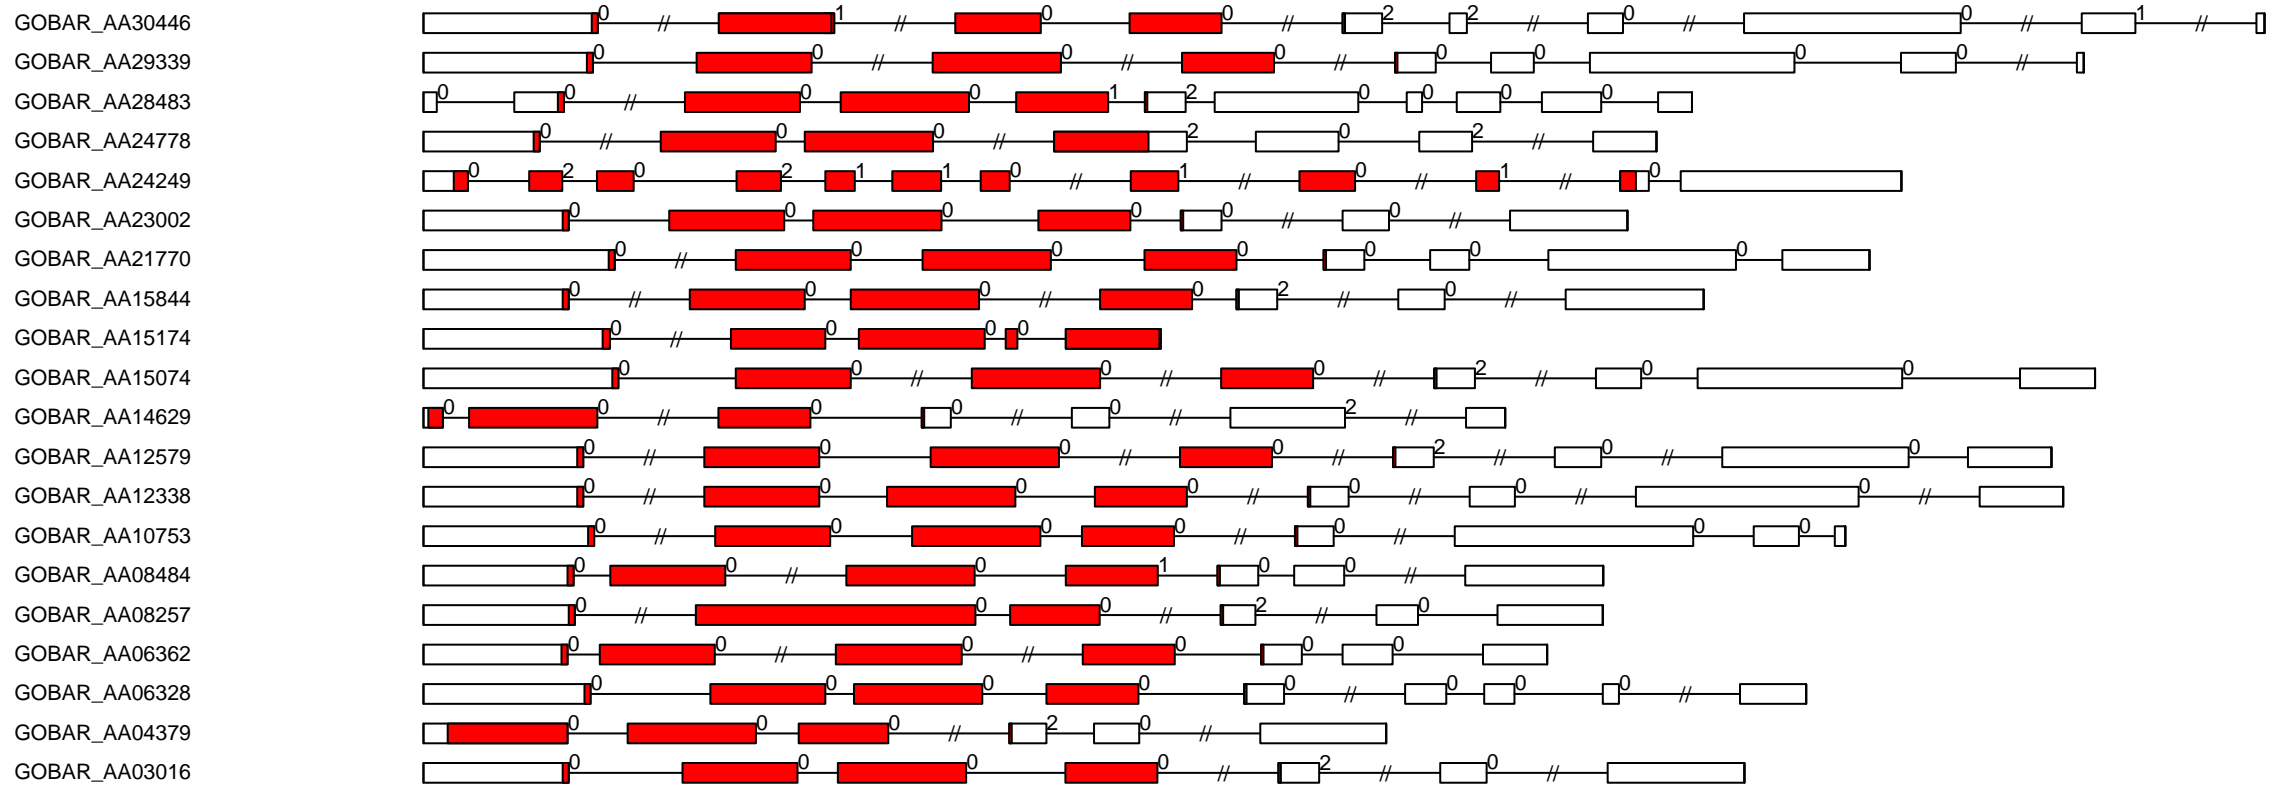

-1000

0

1000

2000

3000

4000

### G.ba CMGC\_CDK-CRK7-CDK9 exon-intron and domain diagram (part 2)

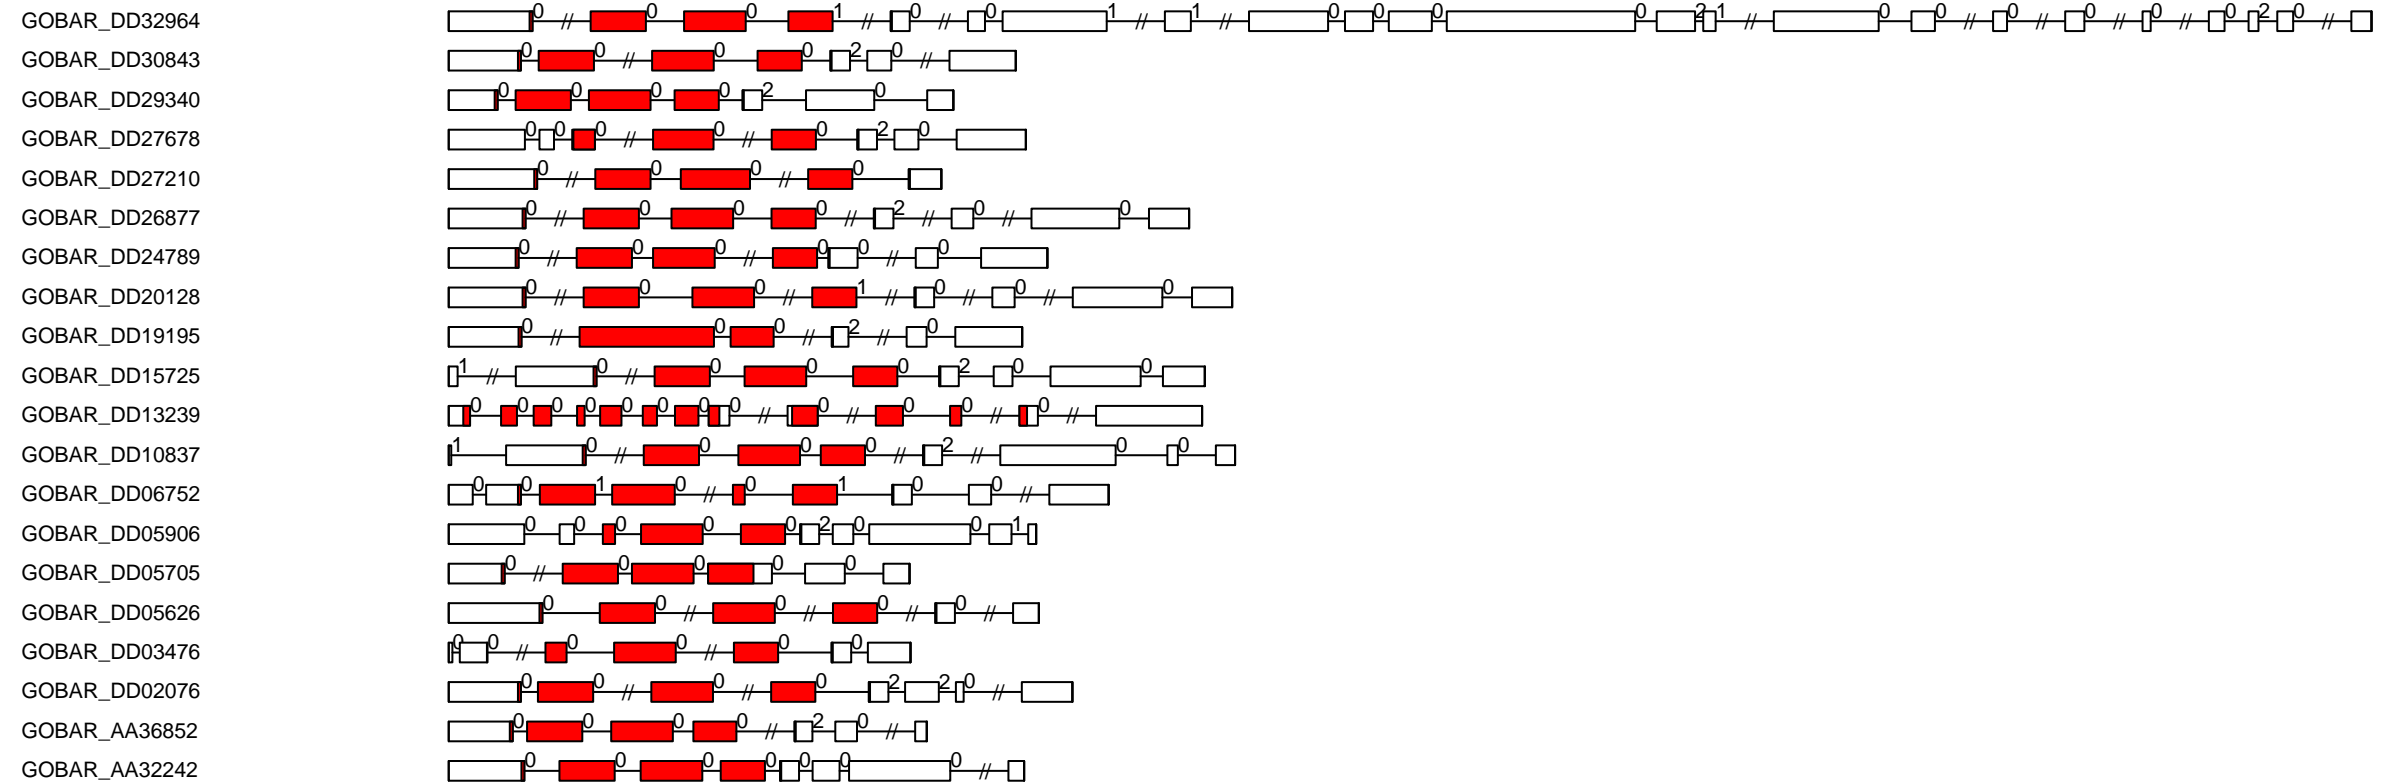

### G.ba CMGC\_CDK-CRK7-CDK9 exon-intron and domain diagram (part 3)

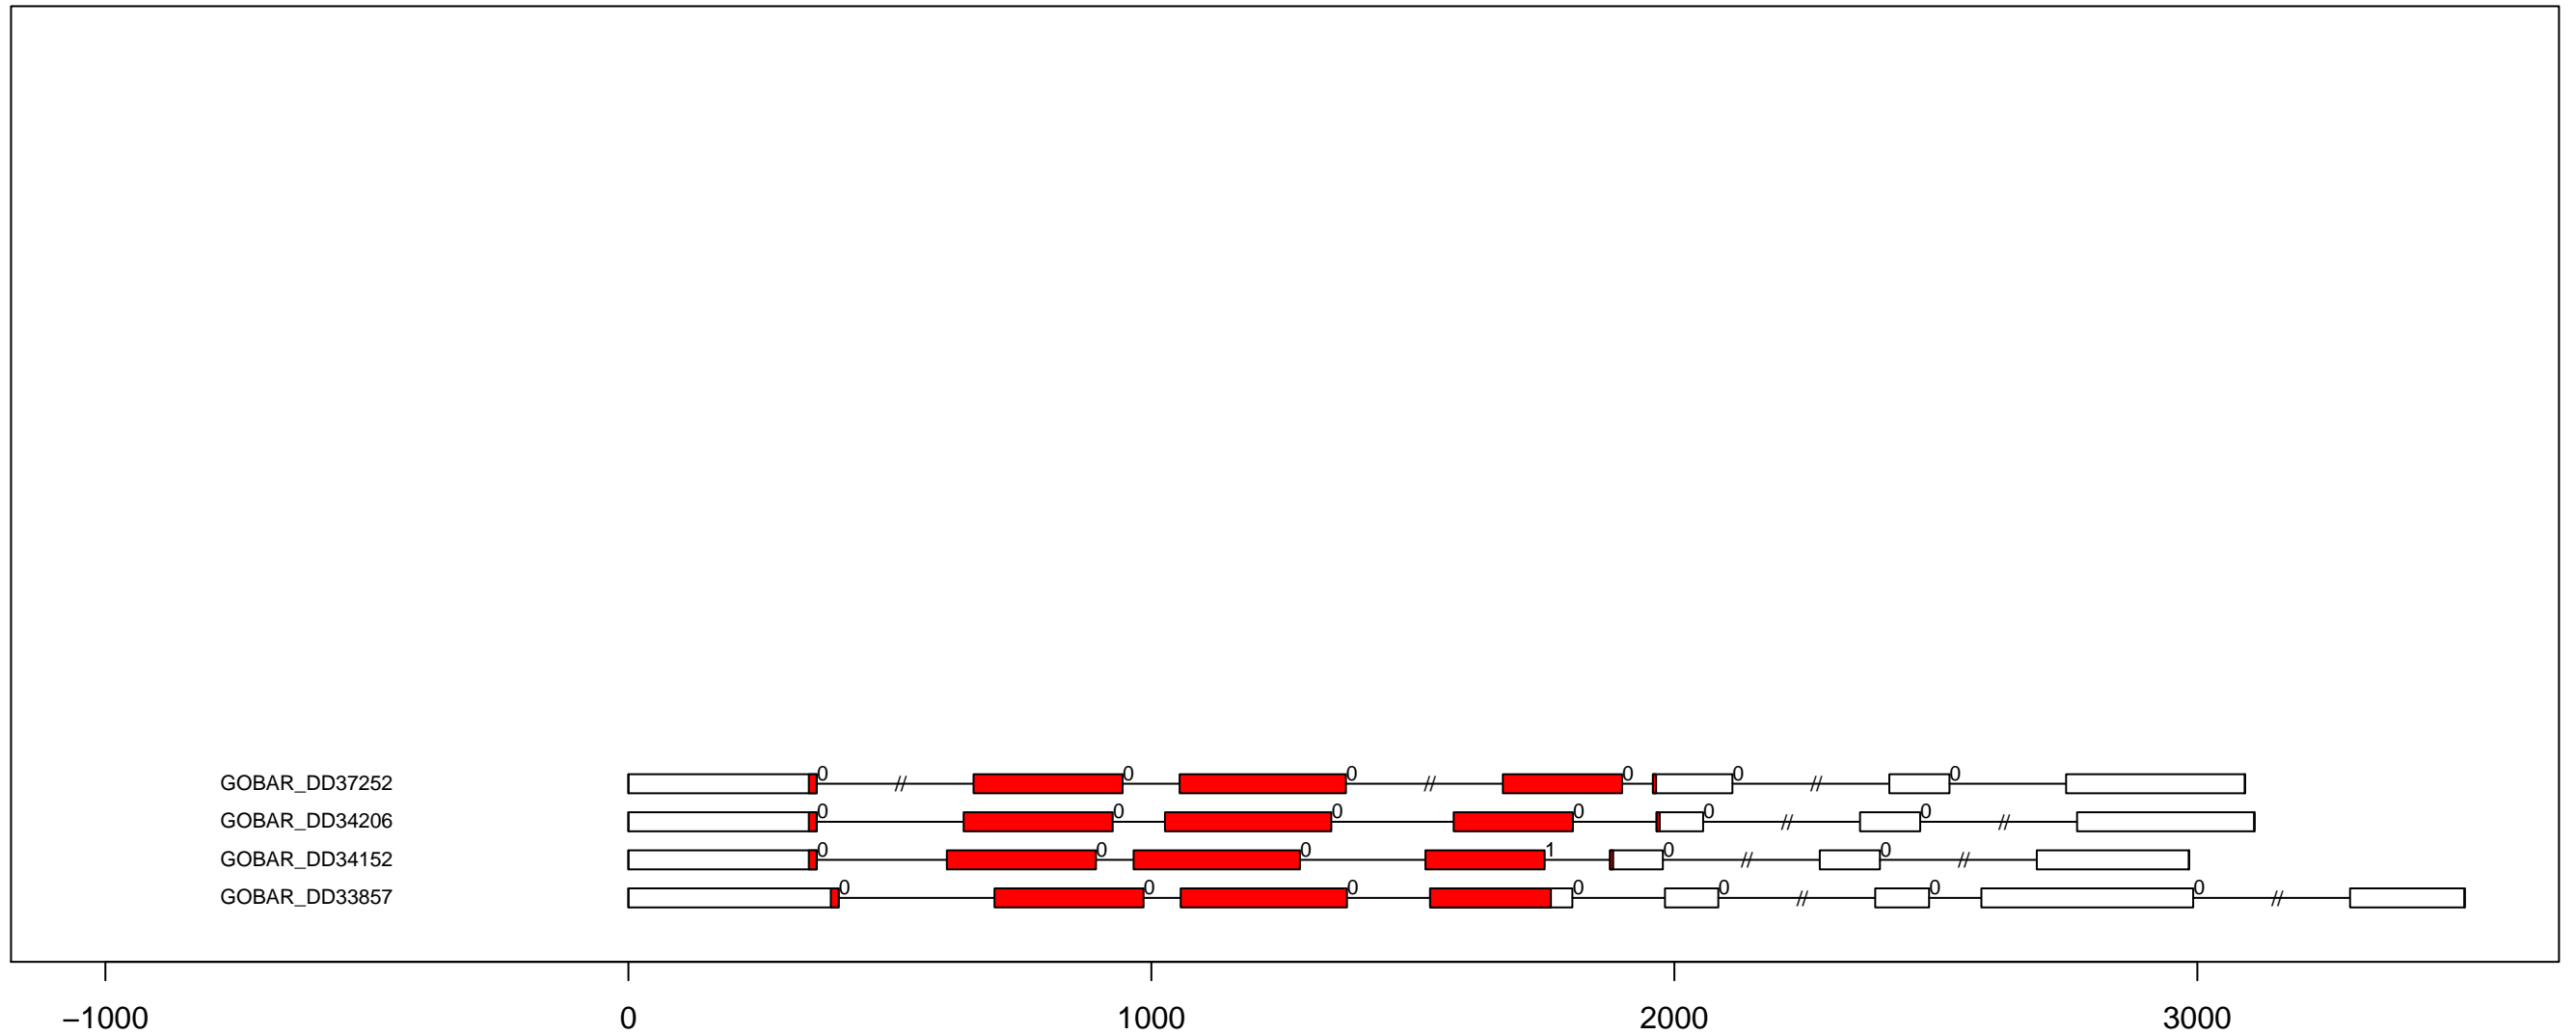

# G.ba CMGC\_CDK-PITSLRE exon-intron and domain diagram (all)

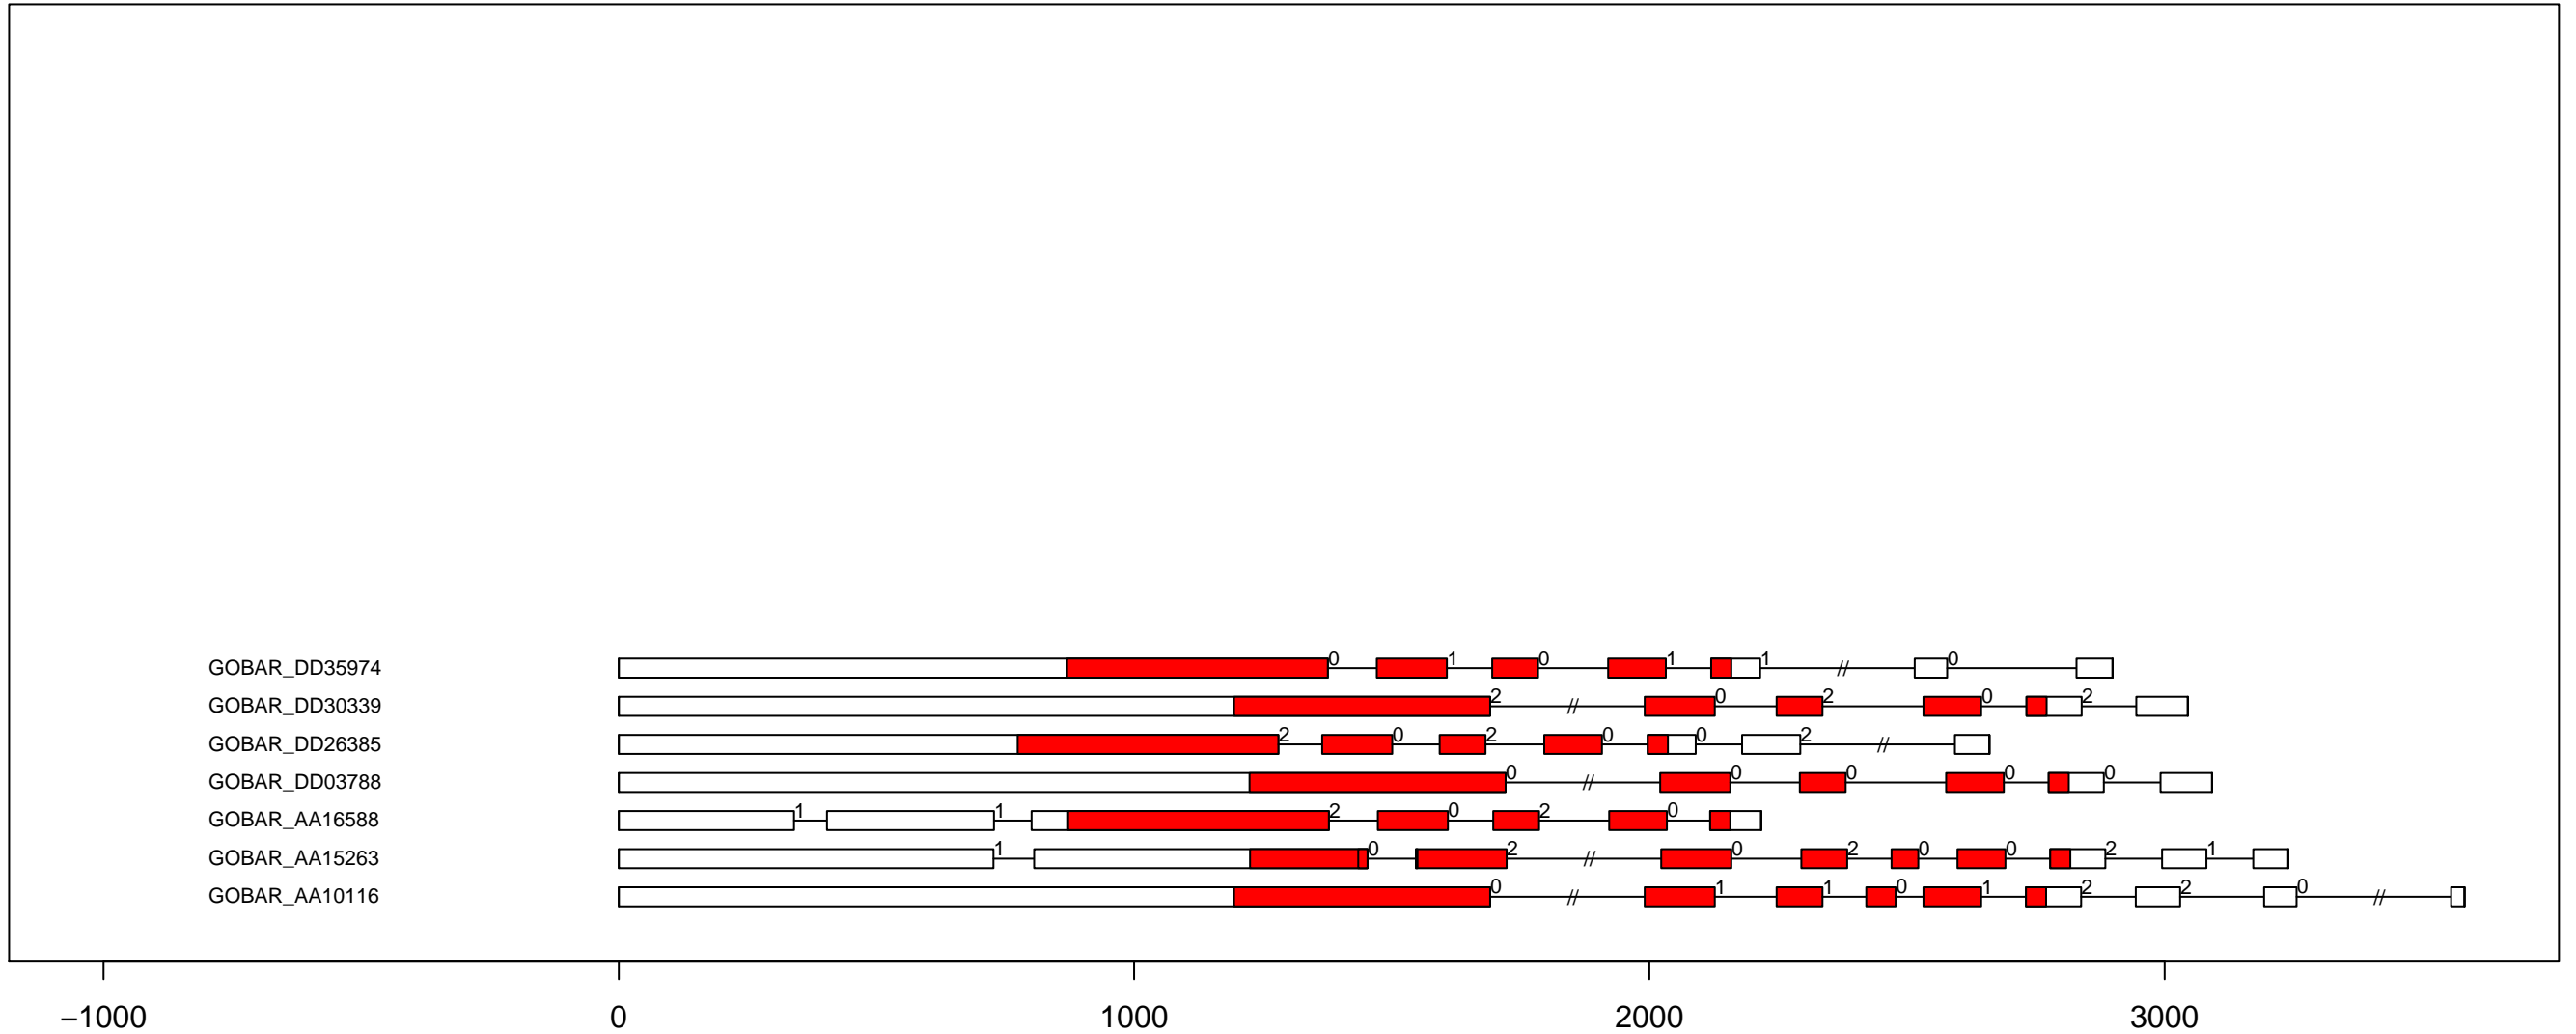

# G.ba CMGC\_CDK-PI exon-intron and domain diagram (all)

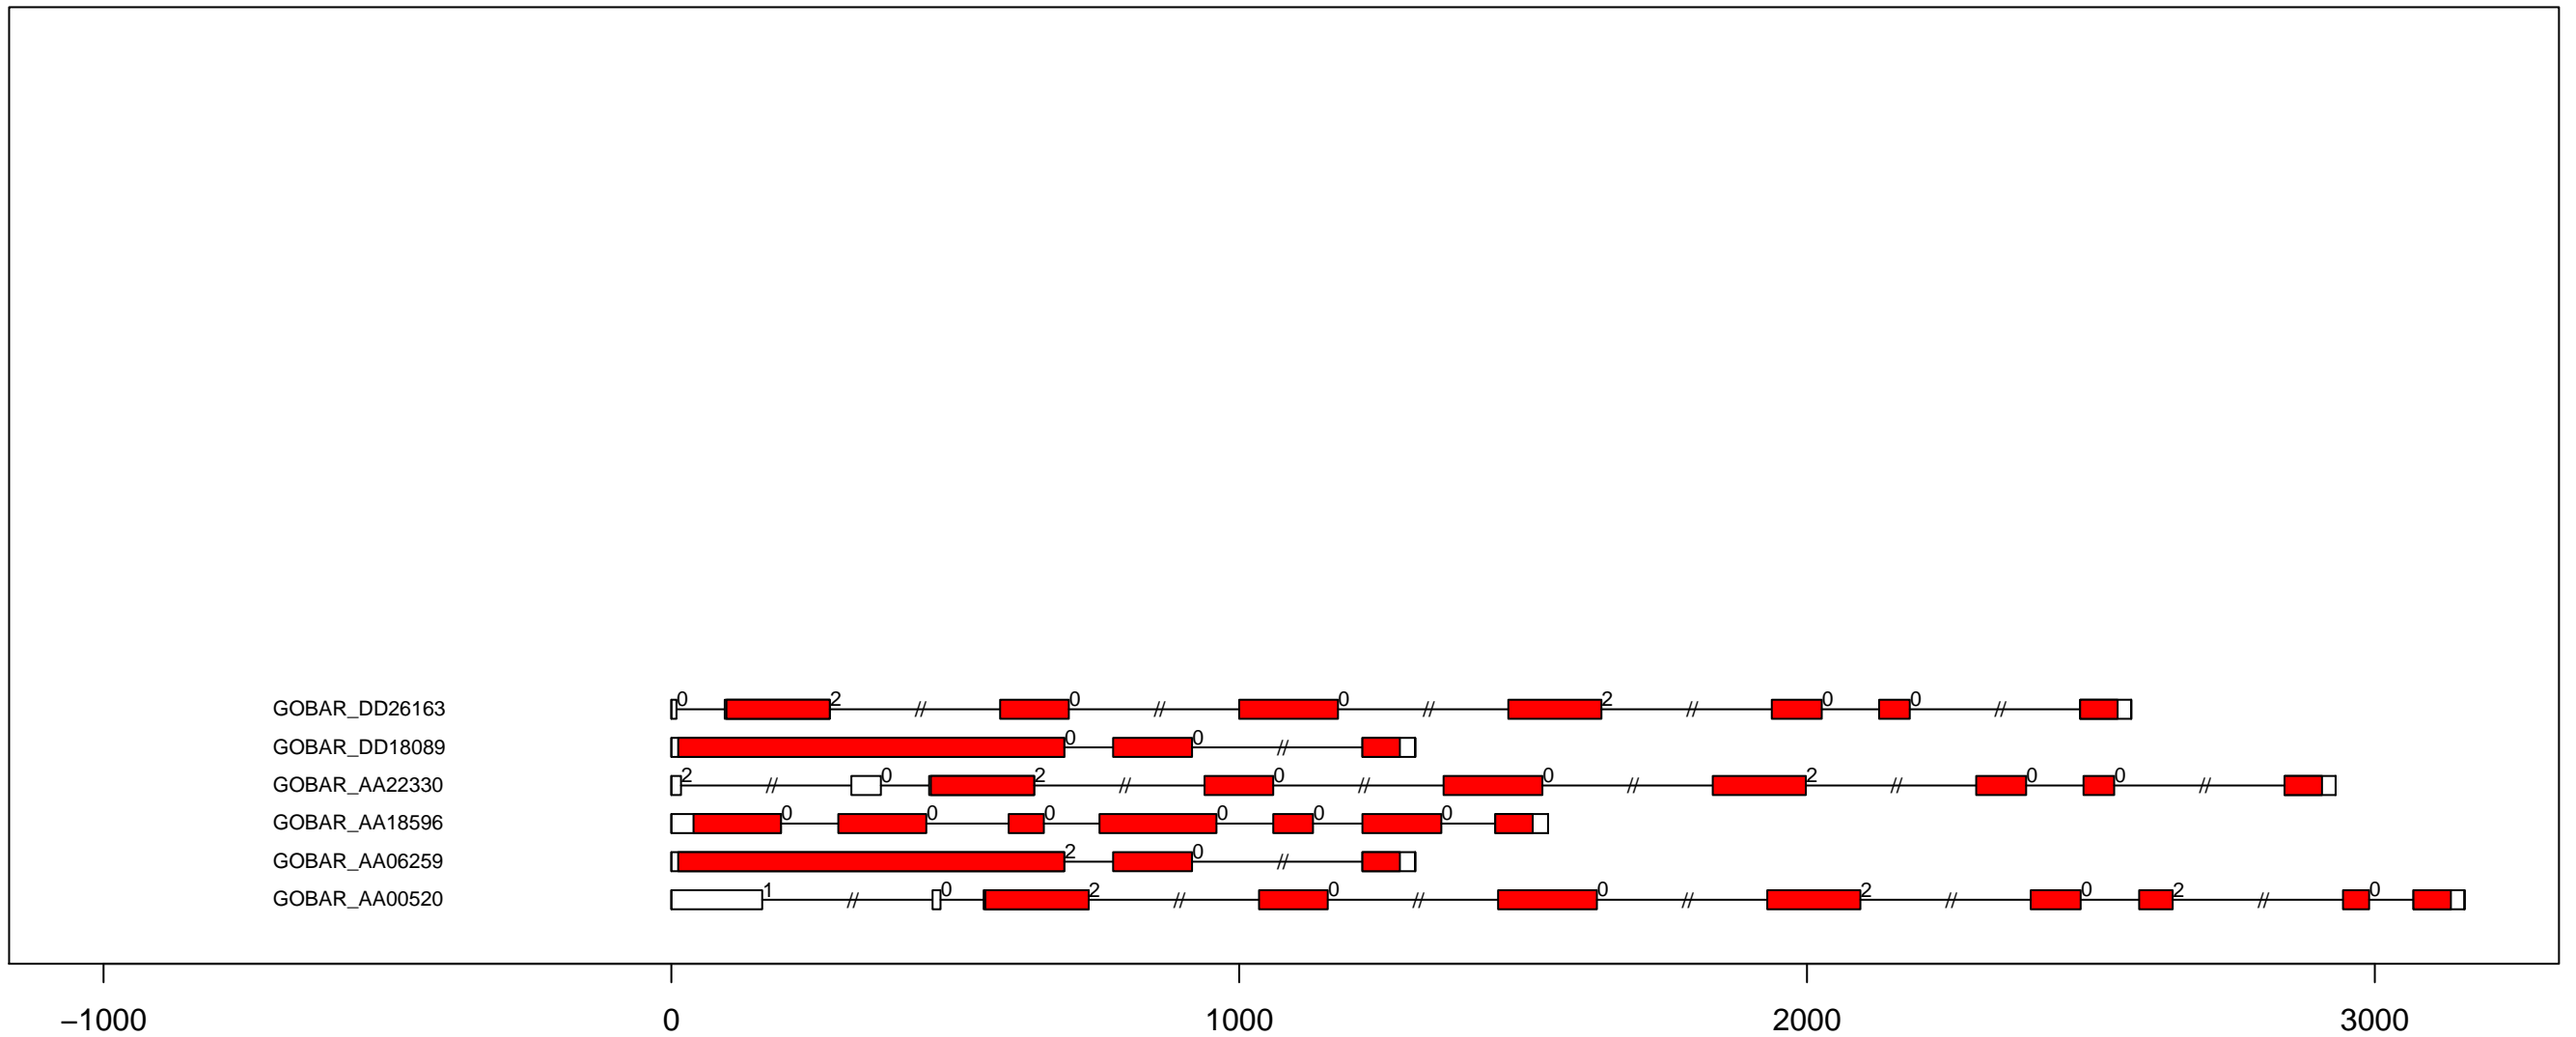

# G.ba CMGC\_CK2 exon-intron and domain diagram (all)

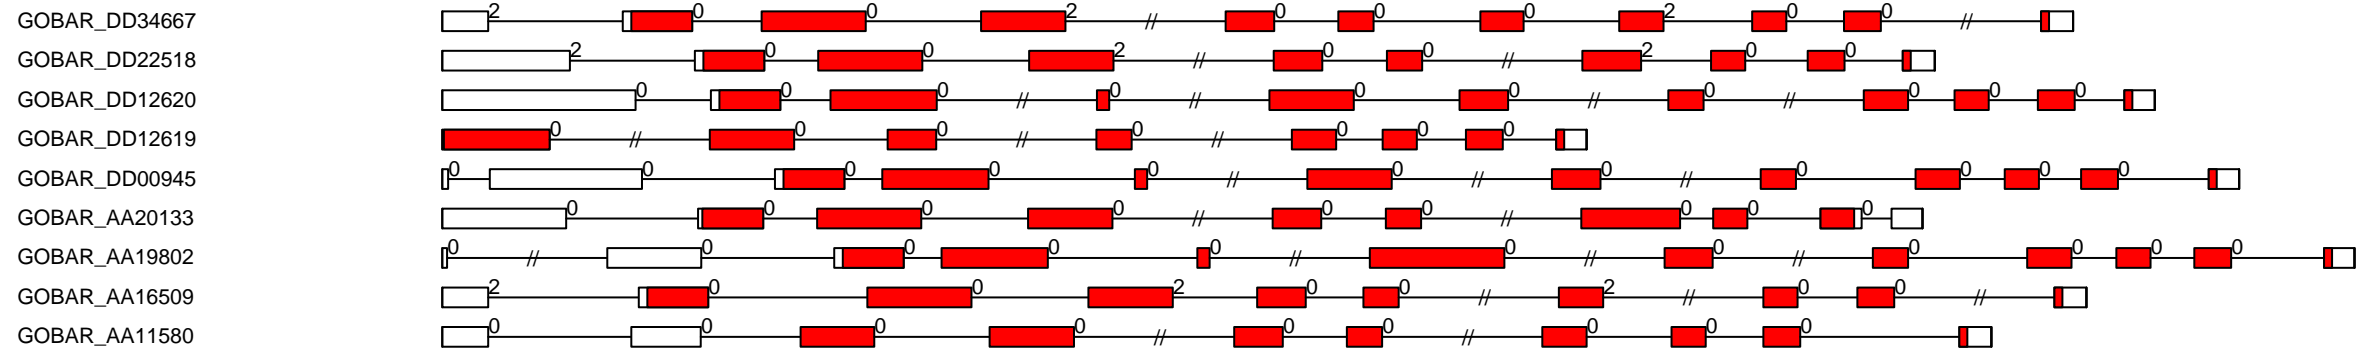

-1000

0

1000

2000

3000



# G.ba CMGC\_CLK exon-intron and domain diagram (all)

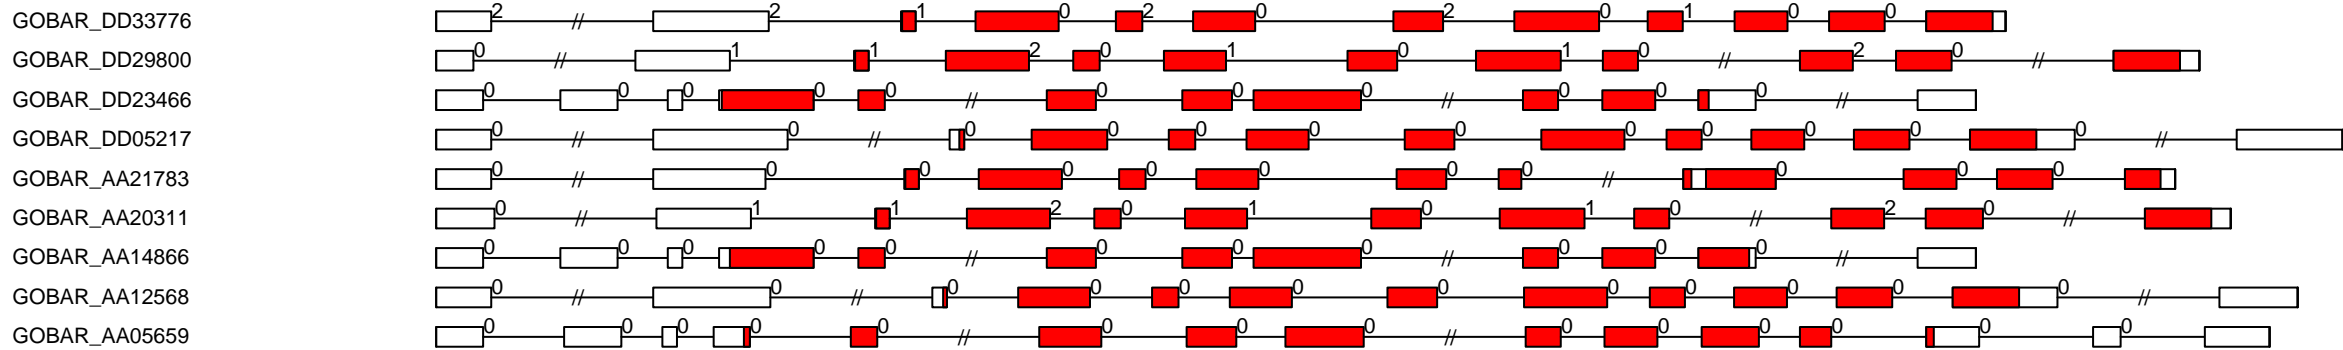

-1000

0

1000

2000

3000

# G.ba CMGC\_DYRK-PRP4 exon-intron and domain diagram (all)

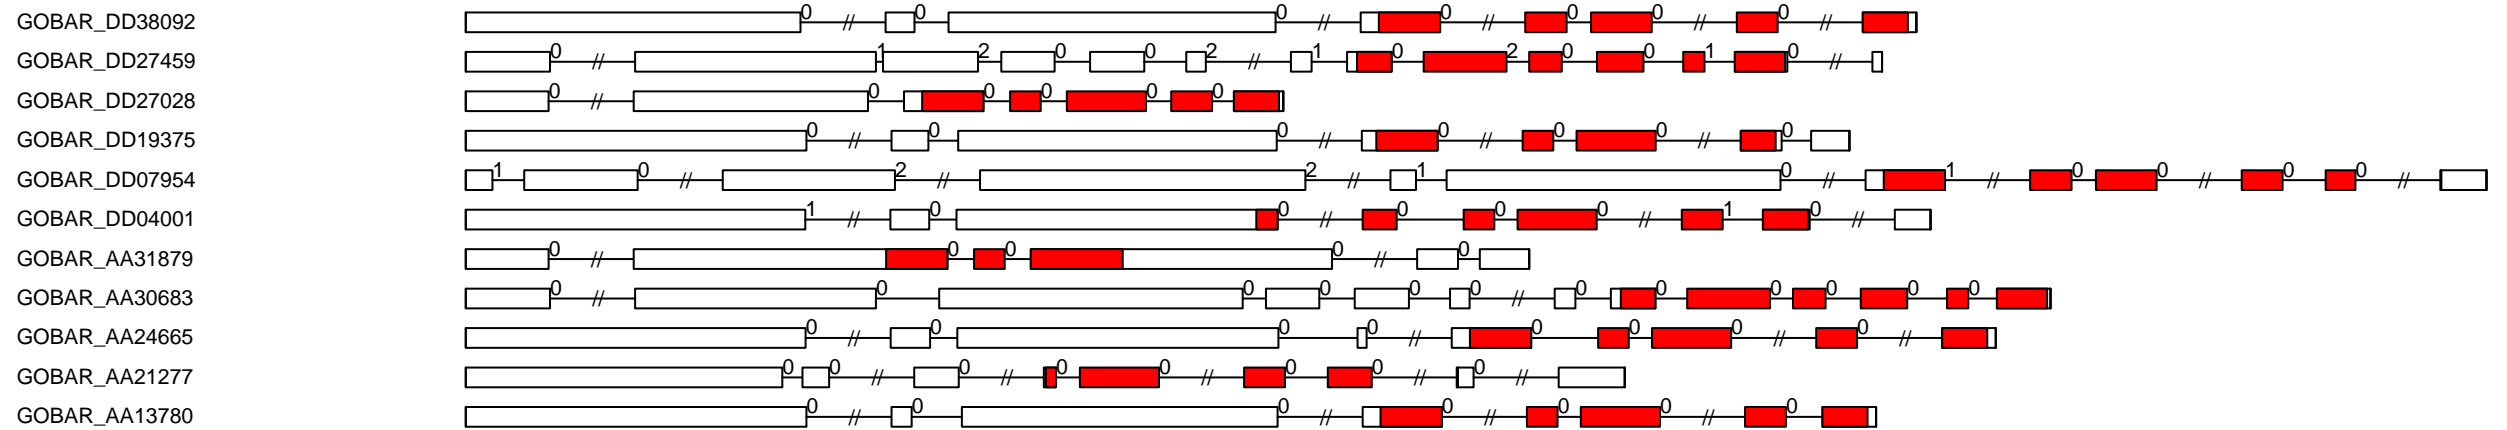

0

2000

4000

6000

# G.ba CMGC\_DYRK-YAK exon-intron and domain diagram (all)

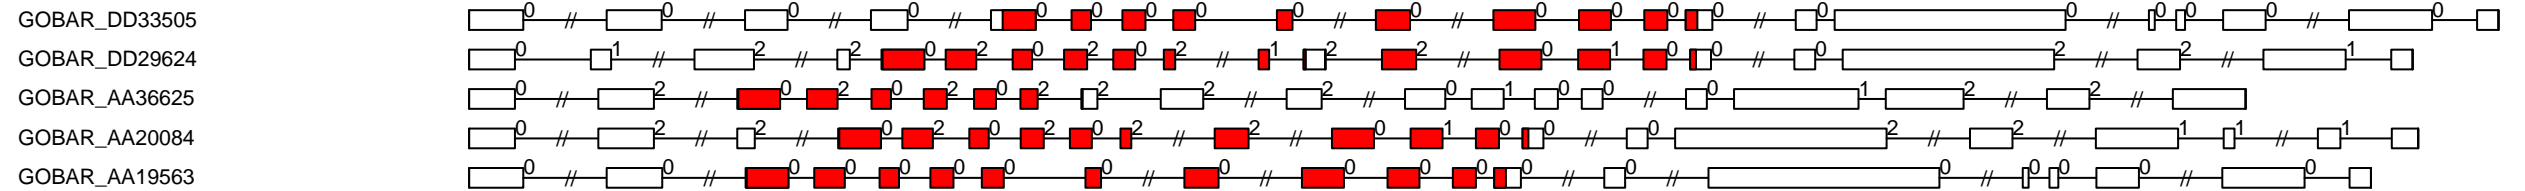

0

2000

4000

6000

### G.ba CMGC\_GSK exon-intron and domain diagram (all)

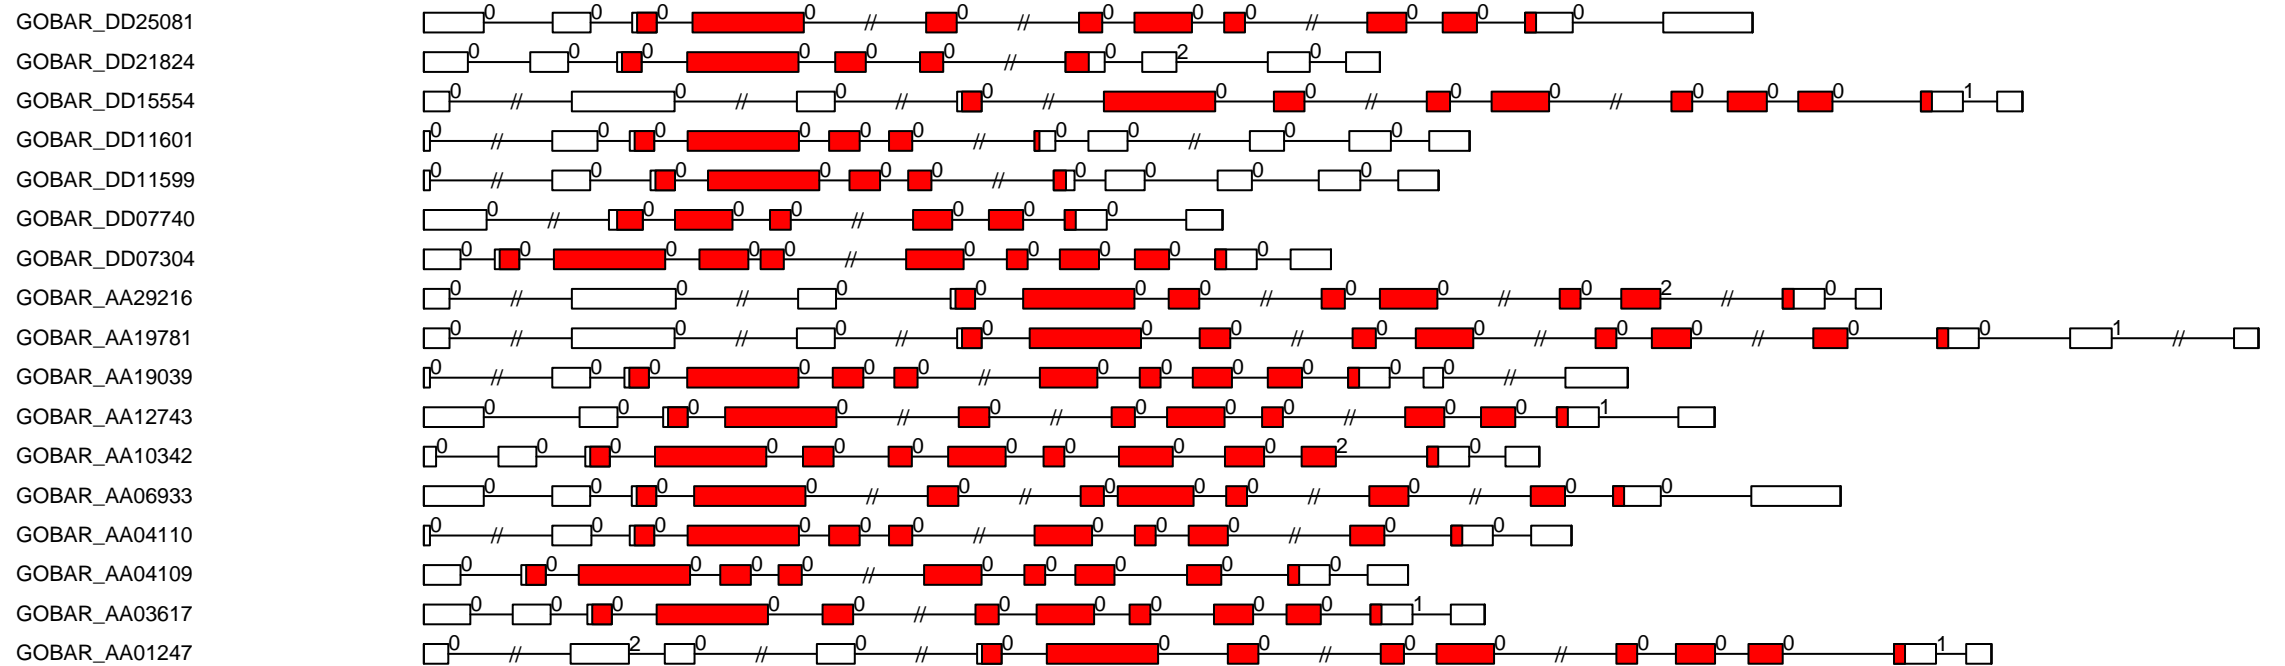

-1000

0

1000

2000

3000

4000

# G.ba CMGC\_MAPK exon-intron and domain diagram (part 1)

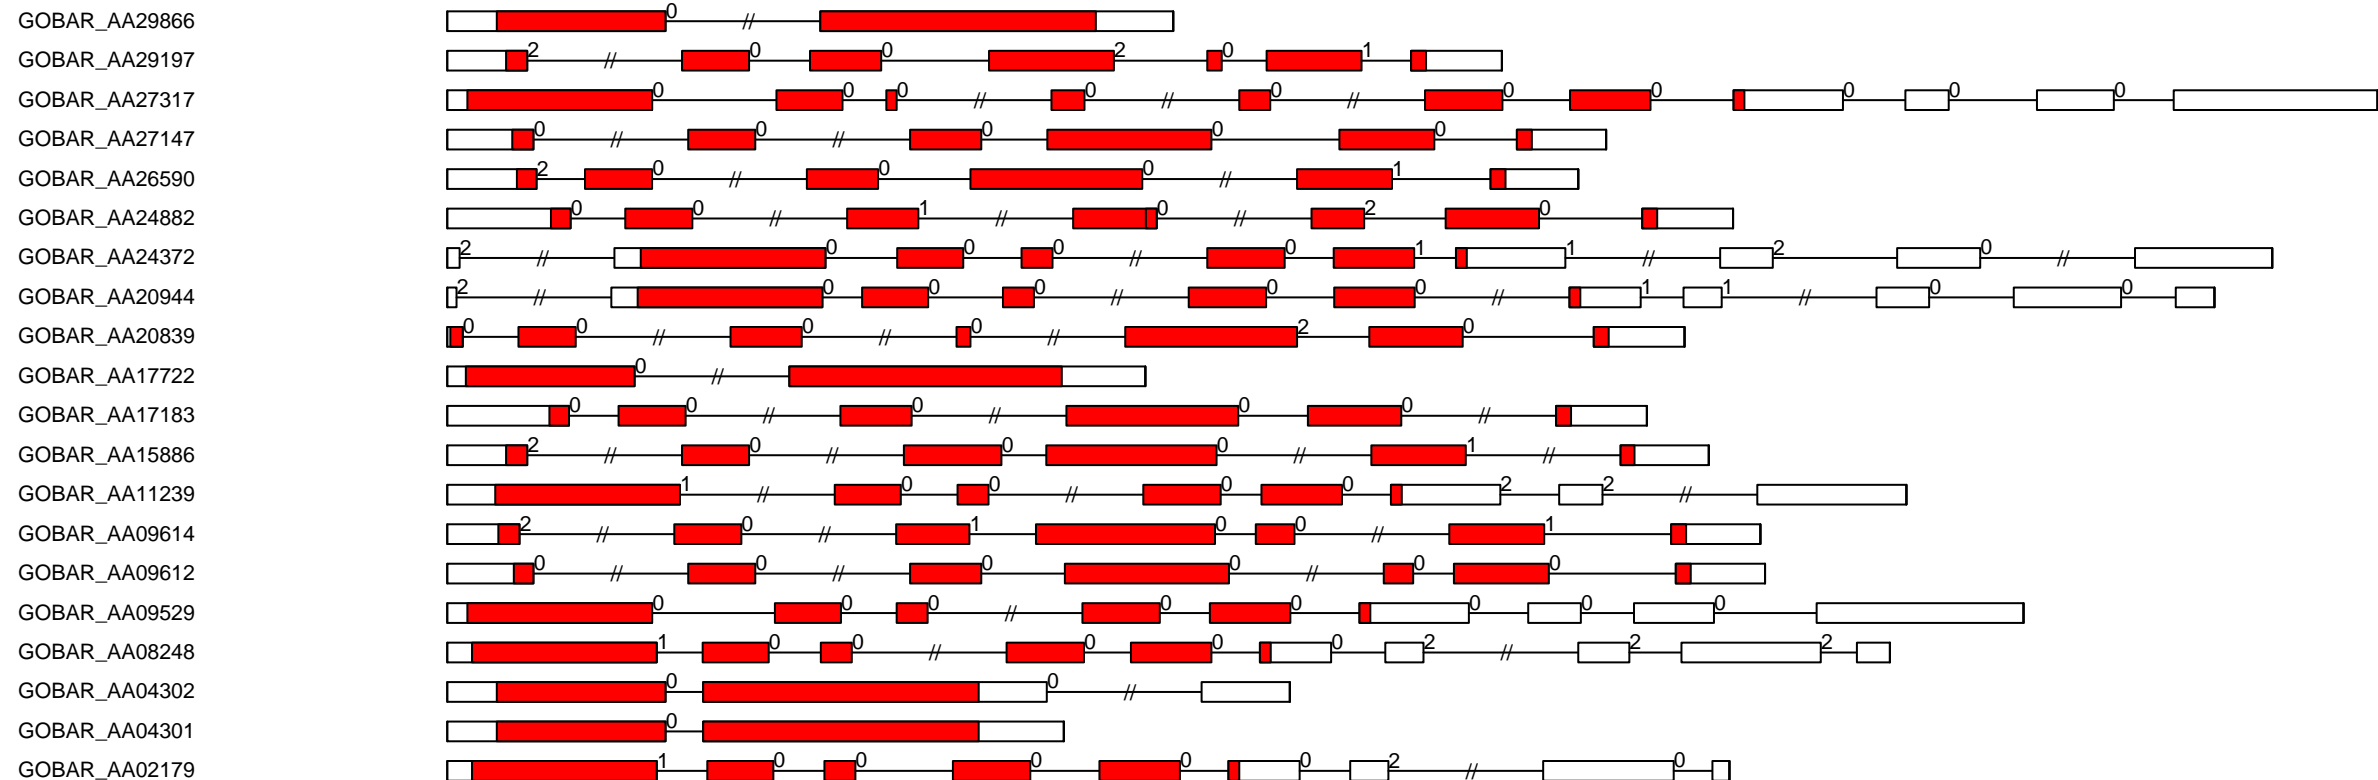

-1000

0

1000

2000

3000

### G.ba CMGC\_MAPK exon-intron and domain diagram (part 2)

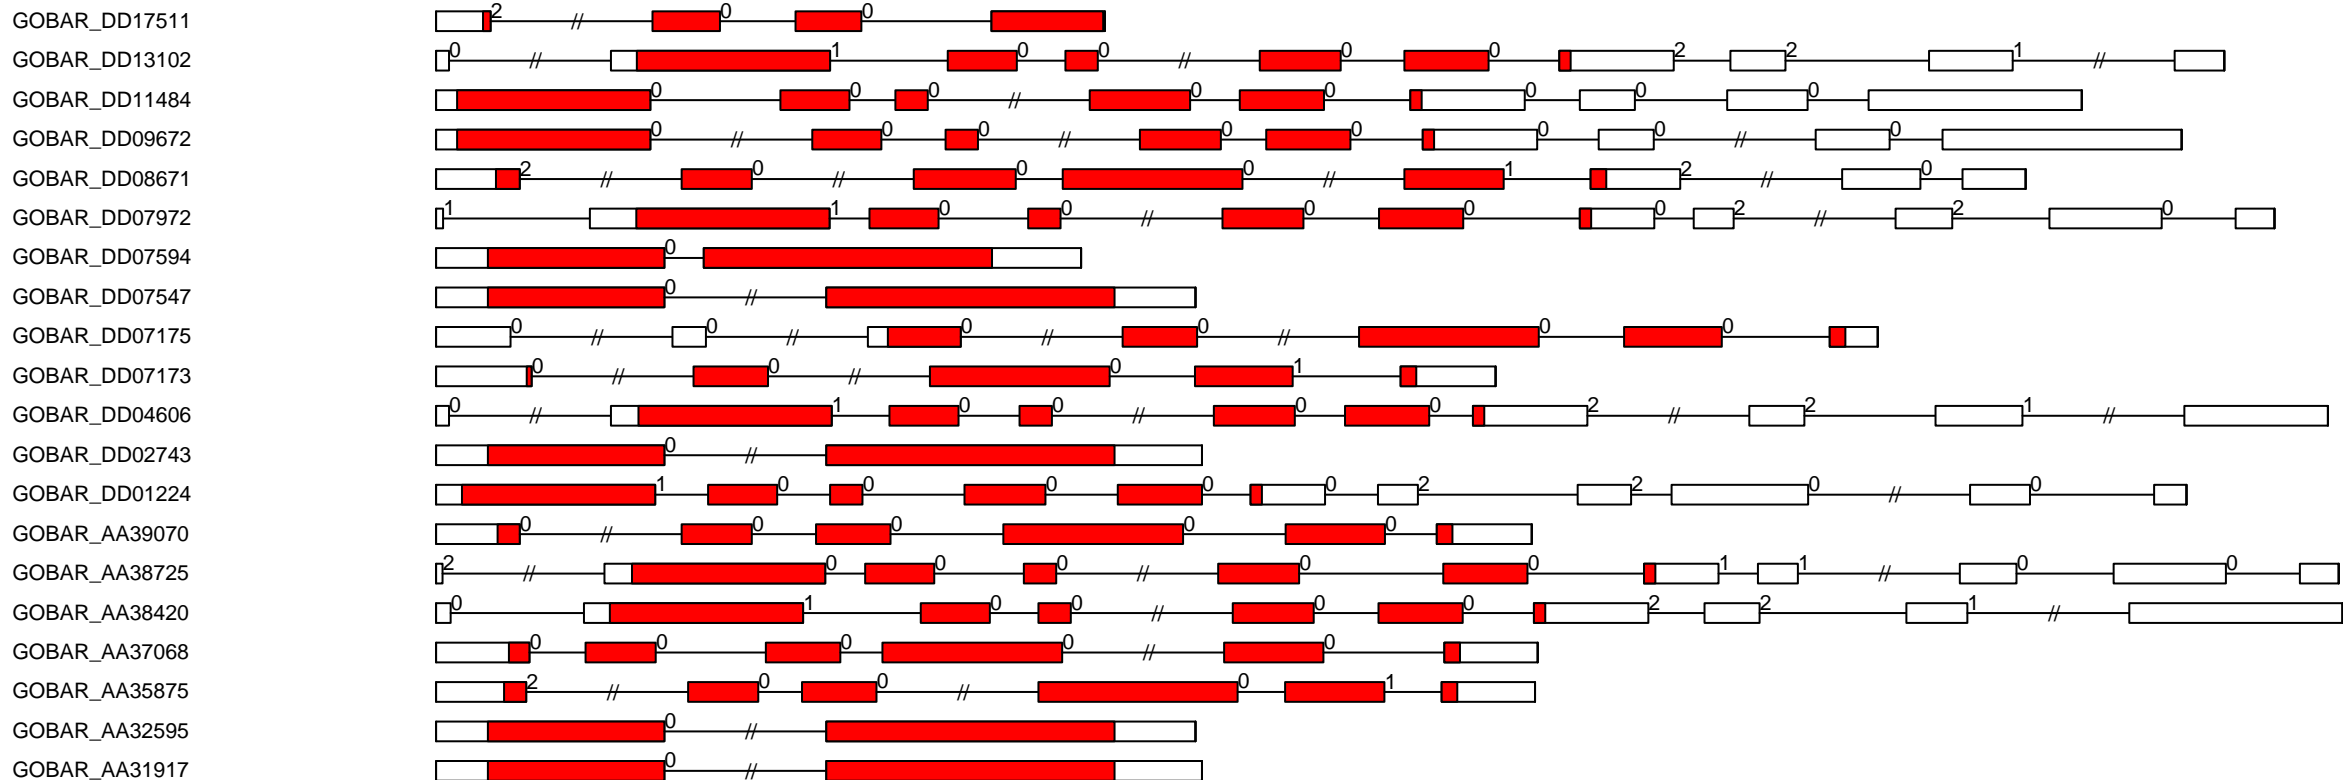

-1000

0

1000

2000

3000

### G.ba CMGC\_MAPK exon-intron and domain diagram (part 3)

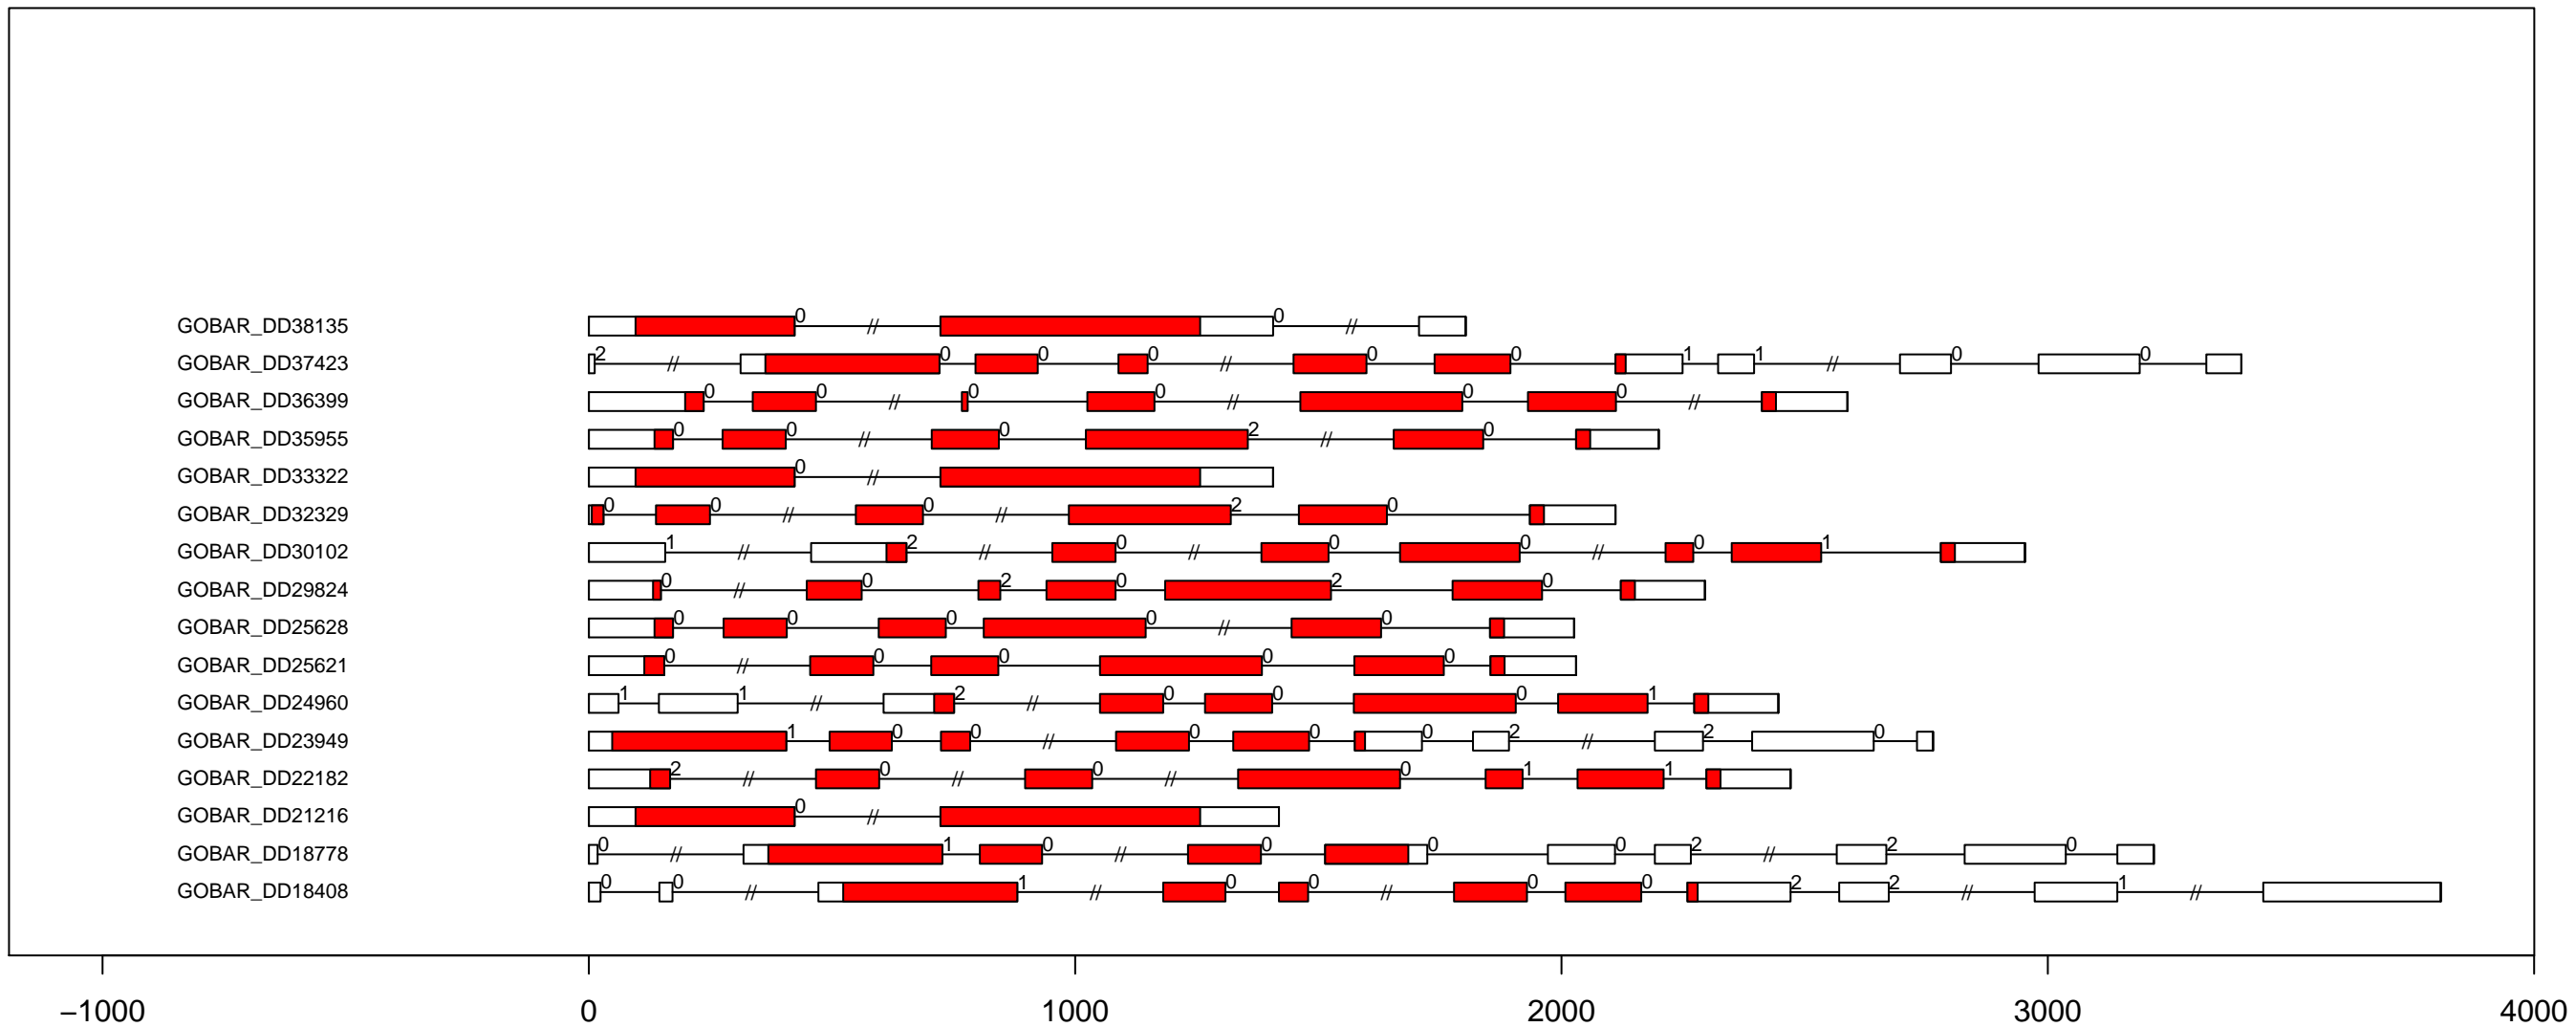

# G.ba CMGC\_PI-Tthe exon-intron and domain diagram (all)

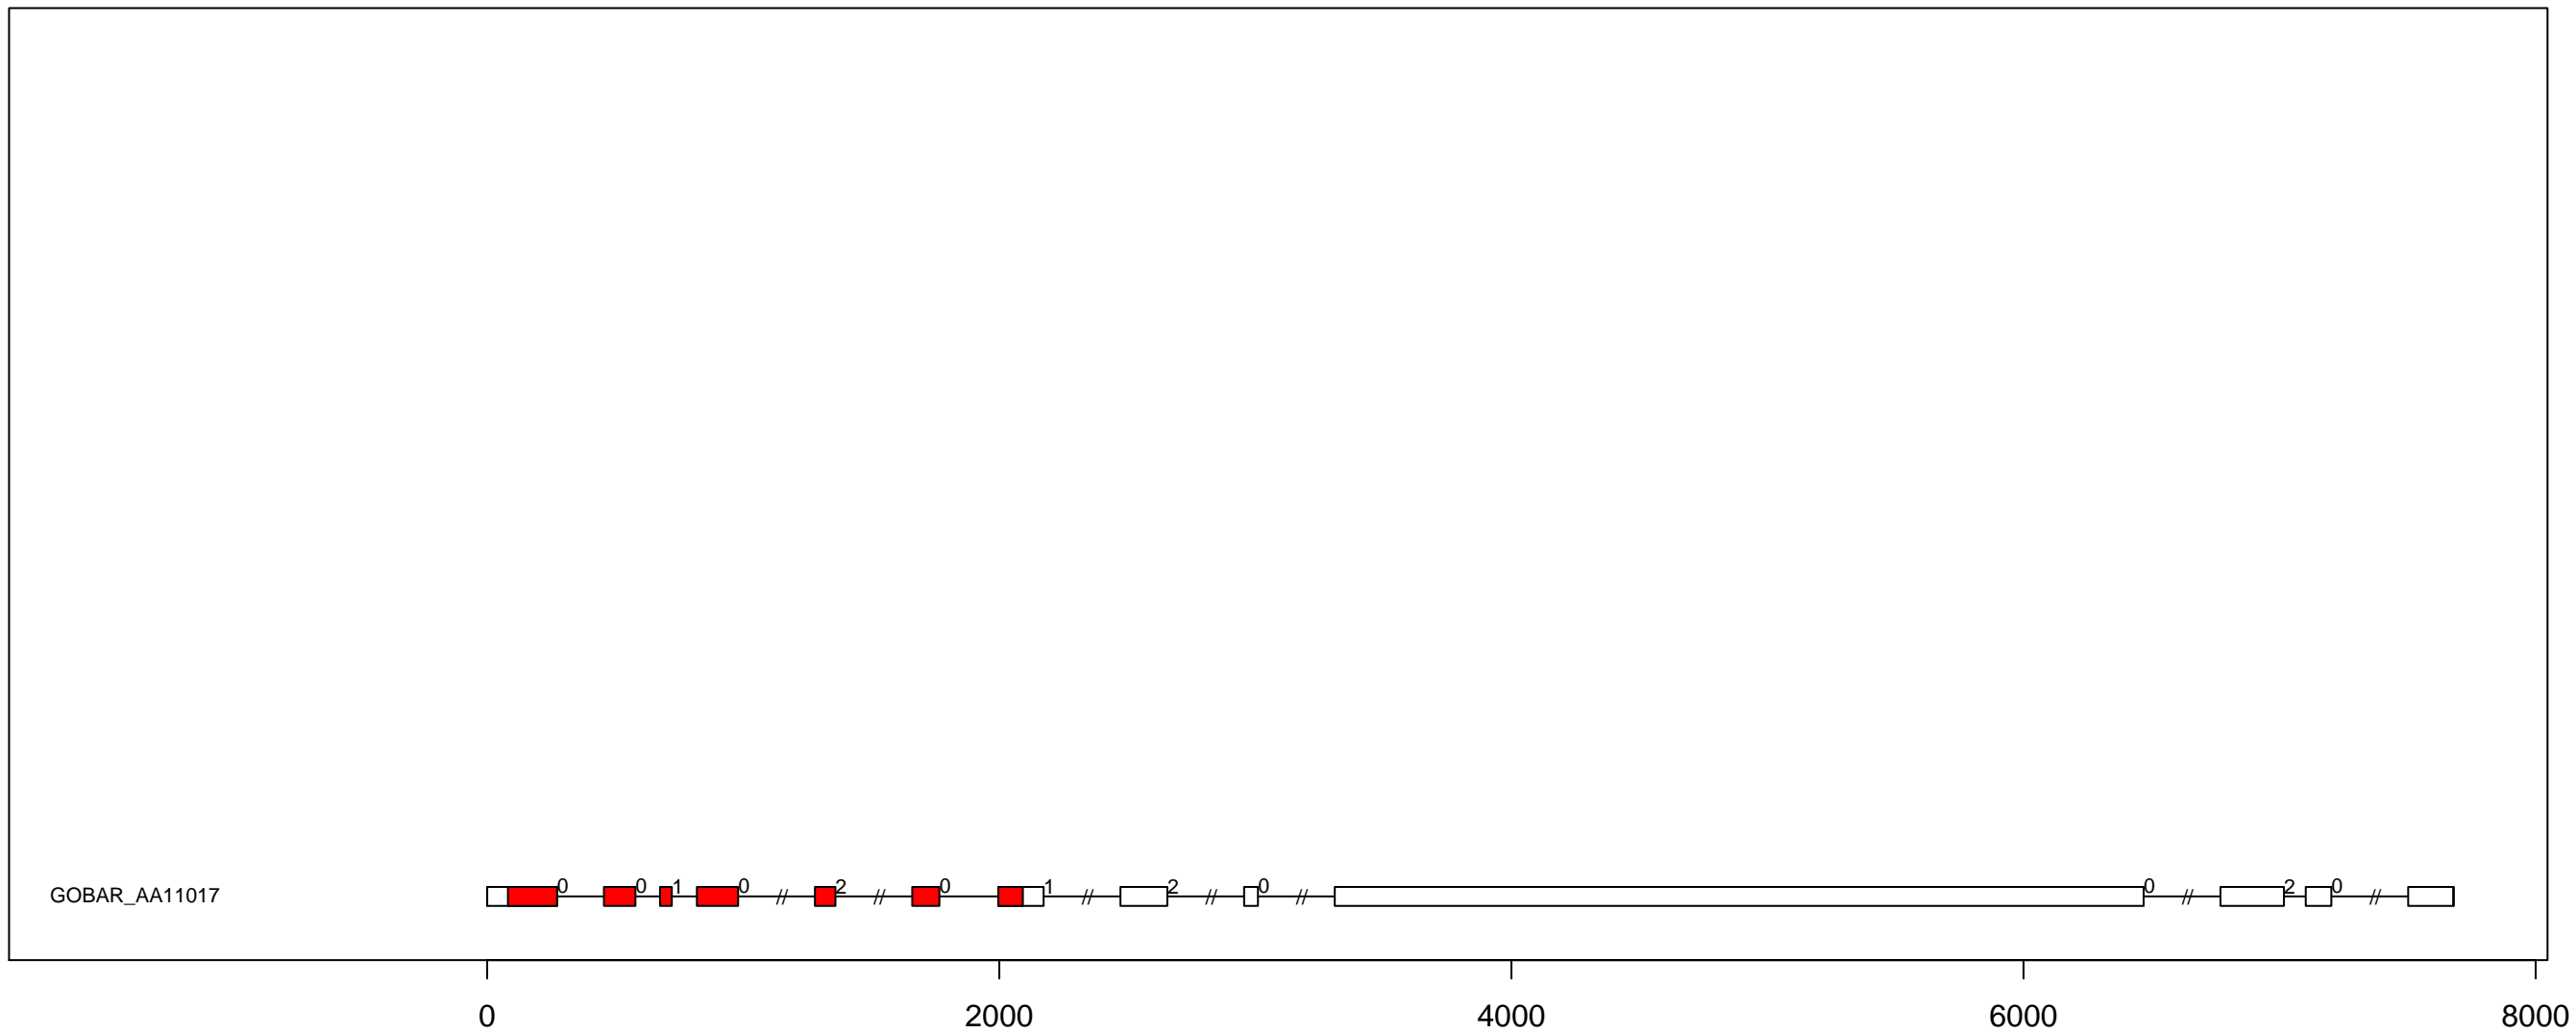



# G.ba CMGC\_RCK exon-intron and domain diagram (all)

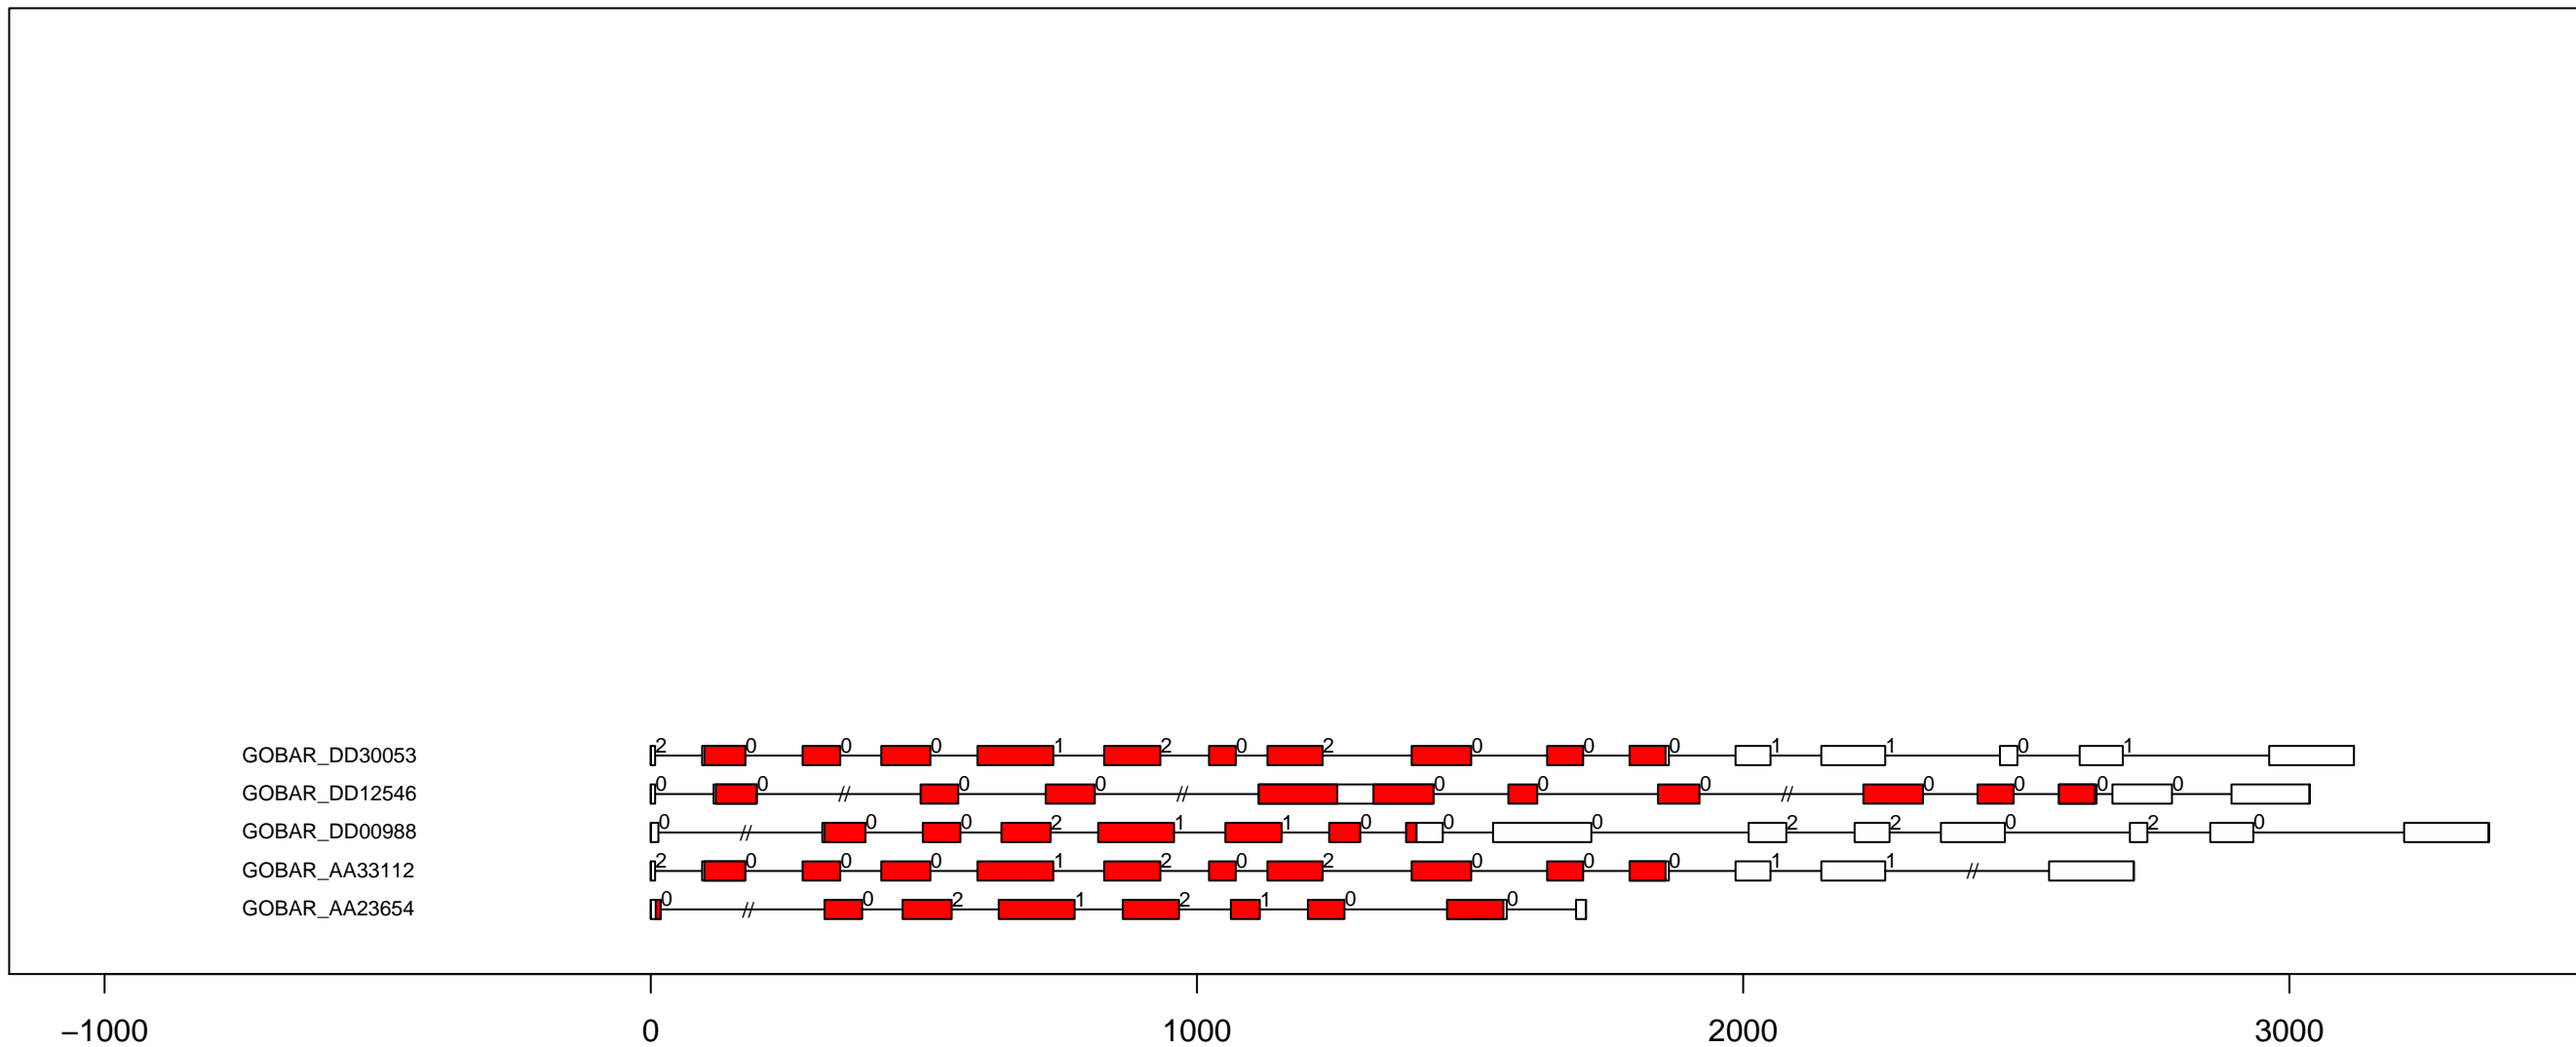

# G.ba CMGC\_SRPK exon-intron and domain diagram (all)

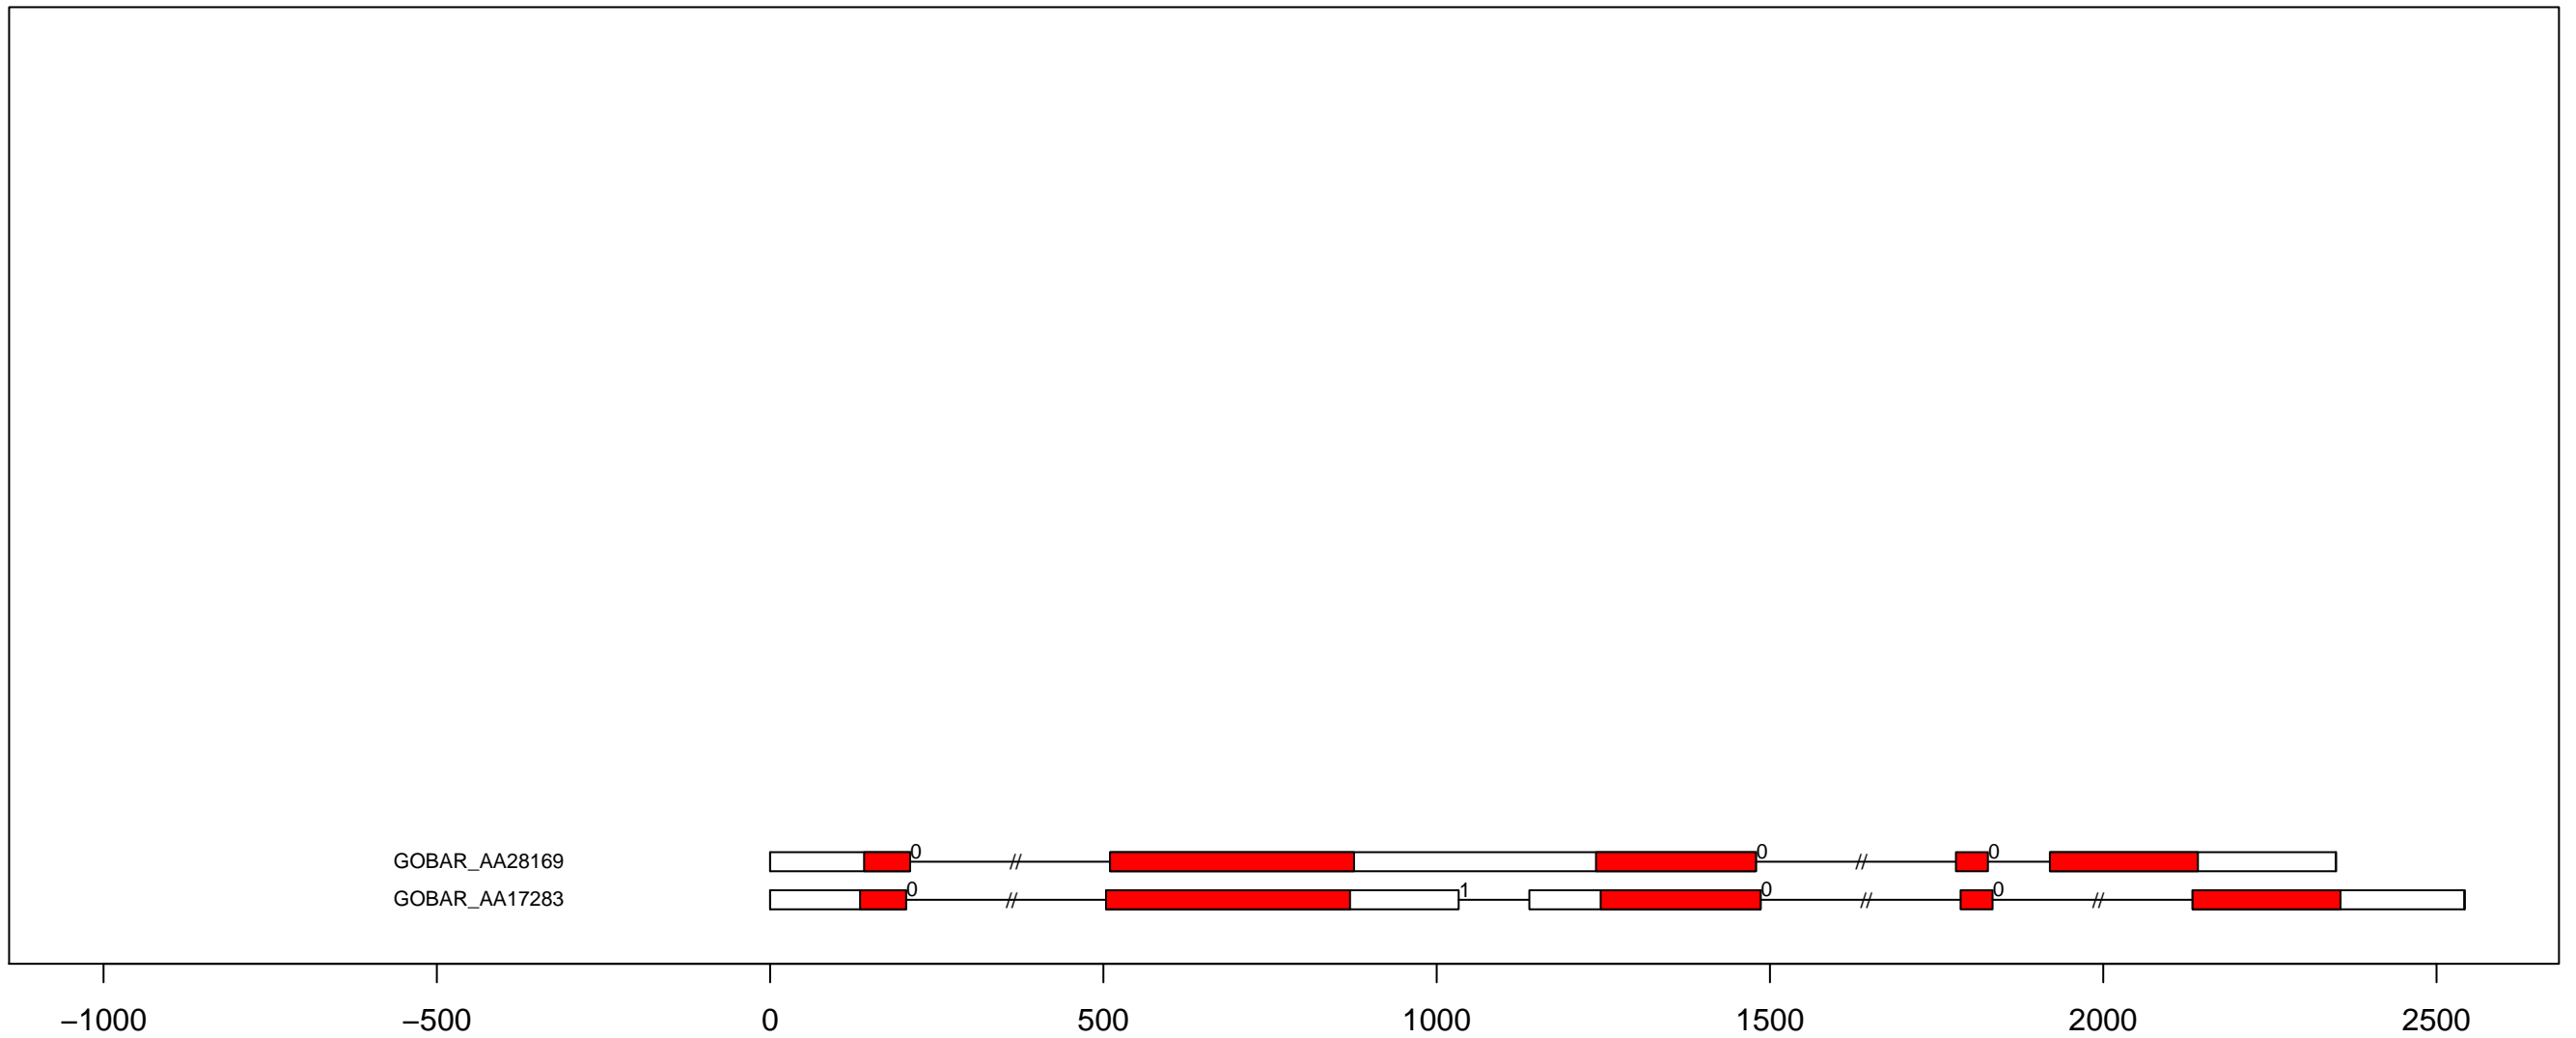

G.ba Group-PI-2 exon-intron and domain diagram (all)

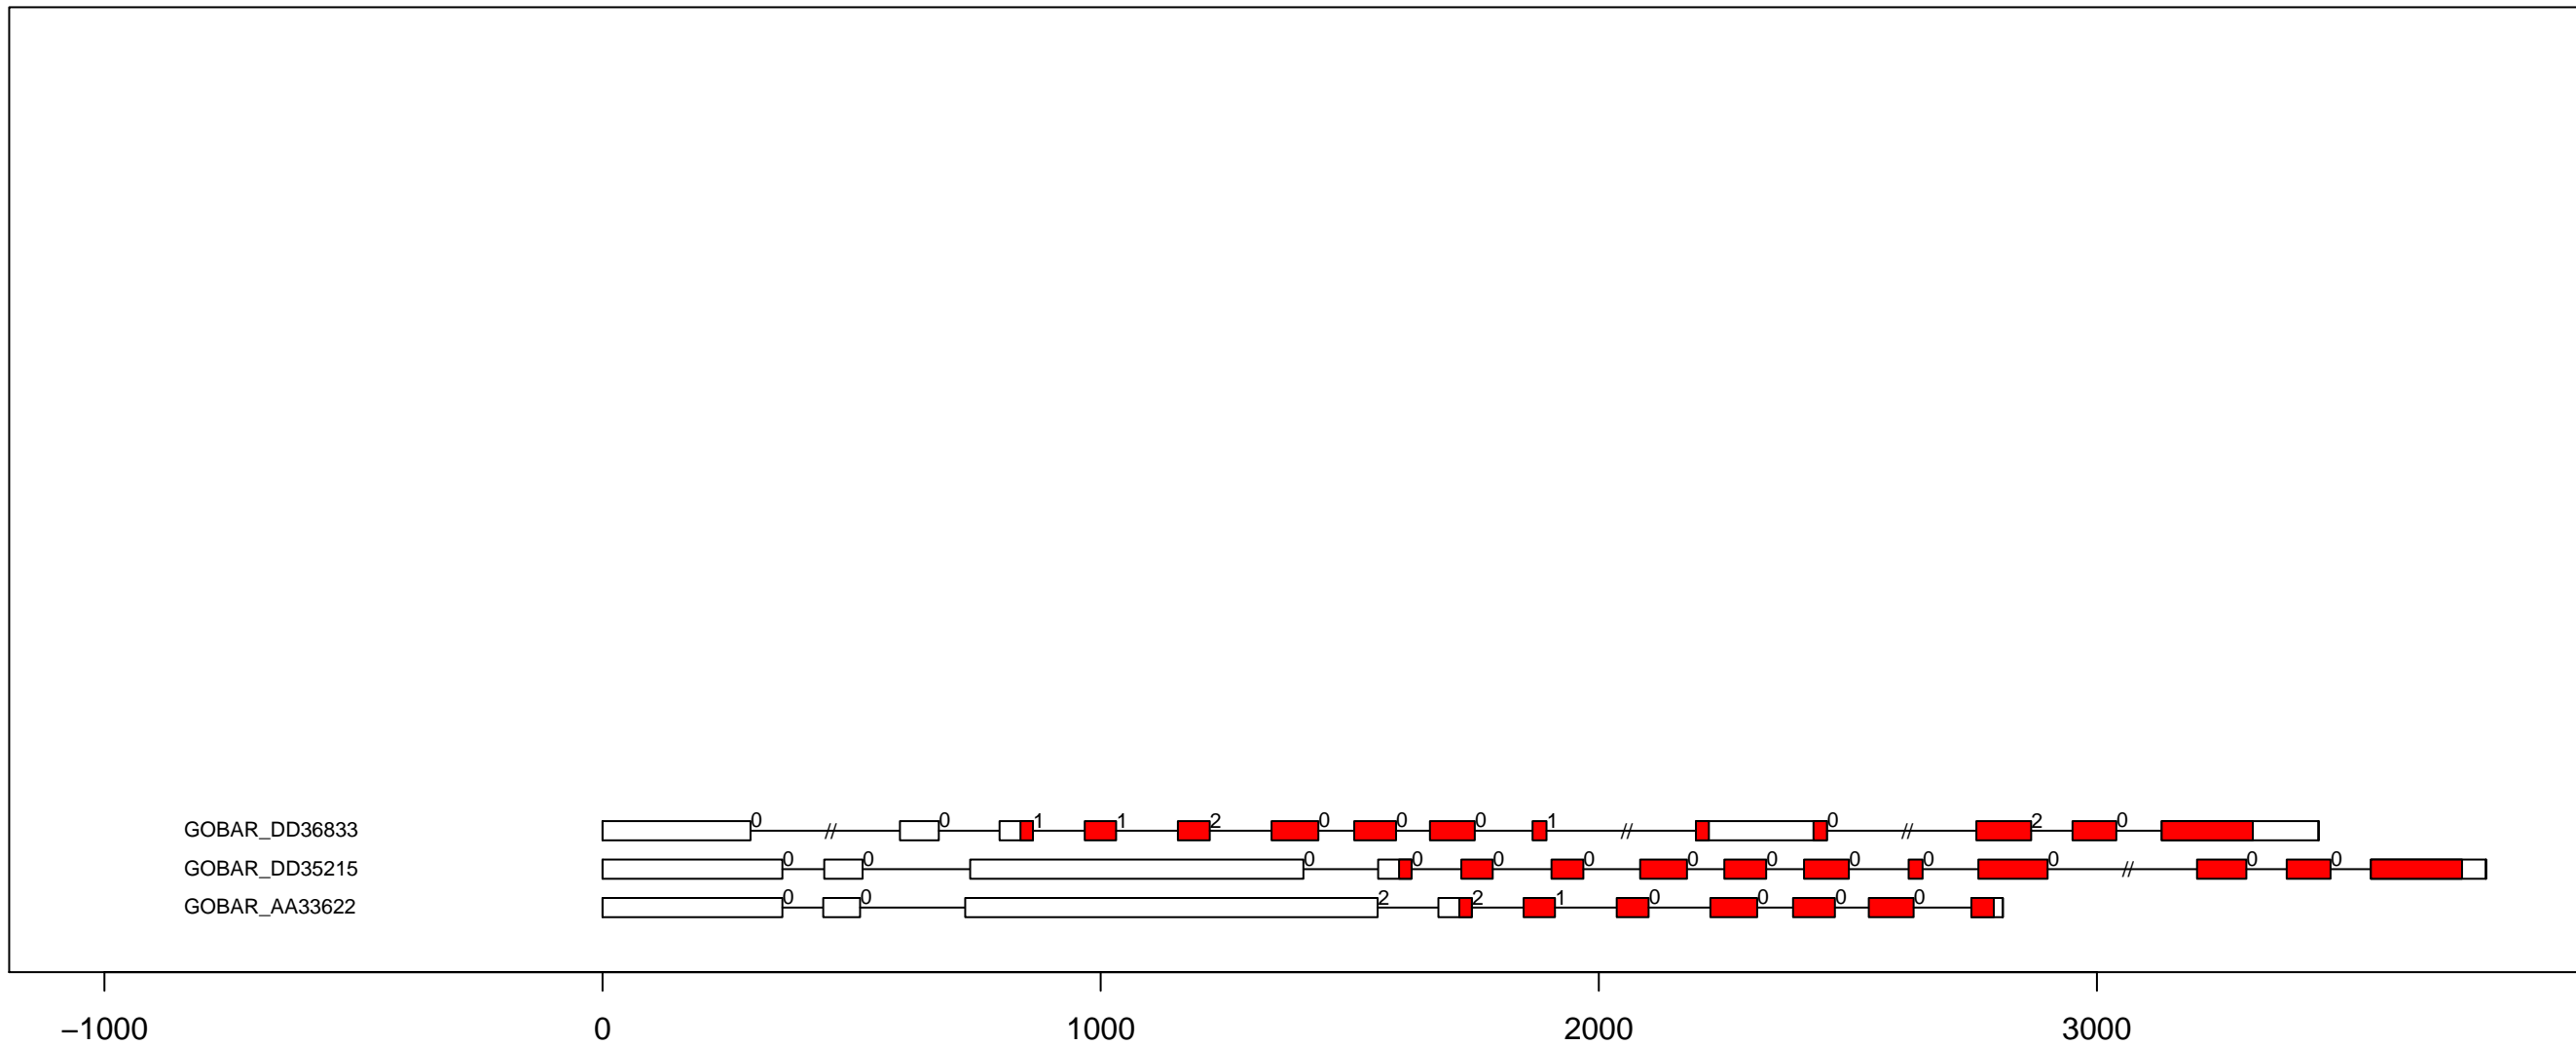

# G.ba Group-PI-3 exon-intron and domain diagram (all)

GOBAR\_DD18657  
GOBAR\_DD03531  
GOBAR\_DD02687  
GOBAR\_AA33276  
GOBAR\_AA27656  
GOBAR\_AA23893

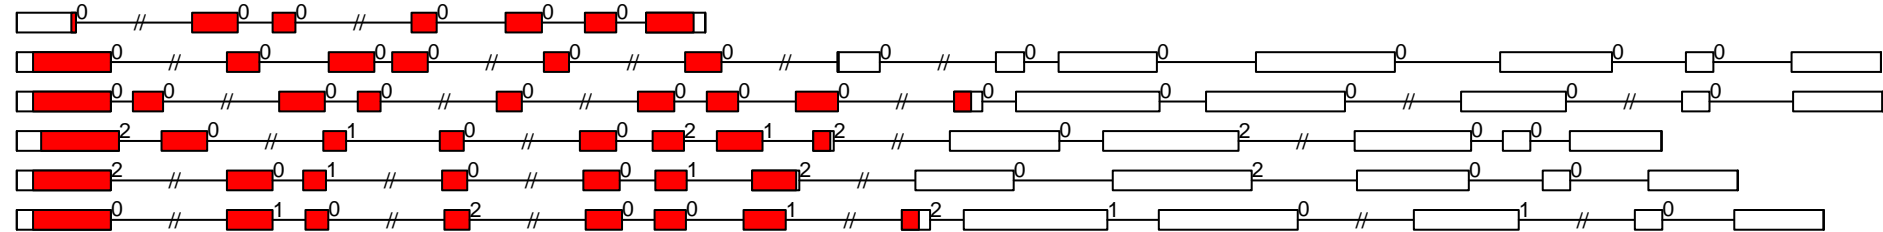

-1000

0

1000

2000

3000

4000

5000



# G.ba IRE1 exon-intron and domain diagram (all)

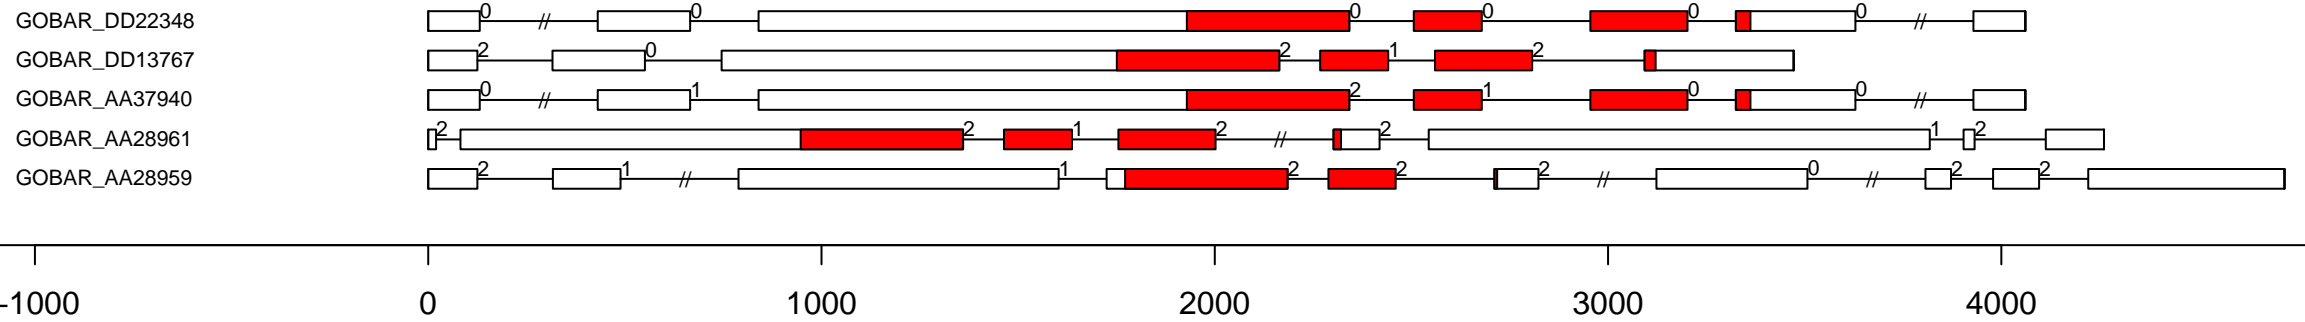

# G.ba NAK exon-intron and domain diagram (all)

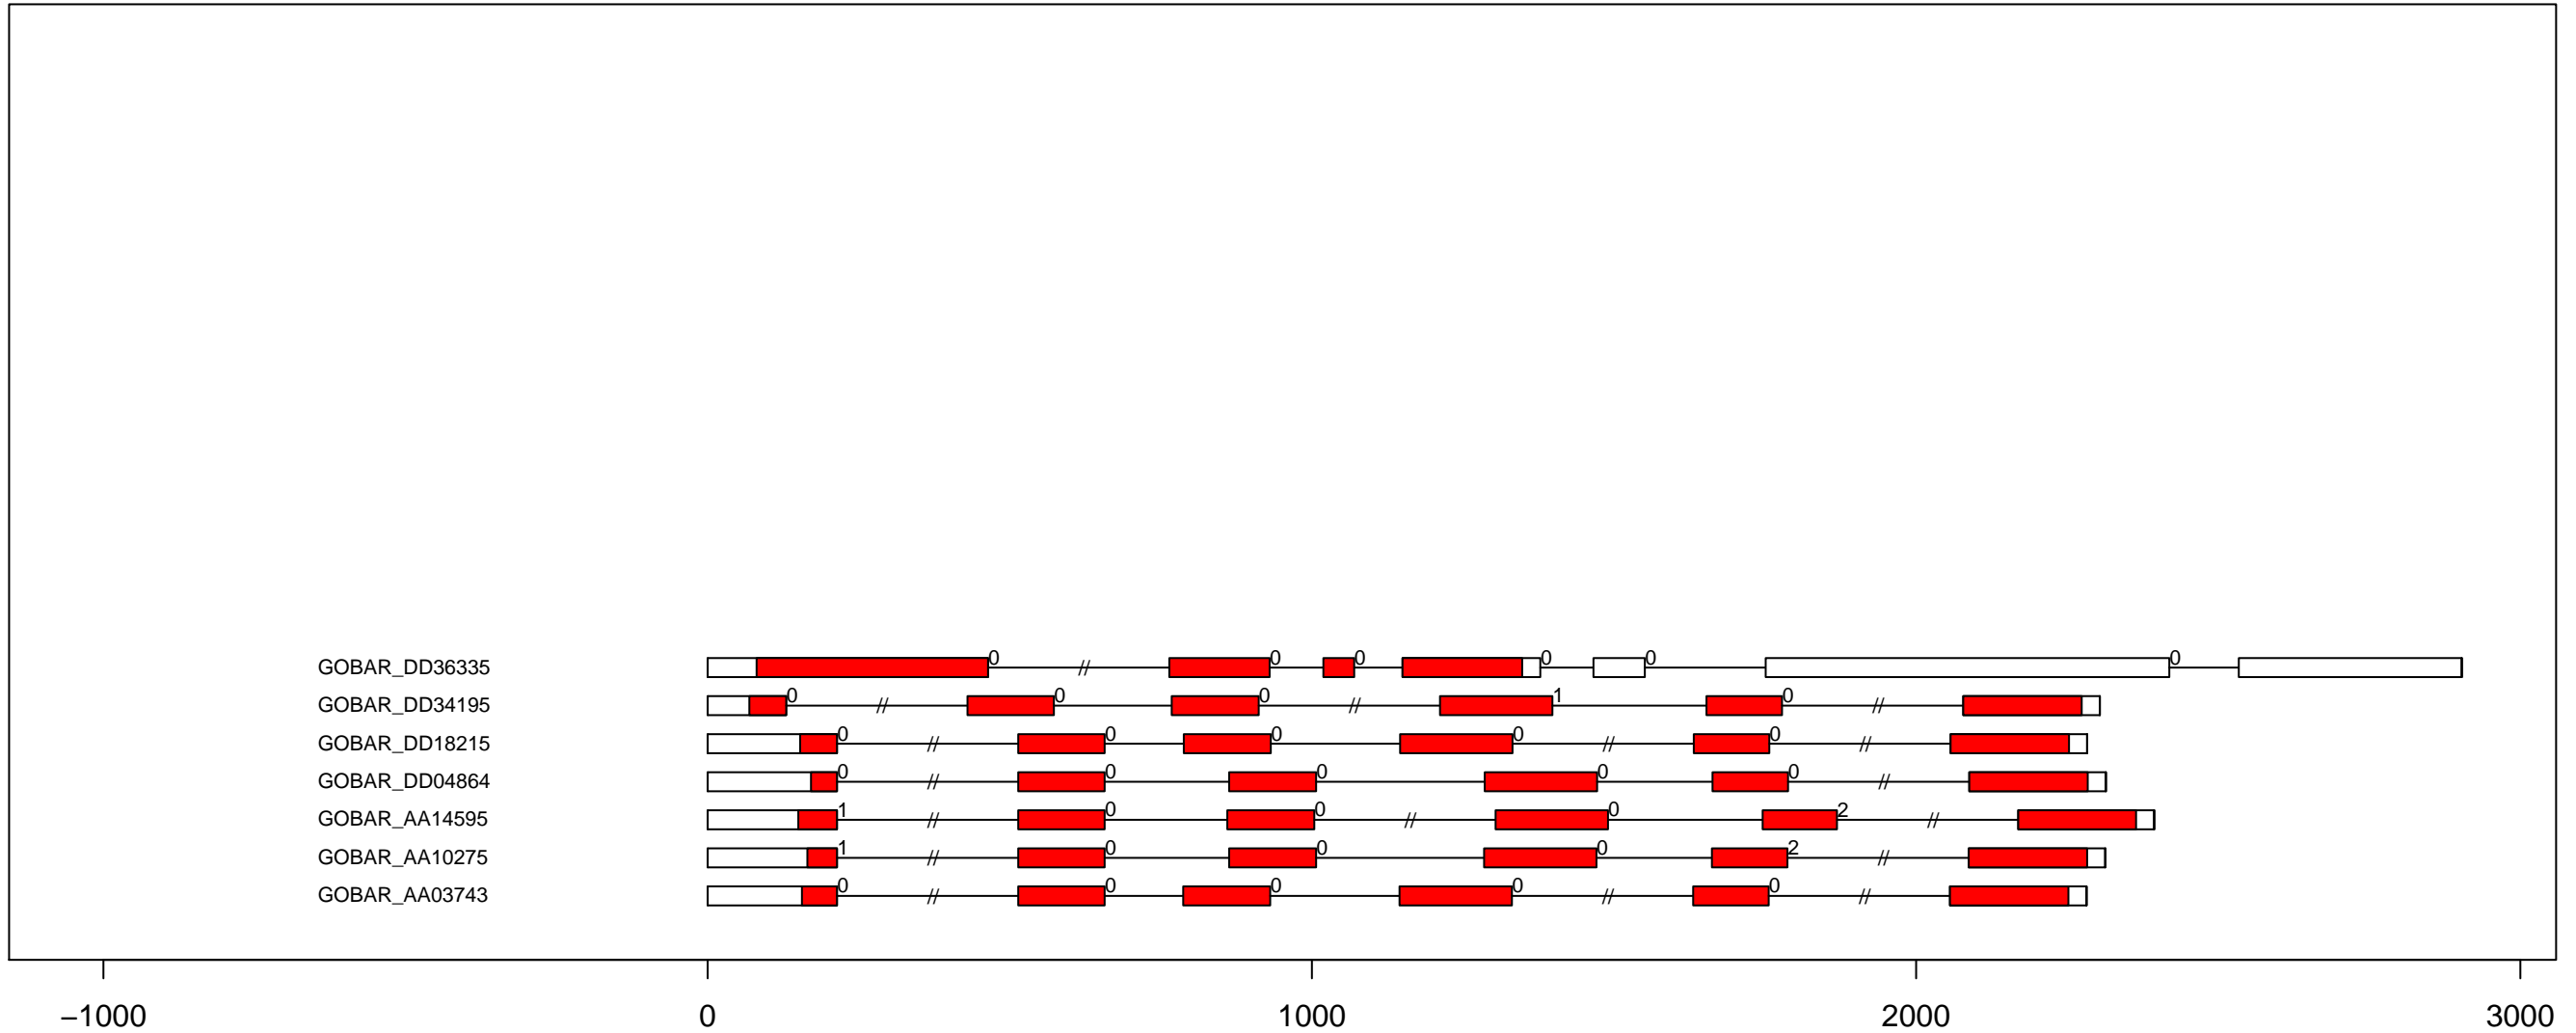

# G.ba NEK exon-intron and domain diagram (all)

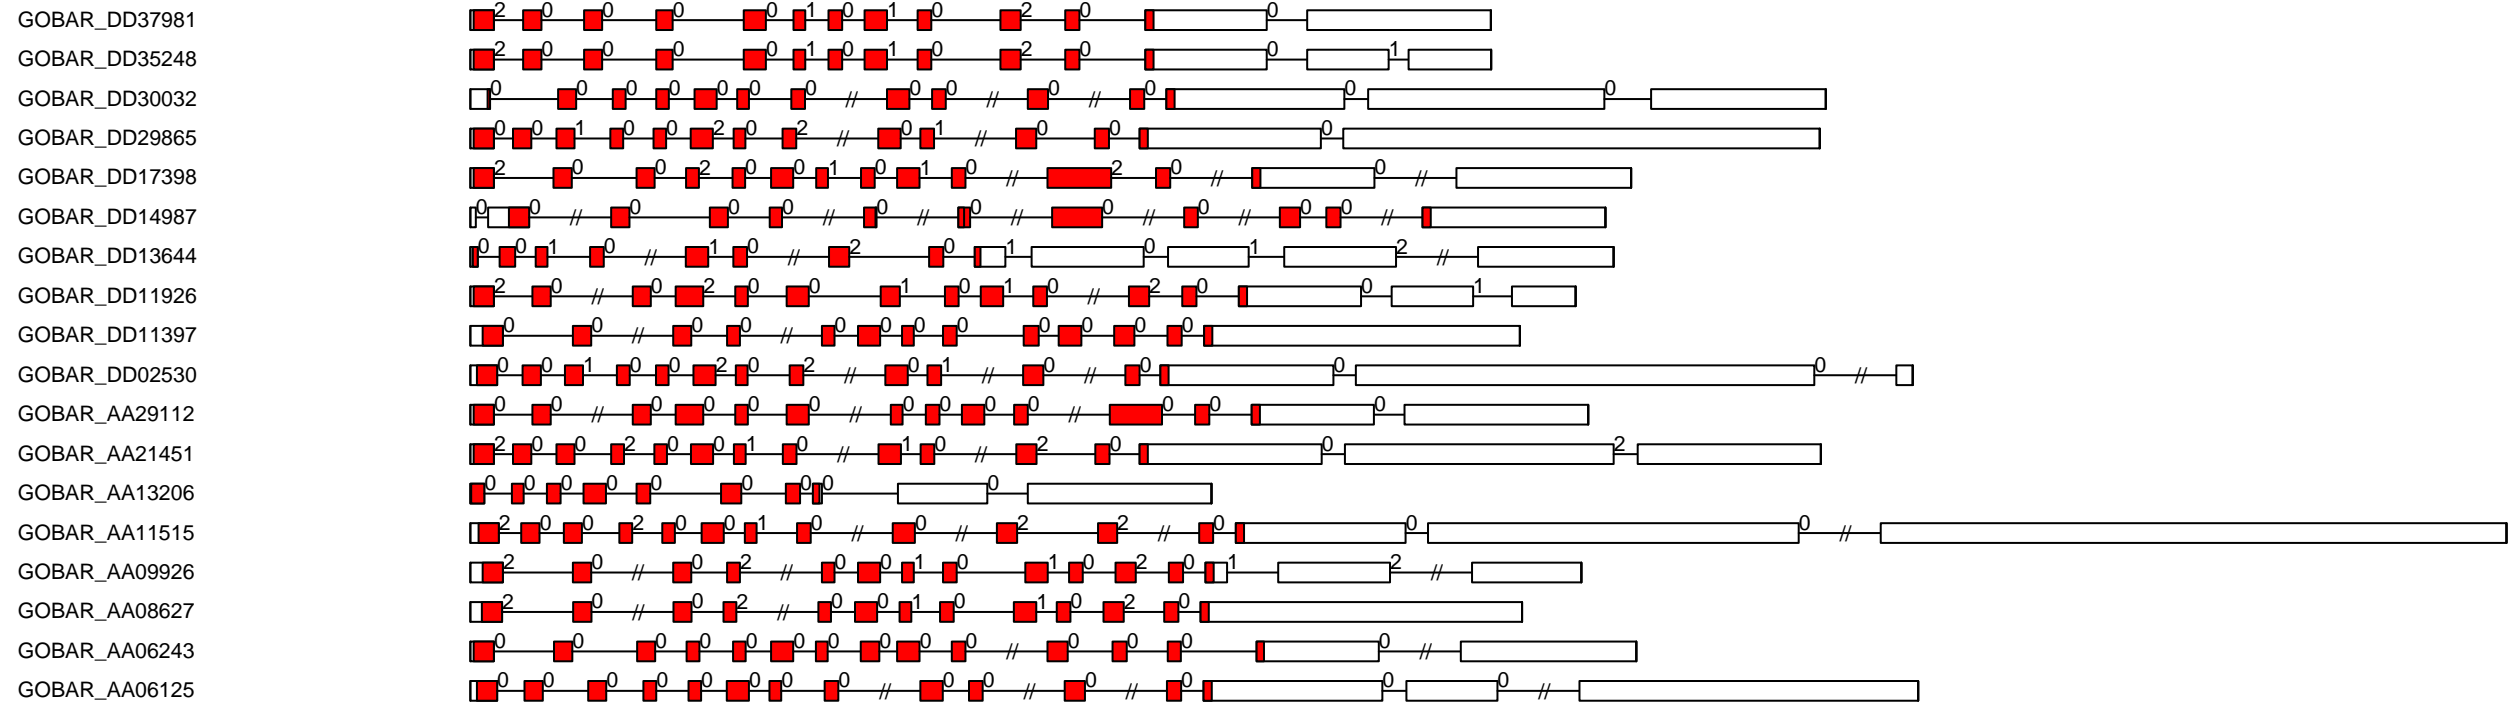



# G.ba PEK\_GCN2 exon-intron and domain diagram (all)

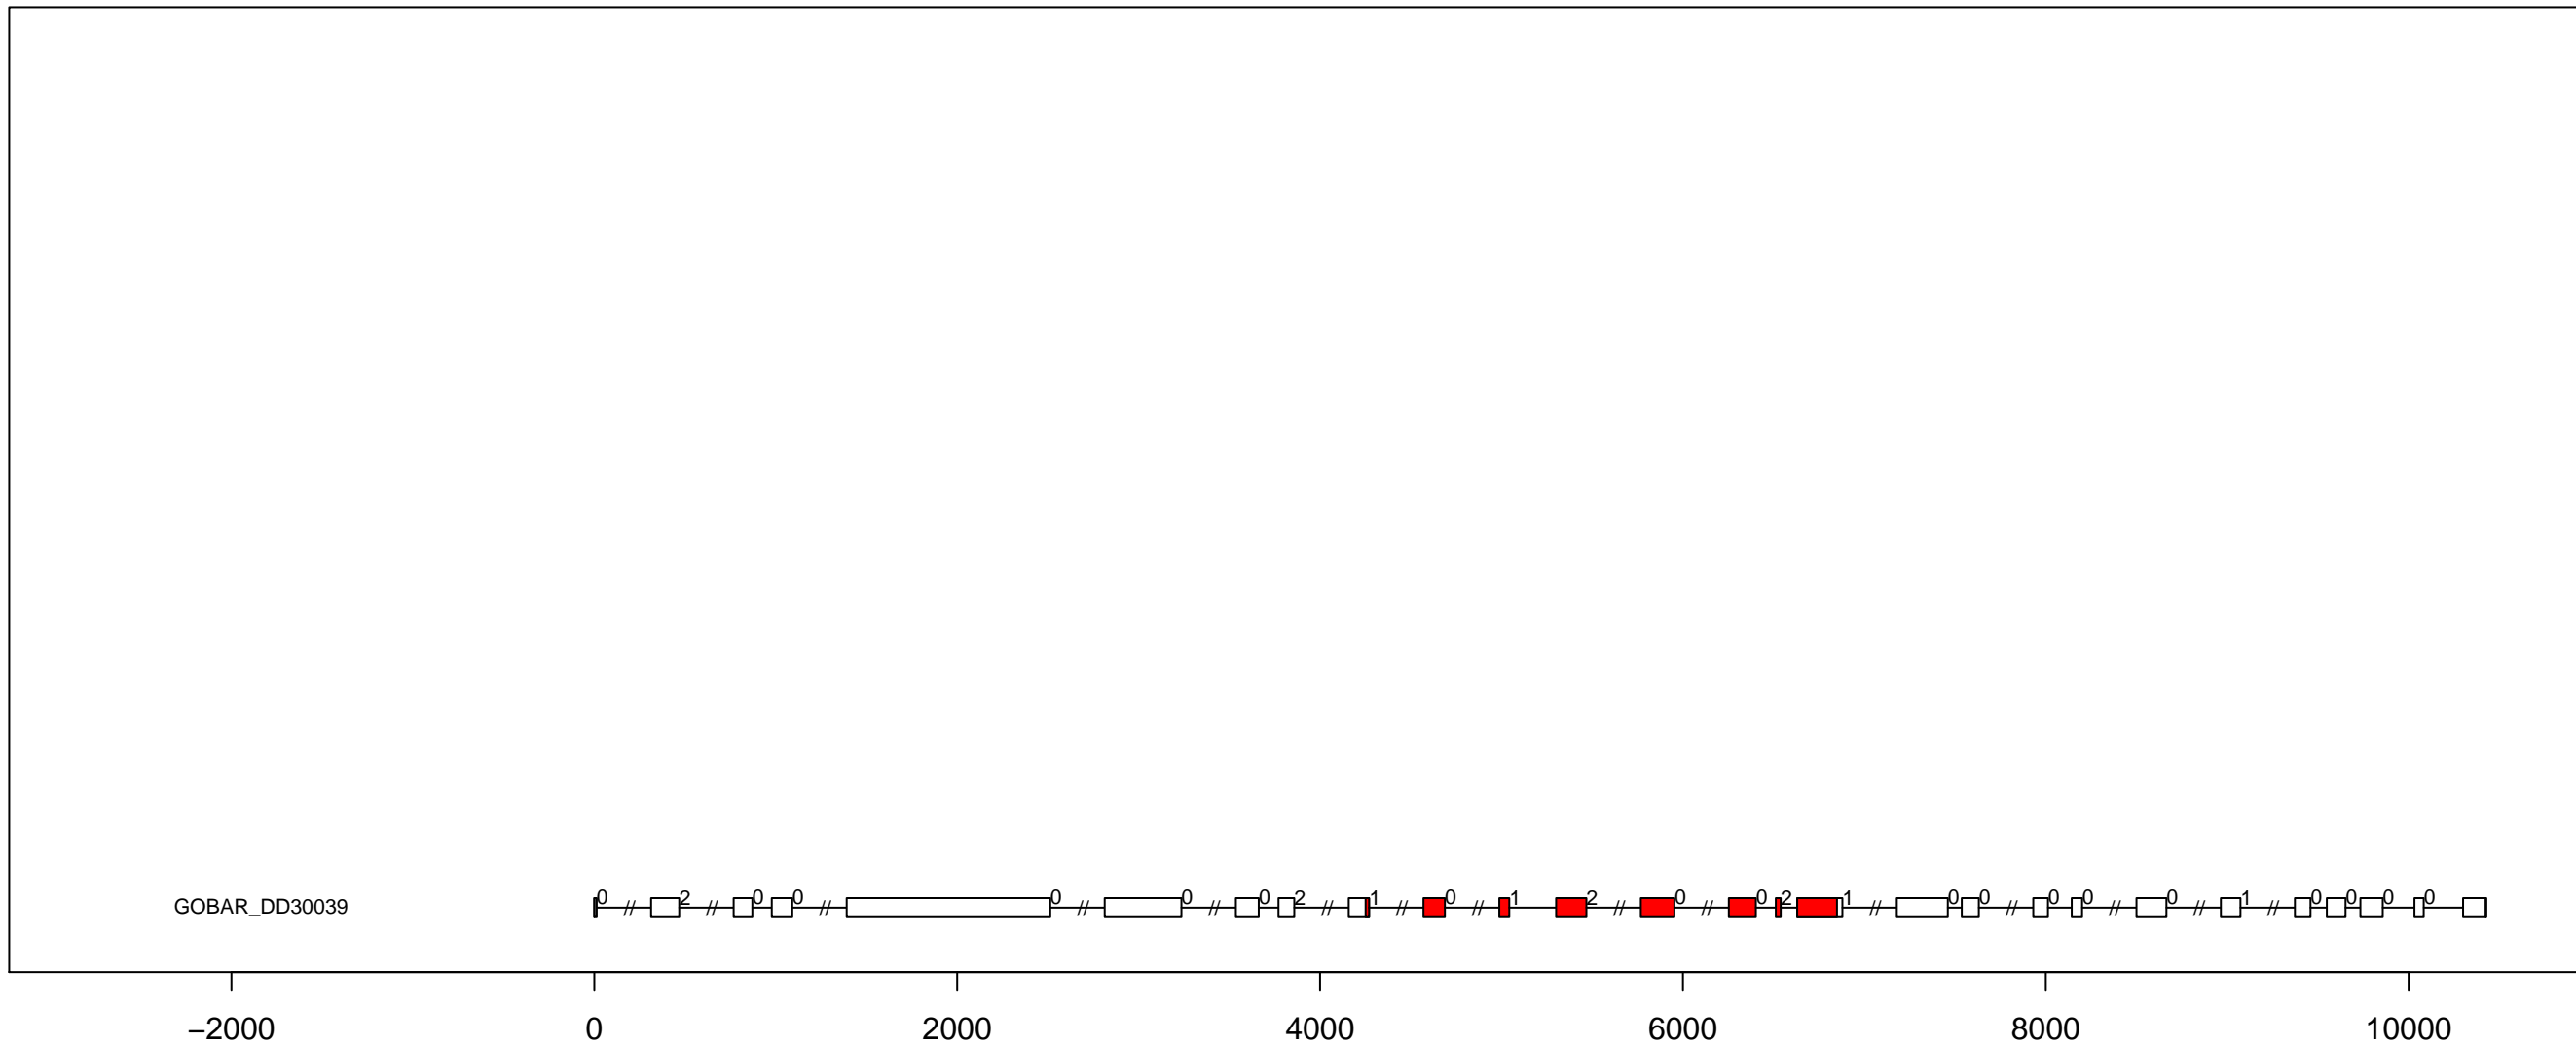

# G.ba PEK\_PEK exon-intron and domain diagram (all)

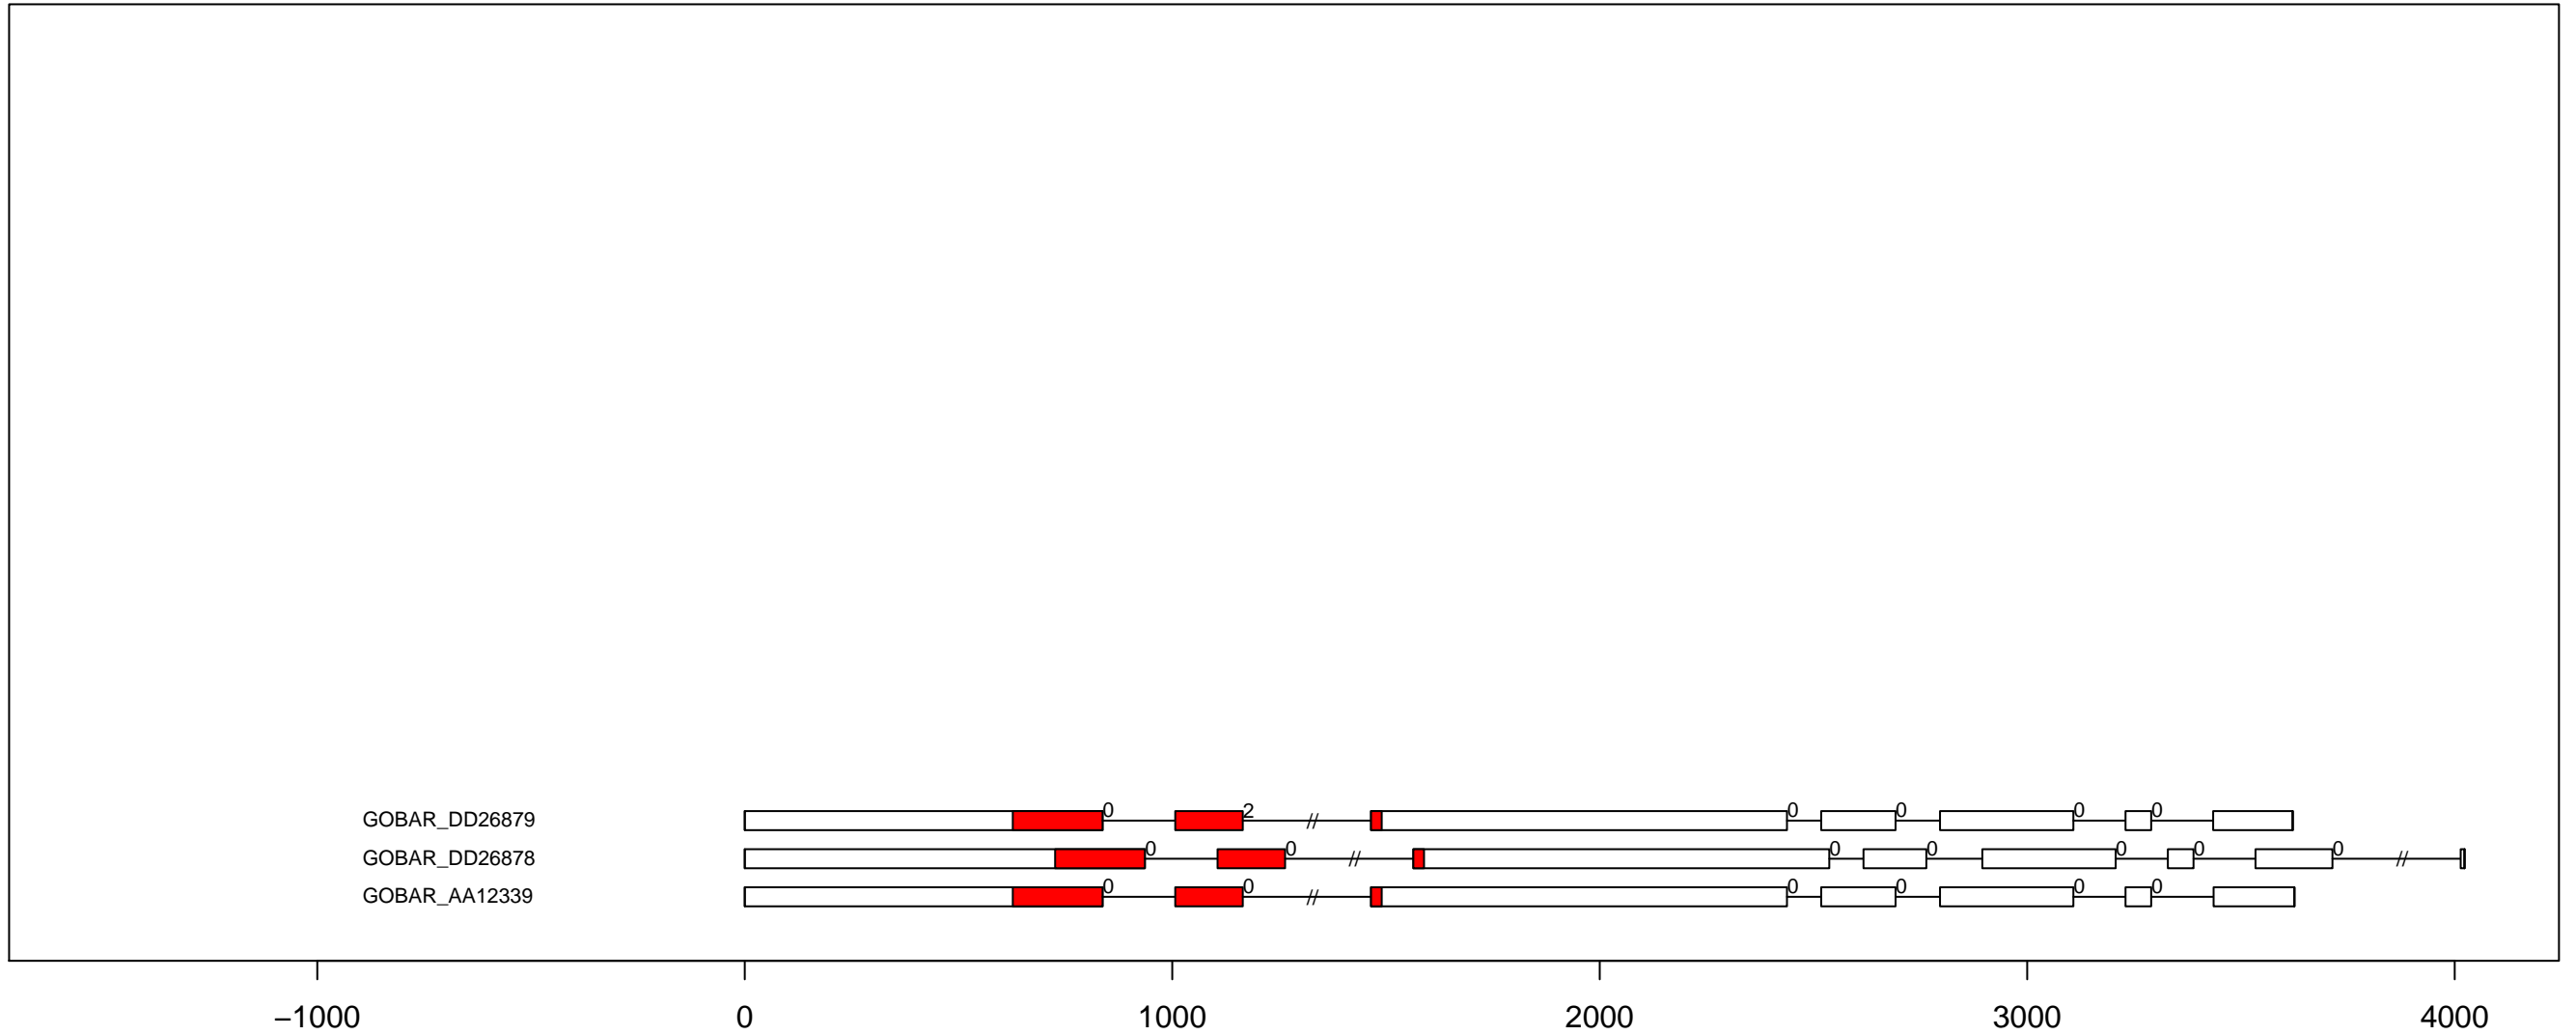

# G.ba RLK-Pelle\_C-LEC exon-intron and domain diagram (all)

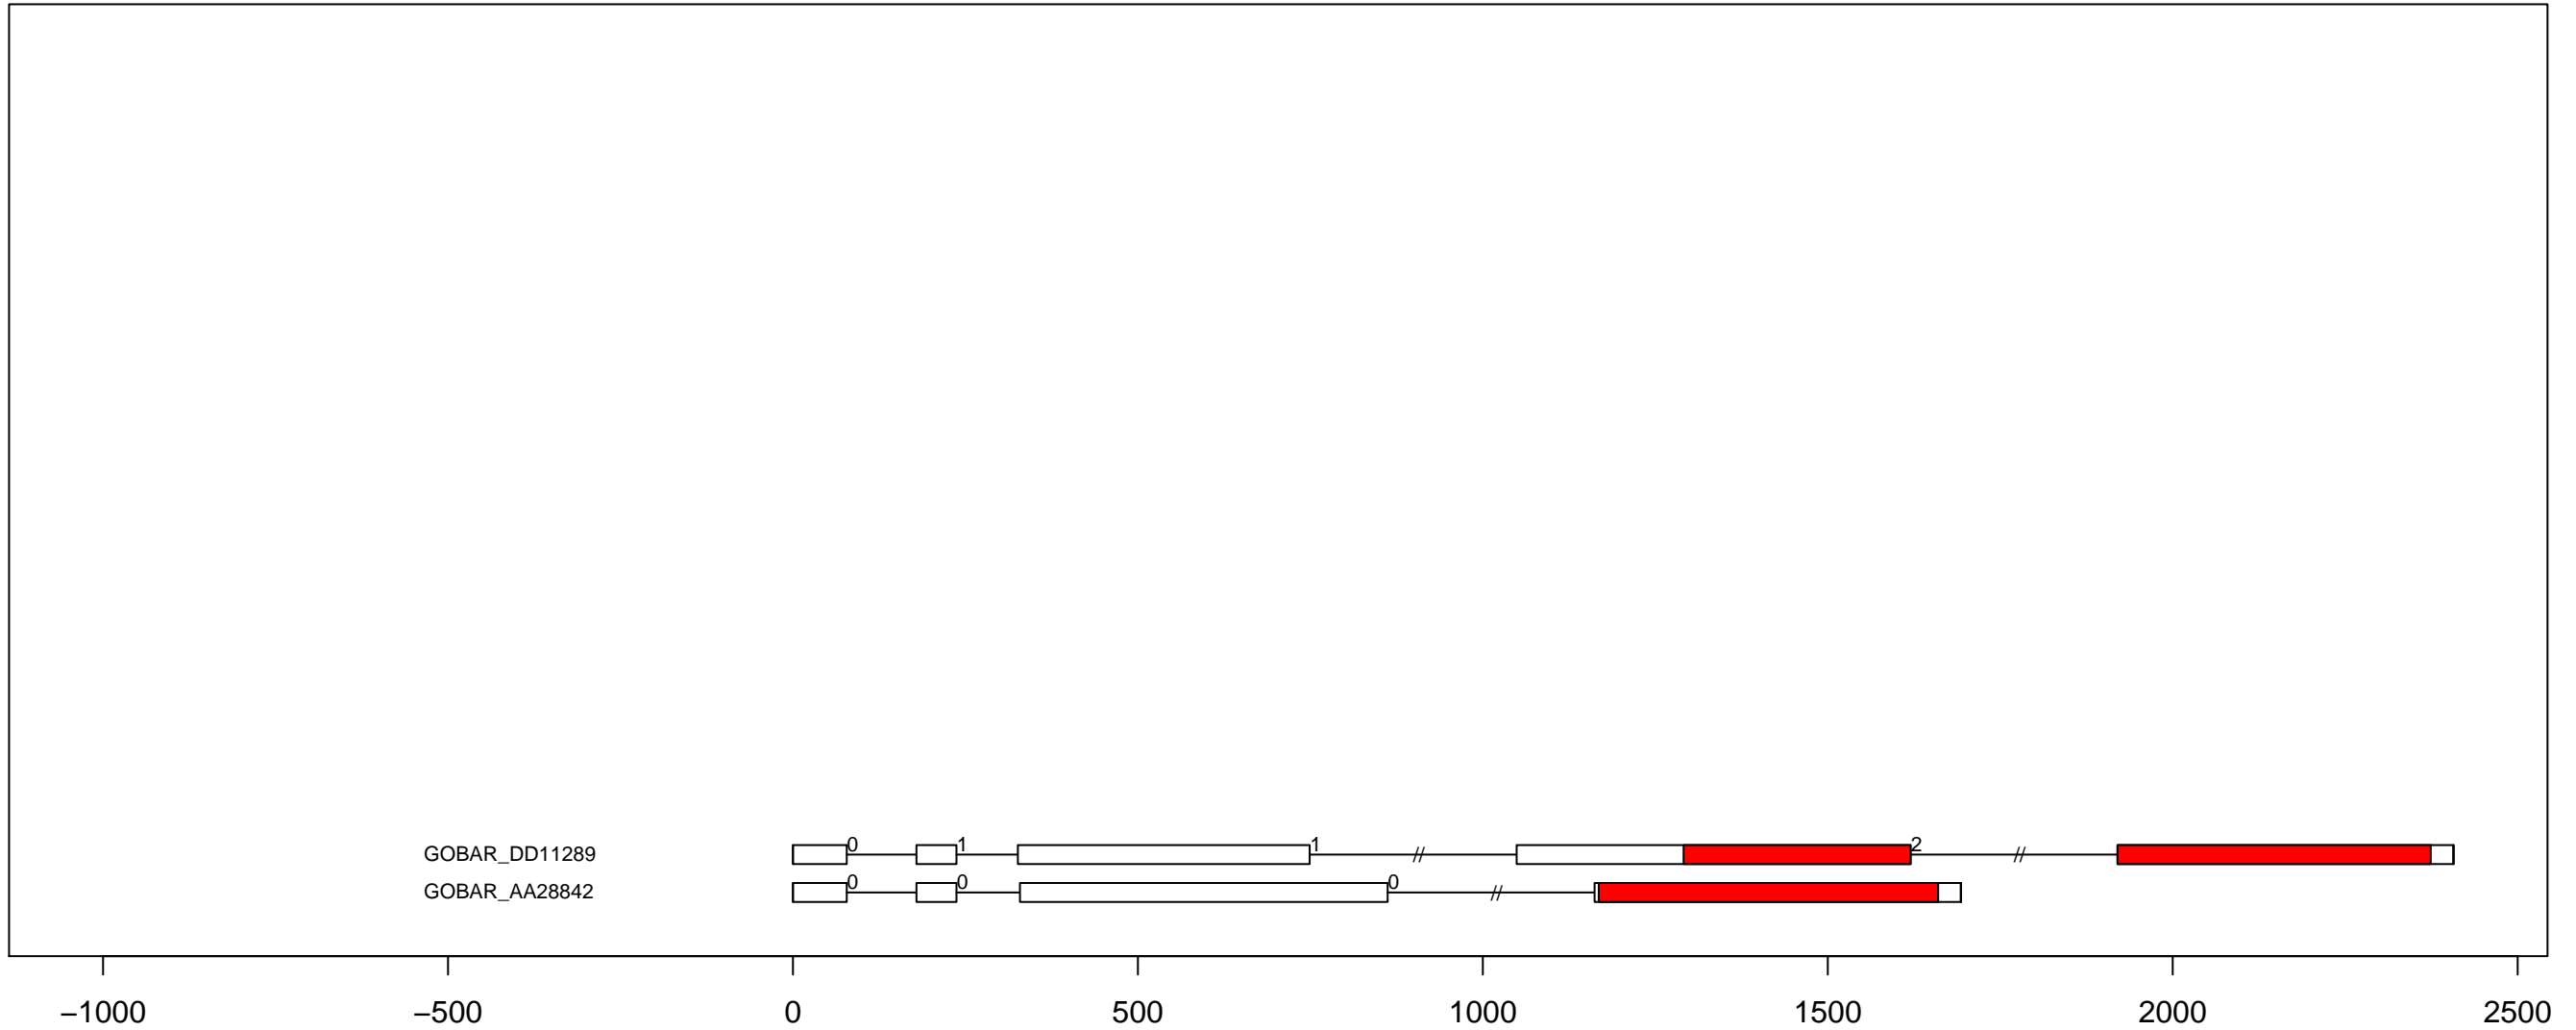

### G.ba RLK-Pelle\_CR4L exon-intron and domain diagram (part 1)

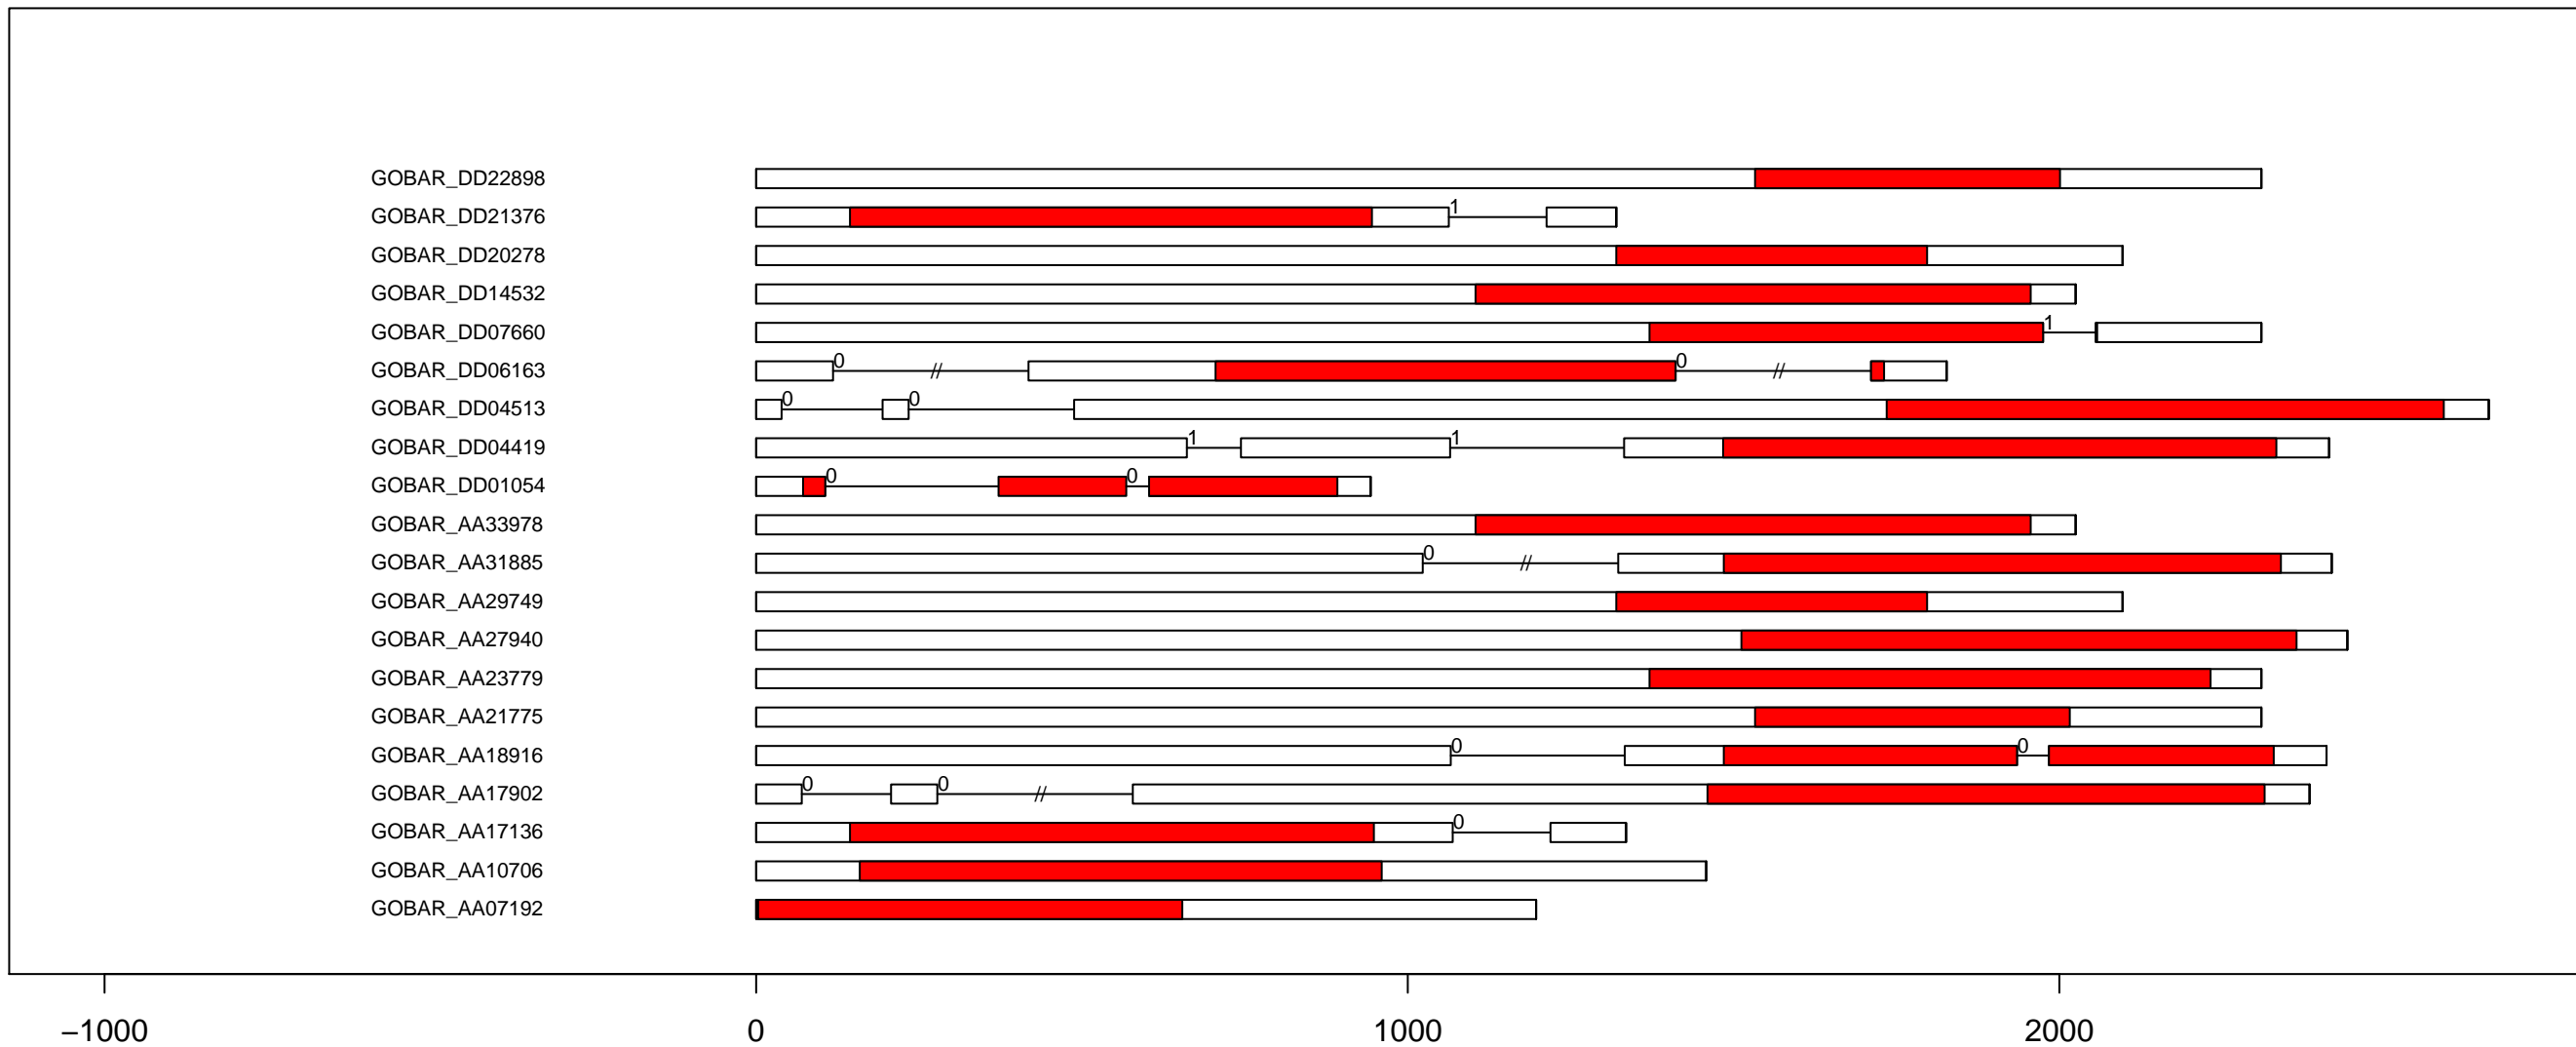

# G.ba RLK-Pelle\_CR4L exon-intron and domain diagram (part 2)

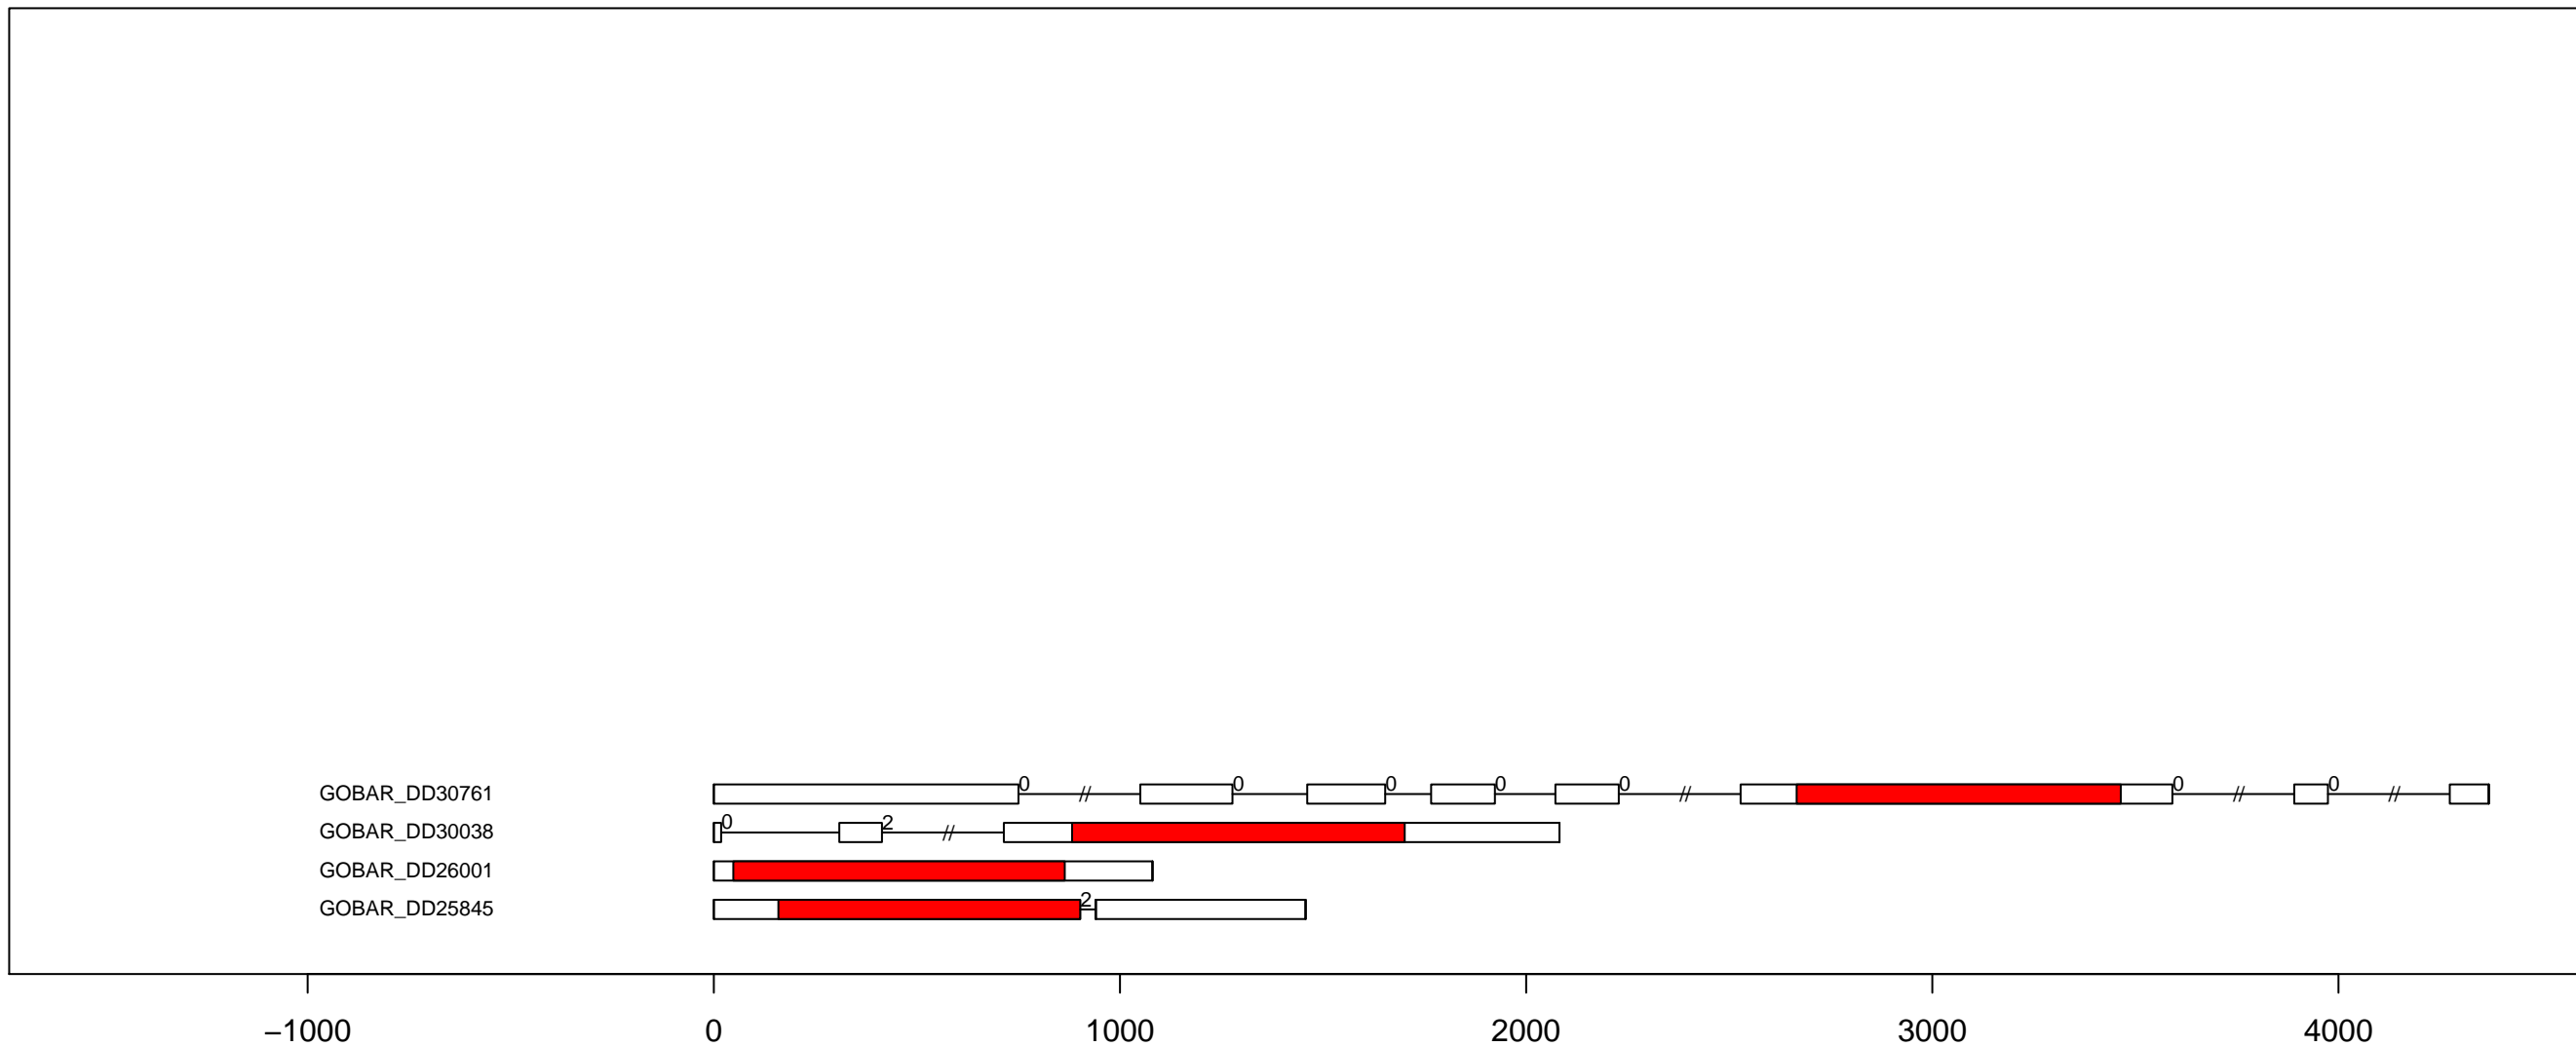

### G.ba RLK-Pelle\_CrRLK1L-1 exon-intron and domain diagram (part 1)

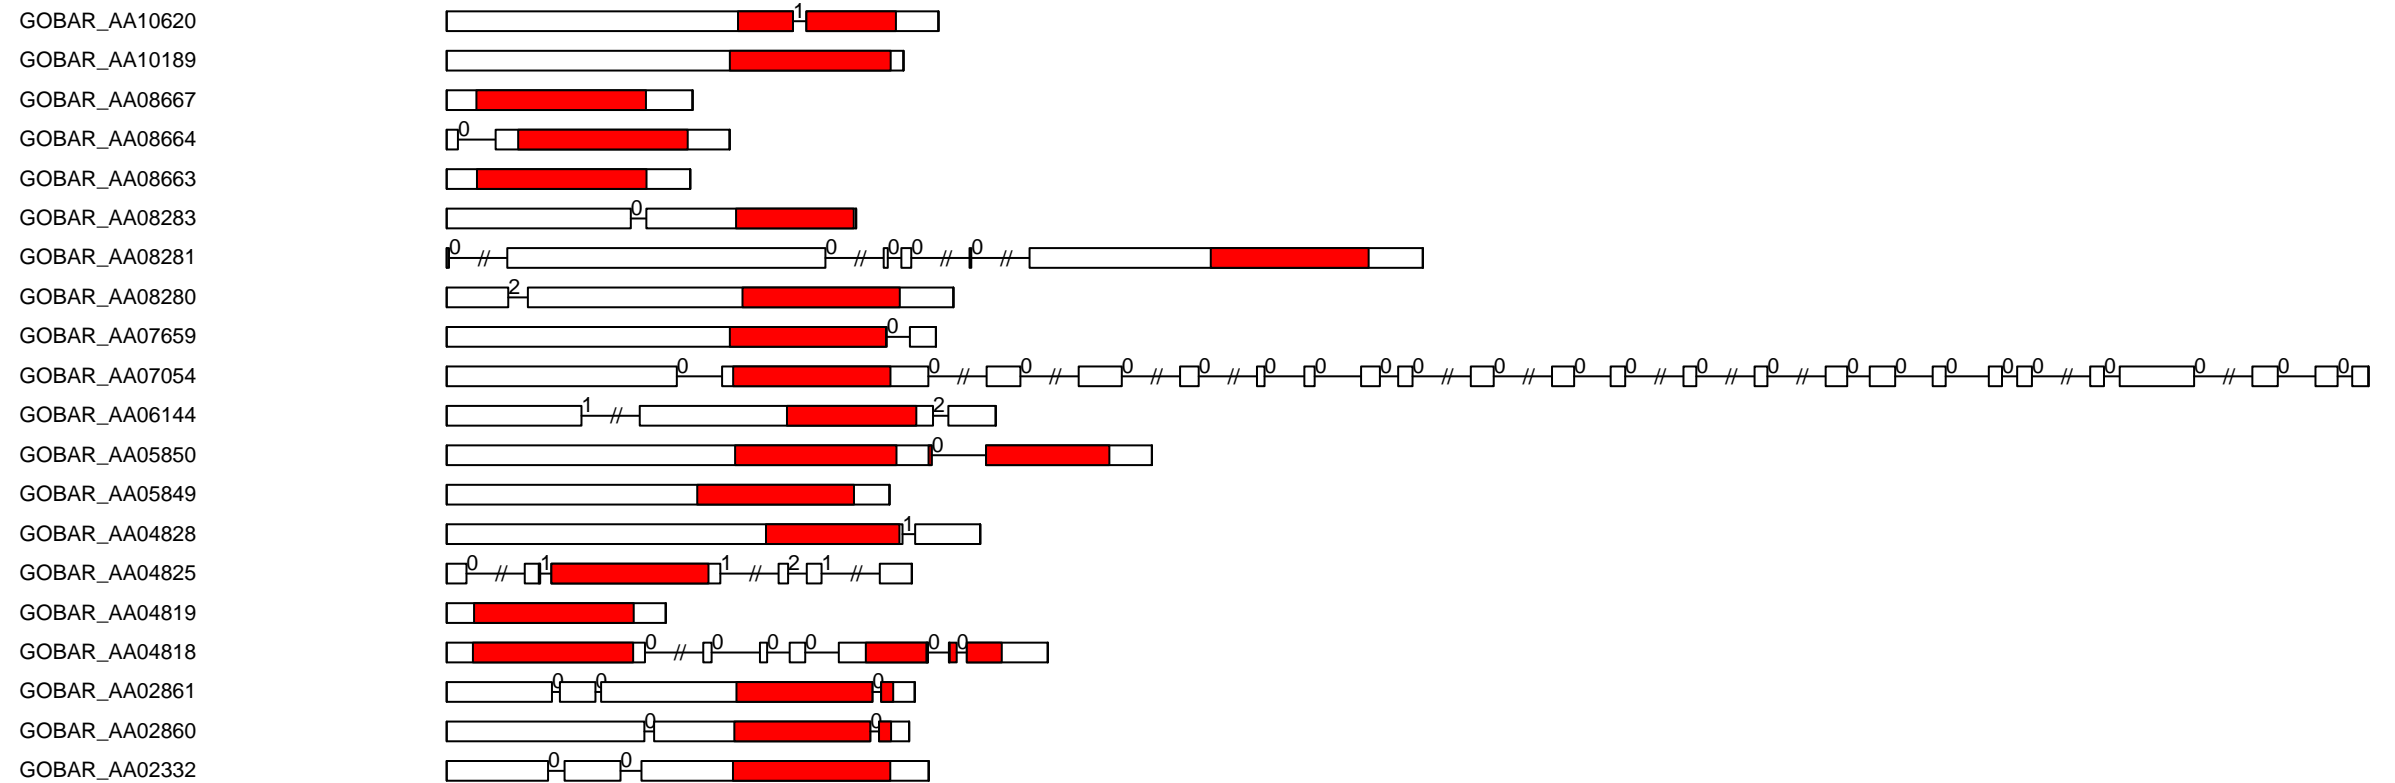



### G.ba RLK-Pelle\_CrRLK1L-1 exon-intron and domain diagram (part 3)

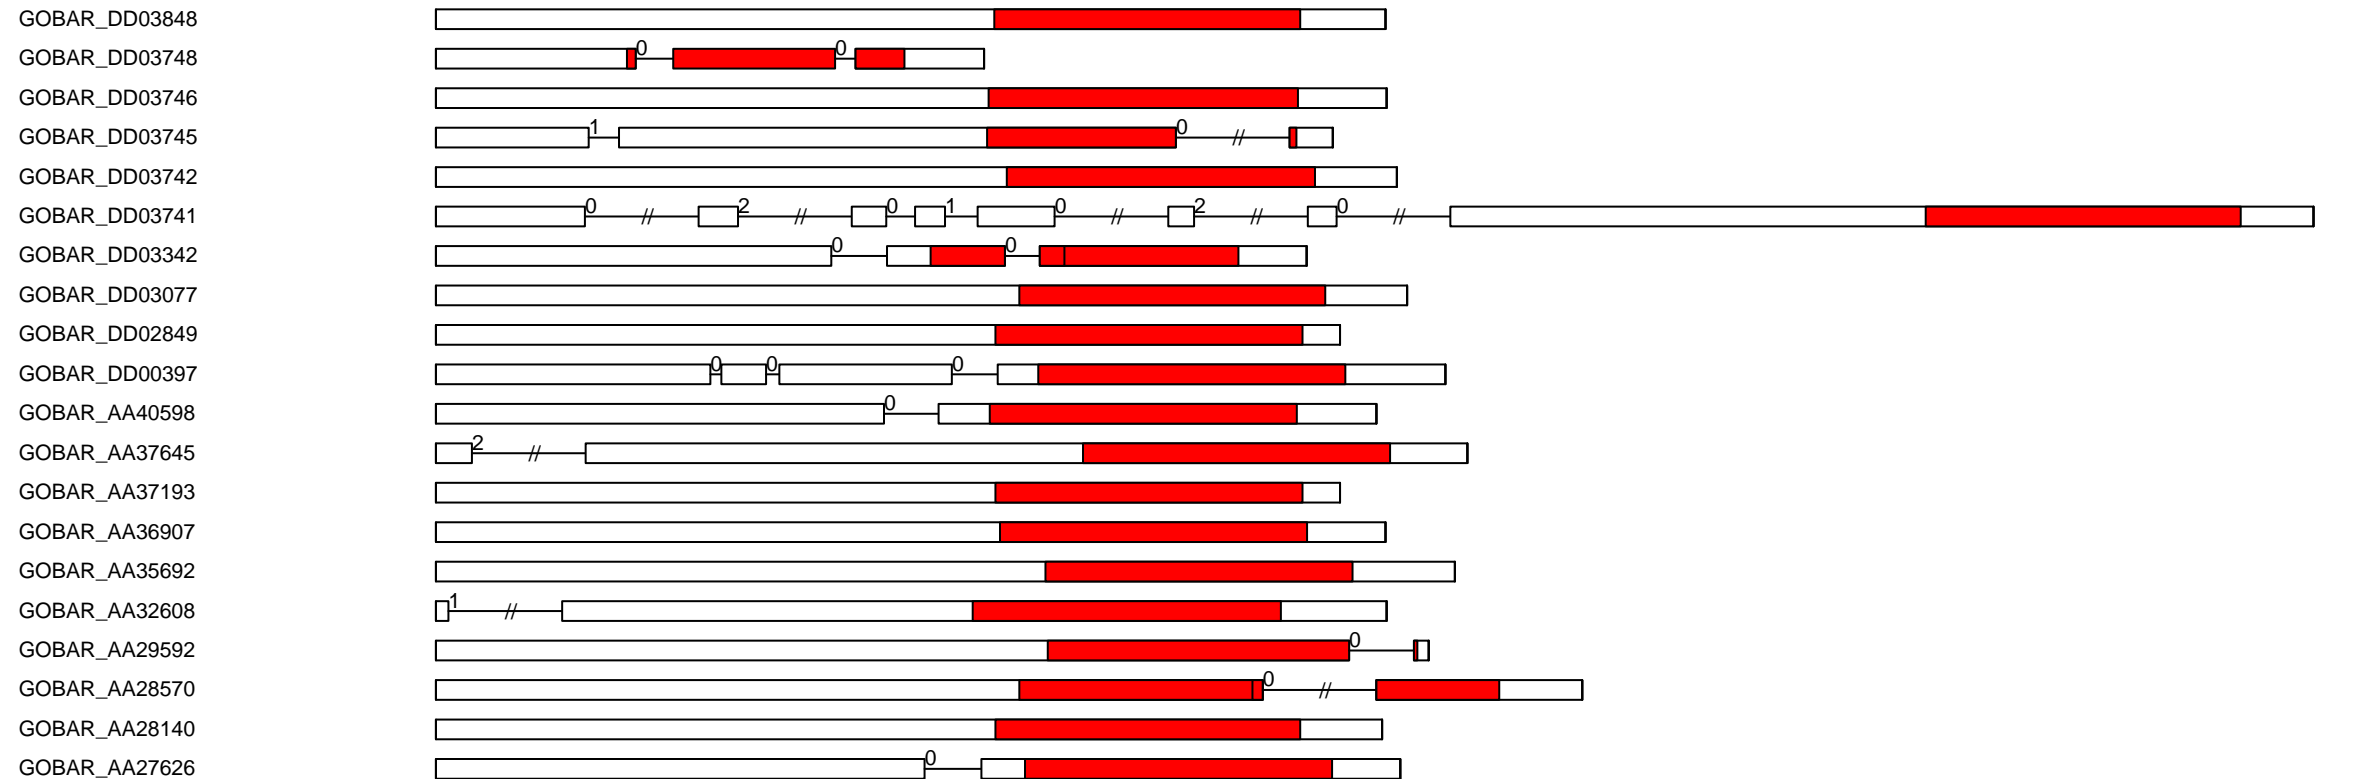



### G.ba RLK-Pelle\_CrRLK1L-1 exon-intron and domain diagram (part 4)

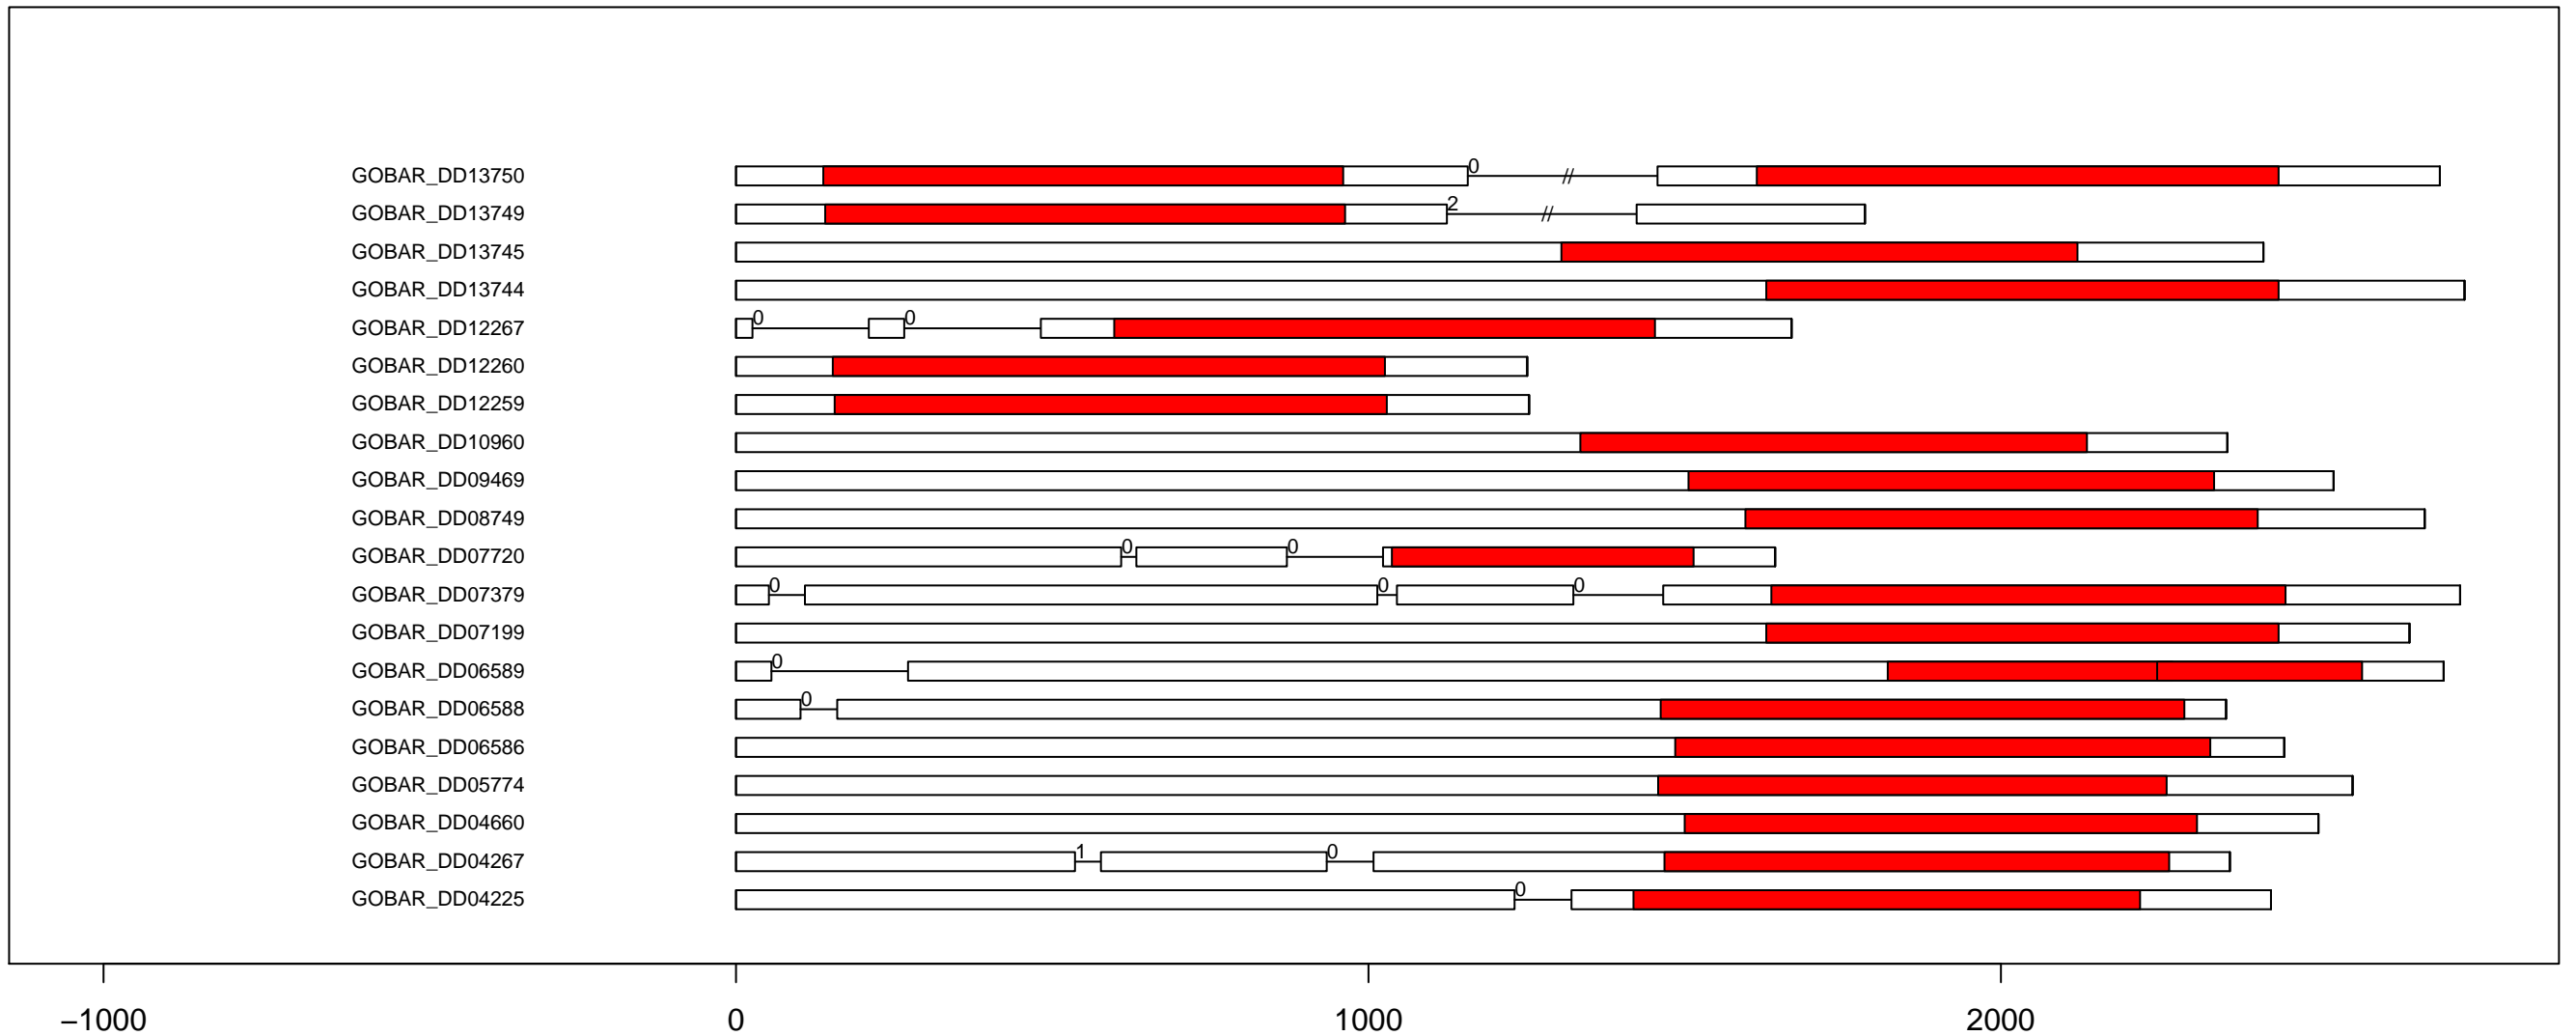

### G.ba RLK-Pelle\_CrRLK1L-1 exon-intron and domain diagram (part 5)

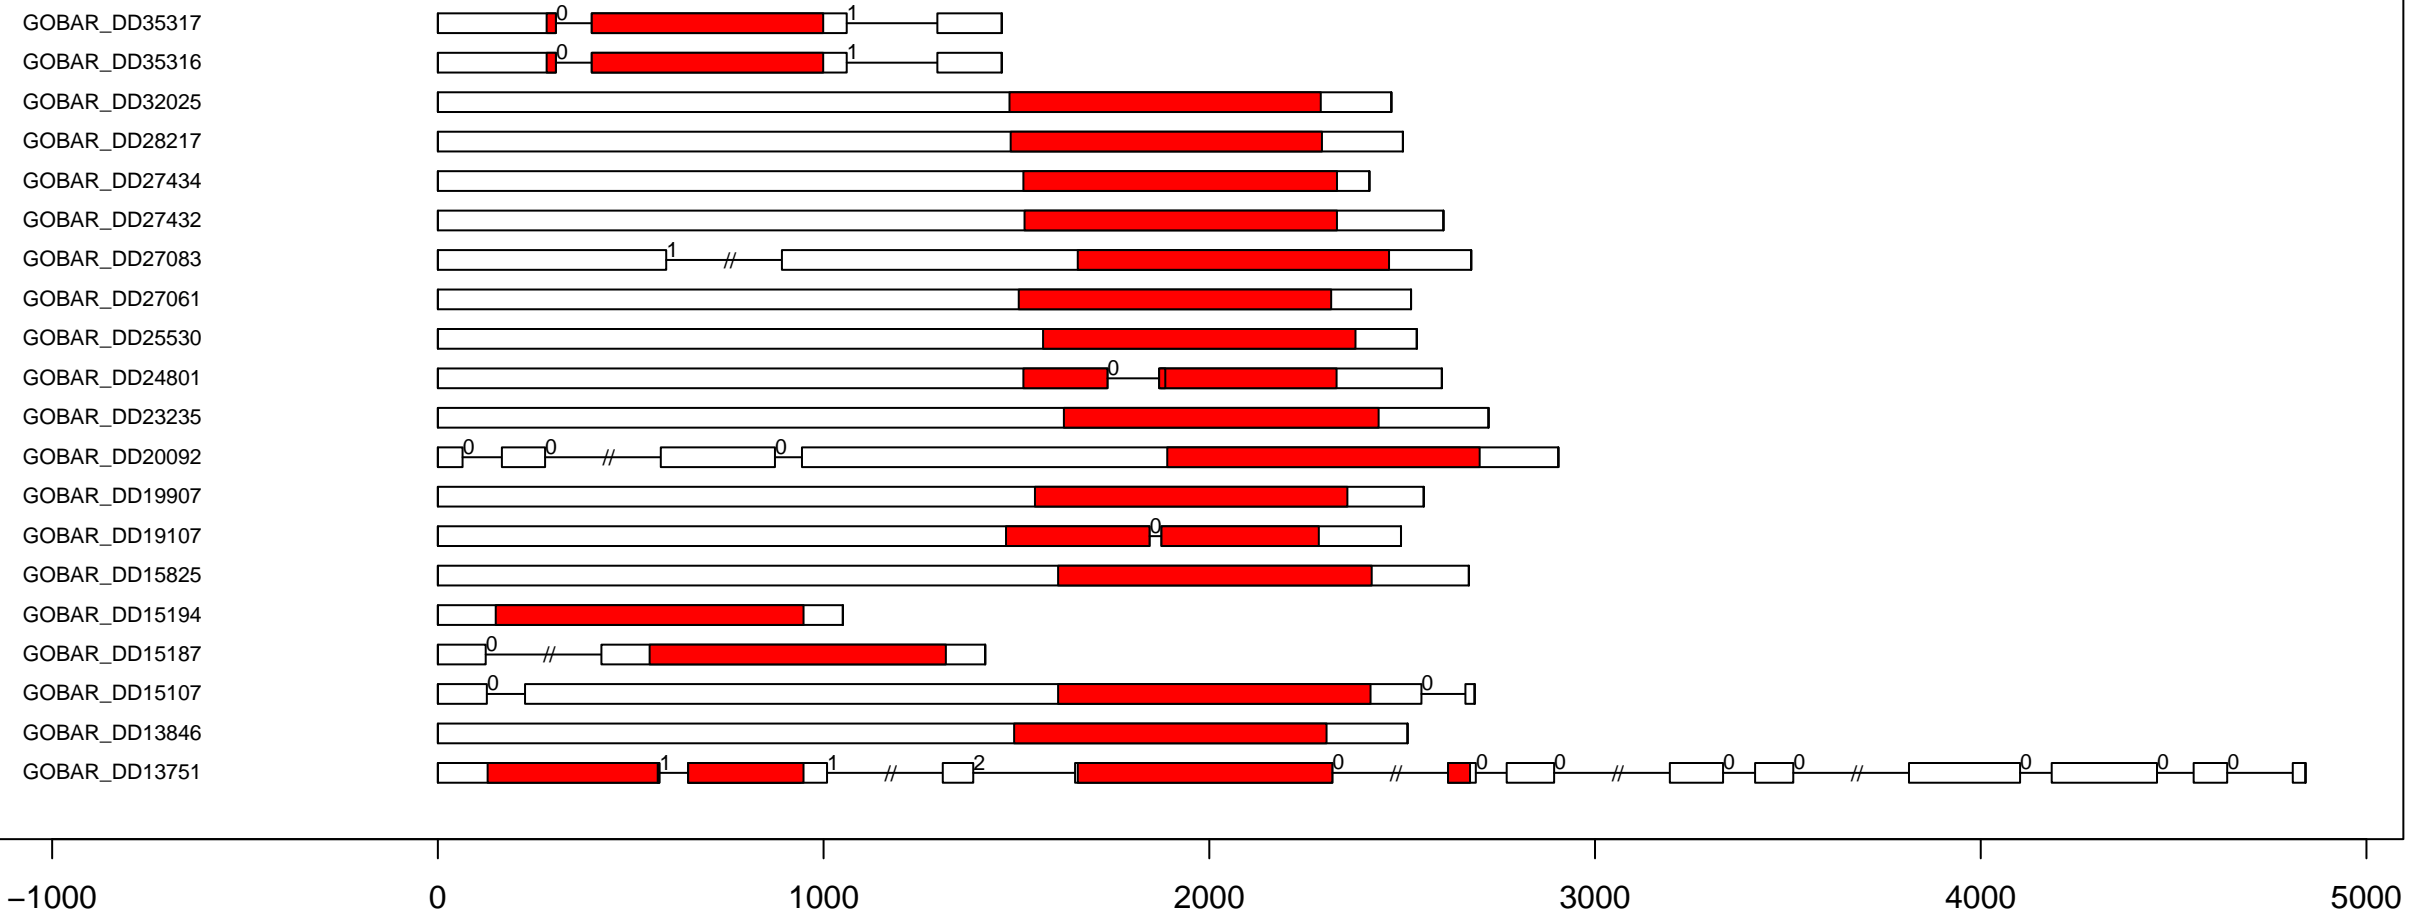

# G.ba RLK-Pelle\_CrRLK1L-1 exon-intron and domain diagram (part 6)

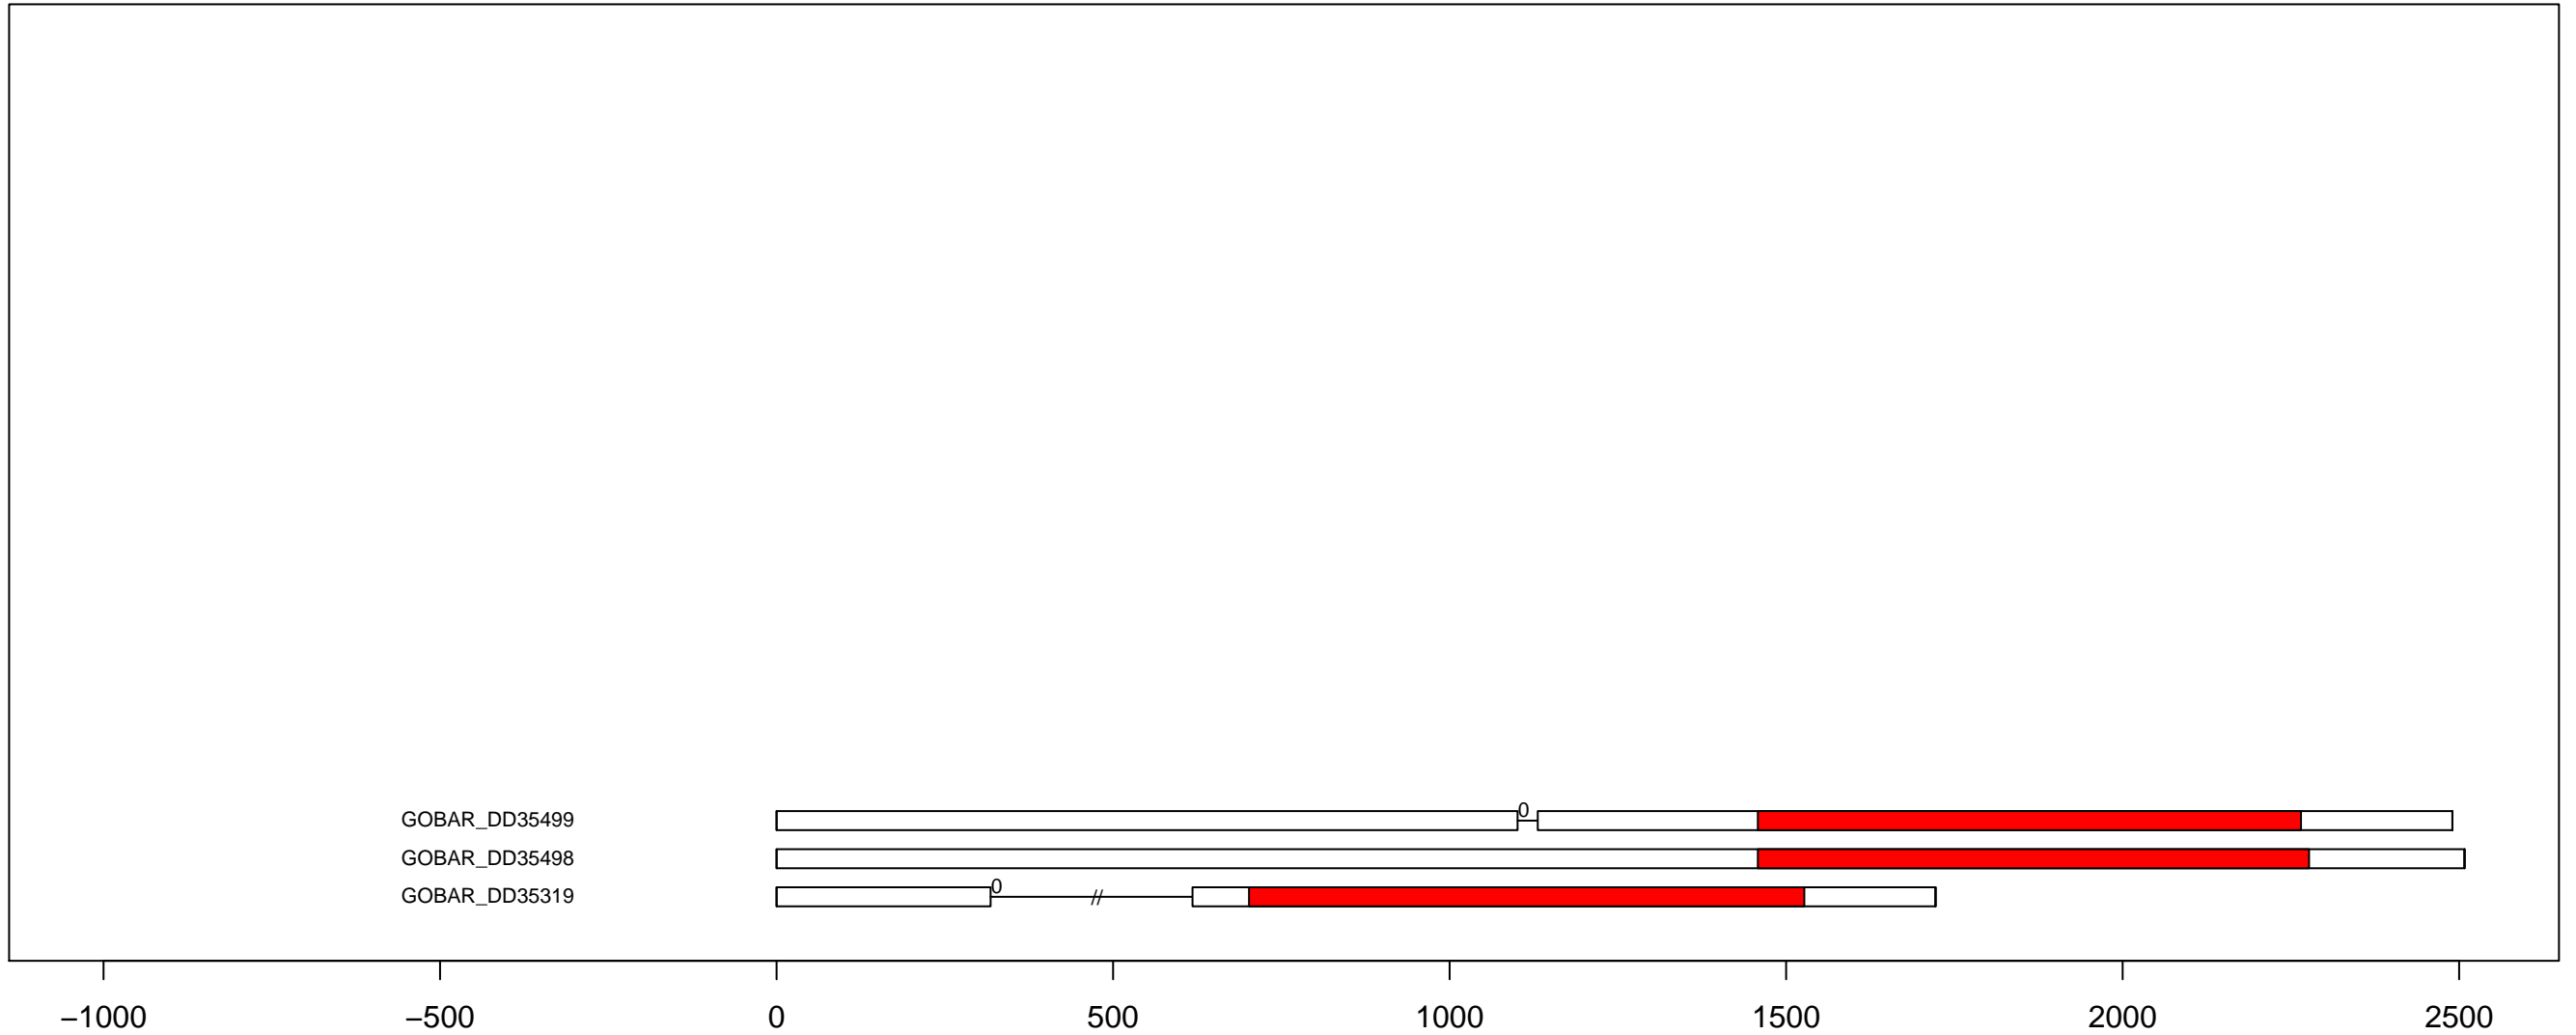

### G.ba RLK-Pelle\_DLSV exon-intron and domain diagram (part 1)

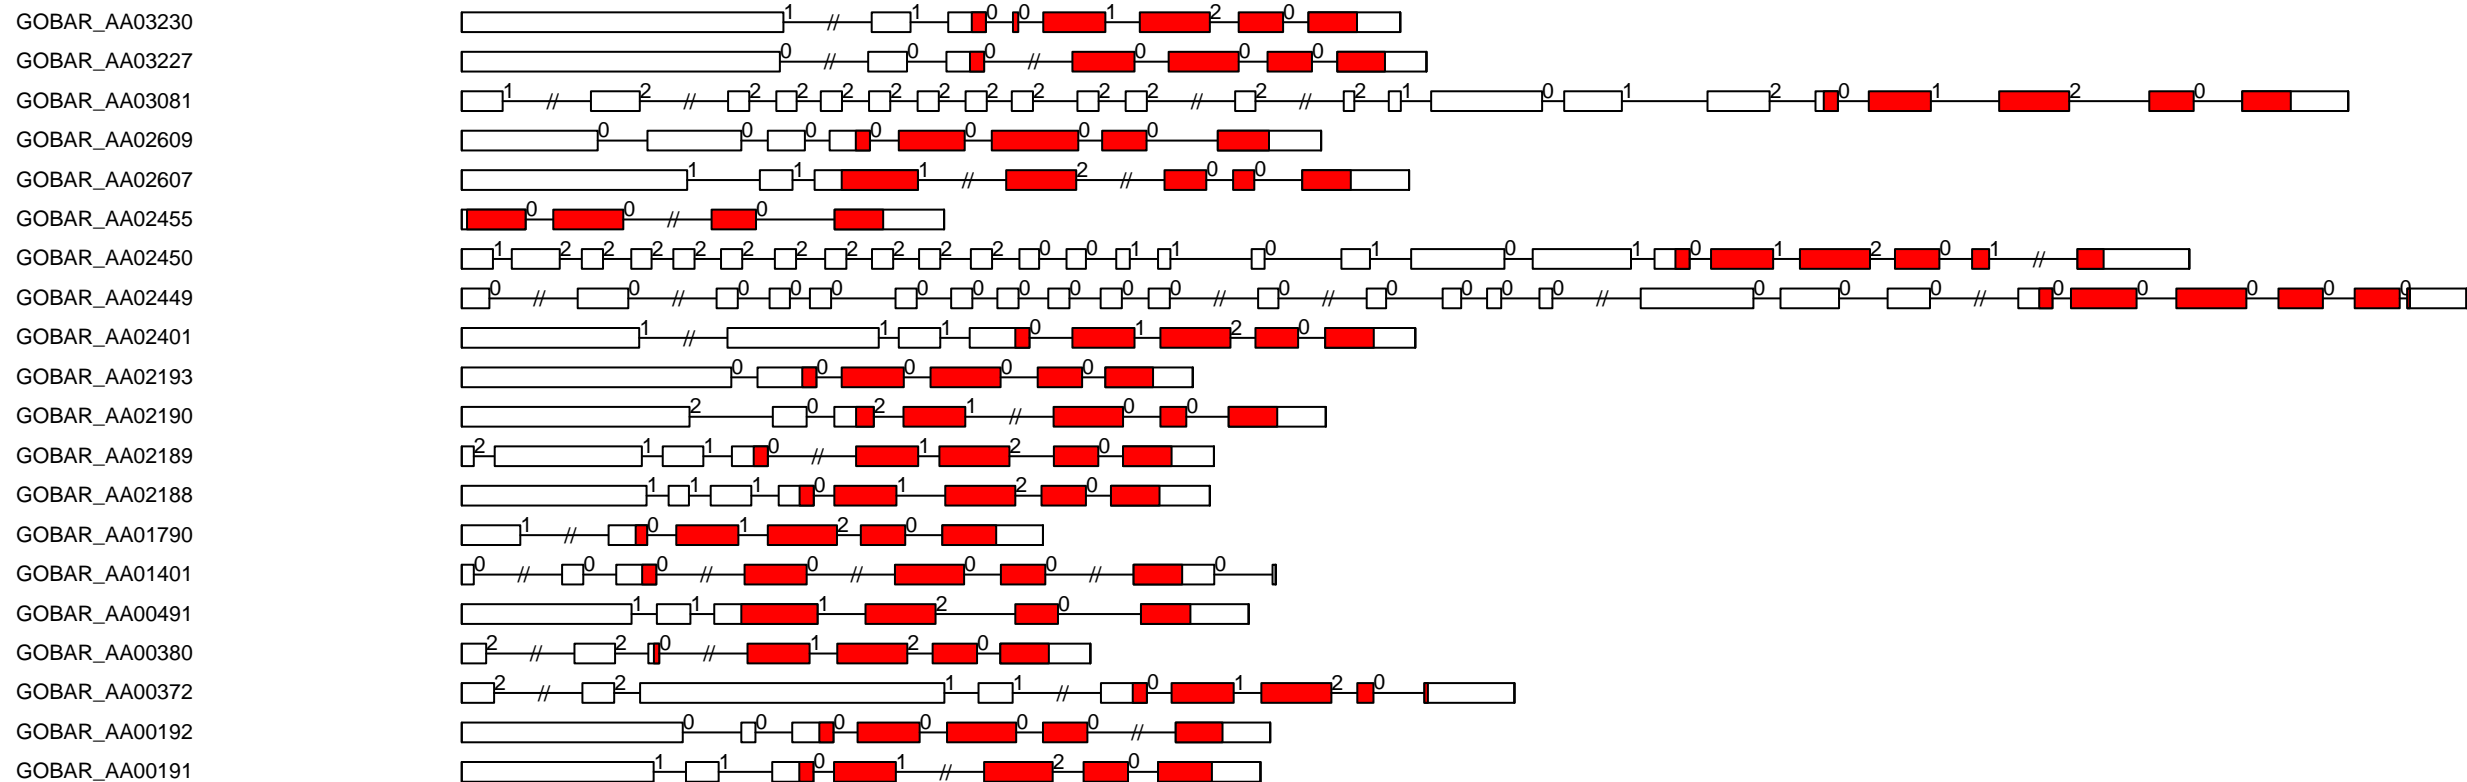

# G.ba RLK-Pelle\_DLSV exon-intron and domain diagram (part 2)

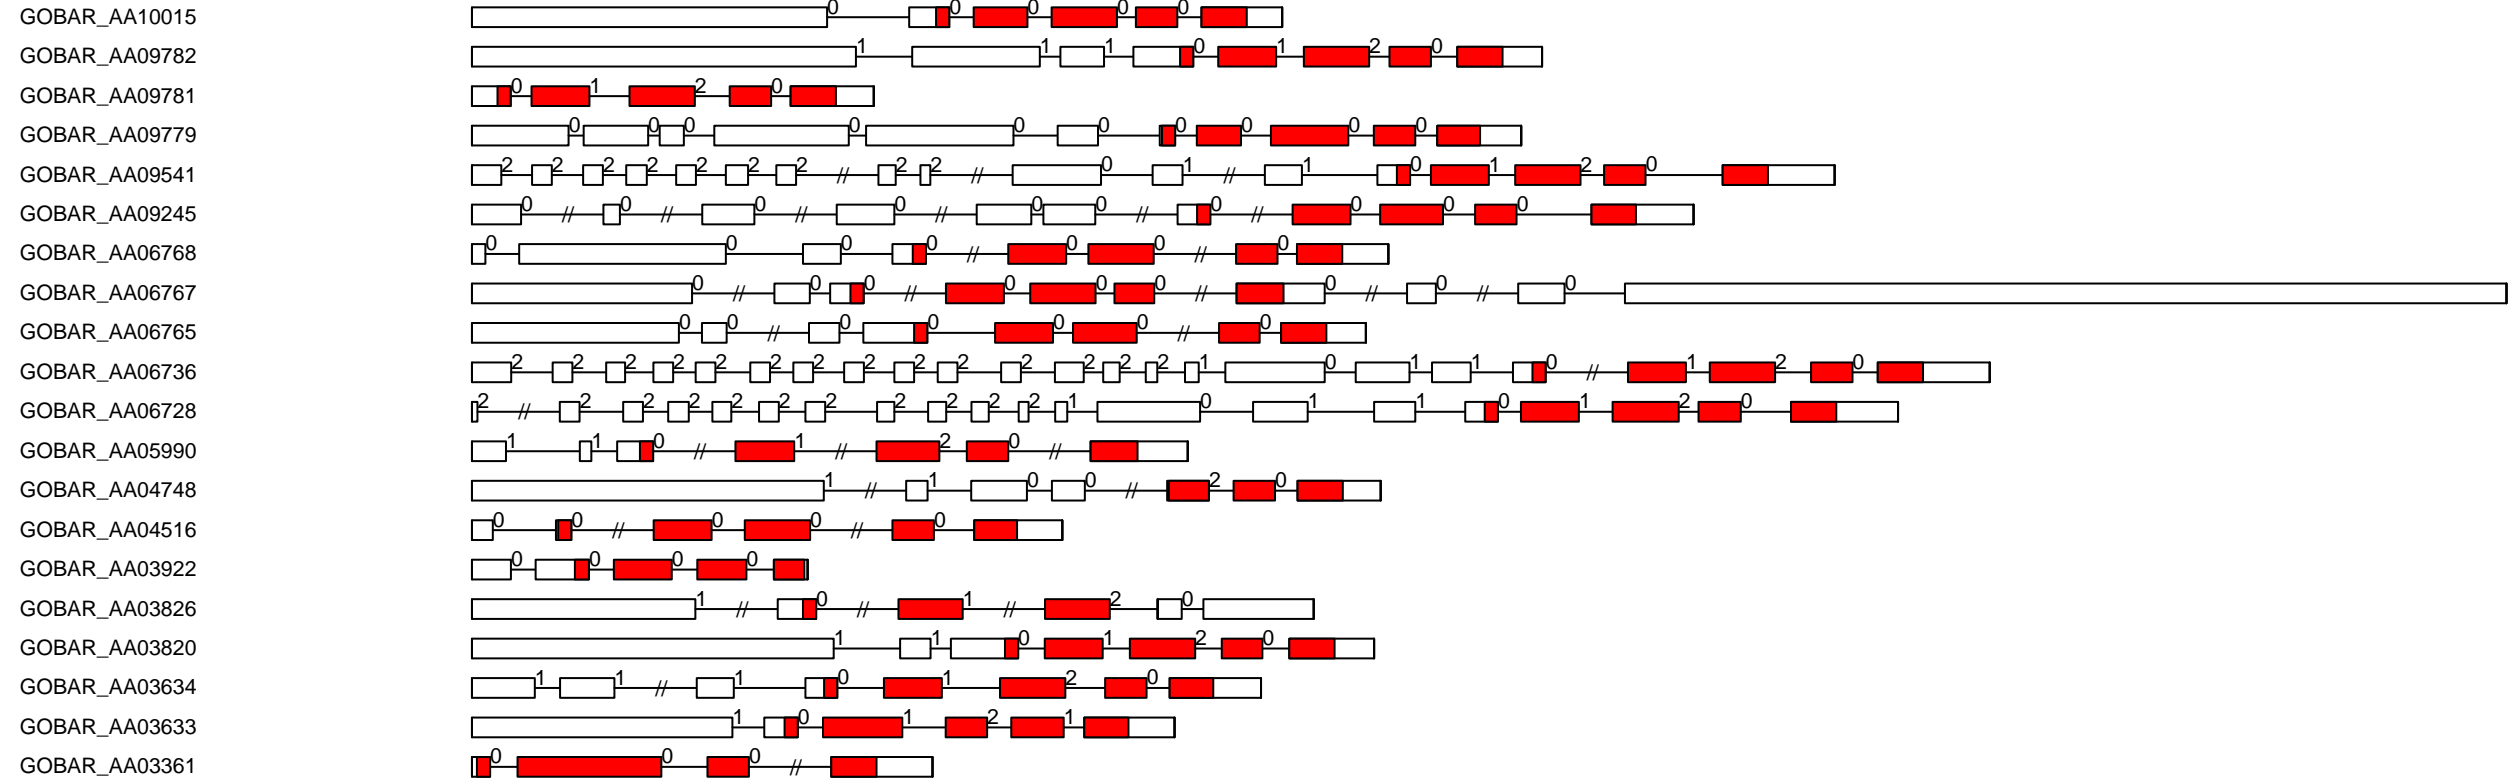



### G.ba RLK-Pelle\_DLSV exon-intron and domain diagram (part 4)

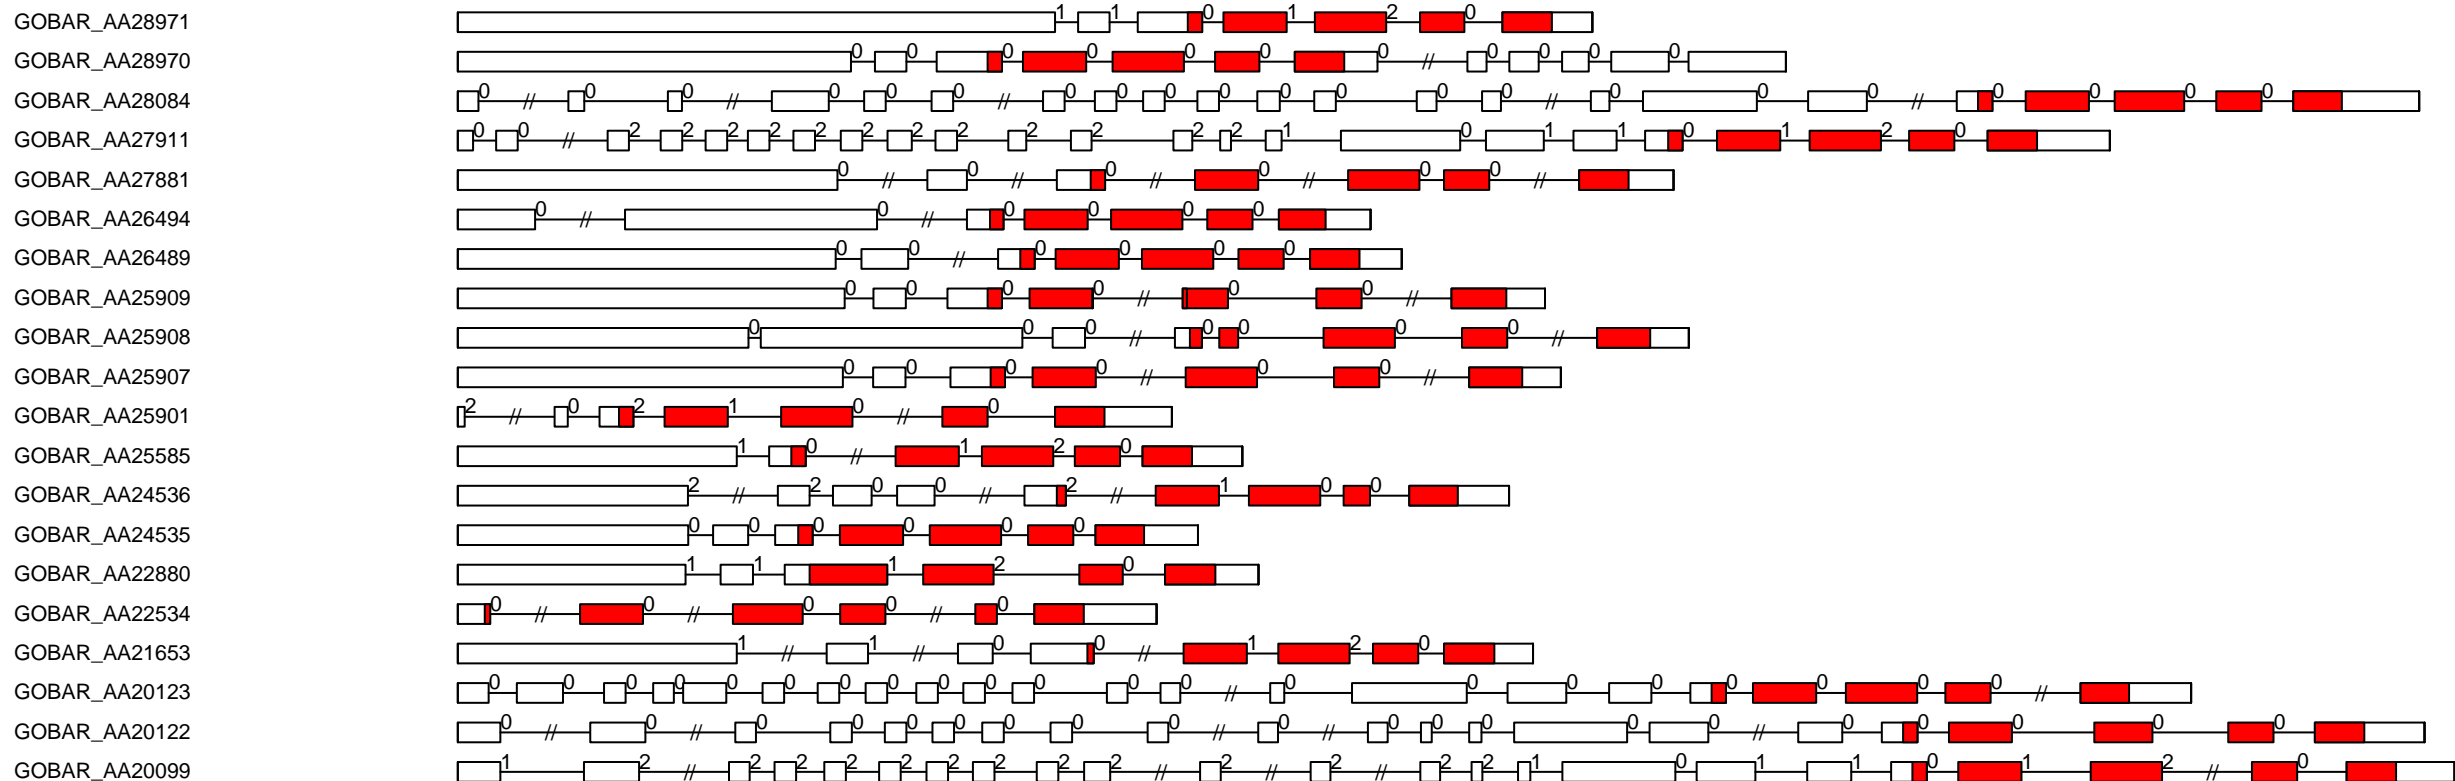

### G.ba RLK-Pelle\_DLSV exon-intron and domain diagram (part 5)

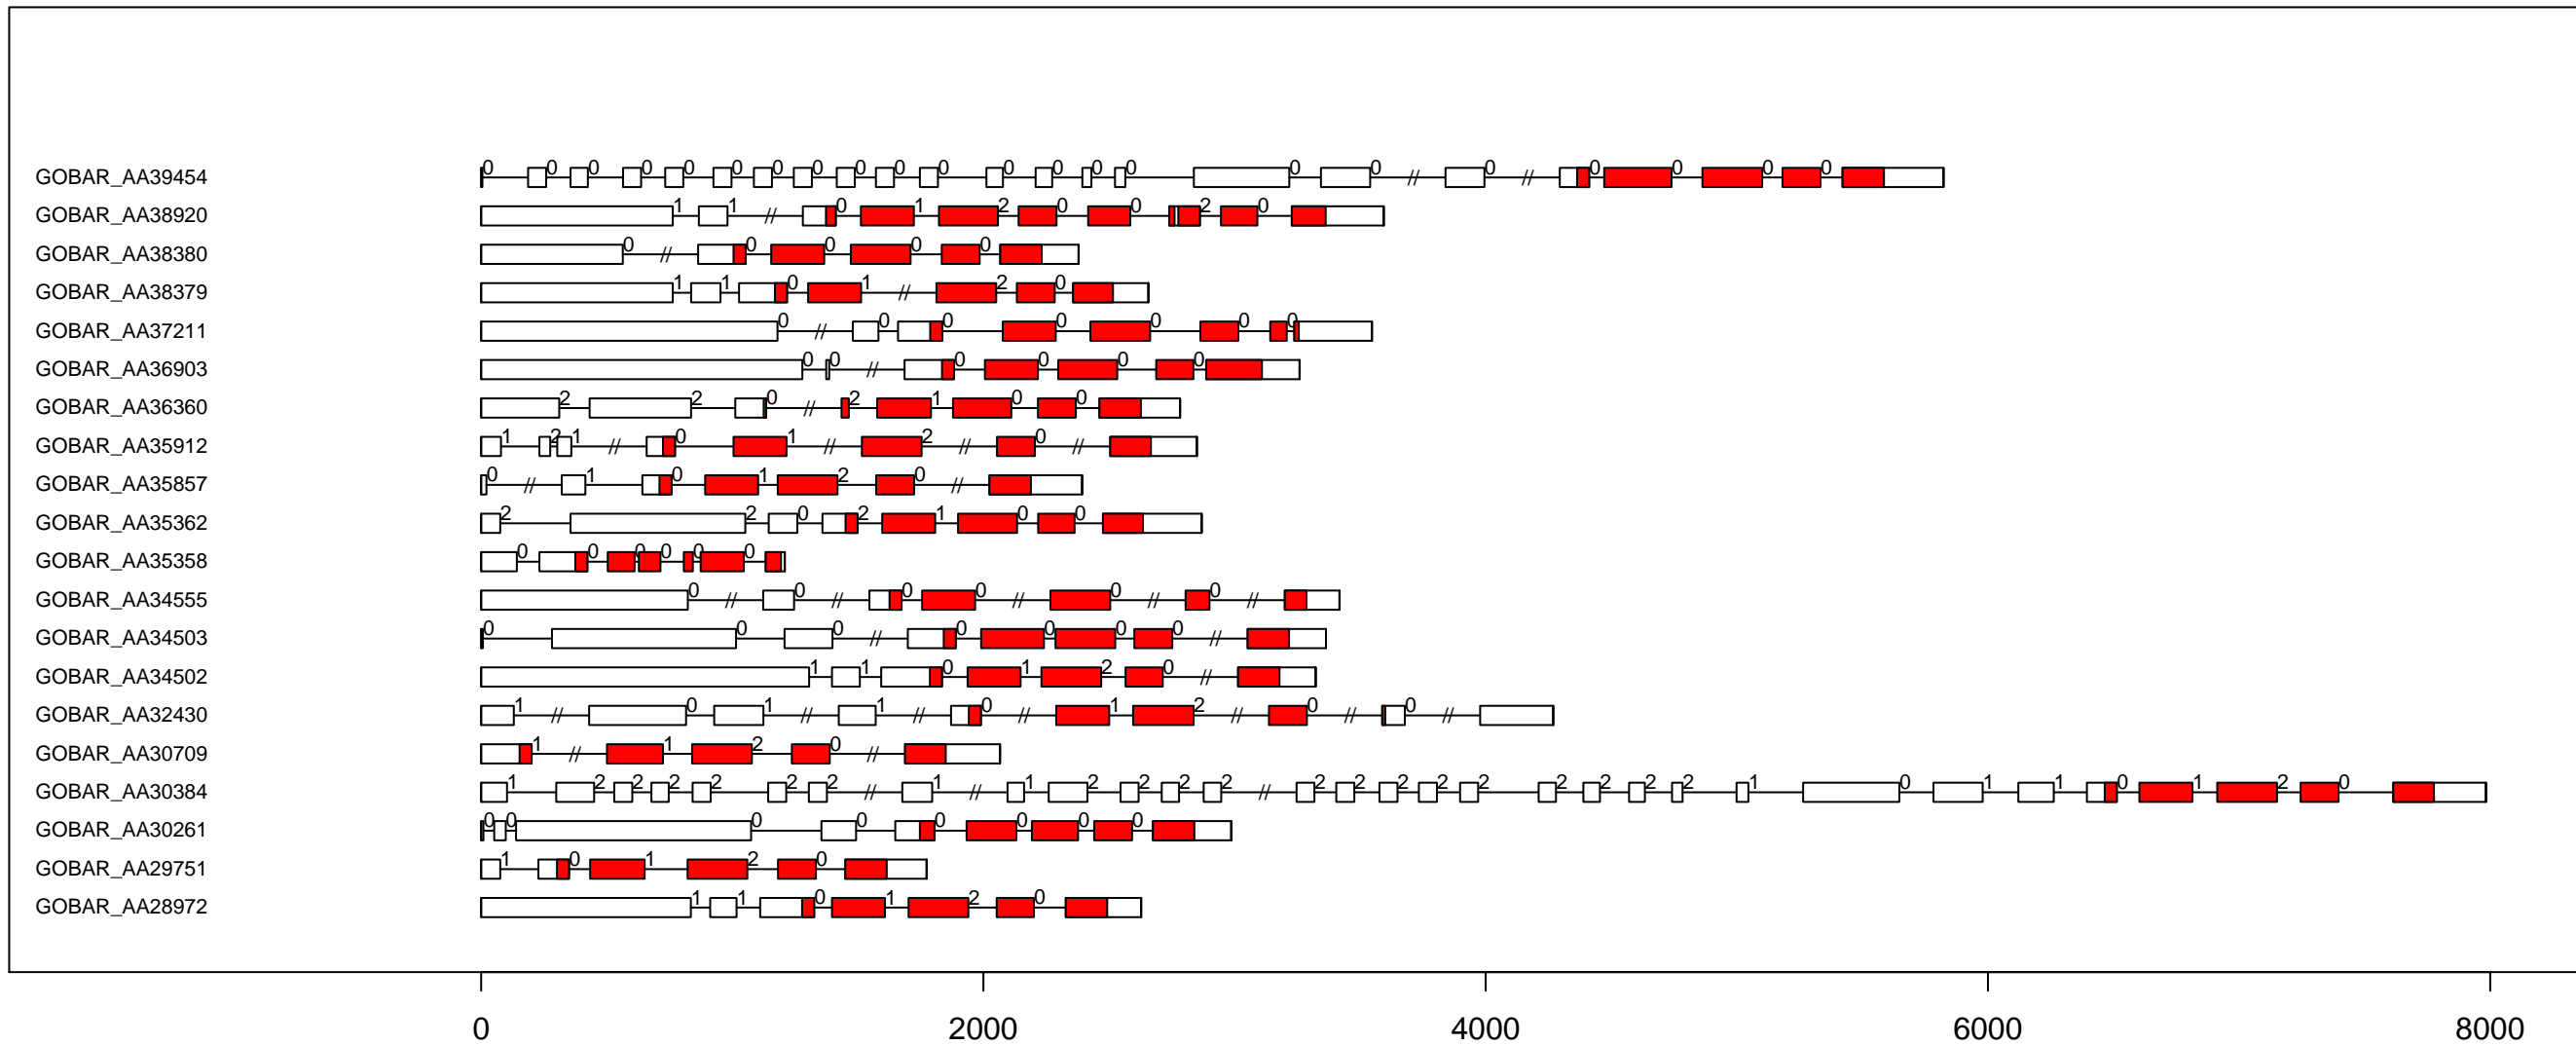



# G.ba RLK-Pelle\_DLSV exon-intron and domain diagram (part 6)

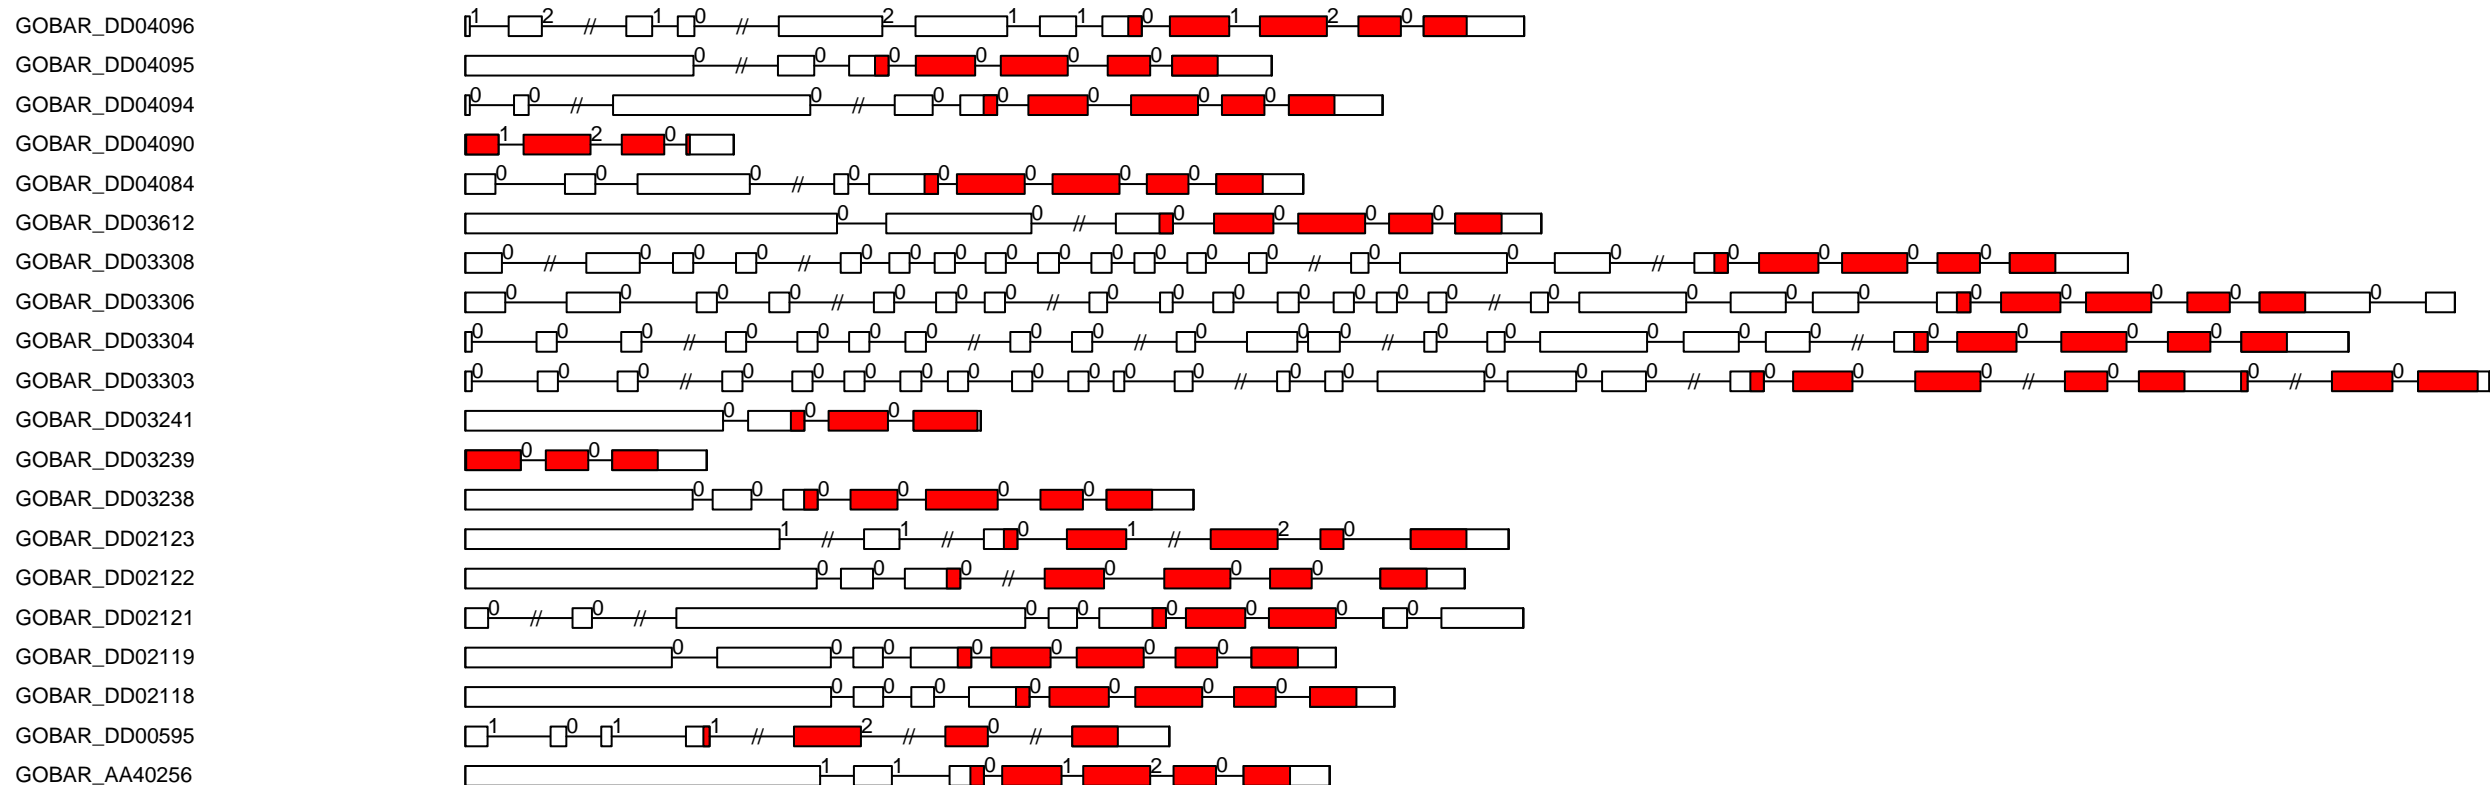

0

2000

4000

6000

### G.ba RLK-Pelle\_DLSV exon-intron and domain diagram (part 7)

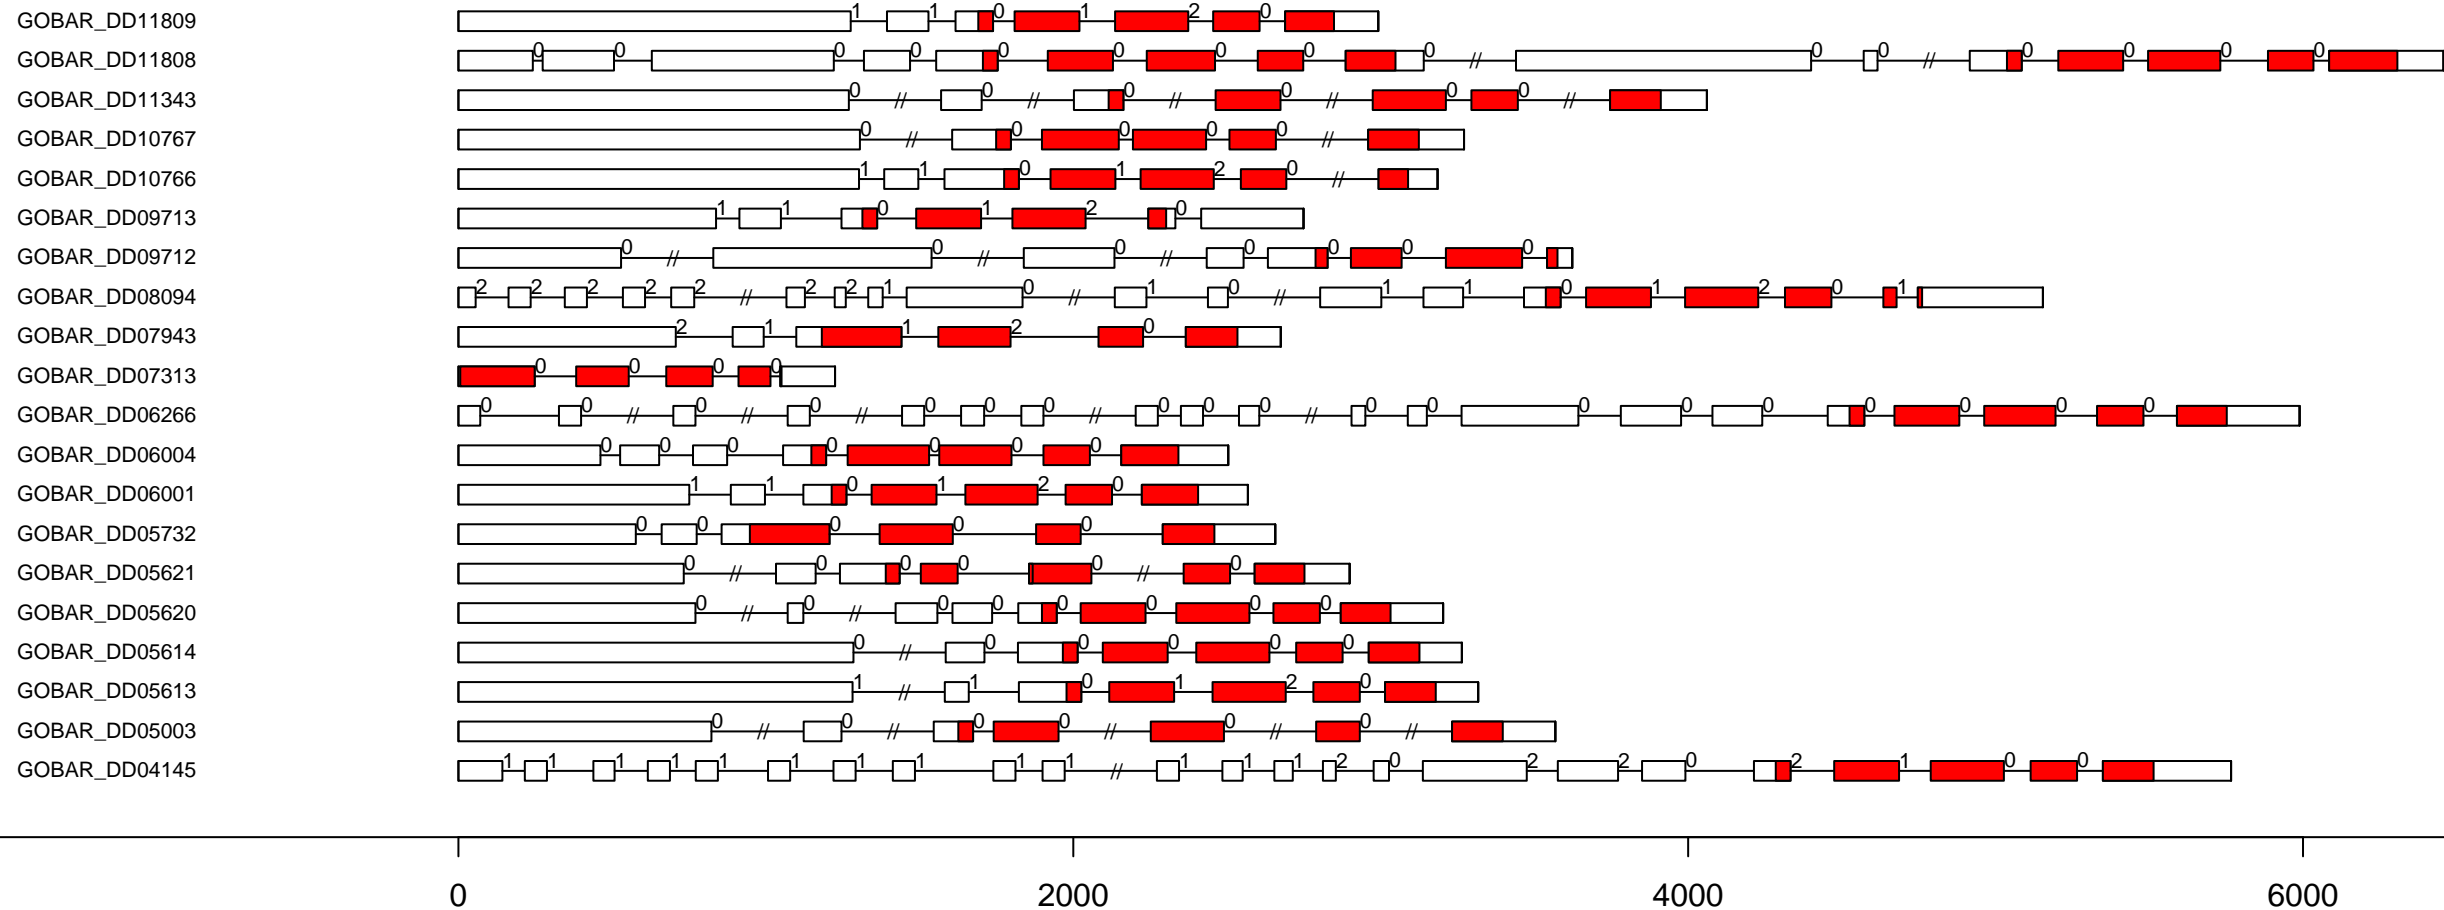

### G.ba RLK-Pelle\_DLSV exon-intron and domain diagram (part 8)

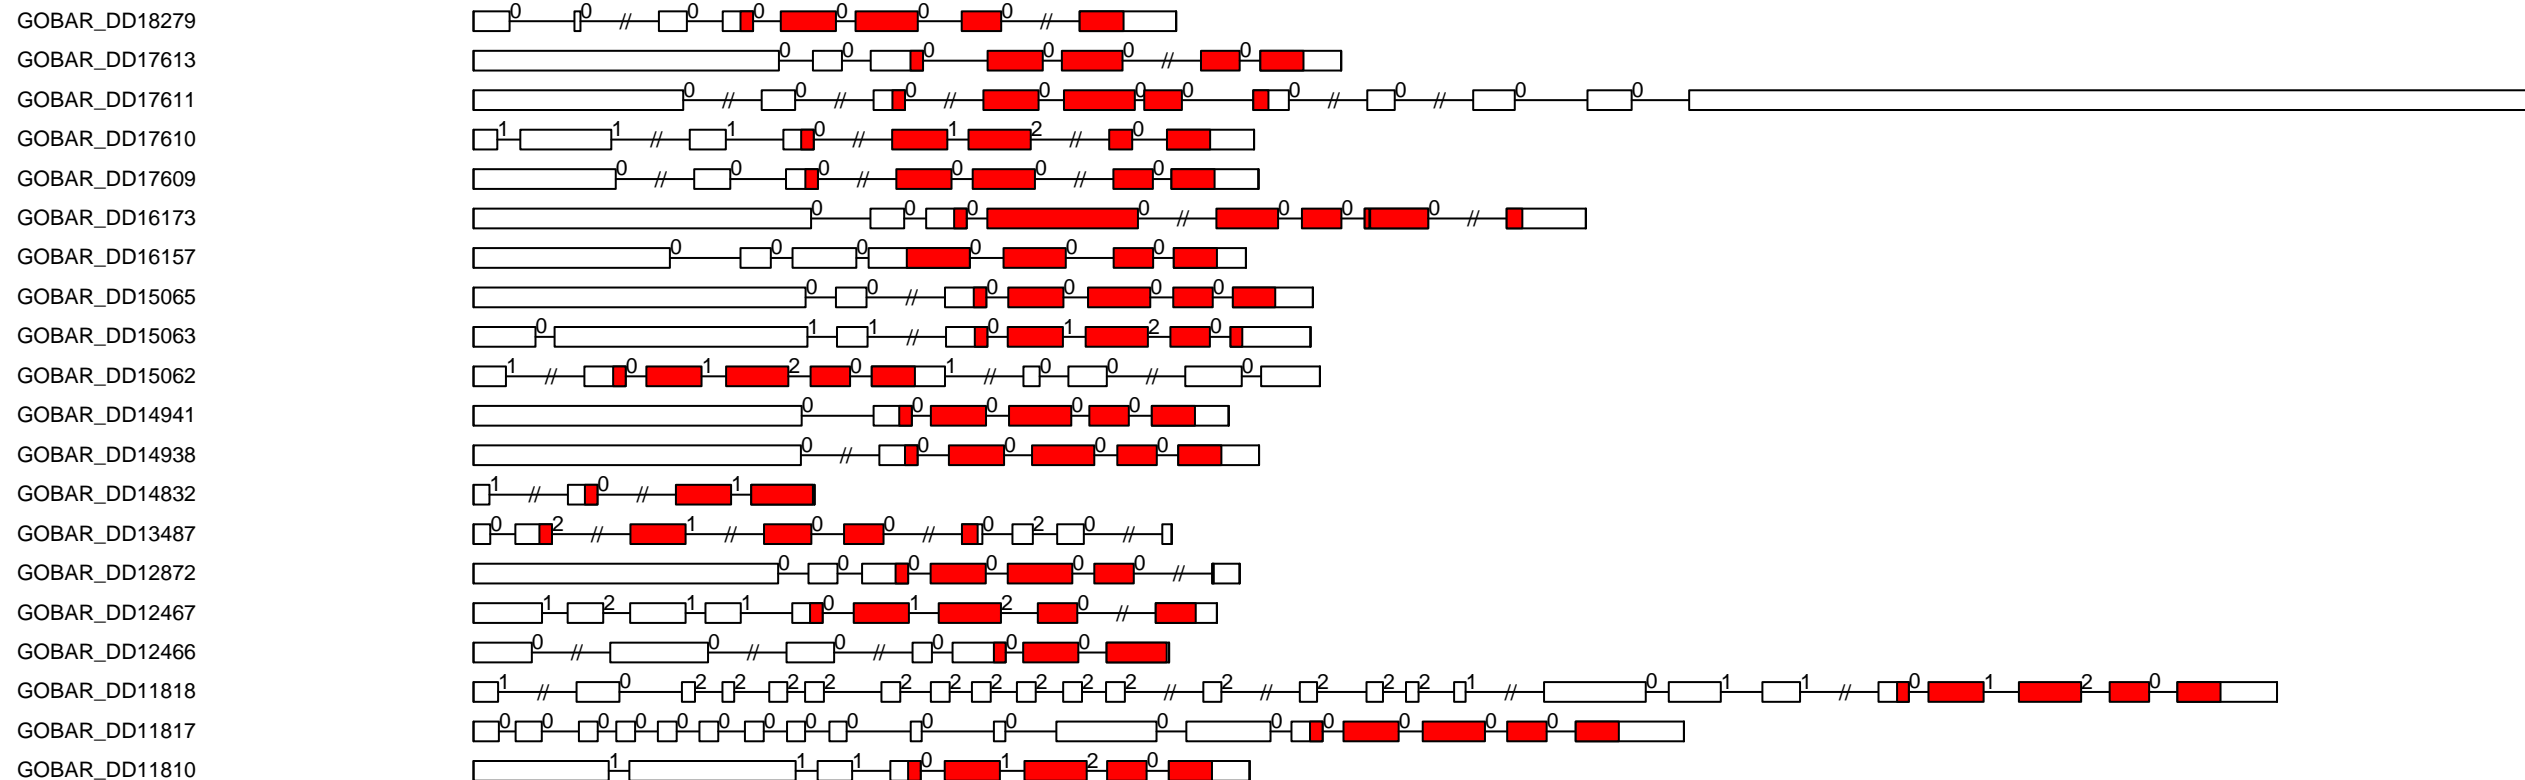

### G.ba RLK-Pelle\_DLSV exon-intron and domain diagram (part 9)

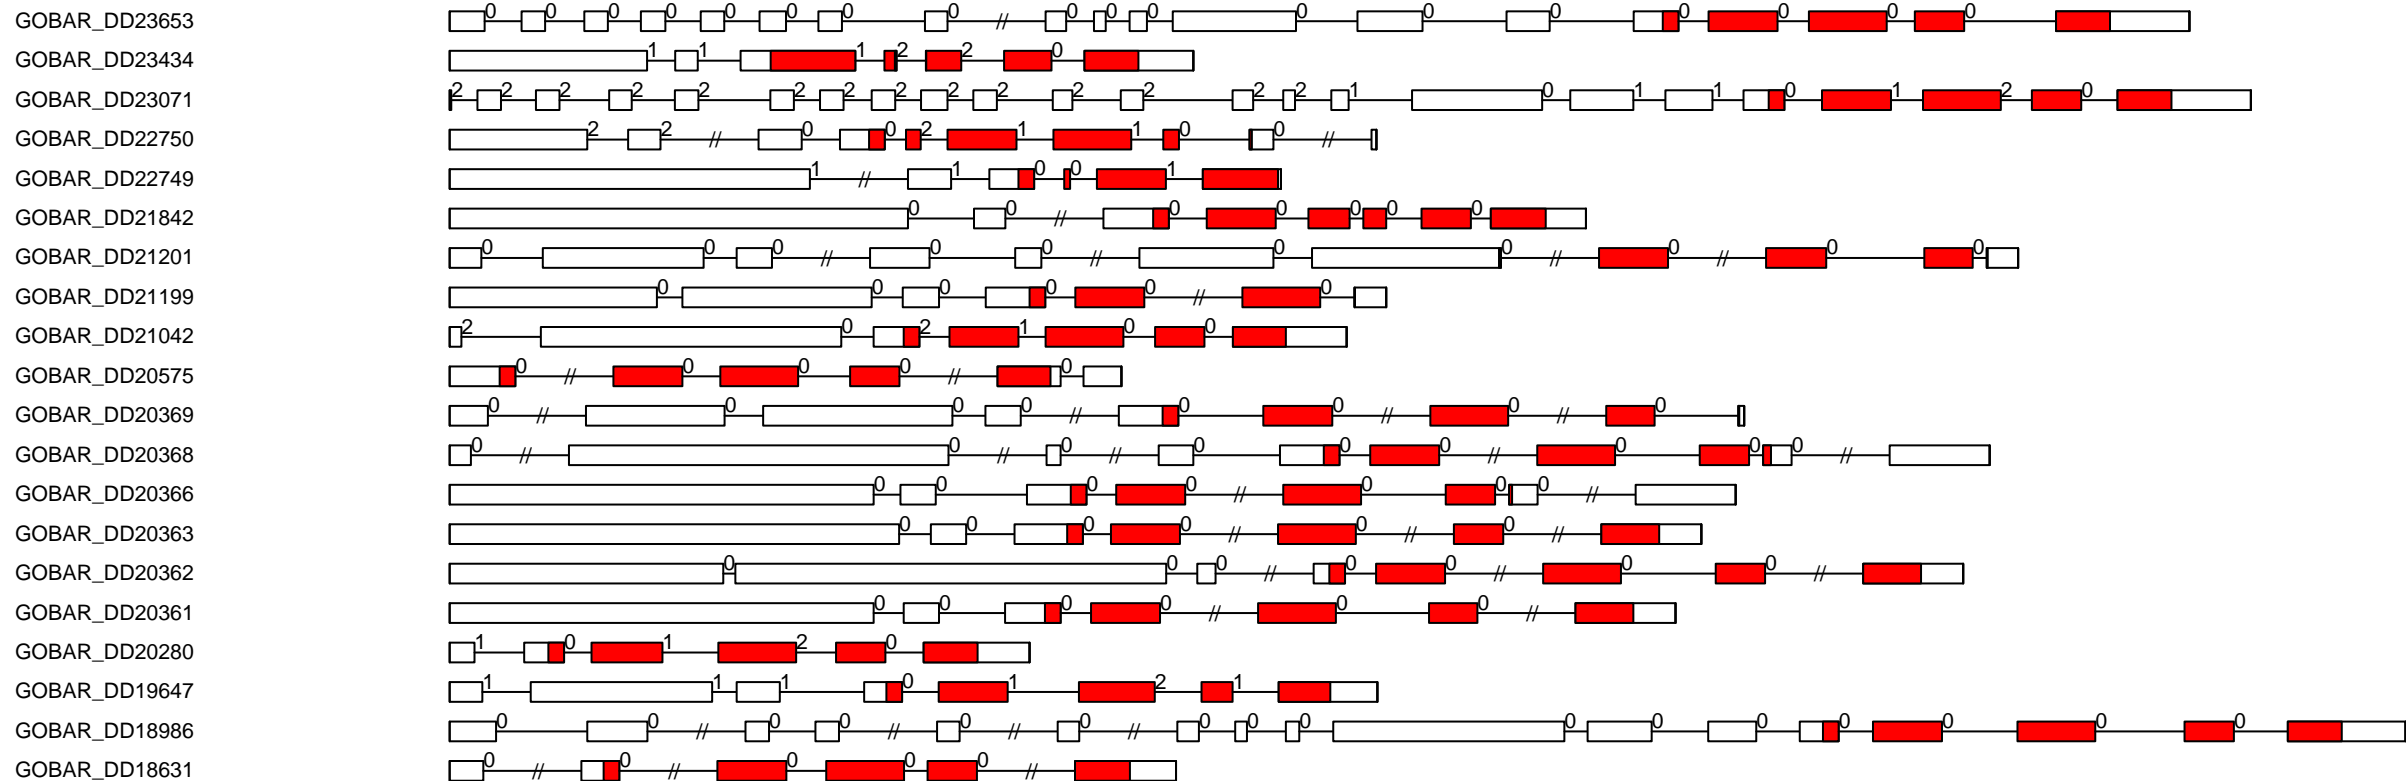

### G.ba RLK-Pelle\_DLSV exon-intron and domain diagram (part 10)

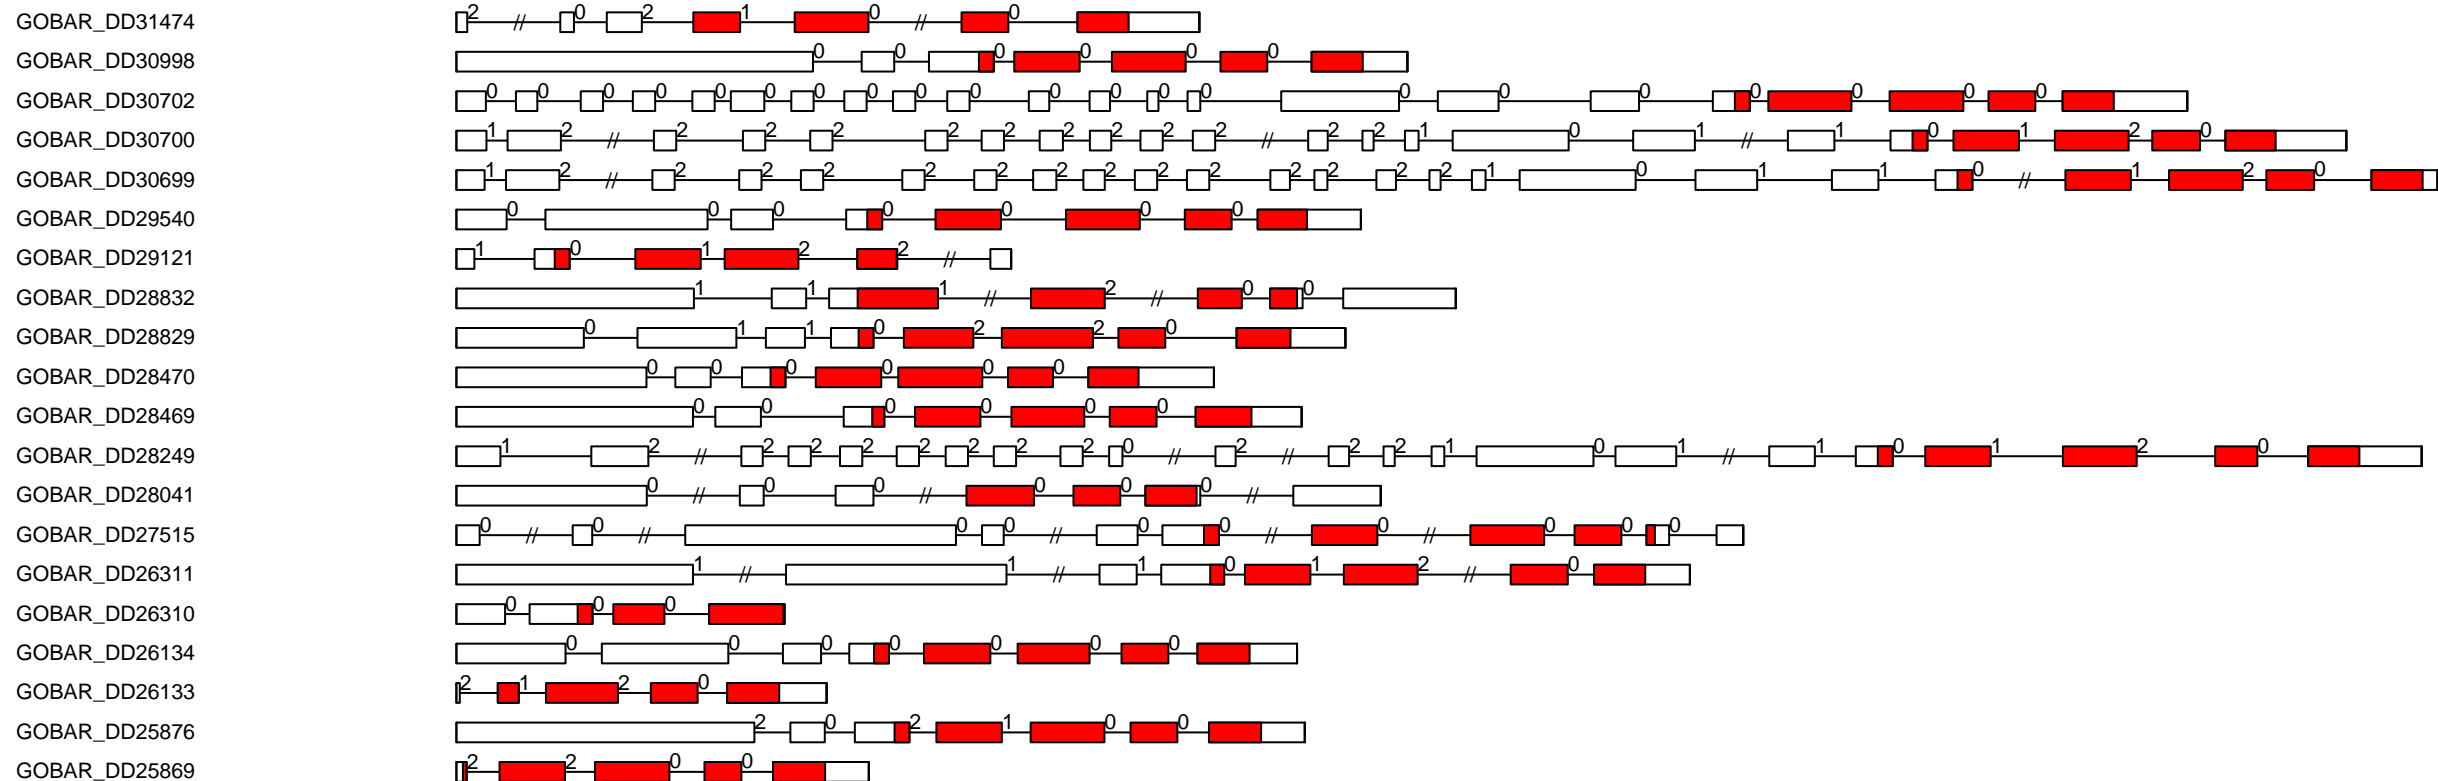

0

2000

4000

6000

# G.ba RLK-Pelle\_DLSV exon-intron and domain diagram (part 11)

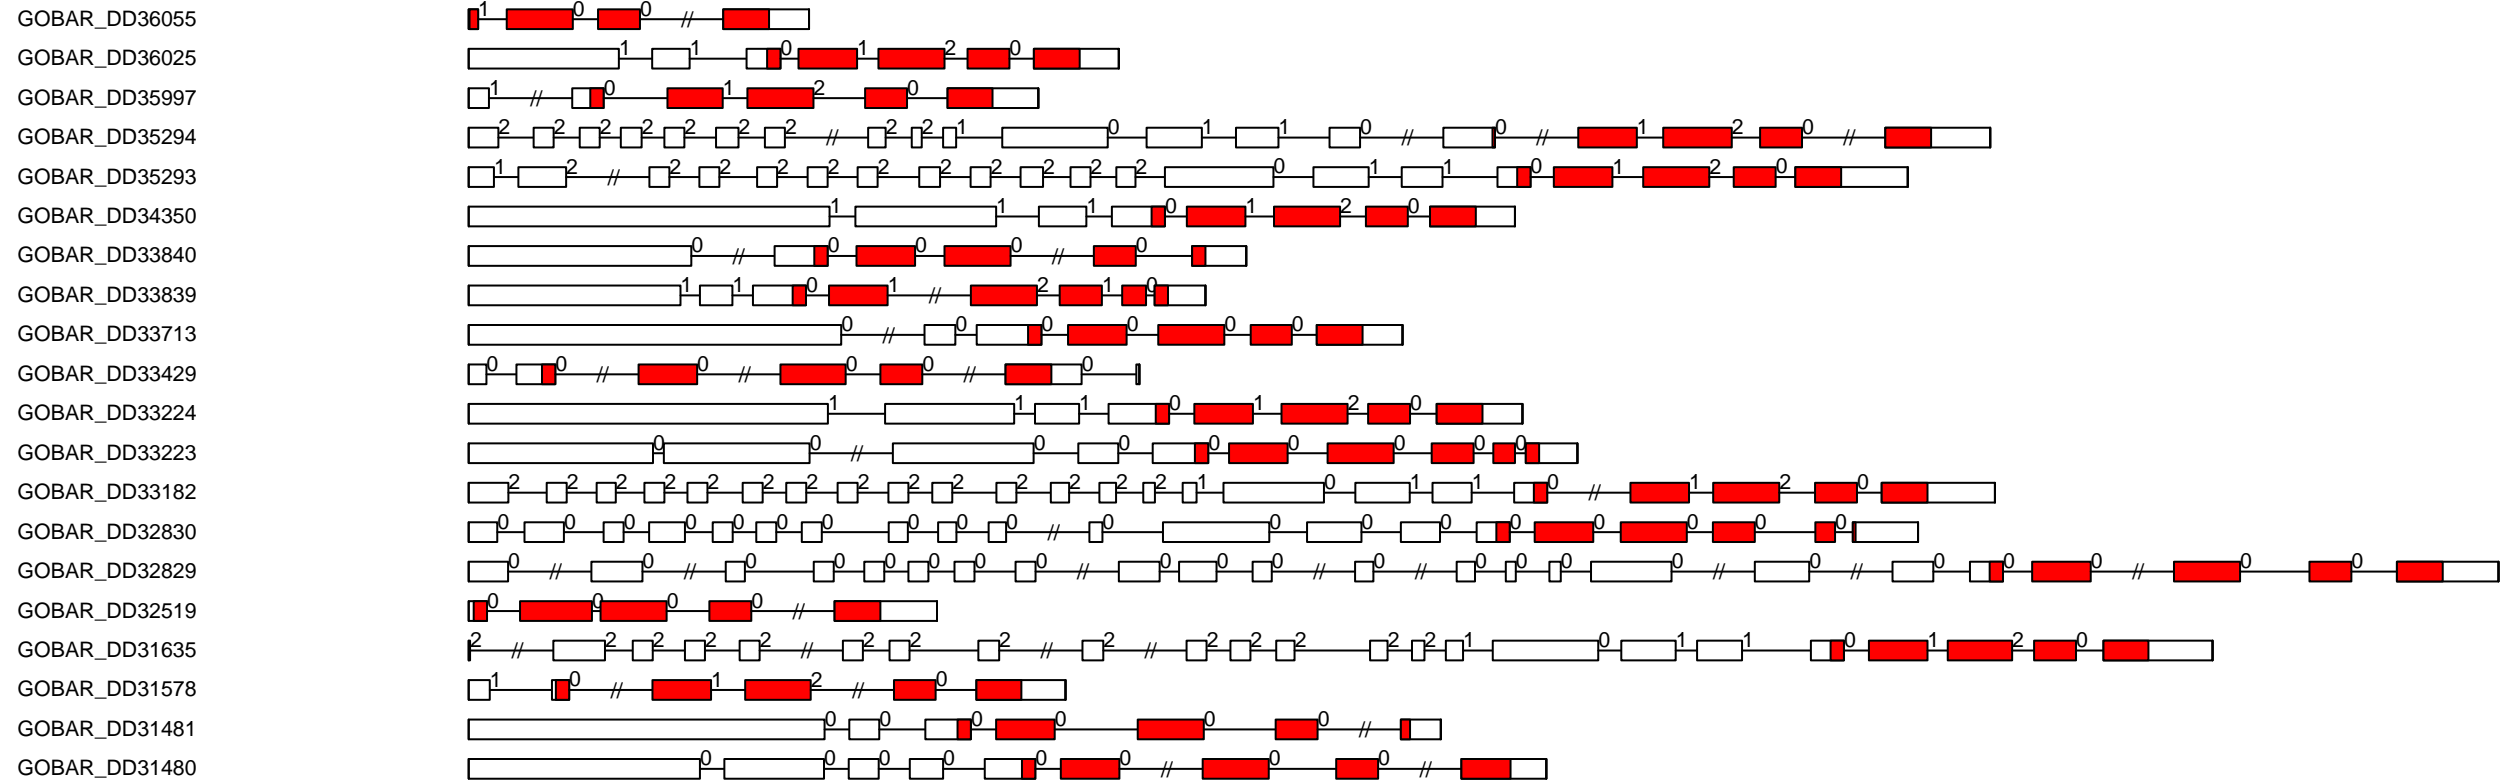

# G.ba RLK-Pelle\_DLSV exon-intron and domain diagram (part 12)

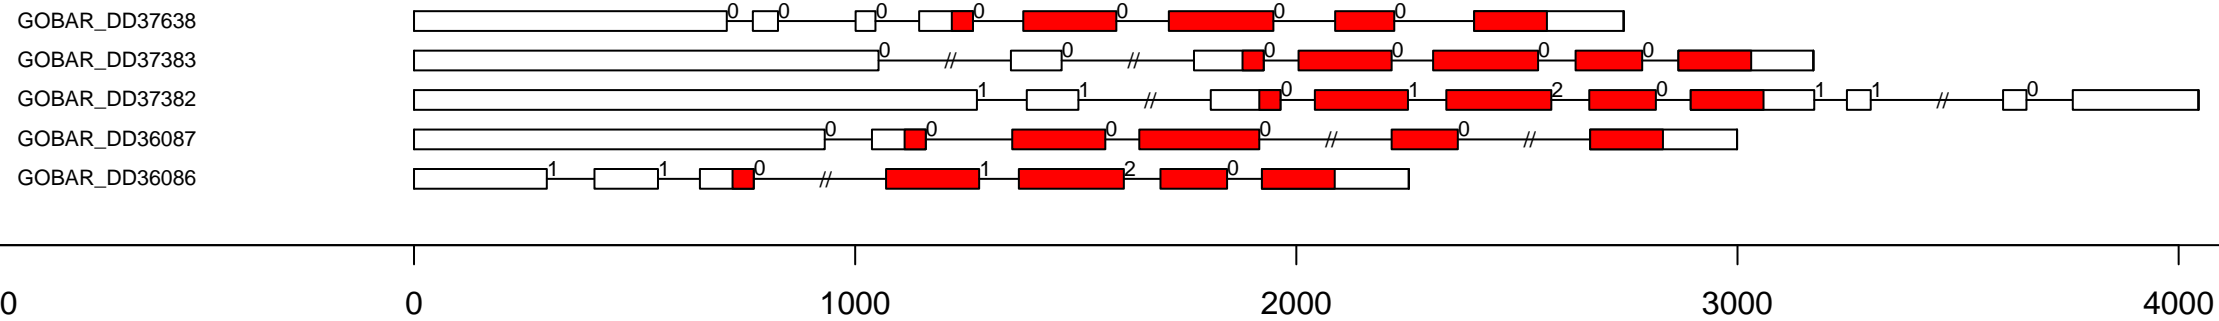

### G.ba RLK-Pelle\_Extensin exon-intron and domain diagram (all)

GOBAR\_DD27466  
 GOBAR\_DD17762  
 GOBAR\_DD16581  
 GOBAR\_DD10255  
 GOBAR\_DD04944  
 GOBAR\_DD02976  
 GOBAR\_AA33194  
 GOBAR\_AA27774  
 GOBAR\_AA09955  
 GOBAR\_AA09158  
 GOBAR\_AA05611  
 GOBAR\_AA05049

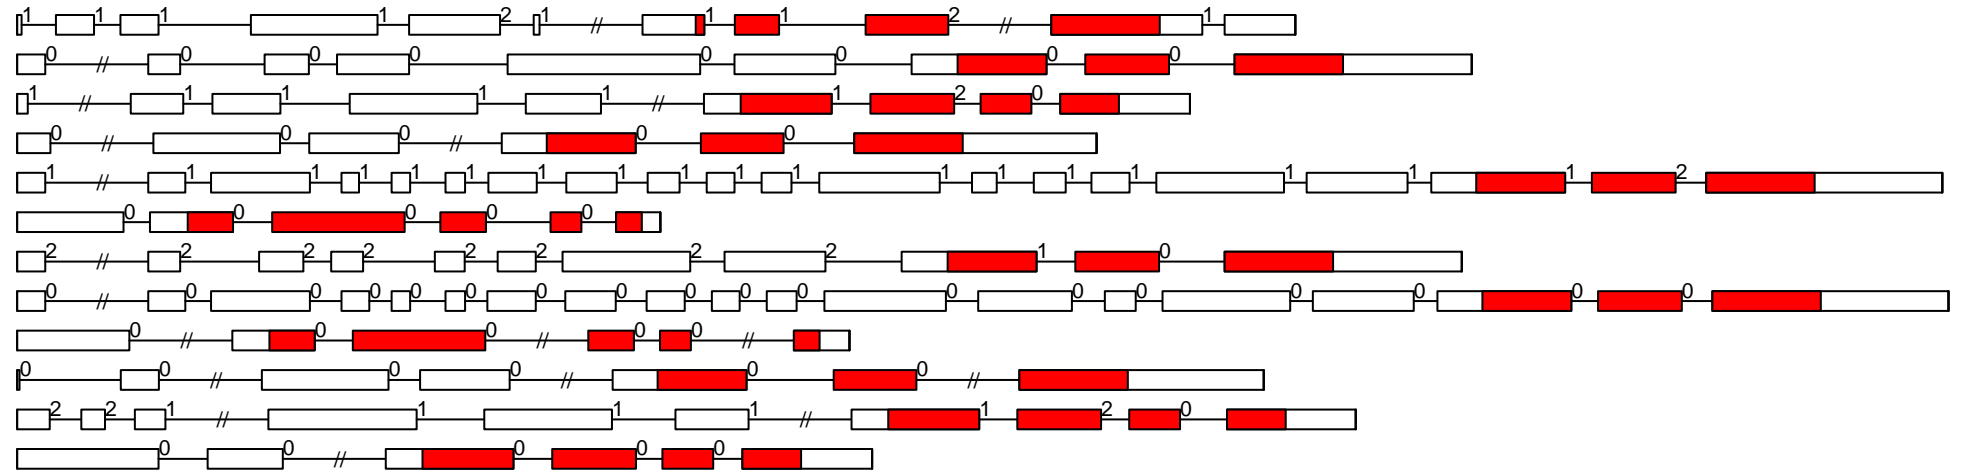



### G.ba RLK-Pelle\_L-LEC exon-intron and domain diagram (part 1)

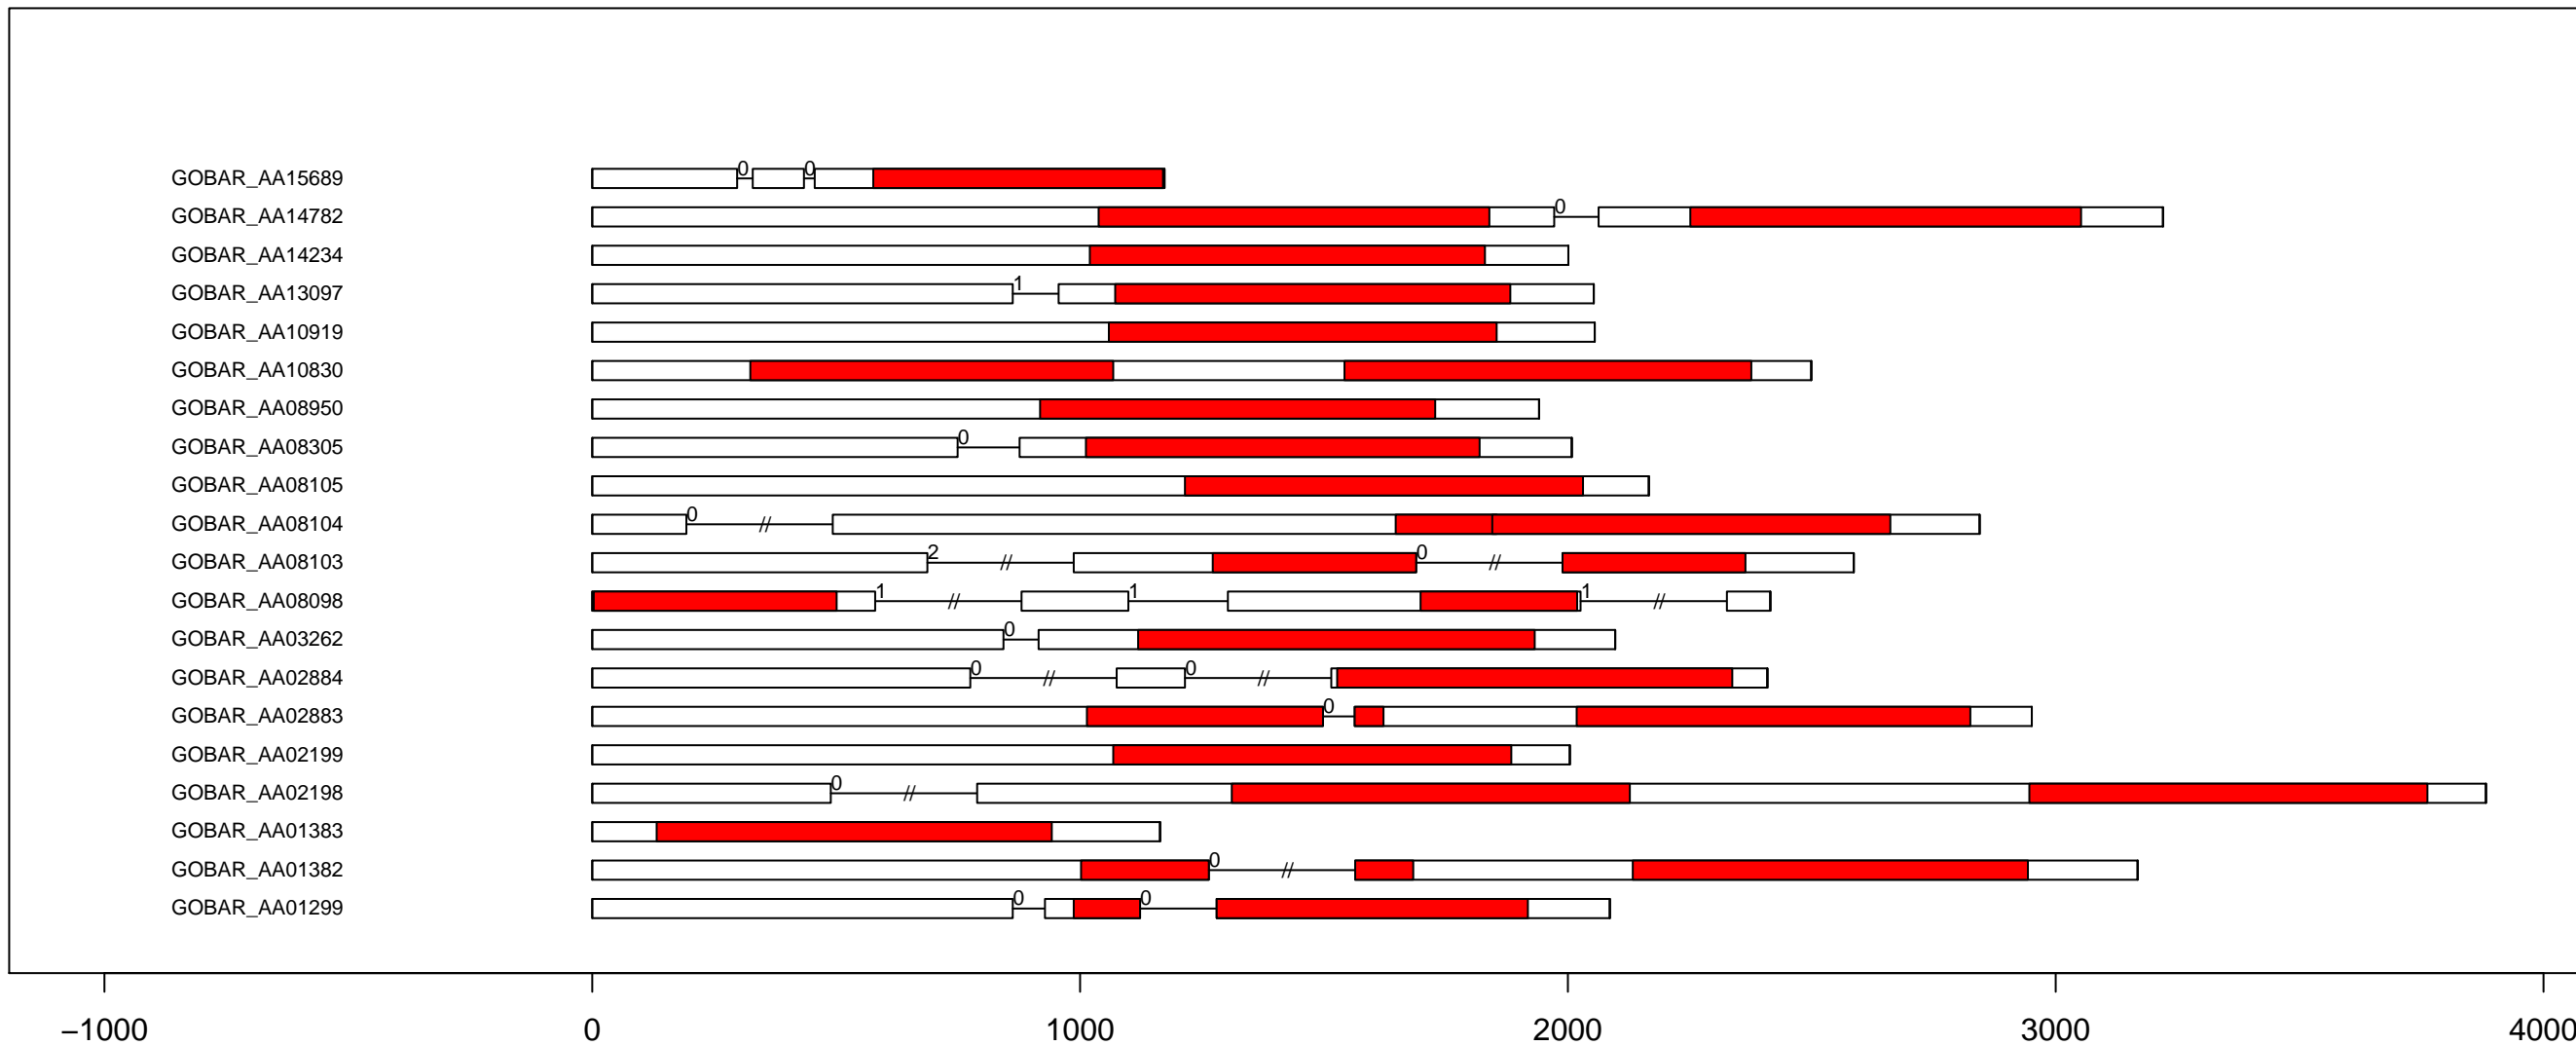

### G.ba RLK-Pelle\_L-LEC exon-intron and domain diagram (part 2)

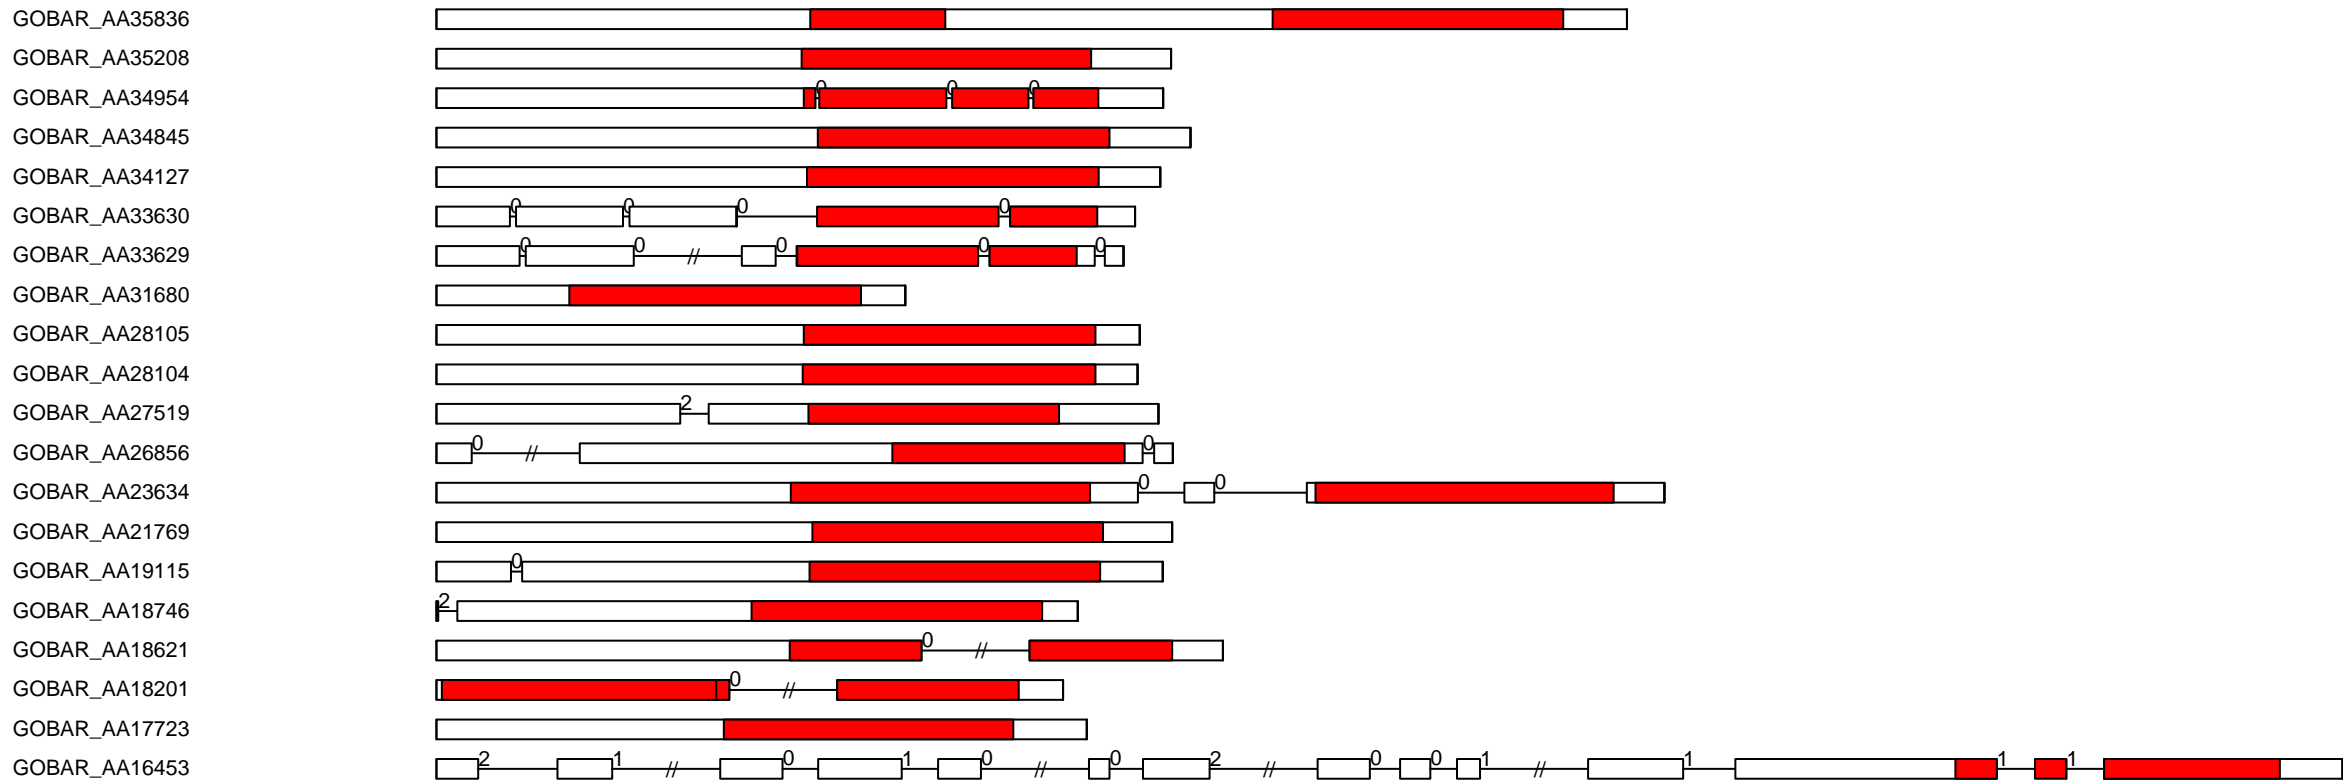

### G.ba RLK-Pelle\_L-LEC exon-intron and domain diagram (part 3)

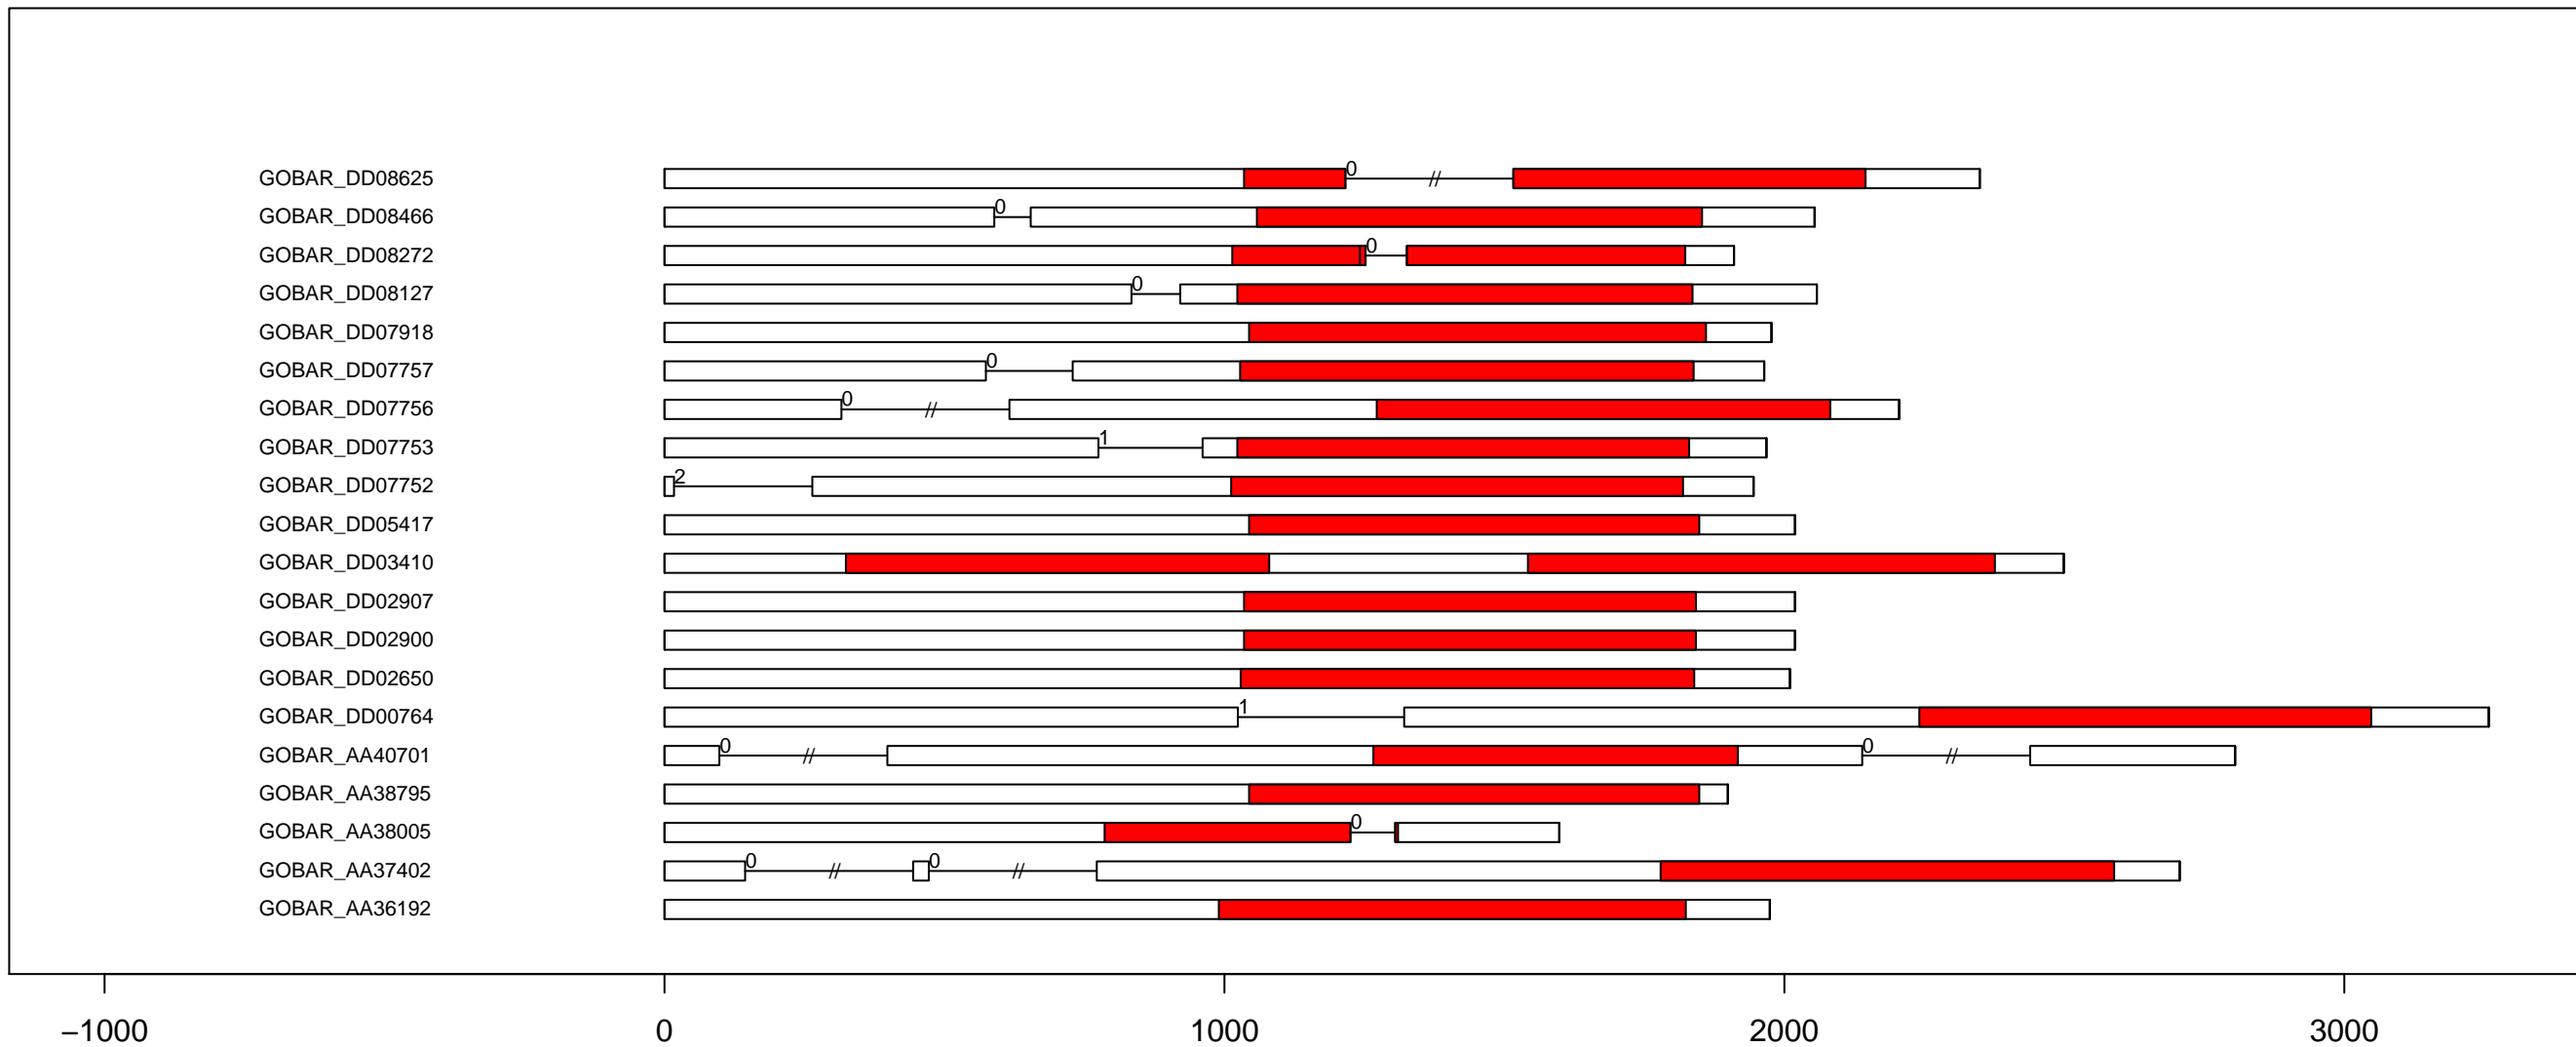

### G.ba RLK-Pelle\_L-LEC exon-intron and domain diagram (part 4)

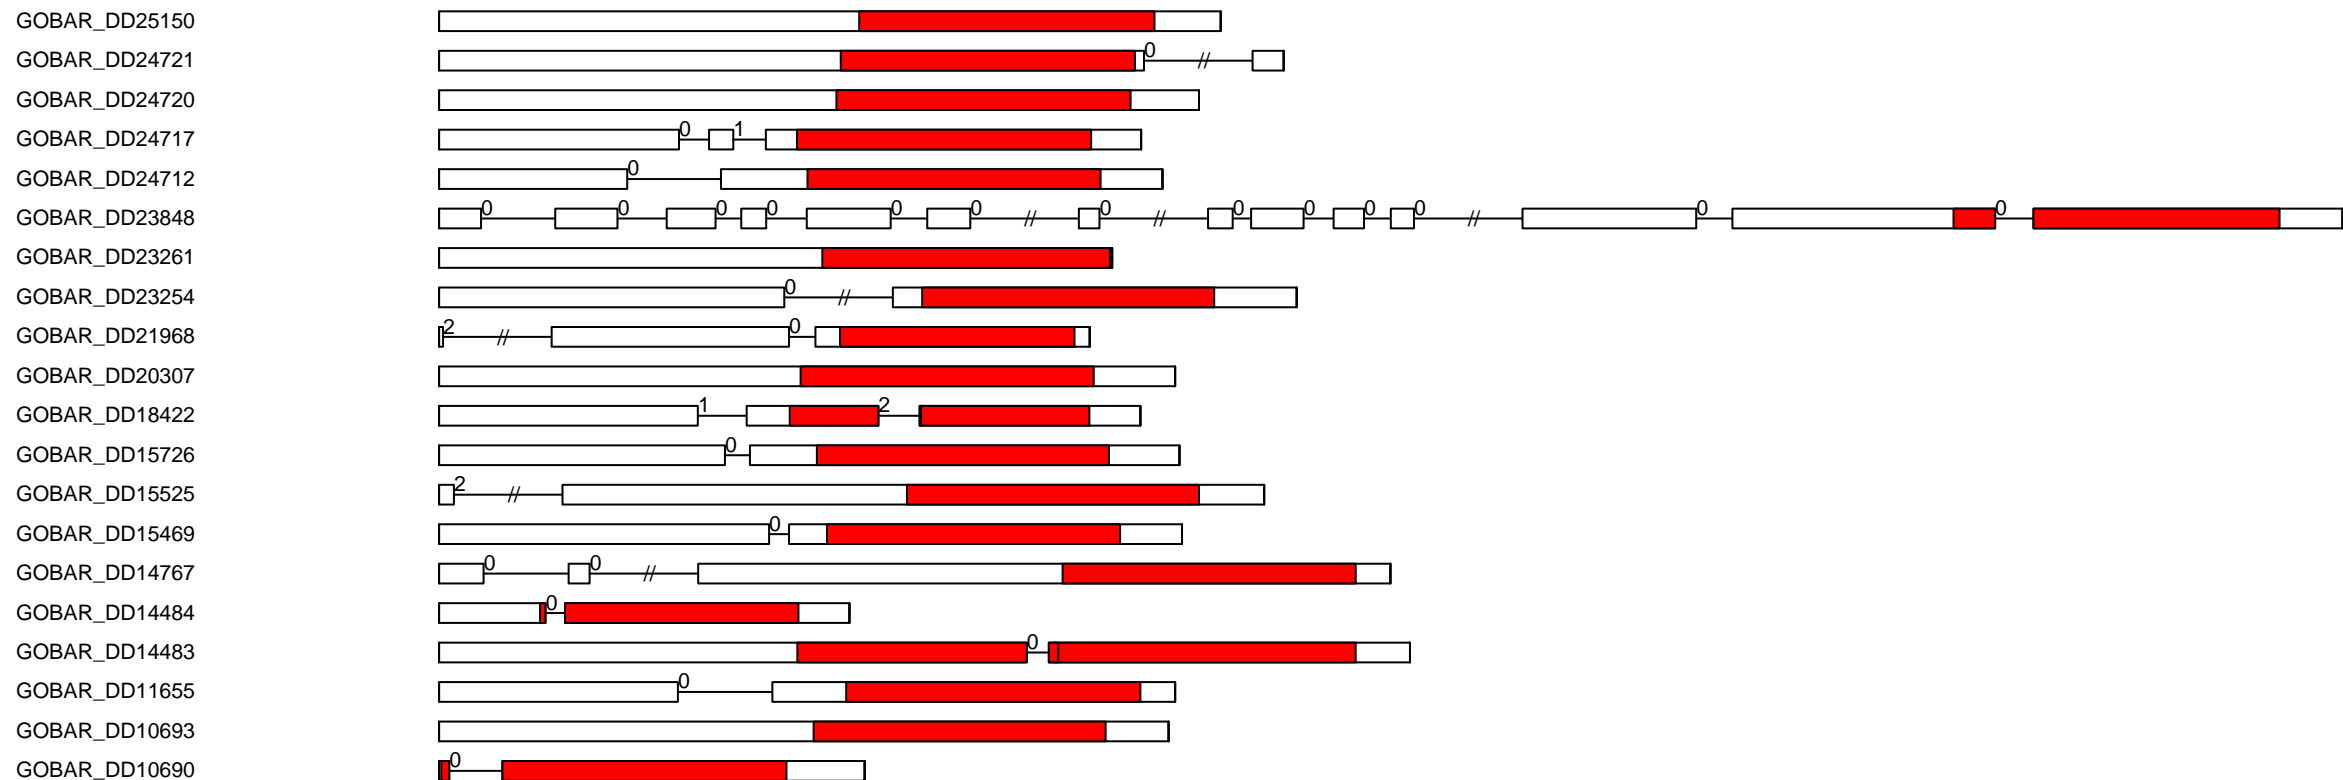

### G.ba RLK-Pelle\_L-LEC exon-intron and domain diagram (part 5)

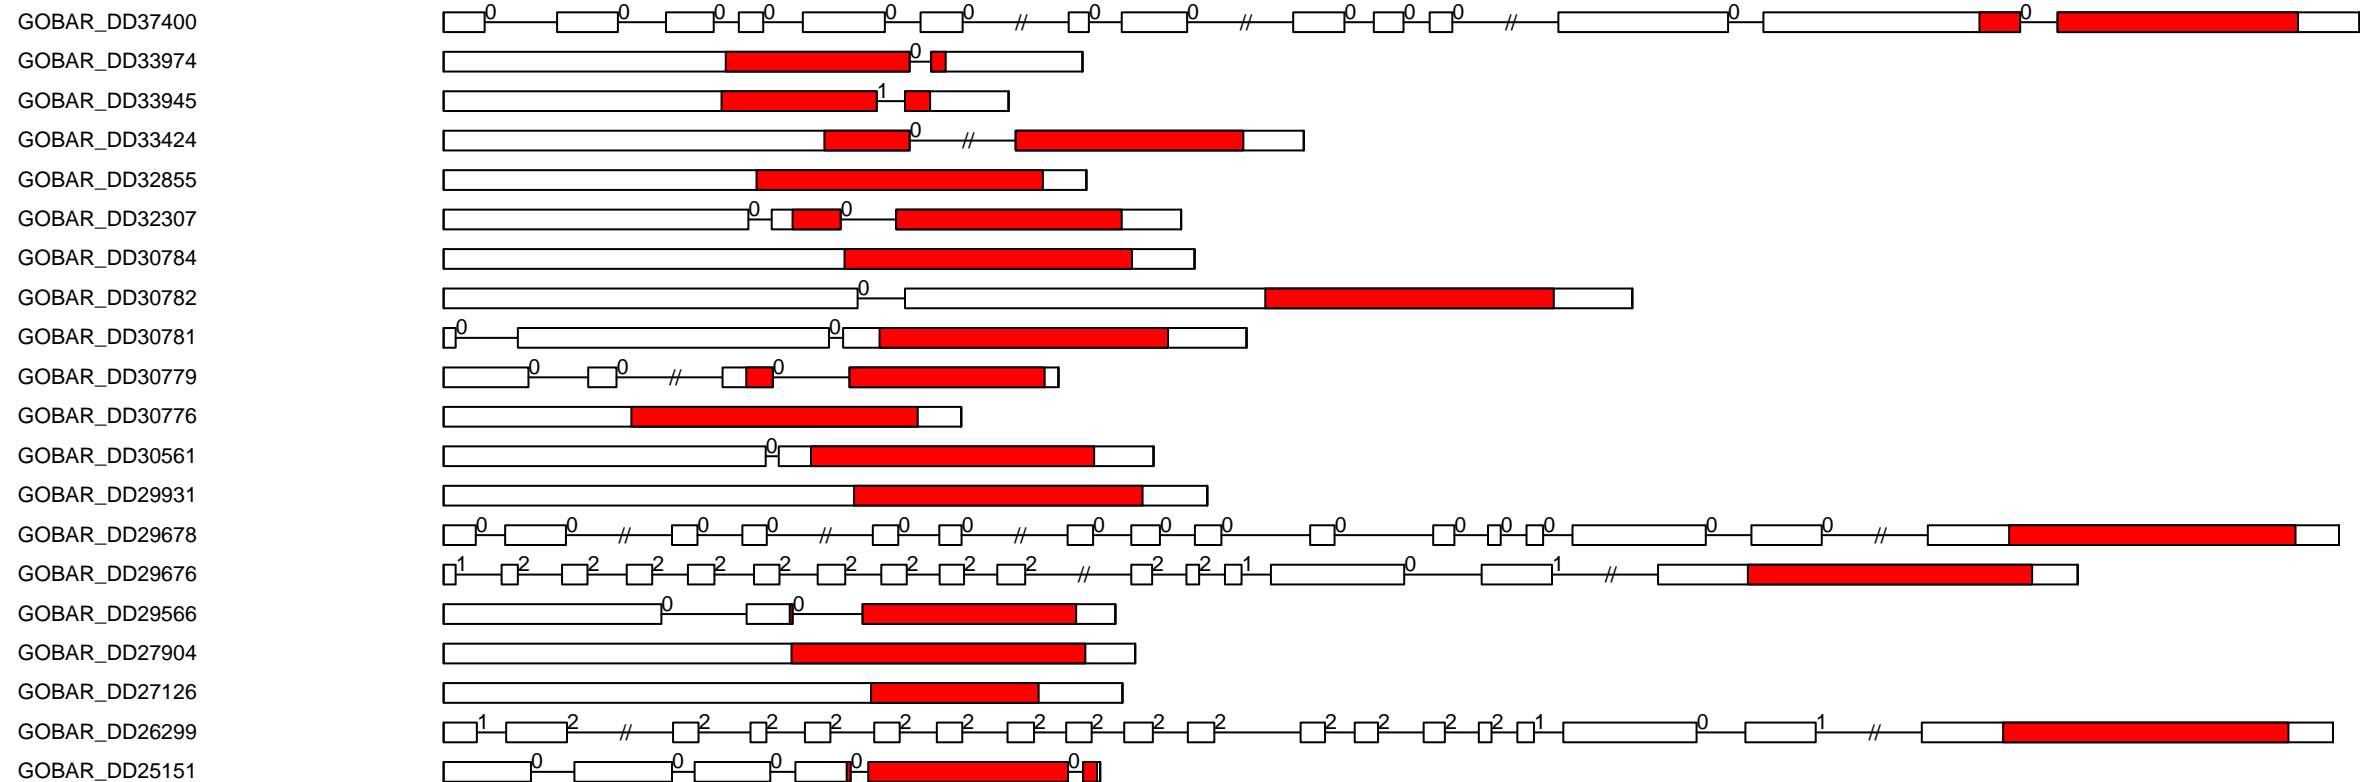

# G.ba RLK-Pelle\_L-LEC exon-intron and domain diagram (part 6)

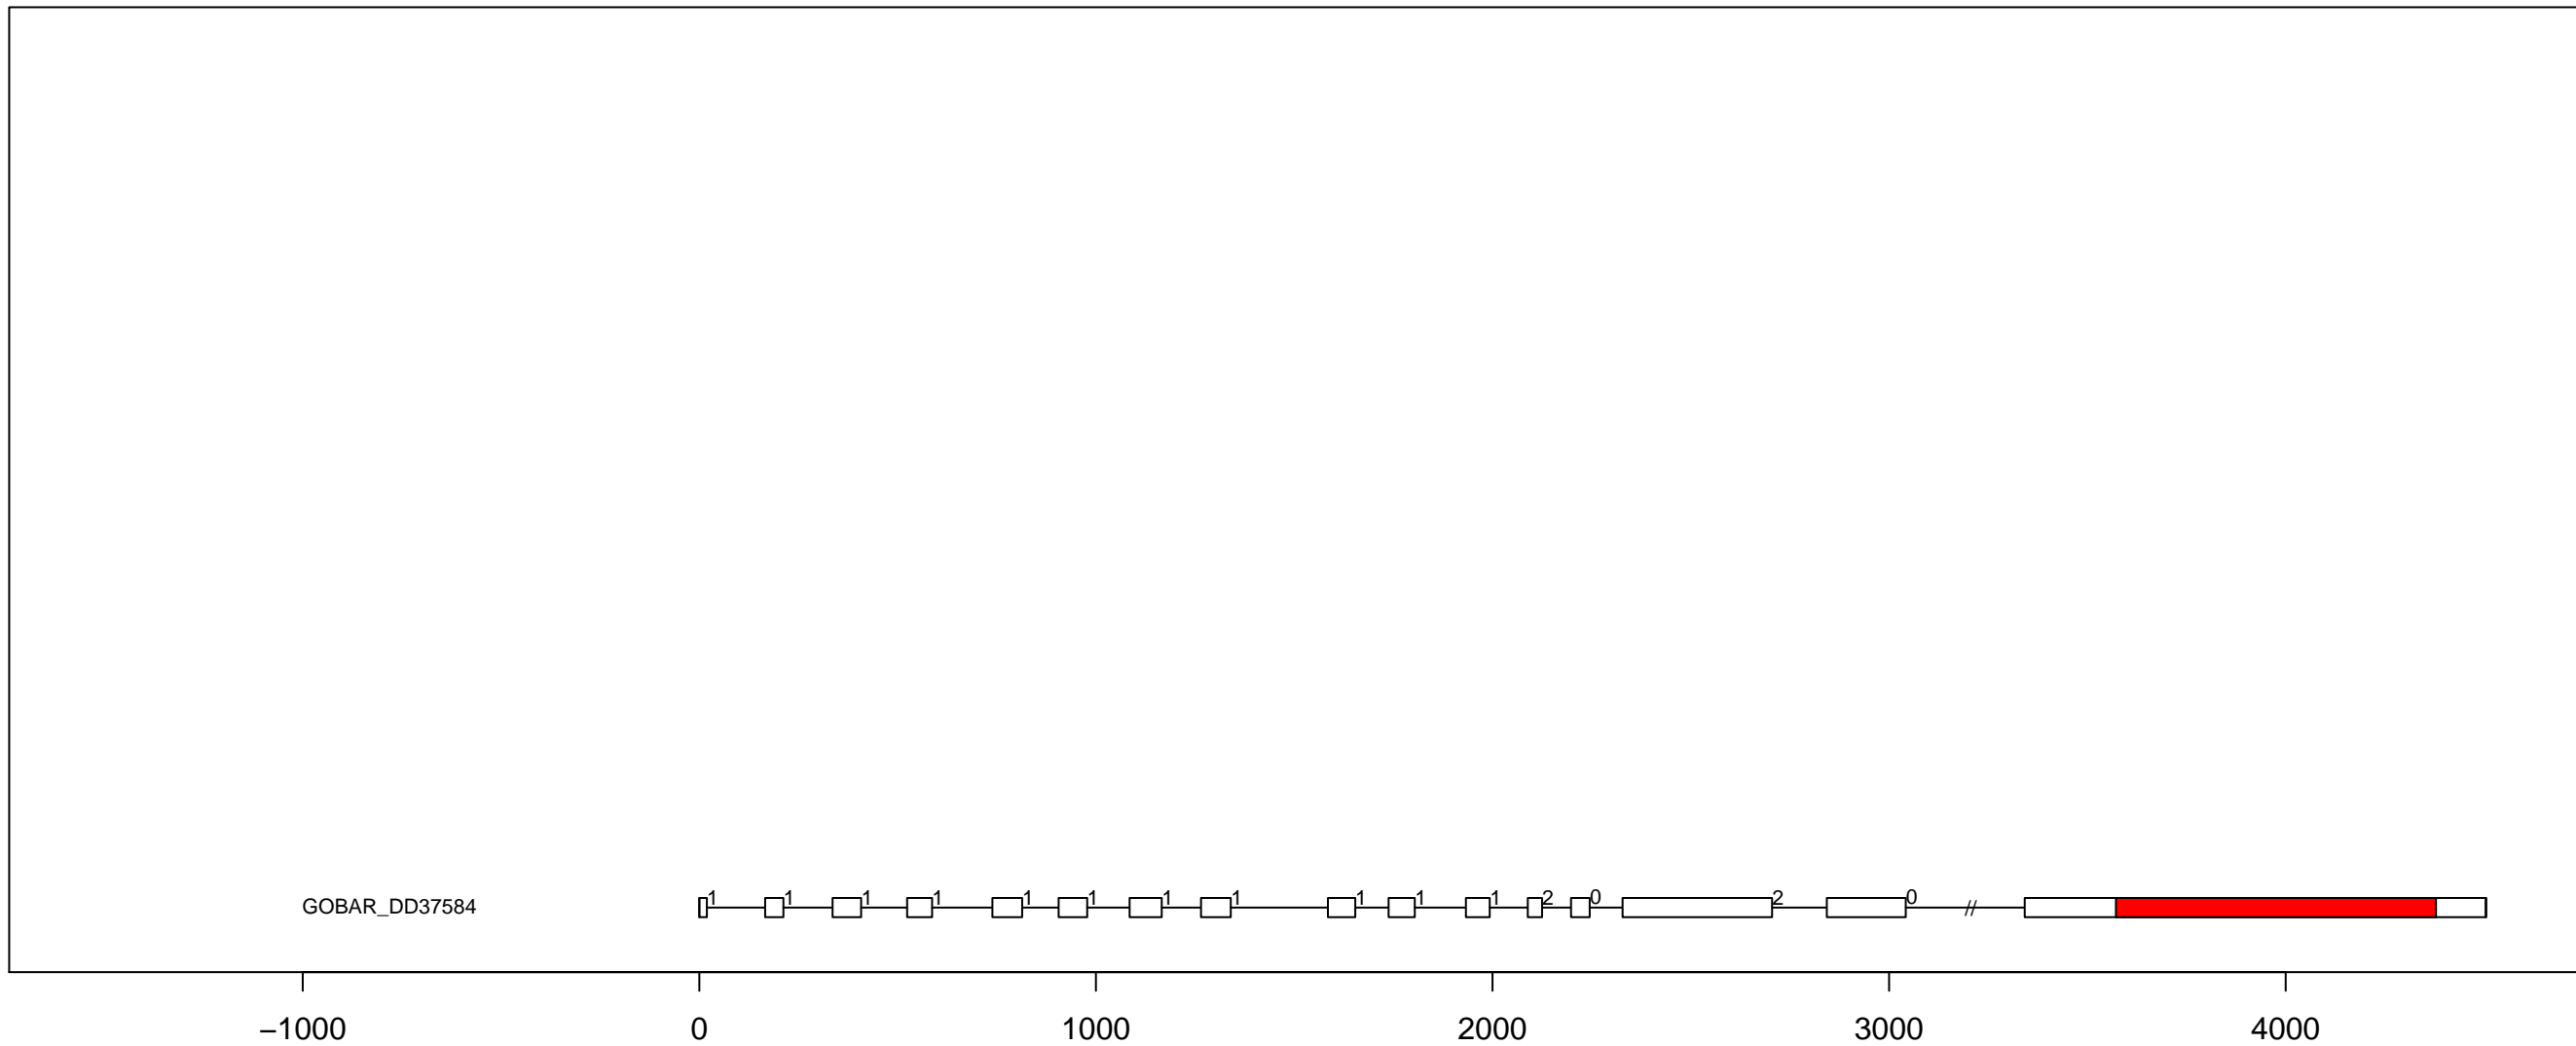

### G.ba RLK-Pelle\_LRK10L-2 exon-intron and domain diagram (part 1)

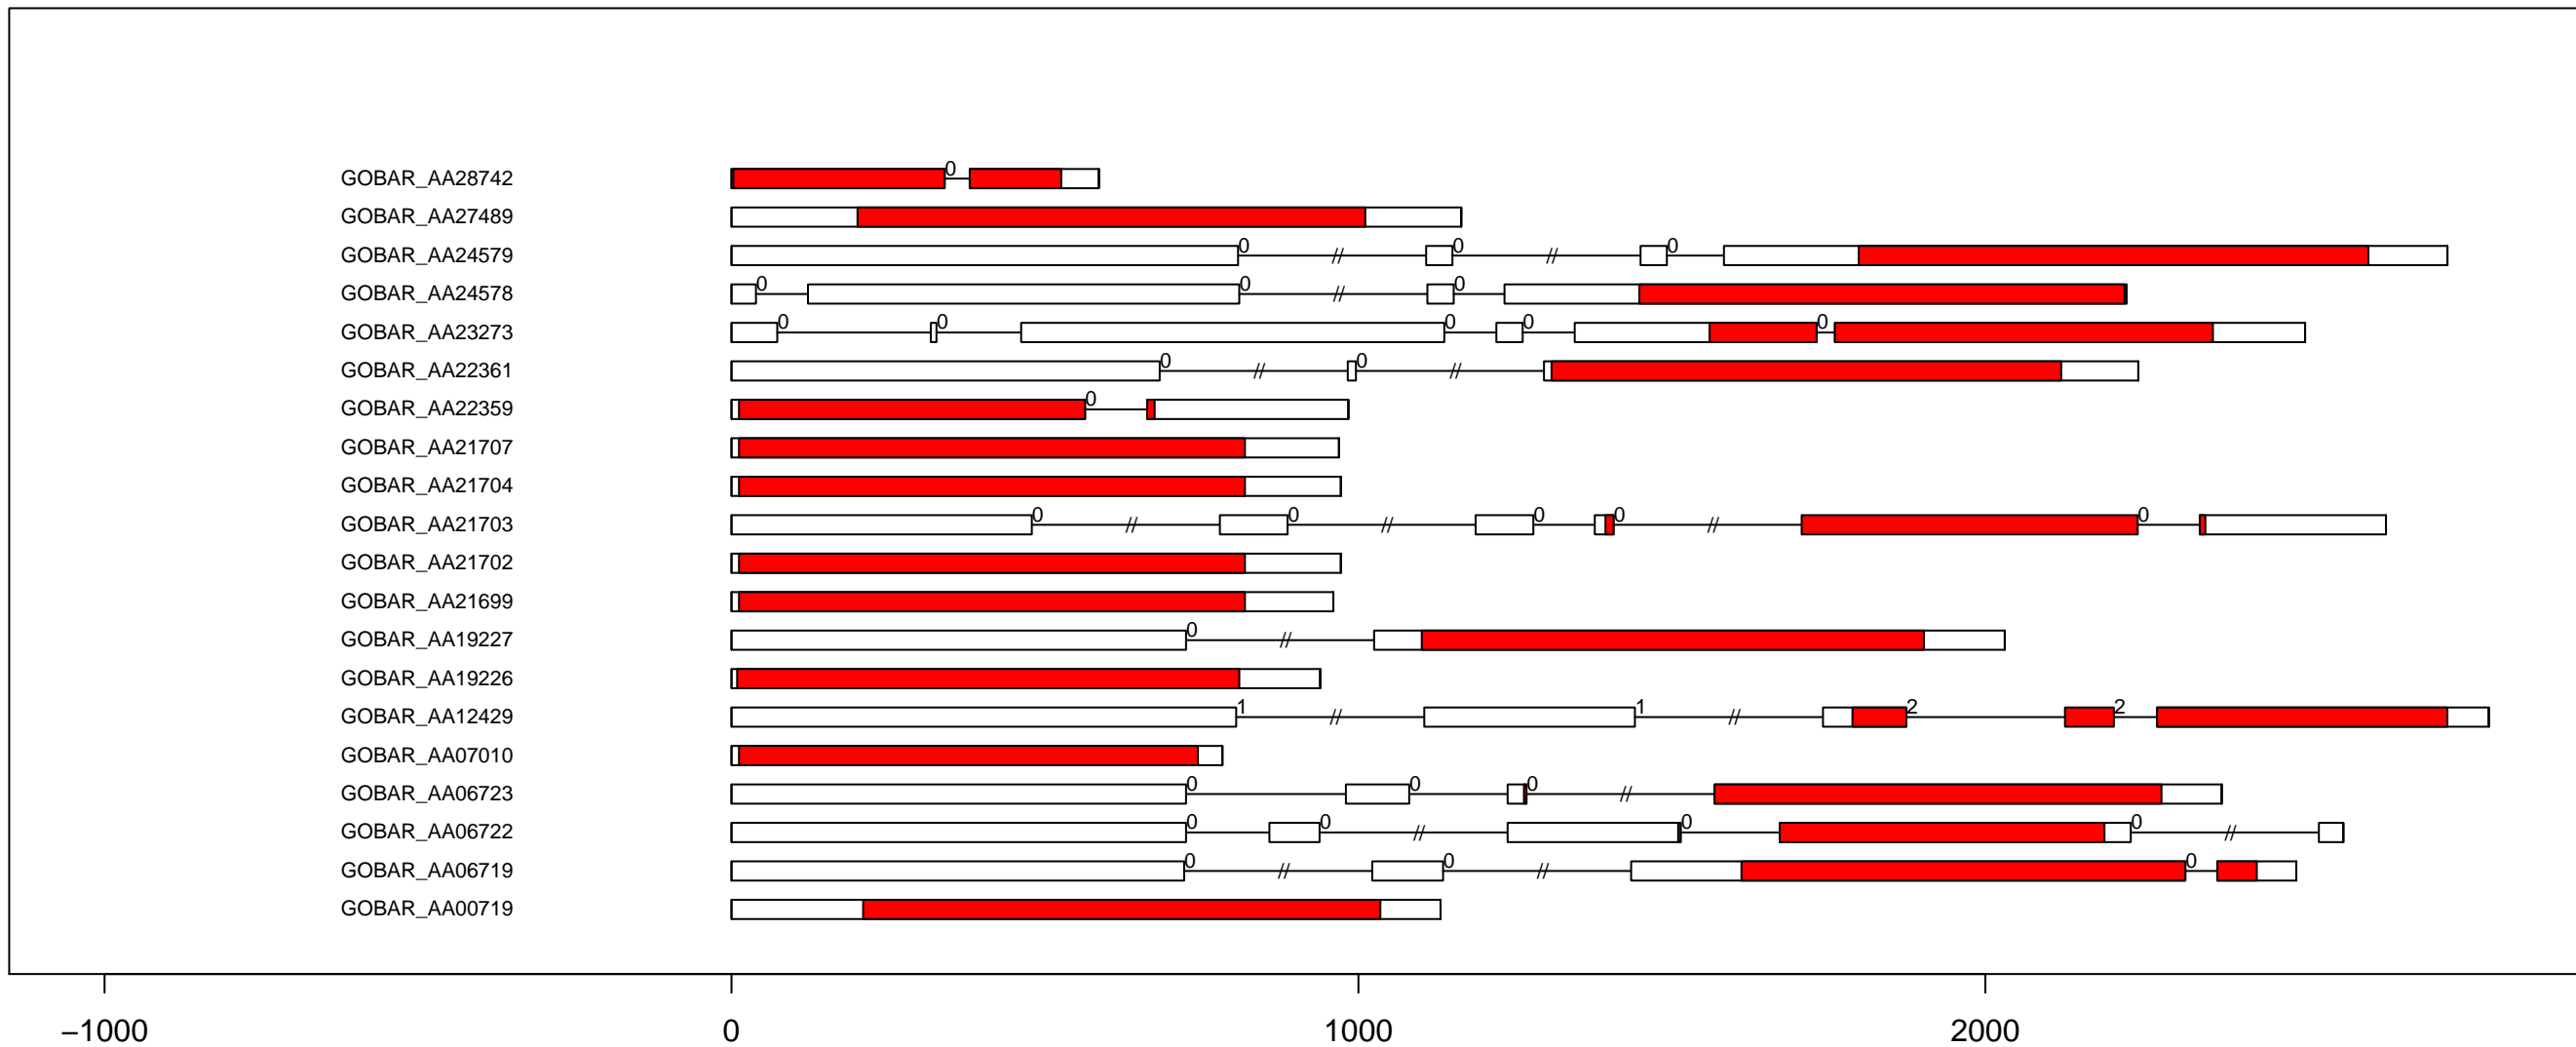





### G.ba RLK-Pelle\_LRK10L-2 exon-intron and domain diagram (part 3)

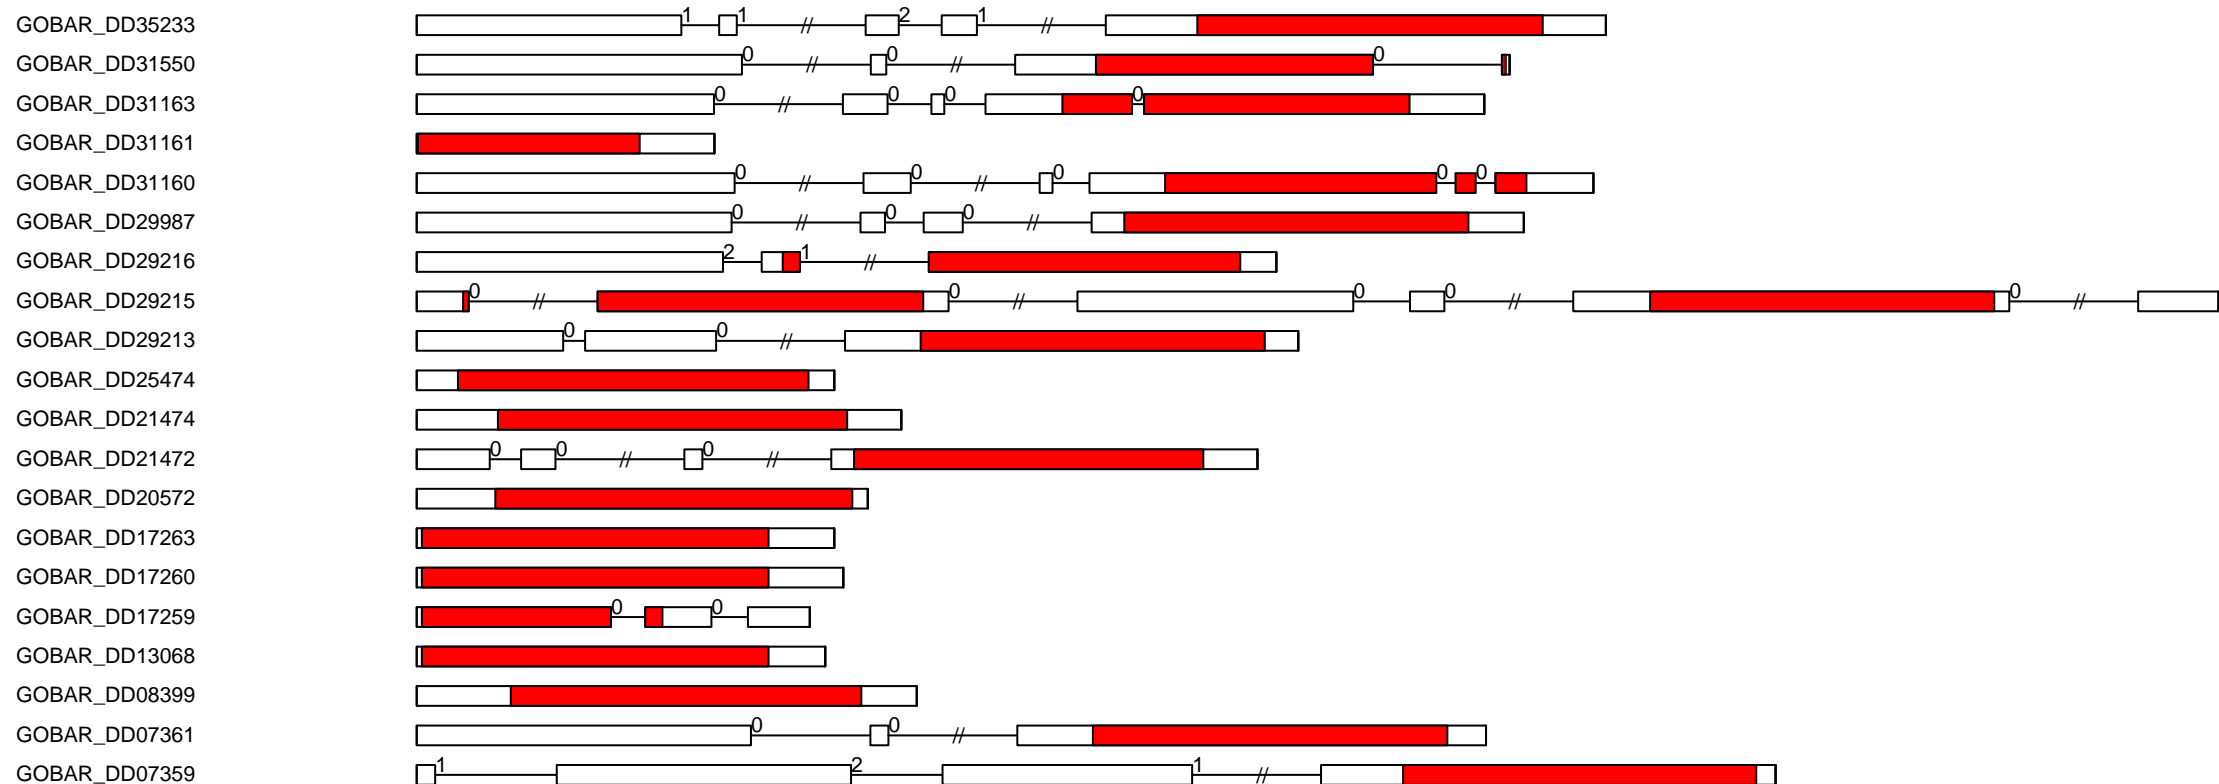

G.ba RLK-Pelle\_LRK10L-2 exon-intron and domain diagram (part 4)

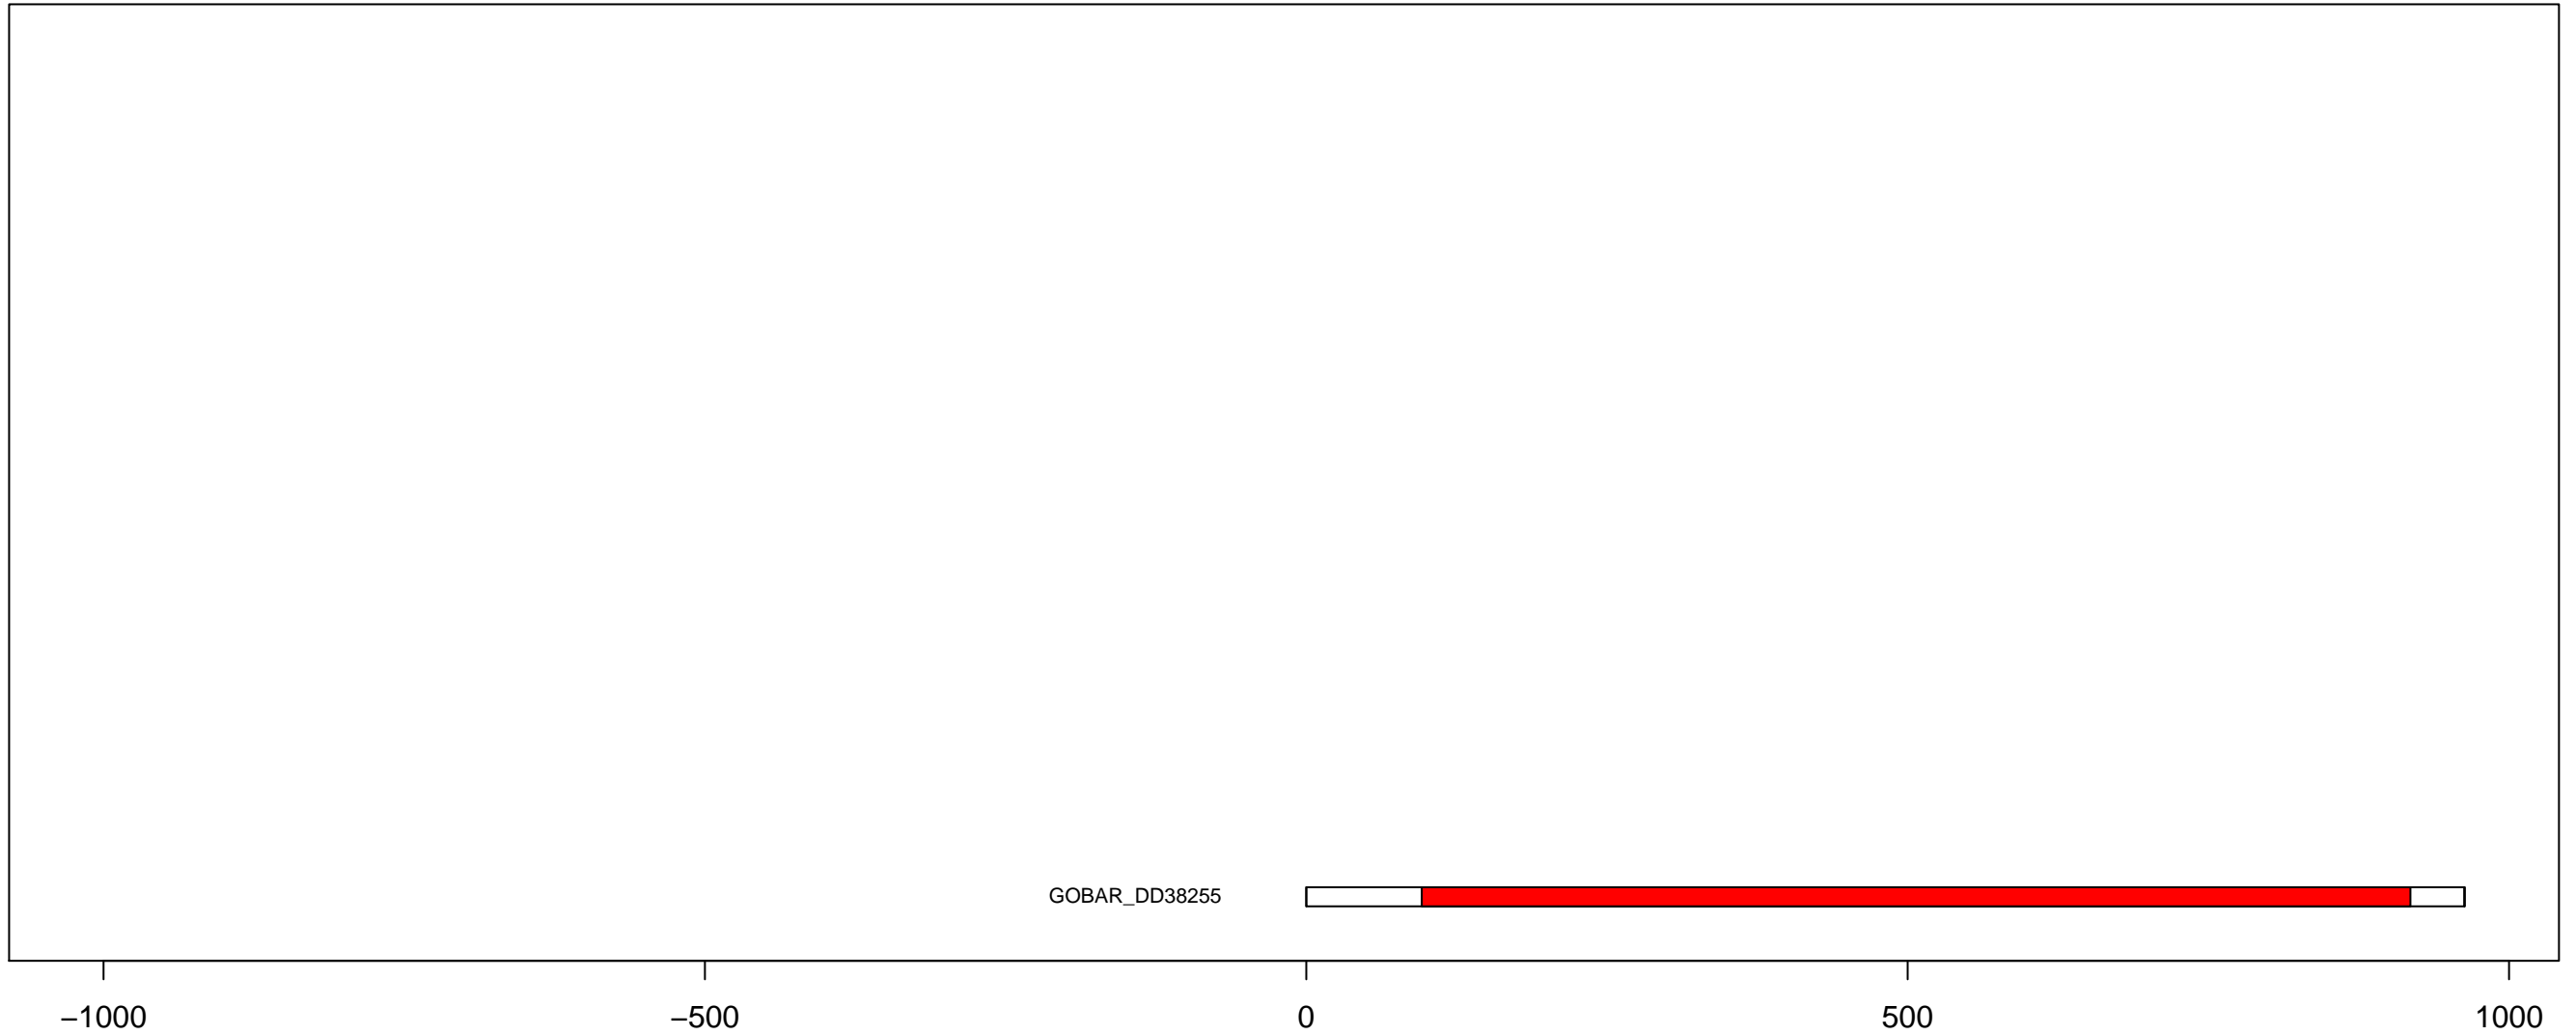

# G.ba RLK-Pelle\_LRR-I-1 exon-intron and domain diagram (all)

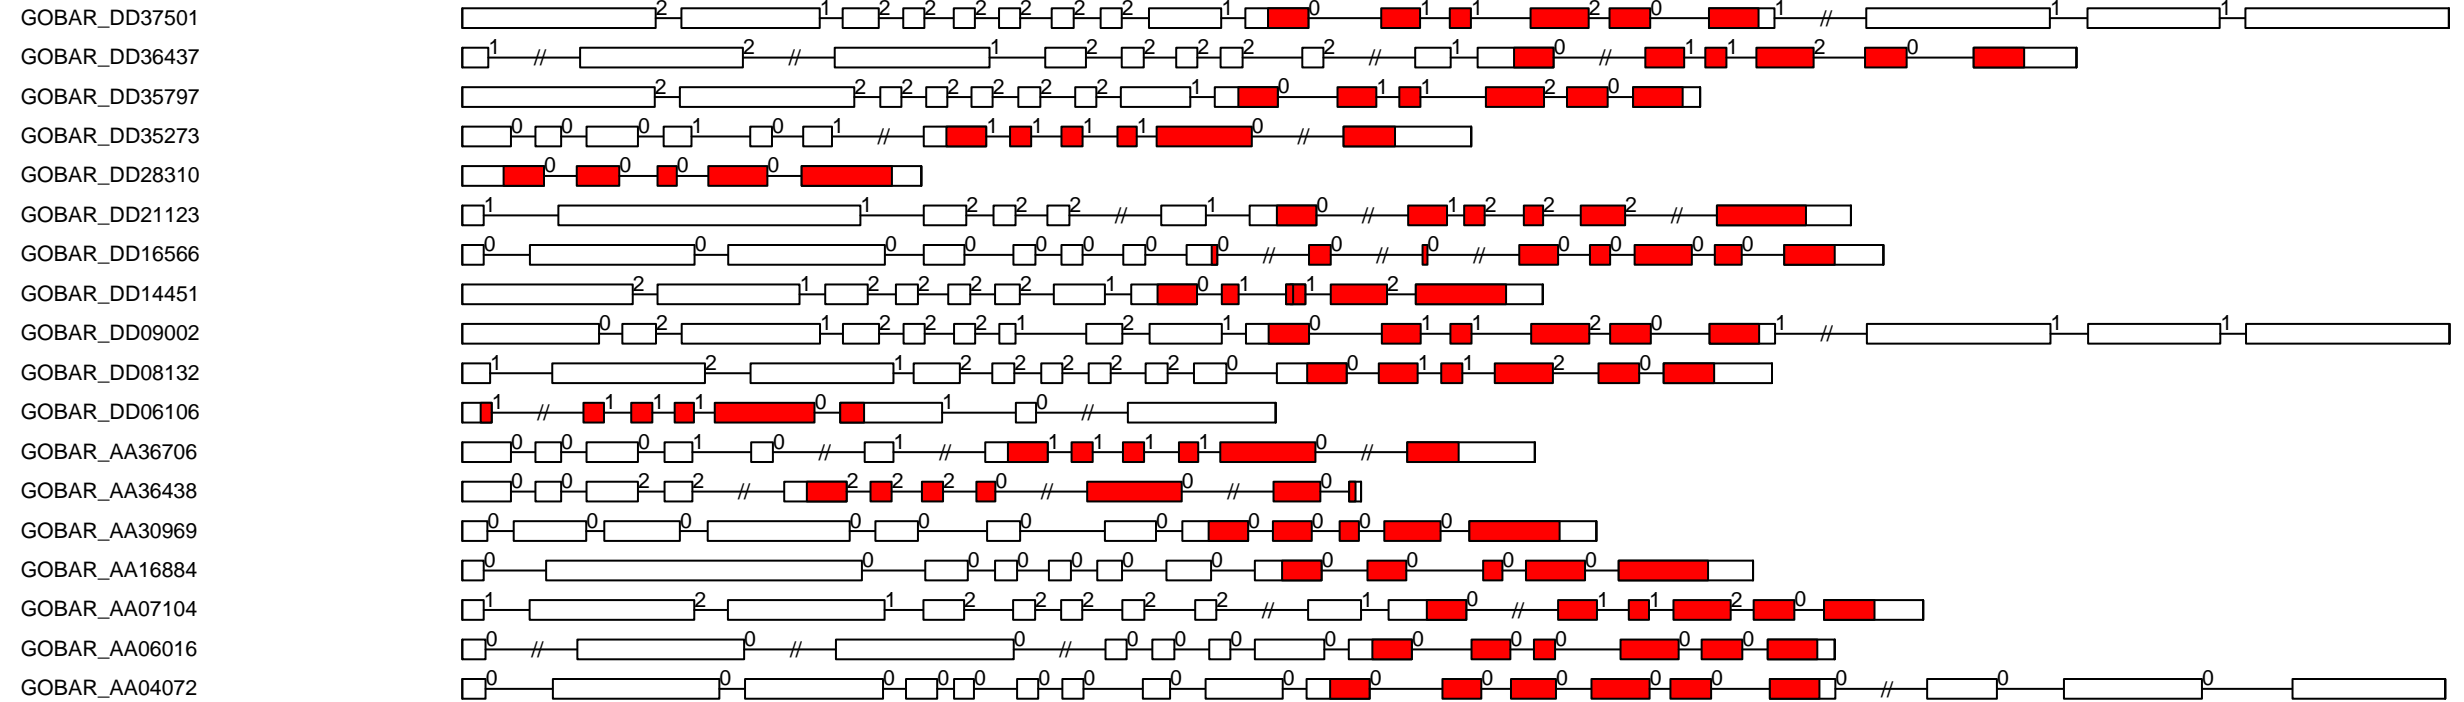

# G.ba RLK-Pelle\_LRR-I-2 exon-intron and domain diagram (all)

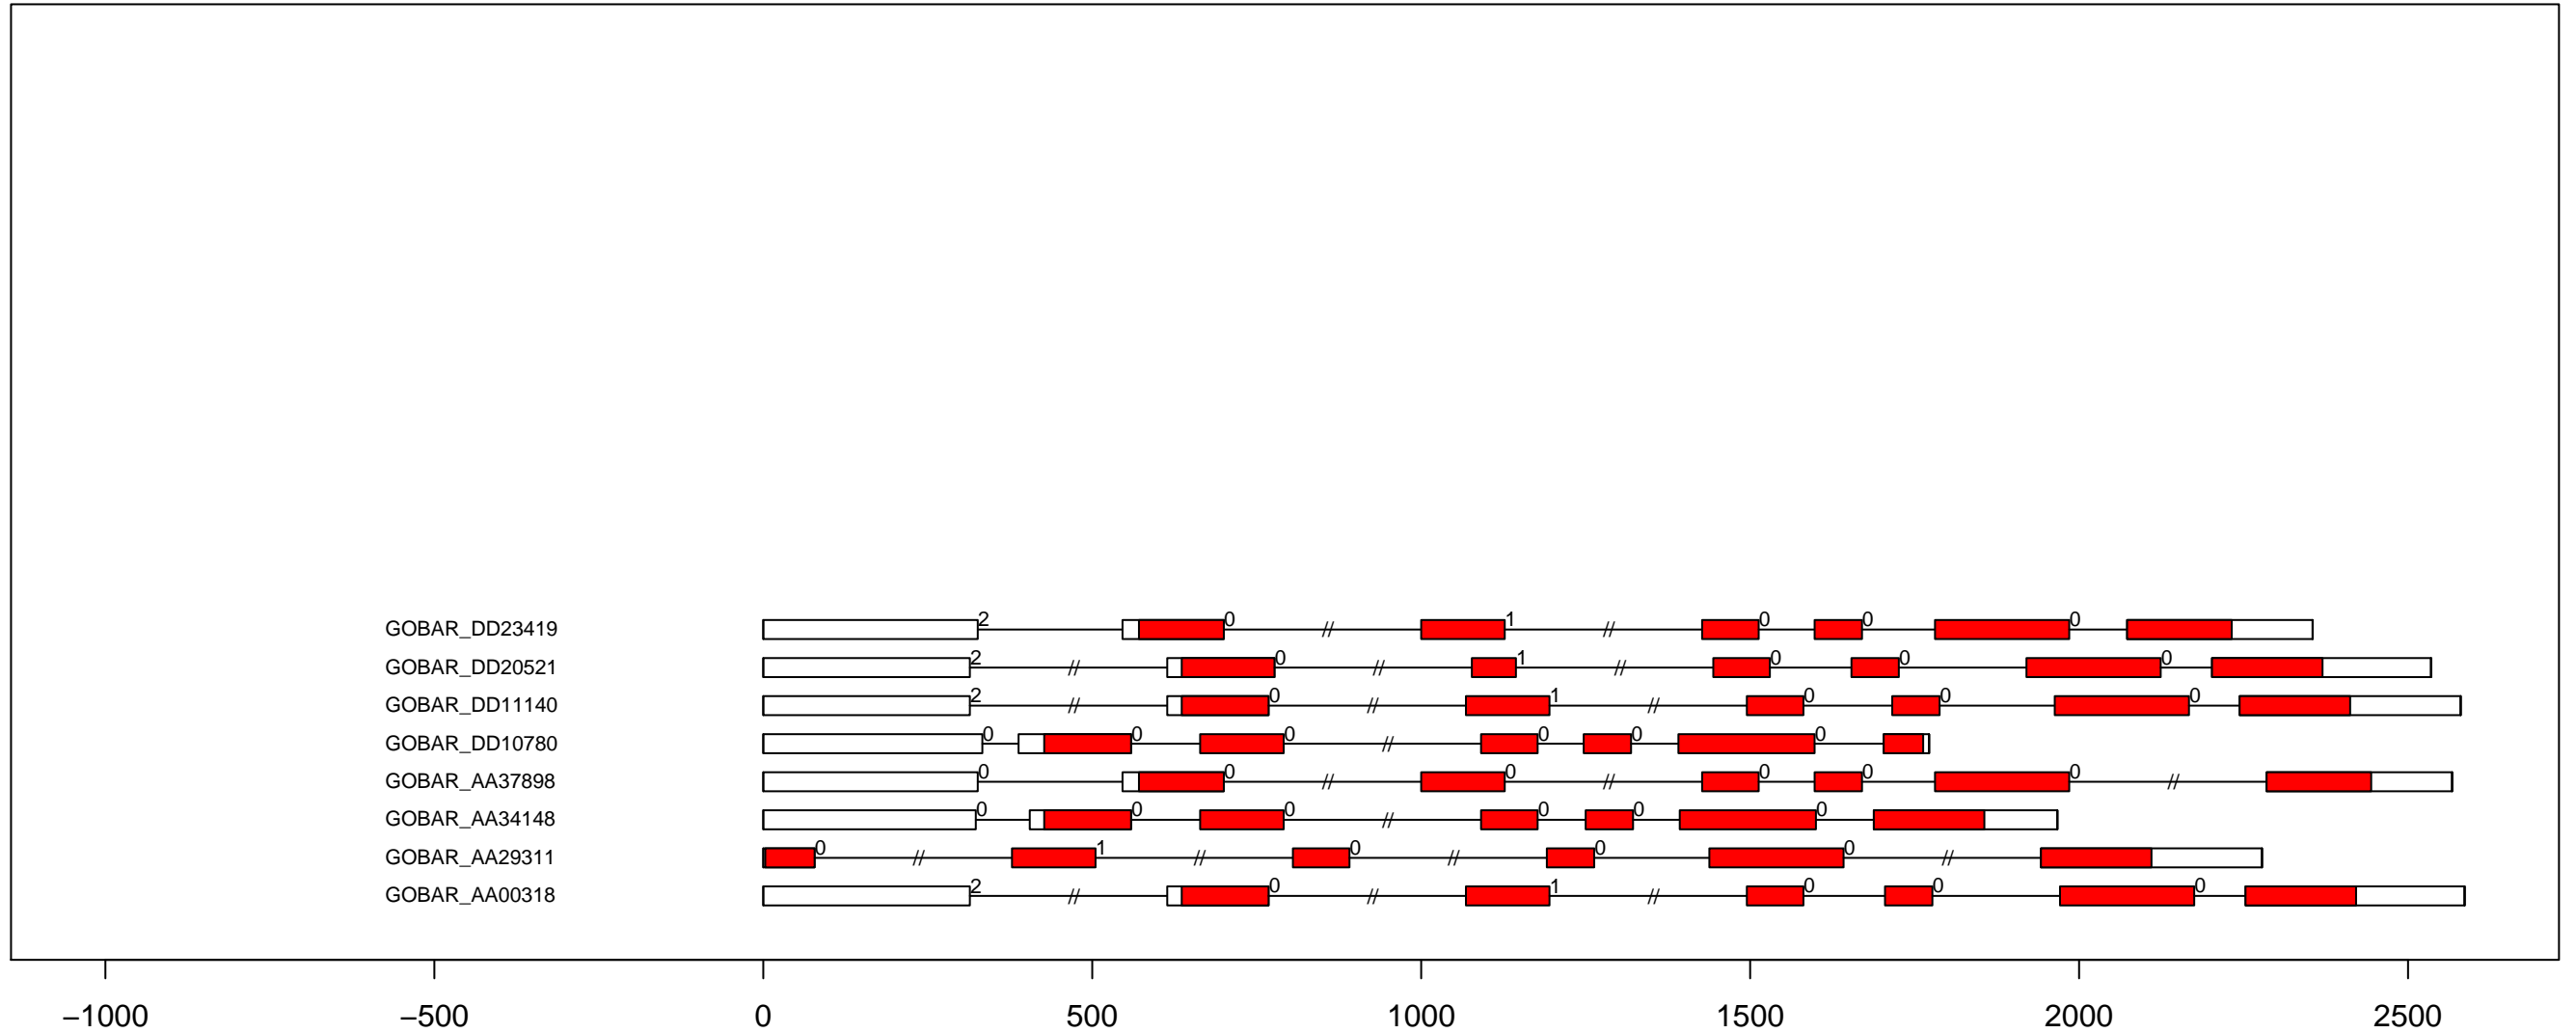

### G.ba RLK-Pelle\_LRR-III exon-intron and domain diagram (part 1)

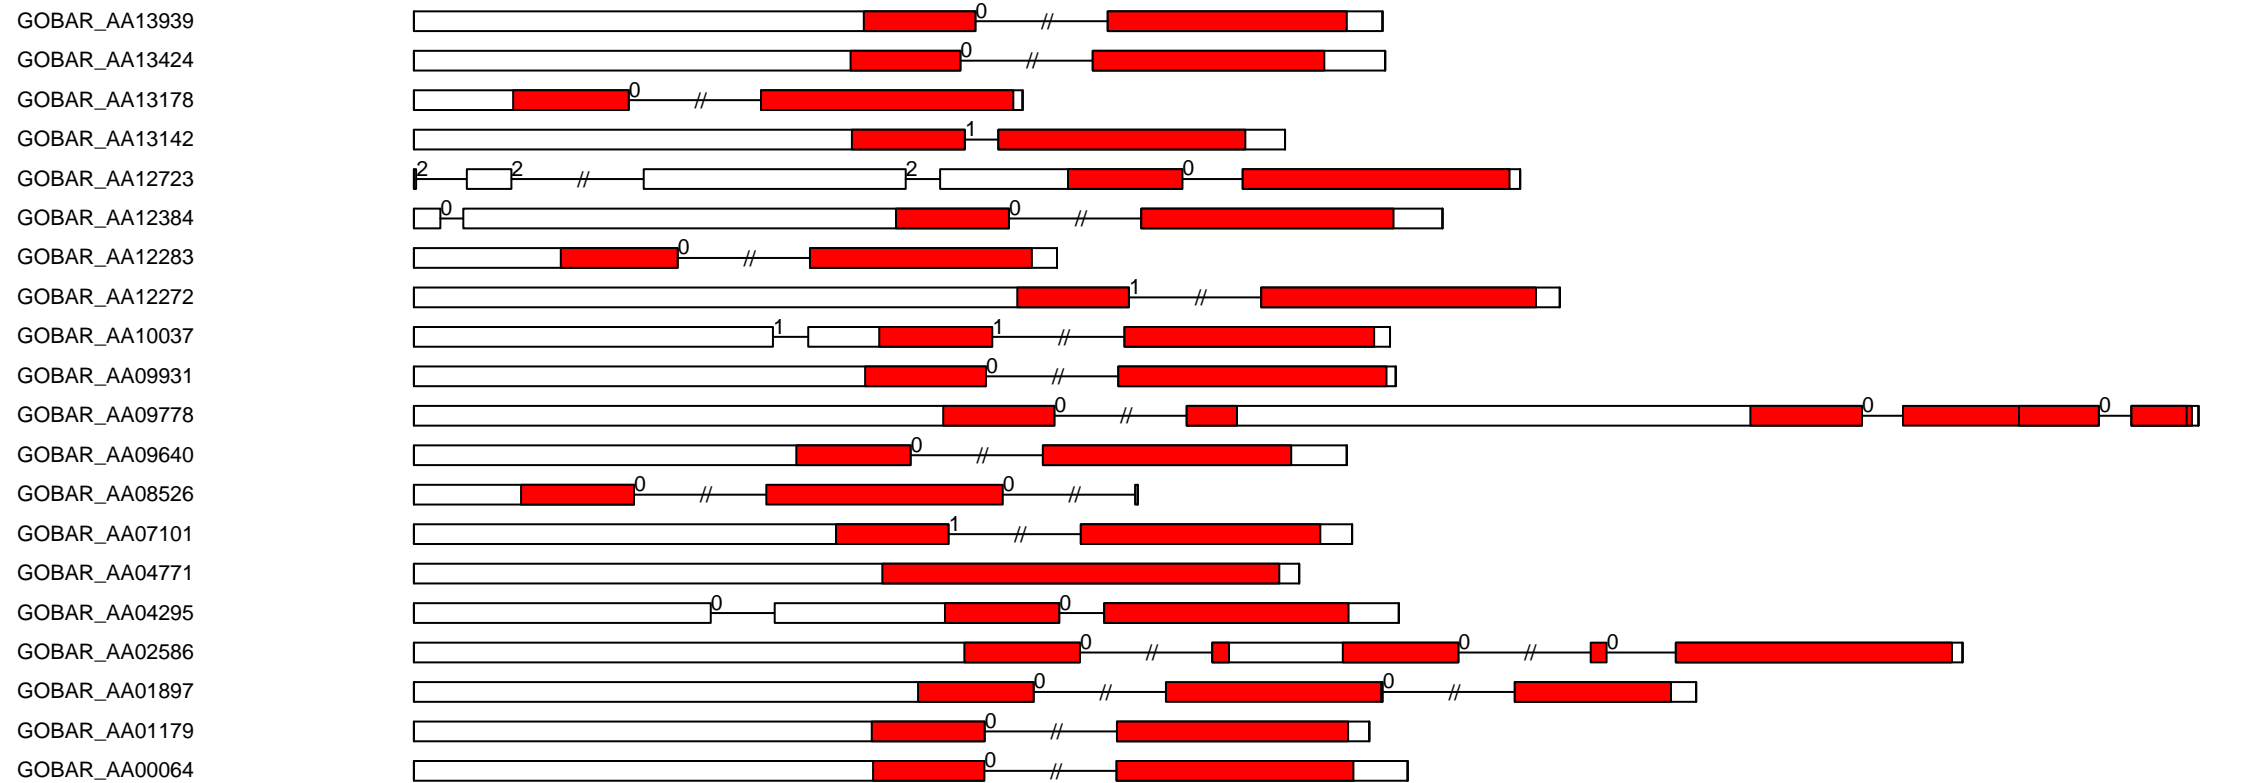

### G.ba RLK-Pelle\_LRR-III exon-intron and domain diagram (part 2)

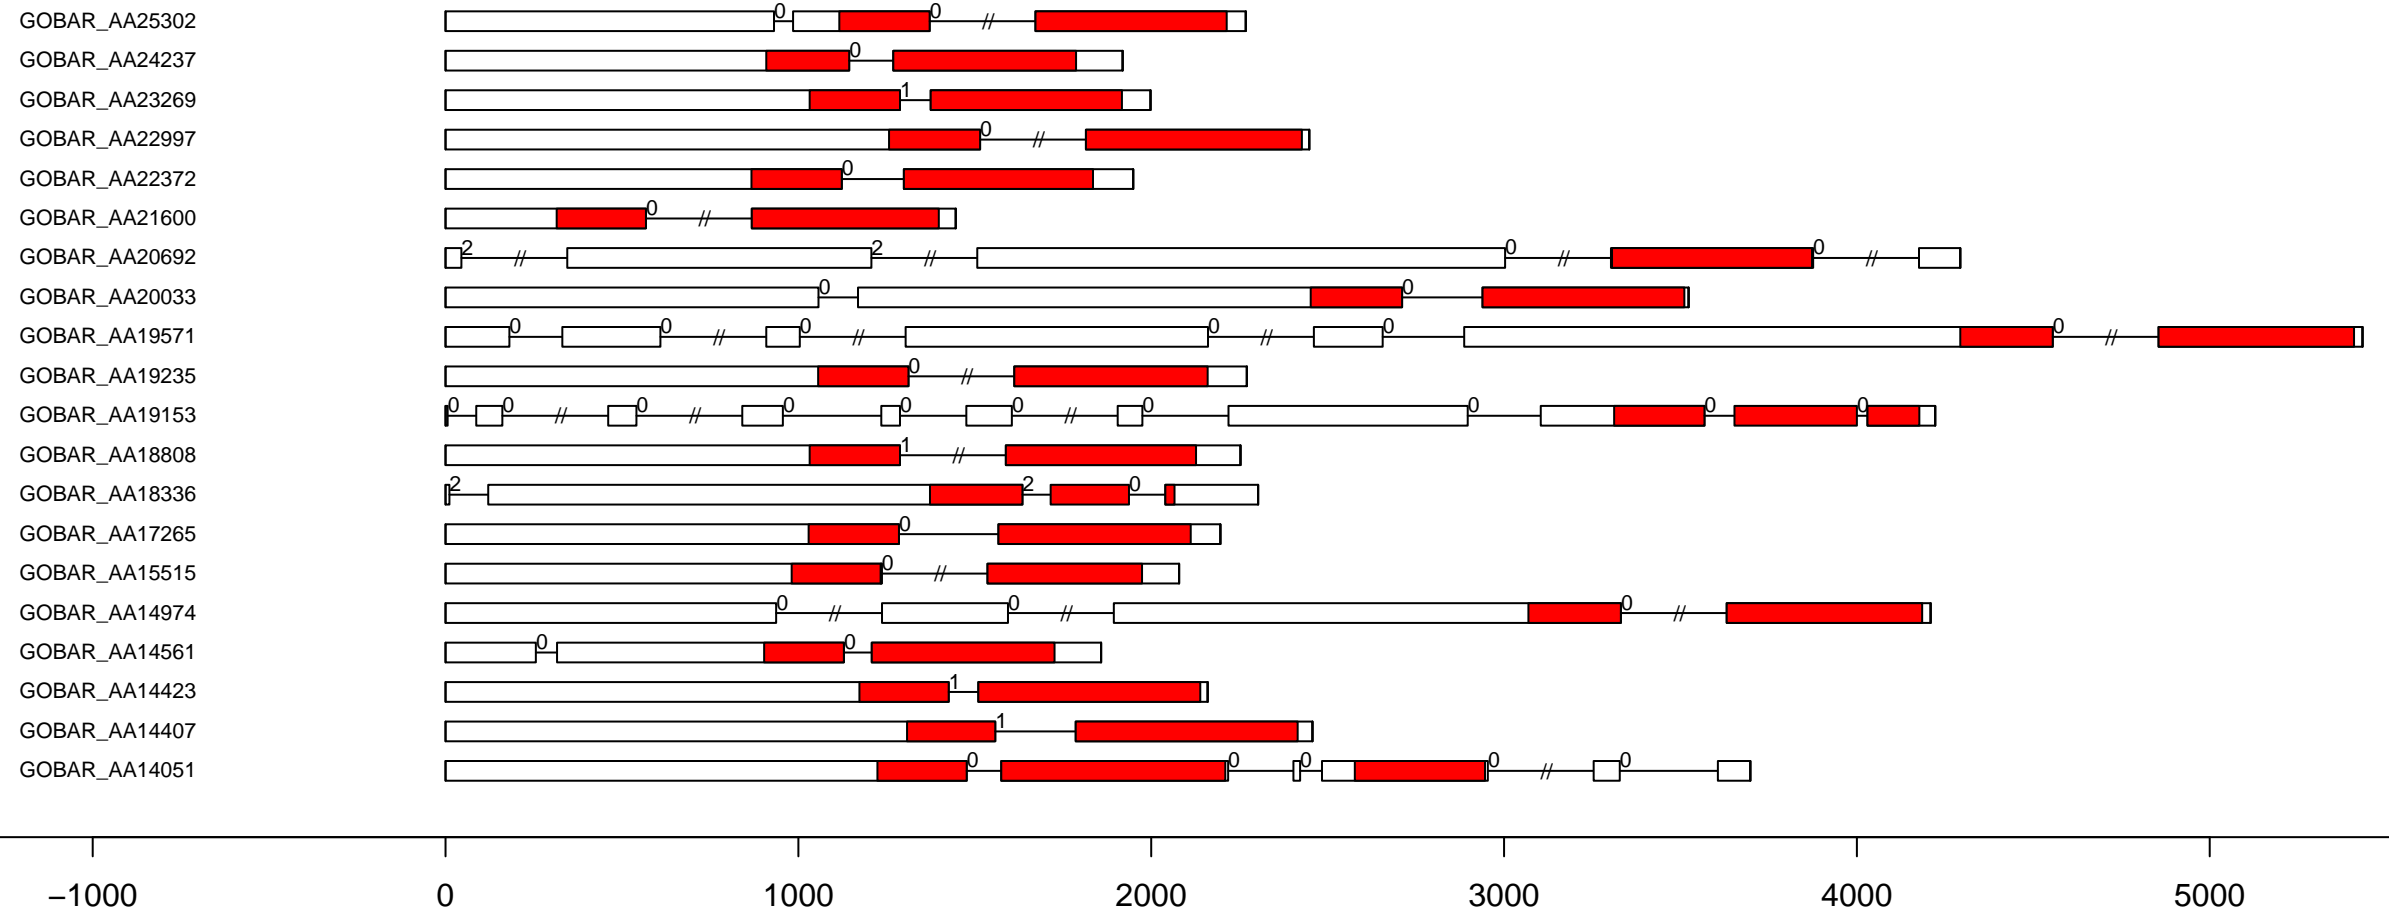

### G.ba RLK-Pelle\_LRR-III exon-intron and domain diagram (part 3)

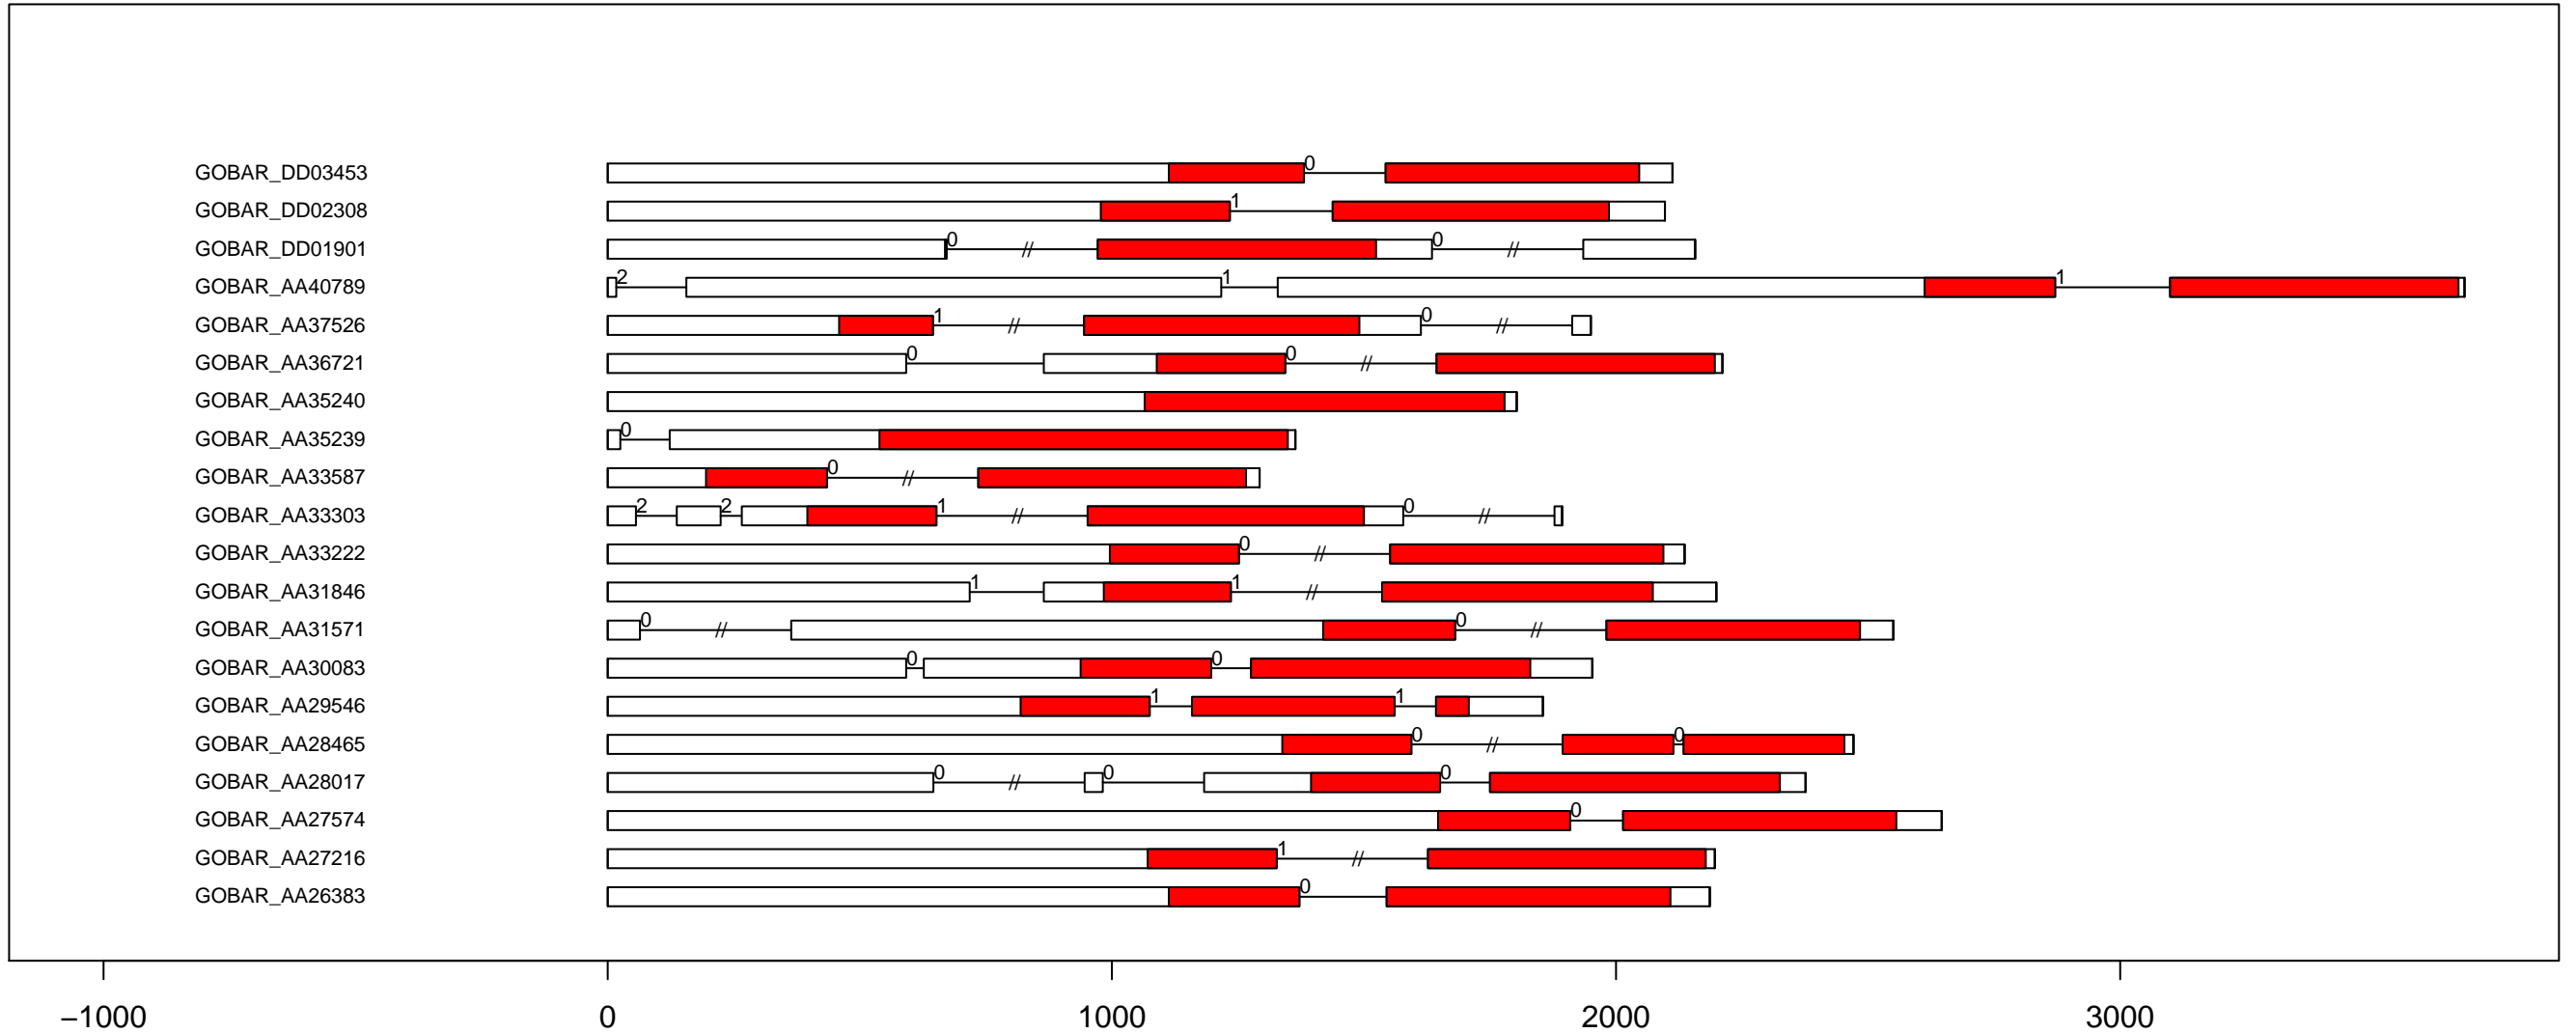

### G.ba RLK-Pelle\_LRR-III exon-intron and domain diagram (part 4)

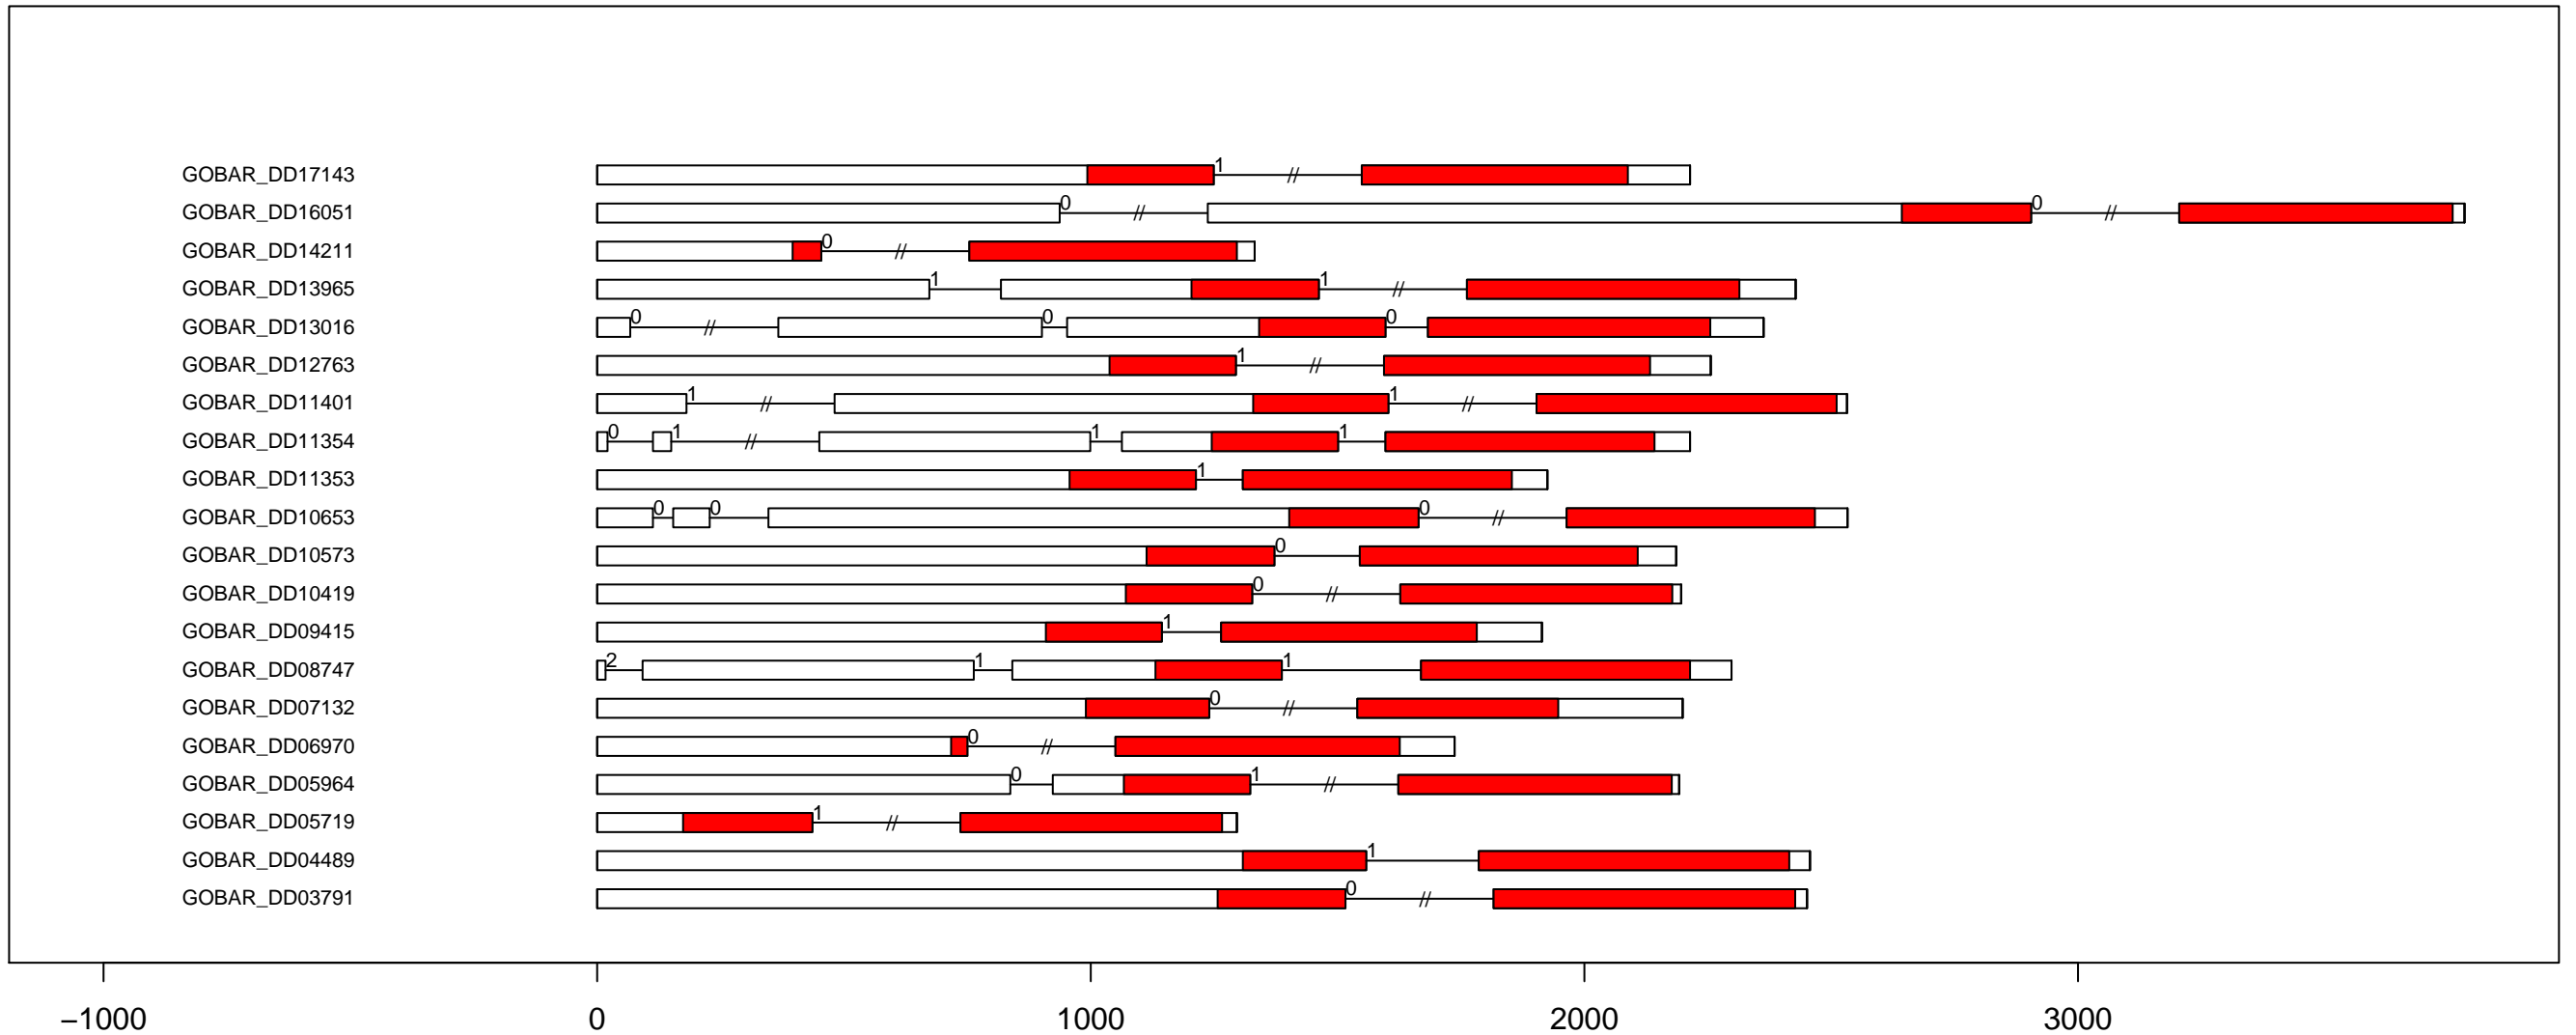



### G.ba RLK-Pelle\_LRR-III exon-intron and domain diagram (part 5)

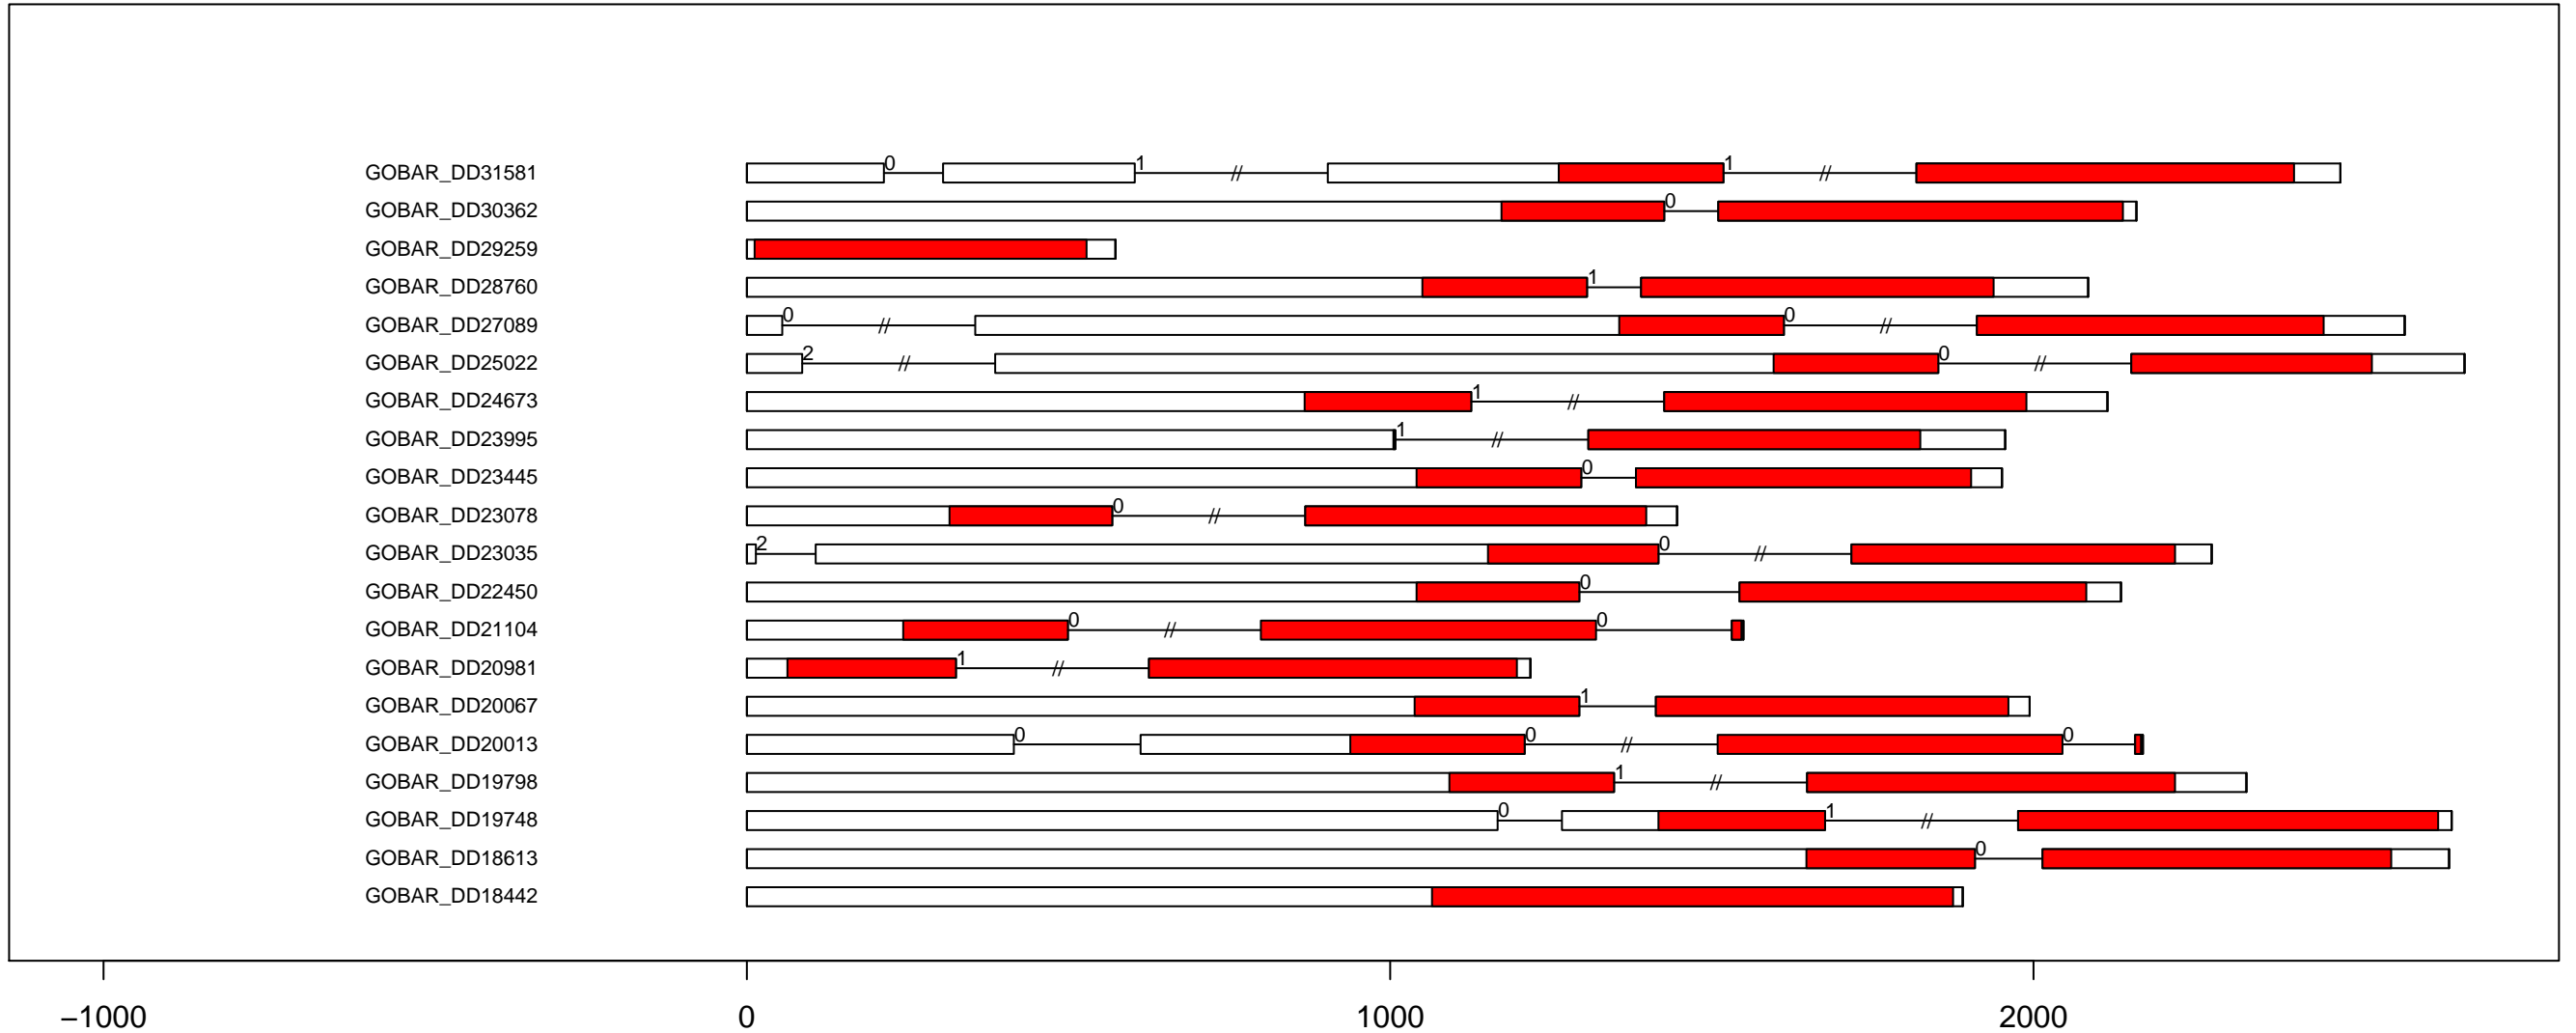

G.ba RLK-Pelle\_LRR-III exon-intron and domain diagram (part 6)

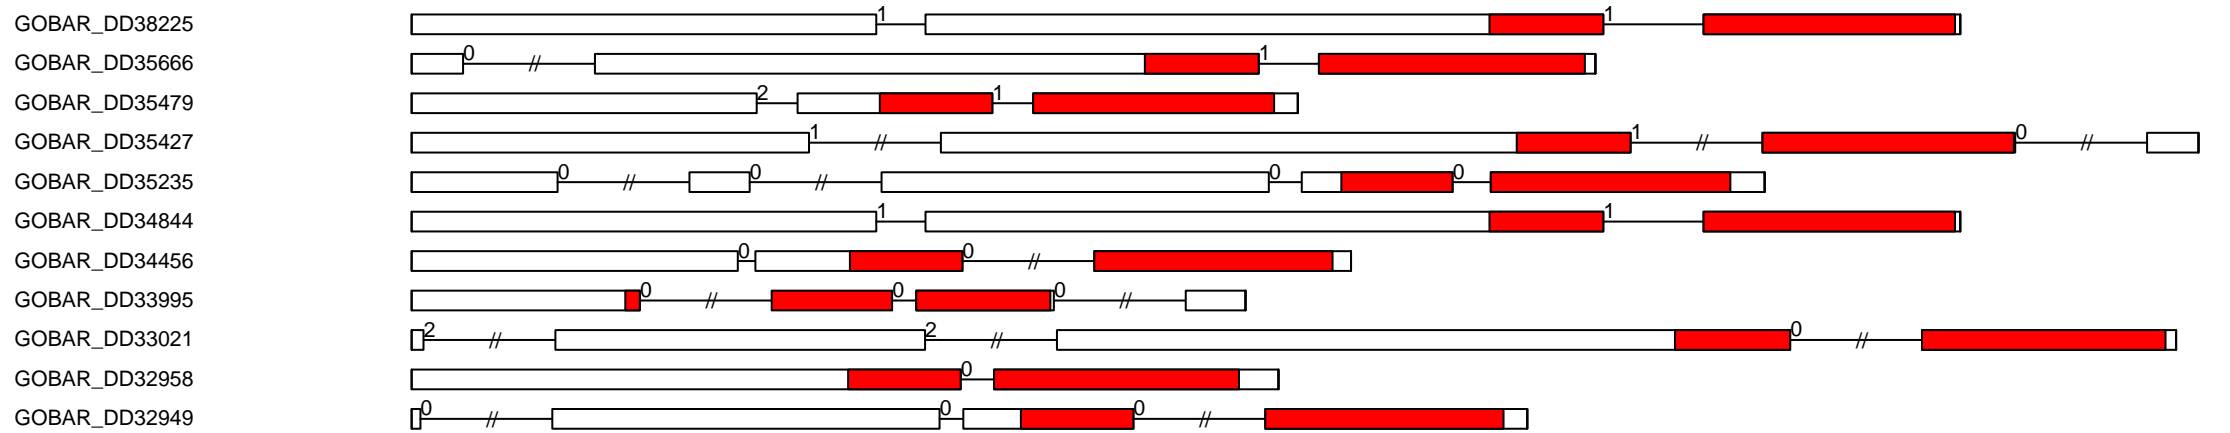

### G.ba RLK-Pelle\_LRR-II exon-intron and domain diagram (part 1)

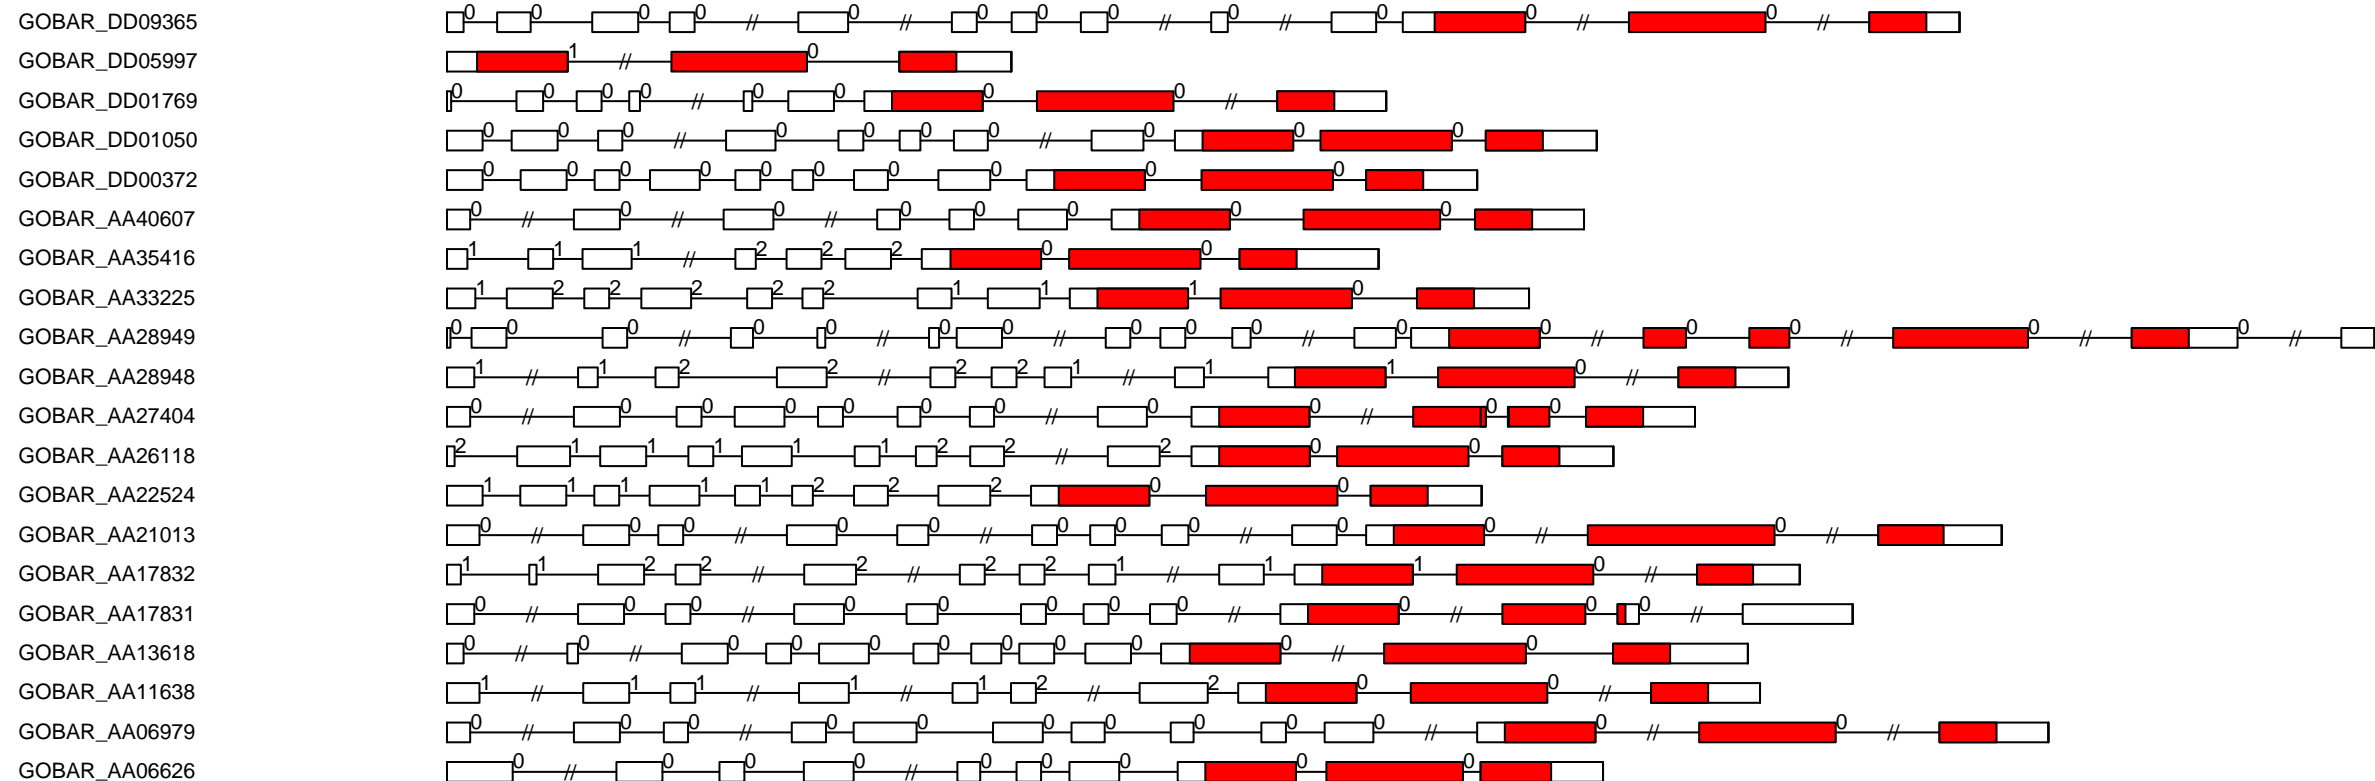

### G.ba RLK-Pelle\_LRR-II exon-intron and domain diagram (part 2)

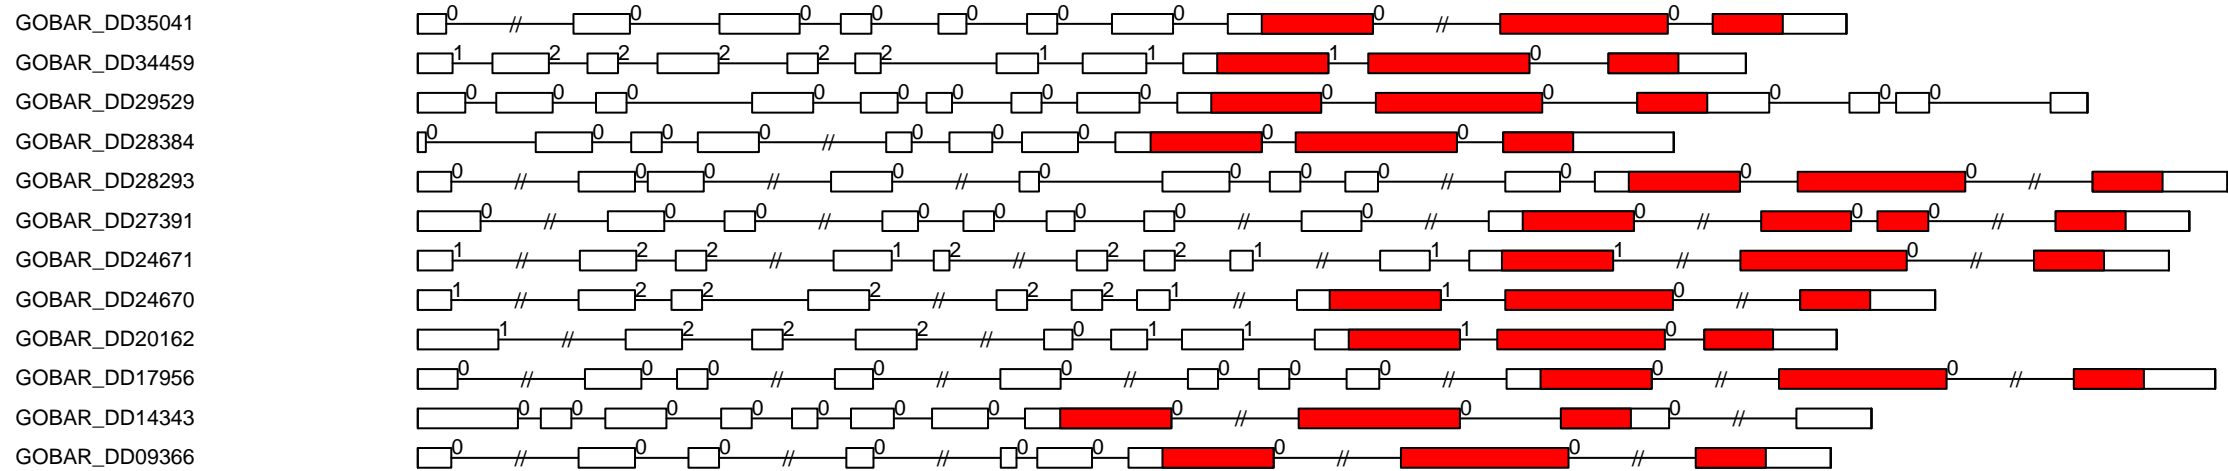

# G.ba RLK-Pelle\_LRR-IV exon-intron and domain diagram (all)

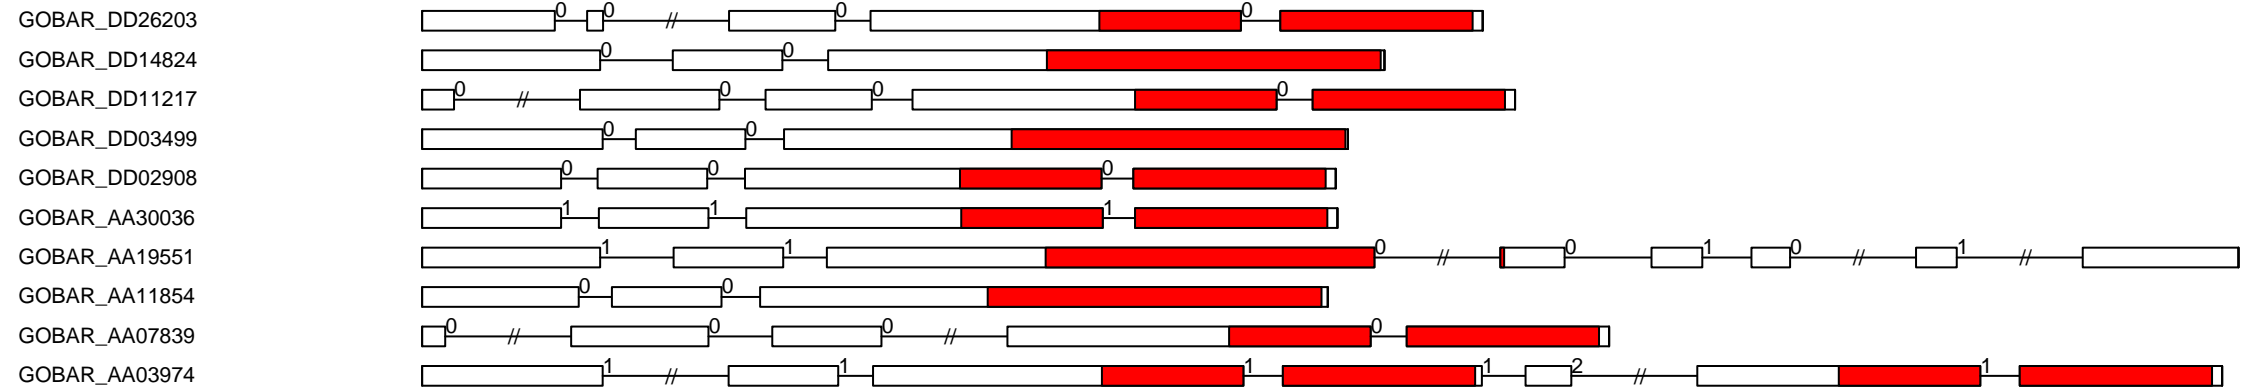

-1000

0

1000

2000

3000

4000

### G.ba RLK-Pelle\_LRR-IX exon-intron and domain diagram (all)

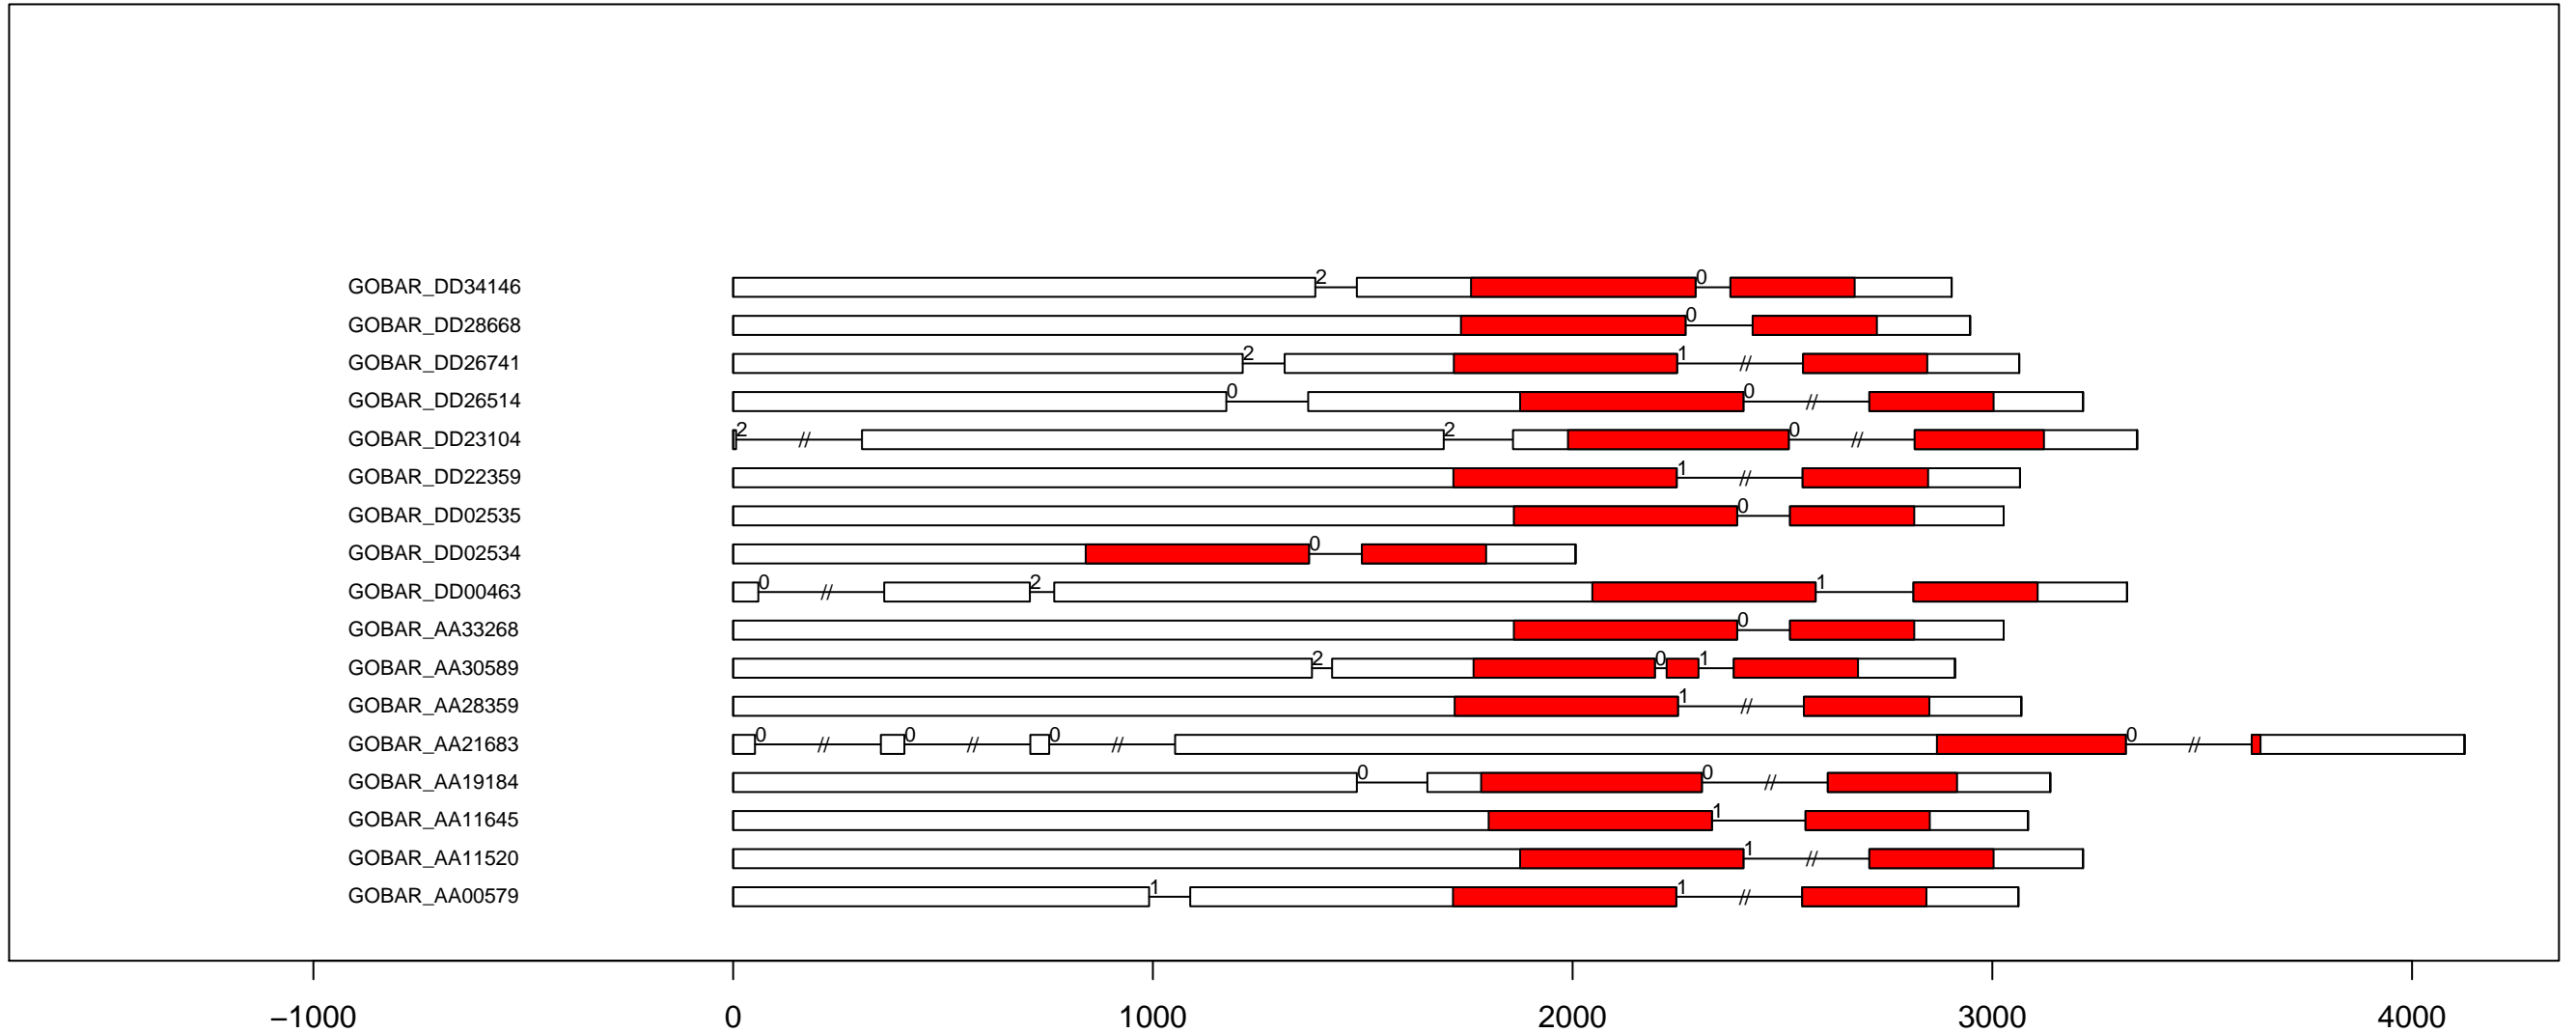

### G.ba RLK-Pelle\_LRR-VI-1 exon-intron and domain diagram (all)

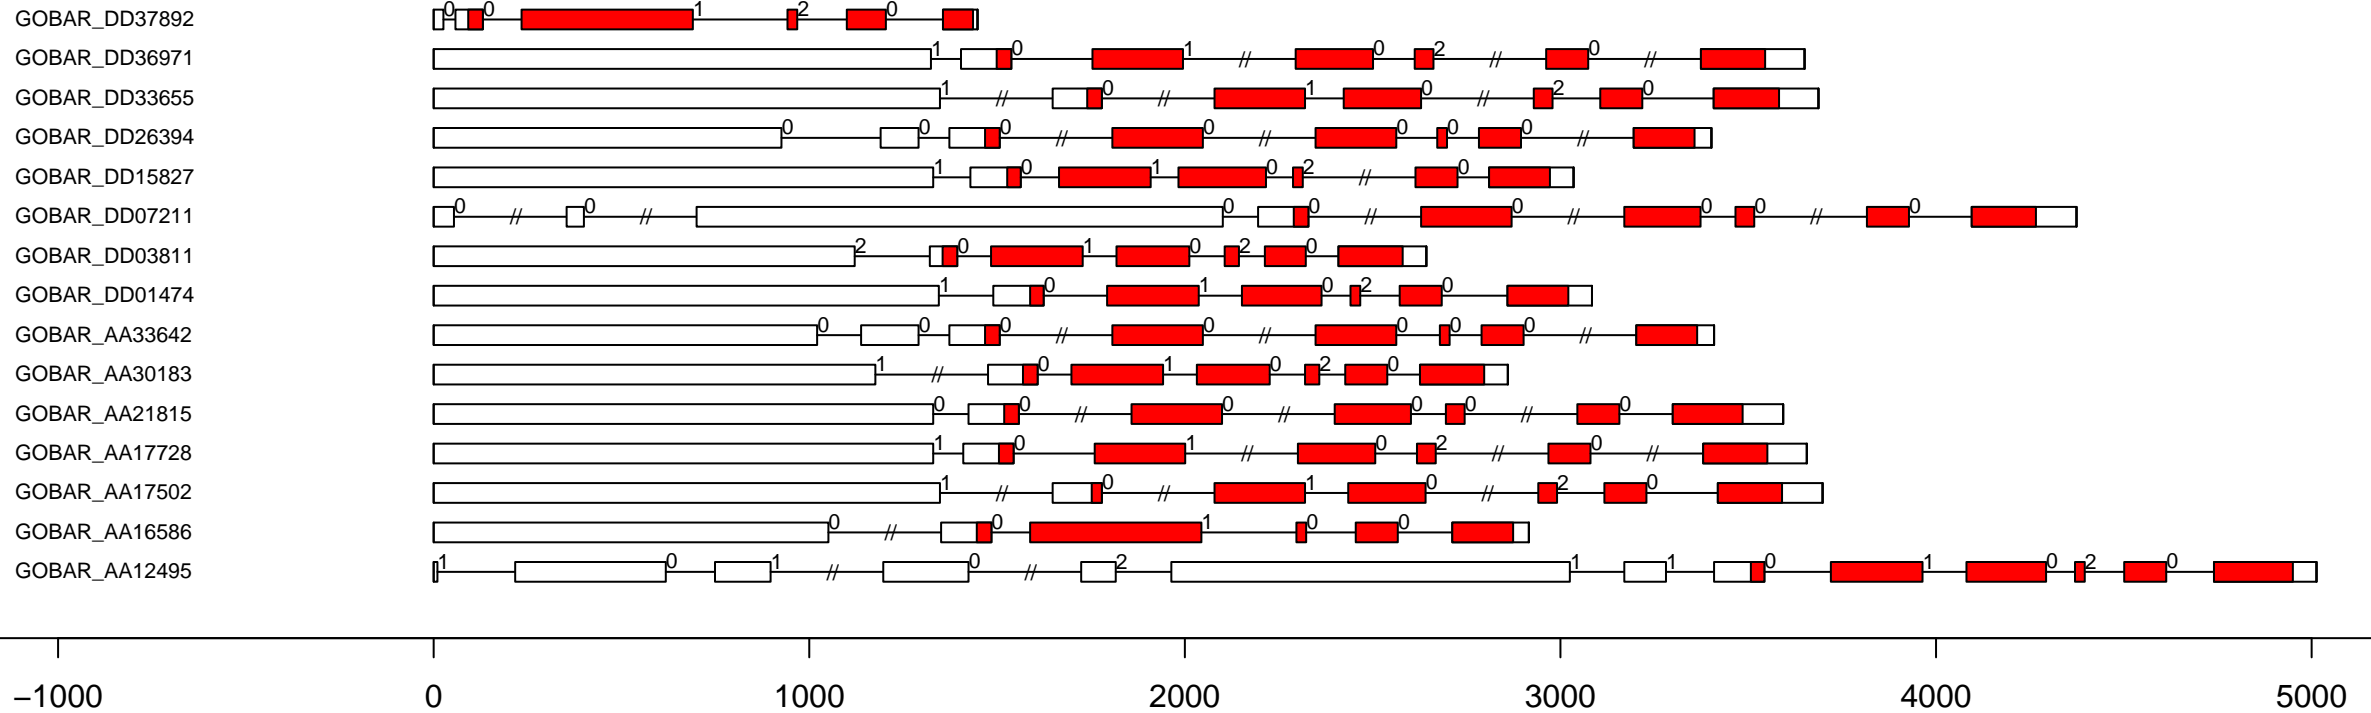







# G.ba RLK-Pelle\_LRR-VII-2 exon-intron and domain diagram (all)

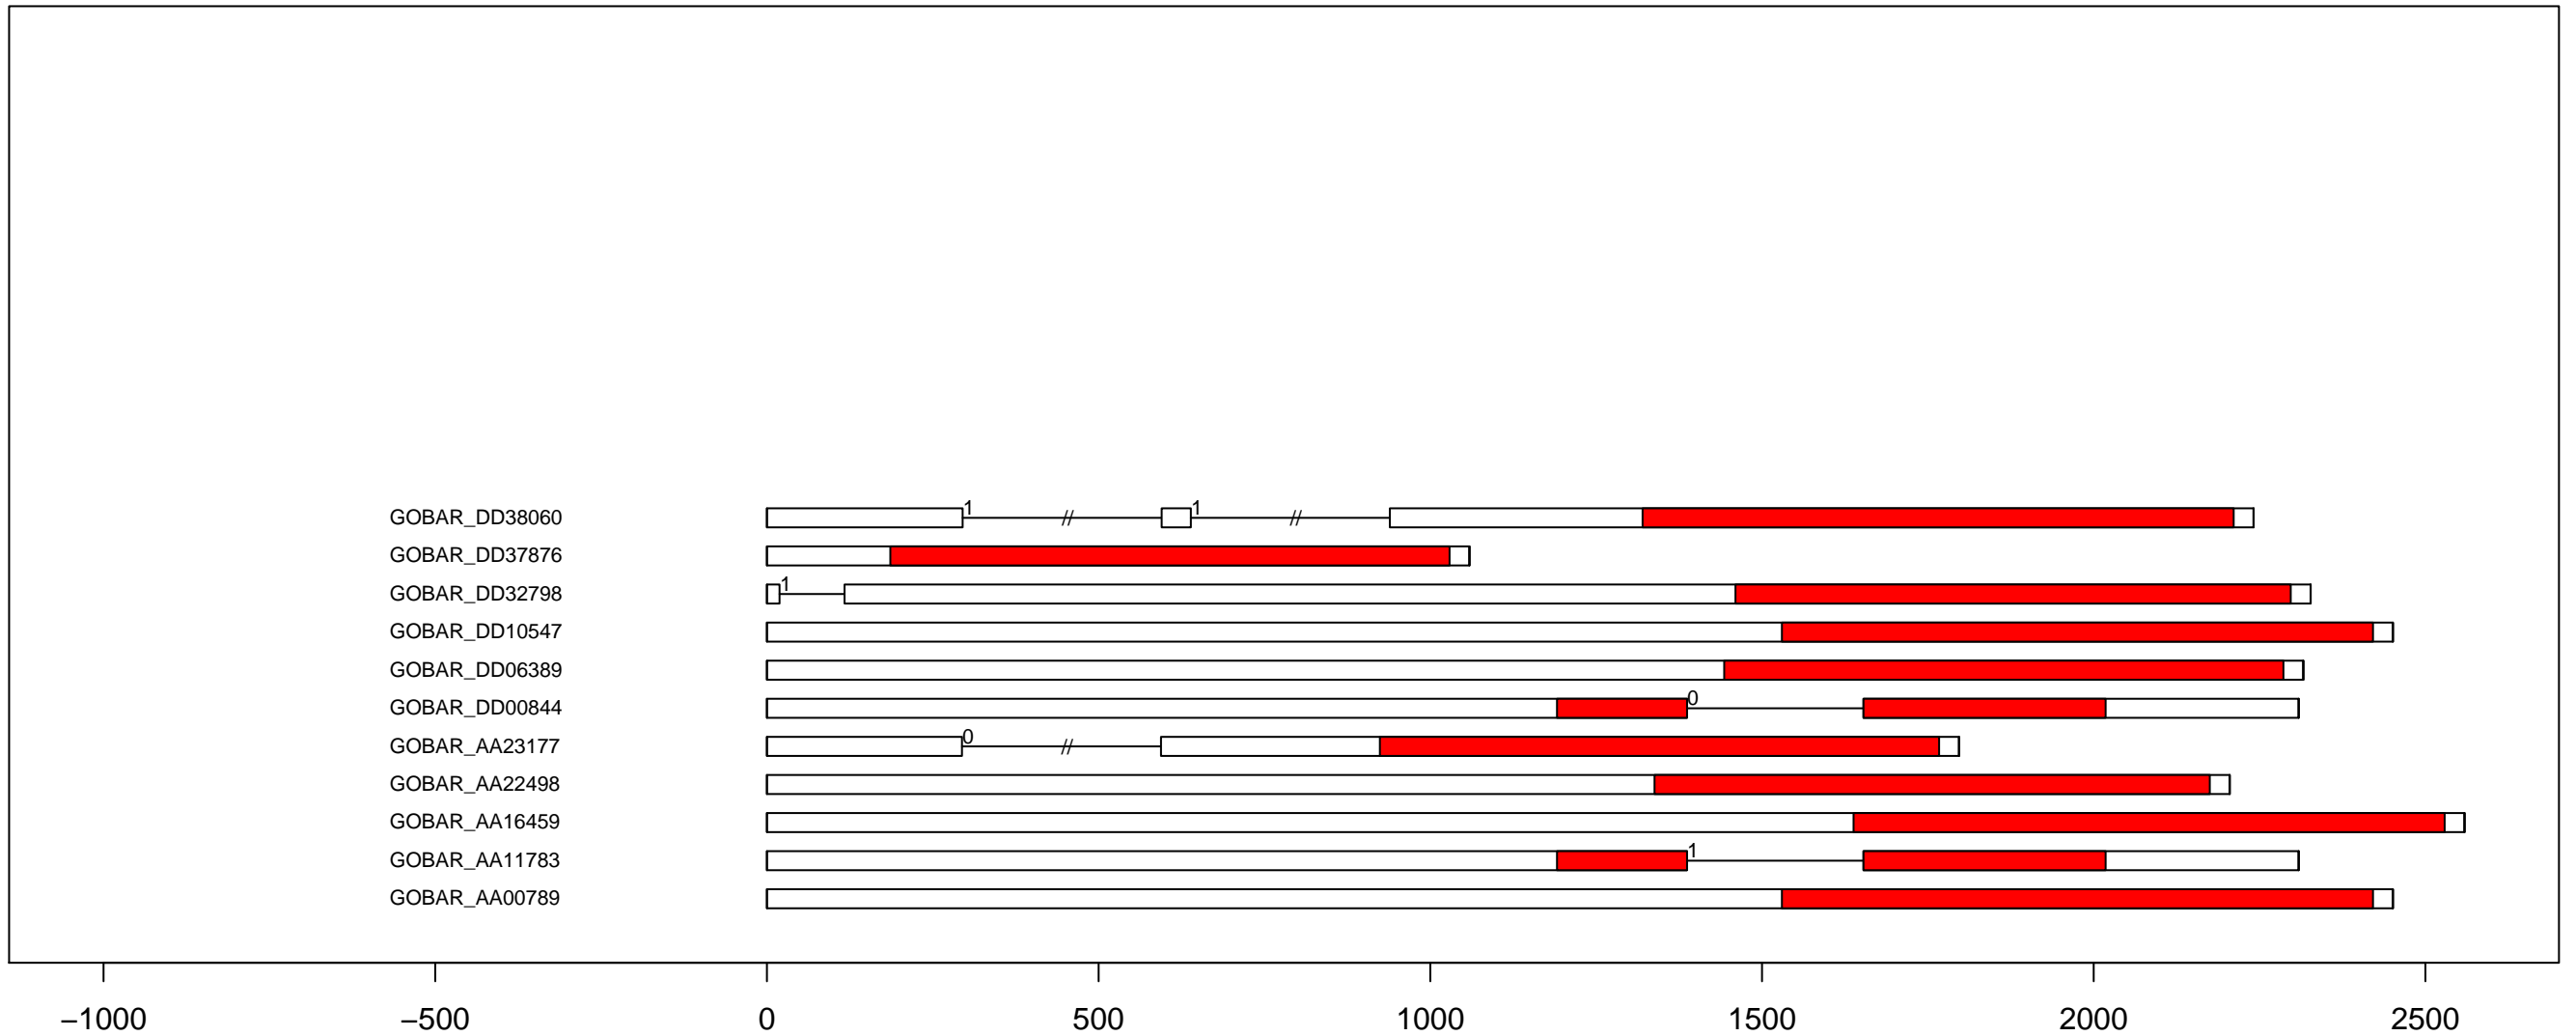

# G.ba RLK-Pelle\_LRR-VII-3 exon-intron and domain diagram (all)

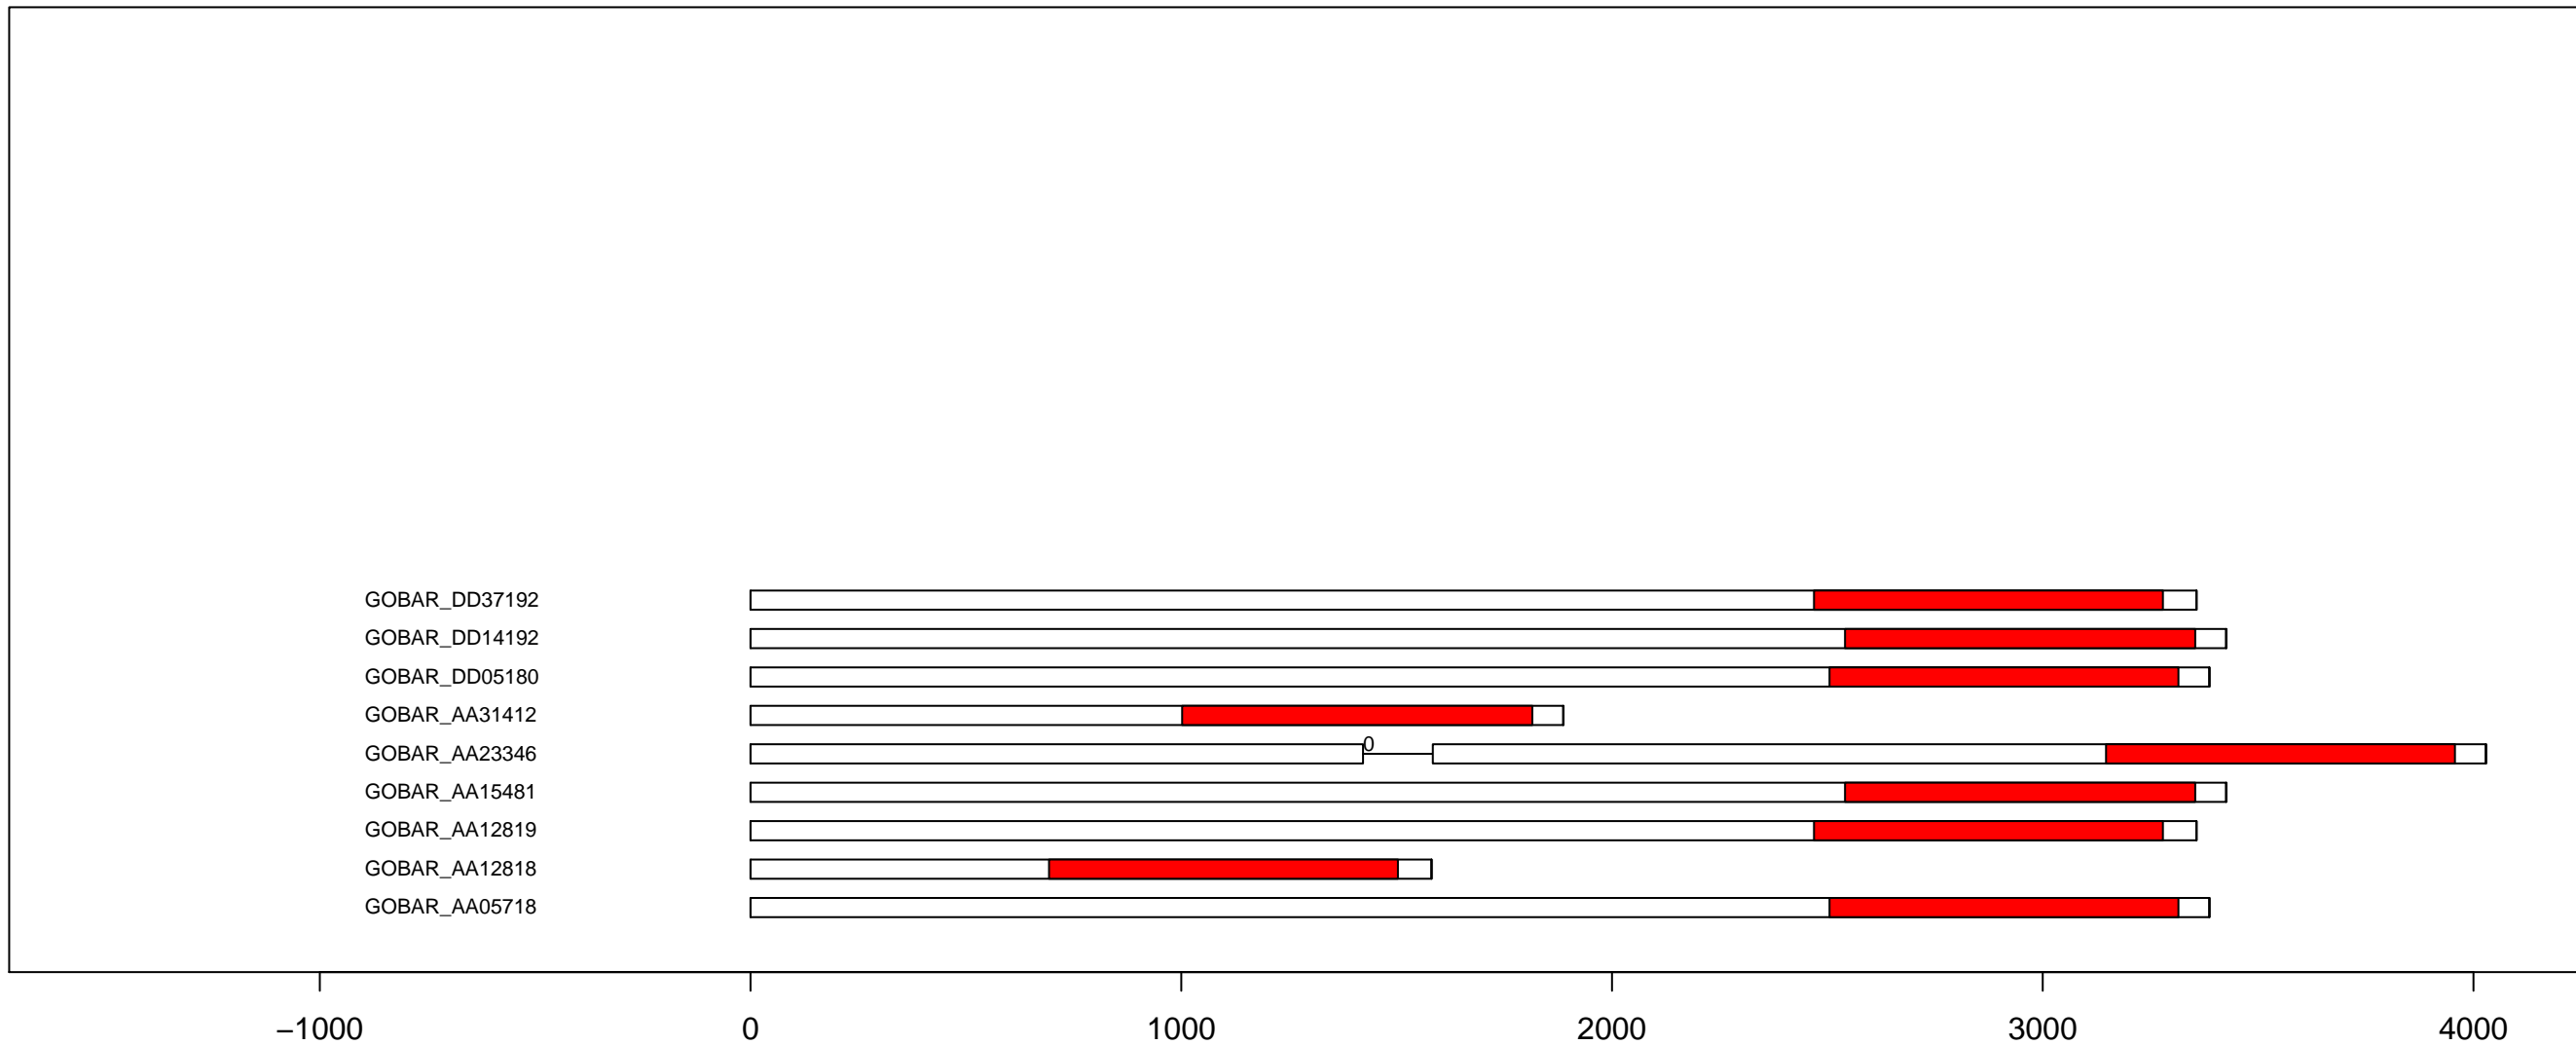

# G.ba RLK-Pelle\_LRR-VIII-1 exon-intron and domain diagram (all)

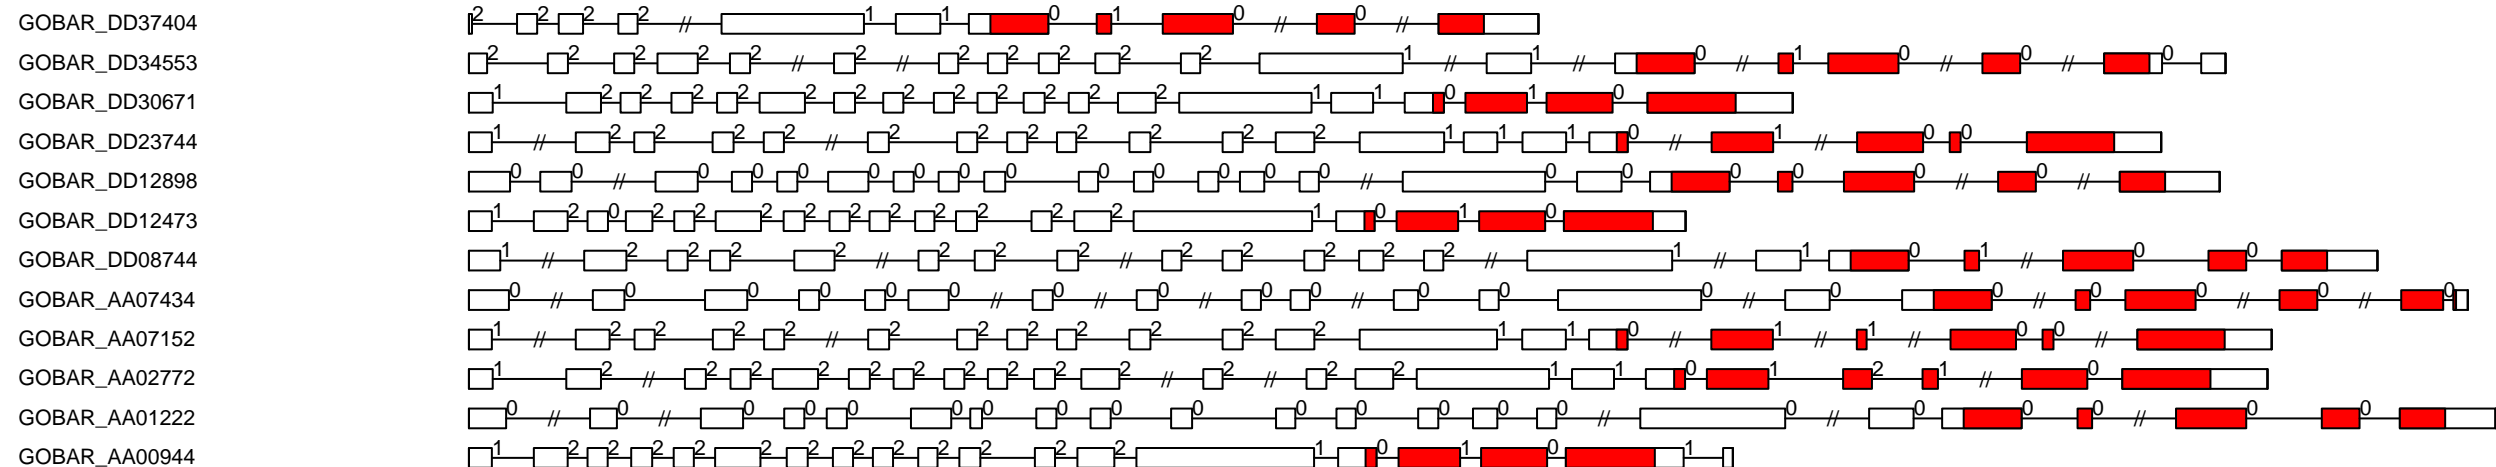

0

2000

4000

6000

### G.ba RLK-Pelle\_LRR-V exon-intron and domain diagram (all)

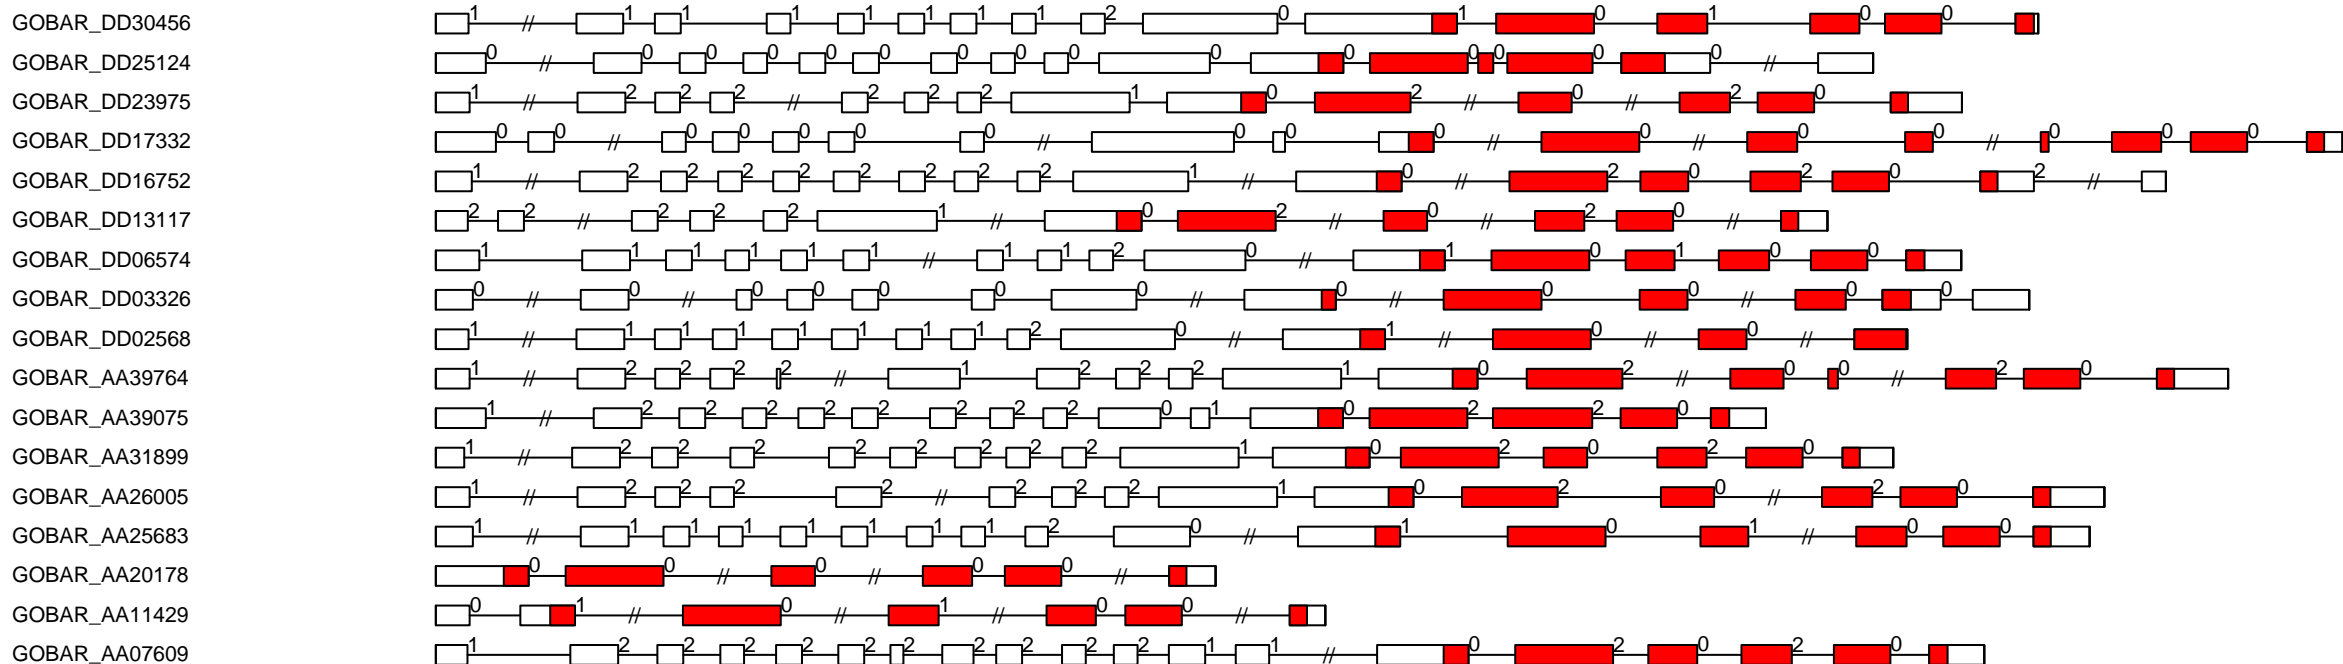

### G.ba RLK-Pelle\_LRR-Xa exon-intron and domain diagram (all)

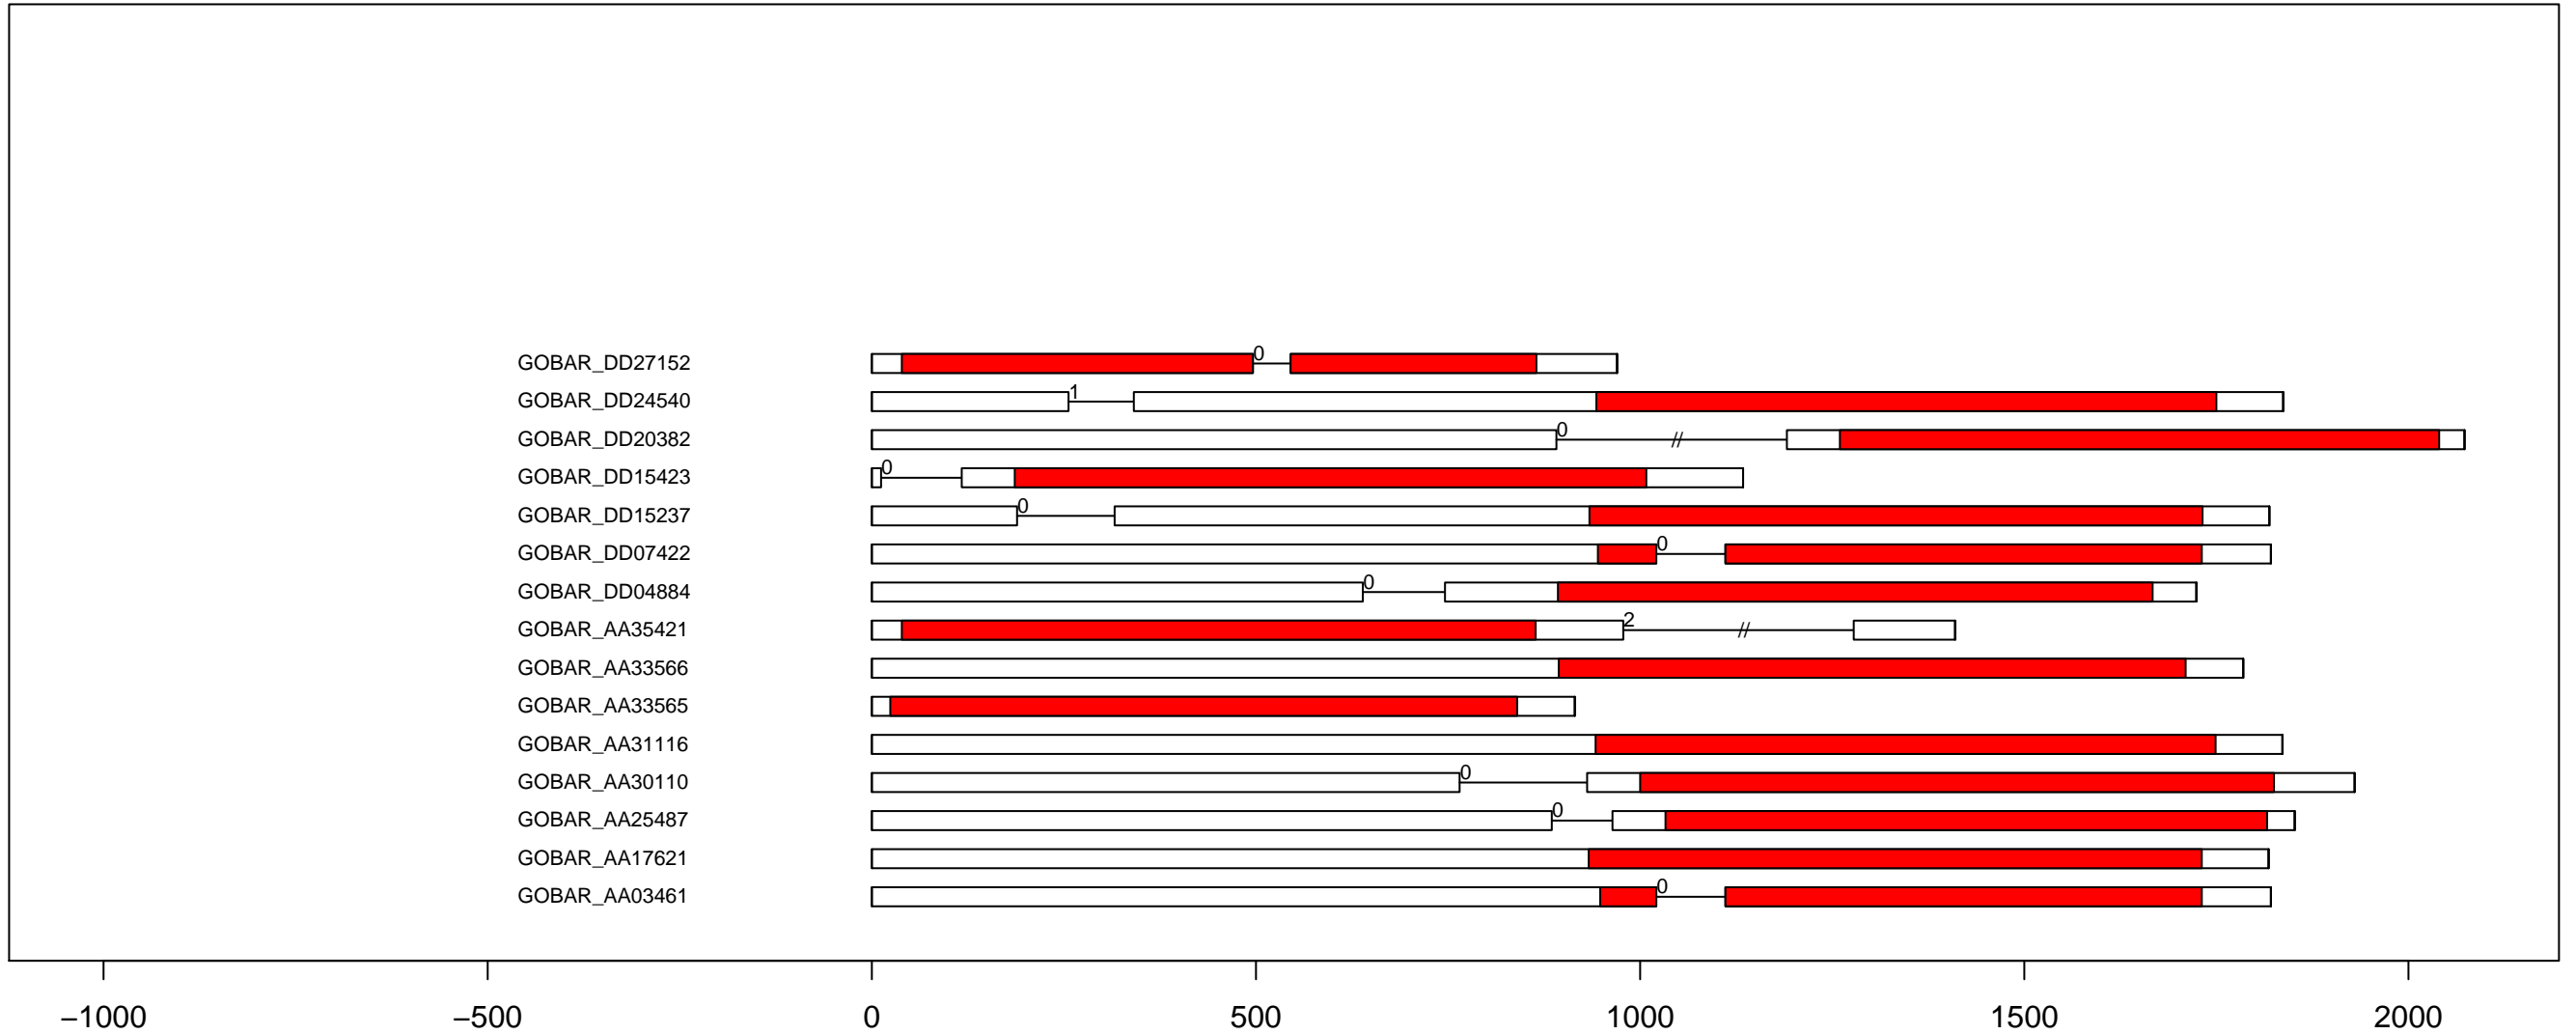

# G.ba RLK-Pelle\_LRR-Xb-1 exon-intron and domain diagram (part 1)

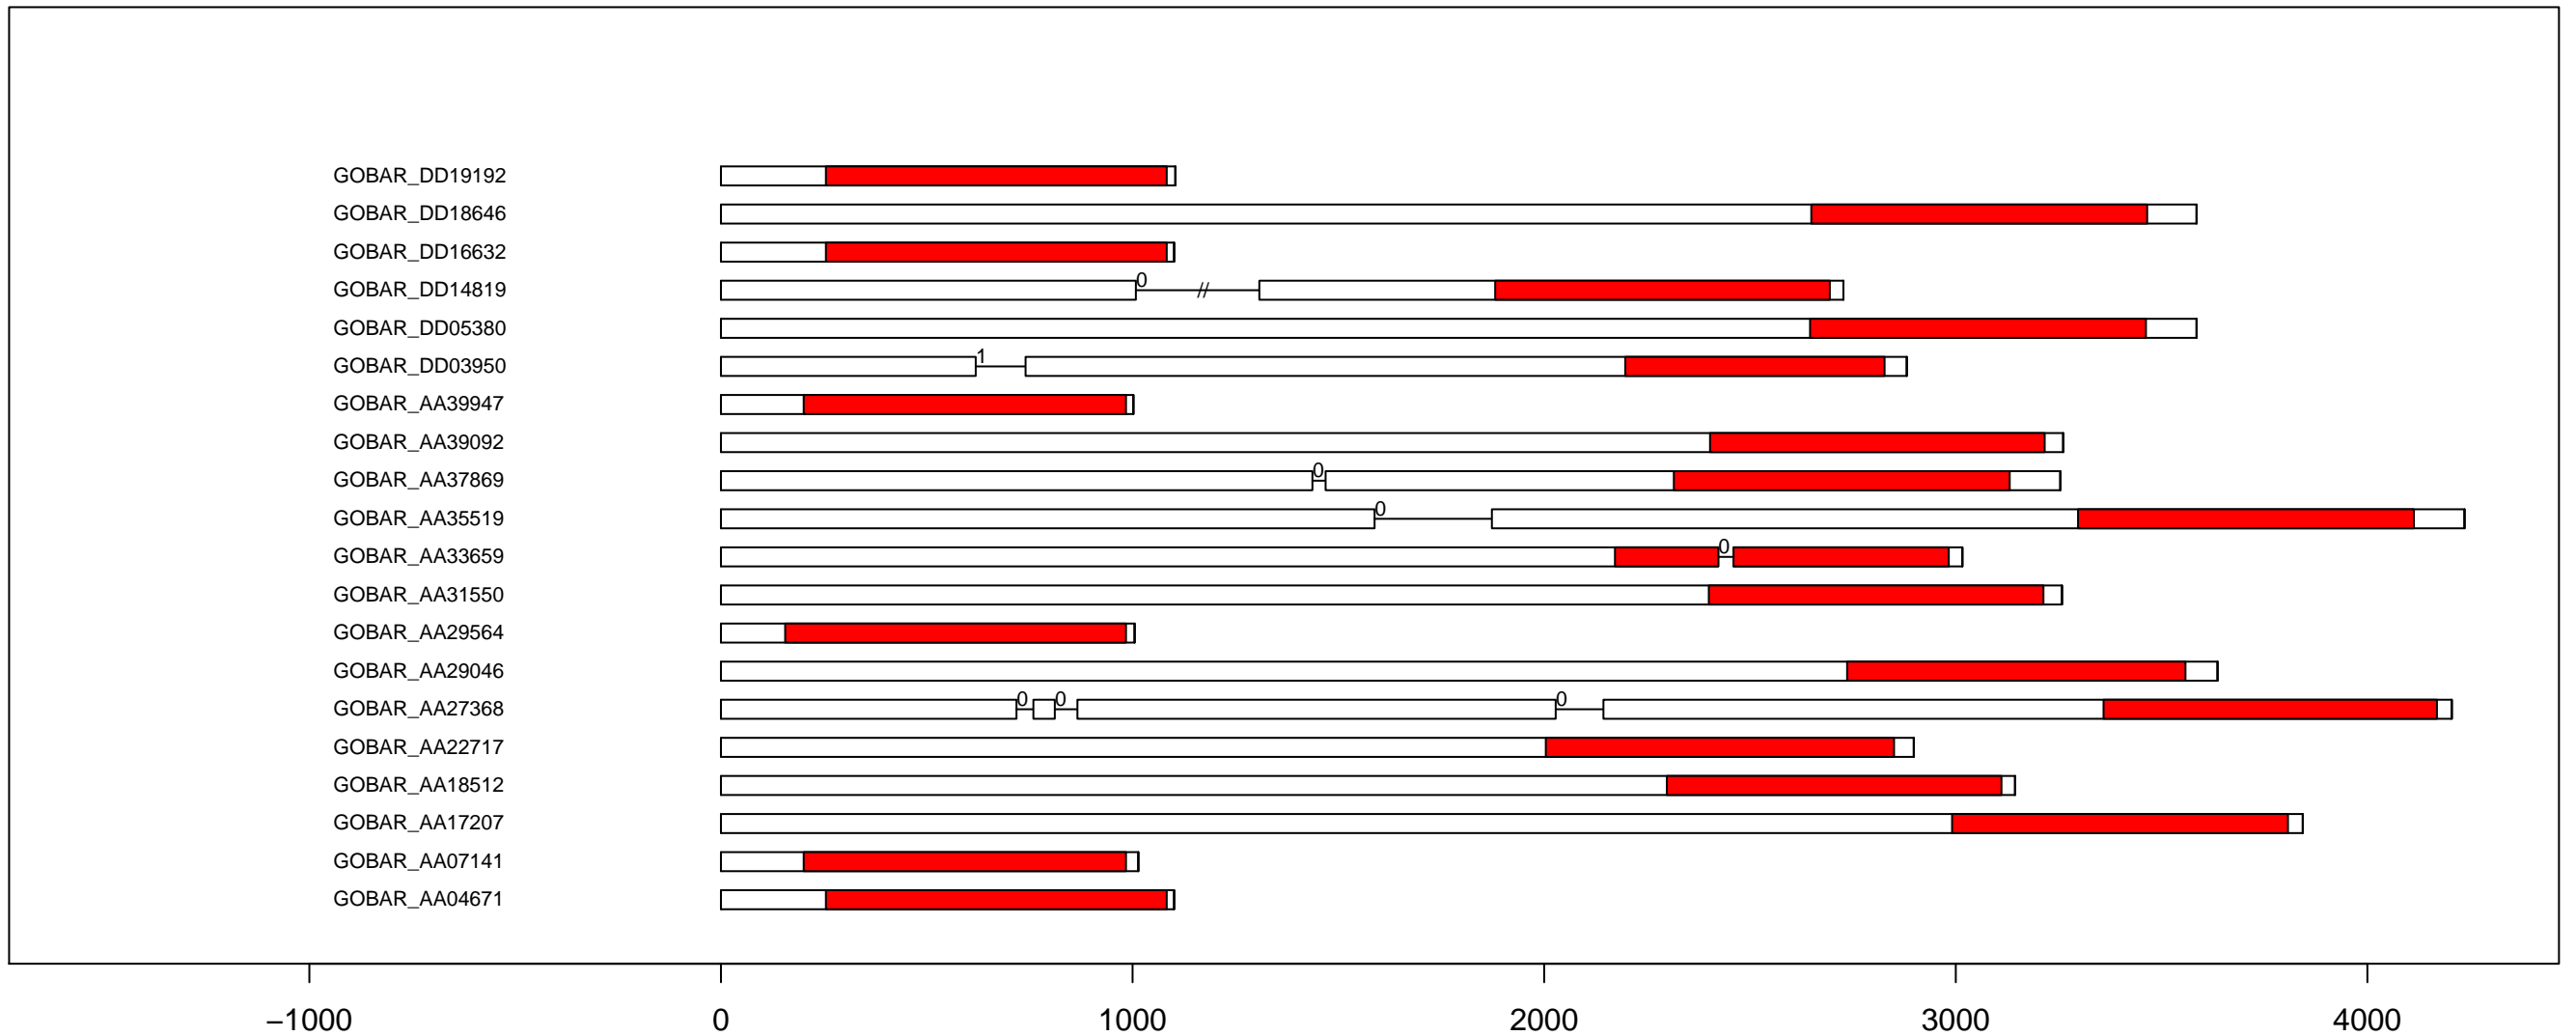

# G.ba RLK-Pelle\_LRR-Xb-1 exon-intron and domain diagram (part 2)

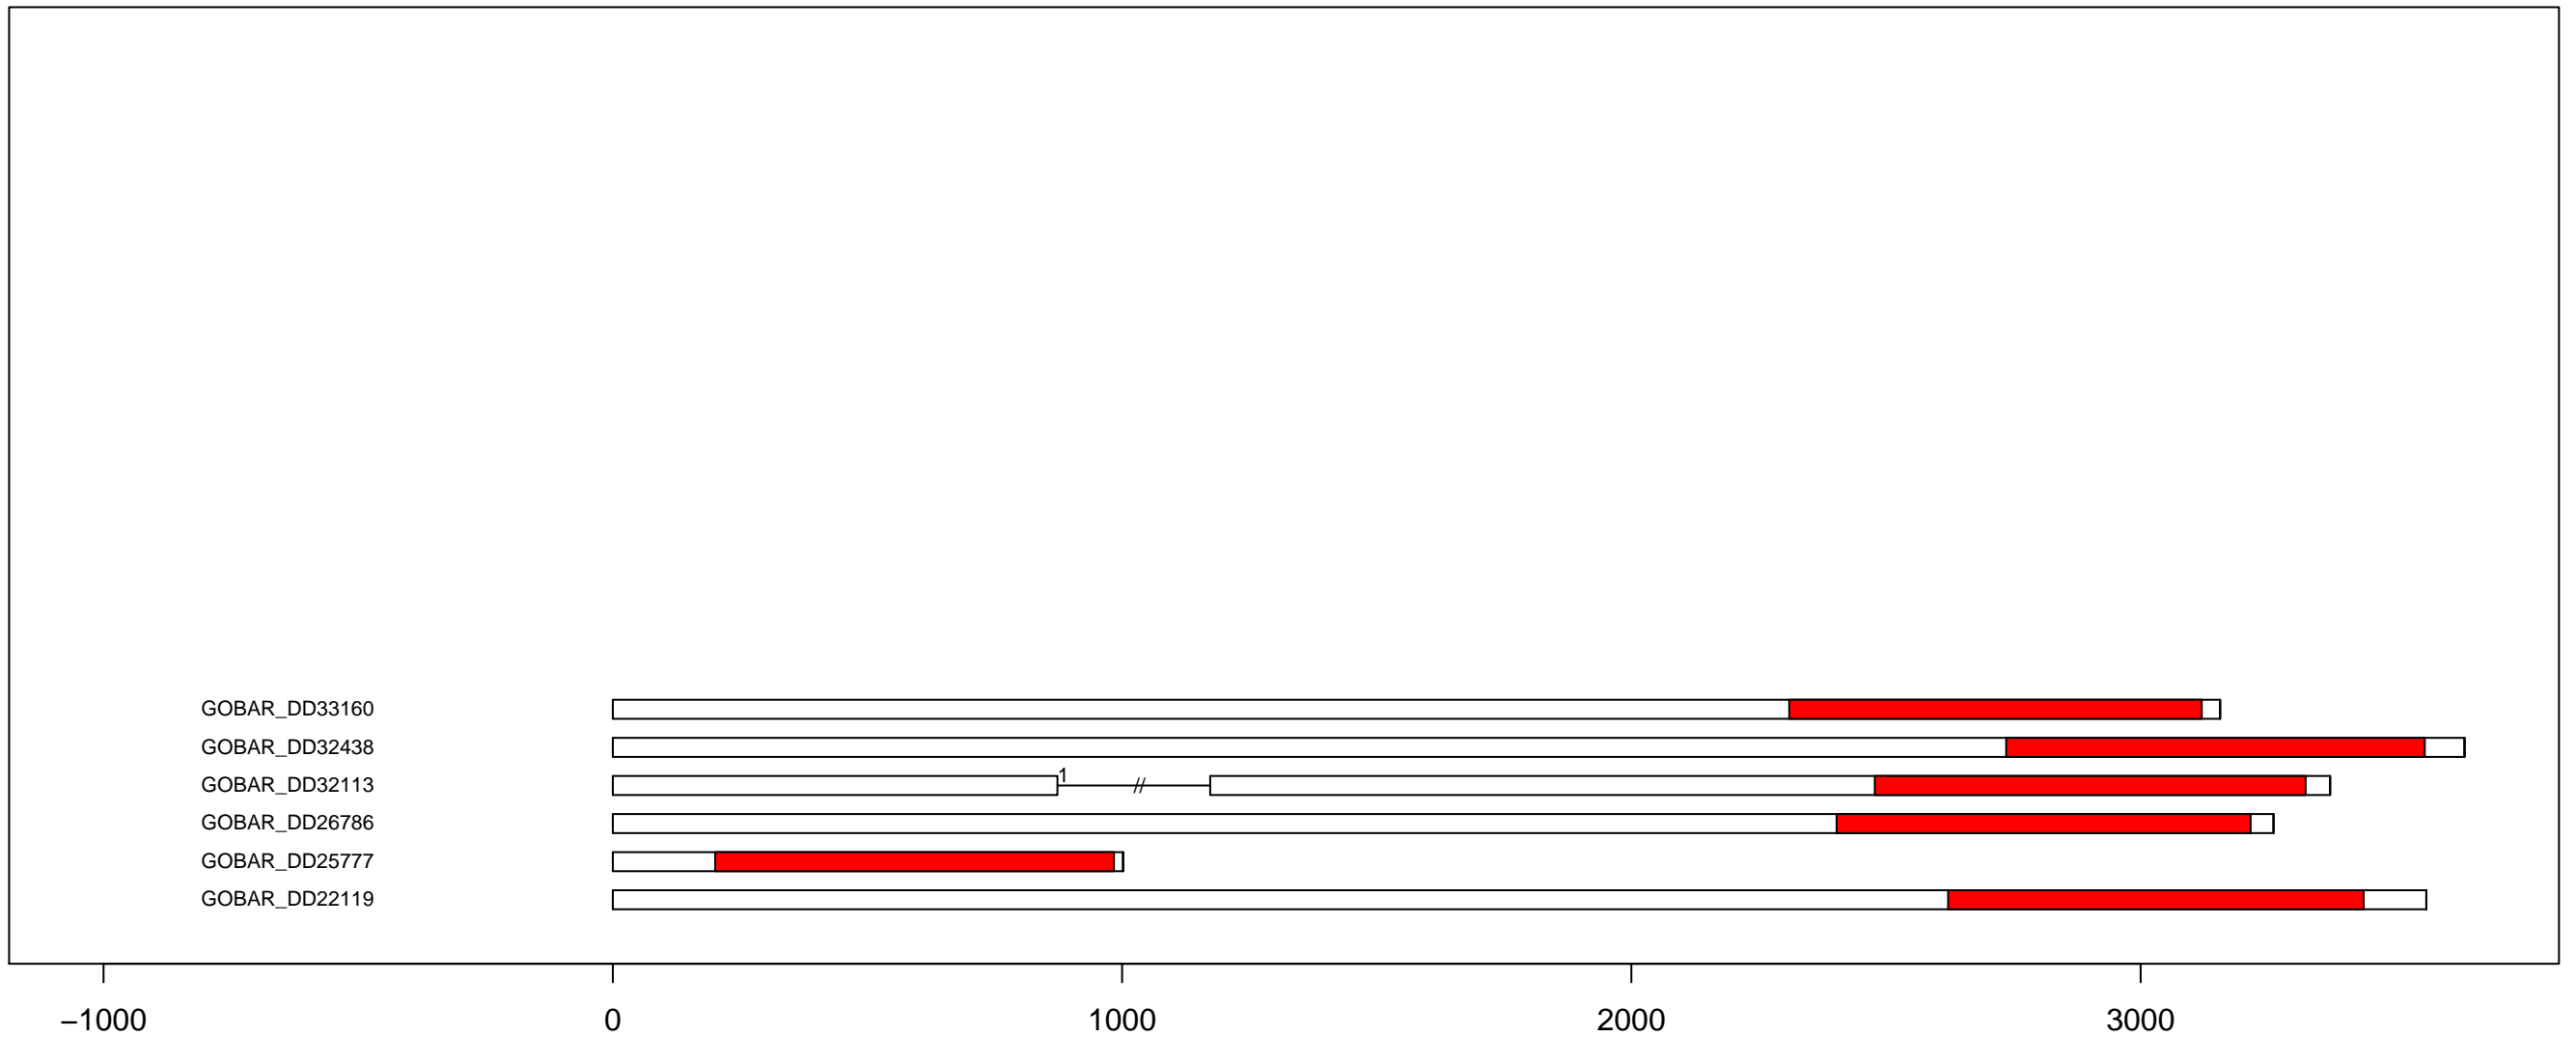



# G.ba RLK-Pelle\_LRR-Xb-2 exon-intron and domain diagram (all)

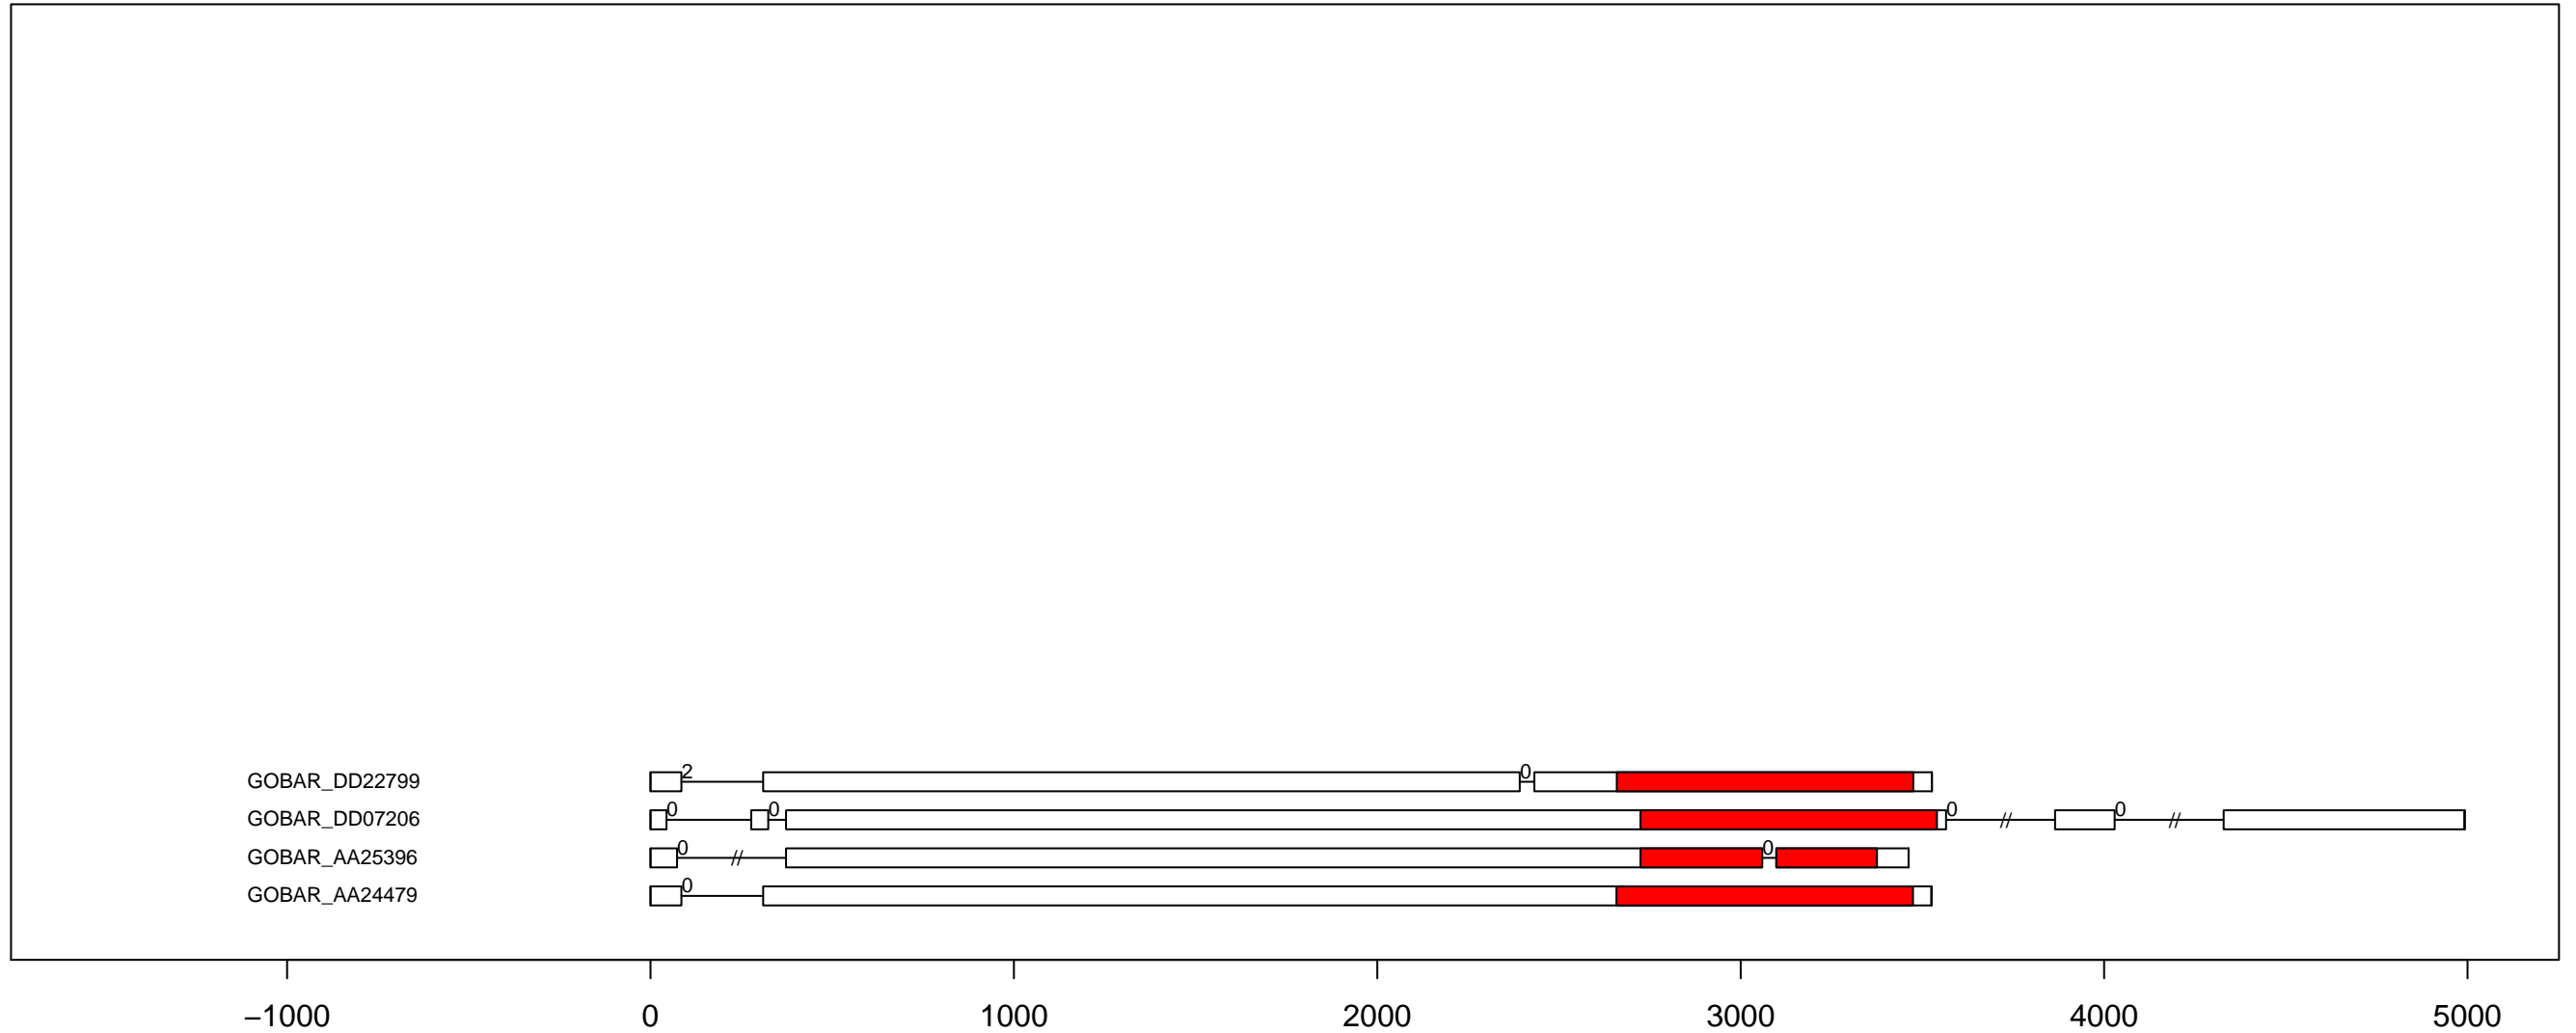

# G.ba RLK-Pelle\_LRR-XI-1 exon-intron and domain diagram (part 1)

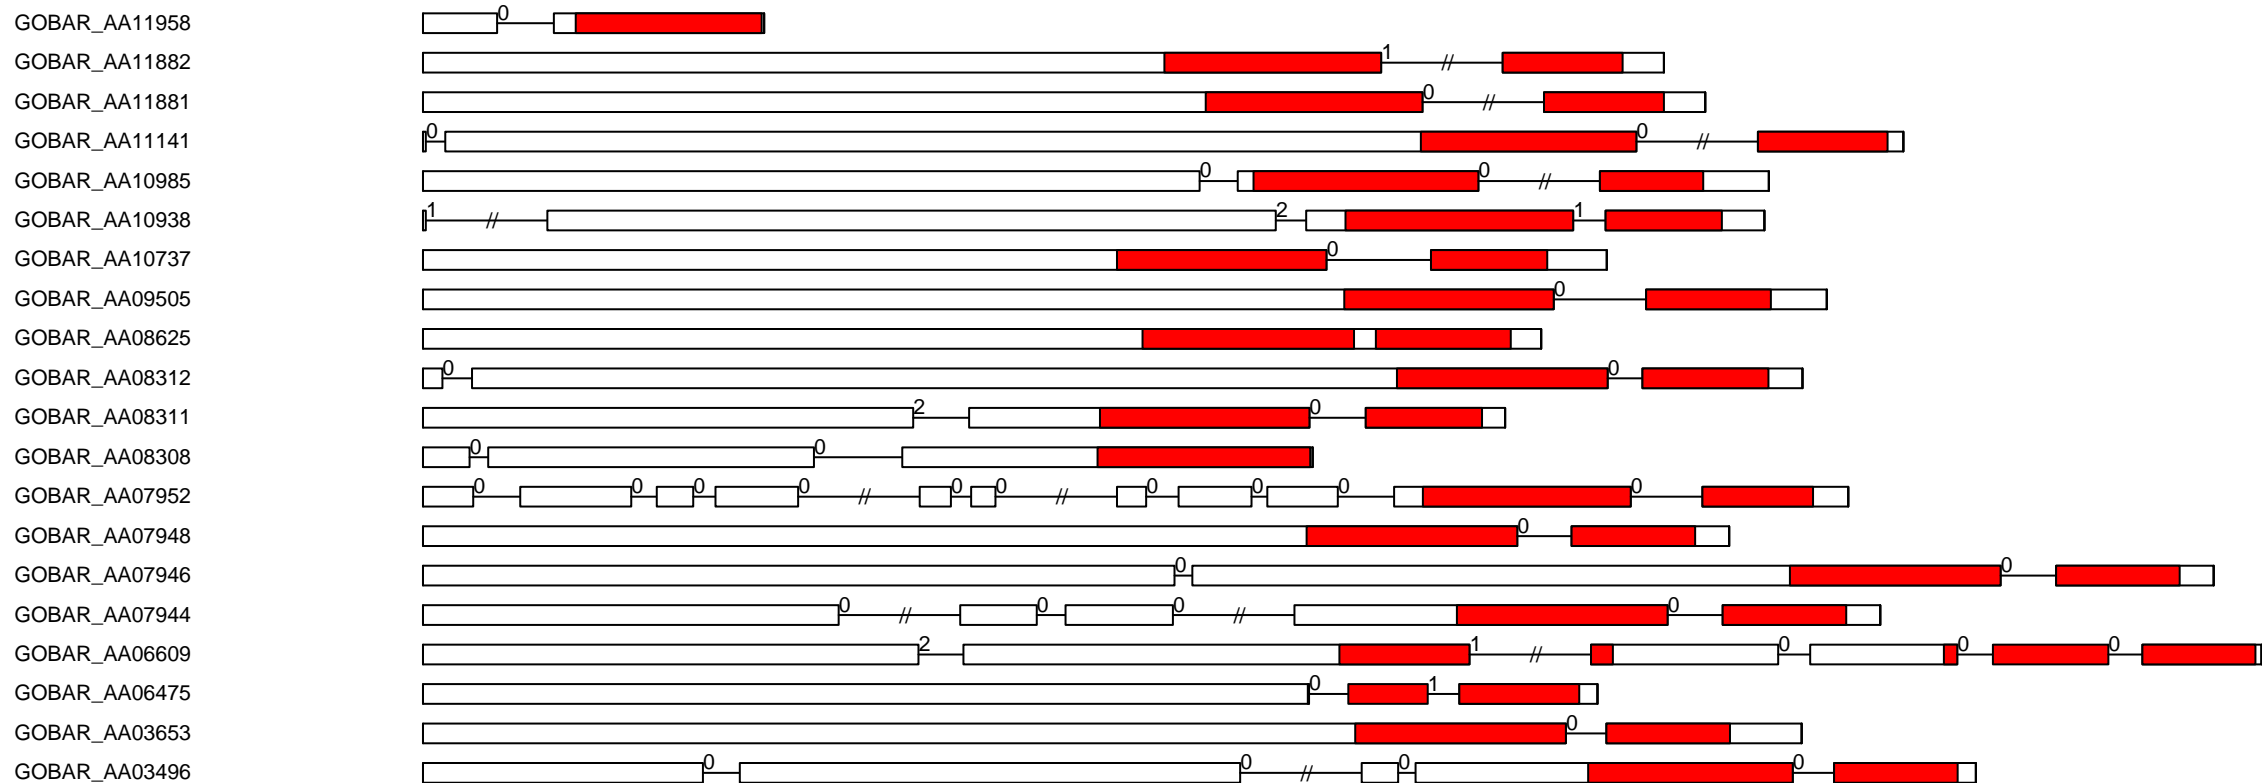

### G.ba RLK-Pelle\_LRR-XI-1 exon-intron and domain diagram (part 2)

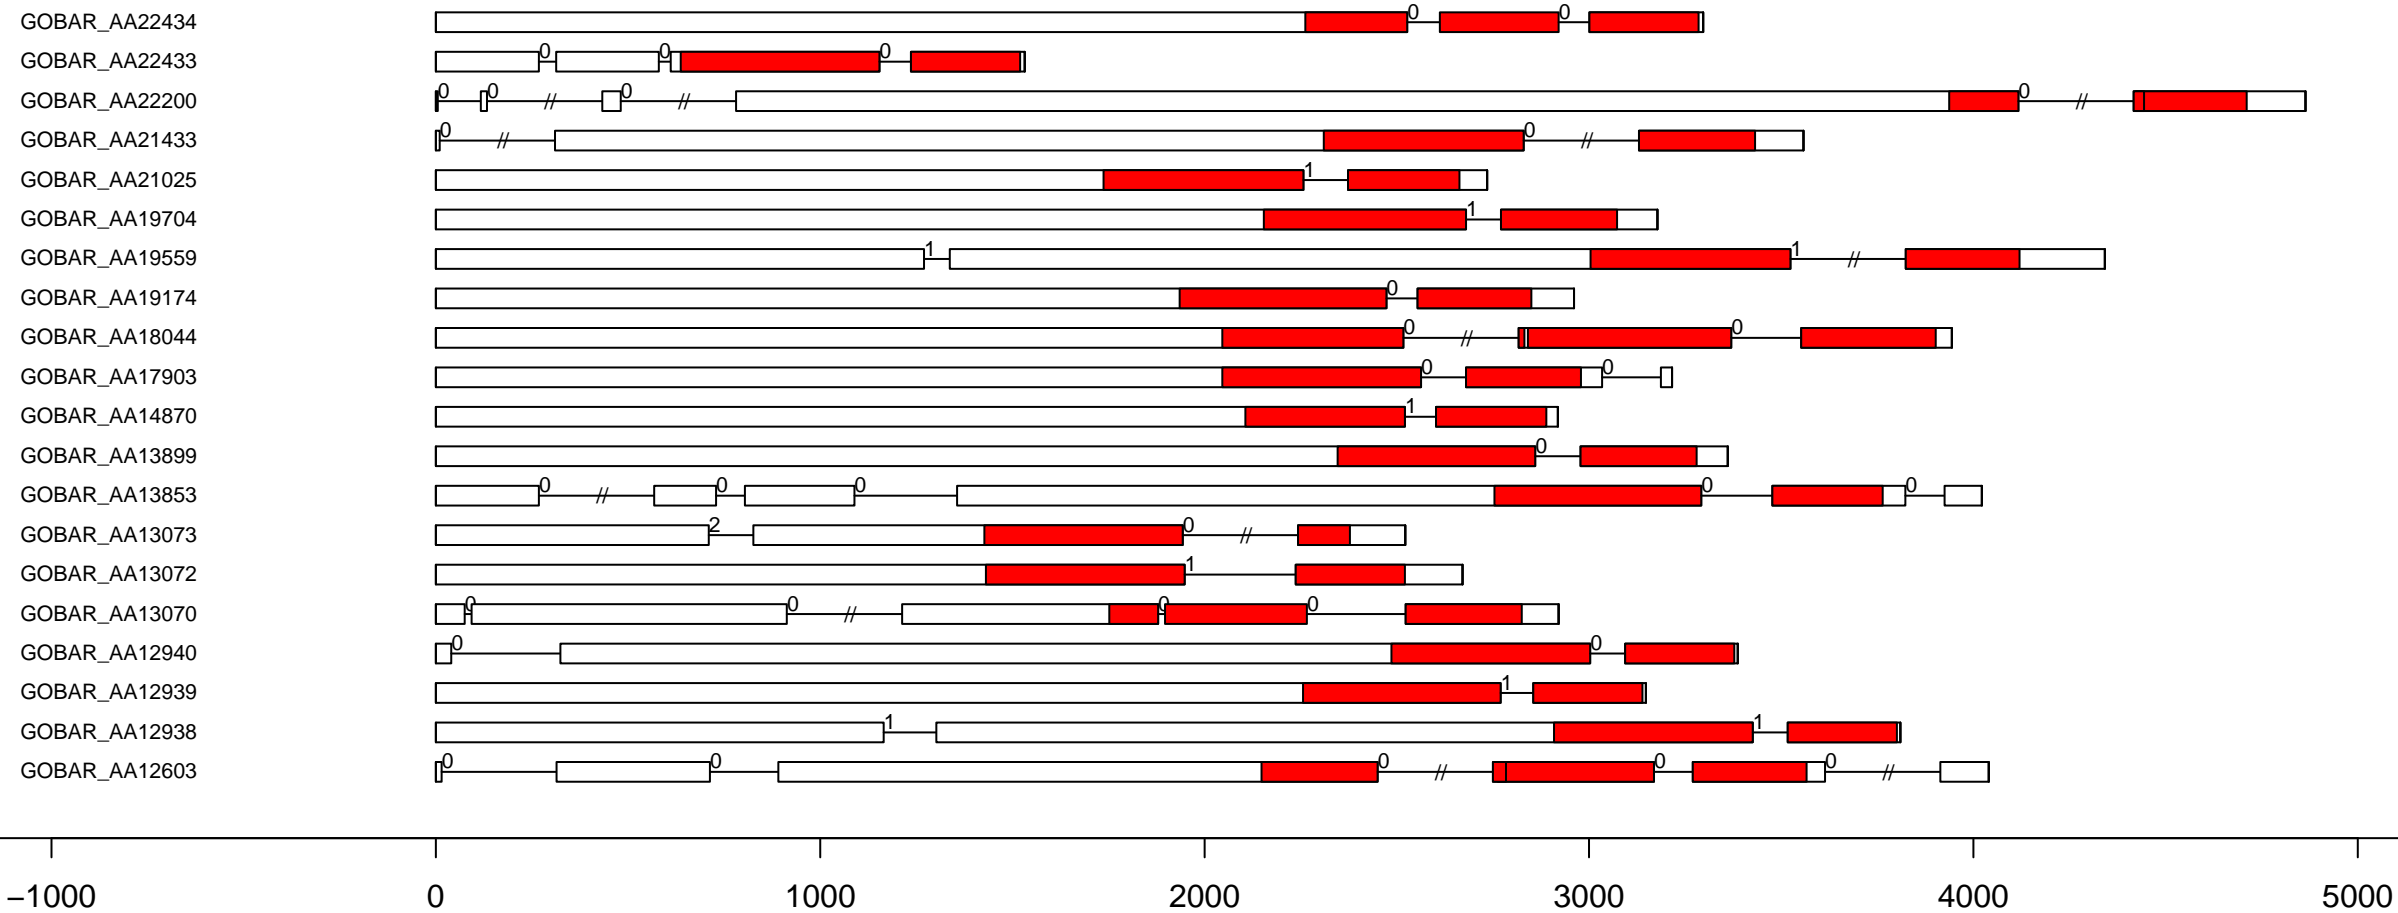



### G.ba RLK-Pelle\_LRR-XI-1 exon-intron and domain diagram (part 4)

GOBAR\_DD02711  
 GOBAR\_DD02282  
 GOBAR\_DD02092  
 GOBAR\_DD01734  
 GOBAR\_DD01733  
 GOBAR\_DD00005  
 GOBAR\_DD00003  
 GOBAR\_AA40857  
 GOBAR\_AA40366  
 GOBAR\_AA40214  
 GOBAR\_AA40063  
 GOBAR\_AA39946  
 GOBAR\_AA39781  
 GOBAR\_AA37640  
 GOBAR\_AA37572  
 GOBAR\_AA37571  
 GOBAR\_AA37429  
 GOBAR\_AA36842  
 GOBAR\_AA36837  
 GOBAR\_AA35019

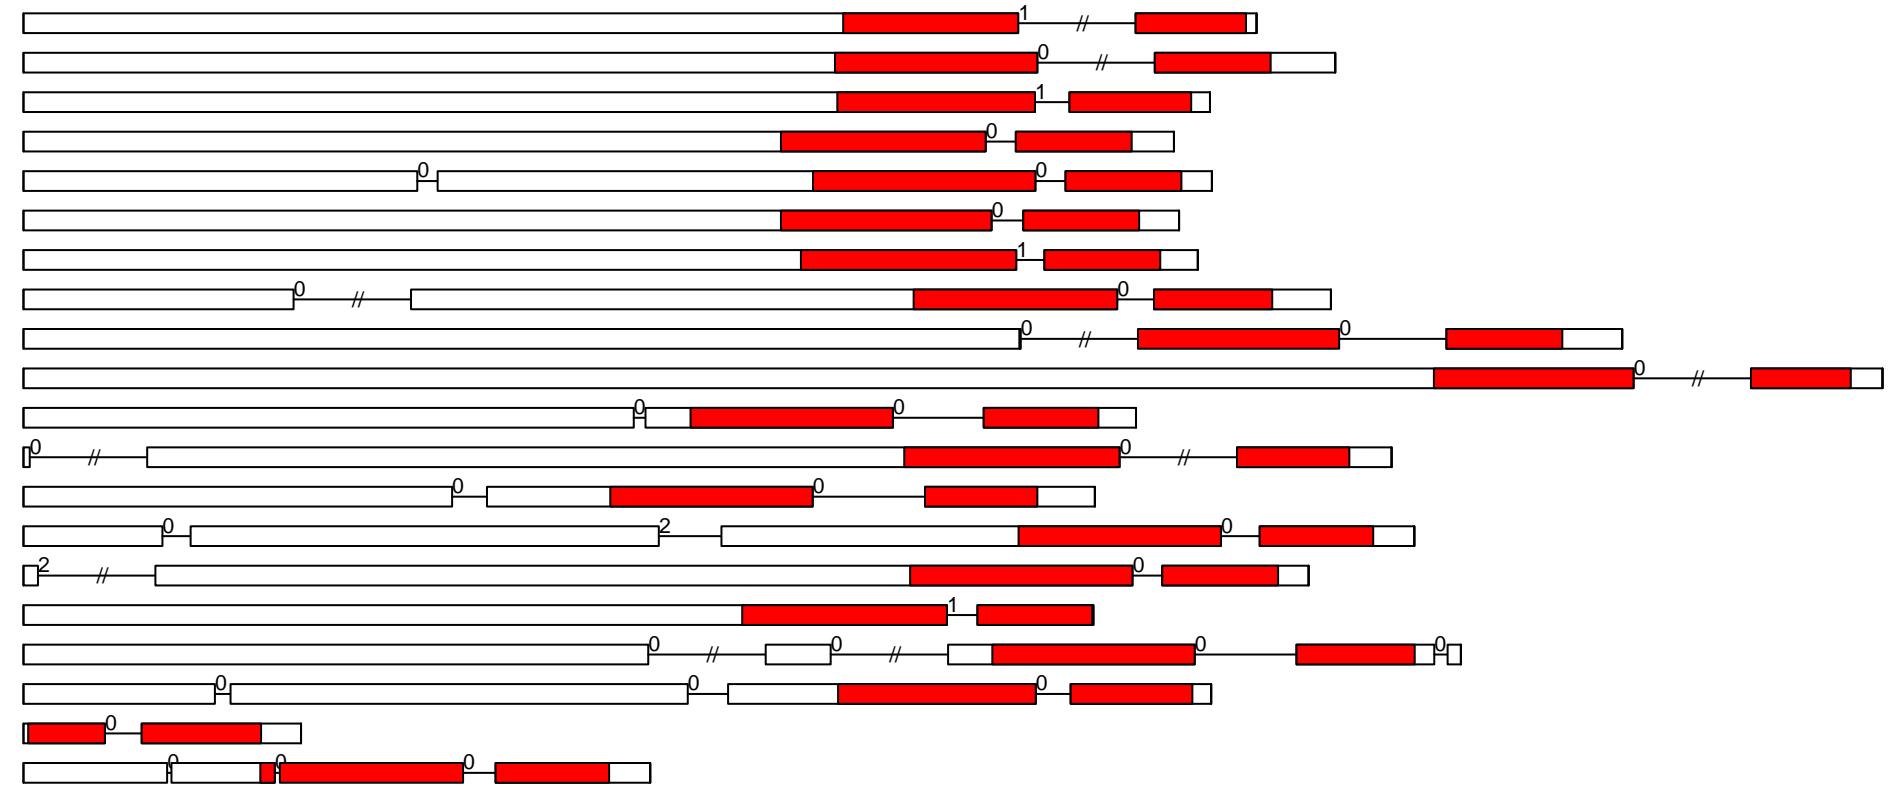

-1000

0

1000

2000

3000

4000

### G.ba RLK-Pelle\_LRR-XI-1 exon-intron and domain diagram (part 5)

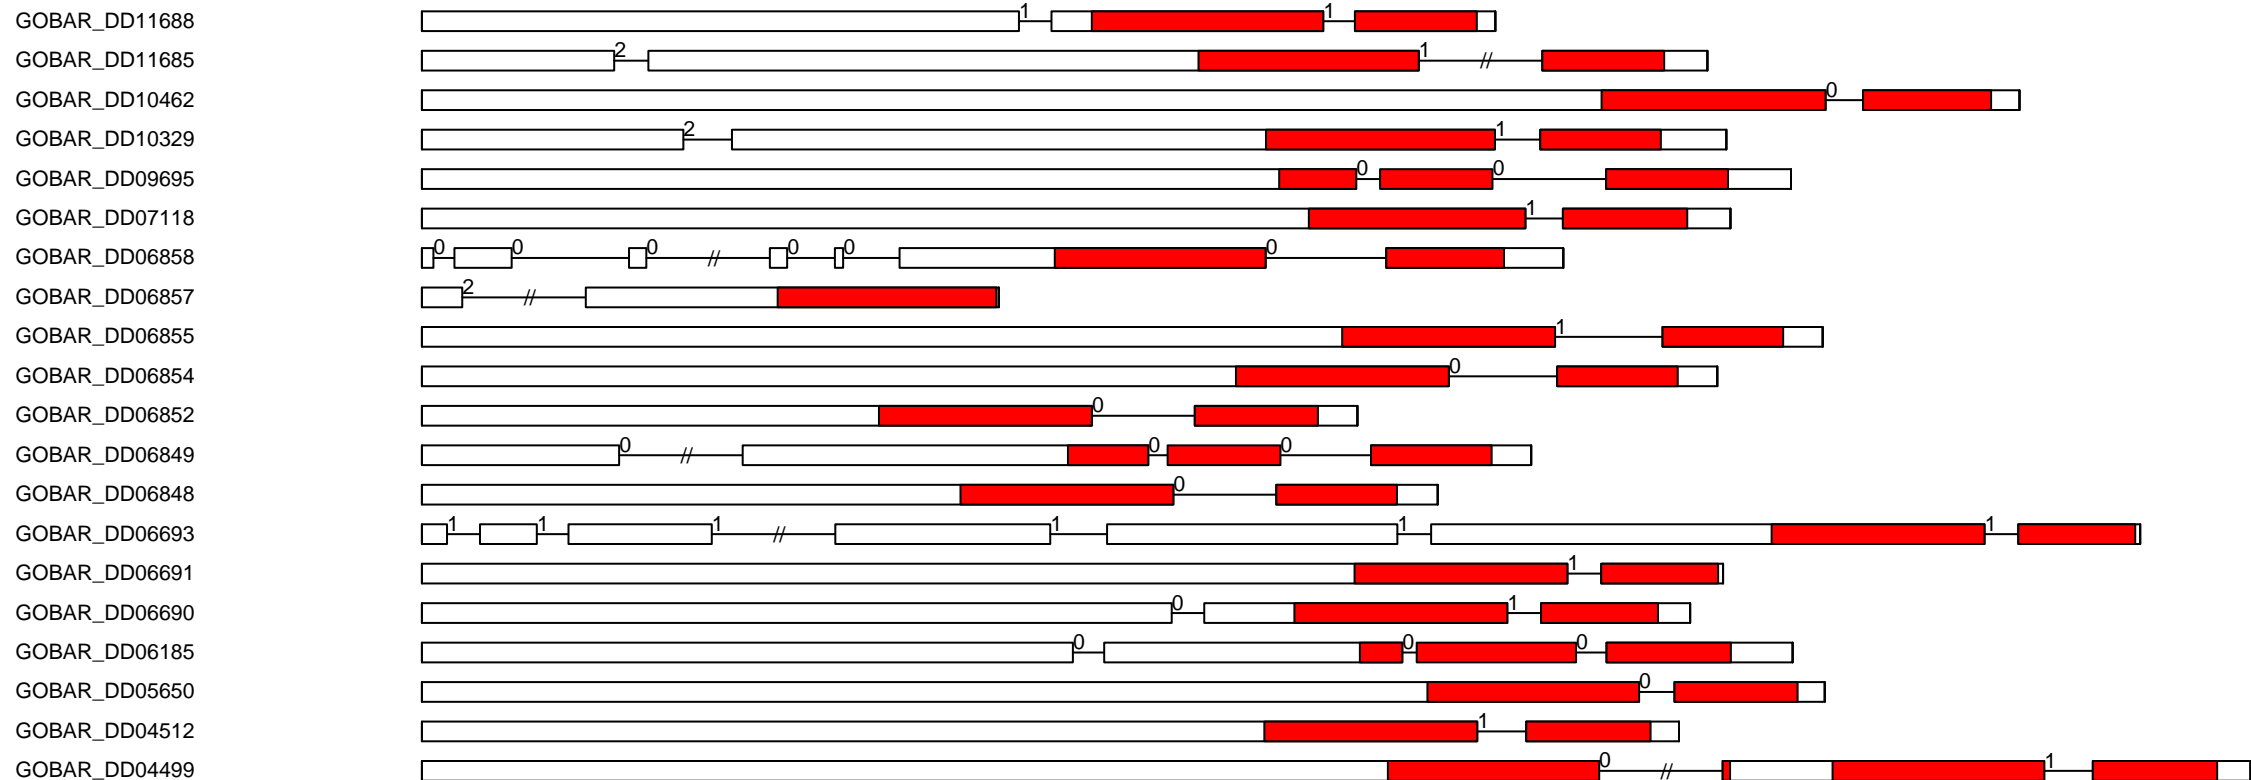

### G.ba RLK-Pelle\_LRR-XI-1 exon-intron and domain diagram (part 6)

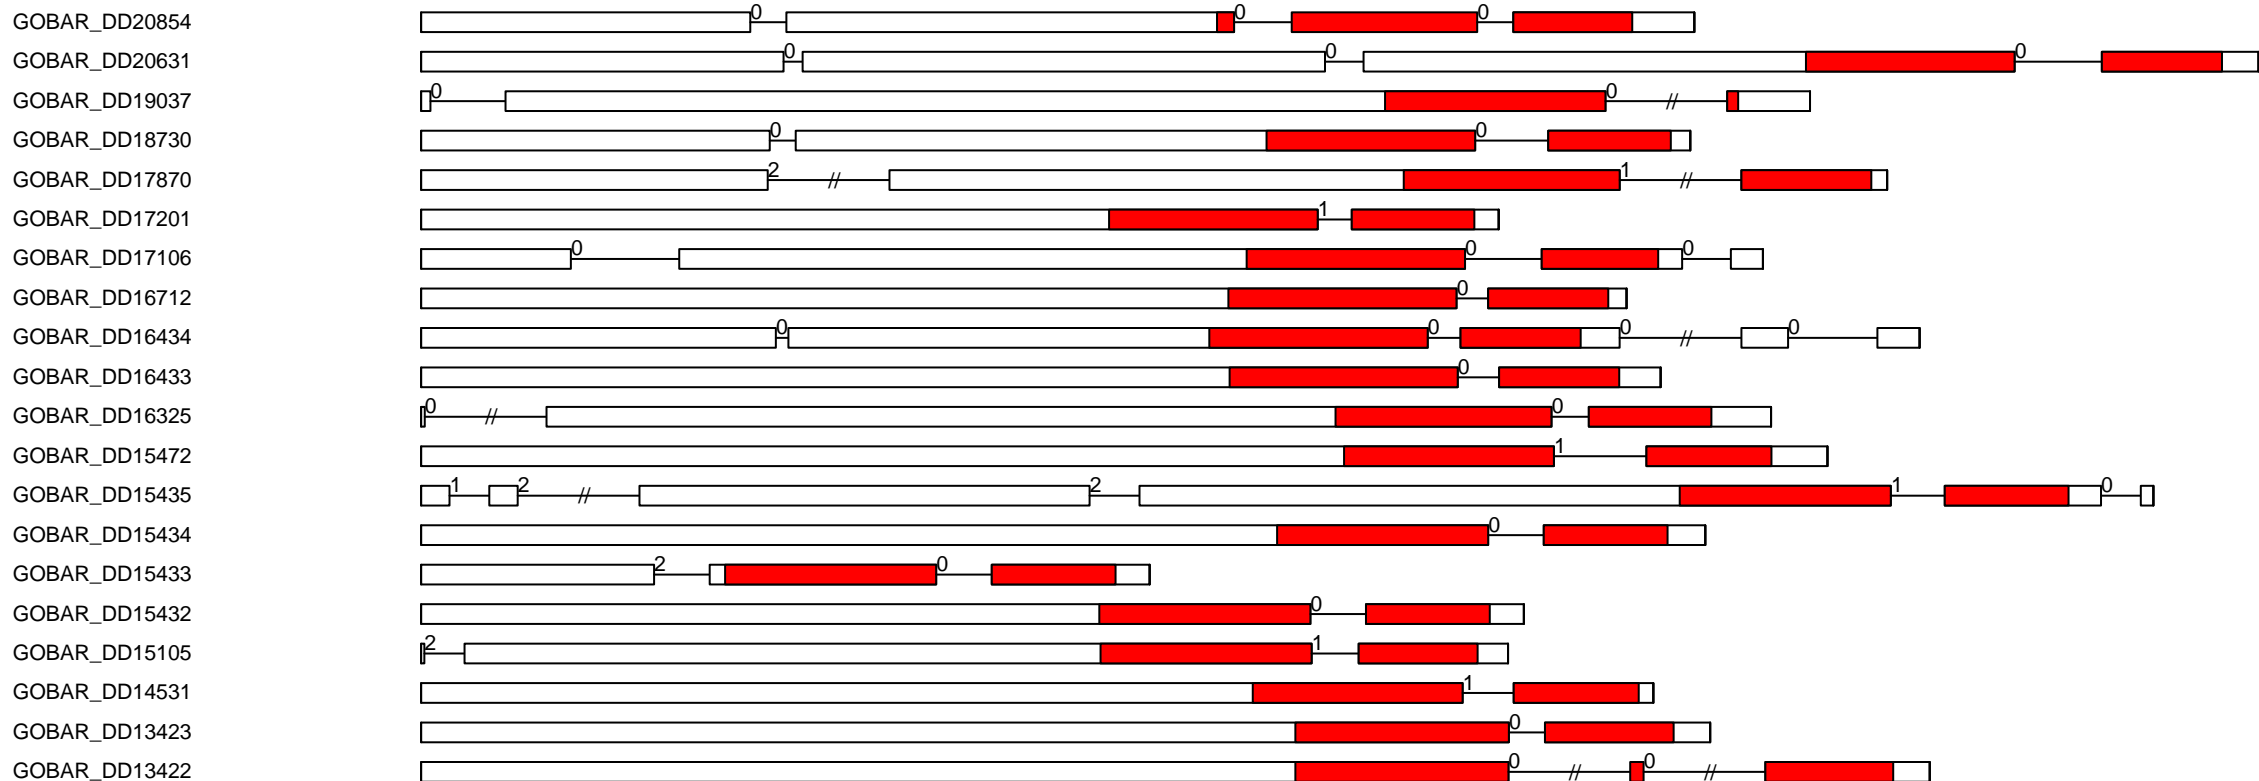

-1000

0

1000

2000

3000

4000

### G.ba RLK-Pelle\_LRR-XI-1 exon-intron and domain diagram (part 7)

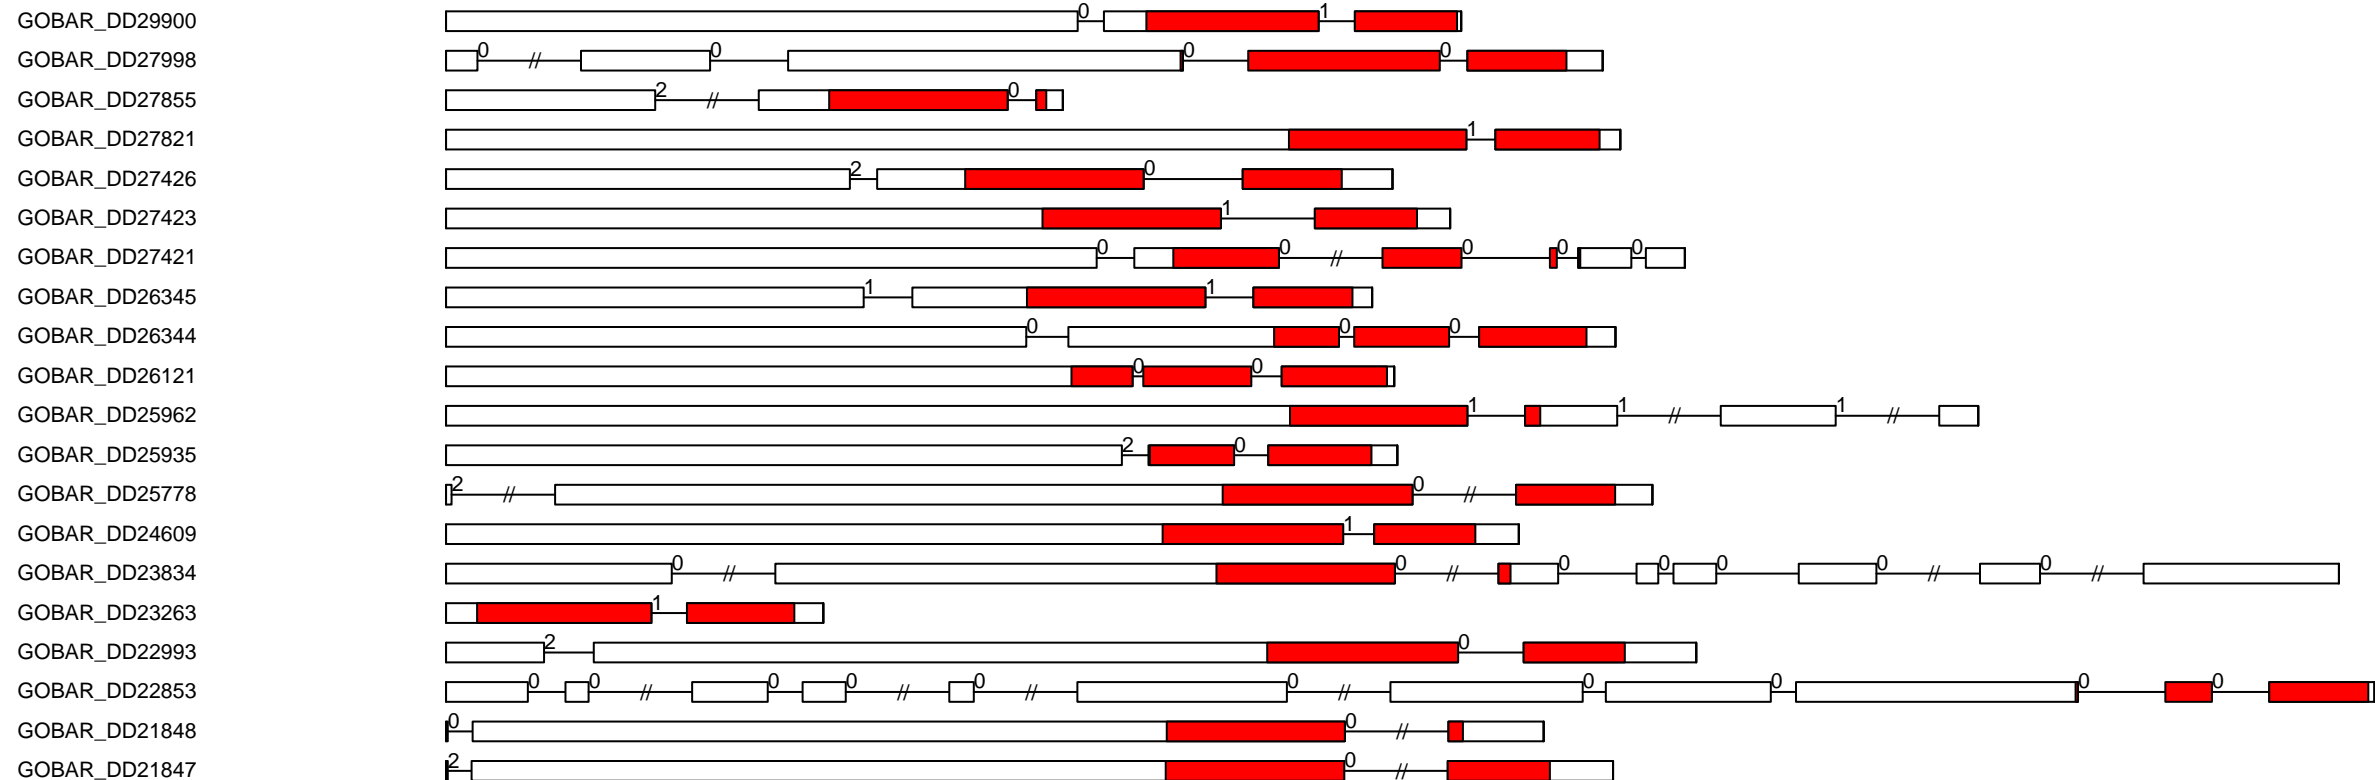



### G.ba RLK-Pelle\_LRR-XI-1 exon-intron and domain diagram (part 8)

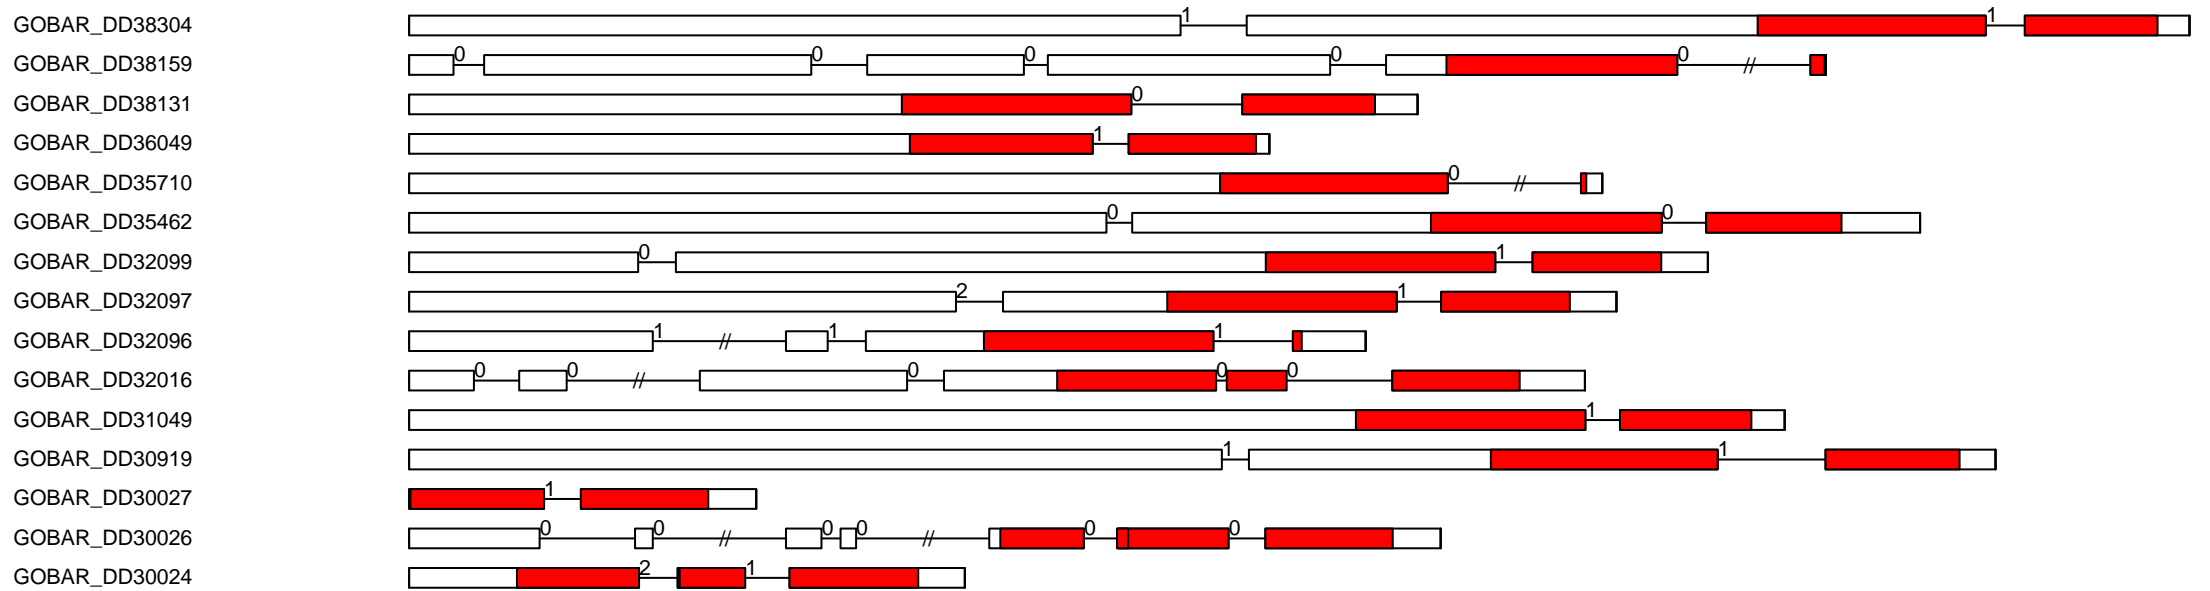

# G.ba RLK-Pelle\_LRR-XI-2 exon-intron and domain diagram (all)

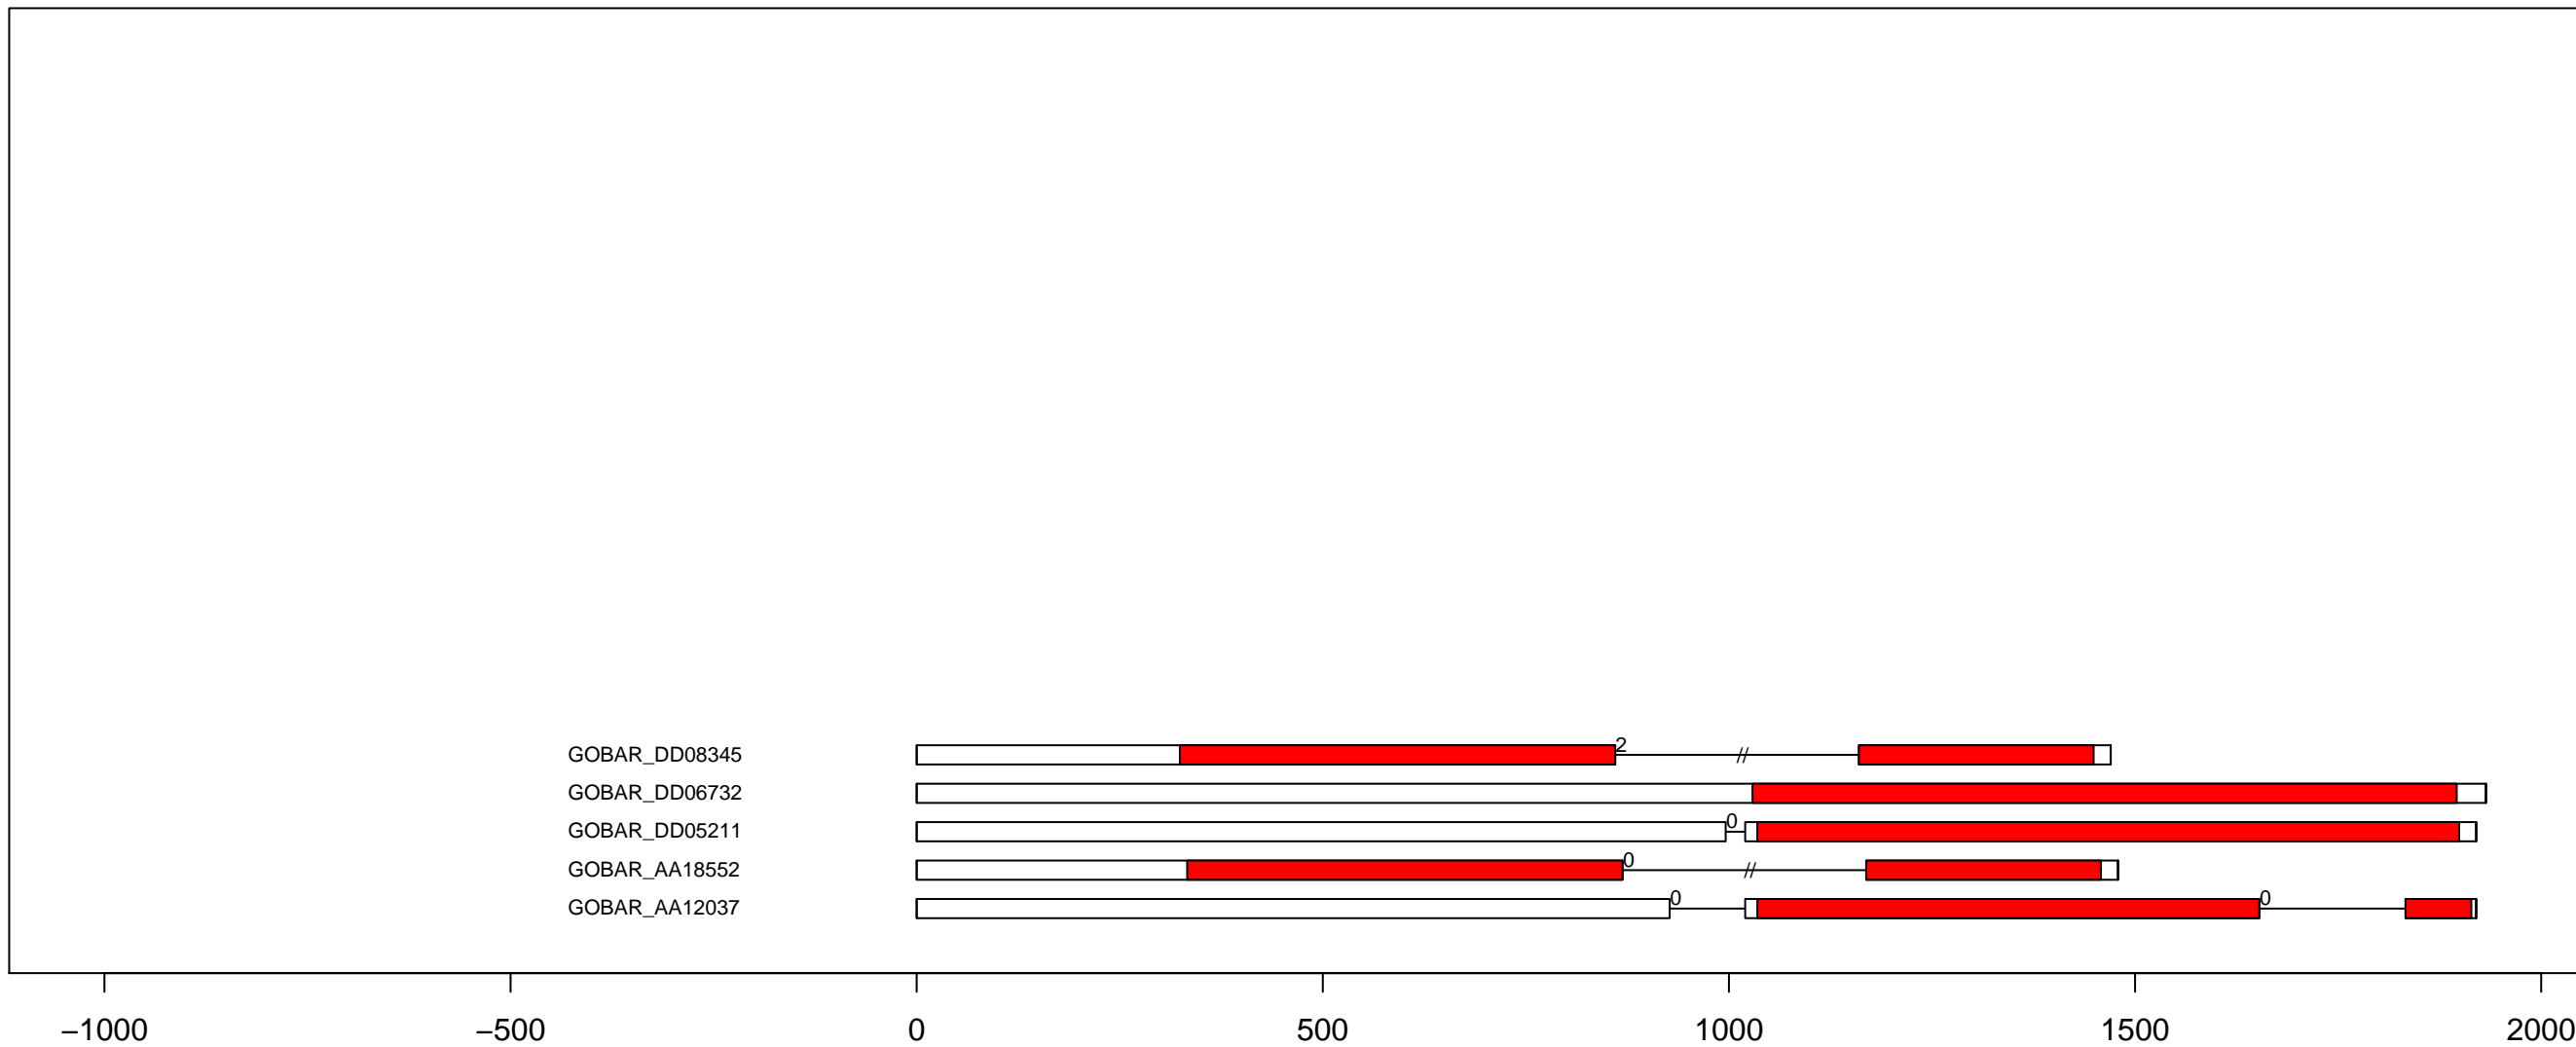

### G.ba RLK-Pelle\_LRR-XII-1 exon-intron and domain diagram (part 1)

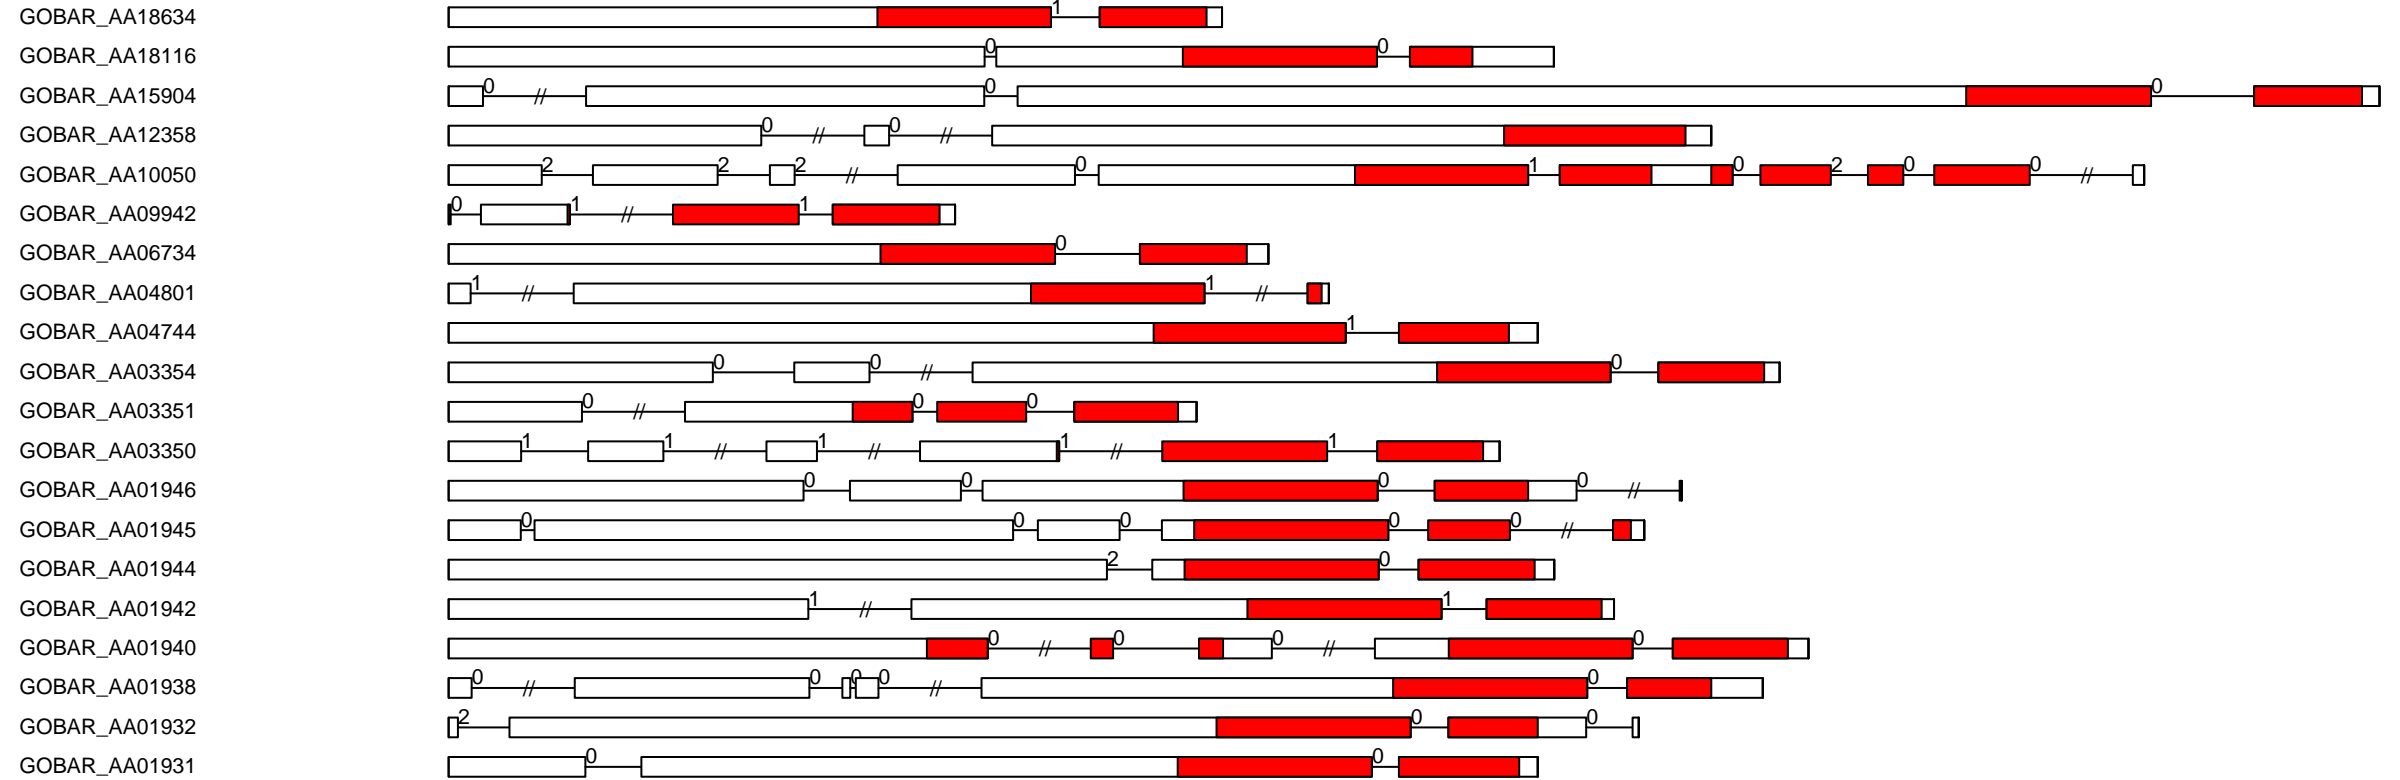

### G.ba RLK-Pelle\_LRR-XII-1 exon-intron and domain diagram (part 2)

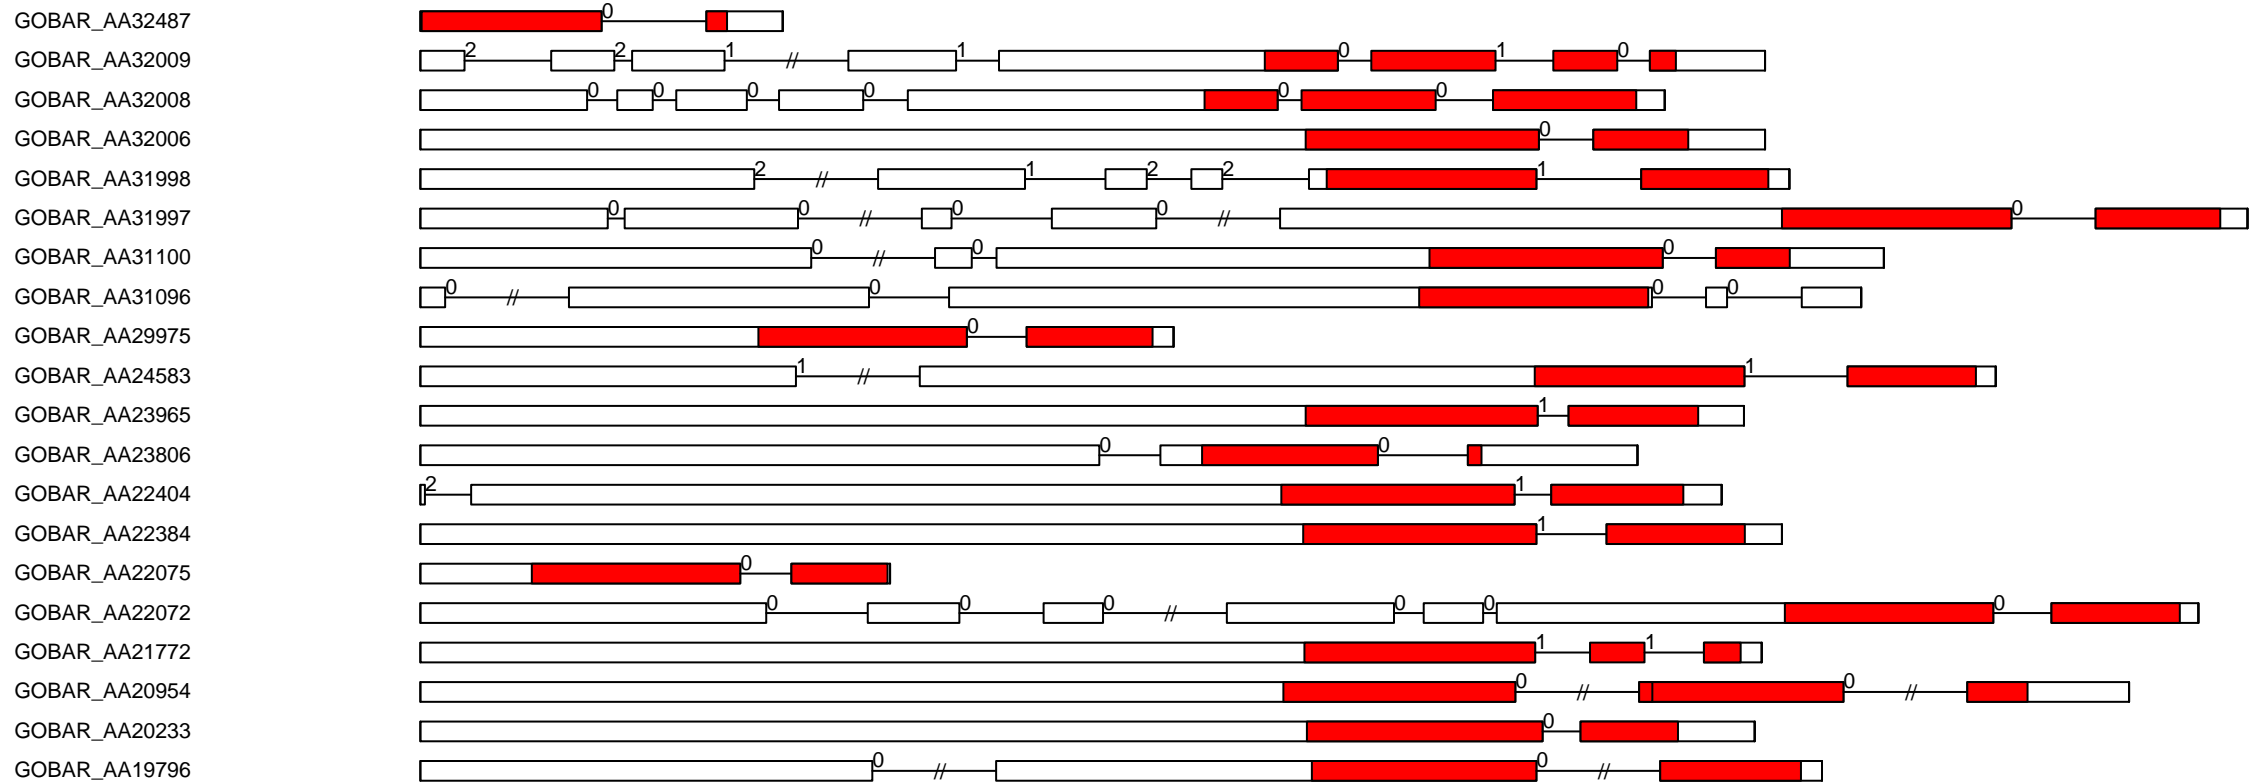



### G.ba RLK-Pelle\_LRR-XII-1 exon-intron and domain diagram (part 4)

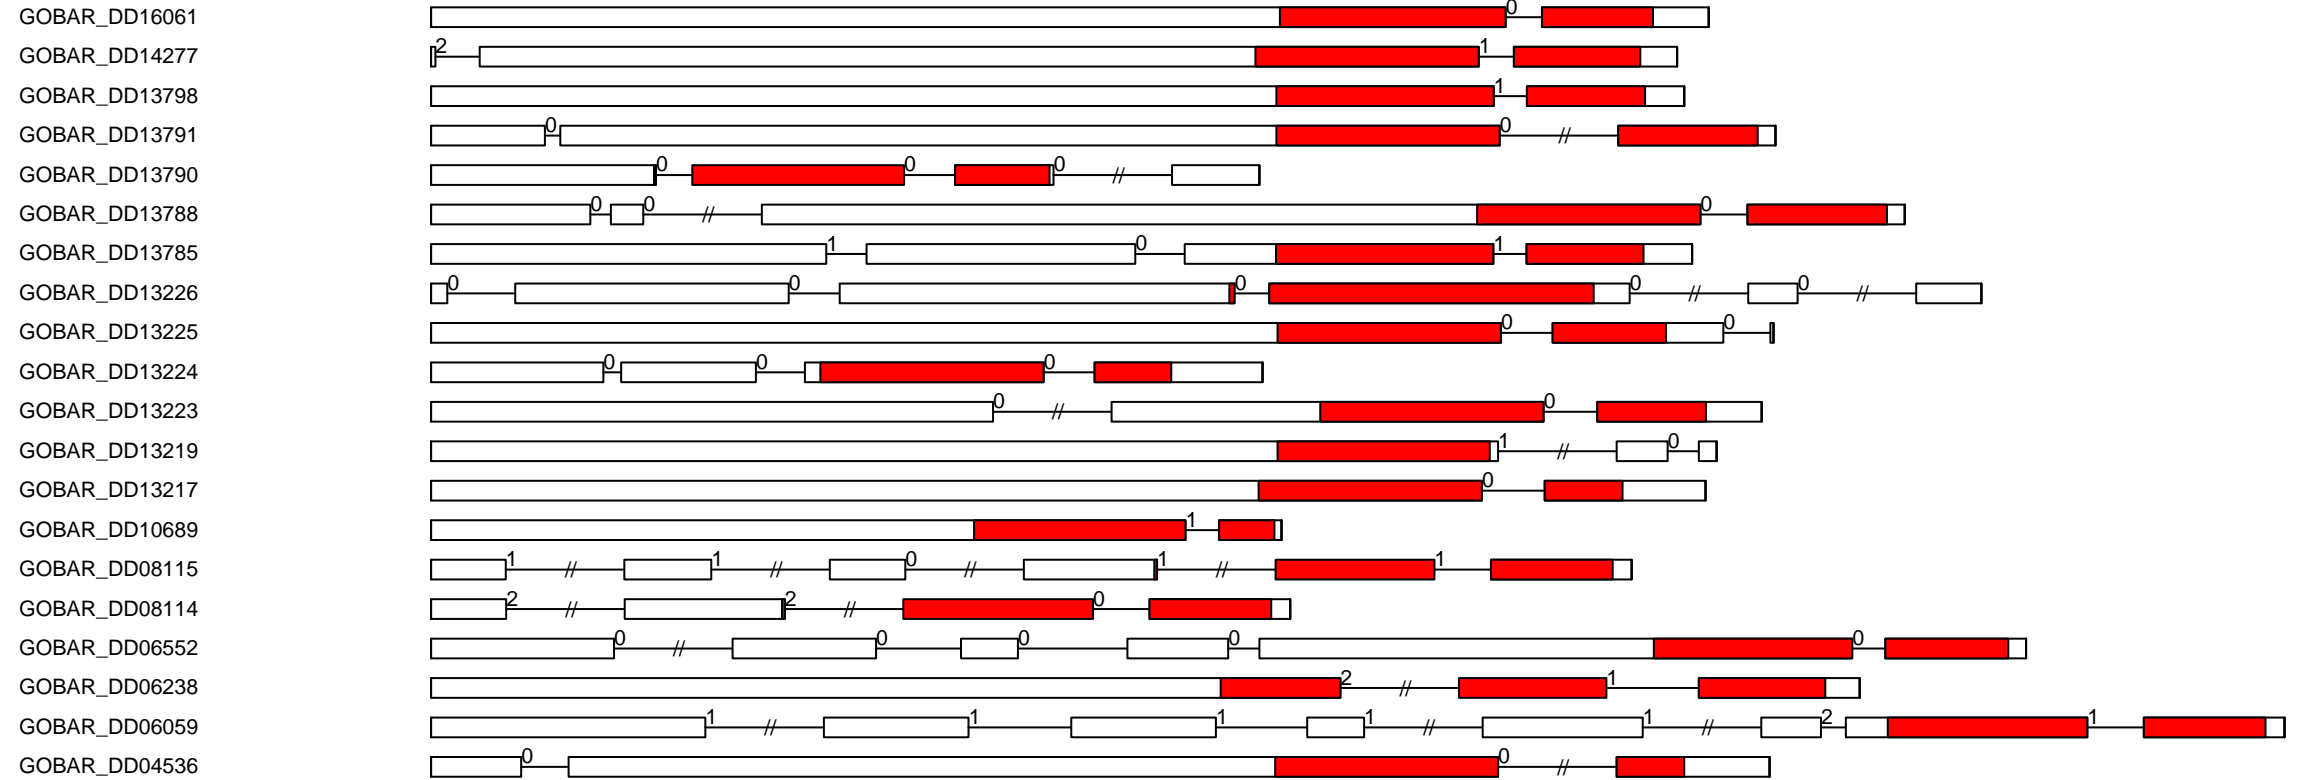

### G.ba RLK-Pelle\_LRR-XII-1 exon-intron and domain diagram (part 5)

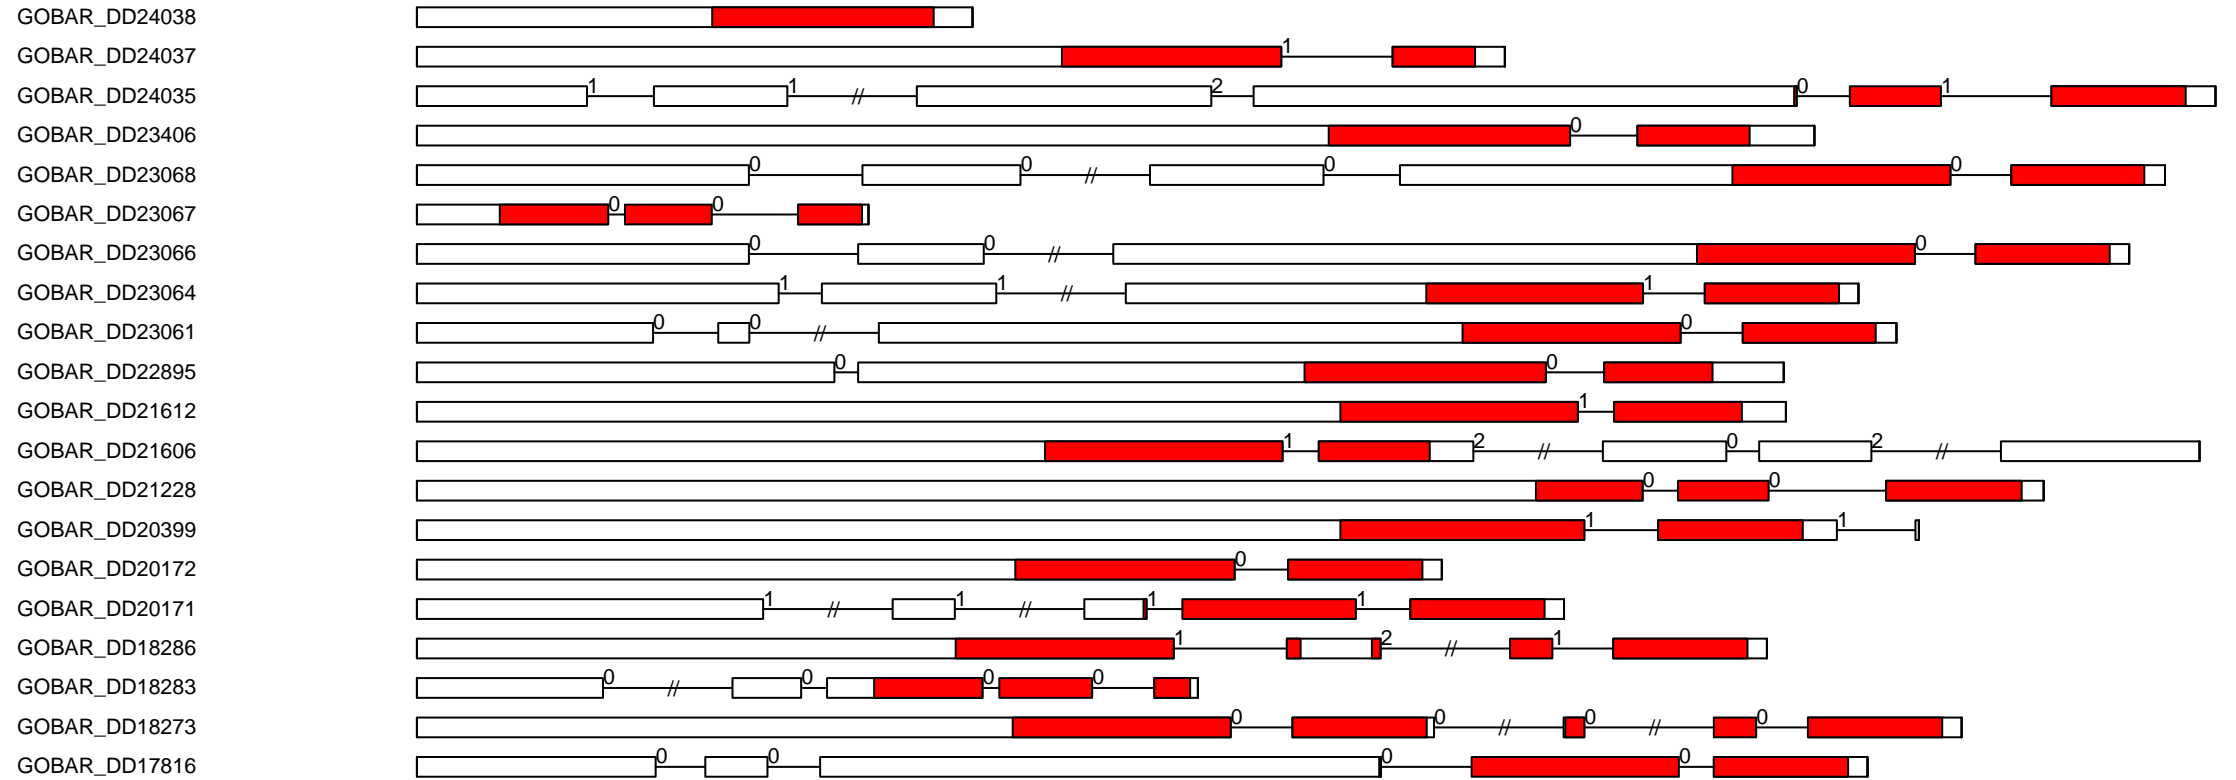

### G.ba RLK-Pelle\_LRR-XII-1 exon-intron and domain diagram (part 6)

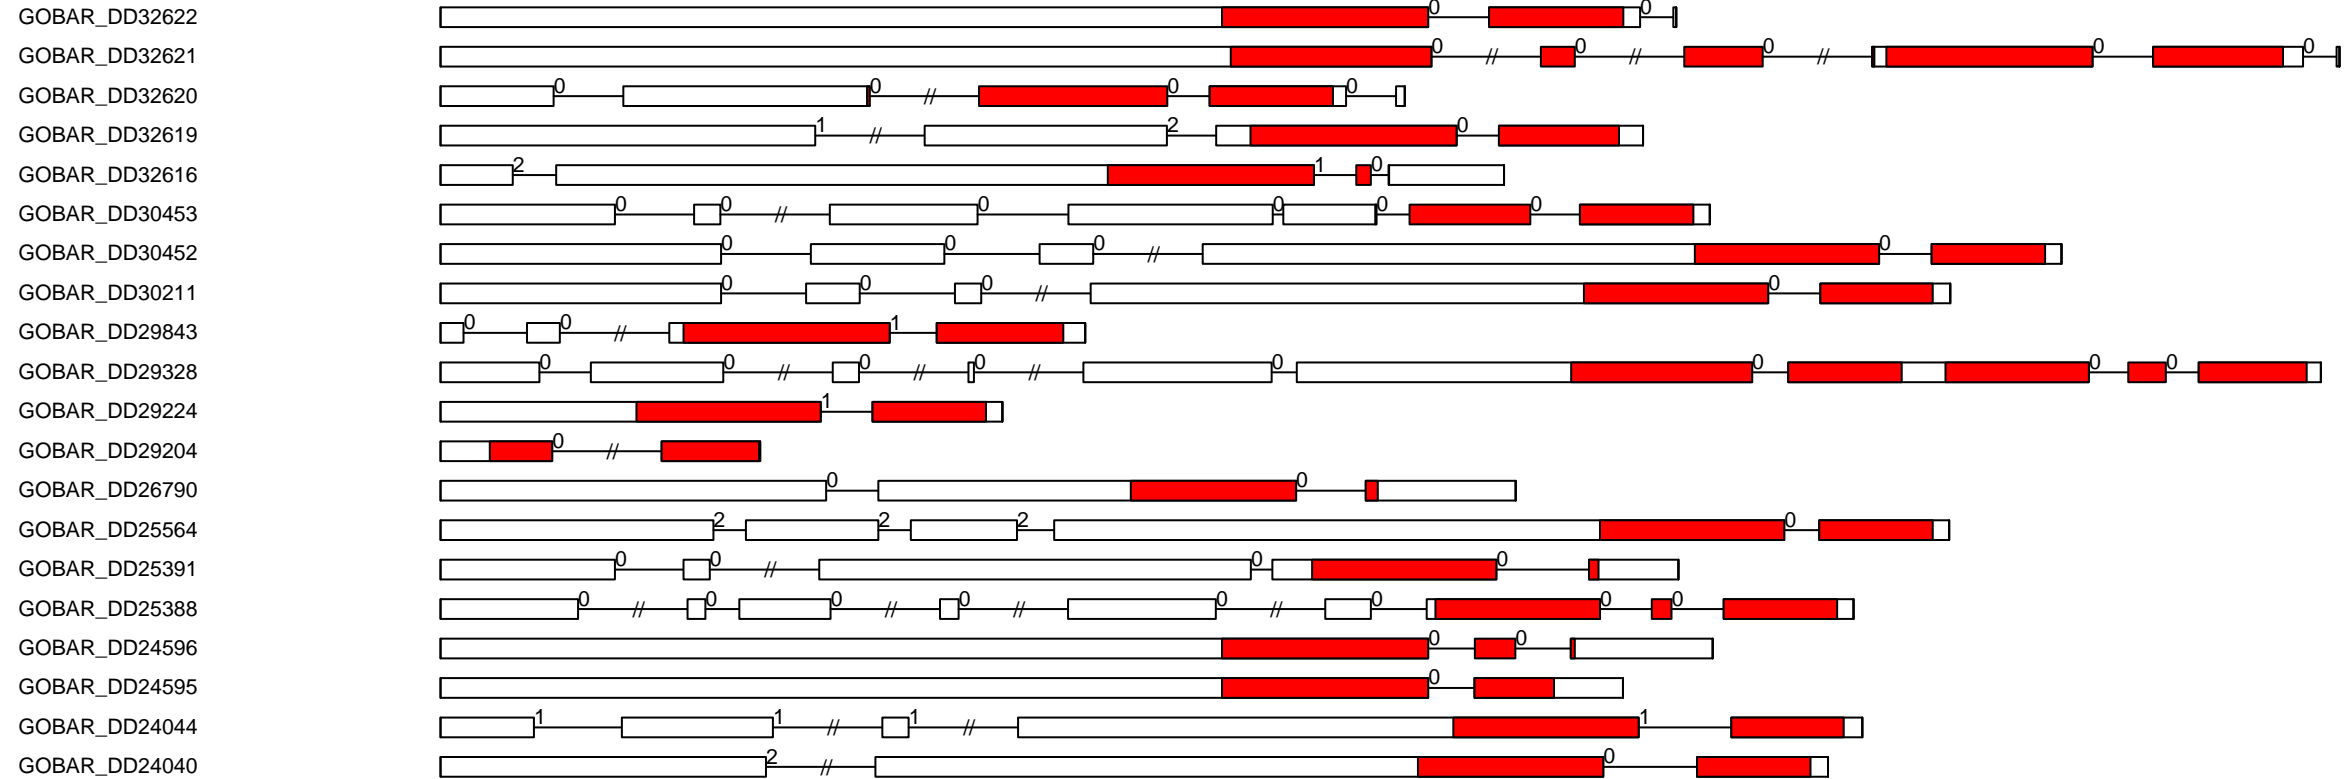



# G.ba RLK-Pelle\_LRR-XII-1 exon-intron and domain diagram (part 7)

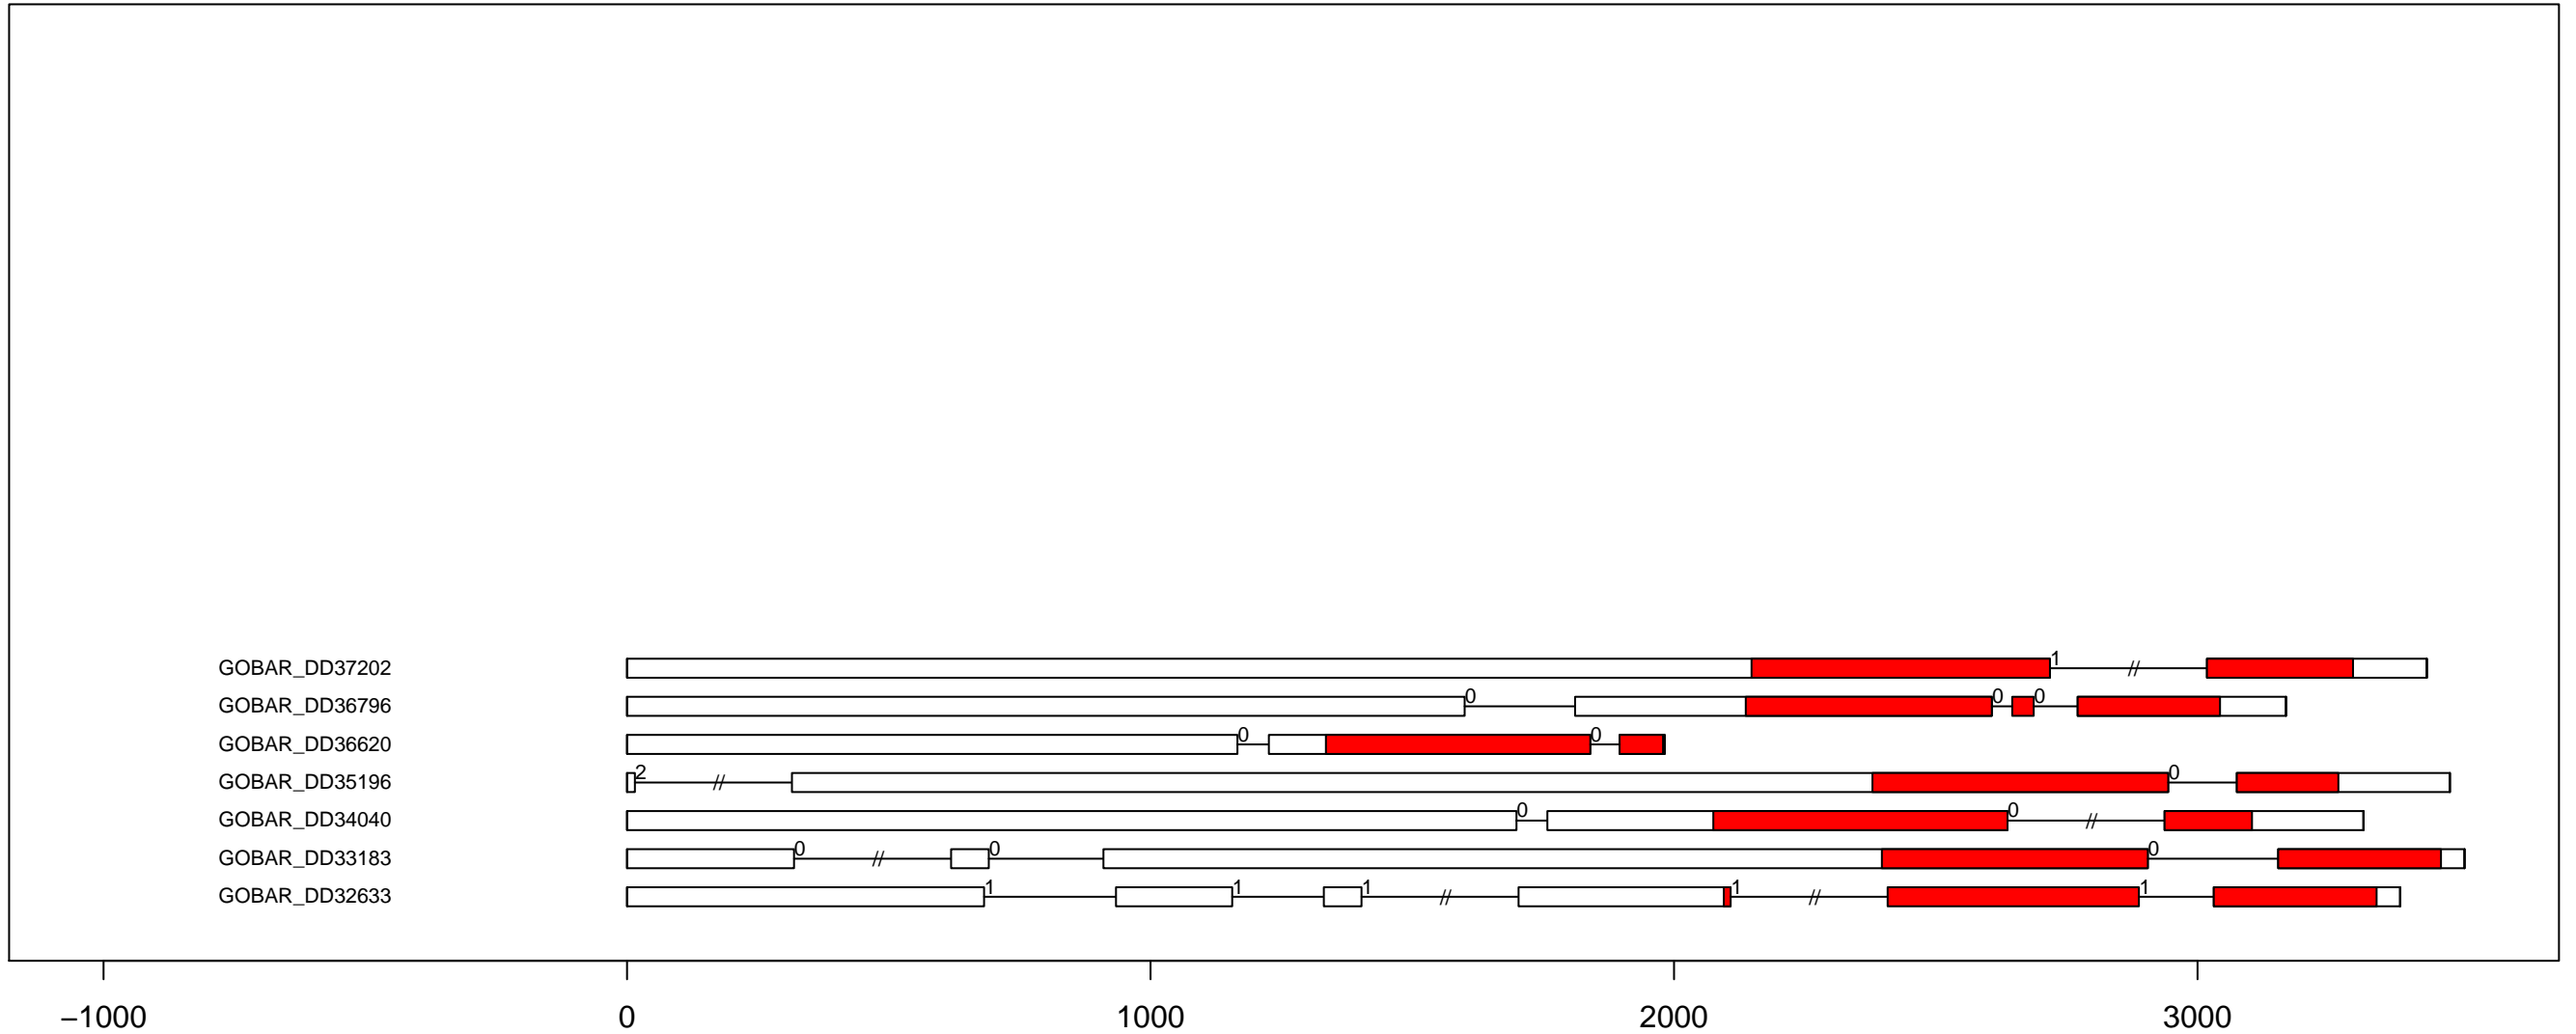

### G.ba RLK-Pelle\_LRR-XIIIa exon-intron and domain diagram (all)

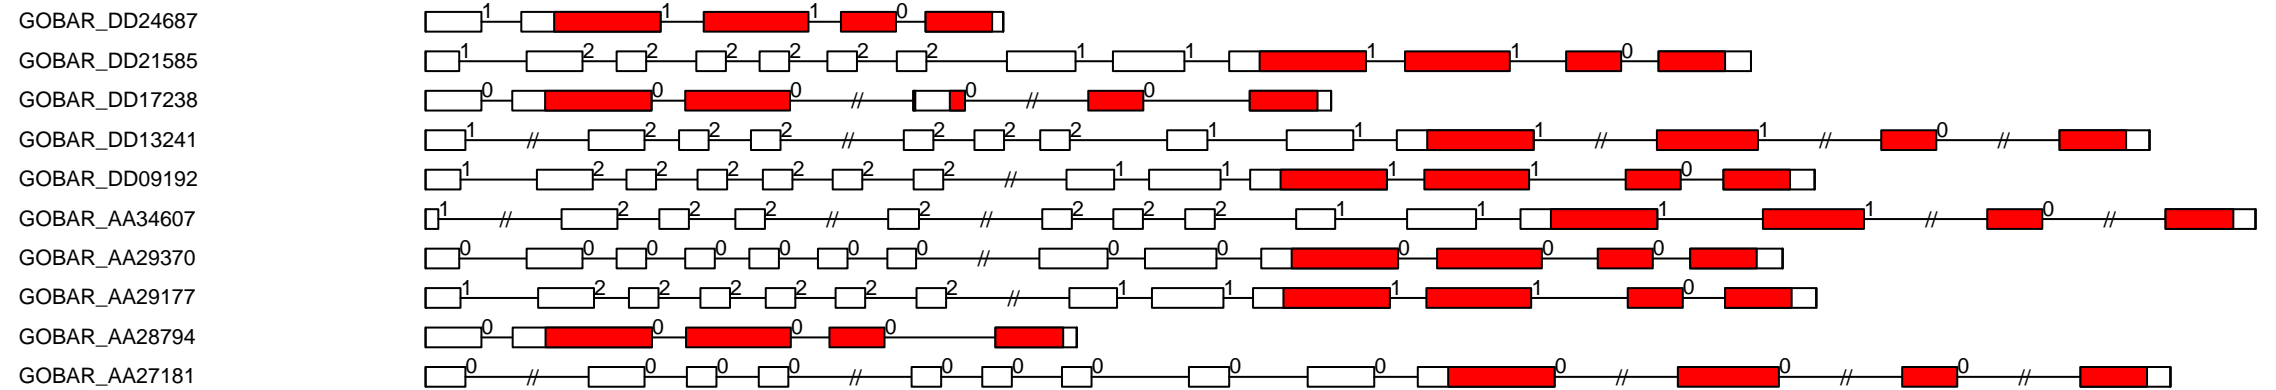

# G.ba RLK-Pelle\_LRR-XIIIb exon-intron and domain diagram (all)

GOBAR\_DD25858

GOBAR\_DD20603

GOBAR\_DD04068

GOBAR\_AA36304

GOBAR\_AA18091

GOBAR\_AA11772

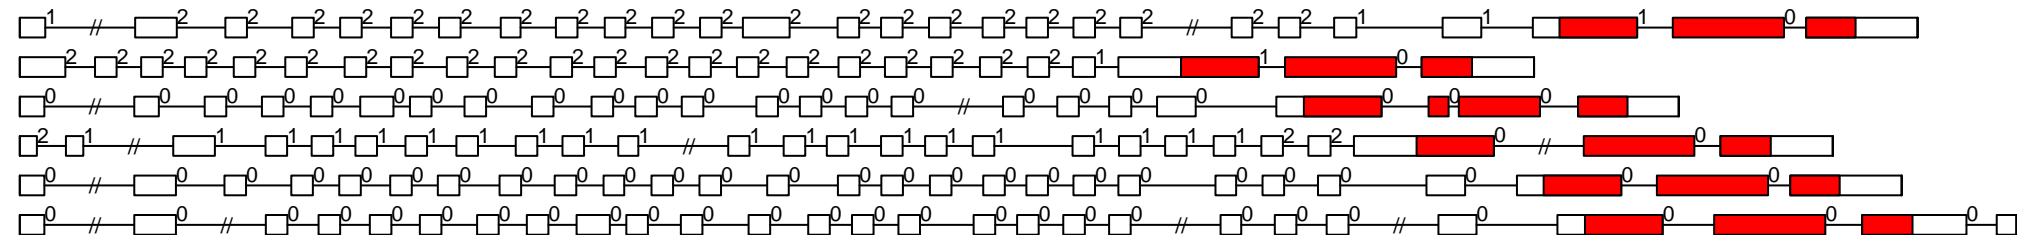

0

2000

4000

6000

# G.ba RLK-Pelle\_LRR-XIV exon-intron and domain diagram (all)

GOBAR\_DD24411  
GOBAR\_DD19141  
GOBAR\_DD03868  
GOBAR\_DD00263  
GOBAR\_AA29303  
GOBAR\_AA25693  
GOBAR\_AA17358  
GOBAR\_AA02674  
GOBAR\_AA02368

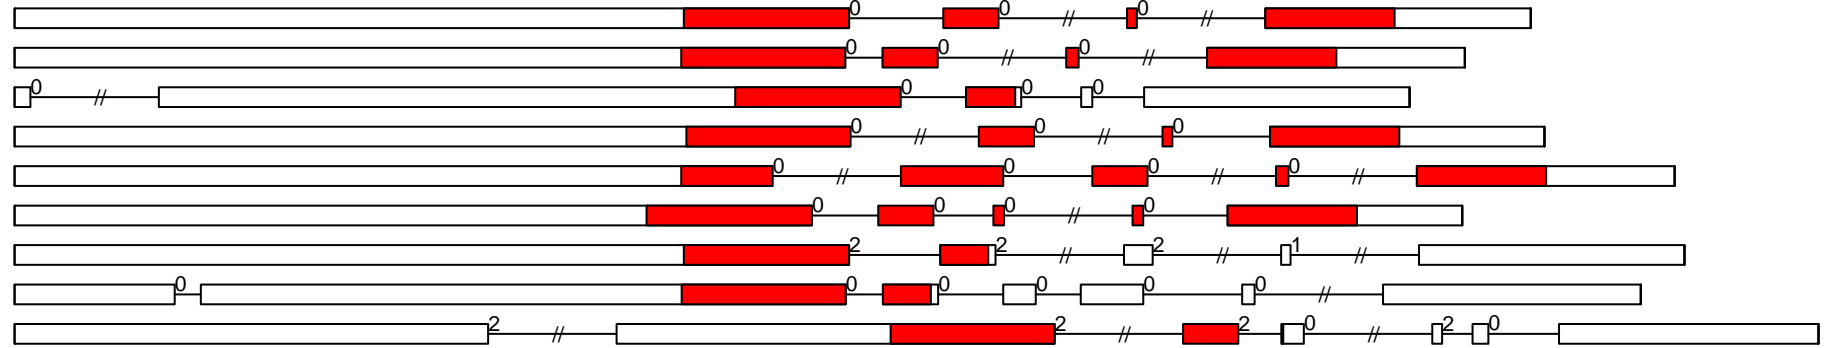

### G.ba RLK-Pelle\_LRR-XV exon-intron and domain diagram (all)

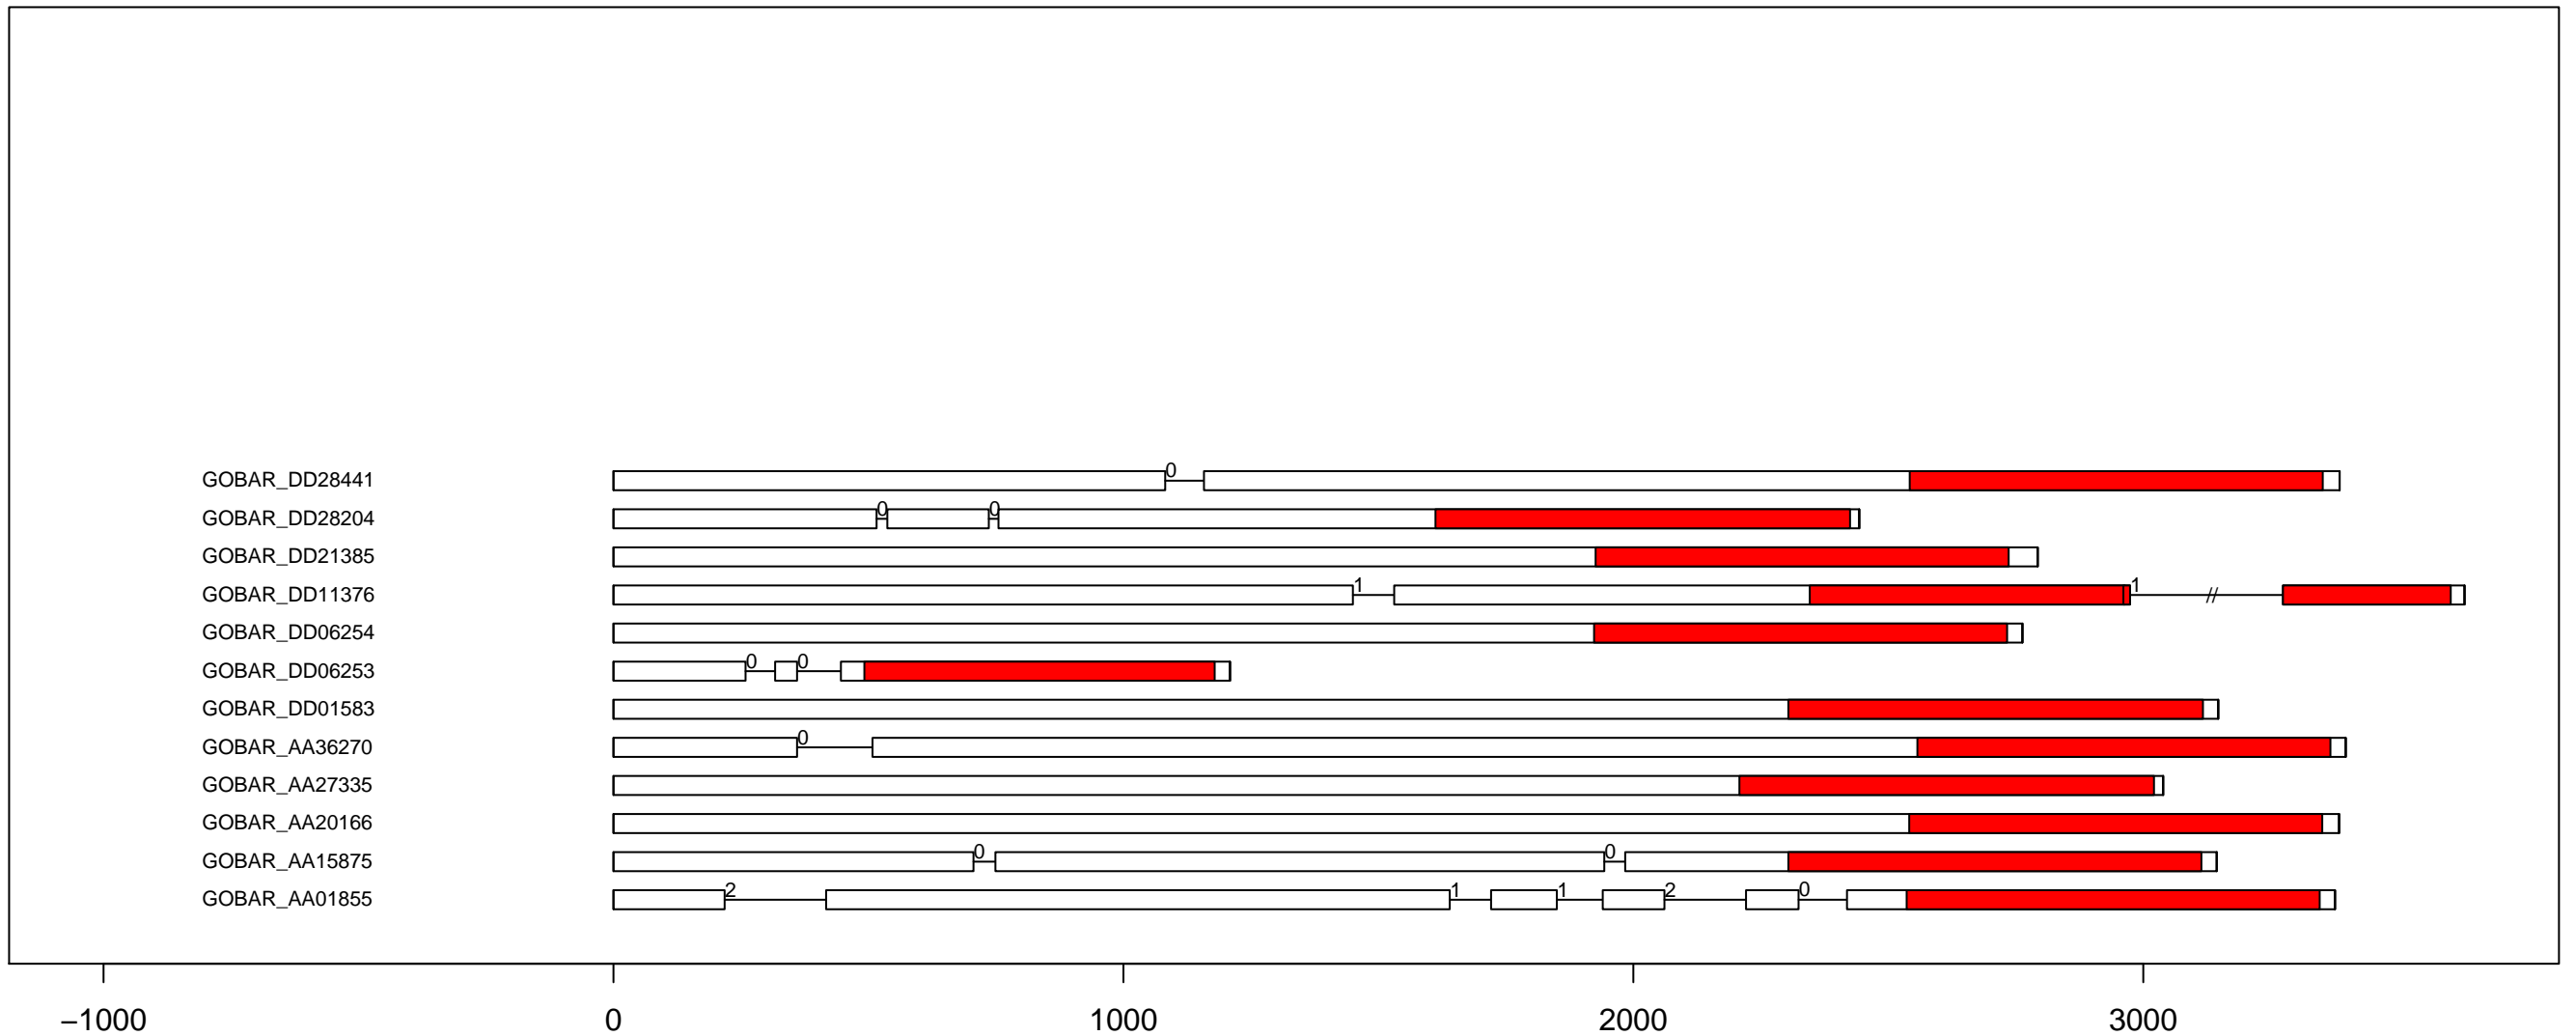

### G.ba RLK-Pelle\_LysM exon-intron and domain diagram (part 1)

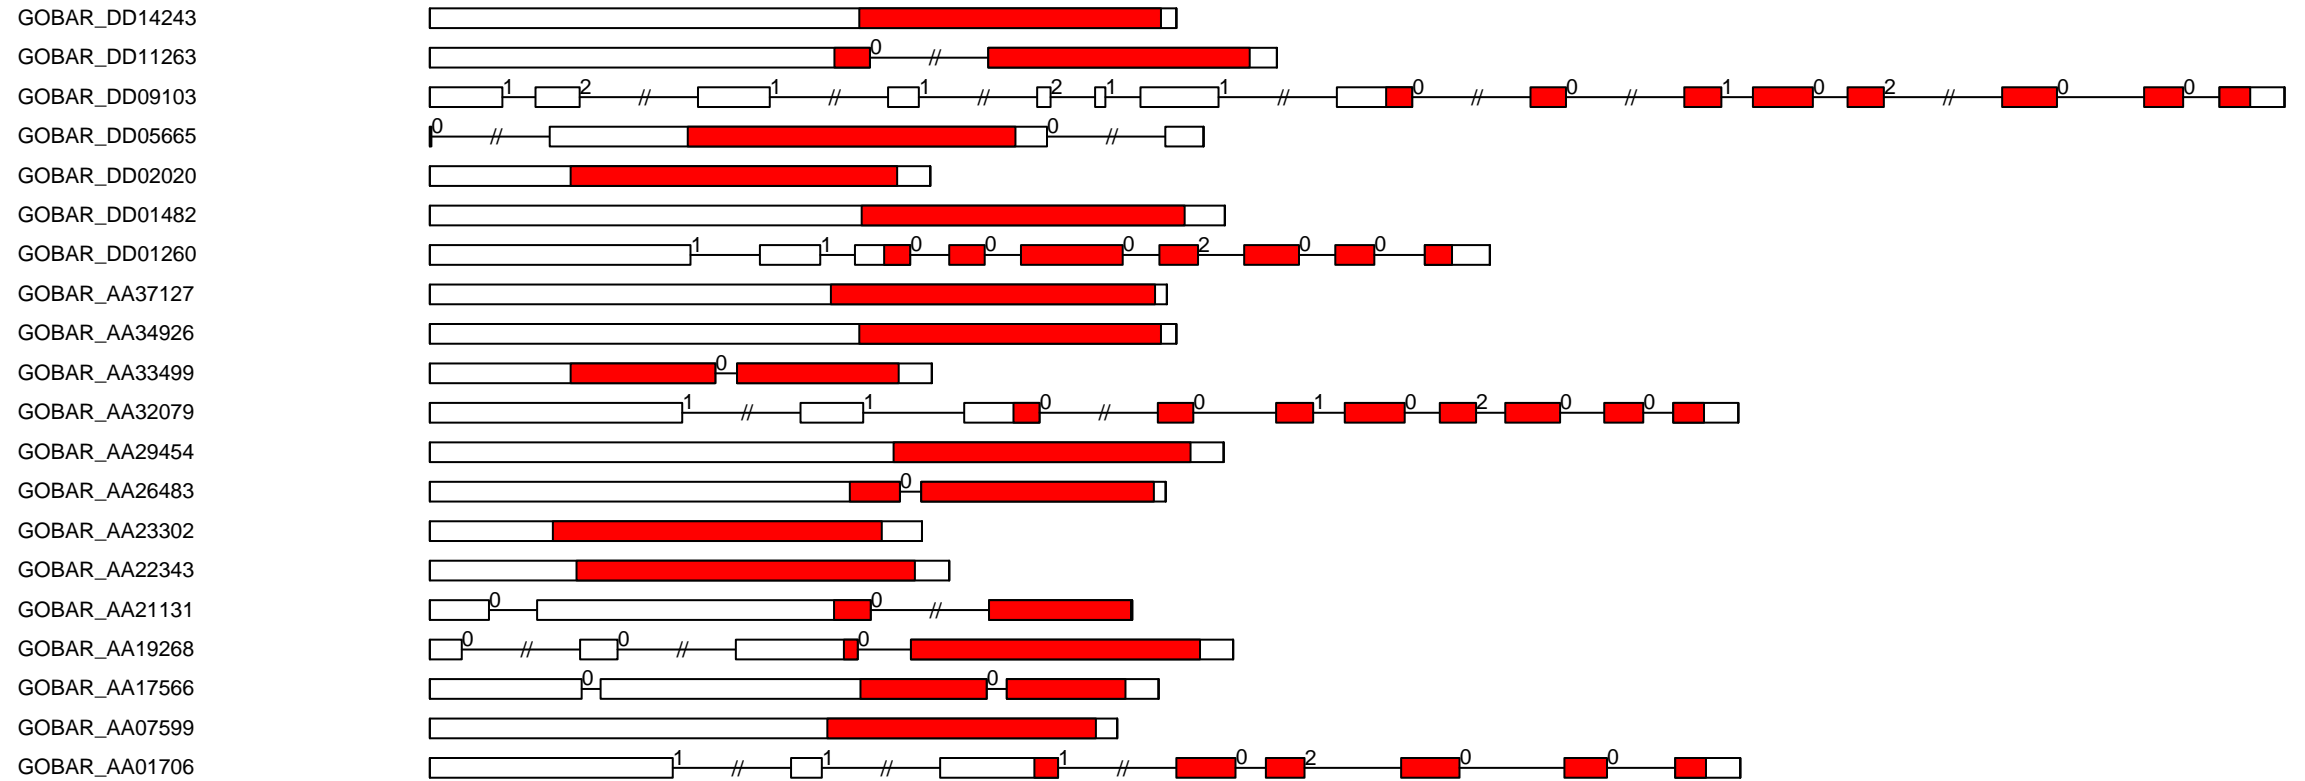

## G.ba RLK-Pelle\_LysM exon-intron and domain diagram (part 2)

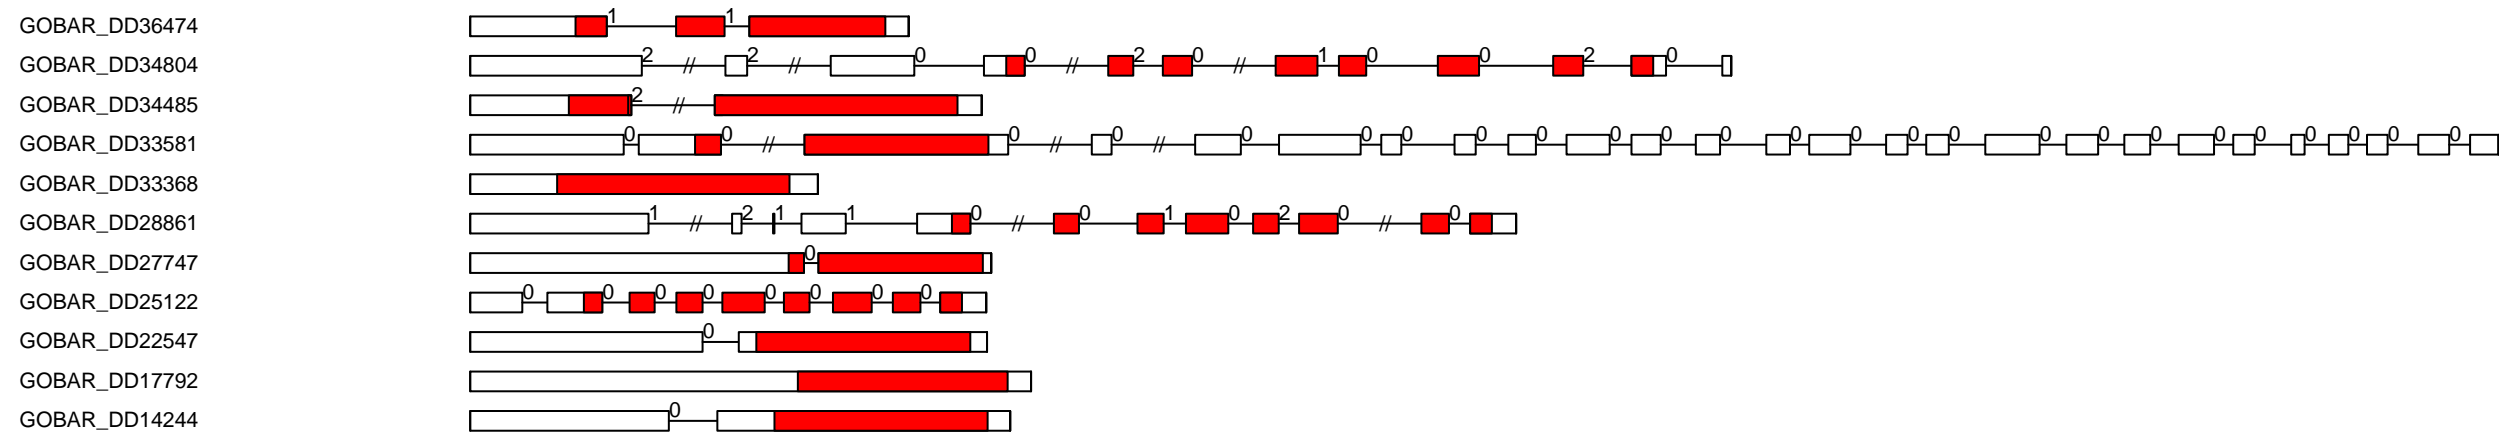

# G.ba RLK-Pelle\_PERK-1 exon-intron and domain diagram (part 1)

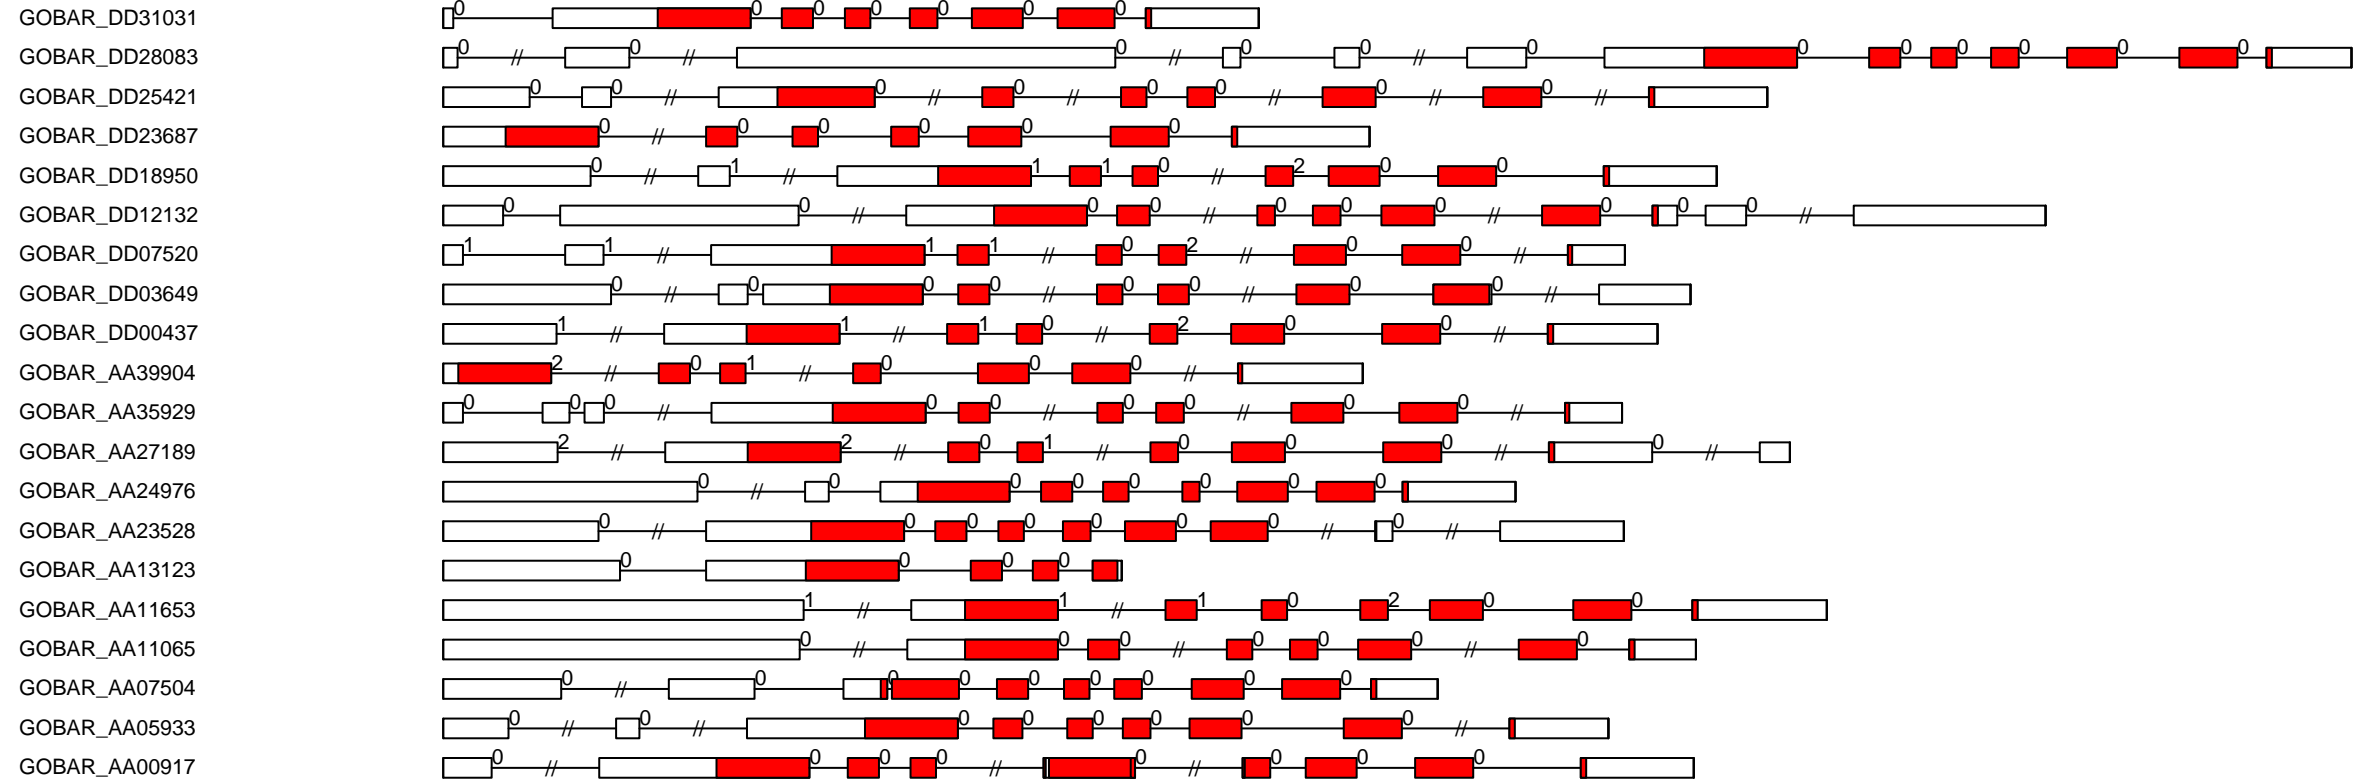

-1000

0

1000

2000

3000

4000

5000



### G.ba RLK-Pelle\_PERK-1 exon-intron and domain diagram (part 2)

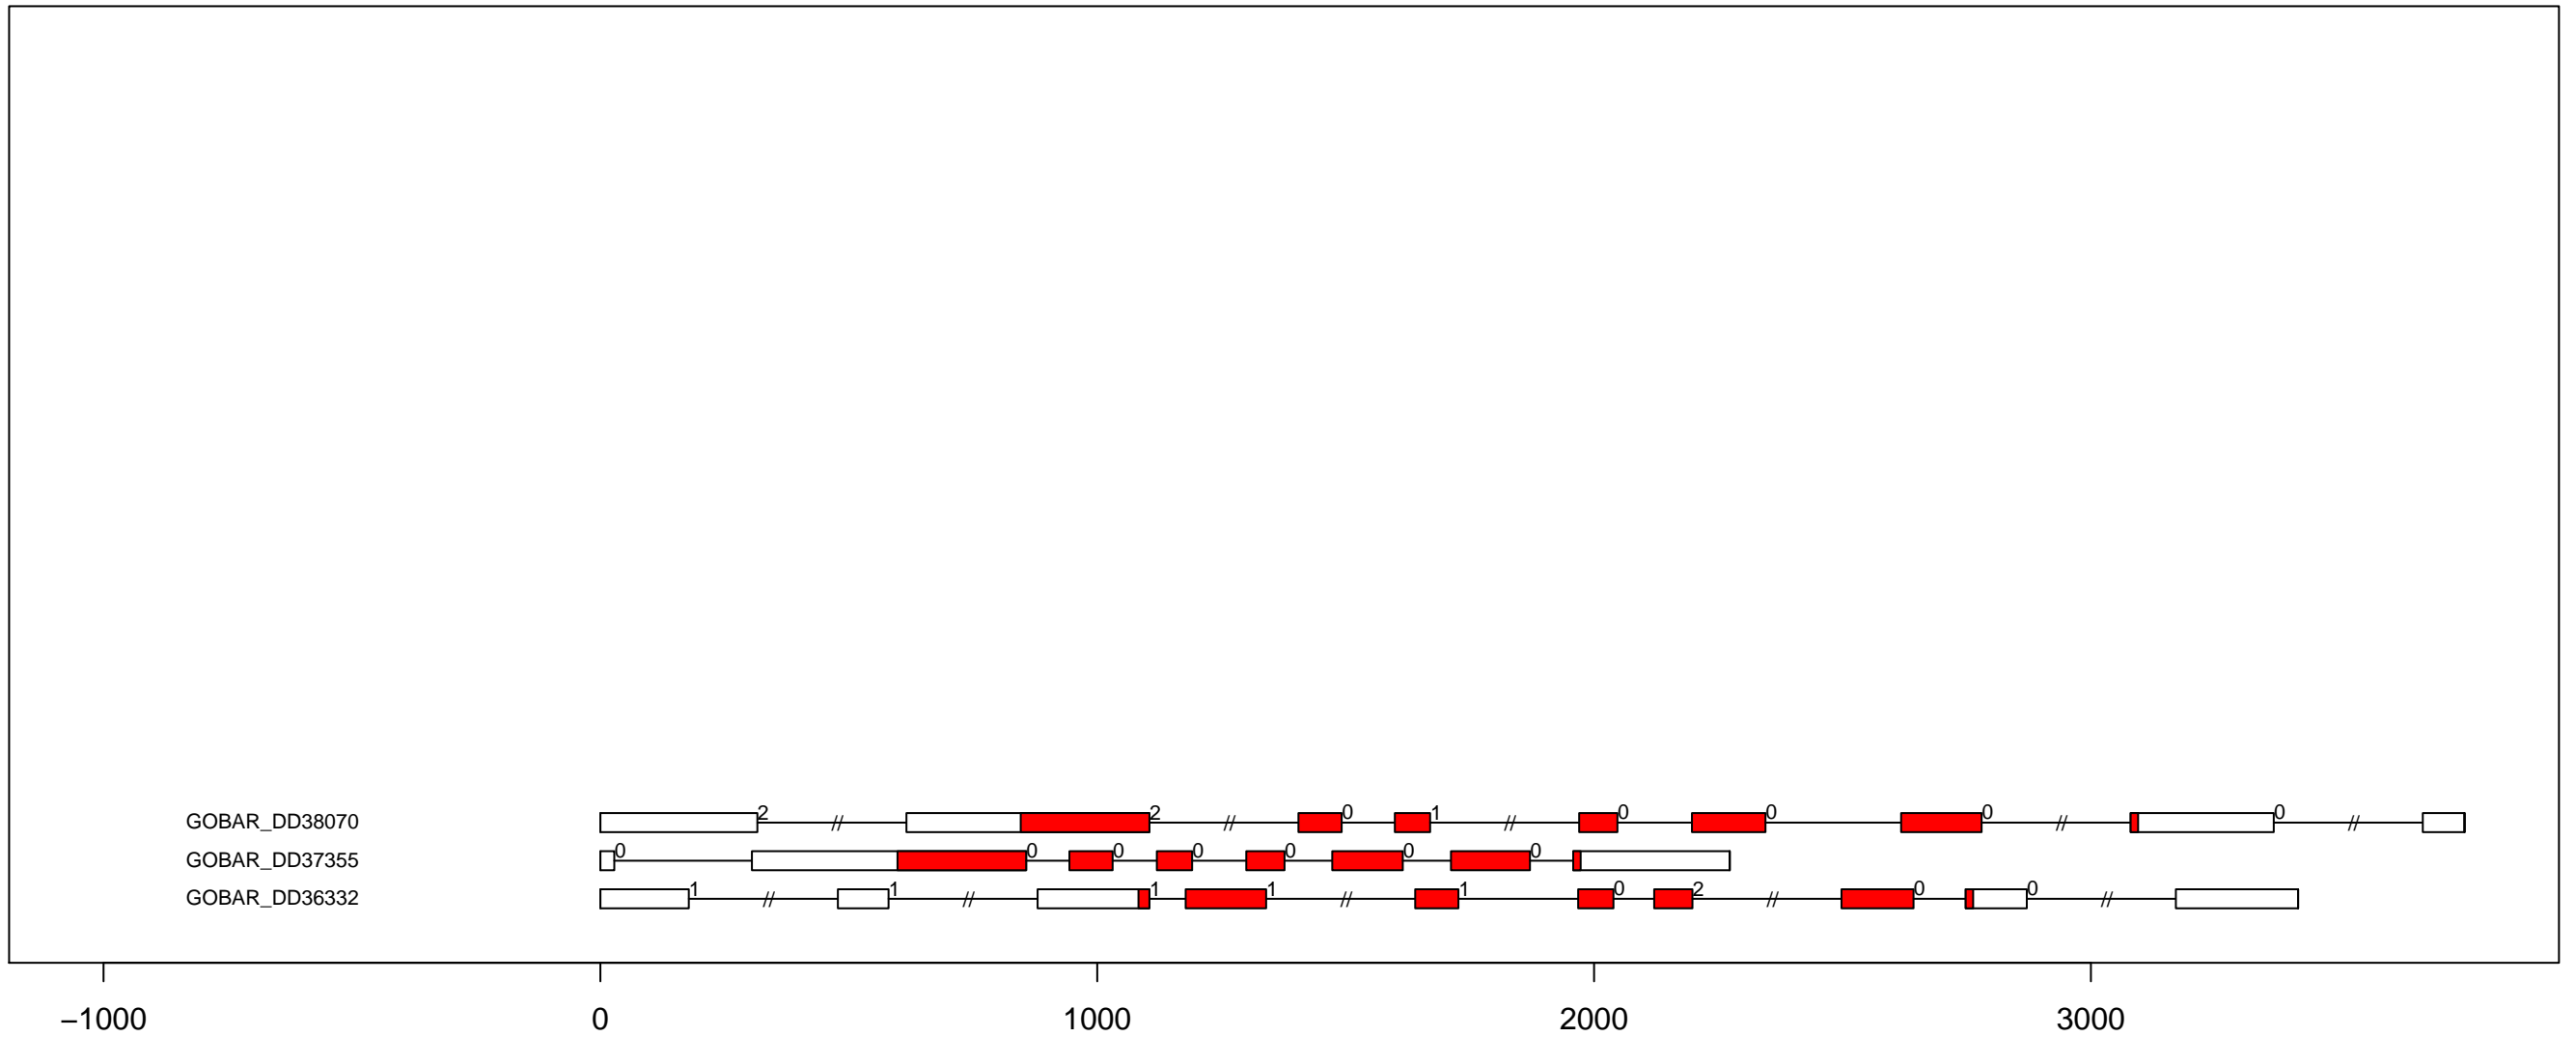



# G.ba RLK-Pelle\_RKF3 exon-intron and domain diagram (all)

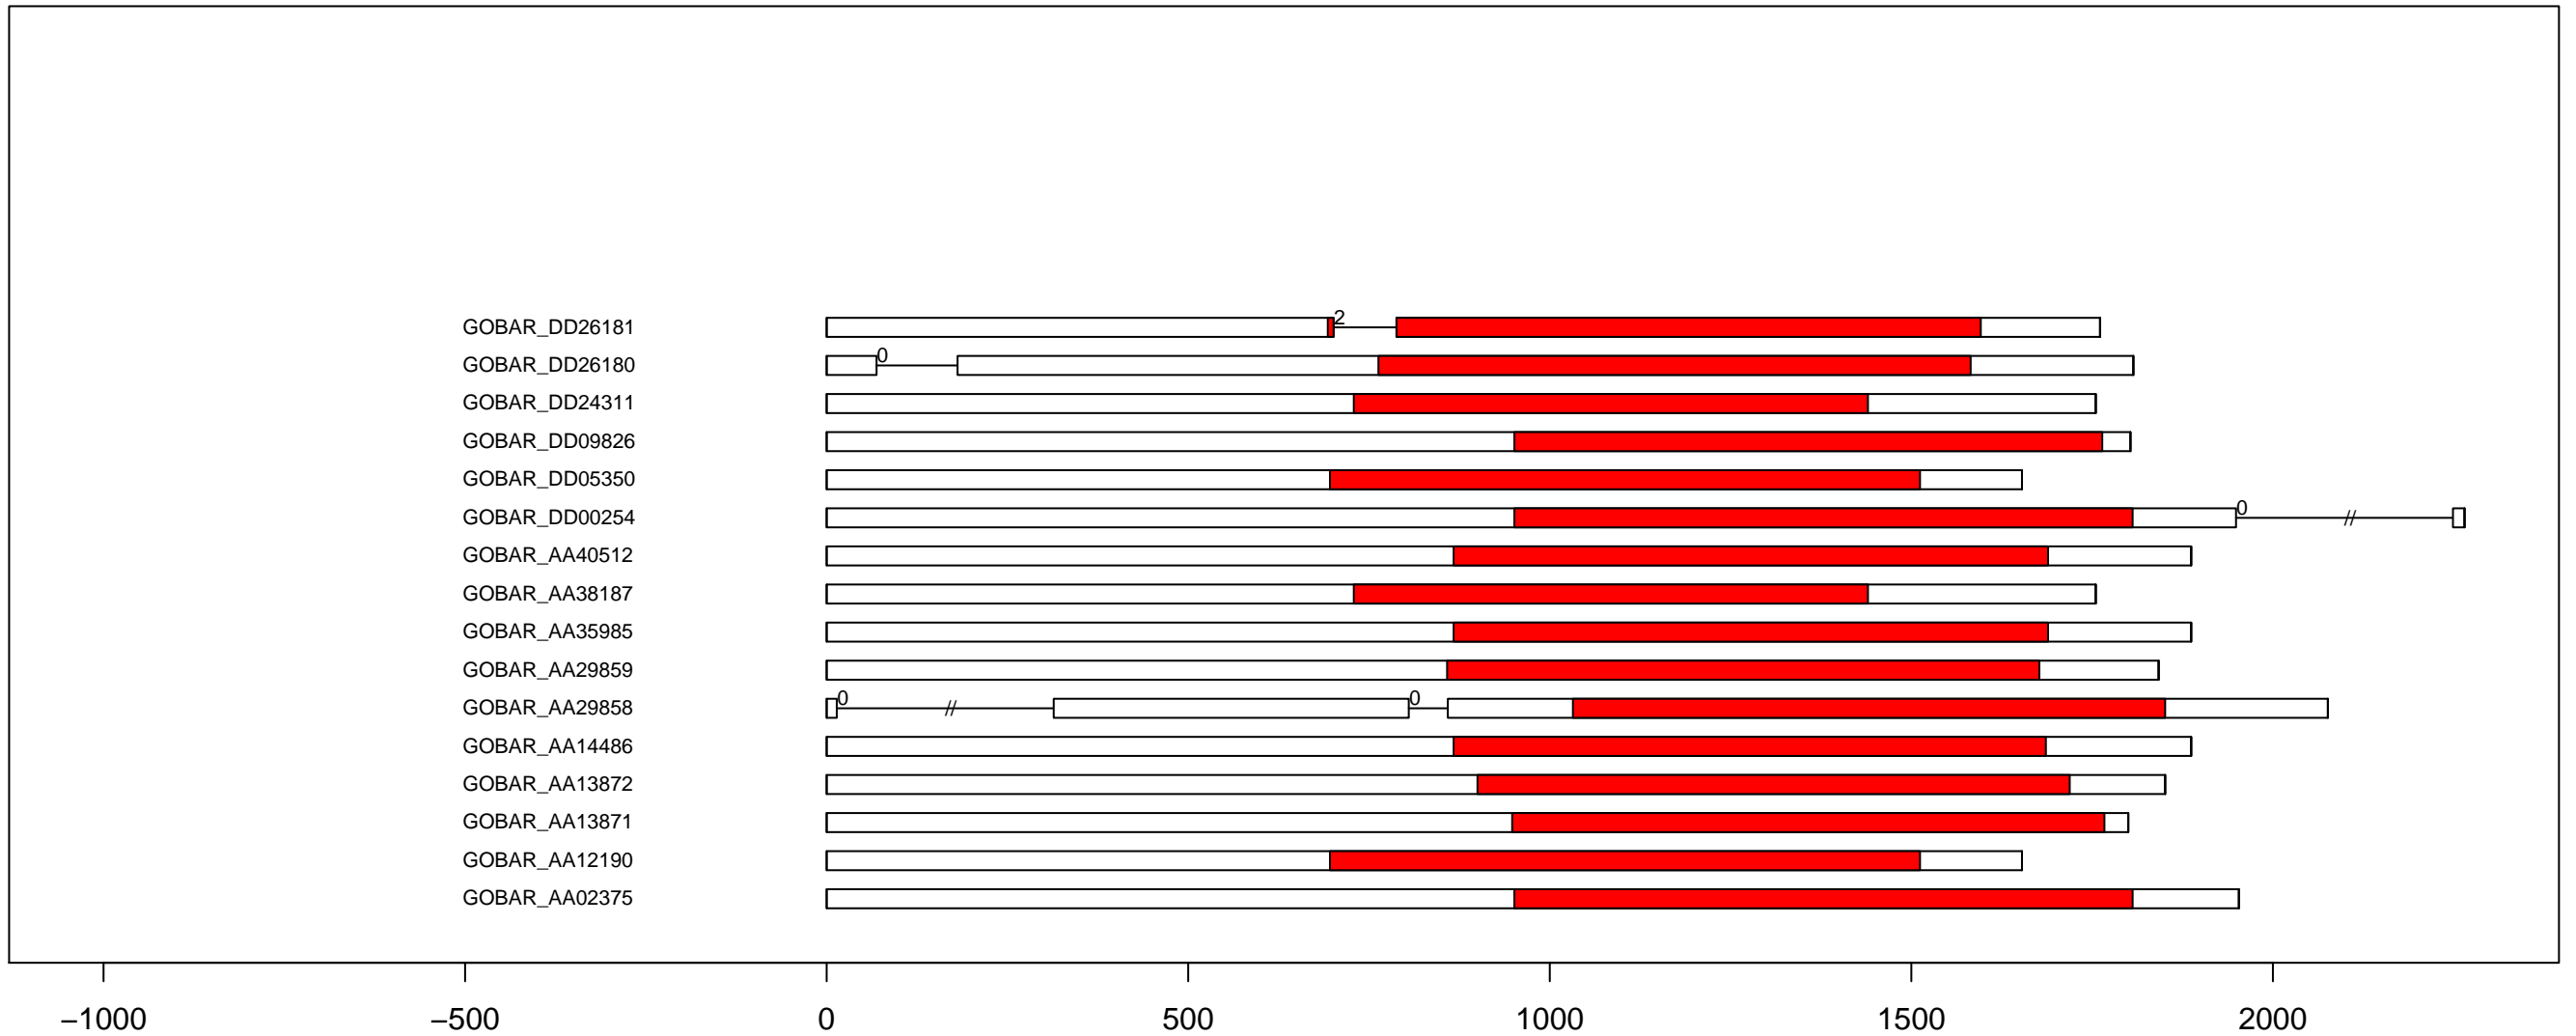

# G.ba RLK-Pelle\_RLCK-II exon-intron and domain diagram (all)

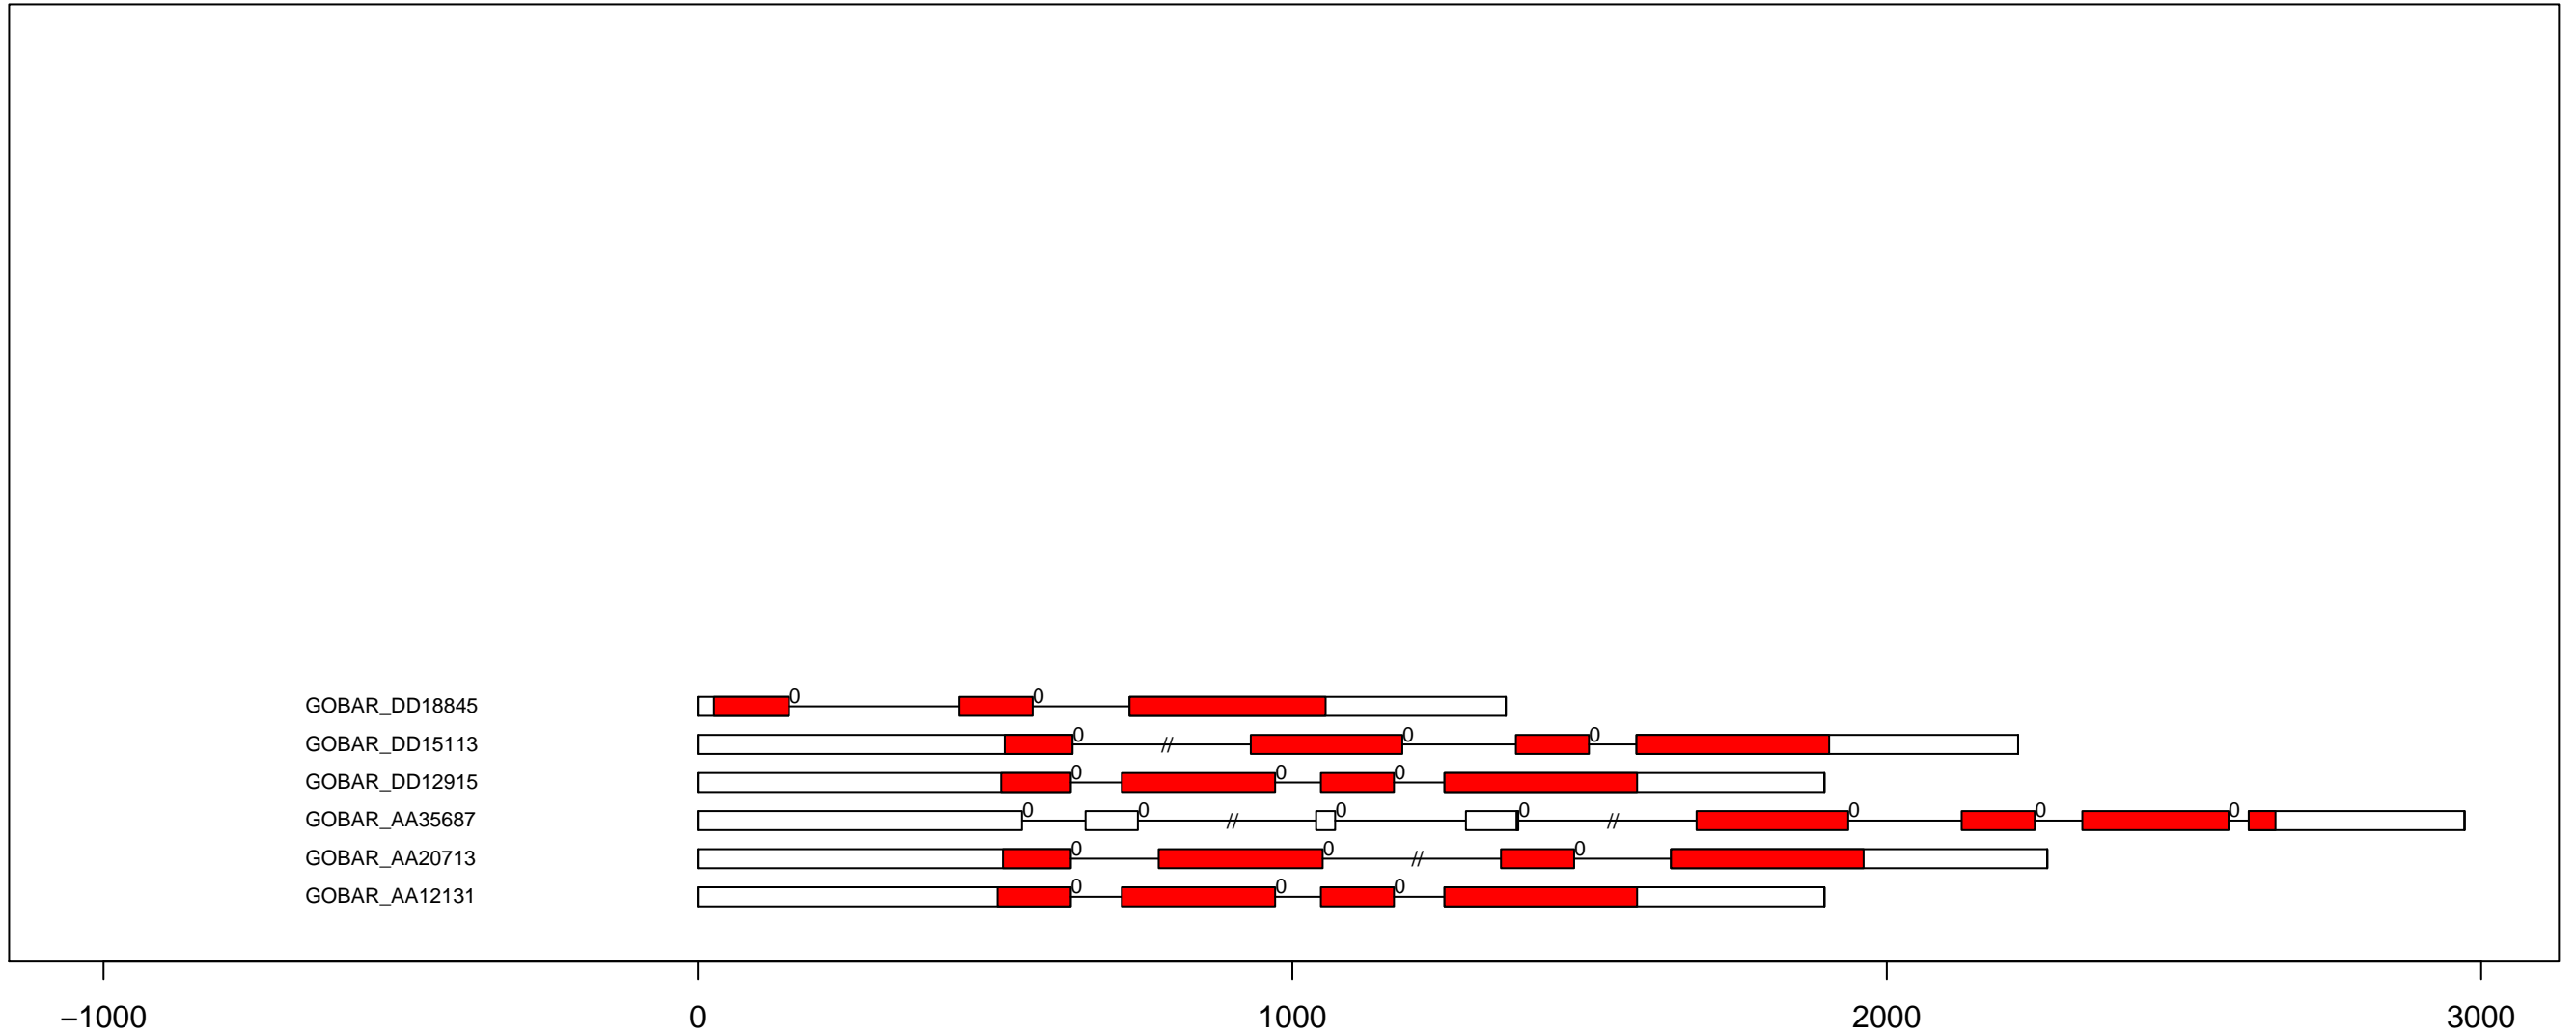



# G.ba RLK-Pelle\_RLCK-IXa exon-intron and domain diagram (all)

GOBAR\_DD28203  
 GOBAR\_DD17576  
 GOBAR\_DD16228  
 GOBAR\_AA28414  
 GOBAR\_AA27333  
 GOBAR\_AA15587

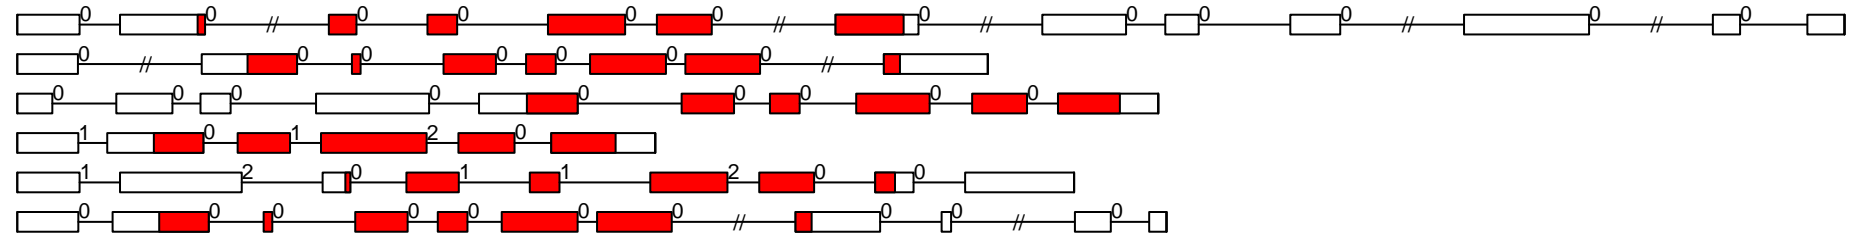

-1000

0

1000

2000

3000

4000

### G.ba RLK-Pelle\_RLCK-IXb exon-intron and domain diagram (part 1)

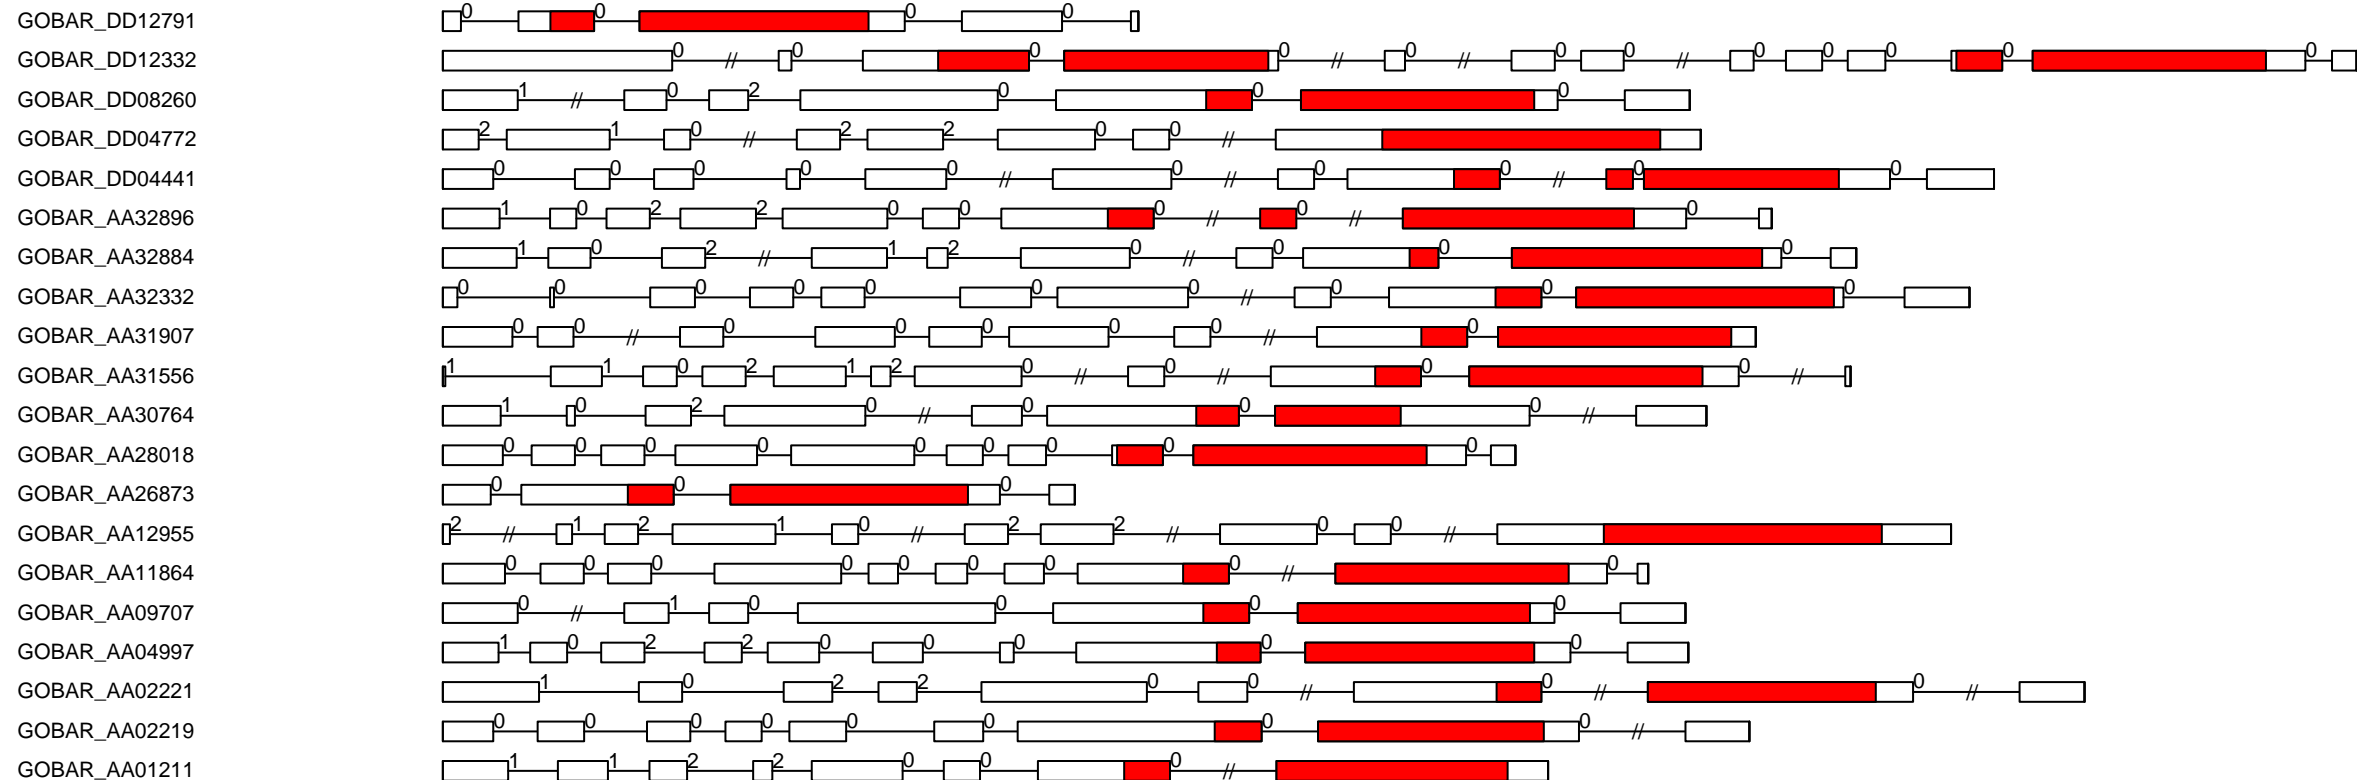





# G.ba RLK-Pelle\_RLCK-Os exon-intron and domain diagram (all)

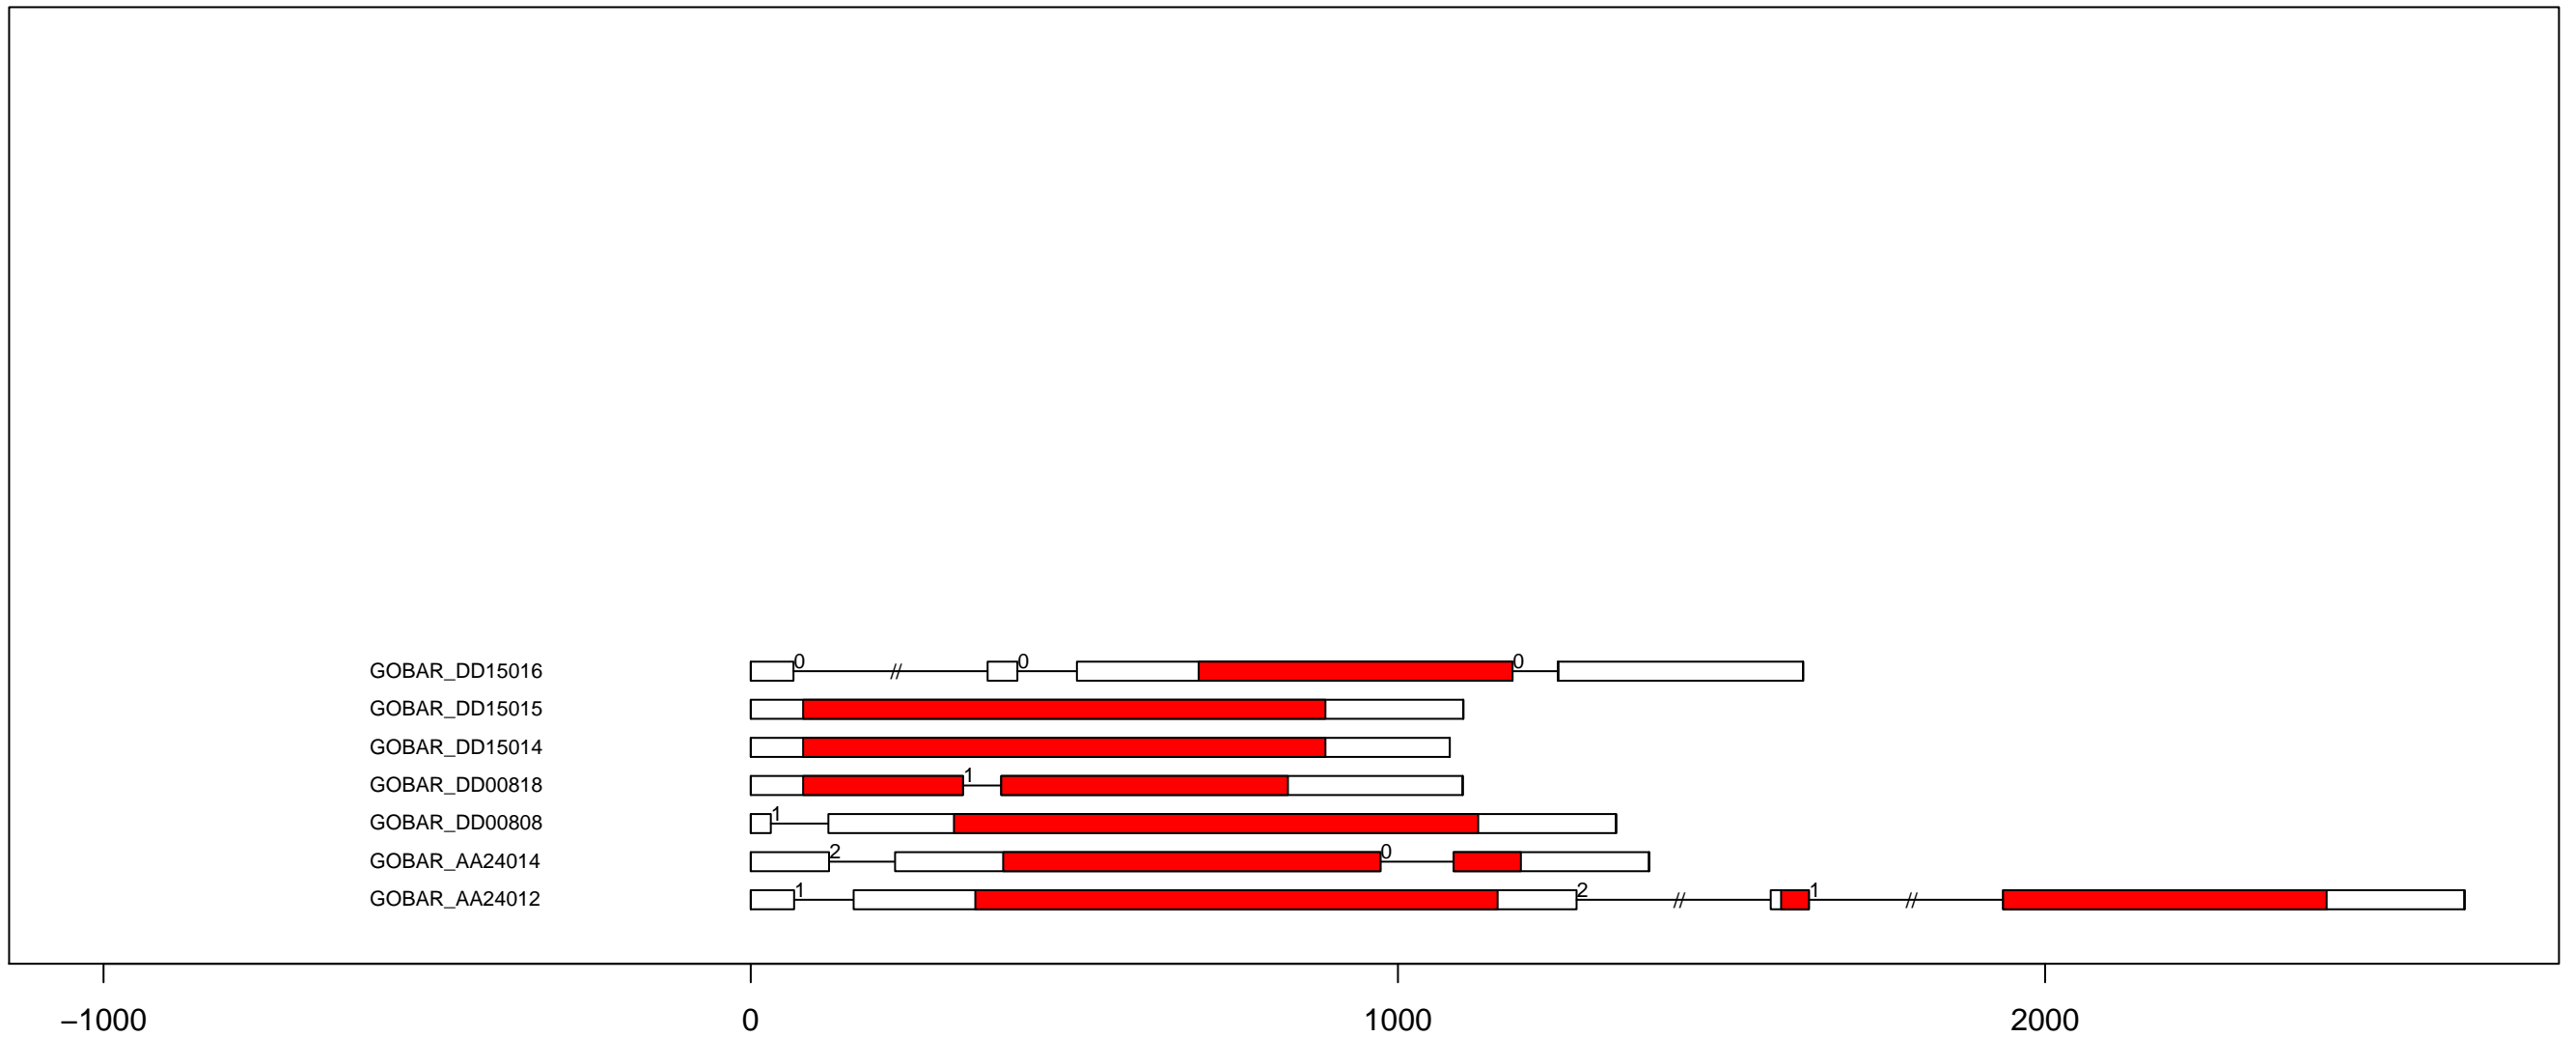

### G.ba RLK-Pelle\_RLCK-VIIa-1 exon-intron and domain diagram (part 1)

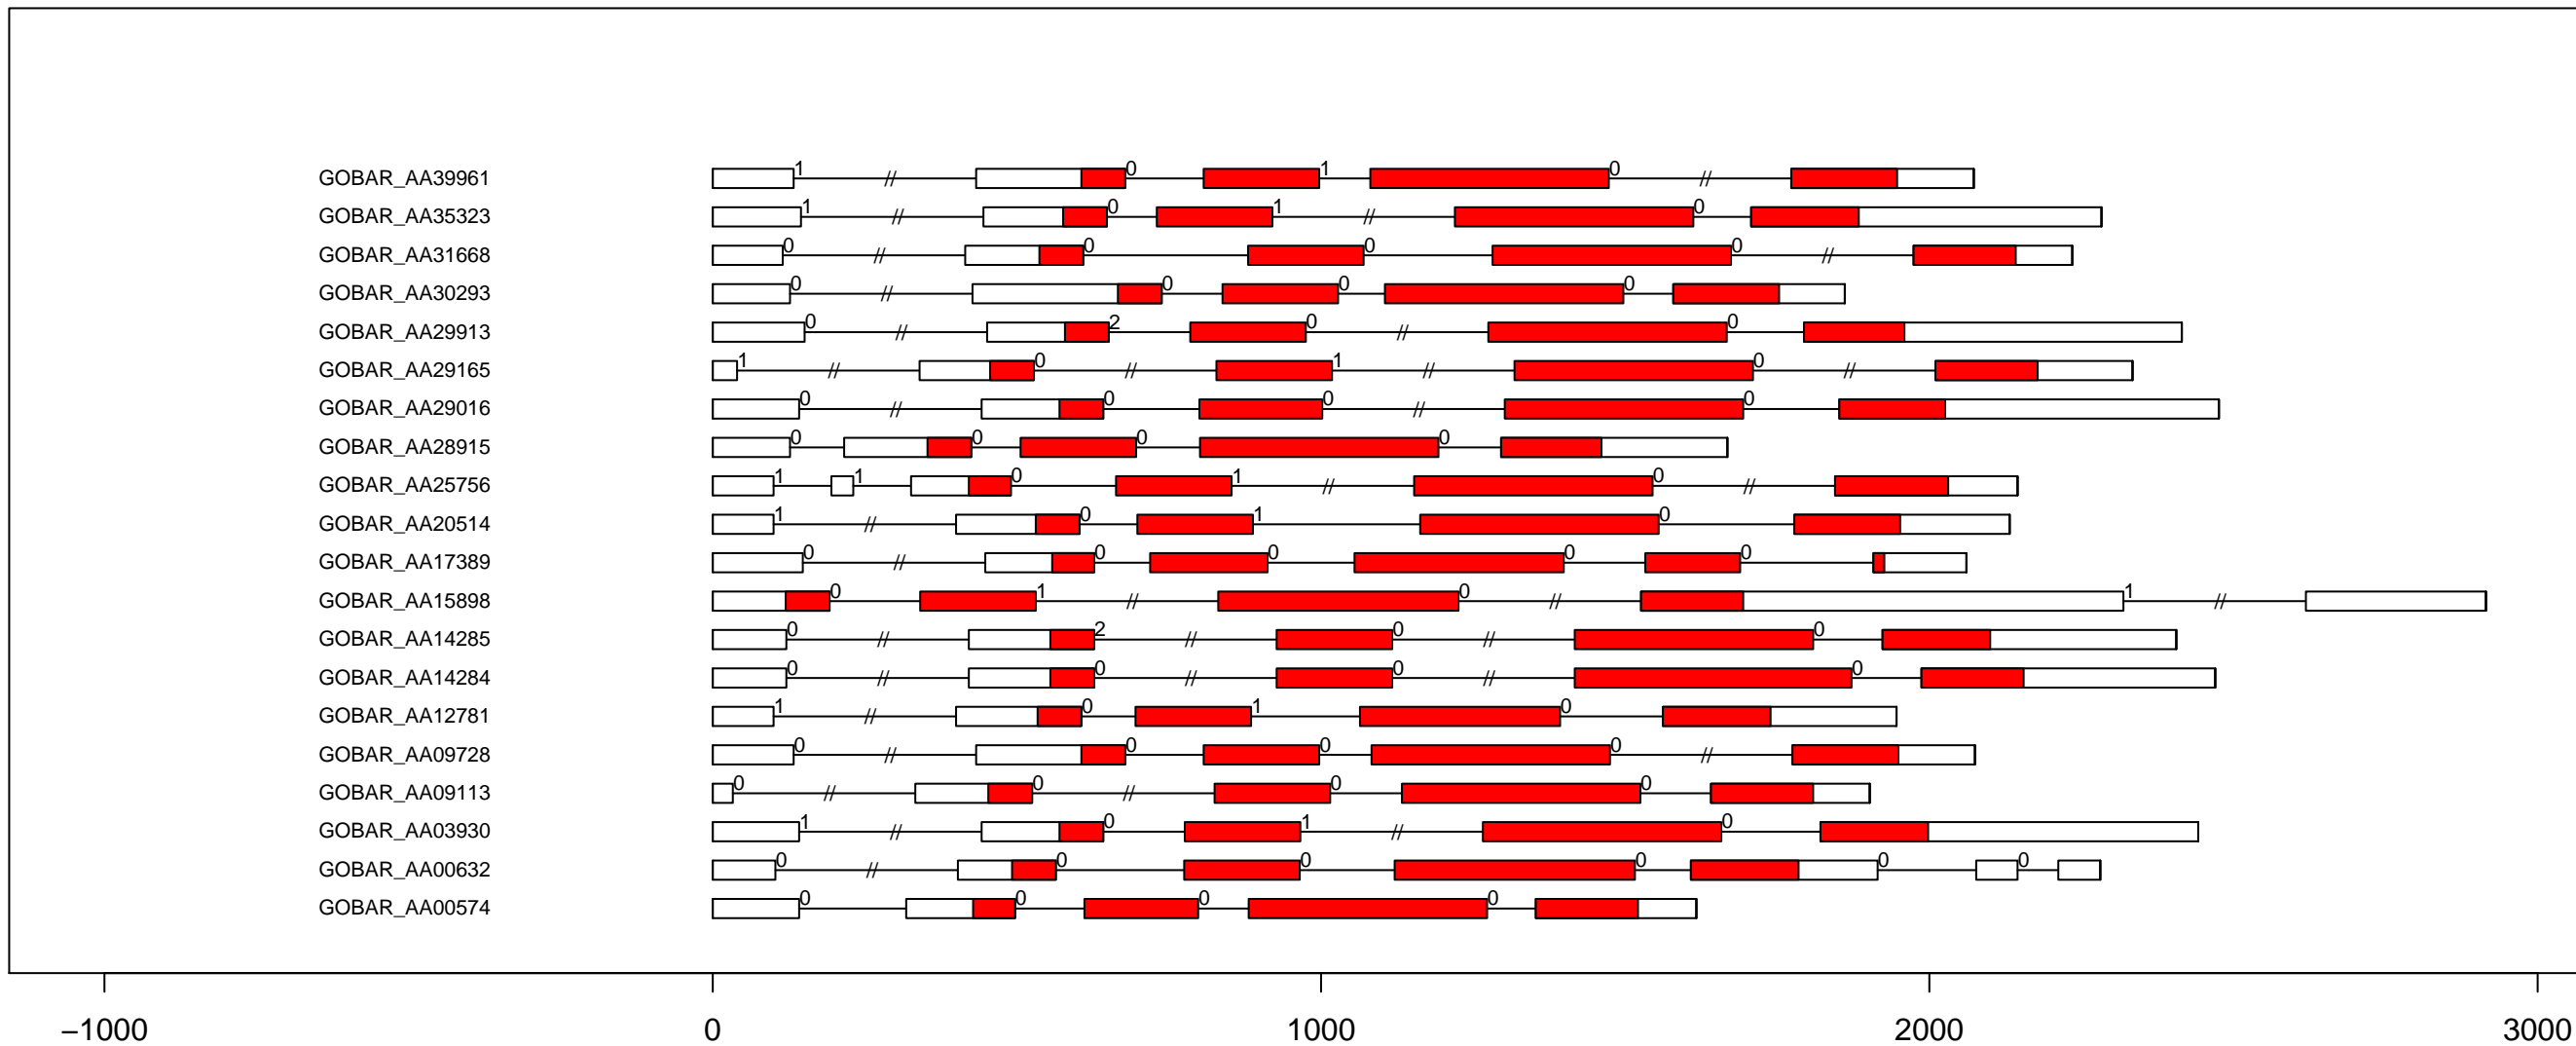

### G.ba RLK-Pelle\_RLCK-VIIa-1 exon-intron and domain diagram (part 2)

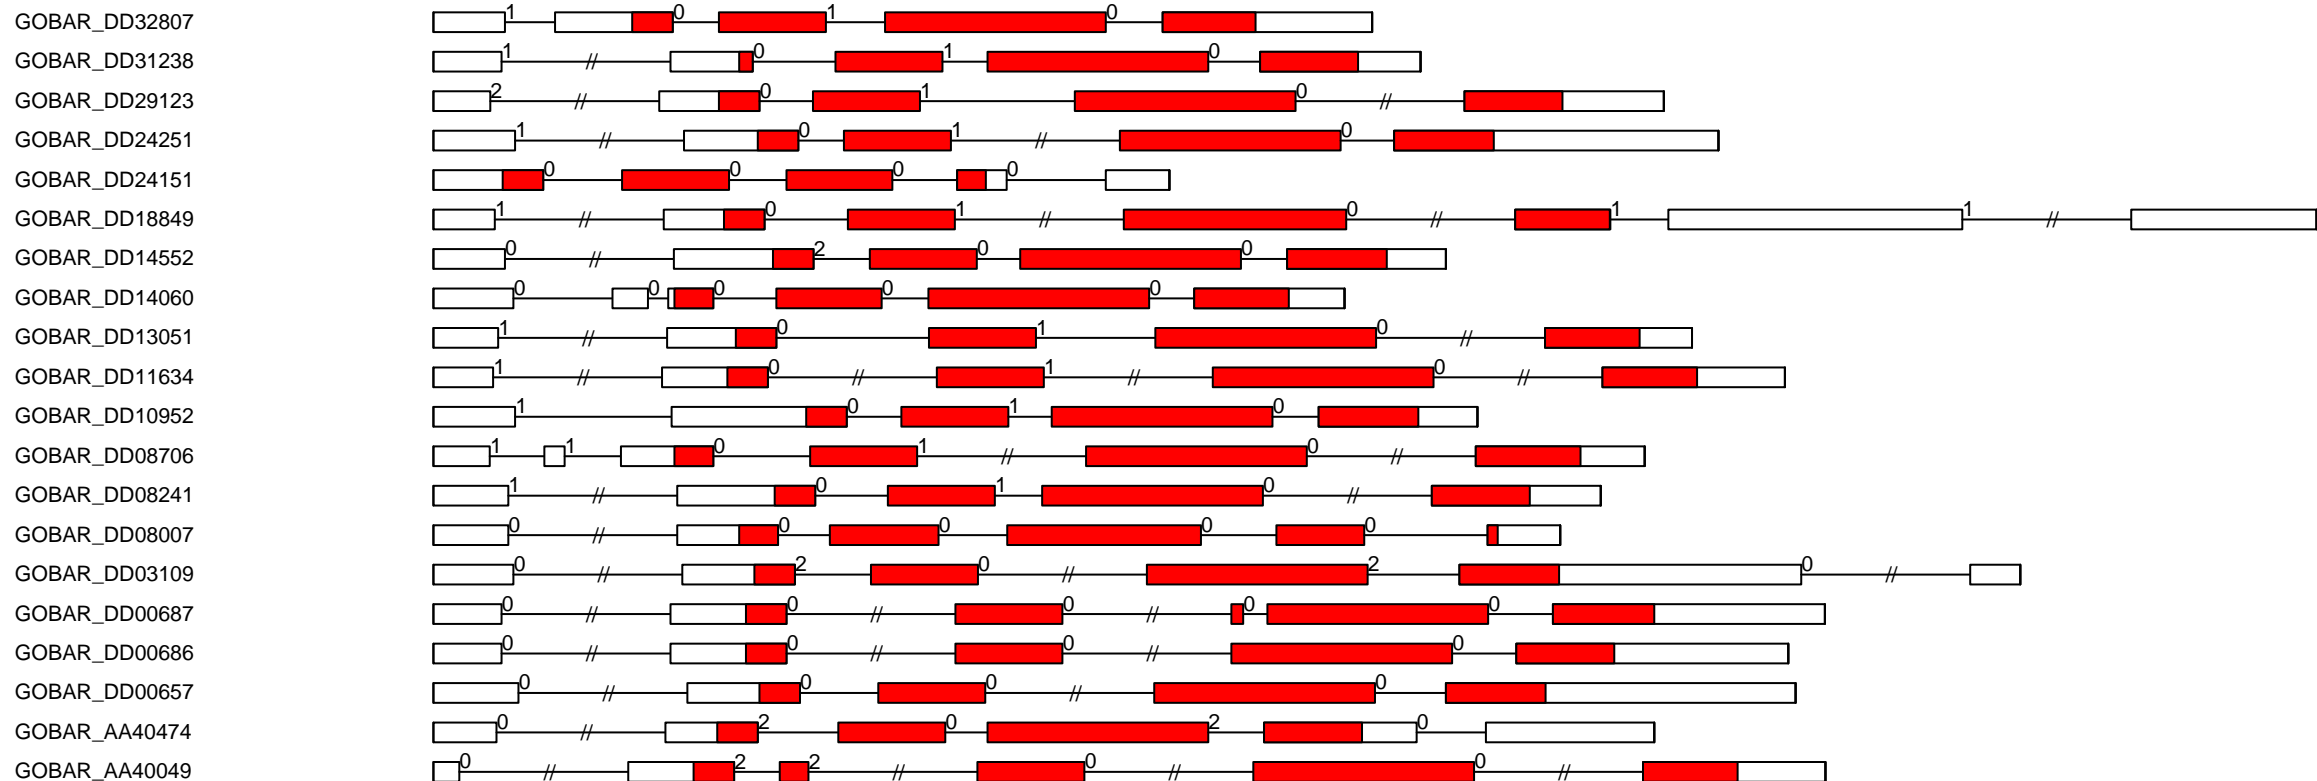

-1000

0

1000

2000

3000

### G.ba RLK-Pelle\_RLCK-VIIa-1 exon-intron and domain diagram (part 3)

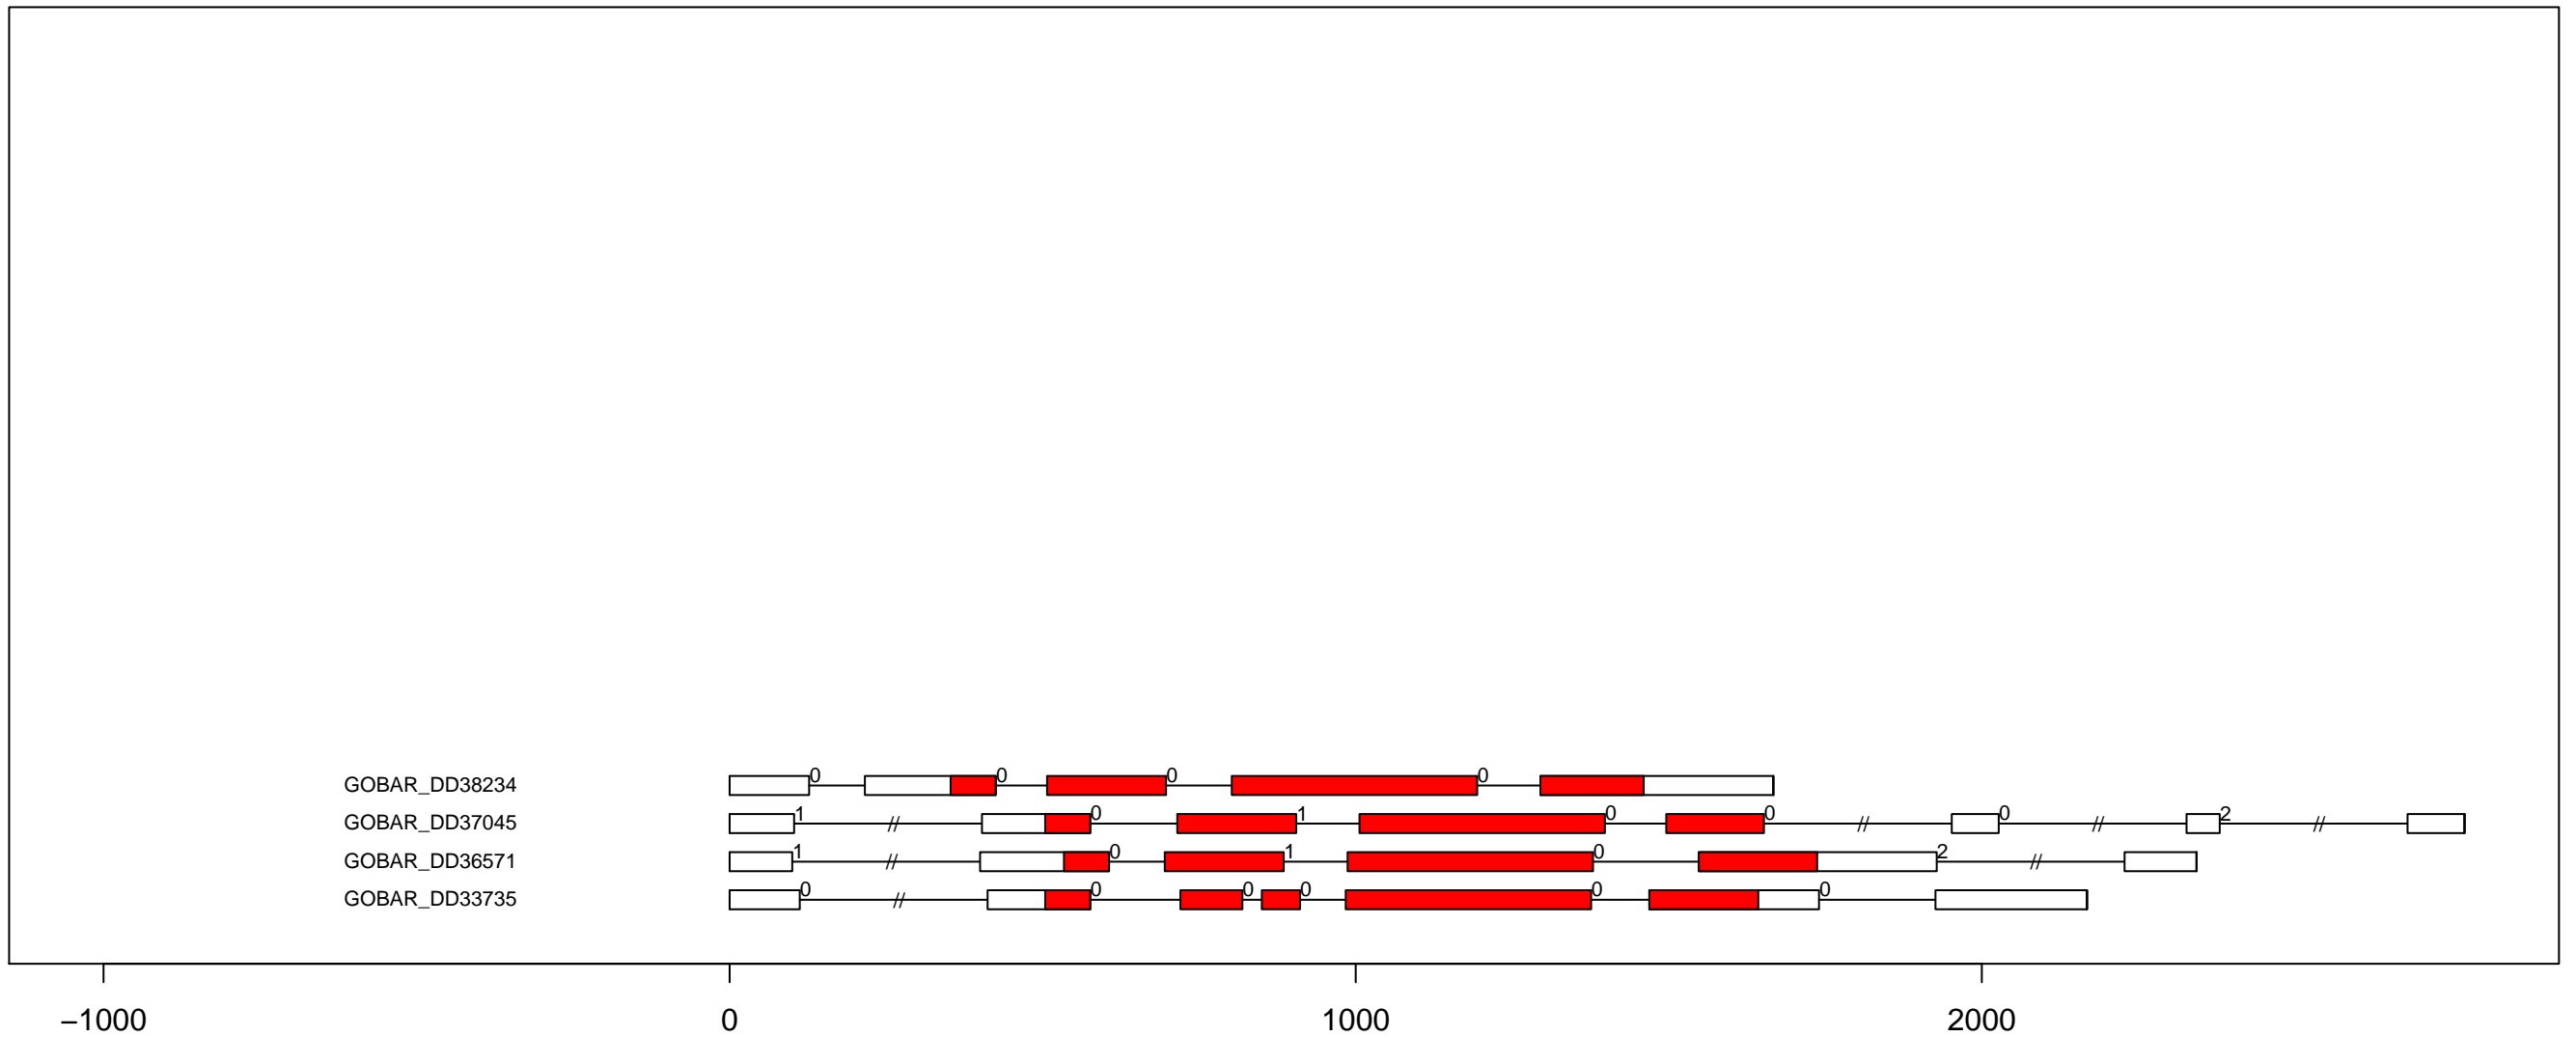

### G.ba RLK-Pelle\_RLCK-VIIa-2 exon-intron and domain diagram (part 1)

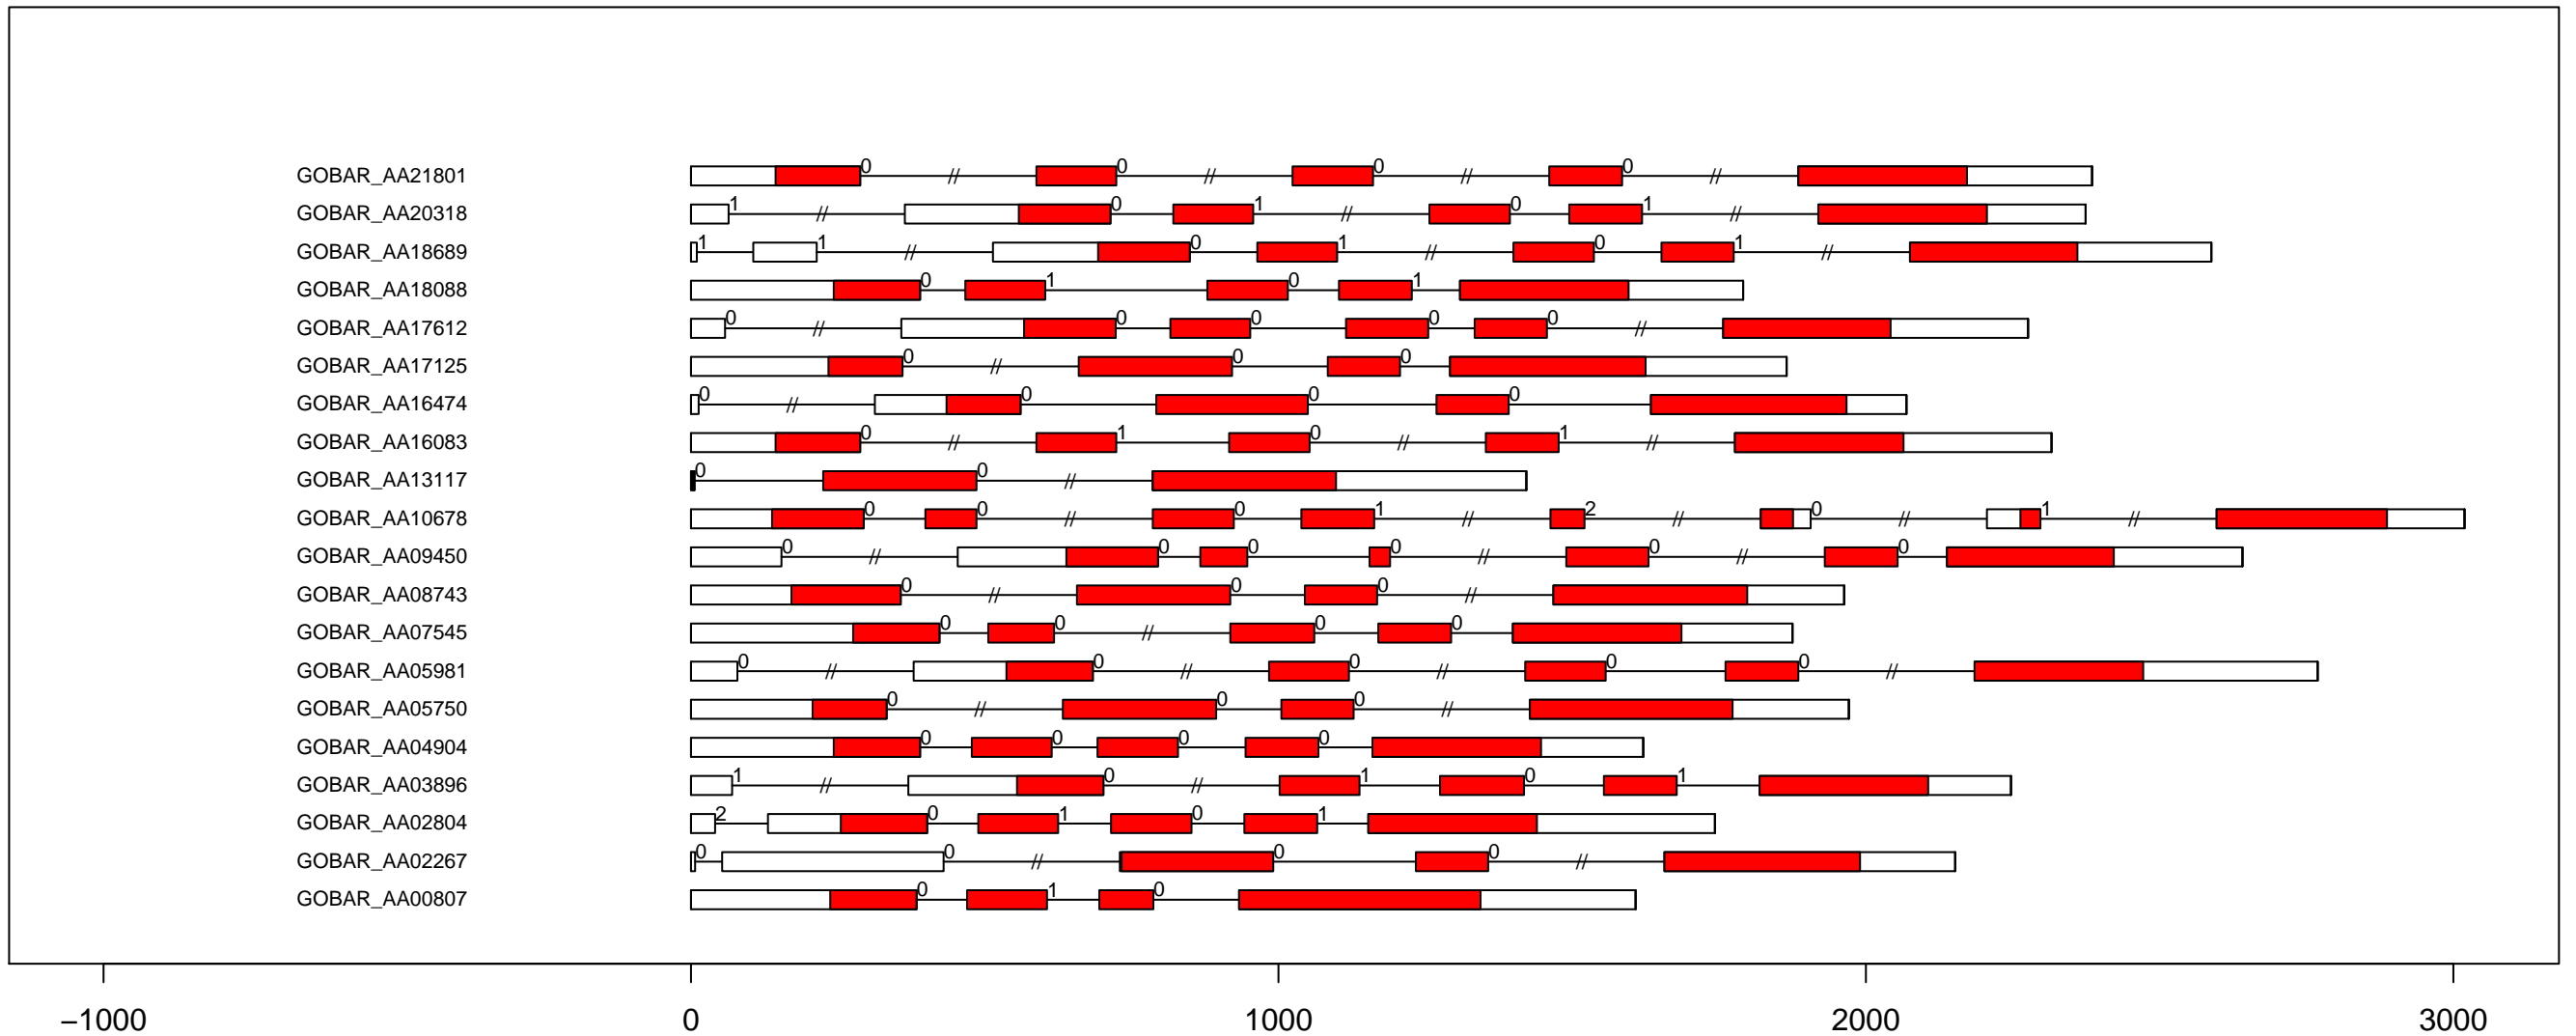



### G.ba RLK-Pelle\_RLCK-VIIa-2 exon-intron and domain diagram (part 3)

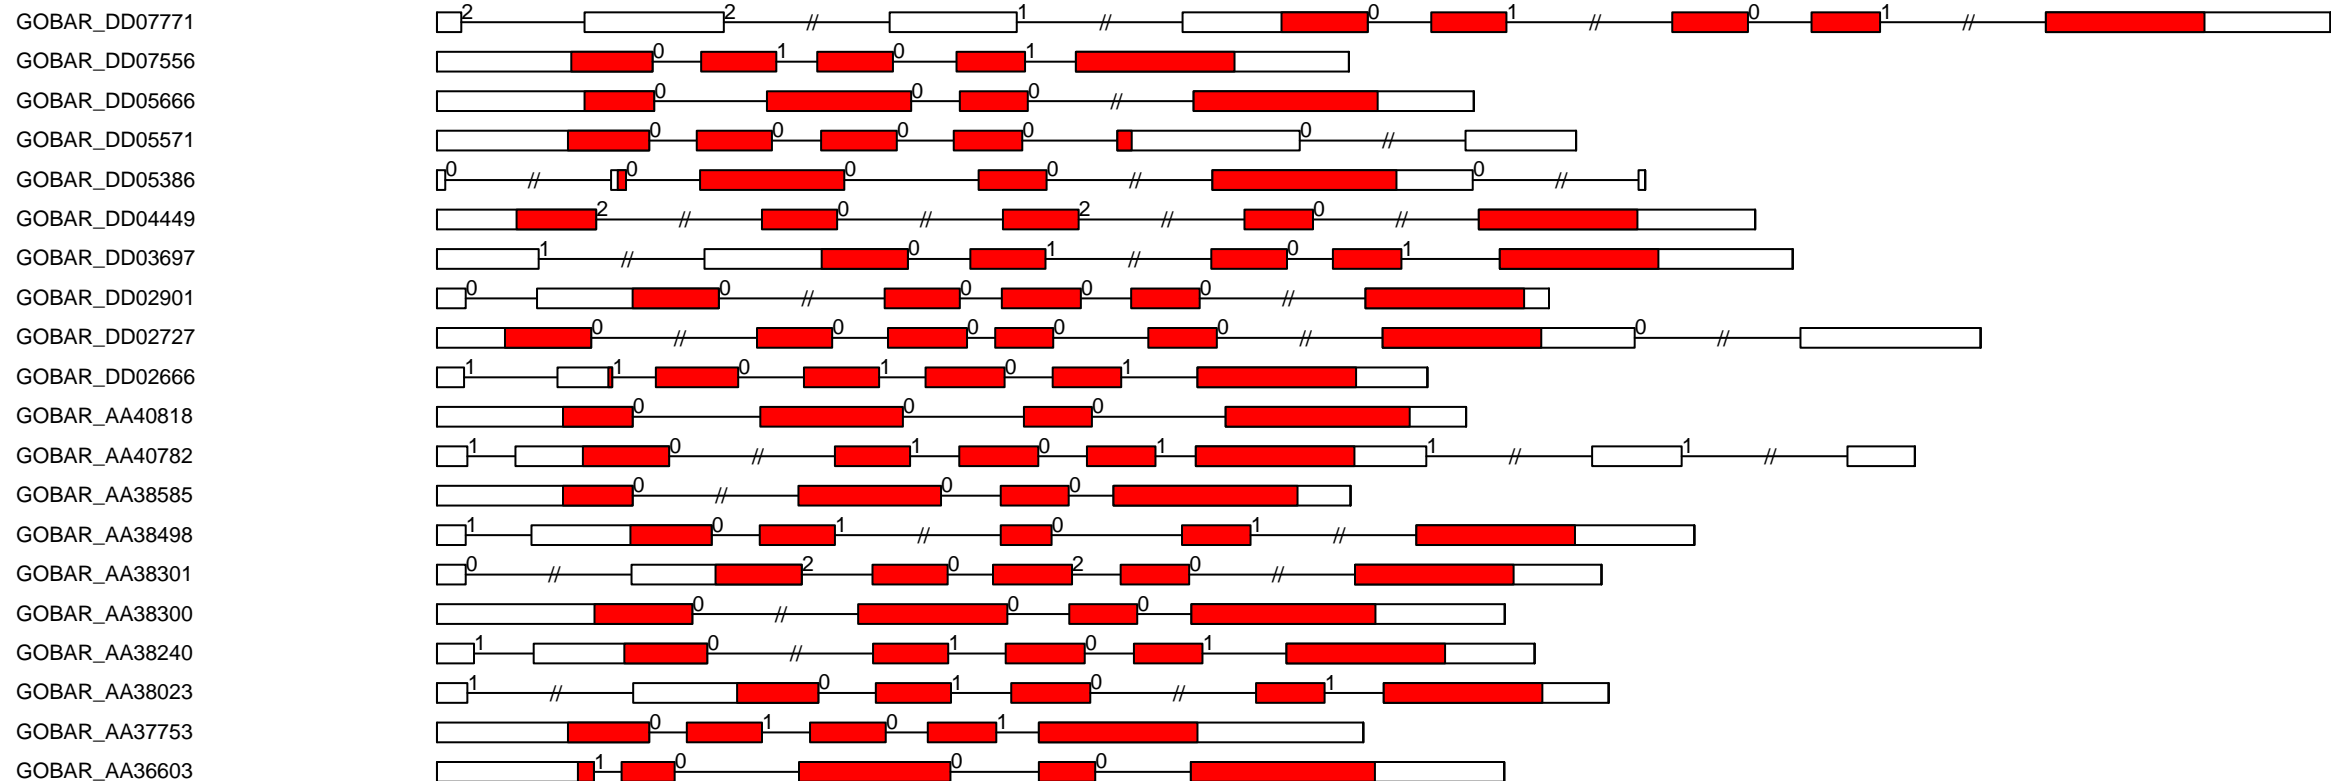

-1000

0

1000

2000

3000

### G.ba RLK-Pelle\_RLCK-VIIa-2 exon-intron and domain diagram (part 4)

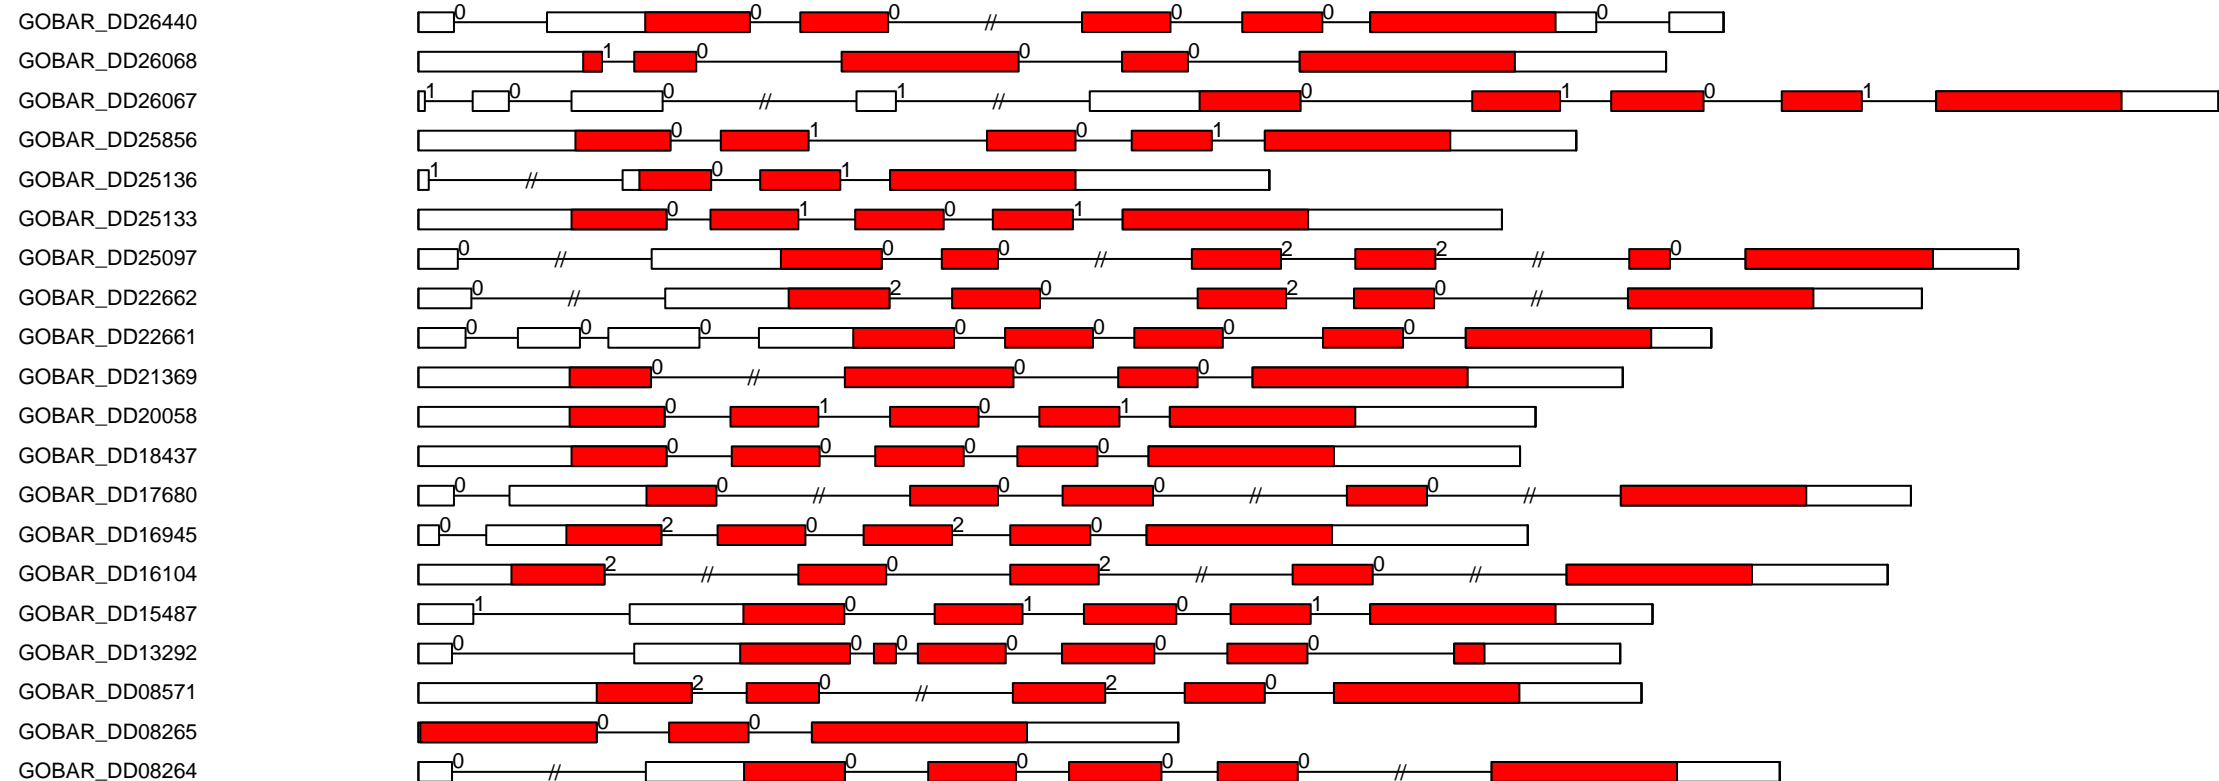

-1000

0

1000

2000



## G.ba RLK-Pelle\_RLCK-VIIa-2 exon-intron and domain diagram (part 5)

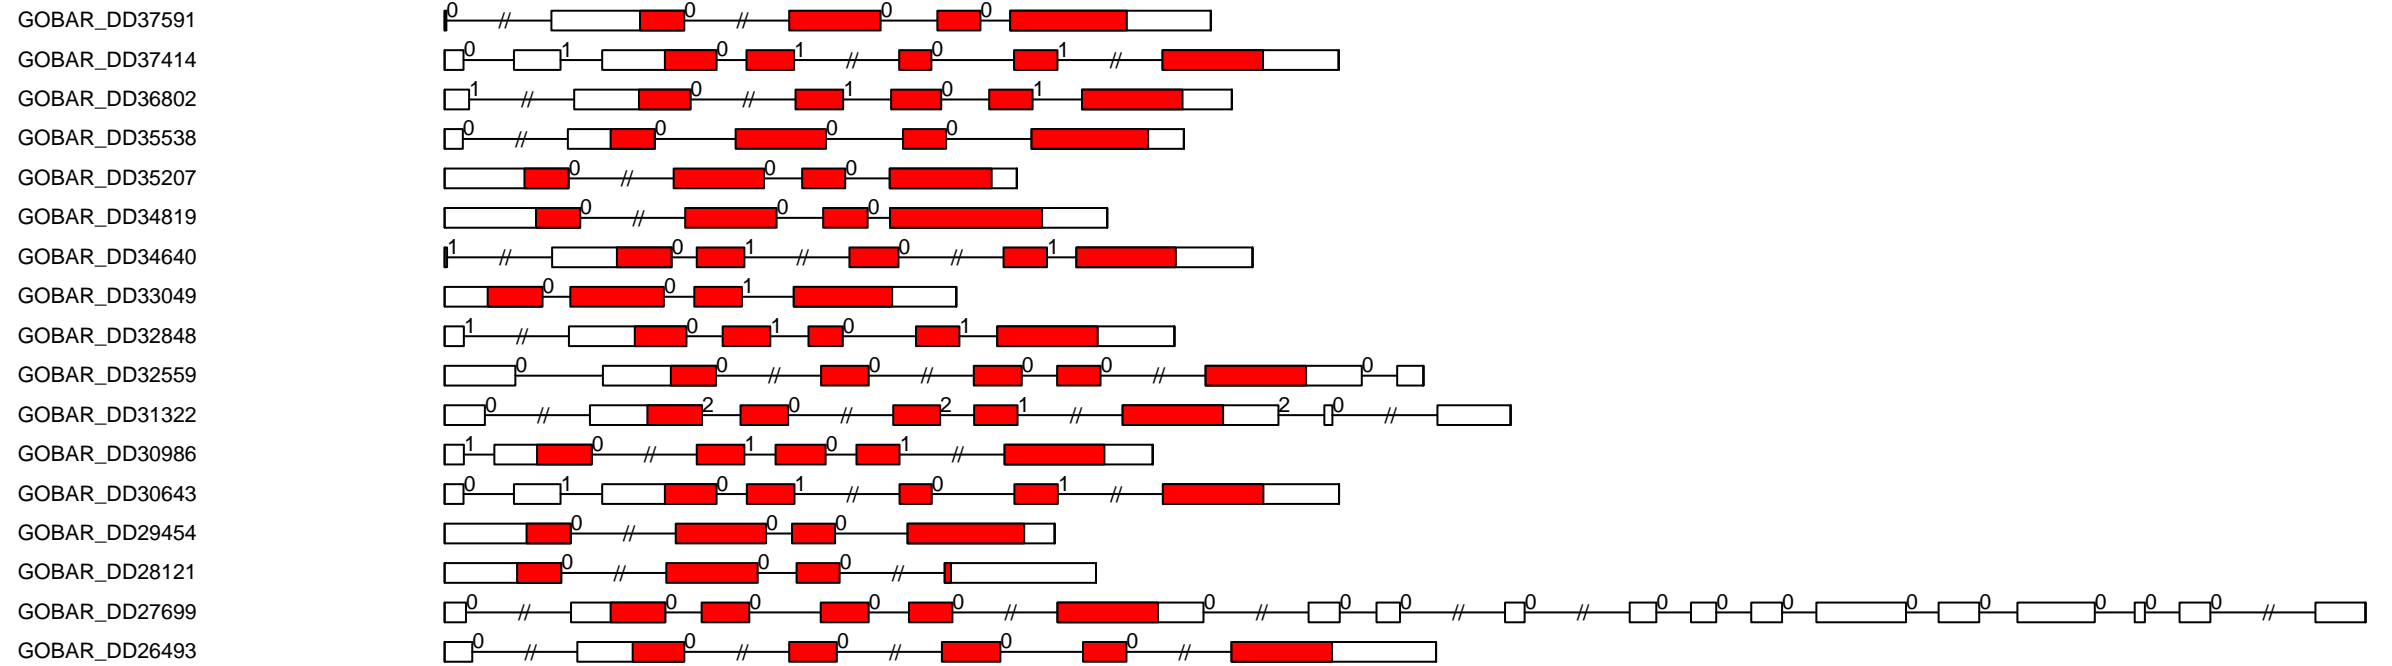



### G.ba RLK-Pelle\_RLCK-VIII exon-intron and domain diagram (all)

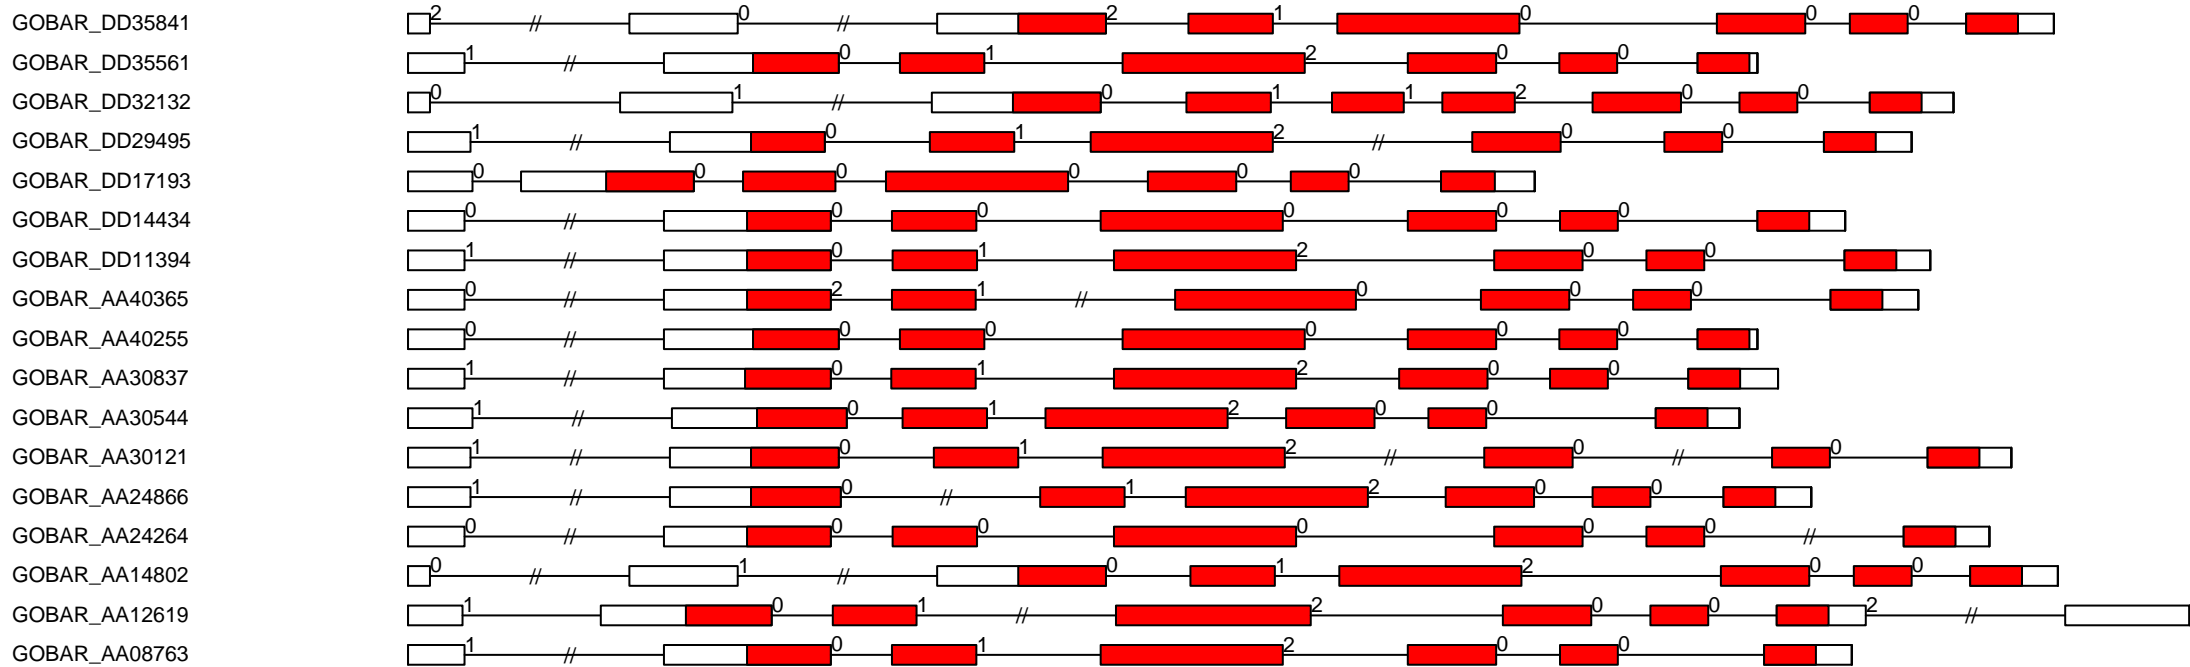

-1000

0

1000

2000

# G.ba RLK-Pelle\_RLCK-VI exon-intron and domain diagram (part 1)

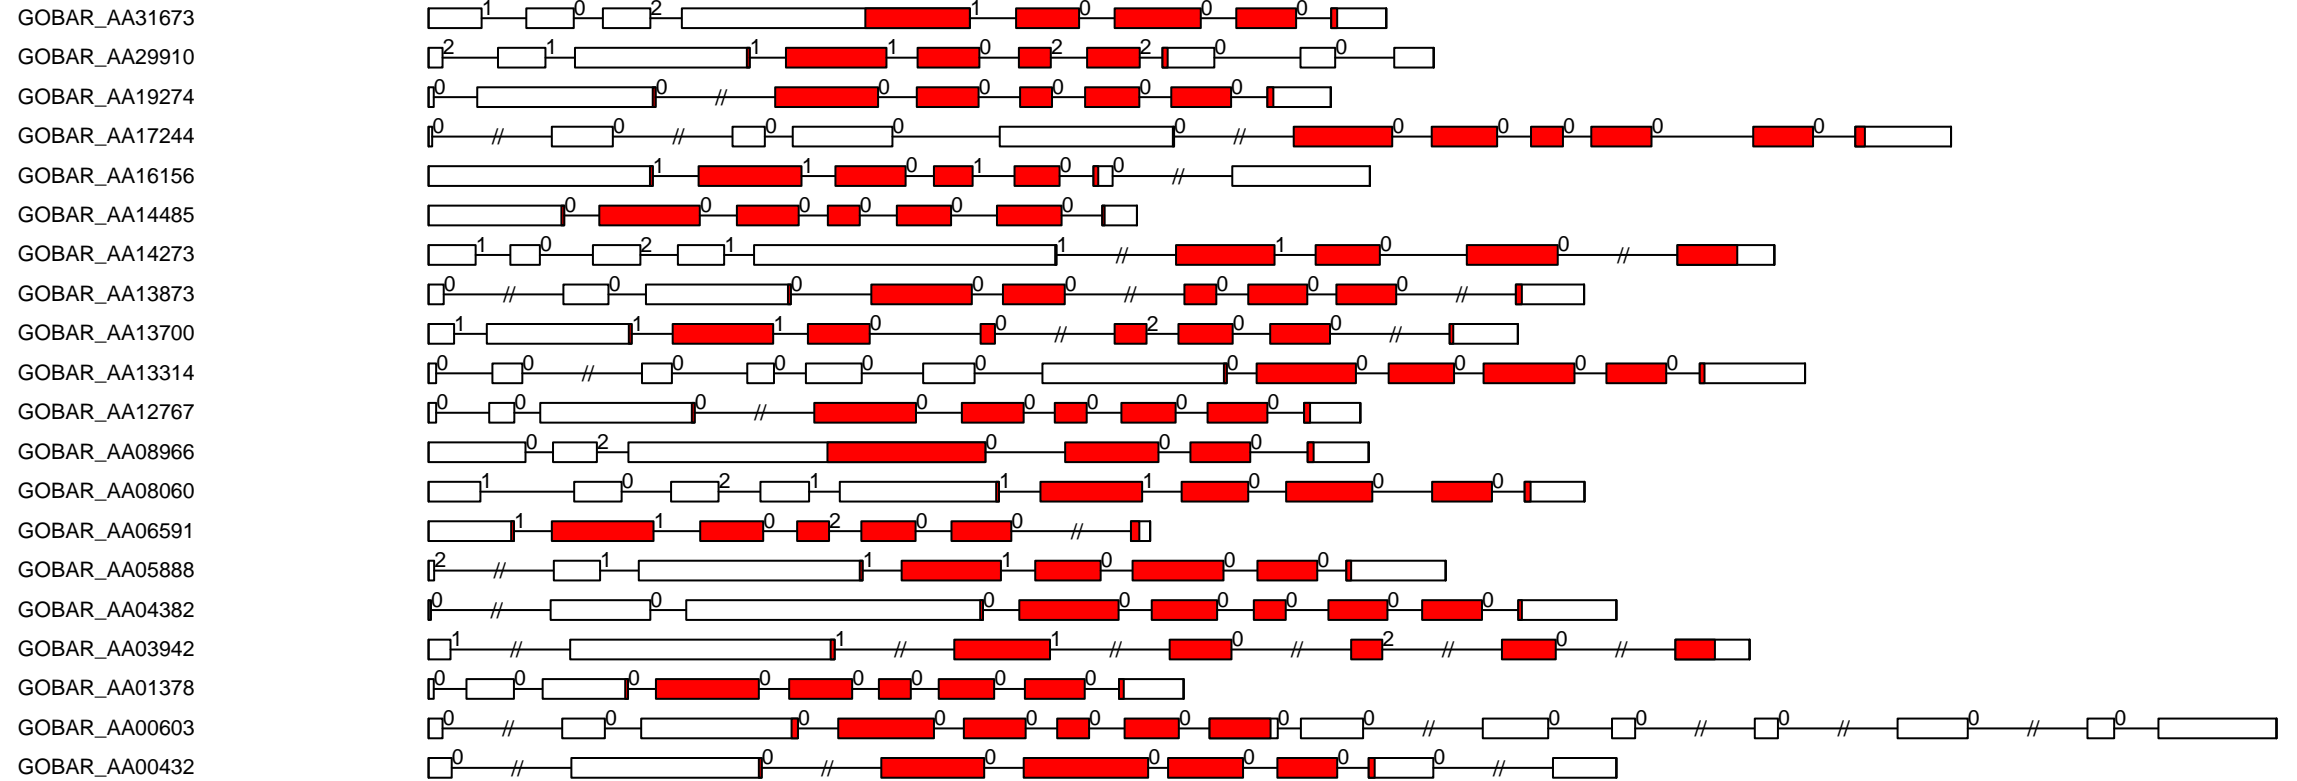

### G.ba RLK-Pelle\_RLCK-VI exon-intron and domain diagram (part 2)

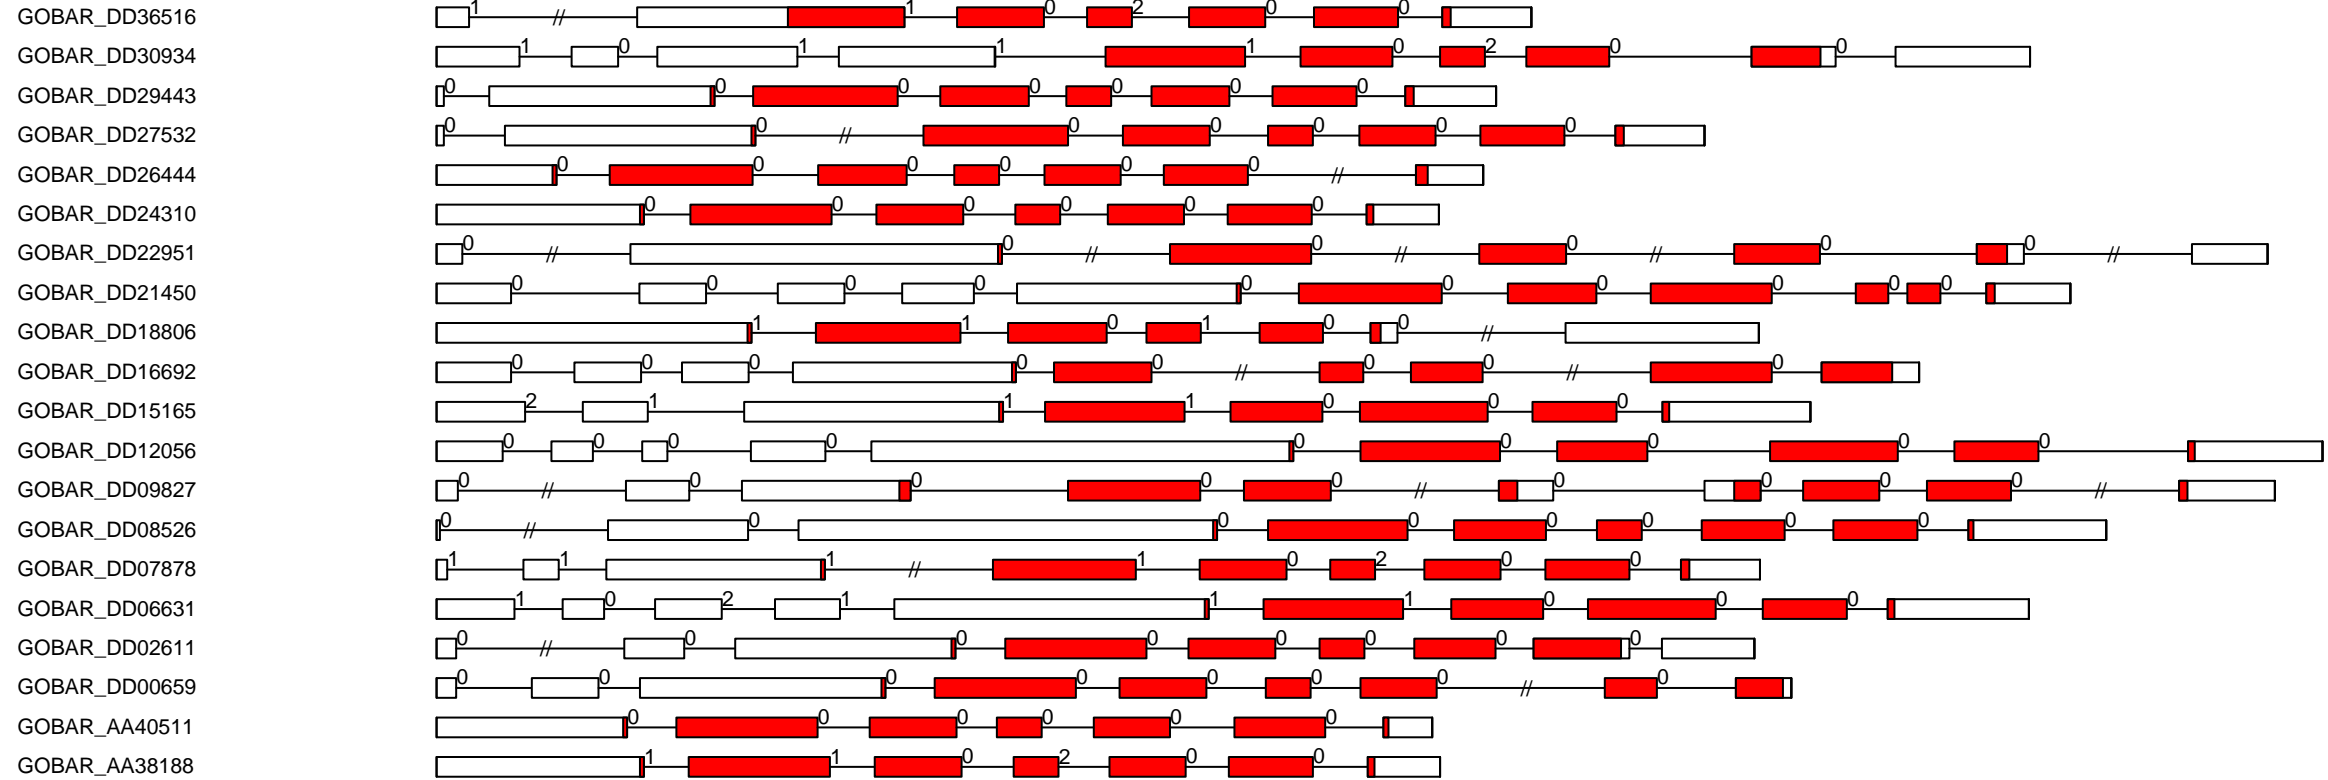

-1000

0

1000

2000

3000



### G.ba RLK-Pelle\_RLCK-V exon-intron and domain diagram (part 2)

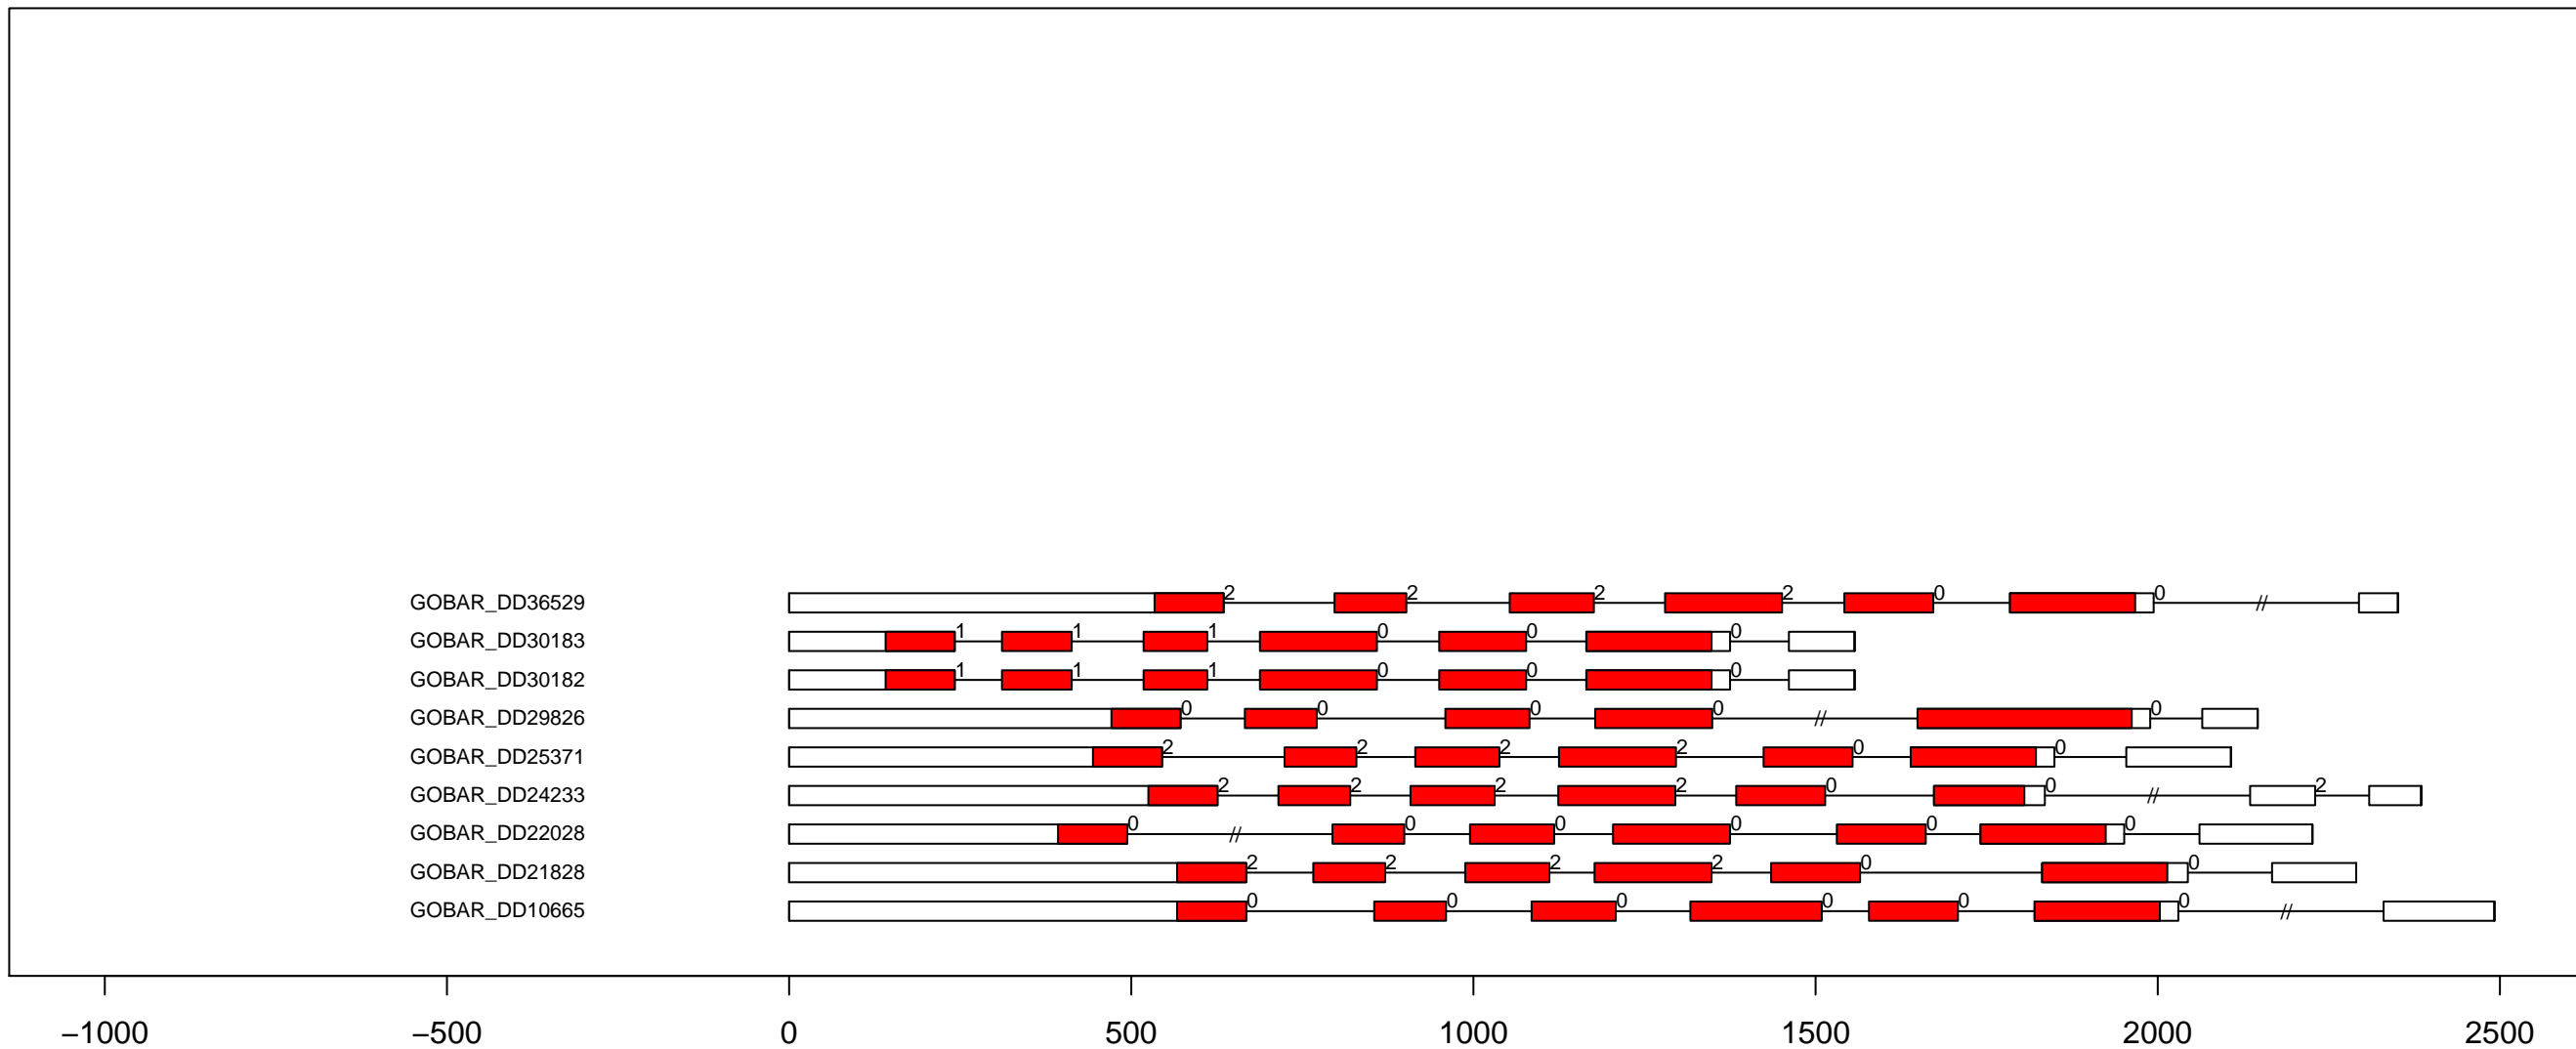

### G.ba RLK-Pelle\_RLCK-XII-1 exon-intron and domain diagram (part 1)

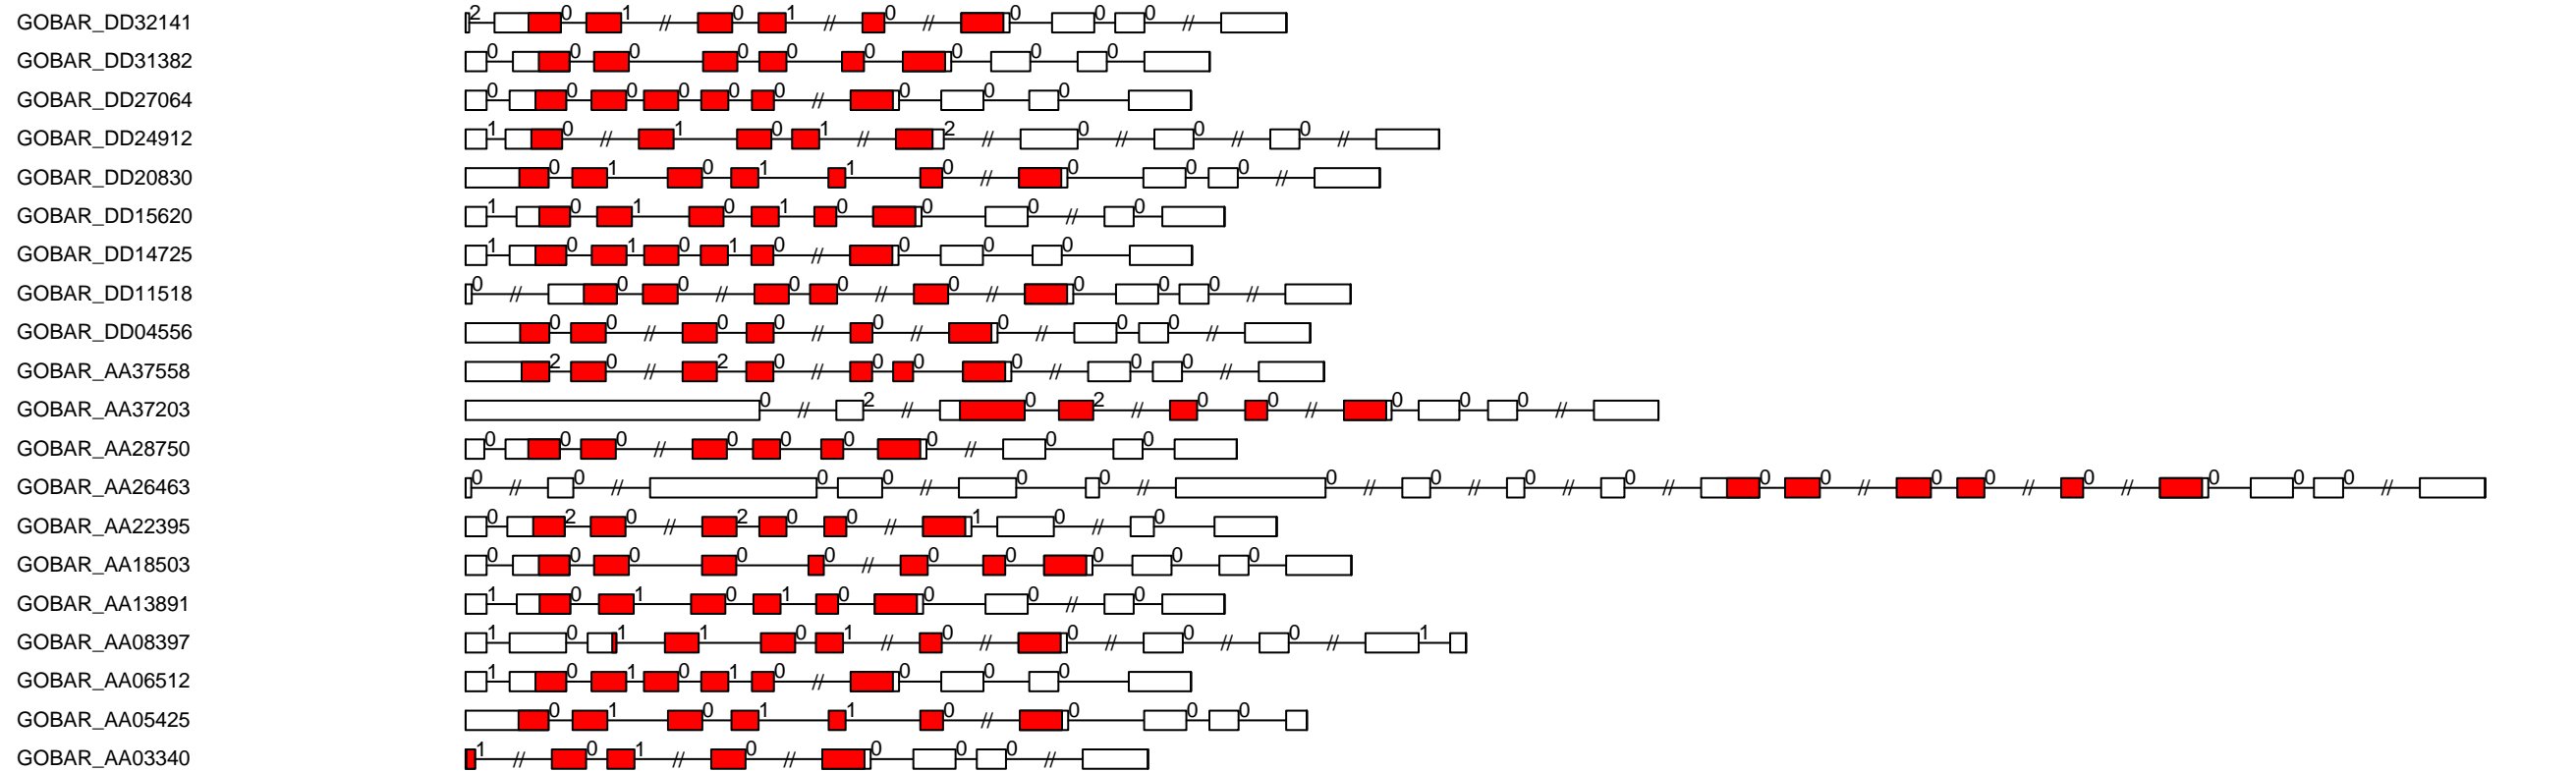



# G.ba RLK-Pelle\_RLCK-XII-1 exon-intron and domain diagram (part 2)

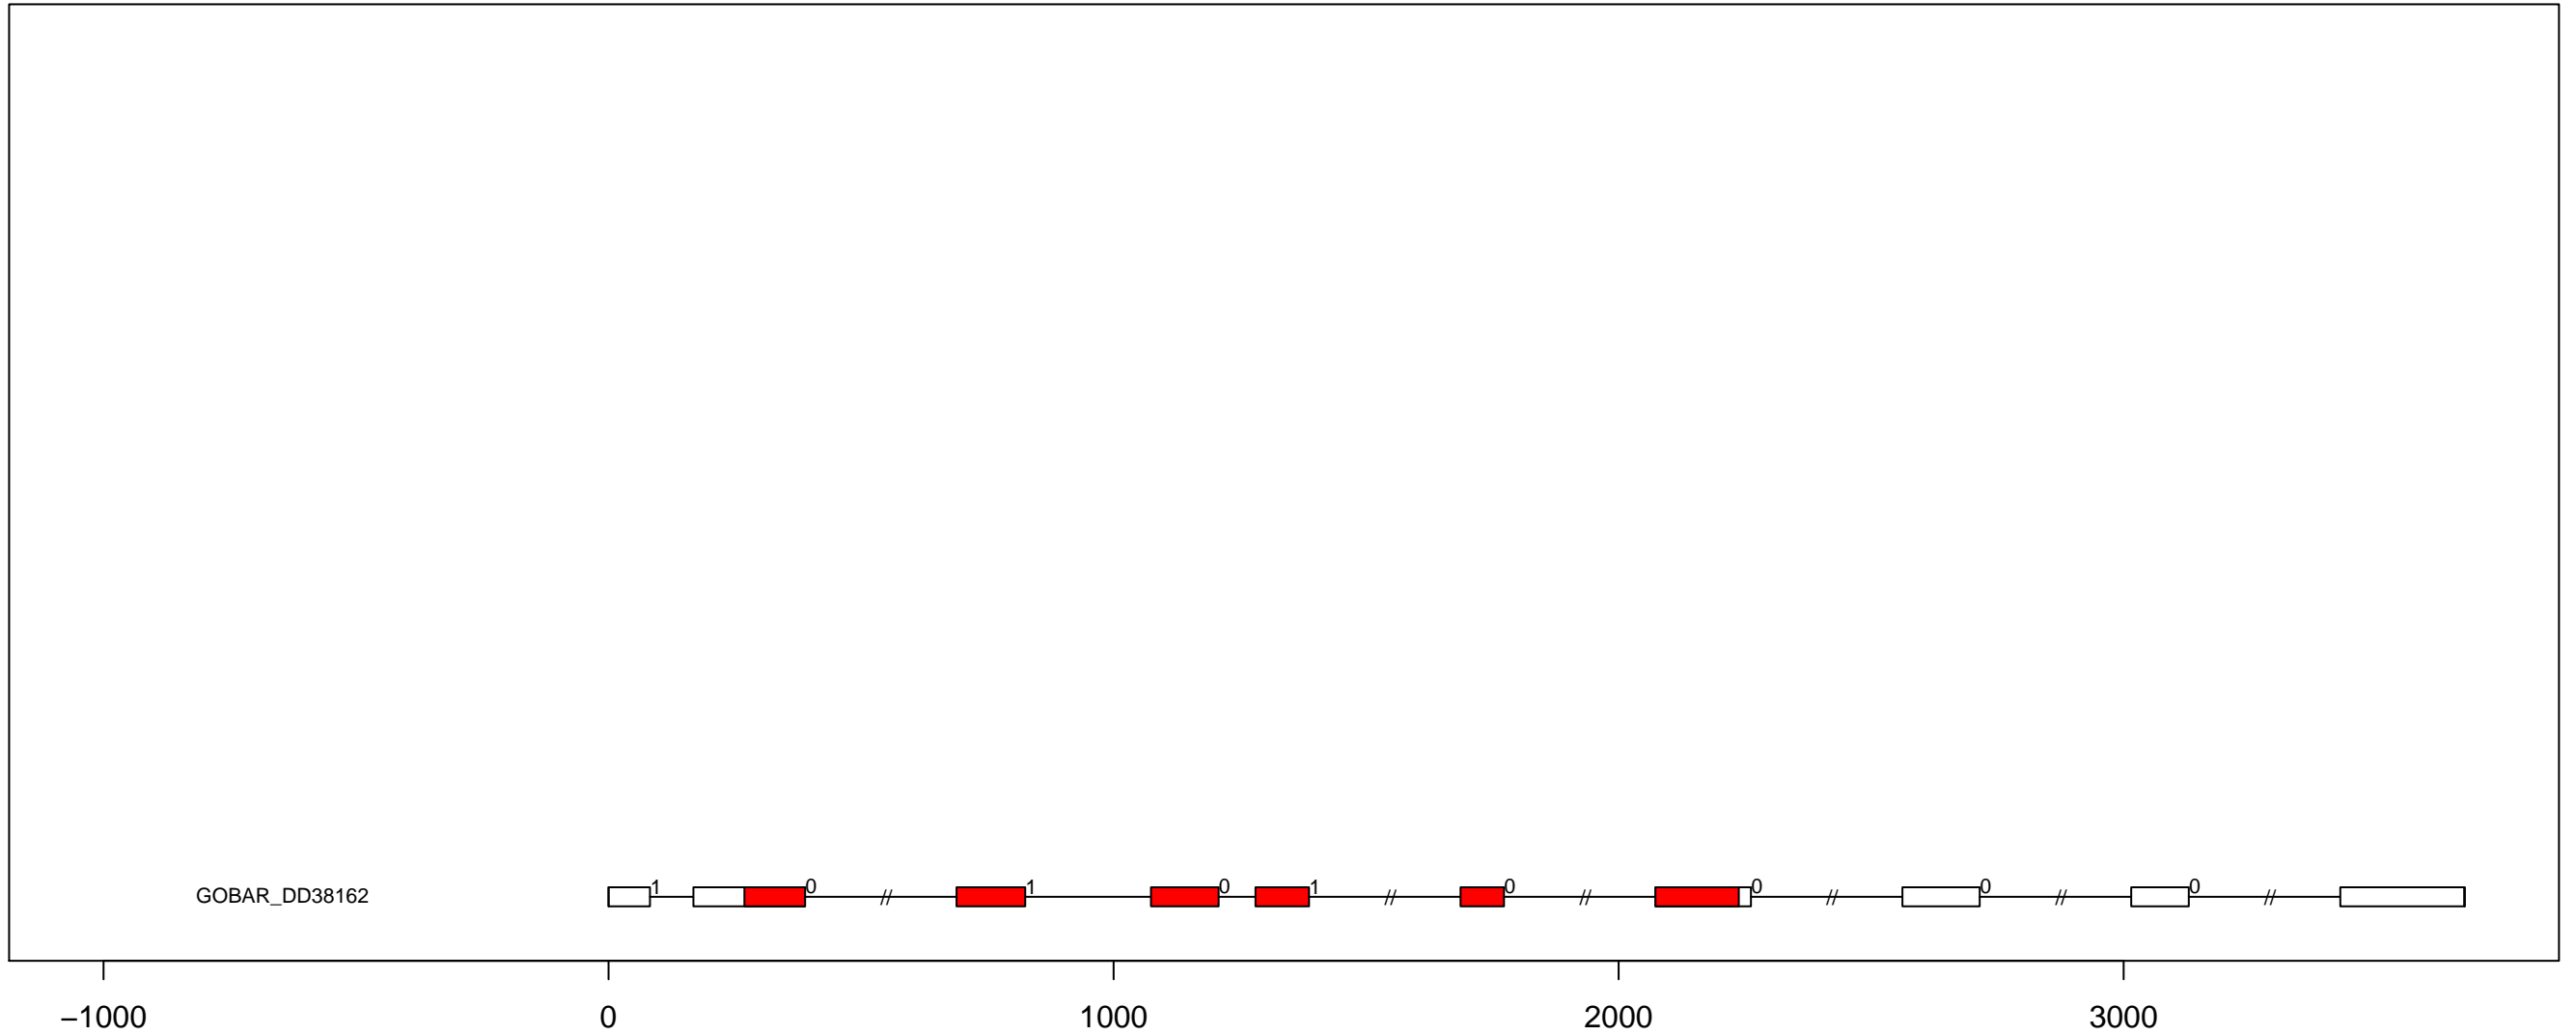

# G.ba RLK-Pelle\_RLCK-XII-2 exon-intron and domain diagram (all)

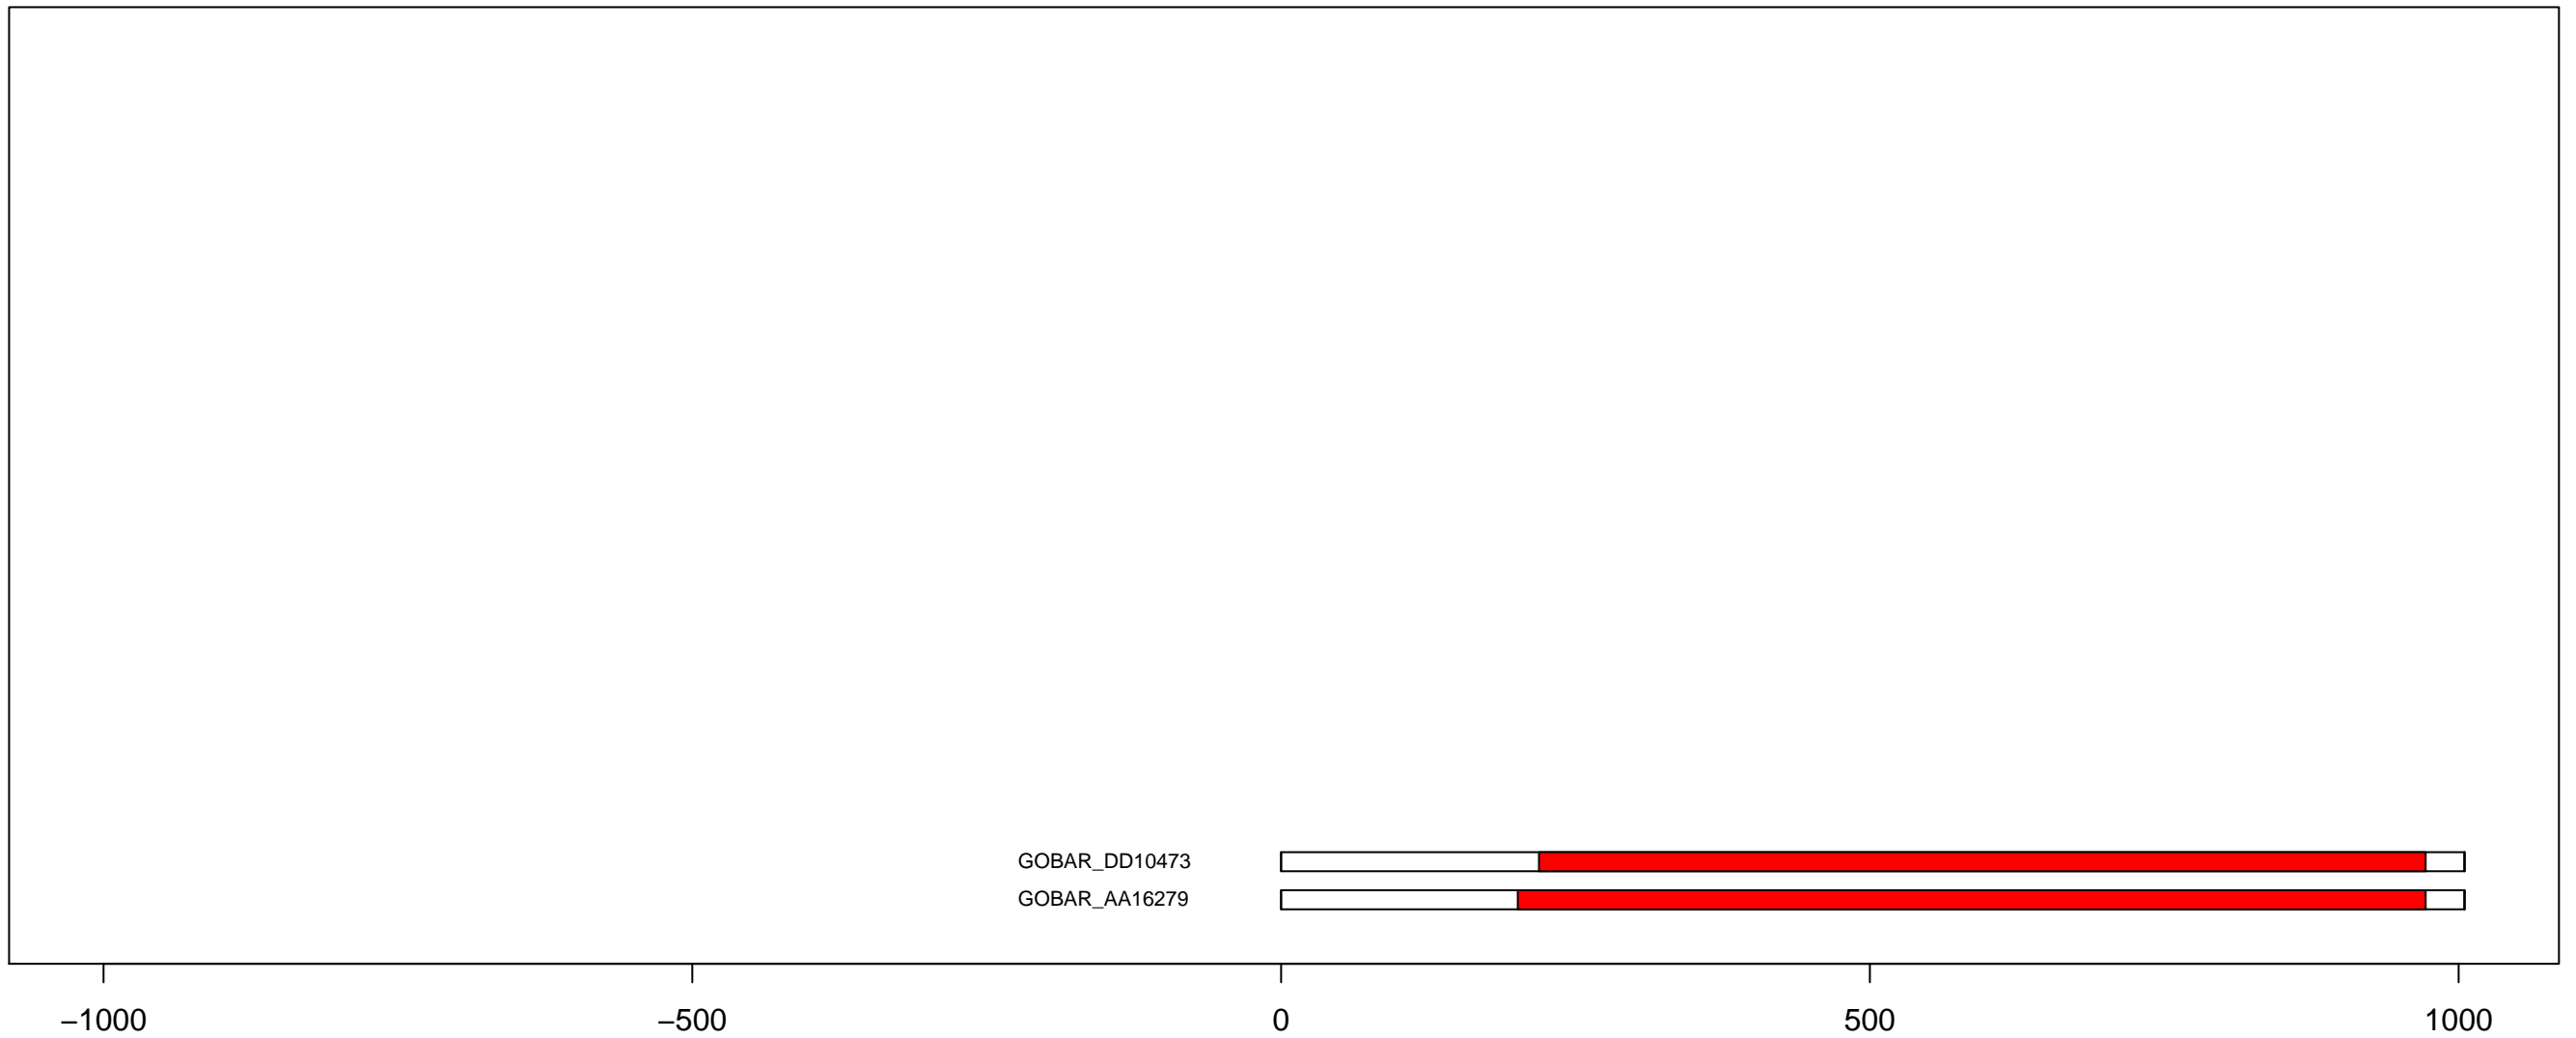

# G.ba RLK-Pelle\_RLCK-XIII exon-intron and domain diagram (all)

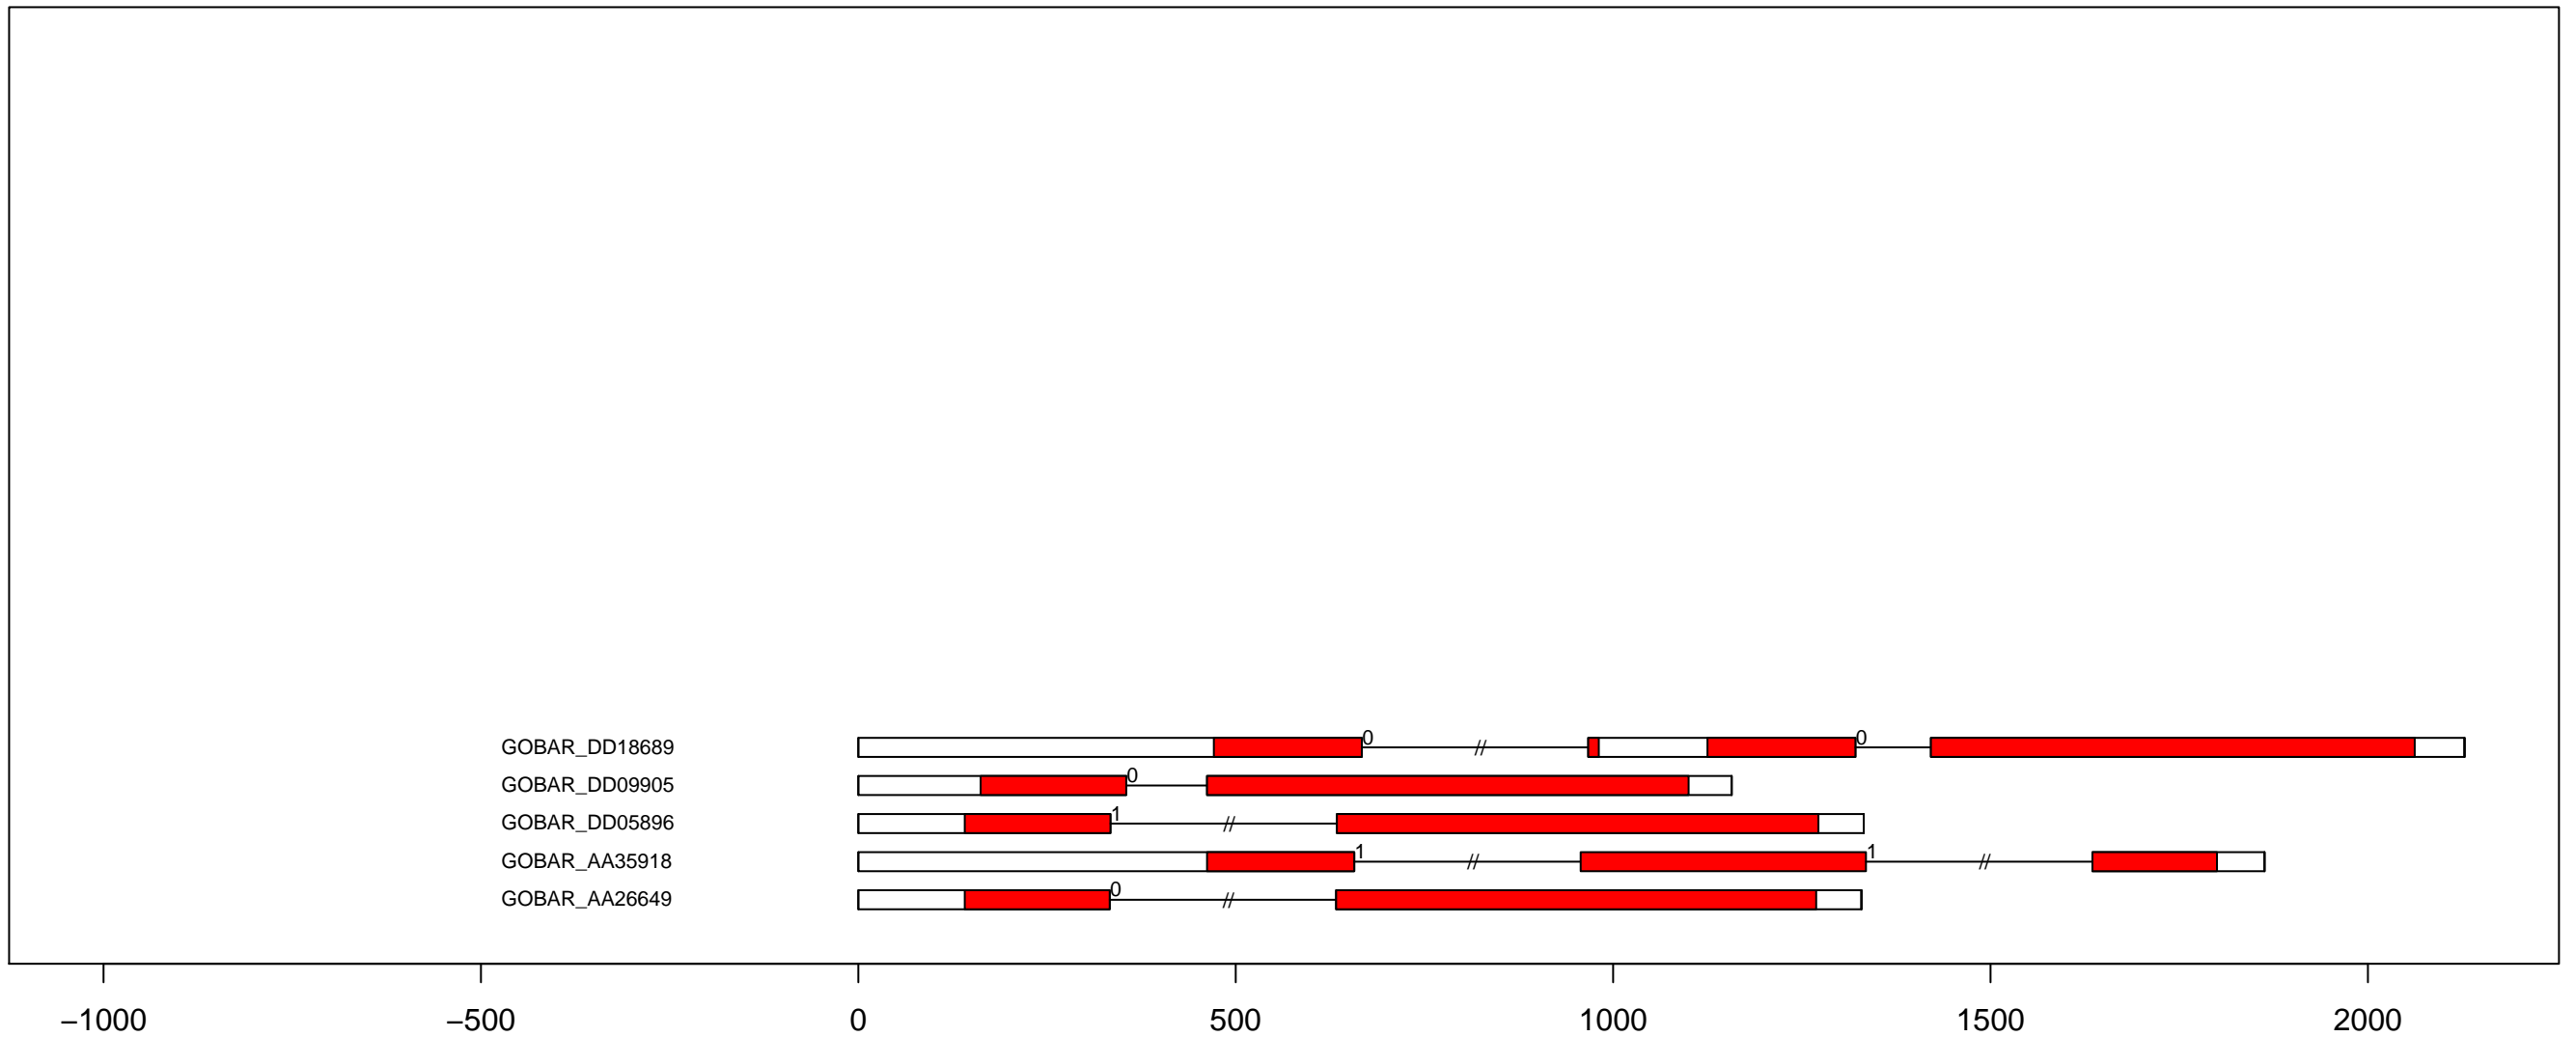

# G.ba RLK-Pelle\_RLCK-XI exon-intron and domain diagram (all)

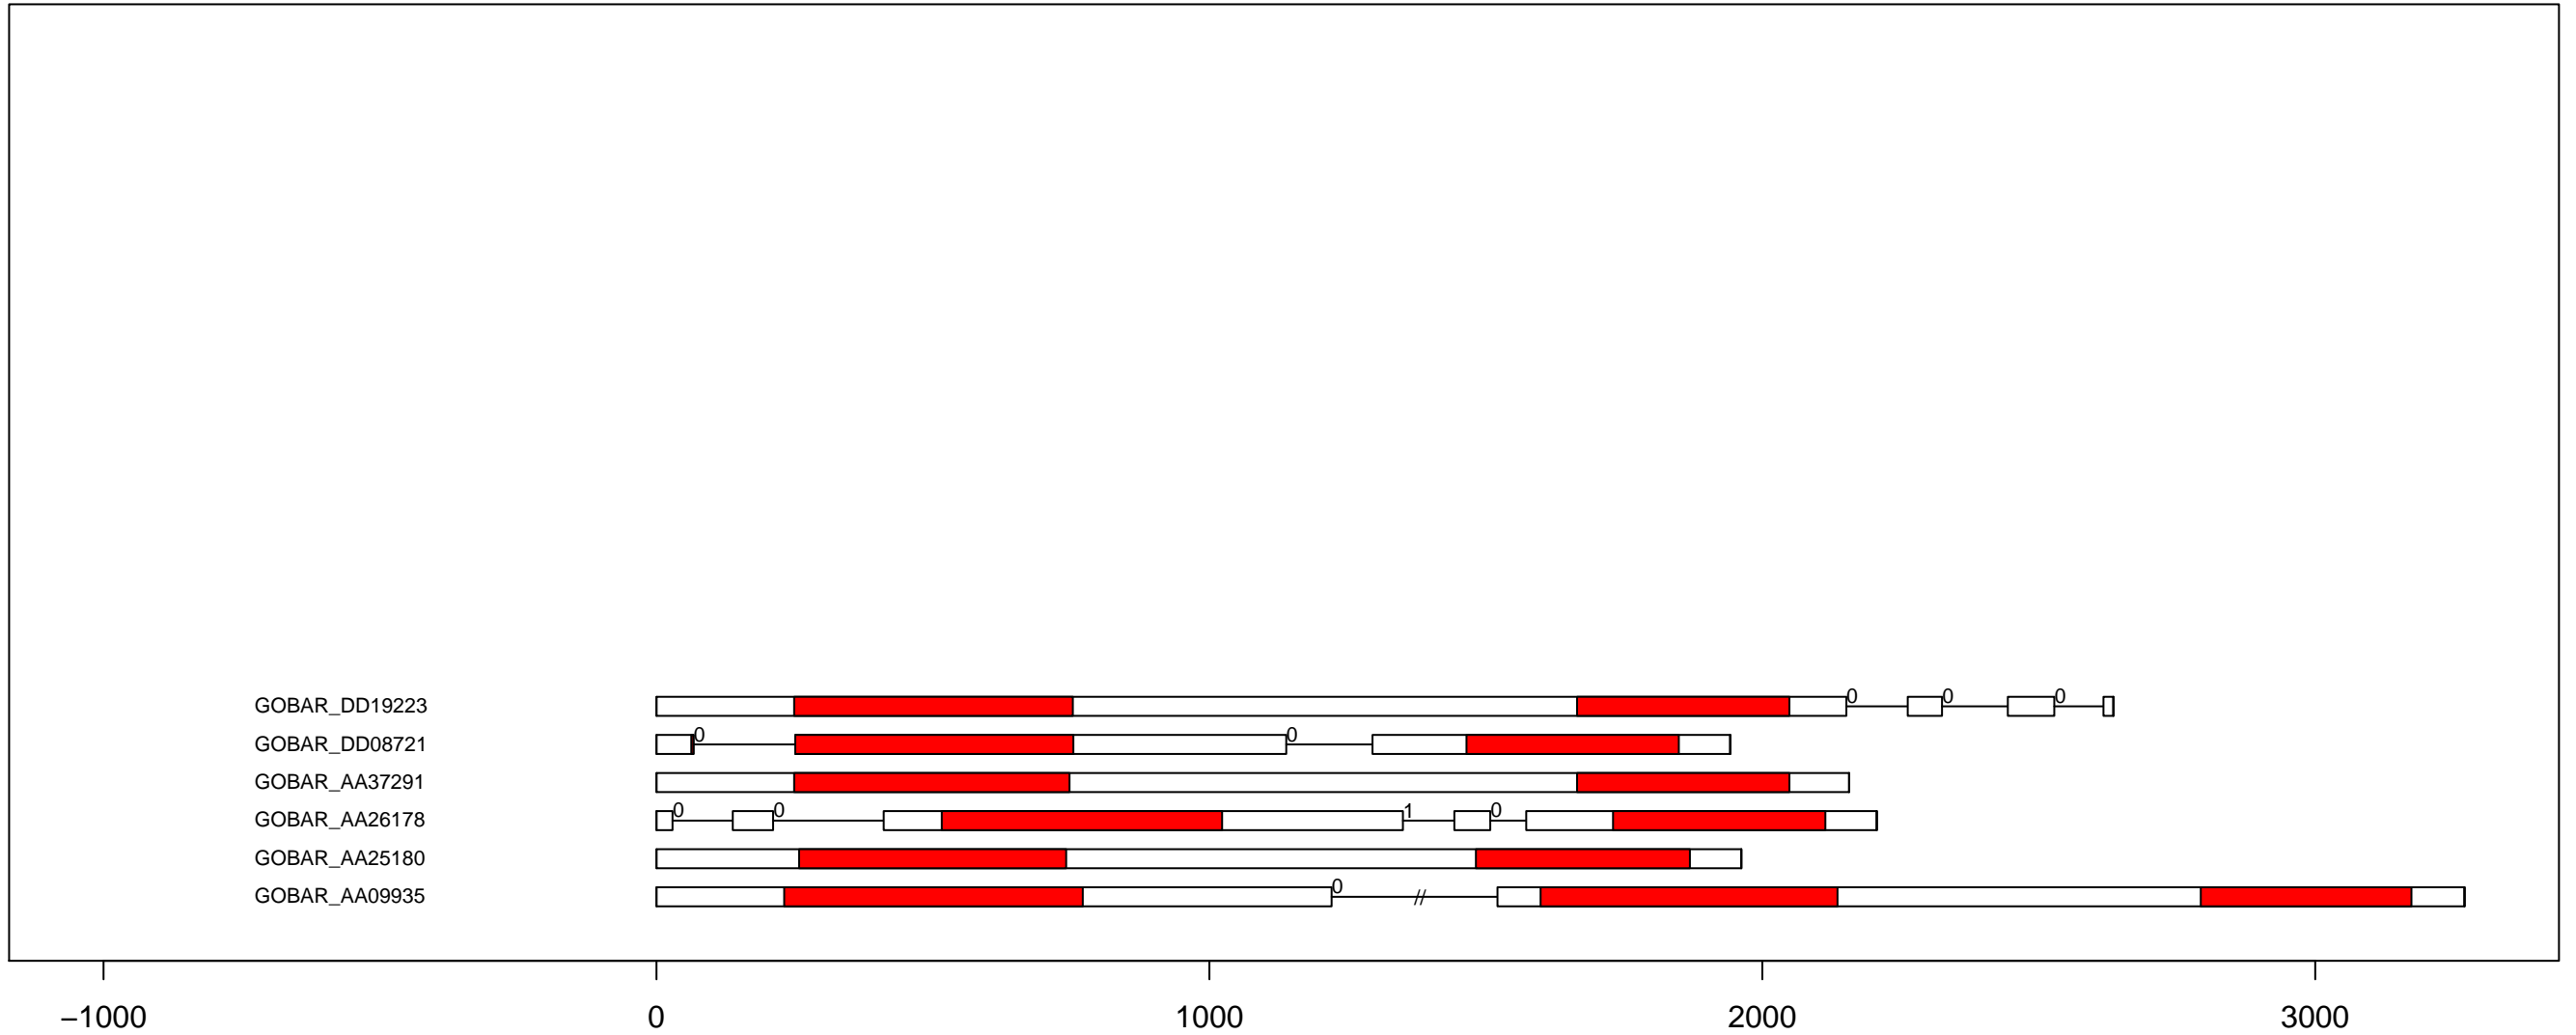



# G.ba RLK-Pelle\_RLCK-XVI exon-intron and domain diagram (all)

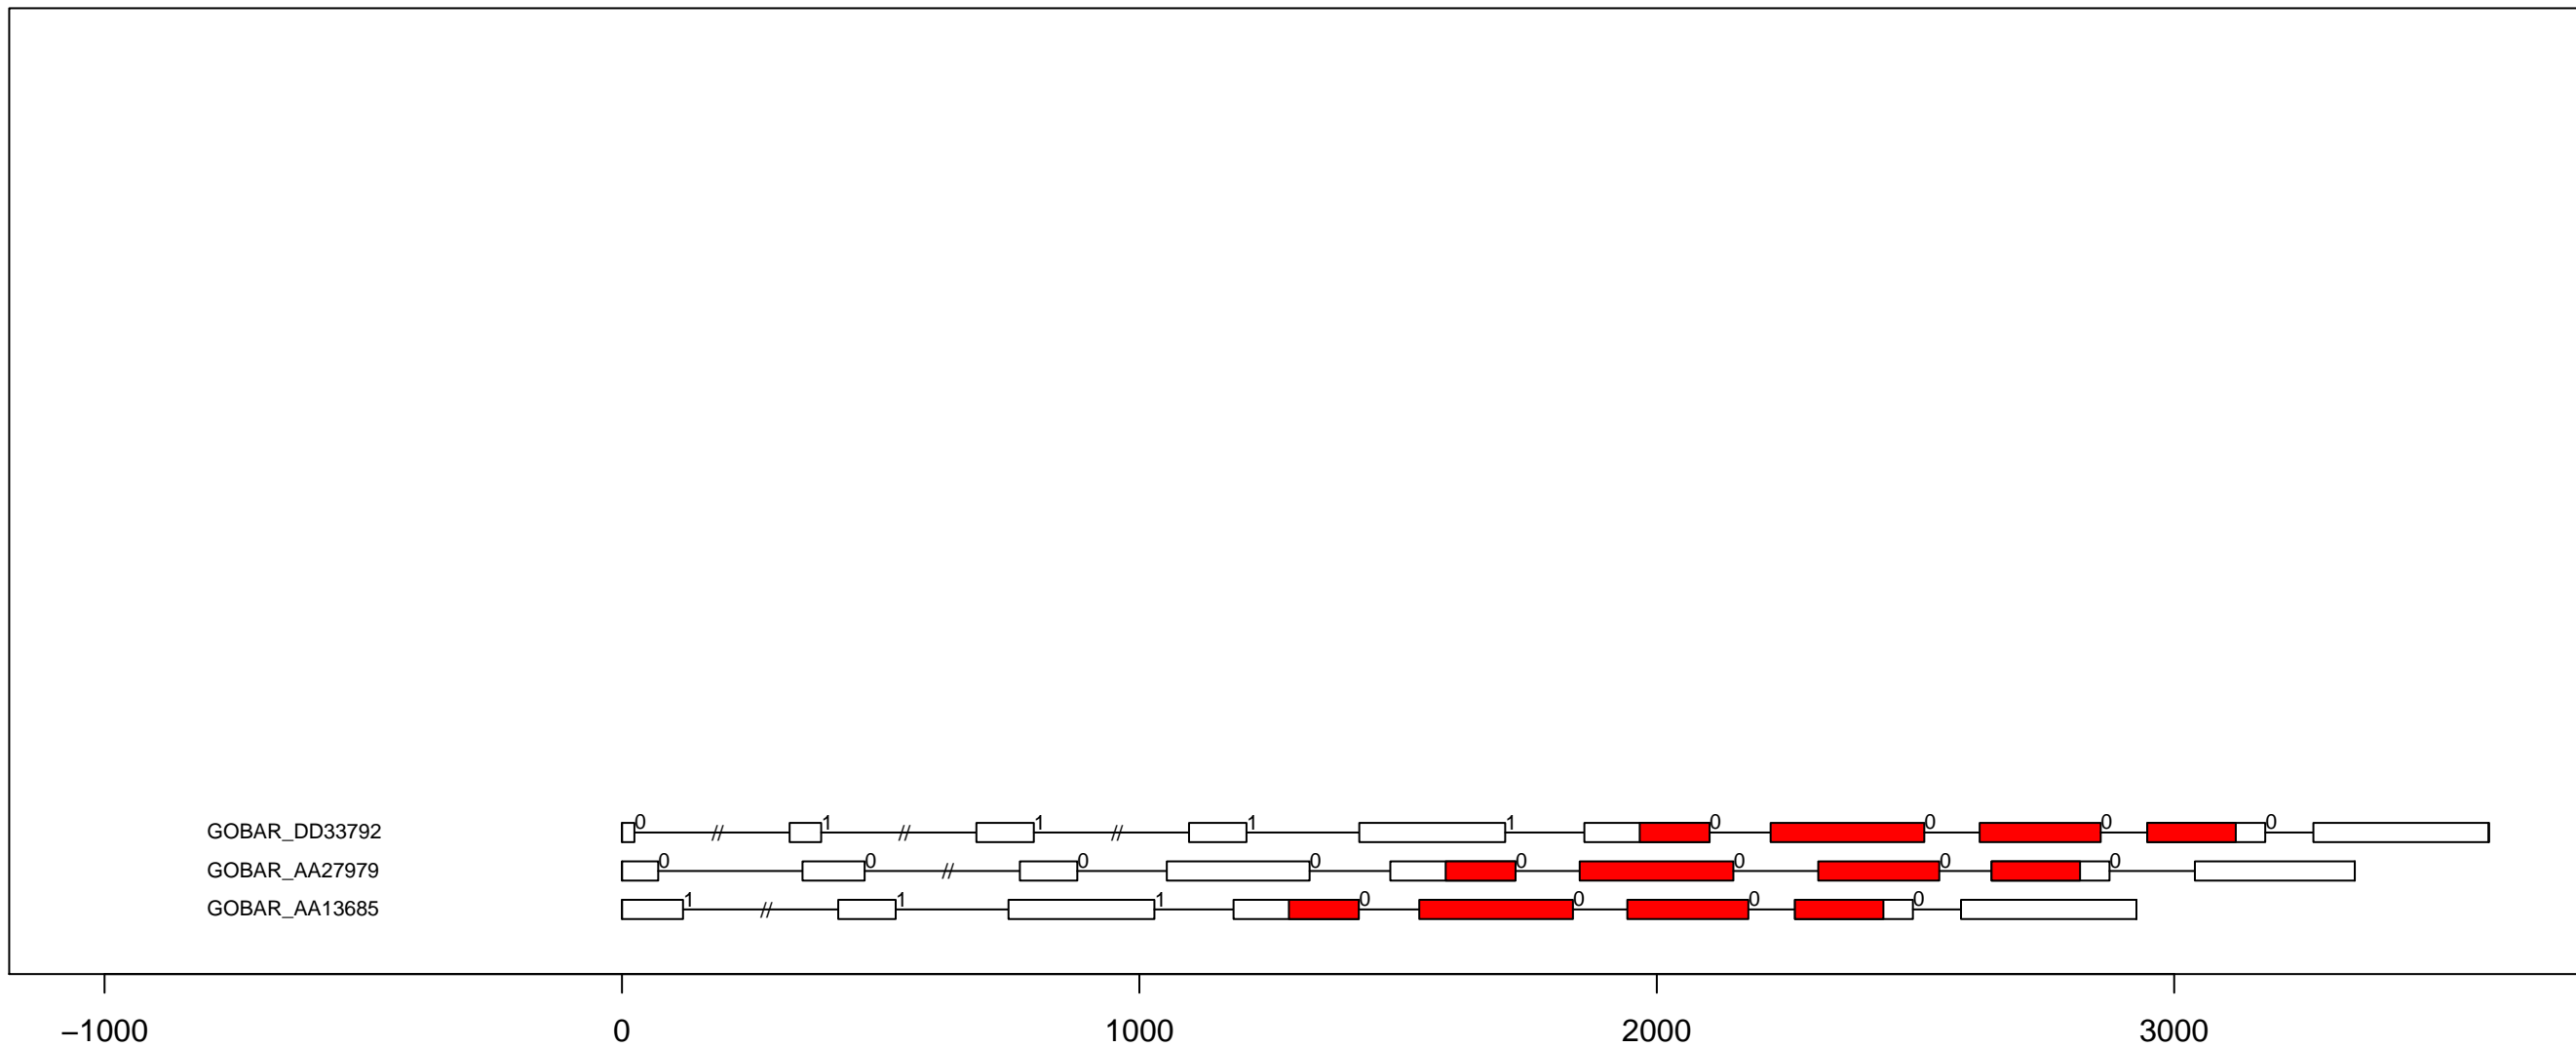

### G.ba RLK-Pelle\_RLCK-XV exon-intron and domain diagram (all)

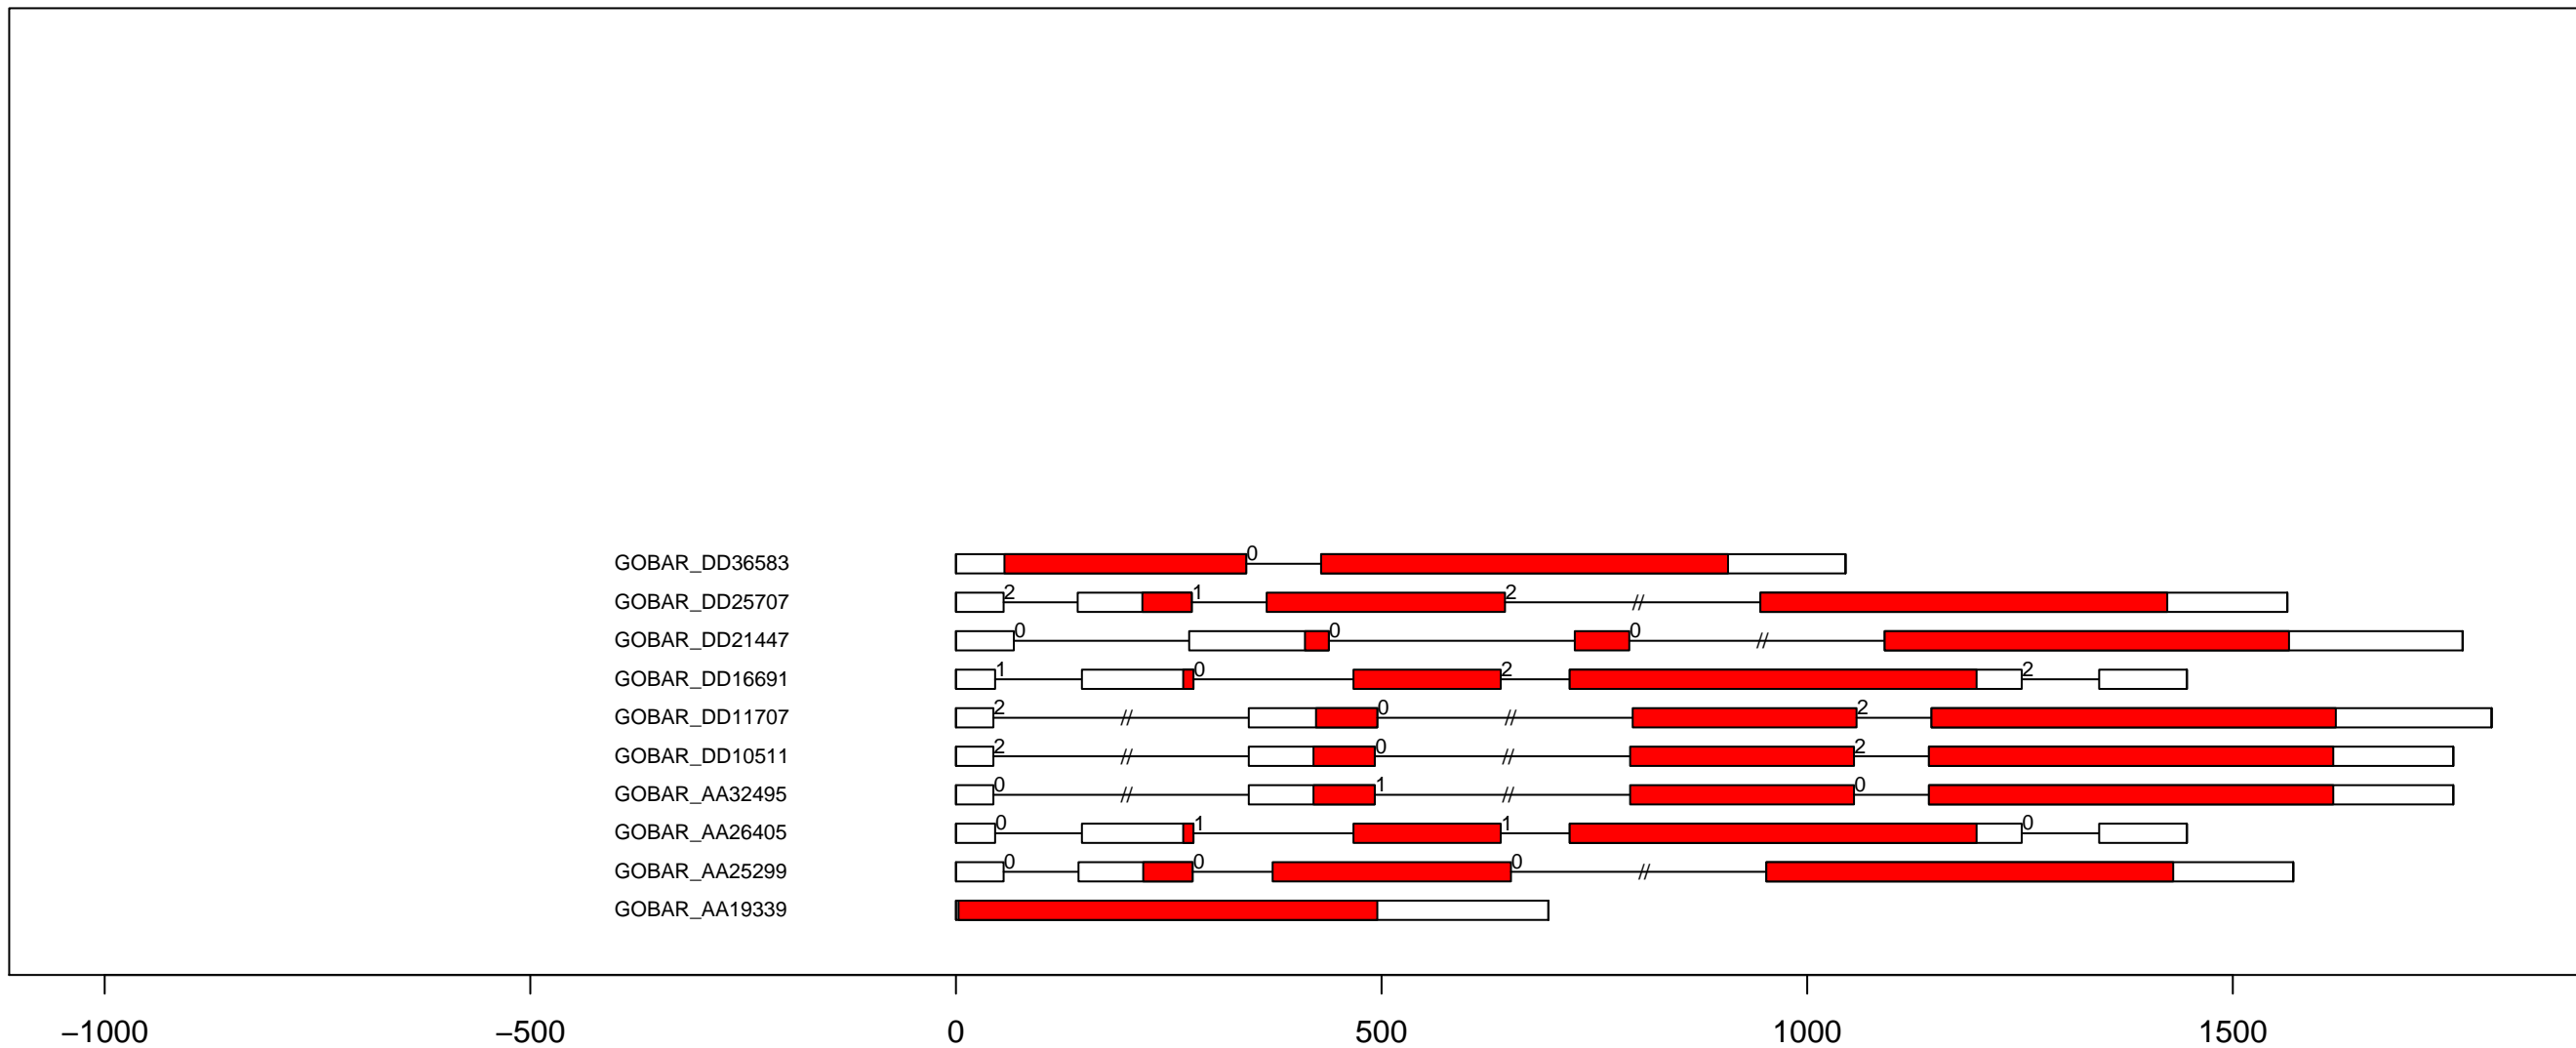

### G.ba RLK-Pelle\_SD-2b exon-intron and domain diagram (part 1)

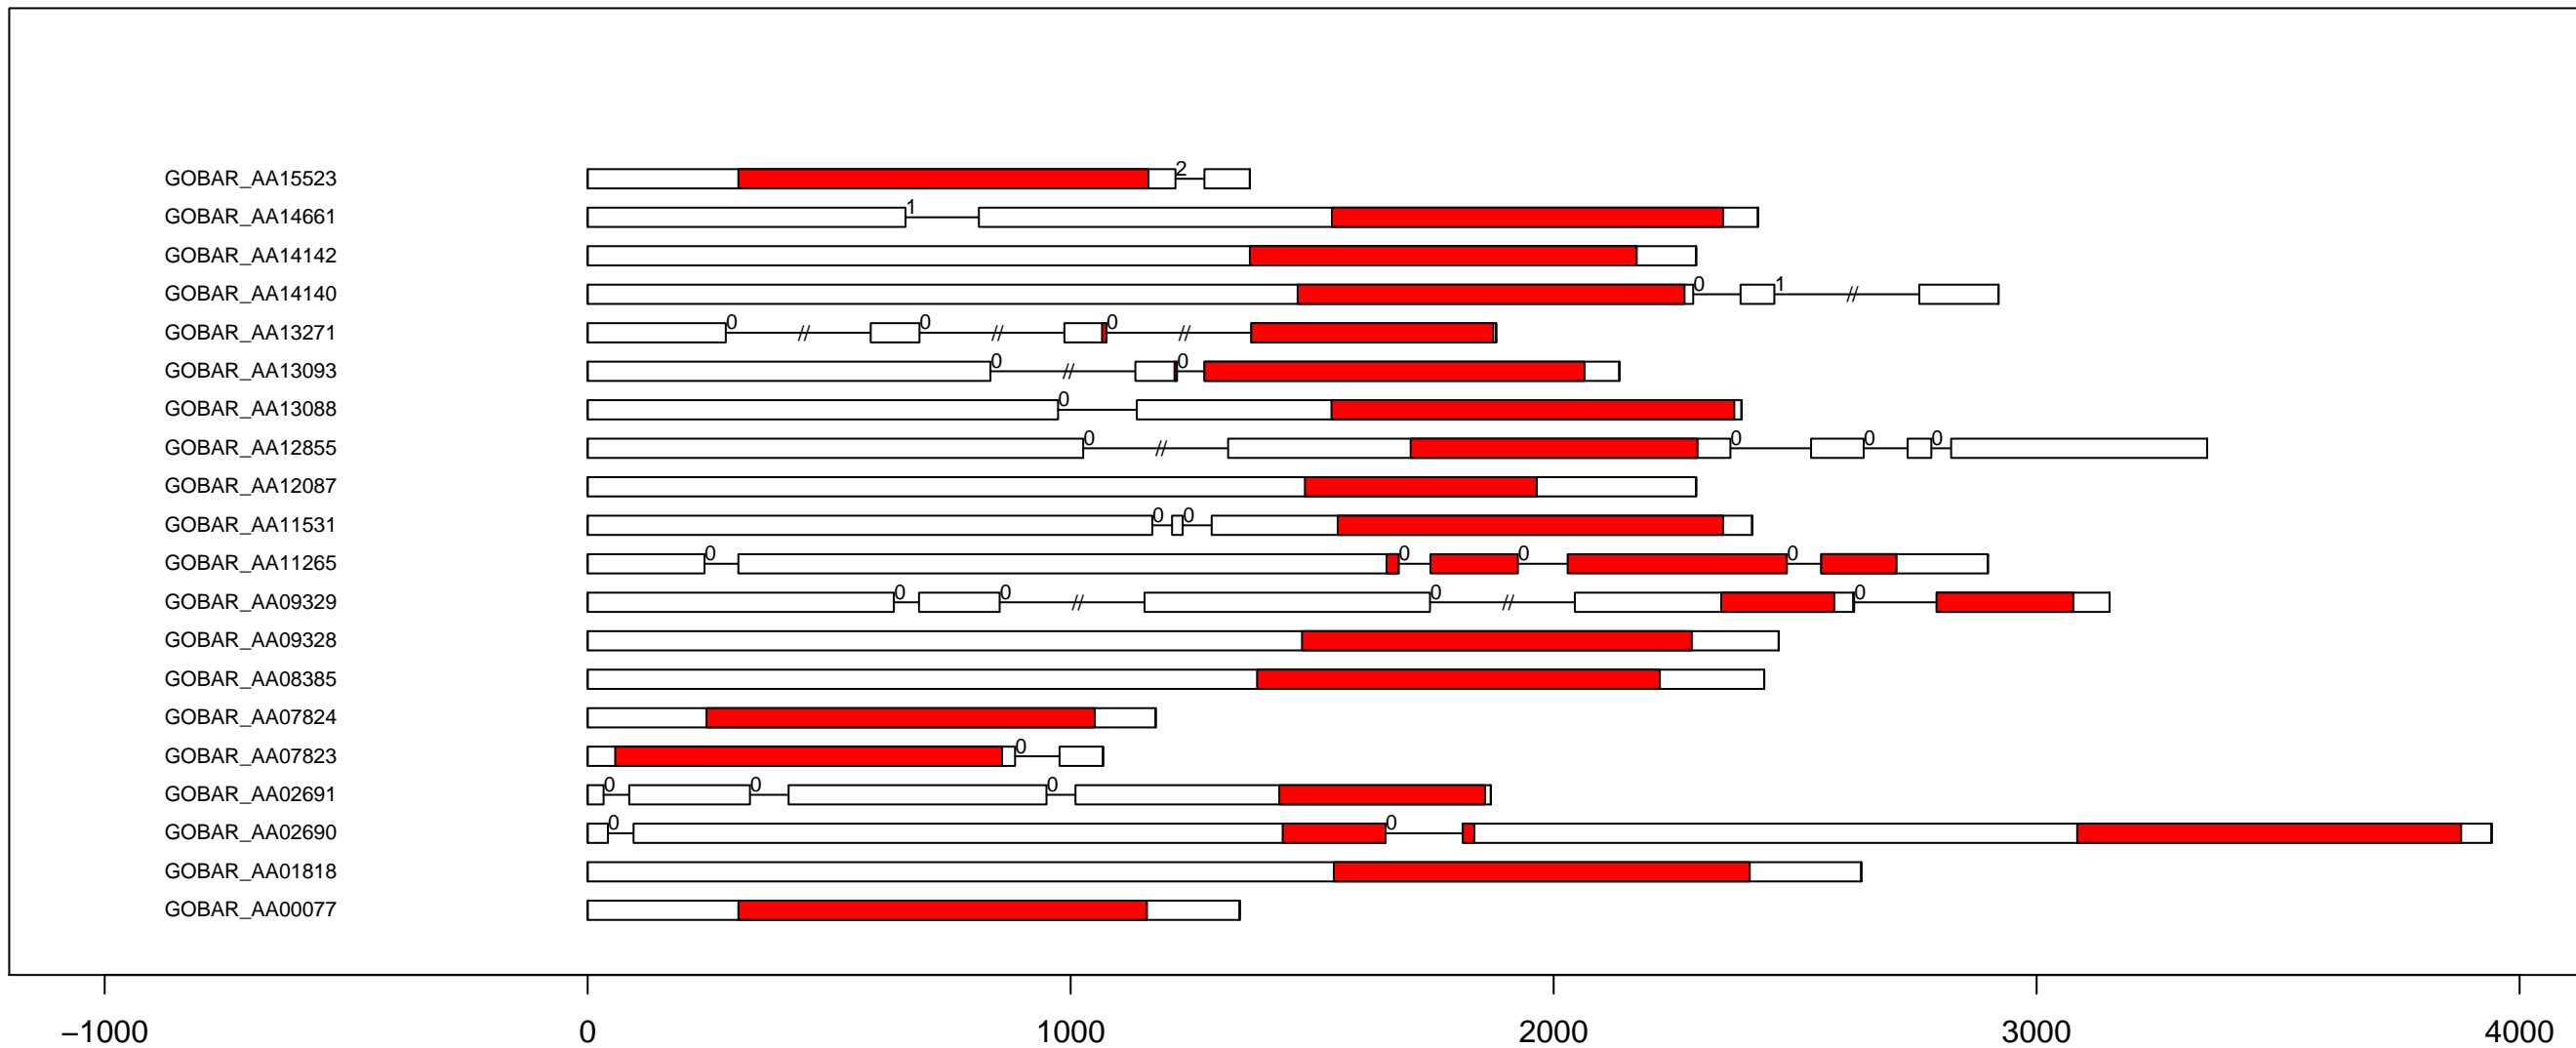



### G.ba RLK-Pelle\_SD-2b exon-intron and domain diagram (part 2)

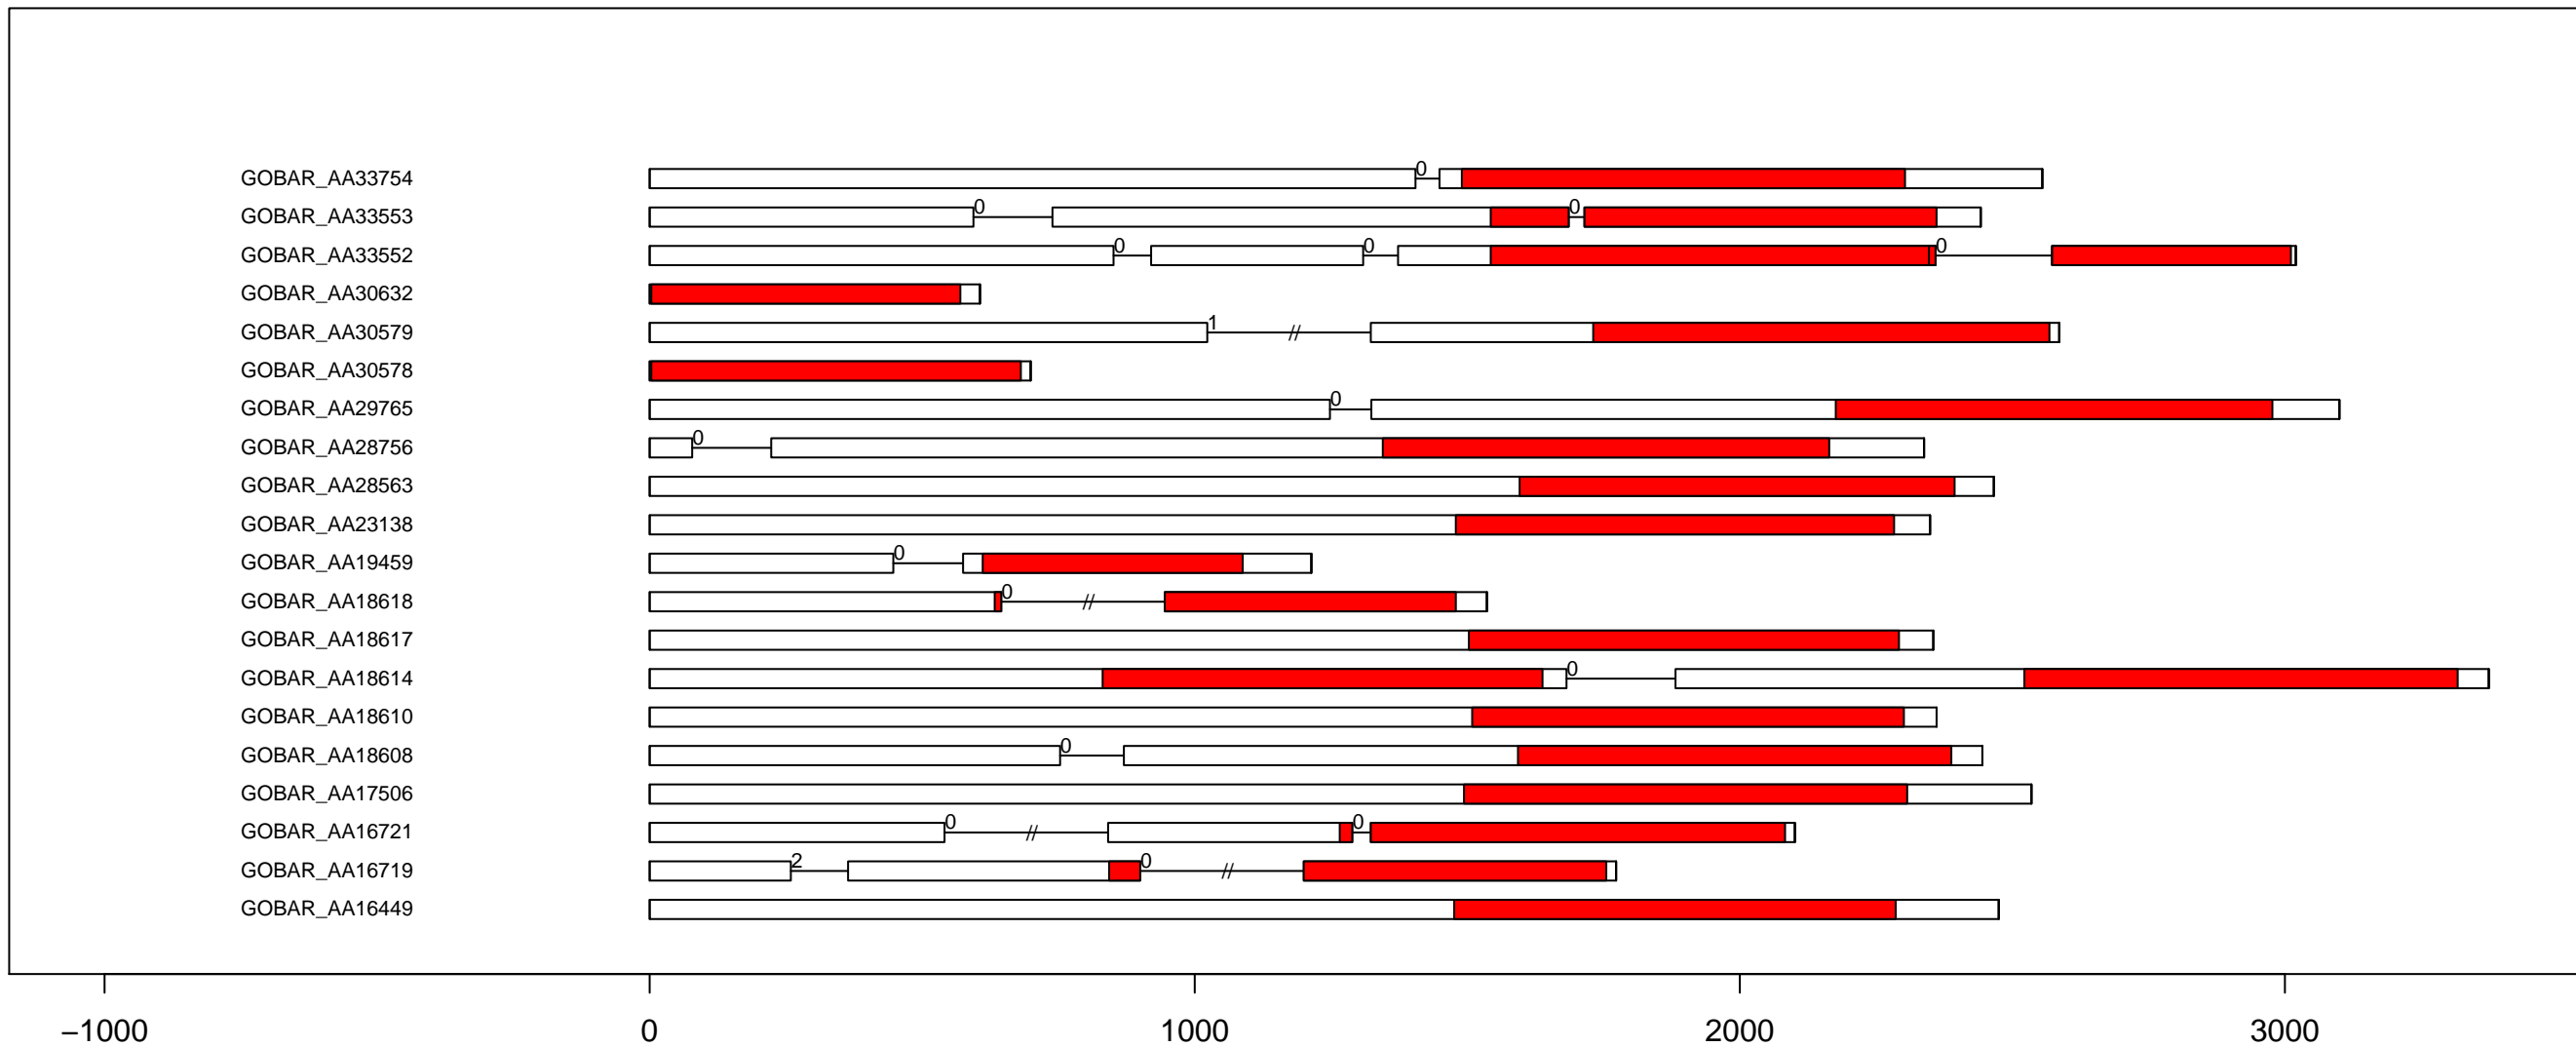

### G.ba RLK-Pelle\_SD-2b exon-intron and domain diagram (part 3)

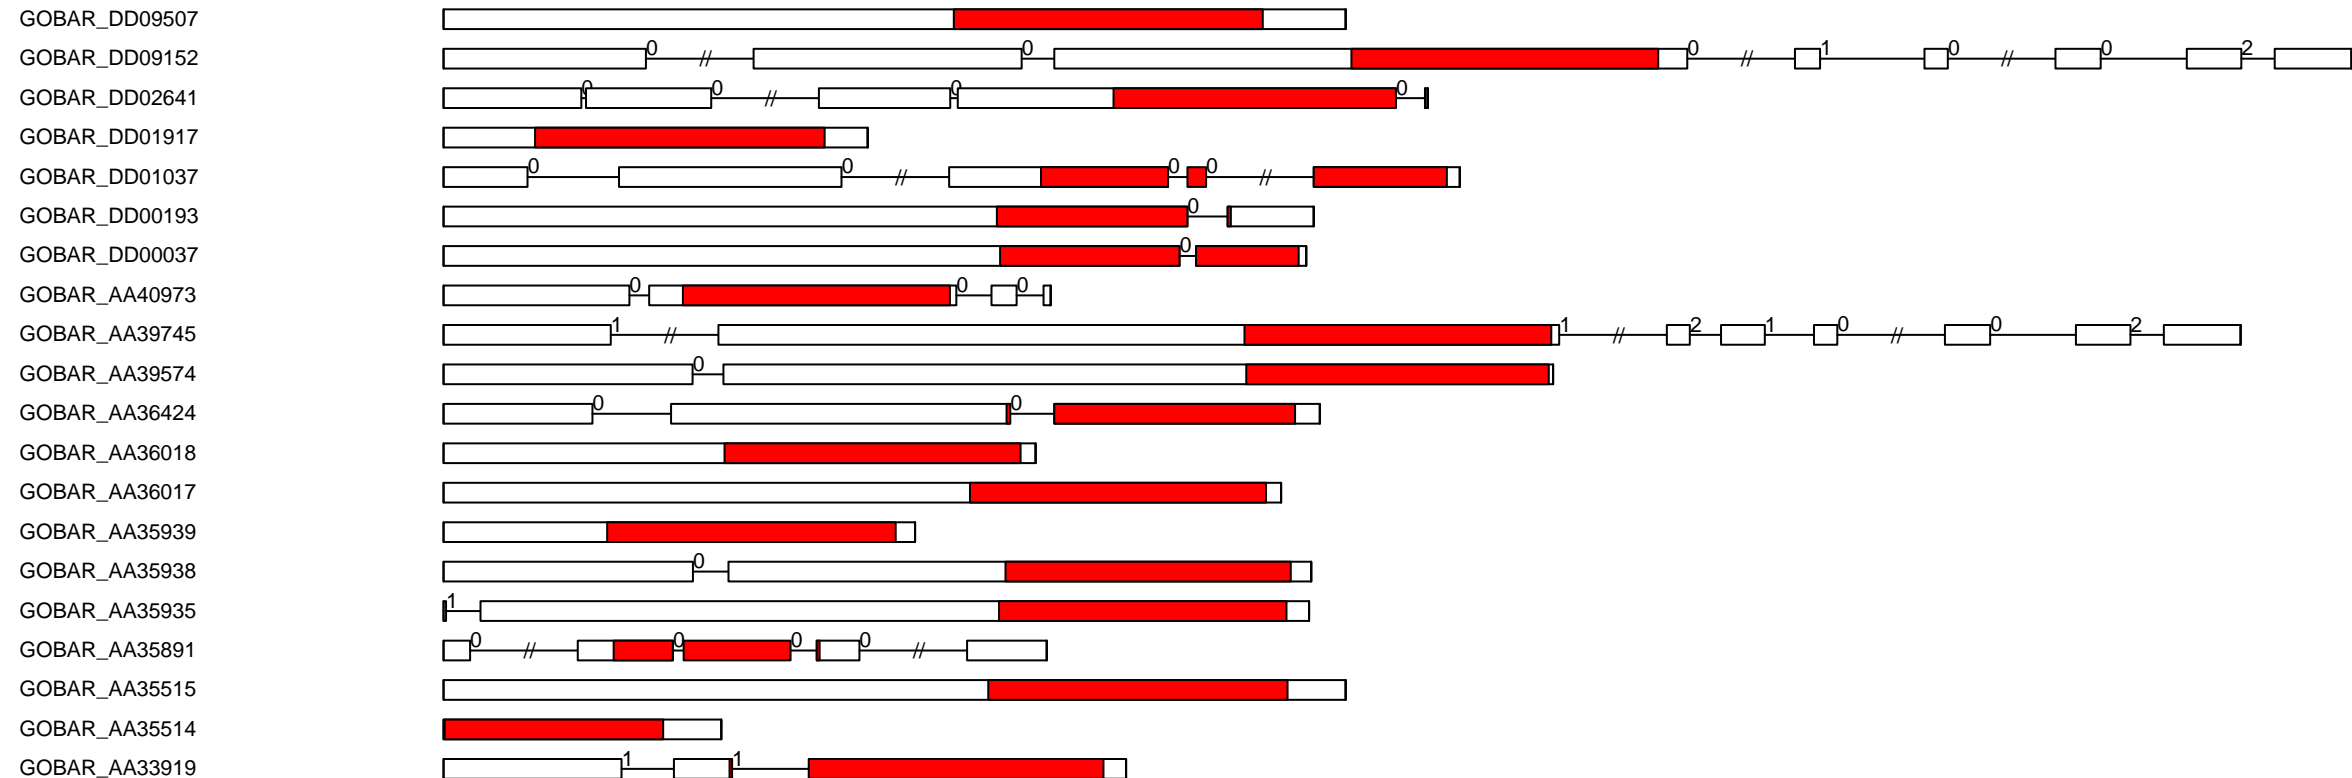



### G.ba RLK-Pelle\_SD-2b exon-intron and domain diagram (part 5)

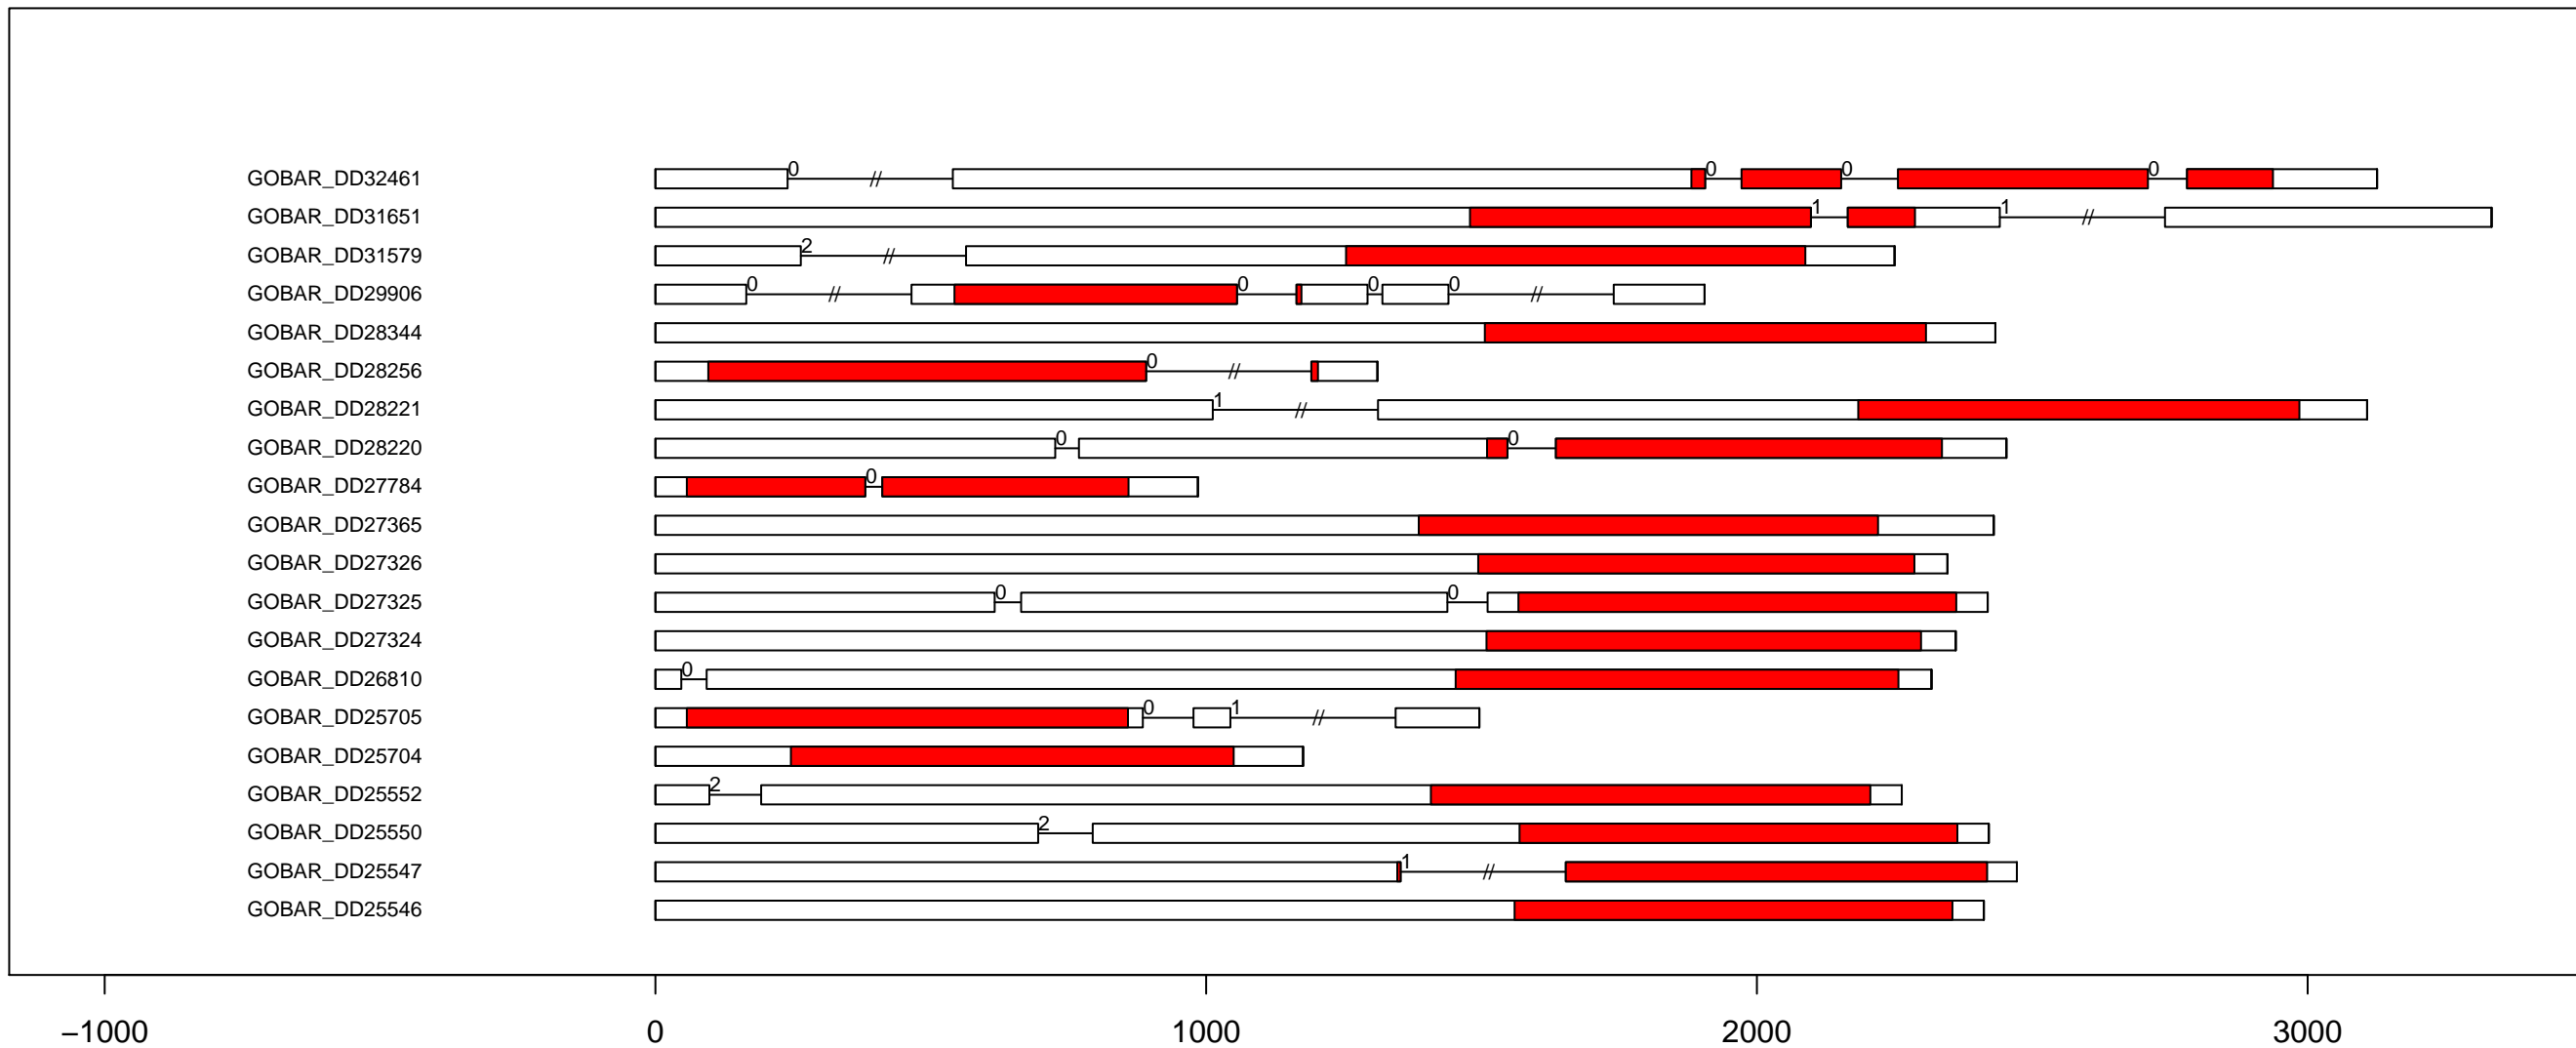

# G.ba RLK-Pelle\_SD-2b exon-intron and domain diagram (part 6)

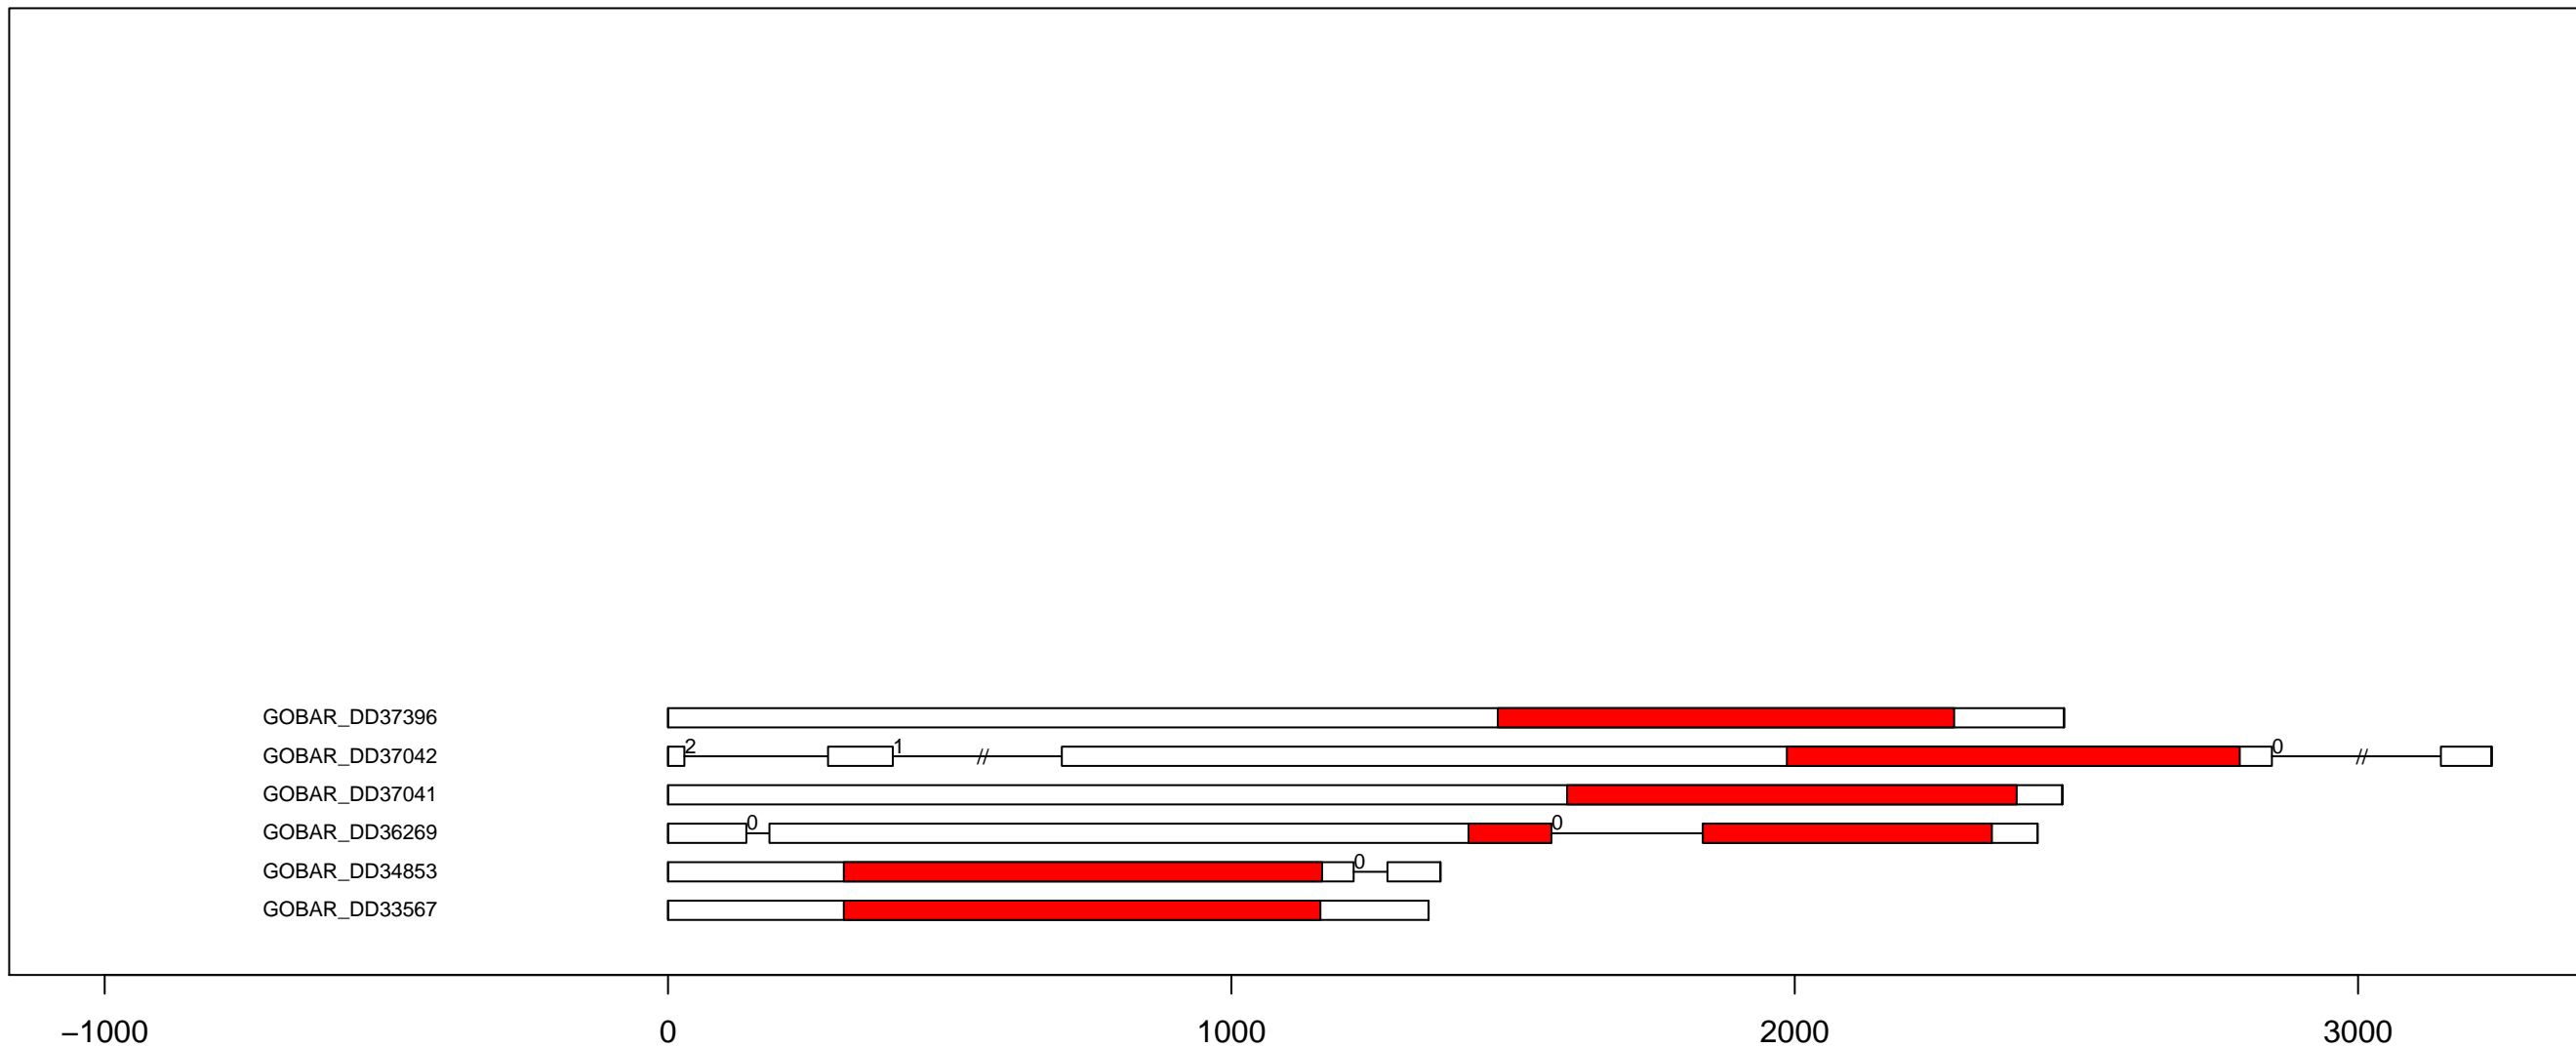

G.ba RLK-Pelle\_Singleton exon-intron and domain diagram (all)

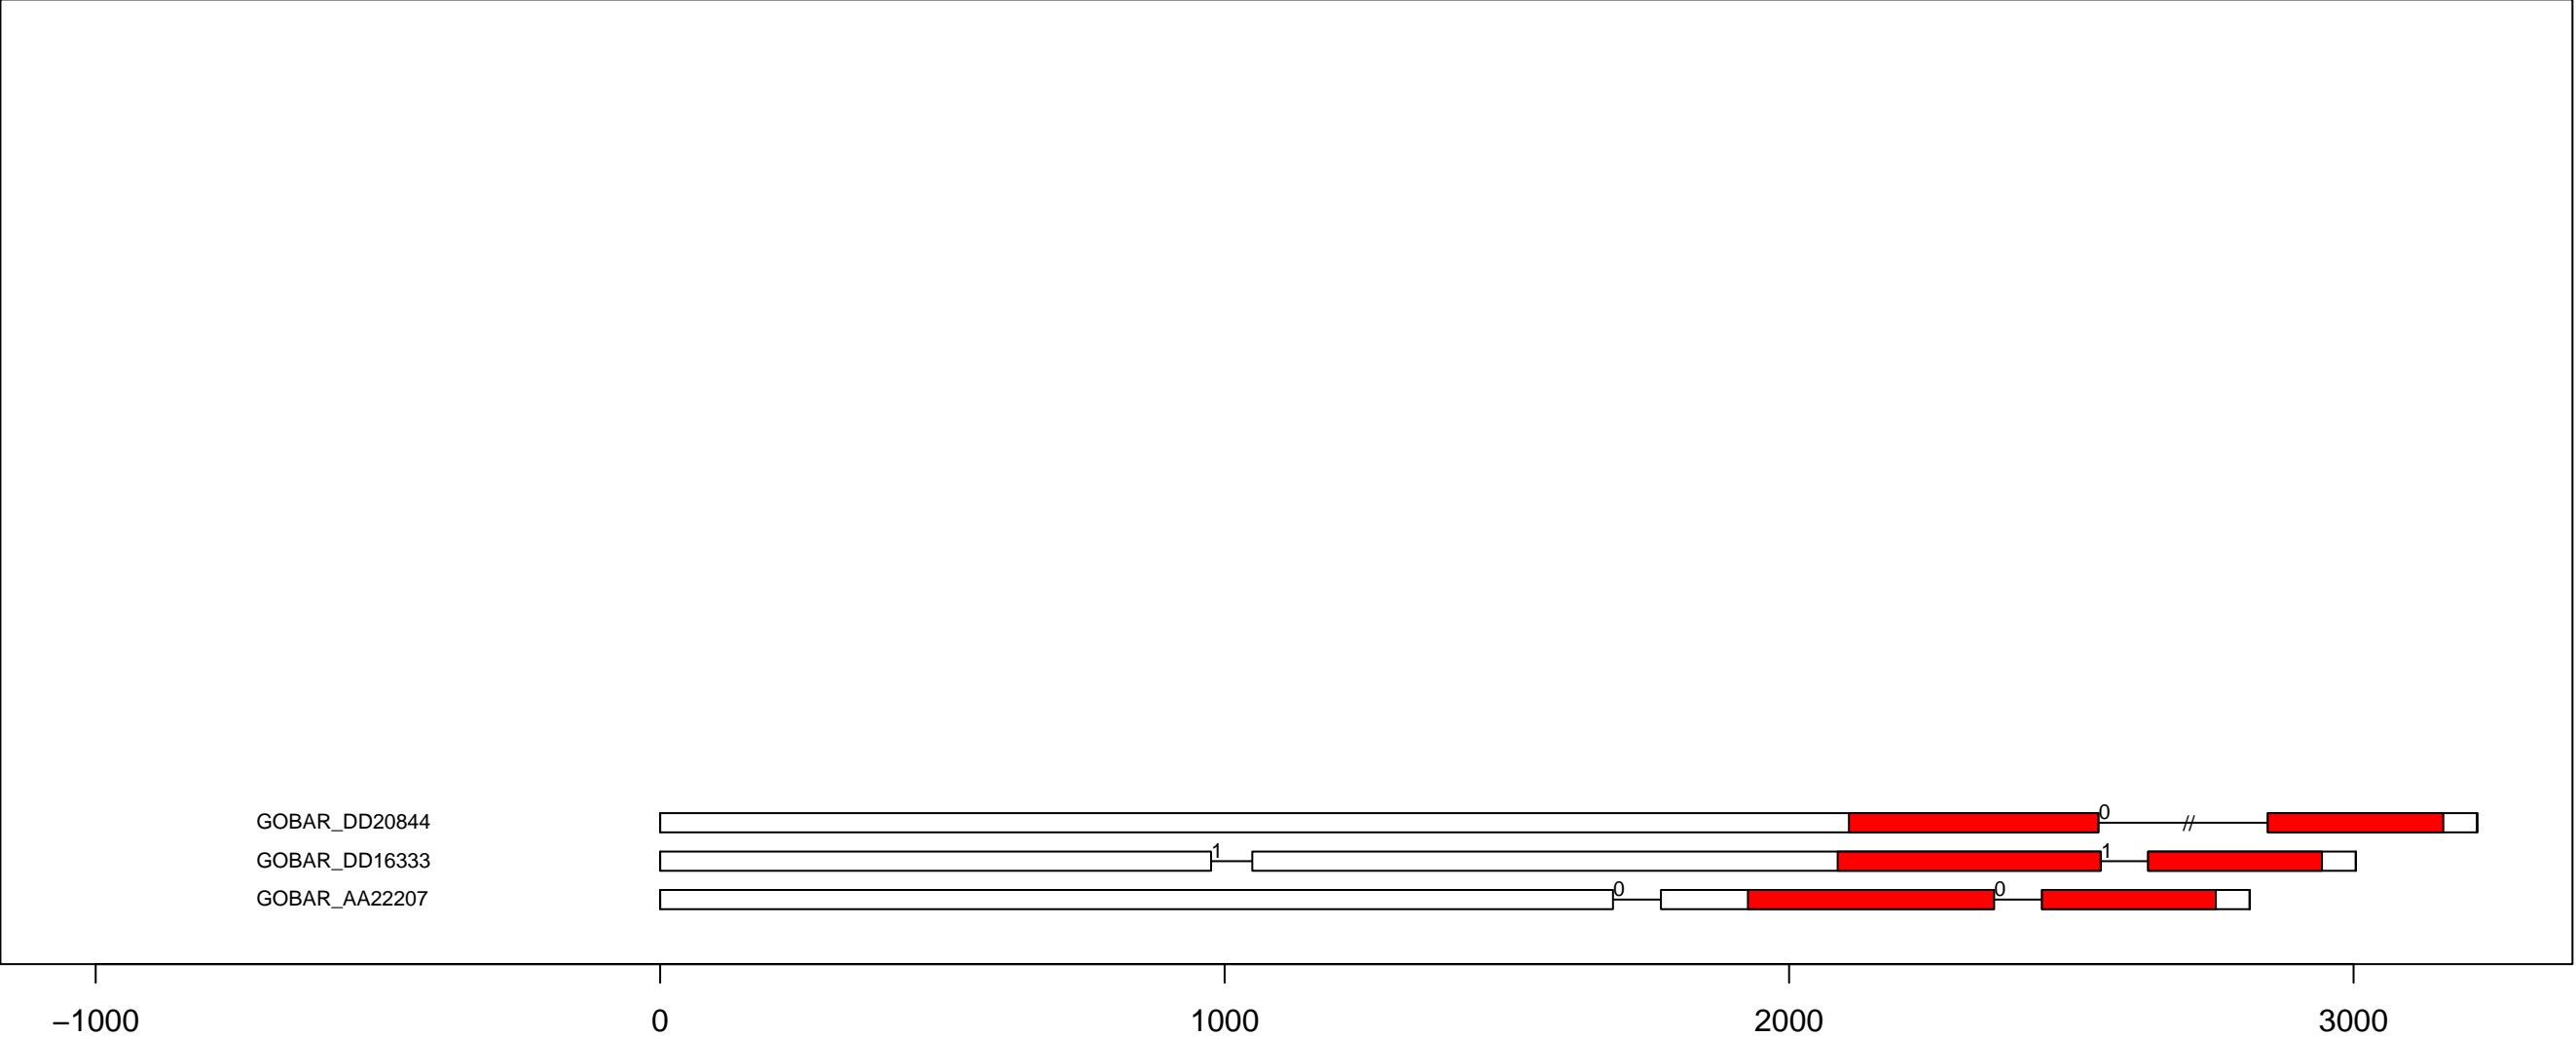

# G.ba RLK-Pelle\_URK-1 exon-intron and domain diagram (all)

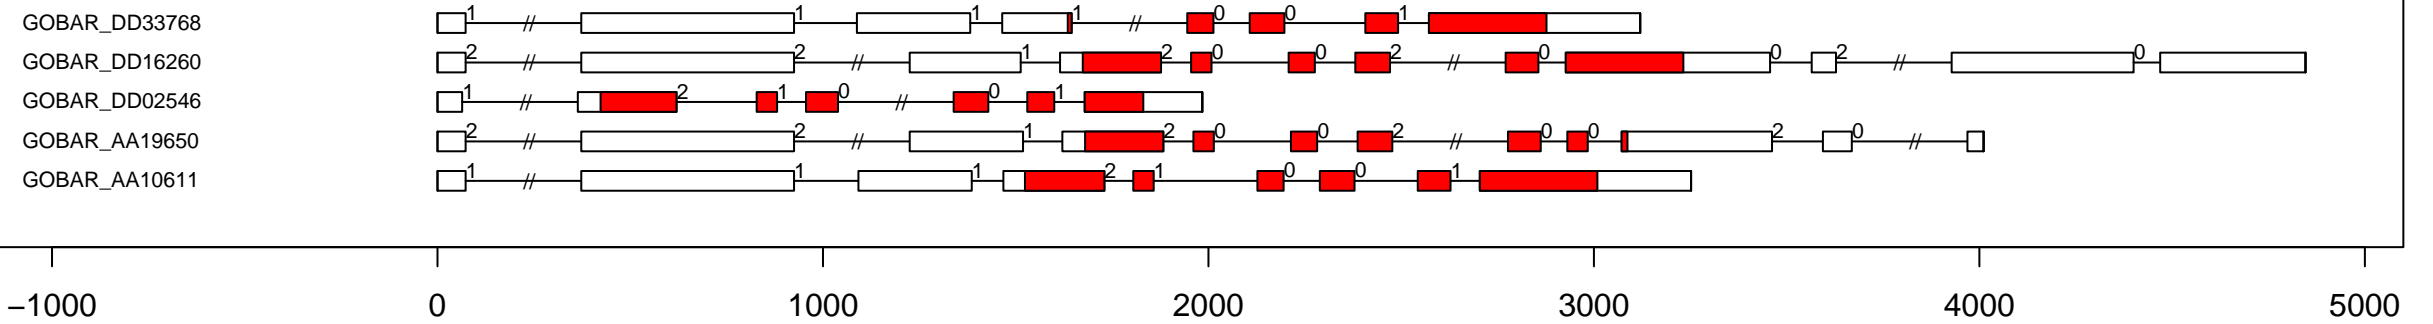

# G.ba RLK-Pelle\_URK-2 exon-intron and domain diagram (all)

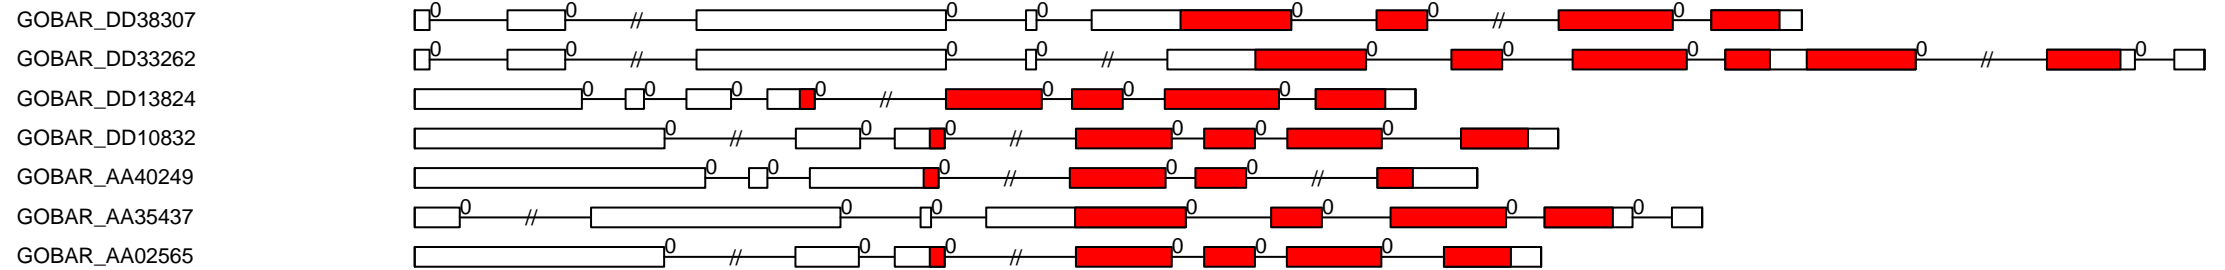



# G.ba RLK-Pelle\_URK-3 exon-intron and domain diagram (all)

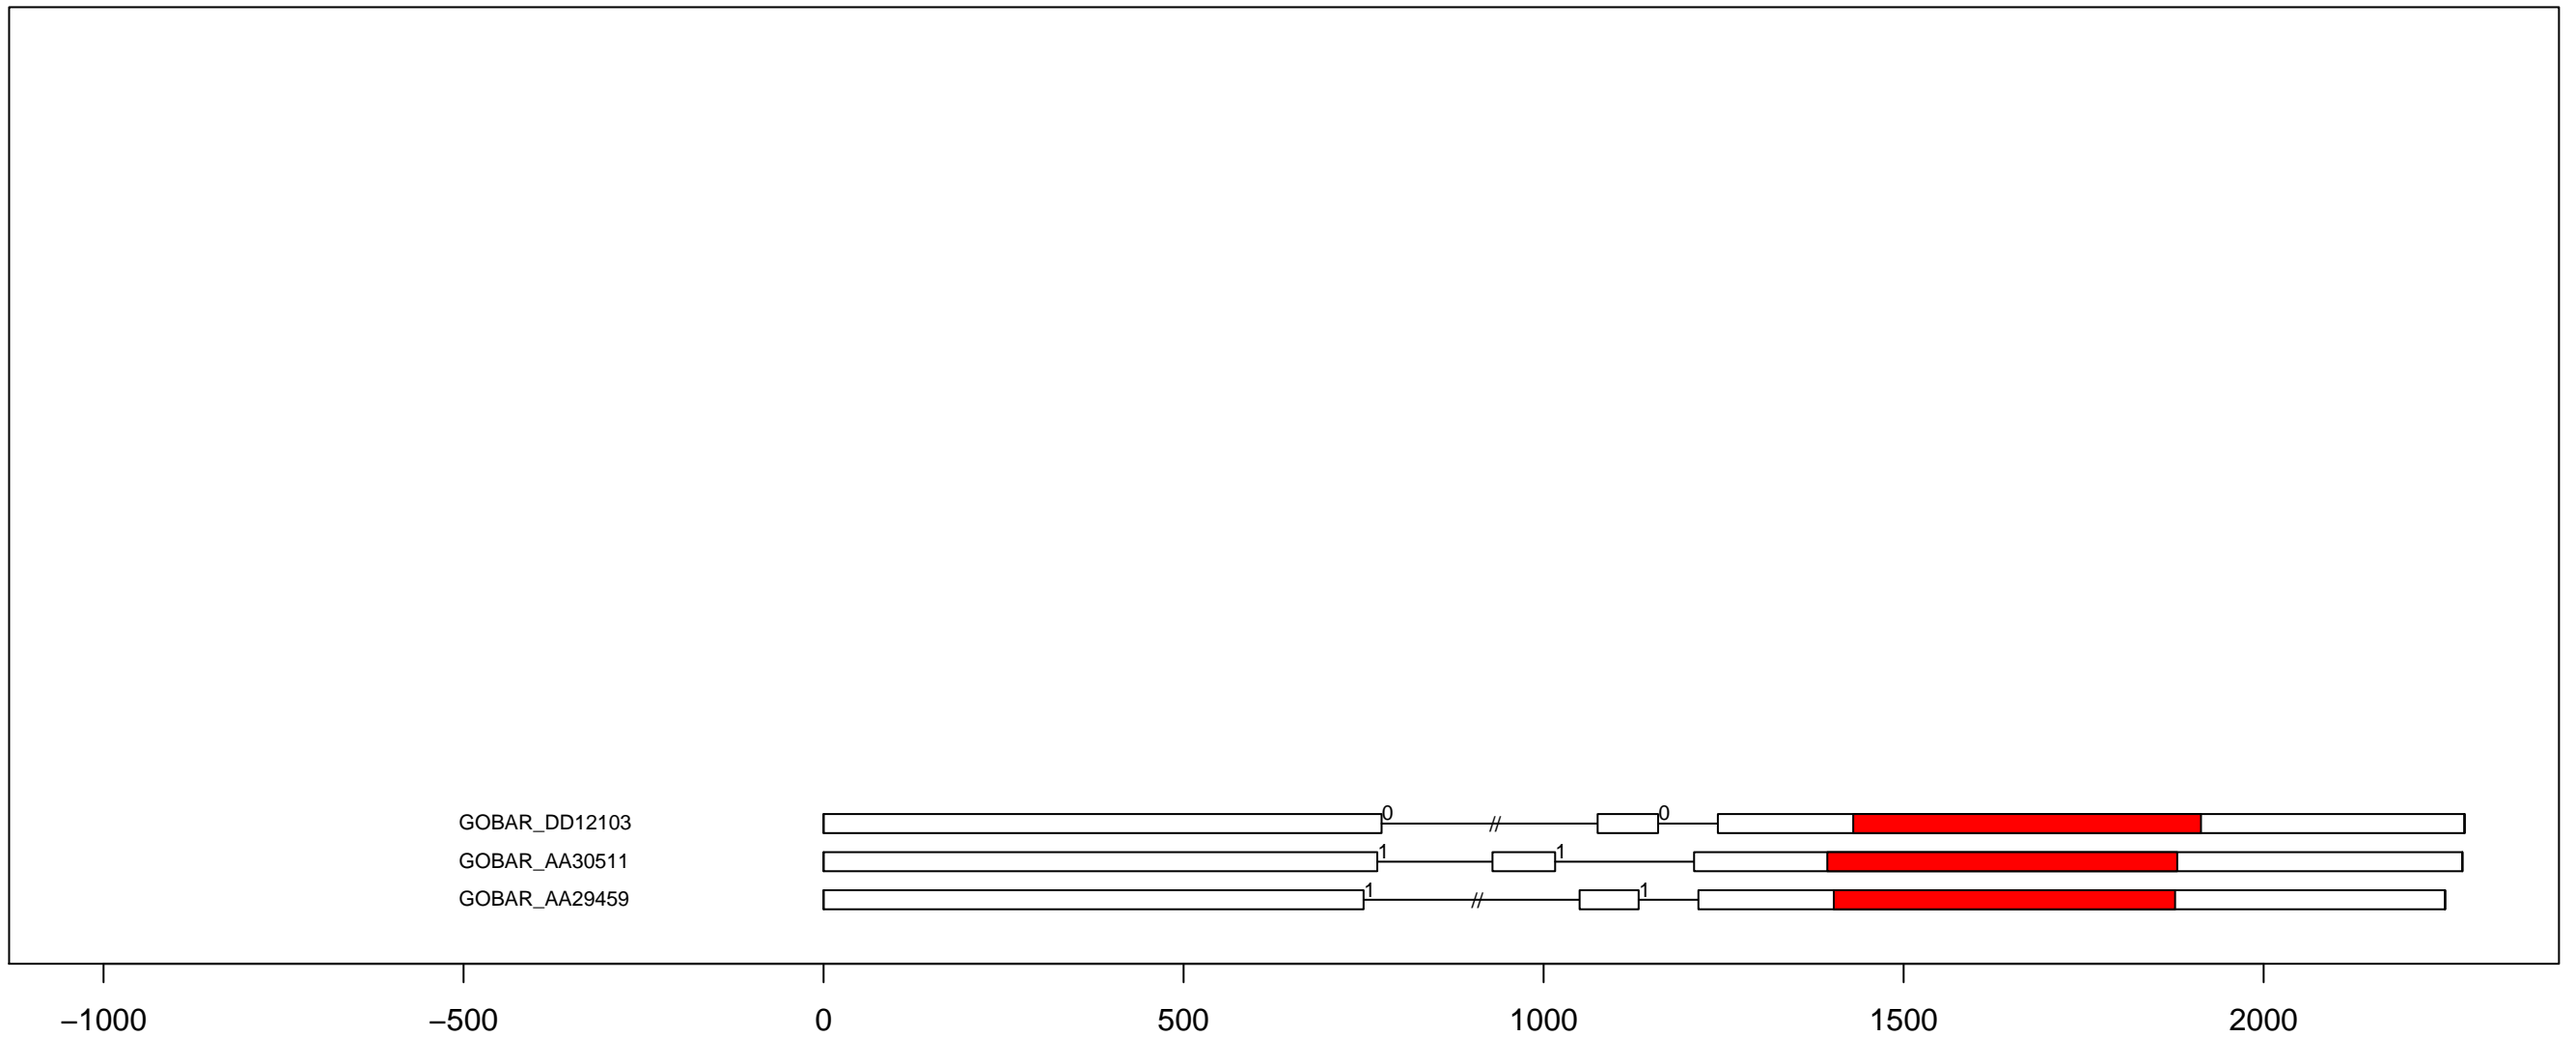

### G.ba RLK-Pelle\_WAK\_LRK10L-1 exon-intron and domain diagram (part 1)

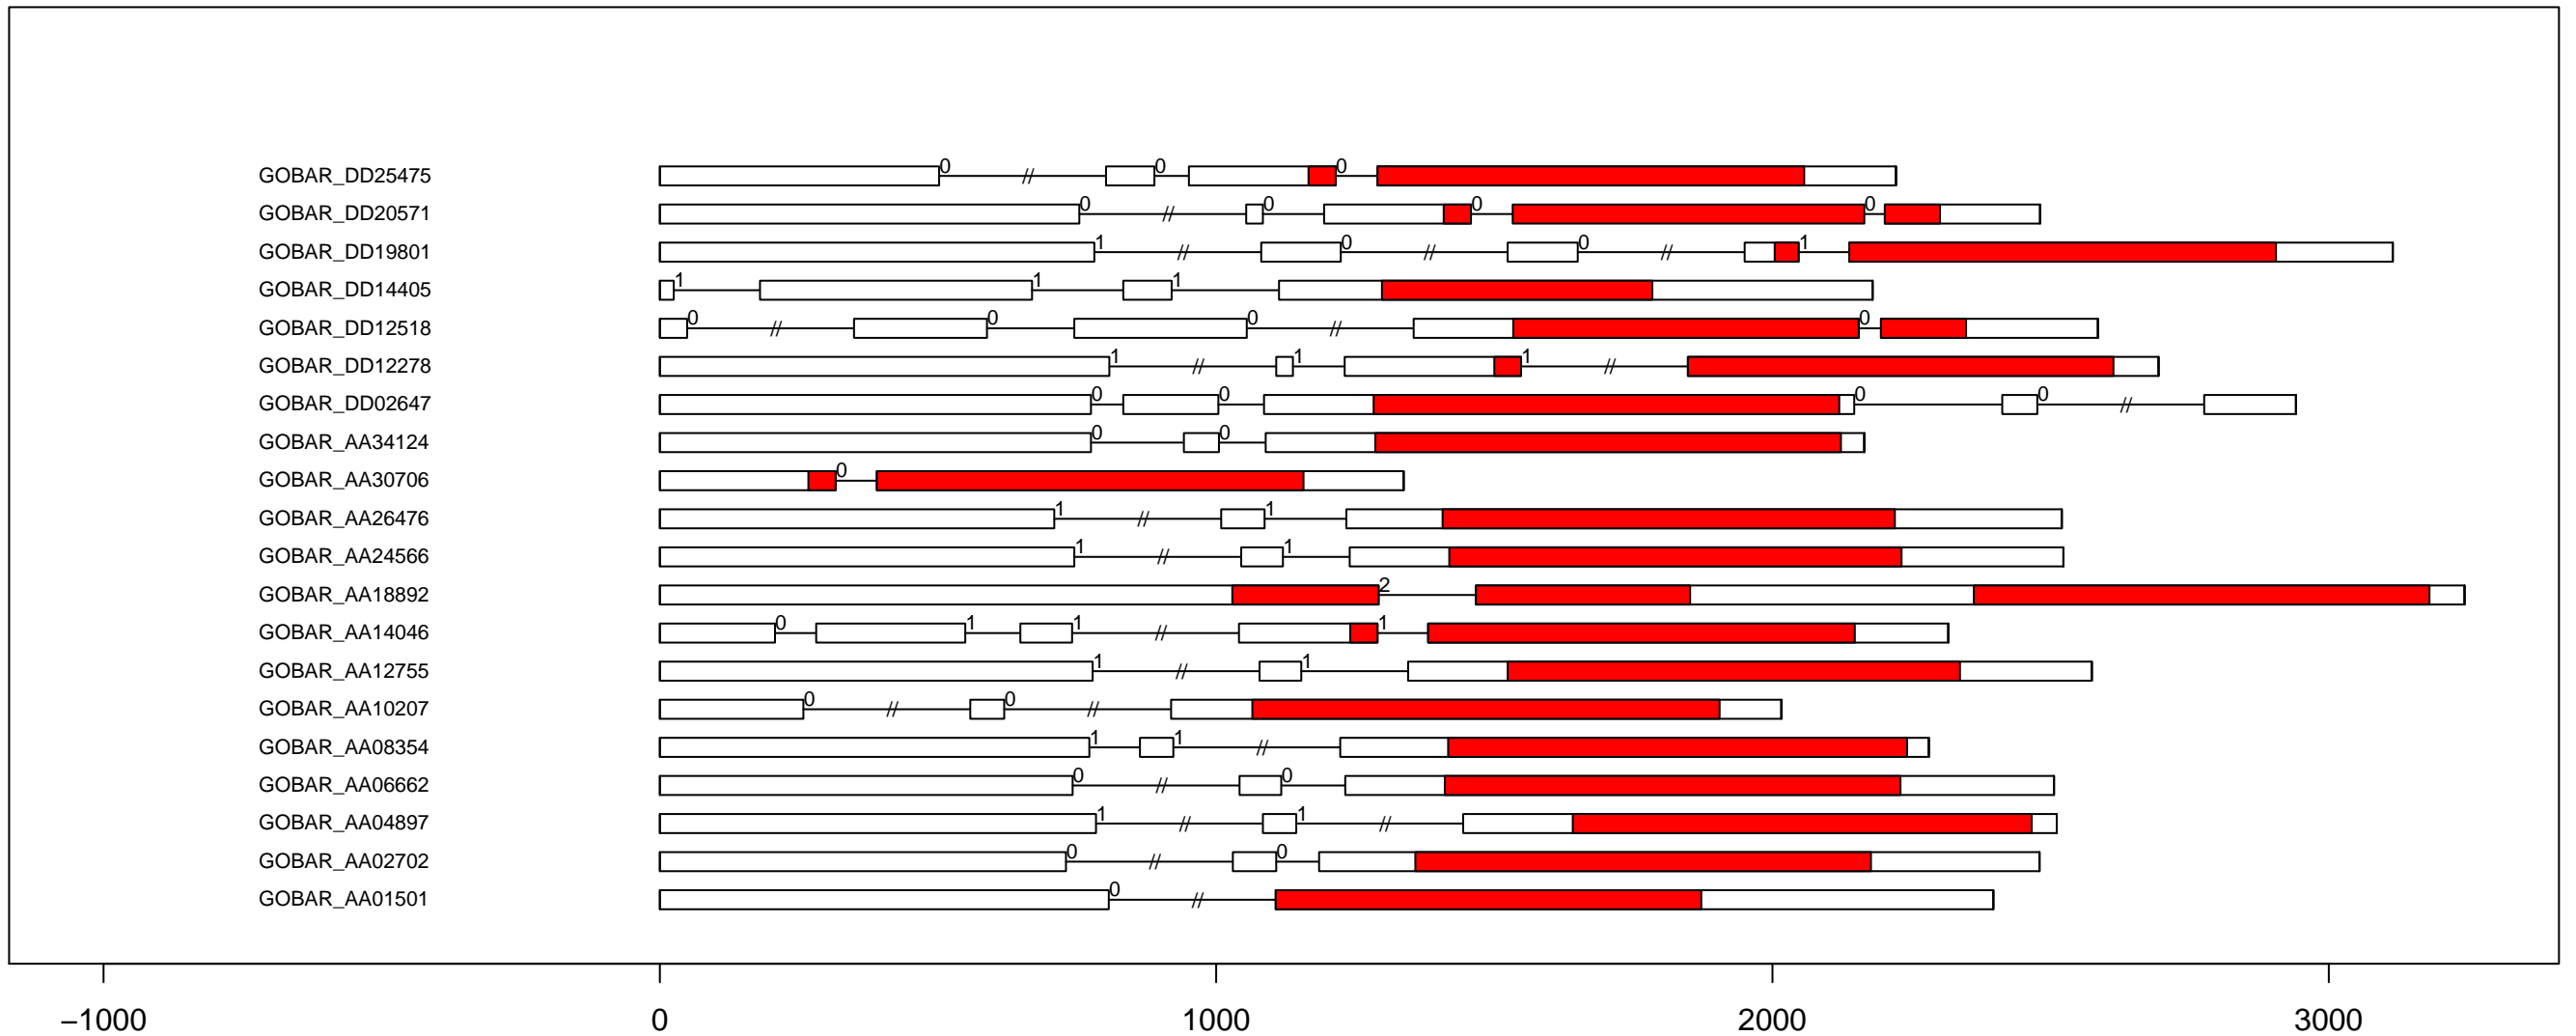

# G.ba RLK-Pelle\_WAK\_LRK10L-1 exon-intron and domain diagram (part 2)

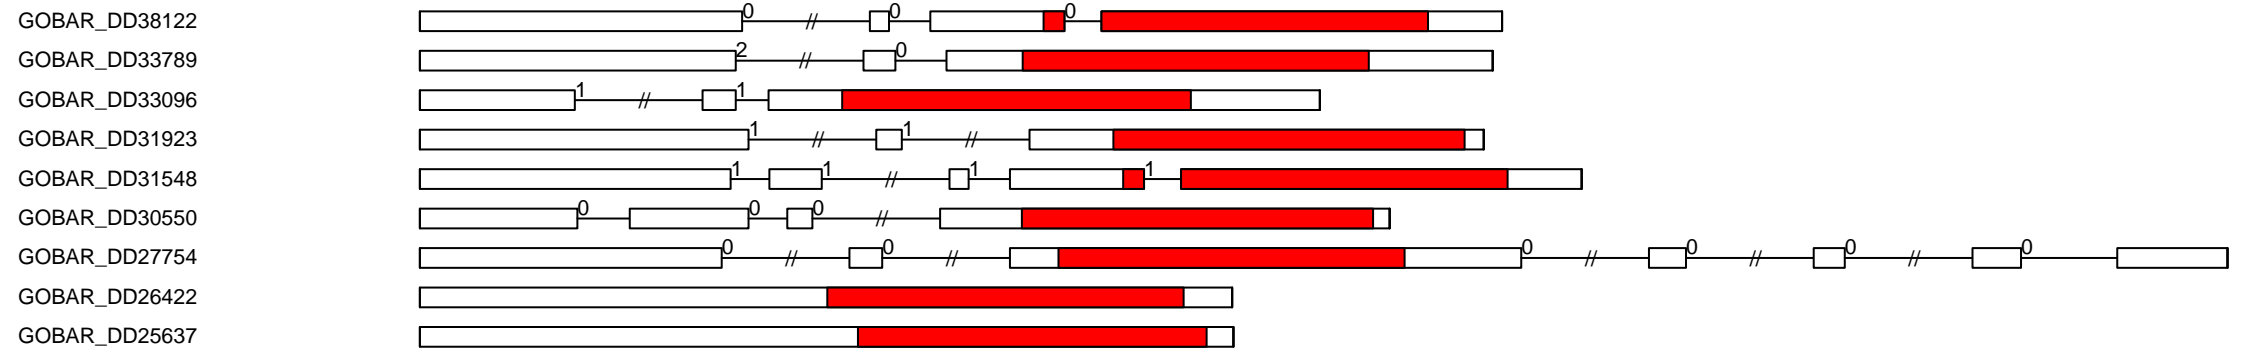

### G.ba RLK-Pelle\_WAK exon-intron and domain diagram (part 1)

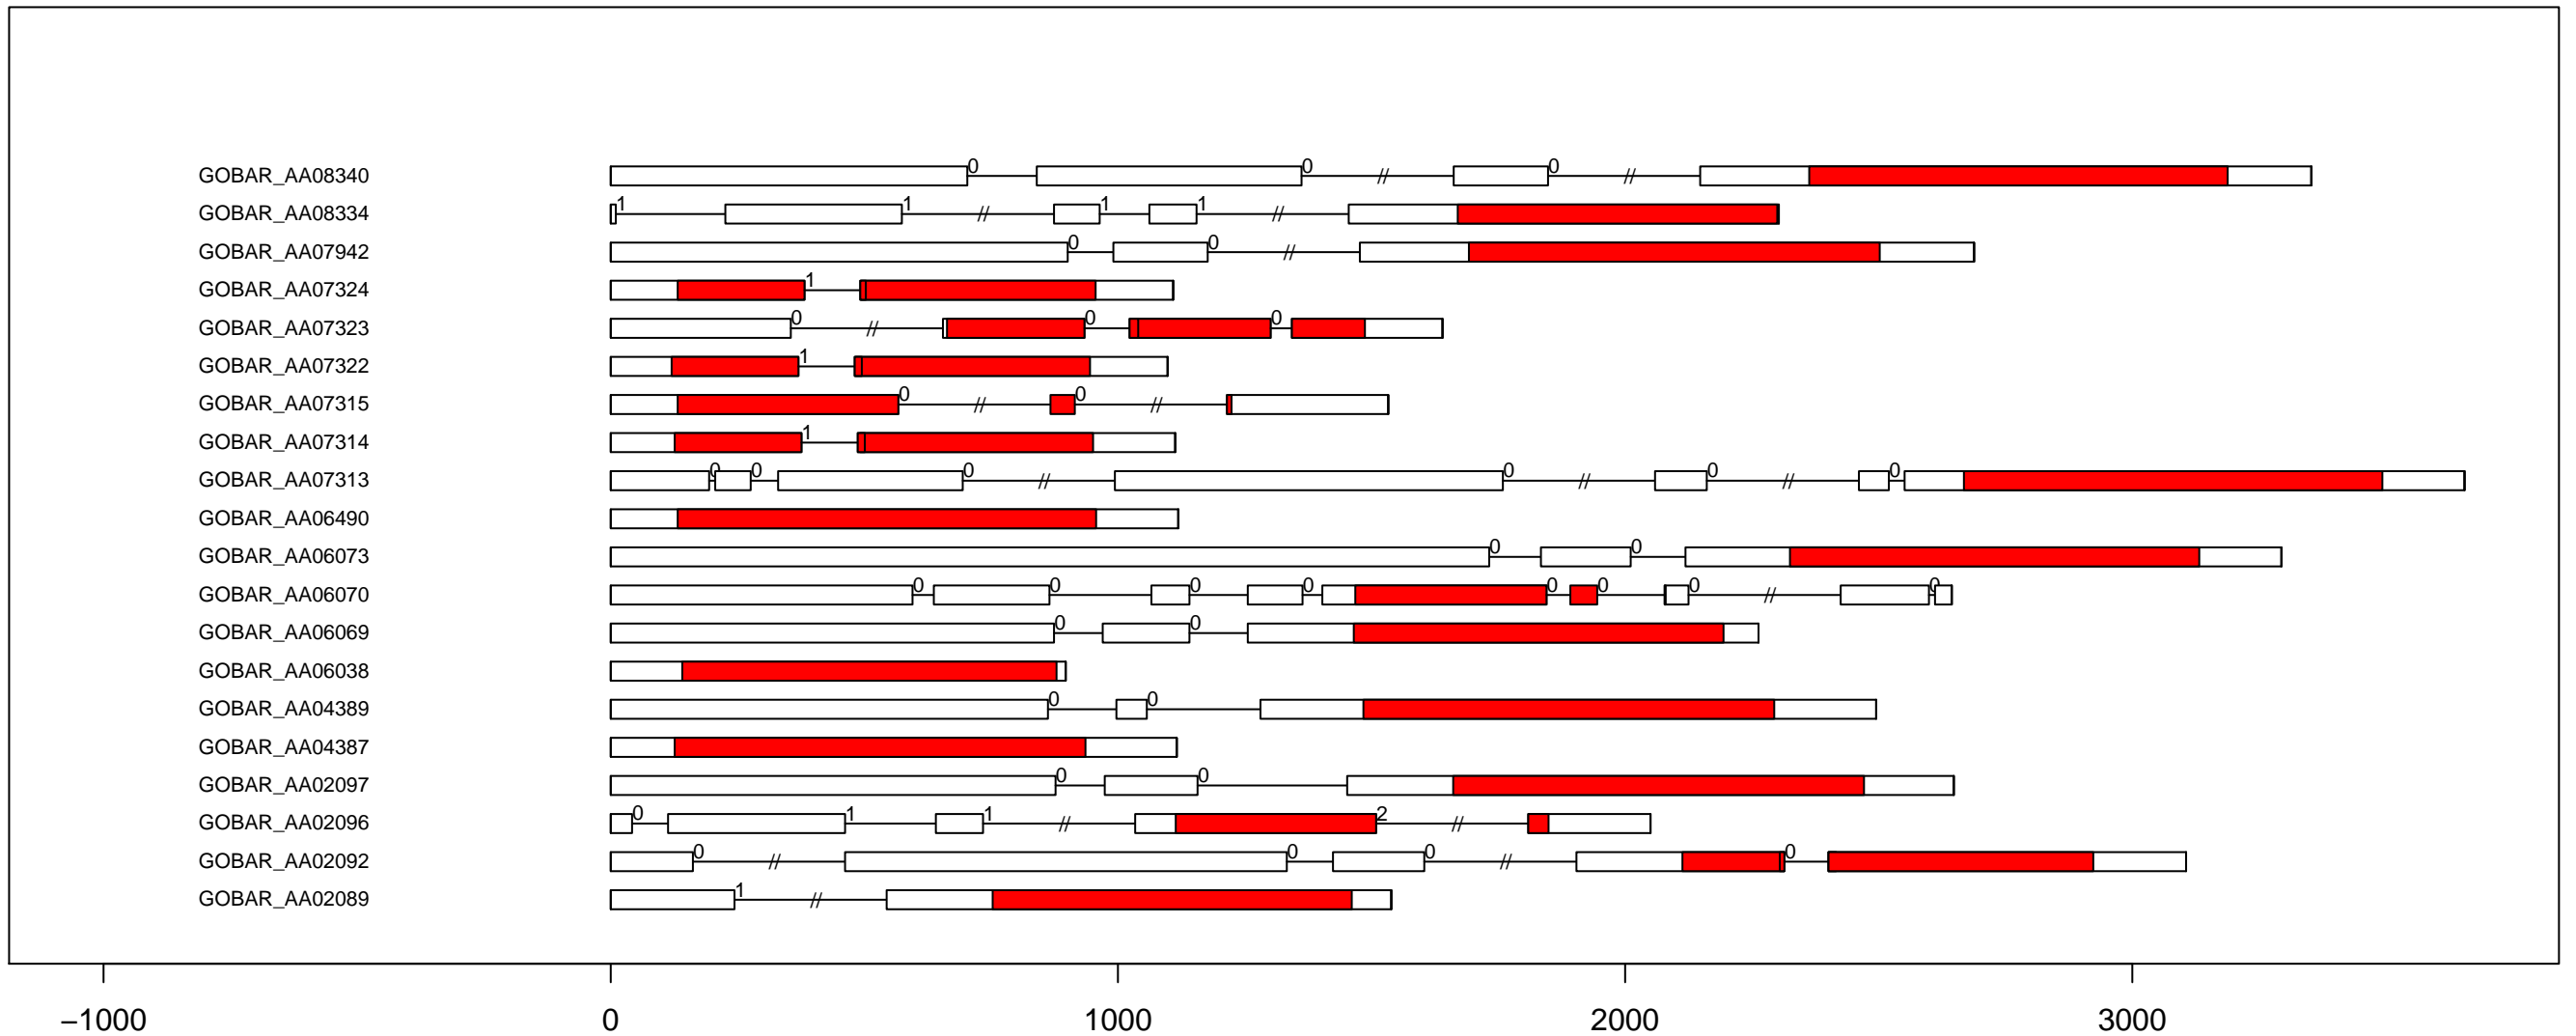

### G.ba RLK-Pelle\_WAK exon-intron and domain diagram (part 2)

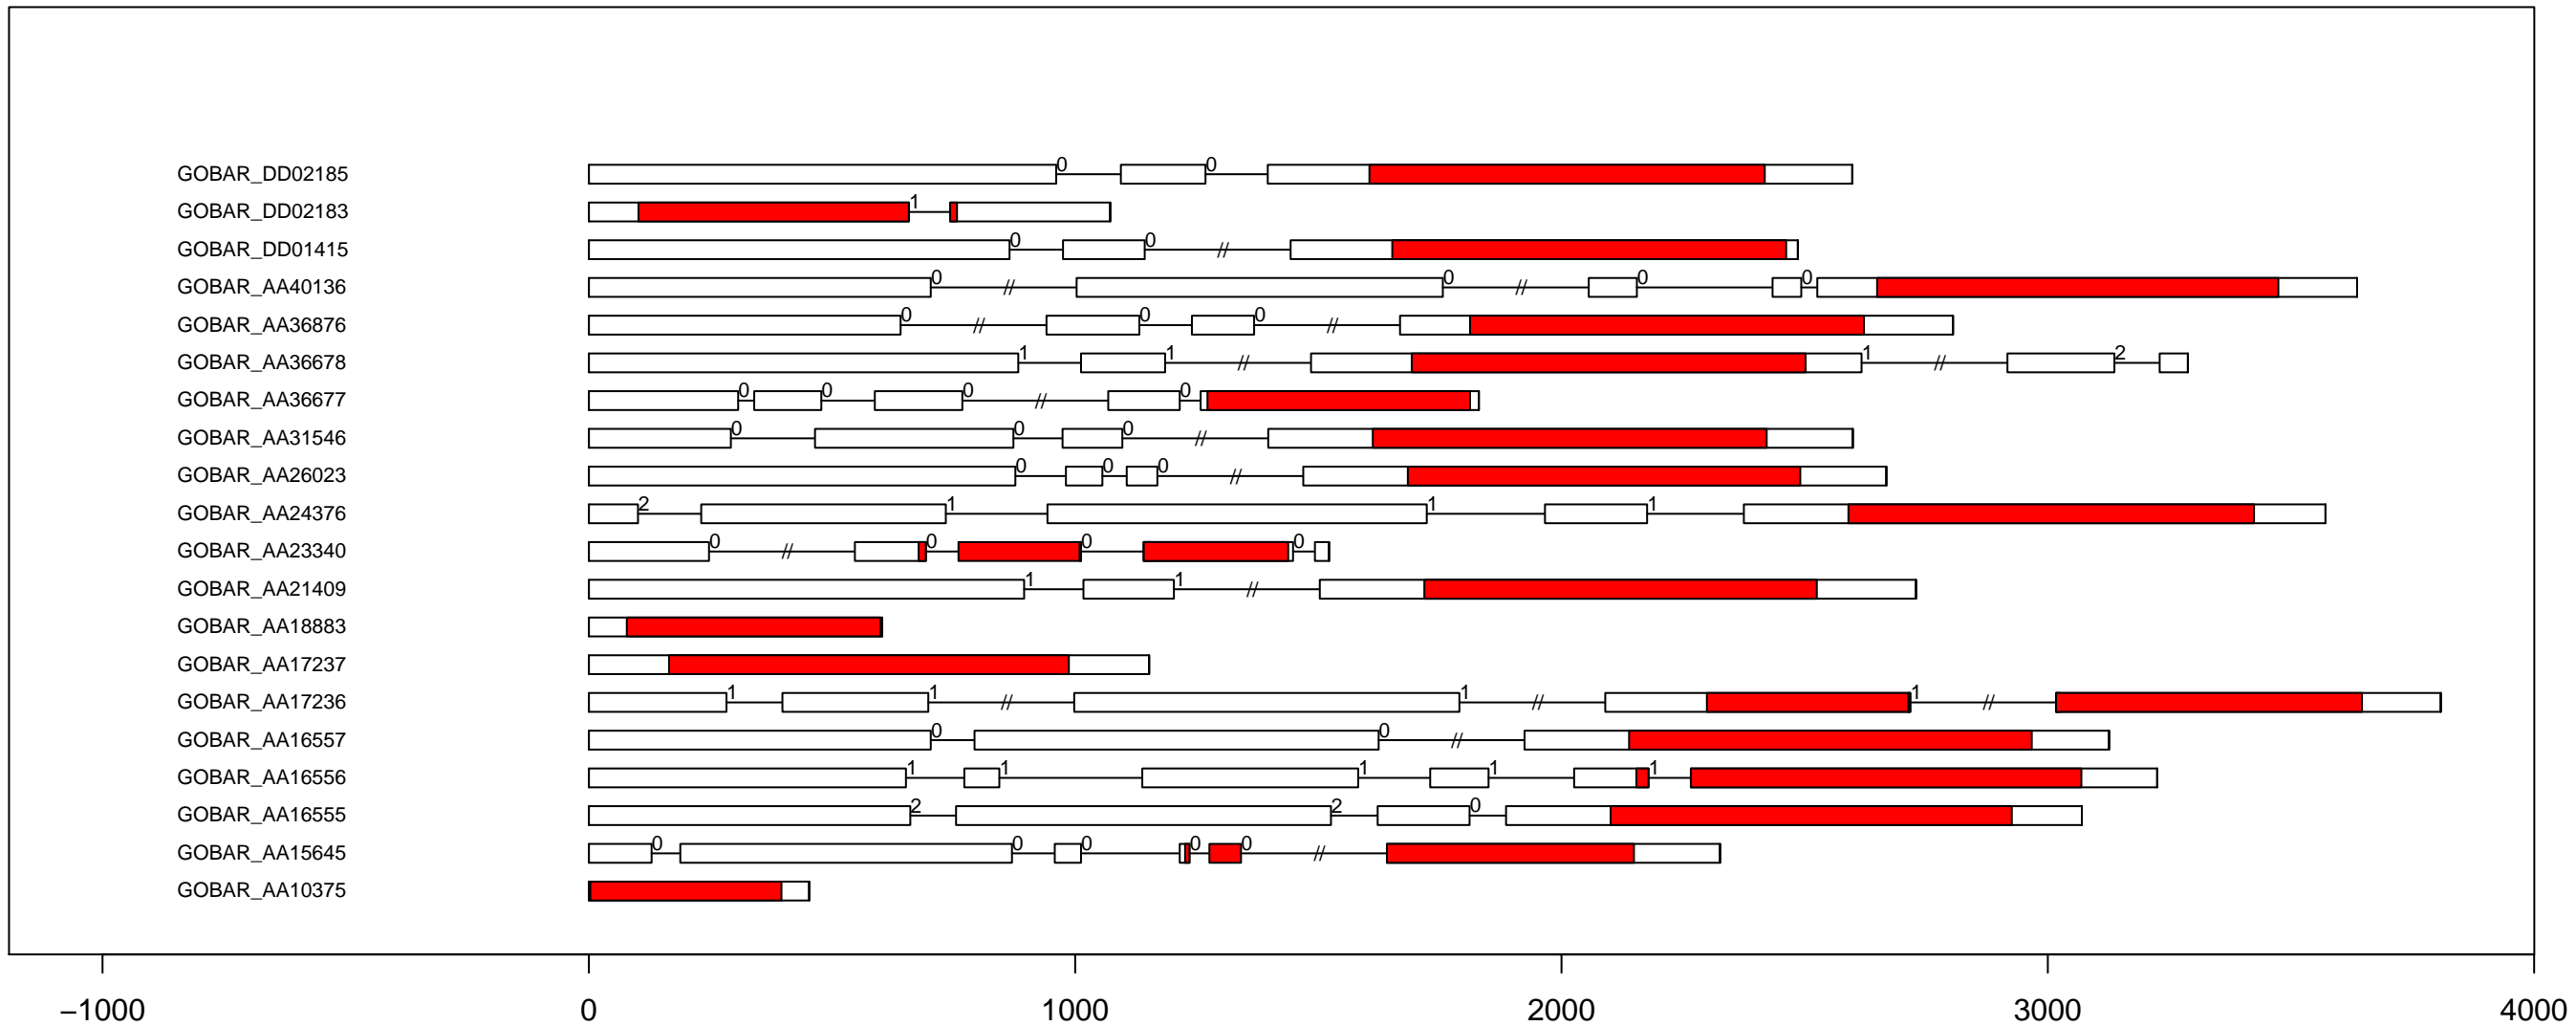



### G.ba RLK-Pelle\_WAK exon-intron and domain diagram (part 4)

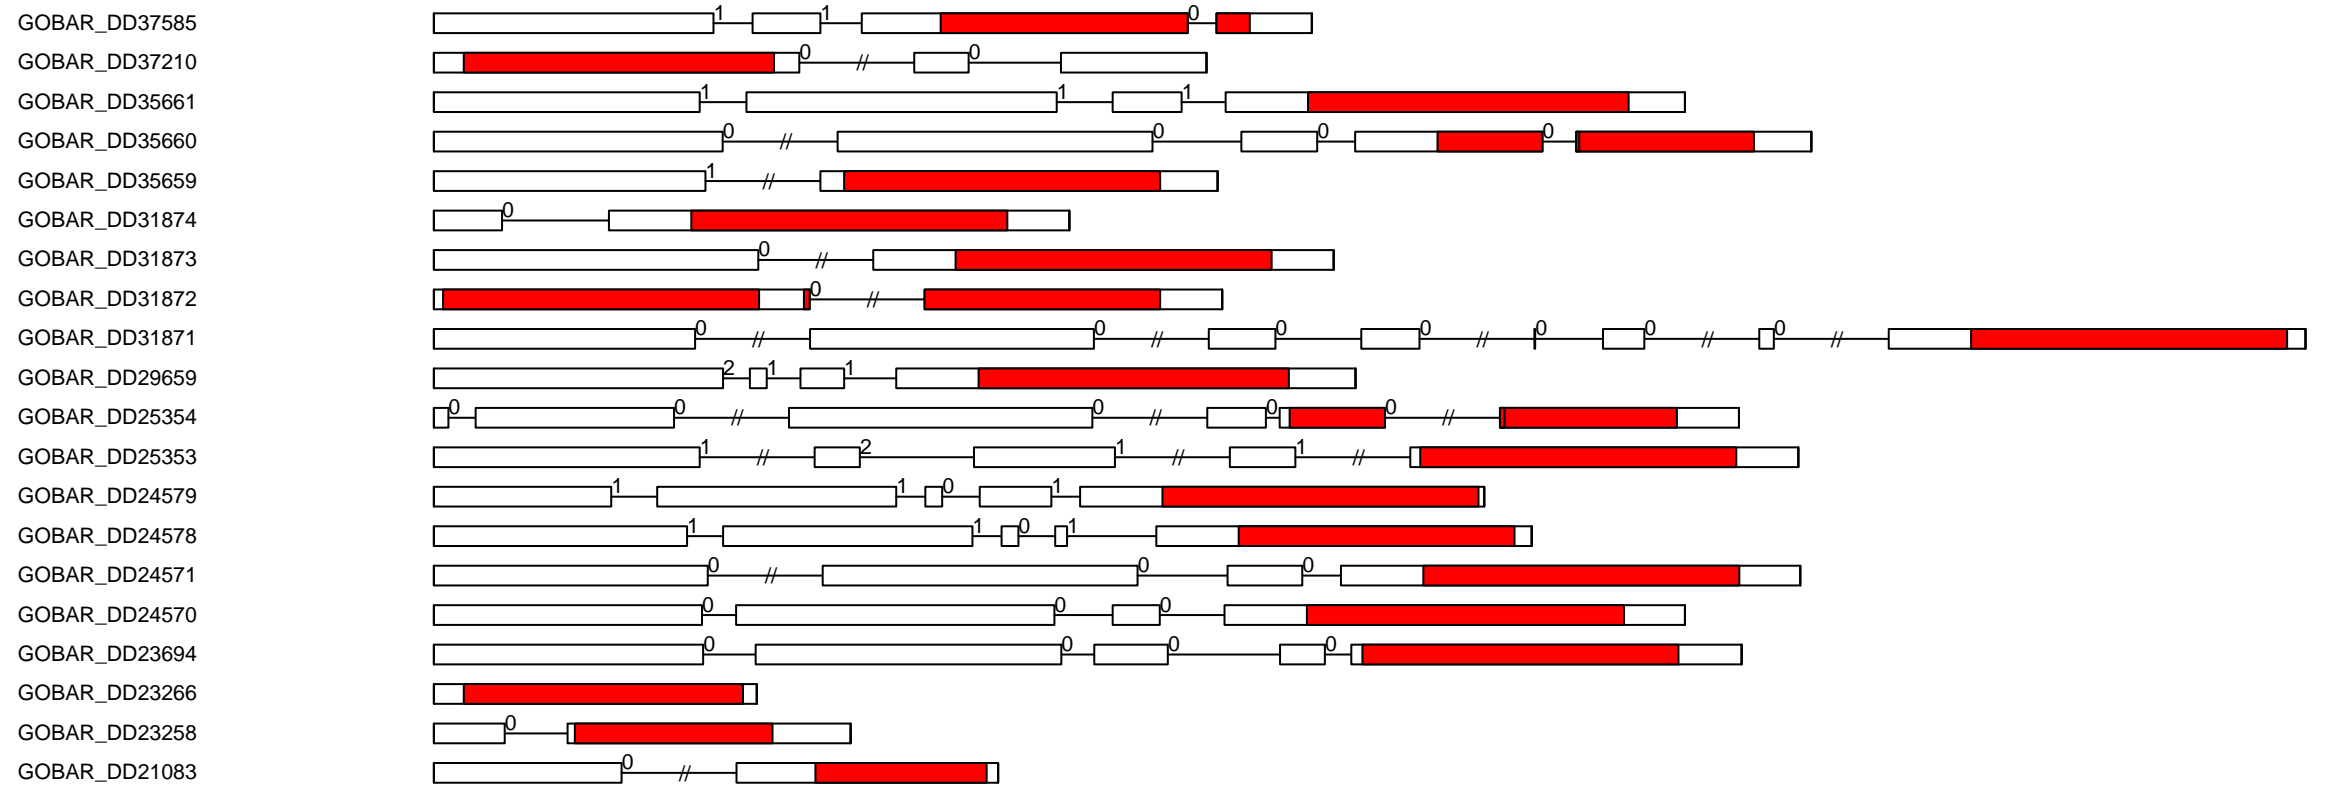

# G.ba RLK-Pelle\_WAK exon-intron and domain diagram (part 5)

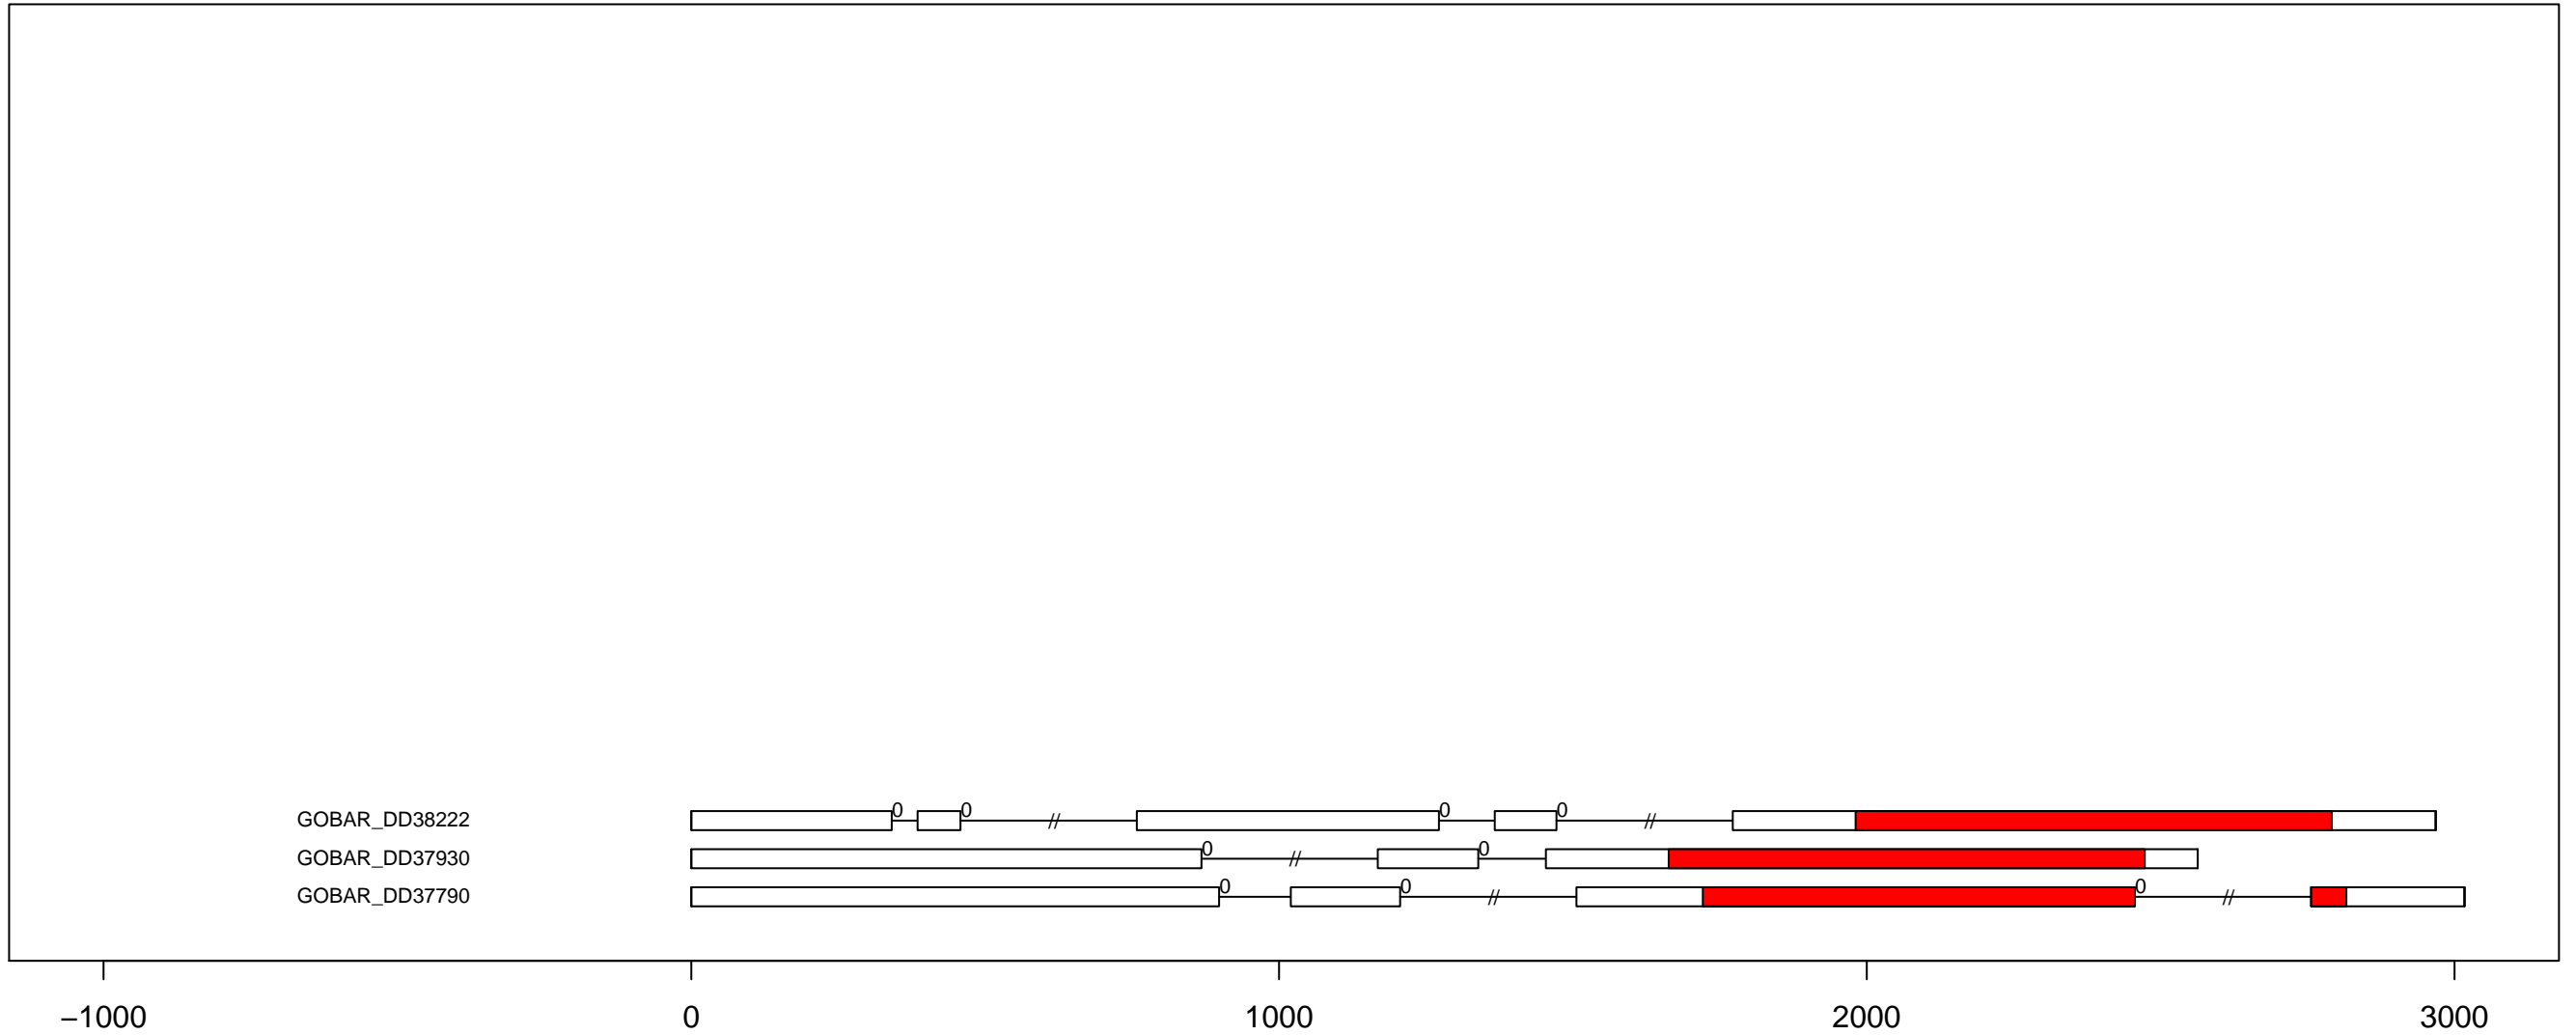



# G.ba SCY1\_SCYL1 exon-intron and domain diagram (all)

GOBAR\_DD34998  
GOBAR\_DD11359

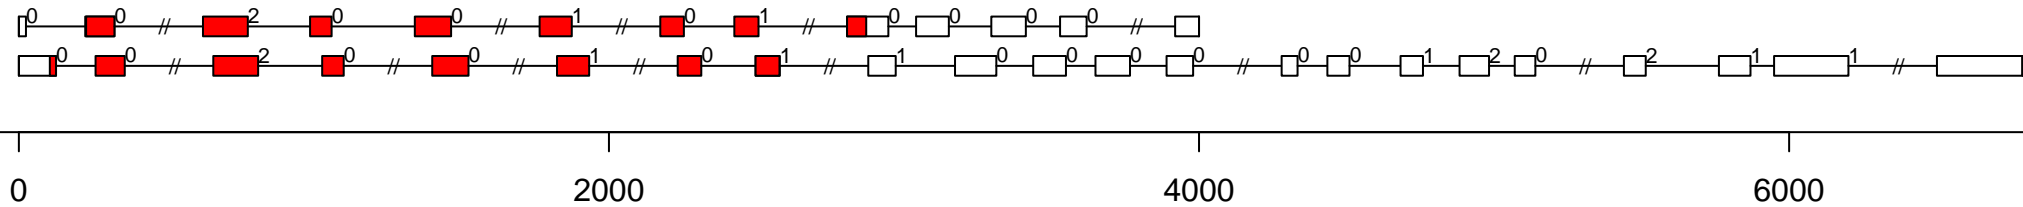

# G.ba SCY1\_SCYL2 exon-intron and domain diagram (all)

GOBAR\_DD34339

GOBAR\_DD19395

GOBAR\_DD15267

GOBAR\_AA25969

GOBAR\_AA25748

GOBAR\_AA08897

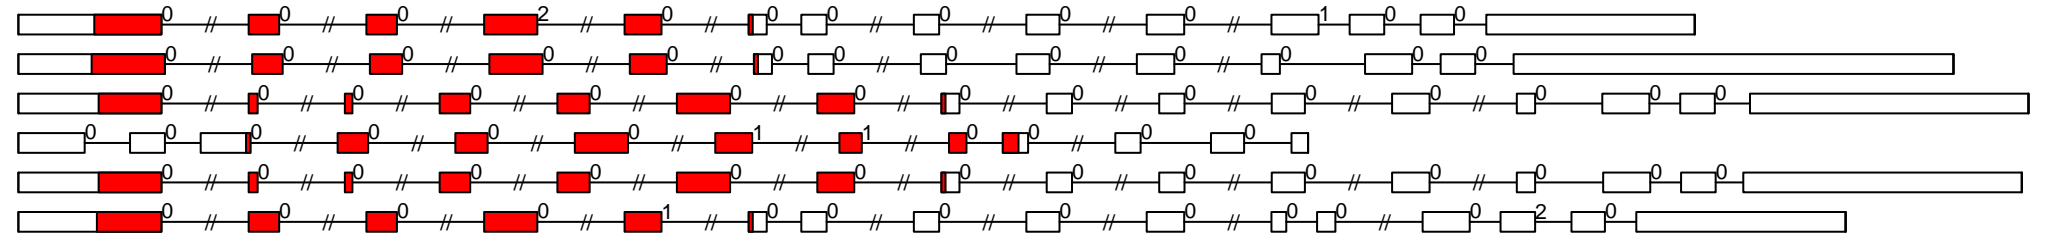

0

2000

4000

6000

### G.ba STE\_STE11 exon-intron and domain diagram (part 1)

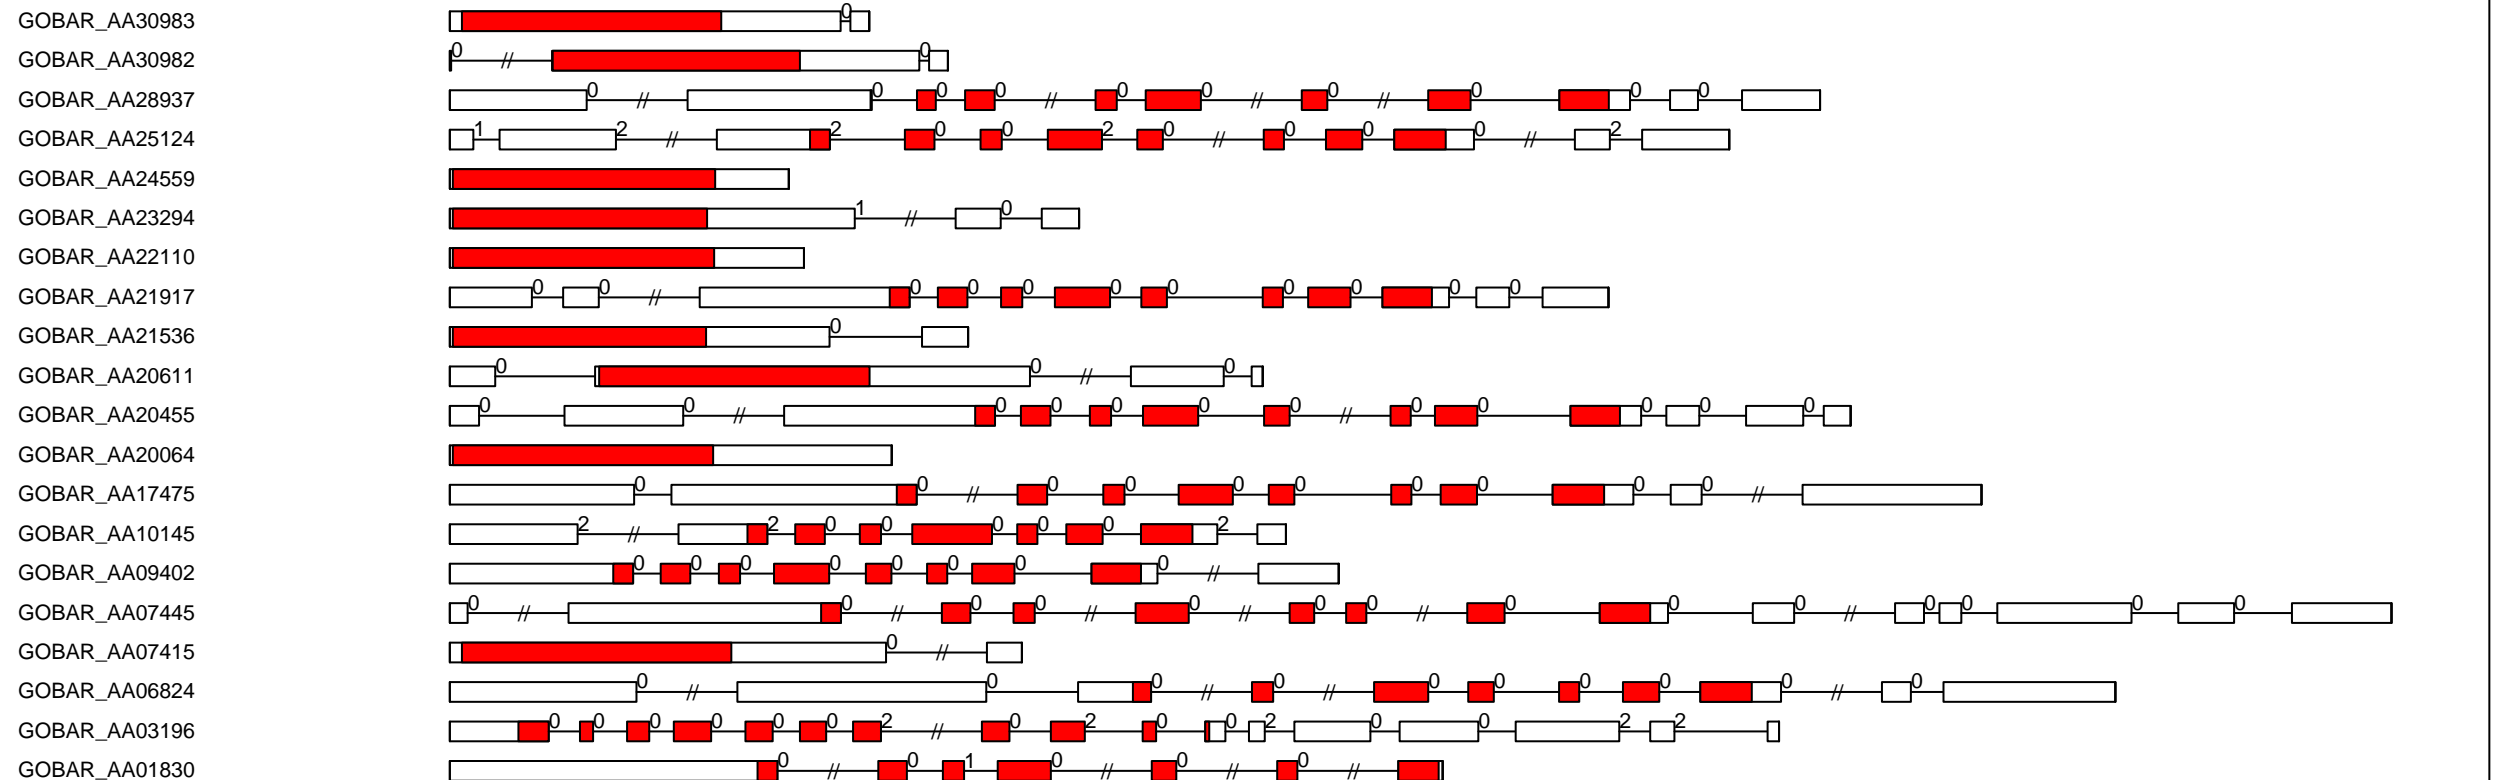

### G.ba STE\_STE11 exon-intron and domain diagram (part 2)

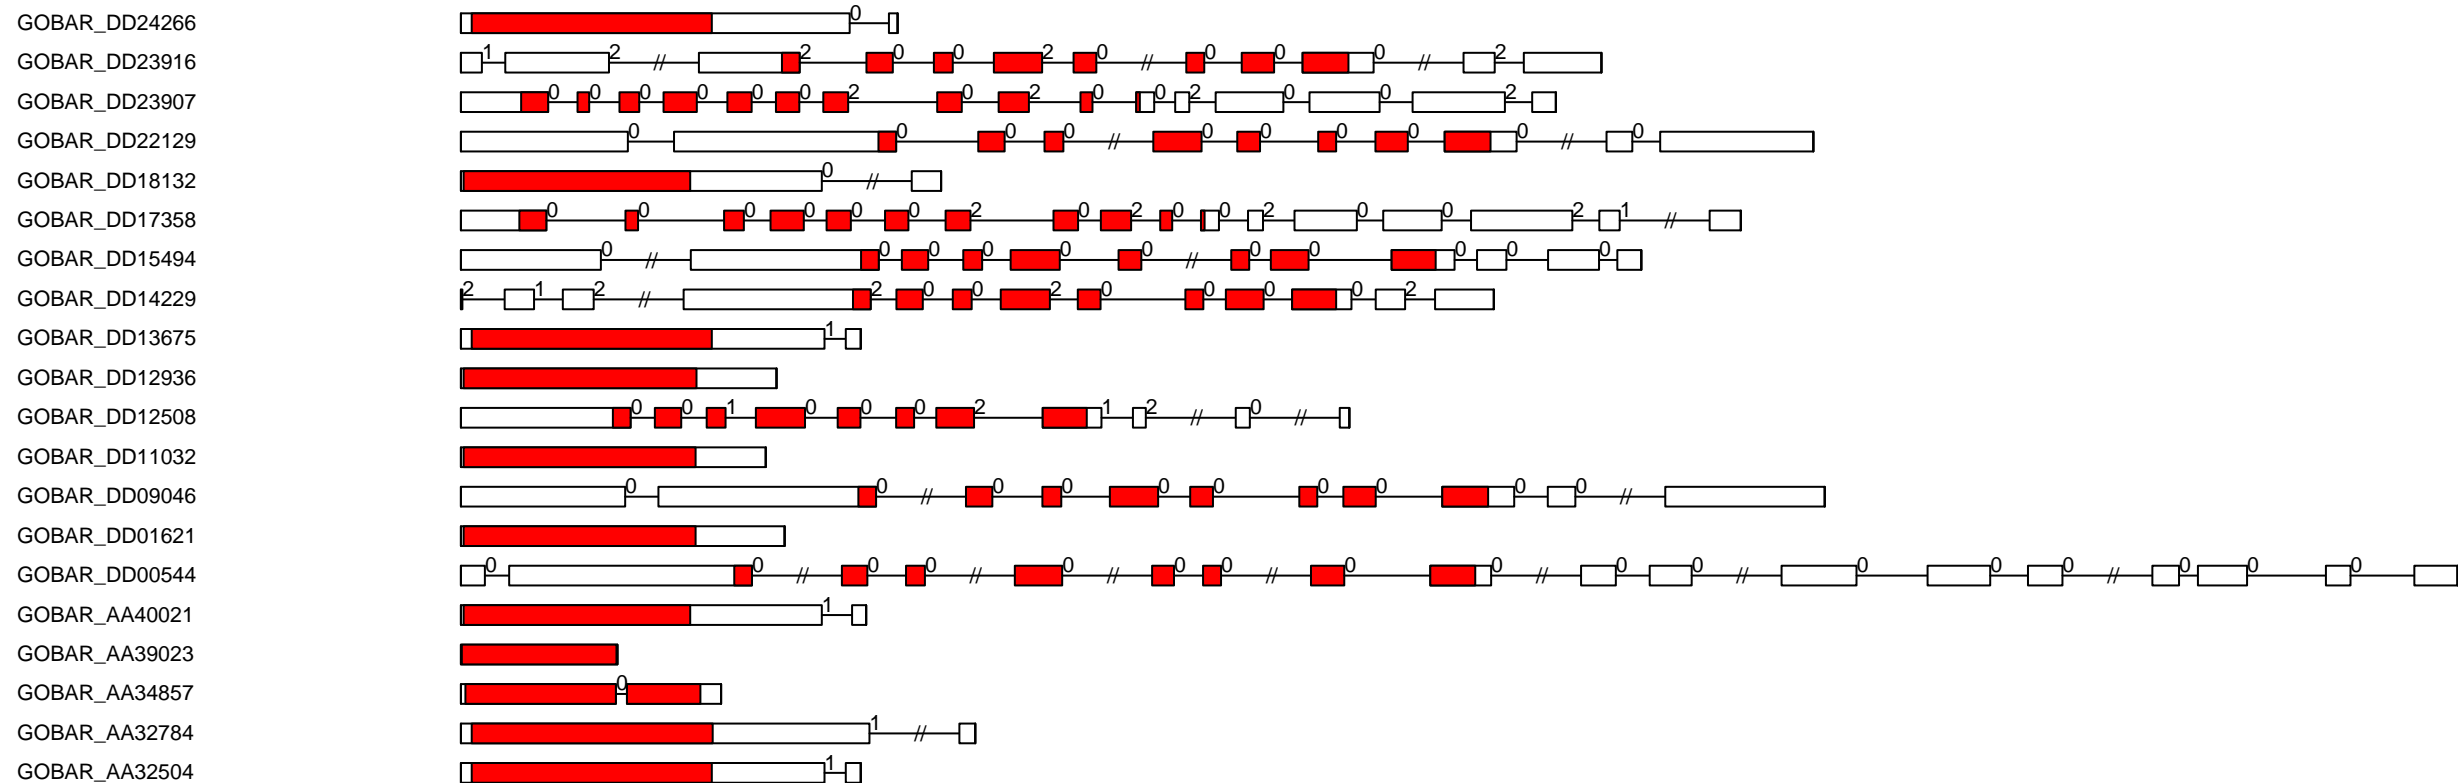

### G.ba STE\_STE11 exon-intron and domain diagram (part 3)

GOBAR\_DD37476  
GOBAR\_DD35765  
GOBAR\_DD33035  
GOBAR\_DD28558  
GOBAR\_DD26795  
GOBAR\_DD25307  
GOBAR\_DD25222  
GOBAR\_DD25115

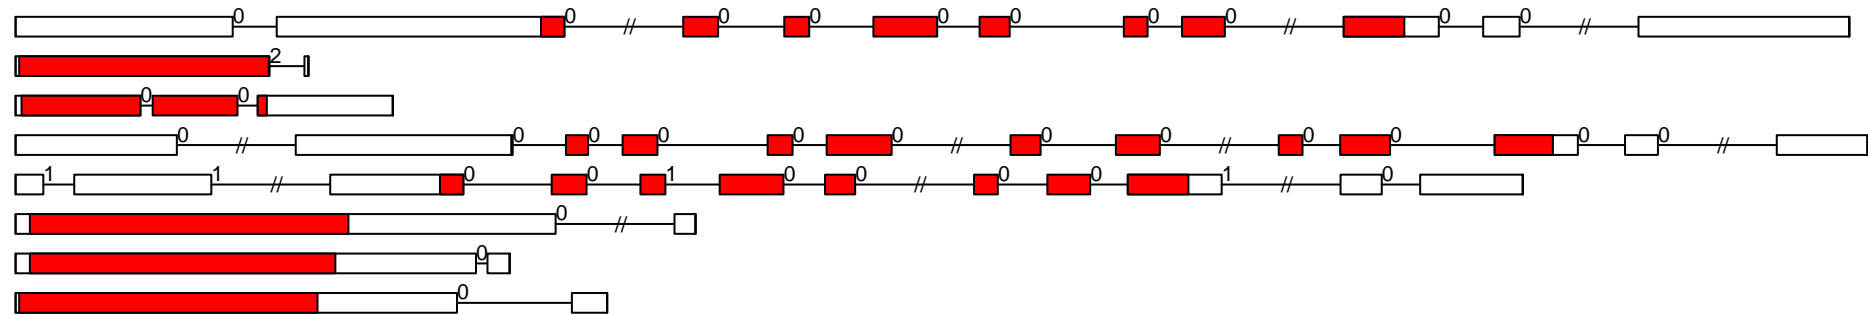

-1000

0

1000

2000

3000

4000

### G.ba STE\_STE20-Fray exon-intron and domain diagram (part 1)

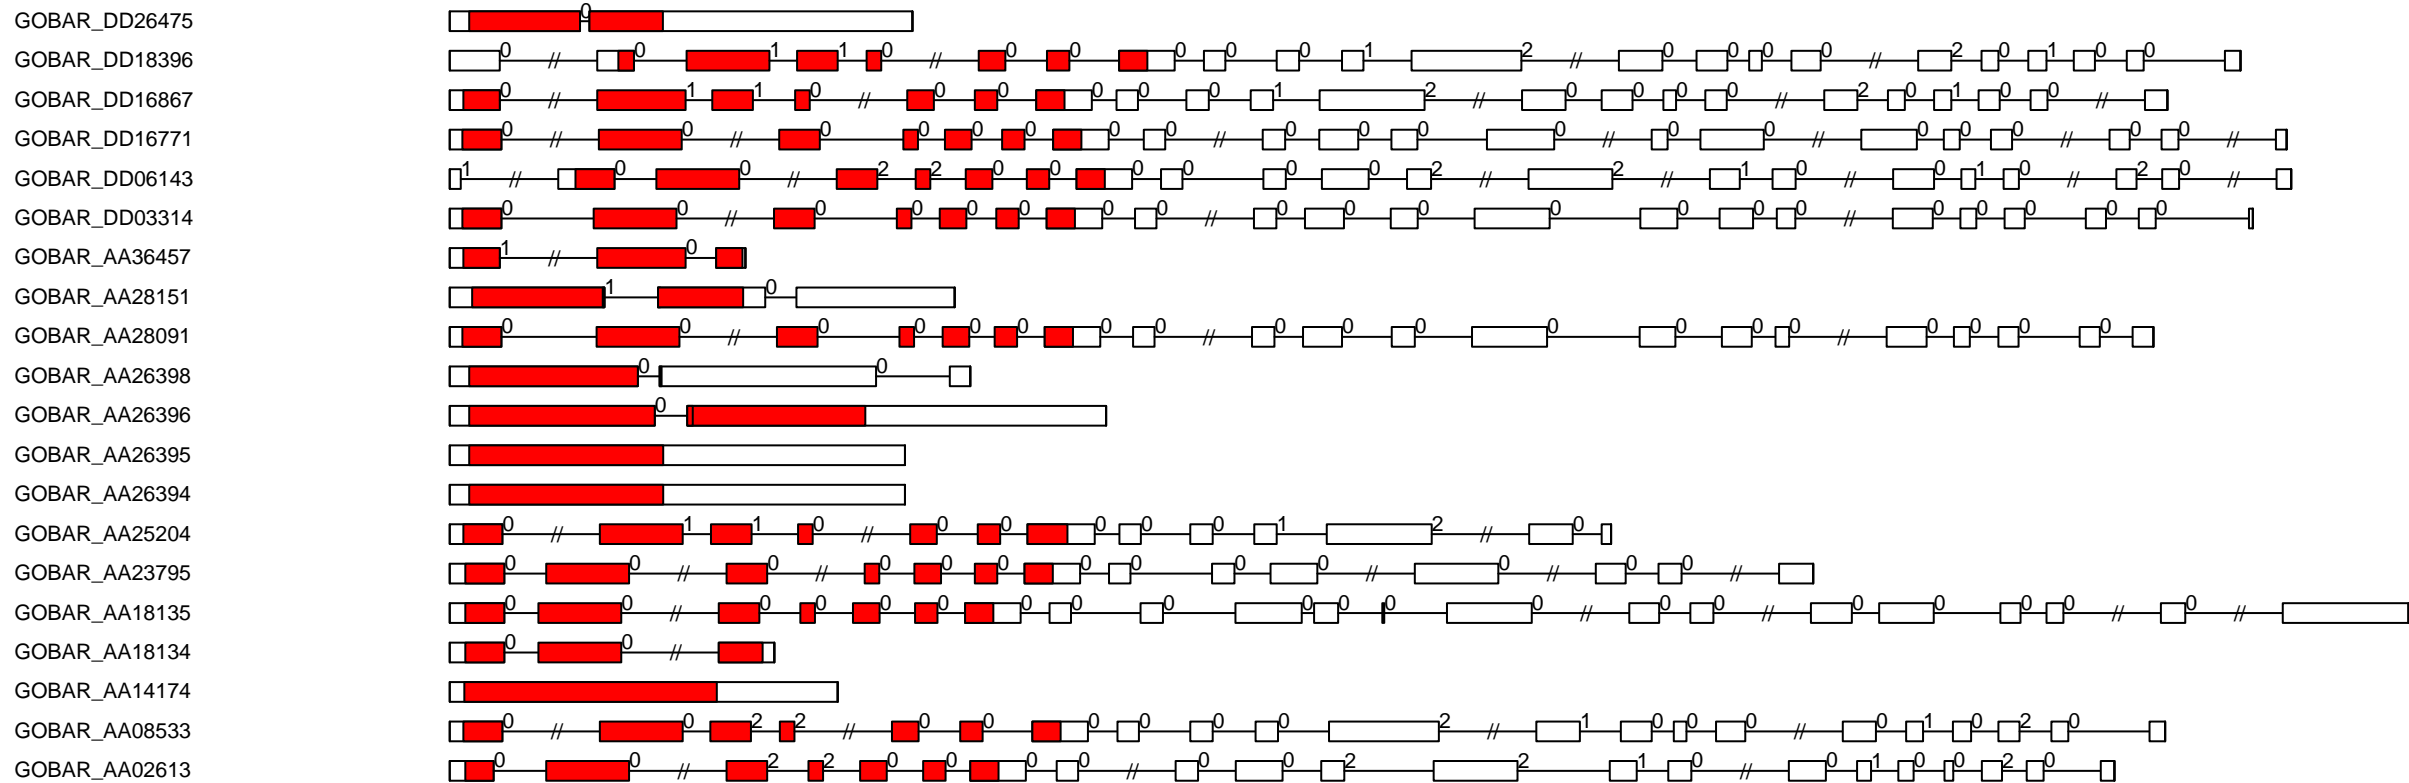

# G.ba STE\_STE20-Fray exon-intron and domain diagram (part 2)

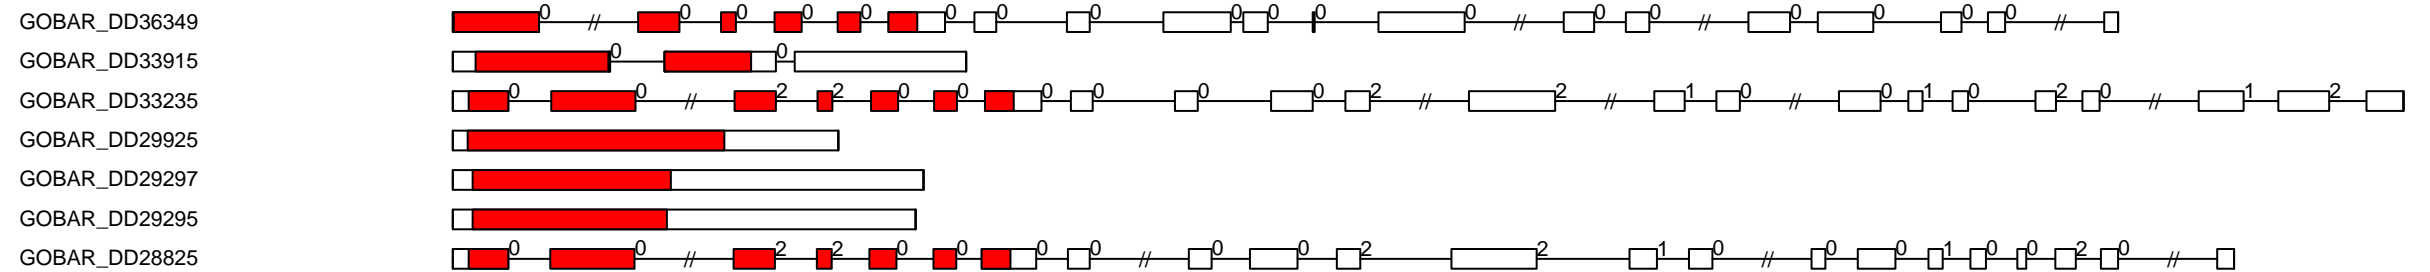

0

2000

4000

6000

# G.ba STE\_STE20-PI exon-intron and domain diagram (all)

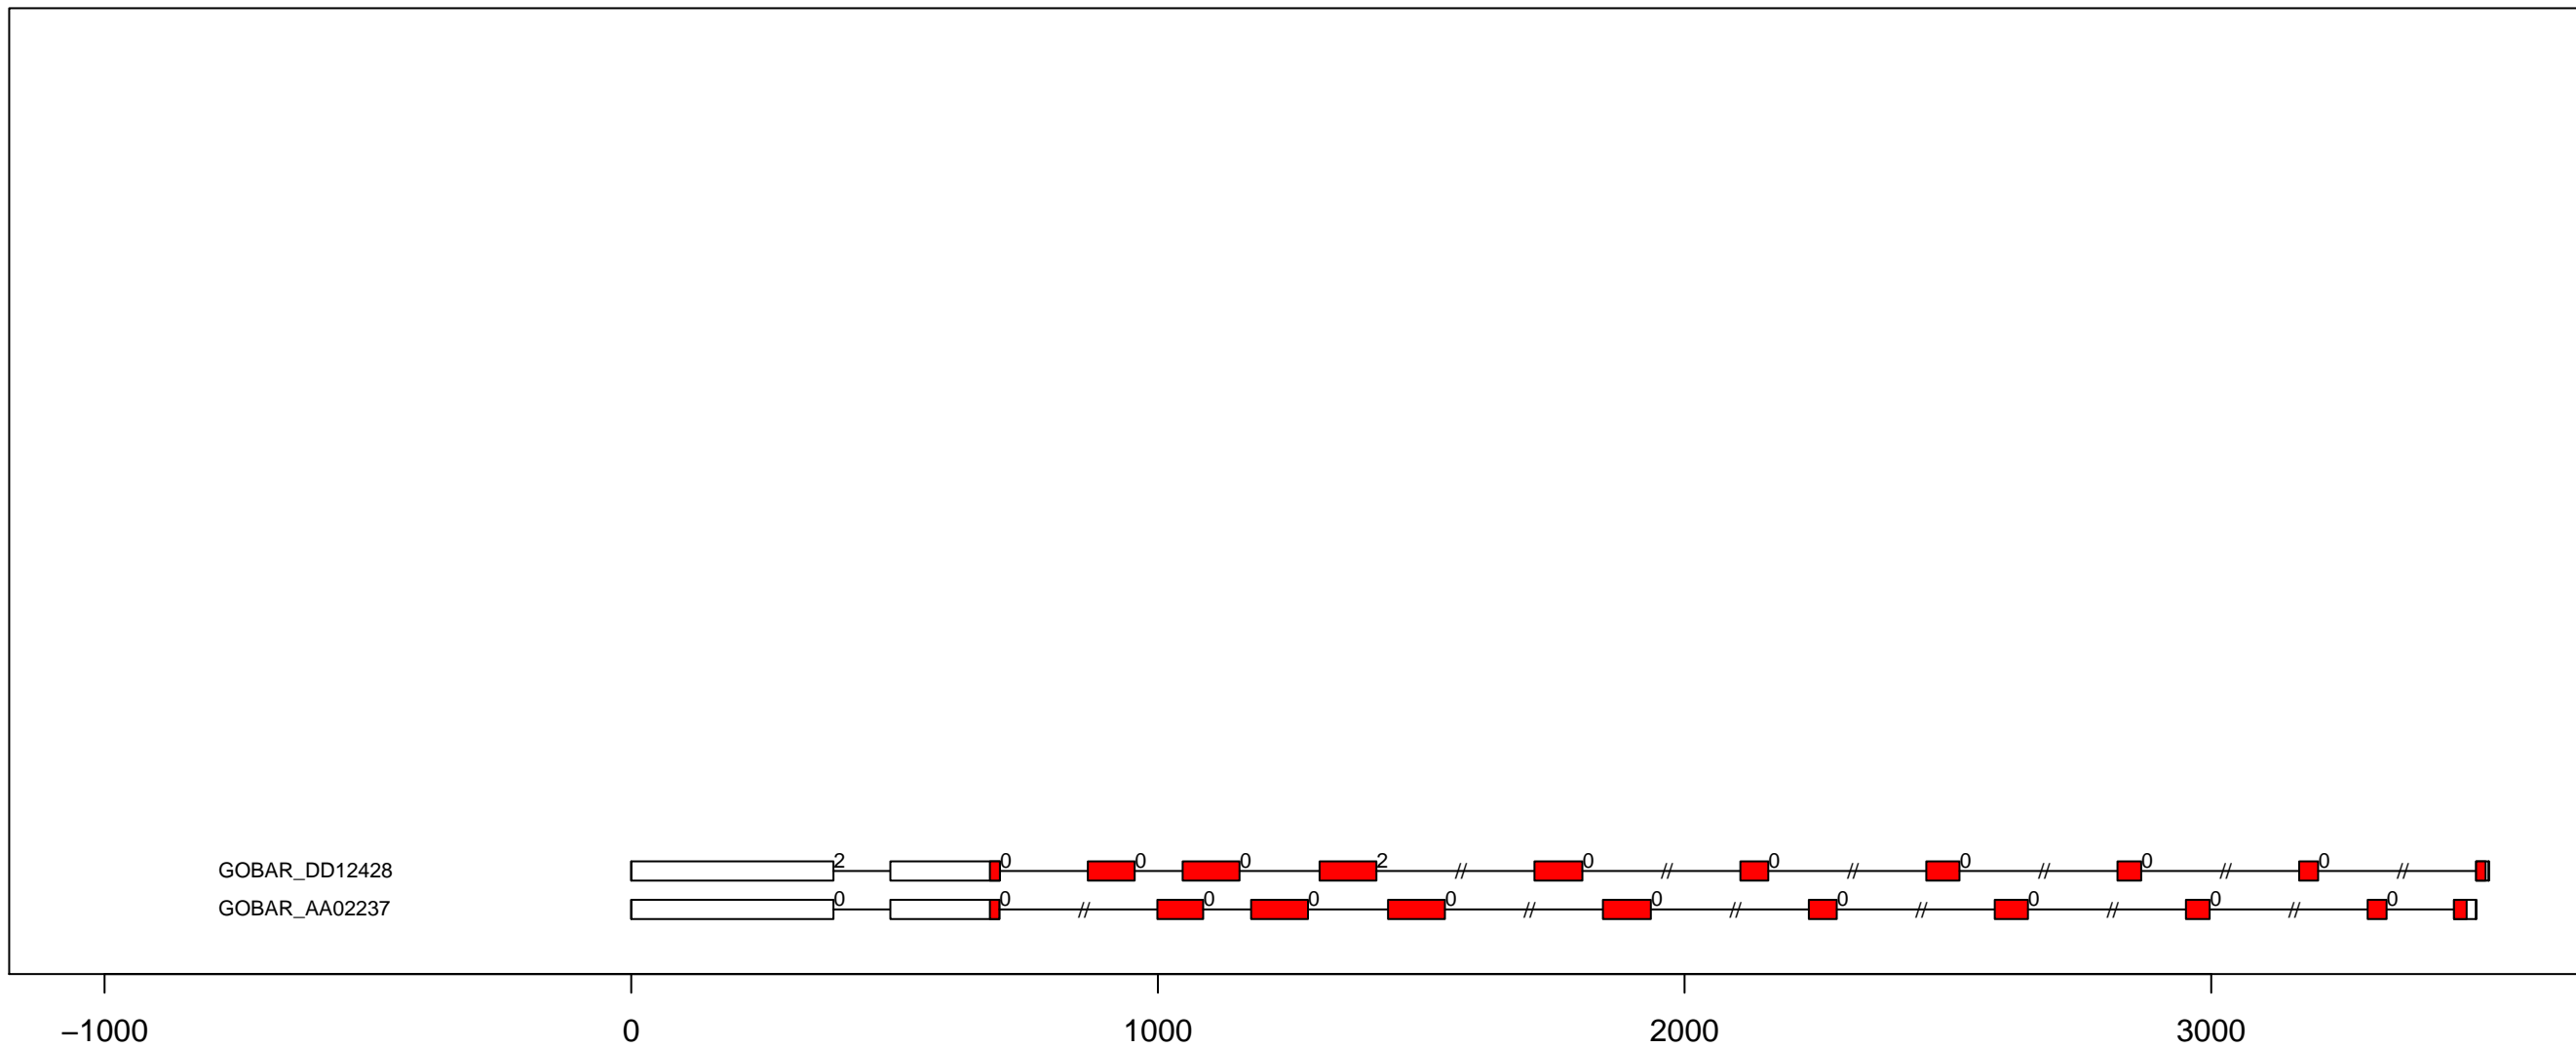



# G.ba STE\_STE20-YSK exon-intron and domain diagram (all)

GOBAR\_DD28897  
GOBAR\_DD19995  
GOBAR\_AA32147

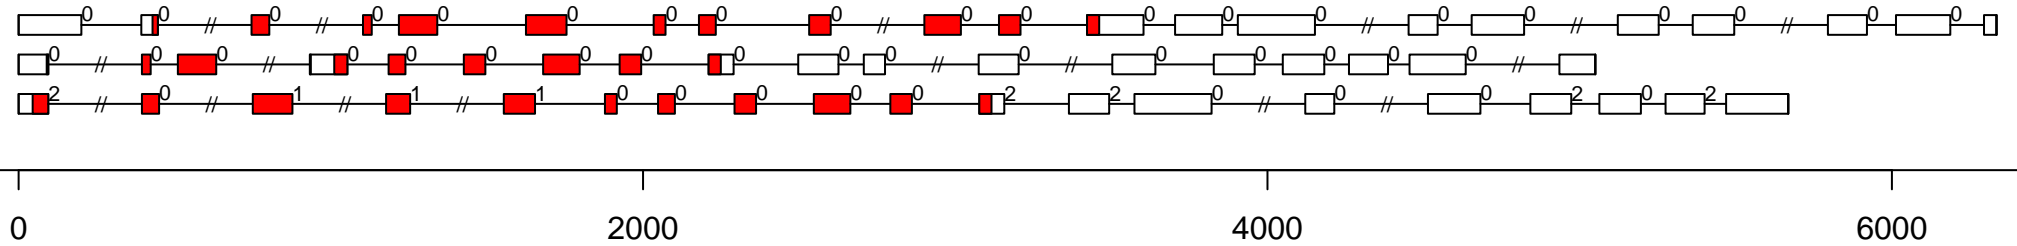

### G.ba STE\_STE7 exon-intron and domain diagram (part 1)

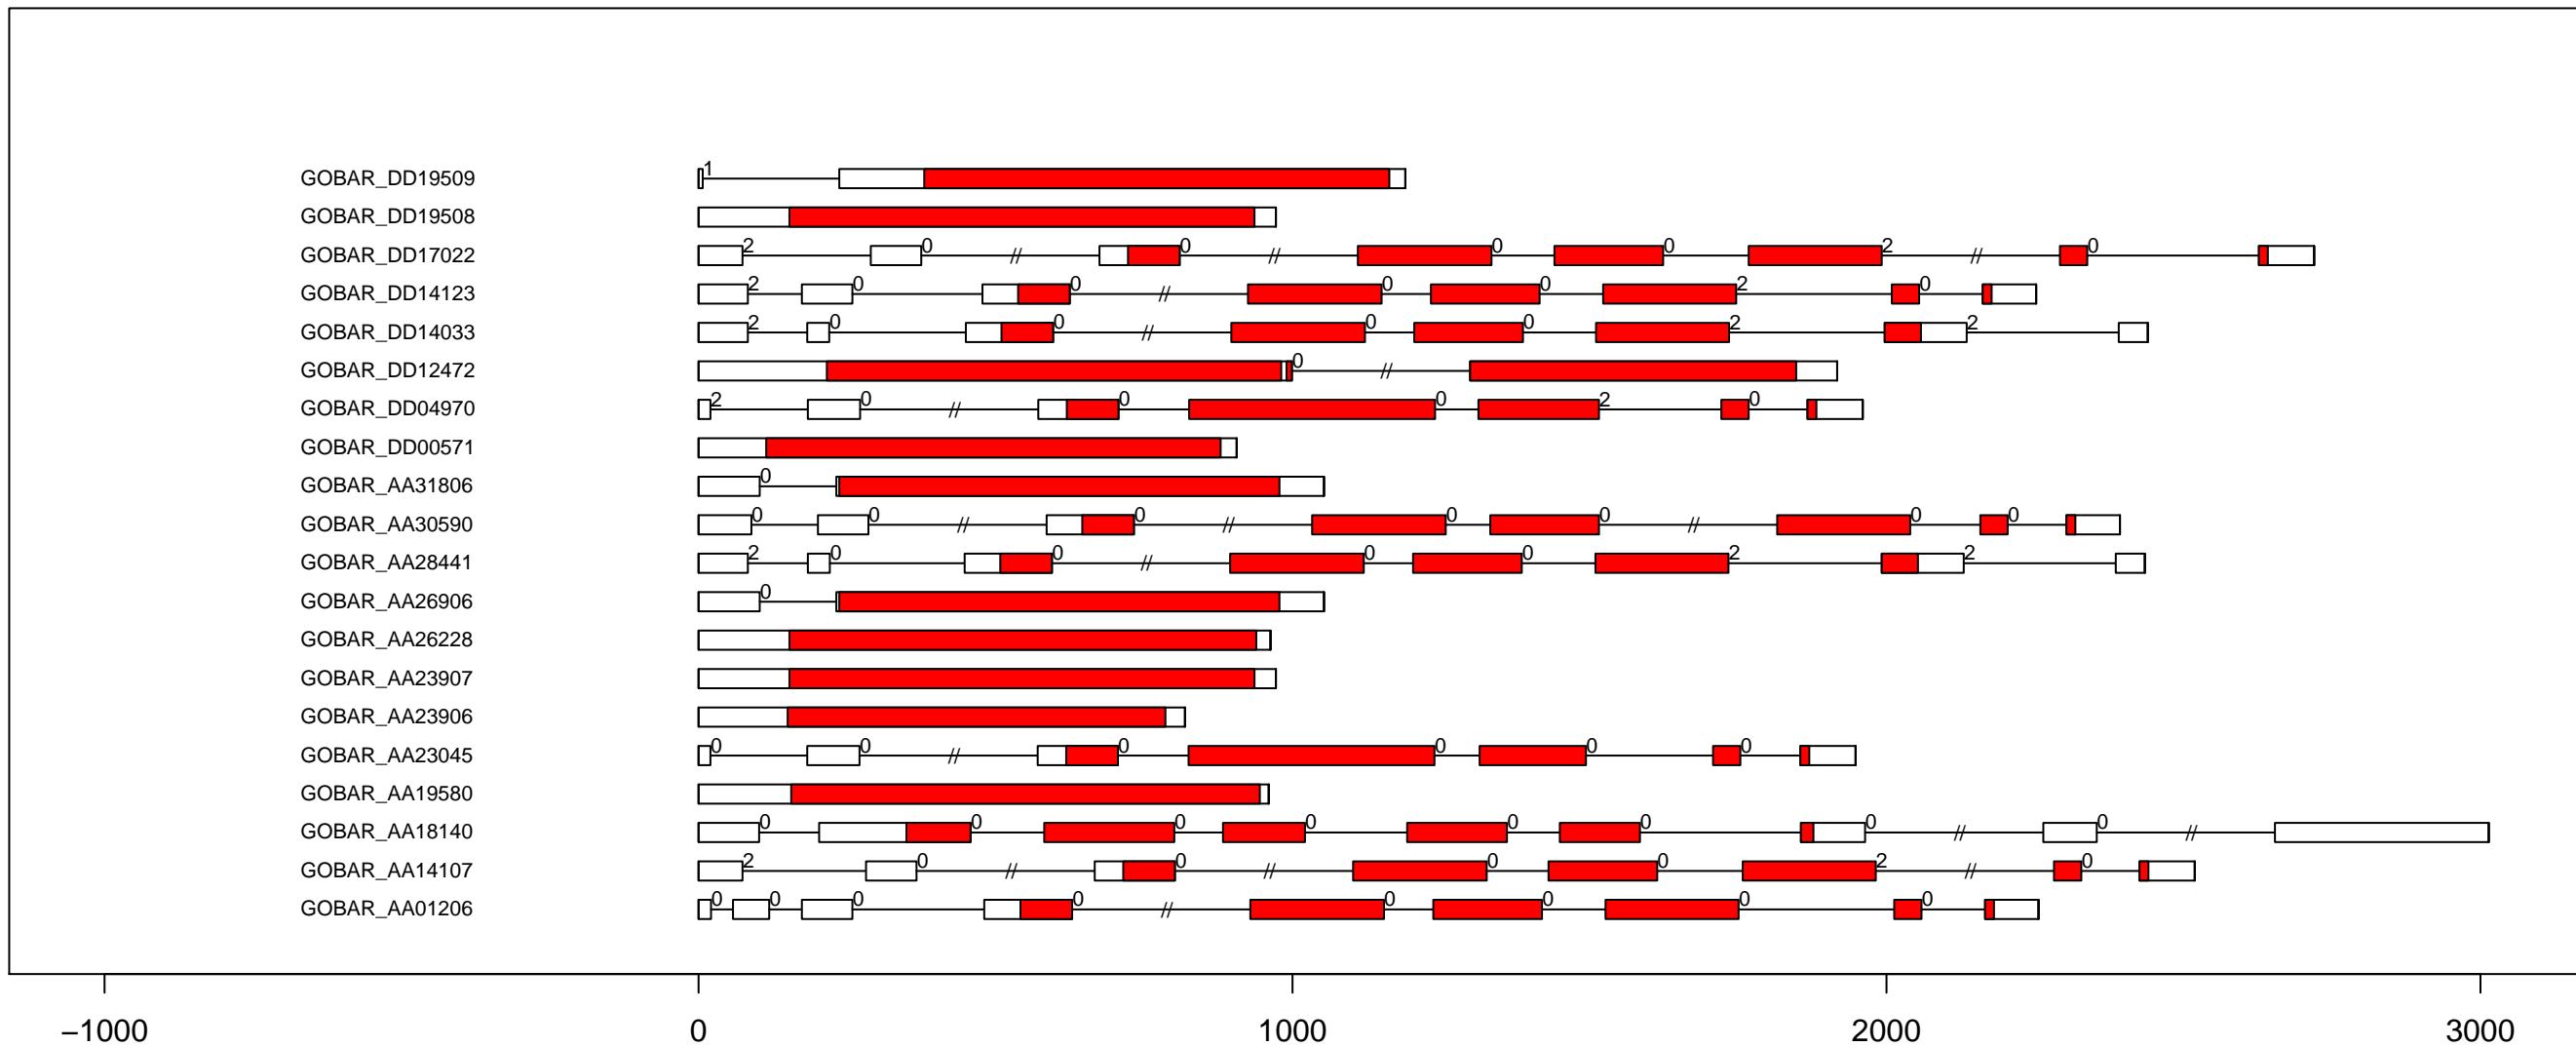

# G.ba STE\_STE7 exon-intron and domain diagram (part 2)

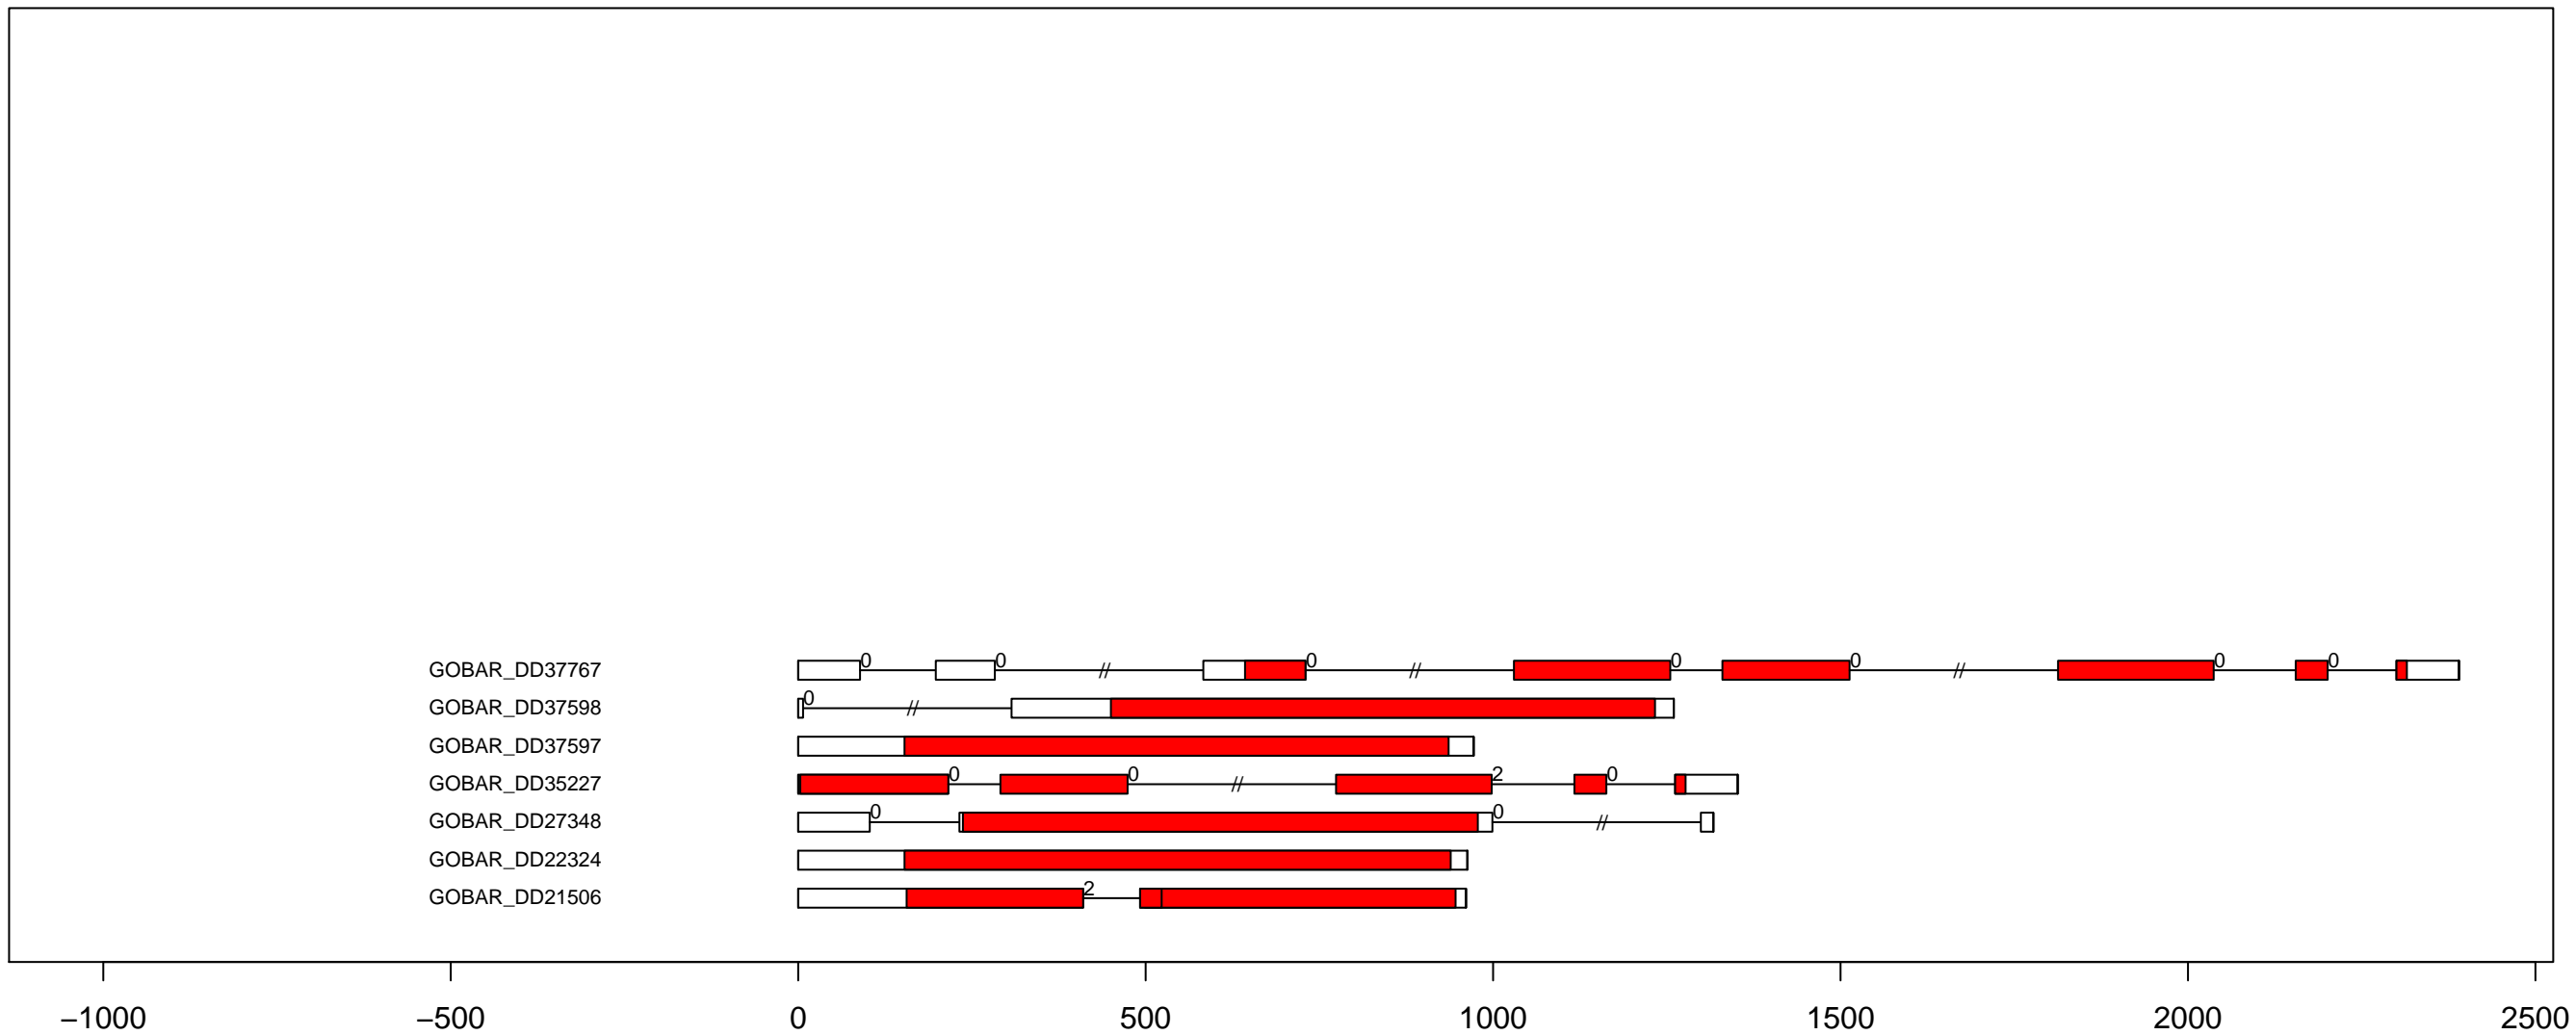

# G.ba STE\_STE-PI exon-intron and domain diagram (all)

GOBAR\_DD24292

GOBAR\_DD05005

GOBAR\_AA34700

GOBAR\_AA18638

GOBAR\_AA05264

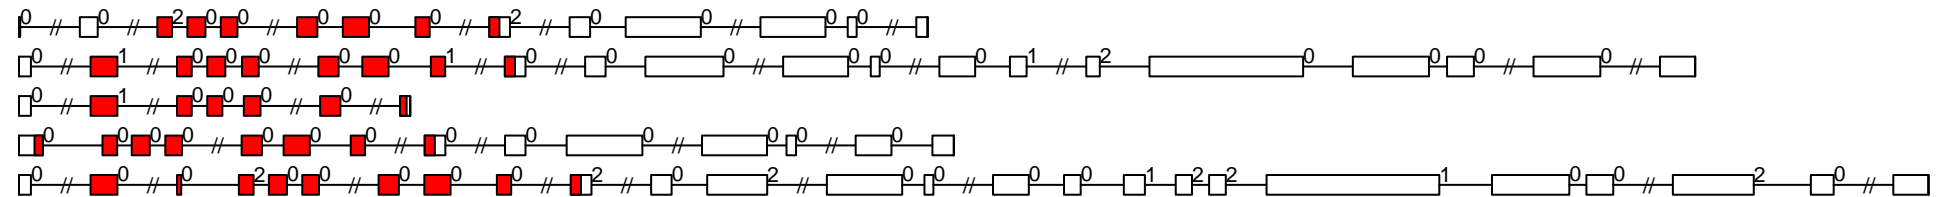

-2000

0

2000

4000

6000

8000

10000

# G.ba TKL\_CTRL1-DRK-1 exon-intron and domain diagram (all)

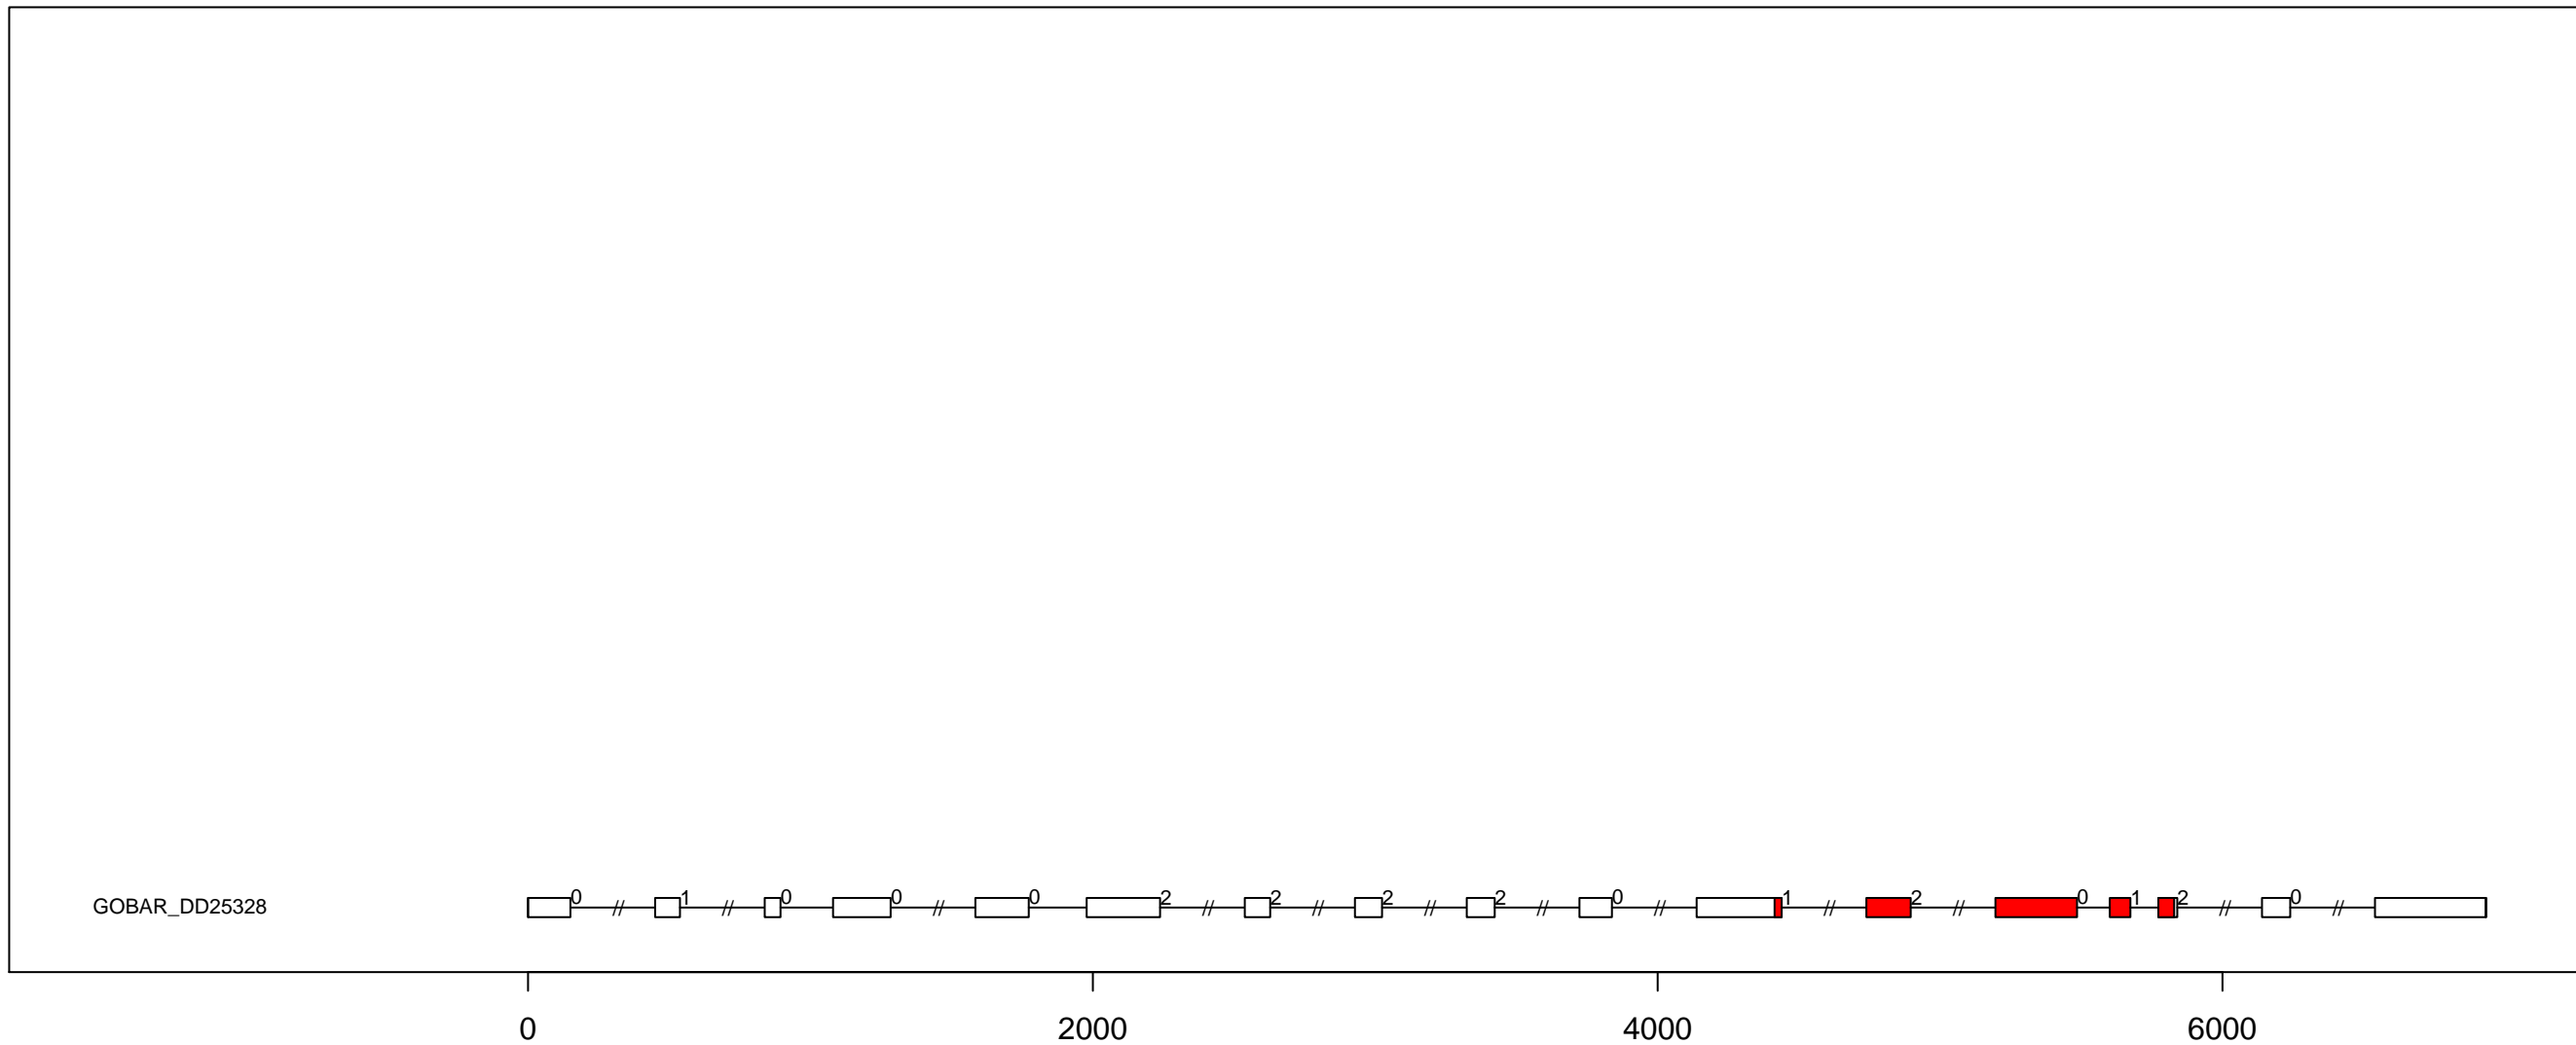

# G.ba TKL\_CTR1-DRK-2 exon-intron and domain diagram (part 1)

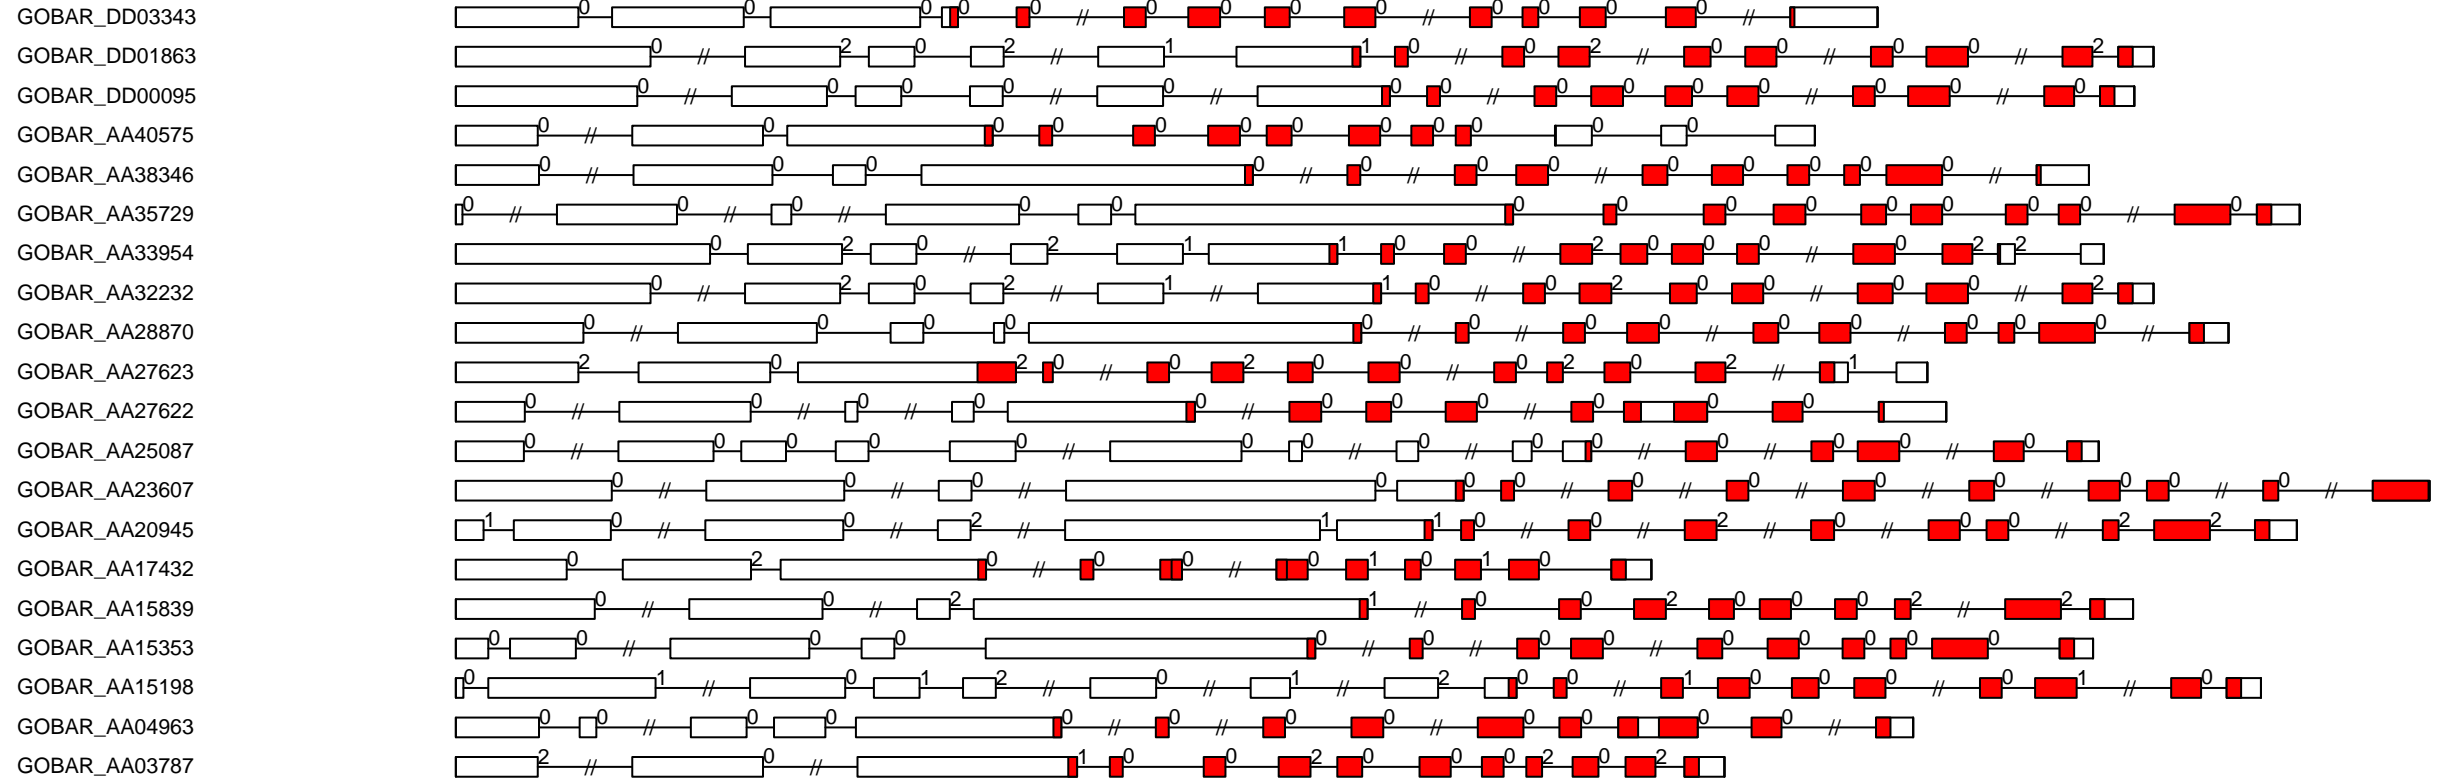

# G.ba TKL\_CTR1-DRK-2 exon-intron and domain diagram (part 2)

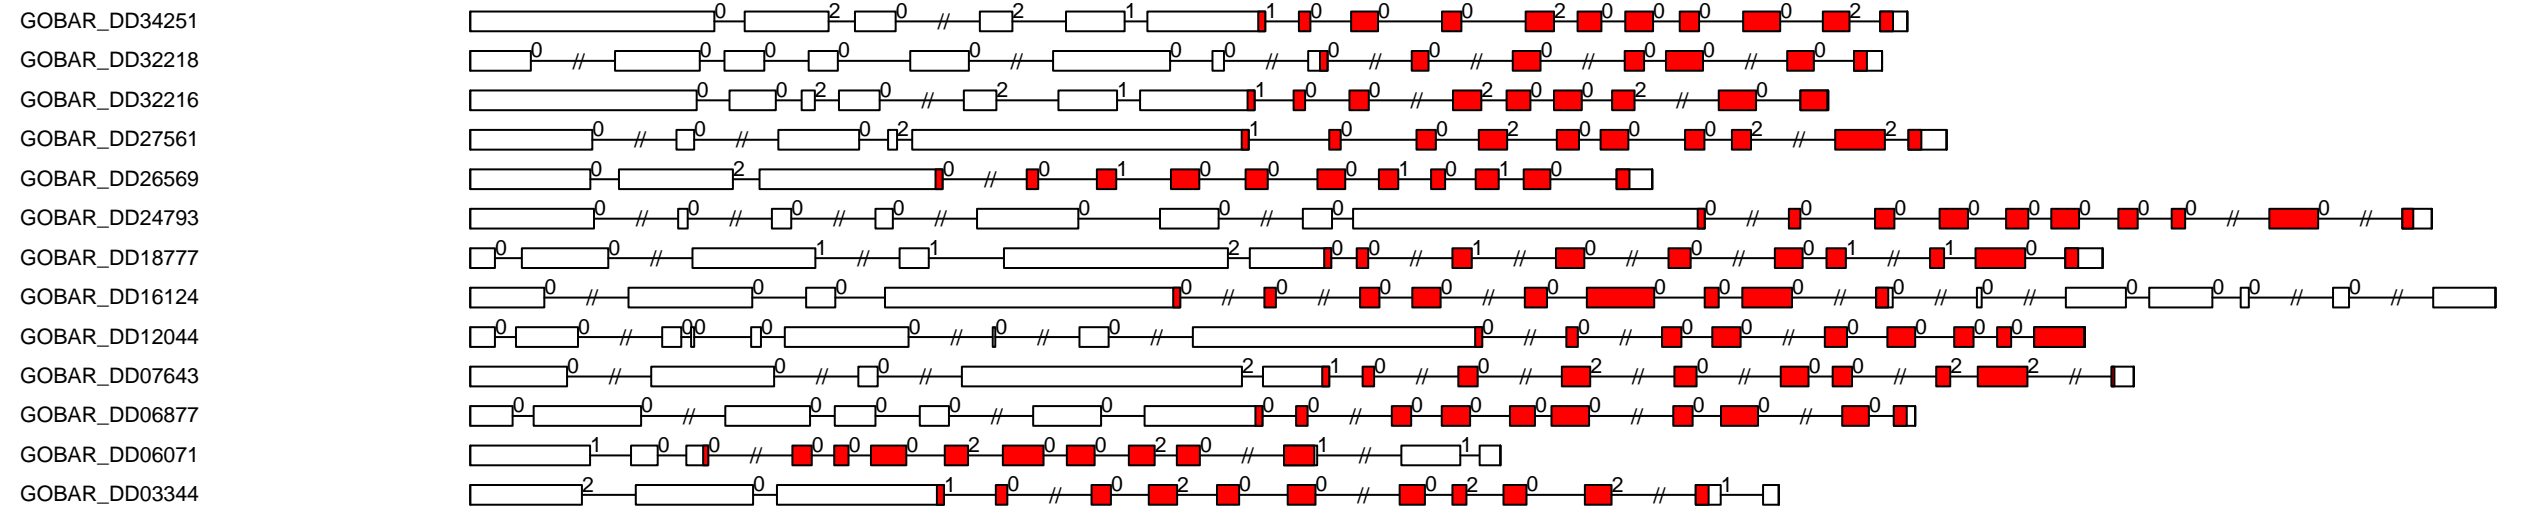

# G.ba TKL\_Gdt exon-intron and domain diagram (all)

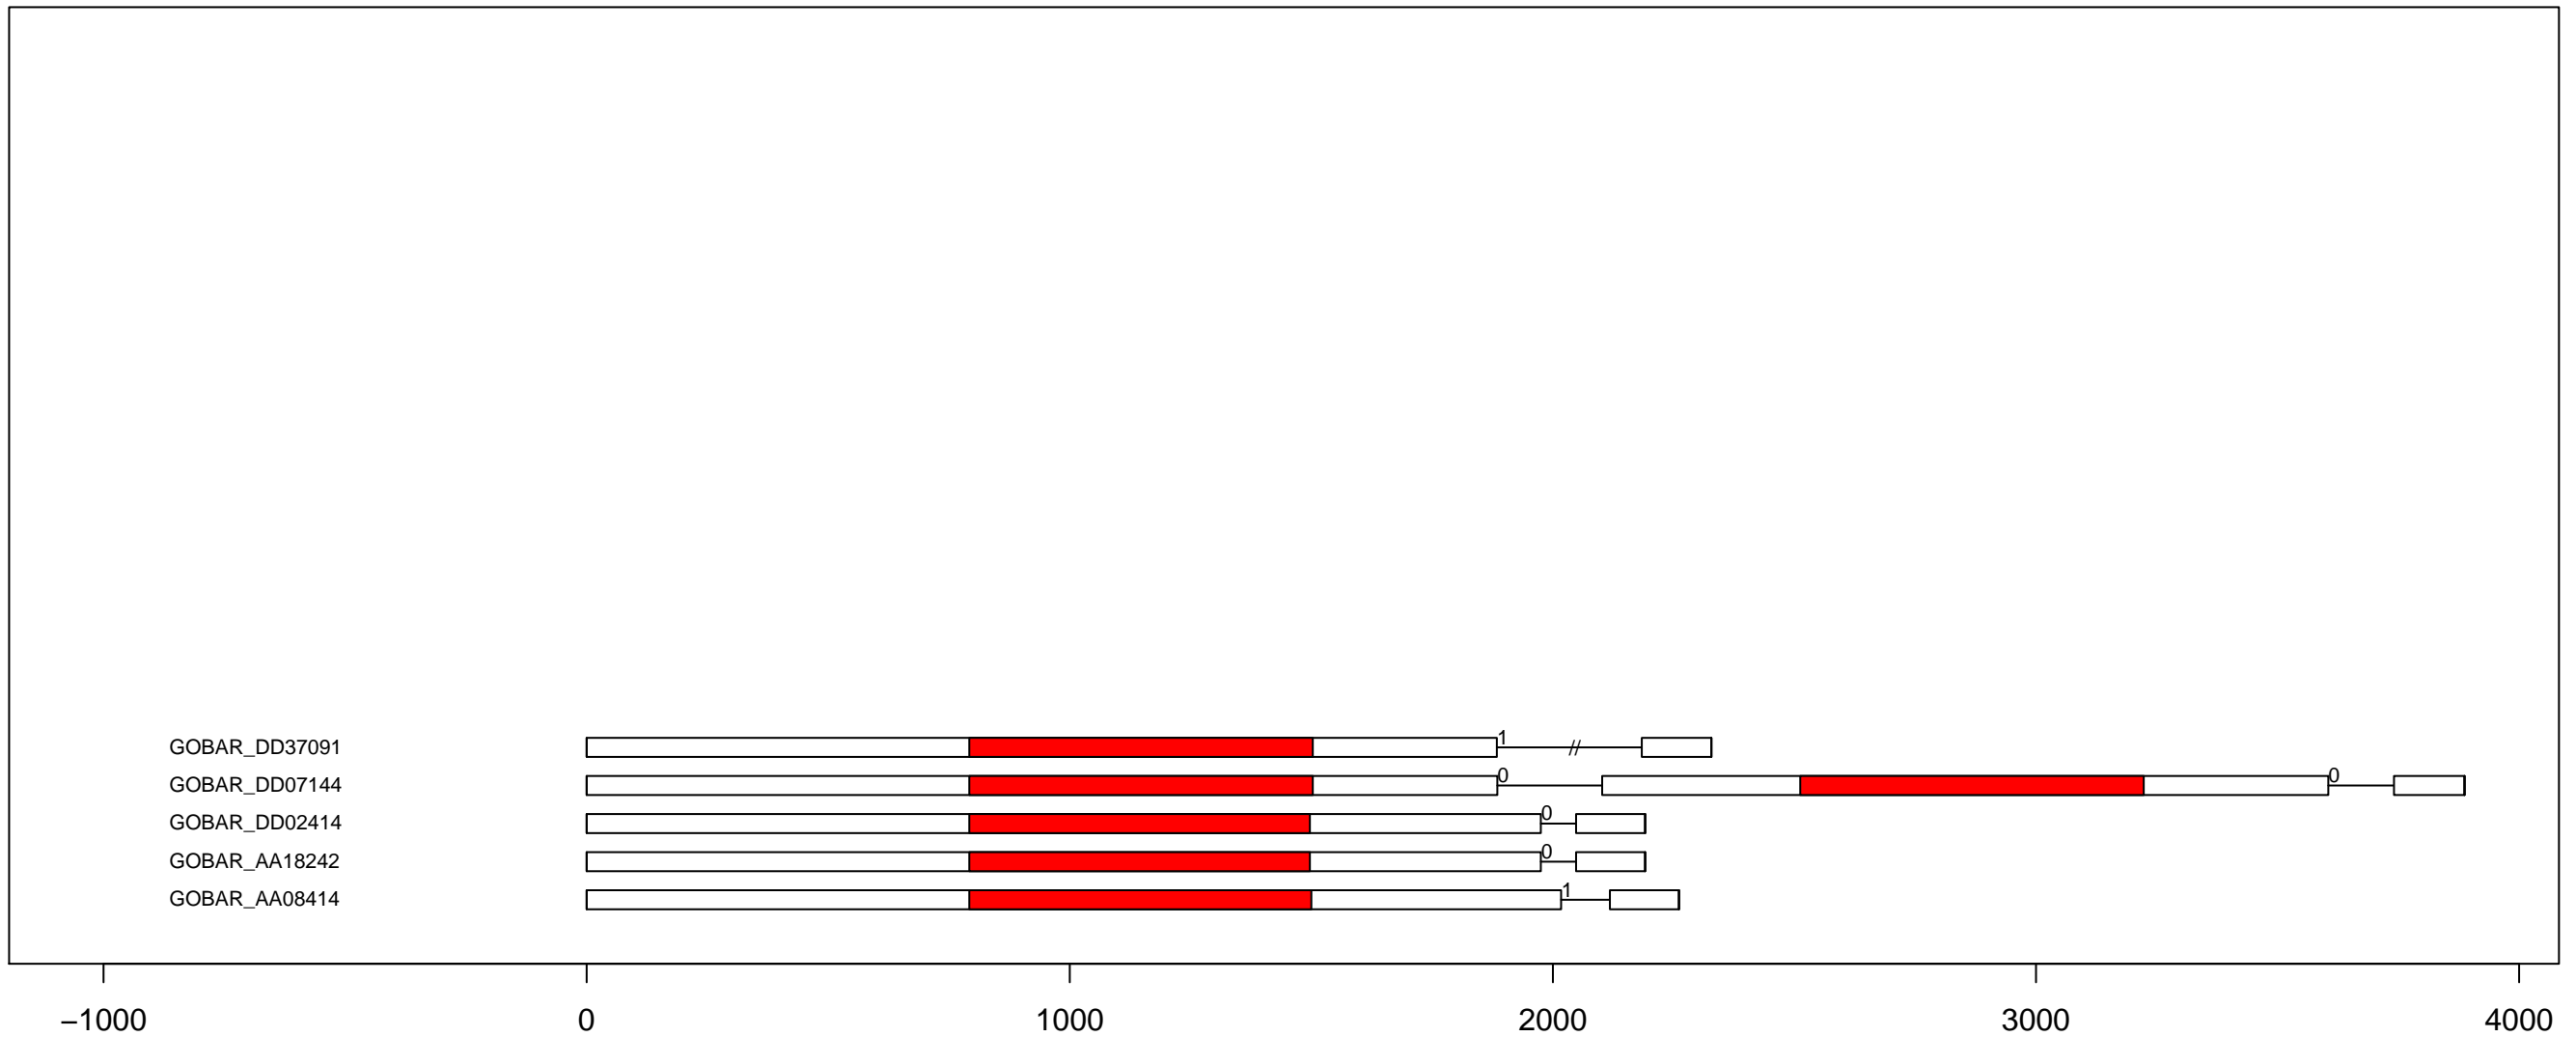



# G.ba TKL-PI-1 exon-intron and domain diagram (all)

GOBAR\_DD23840  
GOBAR\_DD22139  
GOBAR\_DD11709  
GOBAR\_DD01308  
GOBAR\_AA38342  
GOBAR\_AA31170  
GOBAR\_AA19497

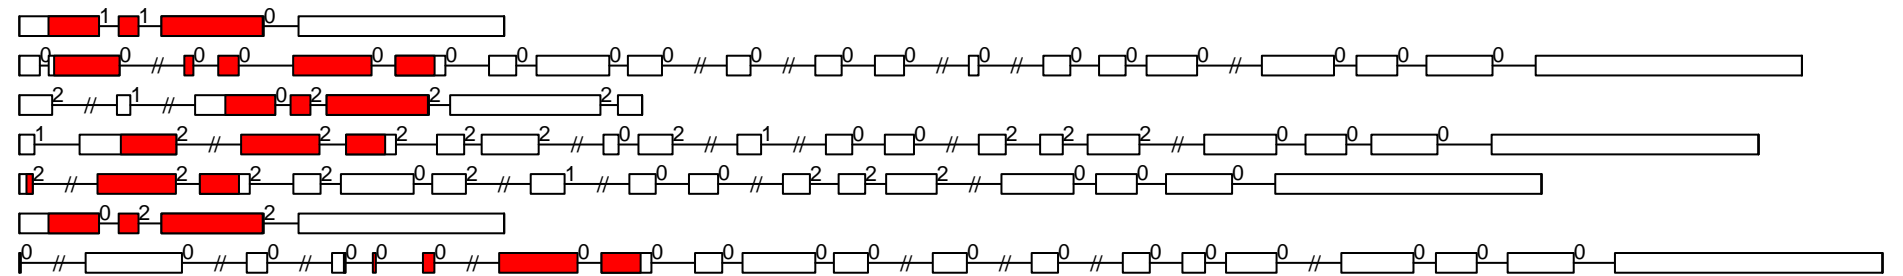

-2000

0

2000

4000

6000

8000

# G.ba TKL-PI-2 exon-intron and domain diagram (all)

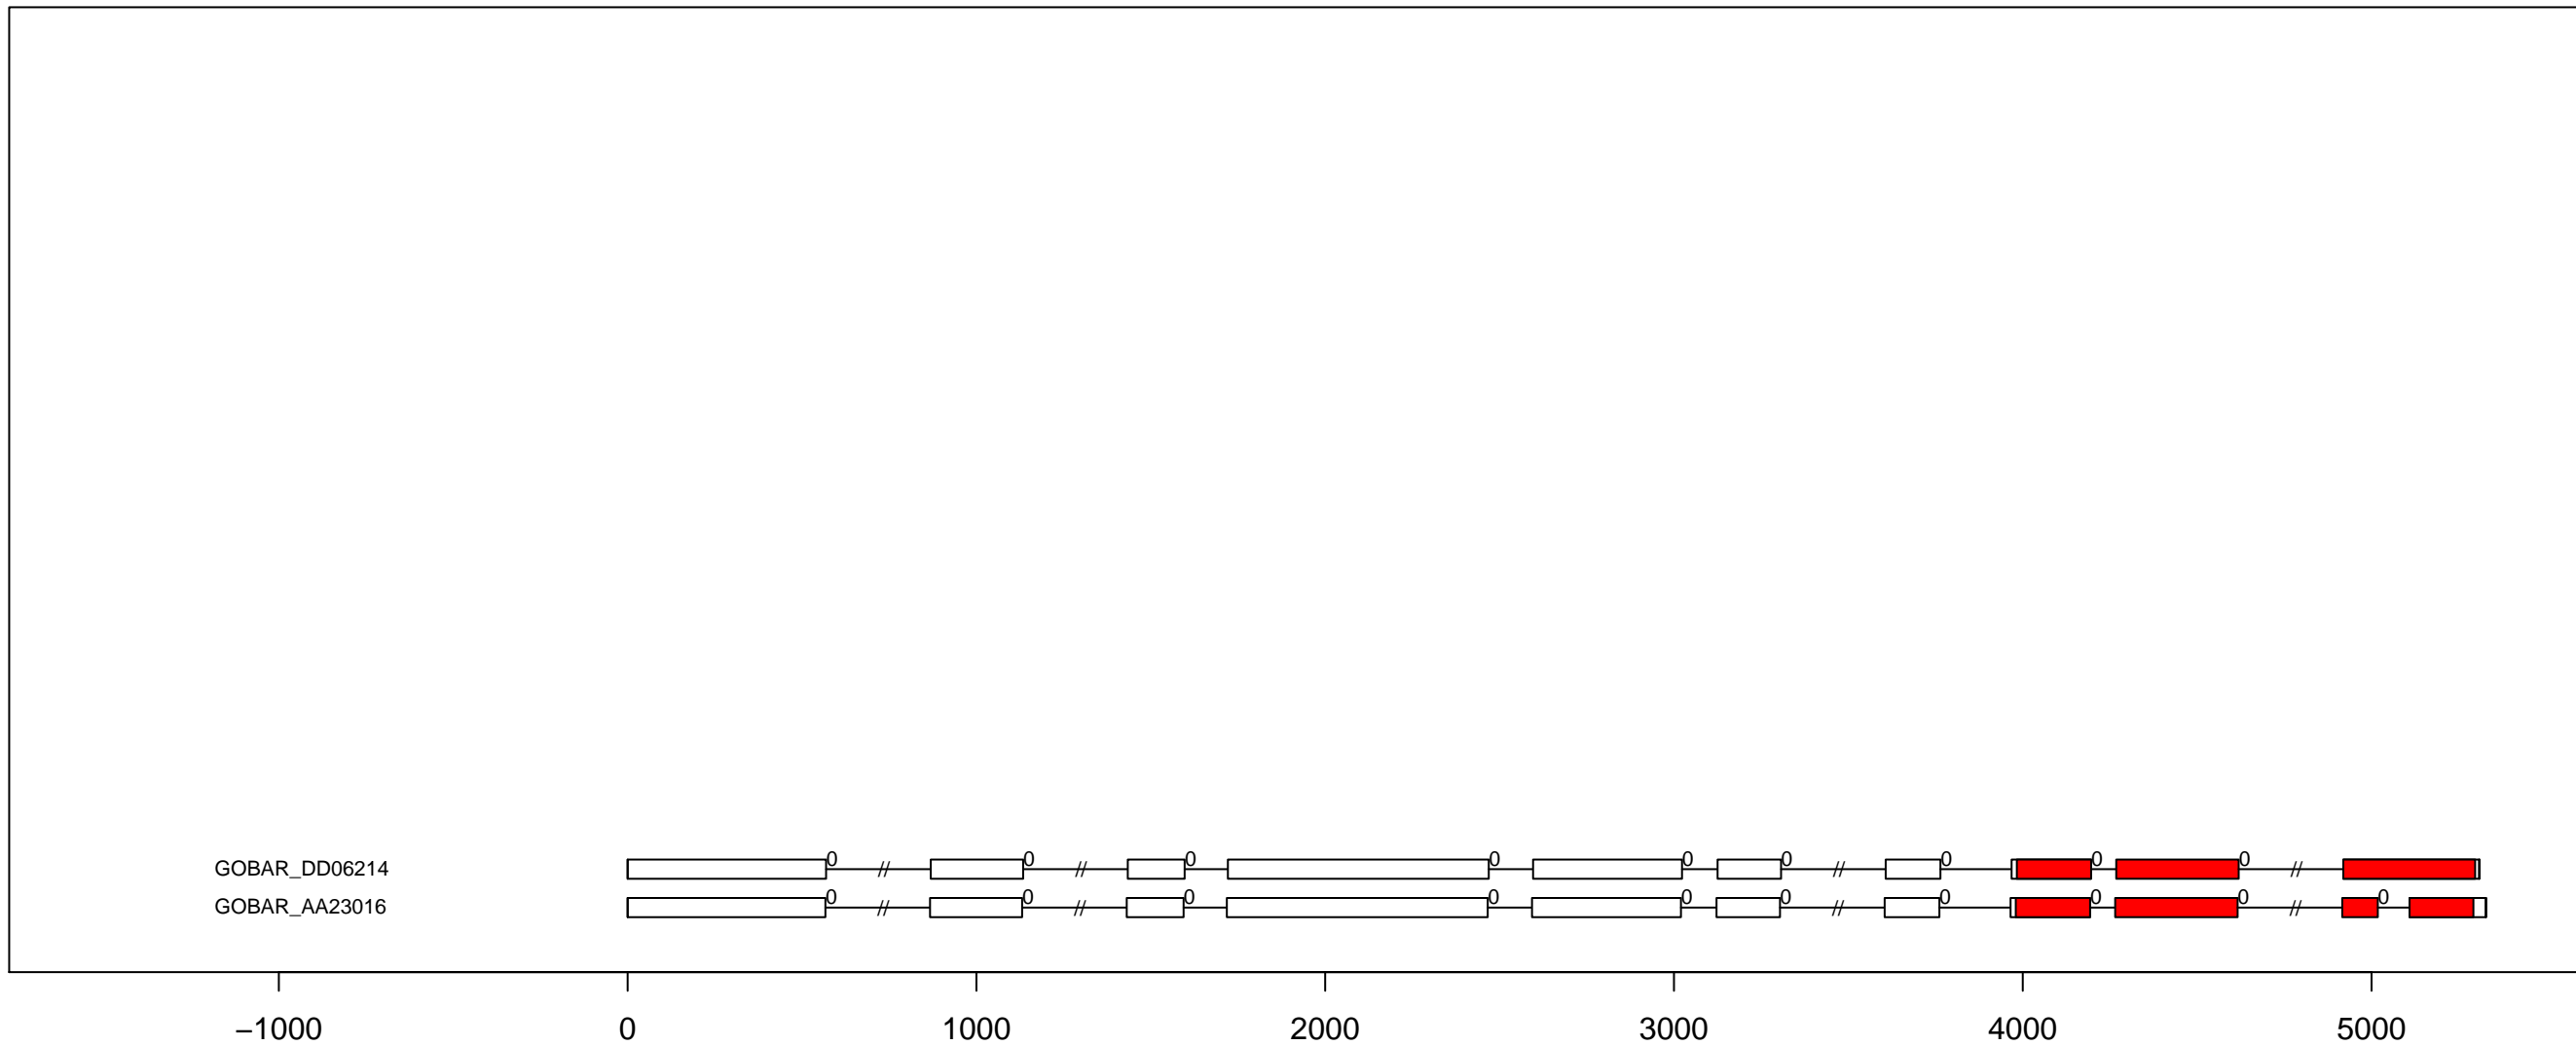

# G.ba TKL-PI-3 exon-intron and domain diagram (all)

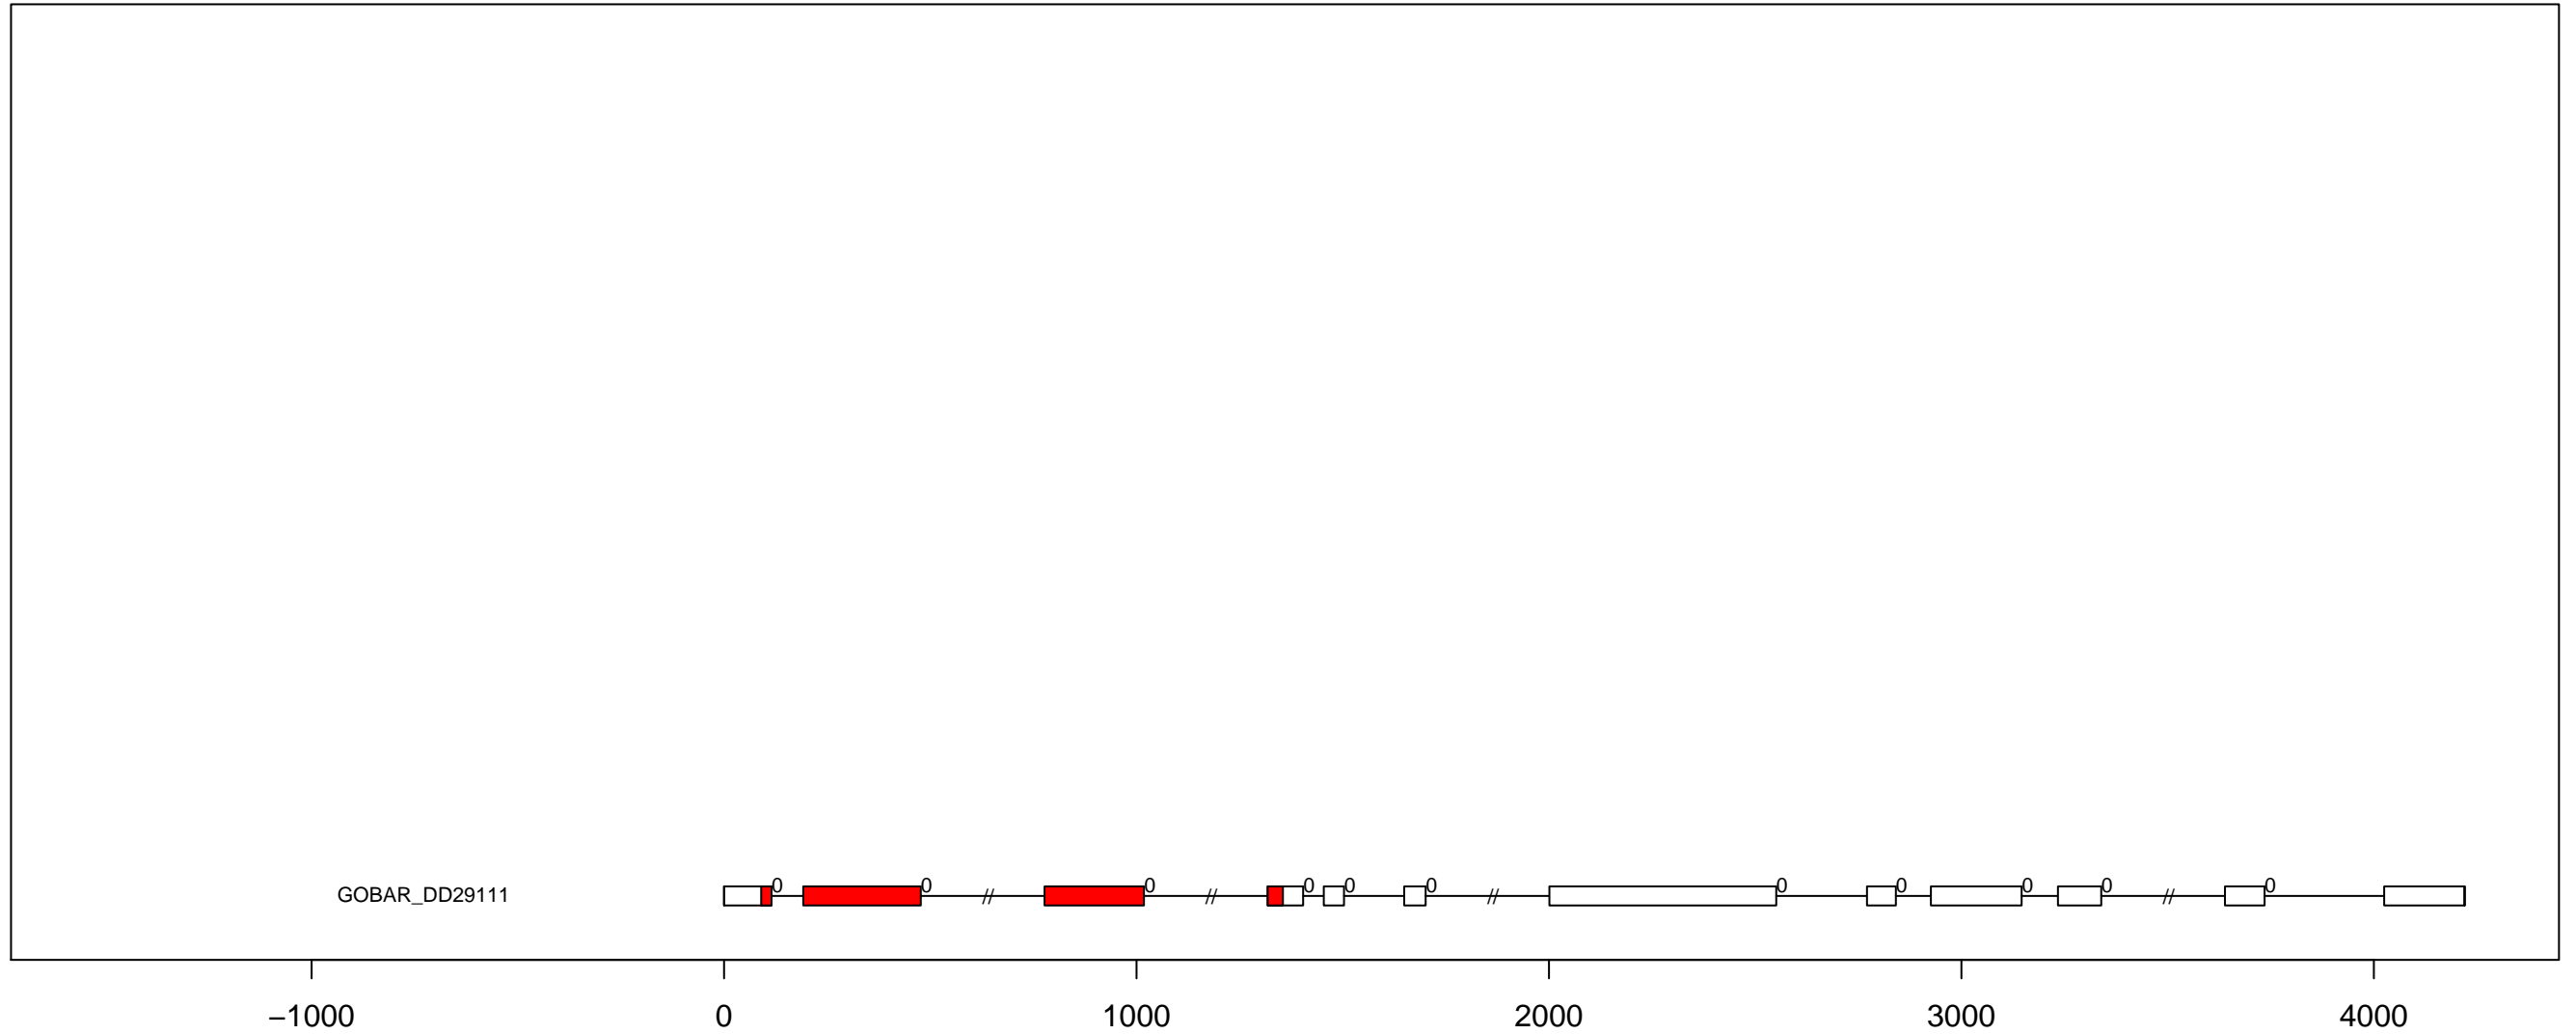

### G.ba TKL-PI-4 exon-intron and domain diagram (part 1)

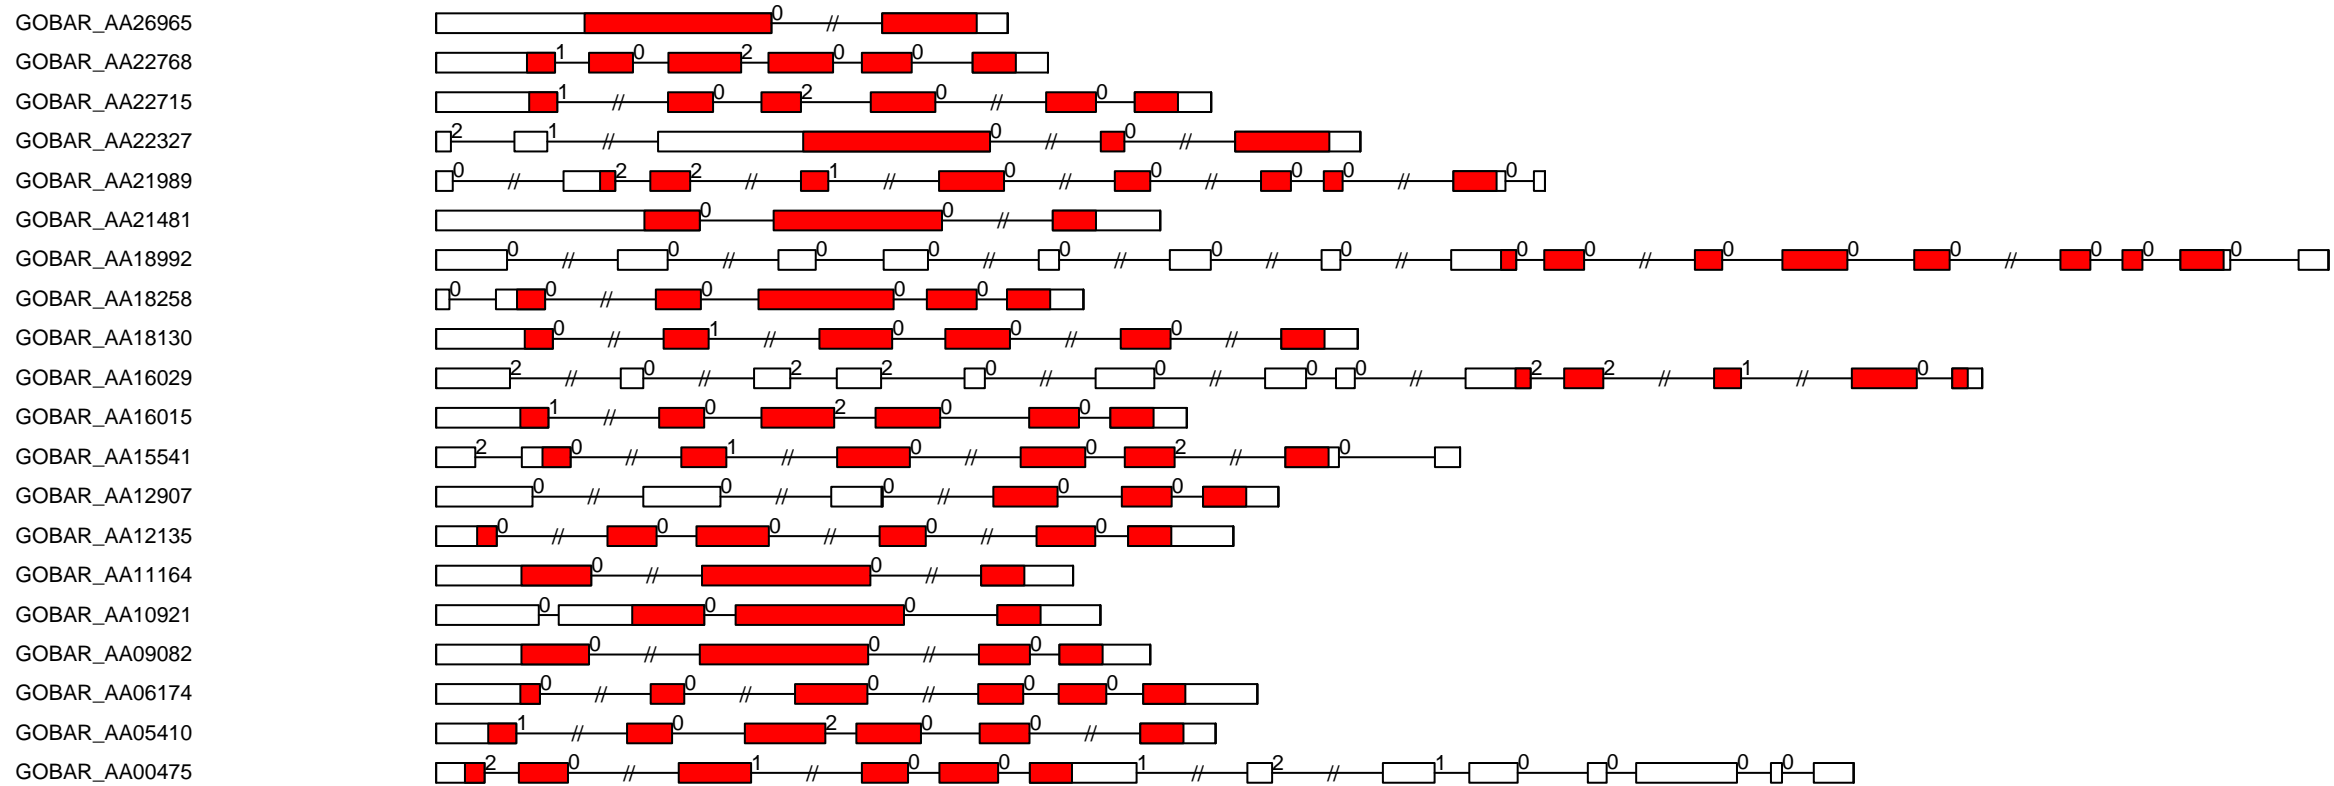

### G.ba TKL-PI-4 exon-intron and domain diagram (part 2)

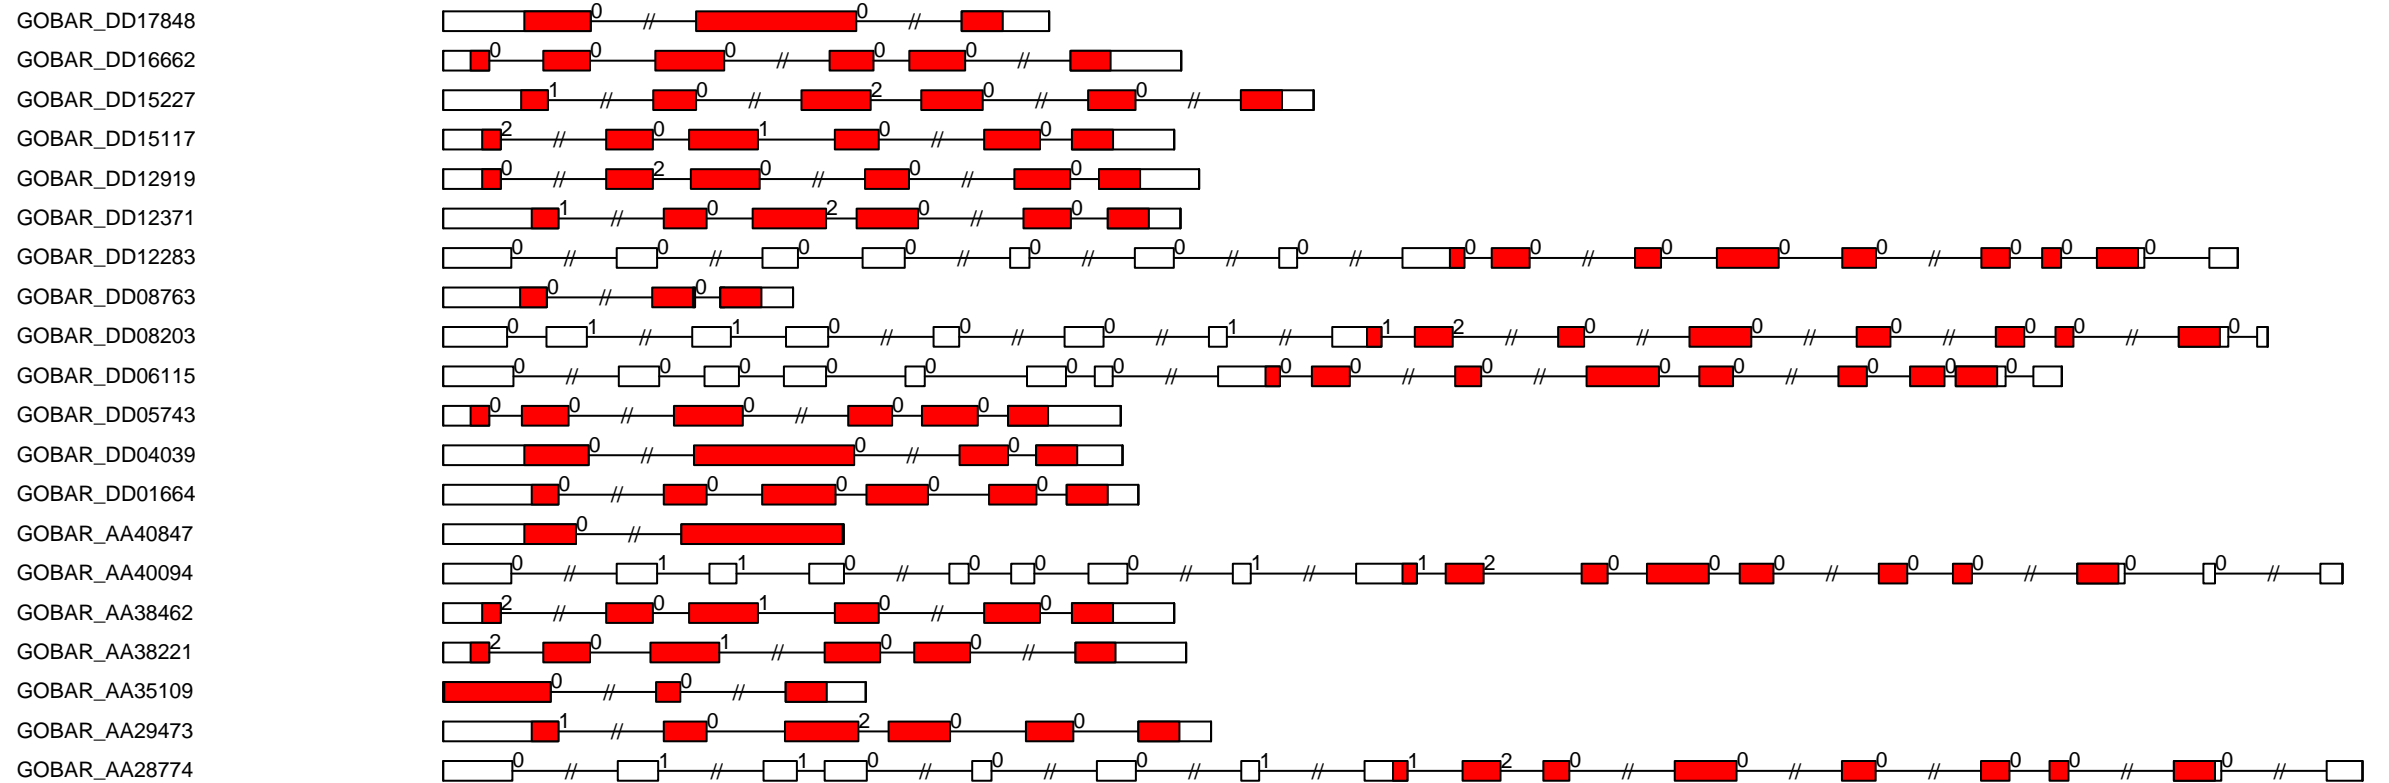

### G.ba TKL-PI-4 exon-intron and domain diagram (part 3)

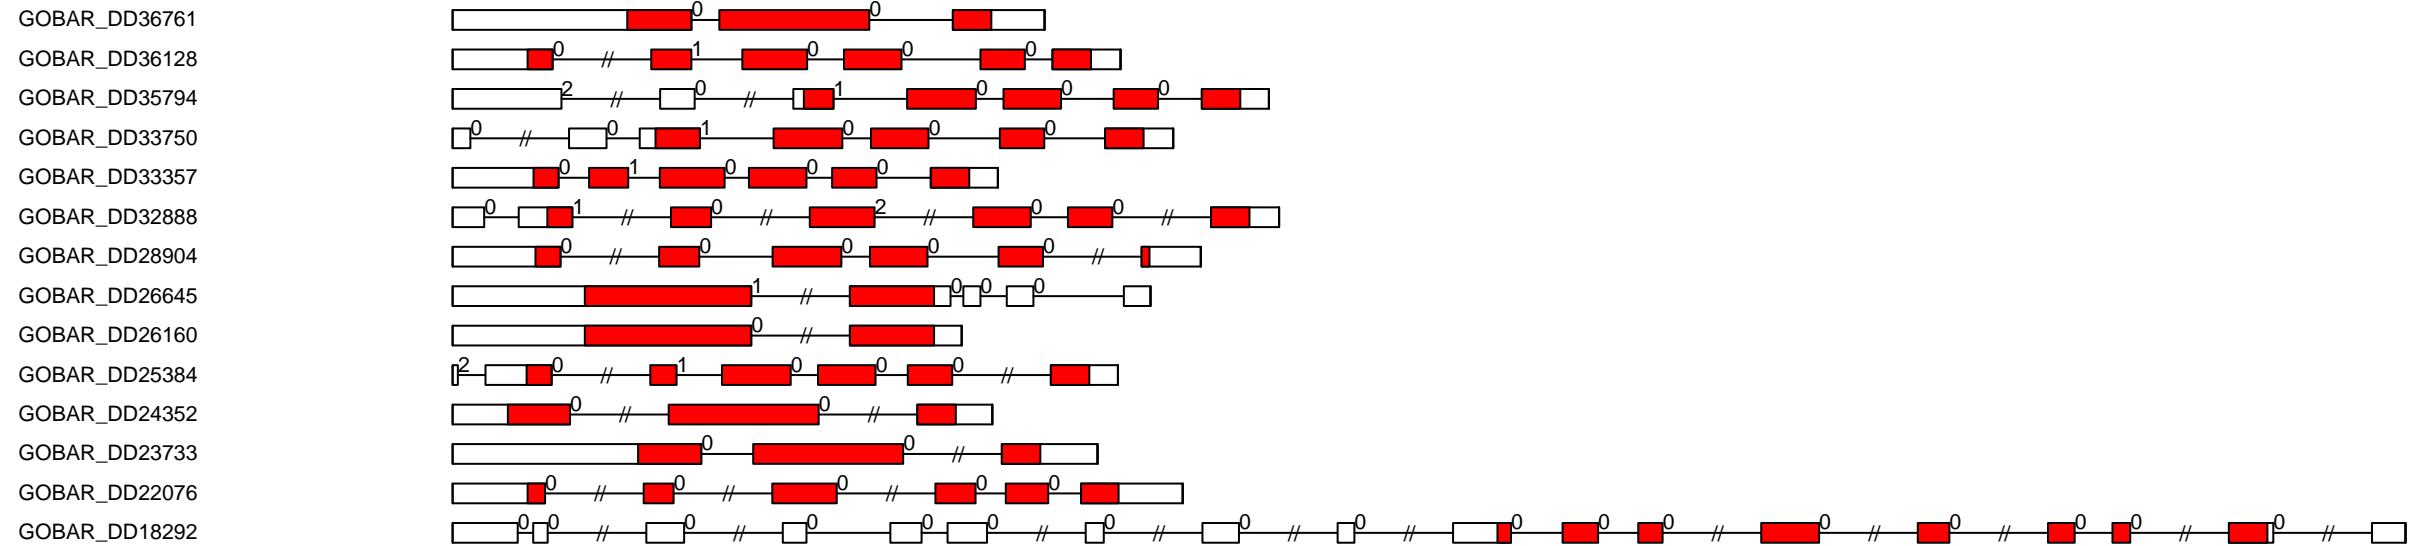

### G.ba TKL-PI-5 exon-intron and domain diagram (all)

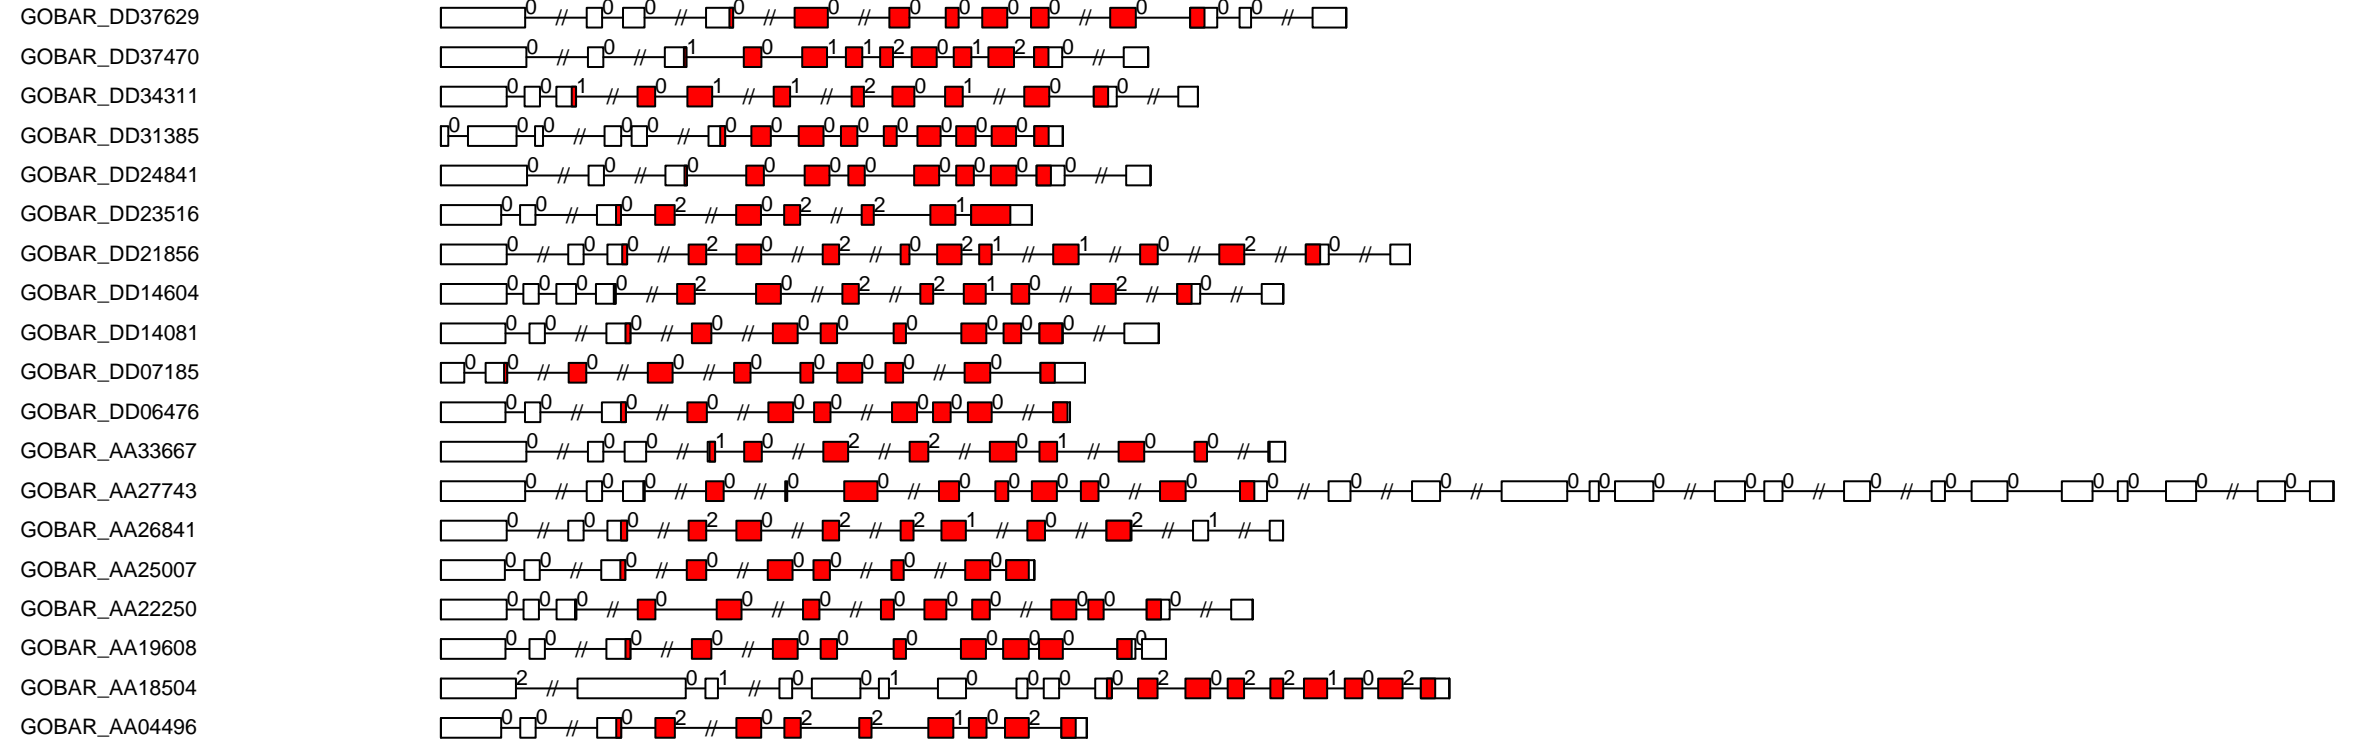

# G.ba TKL-PI-6 exon-intron and domain diagram (all)

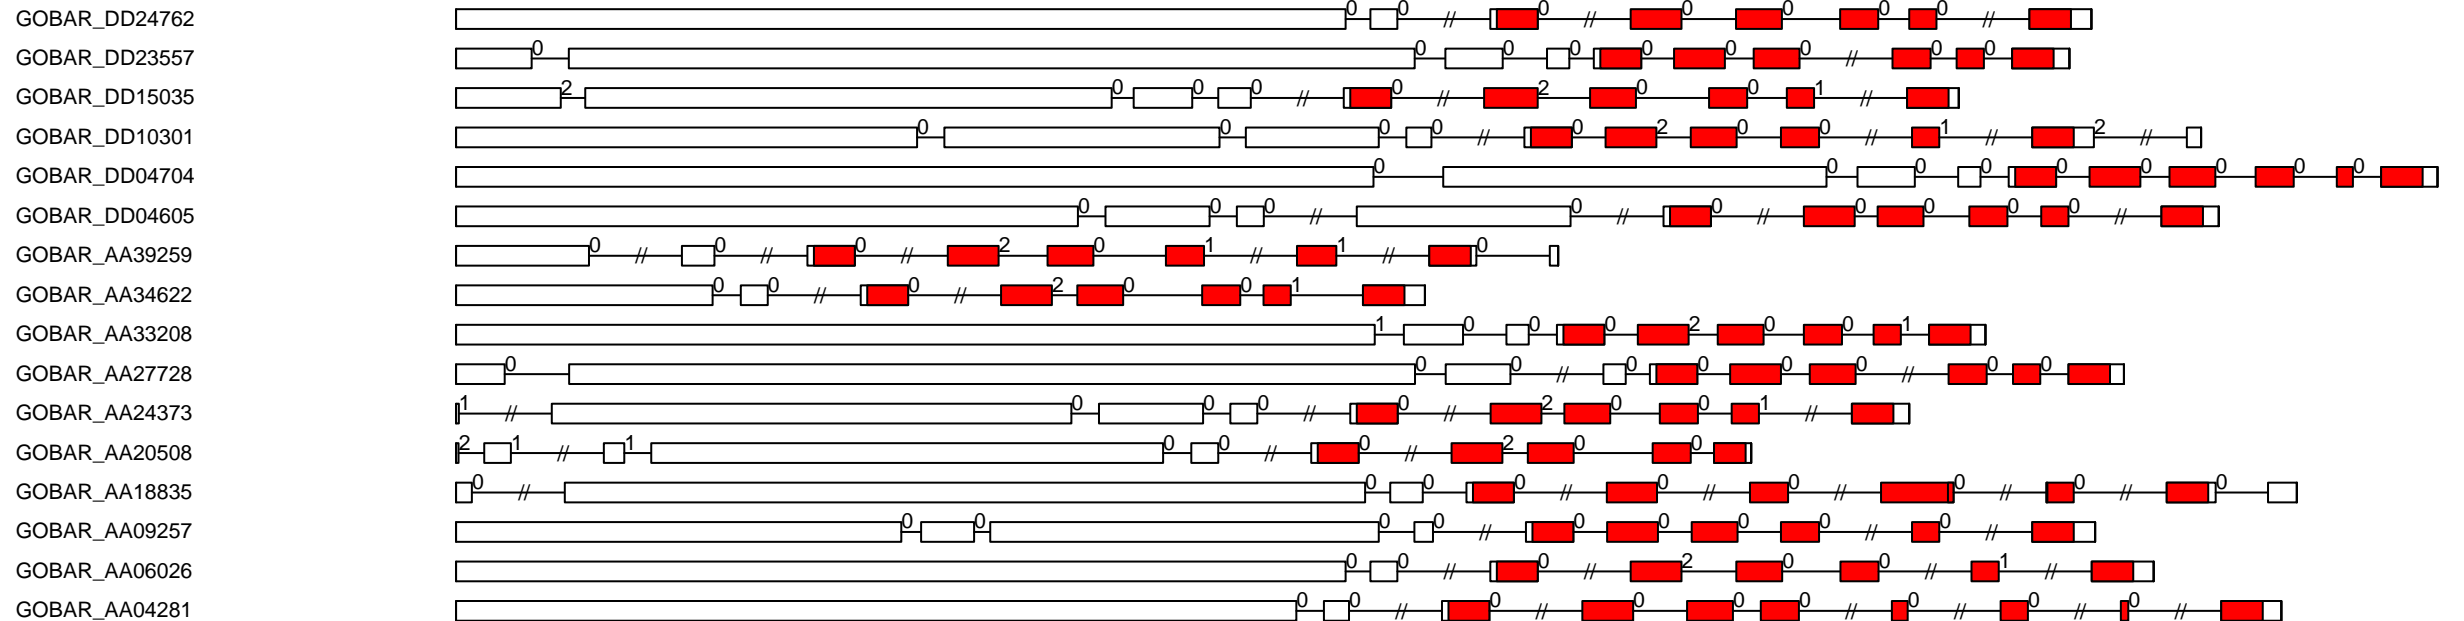



# G.ba TKL-PI-7 exon-intron and domain diagram (all)

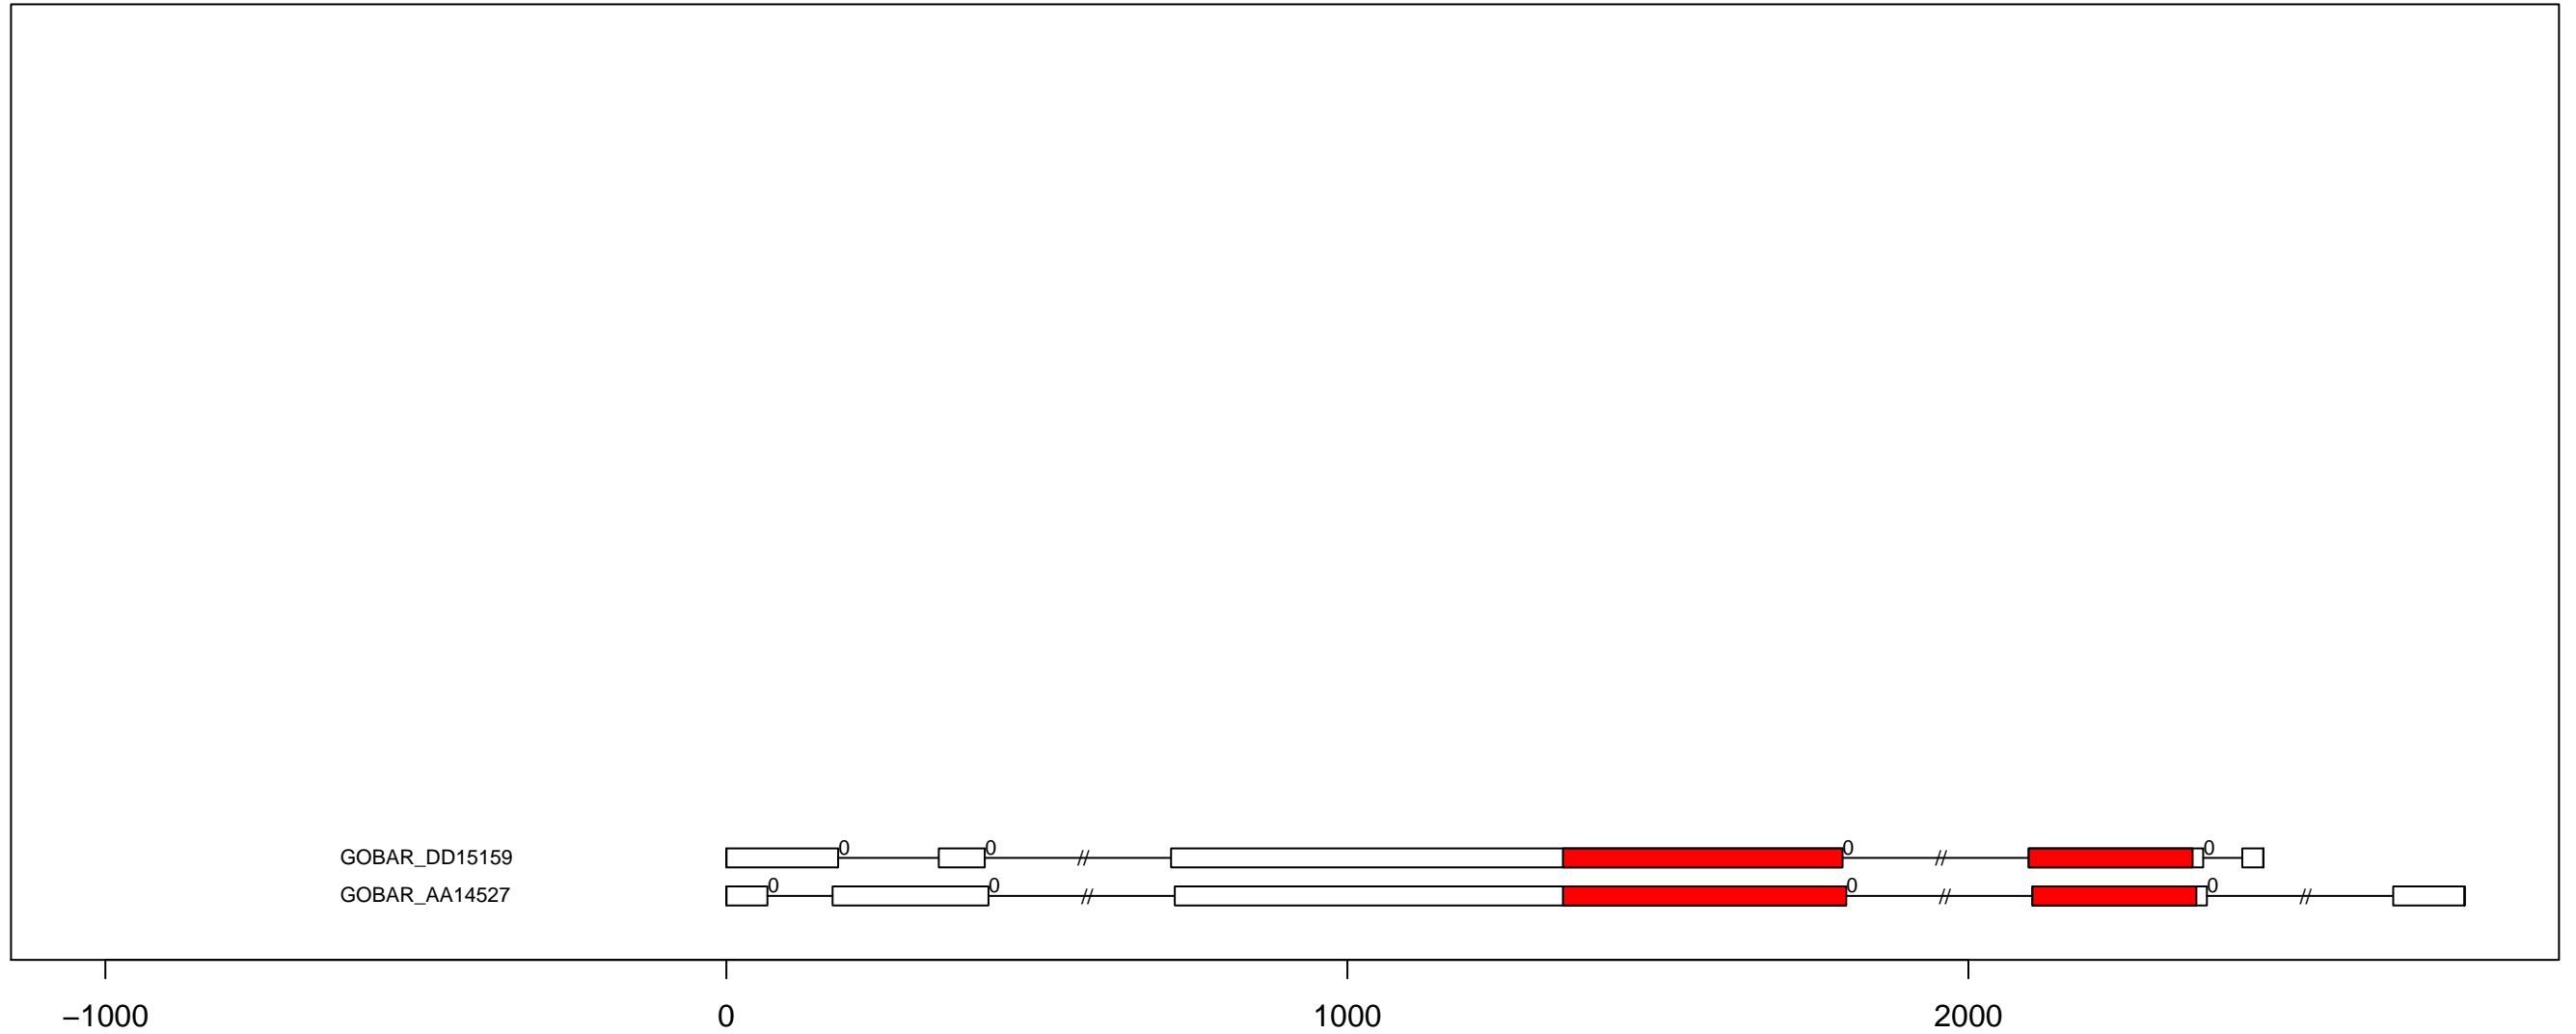

# G.ba TKL-PI-8 exon-intron and domain diagram (all)

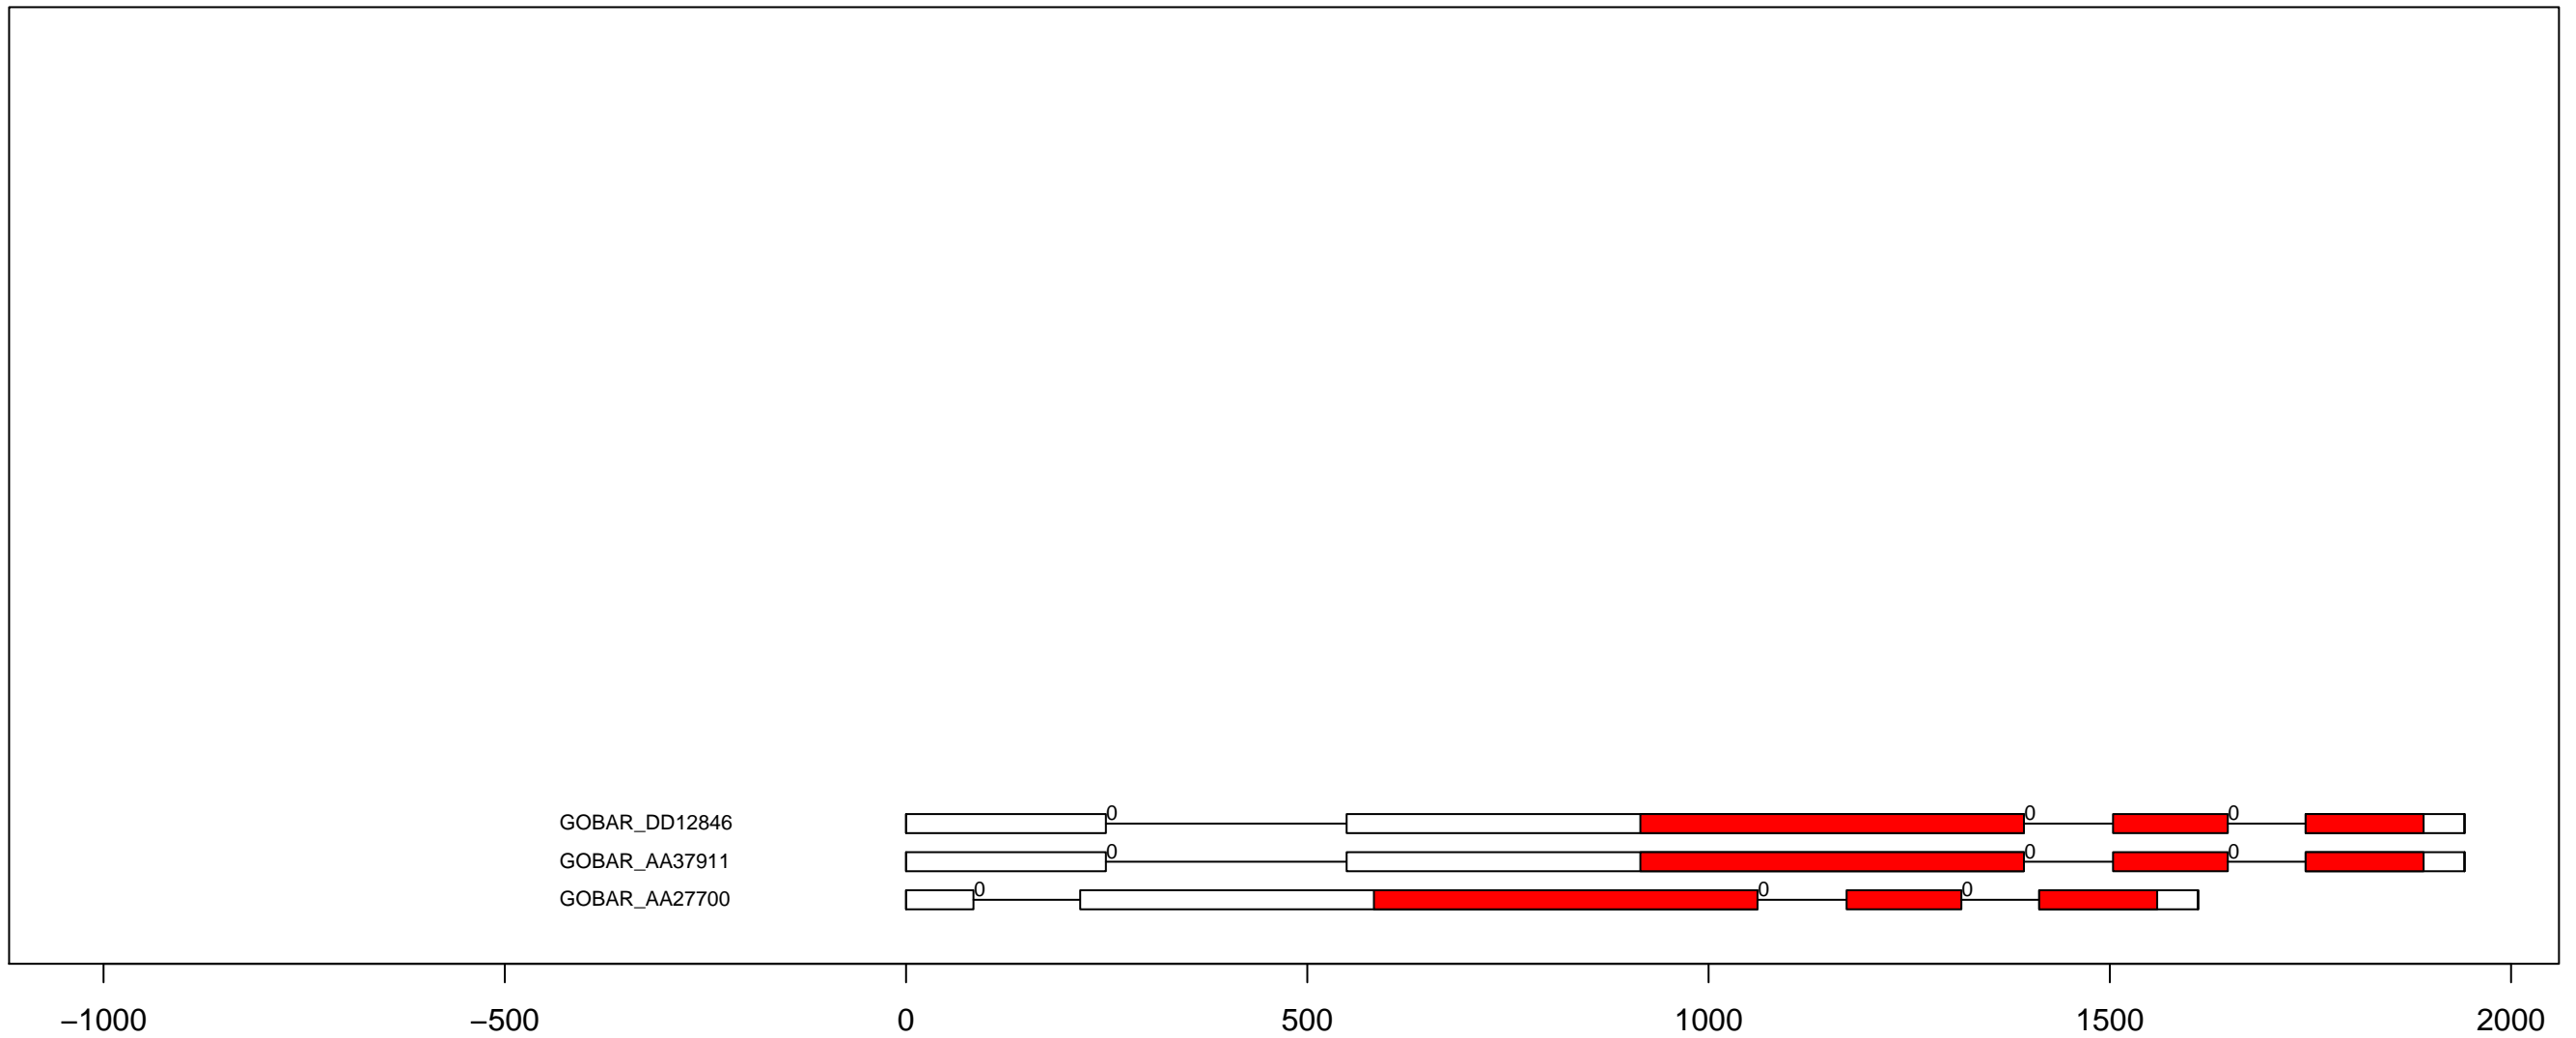

# G.ba TLK exon-intron and domain diagram (all)

GOBAR\_DD34016  
GOBAR\_DD30036  
GOBAR\_DD01926  
GOBAR\_AA26245  
GOBAR\_AA06122

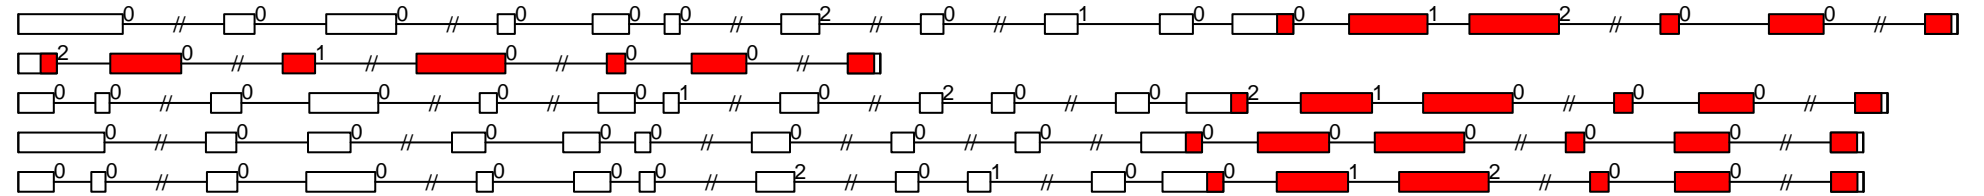

0

2000

4000

6000

# G.ba TTK exon-intron and domain diagram (all)

GOBAR\_DD09503  
GOBAR\_DD09158  
GOBAR\_AA01825

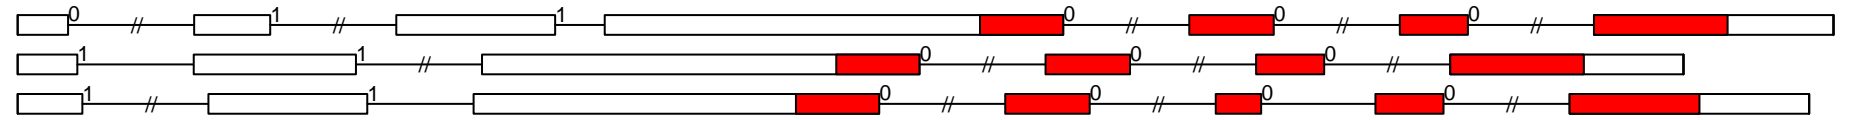

-1000

0

1000

2000

3000

4000

# G.ba ULK\_Fused exon-intron and domain diagram (all)

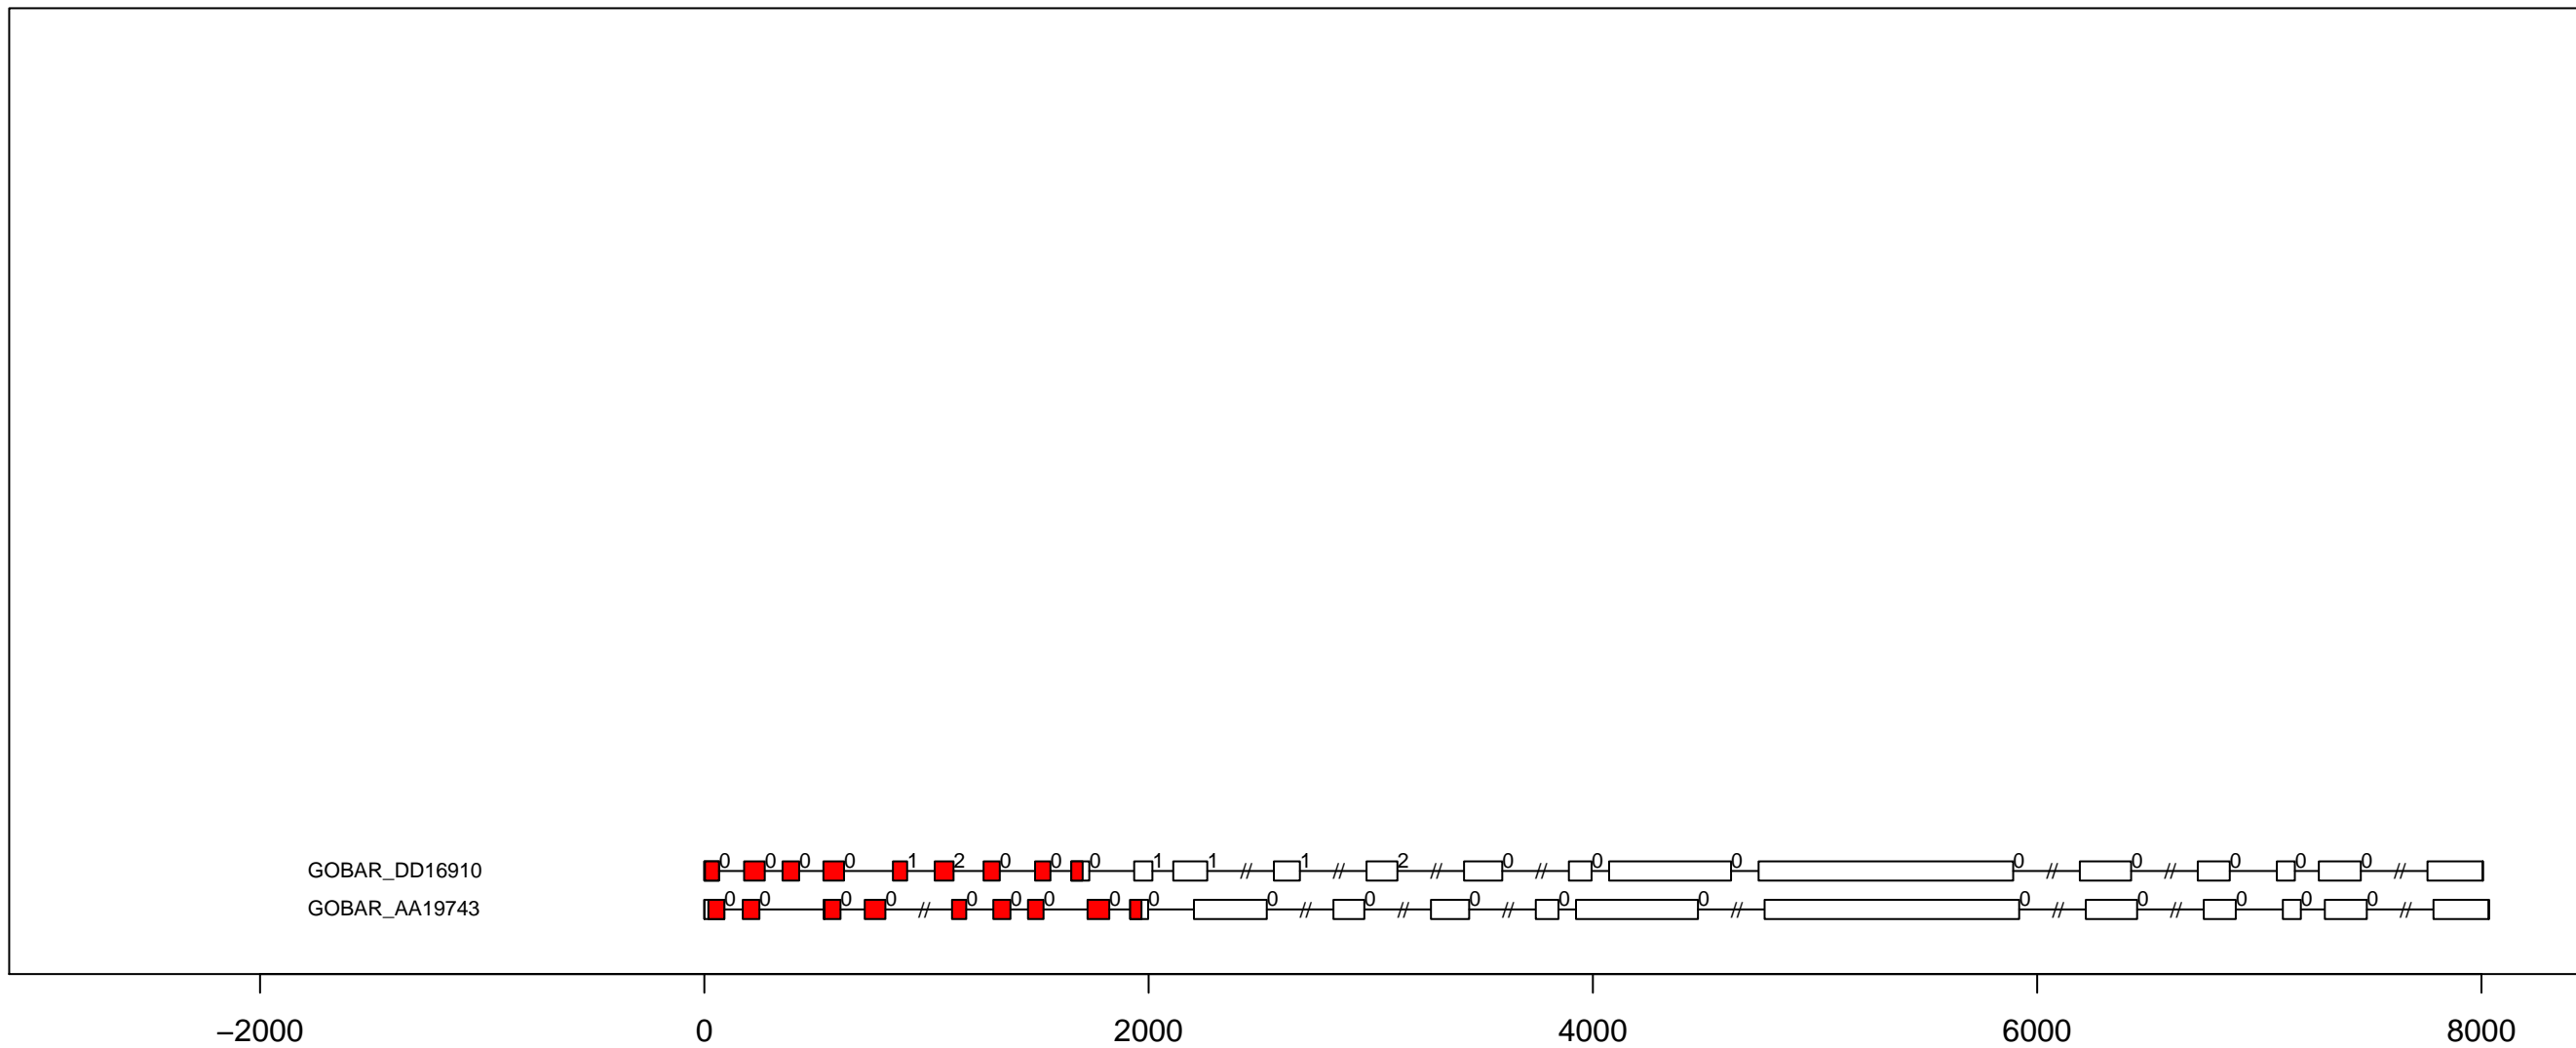



# G.ba WEE exon-intron and domain diagram (all)

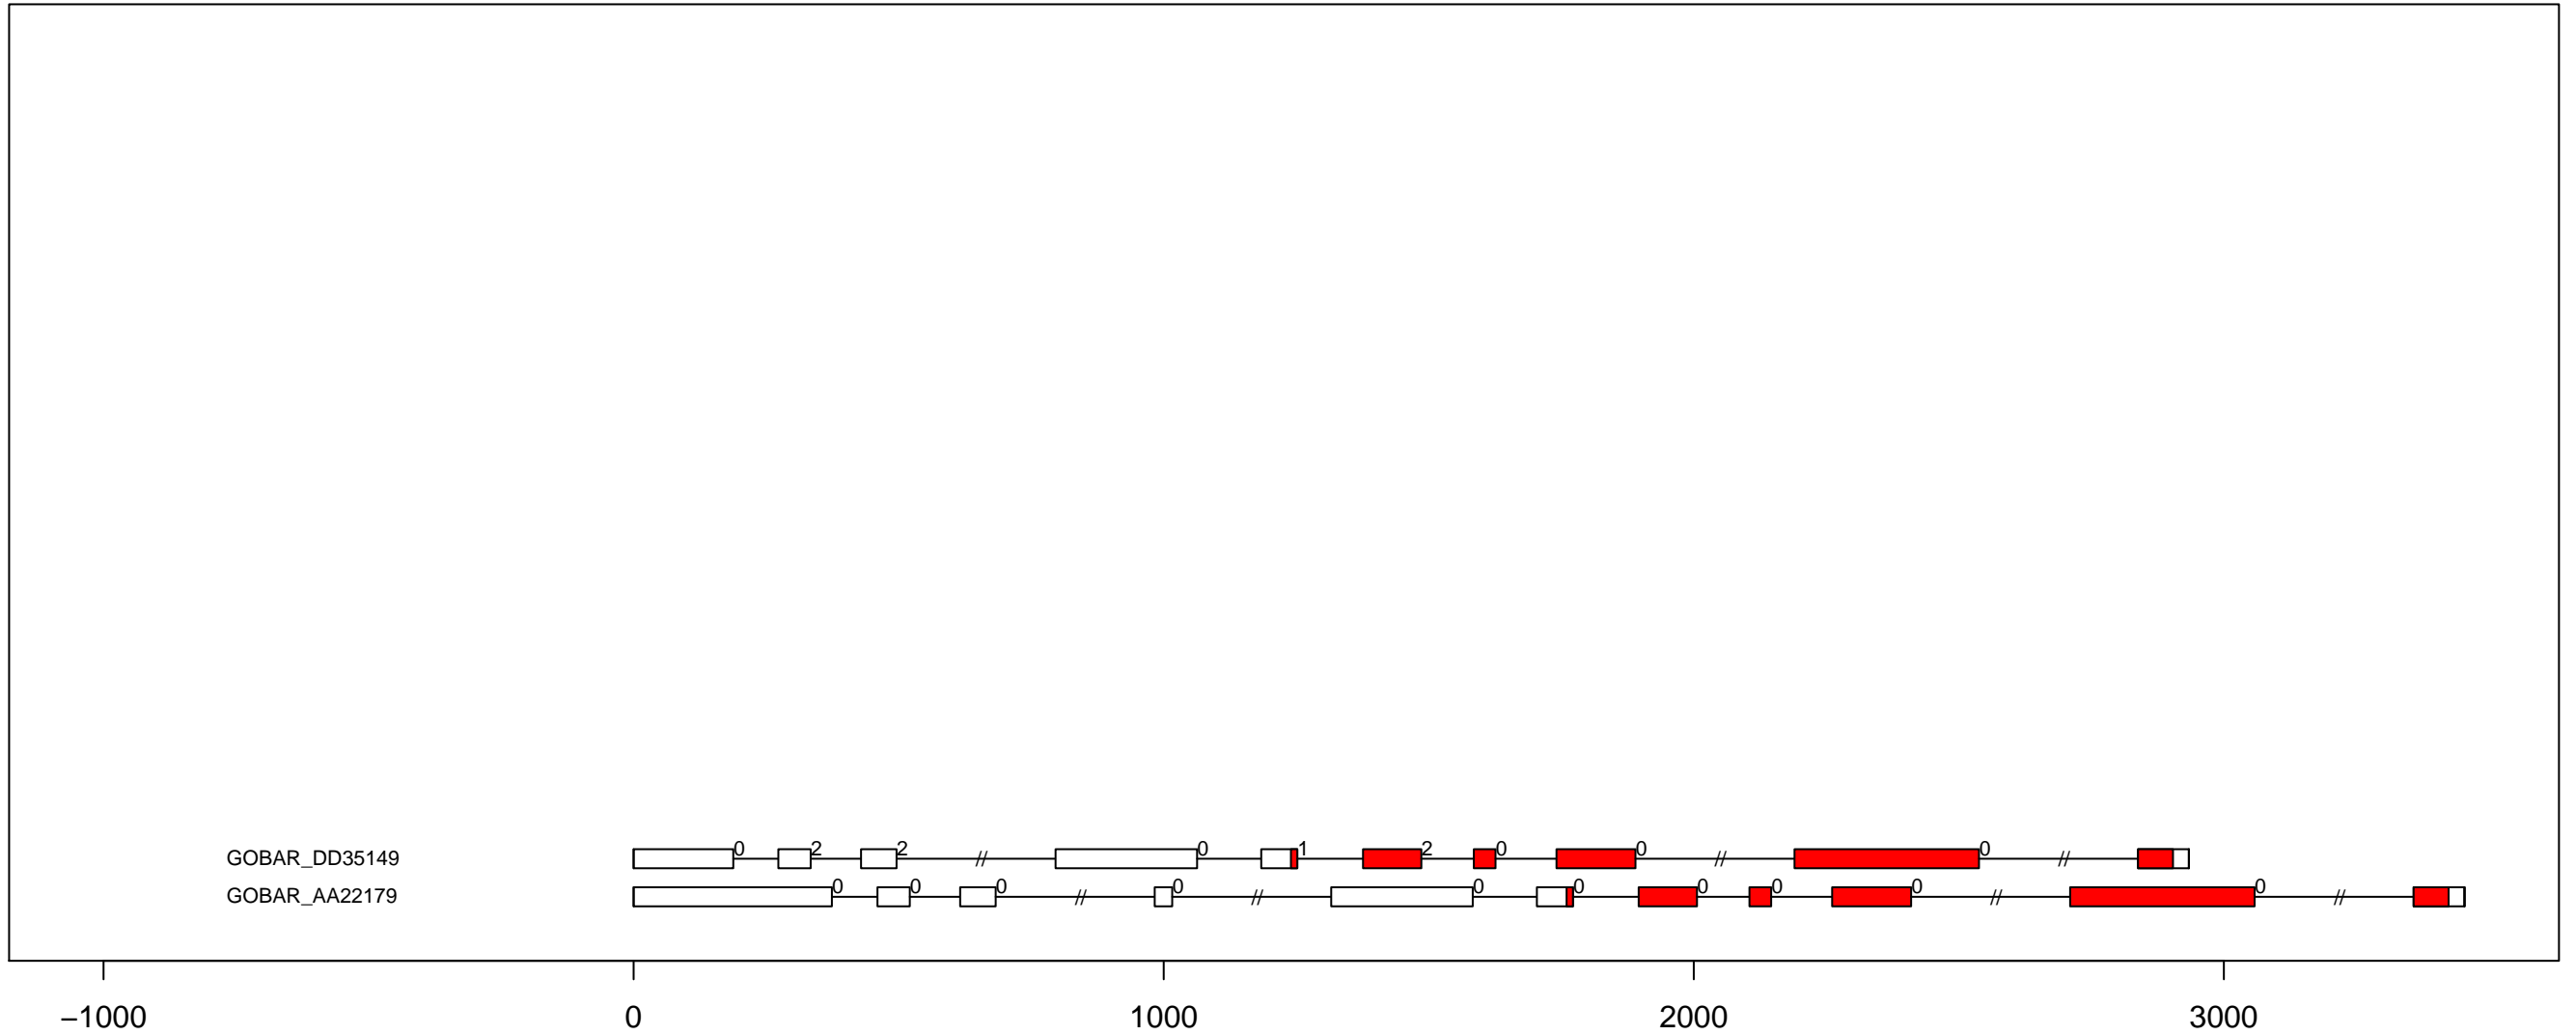

### G.ba WNK\_NRBP exon-intron and domain diagram (part 1)

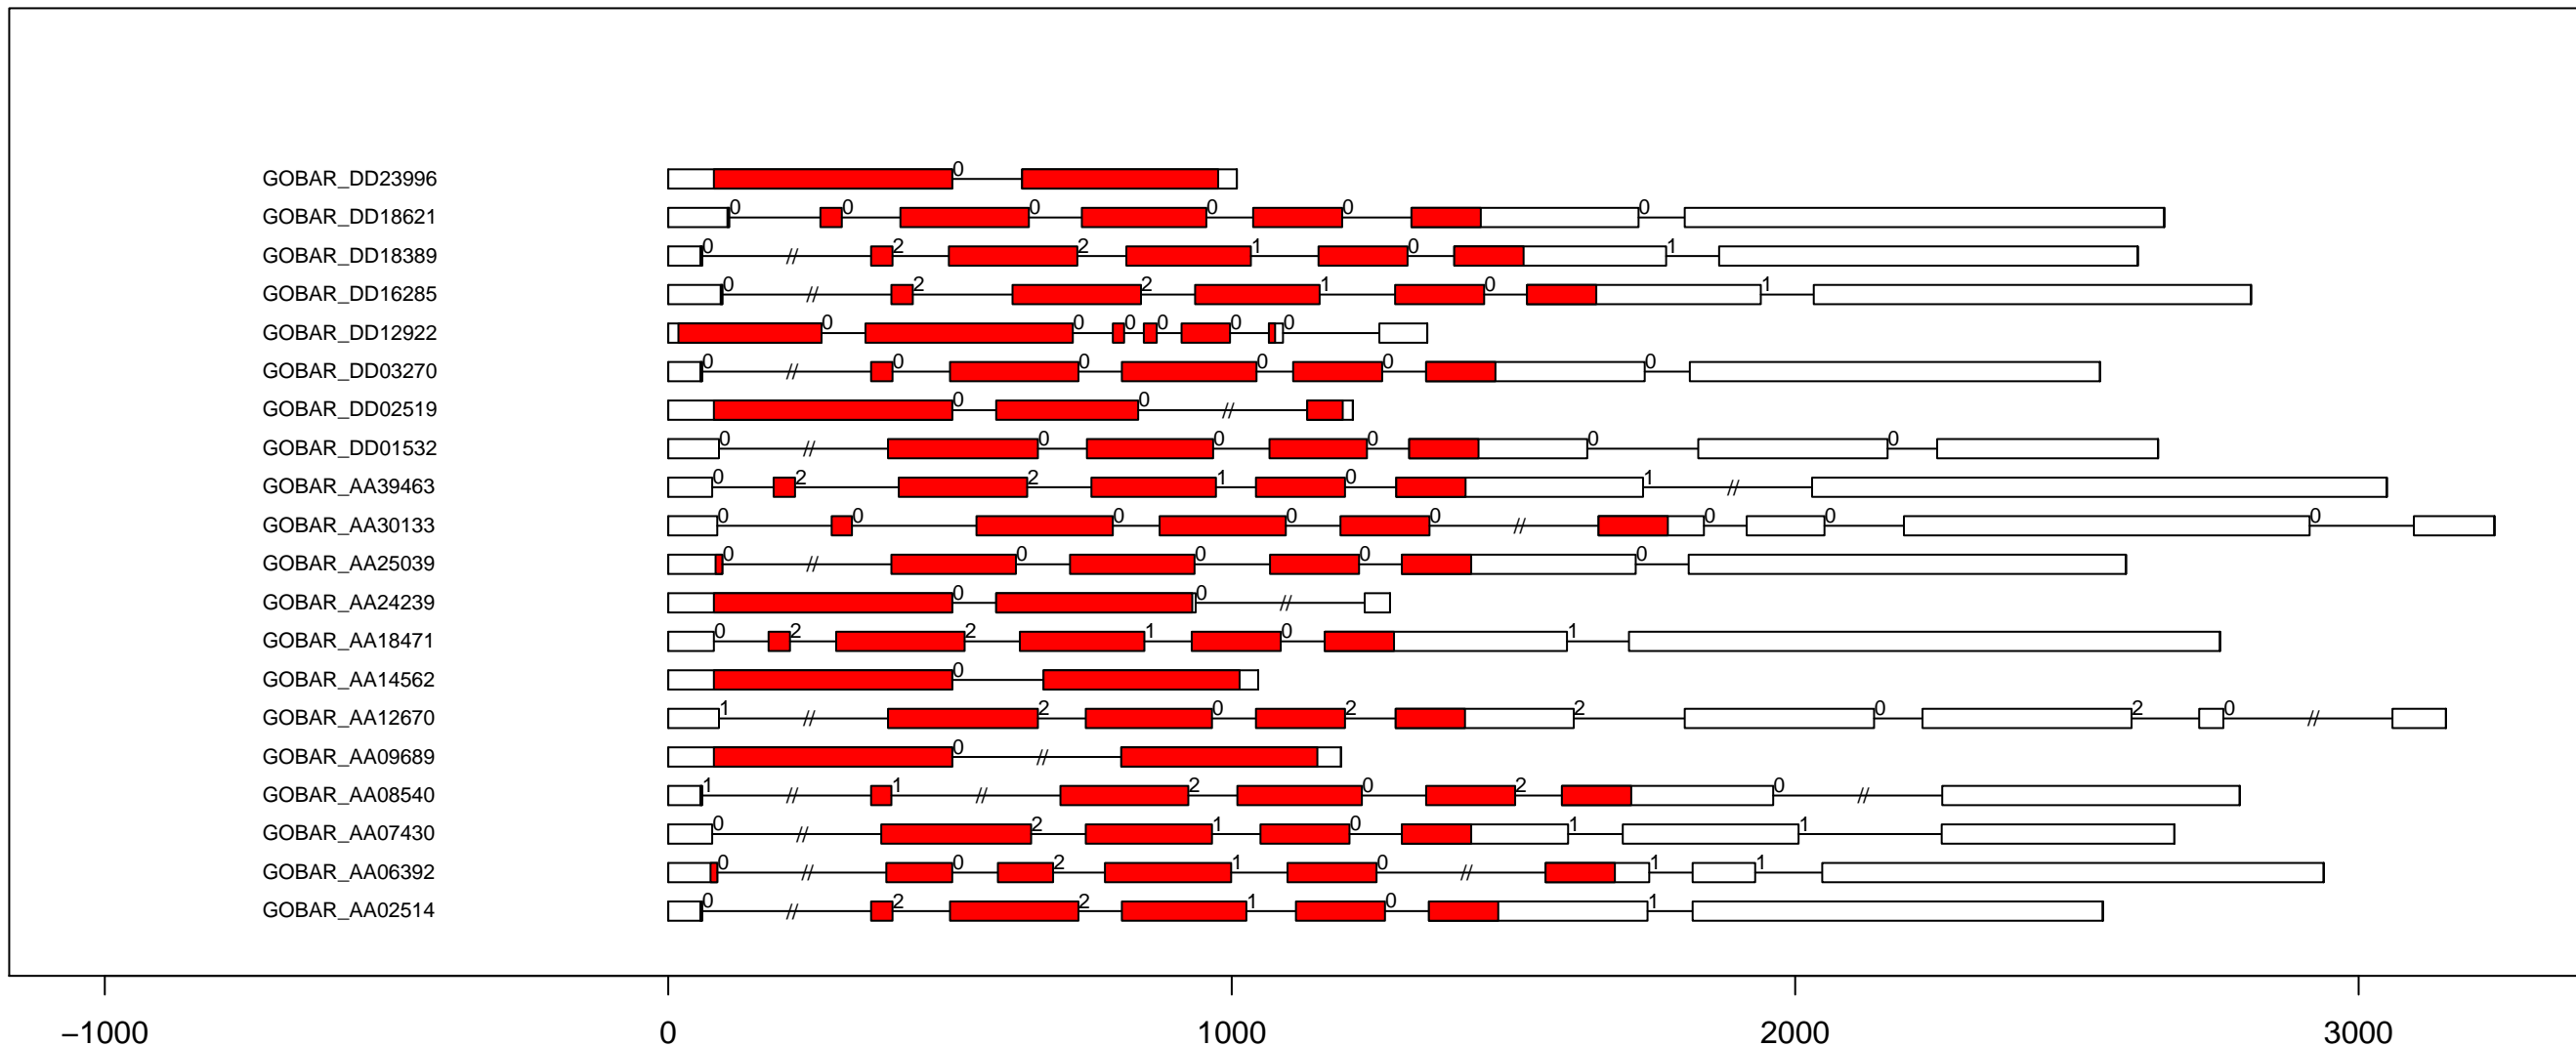



### G.ba WNK\_NRBP exon-intron and domain diagram (part 2)

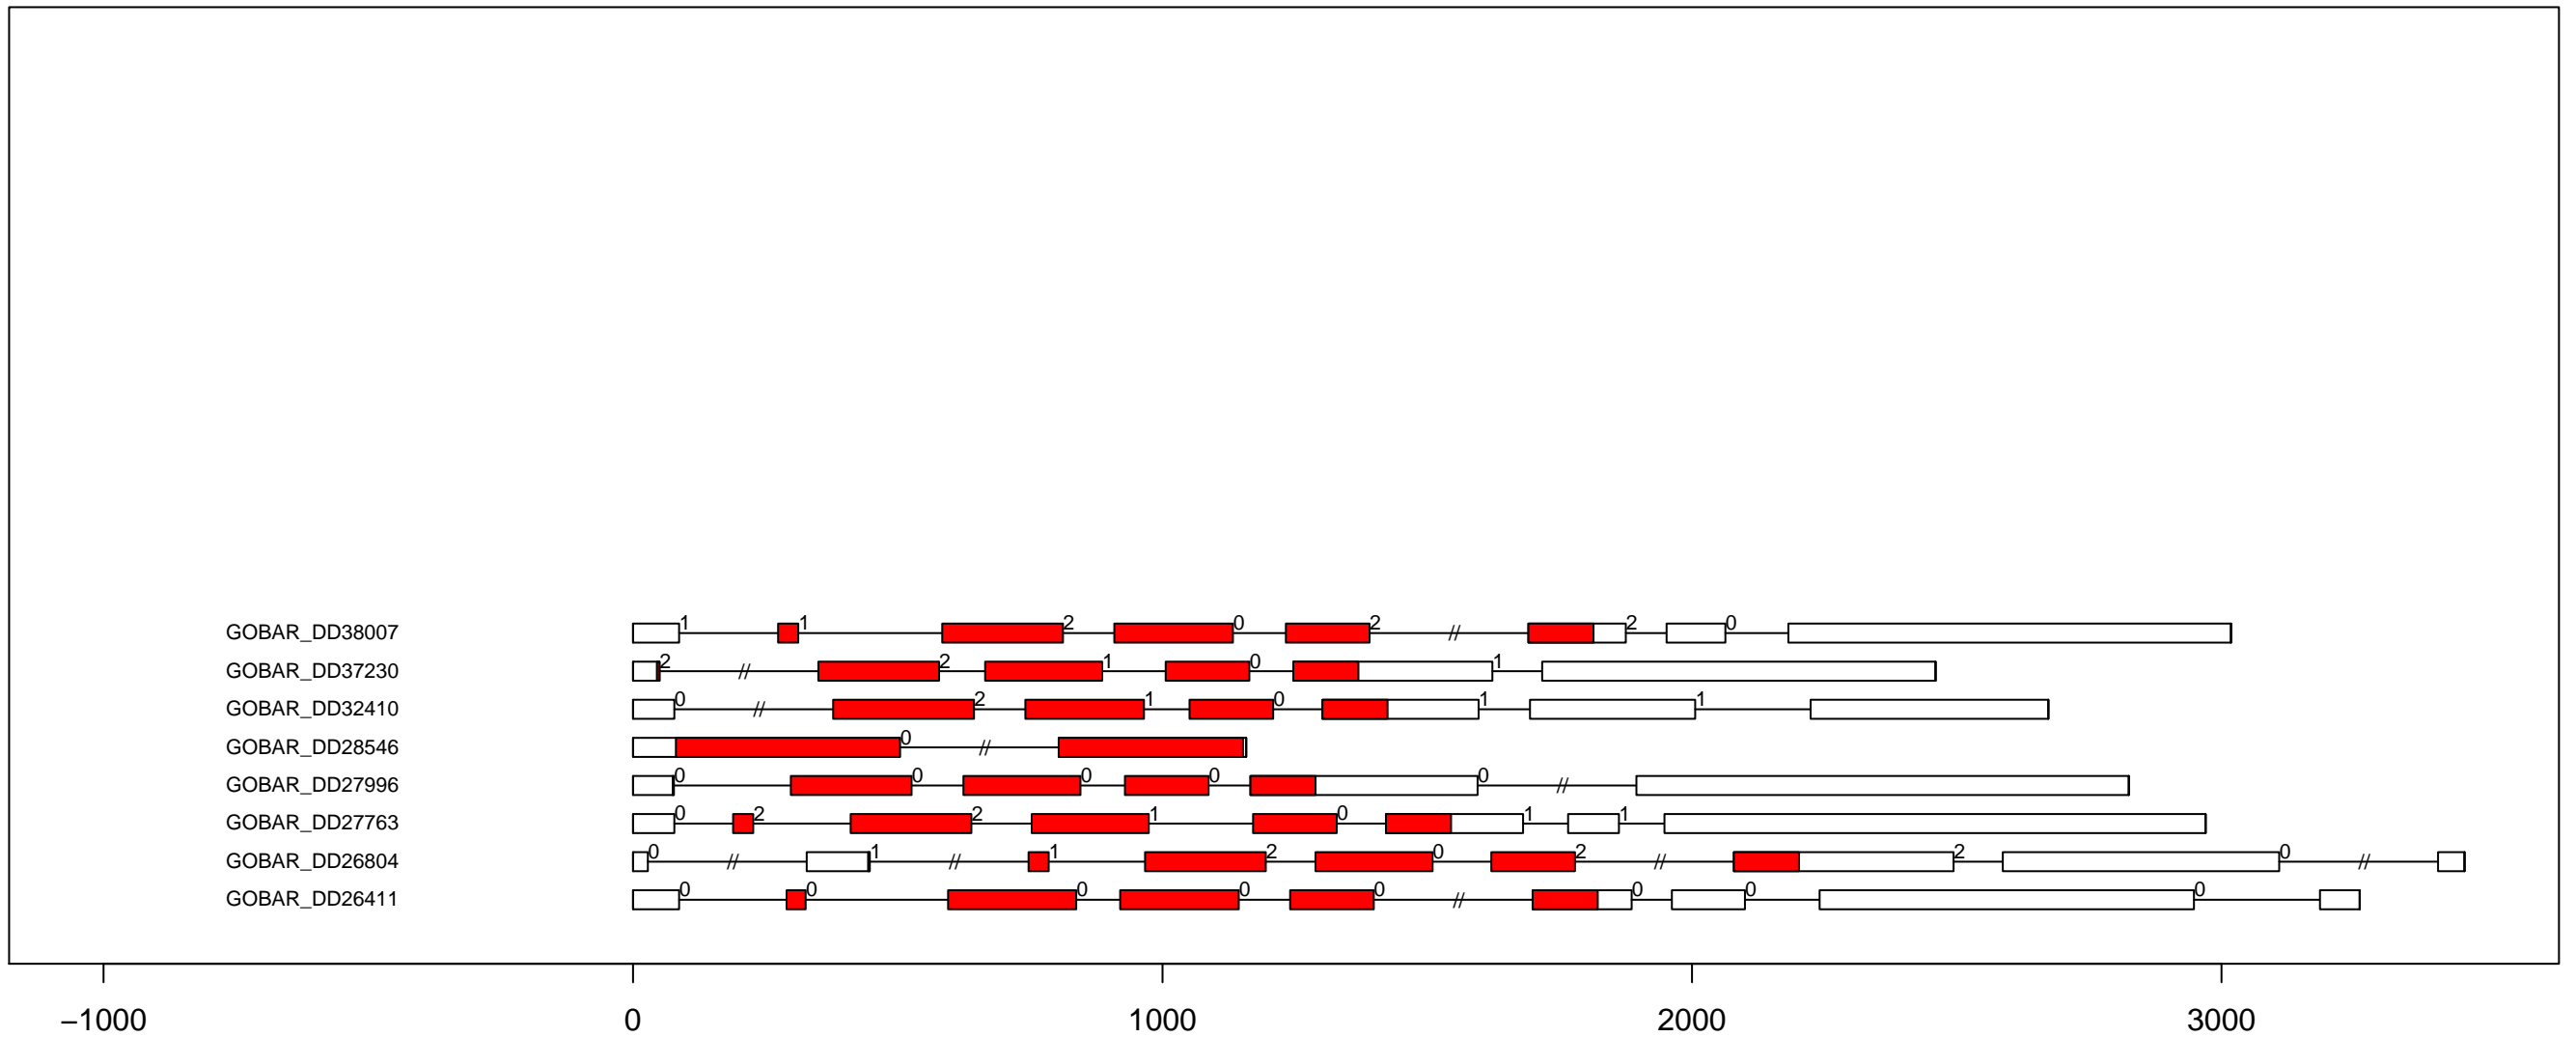

# G.ar AGC\_MAST exon-intron and domain diagram (all)

Cotton\_A\_13739  
Cotton\_A\_13057  
Cotton\_A\_13056  
Cotton\_A\_10287  
Cotton\_A\_07615

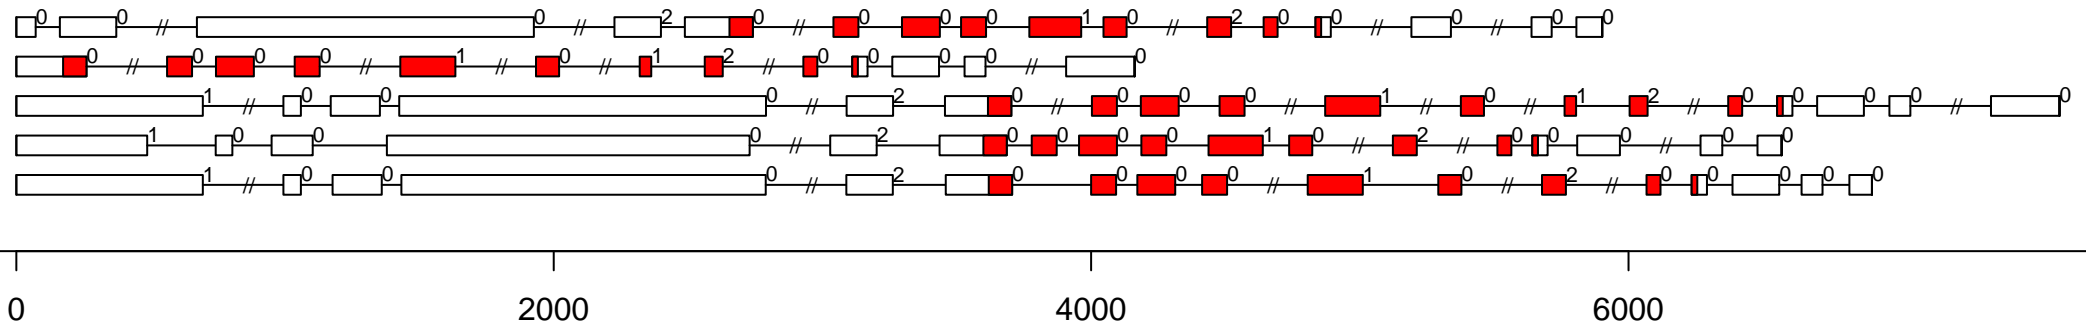

### G.ar AGC\_NDR exon-intron and domain diagram (all)

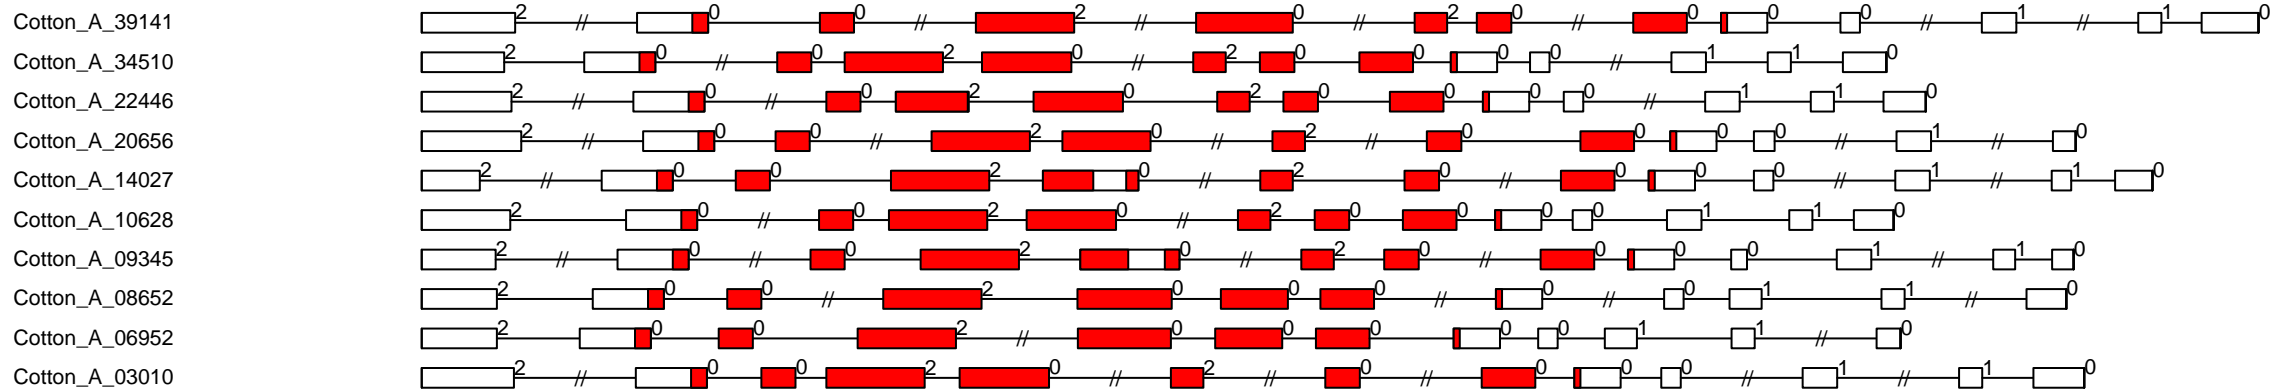

-1000

0

1000

2000

3000

4000

# G.ar AGC\_PDK1 exon-intron and domain diagram (all)

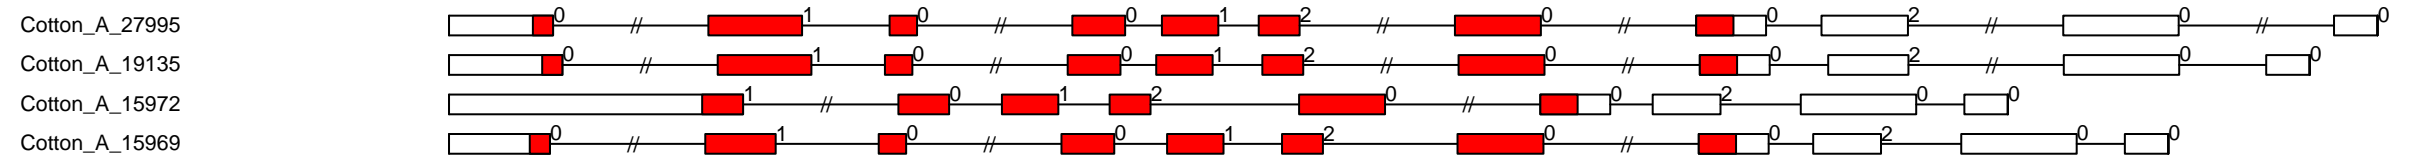

-1000

0

1000

2000

3000

# G.ar AGC\_PKA-PKG exon-intron and domain diagram (all)

Cotton\_A\_18867

Cotton\_A\_10339

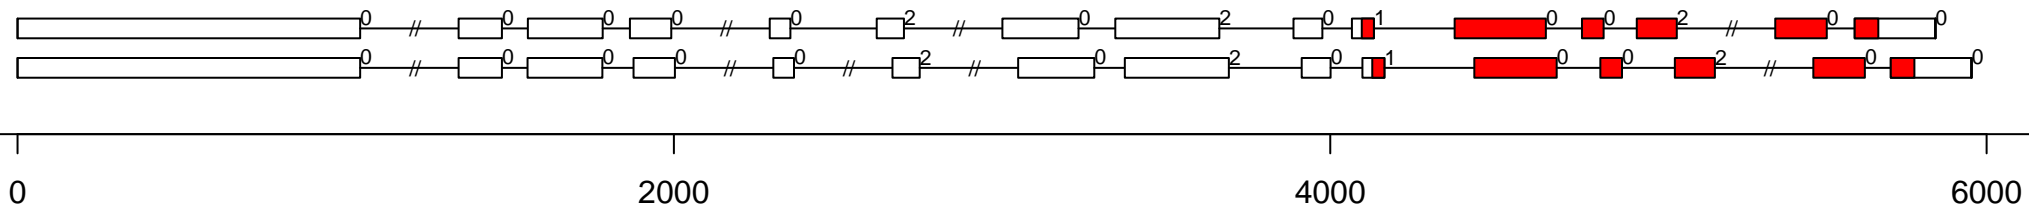

### G.ar AGC\_RSK-2 exon-intron and domain diagram (part 1)

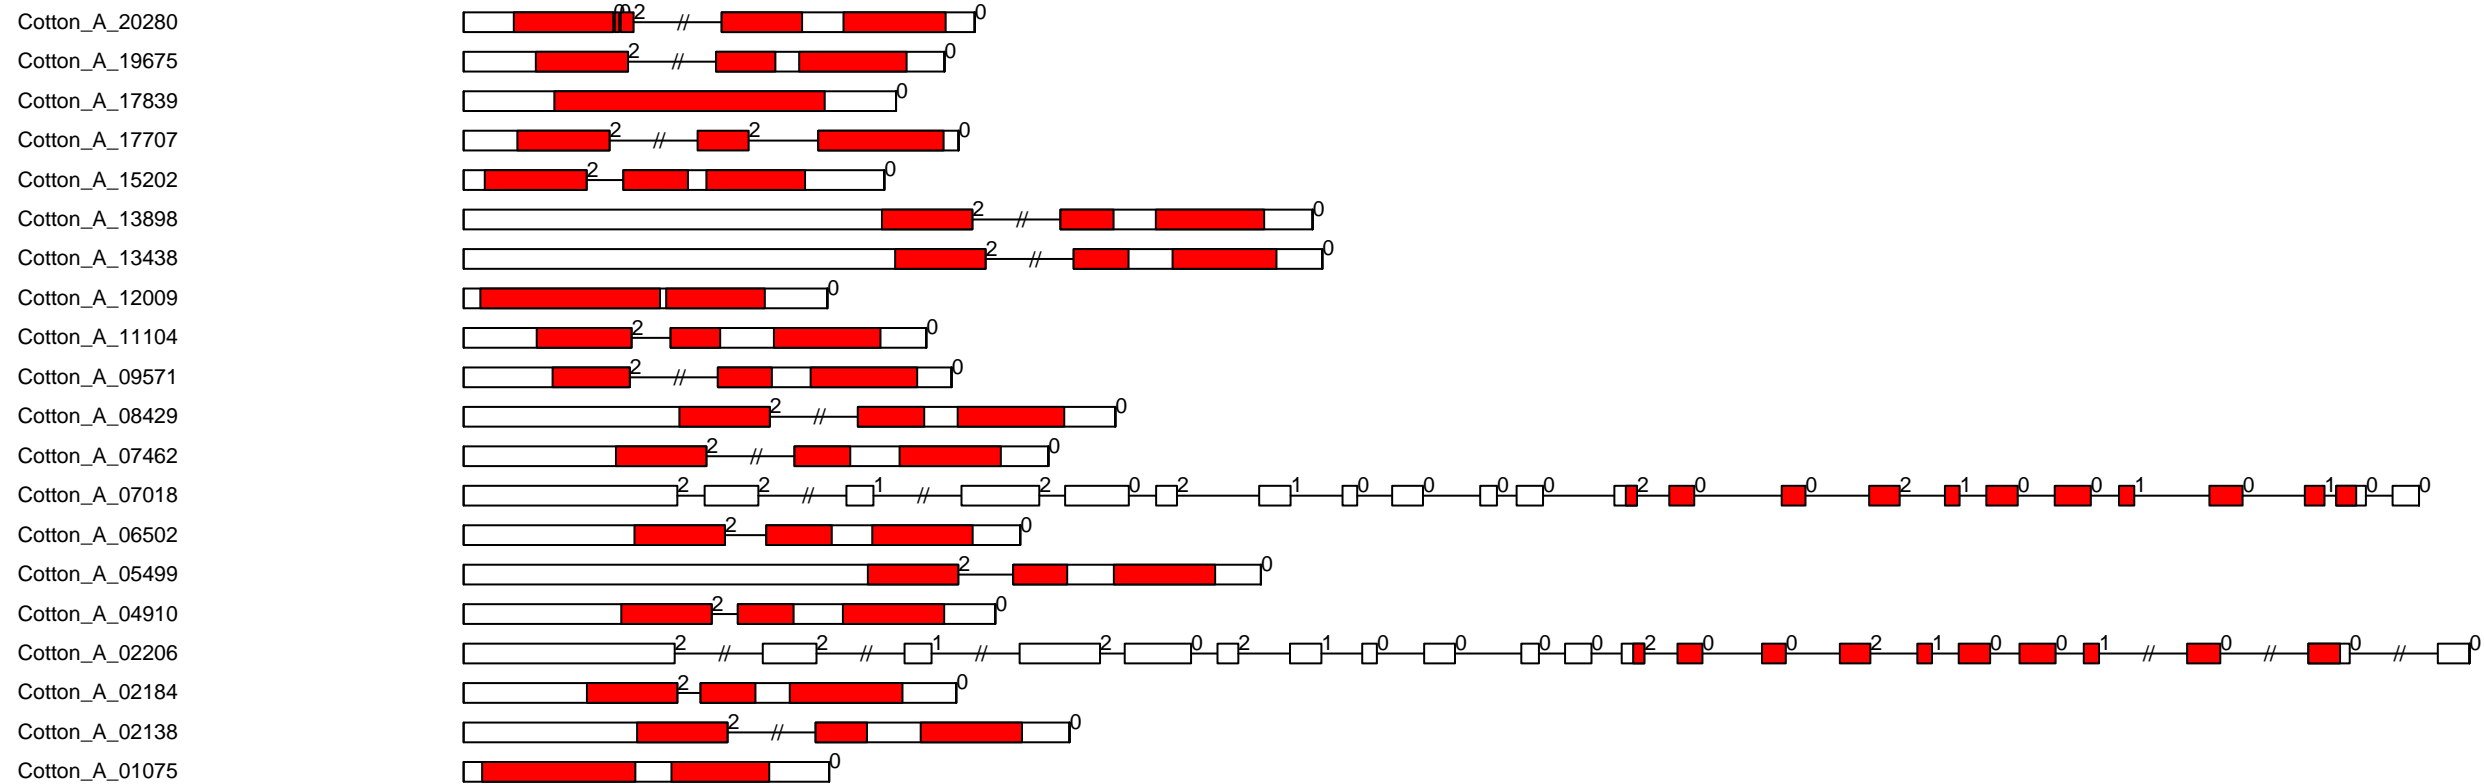

# G.ar AGC\_RSK-2 exon-intron and domain diagram (part 2)

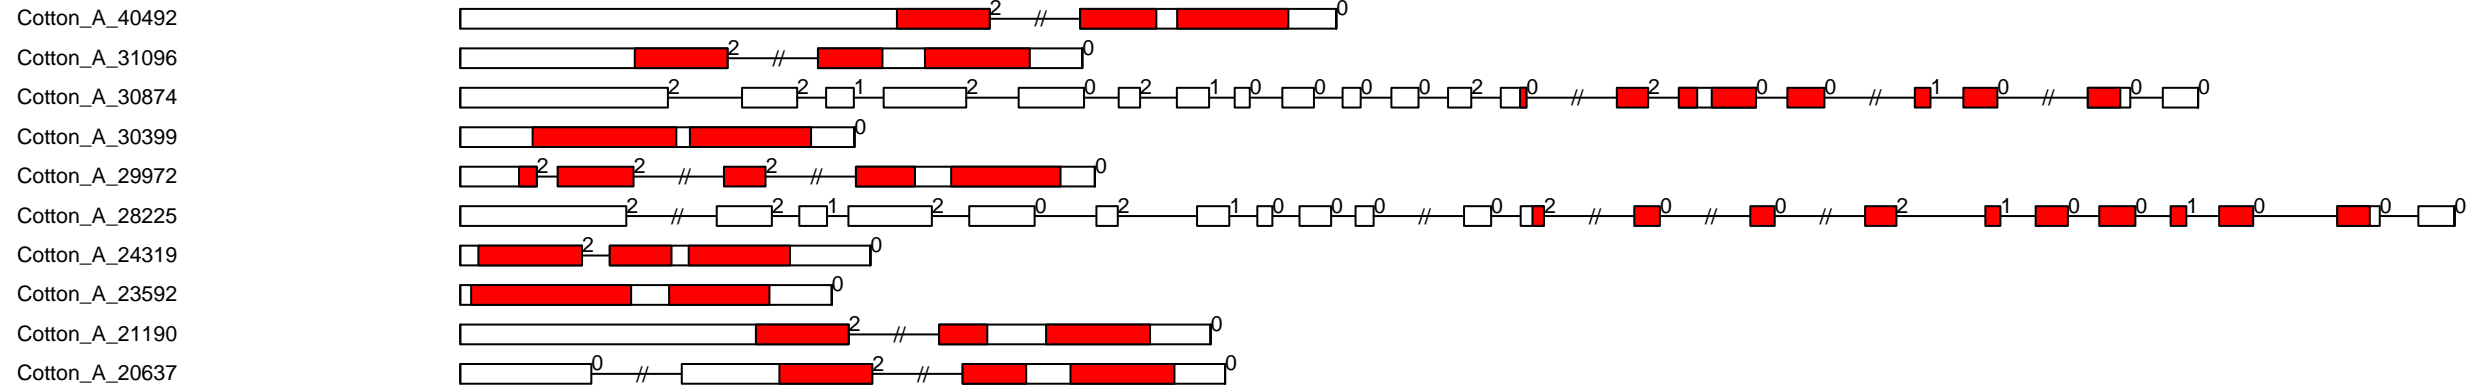

# G.ar AGC-PI exon-intron and domain diagram (all)

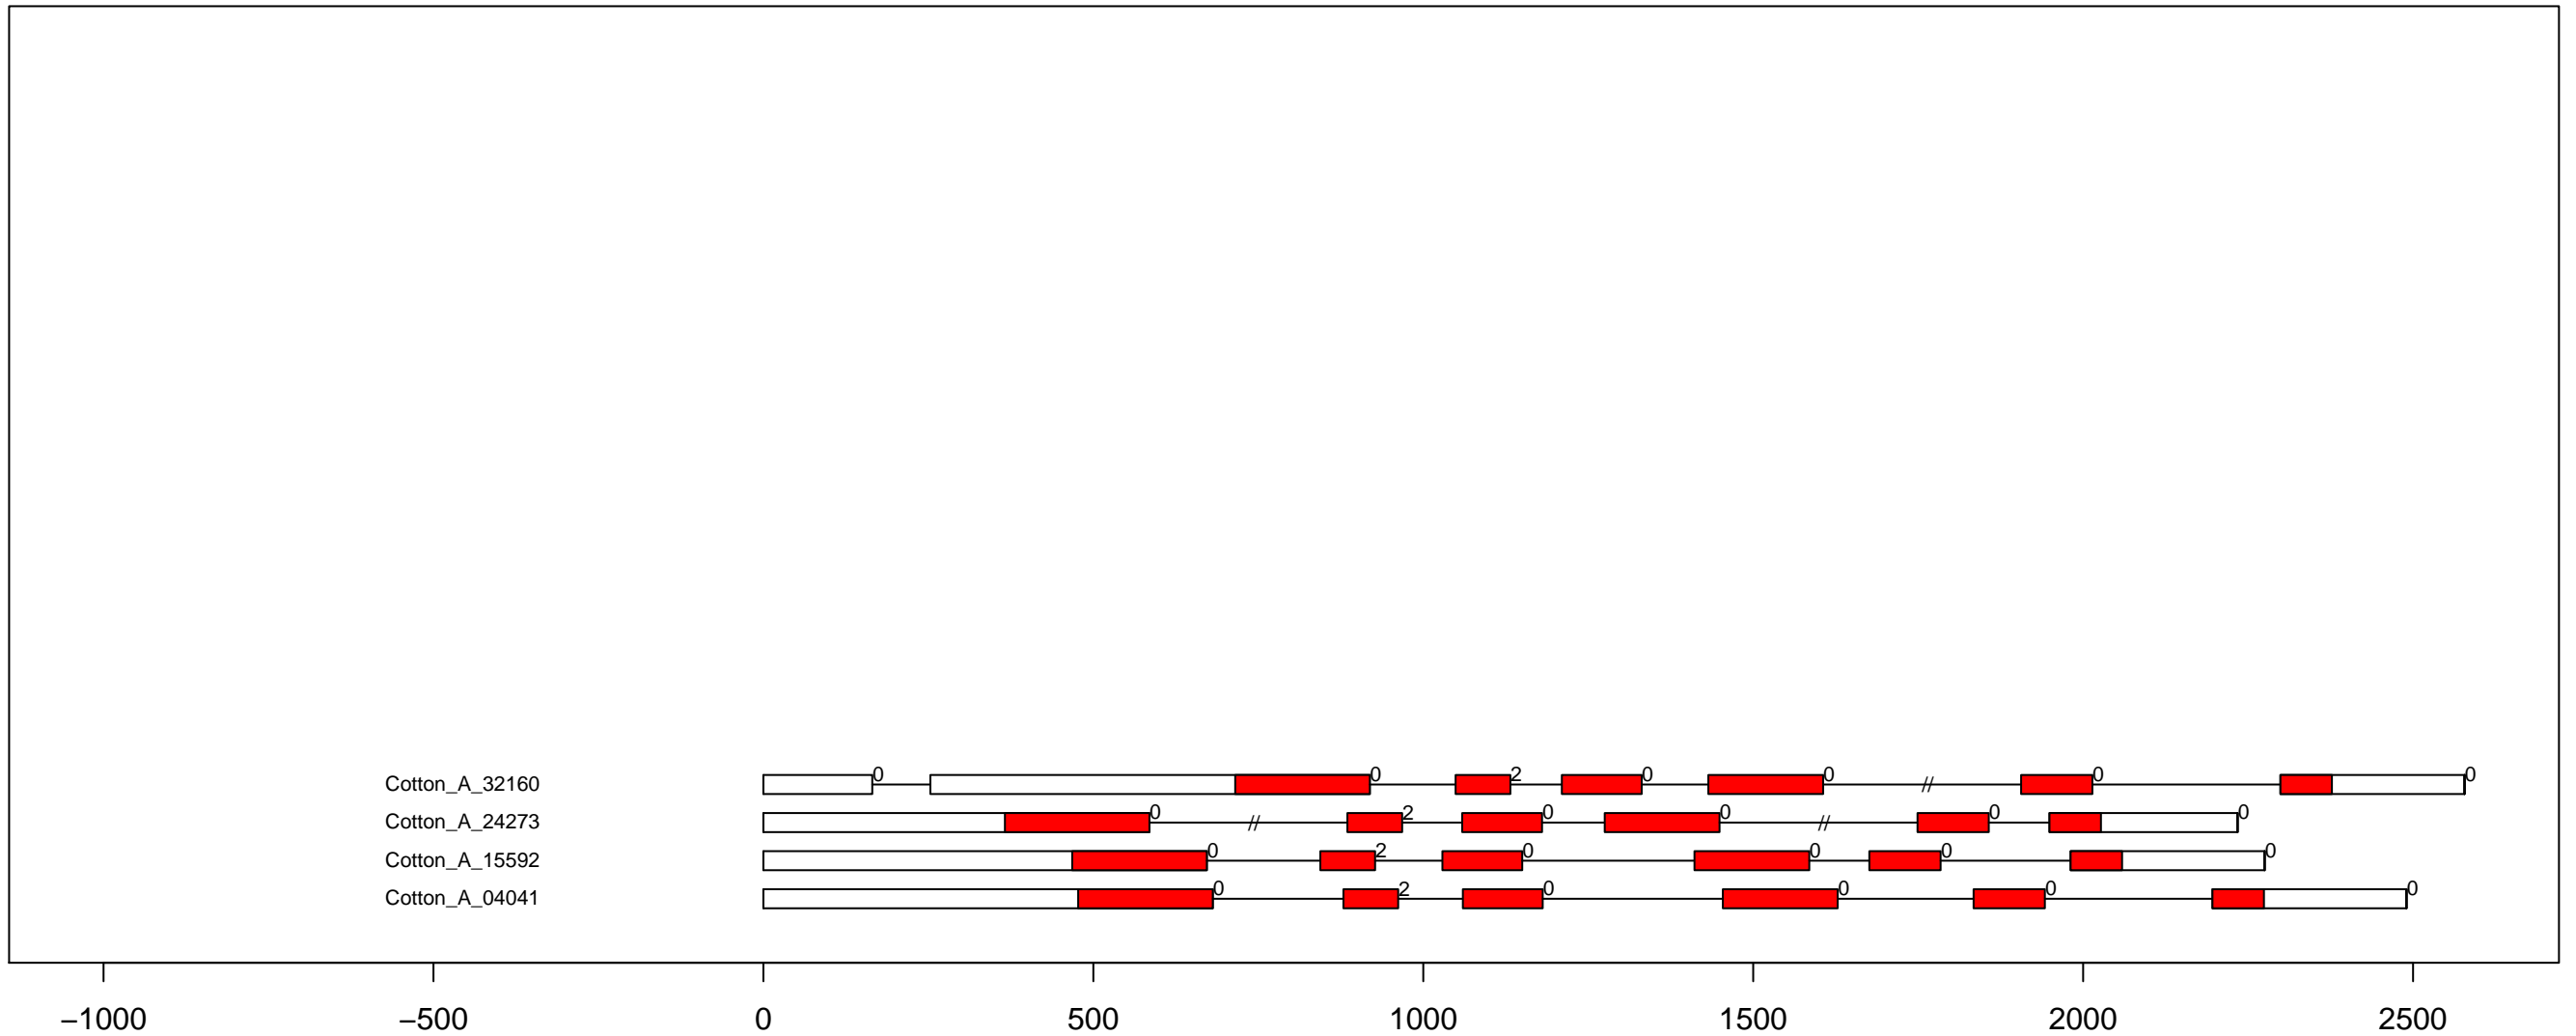



# G.ar Aur exon-intron and domain diagram (all)

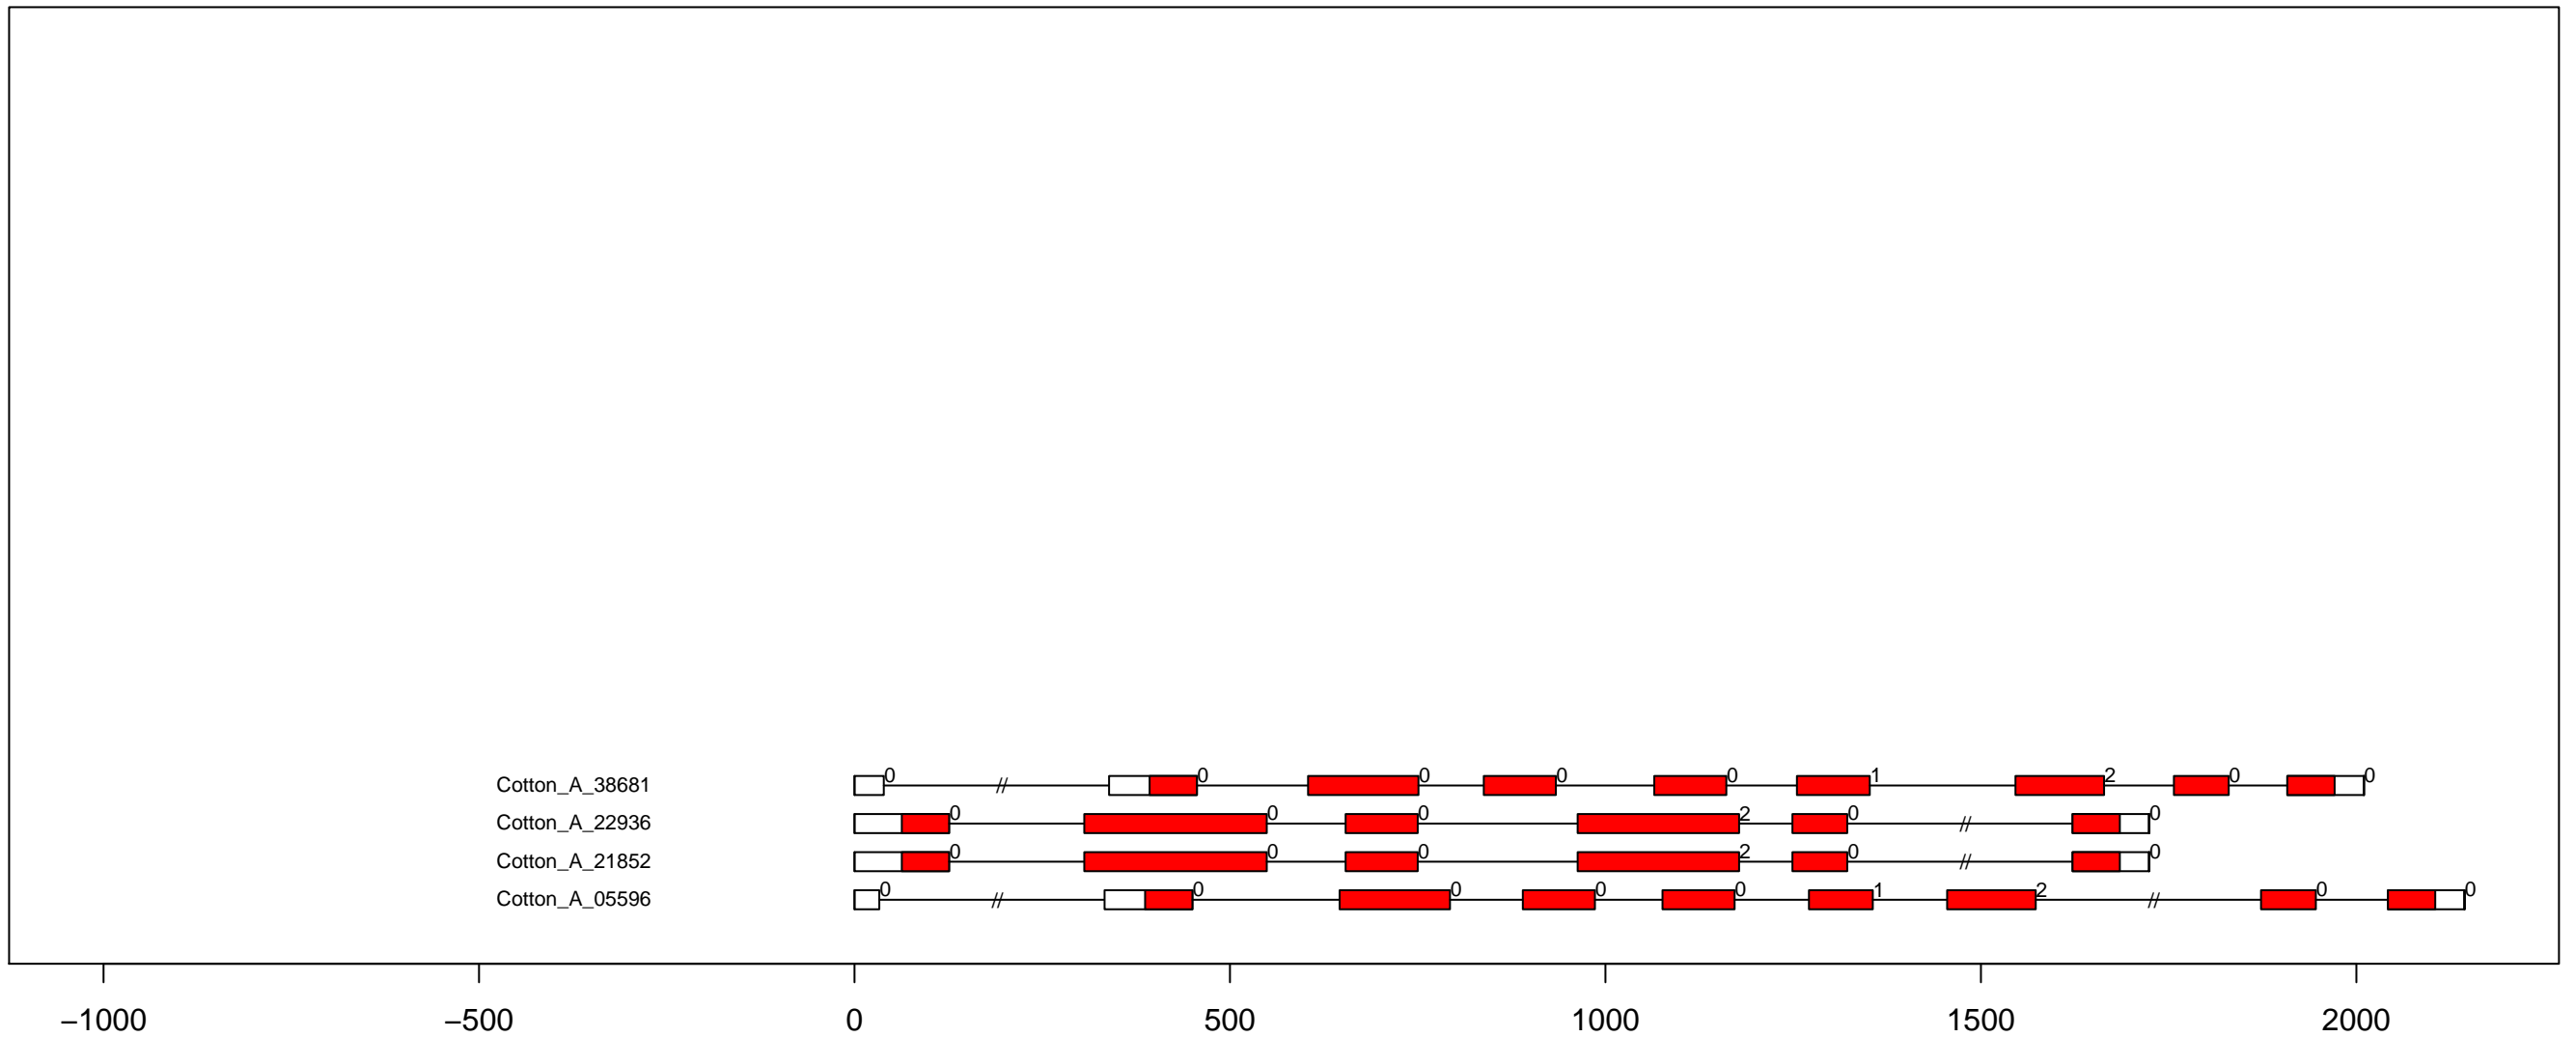

# G.ar BUB exon-intron and domain diagram (all)

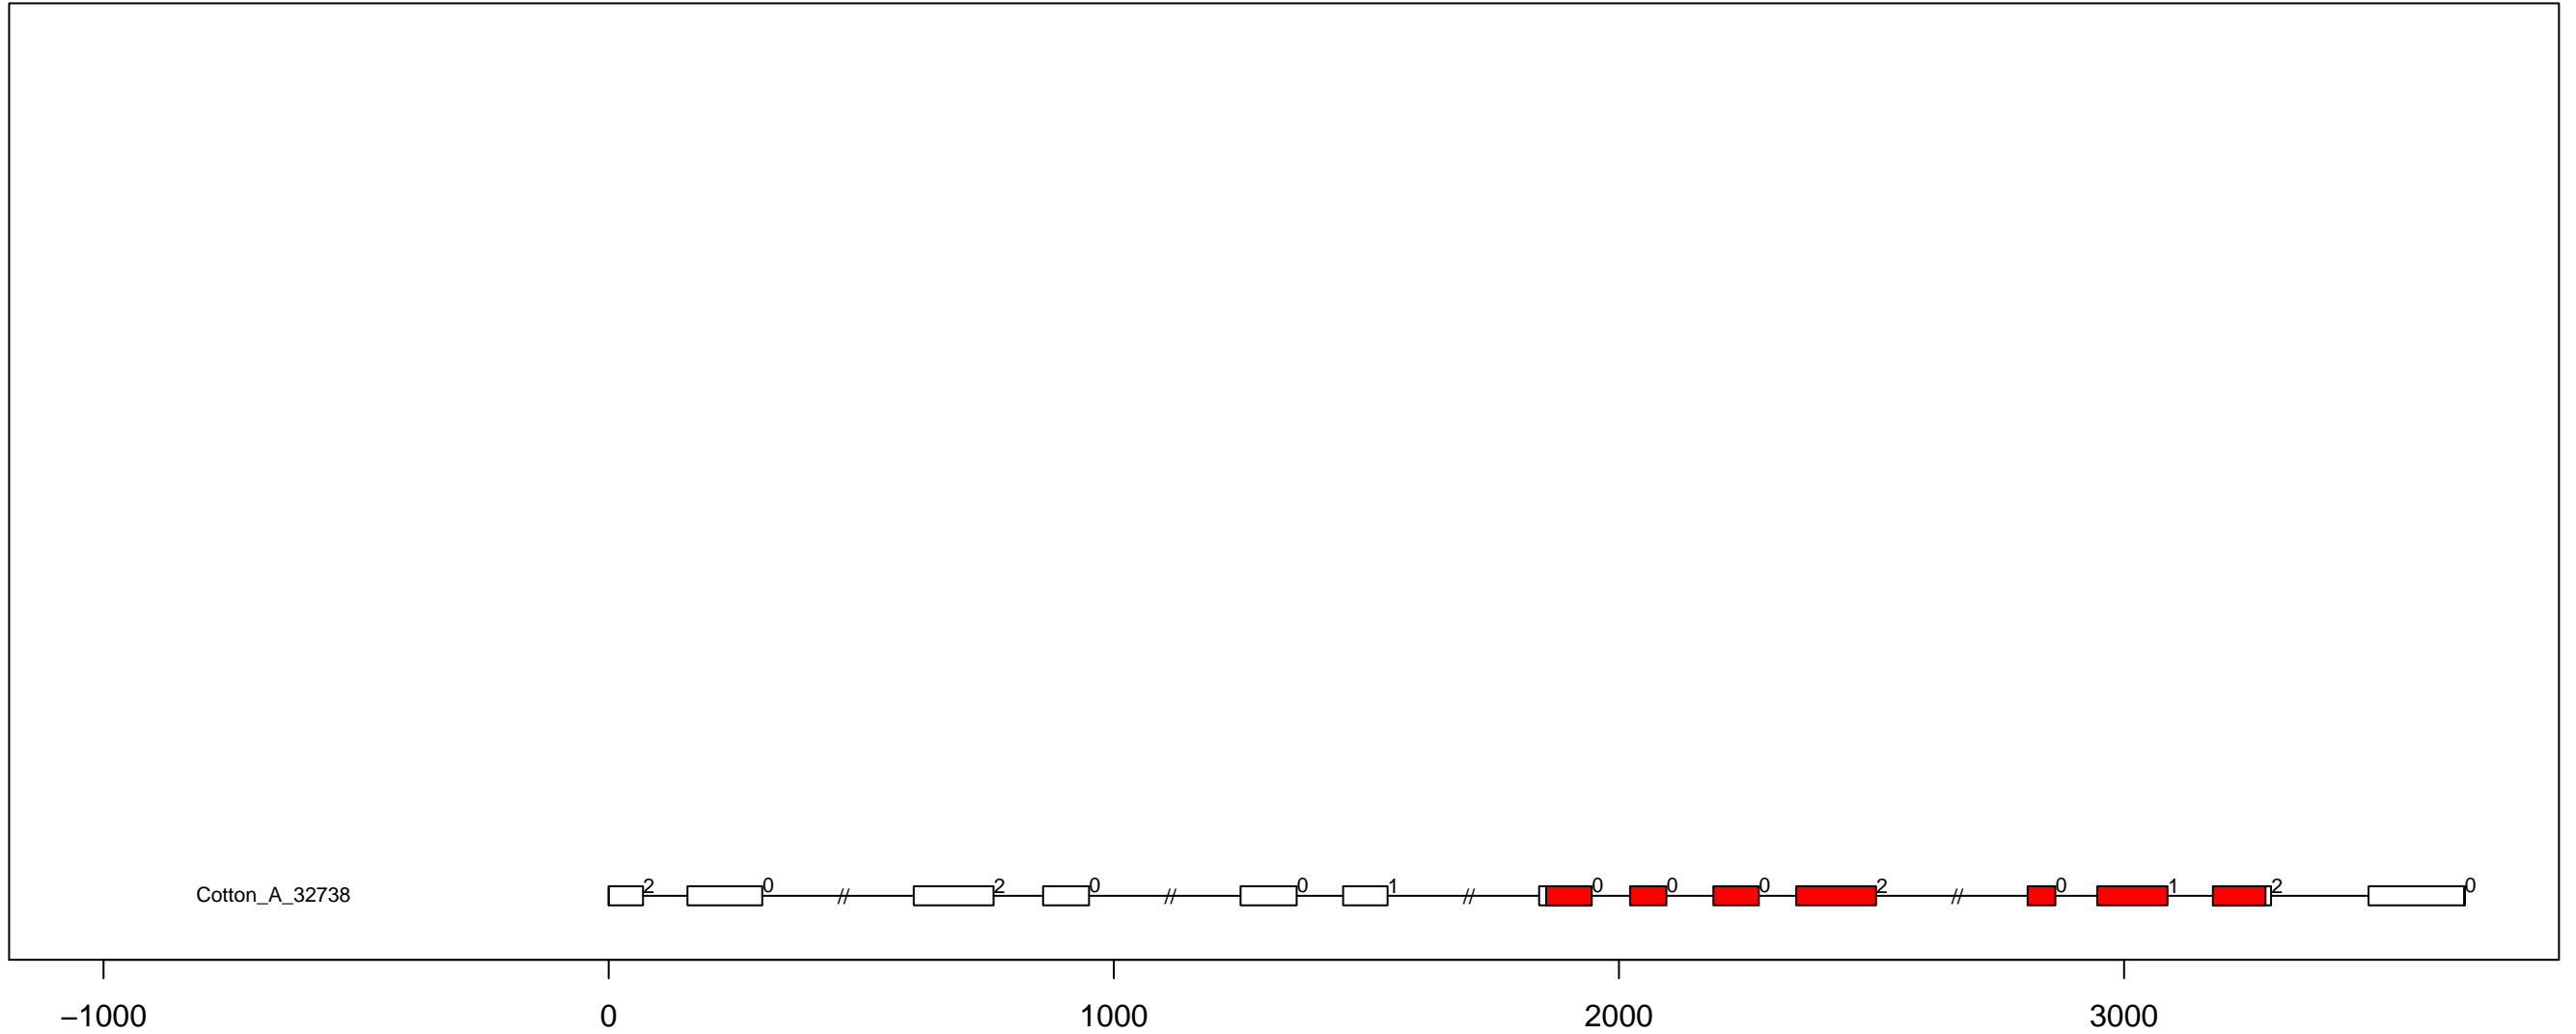

# G.ar CAMK\_AMPK exon-intron and domain diagram (all)

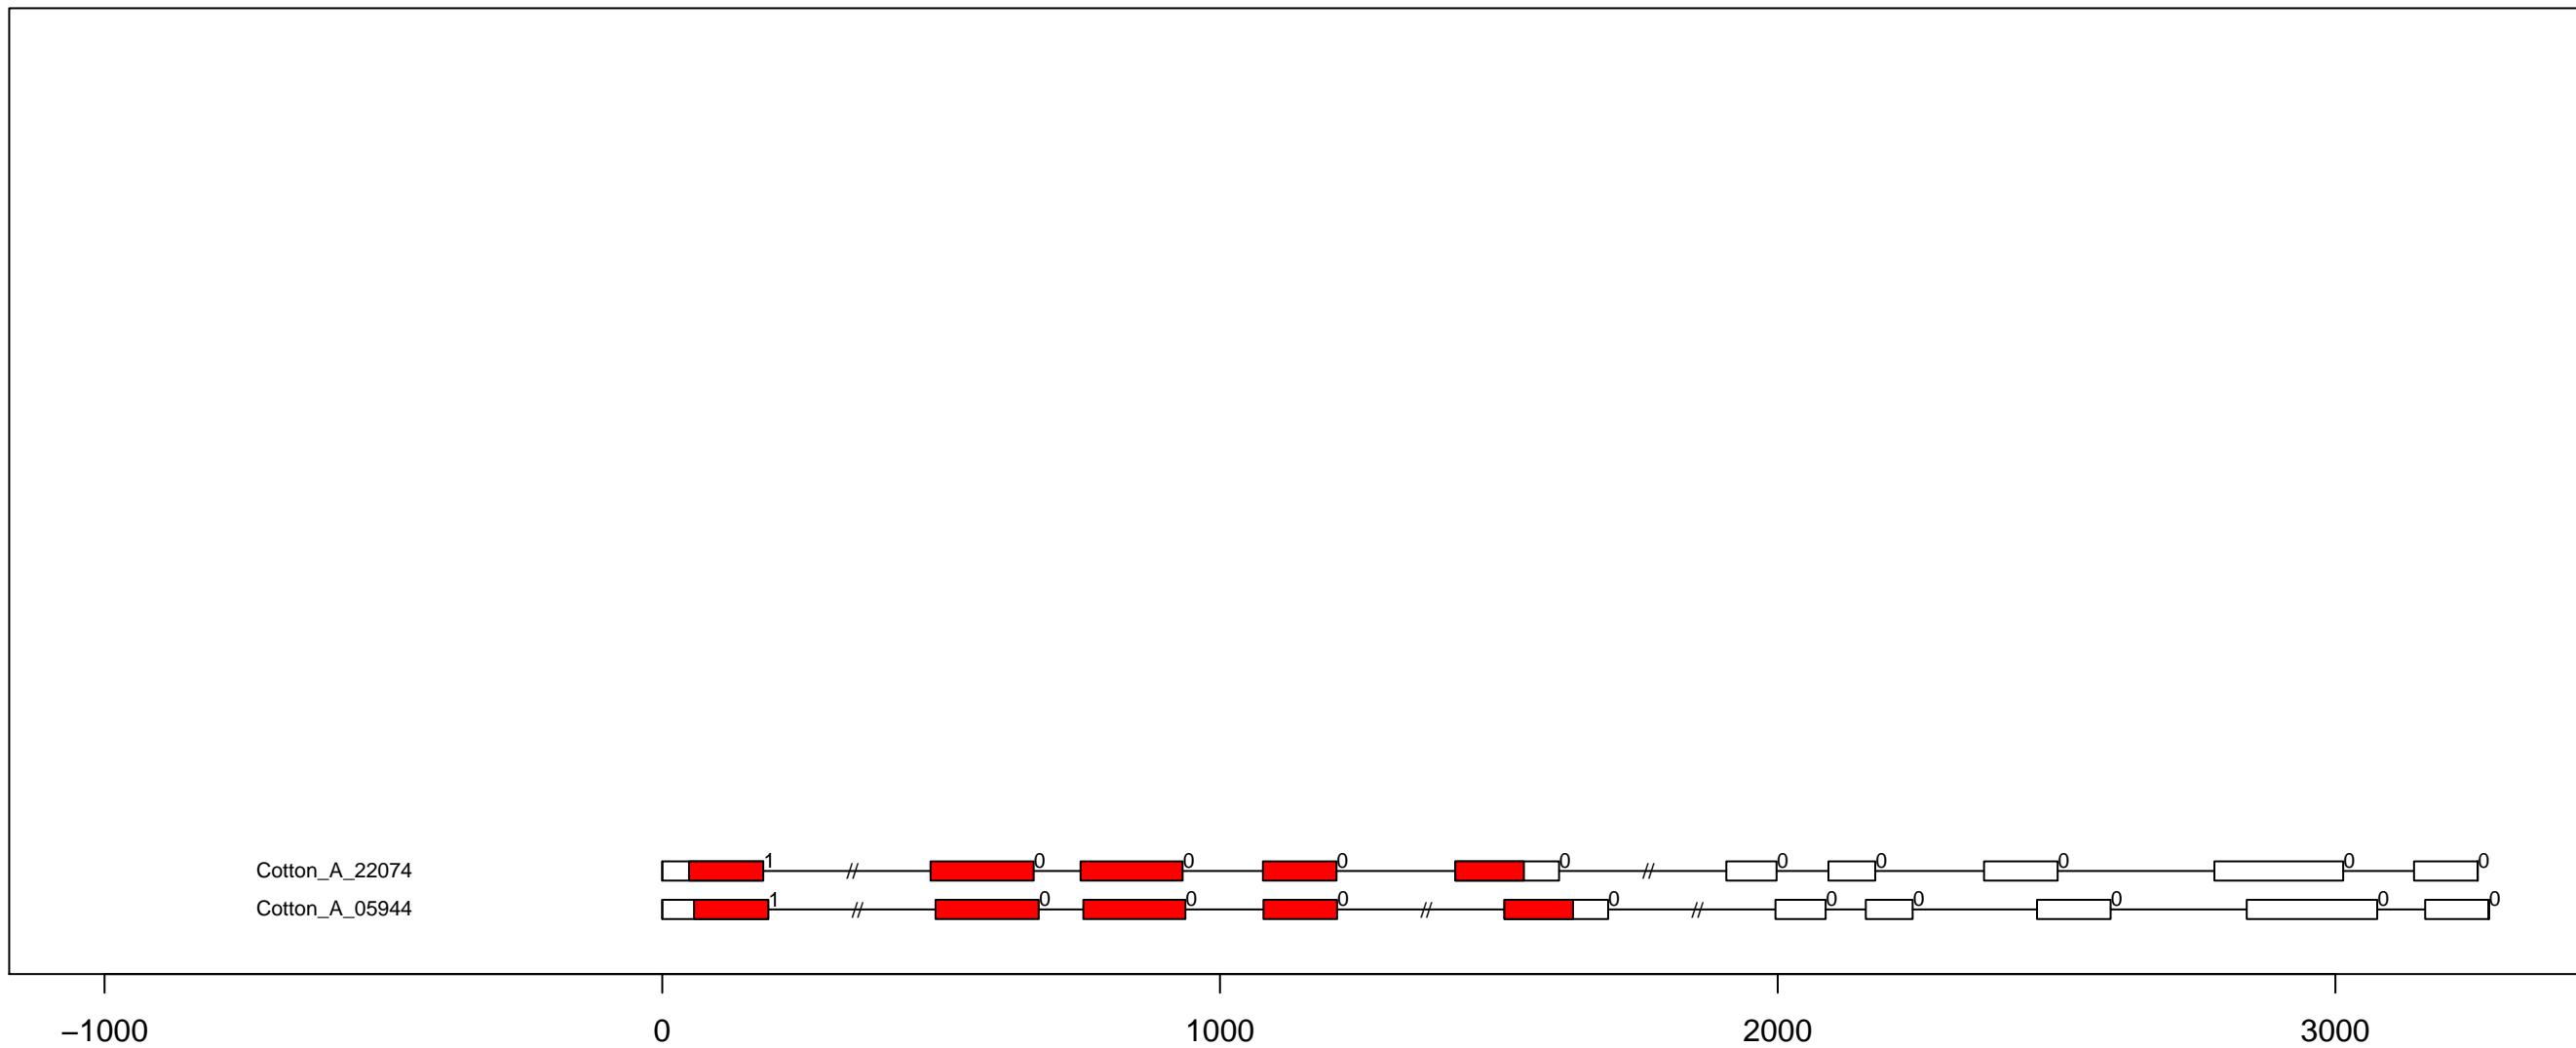

# G.ar CAMK\_CAMK1-DCAMKL exon-intron and domain diagram (all)

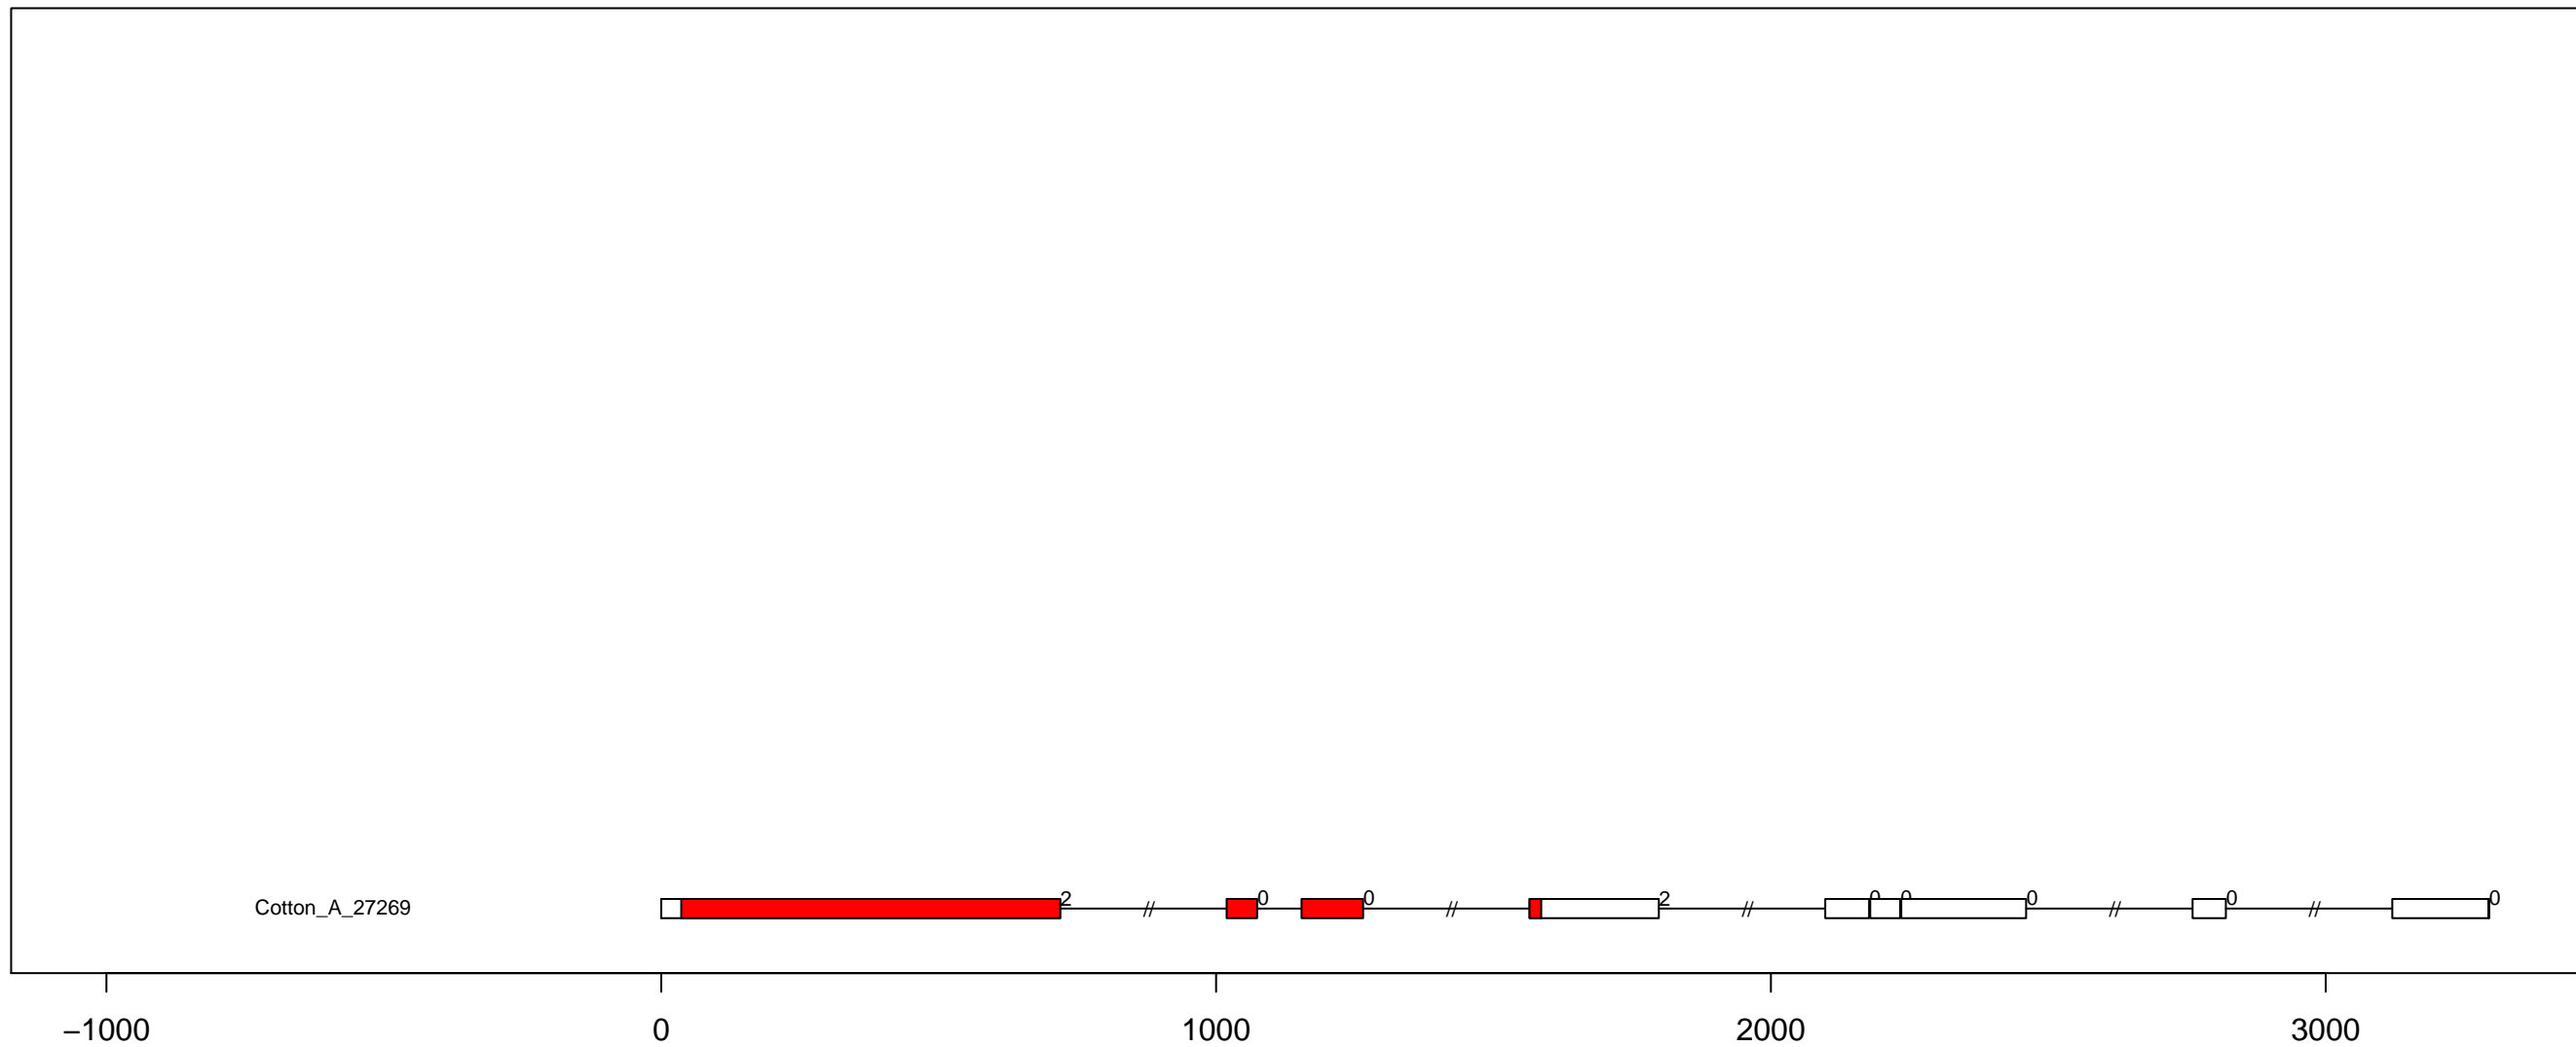

# G.ar CAMK\_CAMKL-CHK1 exon-intron and domain diagram (part 1)

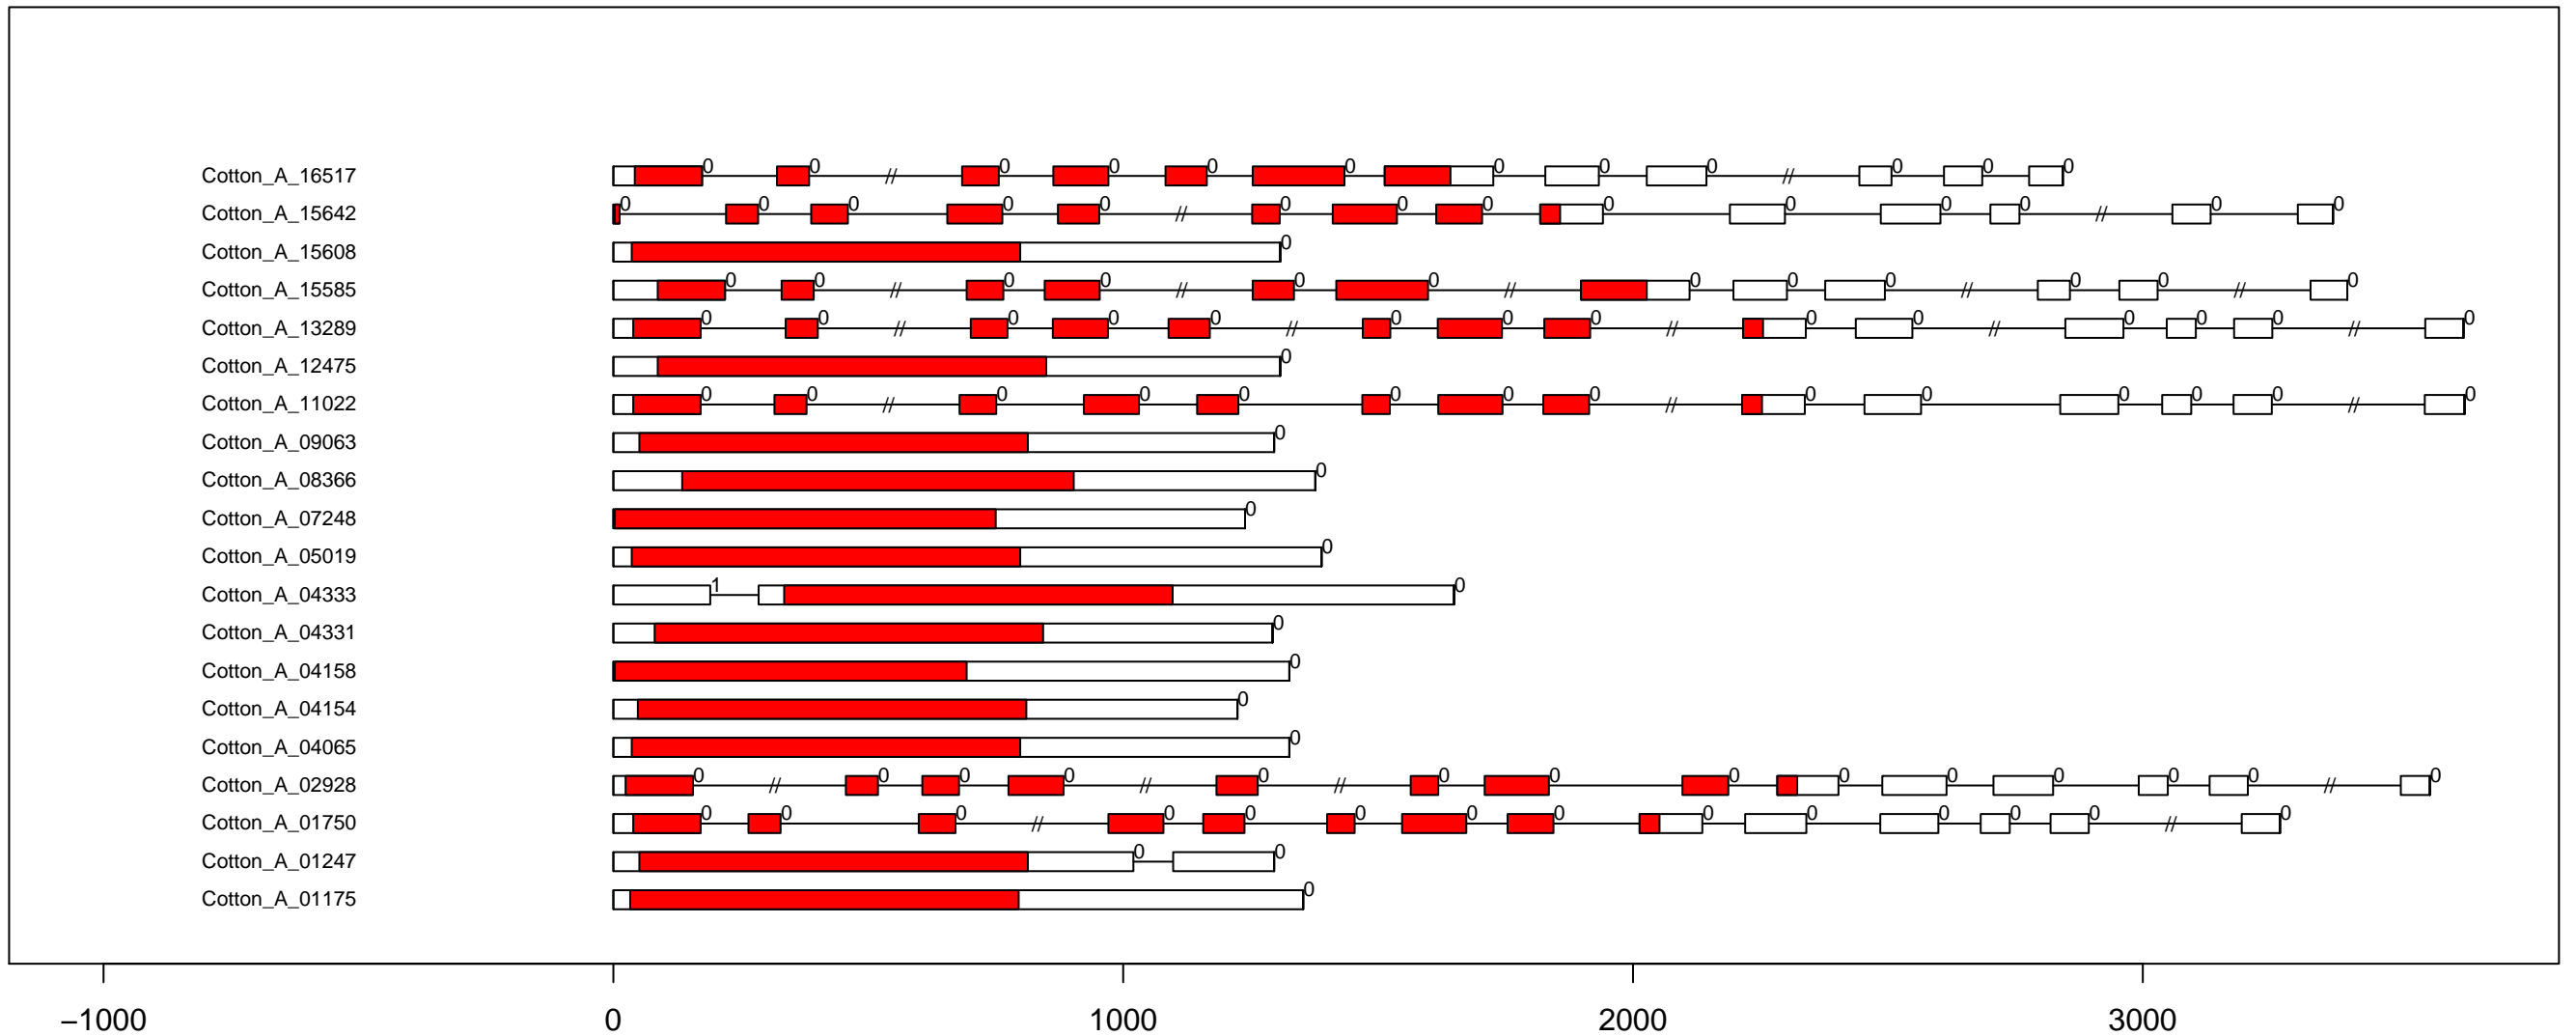

# G.ar CAMK\_CAMKL-CHK1 exon-intron and domain diagram (part 2)

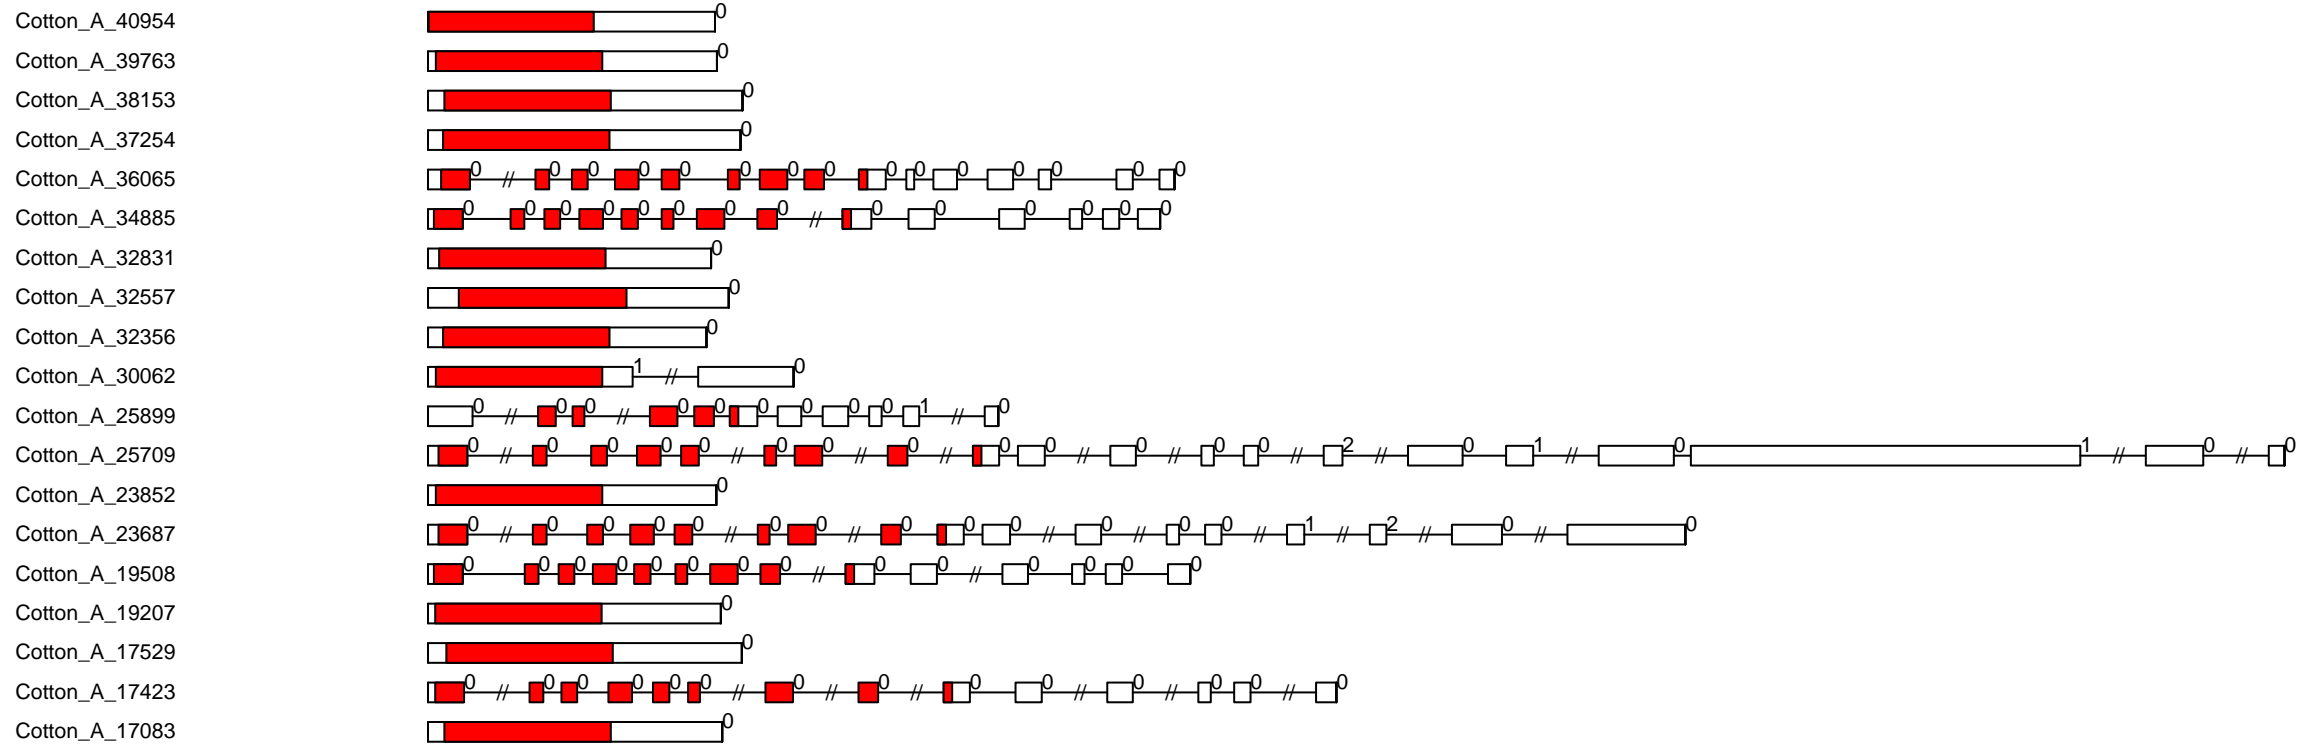

# G.ar CAMK\_CAMKL-LKB exon-intron and domain diagram (all)

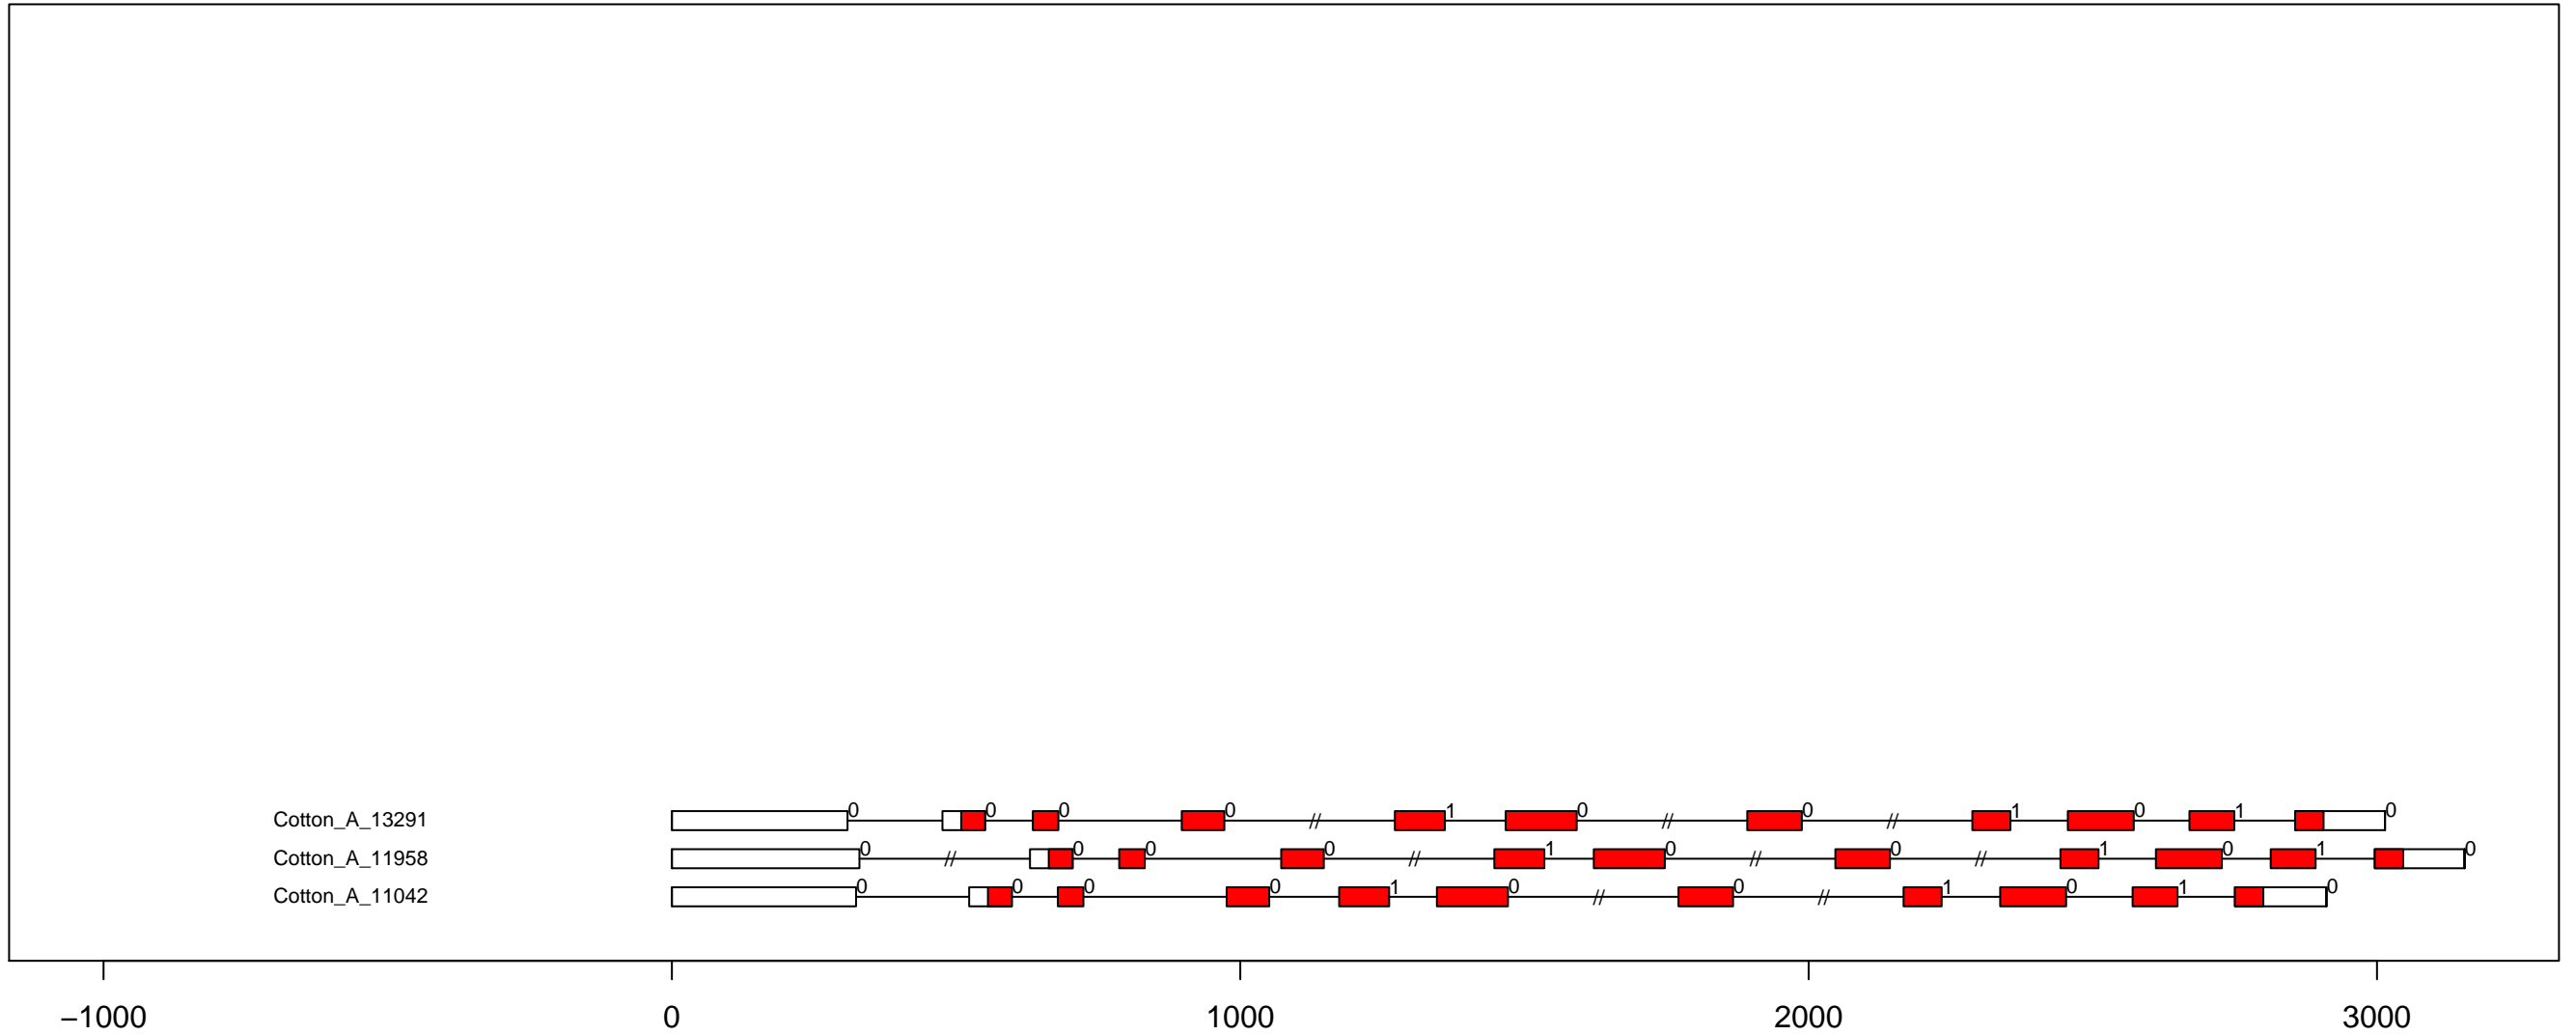

### G.ar CAMK\_CDPK exon-intron and domain diagram (part 1)

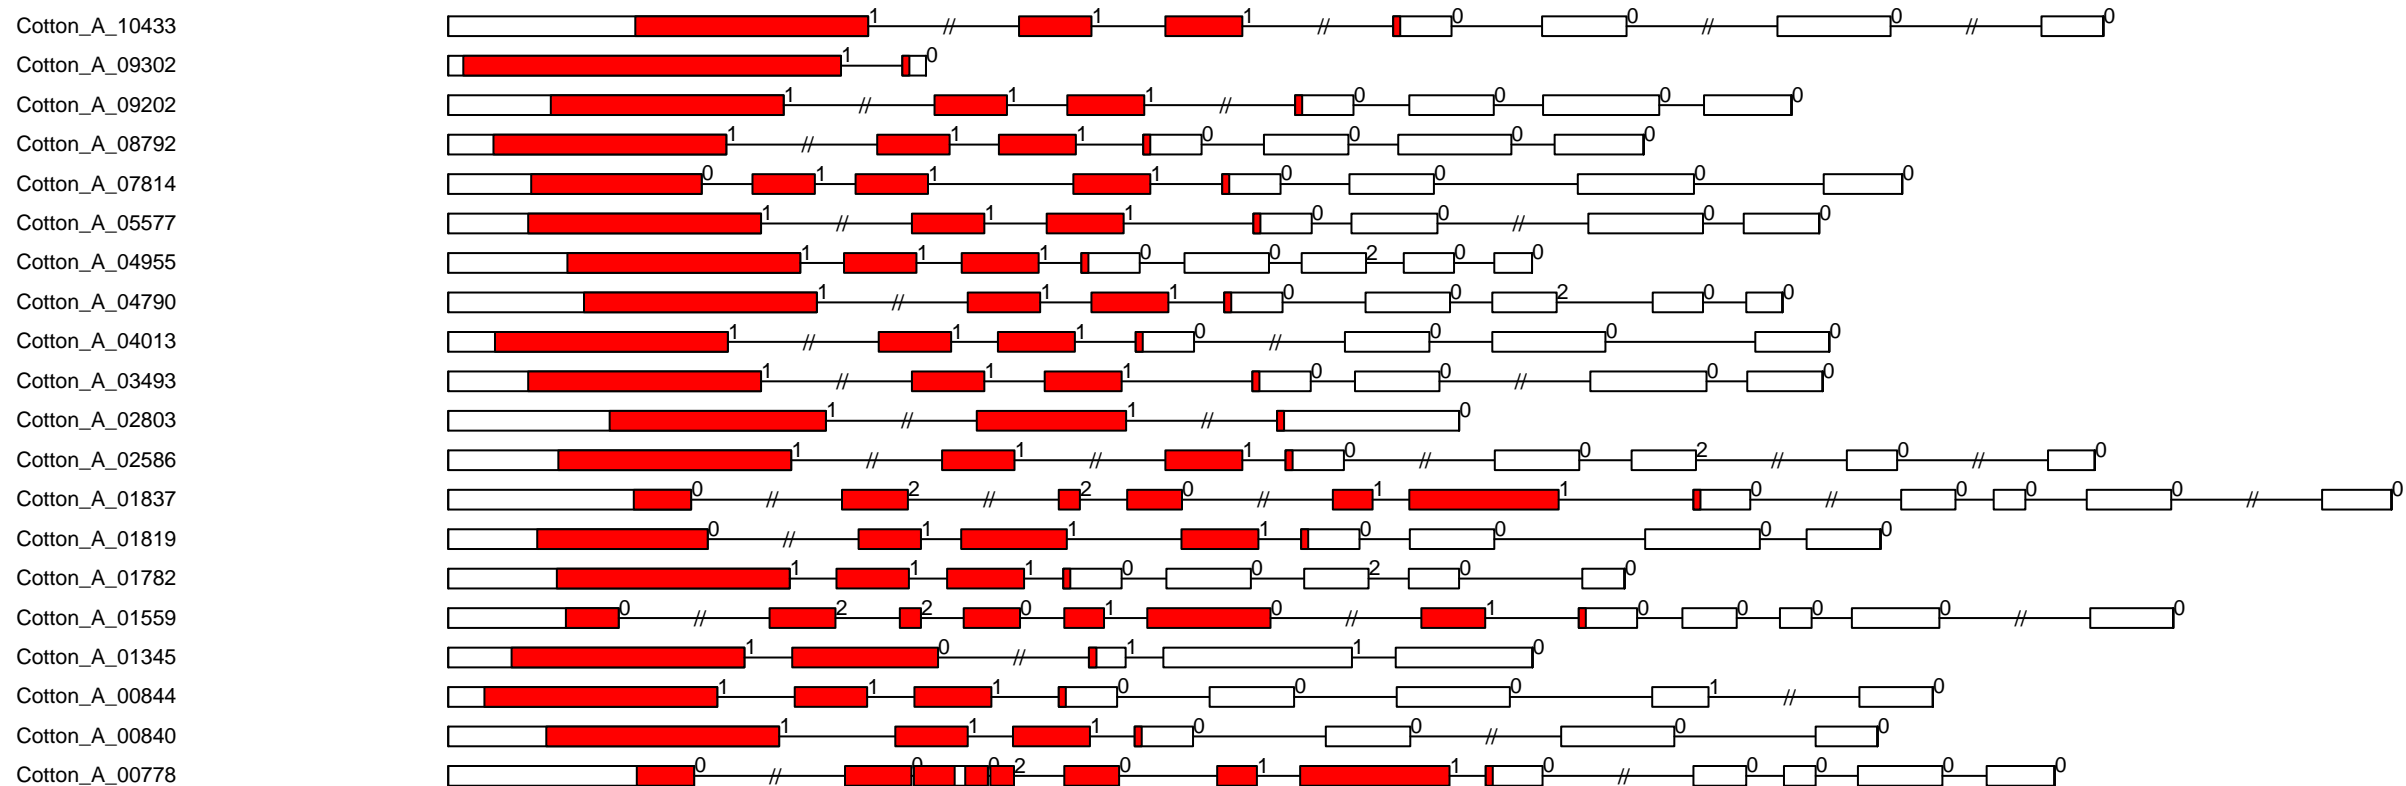

-1000

0

1000

2000

3000

4000



### G.ar CAMK\_CDPK exon-intron and domain diagram (part 2)

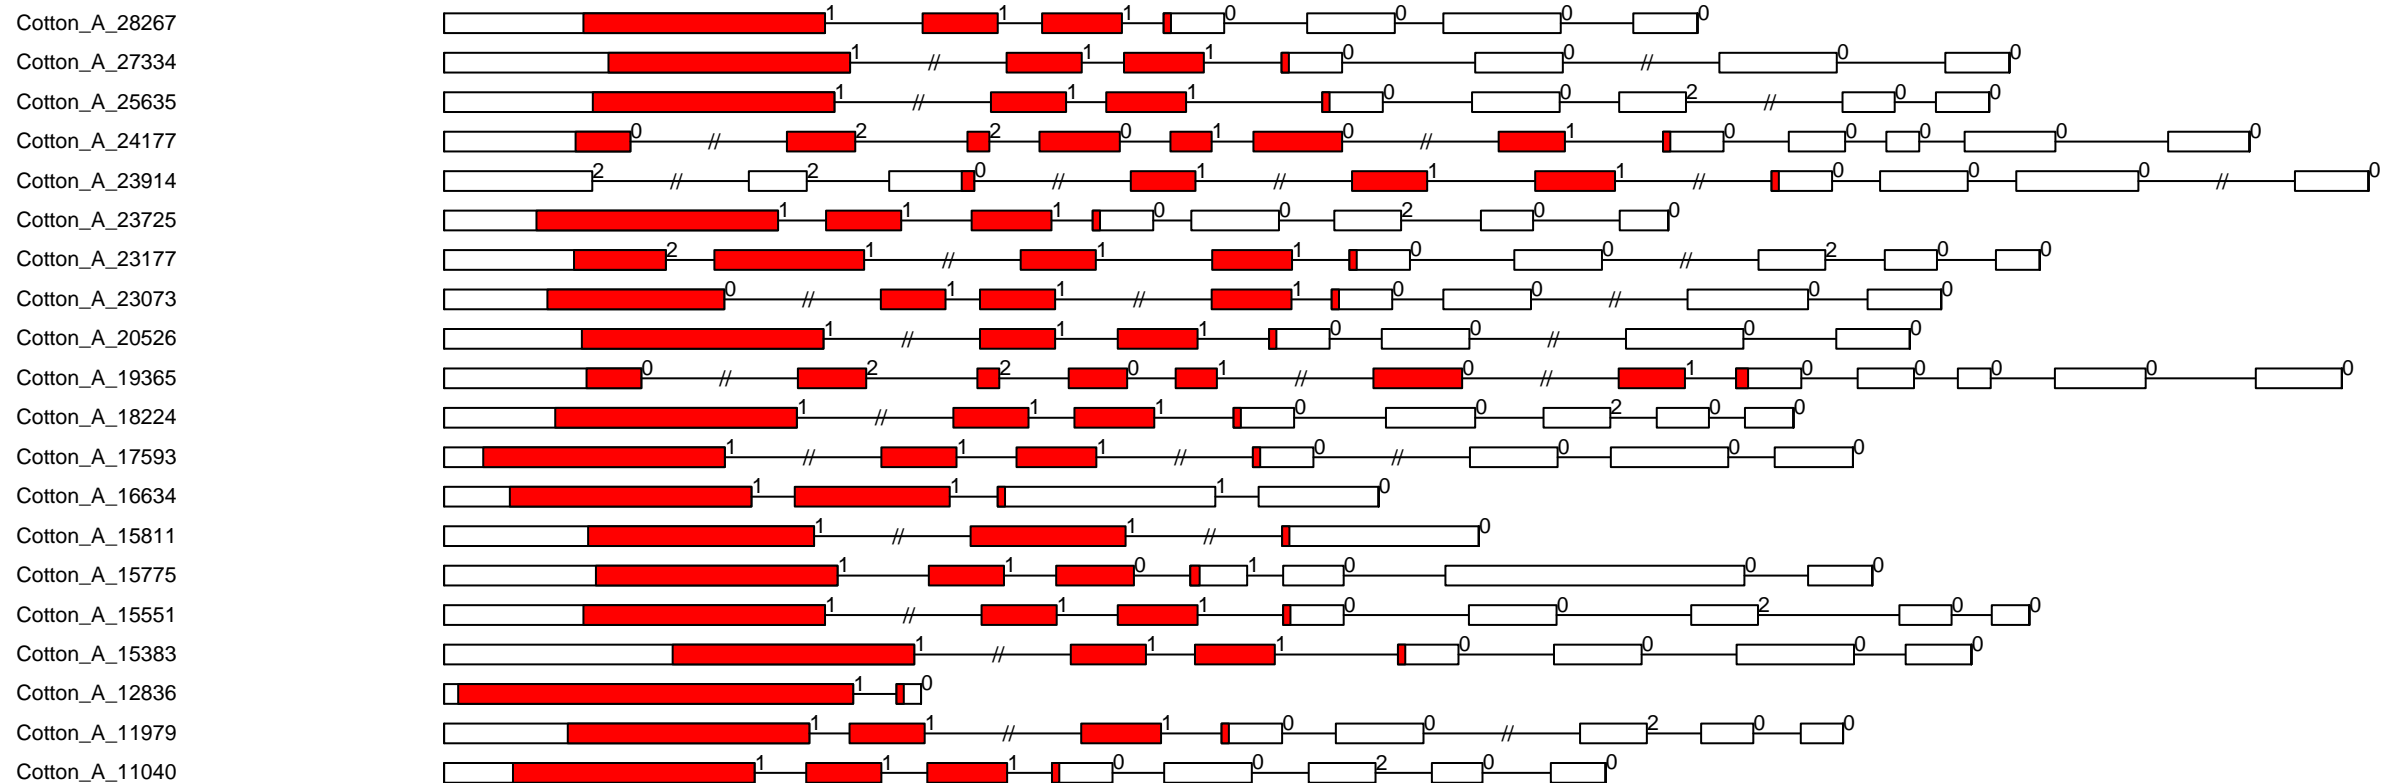

-1000

0

1000

2000

3000



# G.ar CAMK\_OST1L exon-intron and domain diagram (all)

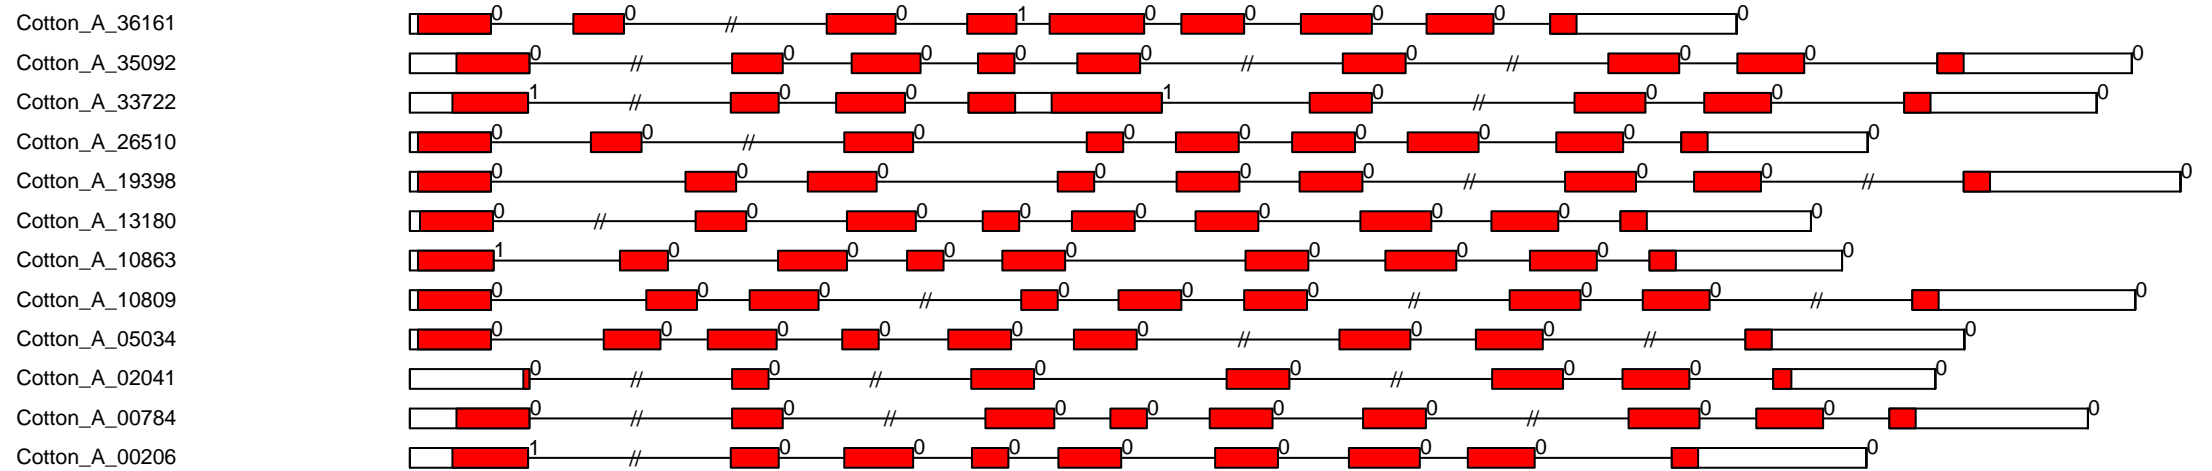

-1000

0

1000

2000

# G.ar CK1\_CK1 exon-intron and domain diagram (all)

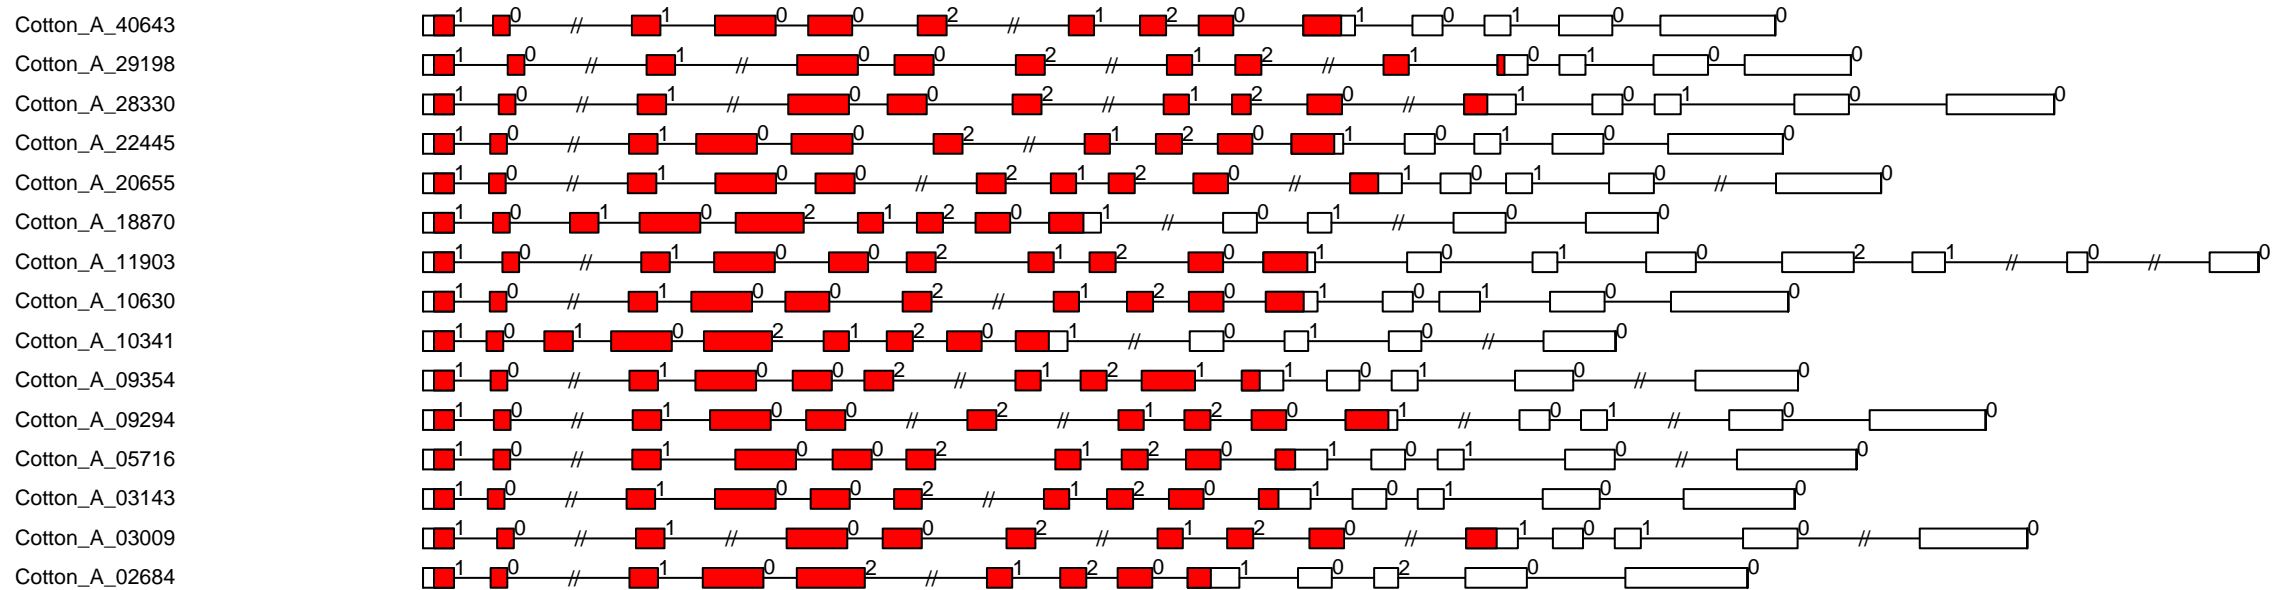

### G.ar CK1\_CK1-PI exon-intron and domain diagram (all)

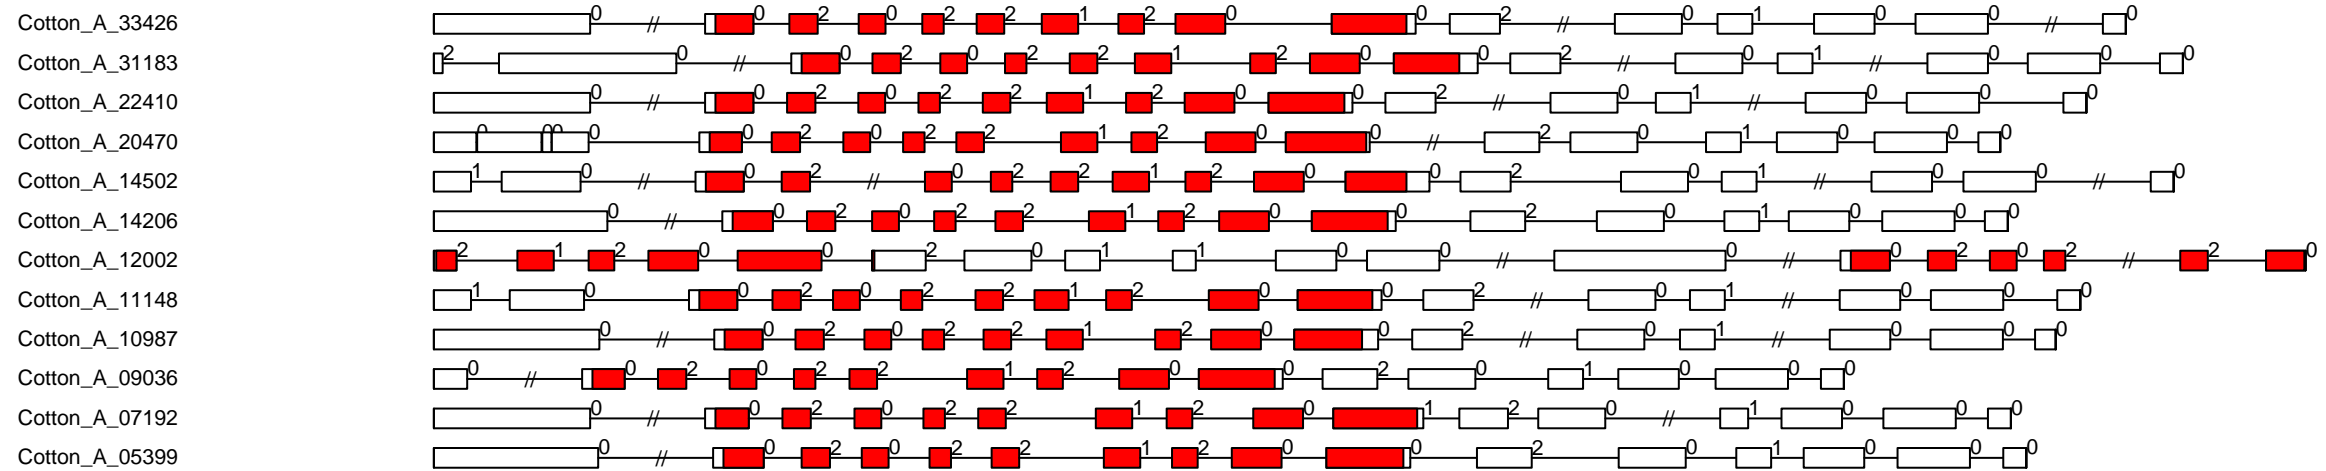

-1000

0

1000

2000

3000

4000

5000

# G.ar CMGC\_CDK-CCRK exon-intron and domain diagram (all)

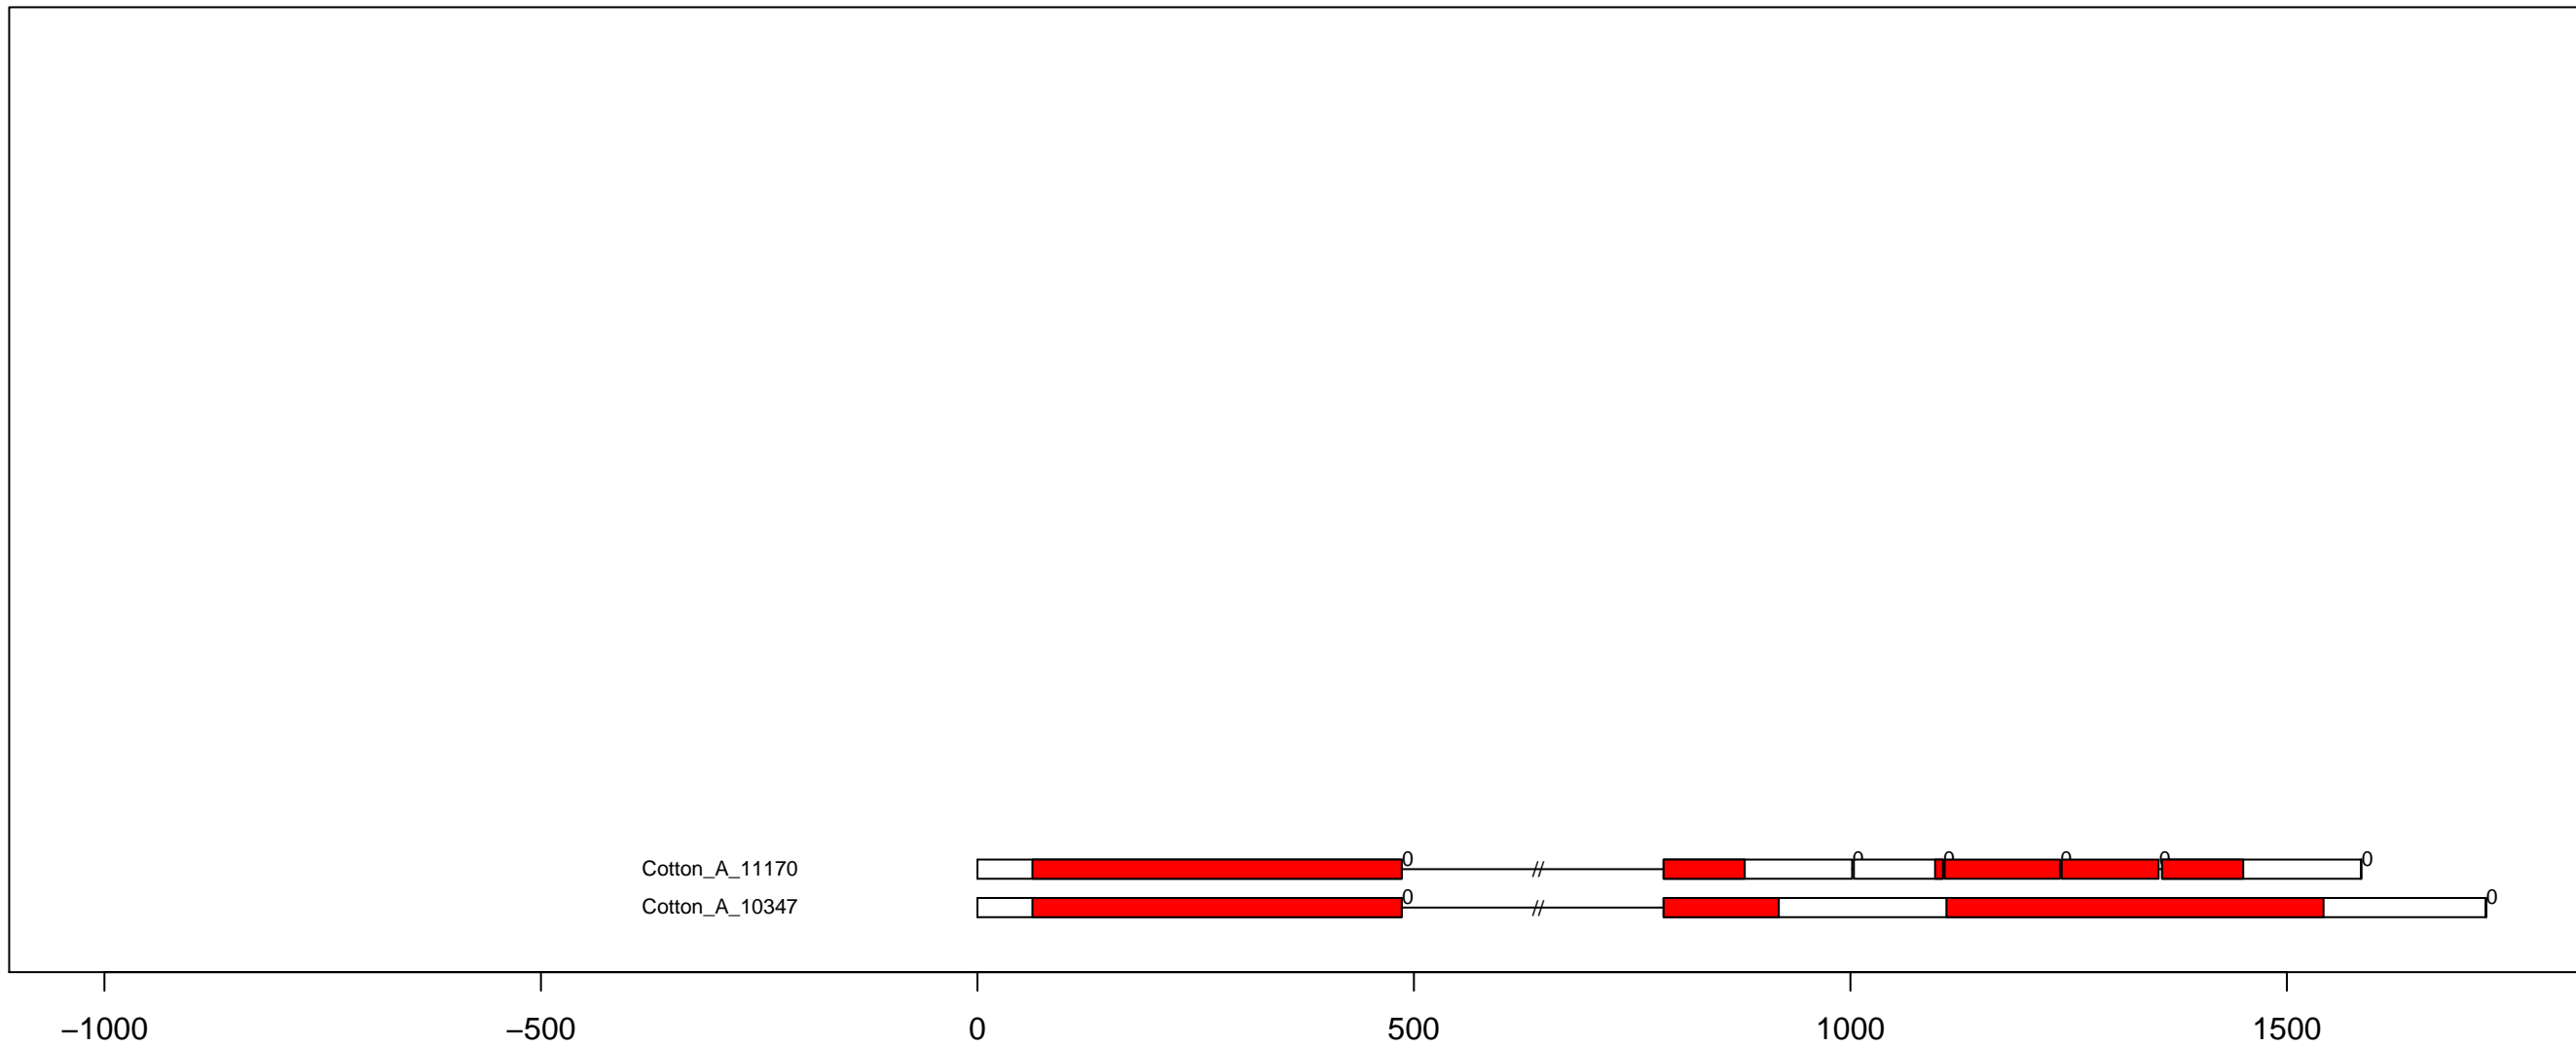

# G.ar CMGC\_CDK-CDK7 exon-intron and domain diagram (all)

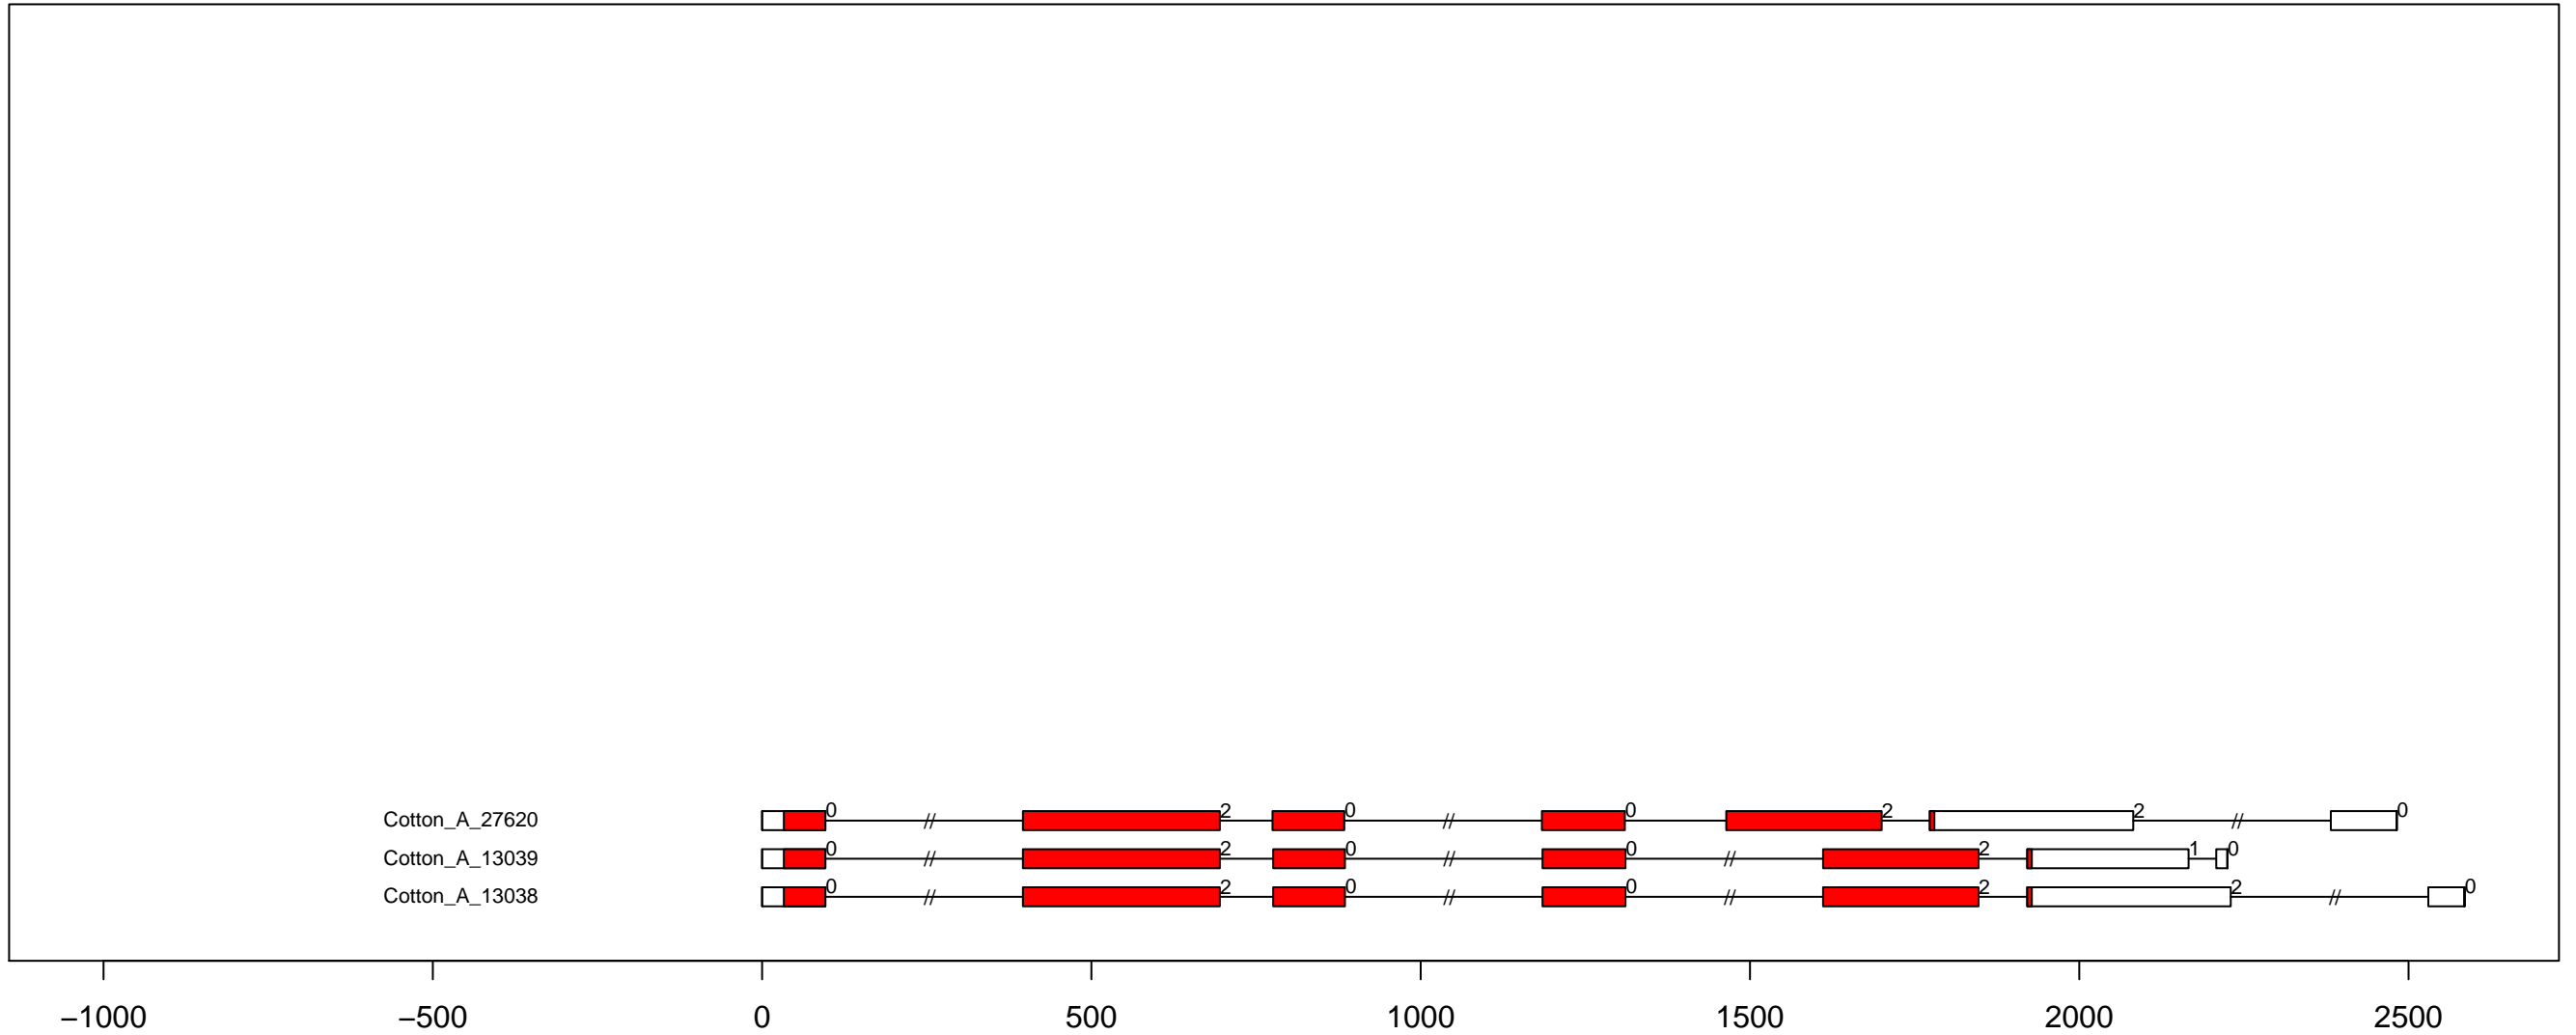

# G.ar CMGC\_CDK-CDK8 exon-intron and domain diagram (all)

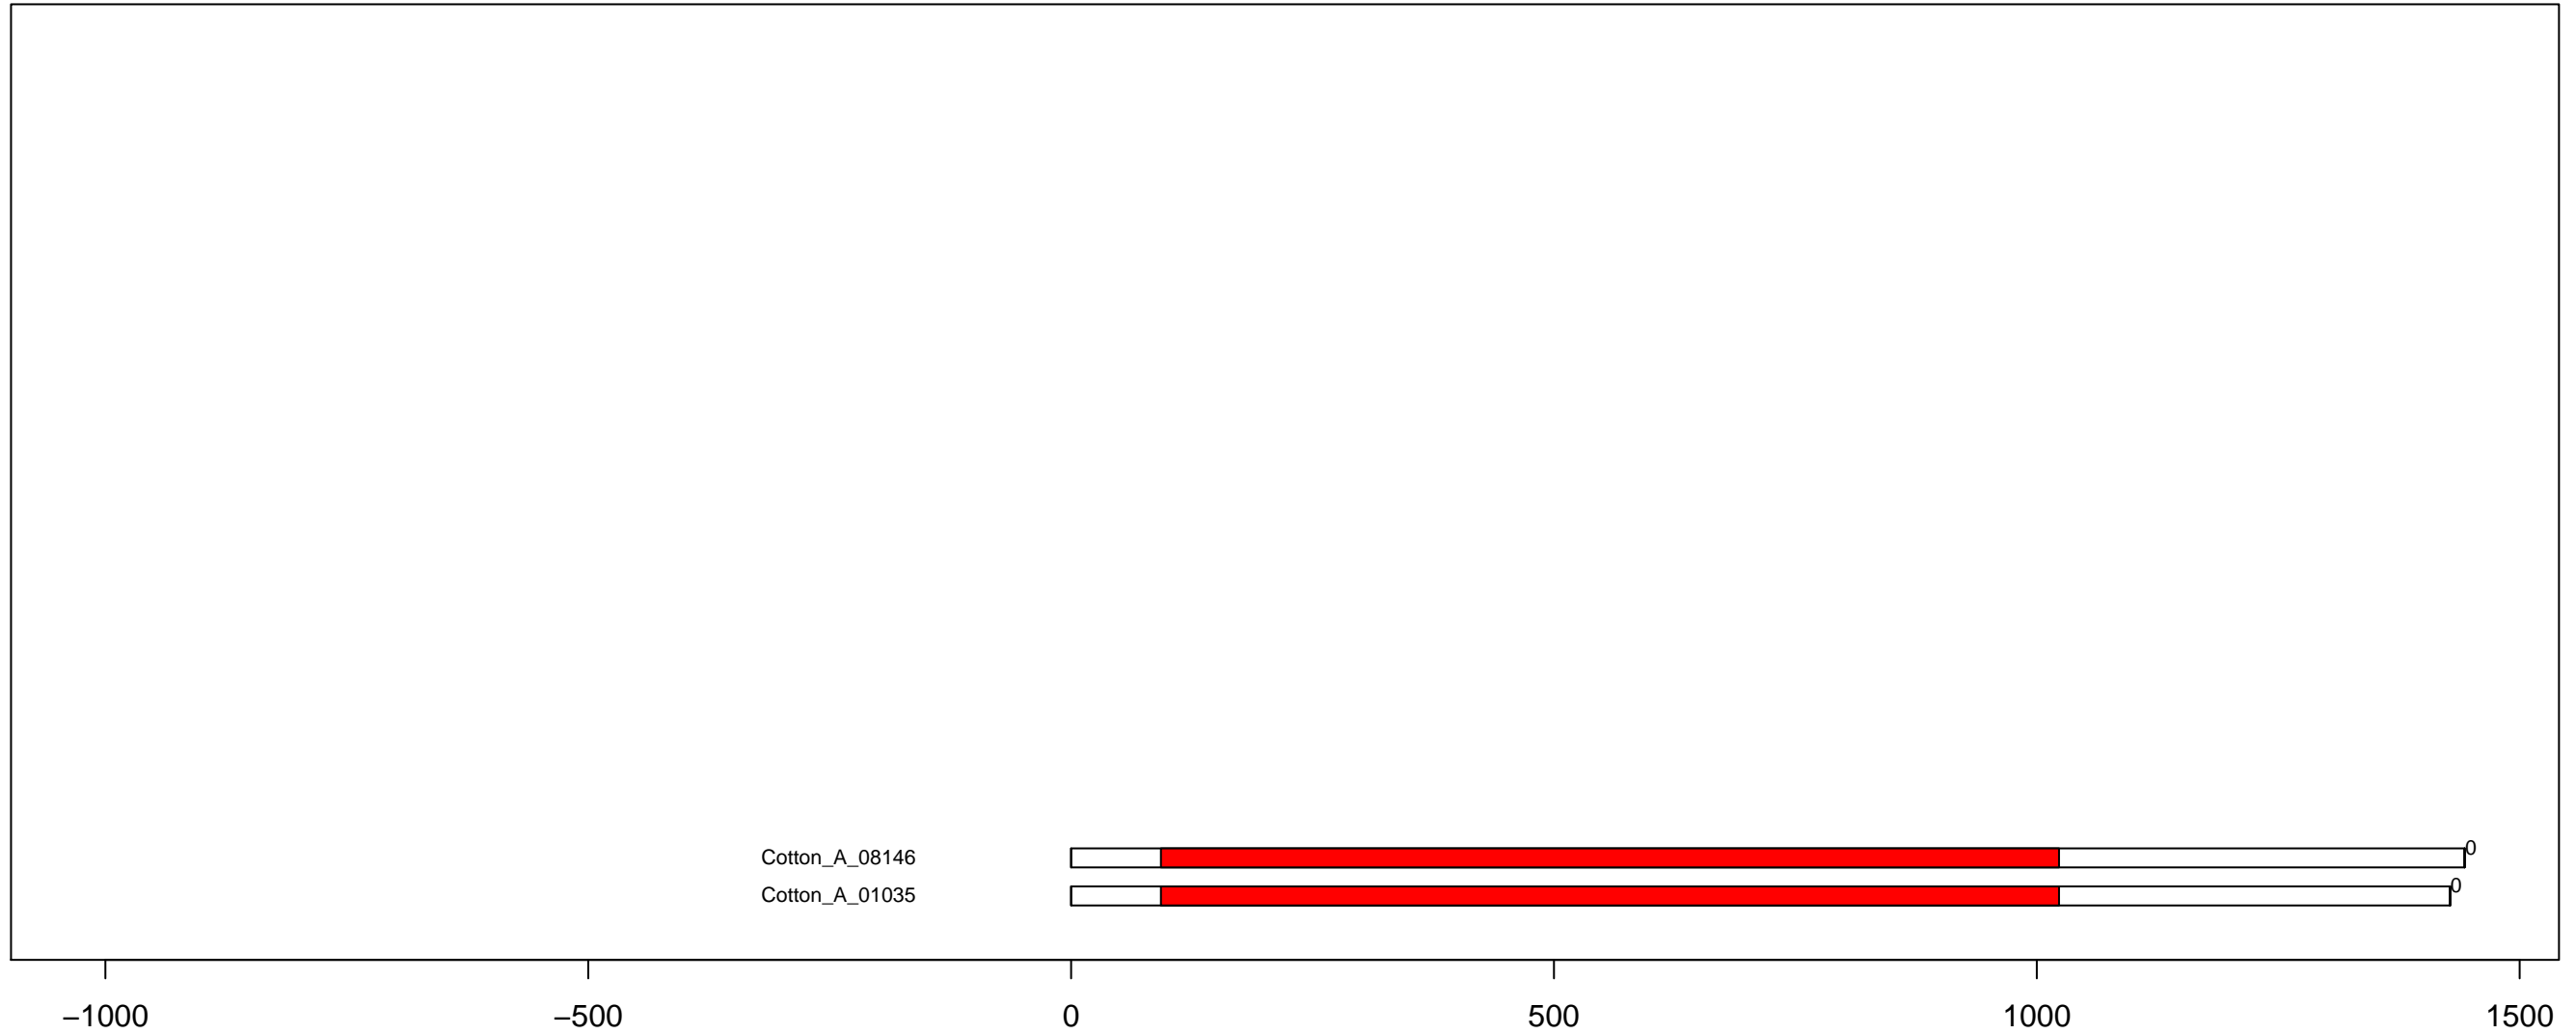



# G.ar CMGC\_CDK-CRK7-CDK9 exon-intron and domain diagram (part 1)

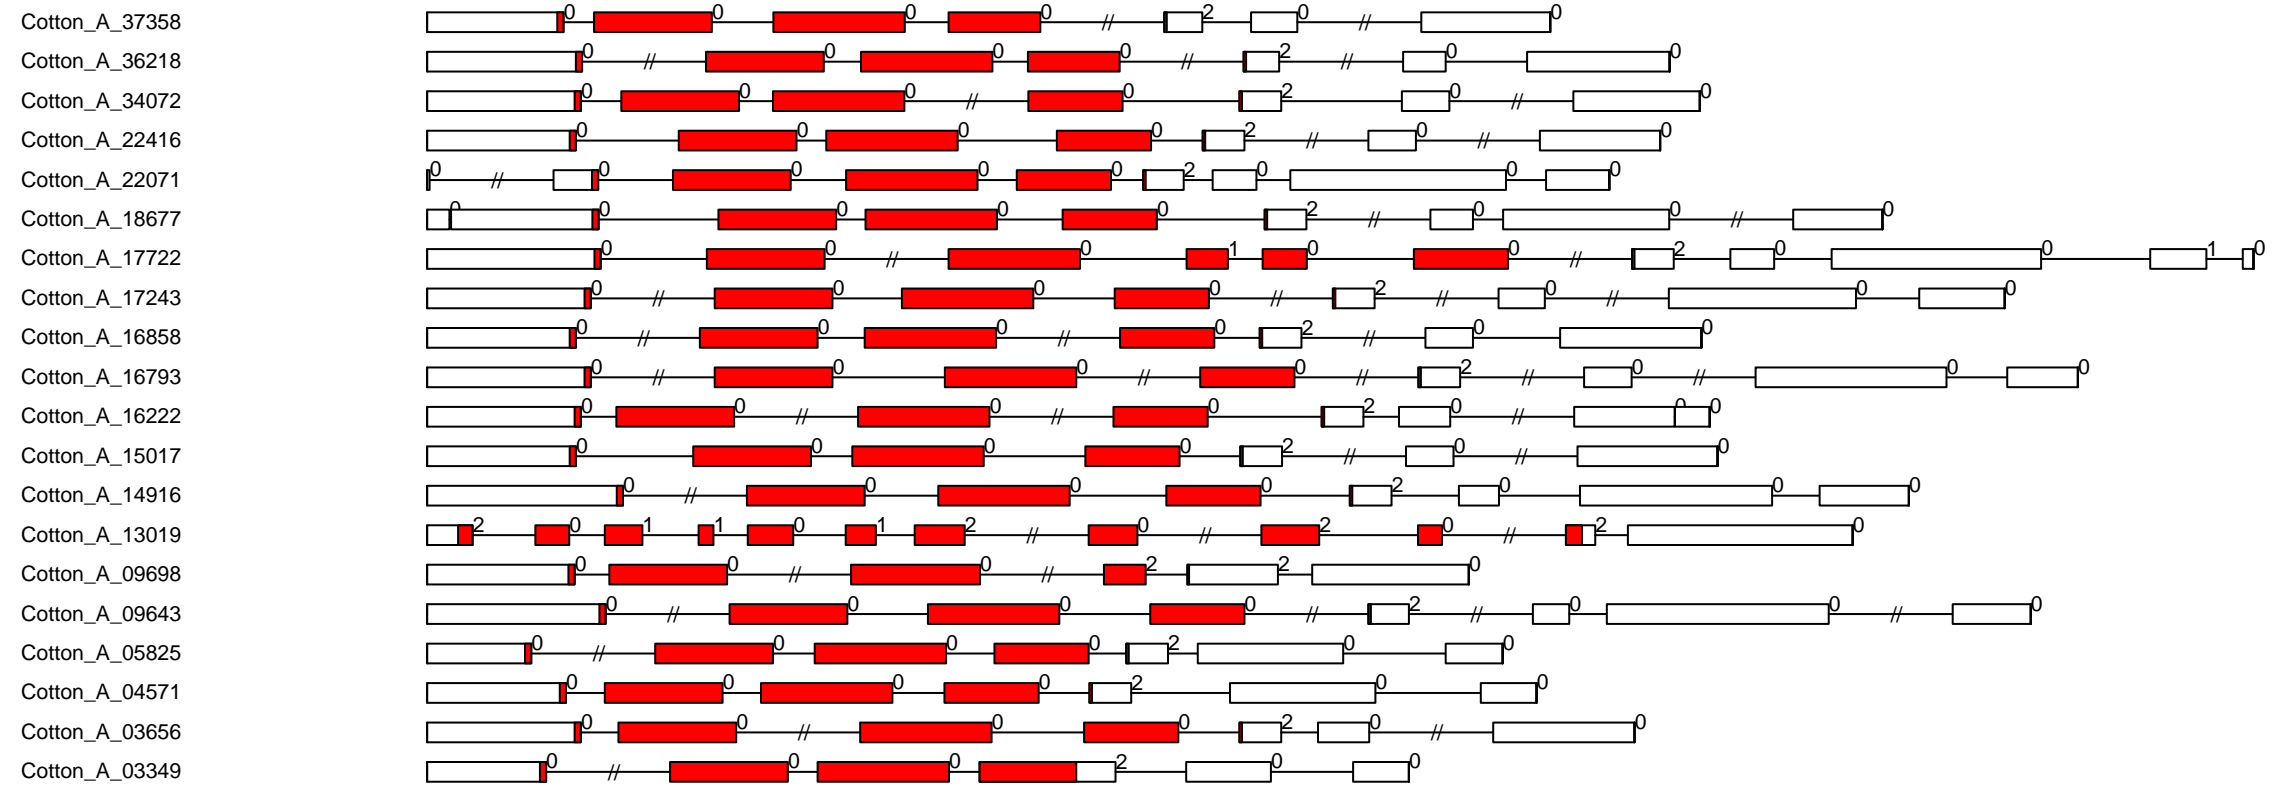

# G.ar CMGC\_CDK-CRK7-CDK9 exon-intron and domain diagram (part 2)

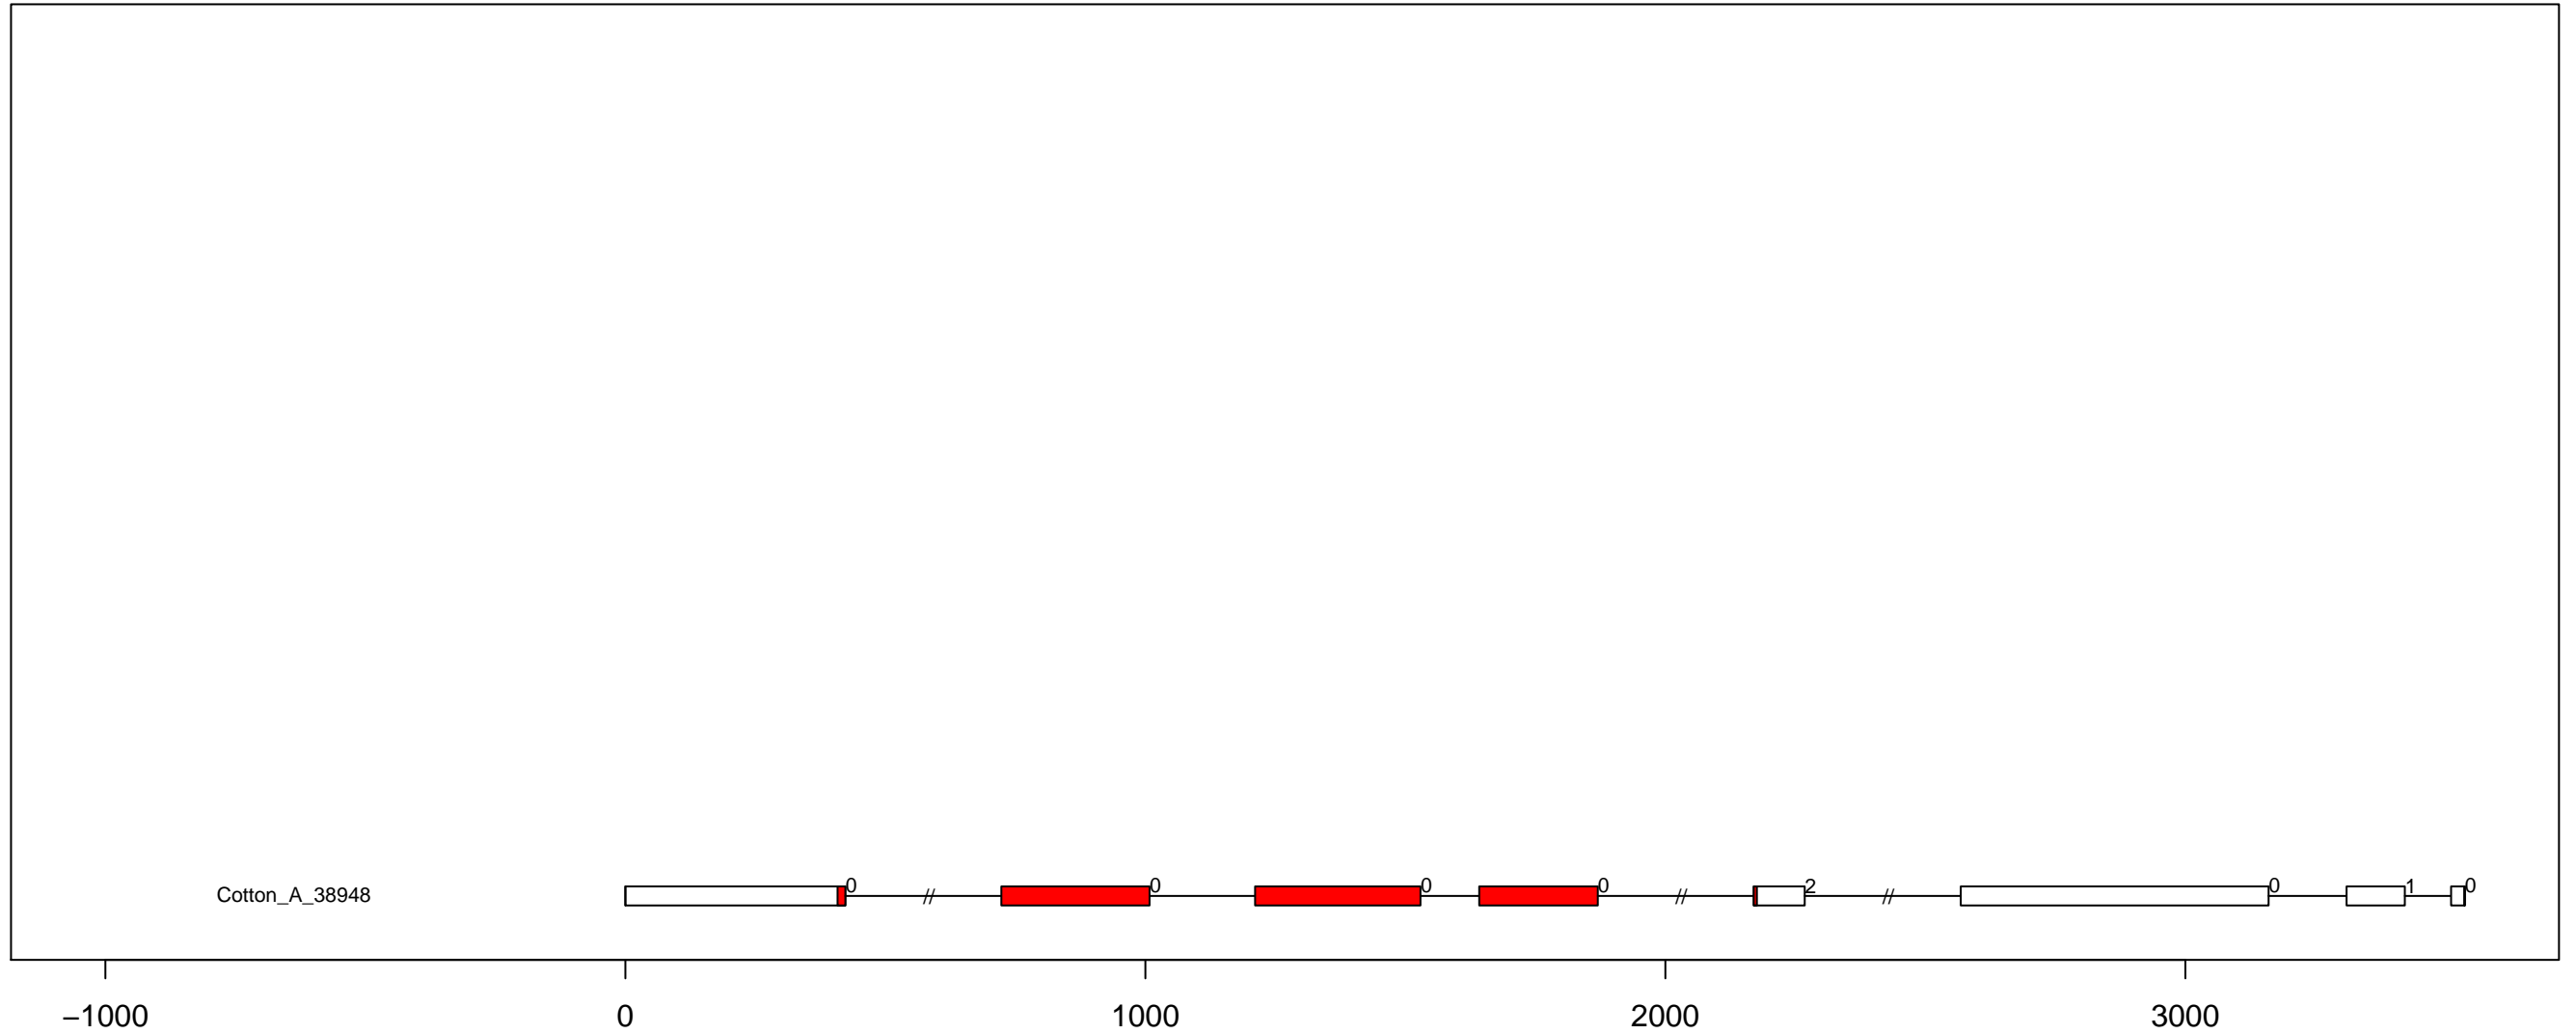

### G.ar CMGC\_CDK-PITSLRE exon-intron and domain diagram (all)

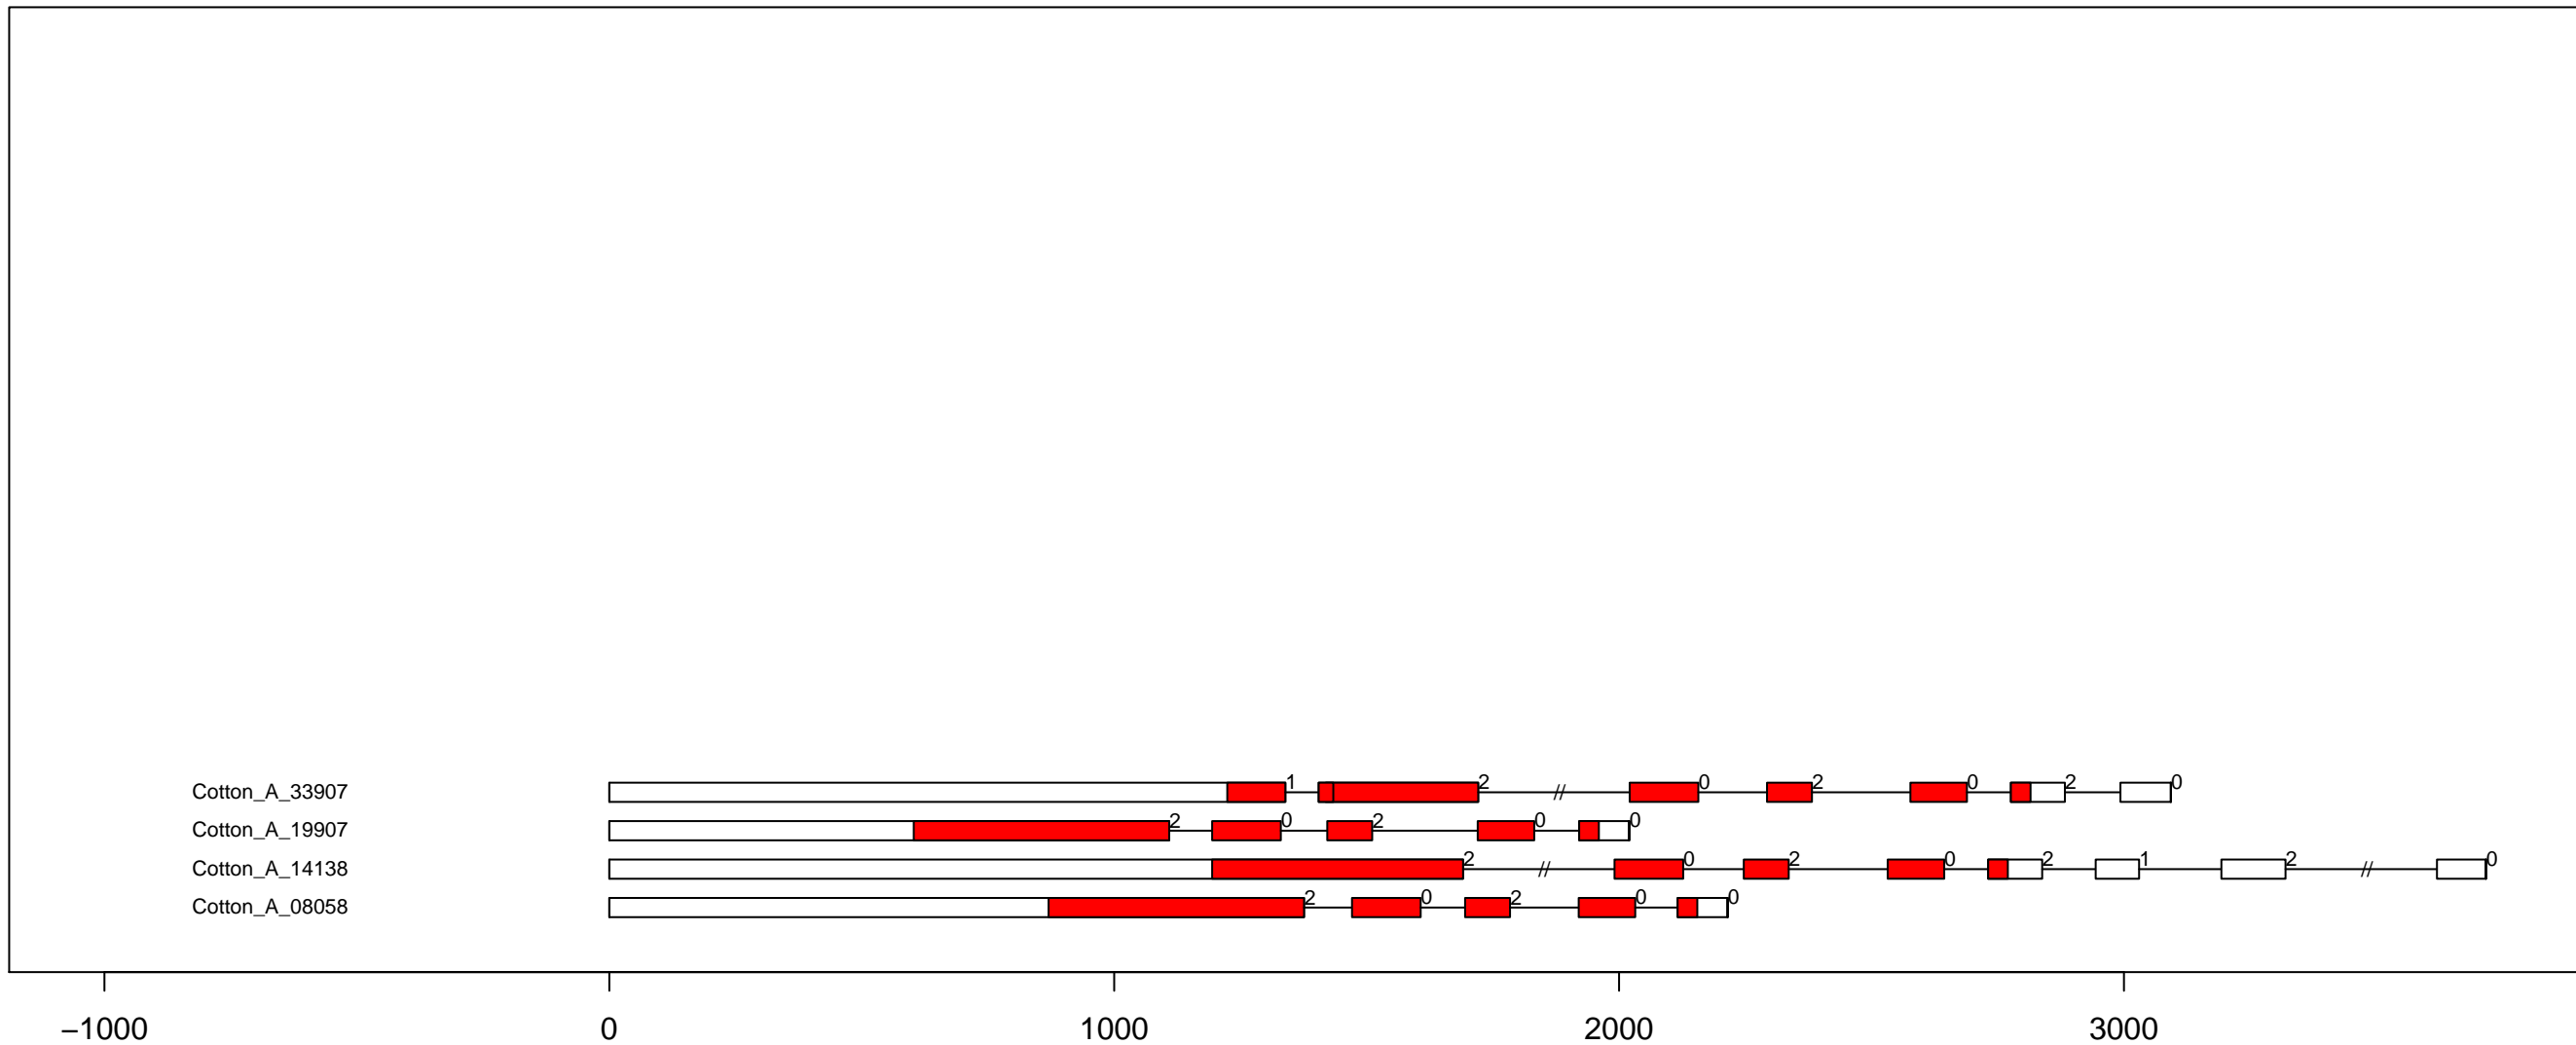

# G.ar CMGC\_CDK-PI exon-intron and domain diagram (all)

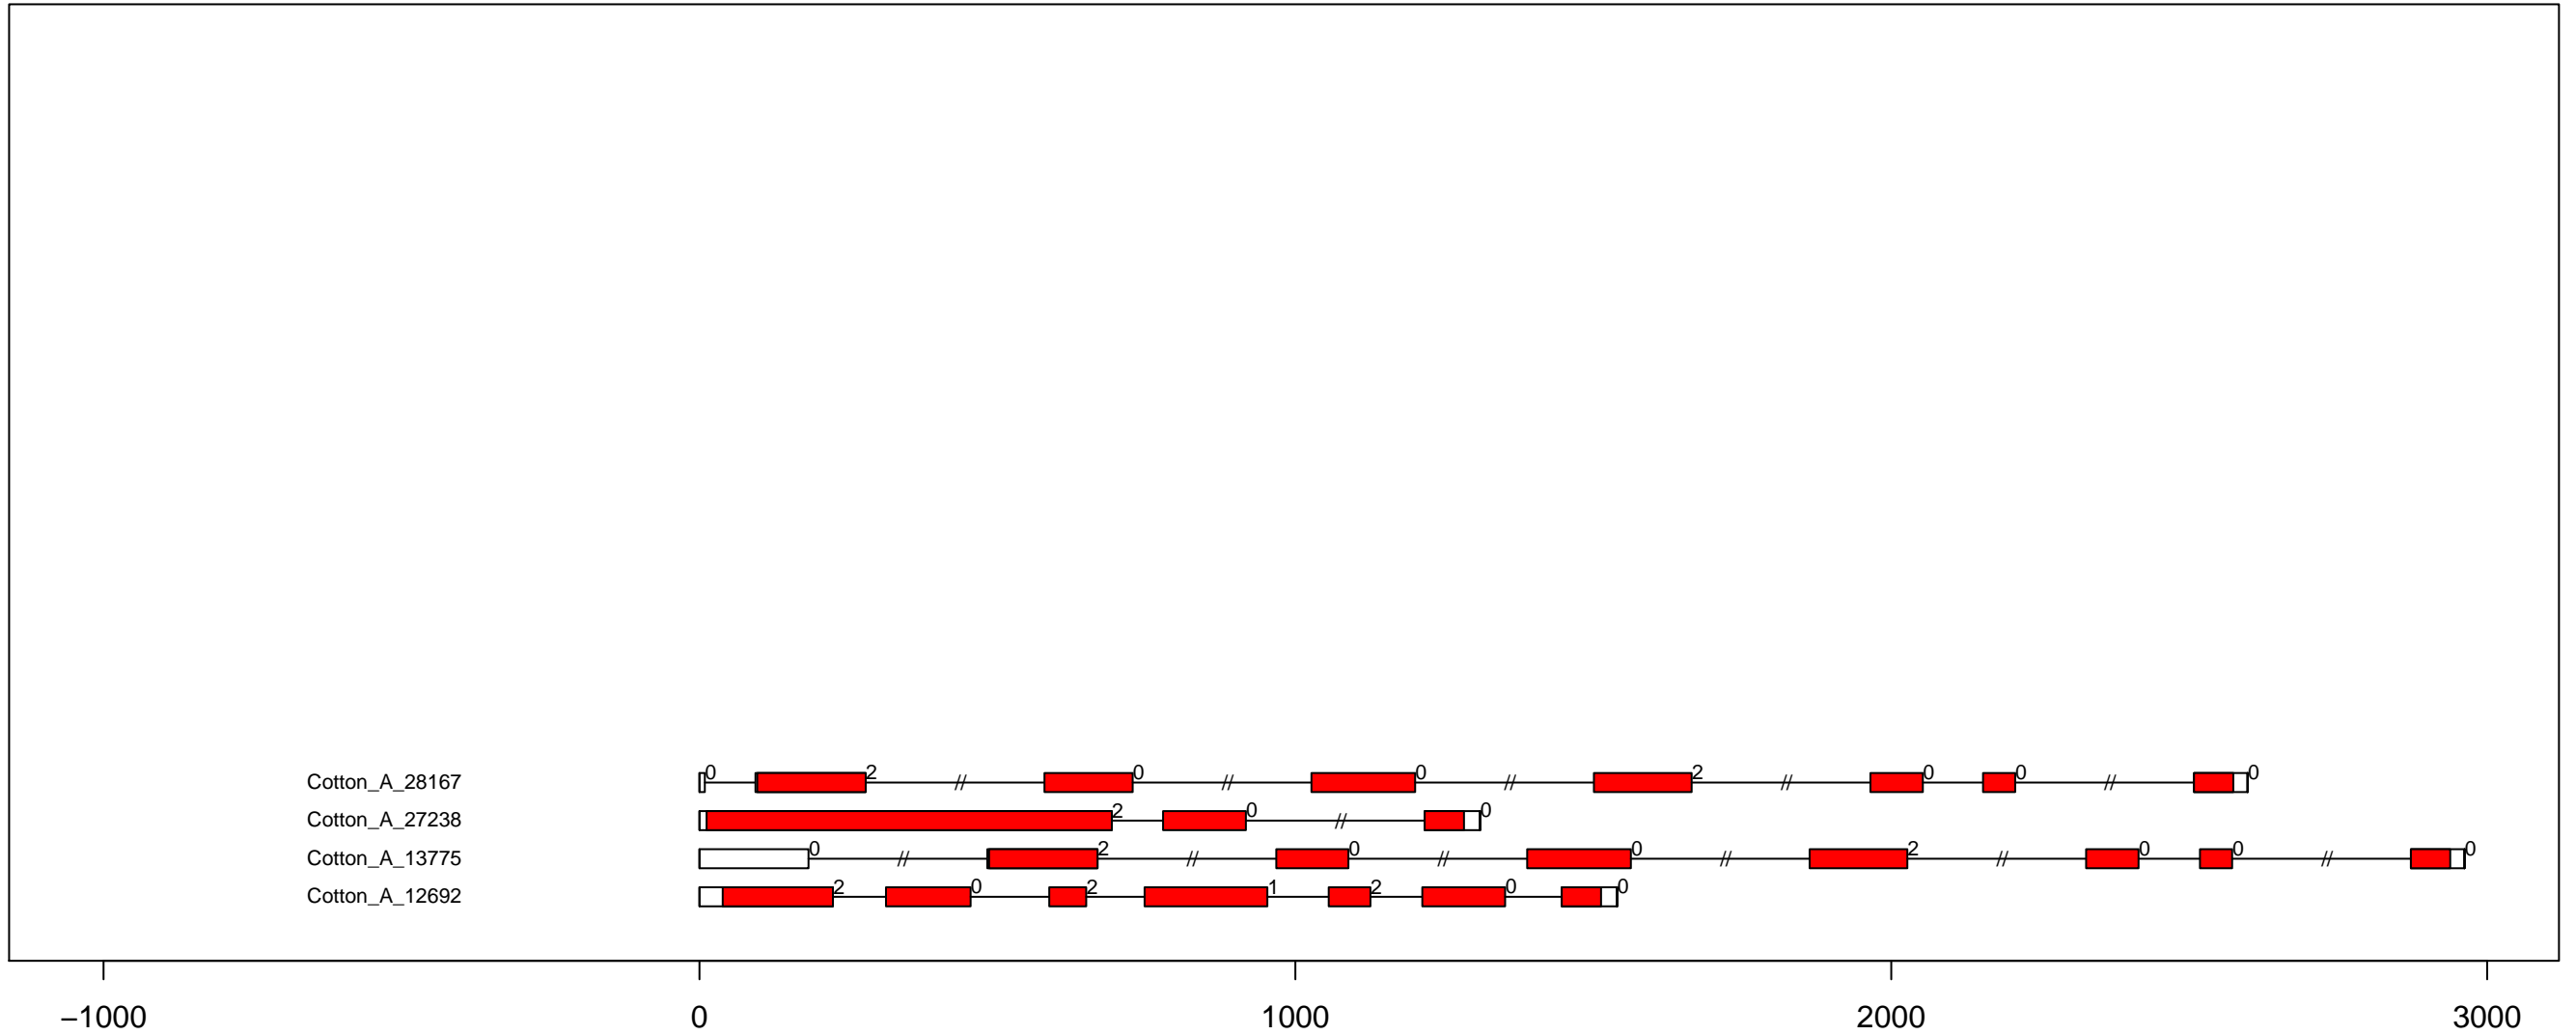



### G.ar CMGC\_CLK exon-intron and domain diagram (all)

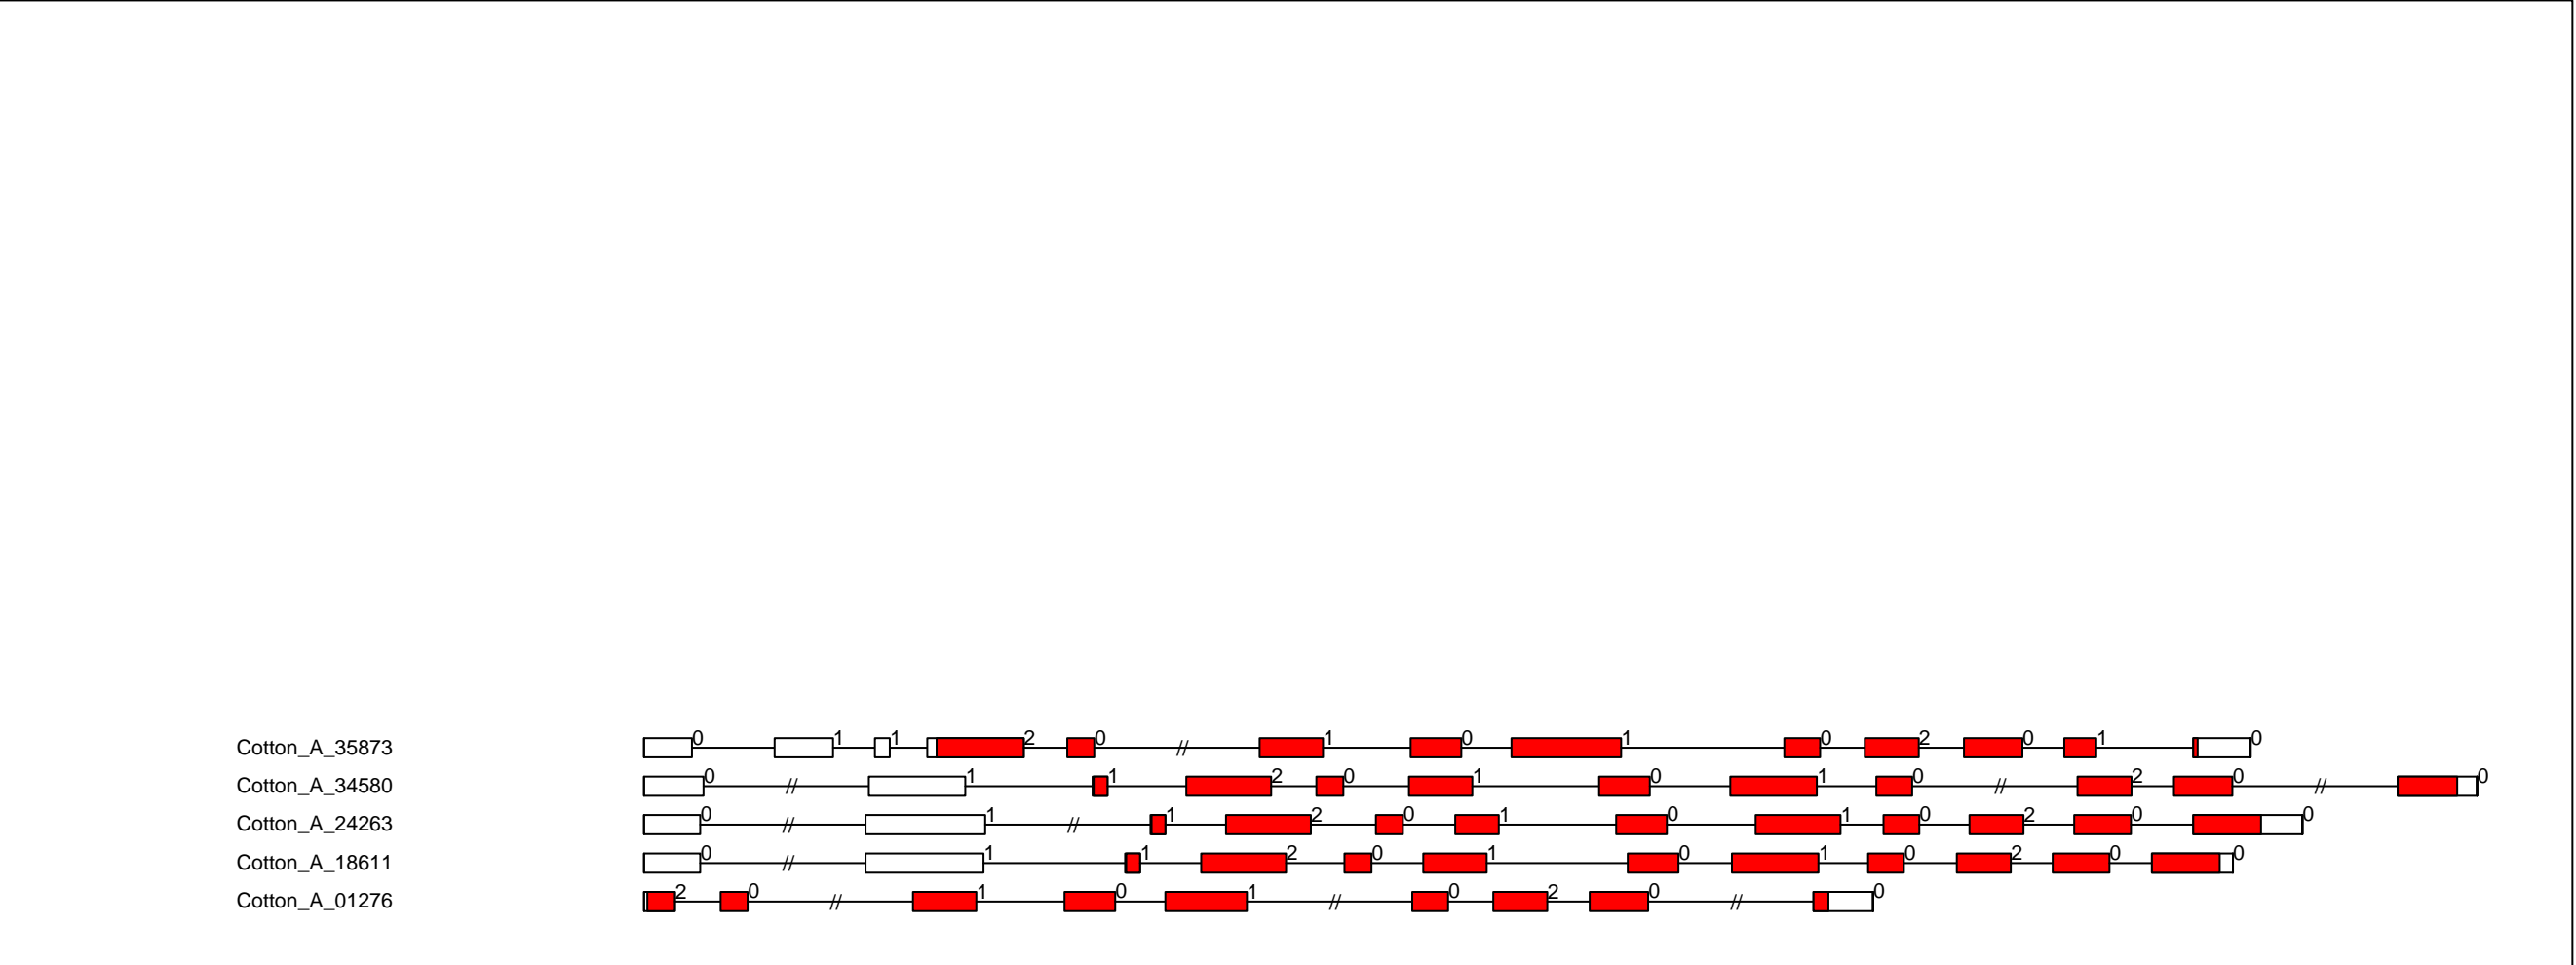

-1000

0

1000

2000

3000

# G.ar CMGC\_DYRK-PRP4 exon-intron and domain diagram (all)

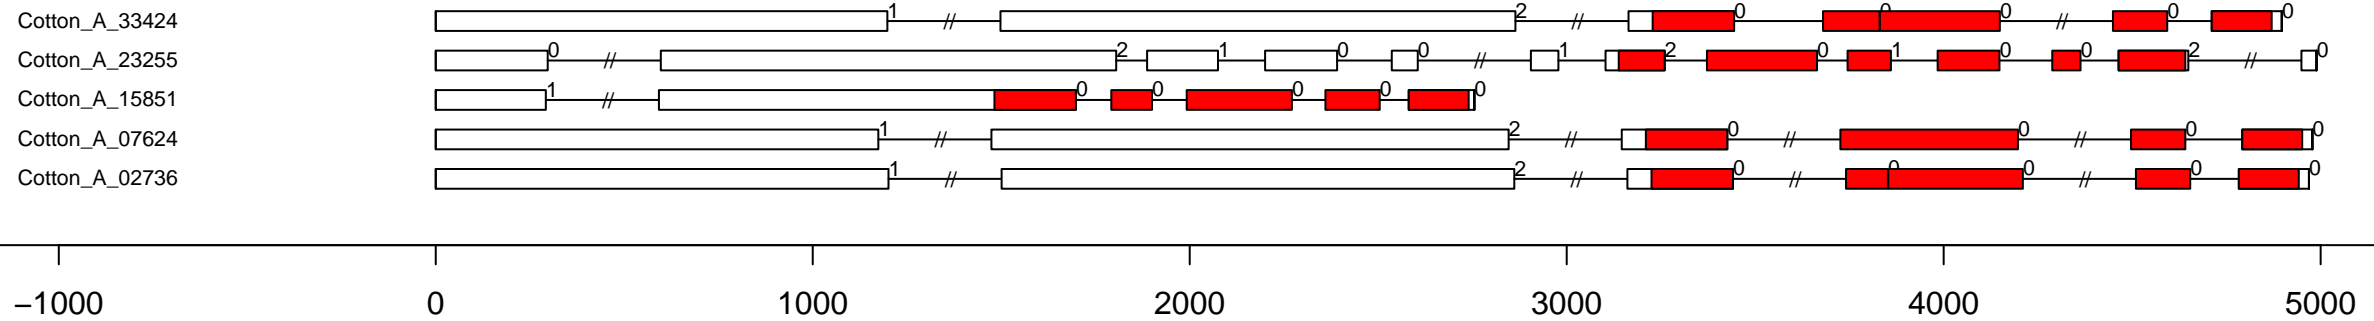

# G.ar CMGC\_DYRK-YAK exon-intron and domain diagram (all)

Cotton\_A\_32071

Cotton\_A\_29534

Cotton\_A\_23503

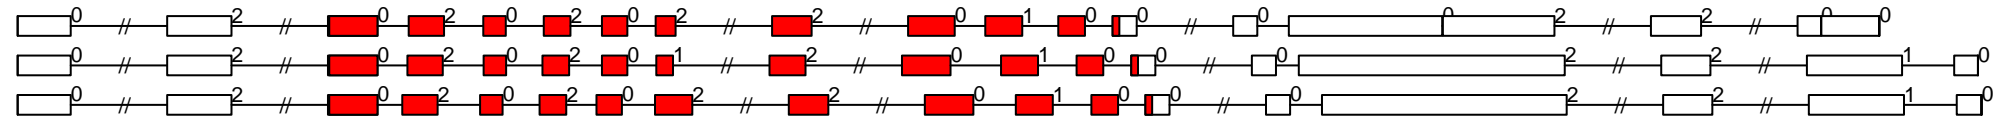

0

2000

4000

6000



# G.ar CMGC\_GSKL exon-intron and domain diagram (all)

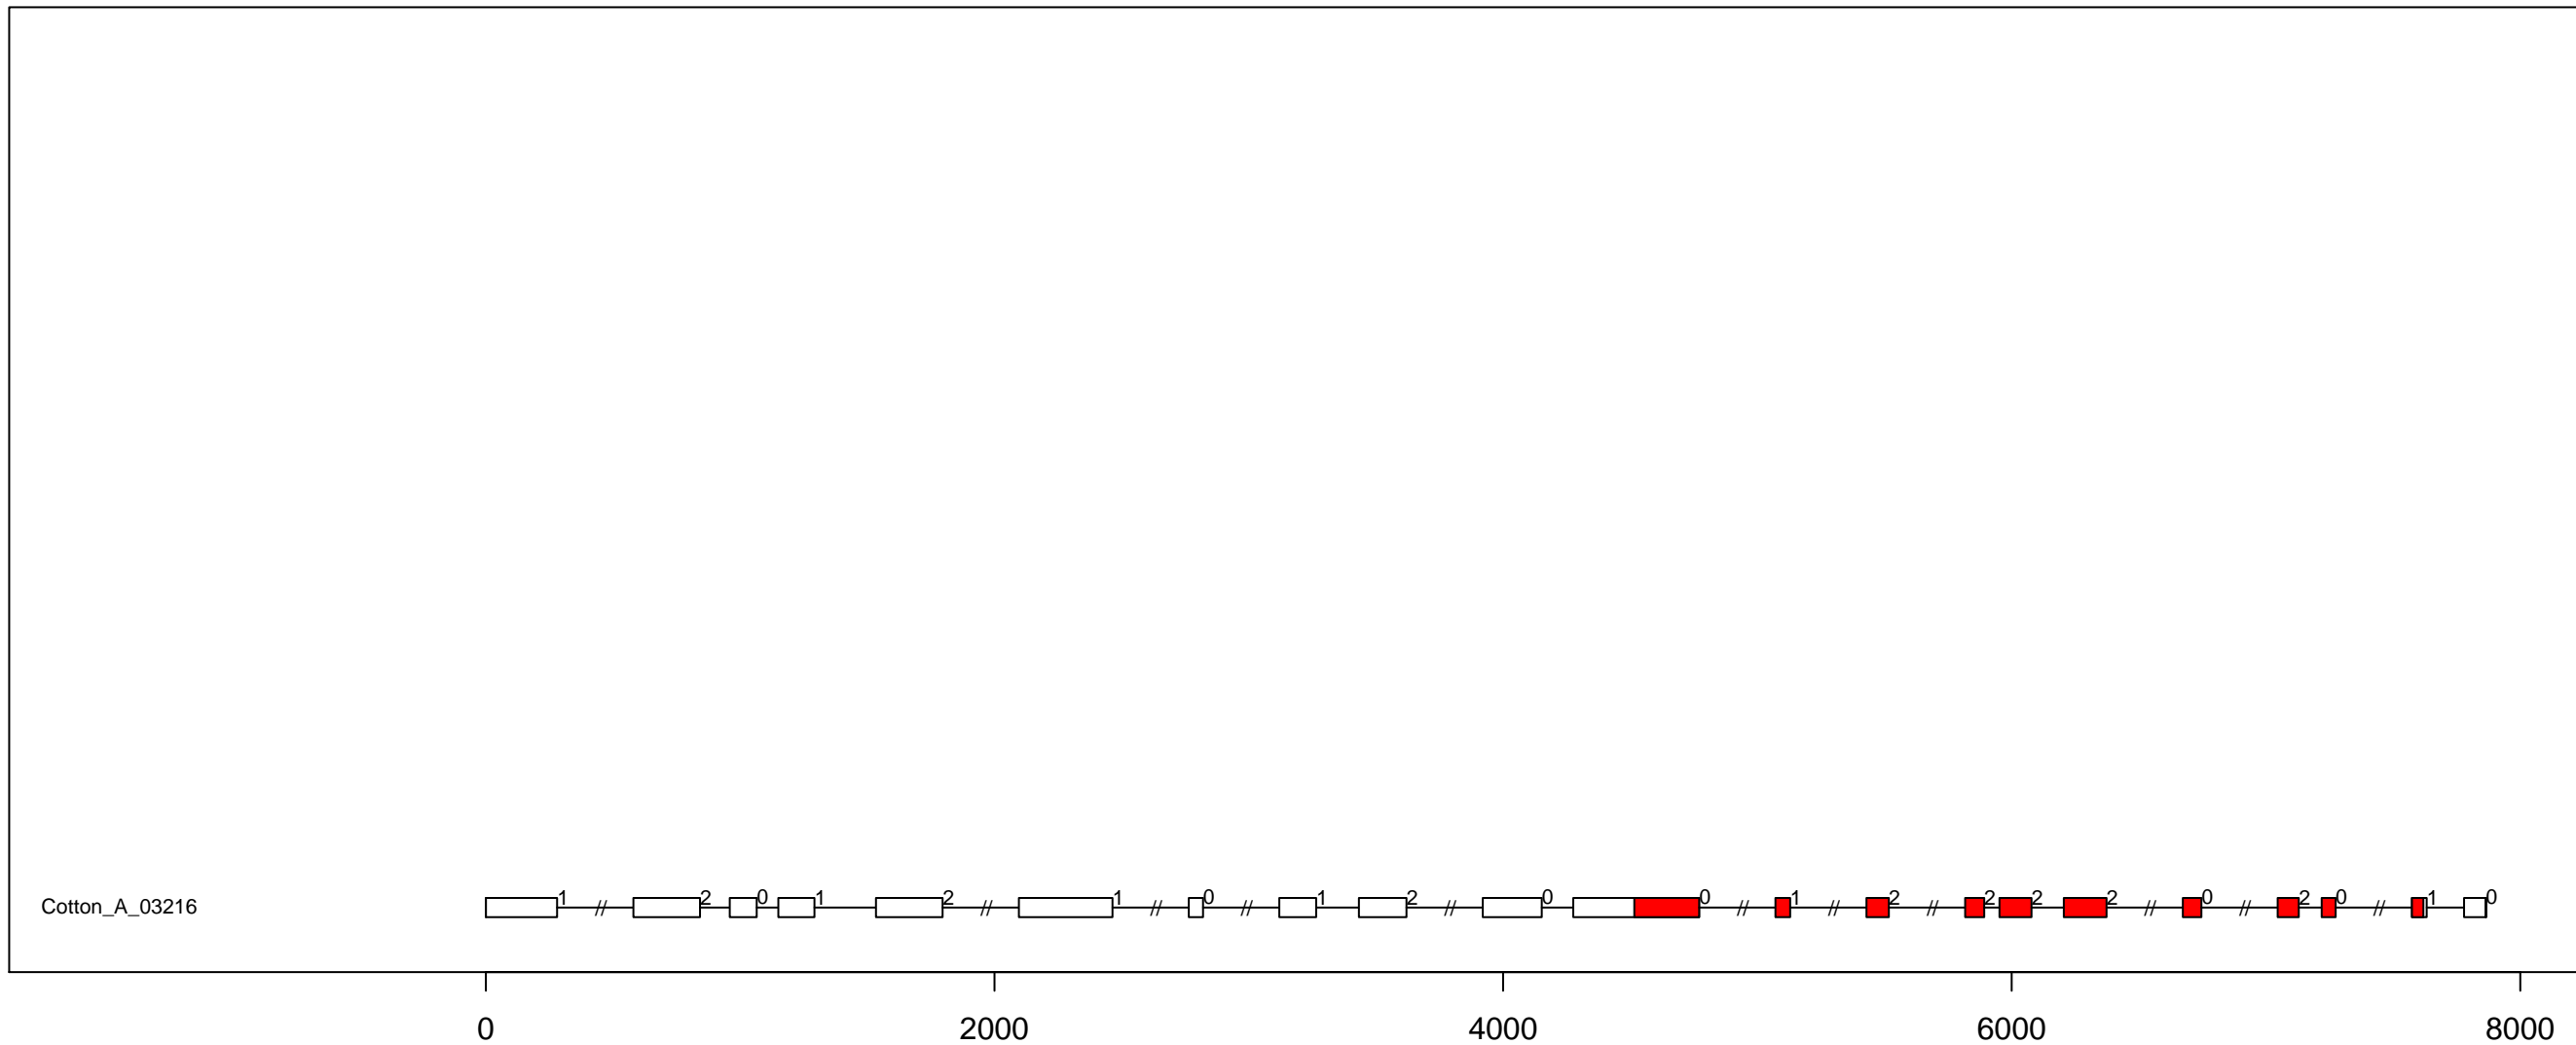

# G.ar CMGC\_GSK exon-intron and domain diagram (all)

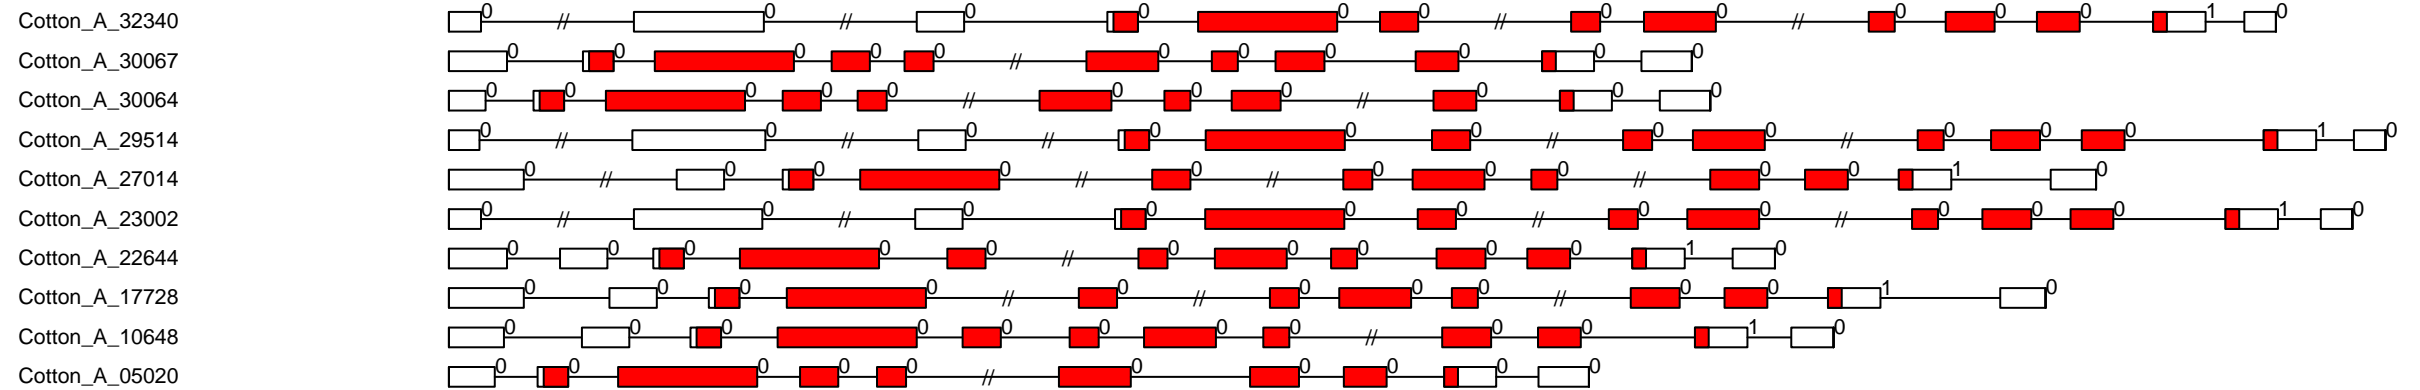

### G.ar CMGC\_MAPK exon-intron and domain diagram (part 1)

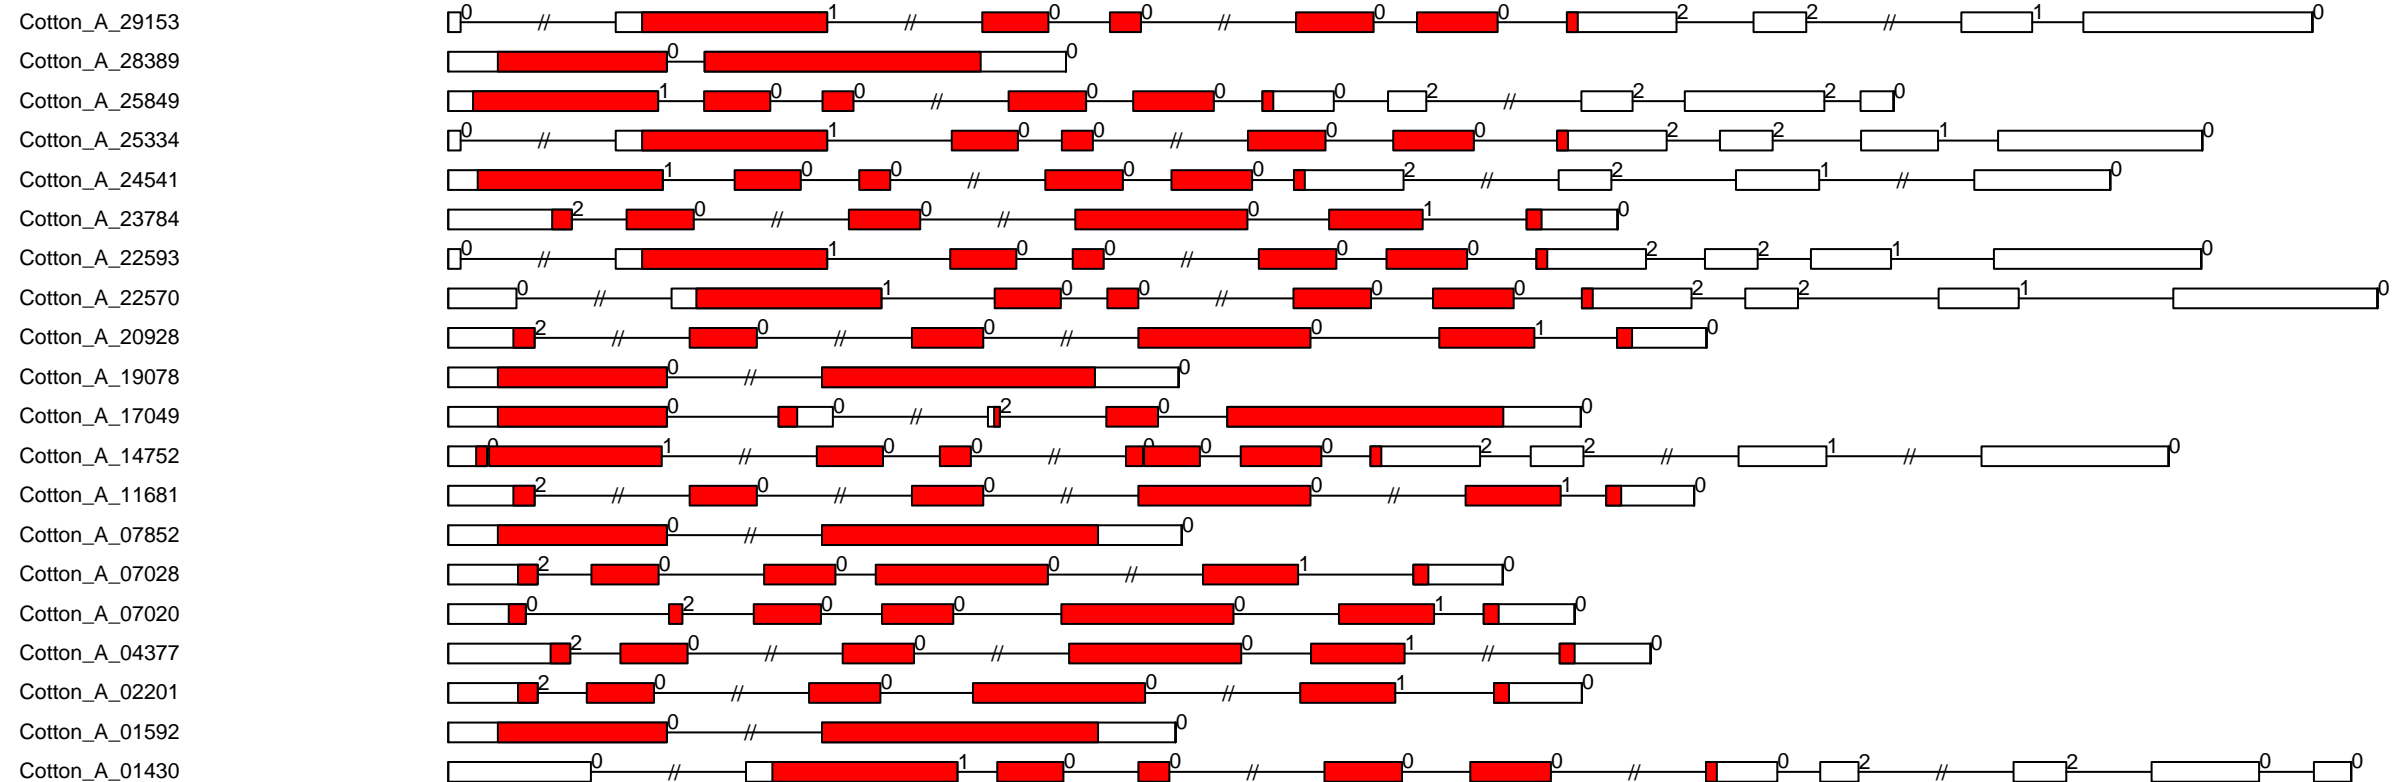

-1000

0

1000

2000

3000

# G.ar CMGC\_MAPK exon-intron and domain diagram (part 2)

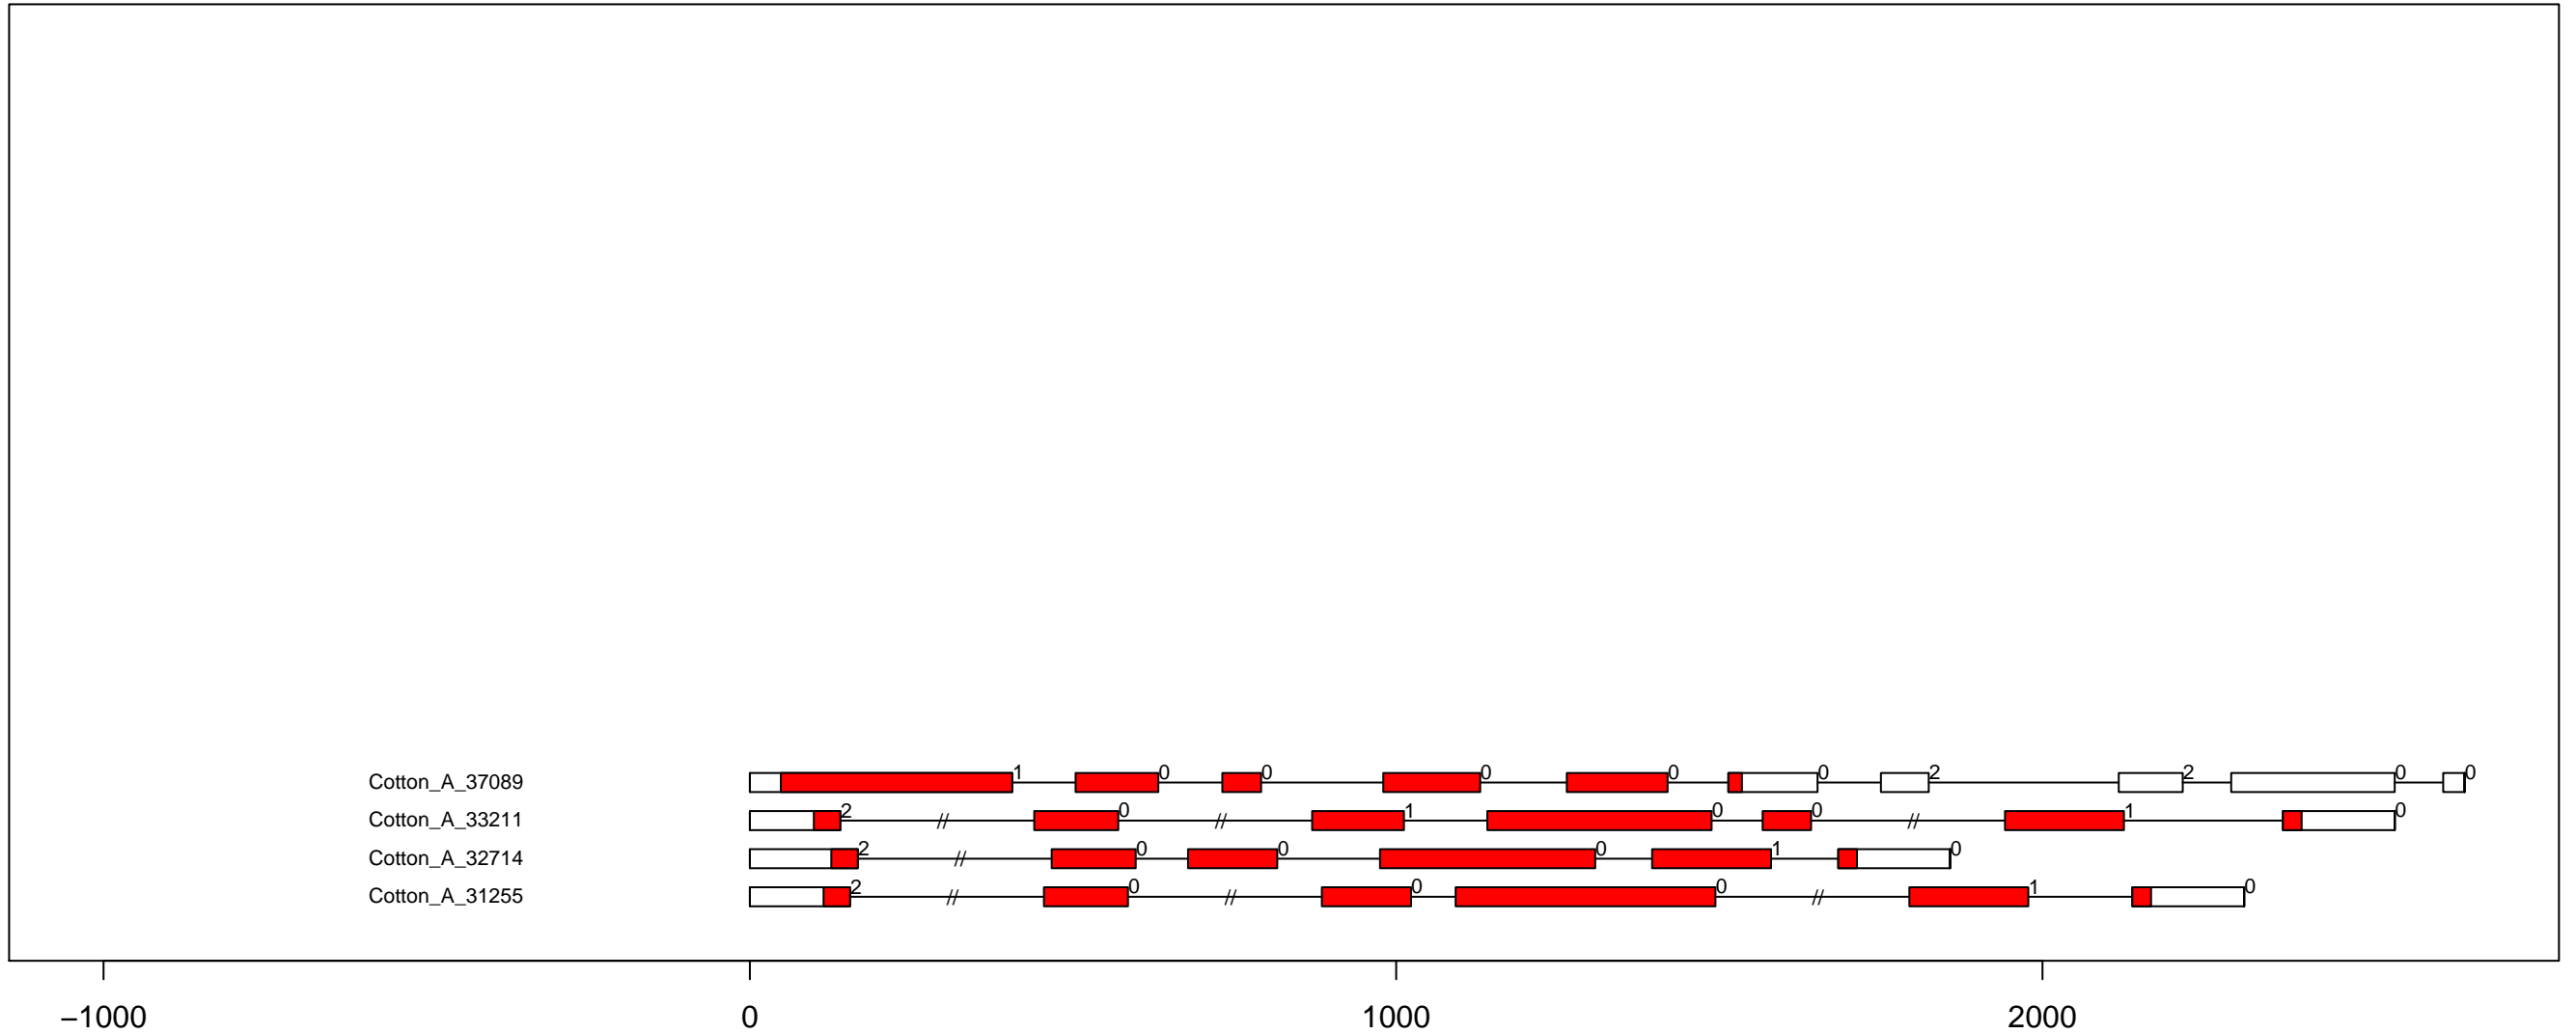

# G.ar CMGC\_PI-Tthe exon-intron and domain diagram (all)

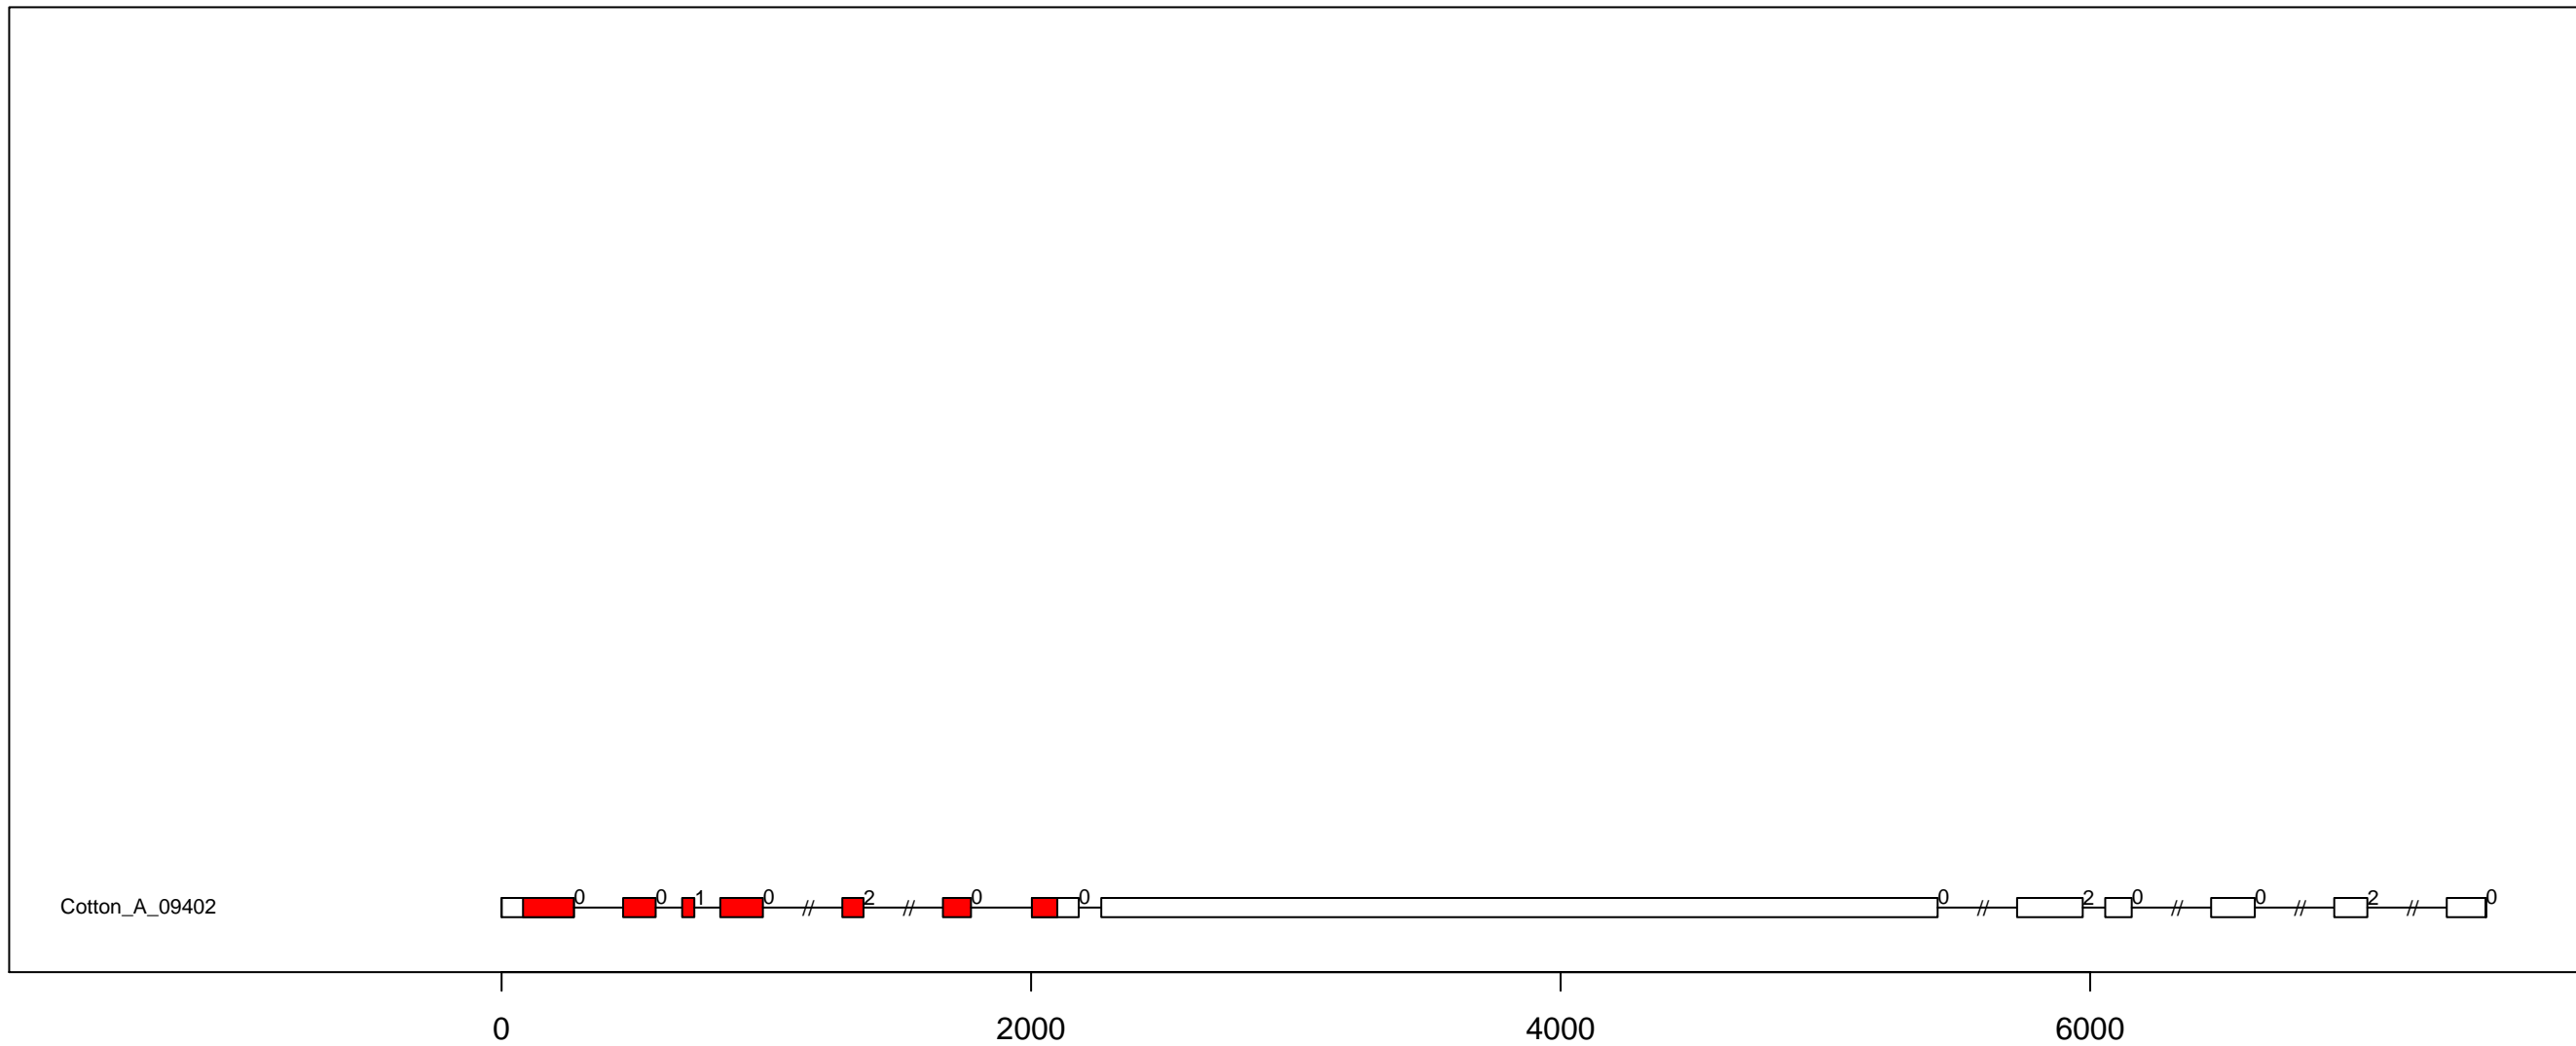

# G.ar CMGC\_RCK exon-intron and domain diagram (all)

Cotton\_A\_25379  
Cotton\_A\_15191  
Cotton\_A\_14275  
Cotton\_A\_07964  
Cotton\_A\_03795

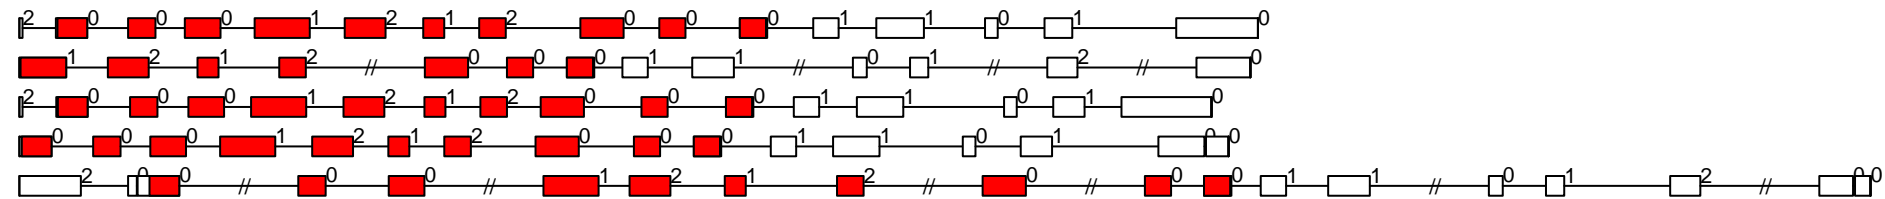

-1000

0

1000

2000

3000

4000

# G.ar CMGC\_SRPK exon-intron and domain diagram (all)

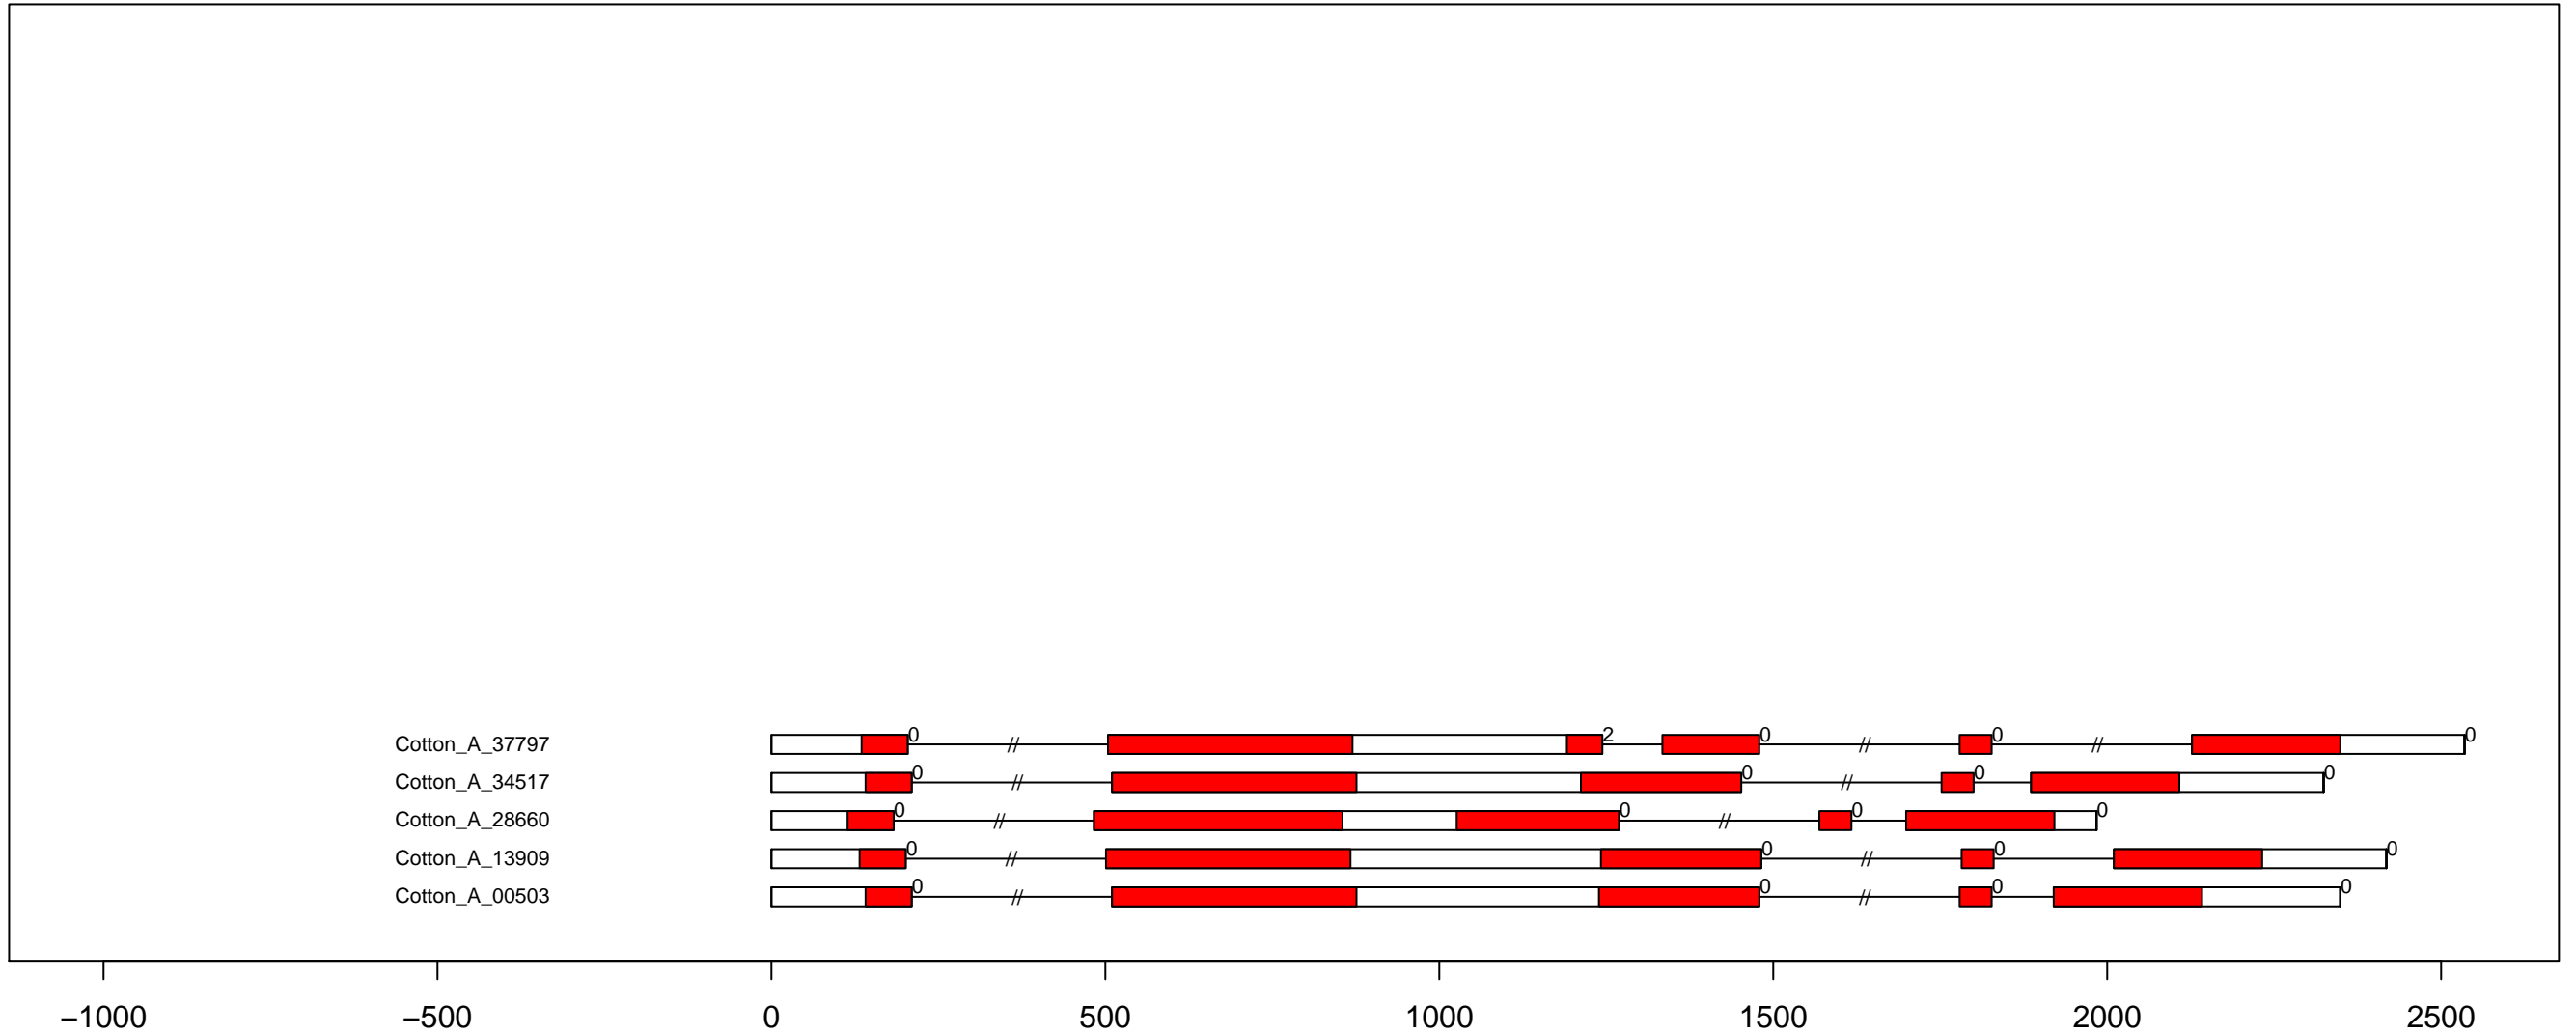

G.ar Group-PI-2 exon-intron and domain diagram (all)

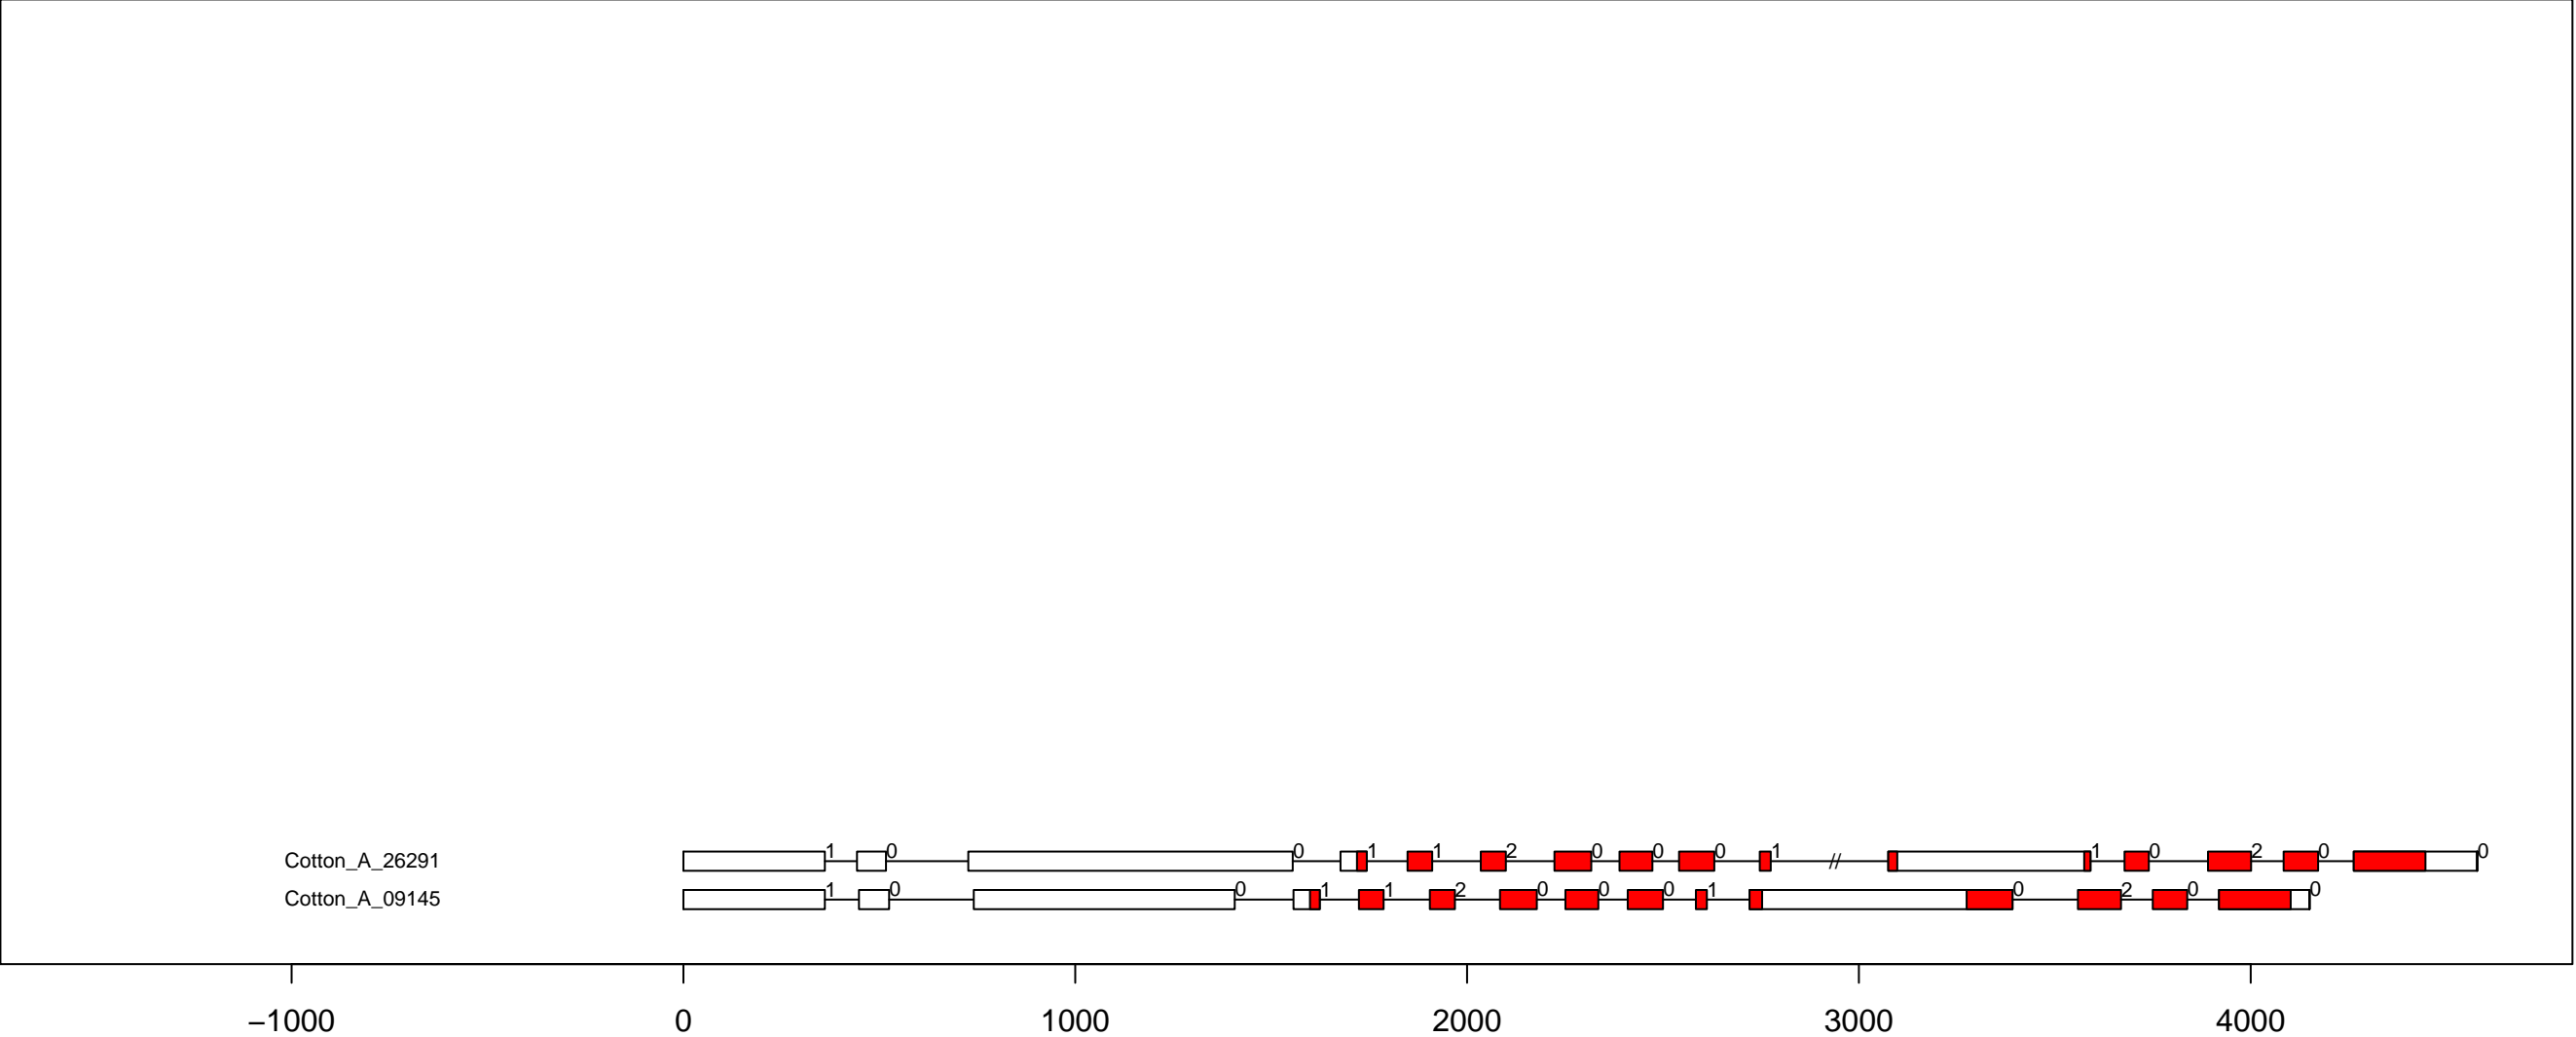



G.ar Group-PI-3 exon-intron and domain diagram (all)

Cotton\_A\_33556  
 Cotton\_A\_22675  
 Cotton\_A\_15660  
 Cotton\_A\_10908

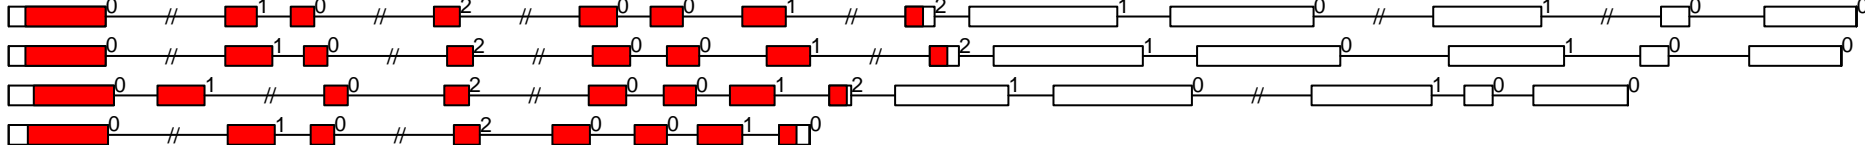

-1000

0

1000

2000

3000

4000

G.ar Group-PI-4 exon-intron and domain diagram (all)

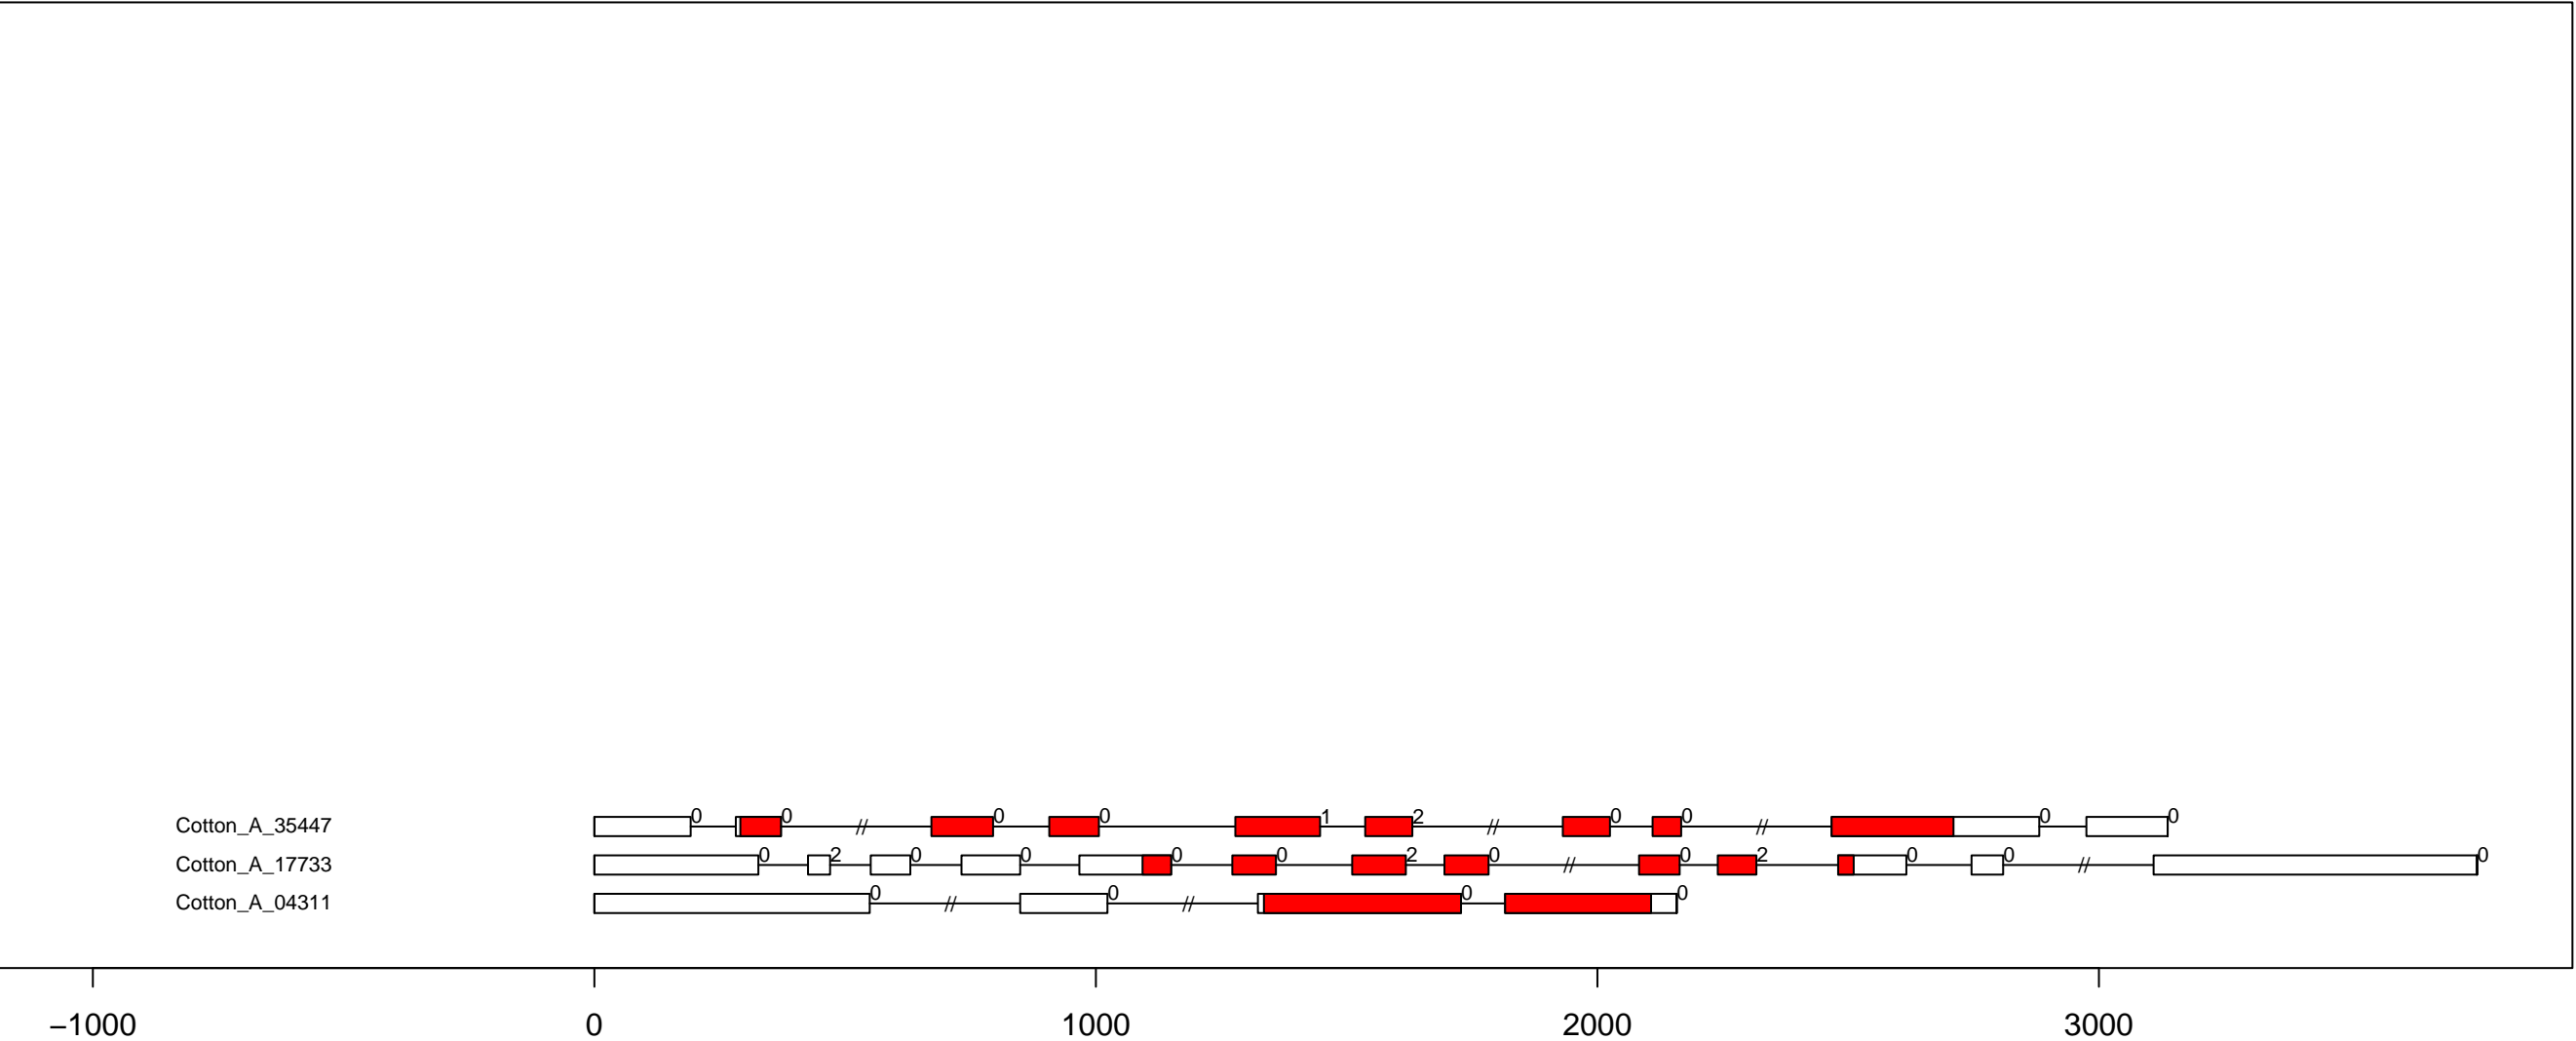

# G.ar IRE1 exon-intron and domain diagram (all)

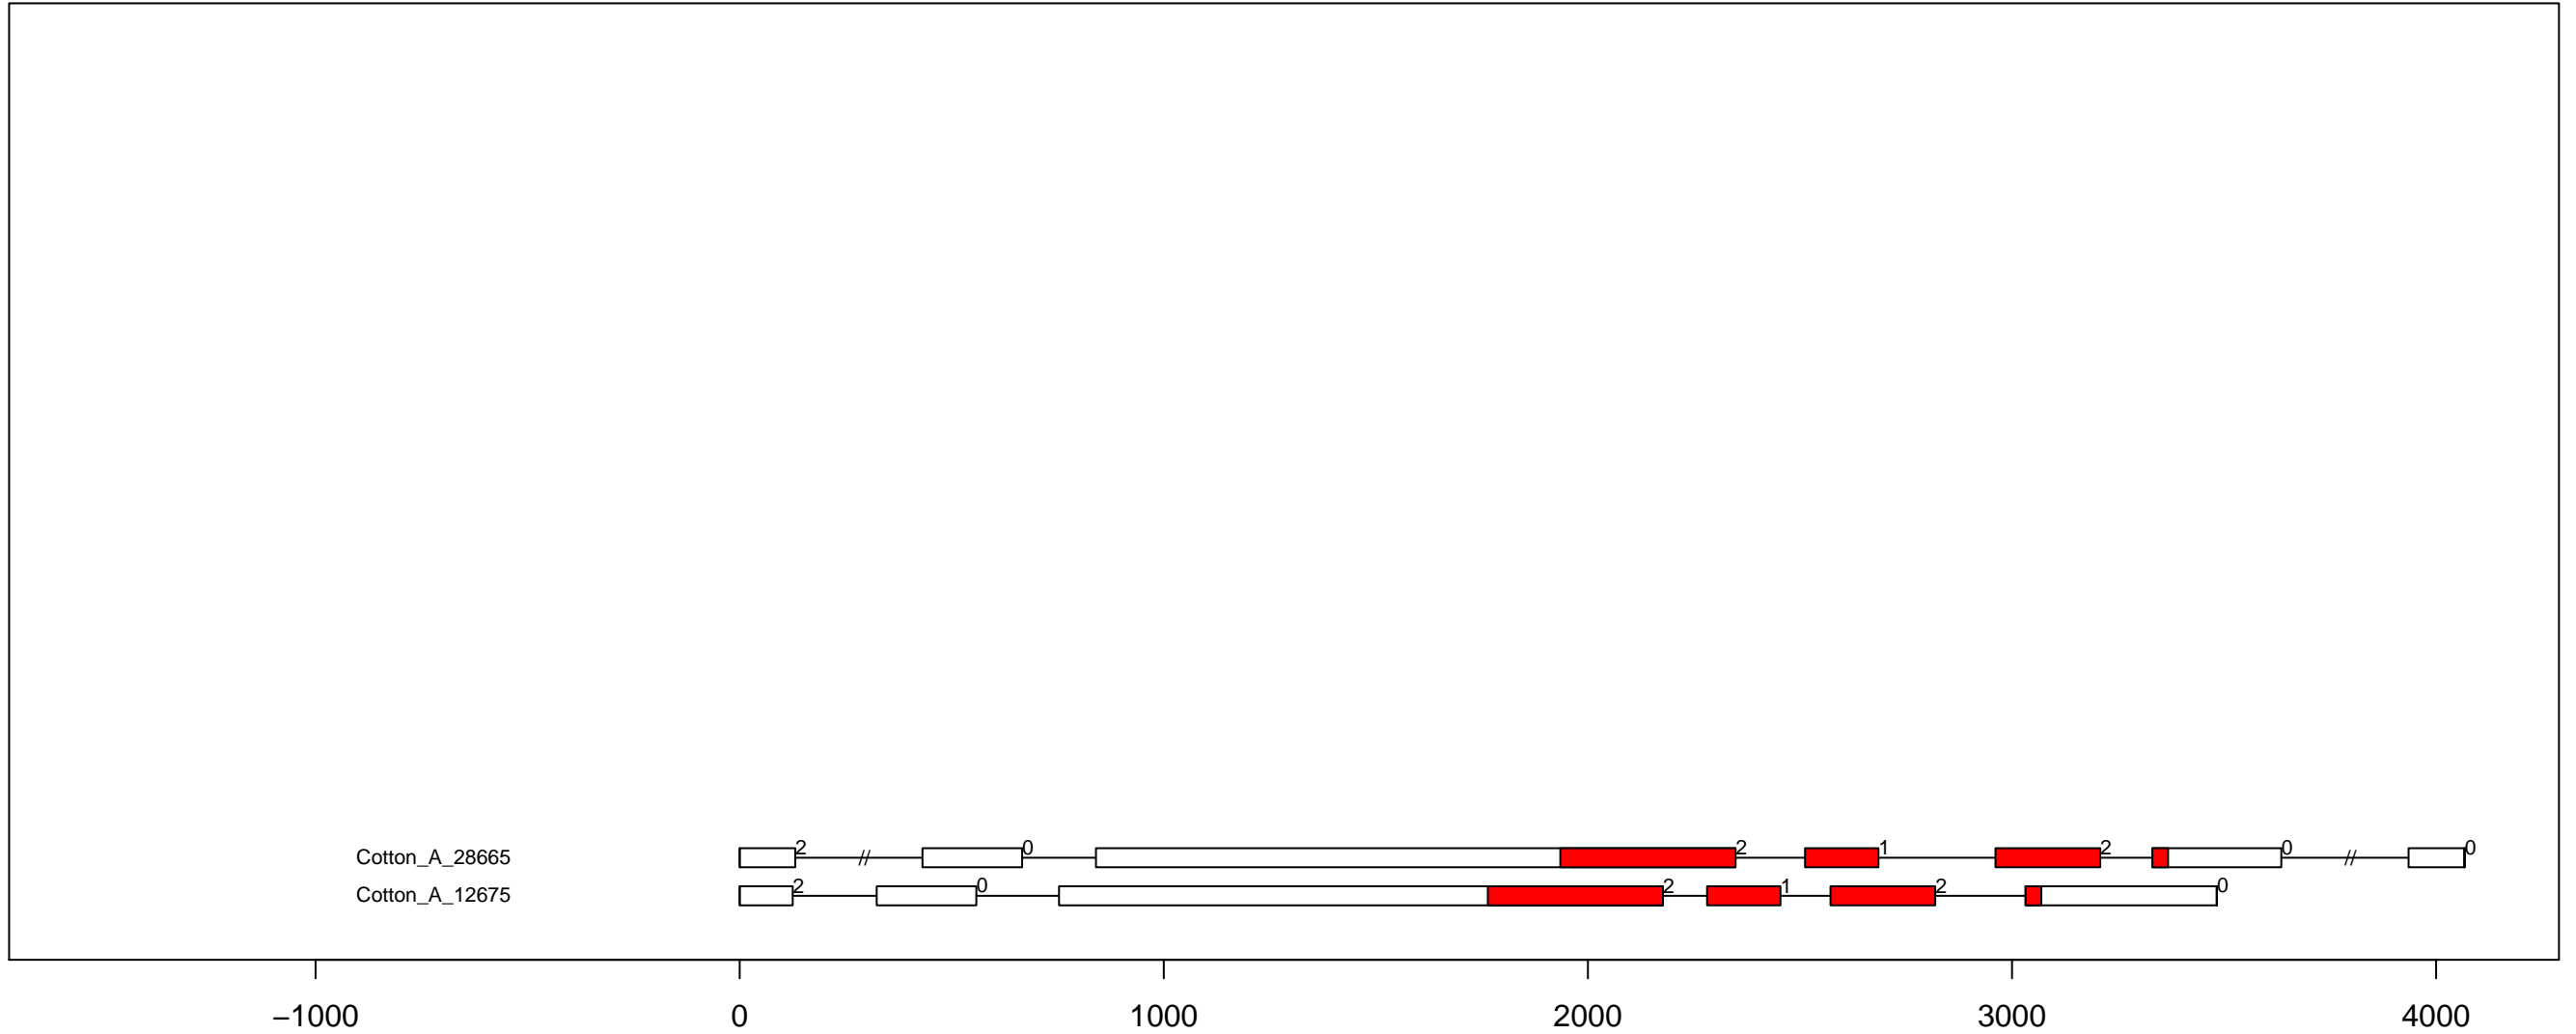

# G.ar NAK exon-intron and domain diagram (all)

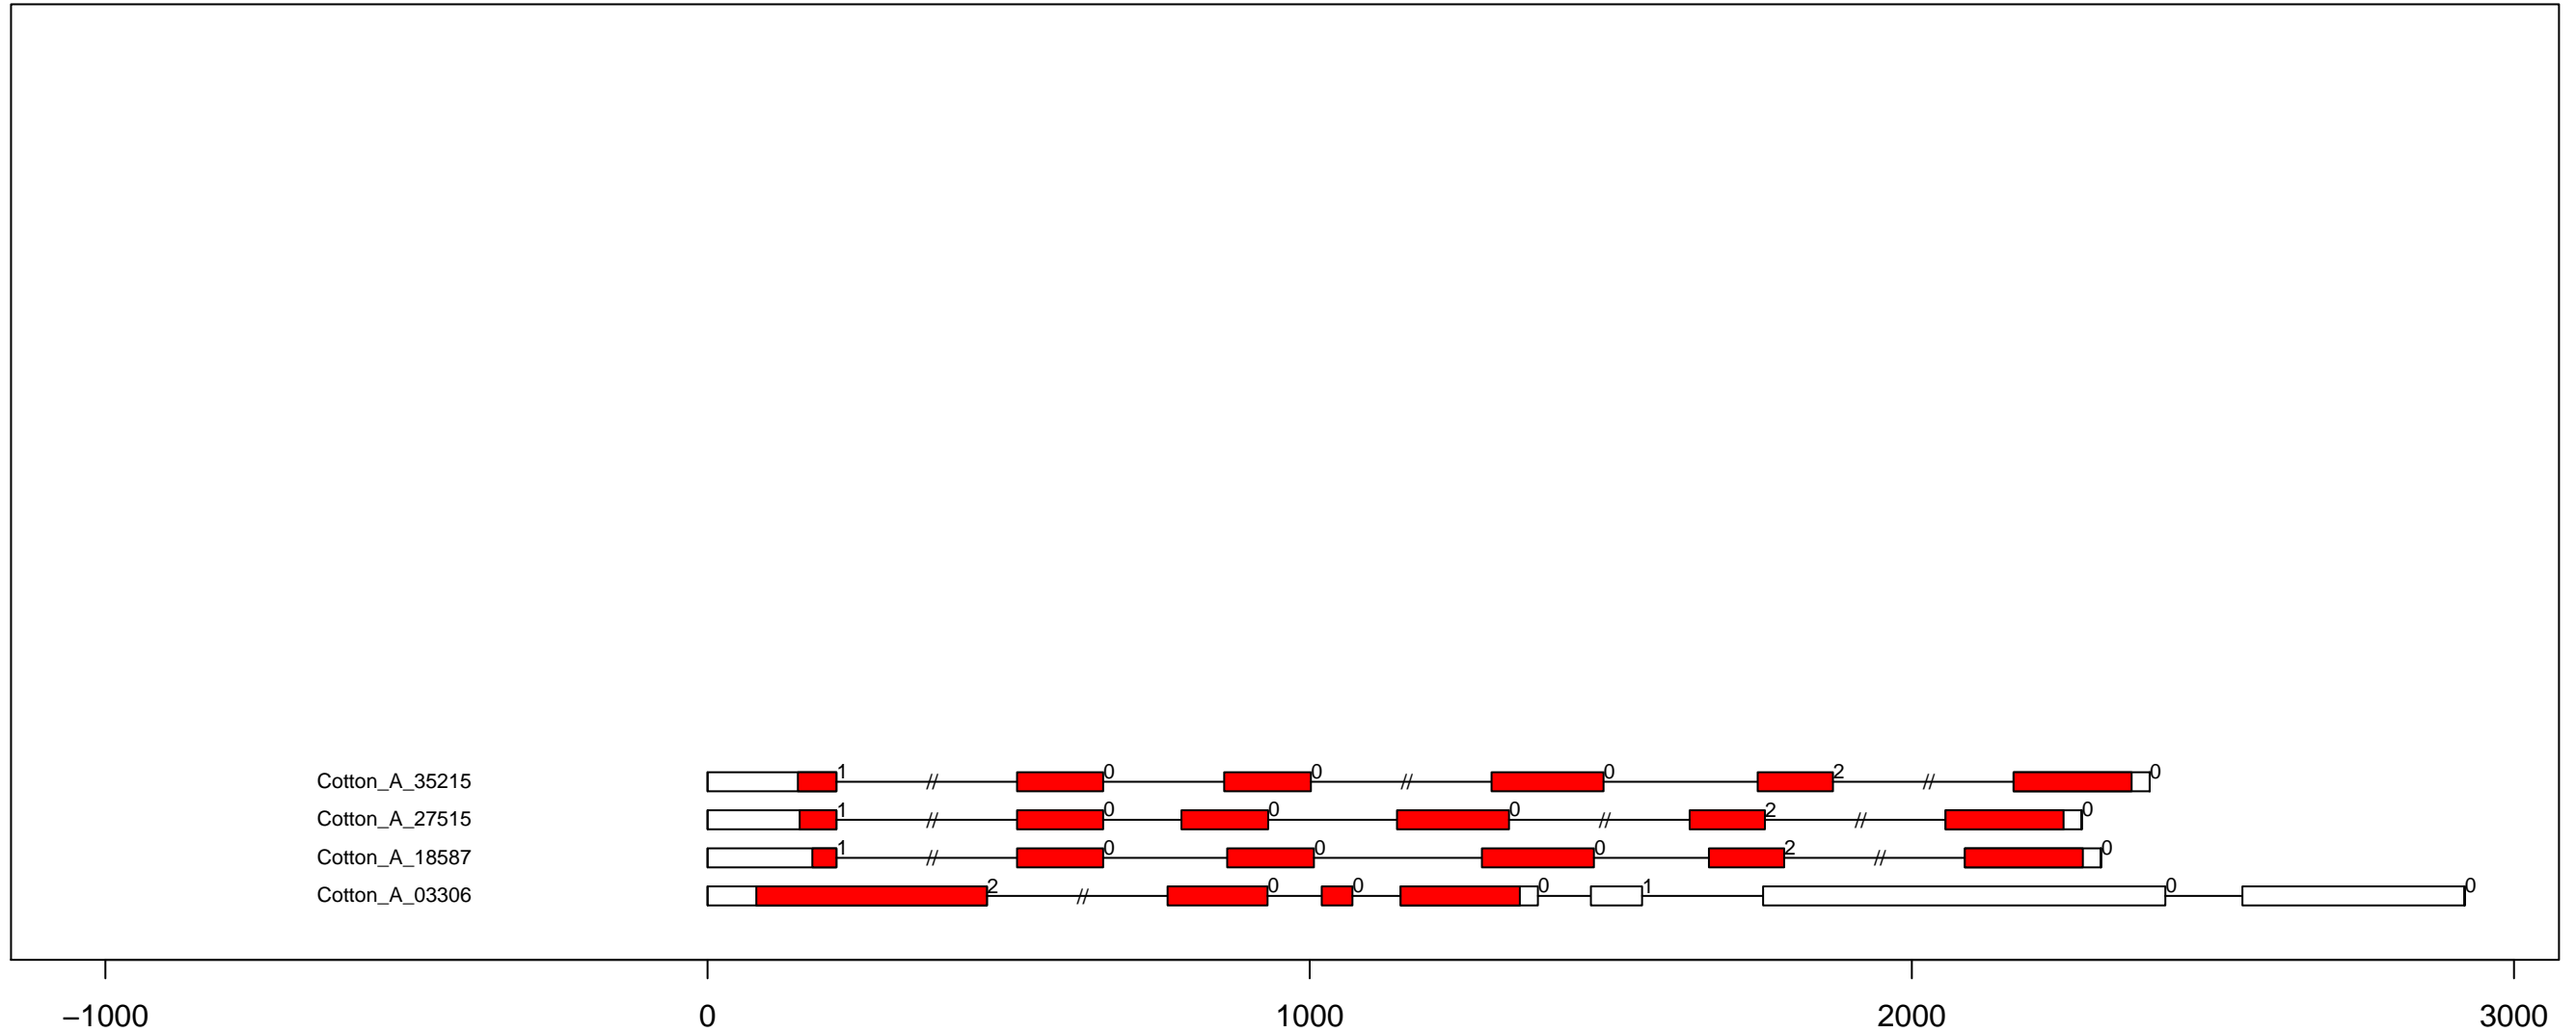

# G.ar NEK exon-intron and domain diagram (all)

Cotton\_A\_35259

Cotton\_A\_30266

Cotton\_A\_22020

Cotton\_A\_16984

Cotton\_A\_15339

Cotton\_A\_14978

Cotton\_A\_12869

Cotton\_A\_11088

Cotton\_A\_07798

Cotton\_A\_02624

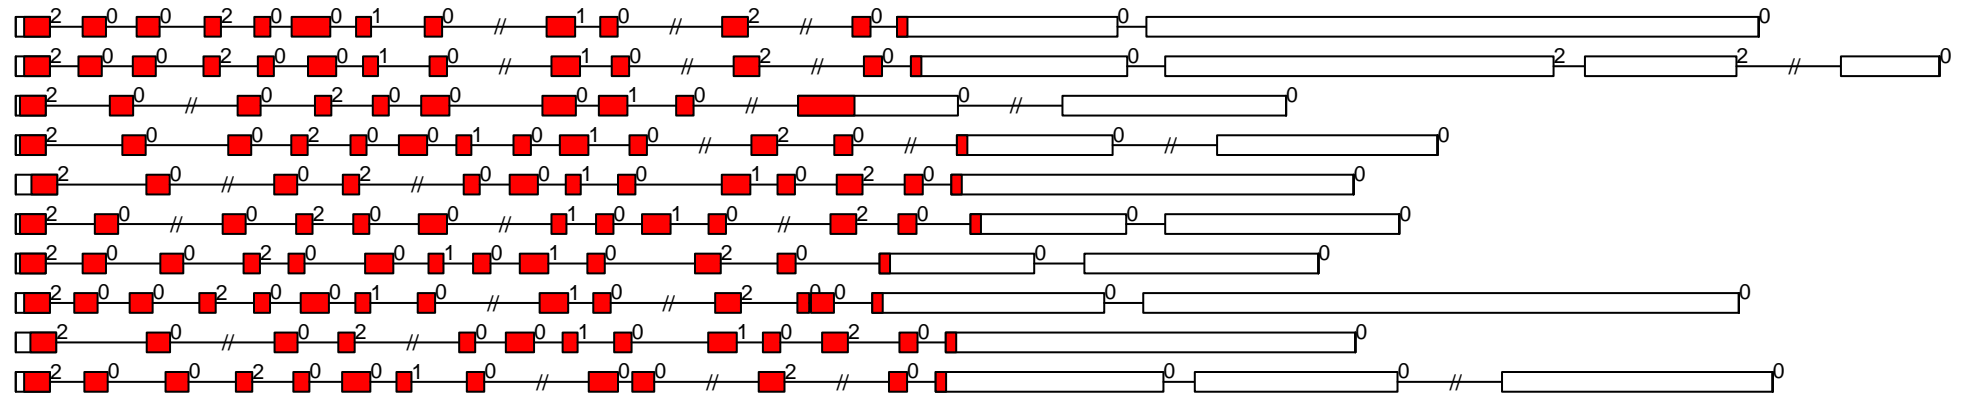

-1000

0

1000

2000

3000

4000

5000

# G.ar PEK\_GCN2 exon-intron and domain diagram (all)

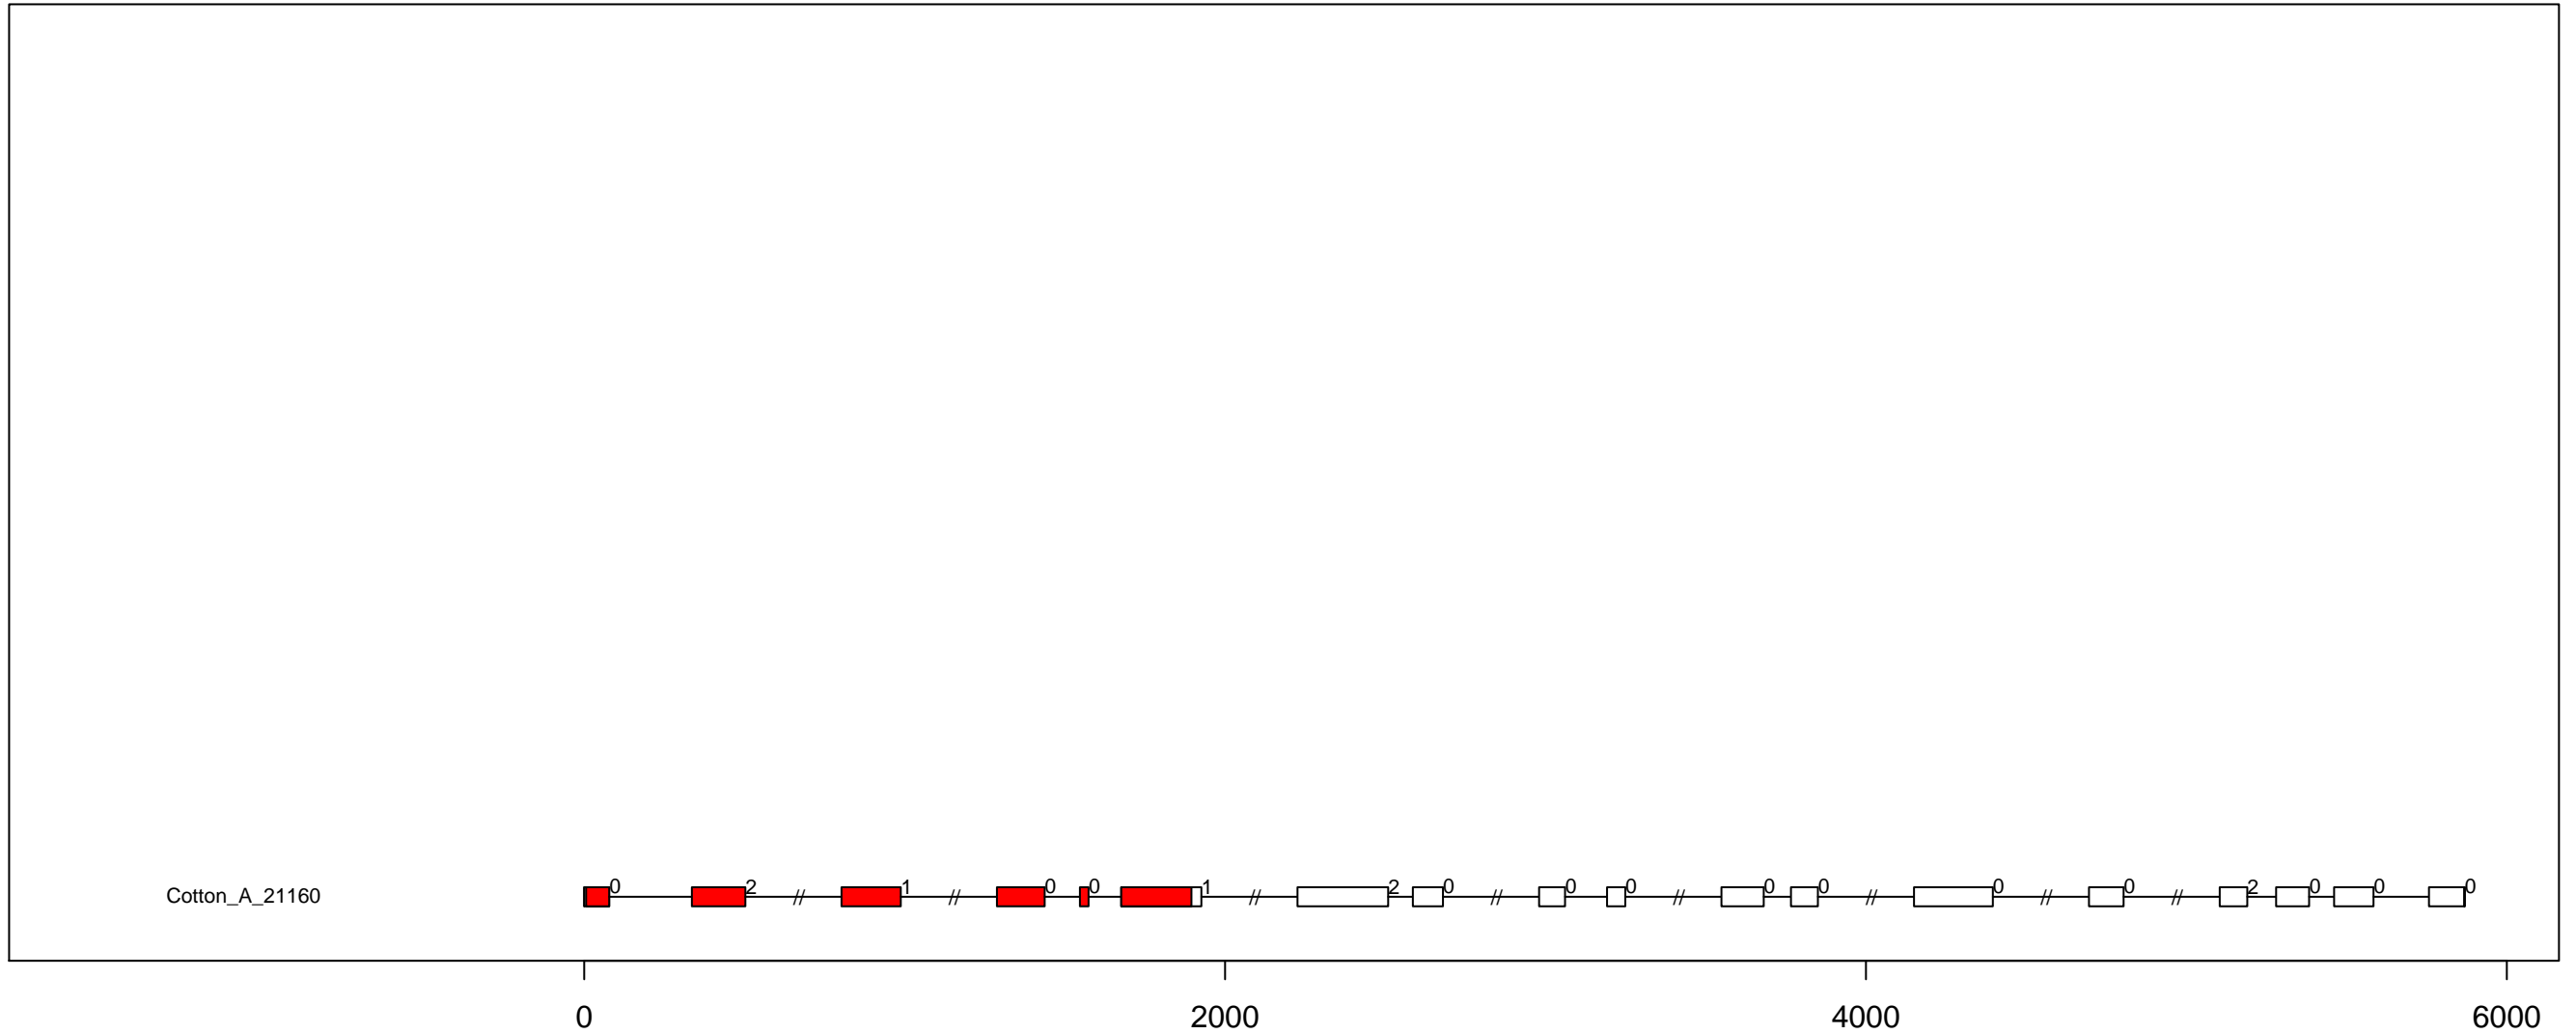

# G.ar PEK\_PEK exon-intron and domain diagram (all)

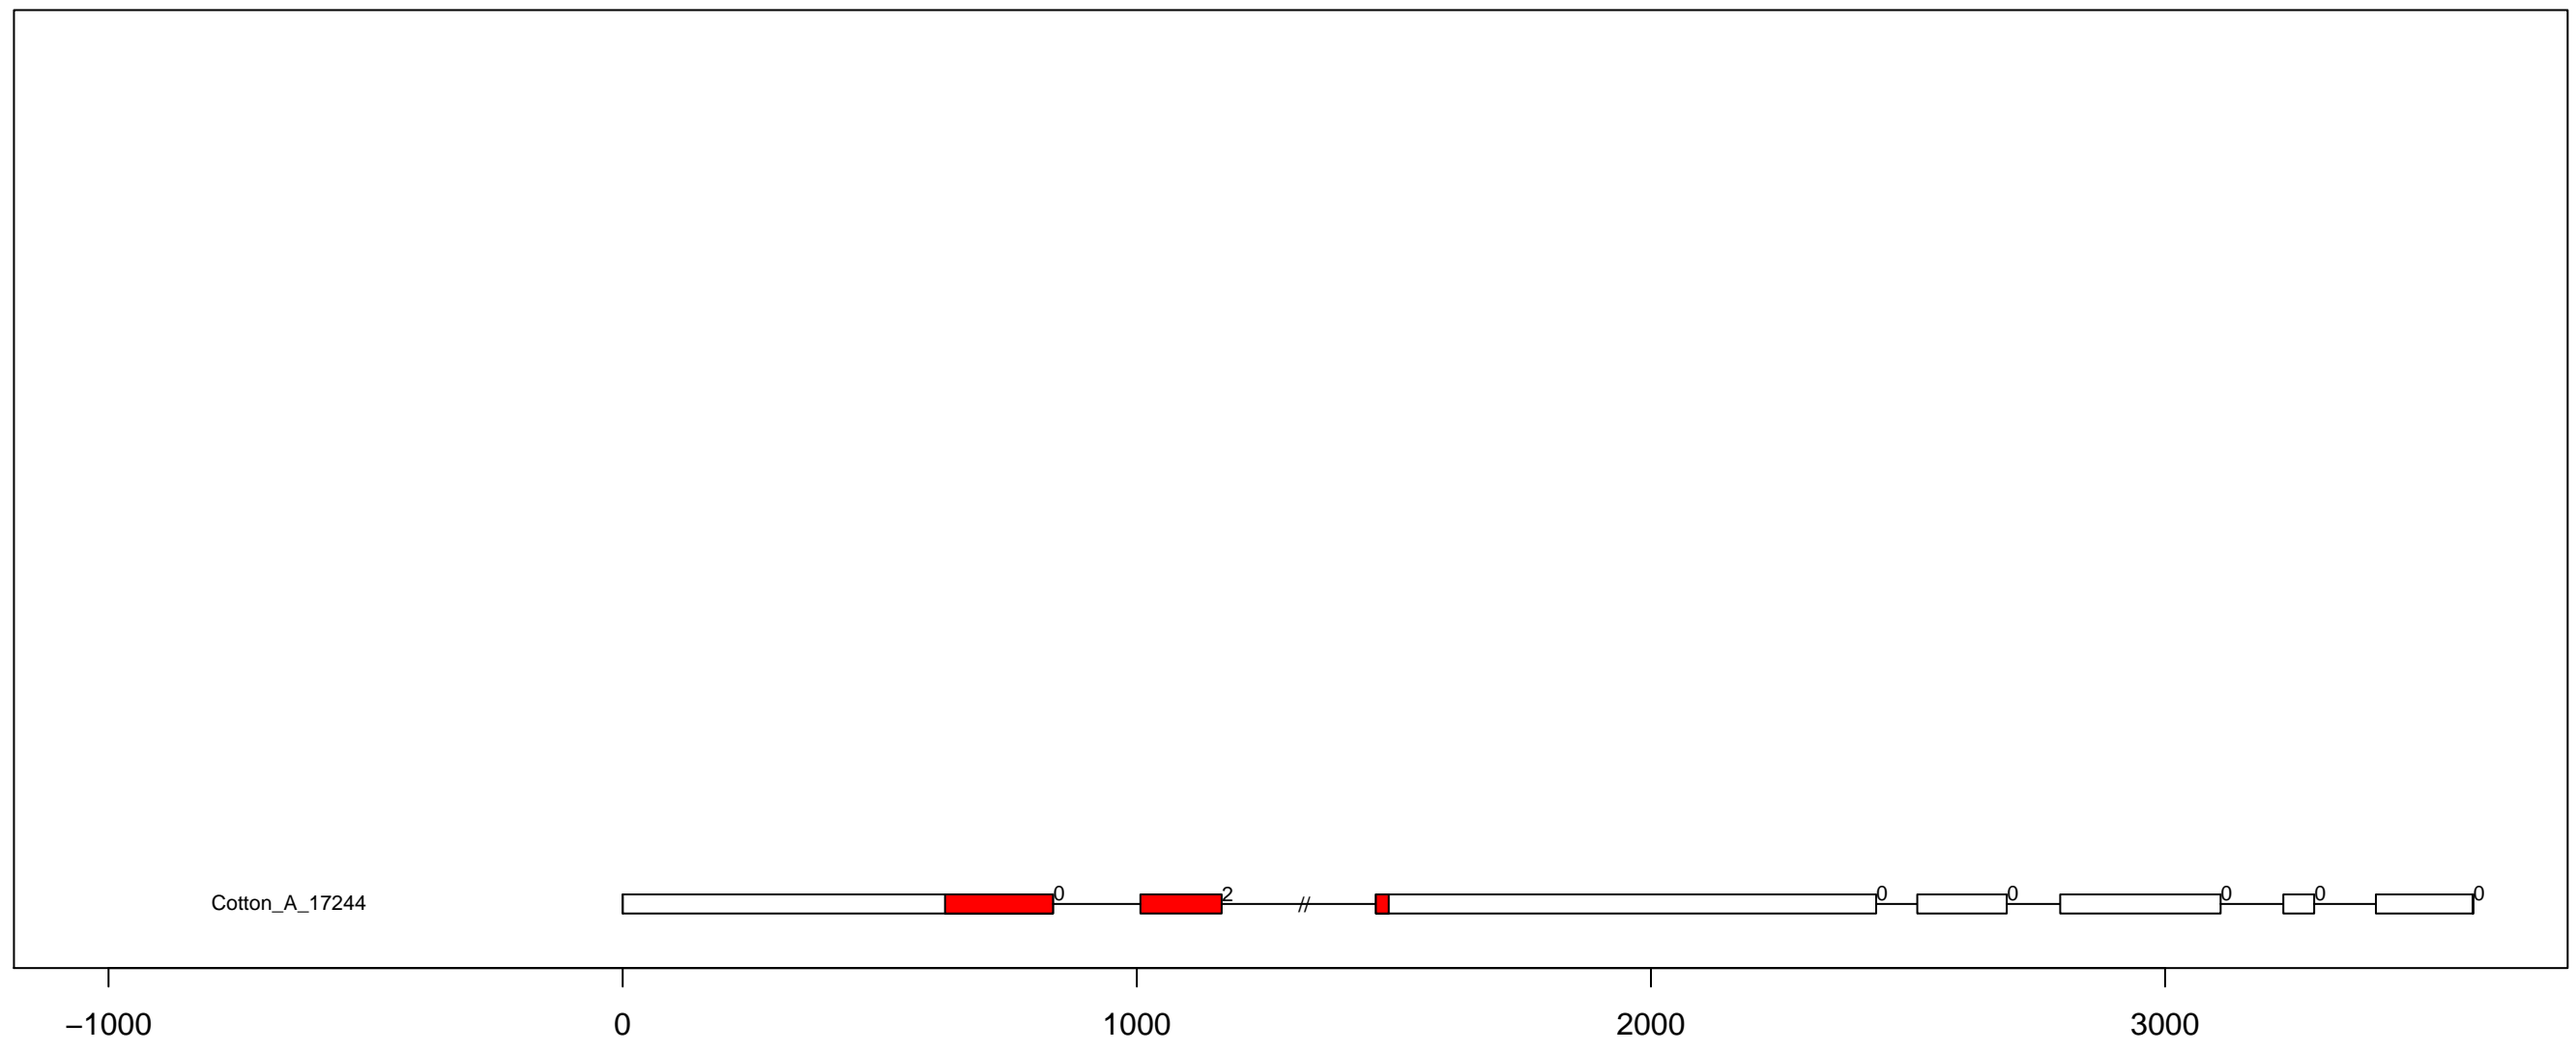

# G.ar RLK-Pelle\_C-LEC exon-intron and domain diagram (all)

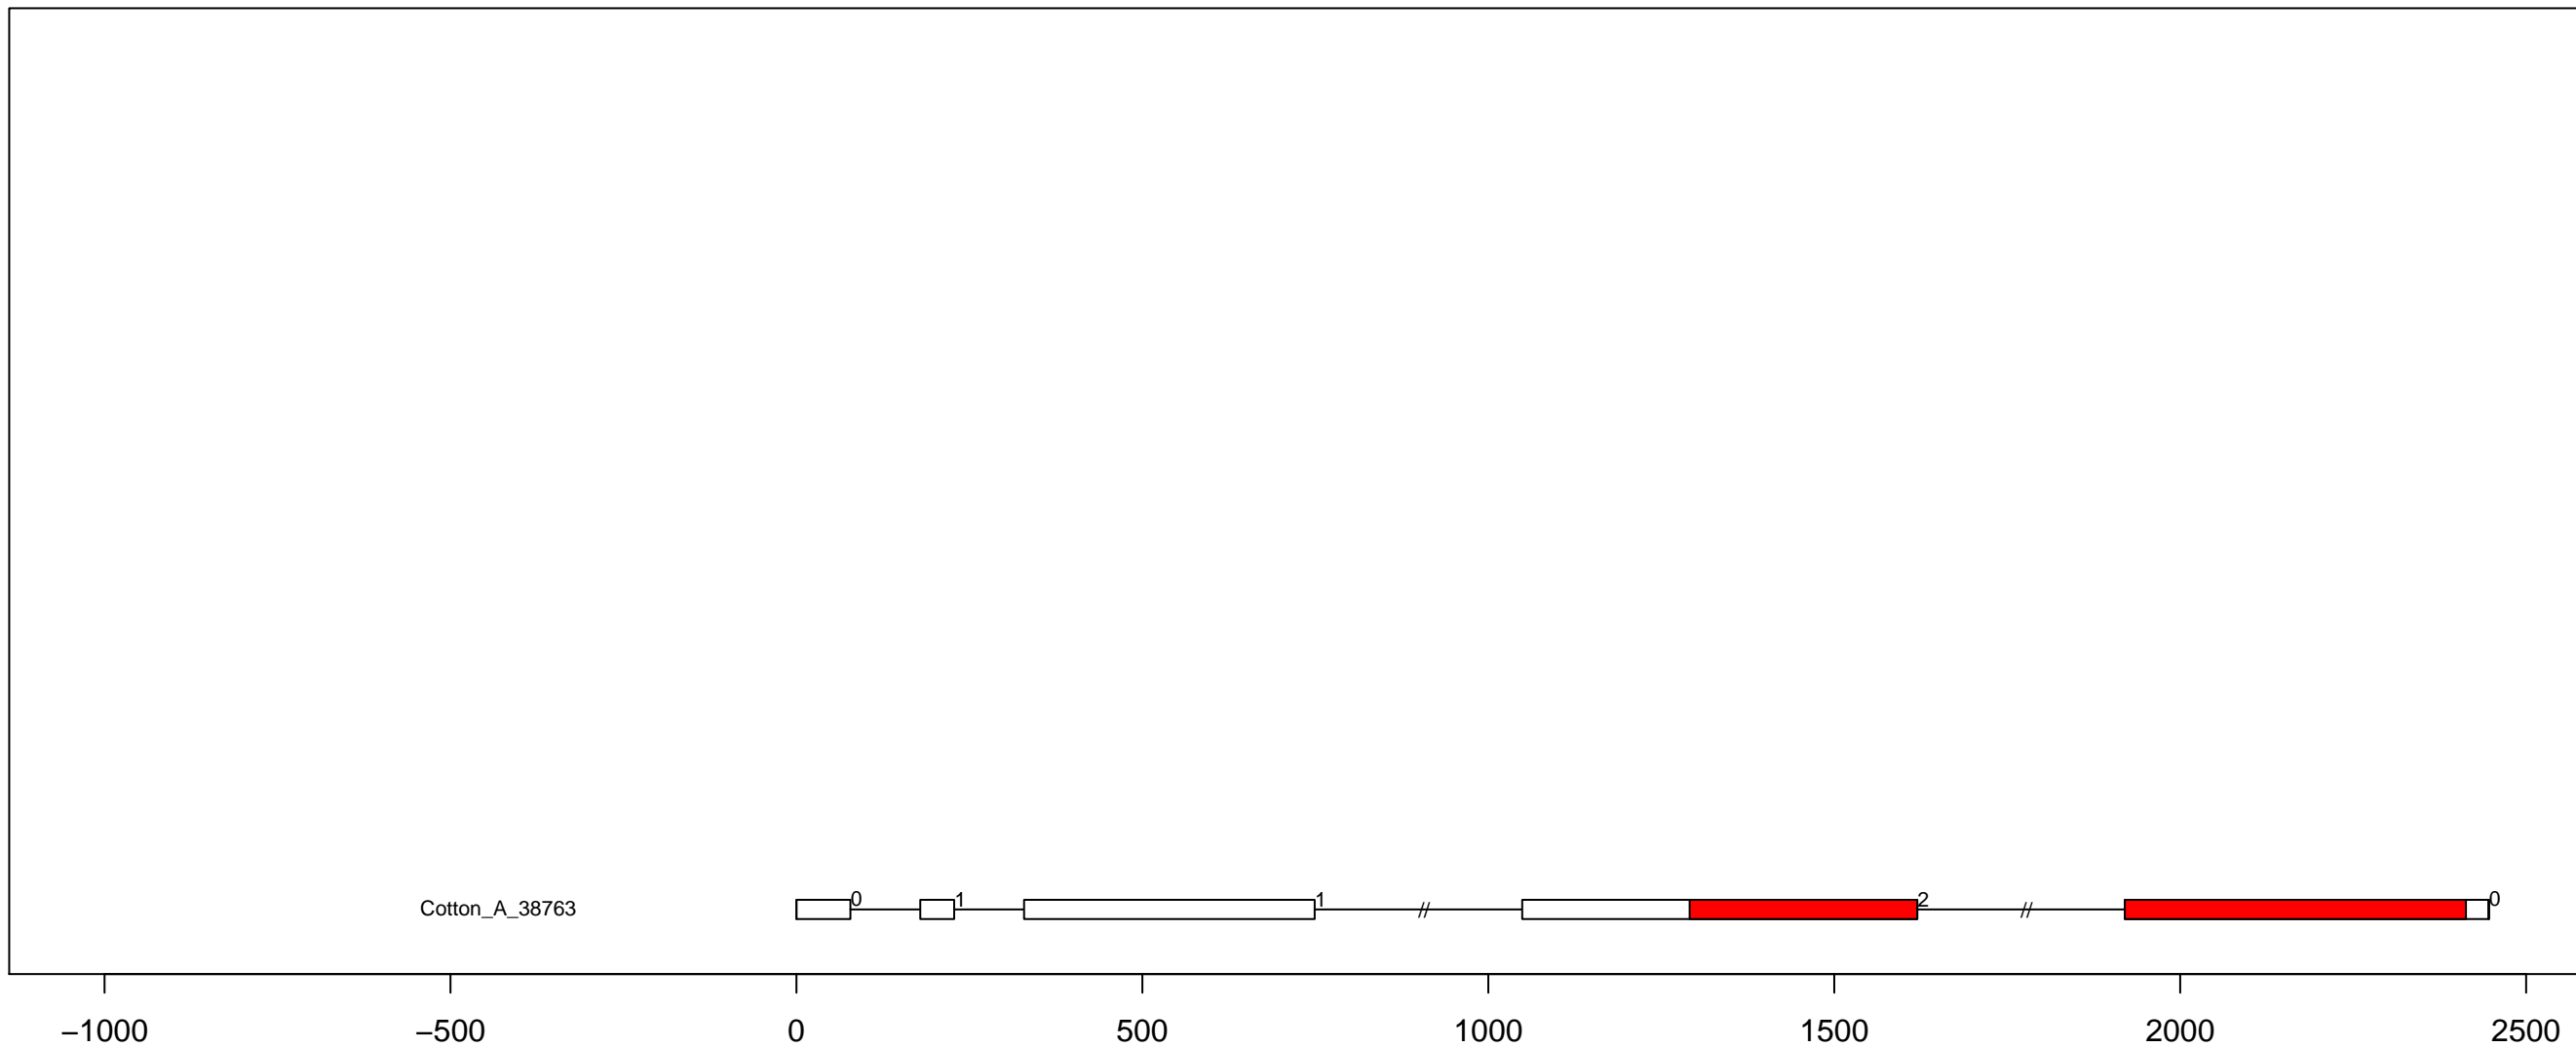



### G.ar RLK-Pelle\_CR4L exon-intron and domain diagram (all)

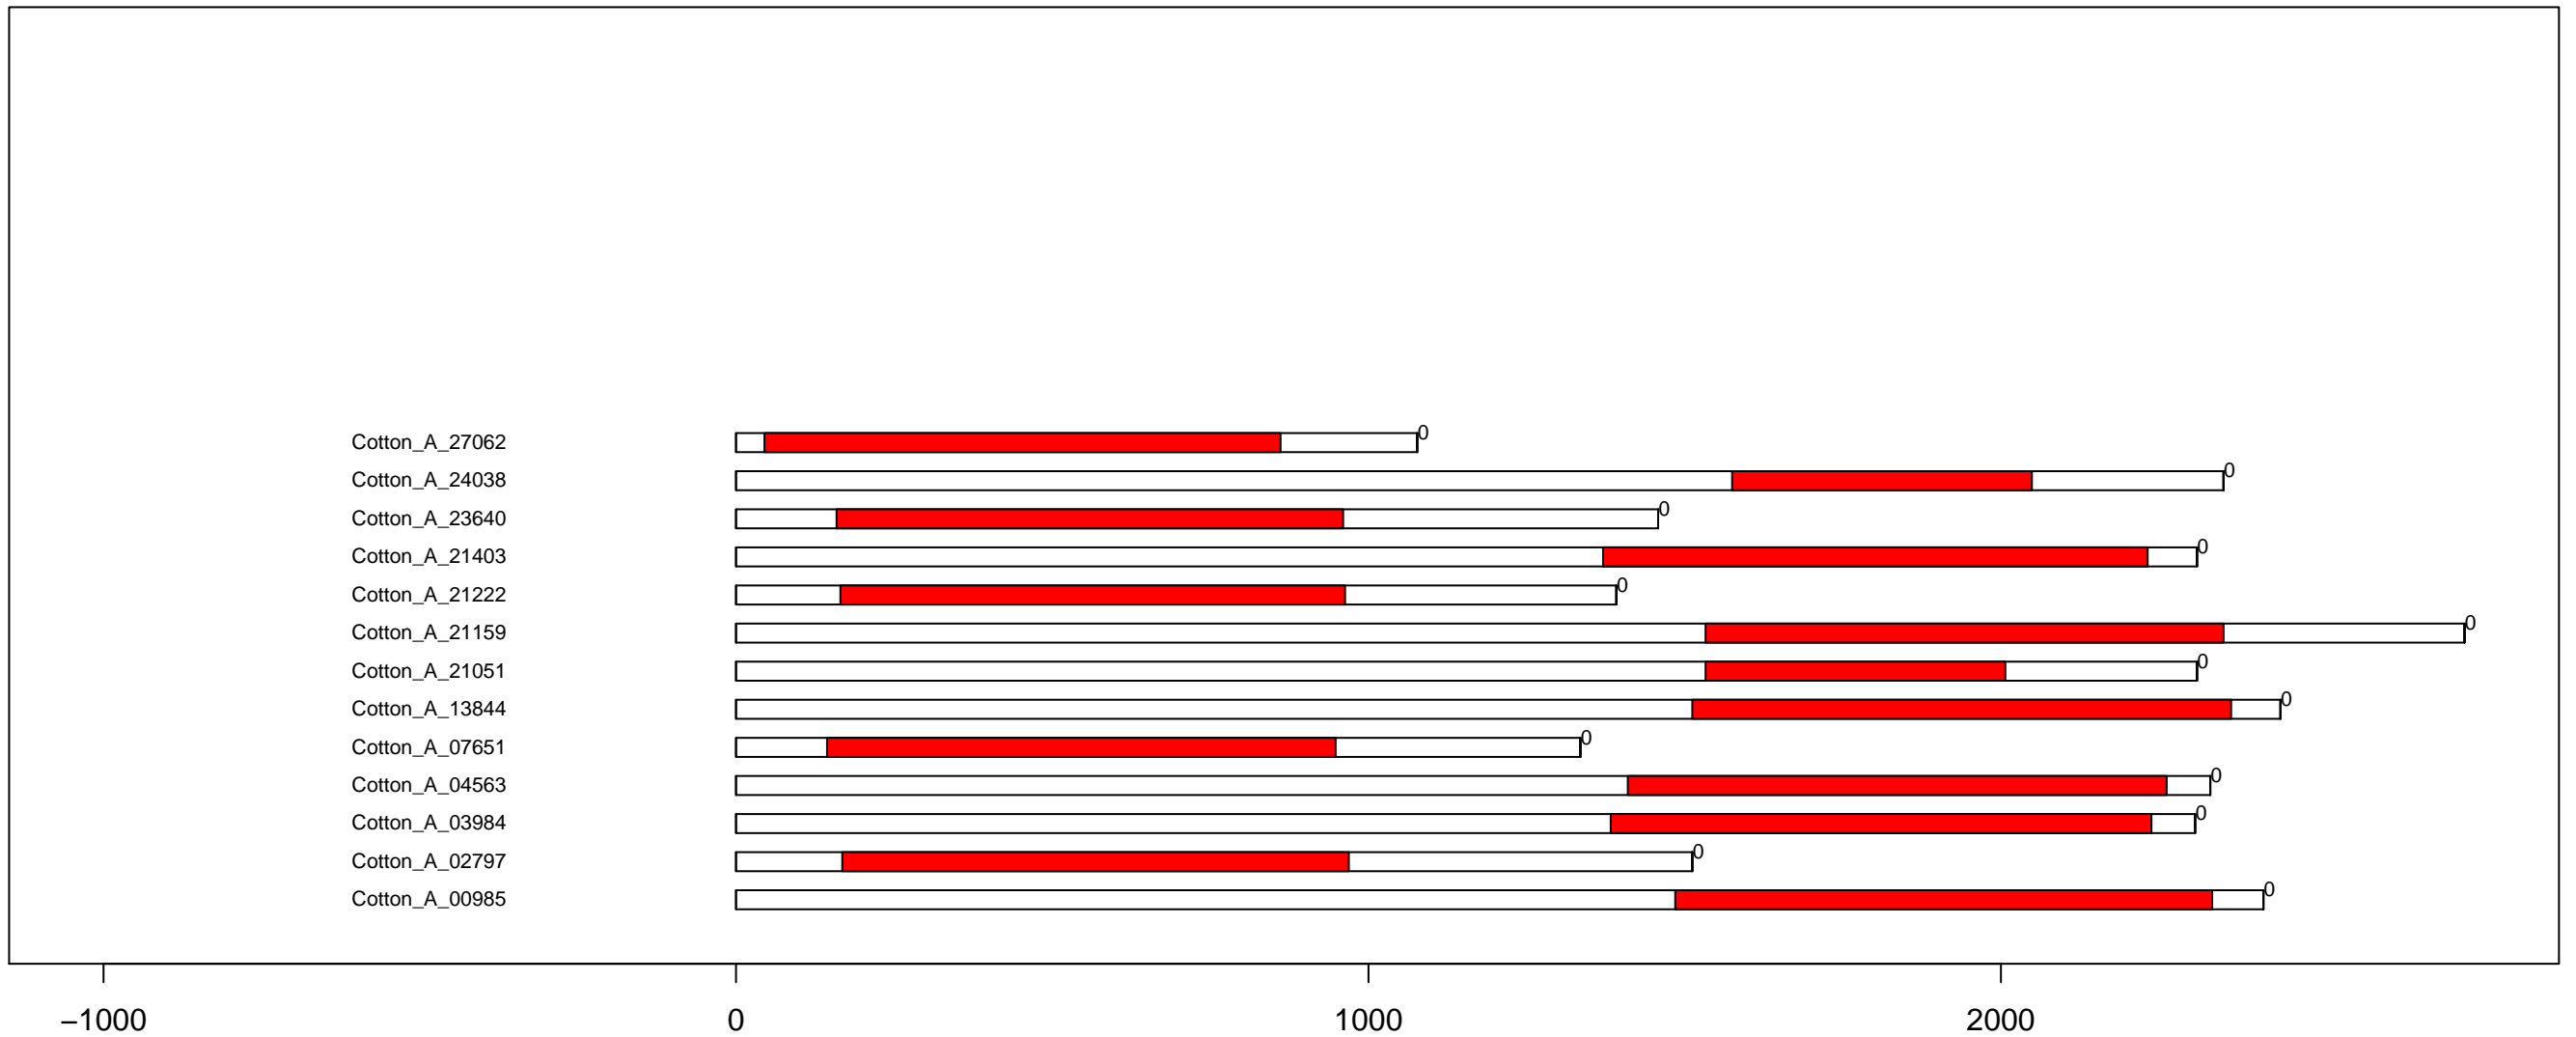

# G.ar RLK-Pelle\_CrRLK1L-1 exon-intron and domain diagram (part 1)

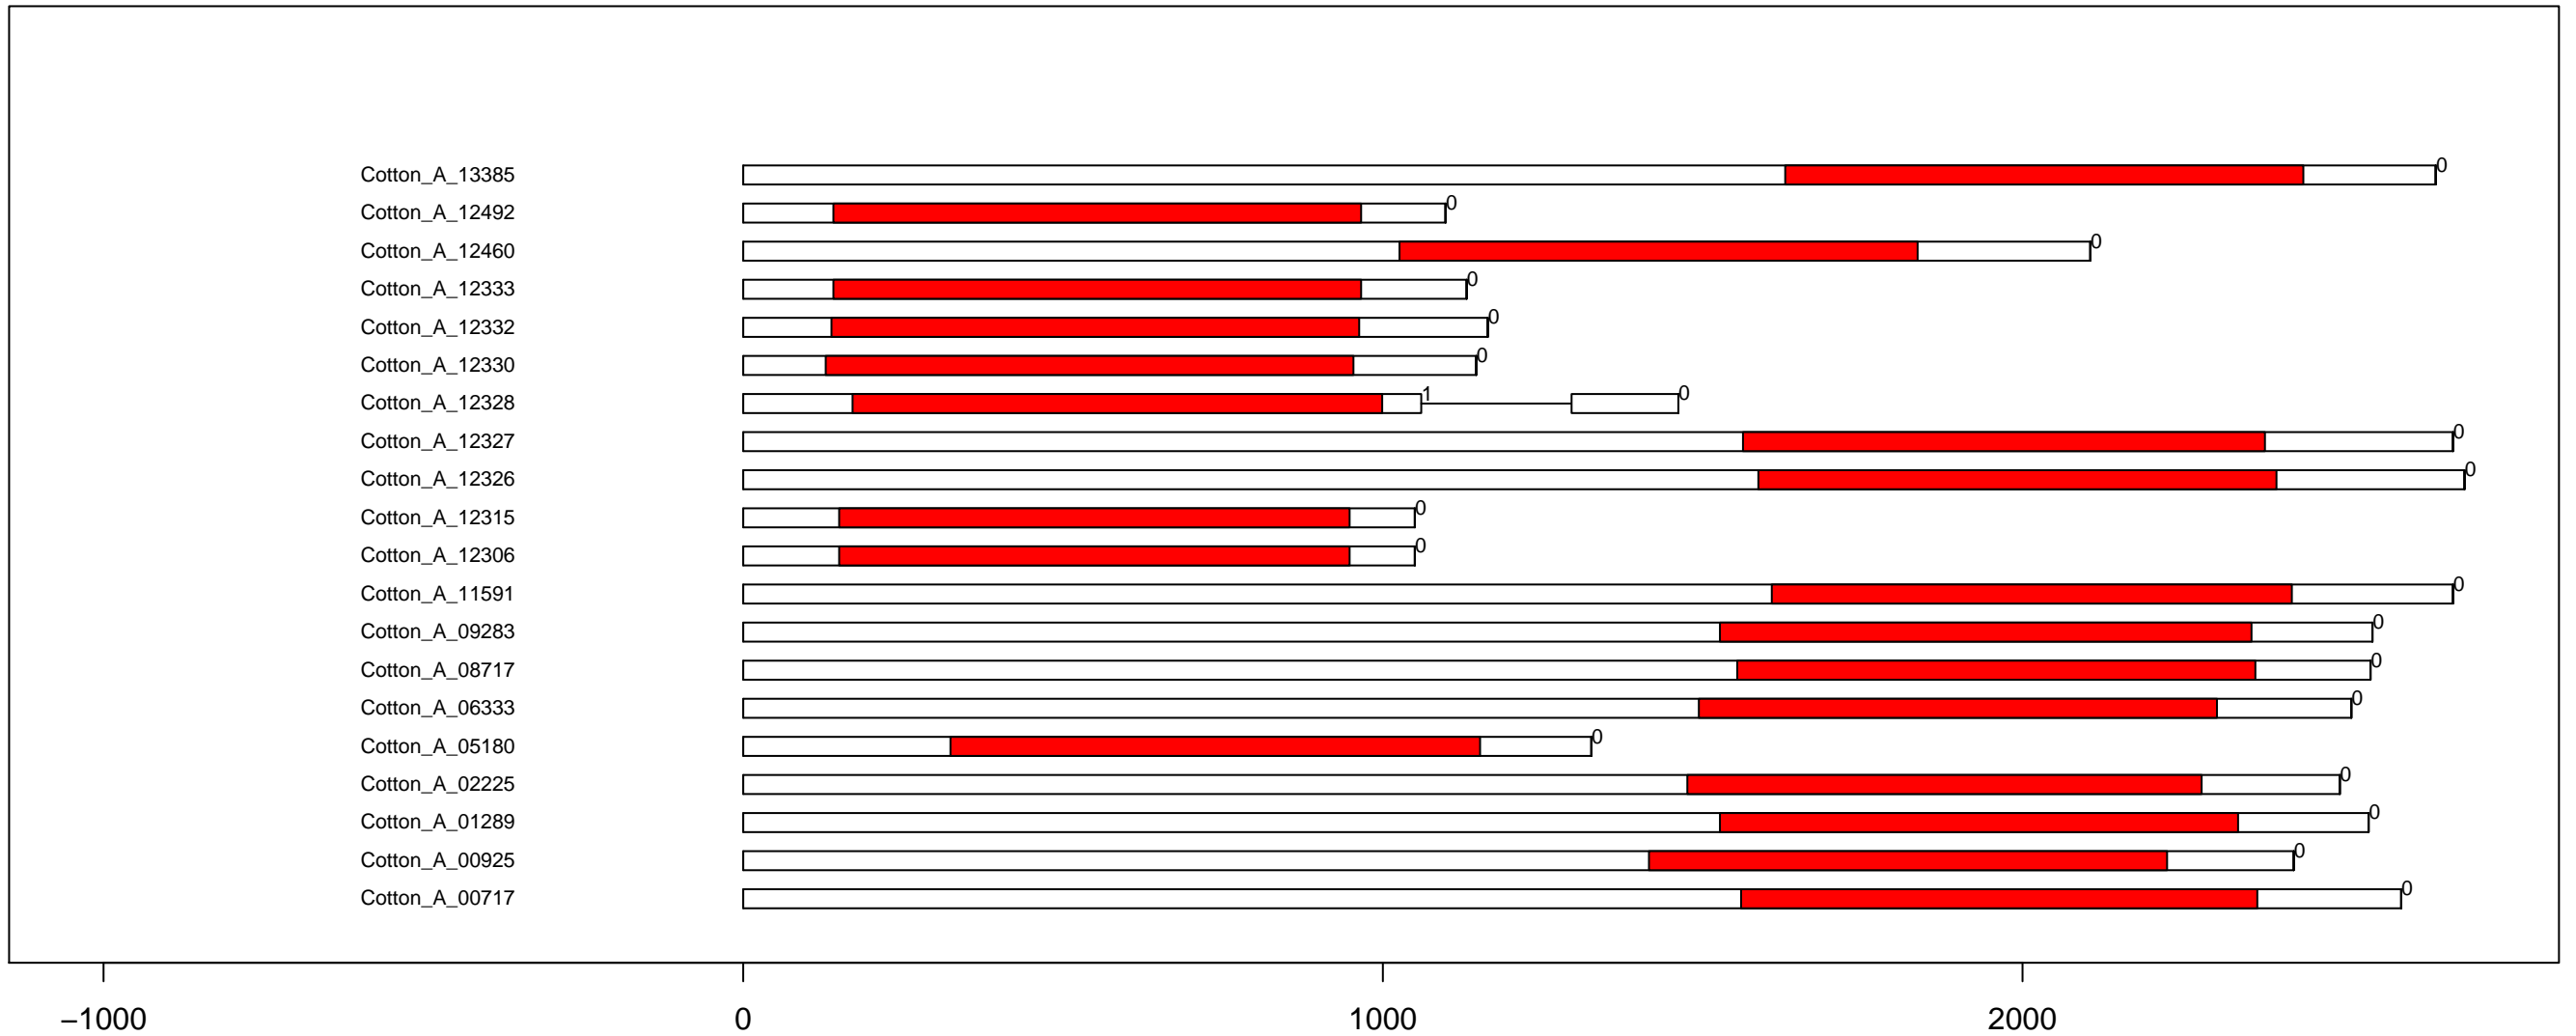



### G.ar RLK-Pelle\_CrRLK1L-1 exon-intron and domain diagram (part 3)

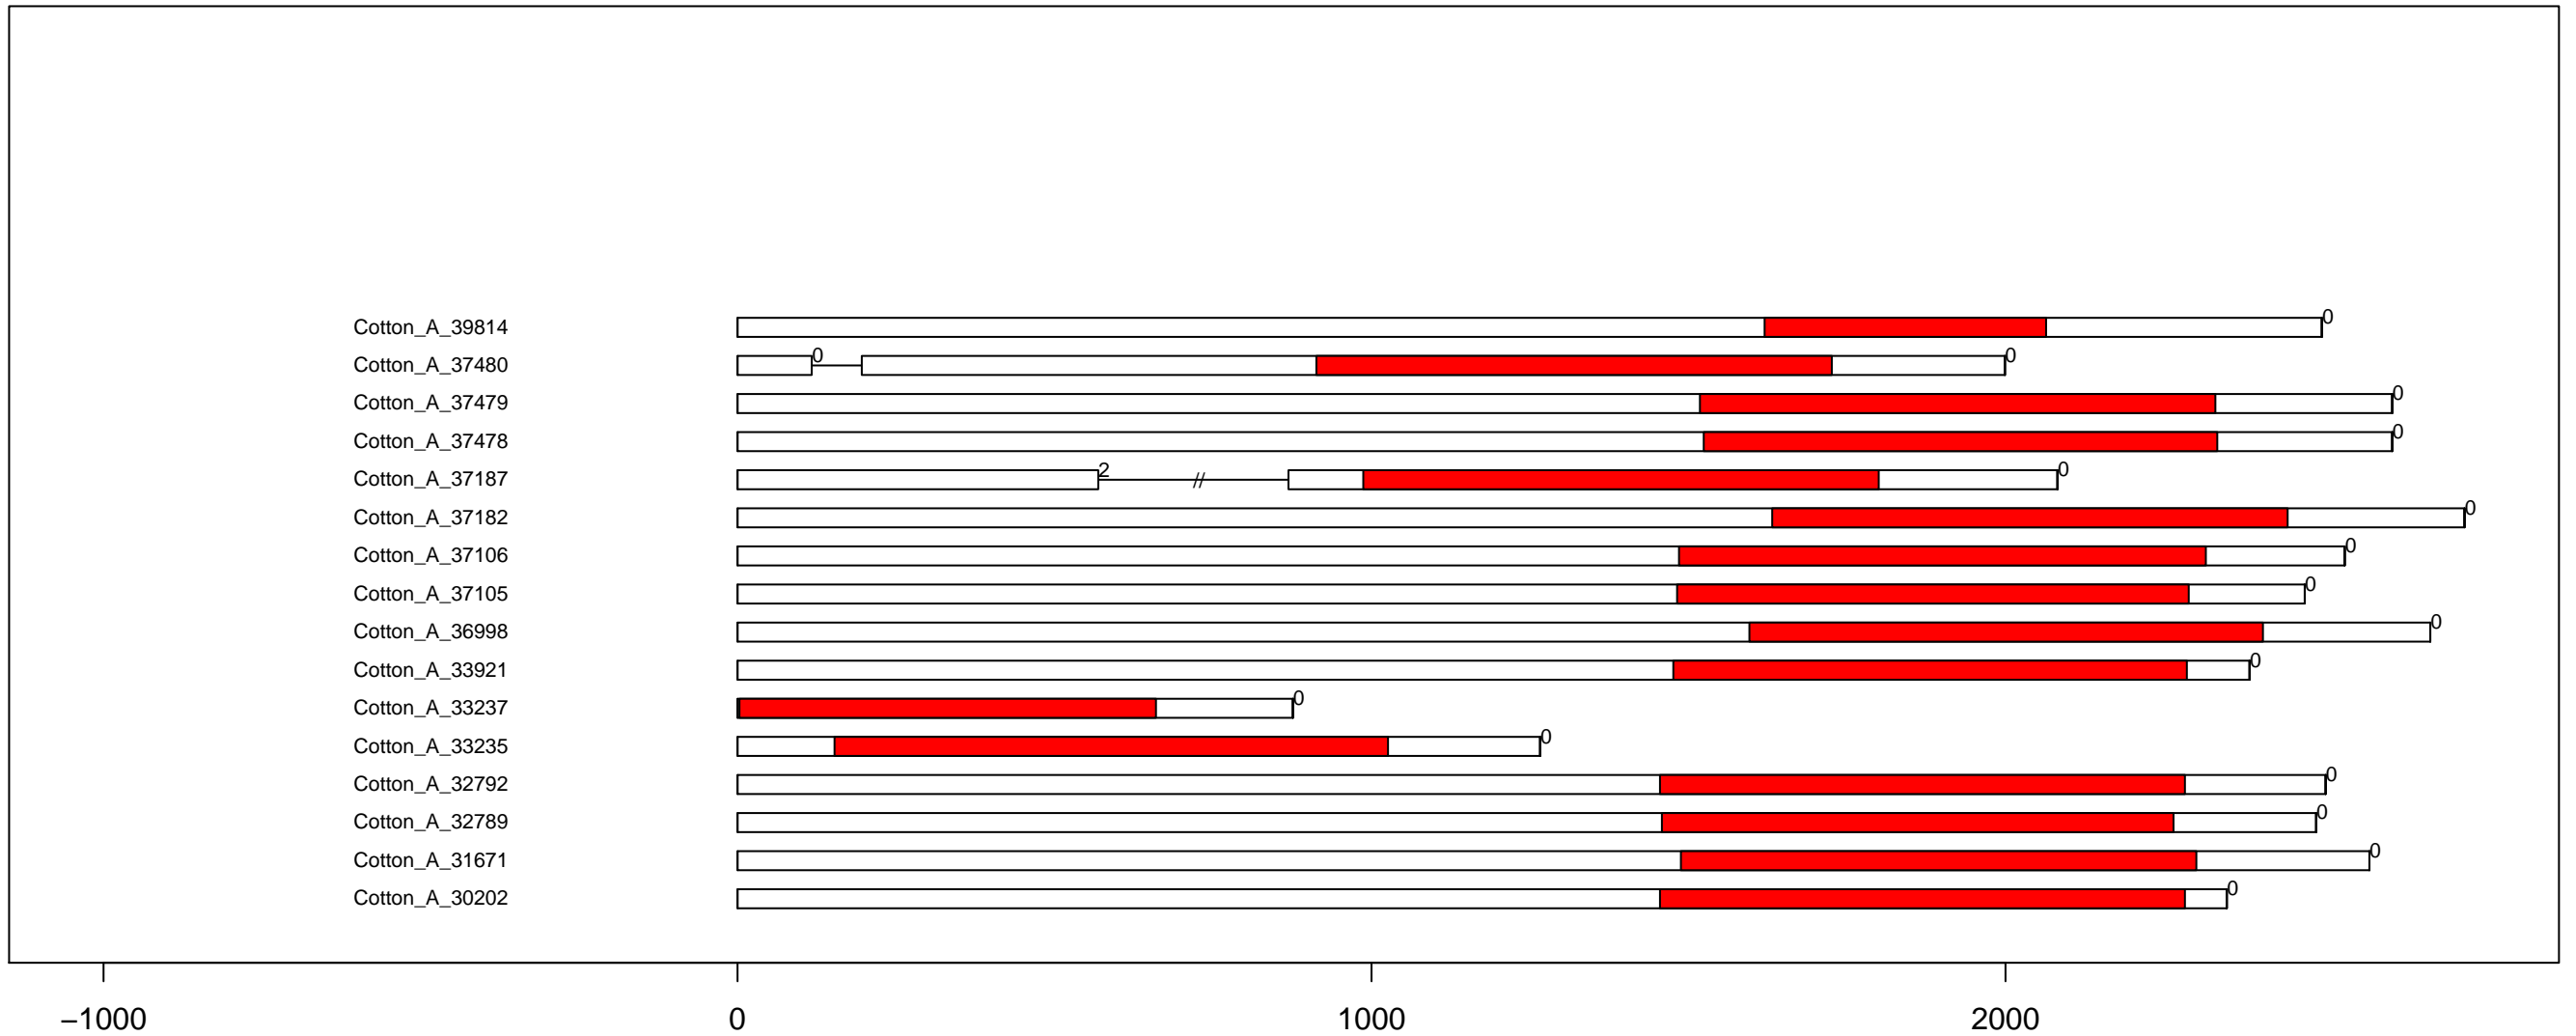

# G.ar RLK-Pelle\_DLSV exon-intron and domain diagram (part 1)

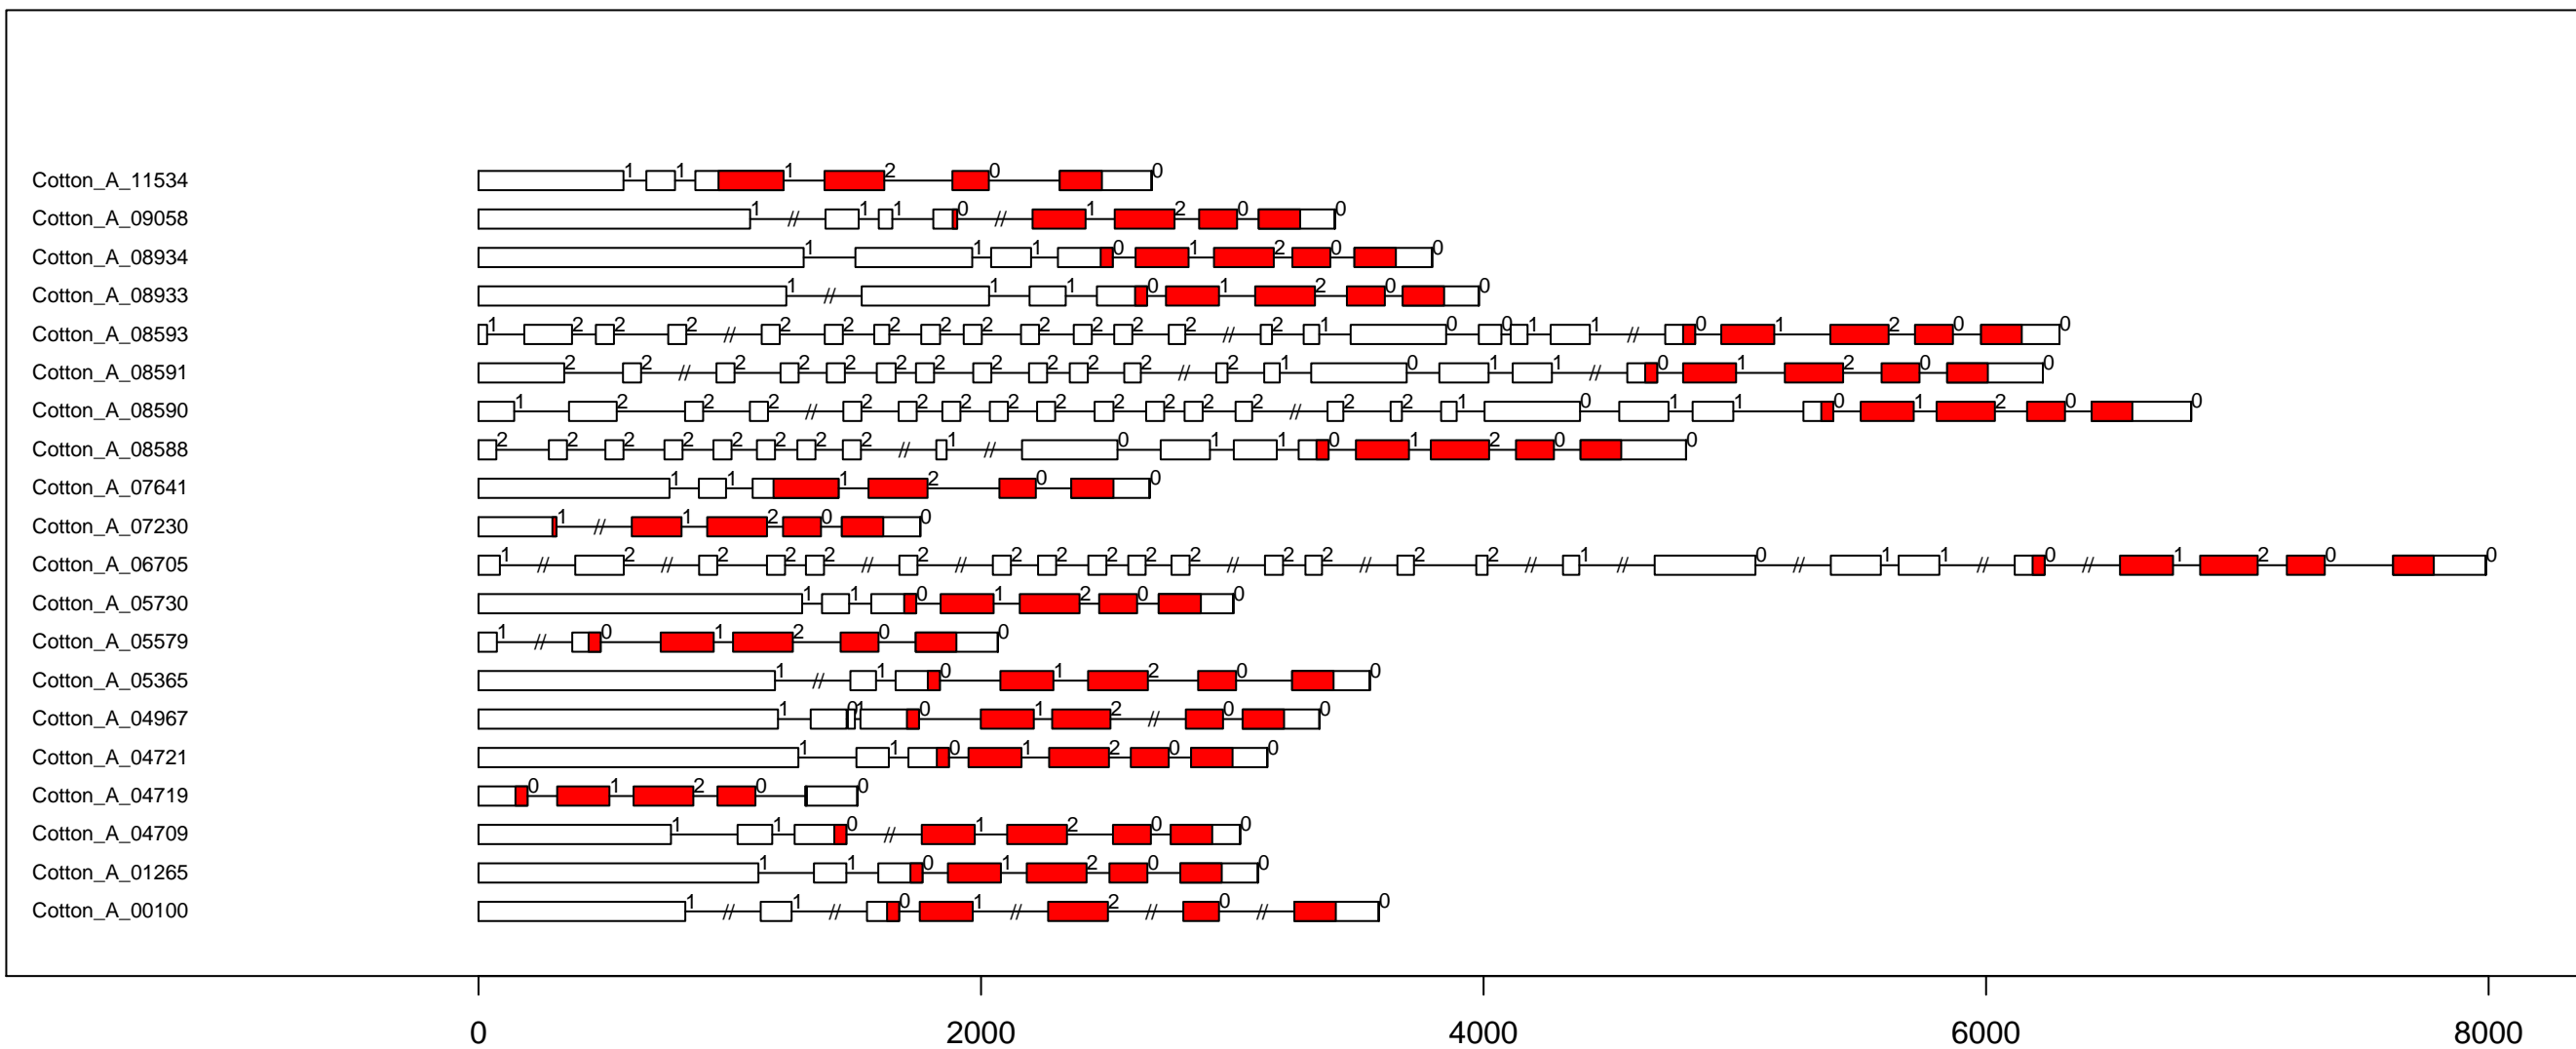

# G.ar RLK-Pelle\_DLSV exon-intron and domain diagram (part 2)

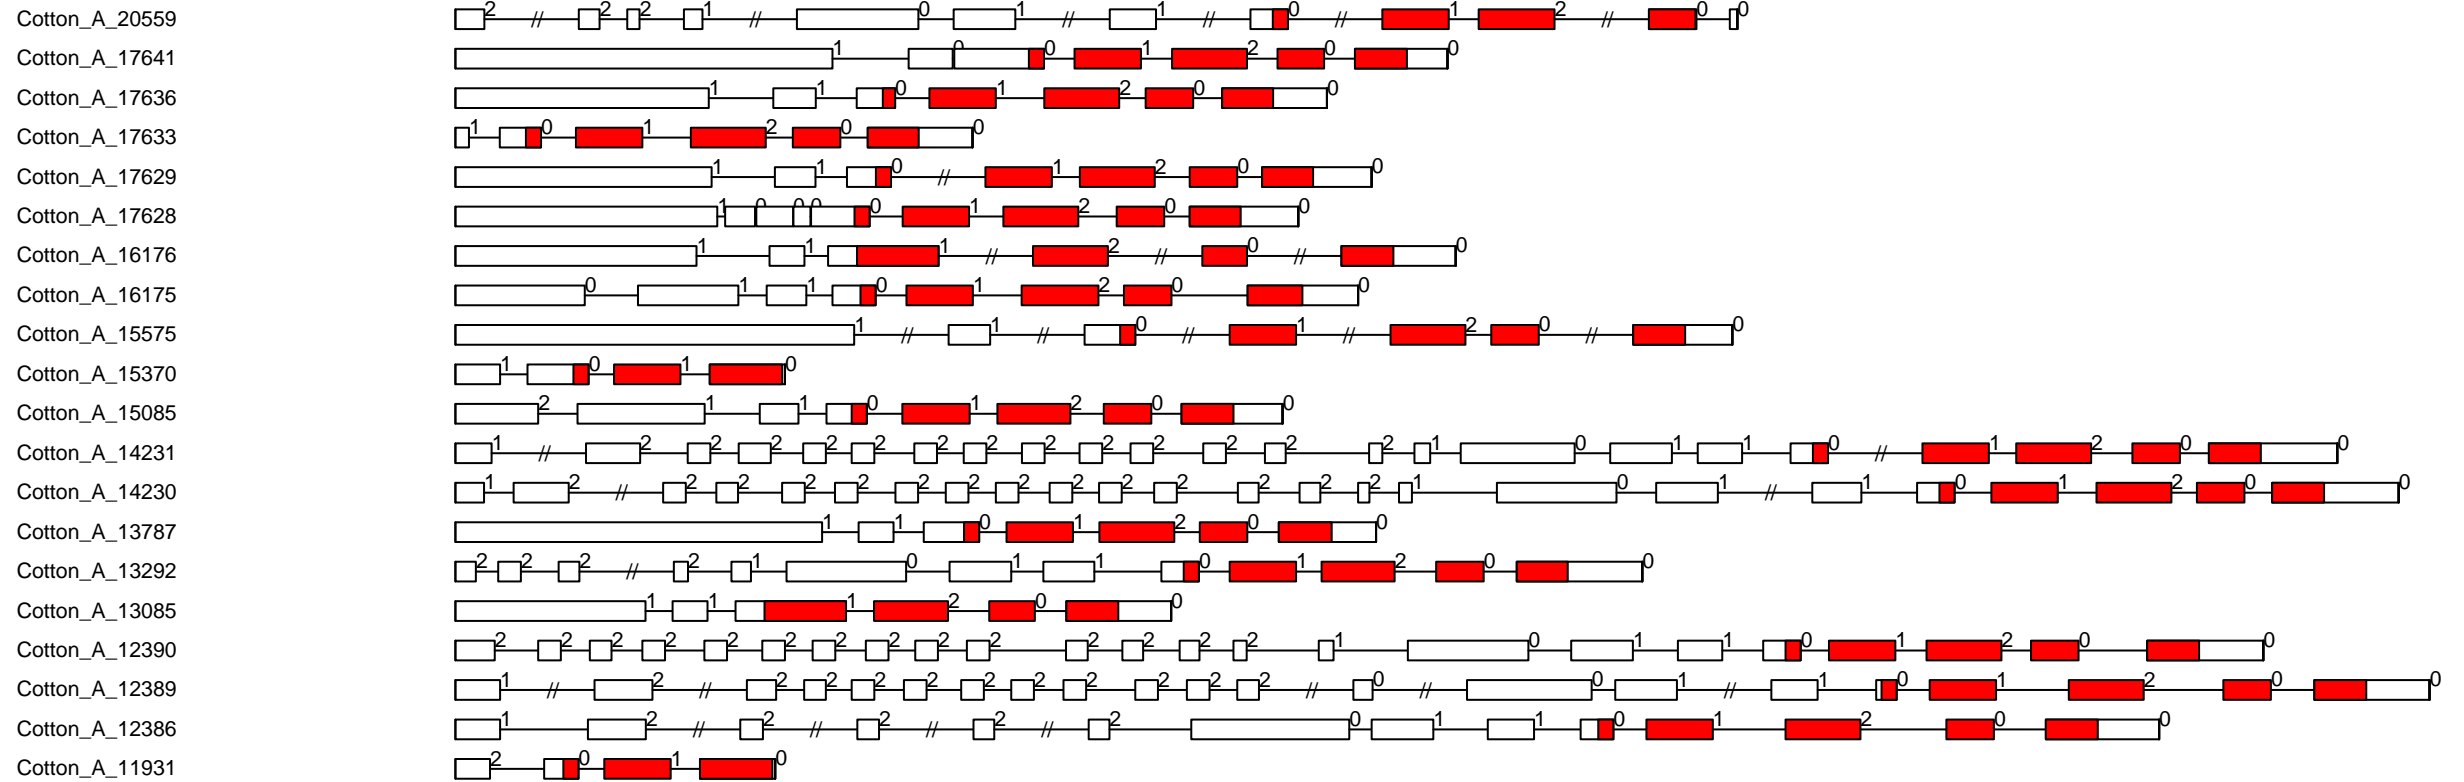

### G.ar RLK-Pelle\_DLSV exon-intron and domain diagram (part 3)

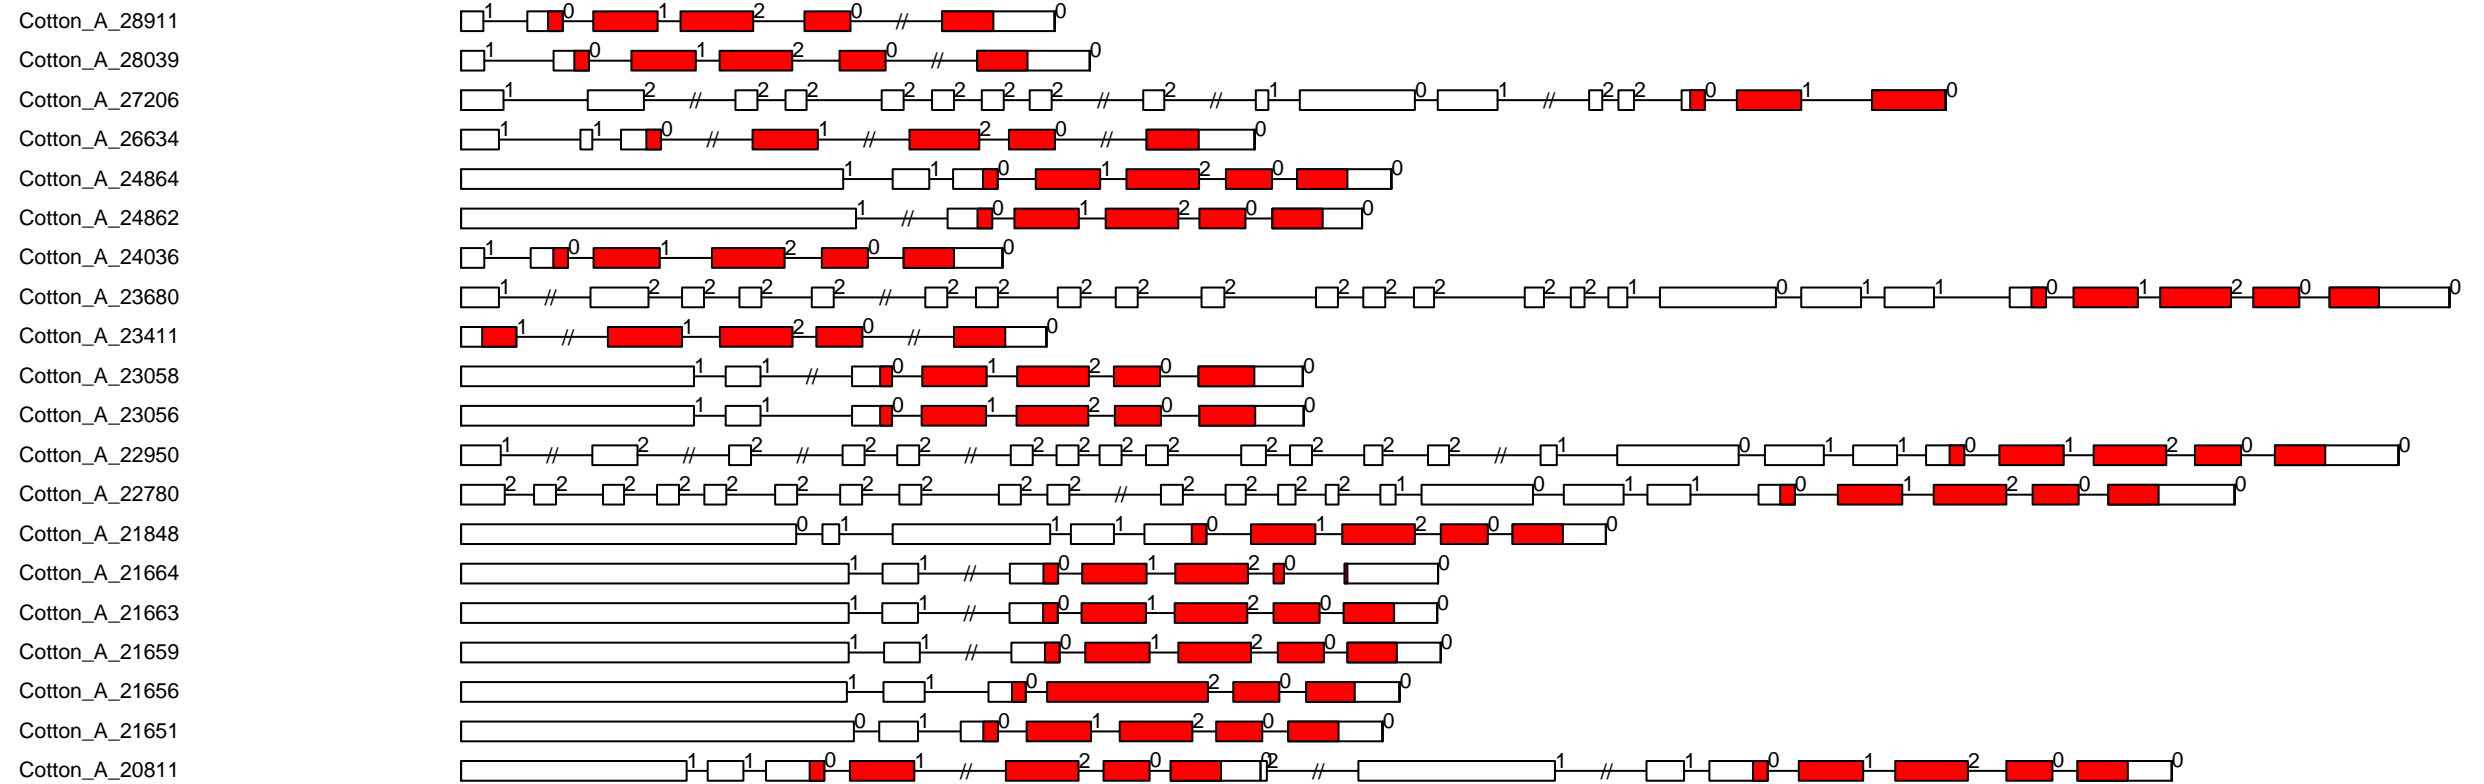

### G.ar RLK-Pelle\_DLSV exon-intron and domain diagram (part 4)

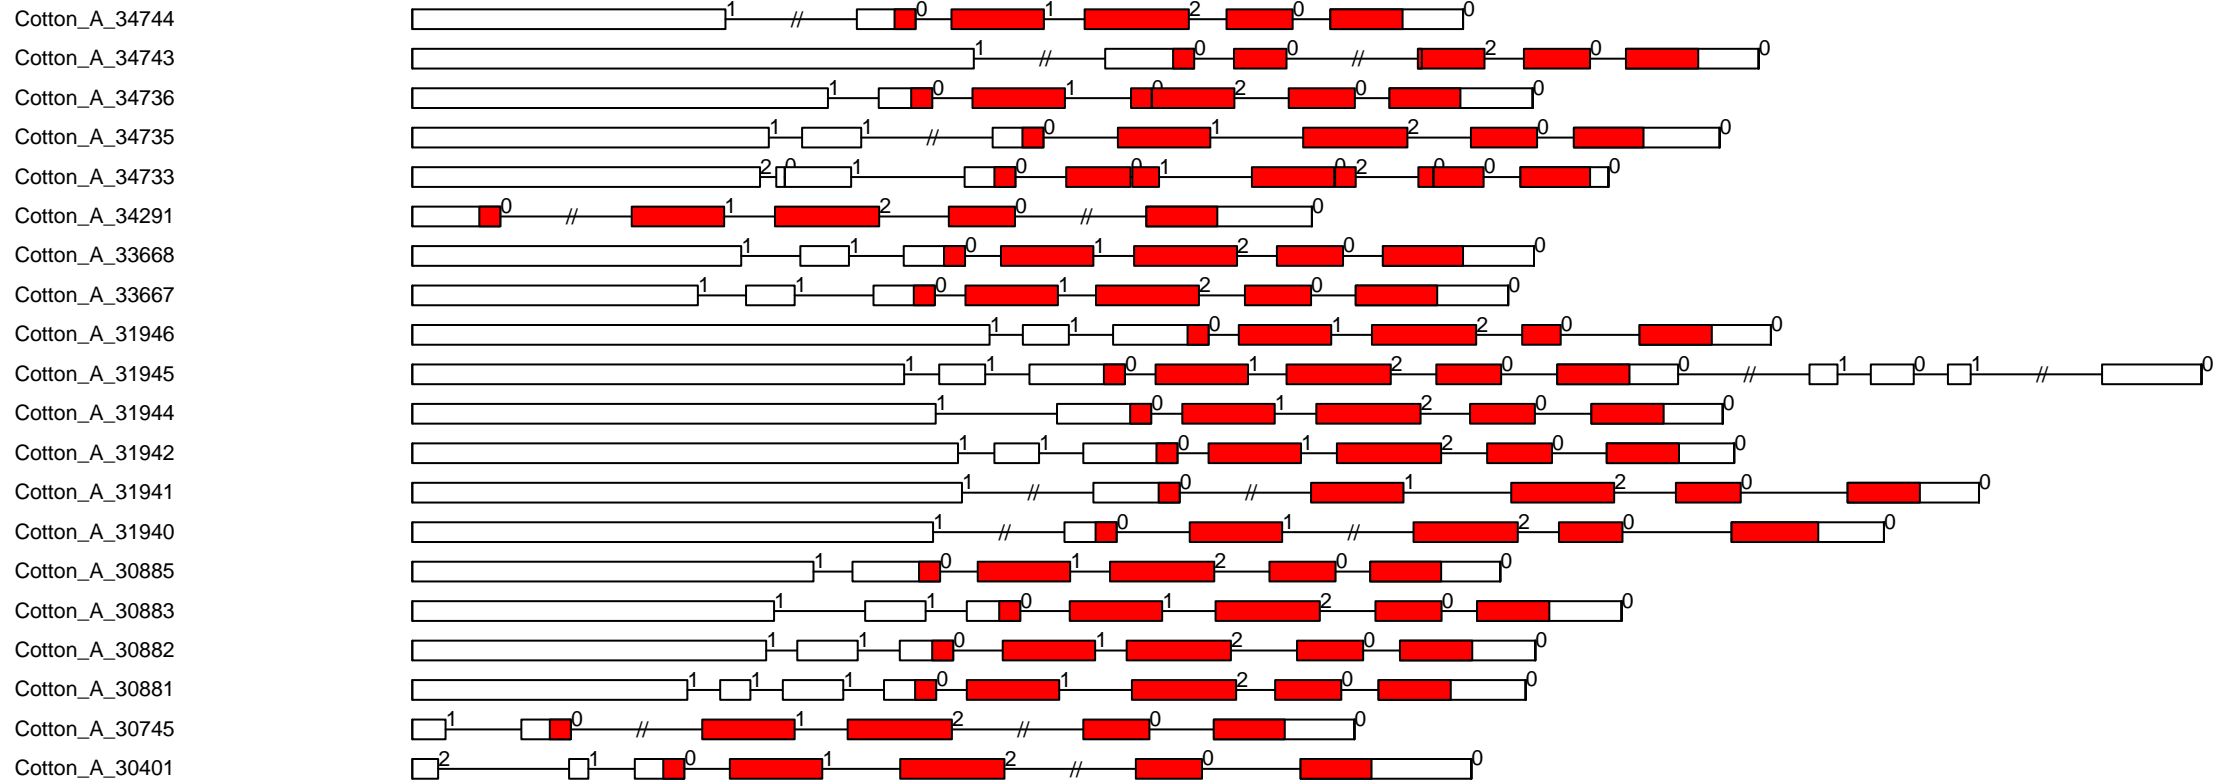



### G.ar RLK-Pelle\_DLSV exon-intron and domain diagram (part 5)

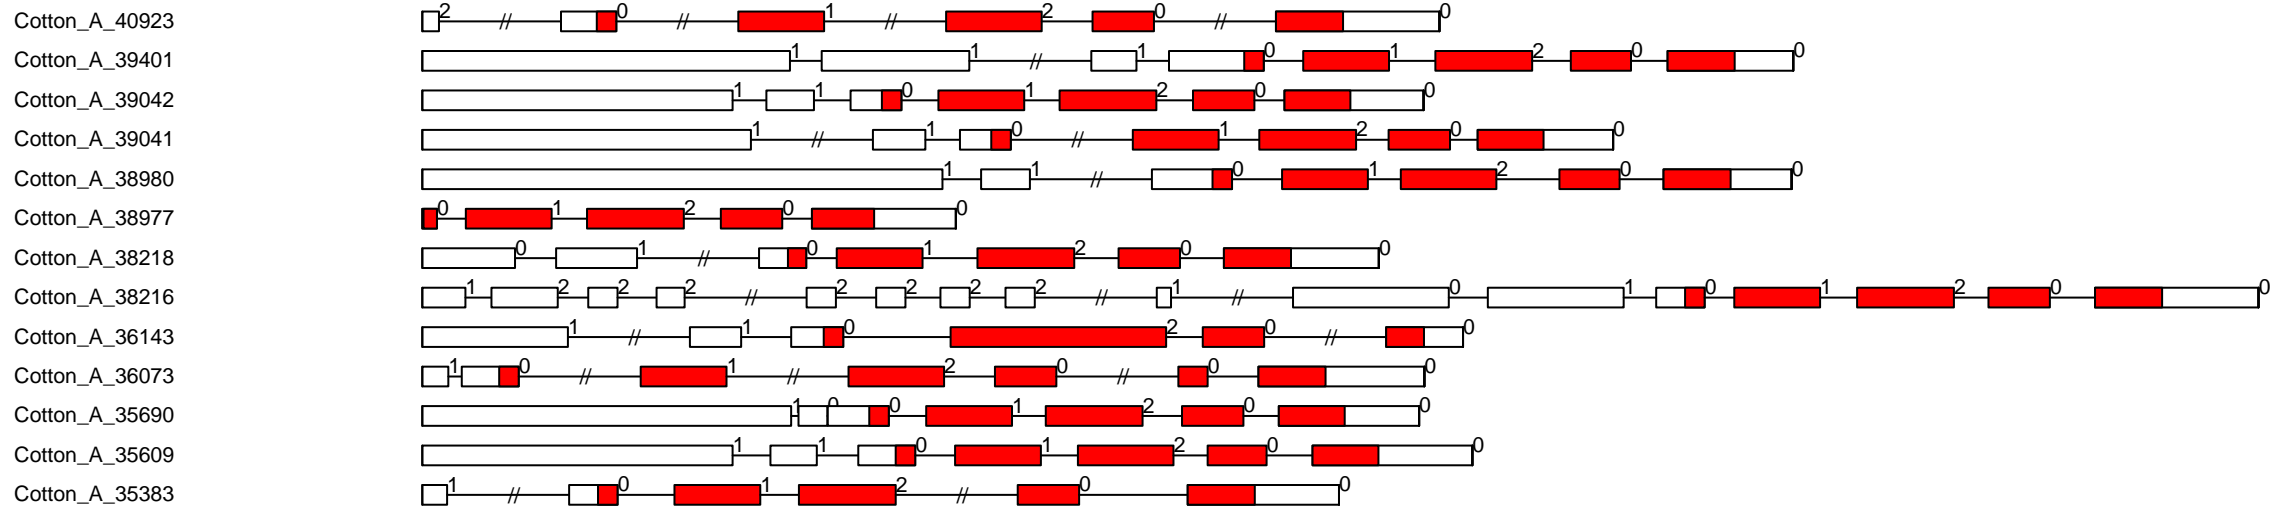

# G.ar RLK-Pelle\_Extensin exon-intron and domain diagram (all)

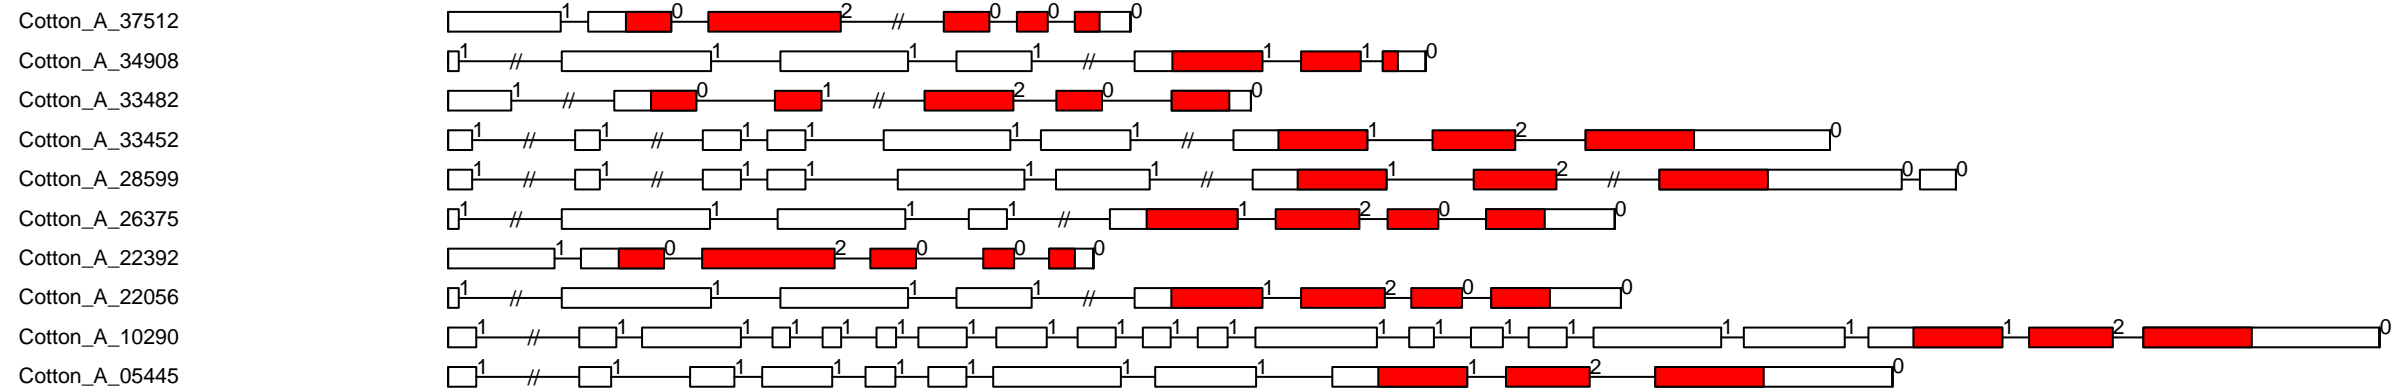

### G.ar RLK-Pelle\_L-LEC exon-intron and domain diagram (part 1)

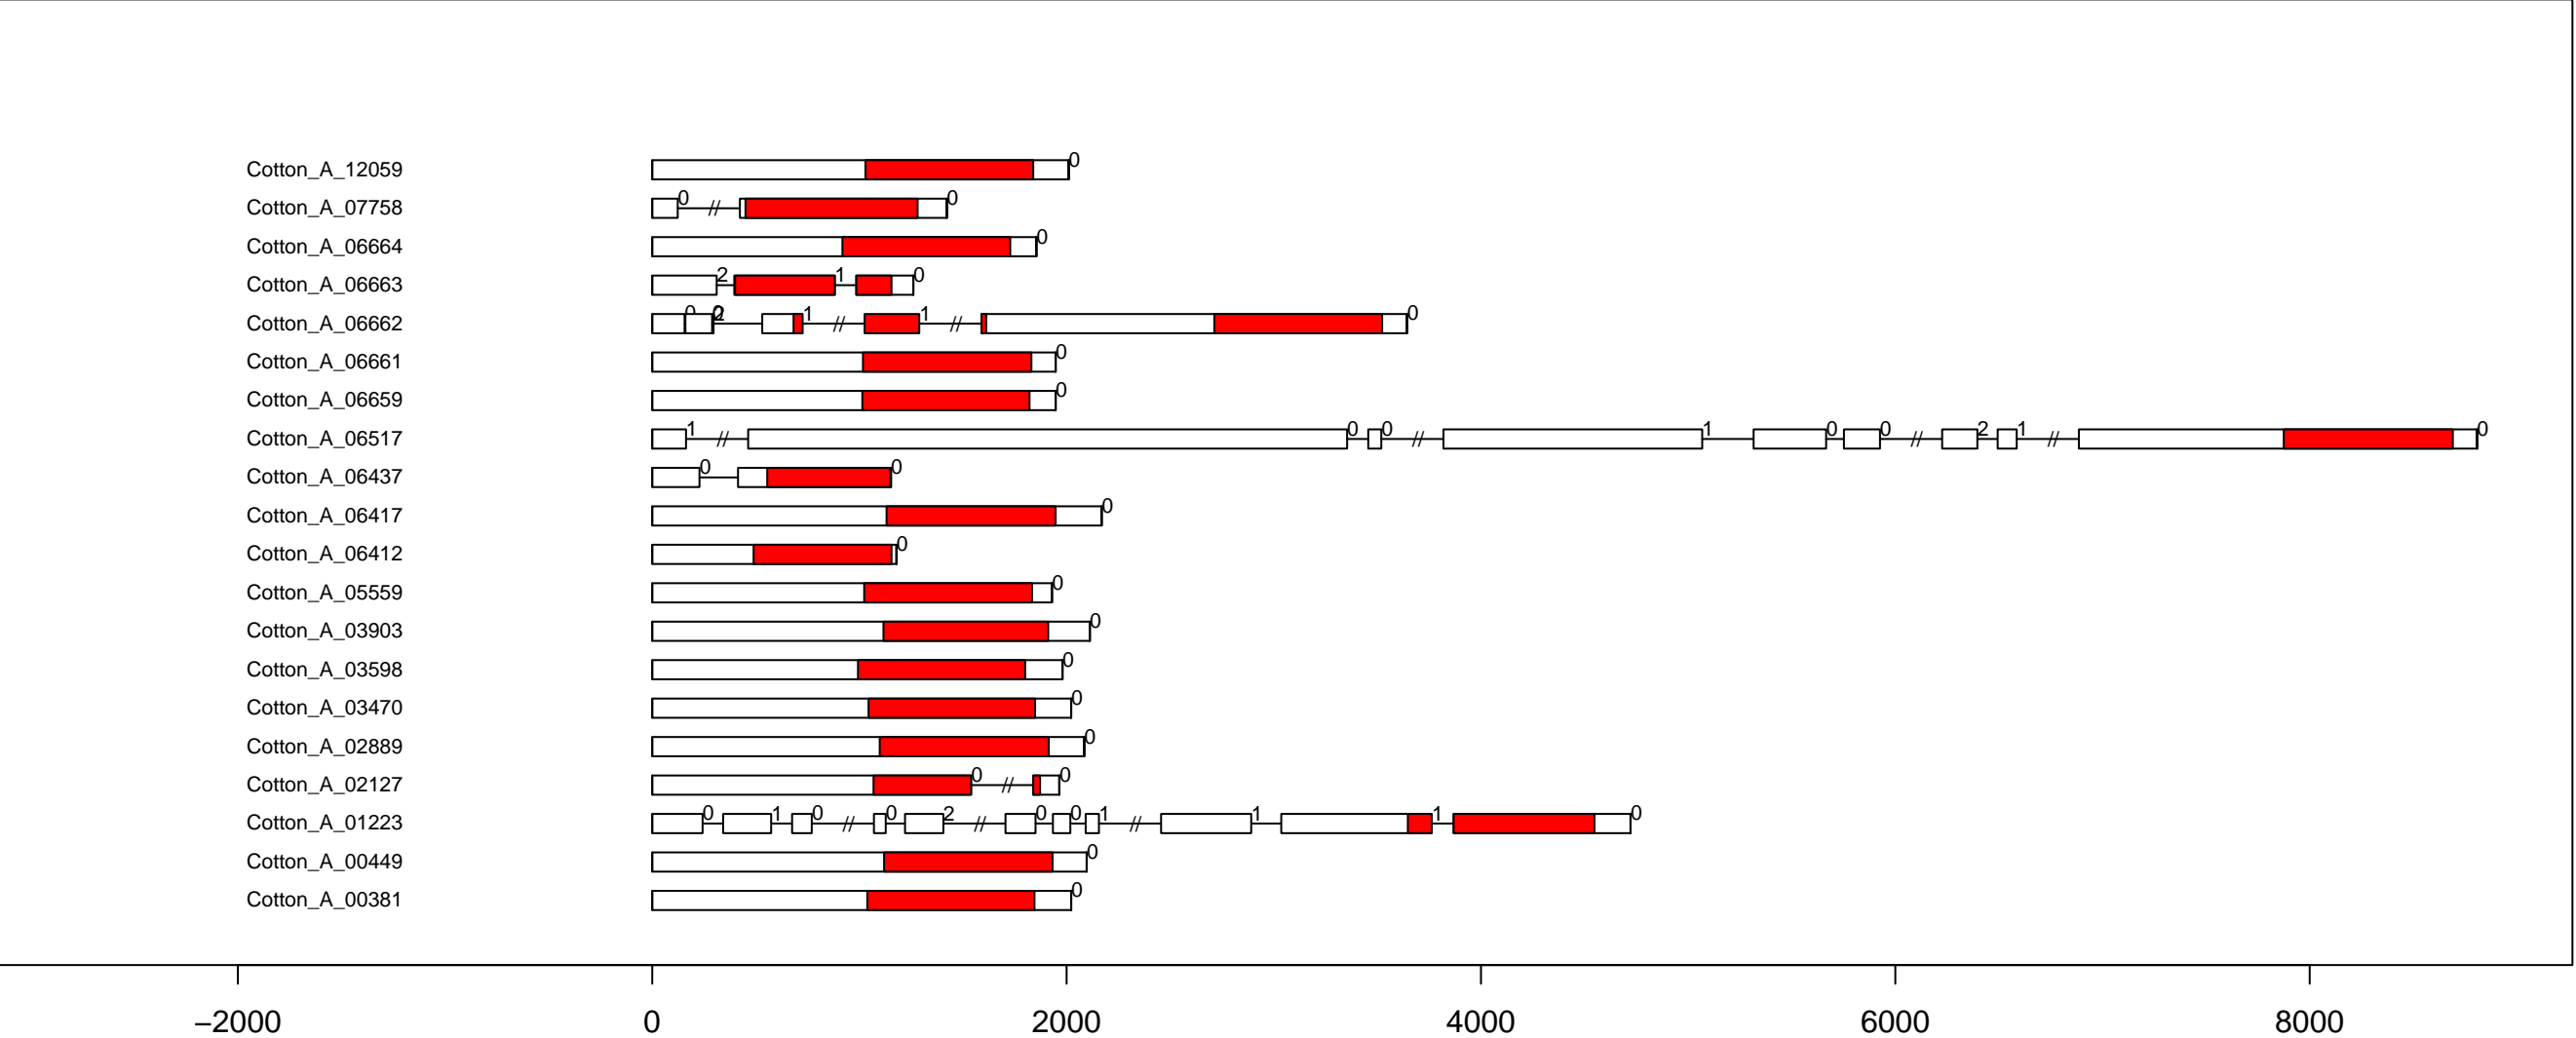

G.ar RLK-Pelle\_L-LEC exon-intron and domain diagram (part 2)

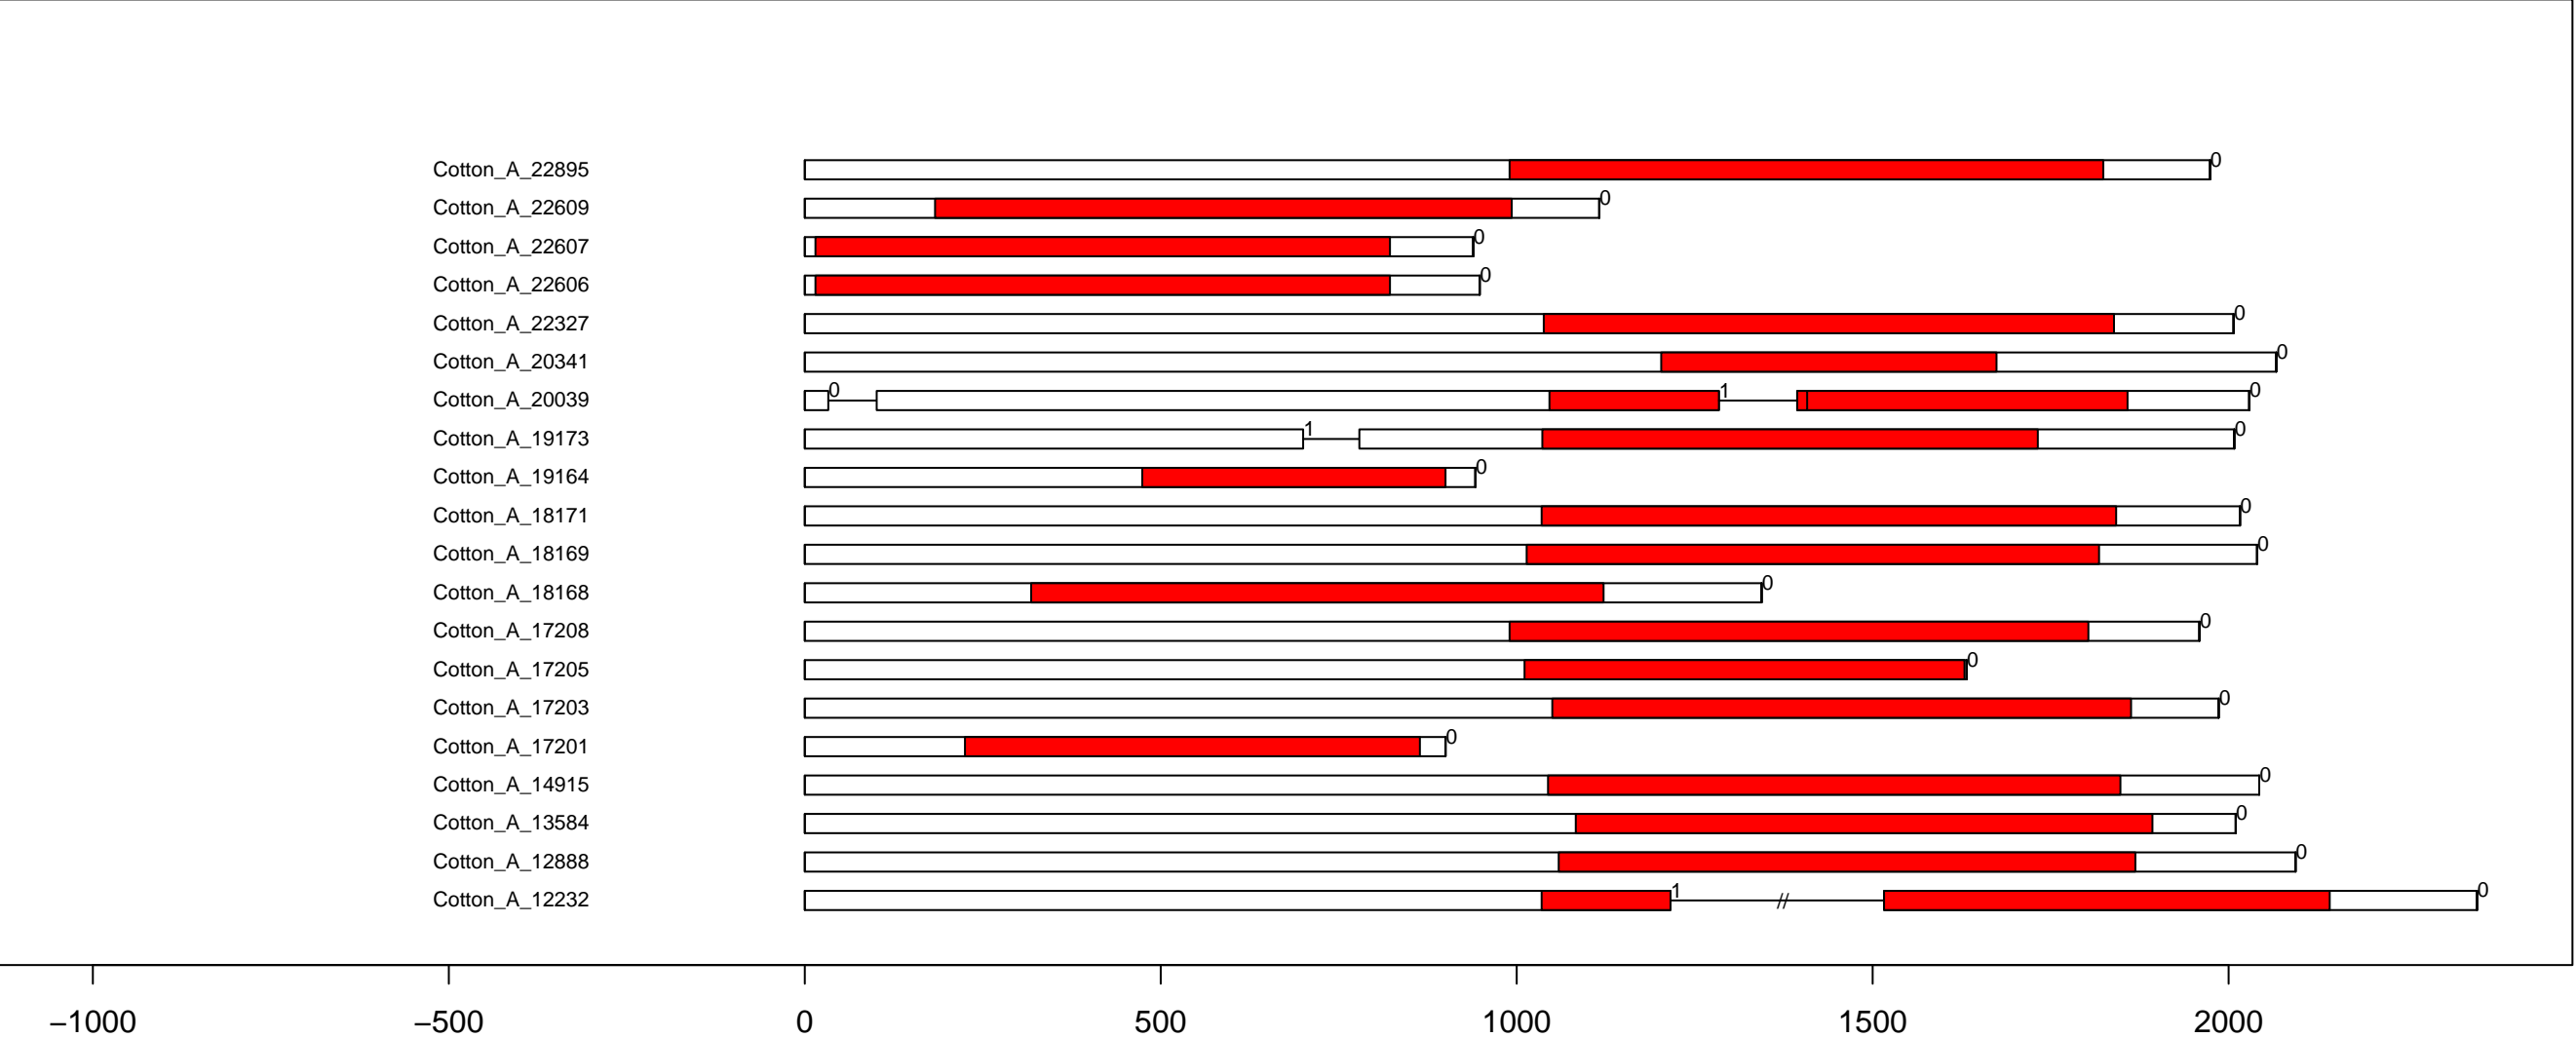

G.ar RLK-Pelle\_L-LEC exon-intron and domain diagram (part 3)

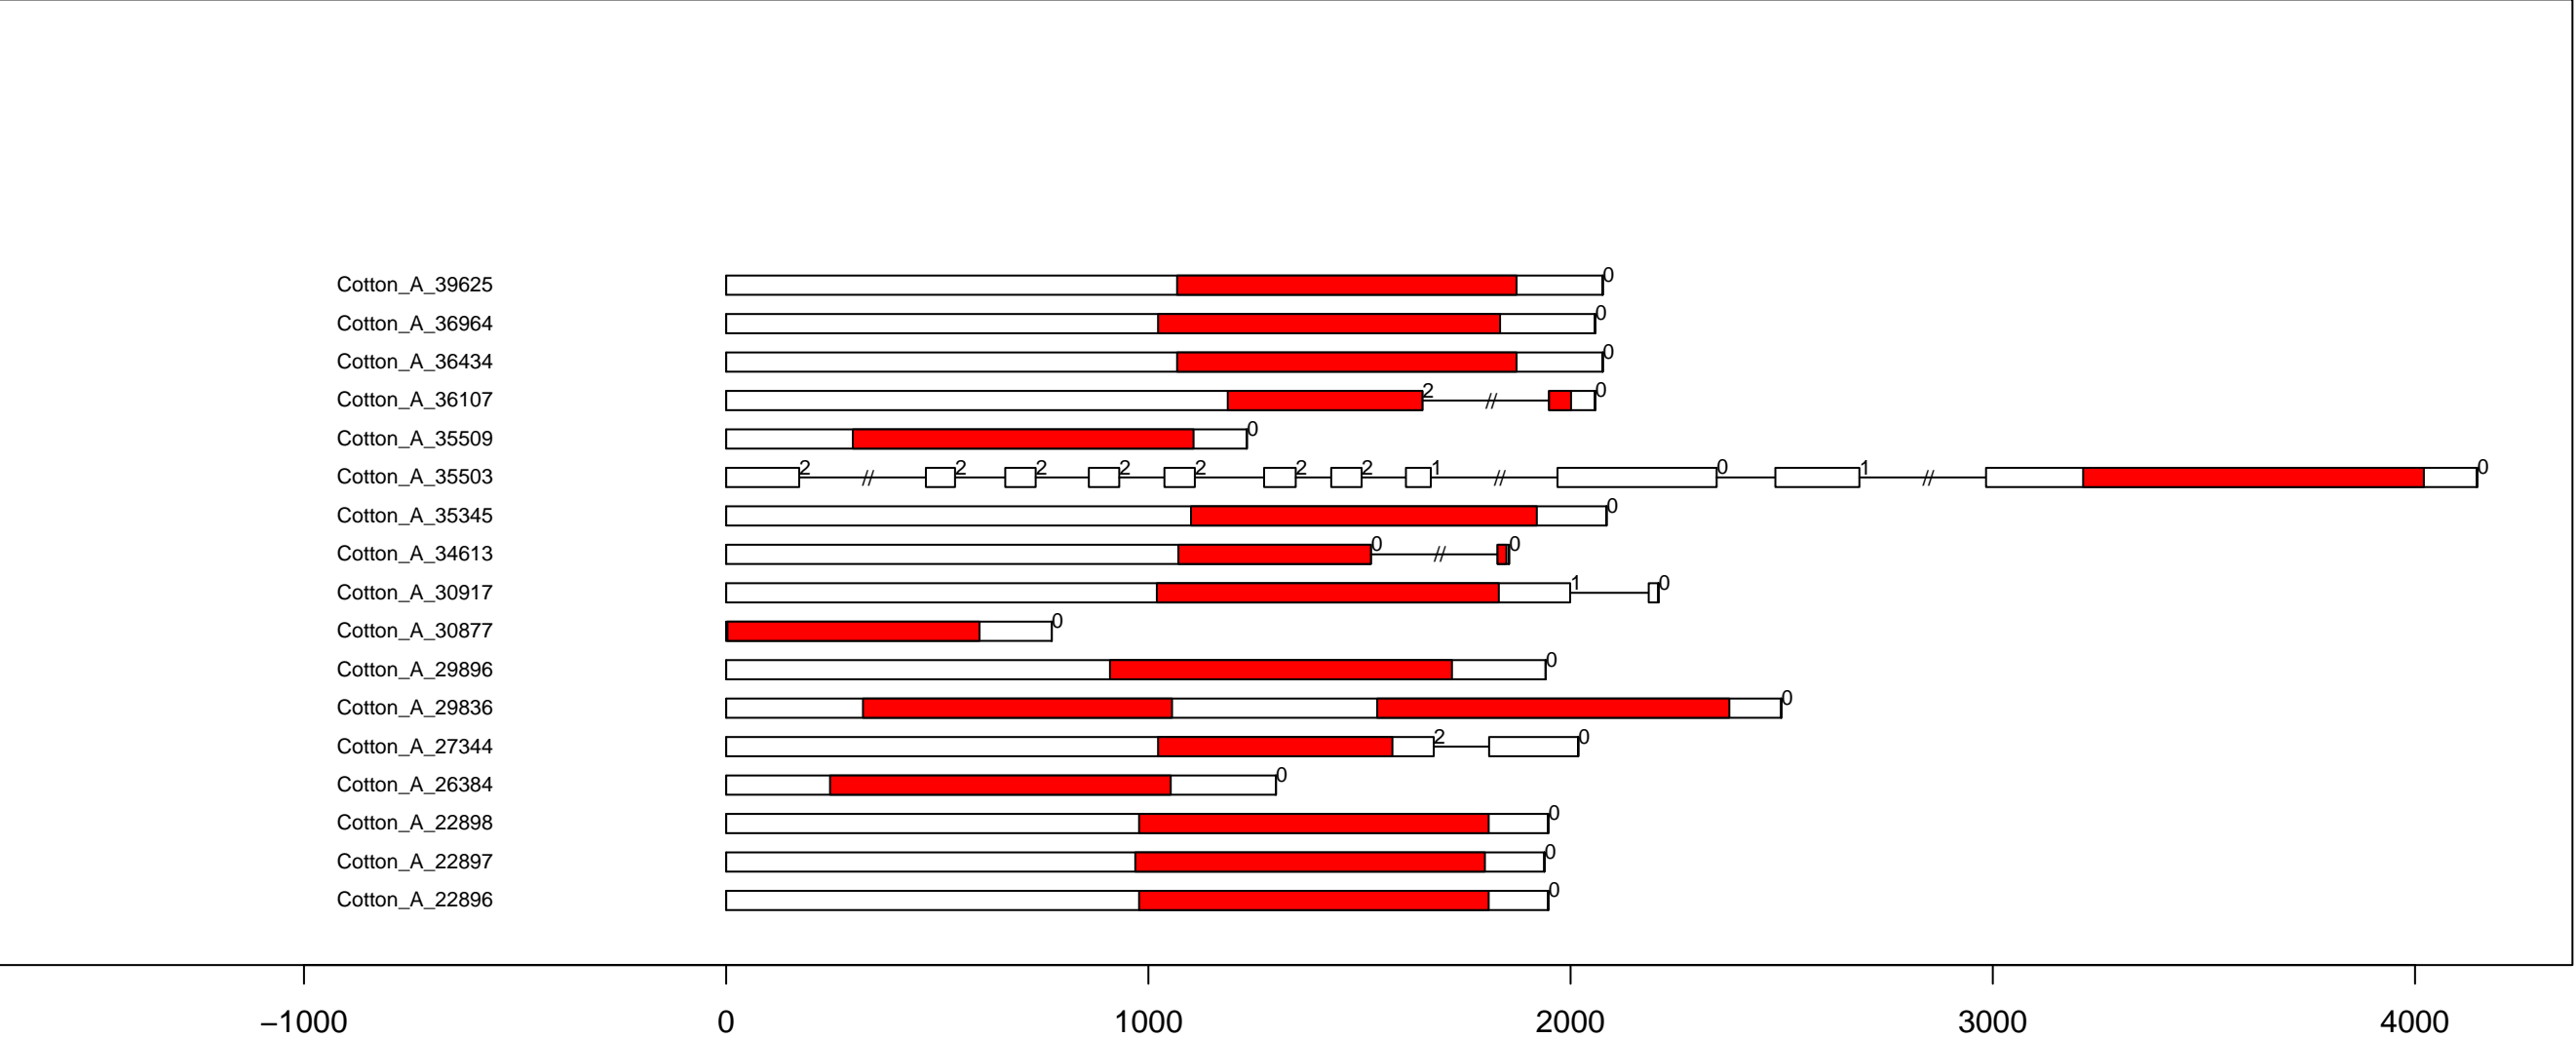

### G.ar RLK-Pelle\_LRK10L-2 exon-intron and domain diagram (part 1)

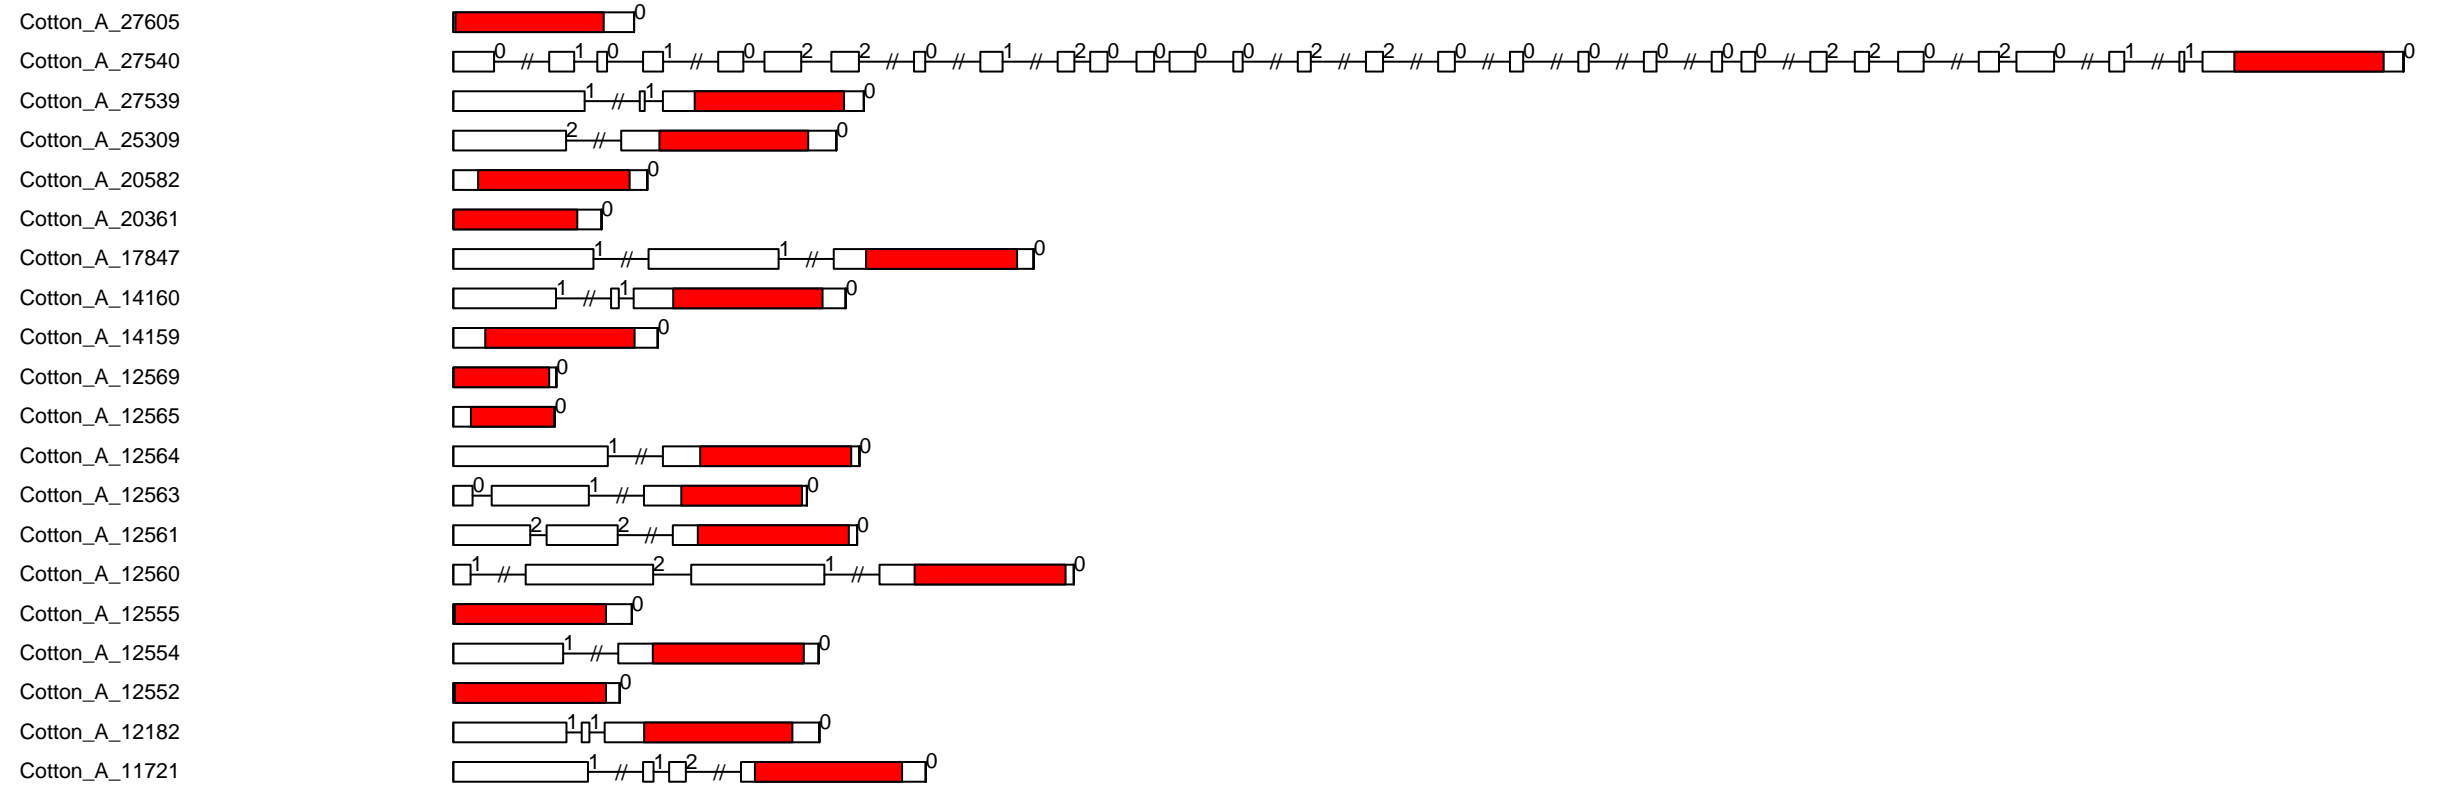

# G.ar RLK-Pelle\_LRK10L-2 exon-intron and domain diagram (part 2)

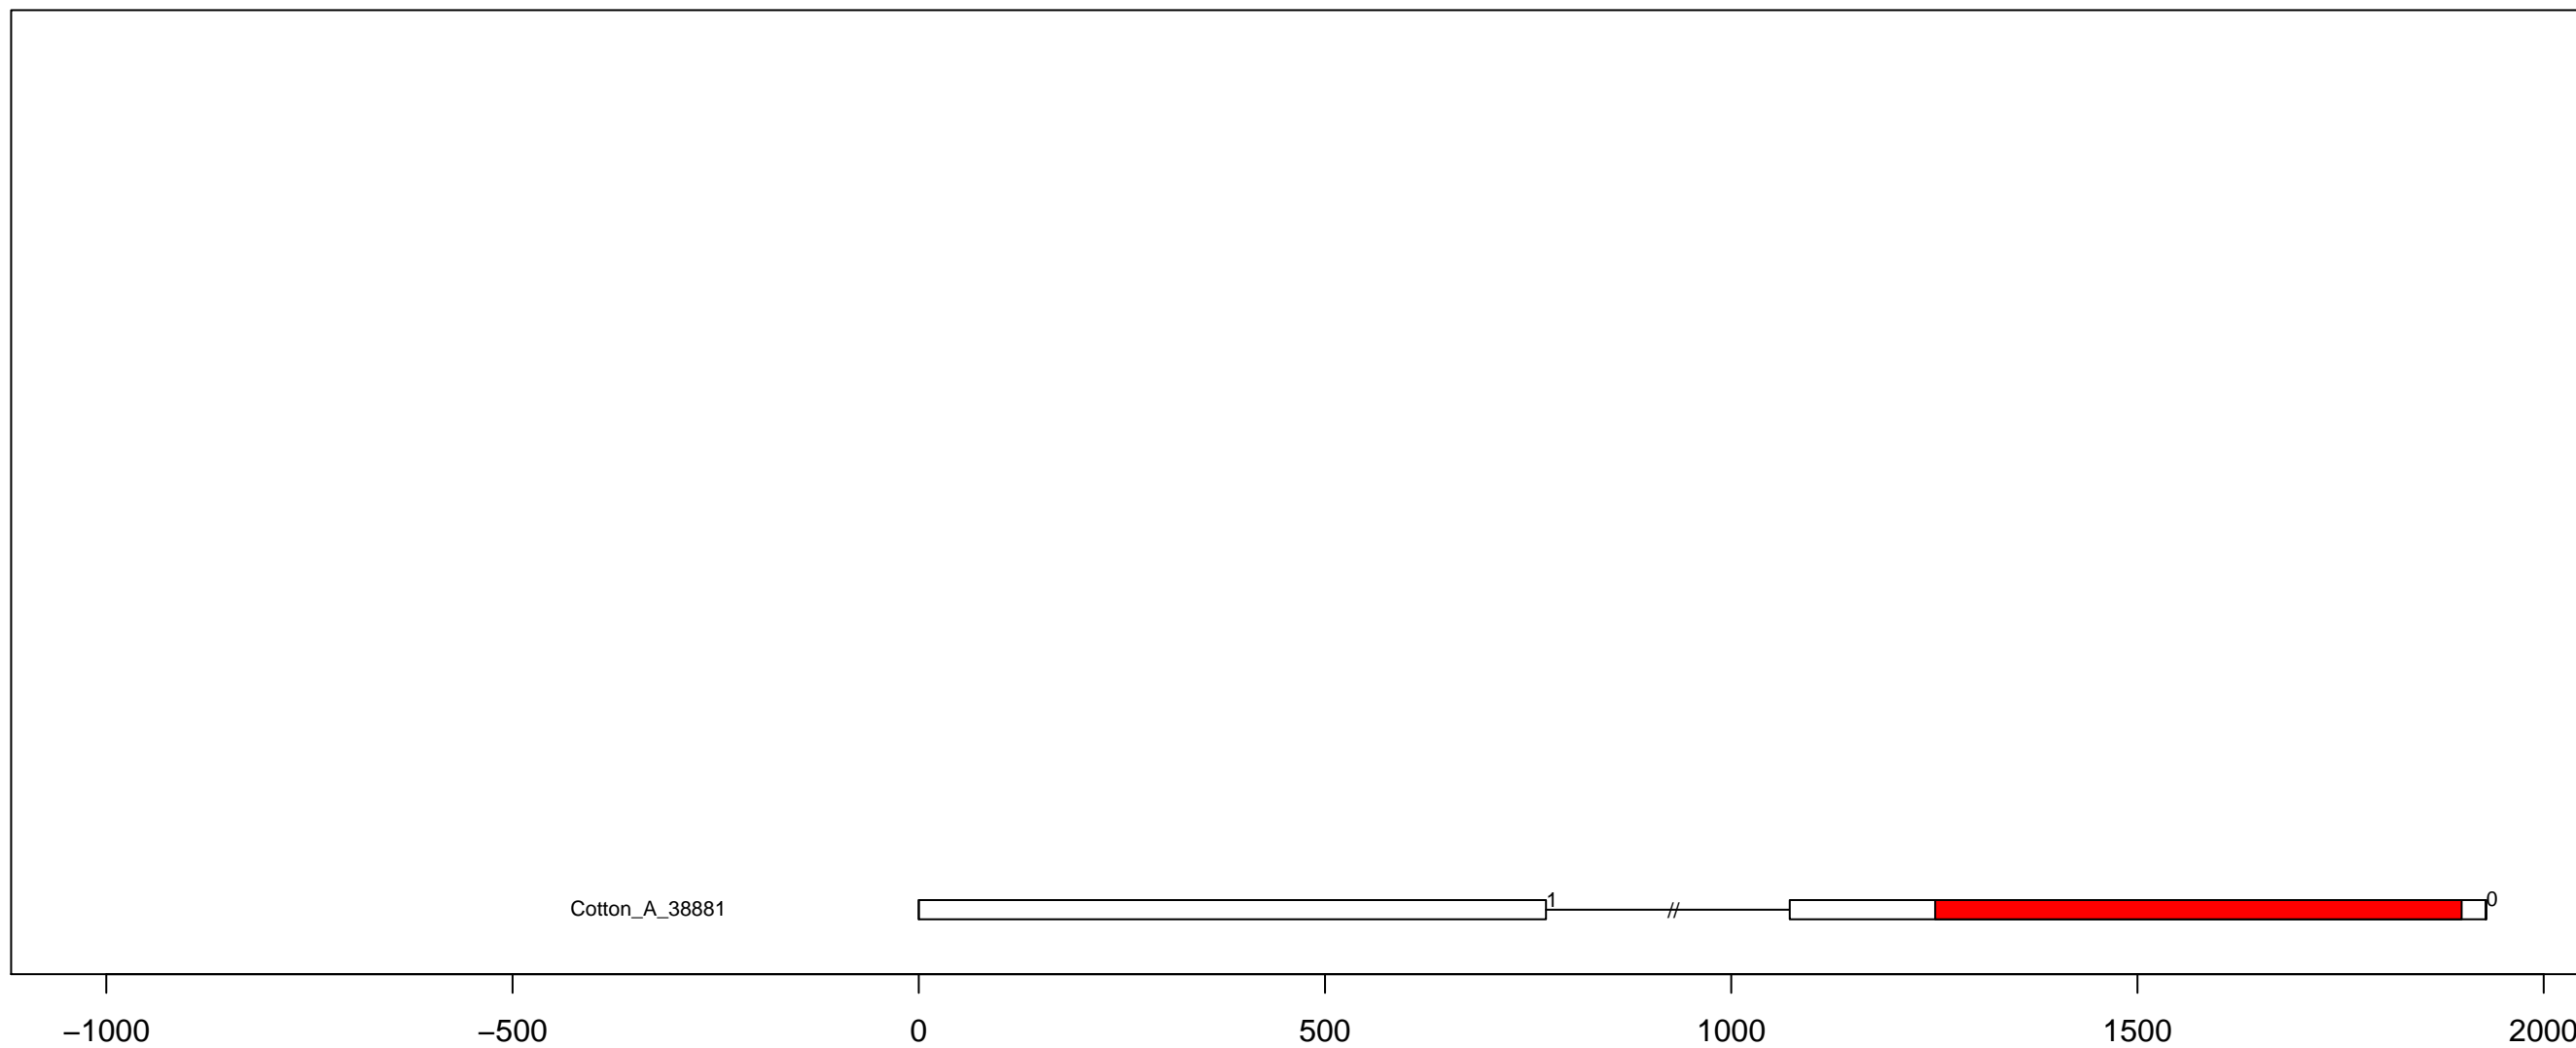

### G.ar RLK-Pelle\_LRR-I-1 exon-intron and domain diagram (all)

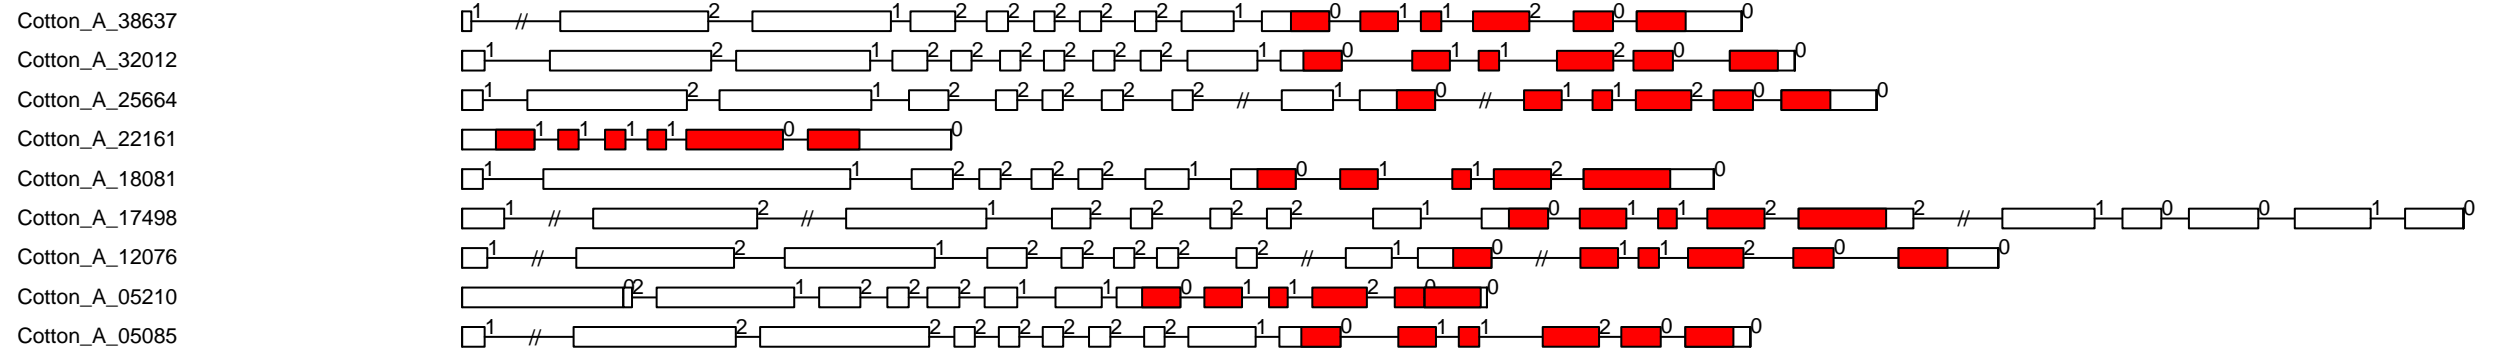

0

2000

4000

6000



# G.ar RLK-Pelle\_LRR-I-2 exon-intron and domain diagram (all)

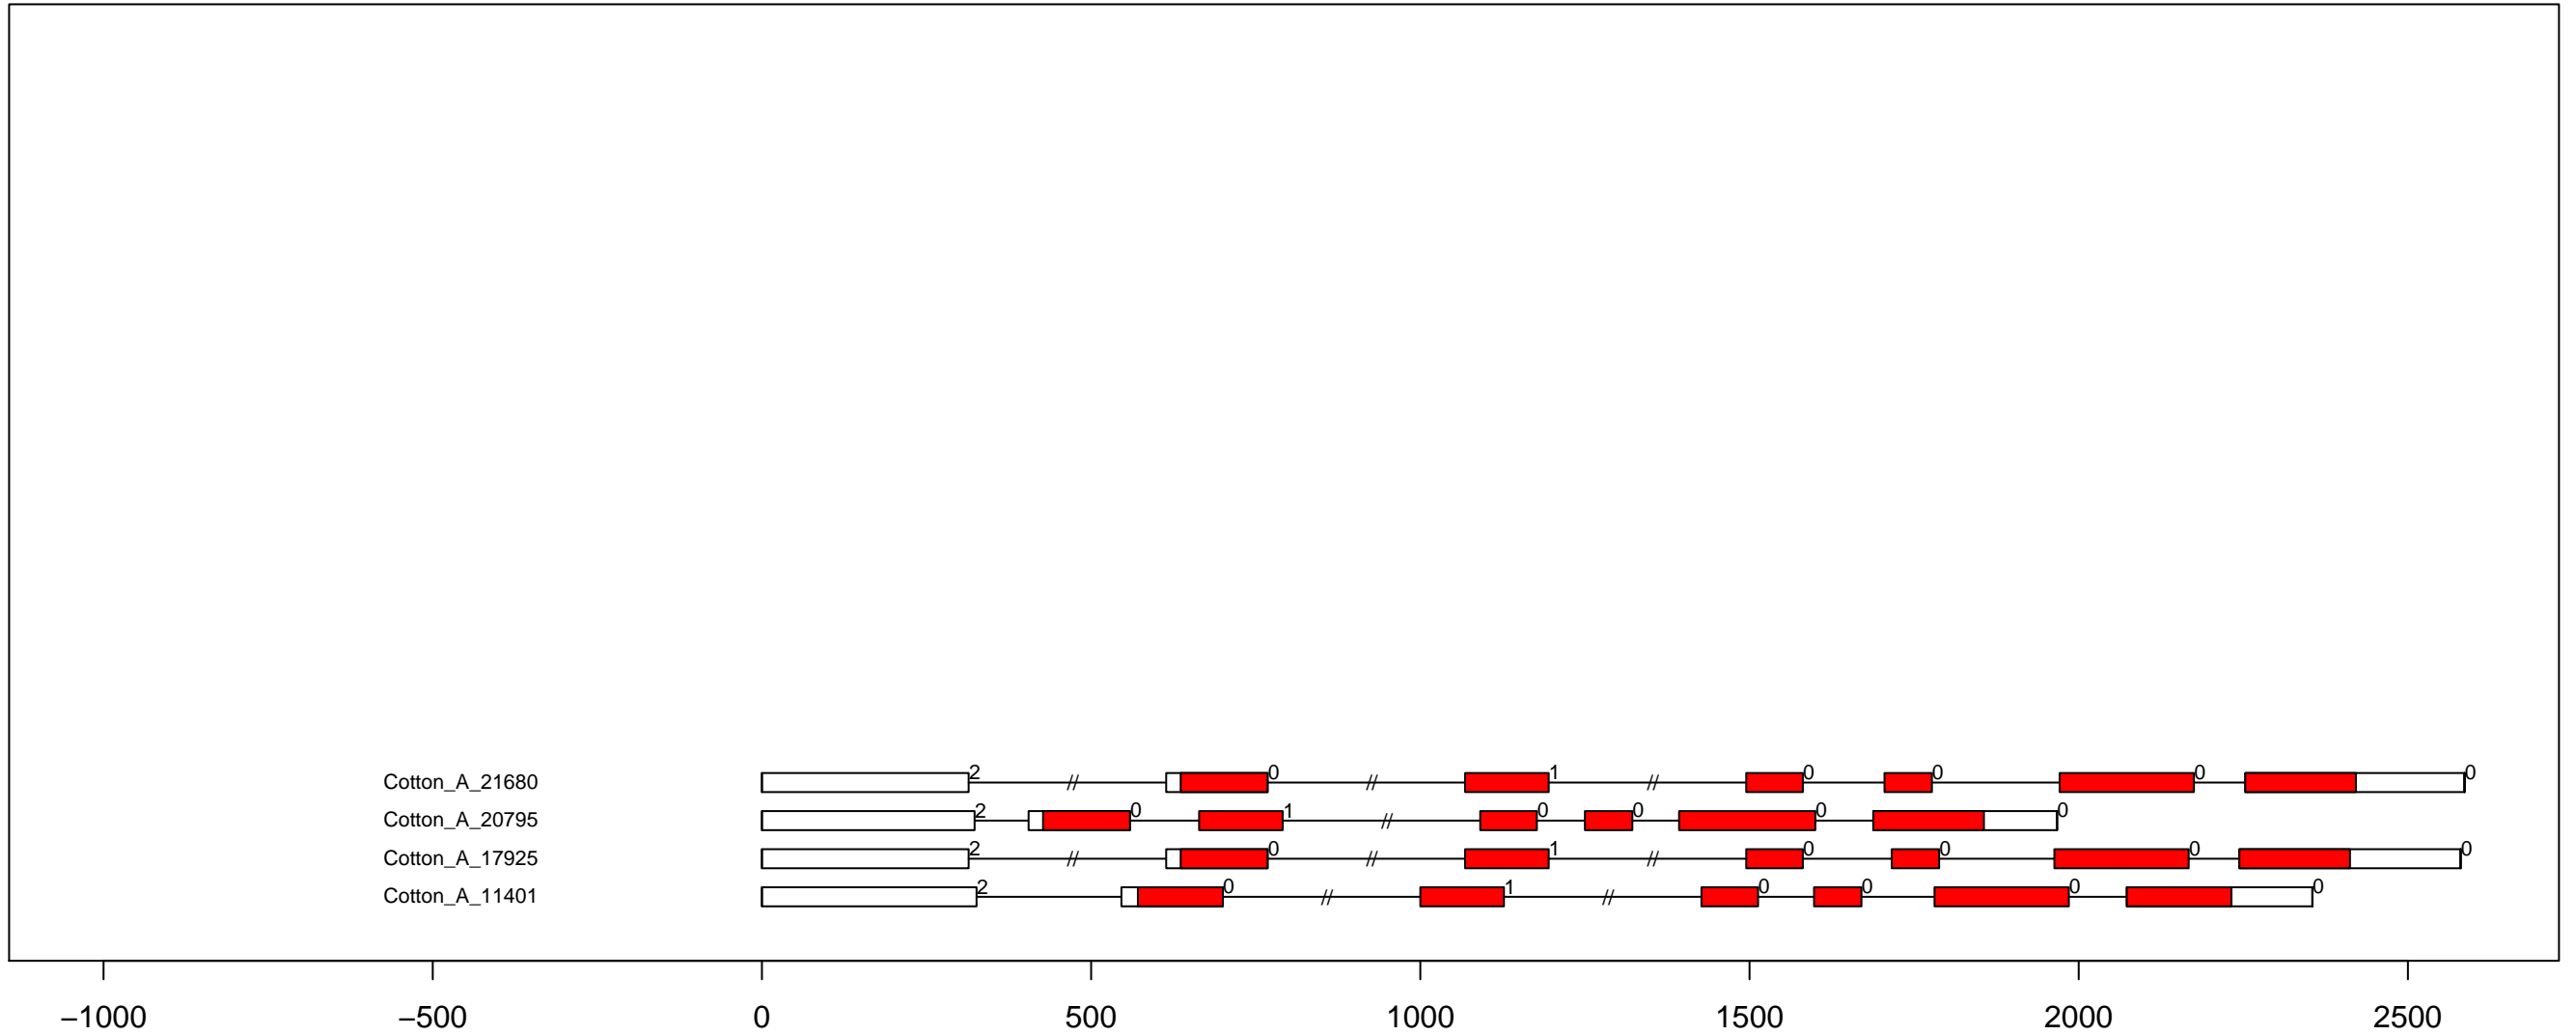

### G.ar RLK-Pelle\_LRR-III exon-intron and domain diagram (part 1)

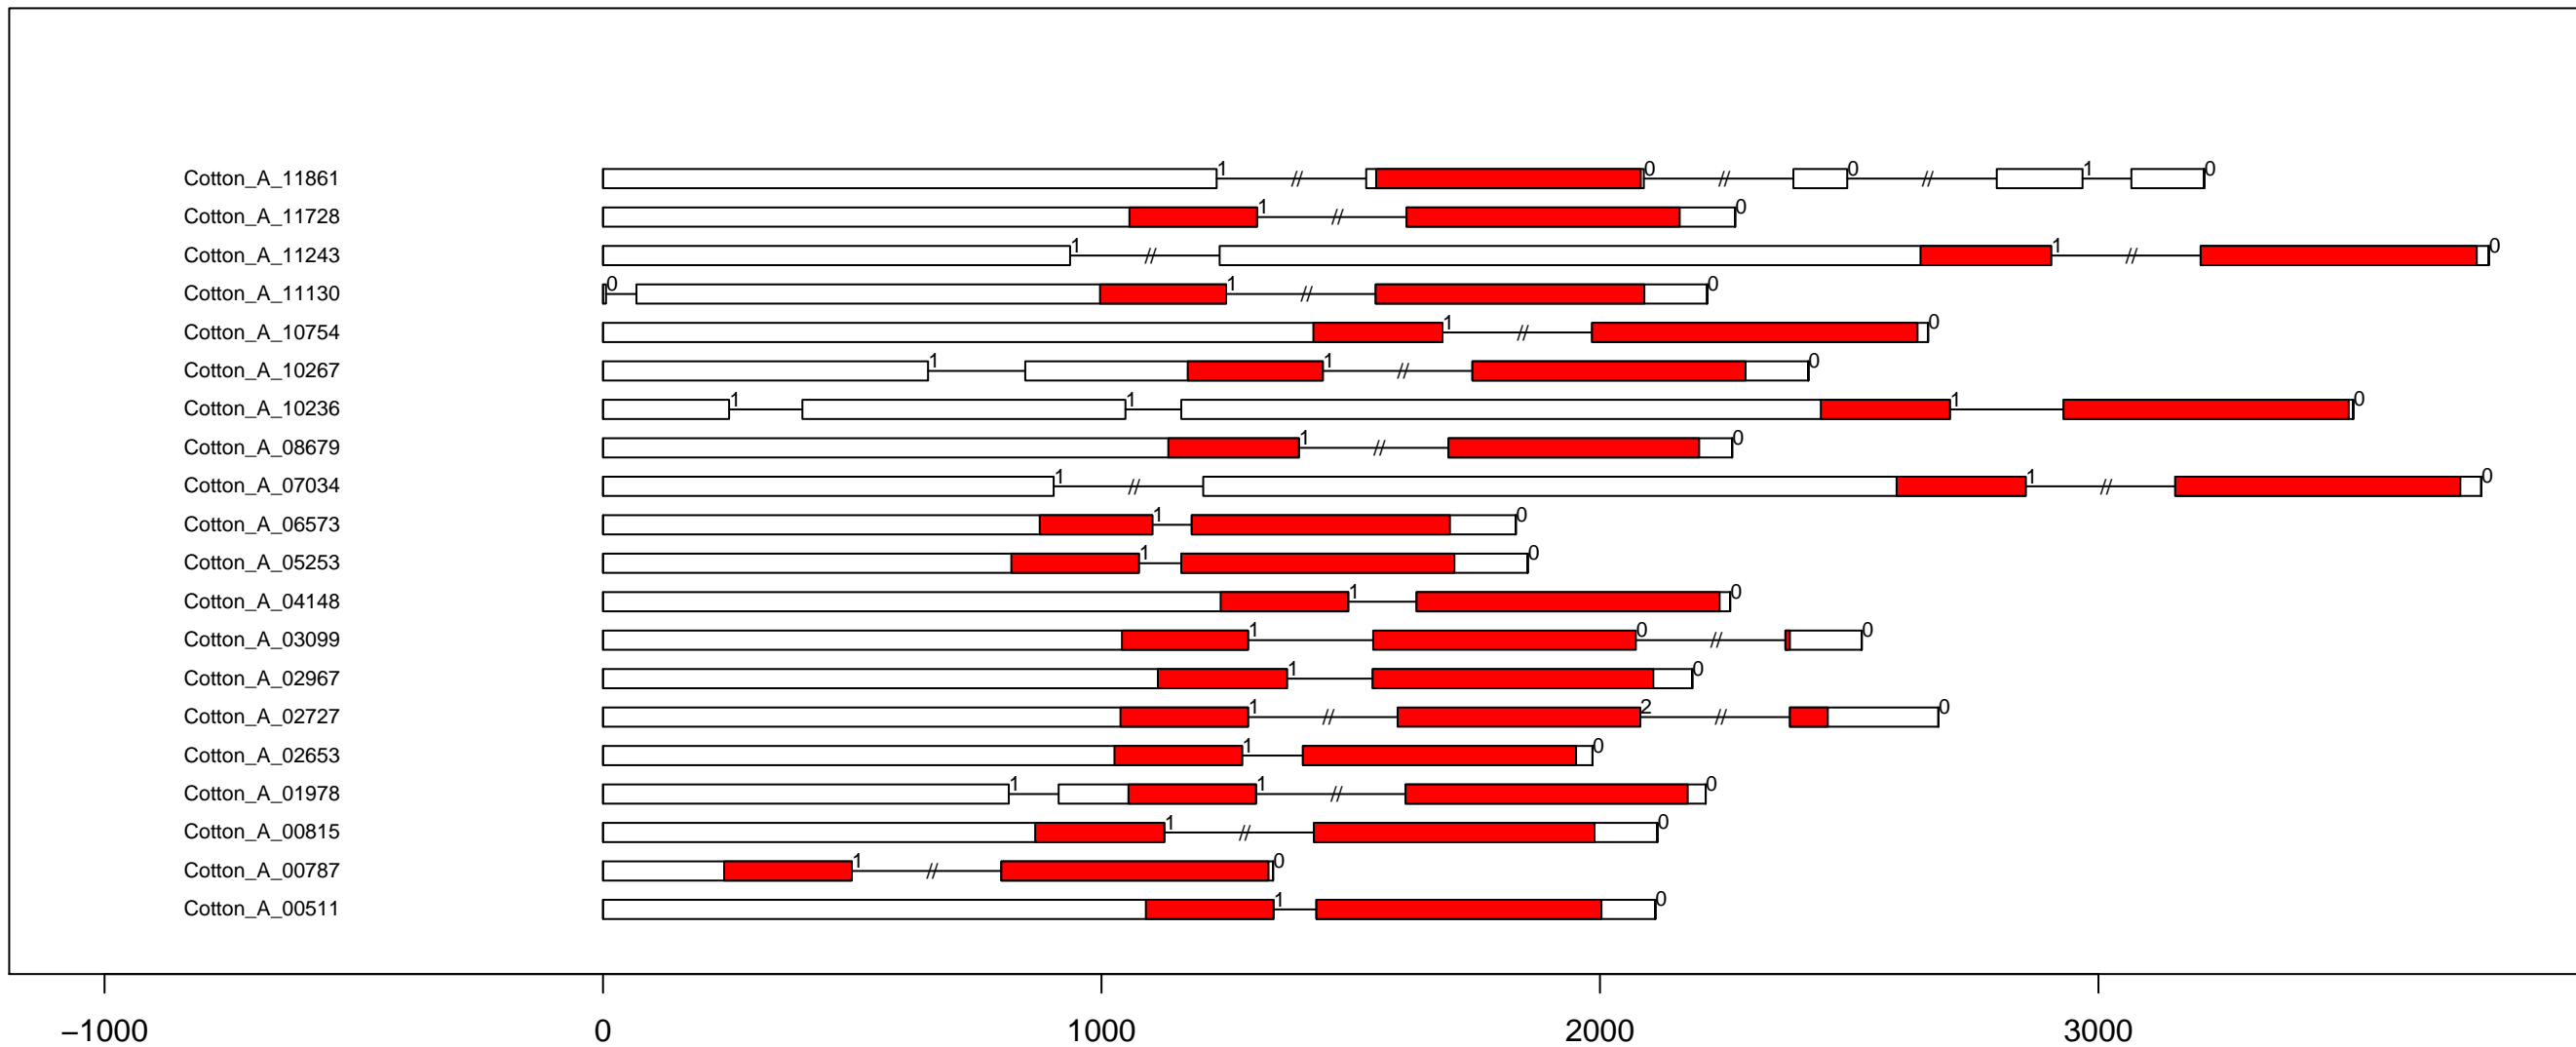

### G.ar RLK-Pelle\_LRR-III exon-intron and domain diagram (part 2)

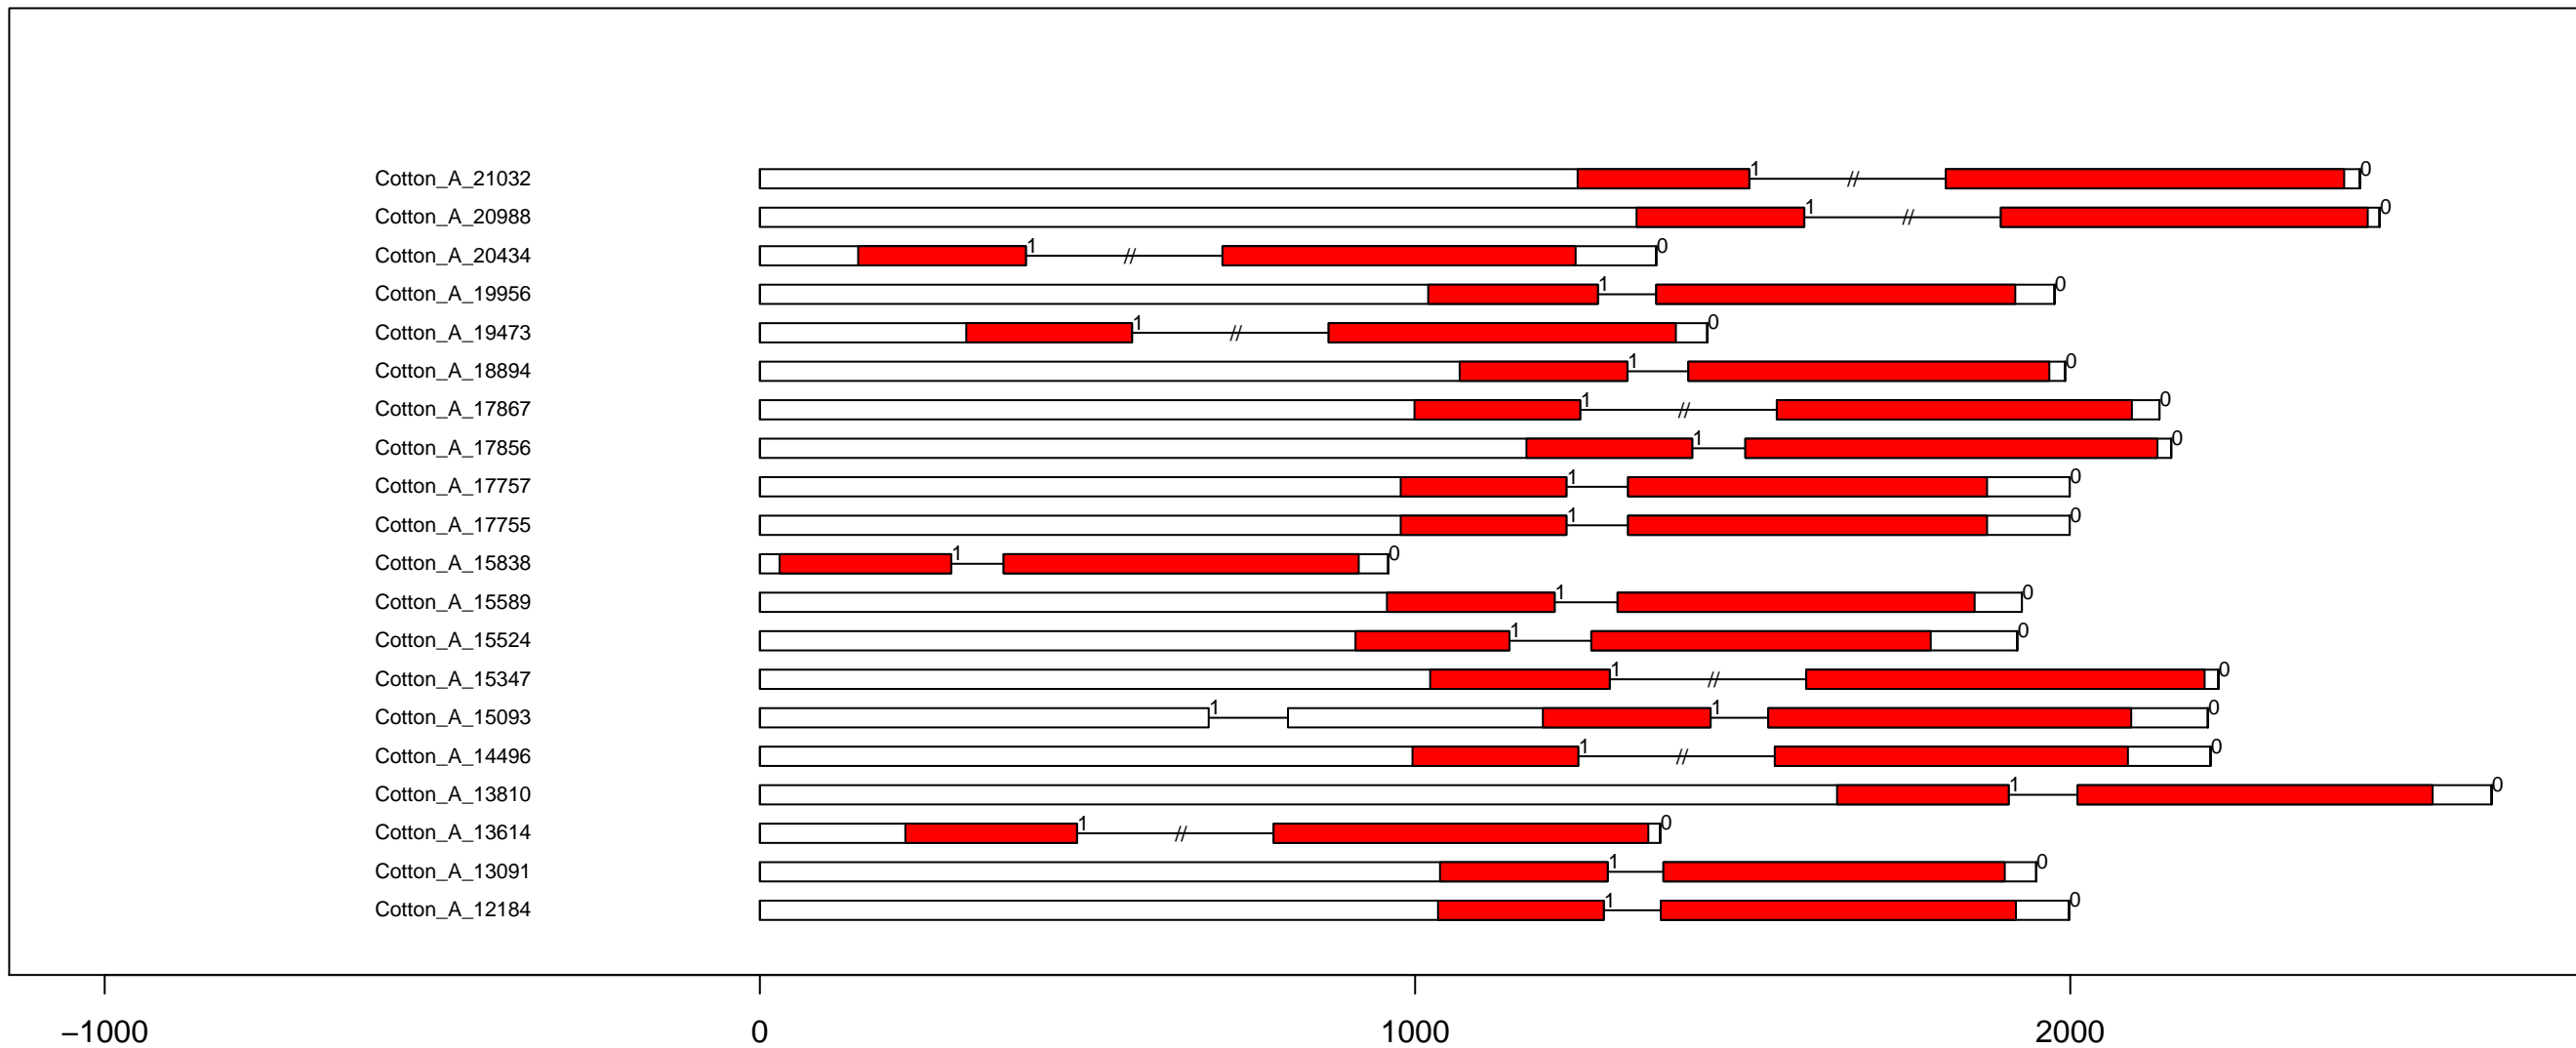

### G.ar RLK-Pelle\_LRR-III exon-intron and domain diagram (part 3)

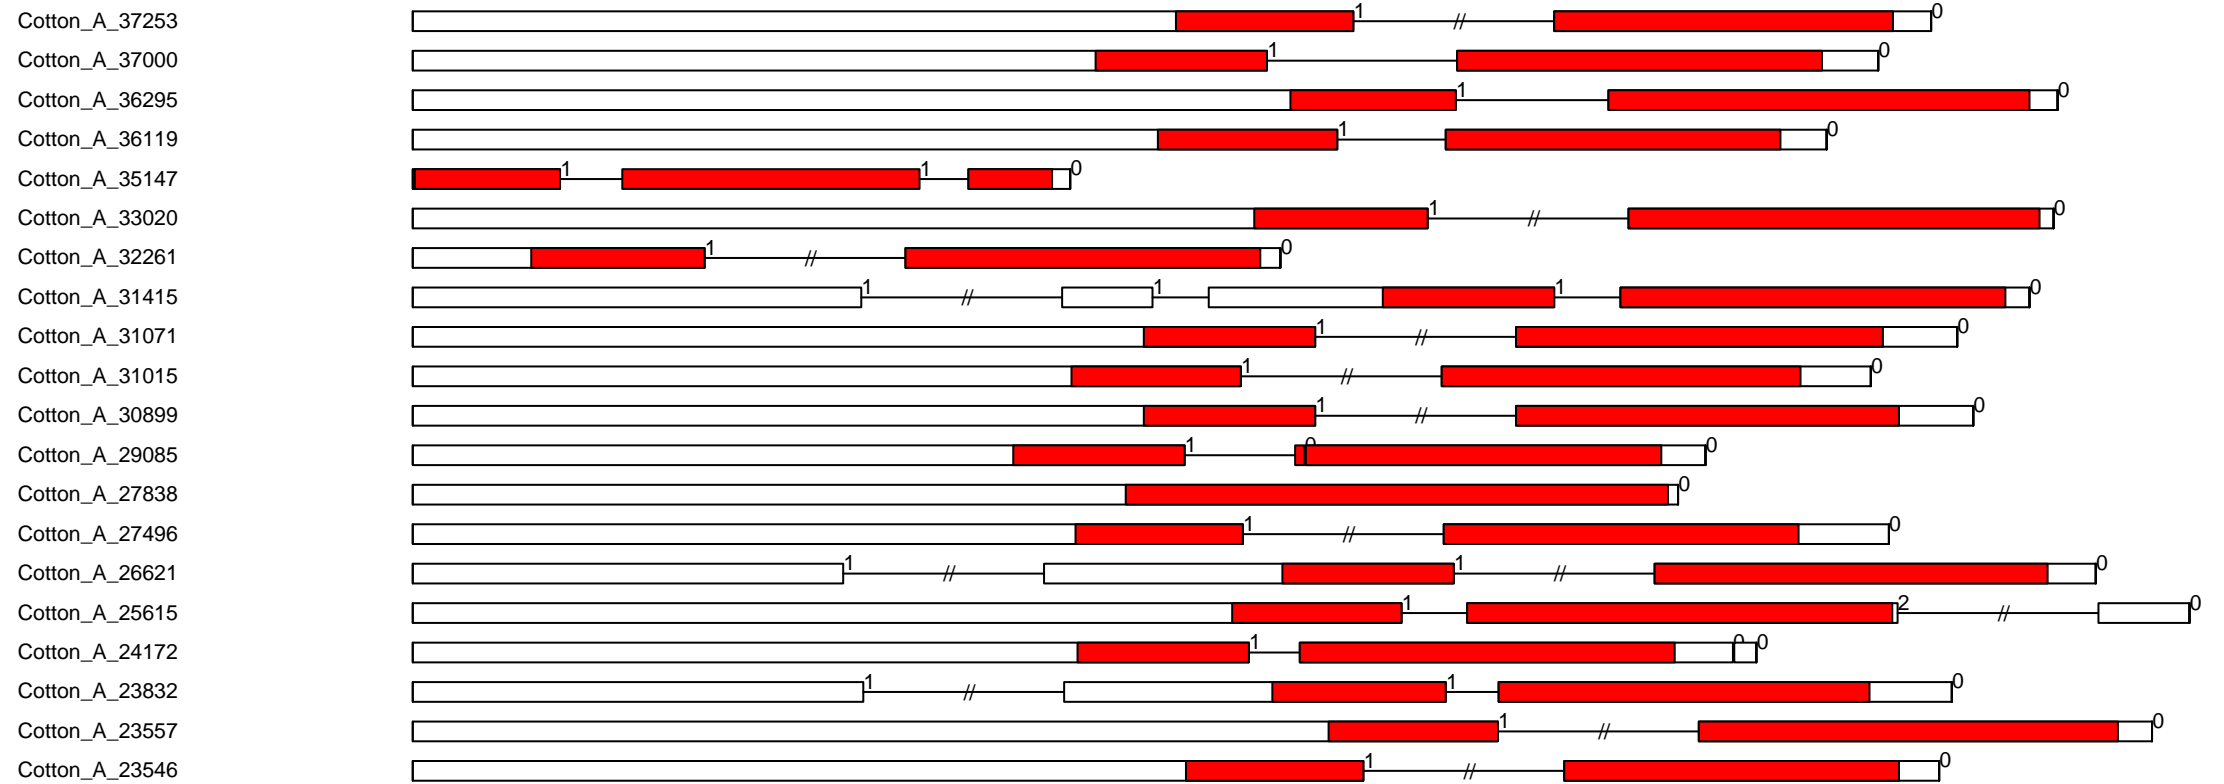

-1000

0

1000

2000

# G.ar RLK-Pelle\_LRR-III exon-intron and domain diagram (part 4)

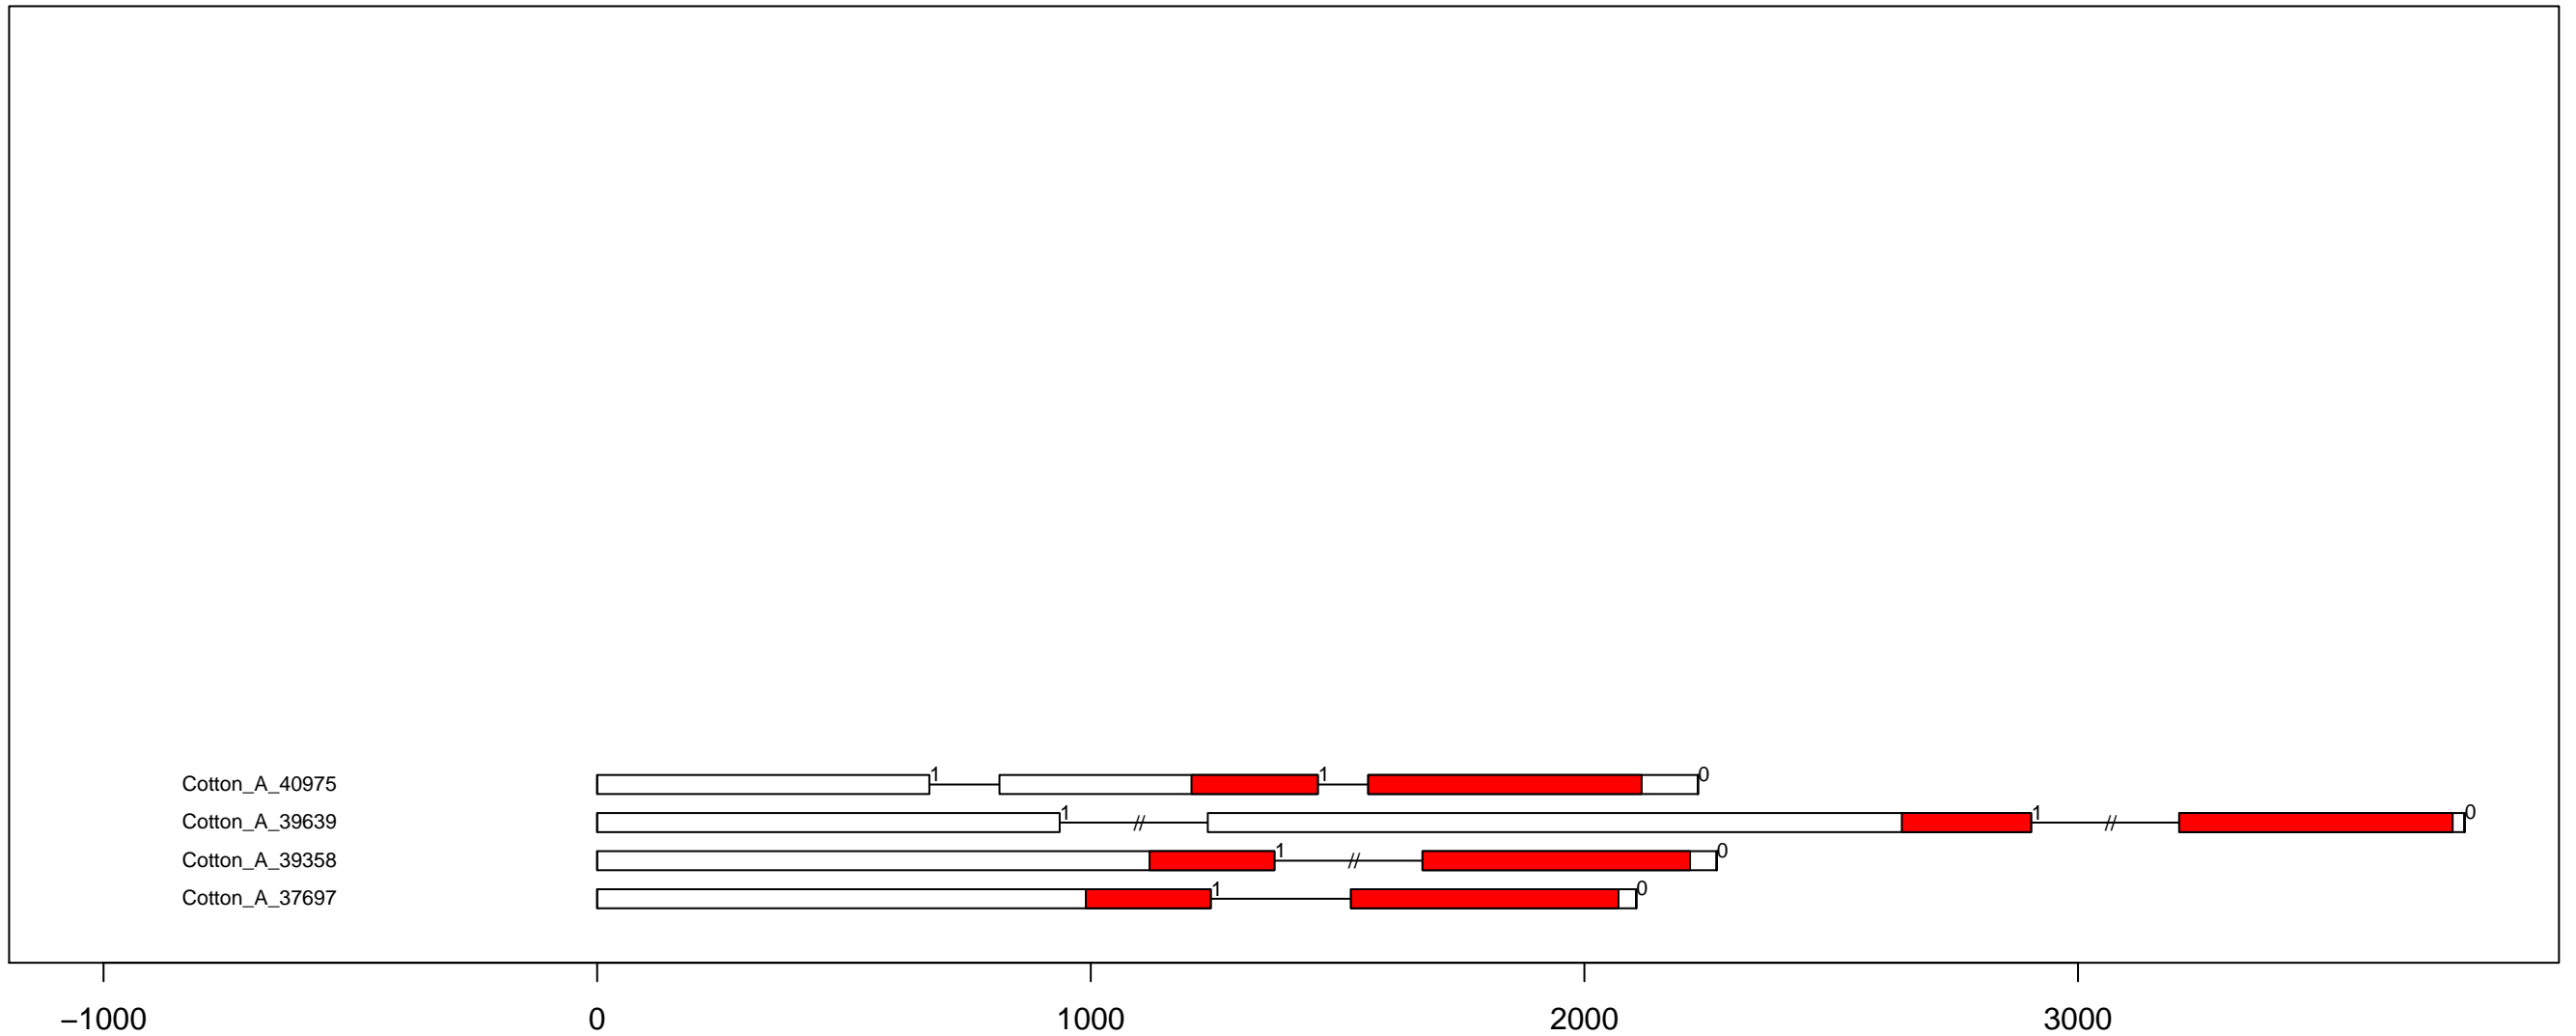

### G.ar RLK-Pelle\_LRR-II exon-intron and domain diagram (all)

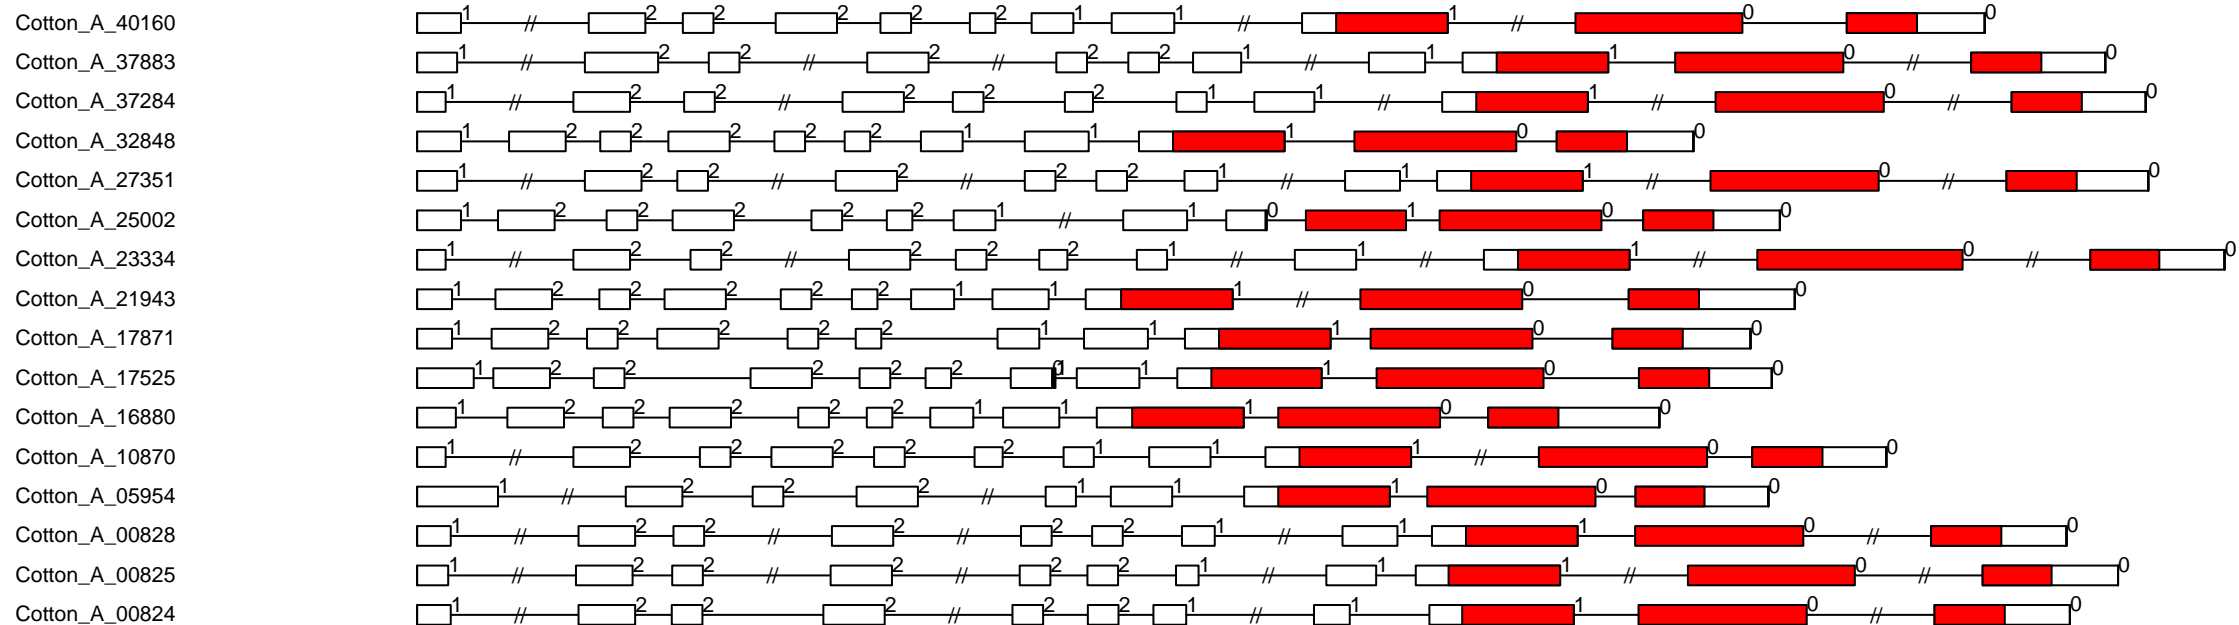

-1000

0

1000

2000

3000

4000

# G.ar RLK-Pelle\_LRR-IV exon-intron and domain diagram (all)

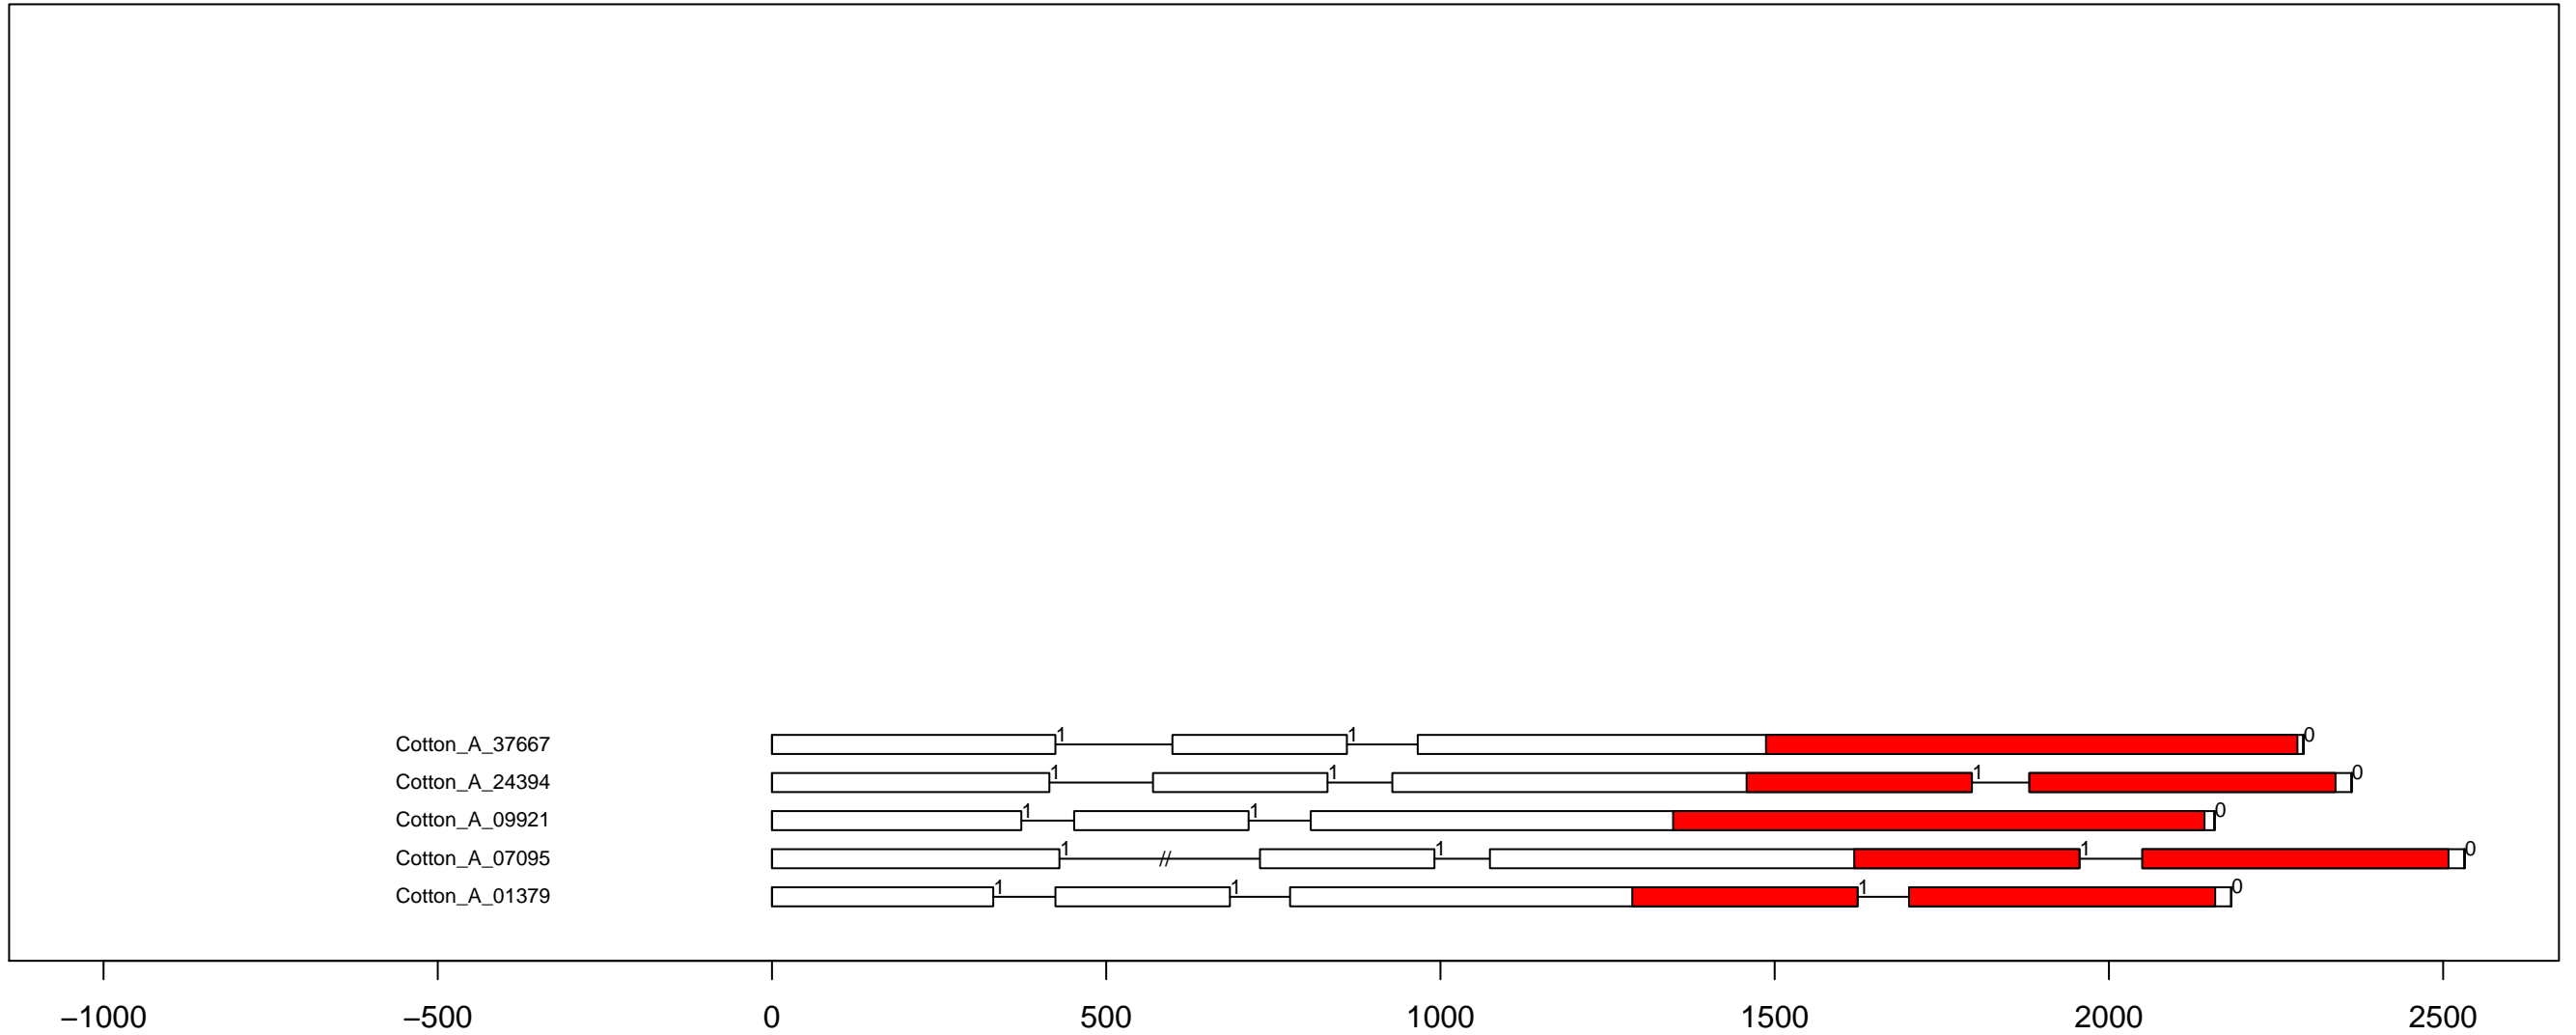

# G.ar RLK-Pelle\_LRR-IX exon-intron and domain diagram (all)

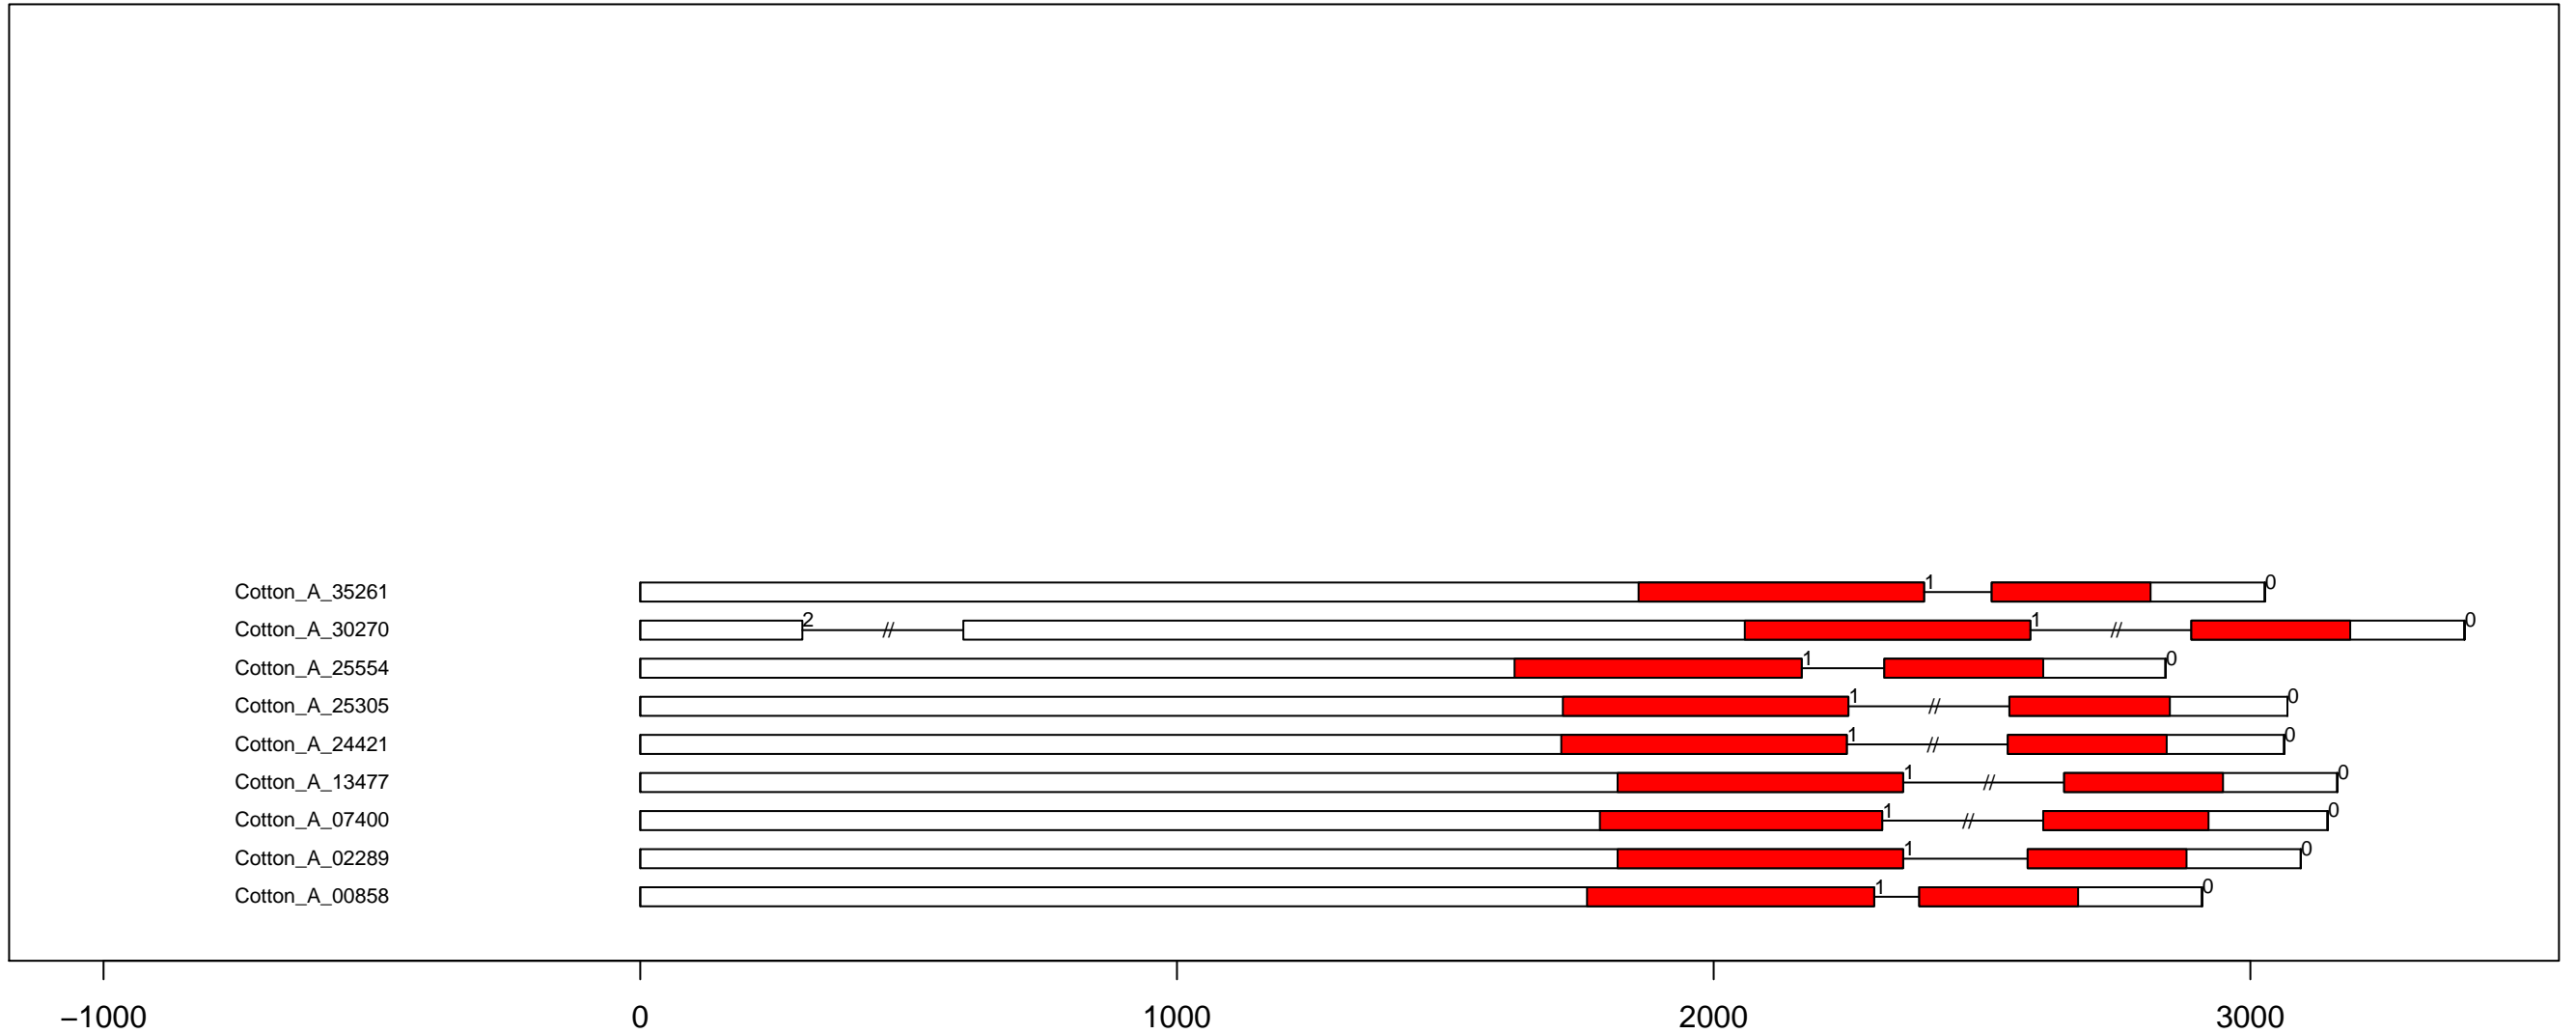



# G.ar RLK-Pelle\_LRR-VI-1 exon-intron and domain diagram (all)

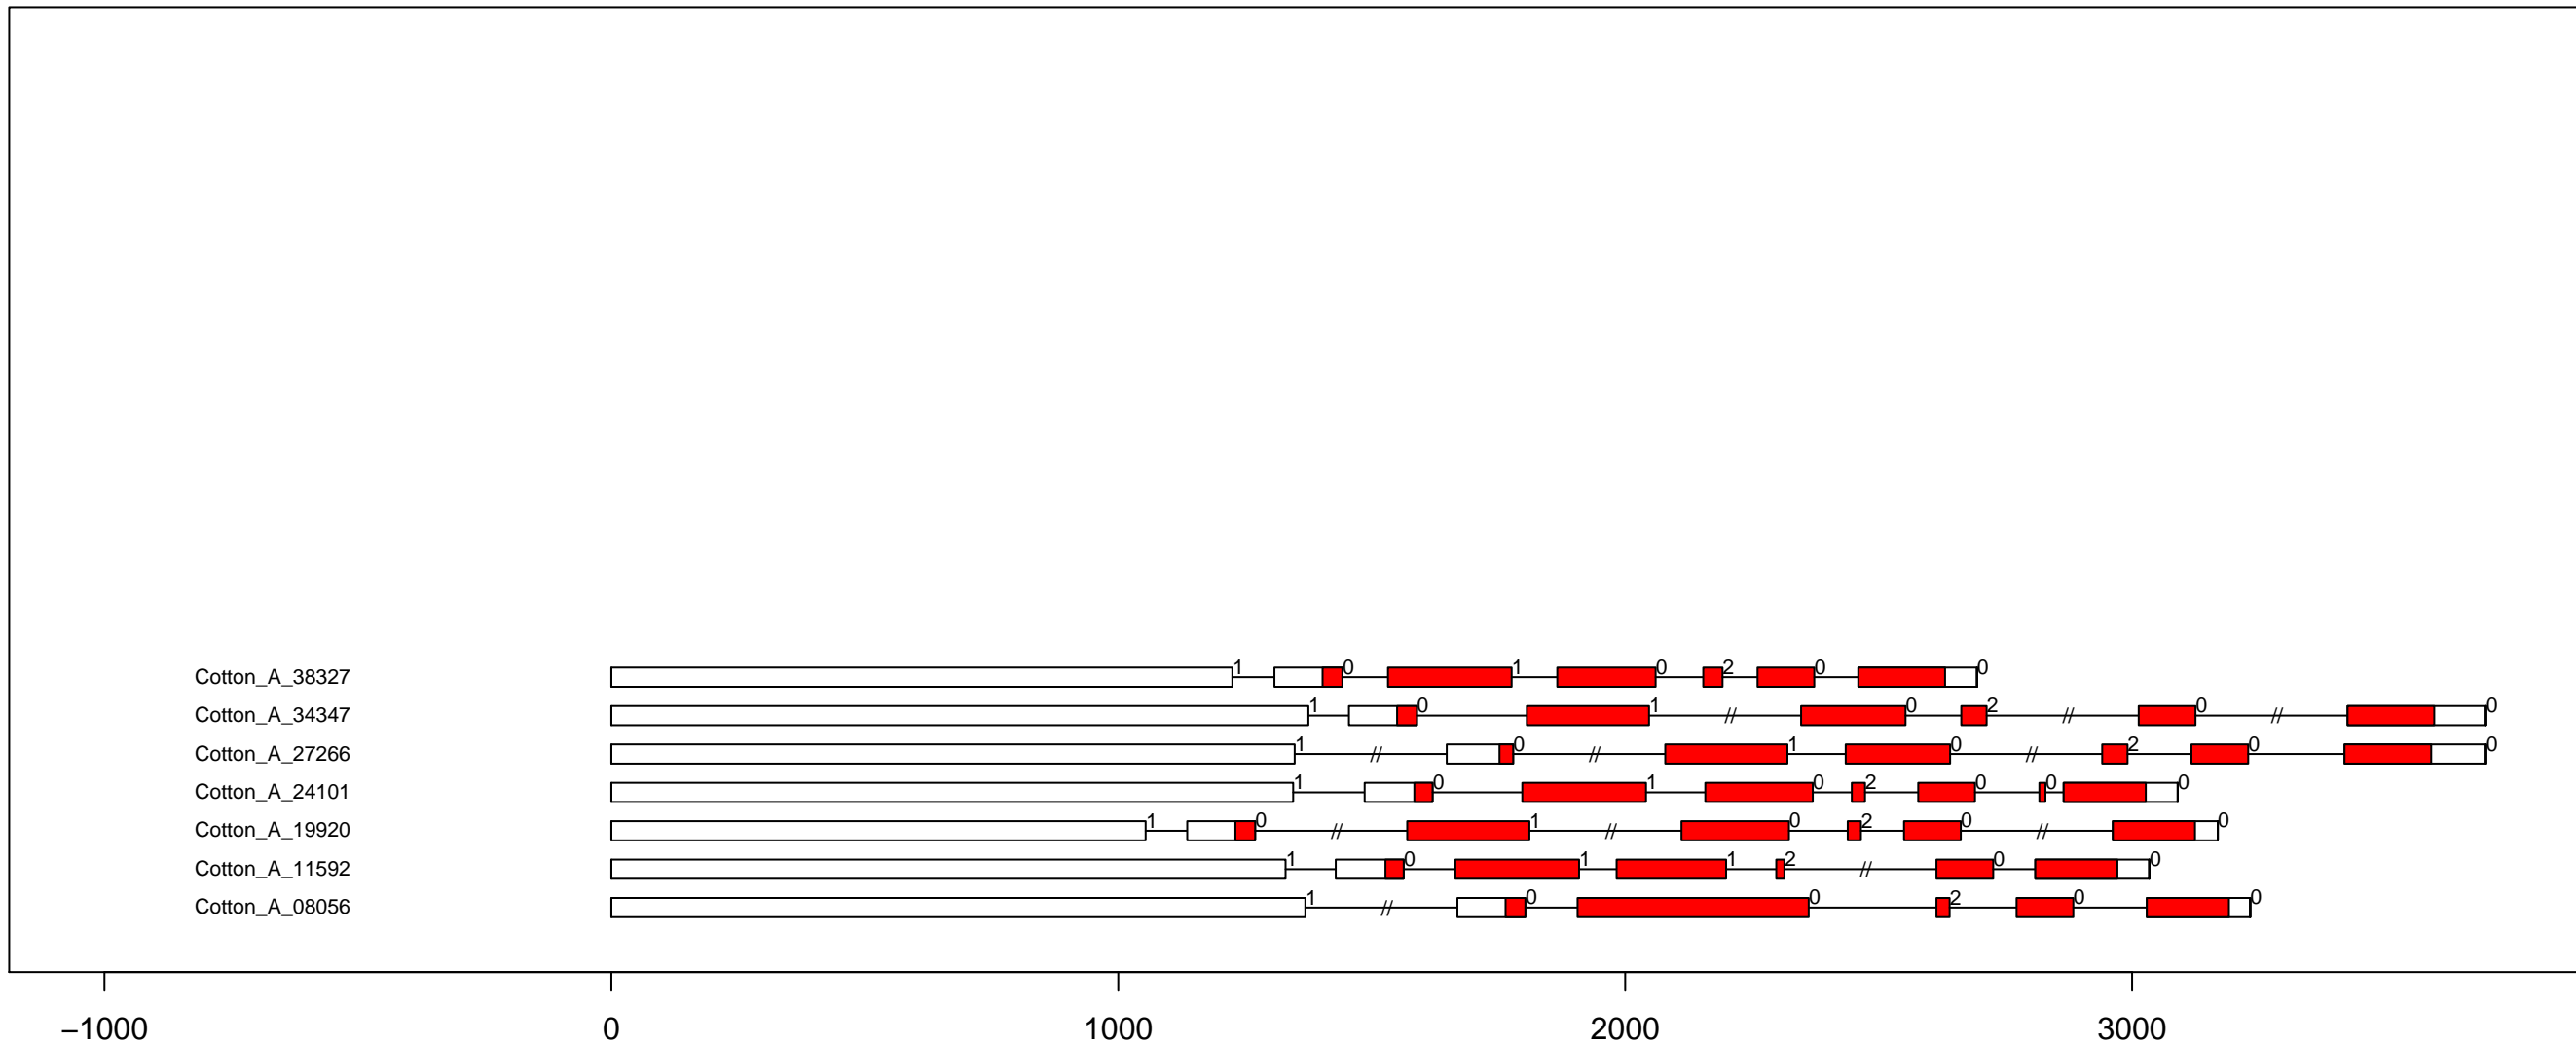

### G.ar RLK-Pelle\_LRR-VI-2 exon-intron and domain diagram (all)

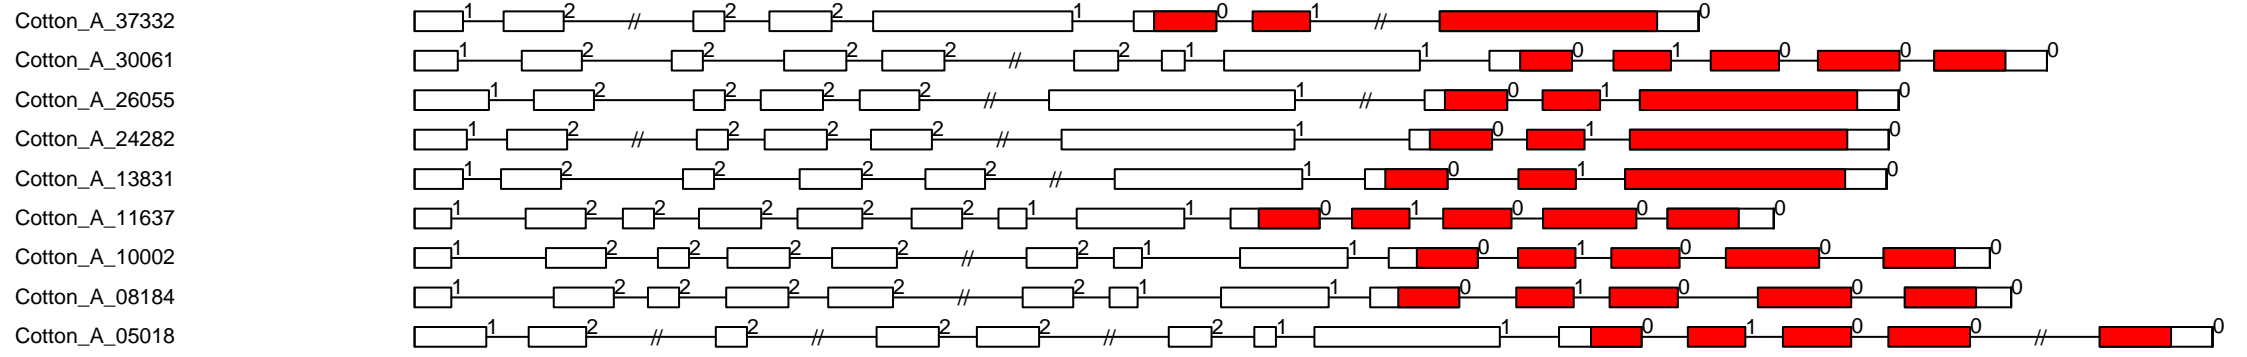

# G.ar RLK-Pelle\_LRR-VII-1 exon-intron and domain diagram (all)

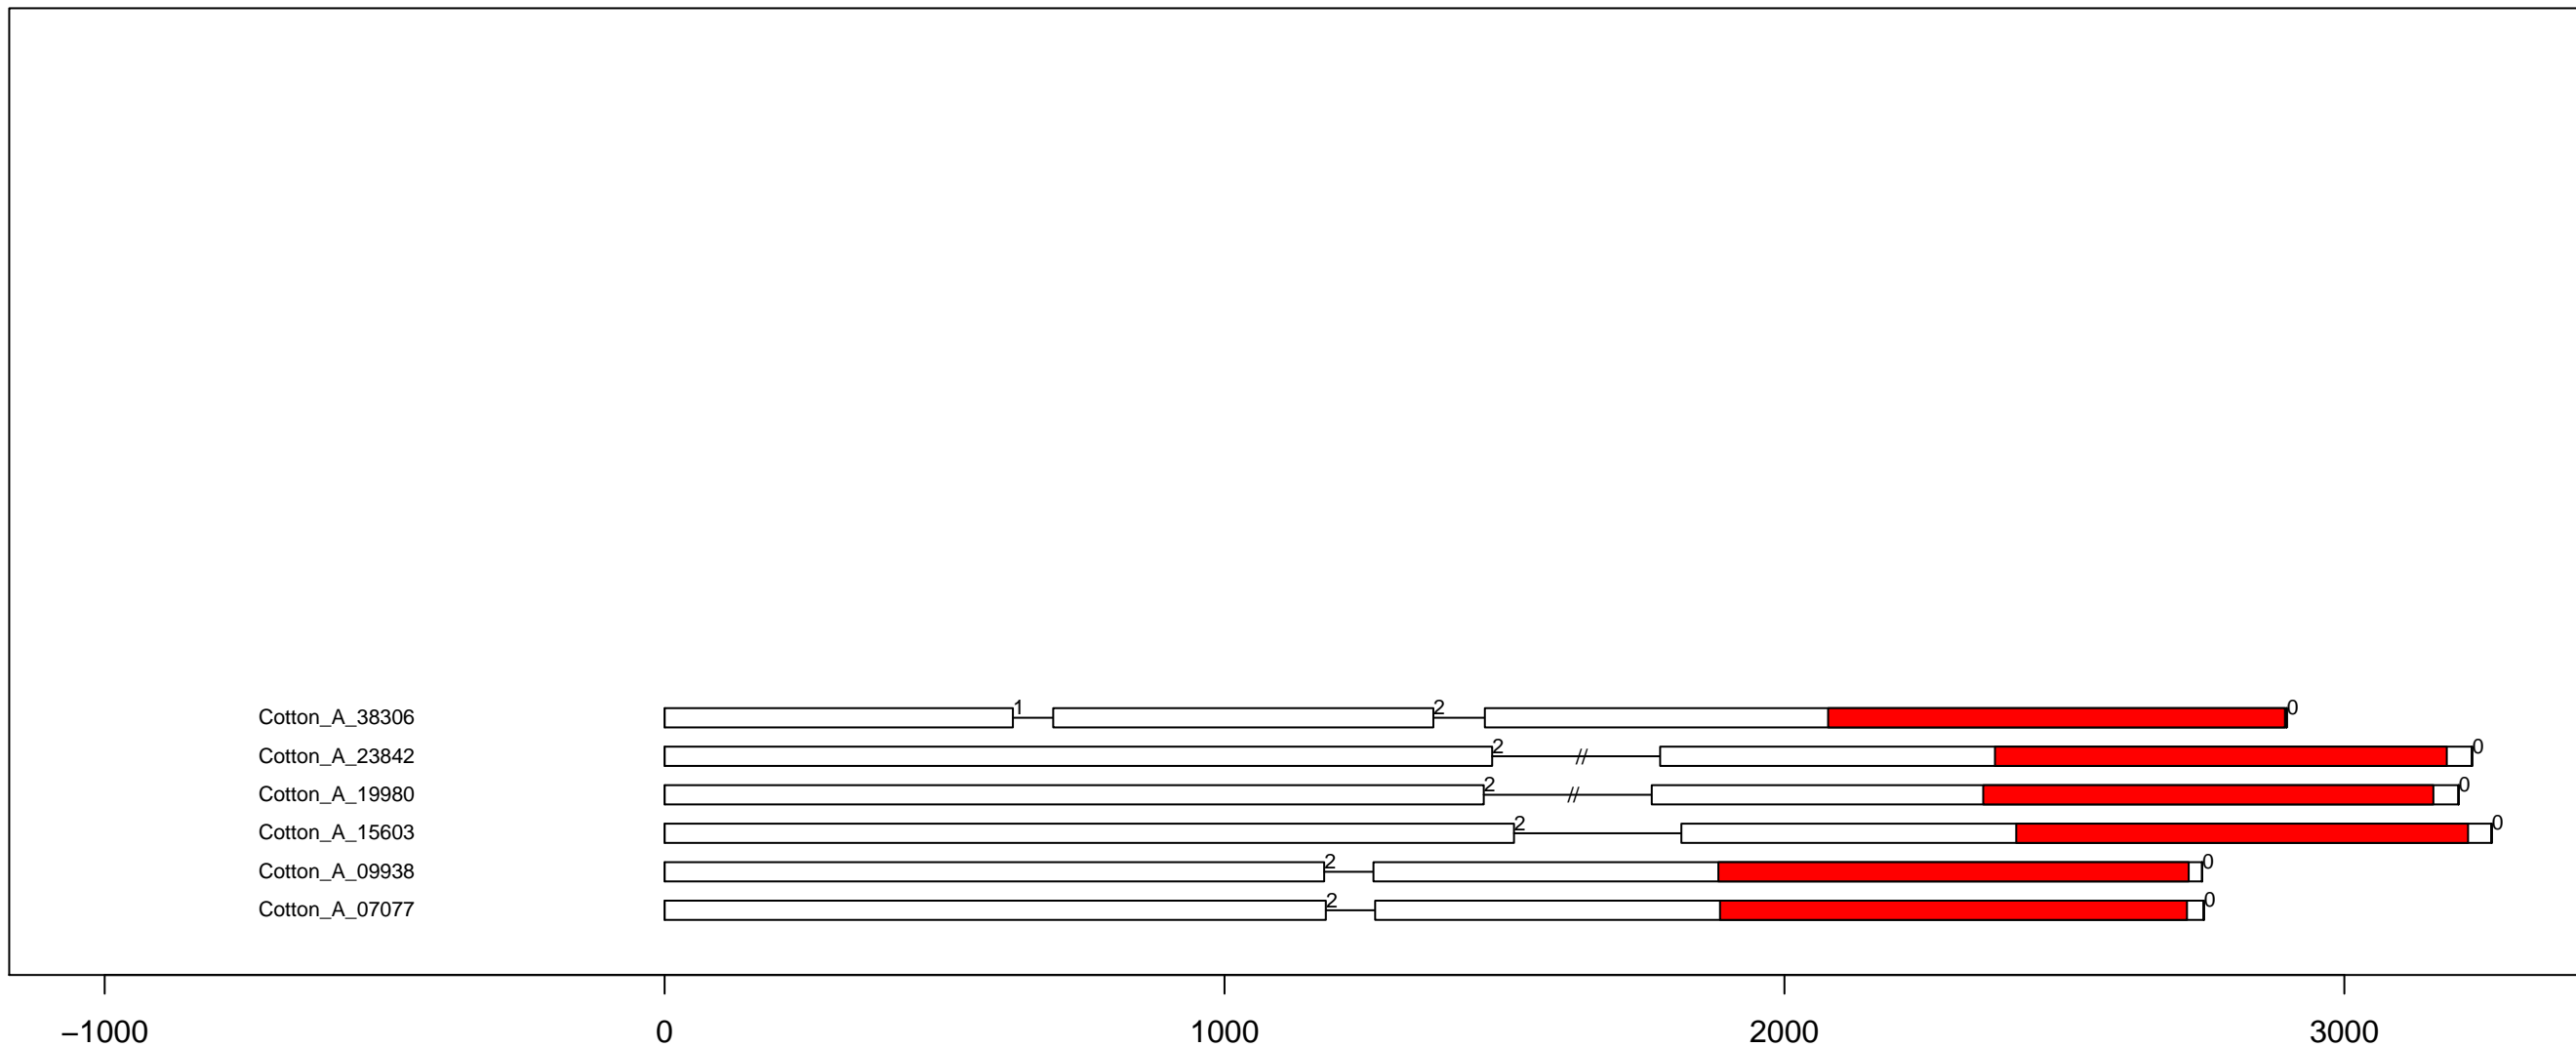

# G.ar RLK-Pelle\_LRR-VII-2 exon-intron and domain diagram (all)

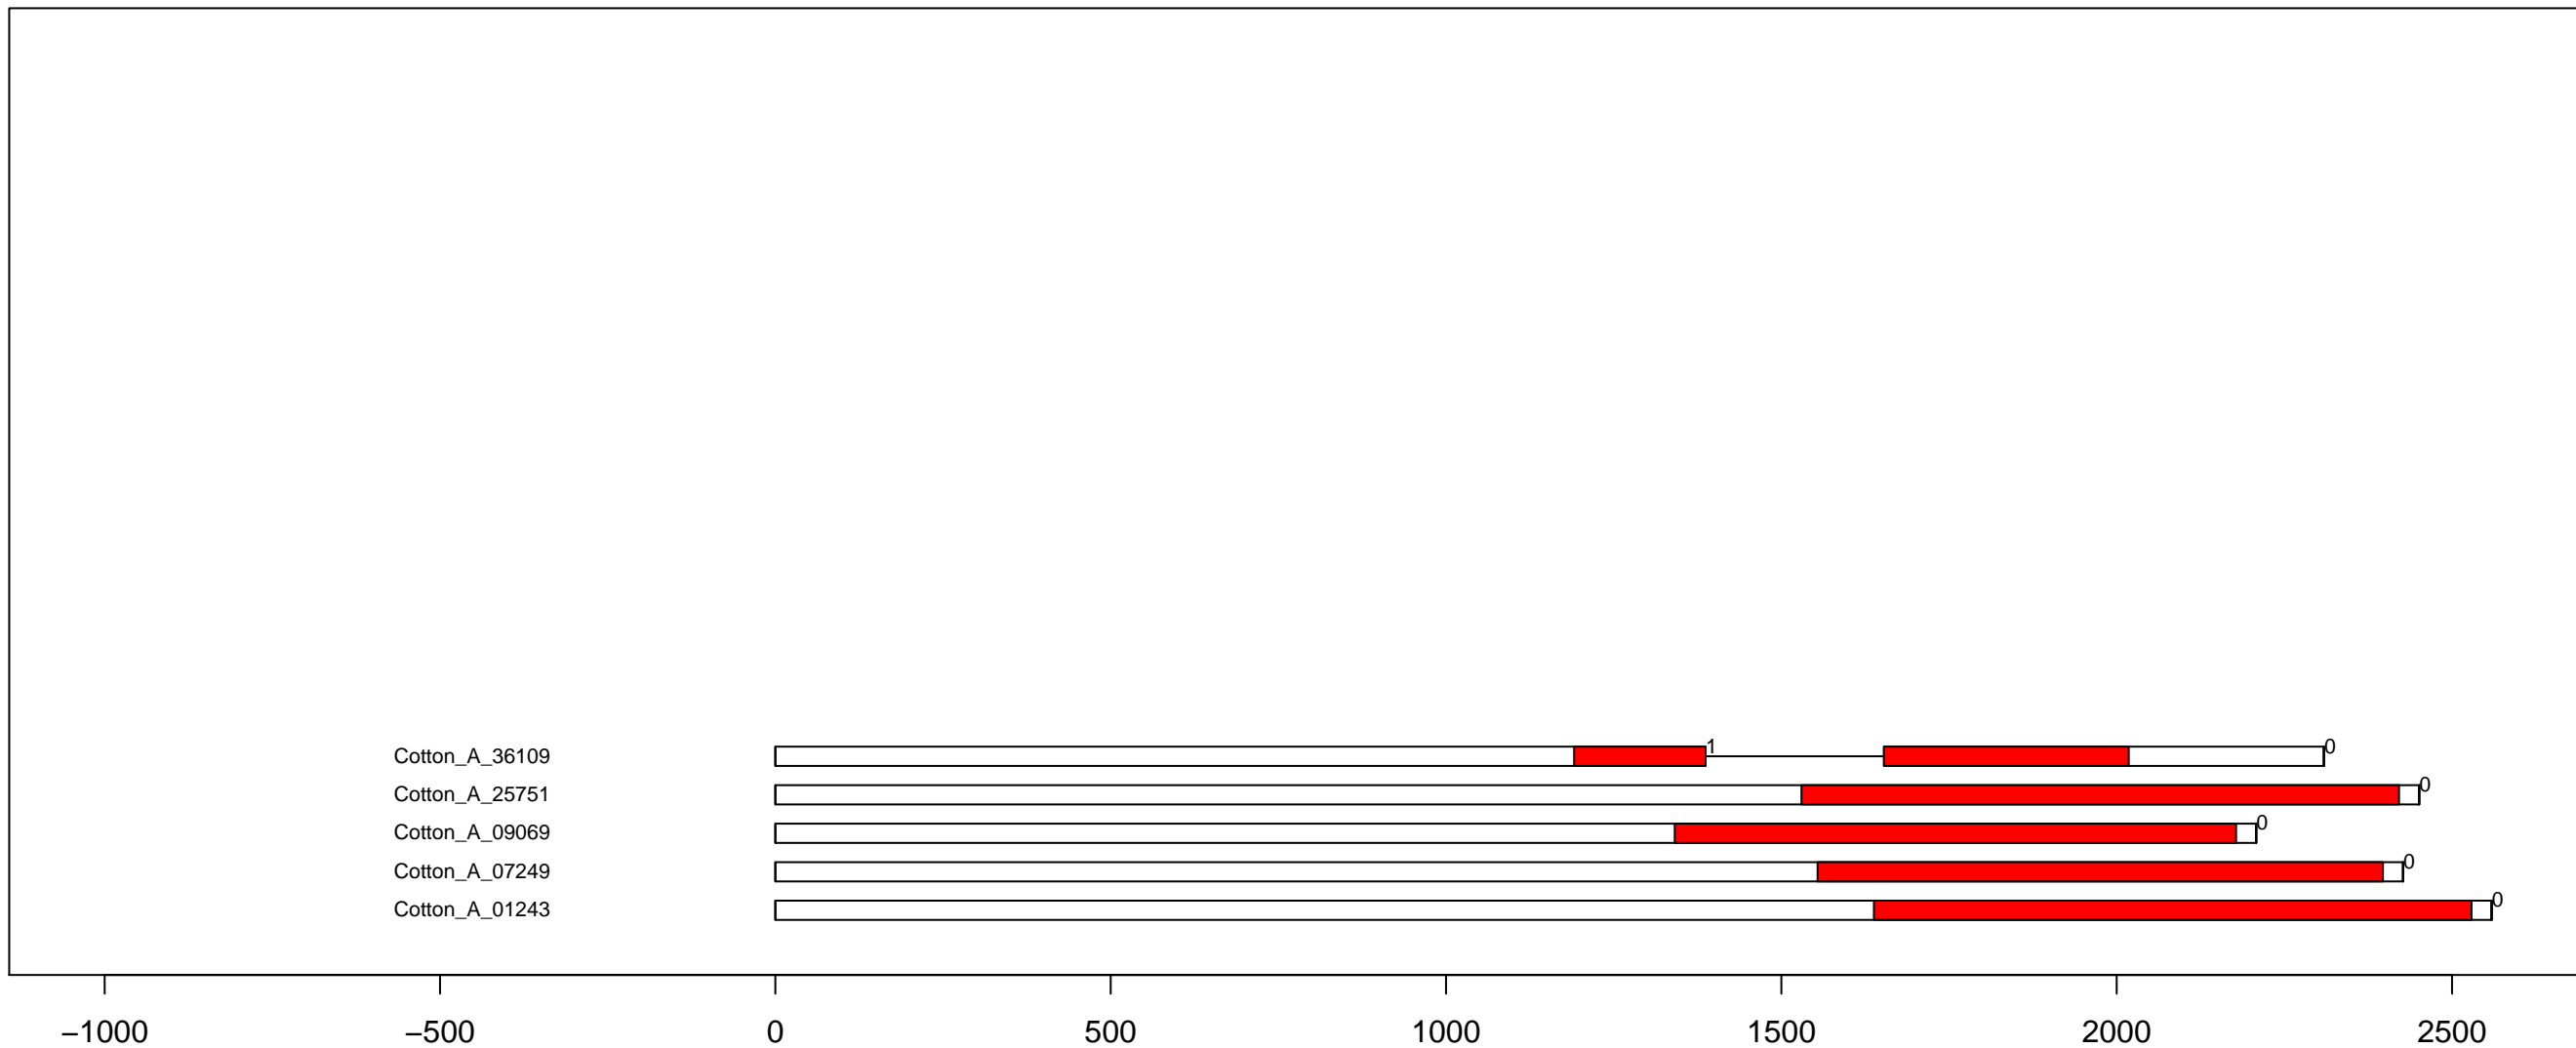

# G.ar RLK-Pelle\_LRR-VII-3 exon-intron and domain diagram (all)

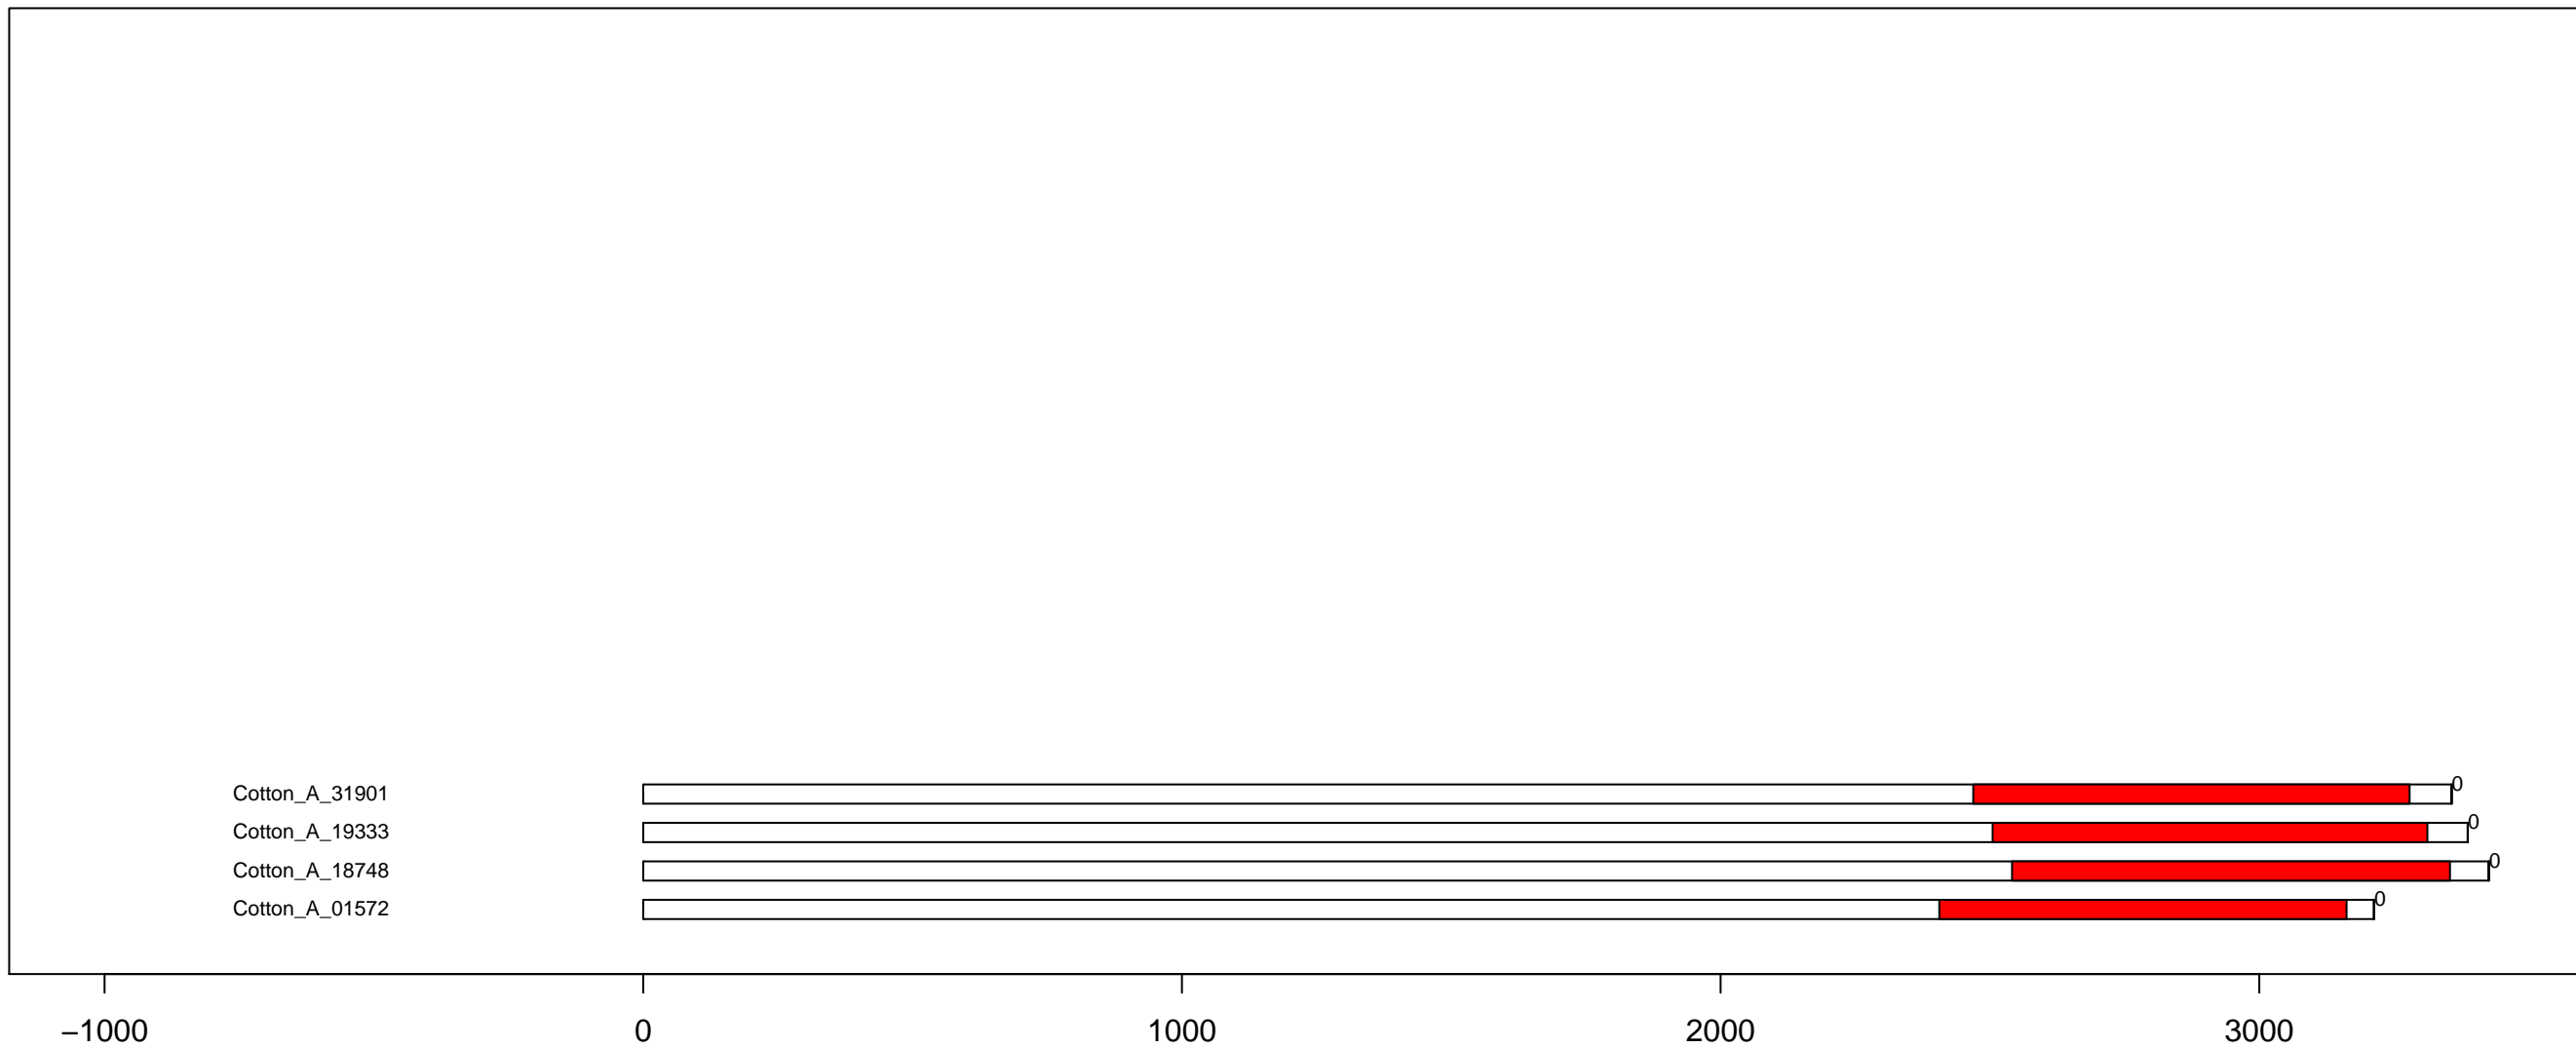

# G.ar RLK-Pelle\_LRR-VIII-1 exon-intron and domain diagram (all)

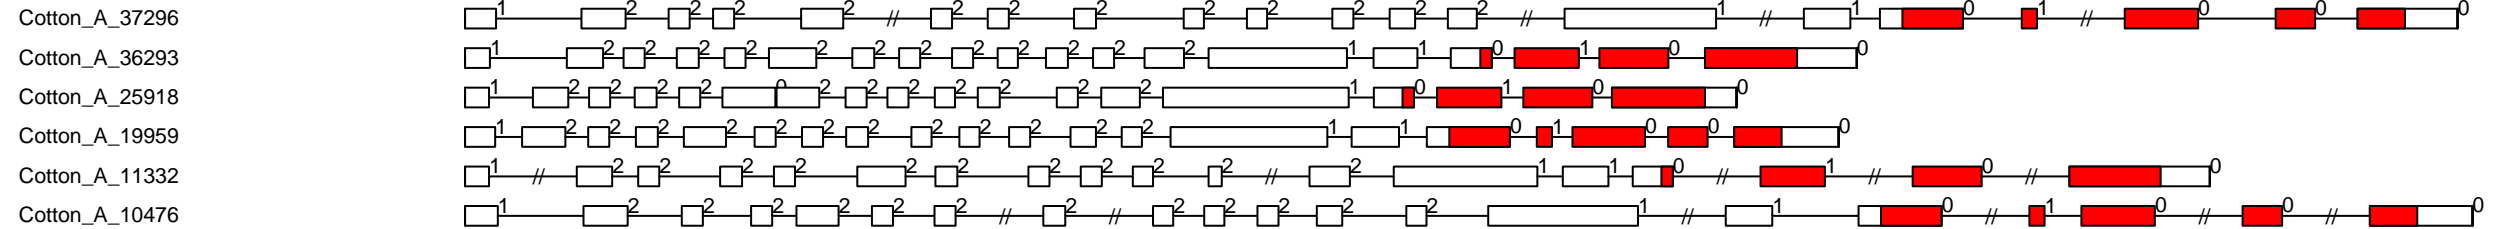

0 2000 4000 6000

# G.ar RLK-Pelle\_LRR-V exon-intron and domain diagram (all)

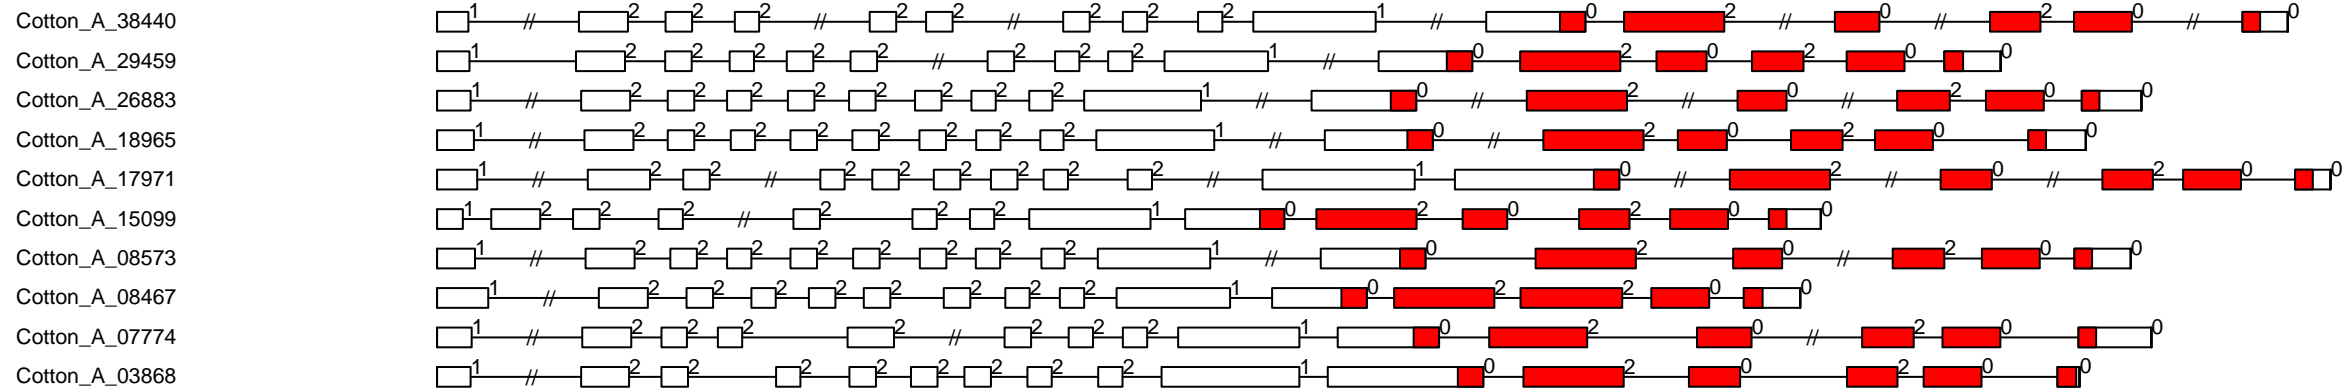

# G.ar RLK-Pelle\_LRR-Xa exon-intron and domain diagram (all)

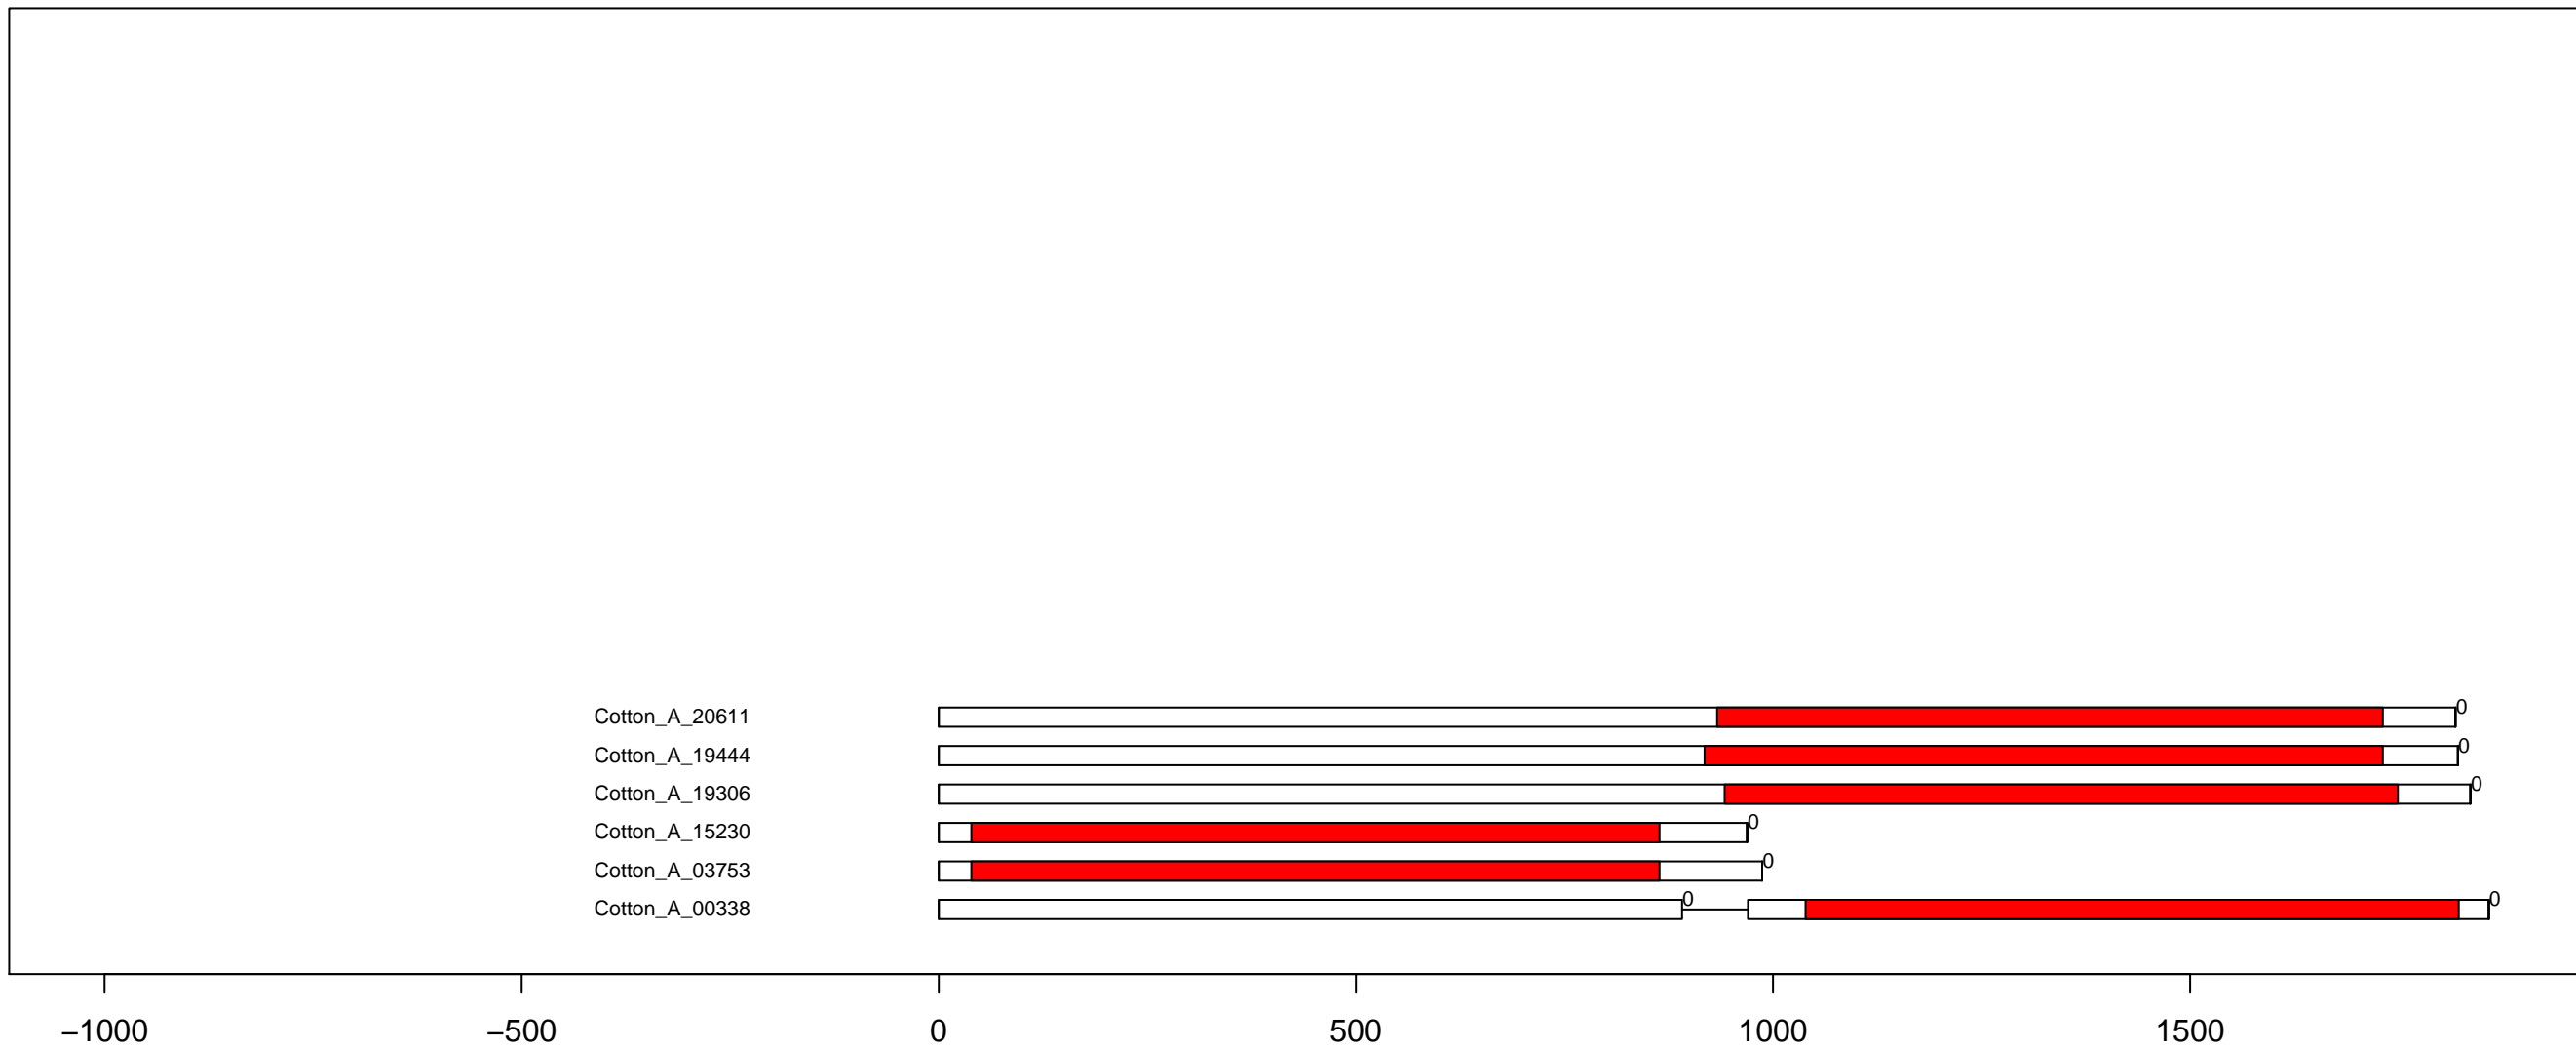



# G.ar RLK-Pelle\_LRR-Xb-1 exon-intron and domain diagram (all)

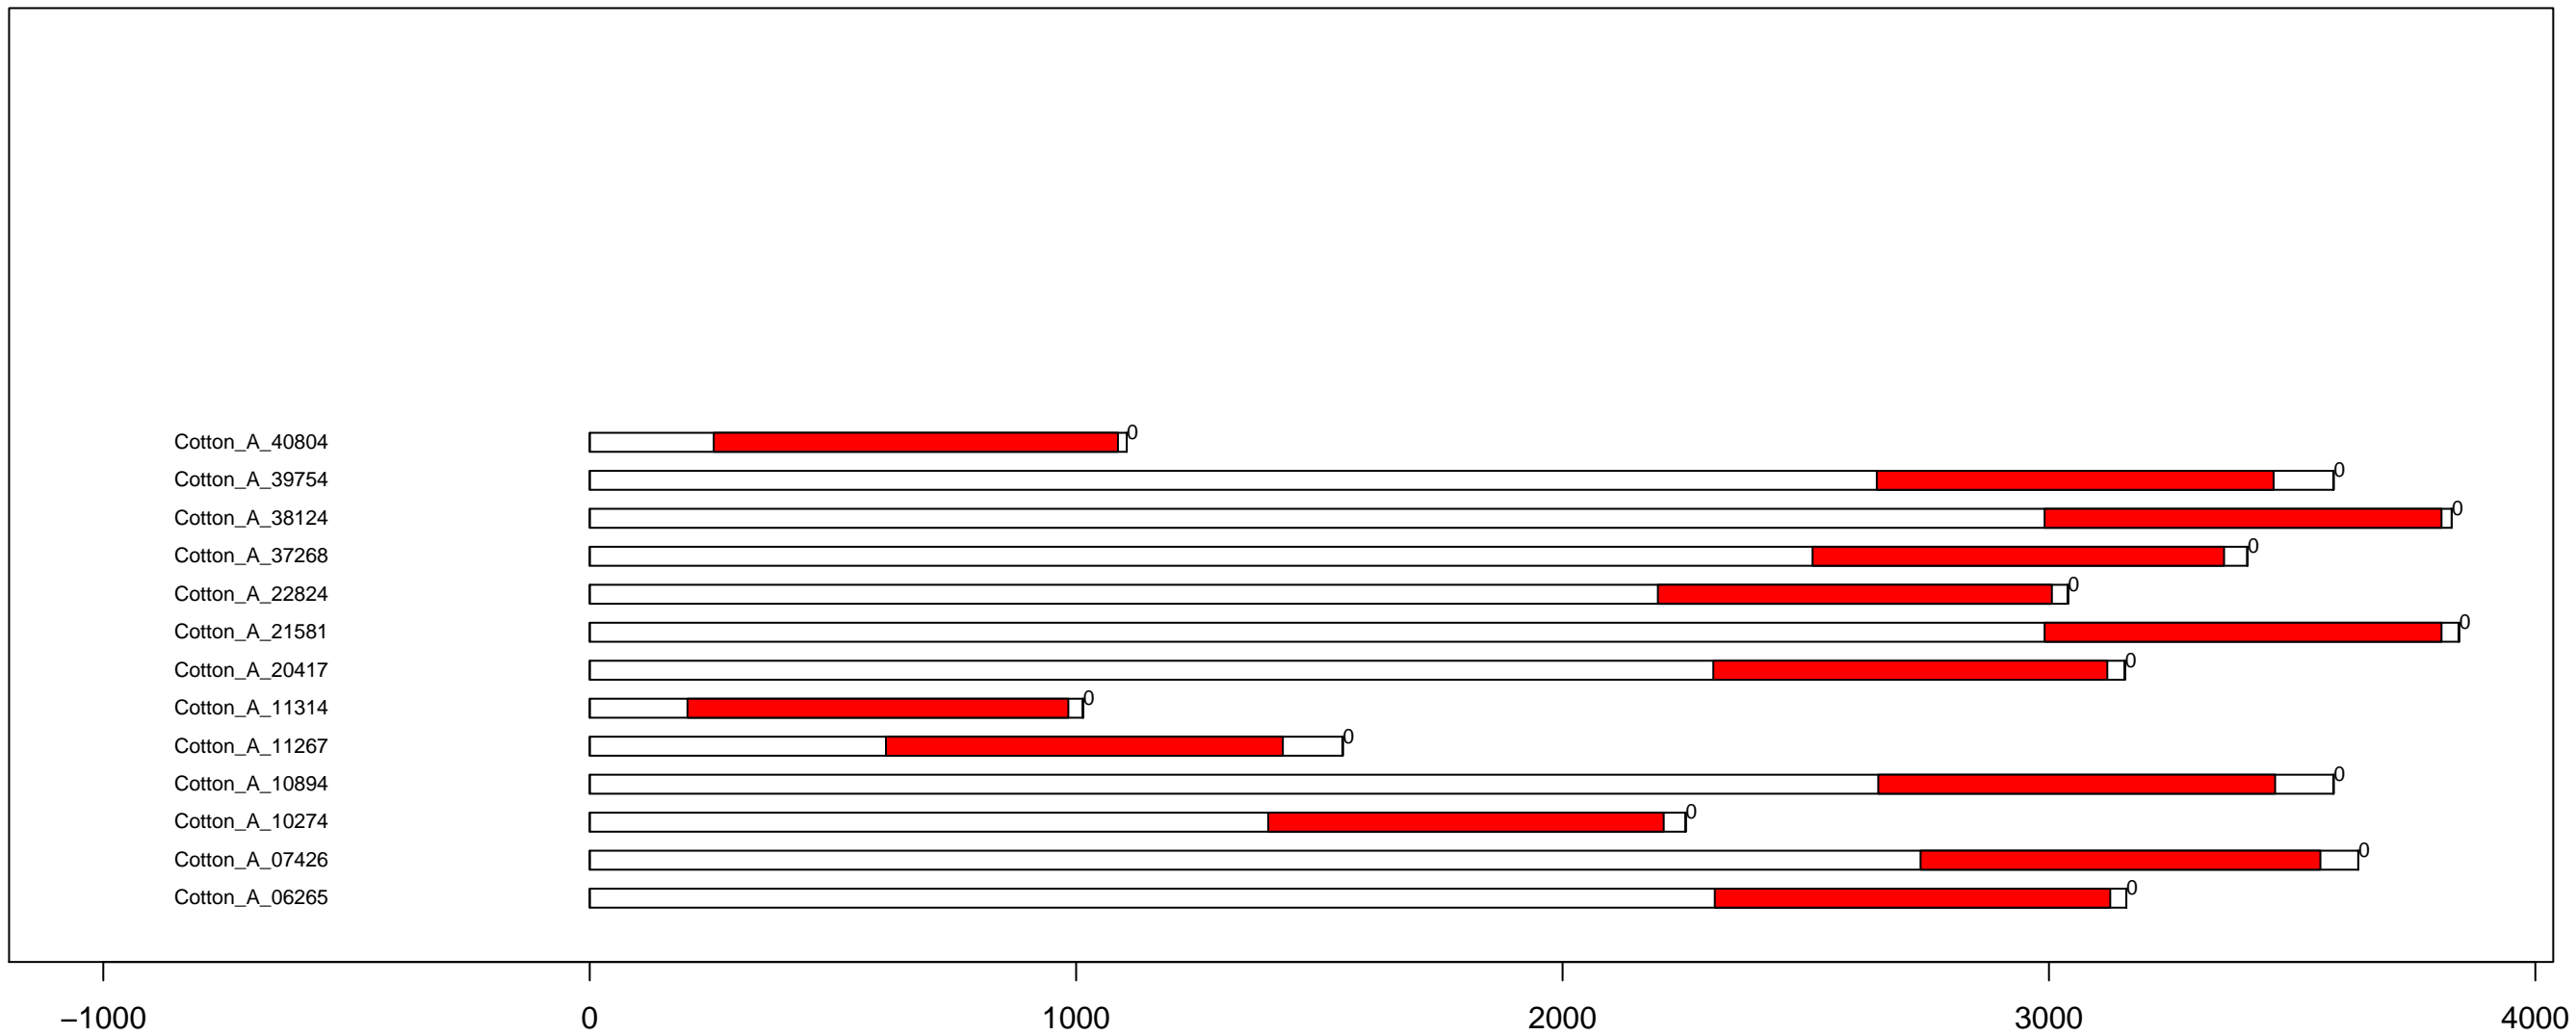

# G.ar RLK-Pelle\_LRR-Xb-2 exon-intron and domain diagram (all)

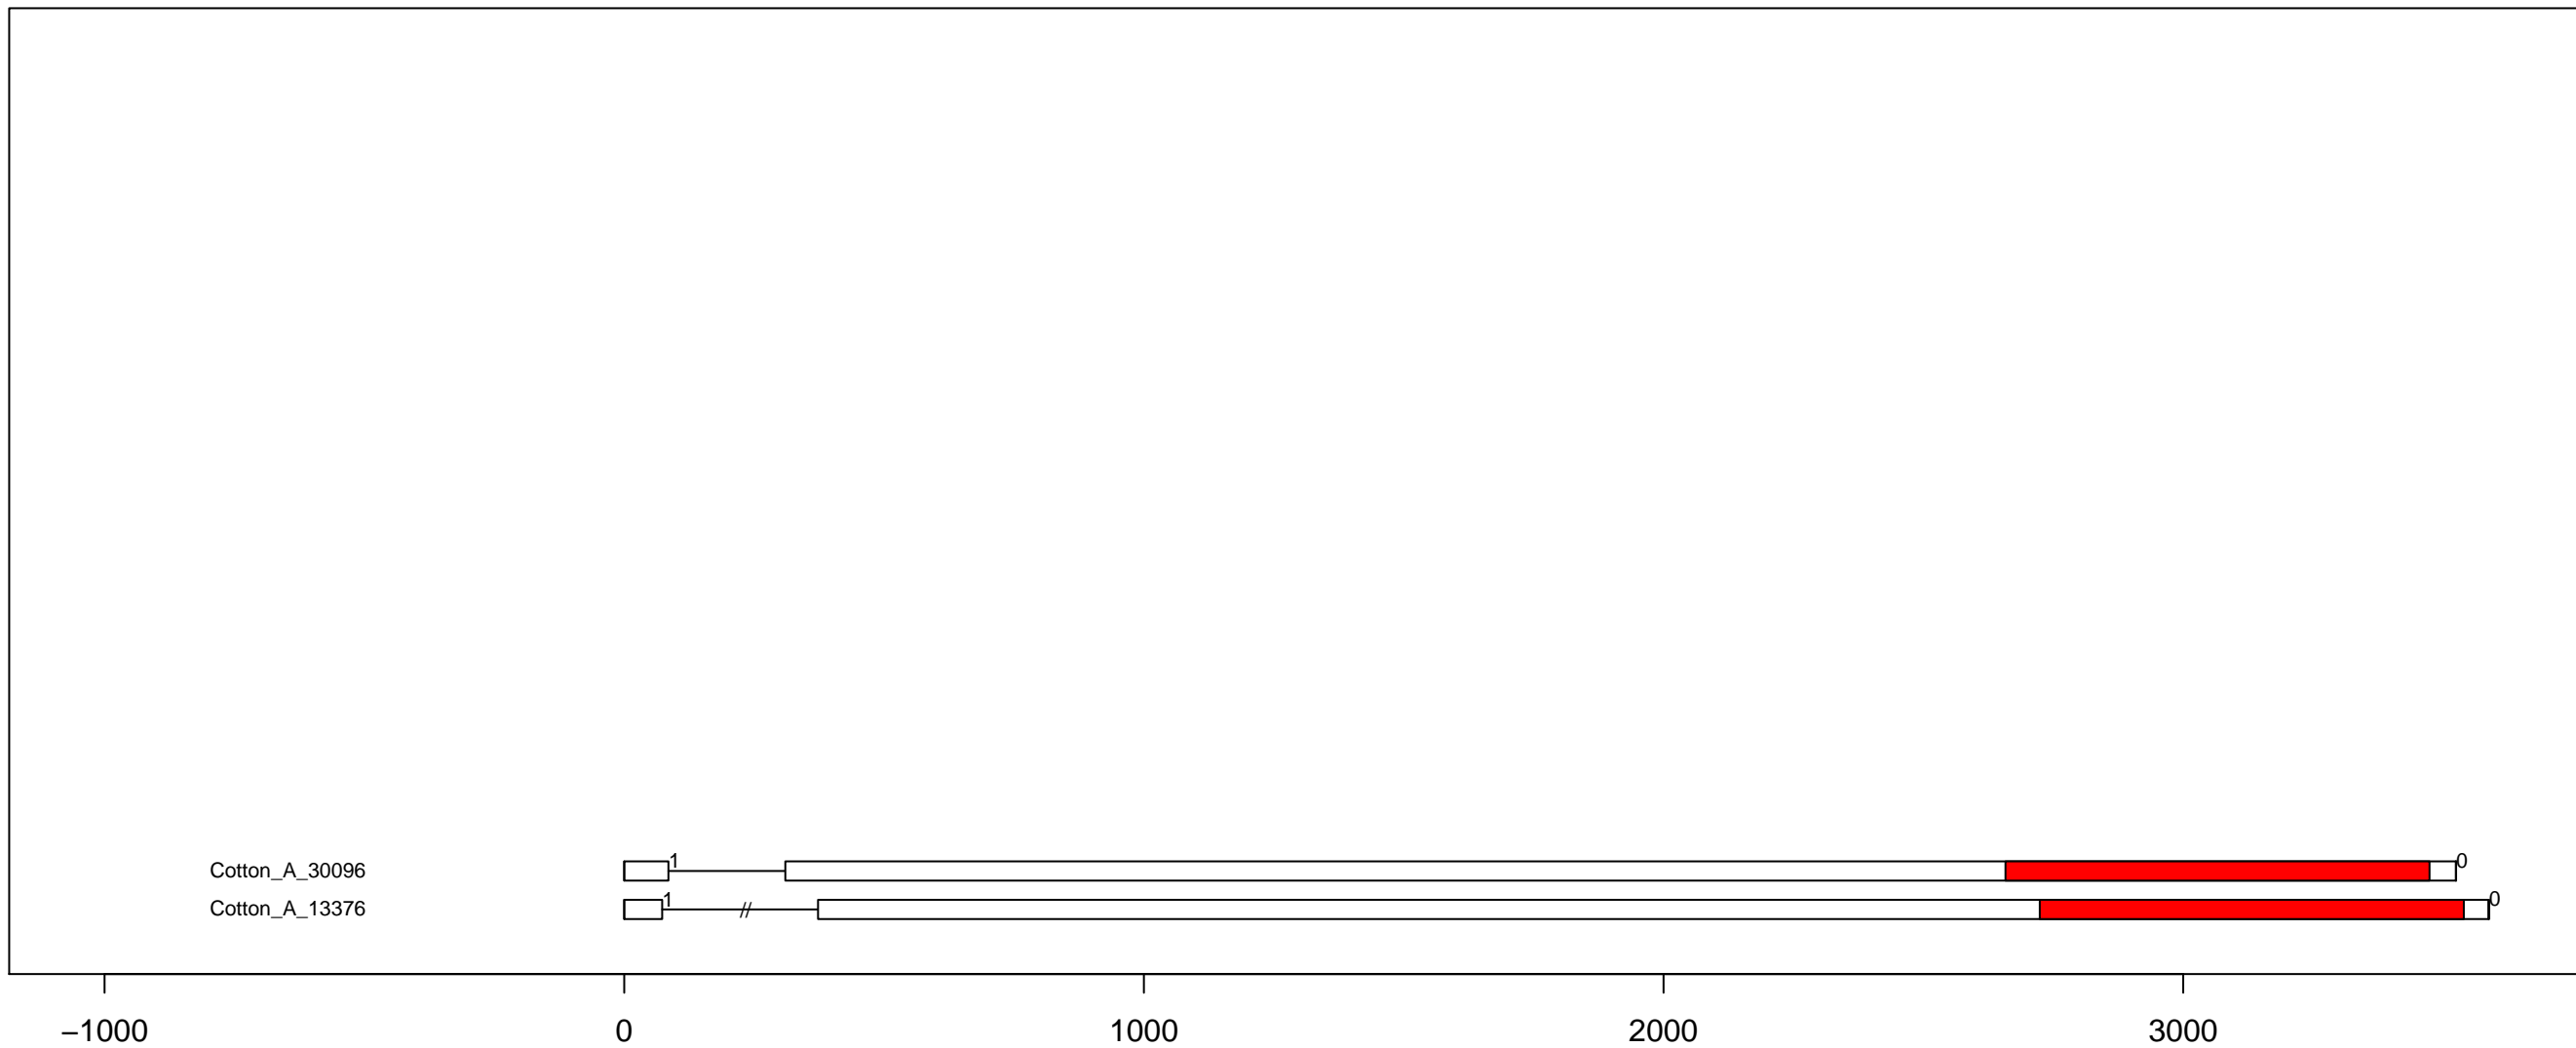

### G.ar RLK-Pelle\_LRR-XI-1 exon-intron and domain diagram (part 1)

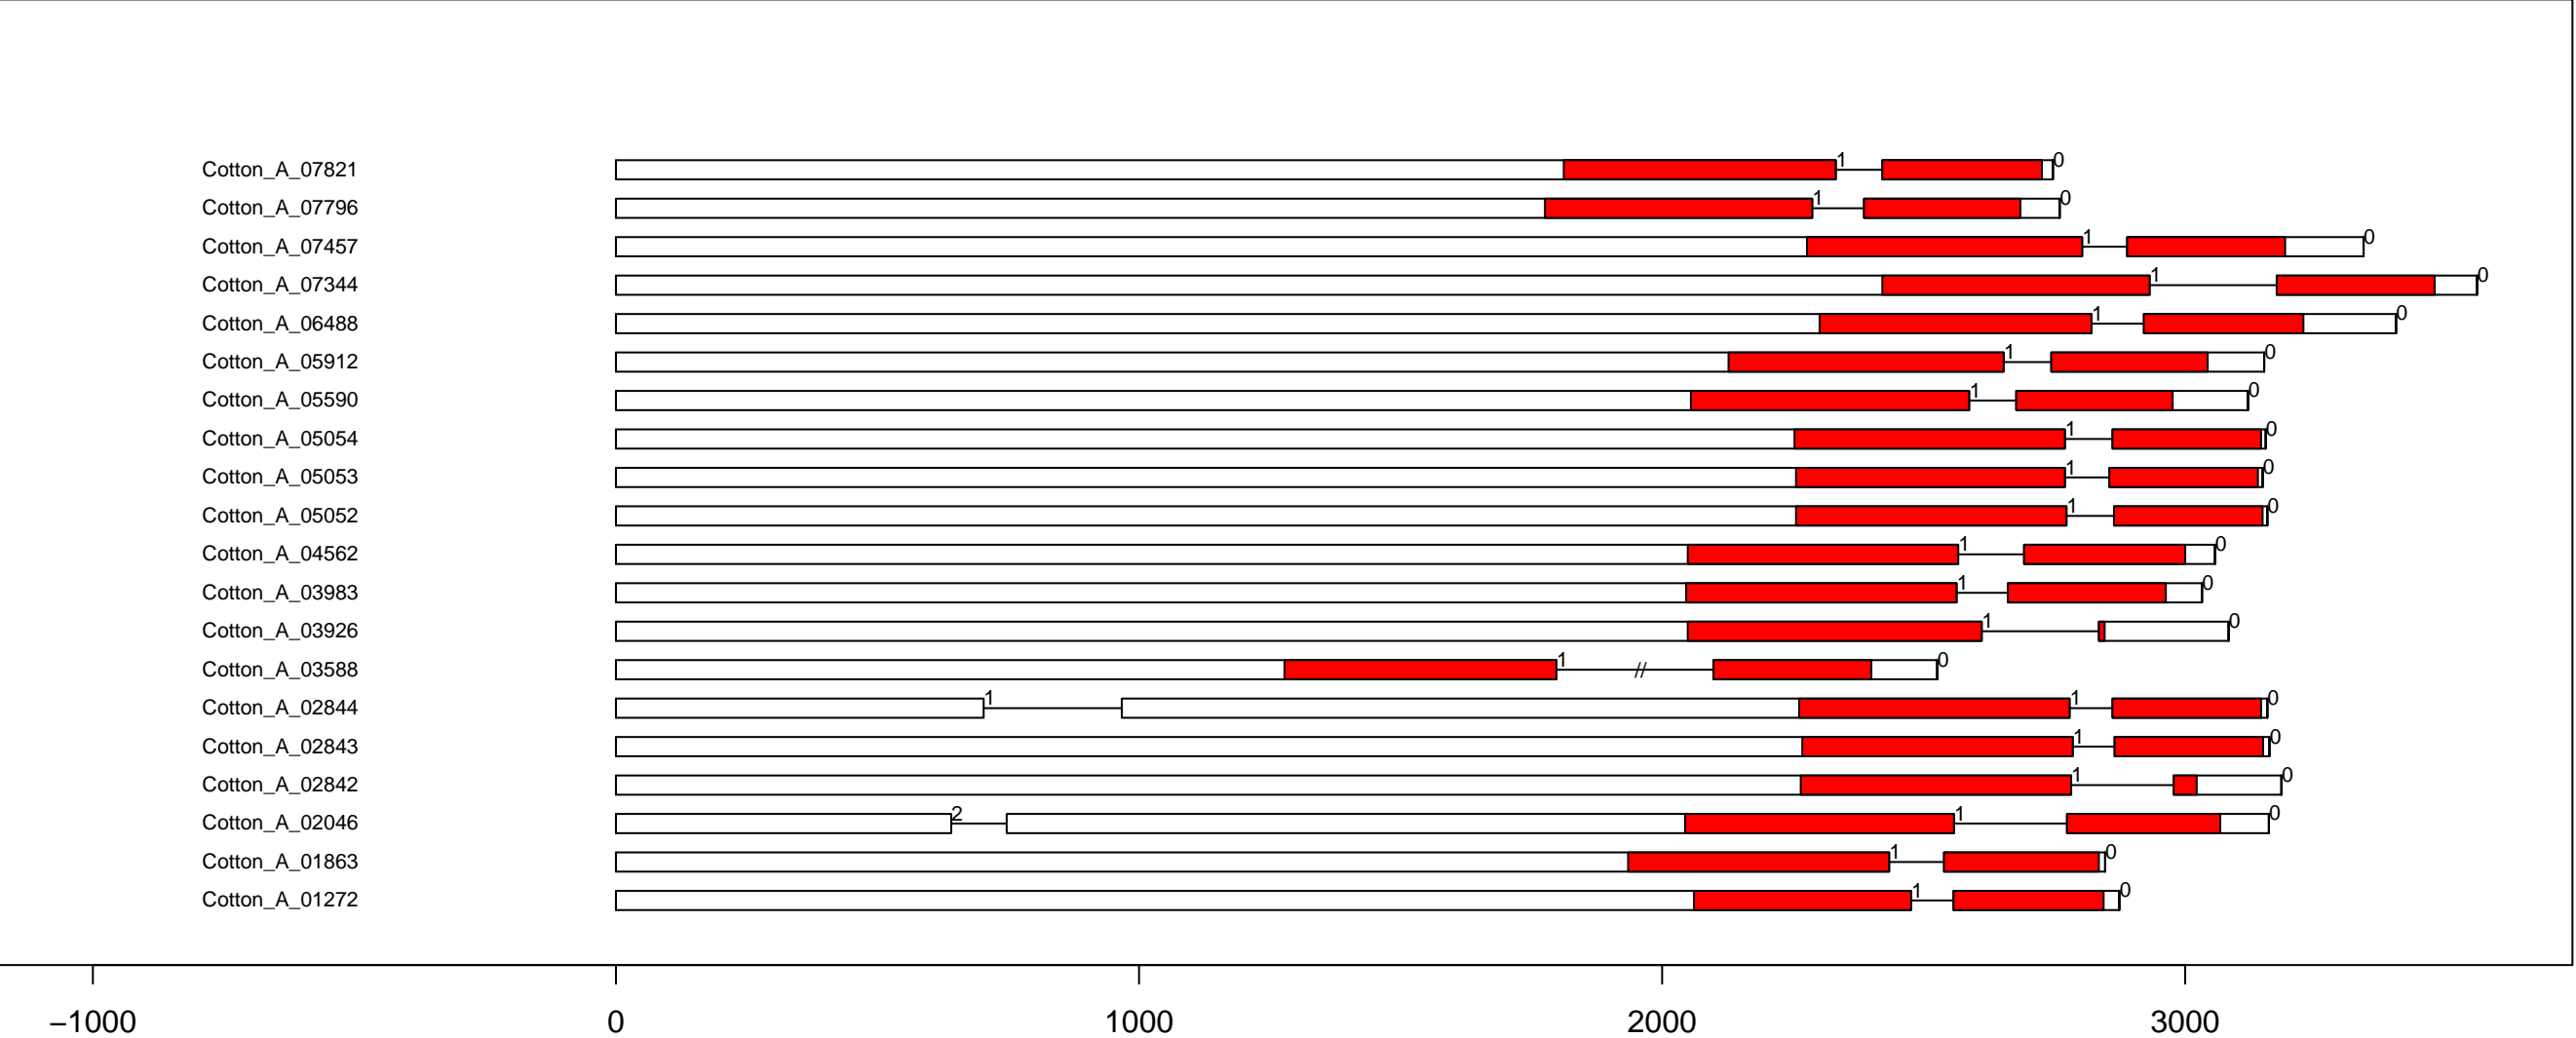

G.ar RLK-Pelle\_LRR-XI-1 exon-intron and domain diagram (part 2)

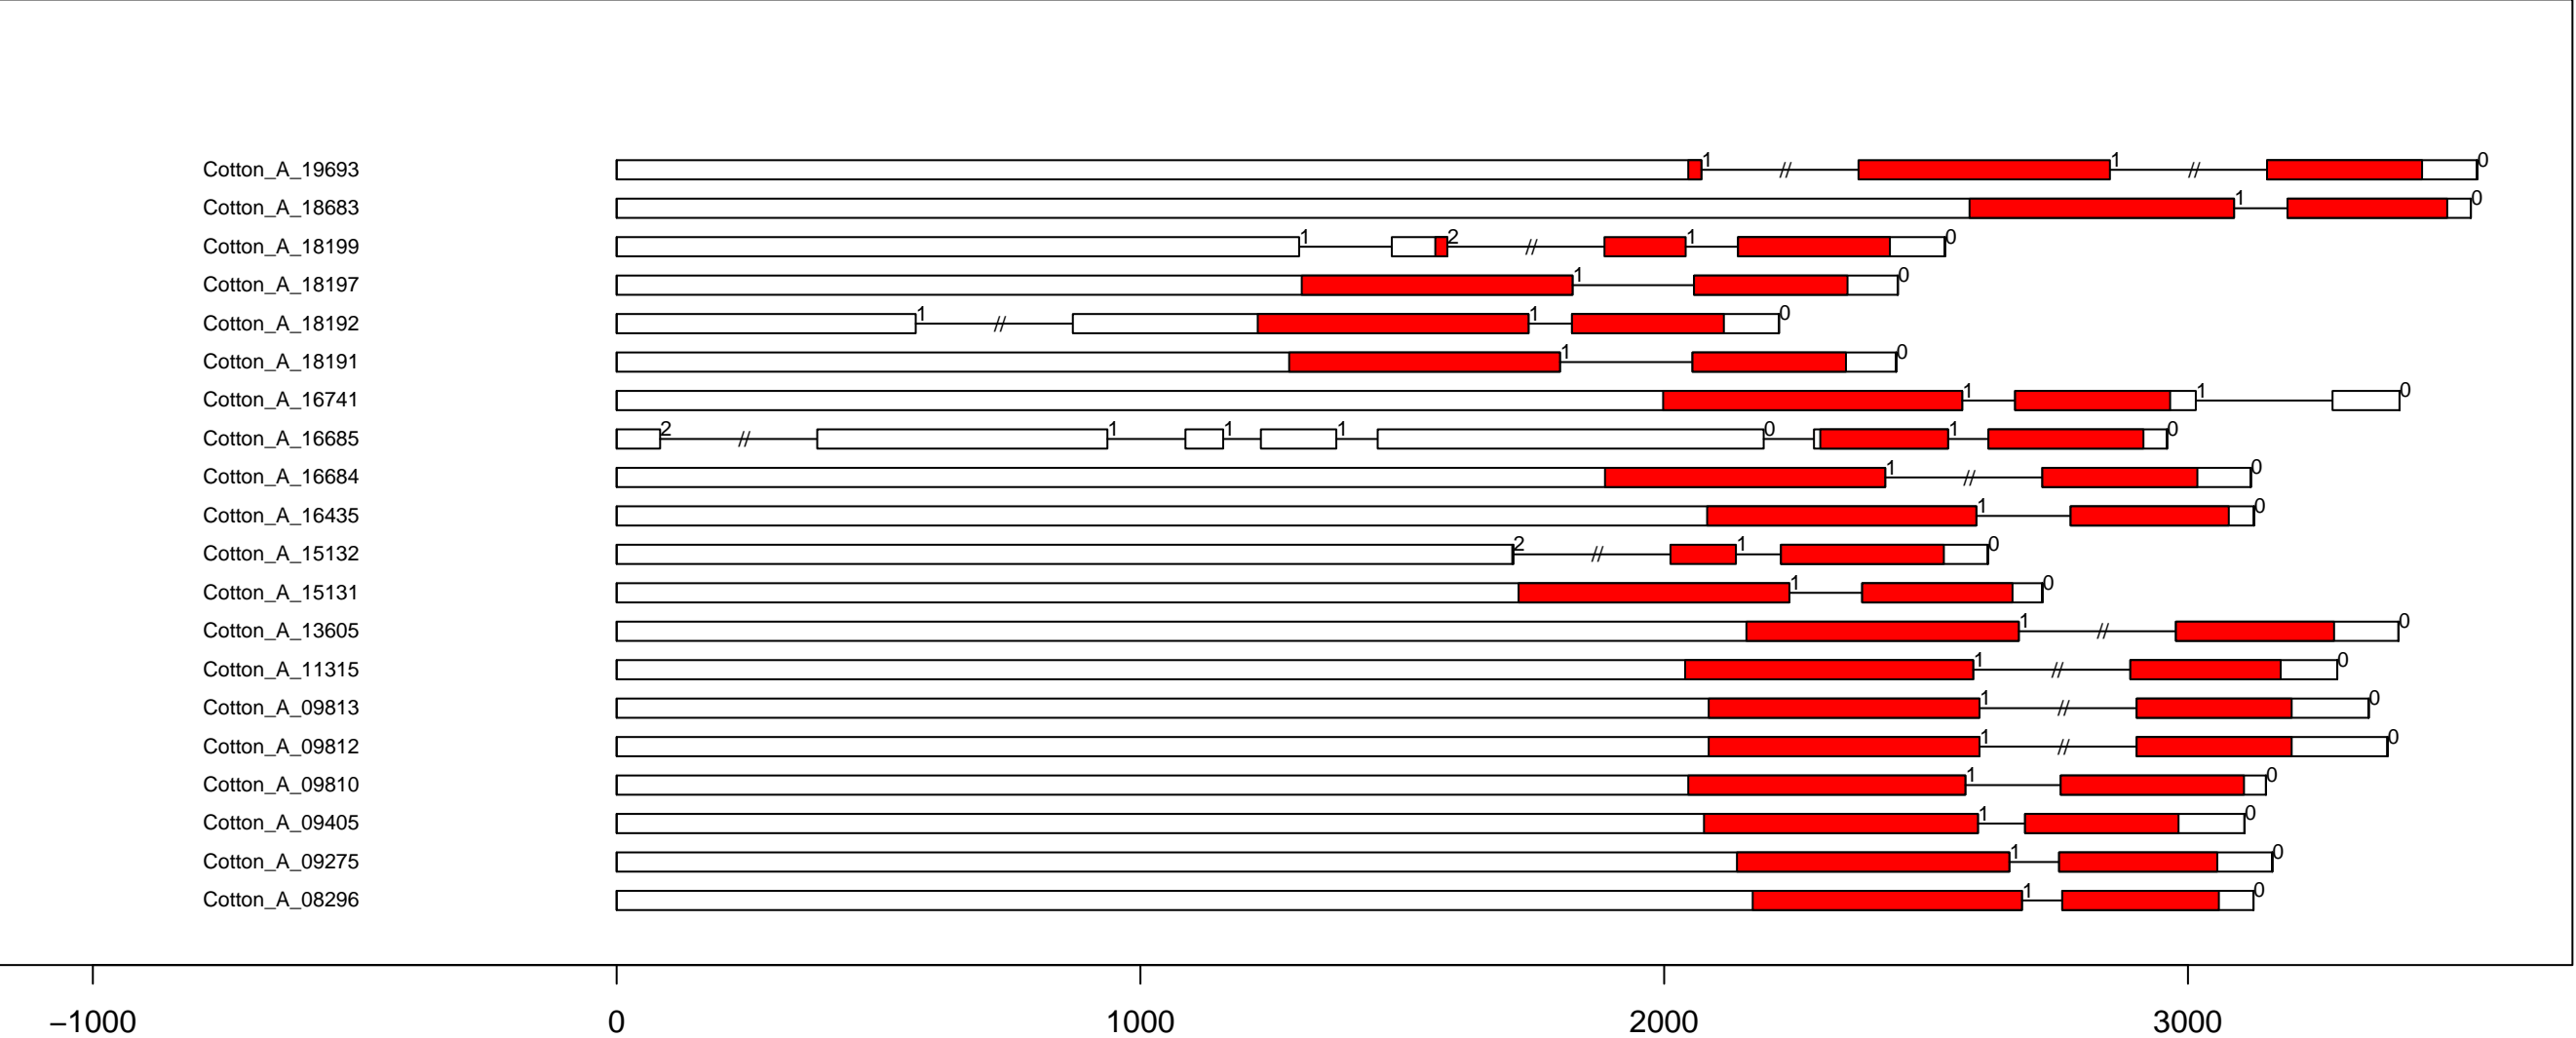

### G.ar RLK-Pelle\_LRR-XI-1 exon-intron and domain diagram (part 3)

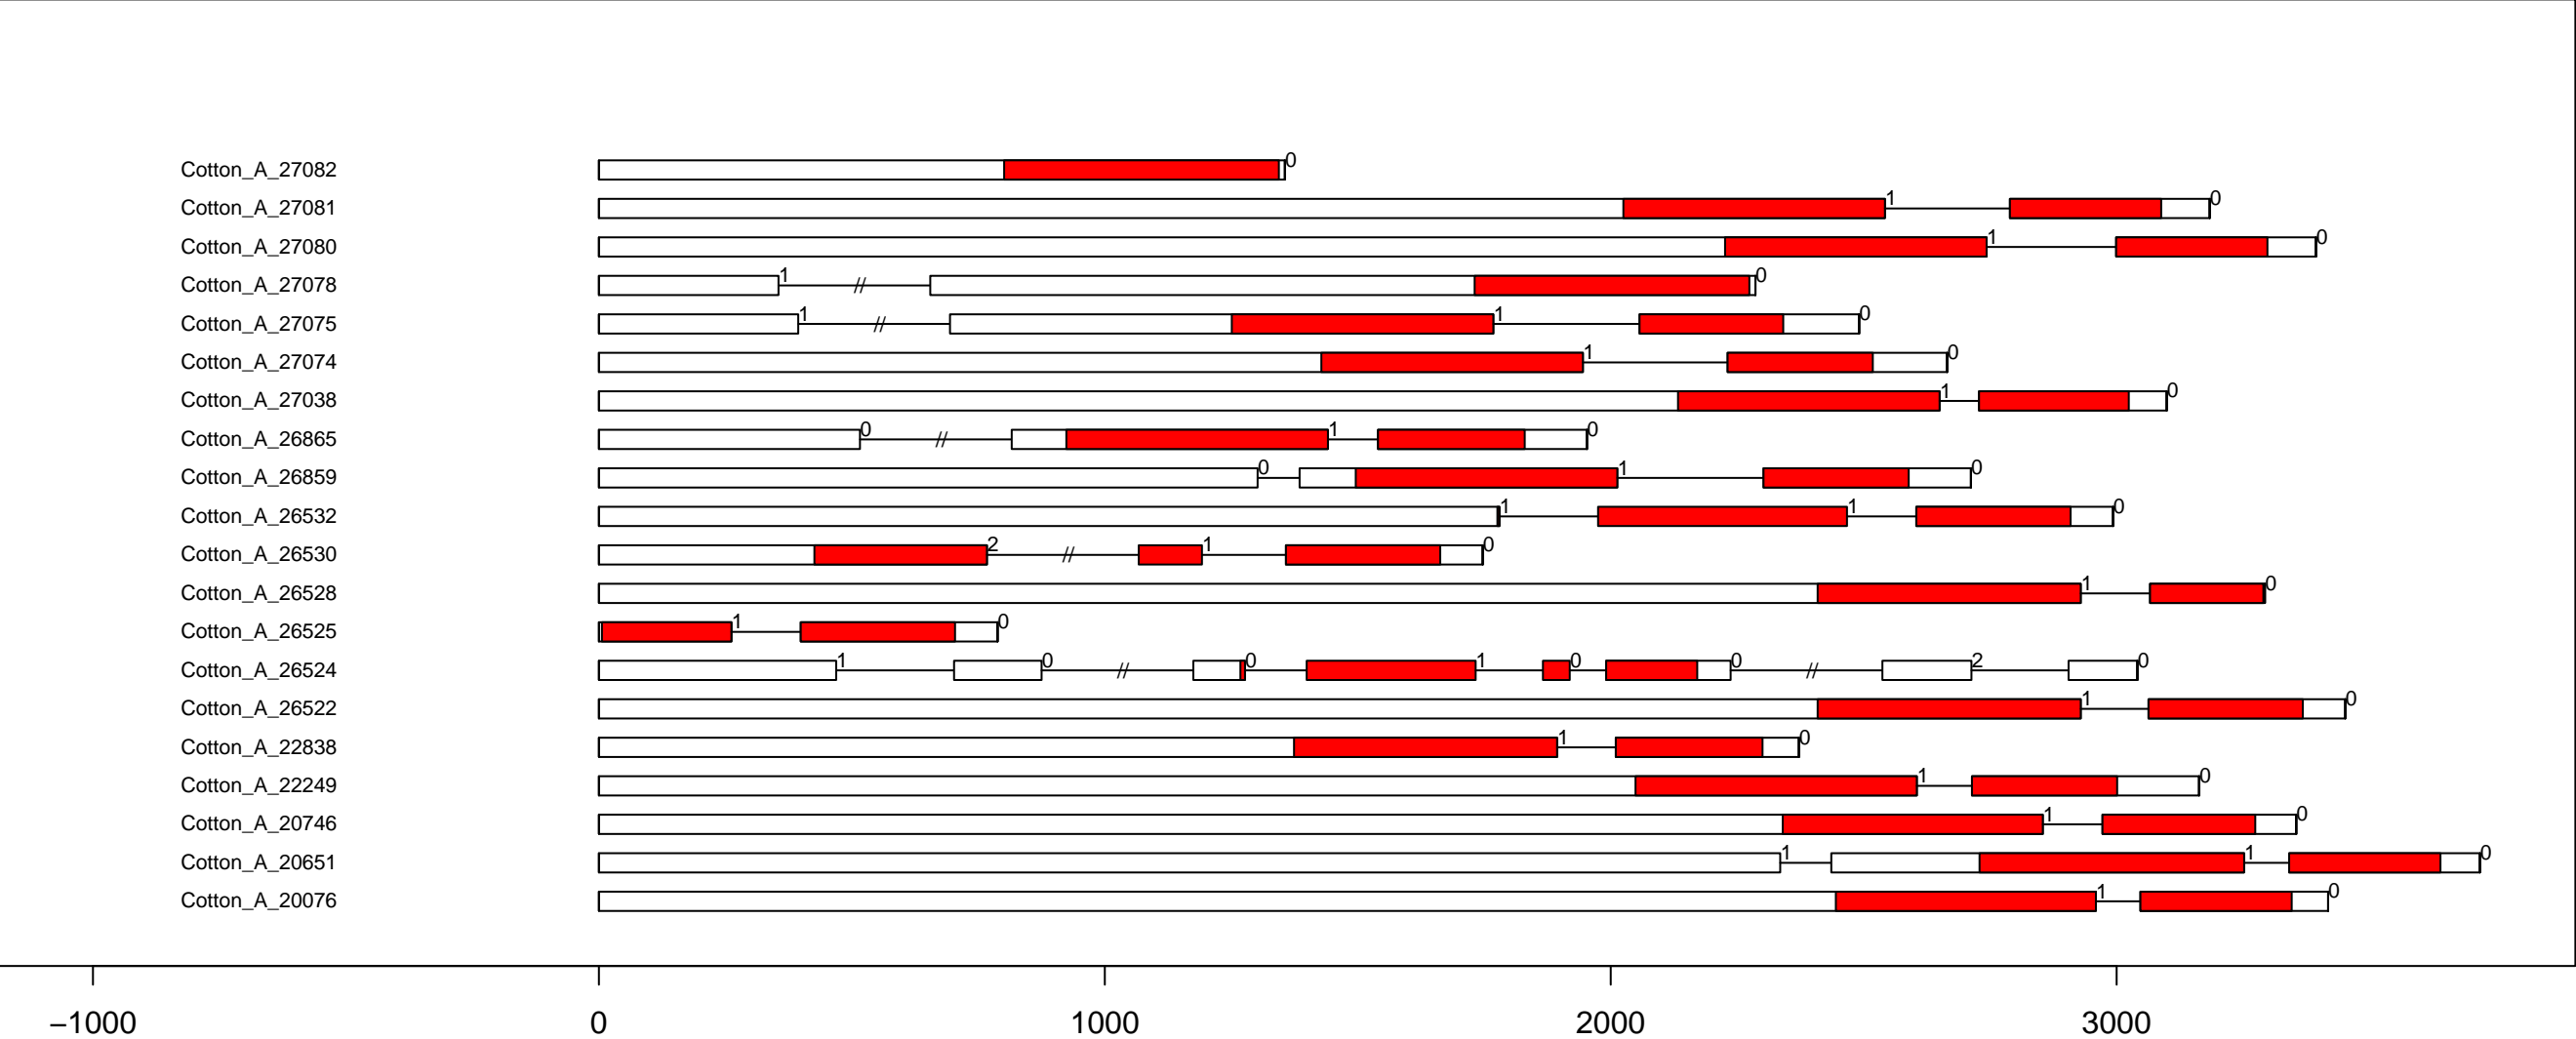

G.ar RLK-Pelle\_LRR-XI-1 exon-intron and domain diagram (part 4)

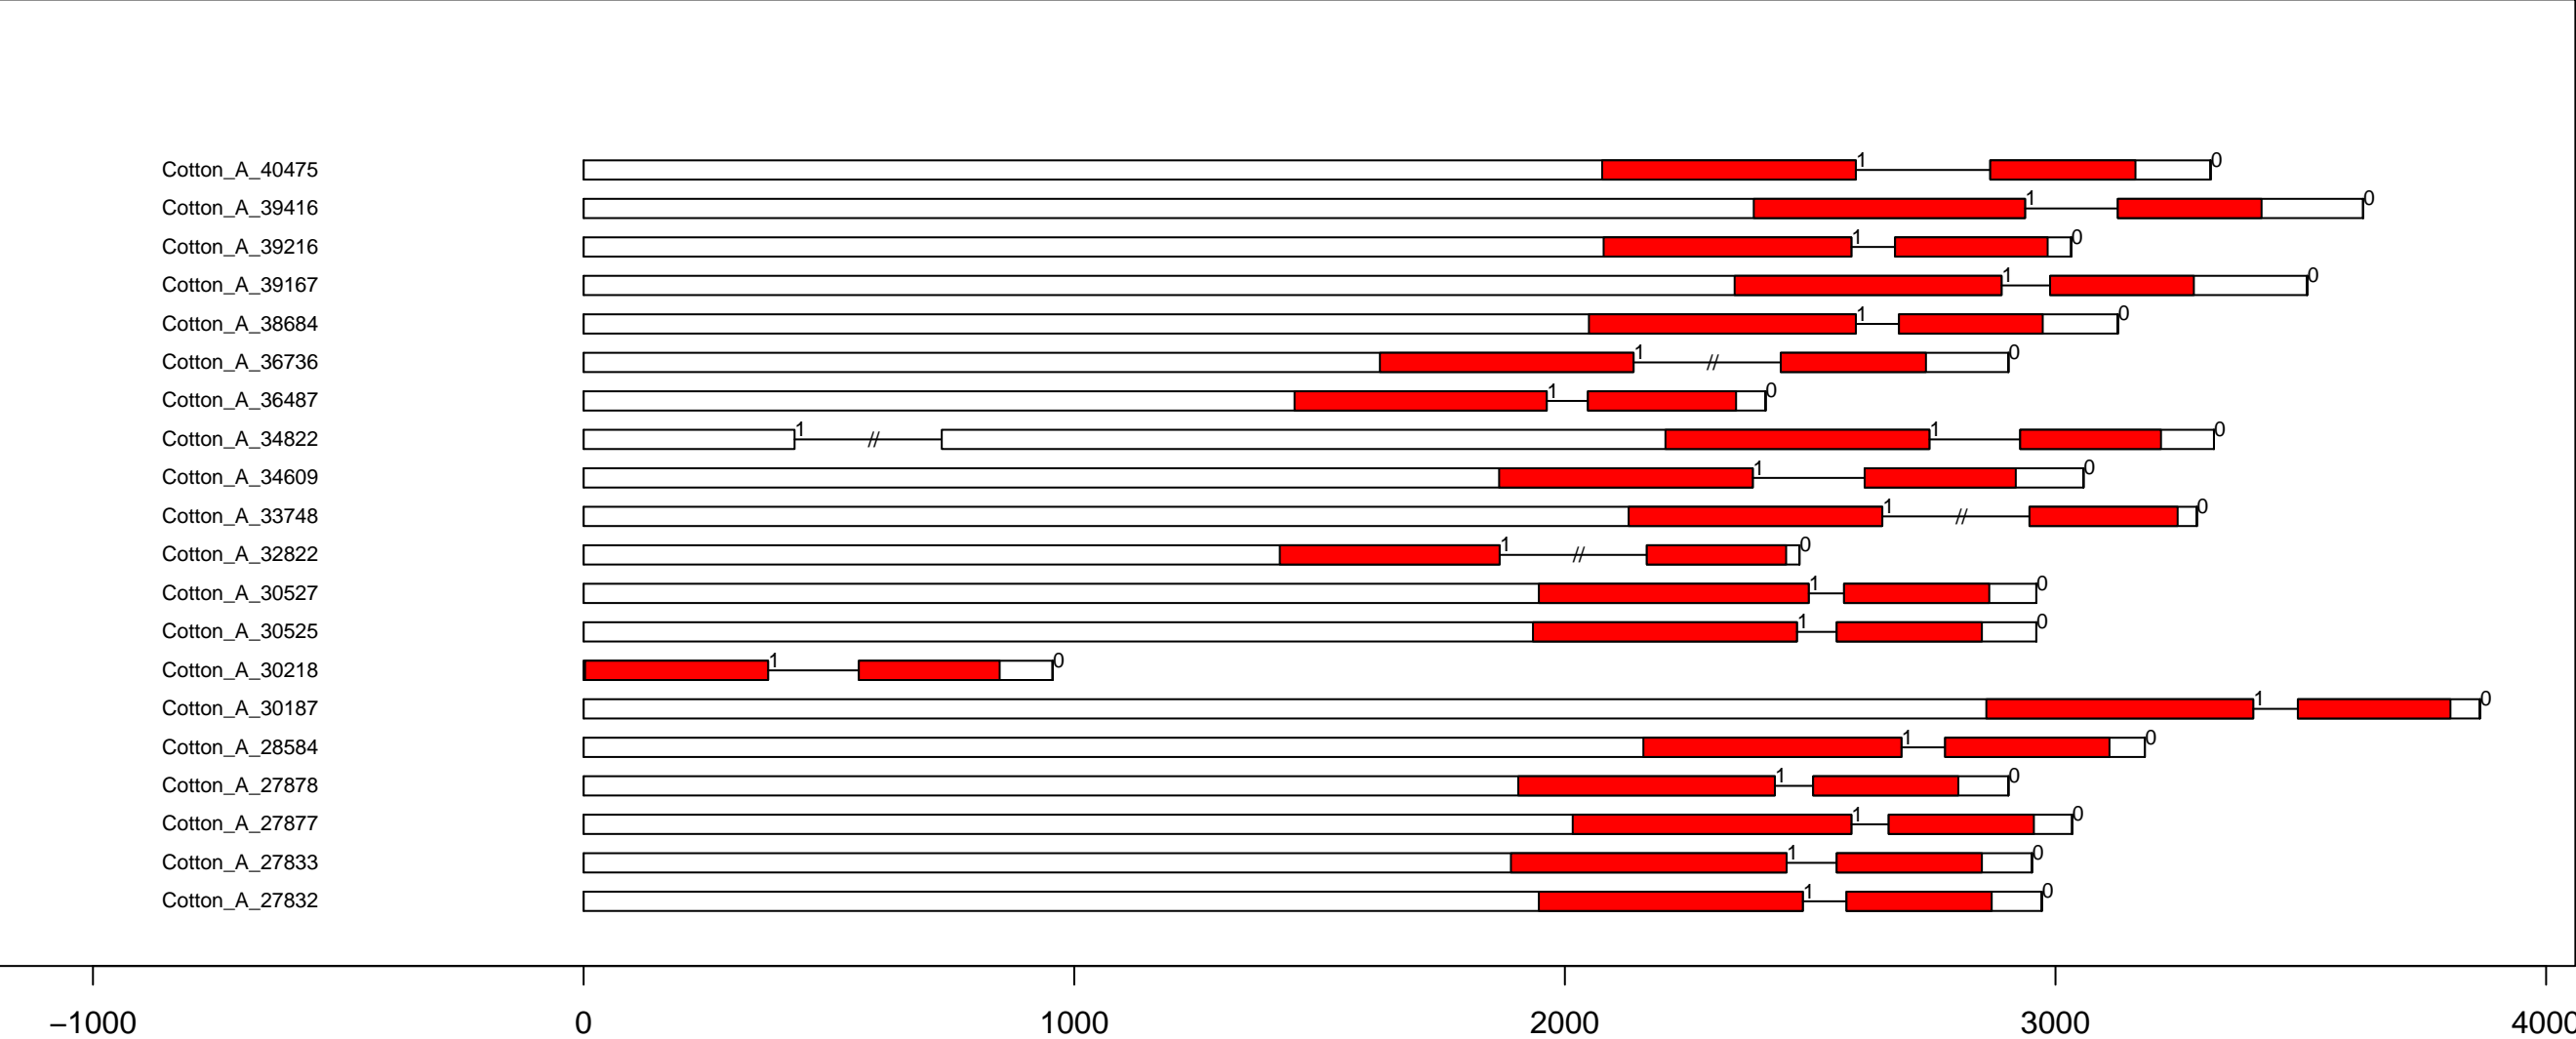

# G.ar RLK-Pelle\_LRR-XI-2 exon-intron and domain diagram (all)

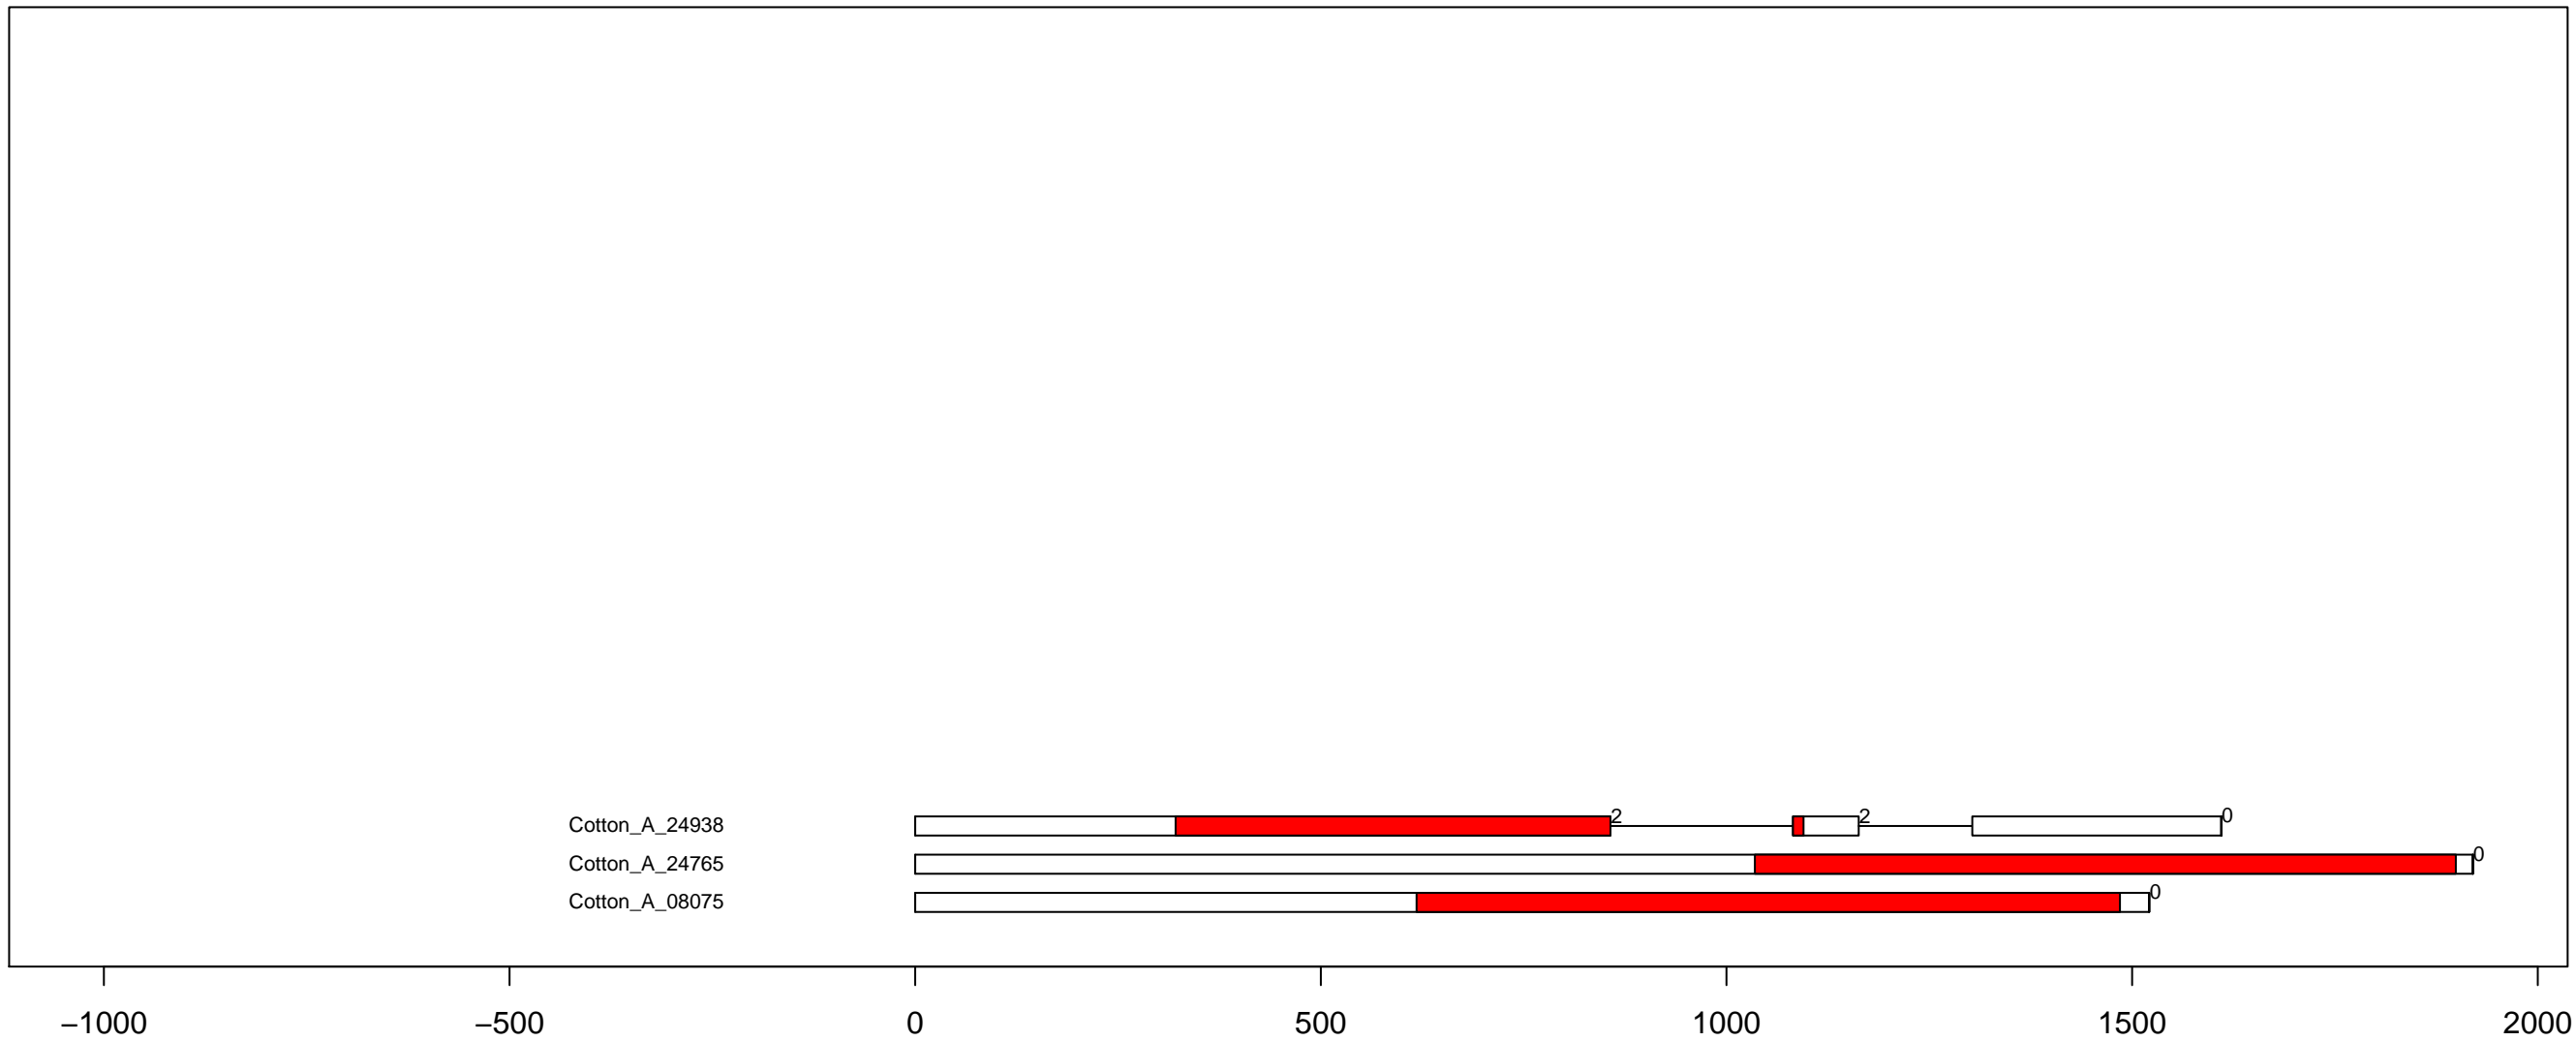

### G.ar RLK-Pelle\_LRR-XII-1 exon-intron and domain diagram (part 1)

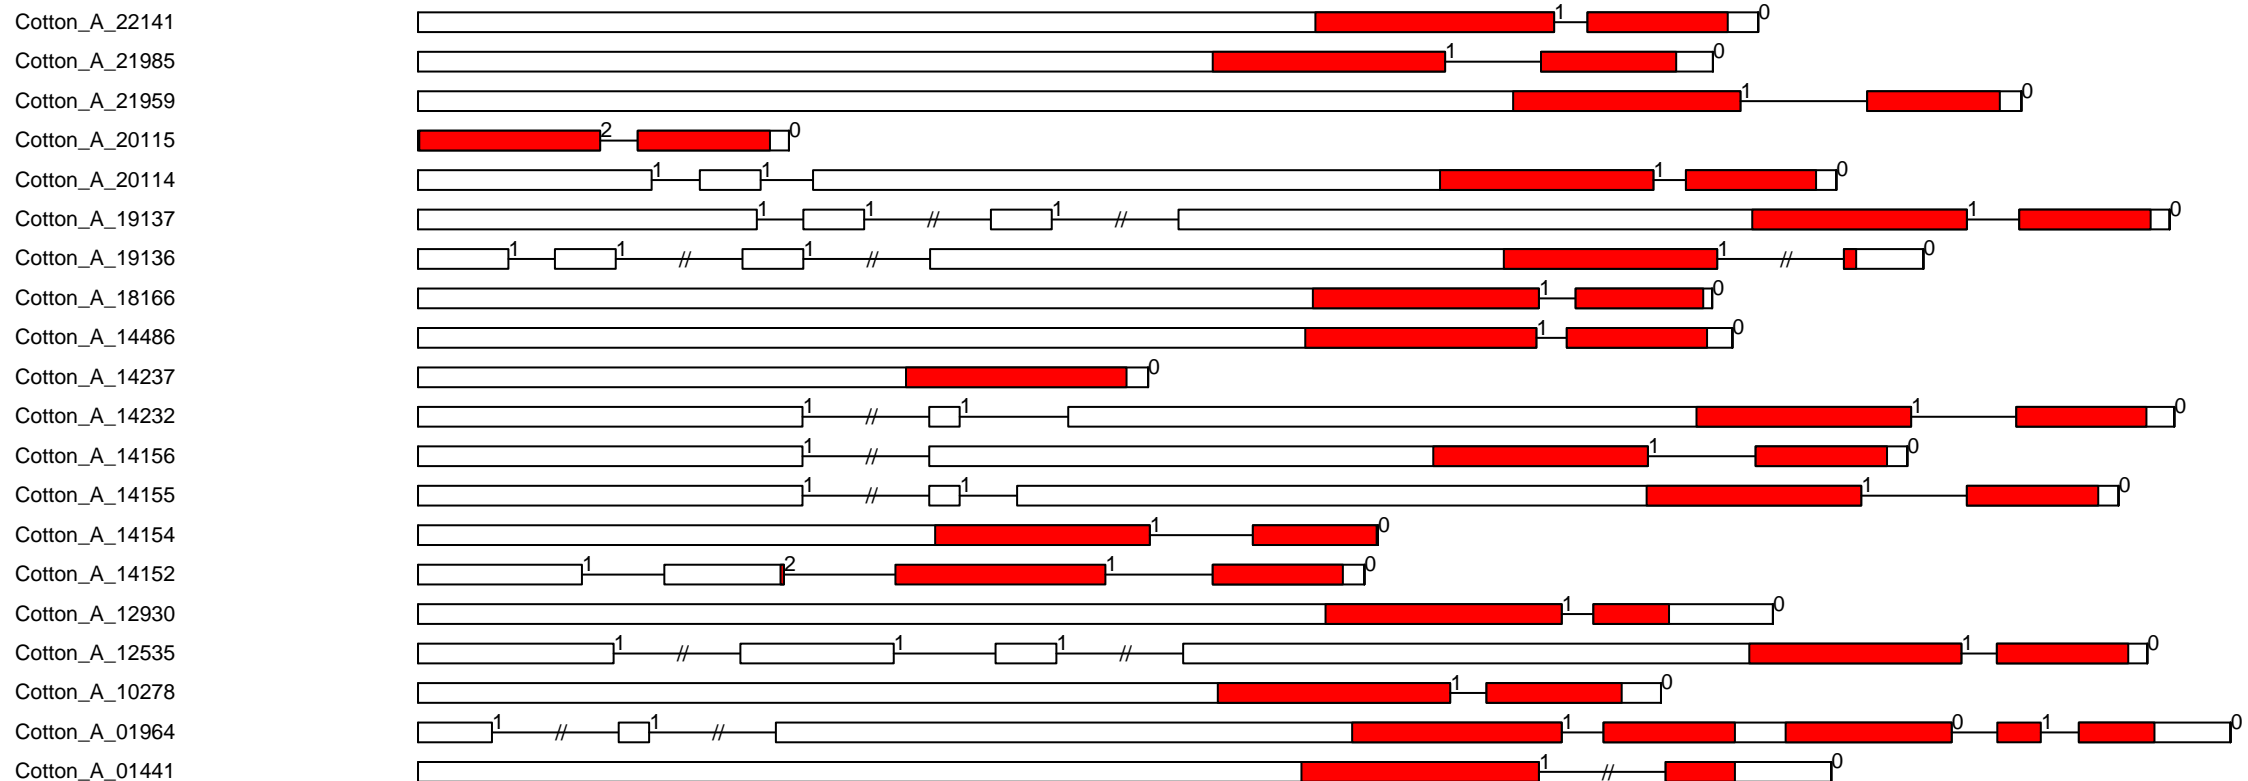



### G.ar RLK-Pelle\_LRR-XII-1 exon-intron and domain diagram (part 2)

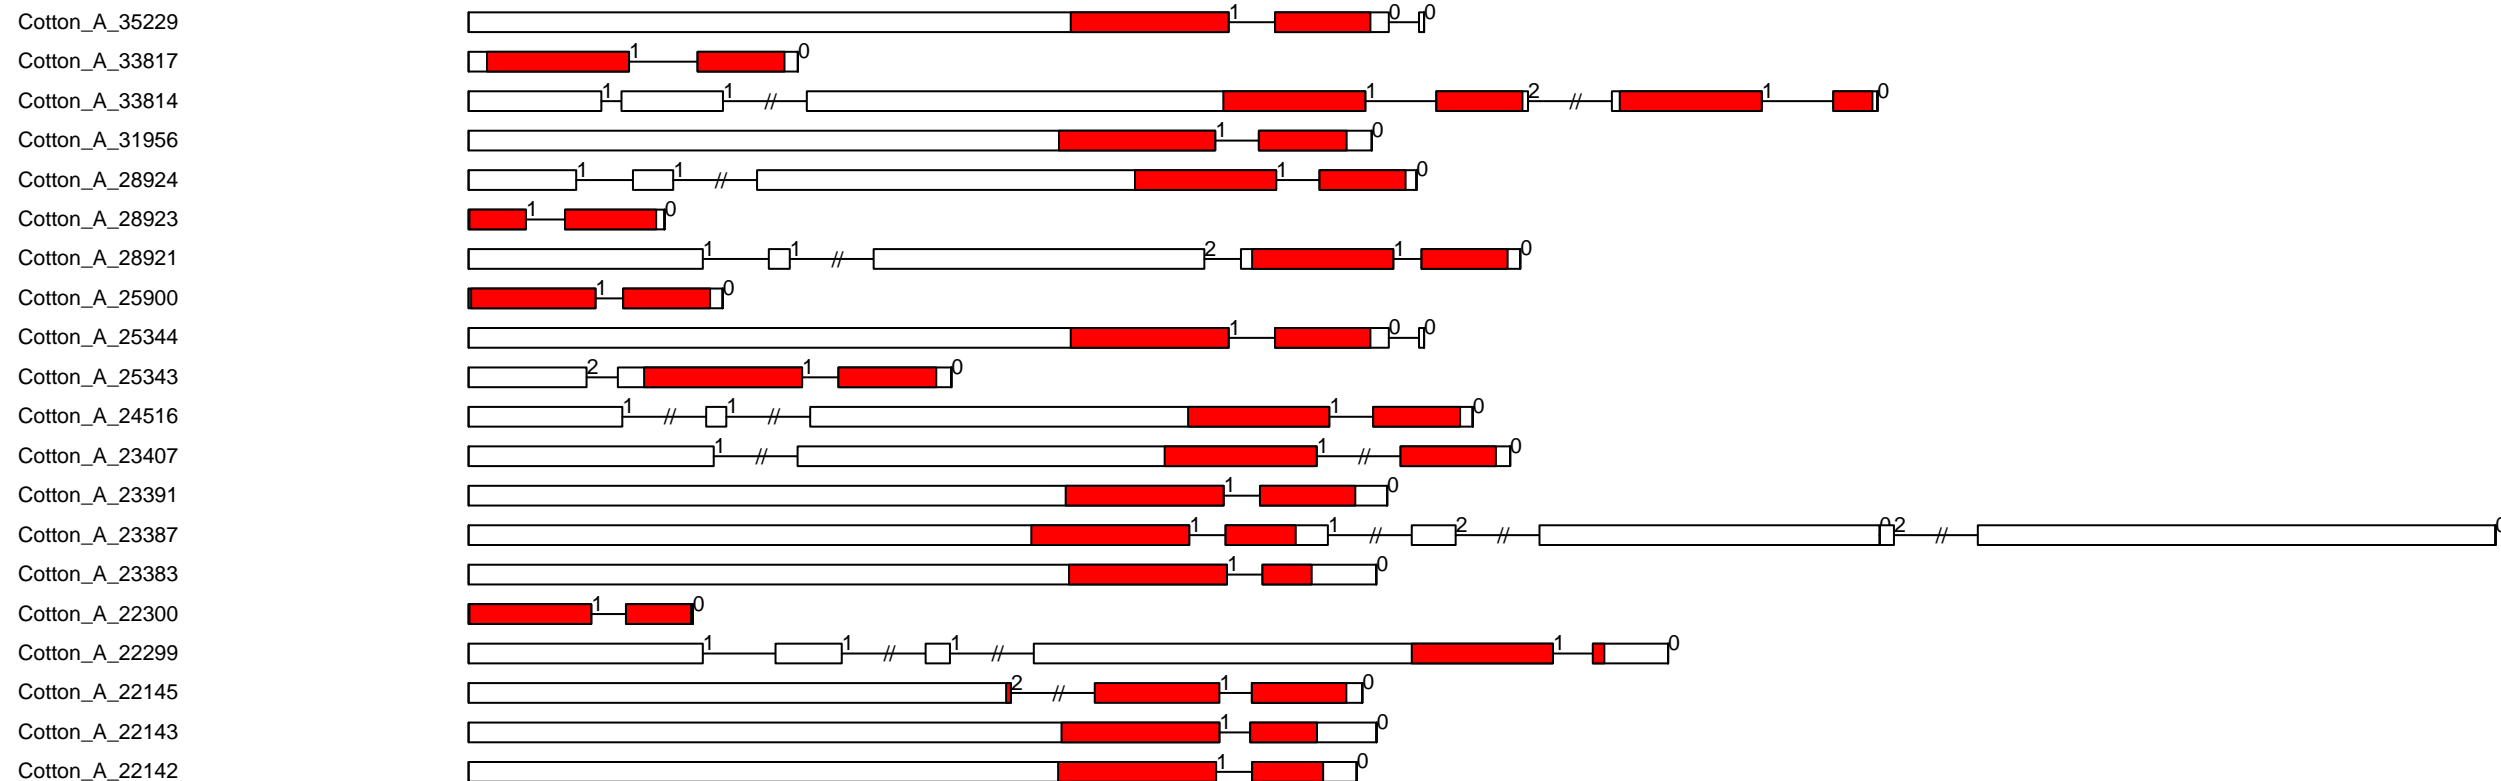

### G.ar RLK-Pelle\_LRR-XII-1 exon-intron and domain diagram (part 3)

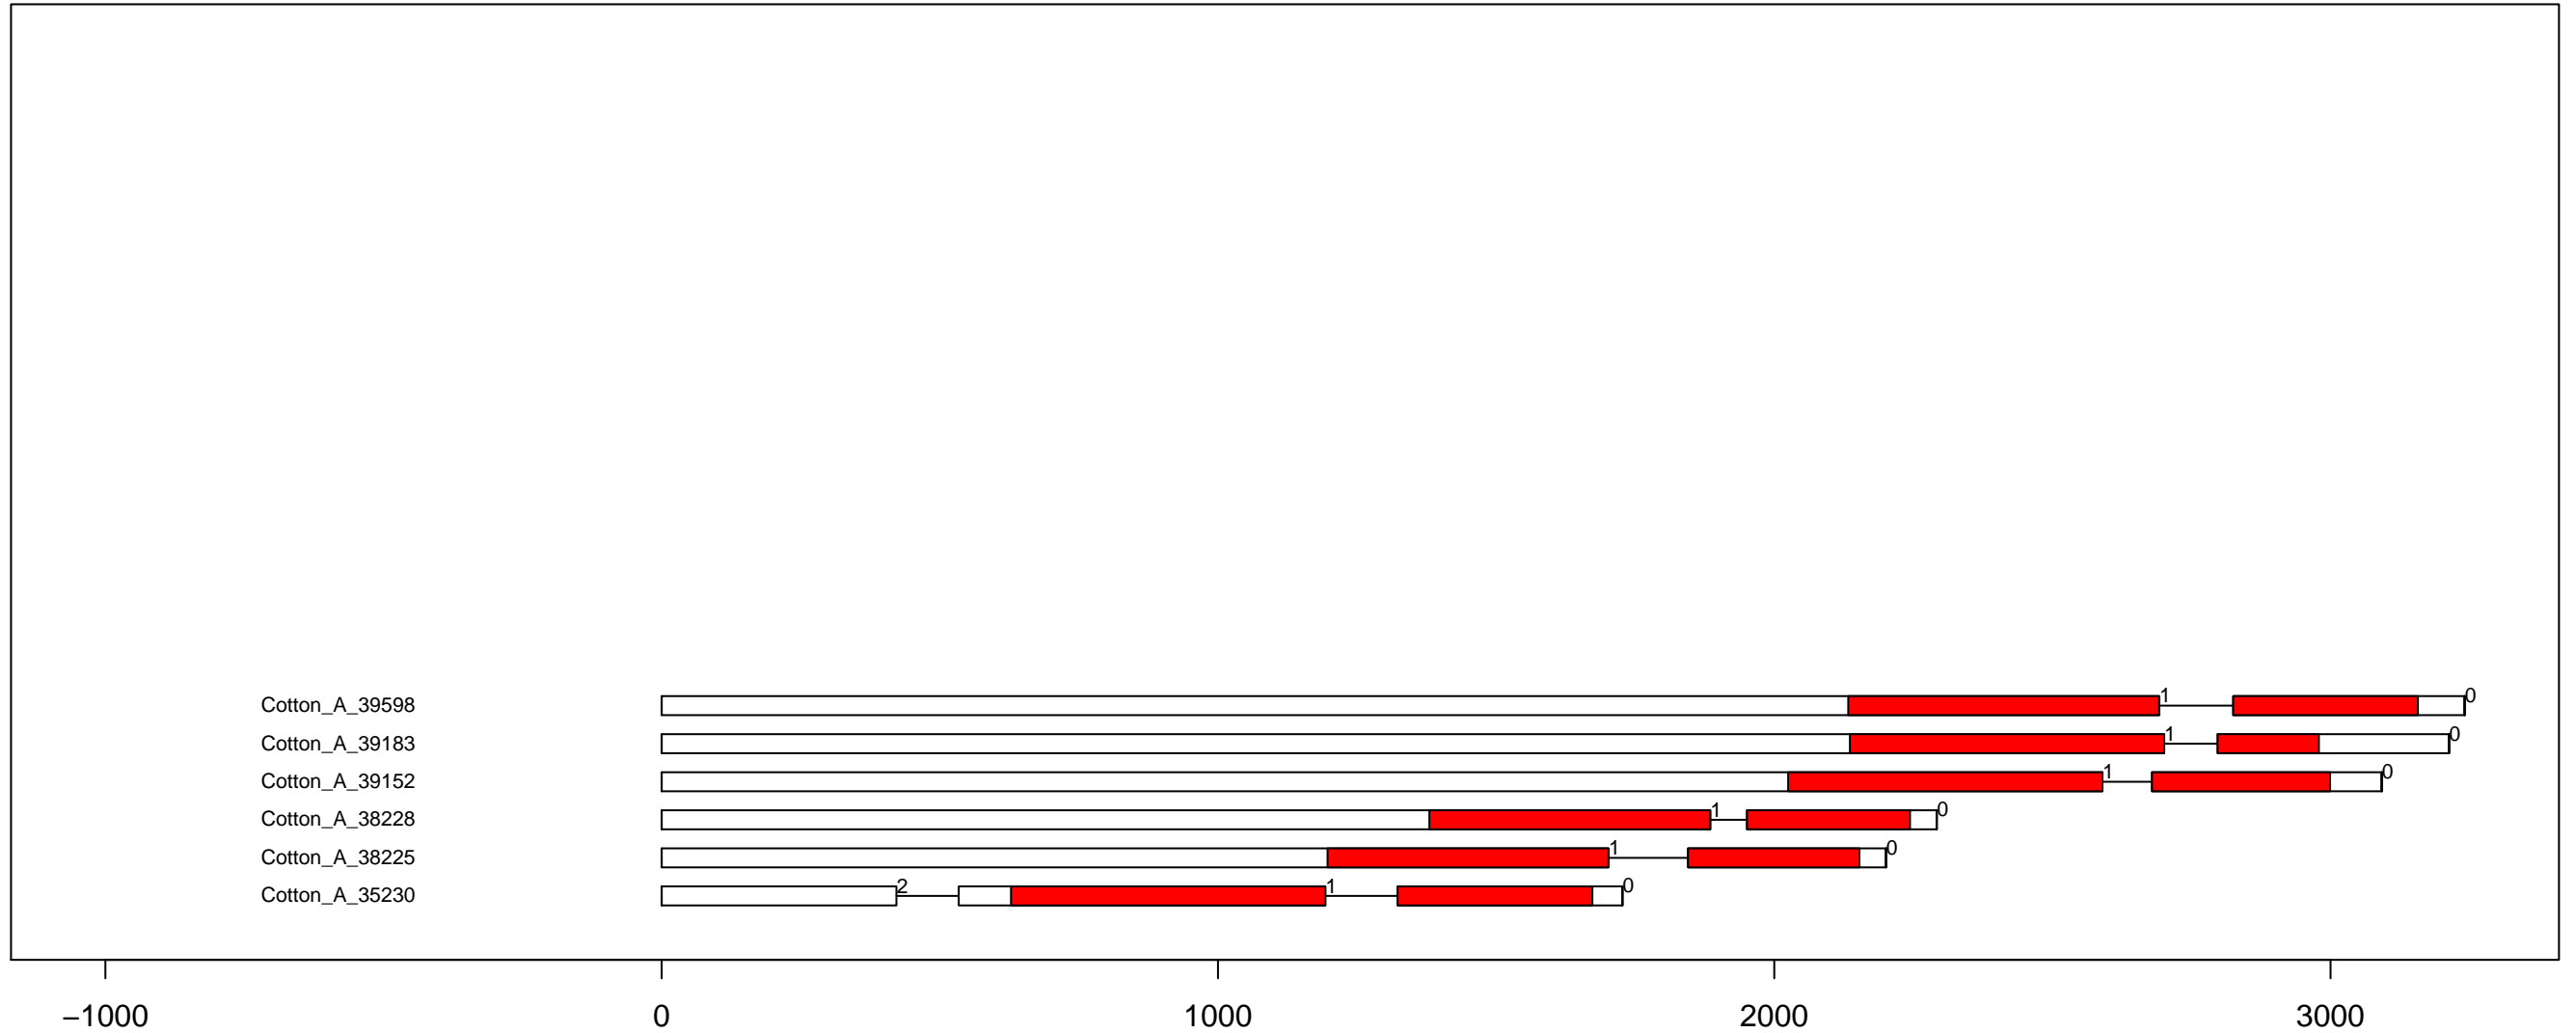

# G.ar RLK-Pelle\_LRR-XIIIa exon-intron and domain diagram (all)

Cotton\_A\_25325  
Cotton\_A\_13017  
Cotton\_A\_09204  
Cotton\_A\_07327  
Cotton\_A\_02688

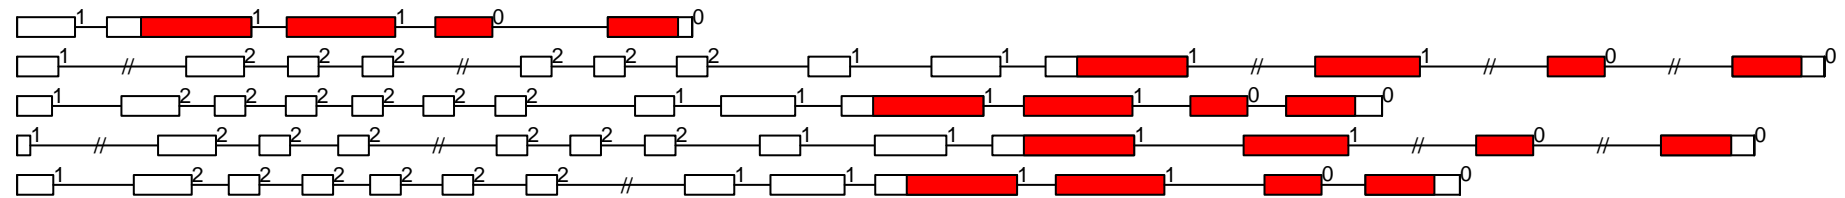

-1000

0

1000

2000

3000

4000

# G.ar RLK-Pelle\_LRR-XIIIb exon-intron and domain diagram (all)

Cotton\_A\_39203  
Cotton\_A\_07558  
Cotton\_A\_05648

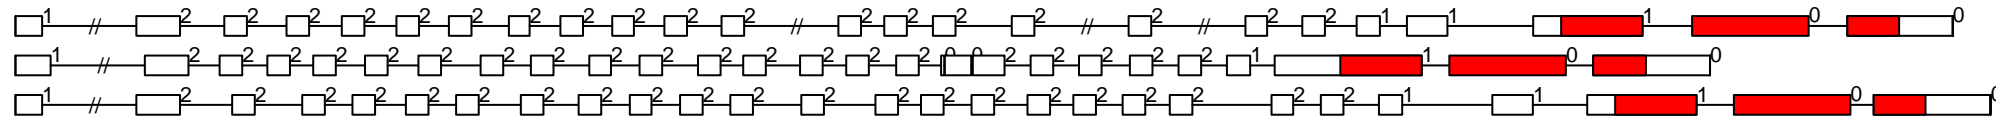

0

2000

4000

6000

# G.ar RLK-Pelle\_LRR-XIV exon-intron and domain diagram (all)

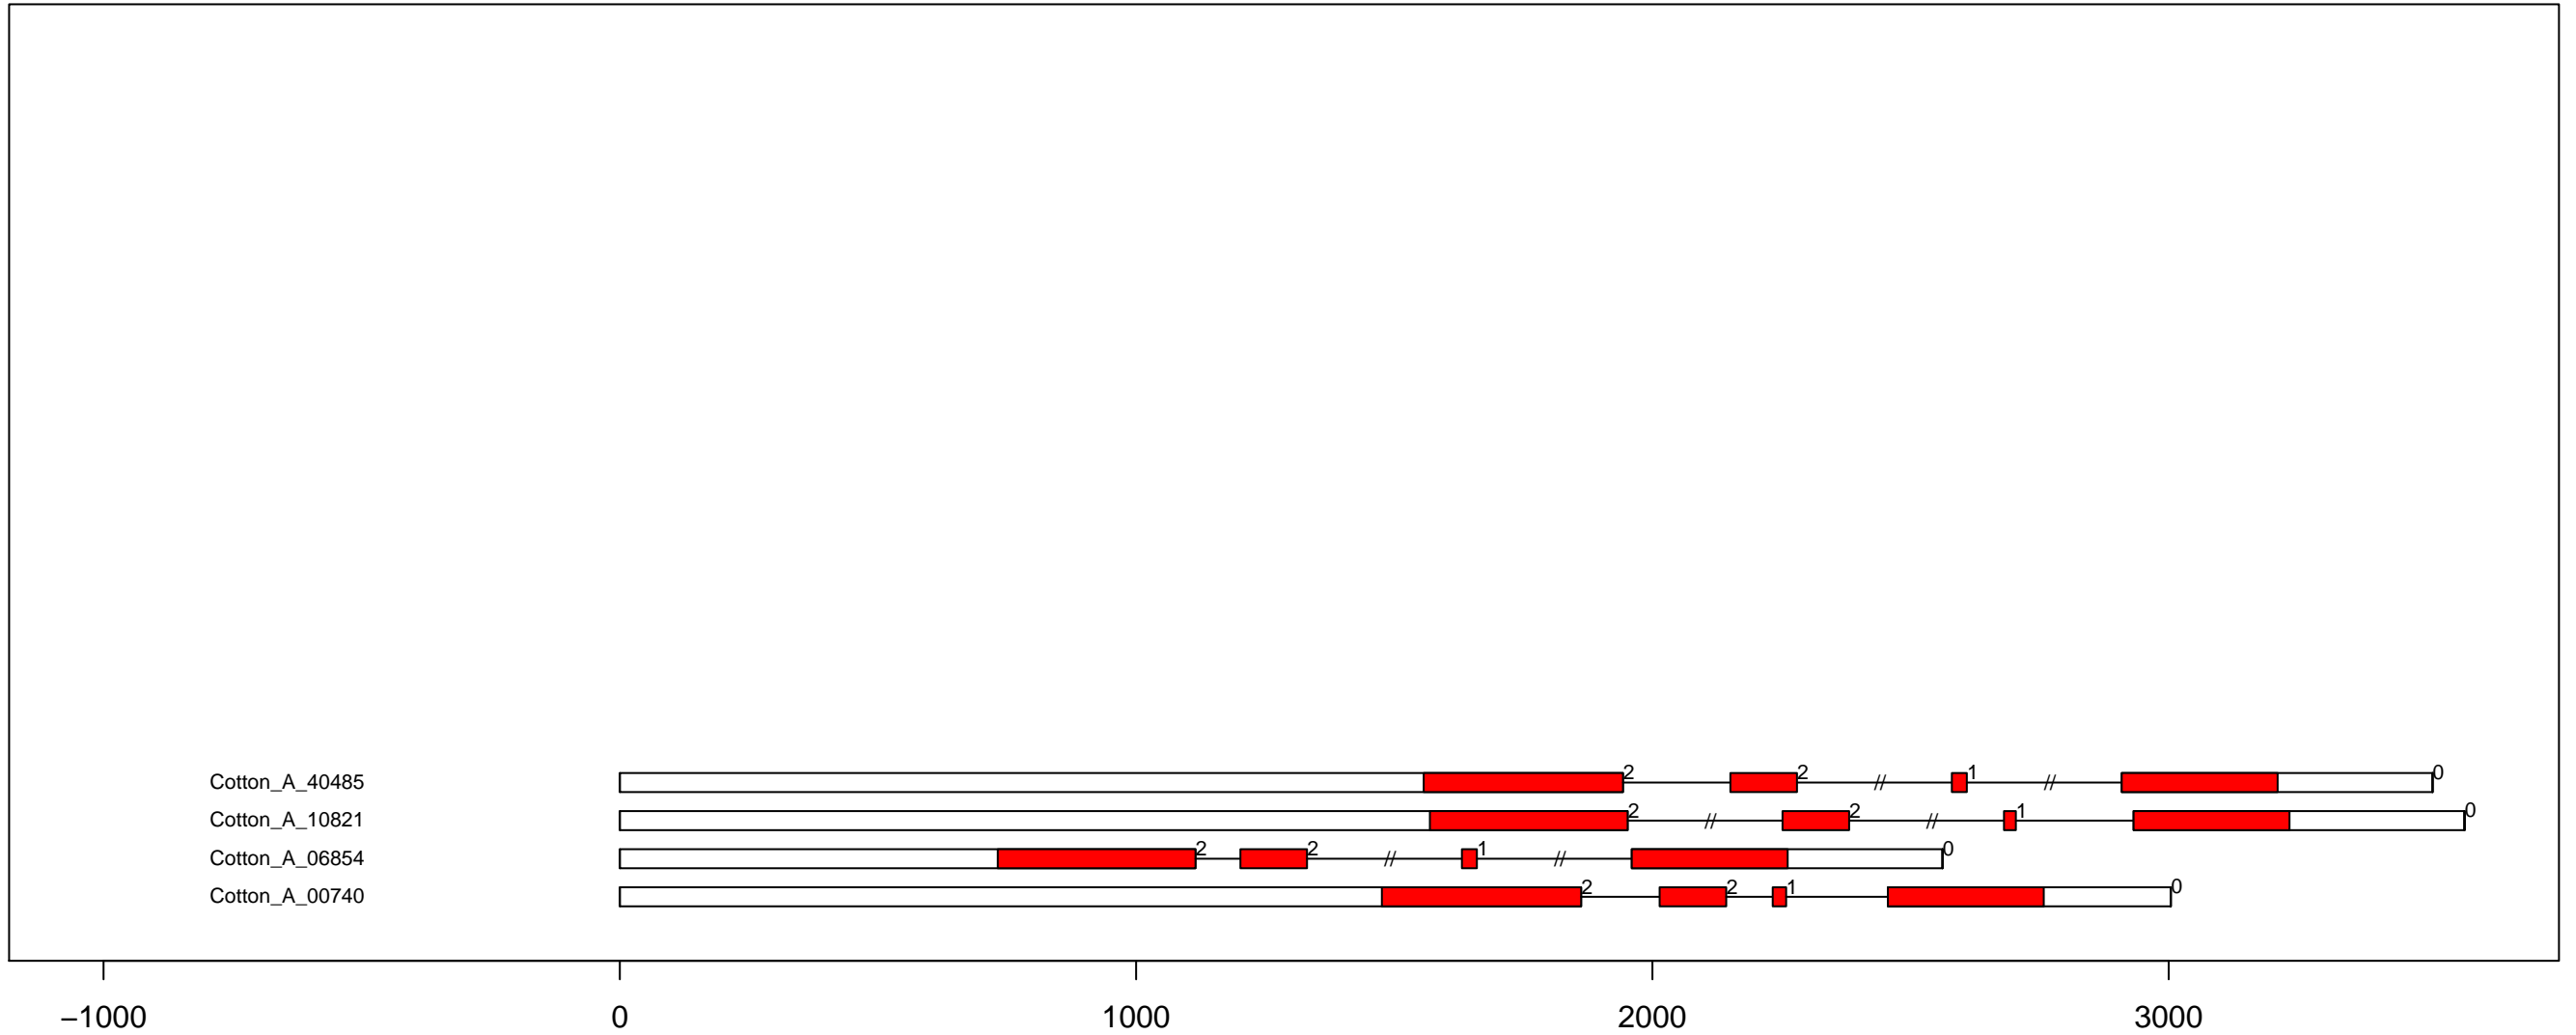

# G.ar RLK-Pelle\_LRR-XV exon-intron and domain diagram (all)

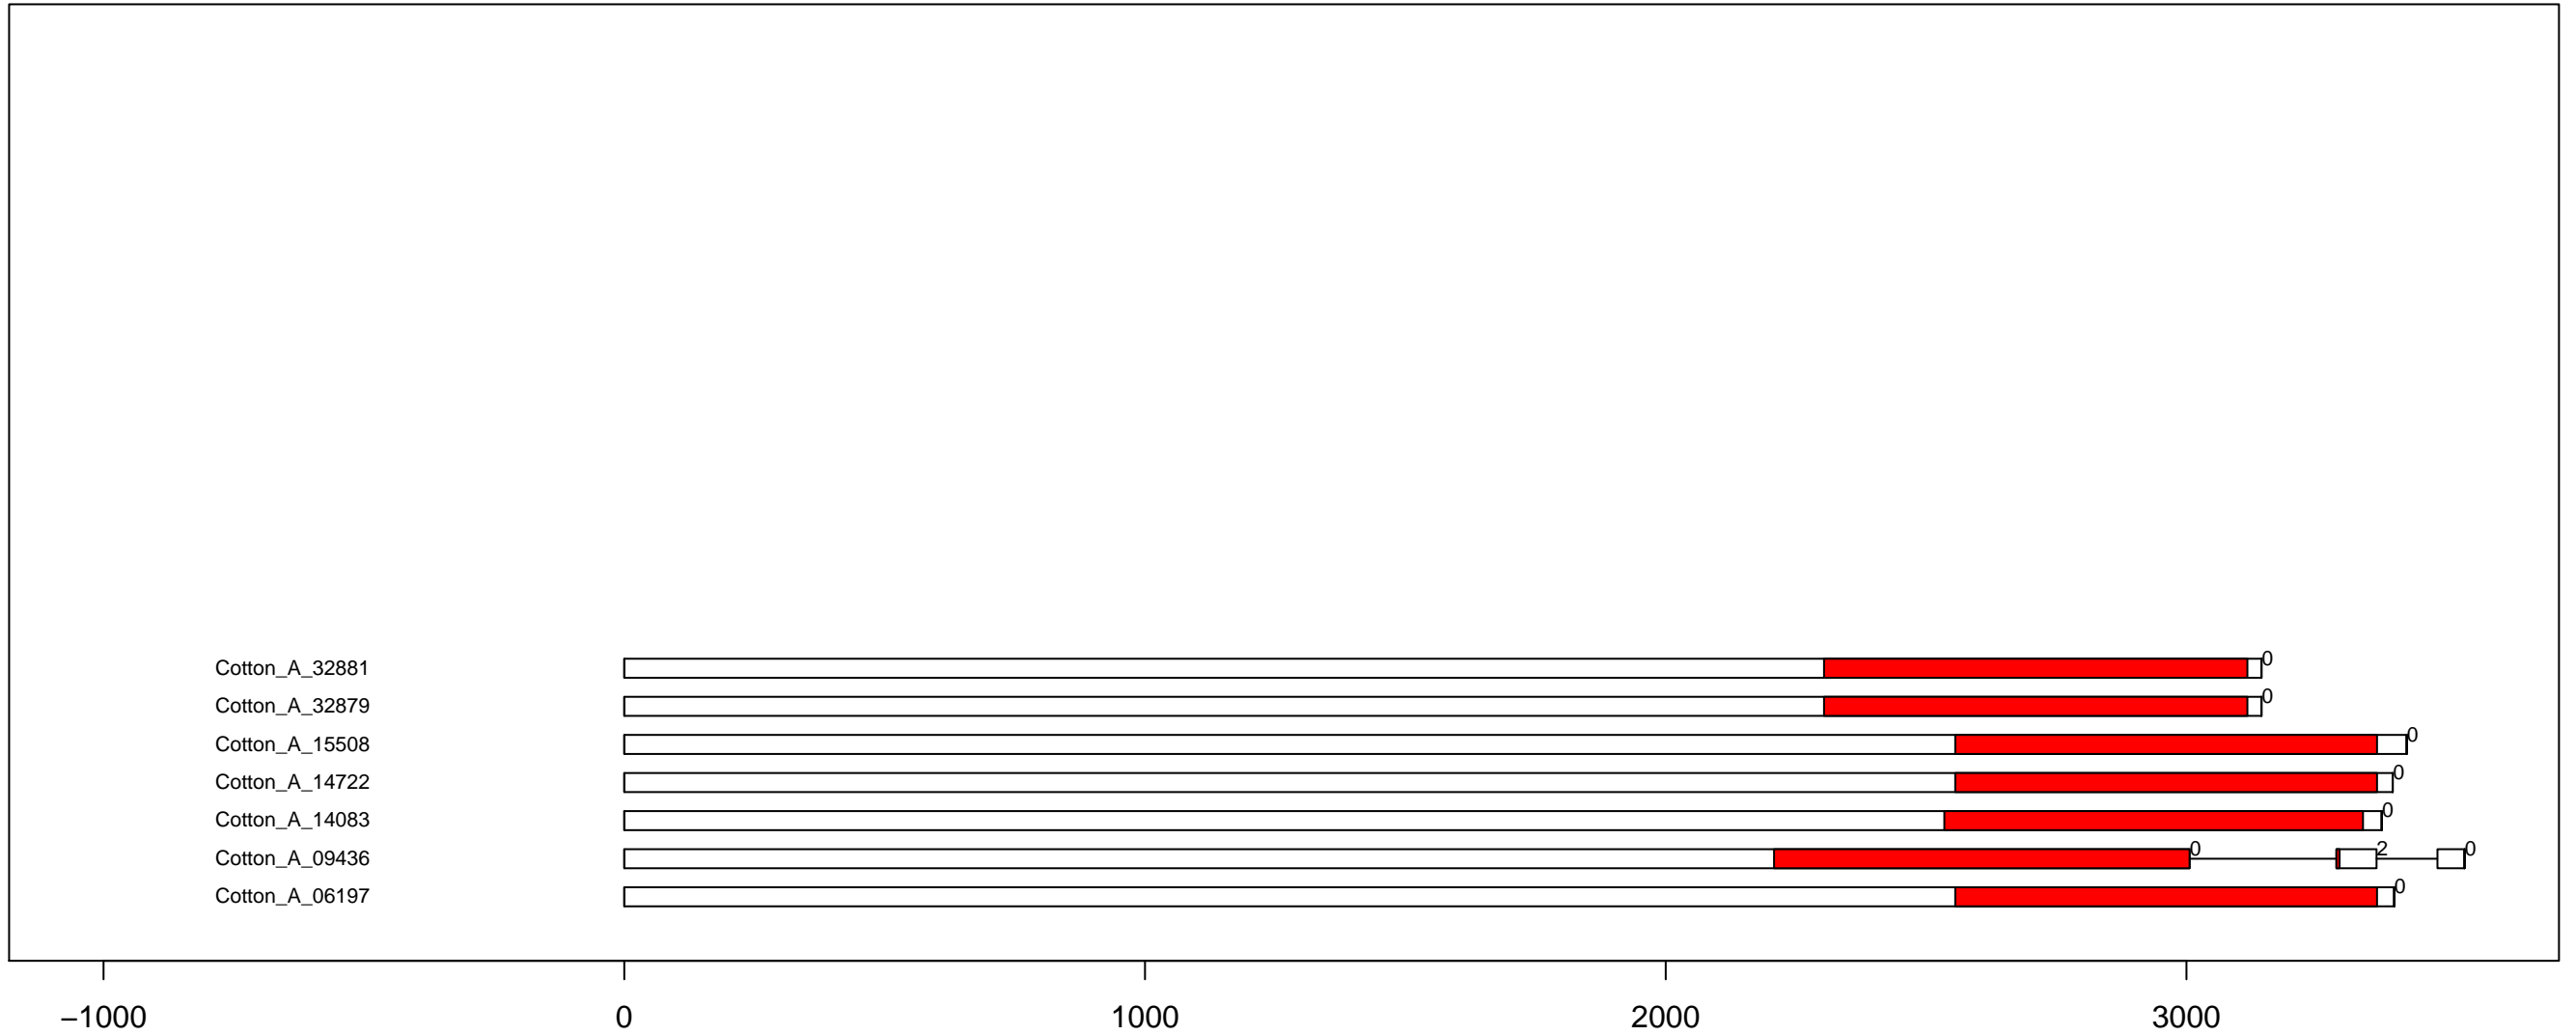

# G.ar RLK-Pelle\_LysM exon-intron and domain diagram (all)

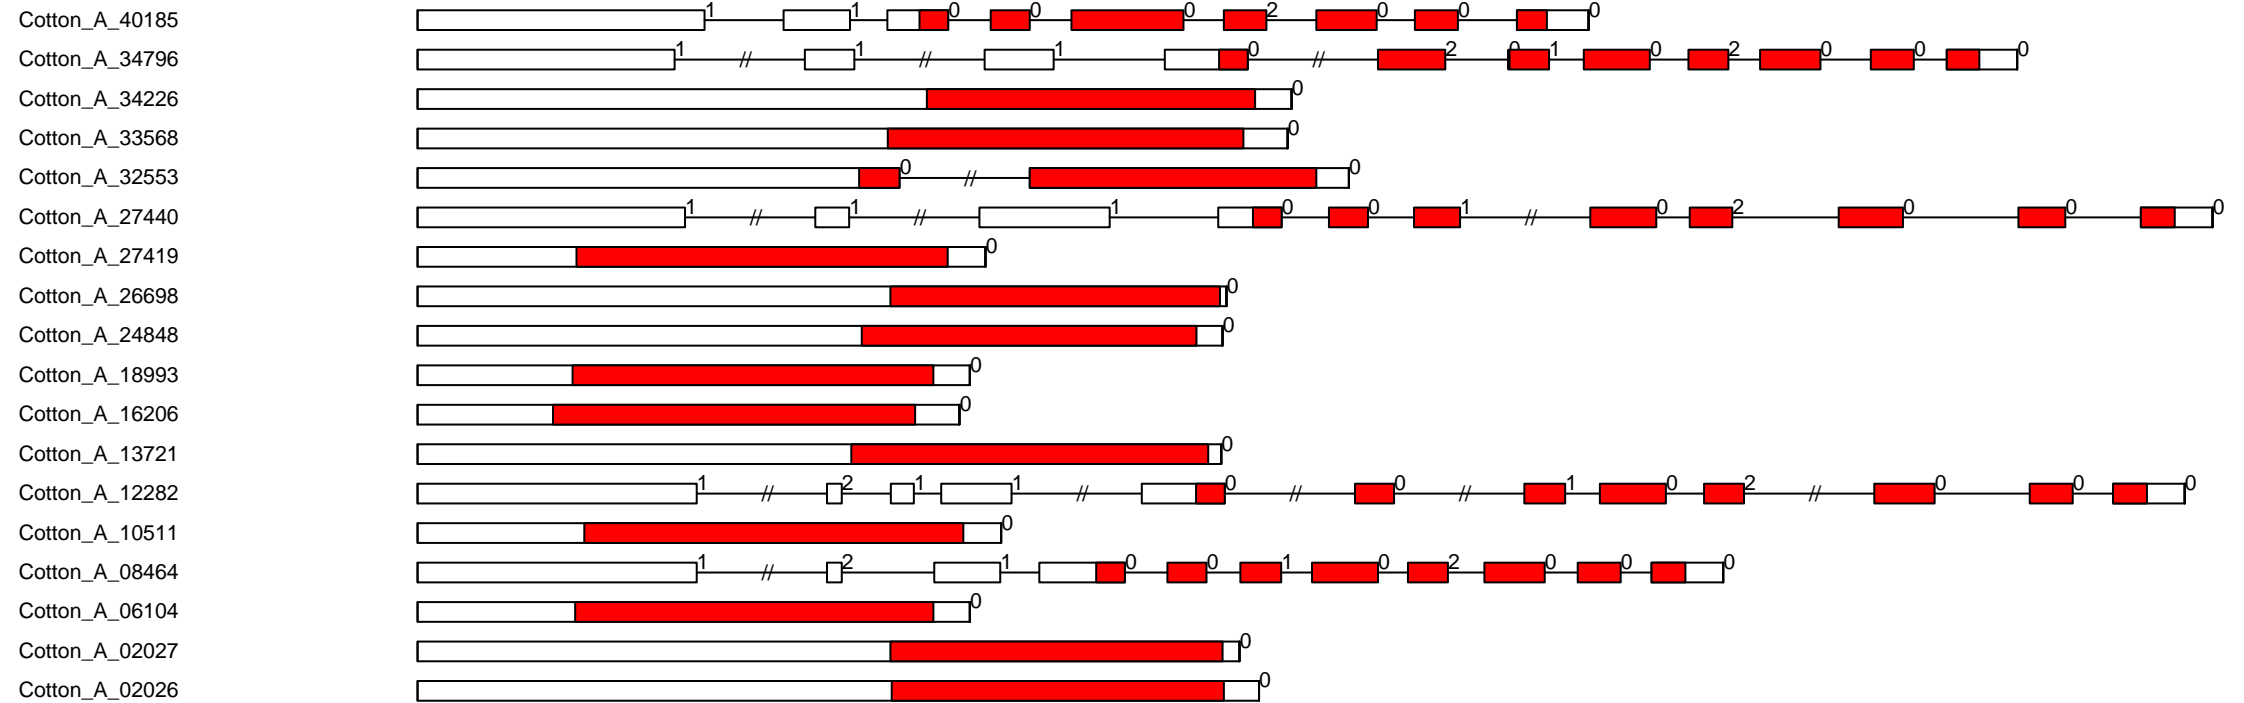

# G.ar RLK-Pelle\_PERK-1 exon-intron and domain diagram (all)

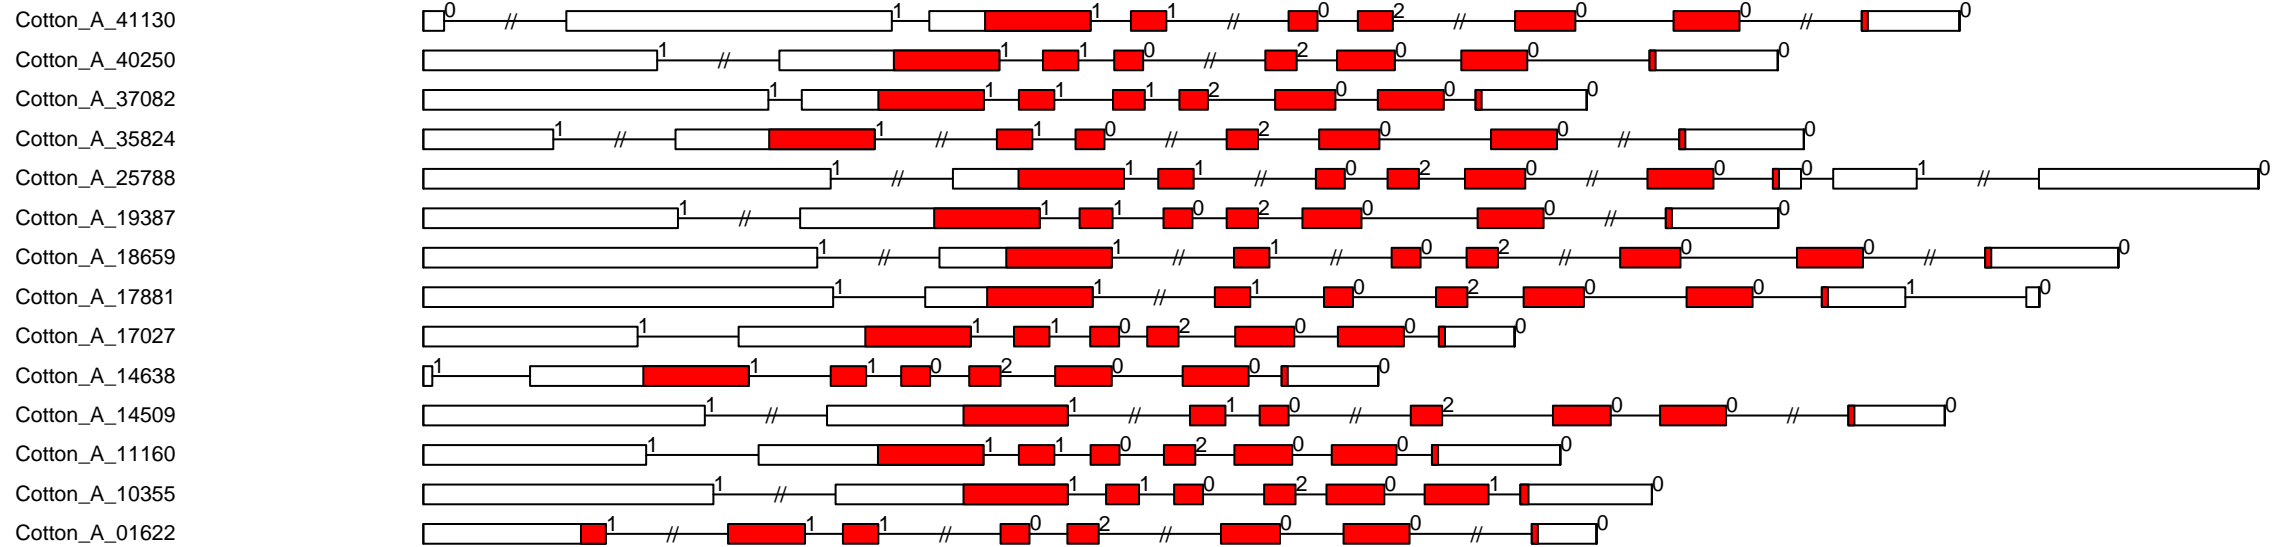

-1000

0

1000

2000

3000

4000



### G.ar RLK-Pelle\_PERK-2 exon-intron and domain diagram (all)

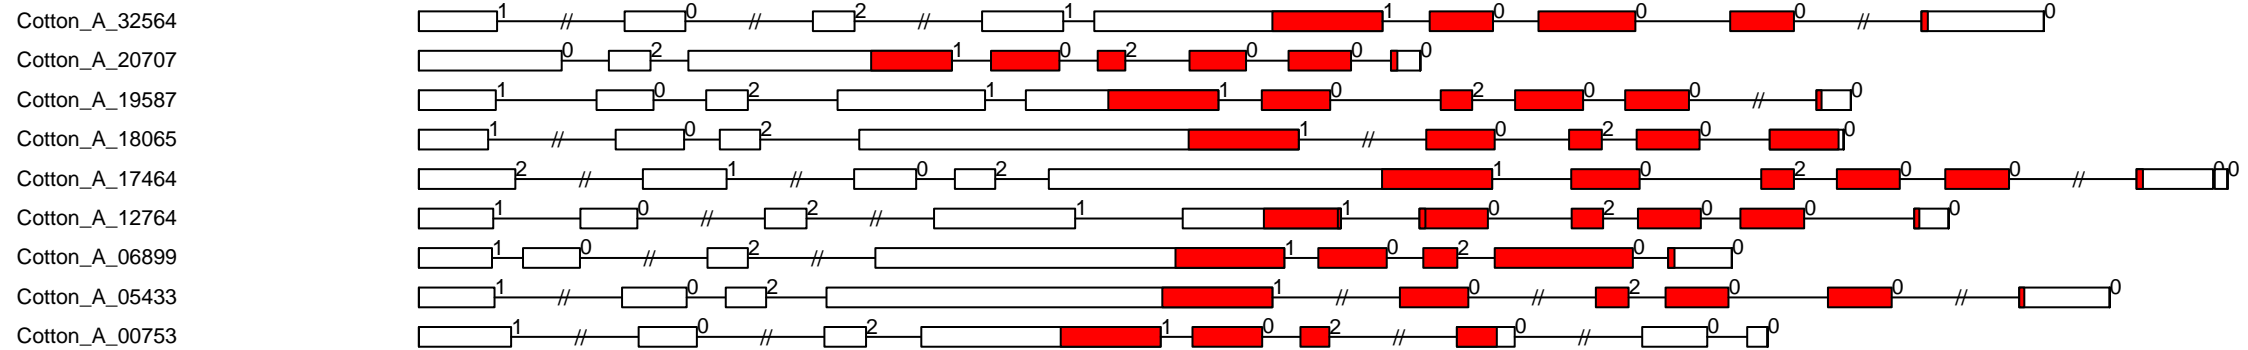

# G.ar RLK-Pelle\_RKF3 exon-intron and domain diagram (all)

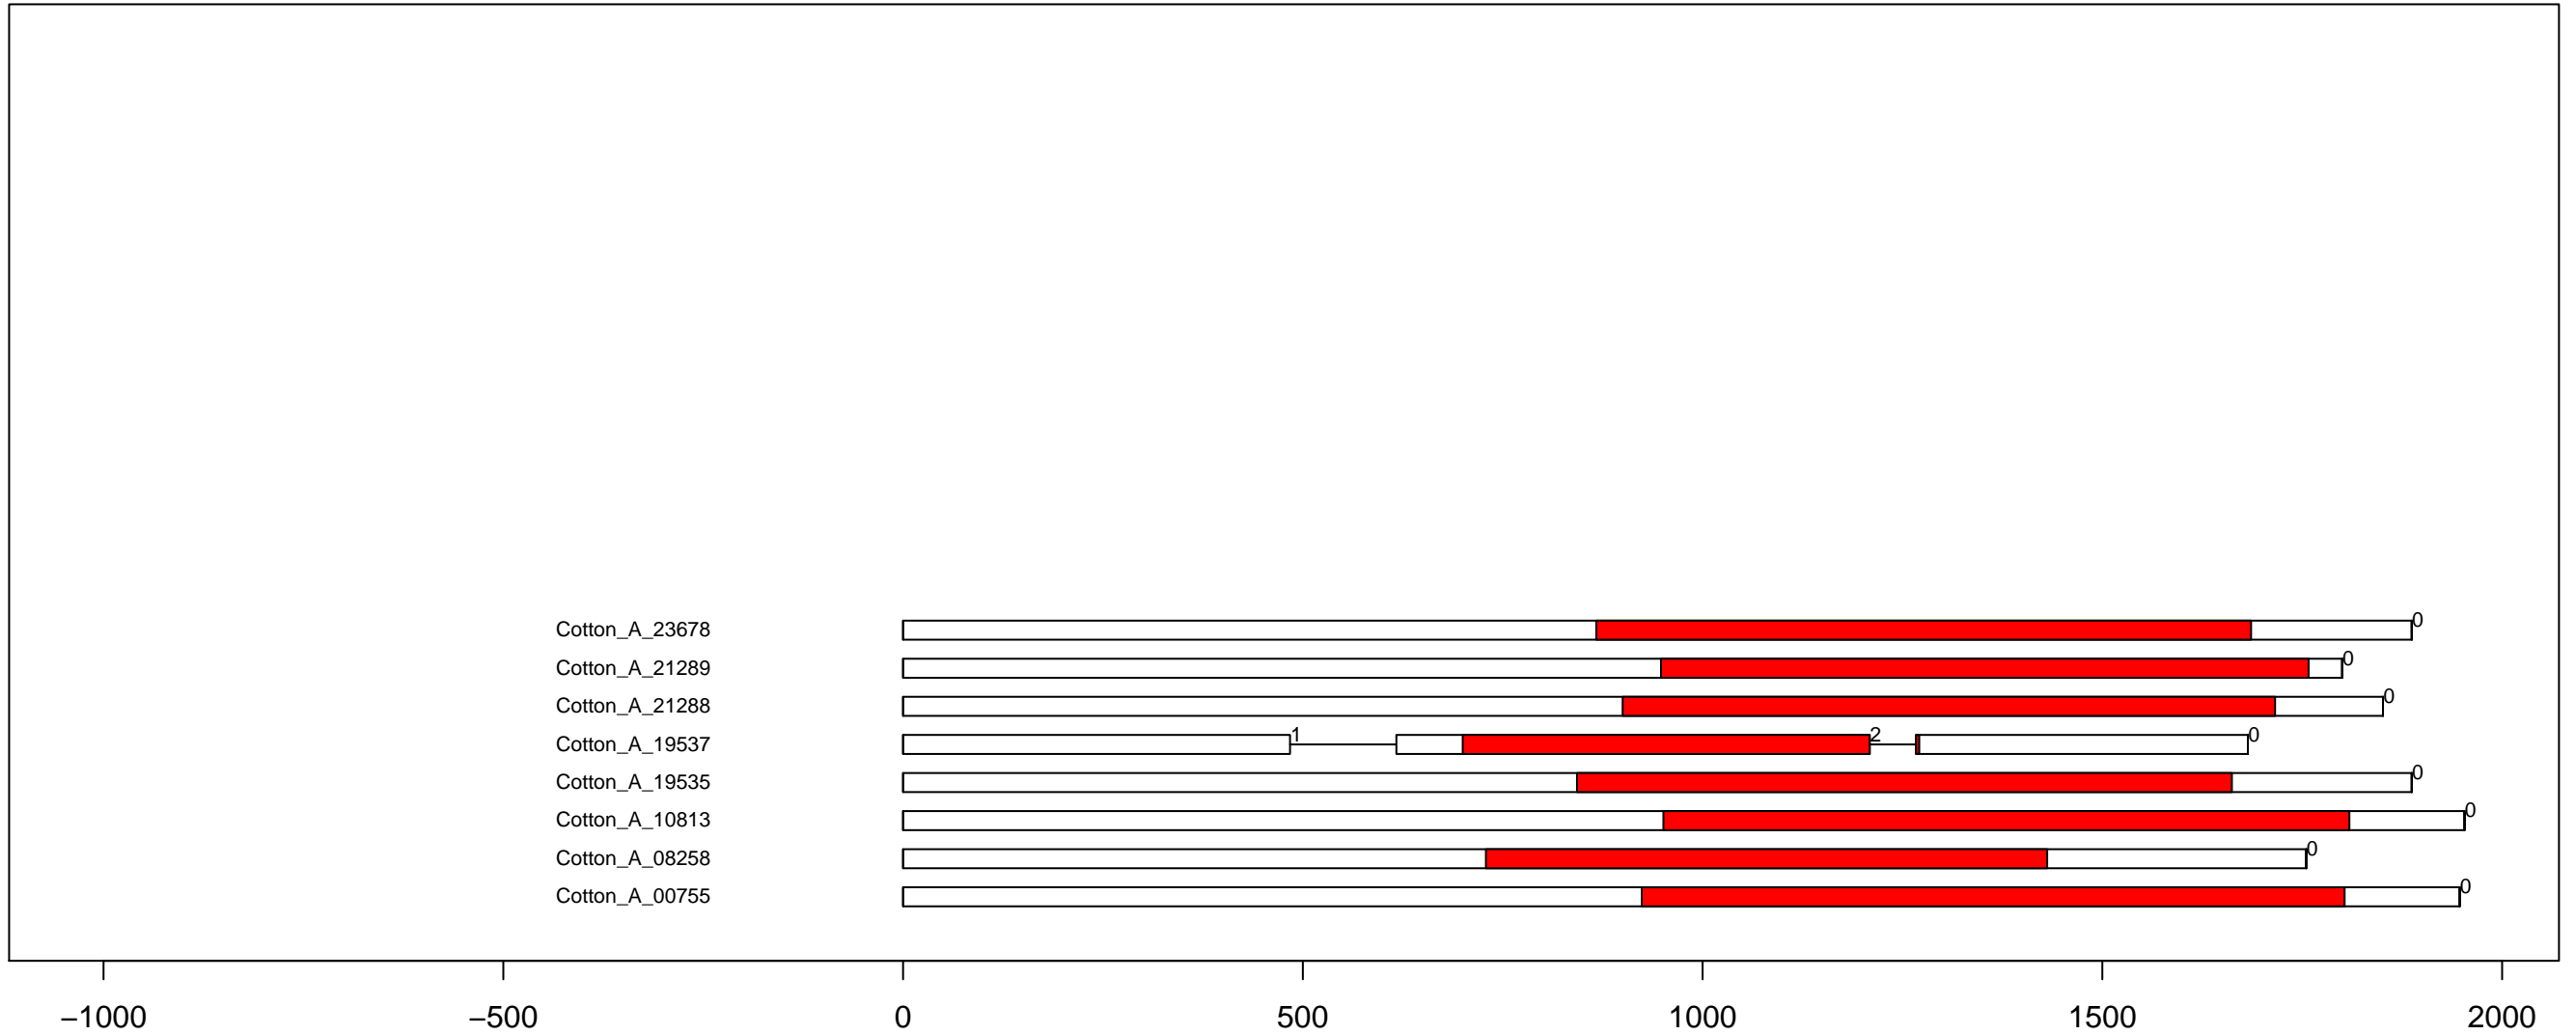

# G.ar RLK-Pelle\_RLCK-II exon-intron and domain diagram (all)

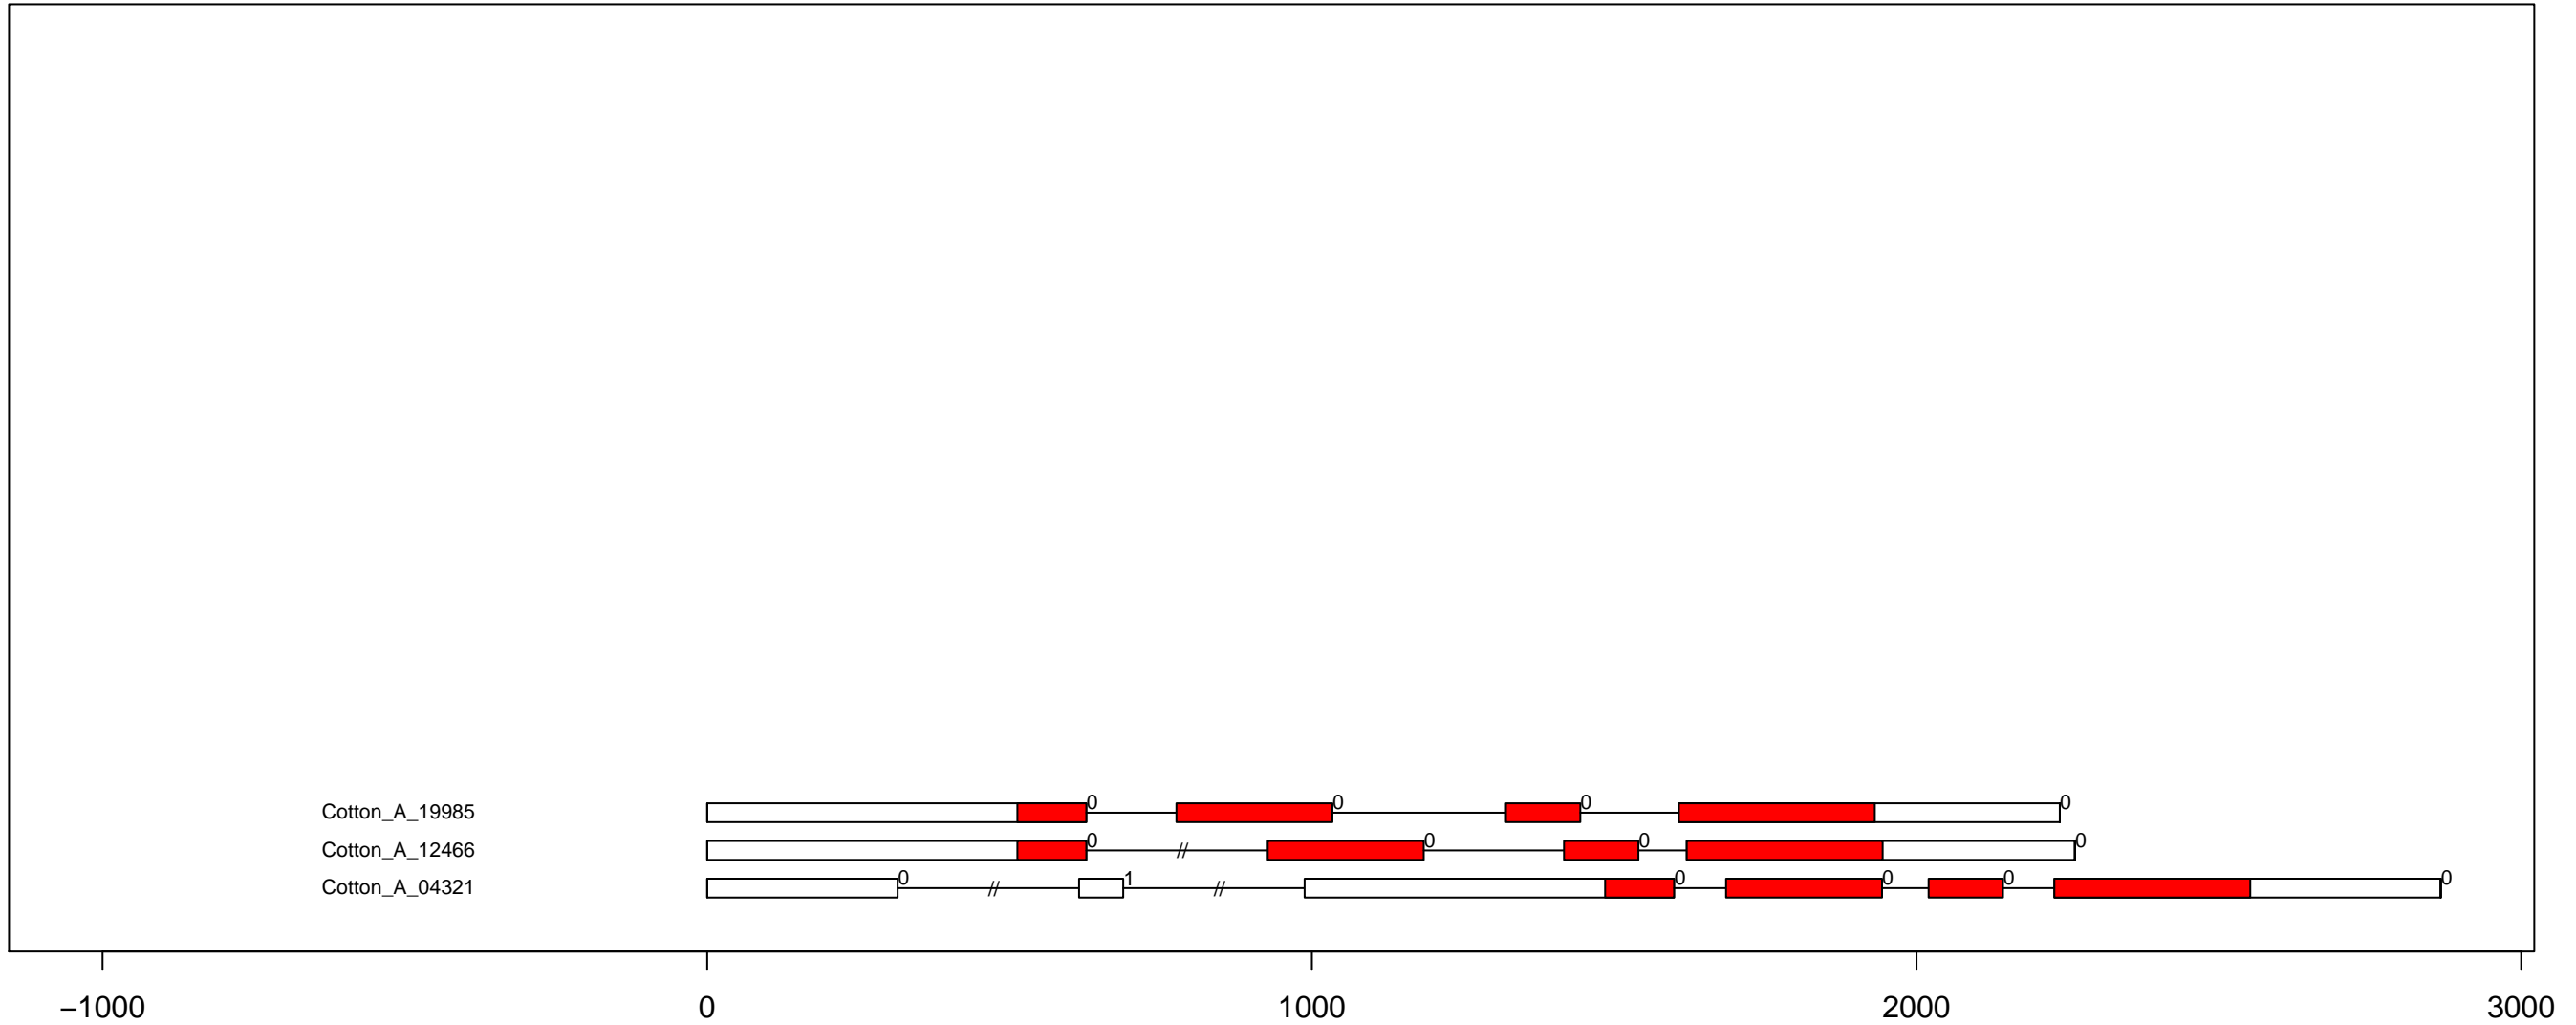

# G.ar RLK-Pelle\_RLCK-IV exon-intron and domain diagram (all)

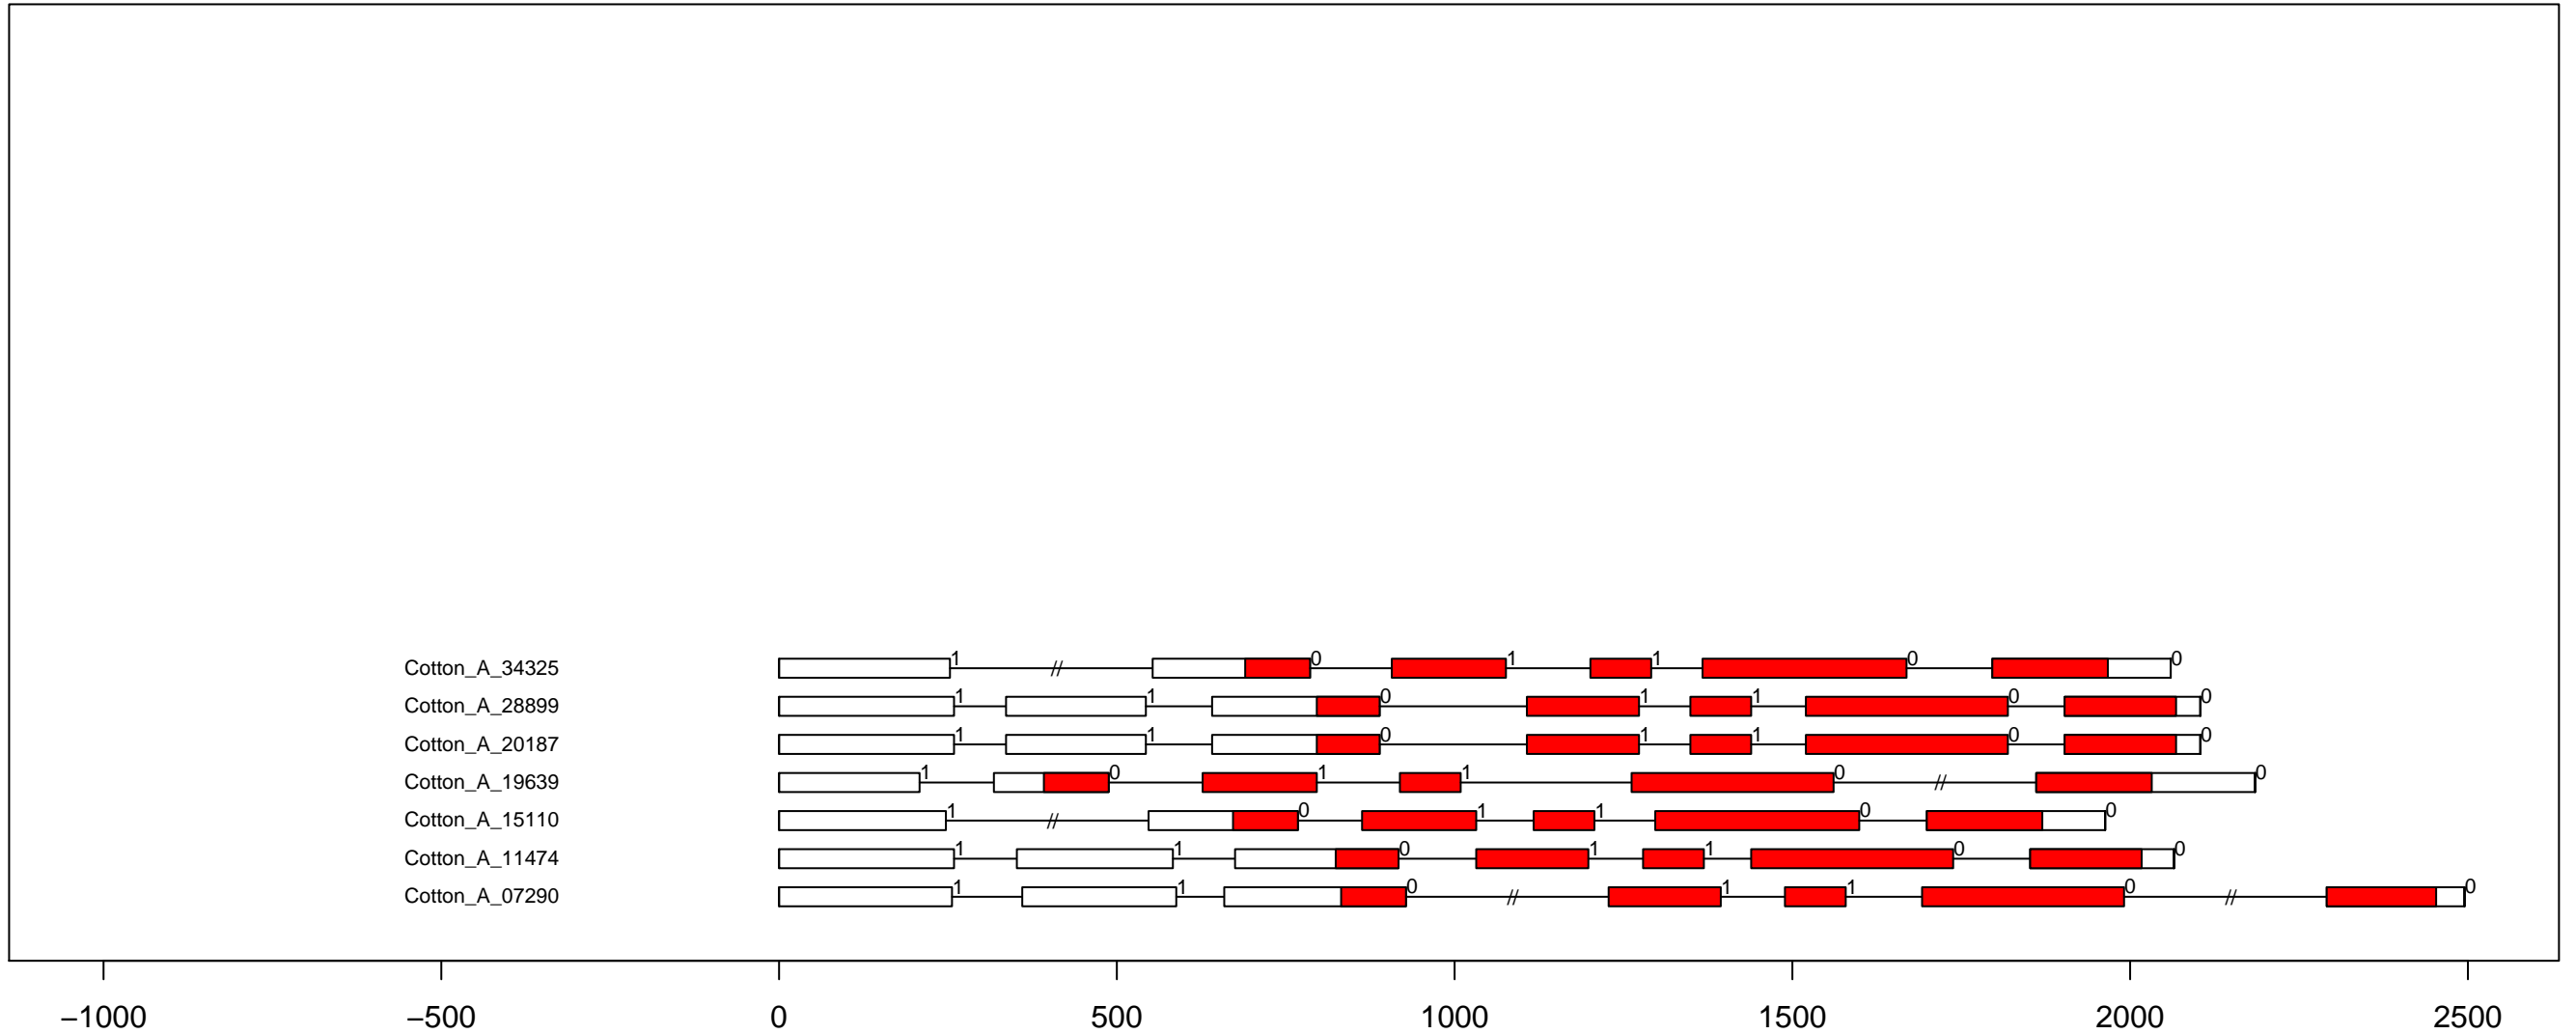

# G.ar RLK-Pelle\_RLCK-IXa exon-intron and domain diagram (all)

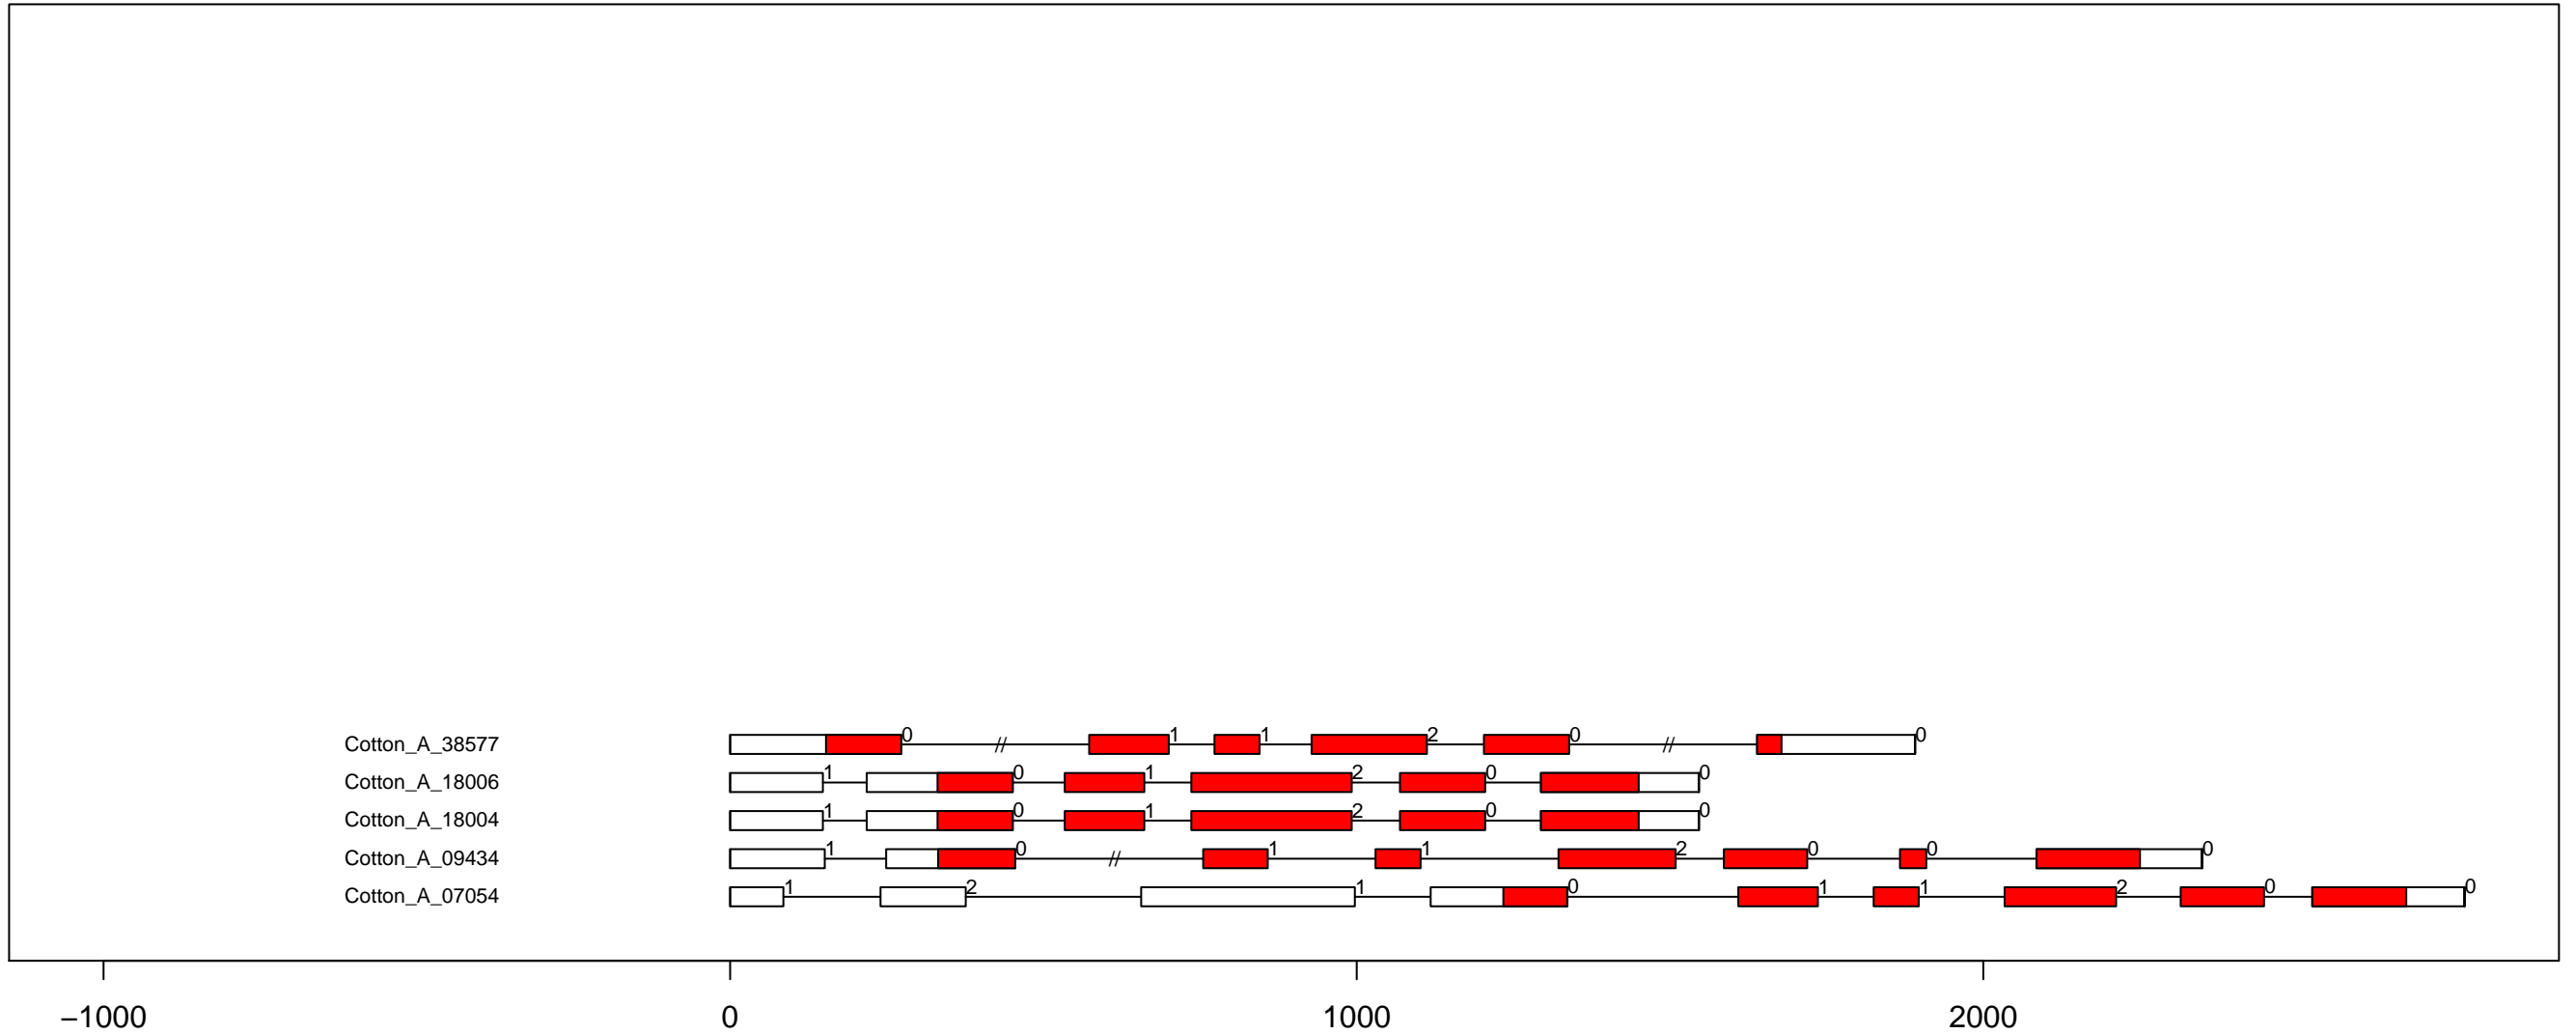

# G.ar RLK-Pelle\_RLCK-IXb exon-intron and domain diagram (all)

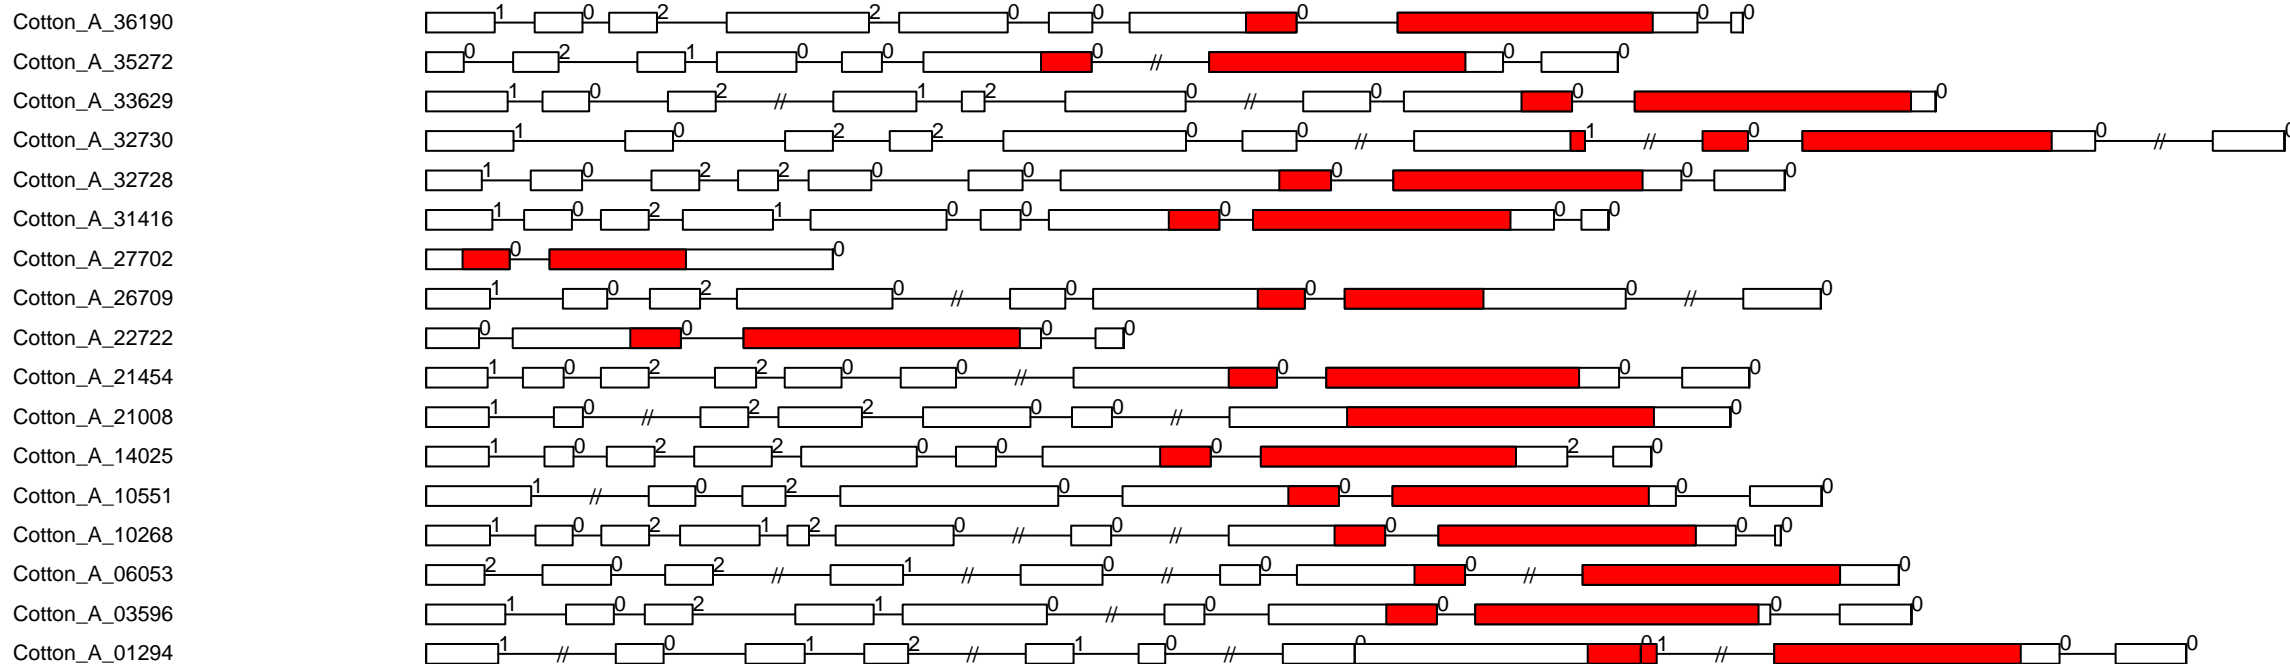

-1000

0

1000

2000

3000

4000

# G.ar RLK-Pelle\_RLCK-Os exon-intron and domain diagram (all)

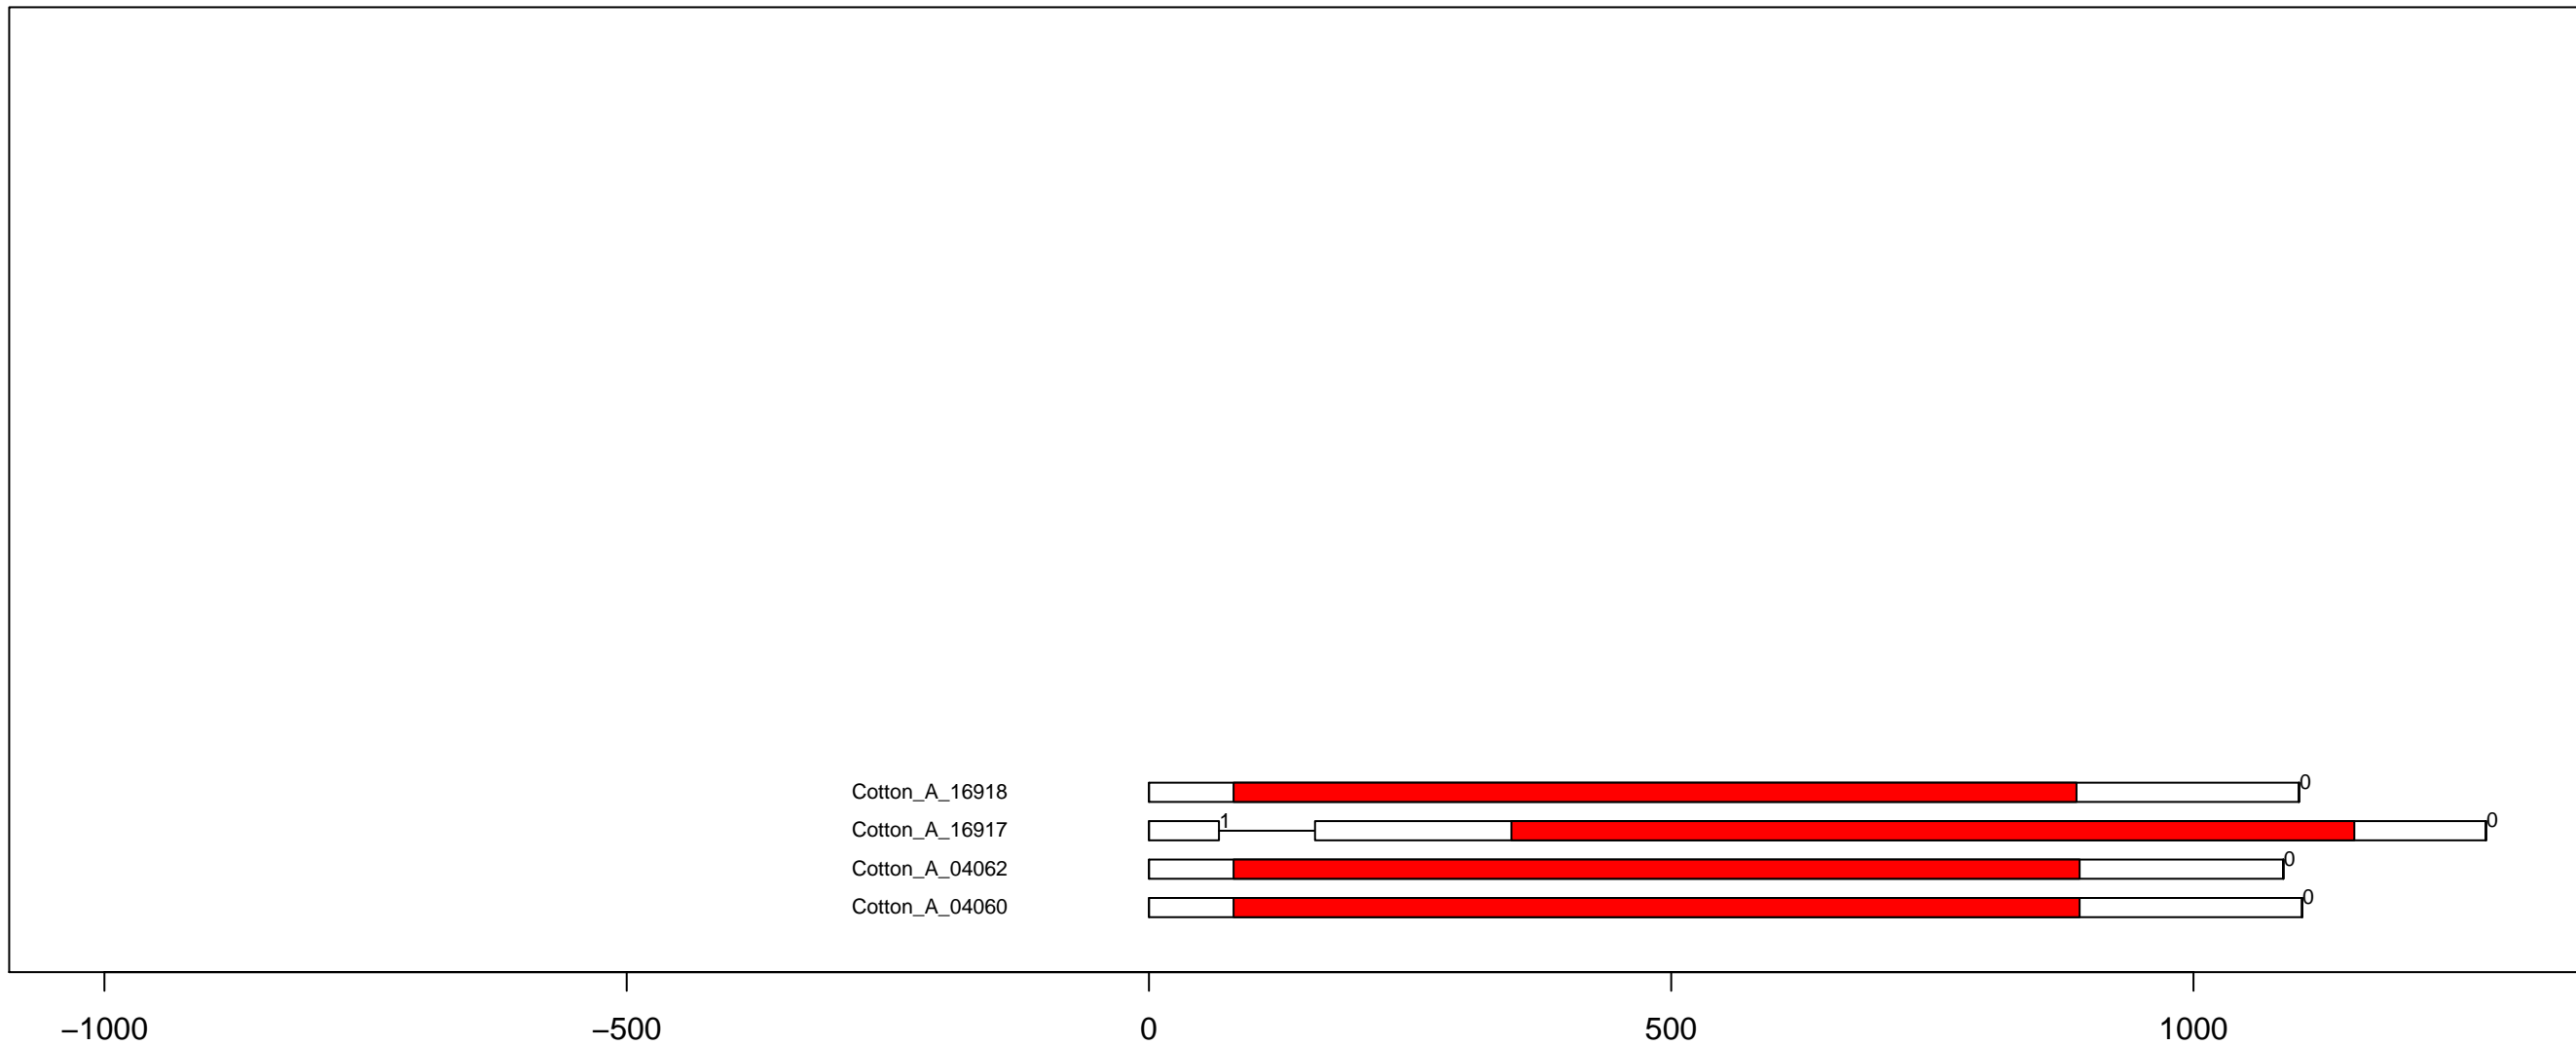

### G.ar RLK-Pelle\_RLCK-VIIa-1 exon-intron and domain diagram (all)

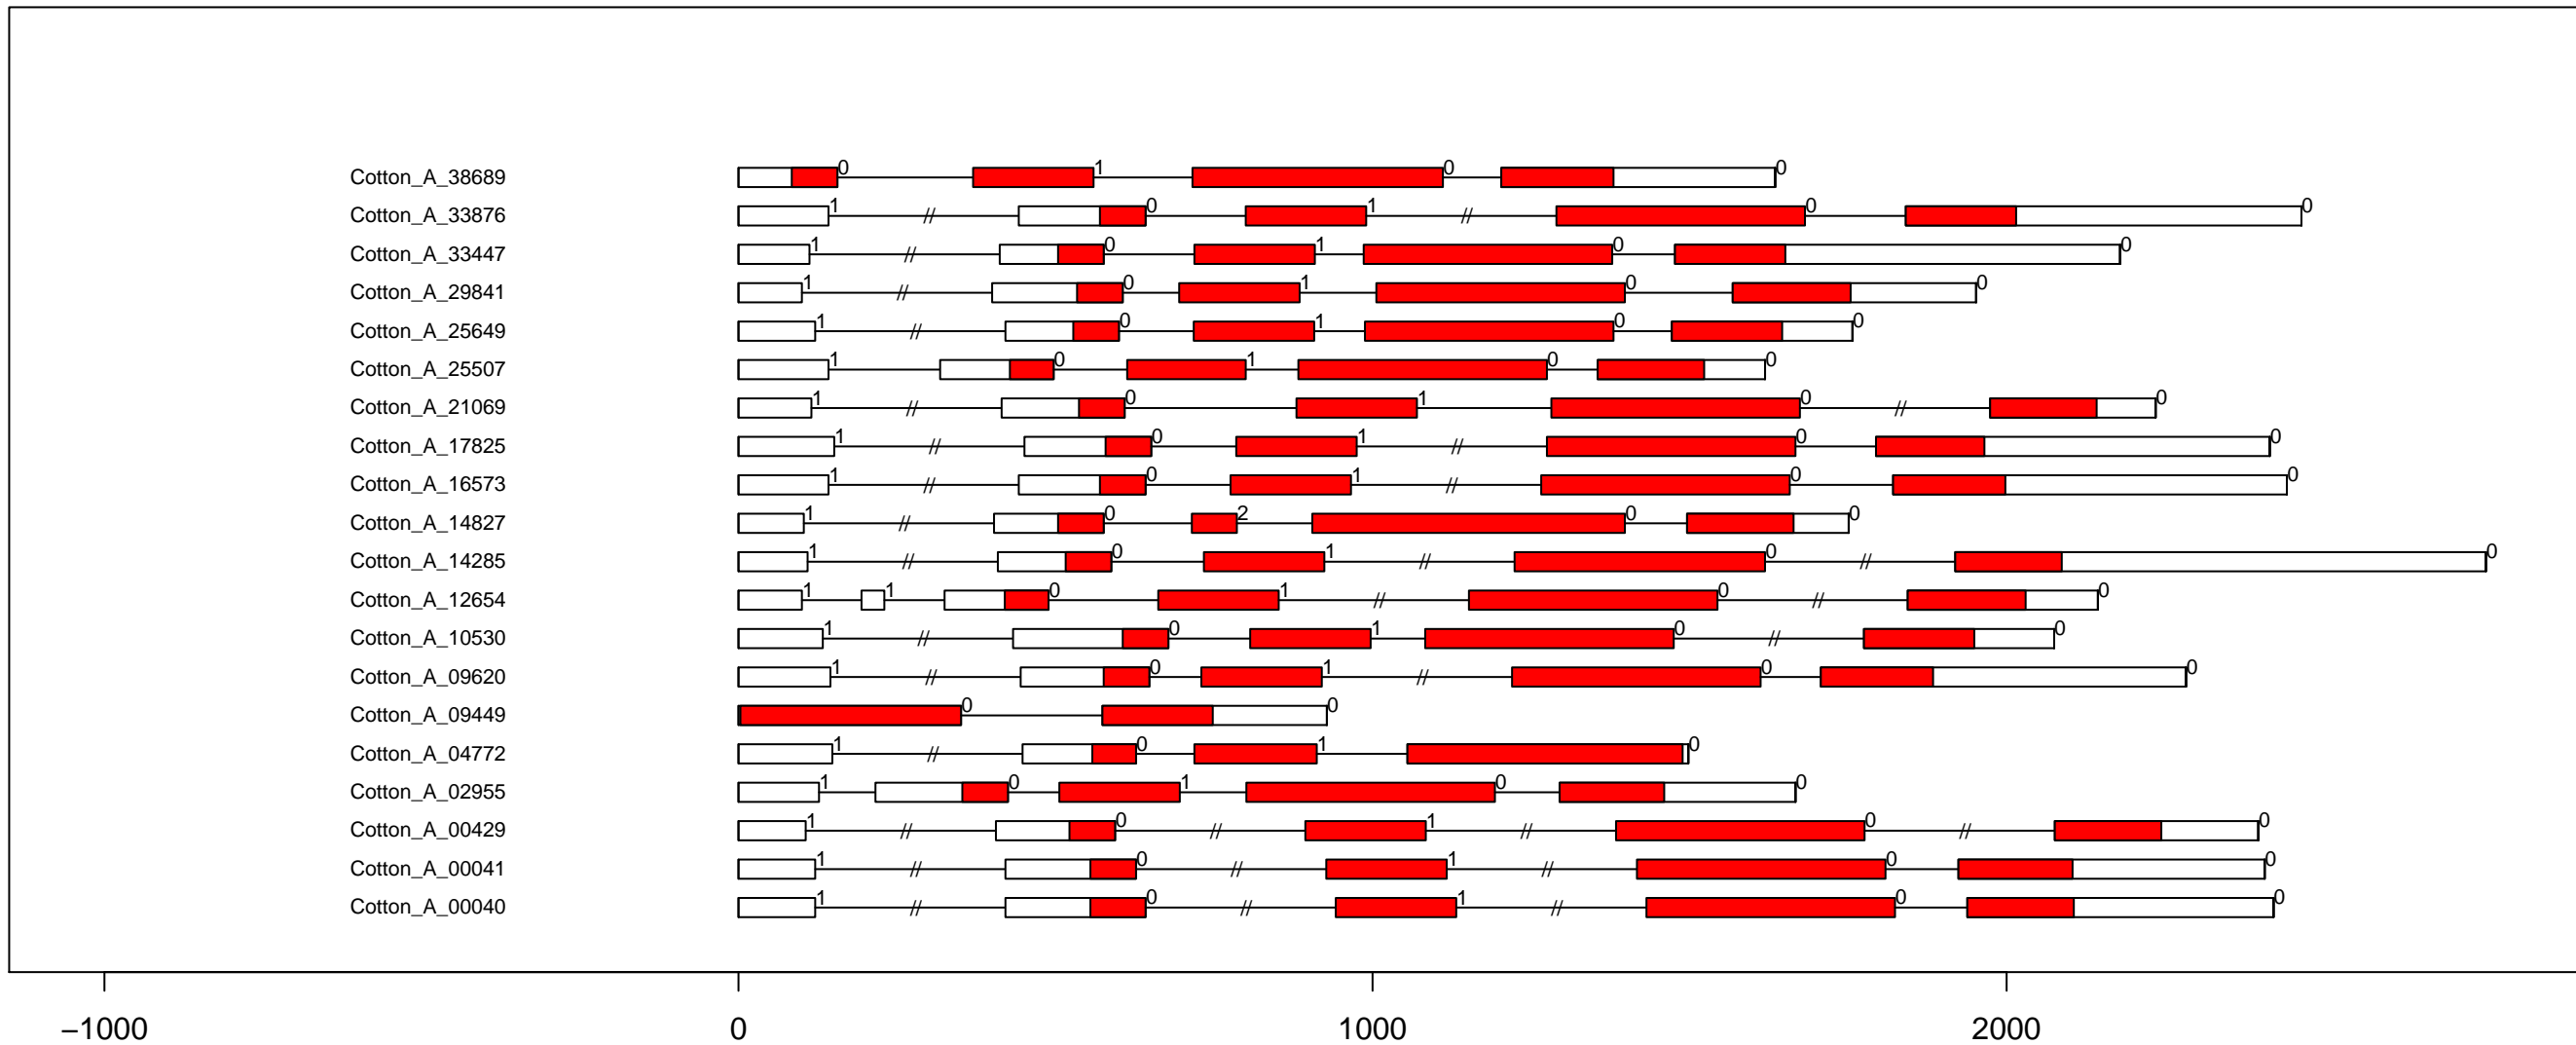



### G.ar RLK-Pelle\_RLCK-VIIa-2 exon-intron and domain diagram (part 1)

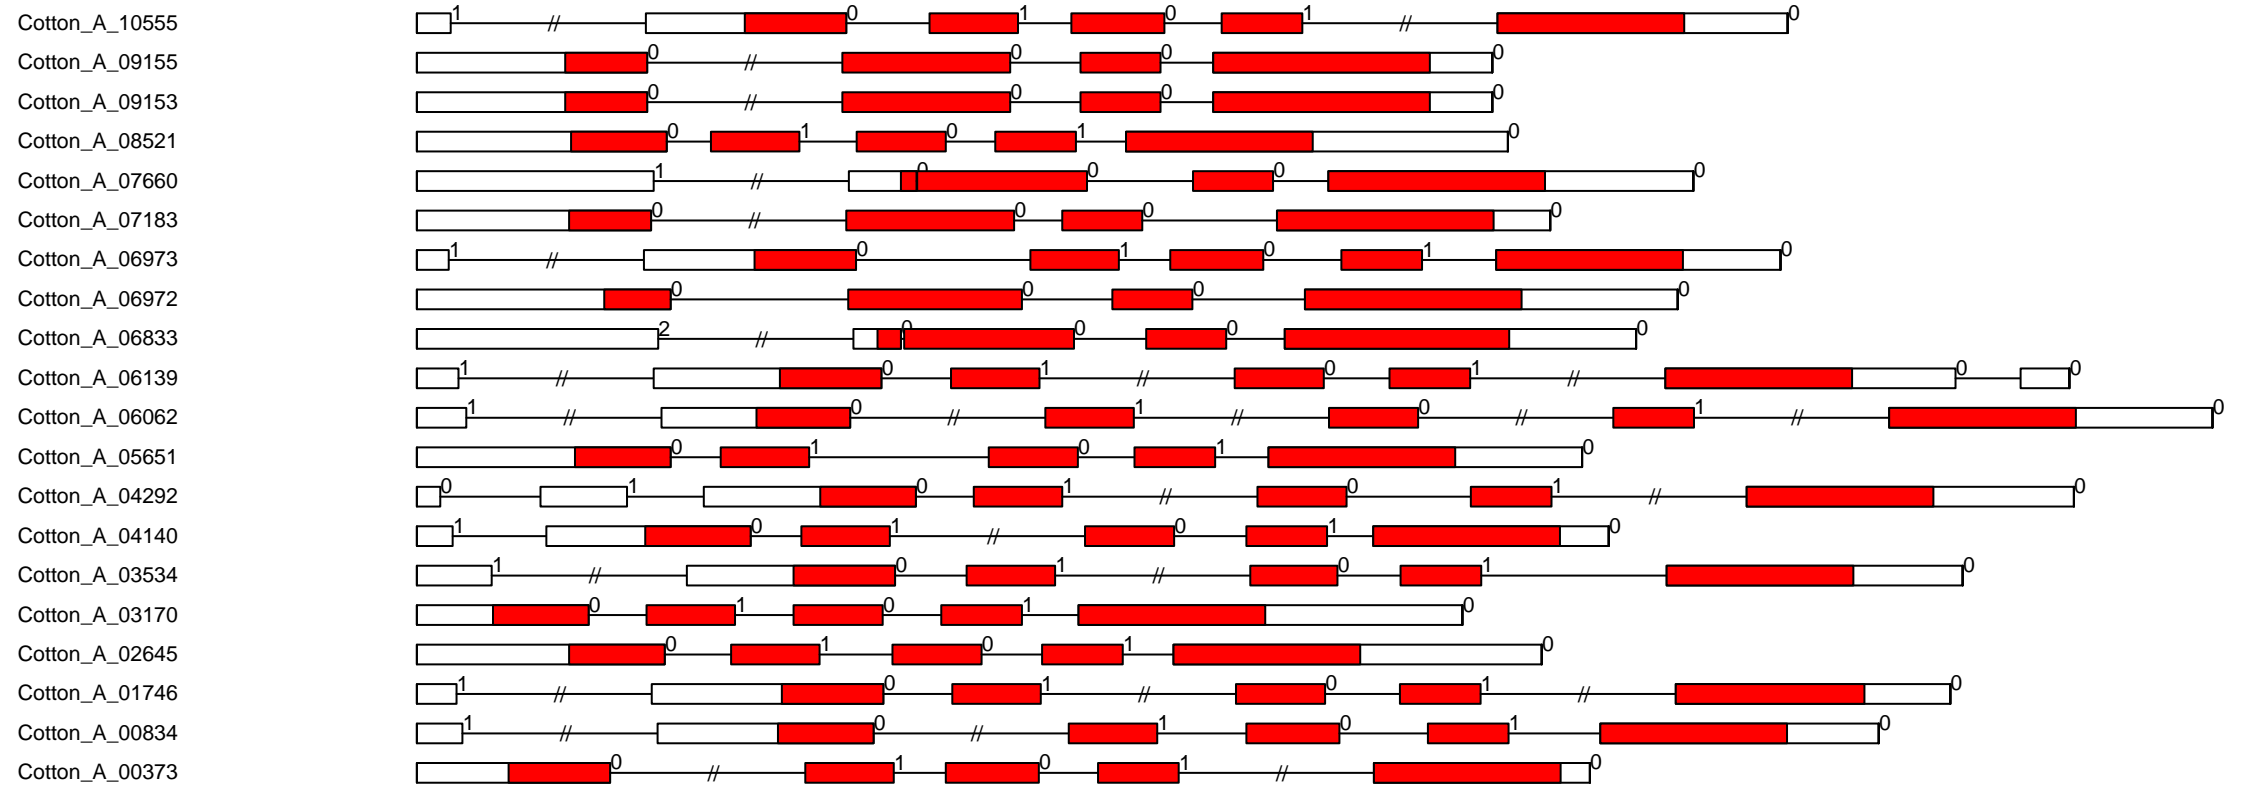

-1000

0

1000

2000

## G.ar RLK-Pelle\_RLCK-VIIa-2 exon-intron and domain diagram (part 2)

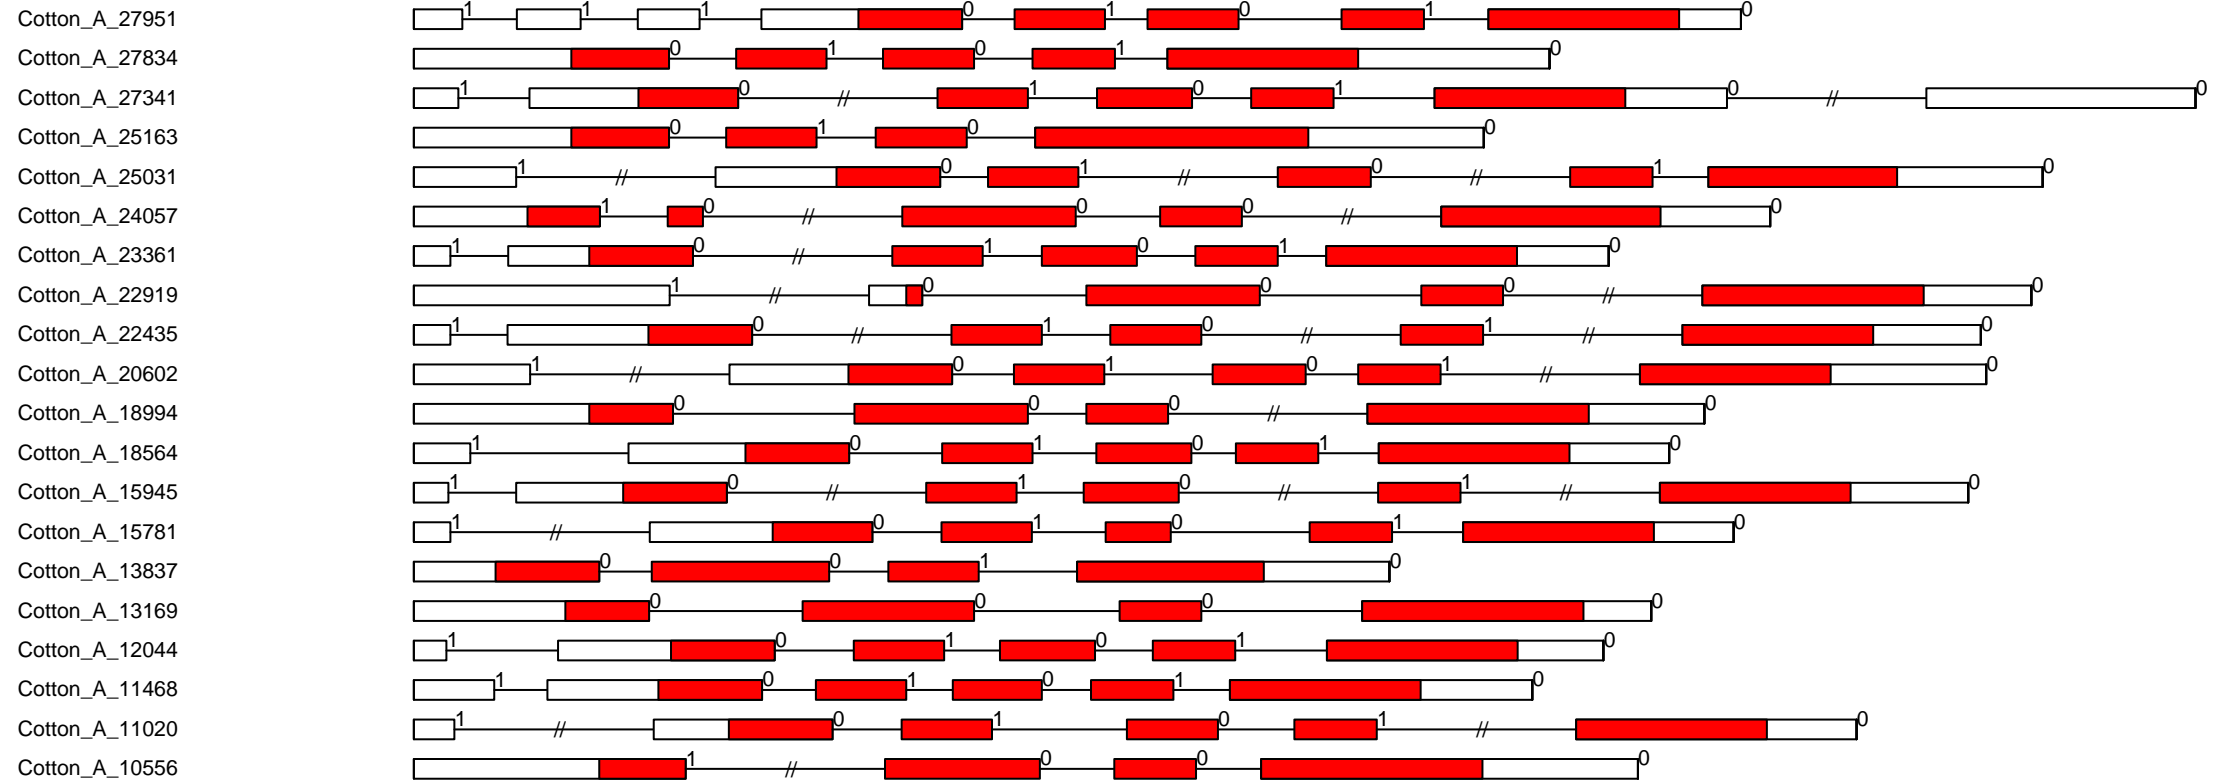

-1000

0

1000

2000

### G.ar RLK-Pelle\_RLCK-VIIa-2 exon-intron and domain diagram (part 3)

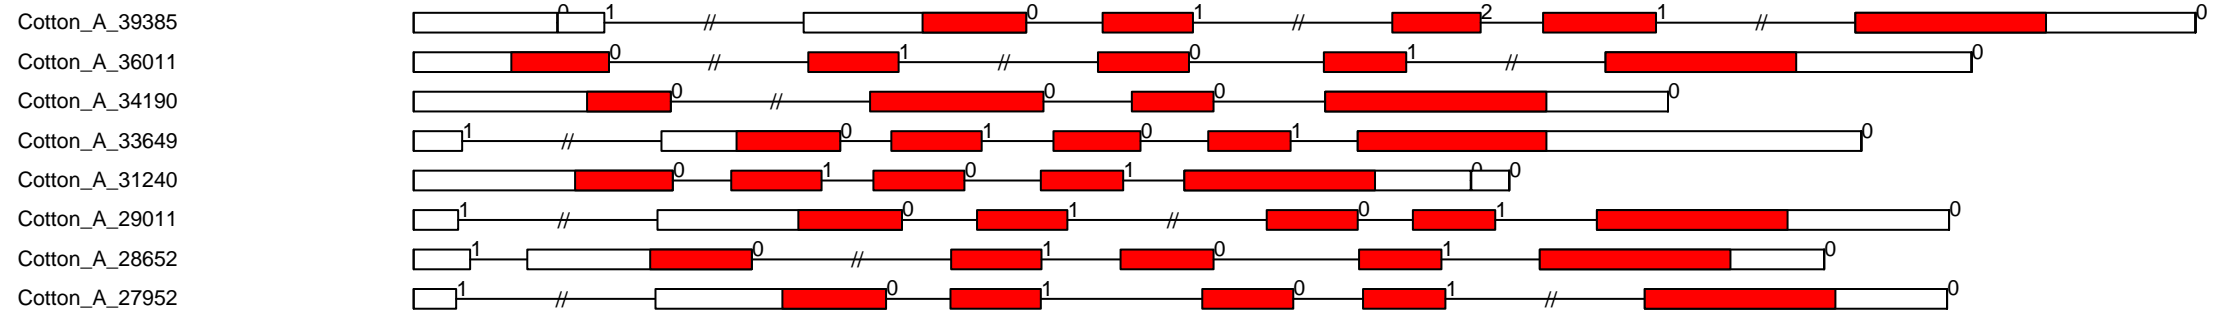

-1000

0

1000

2000

# G.ar RLK-Pelle\_RLCK-VIIb exon-intron and domain diagram (all)

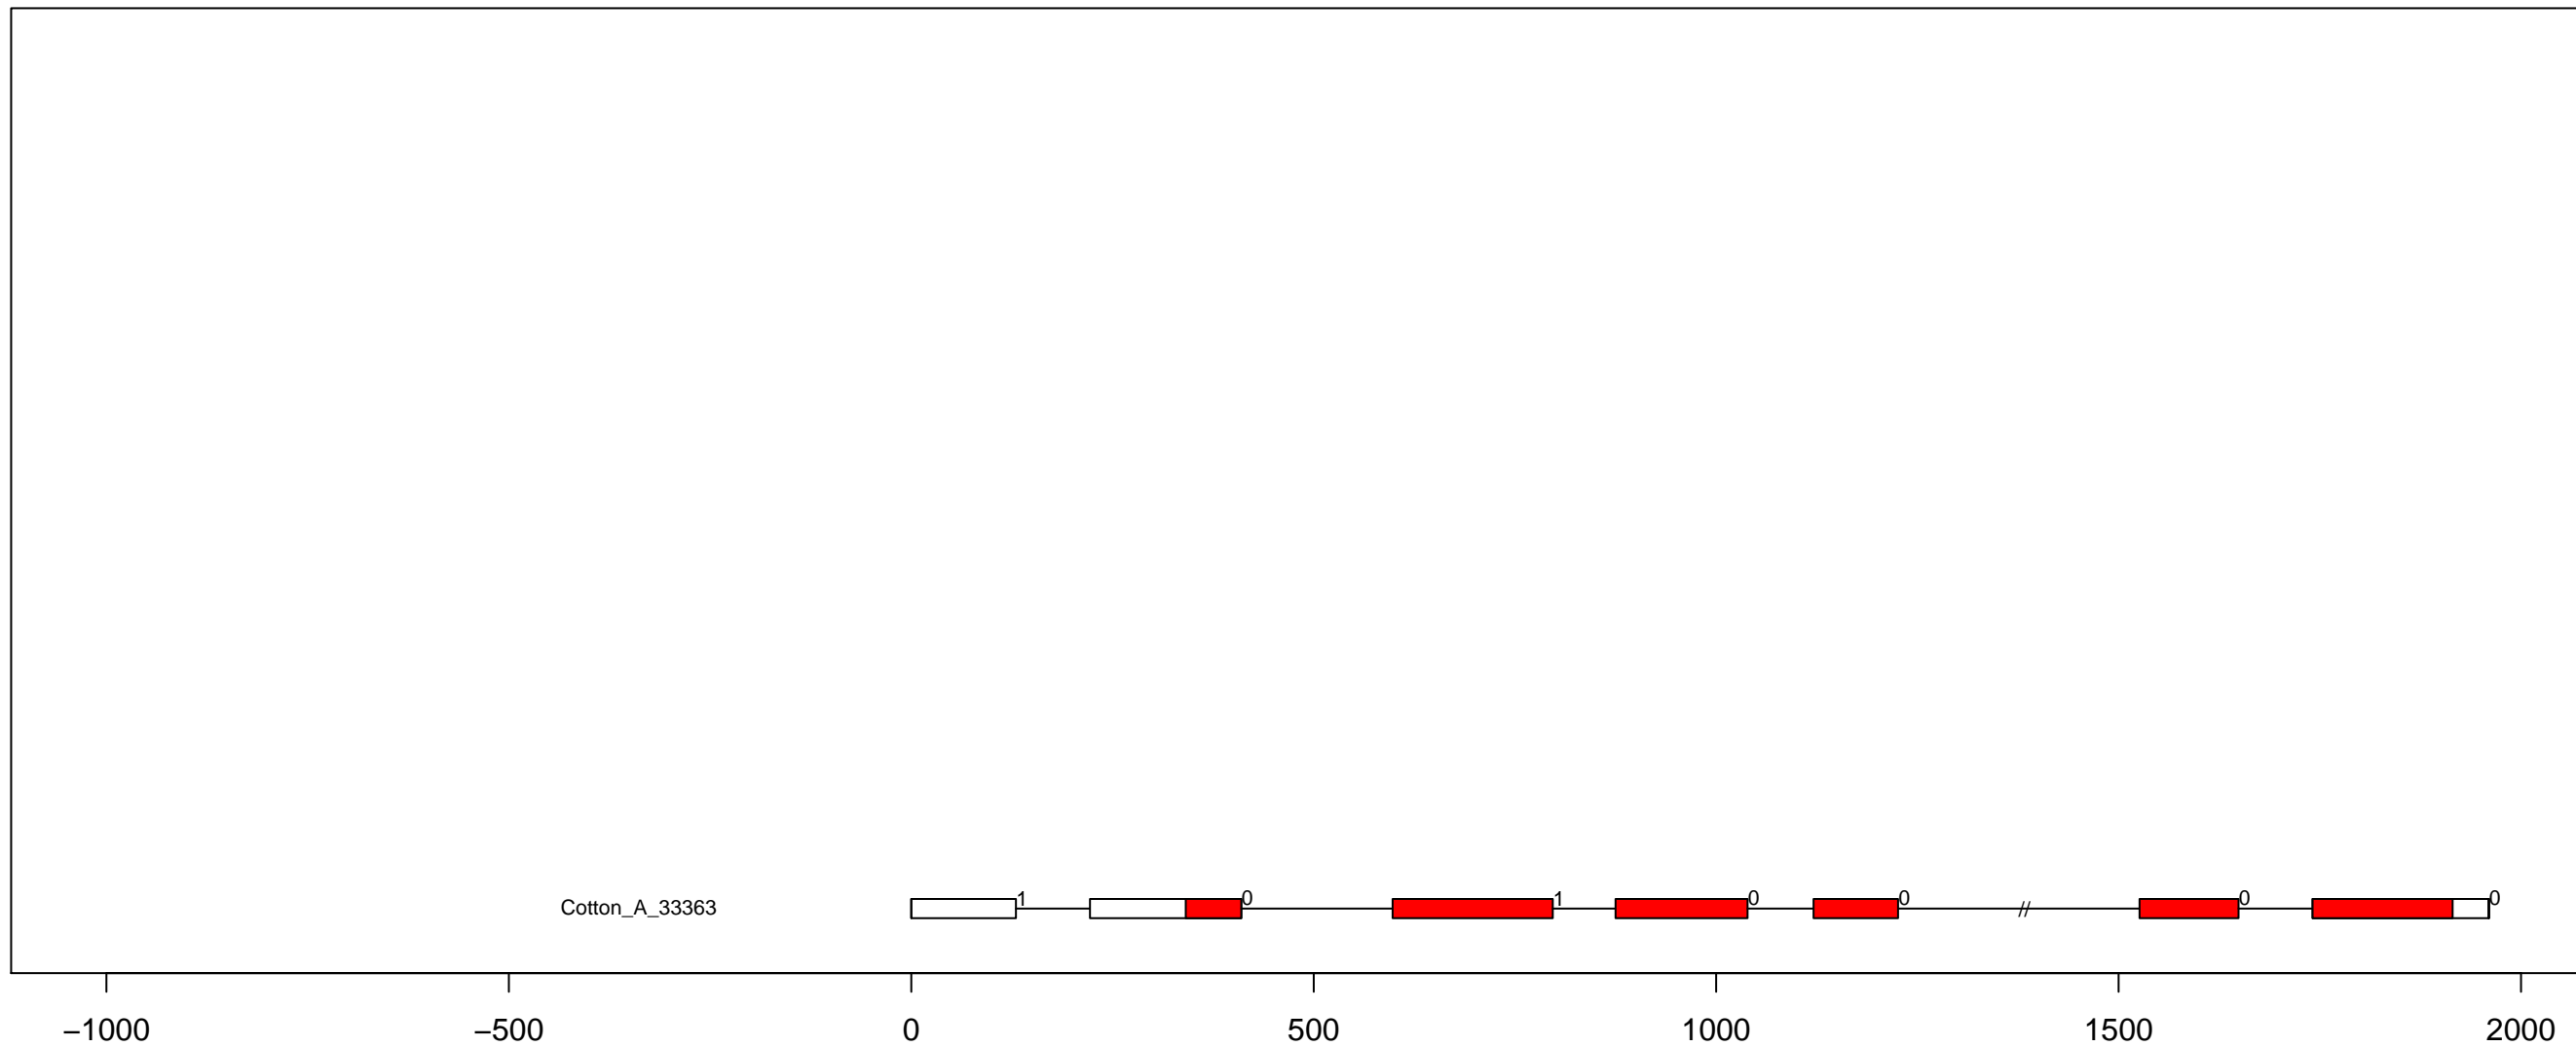

# G.ar RLK-Pelle\_RLCK-VIII exon-intron and domain diagram (all)

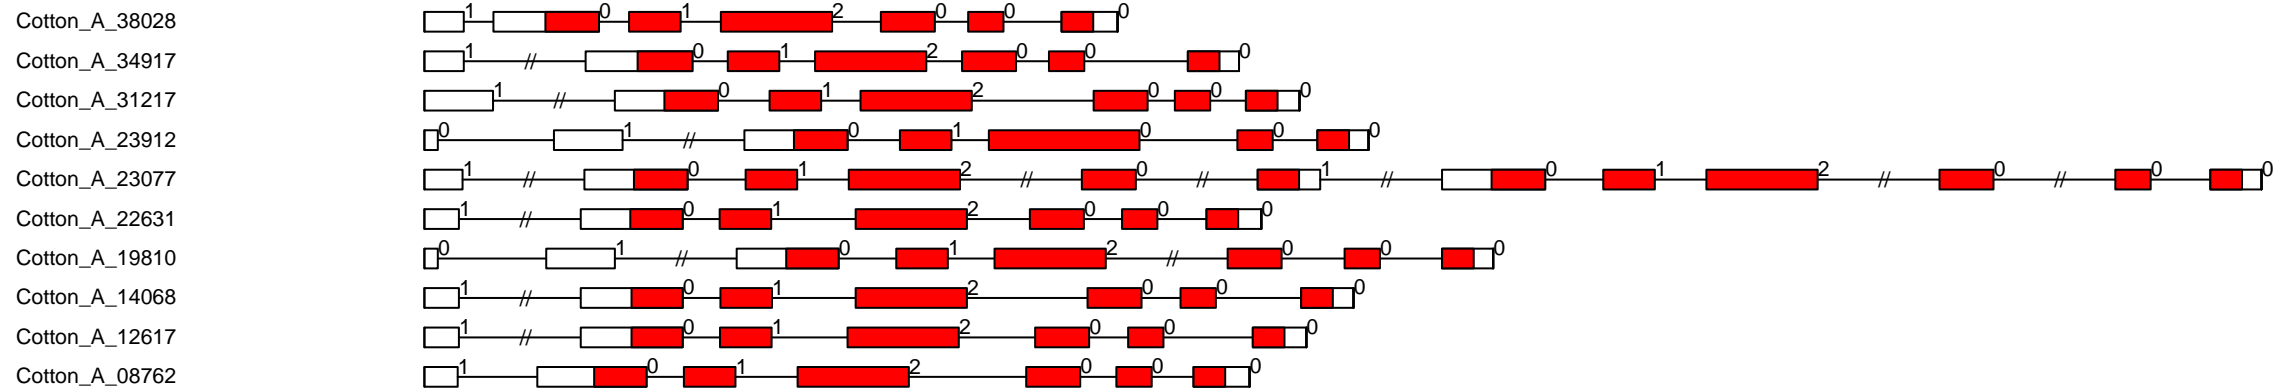

-1000

0

1000

2000

3000

4000



### G.ar RLK-Pelle\_RLCK-V exon-intron and domain diagram (all)

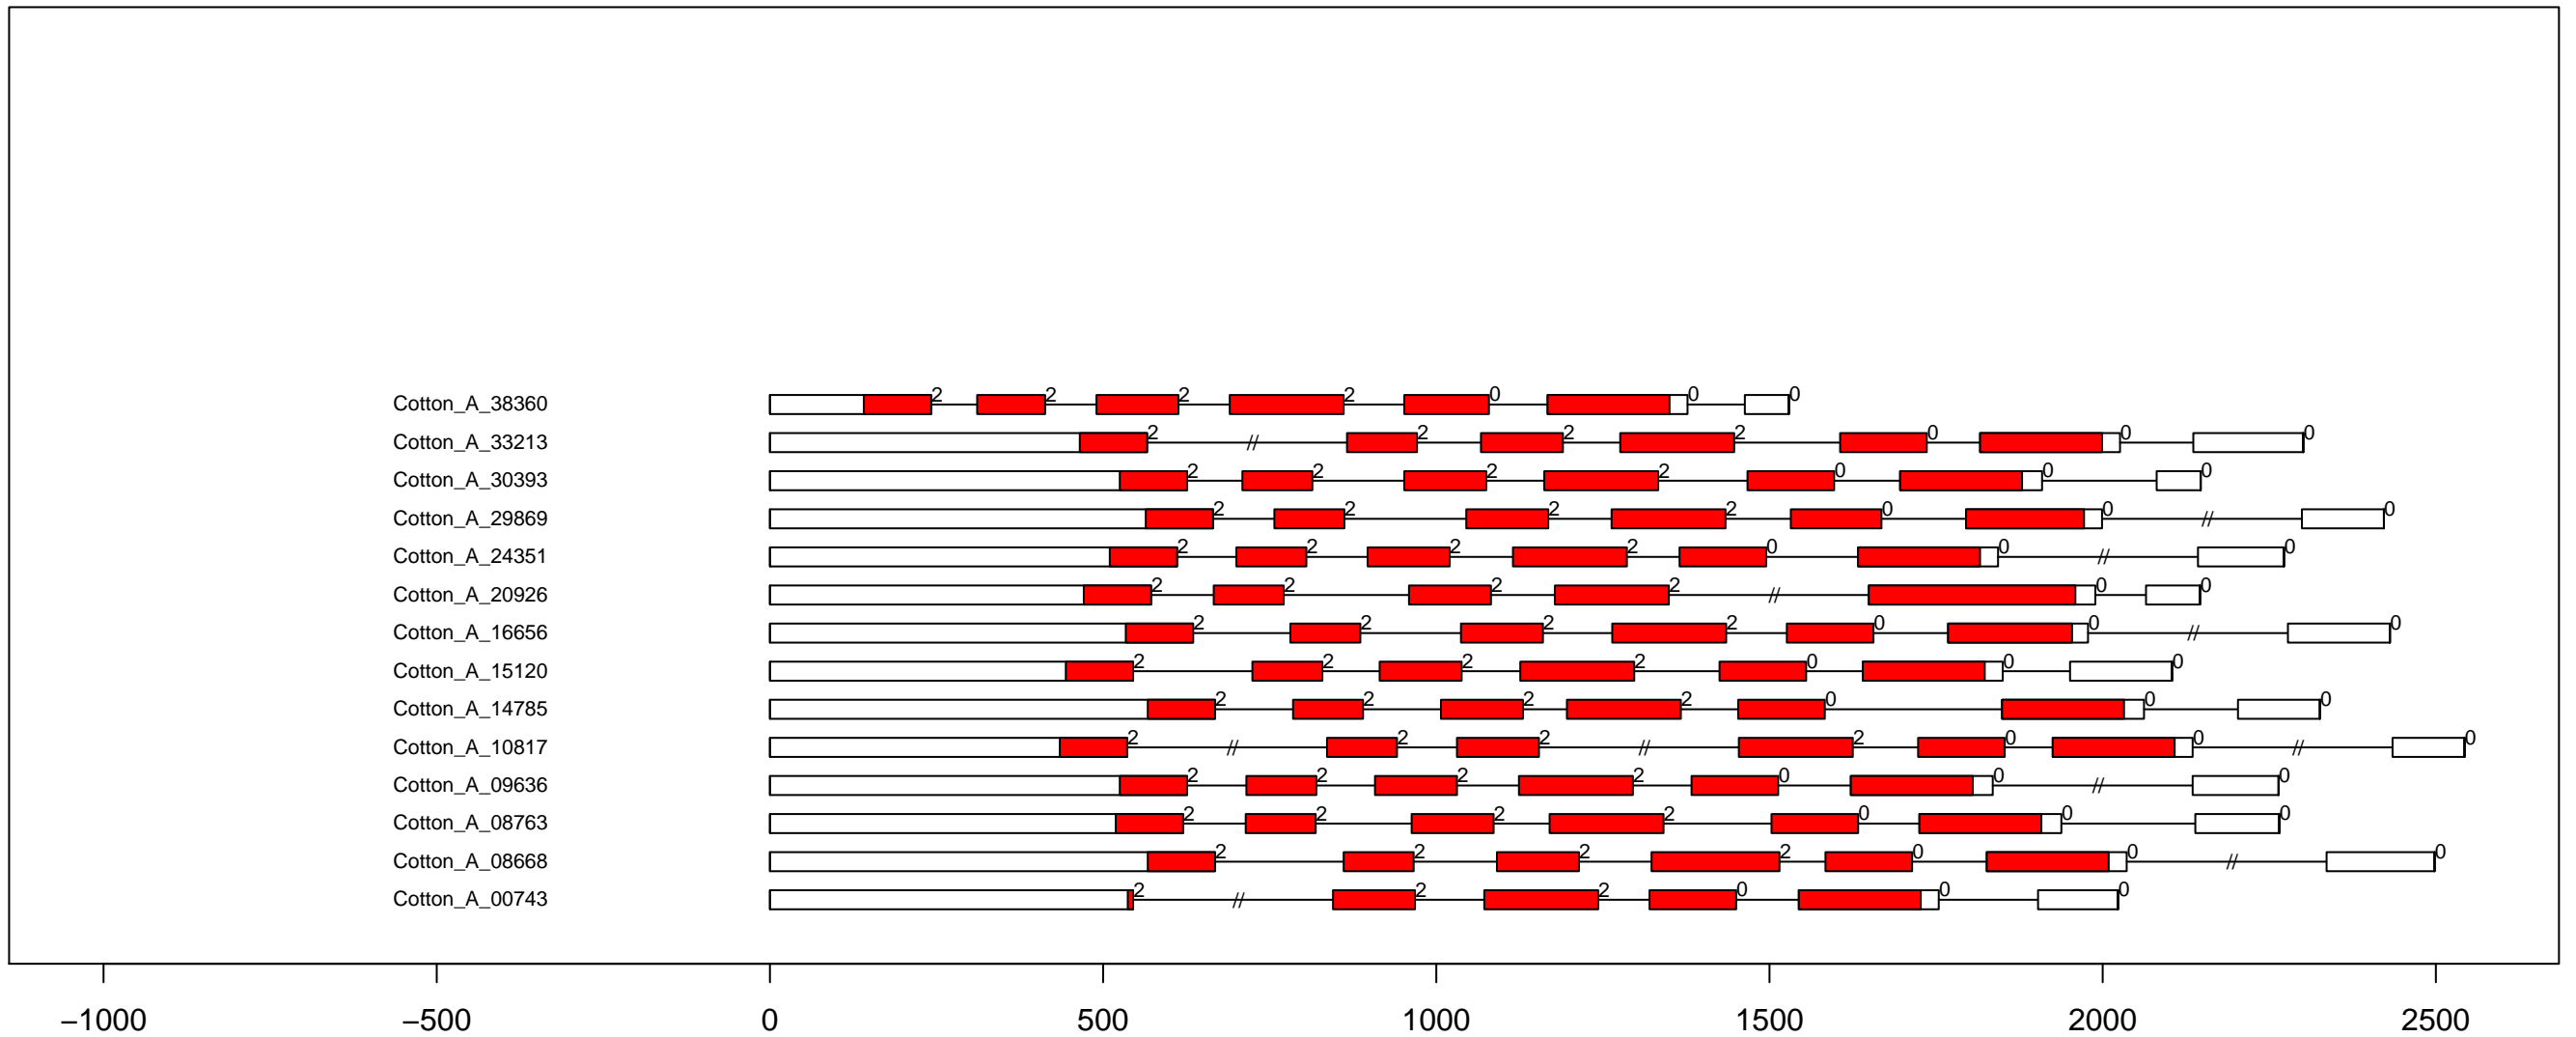

# G.ar RLK-Pelle\_RLCK-XII-1 exon-intron and domain diagram (all)

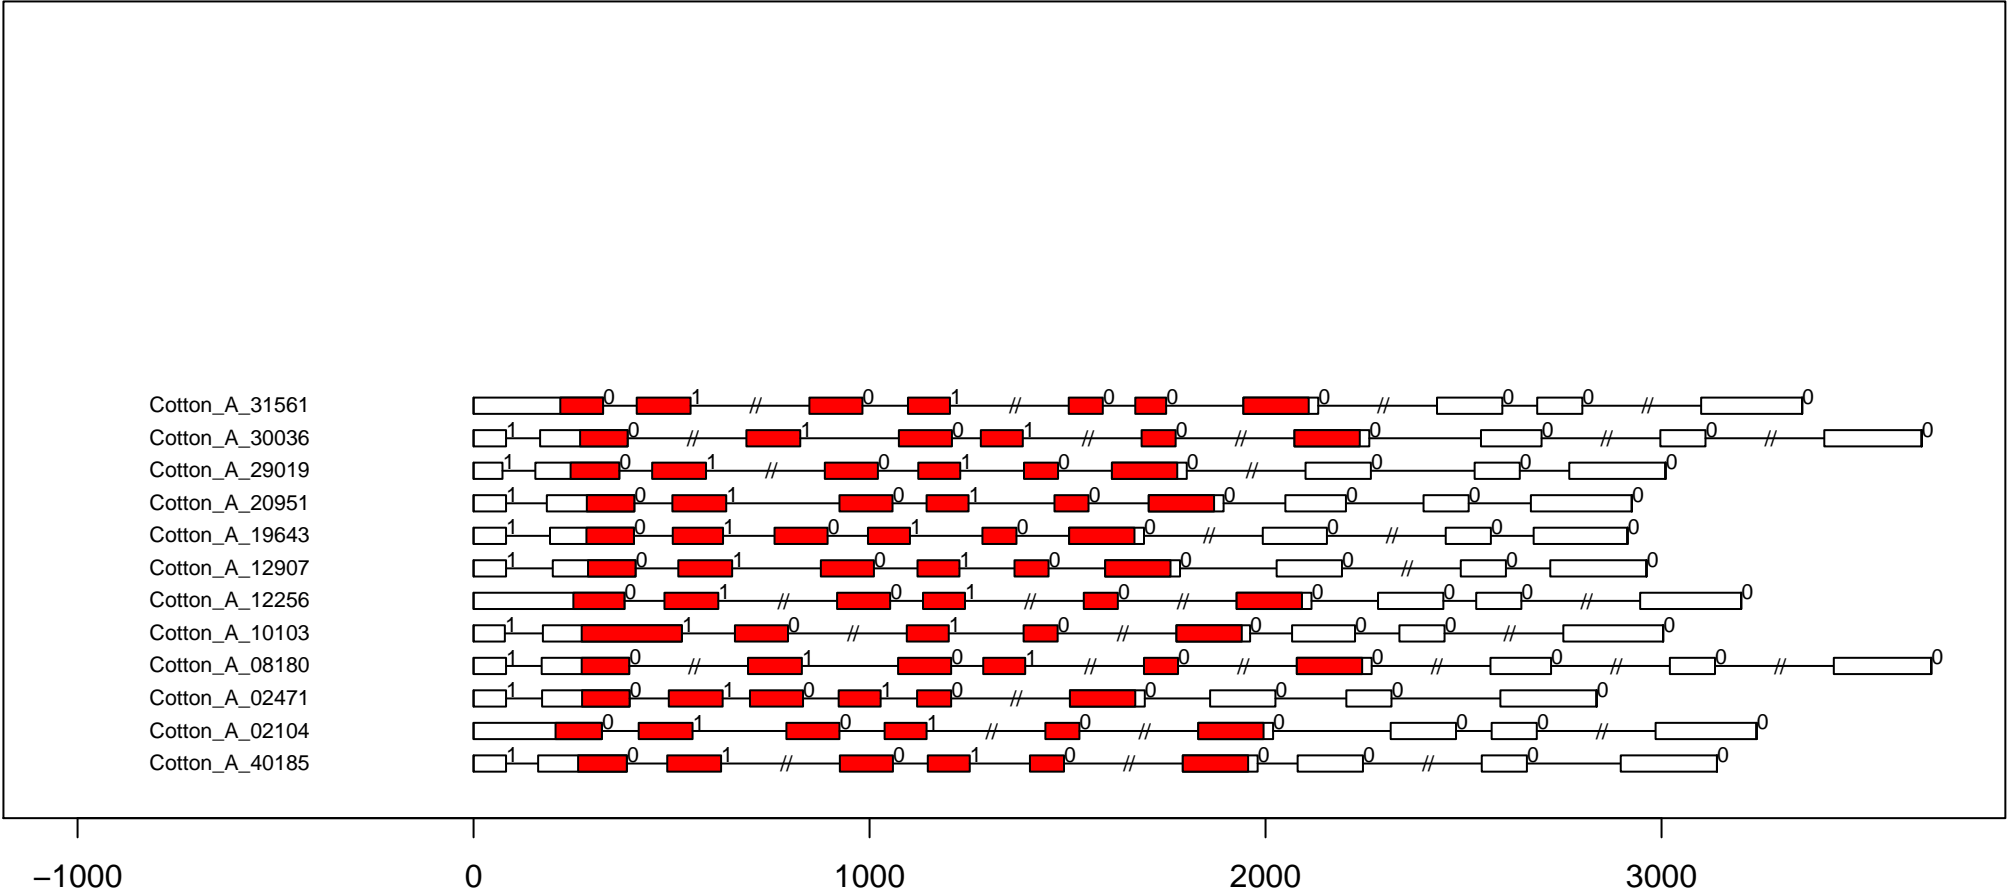



G.ar RLK-Pelle\_RLCK-XII-2 exon-intron and domain diagram (all)

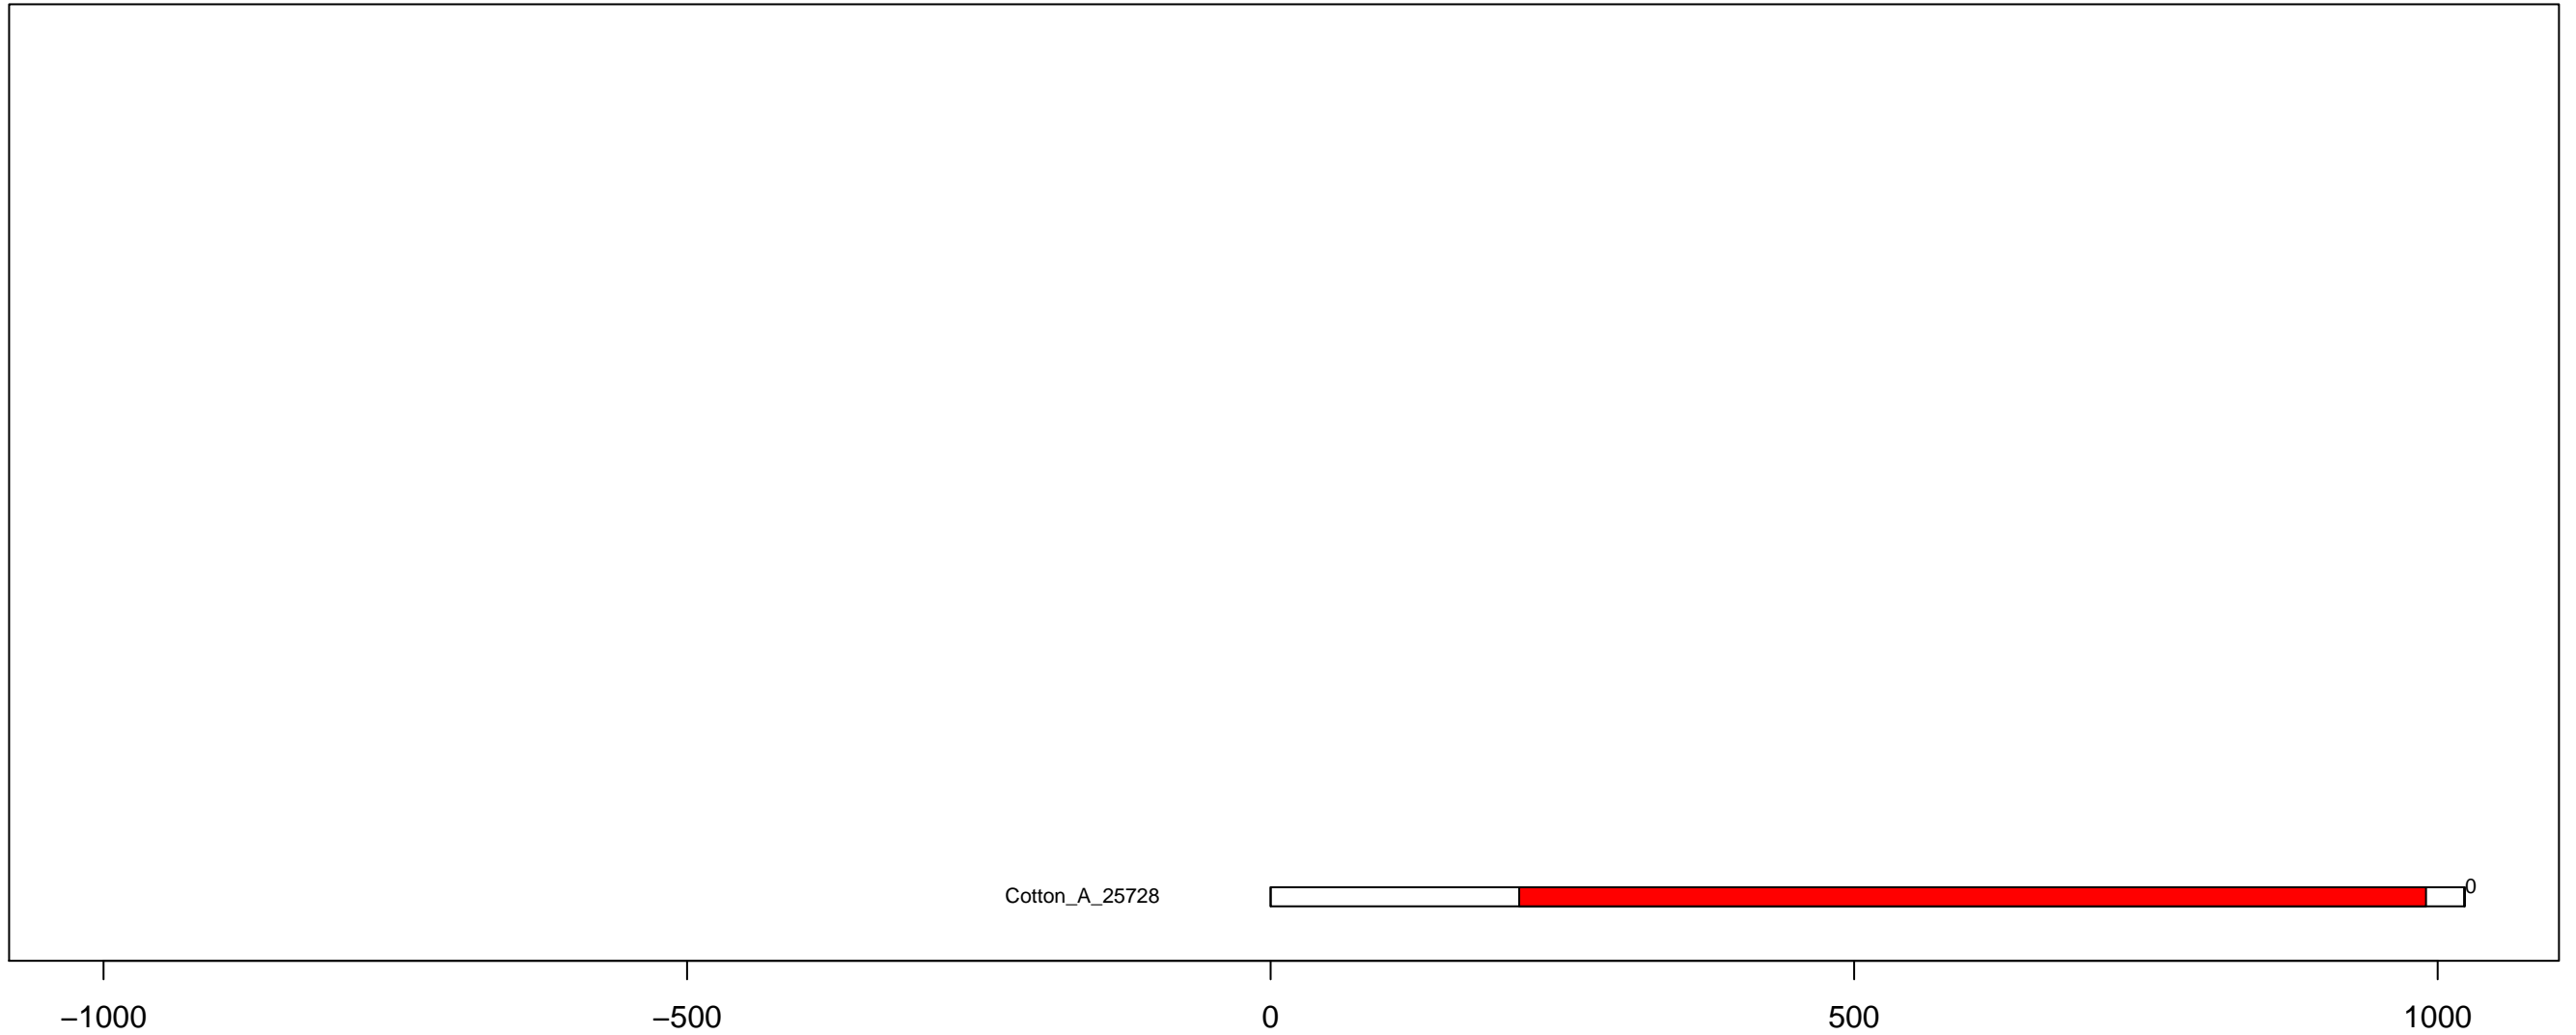

G.ar RLK-Pelle\_RLCK-XIII exon-intron and domain diagram (all)

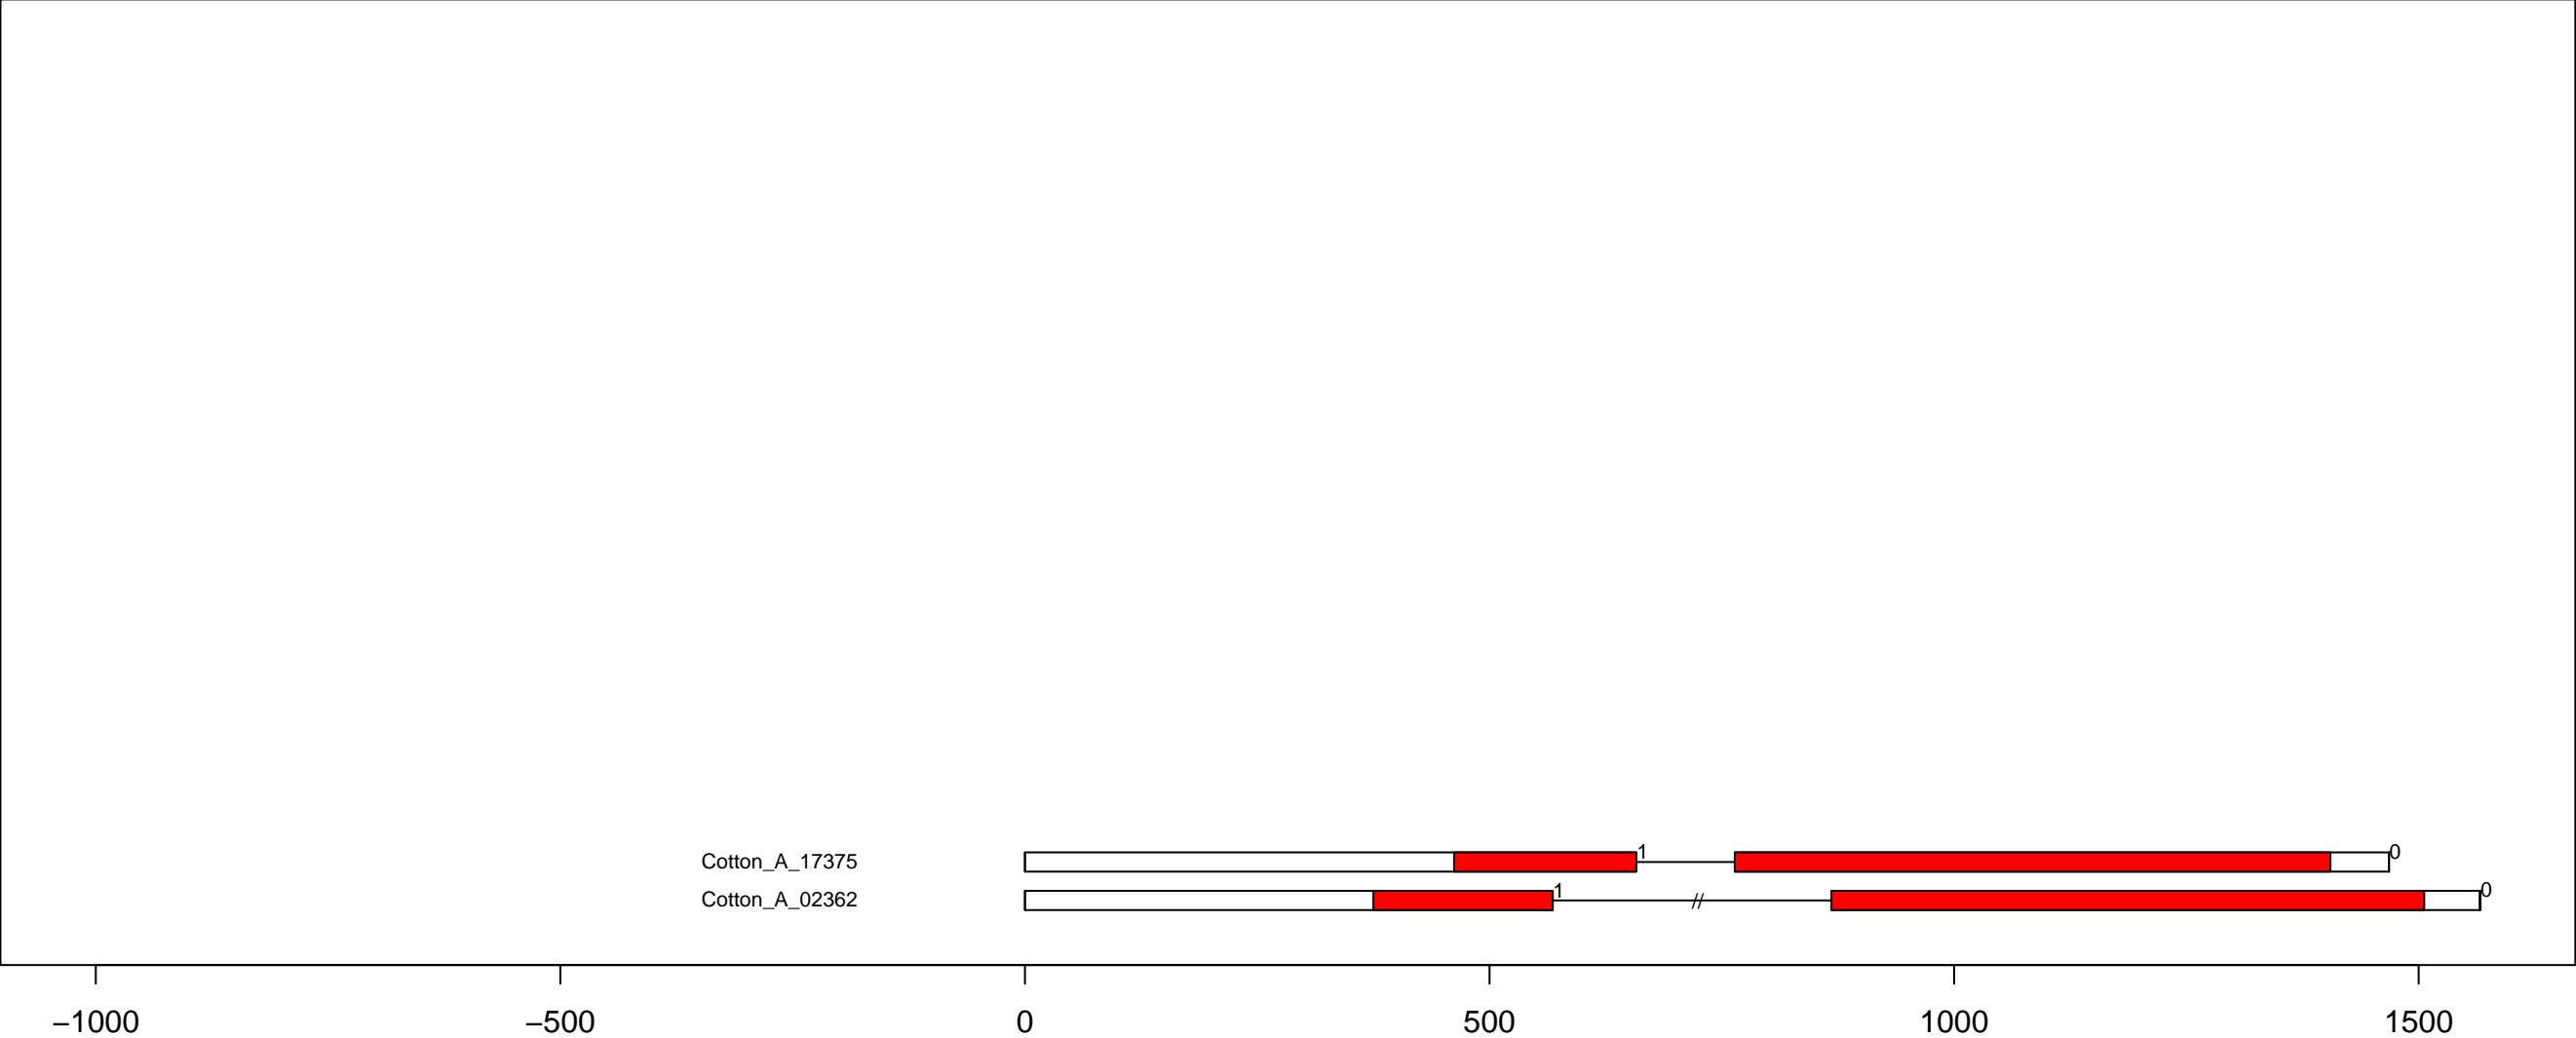

# G.ar RLK-Pelle\_RLCK-XI exon-intron and domain diagram (all)

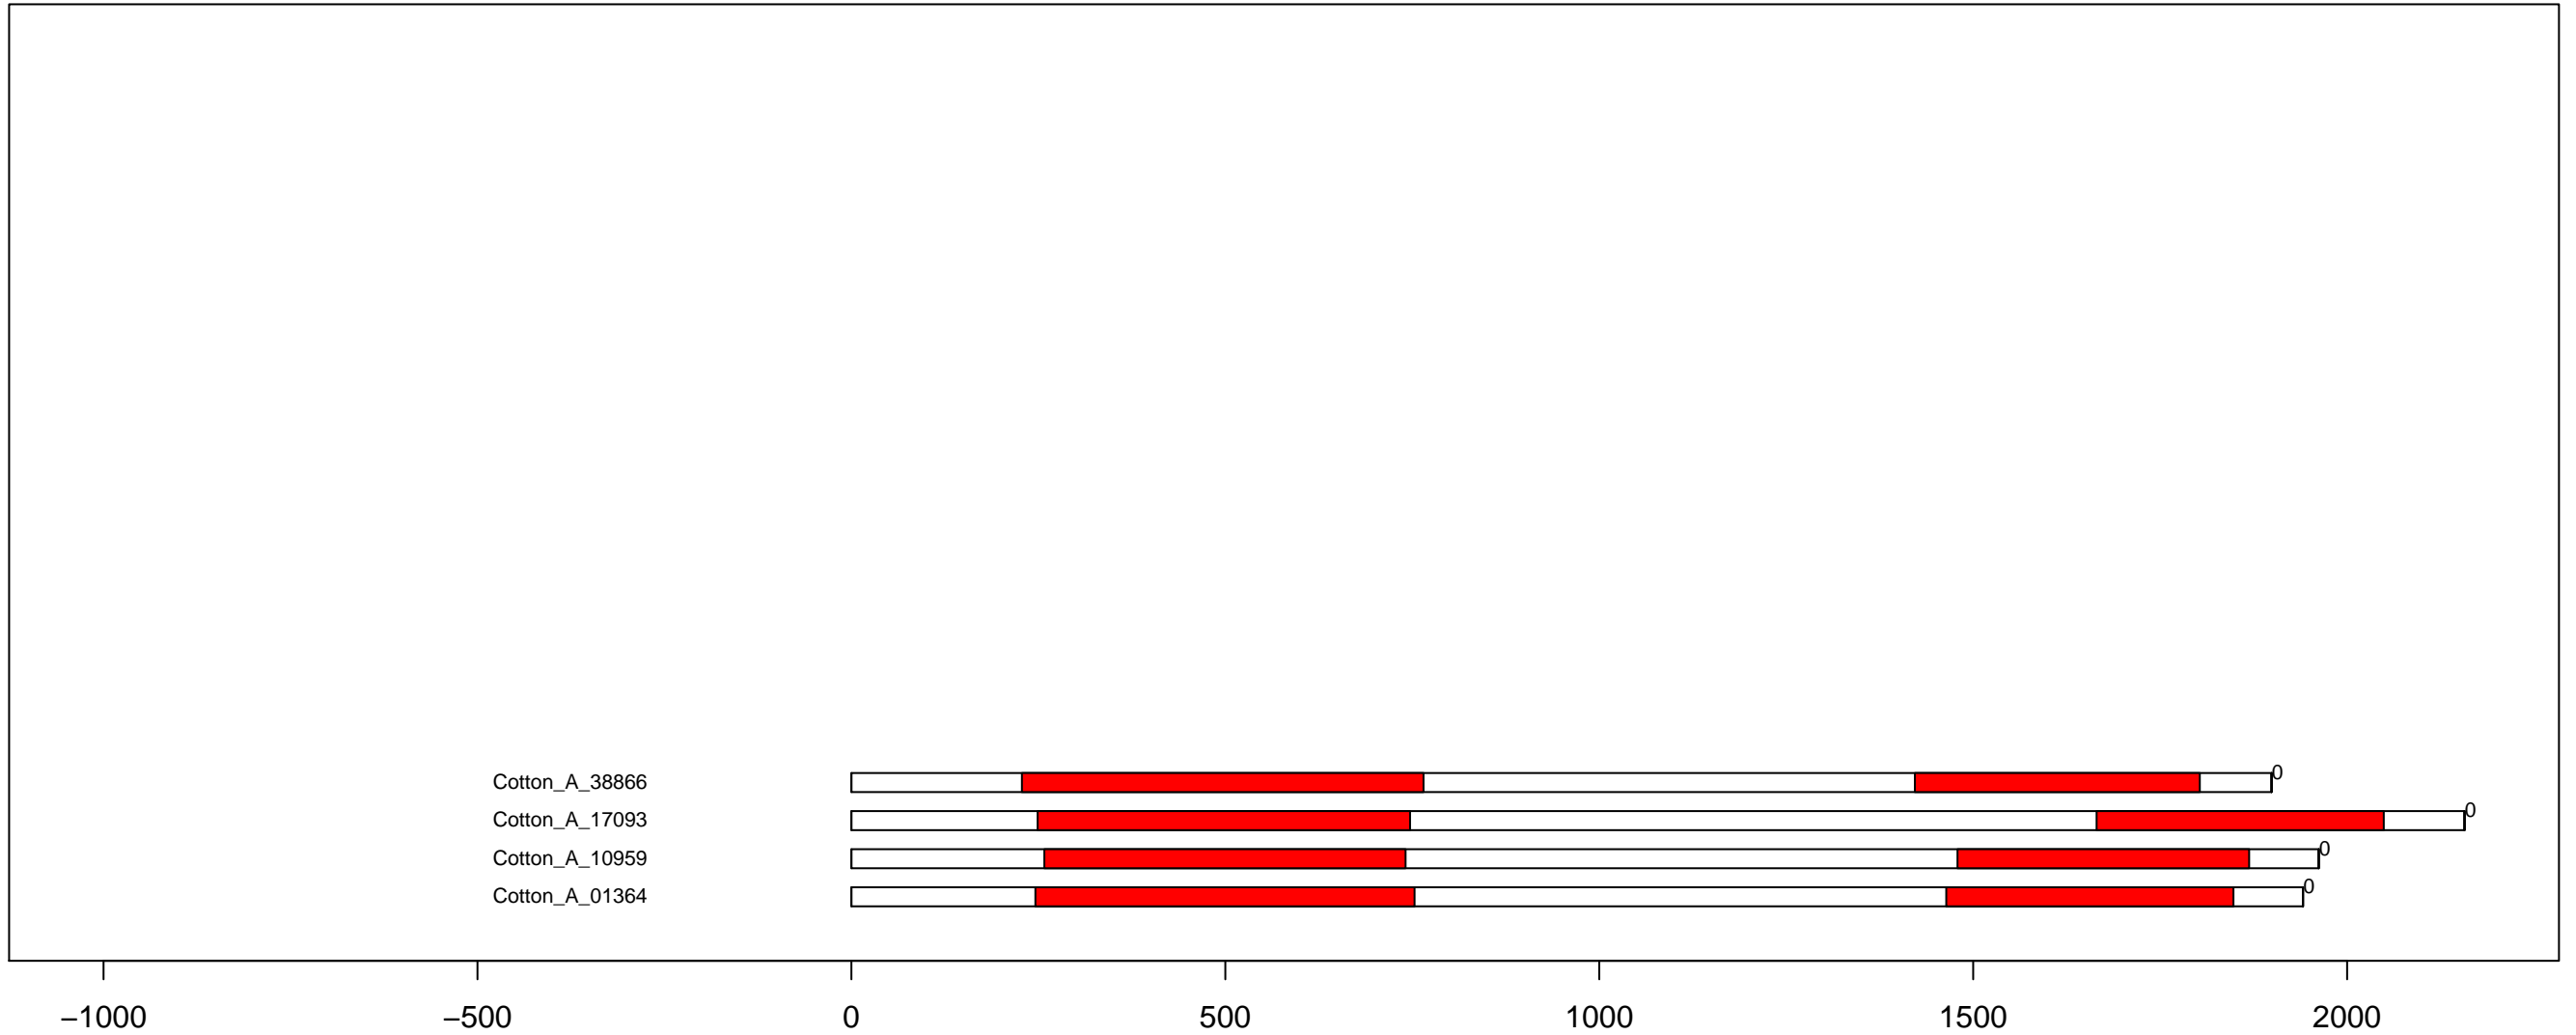

# G.ar RLK-Pelle\_RLCK-X exon-intron and domain diagram (all)

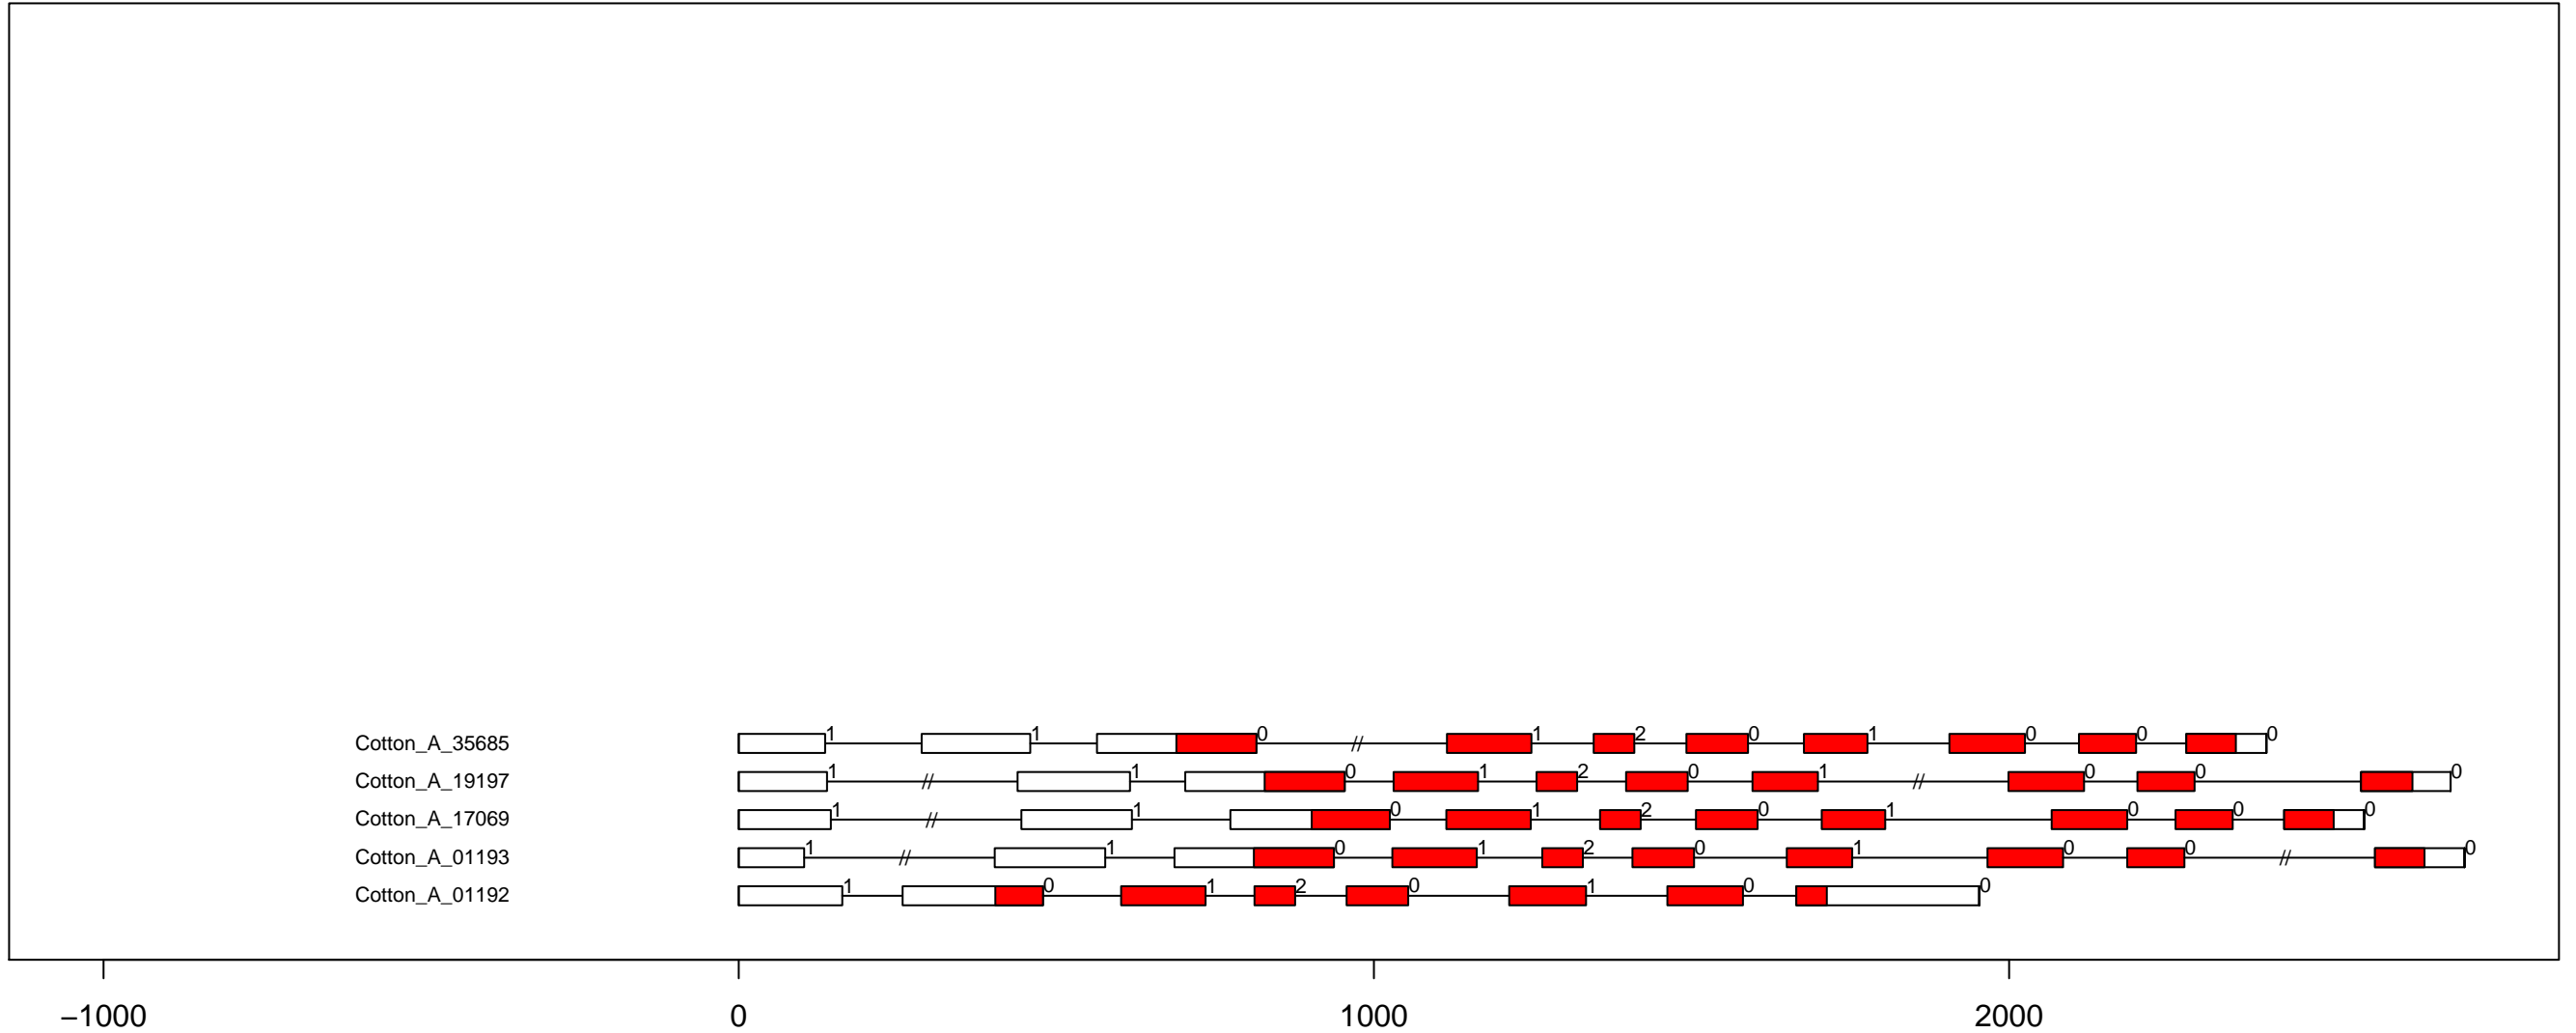

# G.ar RLK-Pelle\_RLCK-XVI exon-intron and domain diagram (all)

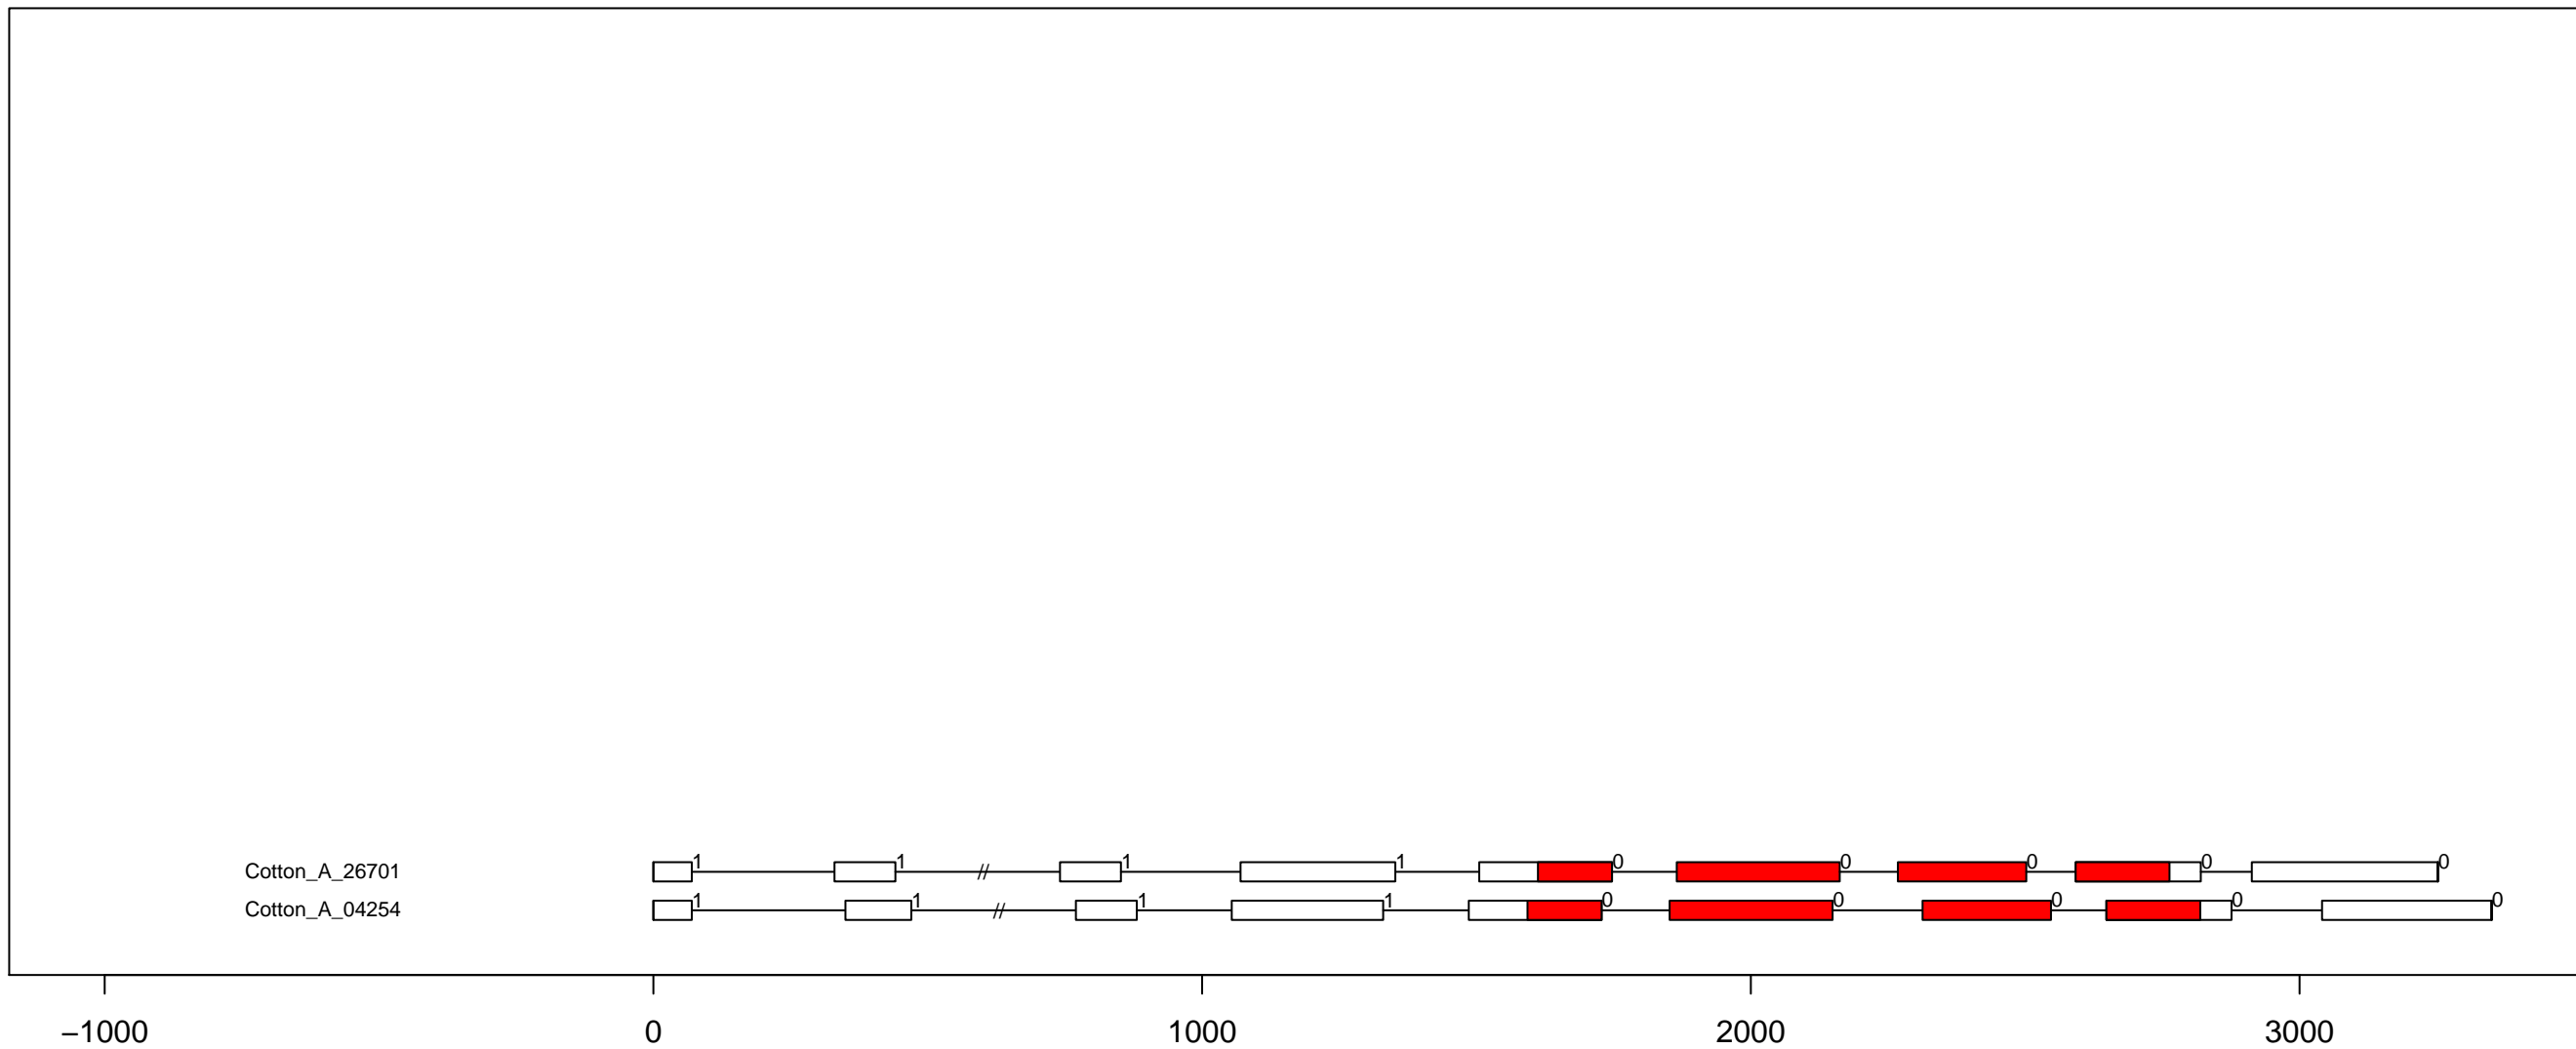

# G.ar RLK-Pelle\_RLCK-XV exon-intron and domain diagram (all)

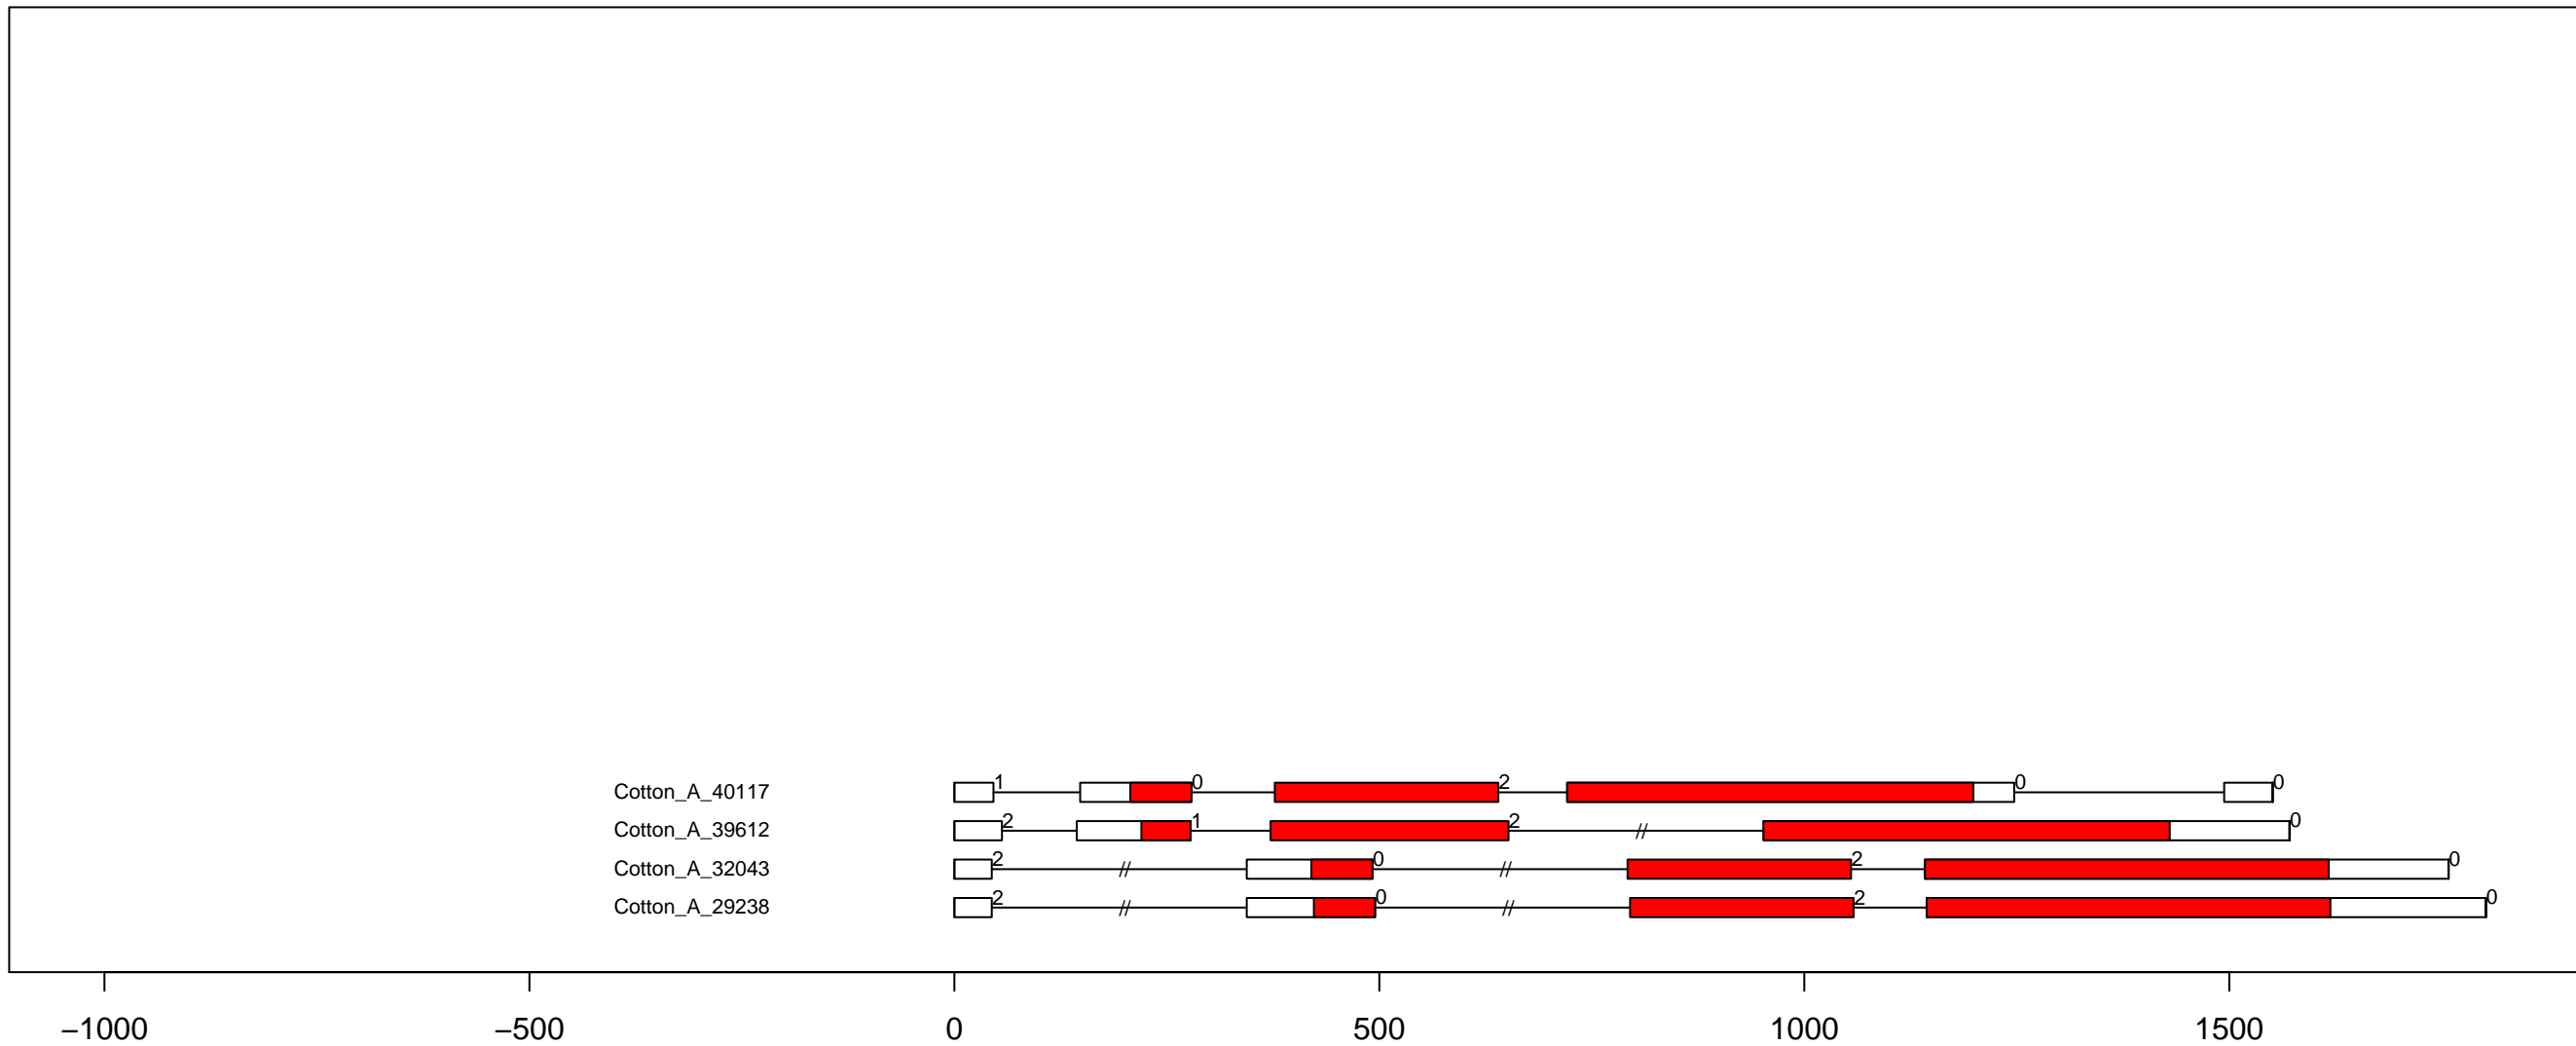

# G.ar RLK-Pelle\_SD-2b exon-intron and domain diagram (part 1)

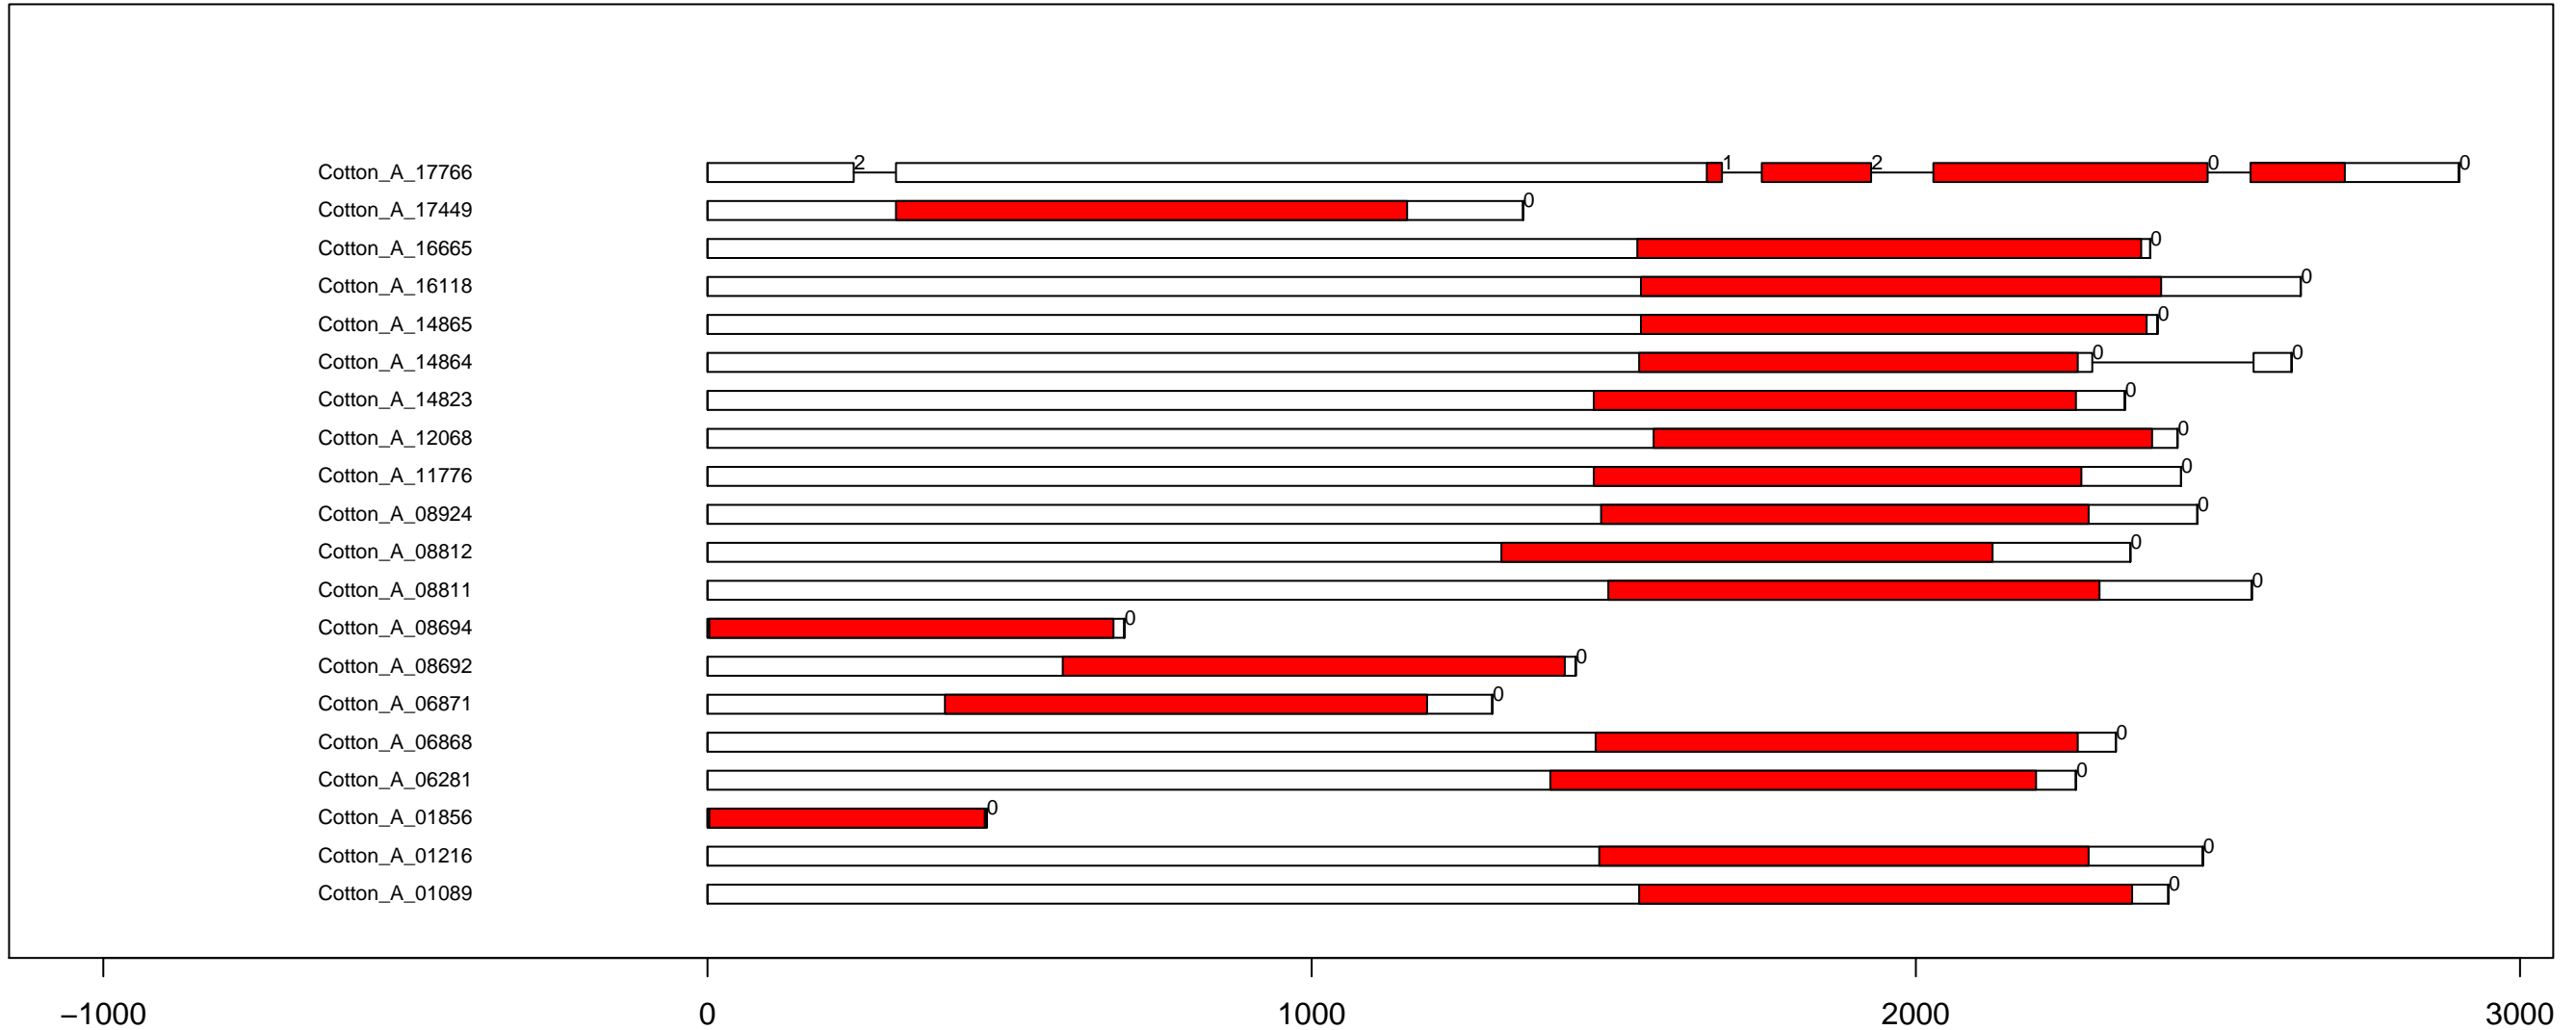

### G.ar RLK-Pelle\_SD-2b exon-intron and domain diagram (part 2)

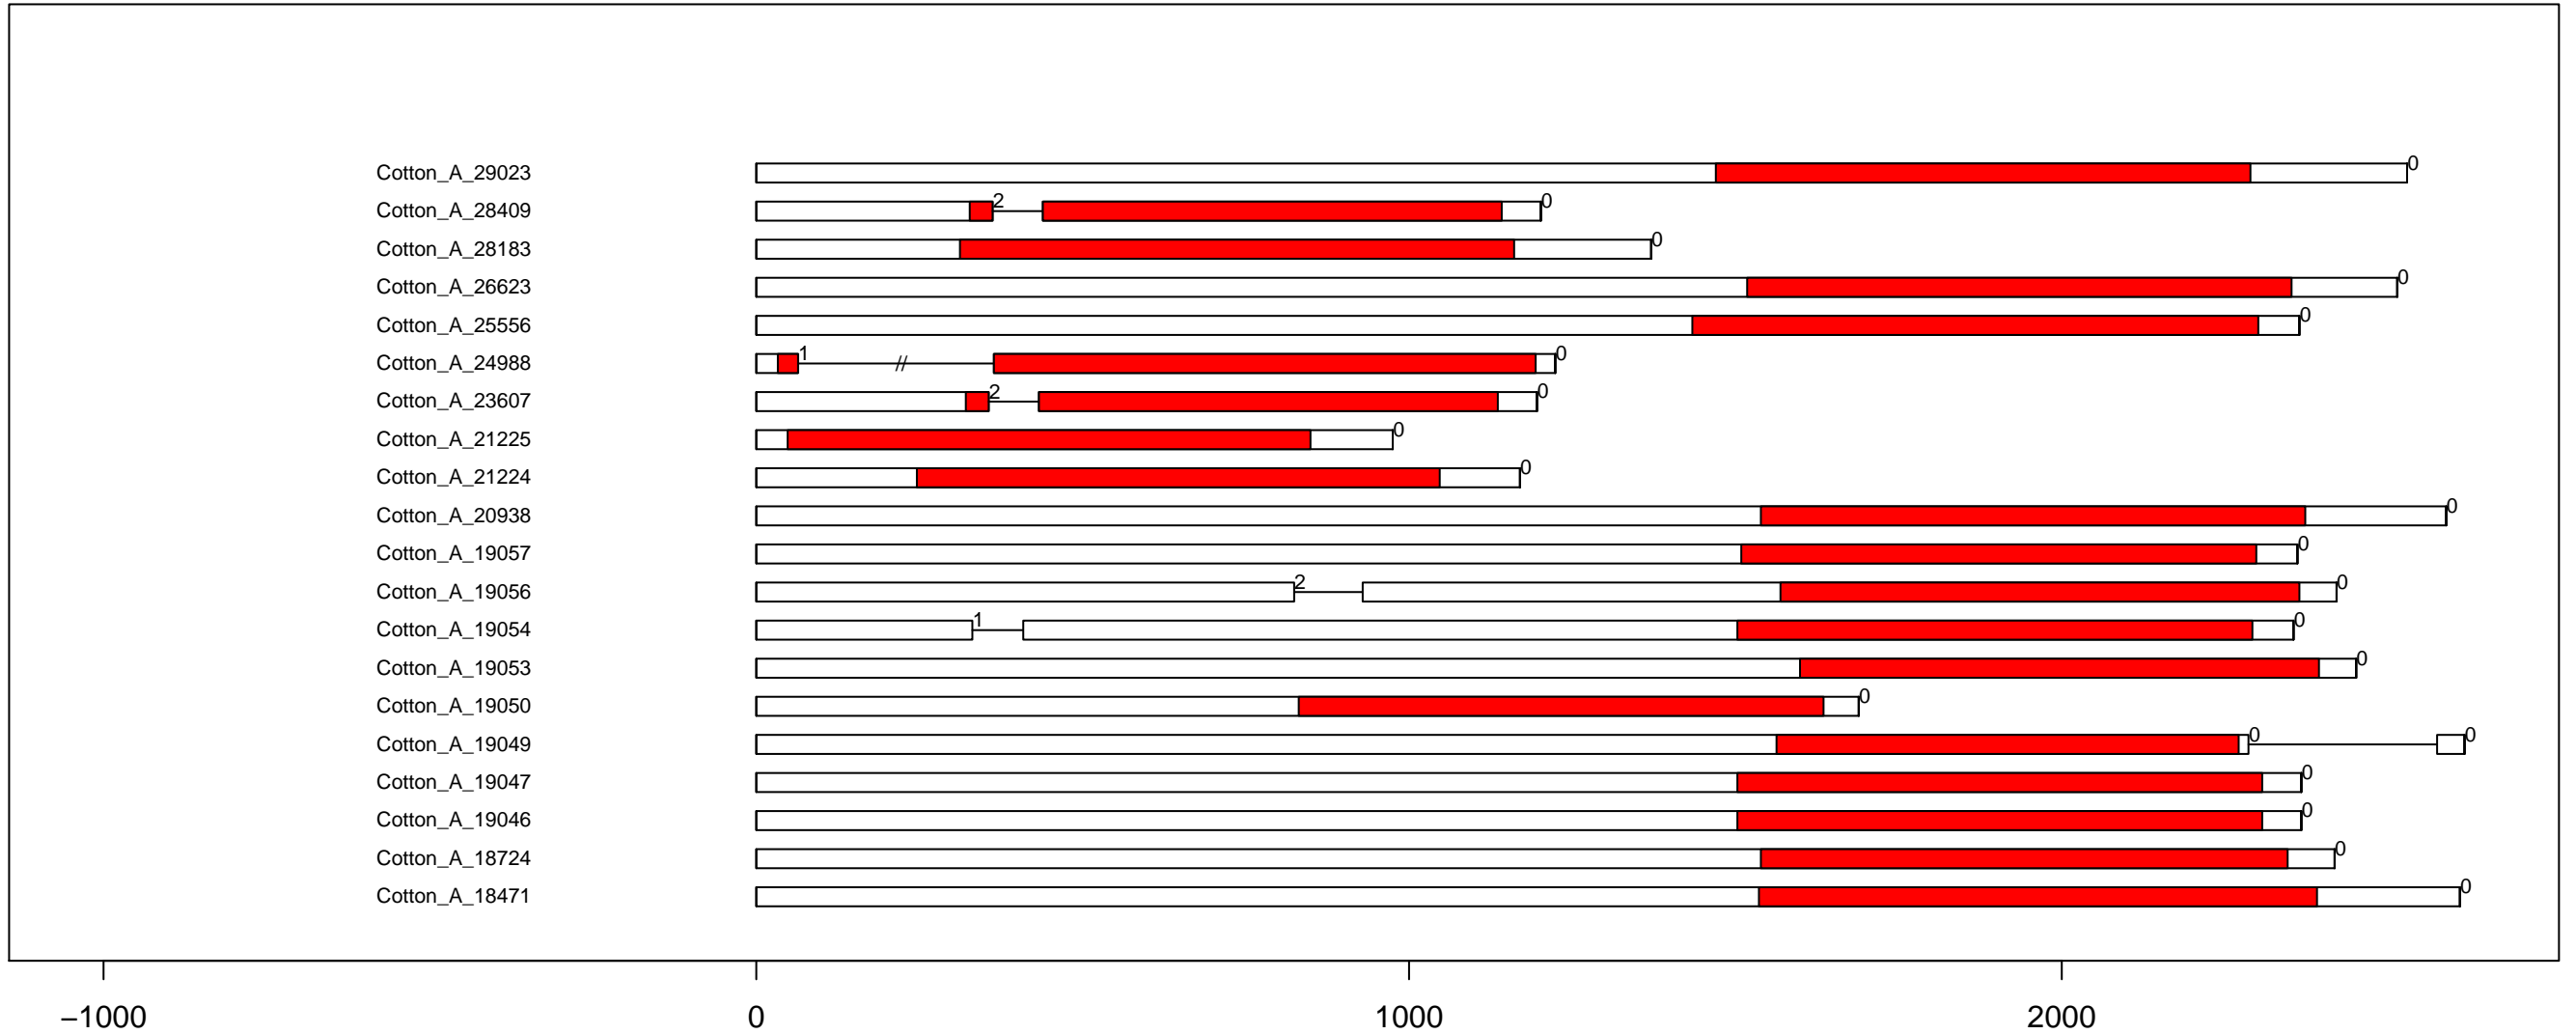



G.ar RLK-Pelle\_SD-2b exon-intron and domain diagram (part 3)

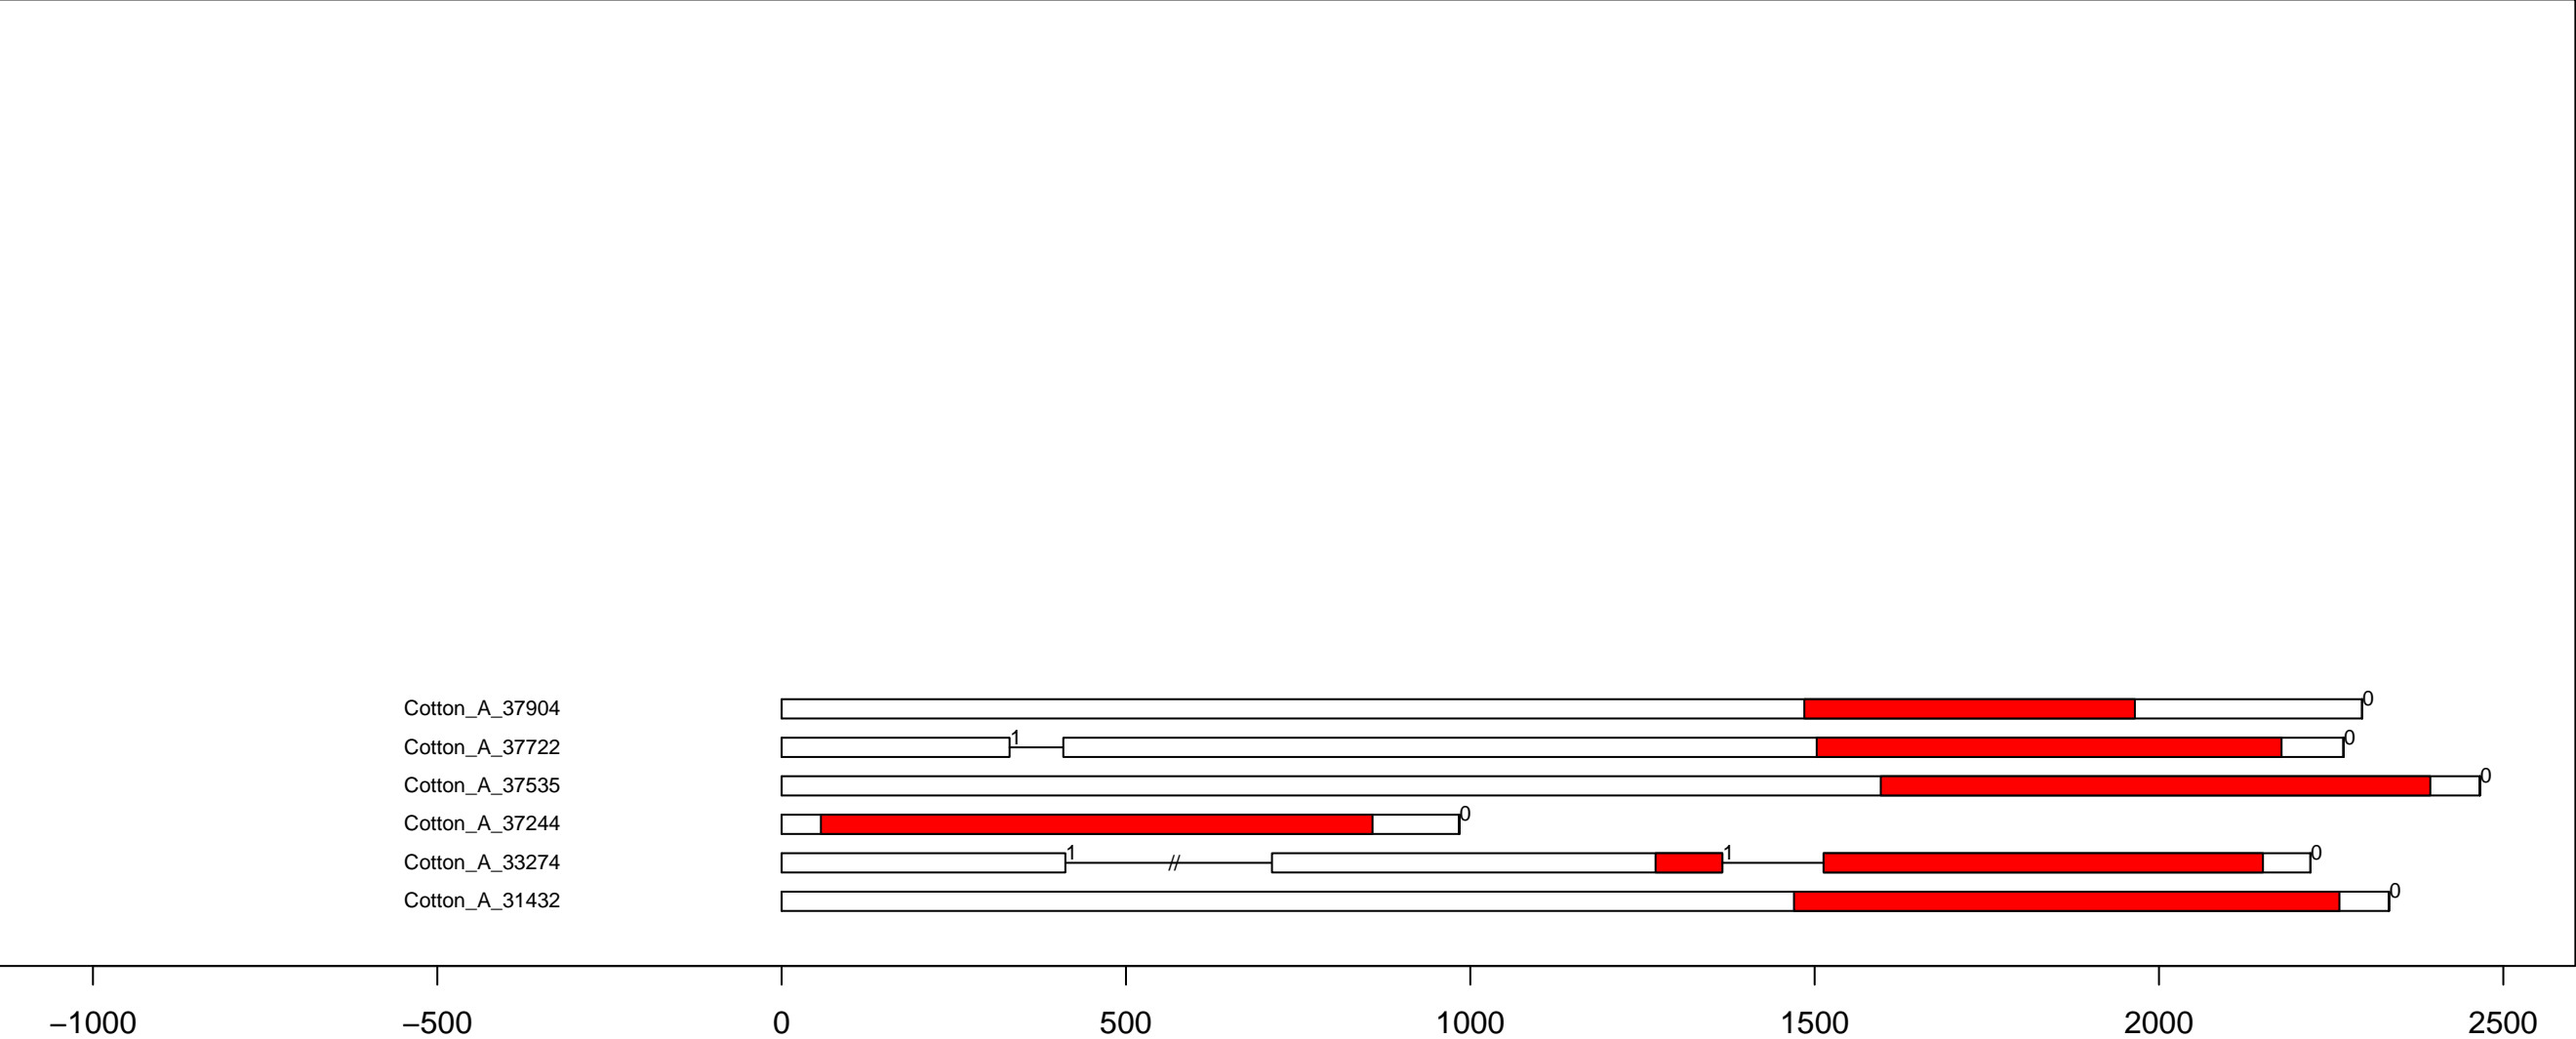

# G.ar RLK-Pelle\_Singleton exon-intron and domain diagram (all)

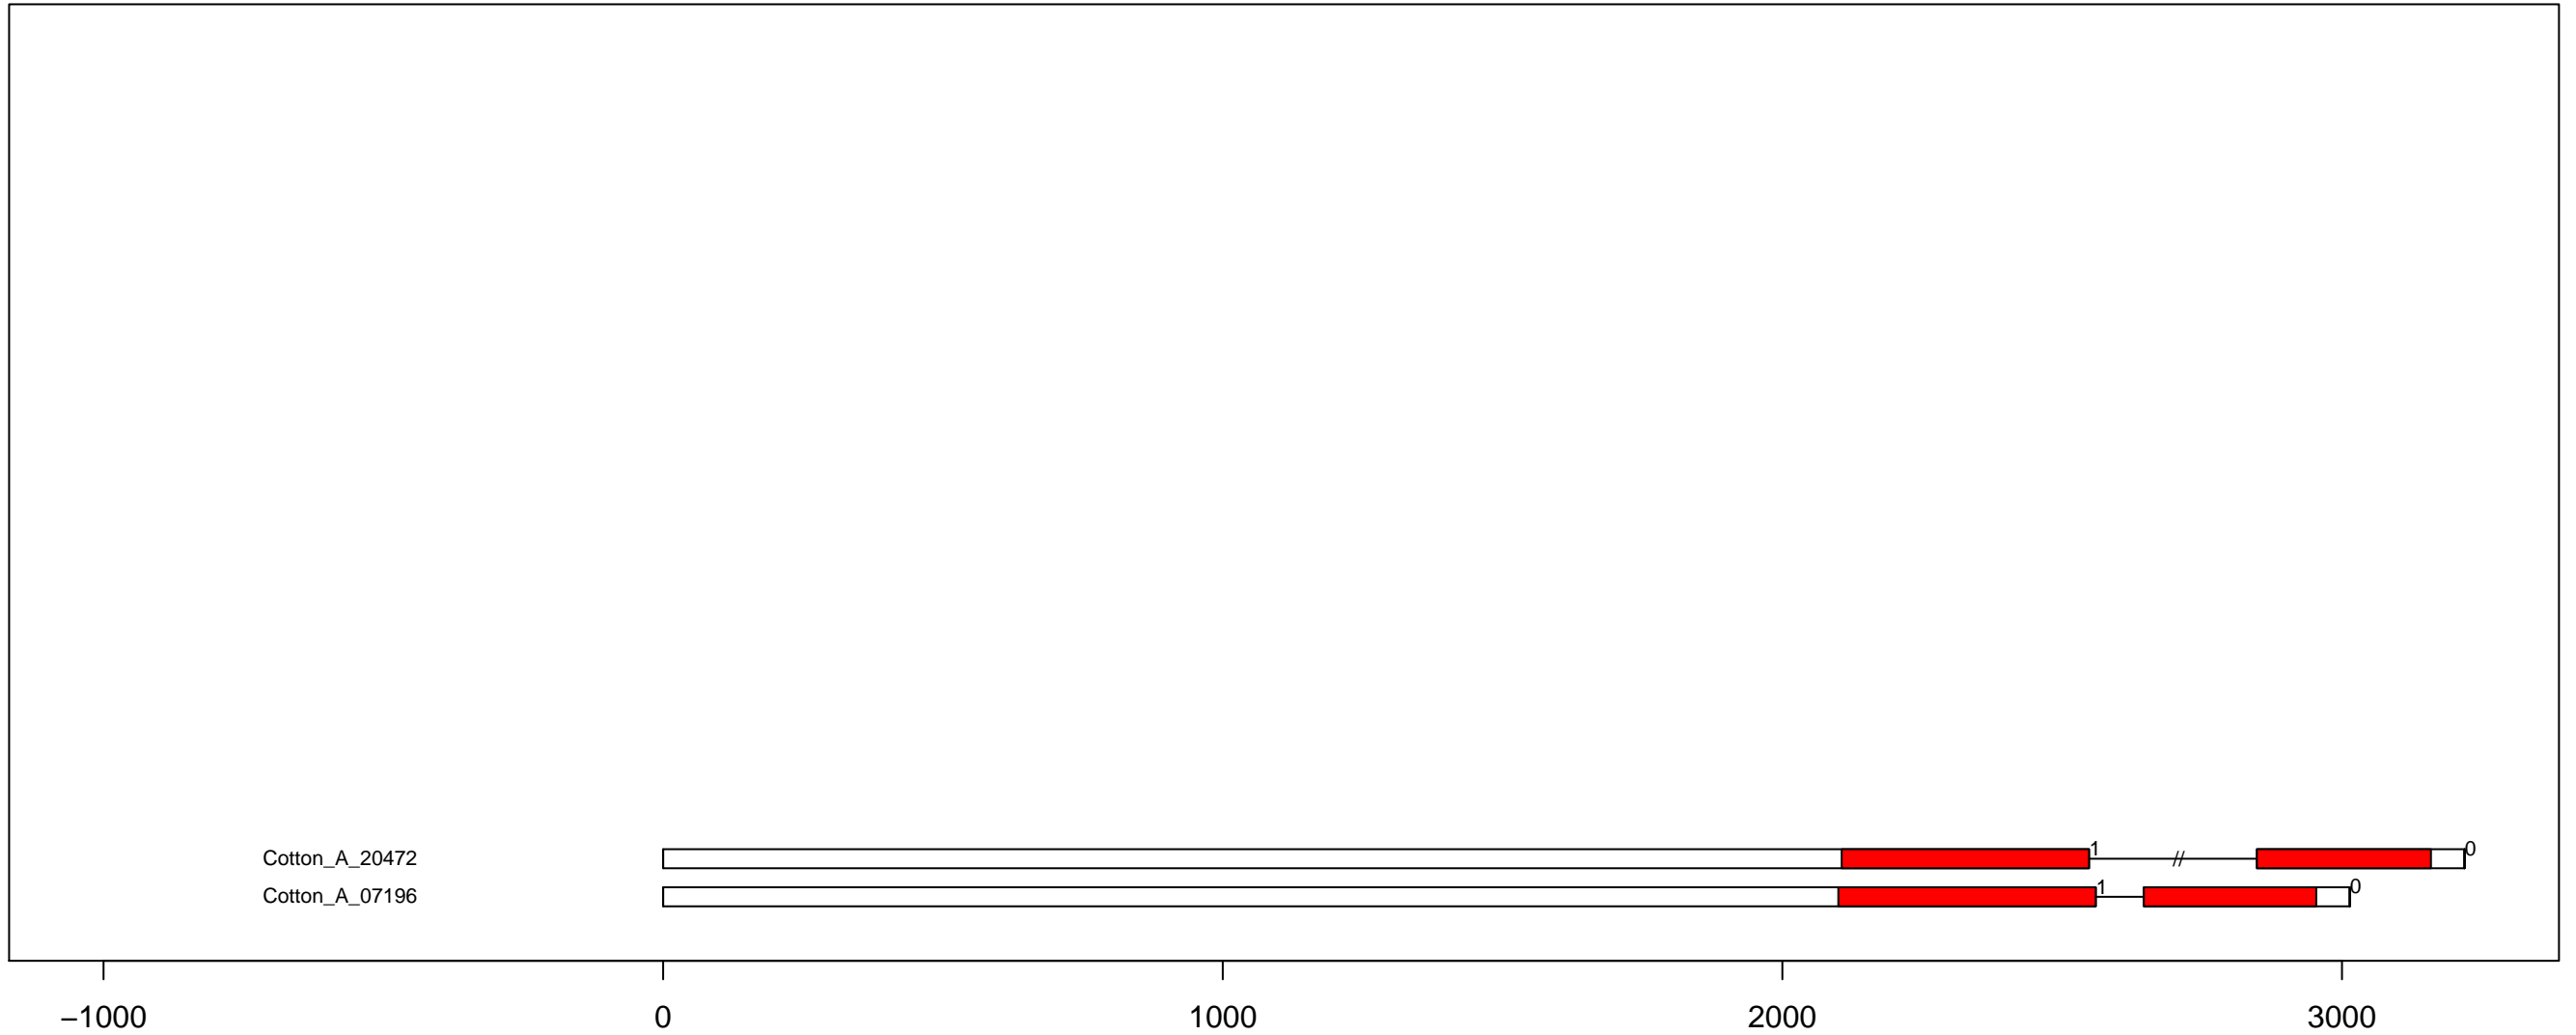

# G.ar RLK-Pelle\_URK-1 exon-intron and domain diagram (all)

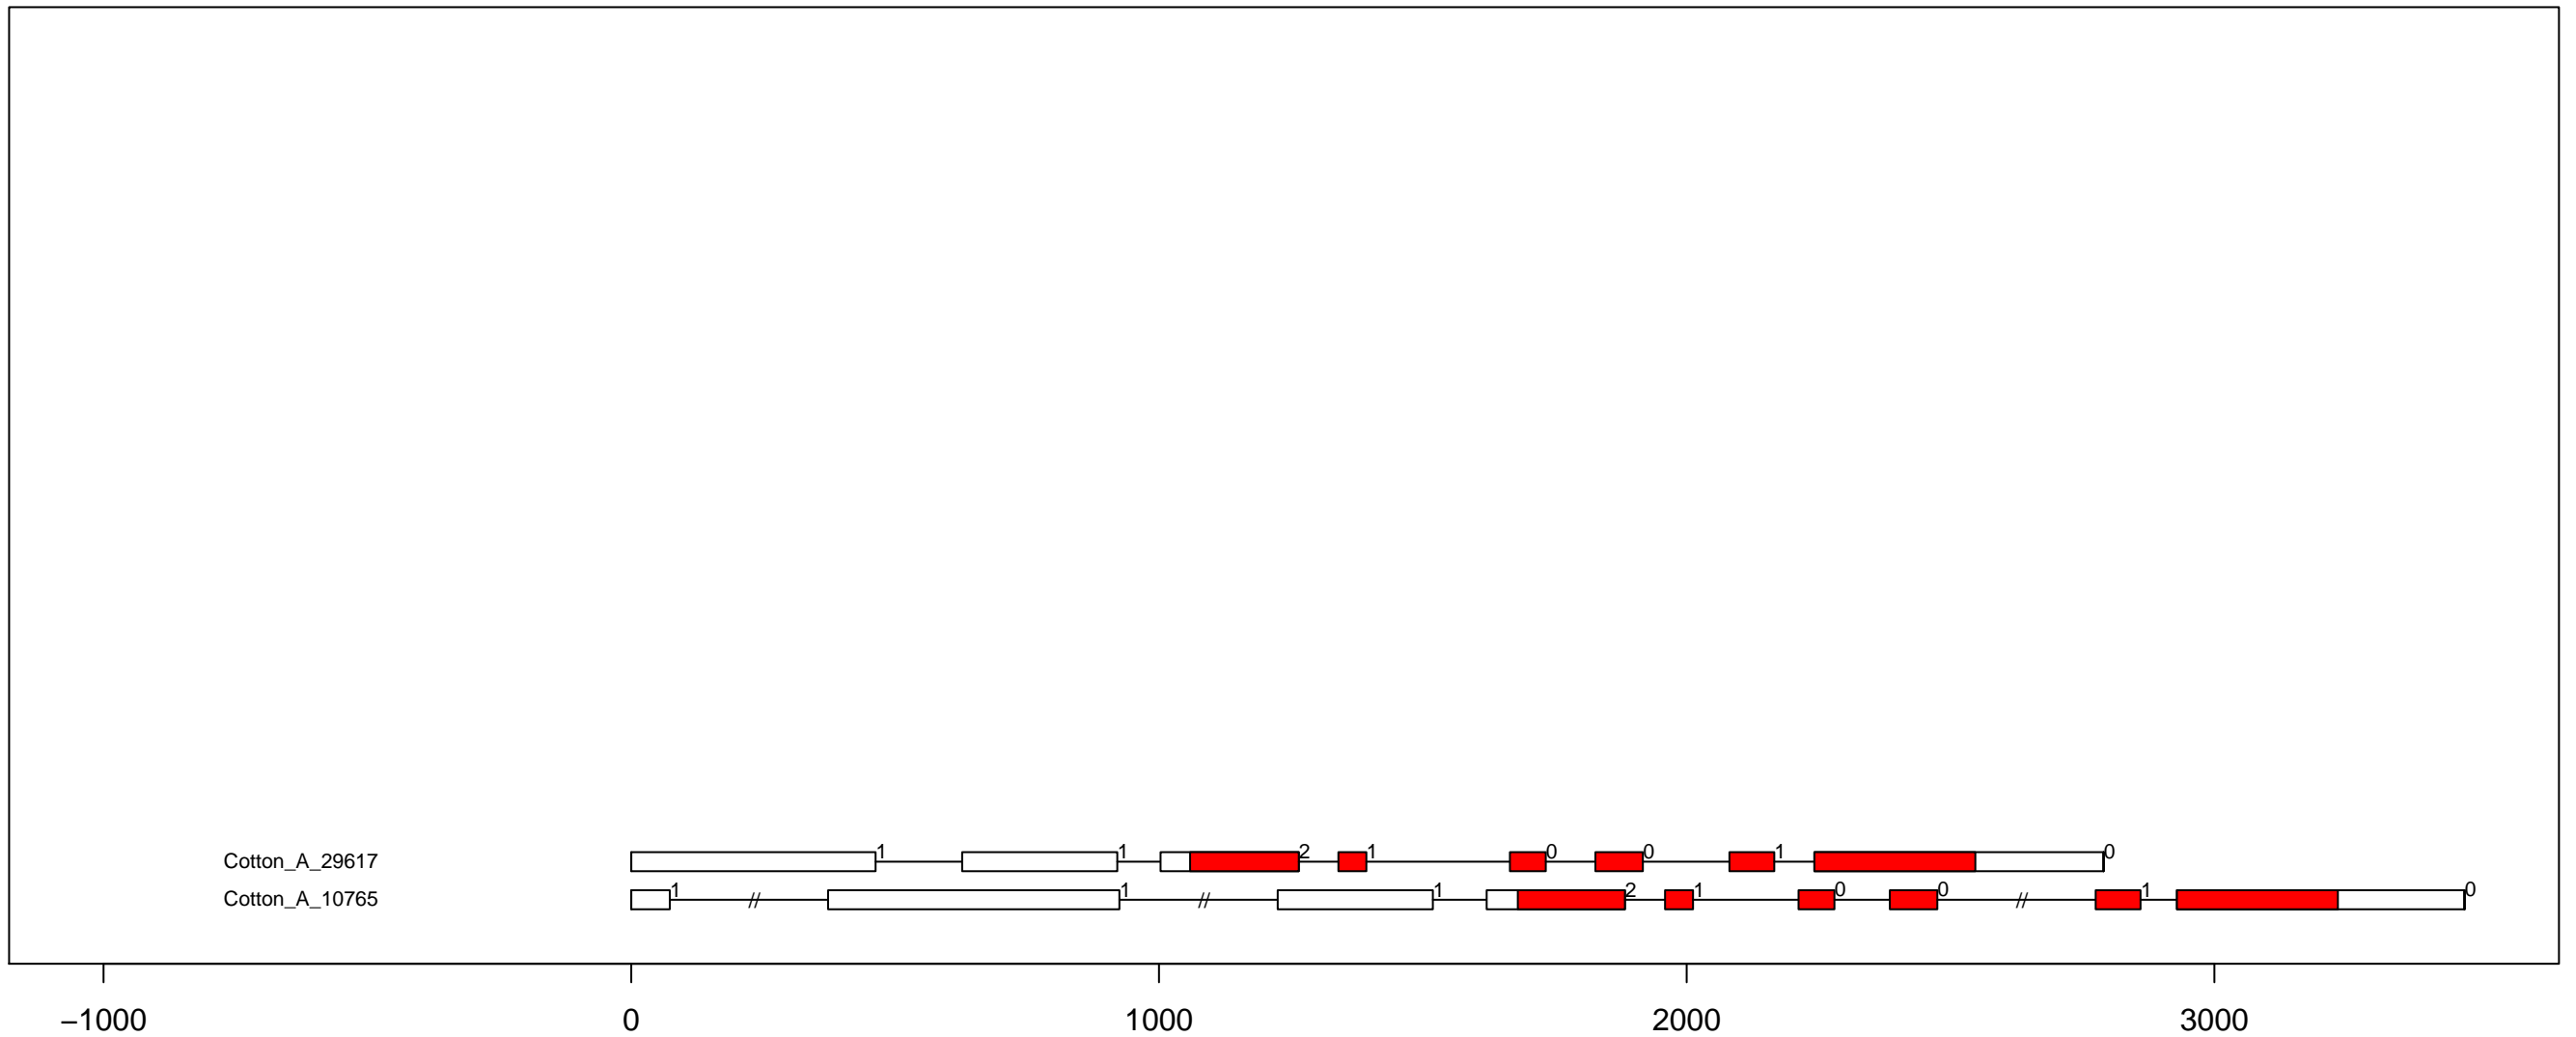



# G.ar RLK-Pelle\_URK-3 exon-intron and domain diagram (all)

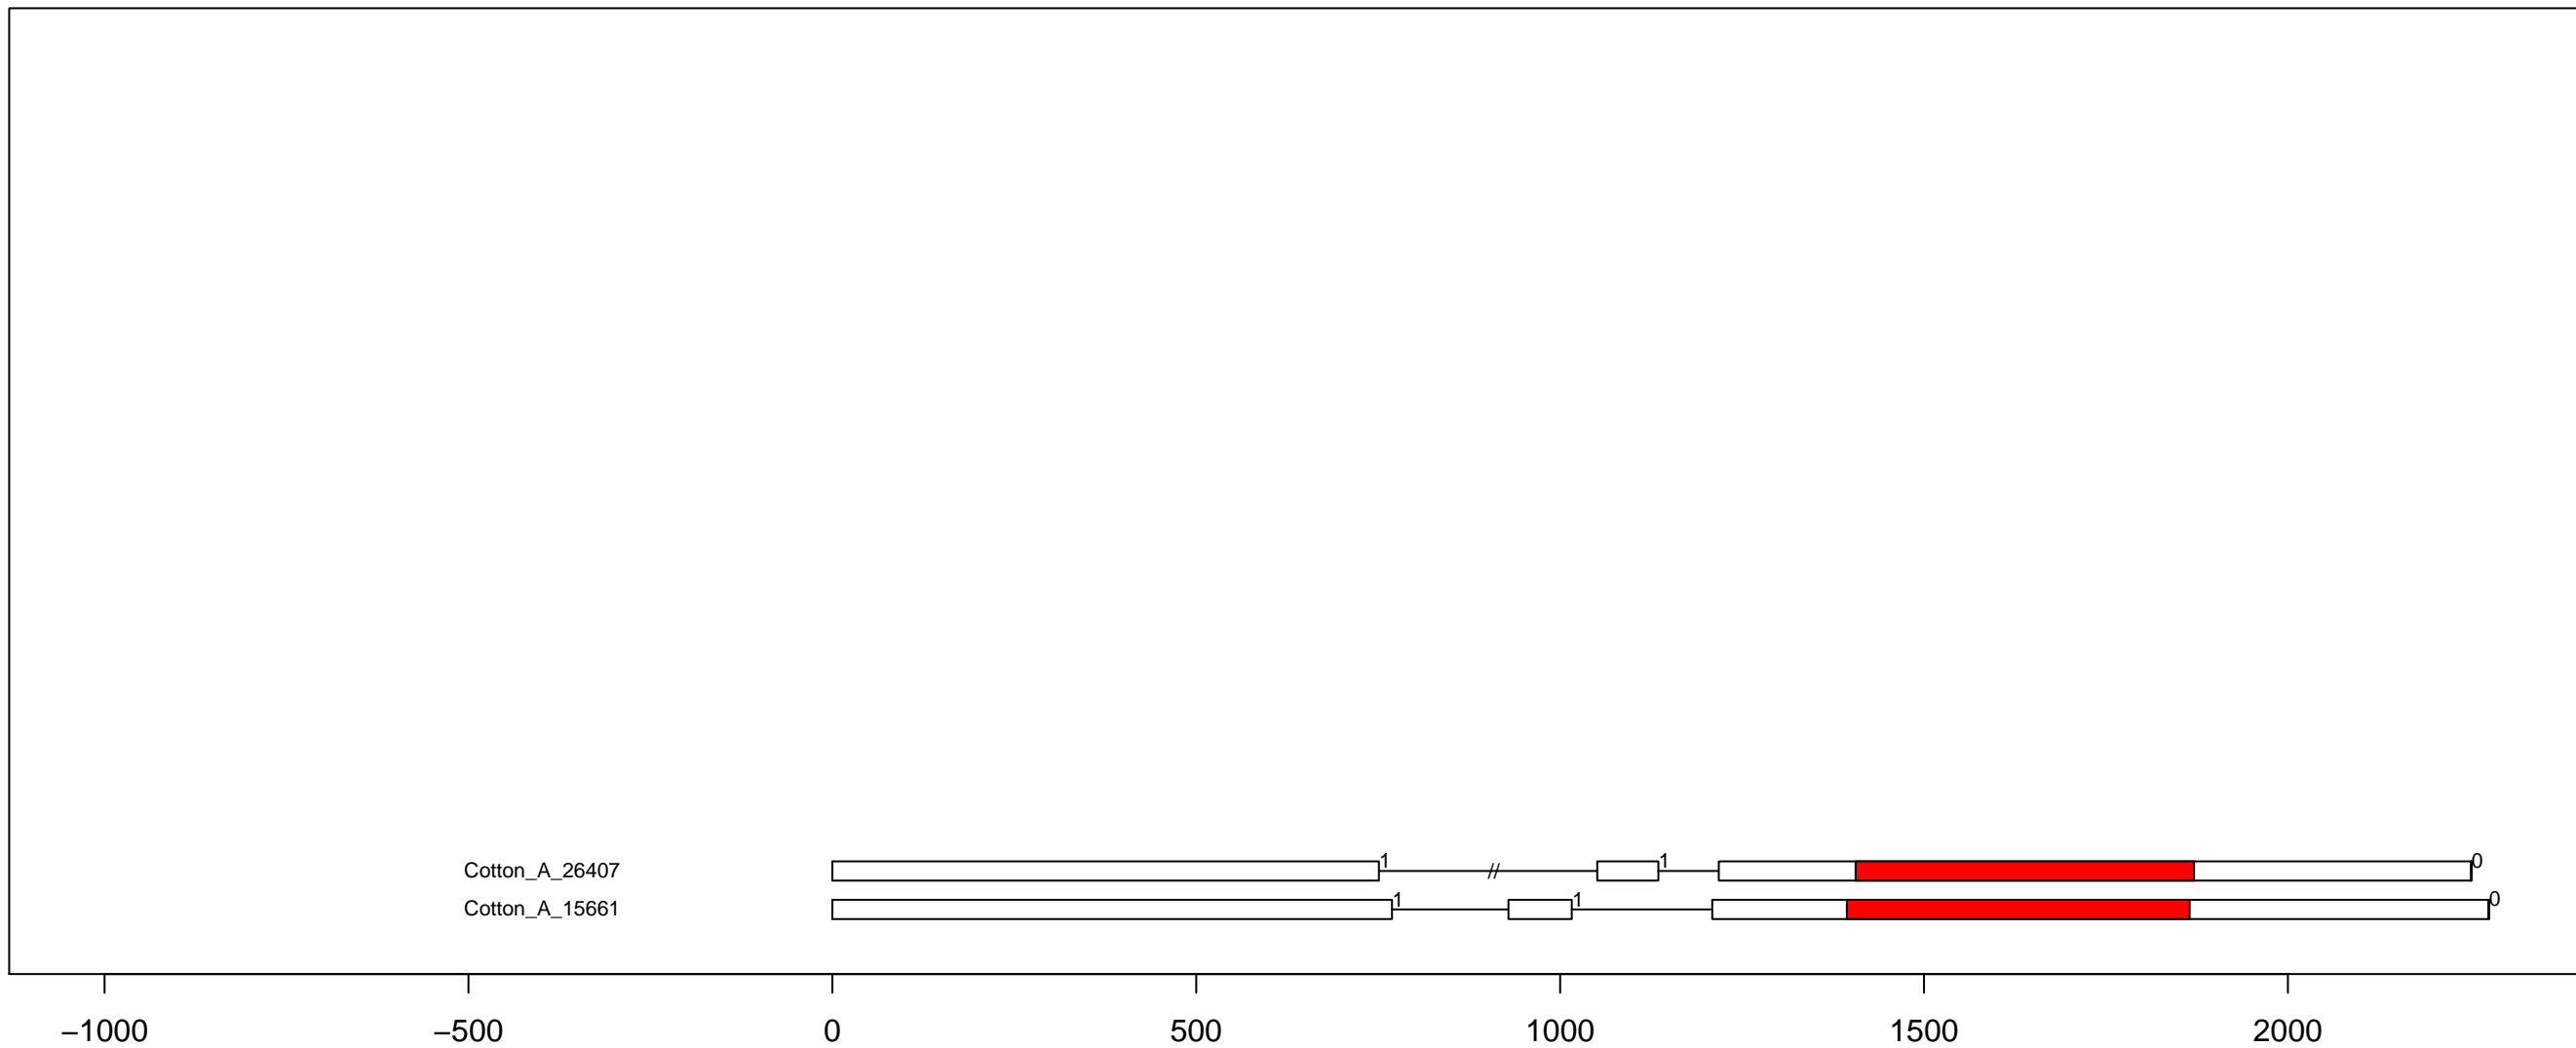

### G.ar RLK-Pelle\_WAK\_LRK10L-1 exon-intron and domain diagram (all)

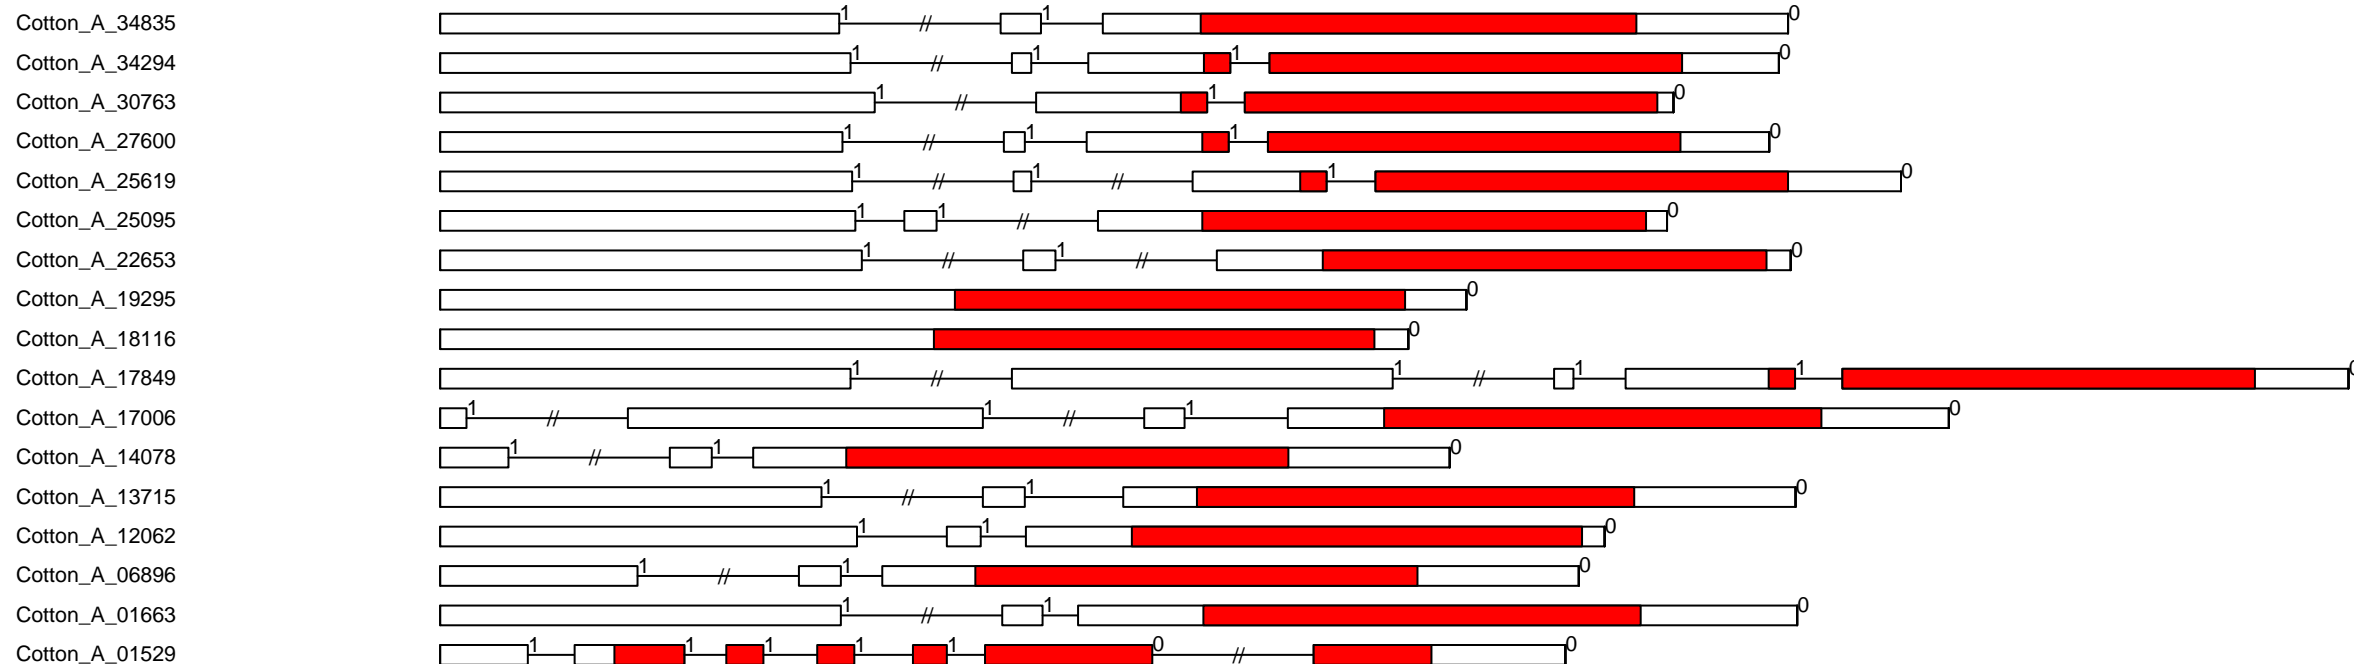

-1000

0

1000

2000

3000

### G.ar RLK-Pelle\_WAK exon-intron and domain diagram (part 1)

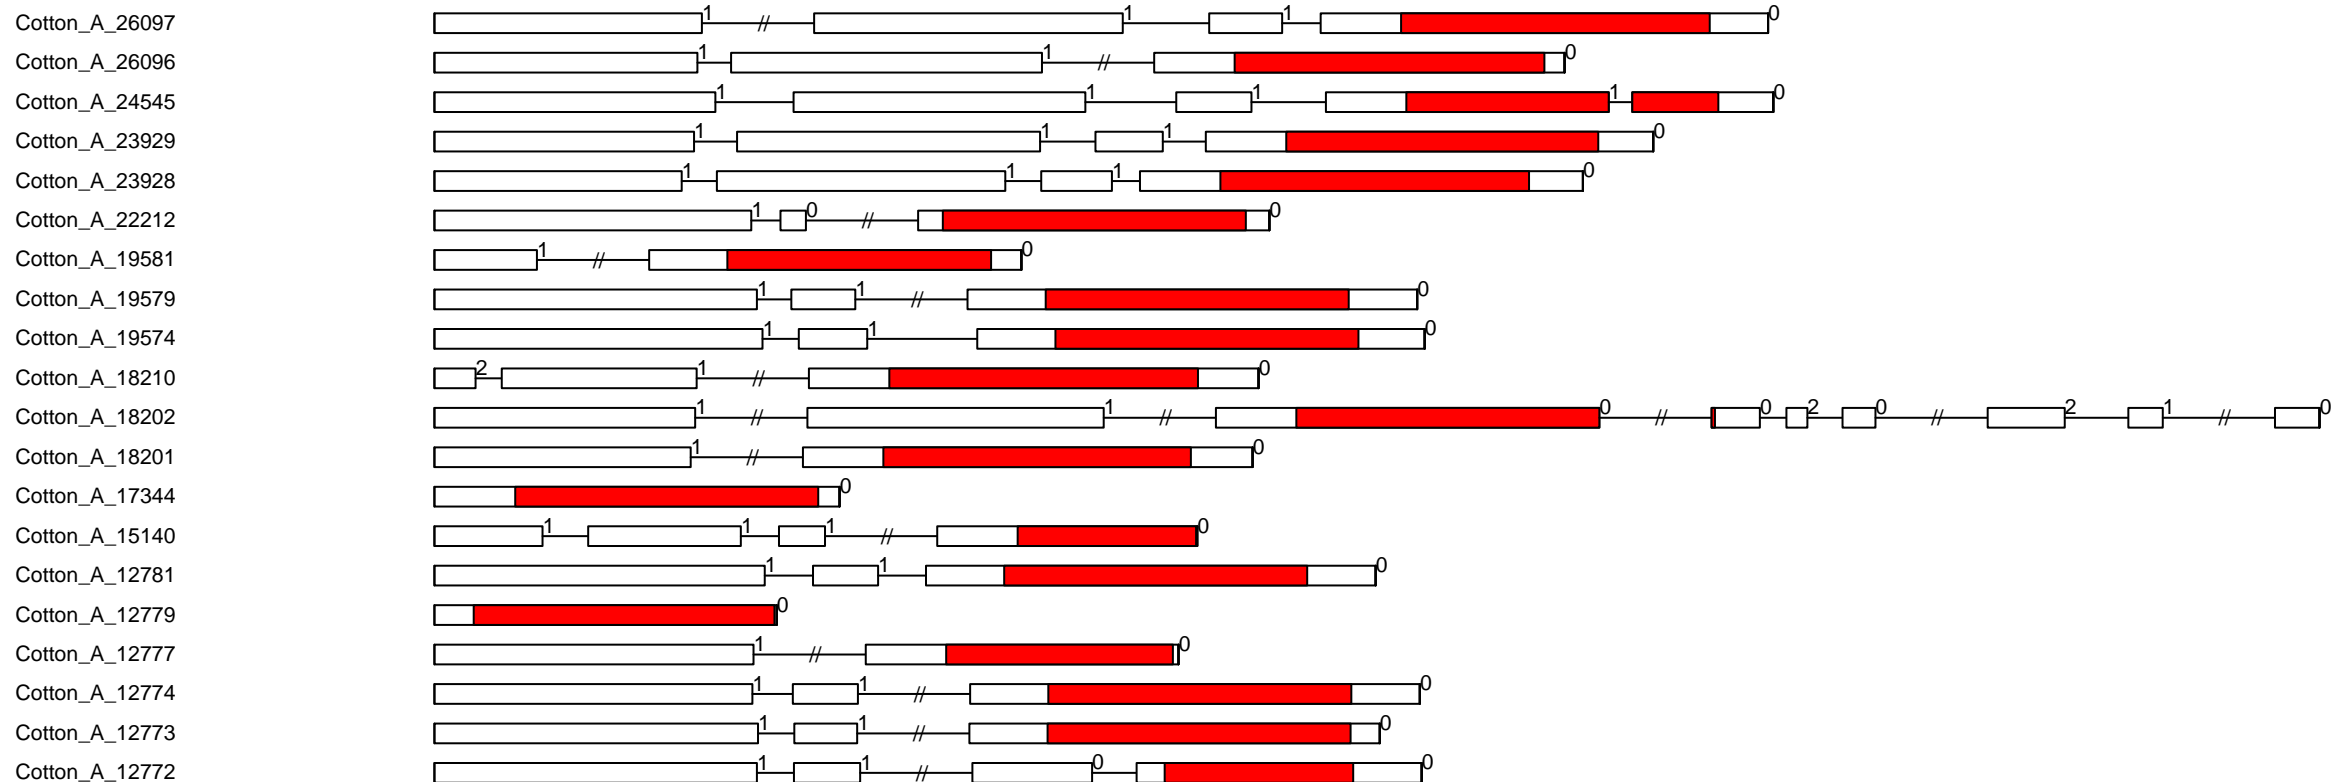

### G.ar RLK-Pelle\_WAK exon-intron and domain diagram (part 2)

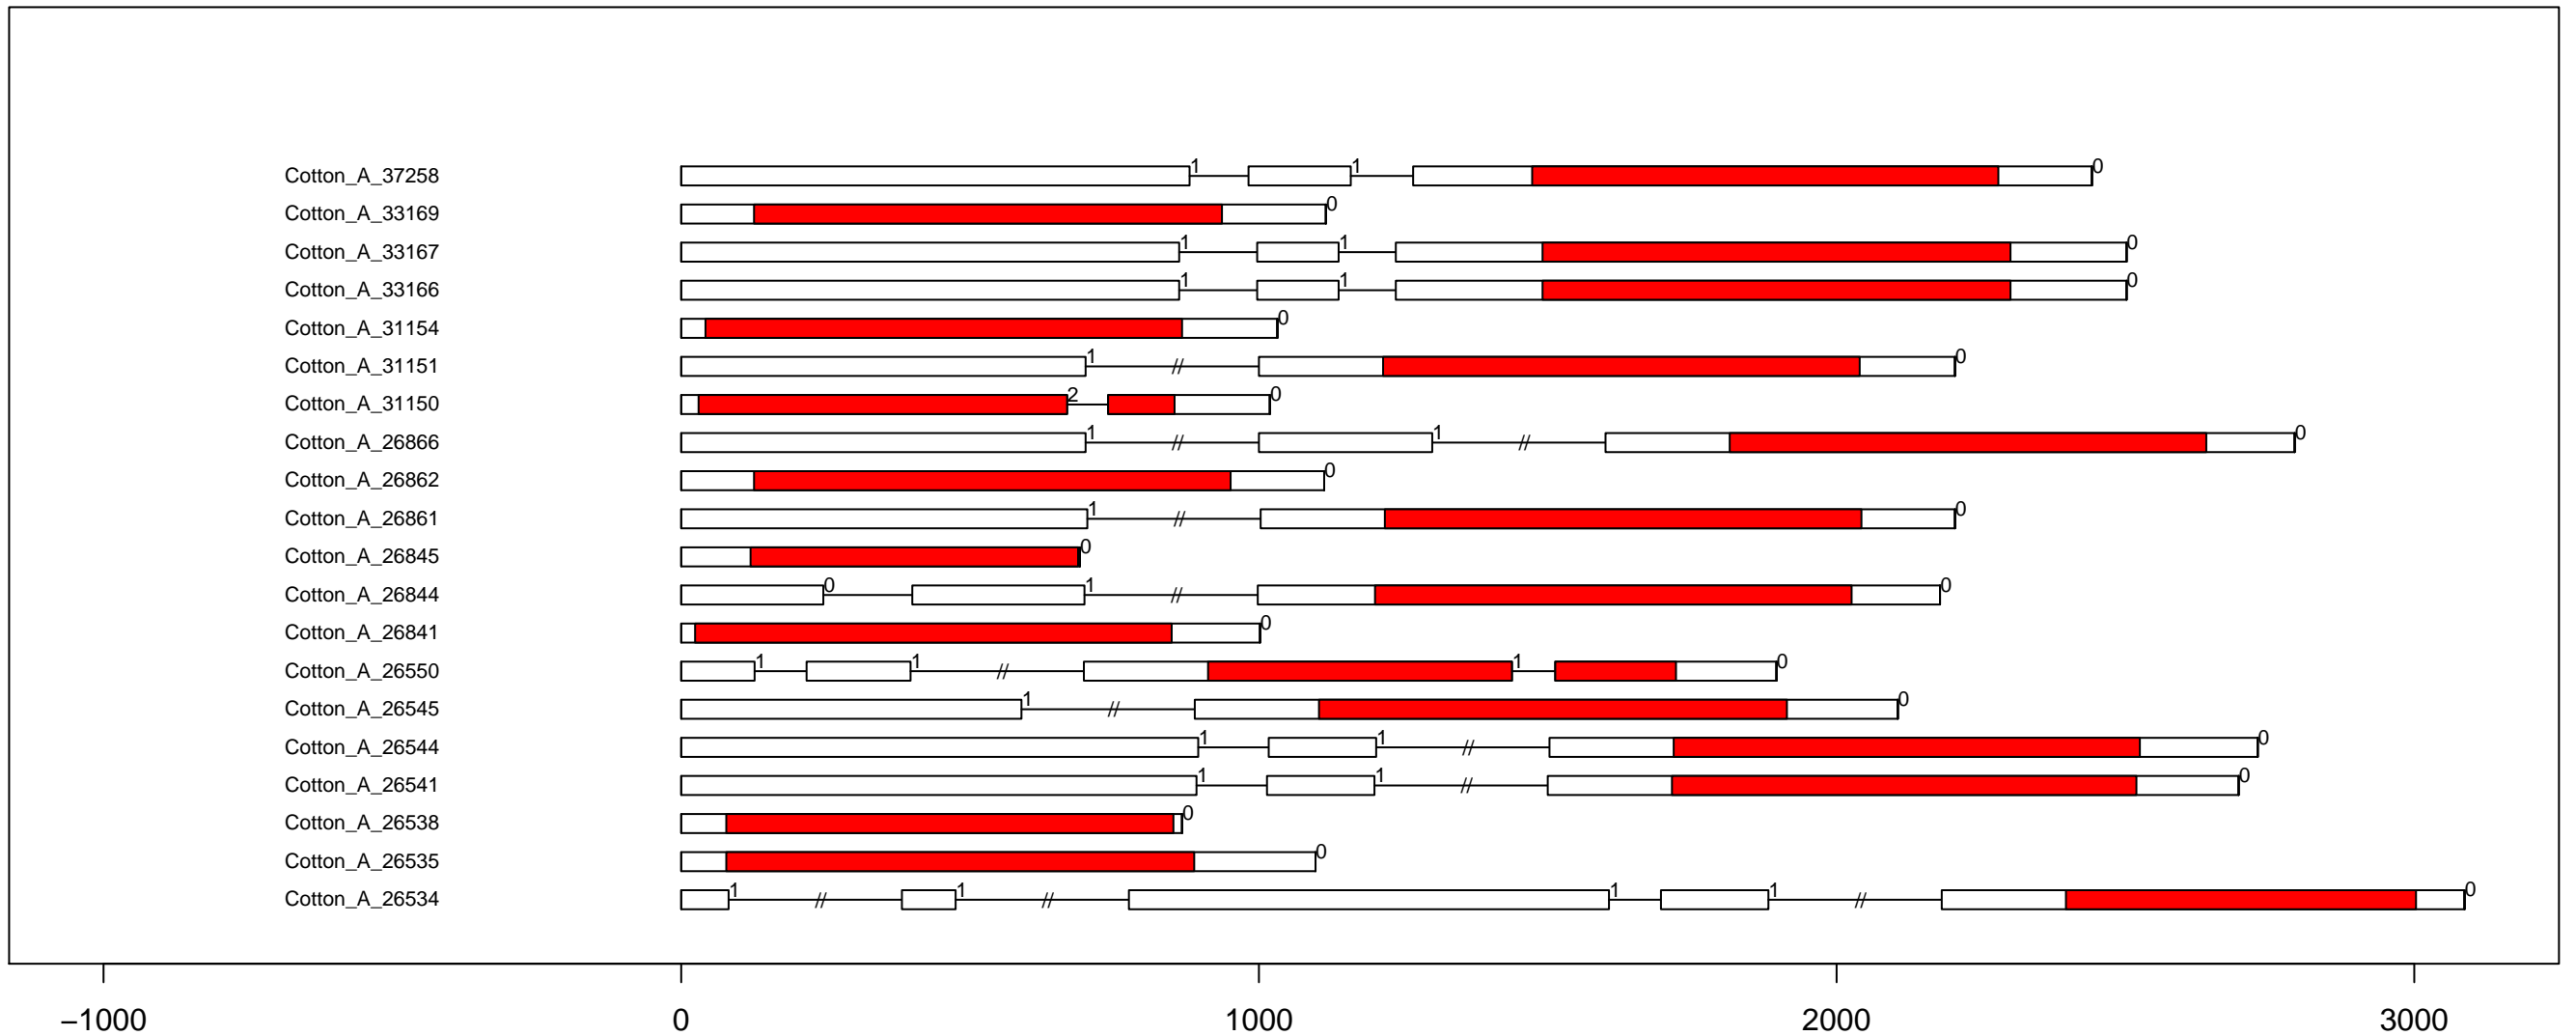



# G.ar SCY1\_SCYL1 exon-intron and domain diagram (all)

Cotton\_A\_15596  
Cotton\_A\_04045

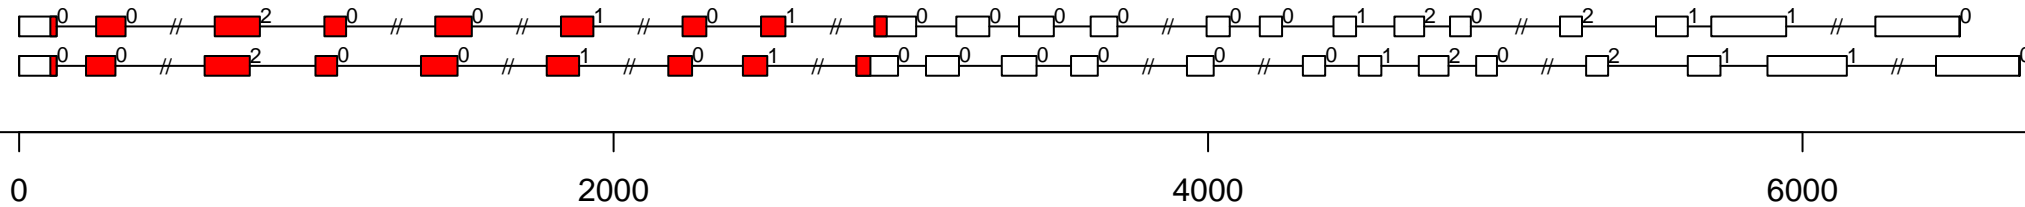

# G.ar SCY1\_SCYL2 exon-intron and domain diagram (all)

Cotton\_A\_05837

Cotton\_A\_04541

Cotton\_A\_04017

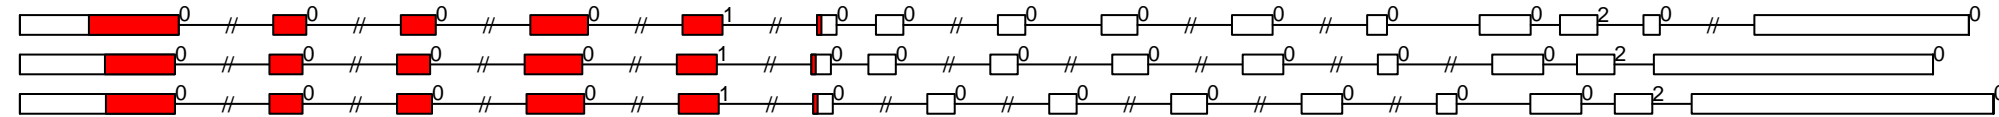

0

2000

4000

6000

### G.ar STE\_STE11 exon-intron and domain diagram (part 1)

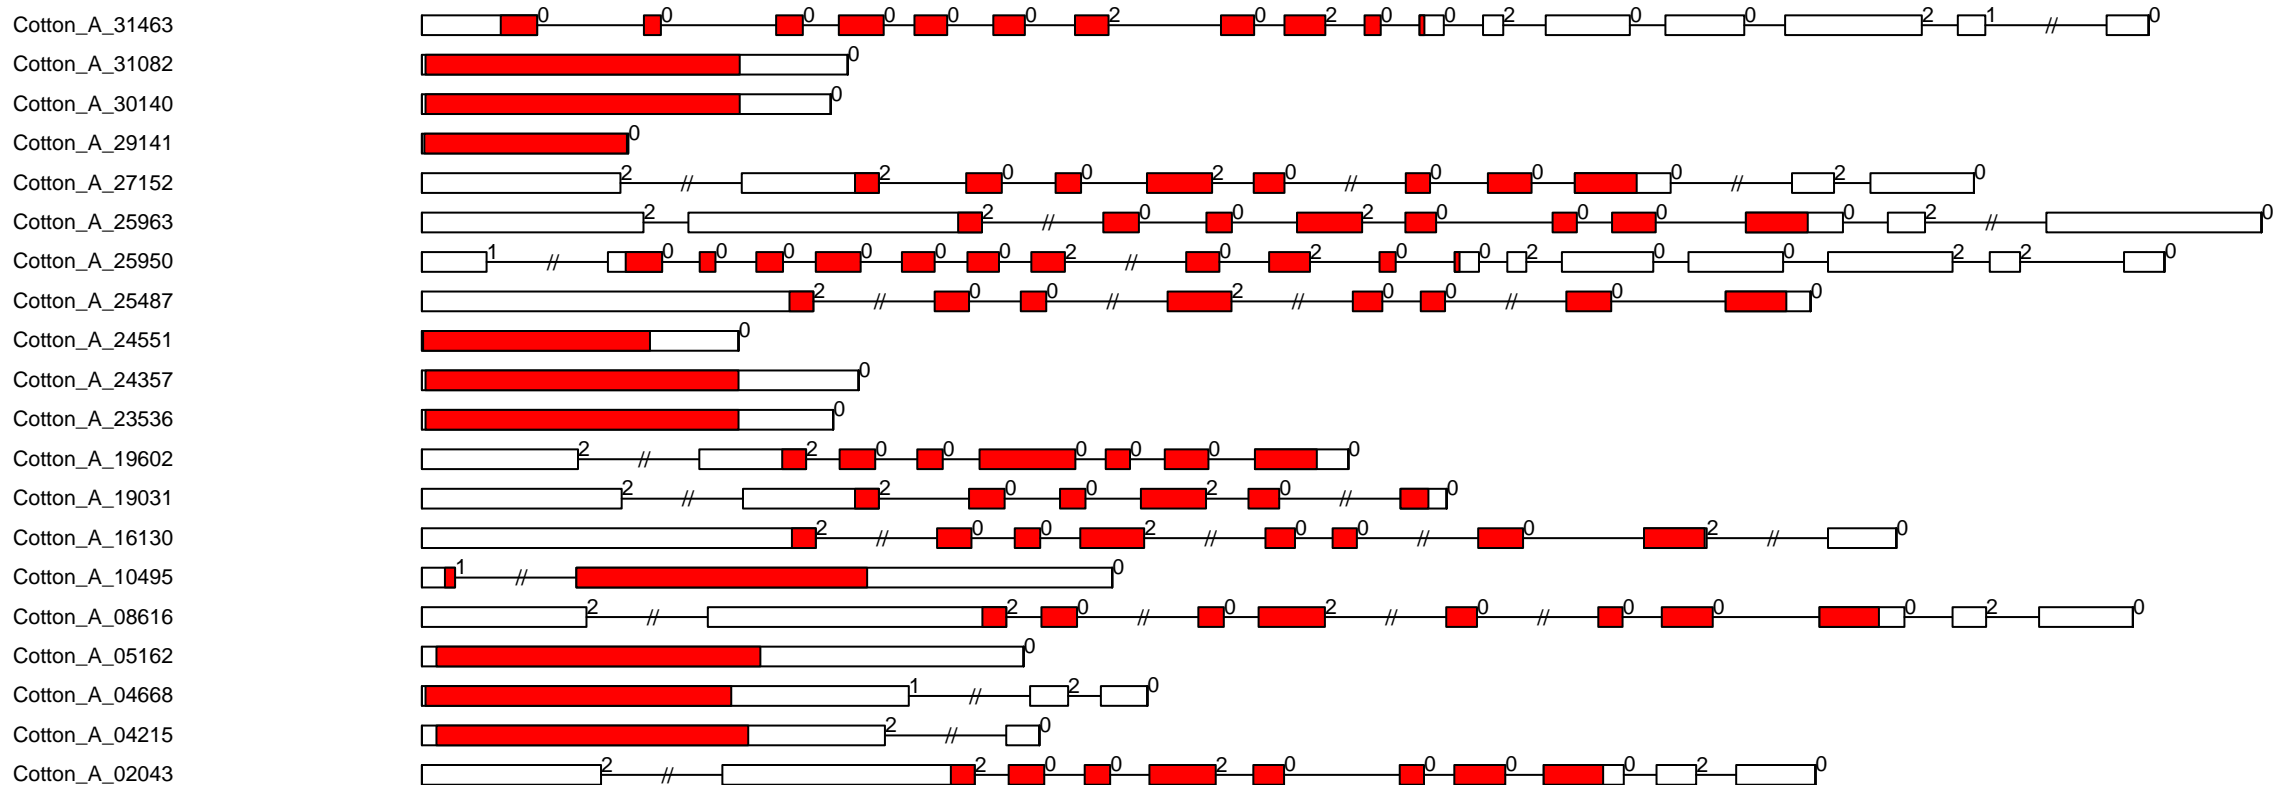



# G.ar STE\_STE20-Fray exon-intron and domain diagram (all)

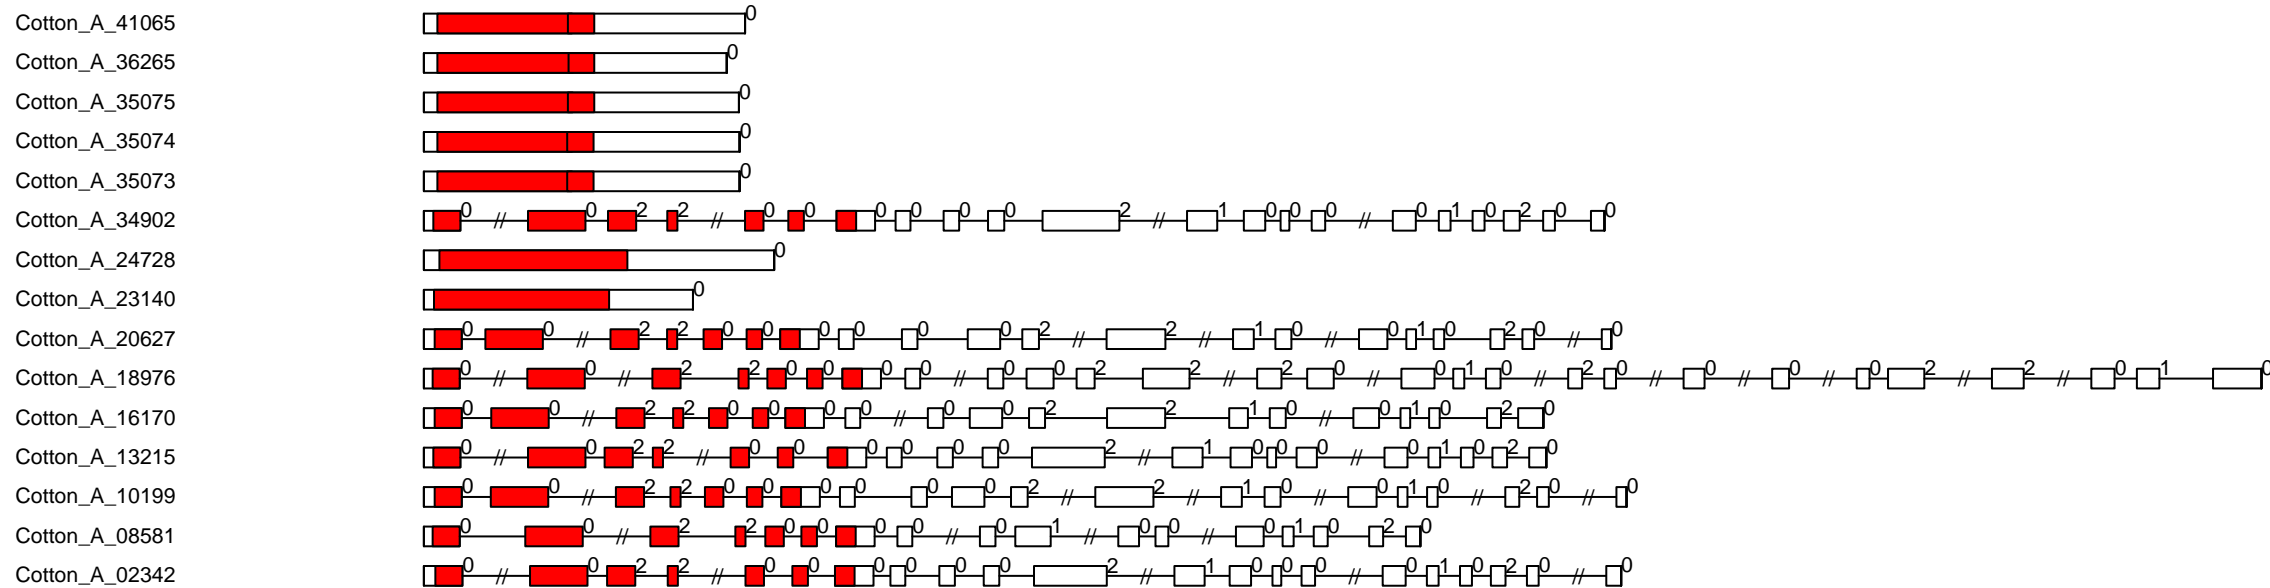

G.ar STE\_STE20-PI exon-intron and domain diagram (all)

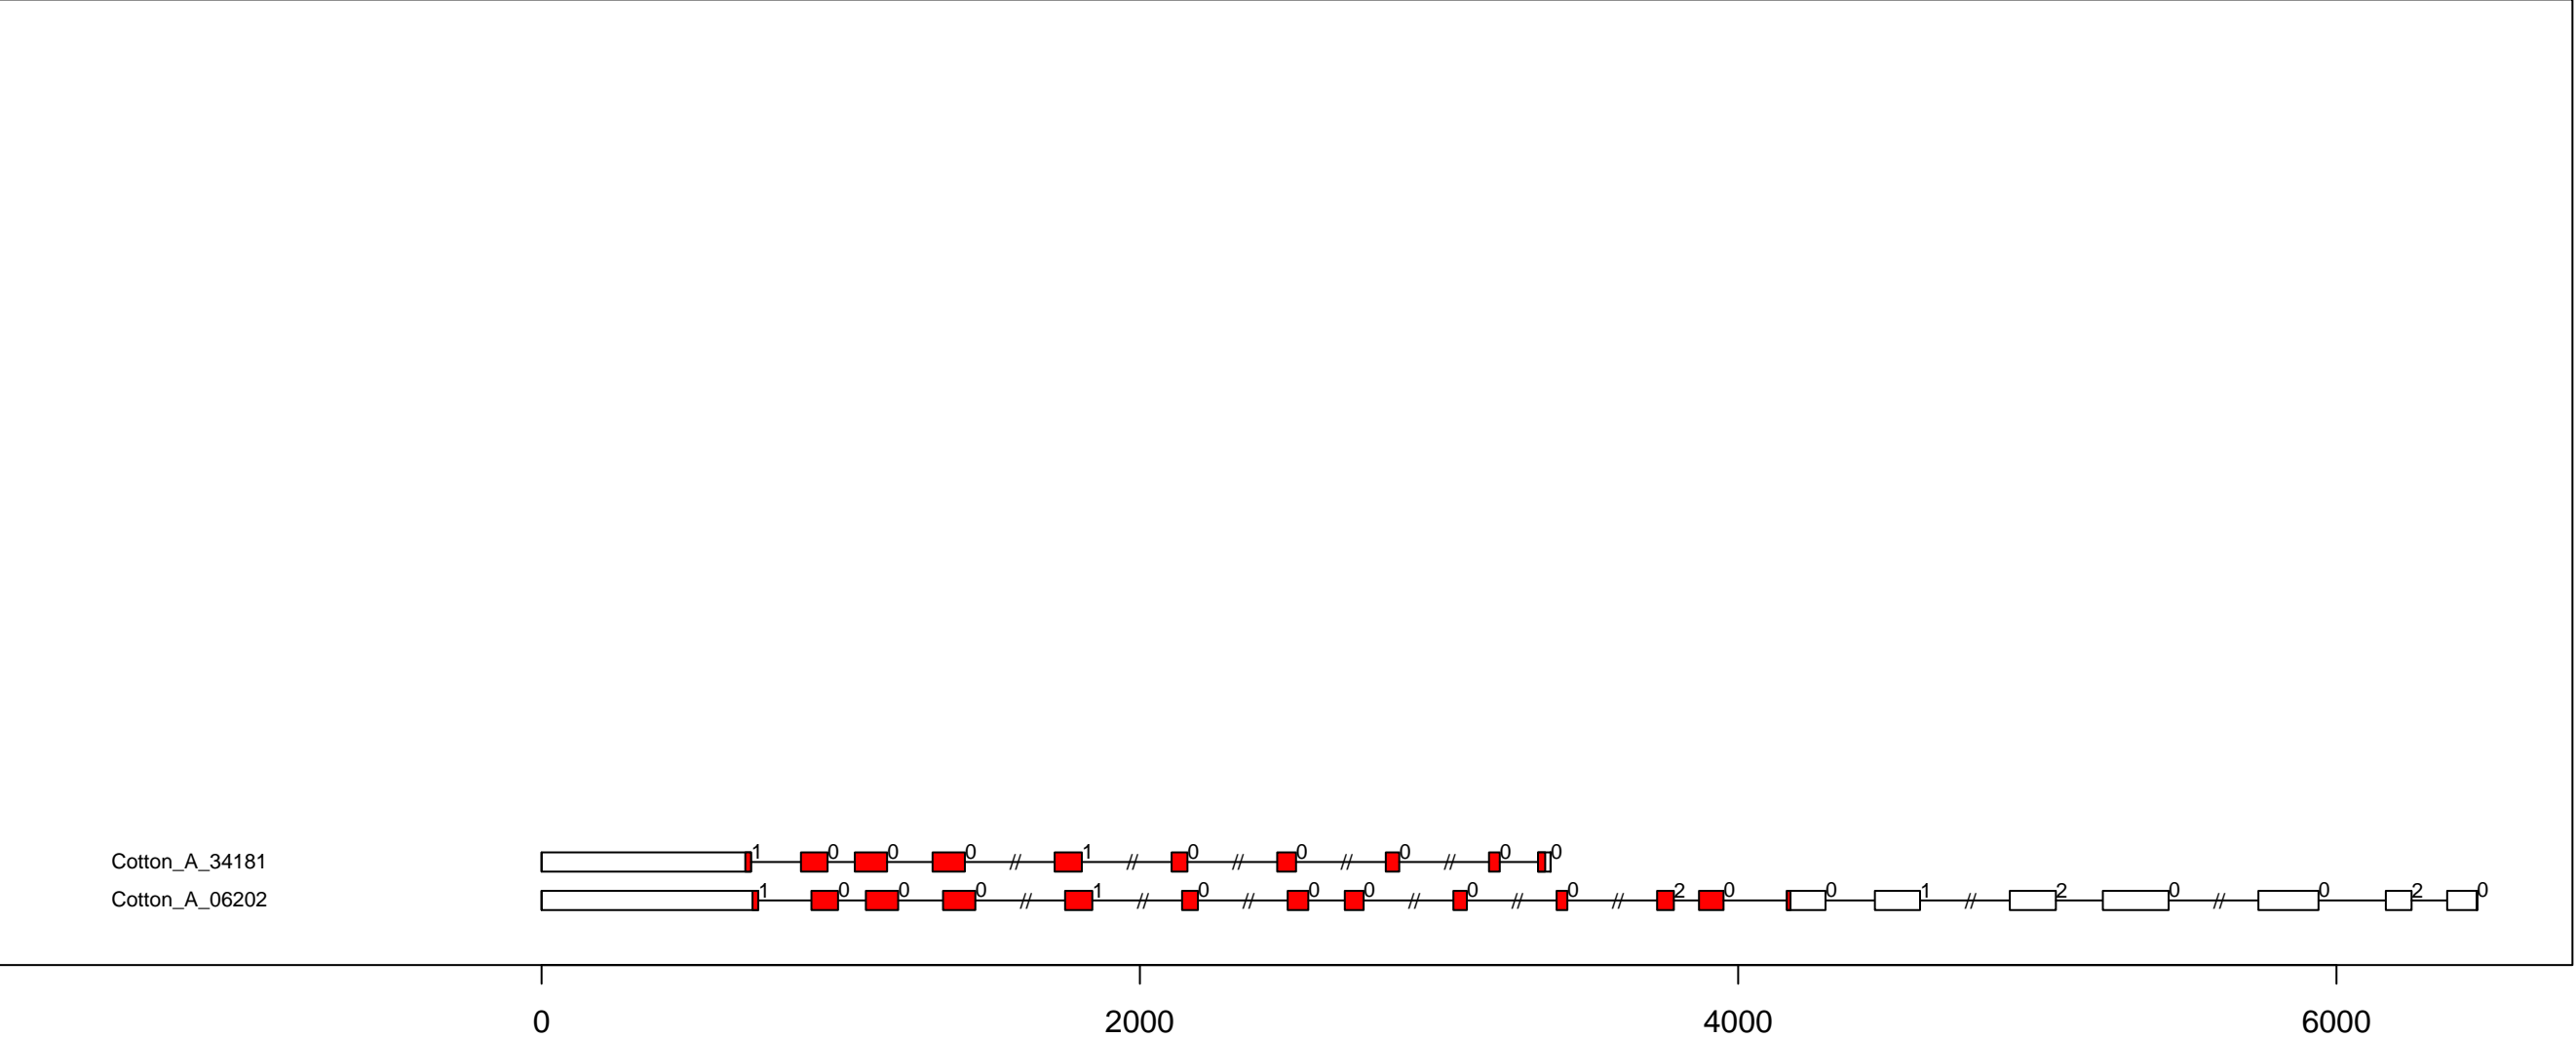

# G.ar STE\_STE20-YSK exon-intron and domain diagram (all)

Cotton\_A\_16780

Cotton\_A\_06259

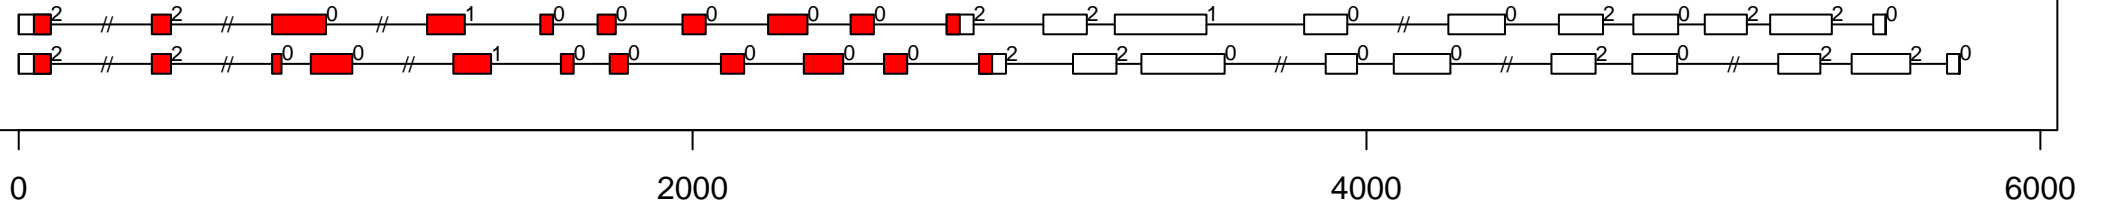





# G.ar STE\_STE-PI exon-intron and domain diagram (all)

Cotton\_A\_14578

Cotton\_A\_08956

Cotton\_A\_00102

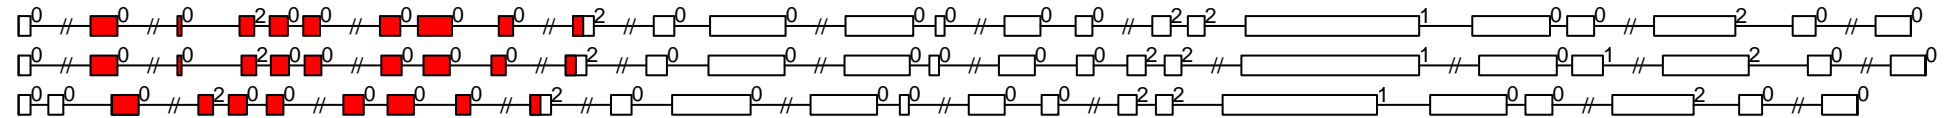

-2000

0

2000

4000

6000

8000

10000

# G.ar TKL\_CTR1-DRK-1 exon-intron and domain diagram (all)

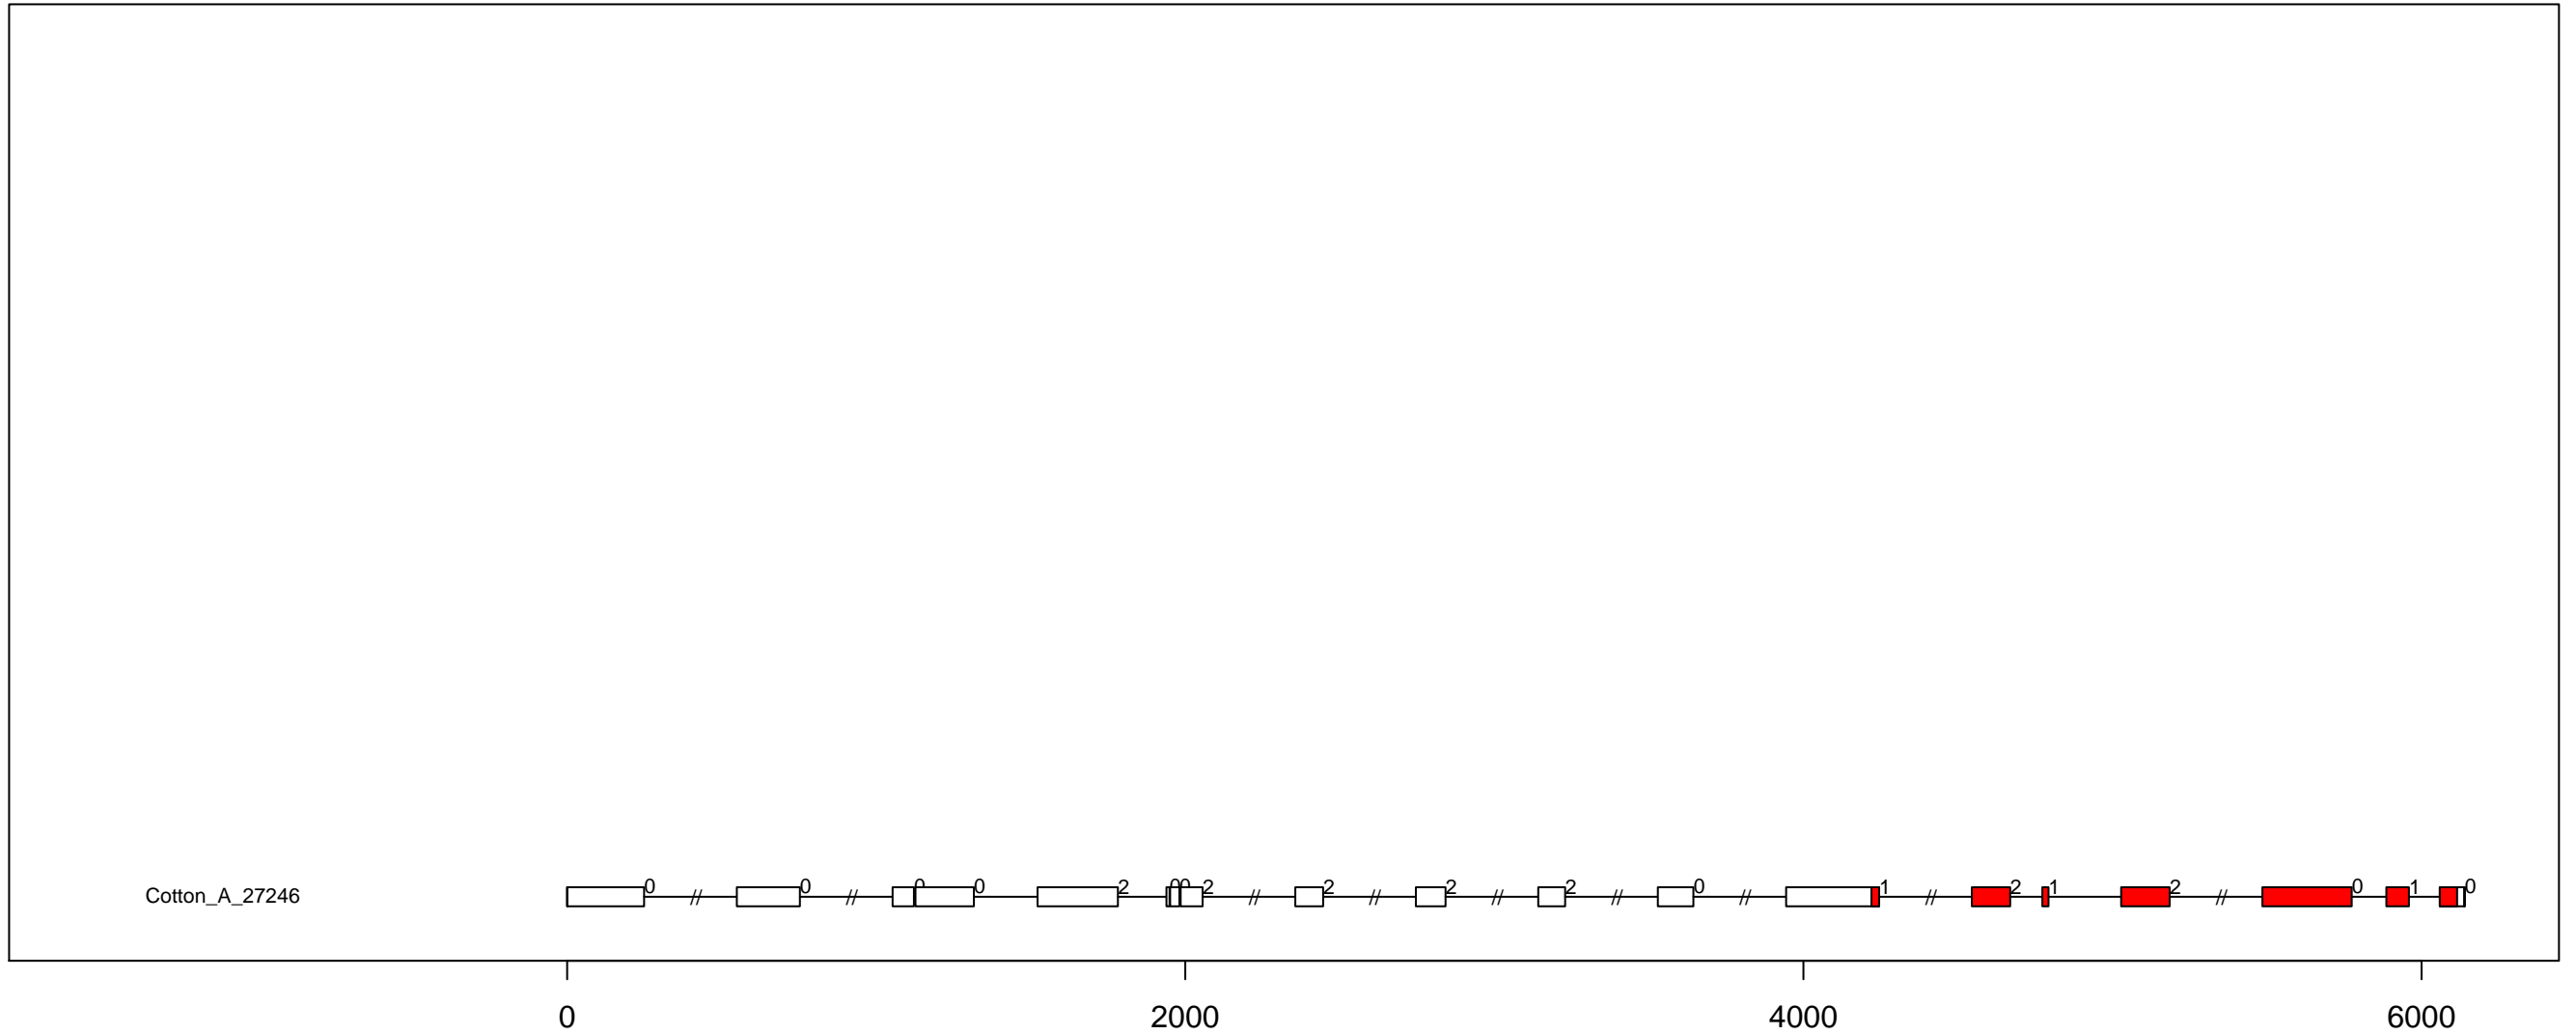

# G.ar TKL\_CTR1-DRK-2 exon-intron and domain diagram (all)

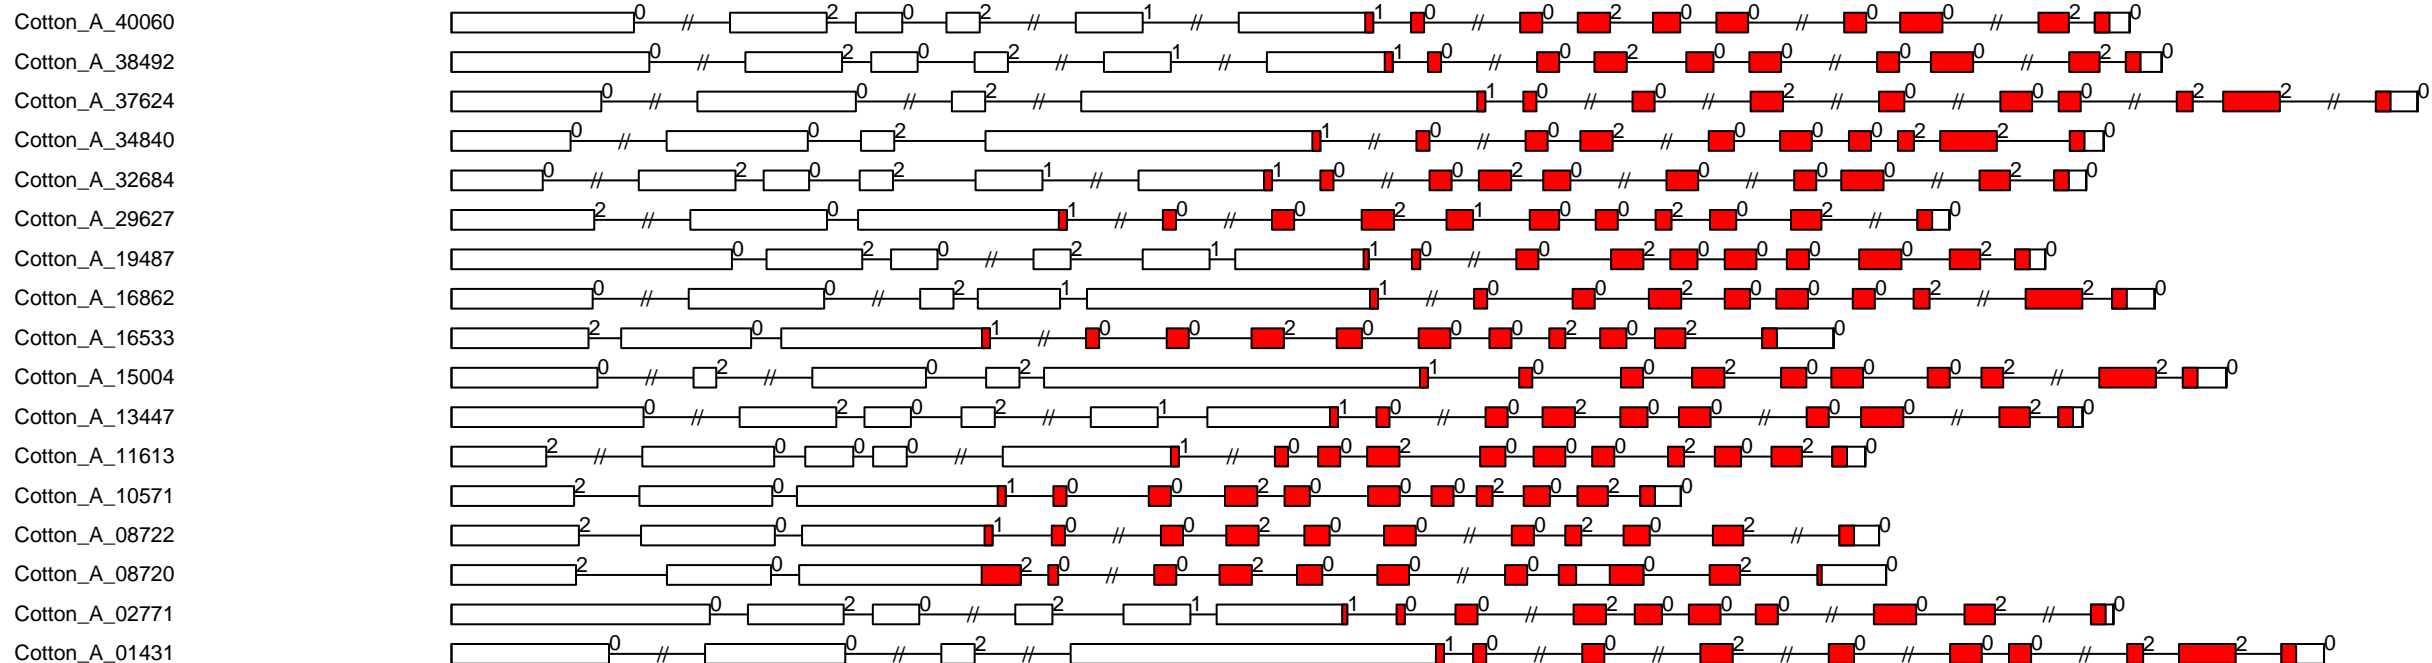

0

2000

4000

6000

G.ar TKL\_Gdt exon-intron and domain diagram (all)

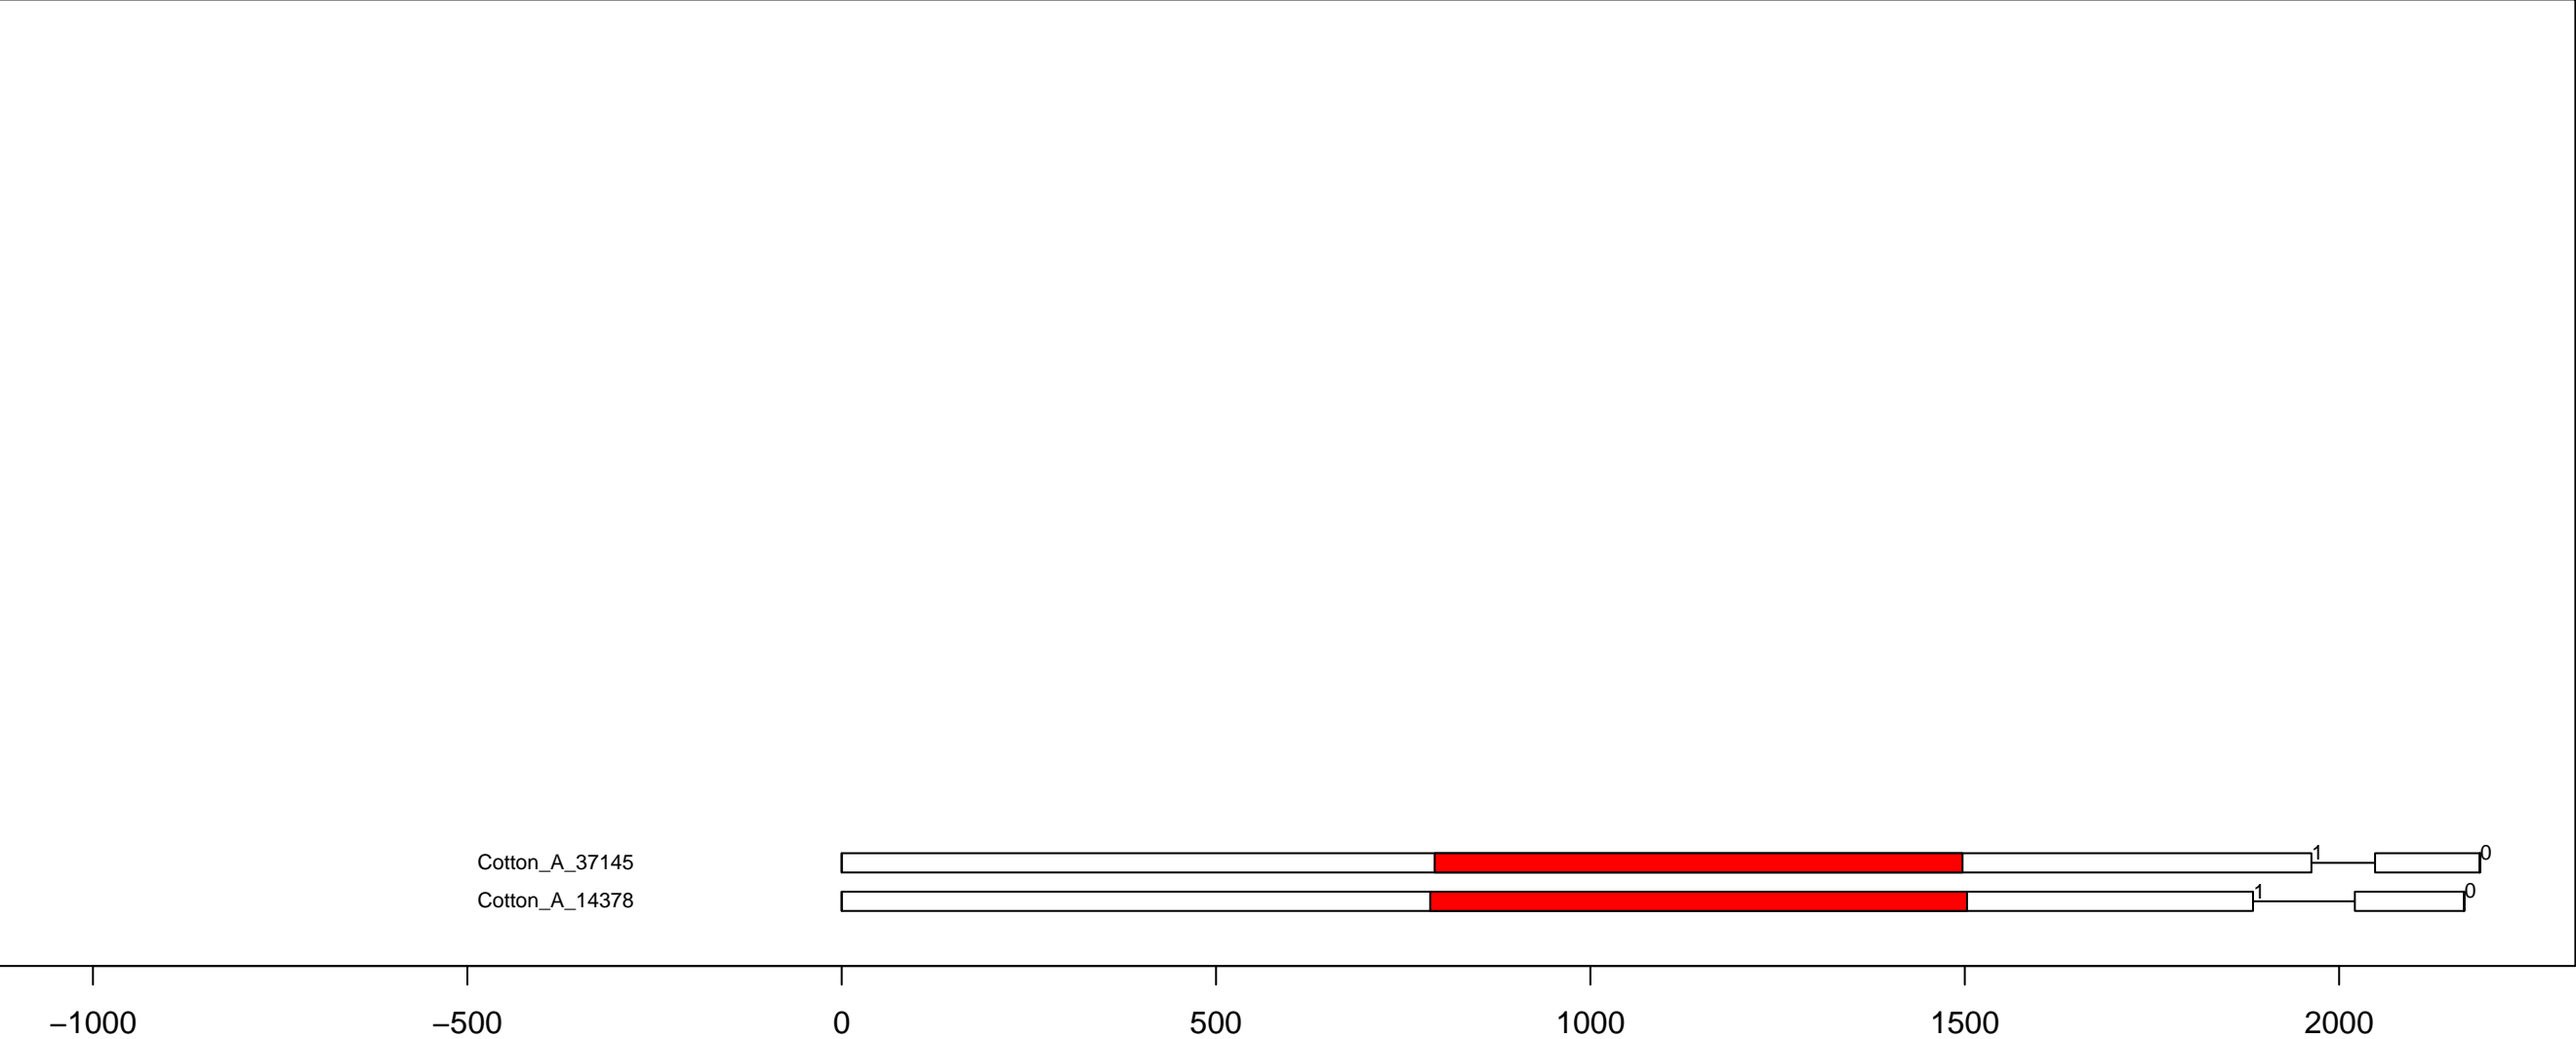

# G.ar TKL-PI-1 exon-intron and domain diagram (all)

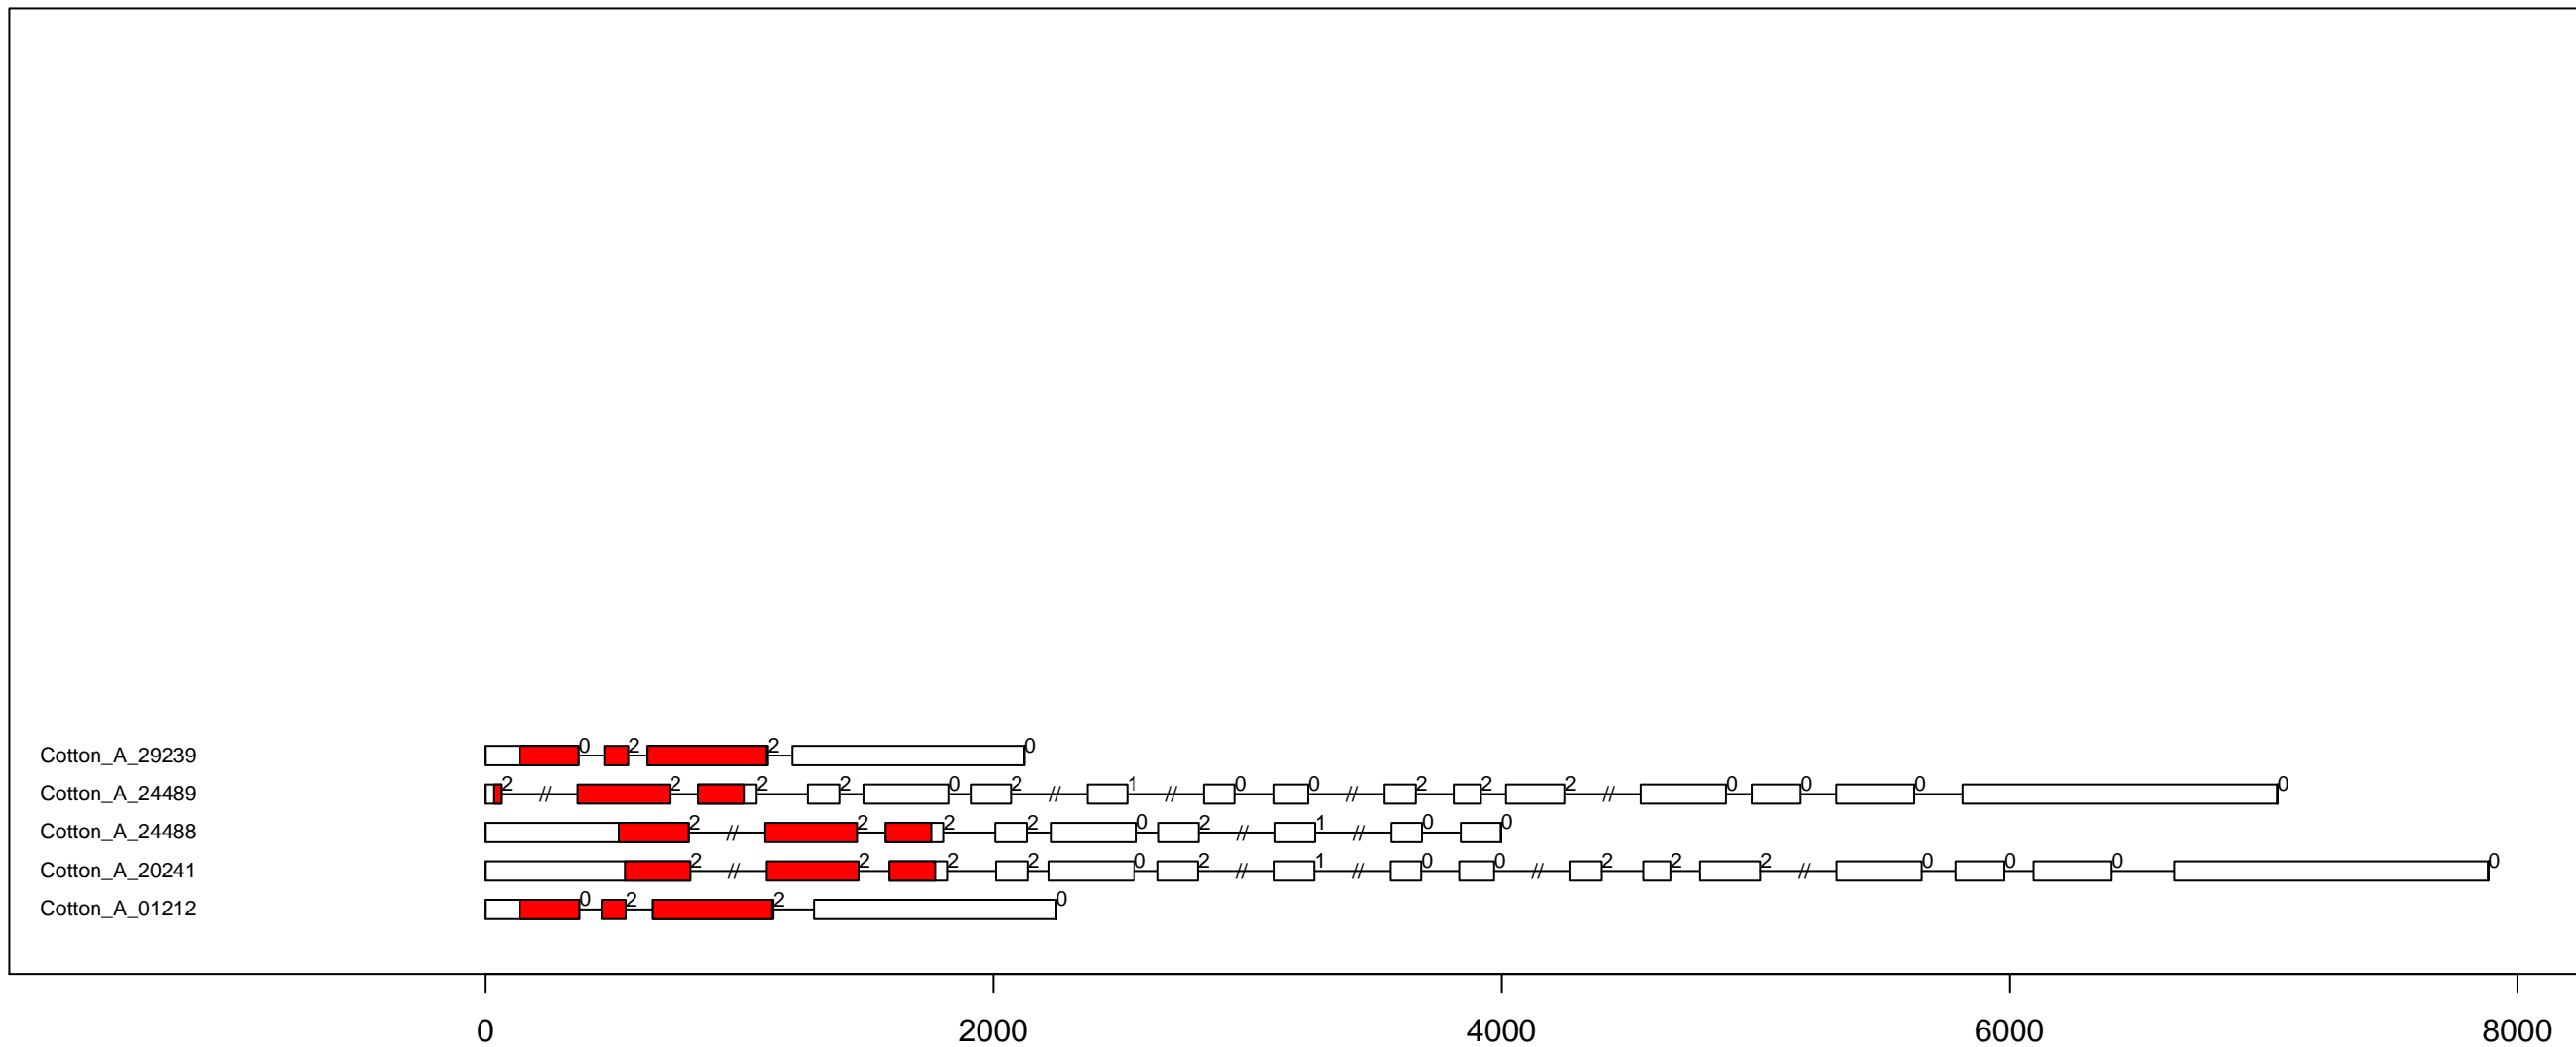

# G.ar TKL-PI-2 exon-intron and domain diagram (all)

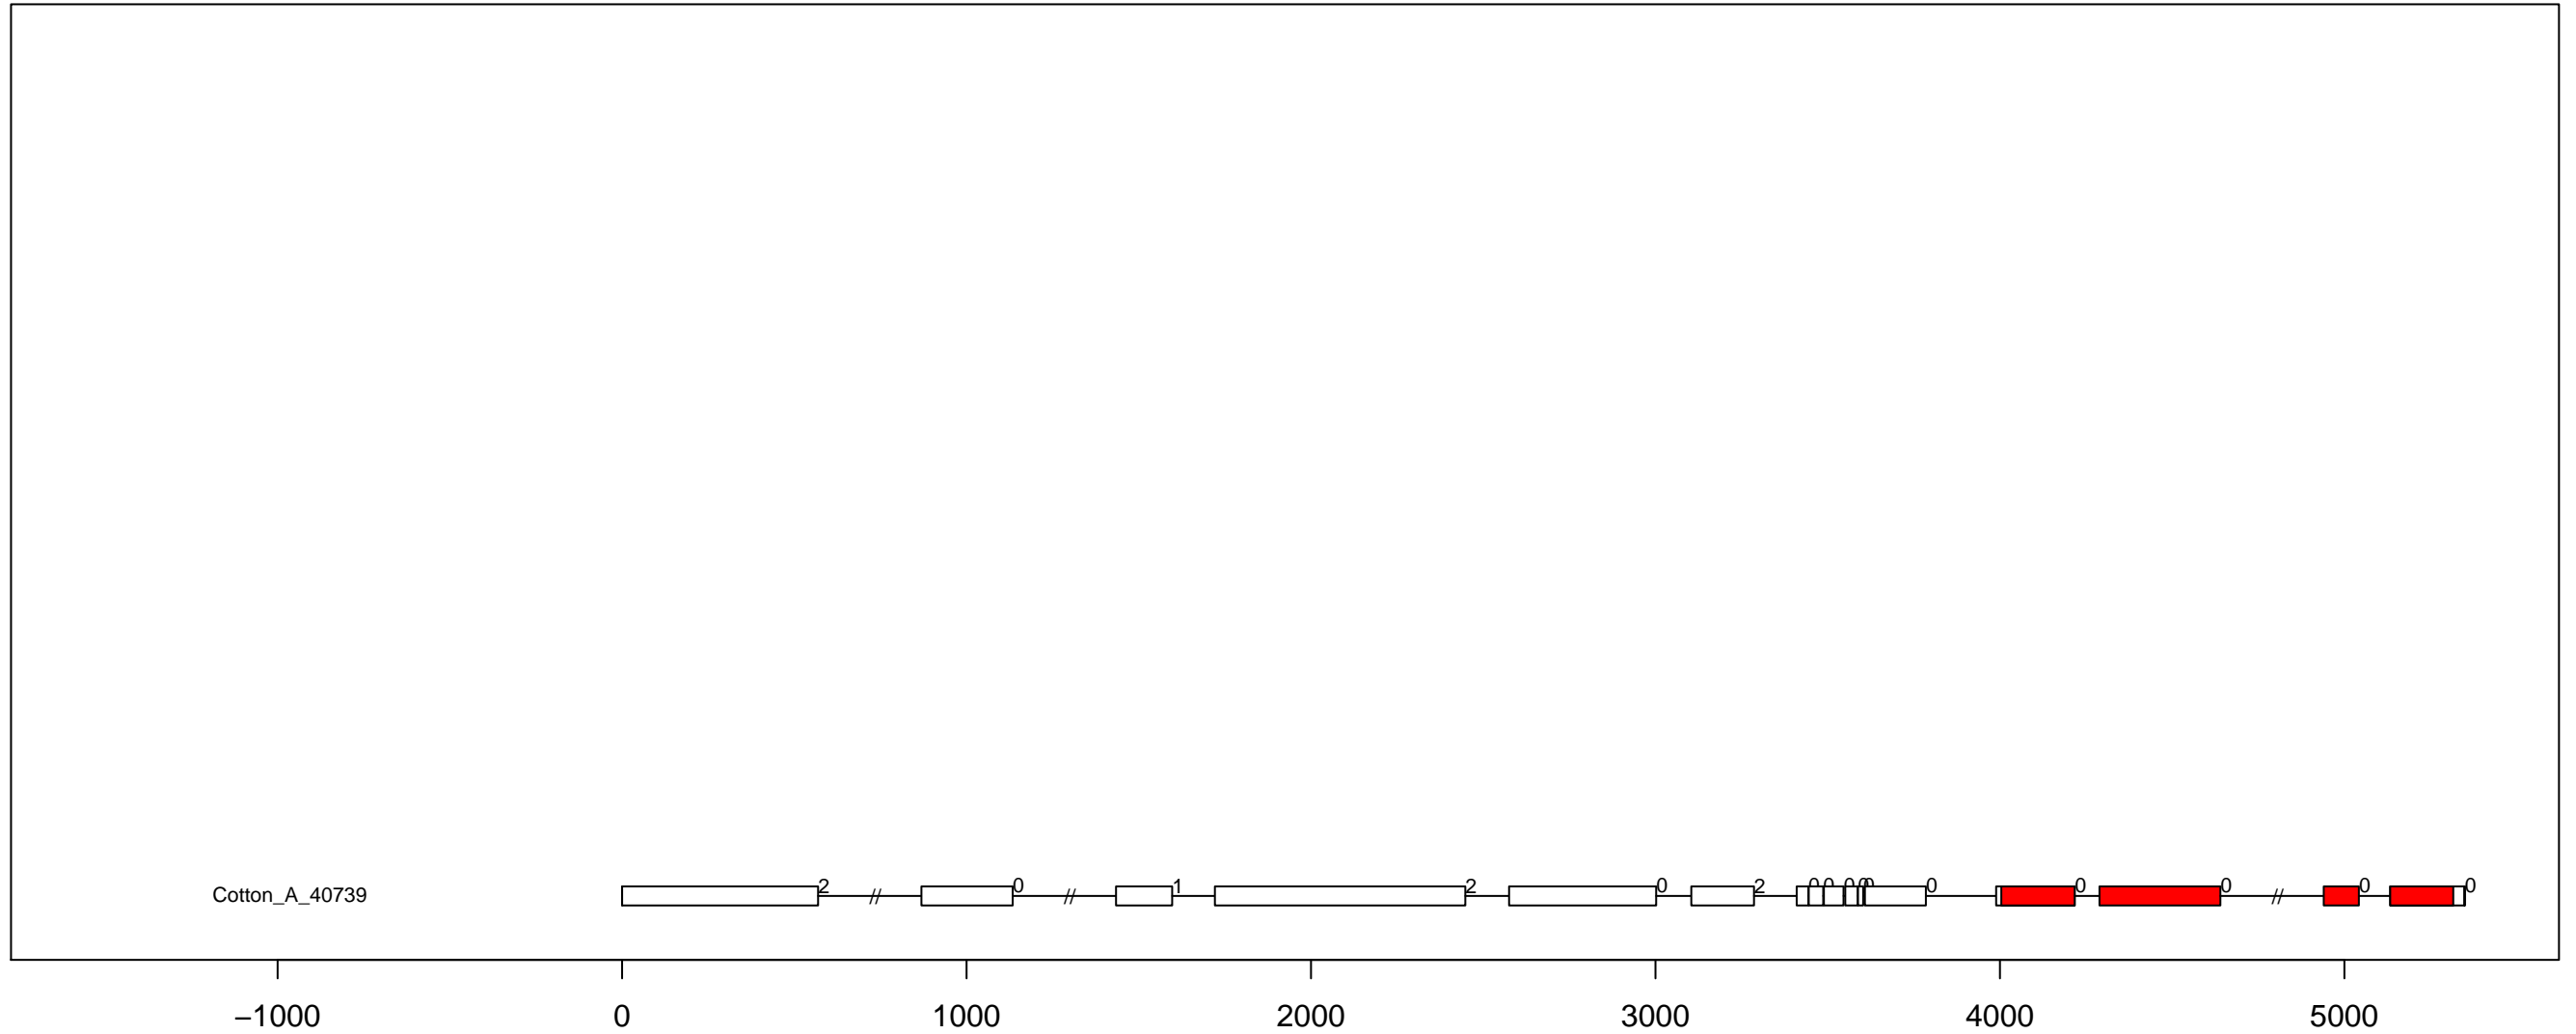

# G.ar TKL-PI-3 exon-intron and domain diagram (all)

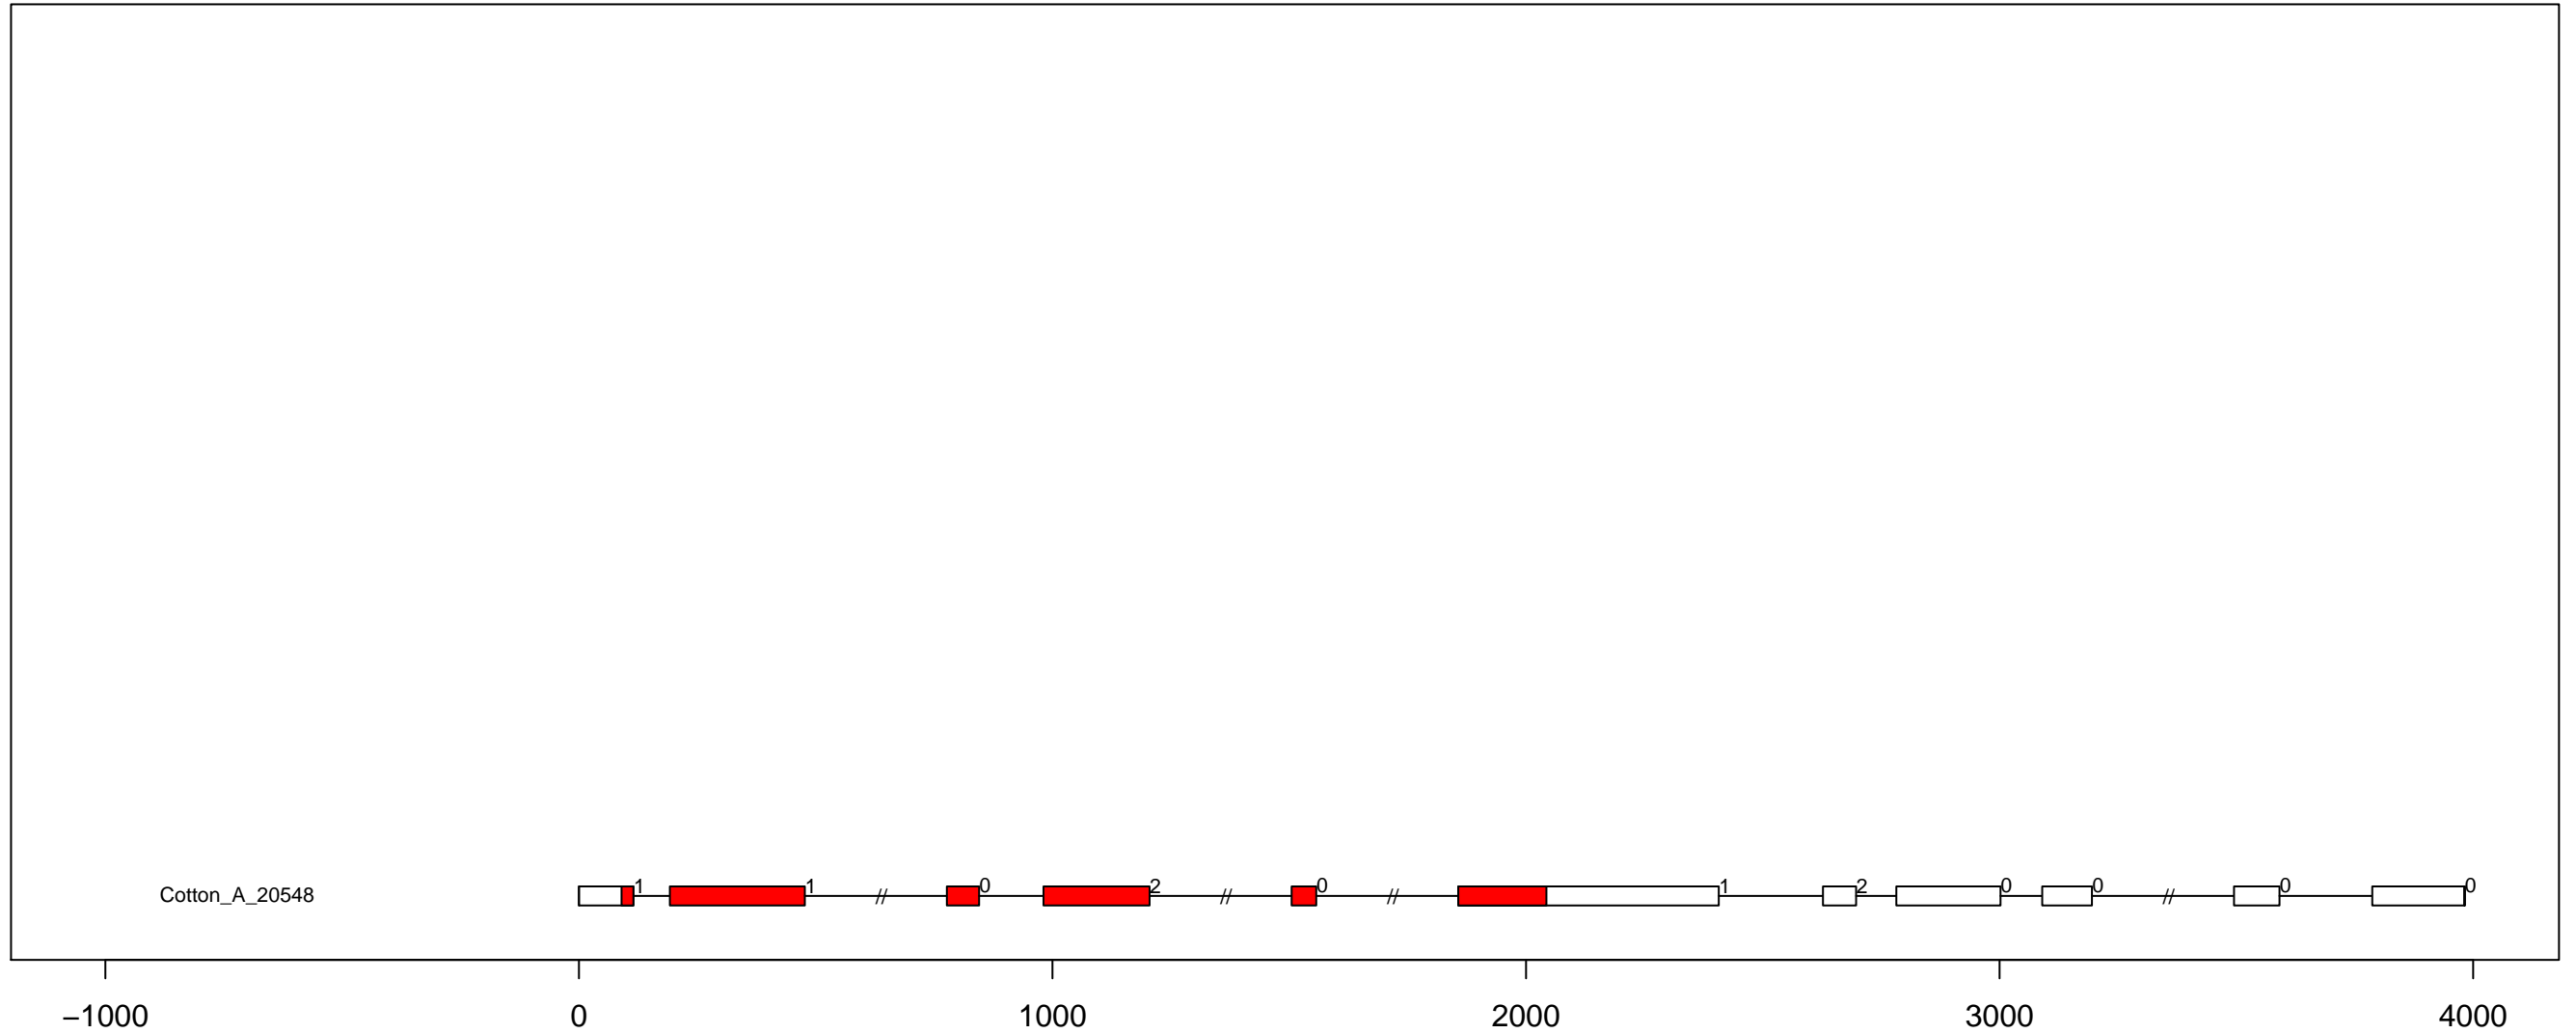

# G.ar TKL-PI-4 exon-intron and domain diagram (part 1)

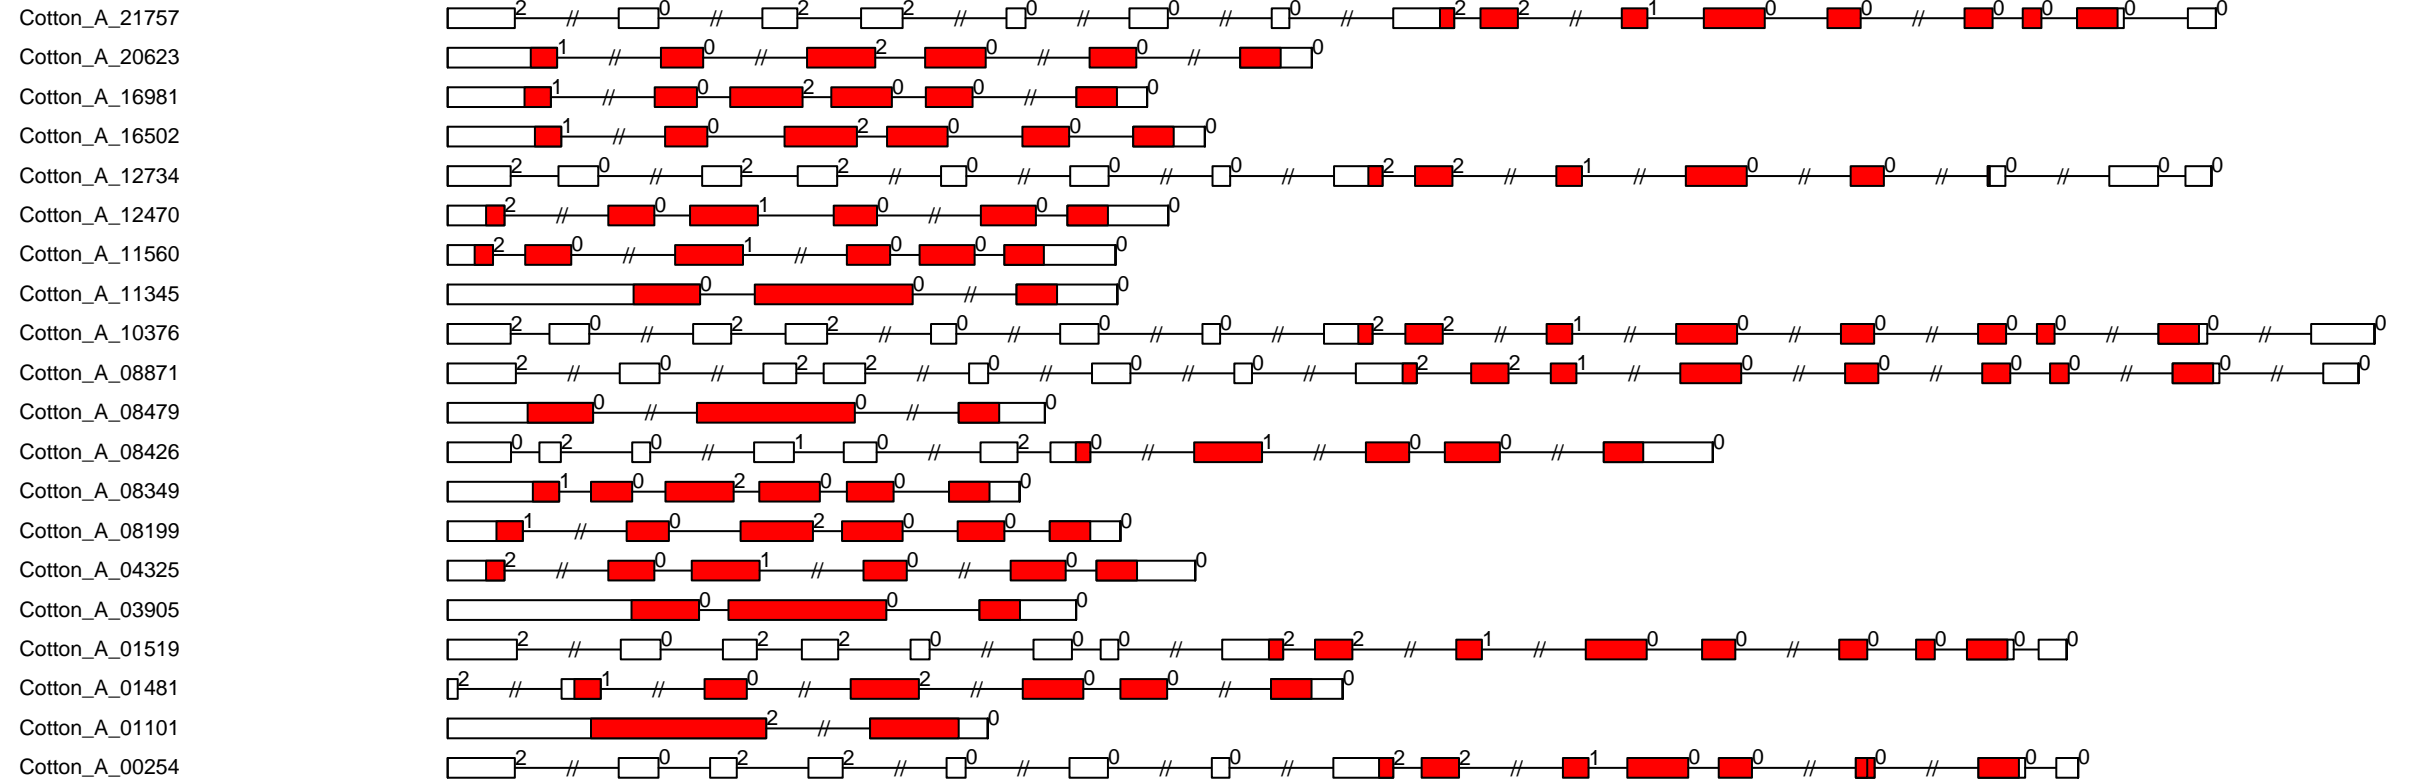

-1000

0

1000

2000

3000

4000

5000





# G.ar TKL-PI-5 exon-intron and domain diagram (all)

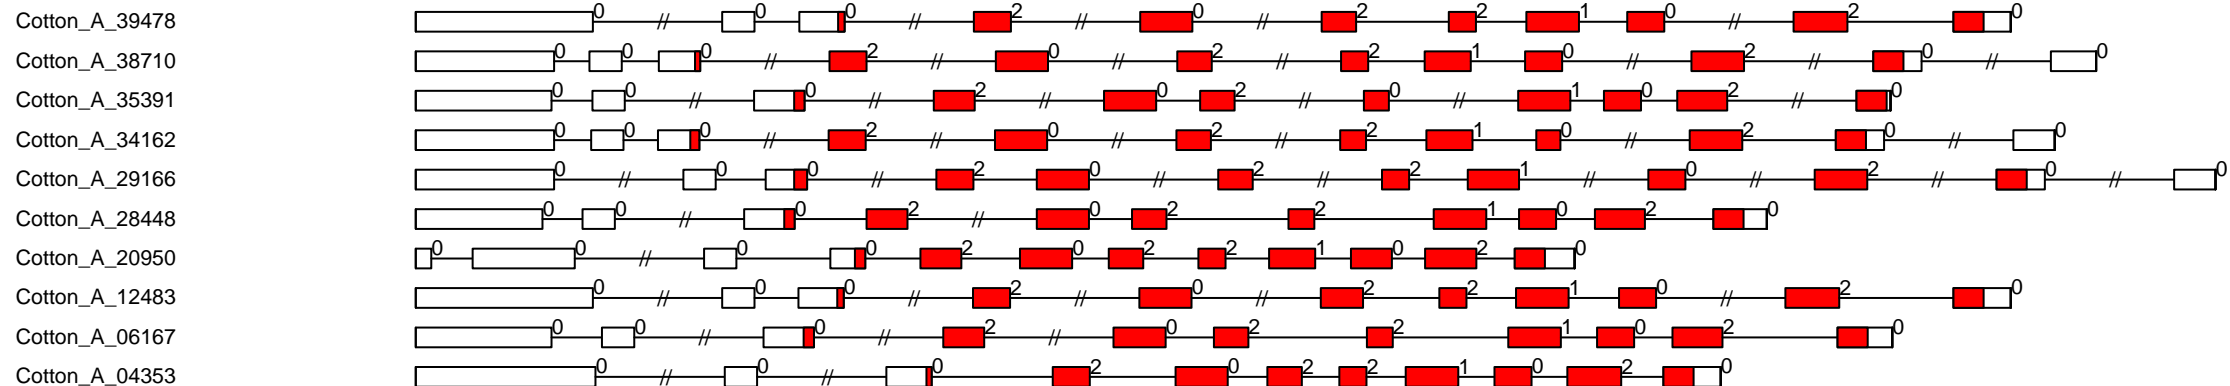

### G.ar TKL-PI-6 exon-intron and domain diagram (all)

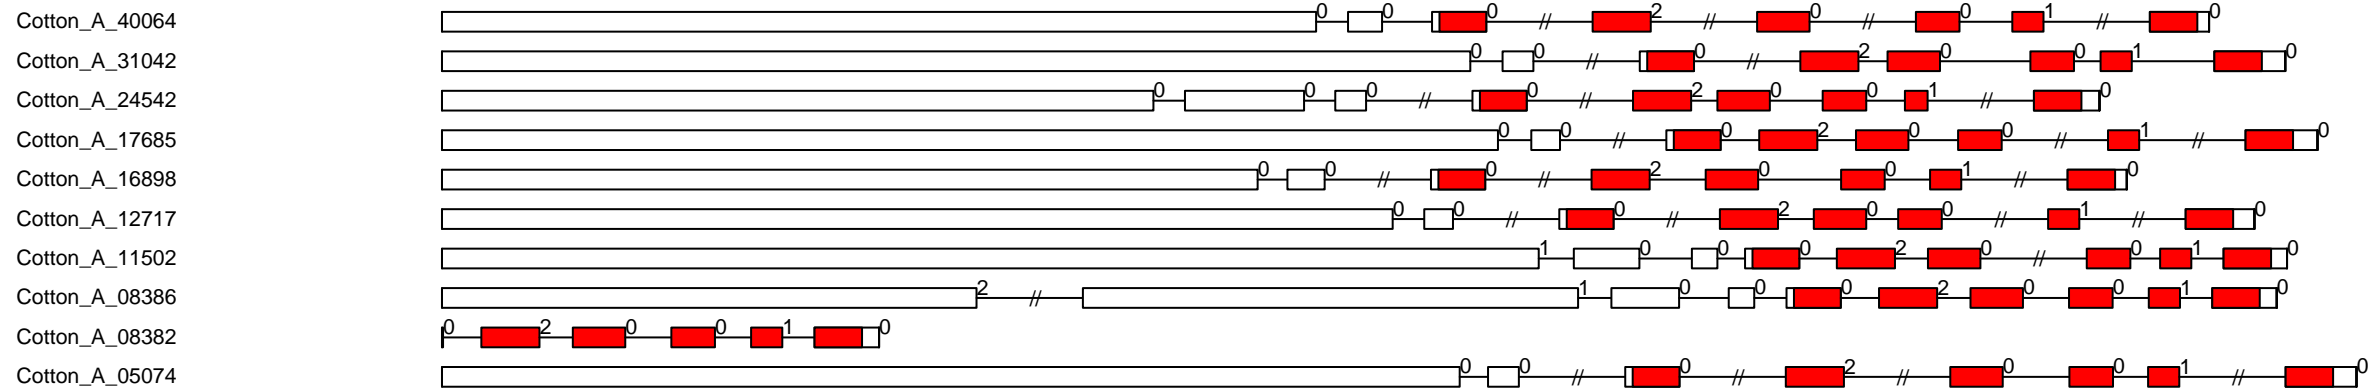

-1000

0

1000

2000

3000

4000

5000

# G.ar TKL-PI-7 exon-intron and domain diagram (all)

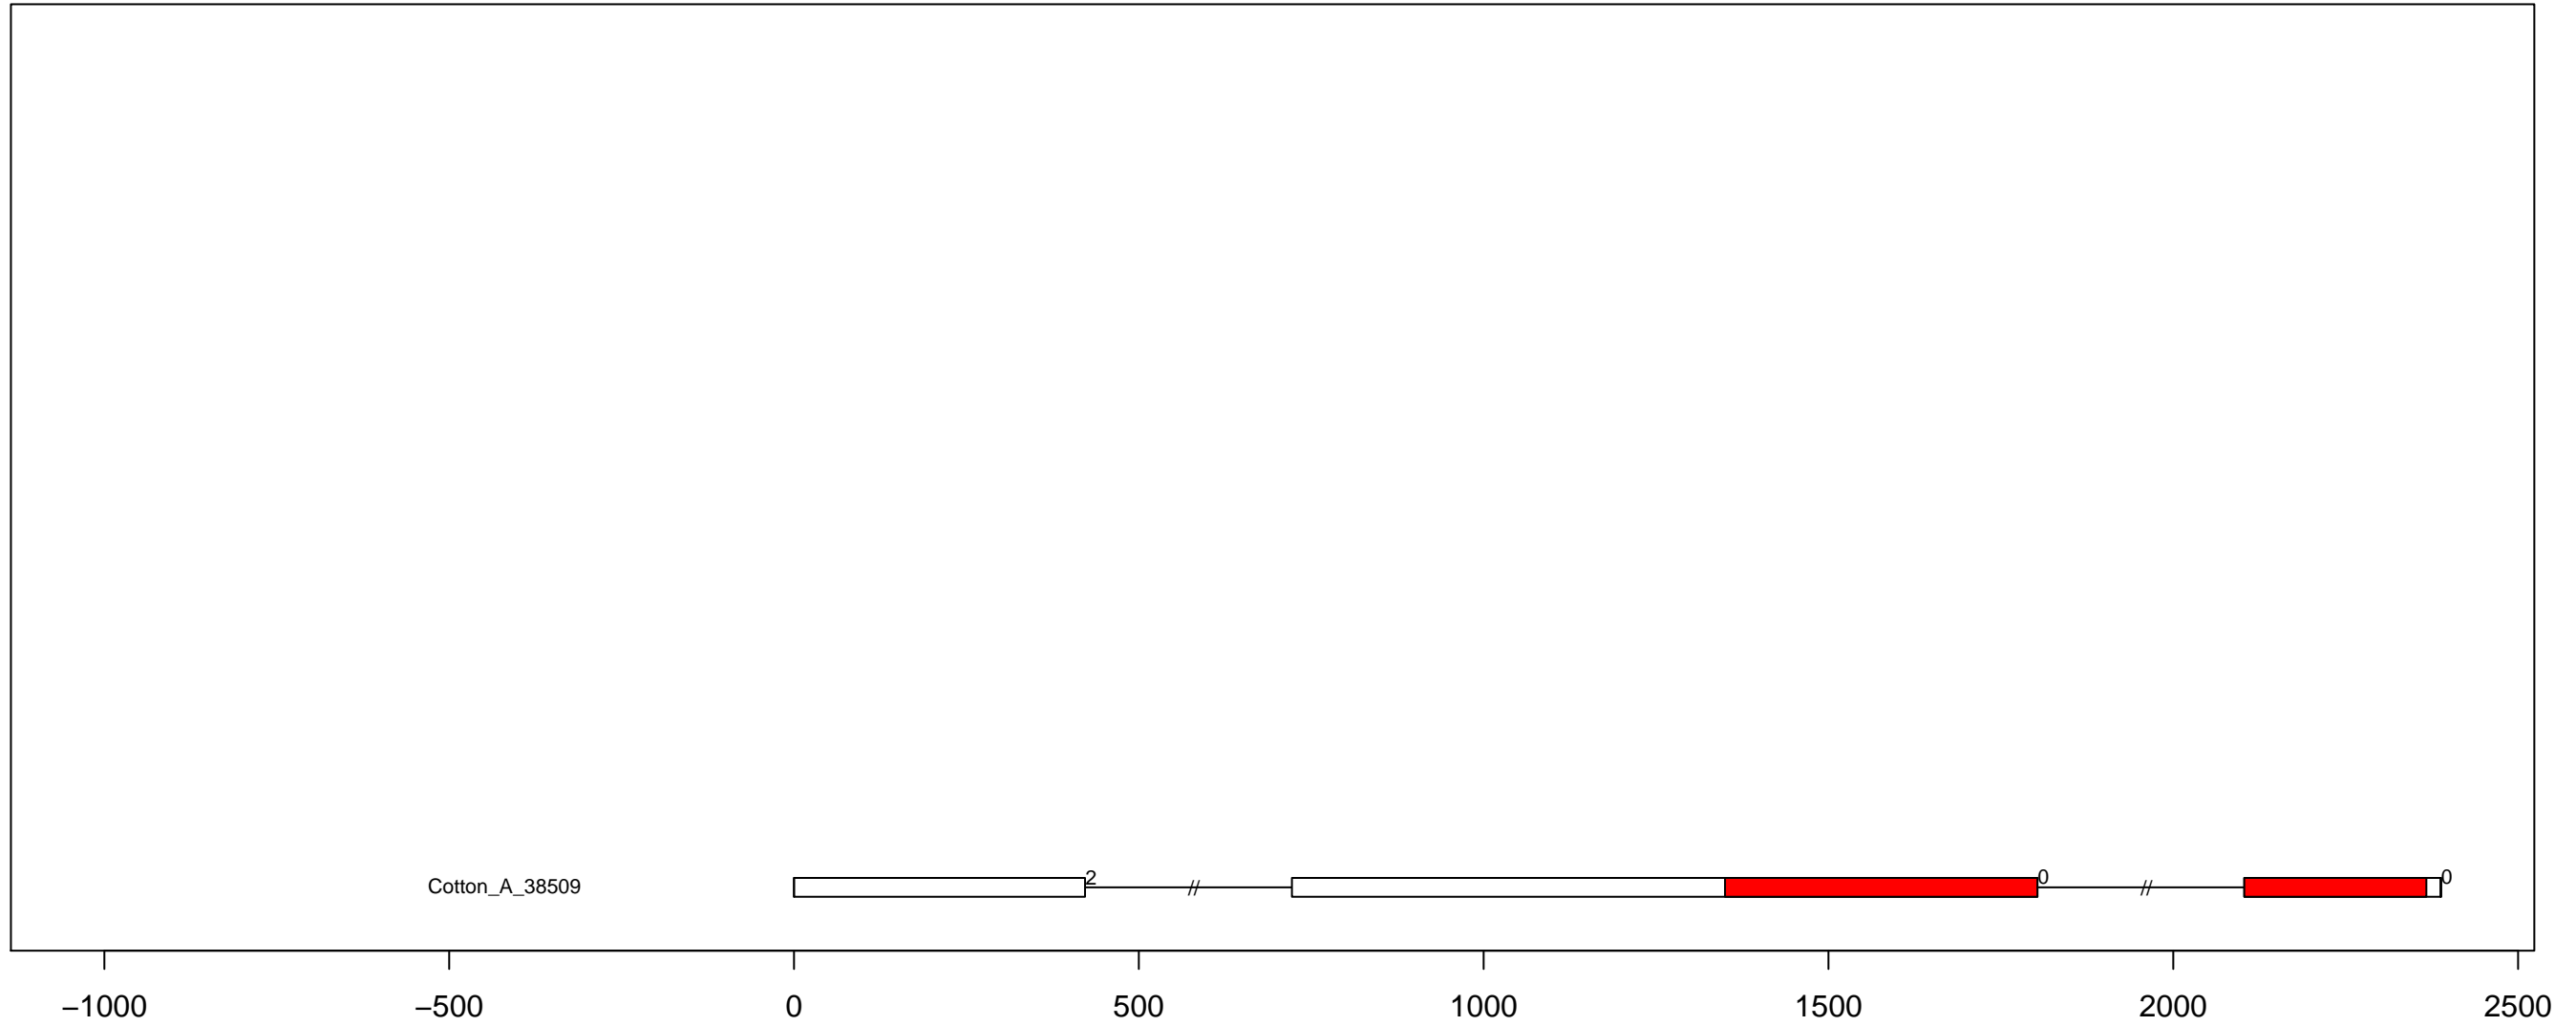

# G.ar TLK exon-intron and domain diagram (all)

Cotton\_A\_20505  
Cotton\_A\_02620

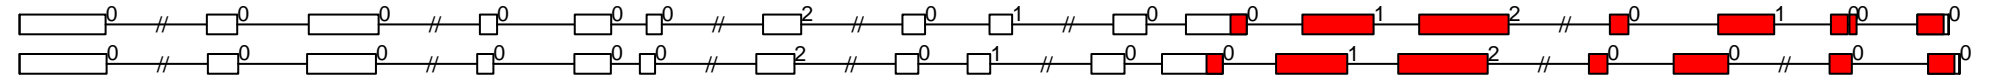

# G.ar TTK exon-intron and domain diagram (all)

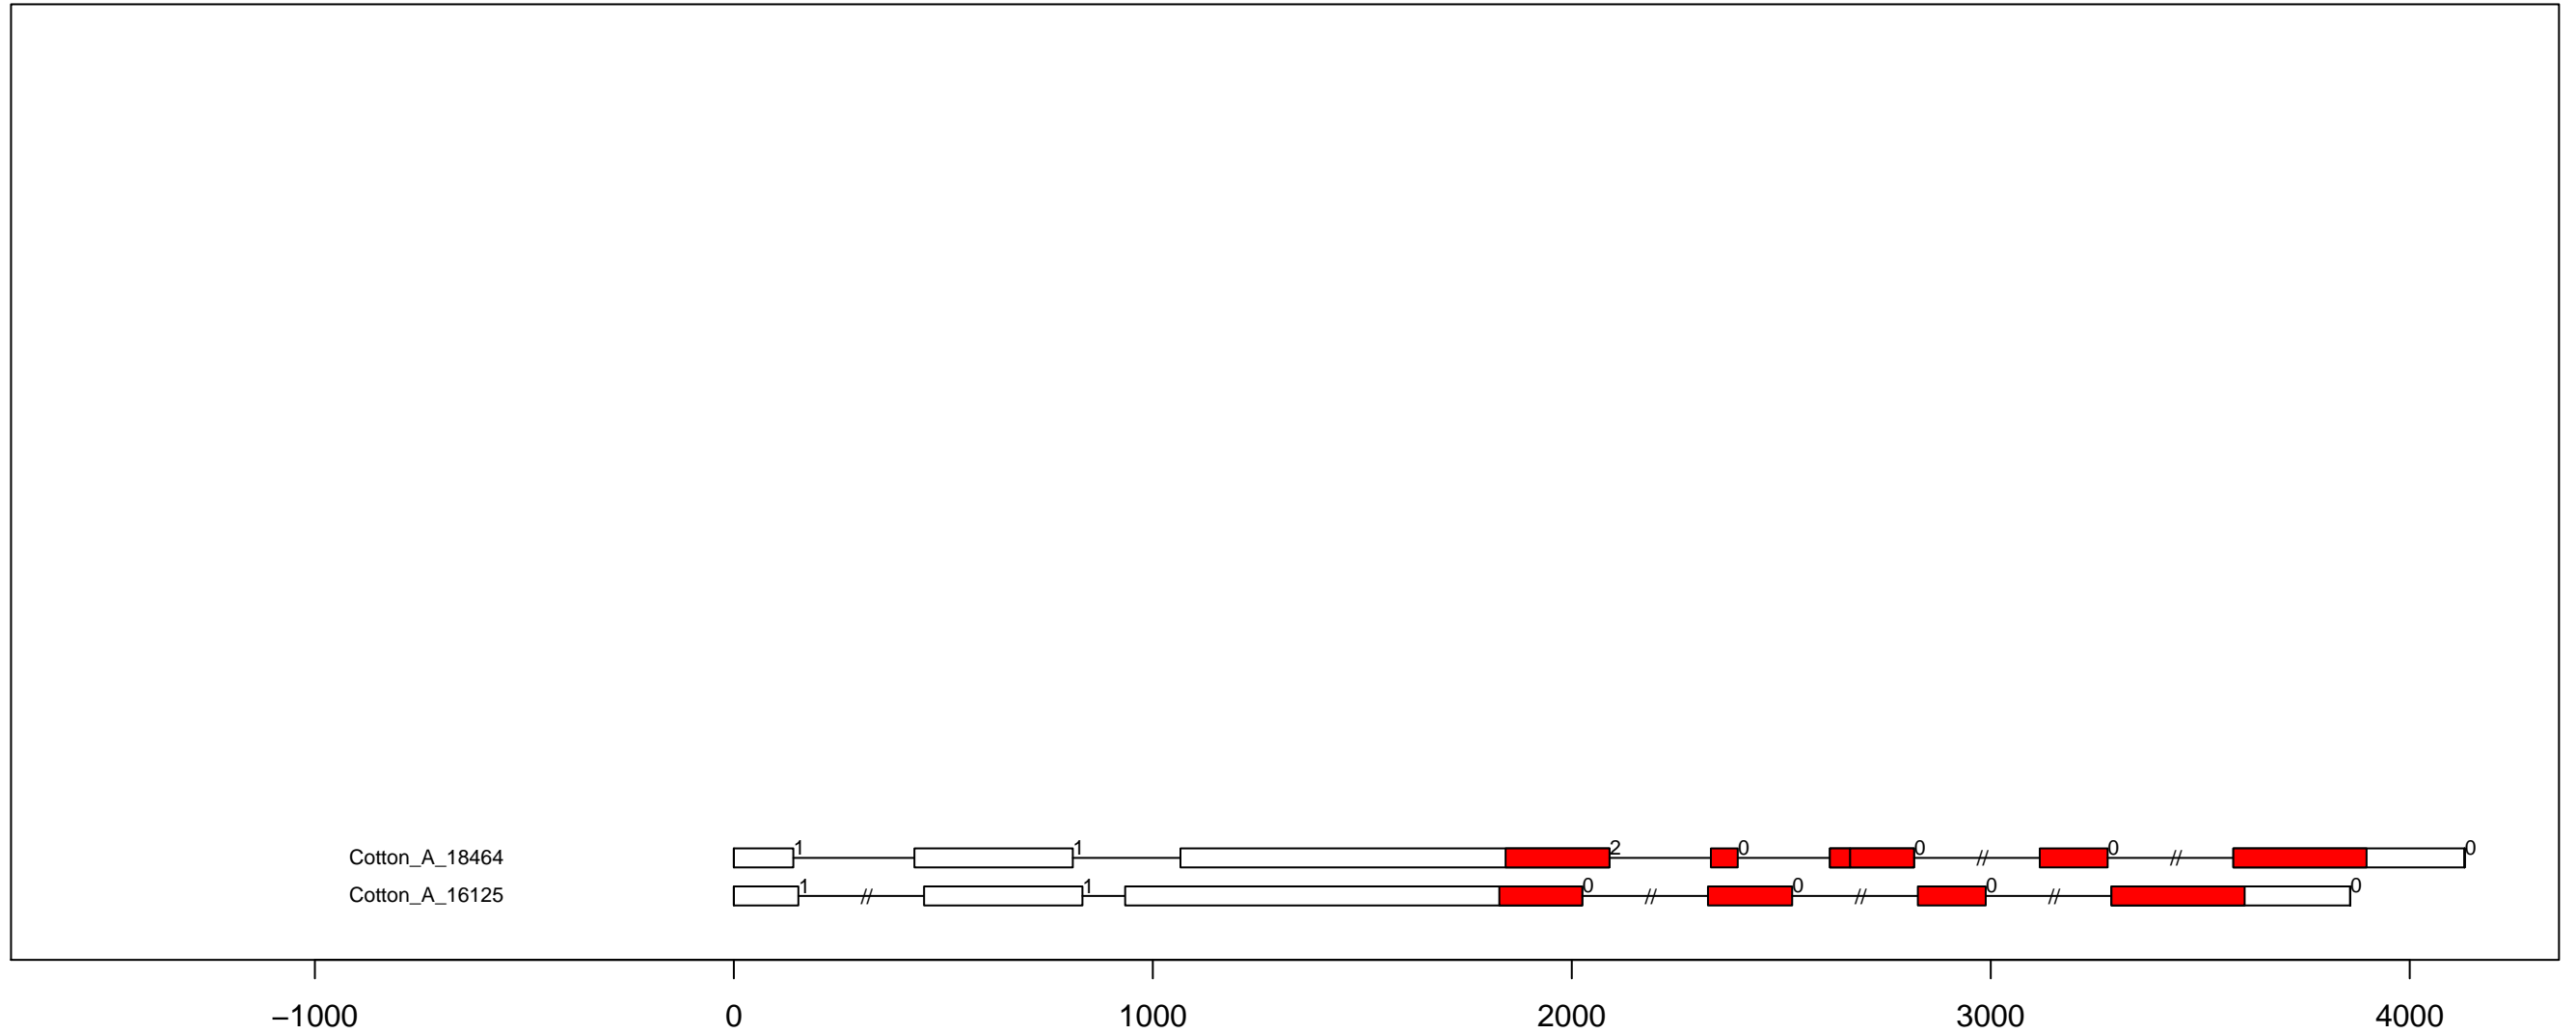

# G.ar ULK\_Fused exon-intron and domain diagram (all)

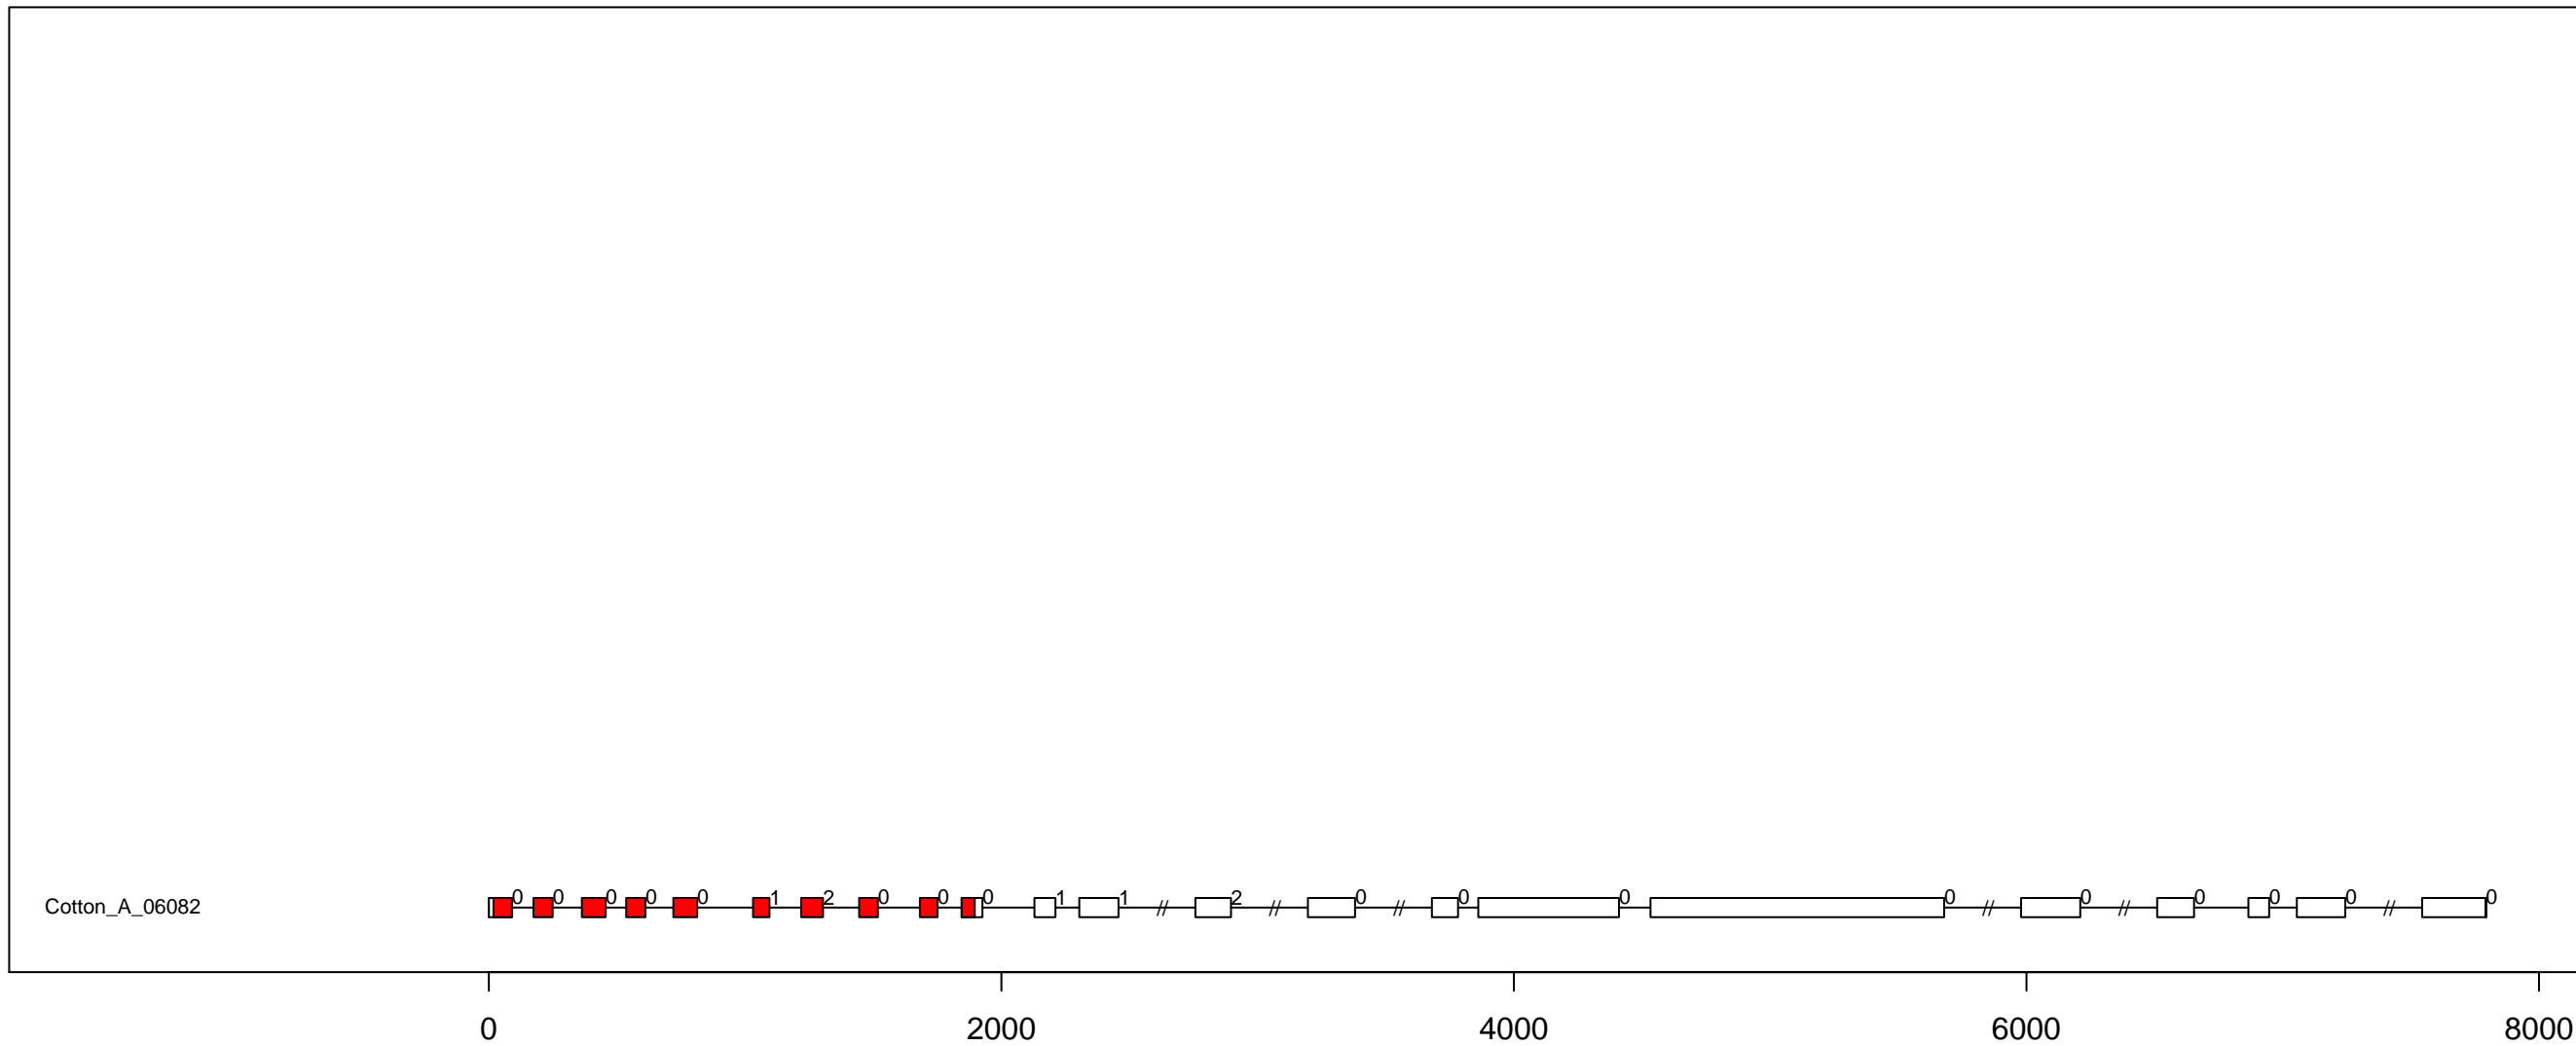

# G.ar ULK\_ULK4 exon-intron and domain diagram (all)

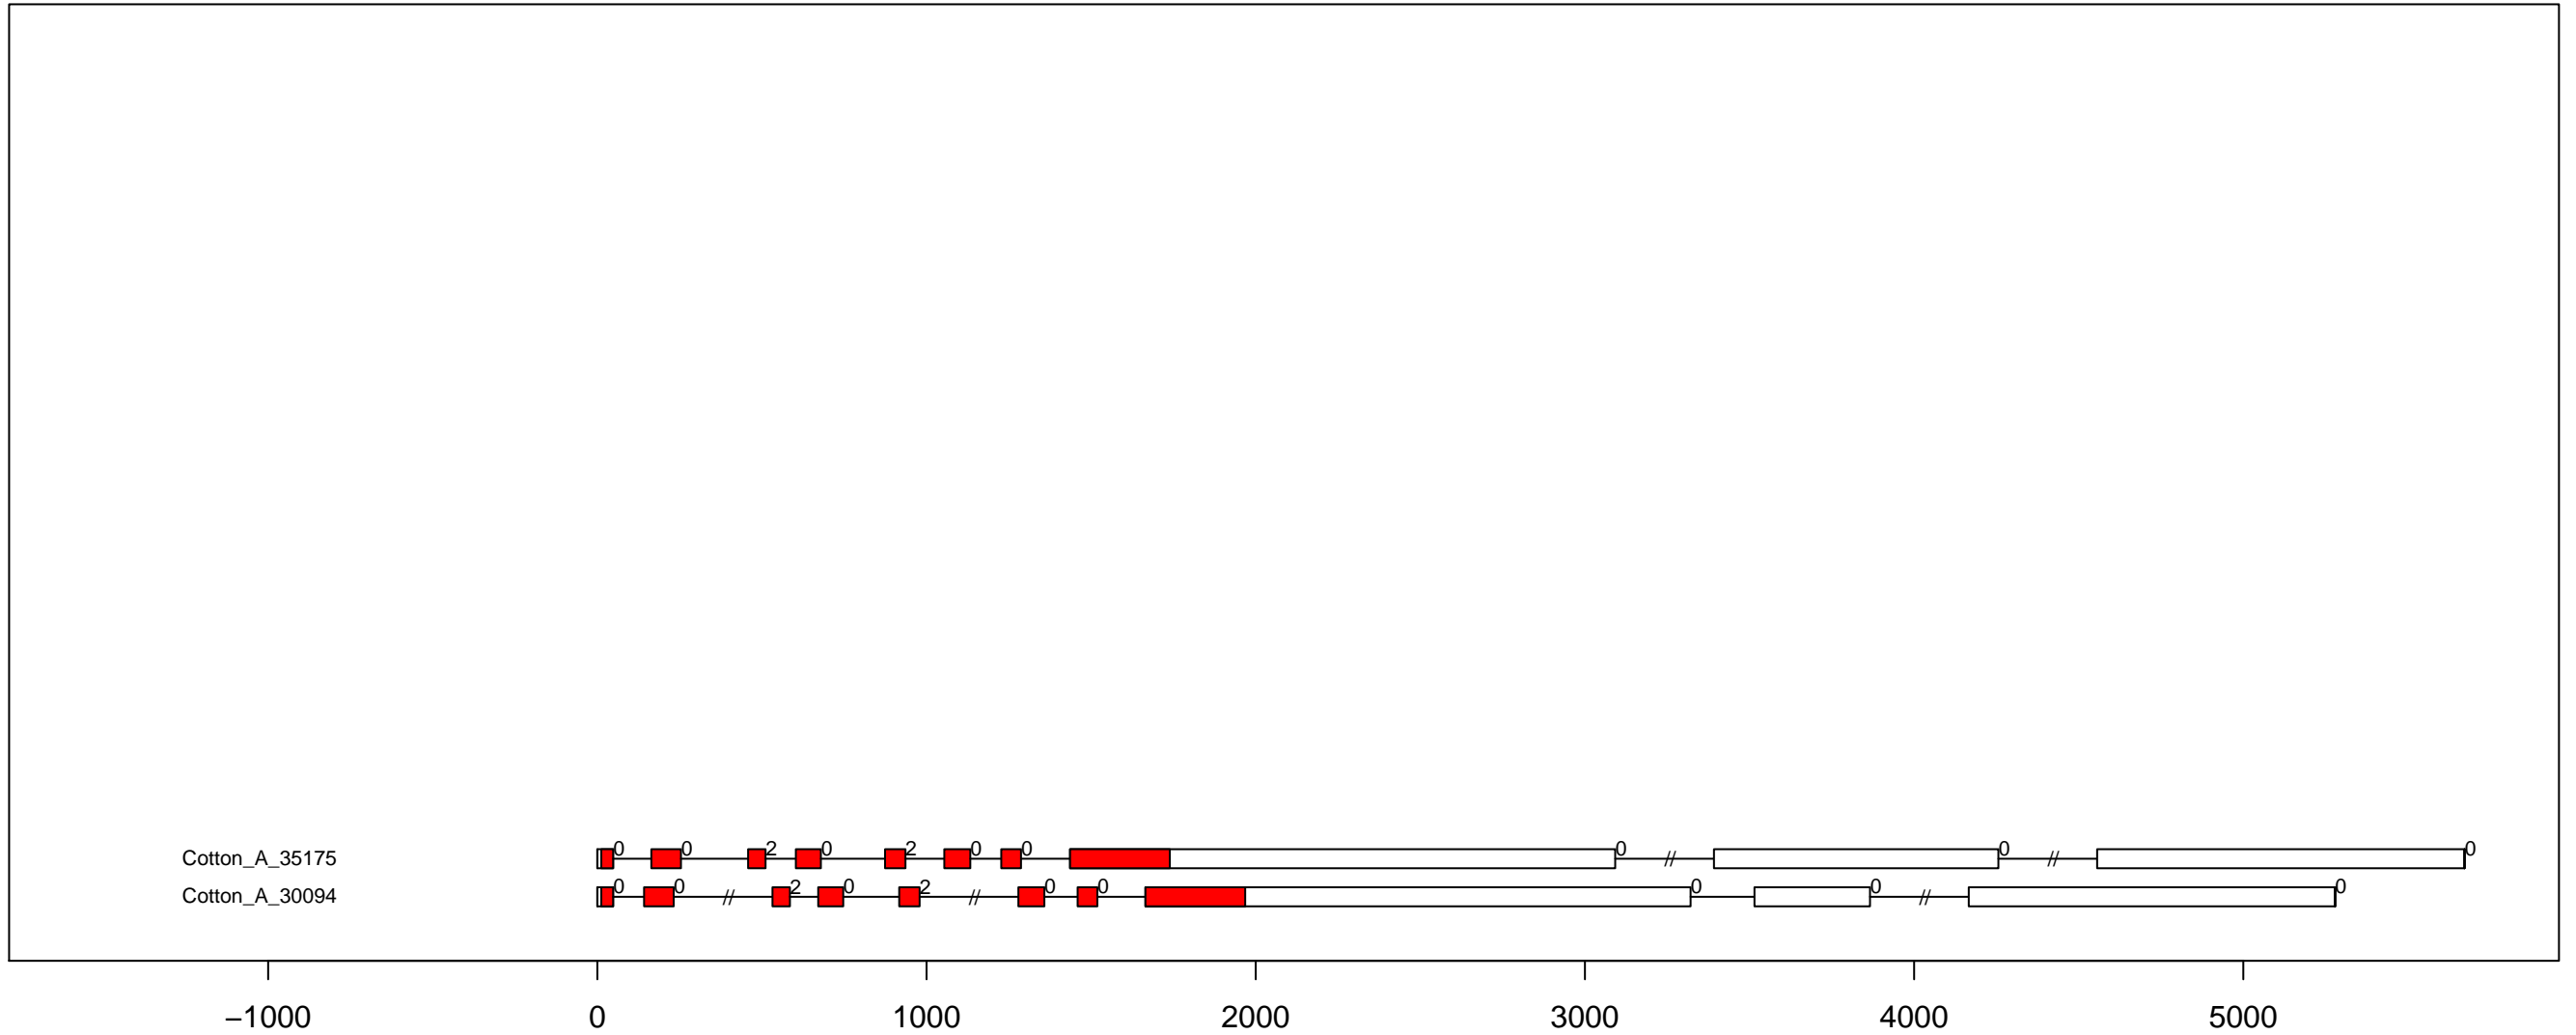



# G.ar WEE exon-intron and domain diagram (all)

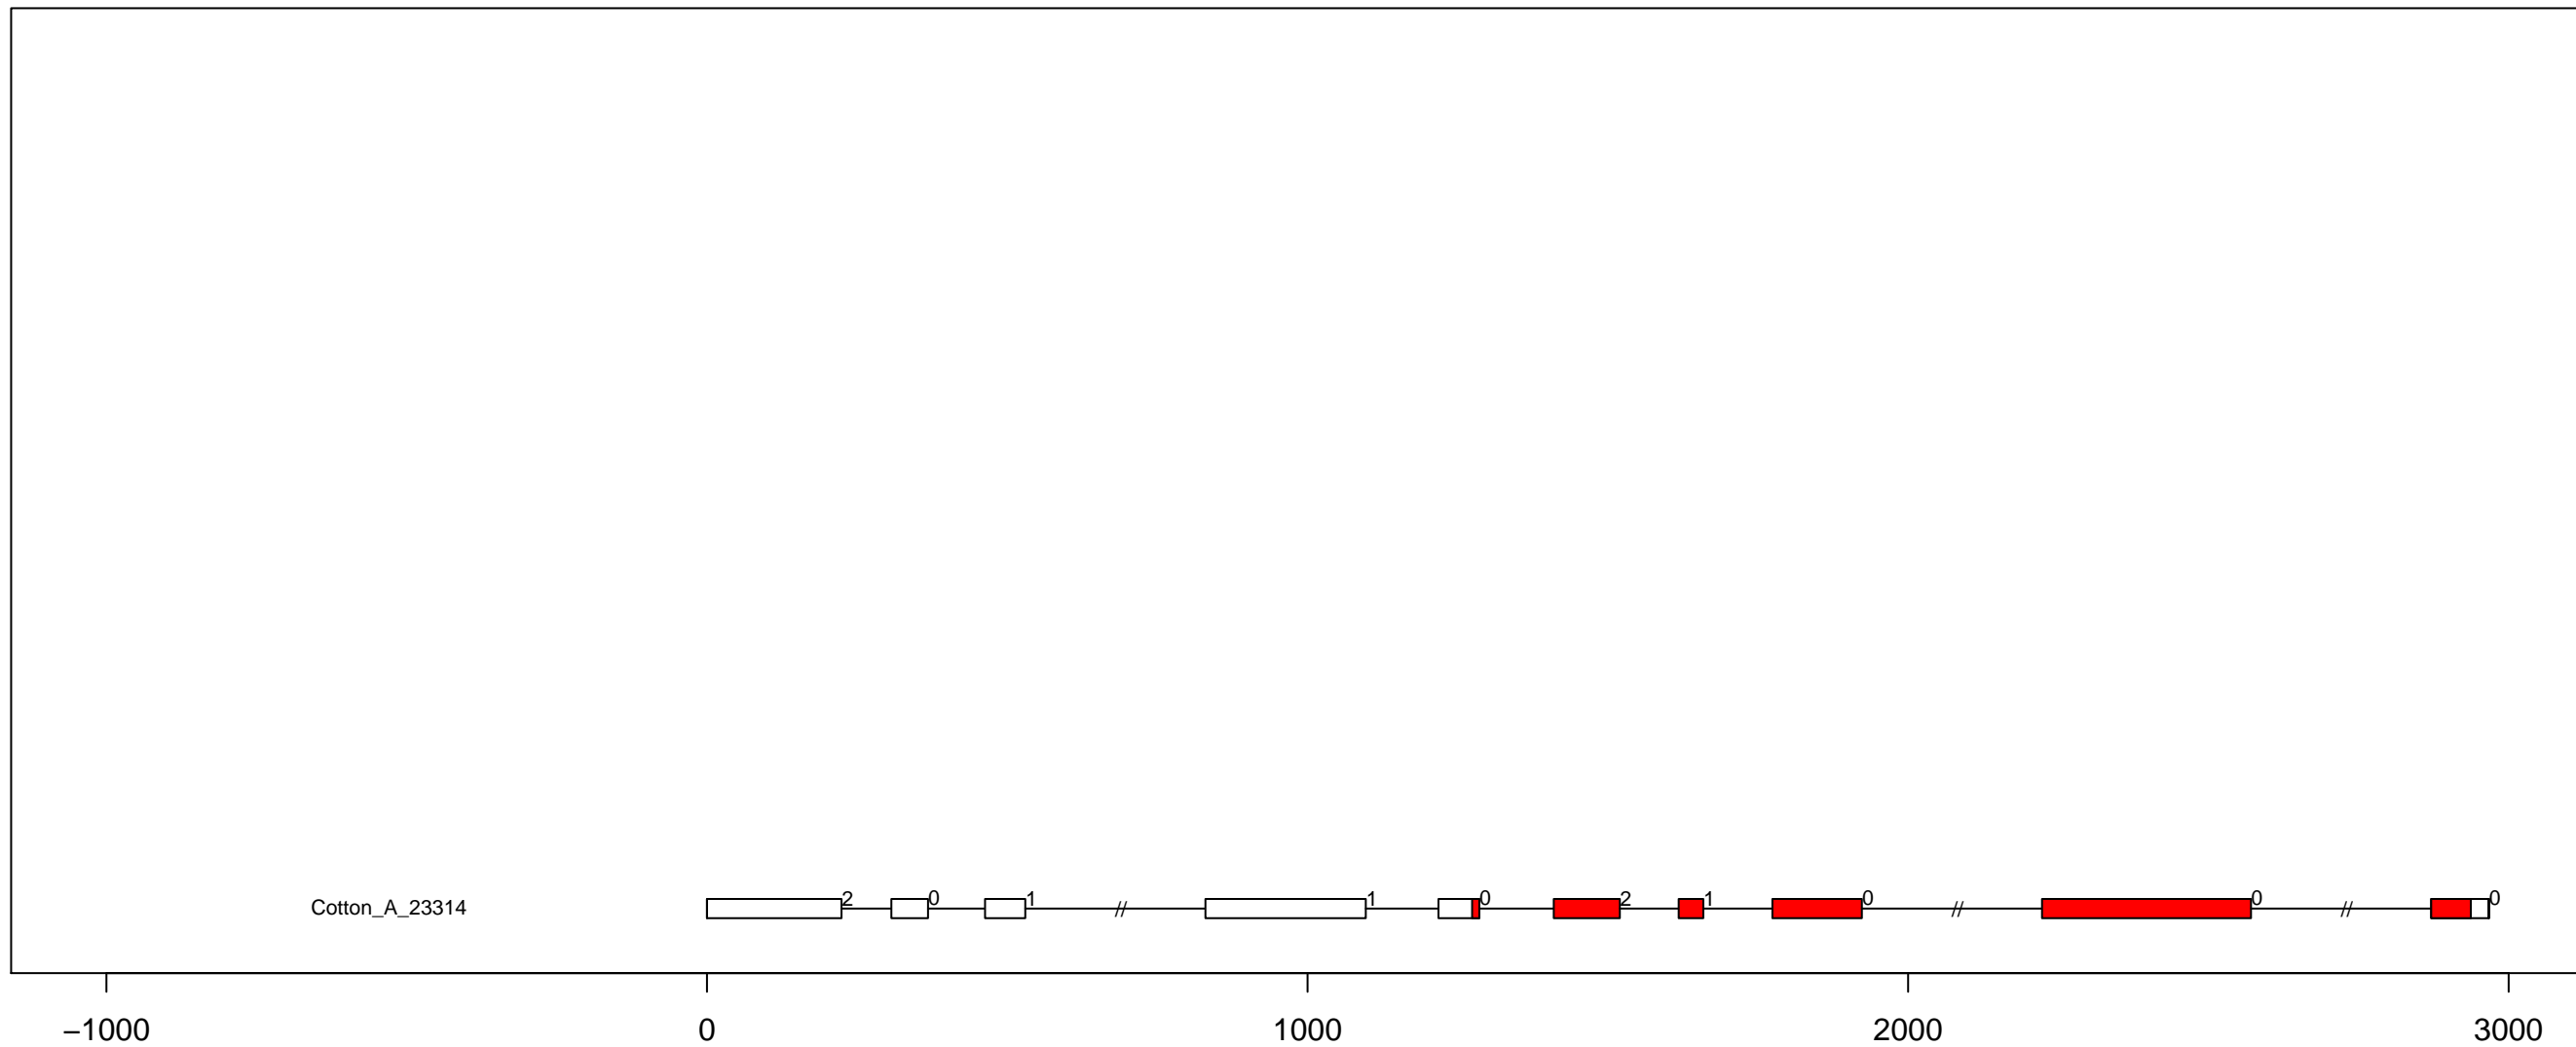

### G.ar WNK\_NRBP exon-intron and domain diagram (all)

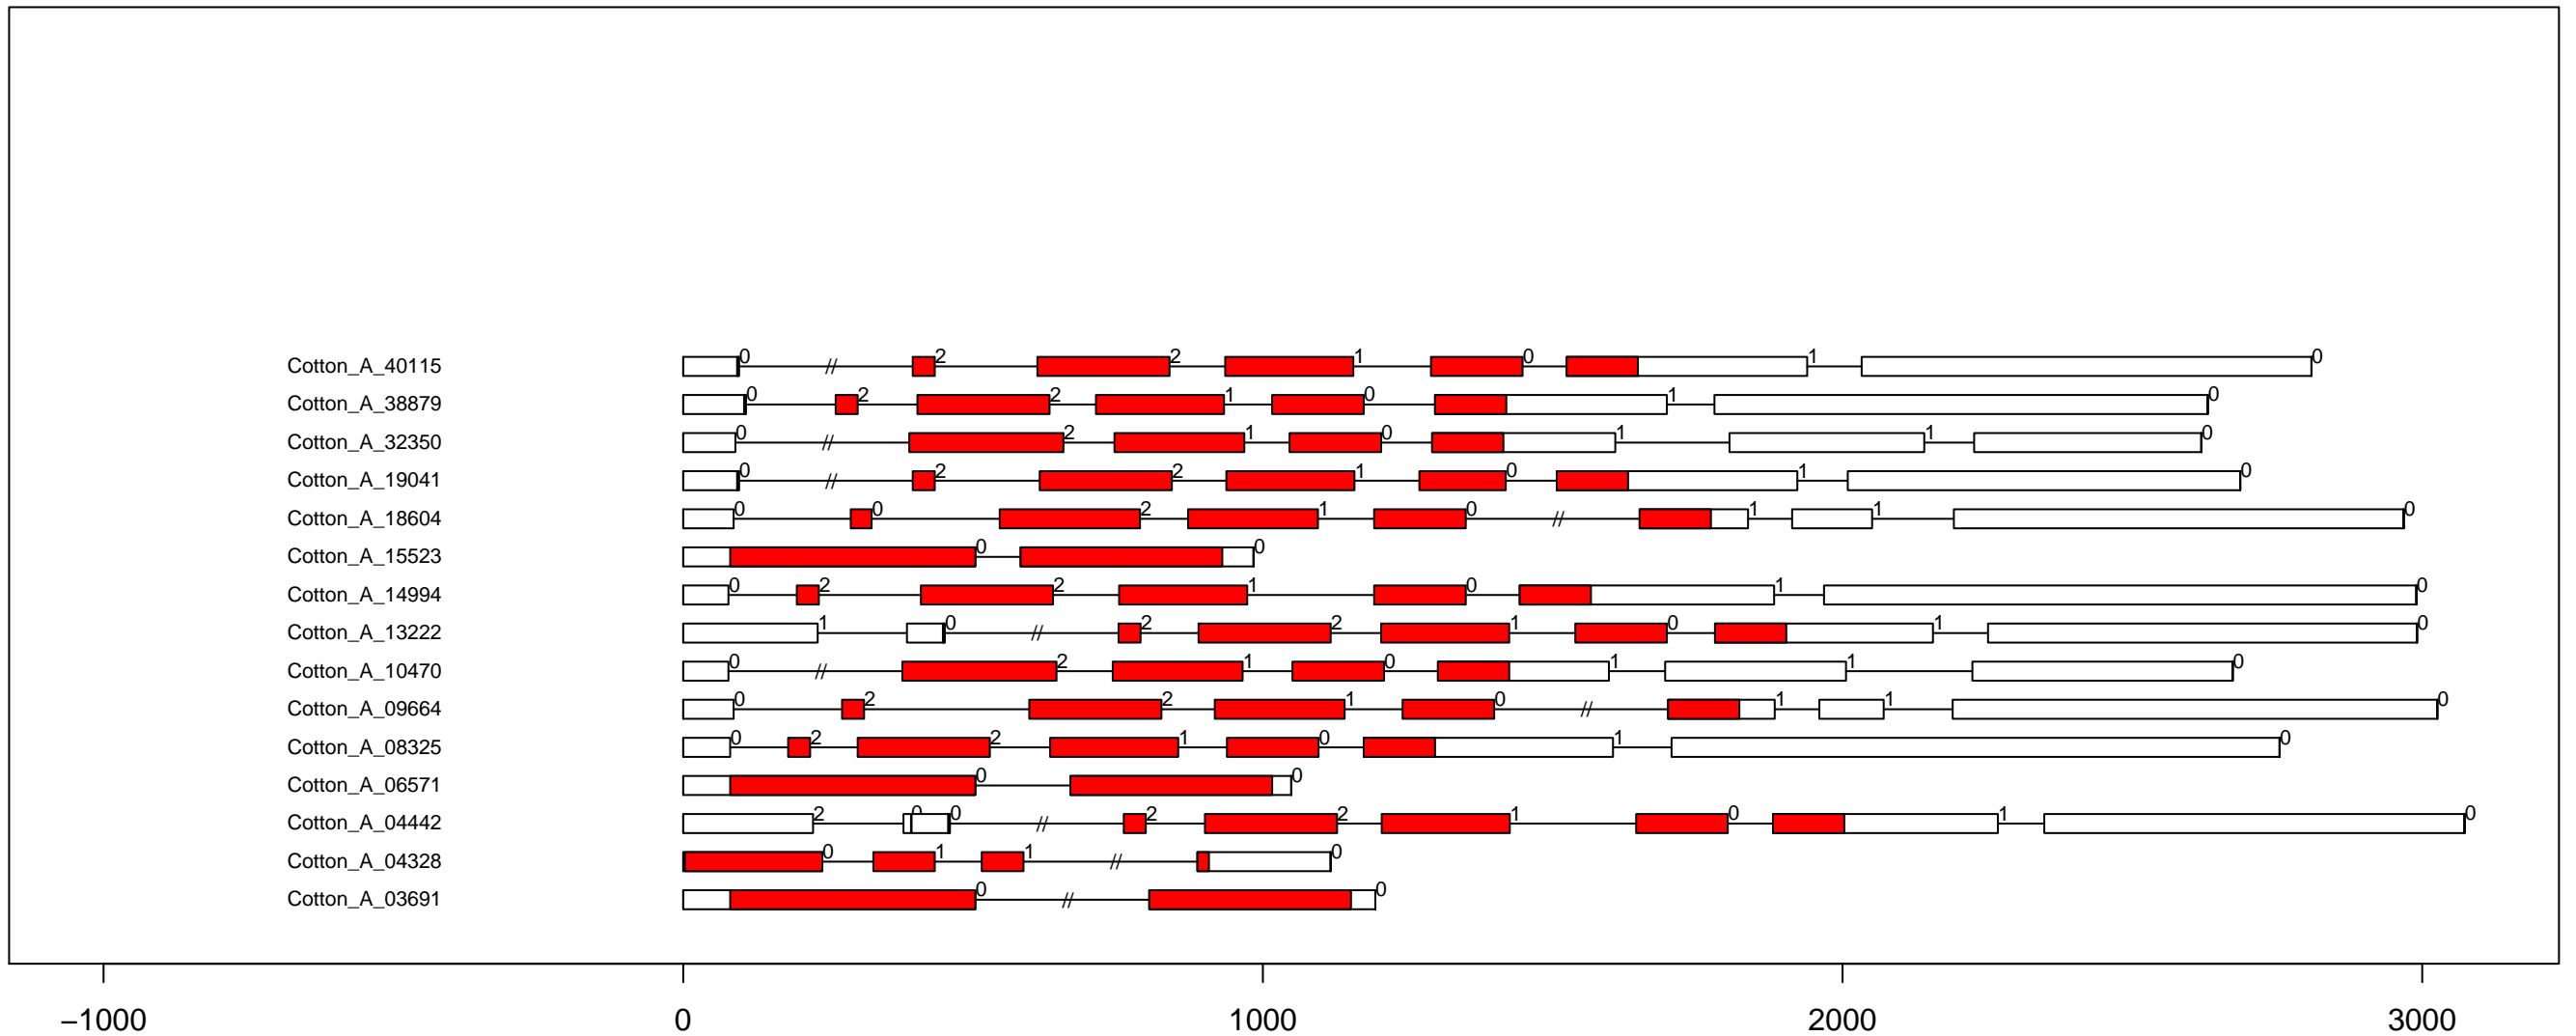

# G.ra AGC\_MAST exon-intron and domain diagram (all)

Gorai.009G203700.1  
Gorai.007G003300.2  
Gorai.006G191300.1  
Gorai.006G064300.1

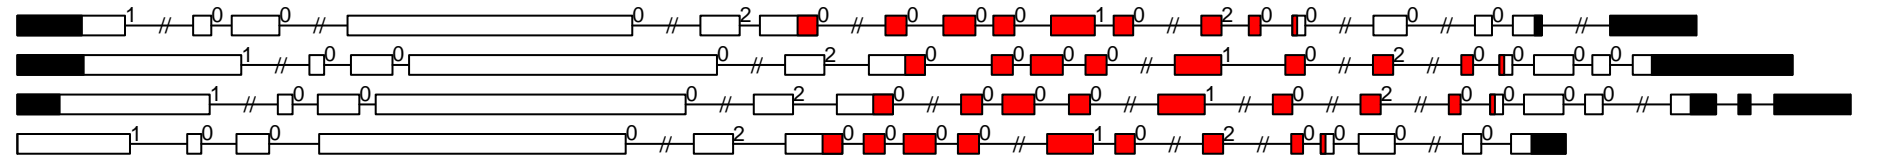

# G.ra AGC\_NDR exon-intron and domain diagram (all)

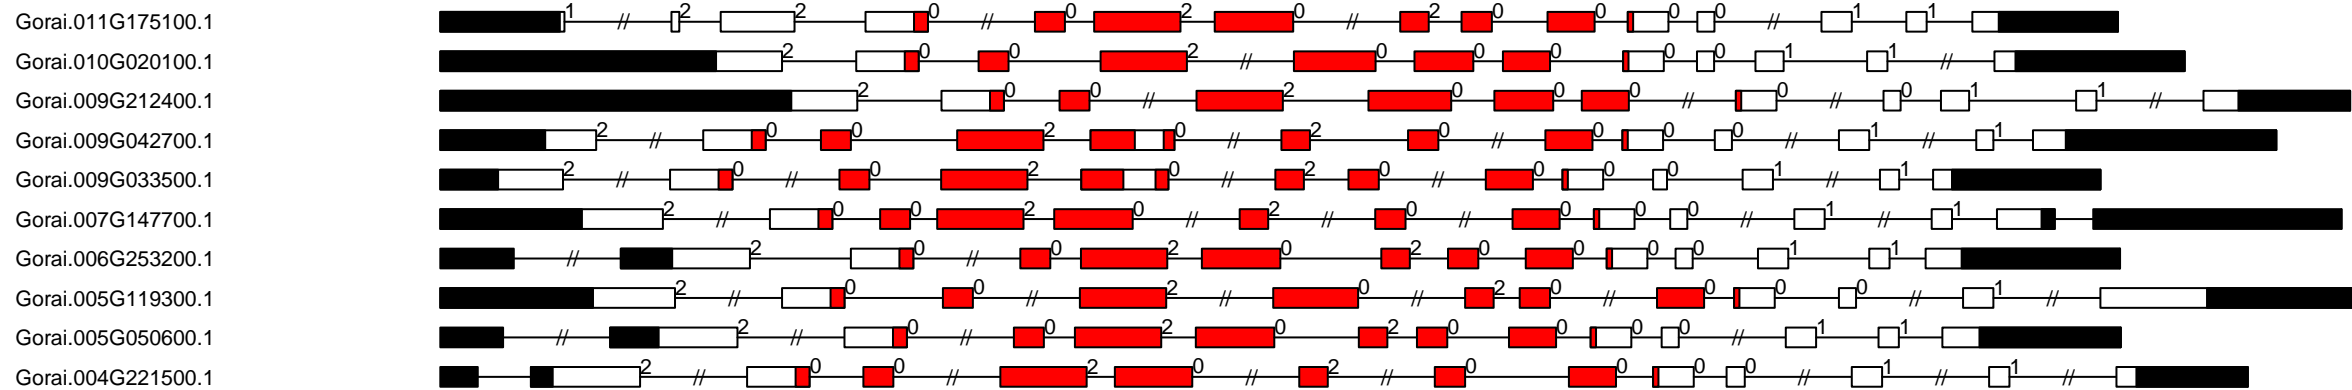

-1000

0

1000

2000

3000

4000

5000

# G.ra AGC\_PDK1 exon-intron and domain diagram (all)

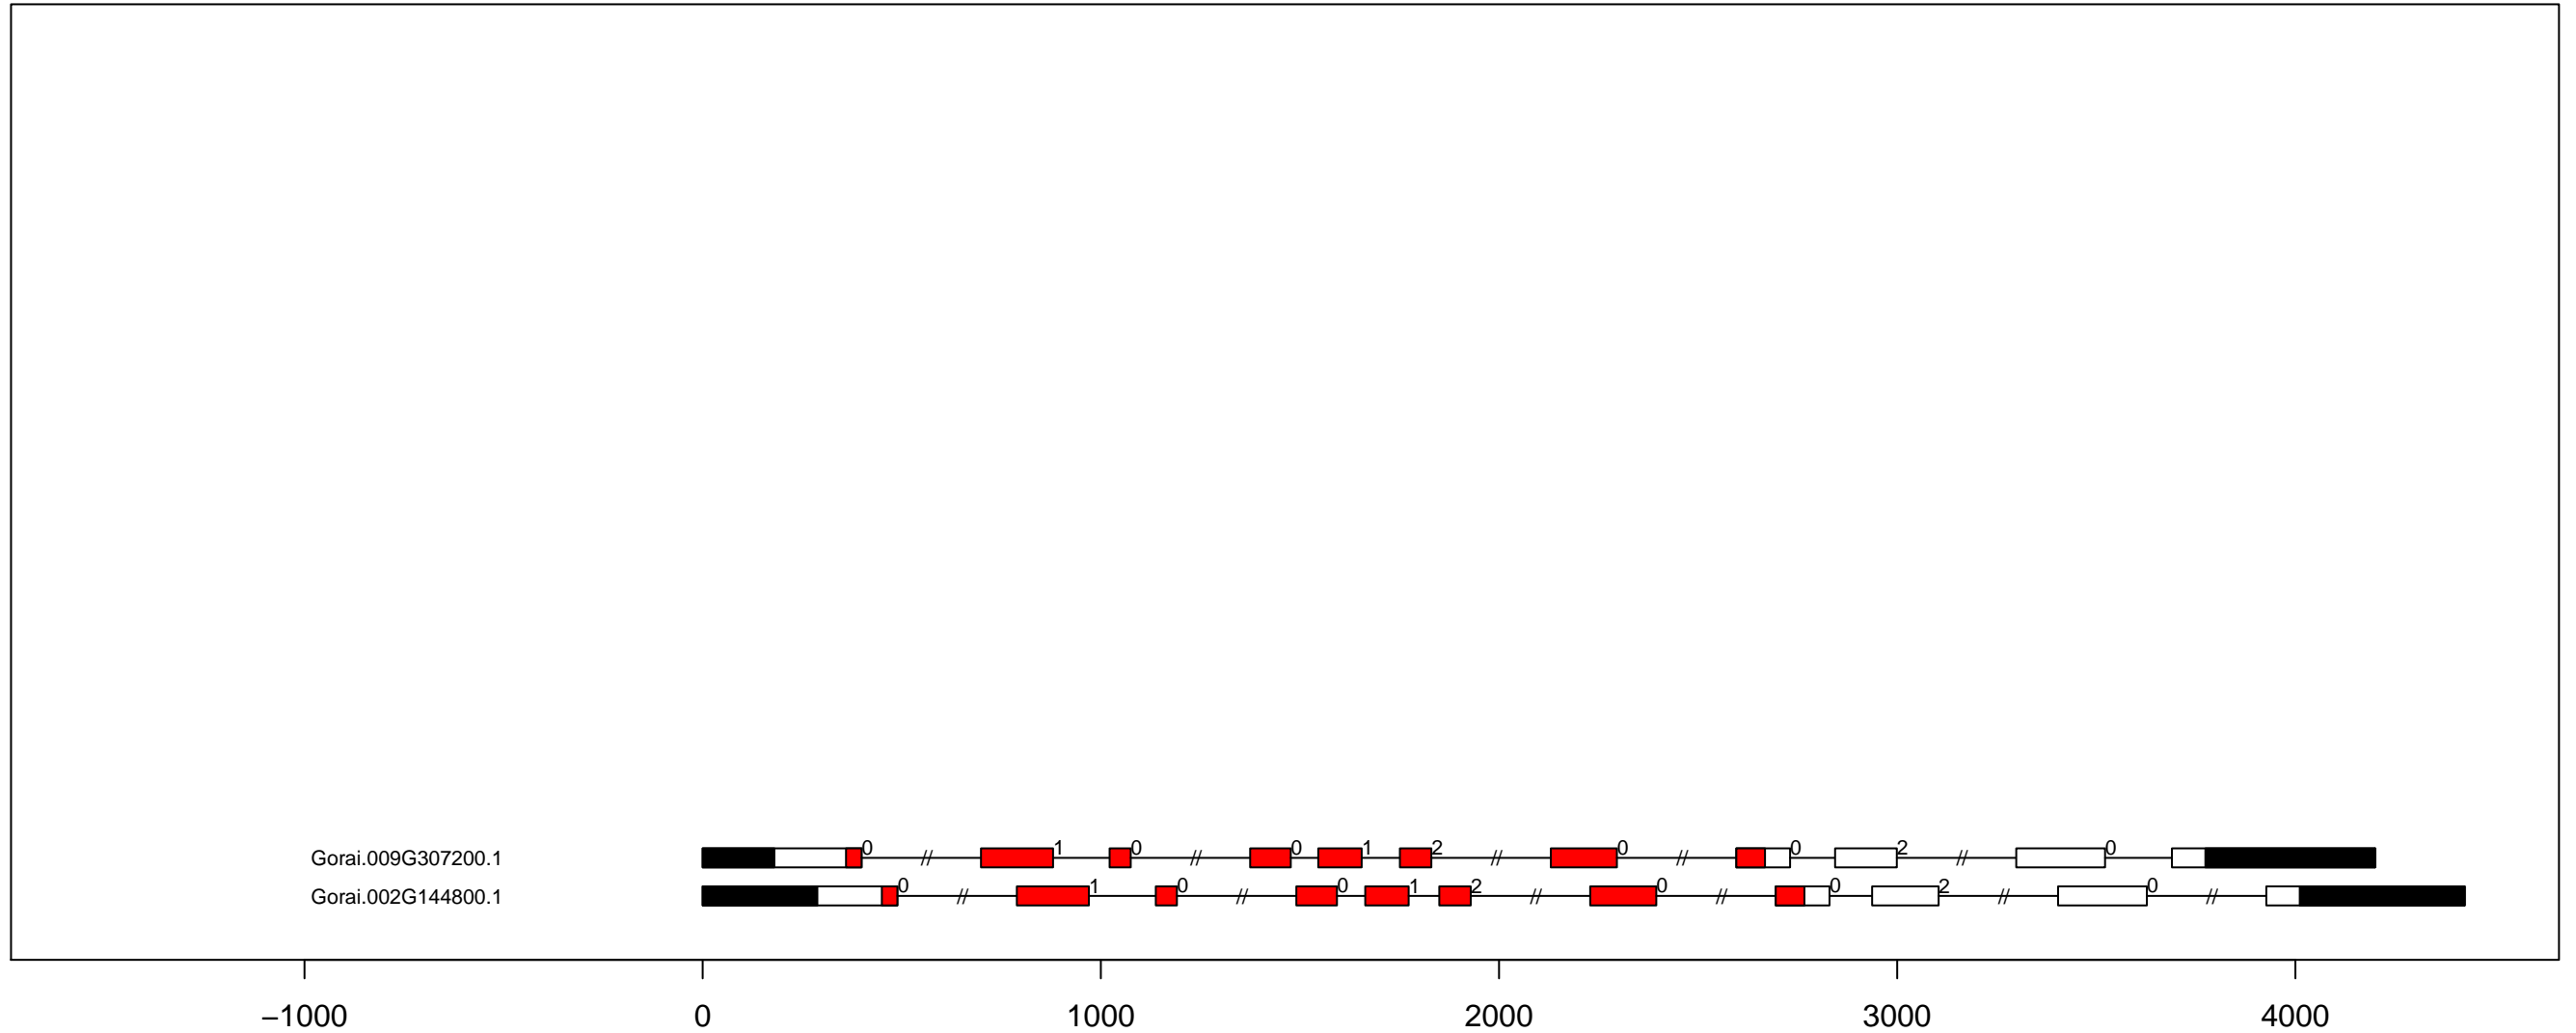

# G.ra AGC\_PKA-PKG exon-intron and domain diagram (all)

Gorai.010G074600.1

Gorai.001G007600.1

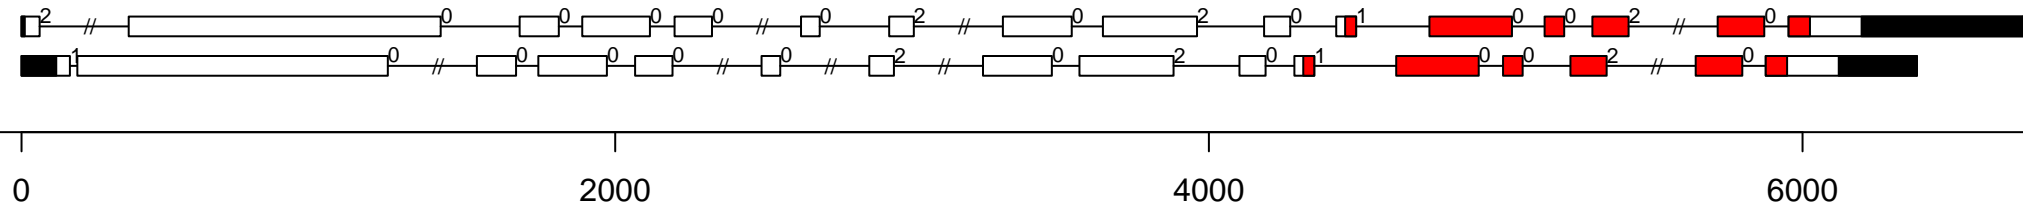

### G.ra AGC\_RSK-2 exon-intron and domain diagram (part 1)

Gorai.009G451500.2

Gorai.009G405700.1

Gorai.009G353100.1

Gorai.009G072200.1

Gorai.009G019600.1

Gorai.008G047700.1

Gorai.008G012600.1

Gorai.007G370900.2

Gorai.007G075400.2

Gorai.006G156900.1

Gorai.006G110800.1

Gorai.006G034200.1

Gorai.005G267200.1

Gorai.004G166000.2

Gorai.004G018700.1

Gorai.003G139300.1

Gorai.002G102000.2

Gorai.001G229700.1

Gorai.001G140200.1

Gorai.001G120600.1

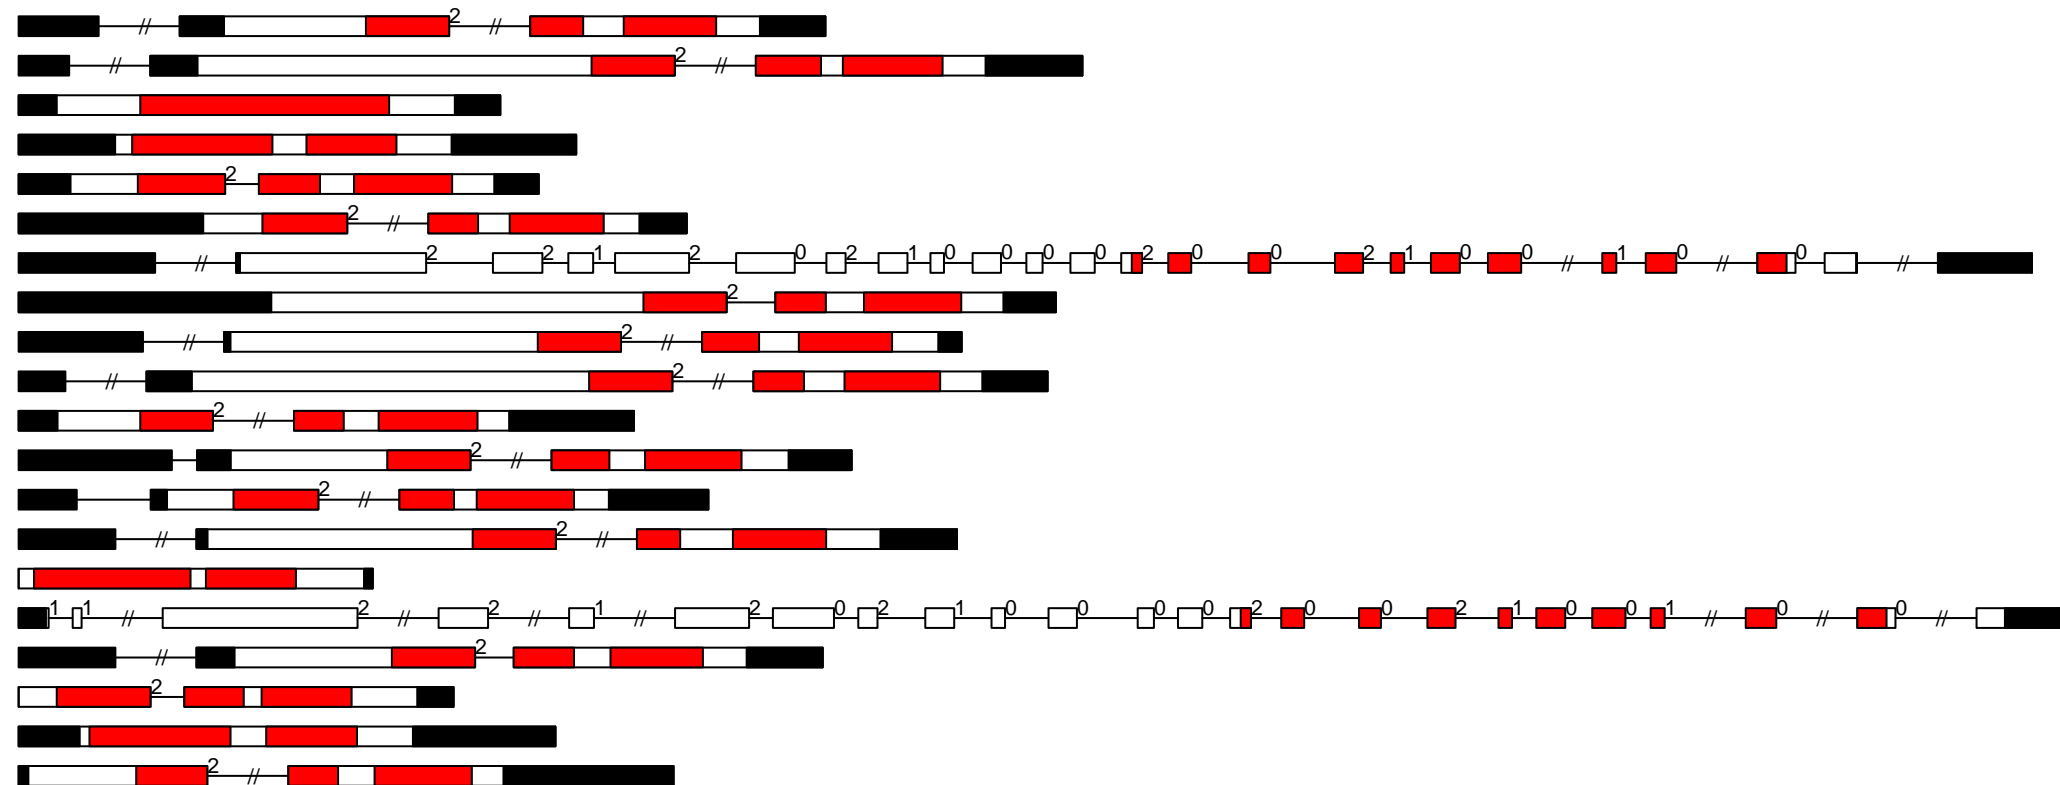

0

2000

4000

6000

### G.ra AGC\_RSK-2 exon-intron and domain diagram (part 2)

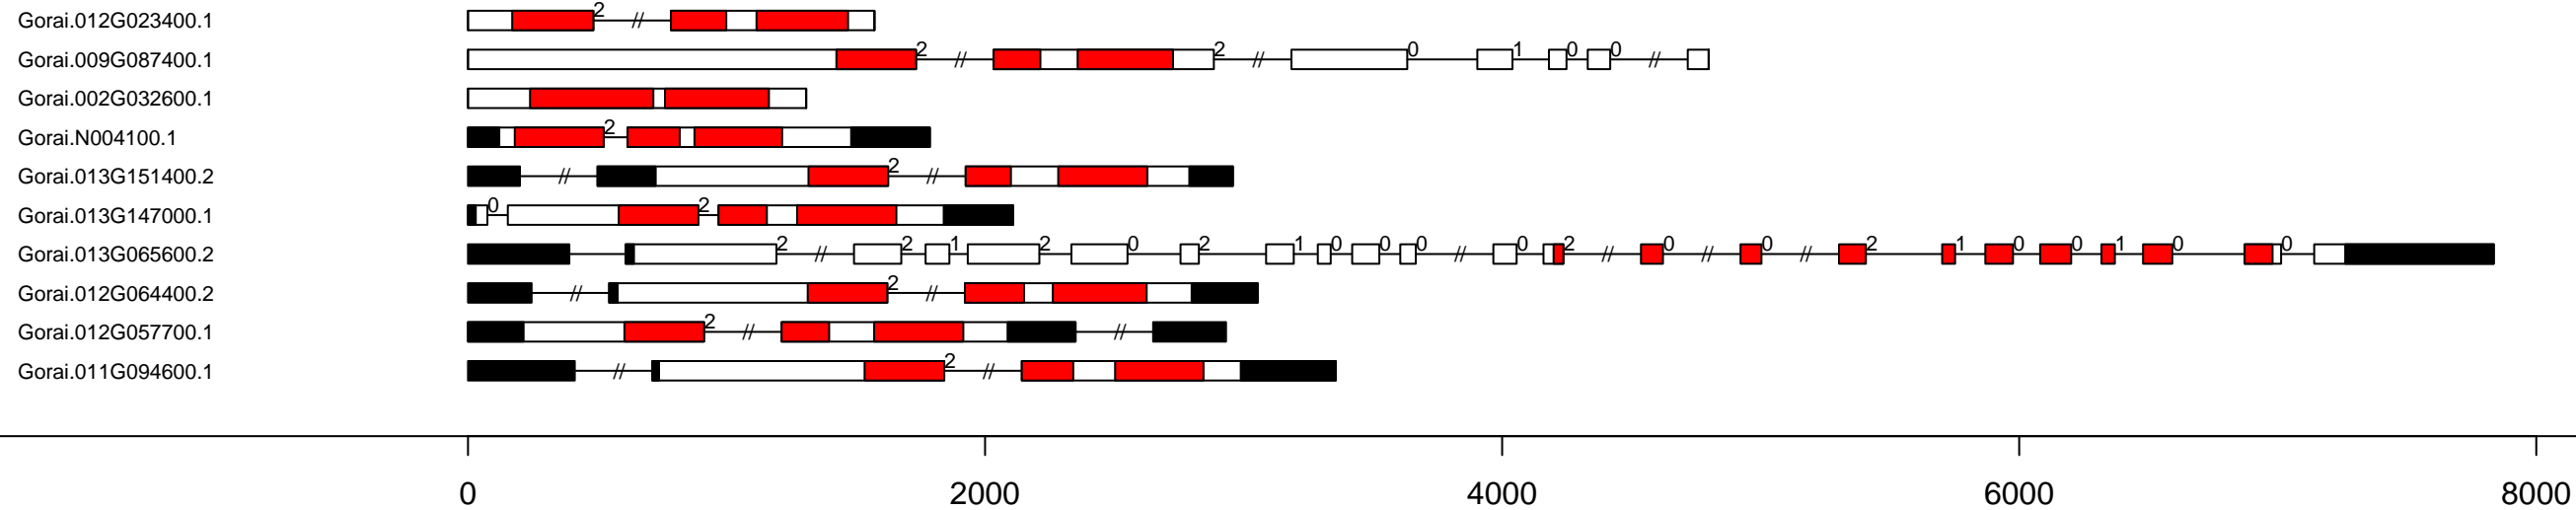



# G.ra AGC-PI exon-intron and domain diagram (all)

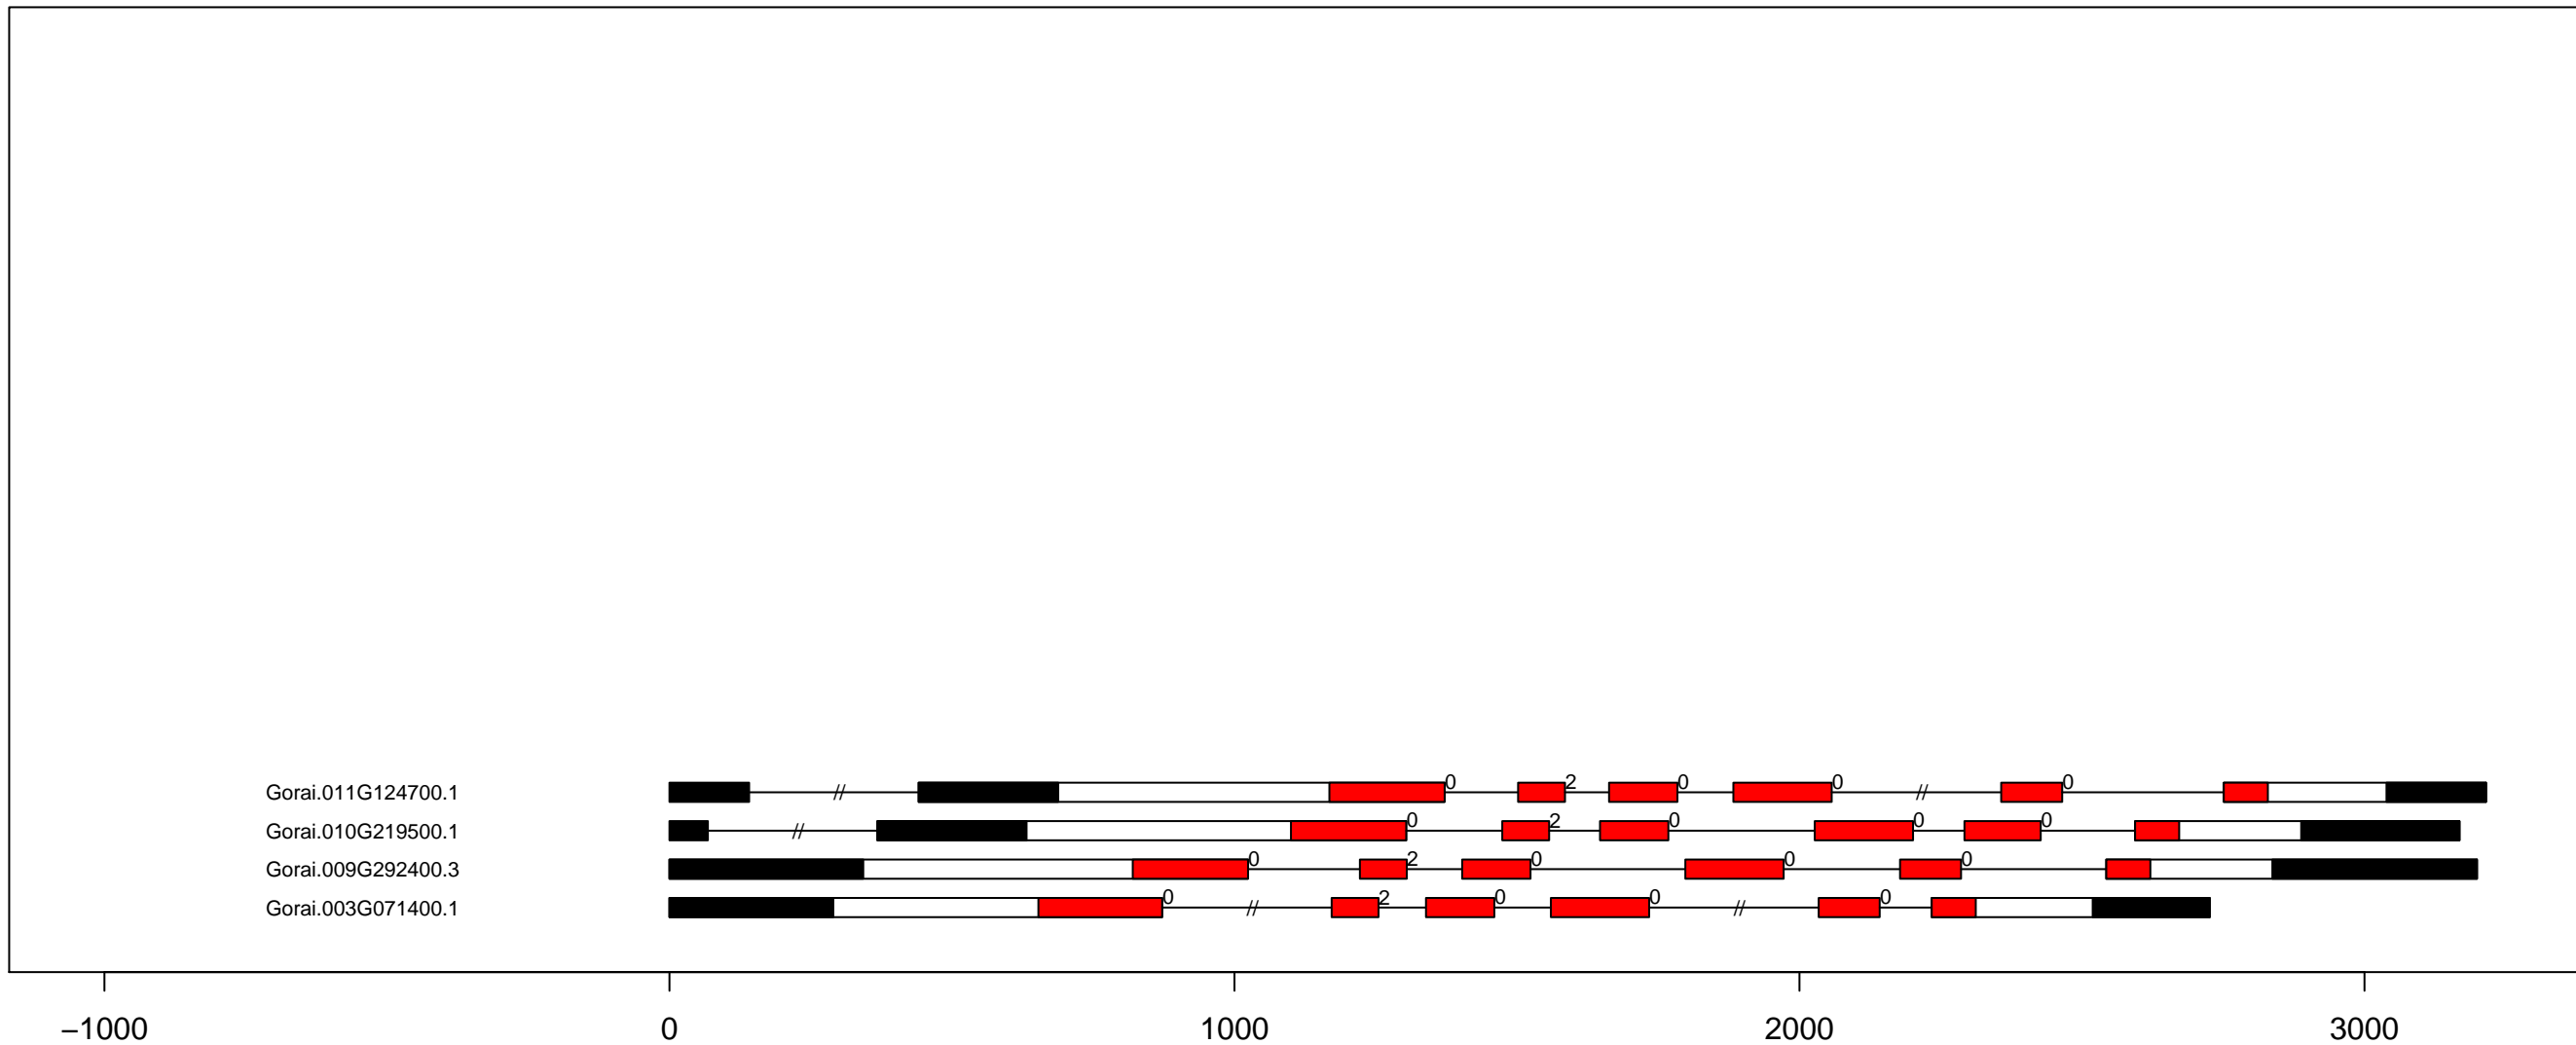

# G.ra Aur exon-intron and domain diagram (all)

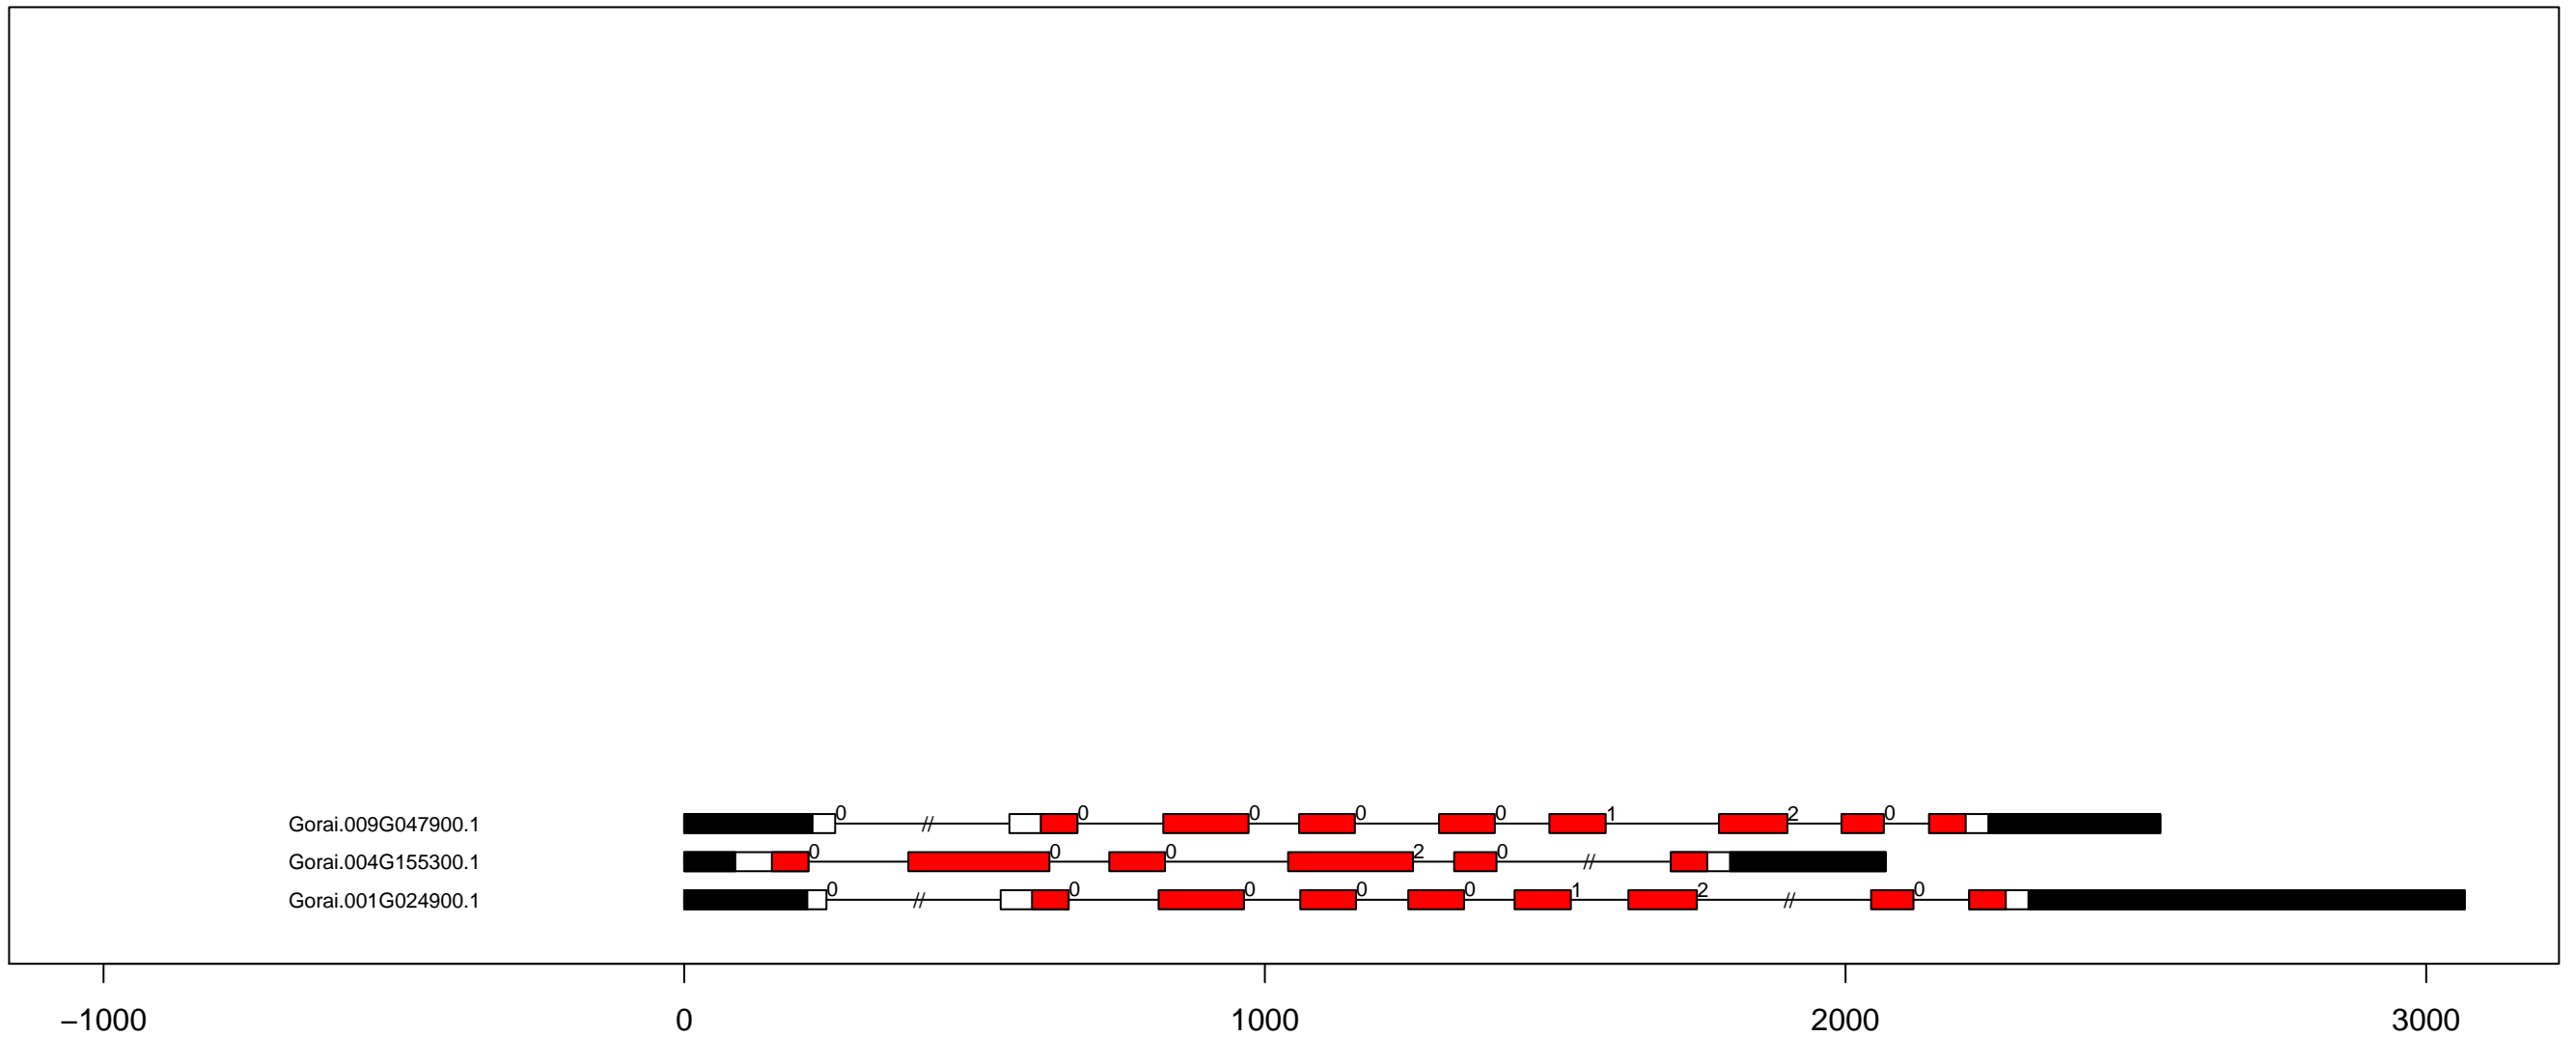

# G.ra BUB exon-intron and domain diagram (all)

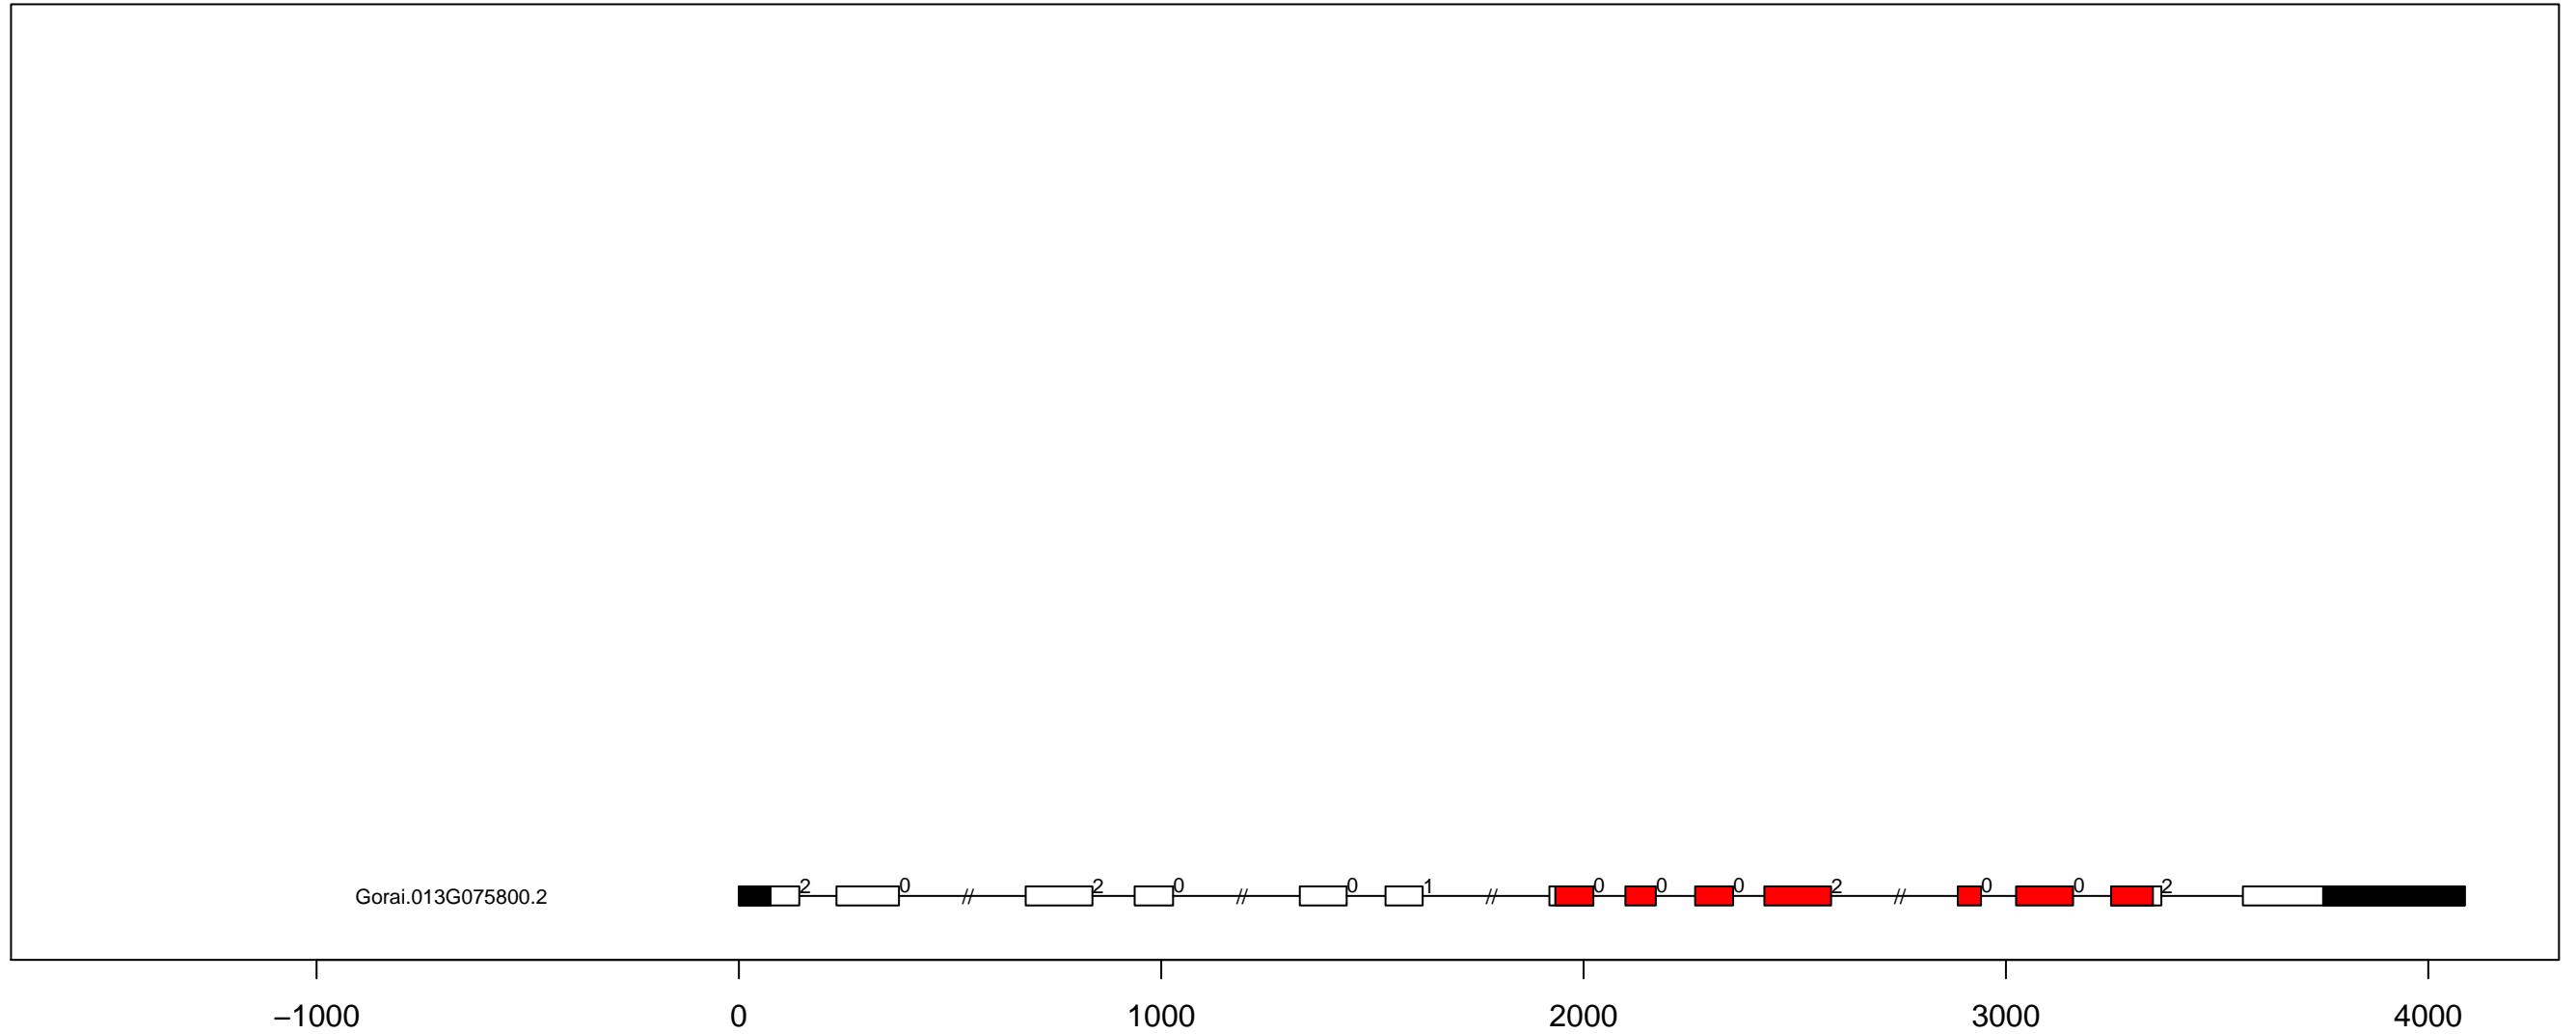

# G.ra CAMK\_AMPK exon-intron and domain diagram (all)

Gorai.007G011900.1  
Gorai.007G080200.1  
Gorai.006G013500.1  
Gorai.001G241000.1

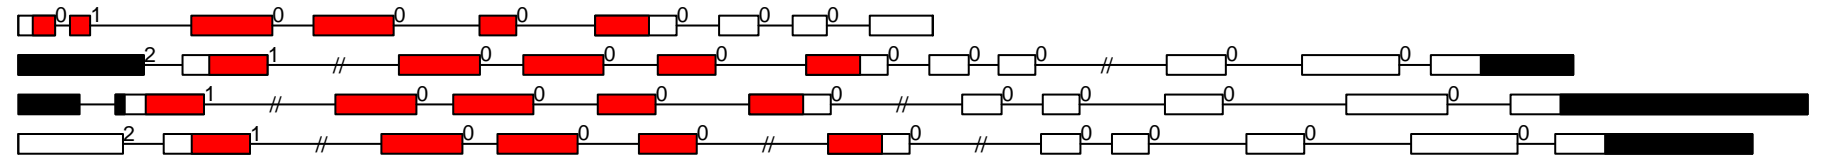

-1000

0

1000

2000

3000

4000

# G.ra CAMK\_CAMK1-DCAMKL exon-intron and domain diagram (all)

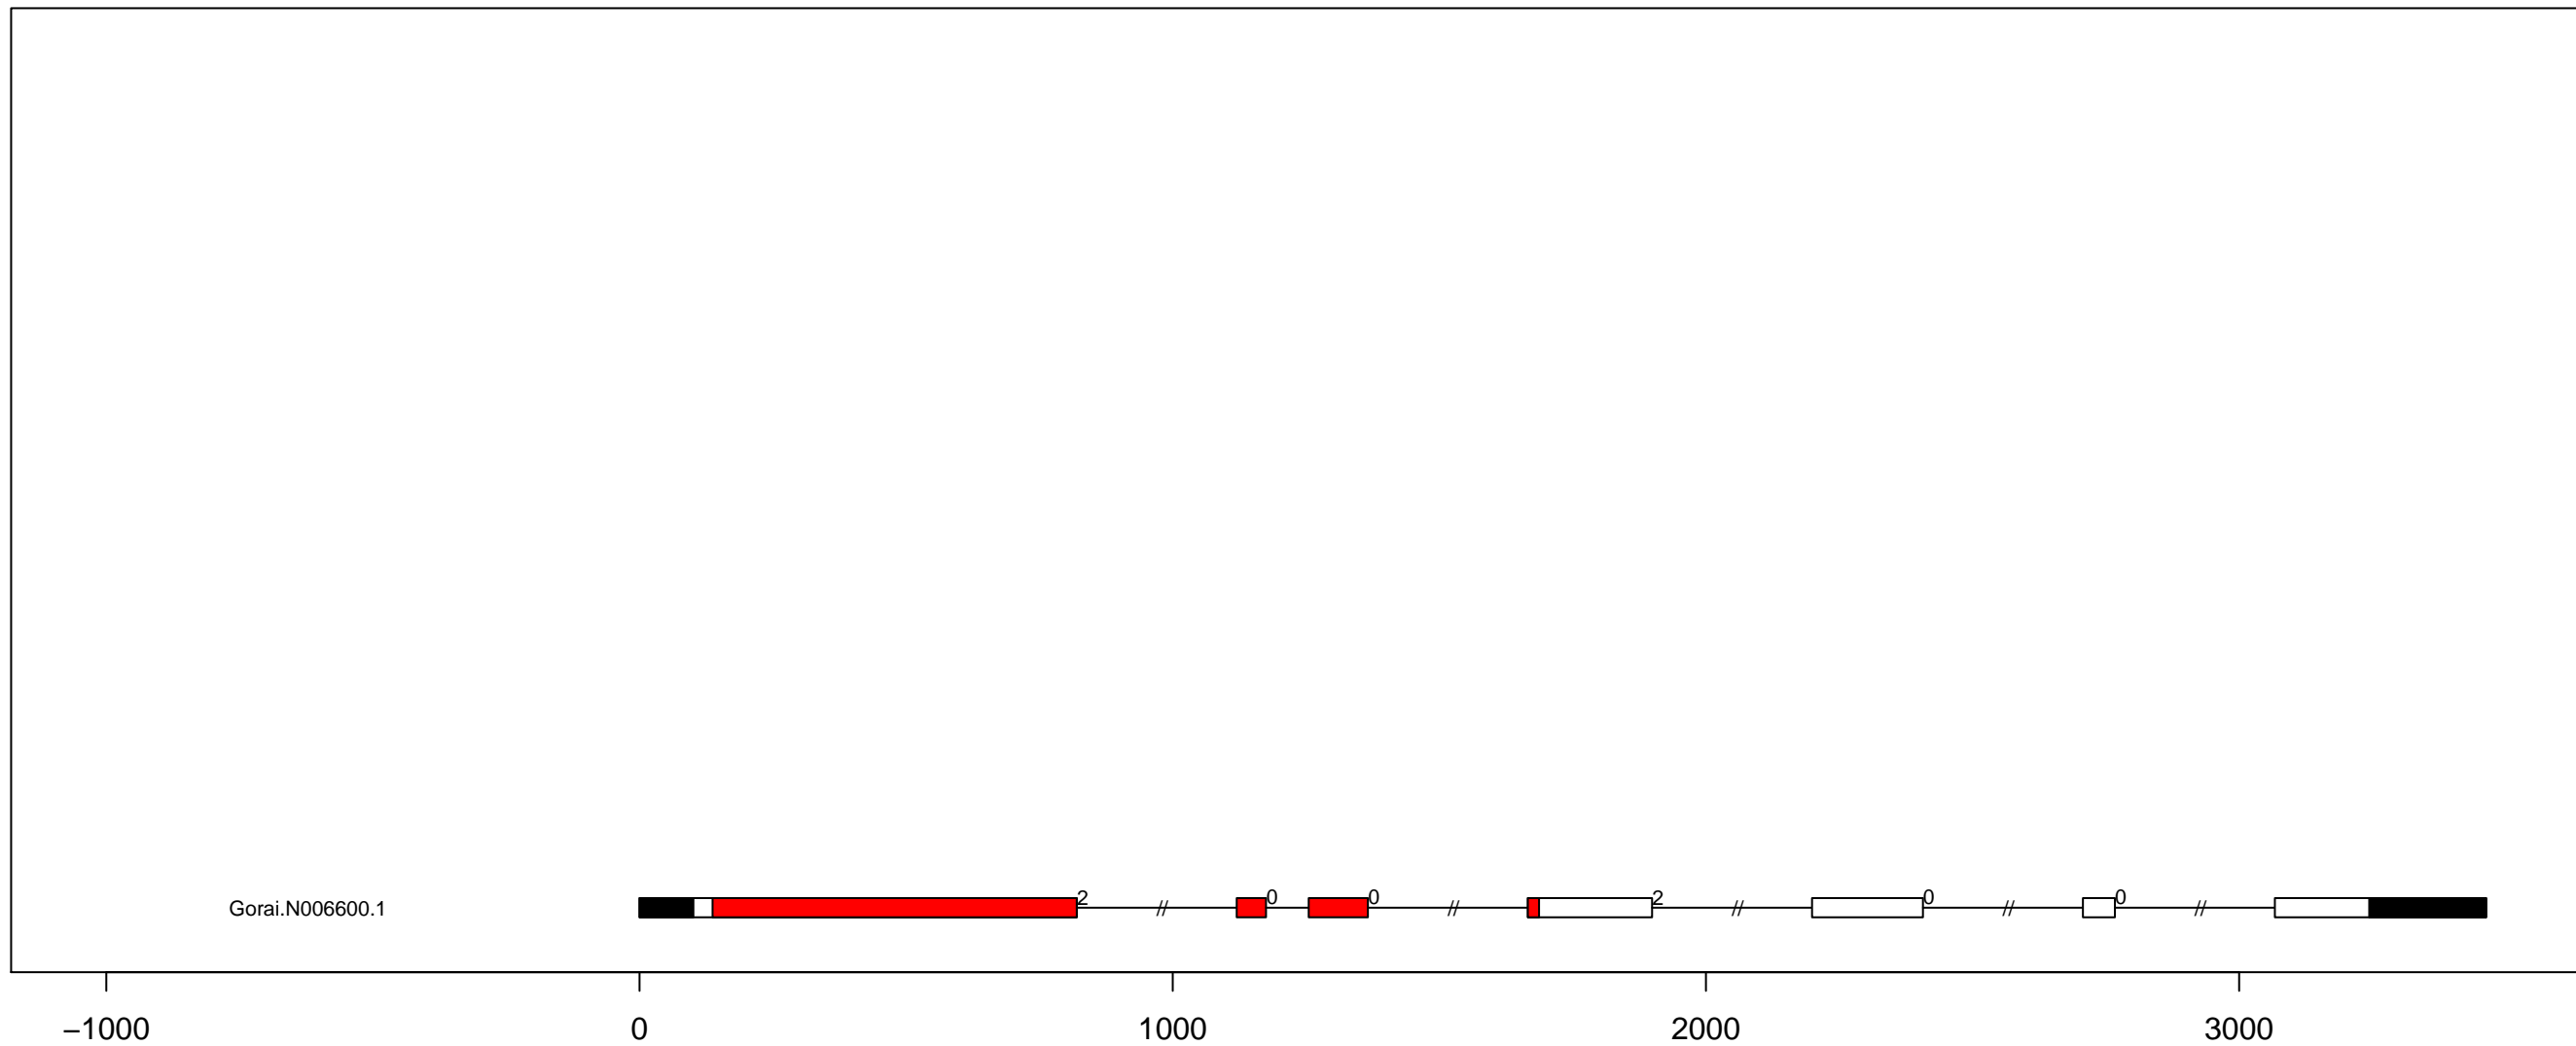



### G.ra CAMK\_CAMKL-CHK1 exon-intron and domain diagram (part 2)

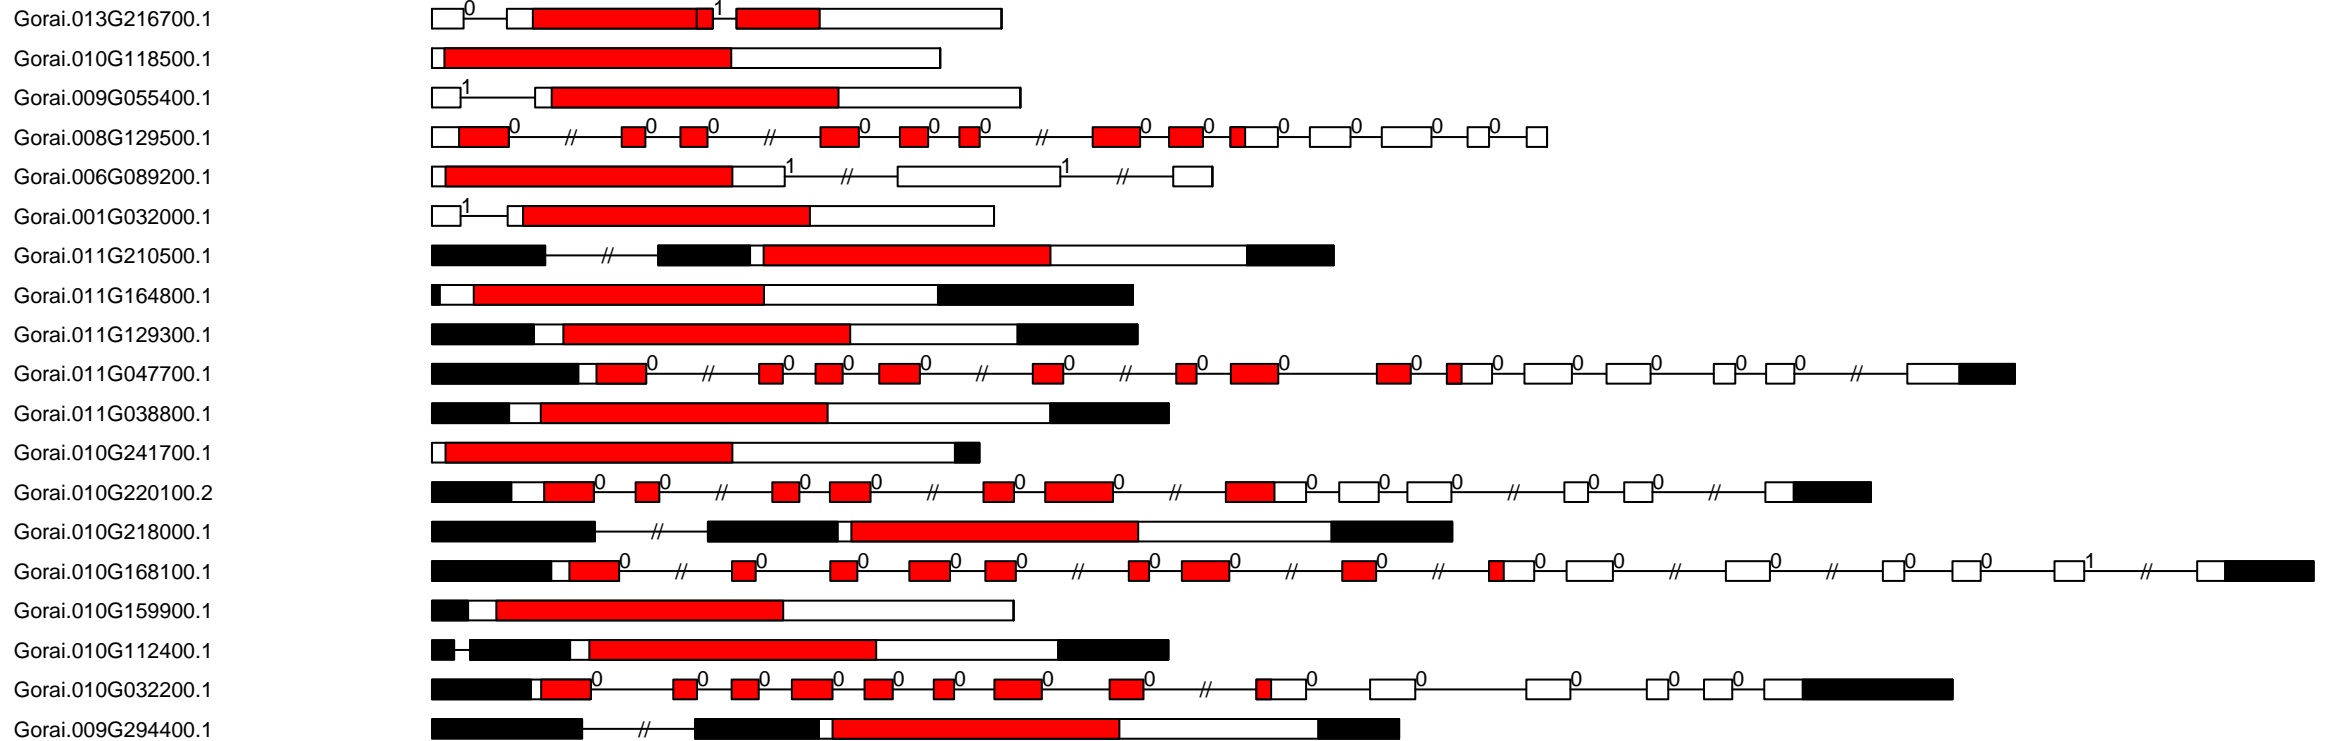

# G.ra CAMK\_CAMKL-LKB exon-intron and domain diagram (all)

Gorai.009G078200.1  
Gorai.004G013200.1  
Gorai.001G132000.1

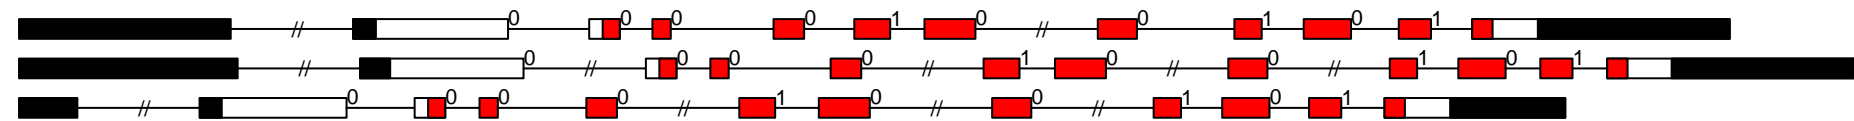

-1000

0

1000

2000

3000

4000



### G.ra CAMK\_CDPK exon-intron and domain diagram (part 1)

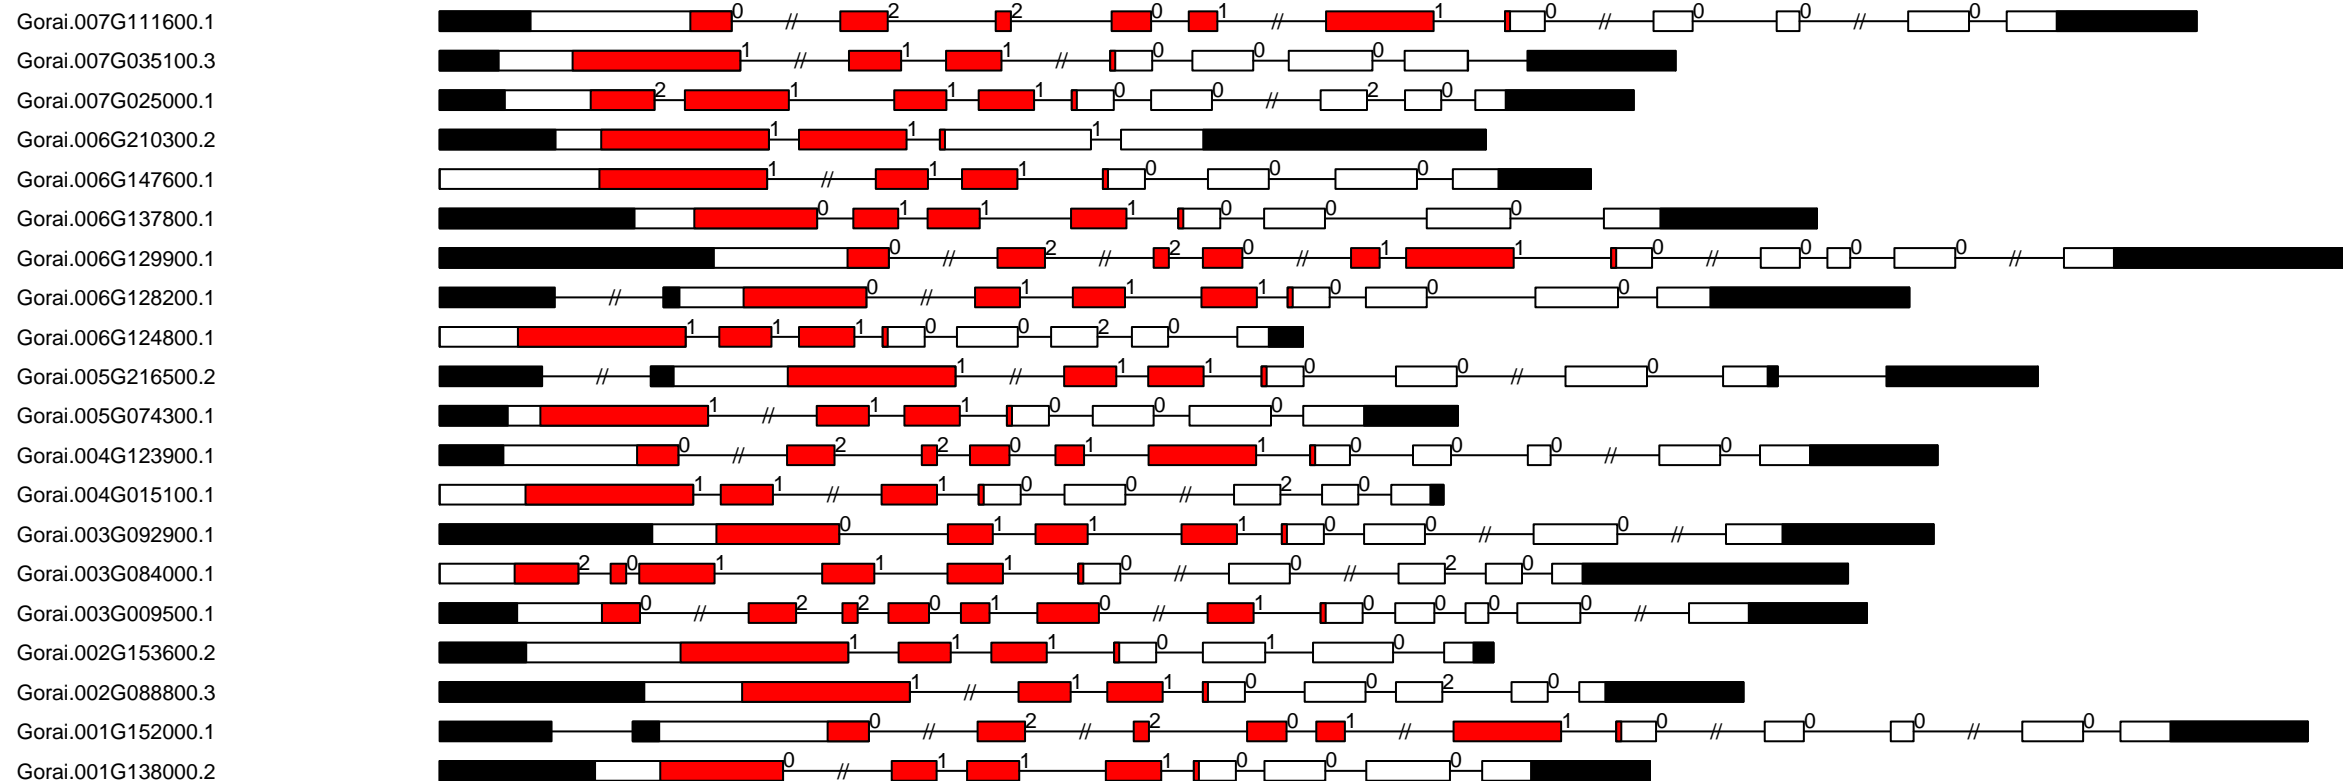

### G.ra CAMK\_CDPK exon-intron and domain diagram (part 2)

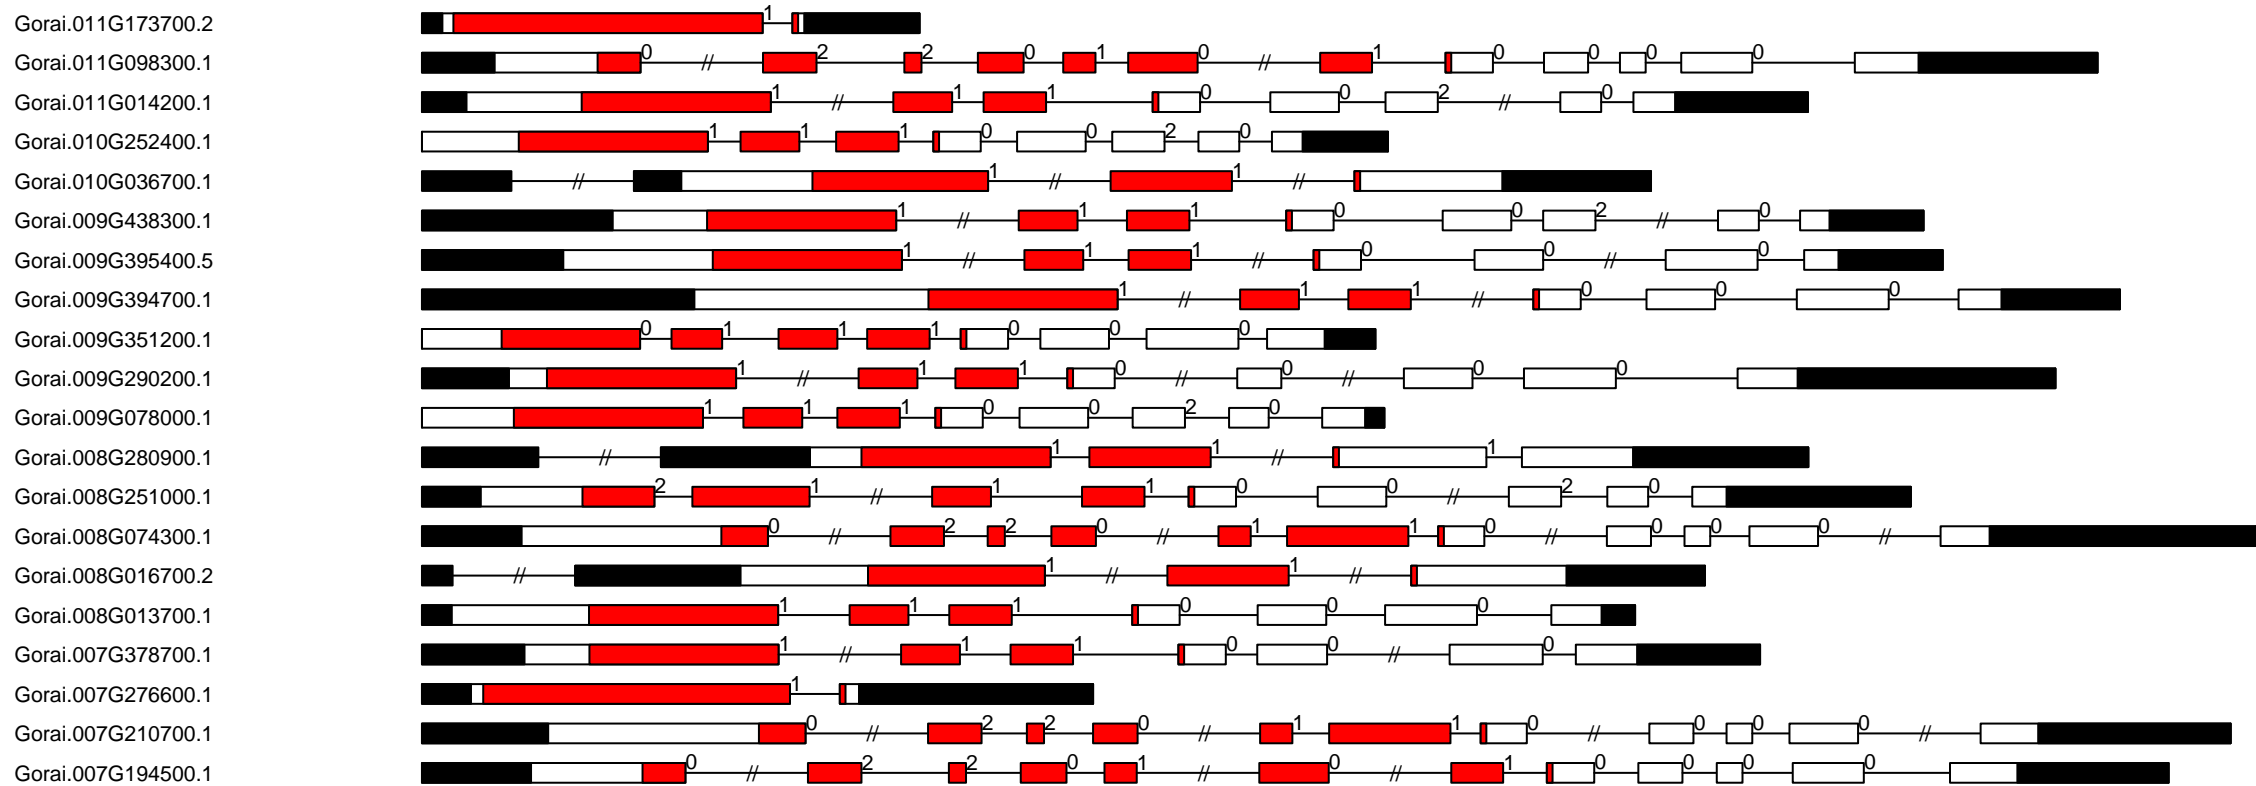



# G.ra CAMK\_OST1L exon-intron and domain diagram (all)

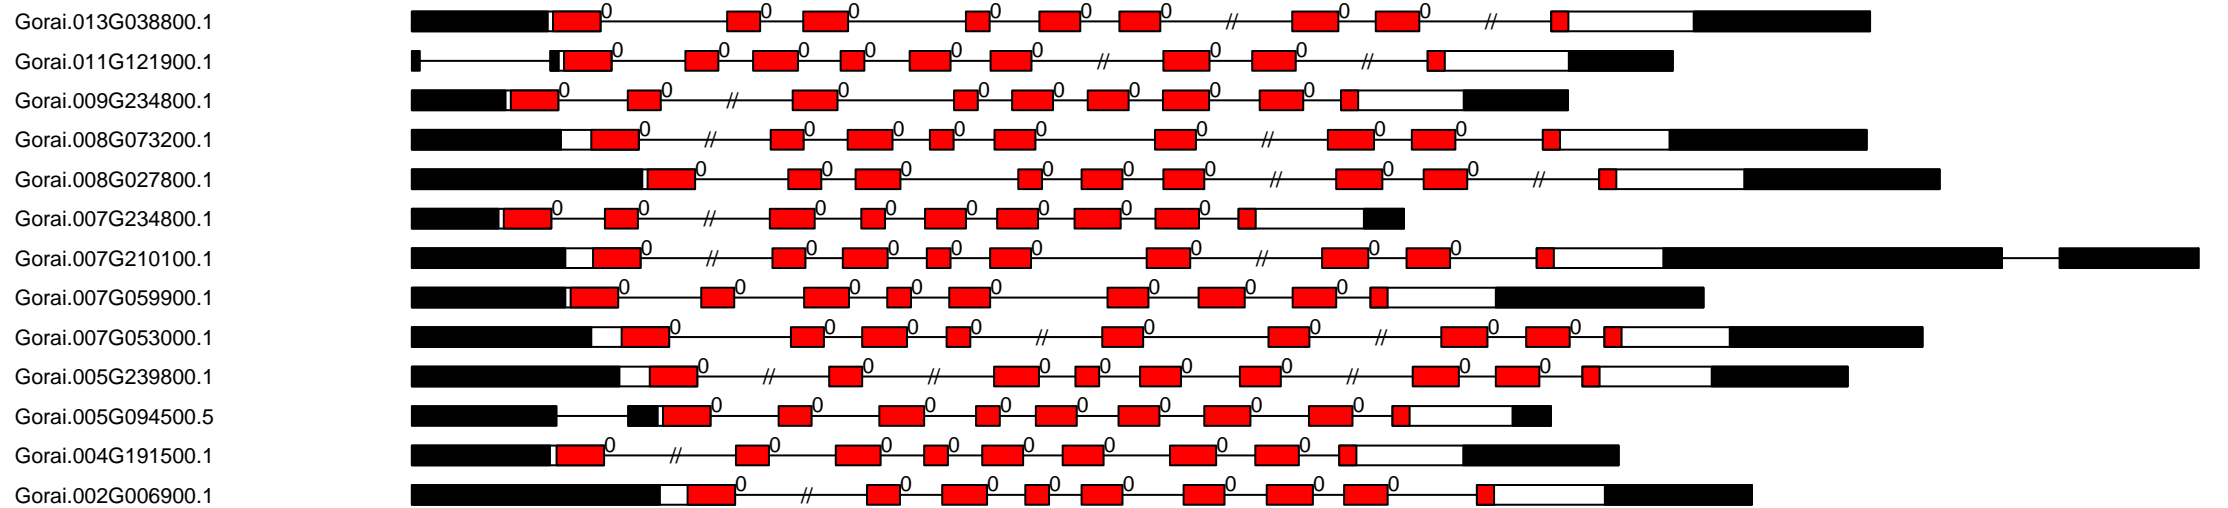

# G.ra CK1\_CK1 exon-intron and domain diagram (all)

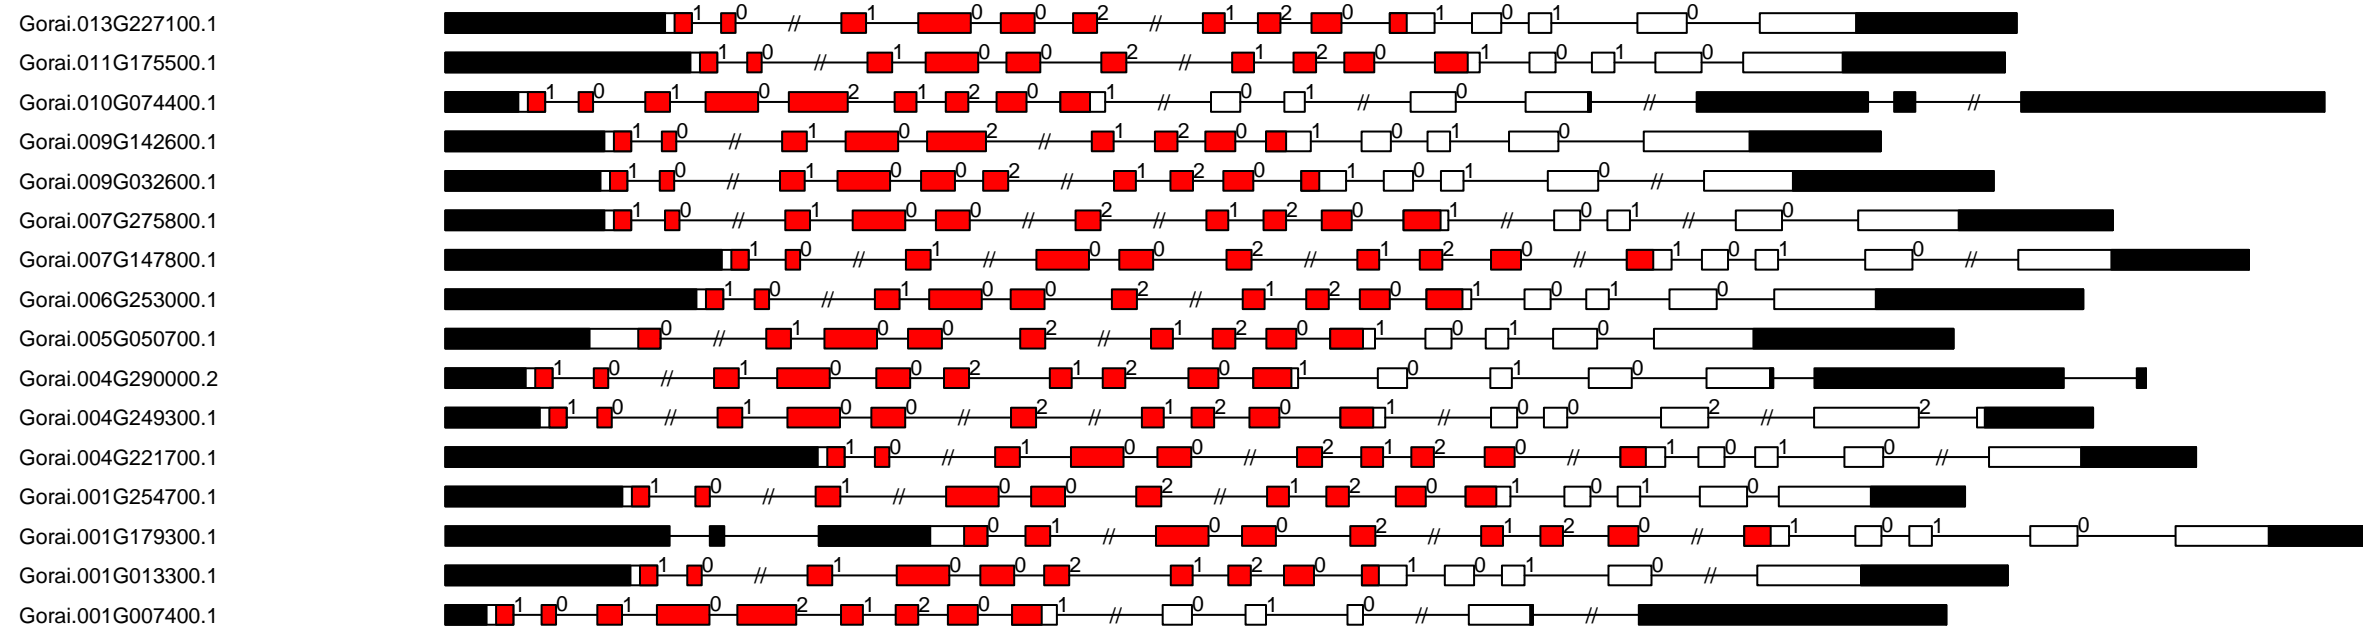

-1000

0

1000

2000

3000

4000

5000

### G.ra CK1\_CK1-PI exon-intron and domain diagram (all)

Gorai.013G219500.2  
 Gorai.013G203000.1  
 Gorai.013G175600.1  
 Gorai.013G123300.1  
 Gorai.011G072100.1  
 Gorai.009G137100.1  
 Gorai.009G024100.1  
 Gorai.007G343500.1  
 Gorai.007G289500.1  
 Gorai.004G279600.2  
 Gorai.004G018100.1  
 Gorai.004G018000.1  
 Gorai.001G026300.2

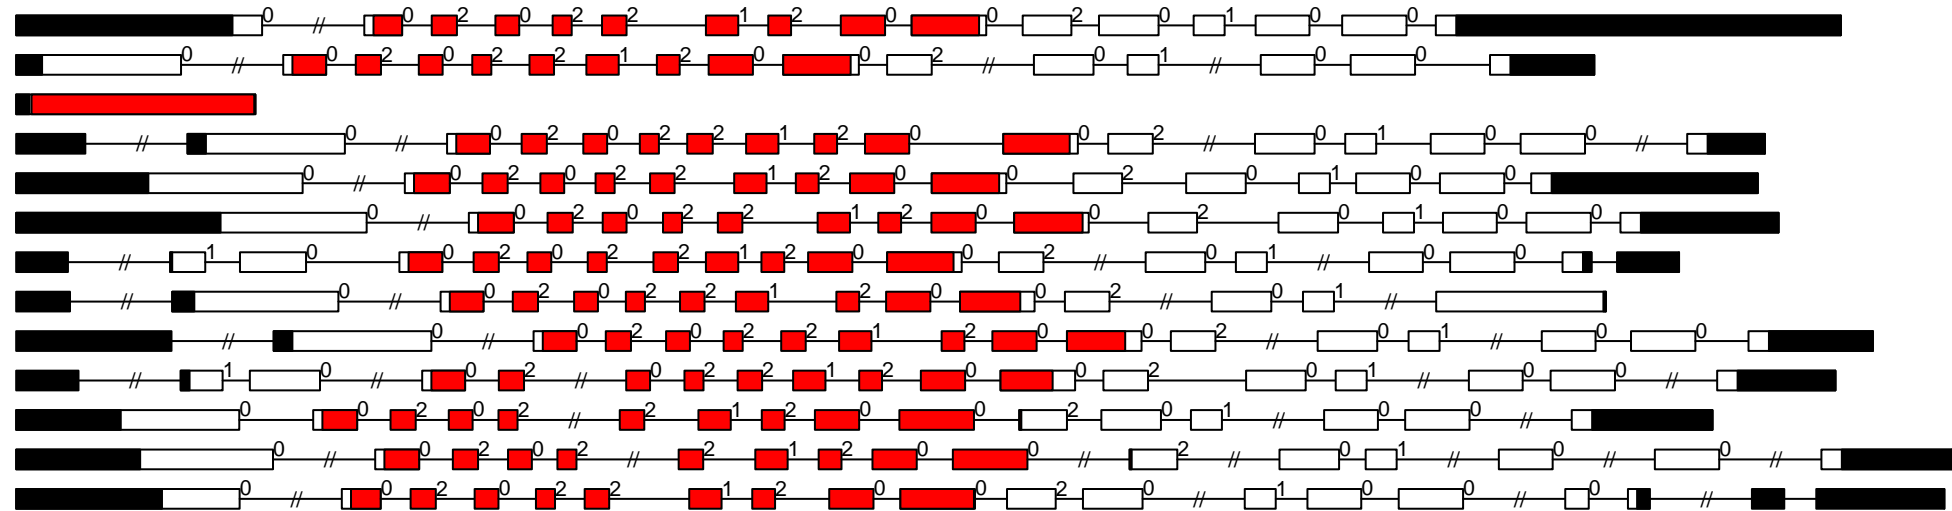

# G.ra CMGC\_CDK-CCRK exon-intron and domain diagram (all)

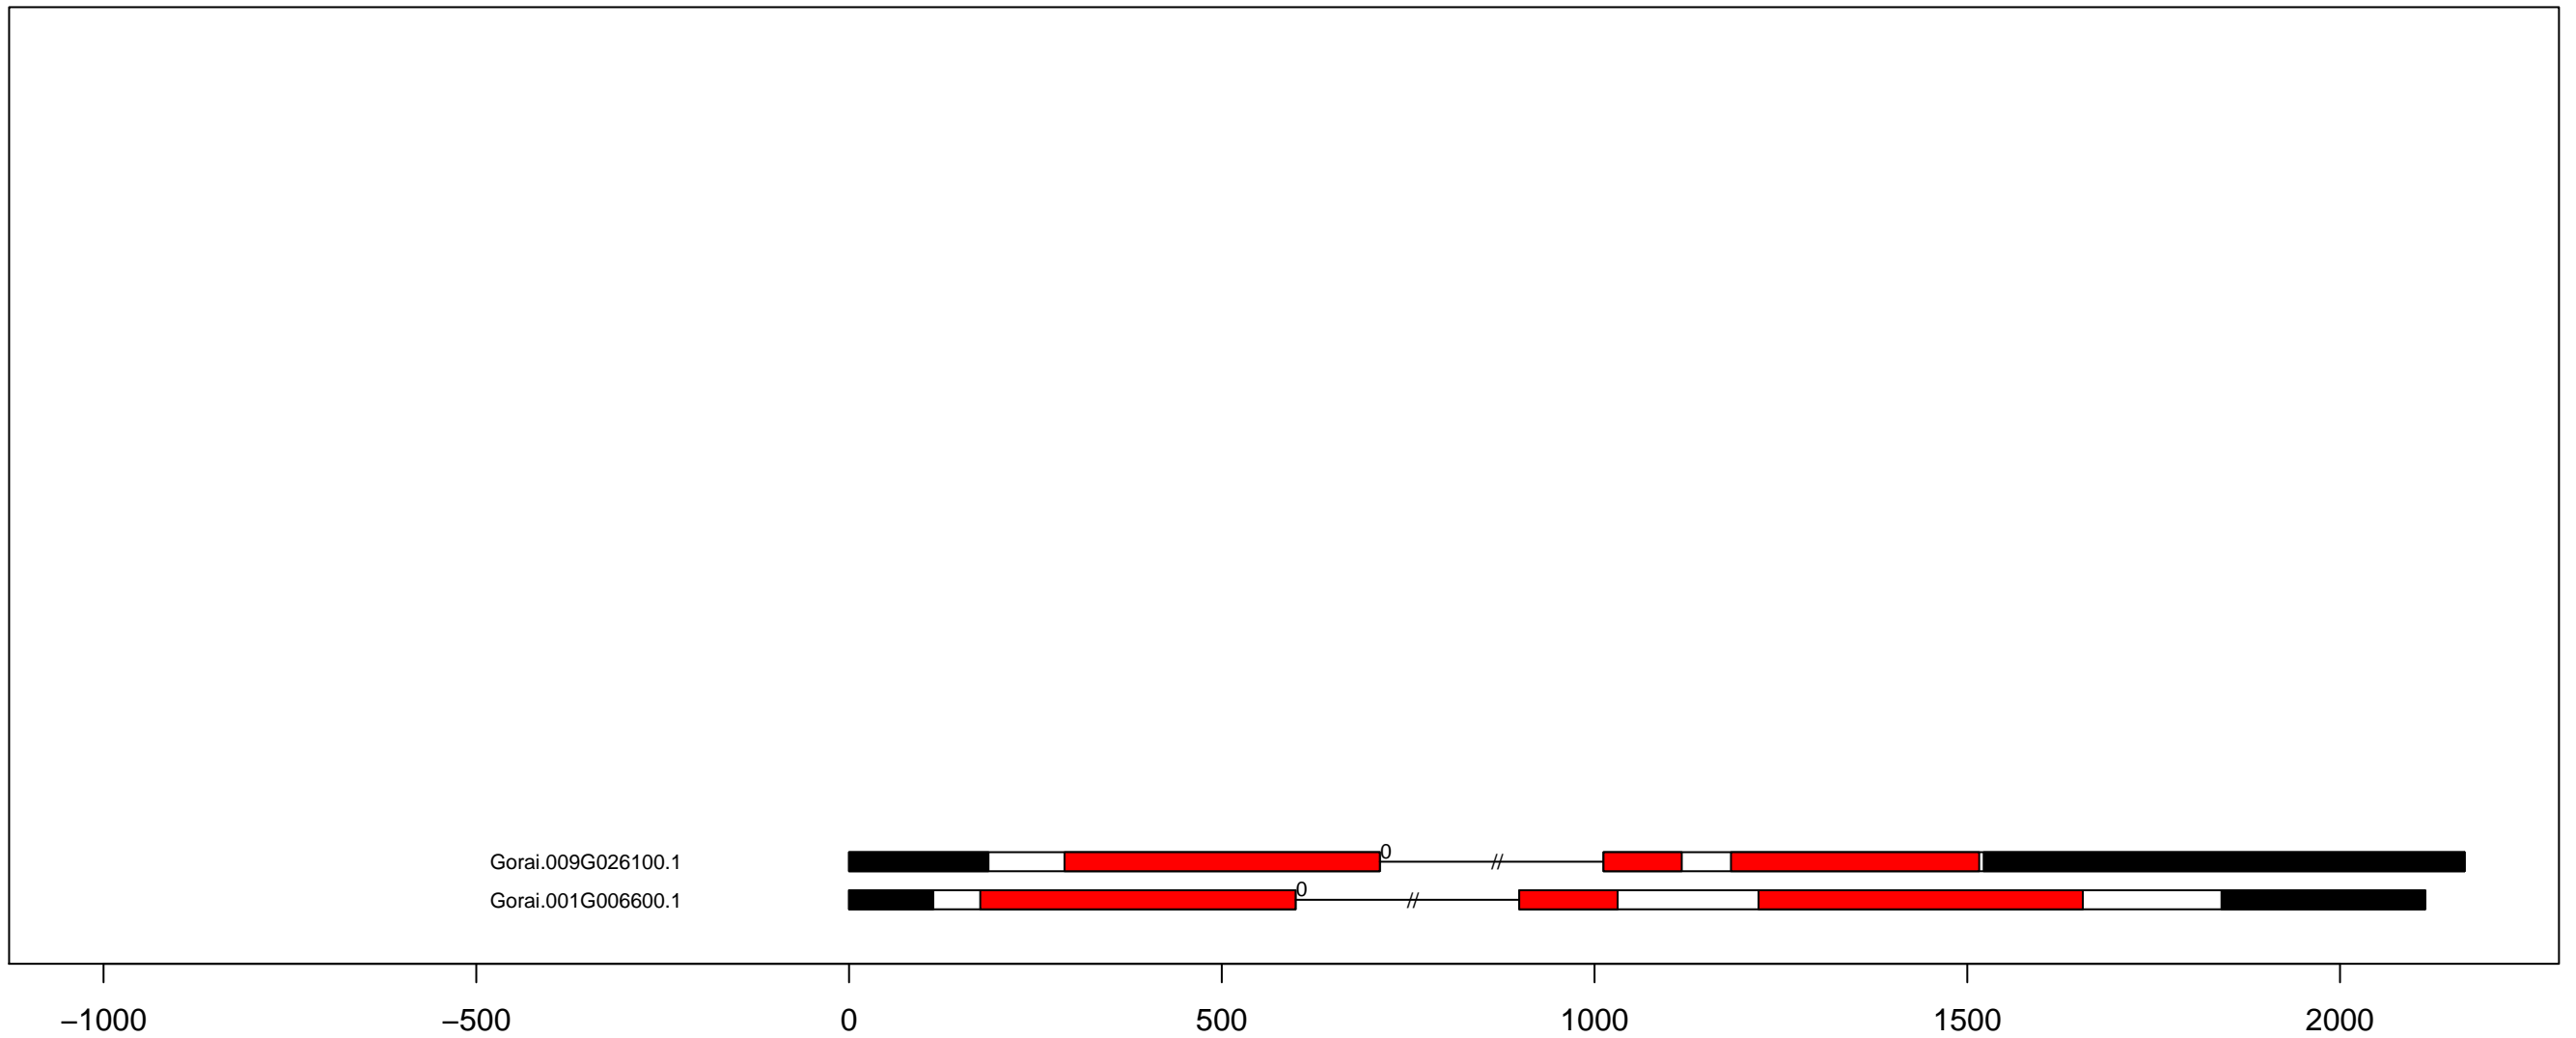

# G.ra CMGC\_CDK-CDK7 exon-intron and domain diagram (all)

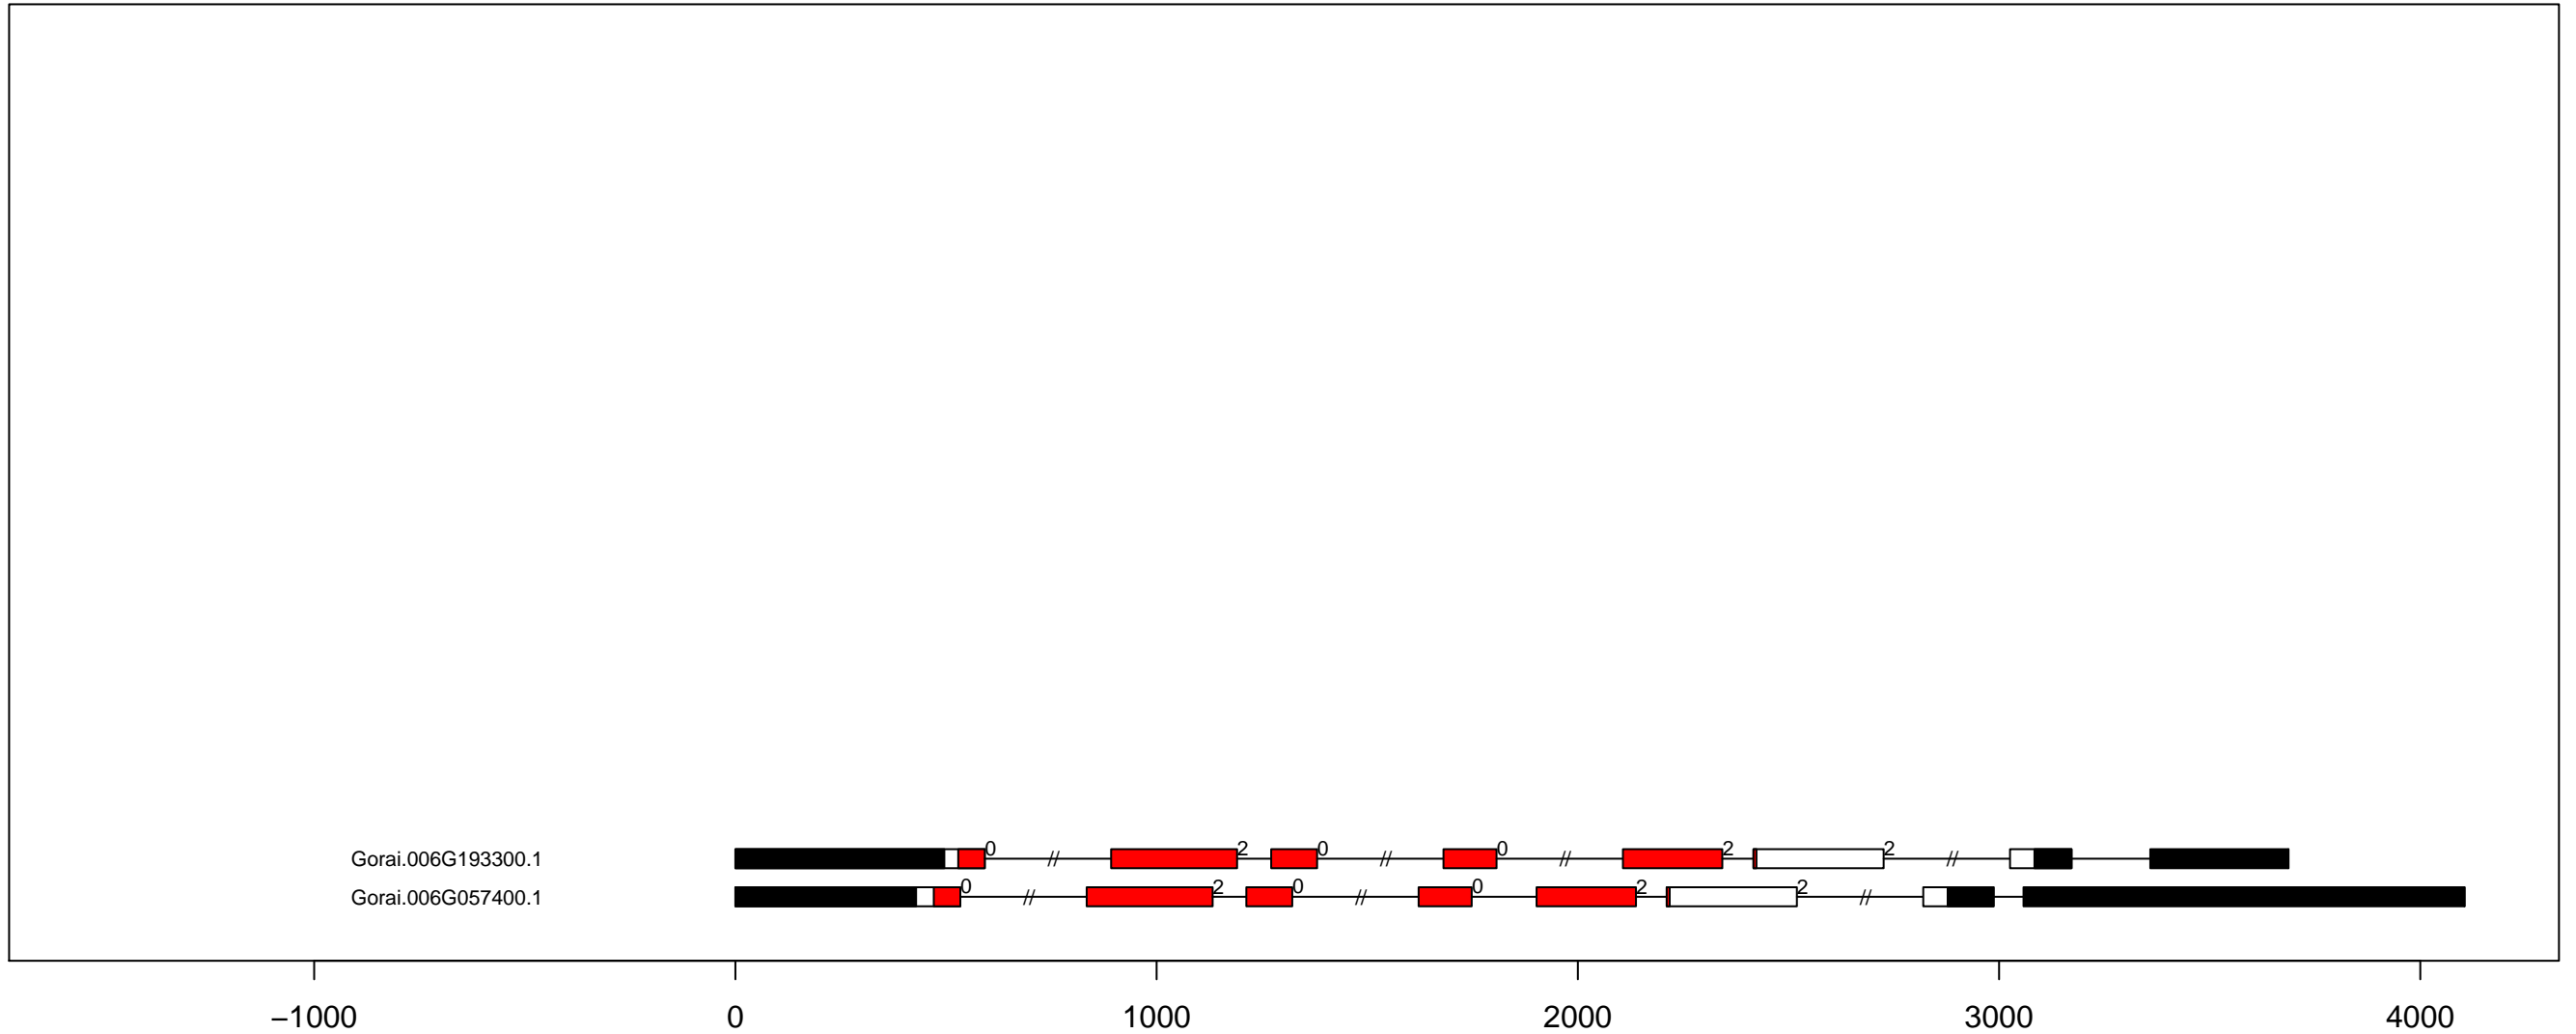



# G.ra CMGC\_CDK-CDK8 exon-intron and domain diagram (all)

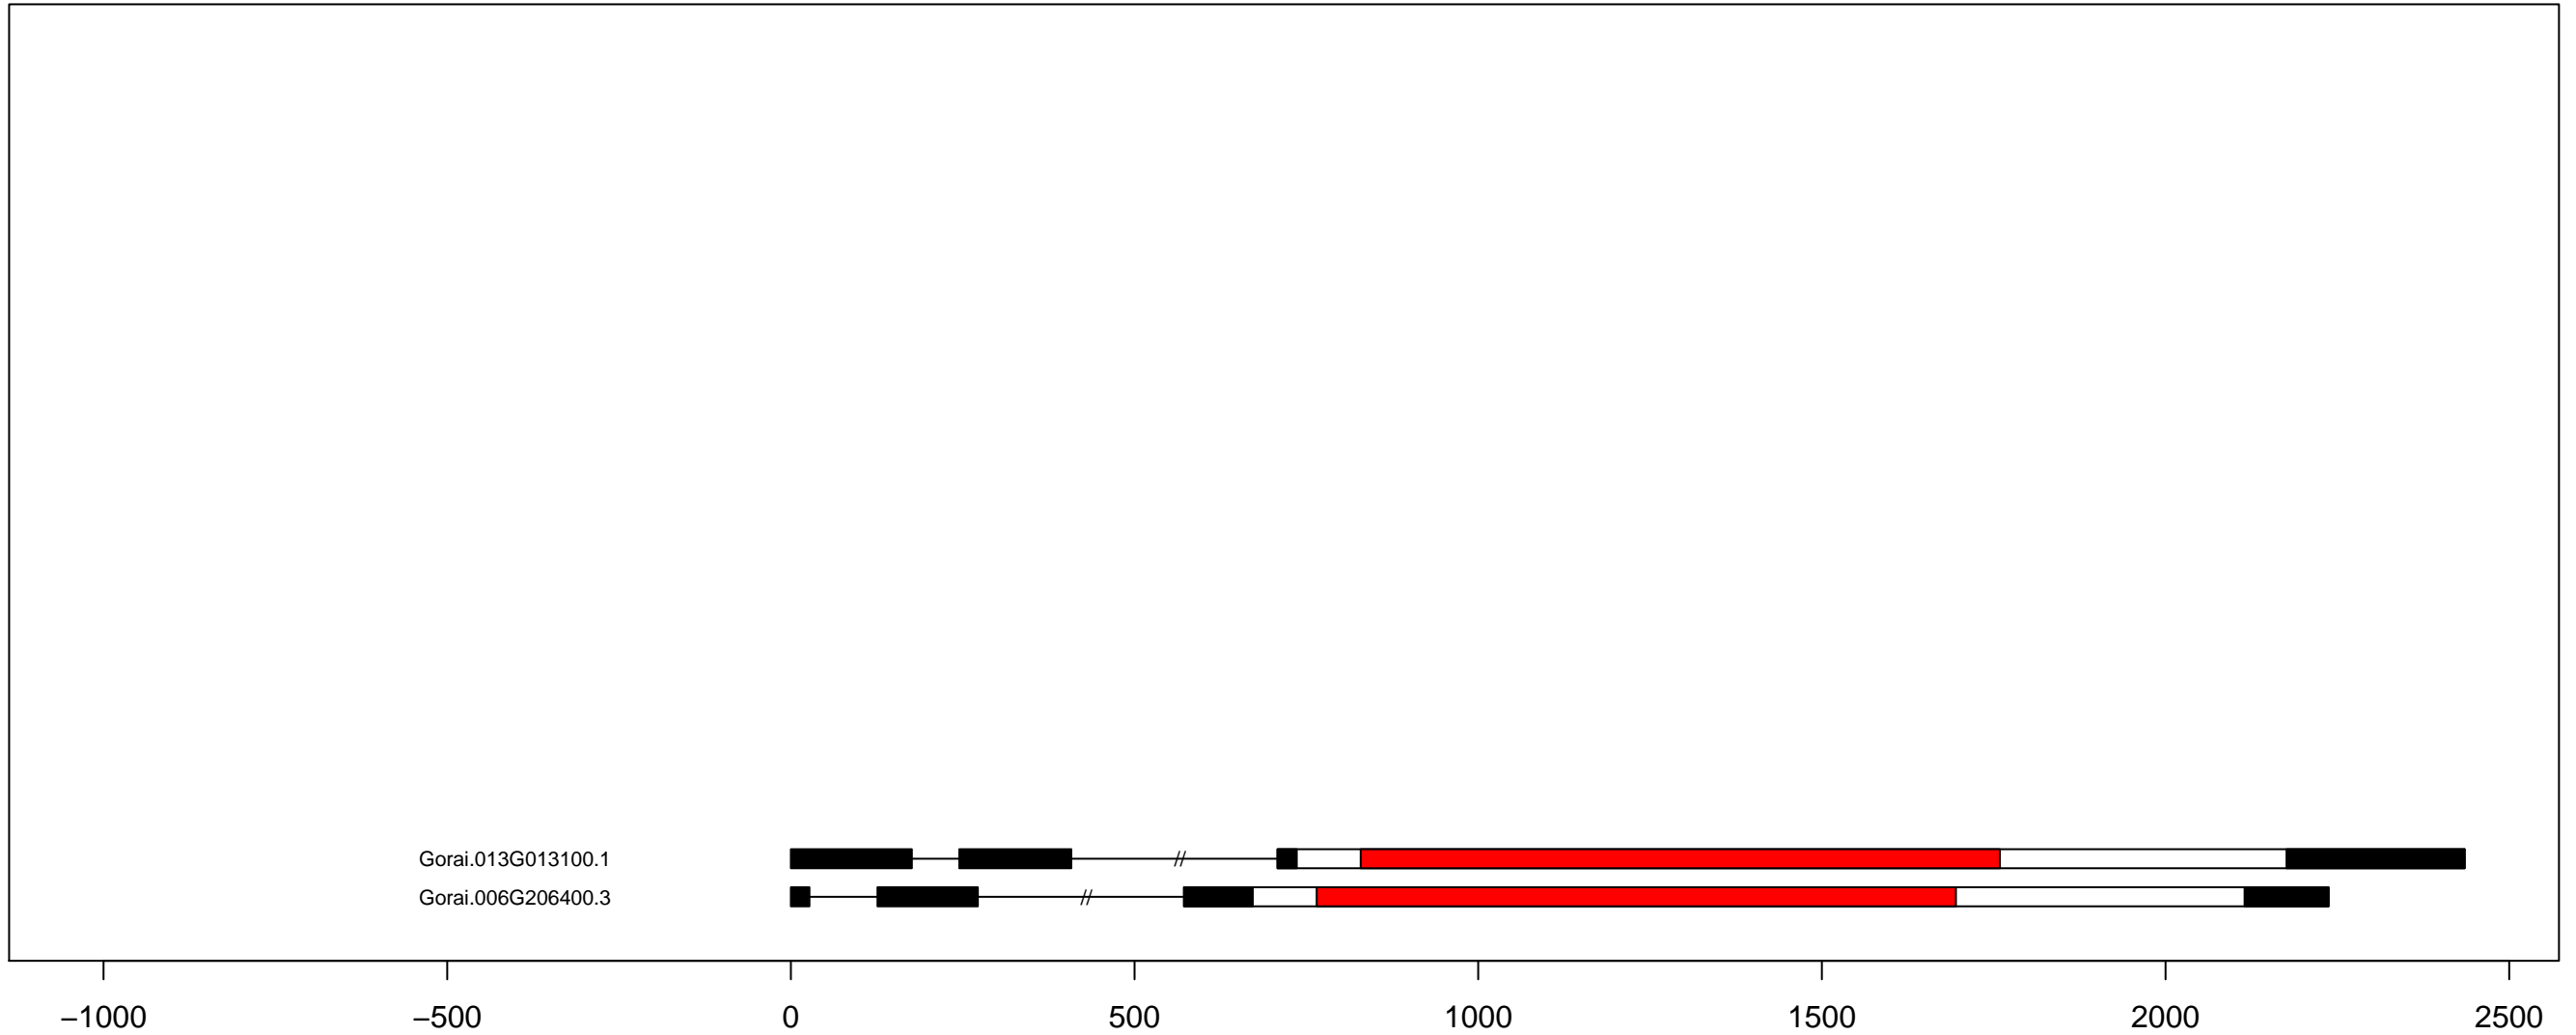

### G.ra CMGC\_CDK-CRK7-CDK9 exon-intron and domain diagram (part 1)

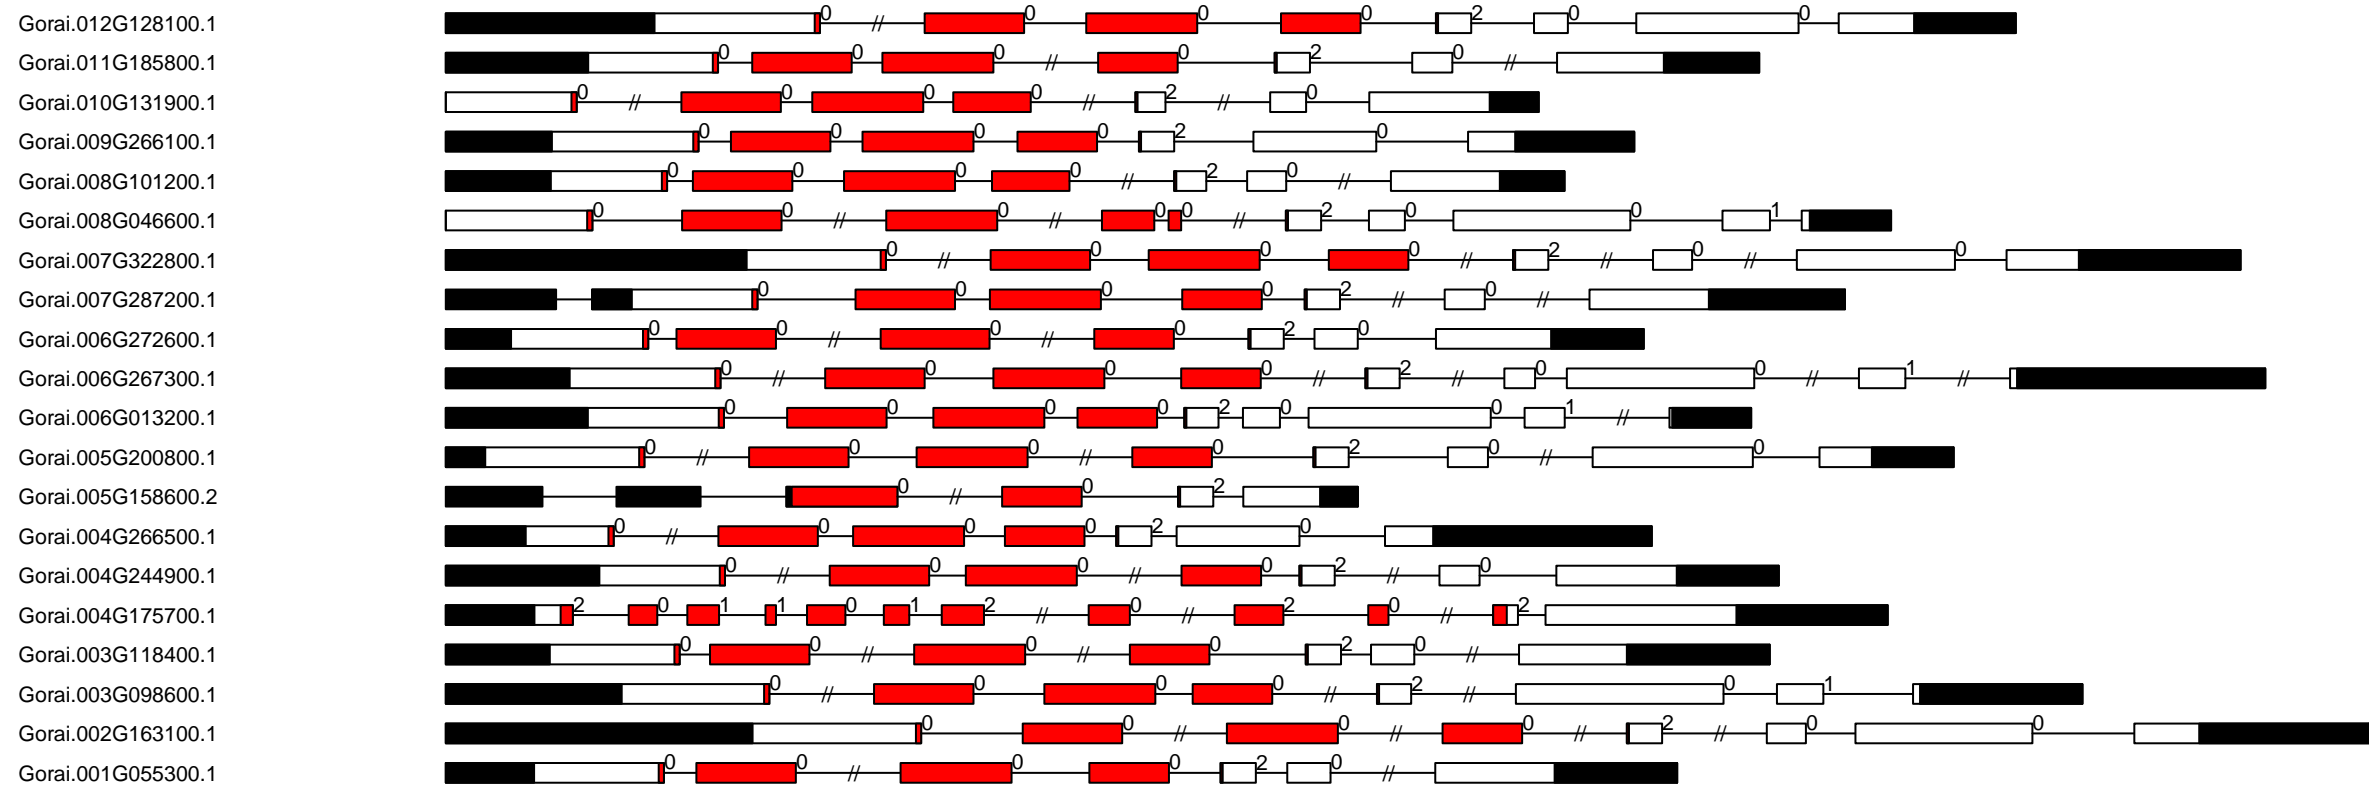

## G.ra CMGC\_CDK-CRK7-CDK9 exon-intron and domain diagram (part 2)

Gorai.013G134700.1  
Gorai.012G170000.1  
Gorai.013G202600.1  
Gorai.013G168700.1

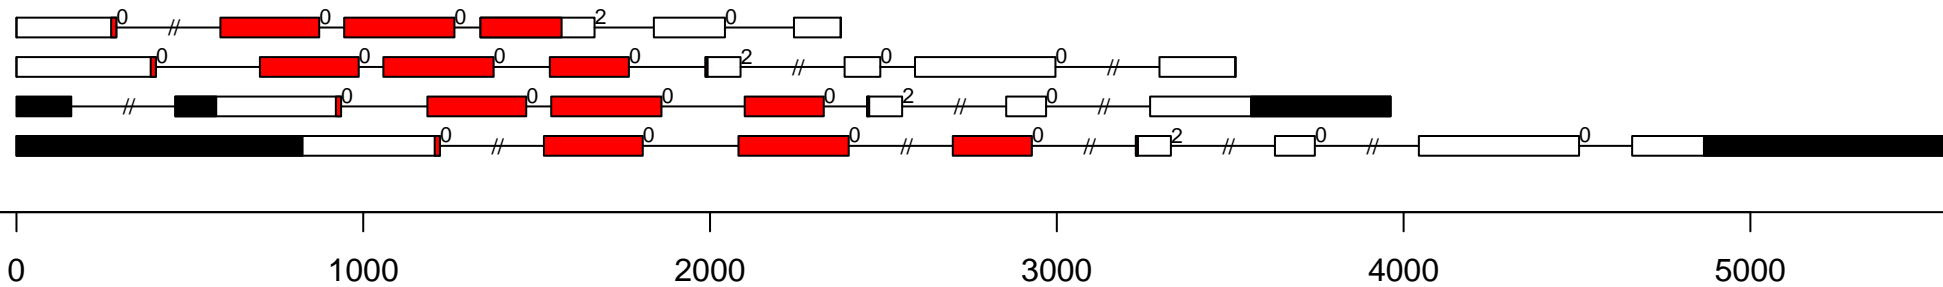

# G.ra CMGC\_CDK-PITSLRE exon-intron and domain diagram (all)

Gorai.008G205000.1  
Gorai.012G174900.2  
Gorai.005G170300.1  
Gorai.001G060800.2

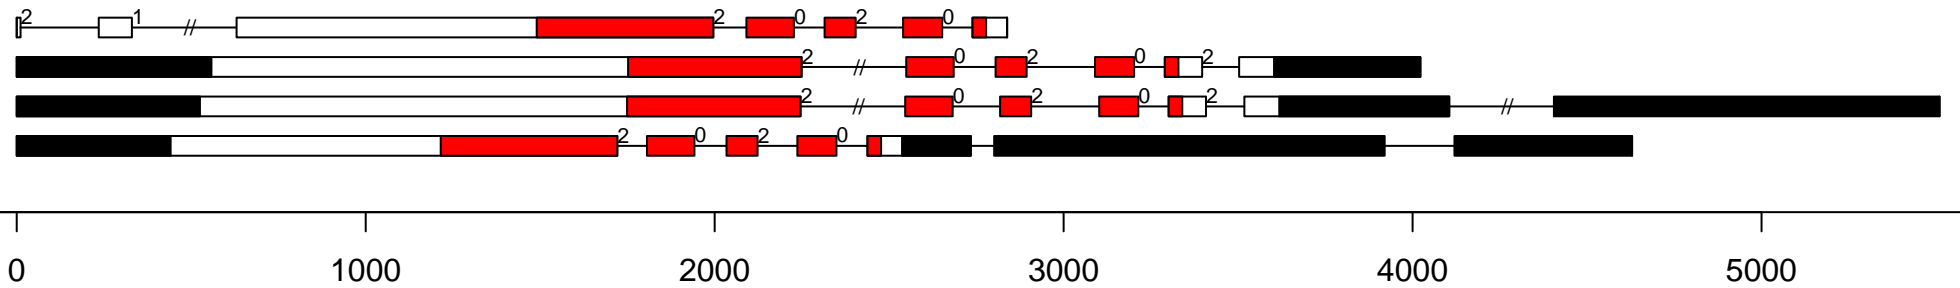

# G.ra CMGC\_CDK-PI exon-intron and domain diagram (all)

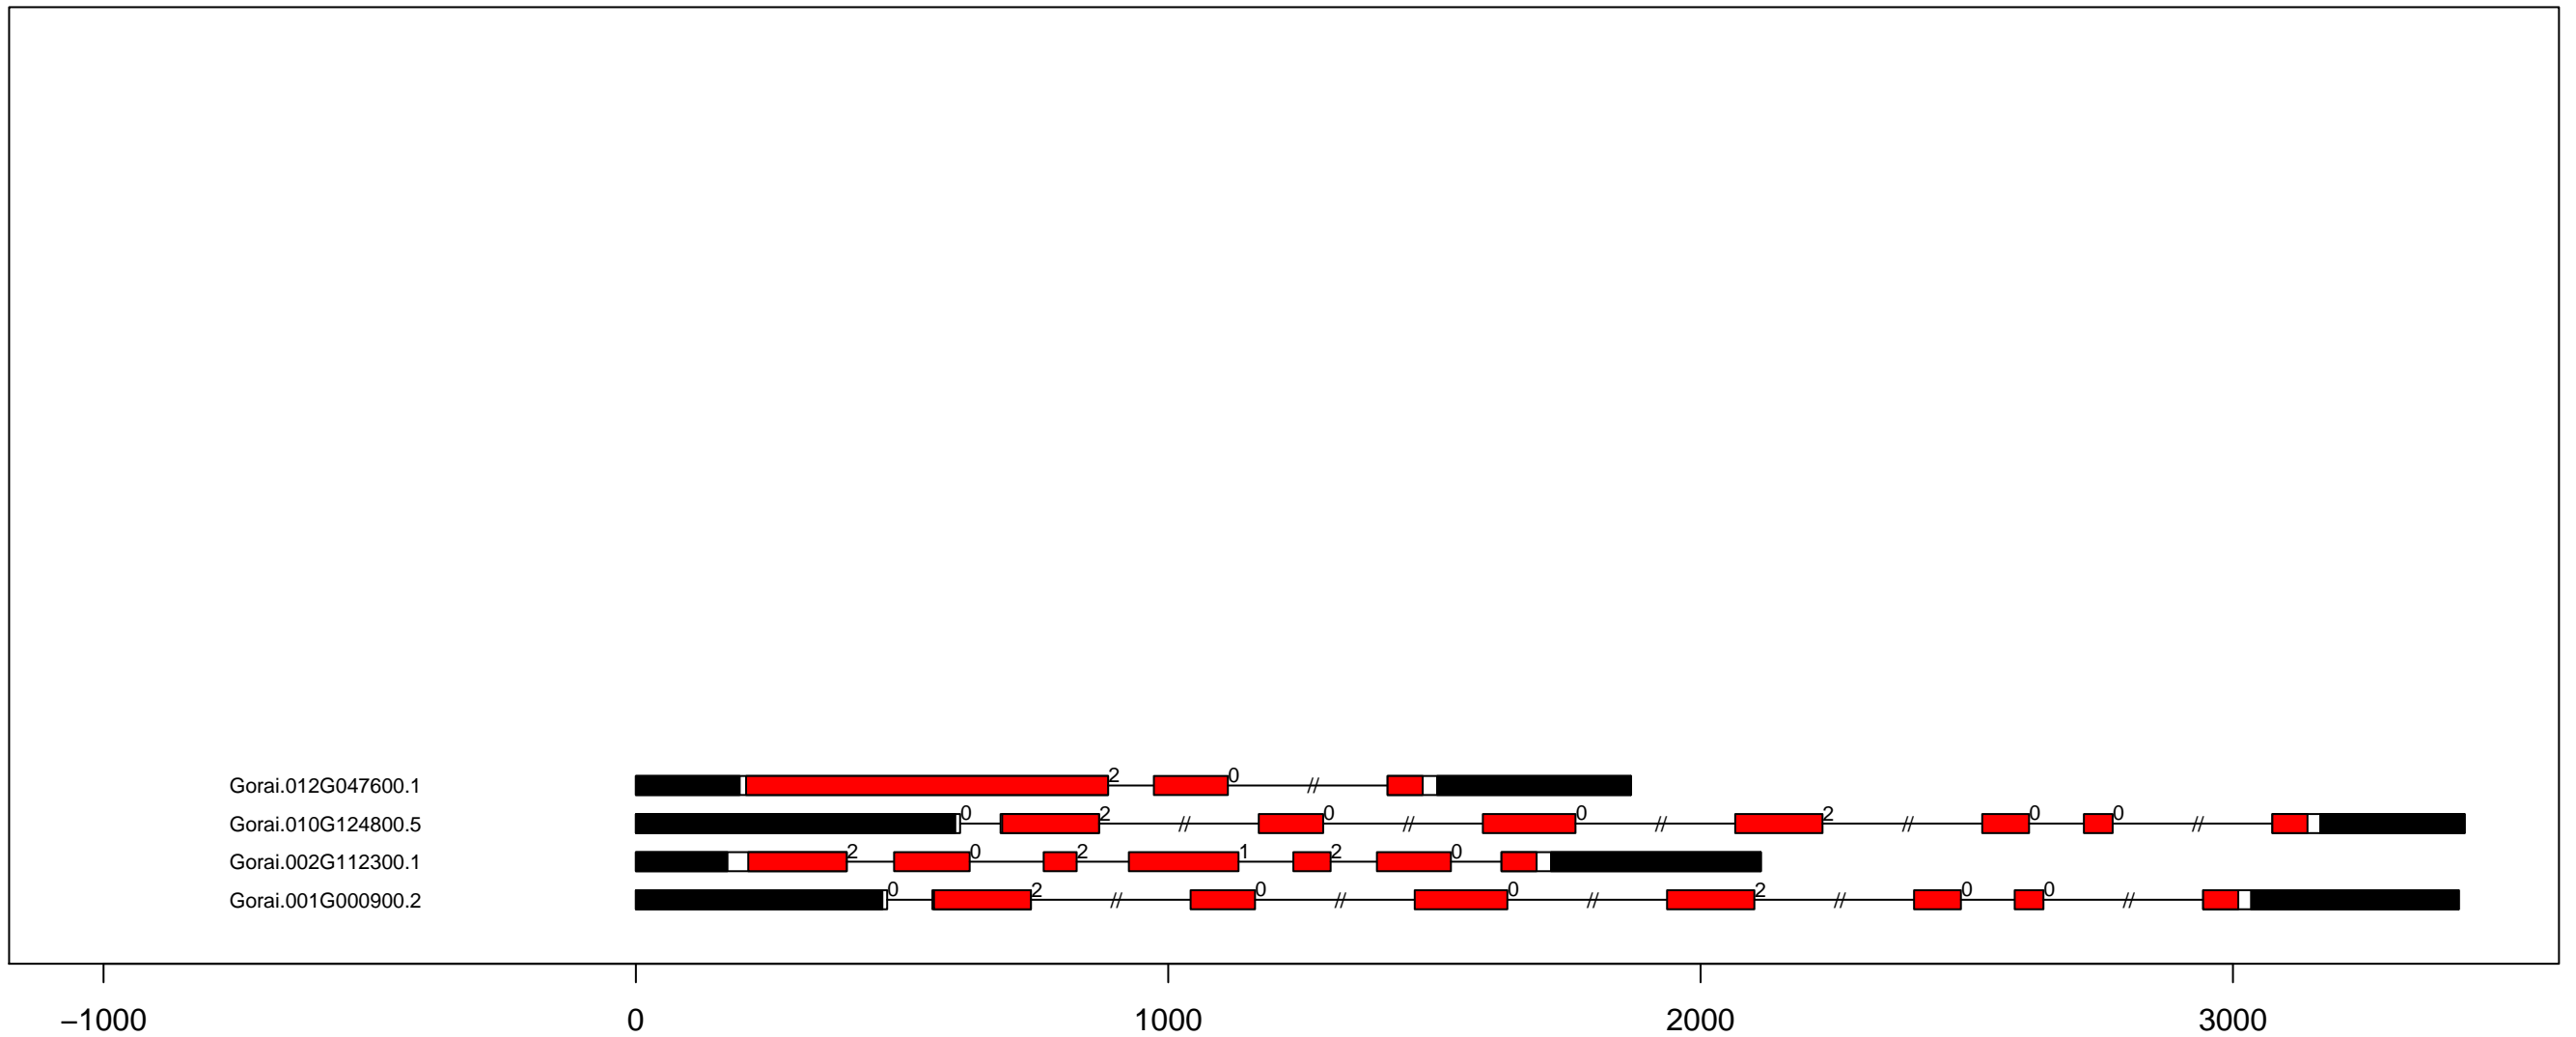

G.ra CMGC\_CK2 exon-intron and domain diagram (all)

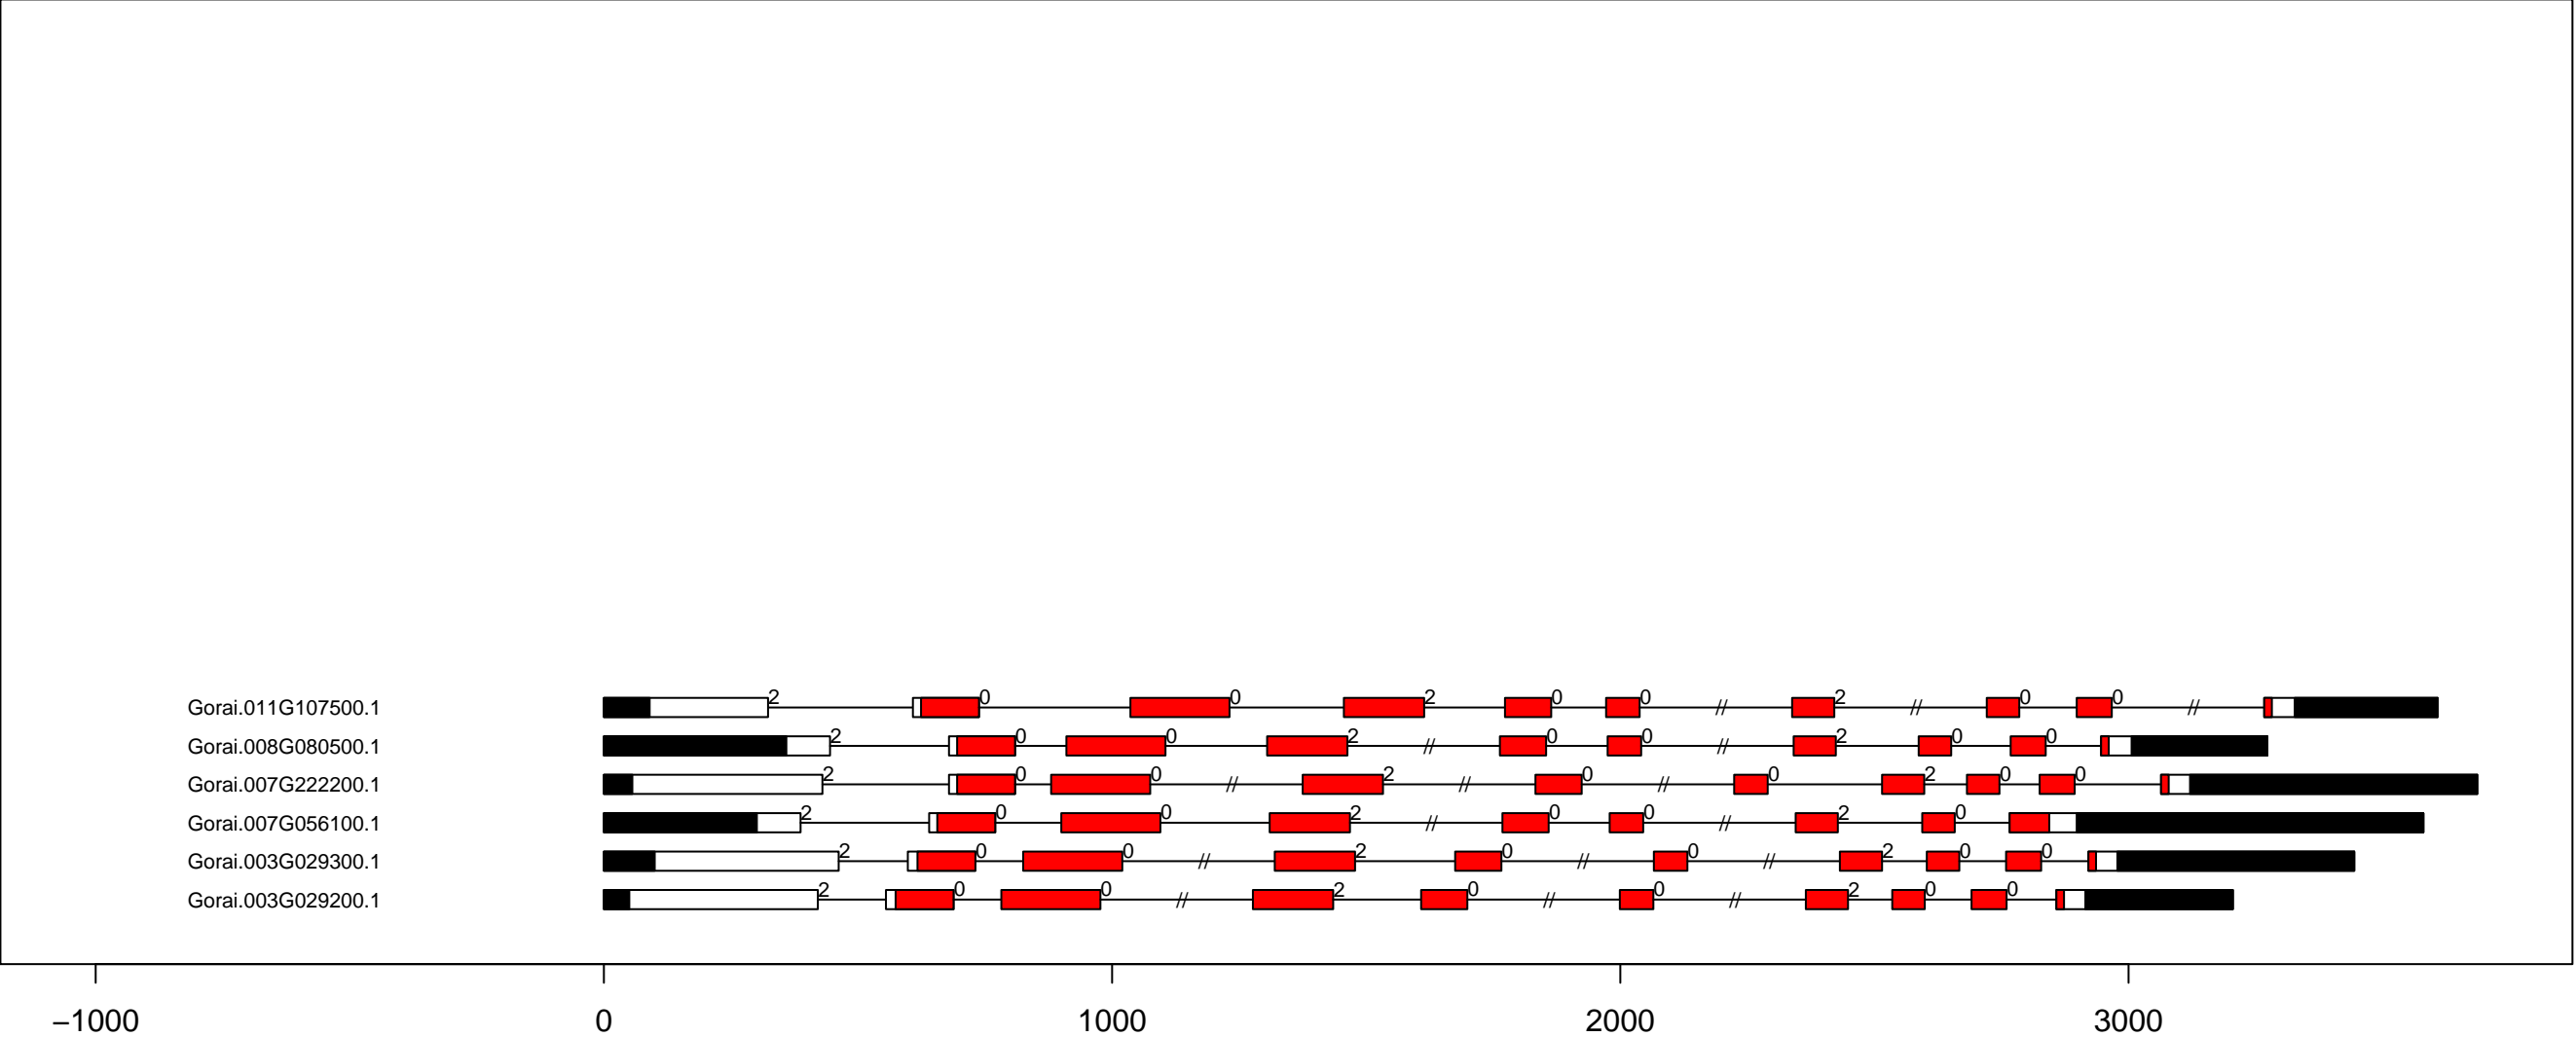

G.ra CMGC\_CLK exon-intron and domain diagram (all)

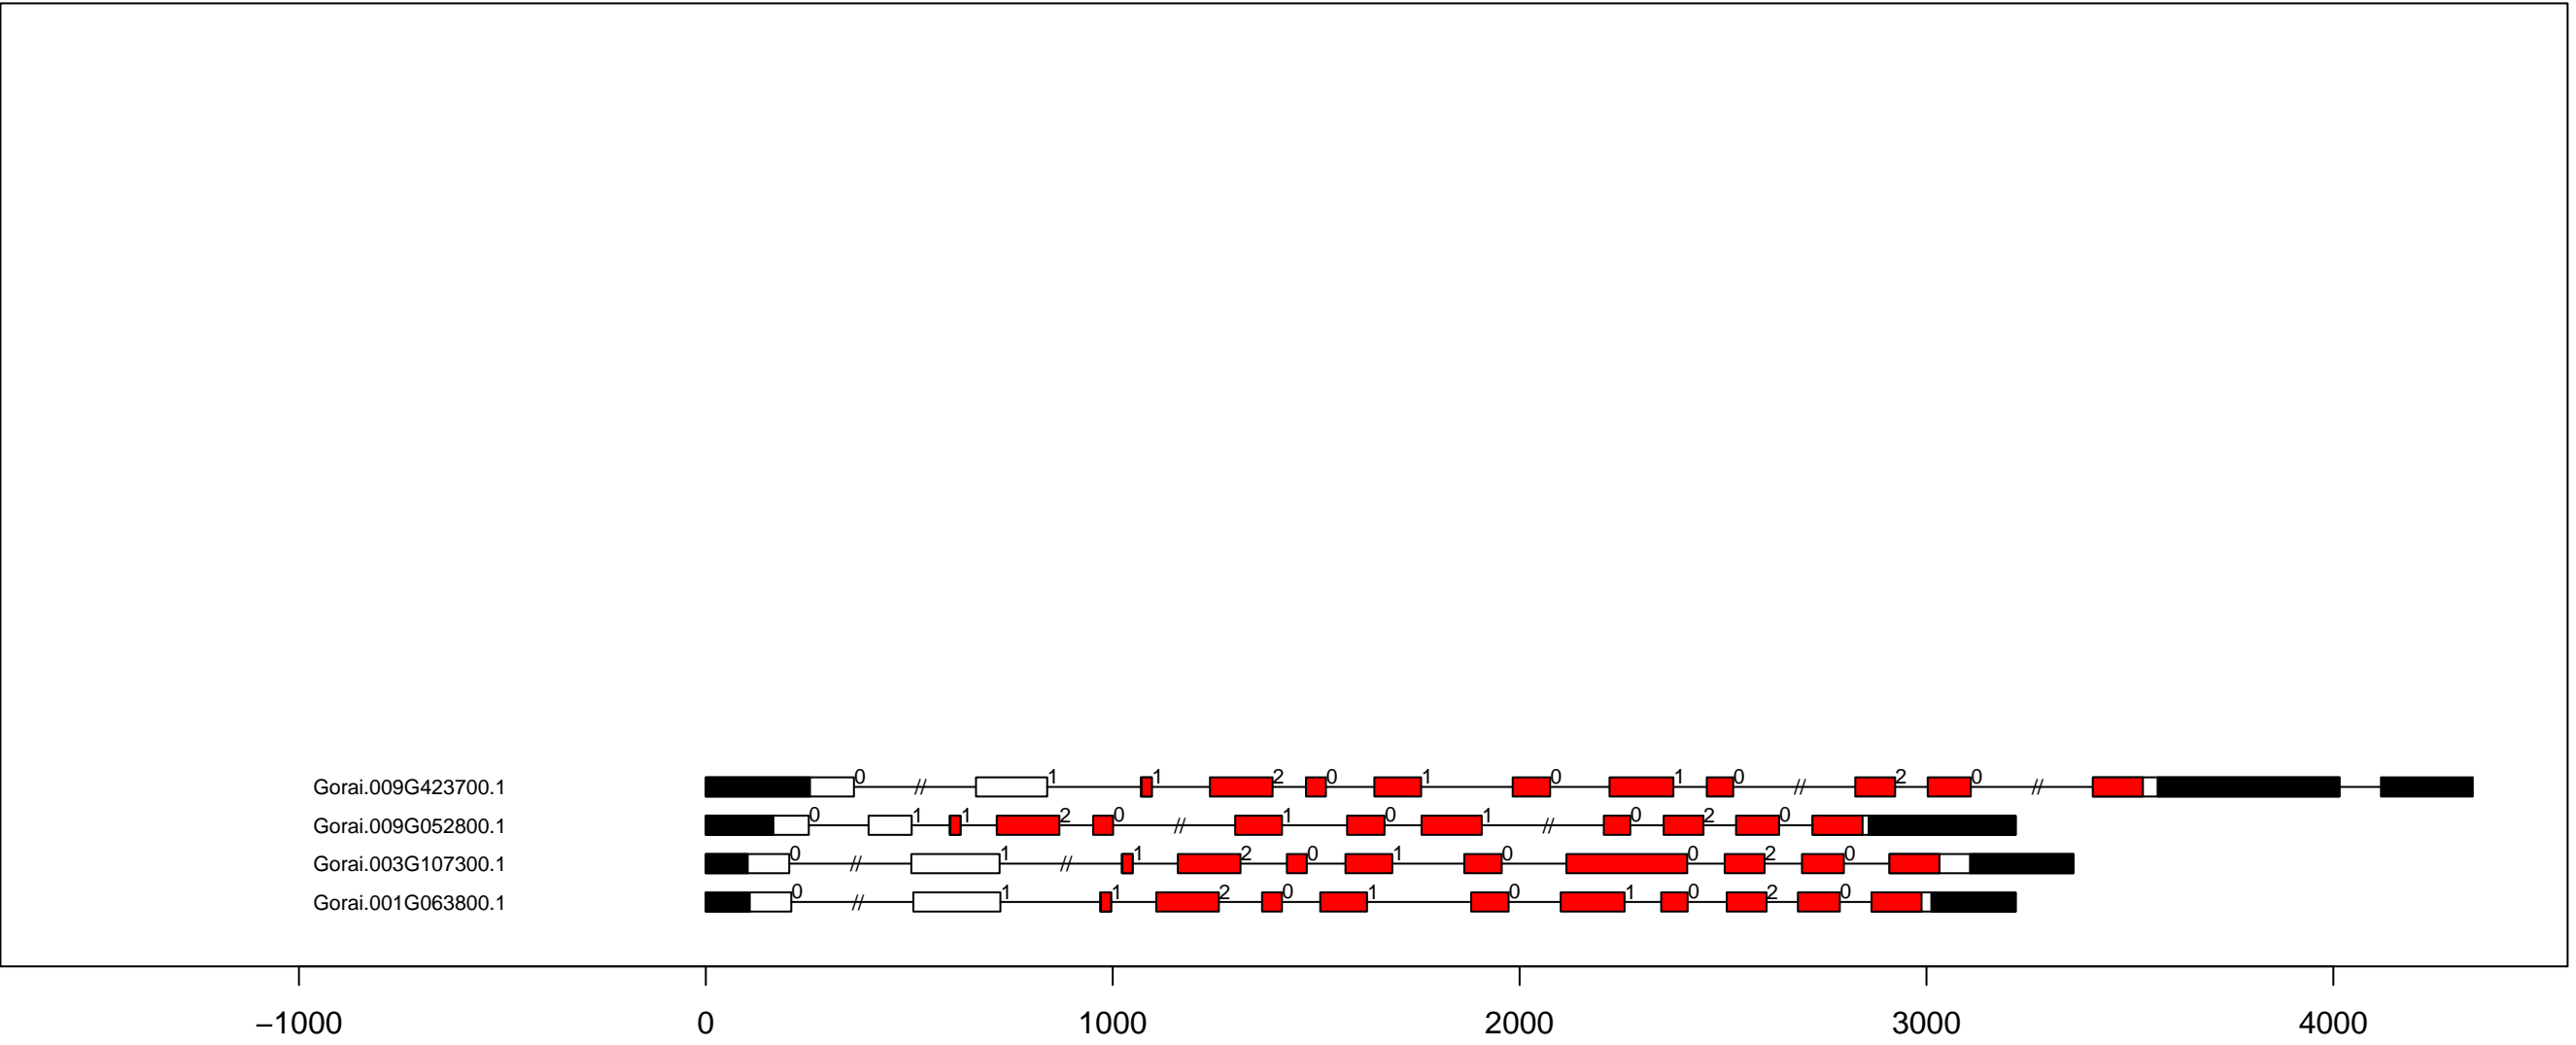

# G.ra CMGC\_DYRK-PRP4 exon-intron and domain diagram (all)

Gorai.013G081700.3

Gorai.011G288600.1

Gorai.007G002400.1

Gorai.005G135000.1

Gorai.001G069500.1

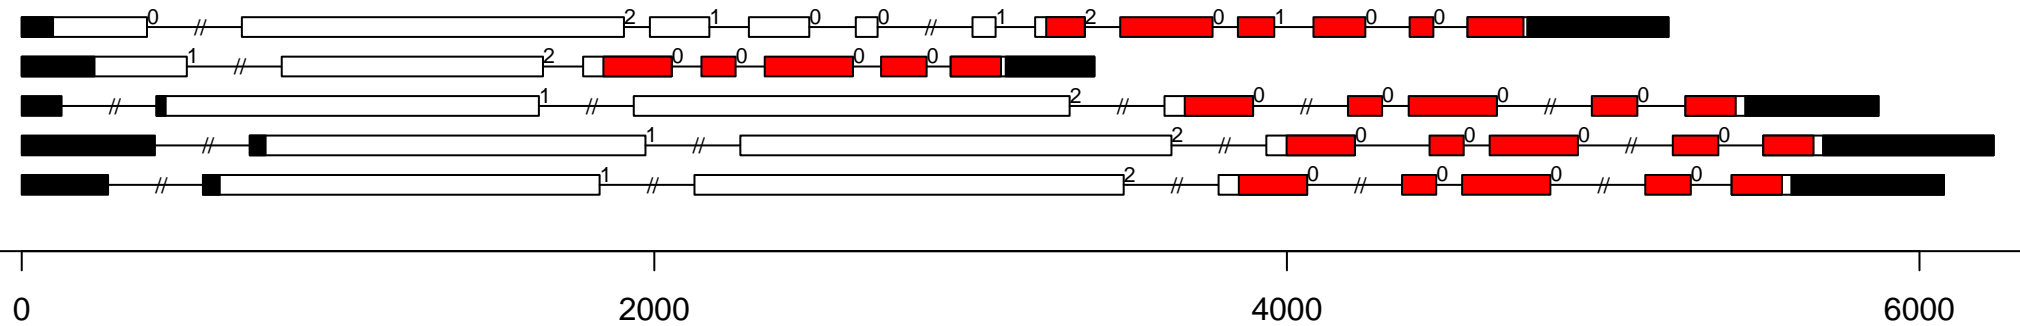



# G.ra CMGC\_DYRK-YAK exon-intron and domain diagram (all)

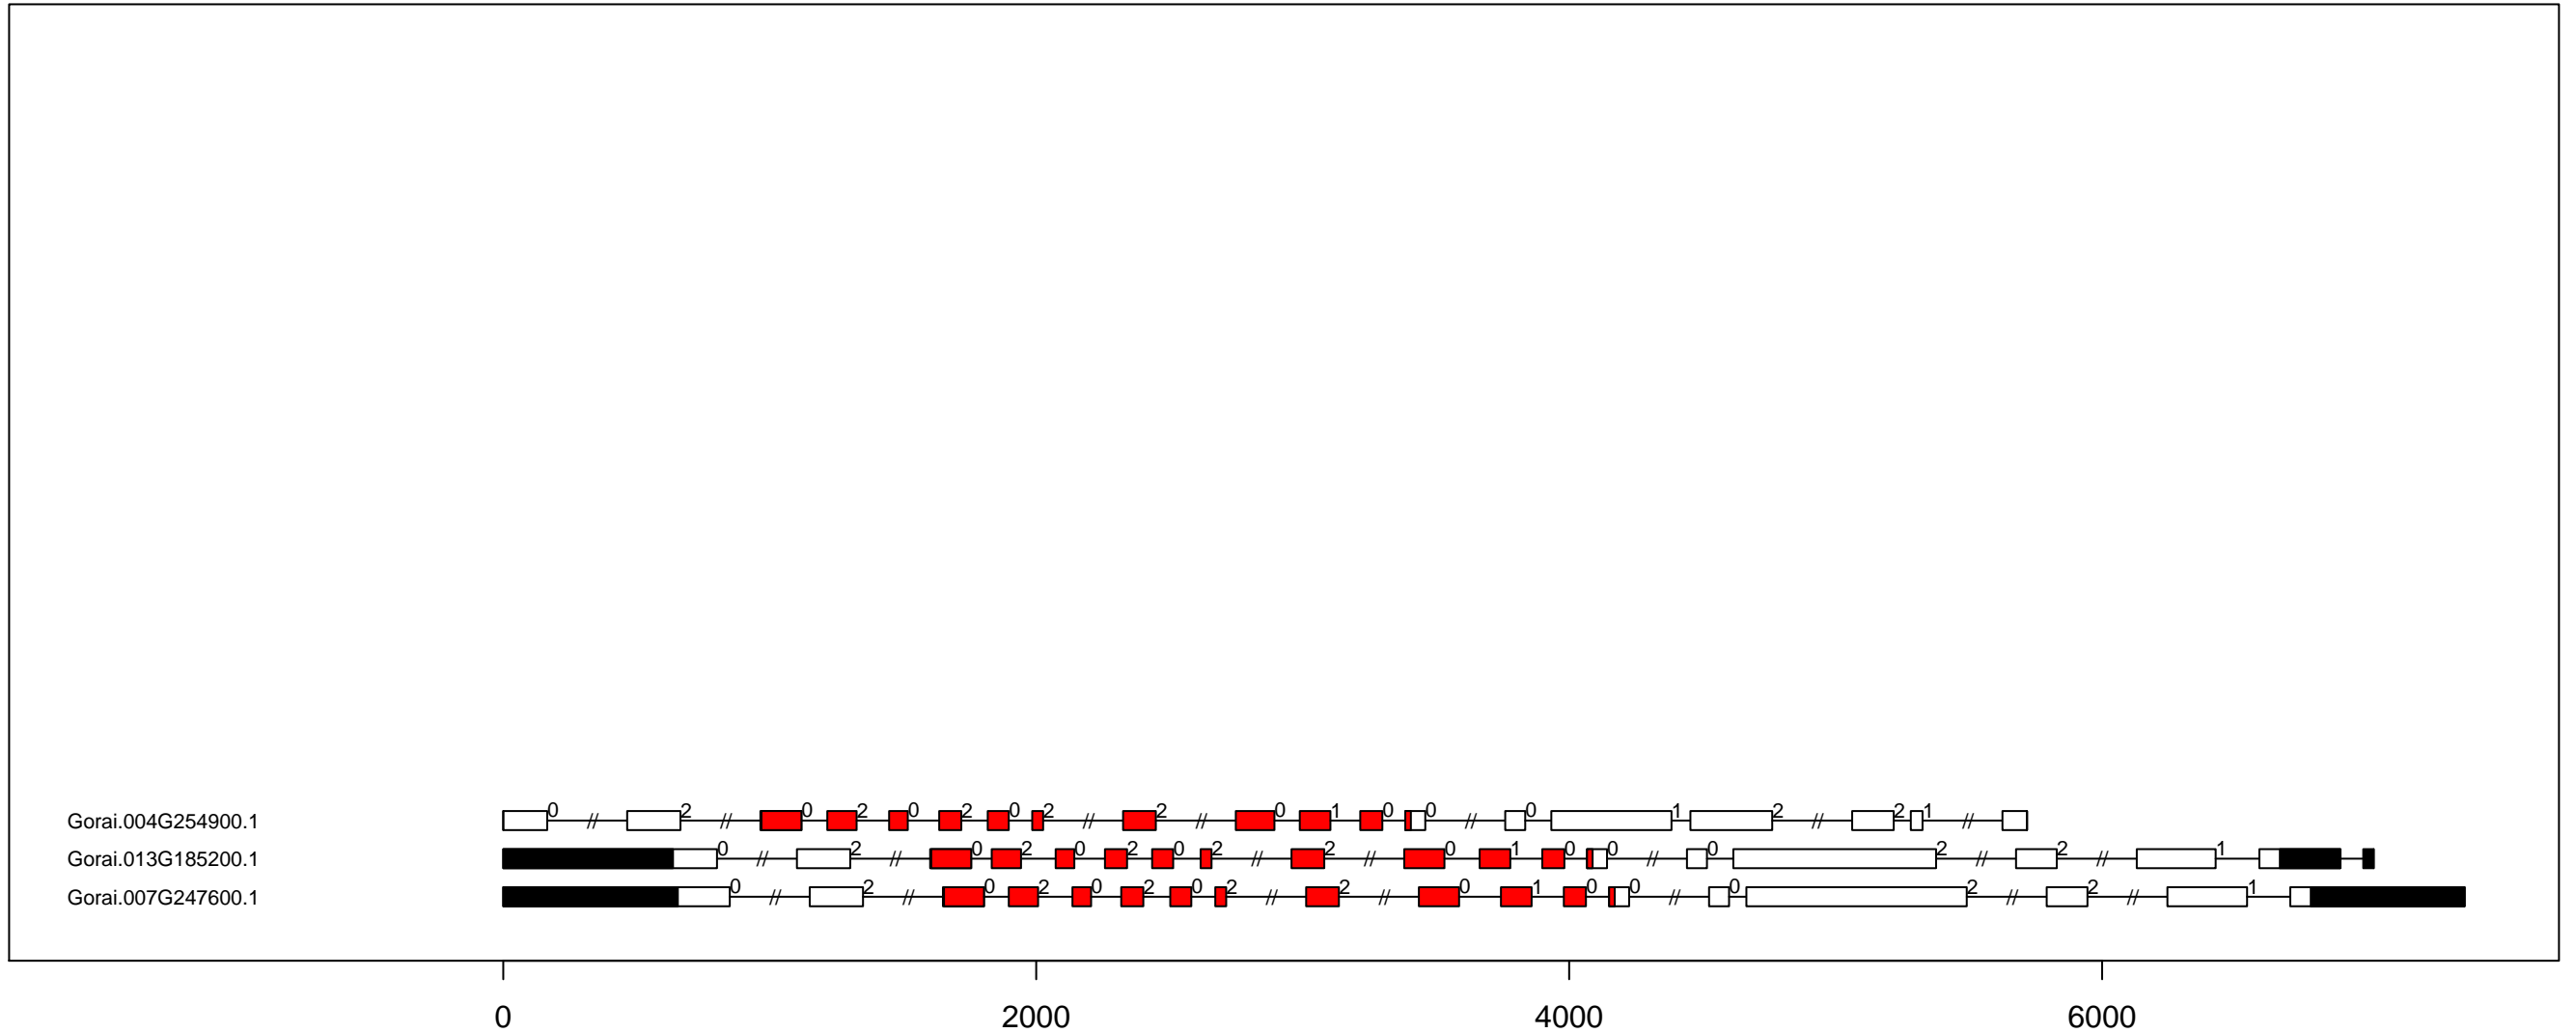

# G.ra CMGC\_GSKL exon-intron and domain diagram (all)

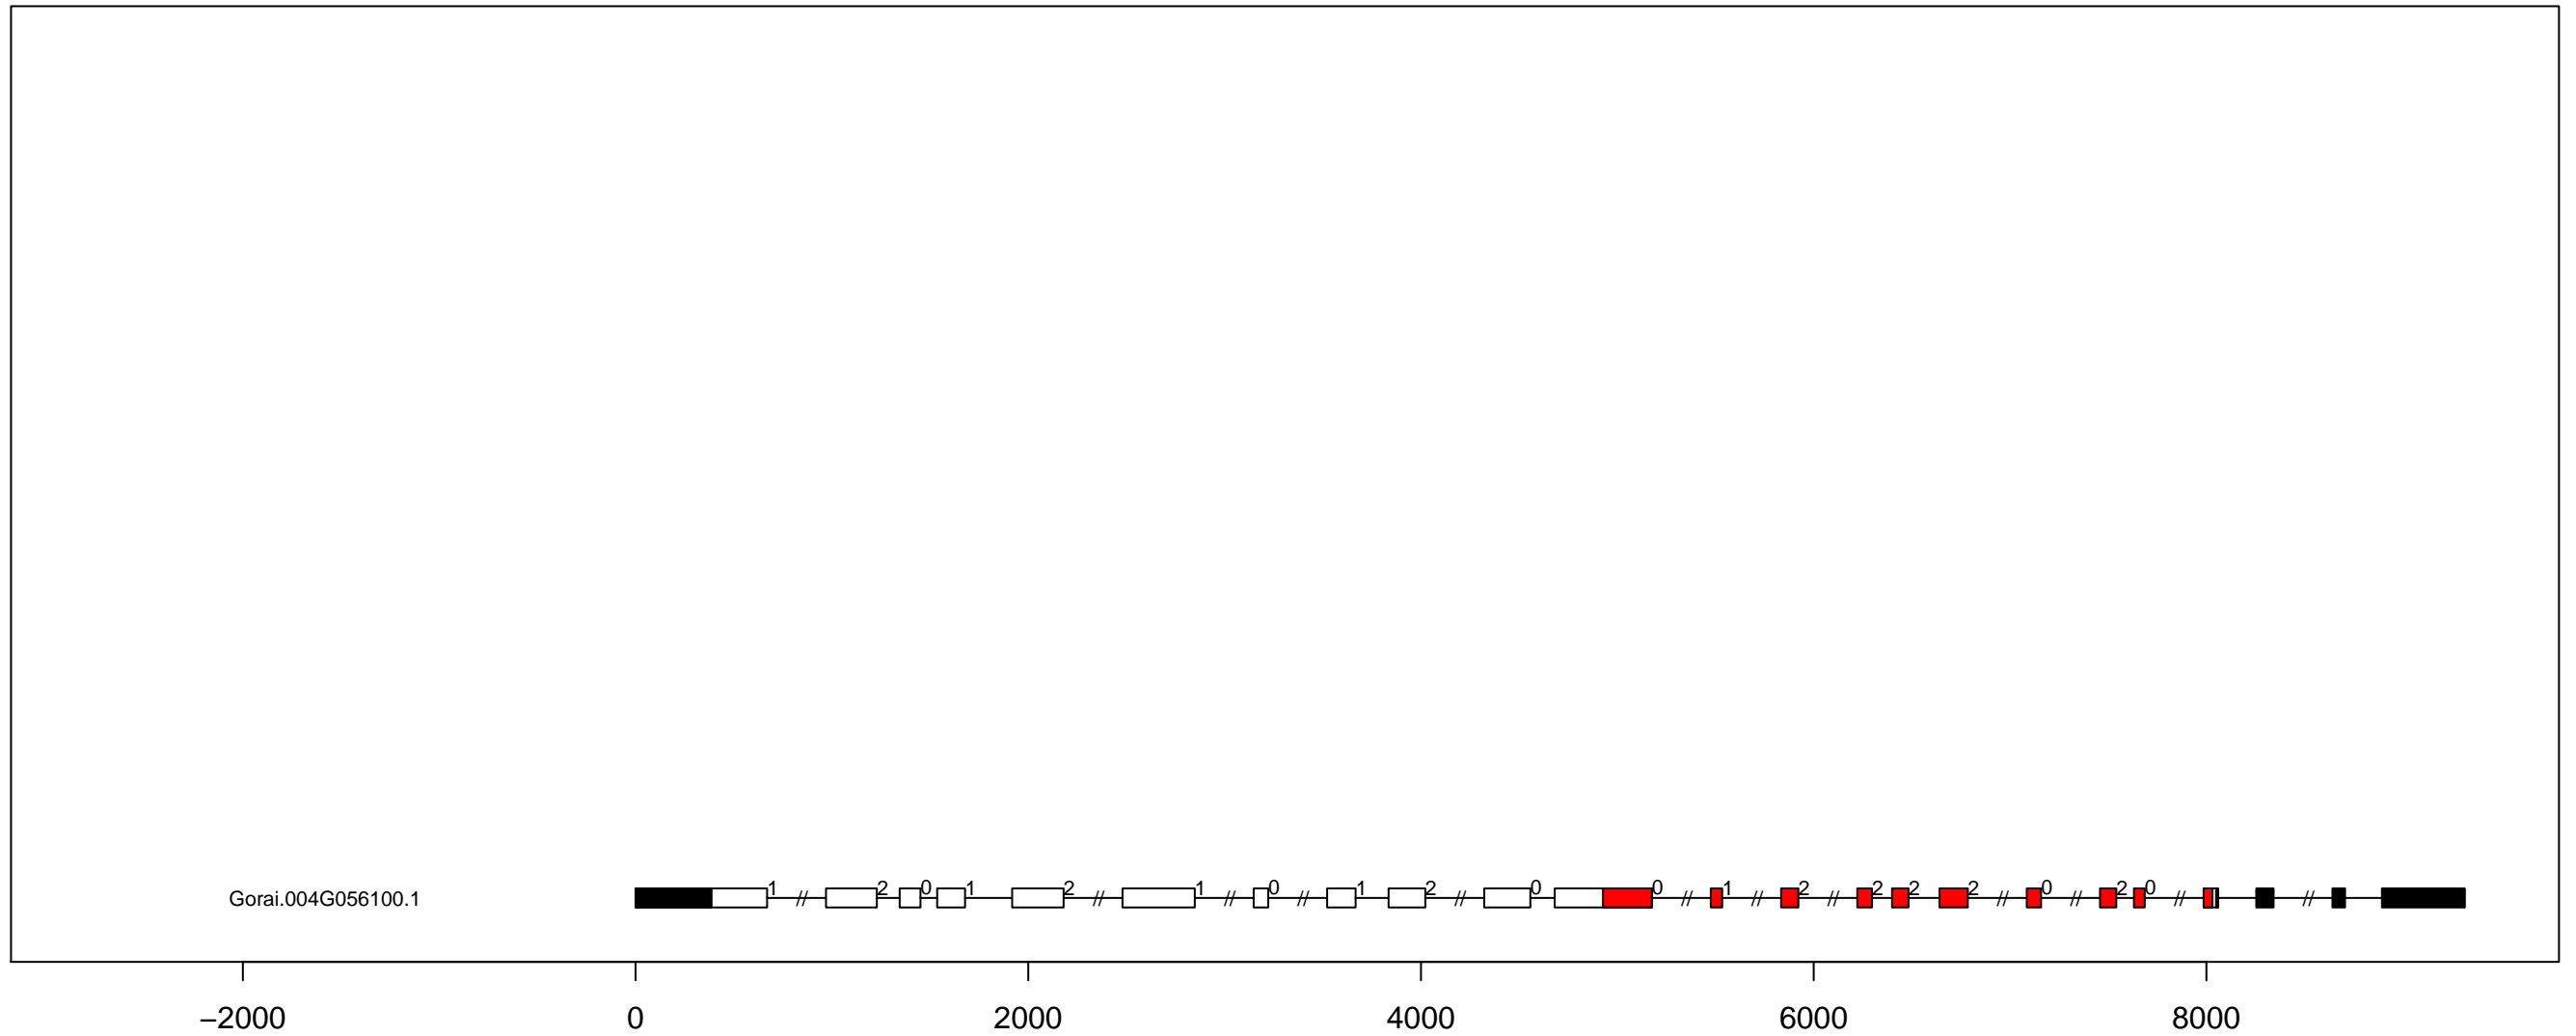

# G.ra CMGC\_GSK exon-intron and domain diagram (all)

Gorai.010G241600.1

Gorai.008G136600.1

Gorai.008G045800.1

Gorai.007G308500.3

Gorai.007G096100.1

Gorai.006G089400.1

Gorai.006G089300.1

Gorai.004G156700.1

Gorai.004G042400.1

Gorai.002G218100.1

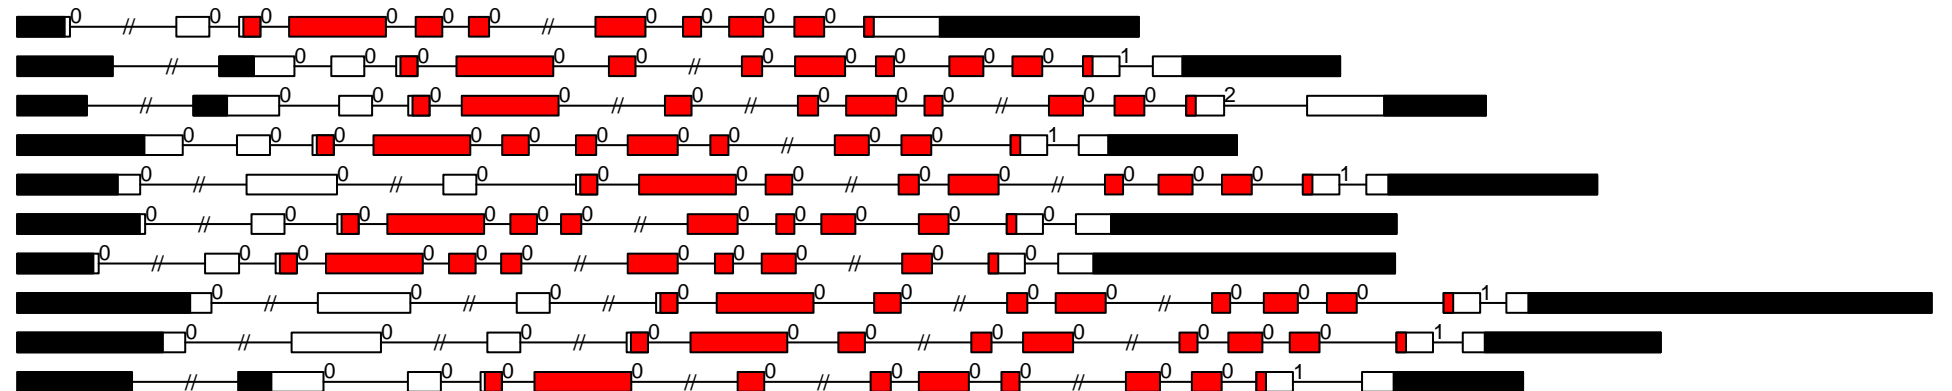

-1000

0

1000

2000

3000

4000

5000

### G.ra CMGC\_MAPK exon-intron and domain diagram (part 1)

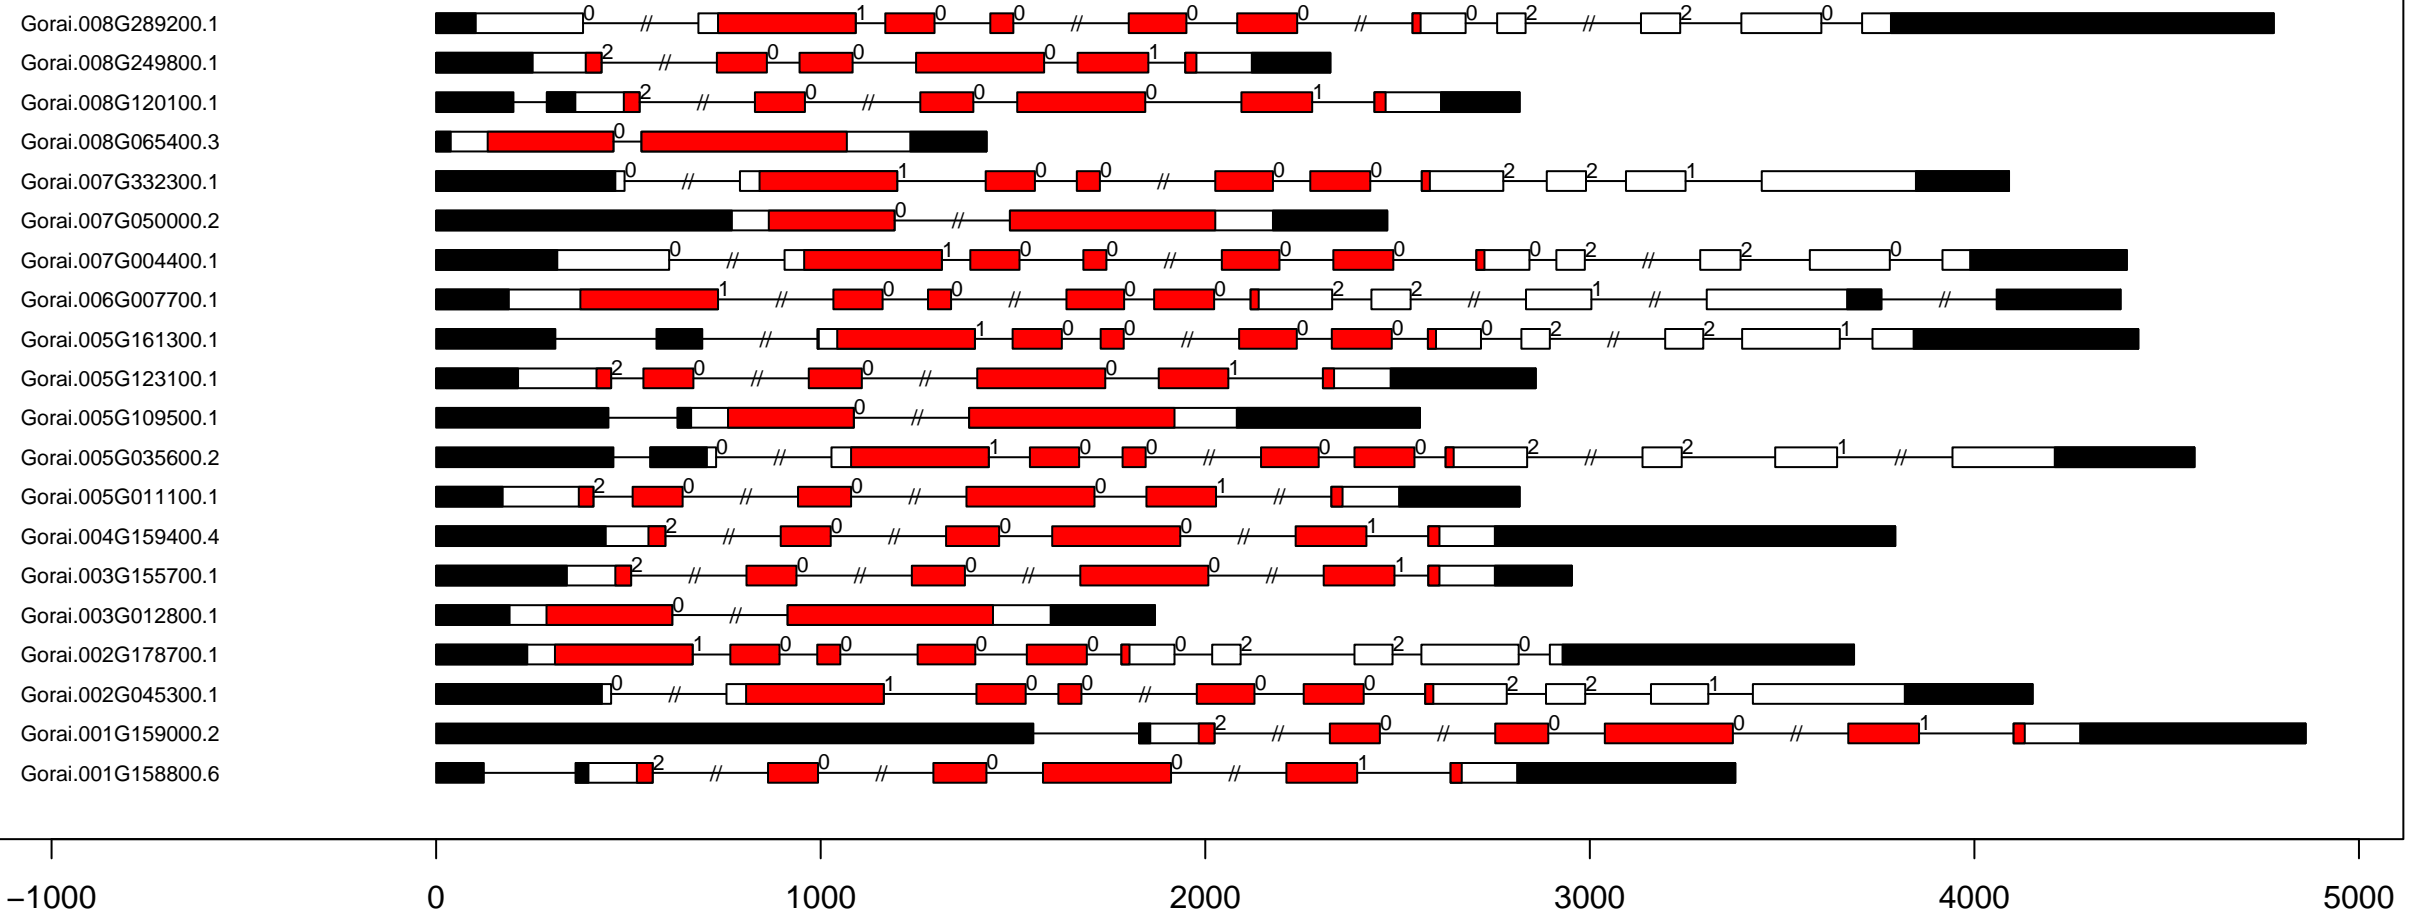

### G.ra CMGC\_MAPK exon-intron and domain diagram (part 2)

Gorai.012G041500.1  
 Gorai.011G132800.1  
 Gorai.011G100600.2  
 Gorai.009G361300.1  
 Gorai.009G199400.1  
 Gorai.009G104600.1  
 Gorai.009G103800.1

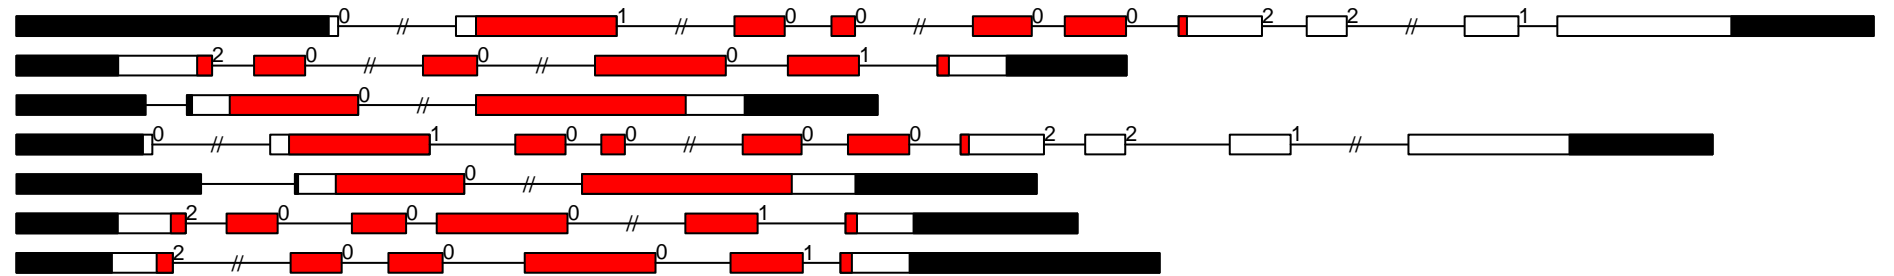

# G.ra CMGC\_PI-Tthe exon-intron and domain diagram (all)

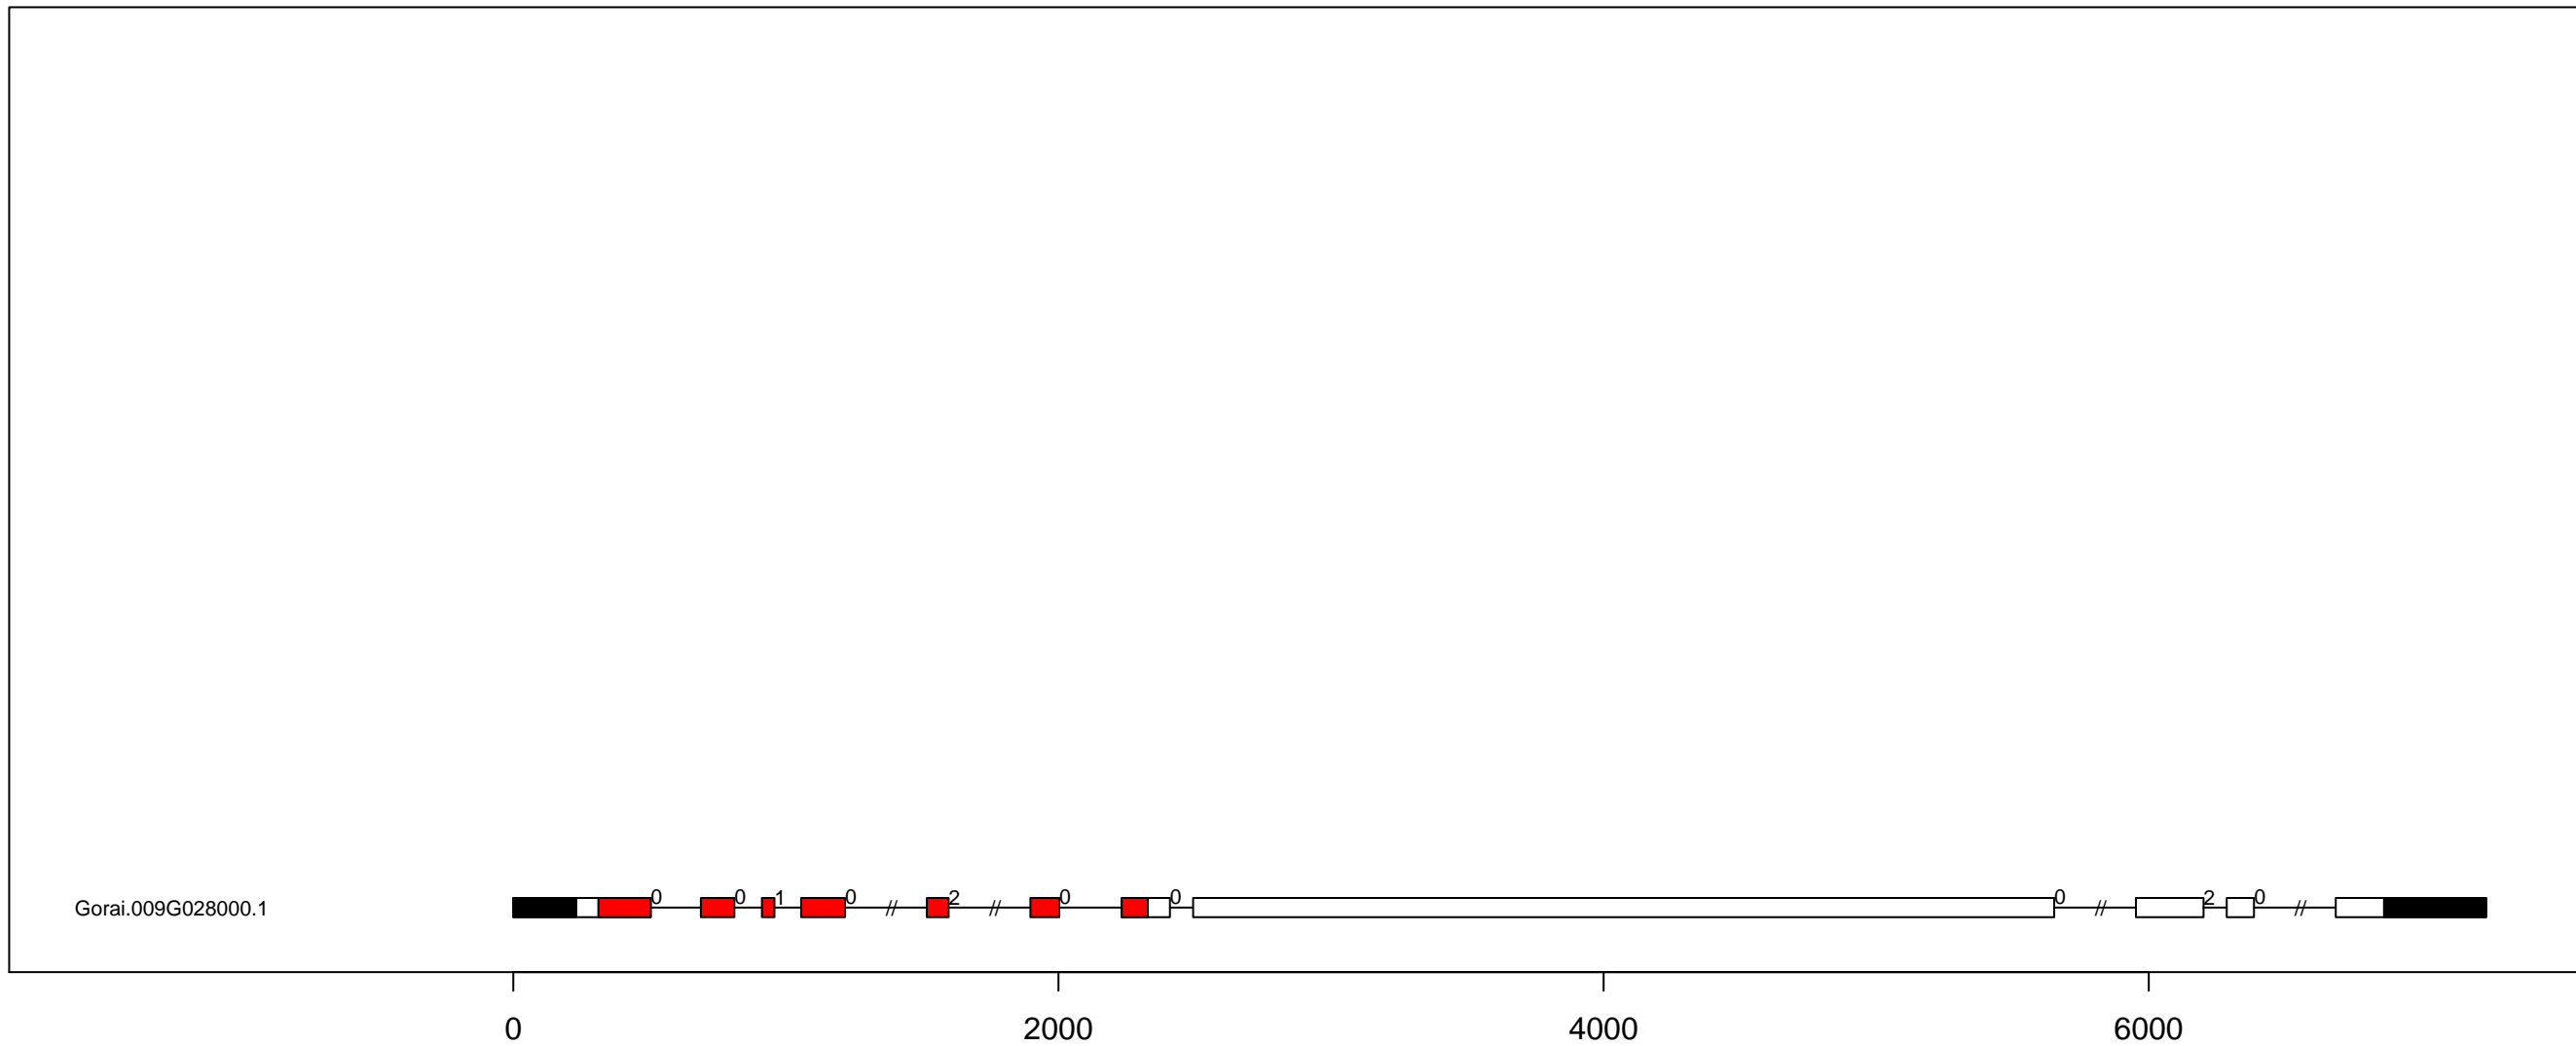

# G.ra CMGC\_RCK exon-intron and domain diagram (all)

Gorai.008G220700.1  
Gorai.003G187100.1  
Gorai.007G157300.1  
Gorai.004G178800.1  
Gorai.001G230900.1

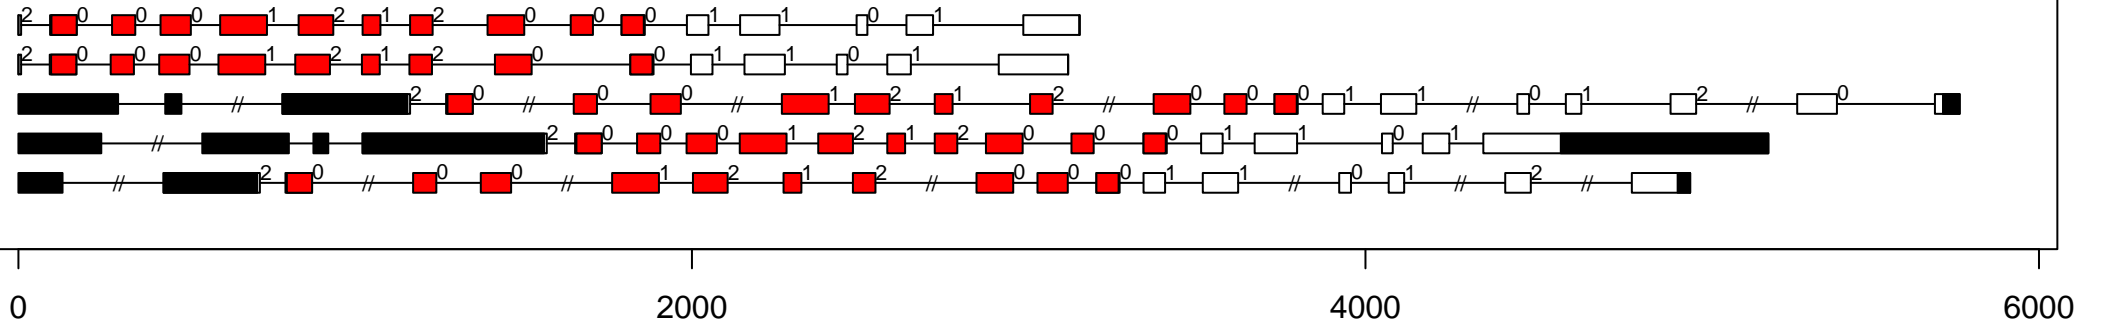

# G.ra CMGC\_SRPK exon-intron and domain diagram (all)

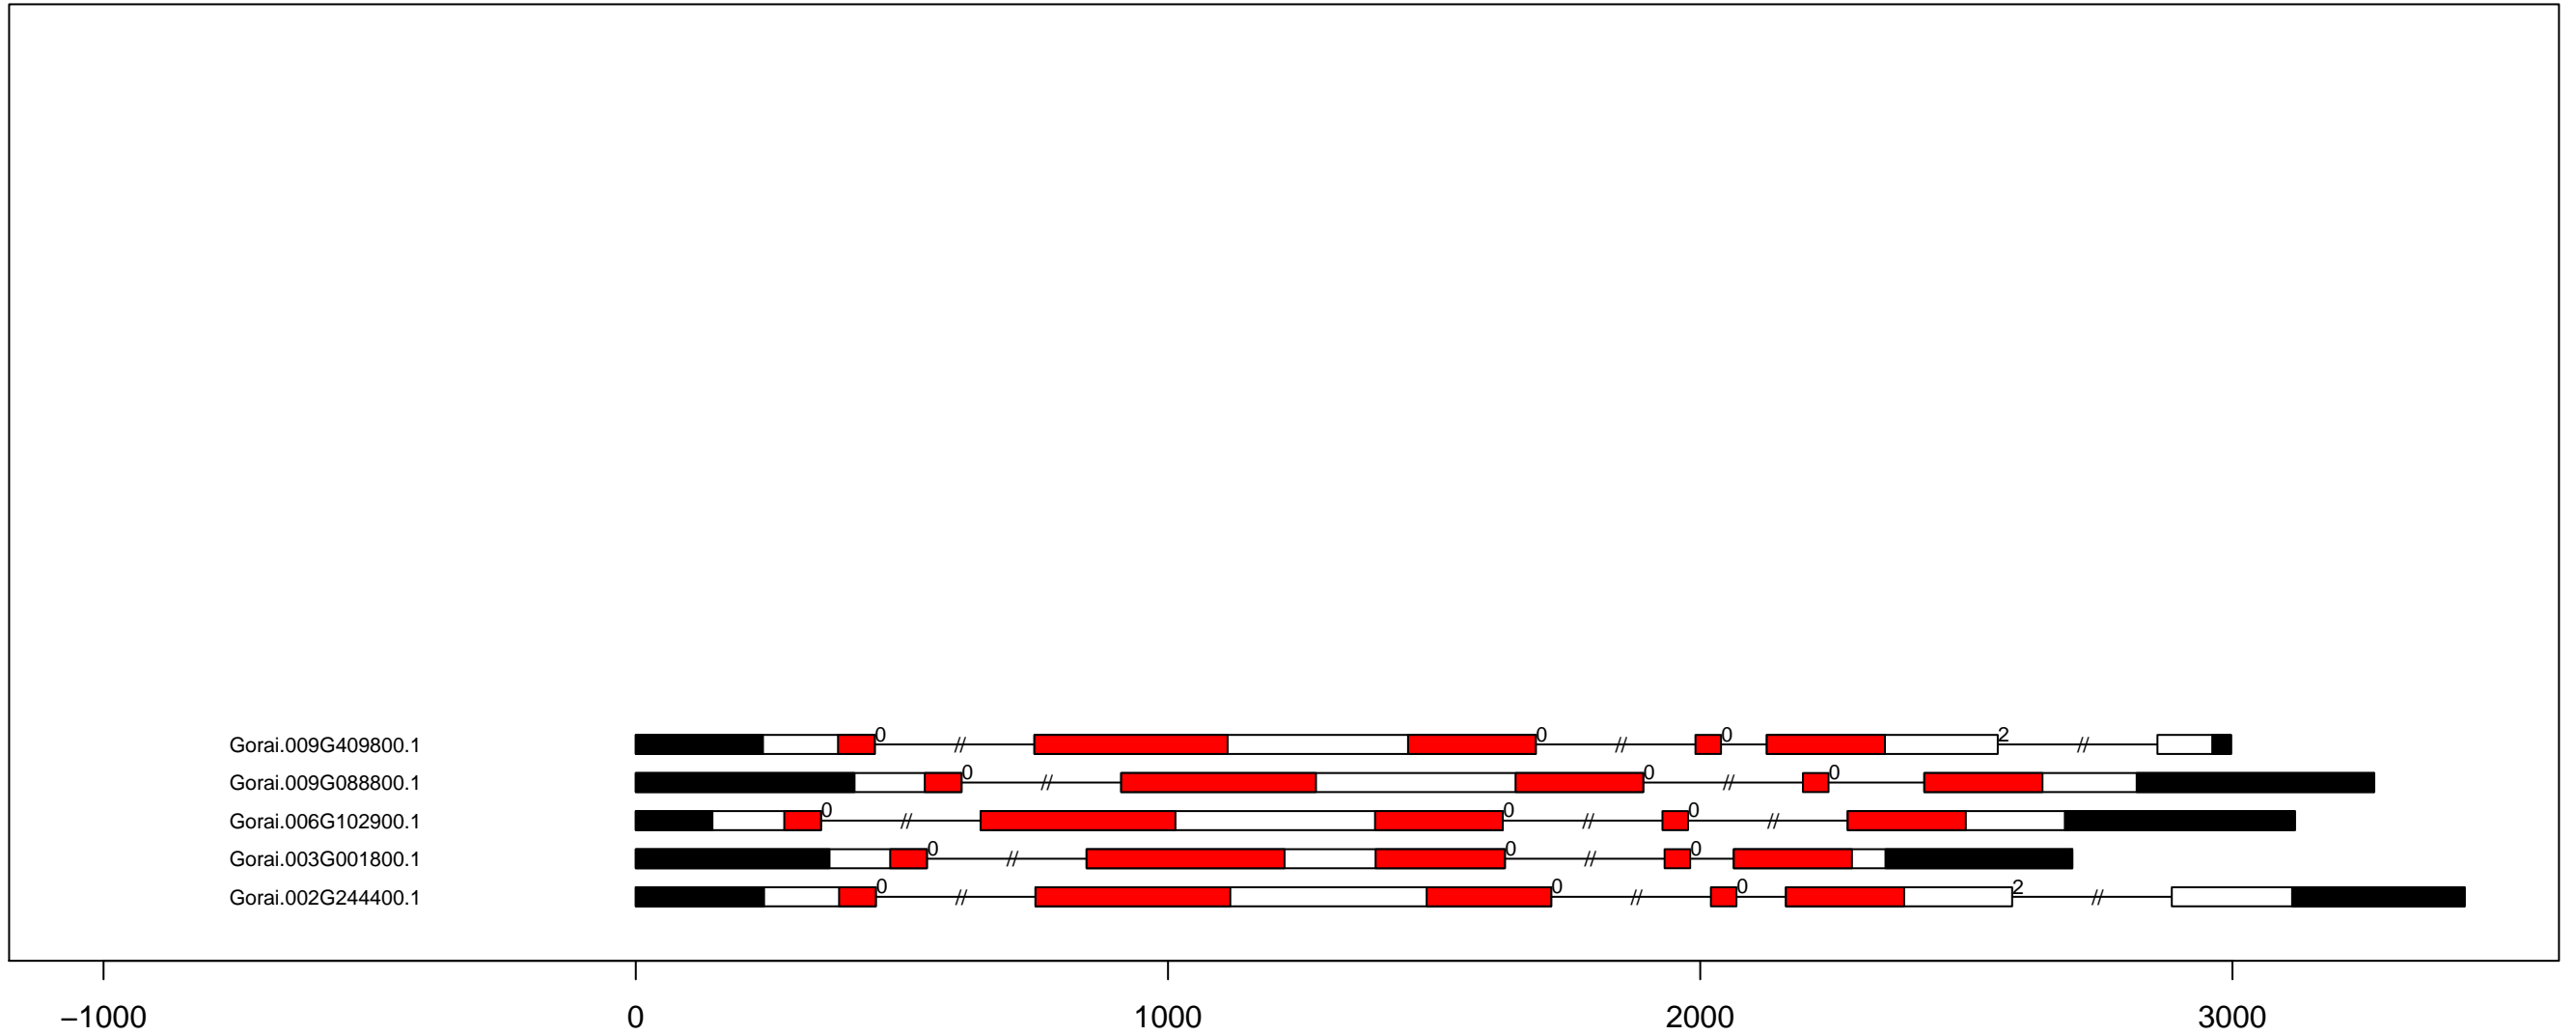



G.ra Group-PI-2 exon-intron and domain diagram (all)

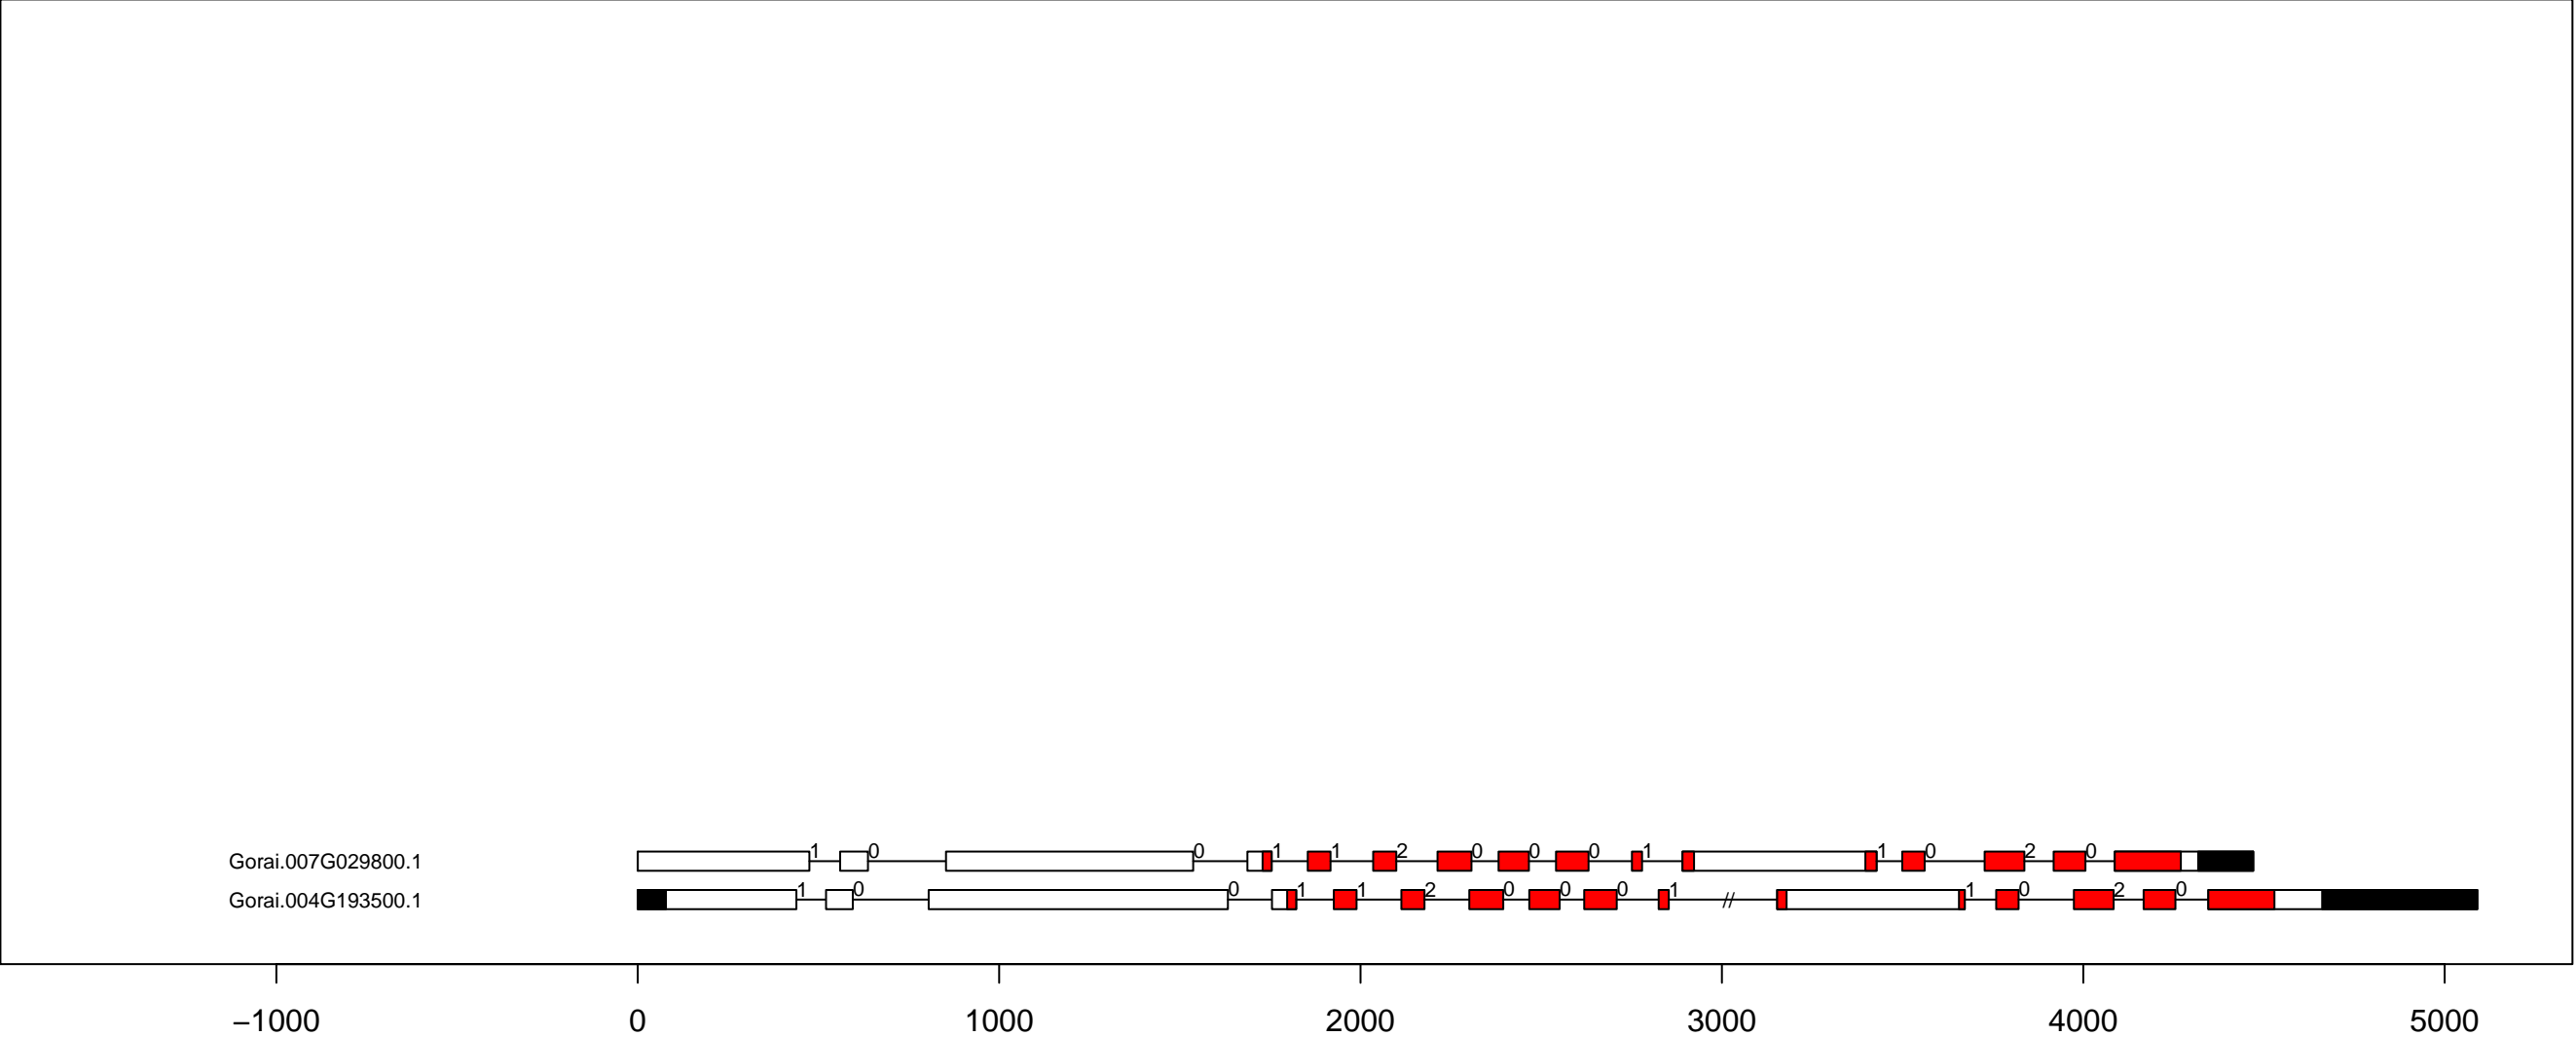

### G.ra Group-PI-3 exon-intron and domain diagram (all)

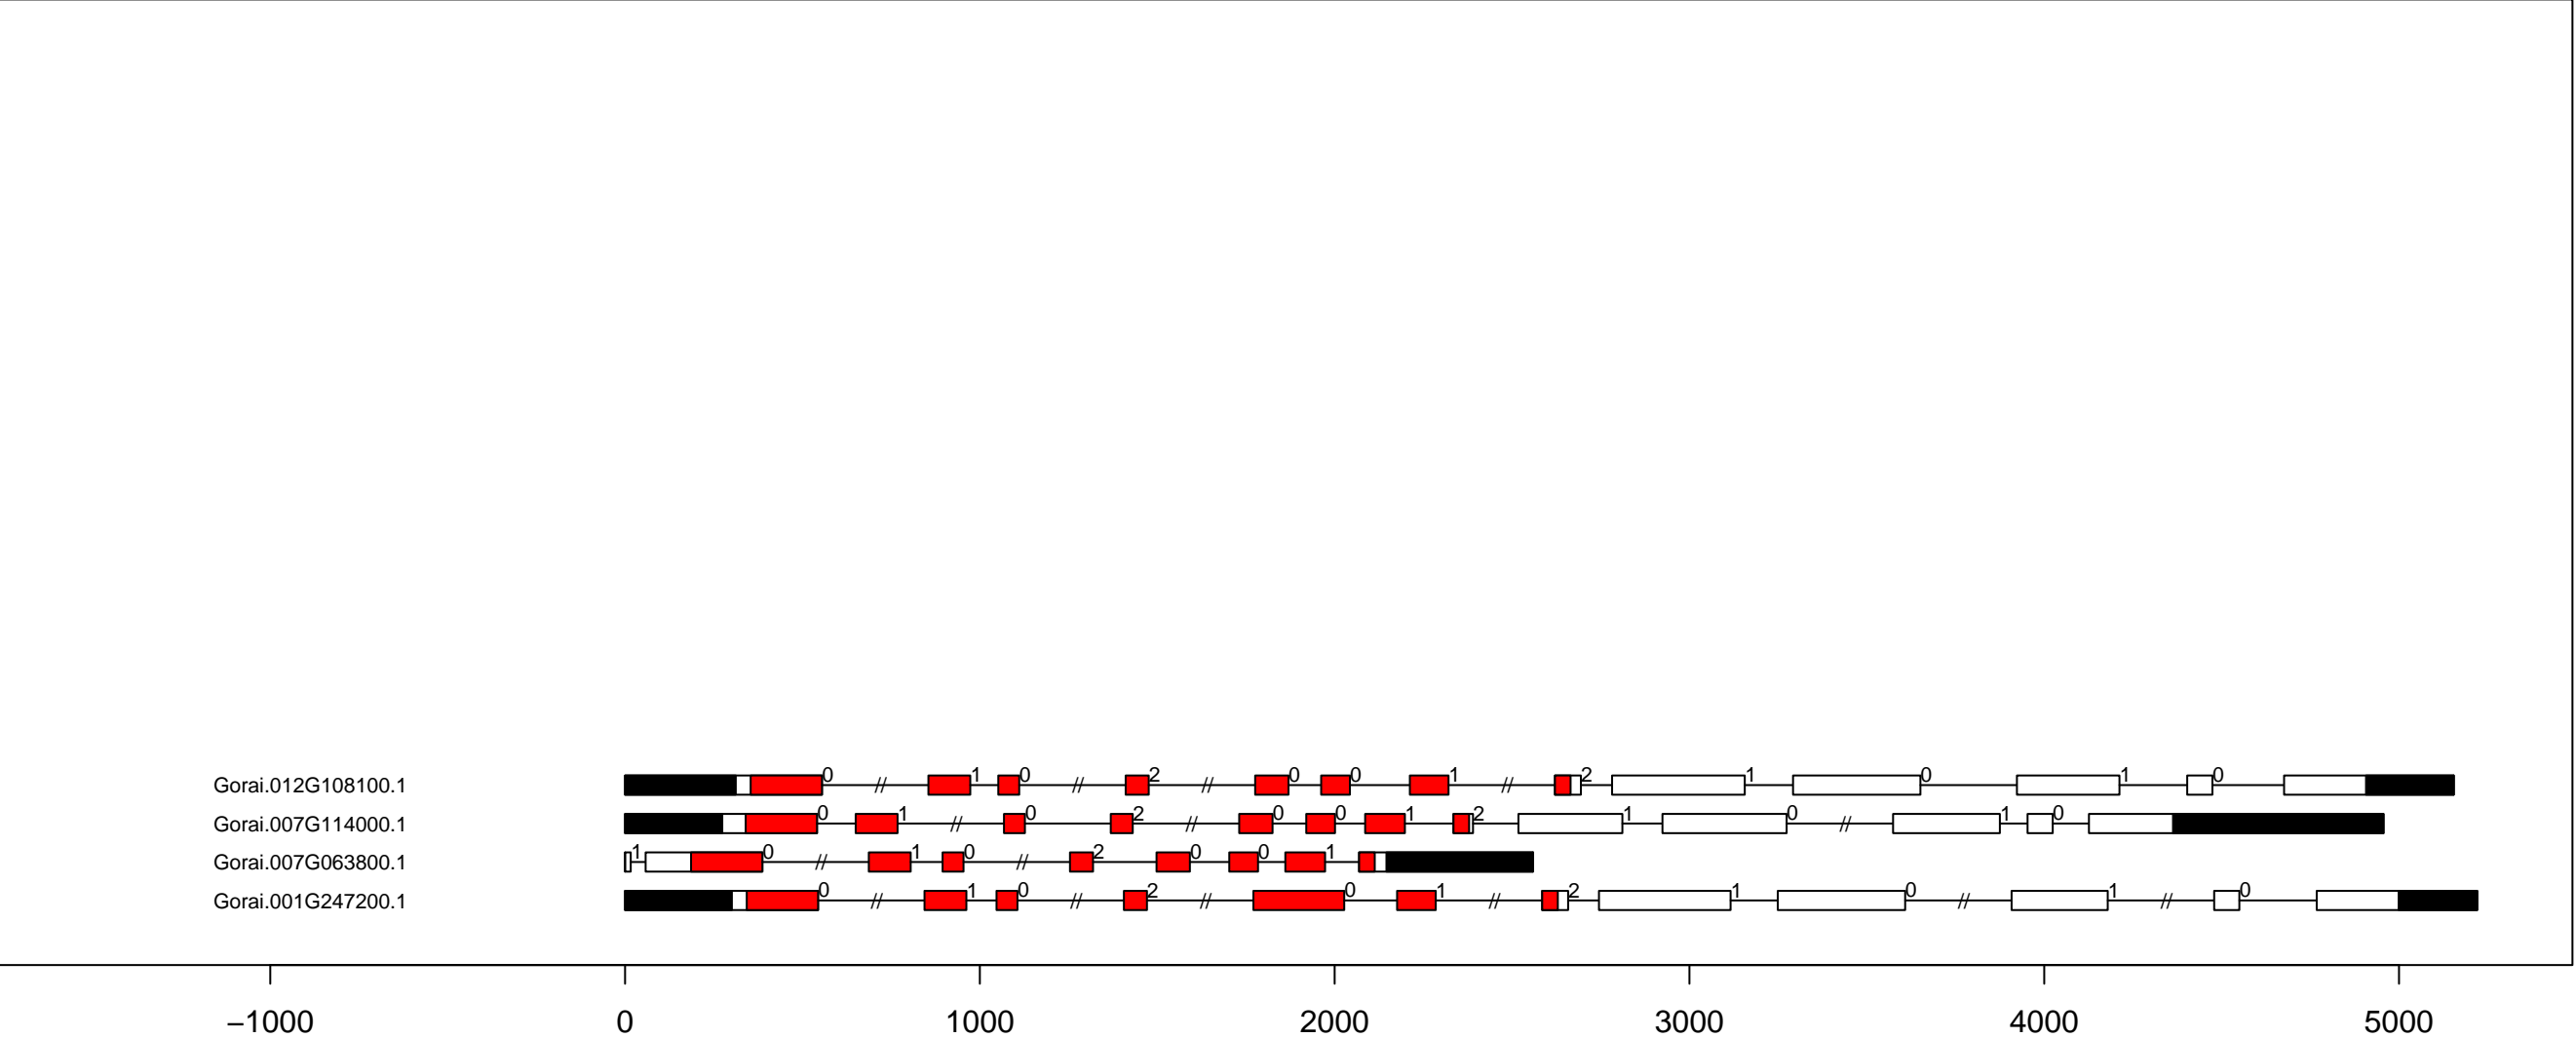

G.ra Group-PI-4 exon-intron and domain diagram (all)

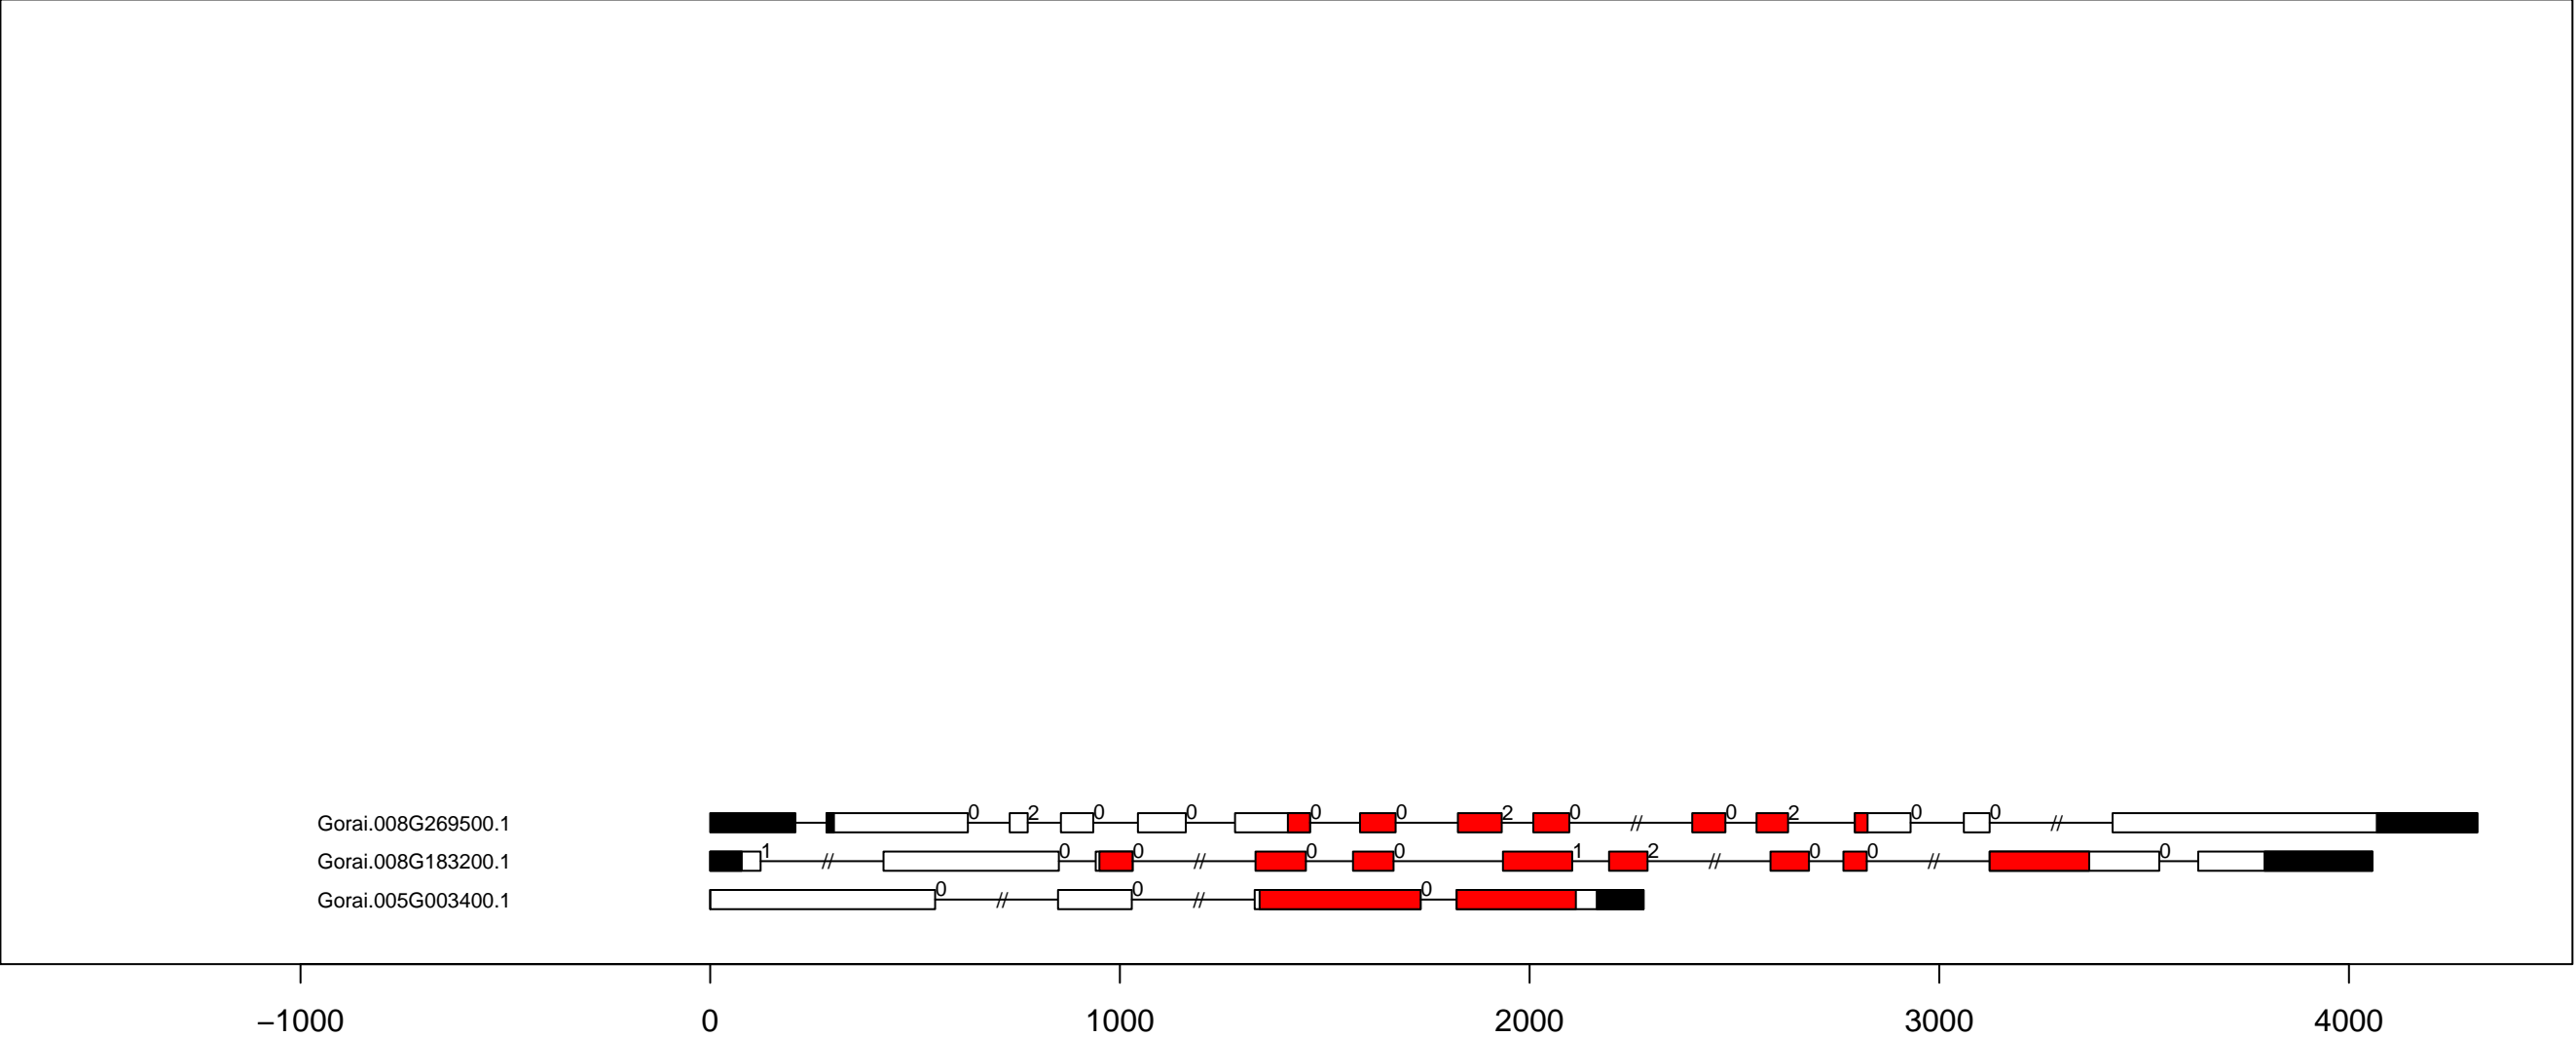

# G.ra IRE1 exon-intron and domain diagram (all)

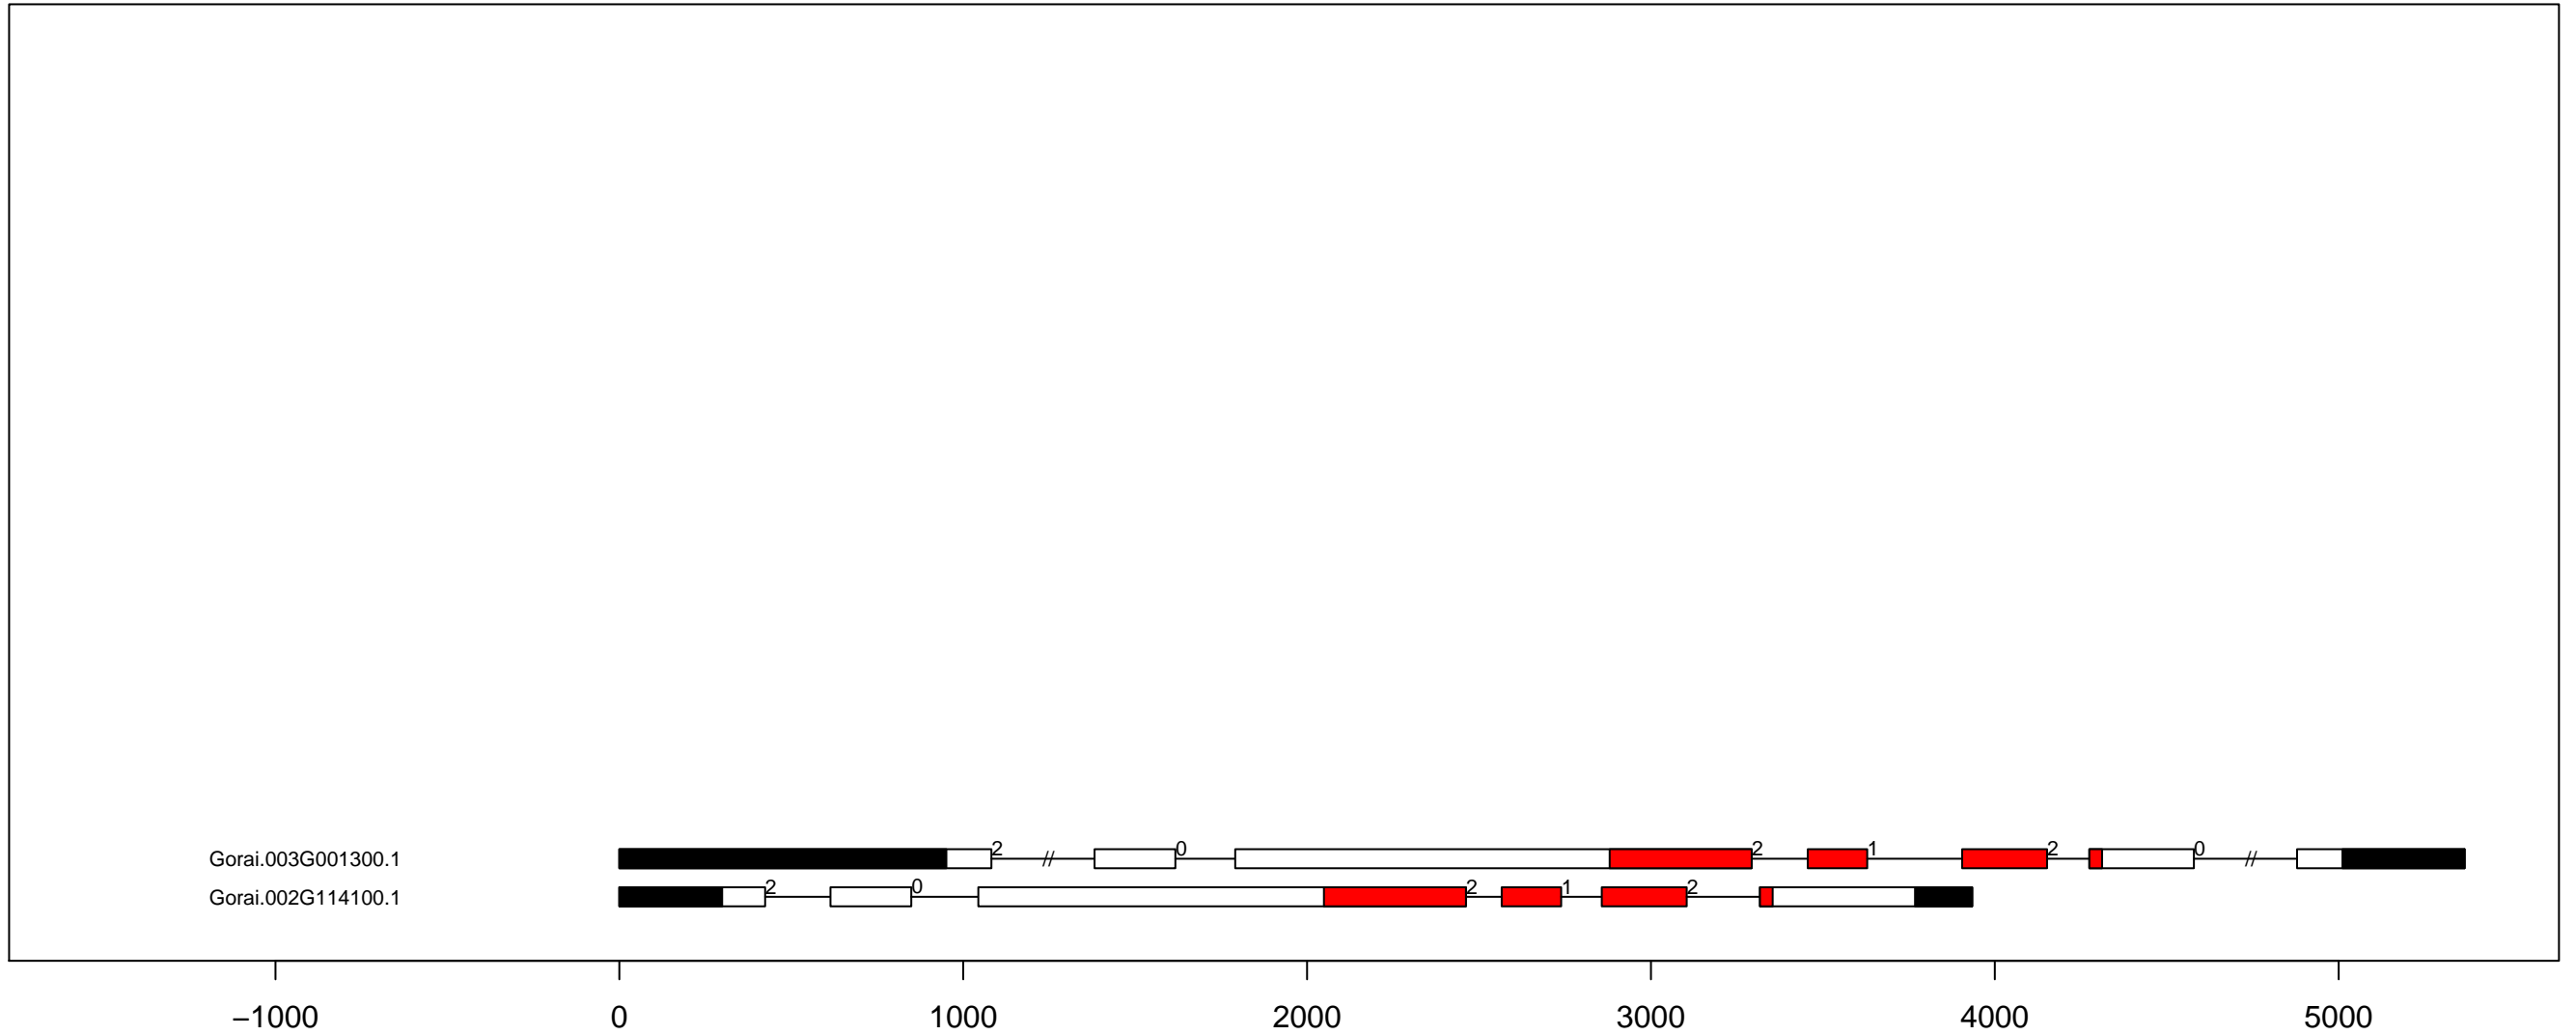

# G.ra NAK exon-intron and domain diagram (all)

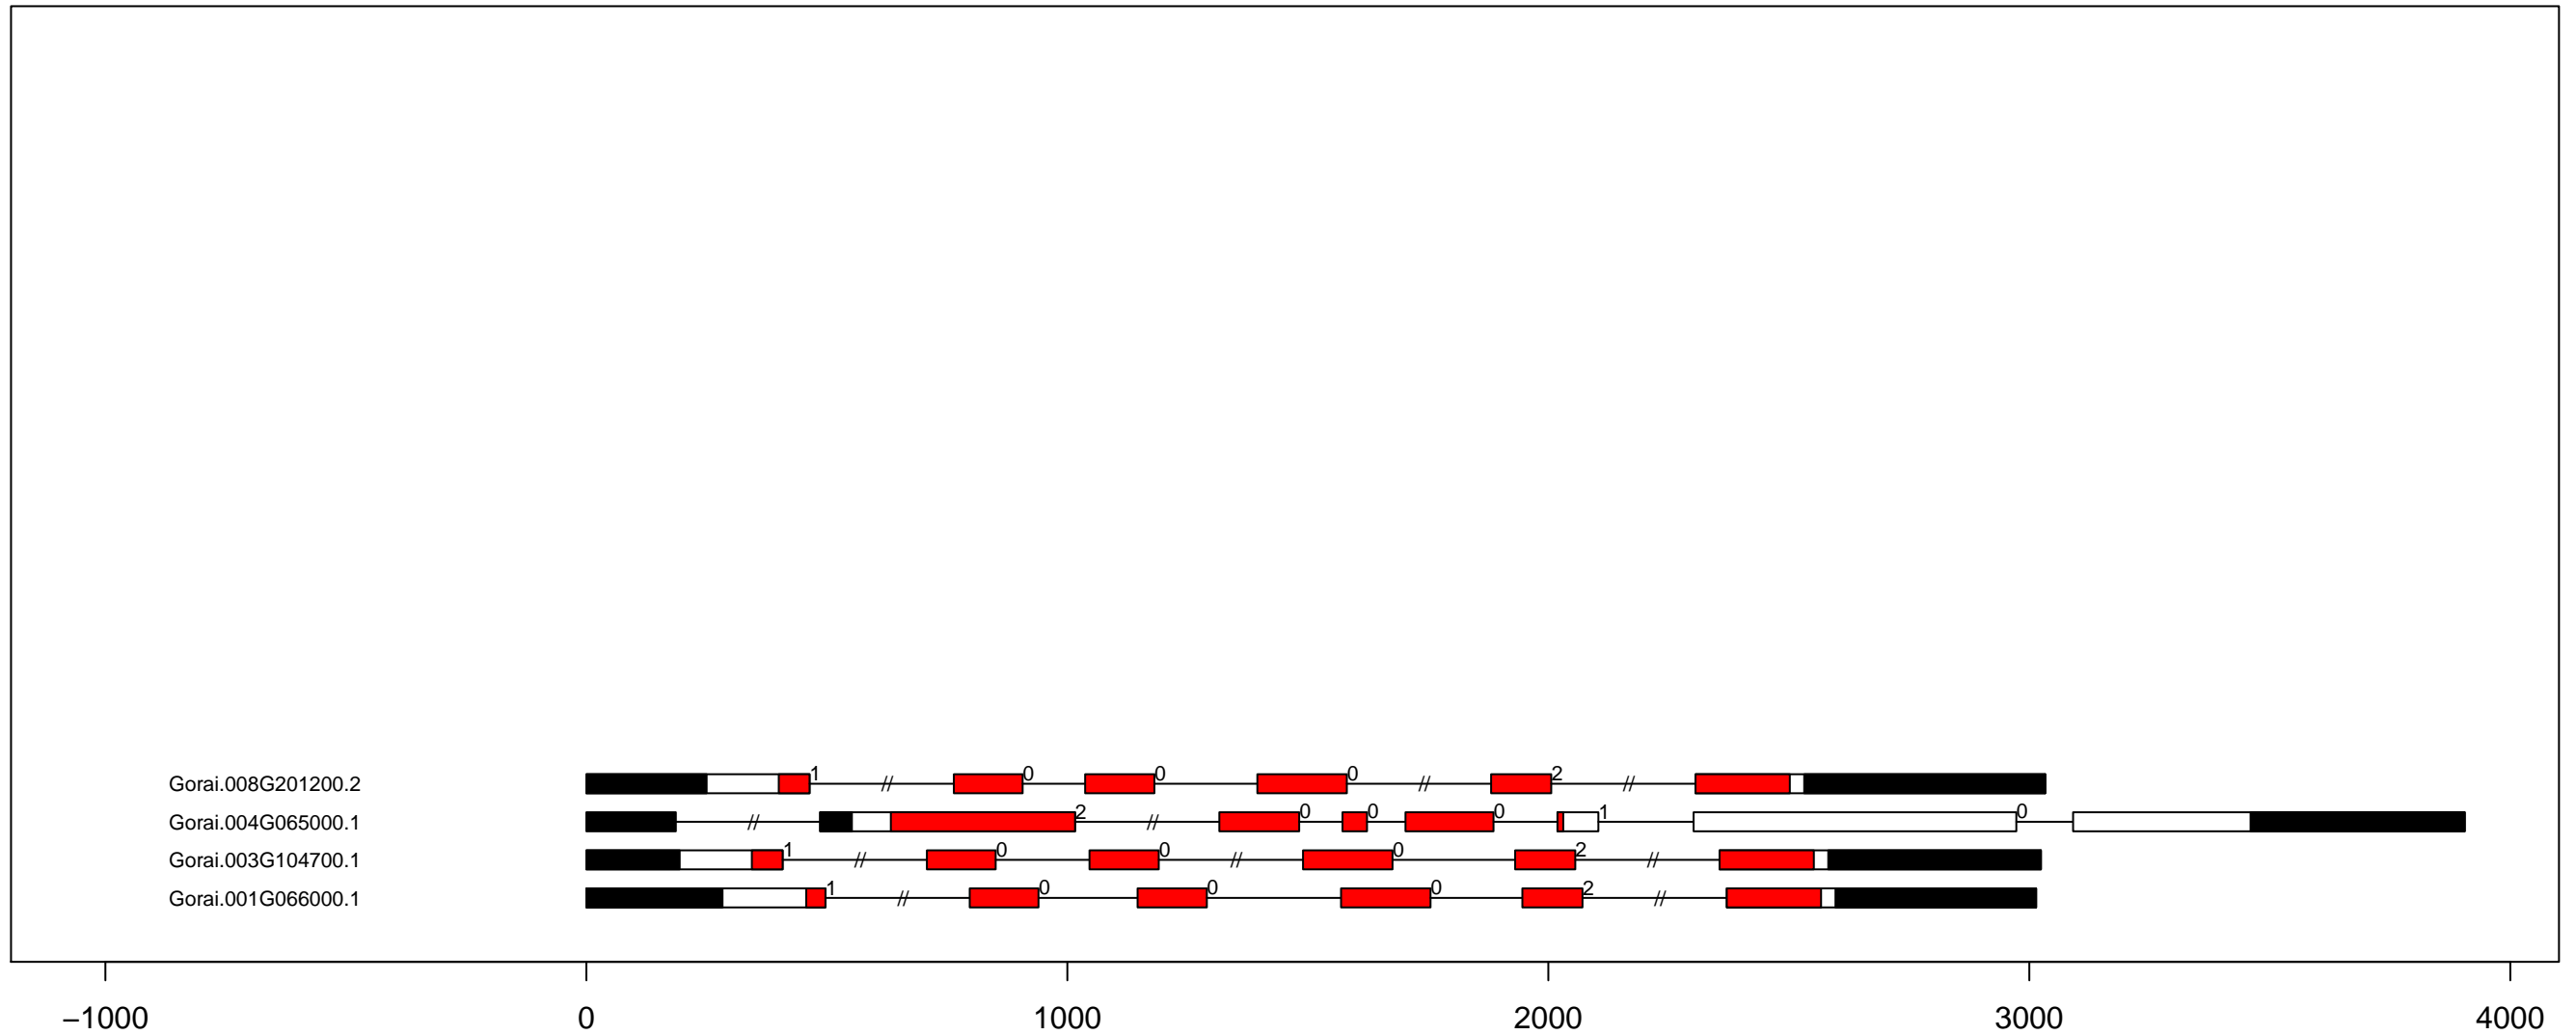

# G.ra NEK exon-intron and domain diagram (all)

Gorai.013G256900.3

Gorai.013G201300.1

Gorai.009G082900.1

Gorai.008G002700.3

Gorai.007G283900.3

Gorai.006G139000.3

Gorai.006G114800.1

Gorai.004G077600.1

Gorai.004G018800.3

Gorai.002G229400.1

Gorai.001G124800.1

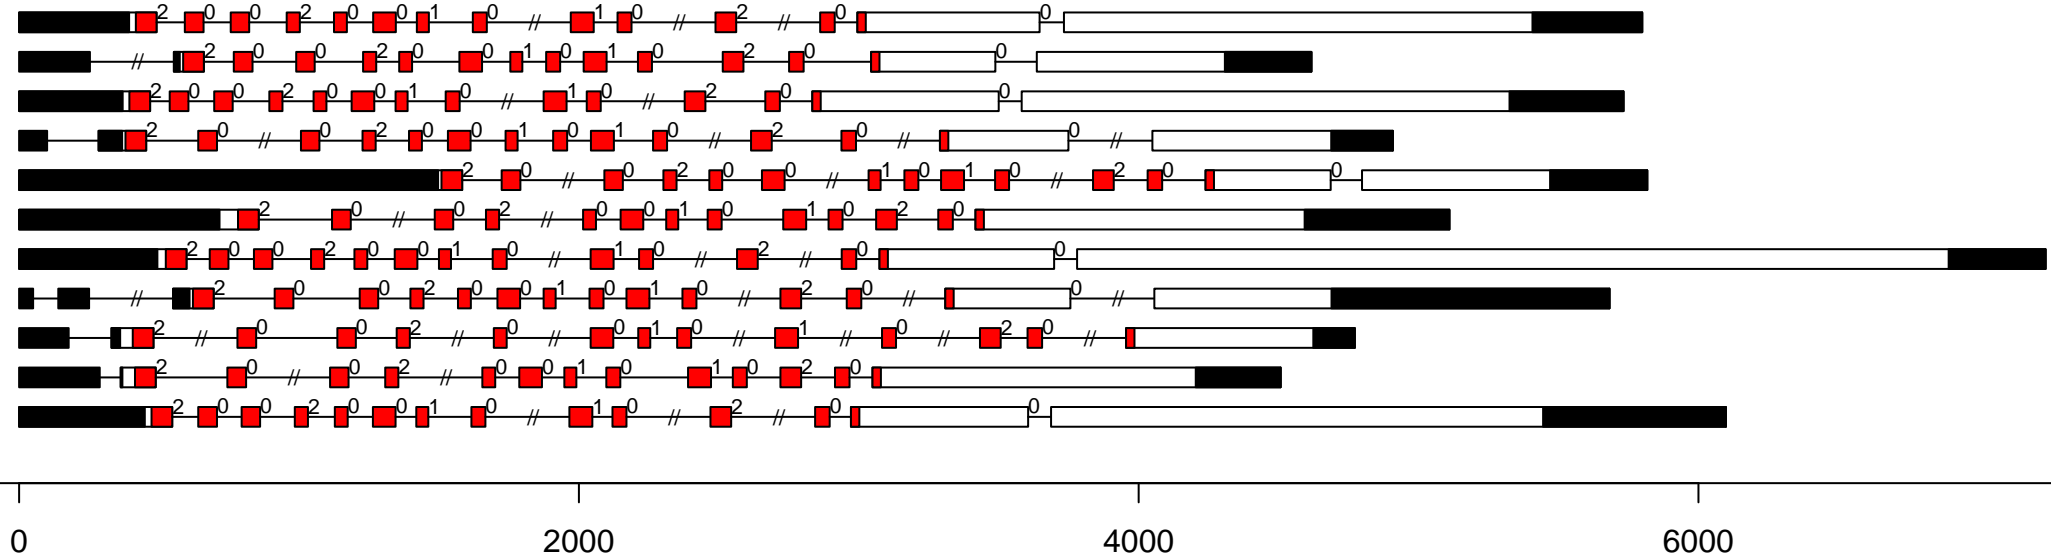

# G.ra PEK\_GCN2 exon-intron and domain diagram (all)

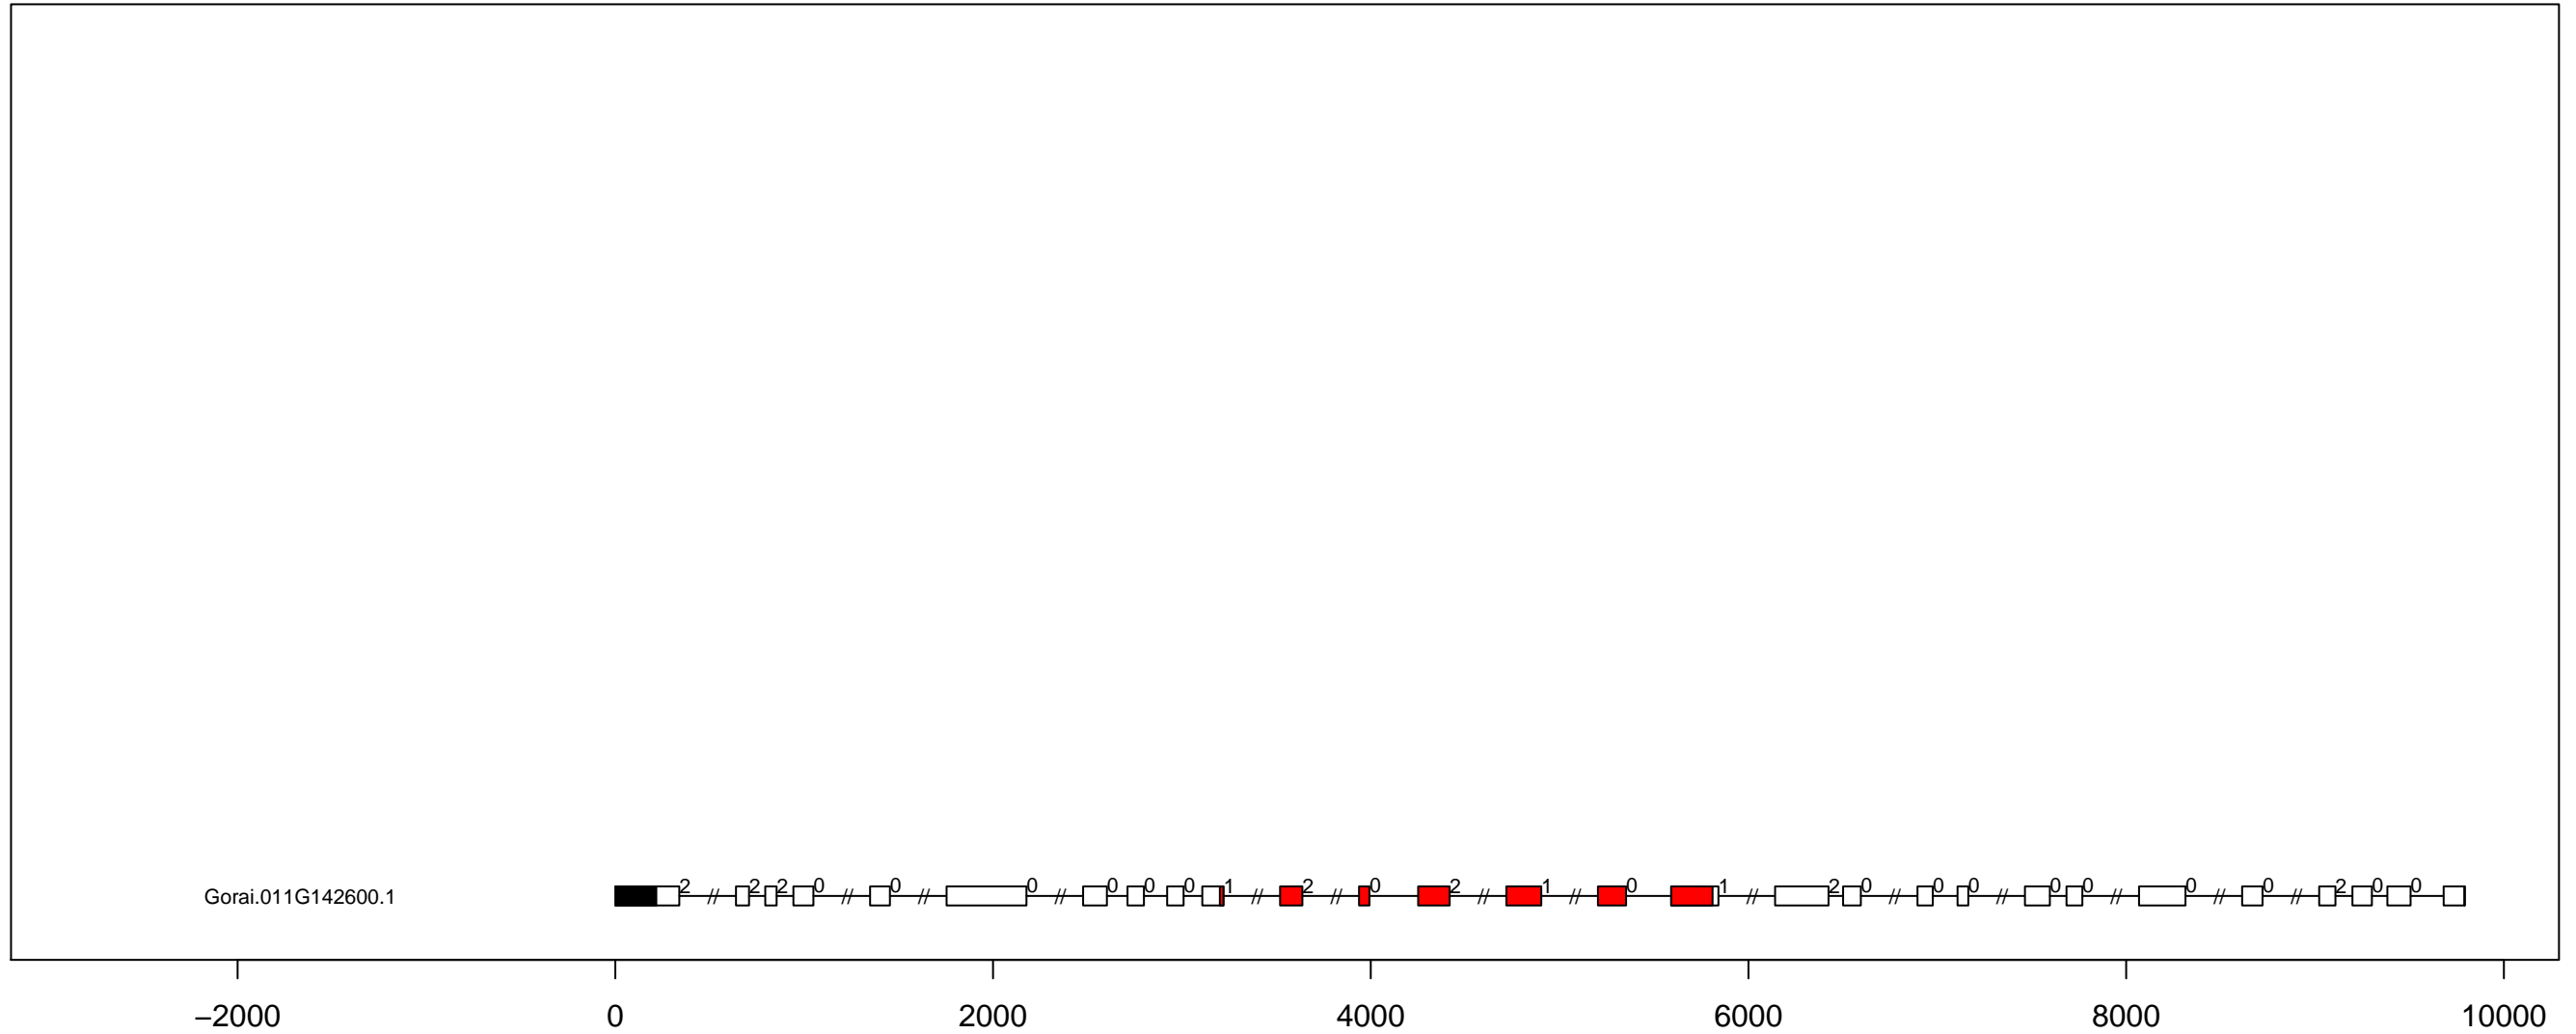

# G.ra PEK\_PEK exon-intron and domain diagram (all)

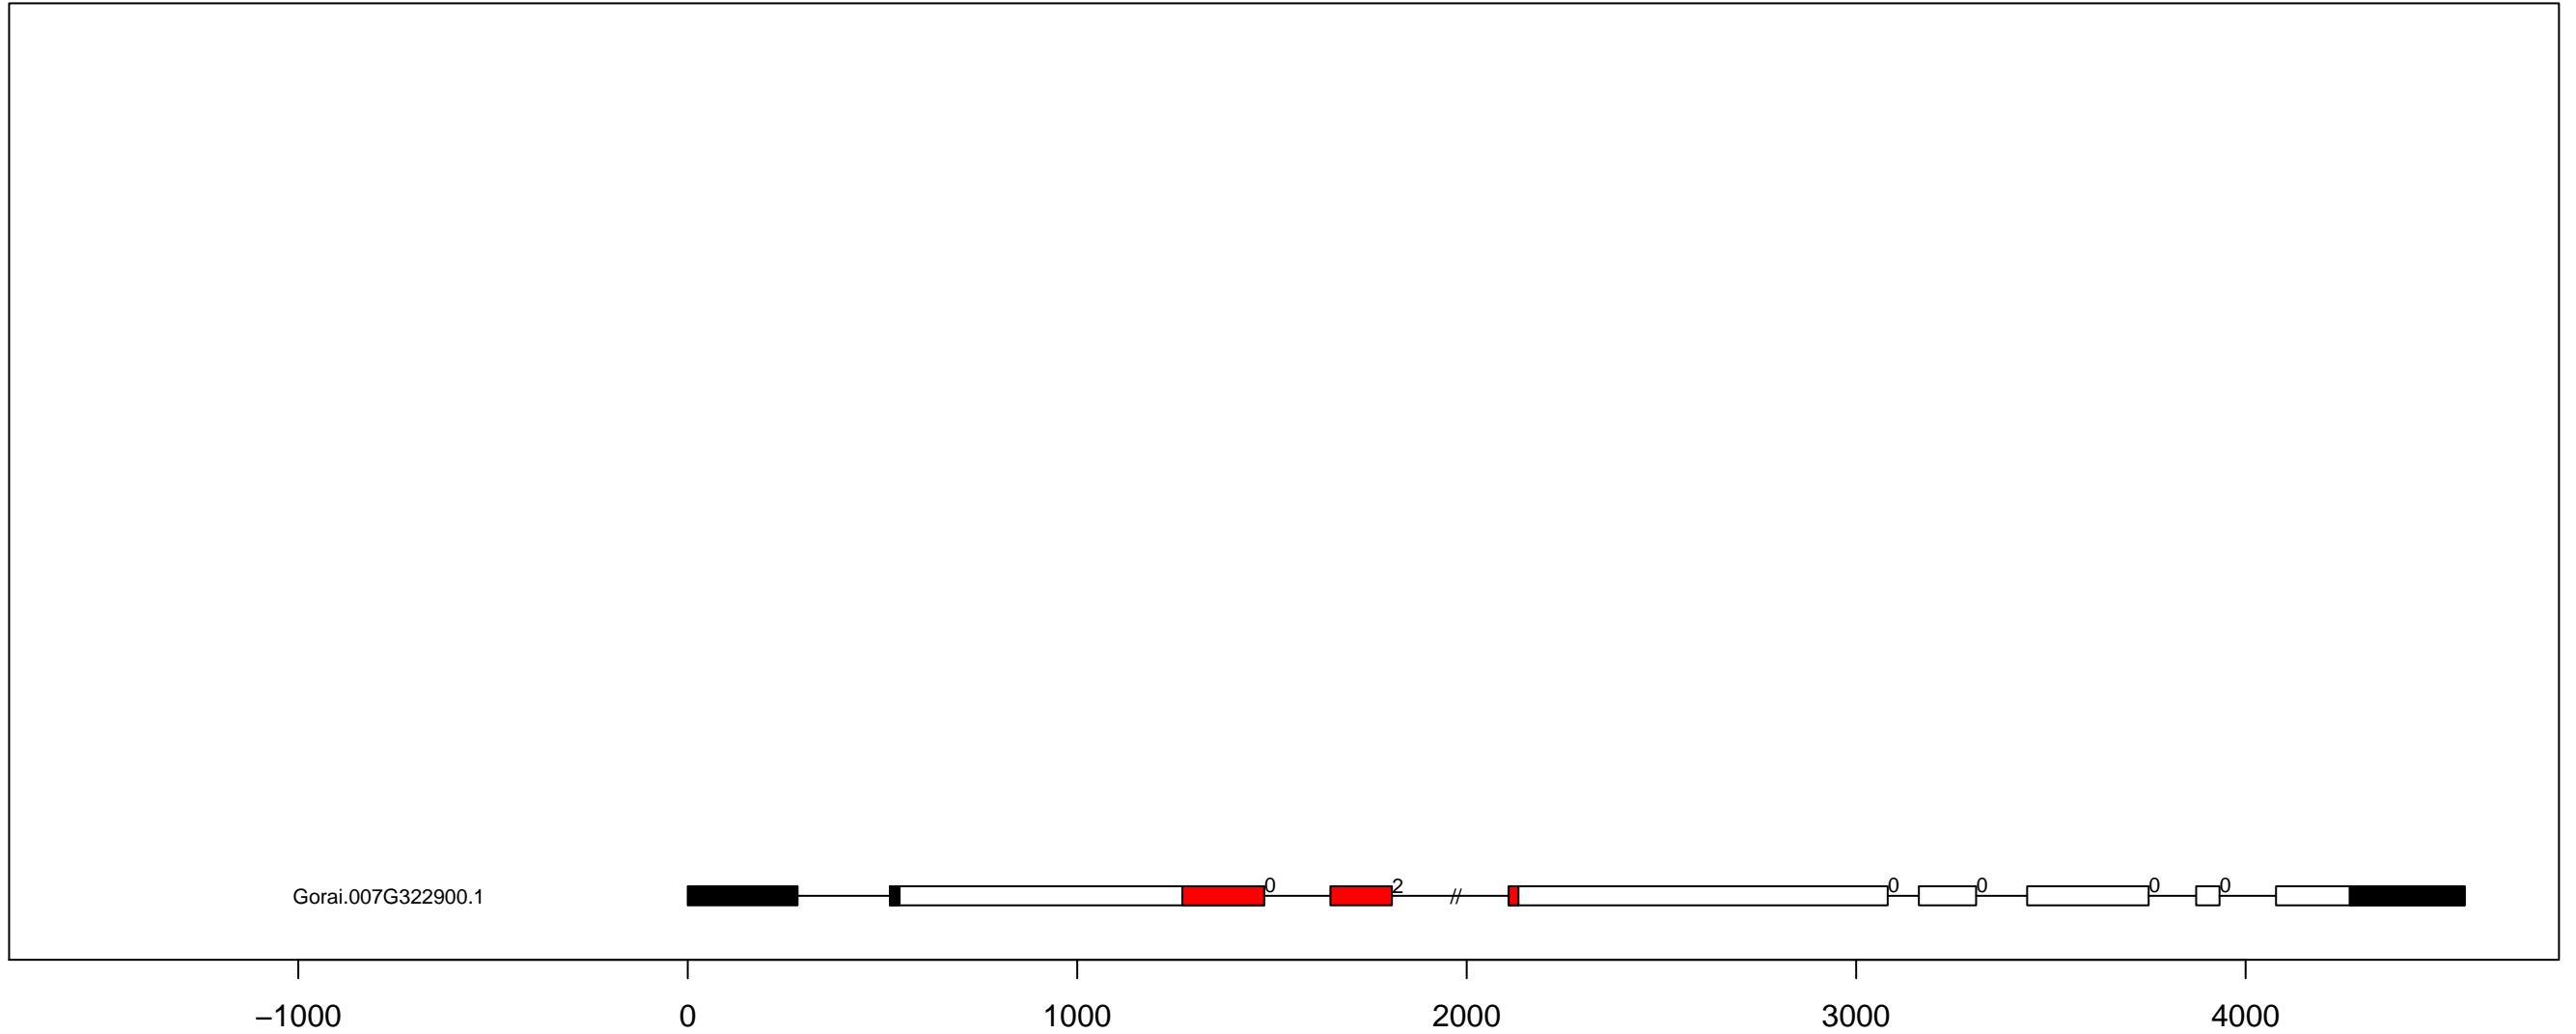



# G.ra RLK-Pelle\_C-LEC exon-intron and domain diagram (all)

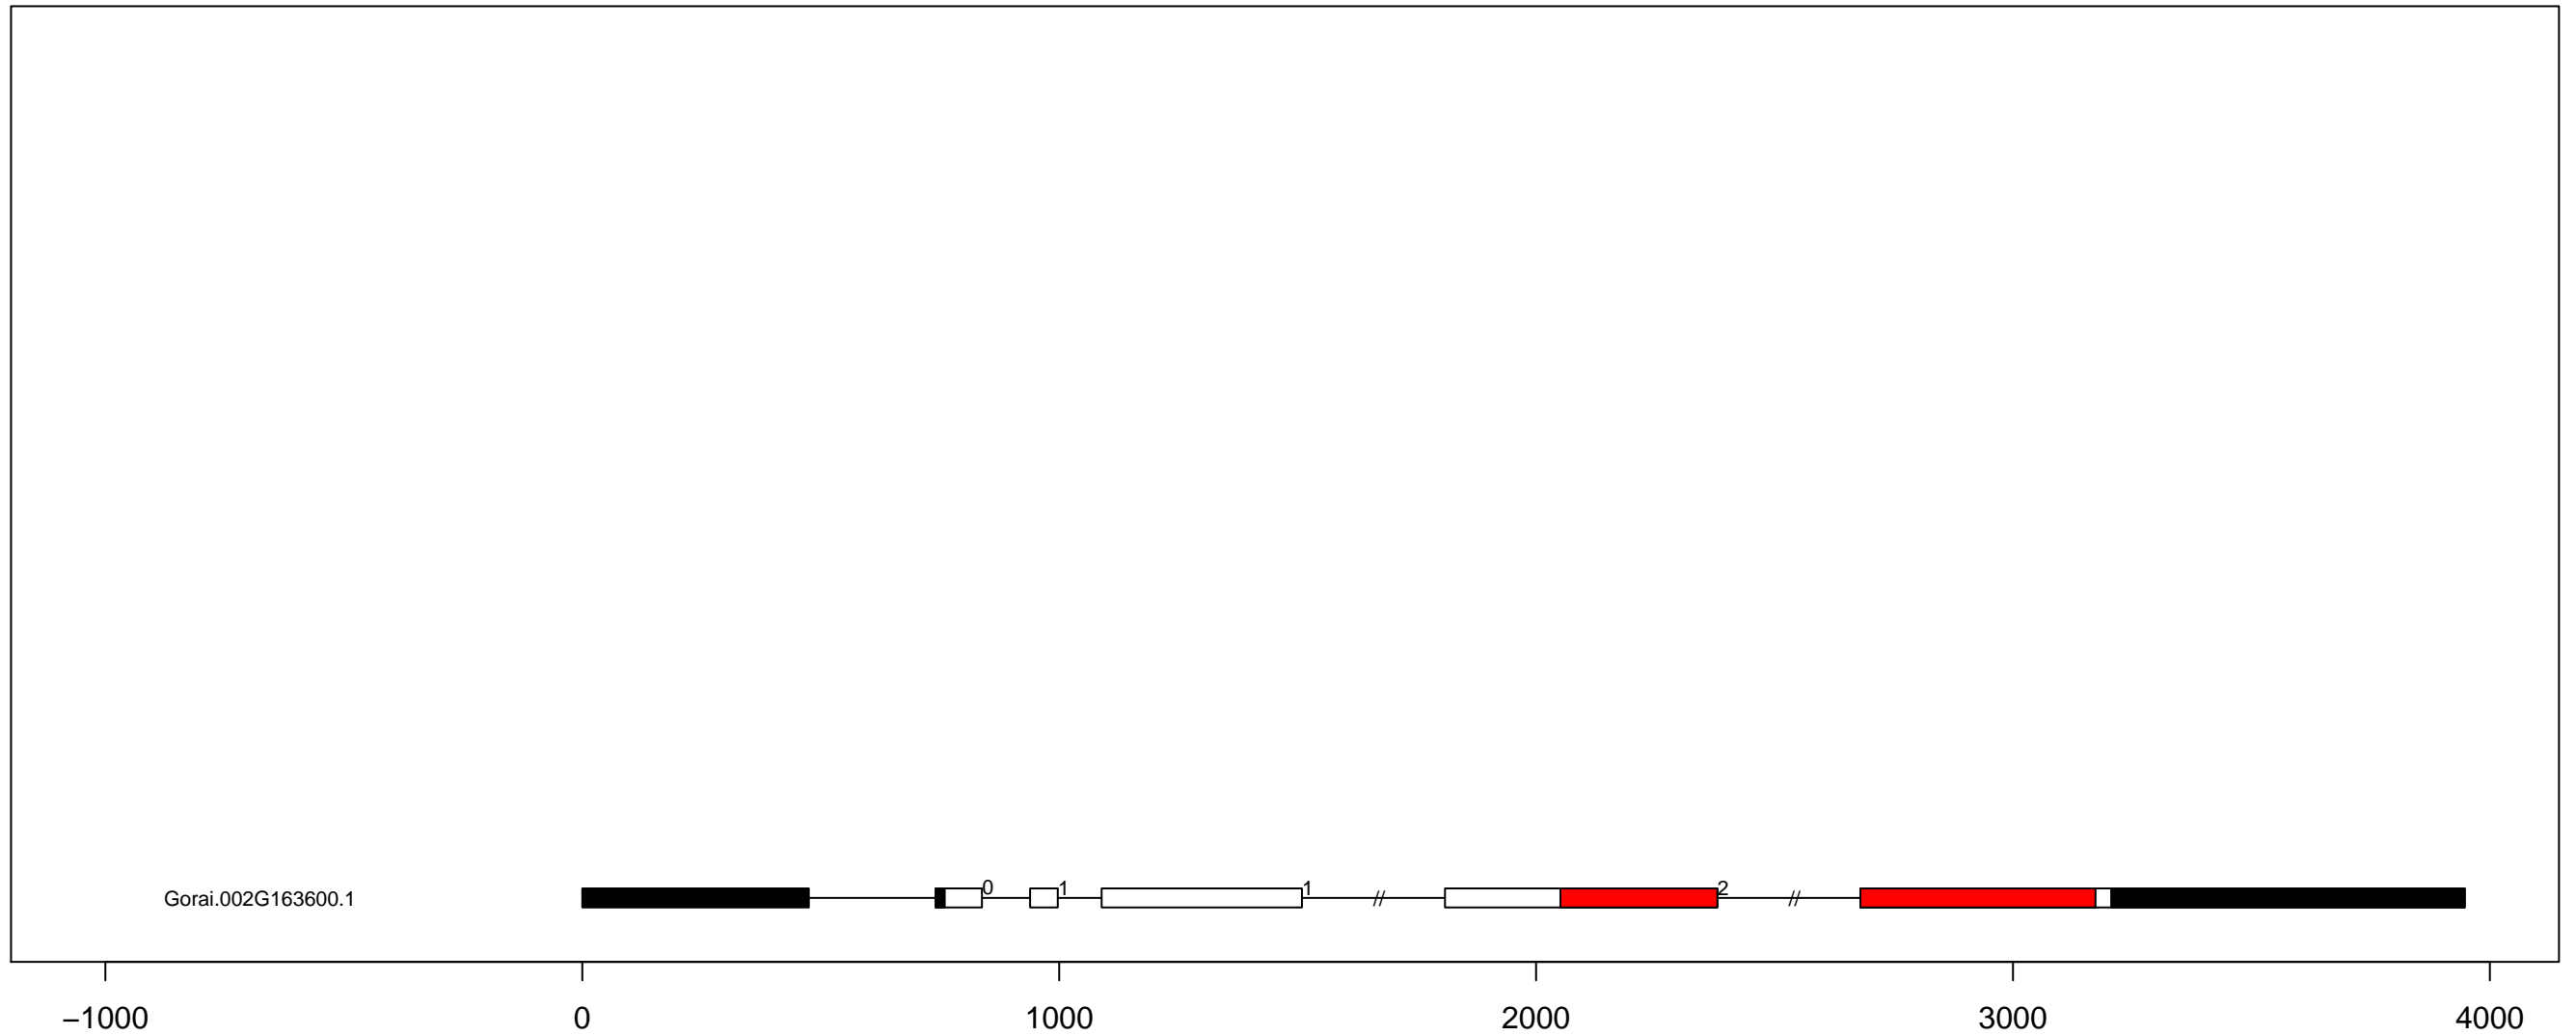

# G.ra RLK-Pelle\_CR4L exon-intron and domain diagram (all)

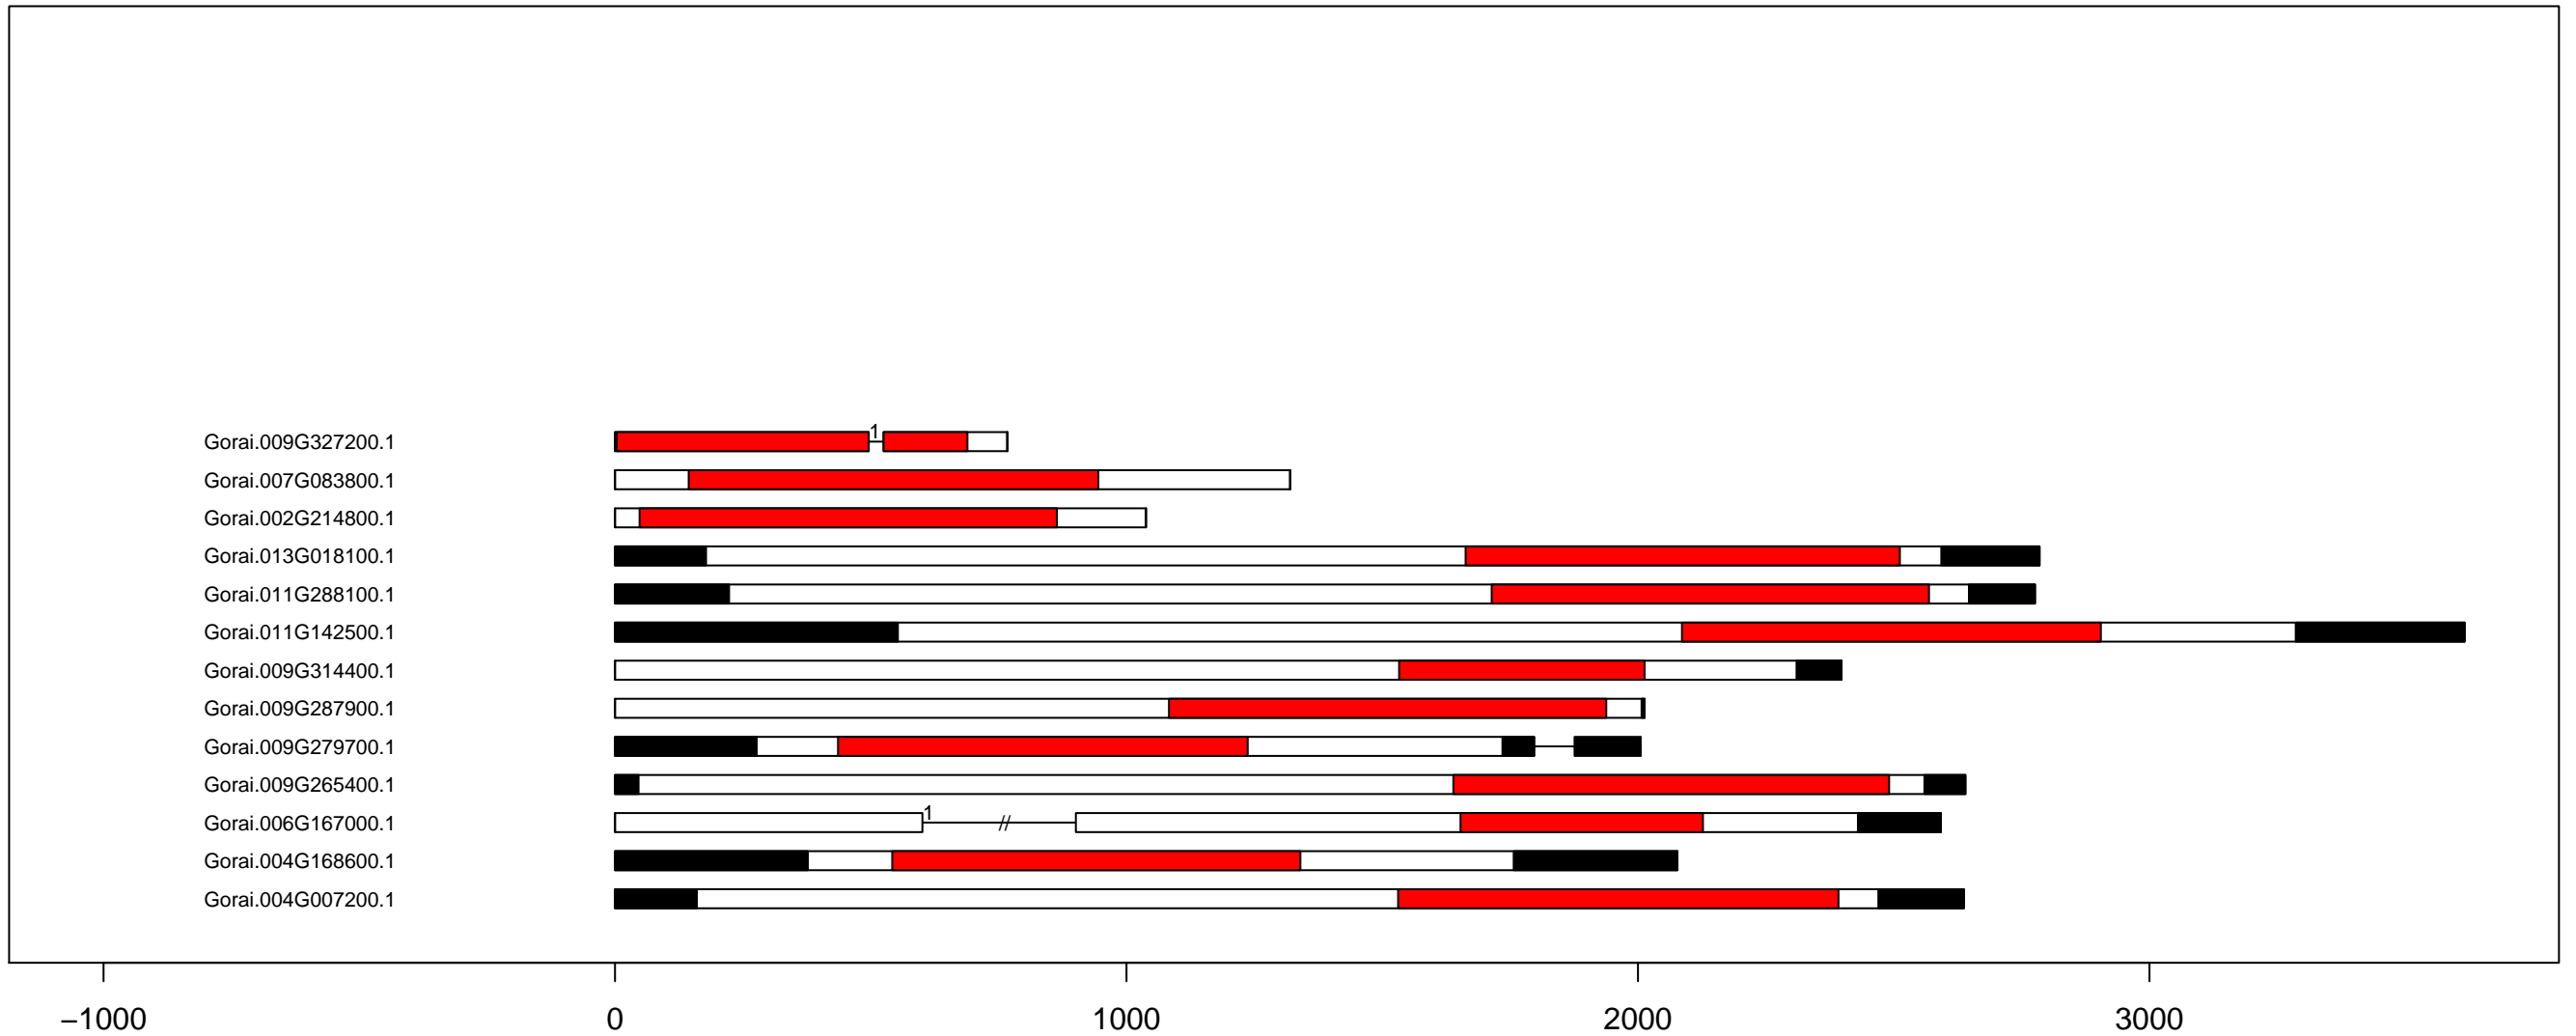

### G.ra RLK-Pelle\_CrRLK1L-1 exon-intron and domain diagram (part 1)

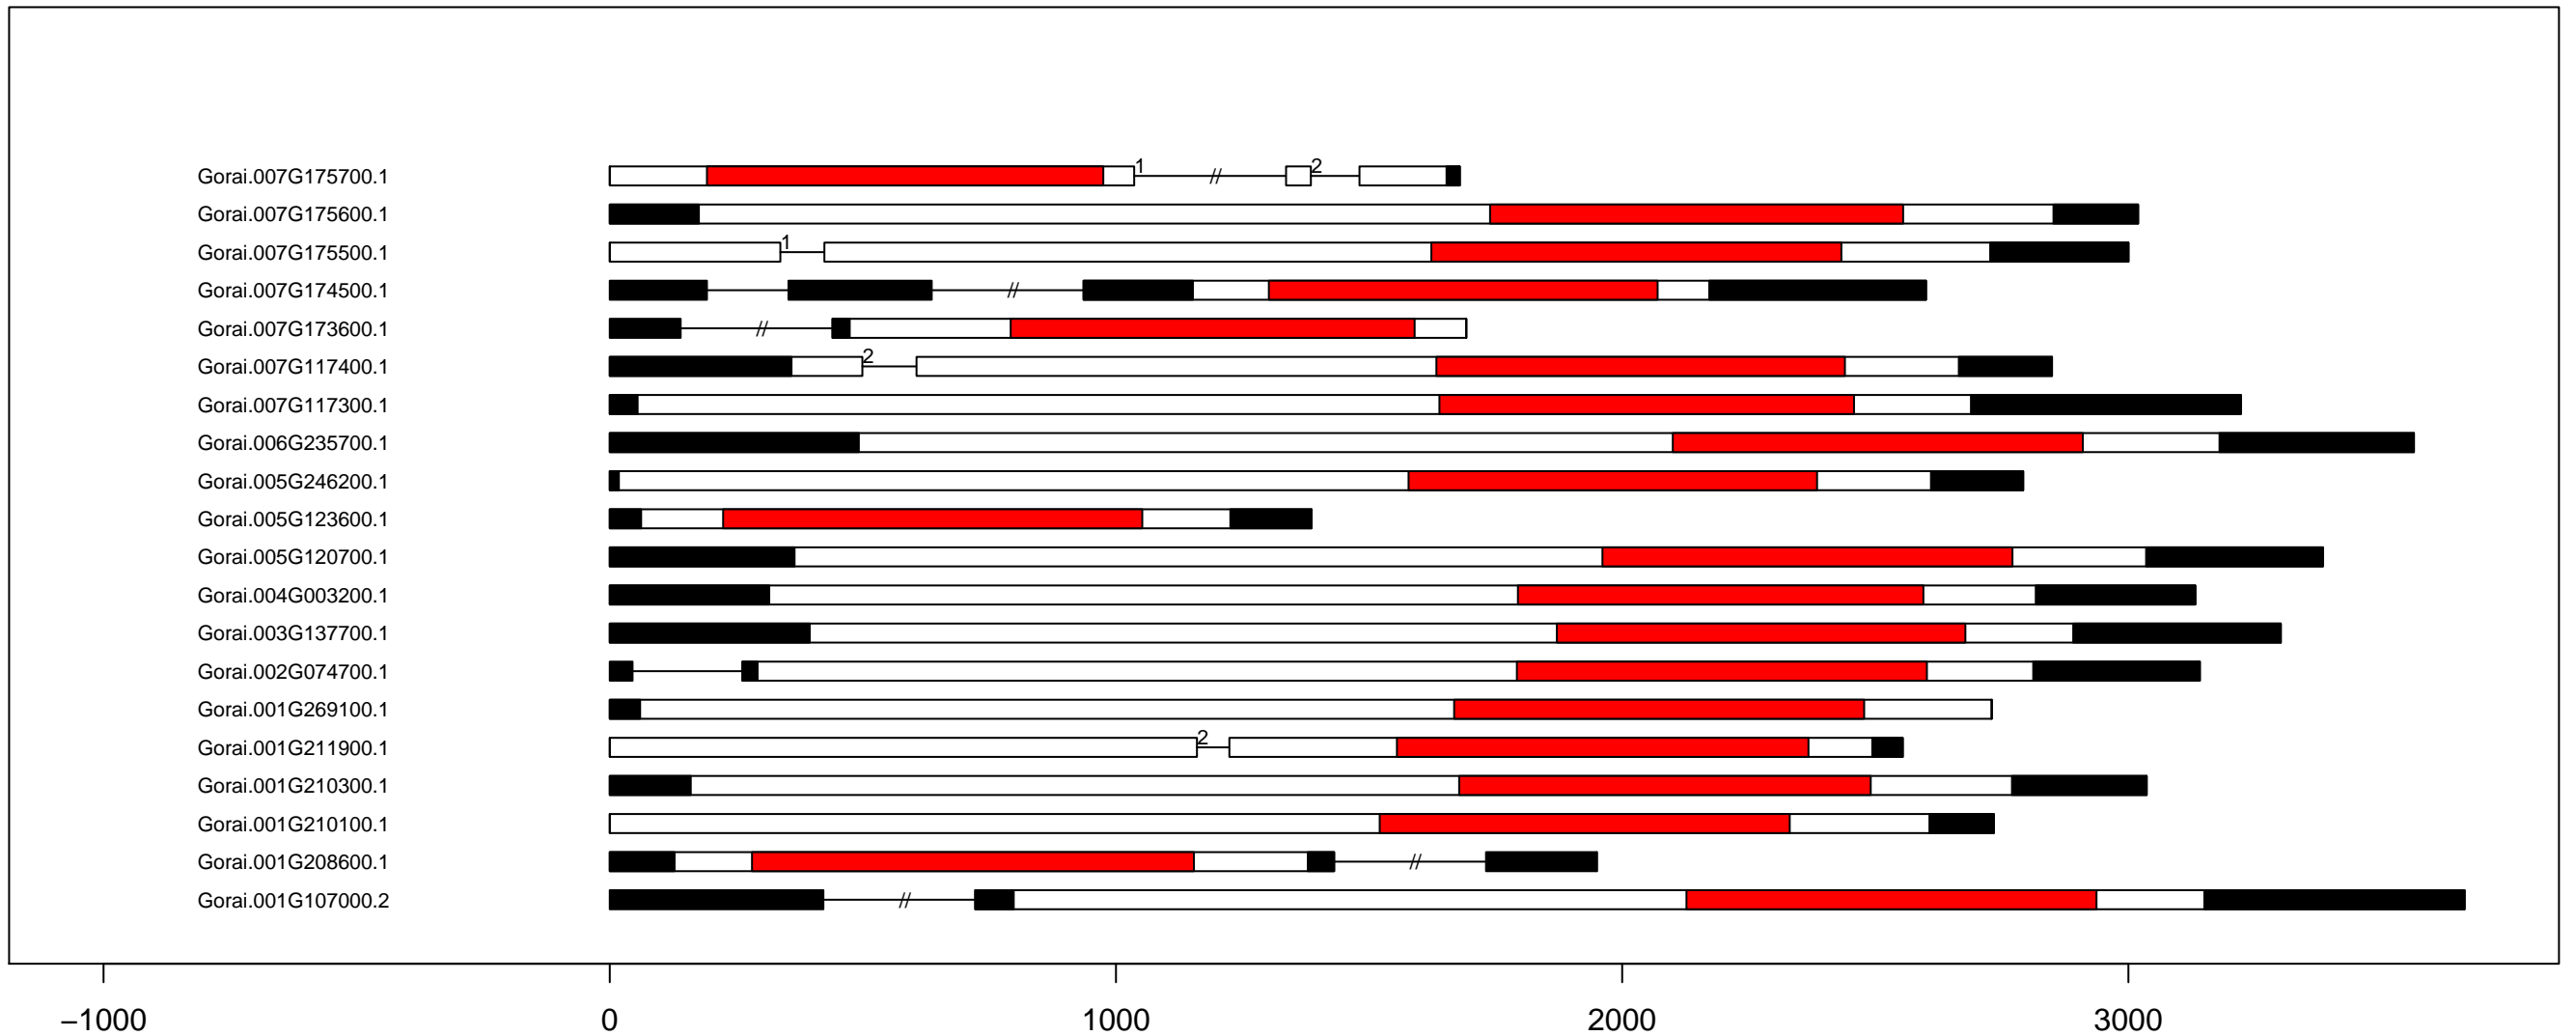

### G.ra RLK-Pelle\_CrRLK1L-1 exon-intron and domain diagram (part 2)

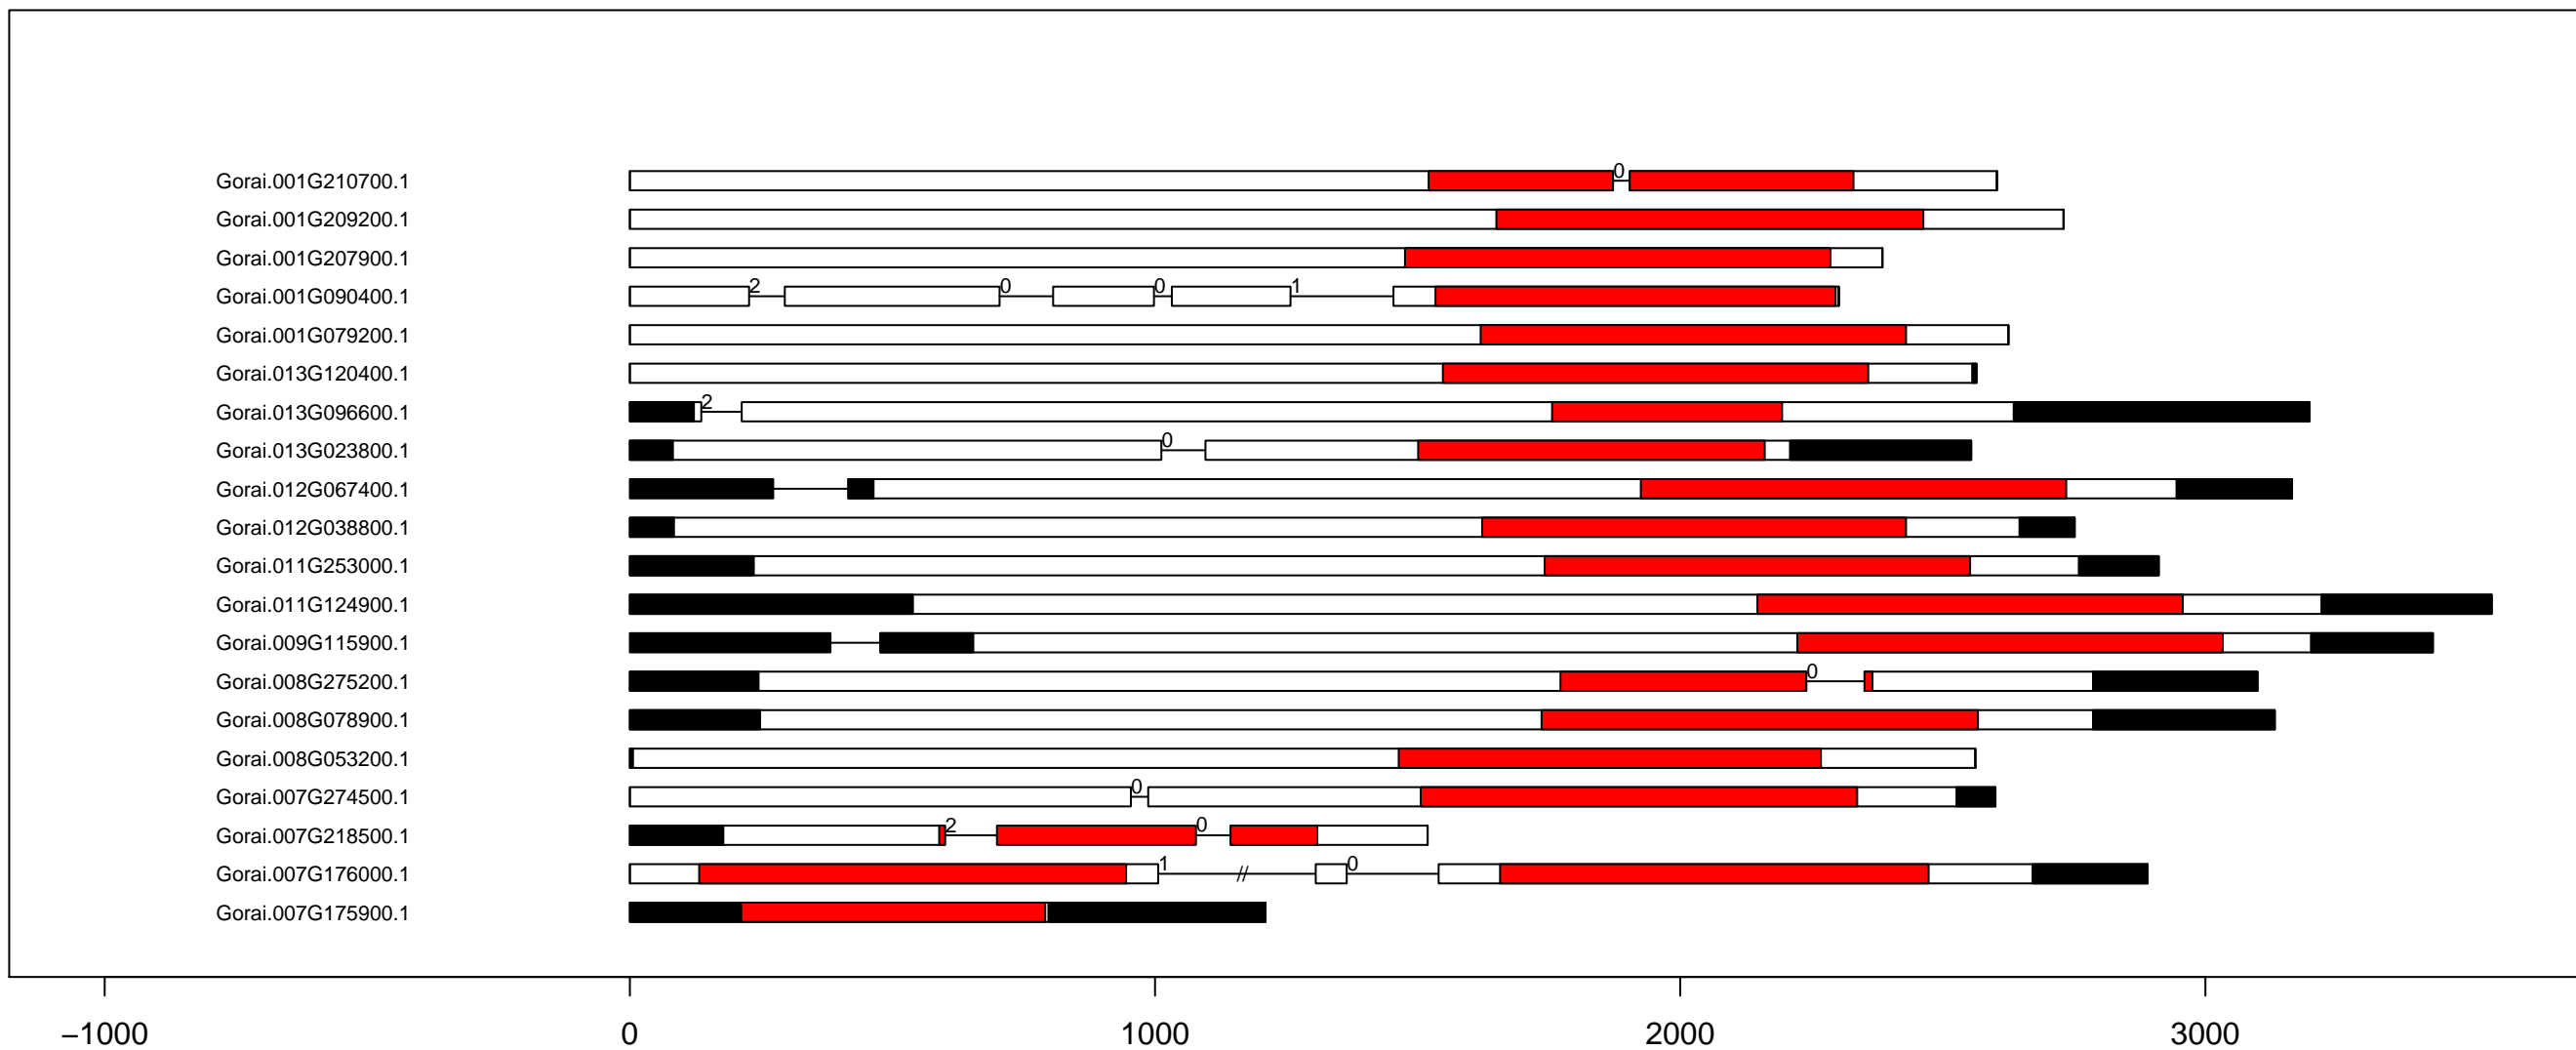

### G.ra RLK-Pelle\_CrRLK1L-1 exon-intron and domain diagram (part 3)

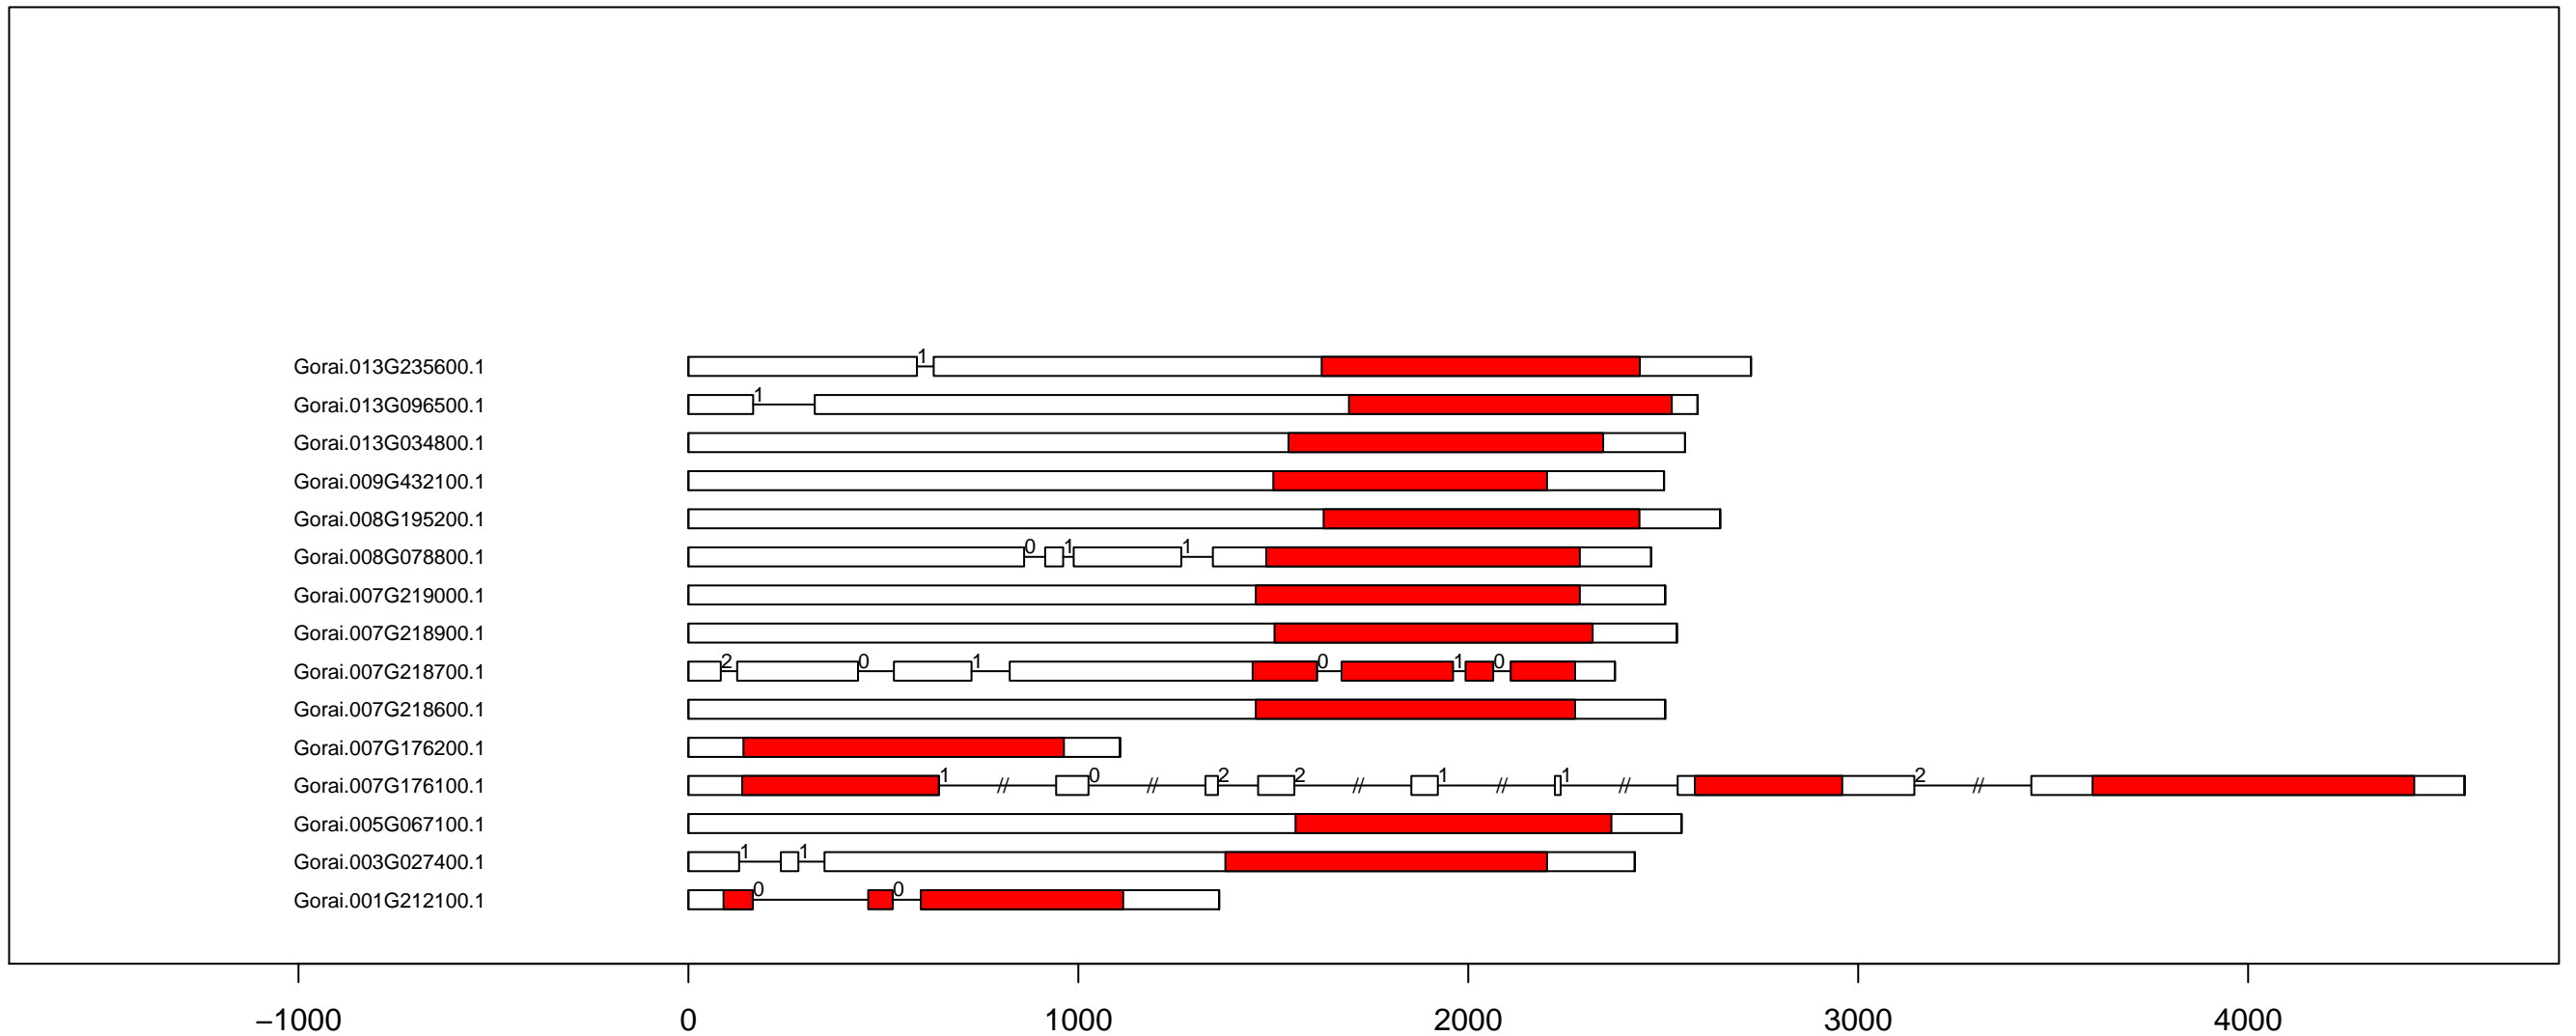

### G.ra RLK-Pelle\_DLSV exon-intron and domain diagram (part 1)

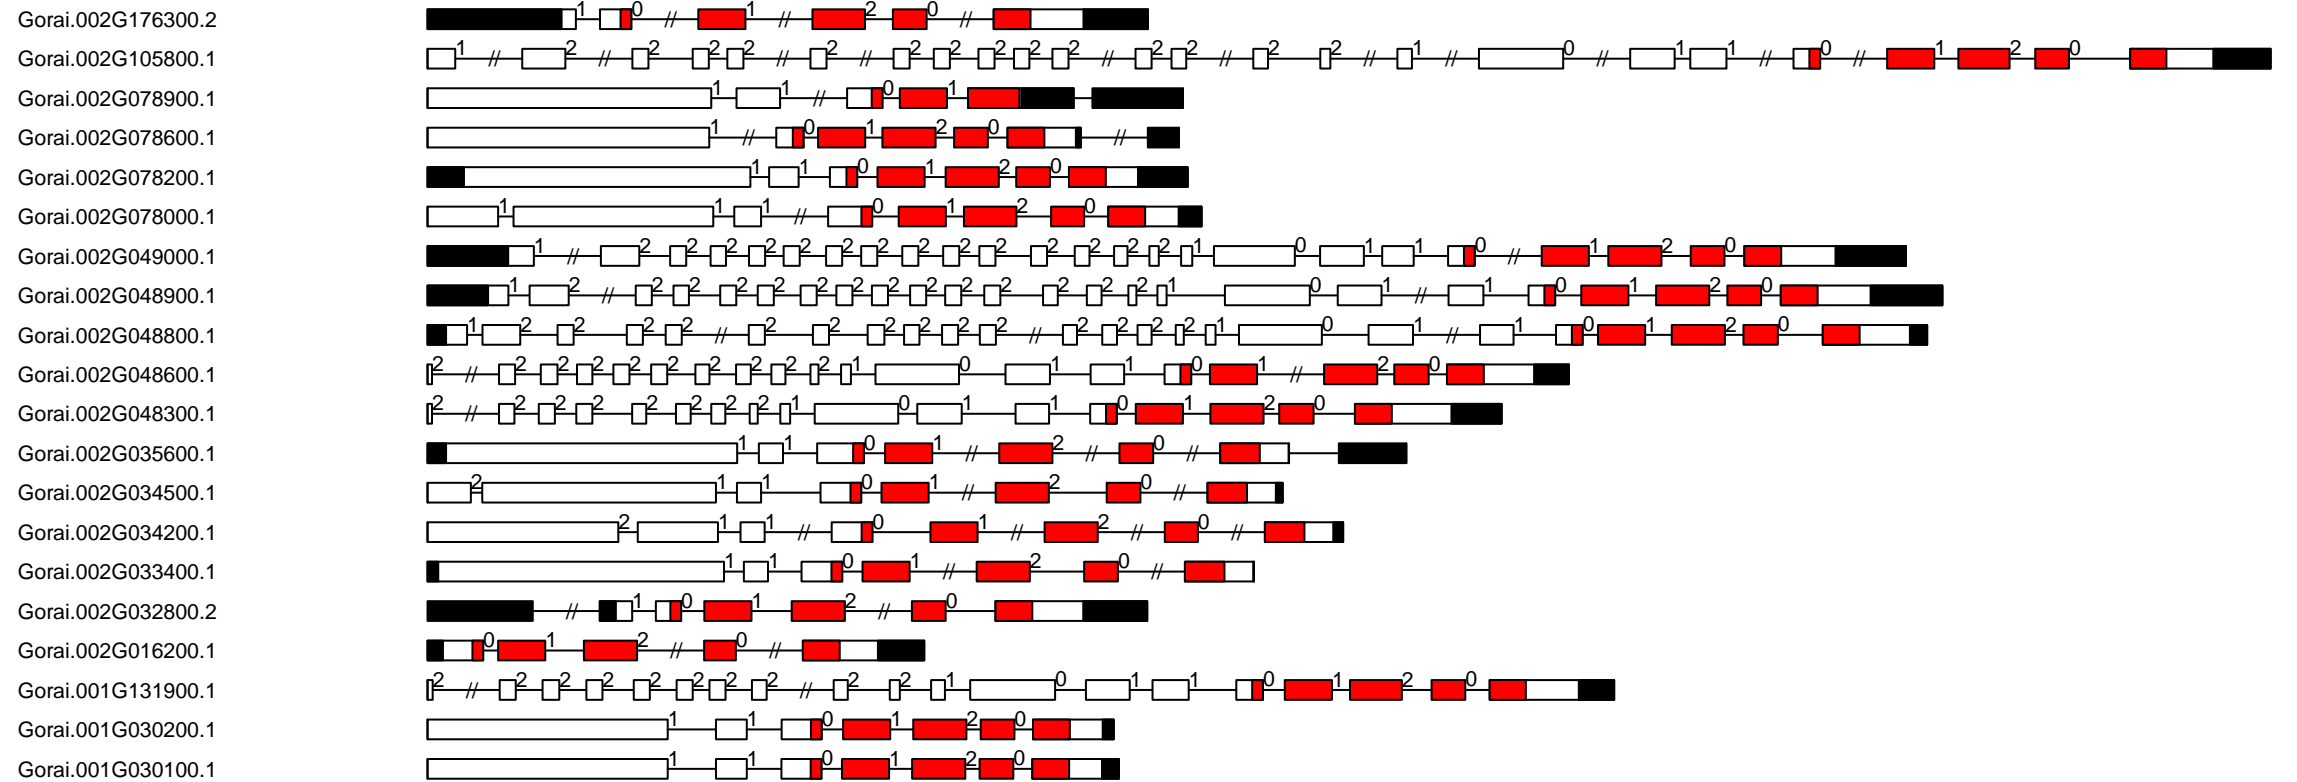

### G.ra RLK-Pelle\_DLSV exon-intron and domain diagram (part 2)

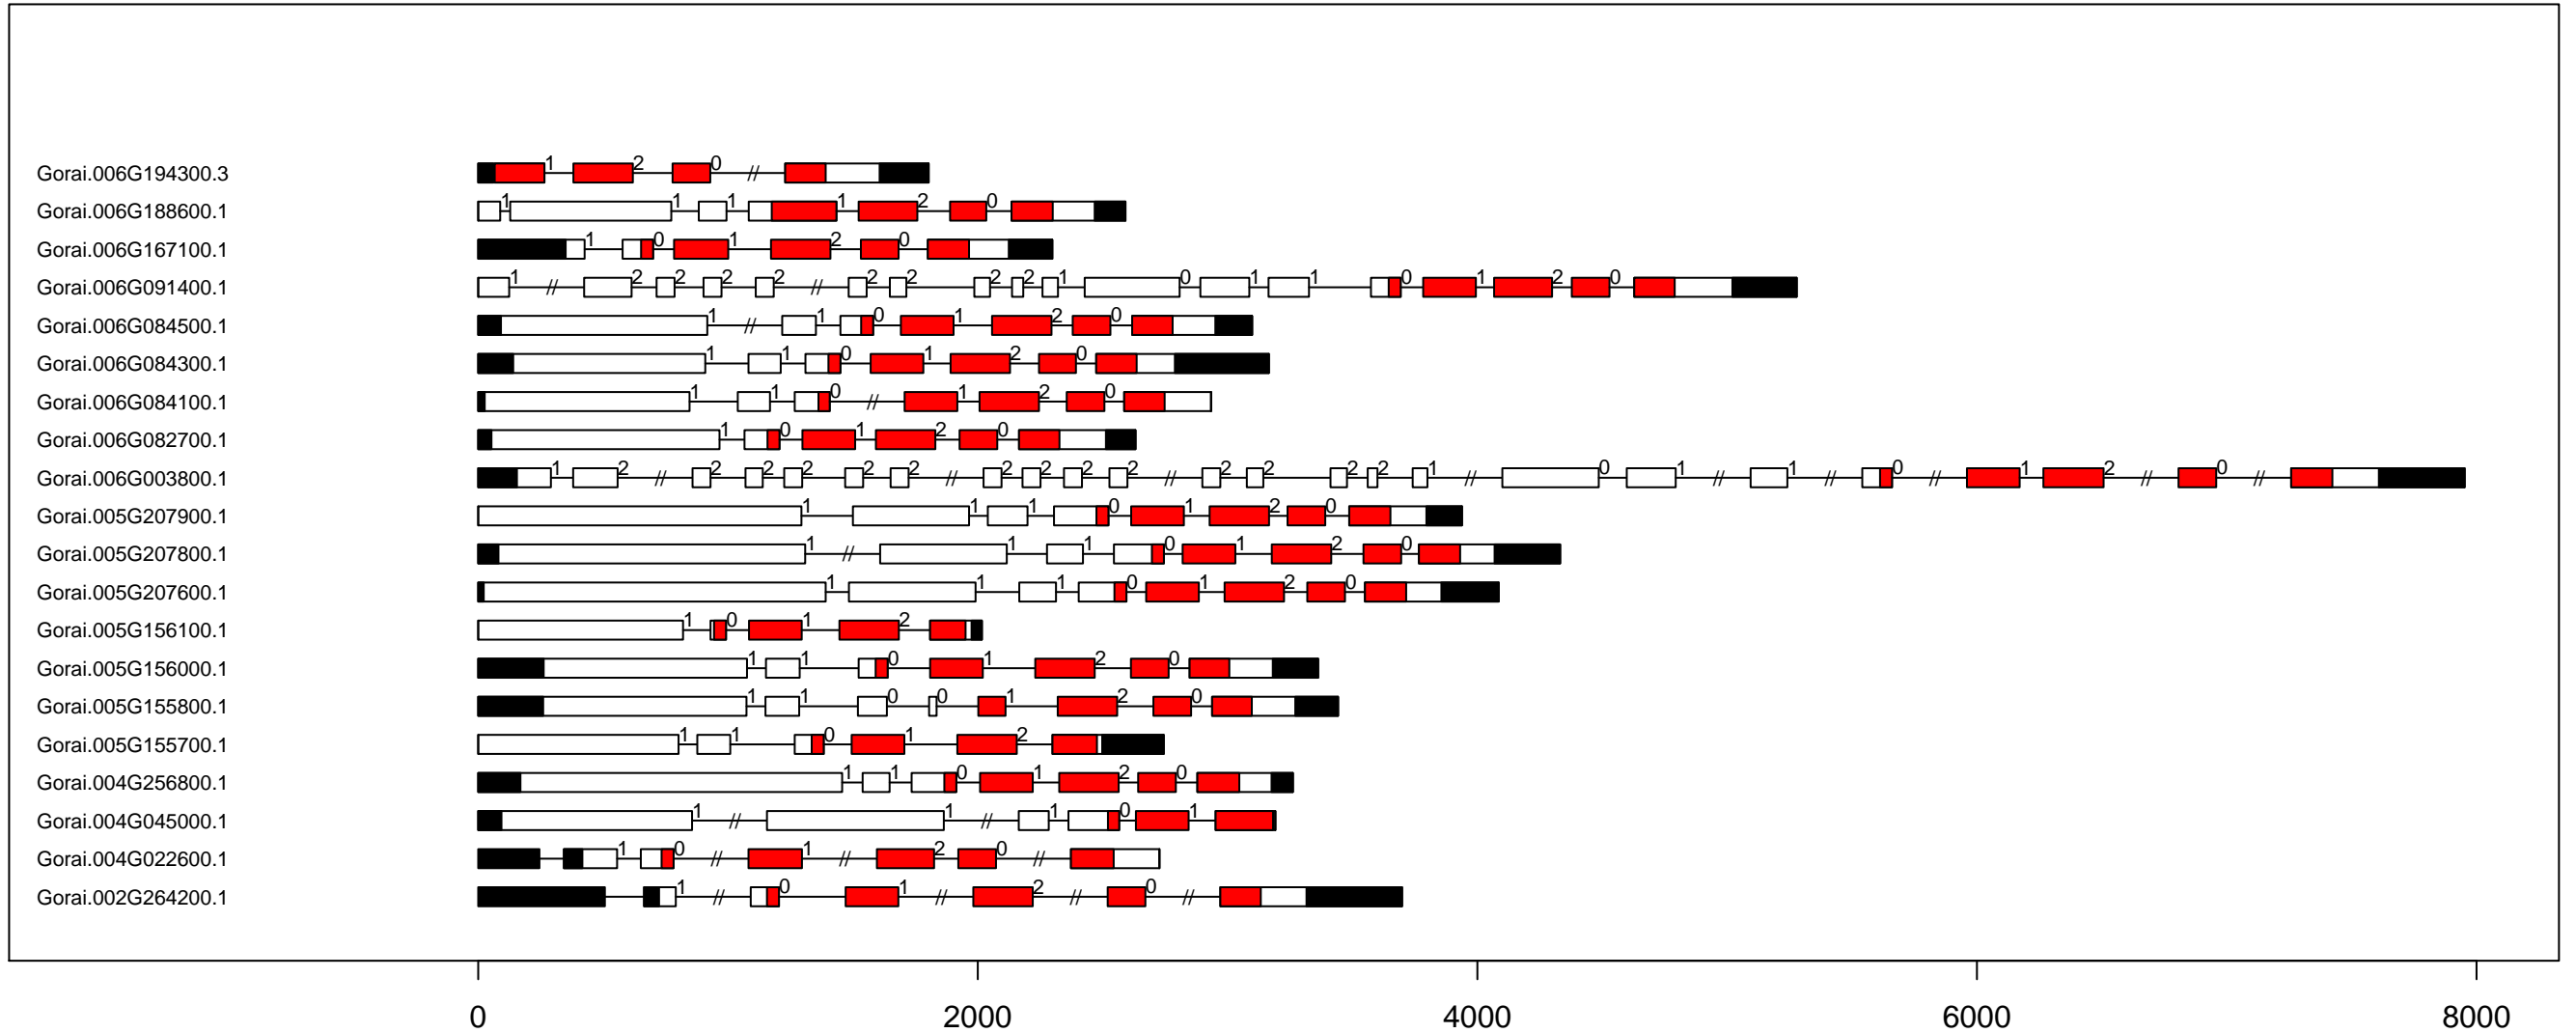

### G.ra RLK-Pelle\_DLSV exon-intron and domain diagram (part 3)

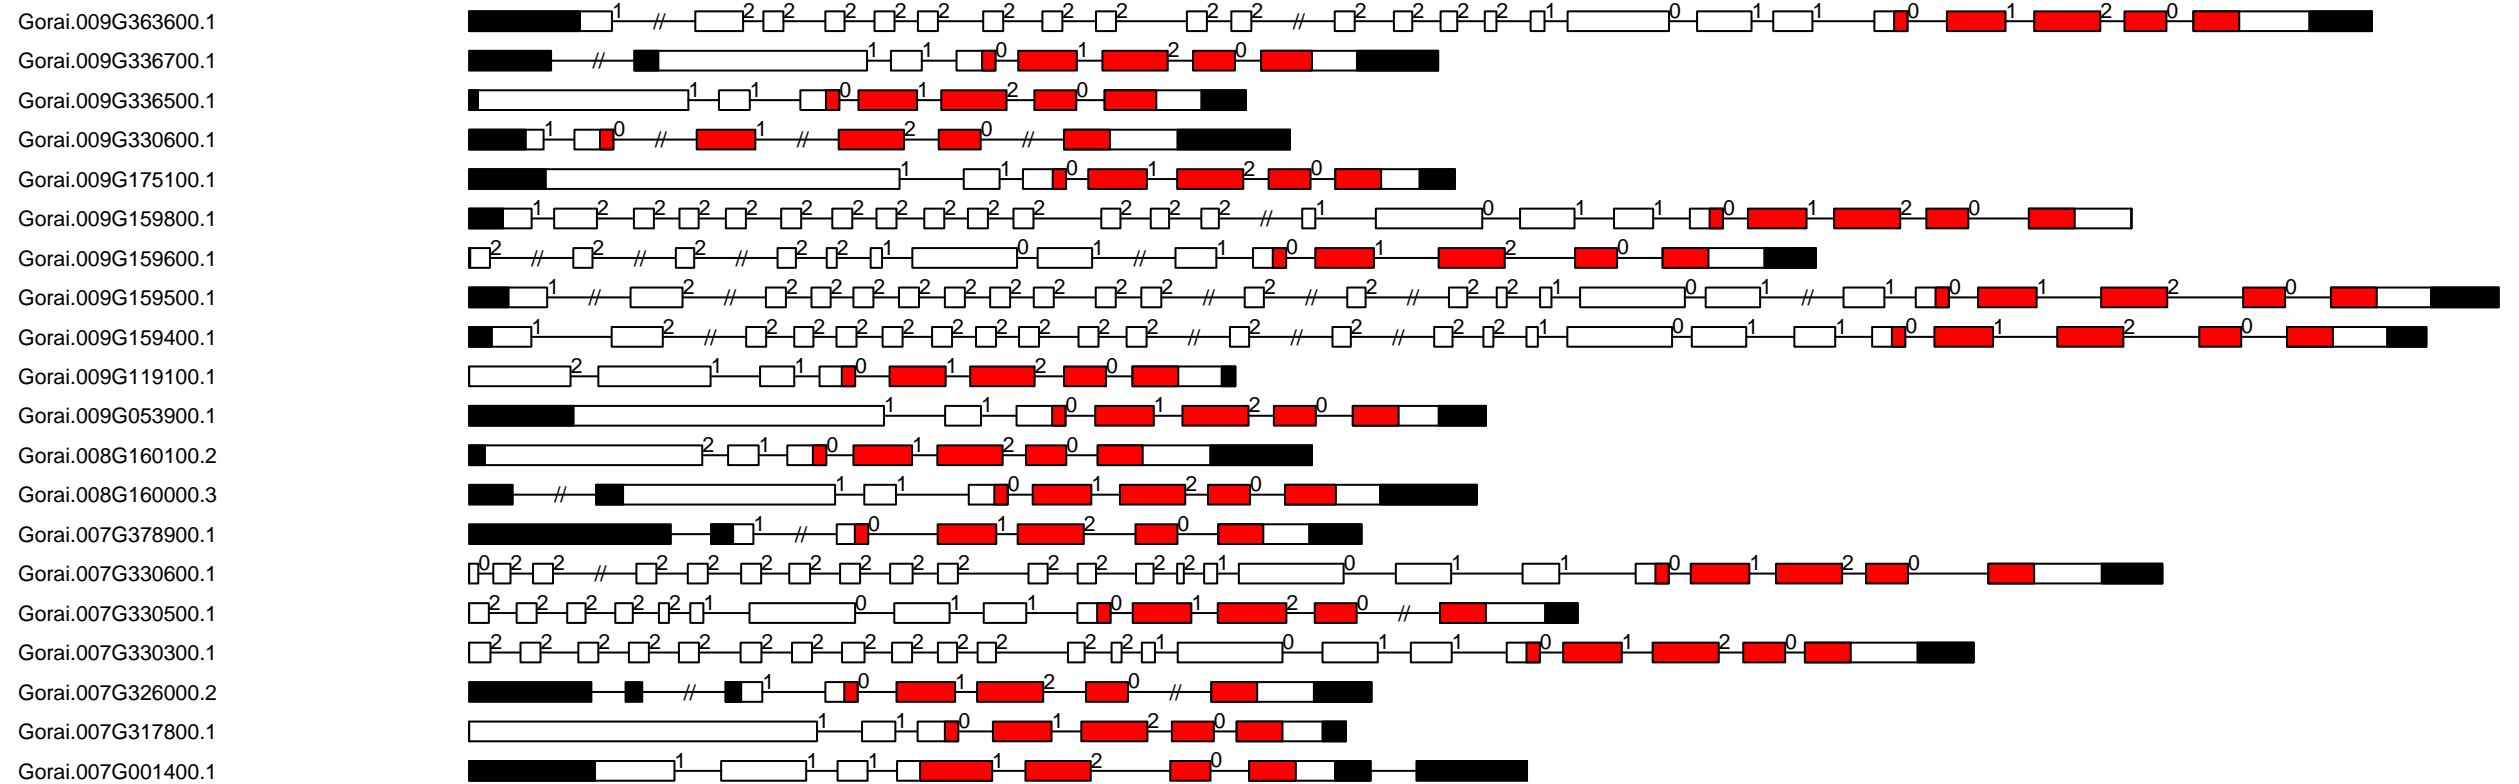



# G.ra RLK-Pelle\_DLSV exon-intron and domain diagram (part 4)

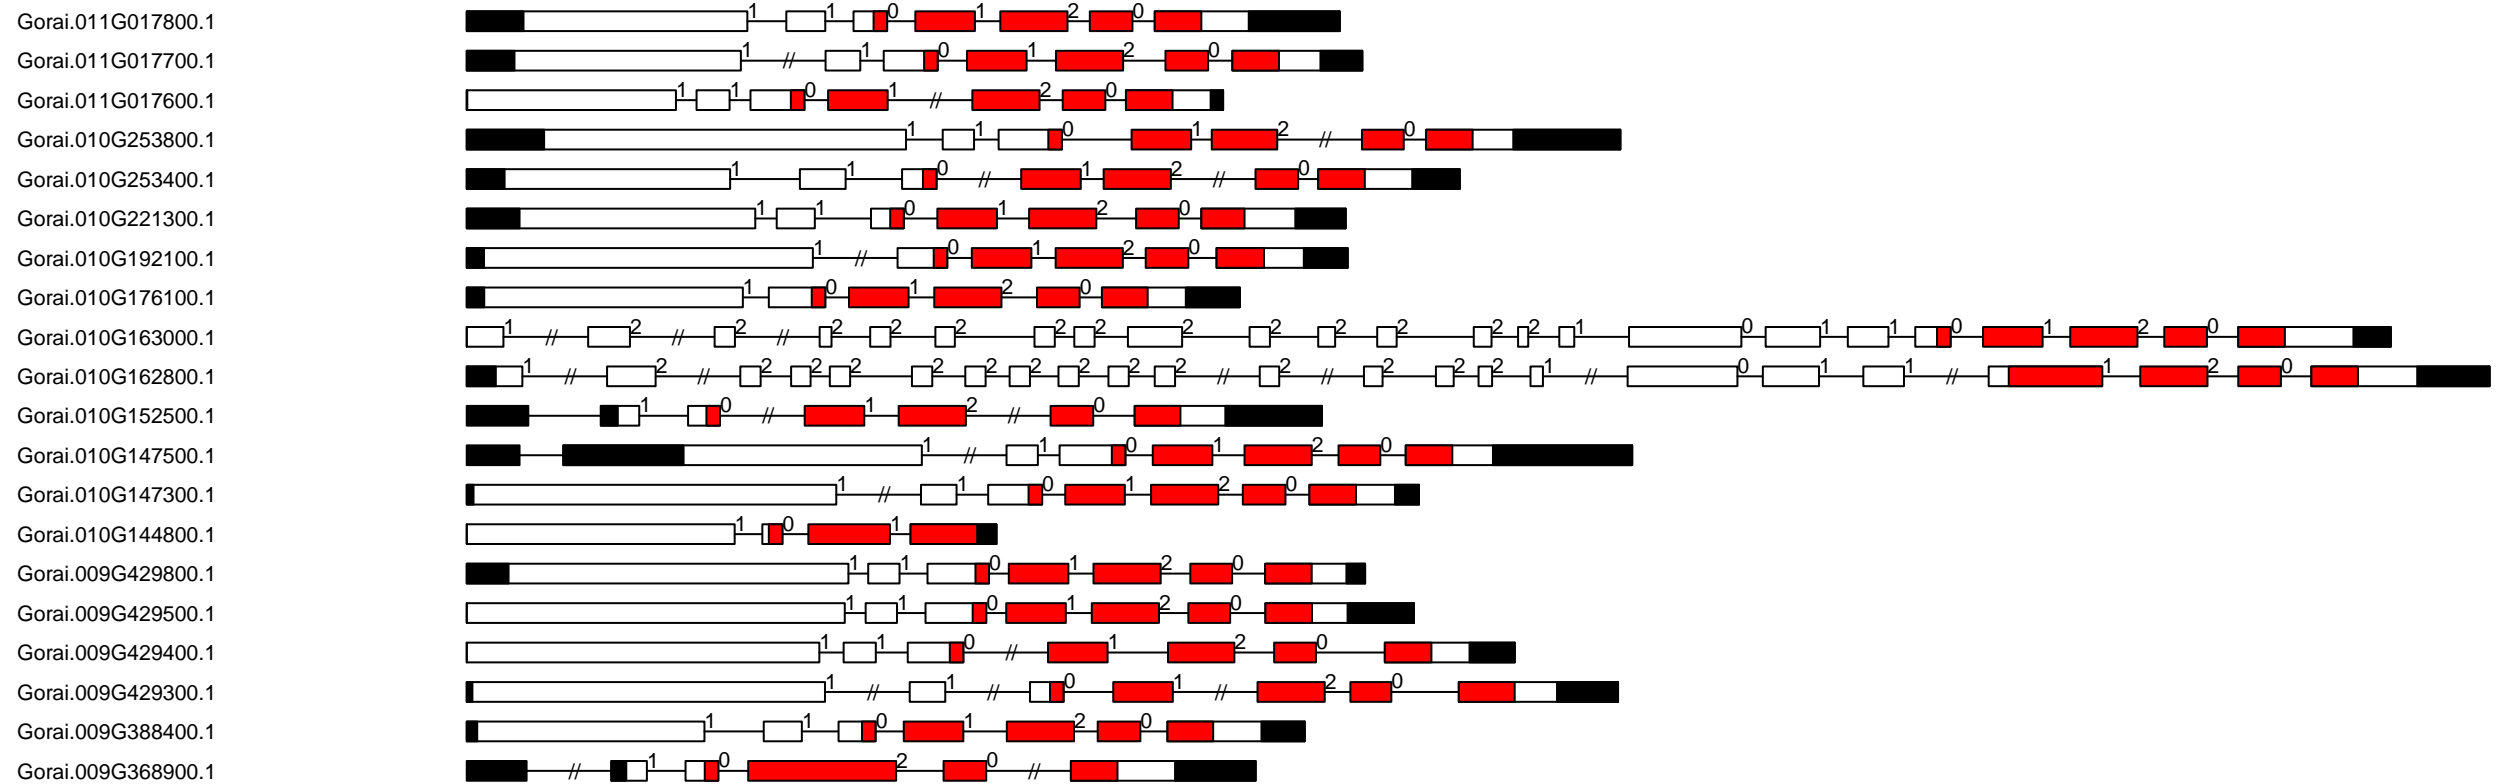

## G.ra RLK-Pelle\_DLSV exon-intron and domain diagram (part 5)

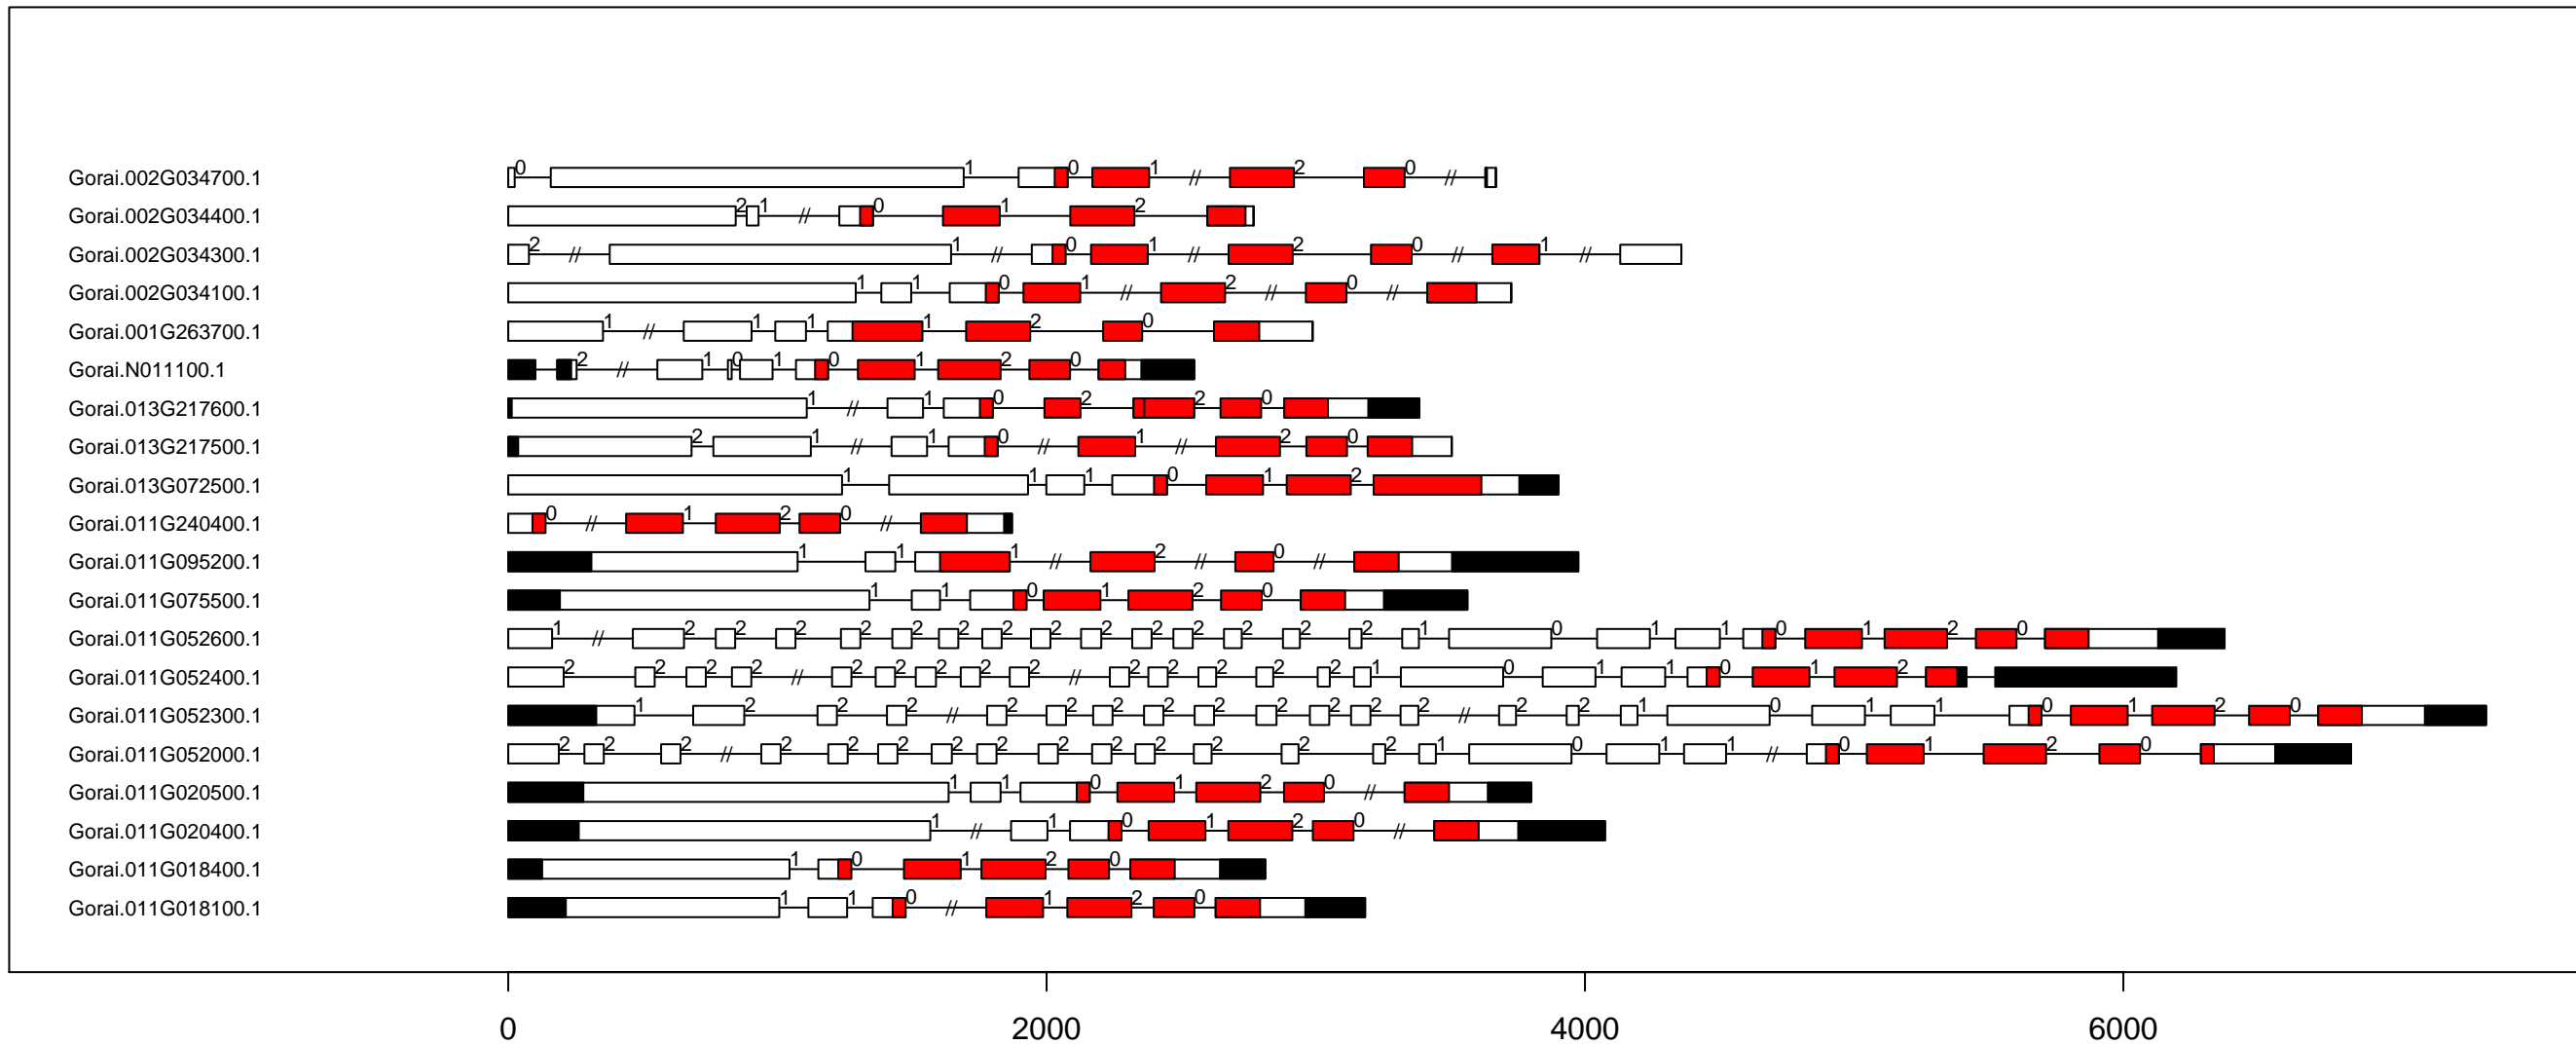

# G.ra RLK-Pelle\_DLSV exon-intron and domain diagram (part 6)

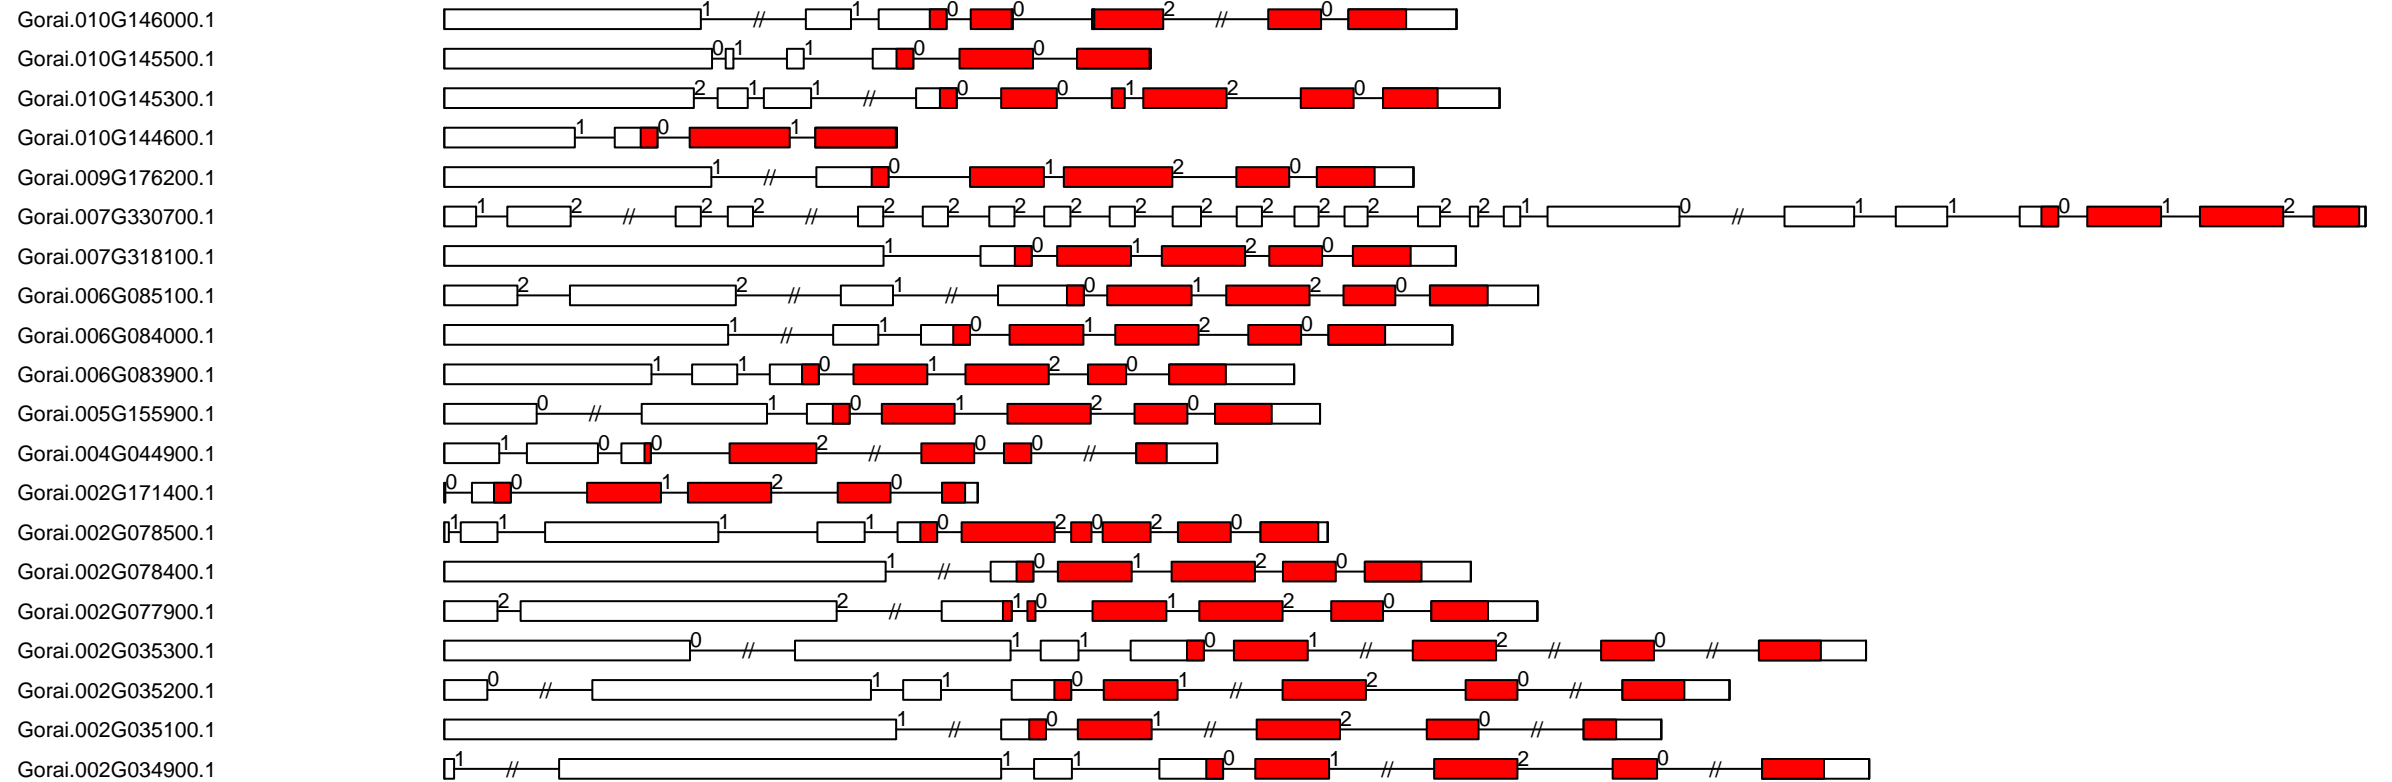

# G.ra RLK-Pelle\_DLSV exon-intron and domain diagram (part 7)

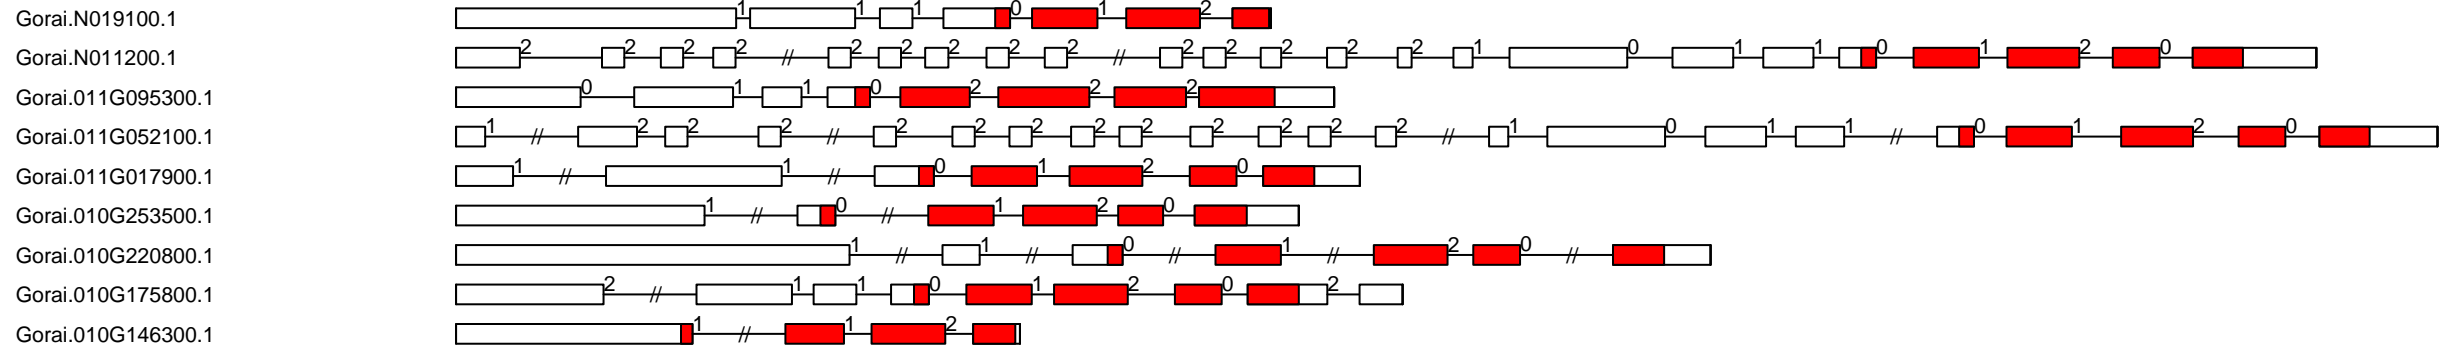

# G.ra RLK-Pelle\_Extensin exon-intron and domain diagram (all)

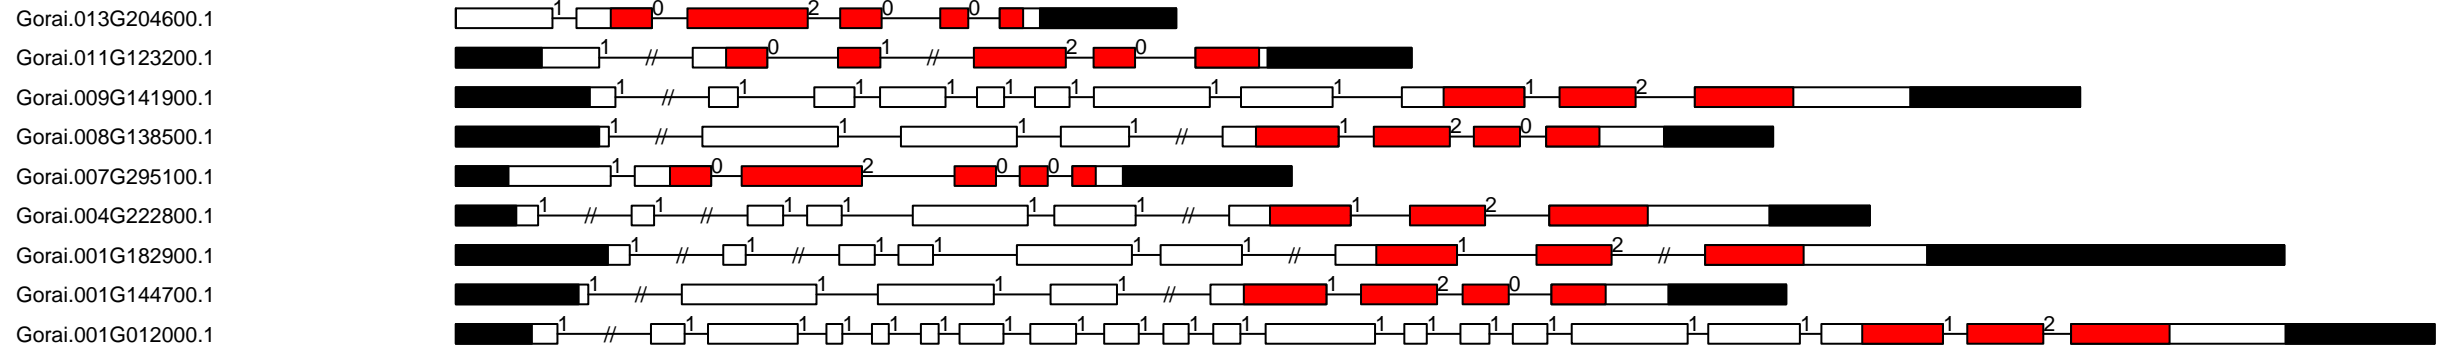



### G.ra RLK-Pelle\_L-LEC exon-intron and domain diagram (part 2)

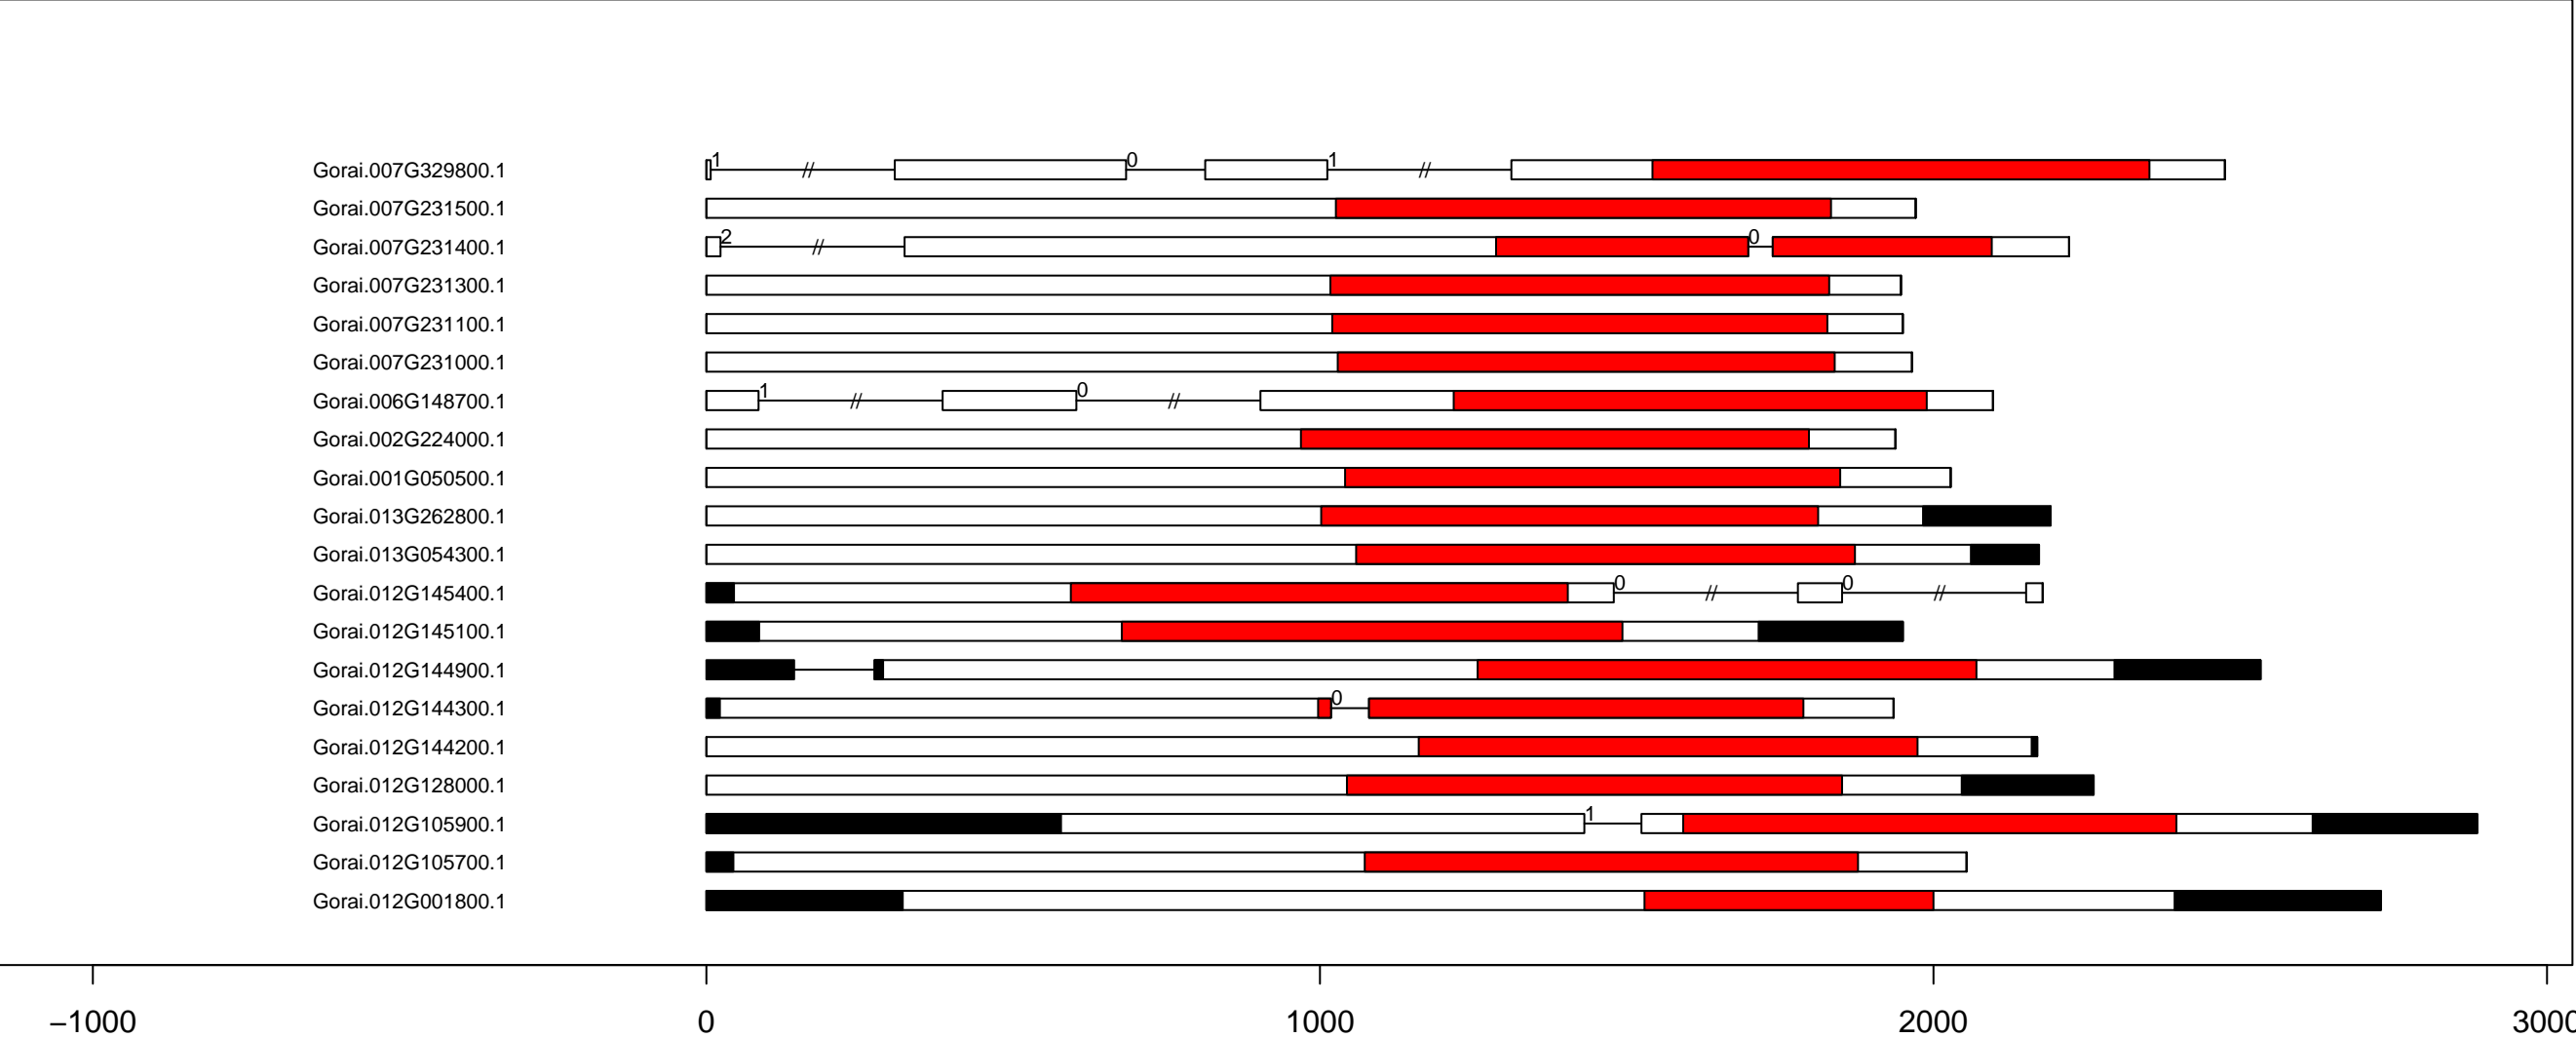

G.ra RLK-Pelle\_L-LEC exon-intron and domain diagram (part 3)

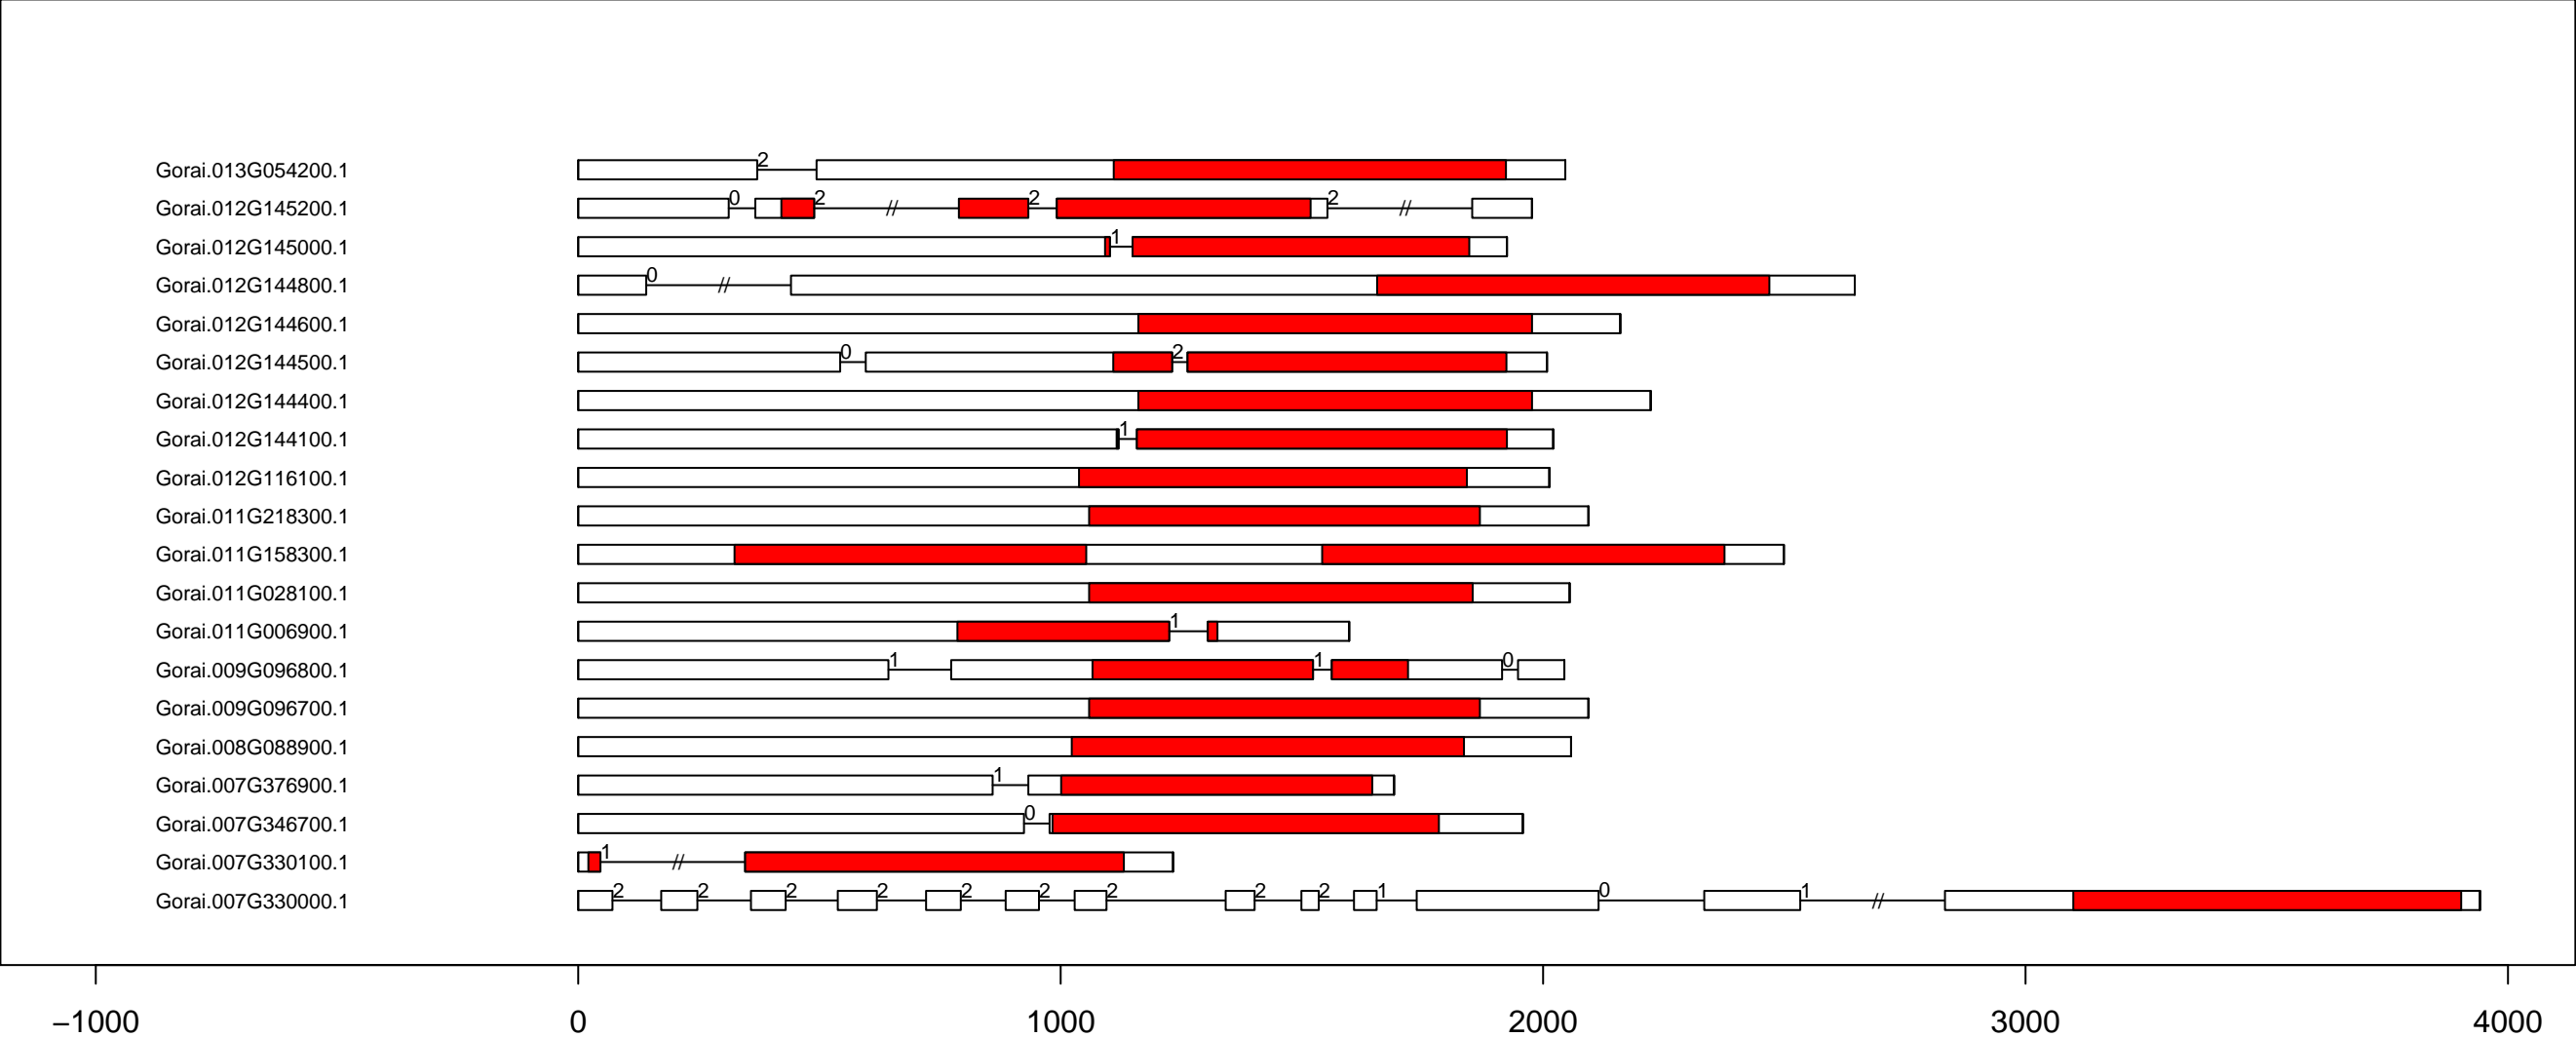



G.ra RLK-Pelle\_L-LEC exon-intron and domain diagram (part 4)

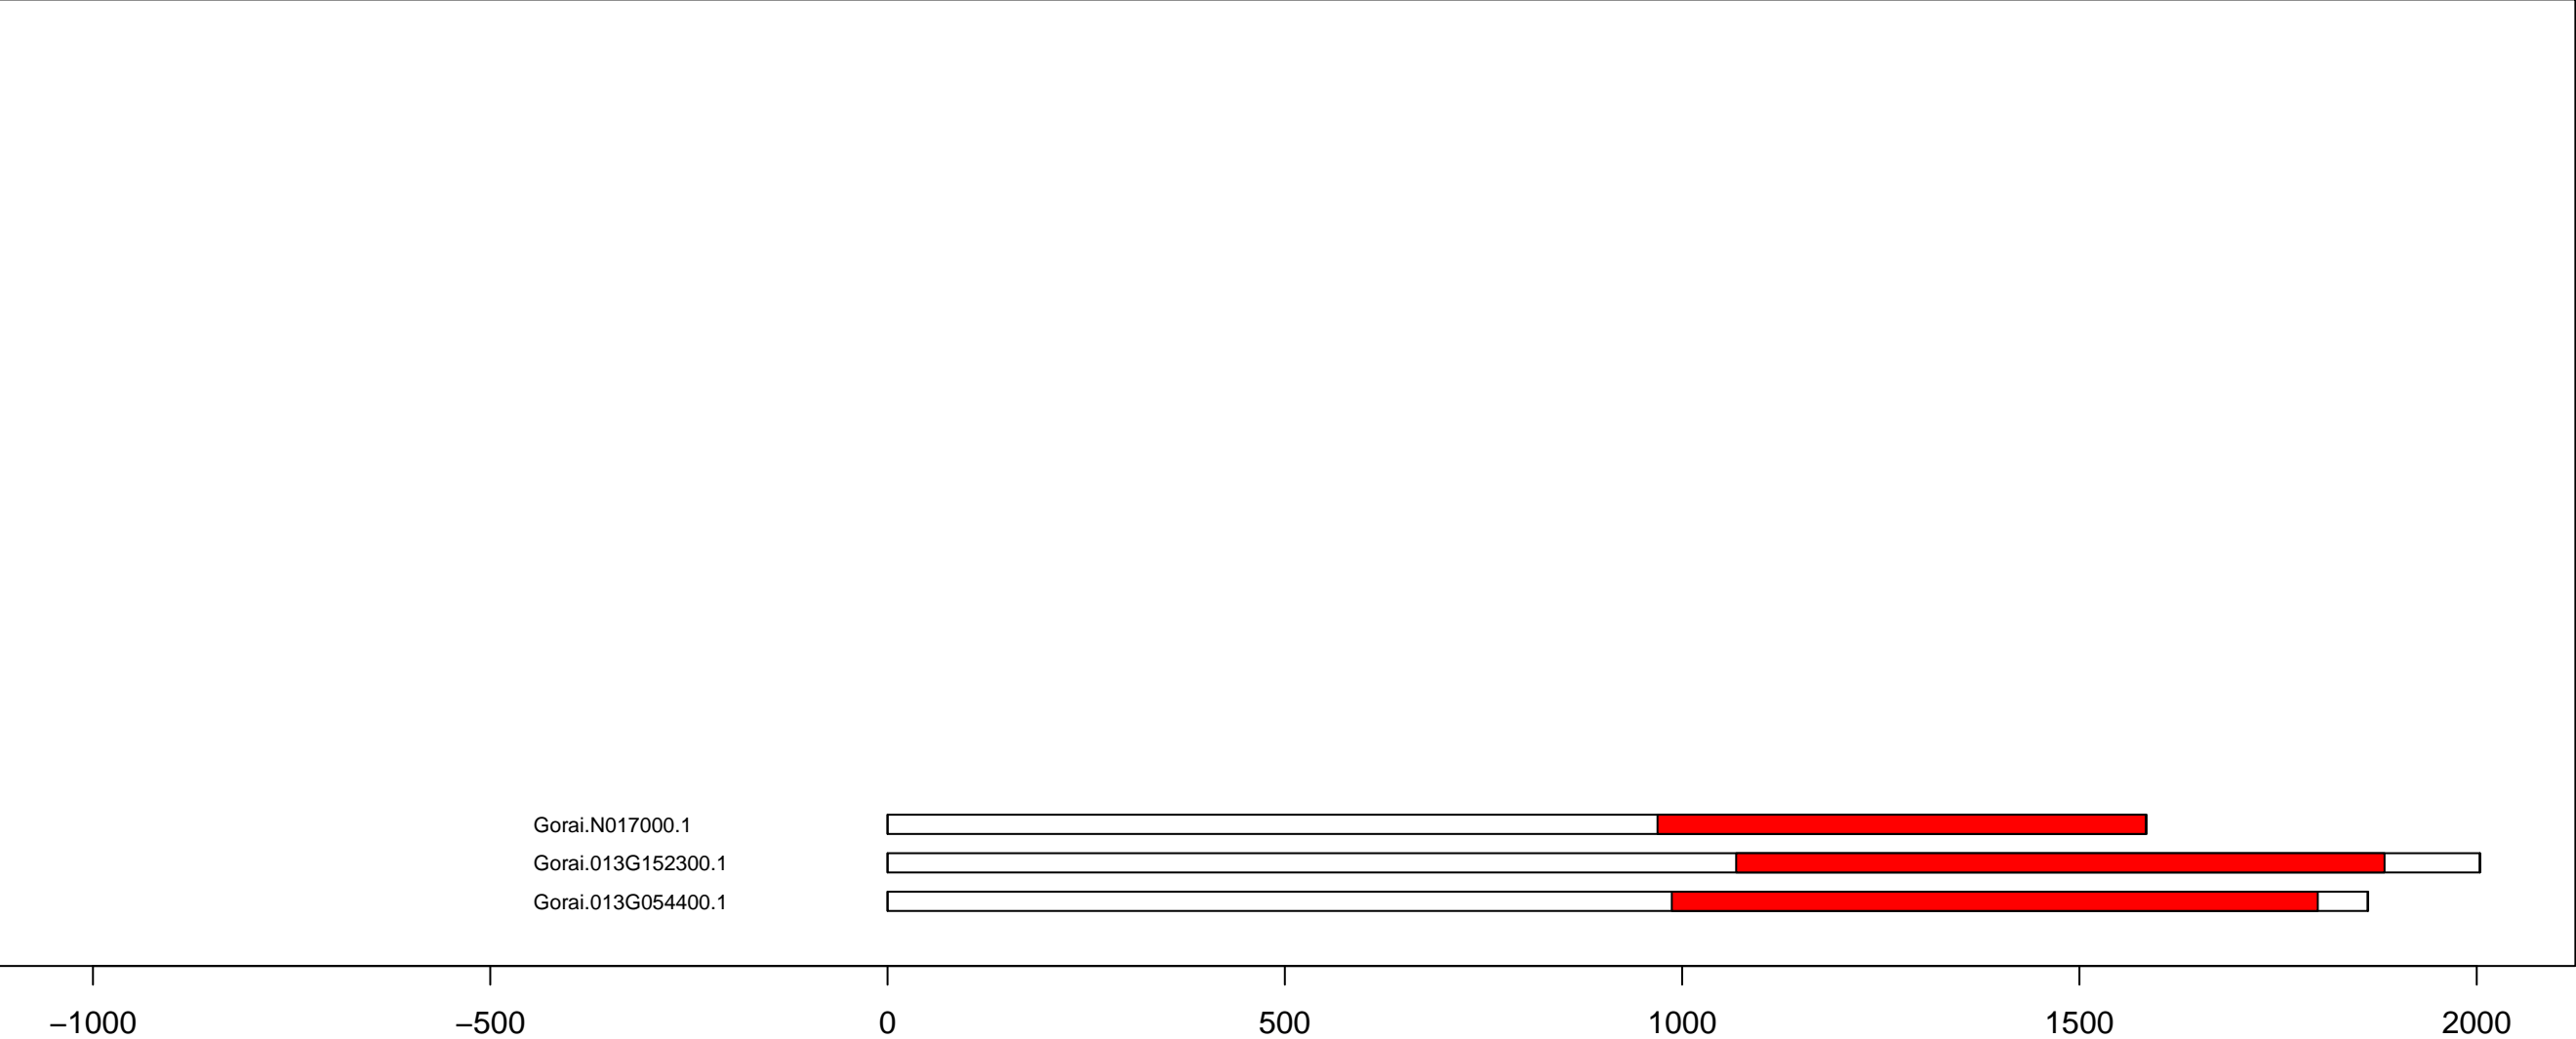



### G.ra RLK-Pelle\_LRK10L-2 exon-intron and domain diagram (part 2)

Gorai.007G183300.1  
 Gorai.007G182500.1  
 Gorai.006G059500.1  
 Gorai.002G047800.1  
 Gorai.002G042100.1  
 Gorai.002G042000.1  
 Gorai.002G041800.1  
 Gorai.002G041500.1  
 Gorai.002G041100.1  
 Gorai.002G040100.1  
 Gorai.013G013500.1  
 Gorai.012G183300.1  
 Gorai.012G003300.1  
 Gorai.012G003200.1  
 Gorai.010G091900.1  
 Gorai.009G305500.1  
 Gorai.009G305400.1  
 Gorai.009G304800.1  
 Gorai.007G335100.1  
 Gorai.007G335000.1

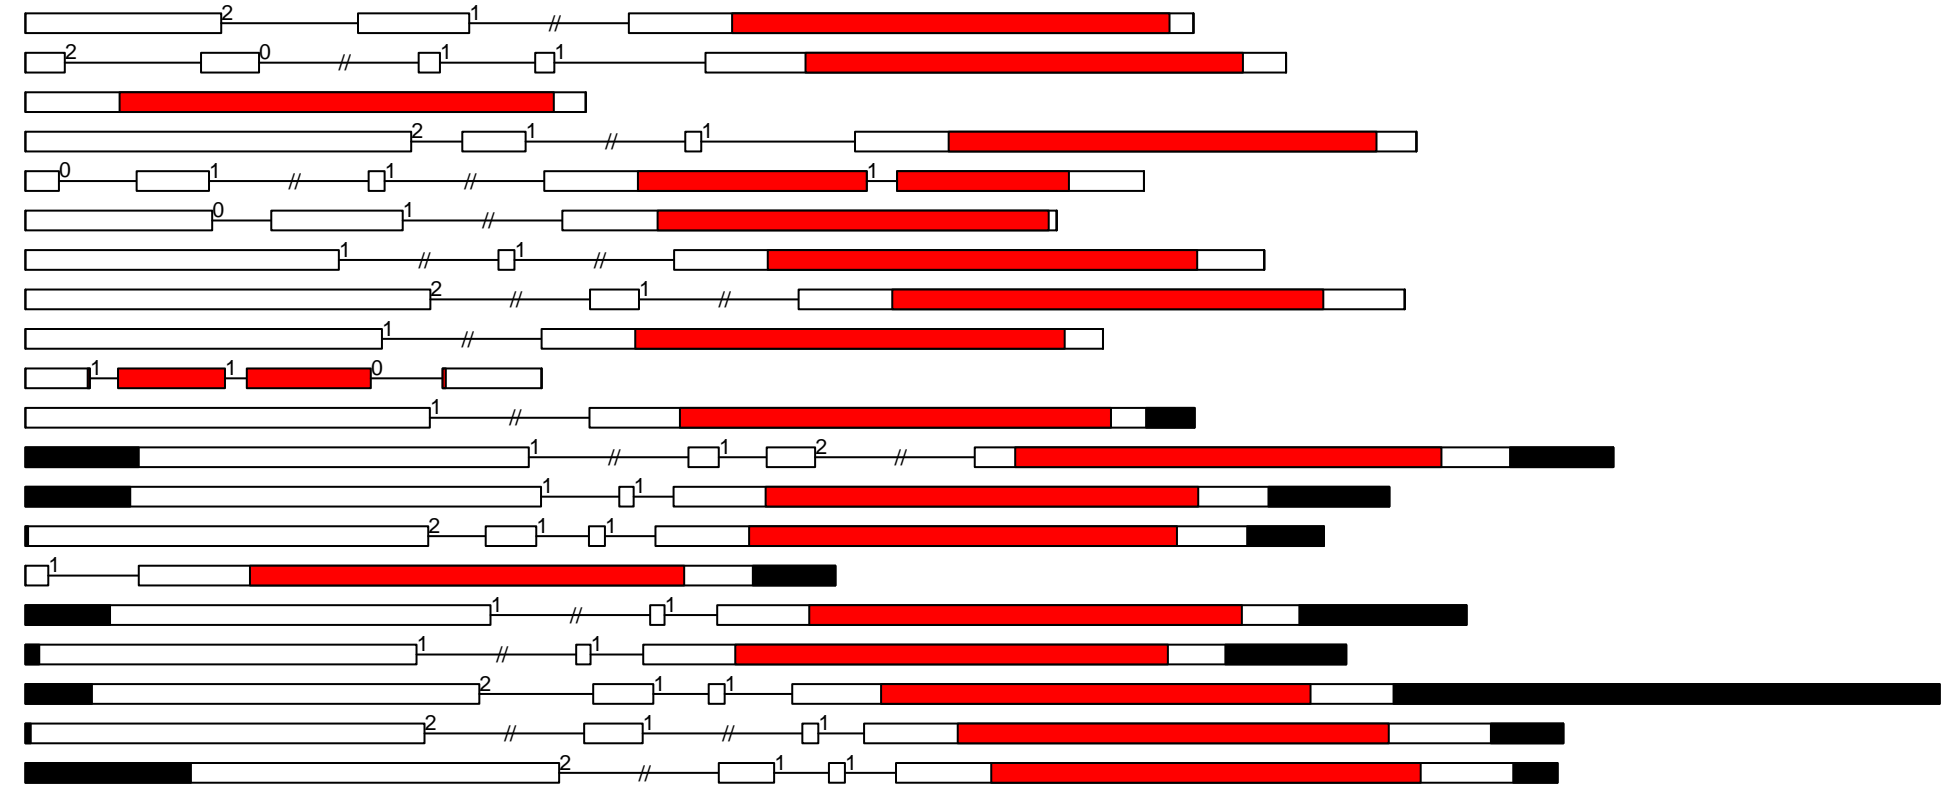

-1000

0

1000

2000

3000

### G.ra RLK-Pelle\_LRK10L-2 exon-intron and domain diagram (part 3)

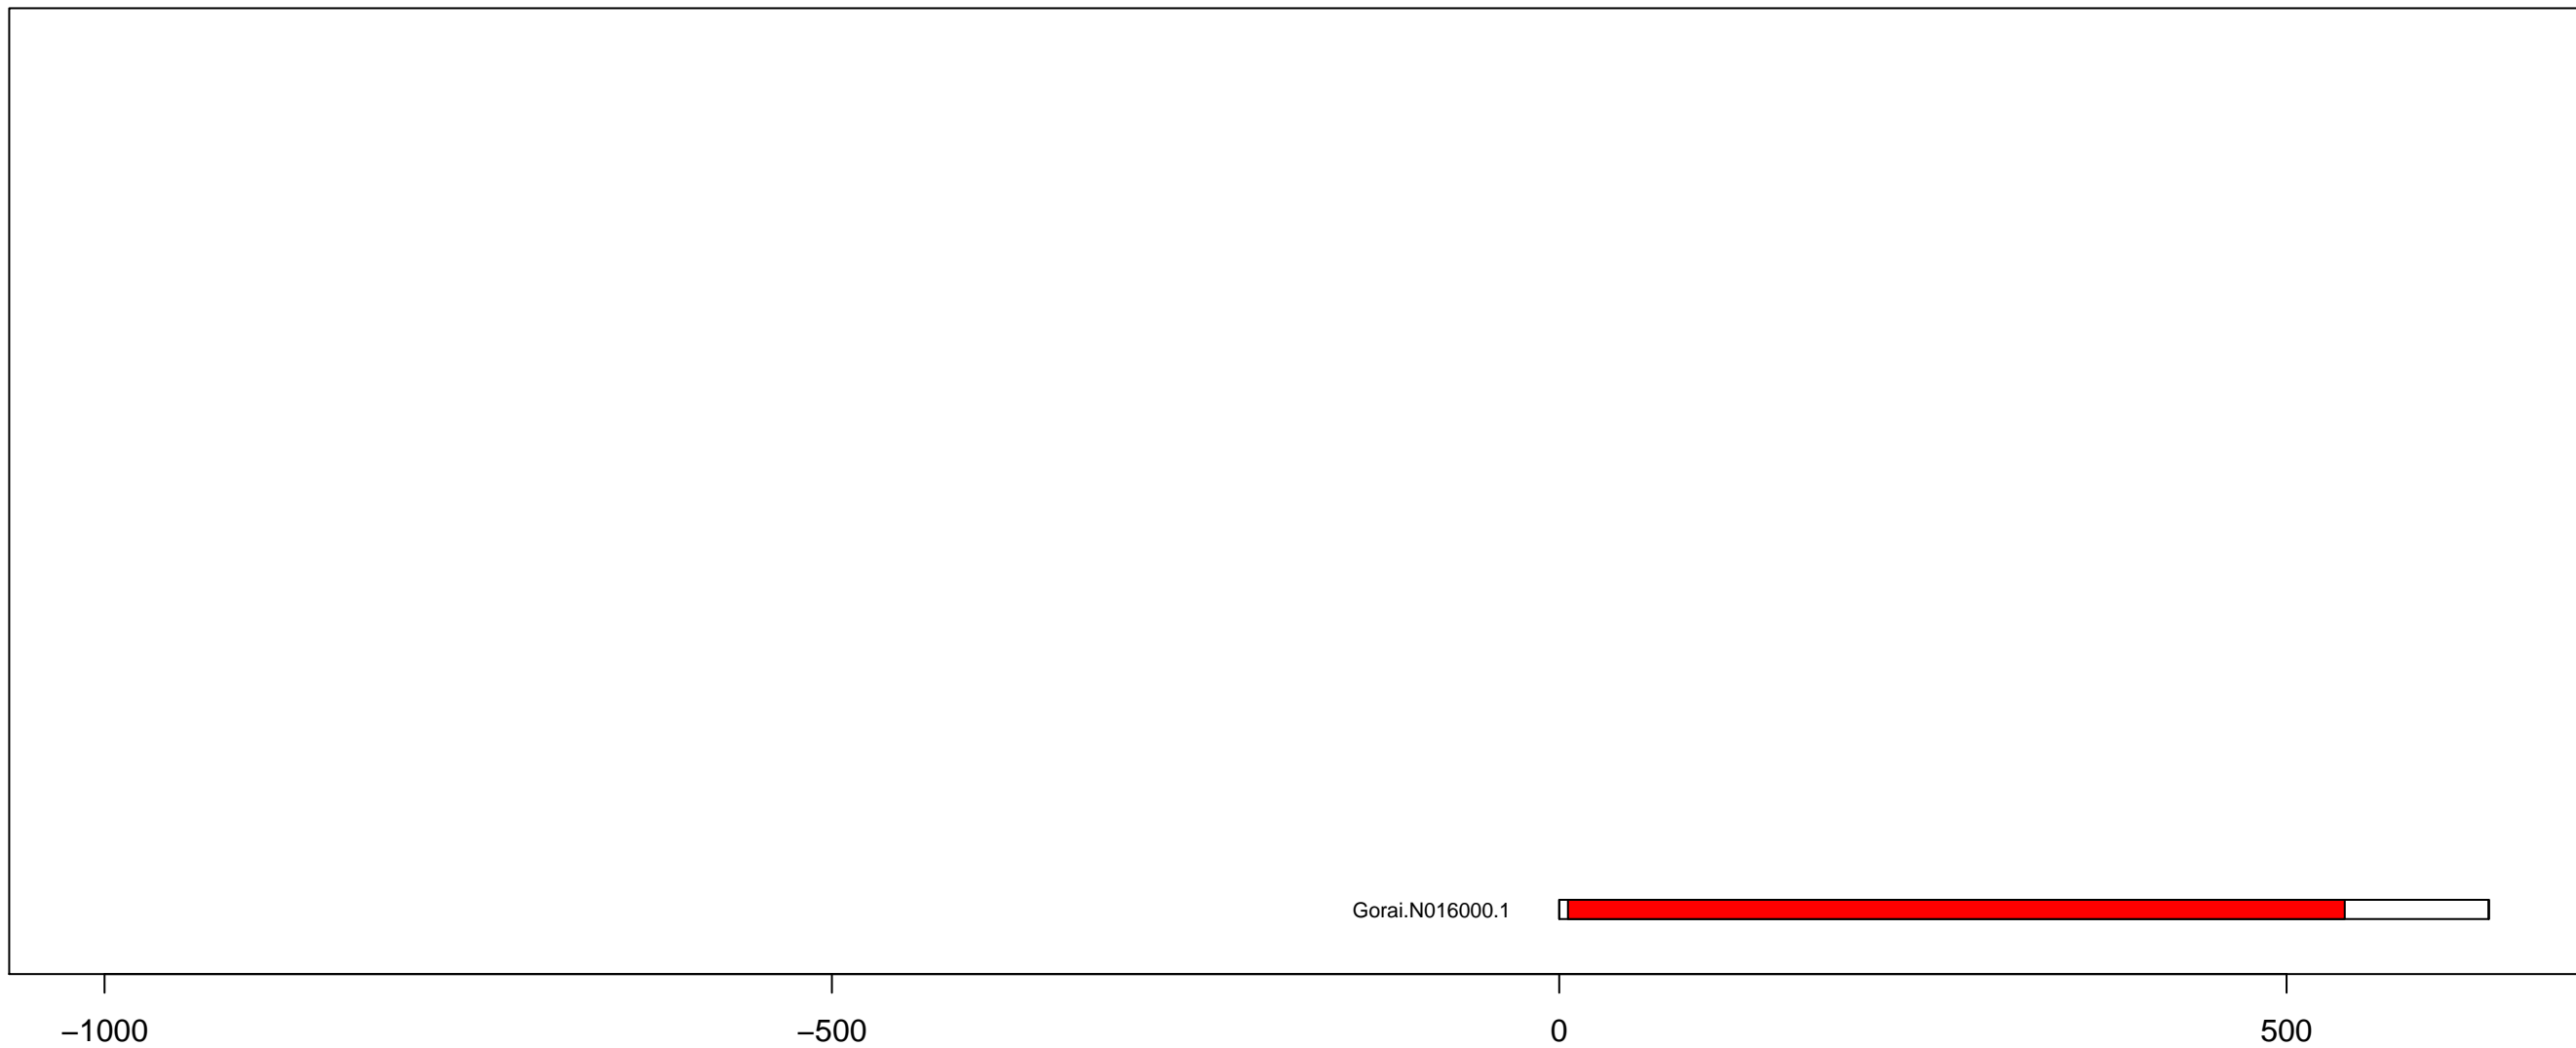

# G.ra RLK-Pelle\_LRR-I-1 exon-intron and domain diagram (all)

Gorai.003G006200.1  
 Gorai.010G230800.1  
 Gorai.008G088500.1  
 Gorai.007G190800.1  
 Gorai.006G169000.1  
 Gorai.005G173400.1  
 Gorai.004G225900.1  
 Gorai.001G186800.1

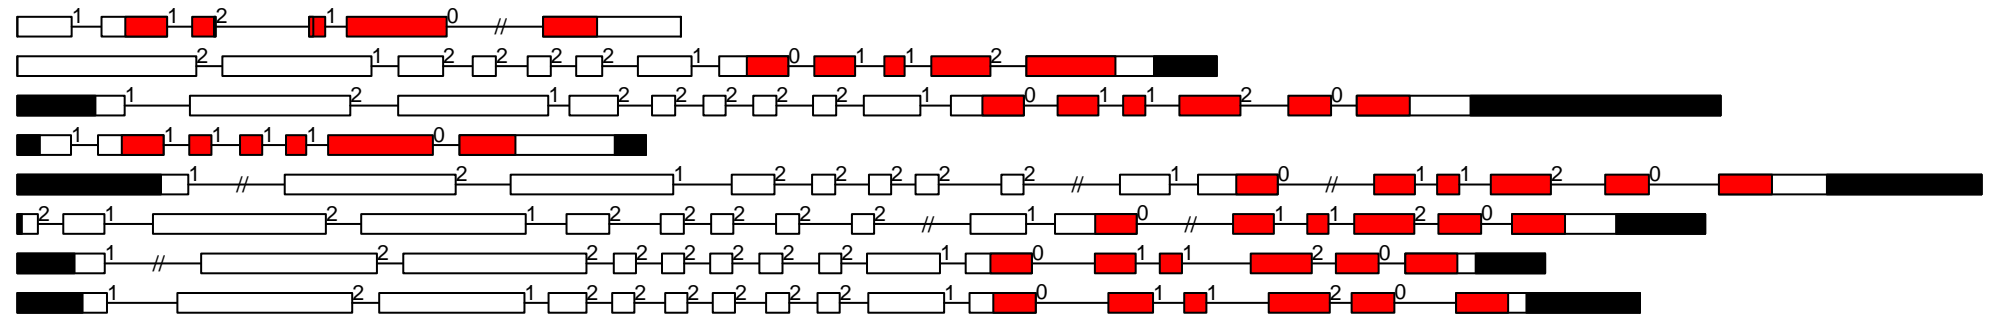

0

2000

4000

6000

# G.ra RLK-Pelle\_LRR-I-2 exon-intron and domain diagram (all)

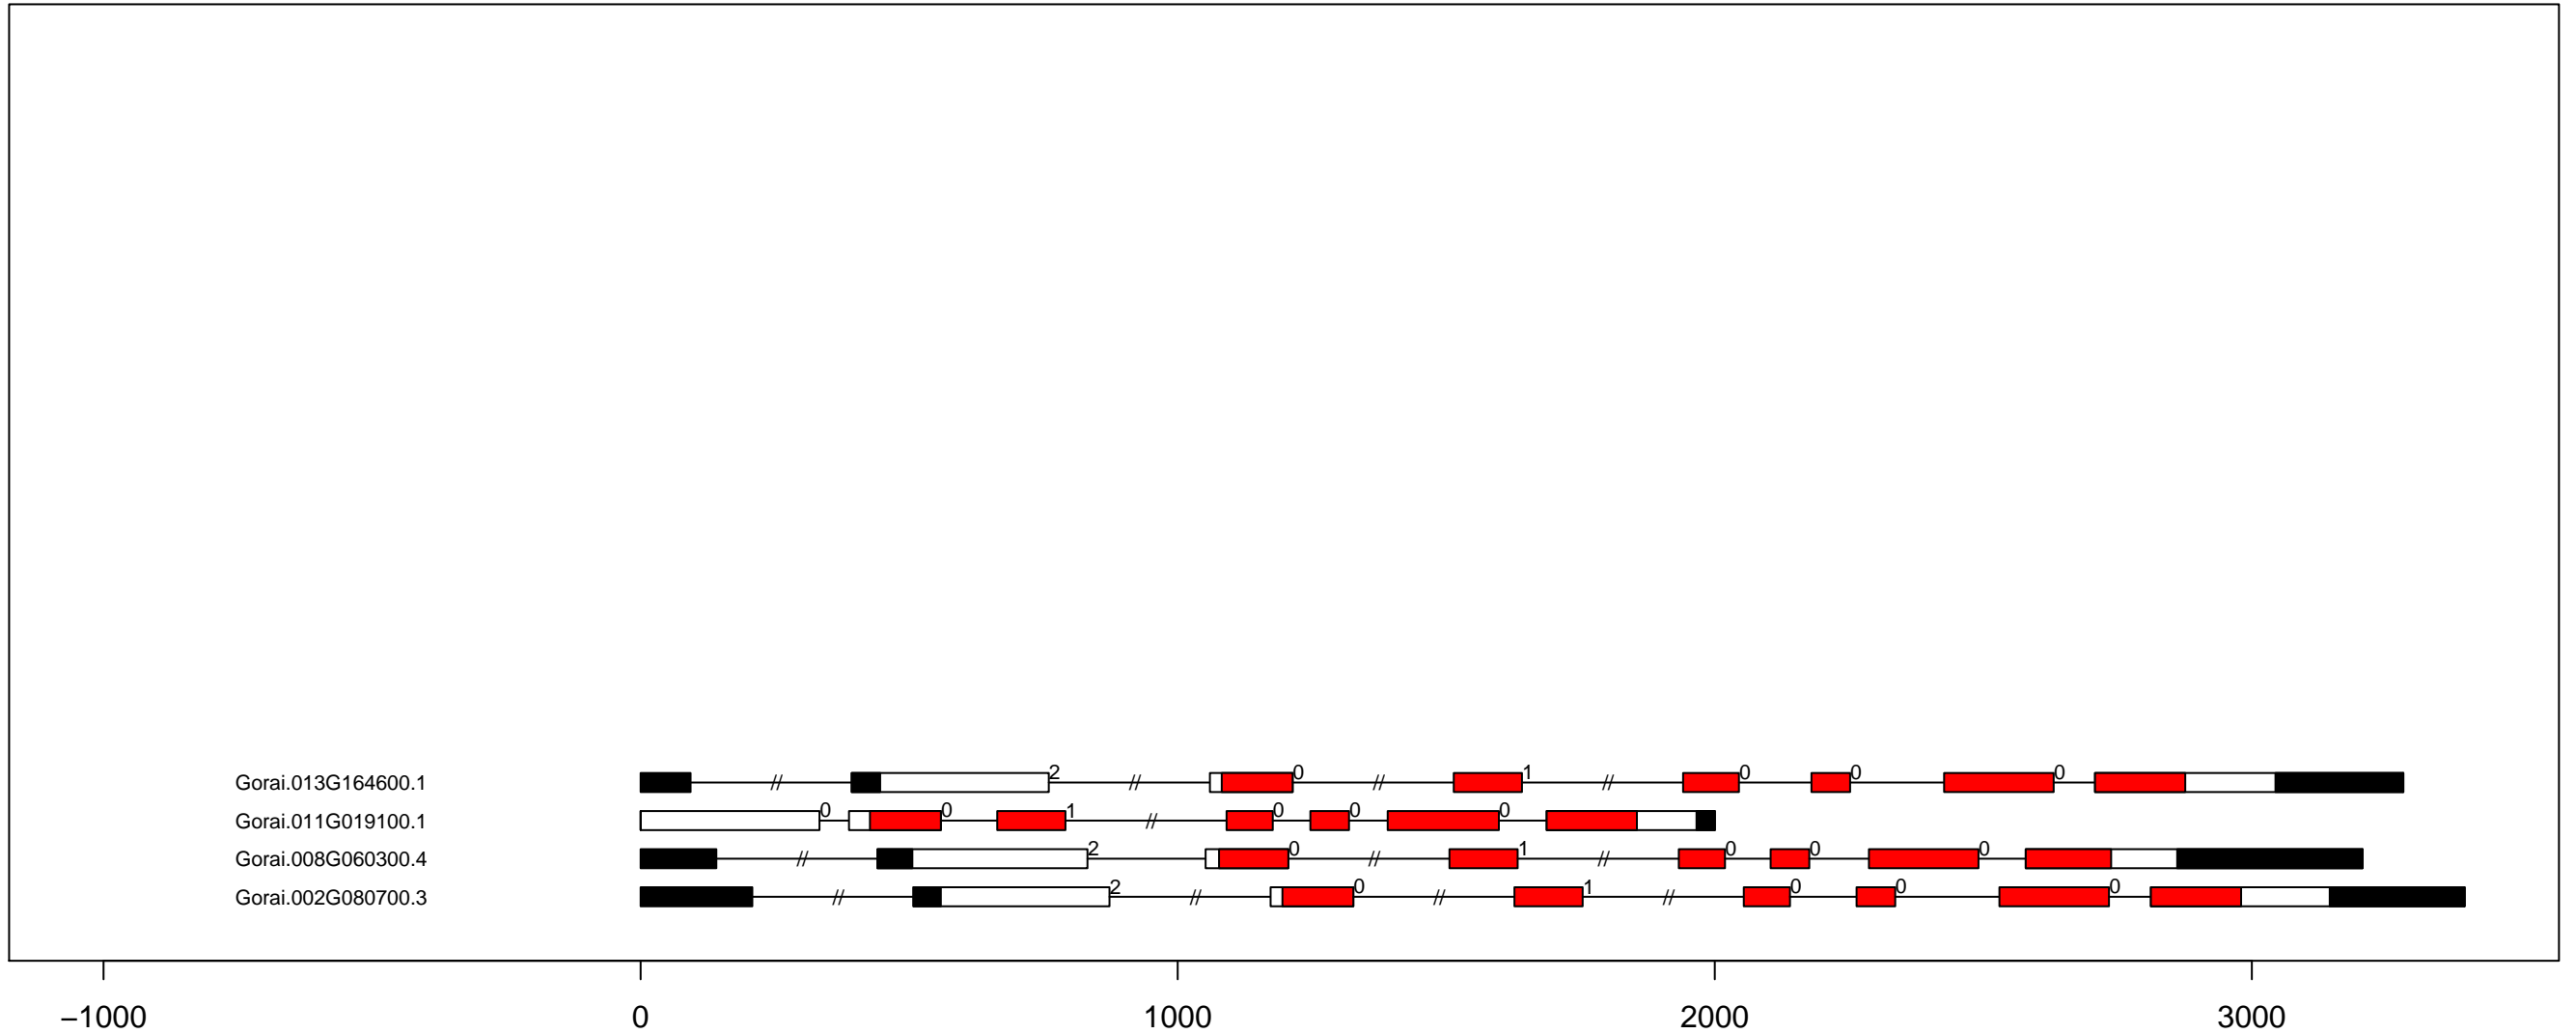

# G.ra RLK-Pelle\_LRR-III exon-intron and domain diagram (part 1)

Gorai.005G193500.1  
Gorai.005G192800.1  
Gorai.005G169100.1  
Gorai.005G133200.1  
Gorai.005G120900.1  
Gorai.004G278900.1  
Gorai.004G134300.1  
Gorai.003G153000.3  
Gorai.003G082600.1  
Gorai.003G046400.1  
Gorai.003G027300.1  
Gorai.003G026300.1  
Gorai.002G243600.1  
Gorai.002G229000.1  
Gorai.002G134400.1  
Gorai.001G260600.1  
Gorai.001G203900.1  
Gorai.001G198100.1  
Gorai.001G081900.1  
Gorai.001G003200.1

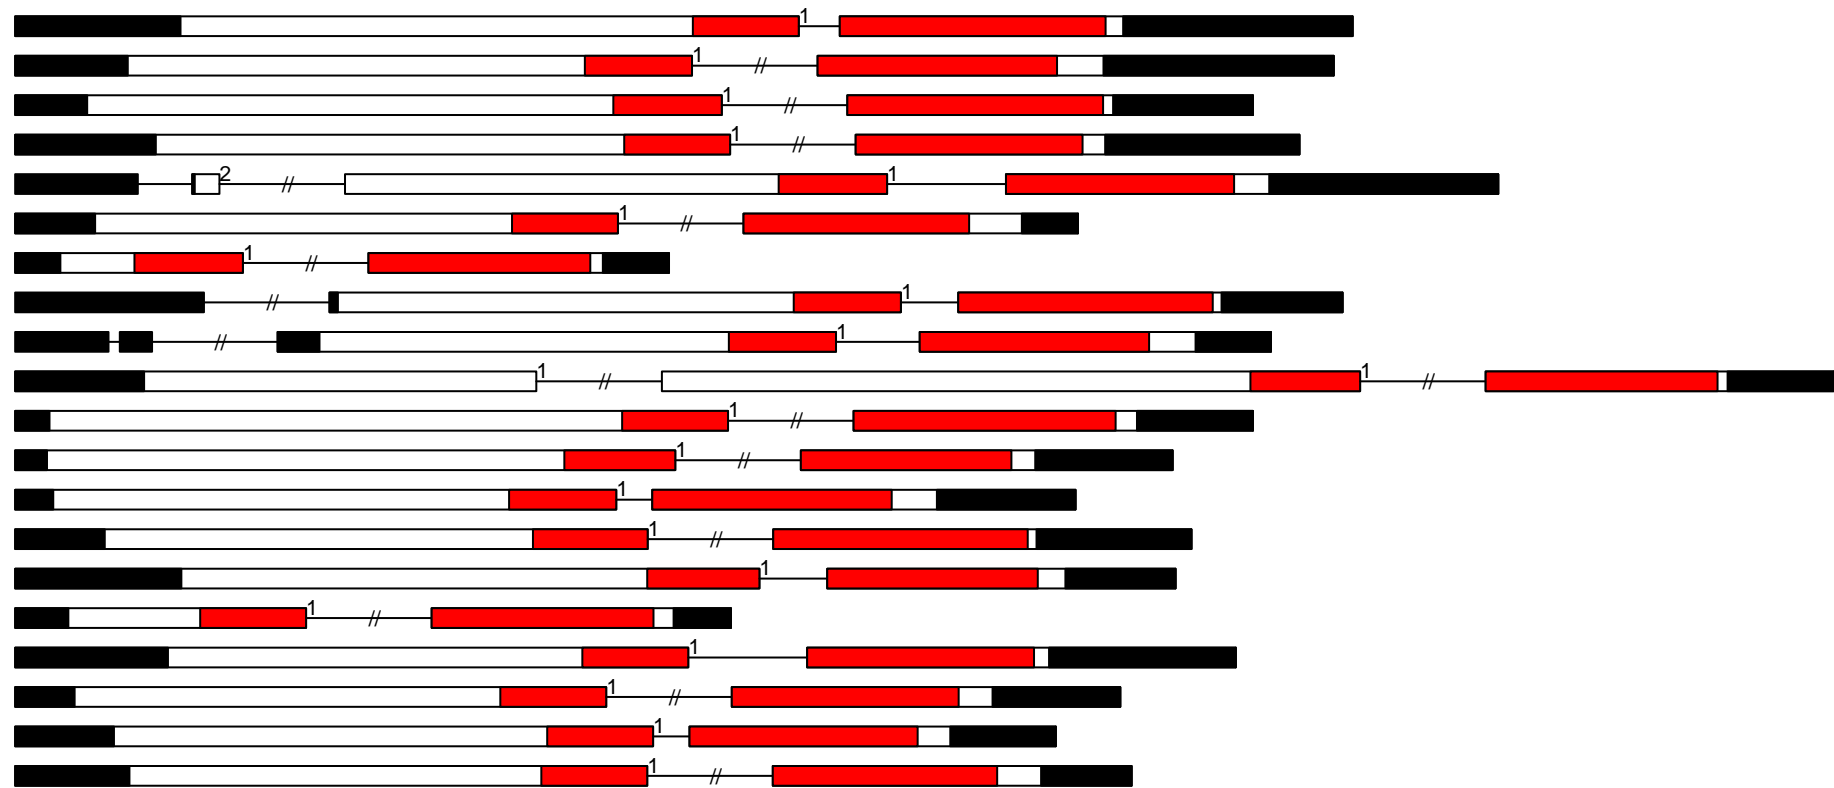

### G.ra RLK-Pelle\_LRR-III exon-intron and domain diagram (part 2)

Gorai.010G067400.1  
 Gorai.009G348000.1  
 Gorai.009G214700.1  
 Gorai.009G120000.1  
 Gorai.009G105200.1  
 Gorai.009G036600.1  
 Gorai.009G022300.1  
 Gorai.009G001100.1  
 Gorai.008G271600.4  
 Gorai.008G214600.1  
 Gorai.008G171200.1  
 Gorai.008G078600.1  
 Gorai.008G023200.2  
 Gorai.007G244000.1  
 Gorai.007G216500.1  
 Gorai.007G186000.1  
 Gorai.007G184800.1  
 Gorai.007G152400.1  
 Gorai.007G047200.1  
 Gorai.005G239500.1

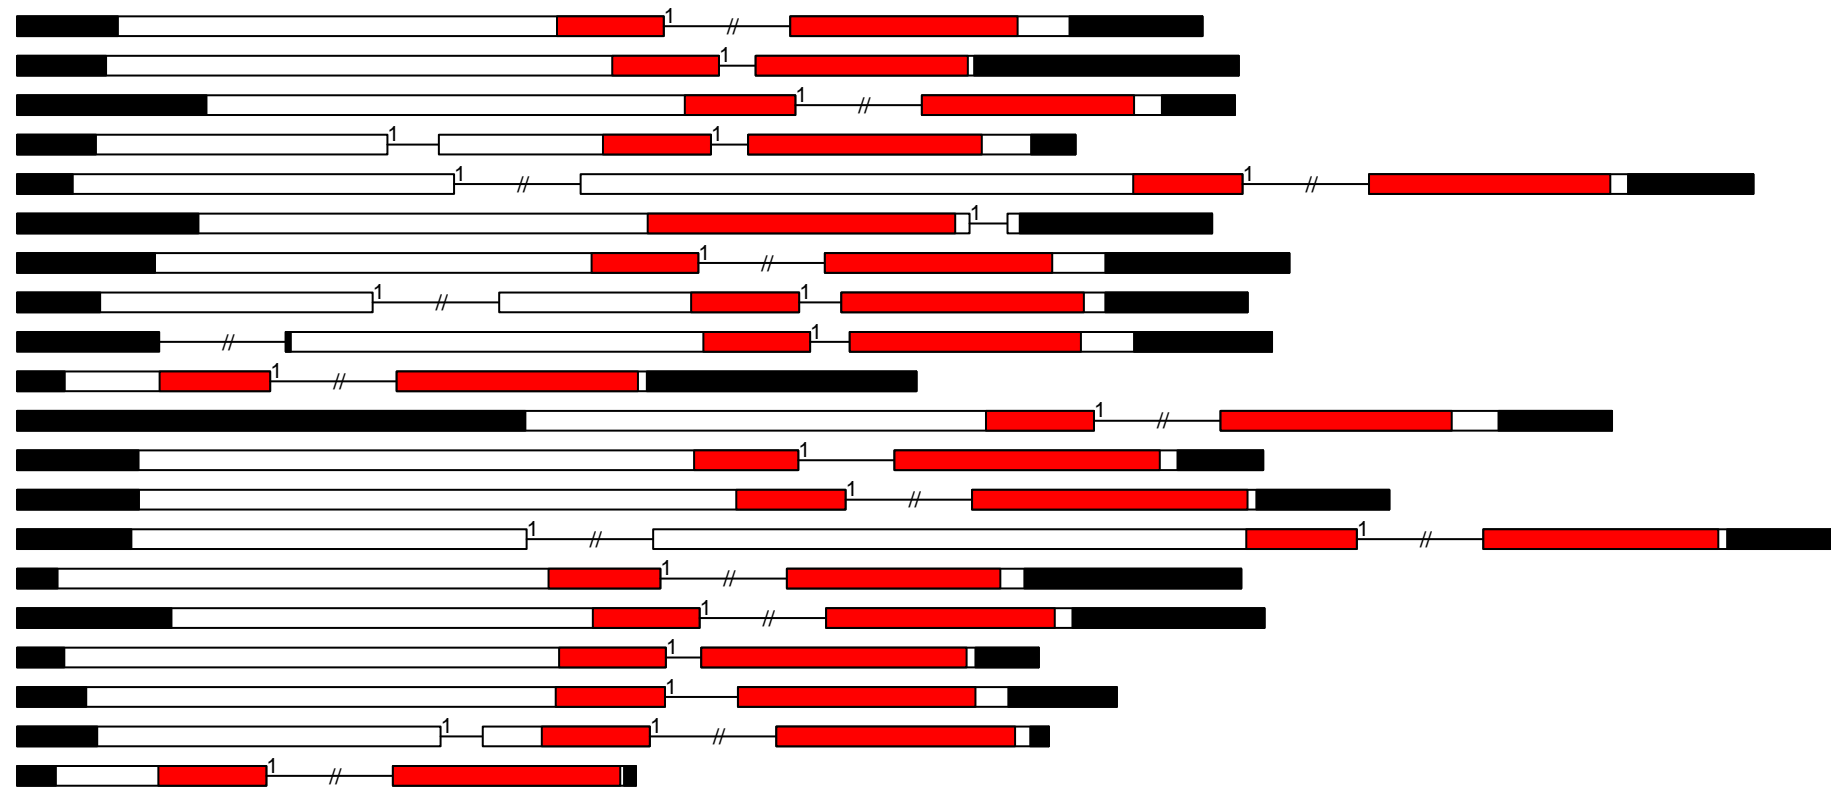



### G.ra RLK-Pelle\_LRR-III exon-intron and domain diagram (part 3)

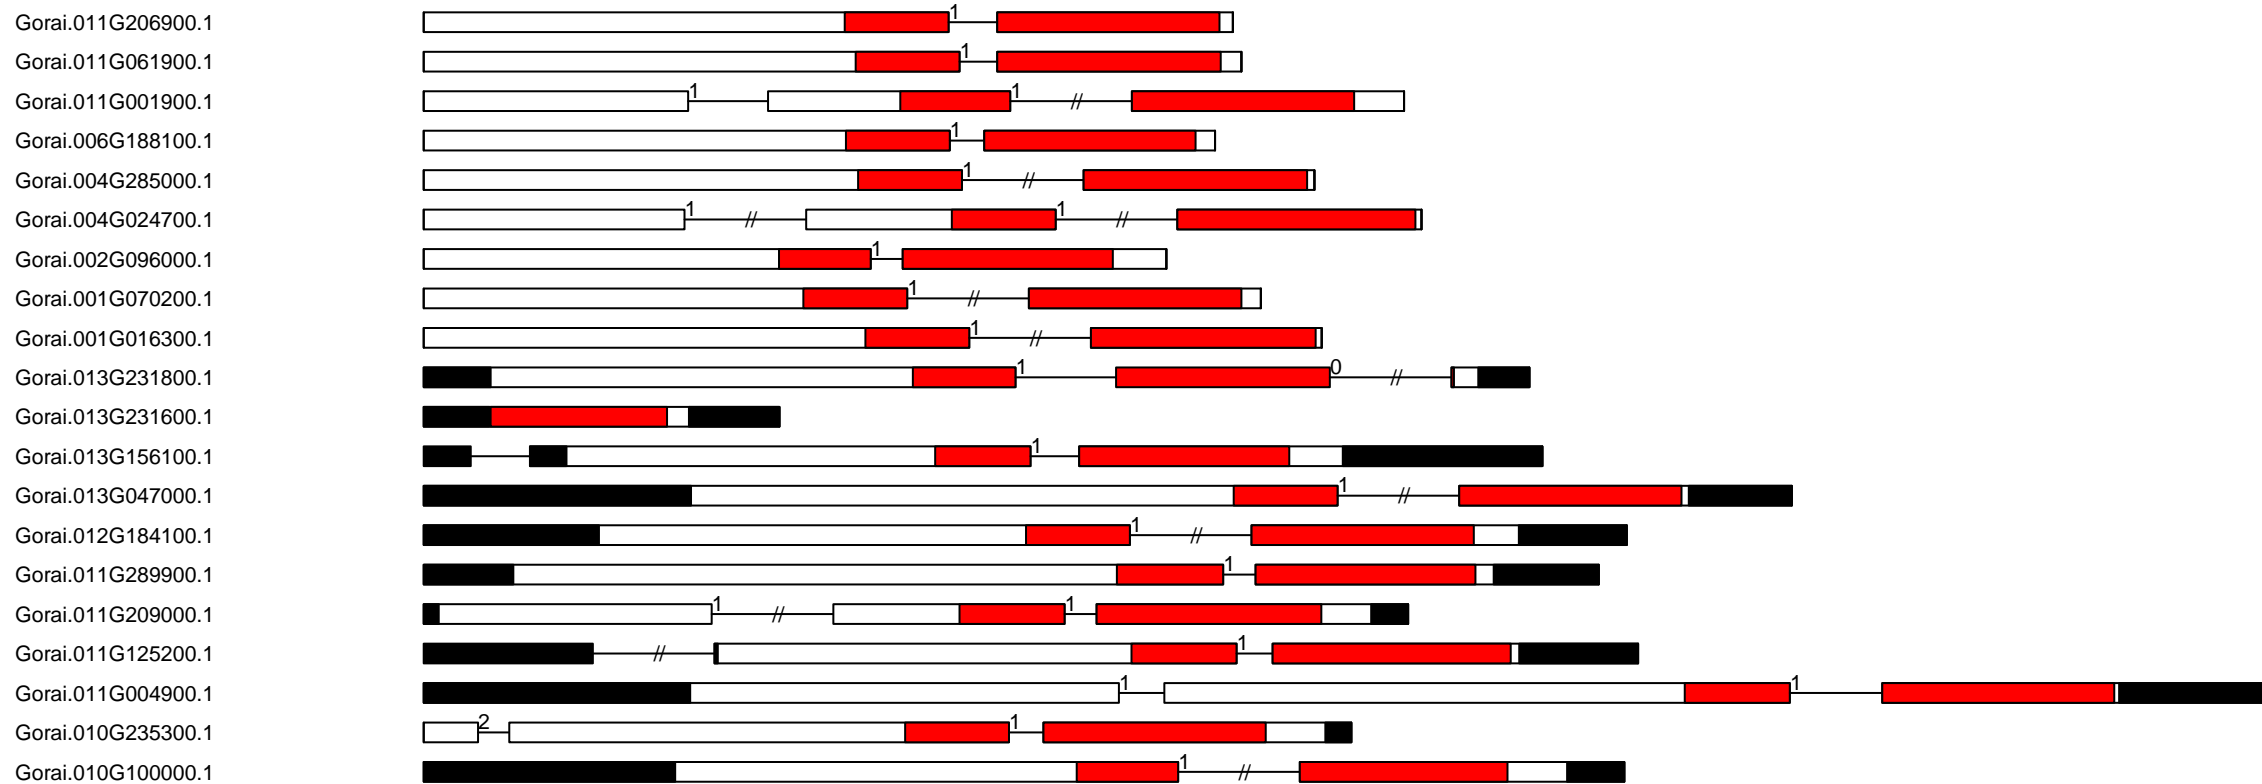

# G.ra RLK-Pelle\_LRR-III exon-intron and domain diagram (part 4)

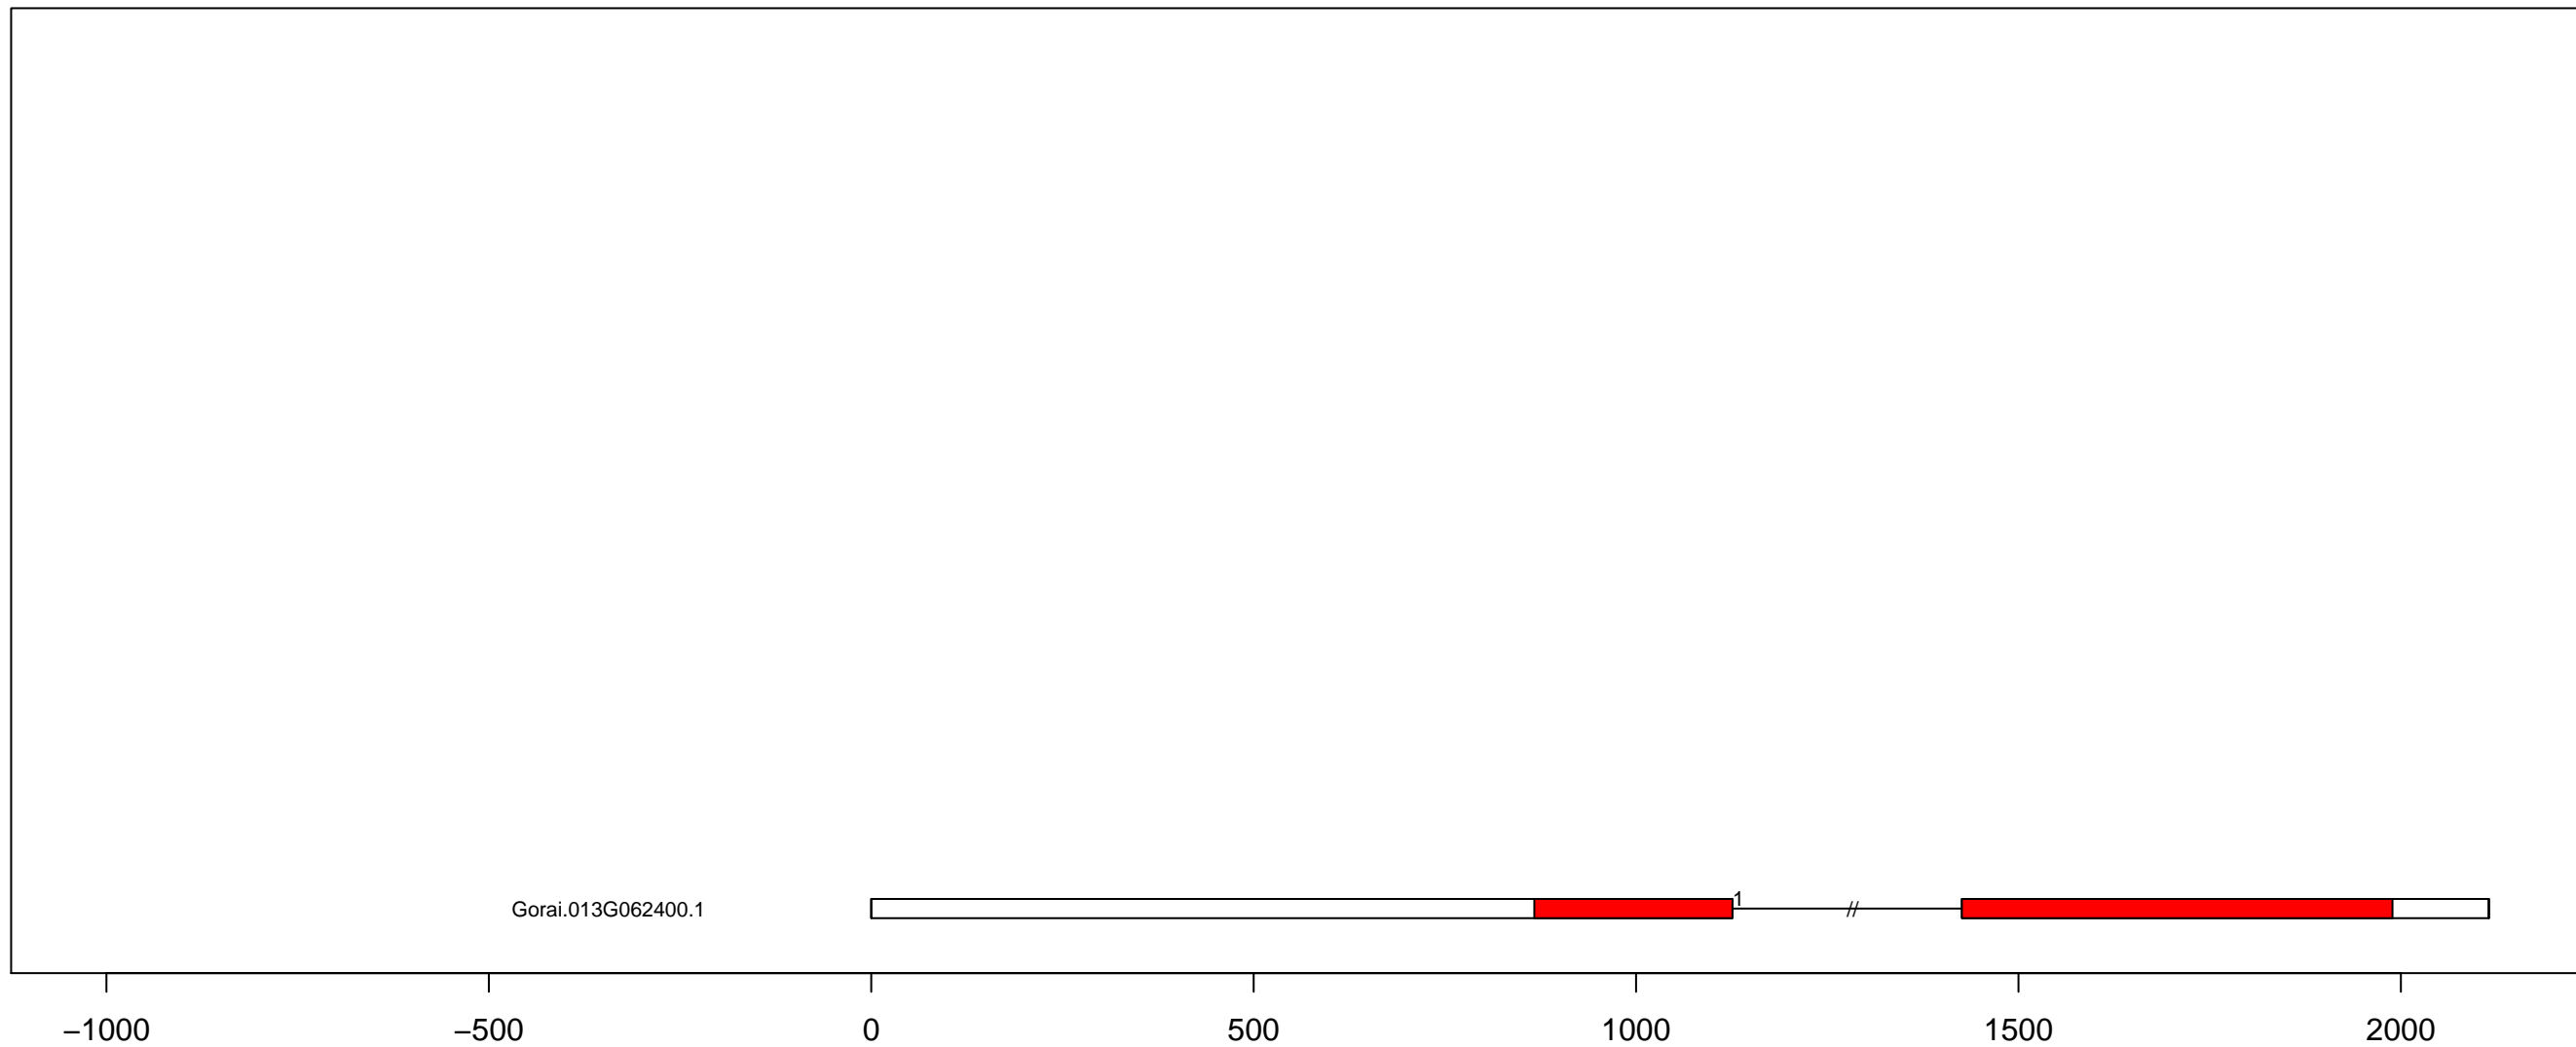

### G.ra RLK-Pelle\_LRR-II exon-intron and domain diagram (all)

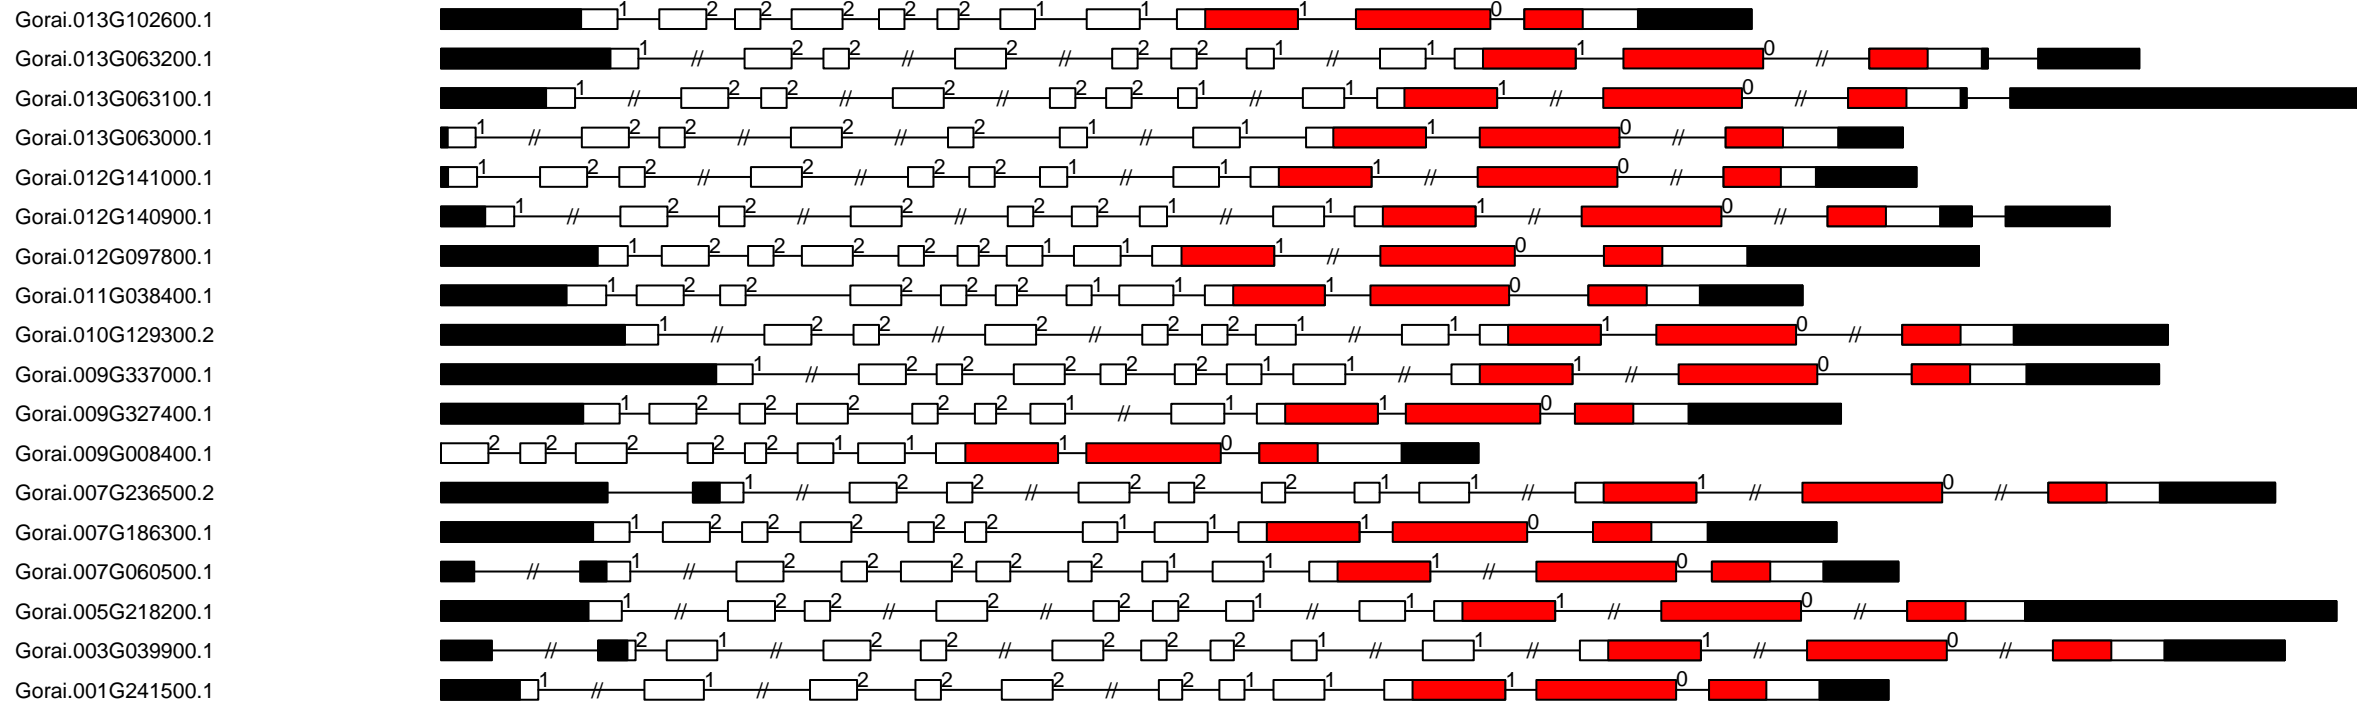

### G.ra RLK-Pelle\_LRR-IV exon-intron and domain diagram (all)

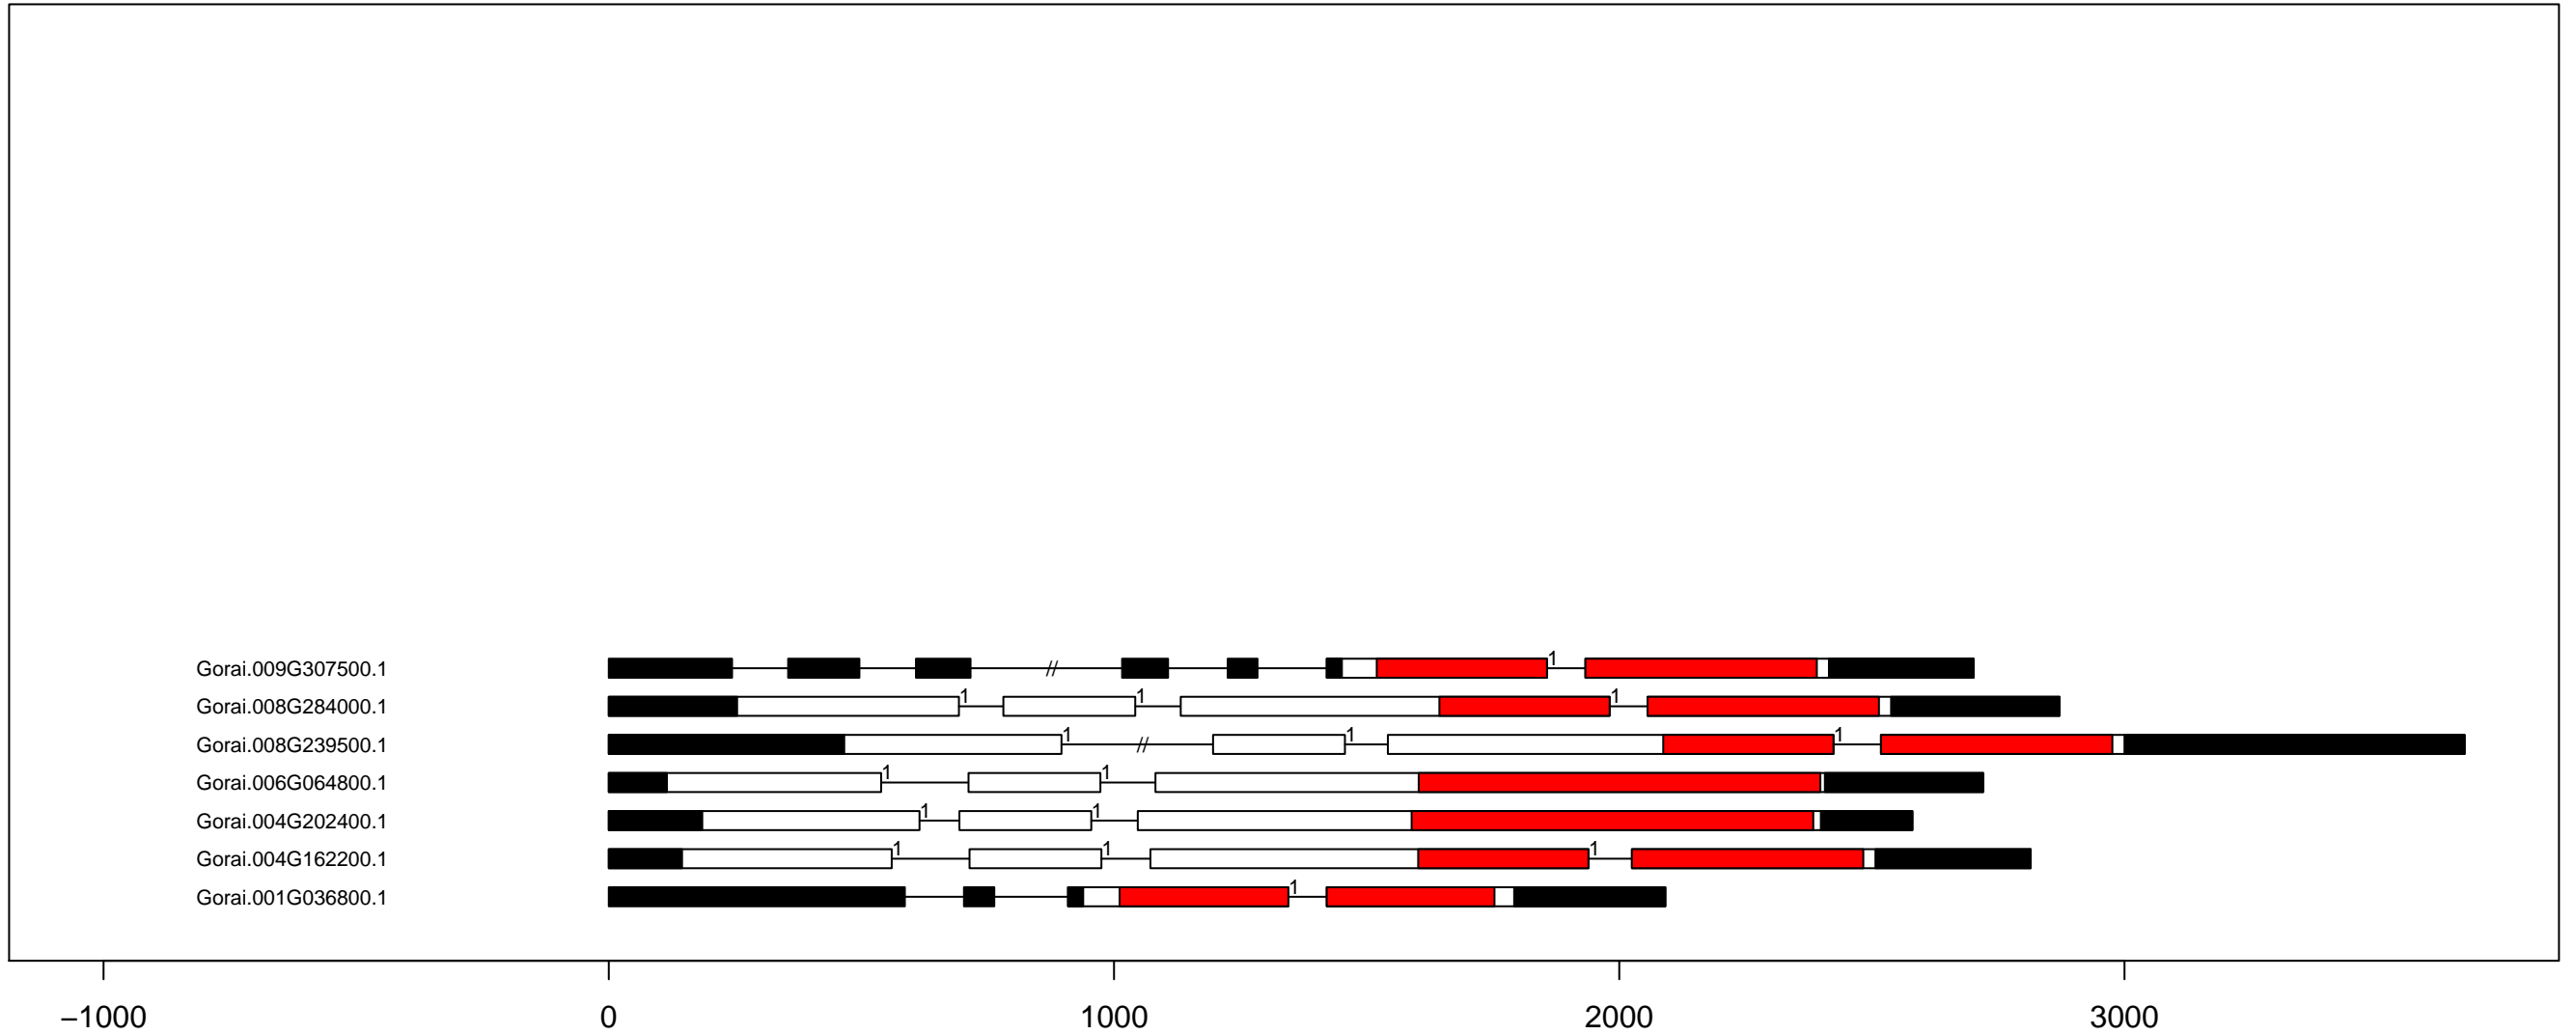

# G.ra RLK-Pelle\_LRR-IX exon-intron and domain diagram (all)

Gorai.006G224800.1  
Gorai.013G030200.1  
Gorai.011G151900.1  
Gorai.008G170100.1  
Gorai.007G187900.1  
Gorai.006G149500.1  
Gorai.006G115200.1  
Gorai.005G026700.1  
Gorai.002G235300.1  
Gorai.001G125200.1

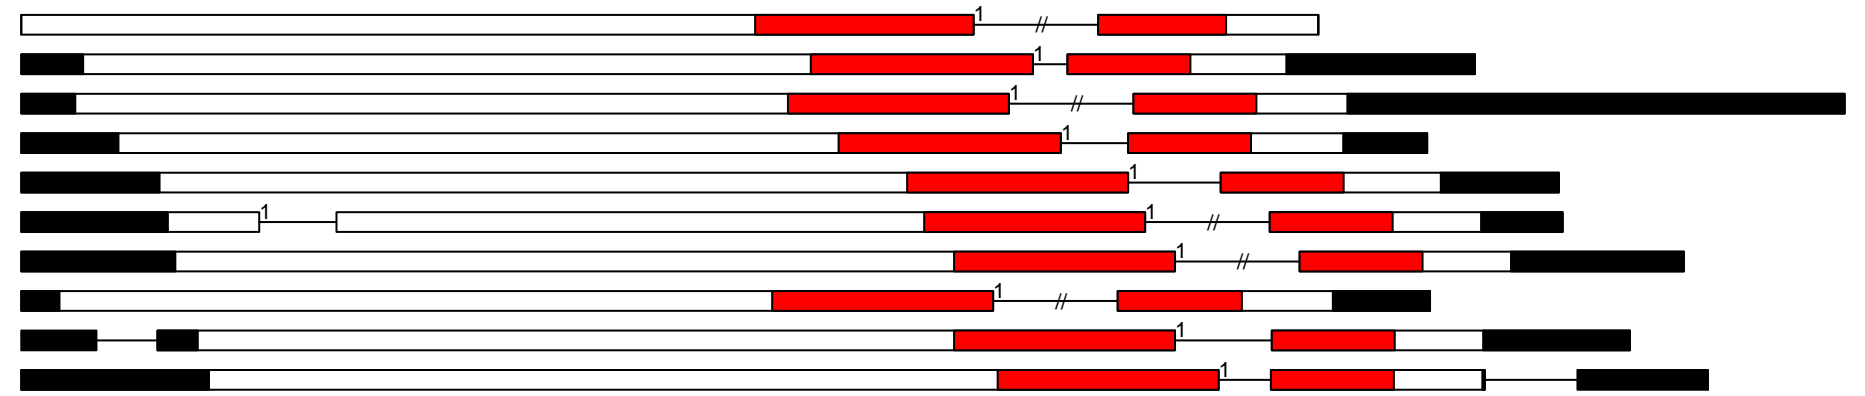

# G.ra RLK-Pelle\_LRR-VI-1 exon-intron and domain diagram (all)

Gorai.N006900.1  
Gorai.013G195600.1  
Gorai.012G088400.1  
Gorai.008G205300.3  
Gorai.007G256600.1  
Gorai.005G139400.1  
Gorai.001G269200.1  
Gorai.001G060100.1

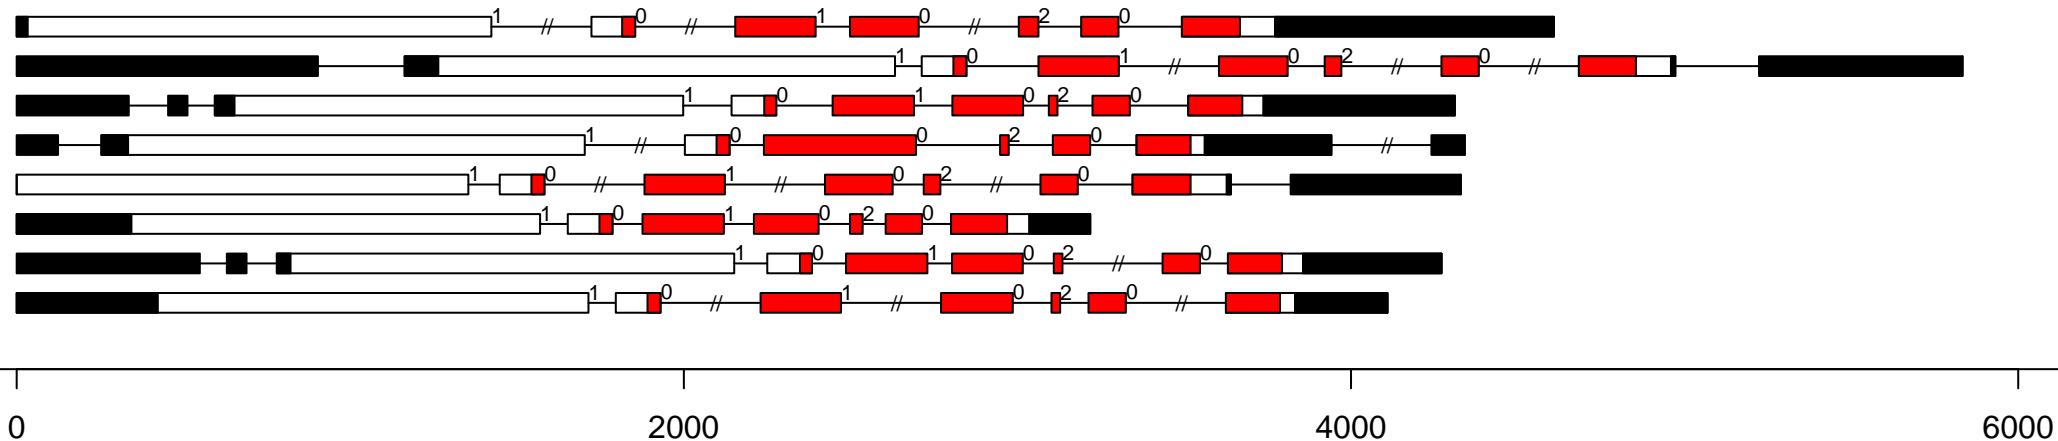

G.ra RLK-Pelle\_LRR-VI-2 exon-intron and domain diagram (all)

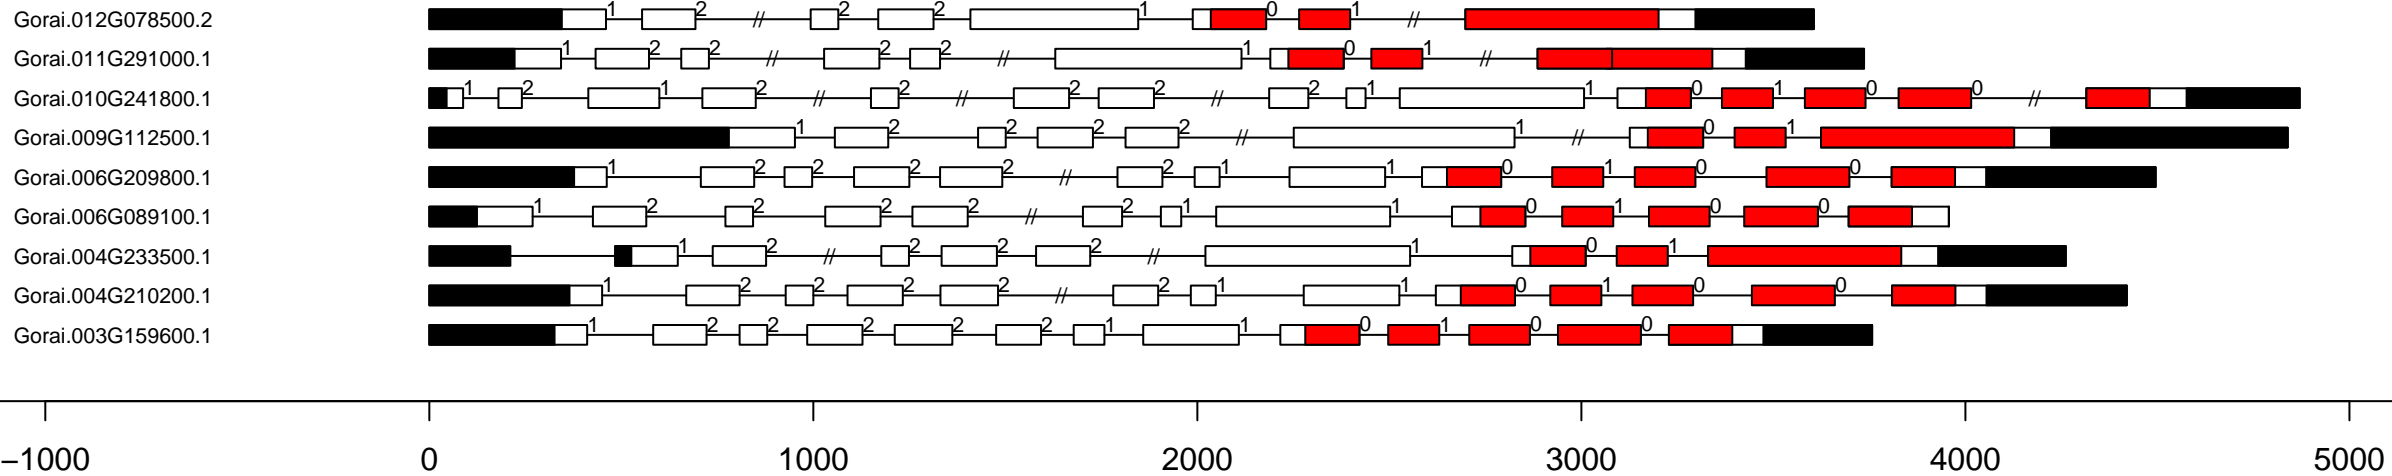

# G.ra RLK-Pelle\_LRR-VII-1 exon-intron and domain diagram (all)

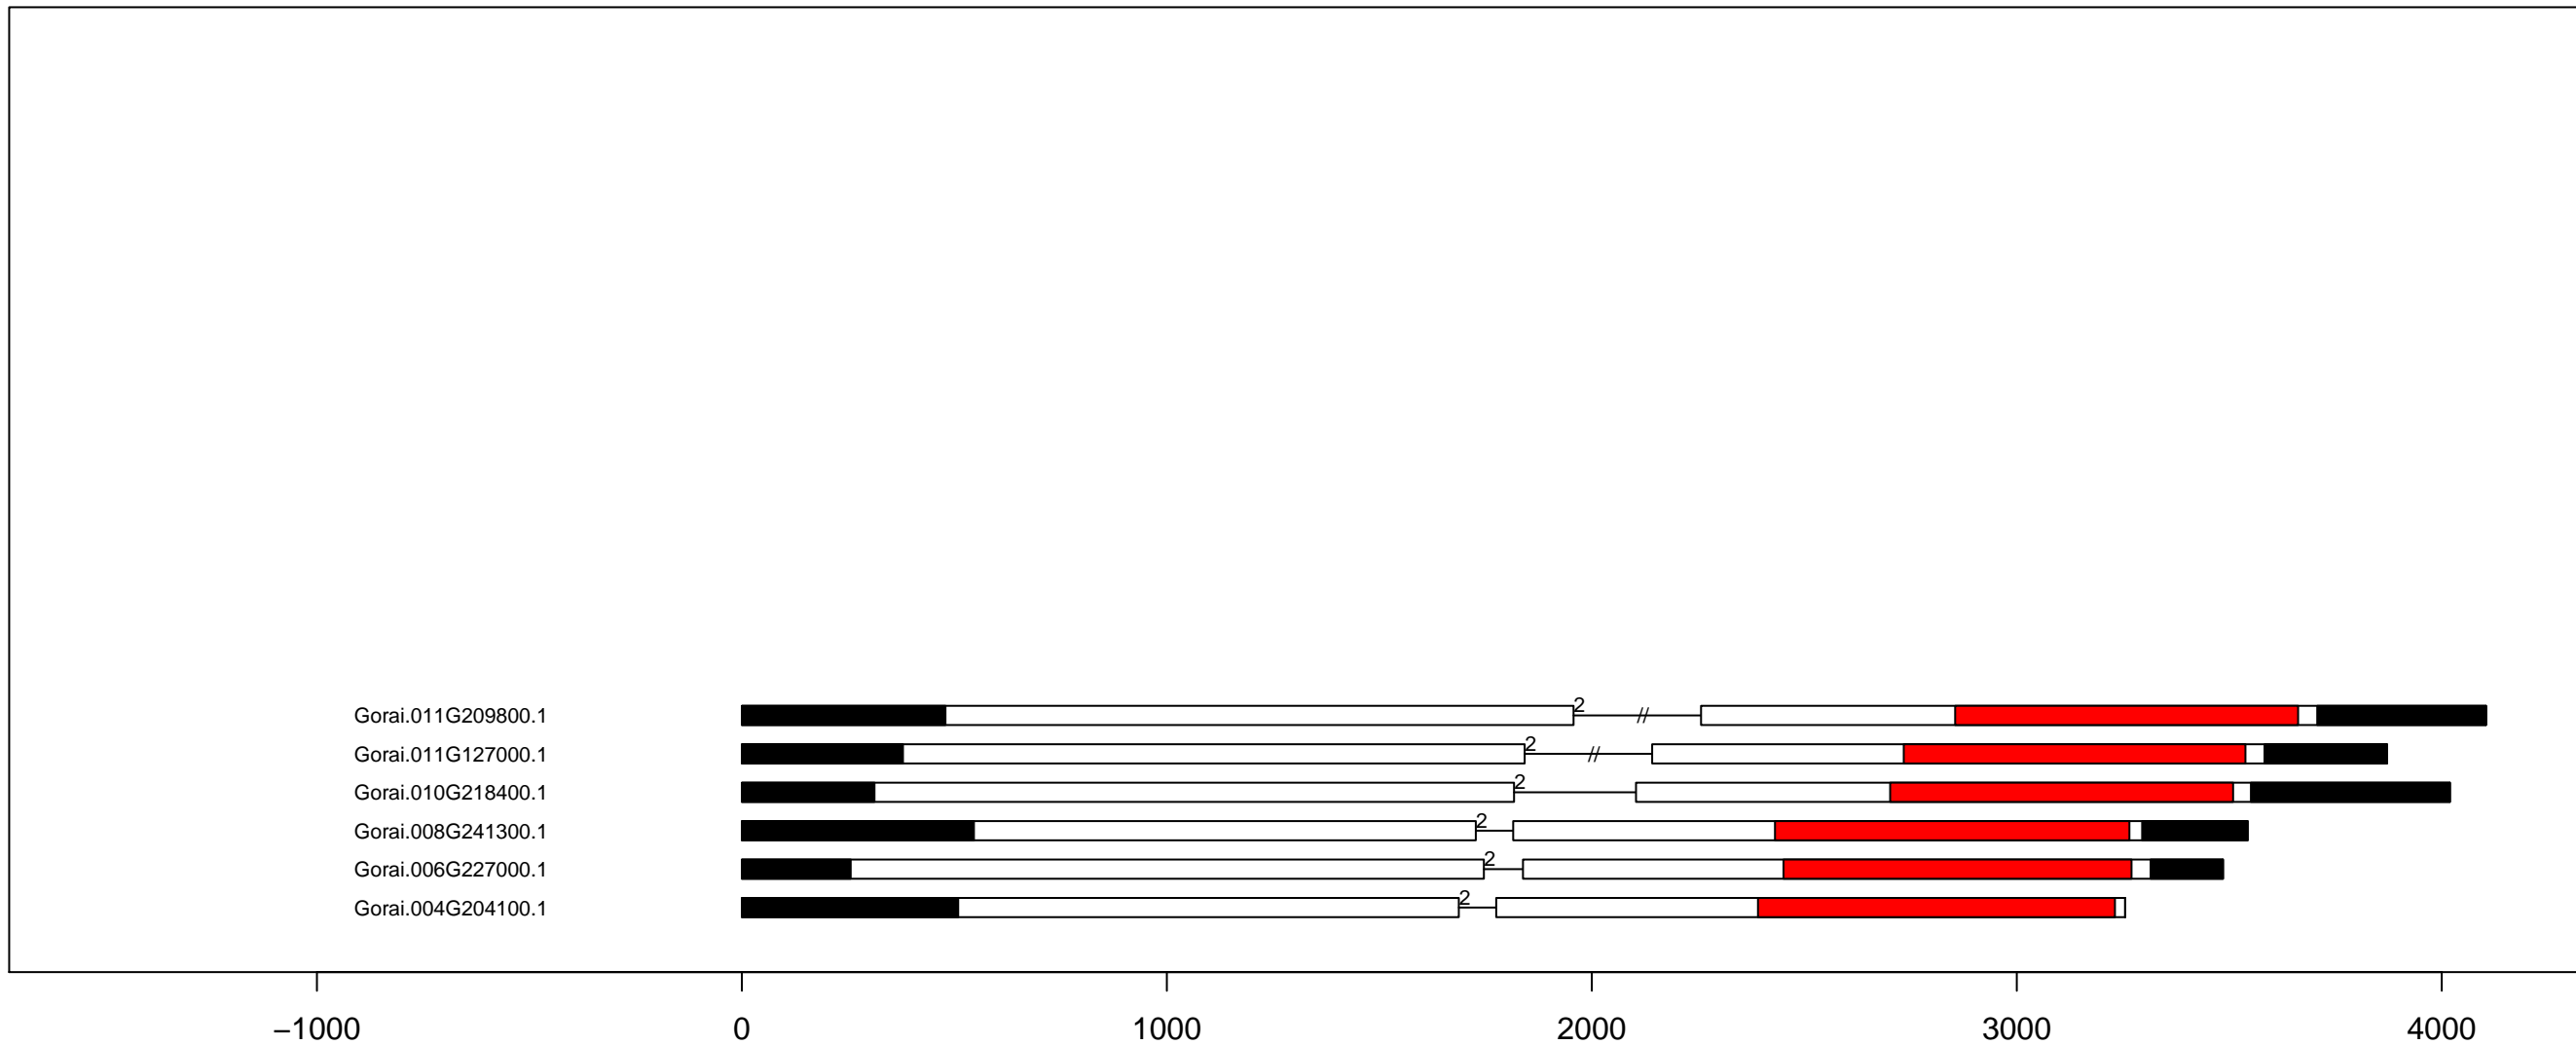



# G.ra RLK-Pelle\_LRR-VII-2 exon-intron and domain diagram (all)

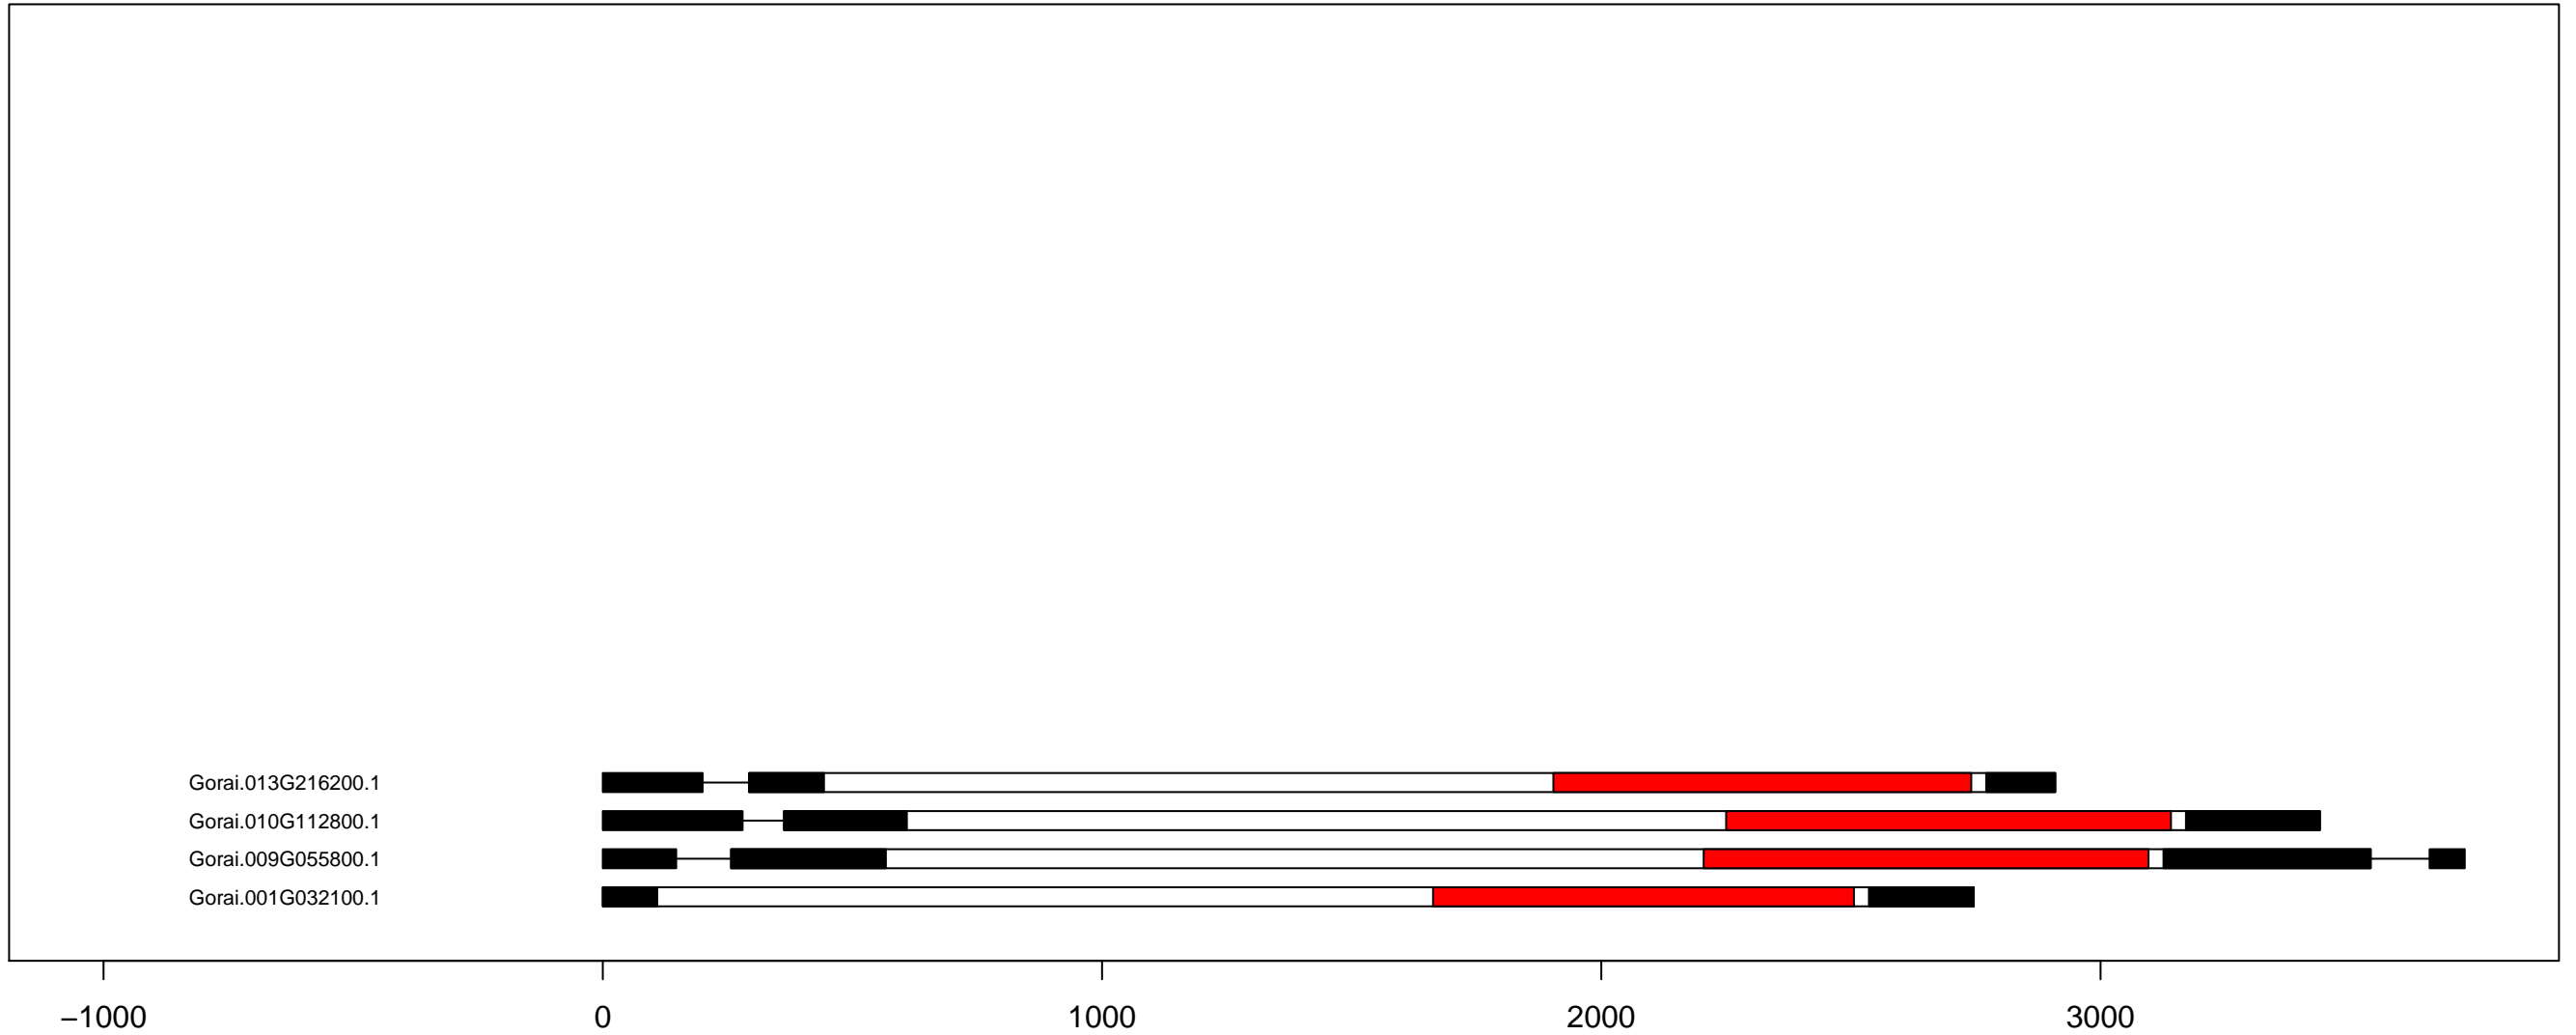

# G.ra RLK-Pelle\_LRR-VII-3 exon-intron and domain diagram (all)

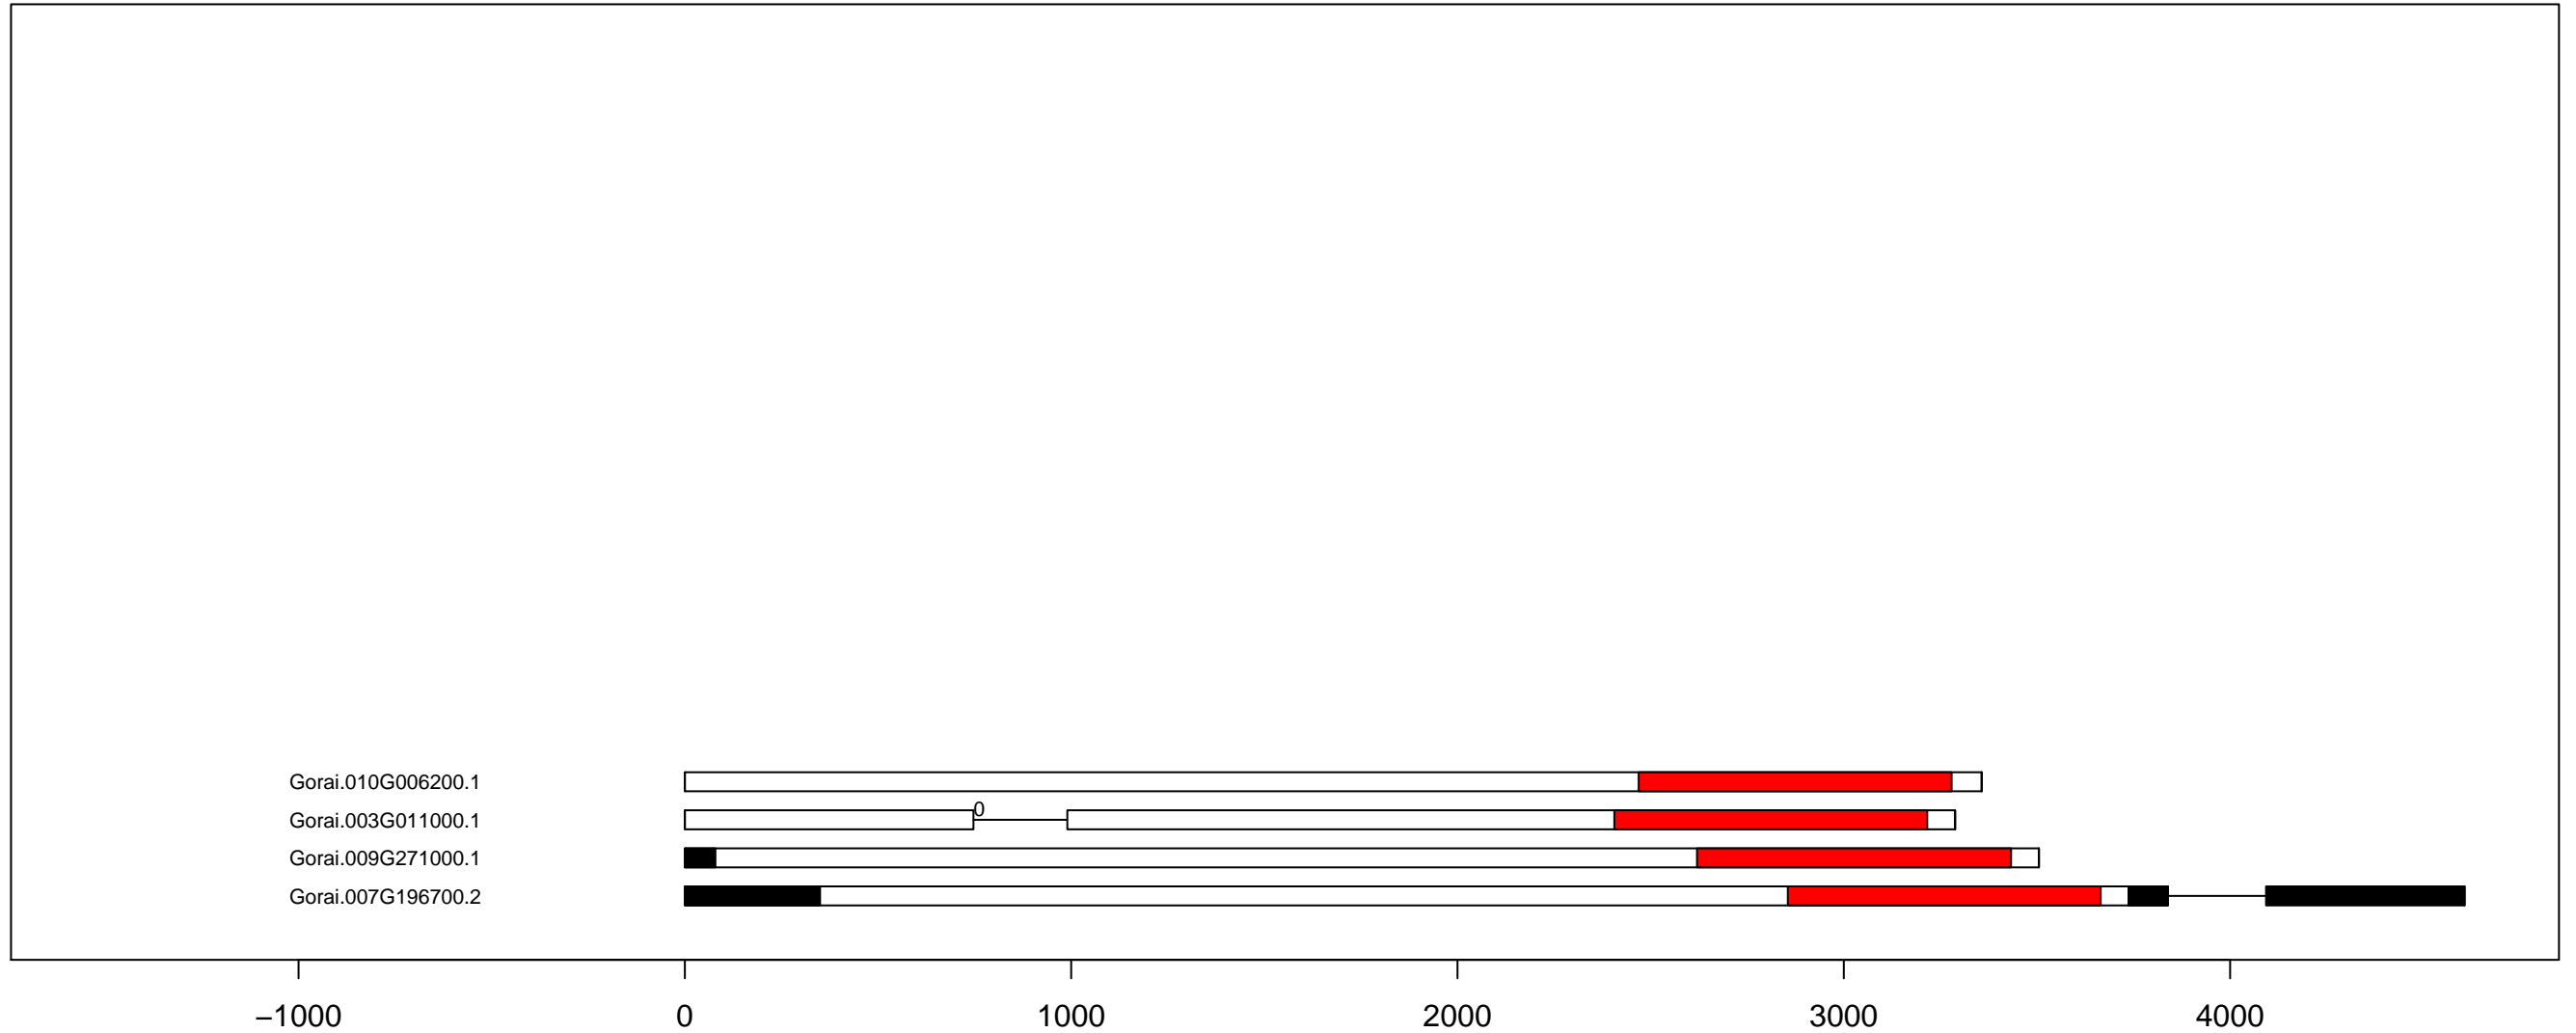

# G.ra RLK-Pelle\_LRR-VIII-1 exon-intron and domain diagram (all)

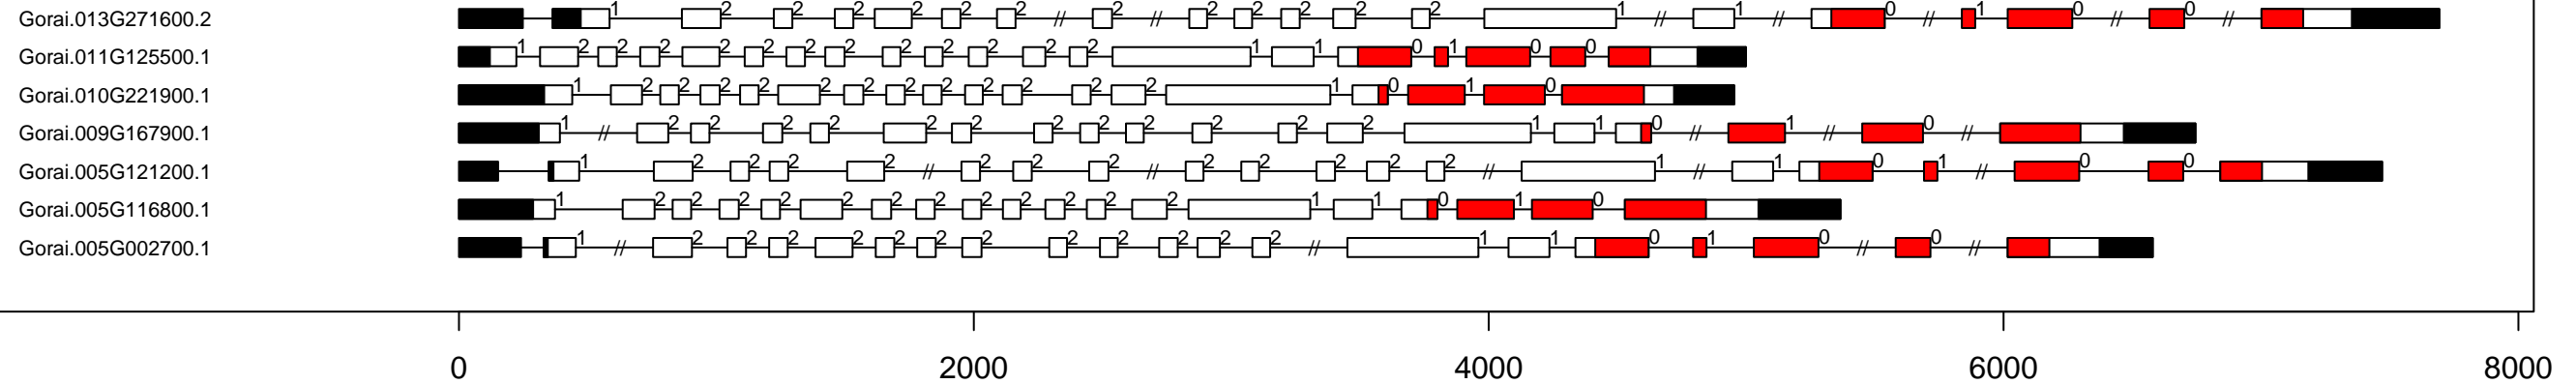

### G.ra RLK-Pelle\_LRR-V exon-intron and domain diagram (all)

Gorai.011G054100.1  
 Gorai.006G141800.1  
 Gorai.011G024500.1  
 Gorai.011G011800.1  
 Gorai.010G183400.1  
 Gorai.010G172500.1  
 Gorai.009G148500.1  
 Gorai.009G120500.1  
 Gorai.005G204500.2

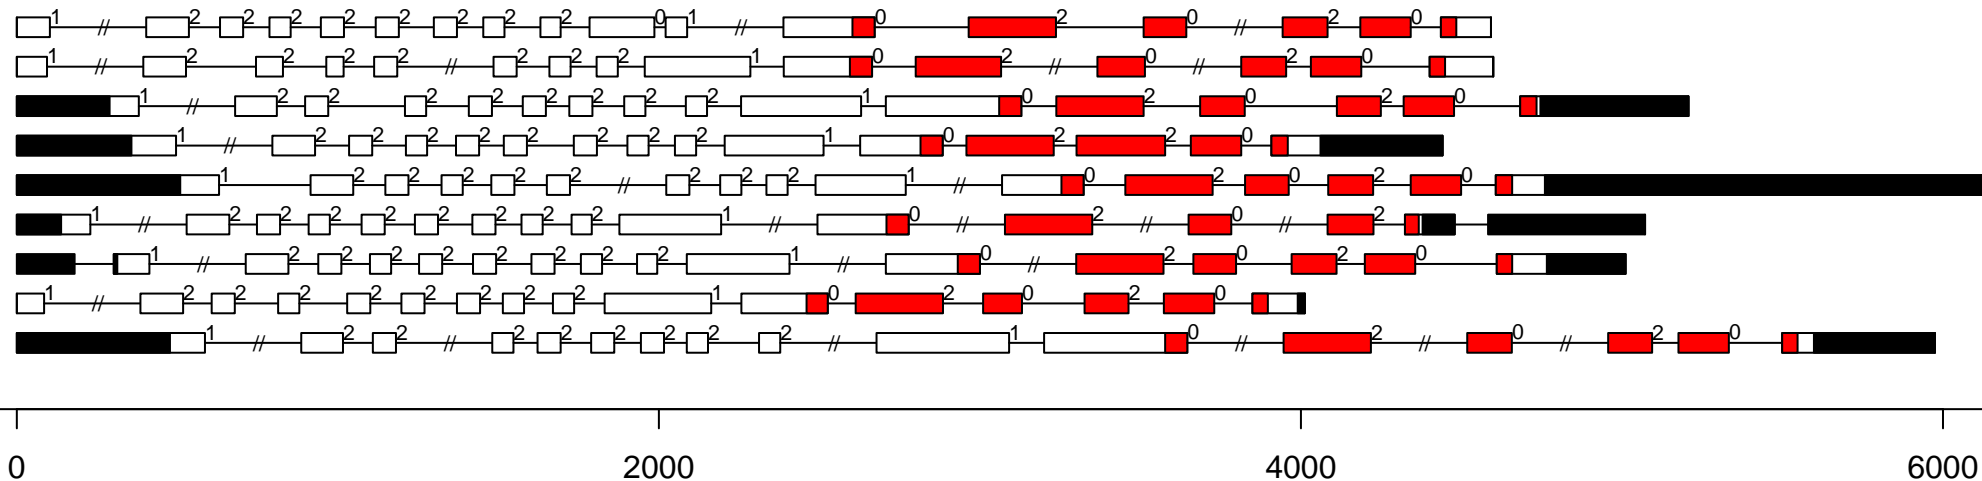

# G.ra RLK-Pelle\_LRR-Xa exon-intron and domain diagram (all)

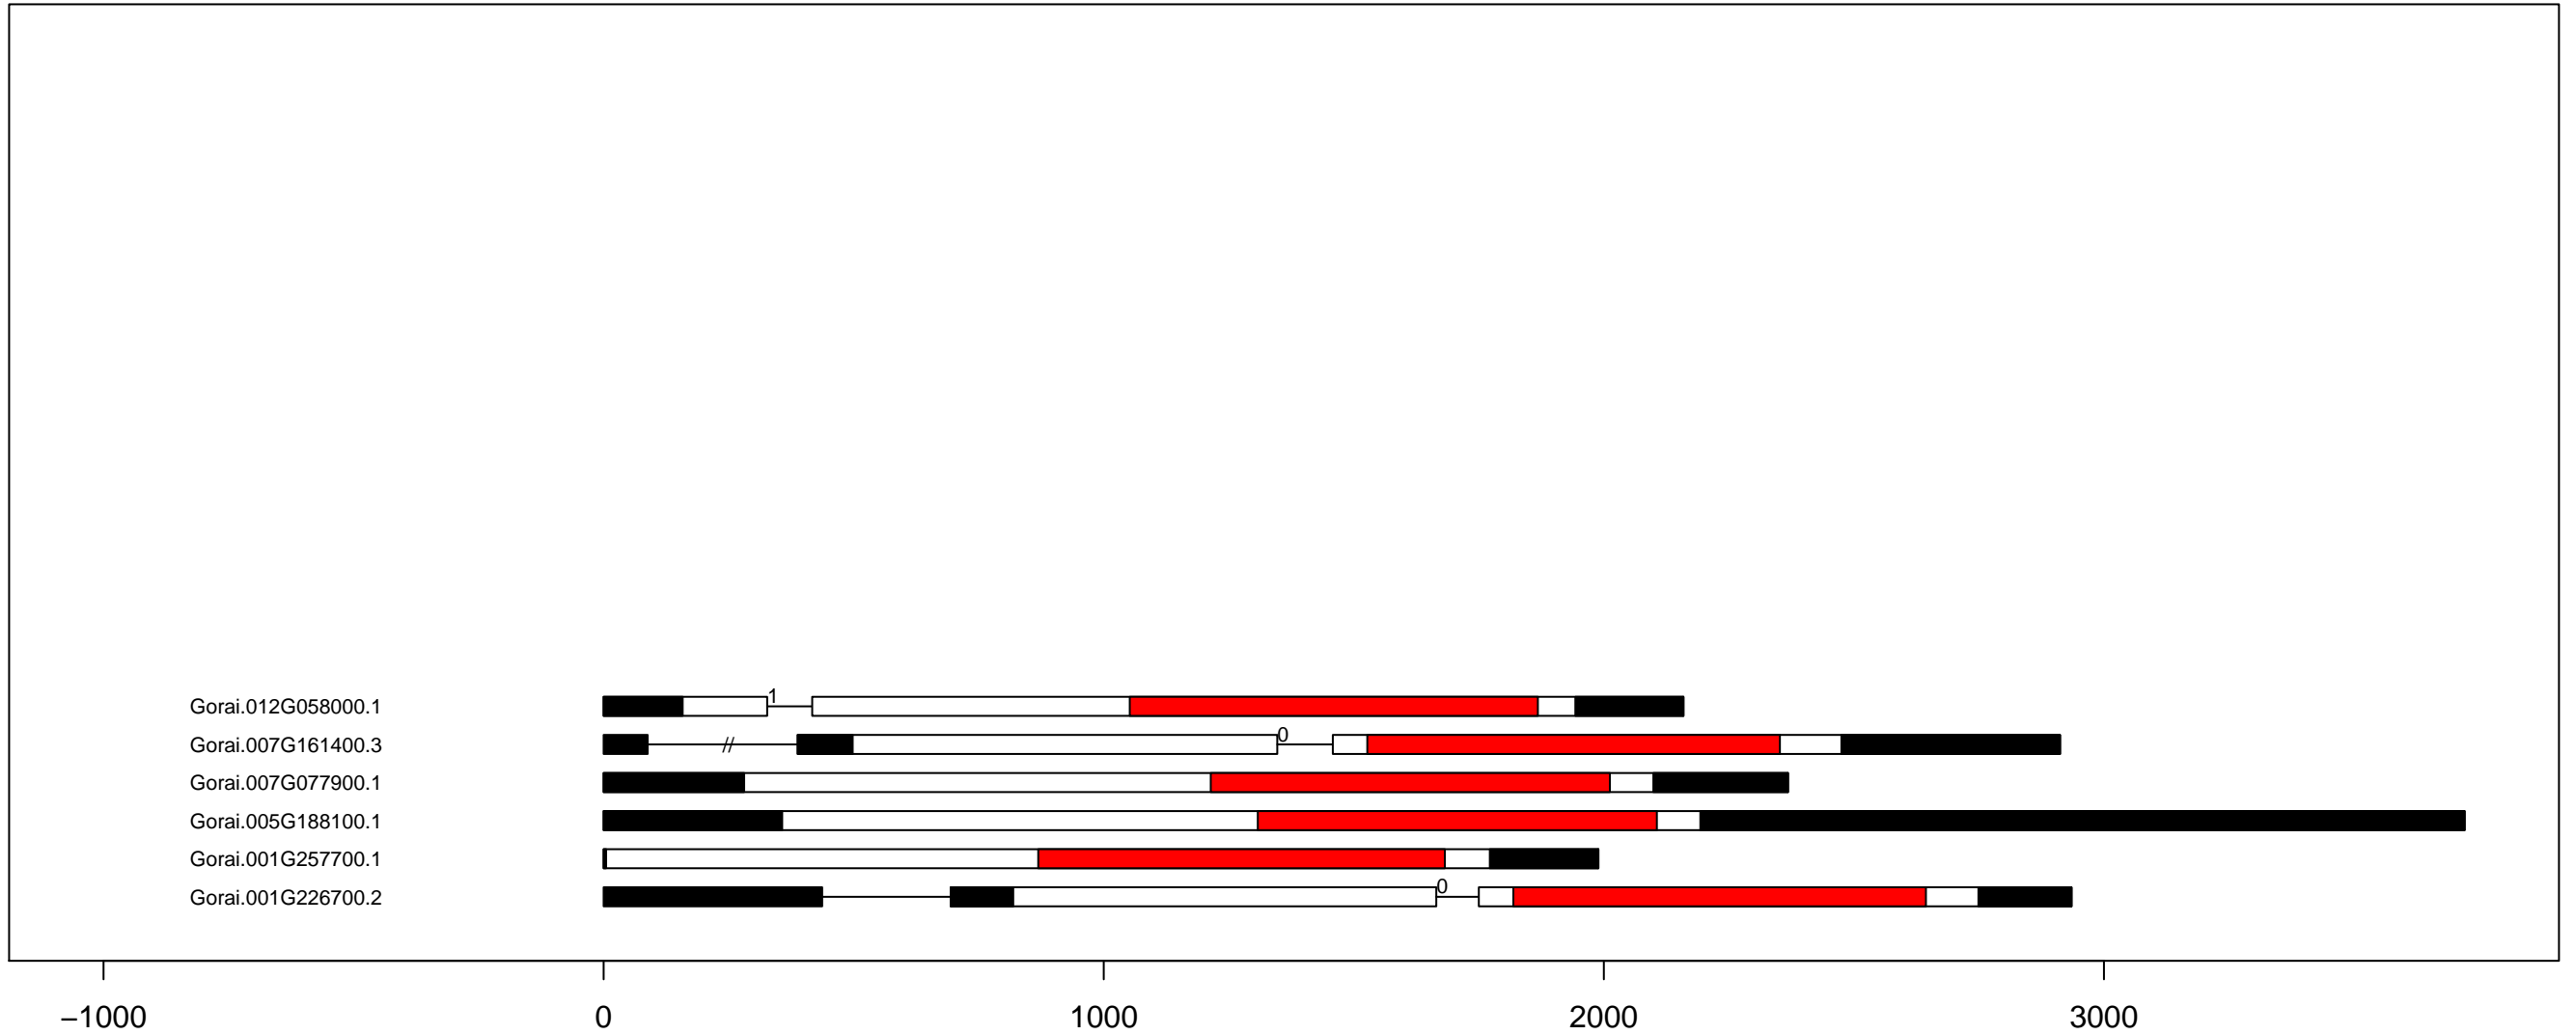

# G.ra RLK-Pelle\_LRR-Xb-1 exon-intron and domain diagram (all)

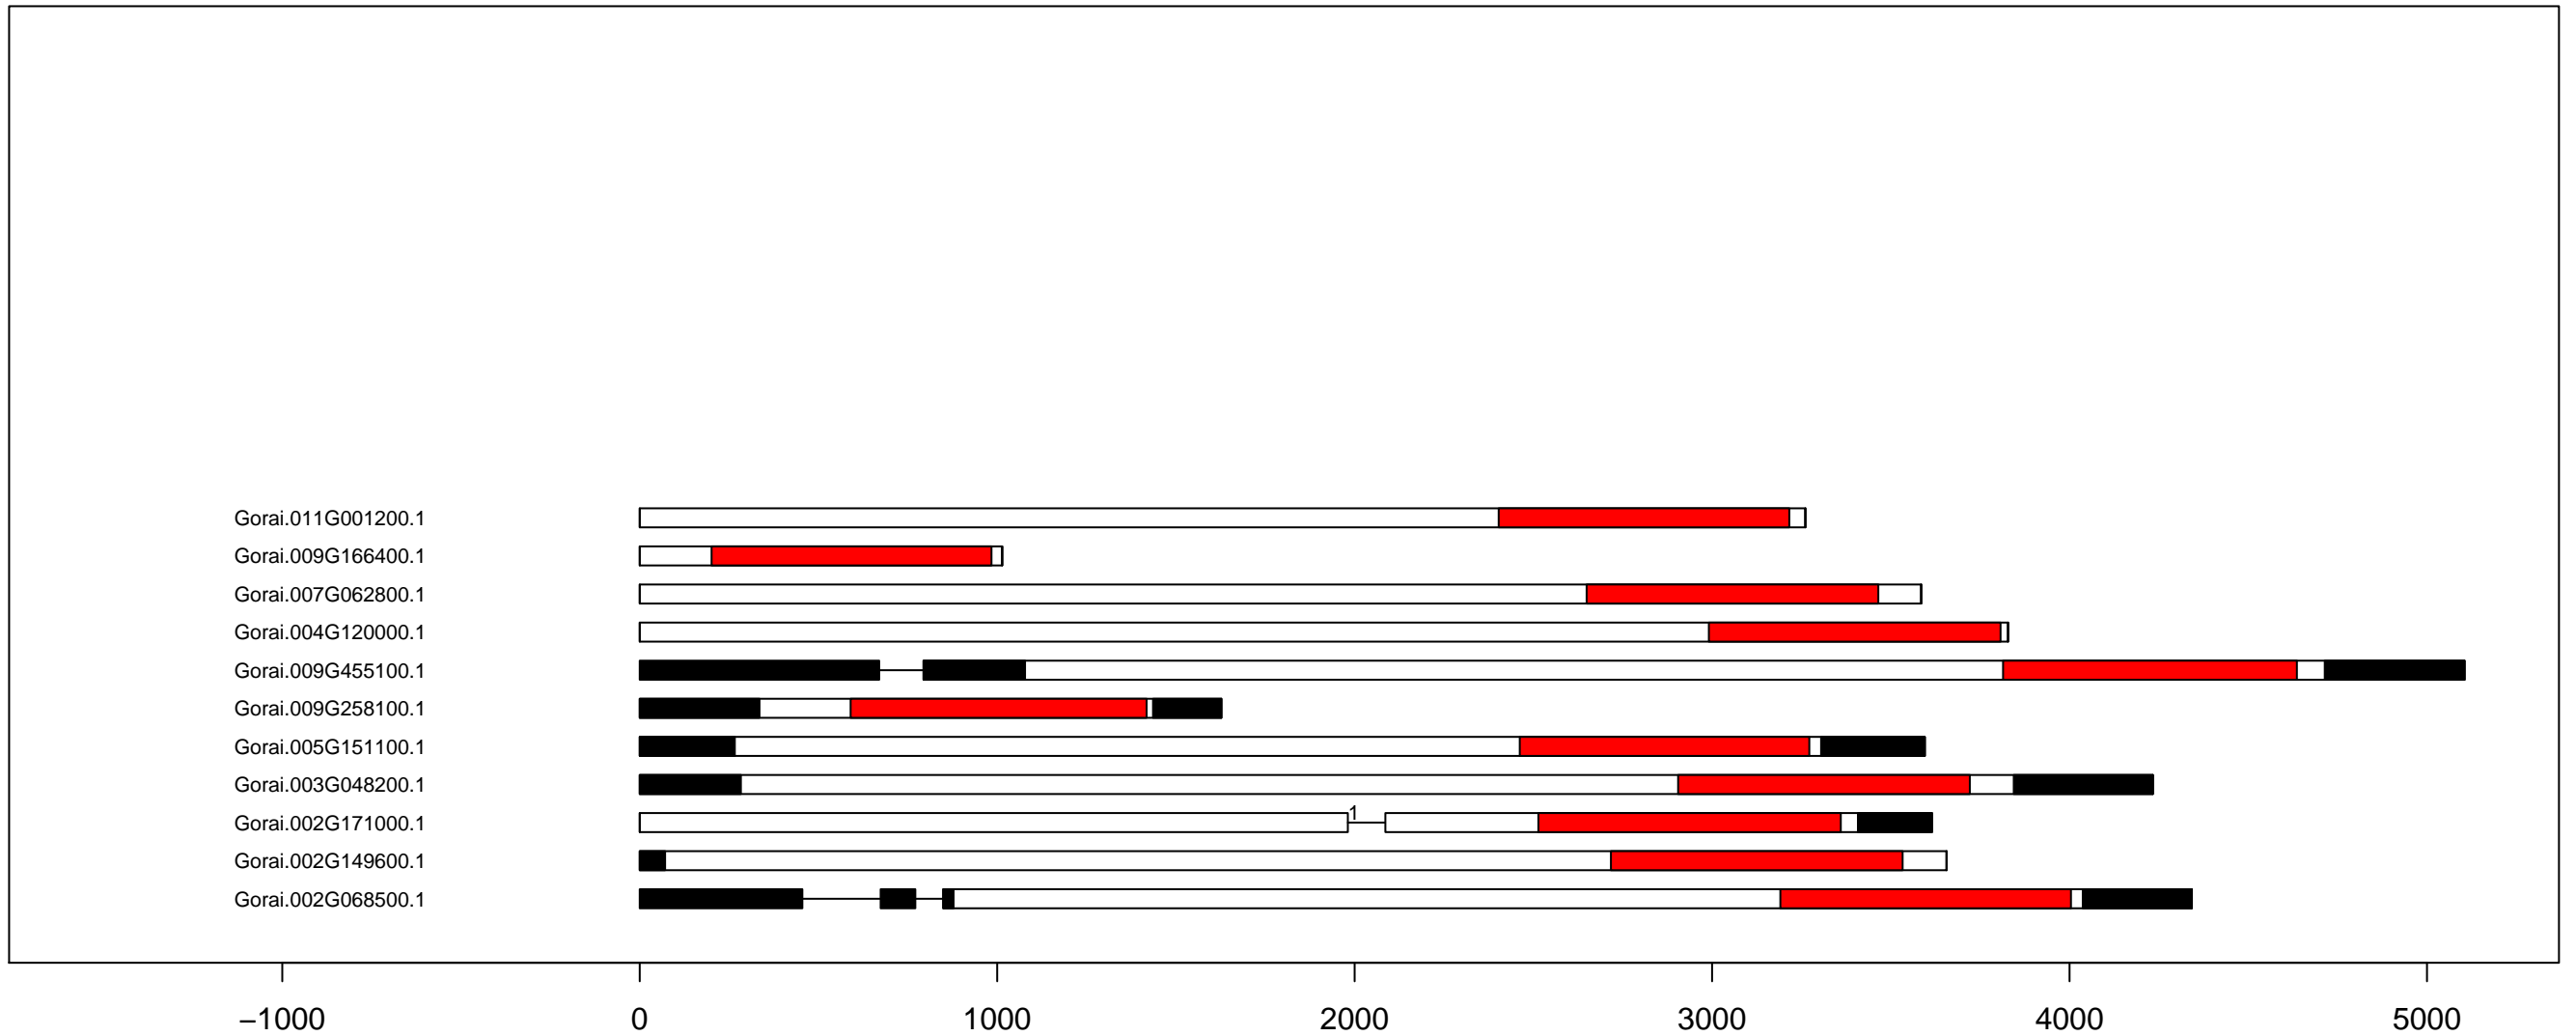

# G.ra RLK-Pelle\_LRR-Xb-2 exon-intron and domain diagram (all)

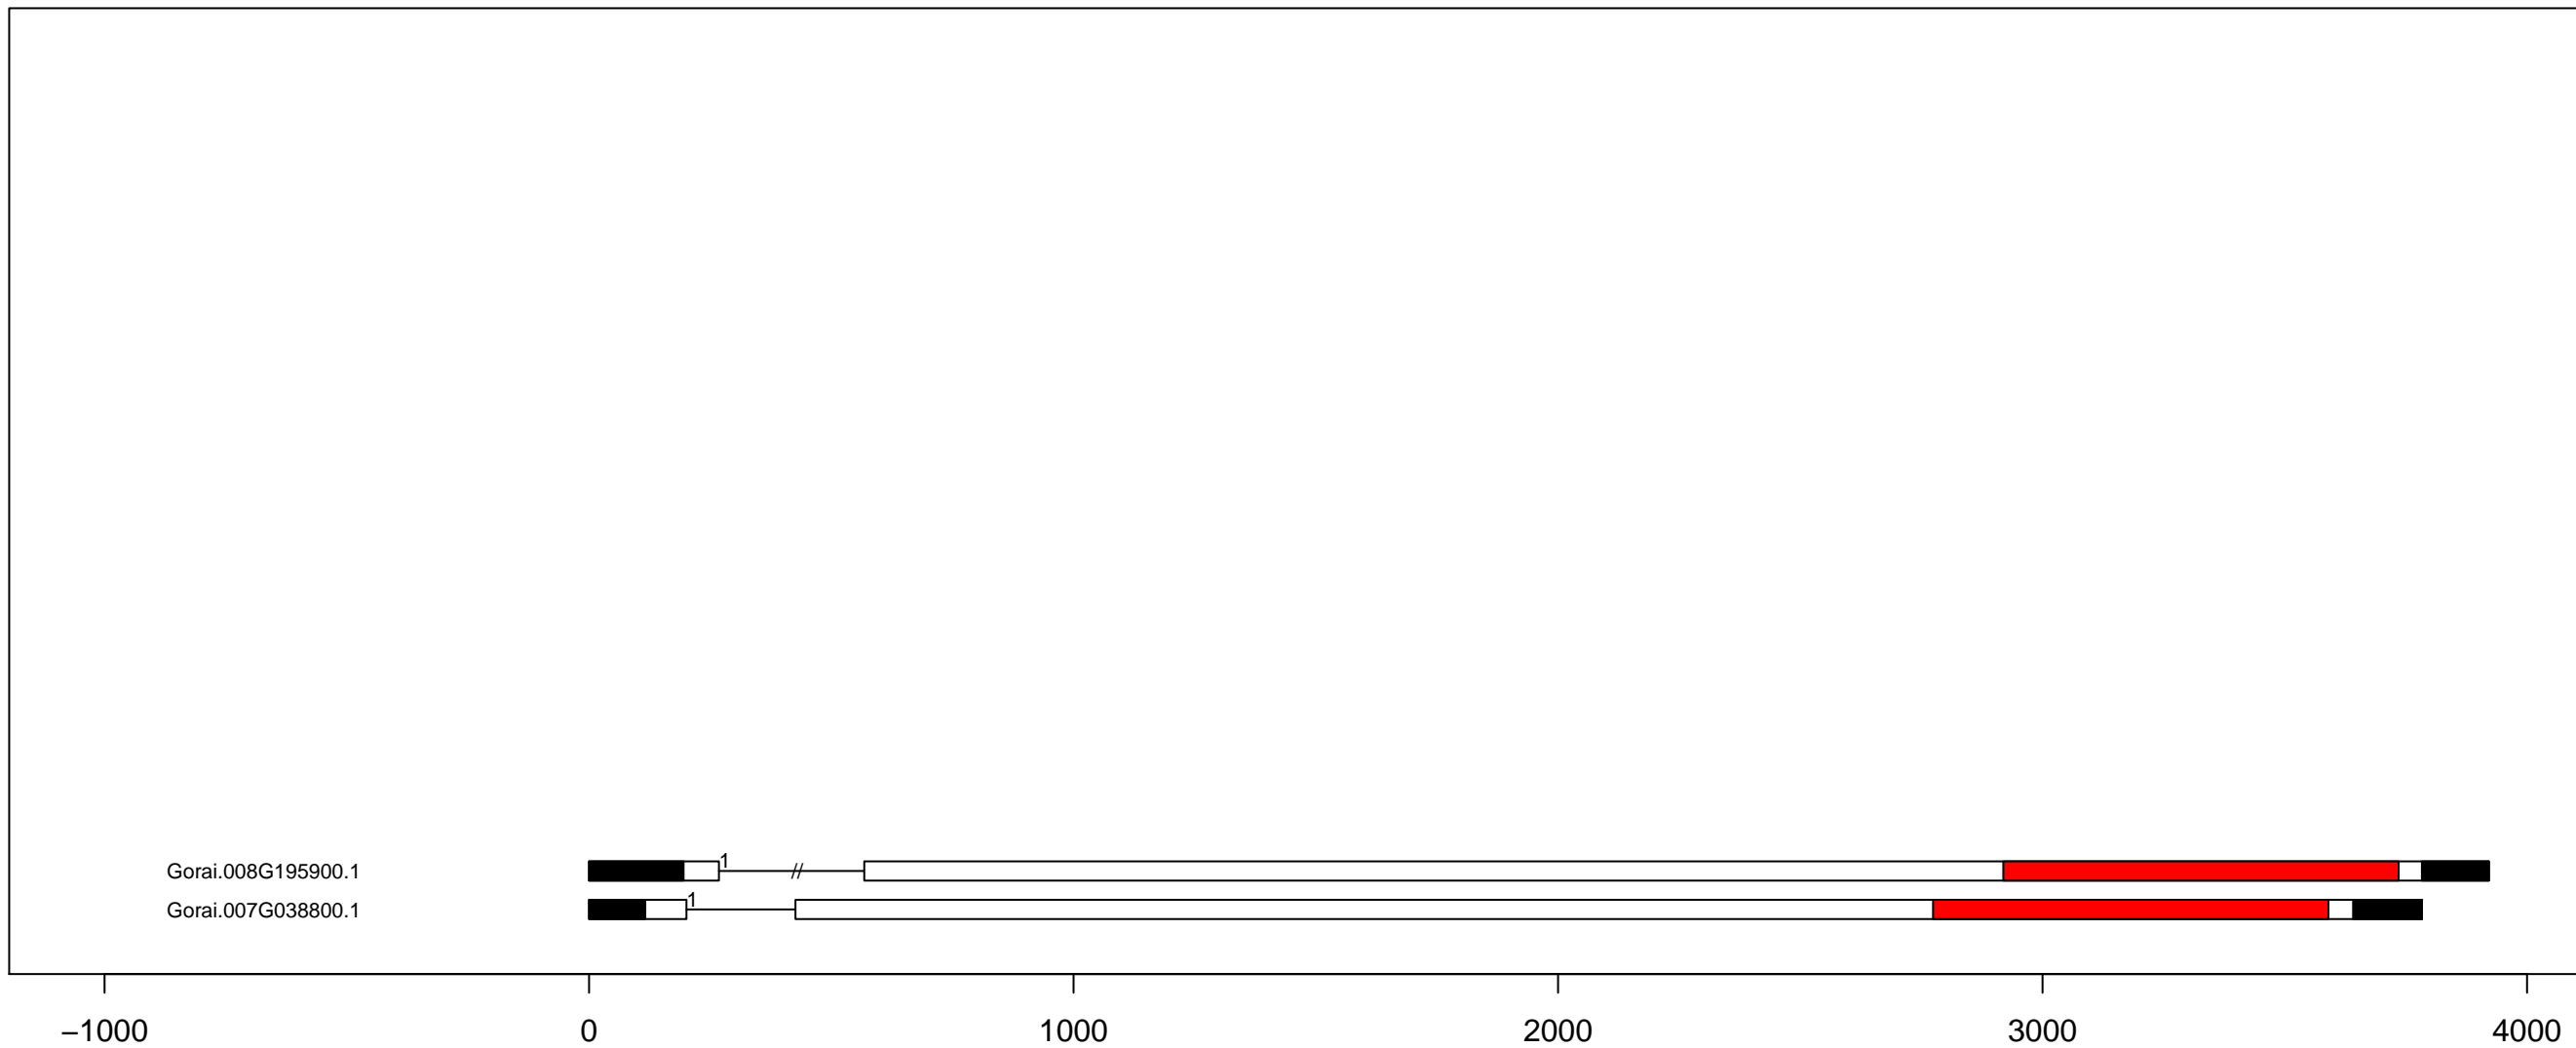

### G.ra RLK-Pelle\_LRR-XI-1 exon-intron and domain diagram (part 1)

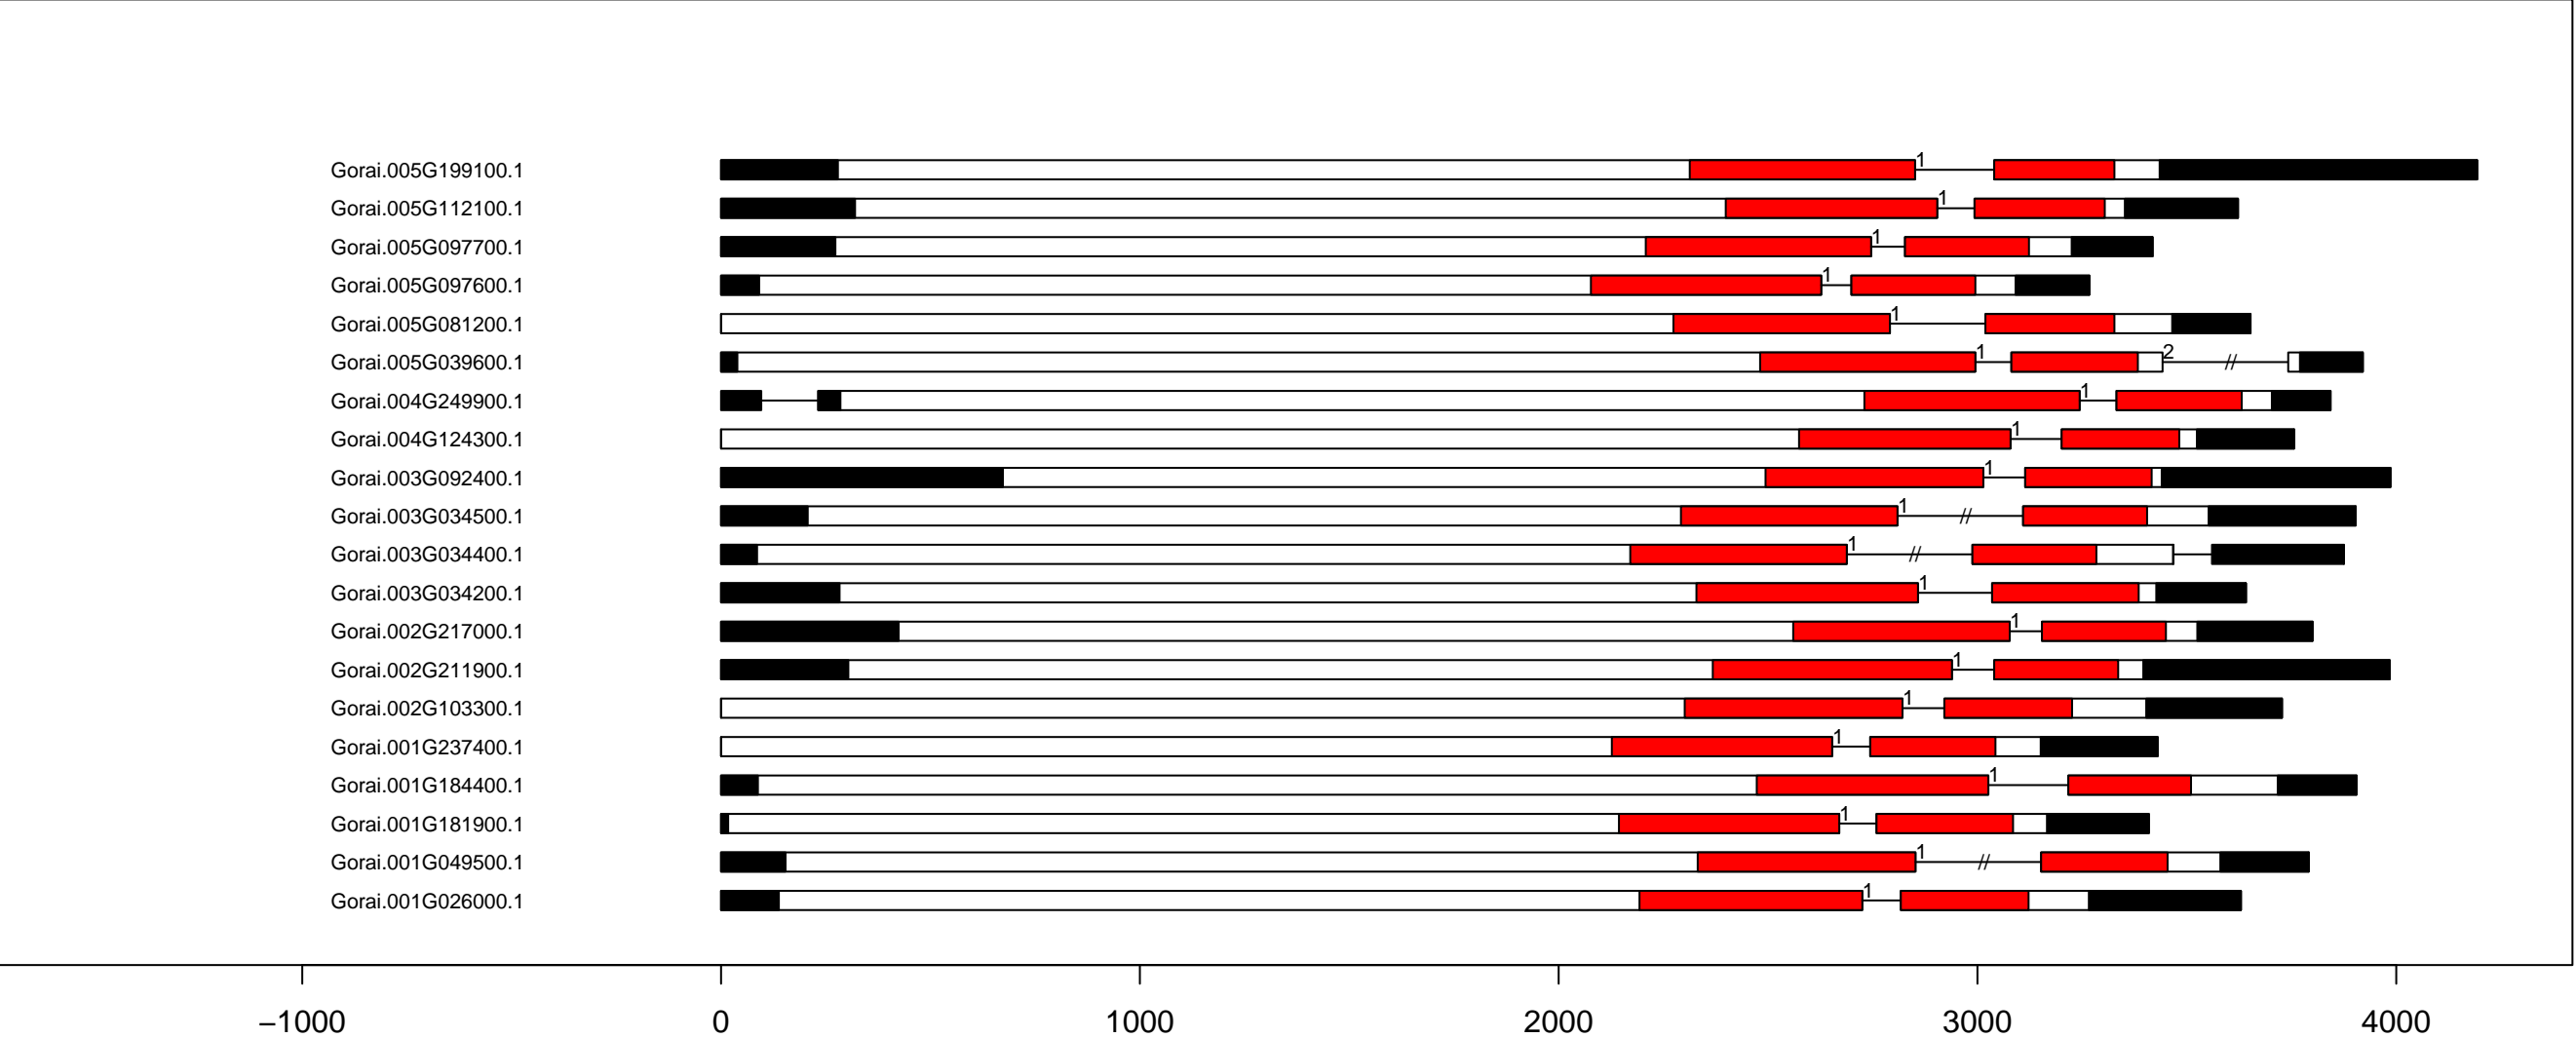



G.ra RLK-Pelle\_LRR-XI-1 exon-intron and domain diagram (part 2)

Gorai.009G048200.1  
 Gorai.009G027700.1  
 Gorai.008G215400.1  
 Gorai.008G087500.1  
 Gorai.008G051700.1  
 Gorai.007G273700.1  
 Gorai.007G271300.2  
 Gorai.007G228700.1  
 Gorai.007G148900.1  
 Gorai.006G219400.2  
 Gorai.006G139200.1  
 Gorai.006G137100.1  
 Gorai.006G131800.1  
 Gorai.006G022800.1  
 Gorai.006G020800.1  
 Gorai.006G020400.1  
 Gorai.006G020100.1  
 Gorai.006G020000.1  
 Gorai.005G268400.1  
 Gorai.005G265400.1

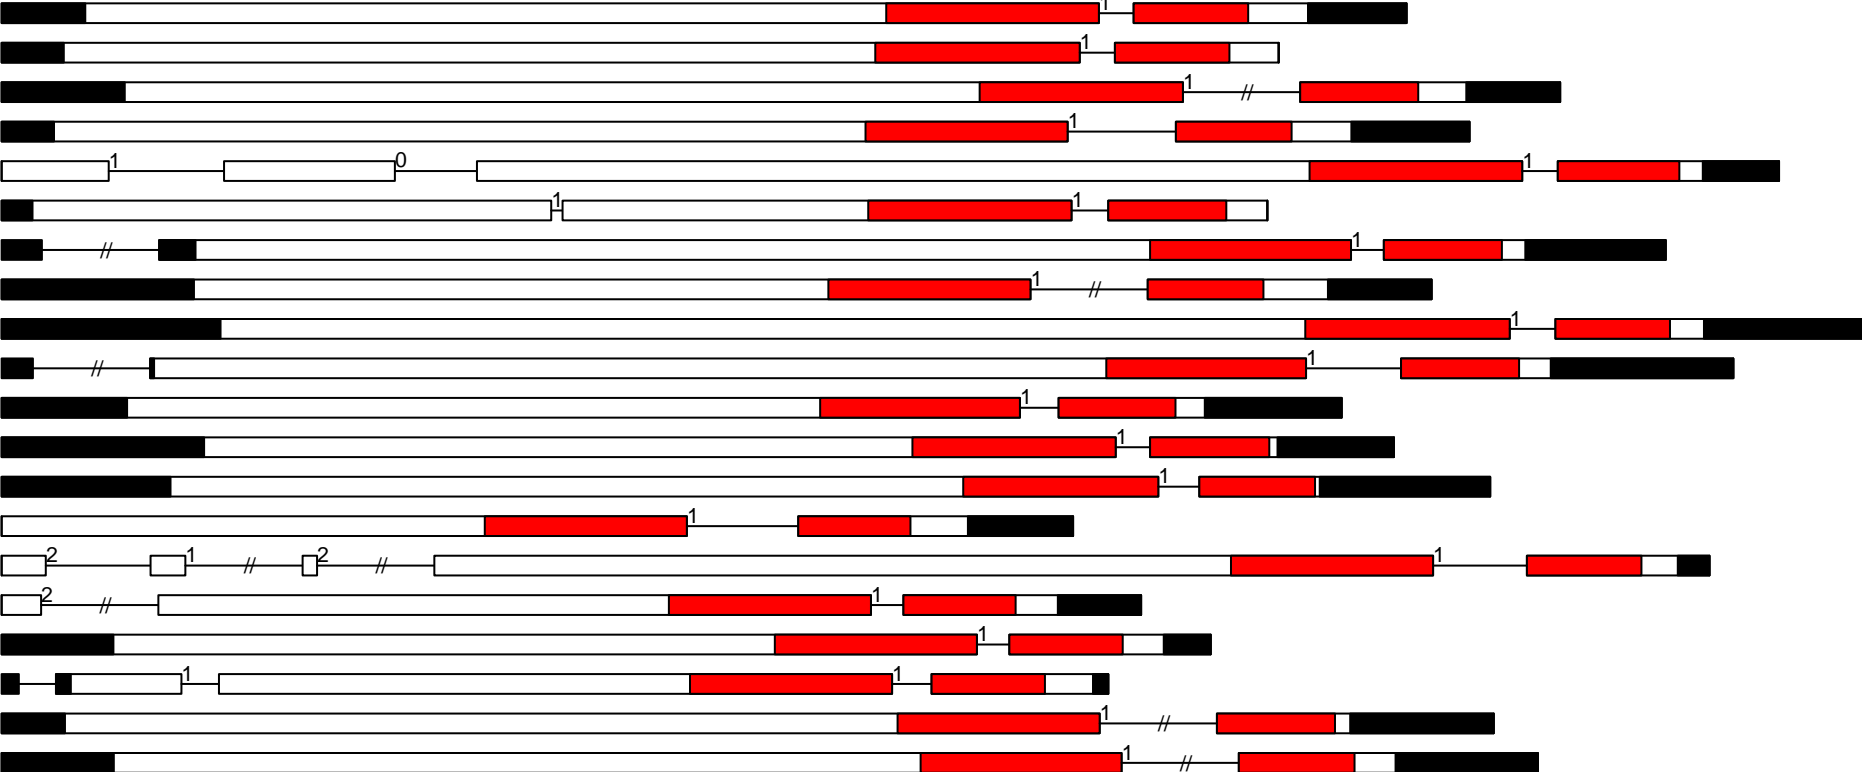

-1000

0

1000

2000

3000

4000

5000

G.ra RLK-Pelle\_LRR-XI-1 exon-intron and domain diagram (part 3)

Gorai.011G217800.1  
Gorai.011G217500.1  
Gorai.011G162100.1  
Gorai.011G030400.1  
Gorai.011G008200.1  
Gorai.010G110800.1  
Gorai.010G104300.2  
Gorai.010G040600.1  
Gorai.010G030500.1  
Gorai.009G452000.2  
Gorai.009G287800.2  
Gorai.009G286600.1  
Gorai.009G278300.1  
Gorai.009G265300.1  
Gorai.009G237700.1  
Gorai.009G225300.1  
Gorai.009G225100.1  
Gorai.009G193600.1  
Gorai.009G166500.1  
Gorai.009G053200.1

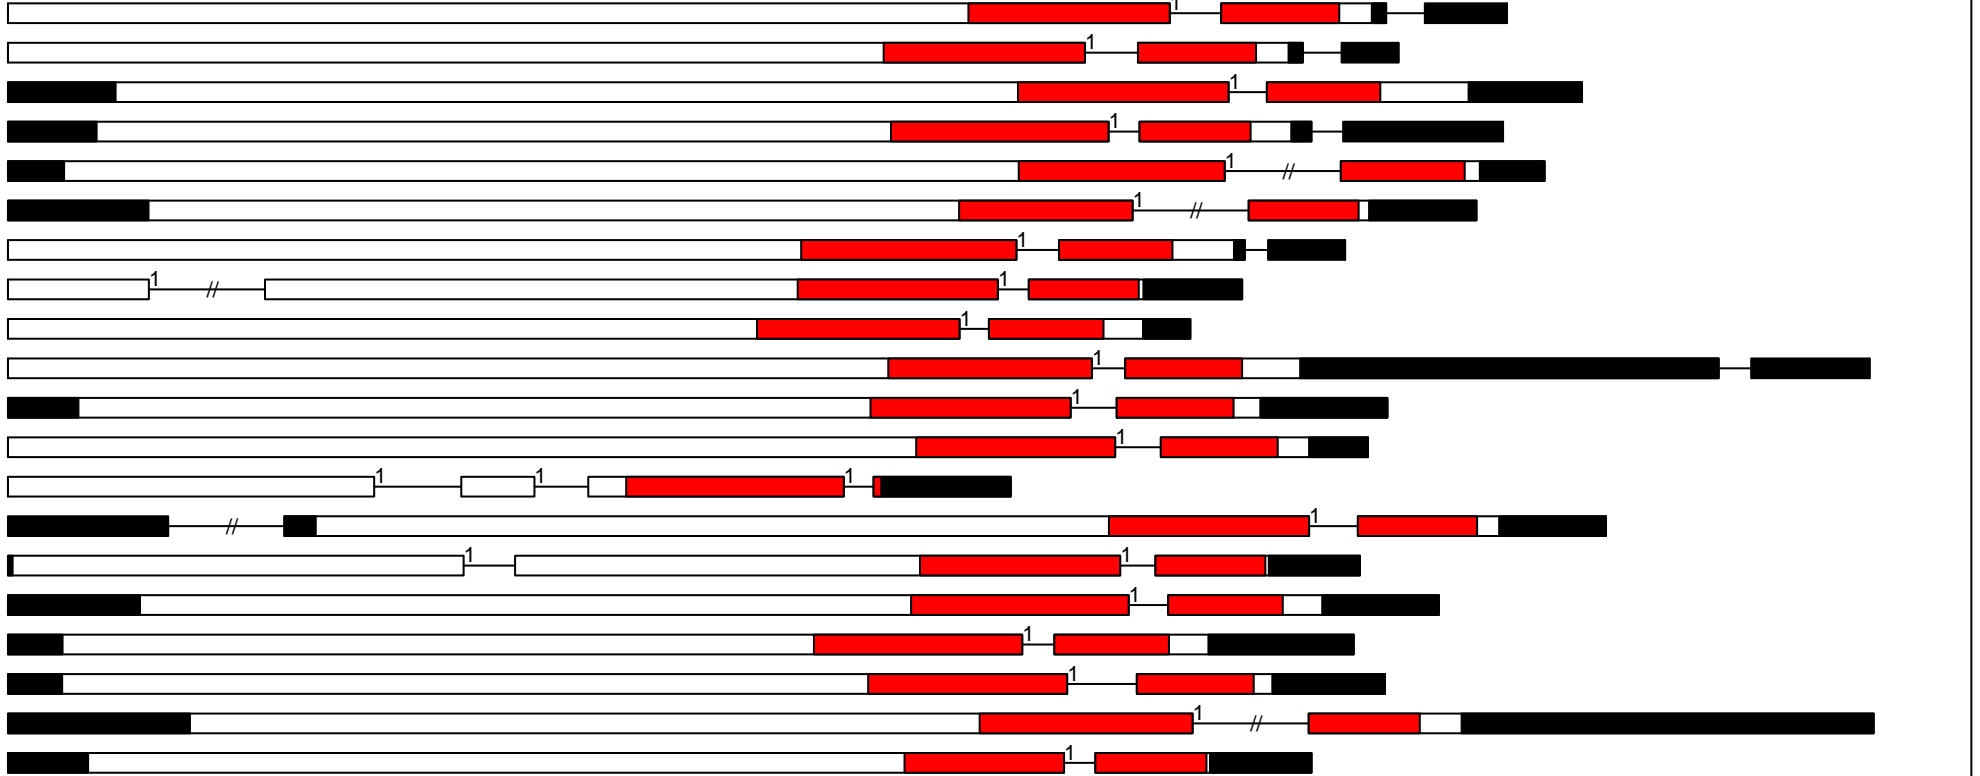

### G.ra RLK-Pelle\_LRR-XI-1 exon-intron and domain diagram (part 4)

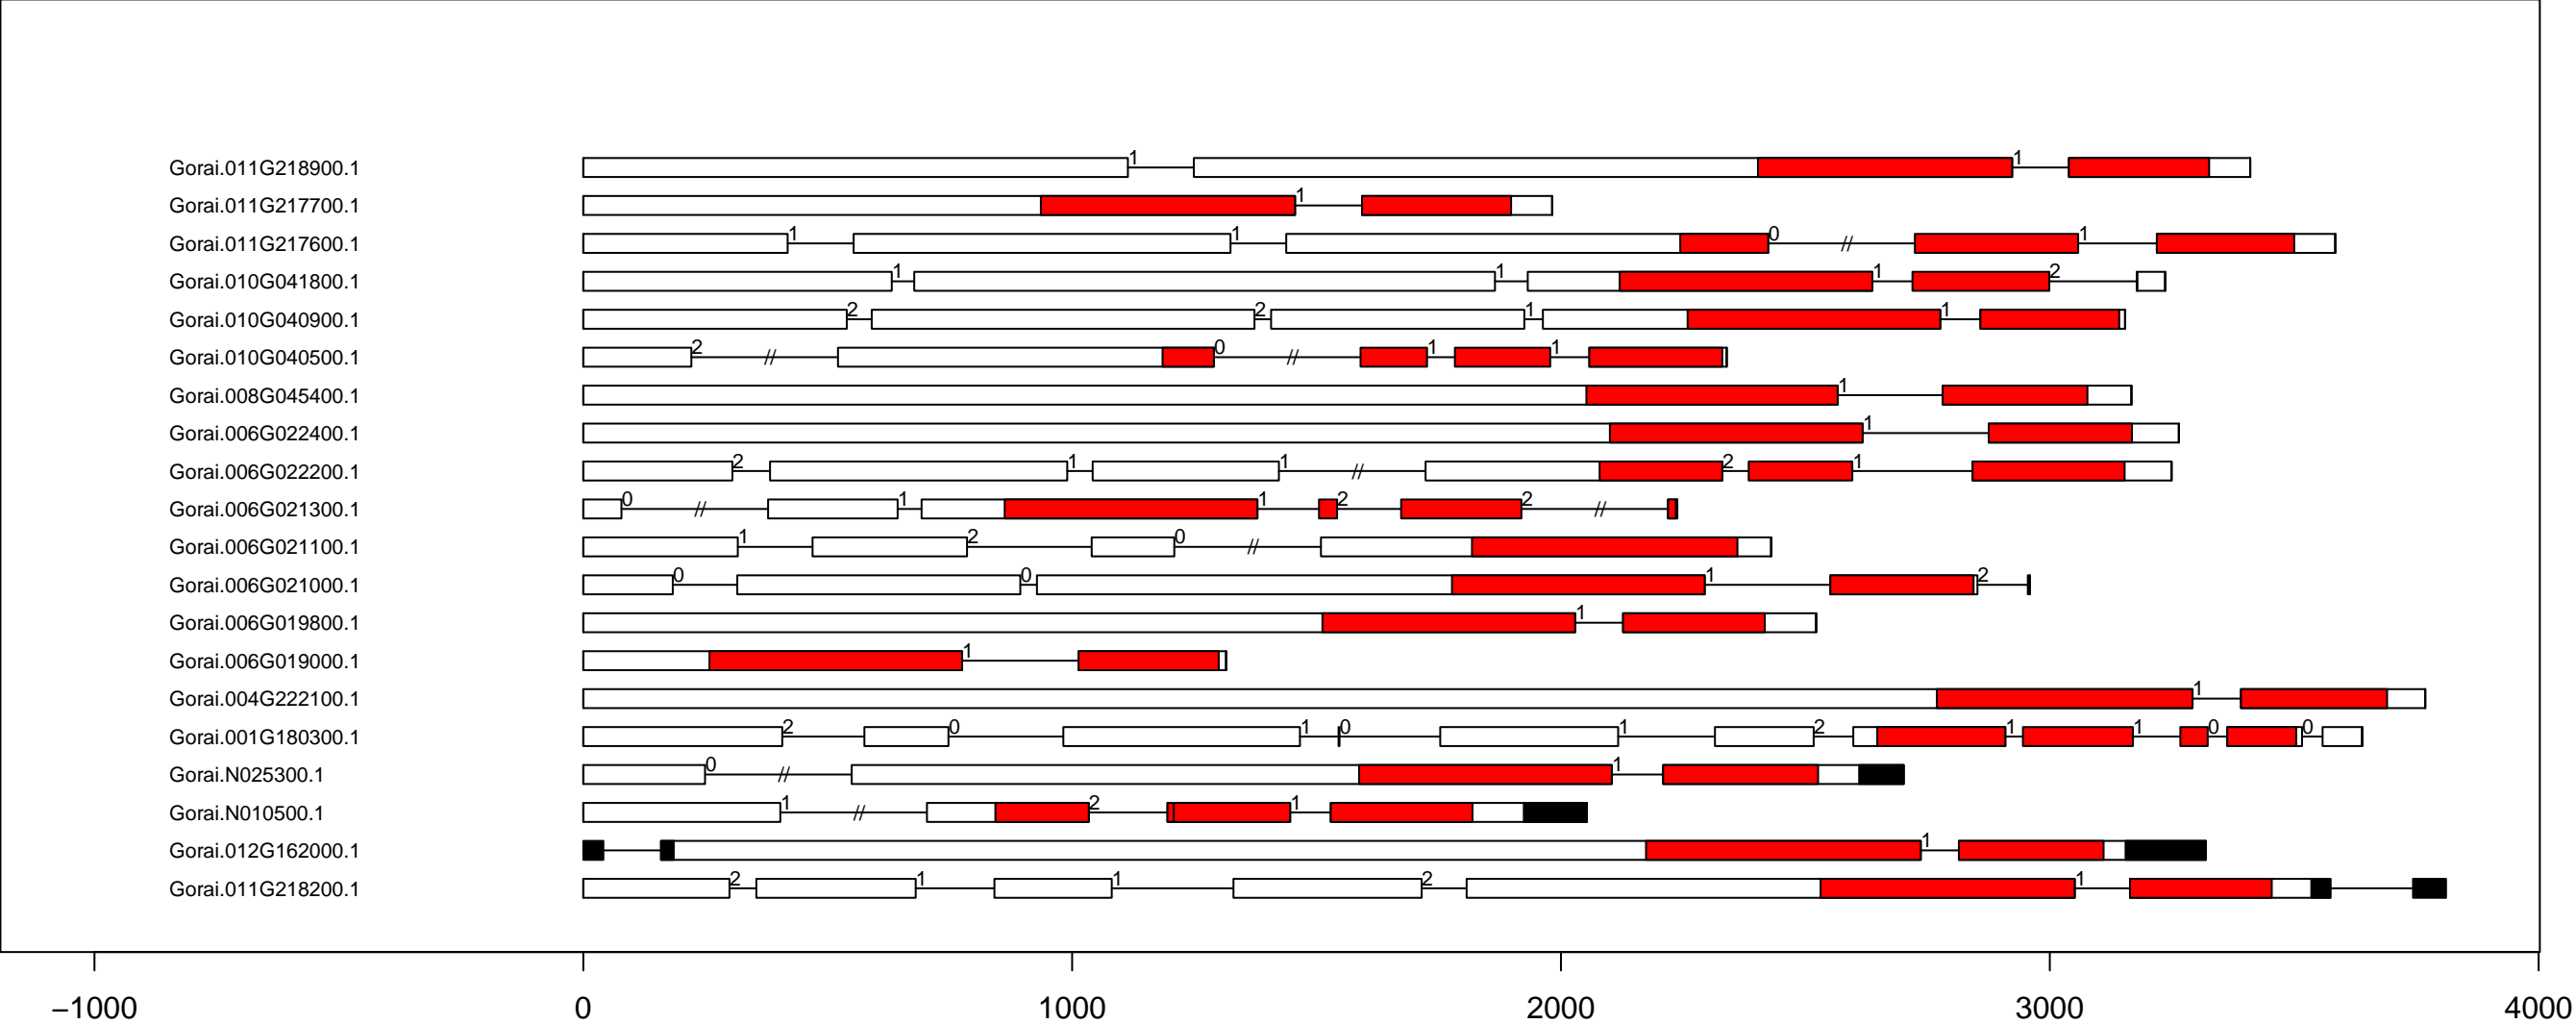

G.ra RLK-Pelle\_LRR-XI-1 exon-intron and domain diagram (part 5)

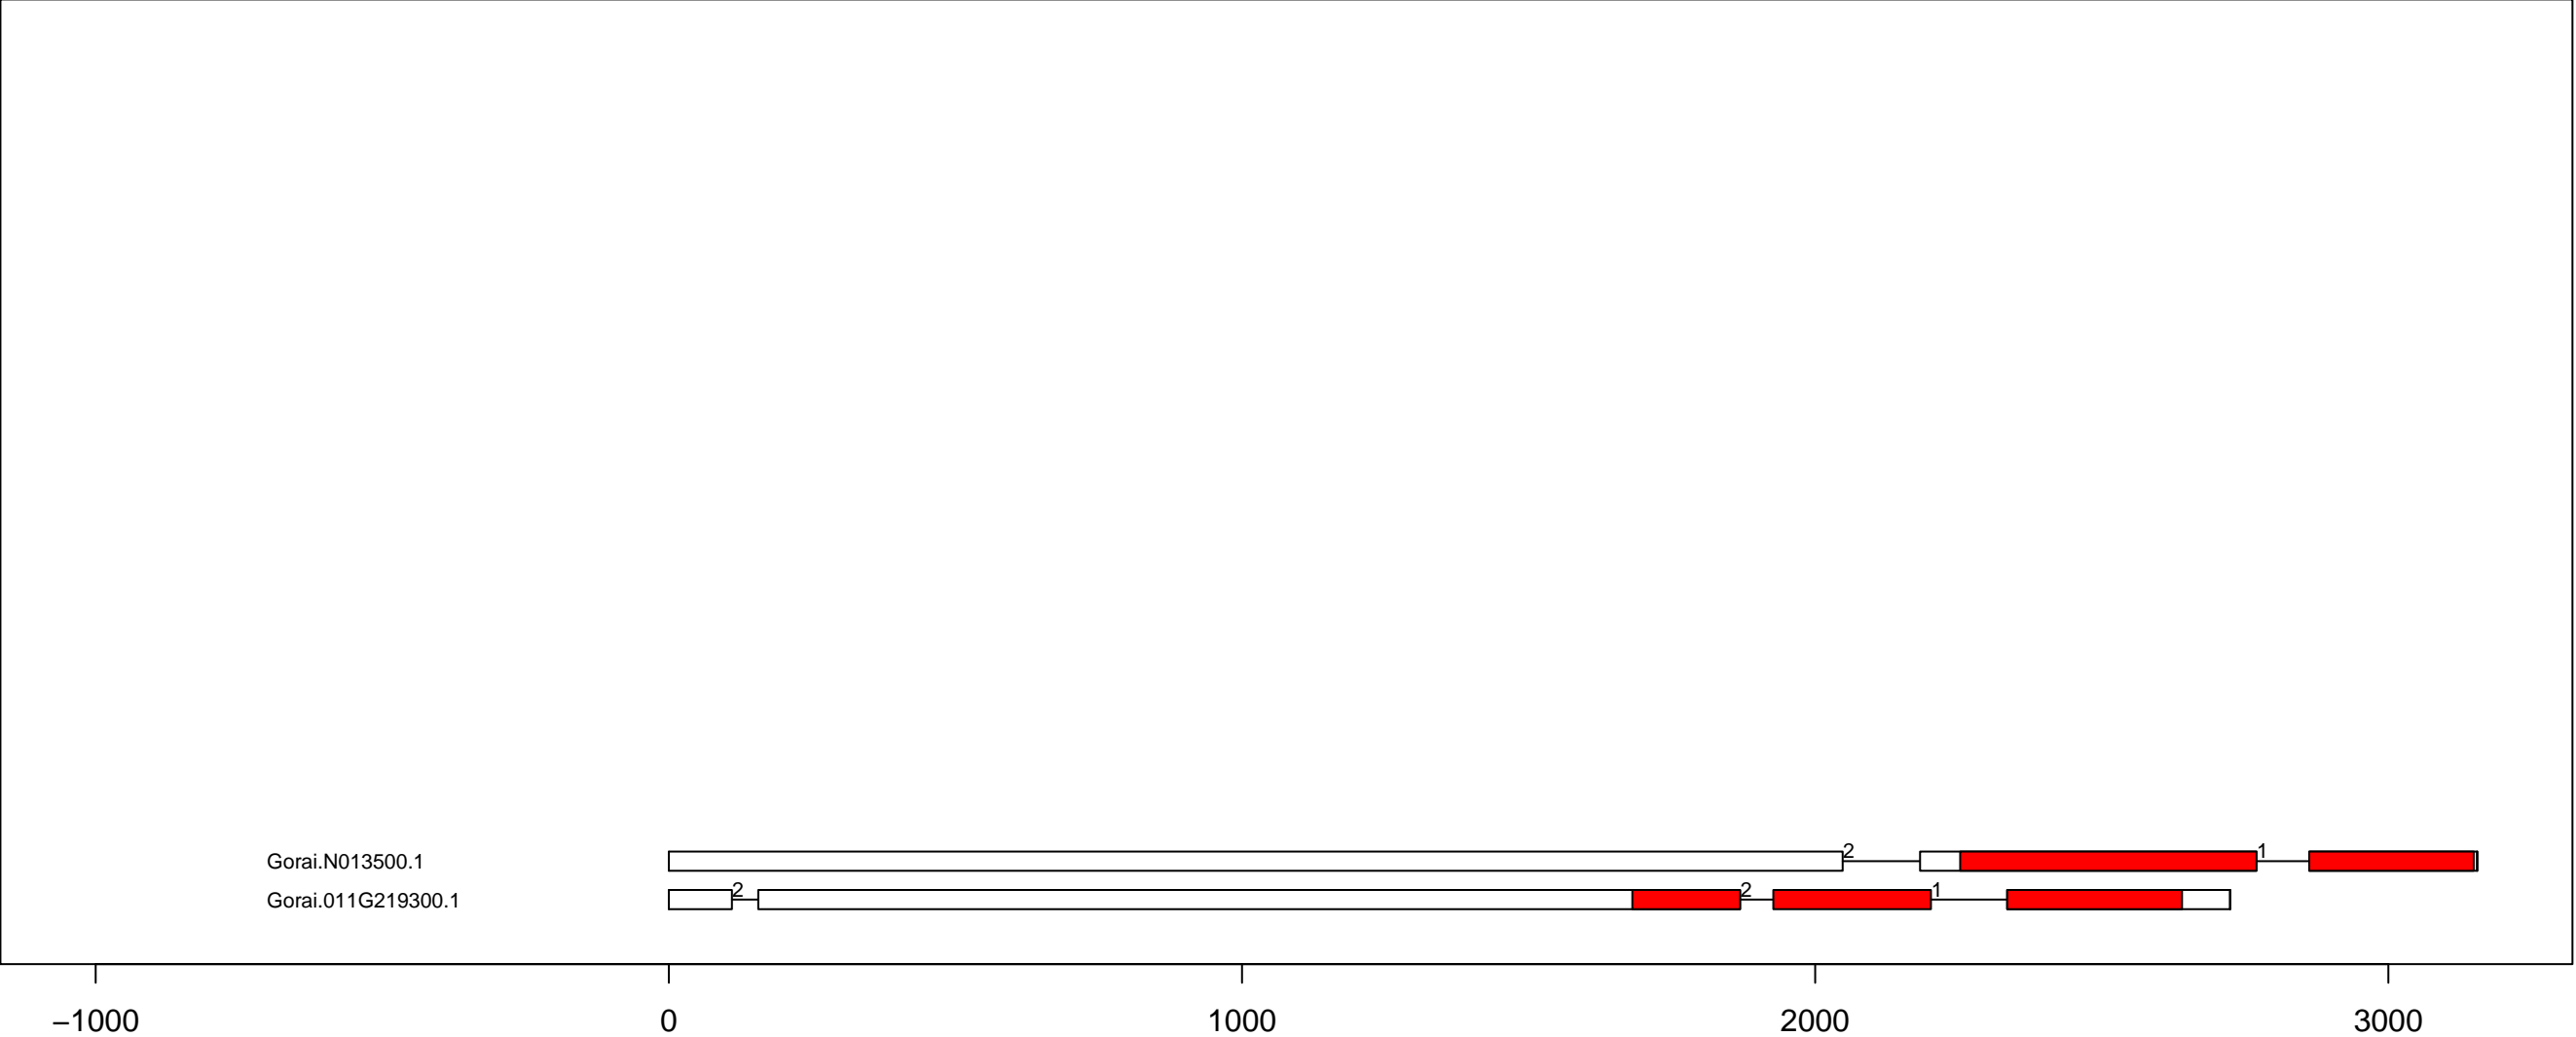

G.ra RLK-Pelle\_LRR-XI-2 exon-intron and domain diagram (all)

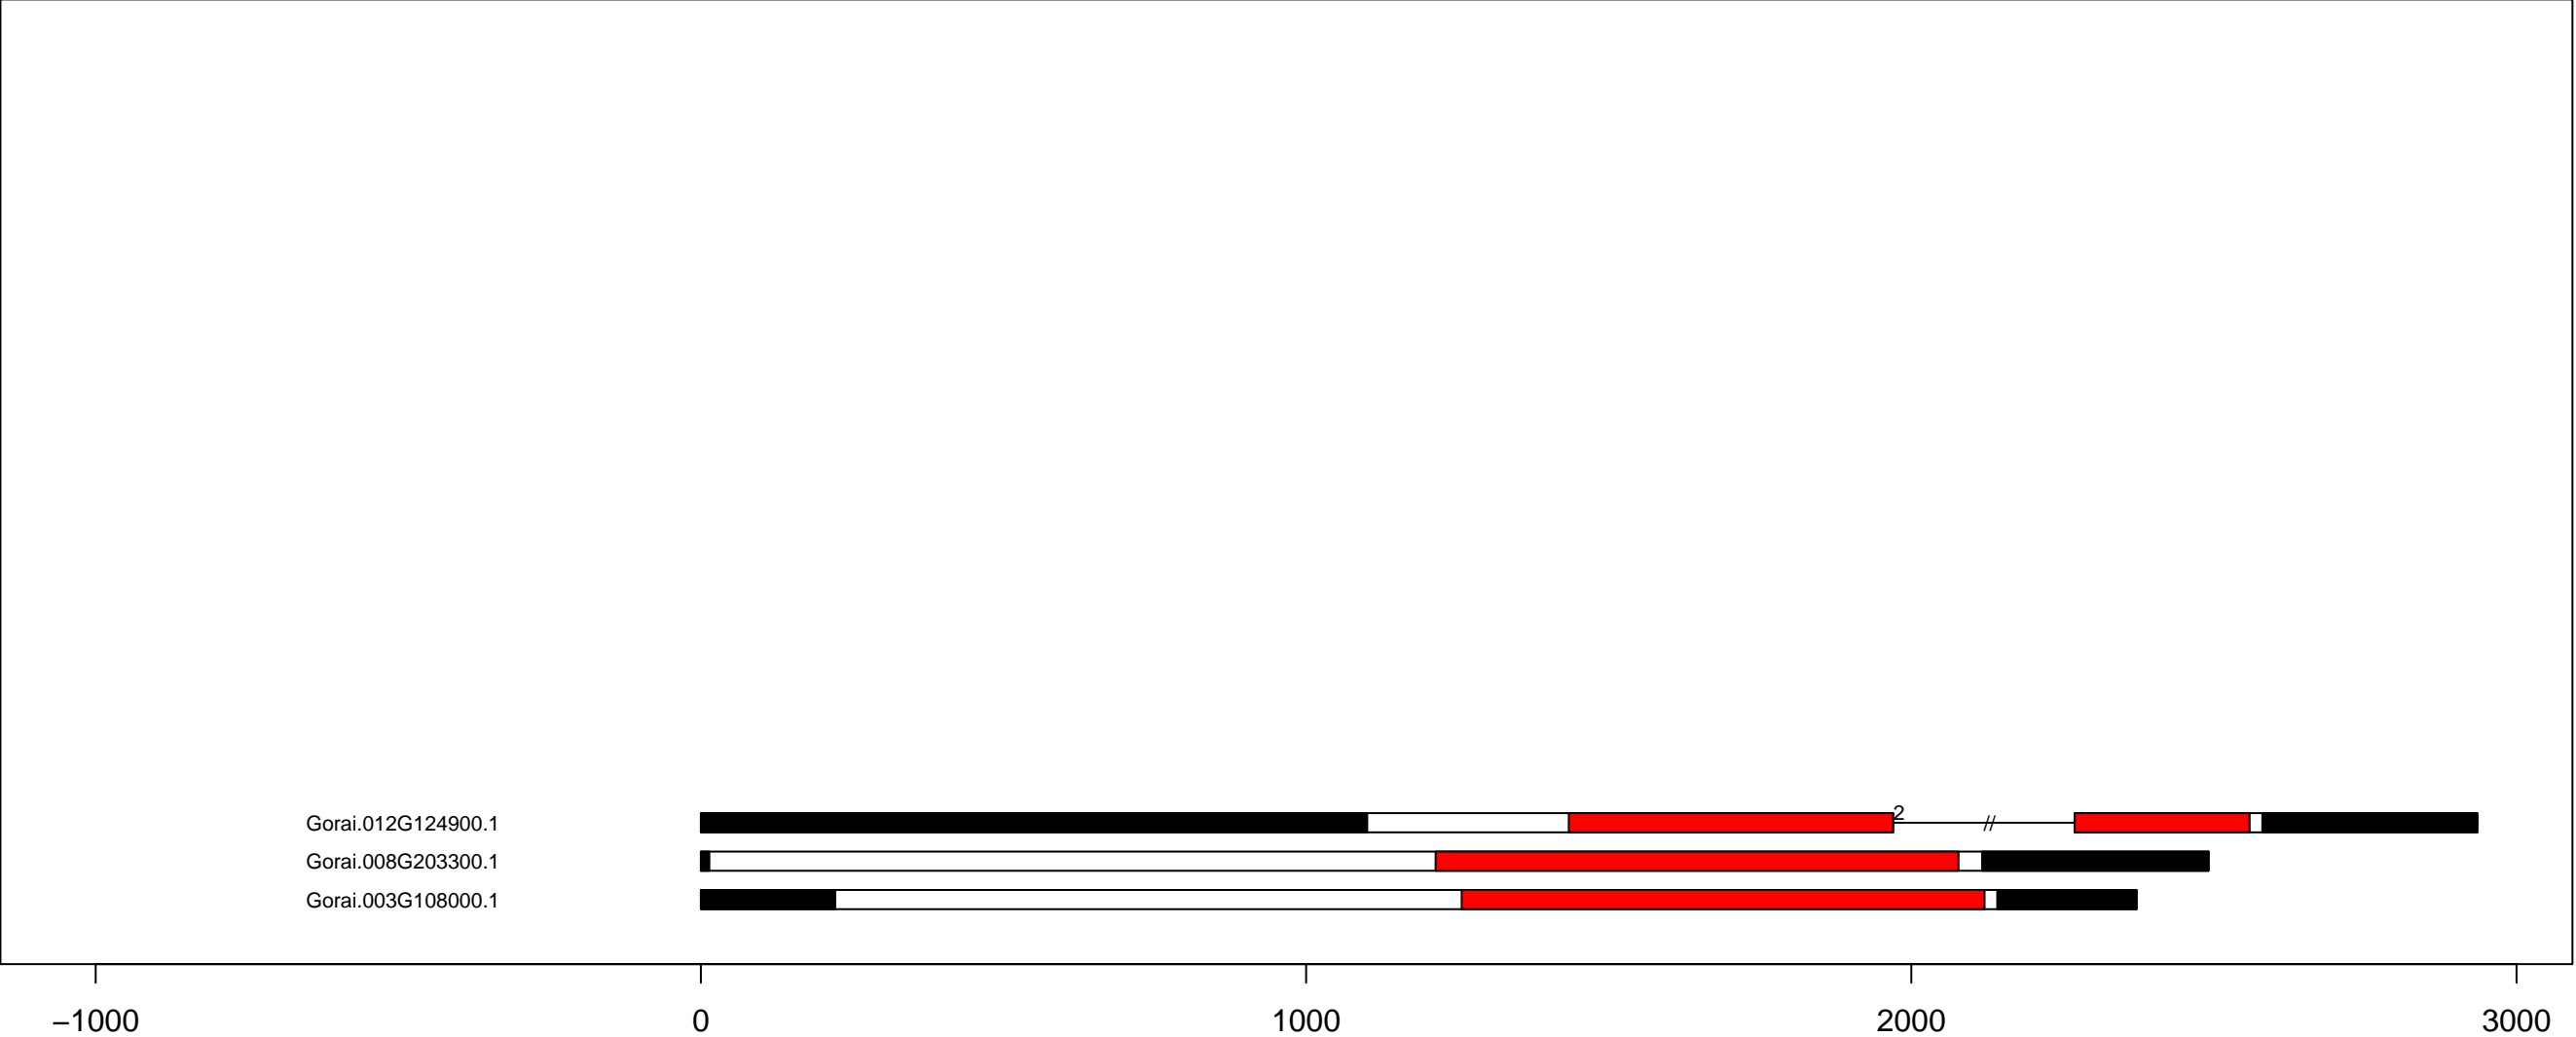

# G.ra RLK-Pelle\_LRR-XII-1 exon-intron and domain diagram (part 1)

Gorai.011G000900.1  
Gorai.010G165300.1  
Gorai.010G136200.1  
Gorai.009G436300.1  
Gorai.009G436200.1  
Gorai.009G371100.1  
Gorai.009G370000.1  
Gorai.009G369800.1  
Gorai.009G340400.1  
Gorai.008G290200.1  
Gorai.007G181000.1  
Gorai.007G045900.1  
Gorai.004G027800.1  
Gorai.002G260200.1  
Gorai.002G133000.1  
Gorai.002G131000.1  
Gorai.002G064300.1  
Gorai.002G051900.1  
Gorai.002G051300.1  
Gorai.002G049400.1

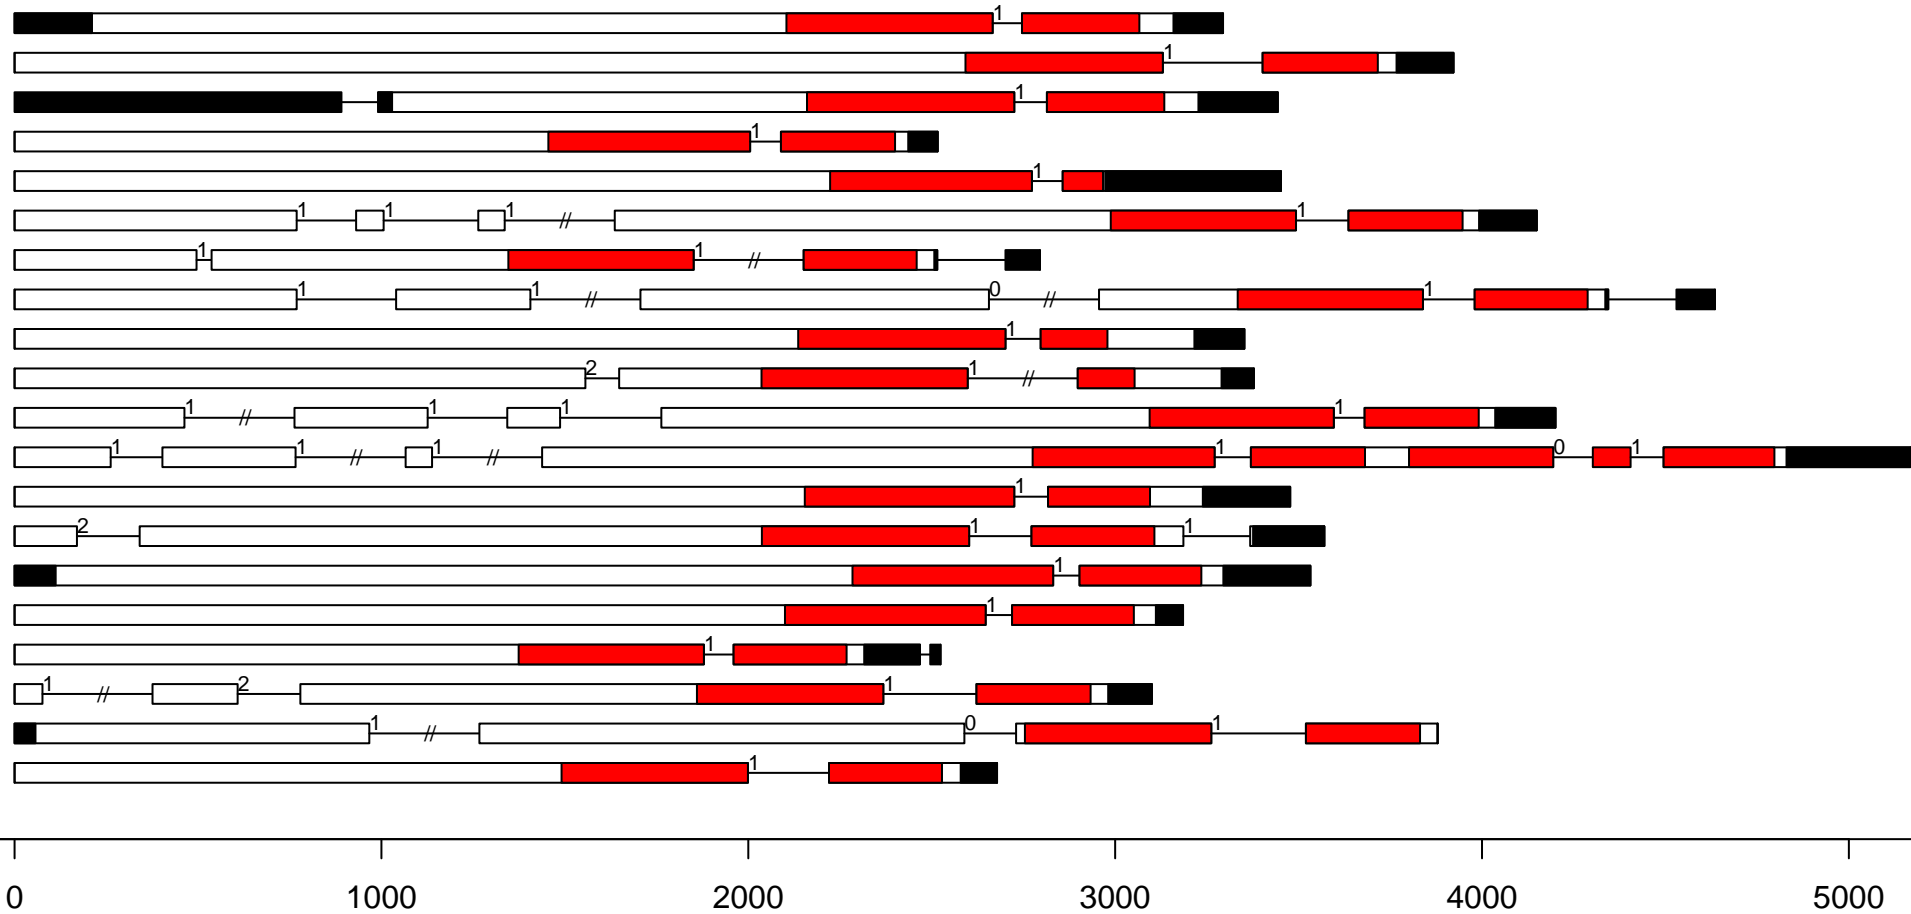

### G.ra RLK-Pelle\_LRR-XII-1 exon-intron and domain diagram (part 2)

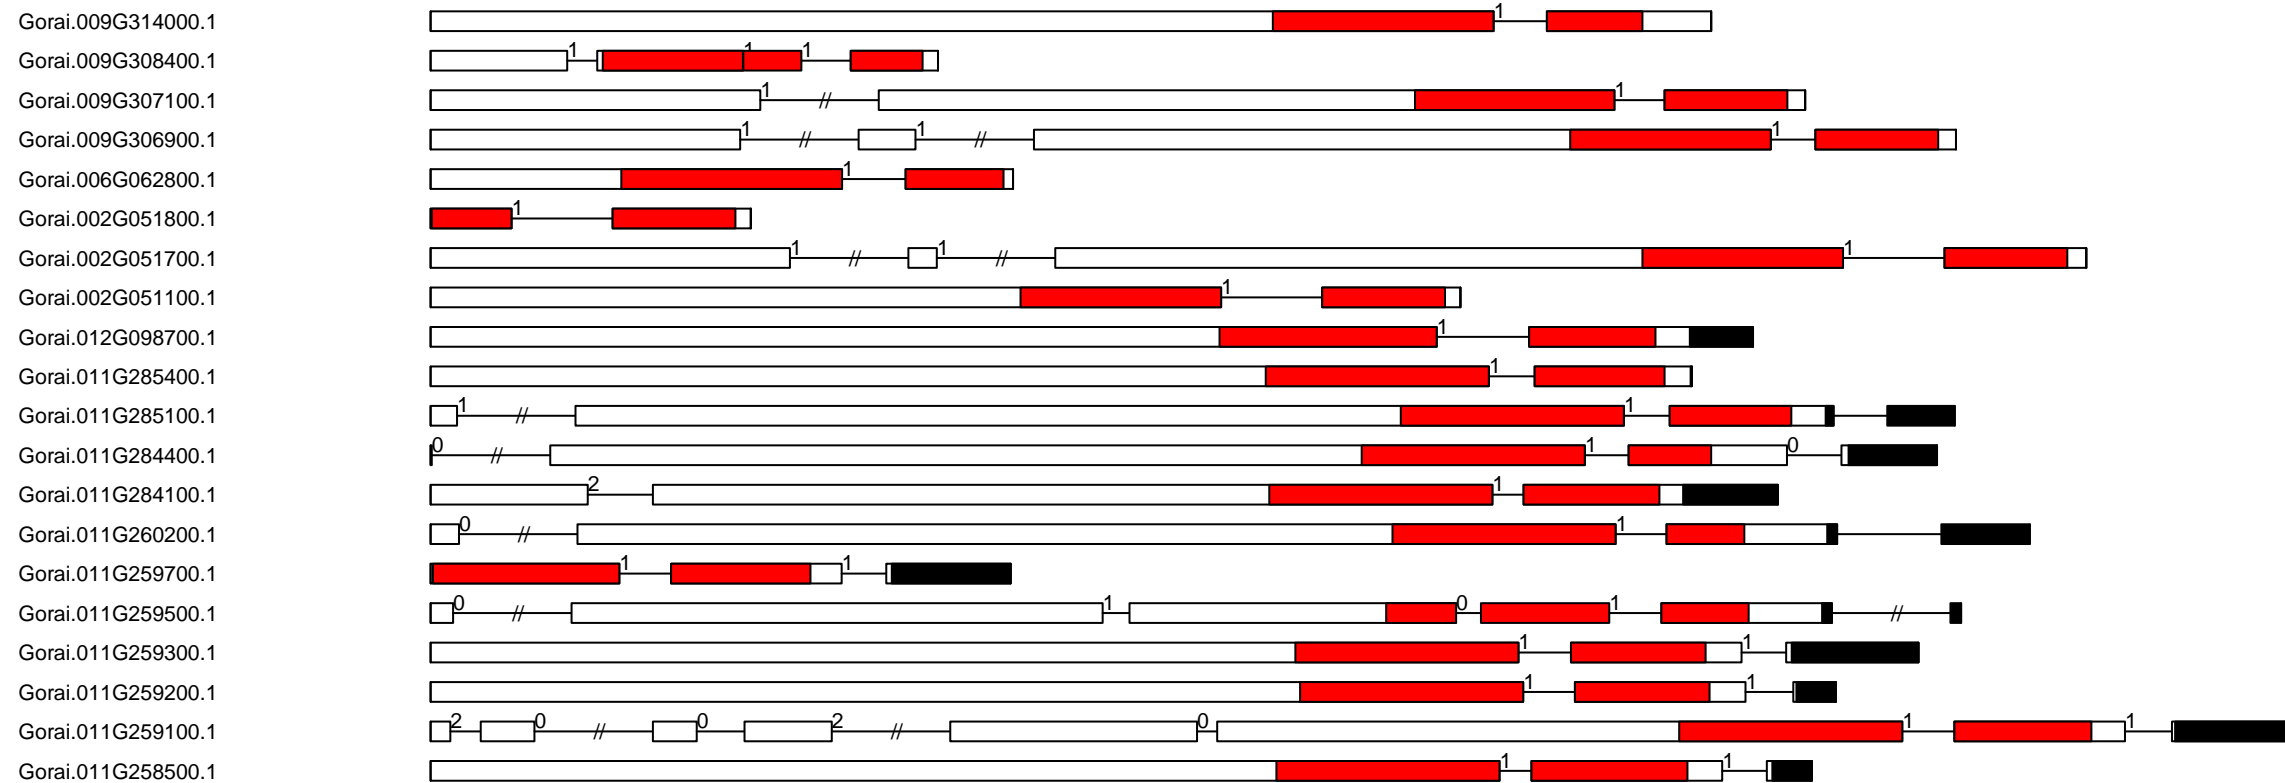





# G.ra RLK-Pelle\_LRR-XII-1 exon-intron and domain diagram (part 4)

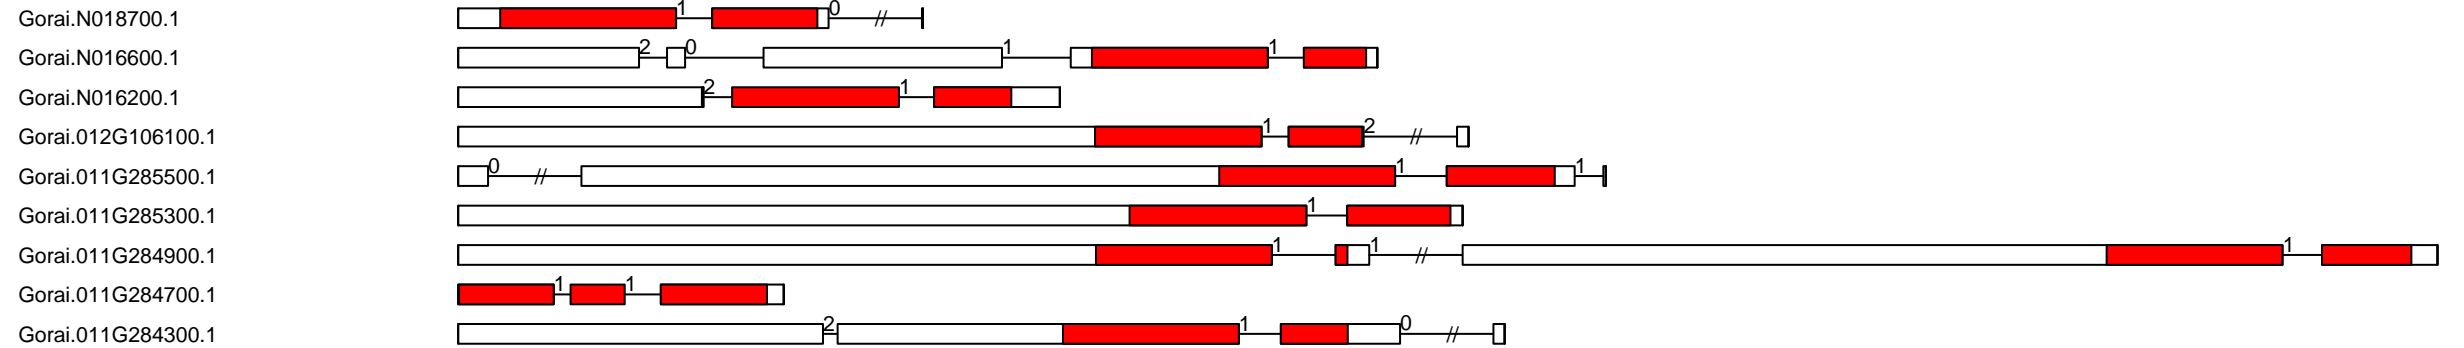

# G.ra RLK-Pelle\_LRR-XIIIa exon-intron and domain diagram (all)

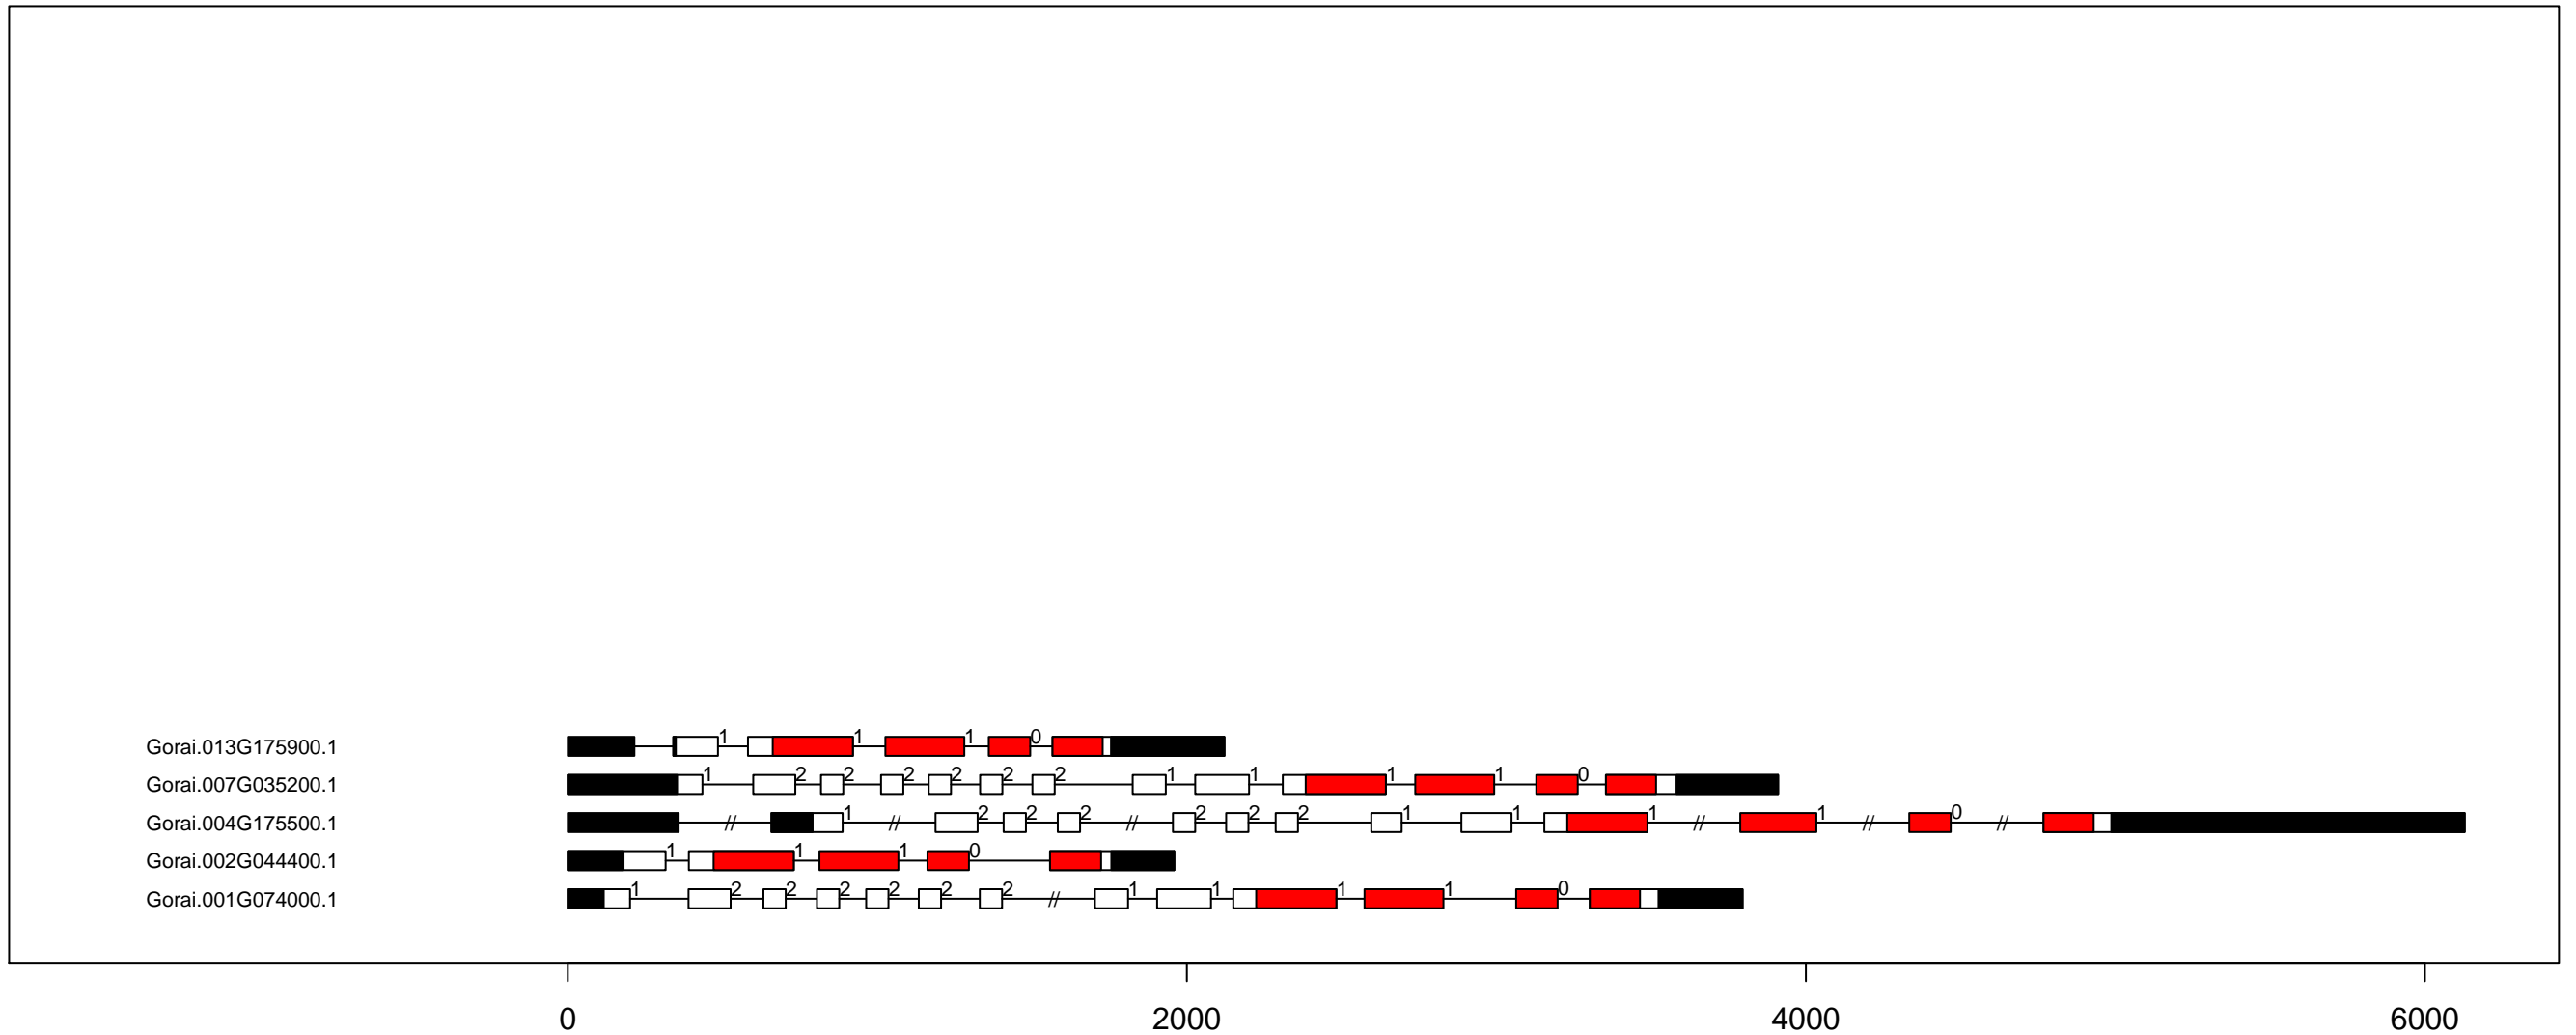

G.ra RLK-Pelle\_LRR-XIIIb exon-intron and domain diagram (all)

Gorai.010G096300.1  
Gorai.007G009000.2  
Gorai.001G019800.1

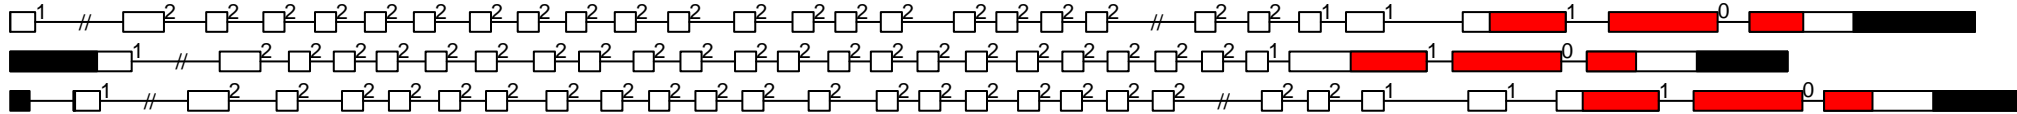

0

2000

4000

6000

# G.ra RLK-Pelle\_LRR-XIV exon-intron and domain diagram (all)

Gorai.013G036900.1  
Gorai.010G010100.2  
Gorai.008G029000.1  
Gorai.005G243800.1  
Gorai.002G127700.4

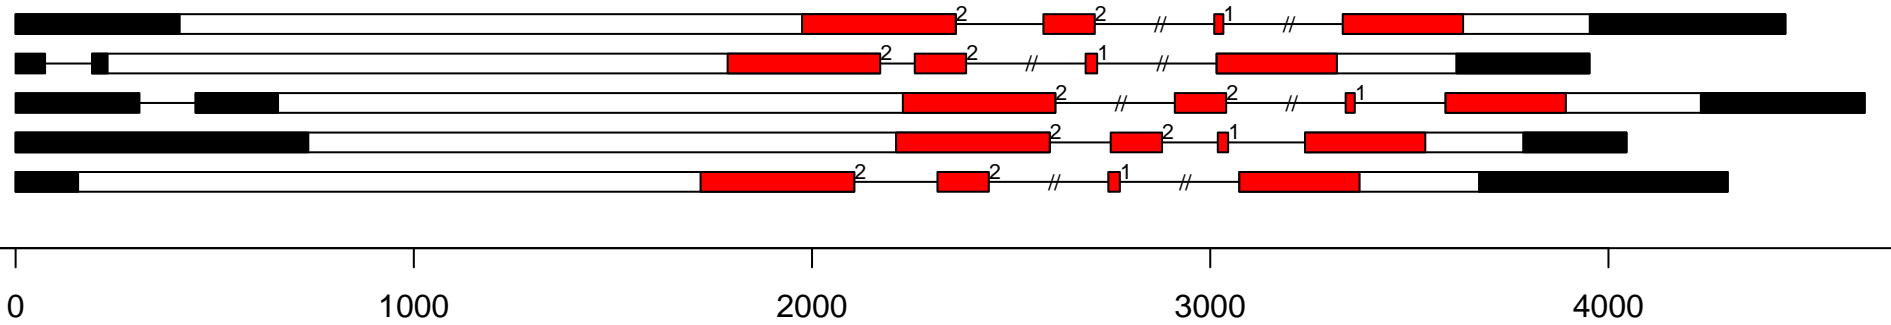

# G.ra RLK-Pelle\_LRR-XV exon-intron and domain diagram (all)

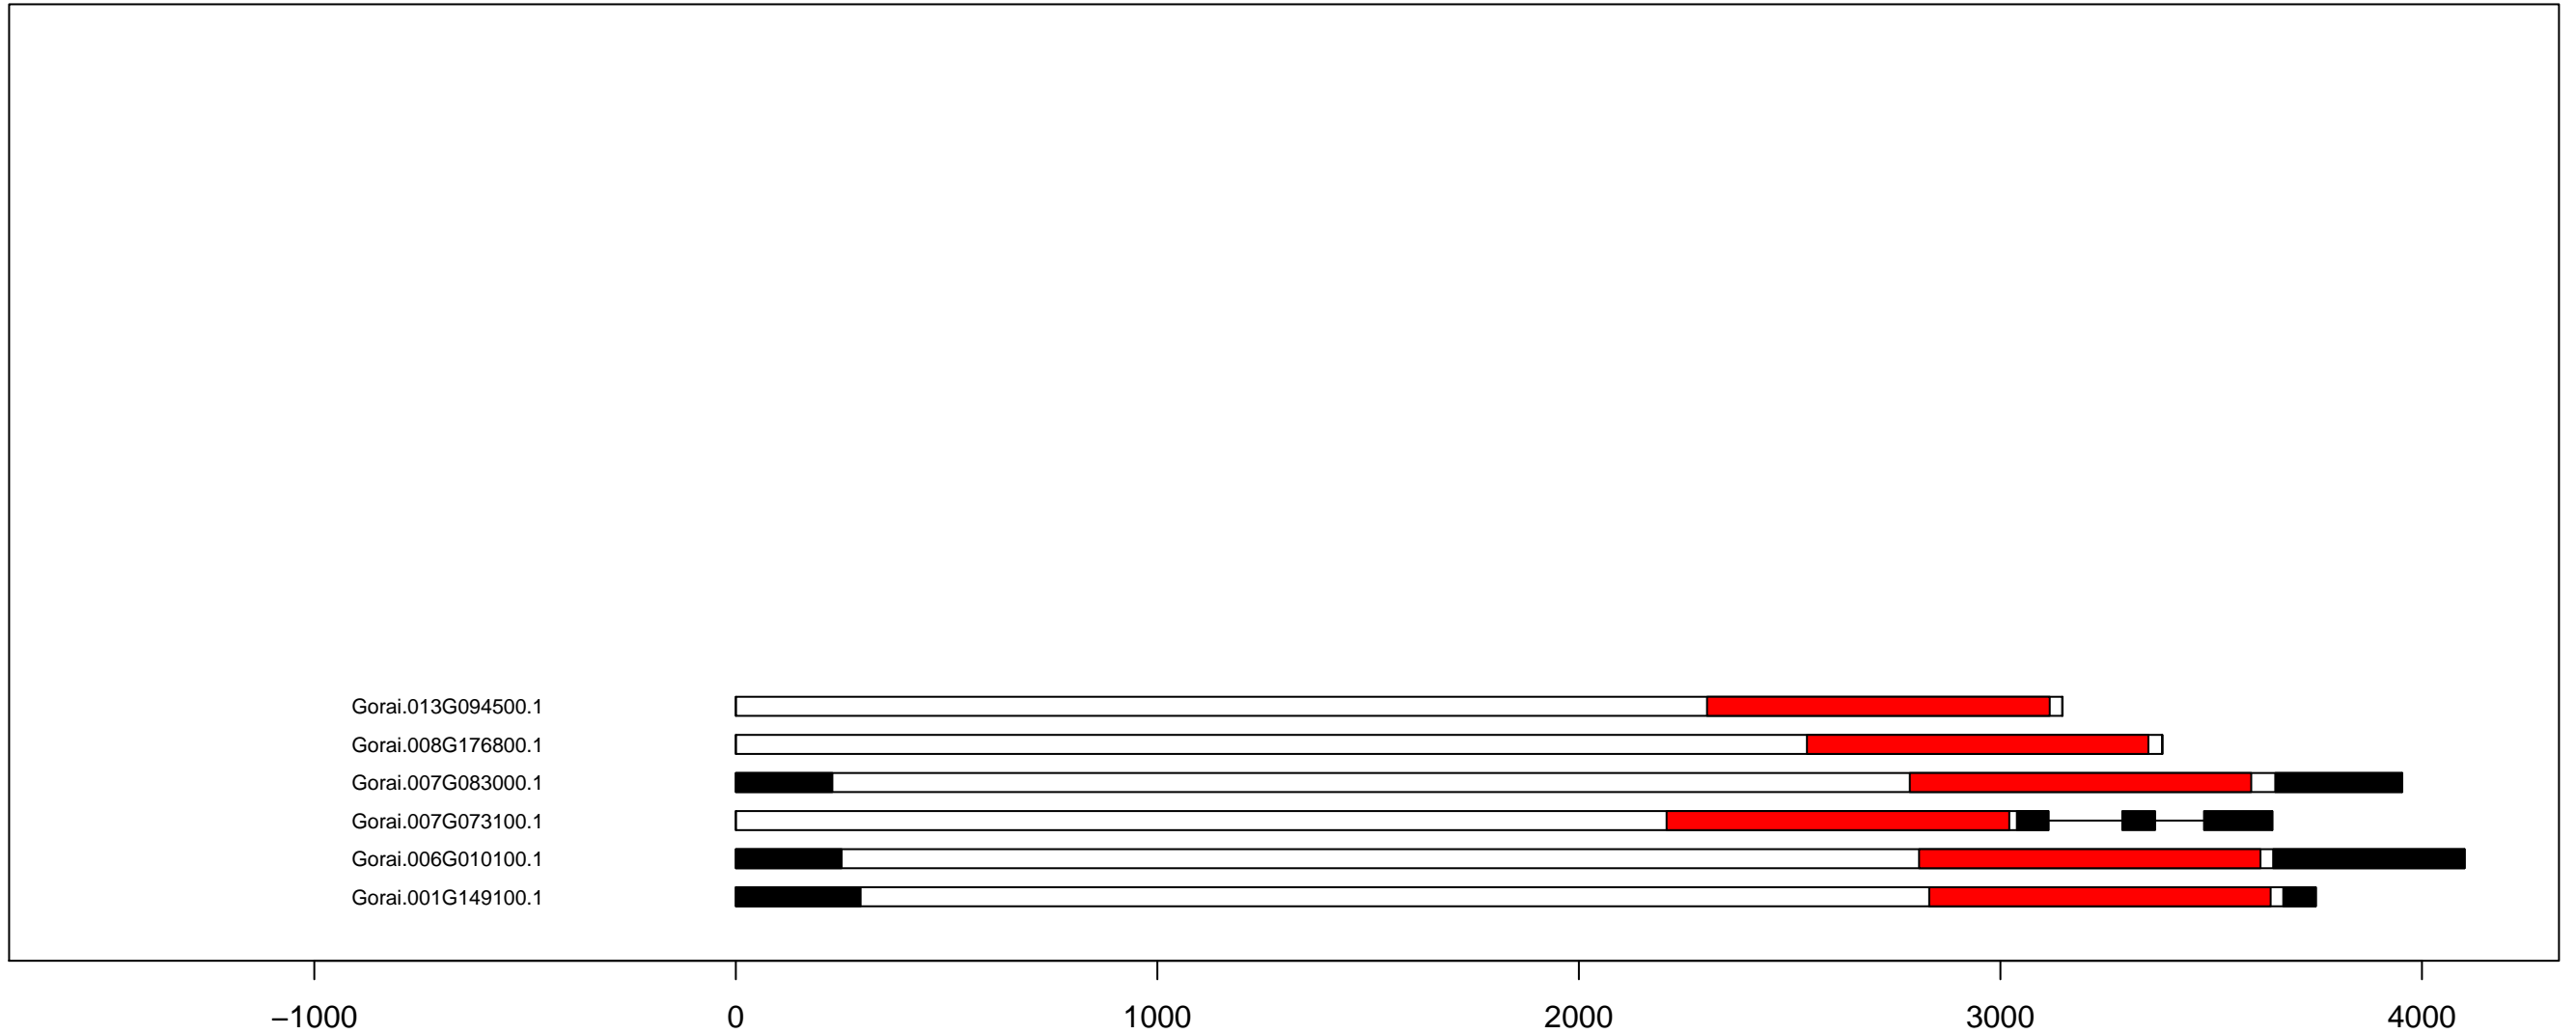

### G.ra RLK-Pelle\_LysM exon-intron and domain diagram (all)

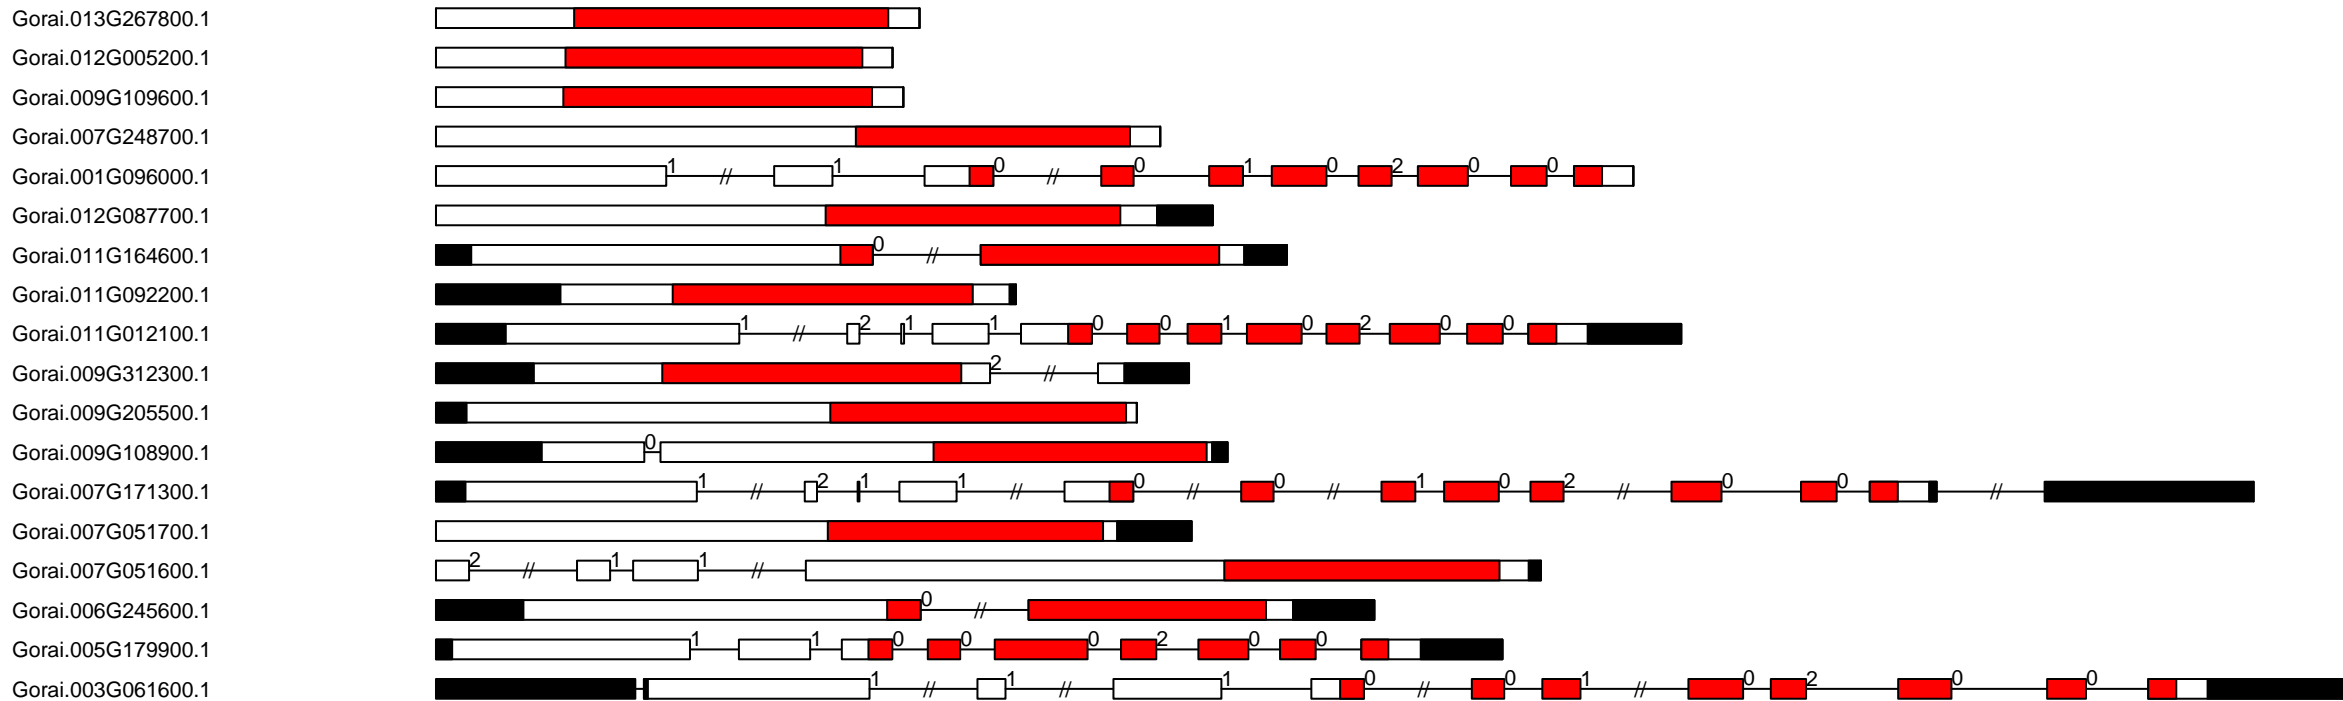

### G.ra RLK-Pelle\_PERK-1 exon-intron and domain diagram (all)

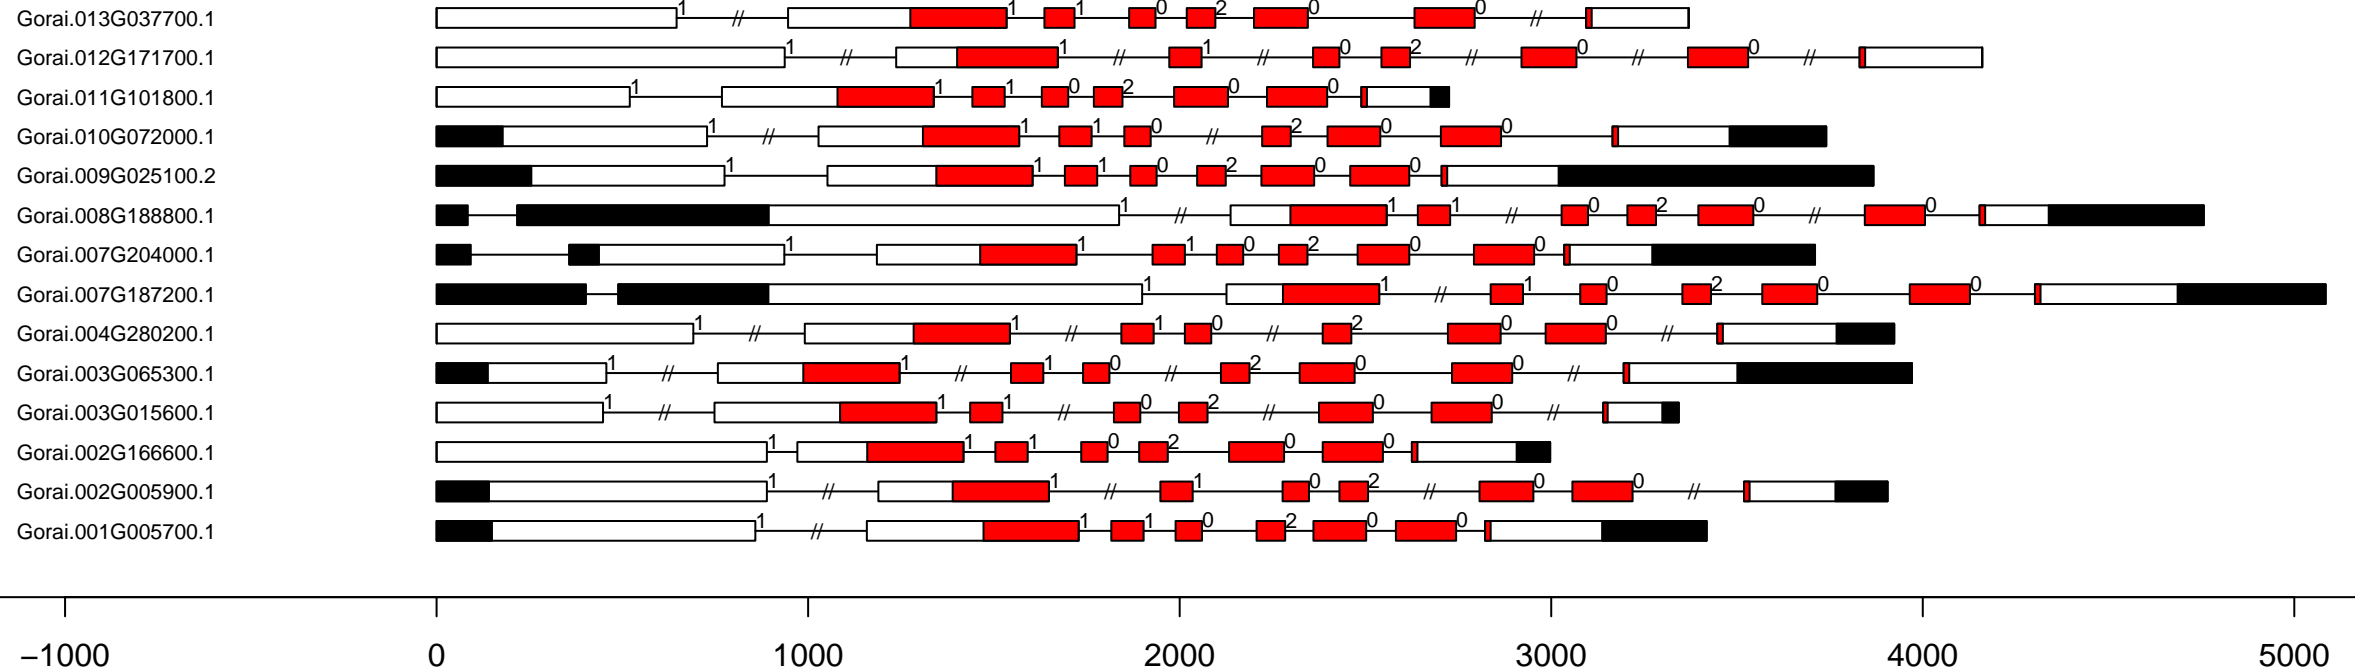

## G.ra RLK-Pelle\_PERK-2 exon-intron and domain diagram (all)

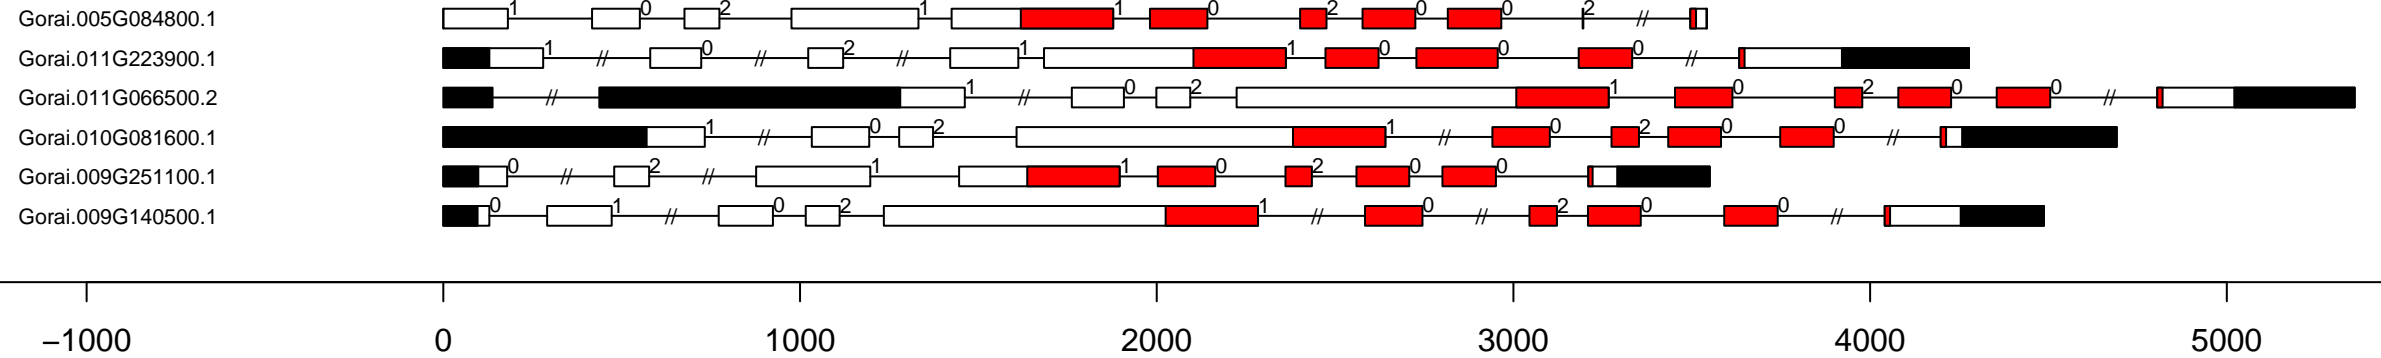



# G.ra RLK-Pelle\_RKF3 exon-intron and domain diagram (all)

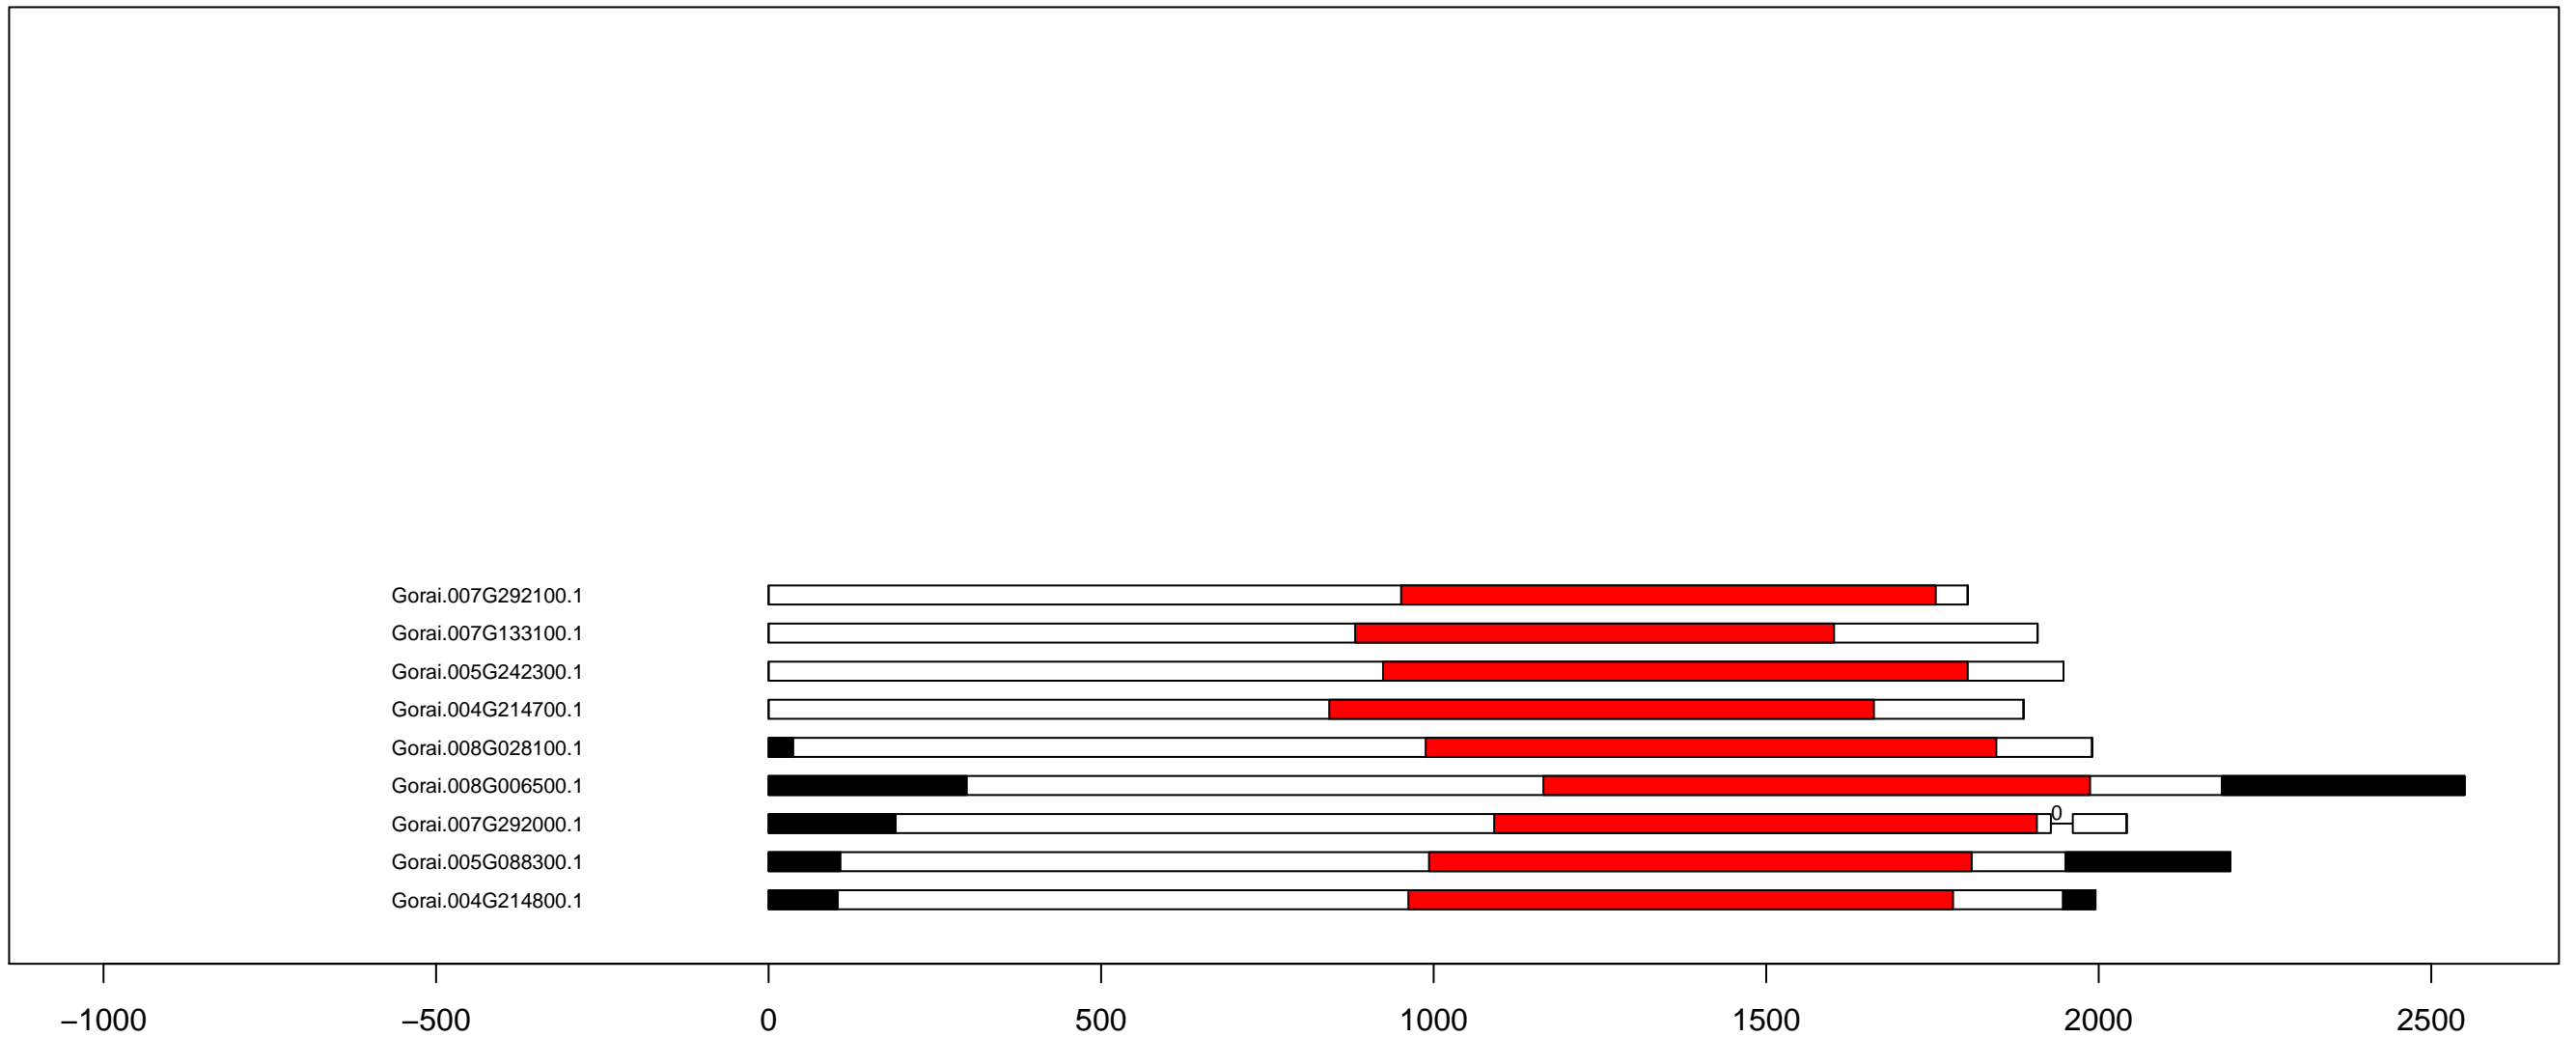

# G.ra RLK-Pelle\_RLCK-II exon-intron and domain diagram (all)

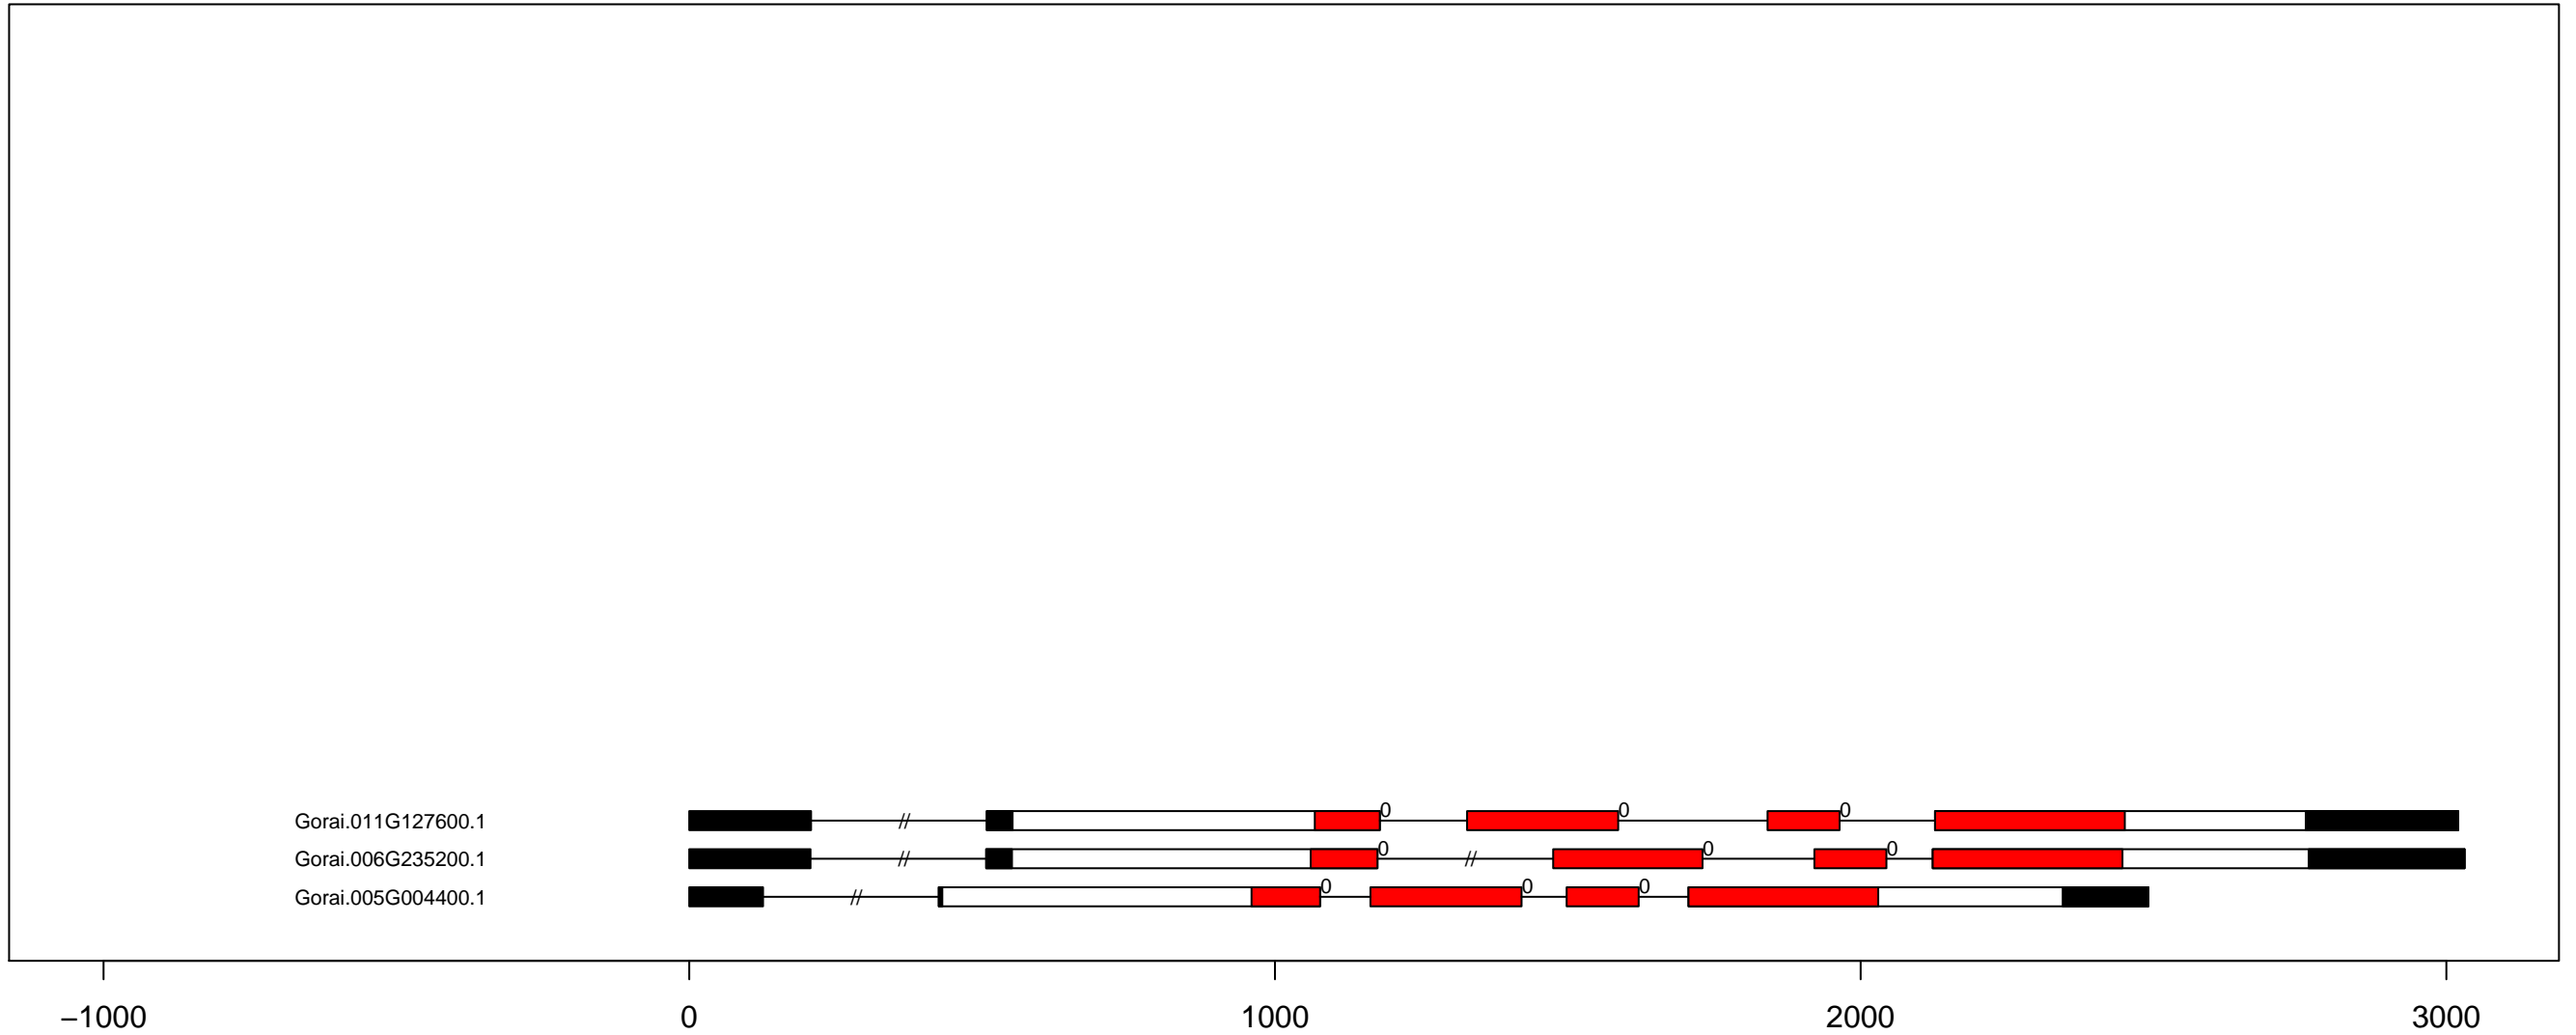



G.ra RLK-Pelle\_RLCK-IXa exon-intron and domain diagram (all)

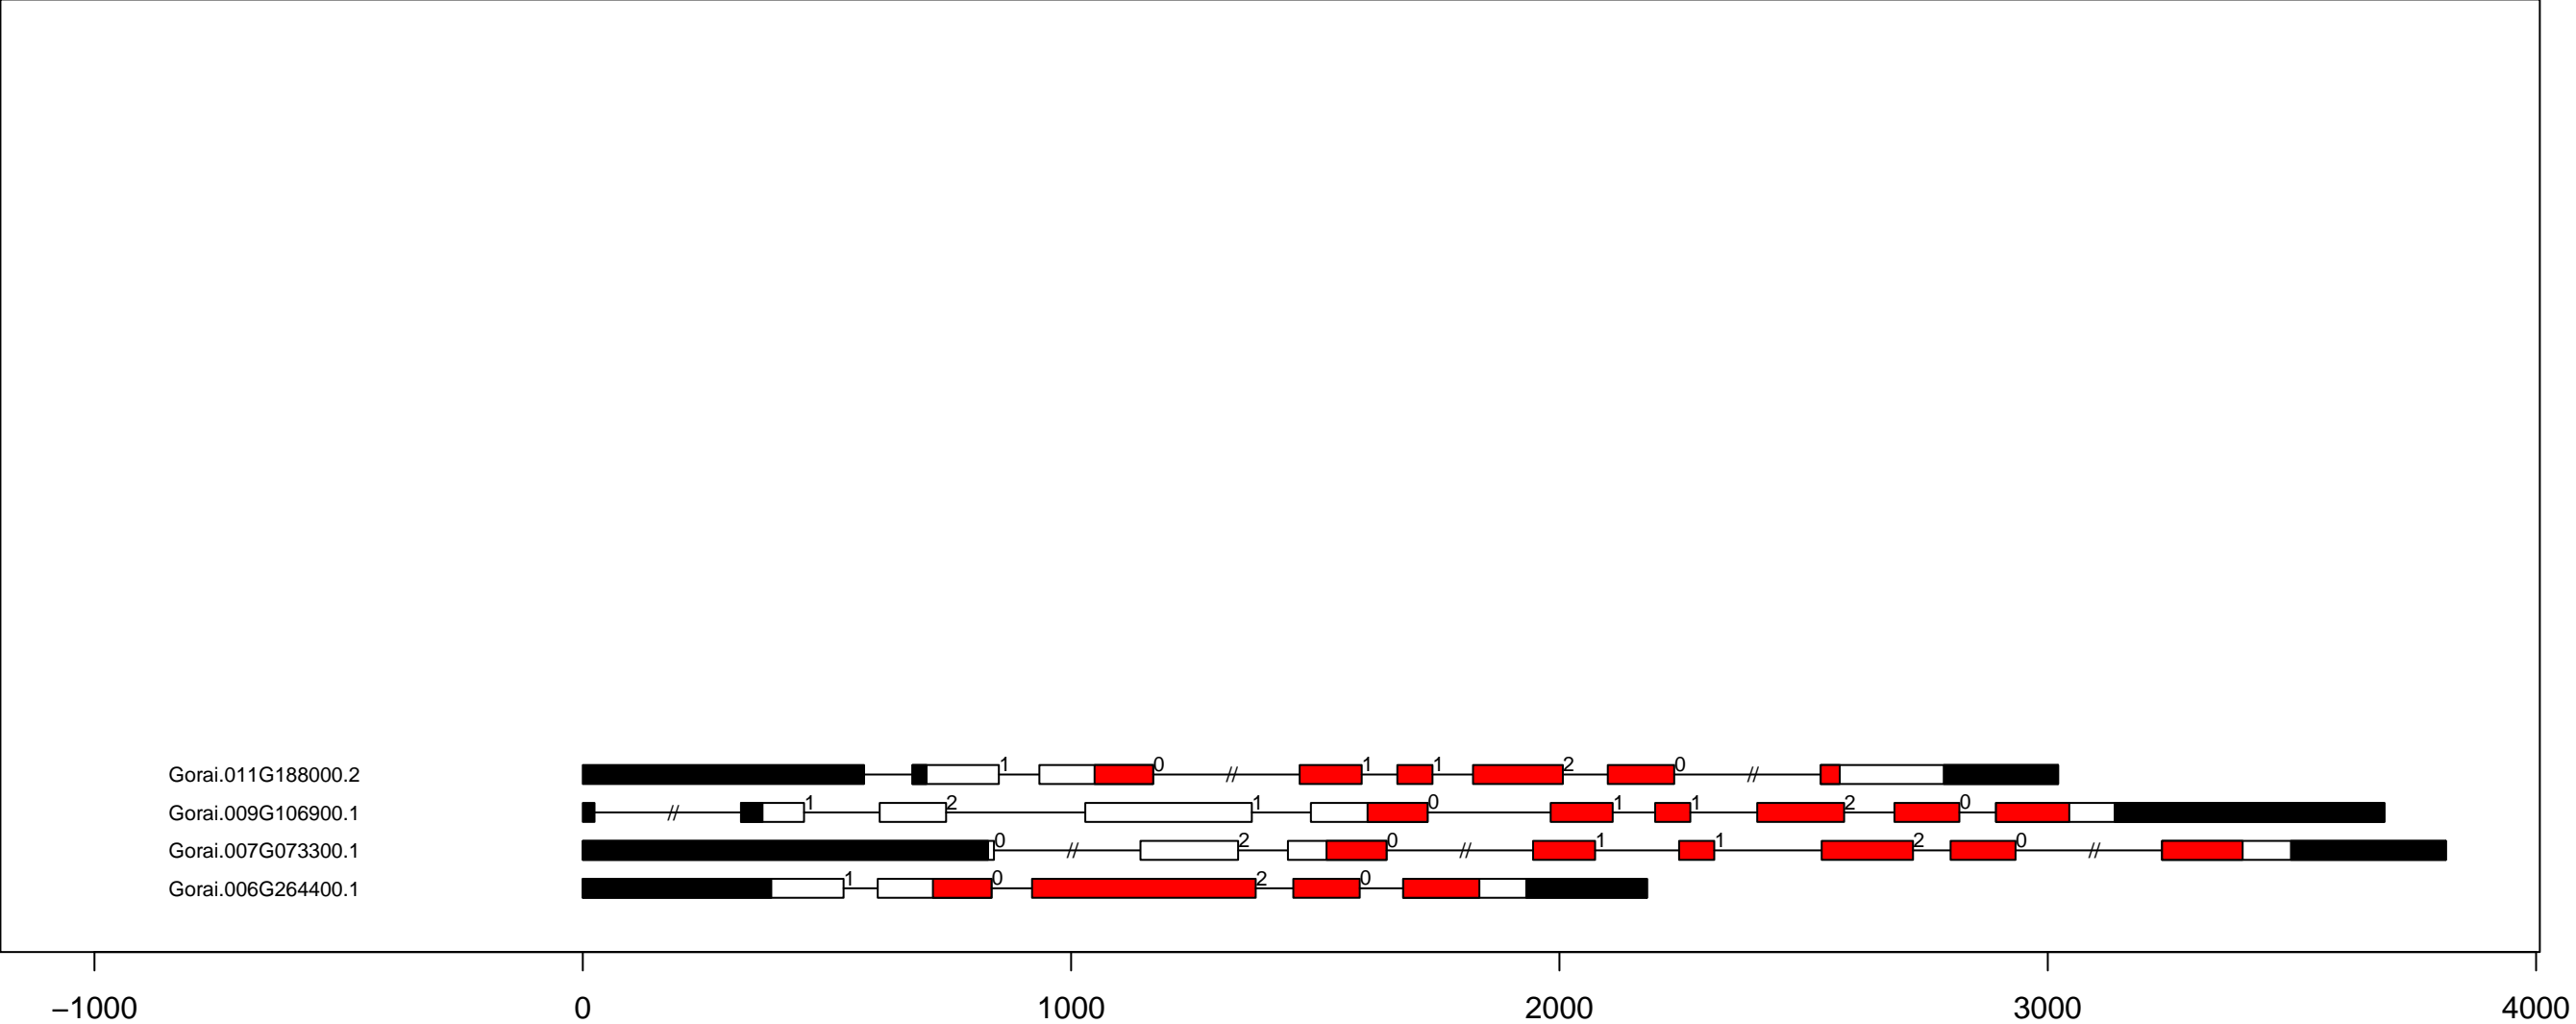

### G.ra RLK-Pelle\_RLCK-IXb exon-intron and domain diagram (all)

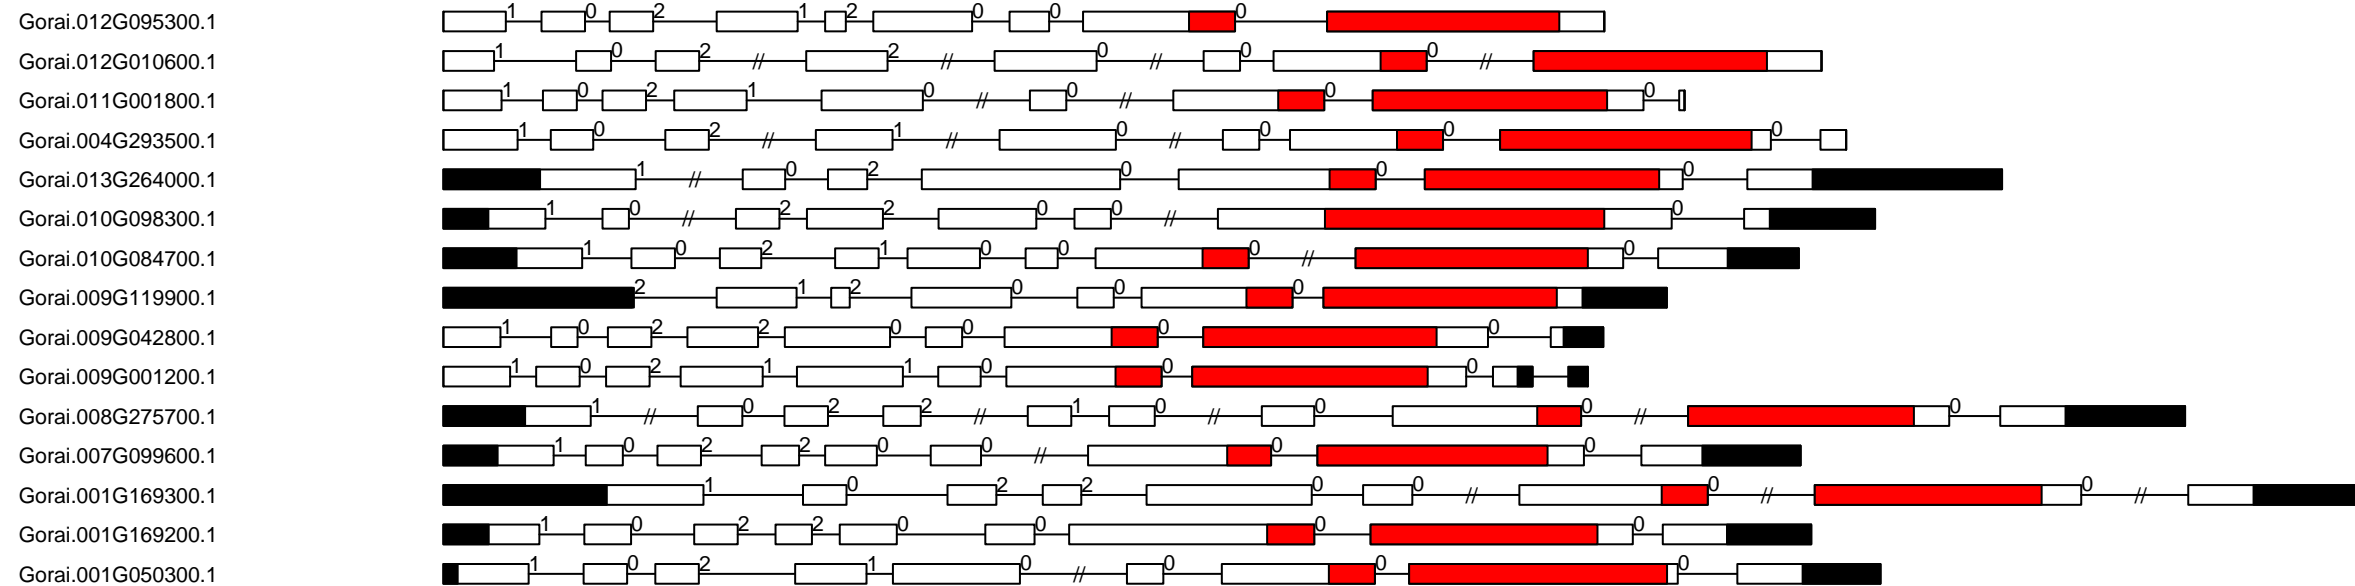

# G.ra RLK-Pelle\_RLCK-Os exon-intron and domain diagram (all)

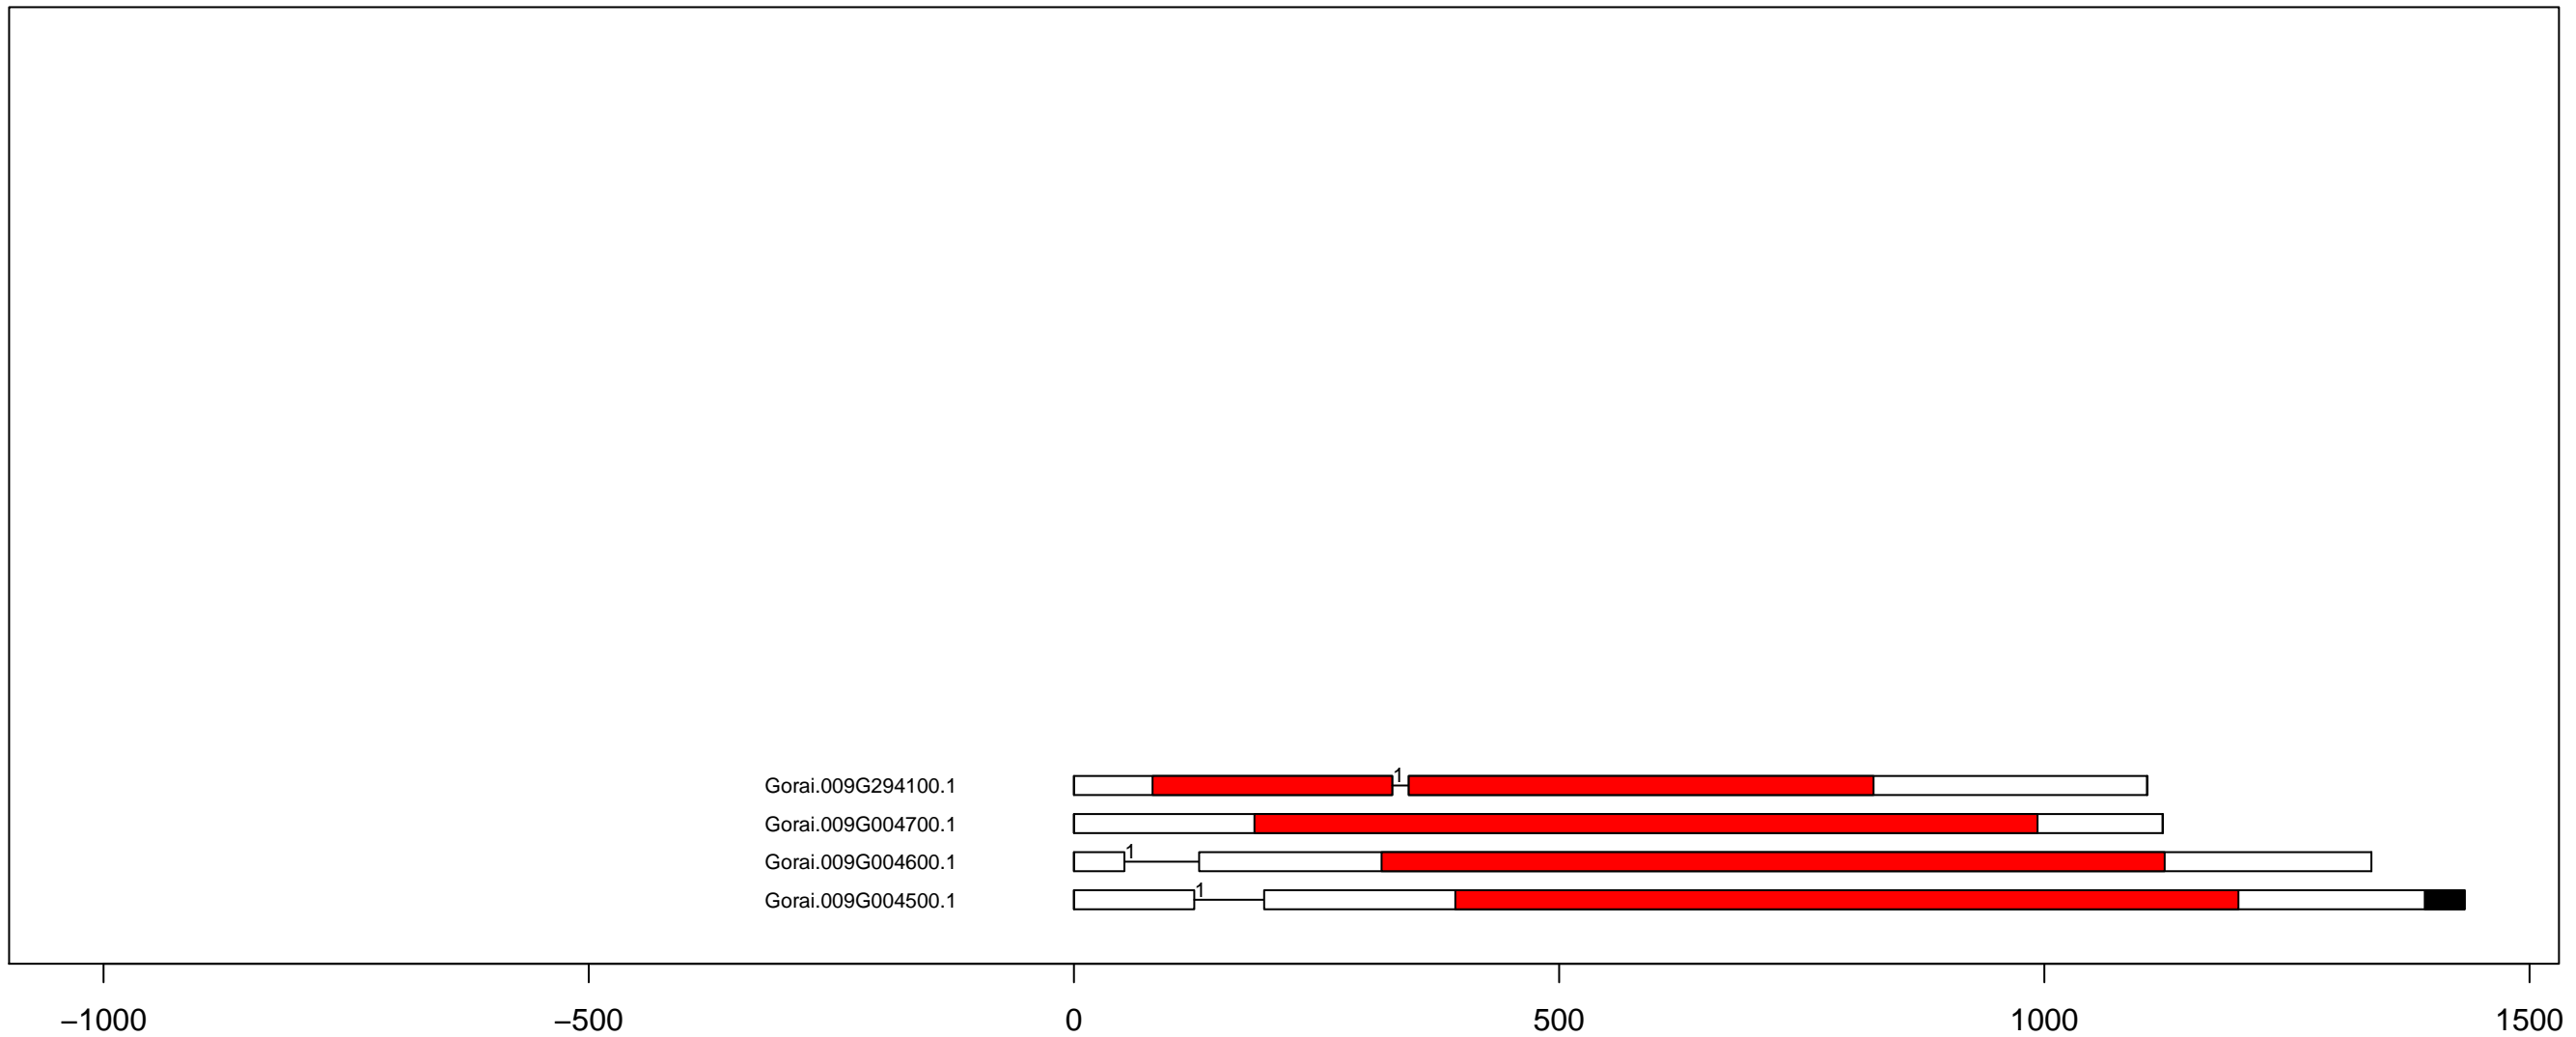

G.ra RLK-Pelle\_RLCK-VIIa-1 exon-intron and domain diagram (part 1)

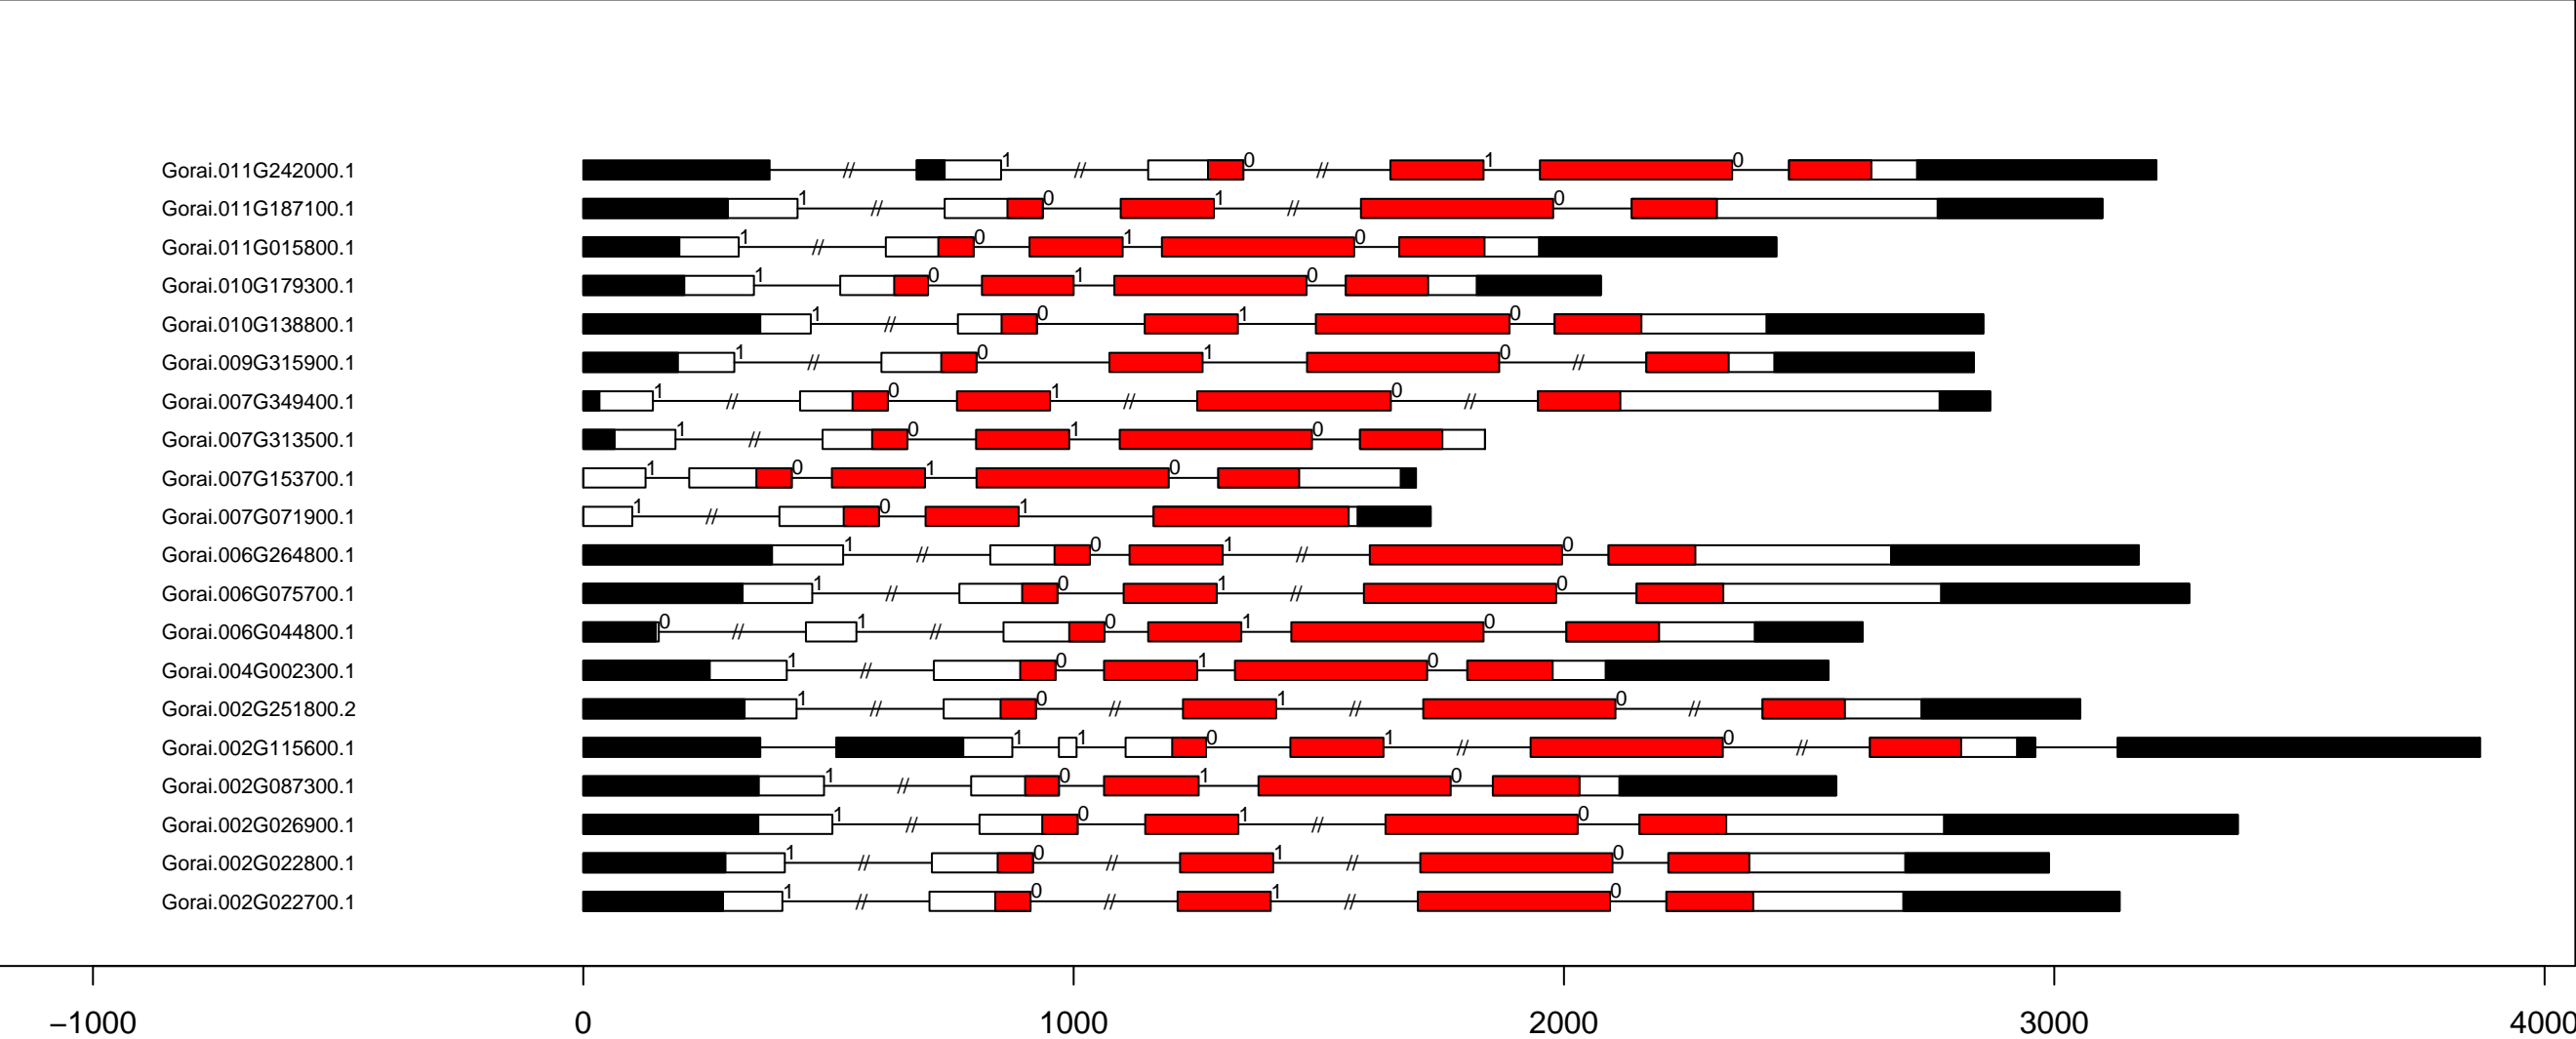

# G.ra RLK-Pelle\_RLCK-VIIa-1 exon-intron and domain diagram (part 2)

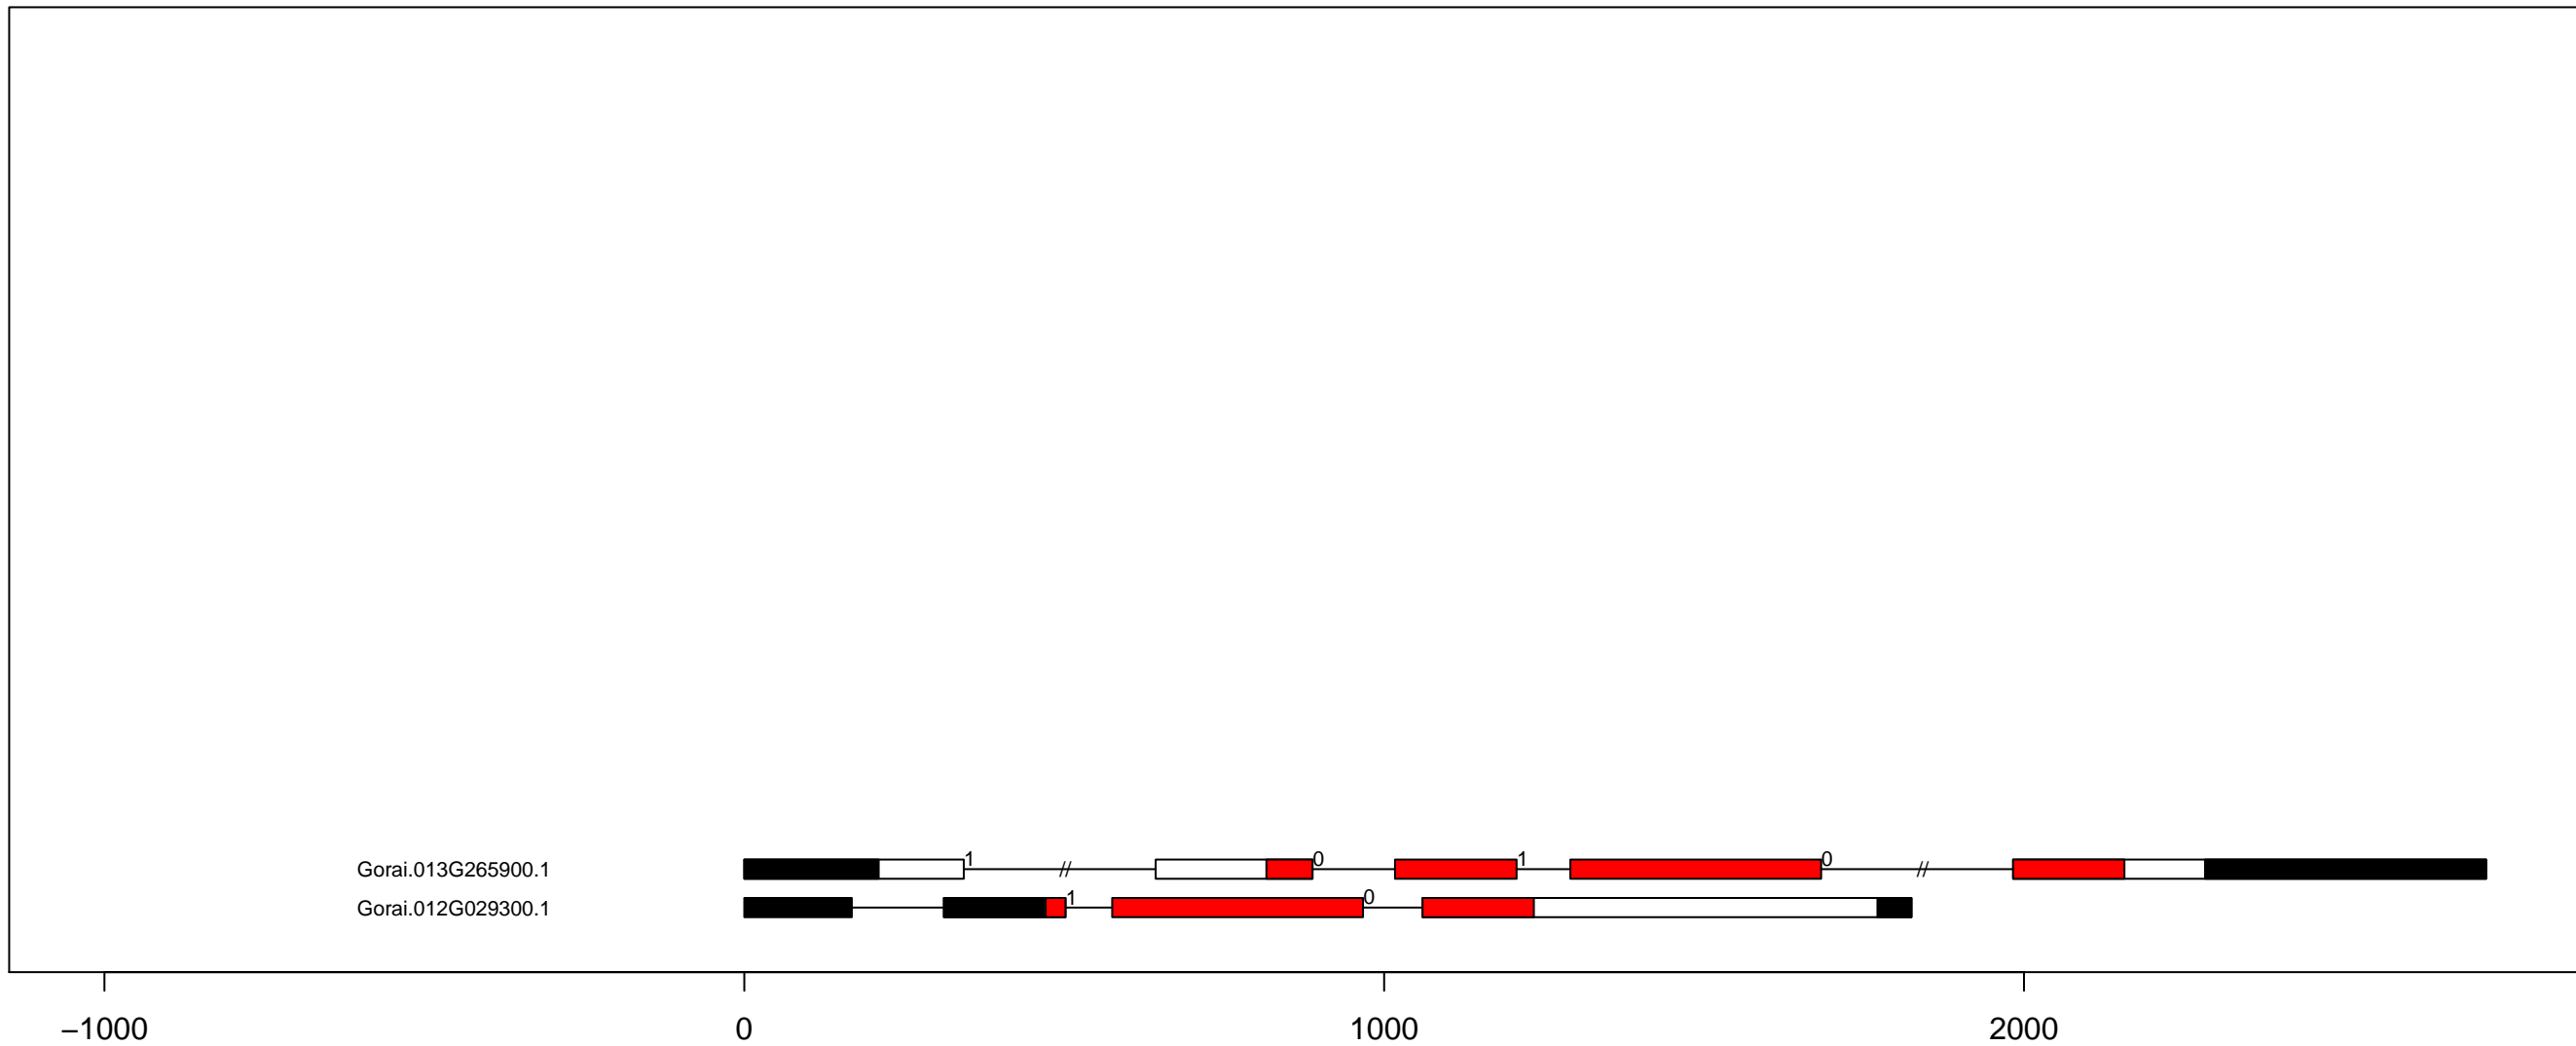



# G.ra RLK-Pelle\_RLCK-VIIa-2 exon-intron and domain diagram (part 1)

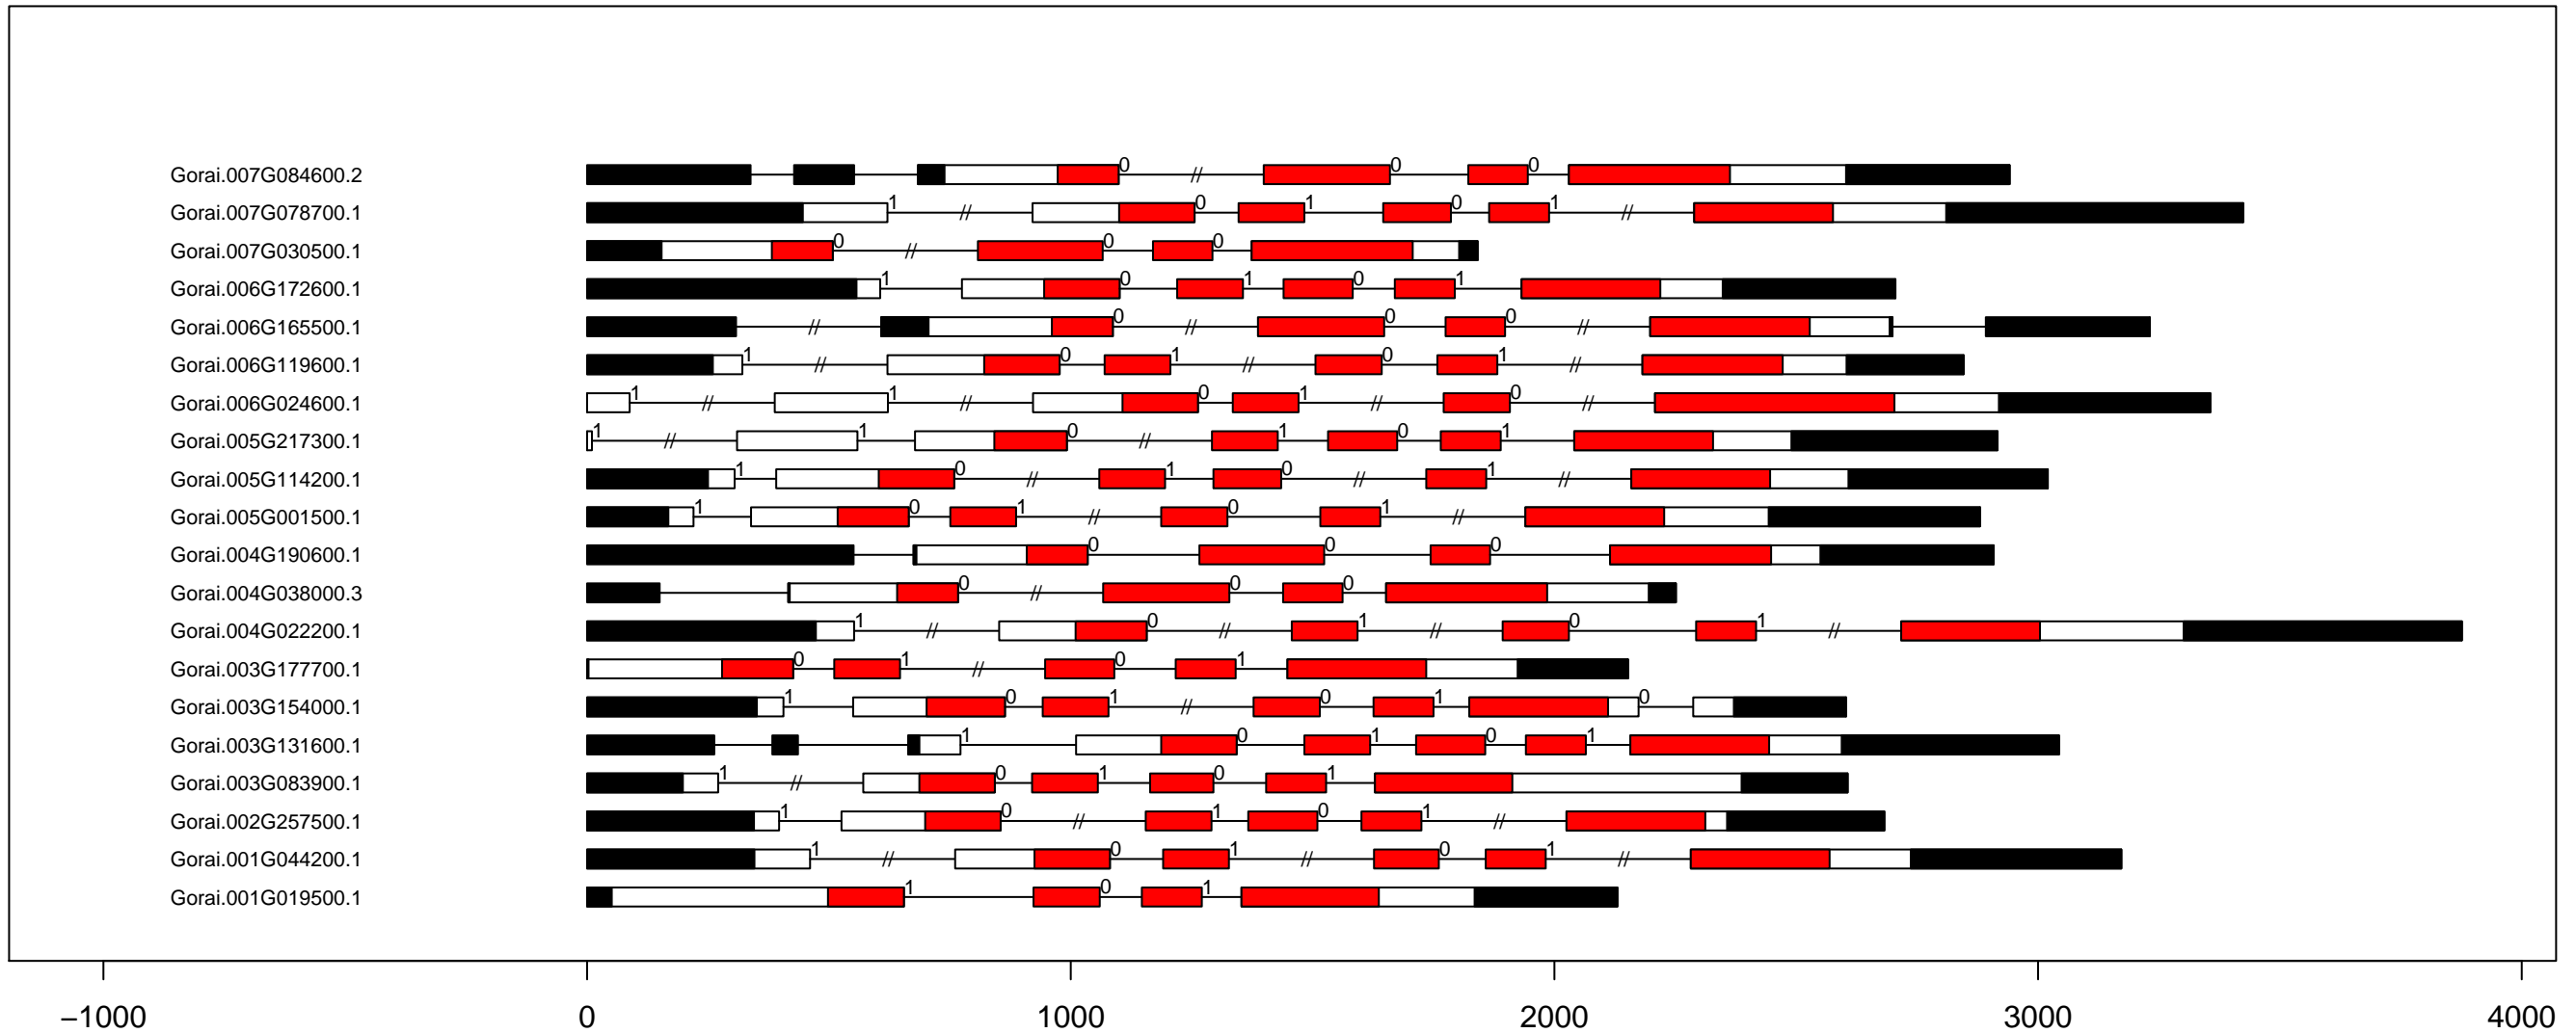

## G.ra RLK-Pelle\_RLCK-VIIa-2 exon-intron and domain diagram (part 2)

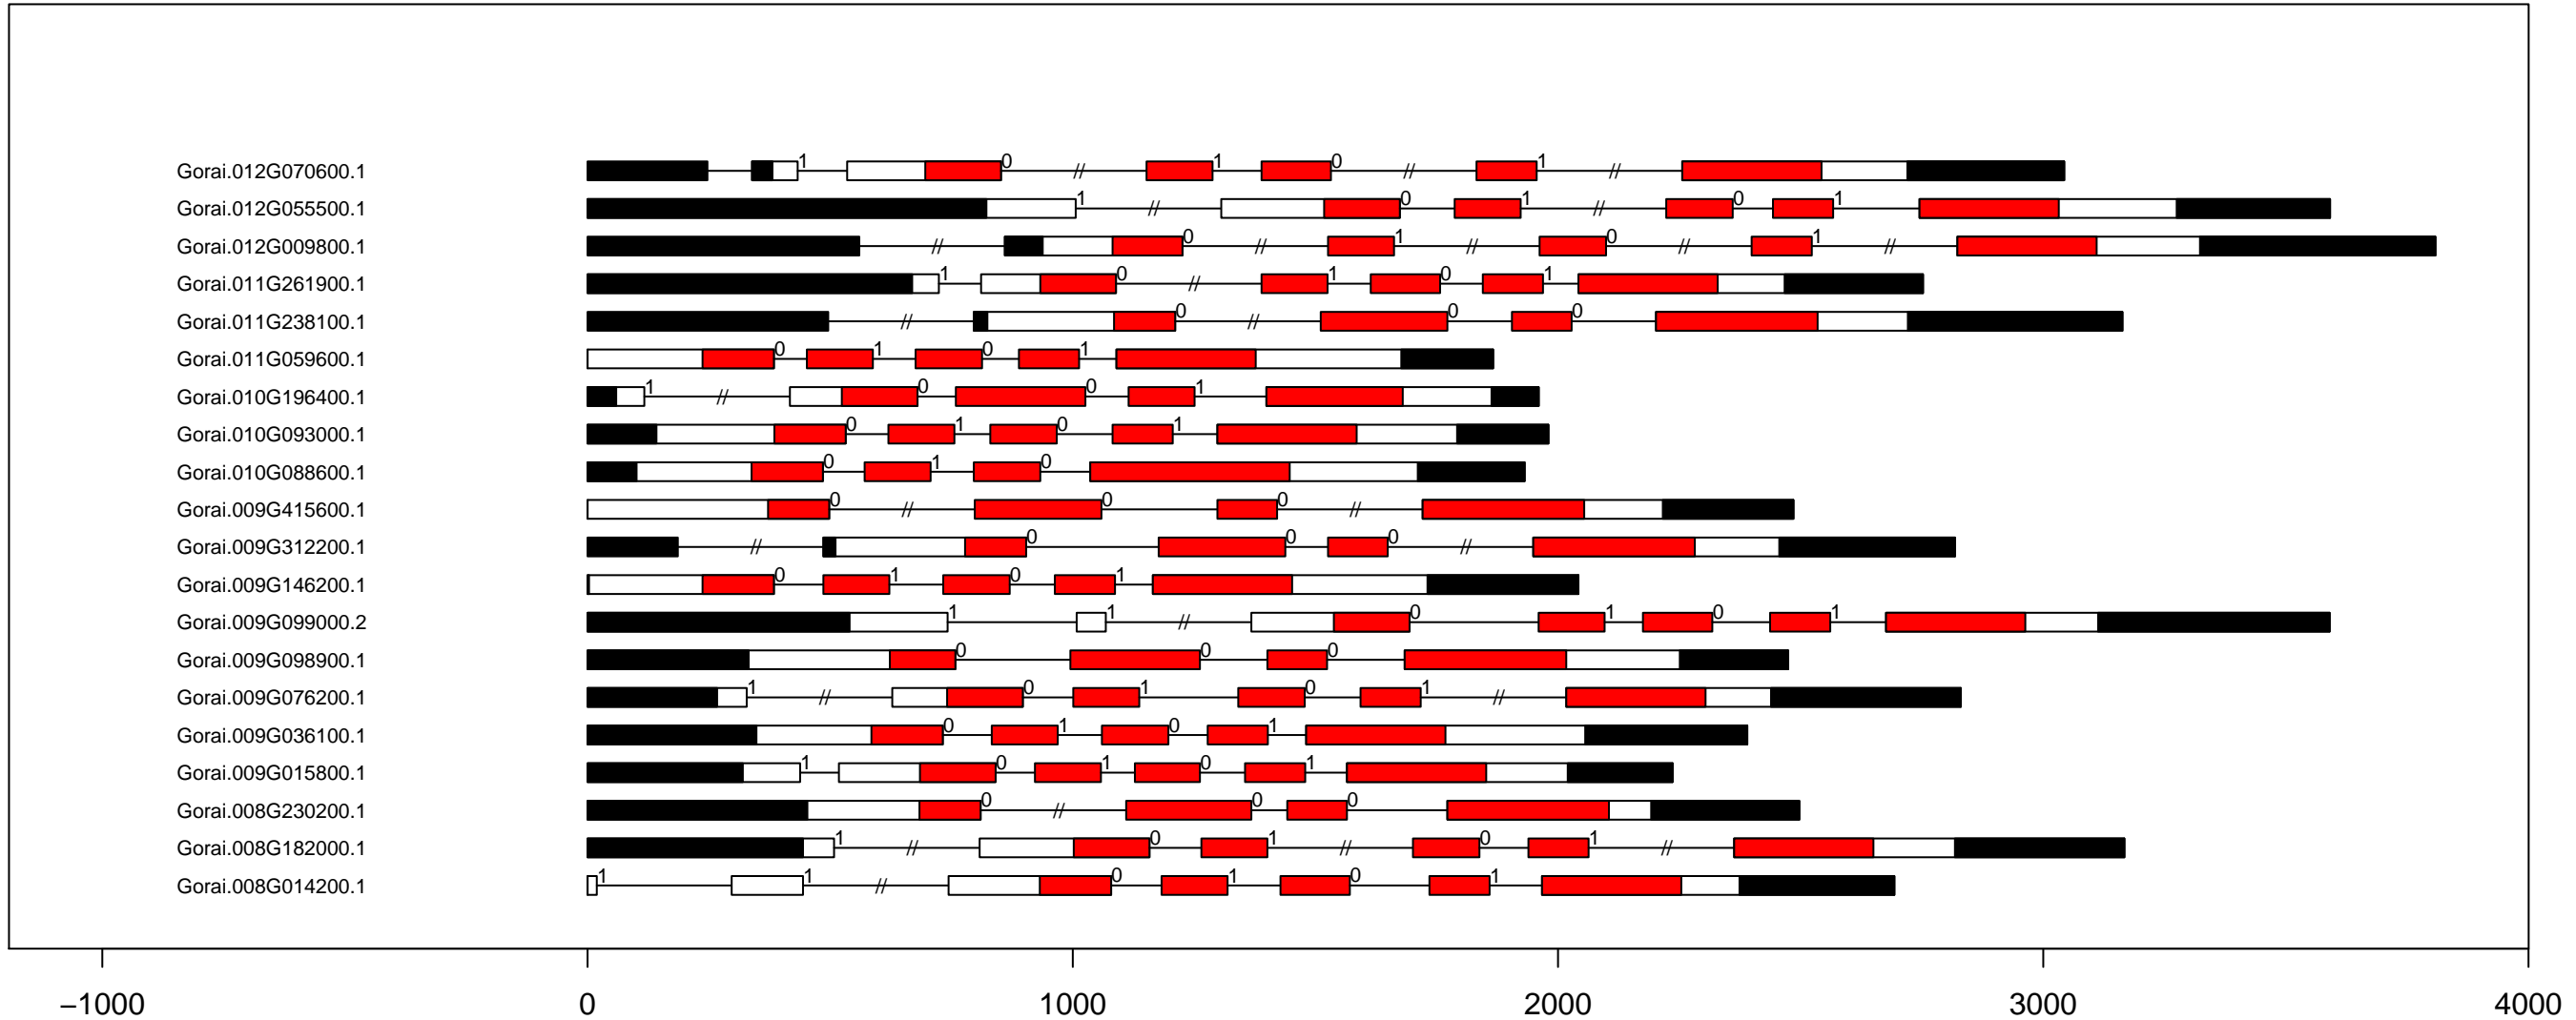

### G.ra RLK-Pelle\_RLCK-VIIa-2 exon-intron and domain diagram (part 3)

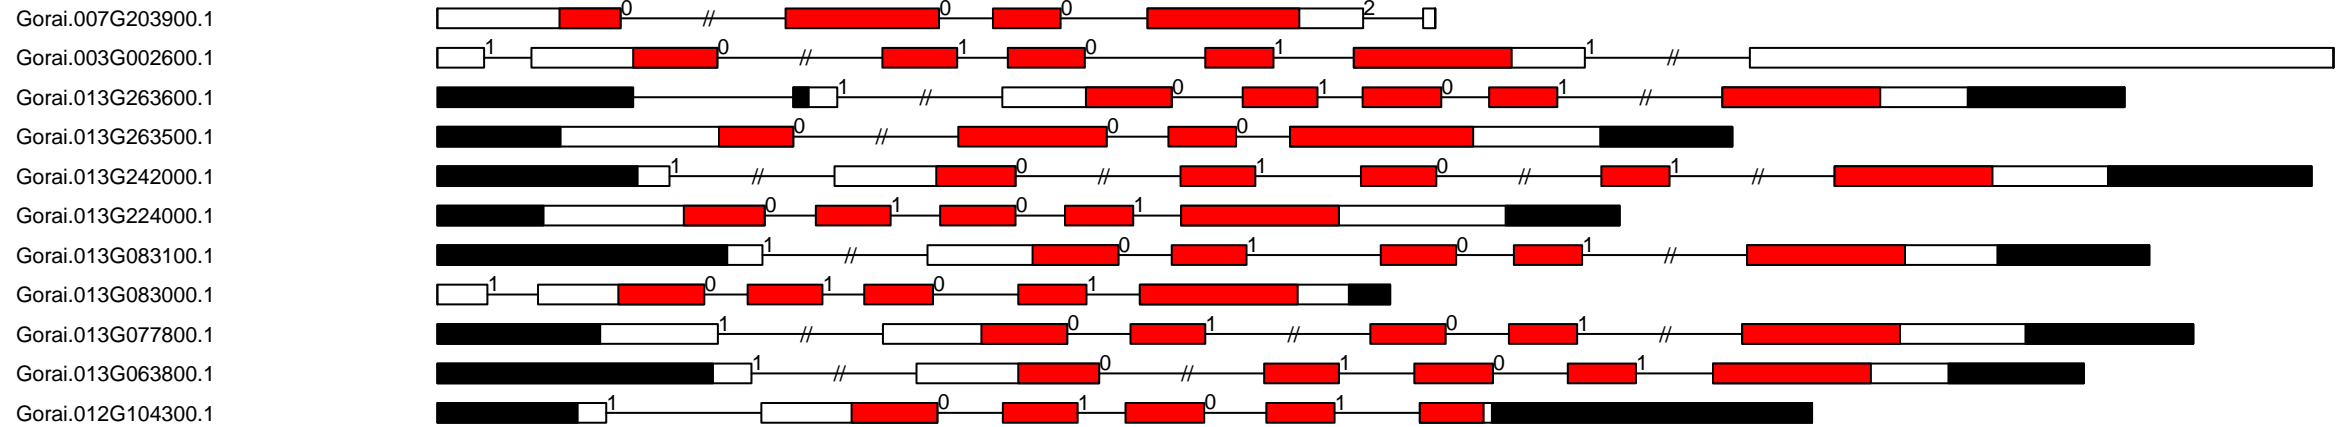

-1000

0

1000

2000

3000

# G.ra RLK-Pelle\_RLCK-VIIb exon-intron and domain diagram (all)

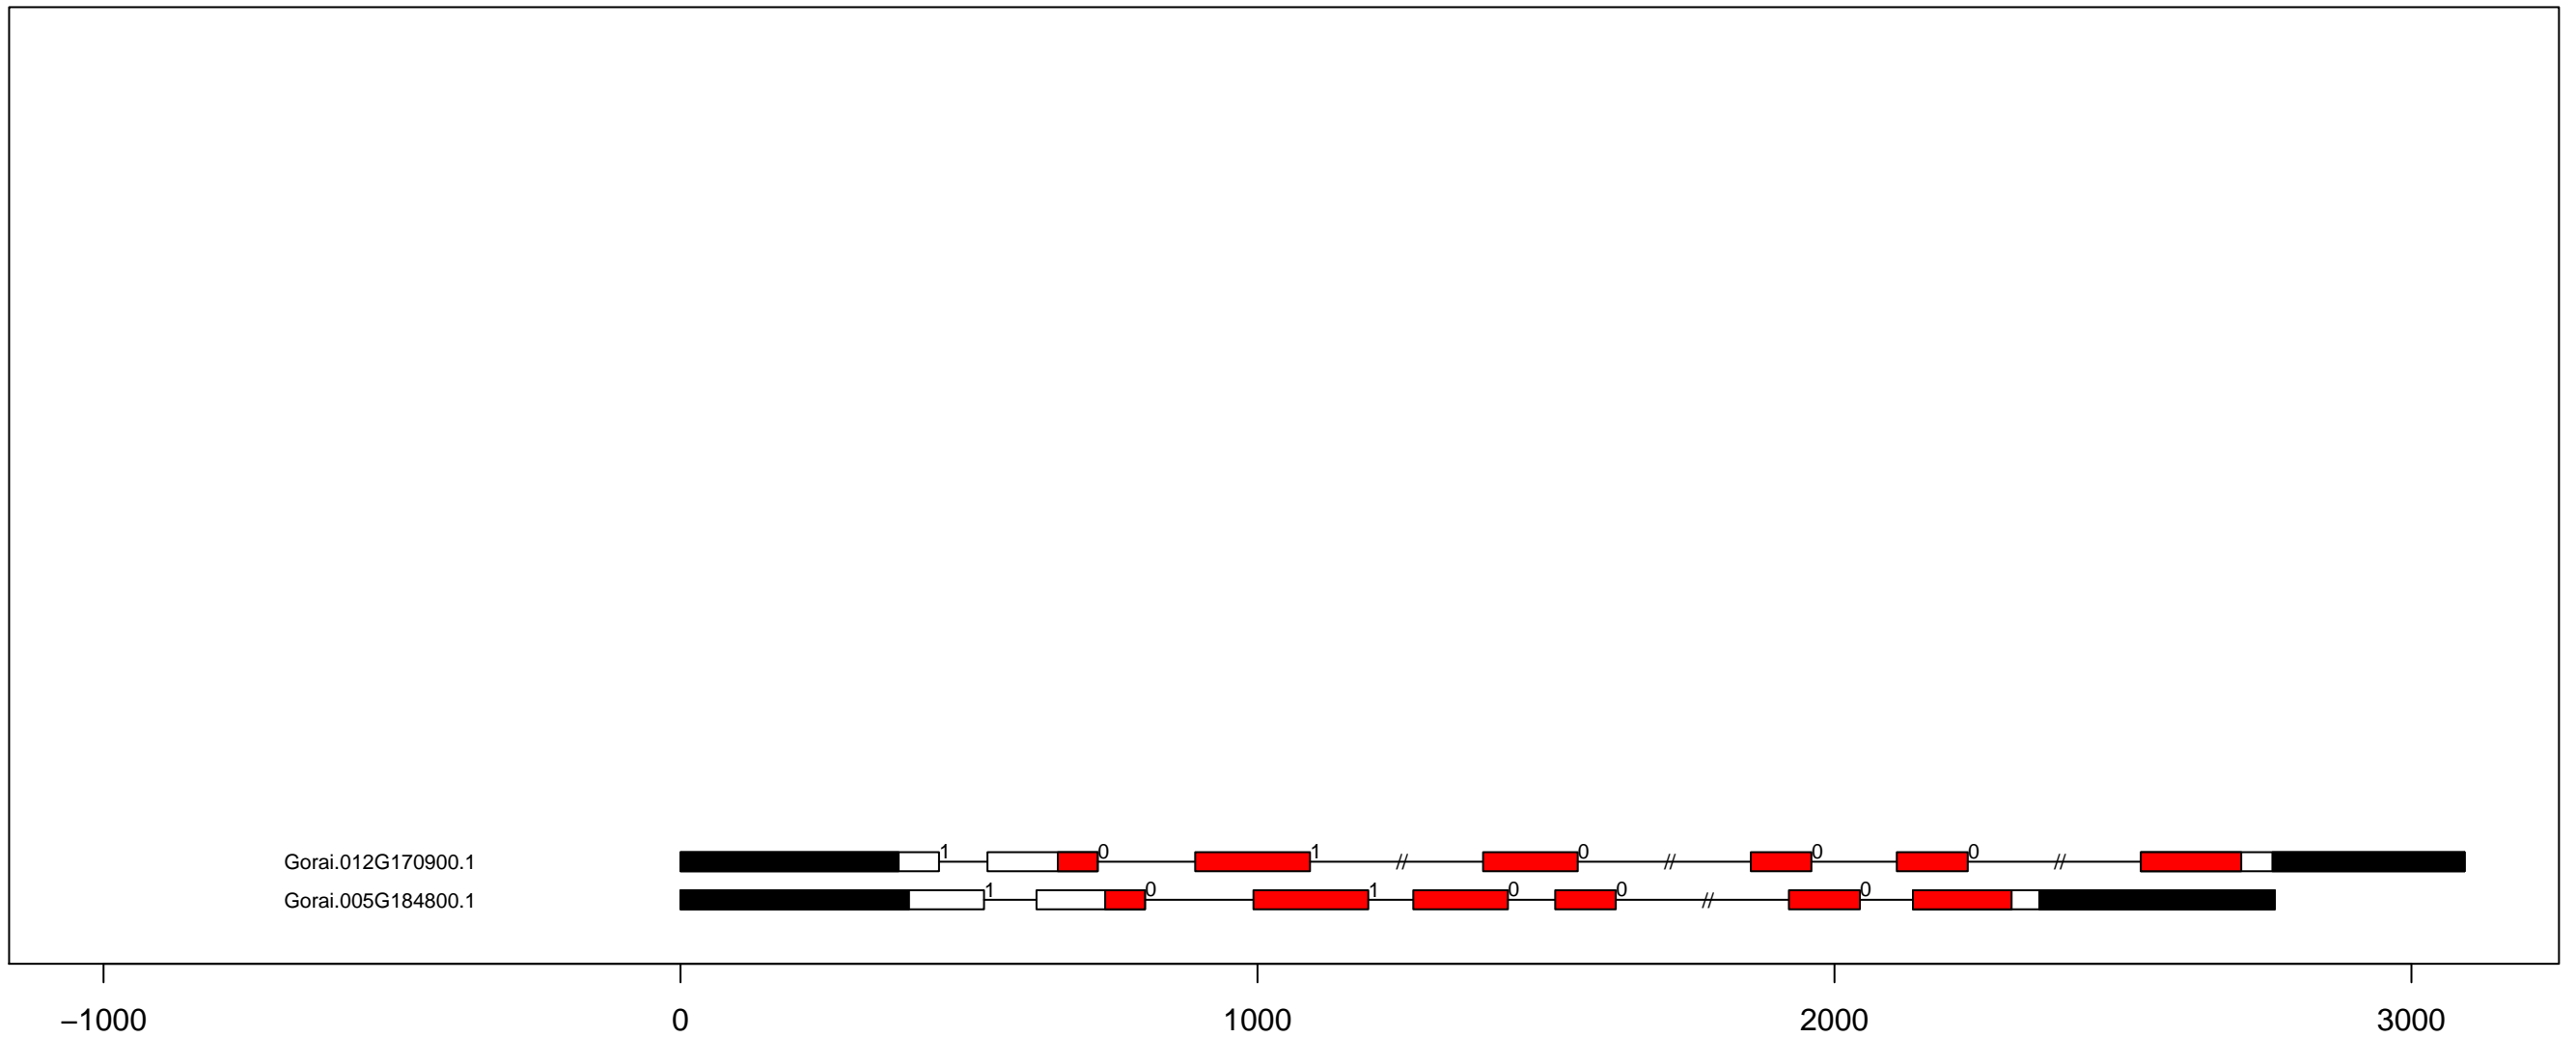



### G.ra RLK-Pelle\_RLCK-VI exon-intron and domain diagram (part 1)

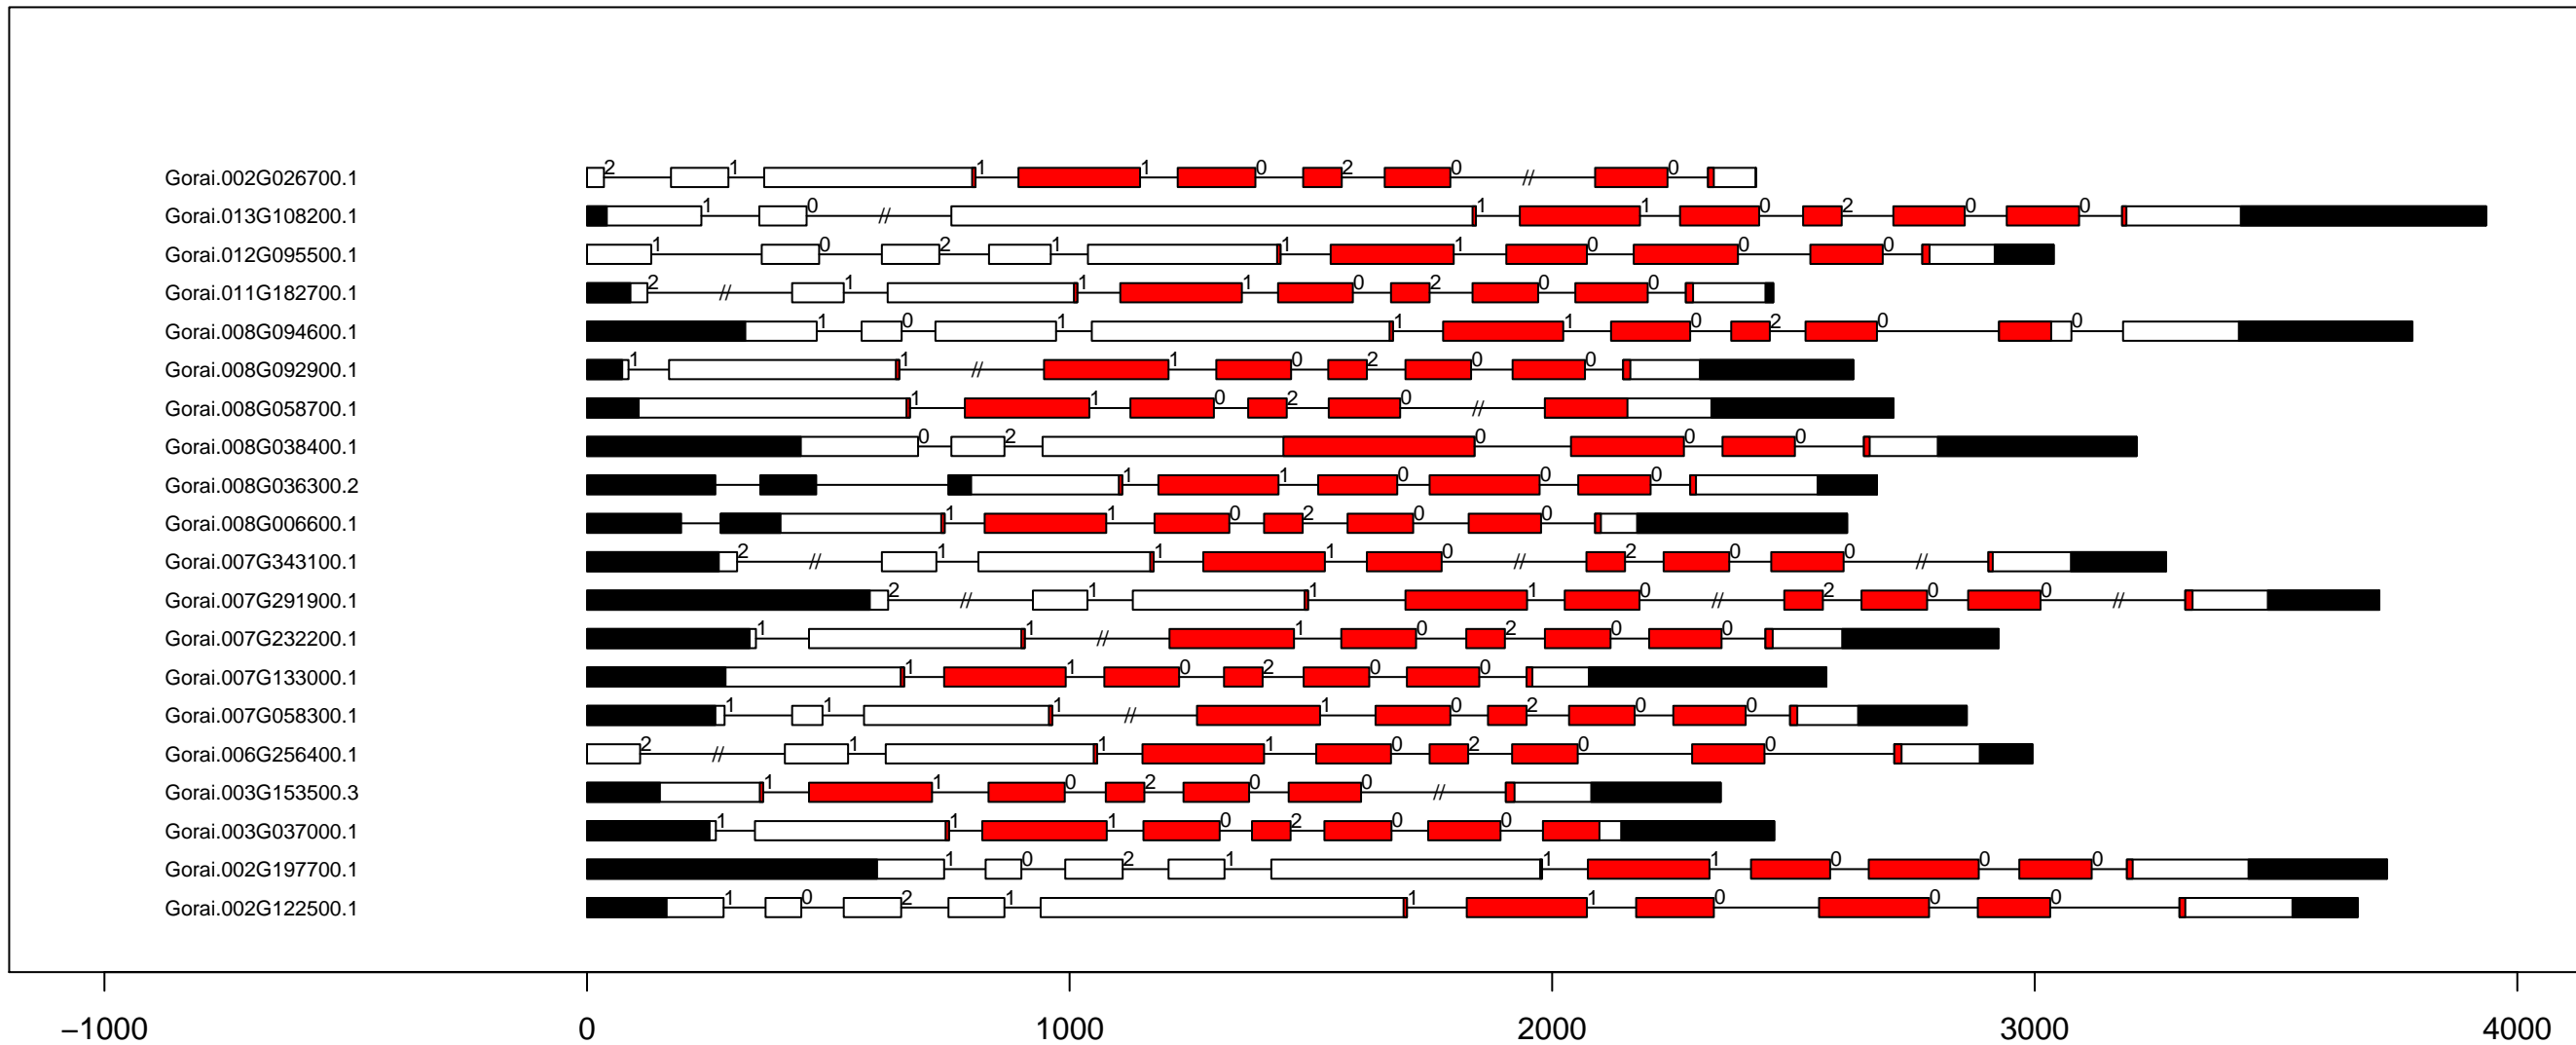

# G.ra RLK-Pelle\_RLCK-VI exon-intron and domain diagram (part 2)

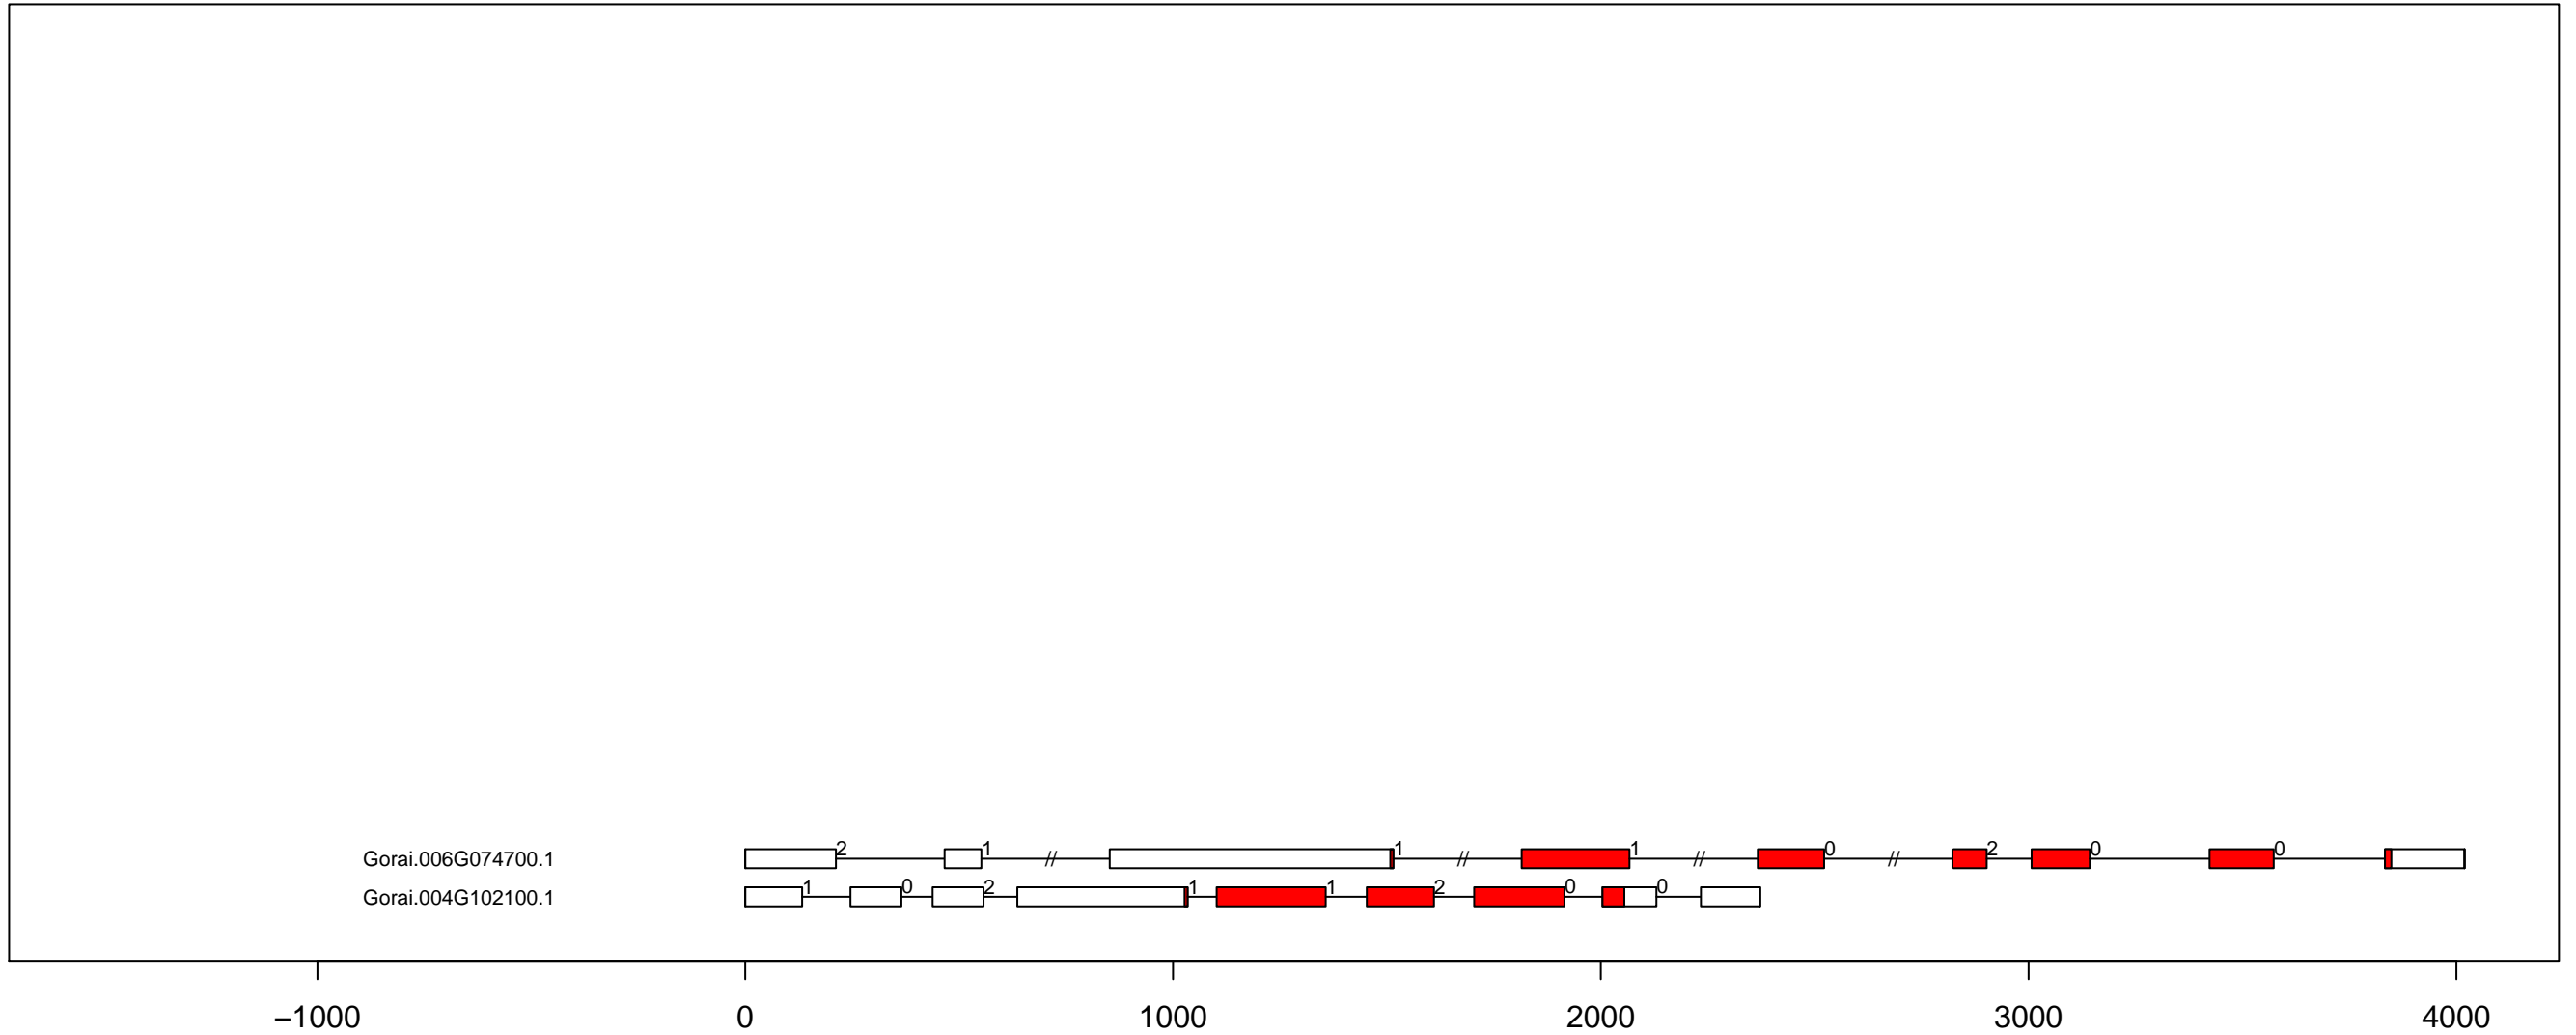

### G.ra RLK-Pelle\_RLCK-V exon-intron and domain diagram (all)

Gorai.012G040400.2  
 Gorai.009G276000.2  
 Gorai.009G213700.2  
 Gorai.008G119900.1  
 Gorai.008G028600.1  
 Gorai.007G308900.1  
 Gorai.007G214500.1  
 Gorai.007G102400.1  
 Gorai.006G266500.1  
 Gorai.005G243300.1  
 Gorai.005G071600.4  
 Gorai.004G117200.1  
 Gorai.002G031900.2  
 Gorai.001G158500.2

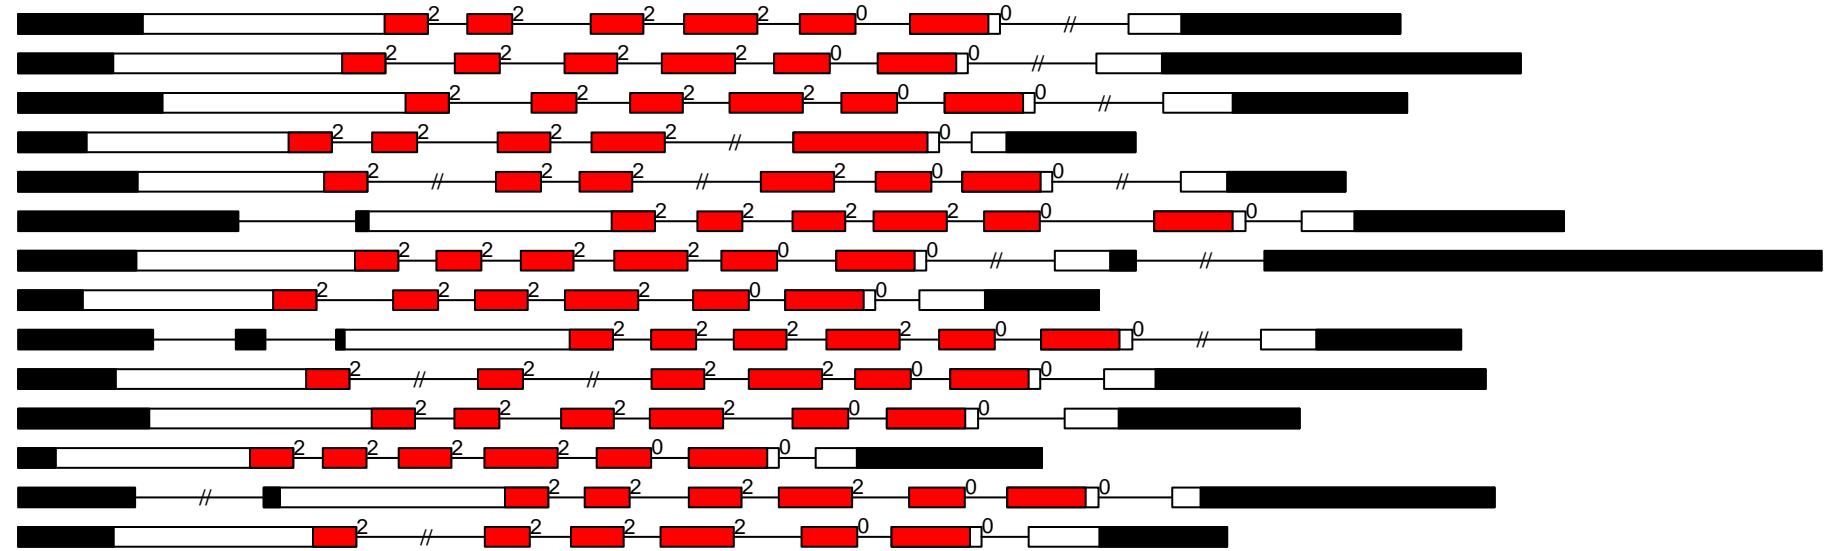



# G.ra RLK-Pelle\_RLCK-XII-1 exon-intron and domain diagram (all)

Gorai.011G295900.1  
Gorai.009G188600.1  
Gorai.009G094800.1  
Gorai.008G246800.4  
Gorai.008G122000.1  
Gorai.008G040100.1  
Gorai.006G209500.1  
Gorai.006G179500.1  
Gorai.005G113100.1  
Gorai.003G126600.1  
Gorai.002G259200.1  
Gorai.002G205100.1  
Gorai.001G114400.1

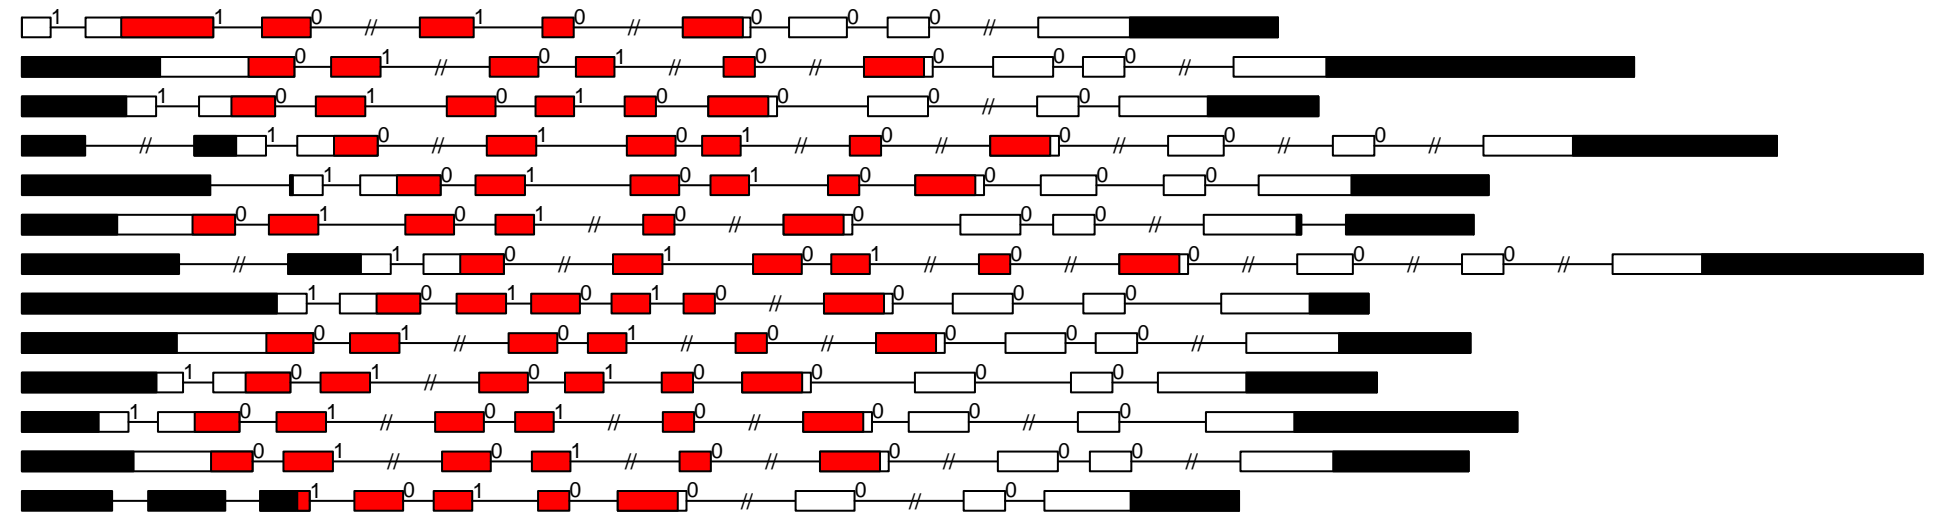

-1000

0

1000

2000

3000

4000

5000

# G.ra RLK-Pelle\_RLCK-XIII exon-intron and domain diagram (all)

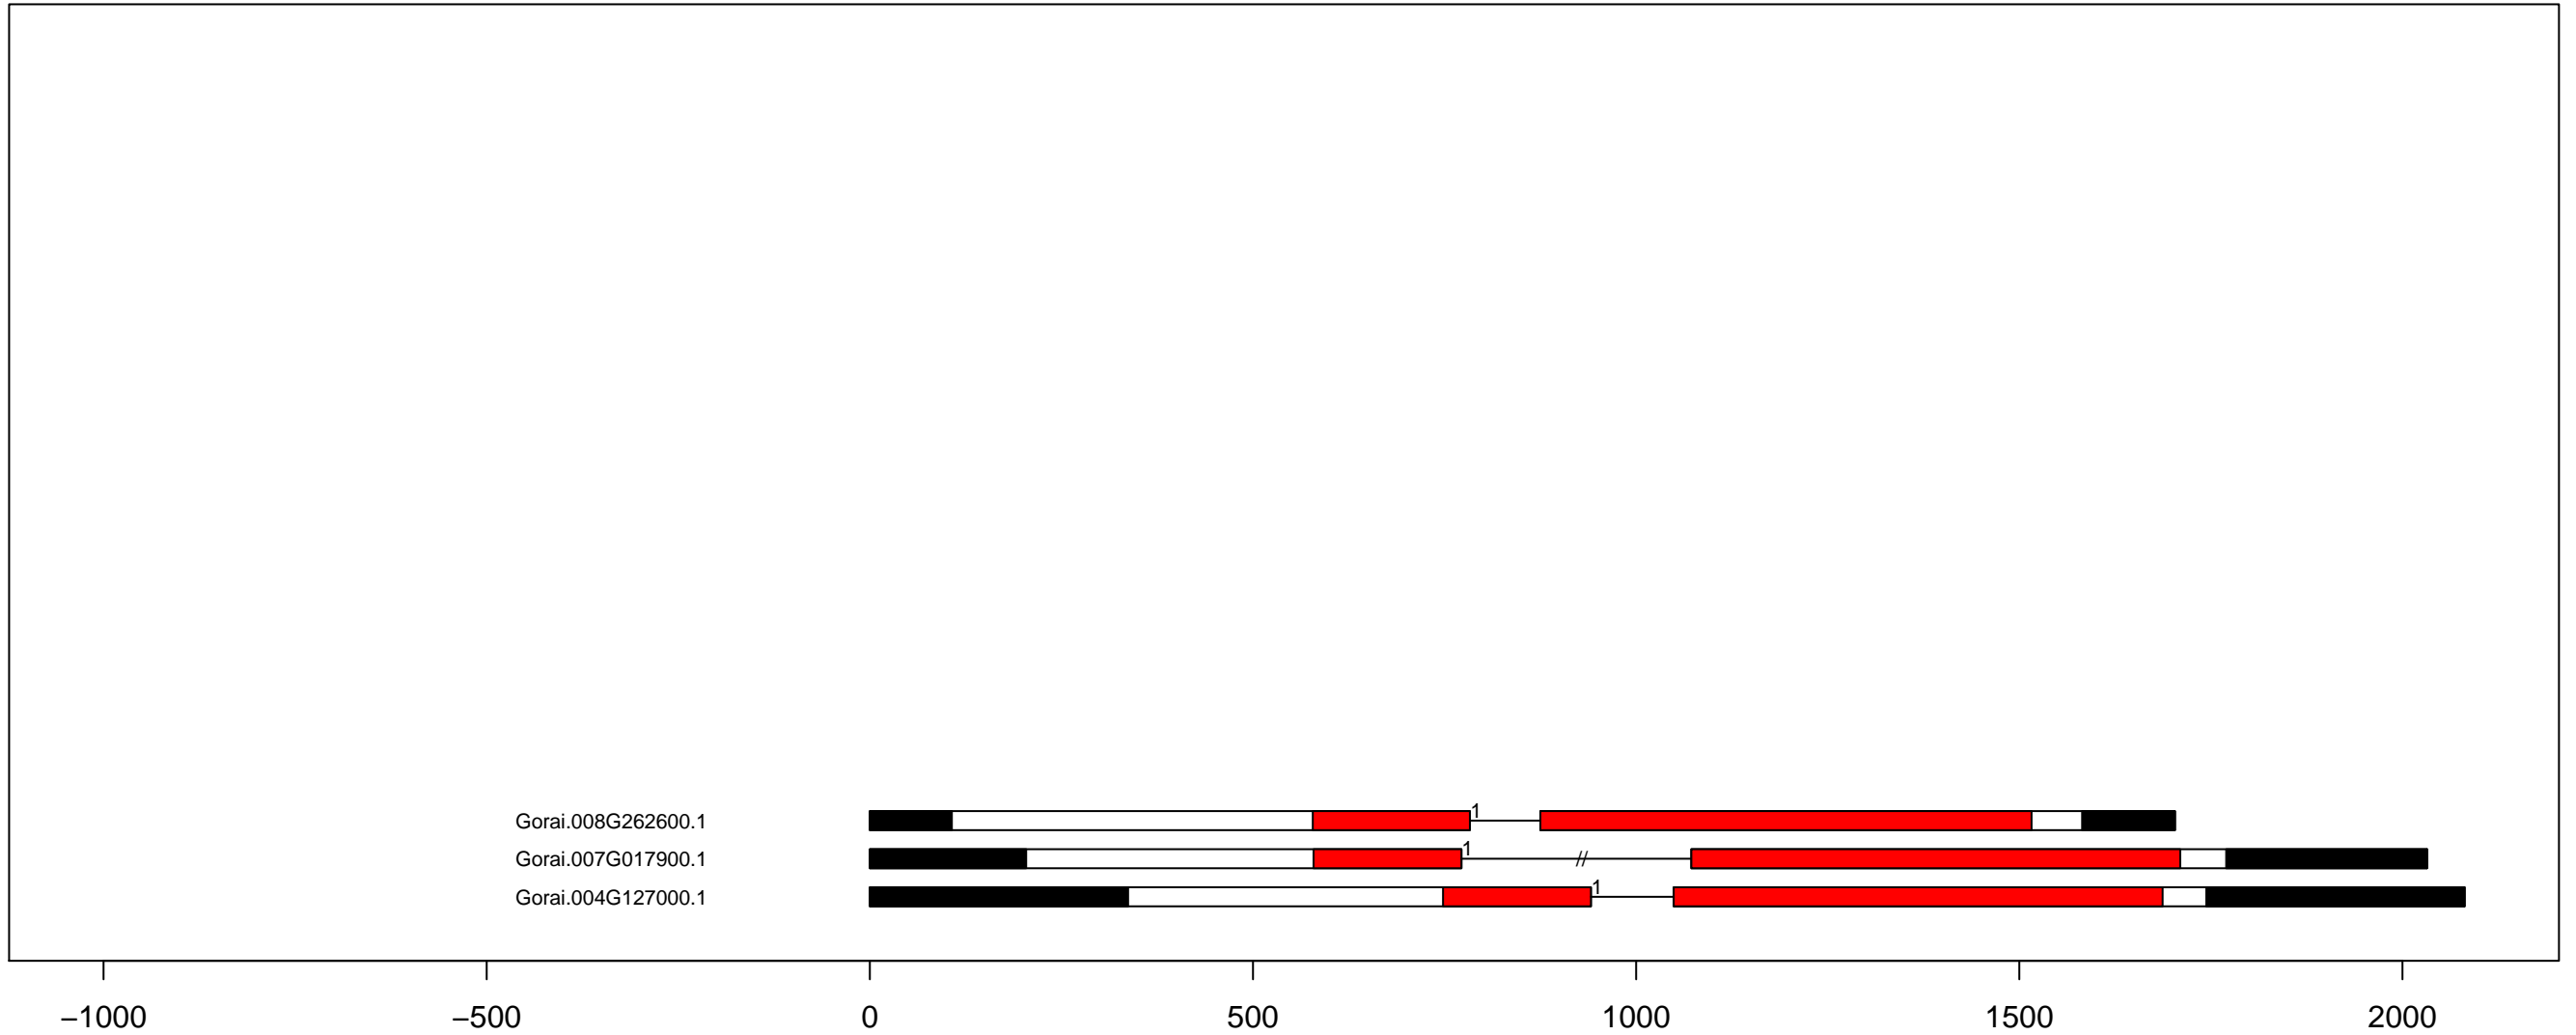

# G.ra RLK-Pelle\_RLCK-XI exon-intron and domain diagram (all)

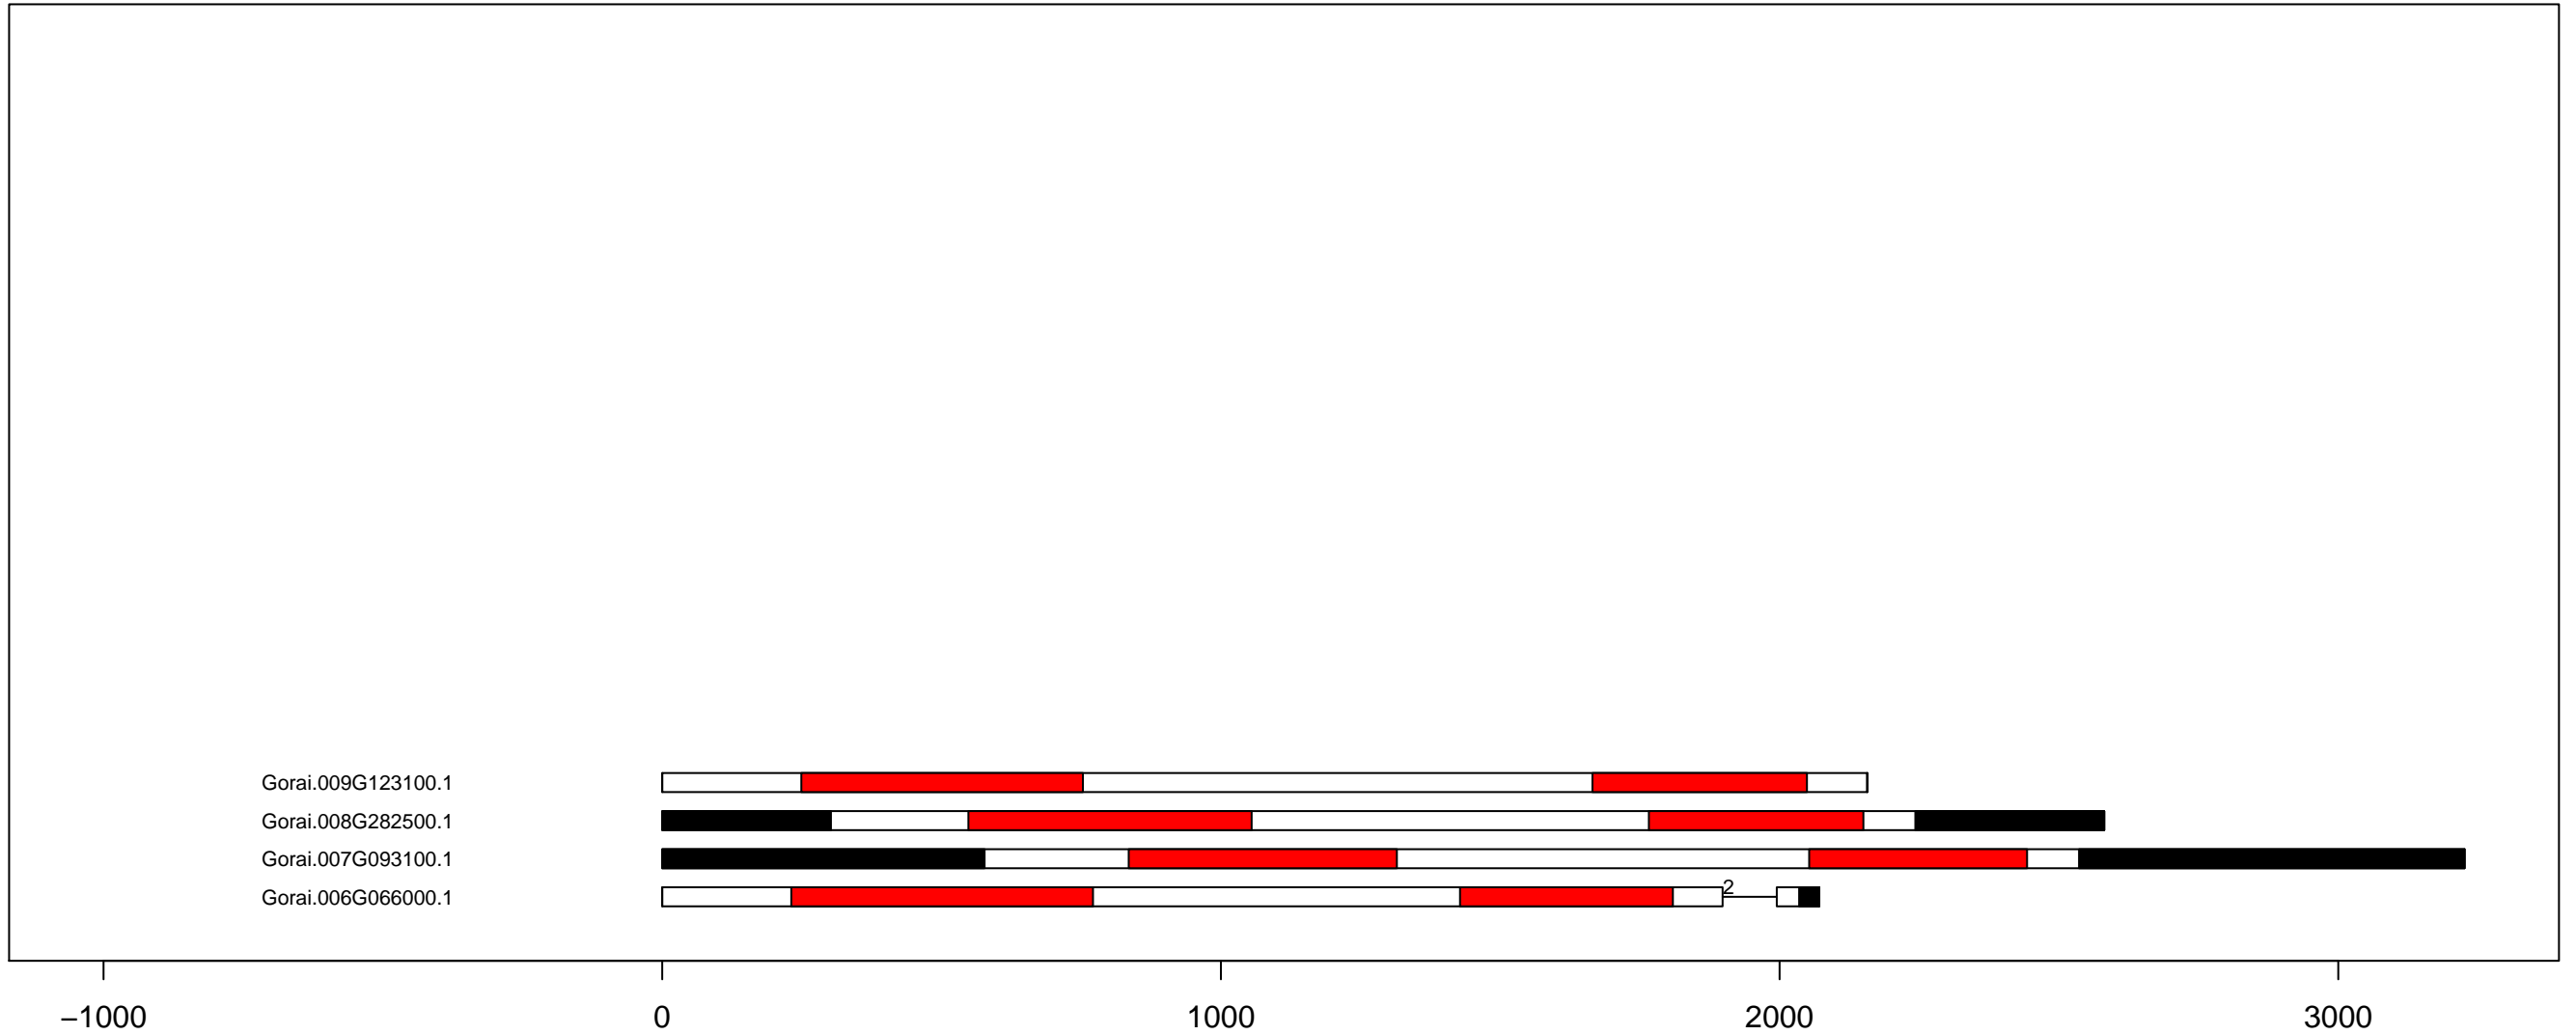



# G.ra RLK-Pelle\_RLCK-XVI exon-intron and domain diagram (all)

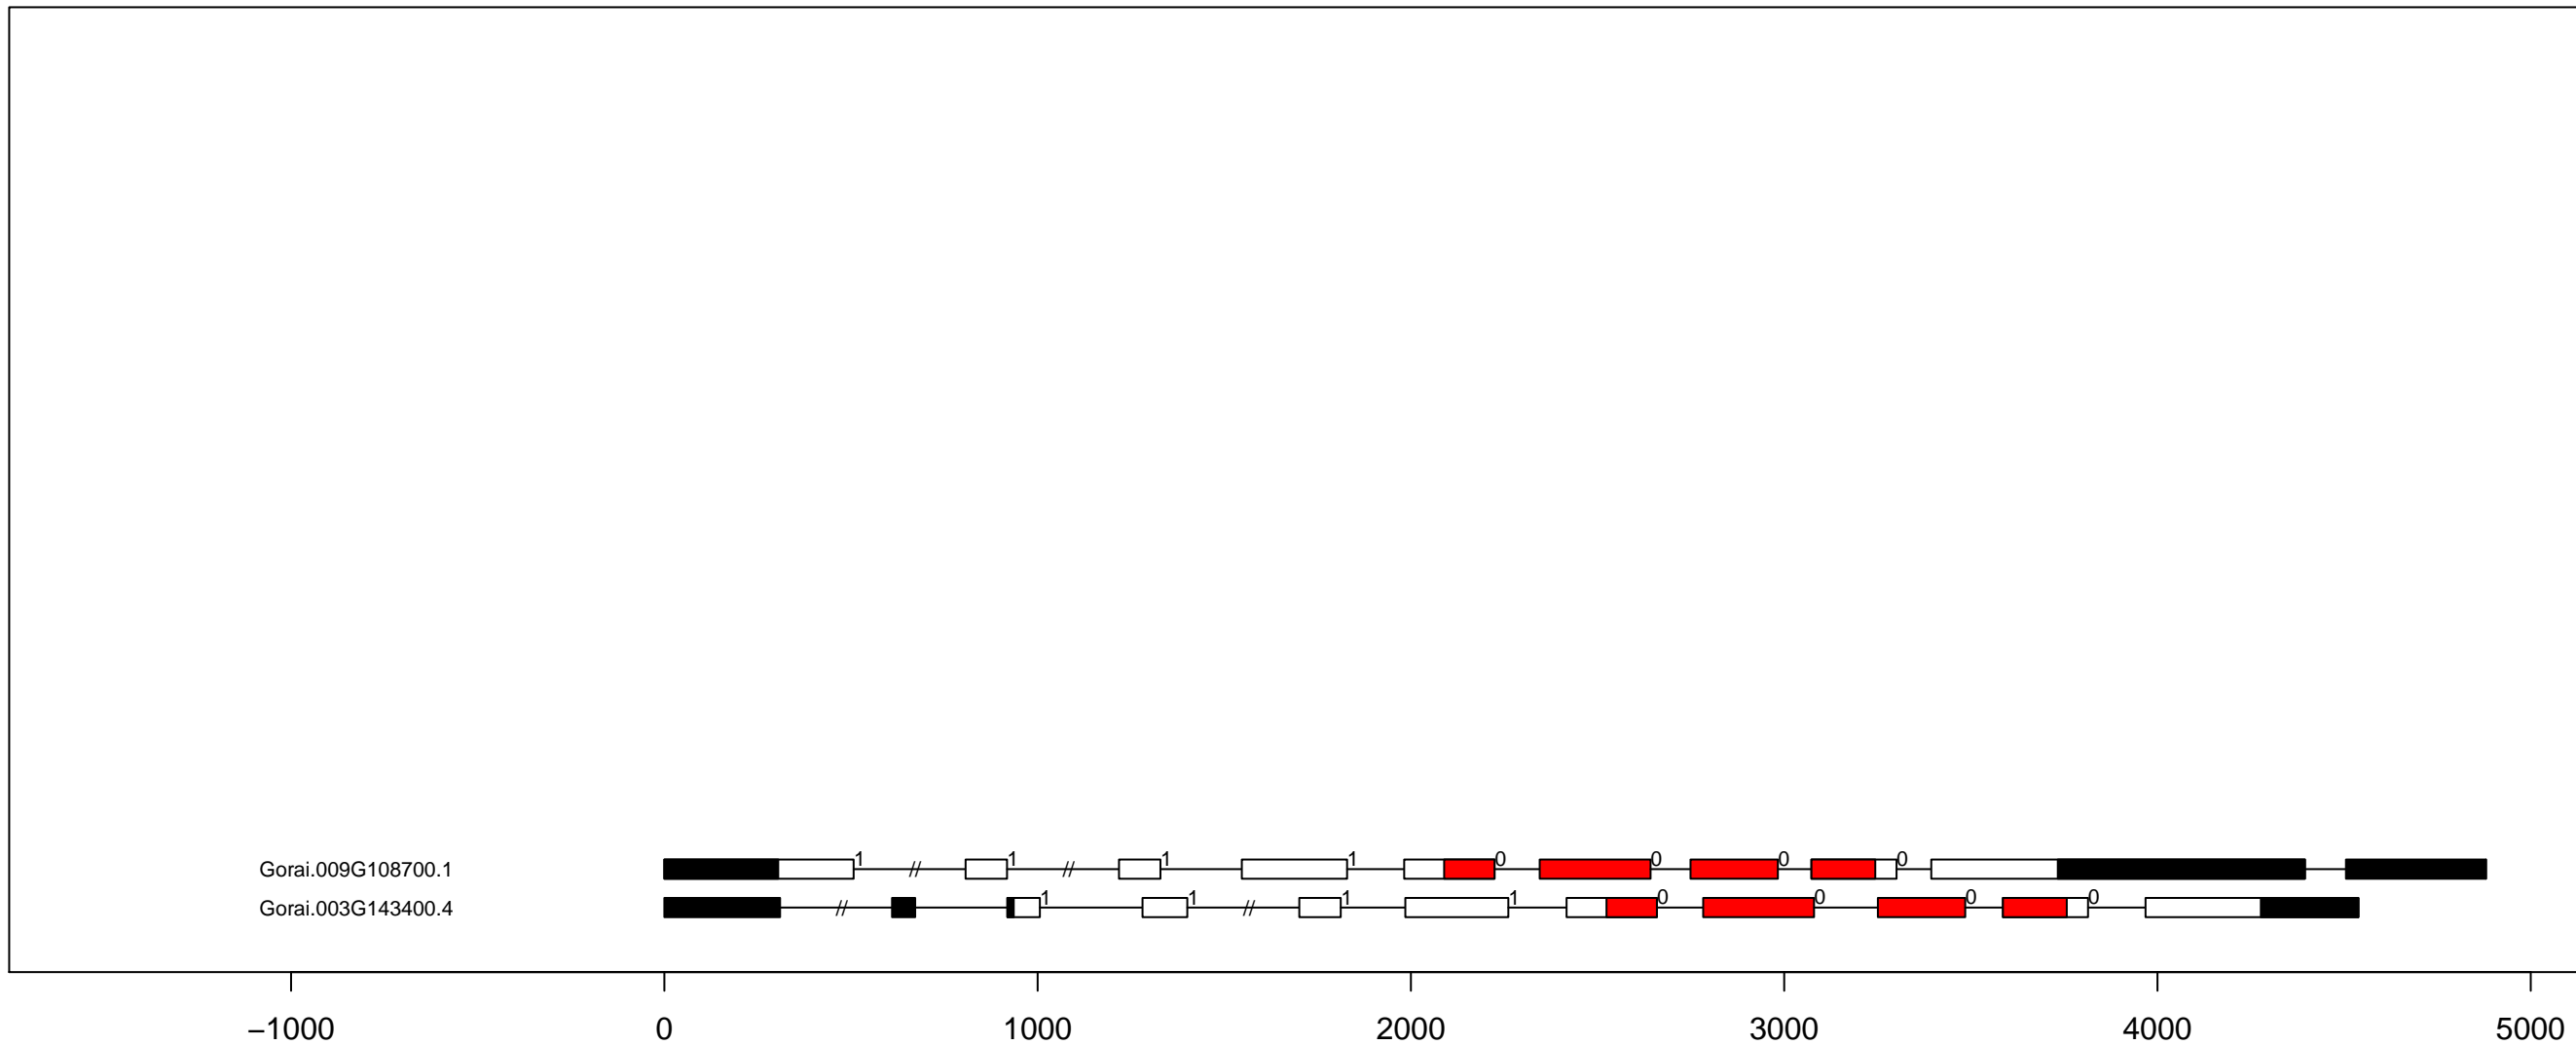

# G.ra RLK-Pelle\_RLCK-XV exon-intron and domain diagram (all)

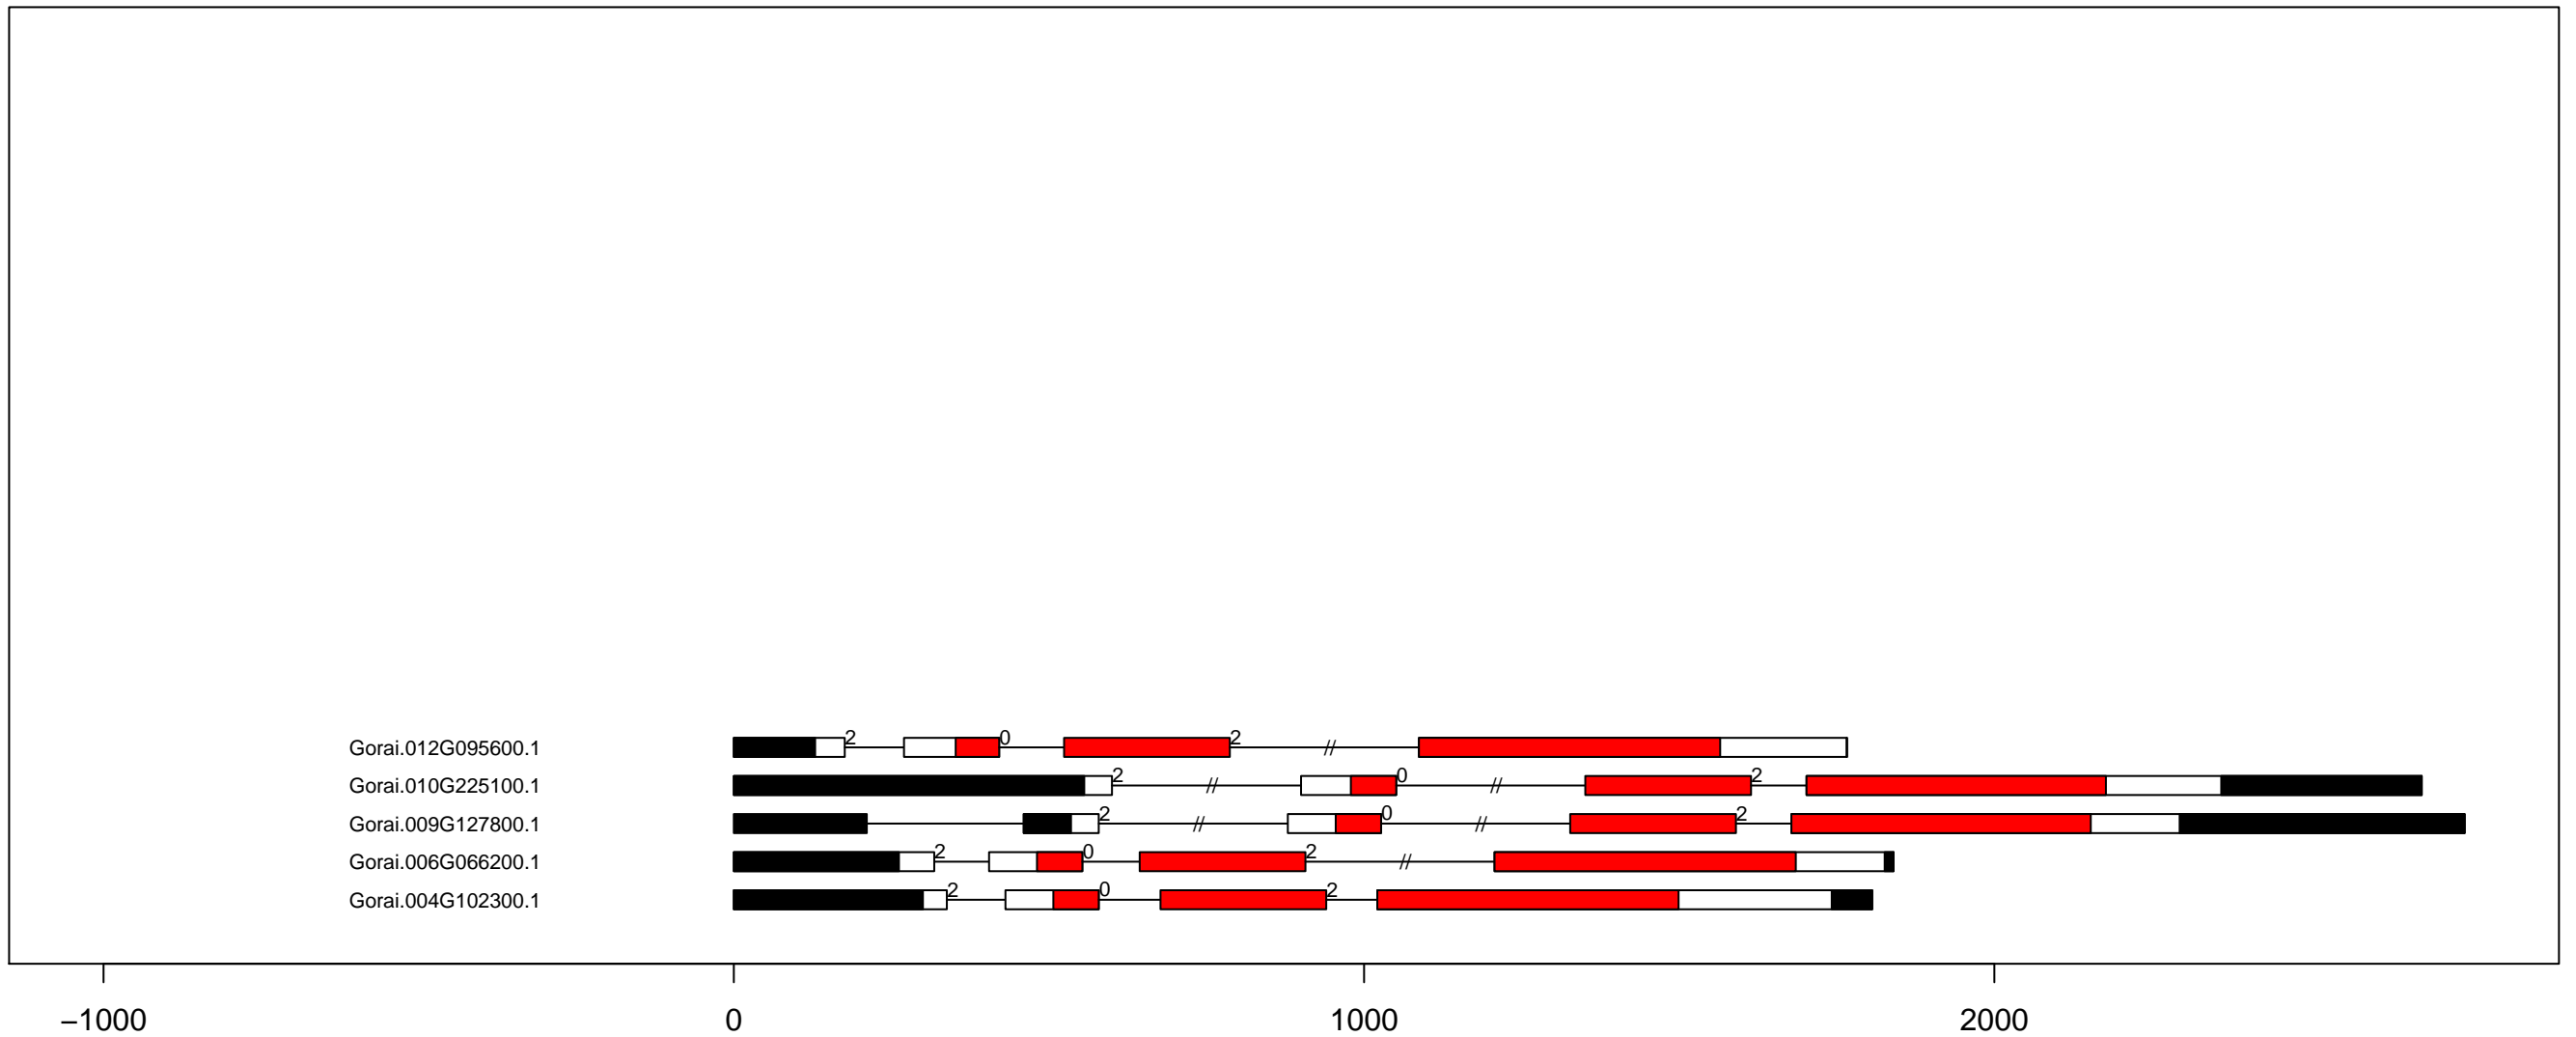

### G.ra RLK-Pelle\_SD-2b exon-intron and domain diagram (part 1)

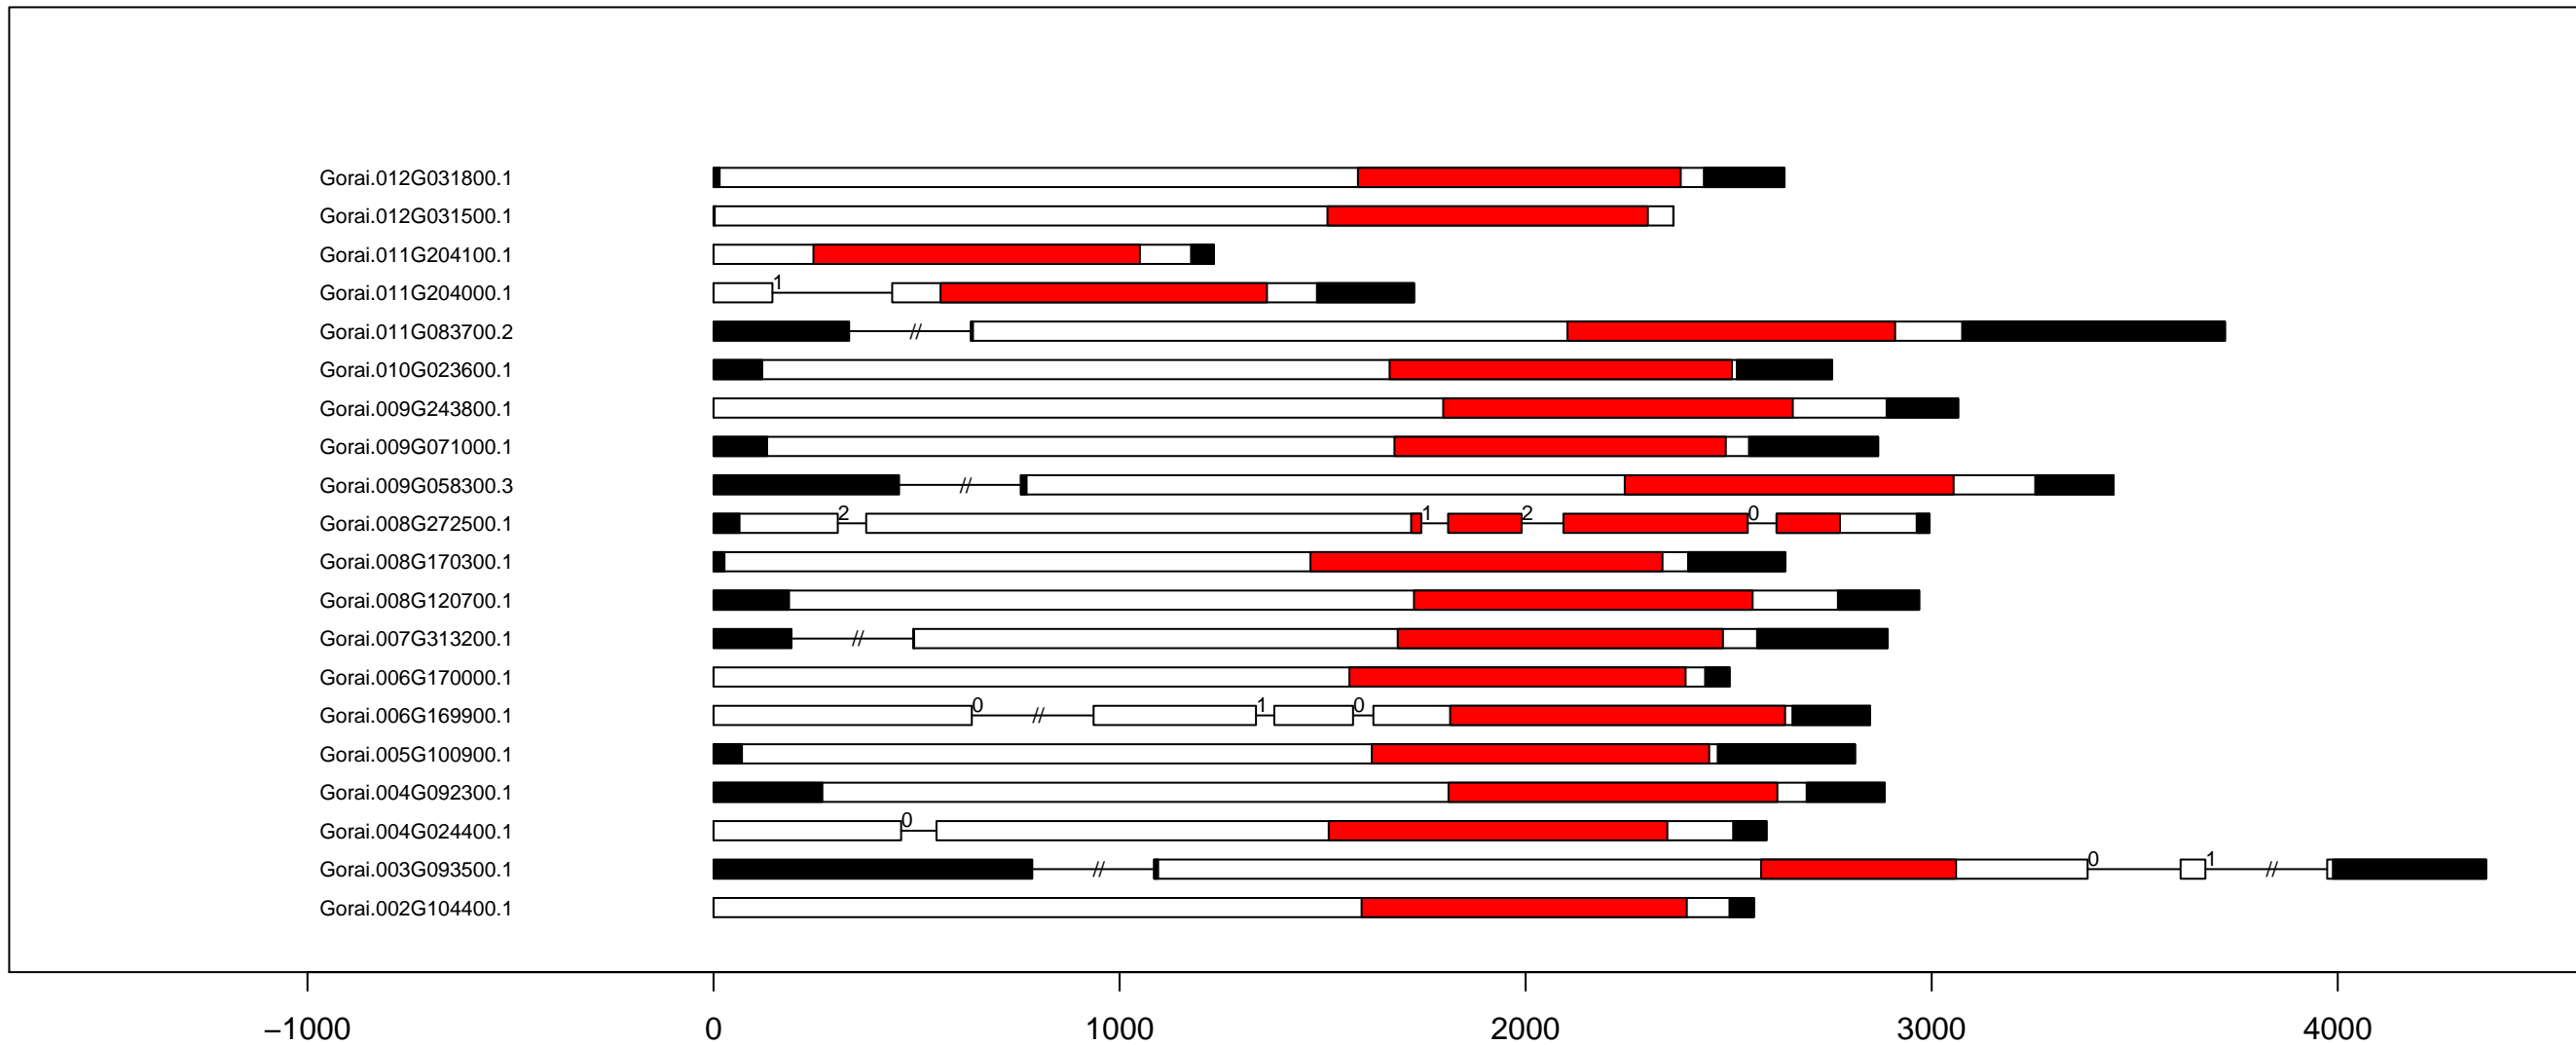





G.ra RLK-Pelle\_SD-2b exon-intron and domain diagram (part 3)

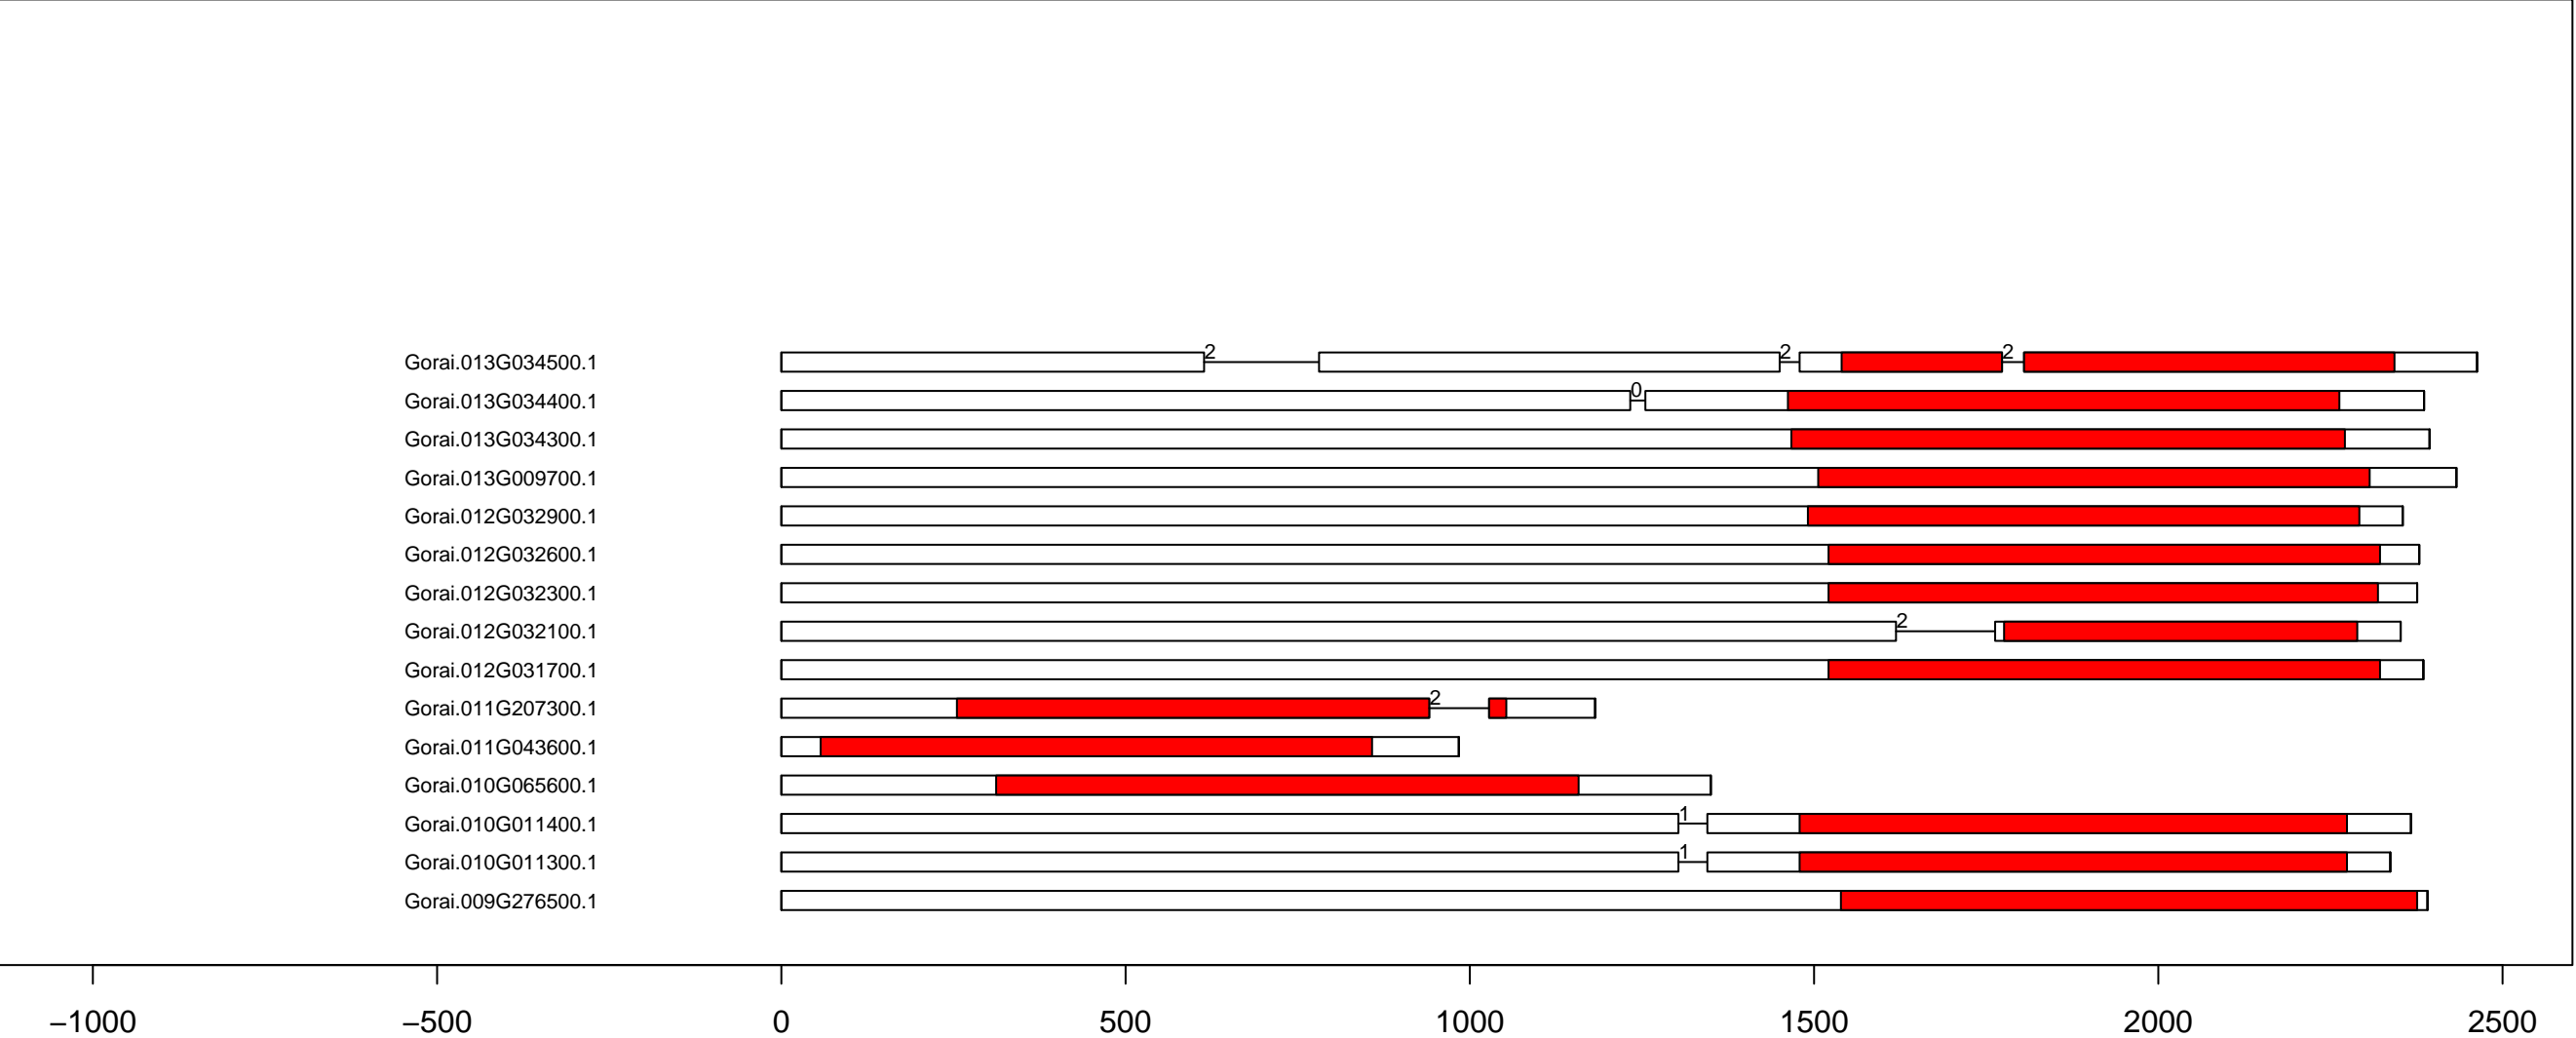

# G.ra RLK-Pelle\_Singleton exon-intron and domain diagram (all)

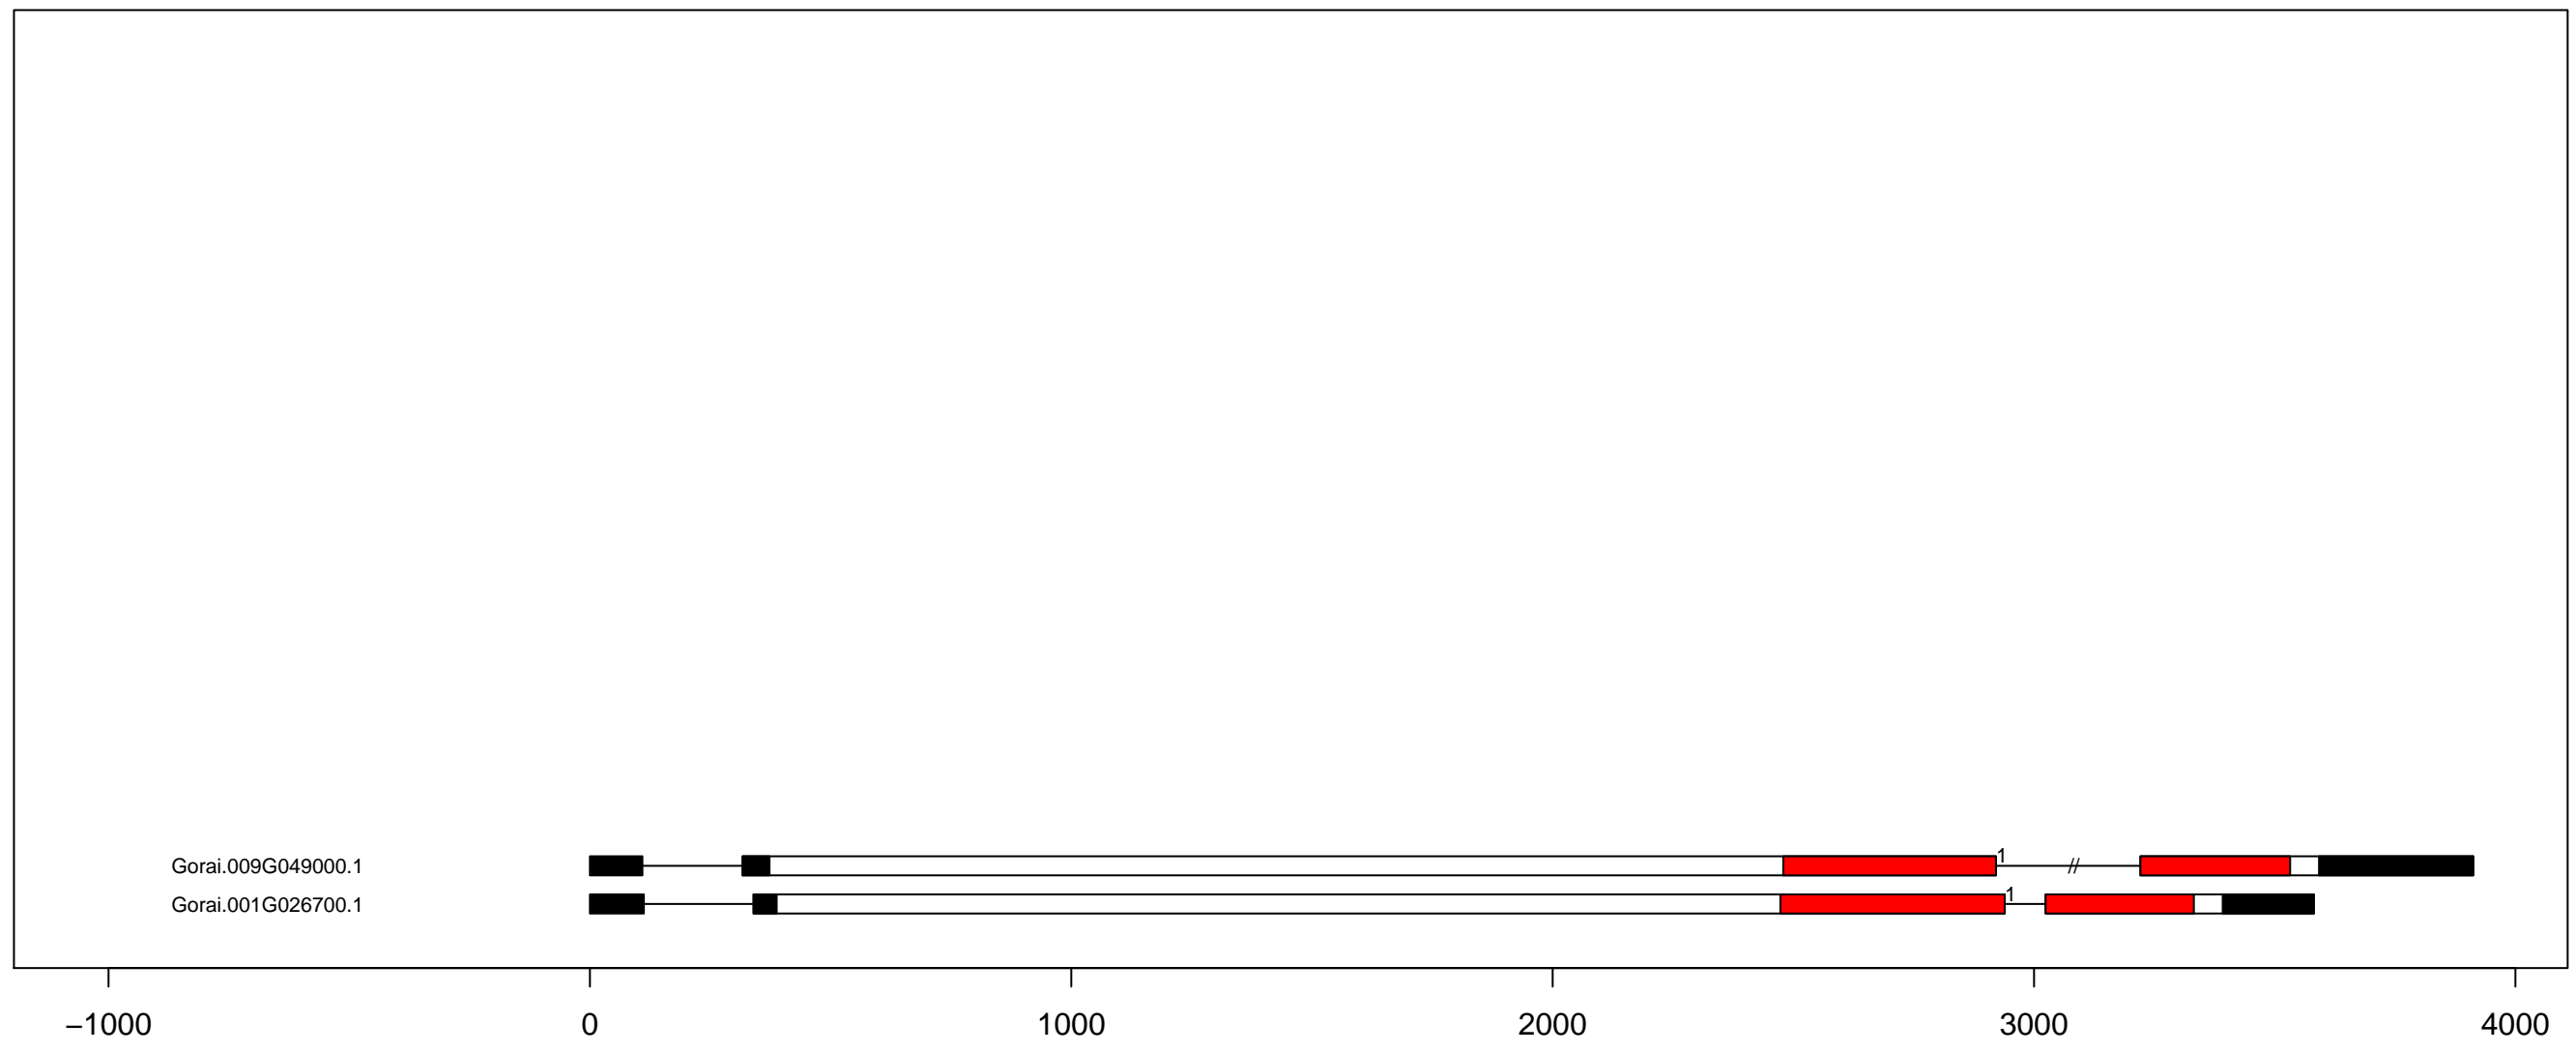

# G.ra RLK-Pelle\_URK-1 exon-intron and domain diagram (all)

Gorai.013G044800.1  
Gorai.008G024300.1  
Gorai.001G126300.1

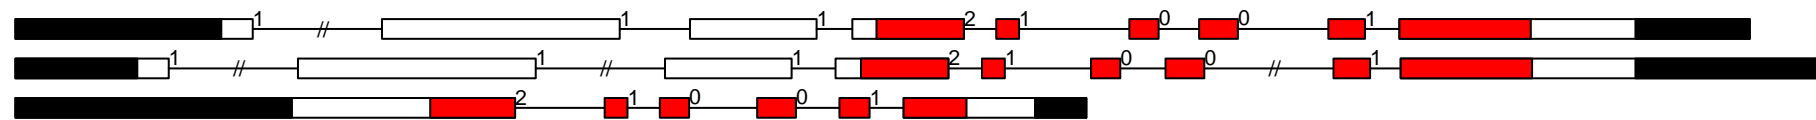



# G.ra RLK-Pelle\_URK-3 exon-intron and domain diagram (all)

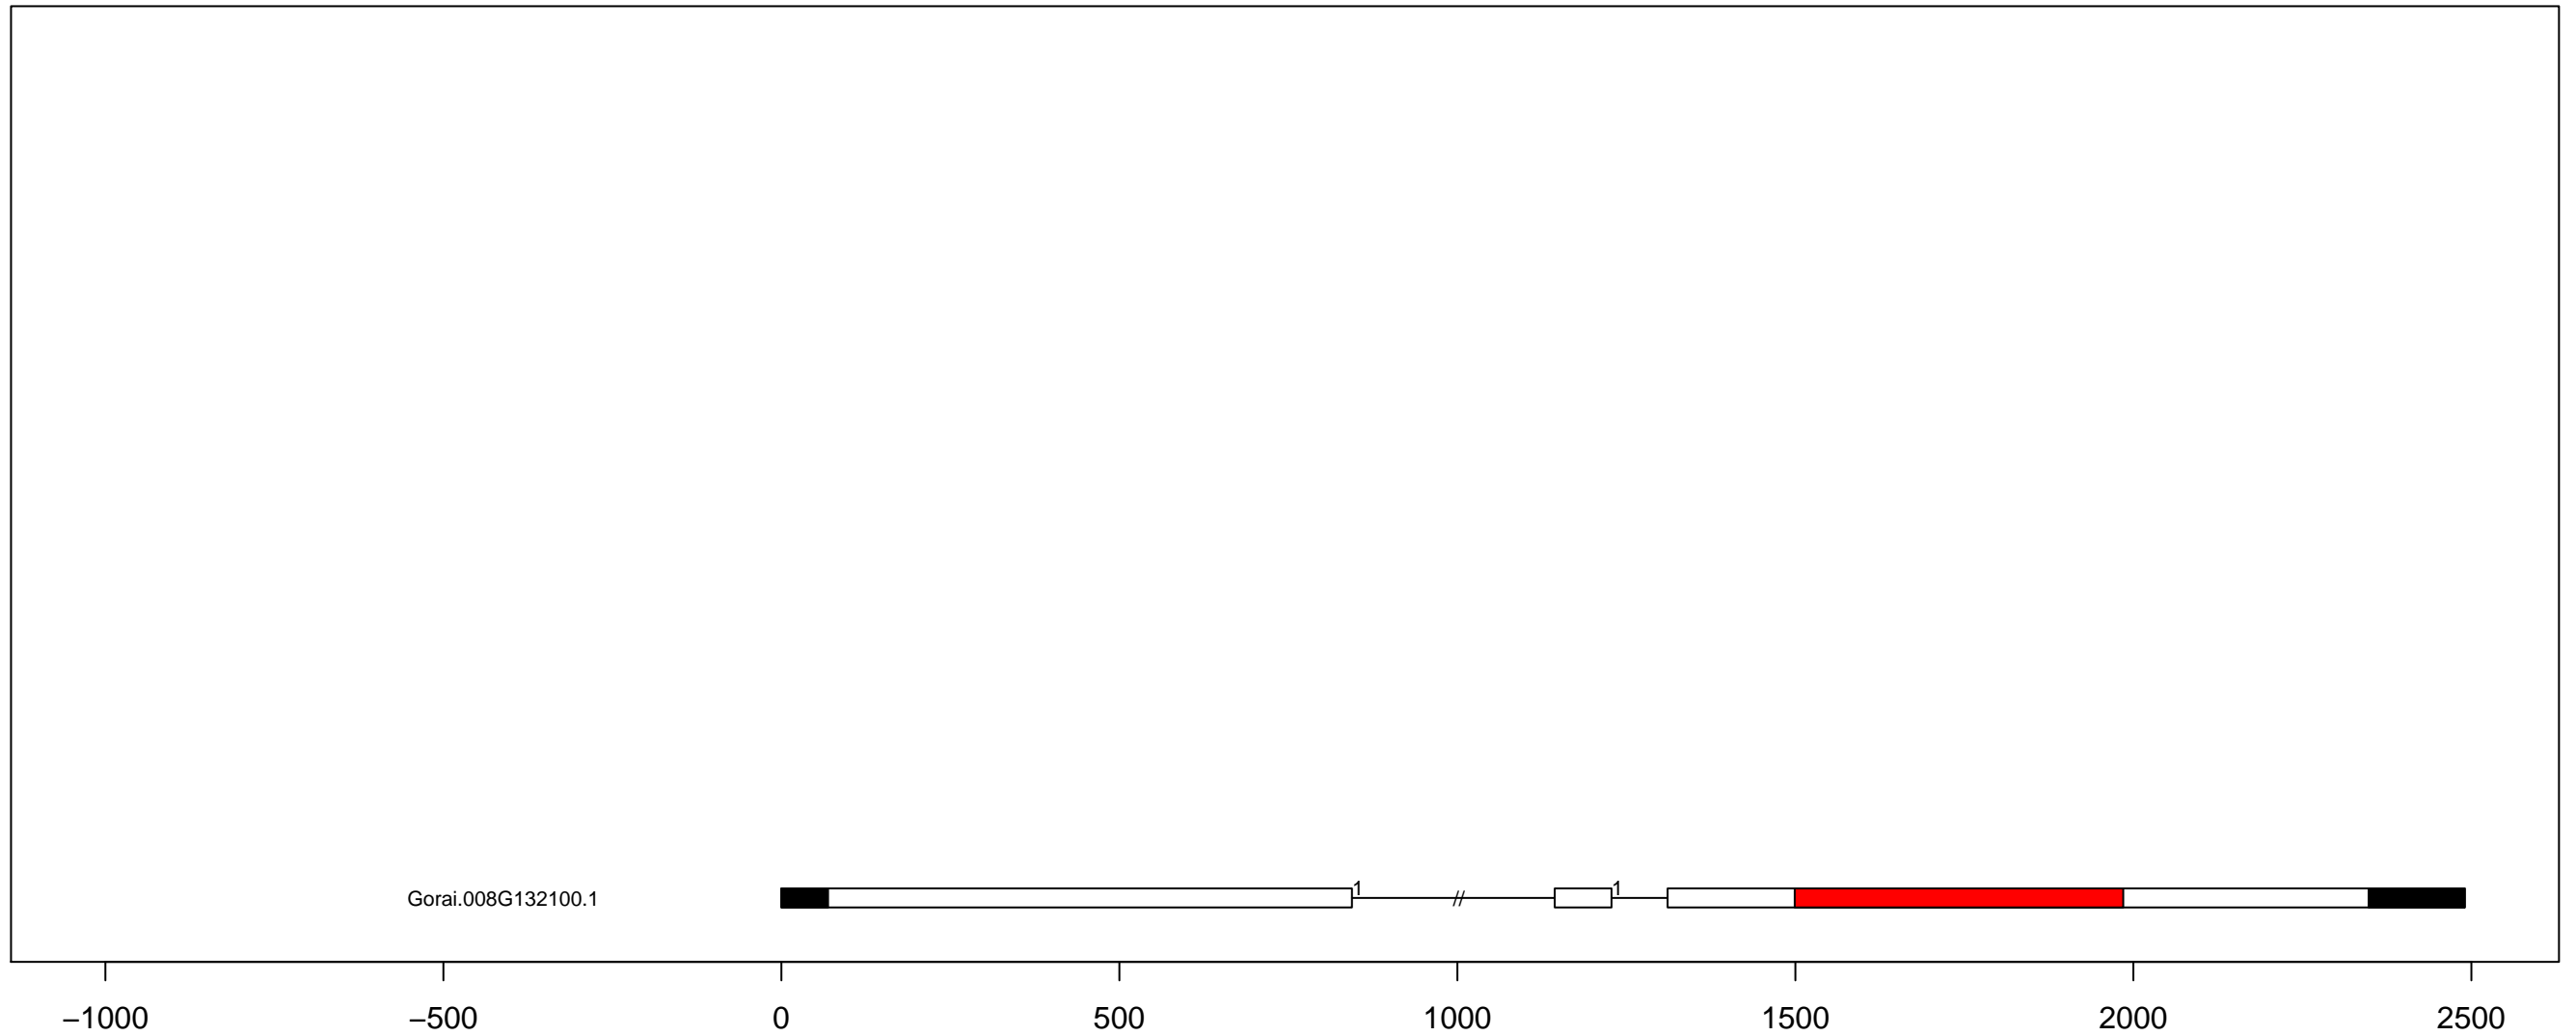

G.ra RLK-Pelle\_WAK\_LRK10L-1 exon-intron and domain diagram (all)

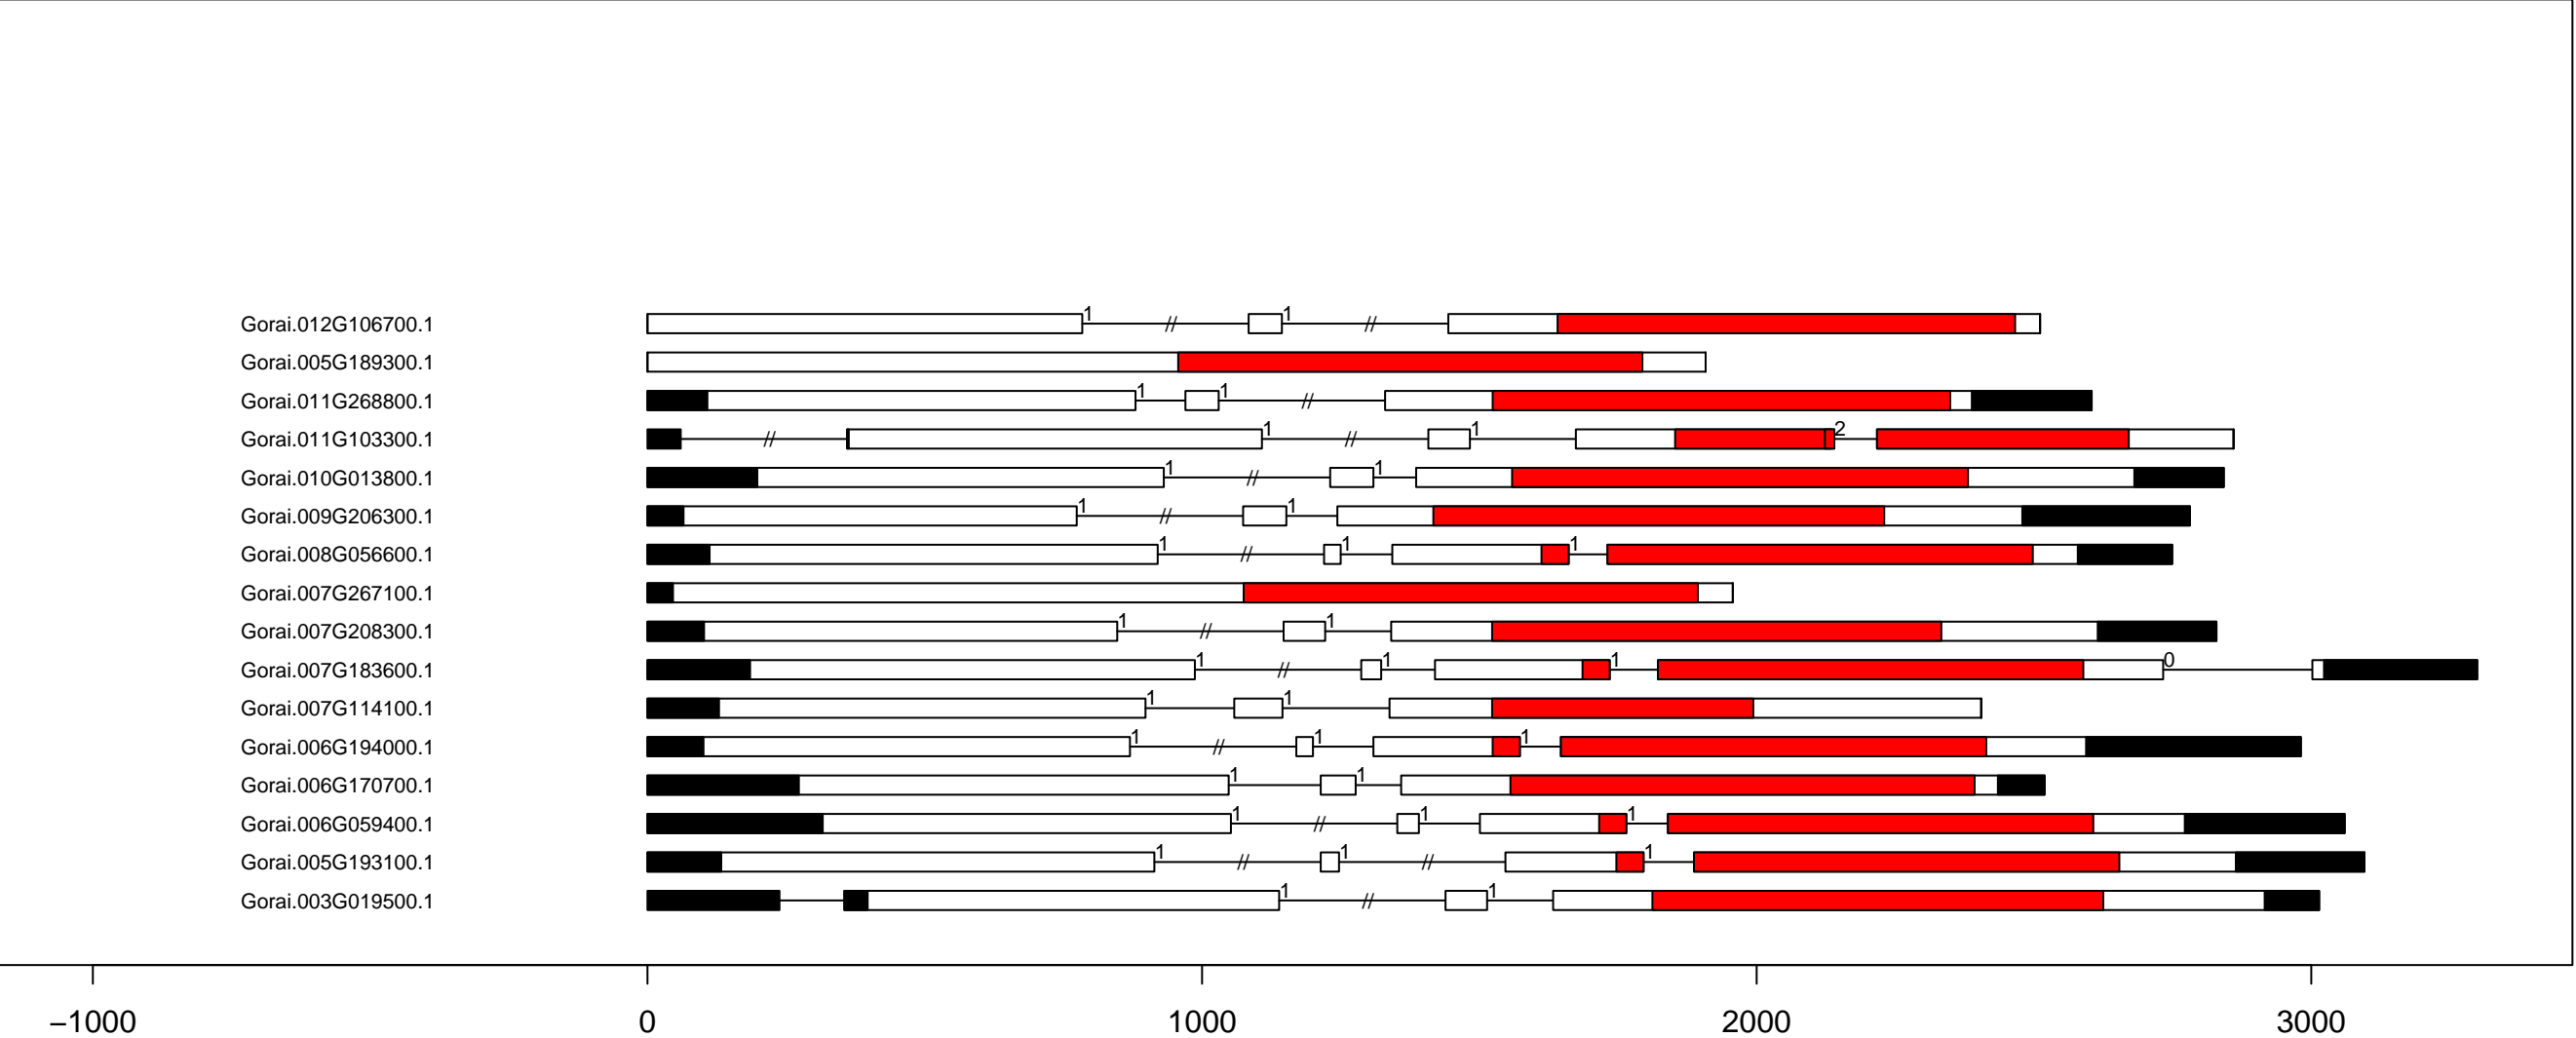



### G.ra RLK-Pelle\_WAK exon-intron and domain diagram (part 2)

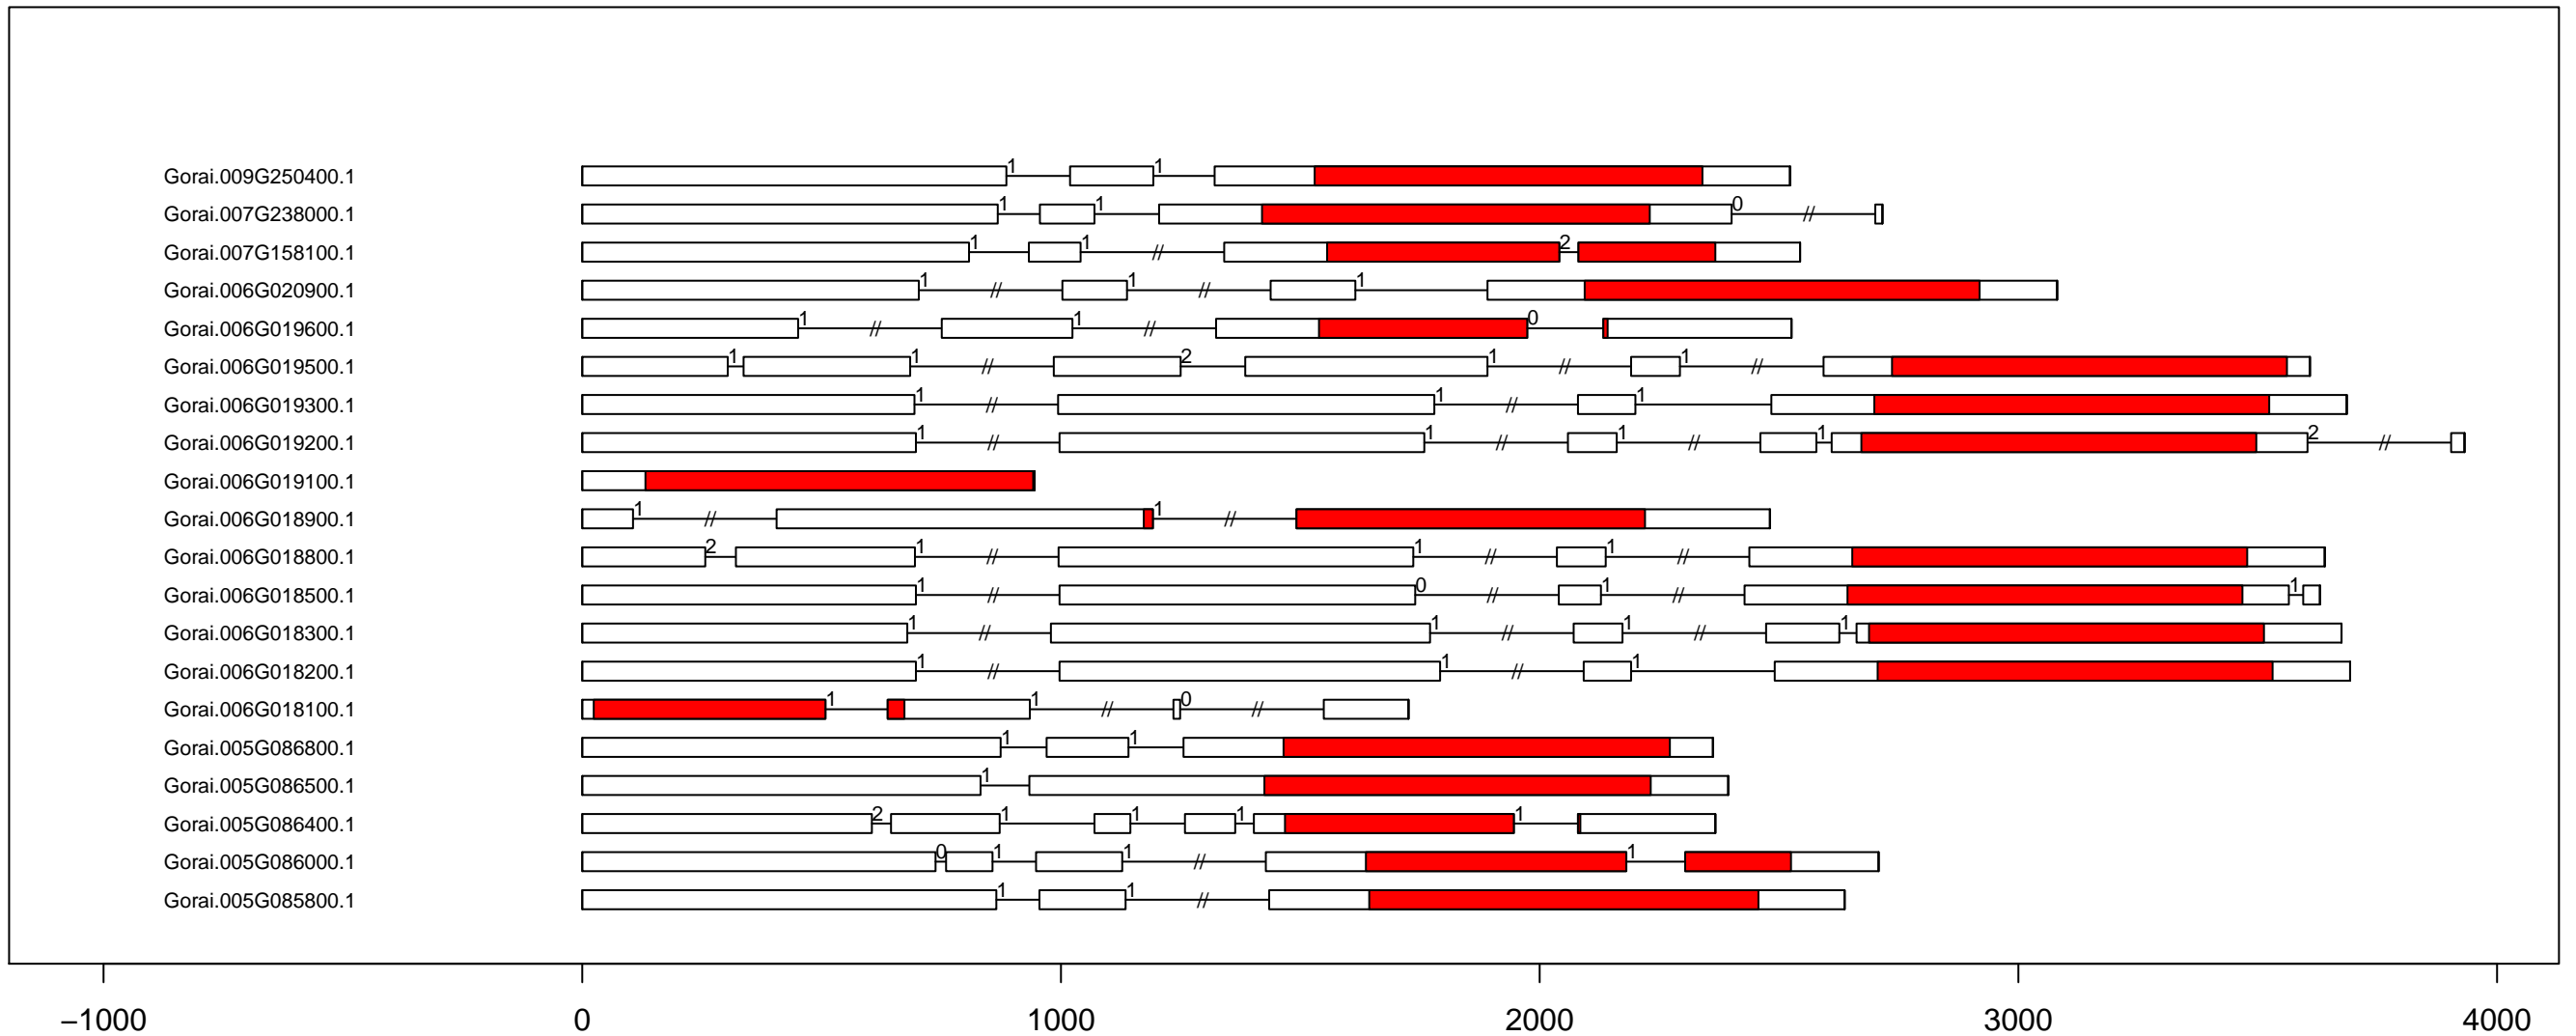



### G.ra RLK-Pelle\_WAK exon-intron and domain diagram (part 3)

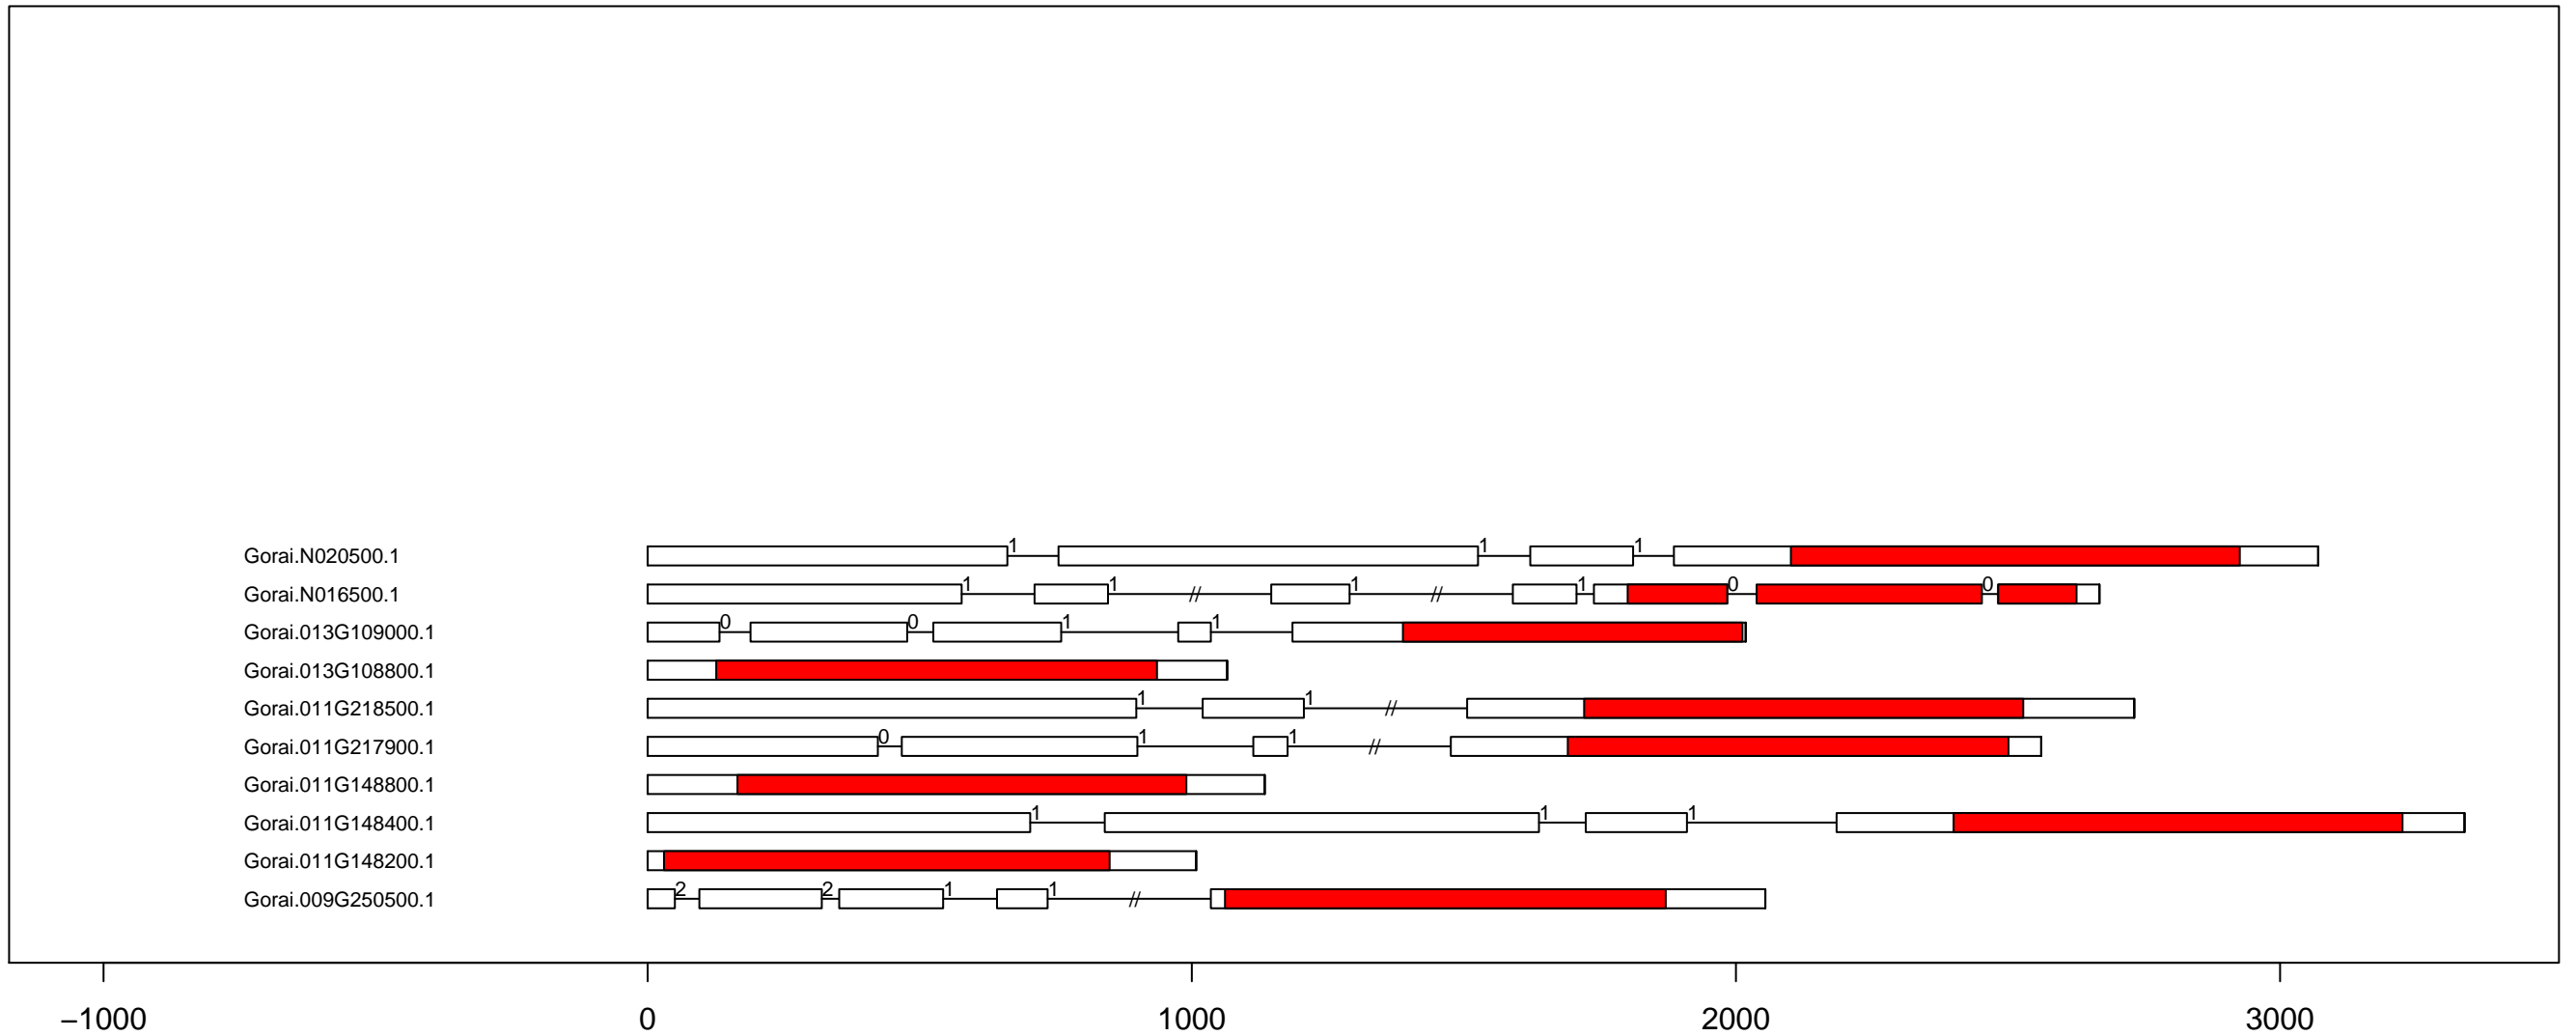

# G.ra SCY1\_SCYL1 exon-intron and domain diagram (all)

Gorai.010G219100.1

Gorai.009G292700.2

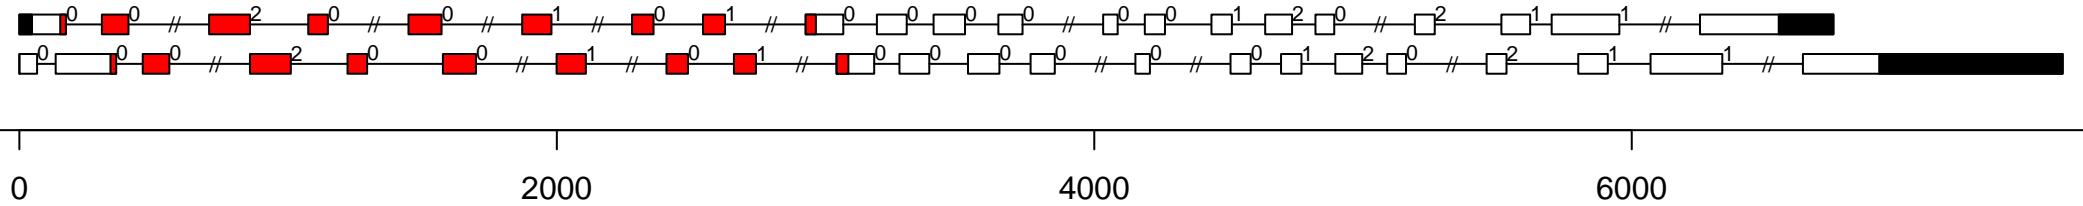

# G.ra SCY1\_SCYL2 exon-intron and domain diagram (all)

Gorai.009G290500.1

Gorai.009G262900.1

Gorai.004G267700.1

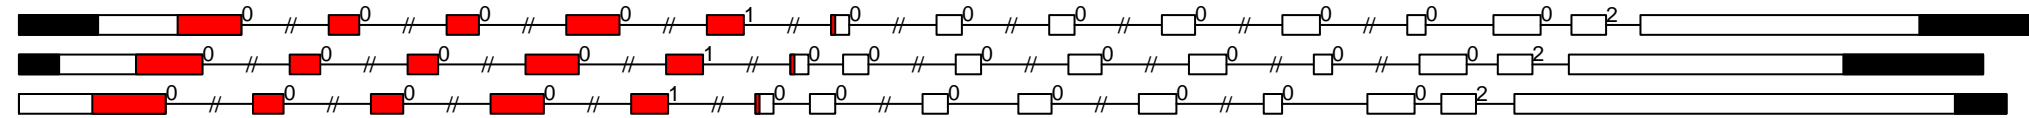

0

2000

4000

6000

# G.ra STE\_STE11 exon-intron and domain diagram (part 1)

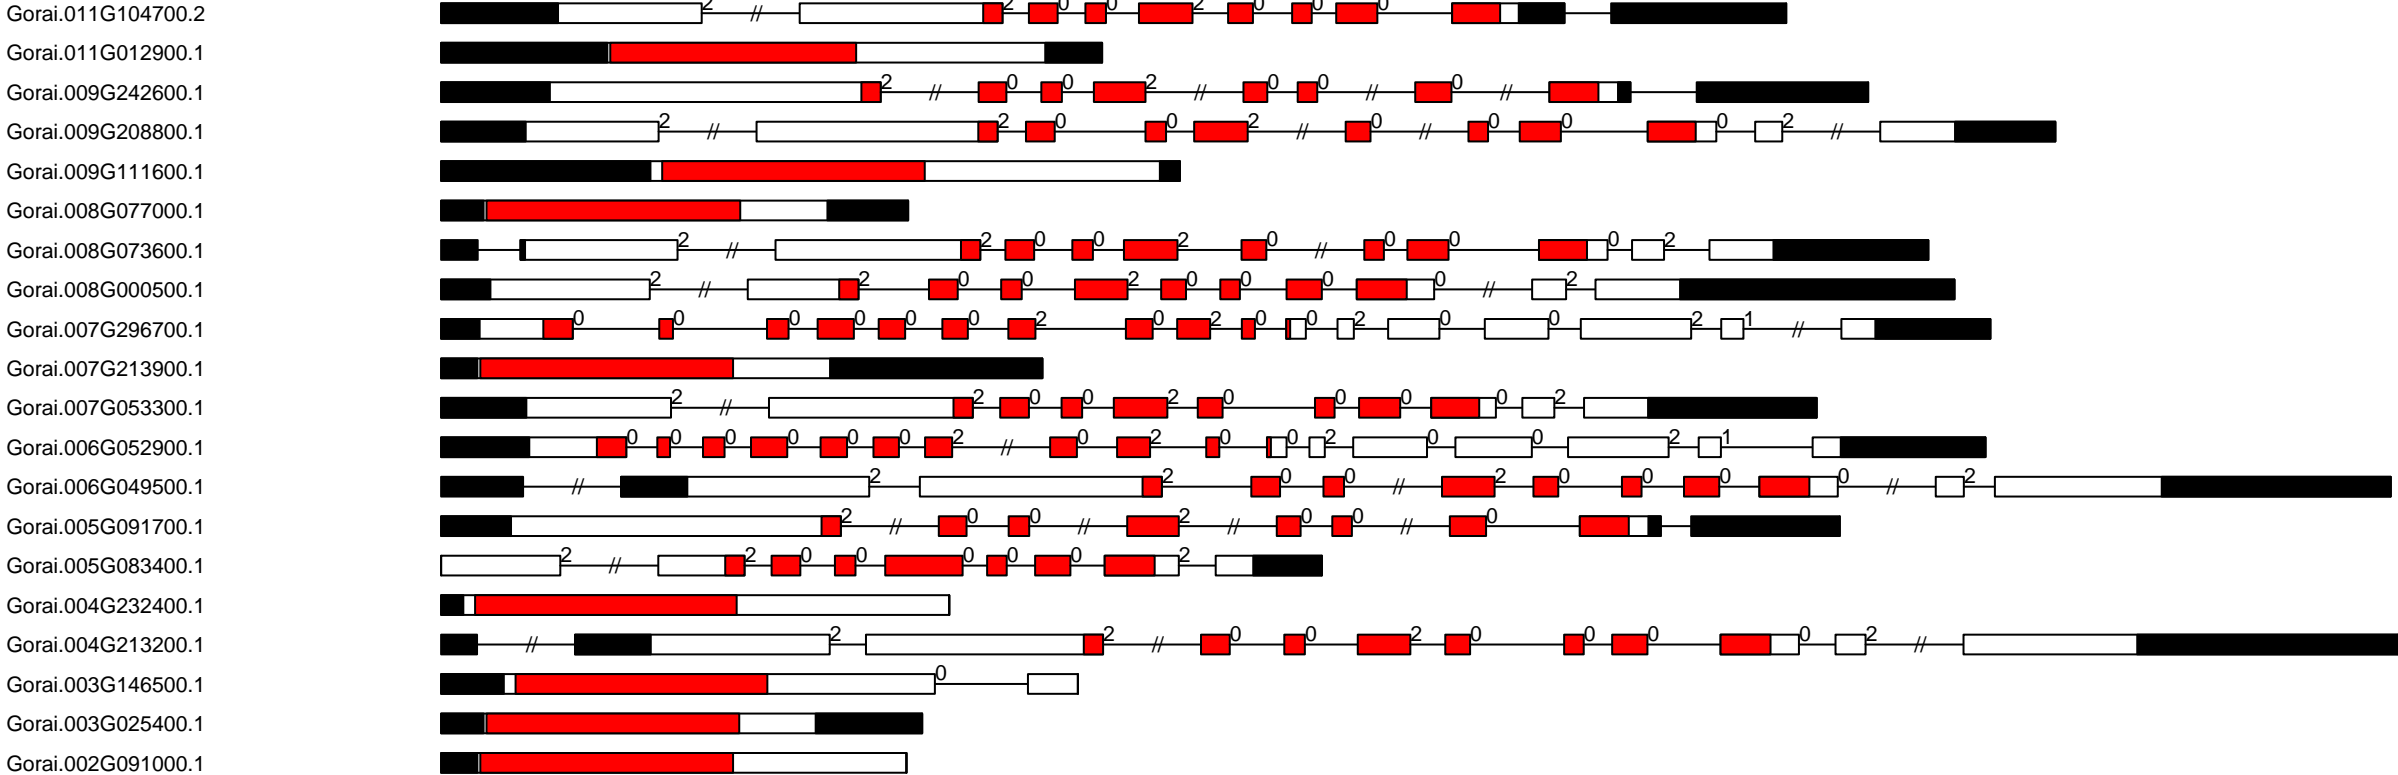



# G.ra STE\_STE20-Fray exon-intron and domain diagram (all)

Gorai.013G174600.1

Gorai.011G155300.1

Gorai.011G155200.1

Gorai.011G154500.1

Gorai.011G154300.1

Gorai.011G095700.3

Gorai.011G053300.2

Gorai.009G149600.1

Gorai.008G258000.1

Gorai.007G076300.1

Gorai.007G020100.1

Gorai.006G247600.1

Gorai.006G030400.4

Gorai.004G130000.1

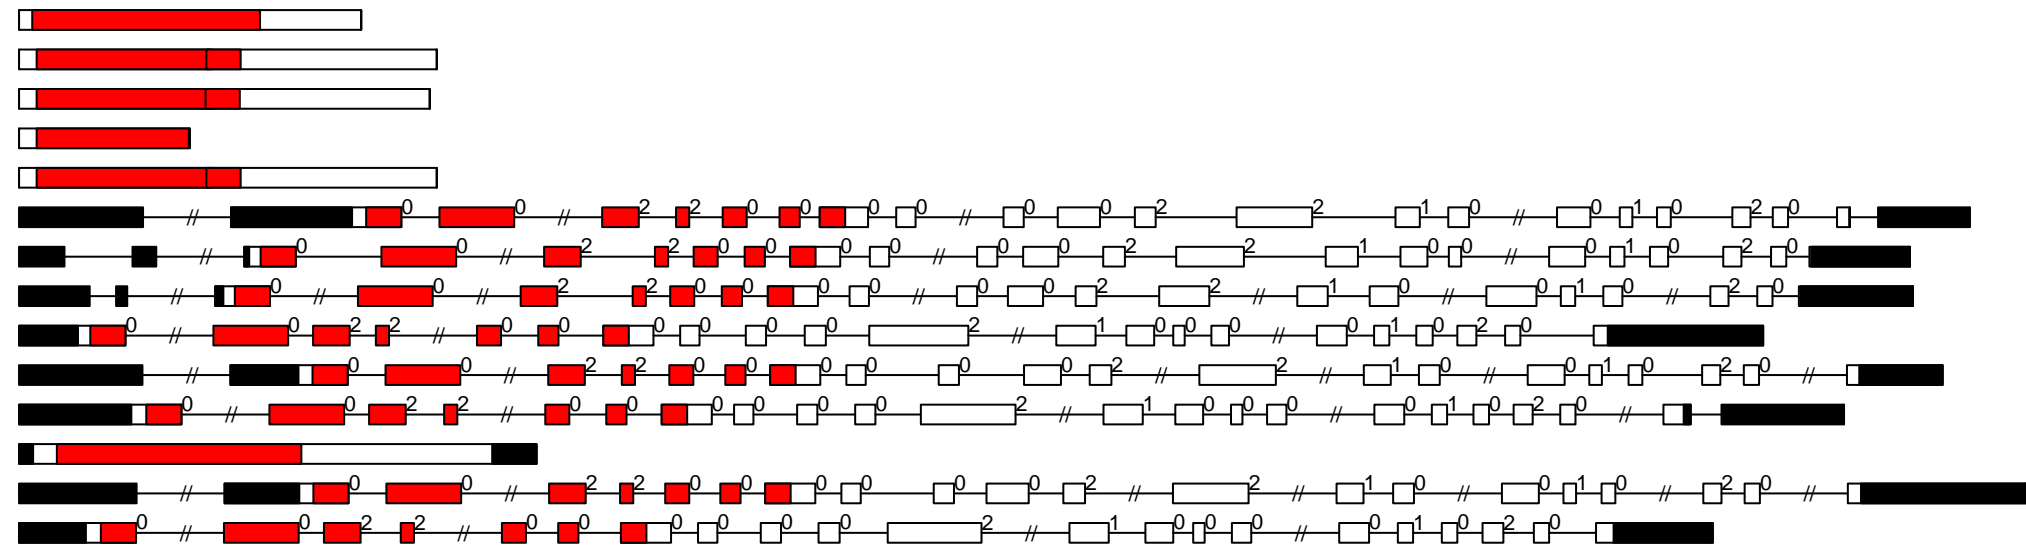

0

2000

4000

6000

G.ra STE\_STE20-PI exon-intron and domain diagram (all)

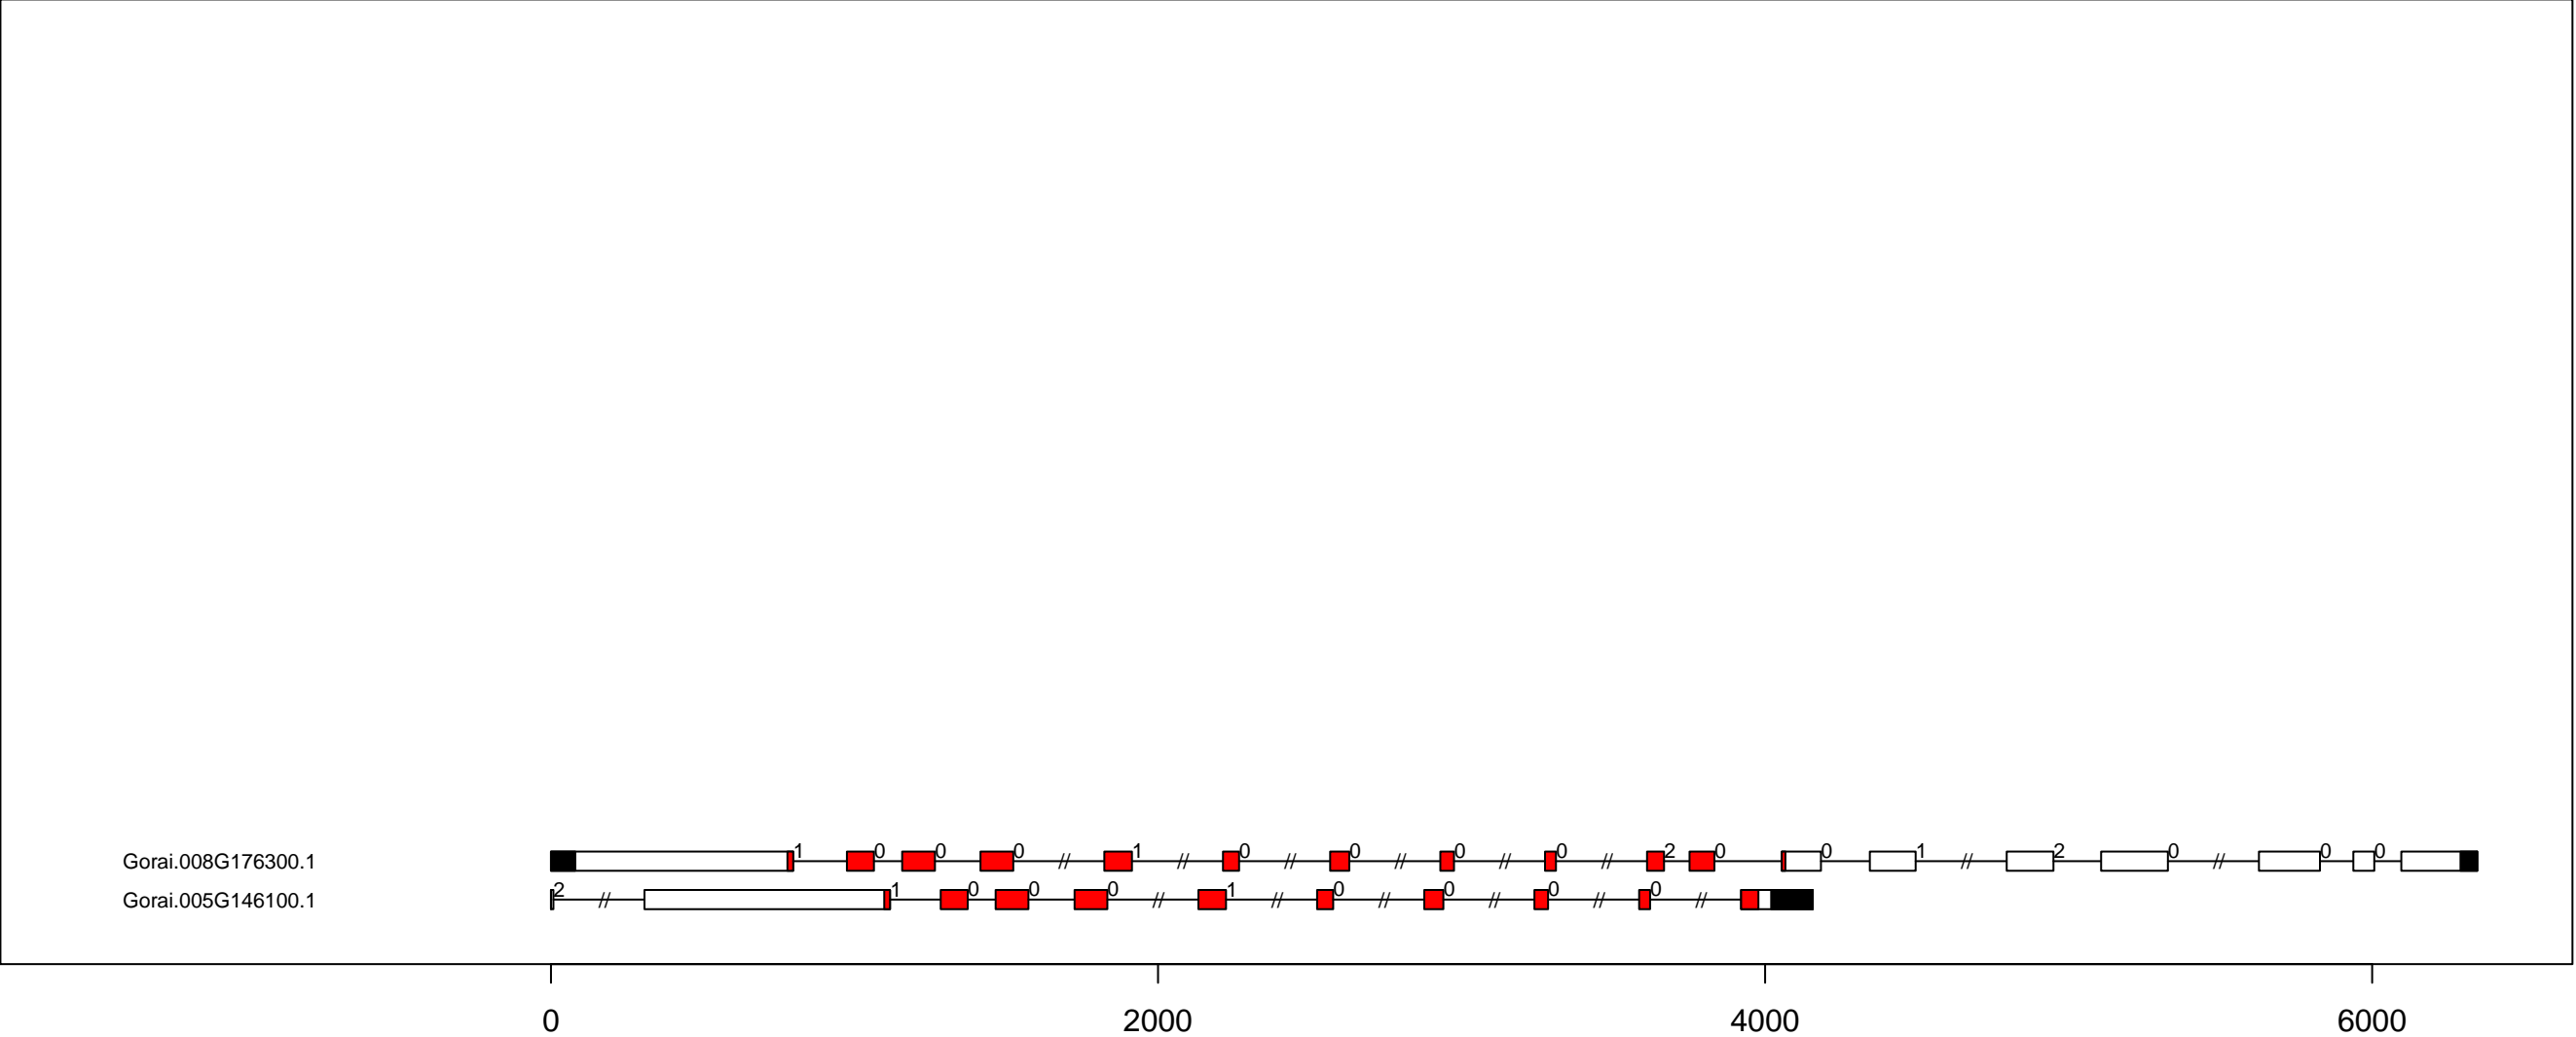

# G.ra STE\_STE20-YSK exon-intron and domain diagram (all)

Gorai.013G169600.1  
Gorai.009G376100.1  
Gorai.002G067900.1

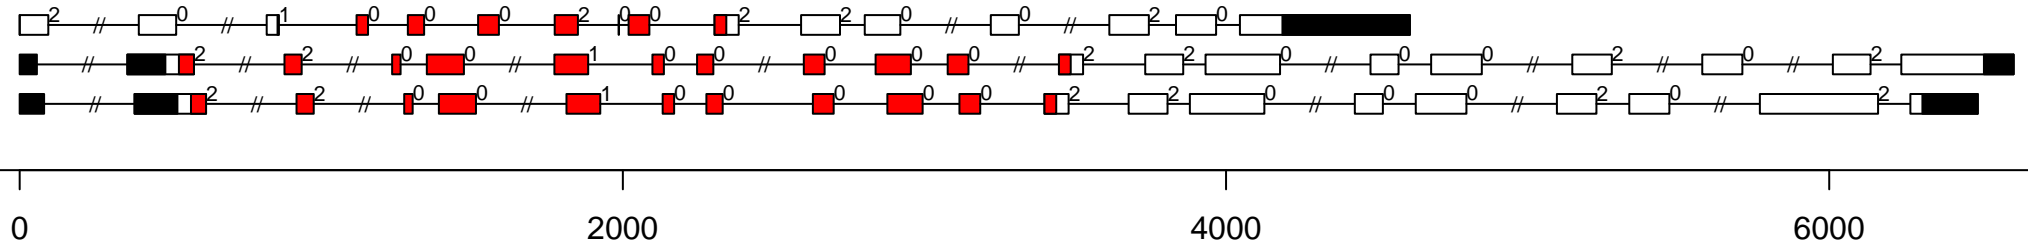



# G.ra STE\_STE7 exon-intron and domain diagram (all)

Gorai.010G221800.1  
 Gorai.008G291800.1  
 Gorai.008G291700.1  
 Gorai.002G188500.1  
 Gorai.013G229600.1  
 Gorai.010G085300.1  
 Gorai.009G033800.2  
 Gorai.008G225100.1  
 Gorai.007G075600.3  
 Gorai.003G184000.1  
 Gorai.001G013600.1  
 Gorai.001G009700.1

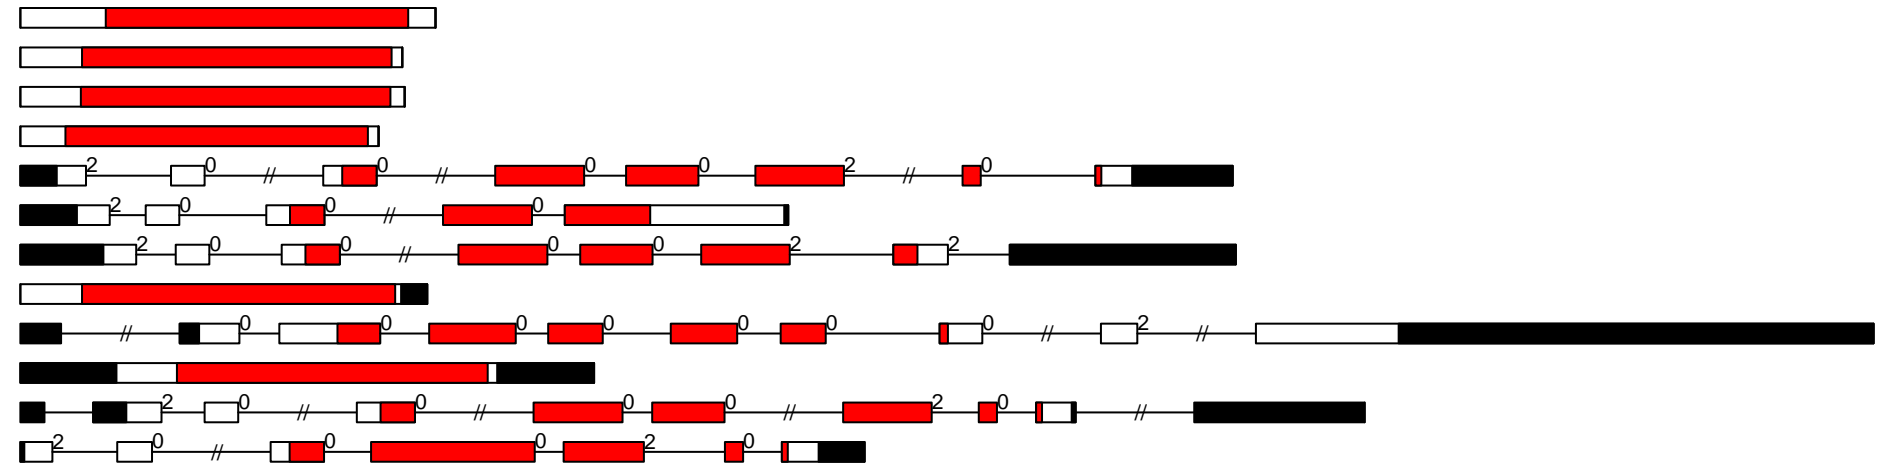

-1000

0

1000

2000

3000

4000

# G.ra STE\_STE-PI exon-intron and domain diagram (all)

Gorai.008G149400.1

Gorai.005G210100.1

Gorai.002G016000.1

-2000

0

2000

4000

6000

8000

10000

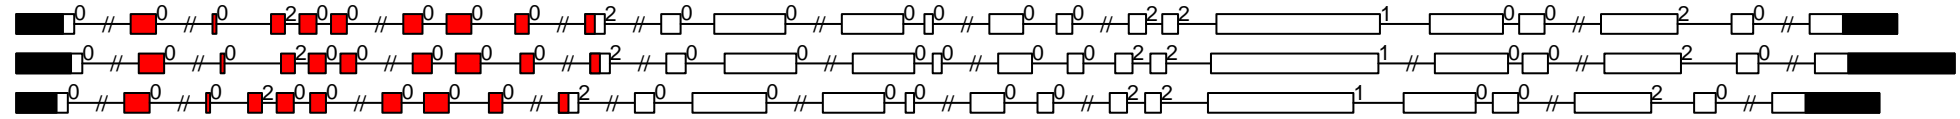

# G.ra TKL\_CTR1-DRK-1 exon-intron and domain diagram (all)

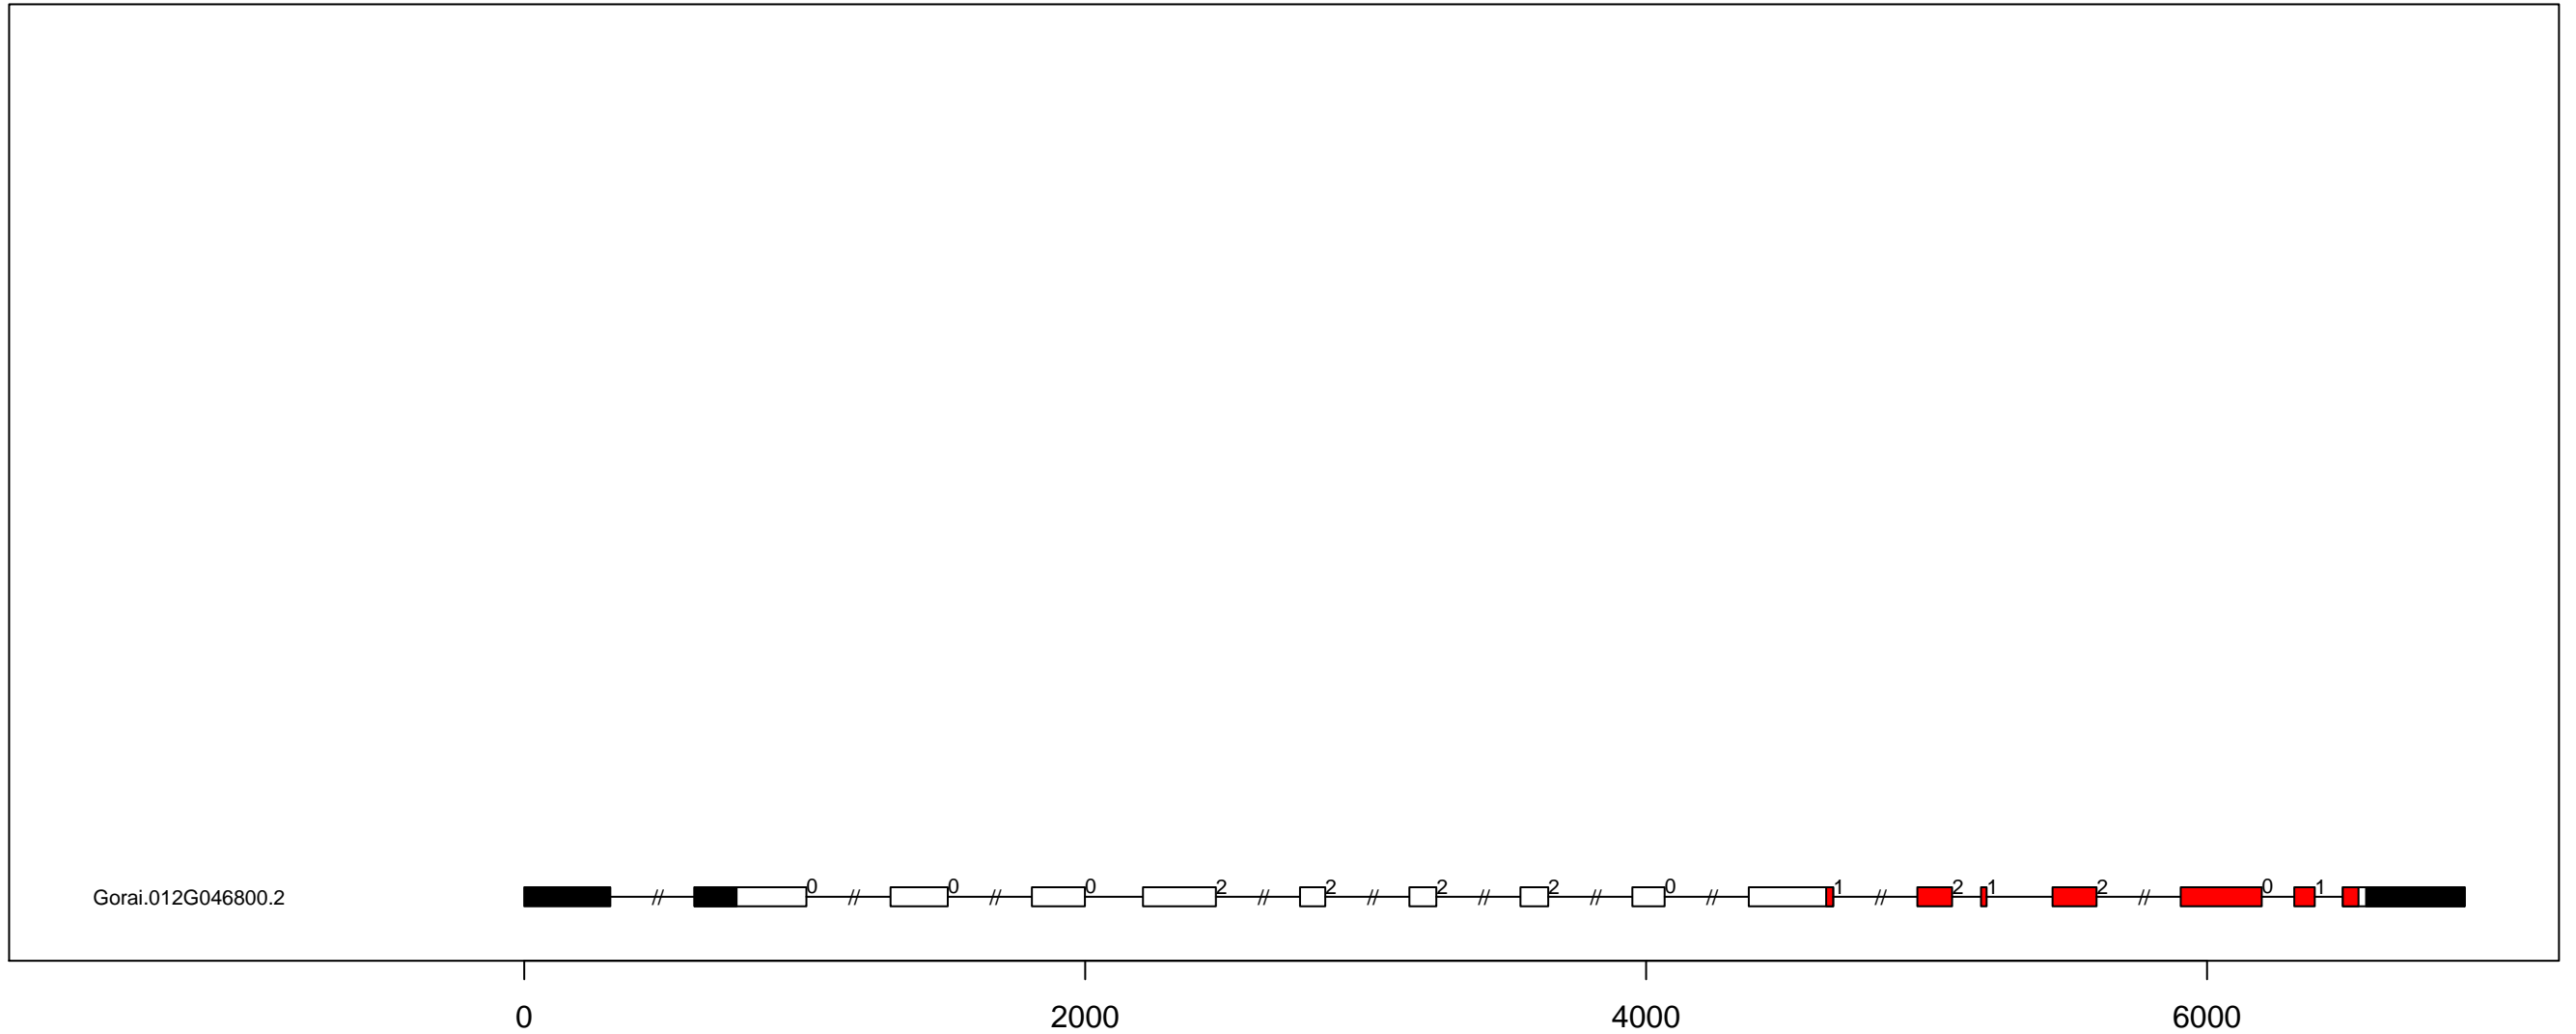

### G.ra TKL\_CTR1-DRK-2 exon-intron and domain diagram (all)

Gorai.011G200300.1

Gorai.010G033900.1

Gorai.009G408200.3

Gorai.009G304300.1

Gorai.009G228800.2

Gorai.009G045200.1

Gorai.008G289300.1

Gorai.007G286200.1

Gorai.006G258400.1

Gorai.006G158200.1

Gorai.006G080100.1

Gorai.006G056600.1

Gorai.005G067400.1

Gorai.005G067300.1

Gorai.004G245400.2

Gorai.003G162100.1

Gorai.002G159900.1

Gorai.001G022800.1

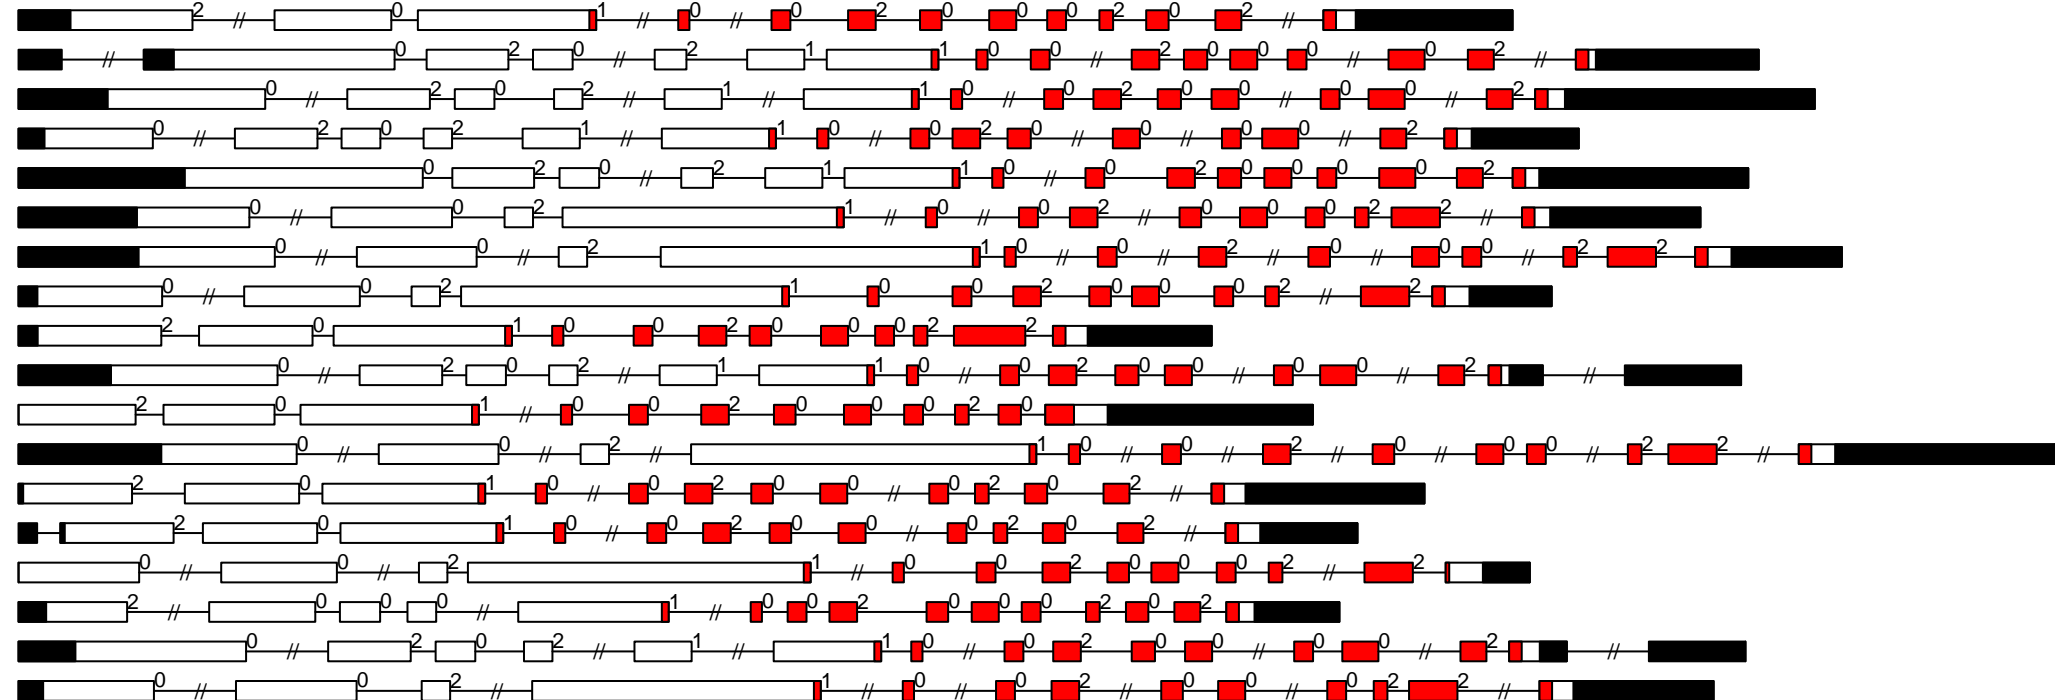

0

2000

4000

6000

G.ra TKL\_Gdt exon-intron and domain diagram (all)

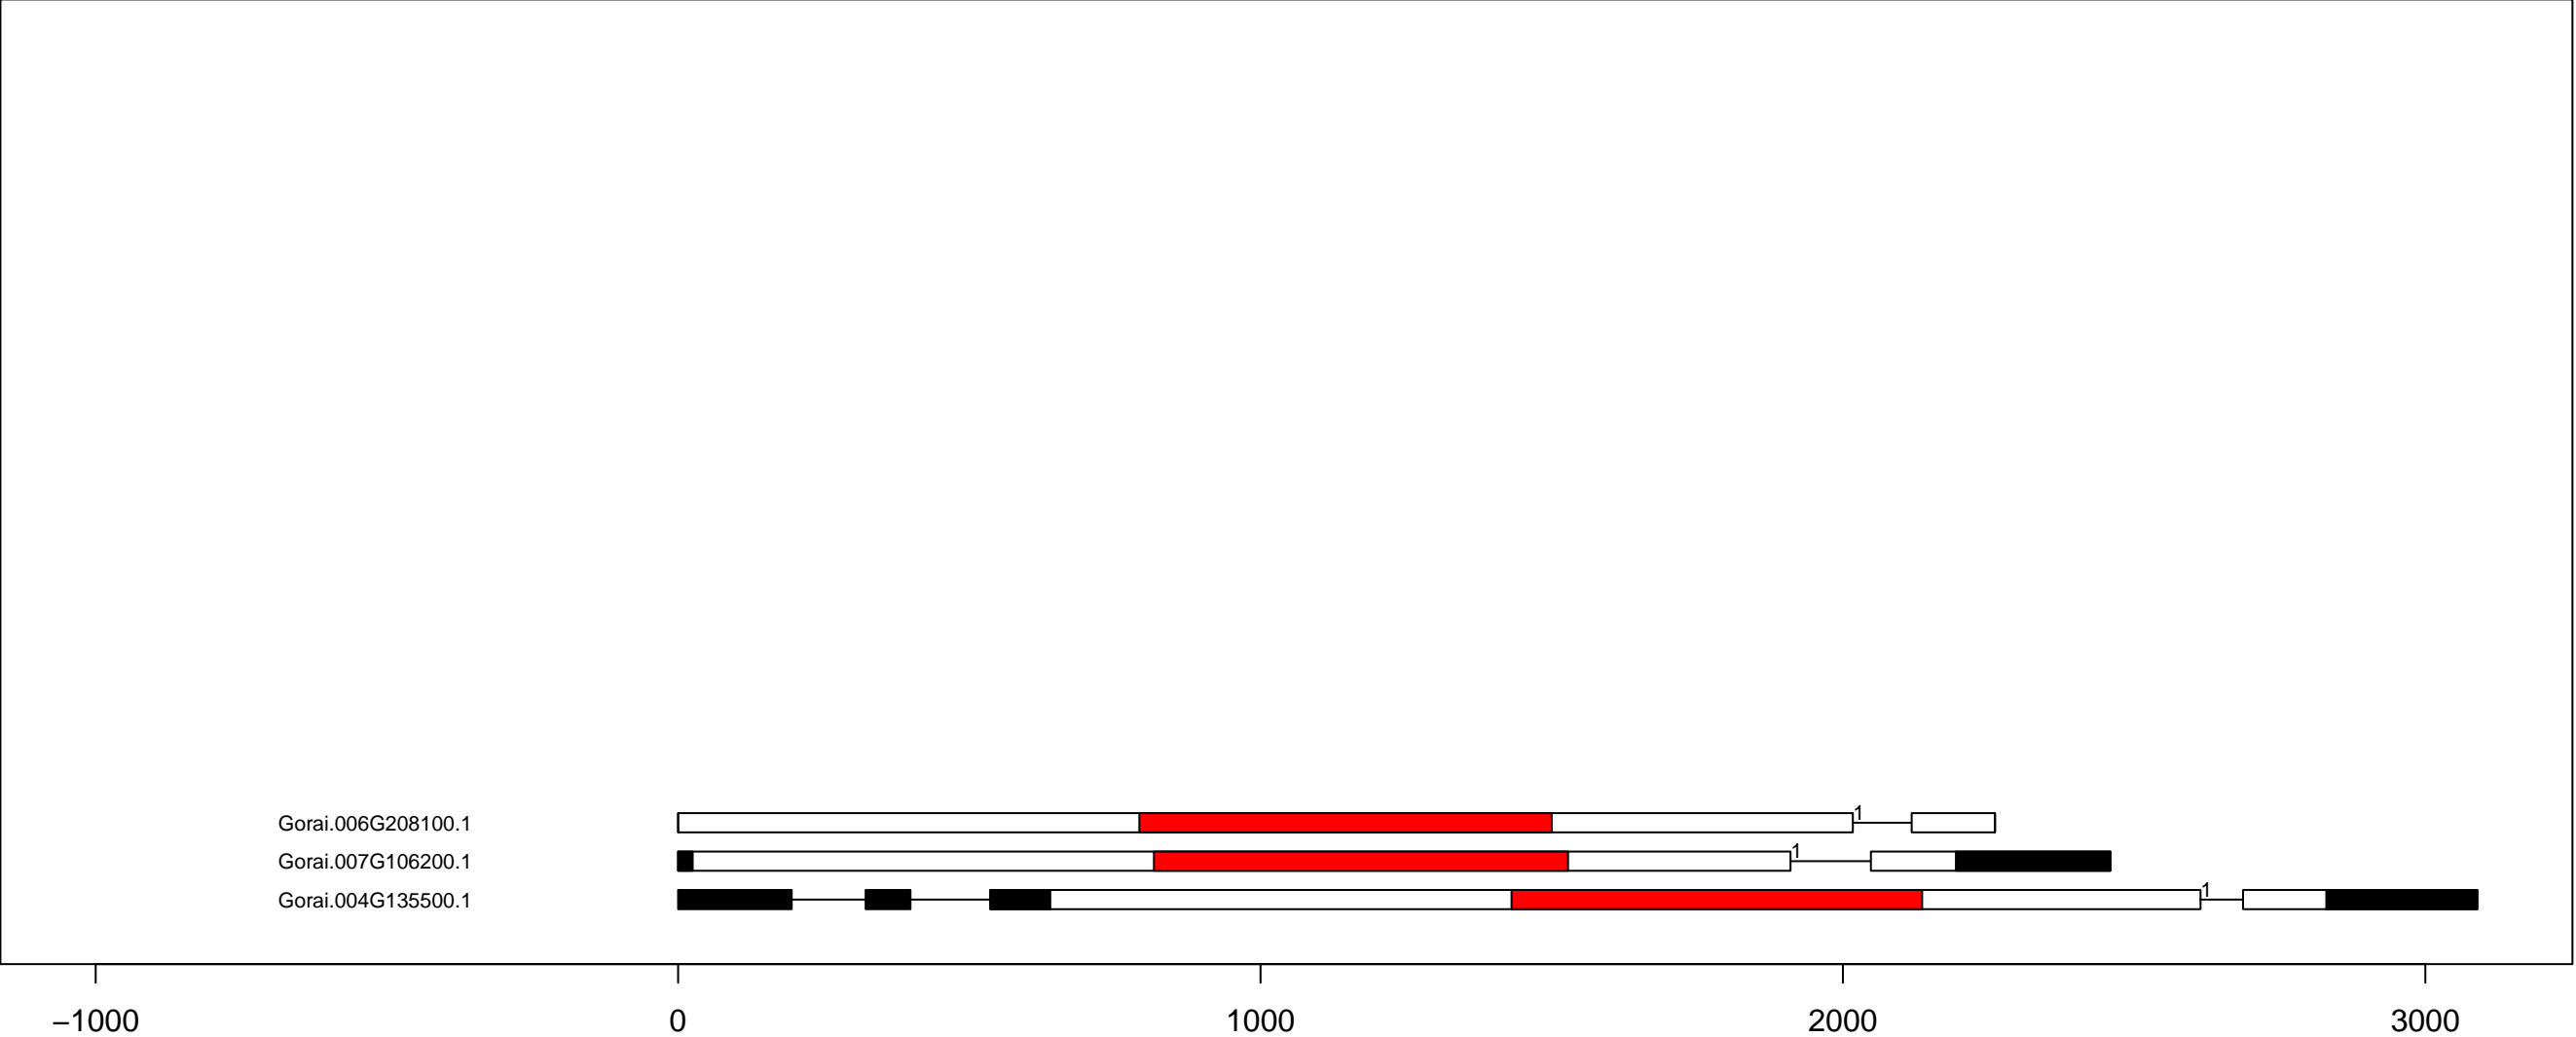

# G.ra TKL-PI-1 exon-intron and domain diagram (all)

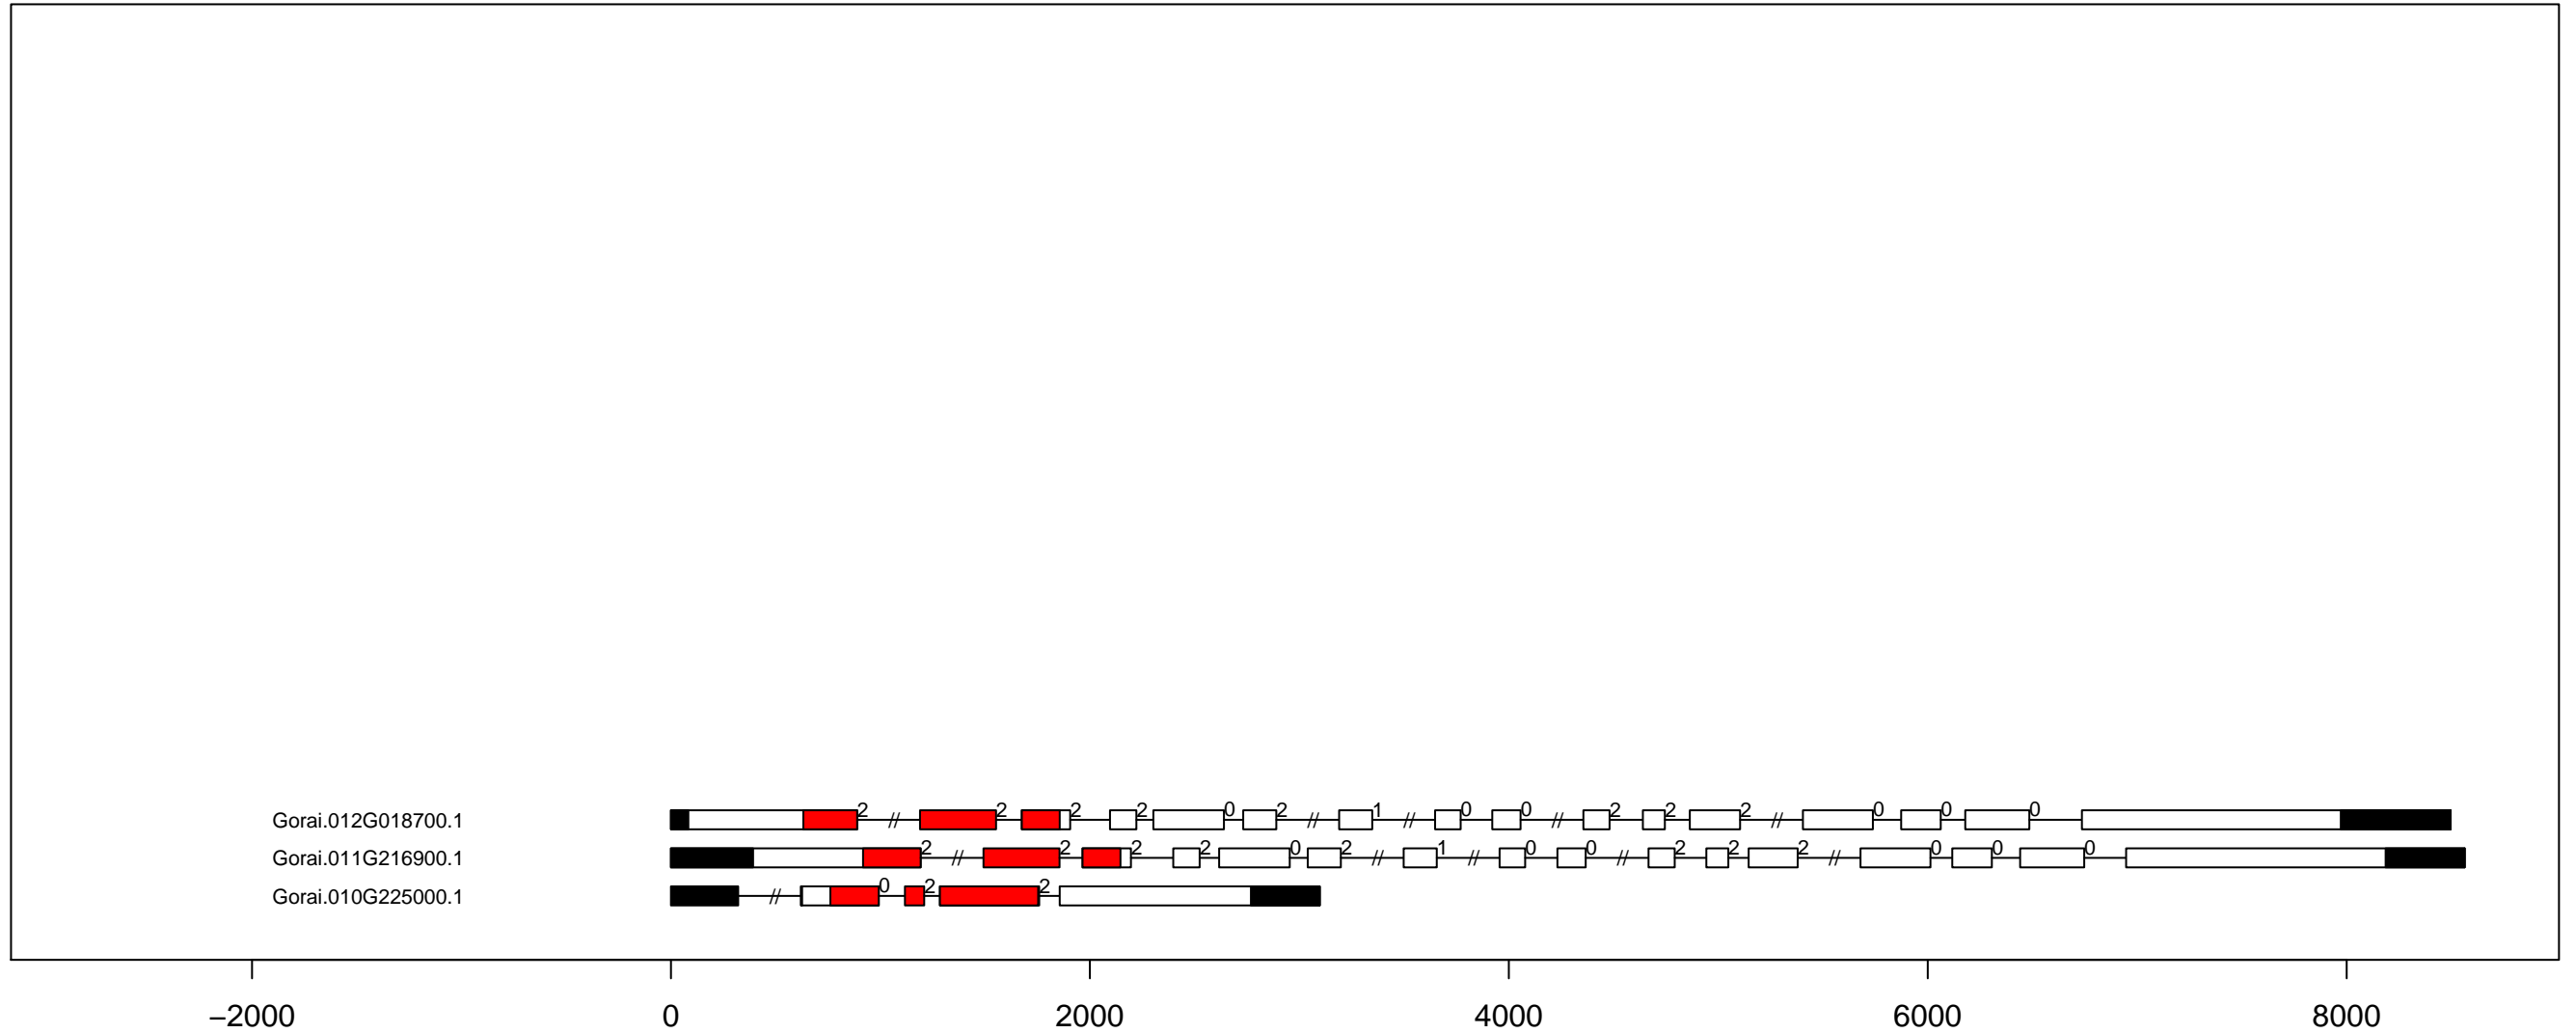

# G.ra TKL-PI-2 exon-intron and domain diagram (all)

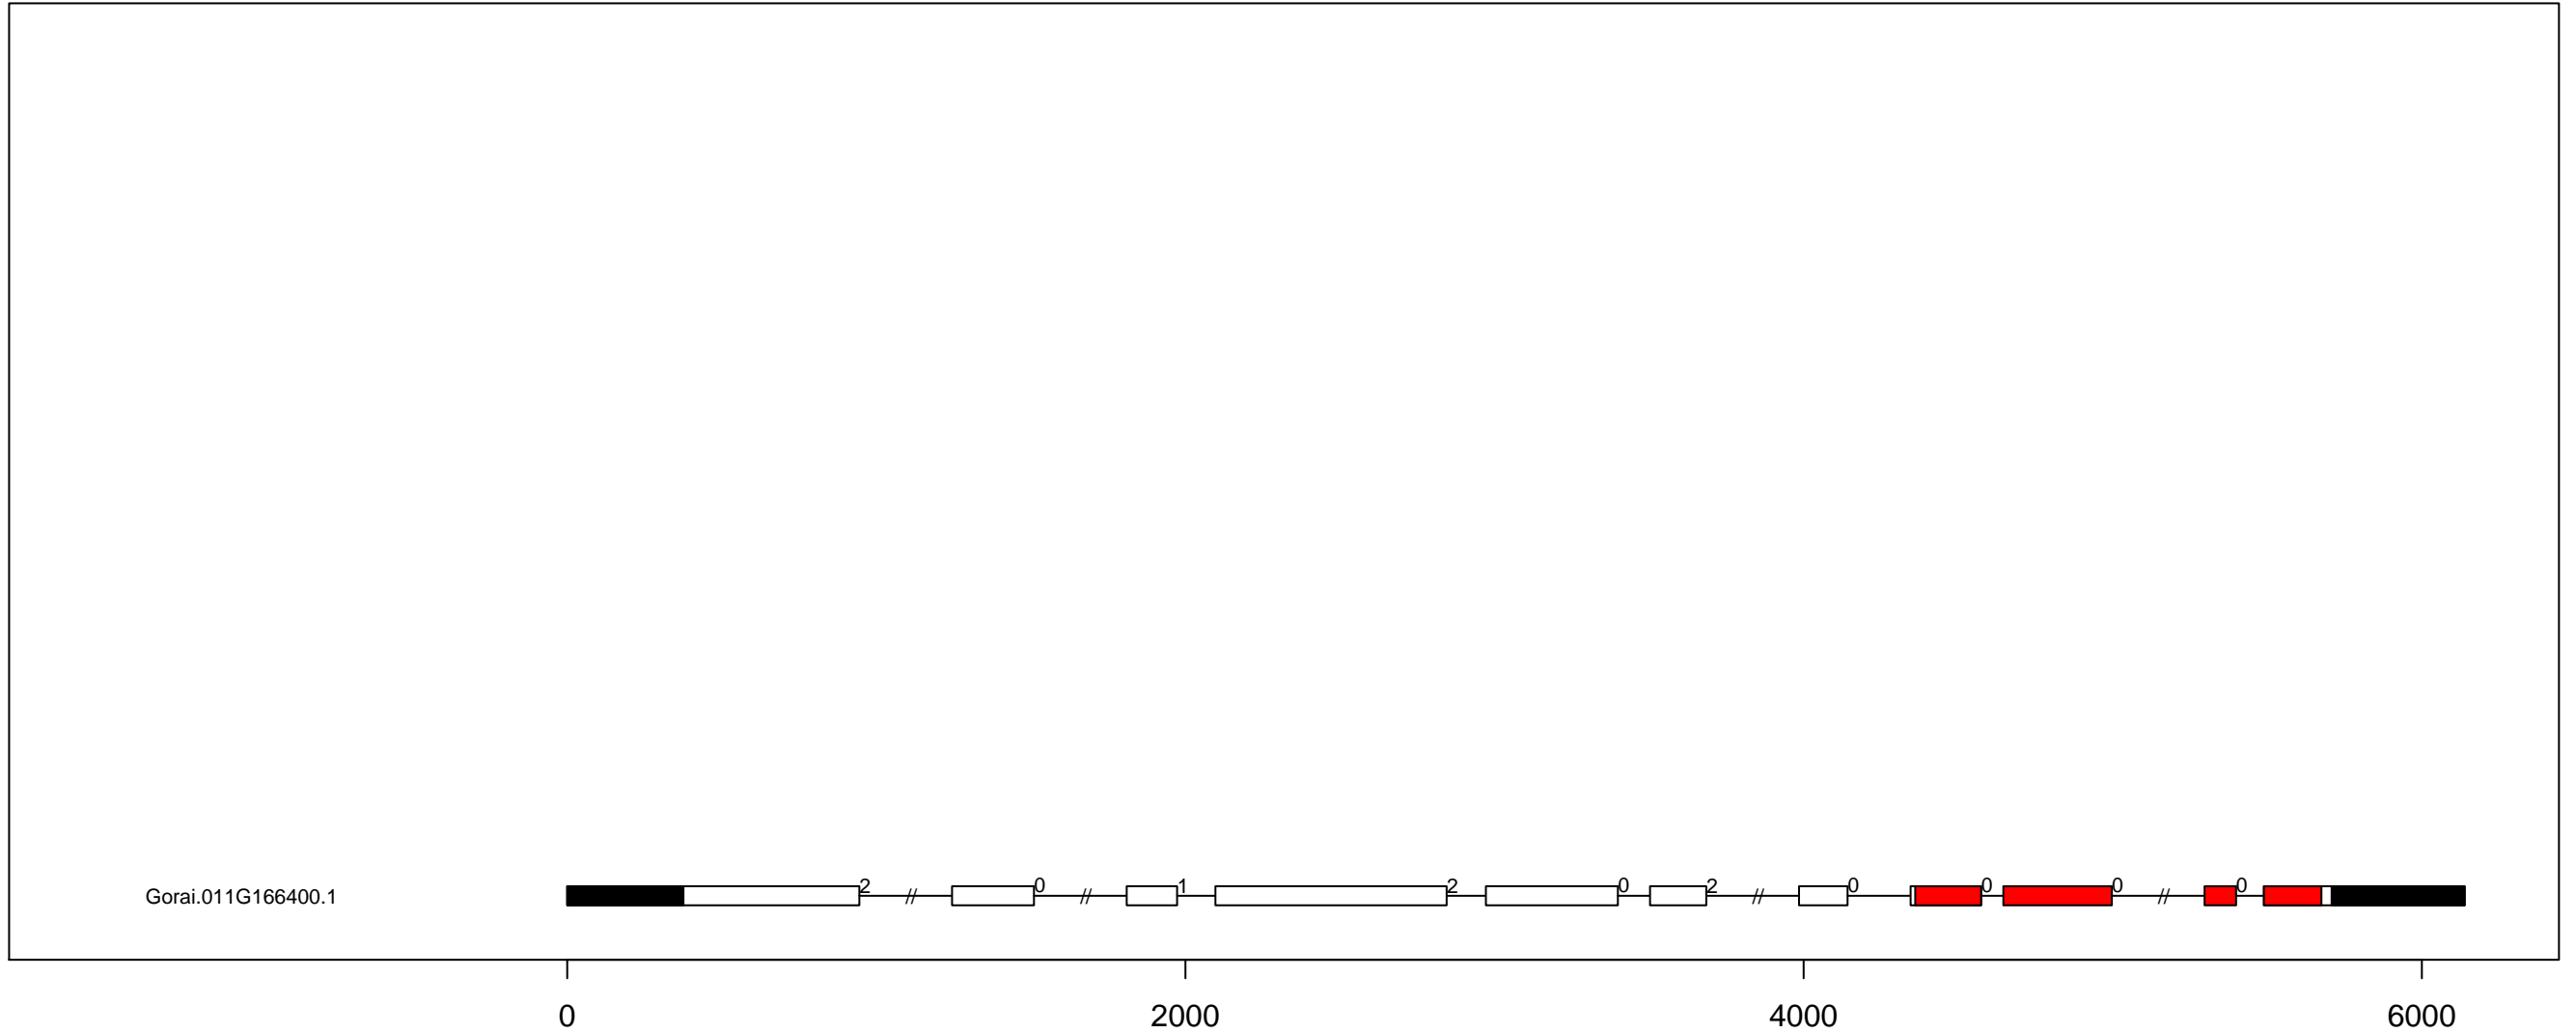

# G.ra TKL-PI-3 exon-intron and domain diagram (all)

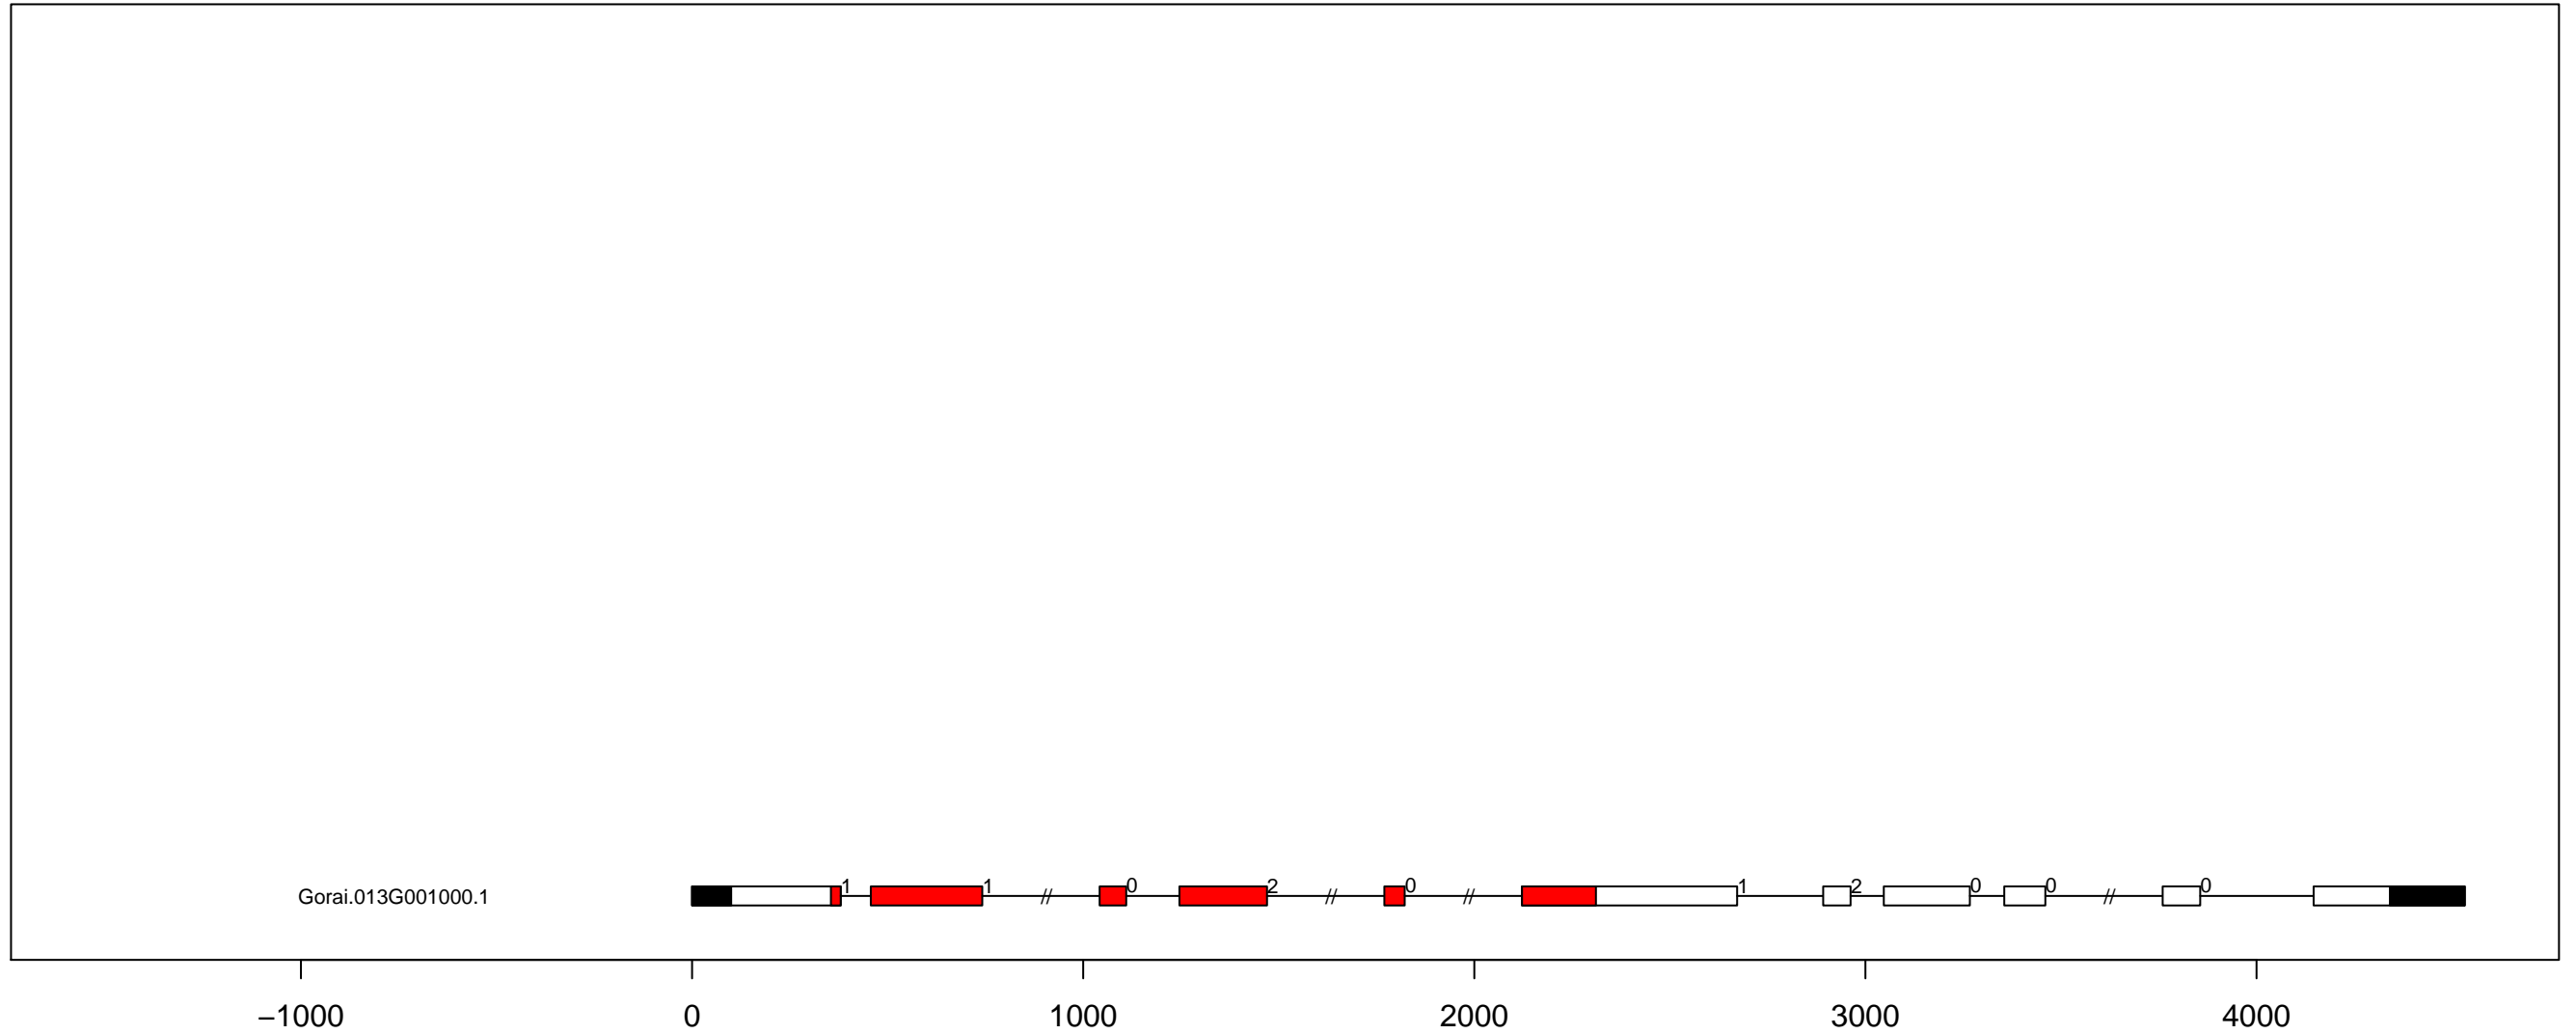



# G.ra TKL-PI-4 exon-intron and domain diagram (part 1)

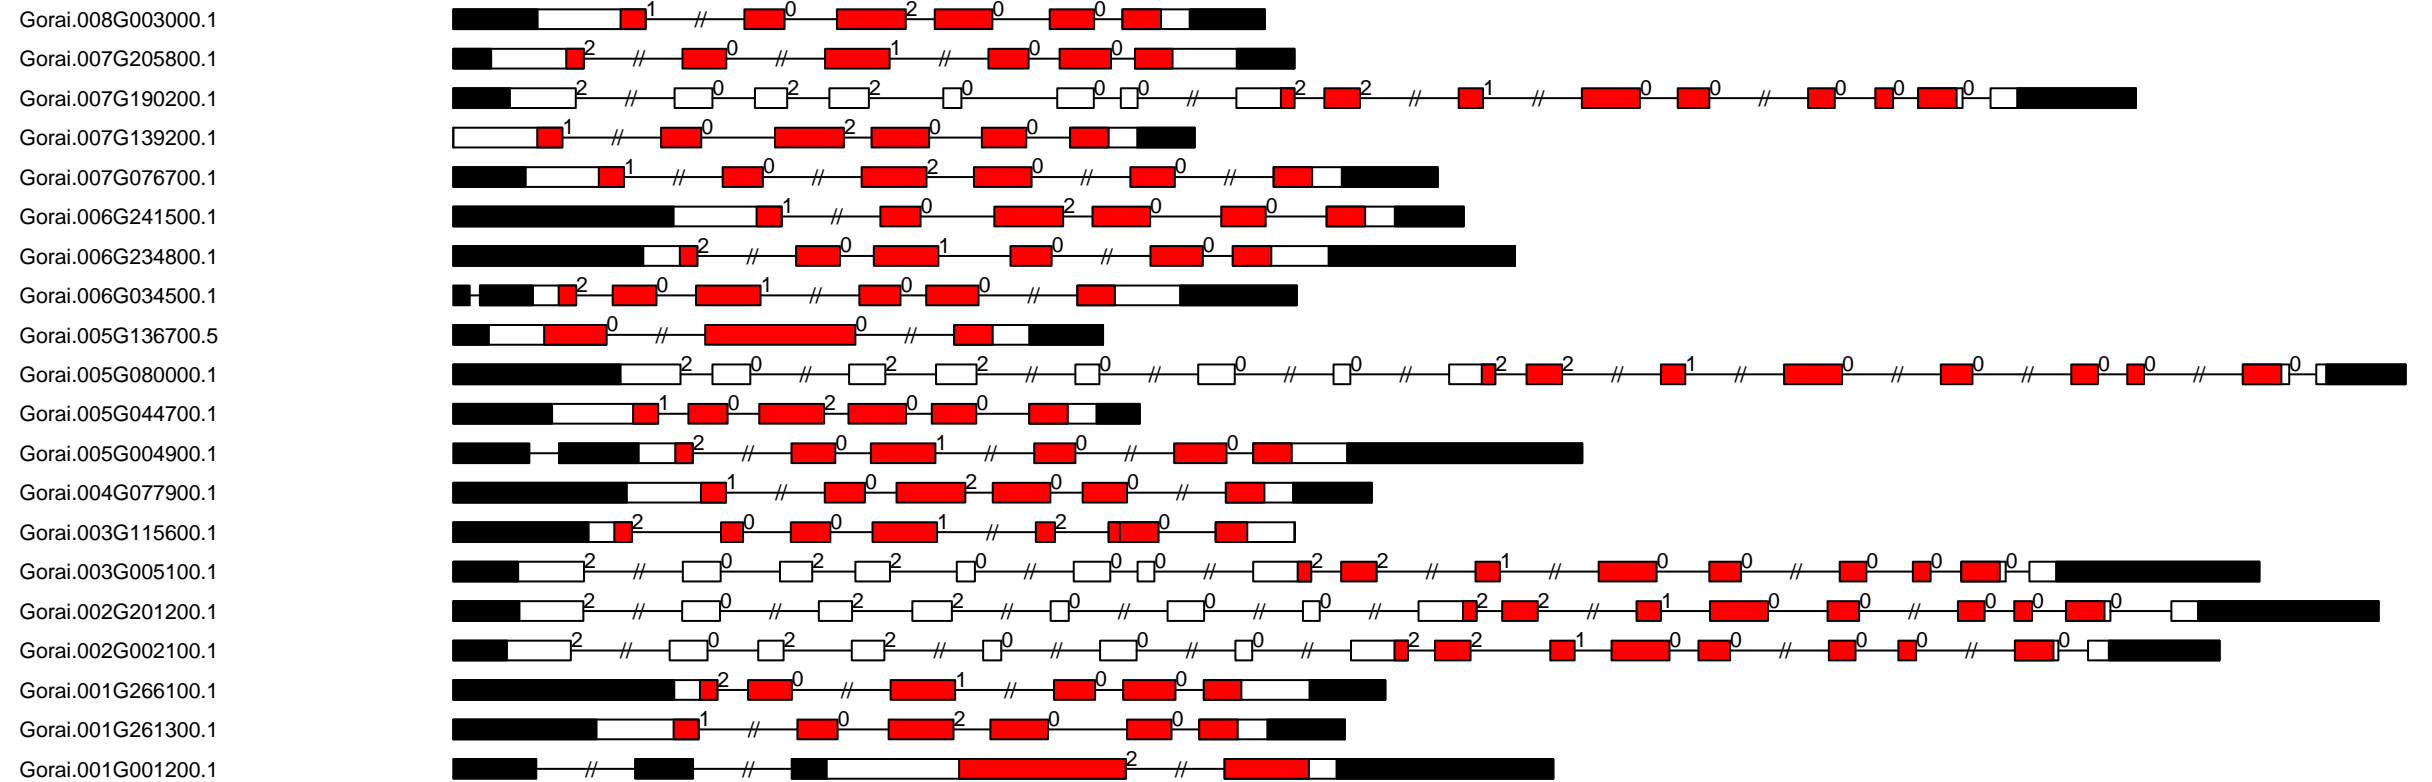

### G.ra TKL-PI-4 exon-intron and domain diagram (part 2)

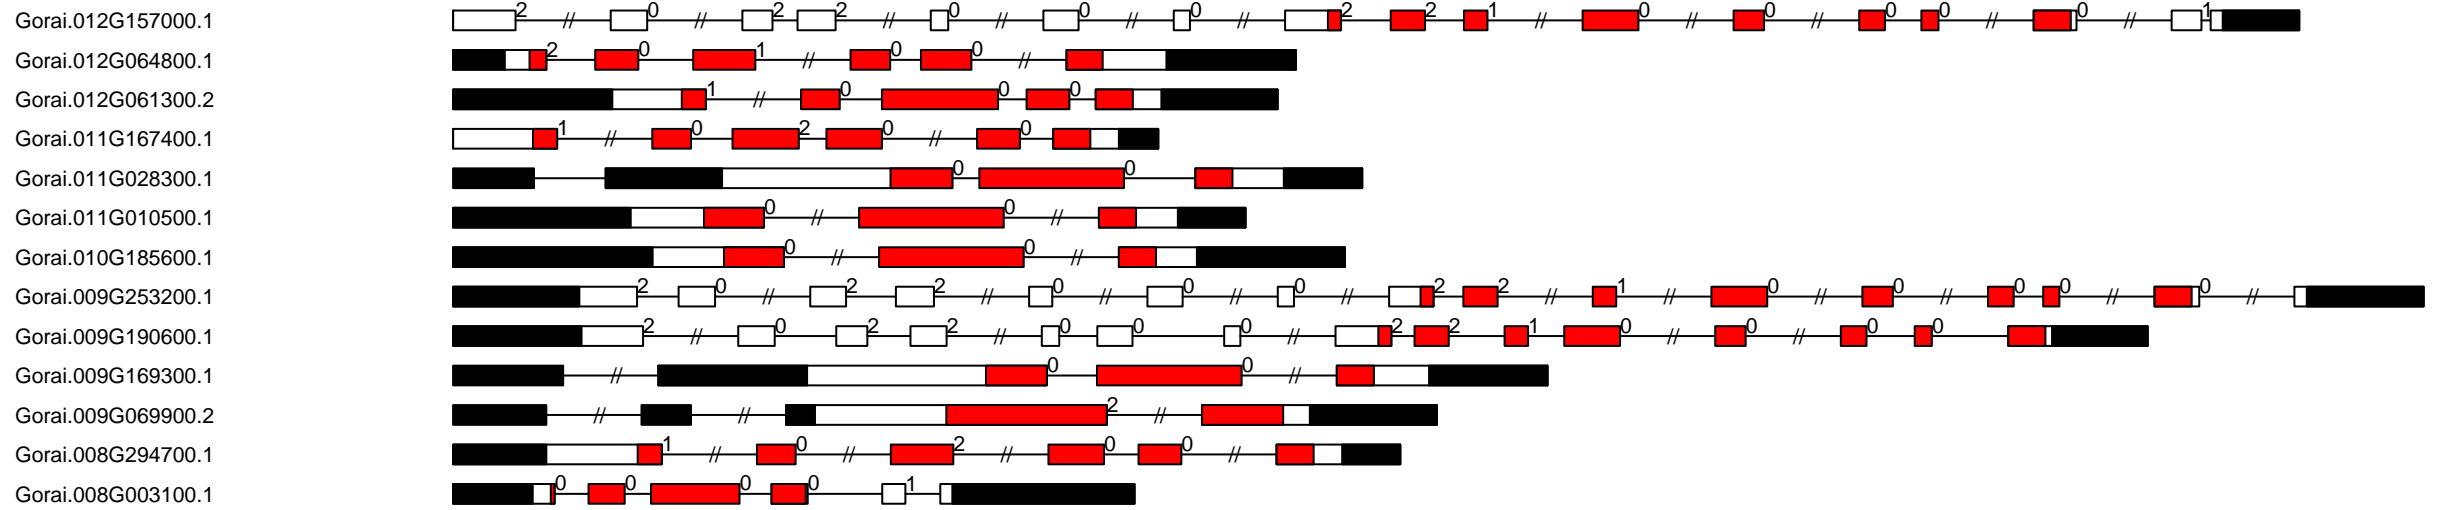

# G.ra TKL-PI-5 exon-intron and domain diagram (all)

Gorai.013G089100.2  
Gorai.012G042800.1  
Gorai.011G131000.1  
Gorai.011G035600.1  
Gorai.008G179300.3  
Gorai.008G121800.1  
Gorai.006G233100.1  
Gorai.005G142900.1  
Gorai.005G007700.1

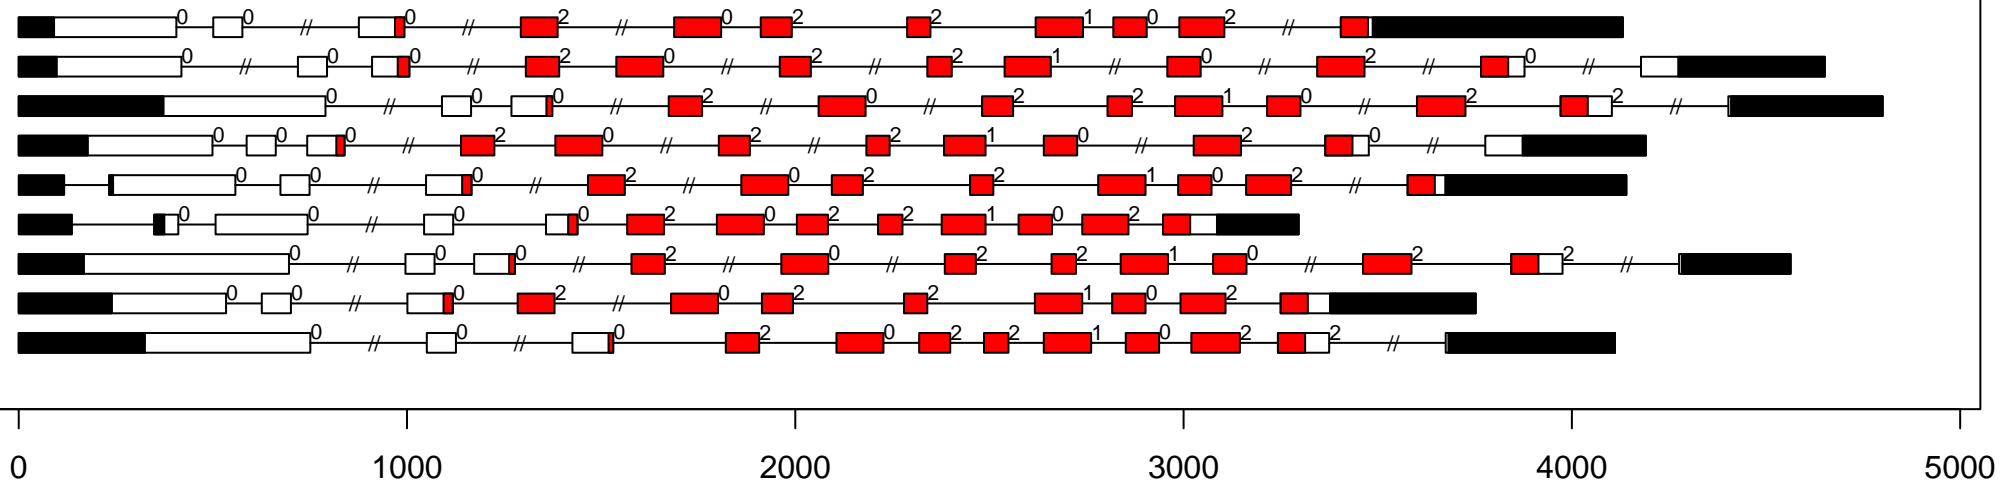

# G.ra TKL-PI-6 exon-intron and domain diagram (all)

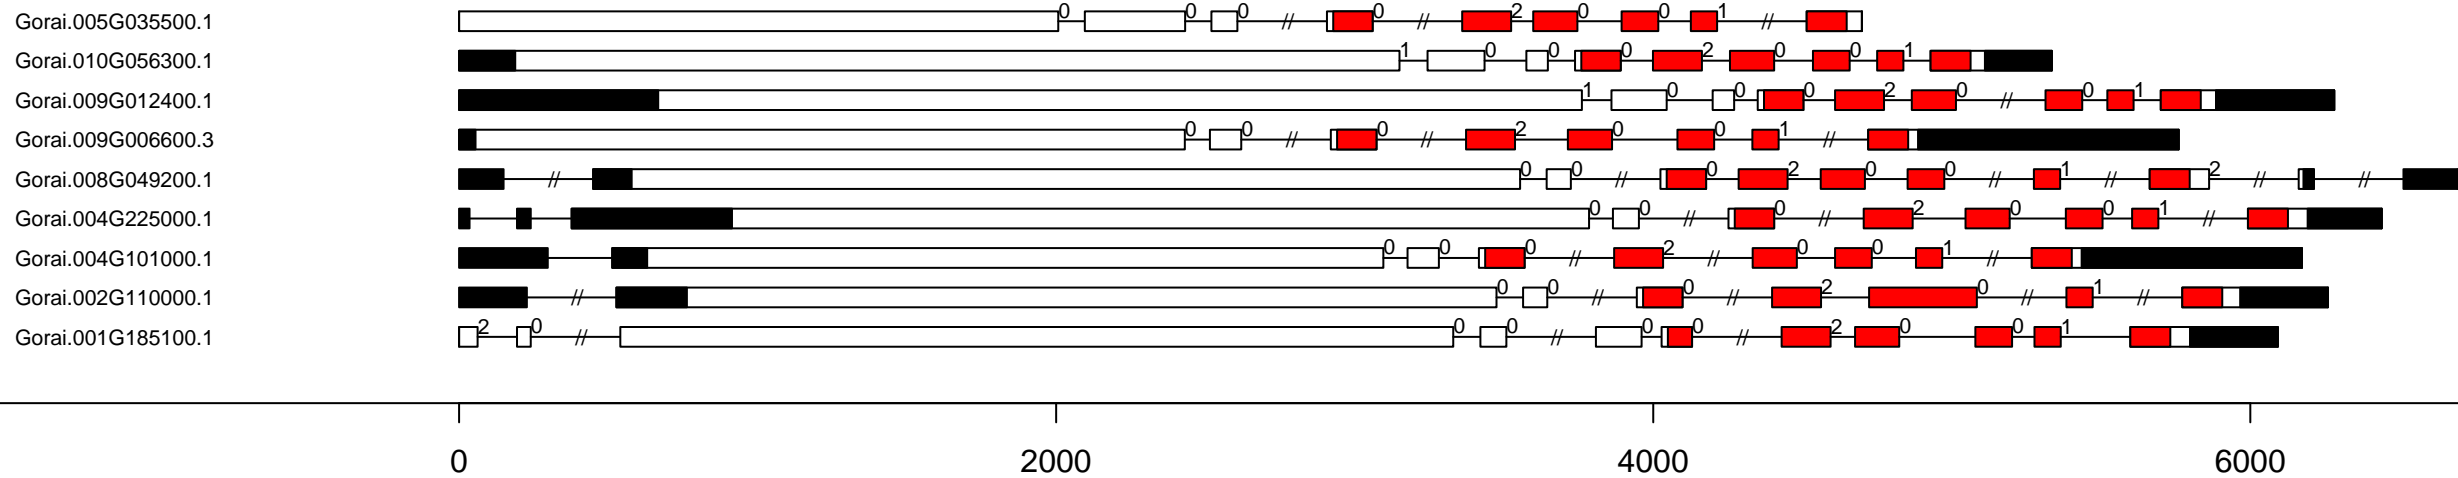

# G.ra TKL-PI-7 exon-intron and domain diagram (all)

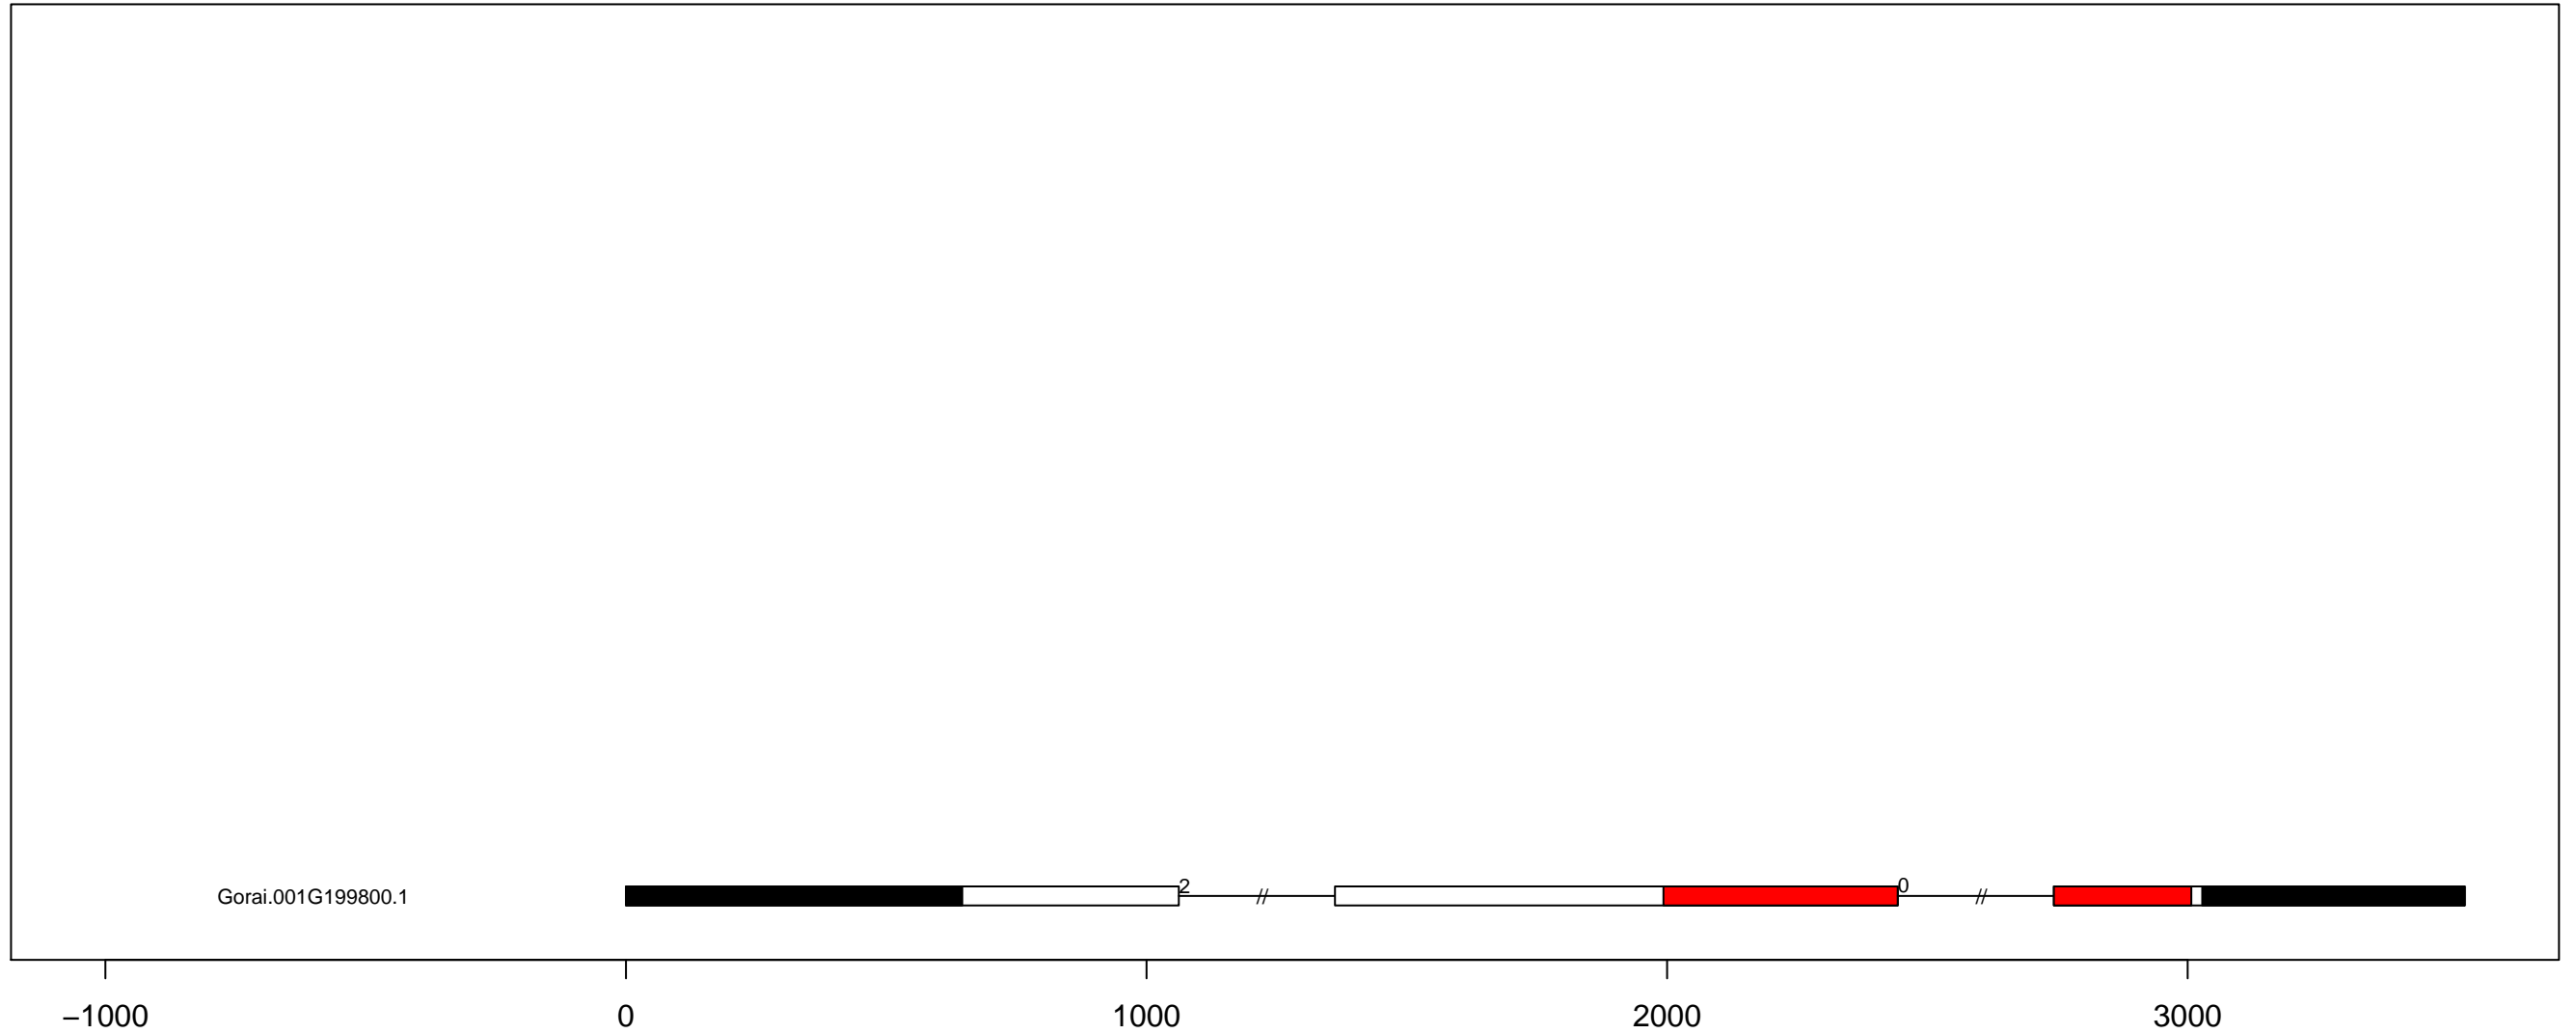

# G.ra TKL-PI-8 exon-intron and domain diagram (all)

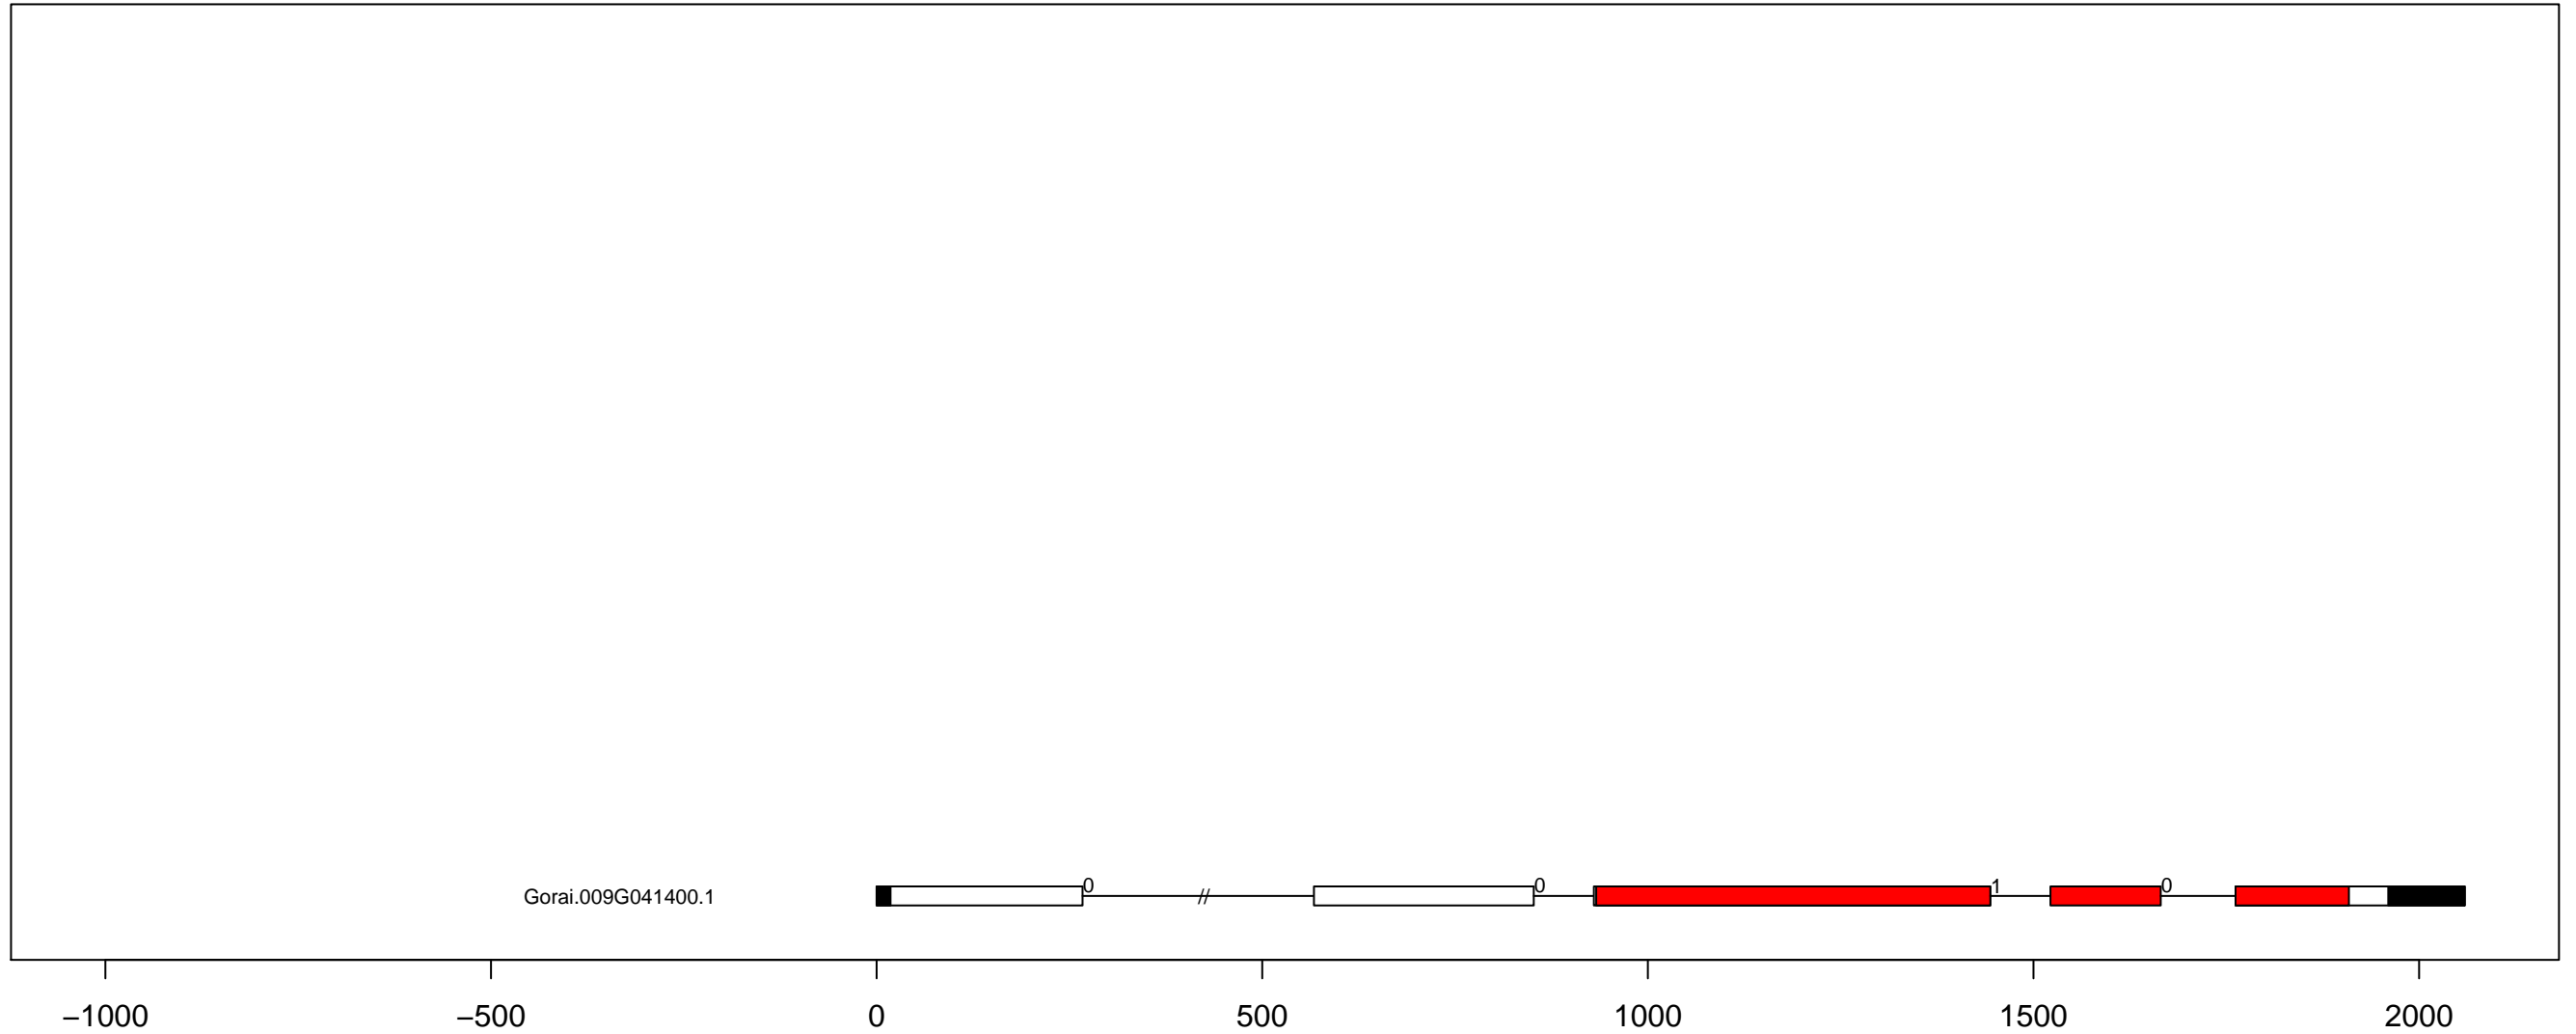

# G.ra TLK exon-intron and domain diagram (all)

Gorai.013G256500.1

Gorai.001G127300.1

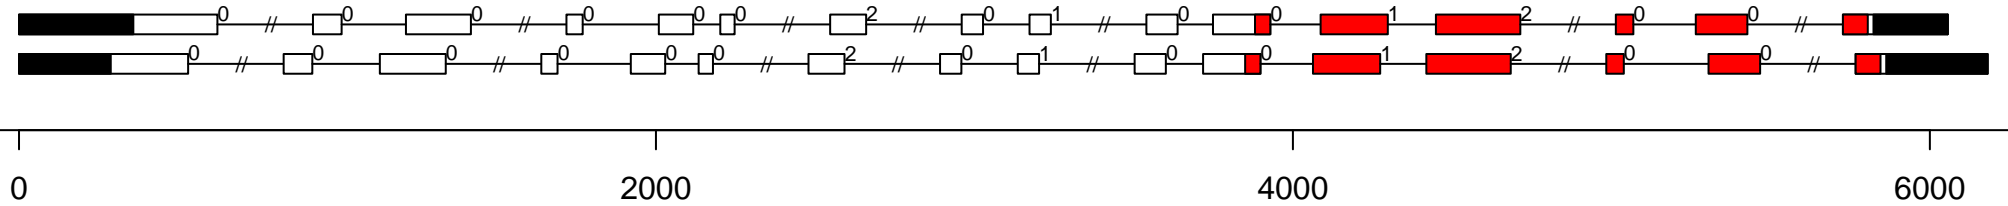

# G.ra TTK exon-intron and domain diagram (all)

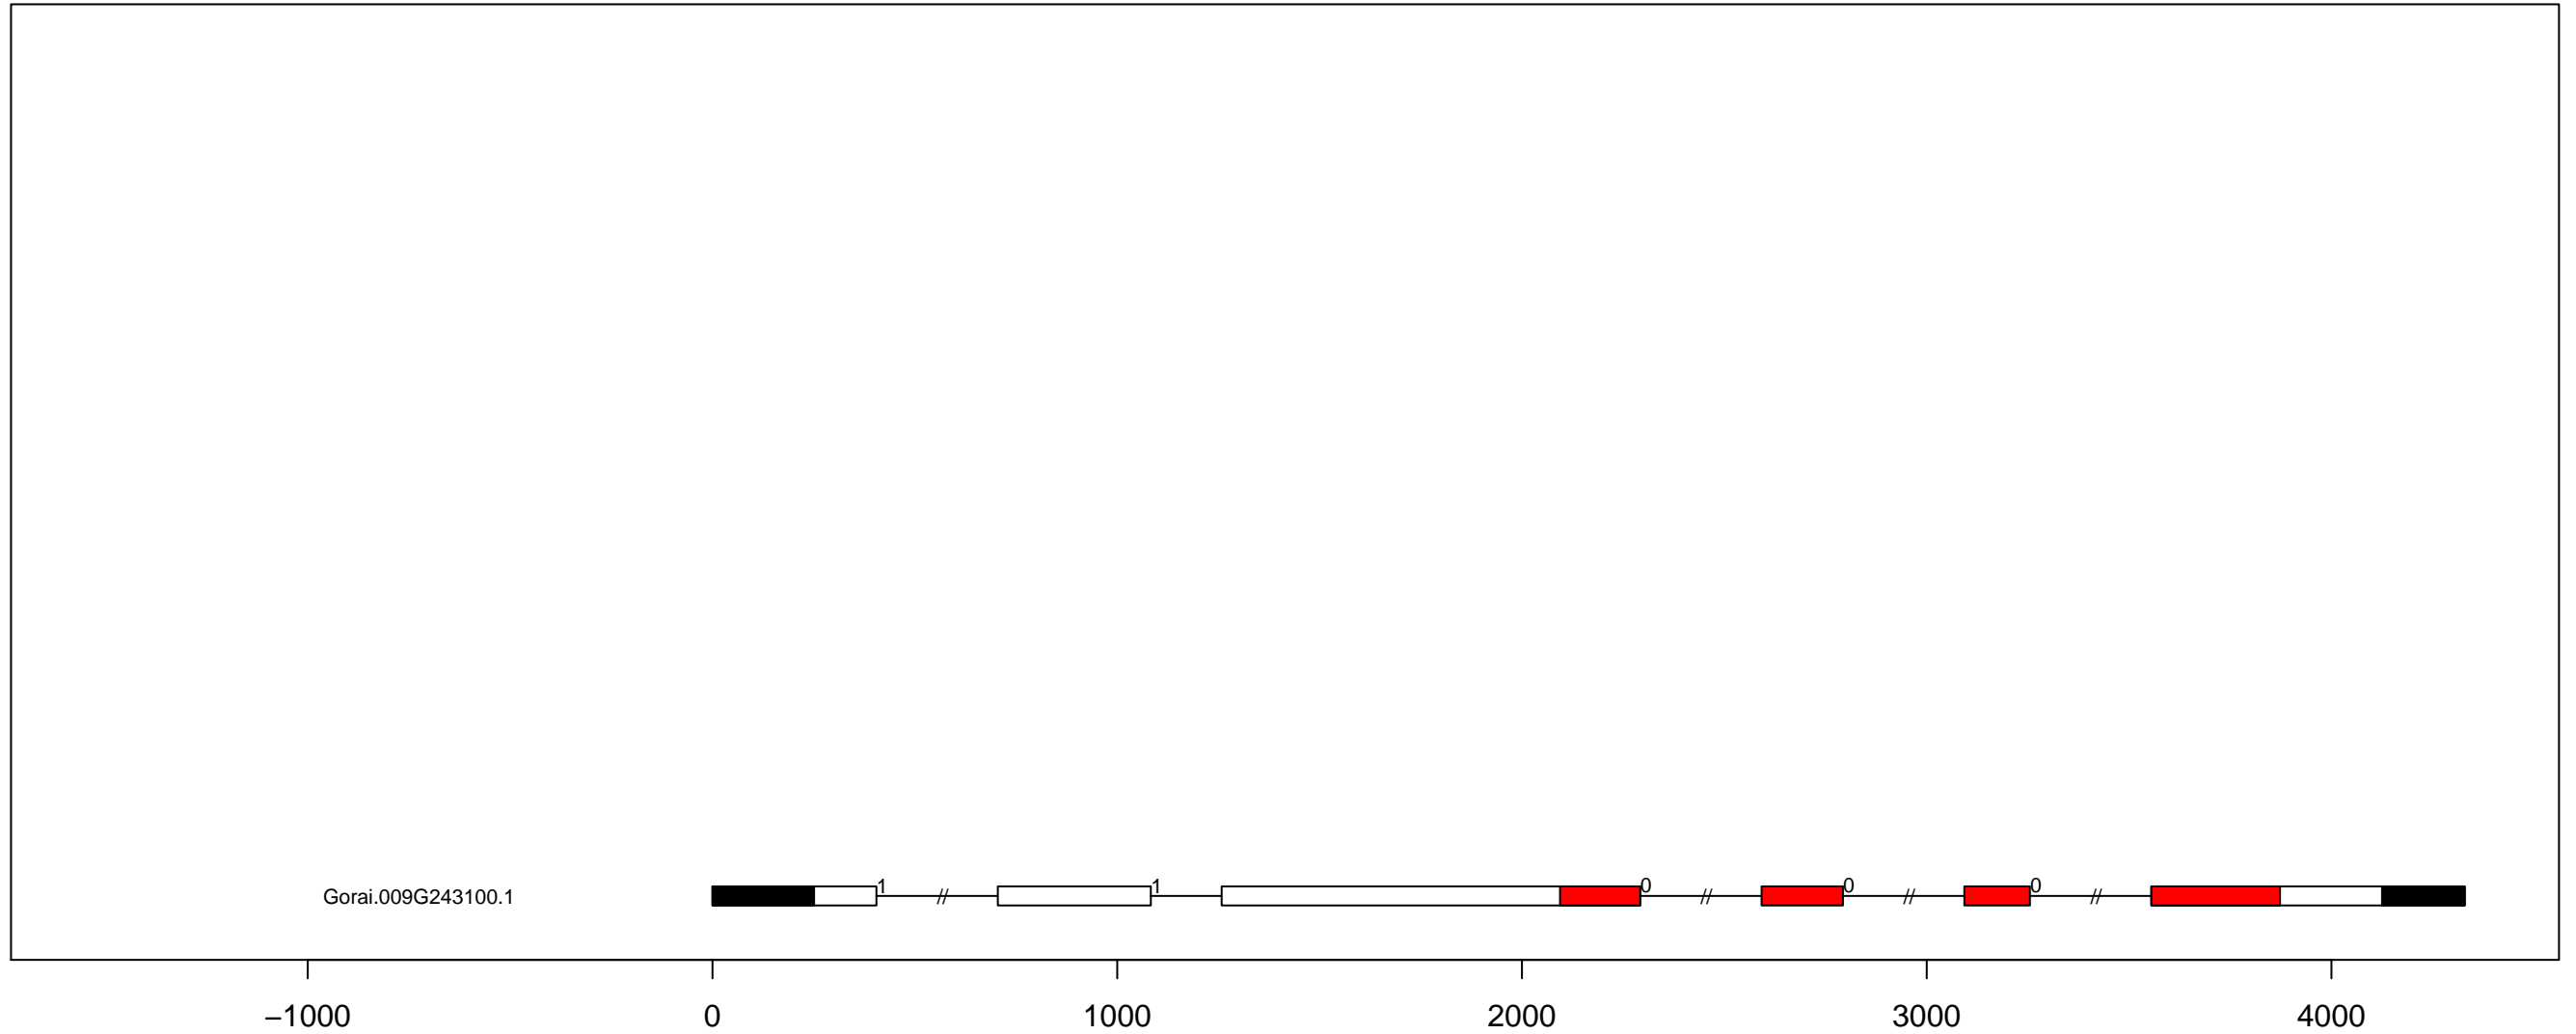



# G.ra ULK\_Fused exon-intron and domain diagram (all)

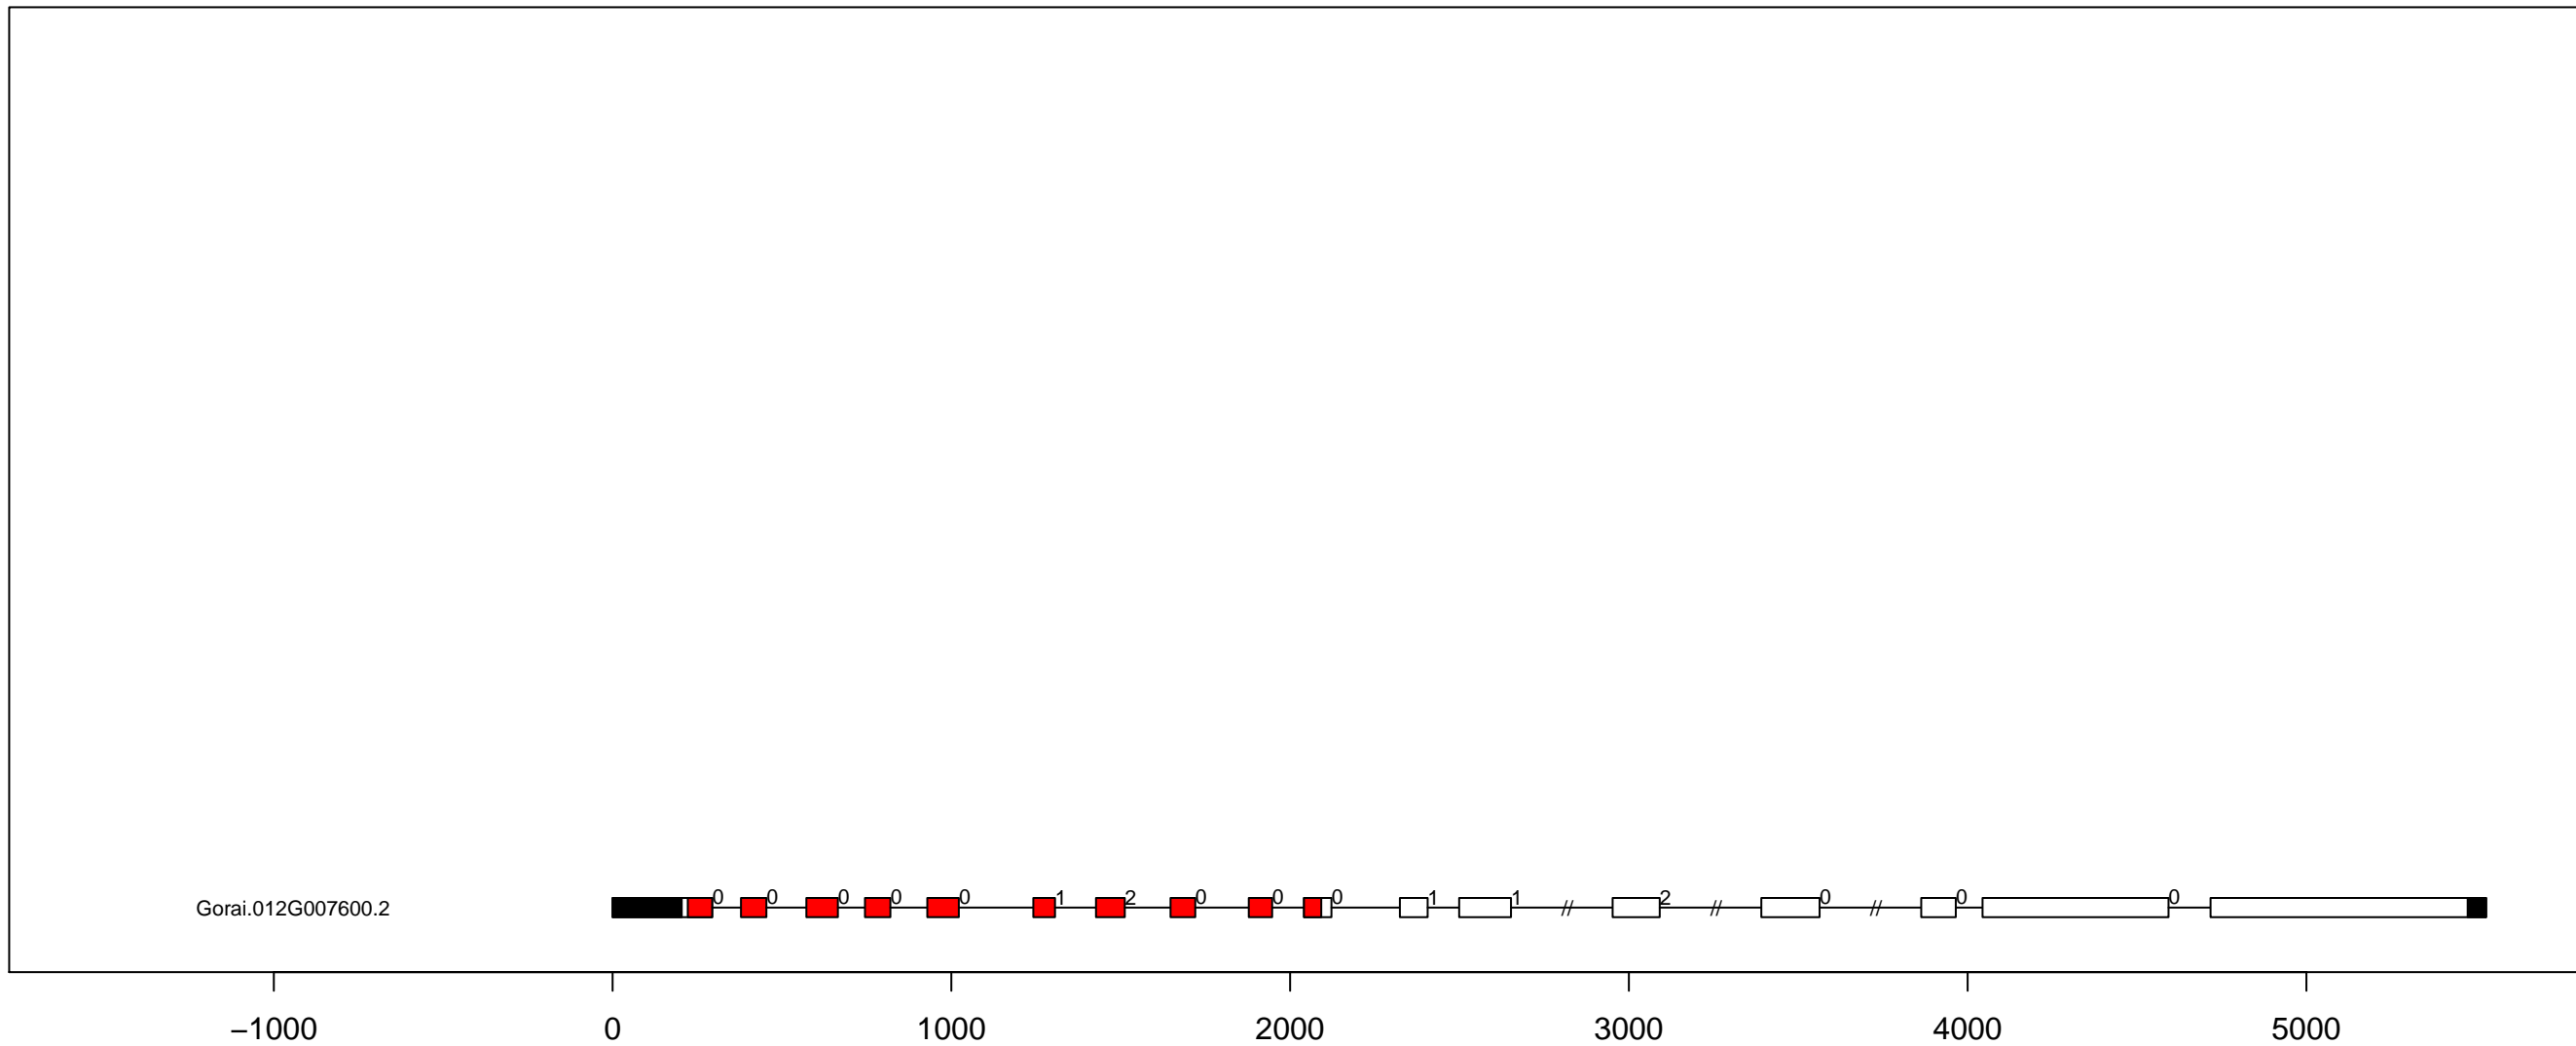

# G.ra ULK\_ULK4 exon-intron and domain diagram (all)

Gorai.011G185300.1

Gorai.005G057000.1

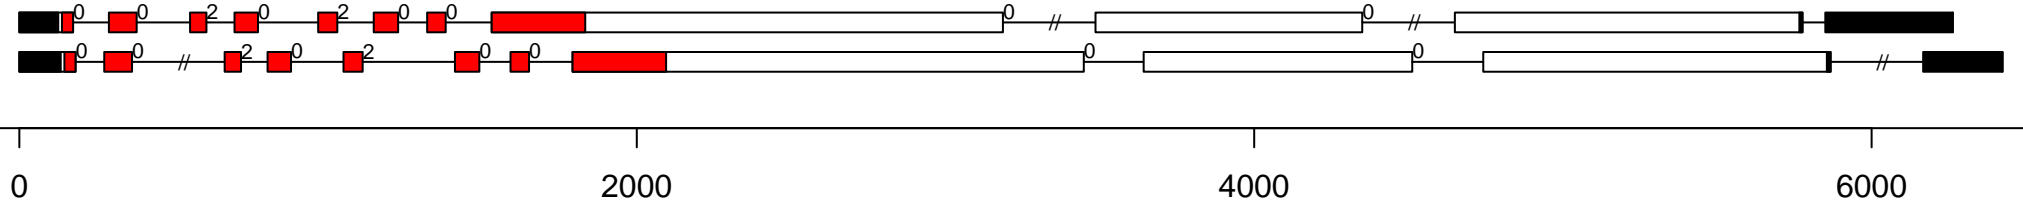

# G.ra WEE exon-intron and domain diagram (all)

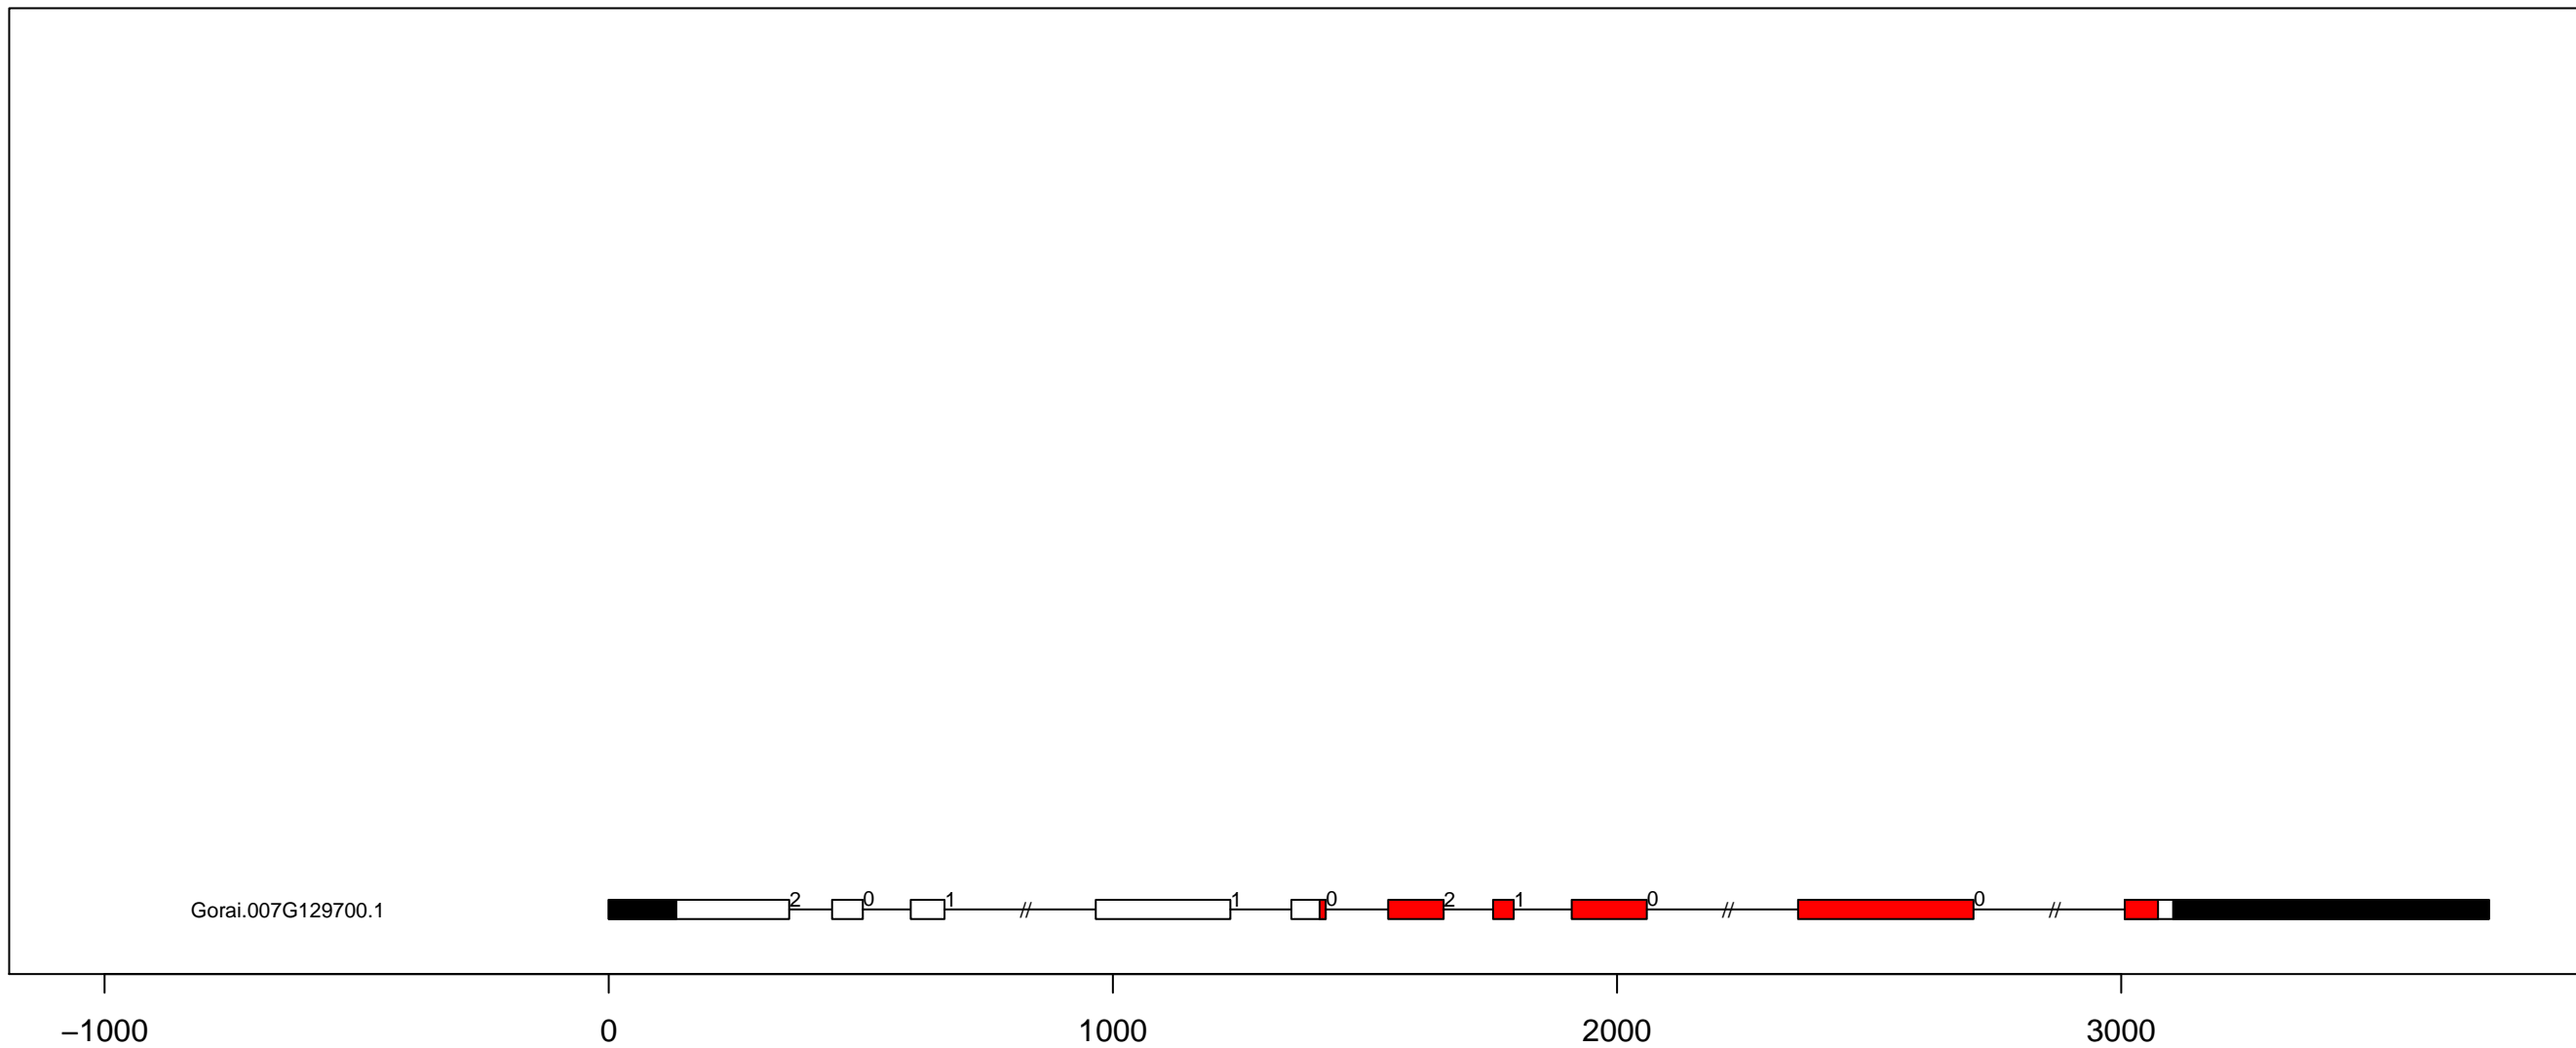

### G.ra WNK\_NRBP exon-intron and domain diagram (all)

Gorai.003G075600.1  
 Gorai.013G272100.1  
 Gorai.013G156000.1  
 Gorai.012G033500.1  
 Gorai.011G128900.1  
 Gorai.008G257300.1  
 Gorai.007G285300.1  
 Gorai.007G167300.1  
 Gorai.006G269500.1  
 Gorai.005G042400.1  
 Gorai.004G150400.1  
 Gorai.003G069600.1  
 Gorai.002G096100.1  
 Gorai.001G064400.1

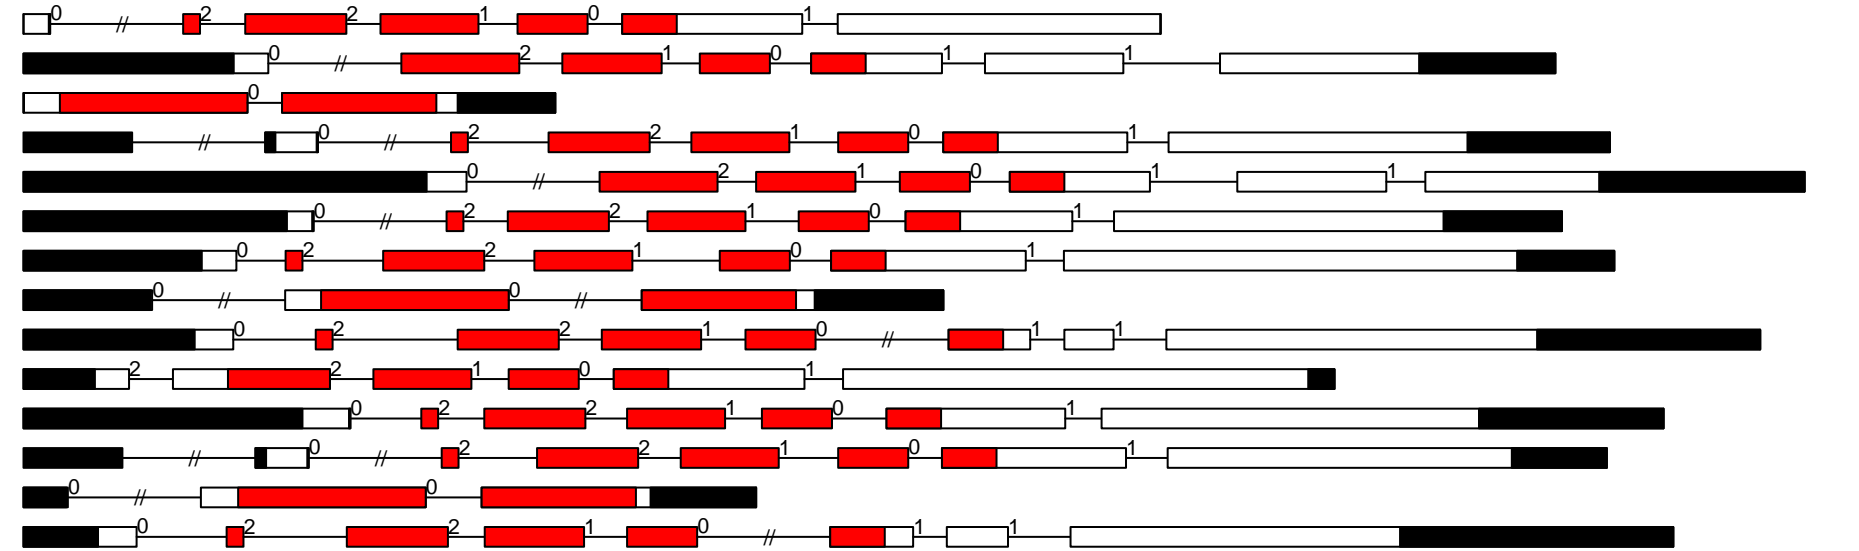

# A.th AGC\_MAST exon-intron and kinase domain diagram (all)

Ath\_AT5G62310.1  
Ath\_AT3G17850.1  
Ath\_AT1G48490.1  
Ath\_AT1G45160.2

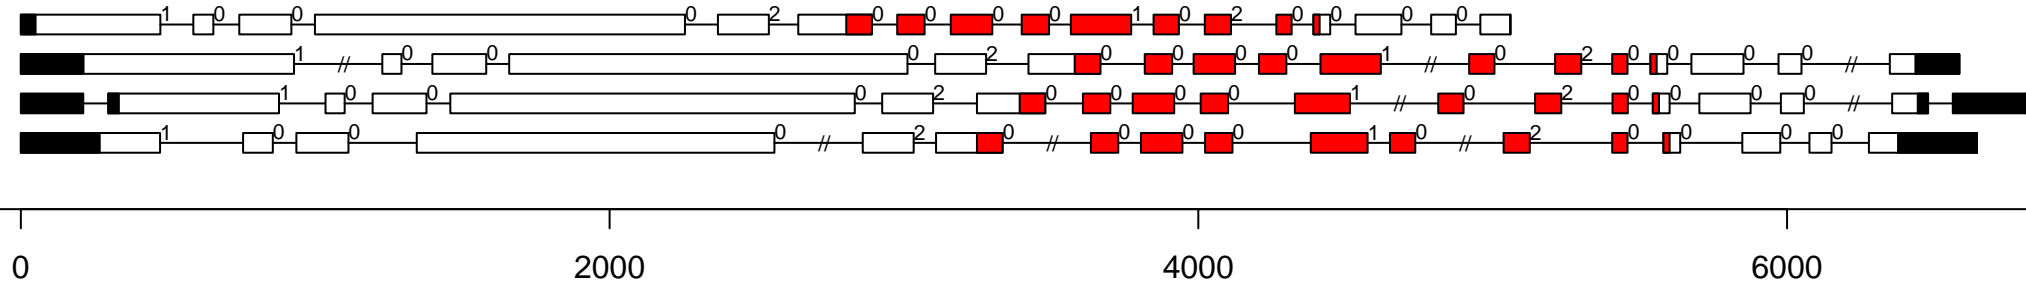

# A.th AGC\_NDR exon-intron and kinase domain diagram (all)

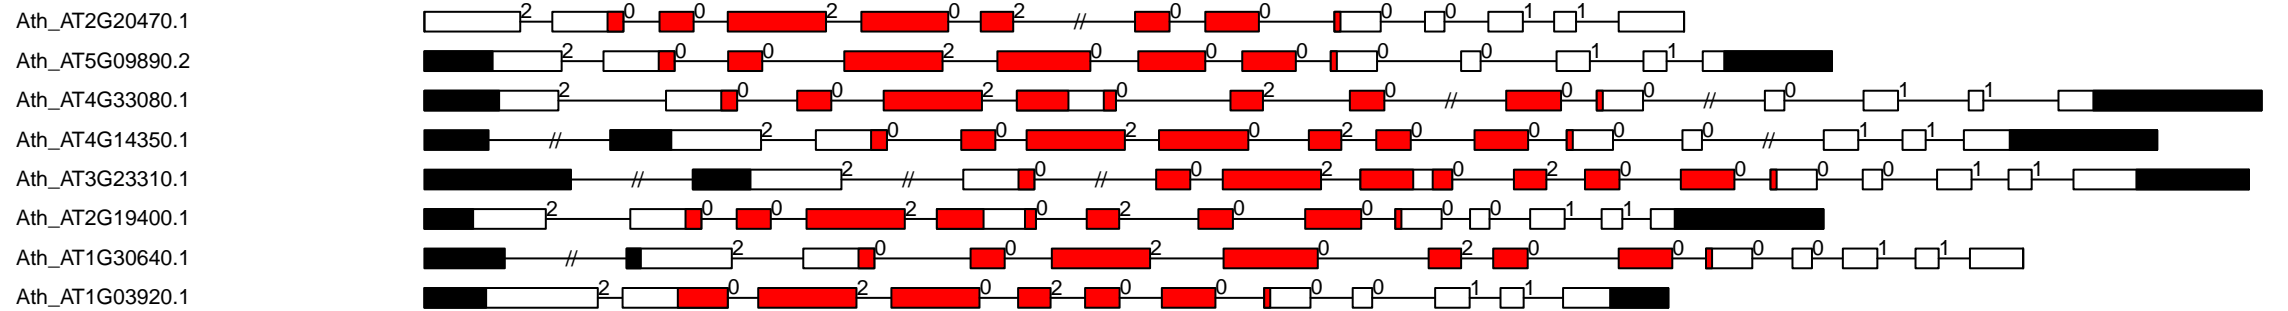

-1000

0

1000

2000

3000

4000

# A.th AGC\_PDK1 exon-intron and kinase domain diagram (all)

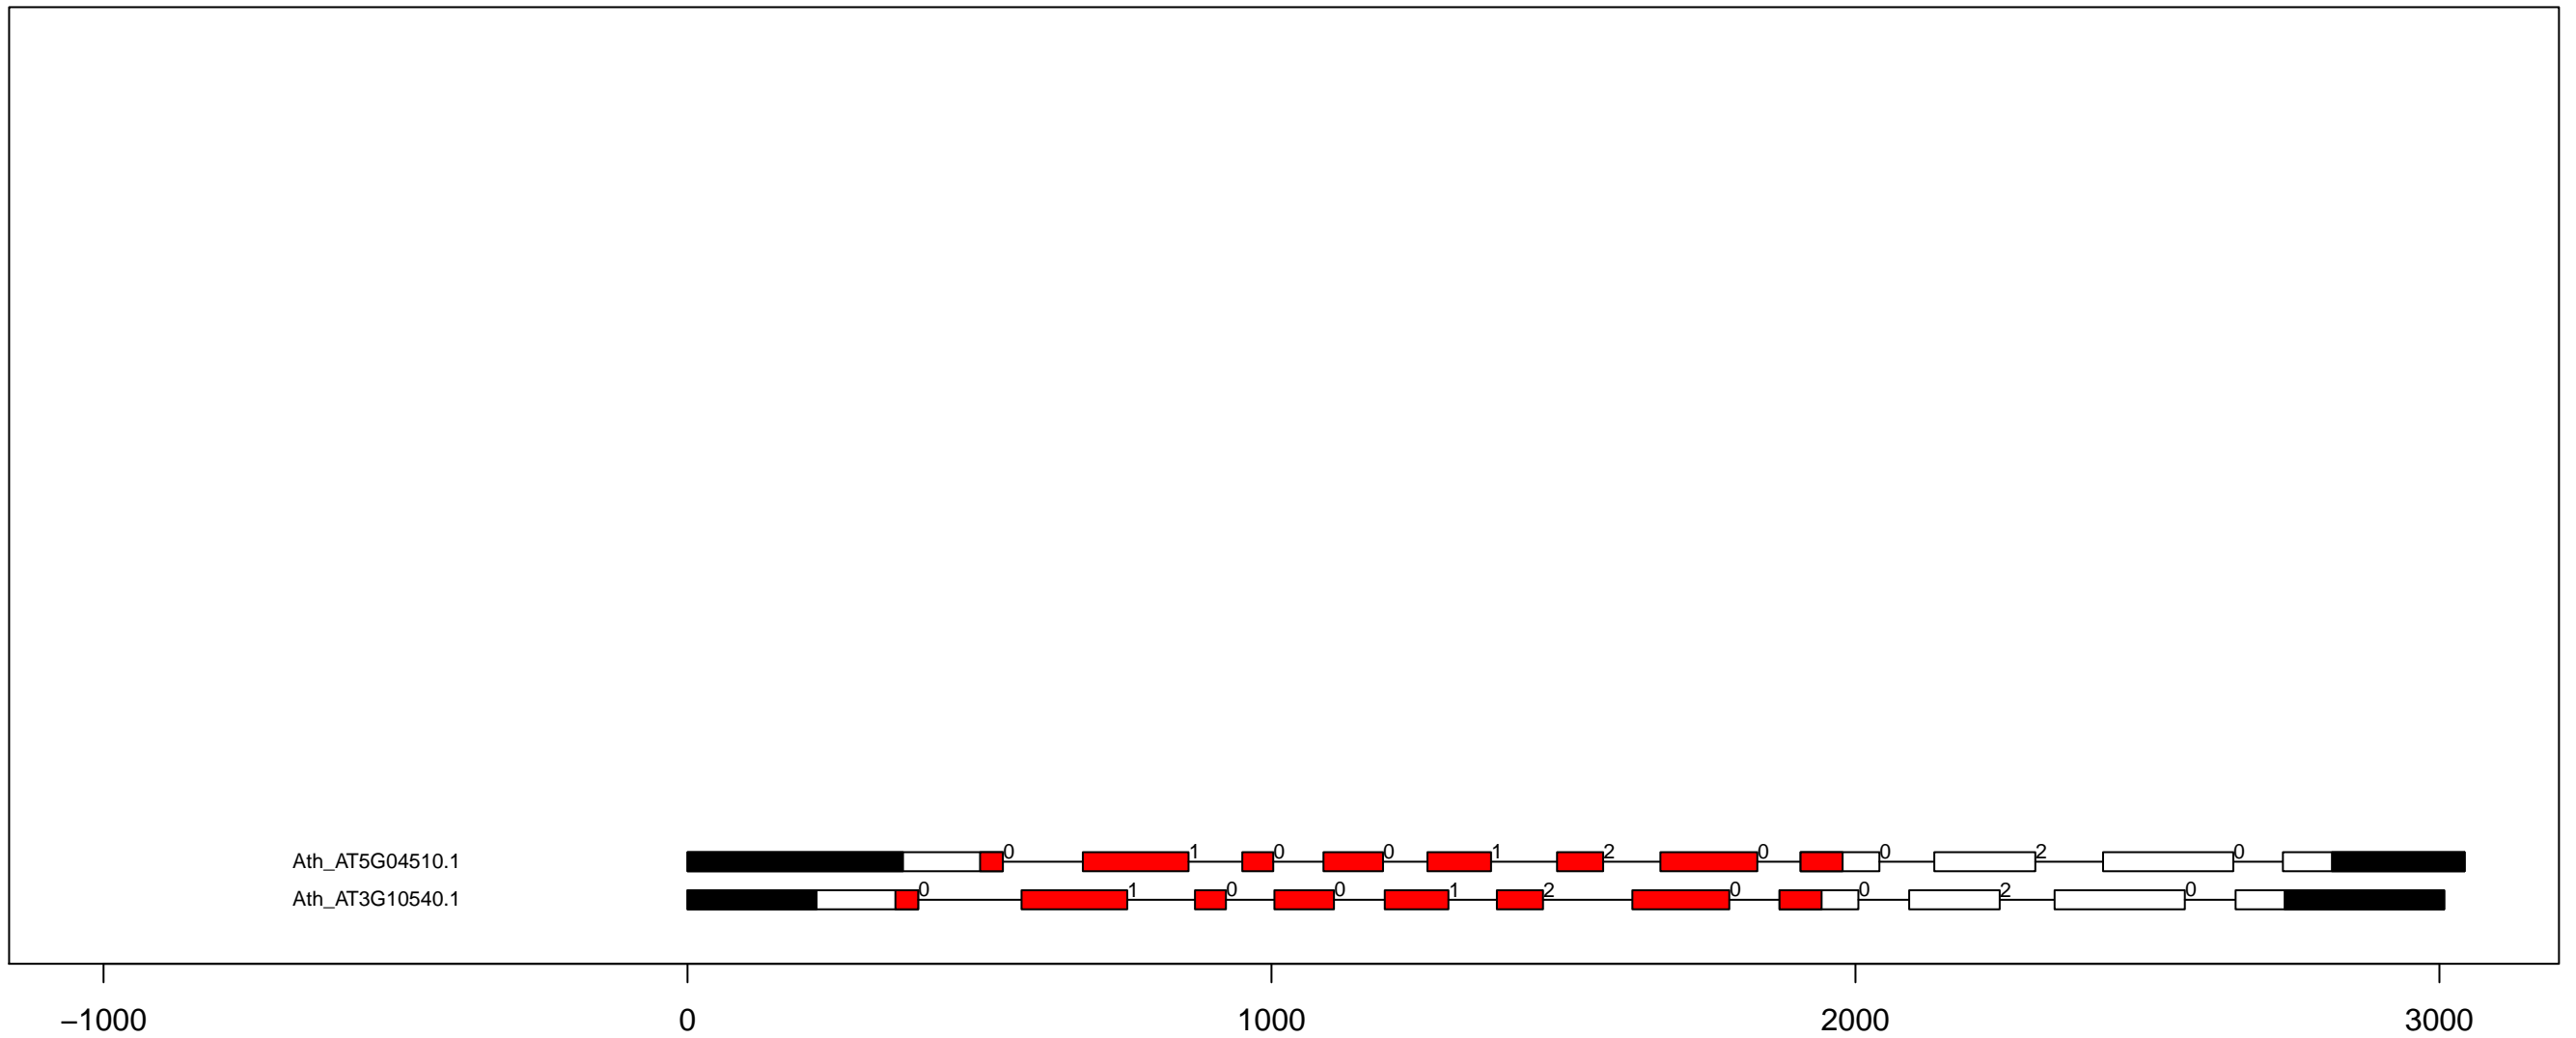

# A.th AGC\_PKA-PKG exon-intron and kinase domain diagram (all)

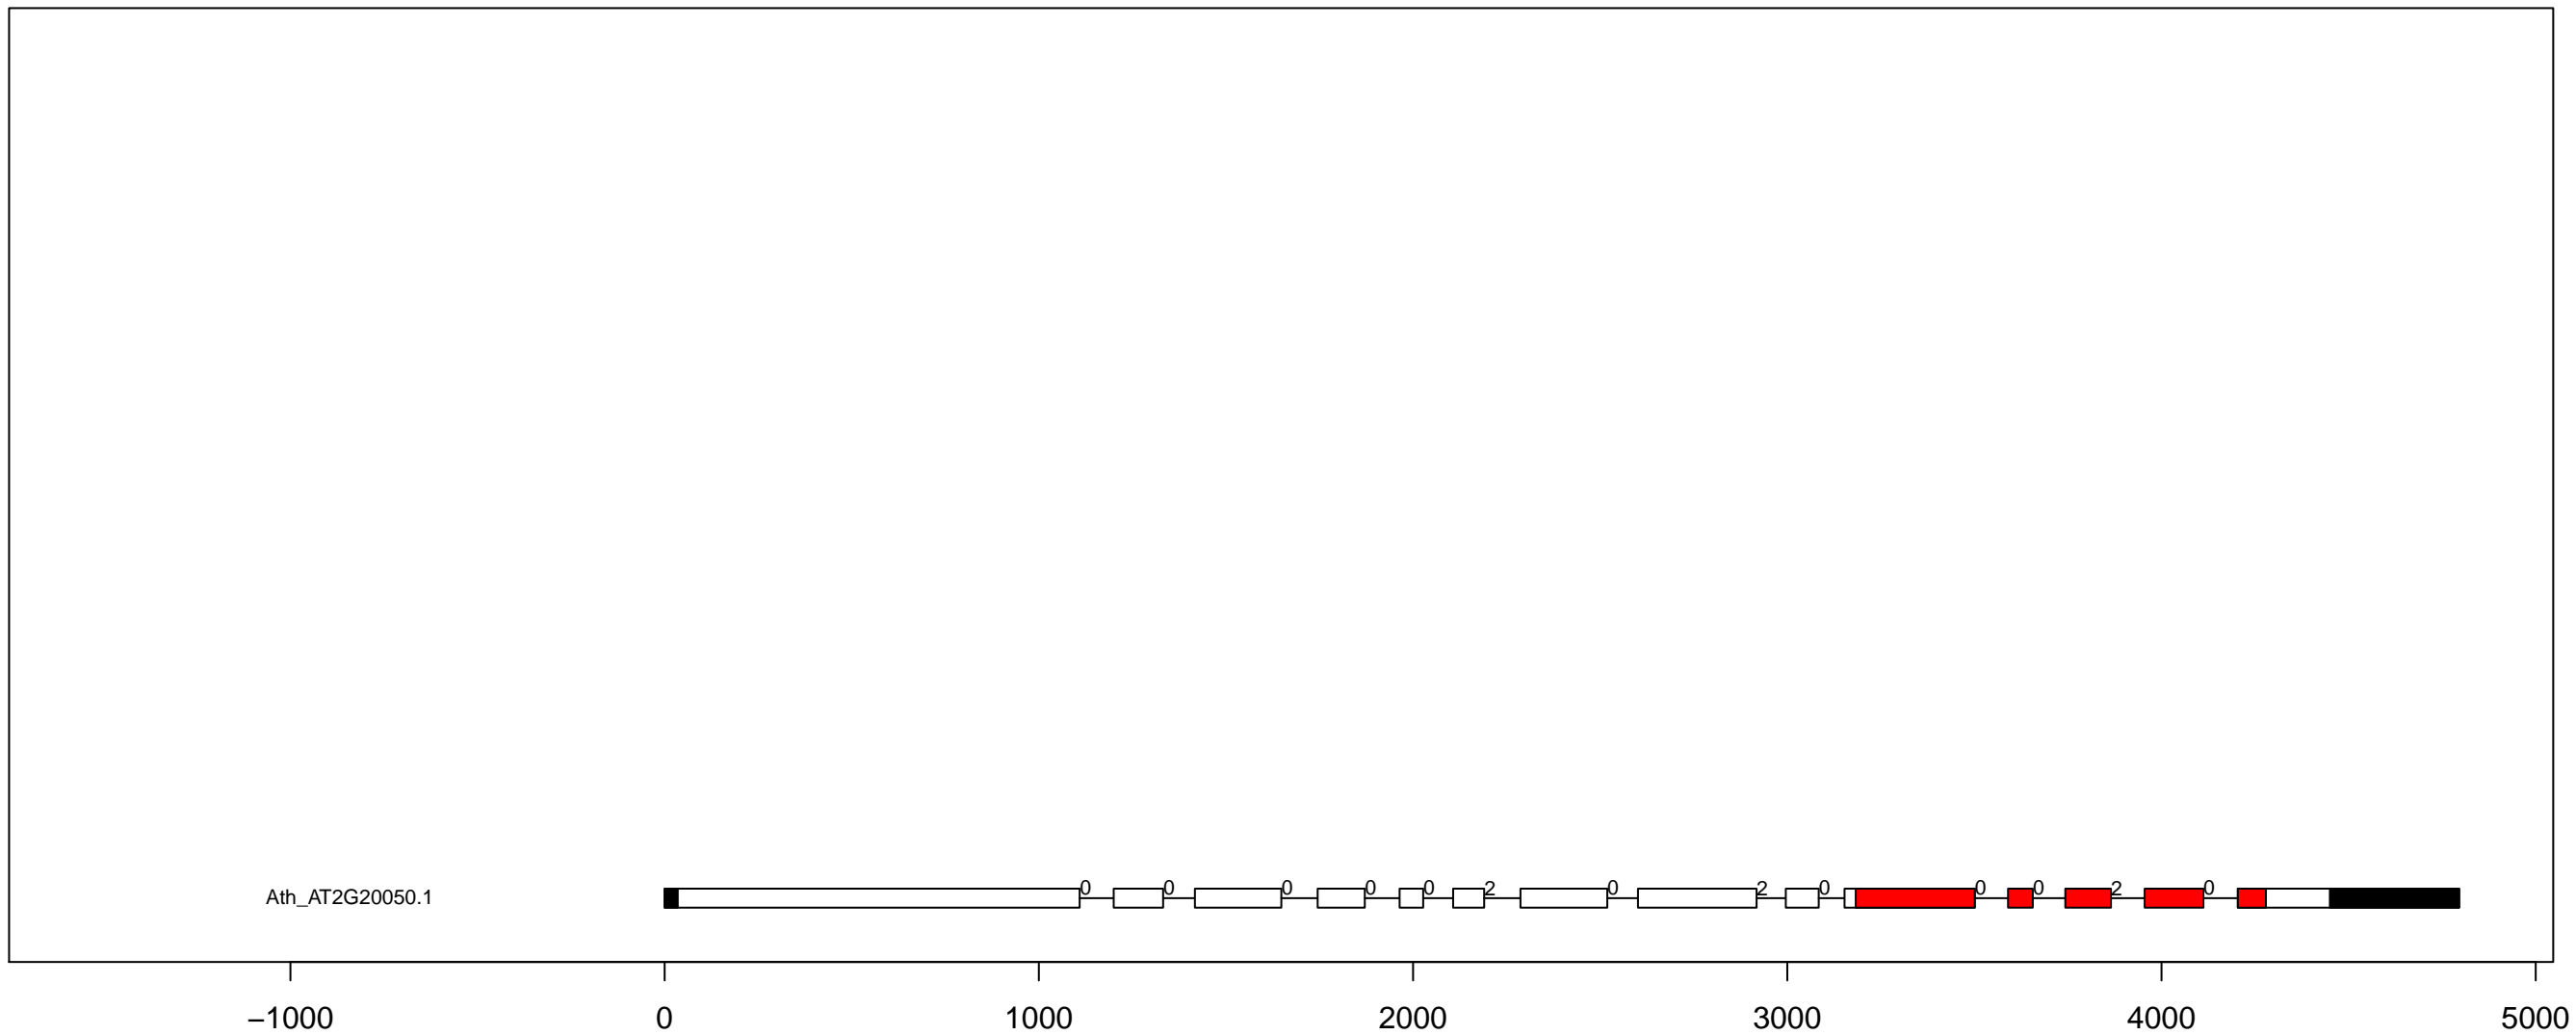





# A.th AGC\_RSK-2 exon-intron and kinase domain diagram (part 2)

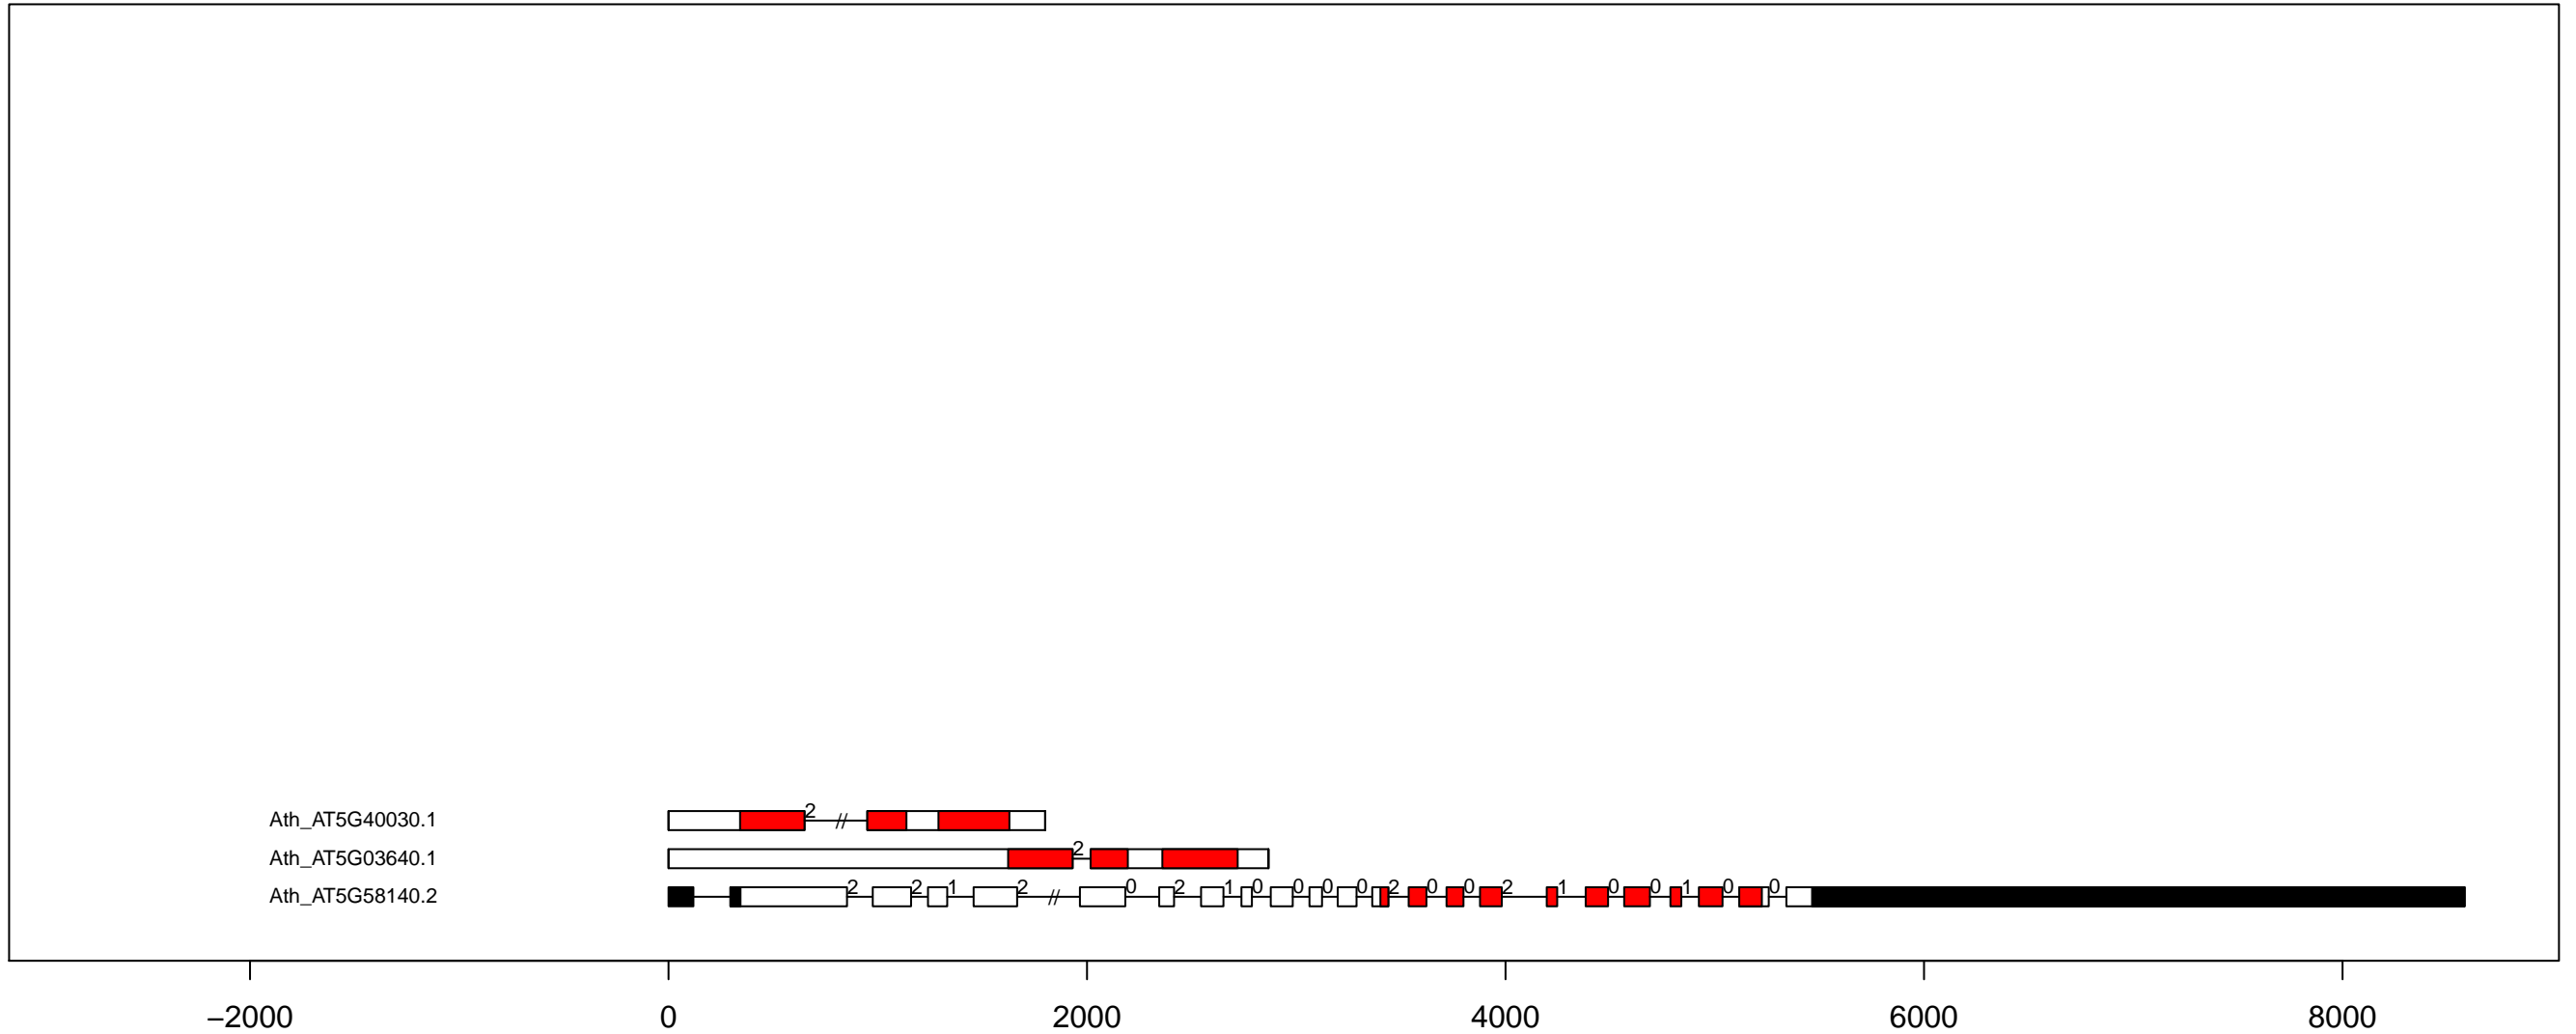

# A.th AGC-PI exon-intron and kinase domain diagram (all)

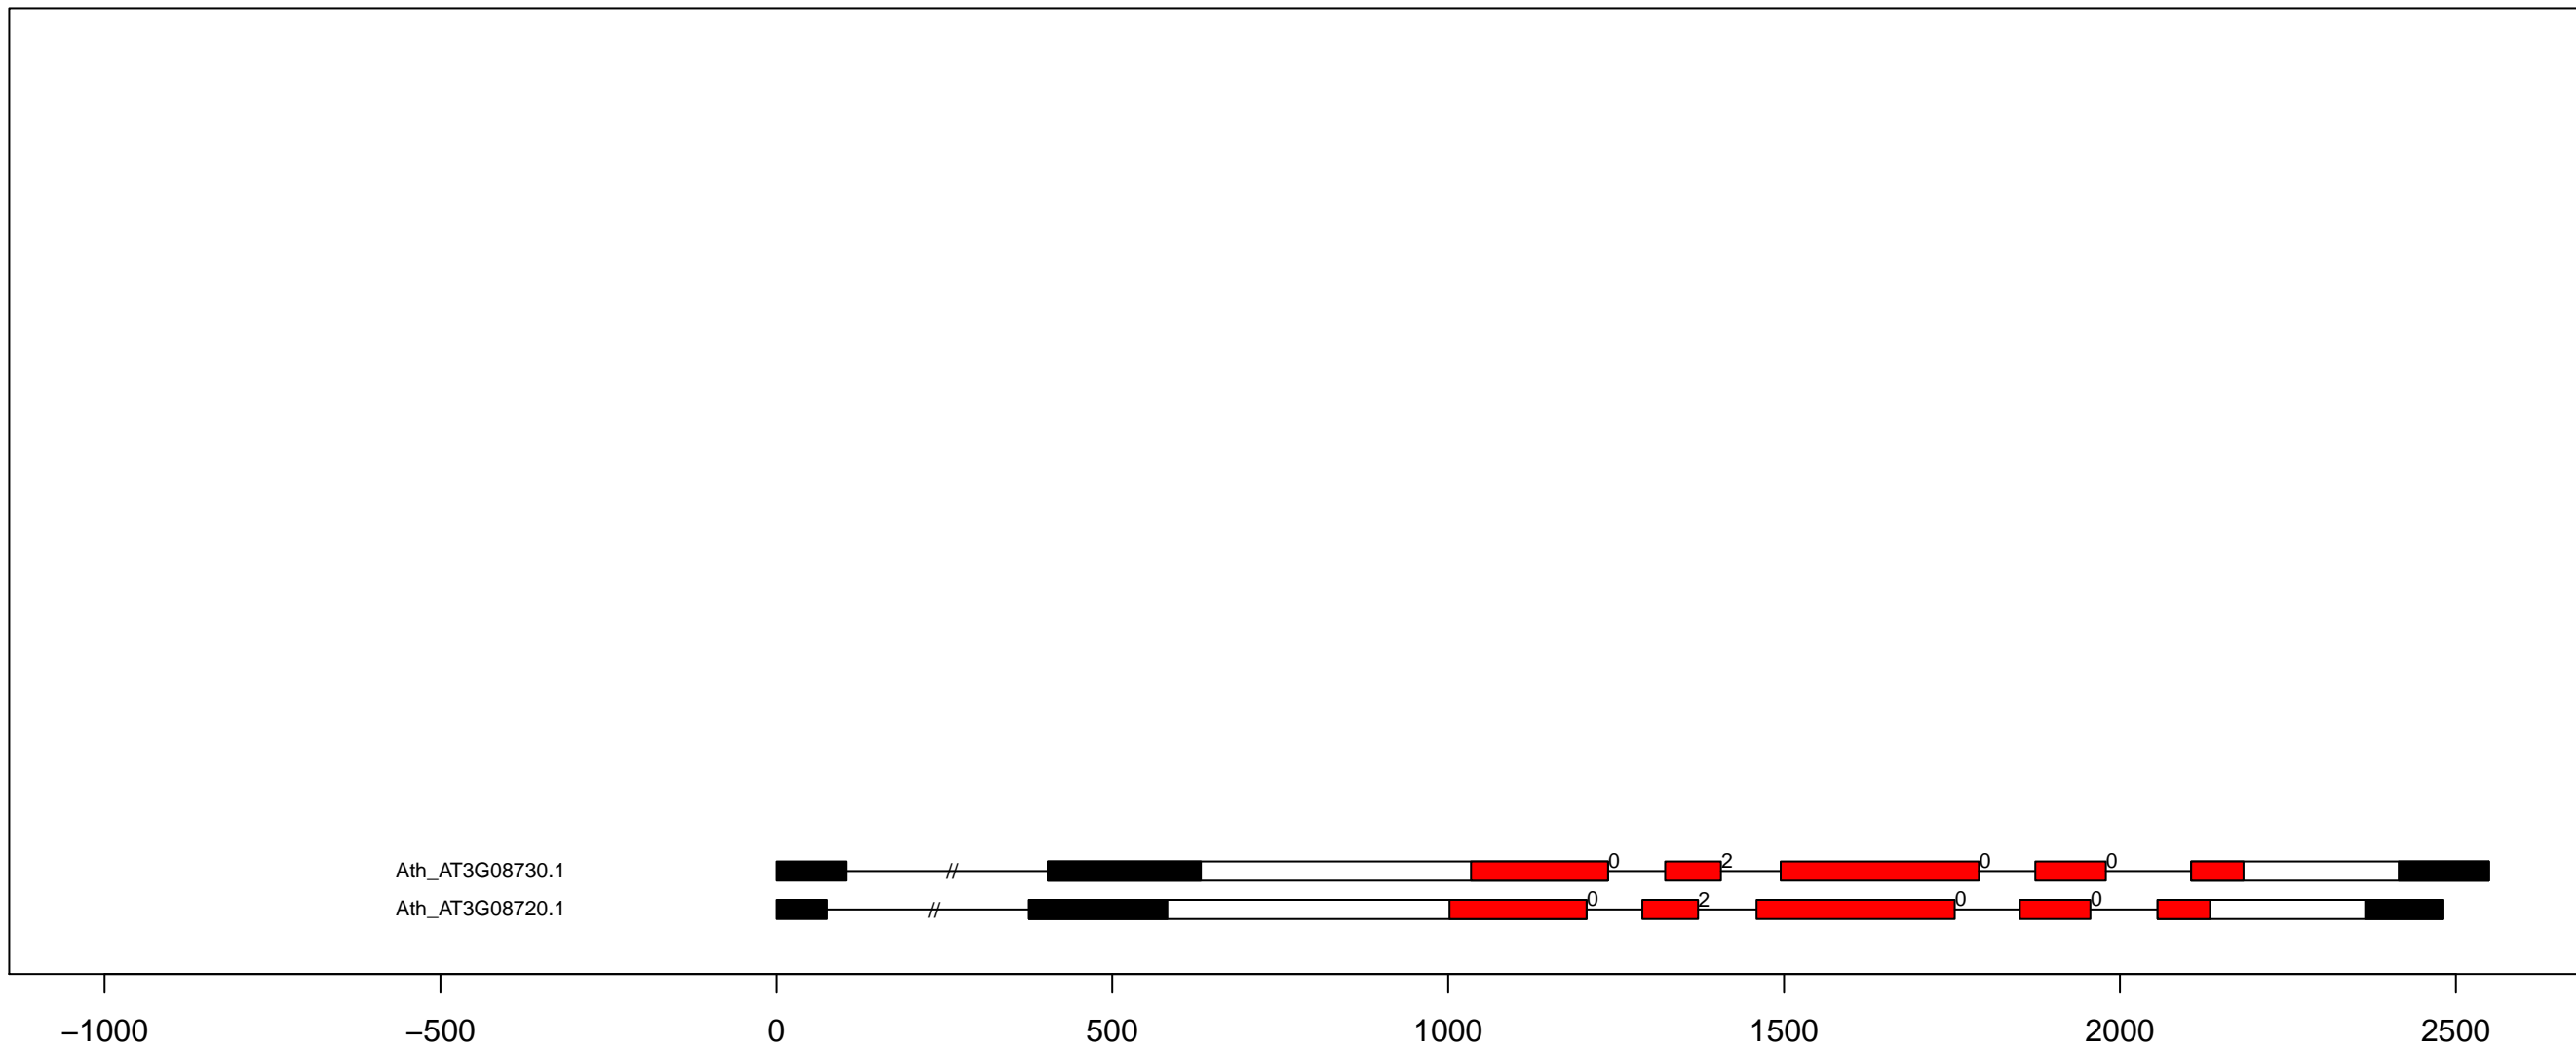



# A.th CAMK\_AMPK exon-intron and kinase domain diagram (all)

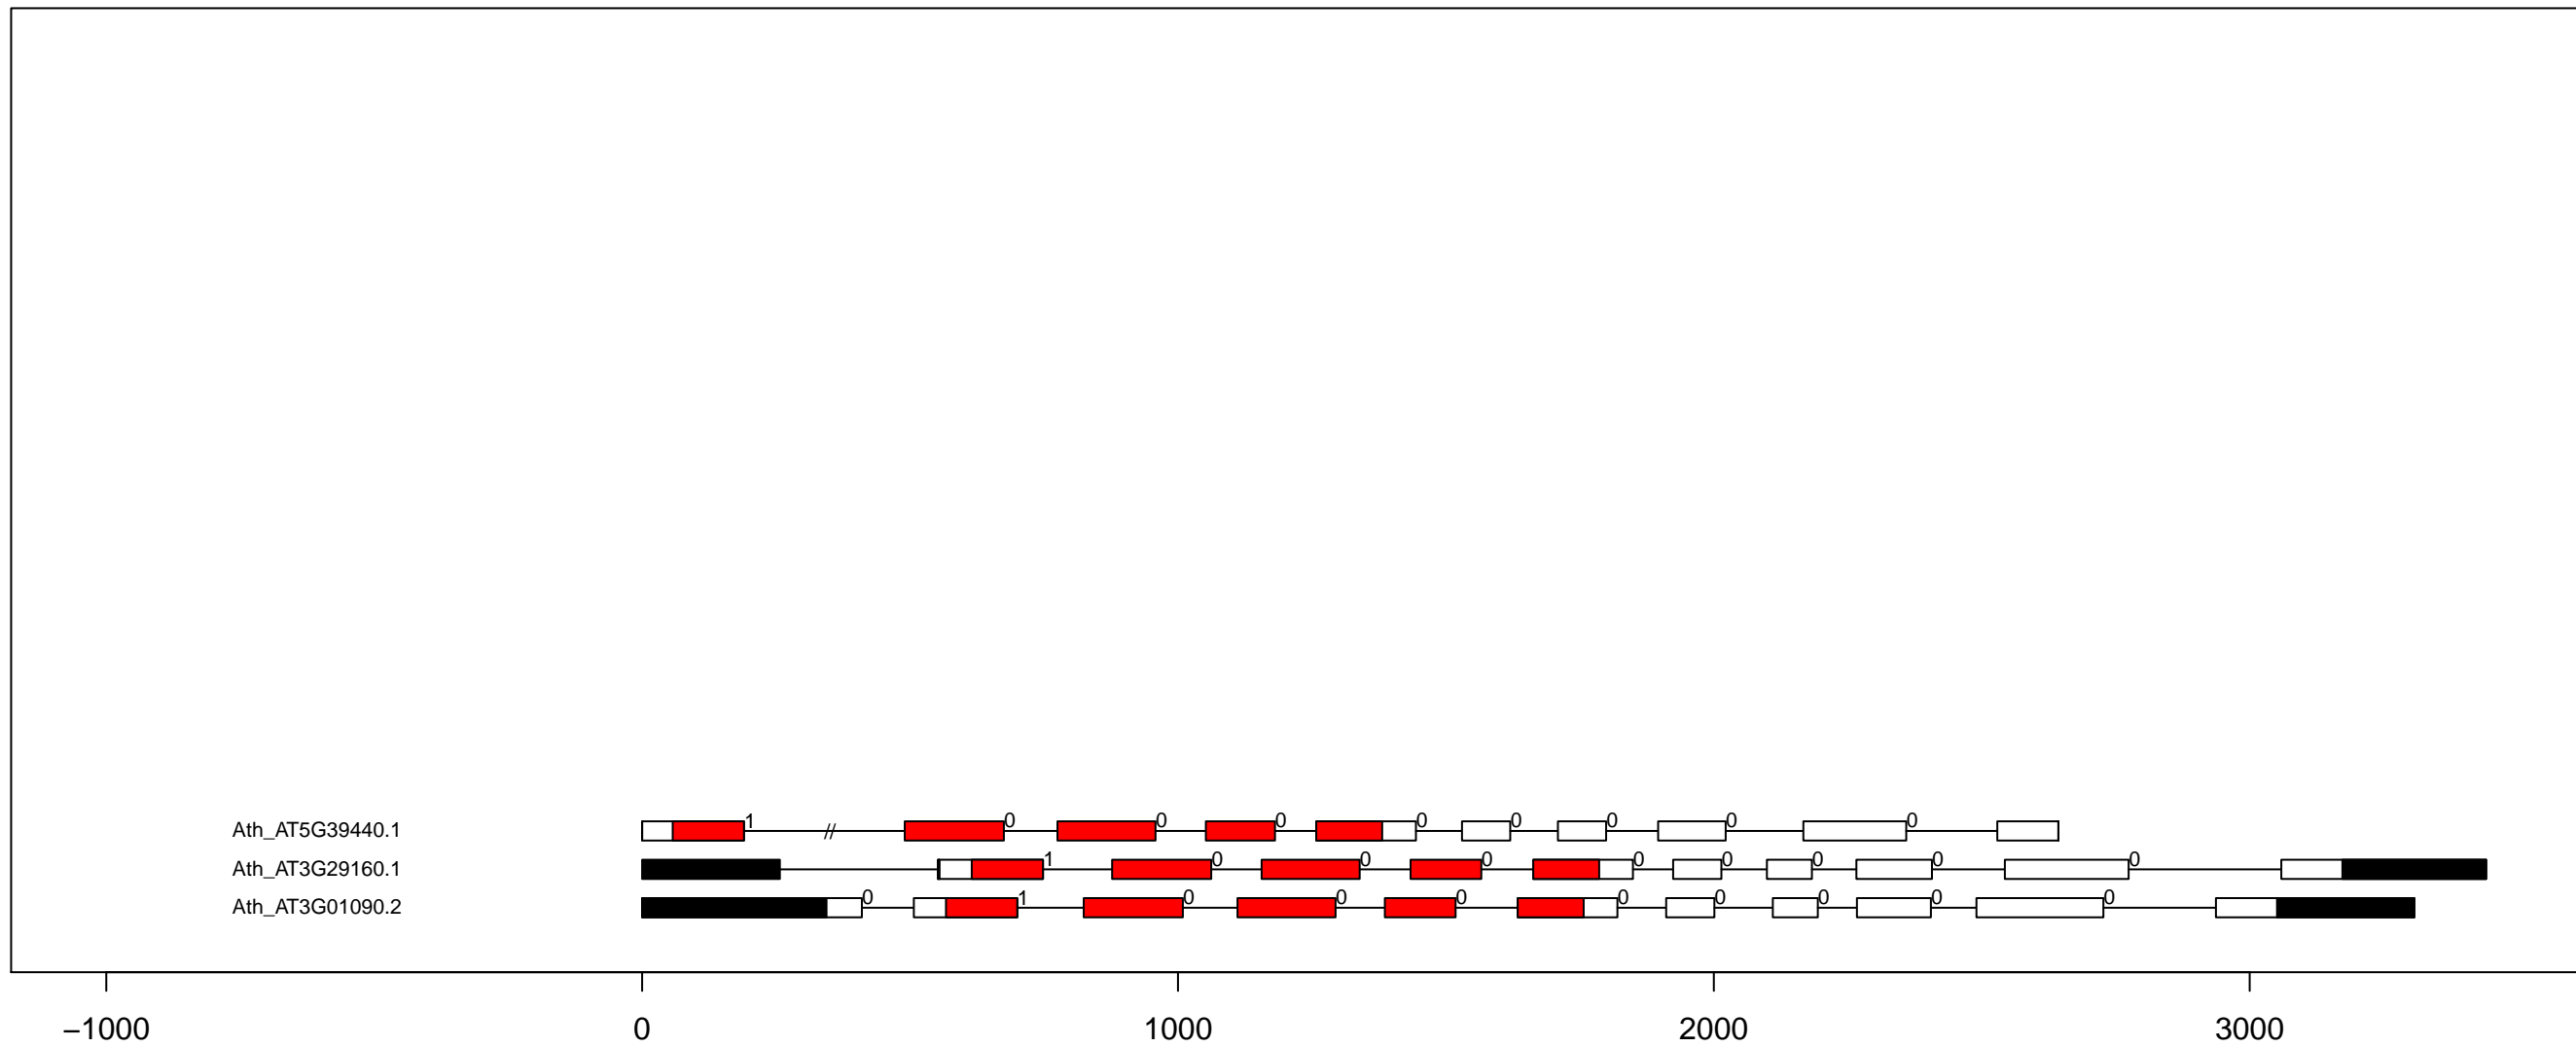

# A.th CAMK\_CAMKL-CHK1 exon-intron and kinase domain diagram (part 1)

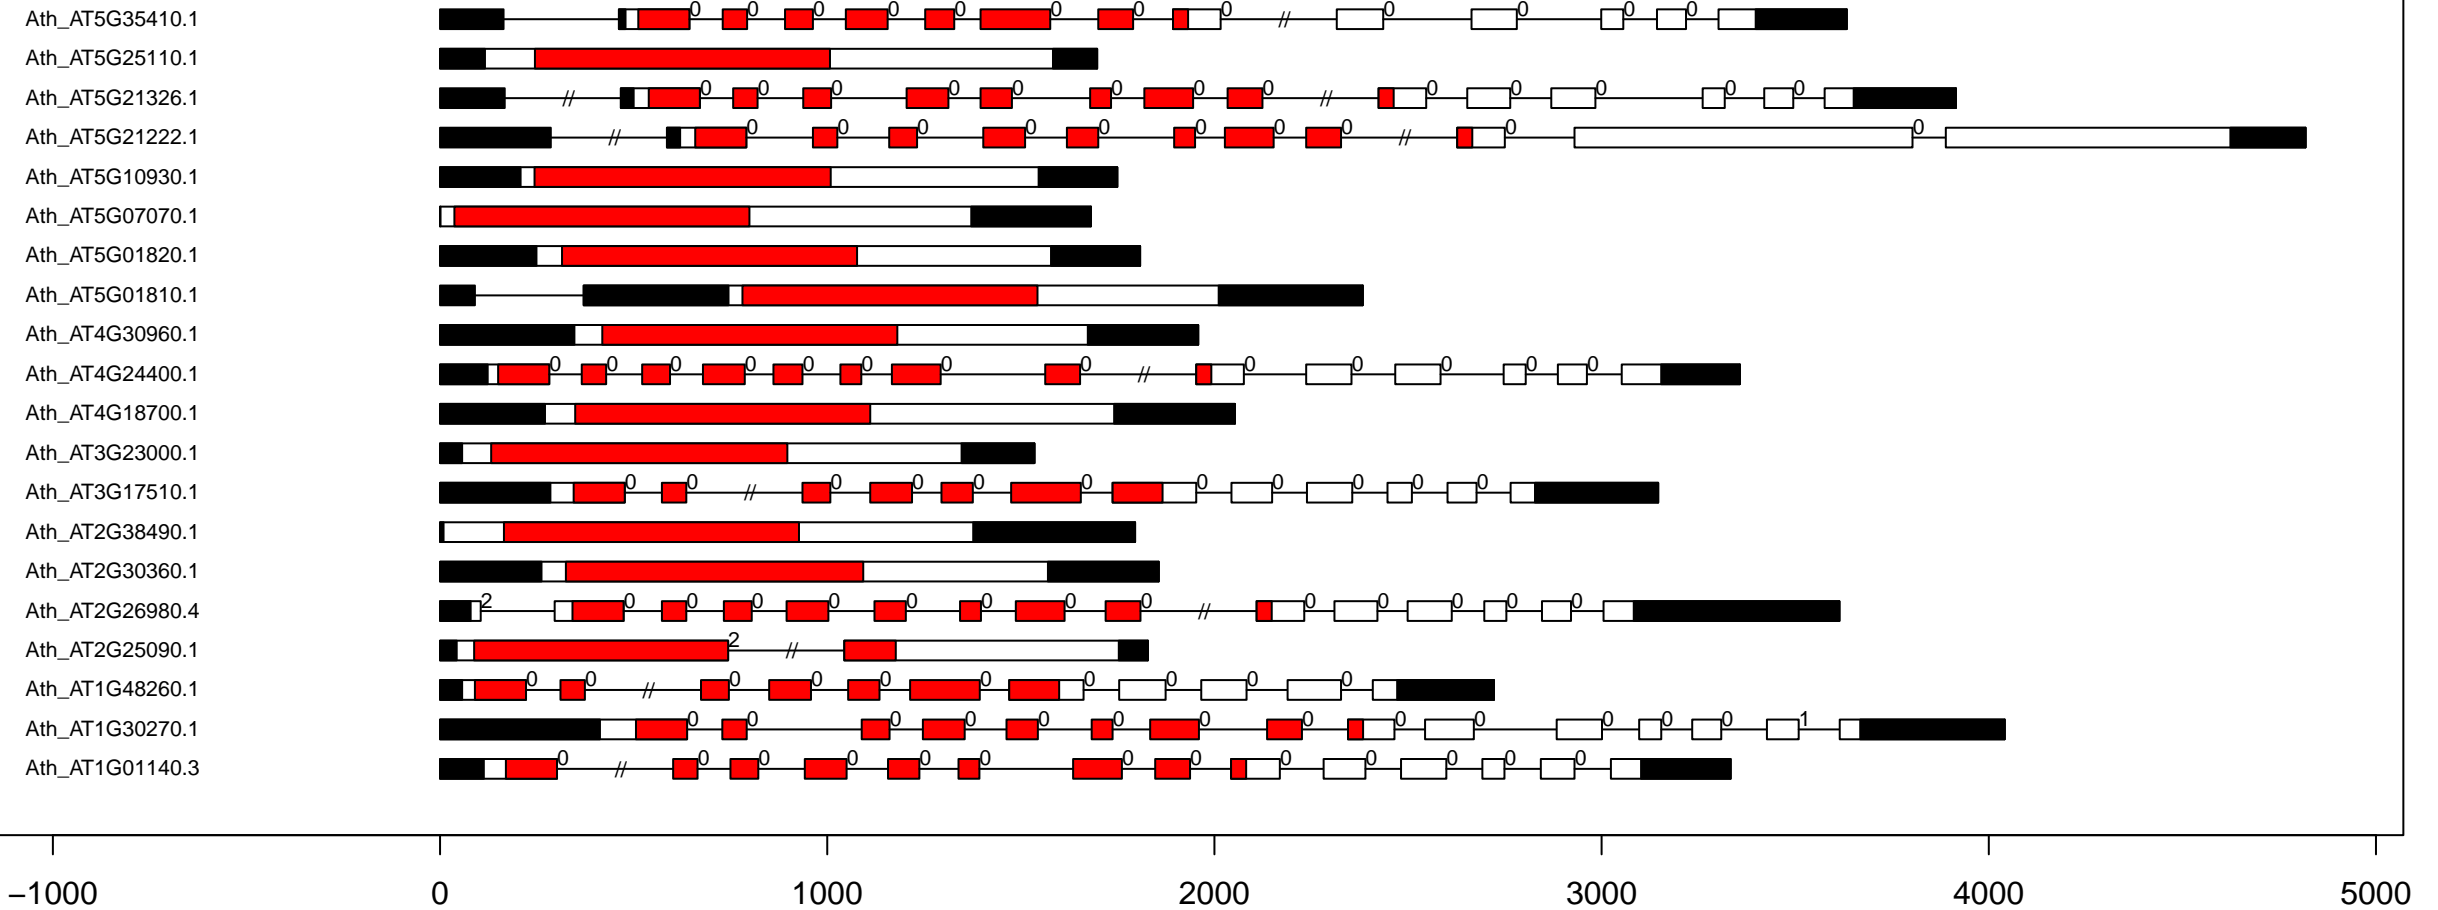



# A.th CAMK\_CAMKL-LKB exon-intron and kinase domain diagram (all)

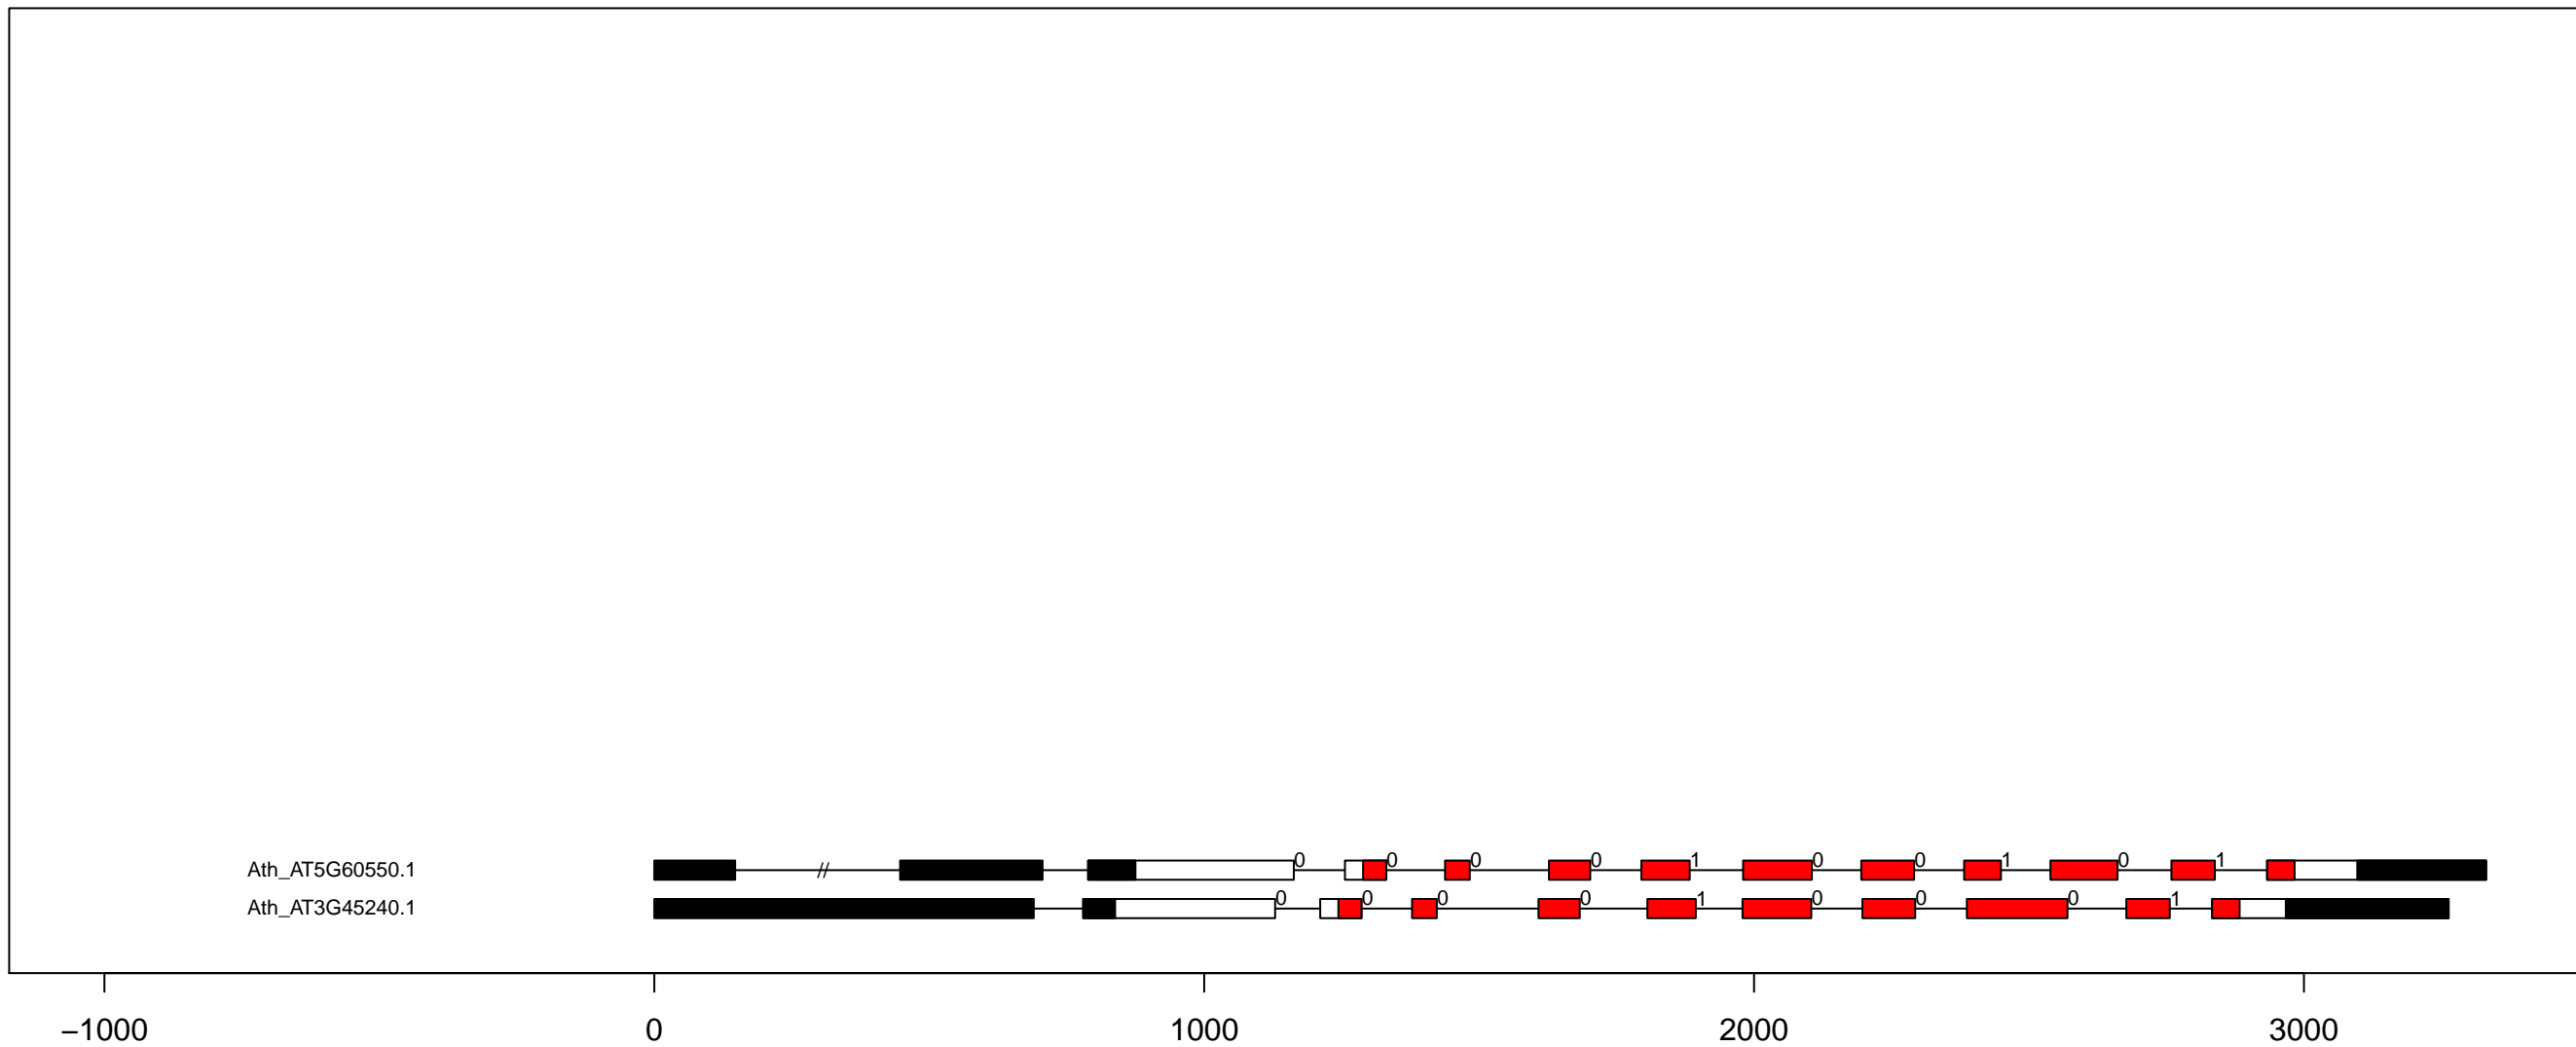



# A.th CAMK\_CDPK exon-intron and kinase domain diagram (part 1)

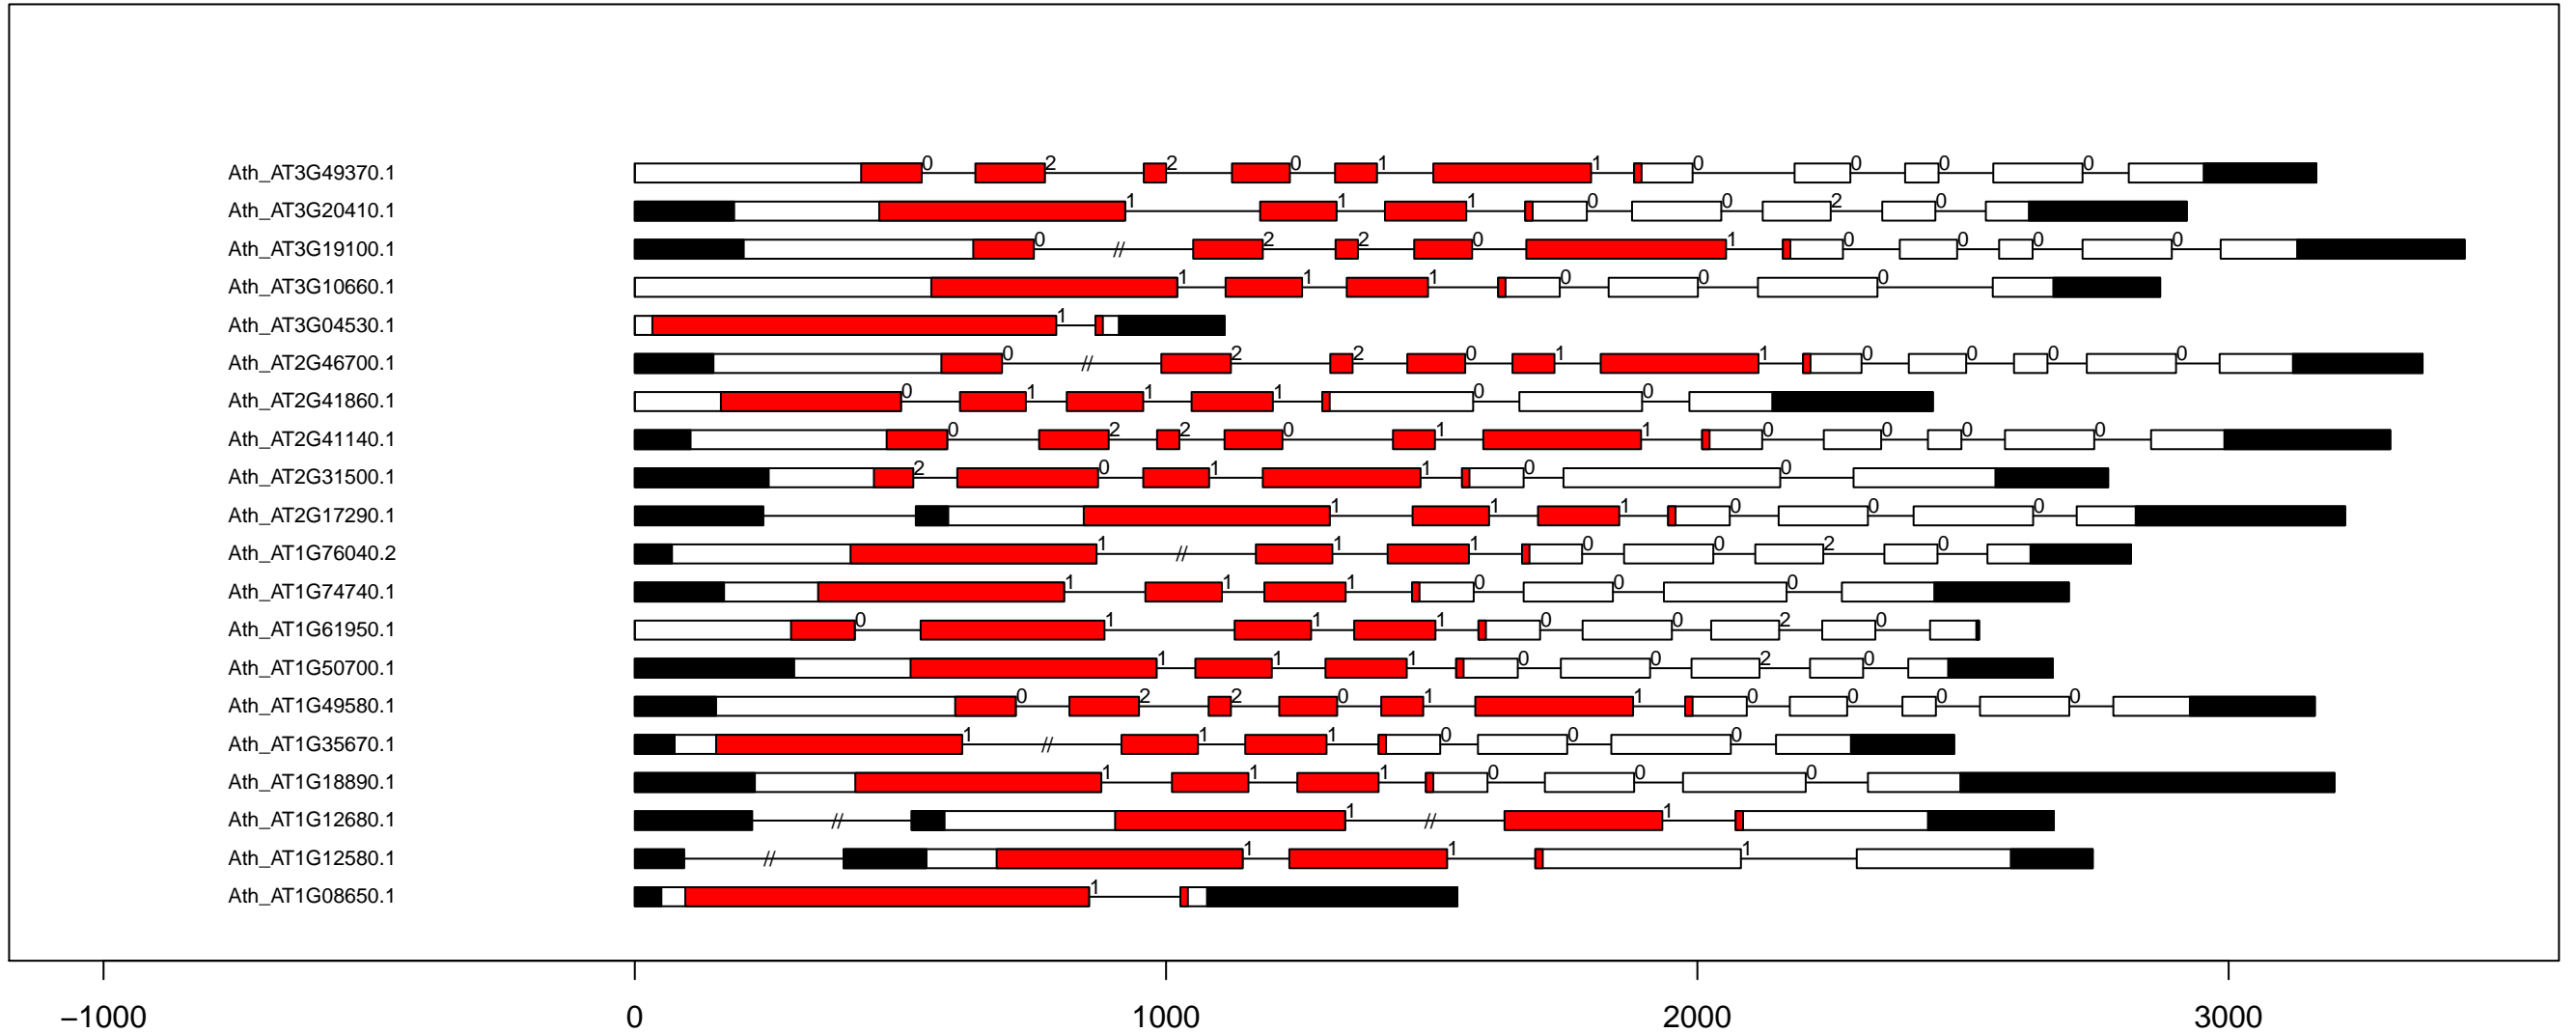

### A.th CAMK\_CDPK exon-intron and kinase domain diagram (part 2)

Ath\_AT2G17890.1  
 Ath\_AT5G66210.2  
 Ath\_AT5G24430.1  
 Ath\_AT5G23580.1  
 Ath\_AT5G19450.1  
 Ath\_AT5G12480.1  
 Ath\_AT5G12180.1  
 Ath\_AT5G04870.1  
 Ath\_AT4G38230.2  
 Ath\_AT4G36070.2  
 Ath\_AT4G35310.1  
 Ath\_AT4G23650.1  
 Ath\_AT4G21940.2  
 Ath\_AT4G09570.1  
 Ath\_AT4G04740.2  
 Ath\_AT4G04720.1  
 Ath\_AT3G57530.1  
 Ath\_AT3G56760.1  
 Ath\_AT3G51850.1  
 Ath\_AT3G50530.2

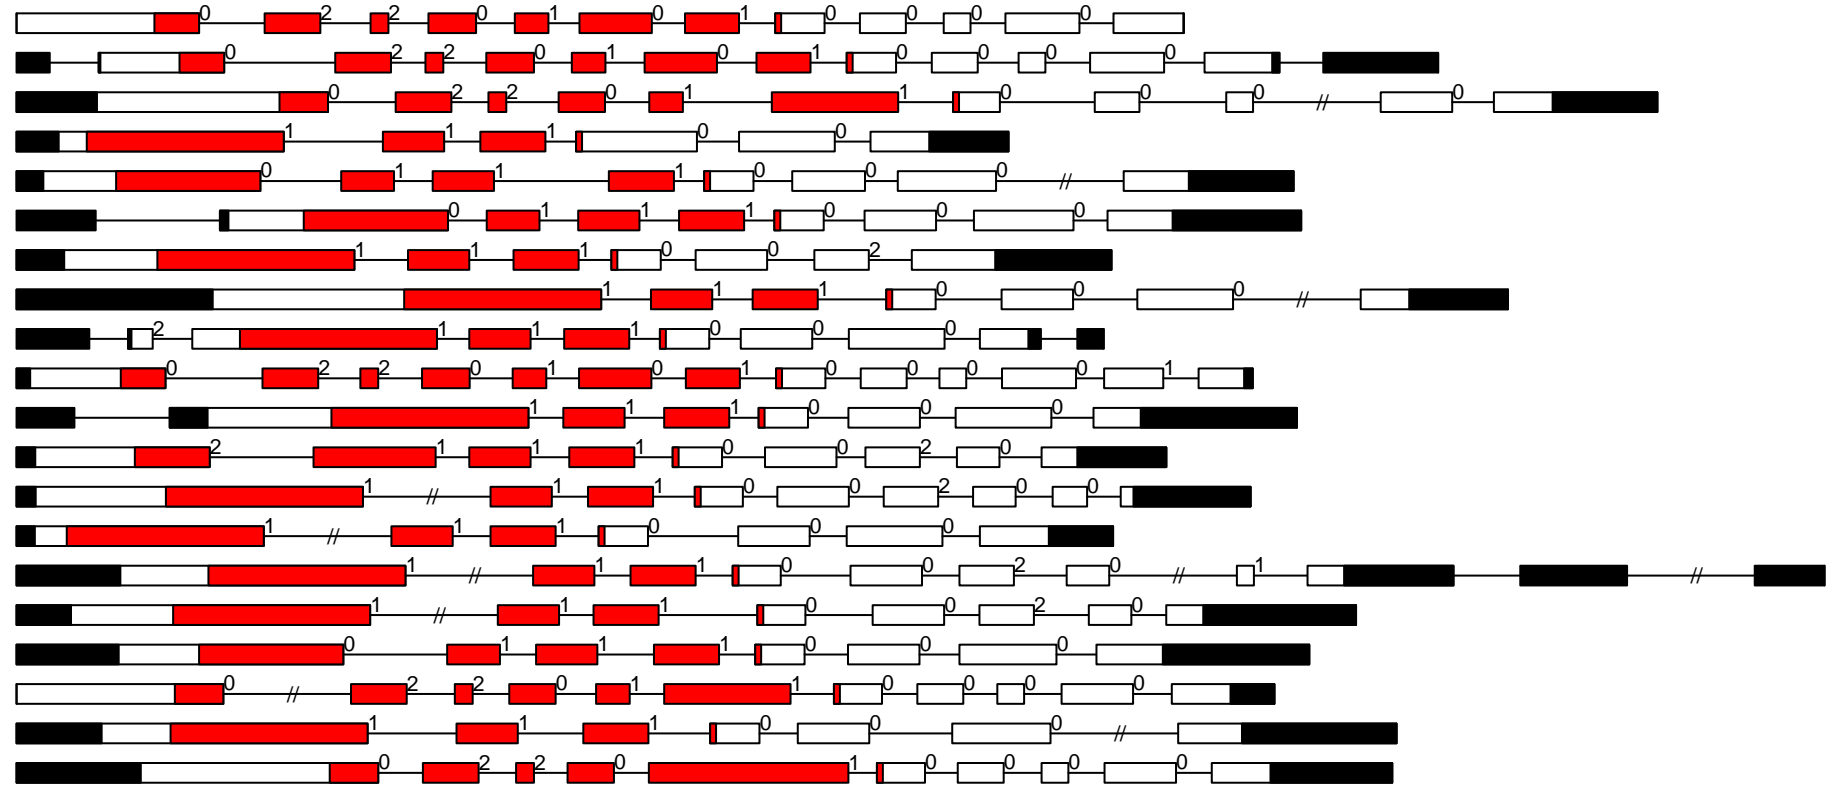





# A.th CK1\_CK1 exon-intron and kinase domain diagram (all)

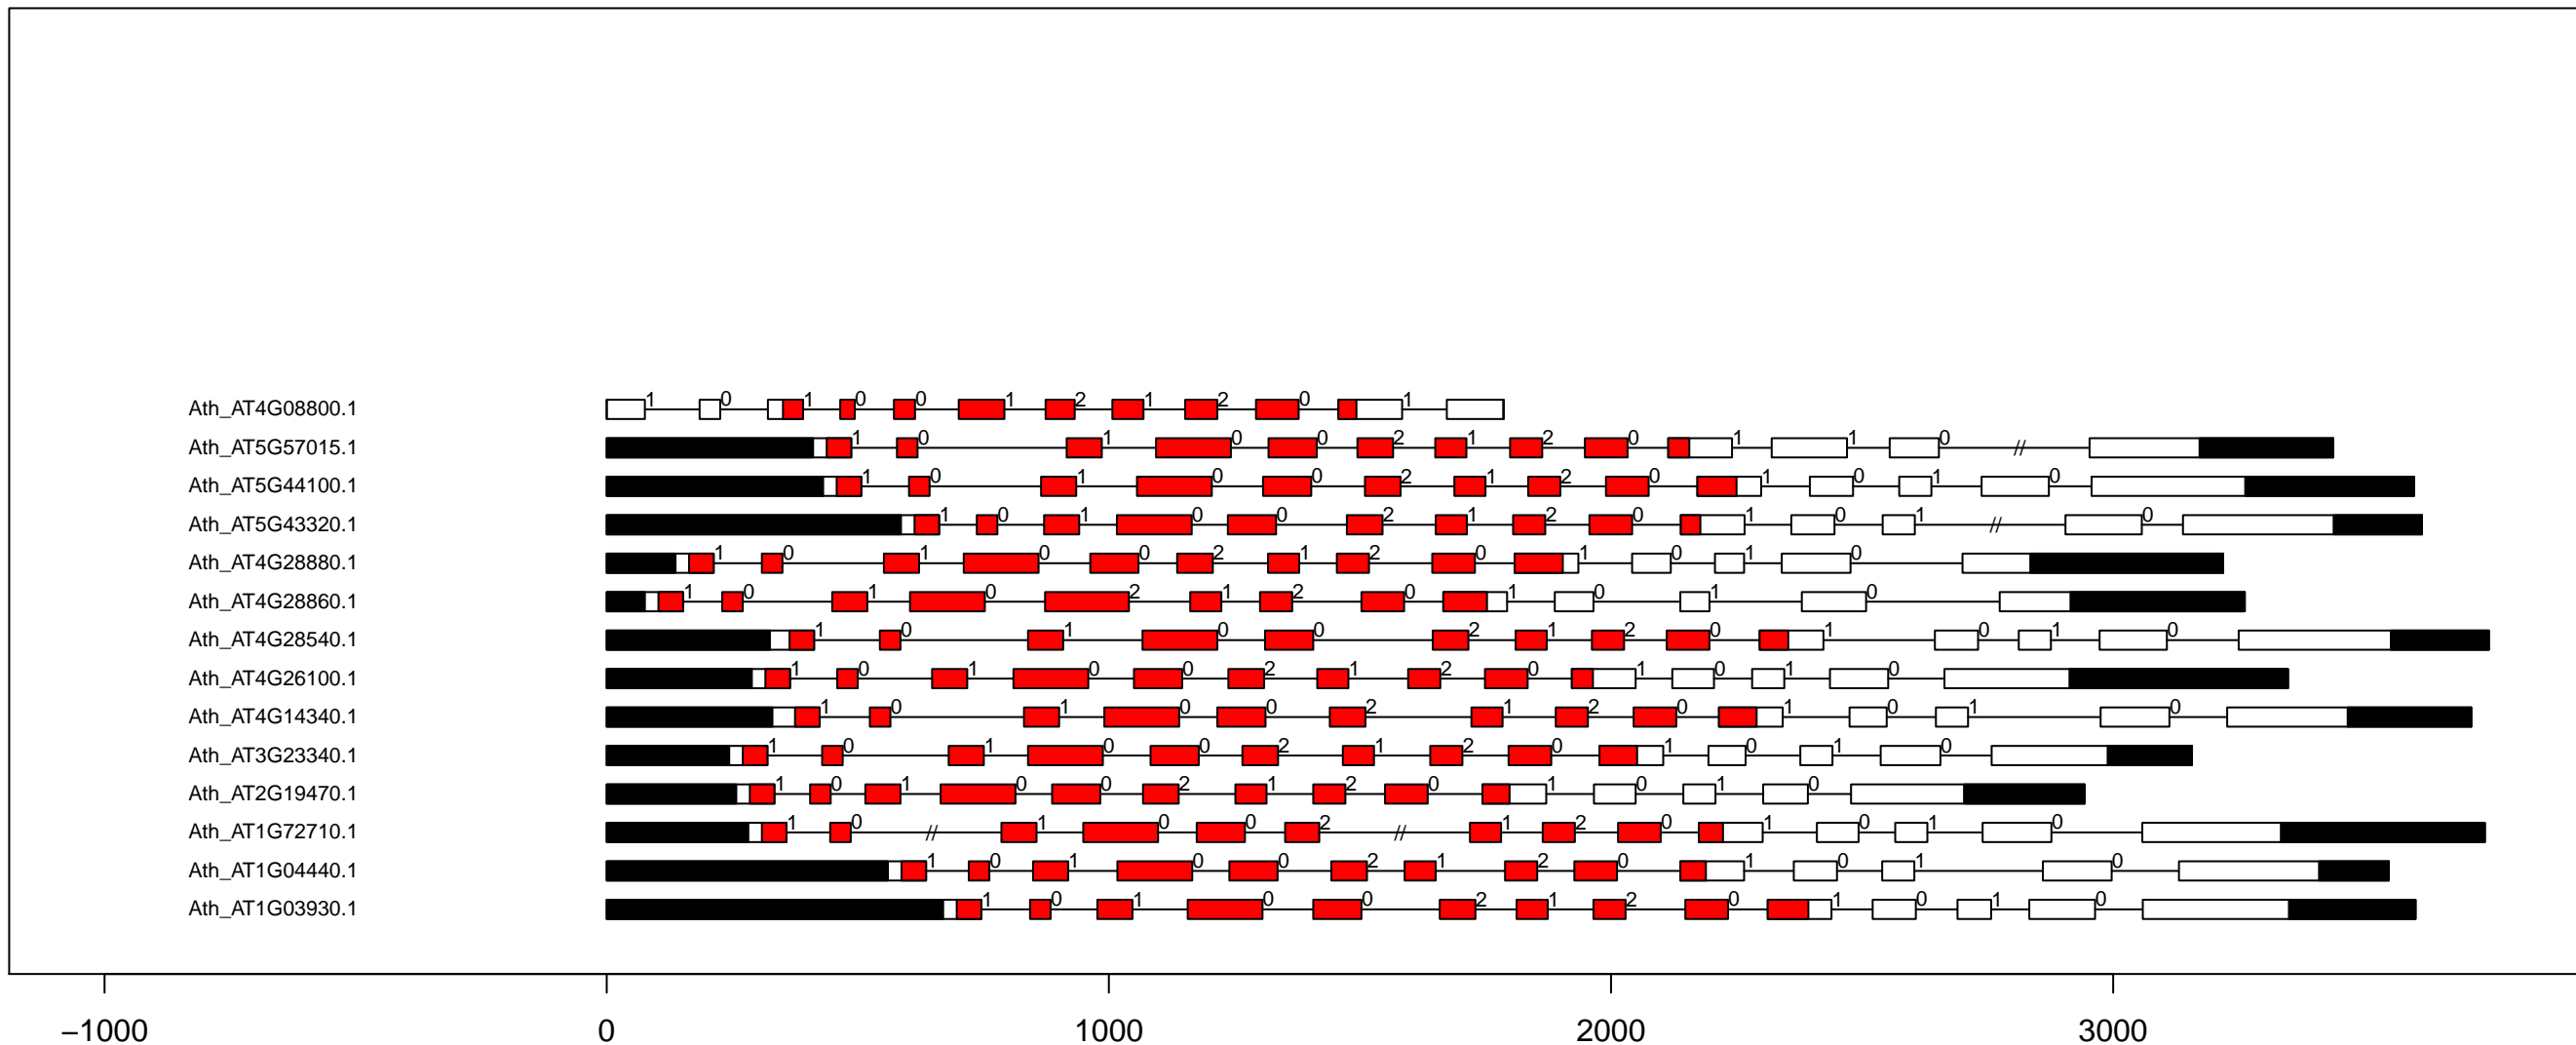

# A.th CK1\_CK1-PI exon-intron and kinase domain diagram (all)

Ath\_AT5G18190.1  
Ath\_AT3G13670.1  
Ath\_AT3G03940.1  
Ath\_AT2G25760.2

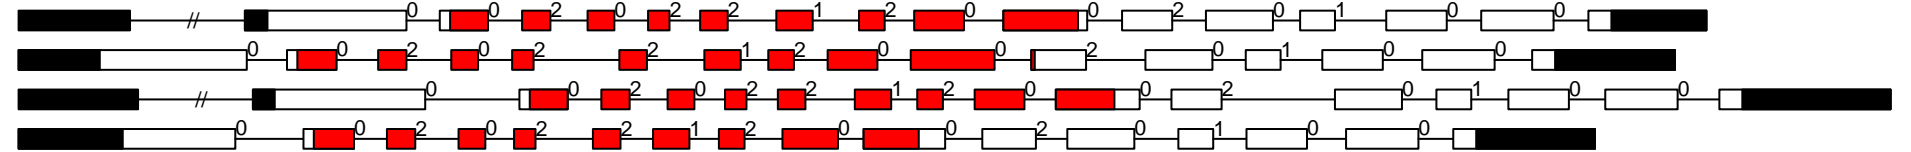

-1000

0

1000

2000

3000

4000

5000

A.th CMGC\_CDK-CCRK exon-intron and kinase domain diagram (all)

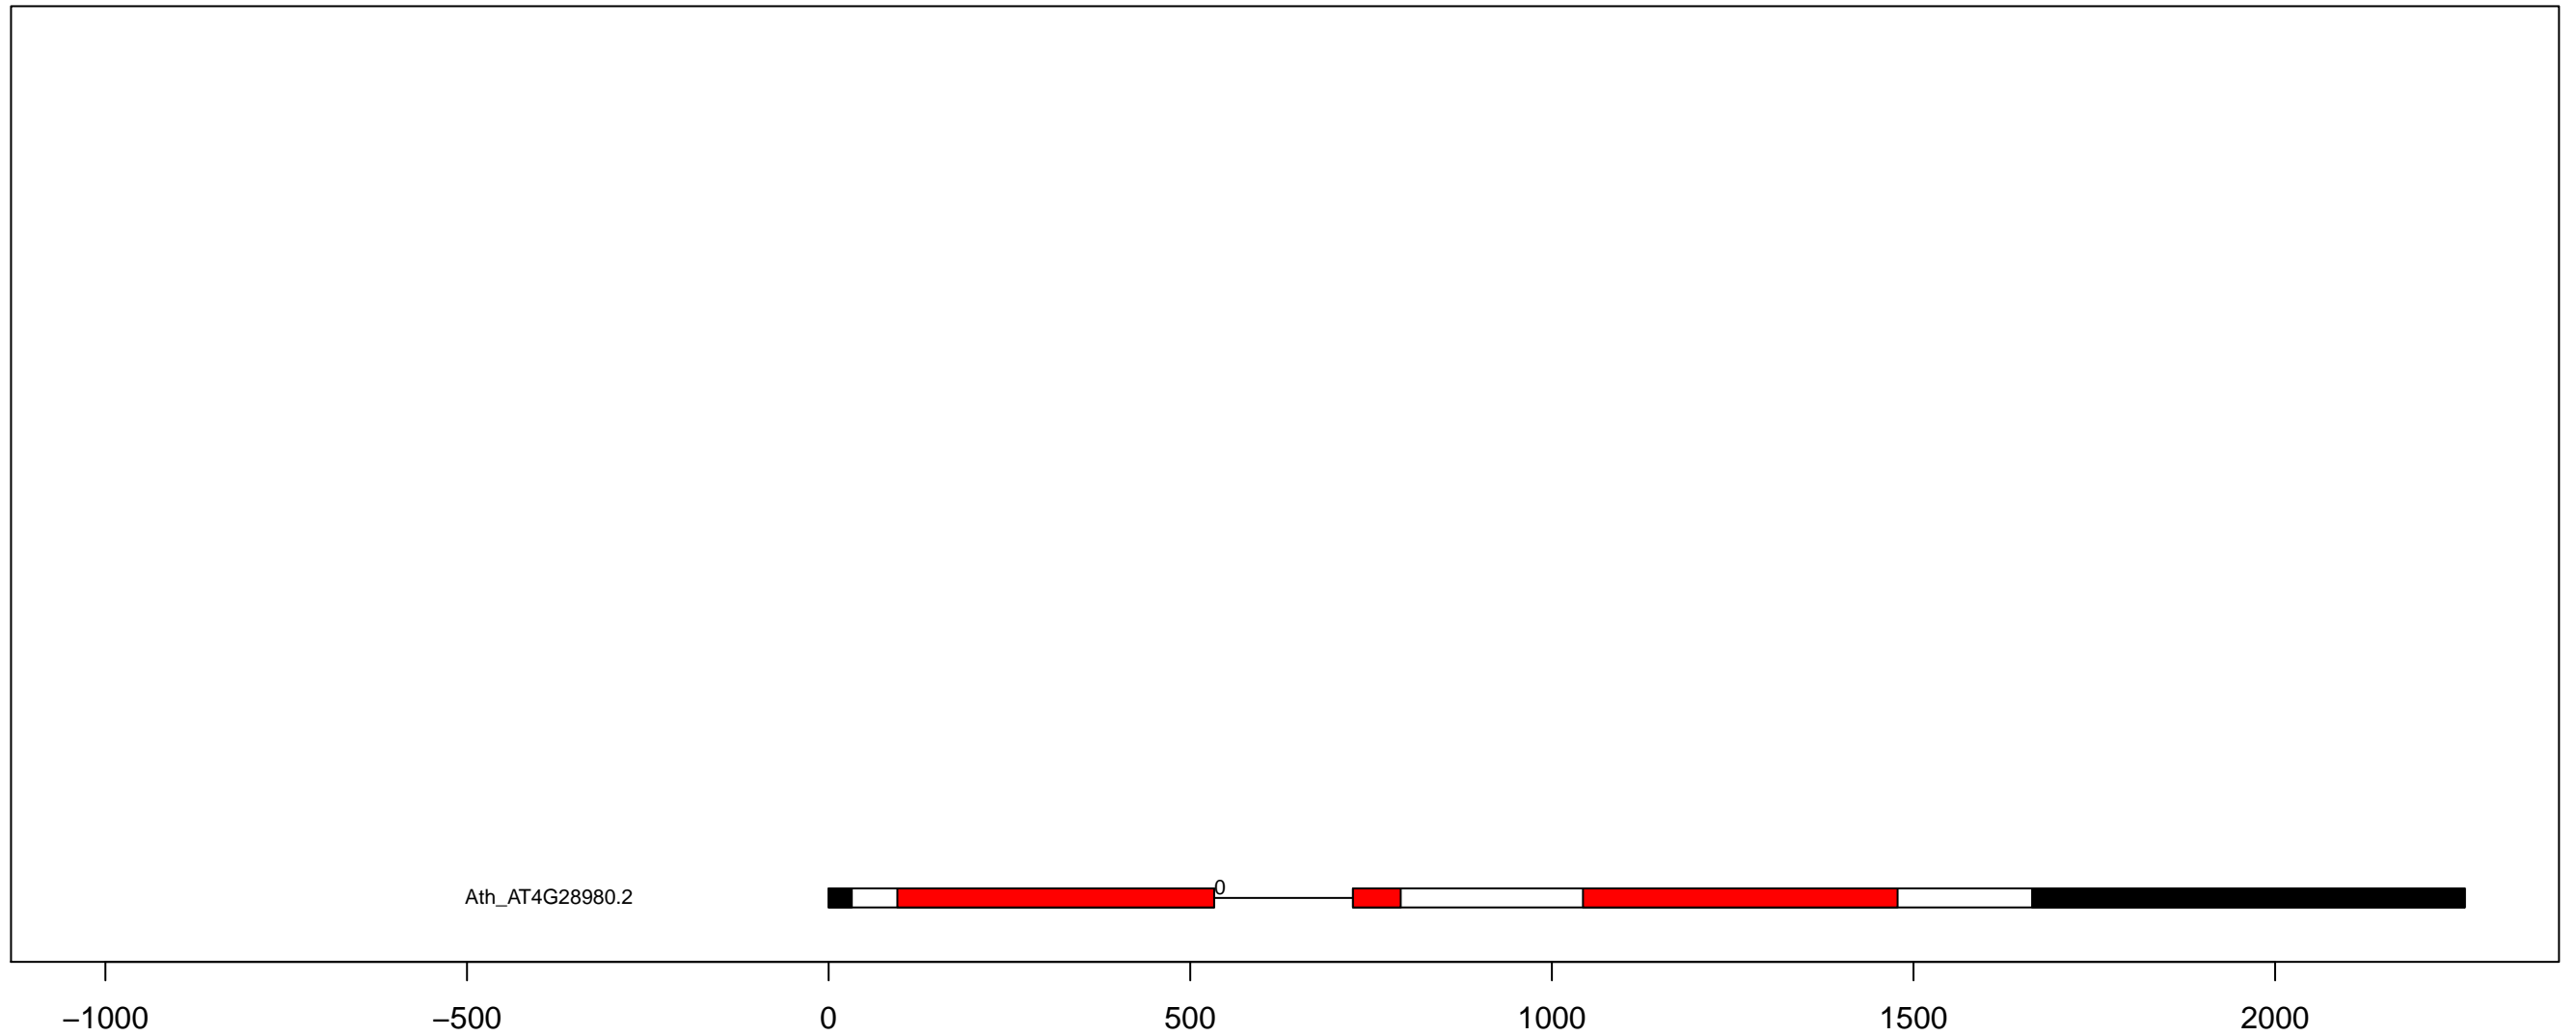

# A.th CMGC\_CDK-CDK7 exon-intron and kinase domain diagram (all)

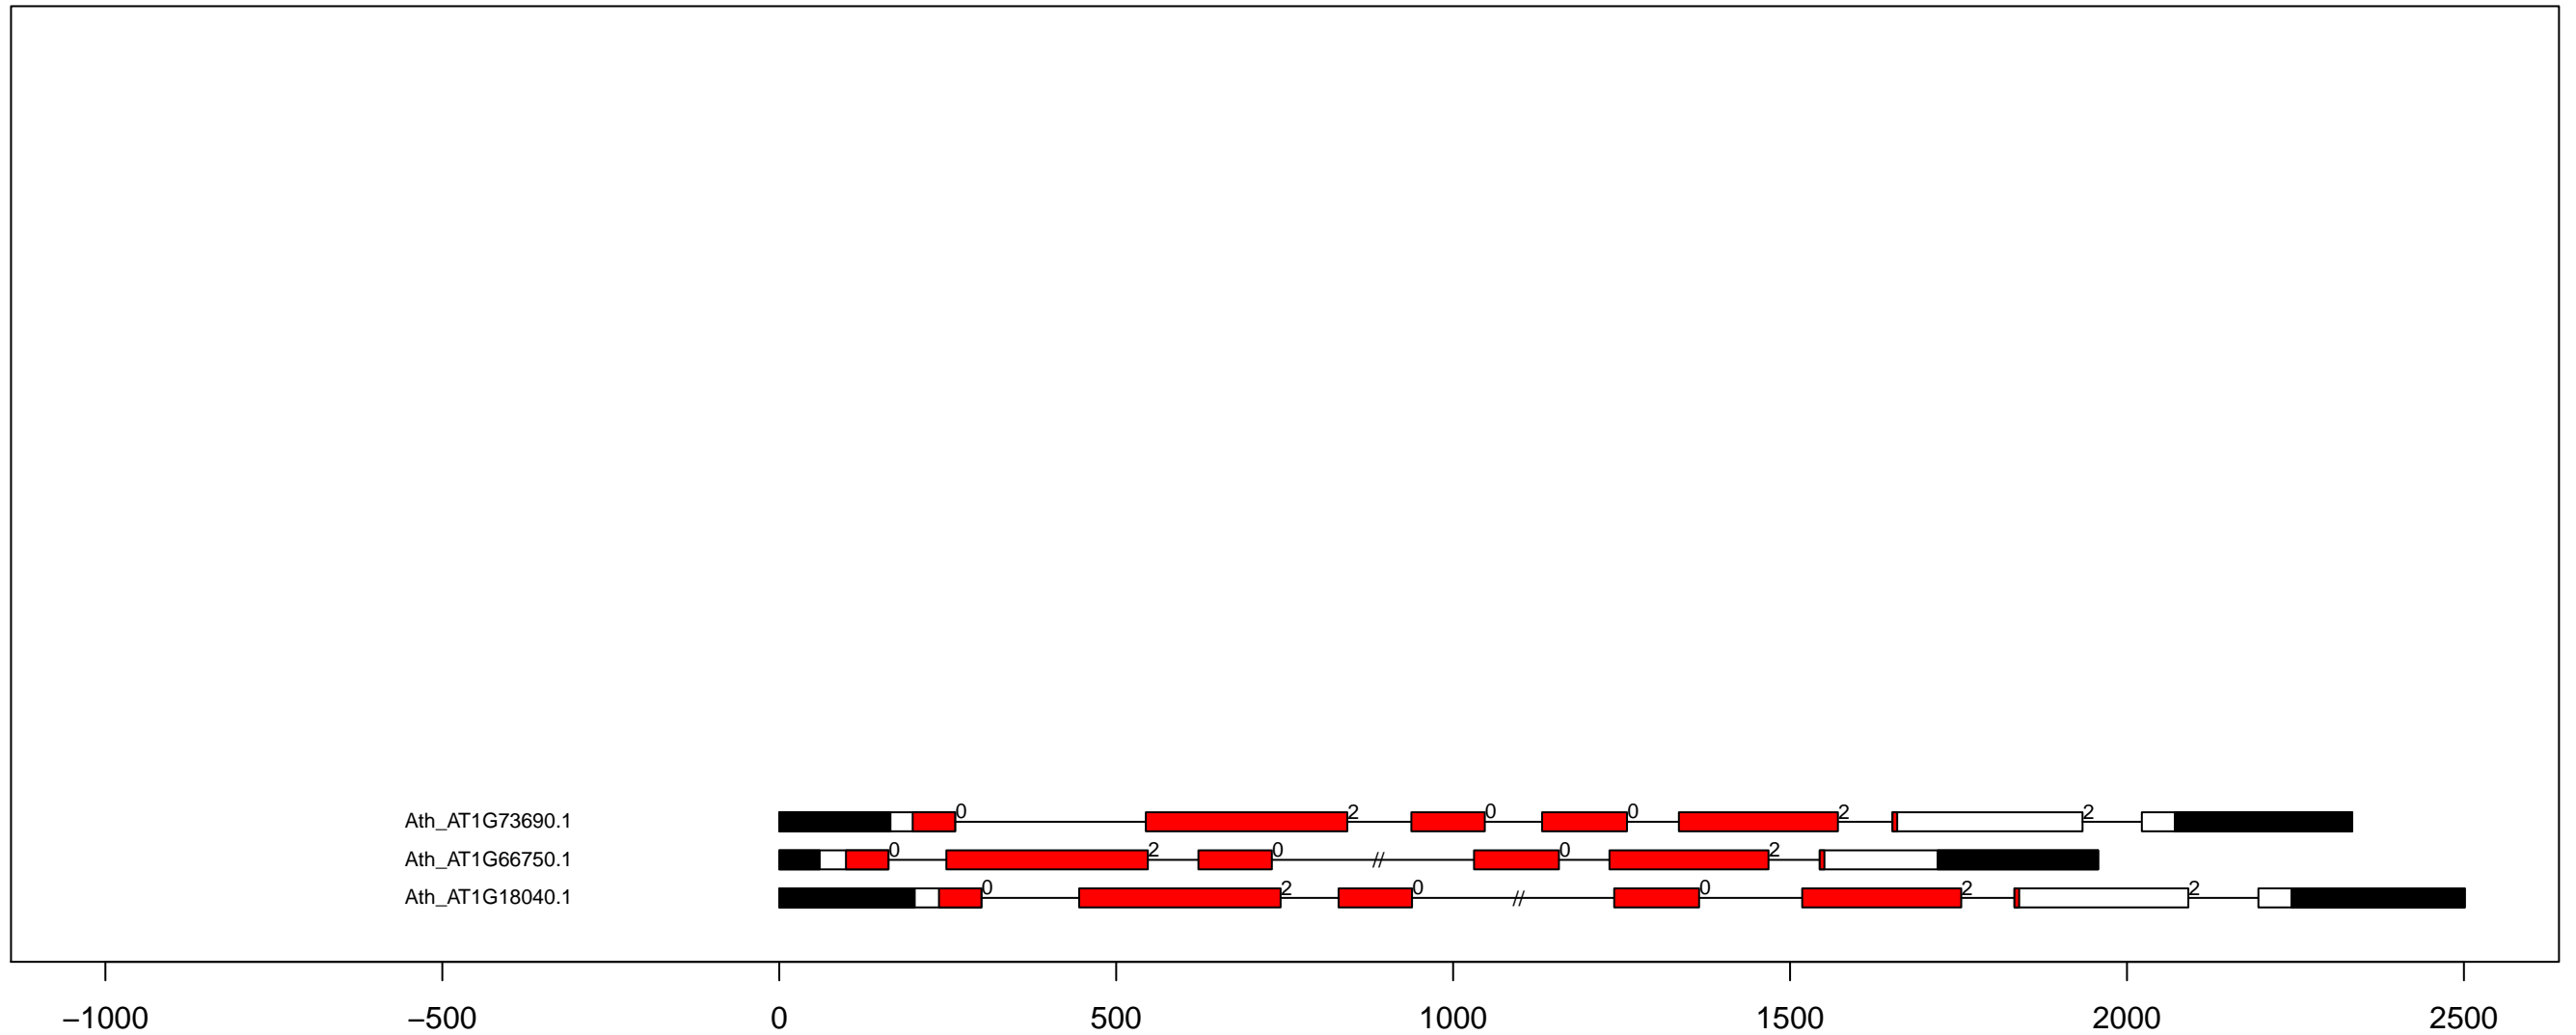



# A.th CMGC\_CDK-CDK8 exon-intron and kinase domain diagram (all)

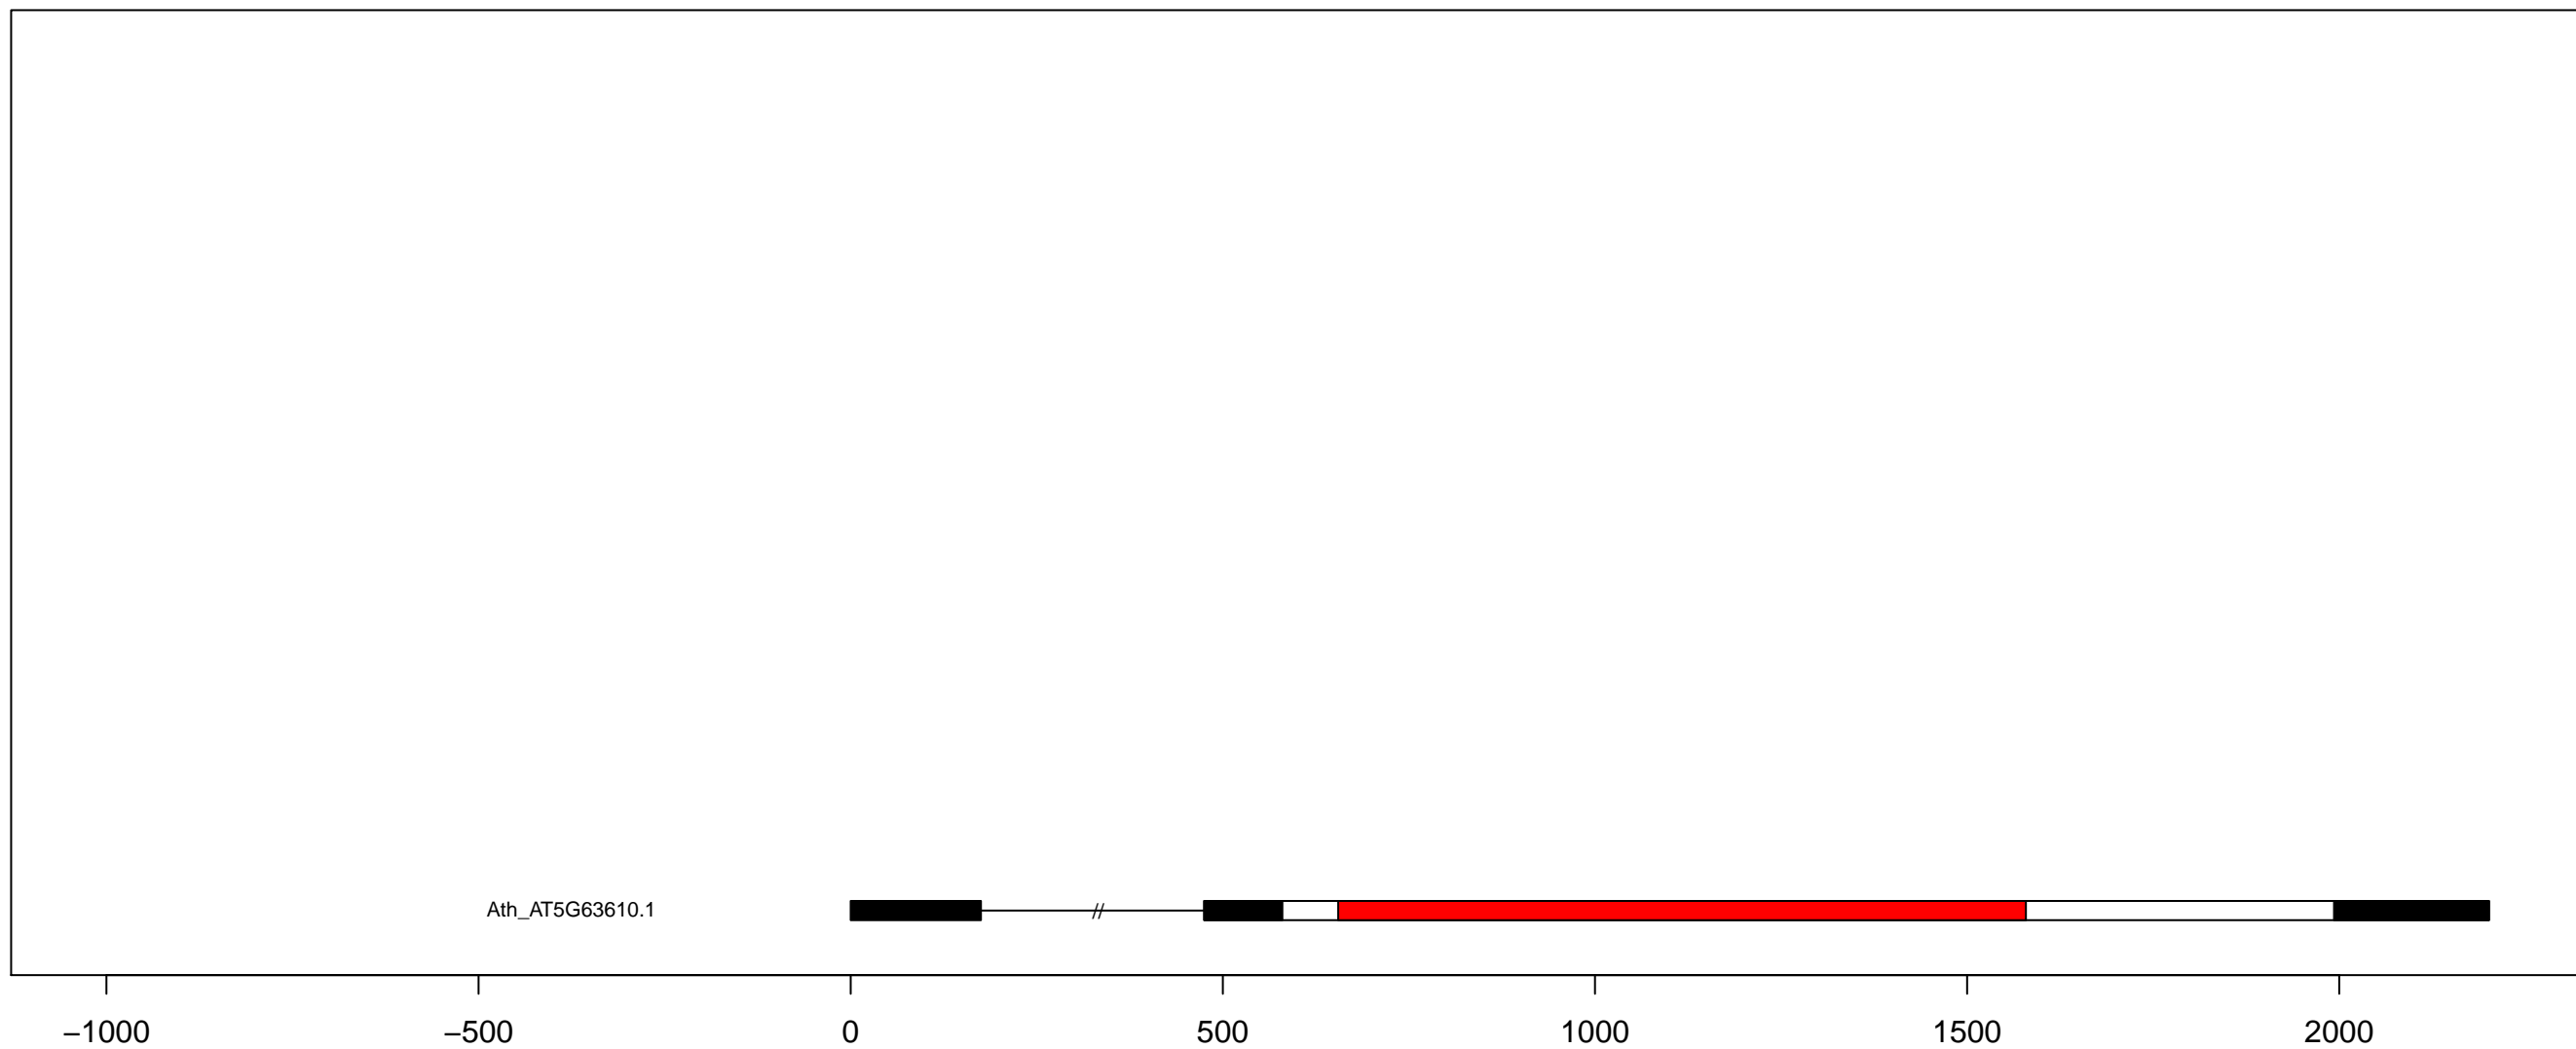

### A.th CMGC\_CDK-CRK7-CDK9 exon-intron and kinase domain diagram (all)

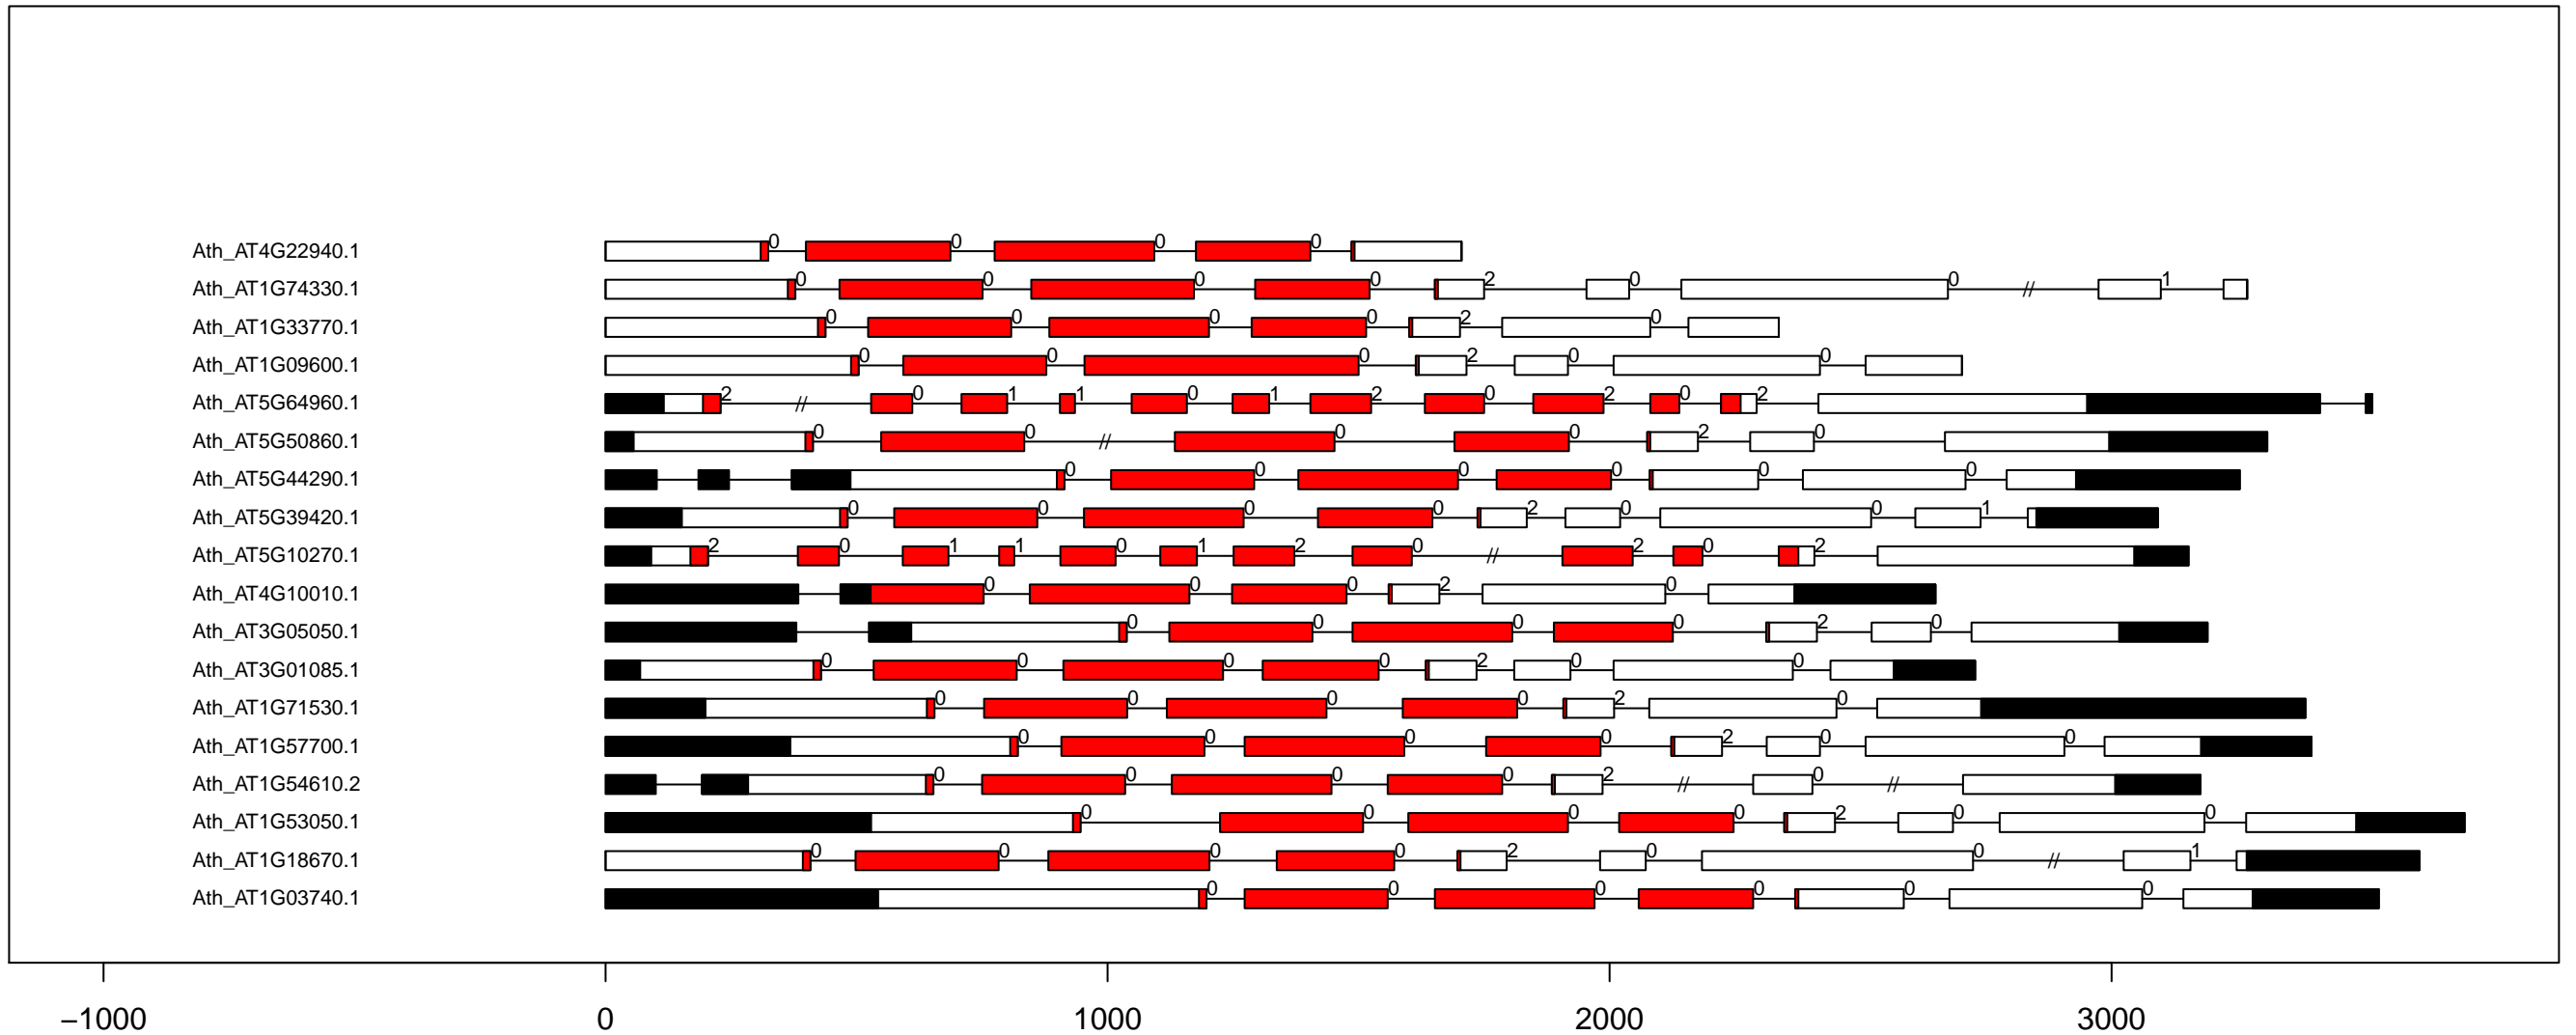

# A.th CMGC\_CDK-PITSLRE exon-intron and kinase domain diagram (all)

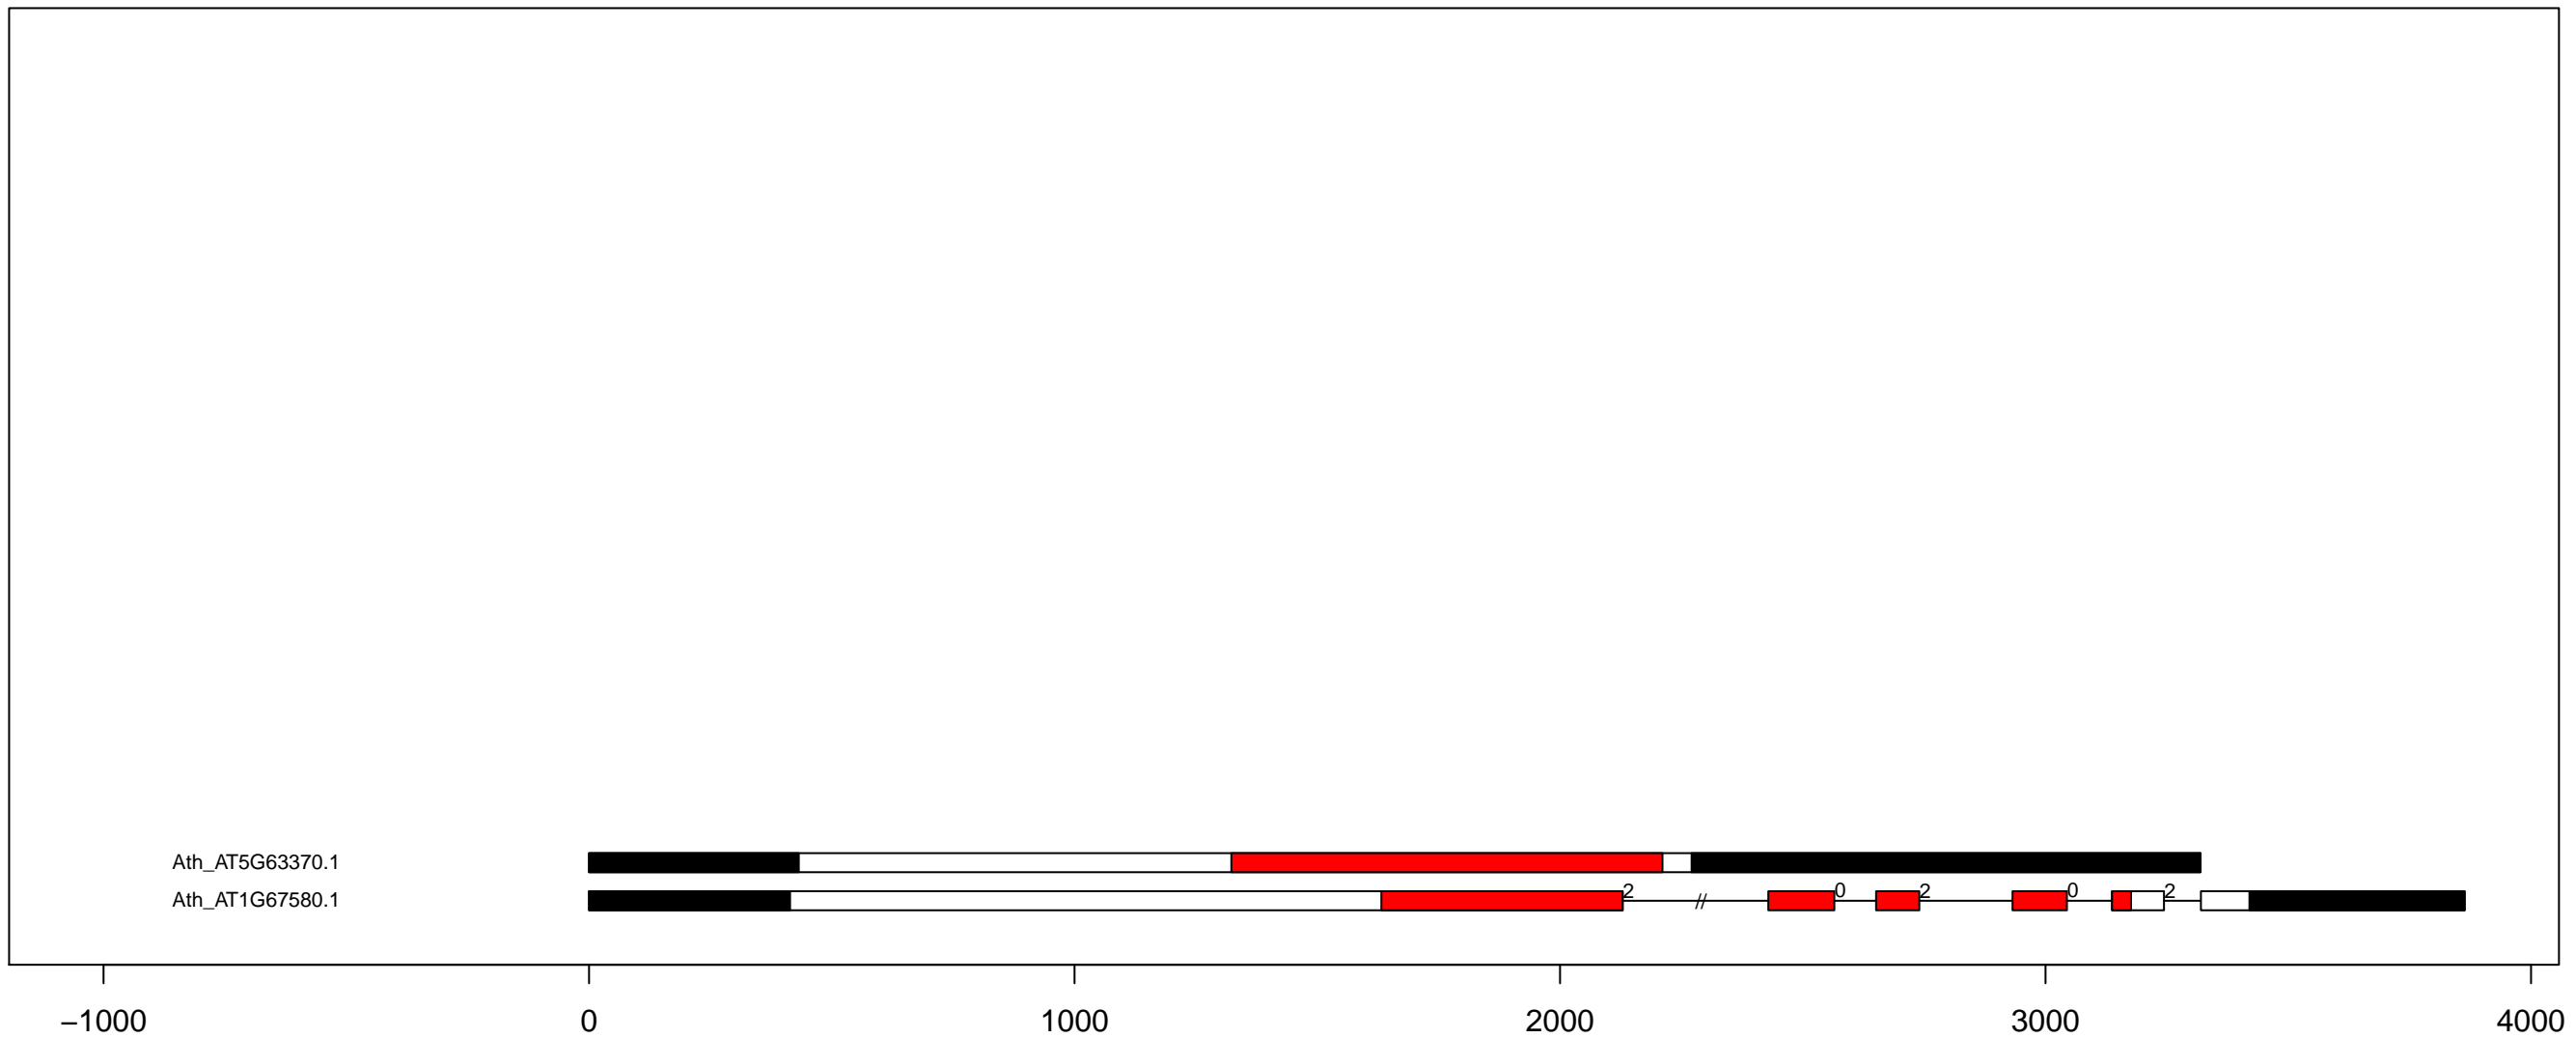

# A.th CMGC\_CDK-PI exon-intron and kinase domain diagram (all)

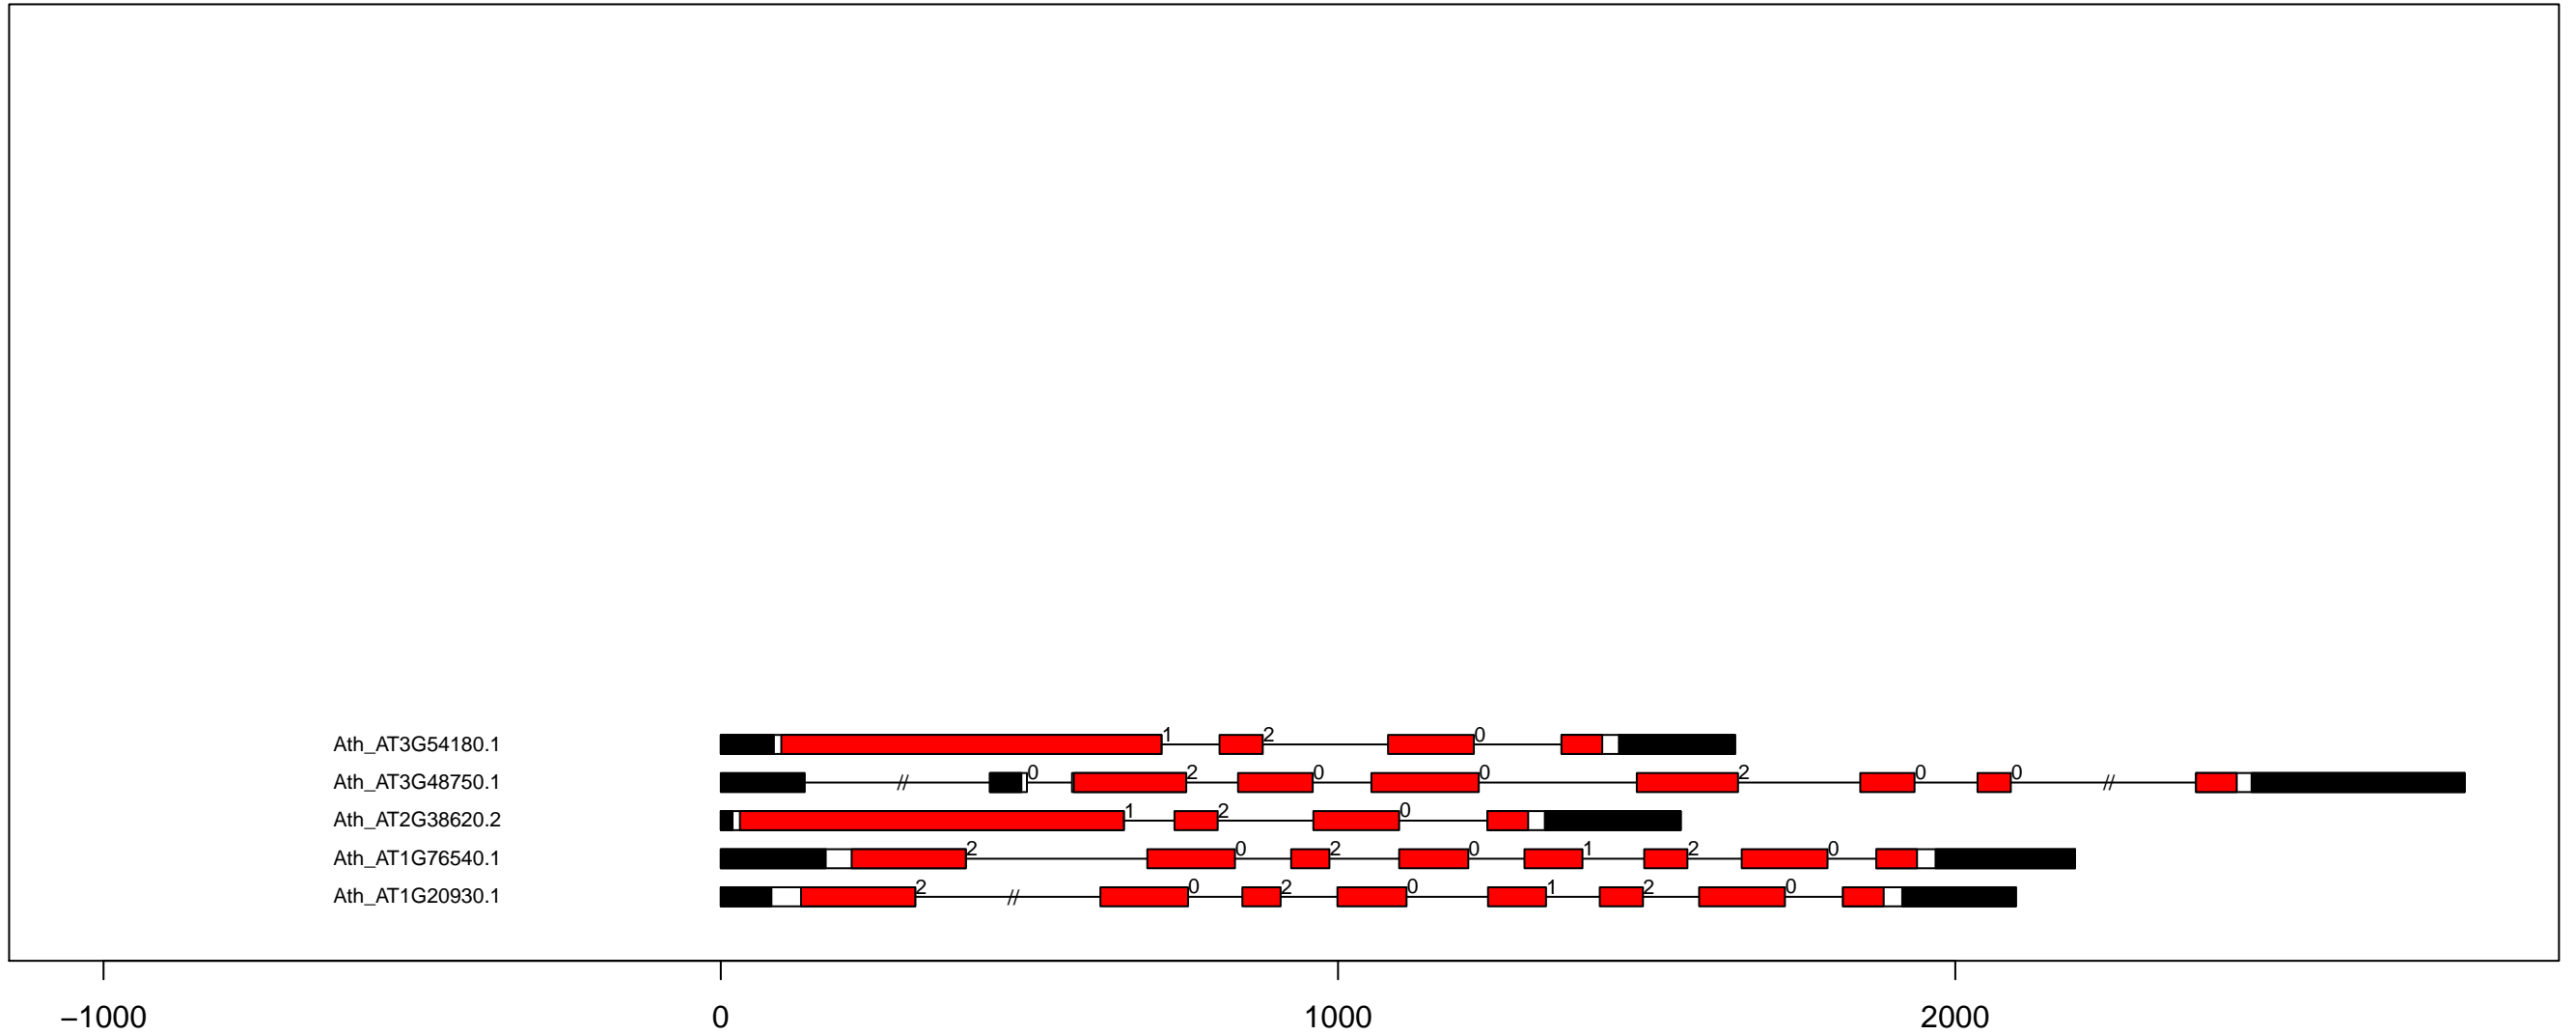

A.th CMGC\_CK2 exon-intron and kinase domain diagram (all)

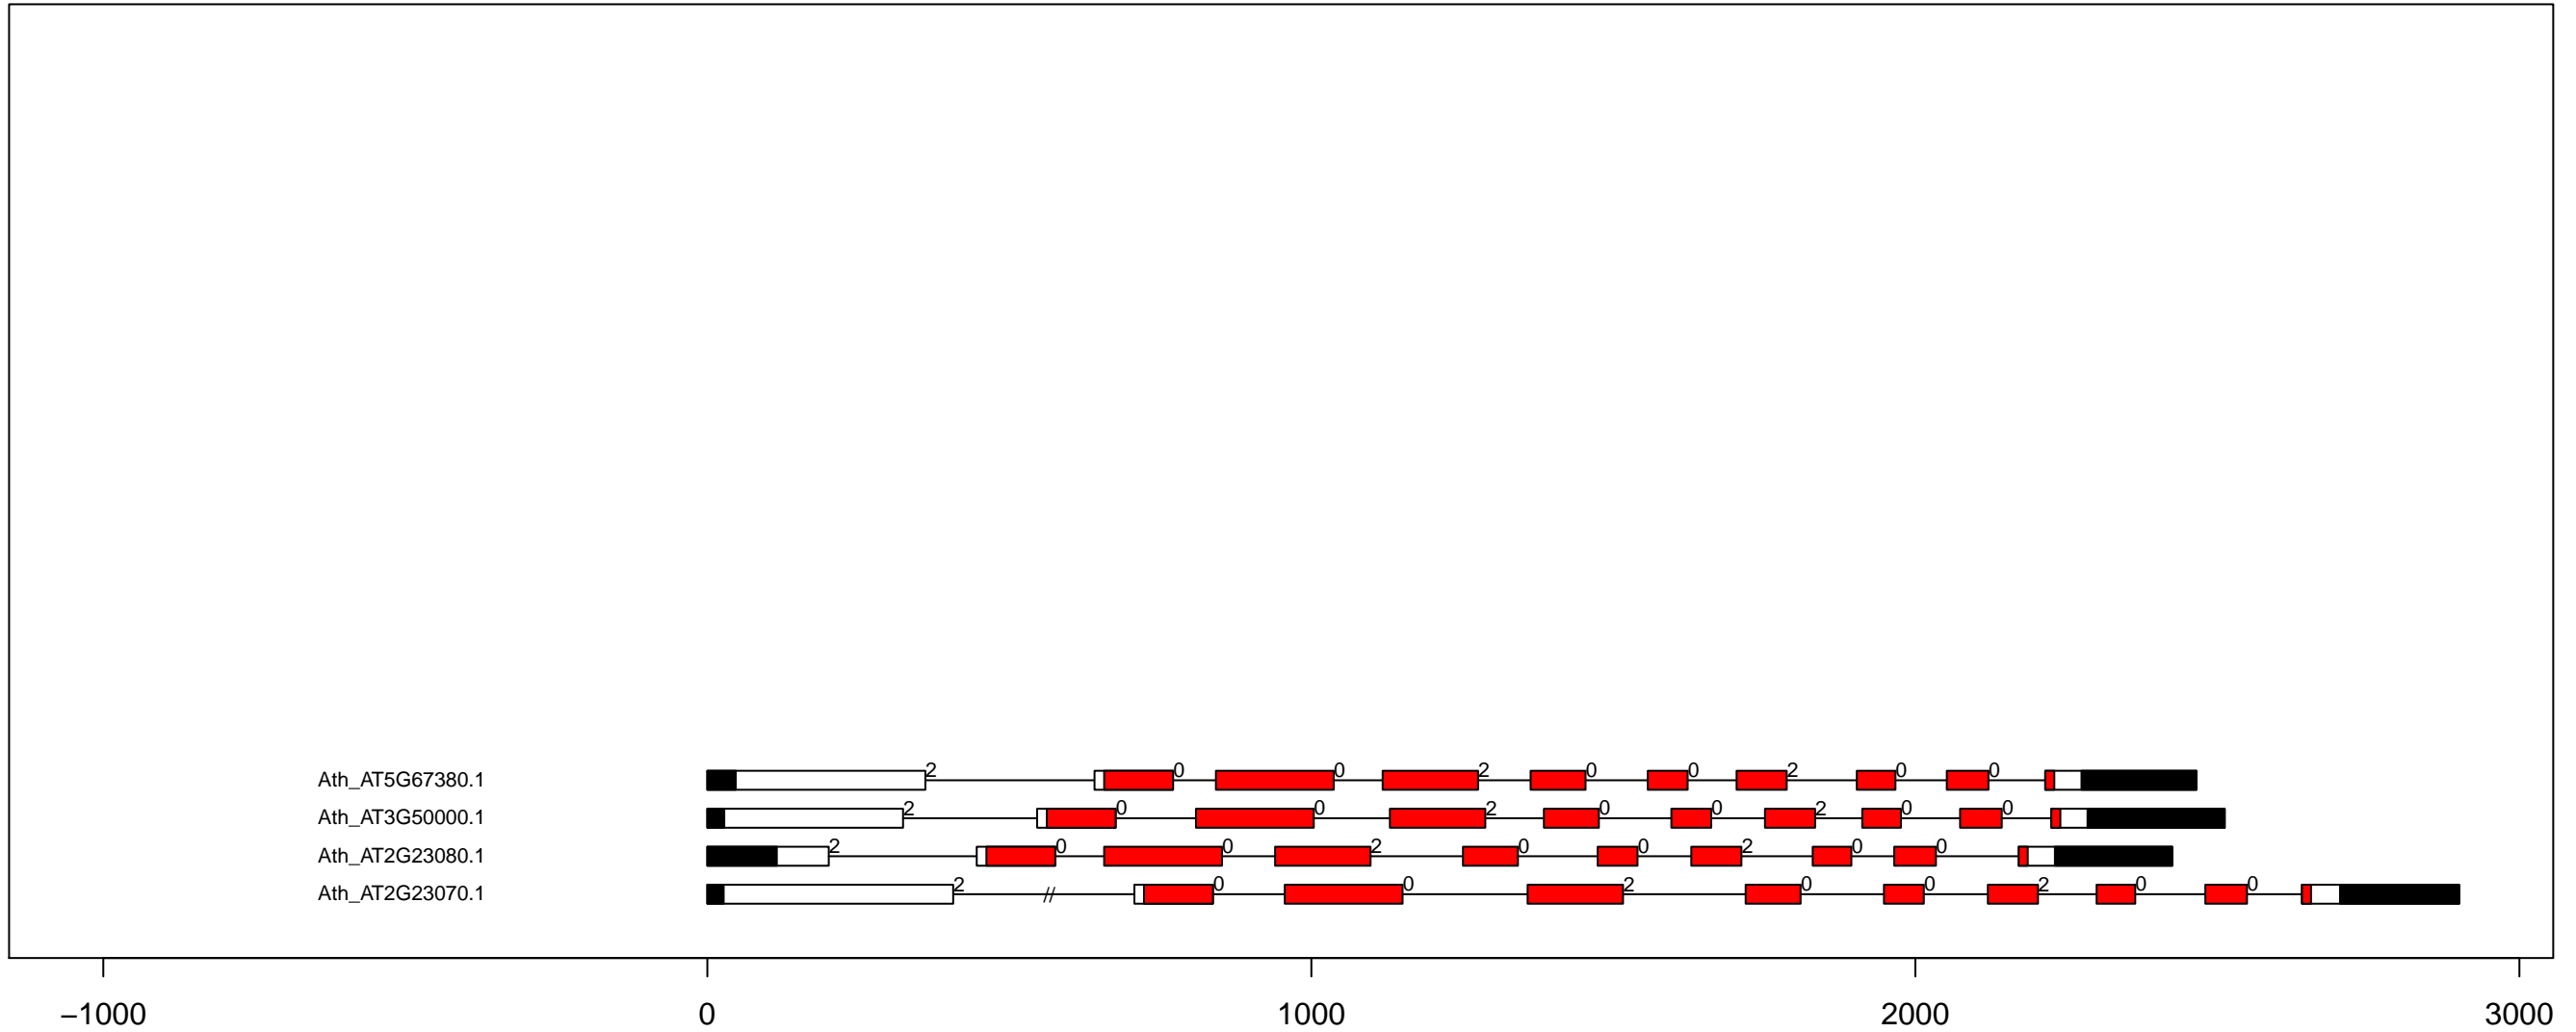

# A.th CMGC\_CLK exon-intron and kinase domain diagram (all)

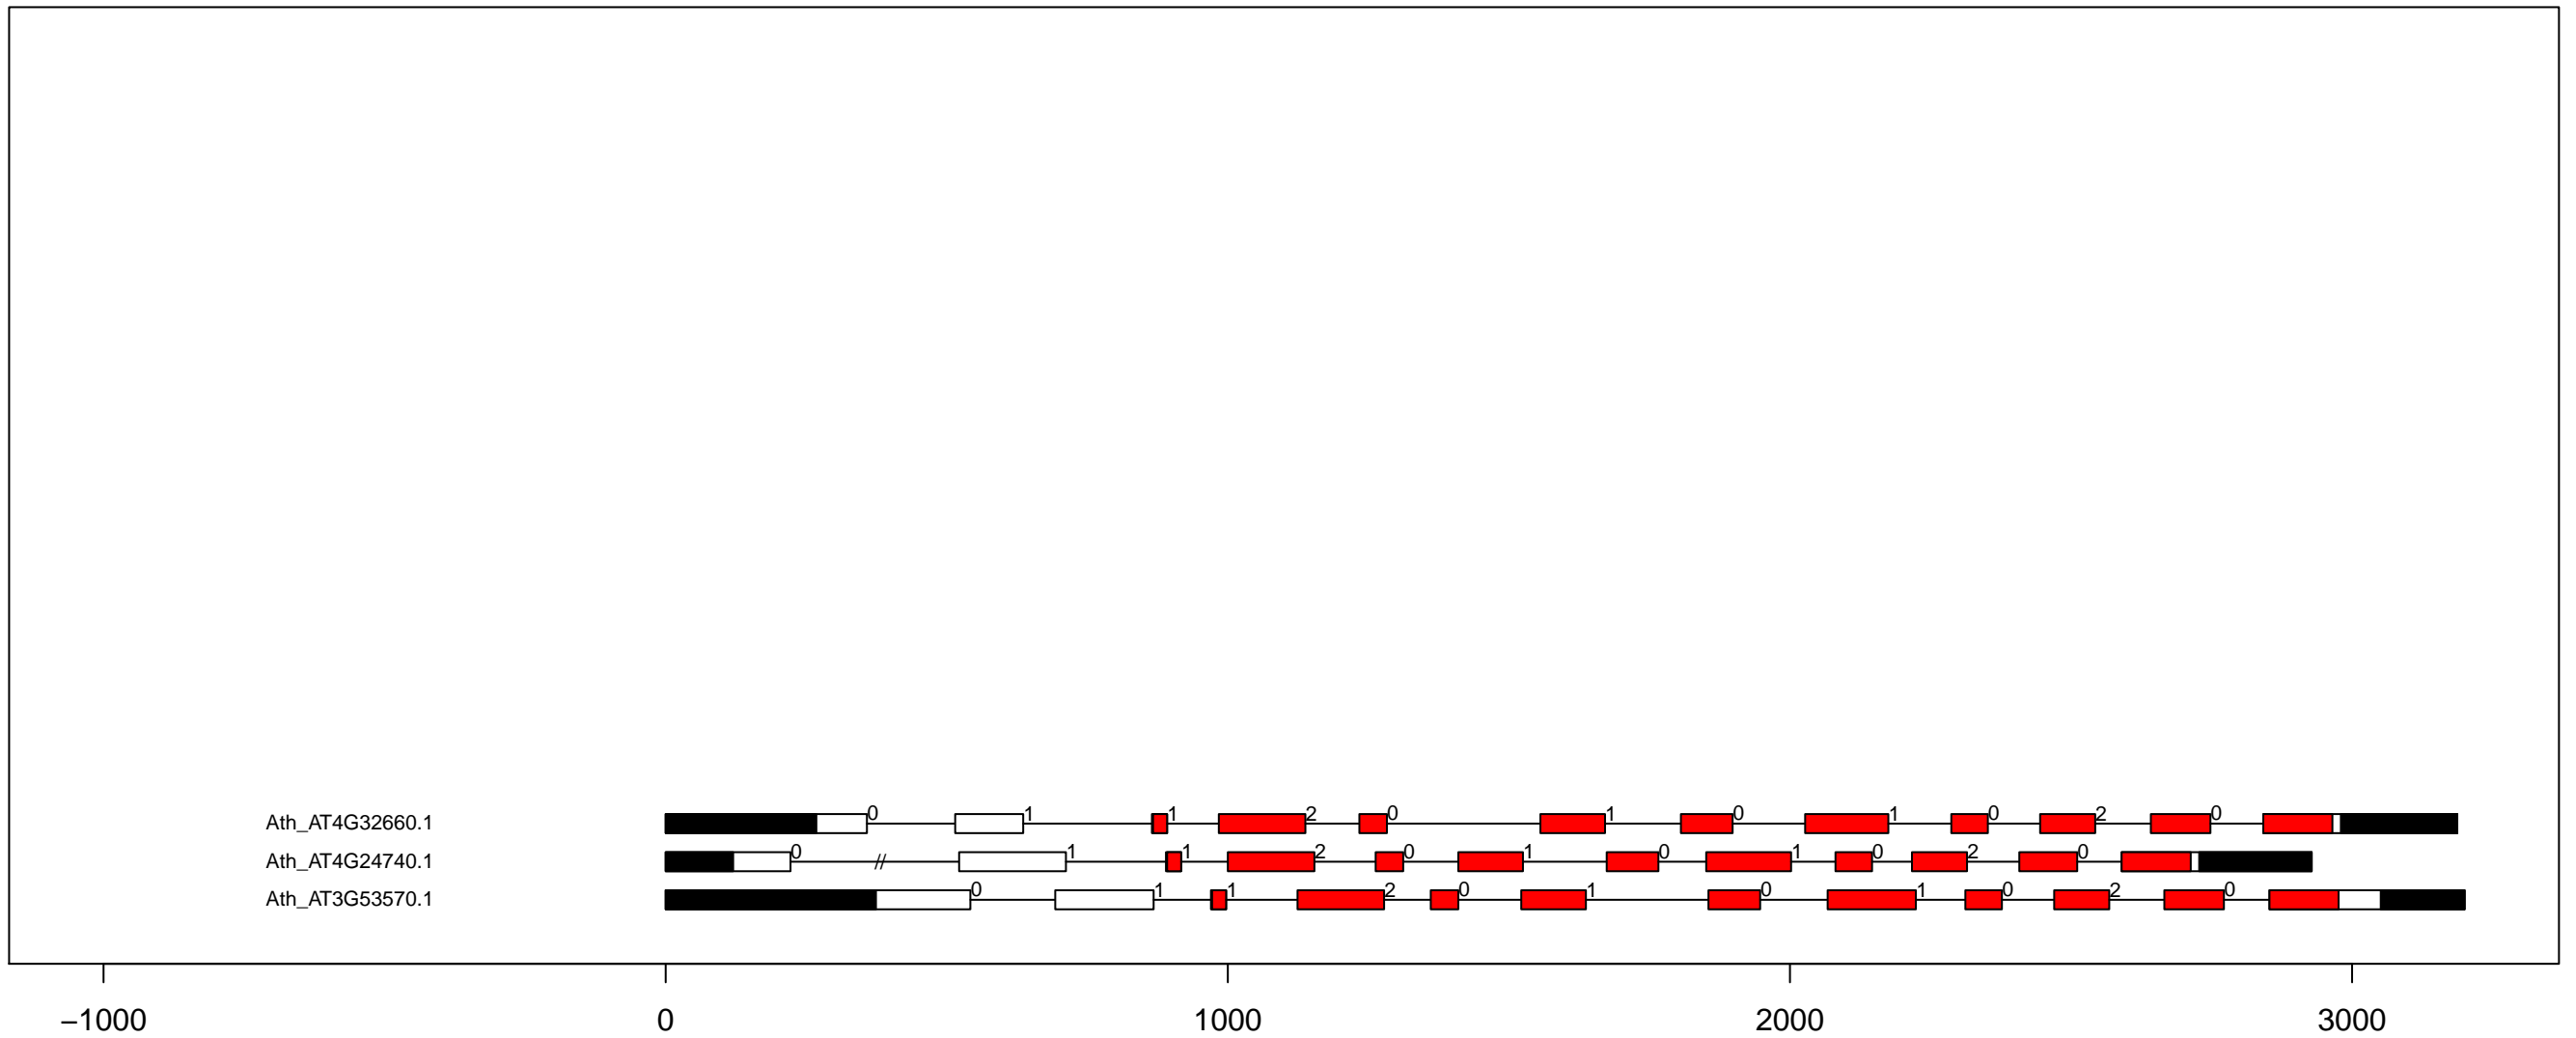

# A.th CMGC\_DYRK-PRP4 exon-intron and kinase domain diagram (all)

Ath\_AT3G53640.1  
 Ath\_AT3G25840.1  
 Ath\_AT3G17750.1  
 Ath\_AT2G40120.1  
 Ath\_AT1G73460.1  
 Ath\_AT1G73450.1  
 Ath\_AT1G13350.2

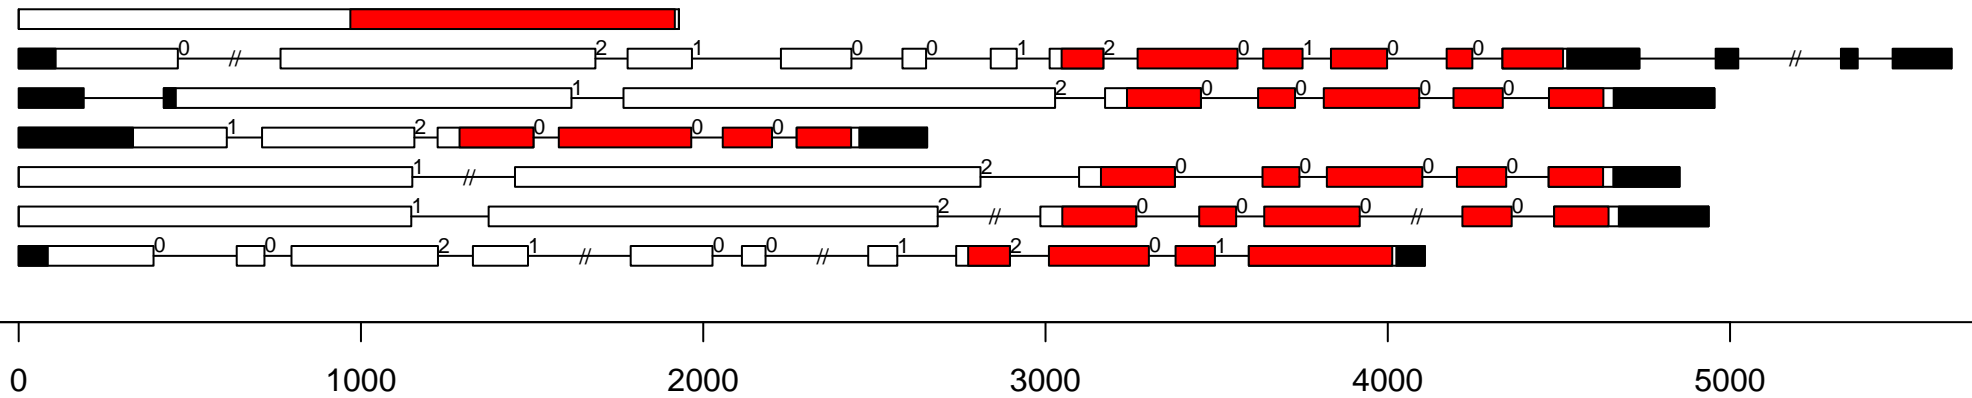

# A.th CMGC\_DYRK-YAK exon-intron and kinase domain diagram (all)

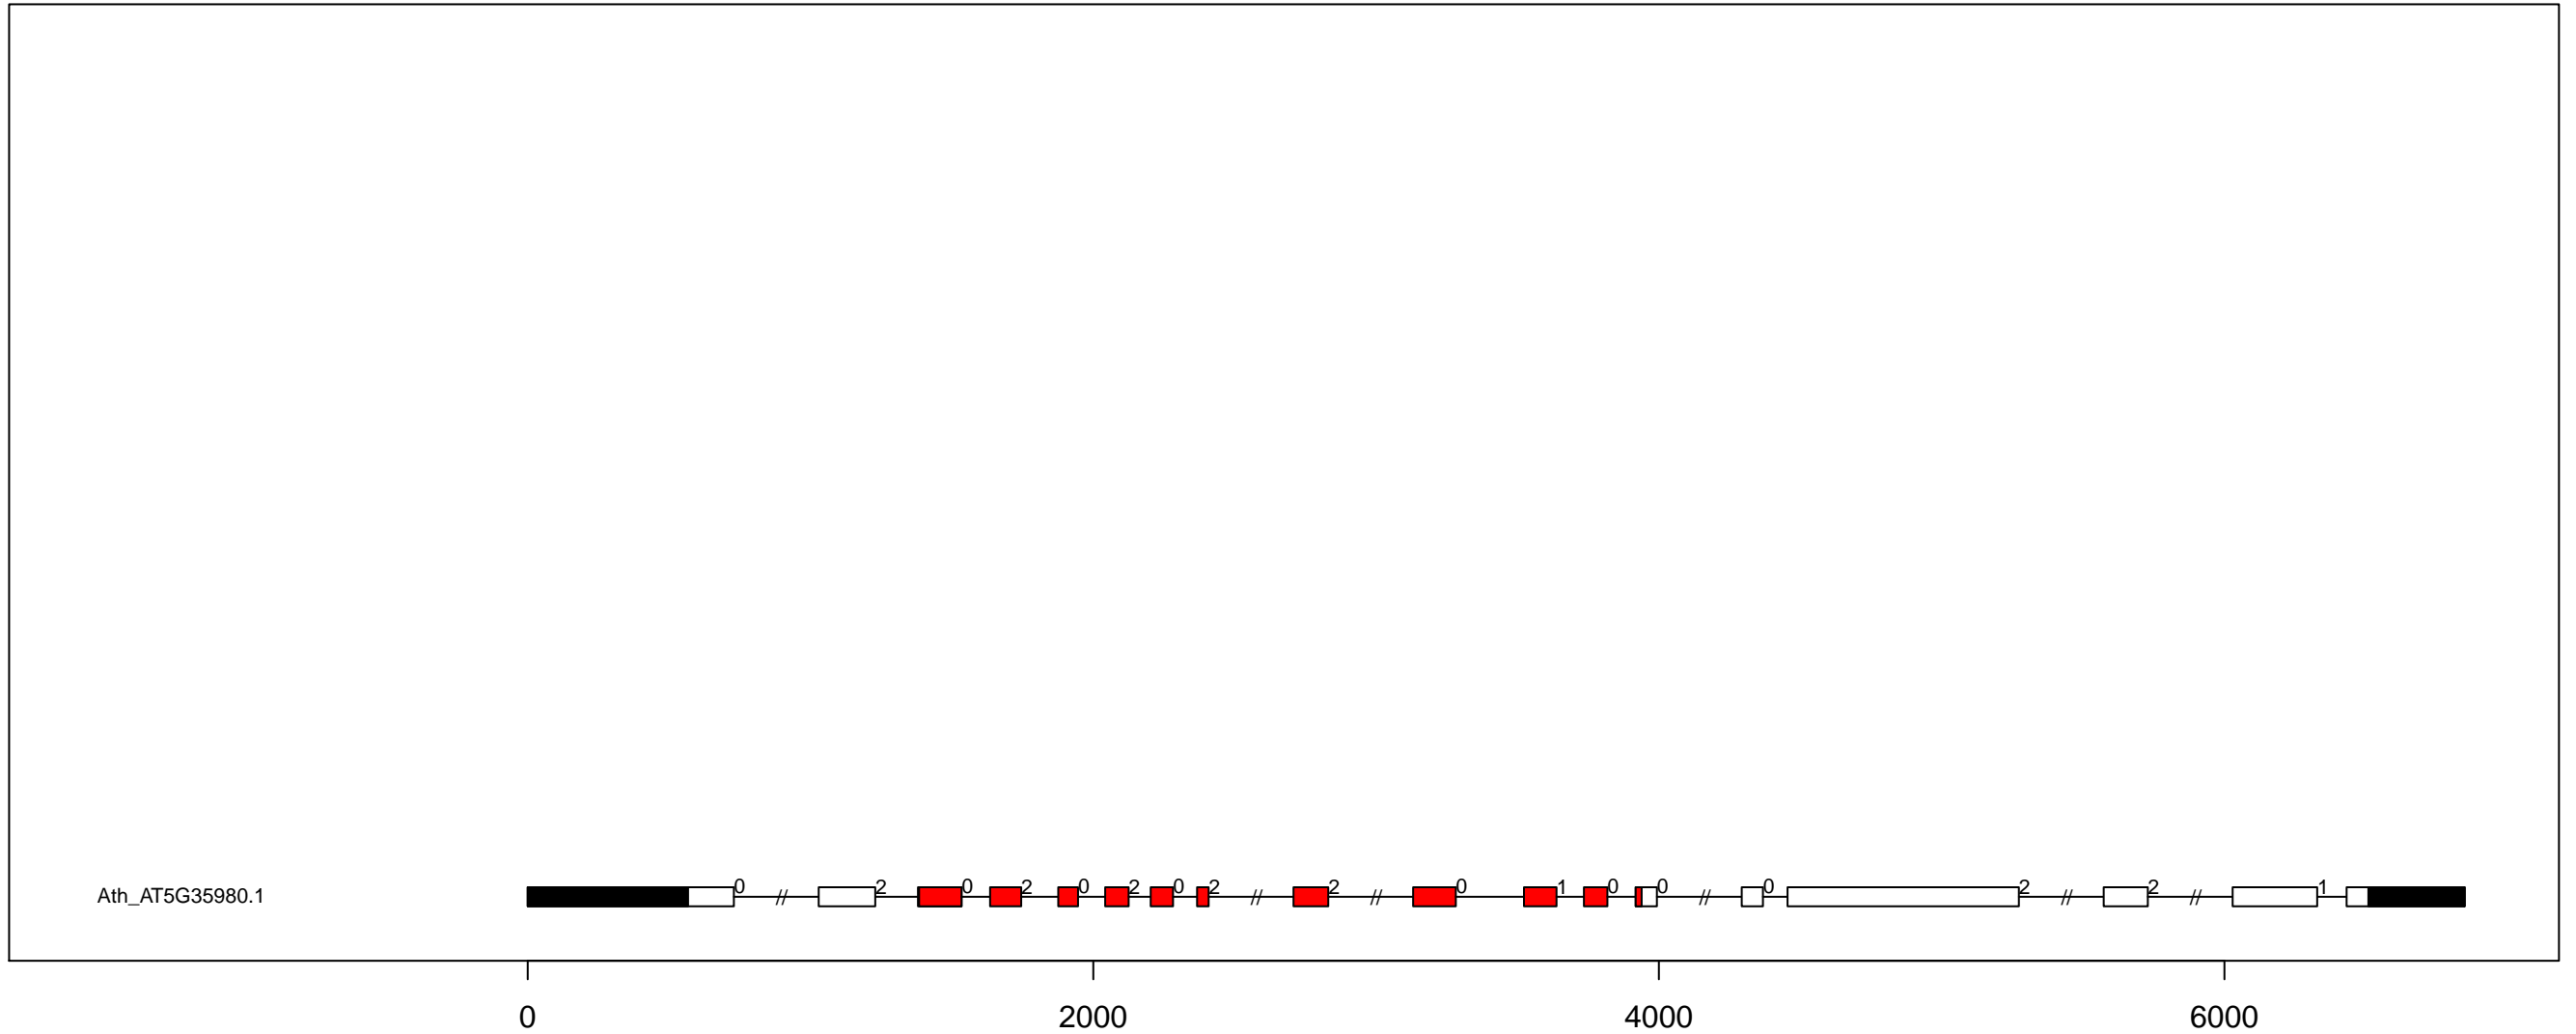



# A.th CMGC\_GSKL exon-intron and kinase domain diagram (all)

Ath\_AT3G63340.2

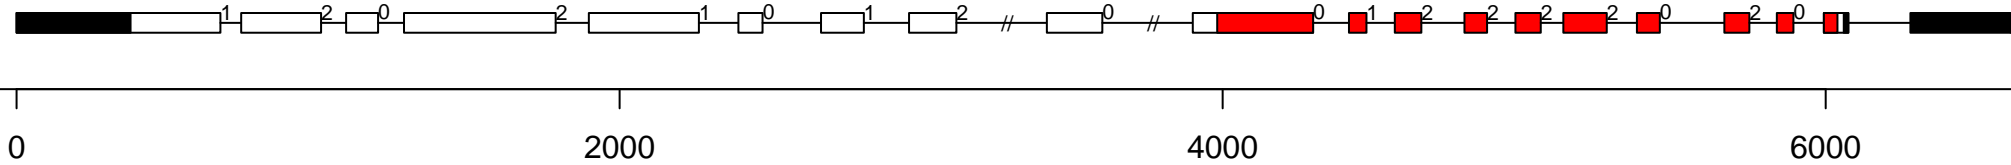

# A.th CMGC\_GSK exon-intron and kinase domain diagram (all)

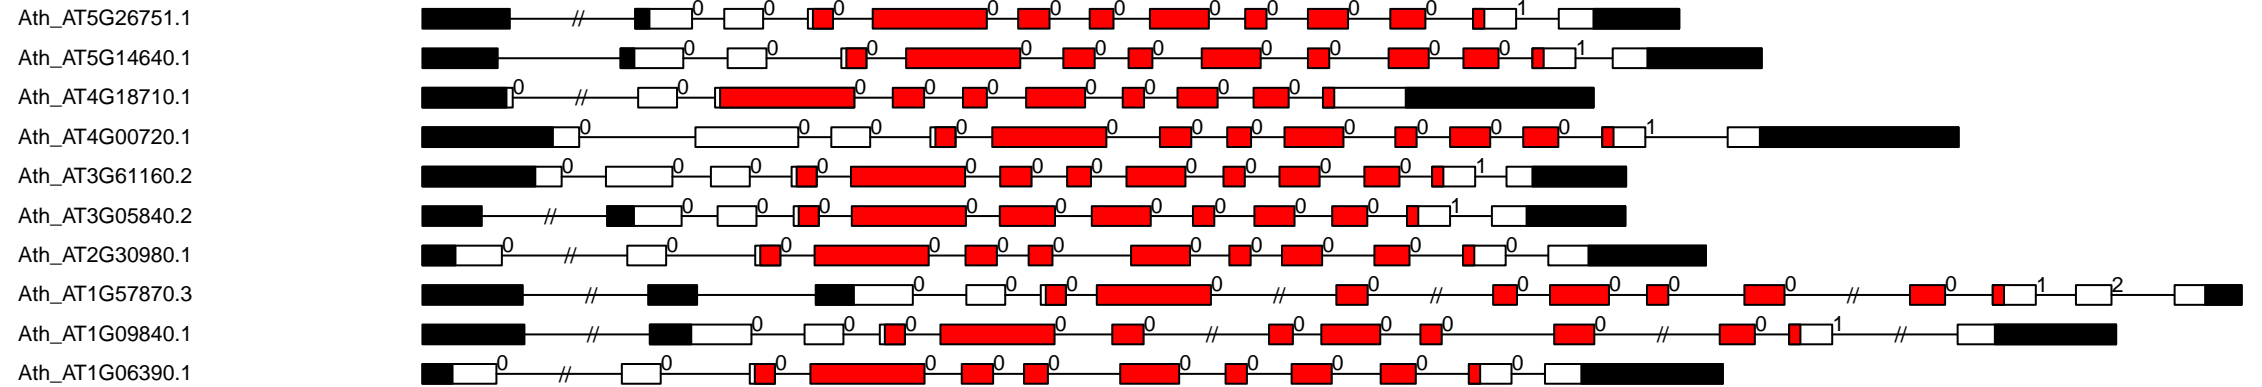

### A.th CMGC\_MAPK exon-intron and kinase domain diagram (all)

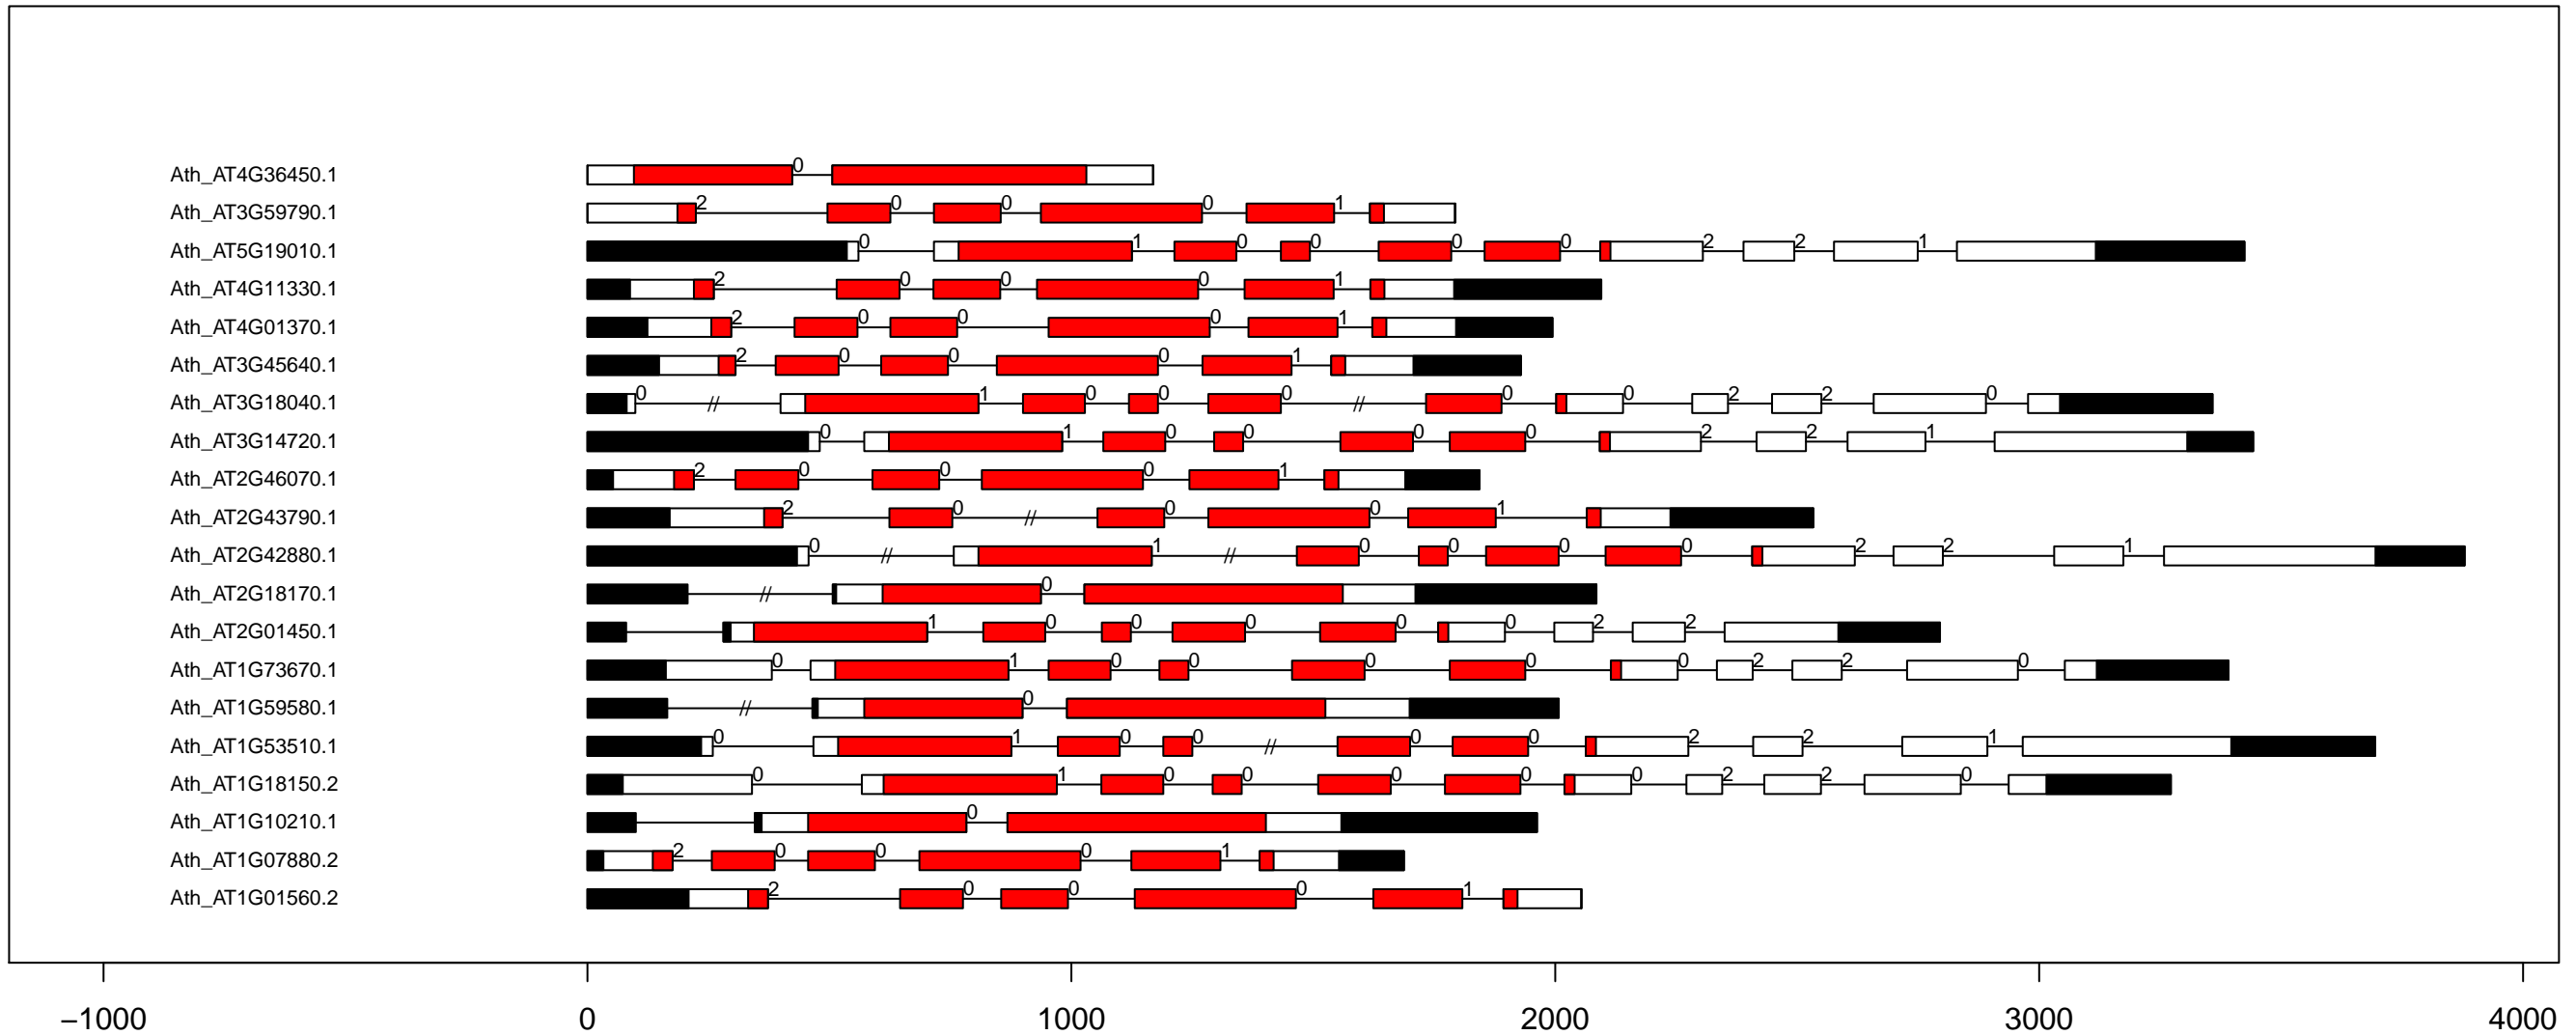

# A.th CMGC\_PI-Tthe exon-intron and kinase domain diagram (all)

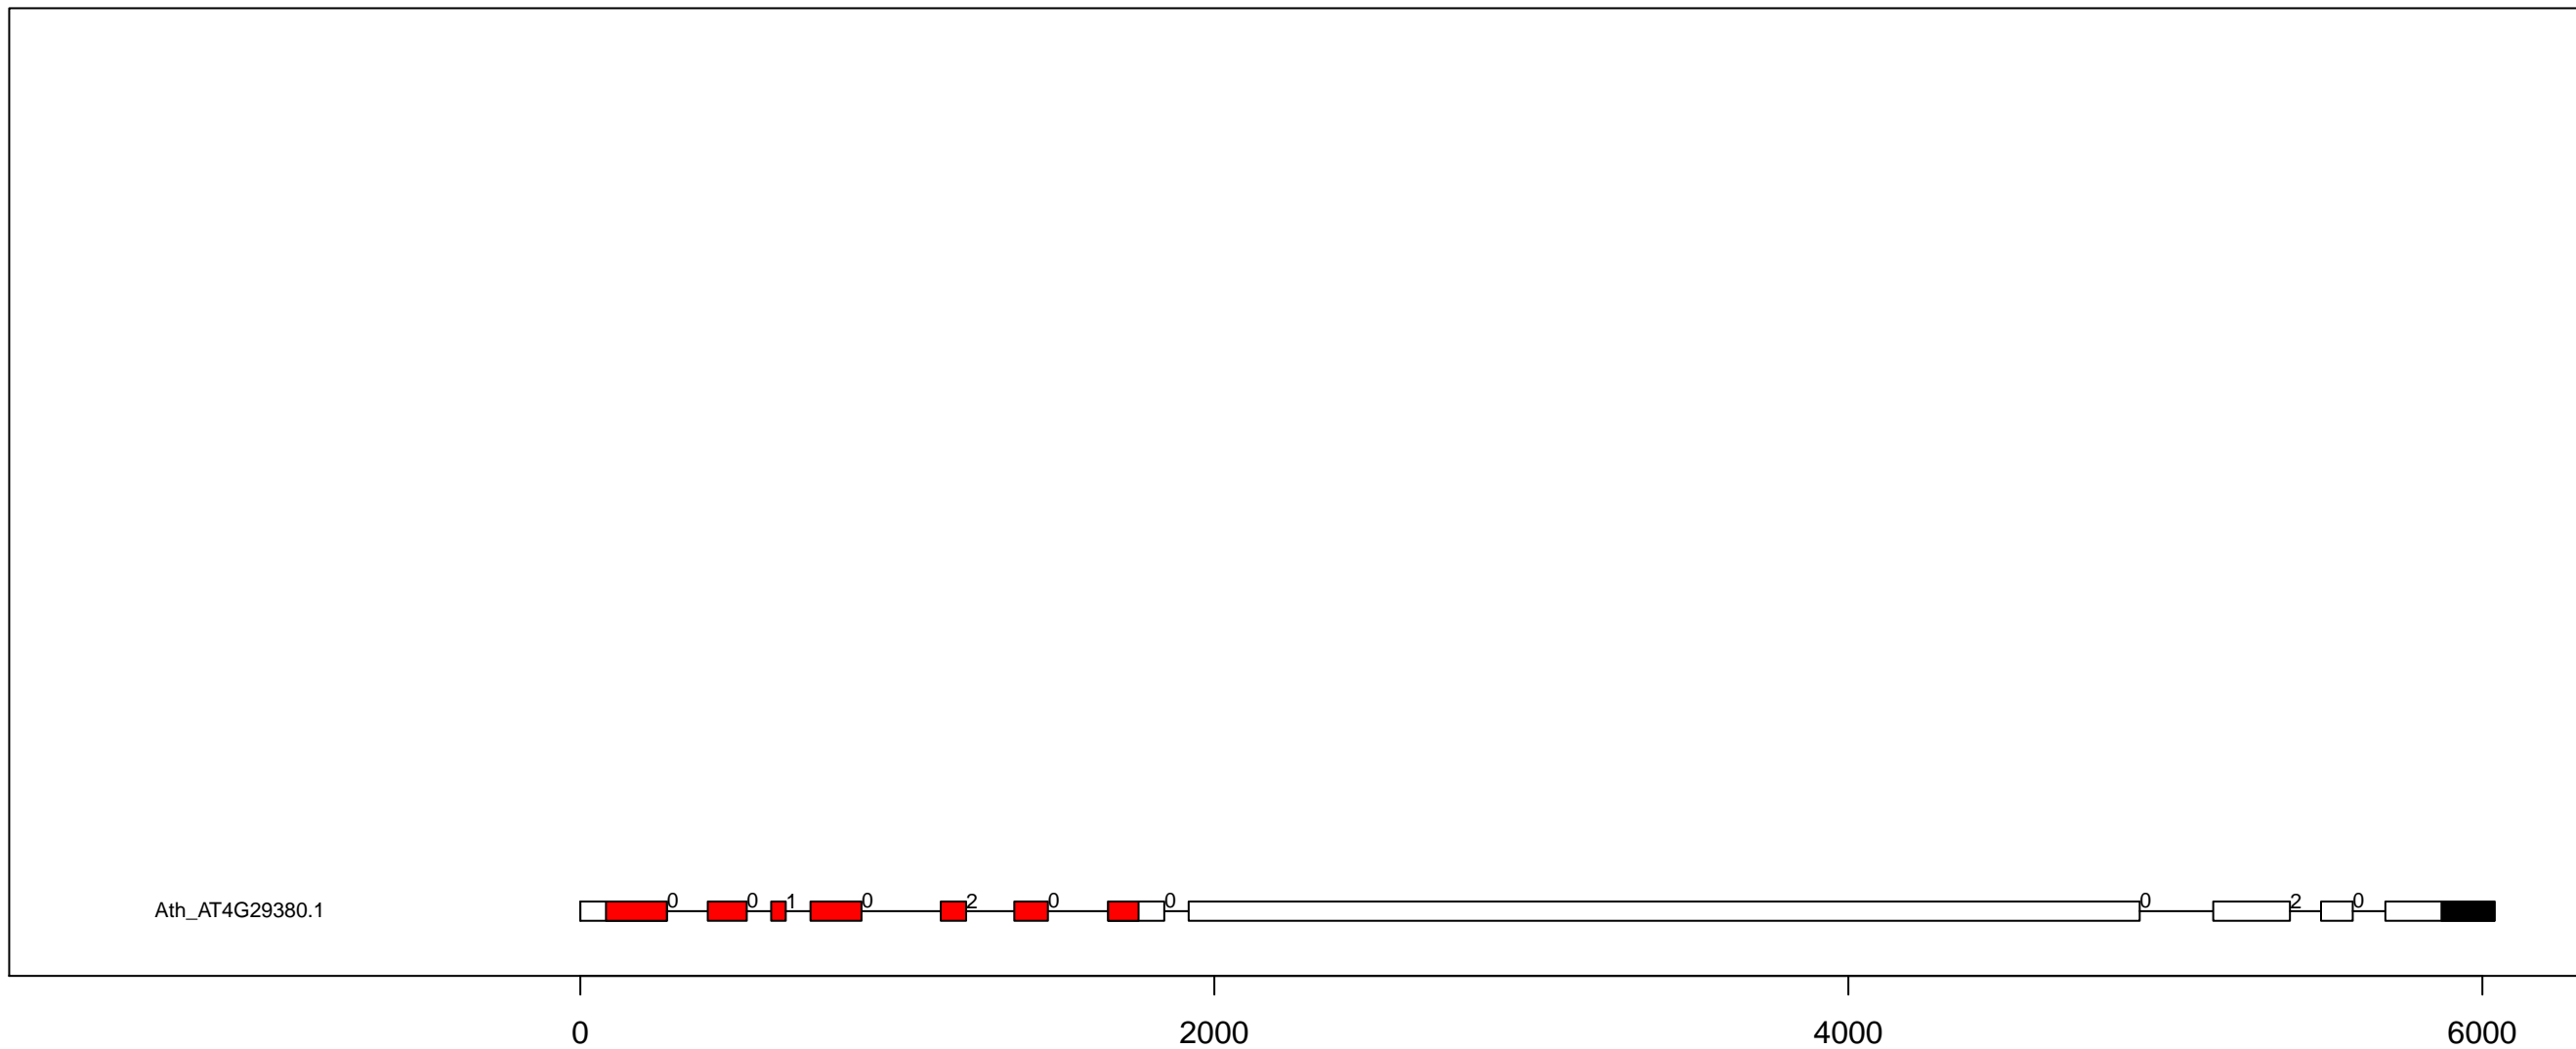

# A.th CMGC\_RCK exon-intron and kinase domain diagram (all)

Ath\_AT5G45430.1  
Ath\_AT4G19110.2  
Ath\_AT4G13020.3

-1000

0

1000

2000

3000

4000

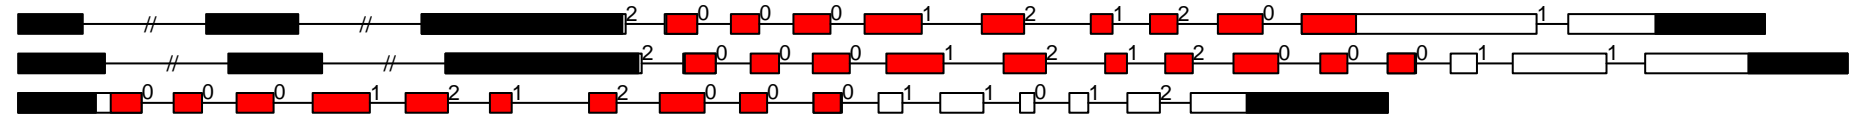

# A.th CMGC\_SRPK exon-intron and kinase domain diagram (all)

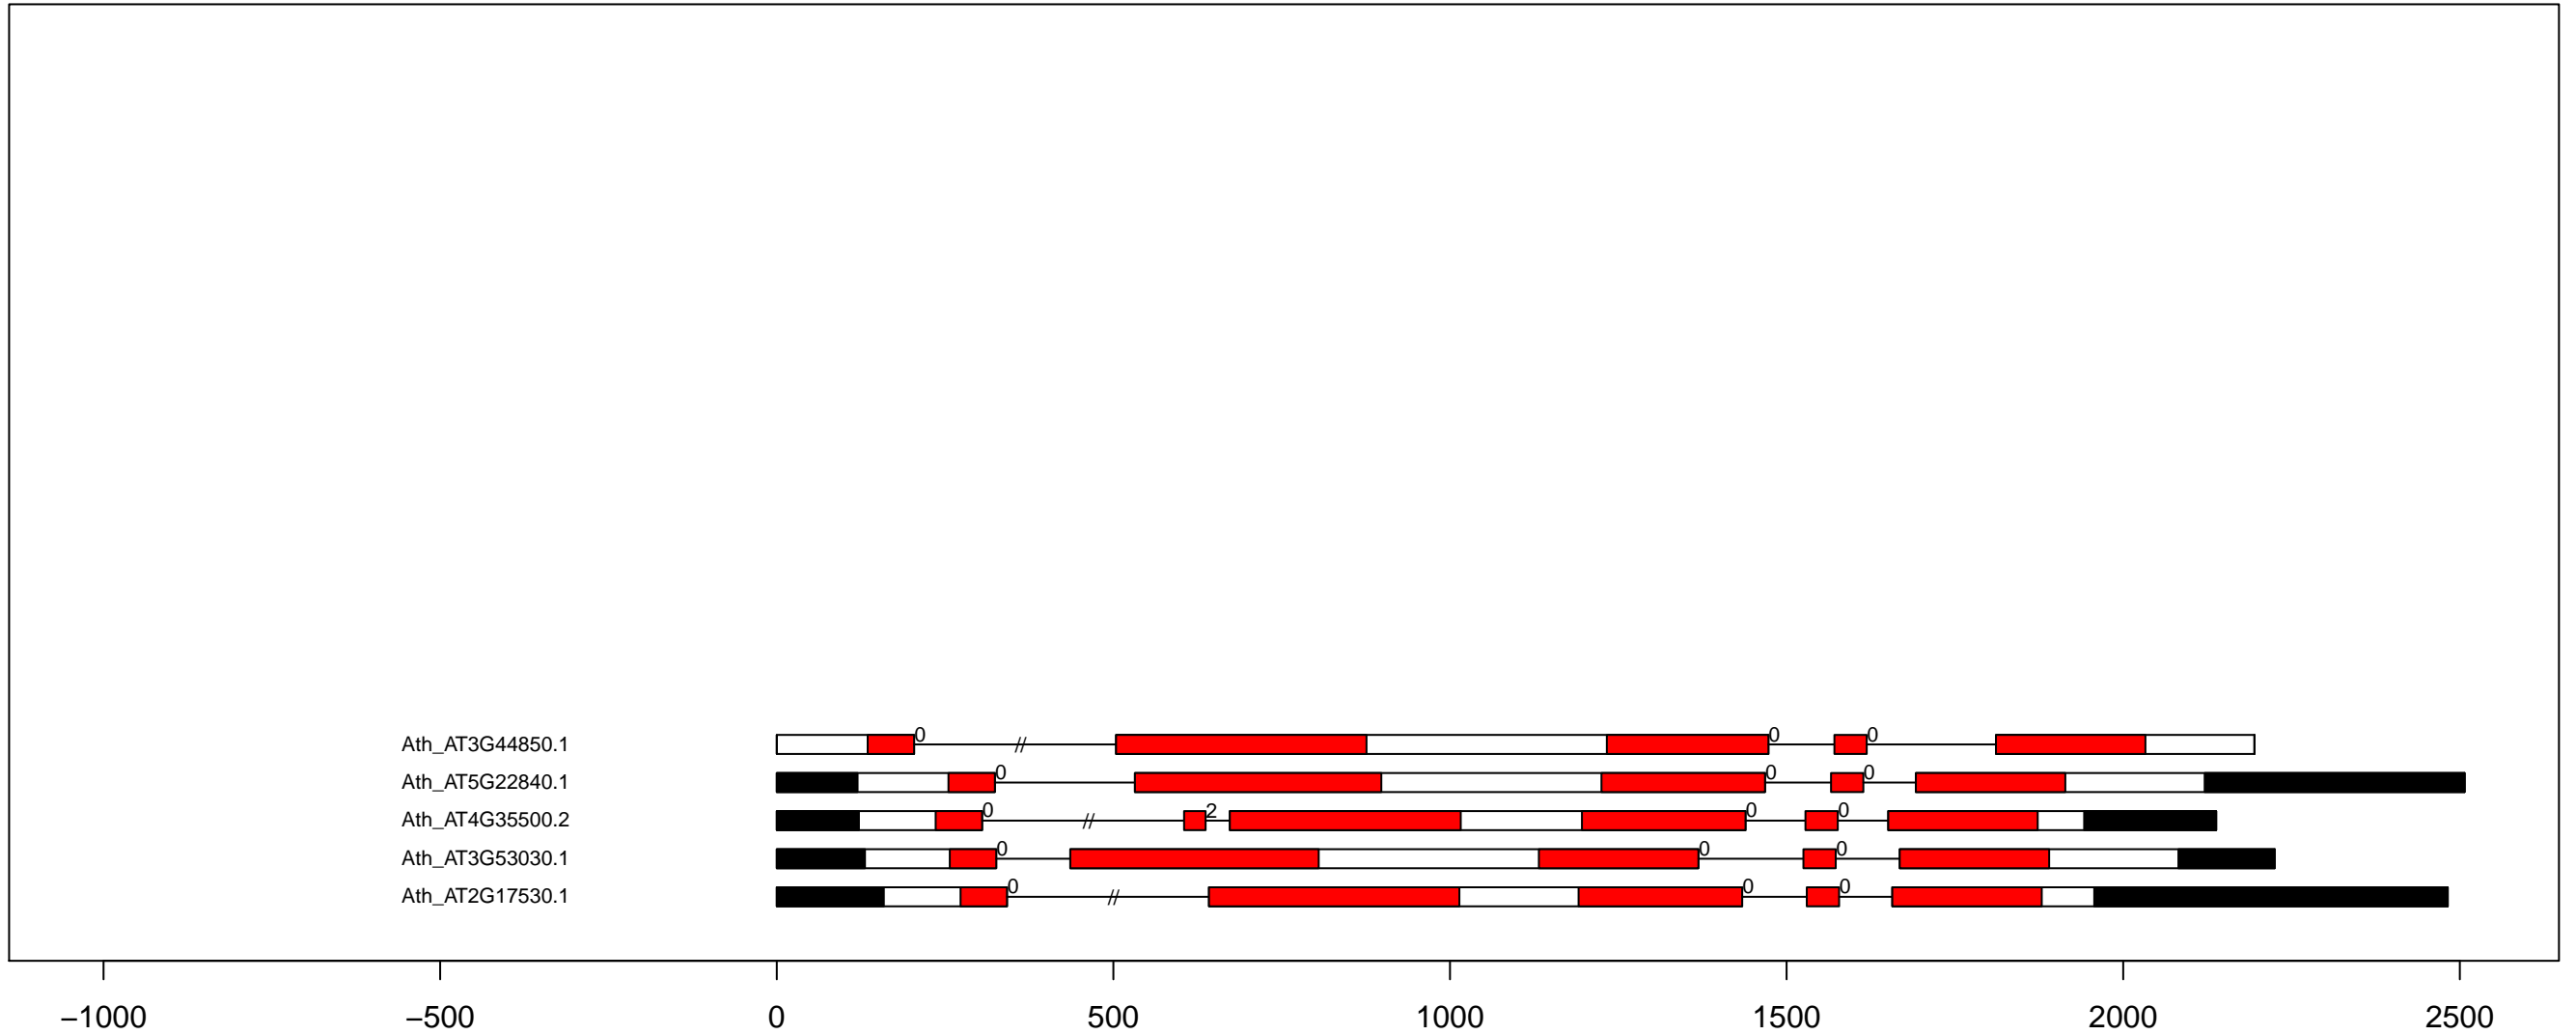

# A.th Group-PI-2 exon-intron and kinase domain diagram (all)

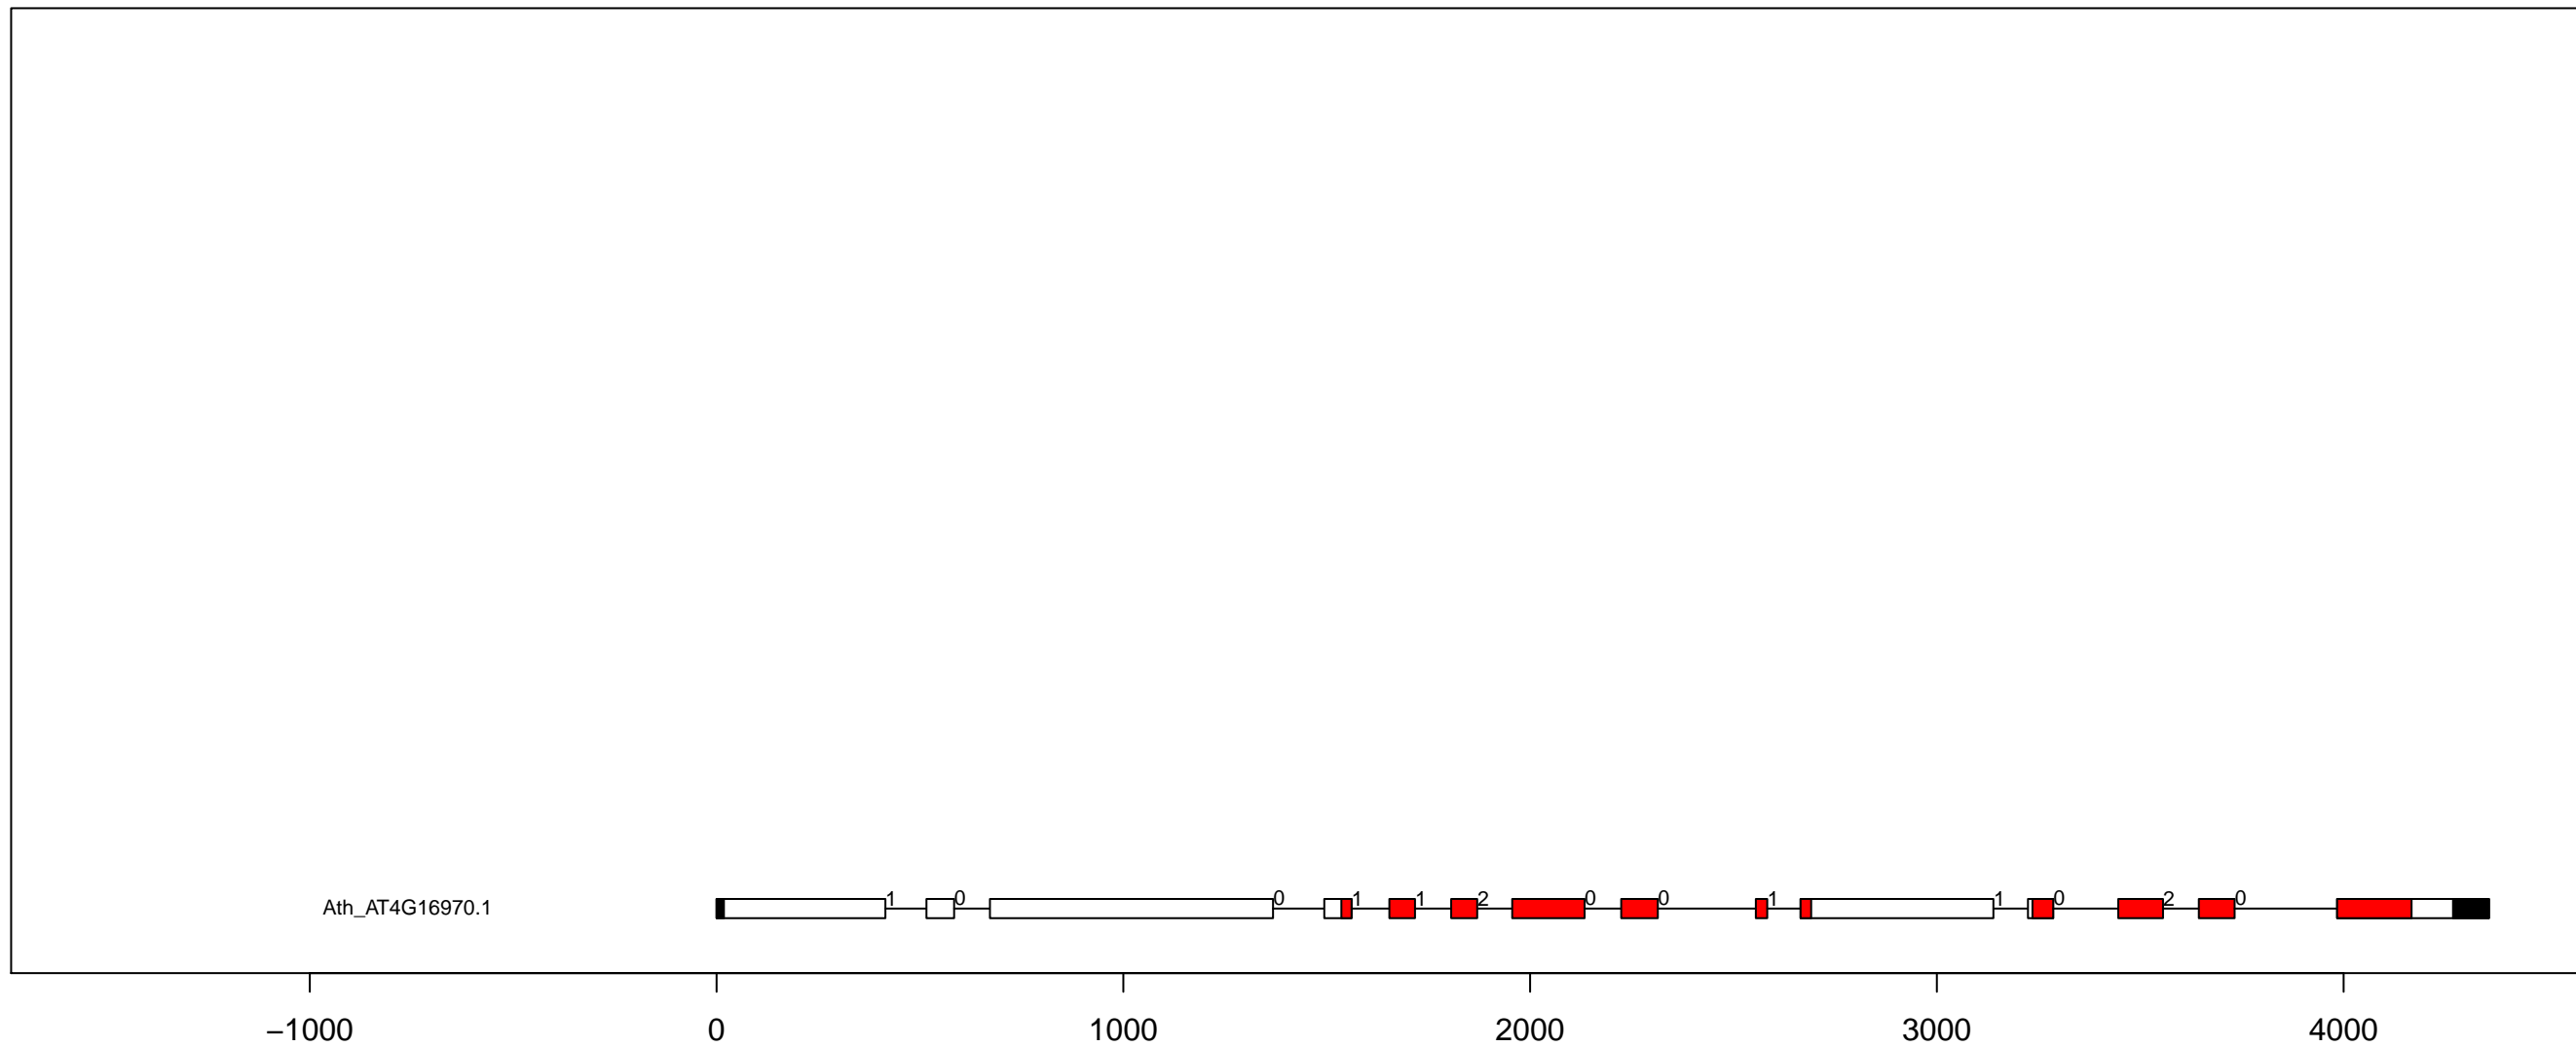

# A.th Group-PI-3 exon-intron and kinase domain diagram (all)

Ath\_AT3G61960.1  
Ath\_AT3G53930.2  
Ath\_AT2G37840.1  
Ath\_AT1G49180.1

-1000

0

1000

2000

3000

4000

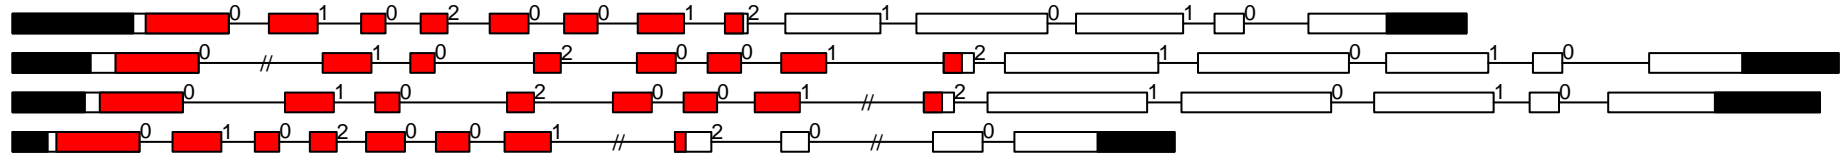



# A.th Group-PI-4 exon-intron and kinase domain diagram (all)

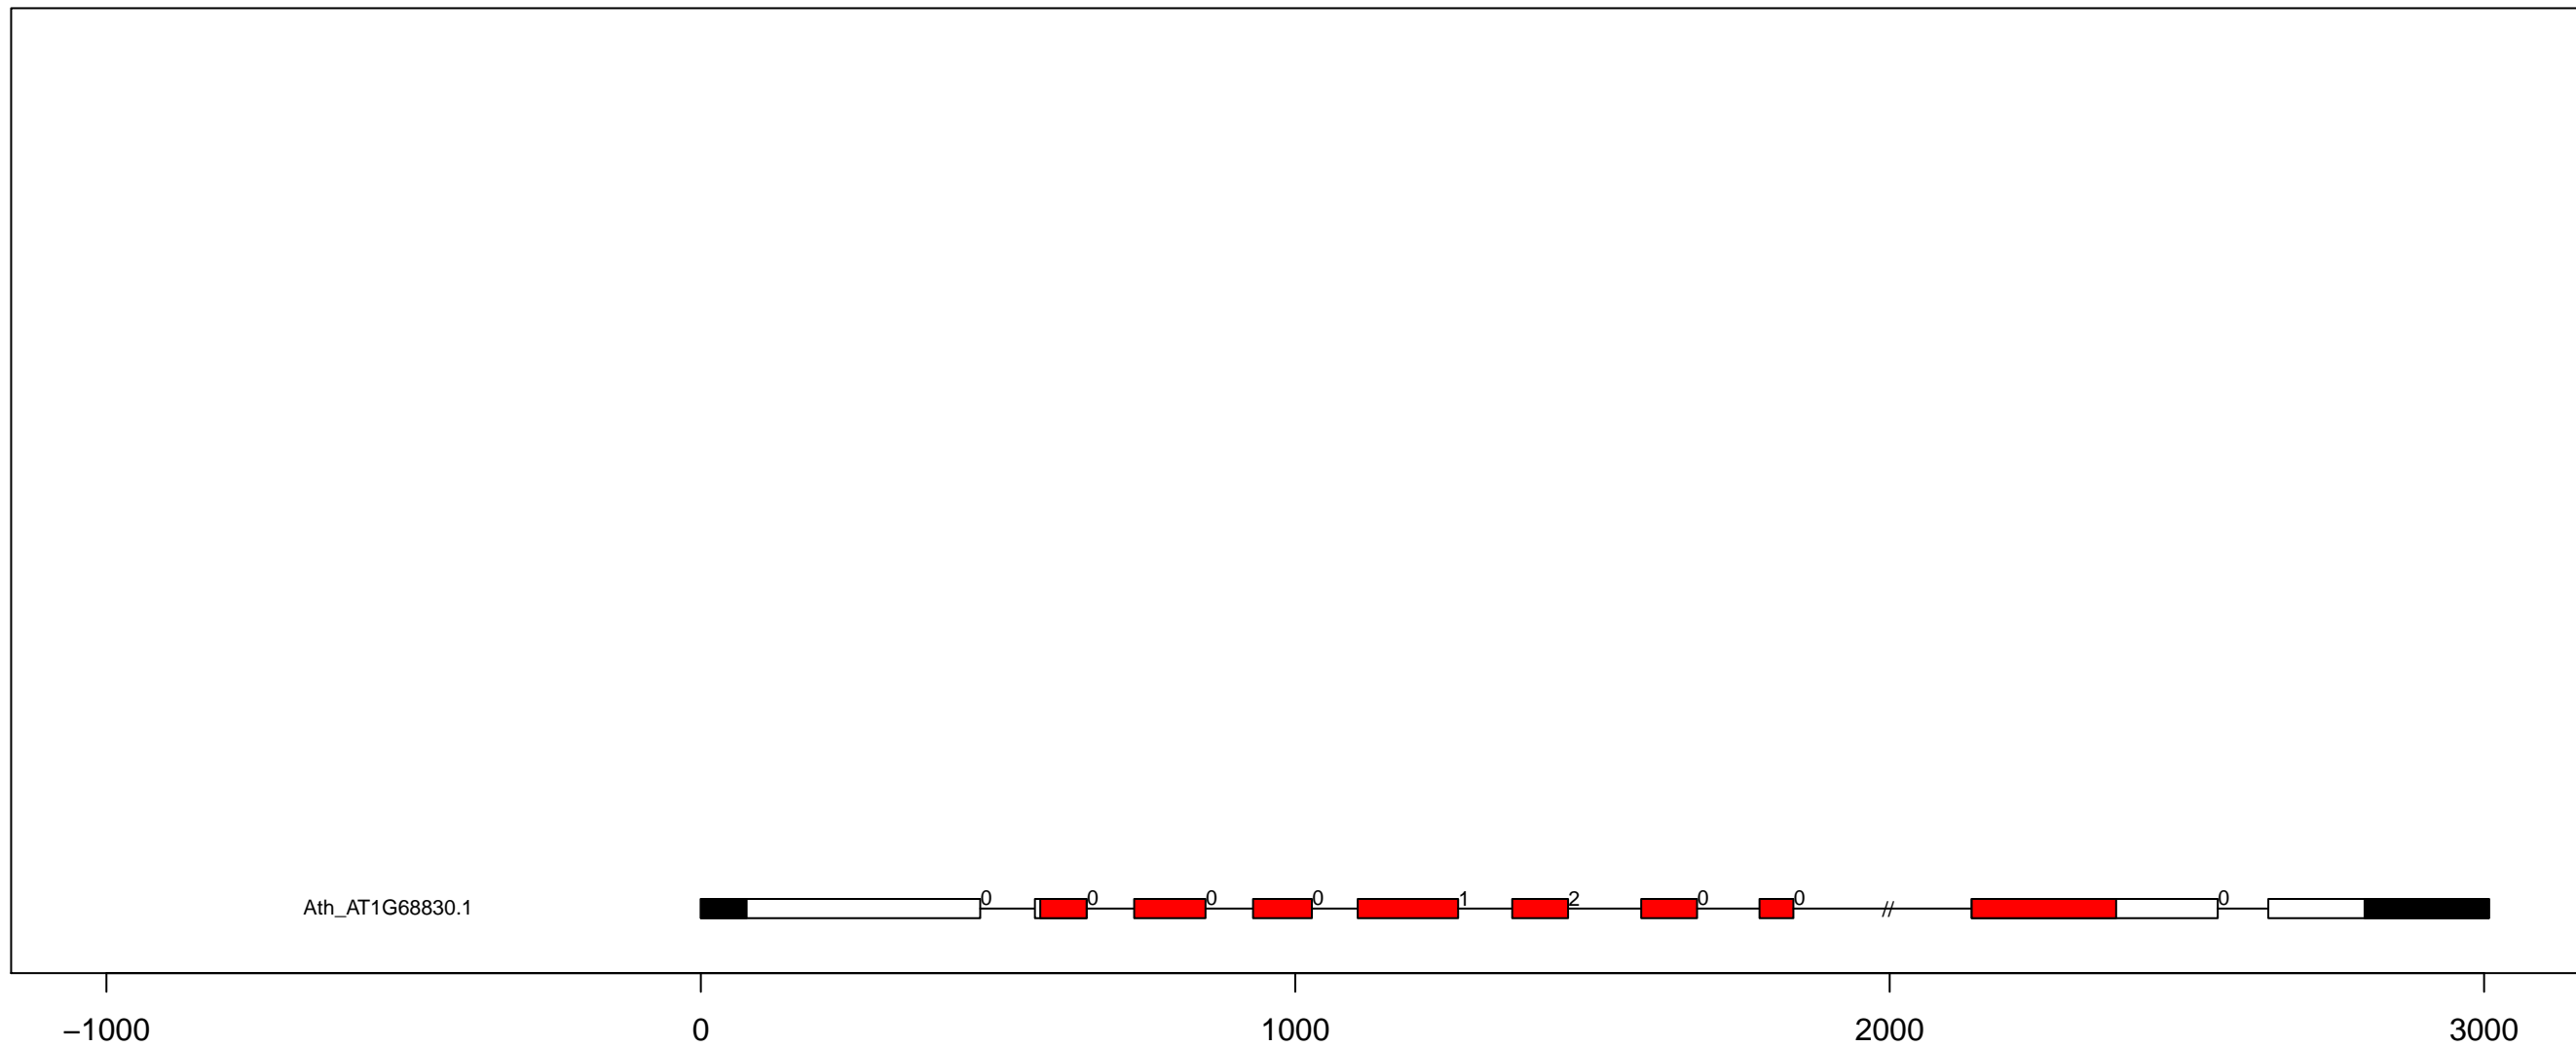



# A.th NAK exon-intron and kinase domain diagram (all)

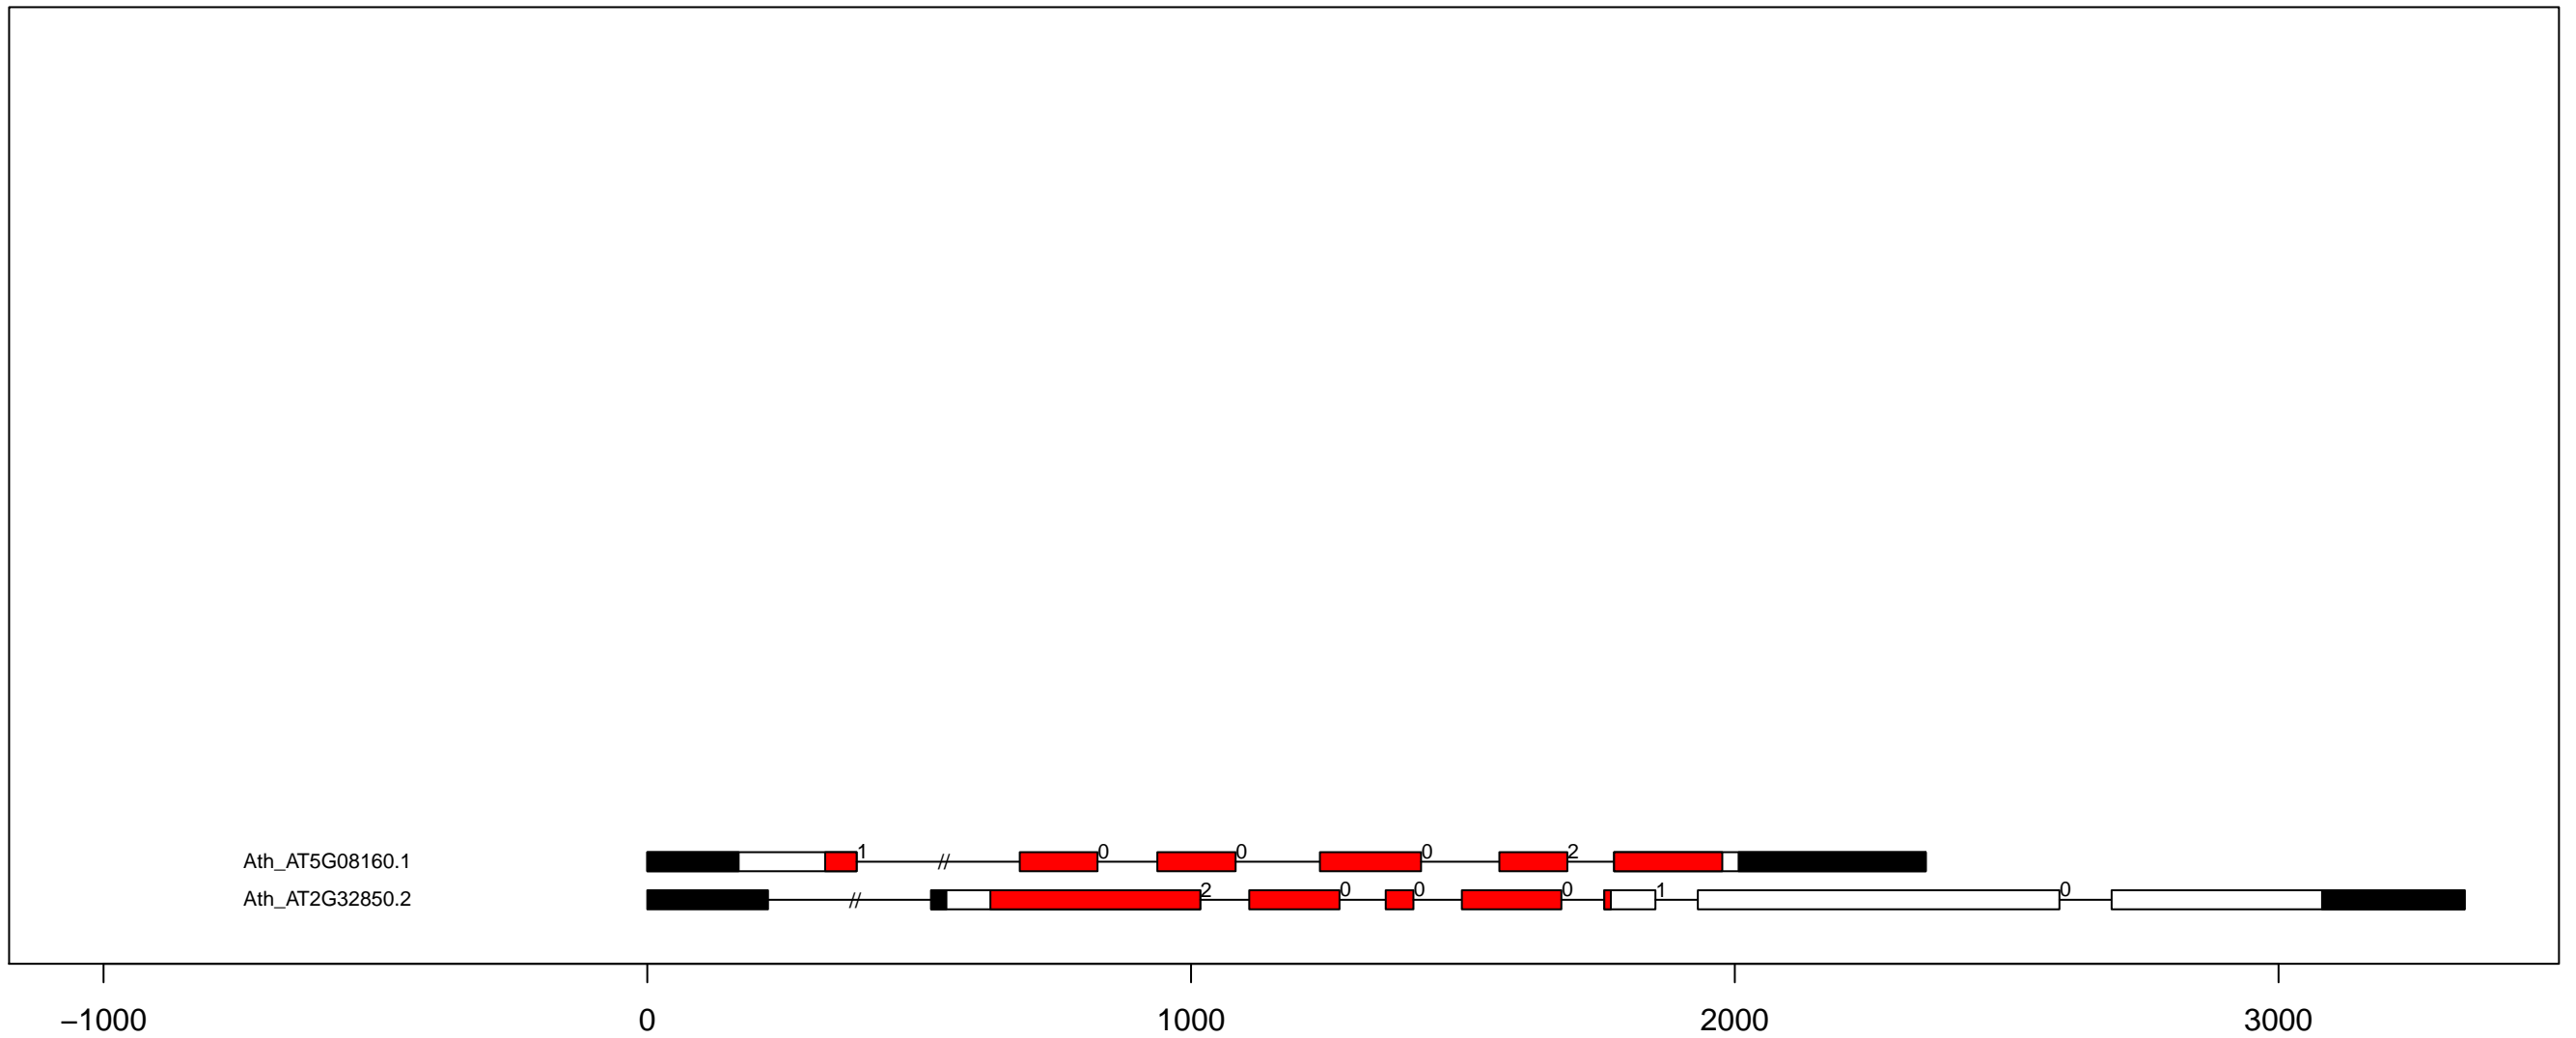

# A.th NEK exon-intron and kinase domain diagram (all)

Ath\_AT3G20860.1  
Ath\_AT5G28290.1  
Ath\_AT3G63280.1  
Ath\_AT3G44200.1  
Ath\_AT3G12200.2  
Ath\_AT3G04810.1  
Ath\_AT1G54510.1

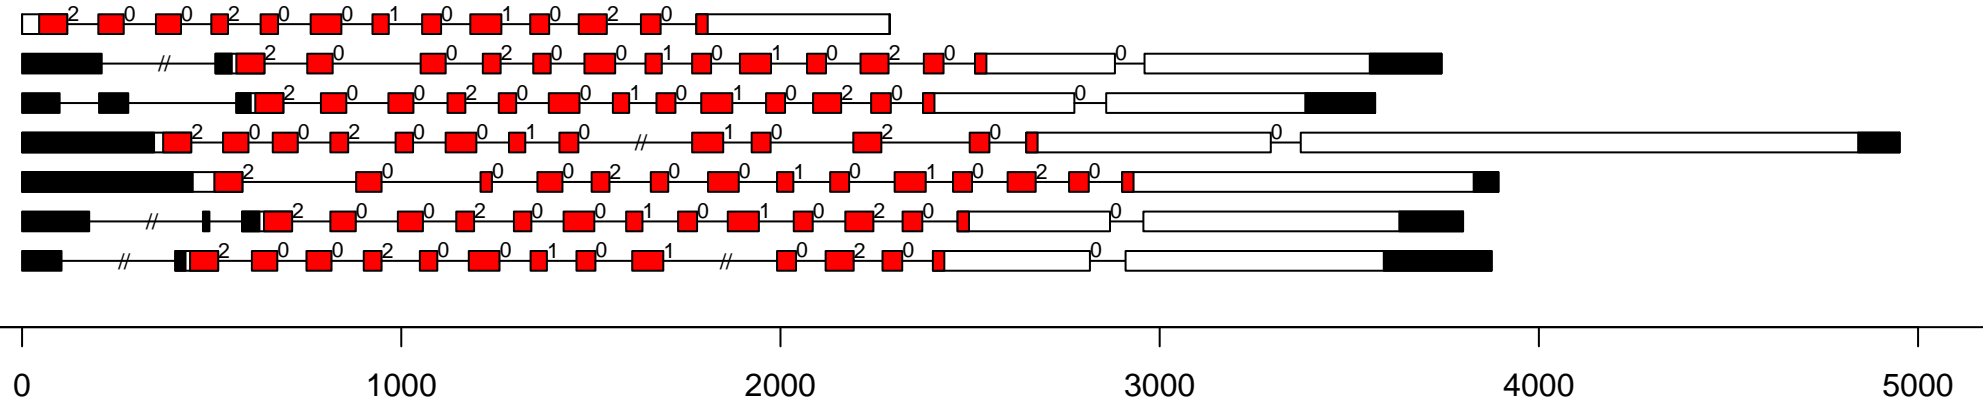

# A.th PEK\_GCN2 exon-intron and kinase domain diagram (all)

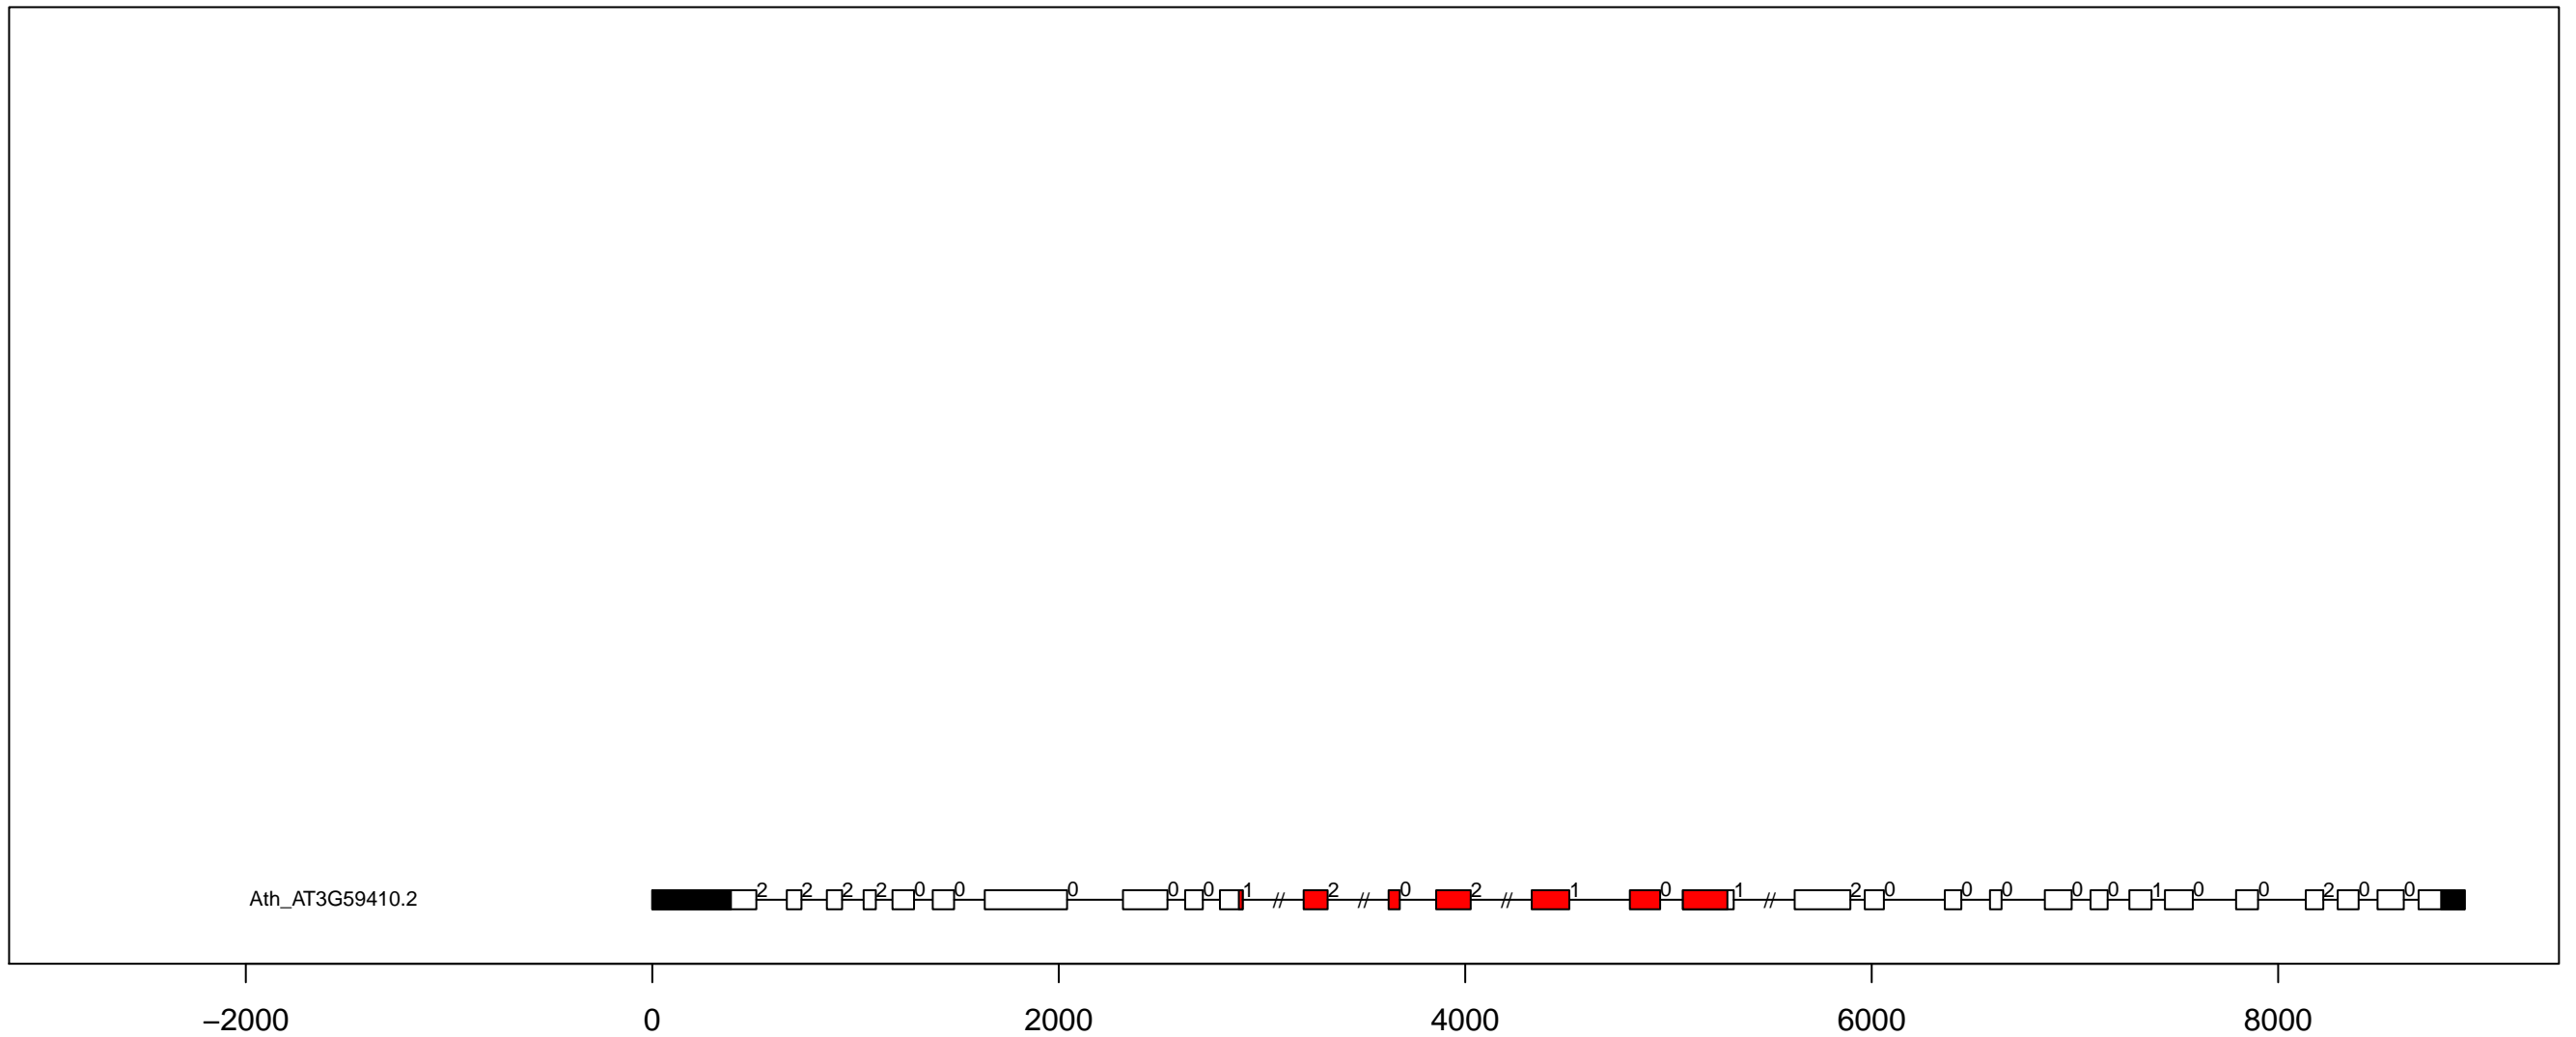

# A.th RLK-Pelle\_C-LEC exon-intron and kinase domain diagram (all)

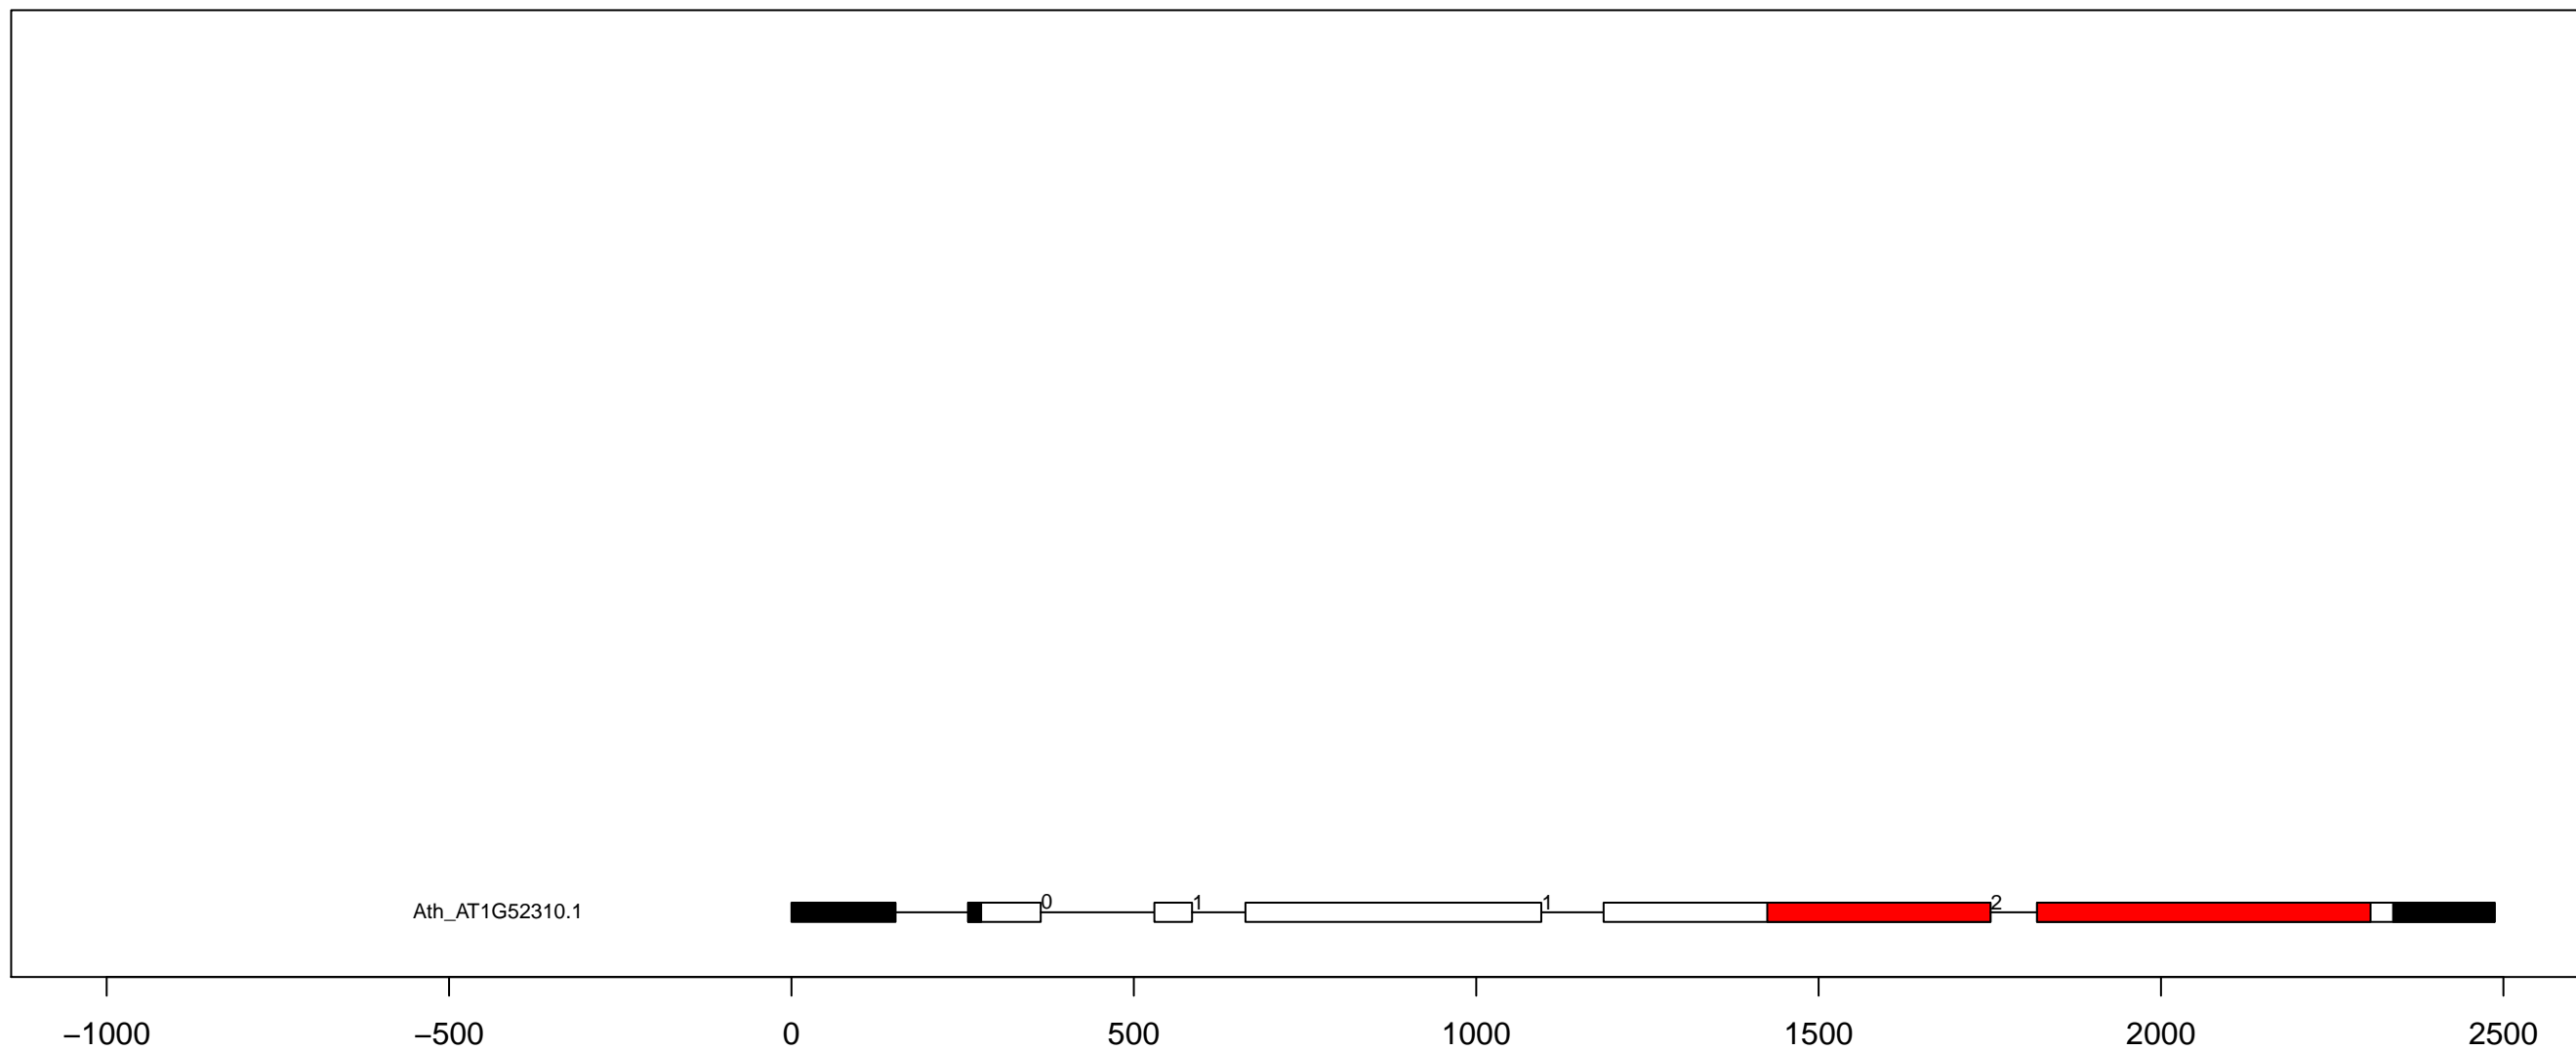

# A.th RLK-Pelle\_CR4L exon-intron and kinase domain diagram (all)

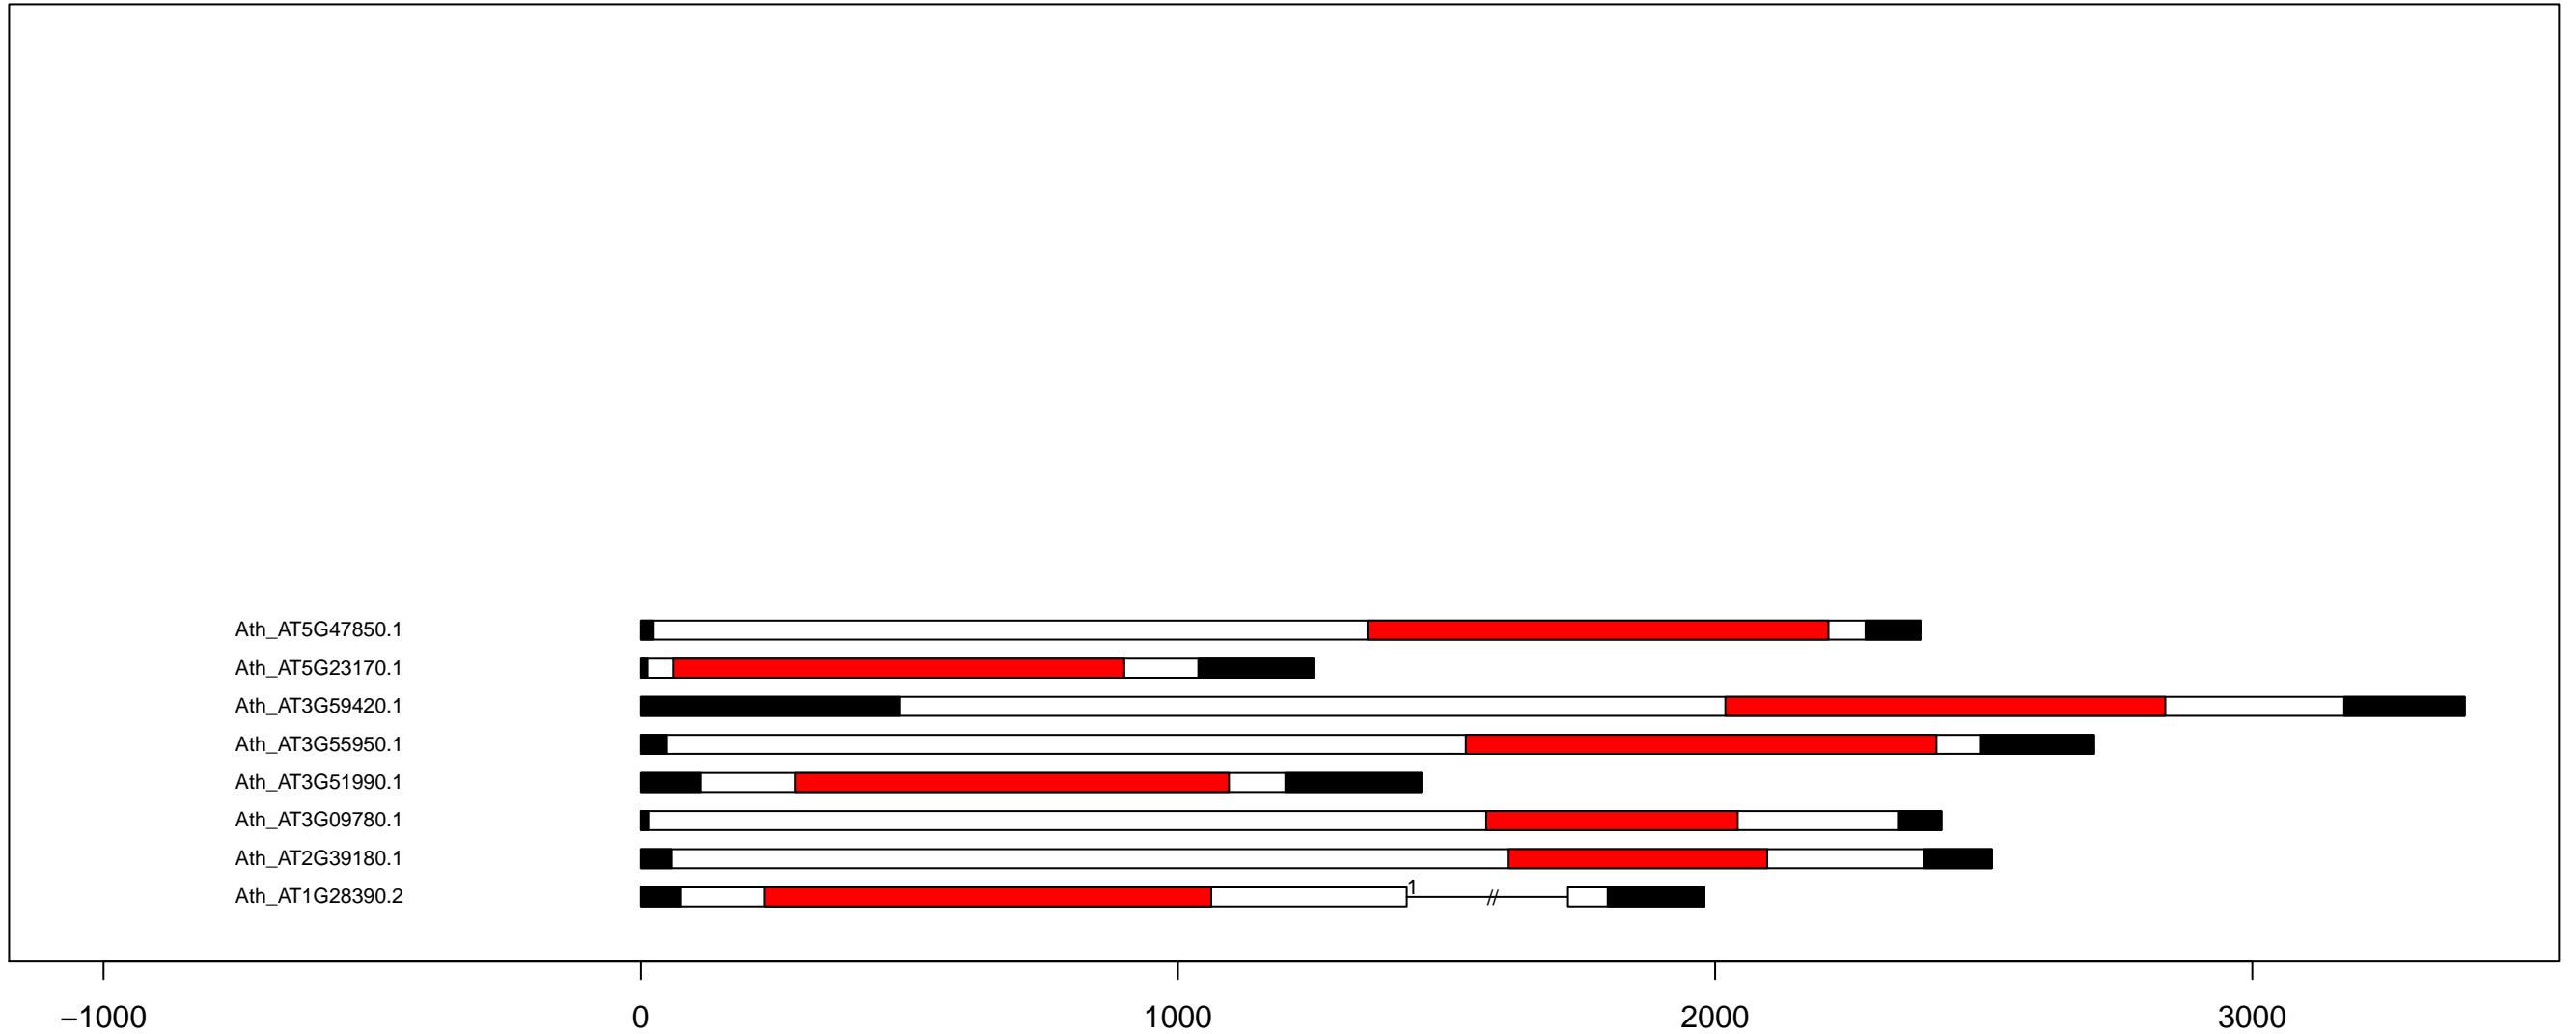

# A.th RLK-Pelle\_CrRLK1L-1 exon-intron and kinase domain diagram (all)

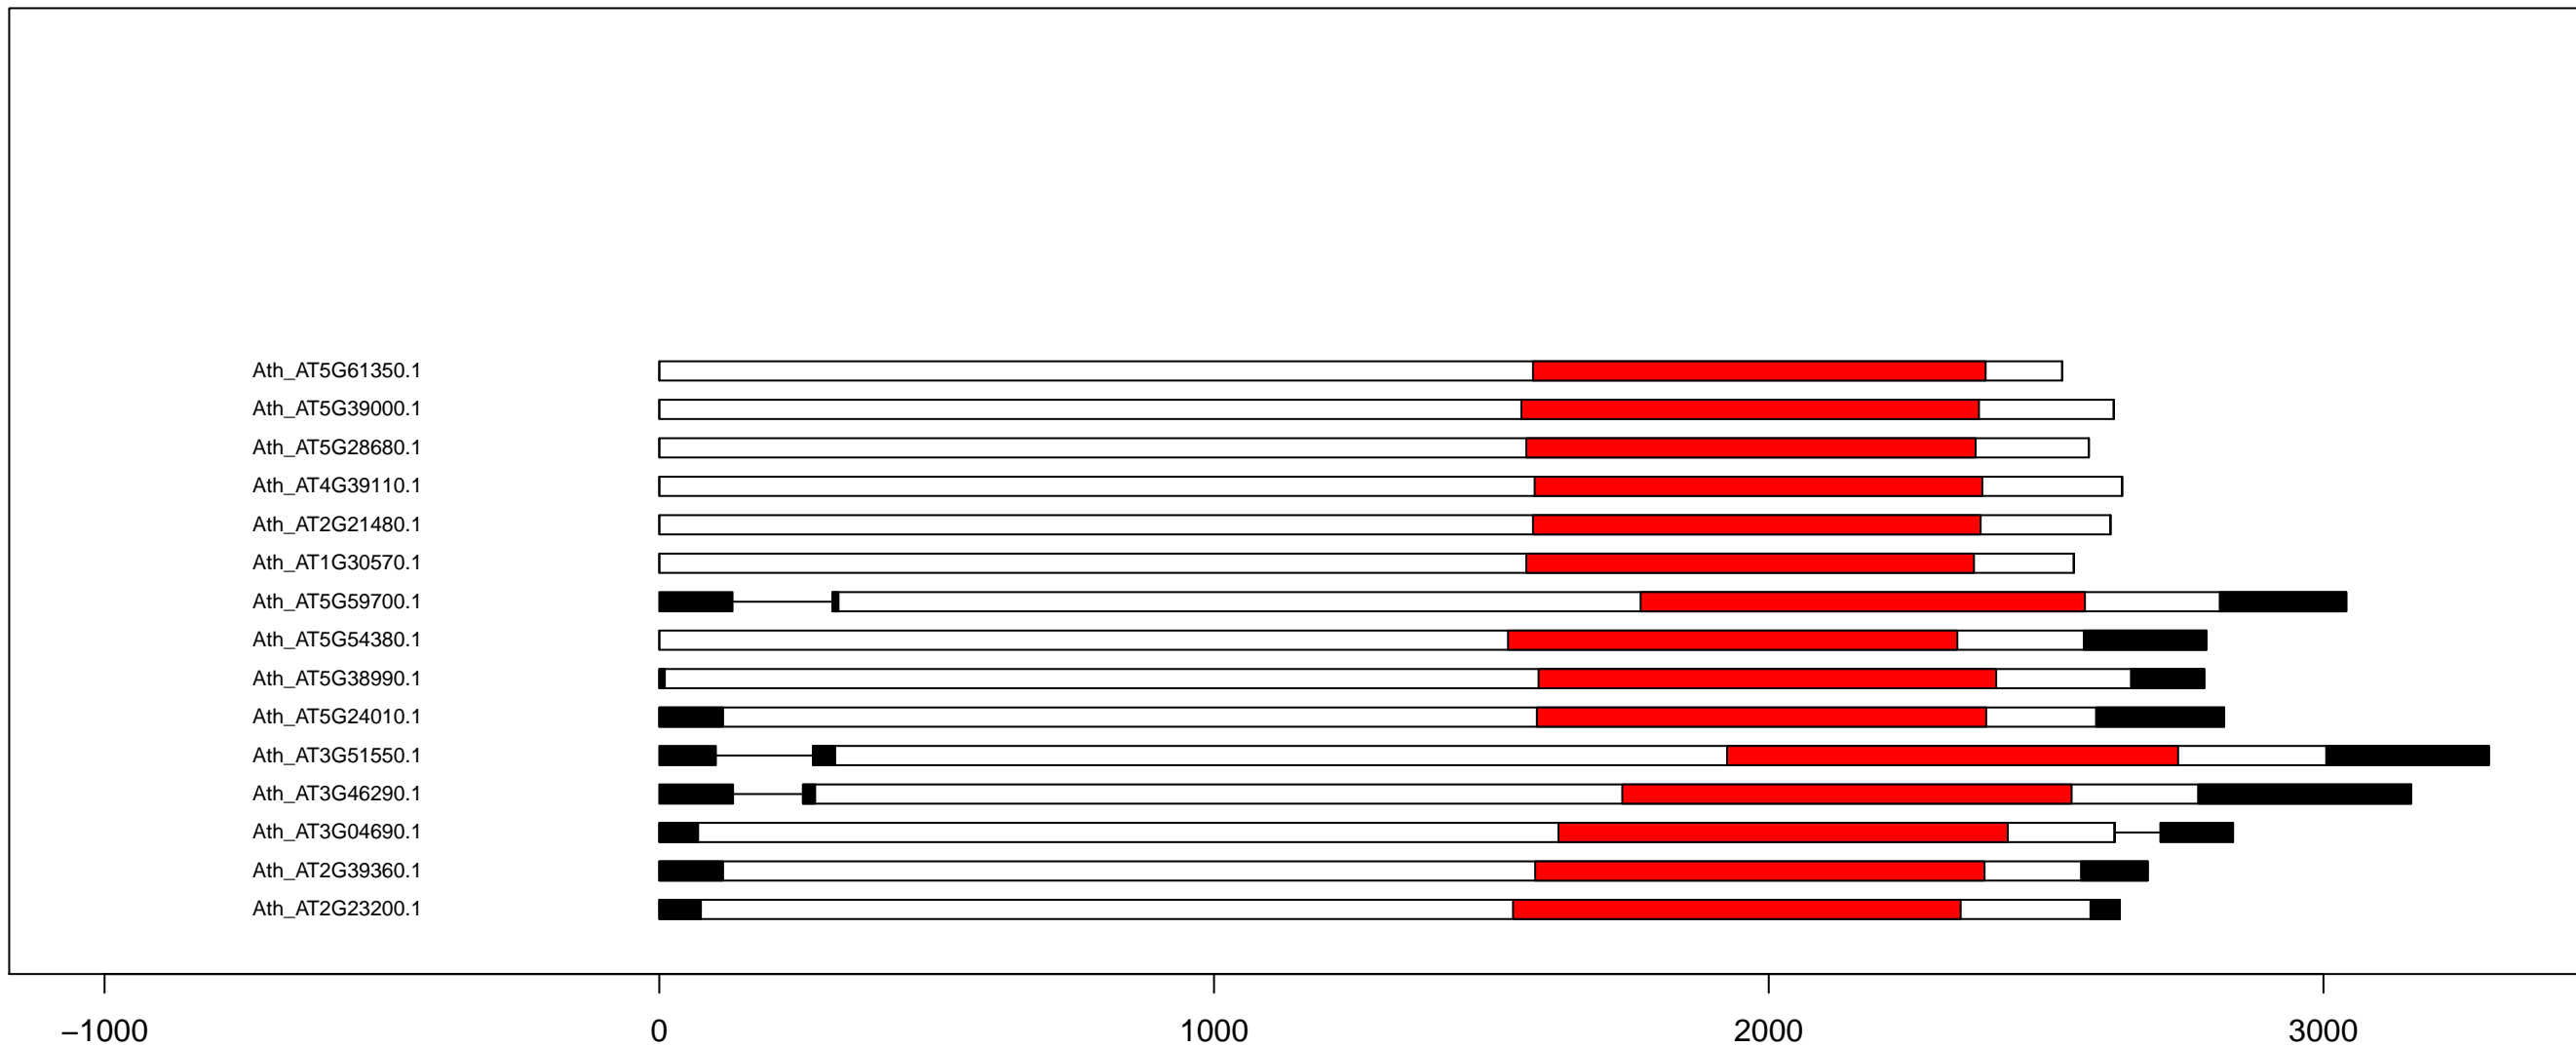



### A.th RLK-Pelle\_DLSV exon-intron and kinase domain diagram (part 1)

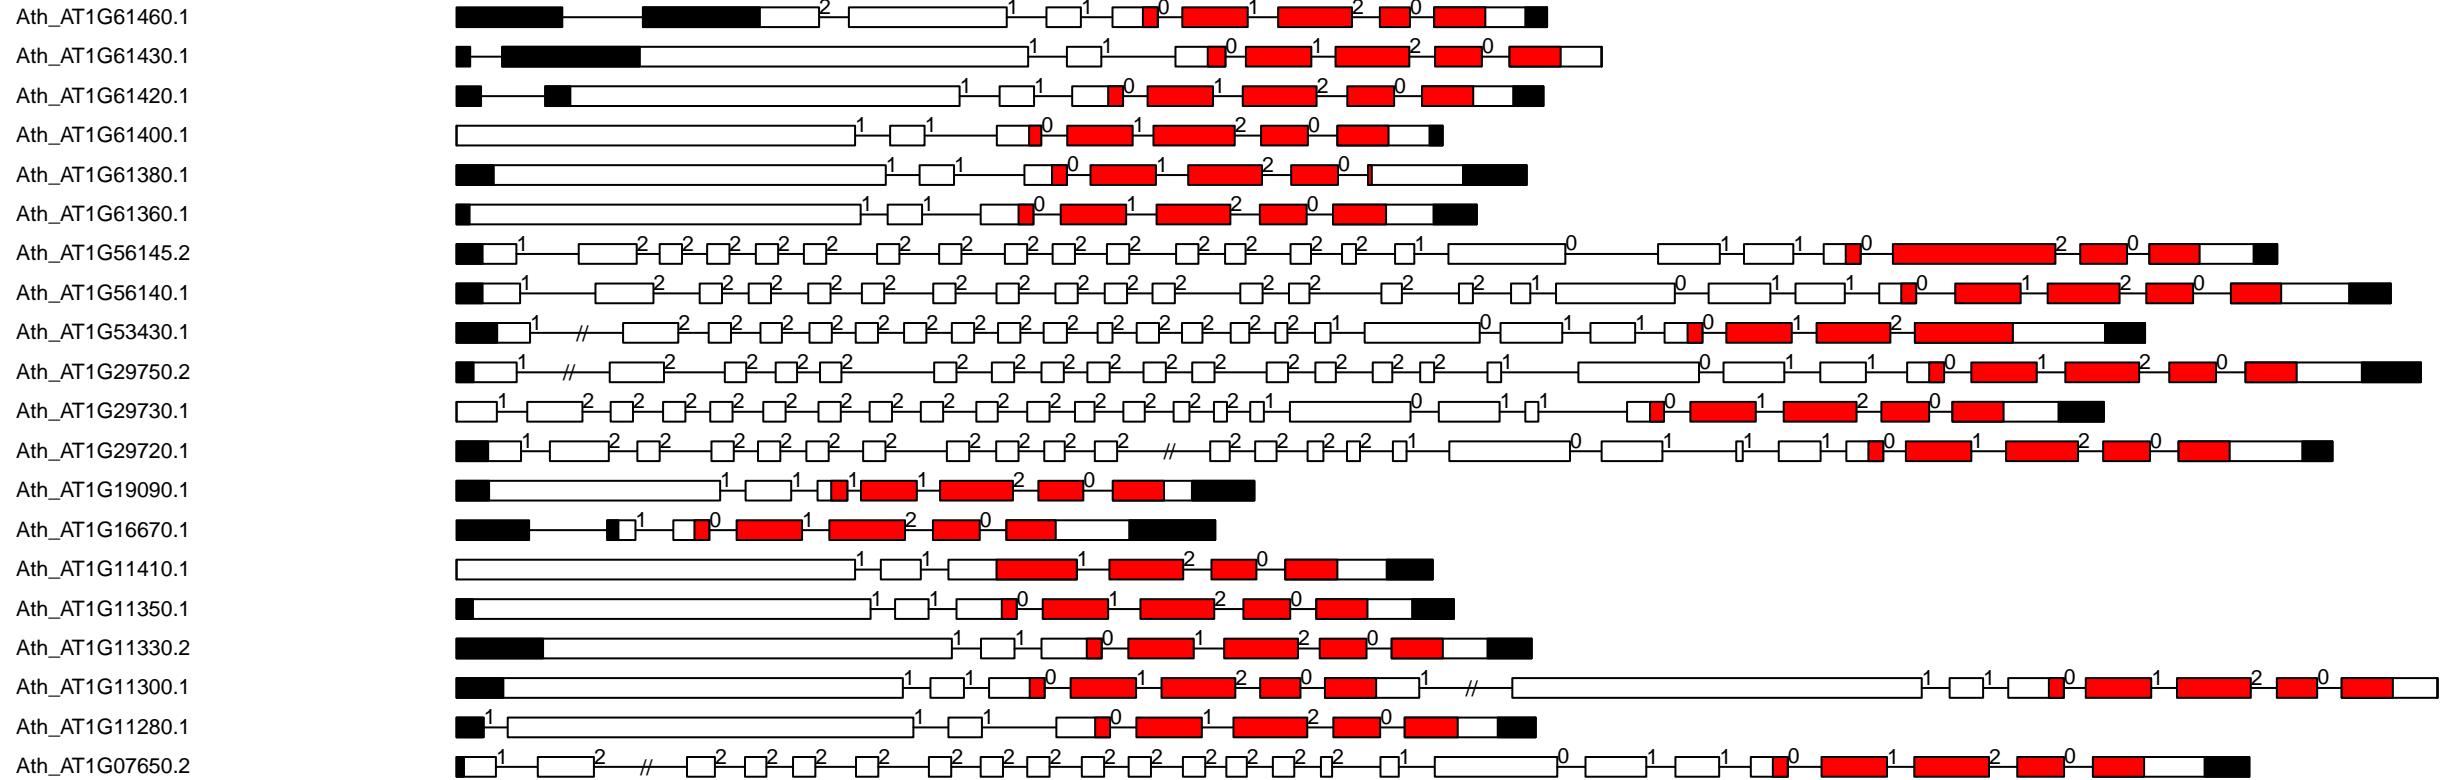

0 2000 4000 6000

# A.th RLK-Pelle\_DLSV exon-intron and kinase domain diagram (part 2)

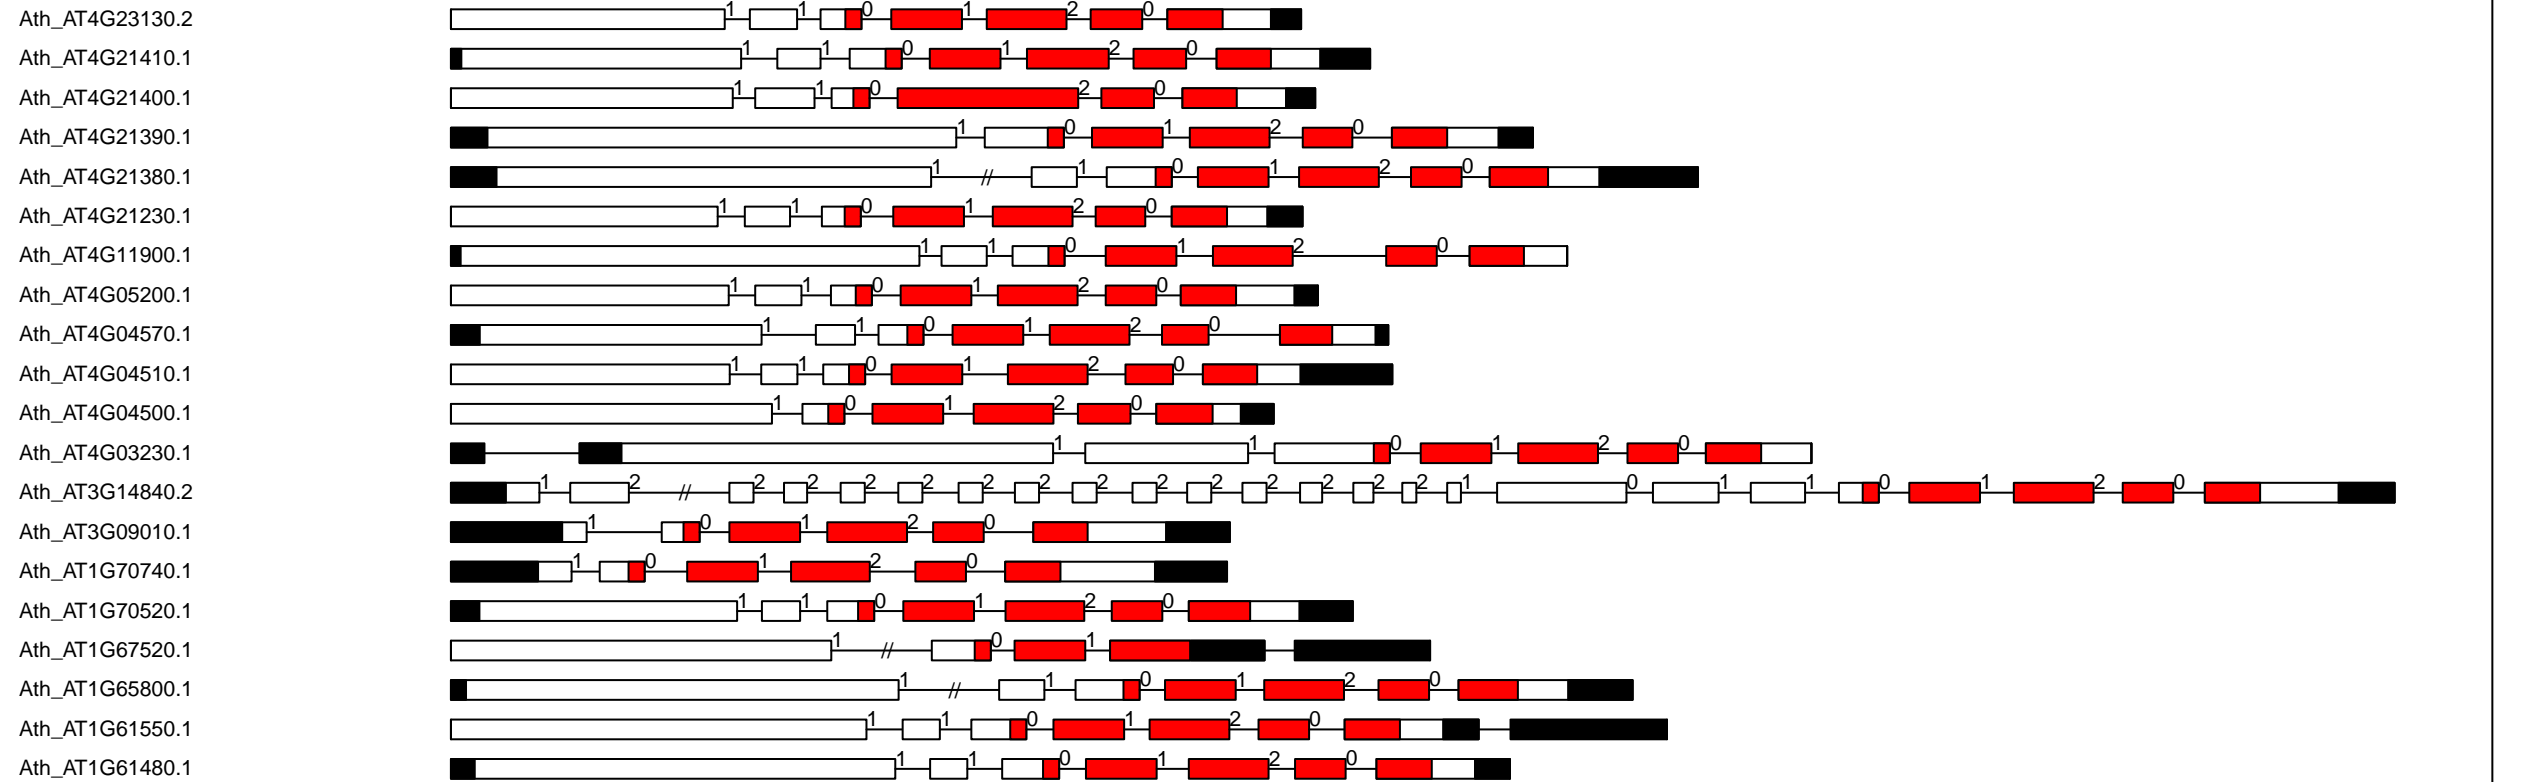

### A.th RLK-Pelle\_DLSV exon-intron and kinase domain diagram (part 3)

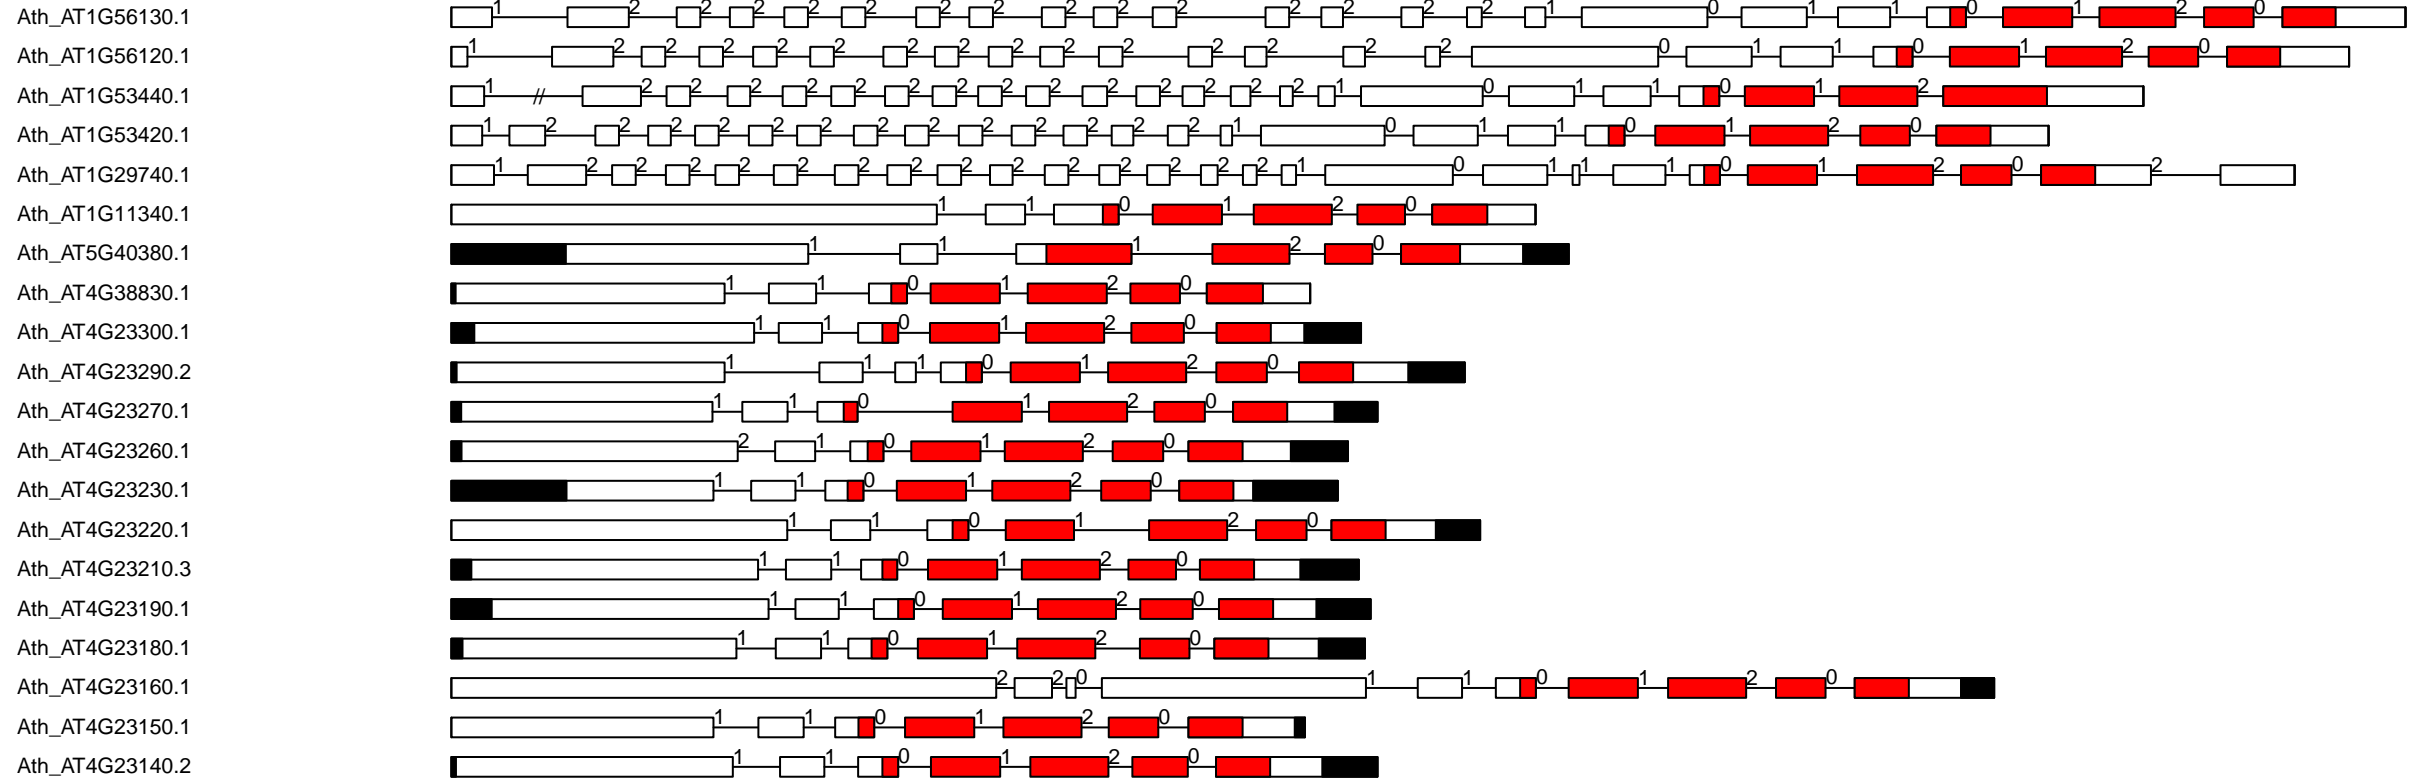





# A.th RLK-Pelle\_DSLV exon-intron and kinase domain diagram (all)

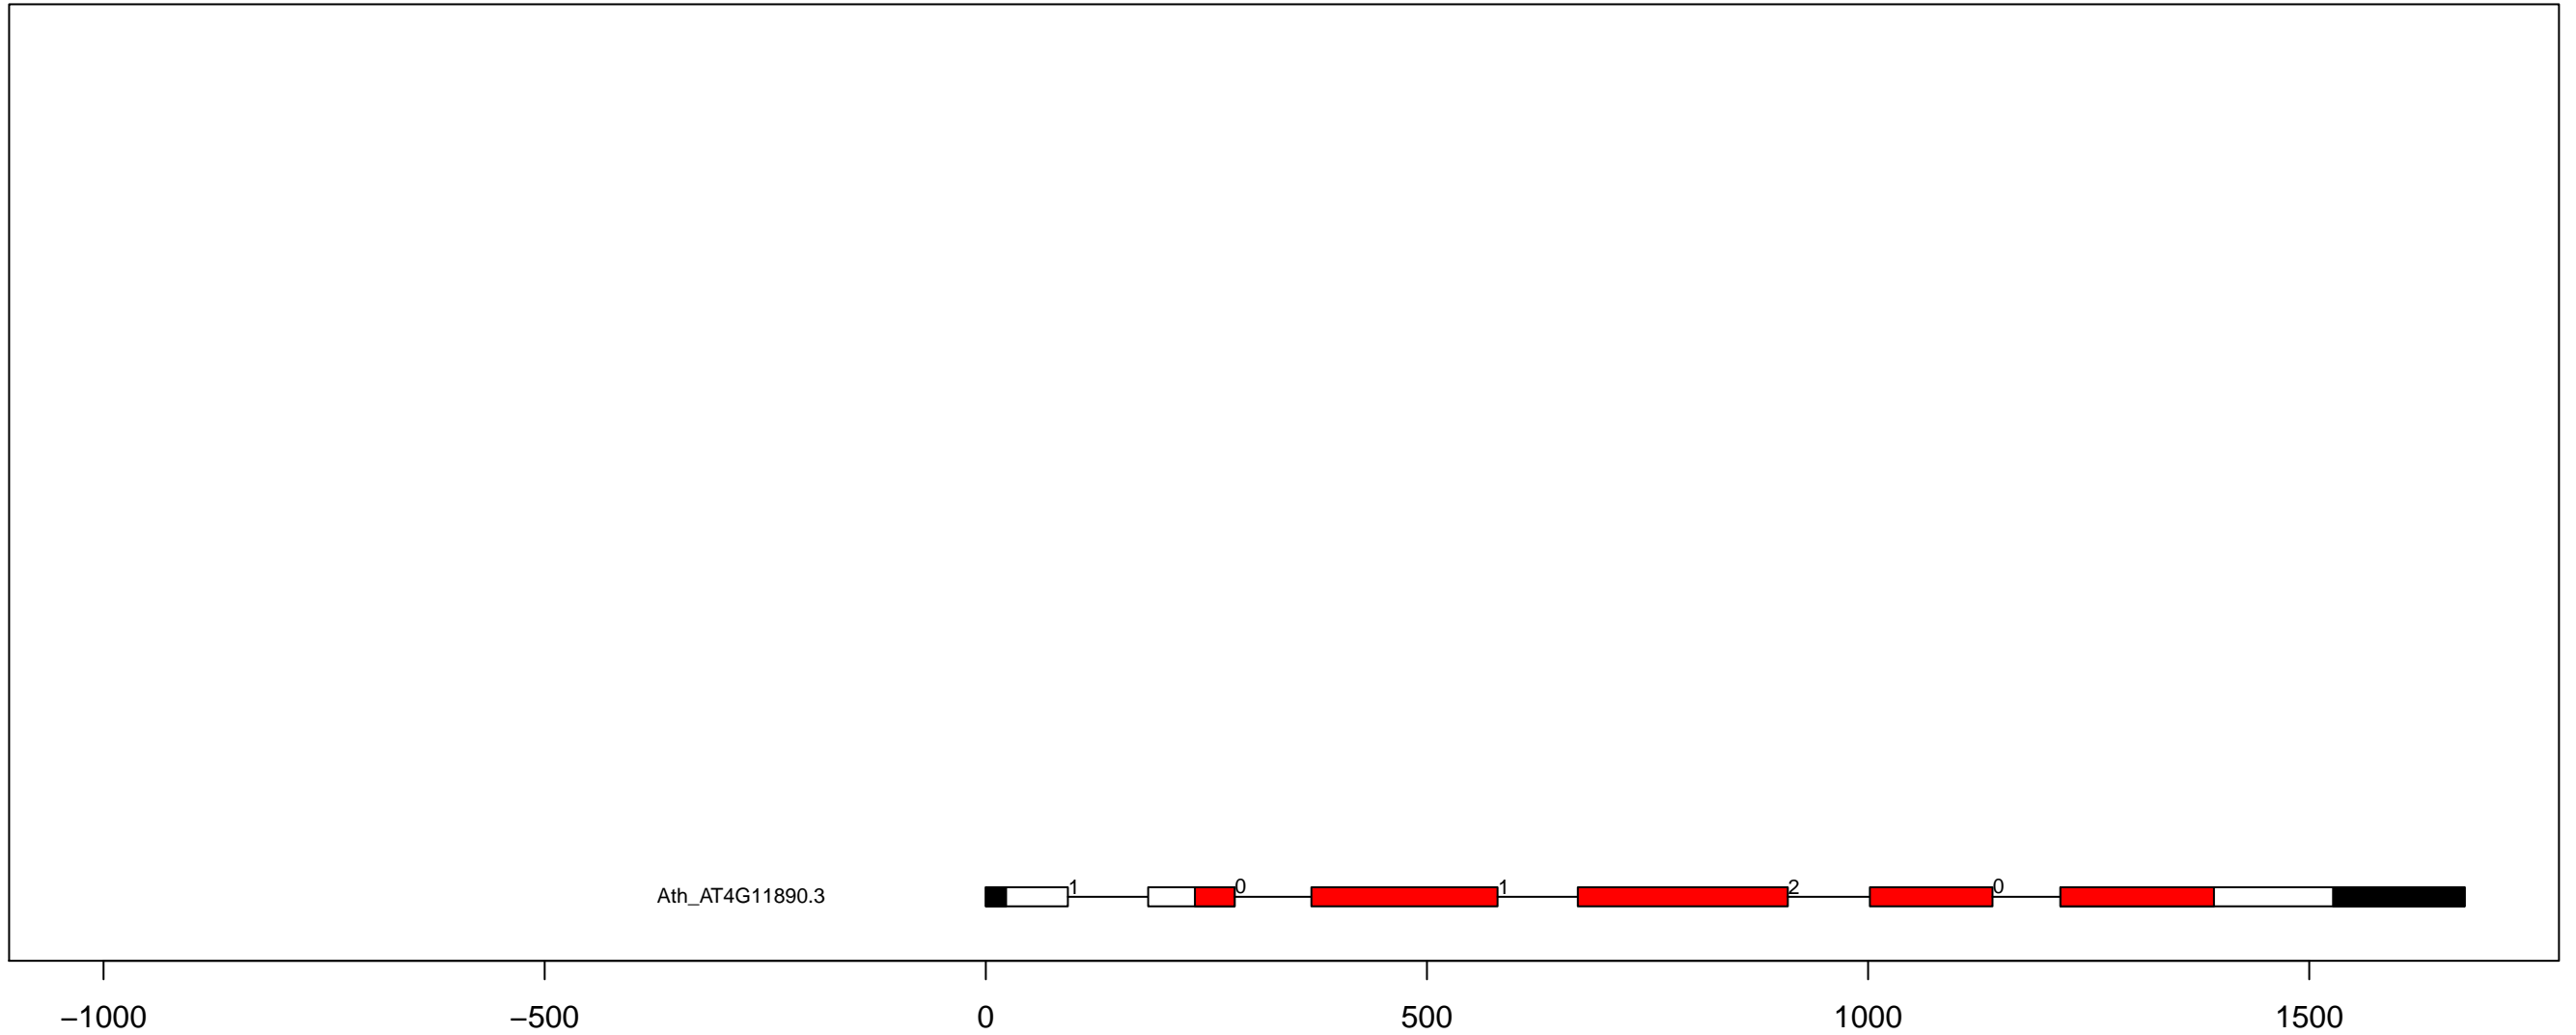

# A.th RLK-Pelle\_Extensin exon-intron and kinase domain diagram (all)

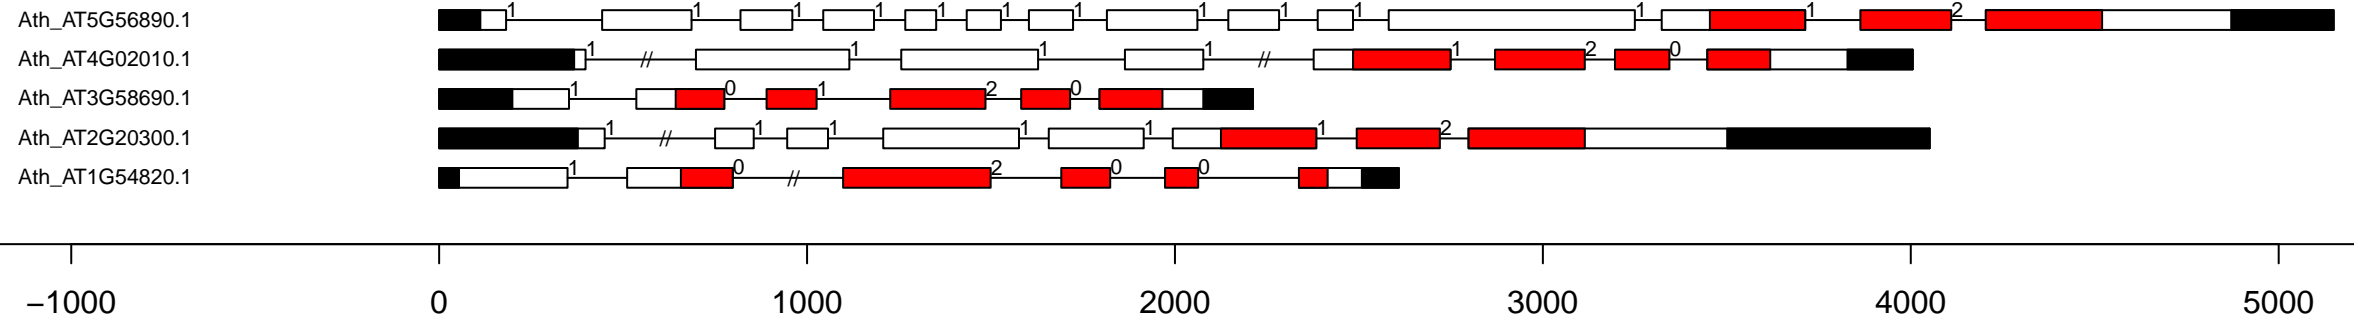





### A.th RLK-Pelle\_L-LEC exon-intron and kinase domain diagram (part 2)

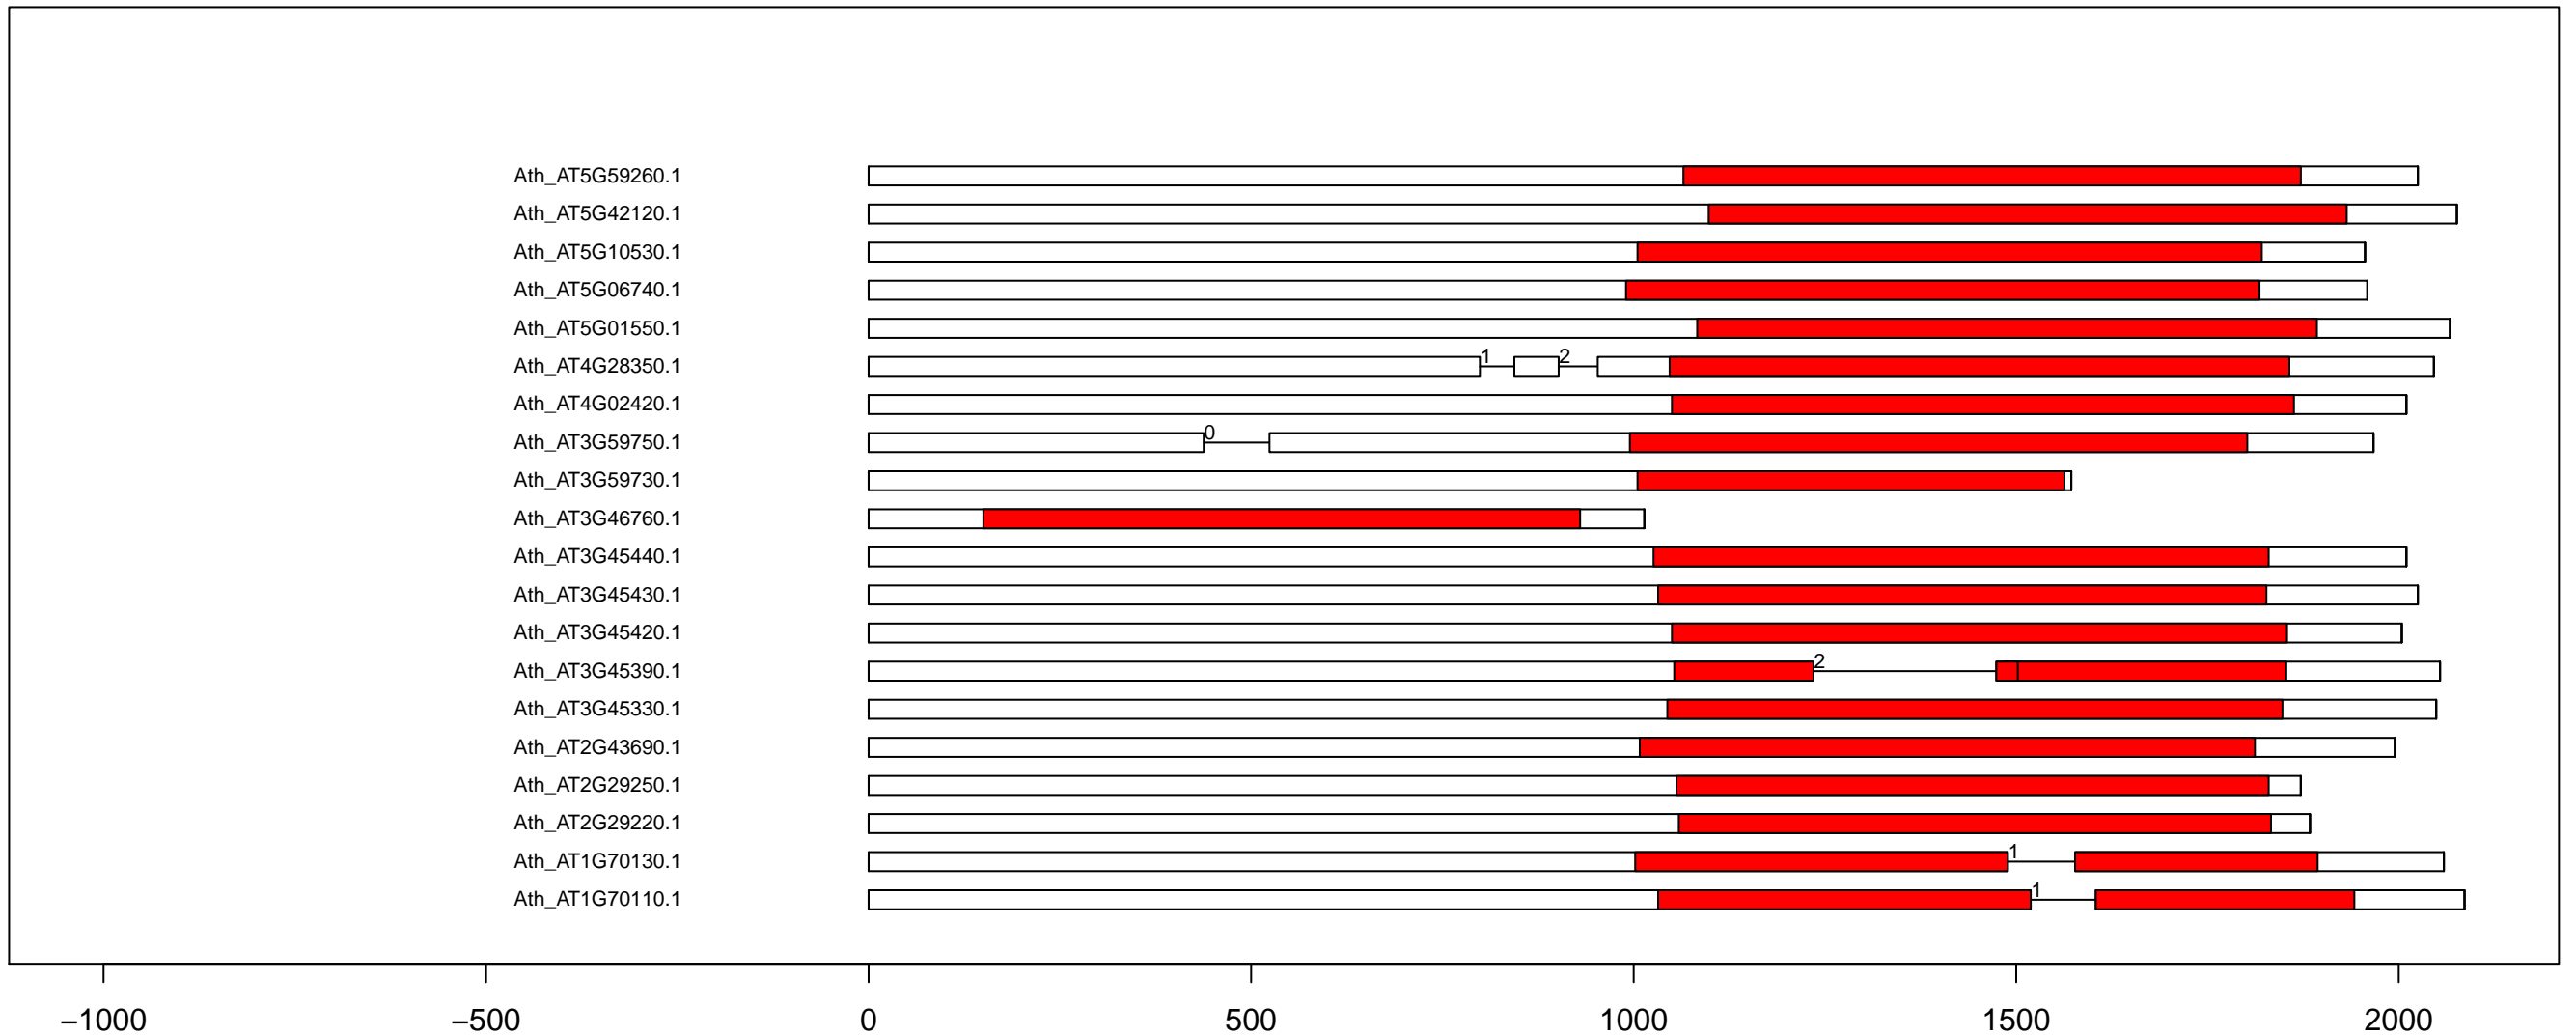

### A.th RLK-Pelle\_L-LEC exon-intron and kinase domain diagram (part 3)

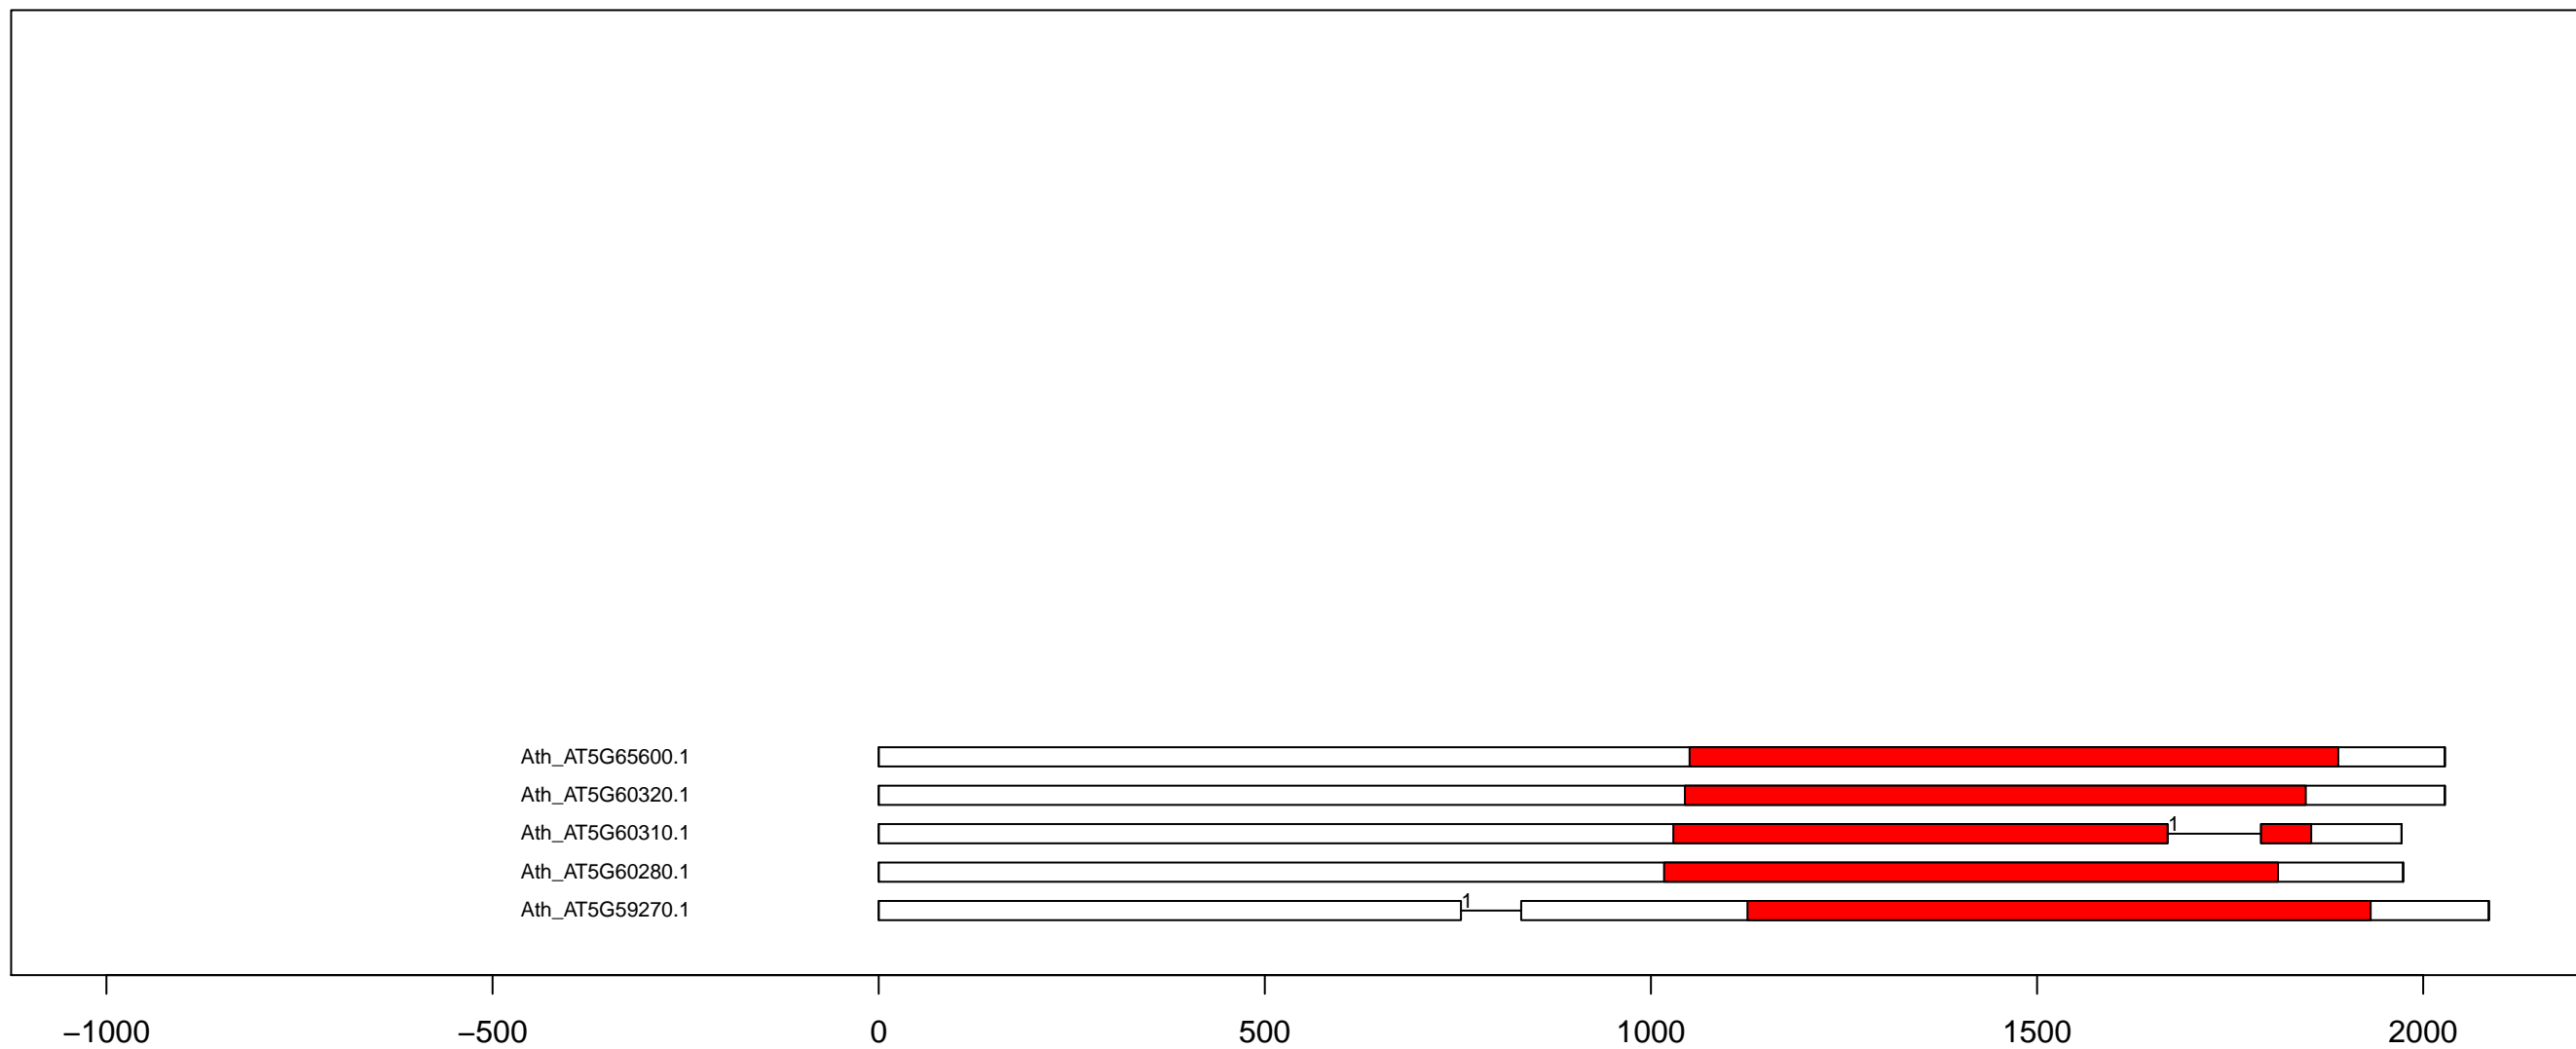

### A.th RLK-Pelle\_LRK10L-2 exon-intron and kinase domain diagram (all)

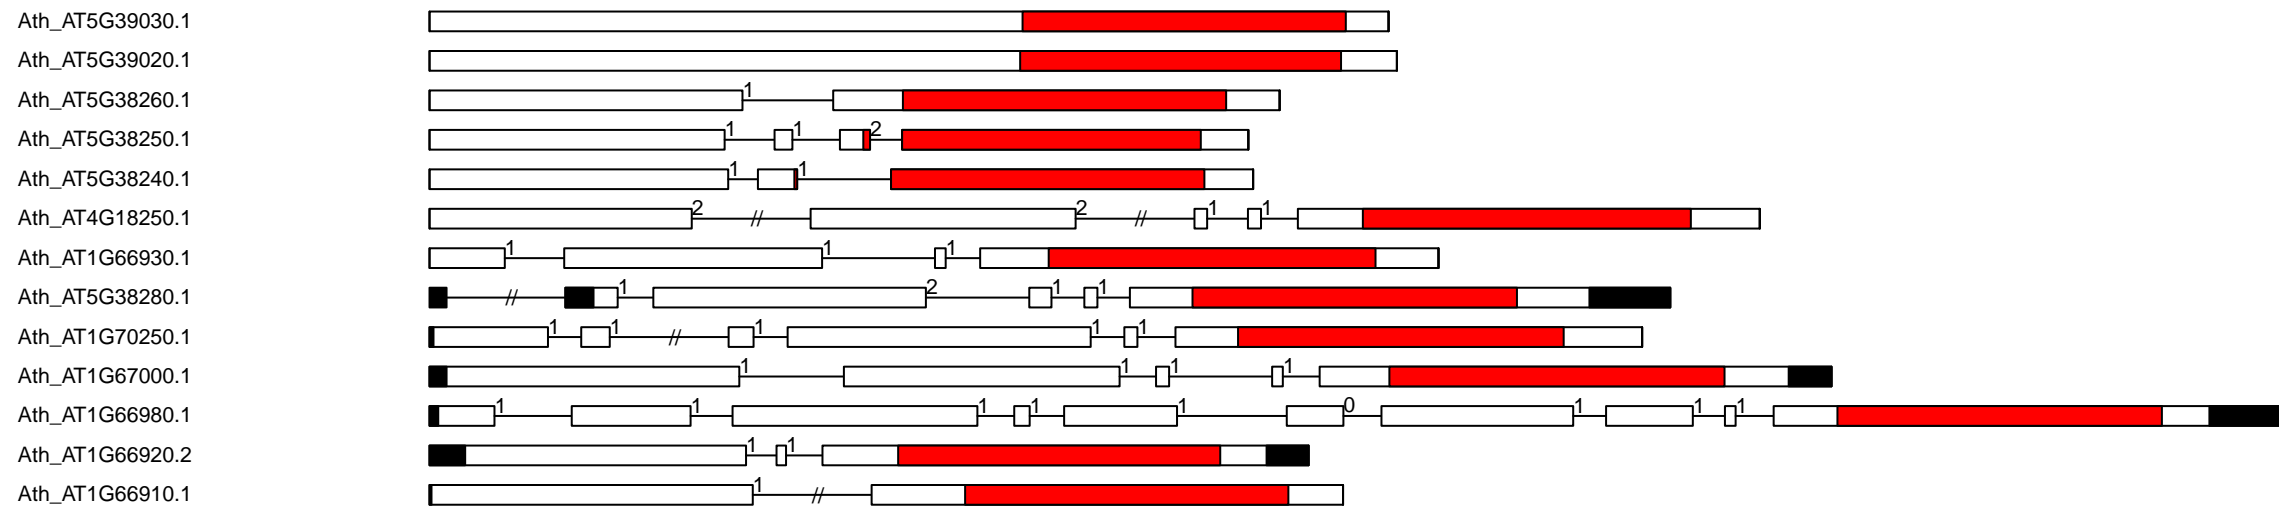

### A.th RLK-Pelle\_LRR-I-1 exon-intron and kinase domain diagram (part 1)

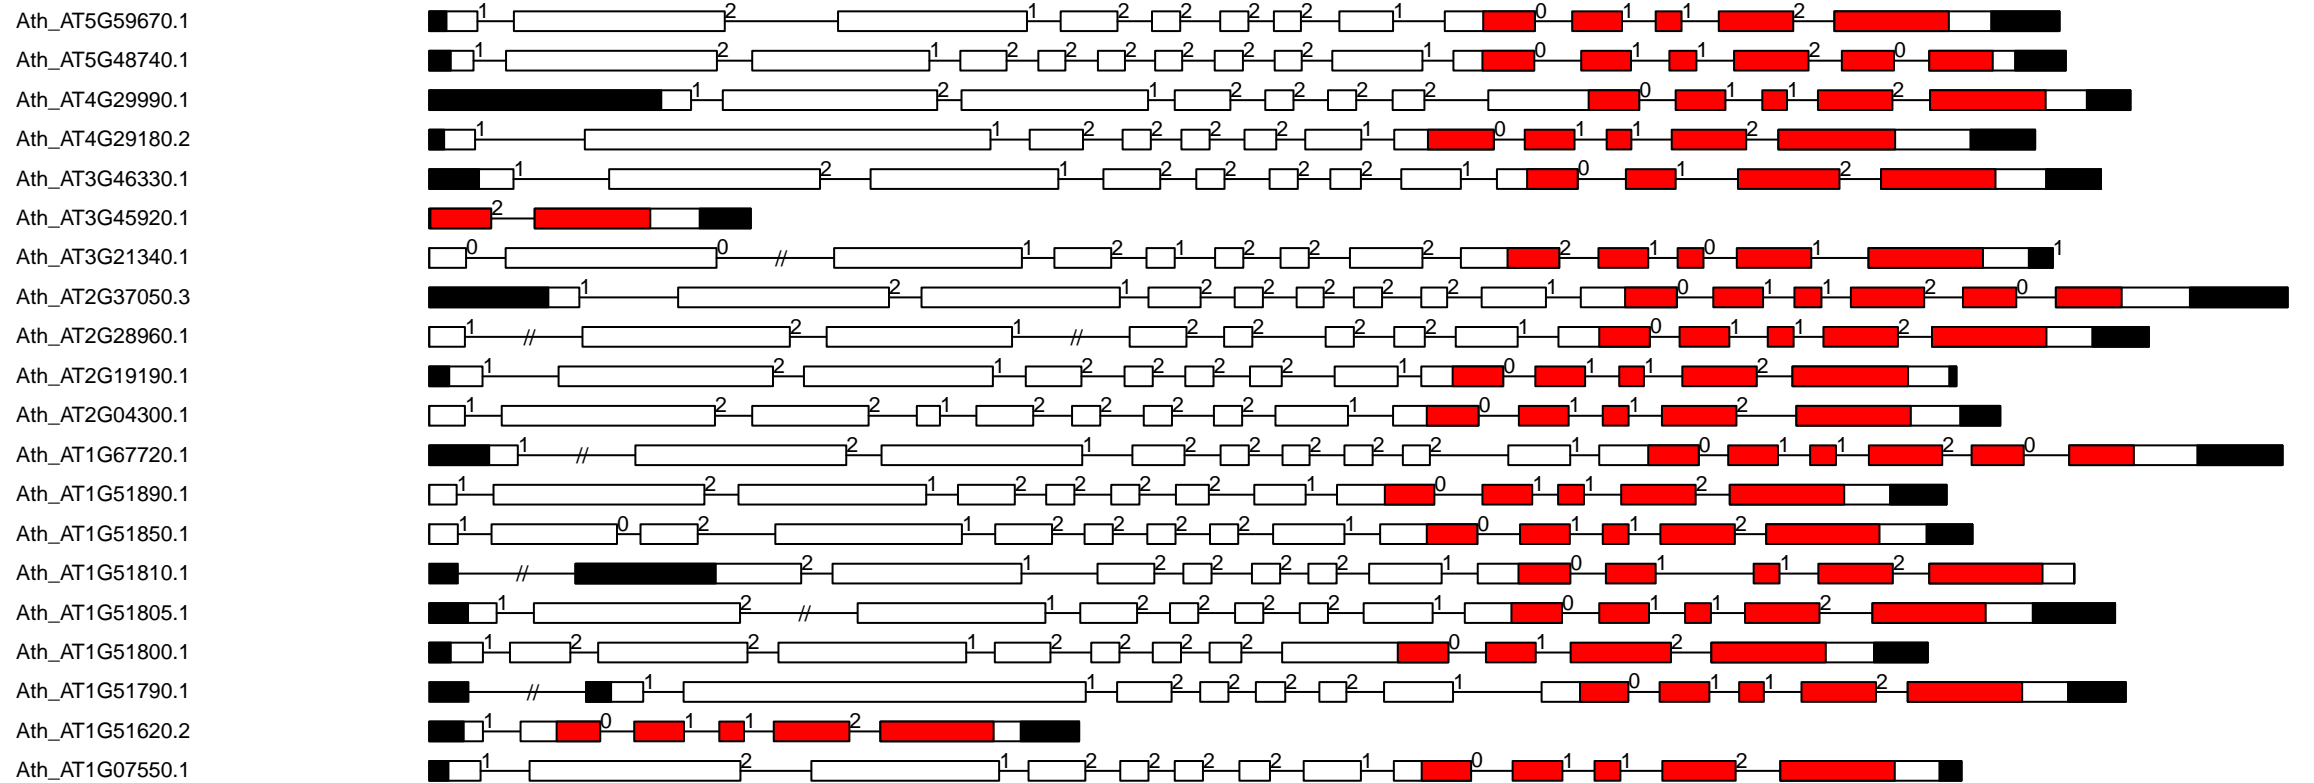

-1000

0

1000

2000

3000

4000

### A.th RLK-Pelle\_LRR-I-1 exon-intron and kinase domain diagram (part 2)

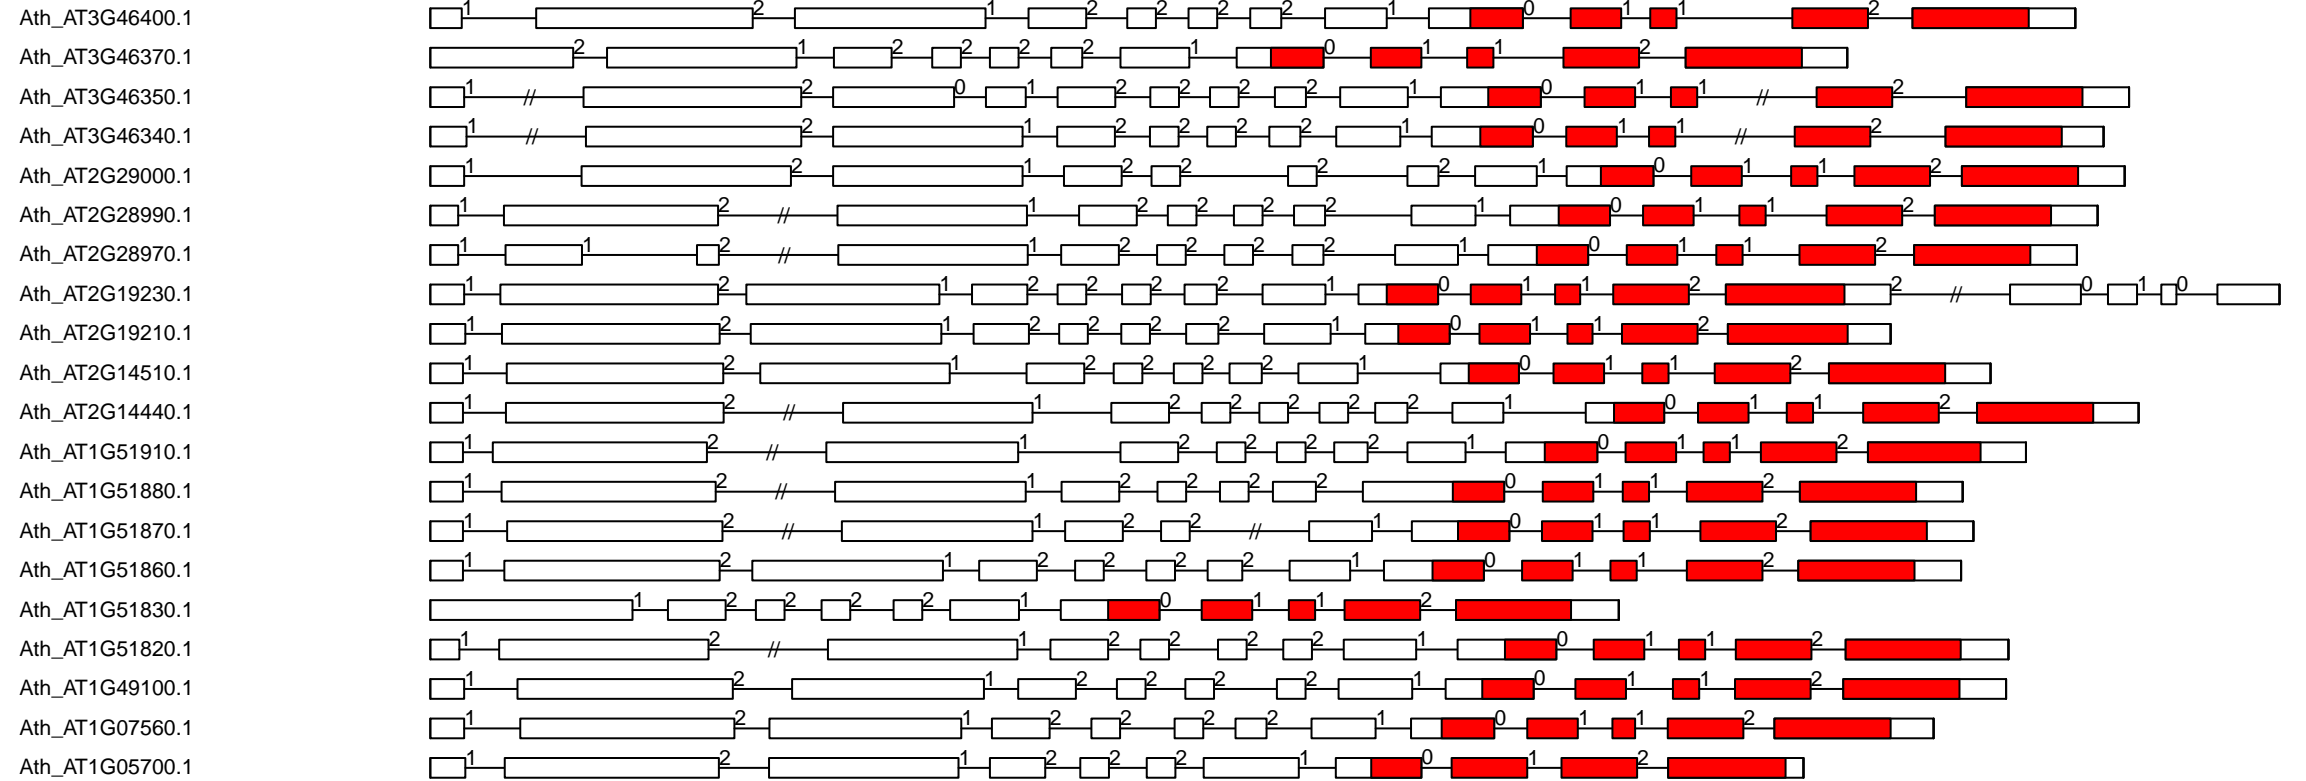

### A.th RLK-Pelle\_LRR-I-1 exon-intron and kinase domain diagram (part 3)

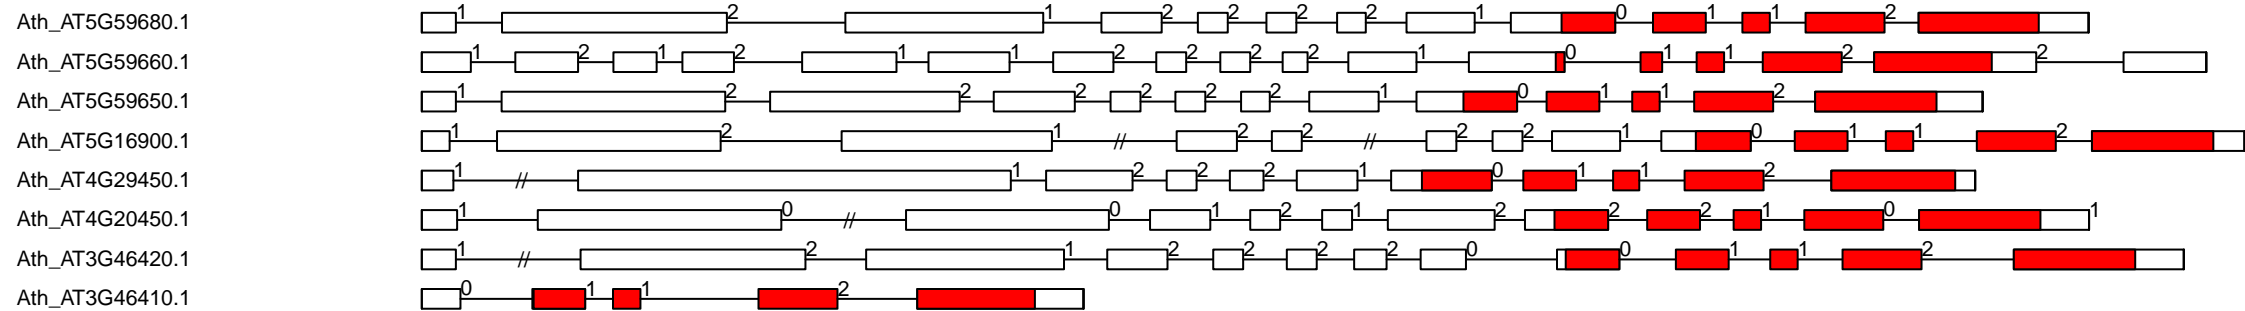

# A.th RLK-Pelle\_LRR-I-2 exon-intron and kinase domain diagram (all)

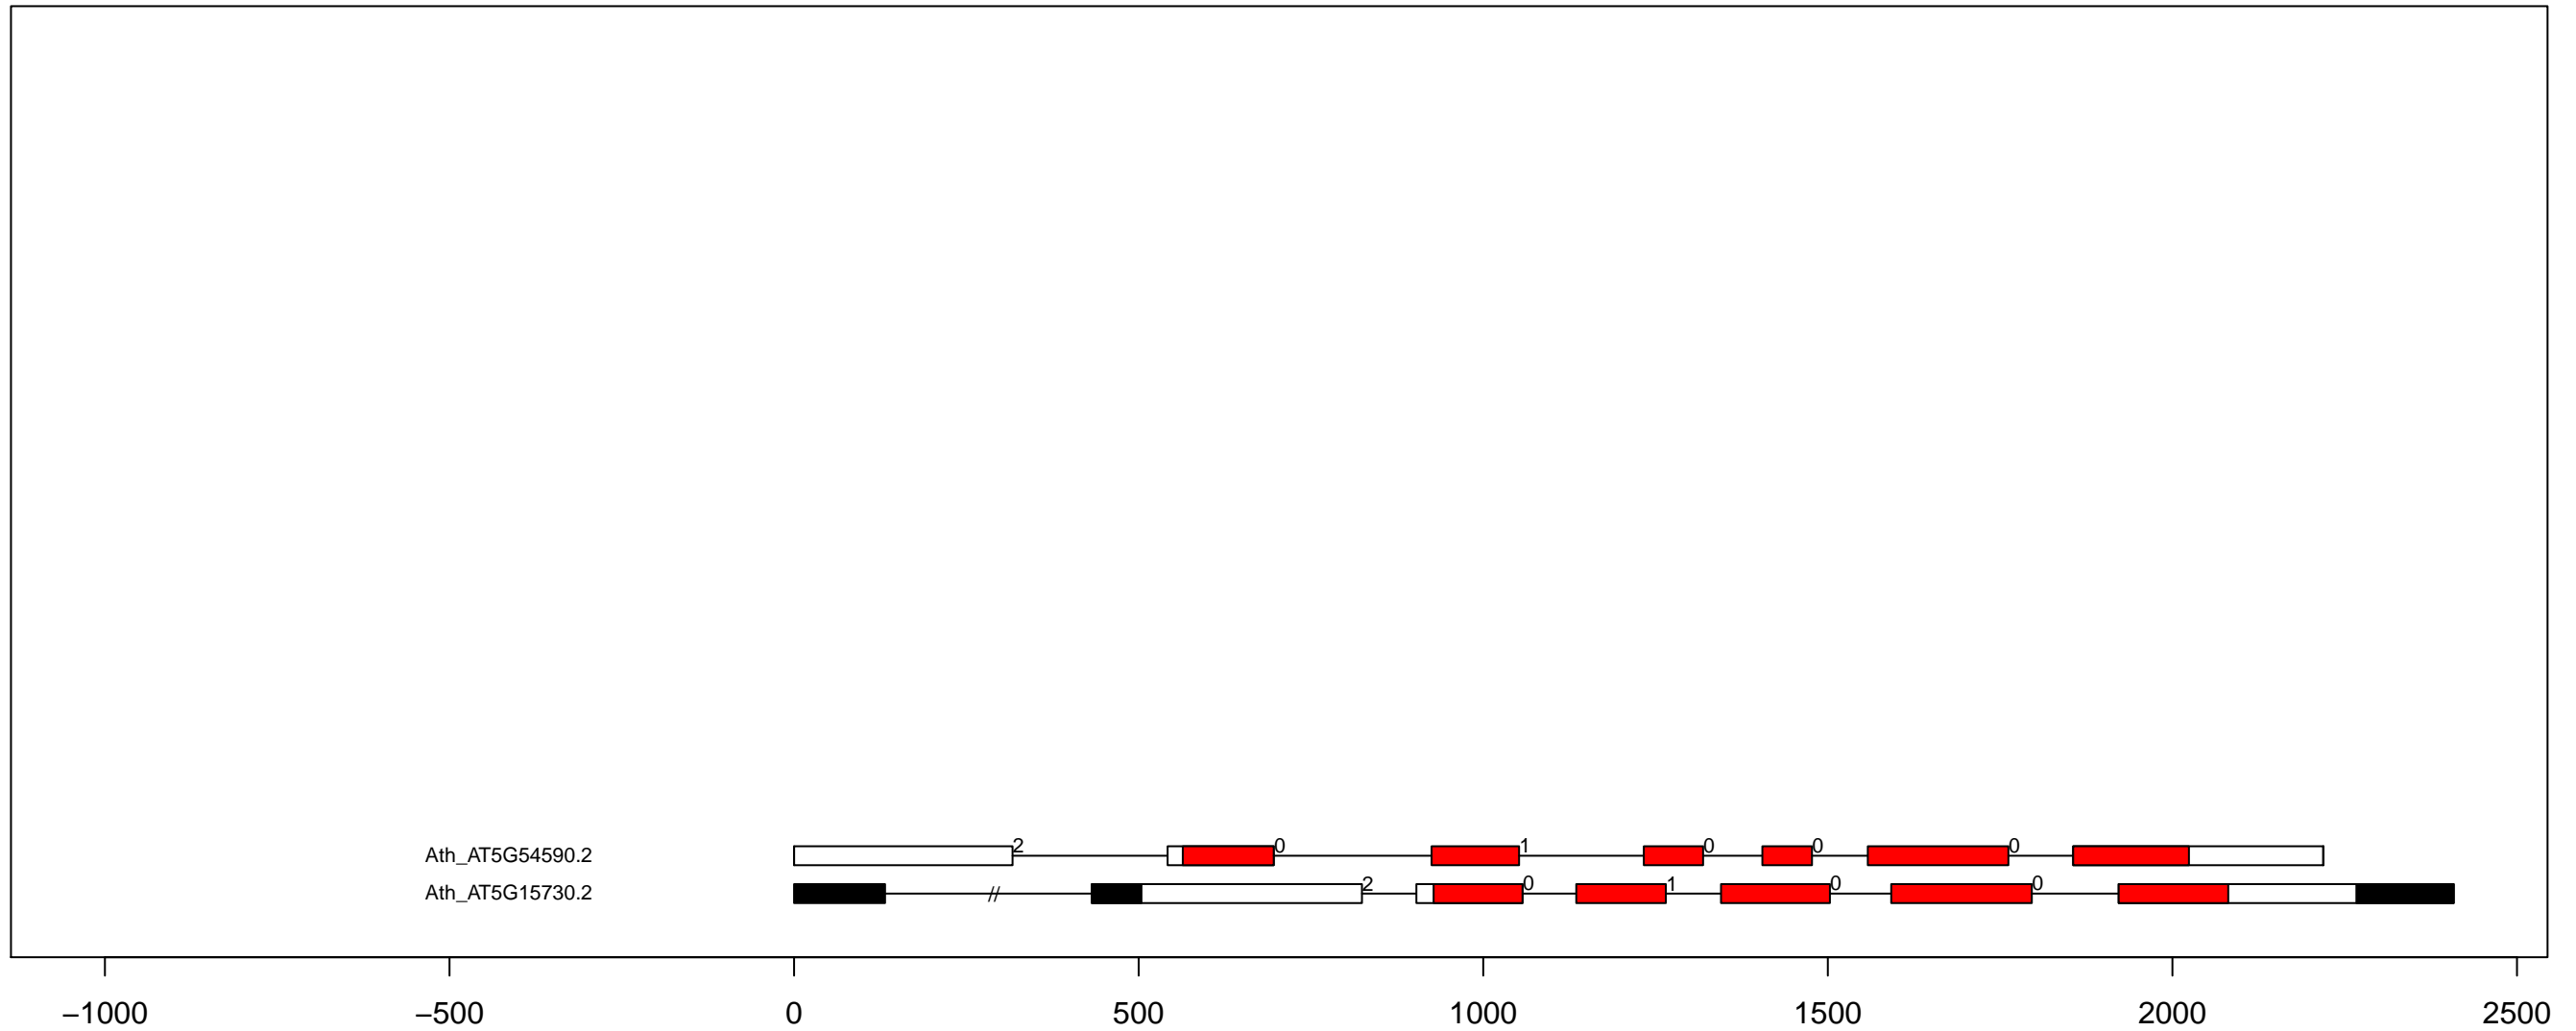

### A.th RLK-Pelle\_LRR-III exon-intron and kinase domain diagram (part 1)

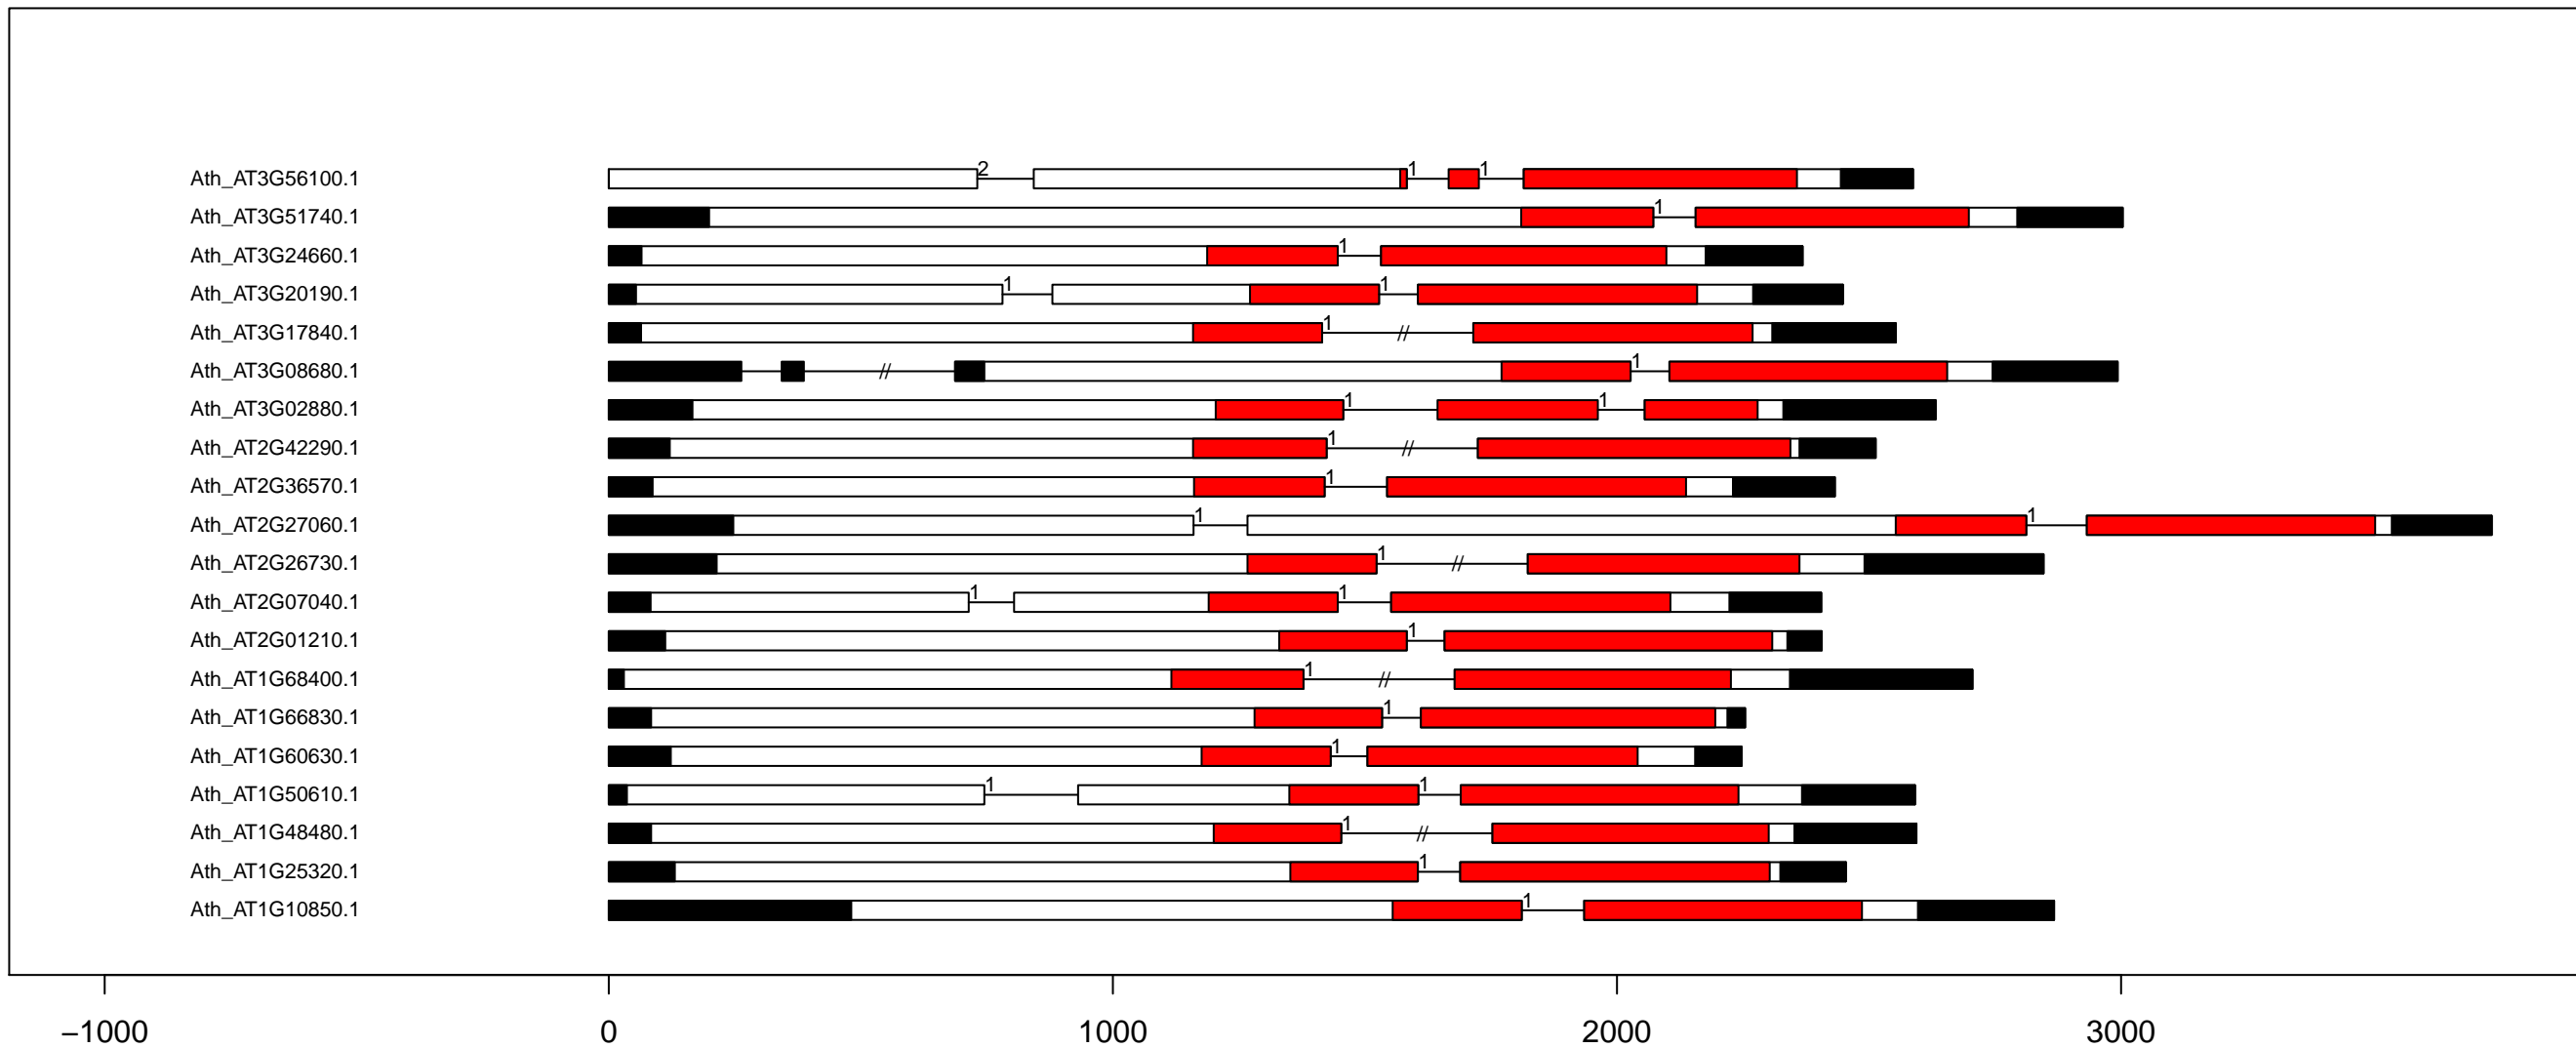



### A.th RLK-Pelle\_LRR-III exon-intron and kinase domain diagram (part 2)

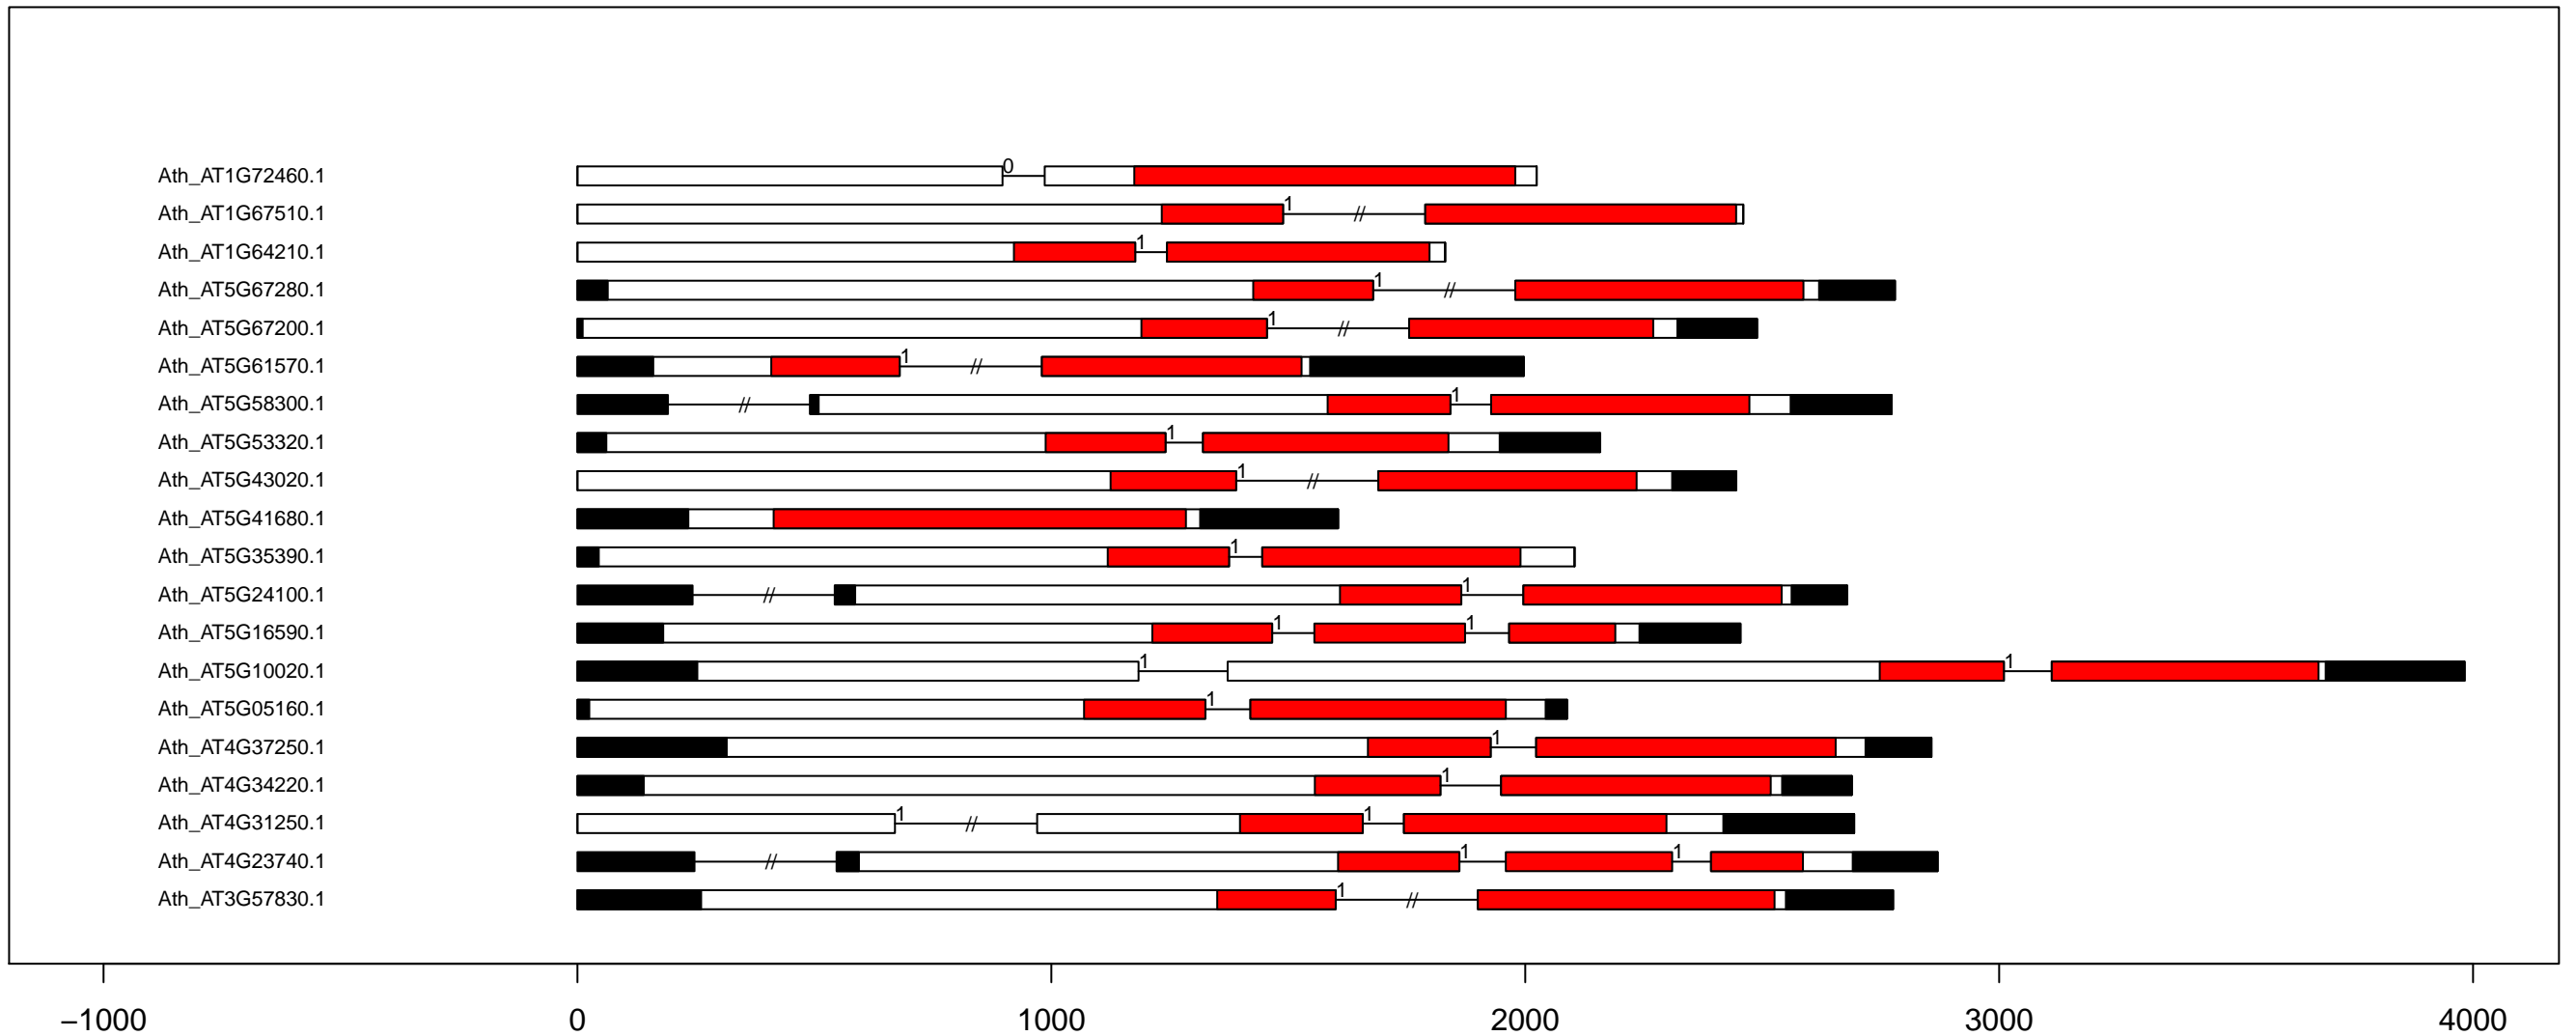

### A.th RLK-Pelle\_LRR-III exon-intron and kinase domain diagram (part 3)

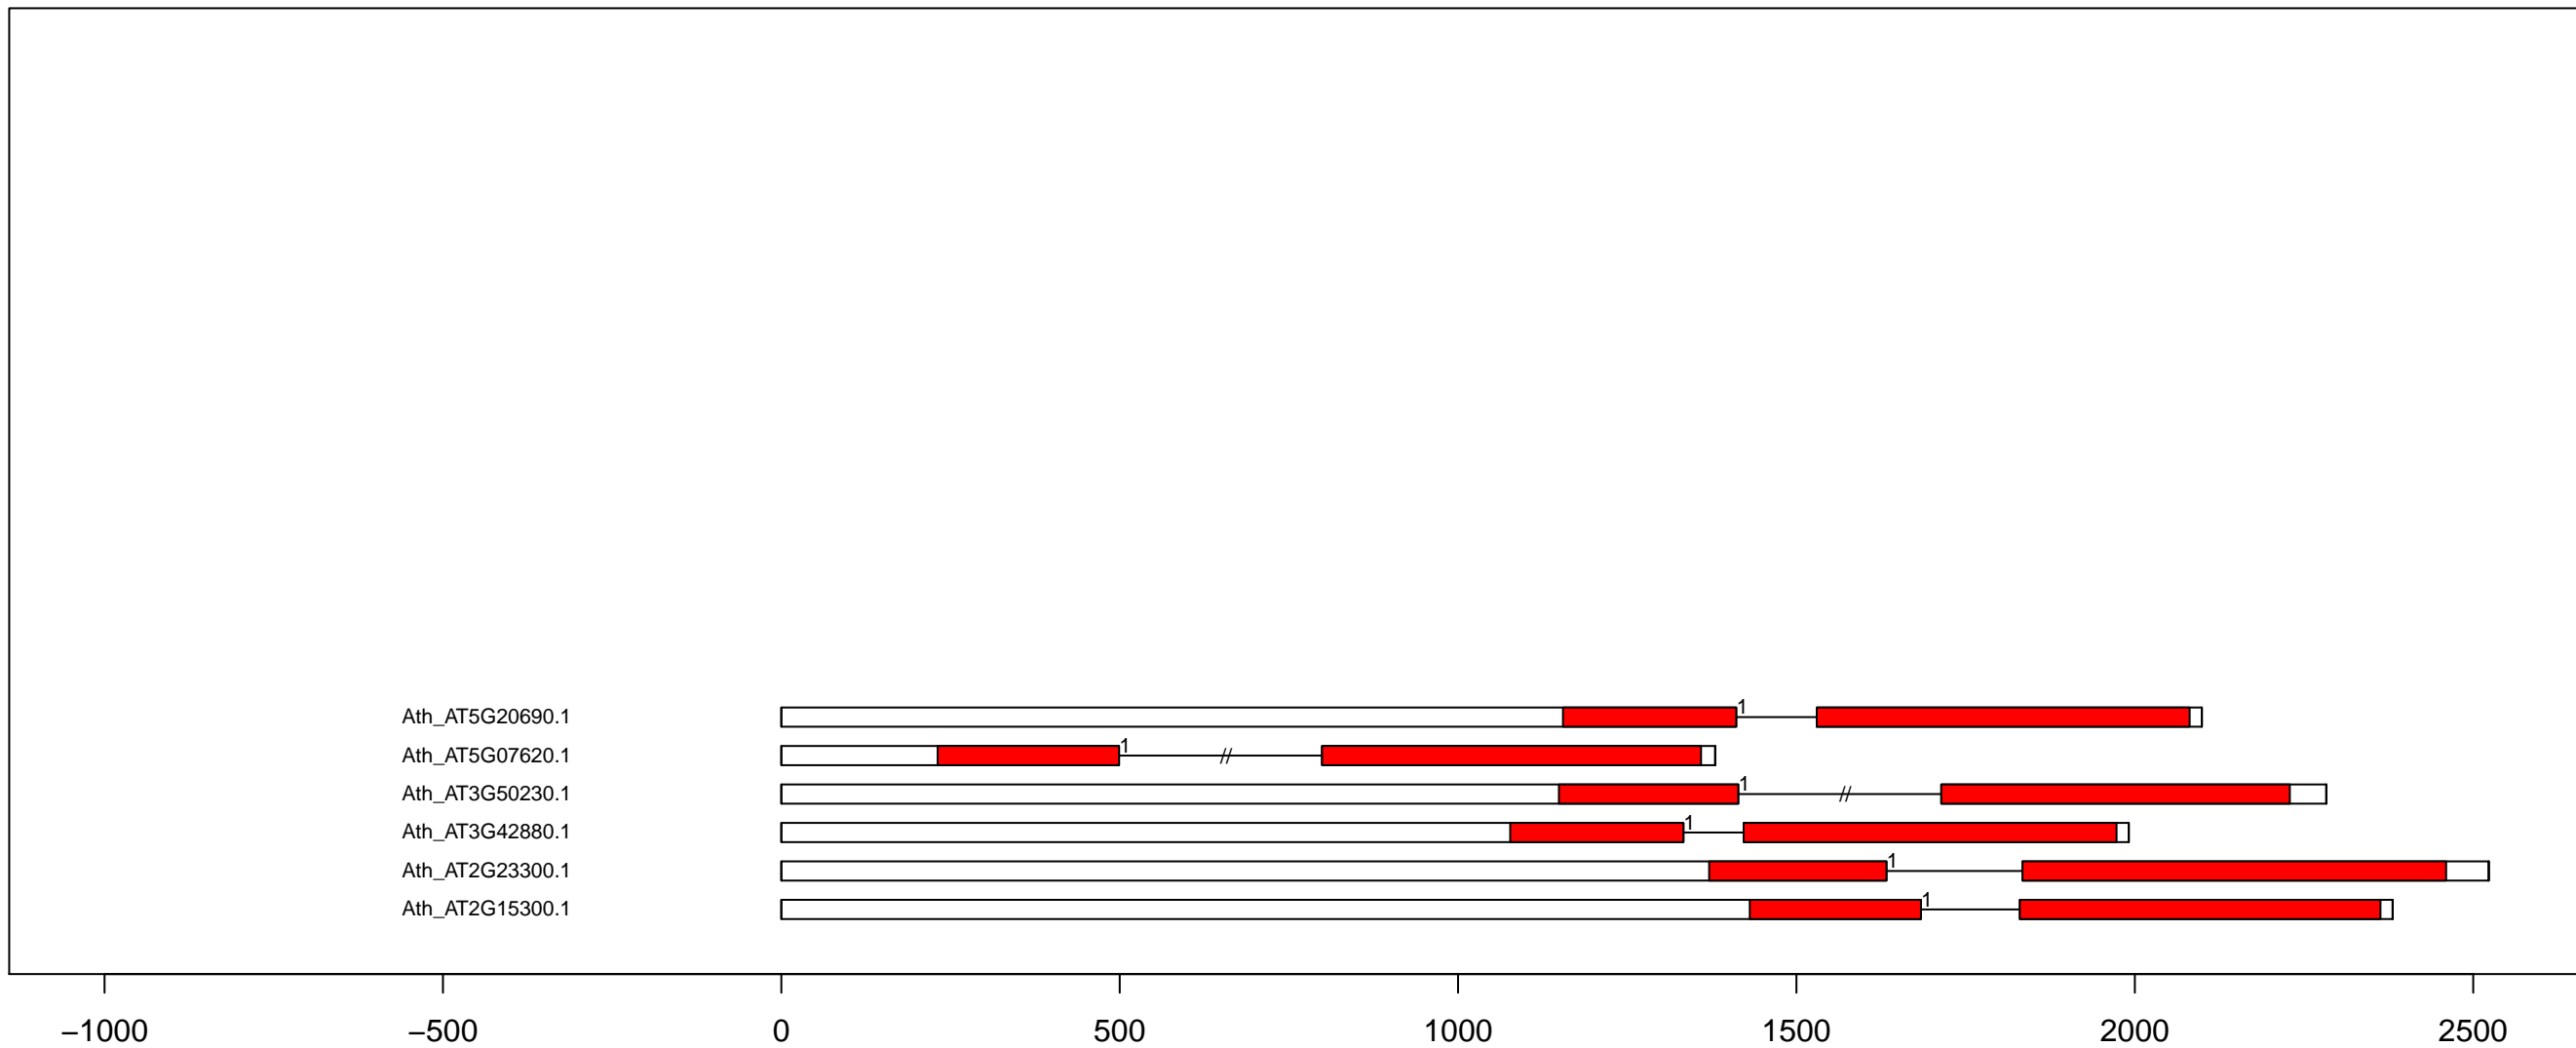

### A.th RLK-Pelle\_LRR-II exon-intron and kinase domain diagram (all)

Ath\_AT5G65240.2

Ath\_AT5G63710.1

Ath\_AT5G45780.1

Ath\_AT5G16000.1

Ath\_AT5G10290.1

Ath\_AT4G33430.2

Ath\_AT4G30520.1

Ath\_AT3G25560.3

Ath\_AT2G23950.1

Ath\_AT2G13800.1

Ath\_AT2G13790.1

Ath\_AT1G71830.1

Ath\_AT1G60800.1

Ath\_AT1G34210.1

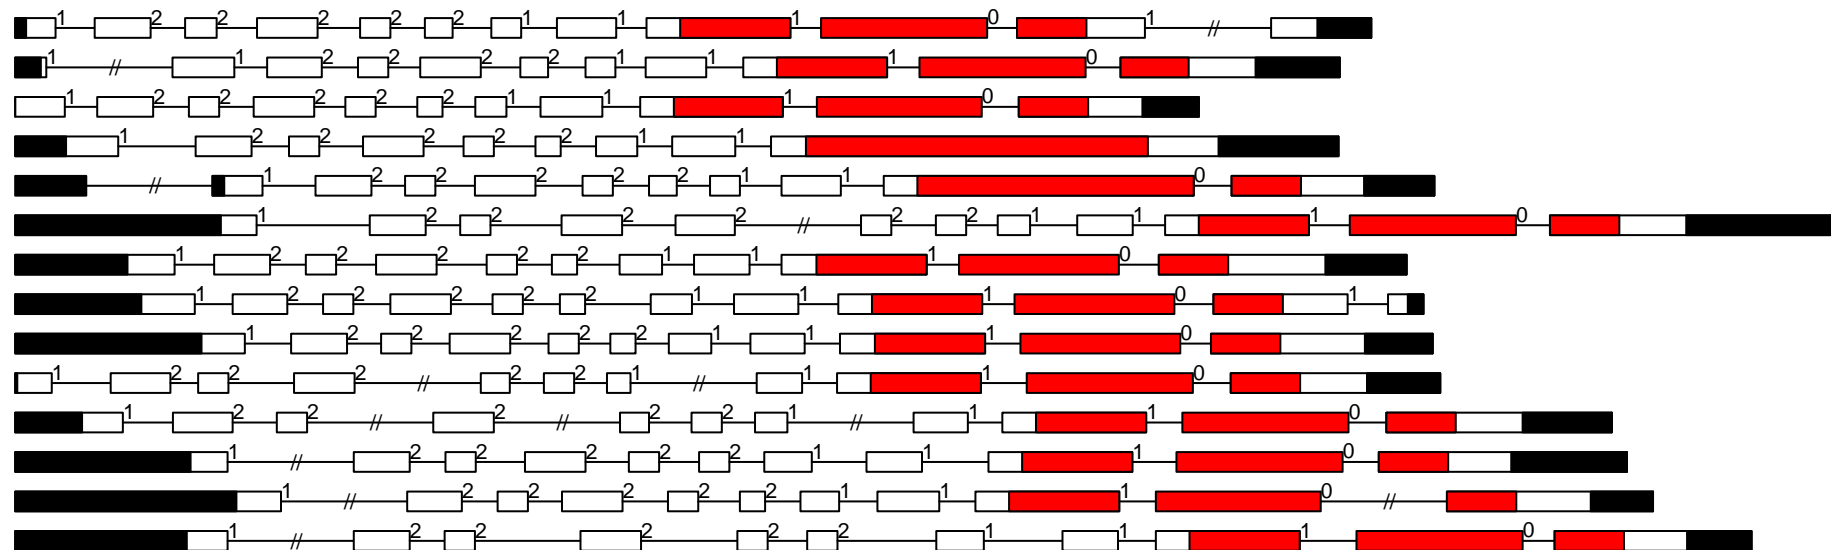

-1000

0

1000

2000

3000

4000

# A.th RLK-Pelle\_LRR-IV exon-intron and kinase domain diagram (all)

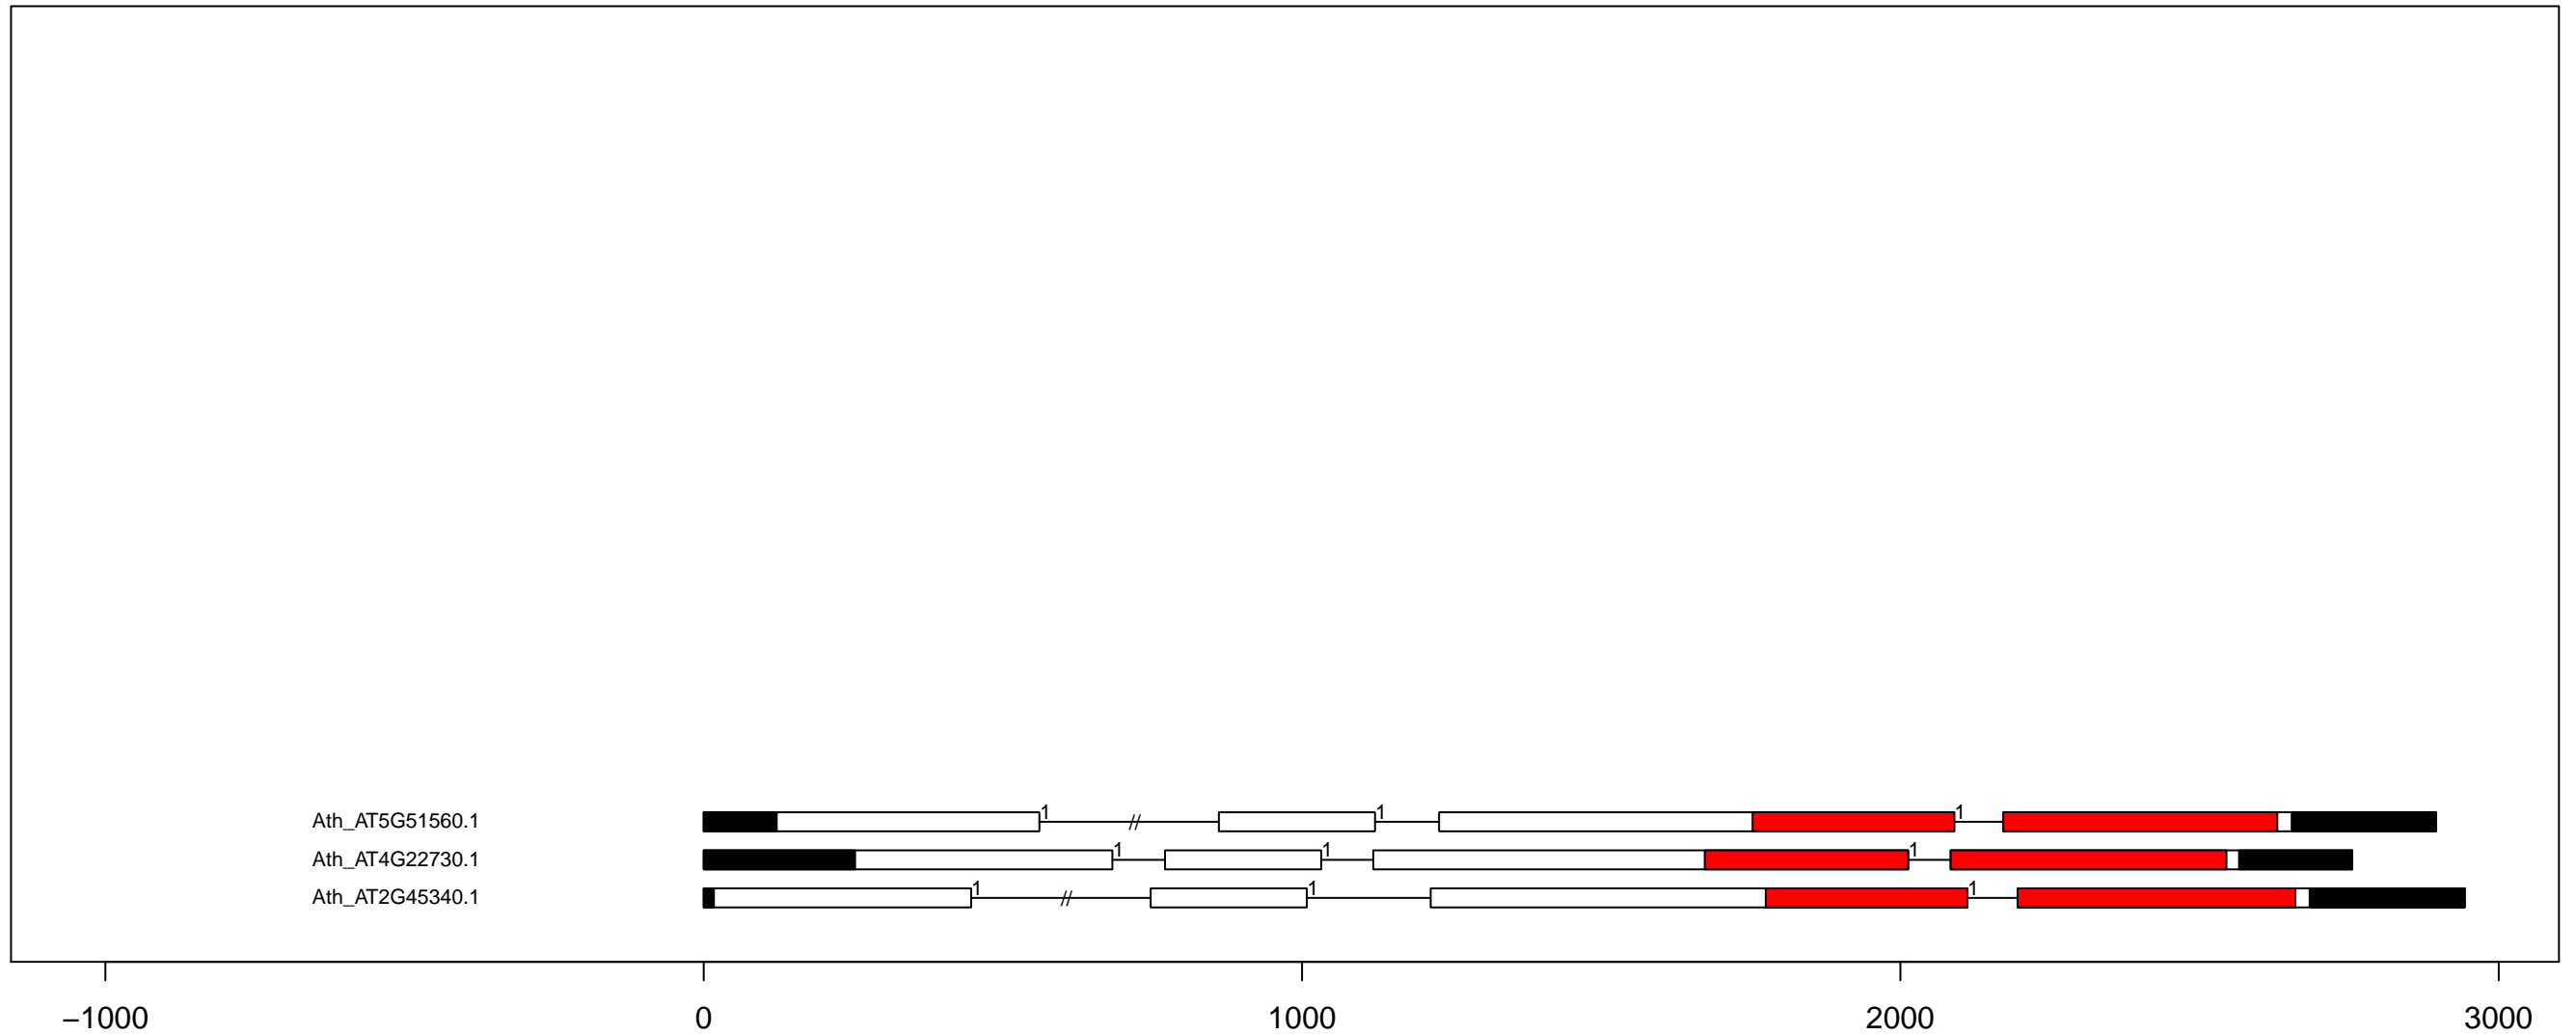

# A.th RLK-Pelle\_LRR-IX exon-intron and kinase domain diagram (all)

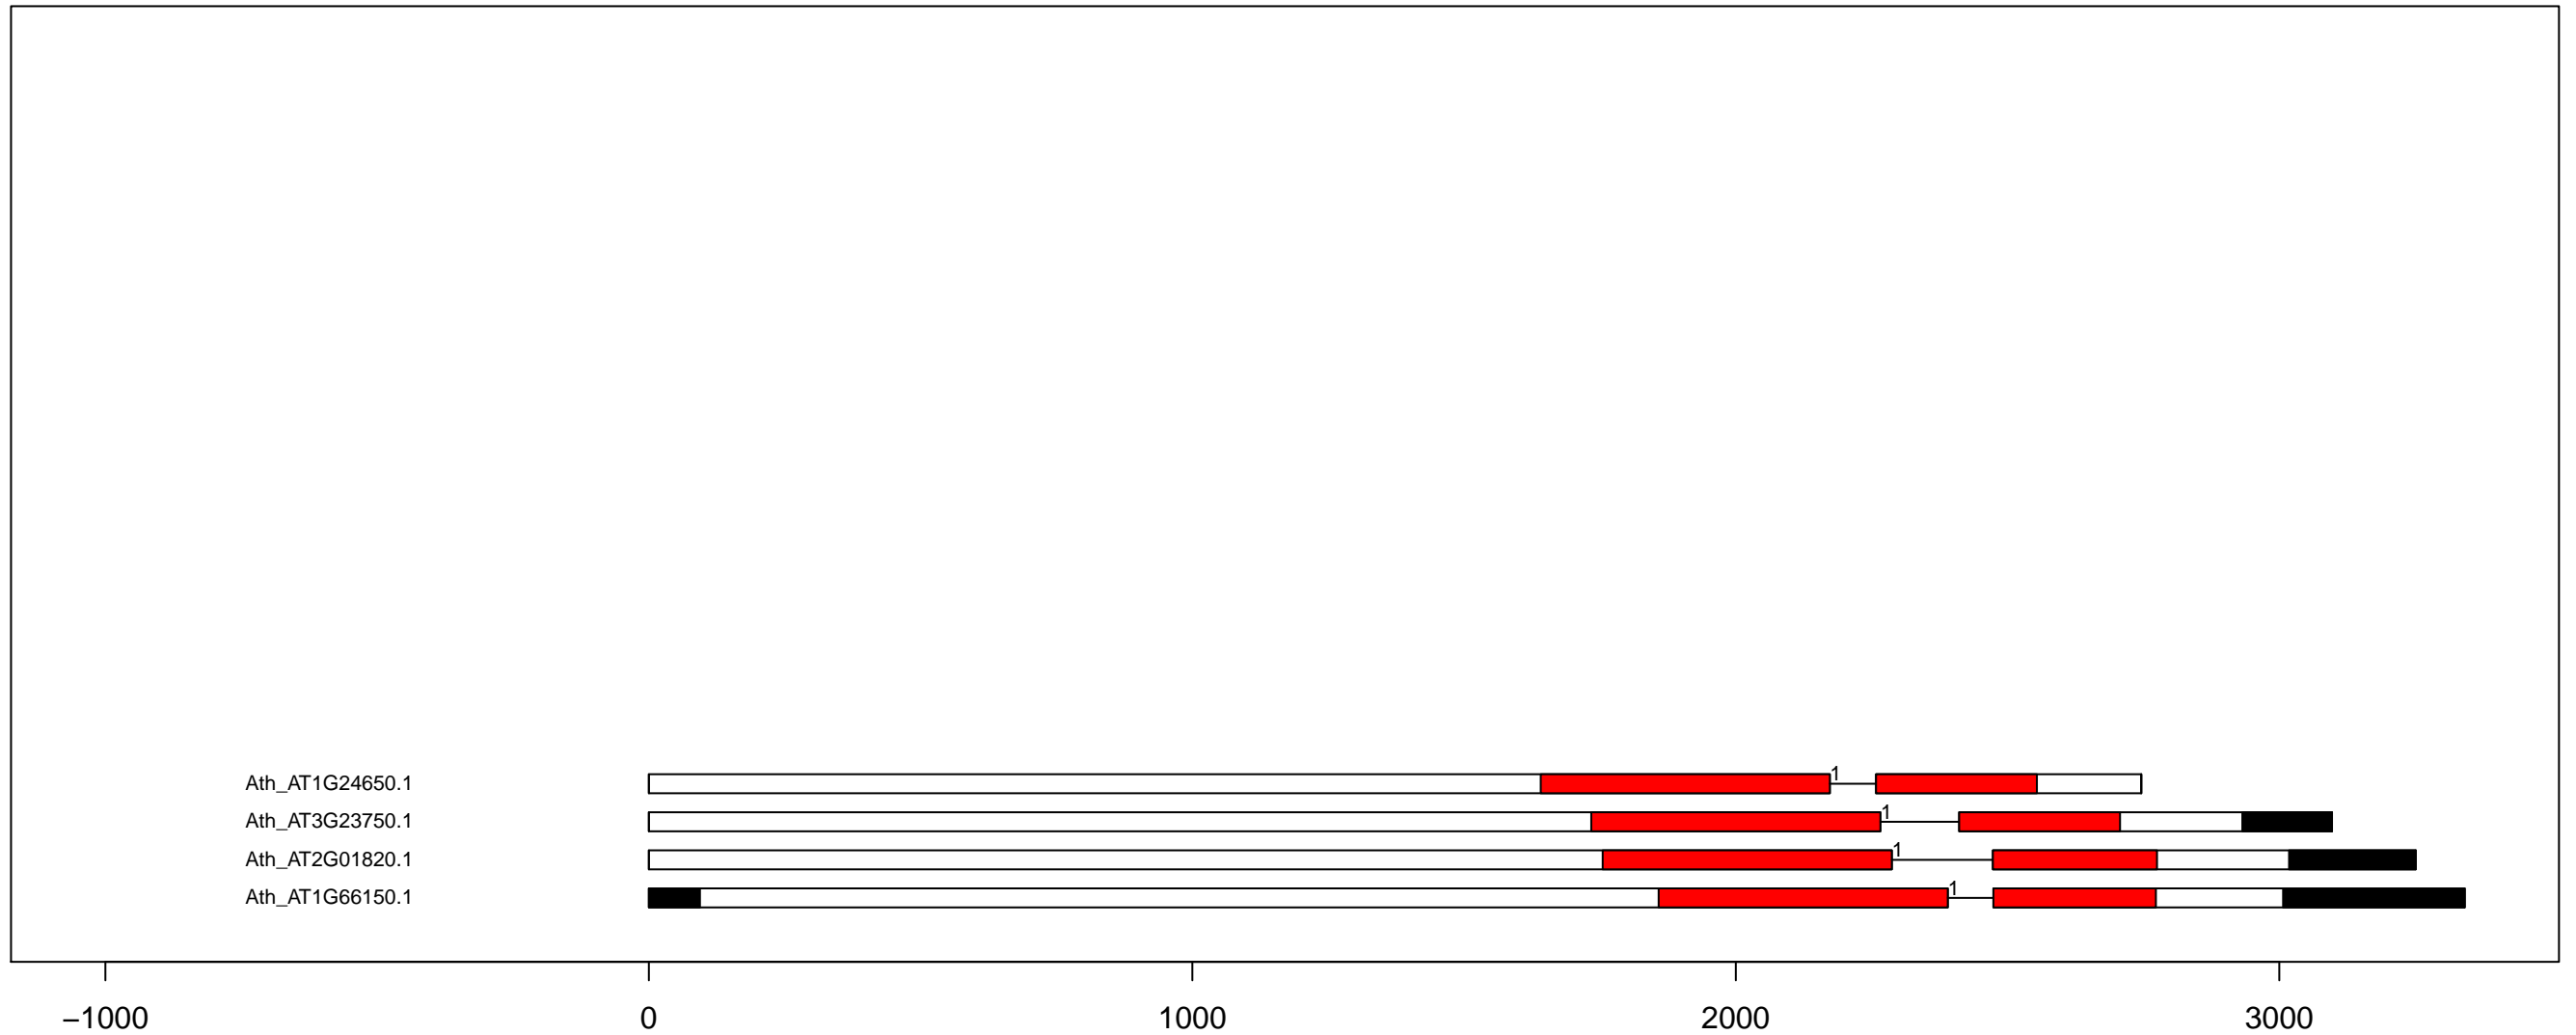

# A.th RLK-Pelle\_LRR-VI-1 exon-intron and kinase domain diagram (all)

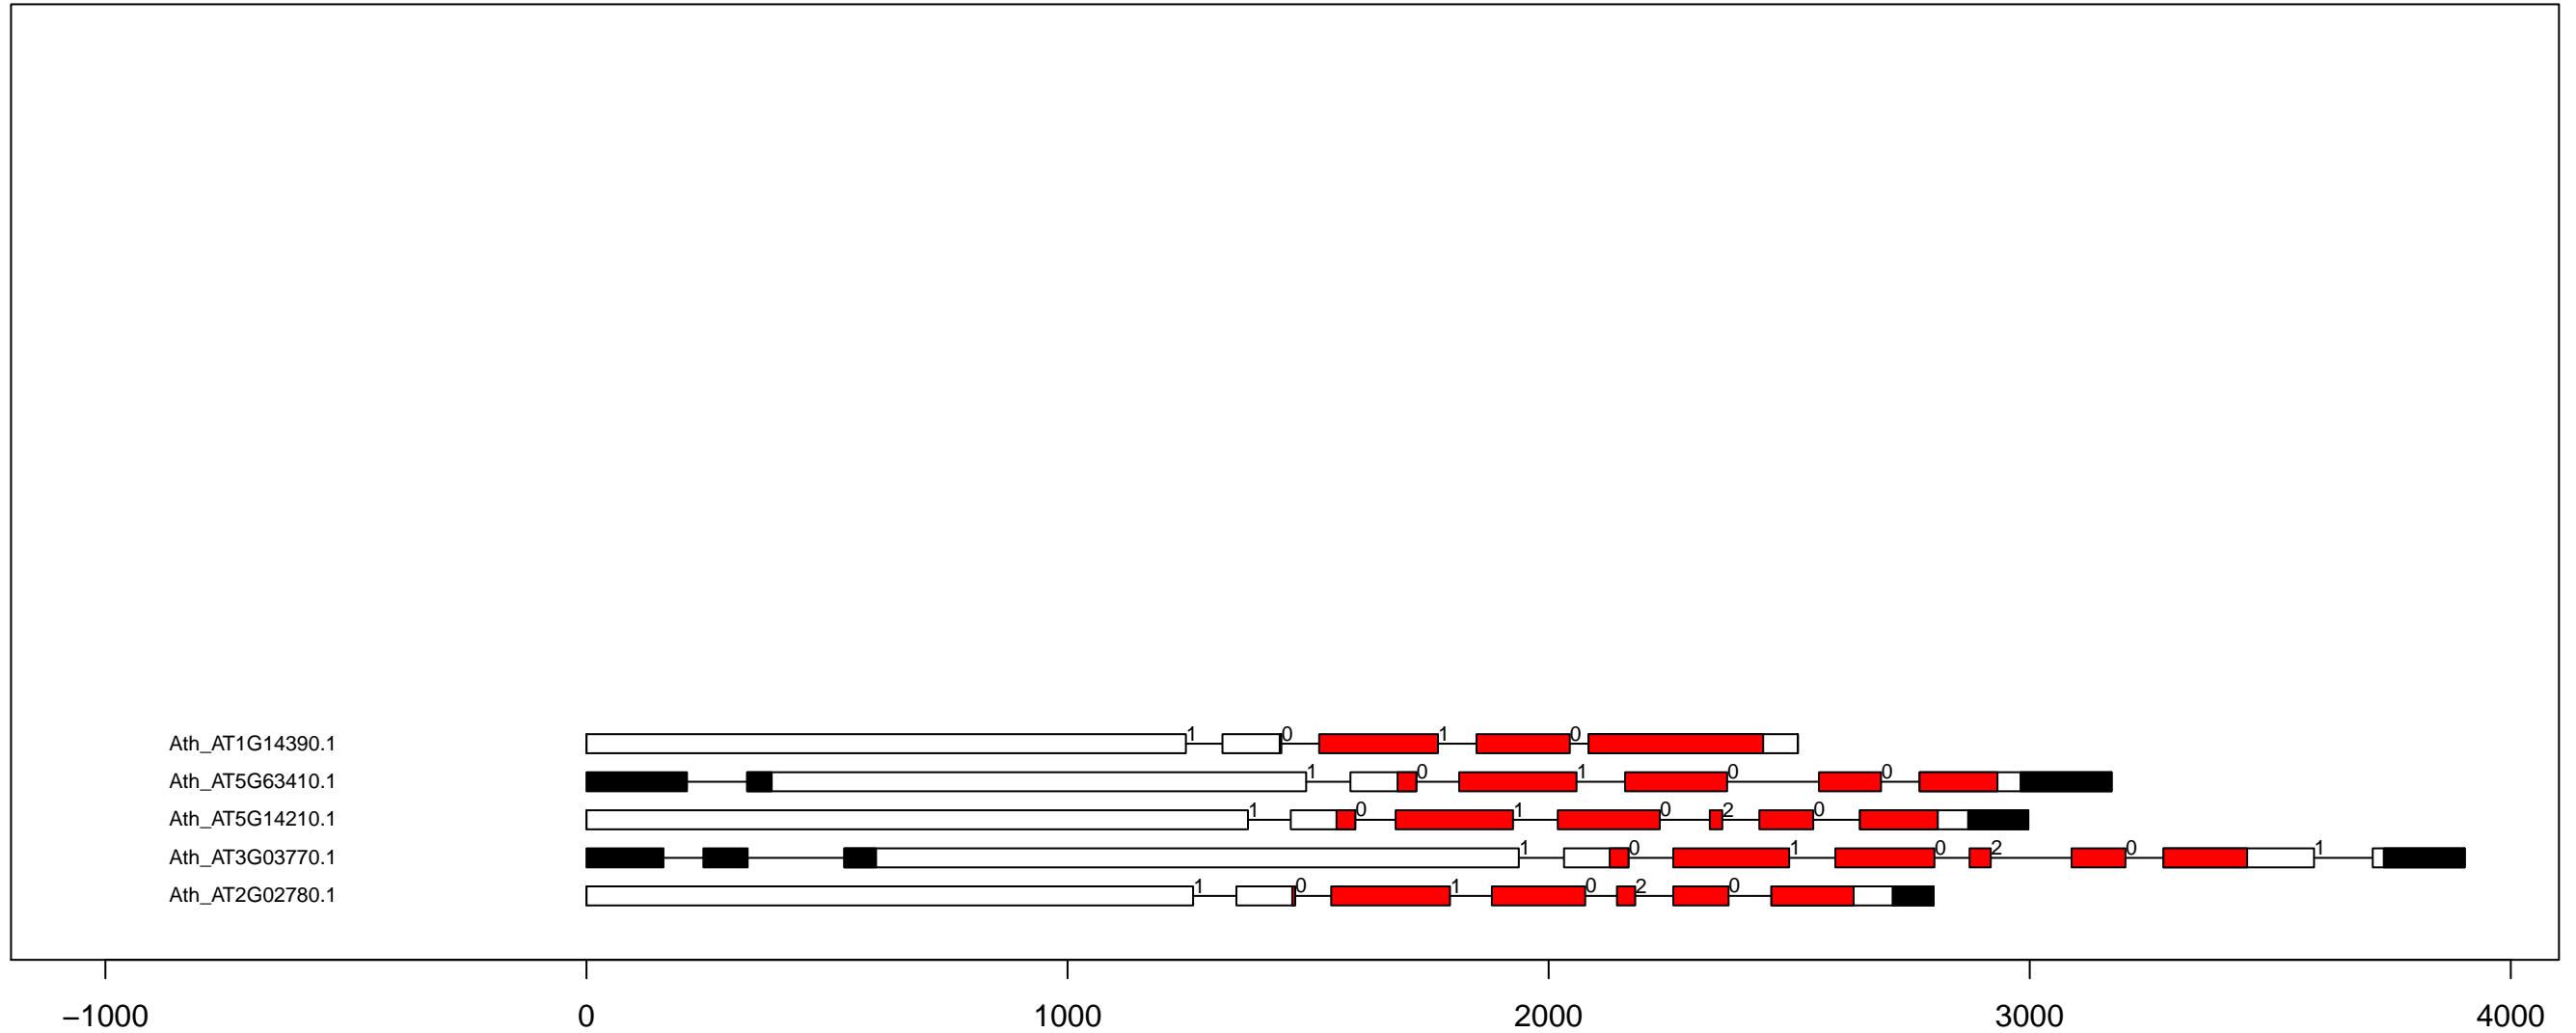

# A.th RLK-Pelle\_LRR-VI-2 exon-intron and kinase domain diagram (all)

Ath\_AT5G07150.1  
 Ath\_AT5G58540.1  
 Ath\_AT5G45840.2  
 Ath\_AT5G41180.1  
 Ath\_AT4G18640.1  
 Ath\_AT3G56050.1  
 Ath\_AT2G40270.1  
 Ath\_AT1G63430.2

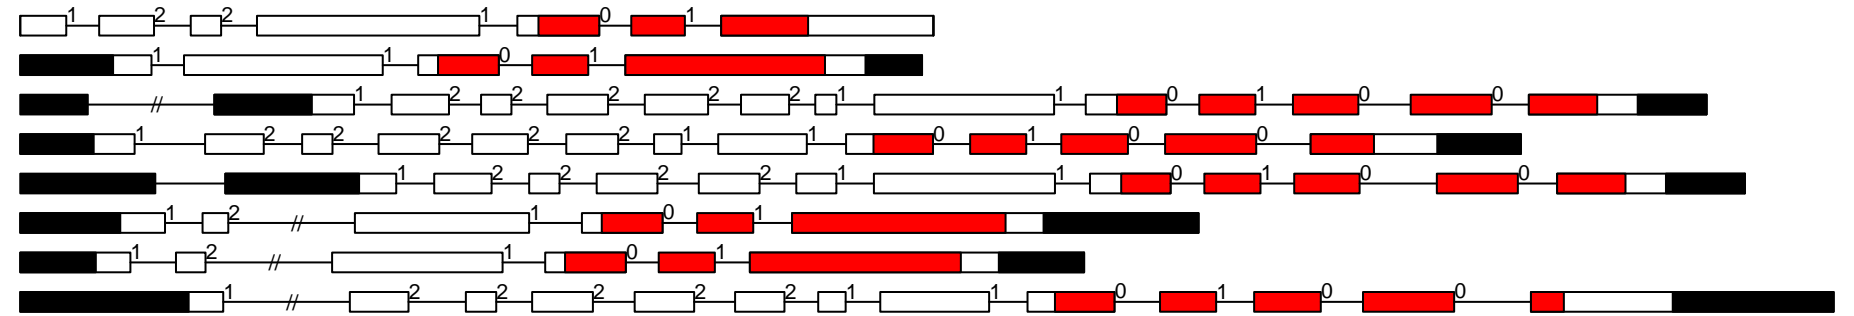

-1000

0

1000

2000

3000

4000

# A.th RLK-Pelle\_LRR-VII-1 exon-intron and kinase domain diagram (all)

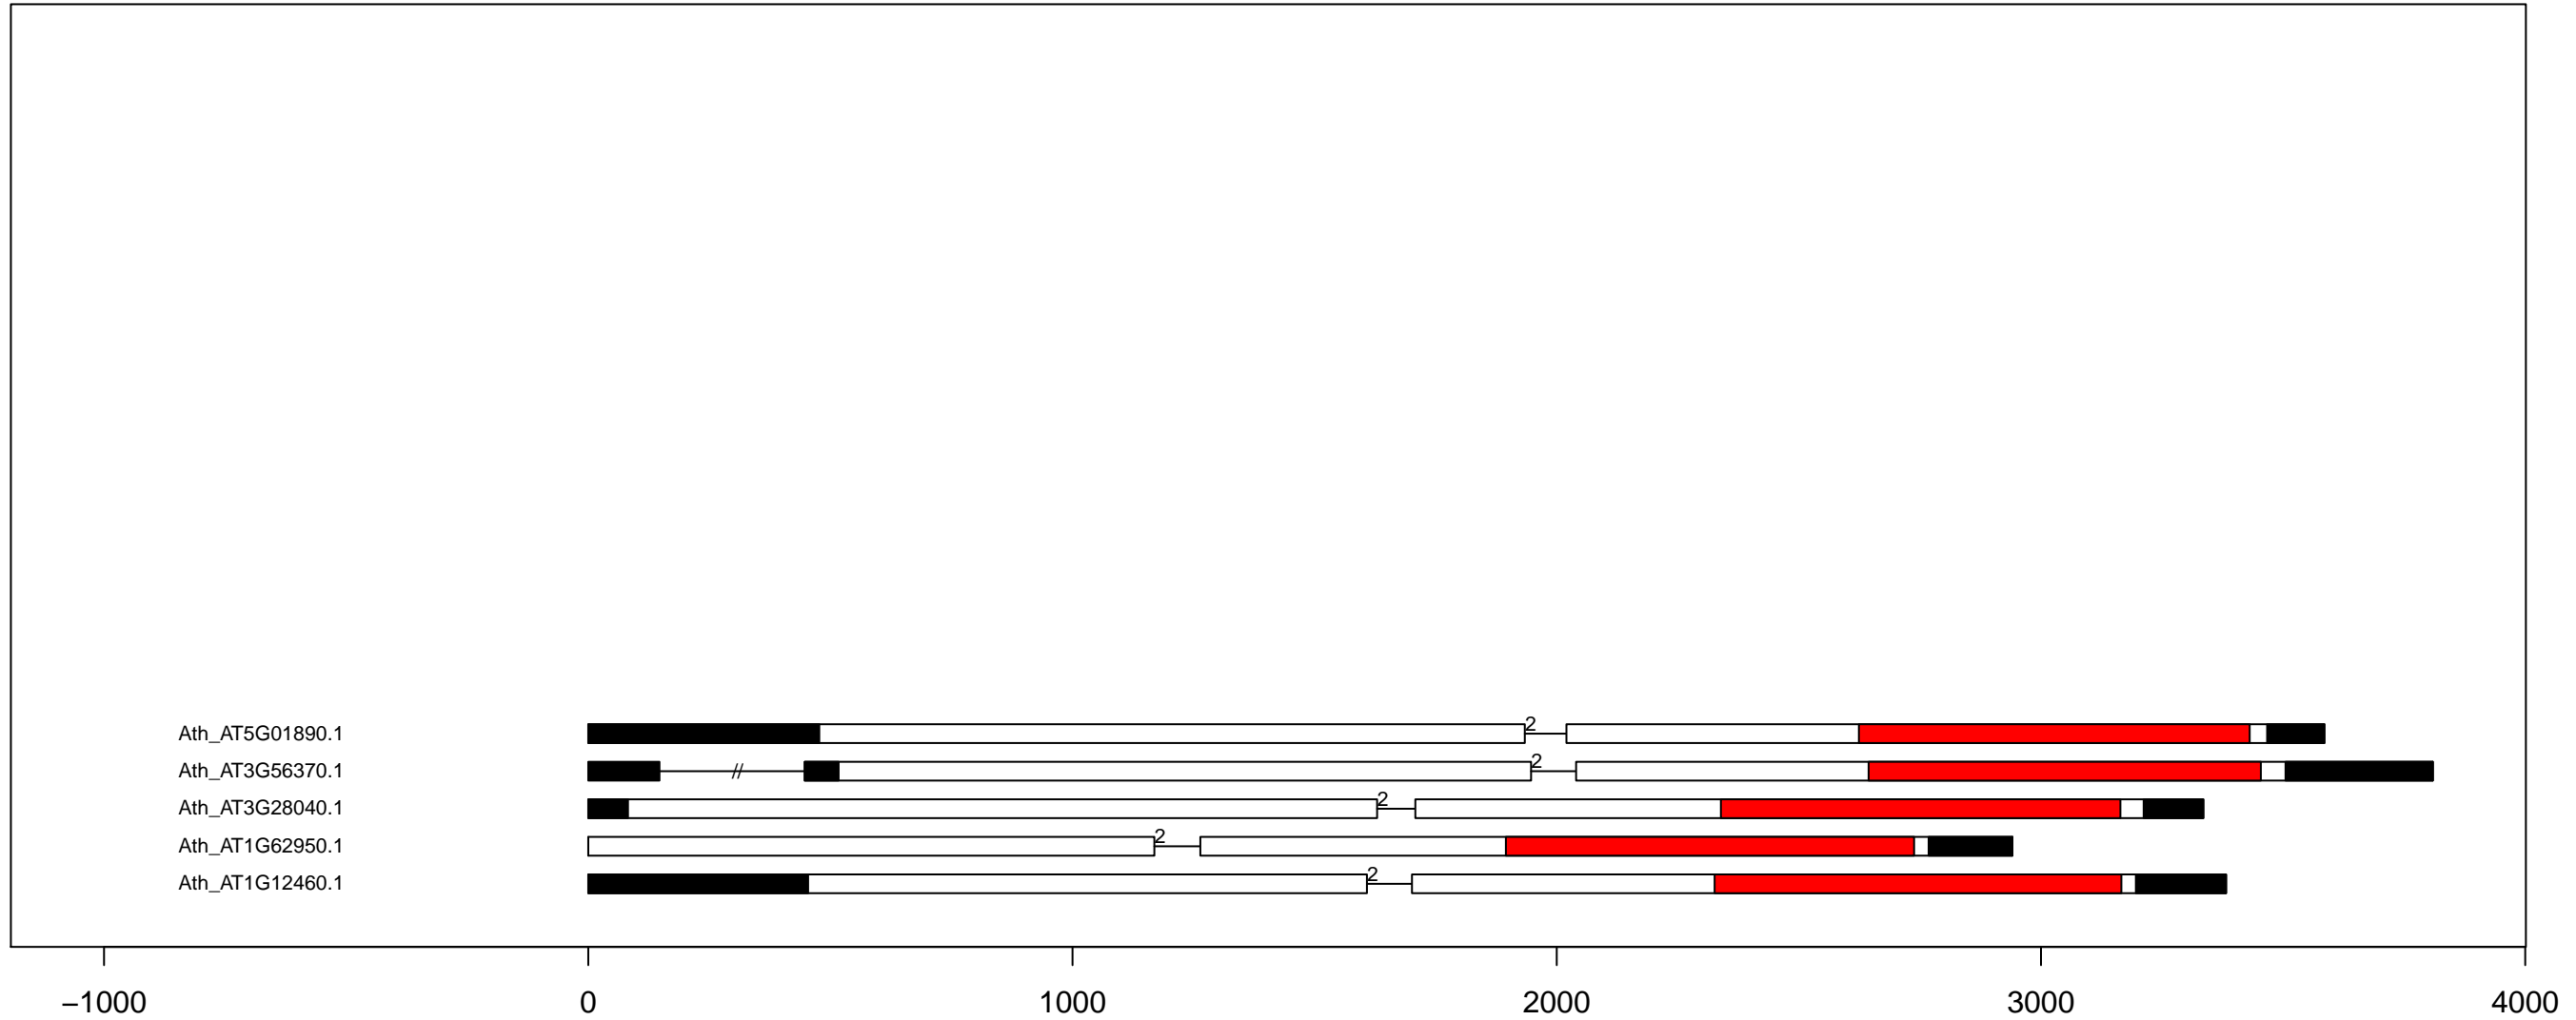



# A.th RLK-Pelle\_LRR-VII-2 exon-intron and kinase domain diagram (all)

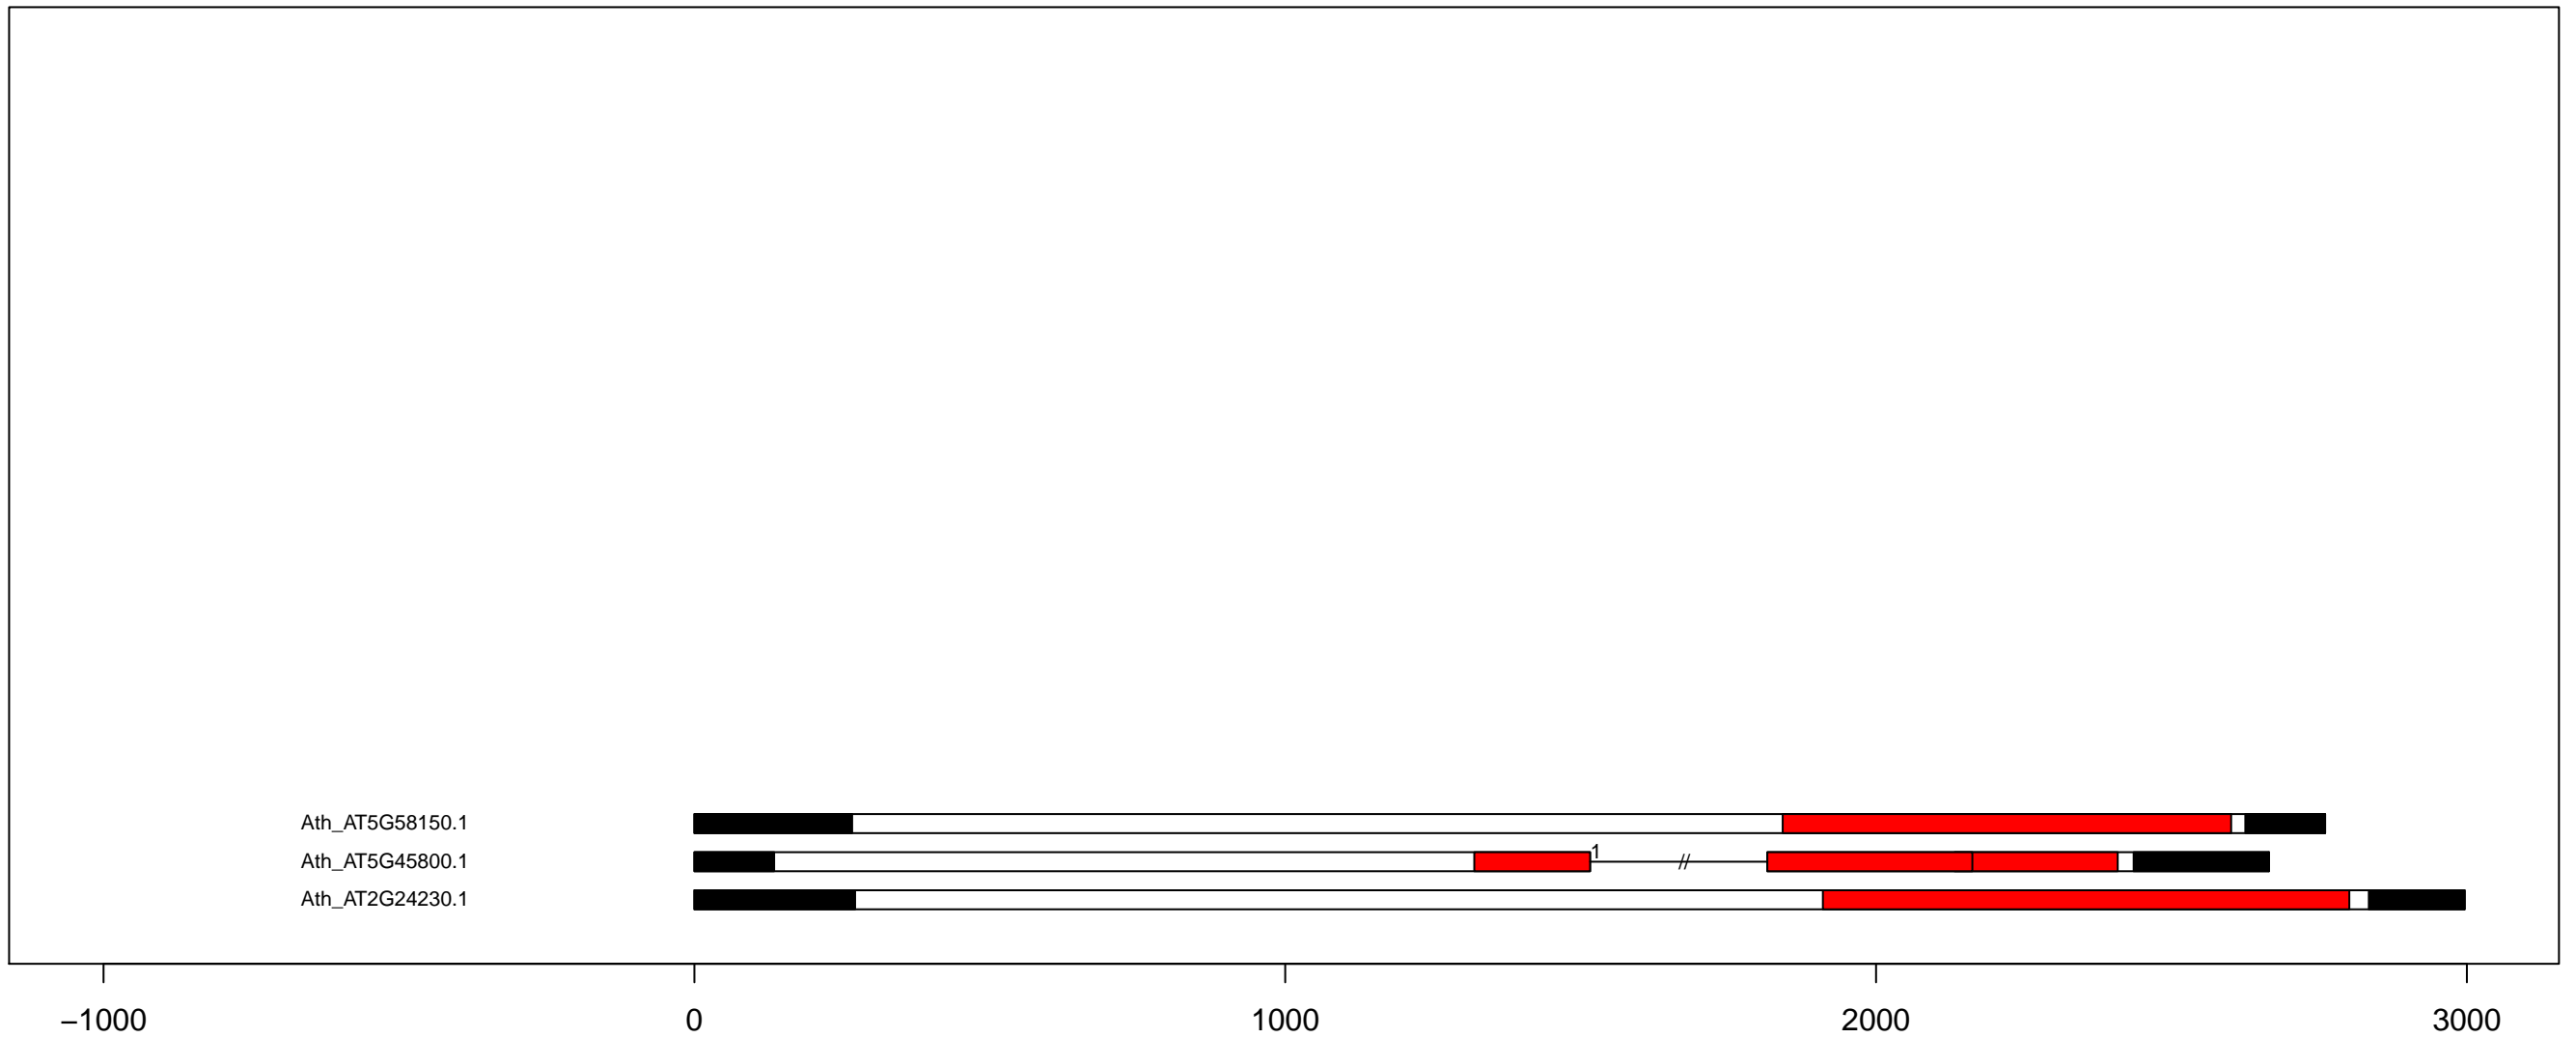

# A.th RLK-Pelle\_LRR-VII-3 exon-intron and kinase domain diagram (all)

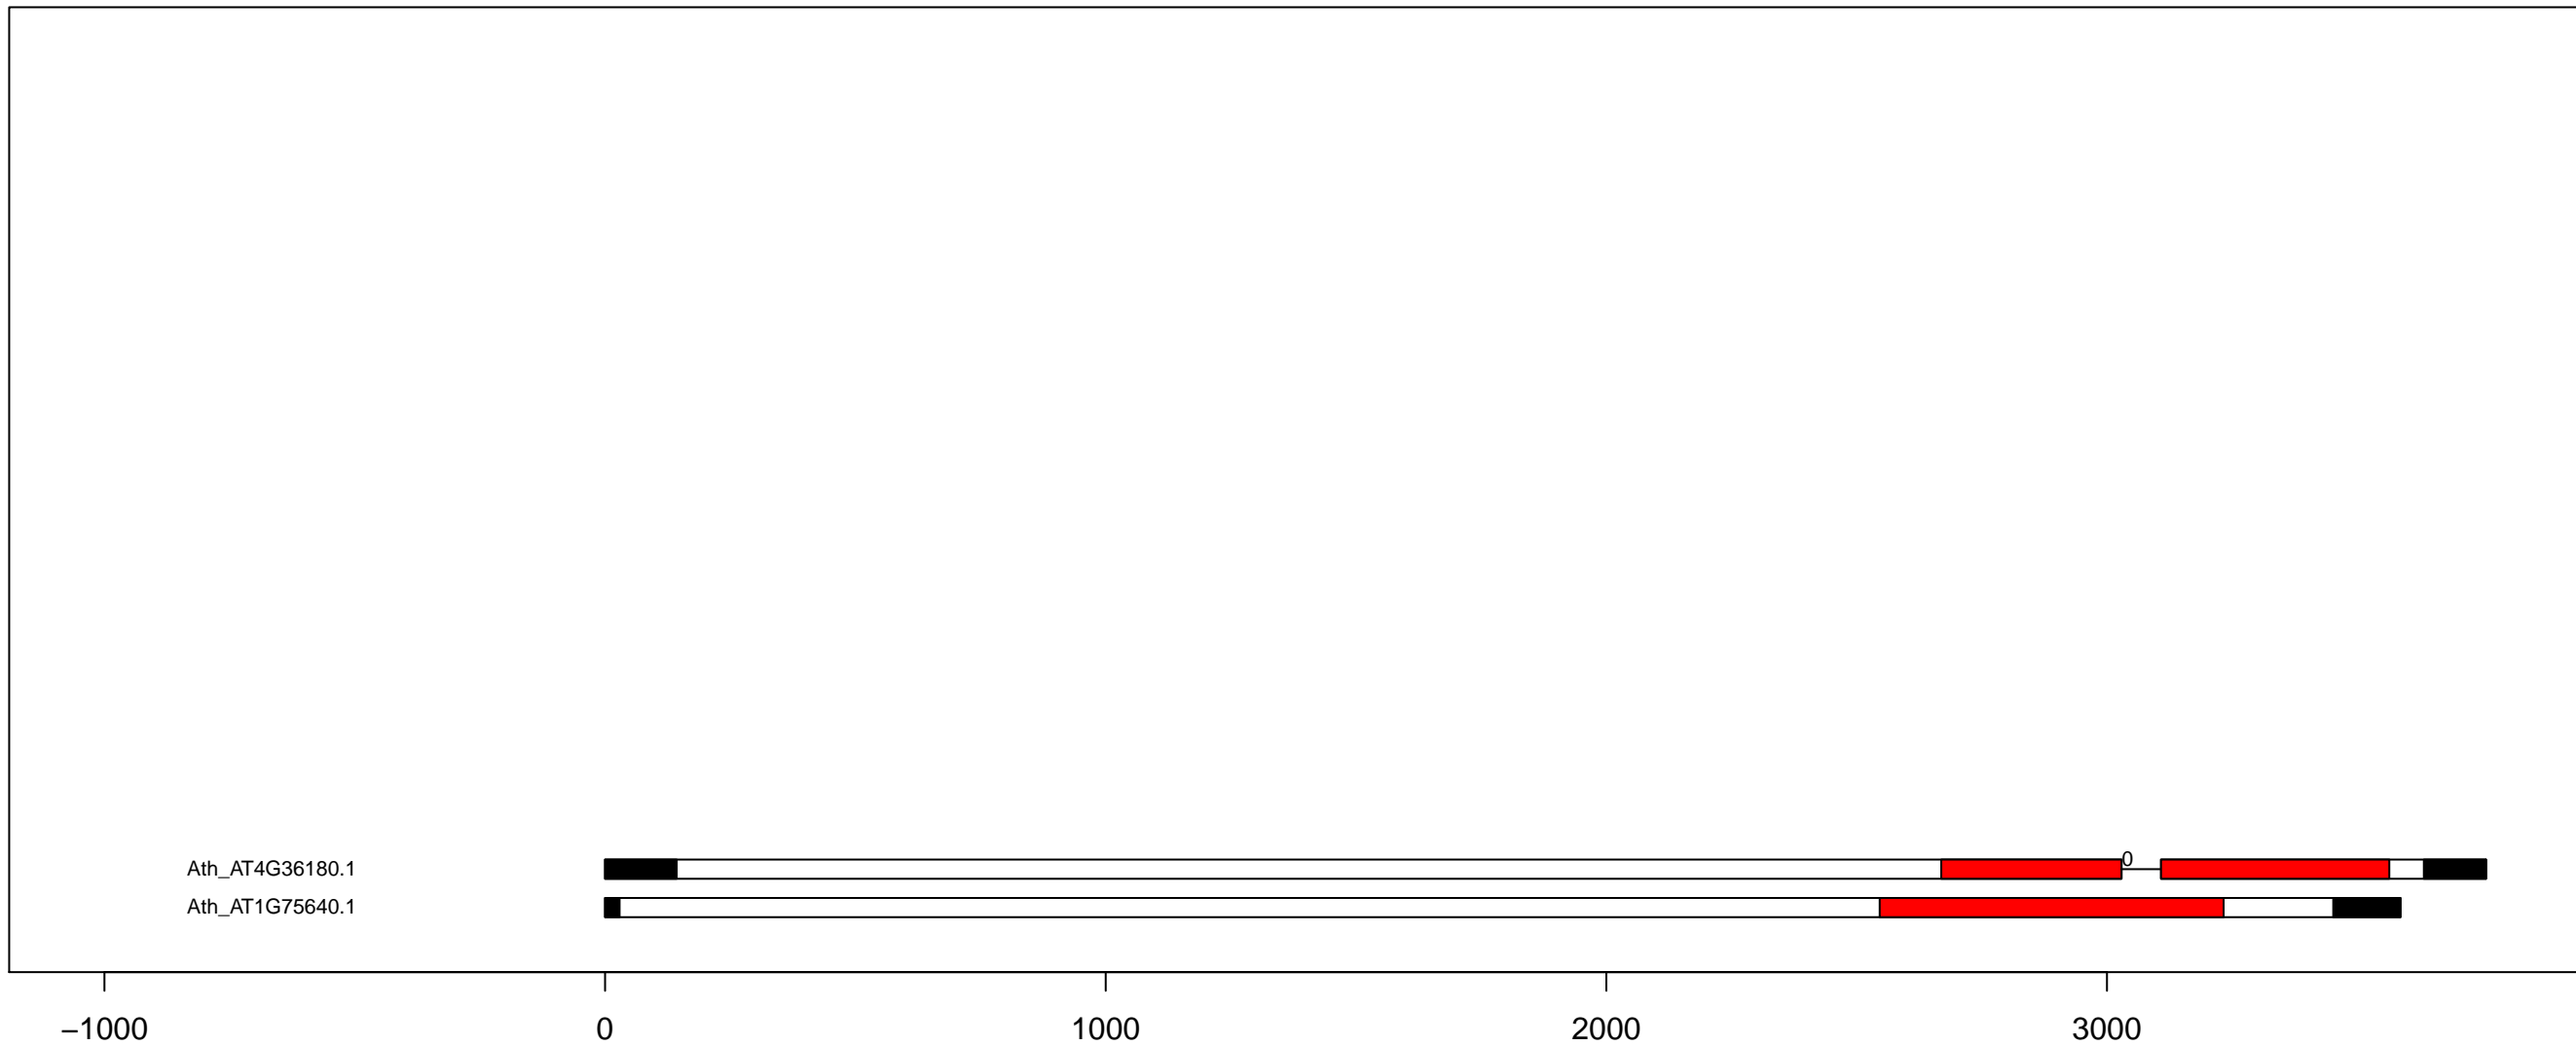

# A.th RLK-Pelle\_LRR-VIII-1 exon-intron and kinase domain diagram (all)

Ath\_AT5G37450.1  
Ath\_AT3G53590.1  
Ath\_AT5G49780.1  
Ath\_AT5G49770.1  
Ath\_AT5G49760.1  
Ath\_AT5G01950.1  
Ath\_AT1G79620.1  
Ath\_AT1G06840.1

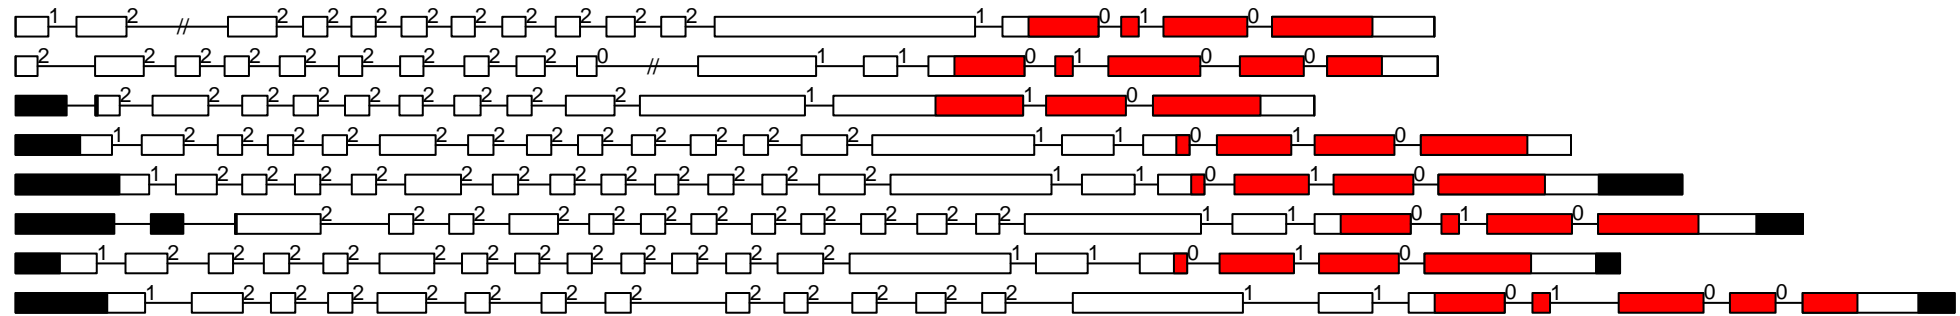

0

2000

4000

6000

# A.th RLK-Pelle\_LRR-V exon-intron and kinase domain diagram (all)

Ath\_AT5G06820.1  
 Ath\_AT4G22130.1  
 Ath\_AT4G03390.1  
 Ath\_AT3G14350.1  
 Ath\_AT3G13065.1  
 Ath\_AT2G20850.1  
 Ath\_AT1G78980.1  
 Ath\_AT1G53730.2  
 Ath\_AT1G11130.1

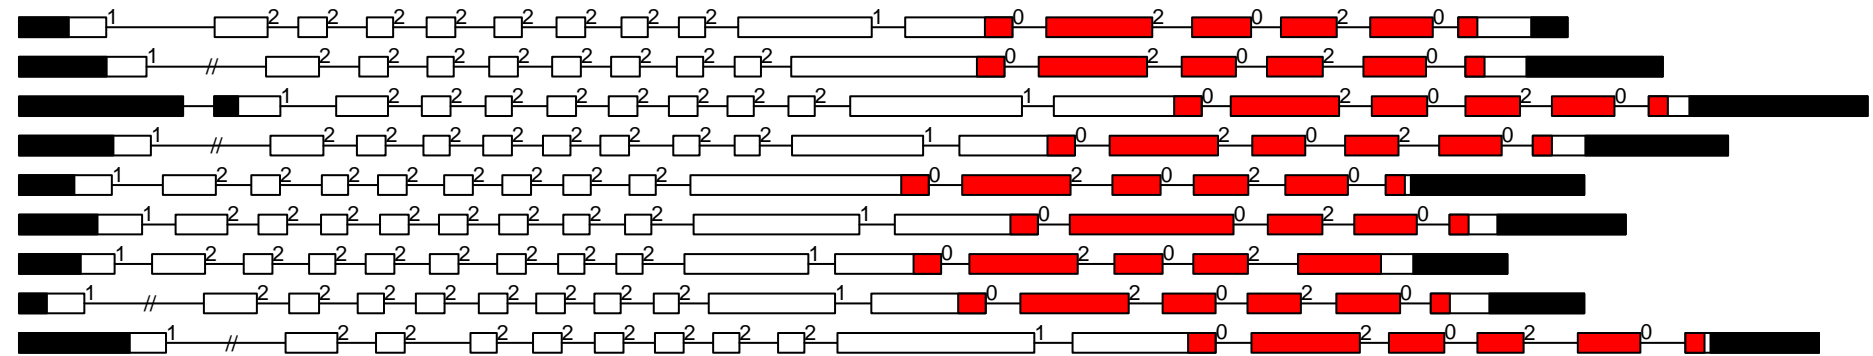

-1000

0

1000

2000

3000

4000

# A.th RLK-Pelle\_LRR-Xa exon-intron and kinase domain diagram (all)

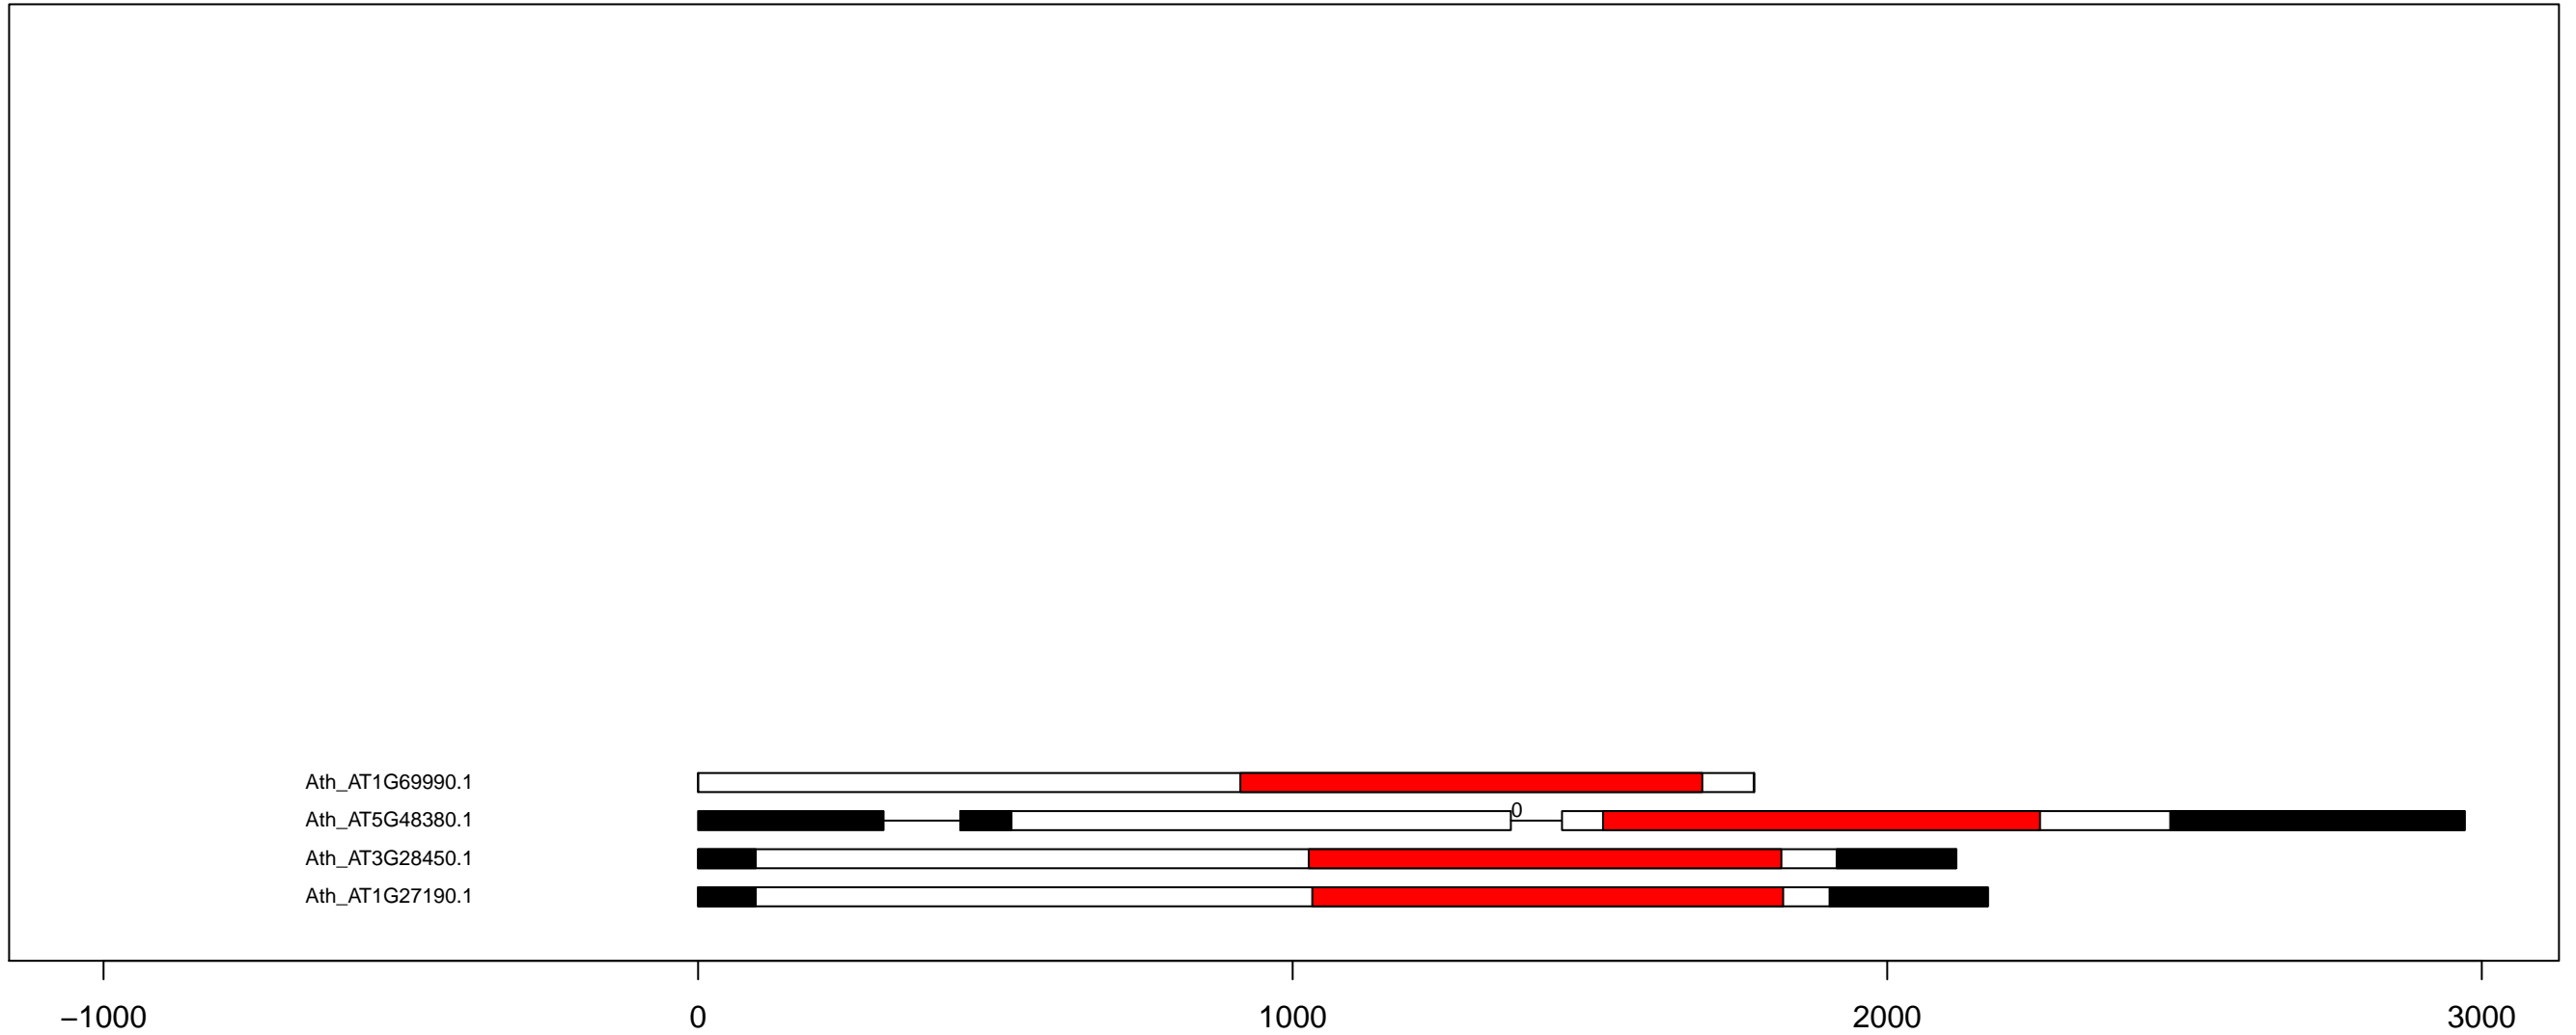



A.th RLK-Pelle\_LRR-Xb-2 exon-intron and kinase domain diagram (all)

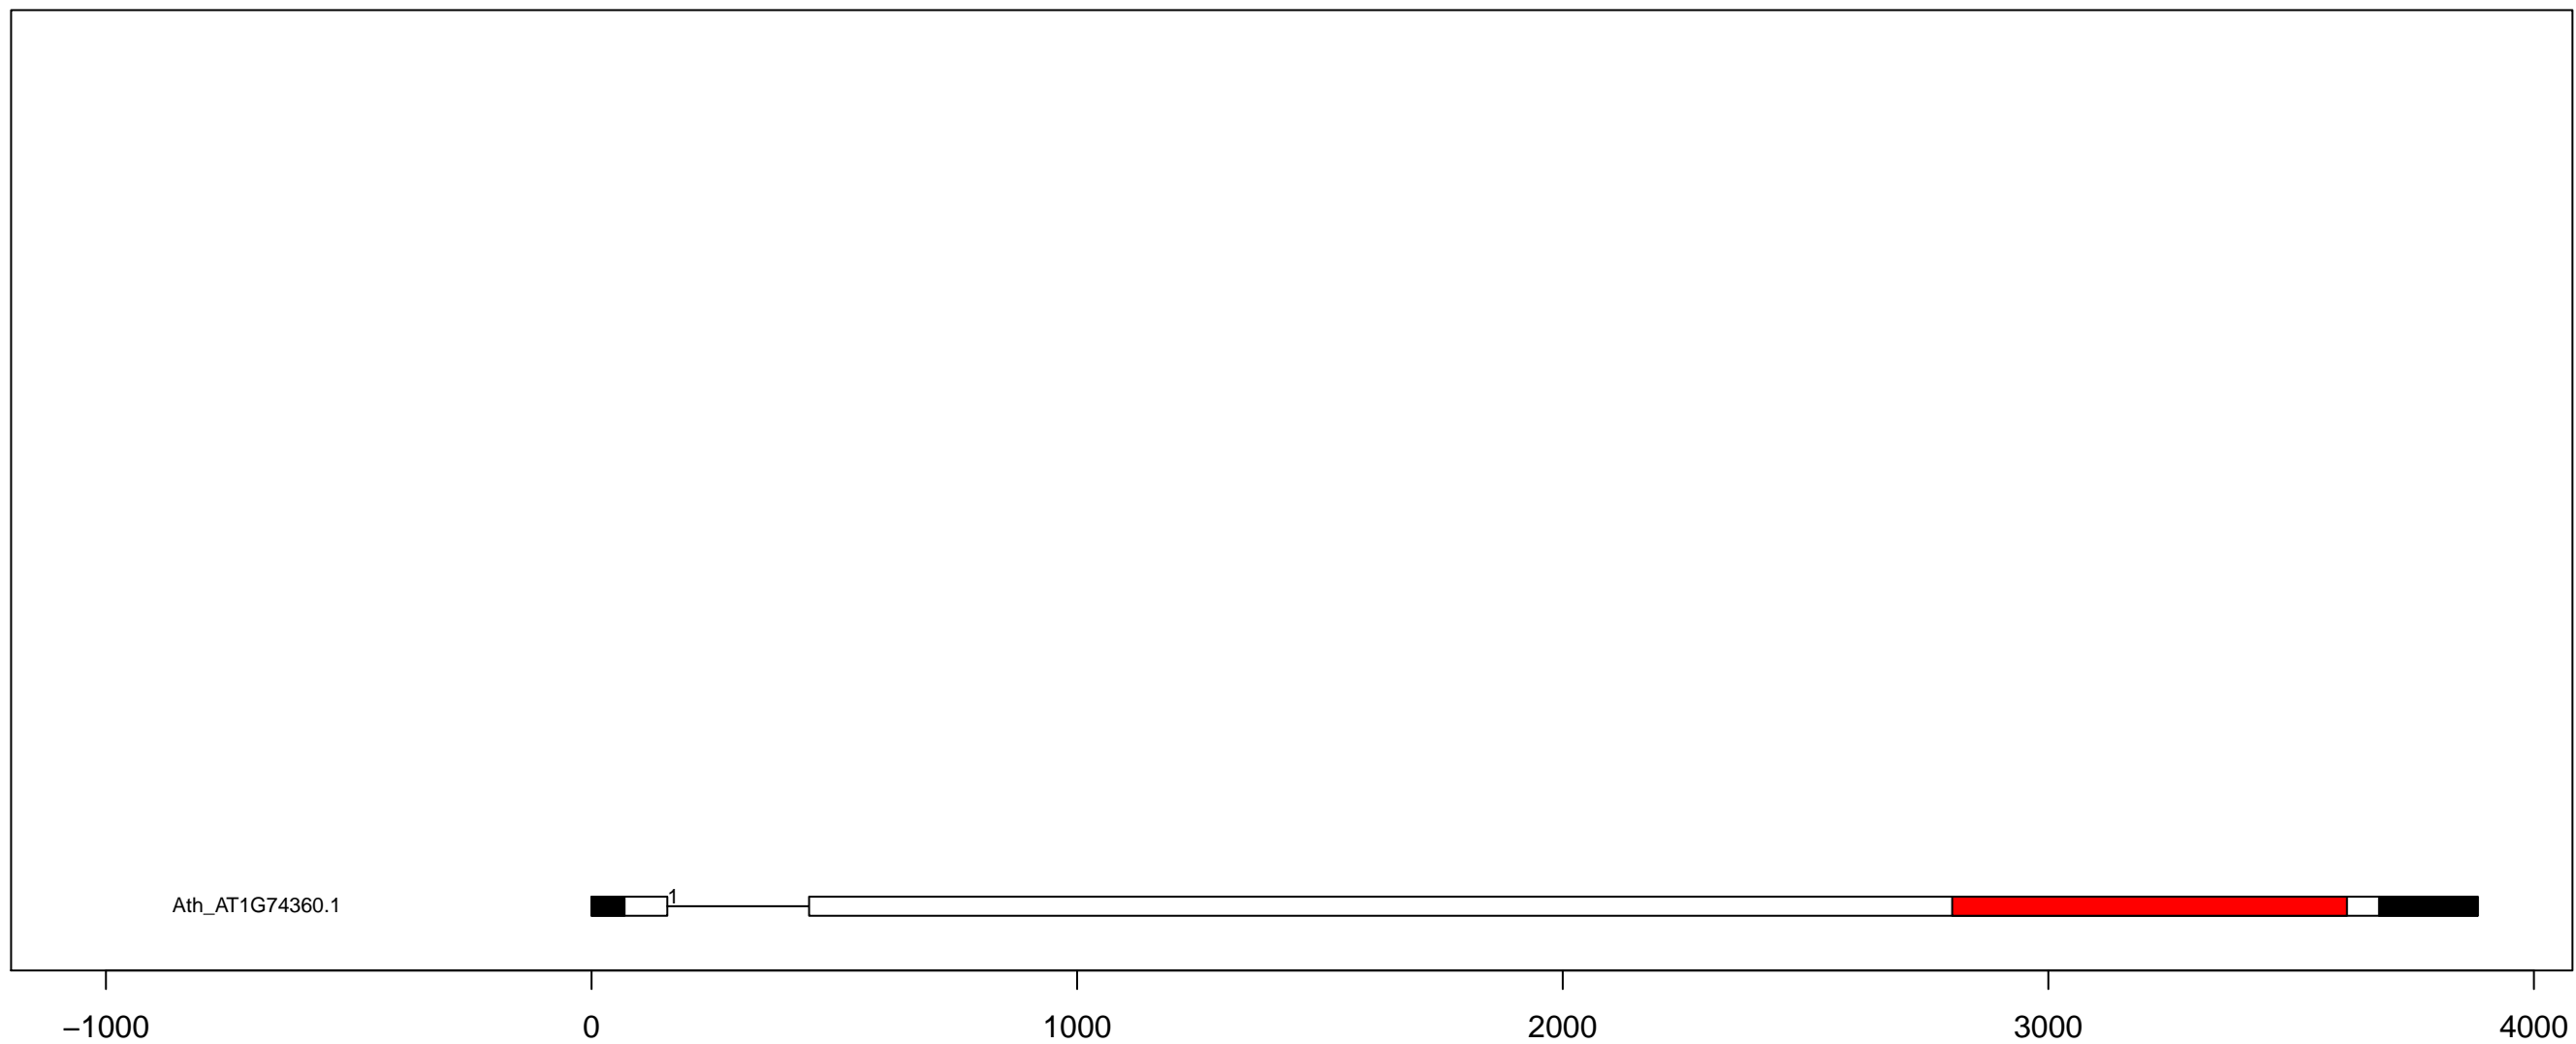

### A.th RLK-Pelle\_LRR-XI-1 exon-intron and kinase domain diagram (part 1)

Ath\_AT4G28490.1  
 Ath\_AT4G26540.1  
 Ath\_AT4G20270.1  
 Ath\_AT4G20140.1  
 Ath\_AT4G08850.1  
 Ath\_AT3G49670.1  
 Ath\_AT3G24240.1  
 Ath\_AT3G19700.1  
 Ath\_AT2G41820.1  
 Ath\_AT2G33170.1  
 Ath\_AT1G75820.1  
 Ath\_AT1G73080.1  
 Ath\_AT1G72180.1  
 Ath\_AT1G35710.1  
 Ath\_AT1G34110.1  
 Ath\_AT1G28440.1  
 Ath\_AT1G17750.1  
 Ath\_AT1G17230.1  
 Ath\_AT1G09970.2  
 Ath\_AT1G08590.1

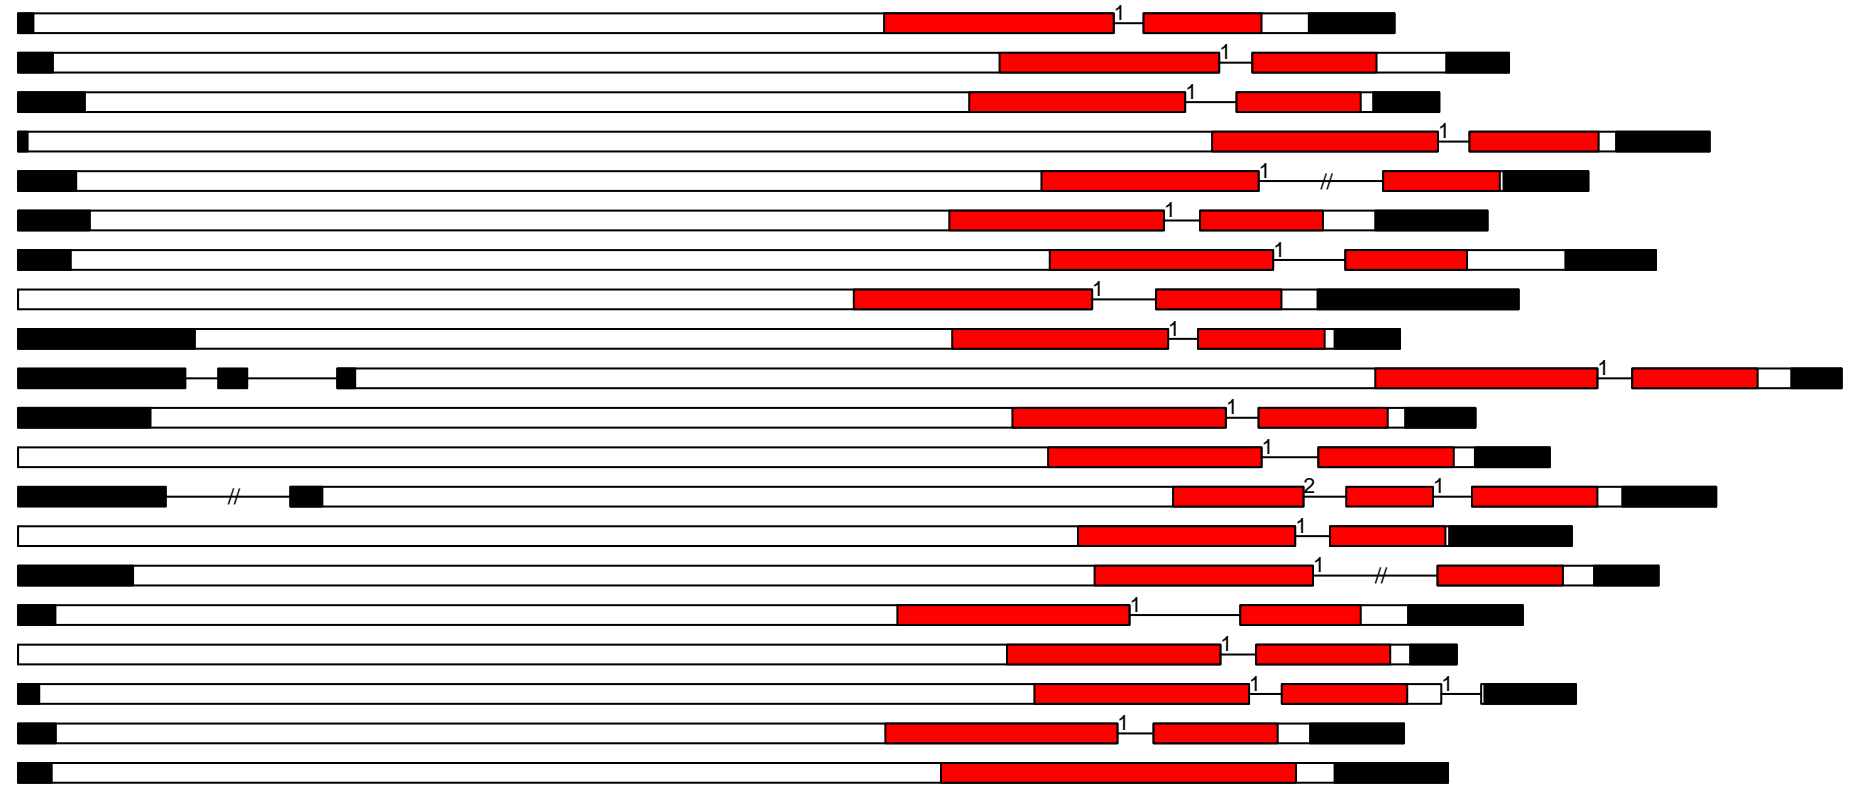



# A.th RLK-Pelle\_LRR-XI-1 exon-intron and kinase domain diagram (part 2)

Ath\_AT5G65710.1  
Ath\_AT5G61480.1  
Ath\_AT5G06940.1  
Ath\_AT1G34420.1  
Ath\_AT5G65700.1  
Ath\_AT5G63930.1  
Ath\_AT5G56040.2  
Ath\_AT5G51350.1  
Ath\_AT5G49660.1  
Ath\_AT5G48940.1  
Ath\_AT5G44700.1  
Ath\_AT5G25930.1  
Ath\_AT4G28650.1

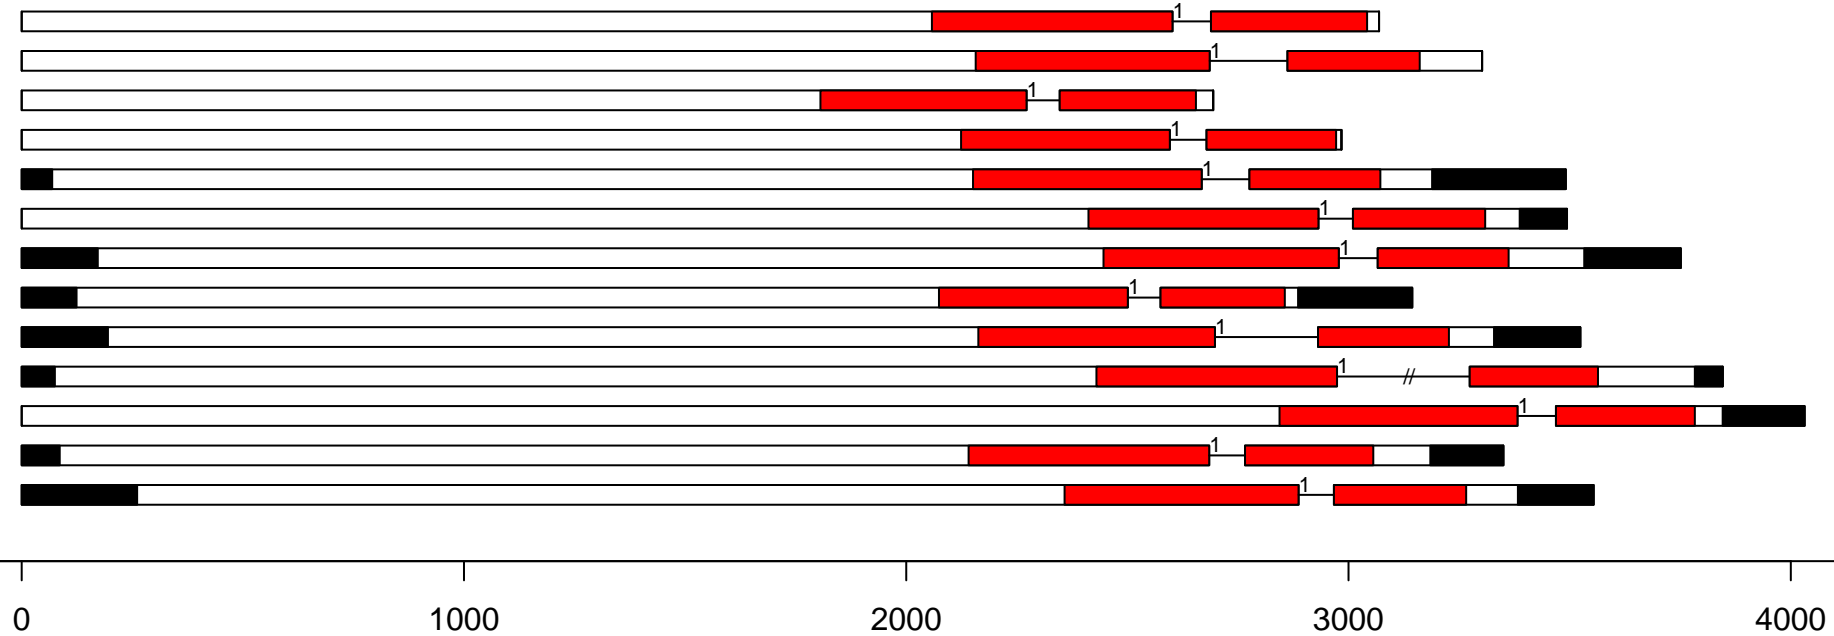

# A.th RLK-Pelle\_LRR-XI-2 exon-intron and kinase domain diagram (all)

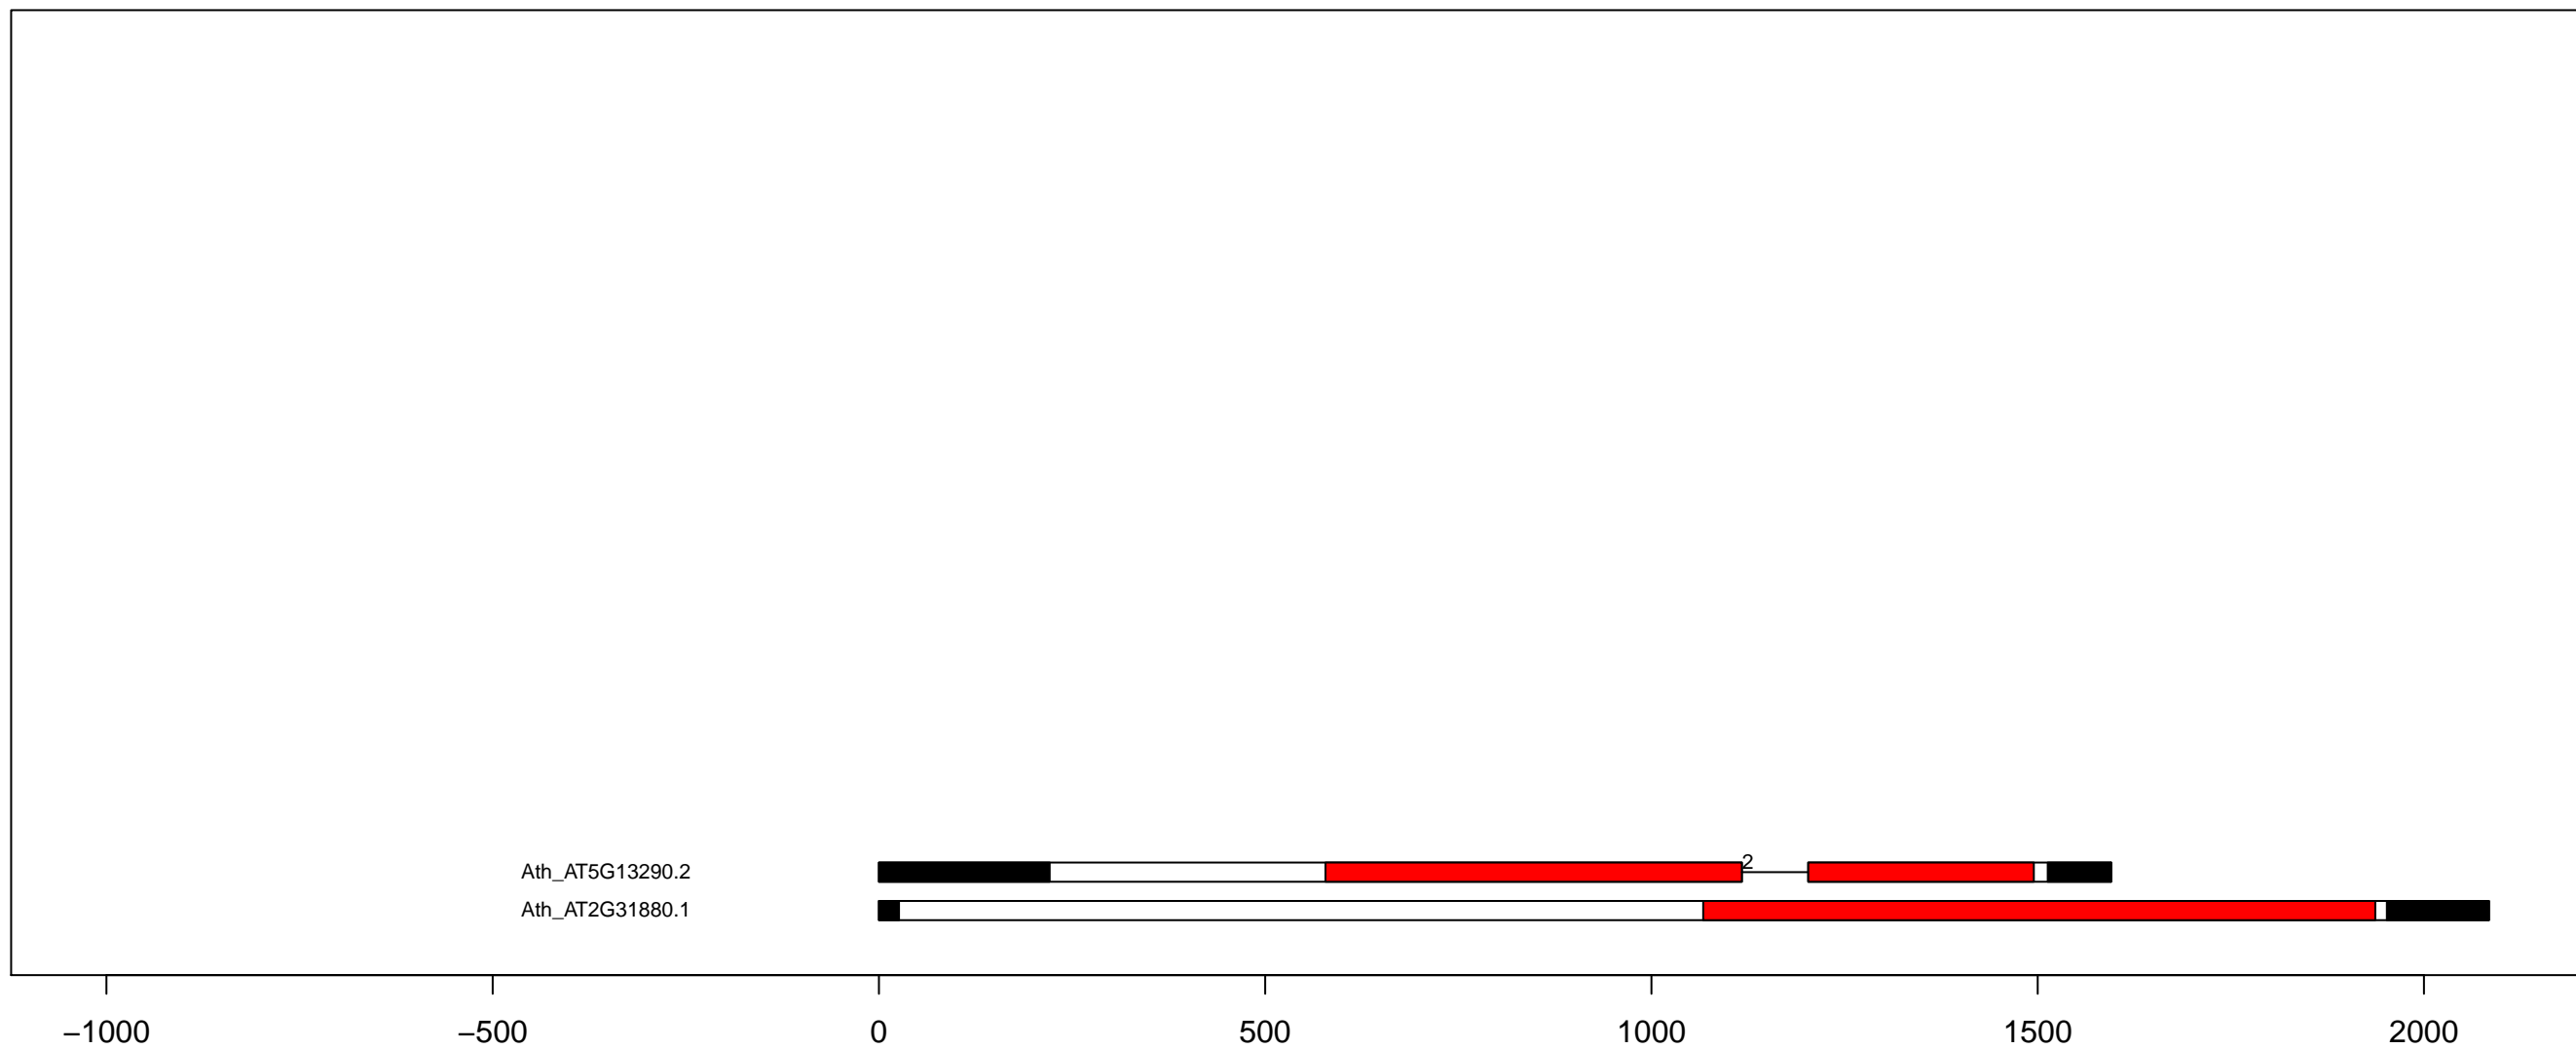





# A.th RLK-Pelle\_LRR-XIIIb exon-intron and kinase domain diagram (all)

Ath\_AT5G62230.1

Ath\_AT5G07180.1

Ath\_AT2G26330.1

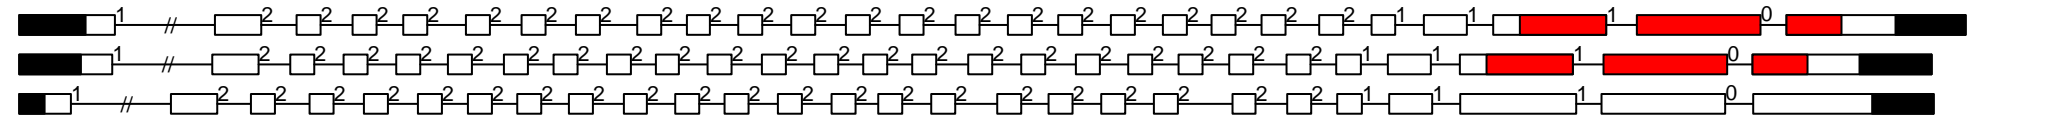

0

2000

4000

6000

# A.th RLK-Pelle\_LRR-XIV exon-intron and kinase domain diagram (all)

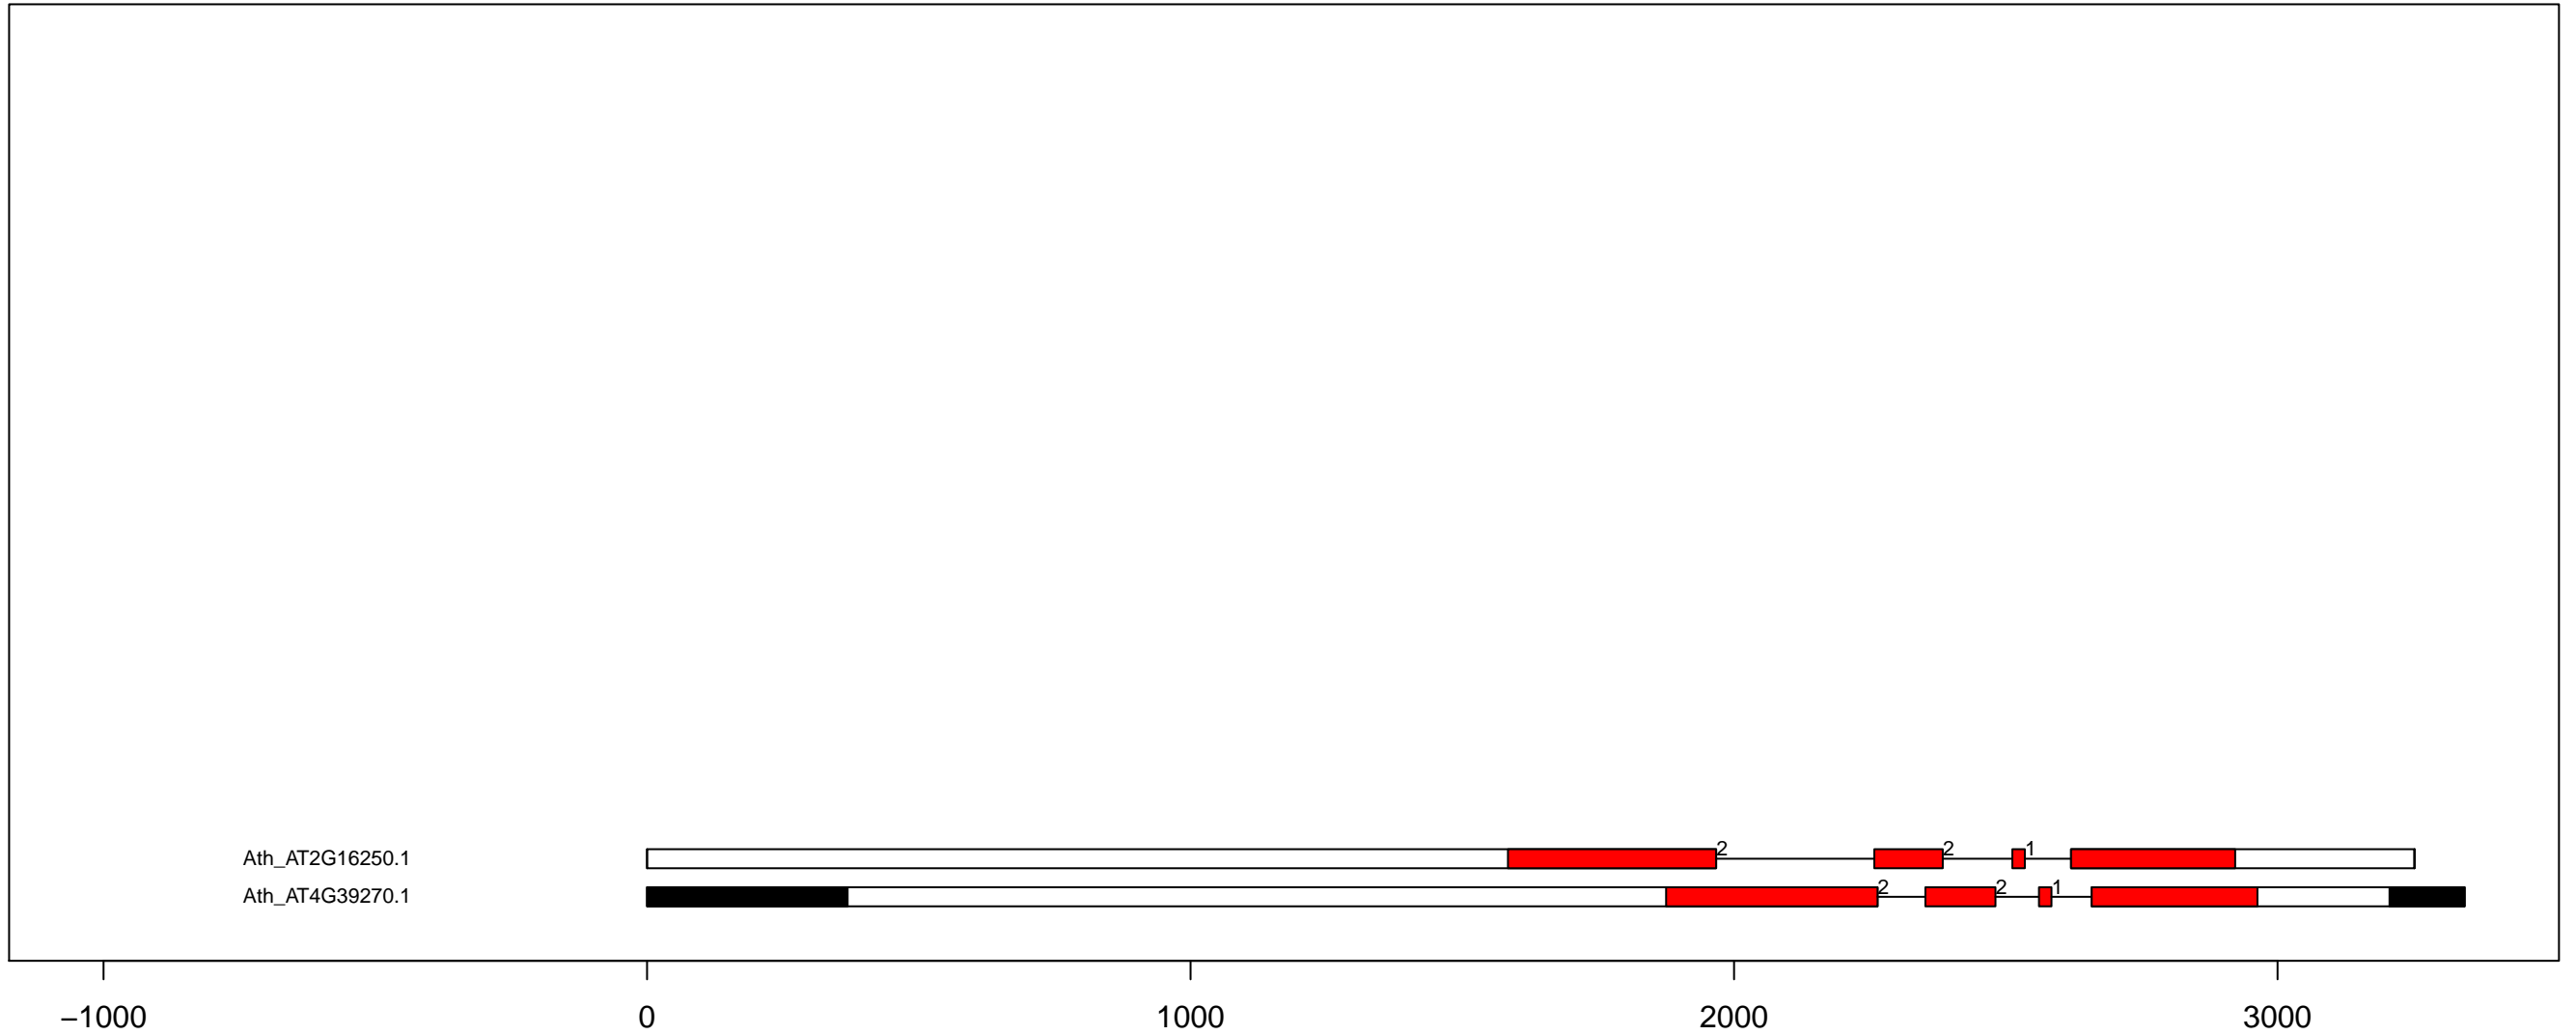

# A.th RLK-Pelle\_LRR-XV exon-intron and kinase domain diagram (all)

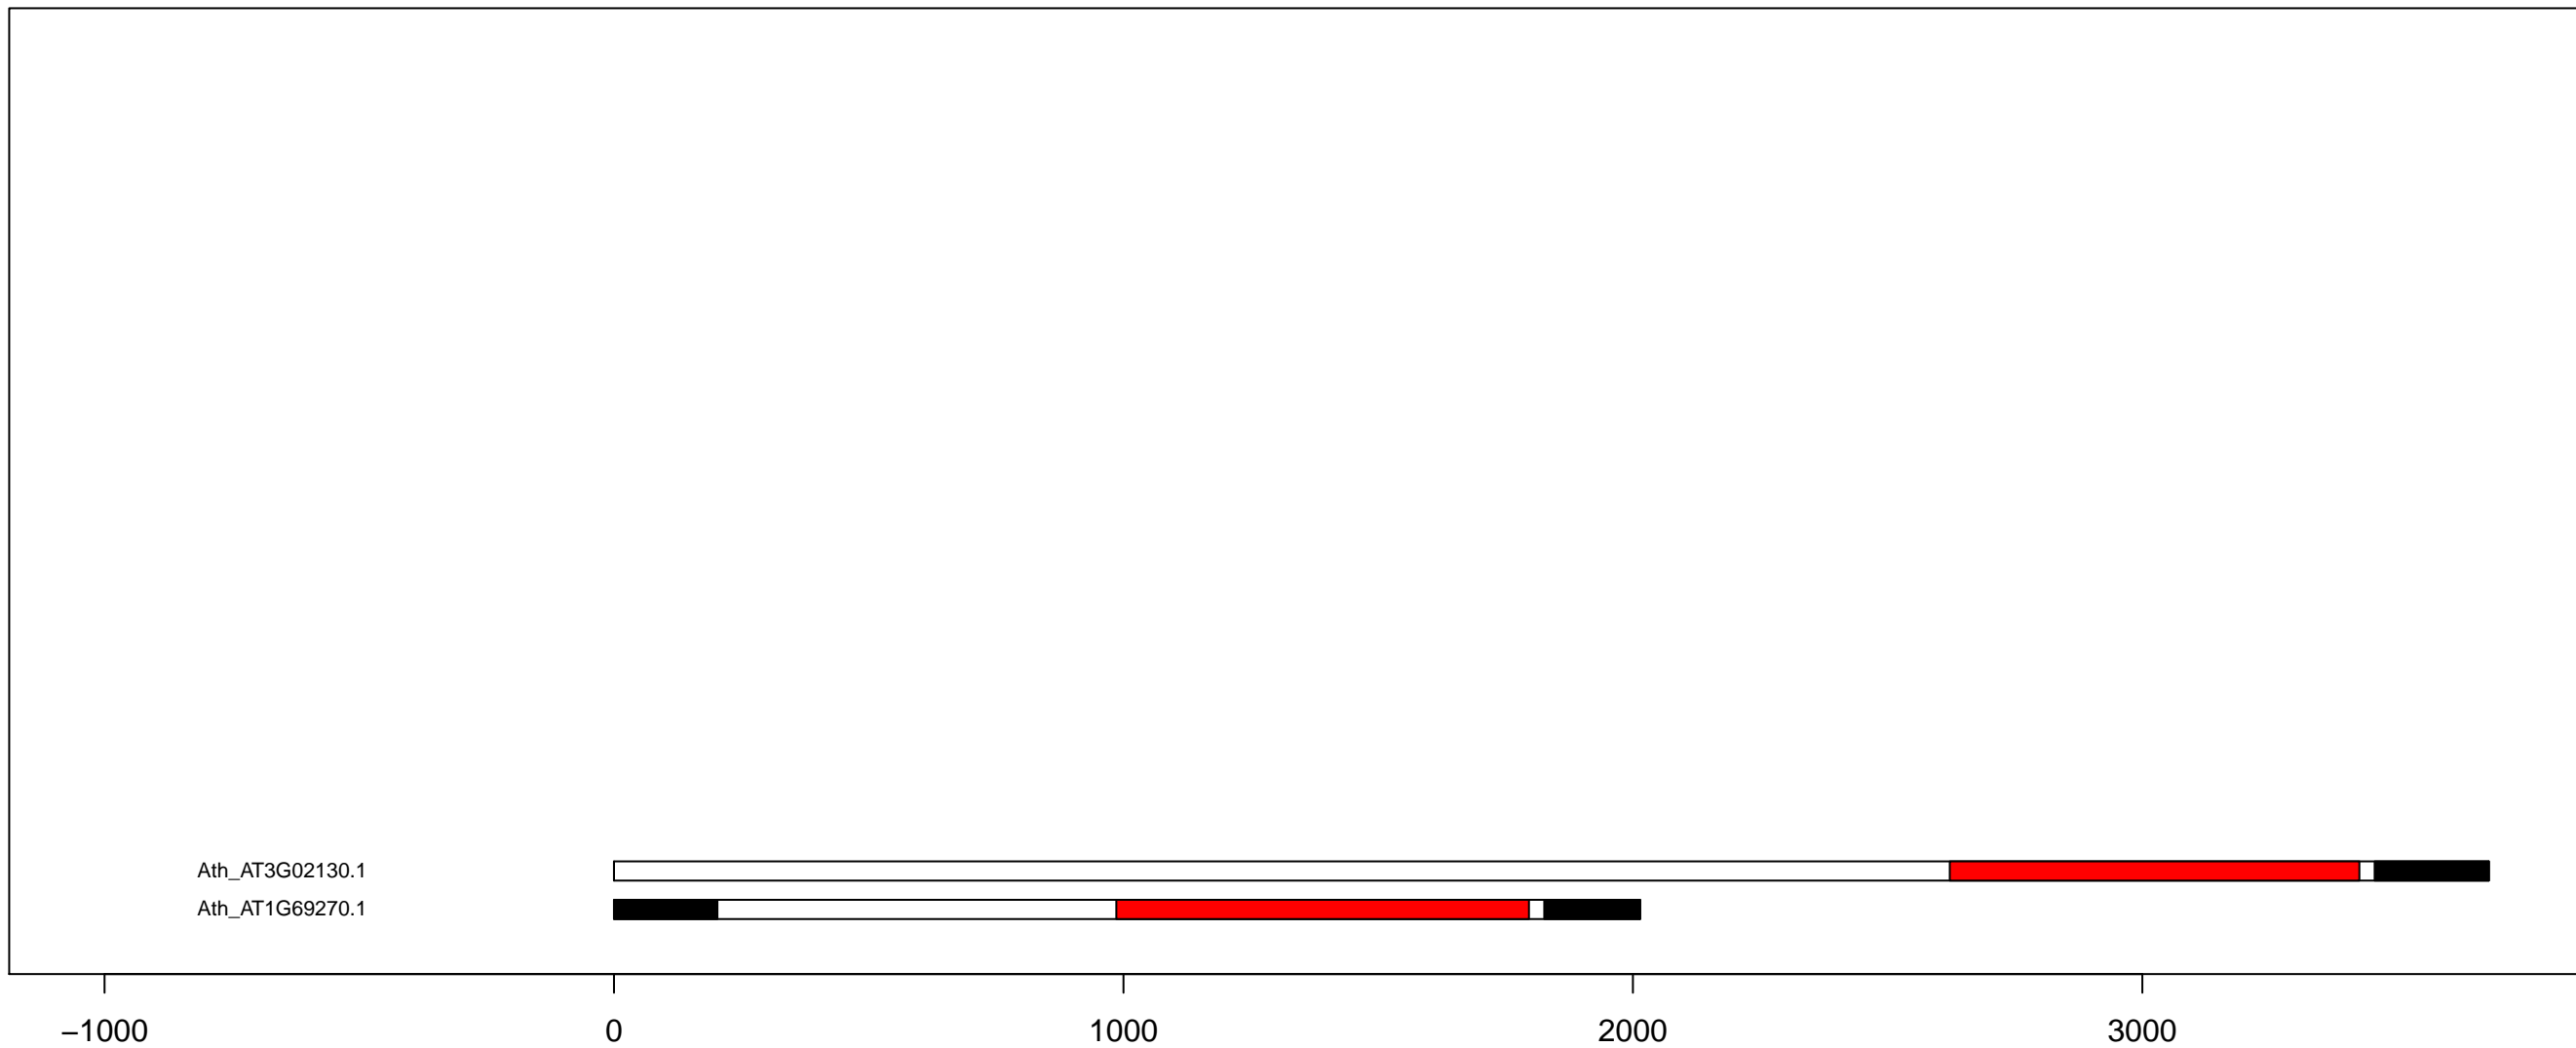

# A.th RLK-Pelle\_LysM exon-intron and kinase domain diagram (all)

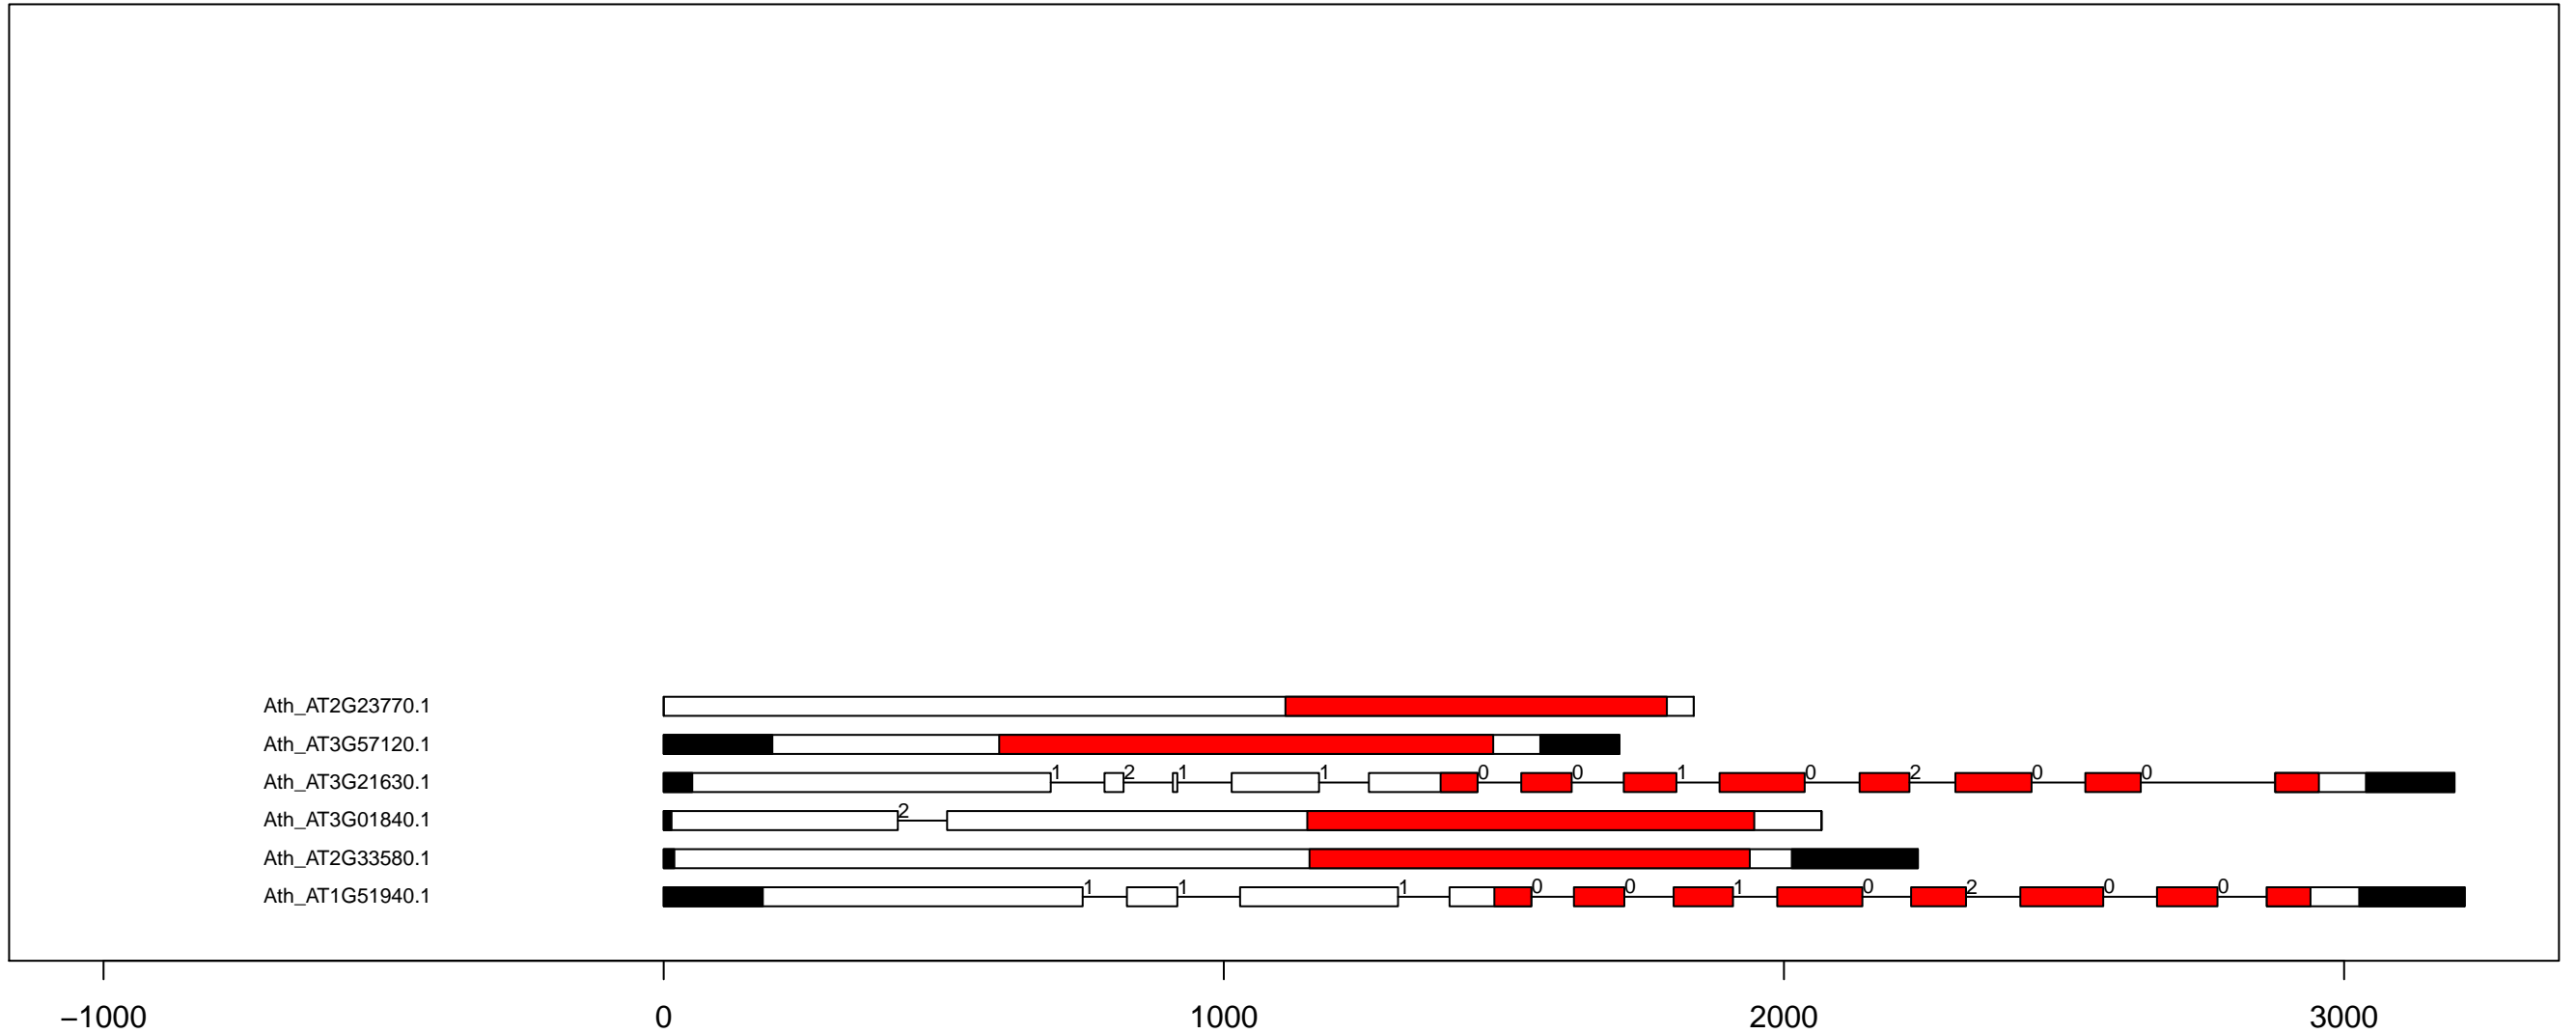



### A.th RLK-Pelle\_PERK-1 exon-intron and kinase domain diagram (all)

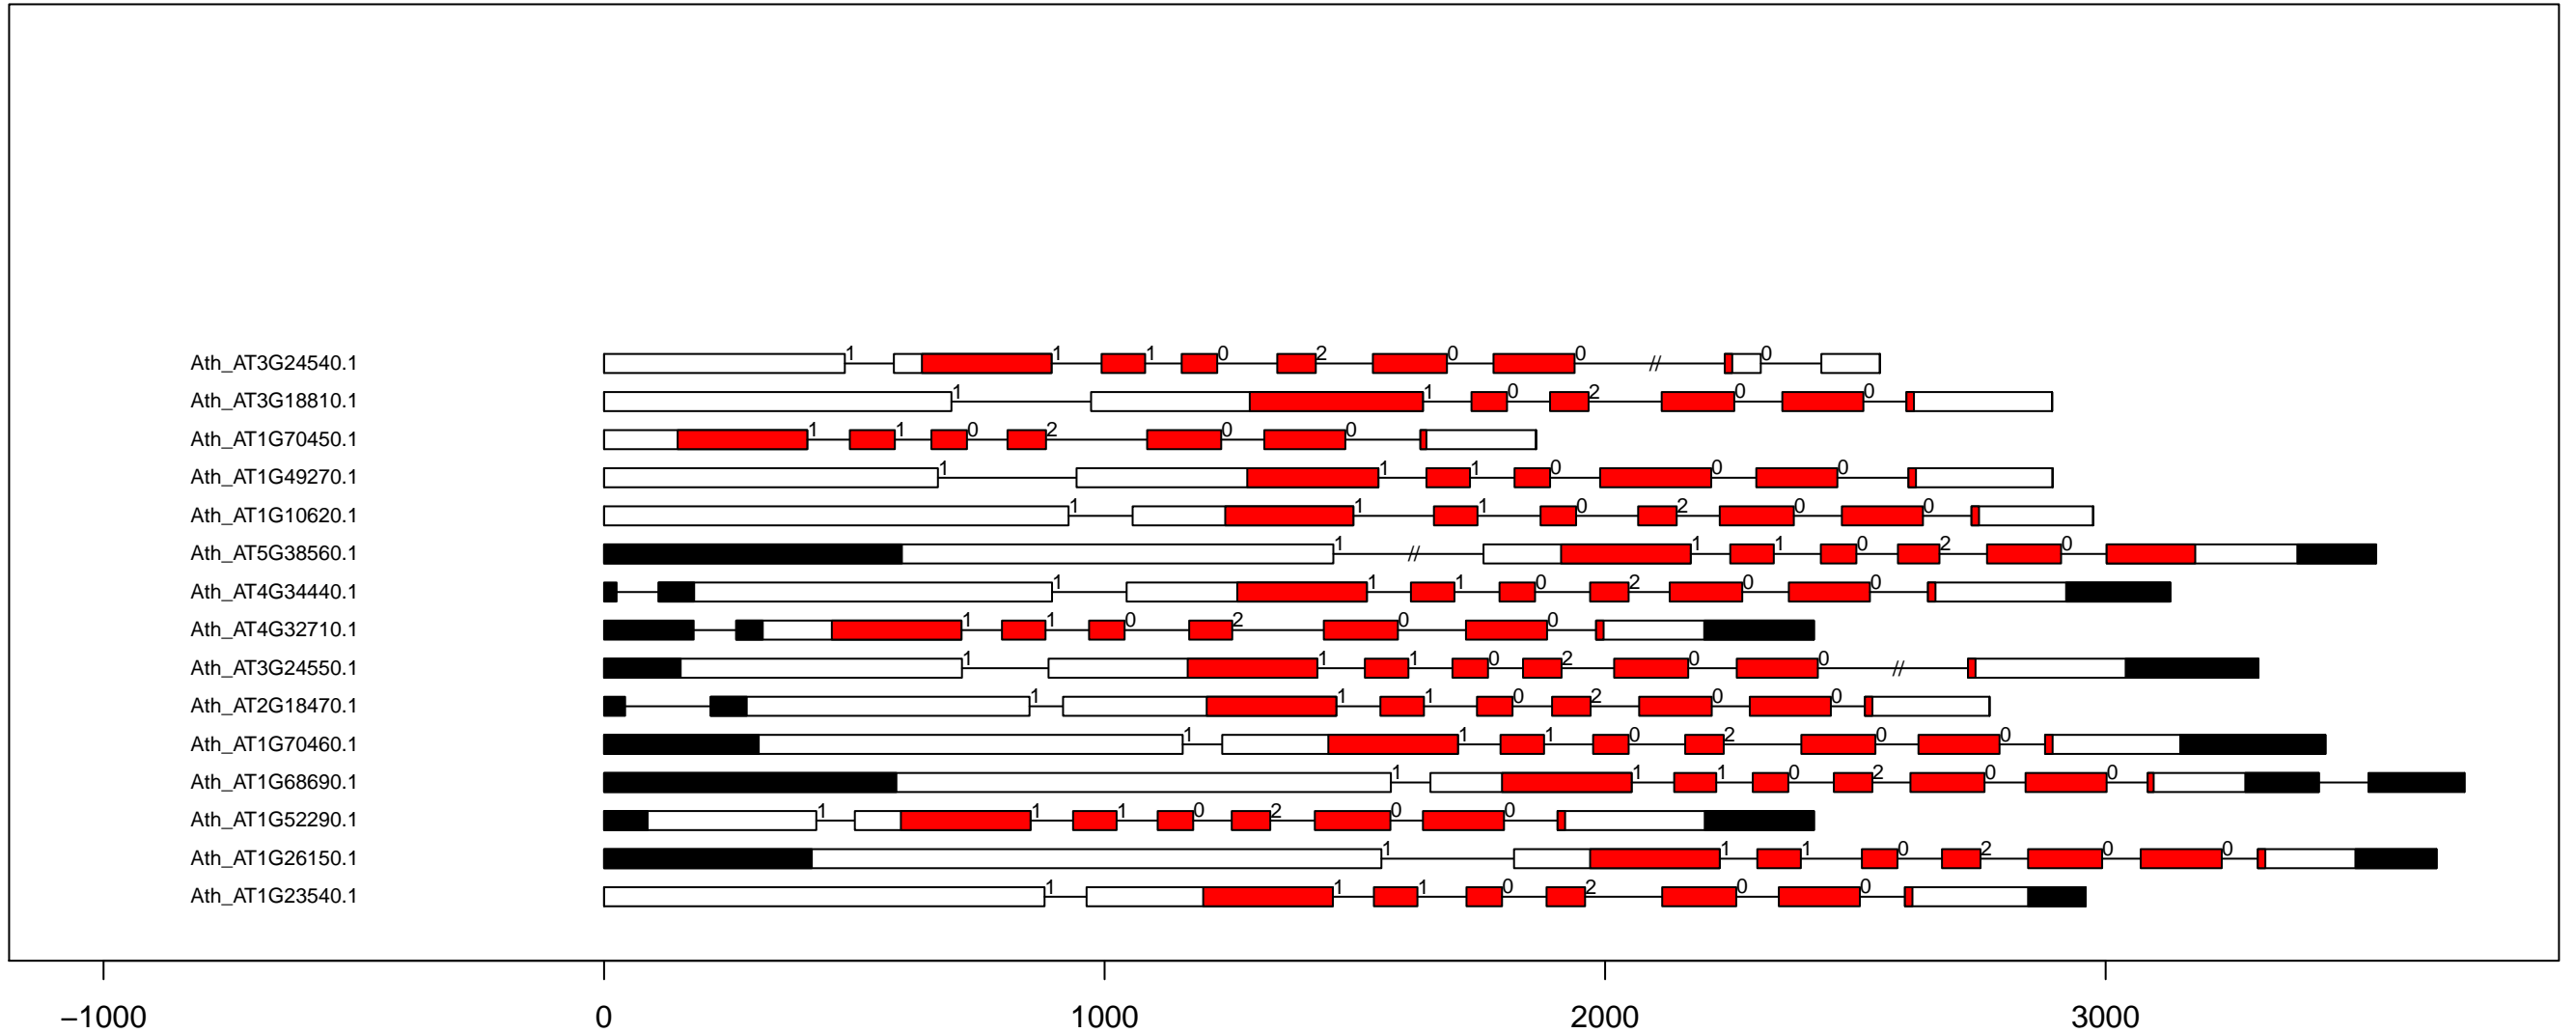



# A.th RLK-Pelle\_RKF3 exon-intron and kinase domain diagram (all)

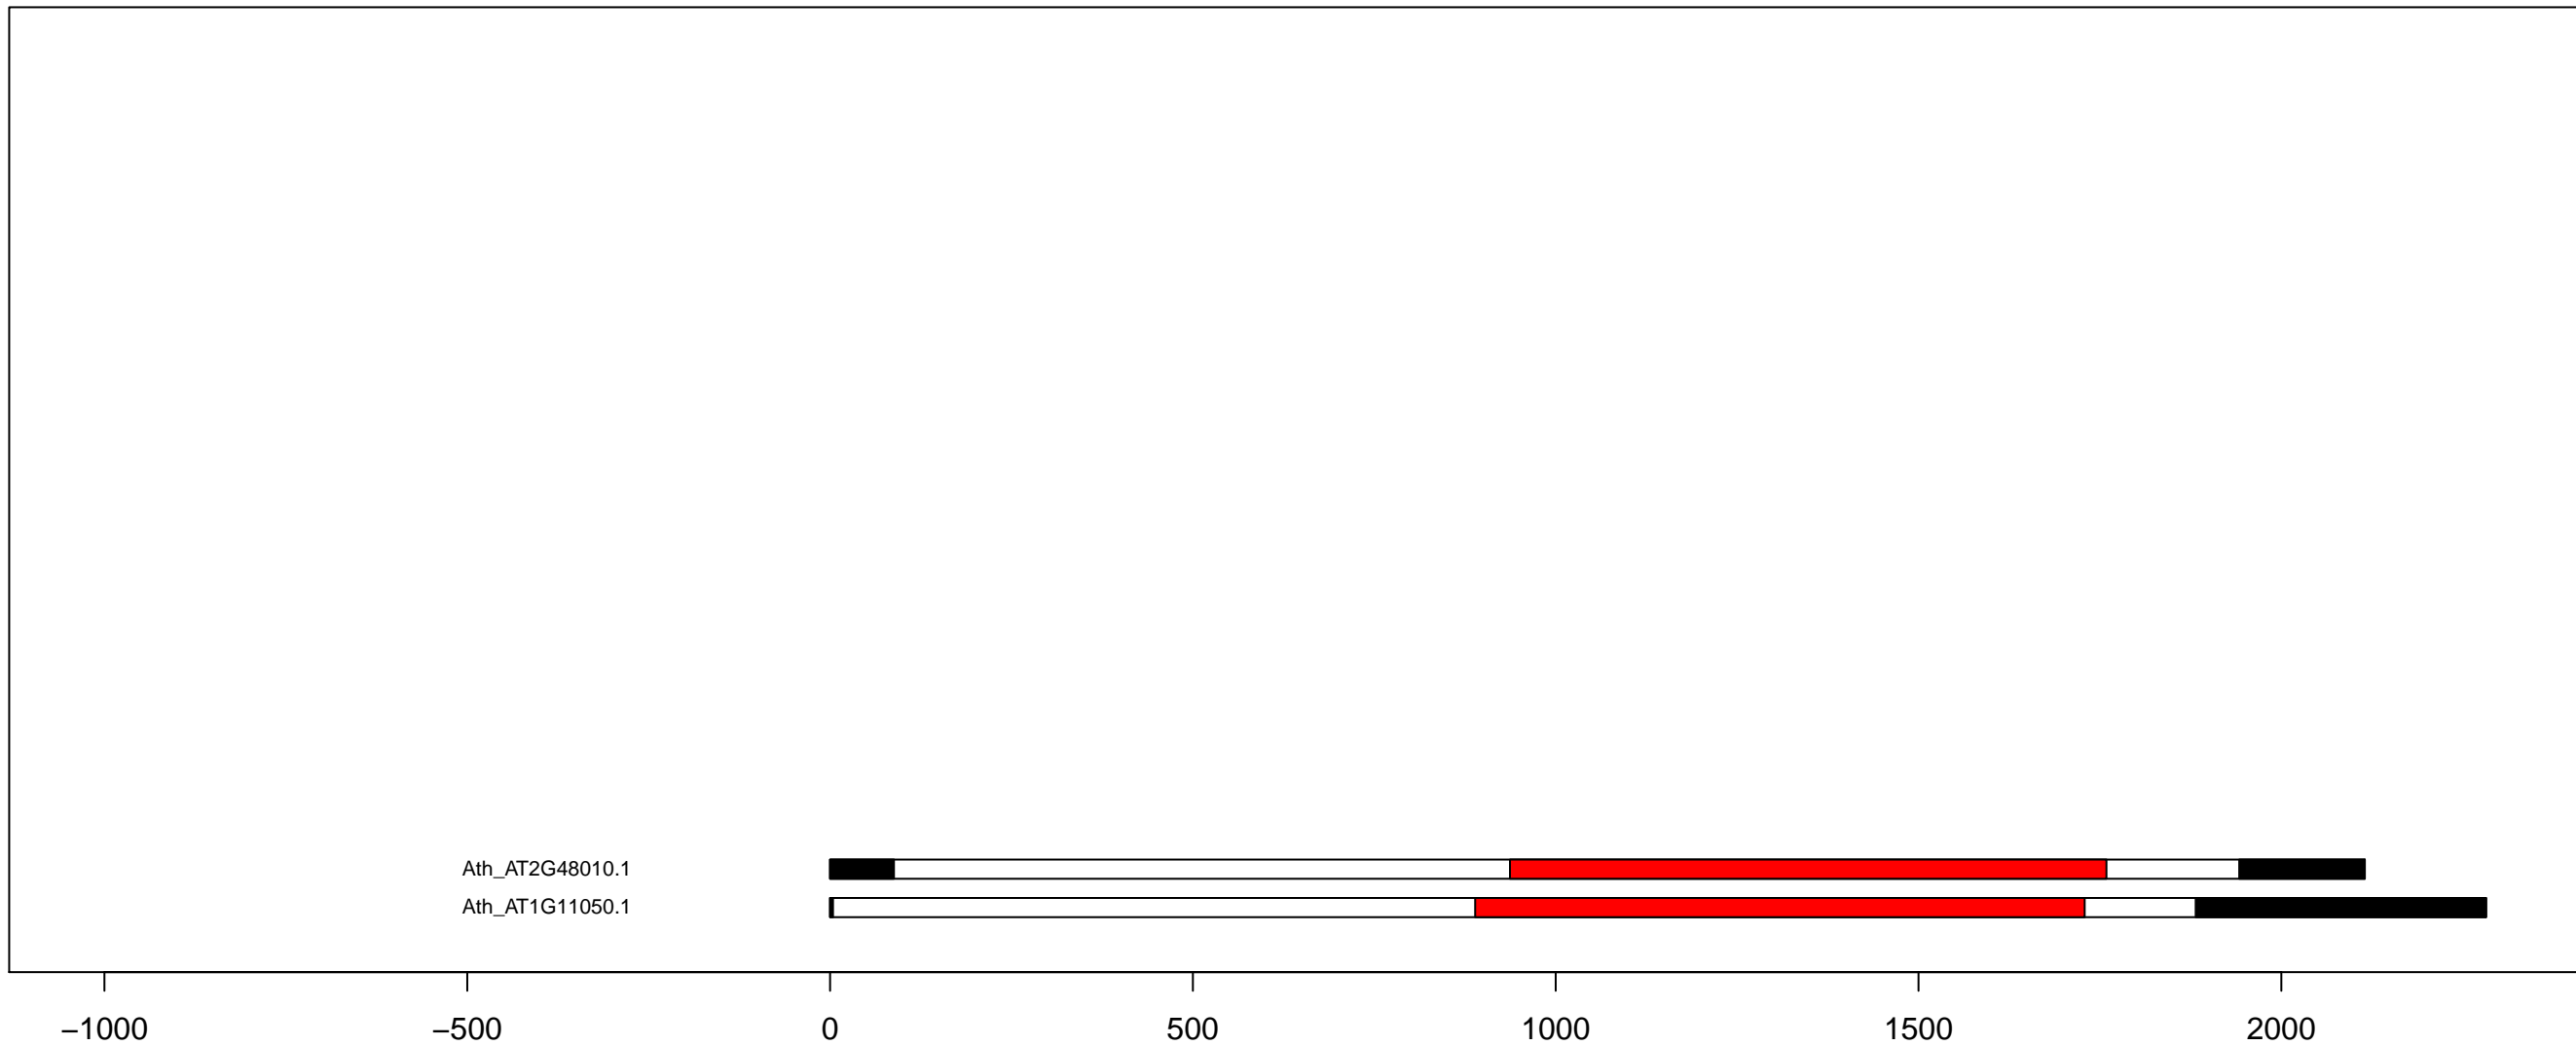

# A.th RLK-Pelle\_RLCK-II exon-intron and kinase domain diagram (all)

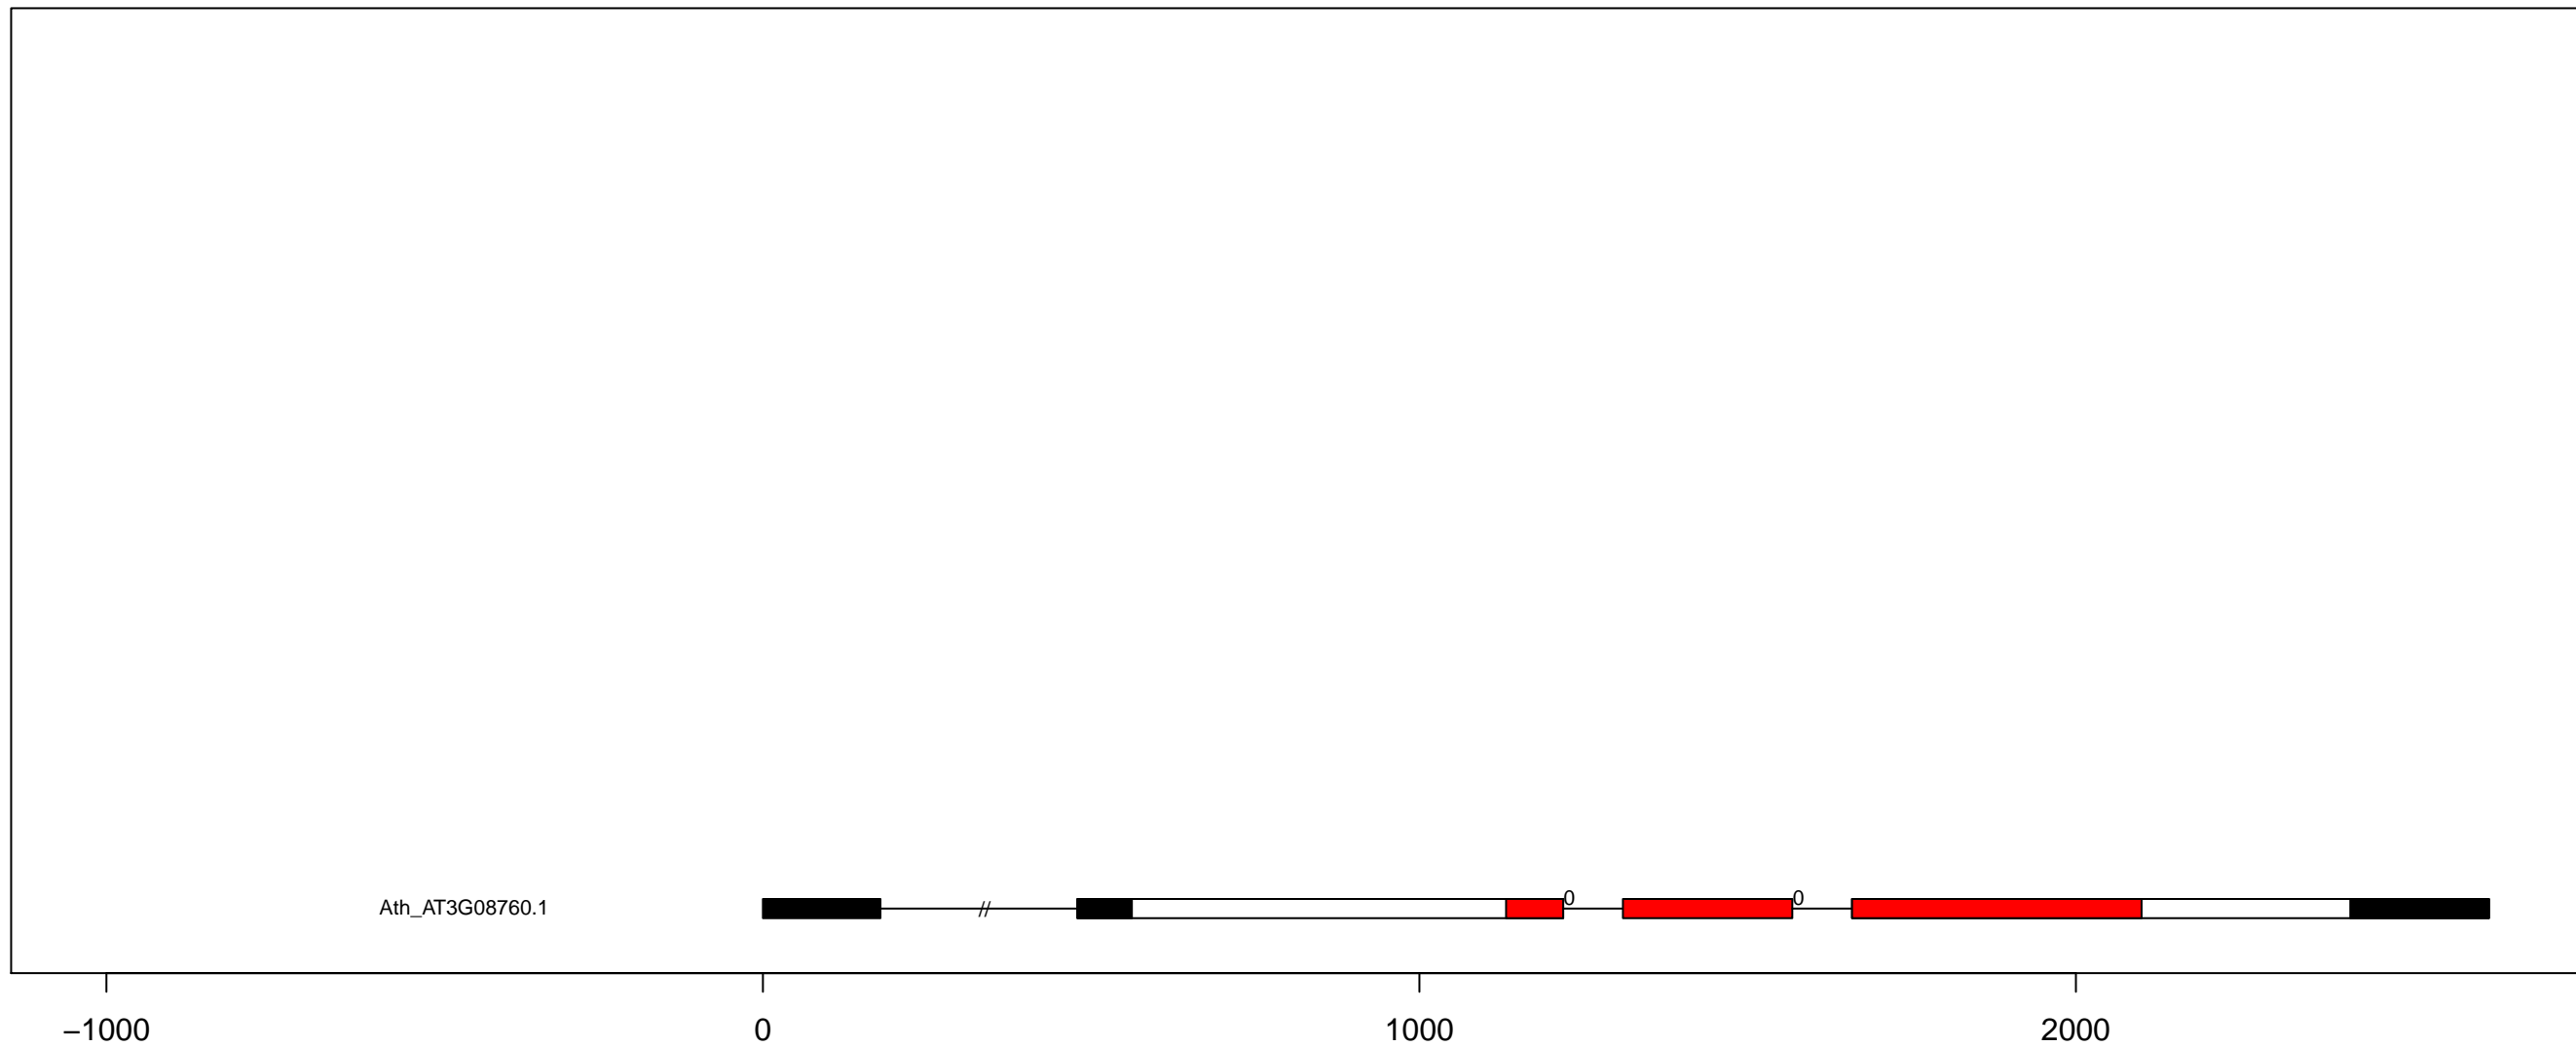

# A.th RLK-Pelle\_RLCK-IV exon-intron and kinase domain diagram (all)

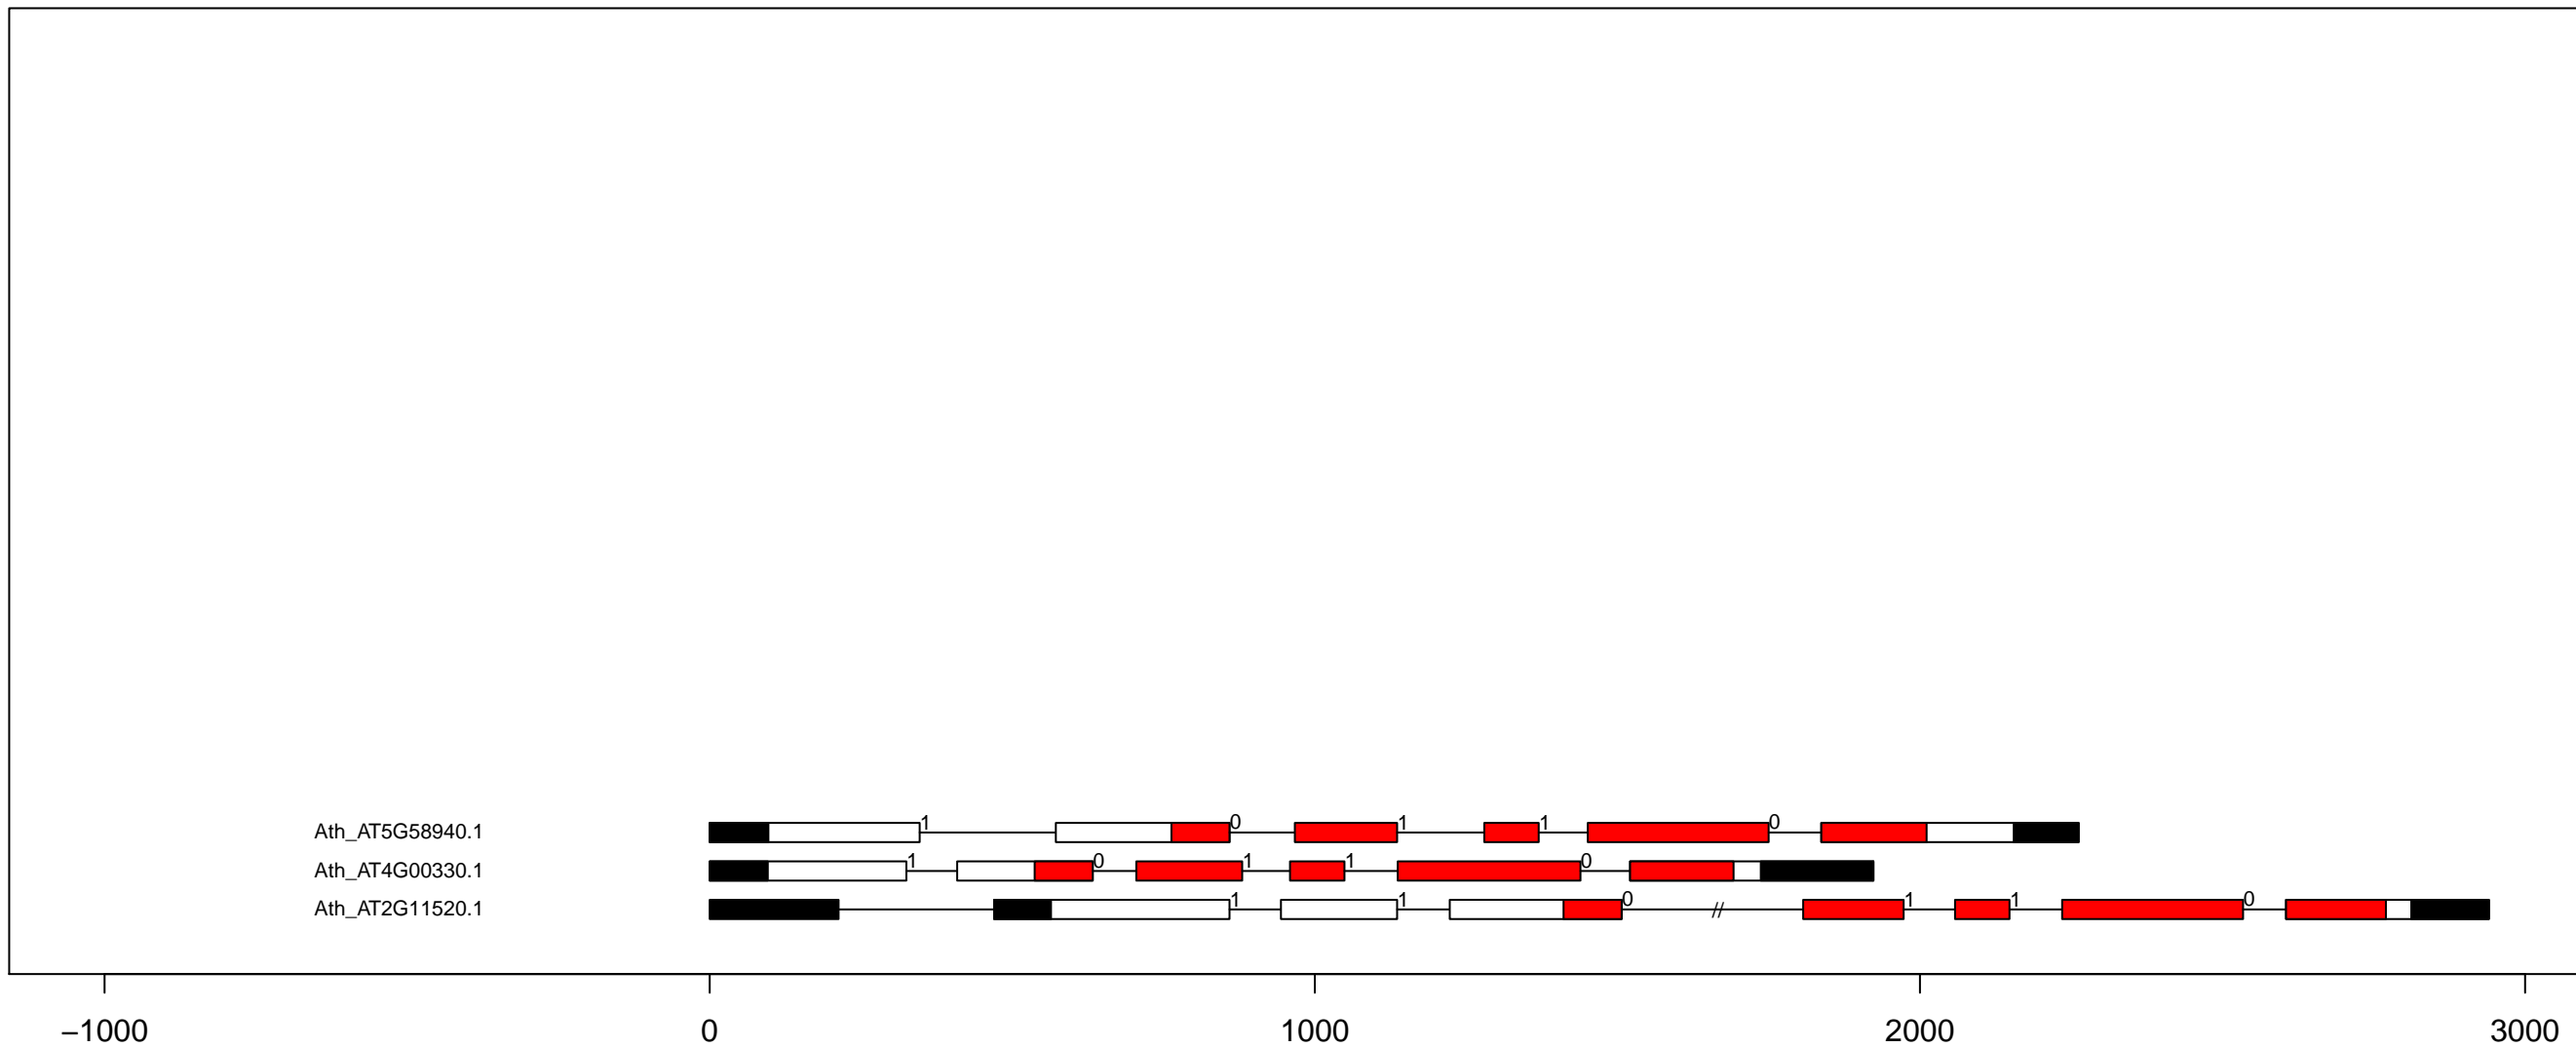

# A.th RLK-Pelle\_RLCK-IXa exon-intron and kinase domain diagram (all)

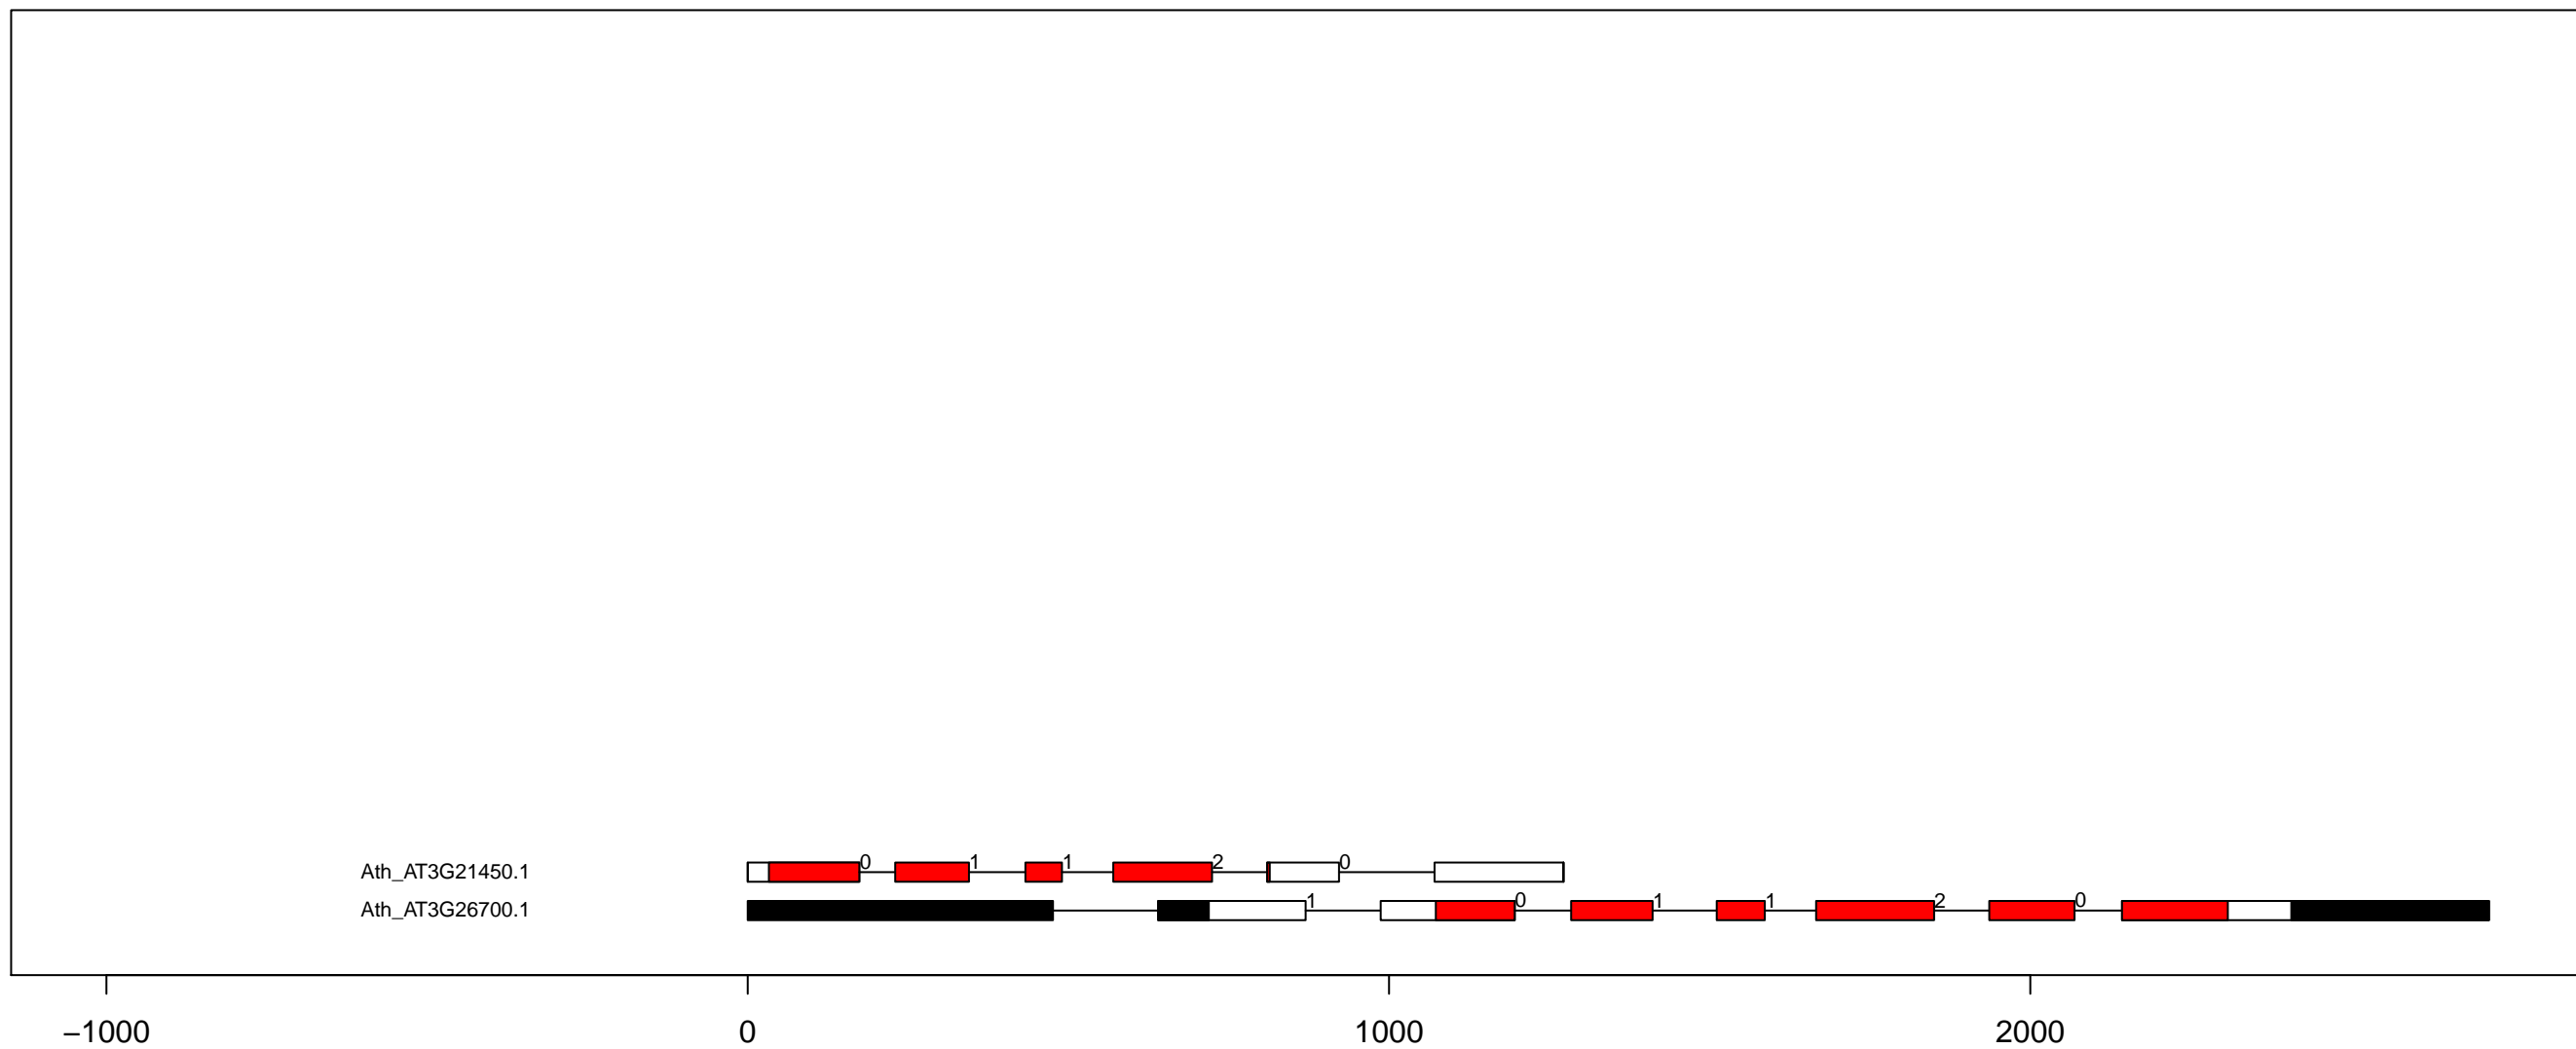



### A.th RLK-Pelle\_RLCK-VIIa-1 exon-intron and kinase domain diagram (all)

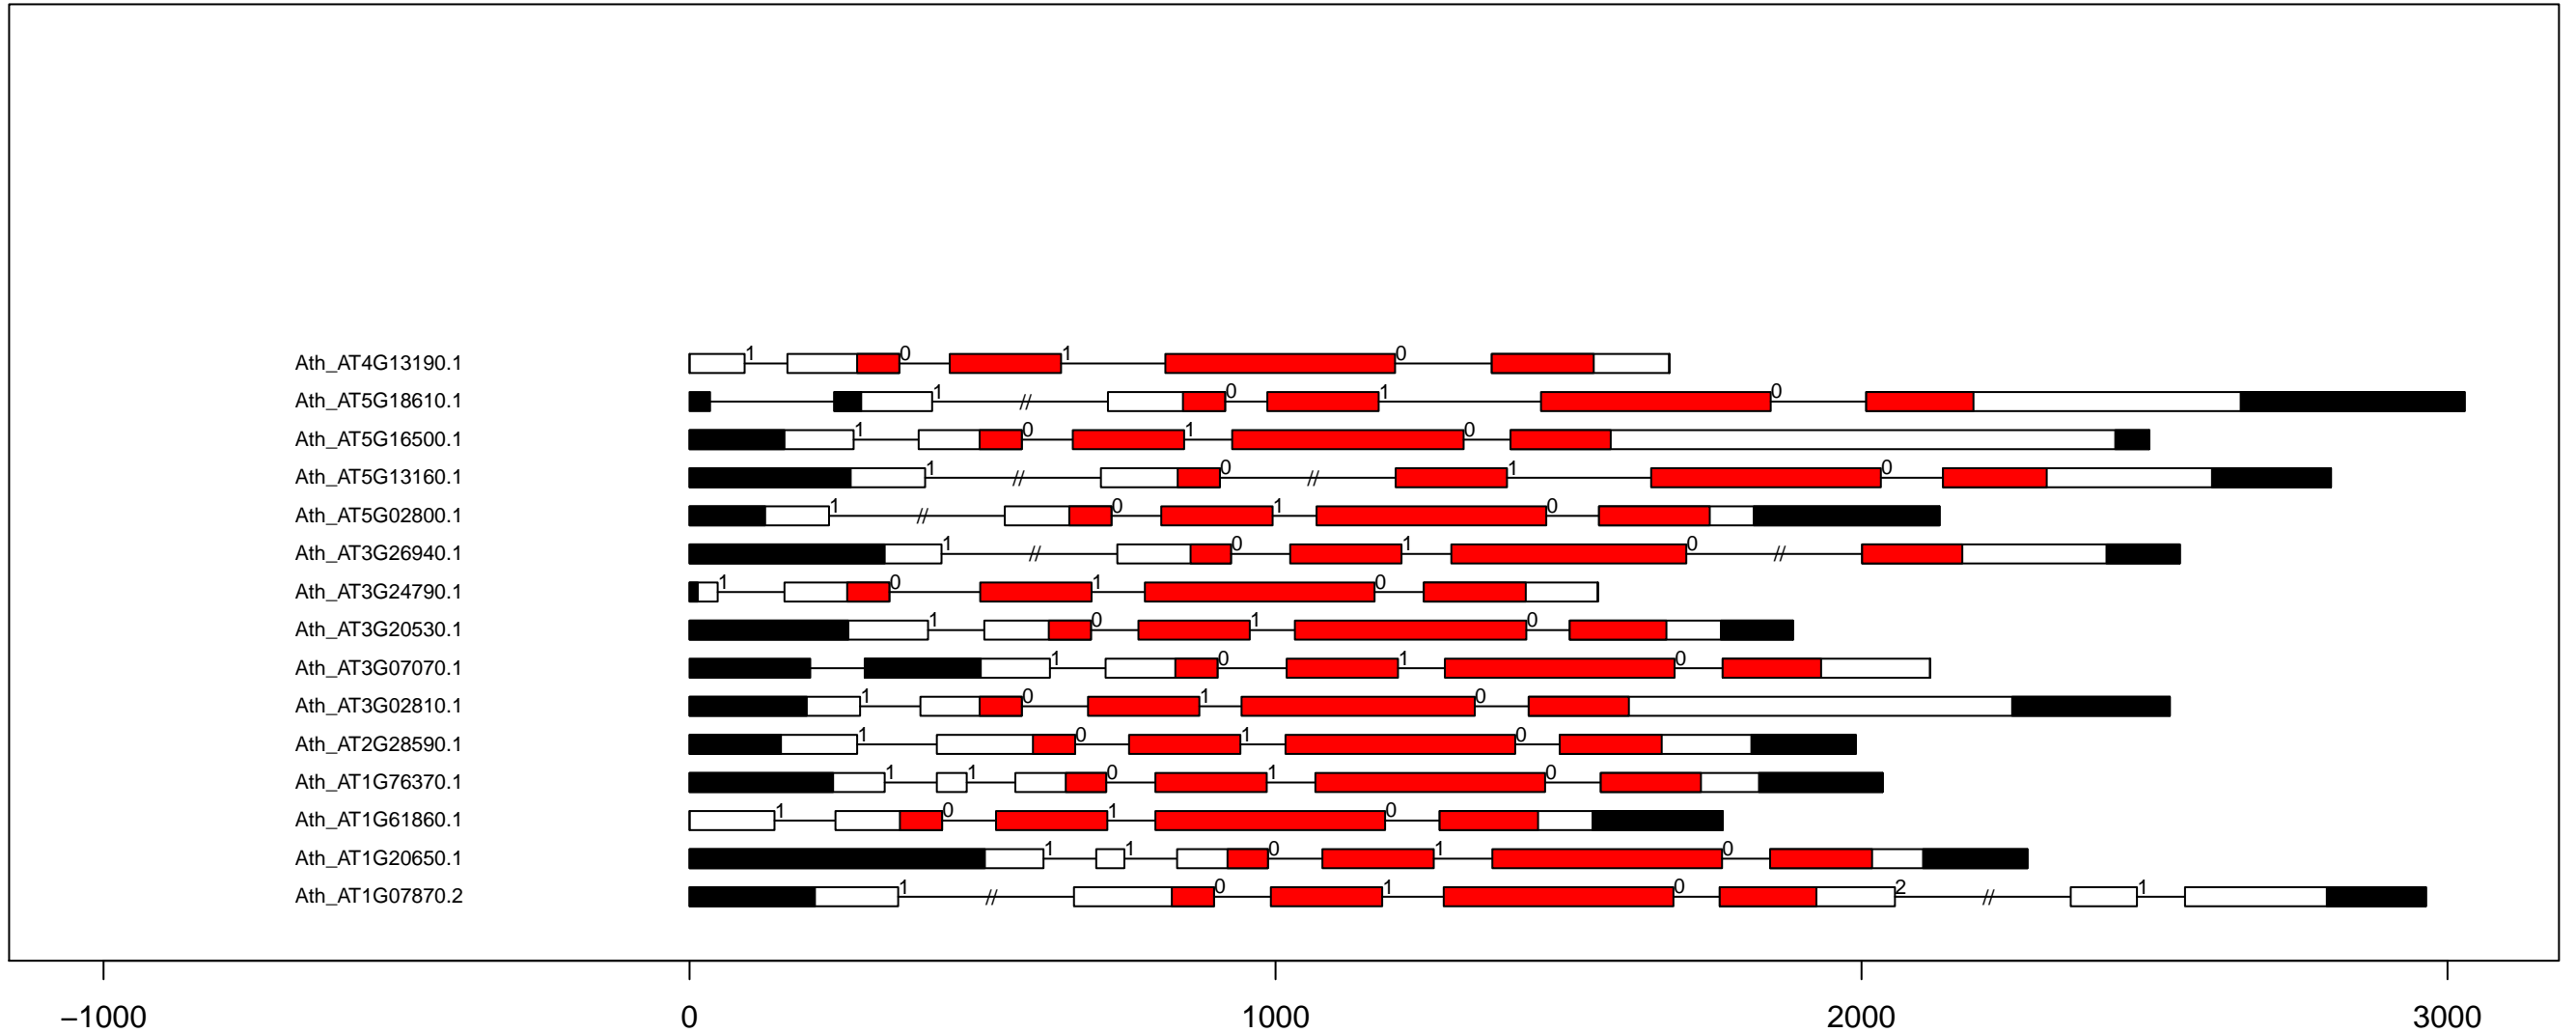



### A.th RLK-Pelle\_RLCK-VIIa-2 exon-intron and kinase domain diagram (part 1)

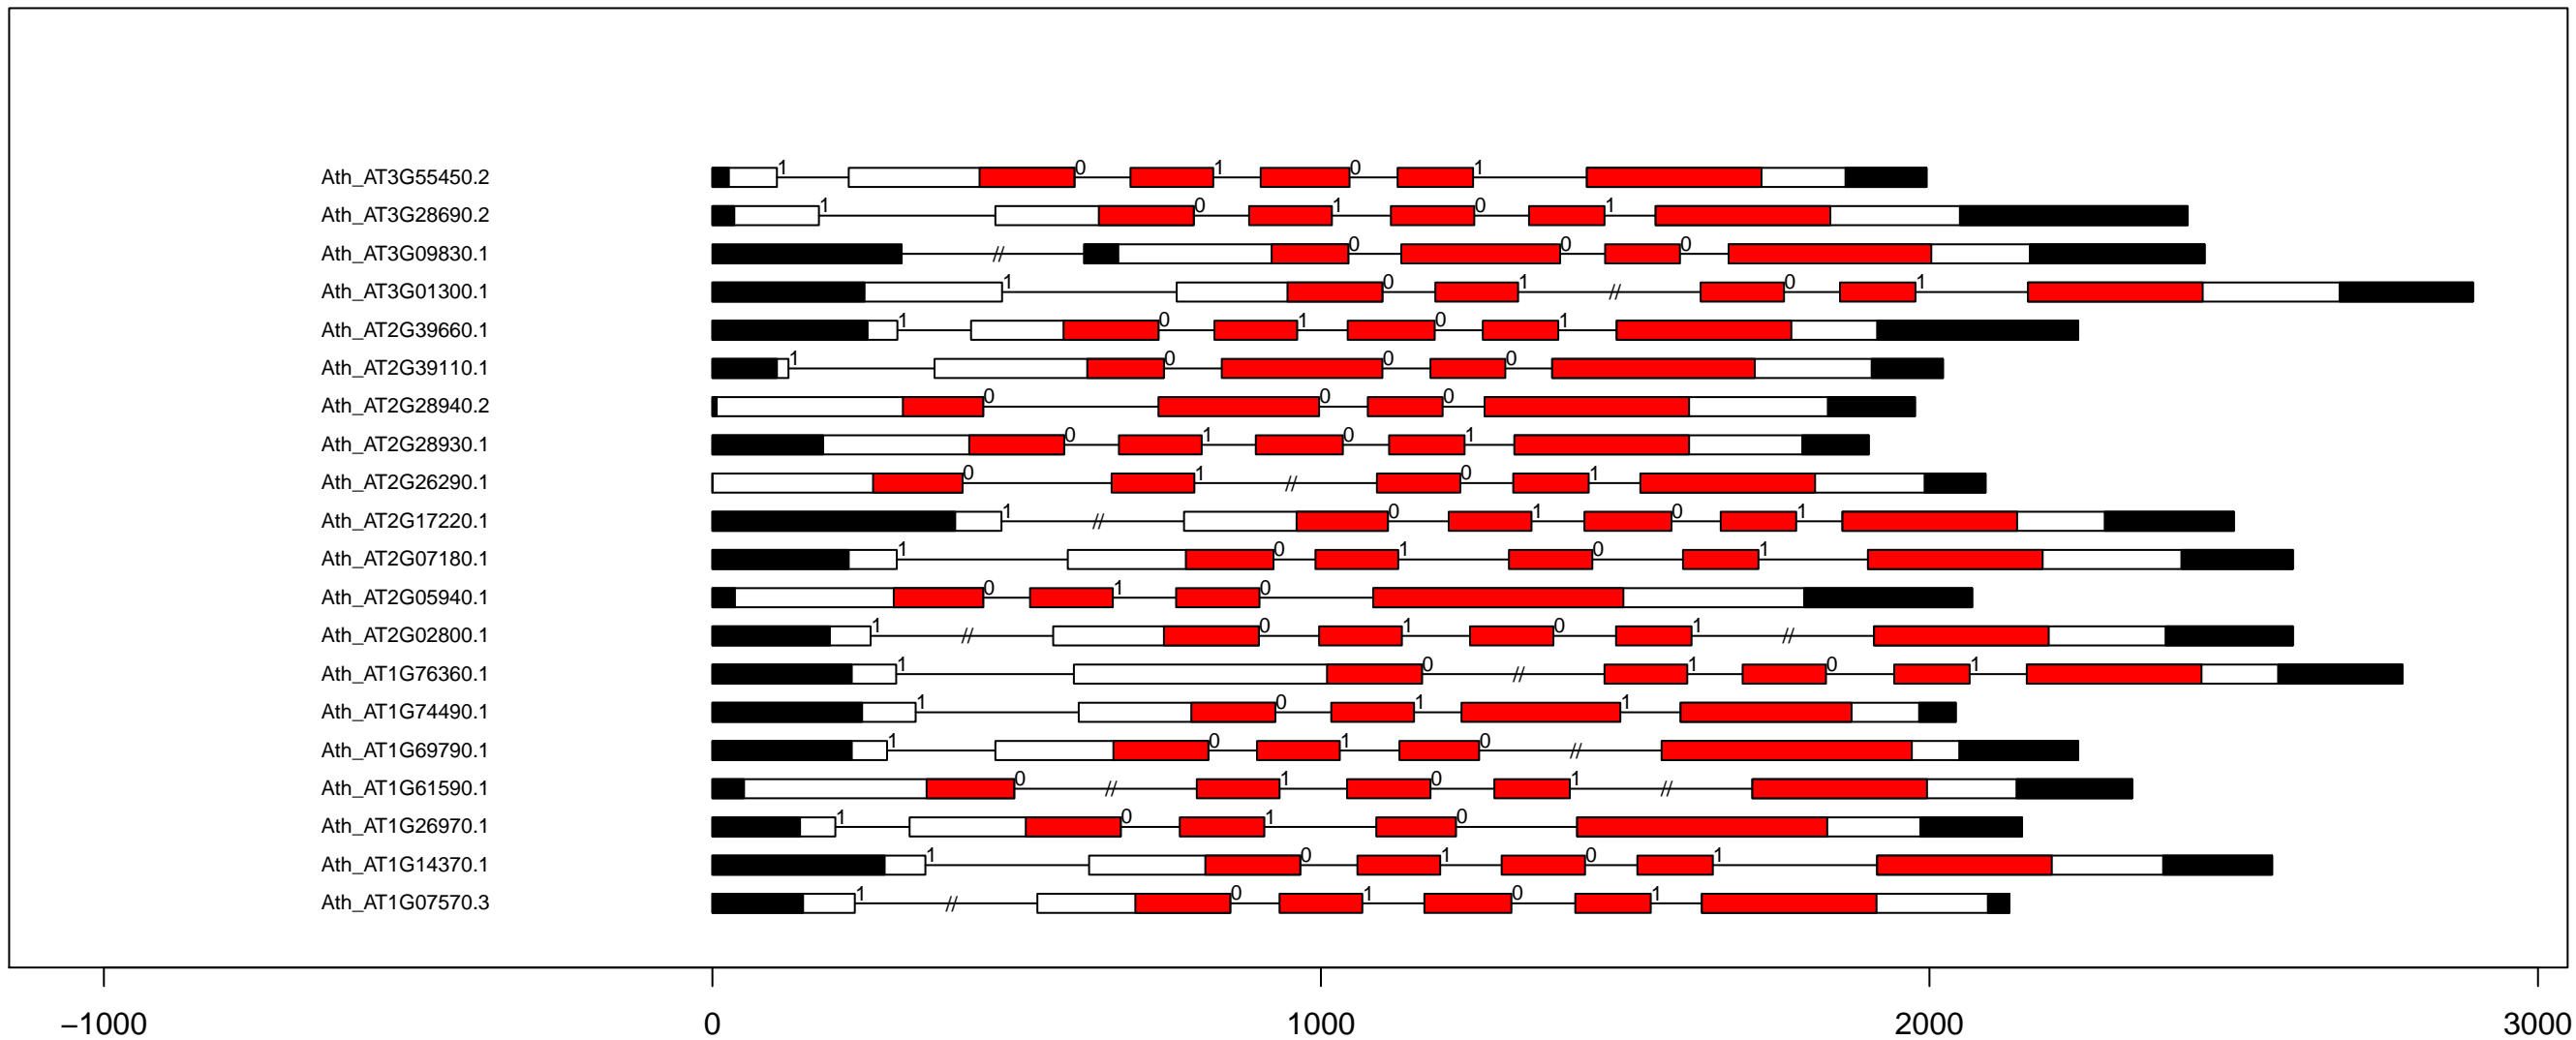

## A.th RLK-Pelle\_RLCK-VIIa-2 exon-intron and kinase domain diagram (part 2)

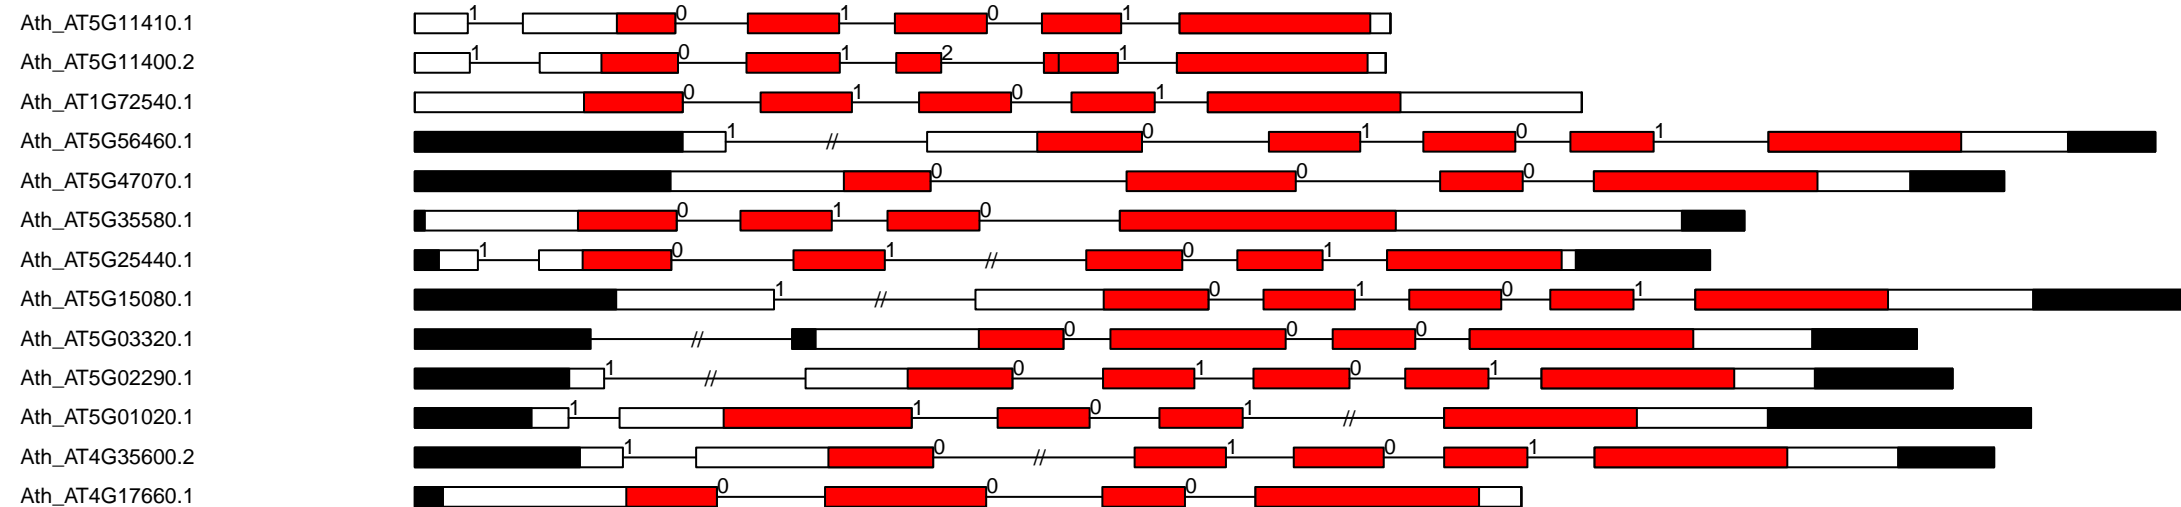

-1000

0

1000

2000

A.th RLK-Pelle\_RLCK-VIIb exon-intron and kinase domain diagram (all)

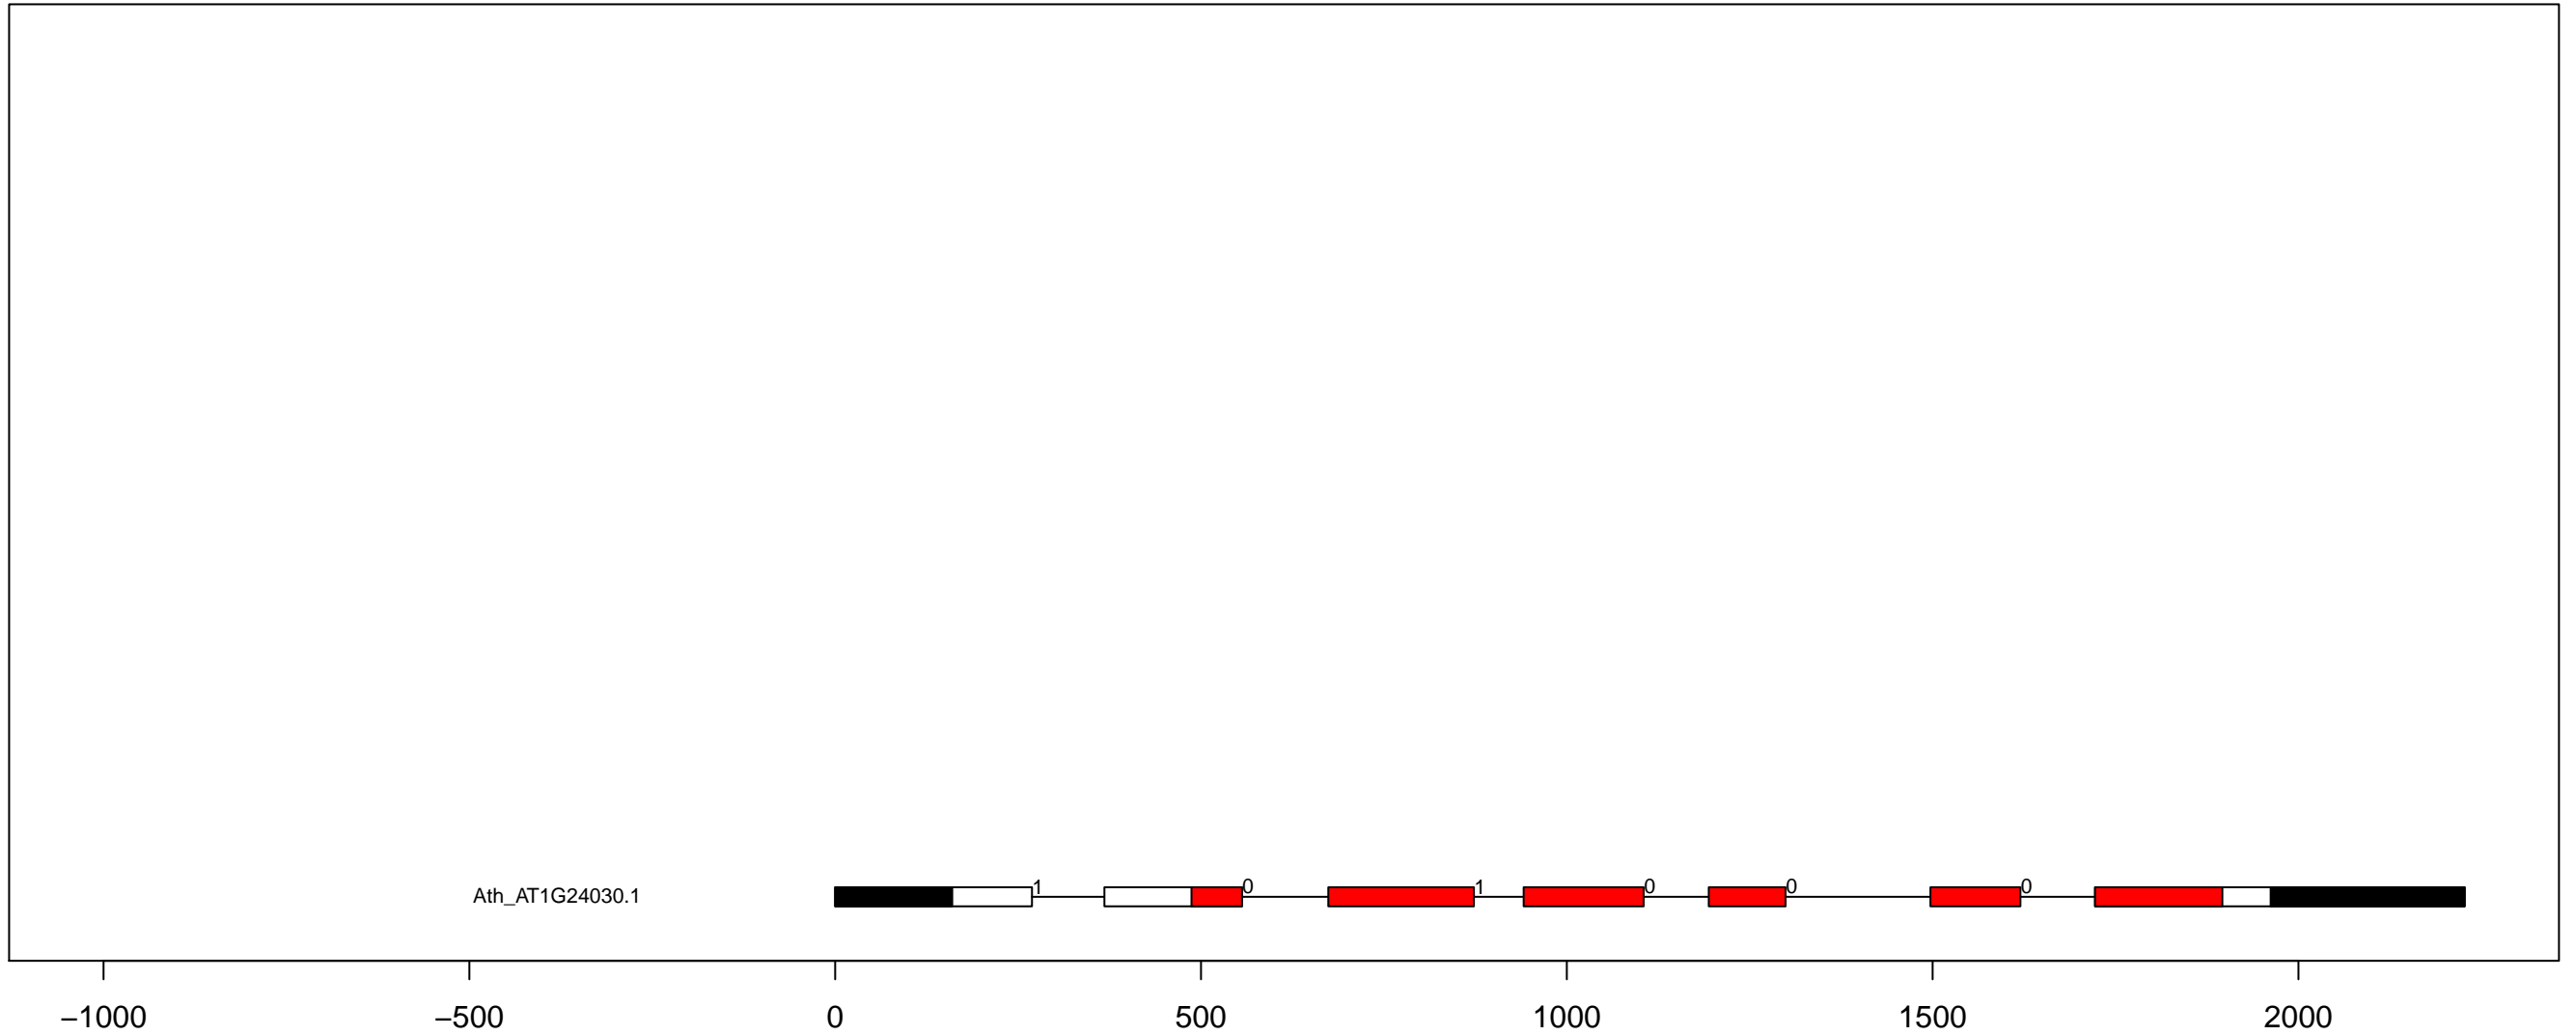

# A.th RLK-Pelle\_RLCK-VIII exon-intron and kinase domain diagram (all)

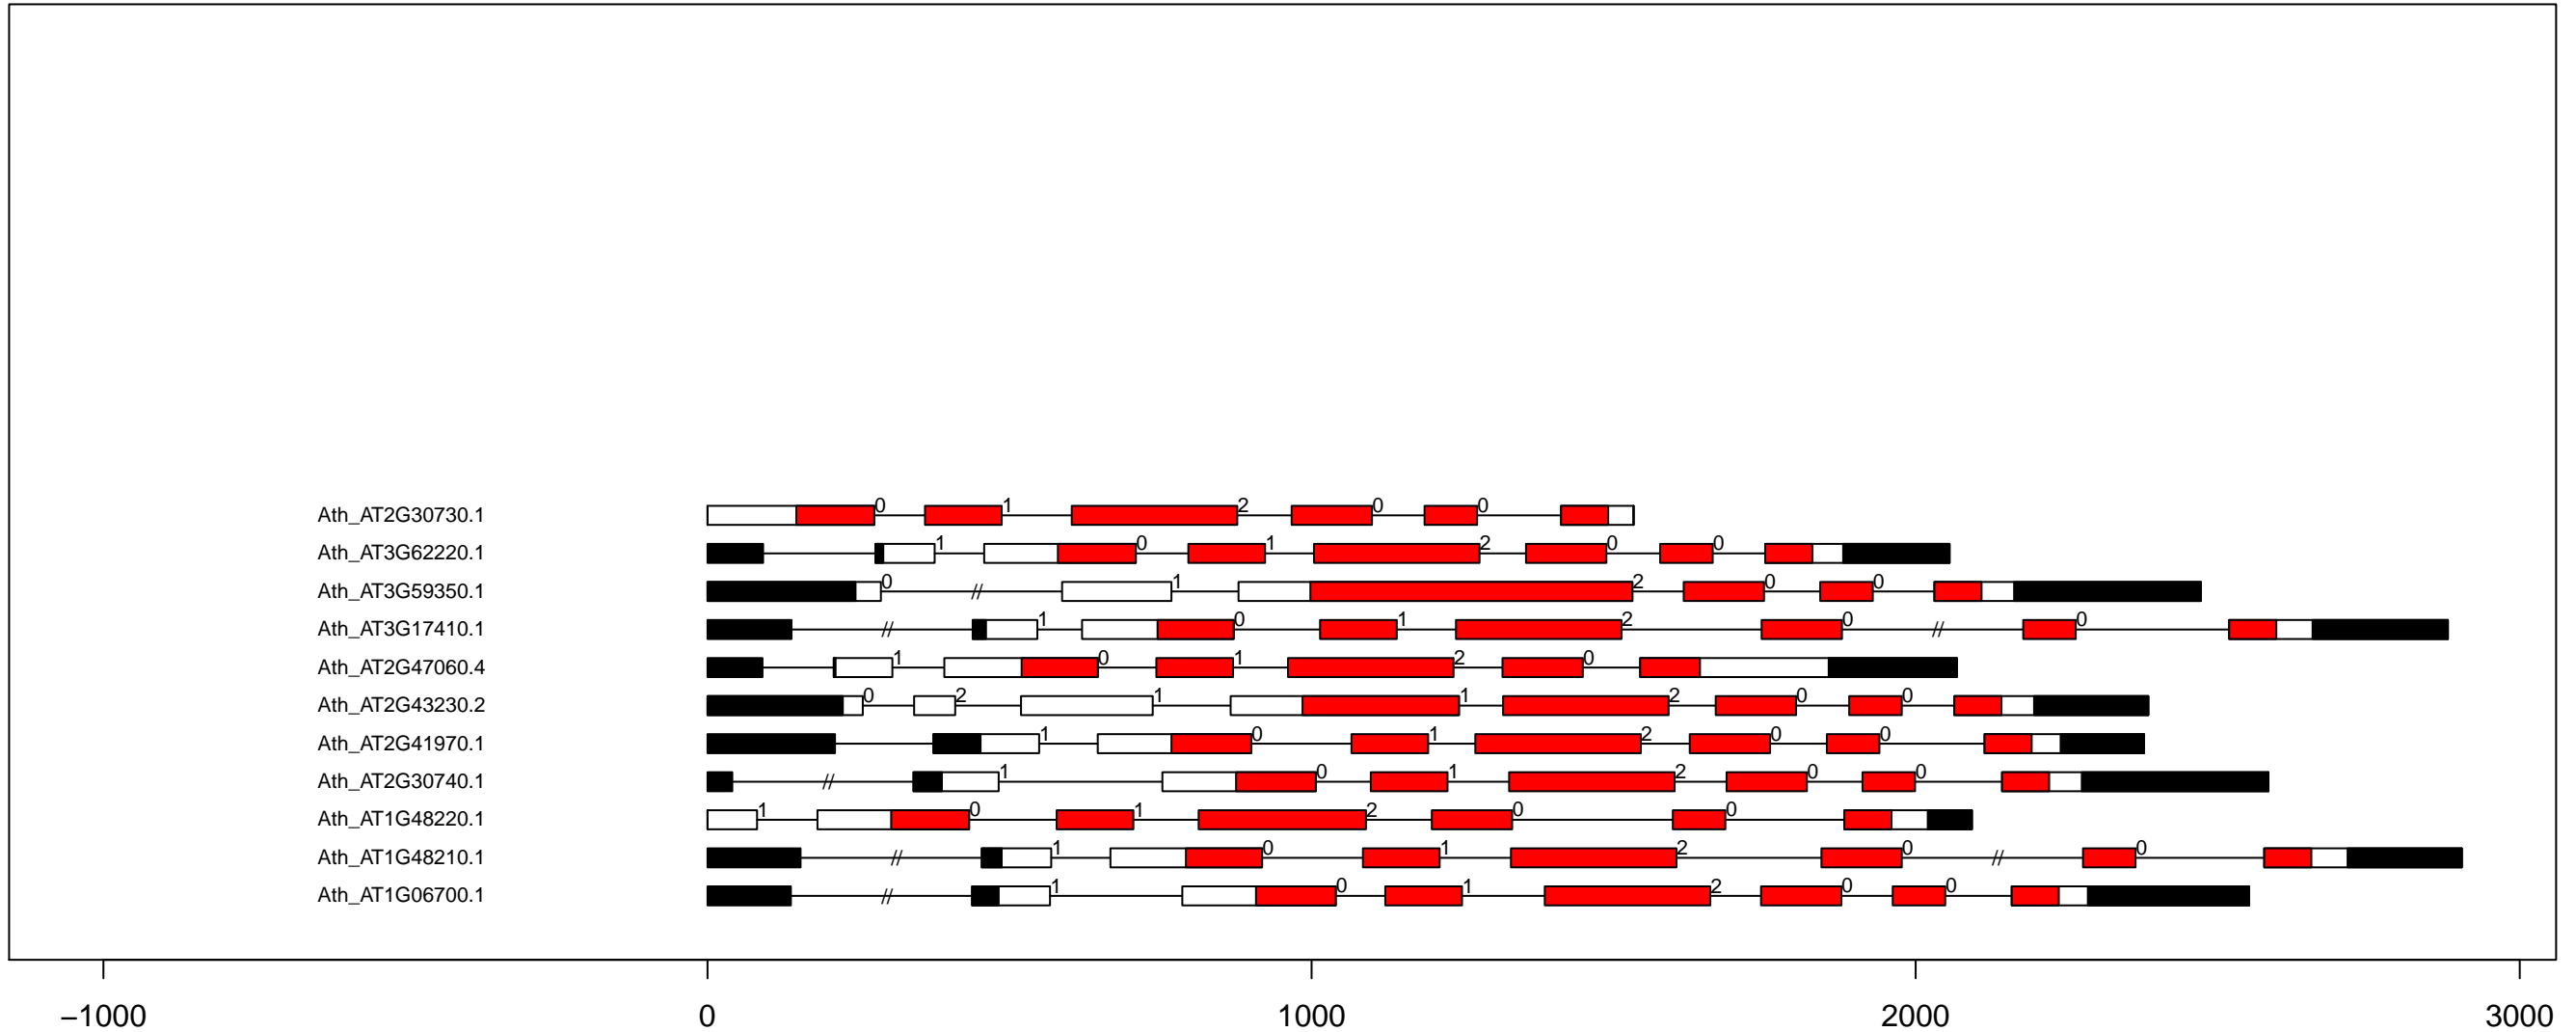

# A.th RLK-Pelle\_RLCK-VI exon-intron and kinase domain diagram (all)

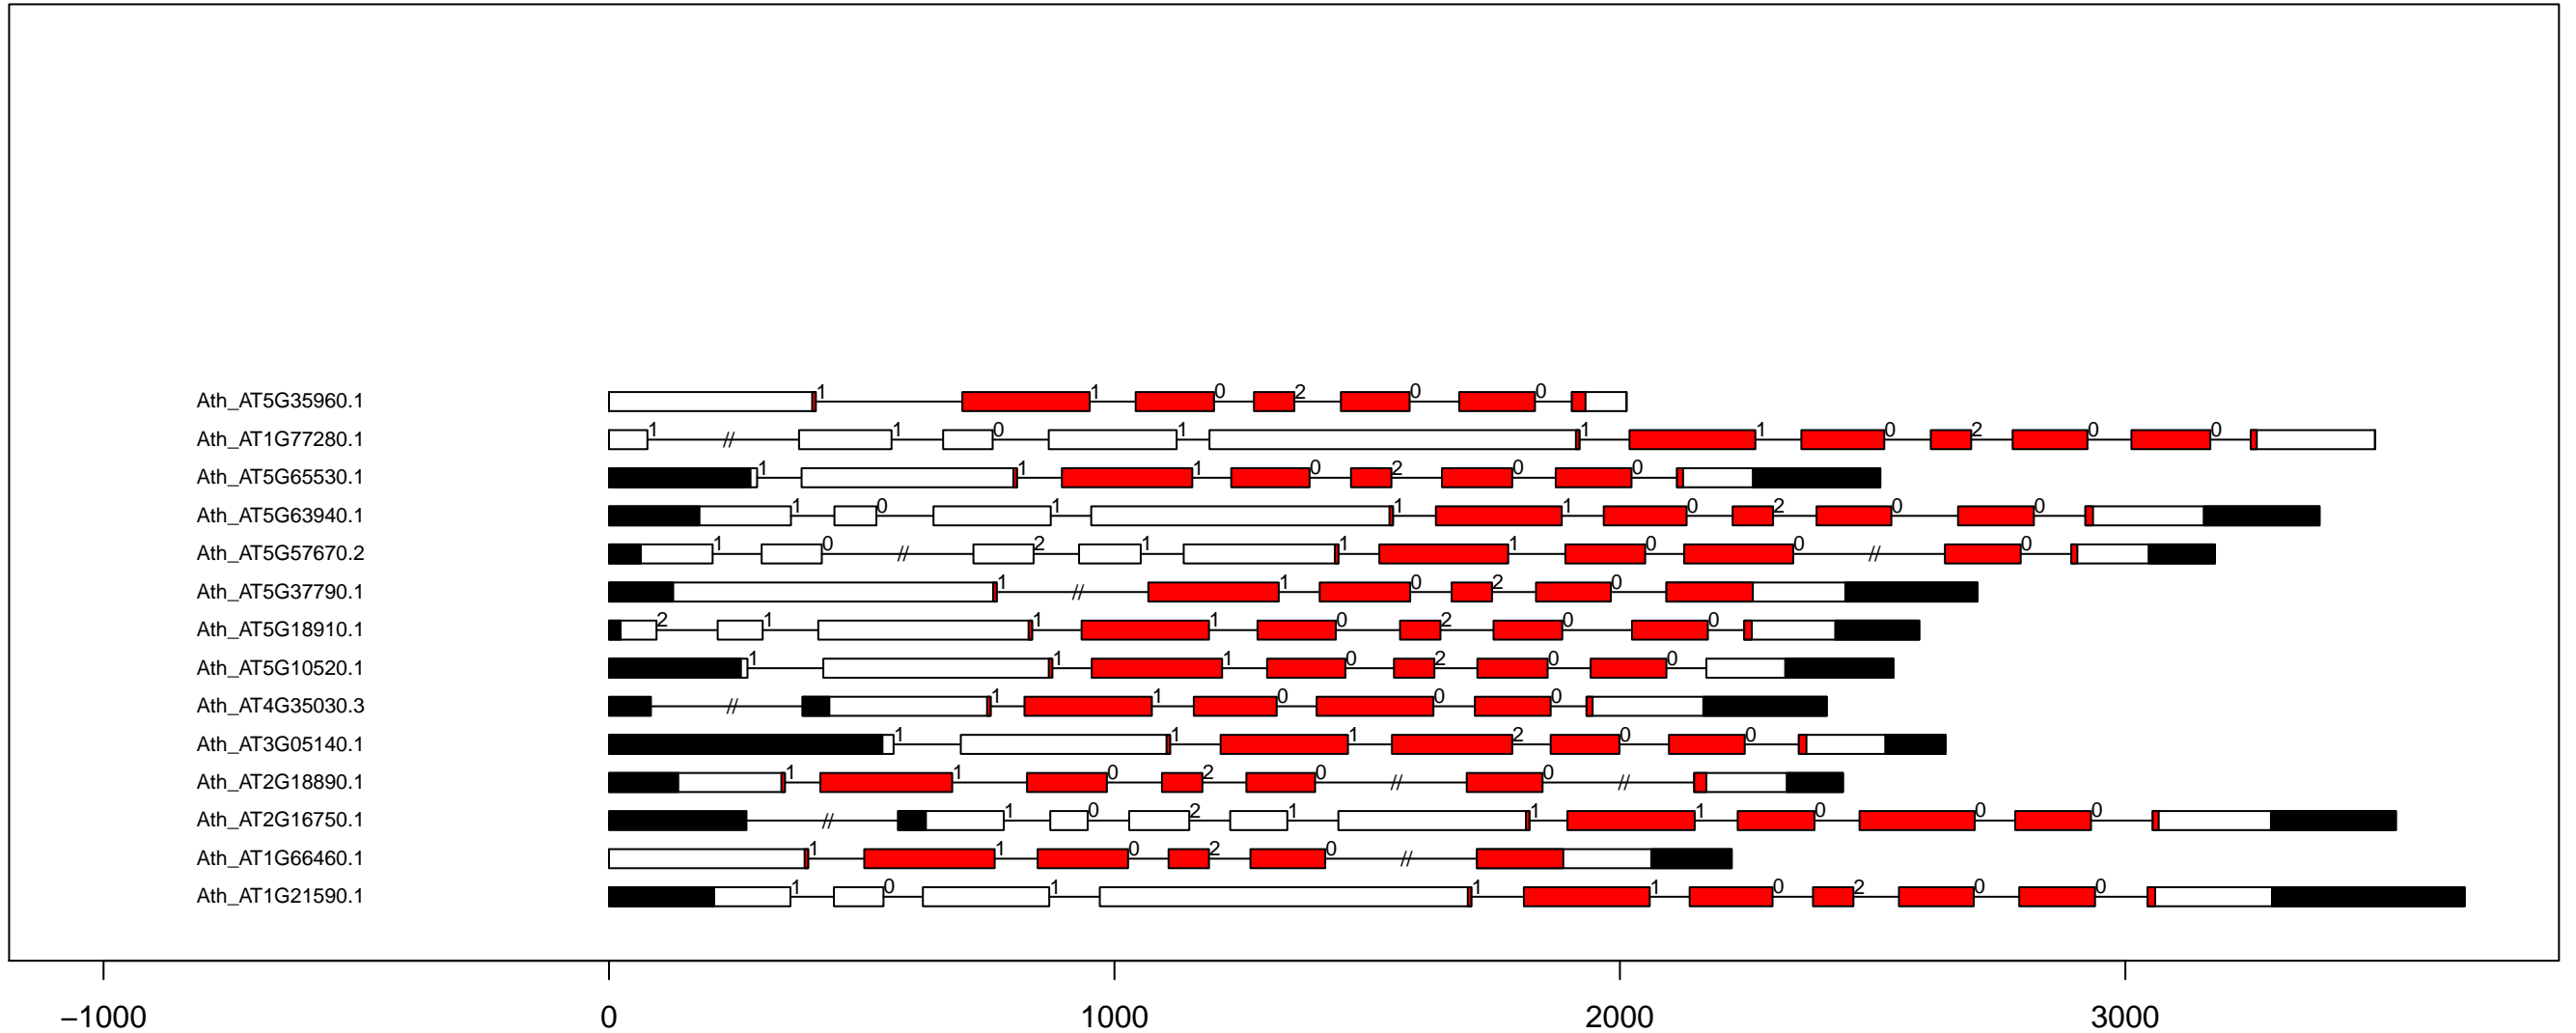

# A.th RLK-Pelle\_RLCK-V exon-intron and kinase domain diagram (all)

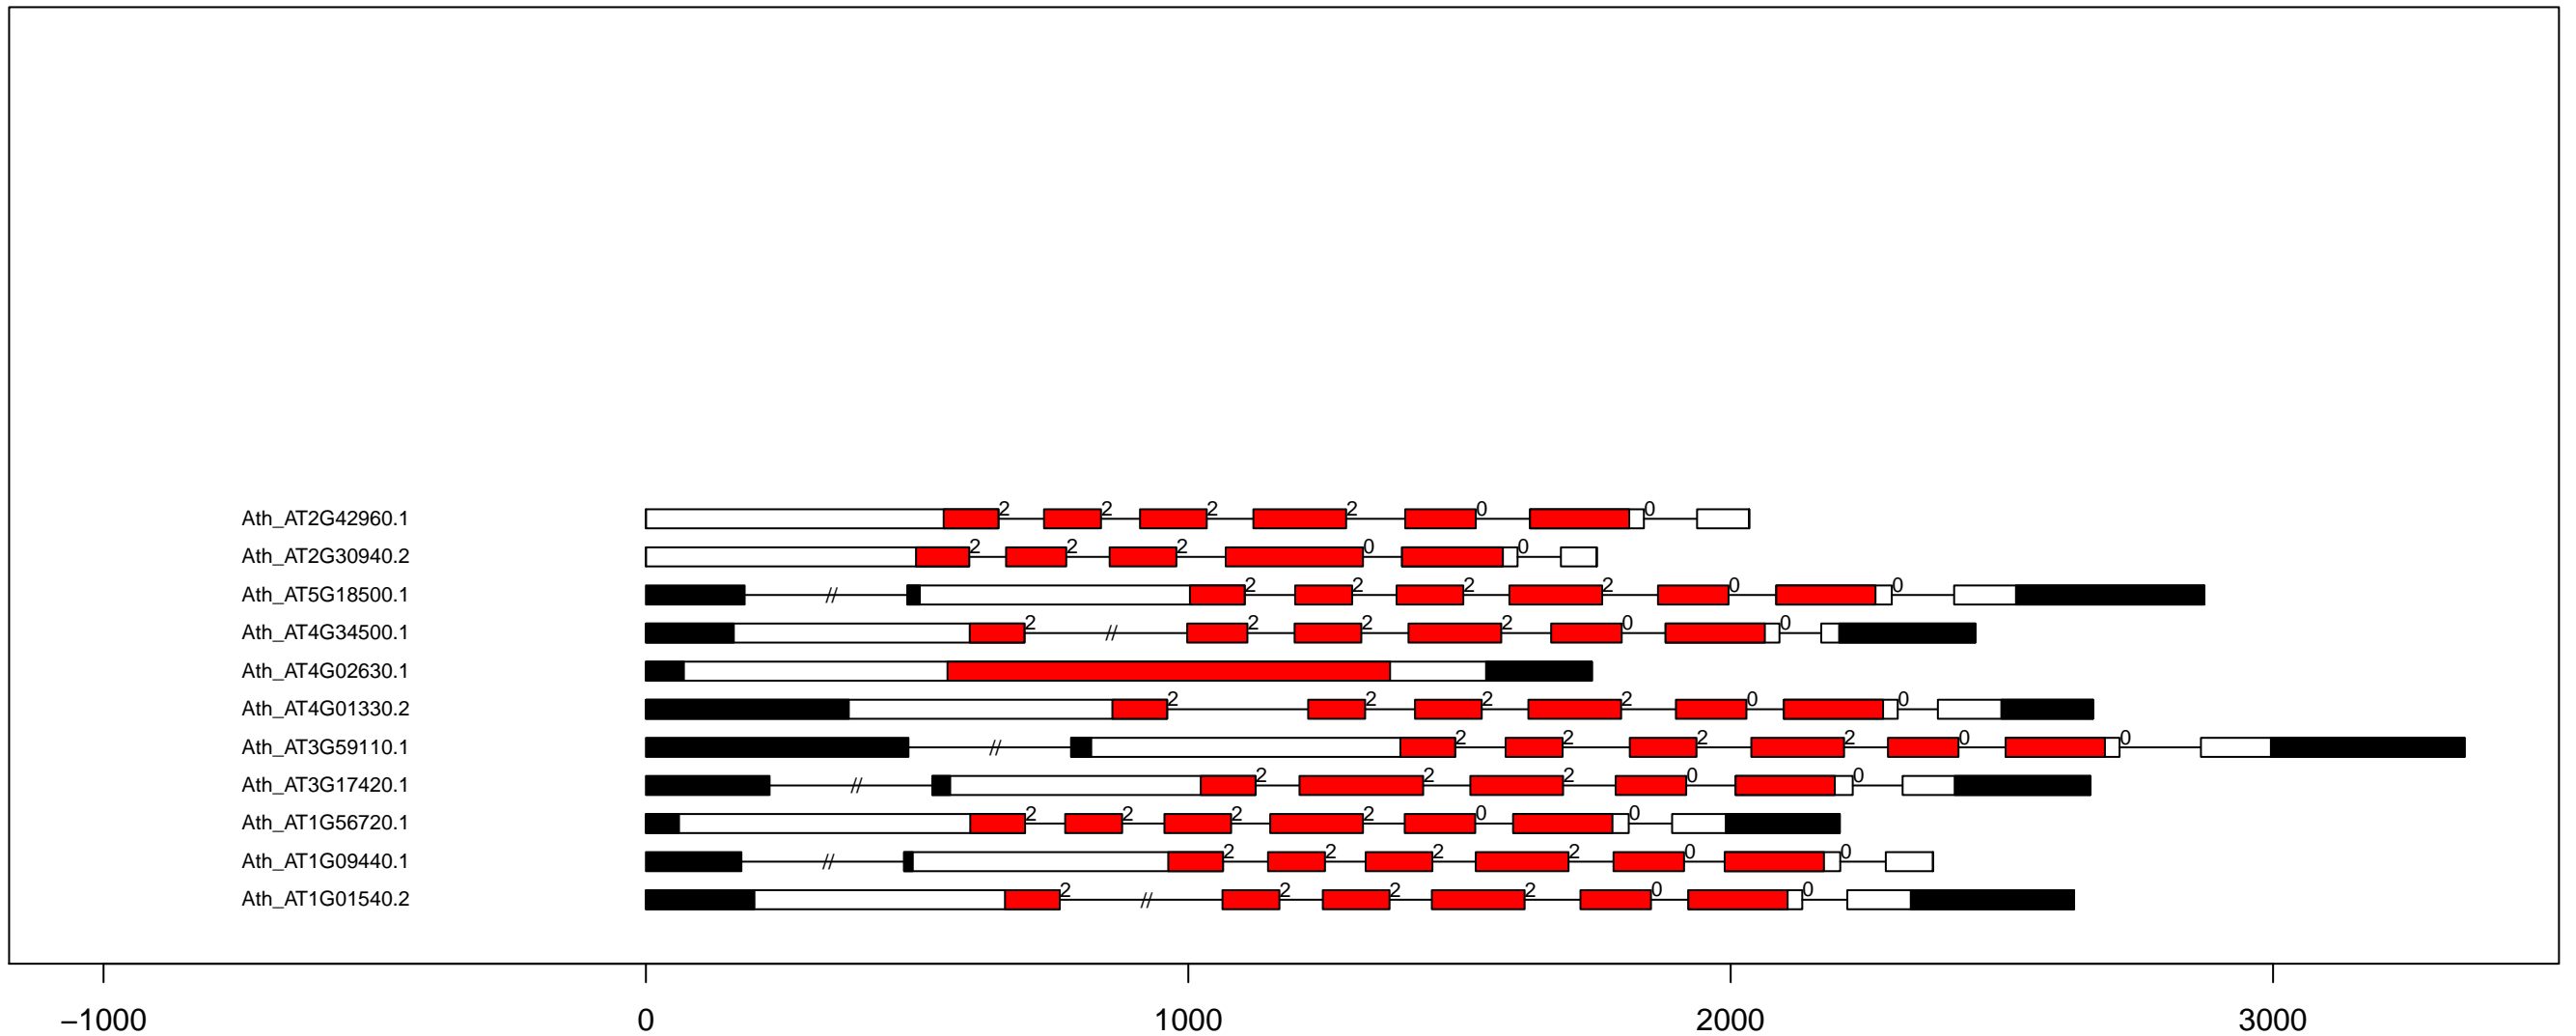

# A.th RLK-Pelle\_RLCK-XII-1 exon-intron and kinase domain diagram (all)

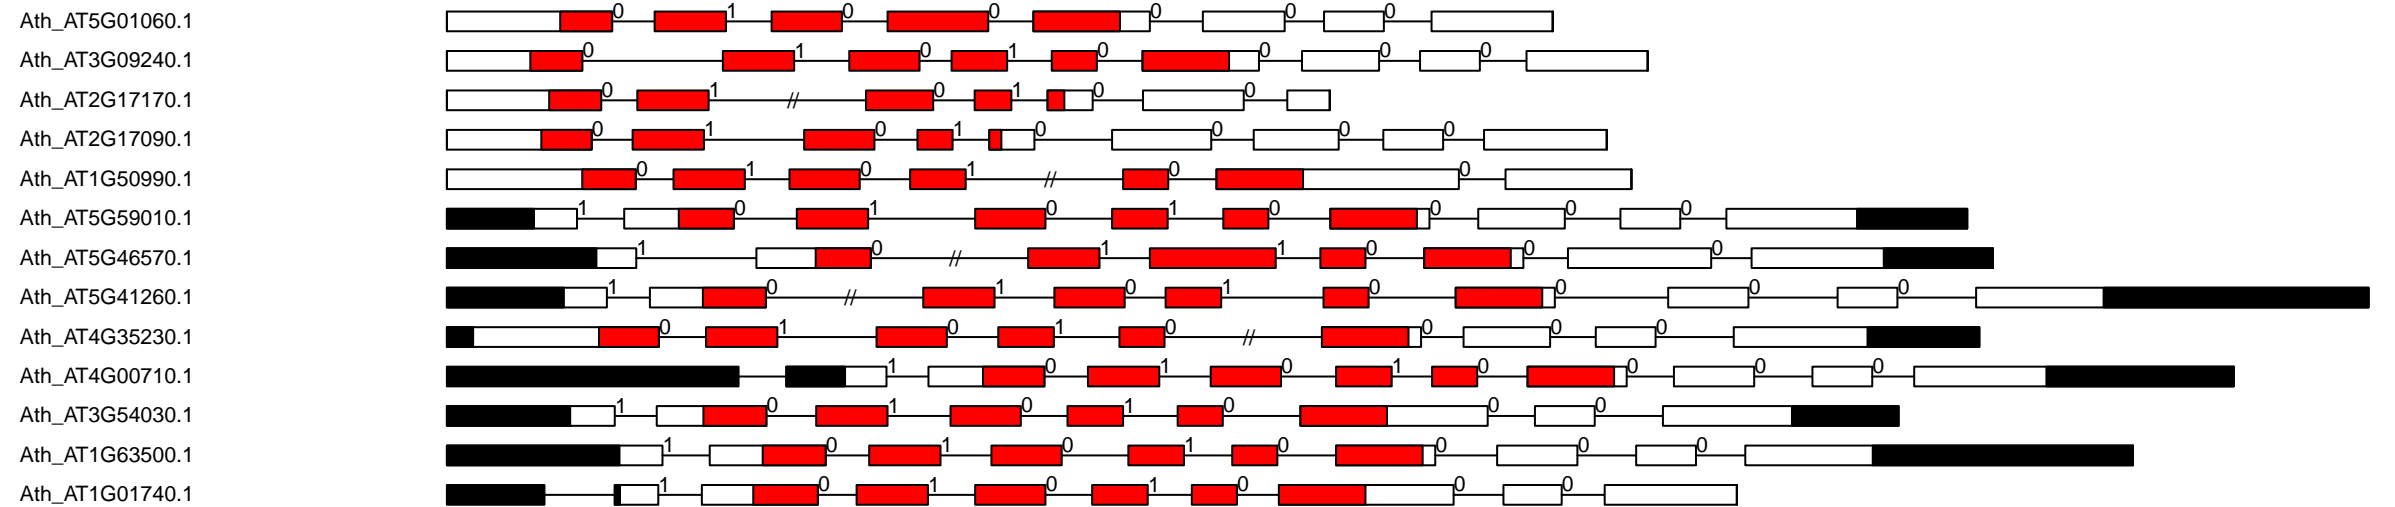

-1000

0

1000

2000

3000

# A.th RLK-Pelle\_RLCK-XII-2 exon-intron and kinase domain diagram (all)

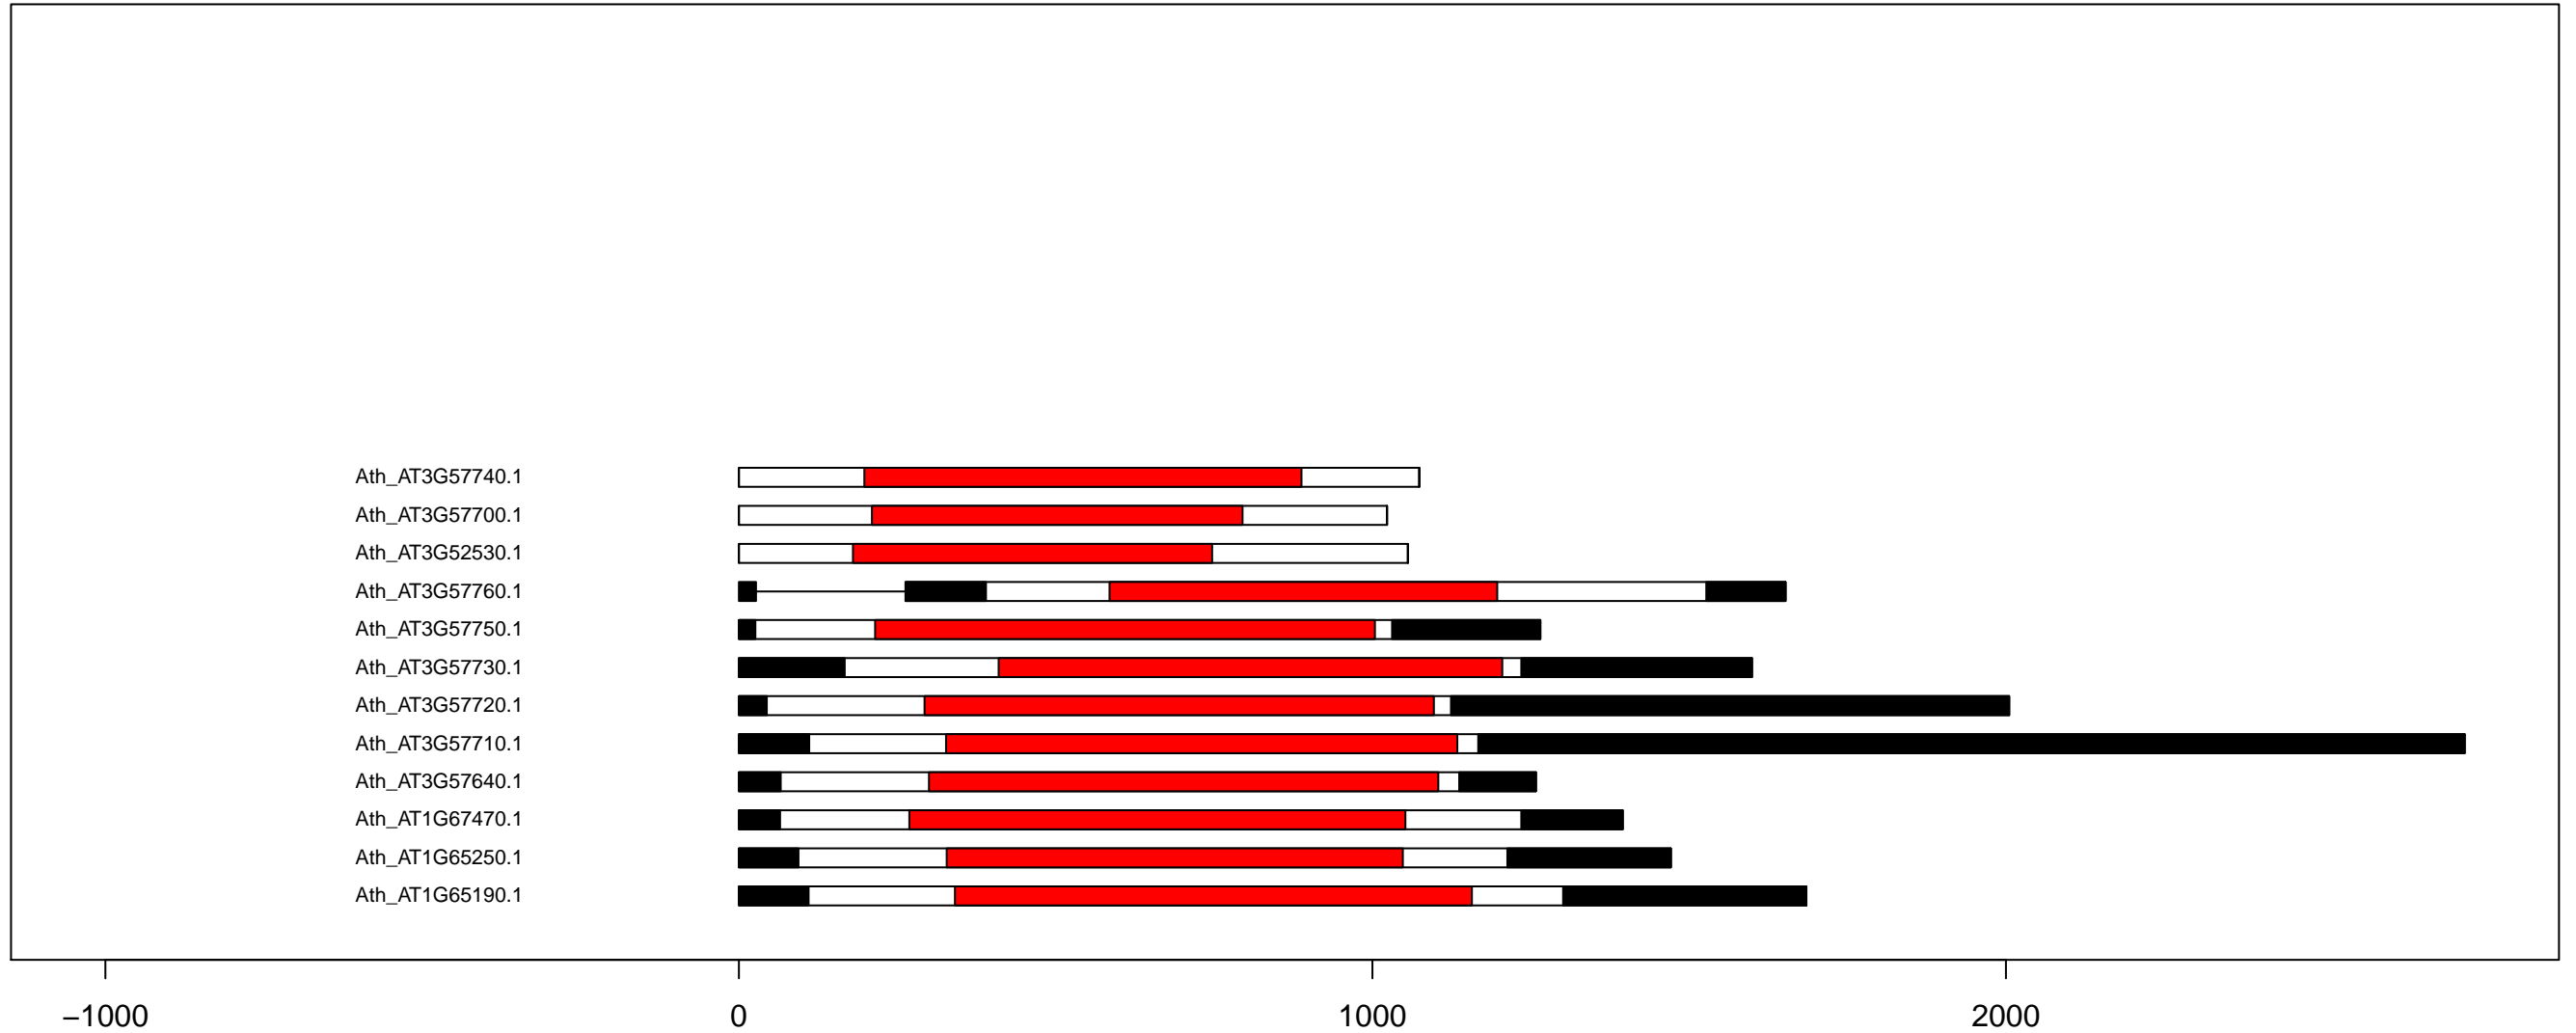



# A.th RLK-Pelle\_RLCK-XIII exon-intron and kinase domain diagram (all)

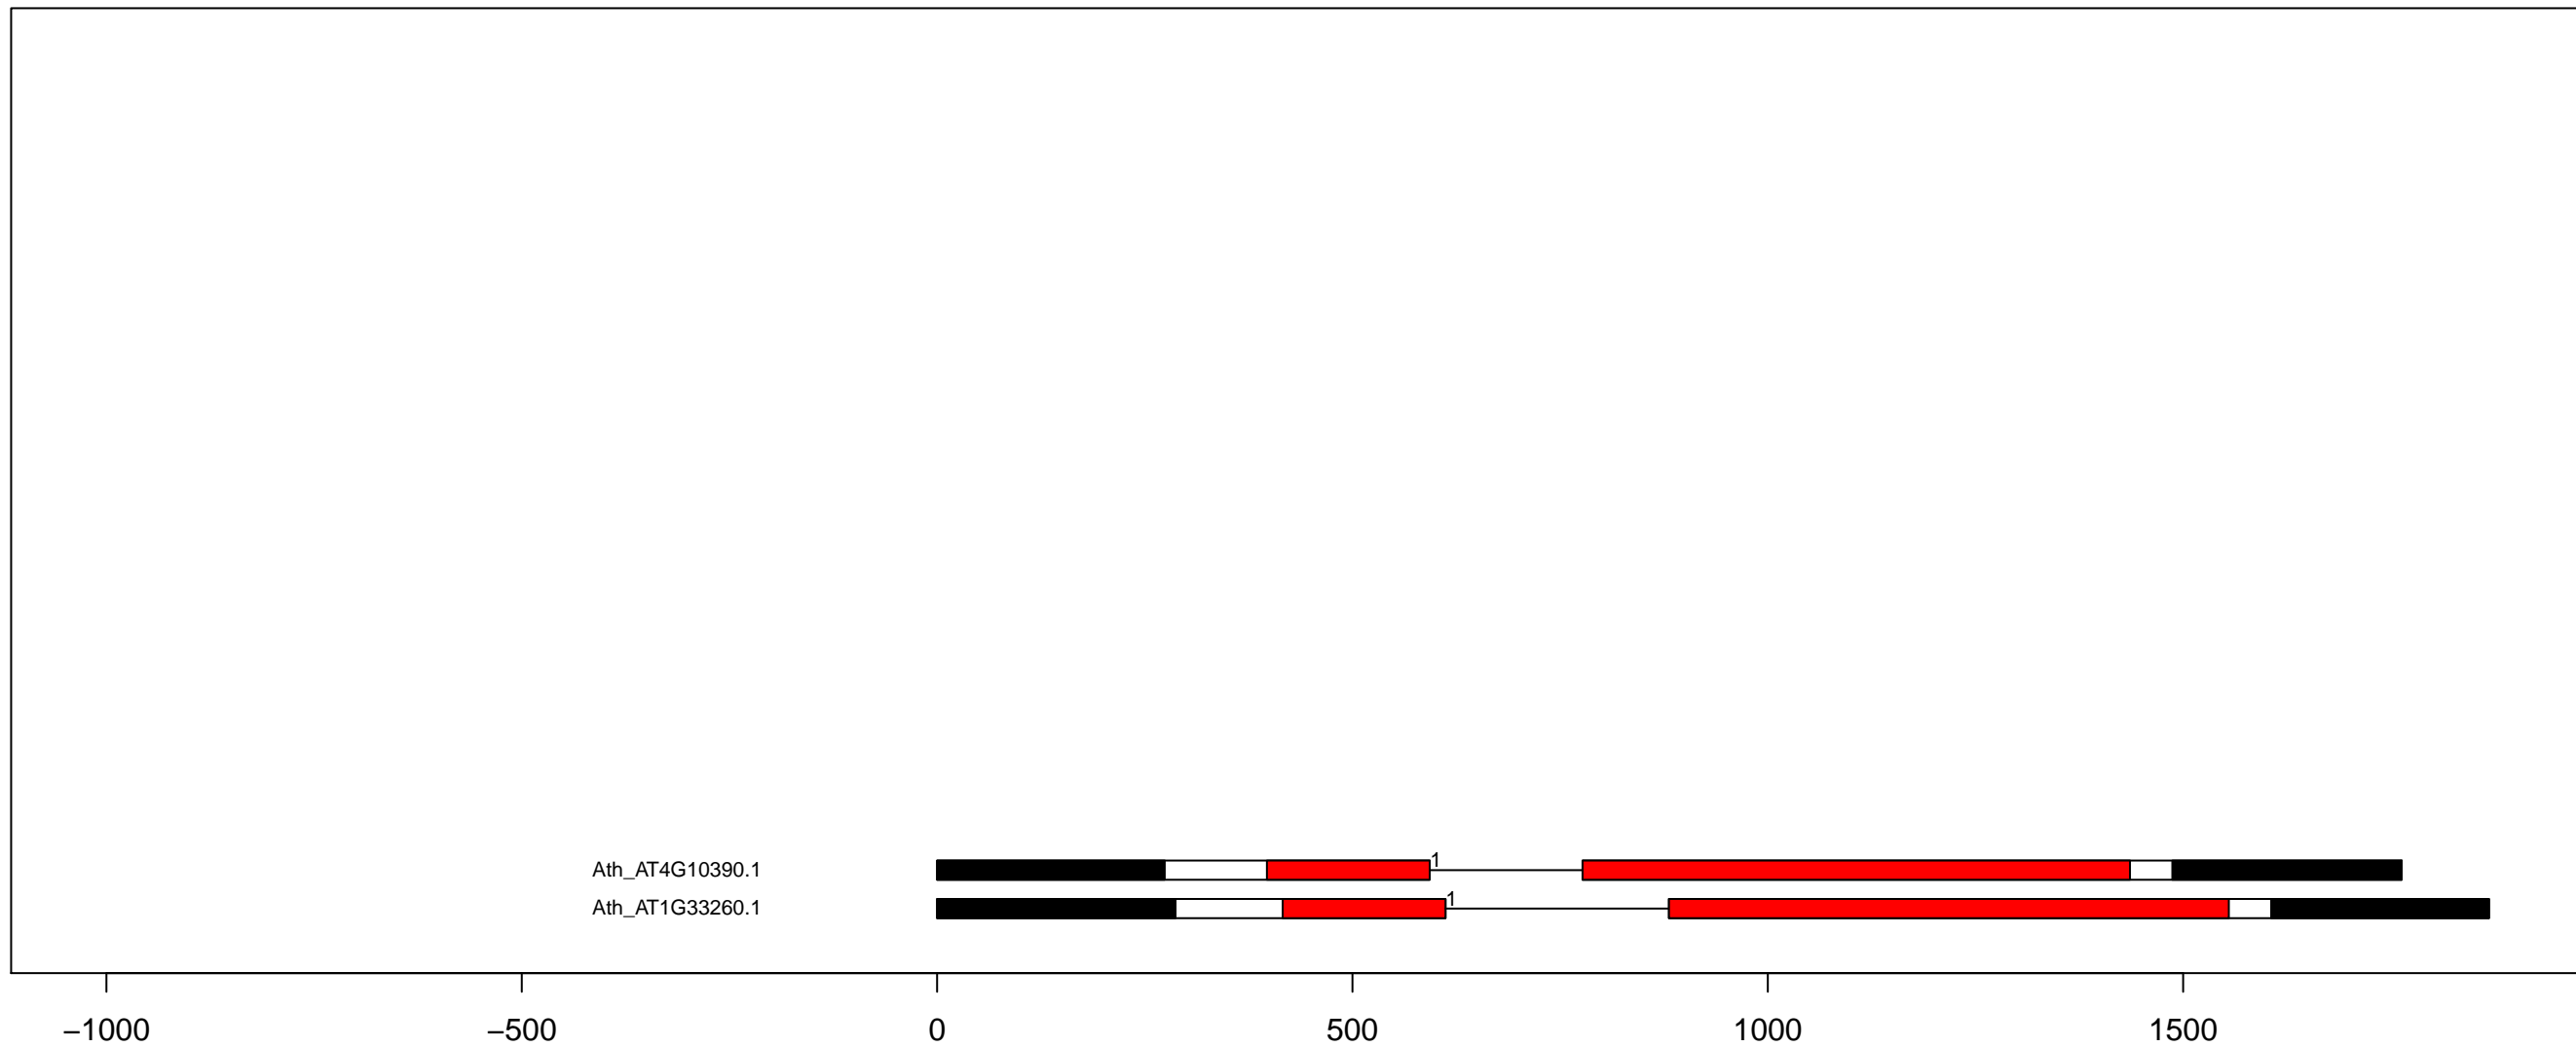

# A.th RLK-Pelle\_RLCK-XI exon-intron and kinase domain diagram (all)

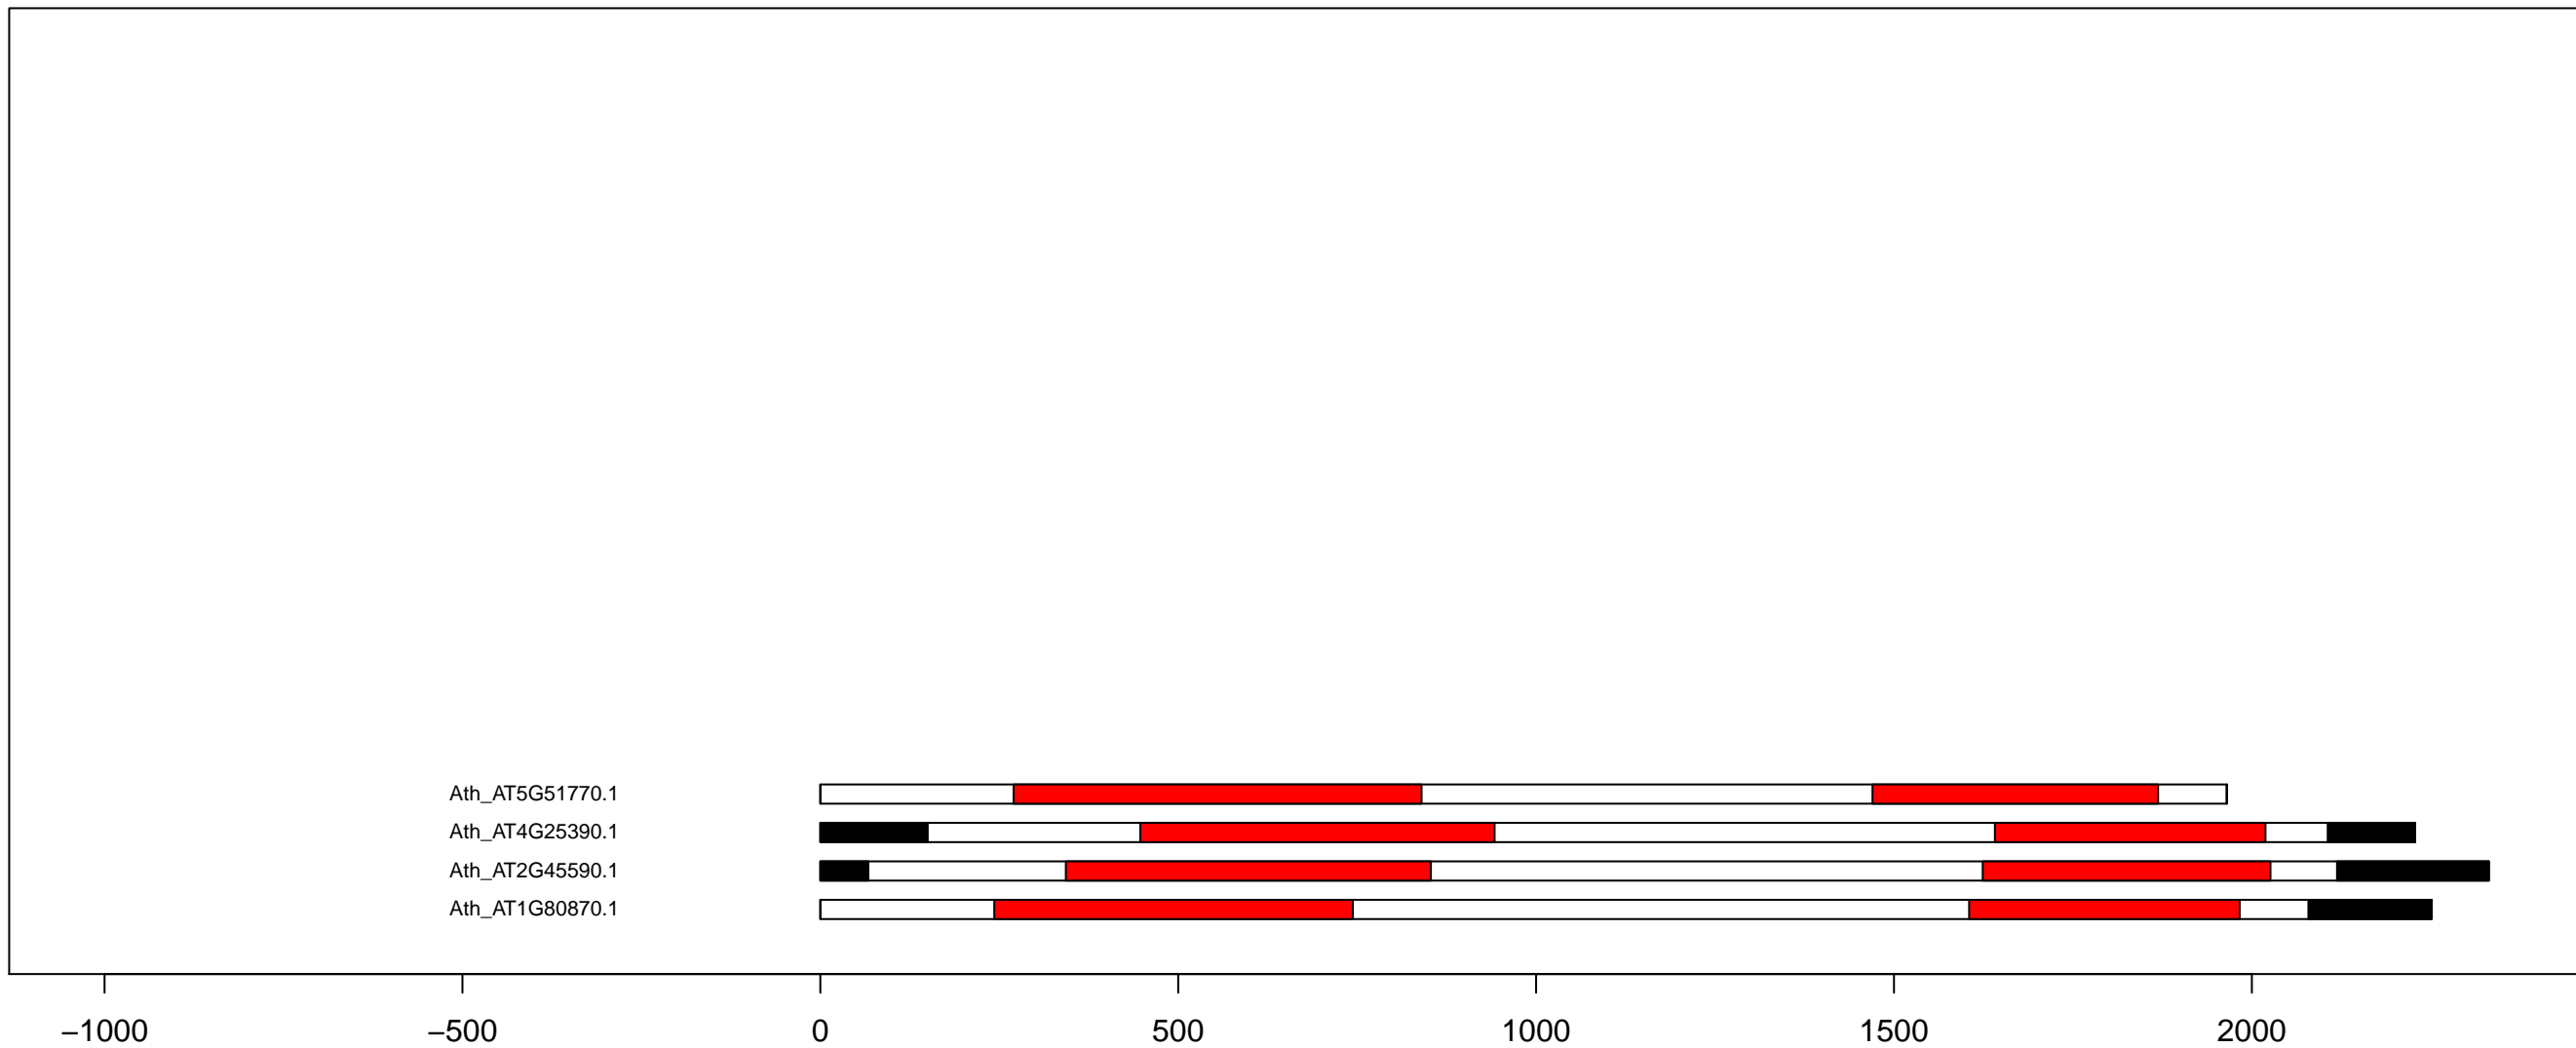

# A.th RLK-Pelle\_RLCK-X exon-intron and kinase domain diagram (all)

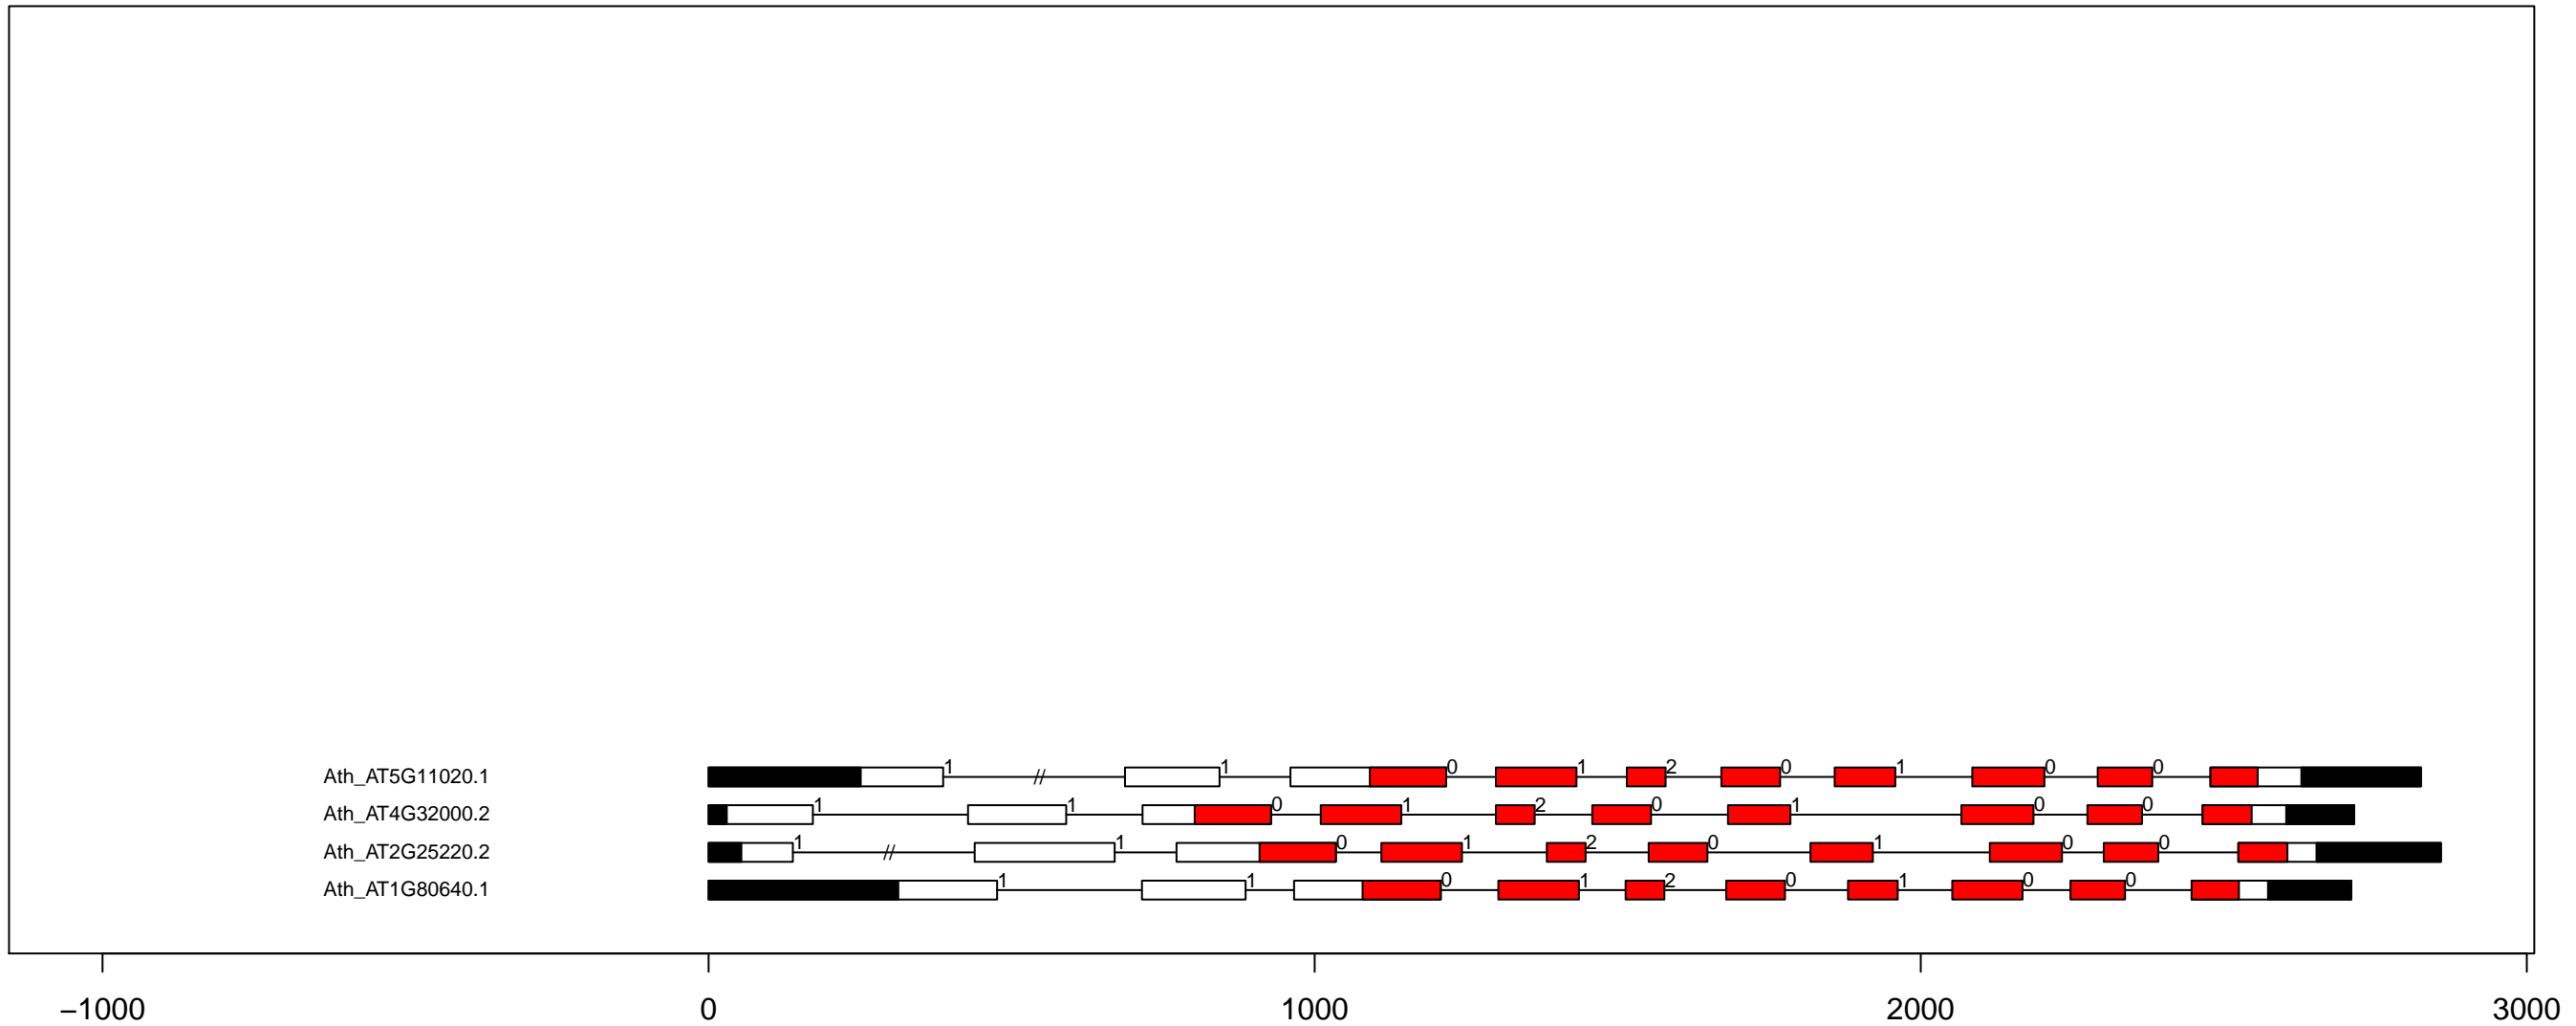

A.th RLK-Pelle\_RLCK-XVII exon-intron and kinase domain diagram (all)

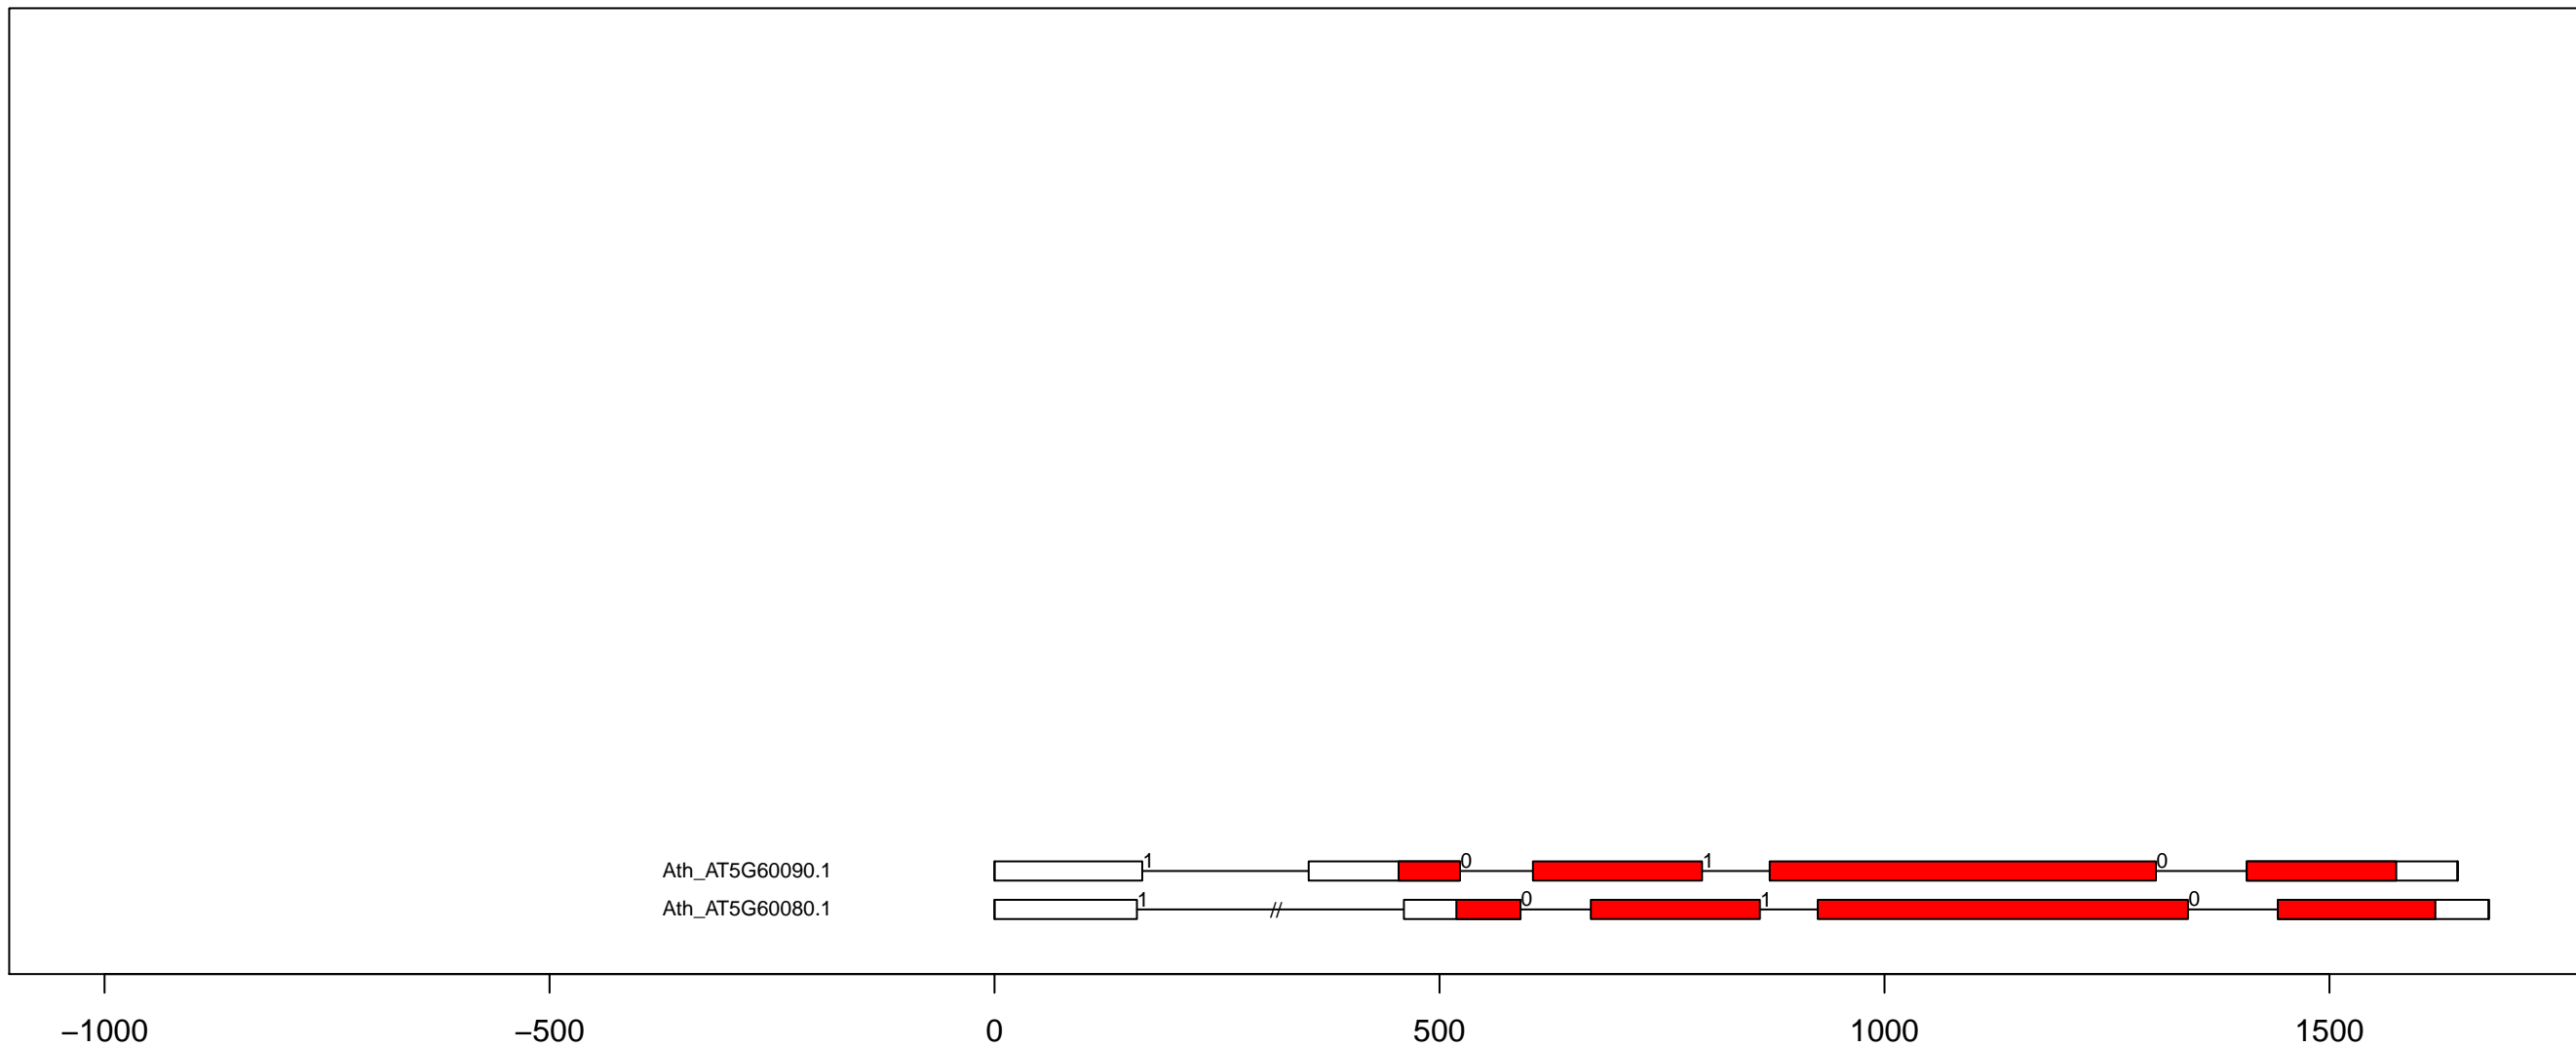

# A.th RLK-Pelle\_RLCK-XVI exon-intron and kinase domain diagram (all)

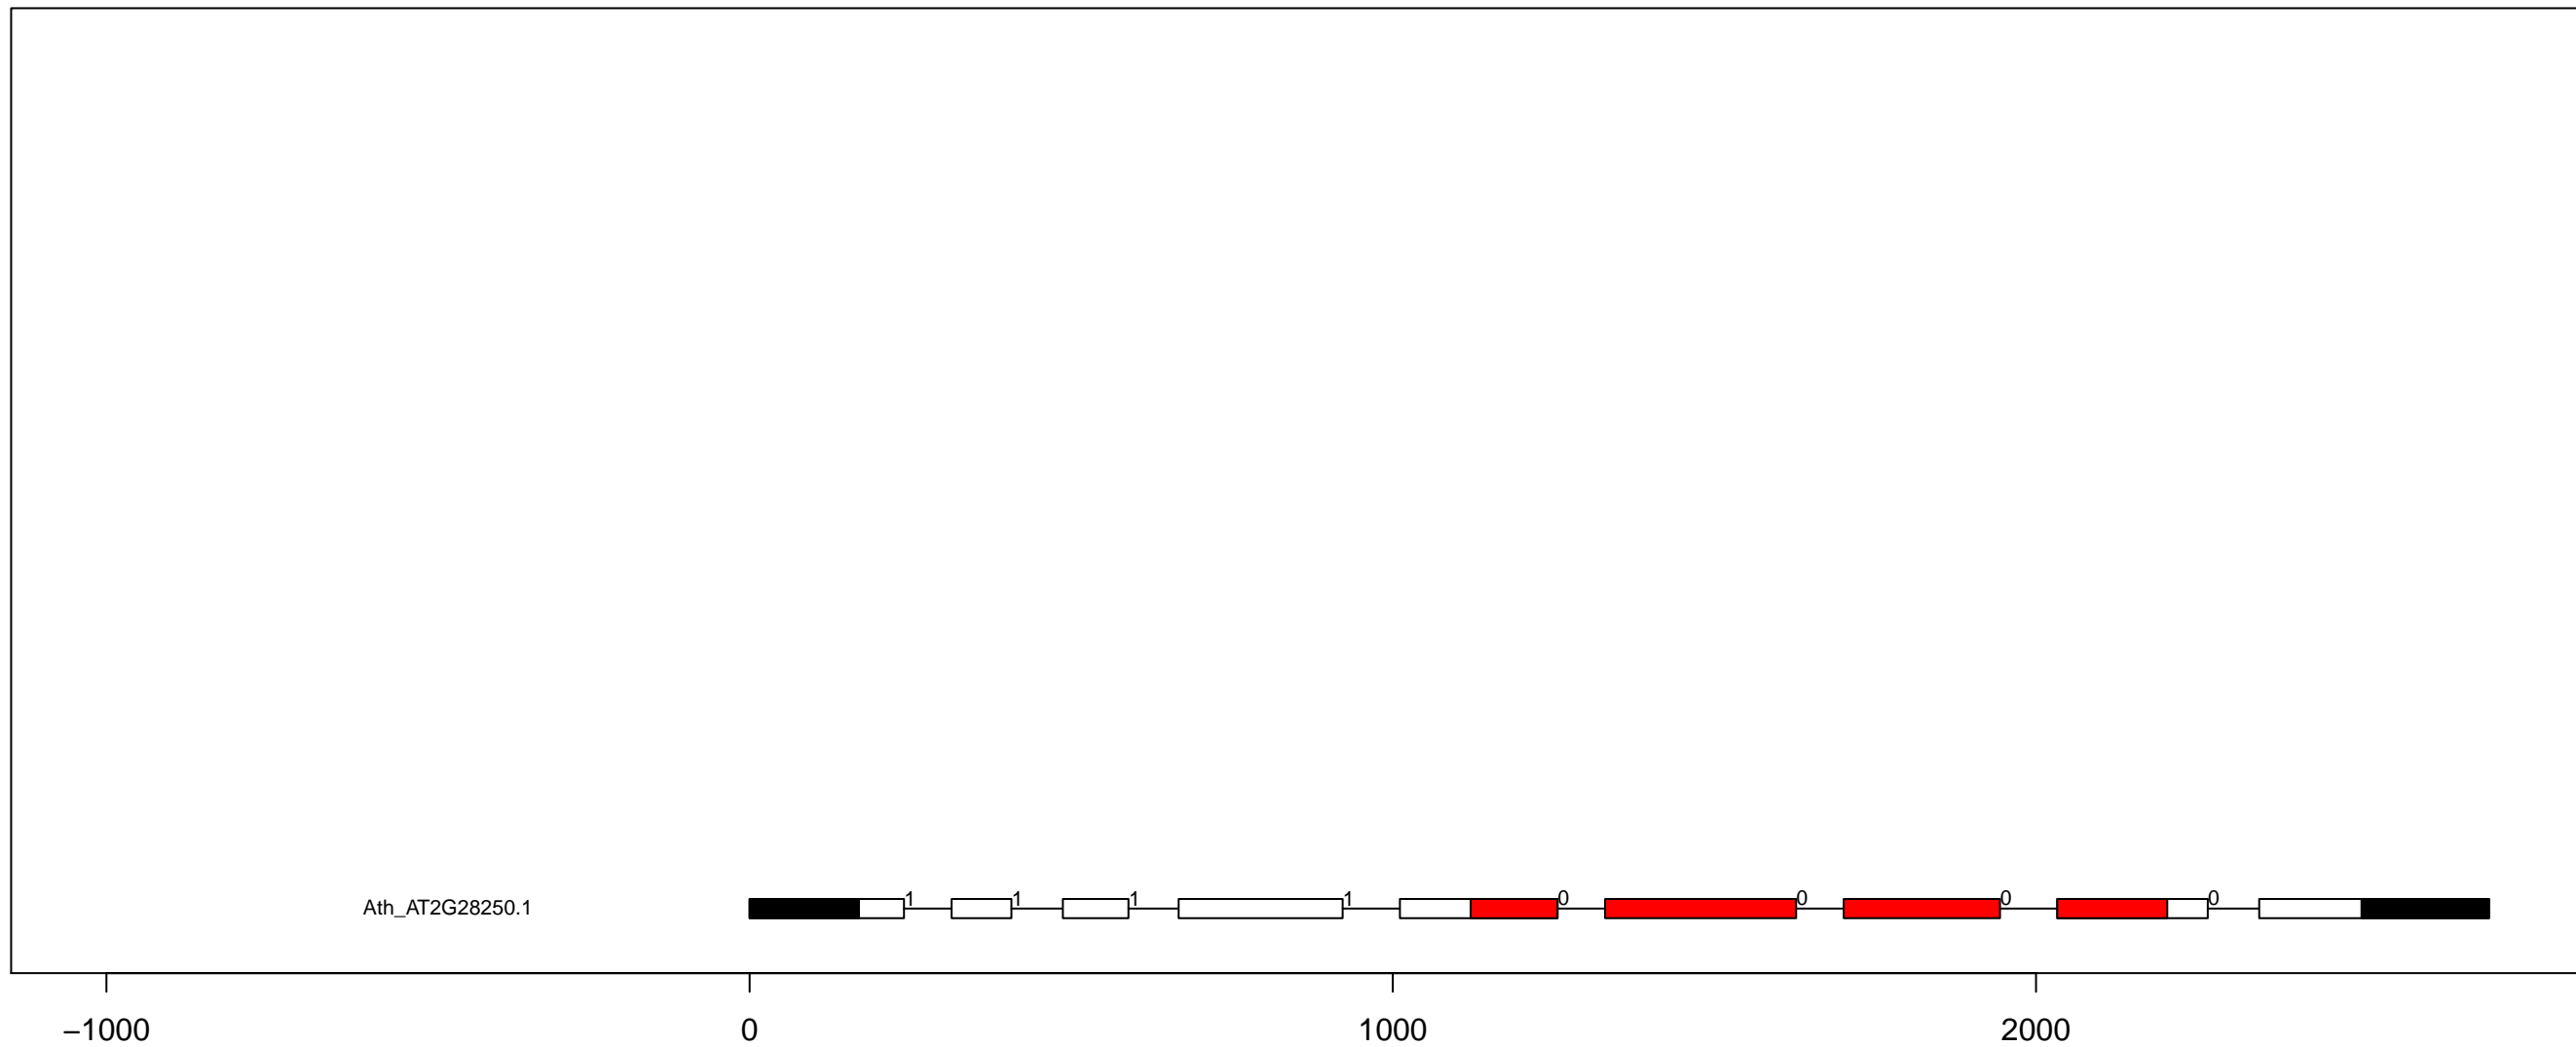

# A.th RLK-Pelle\_RLCK-XV exon-intron and kinase domain diagram (all)

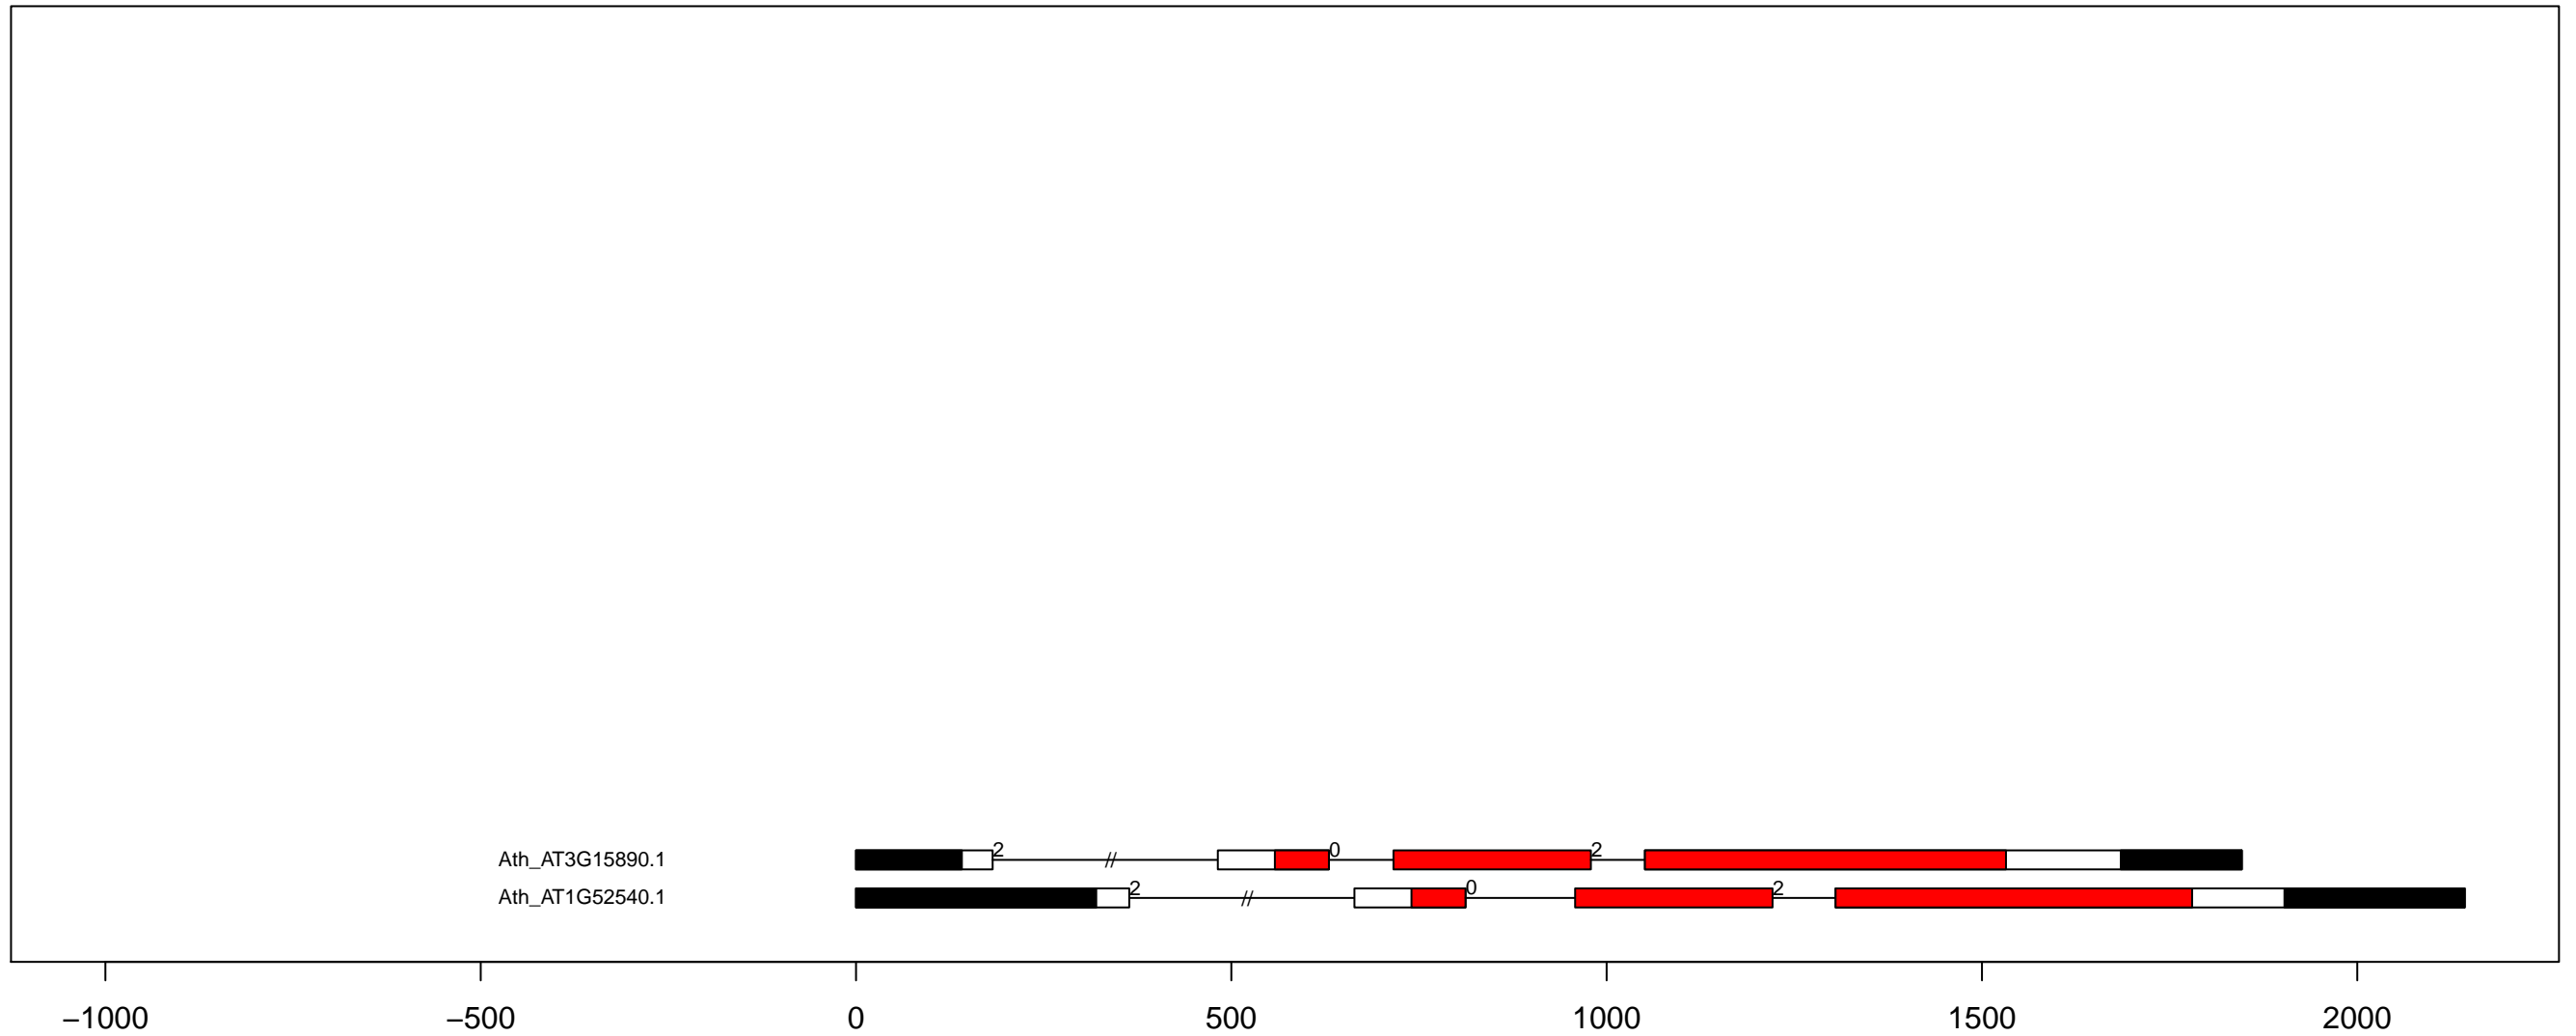

### A.th RLK-Pelle\_SD-2b exon-intron and kinase domain diagram (all)

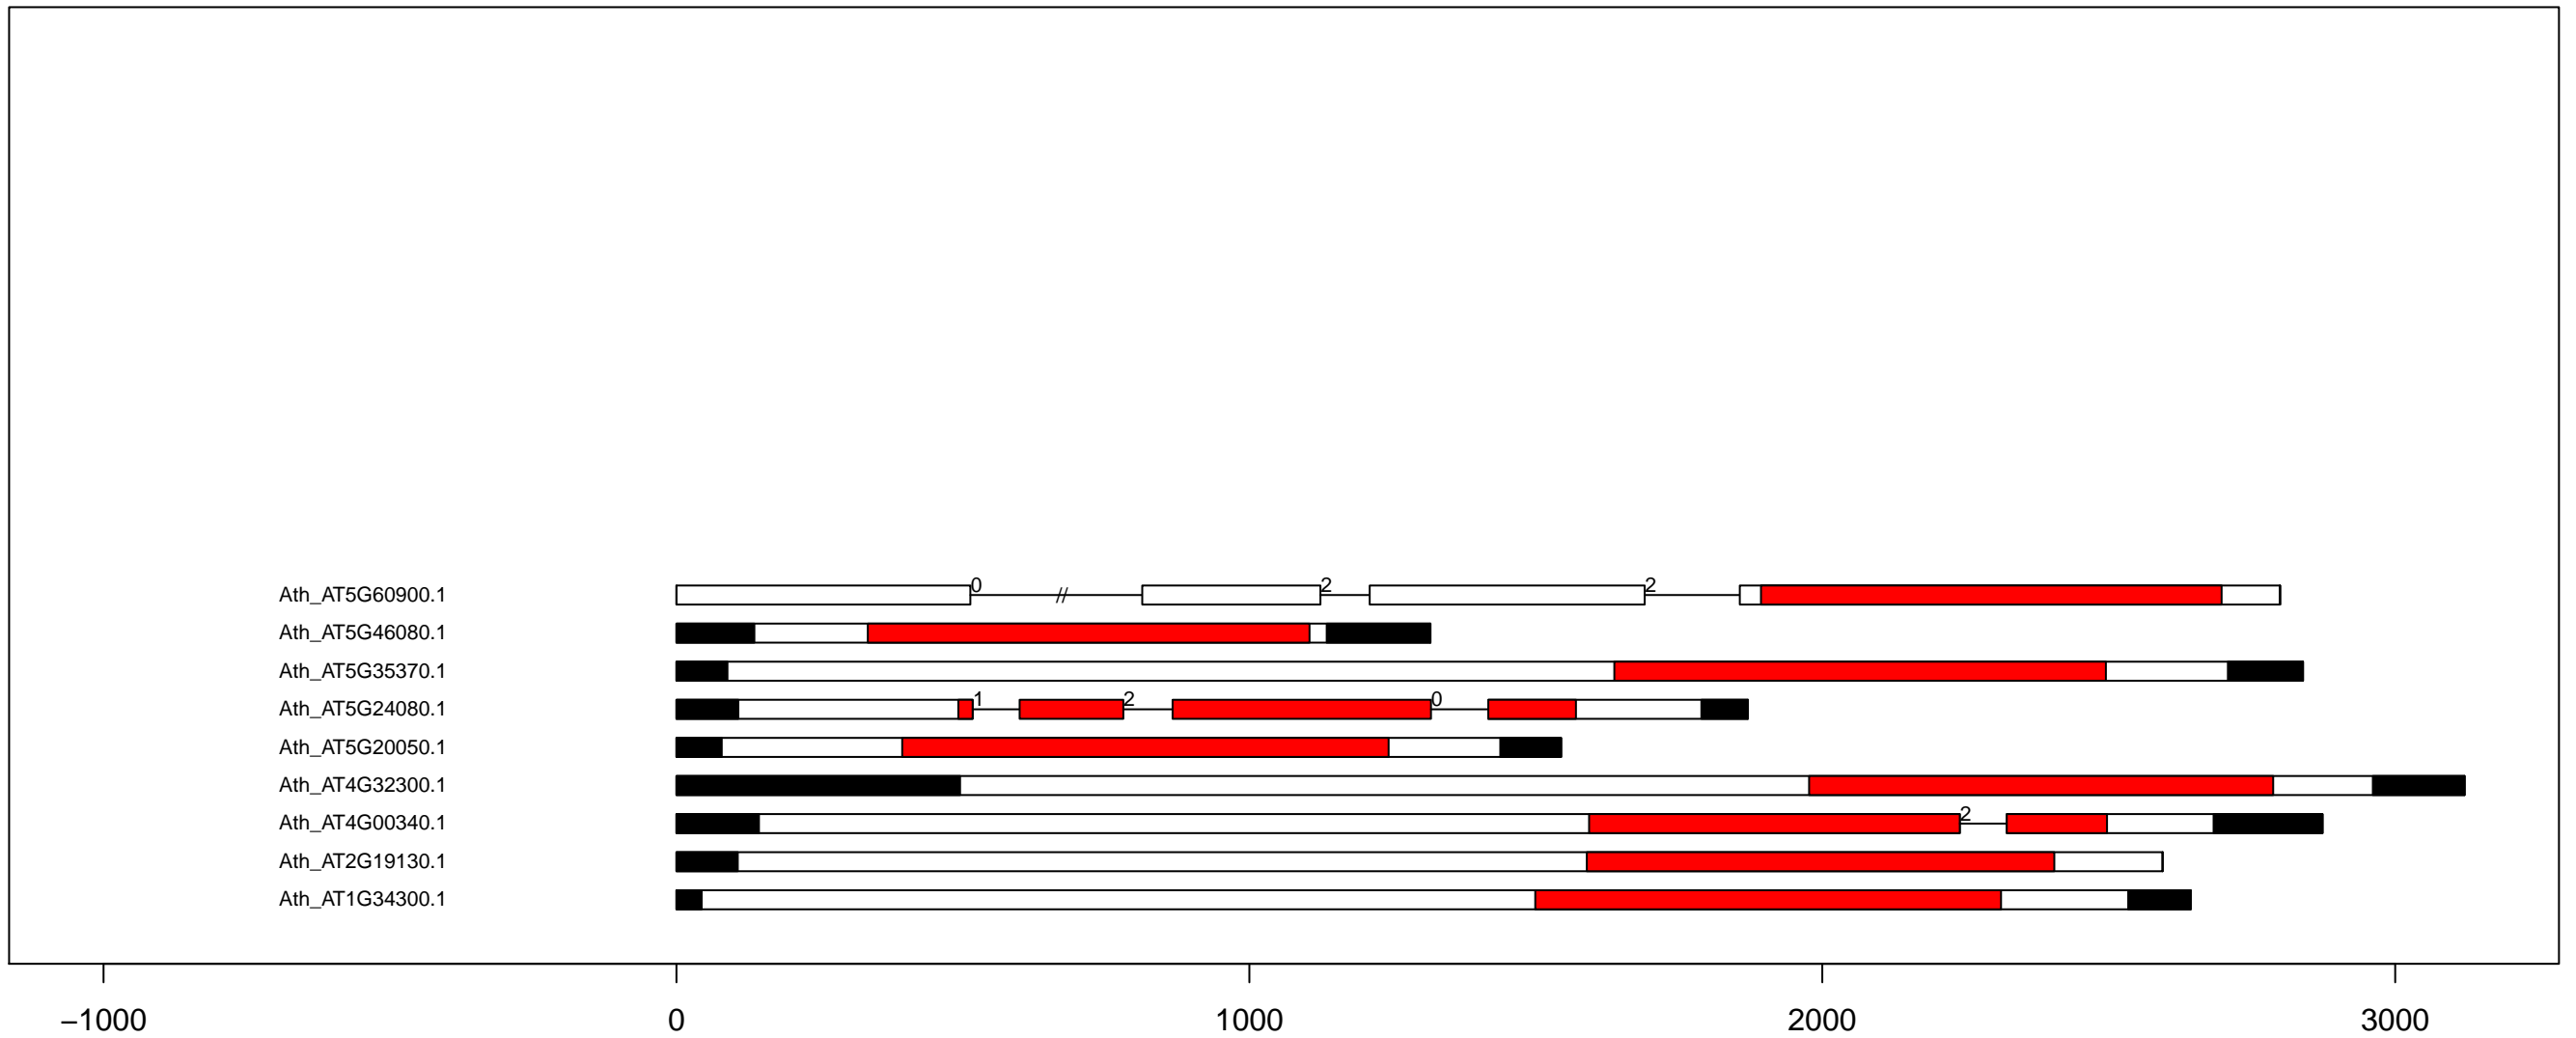

# A.th RLK-Pelle\_Singleton exon-intron and kinase domain diagram (all)

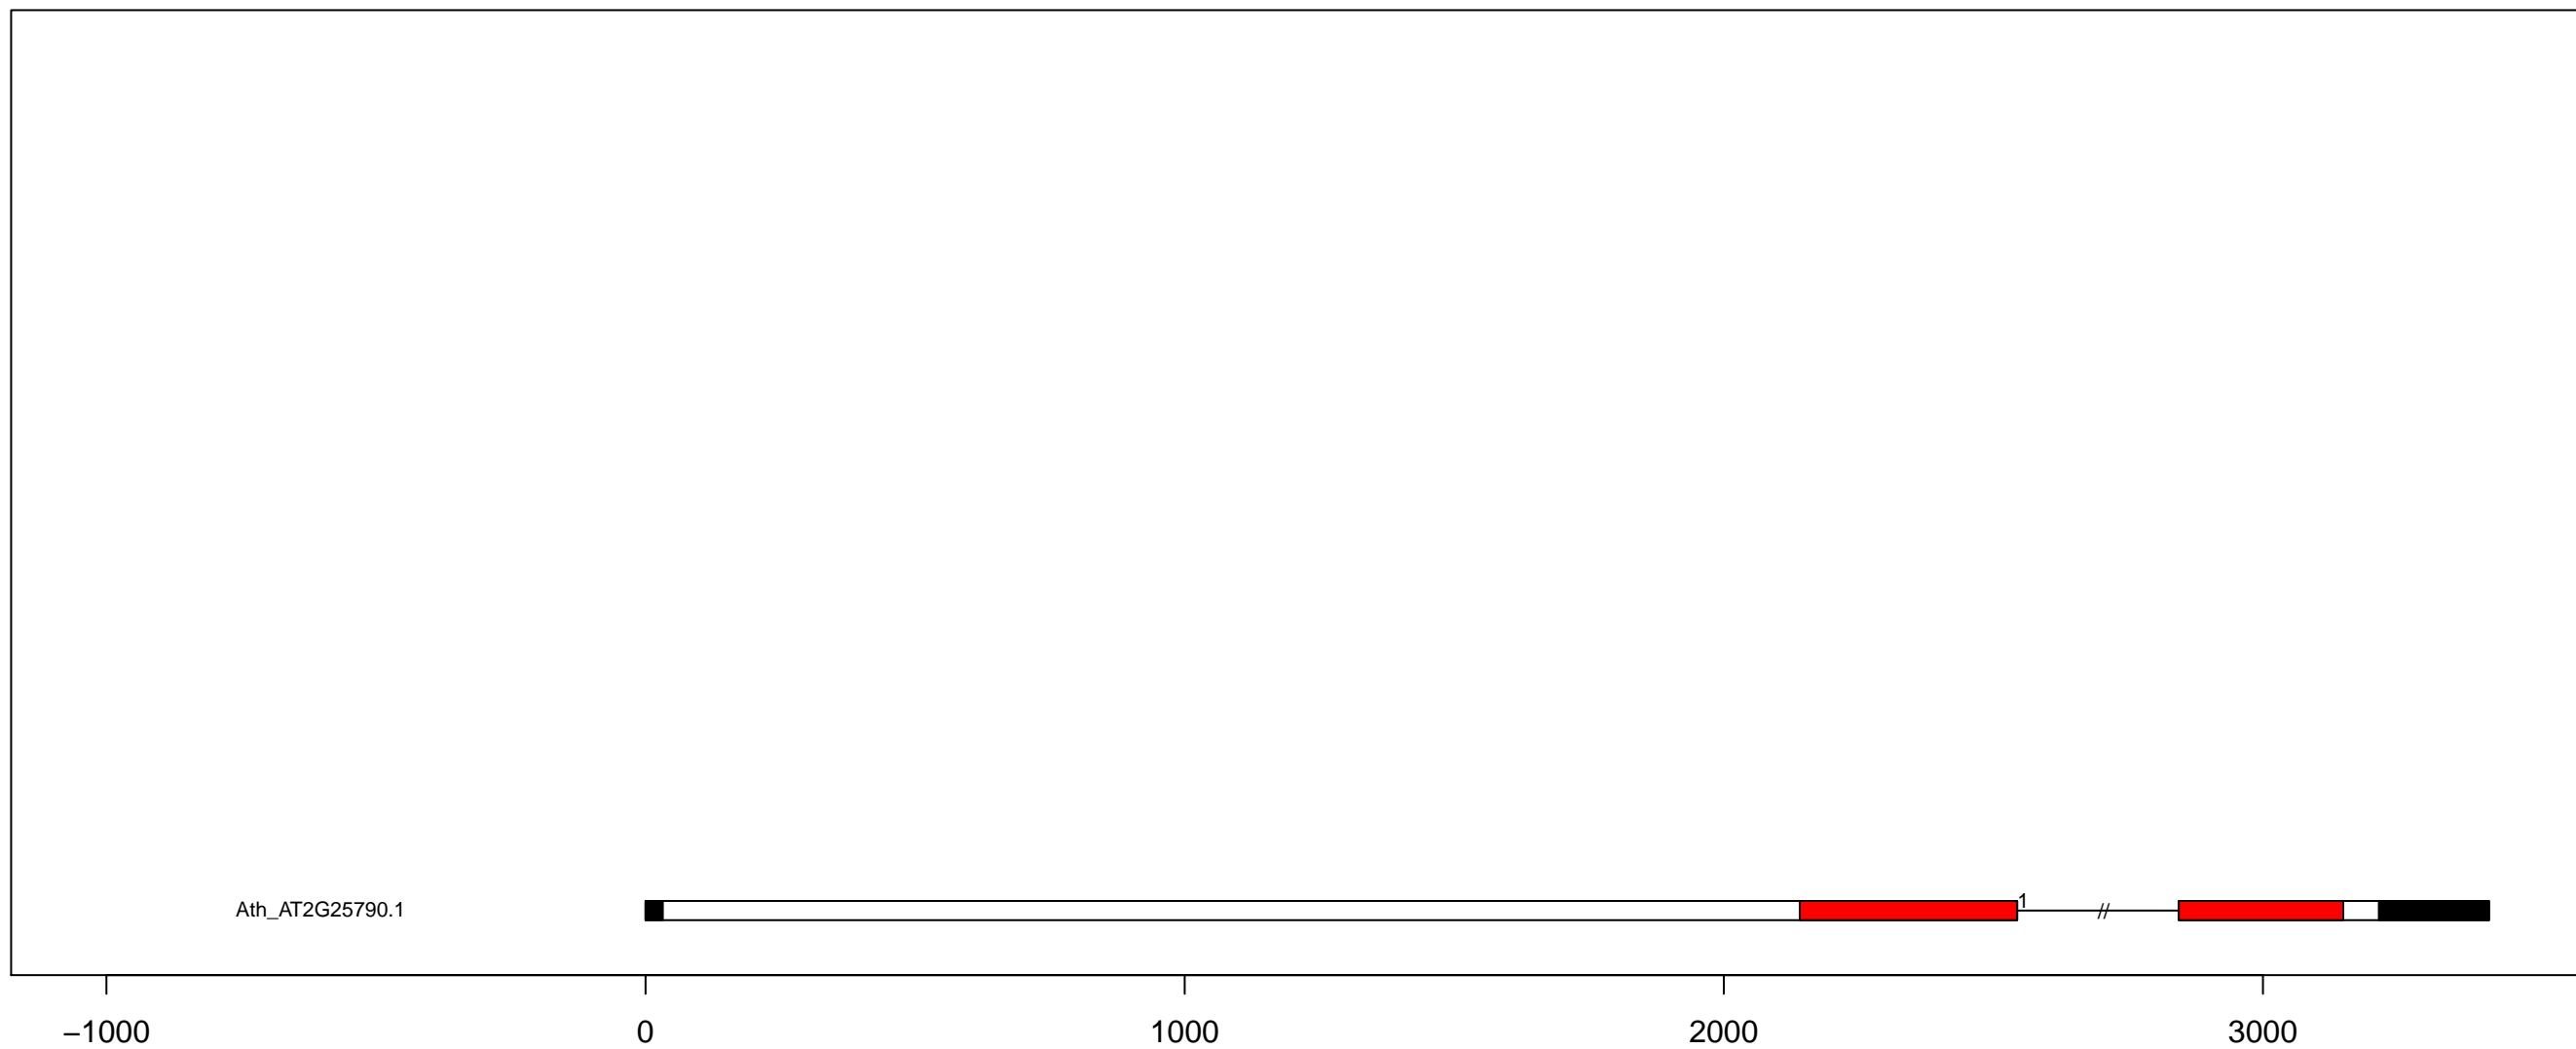



# A.th RLK-Pelle\_URK-1 exon-intron and kinase domain diagram (all)

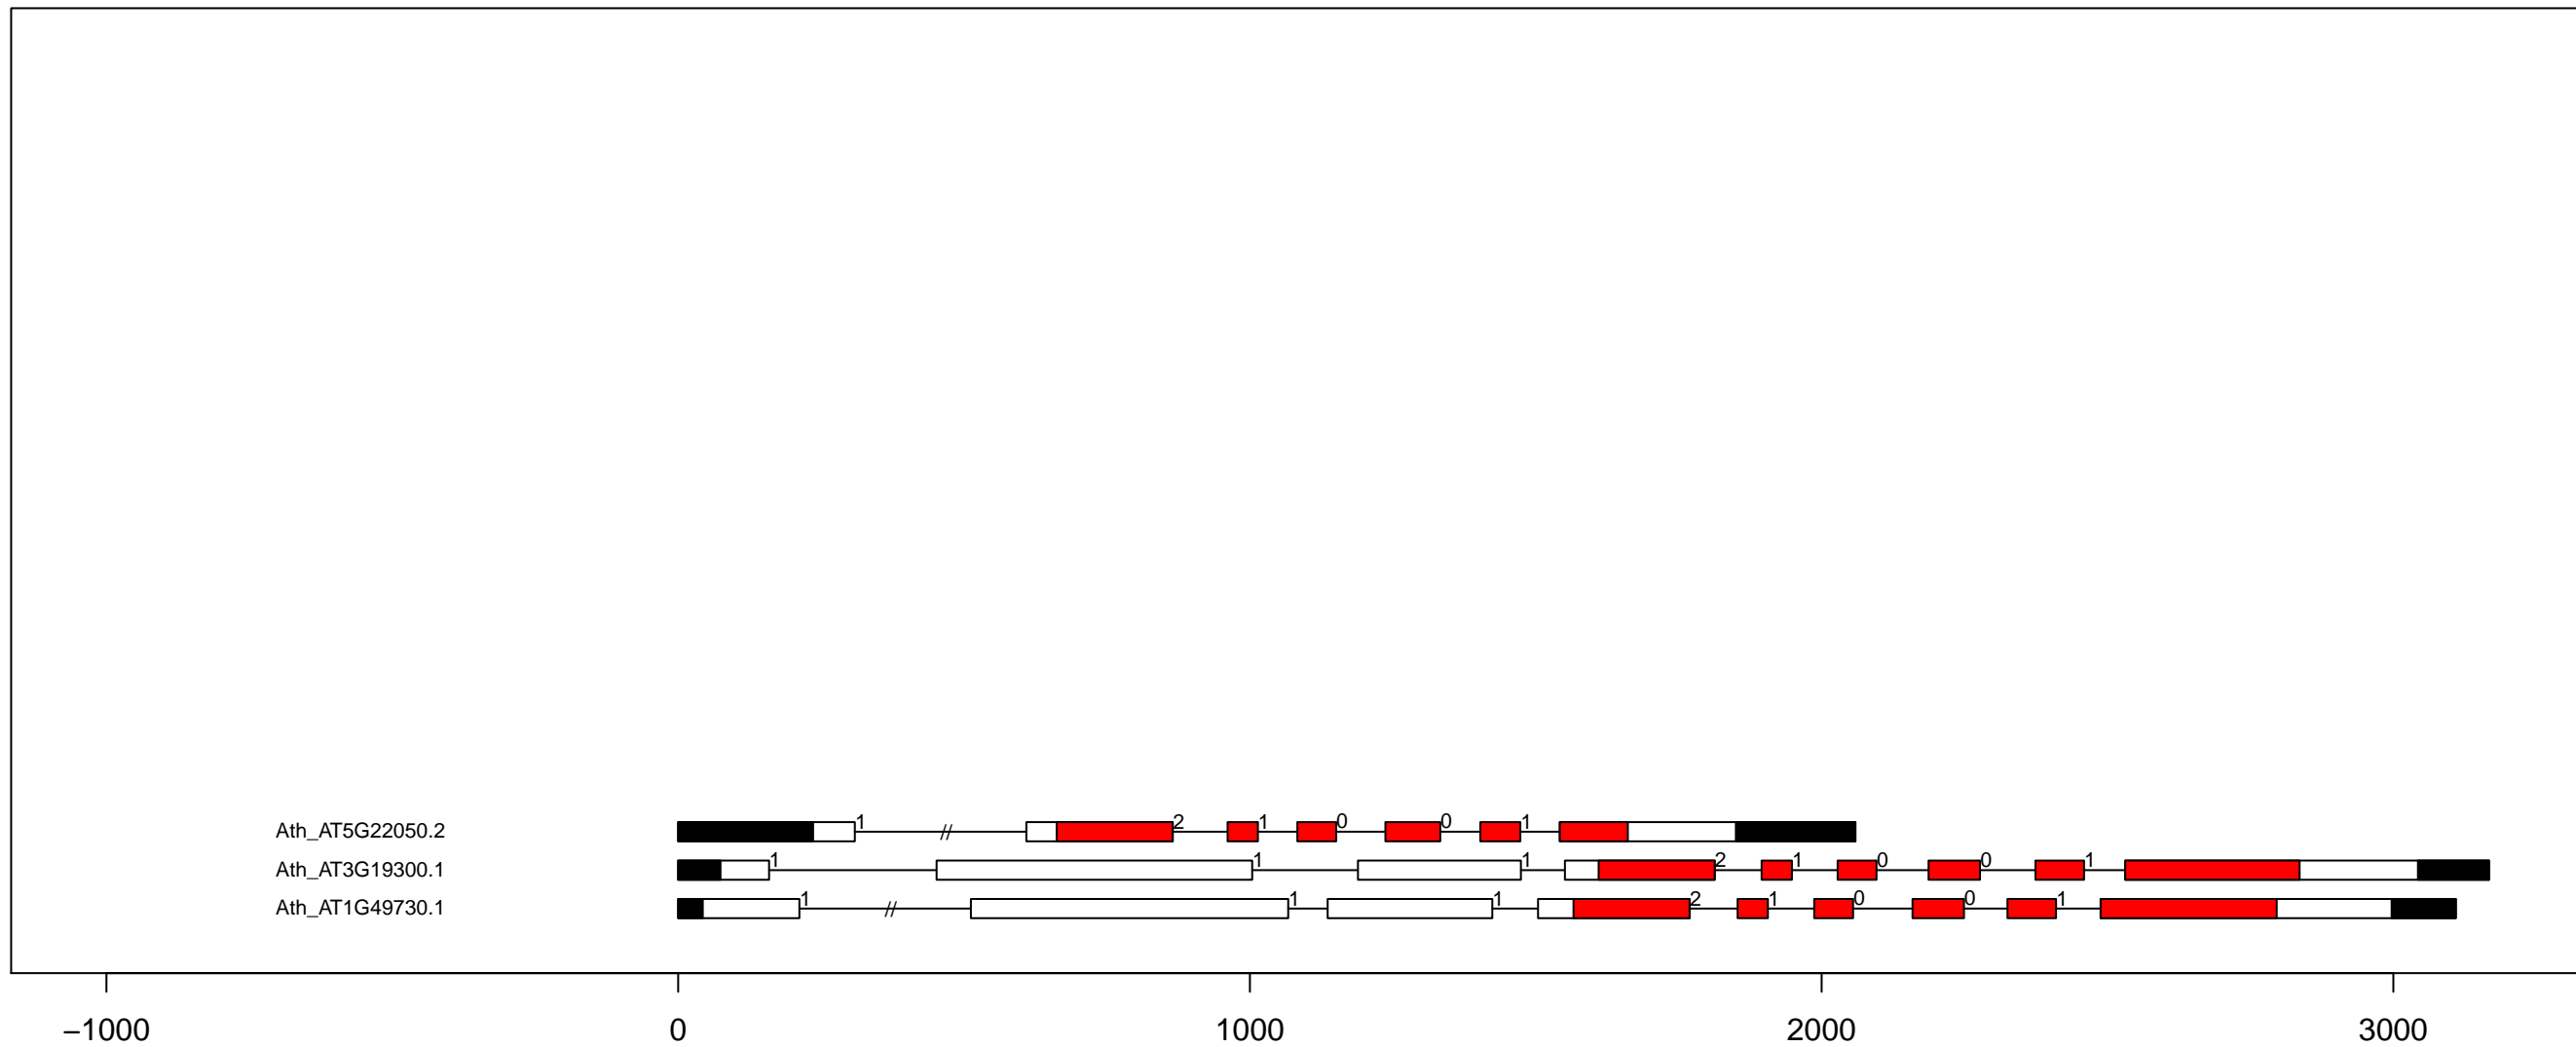

A.th RLK-Pelle\_URK-3 exon-intron and kinase domain diagram (all)

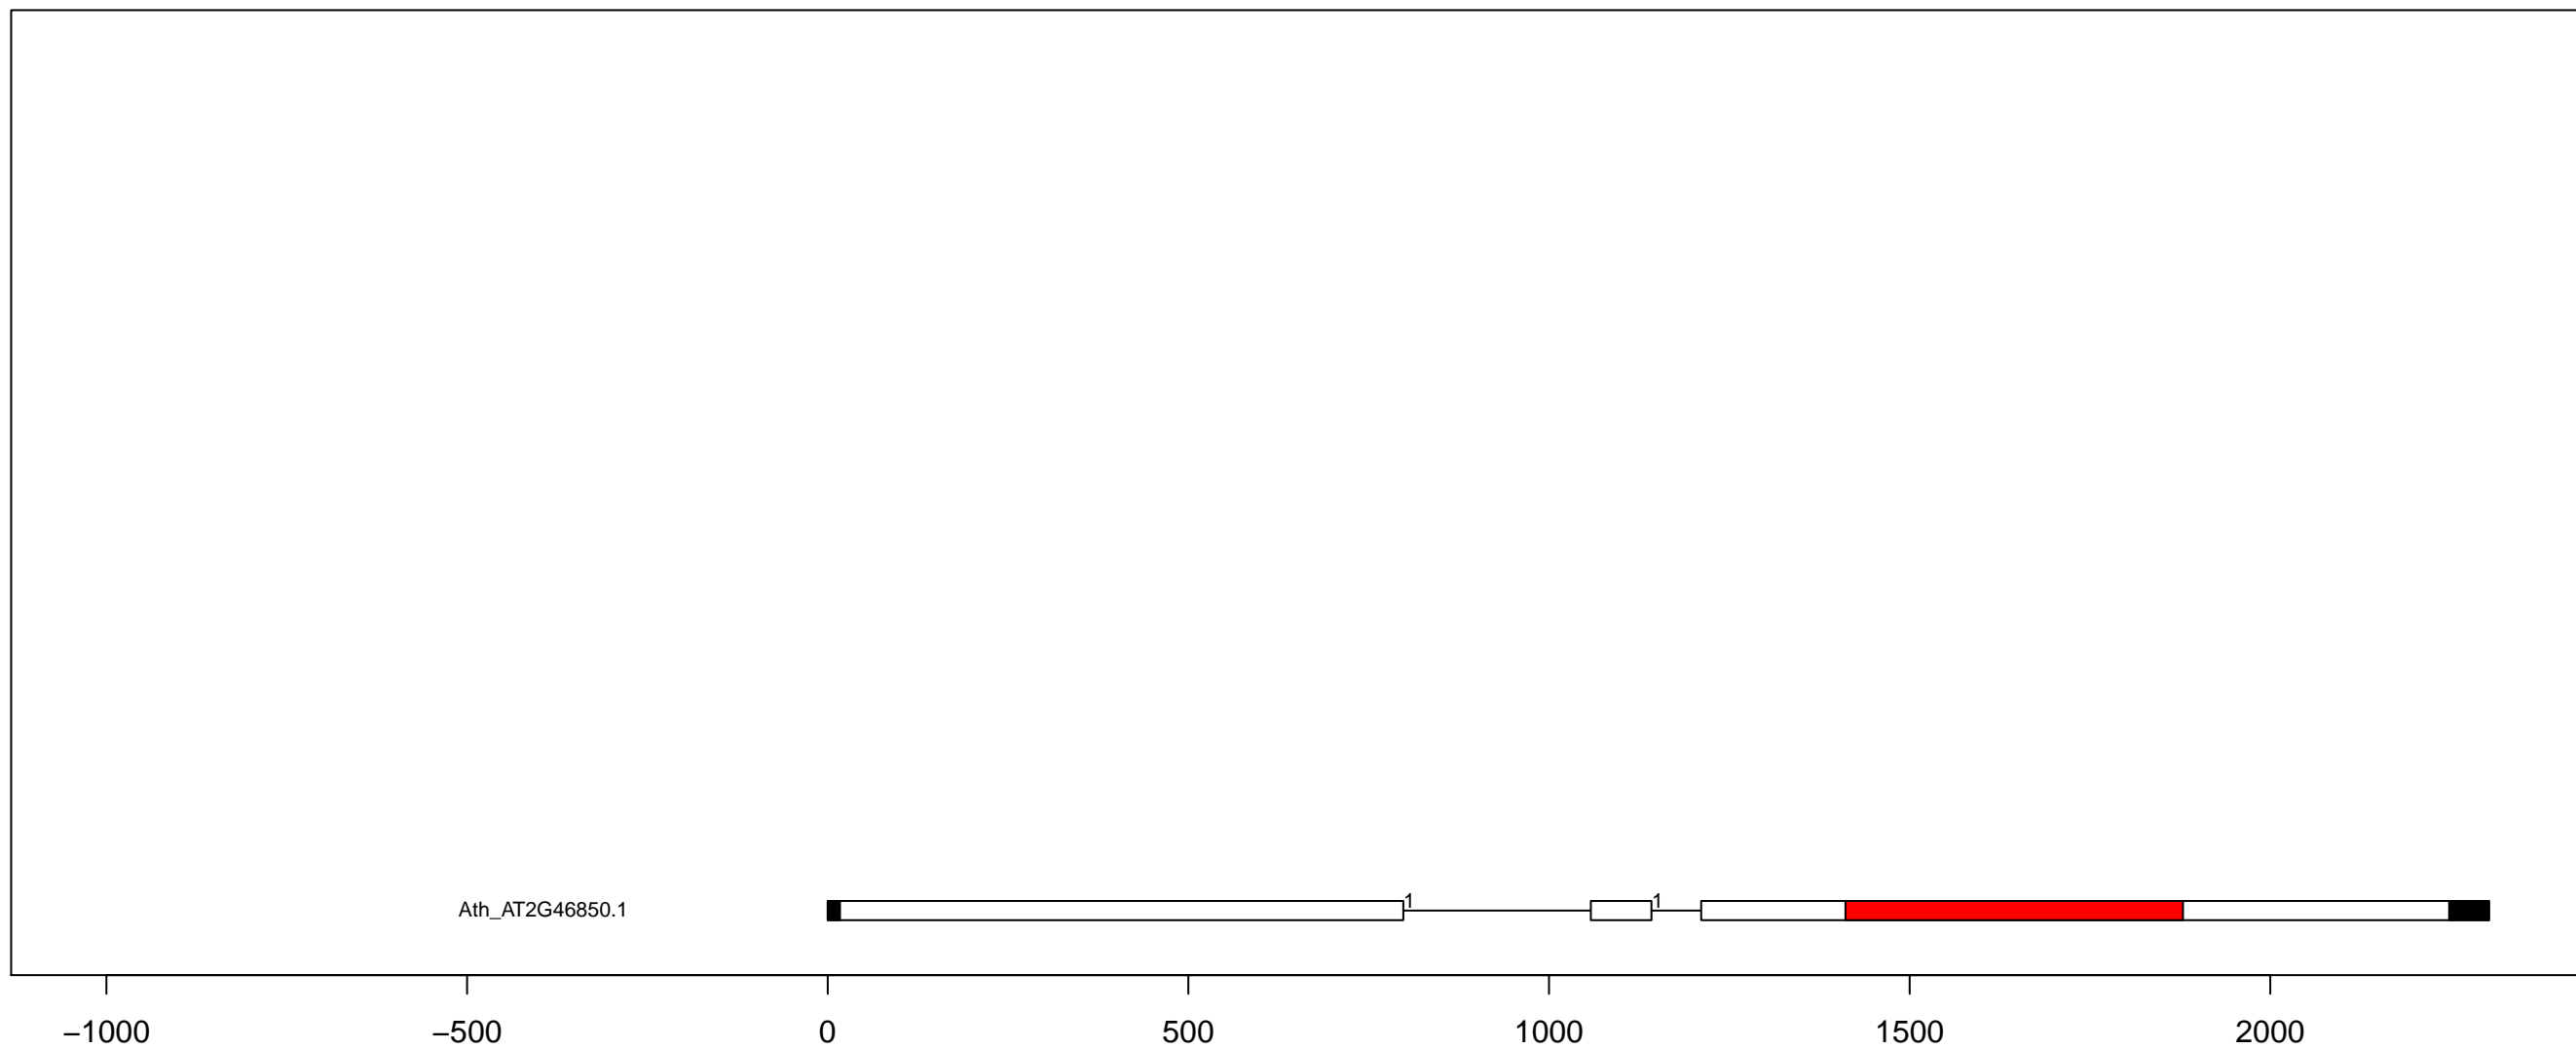

# A.th RLK-Pelle\_WAK\_LRK10L-1 exon-intron and kinase domain diagram (all)

Ath\_AT5G02070.1  
 Ath\_AT3G53840.1  
 Ath\_AT5G66790.1  
 Ath\_AT5G38210.1  
 Ath\_AT2G23450.2  
 Ath\_AT1G69910.1  
 Ath\_AT1G66880.1  
 Ath\_AT1G25390.1  
 Ath\_AT1G18390.2

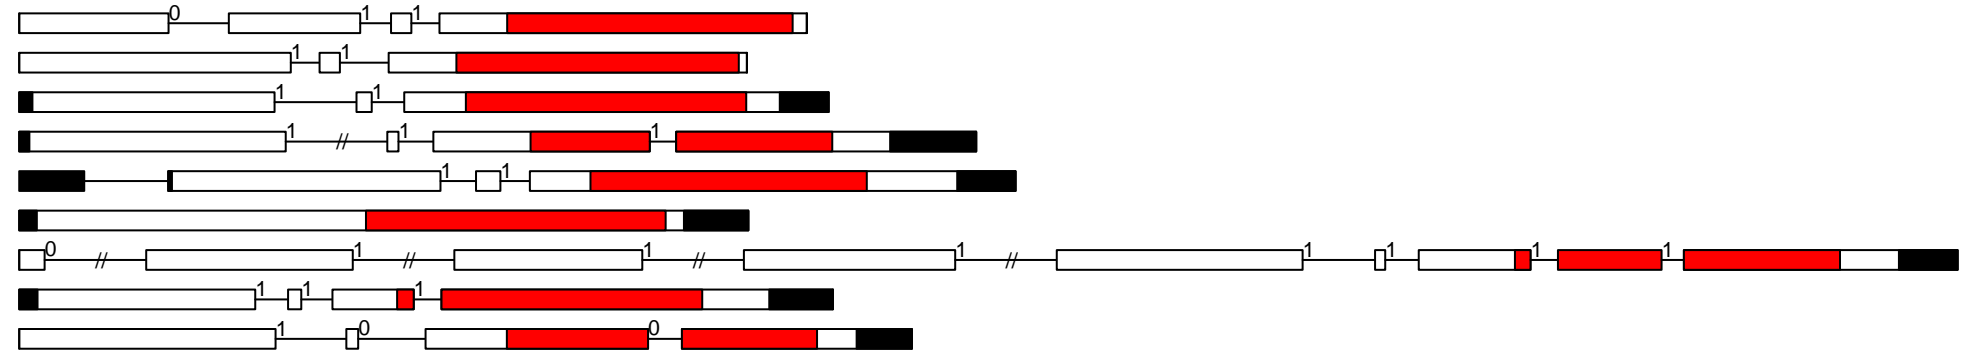

0

2000

4000

6000

# A.th RLK-Pelle\_WAK exon-intron and kinase domain diagram (all)

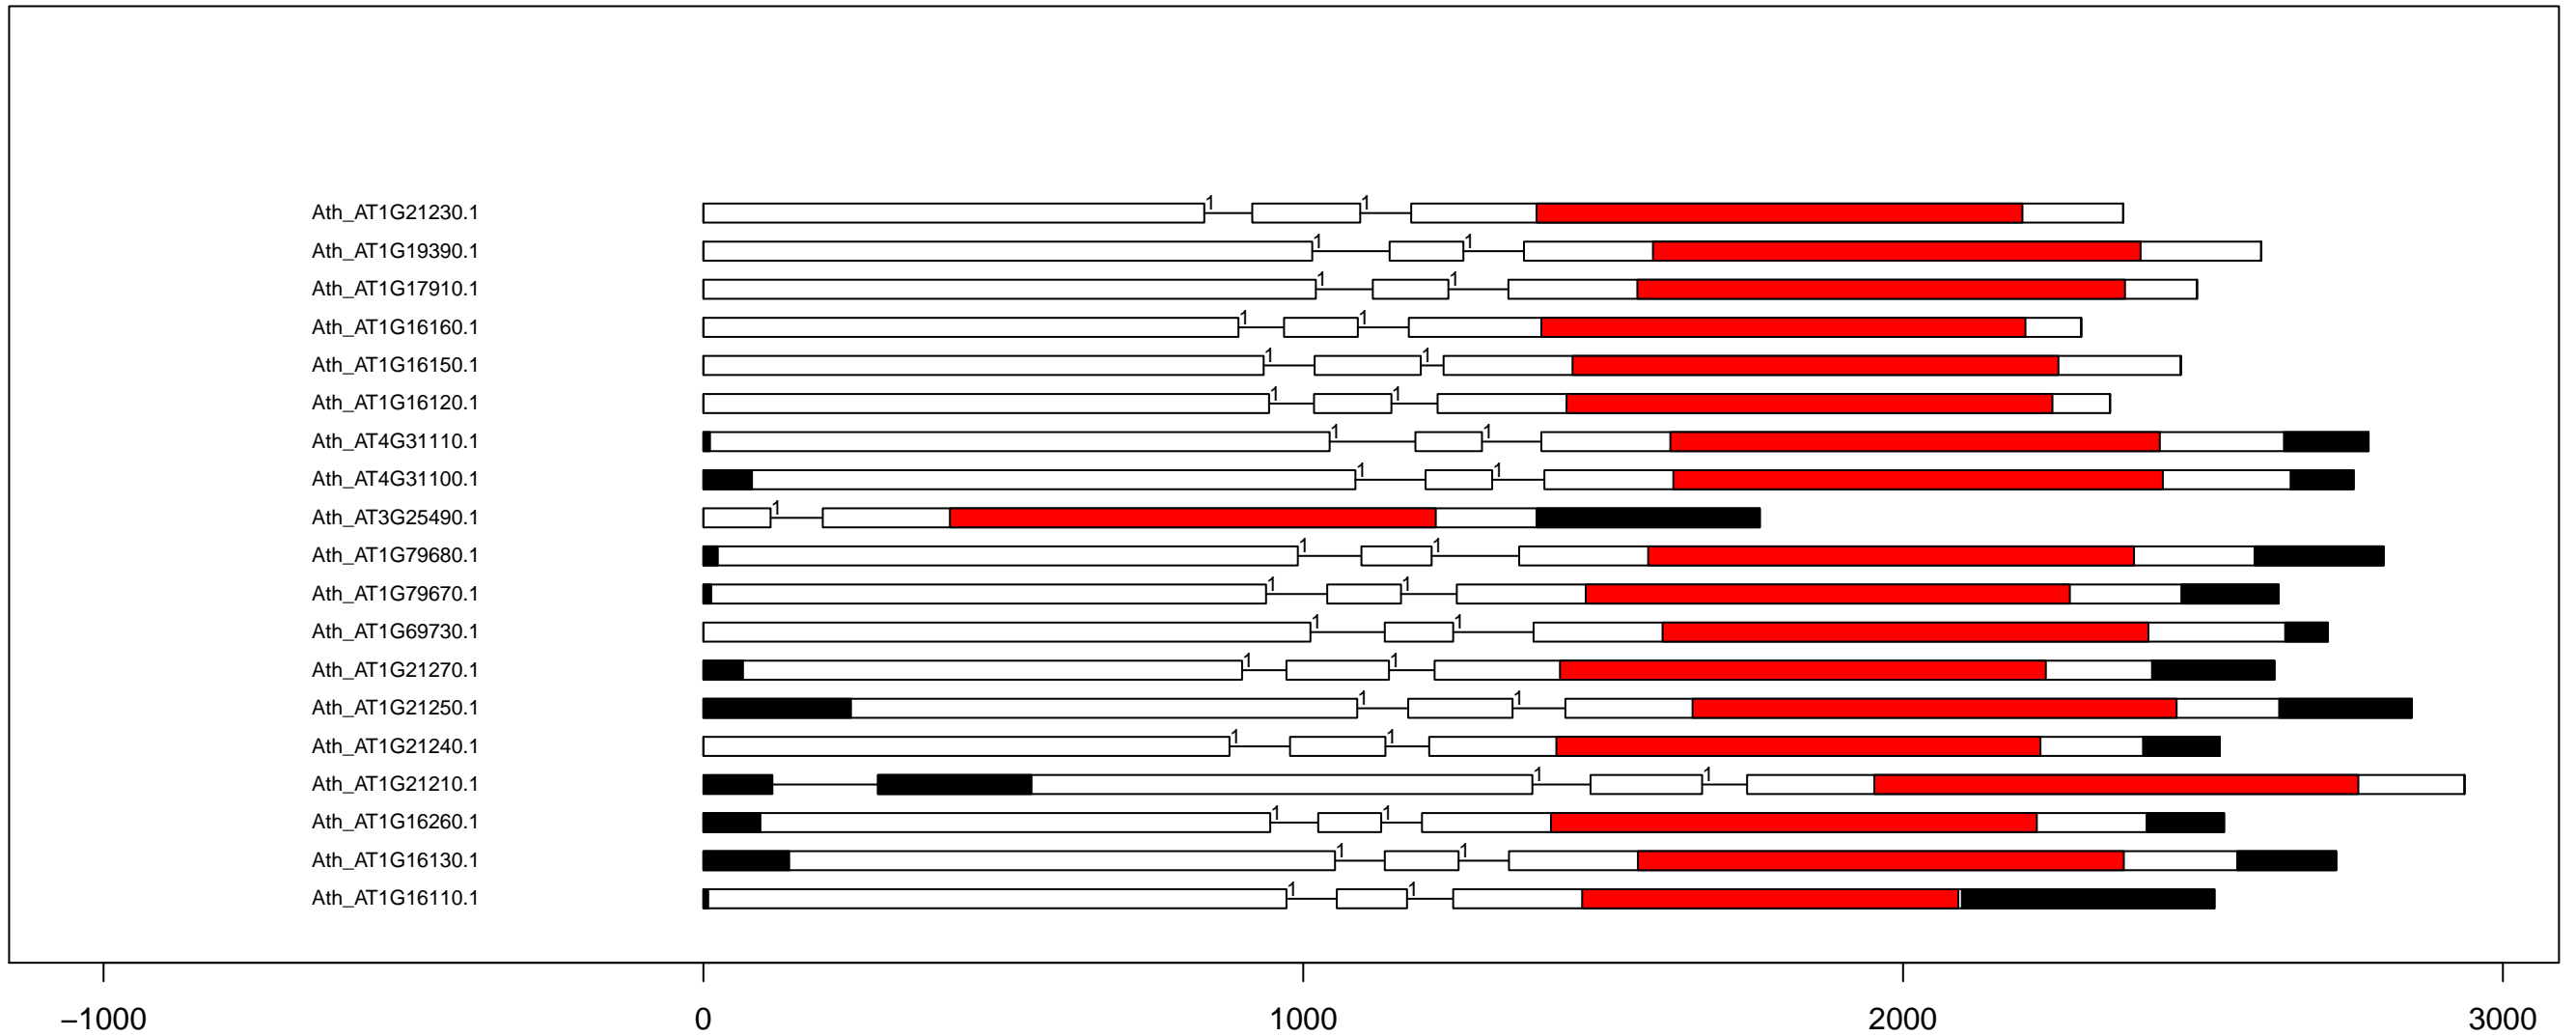

# A.th SCY1\_SCYL1 exon-intron and kinase domain diagram (all)

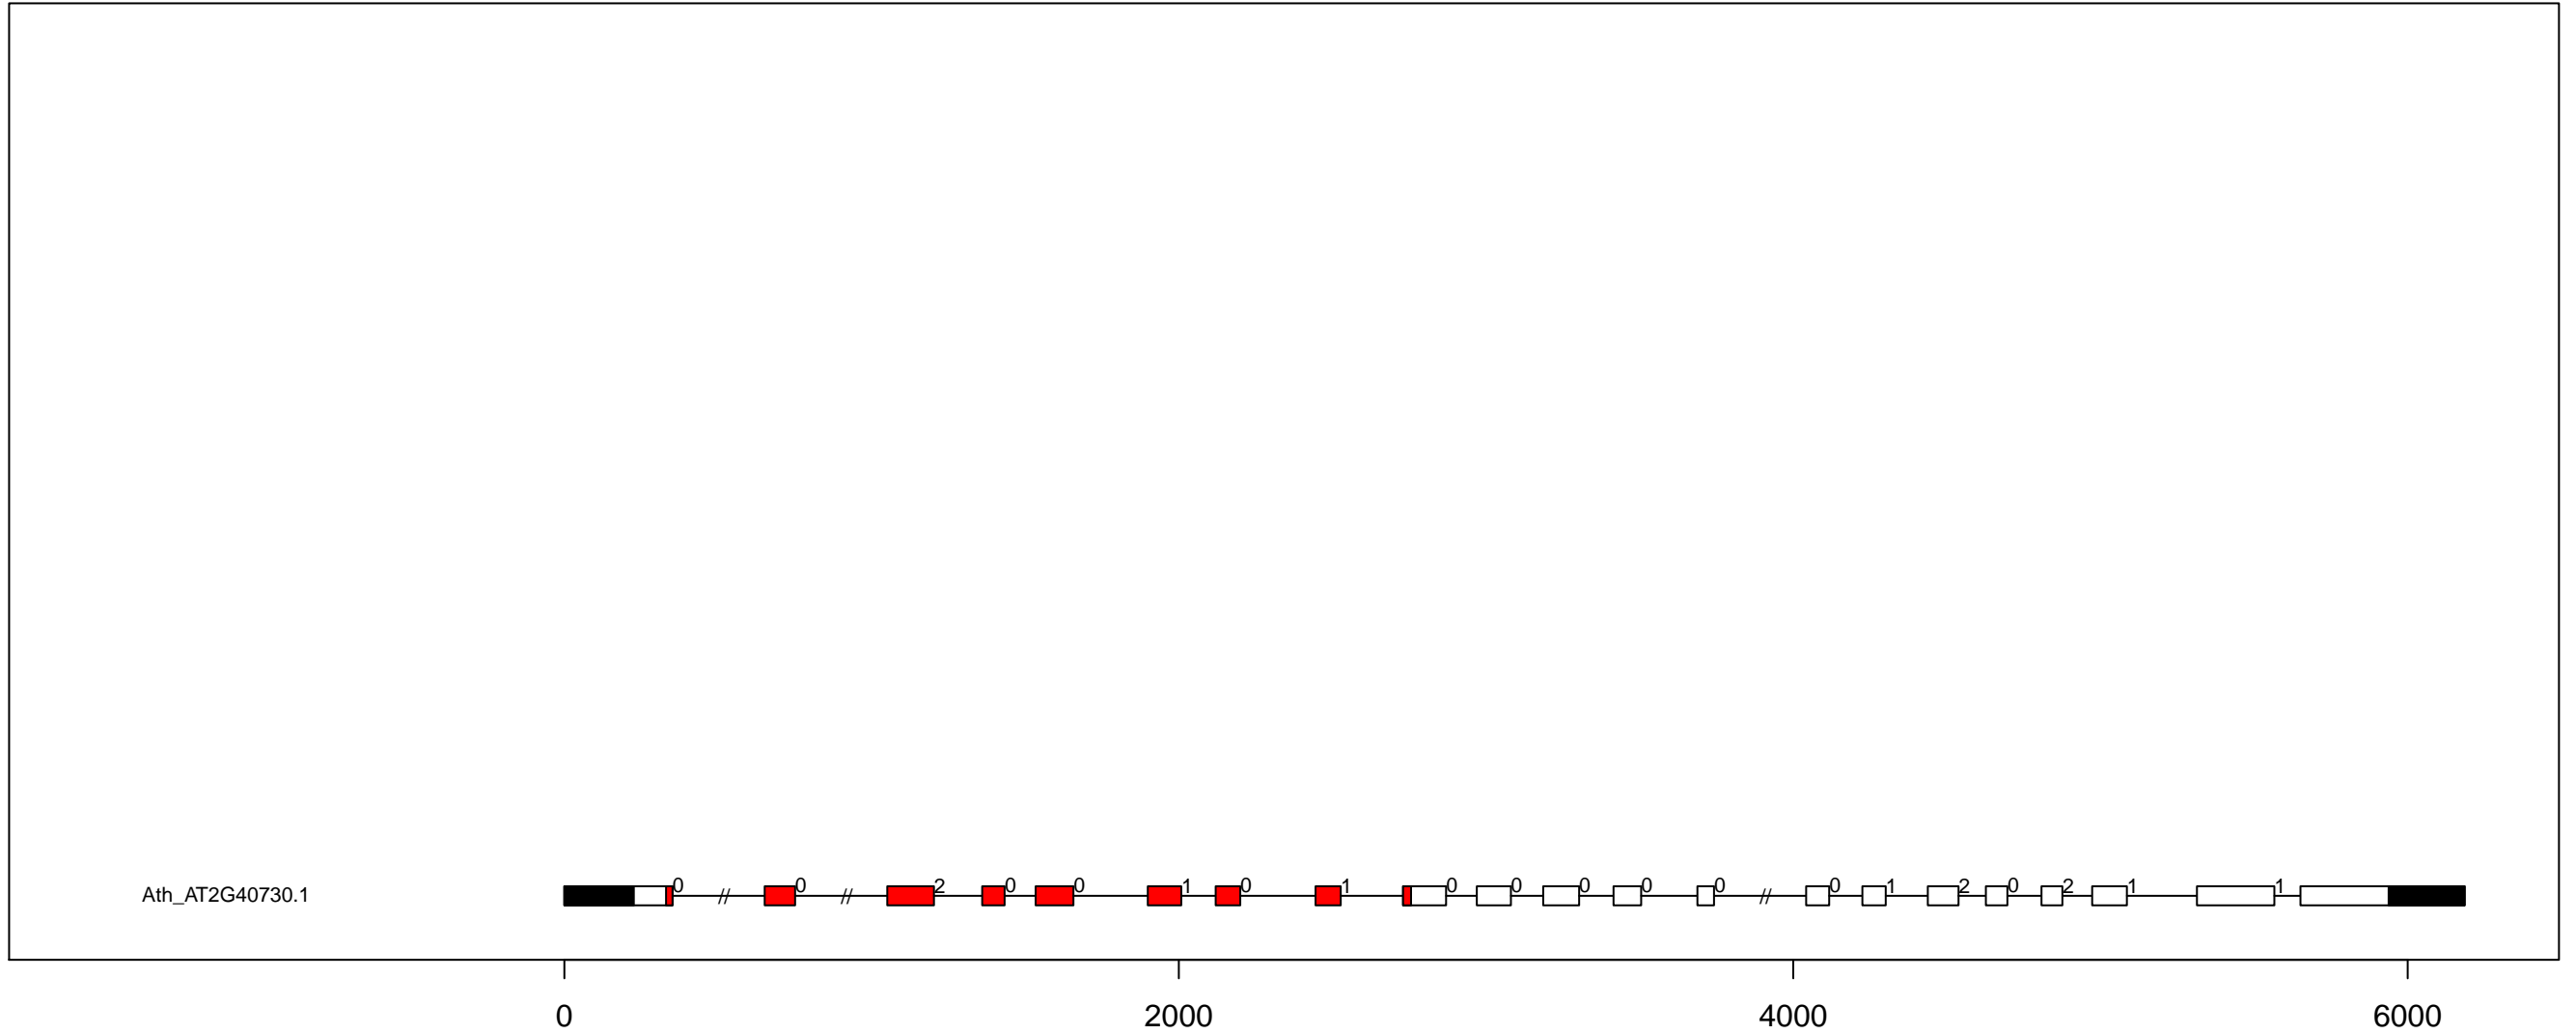

# A.th SCY1\_SCYL2 exon-intron and kinase domain diagram (all)

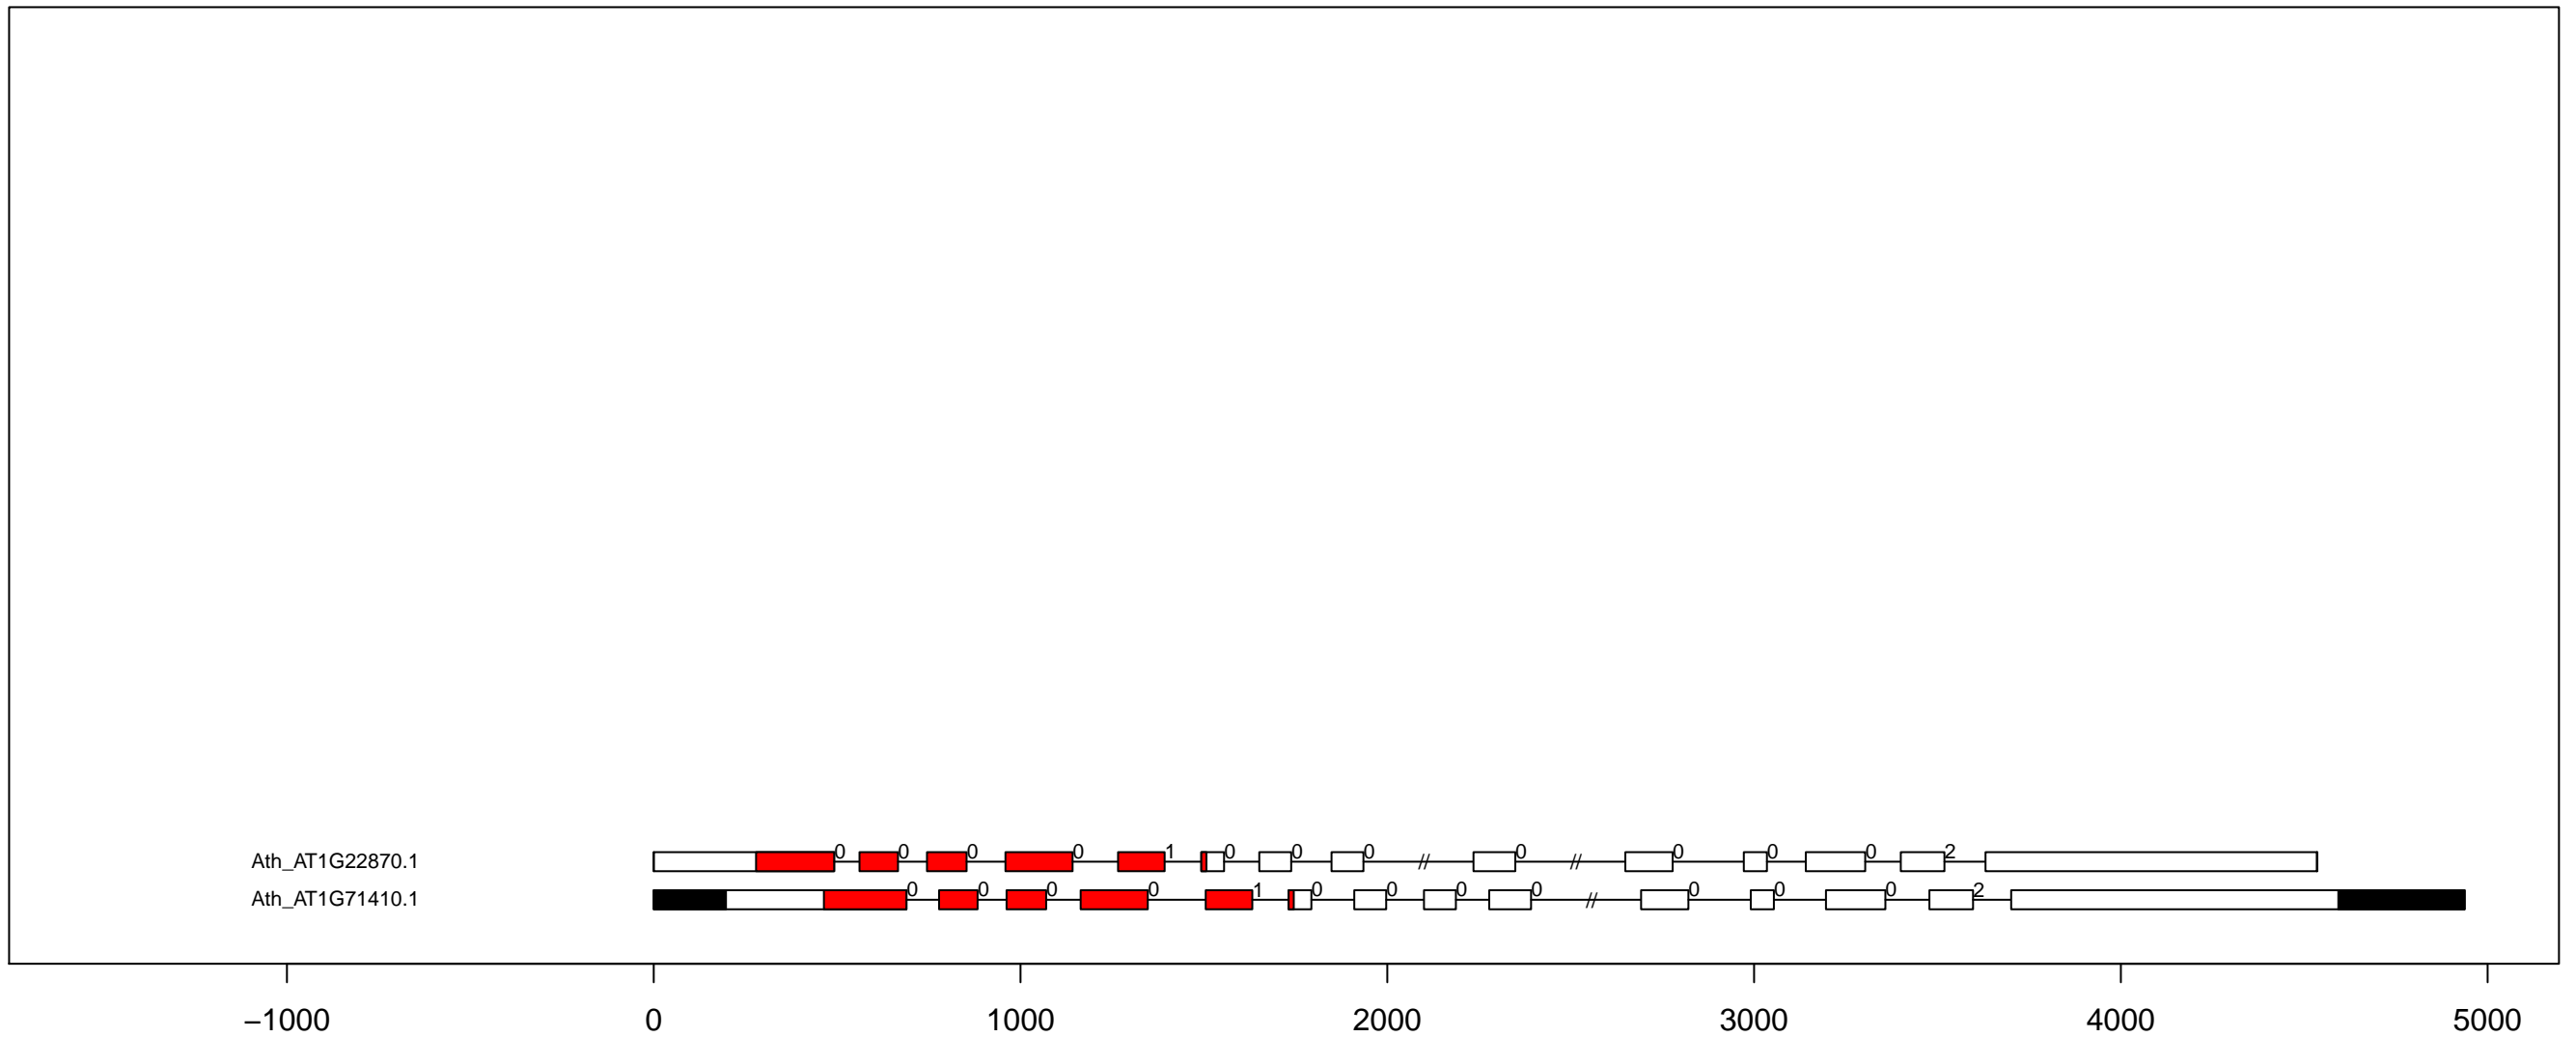

### A.th STE\_STE11 exon-intron and kinase domain diagram (part 1)

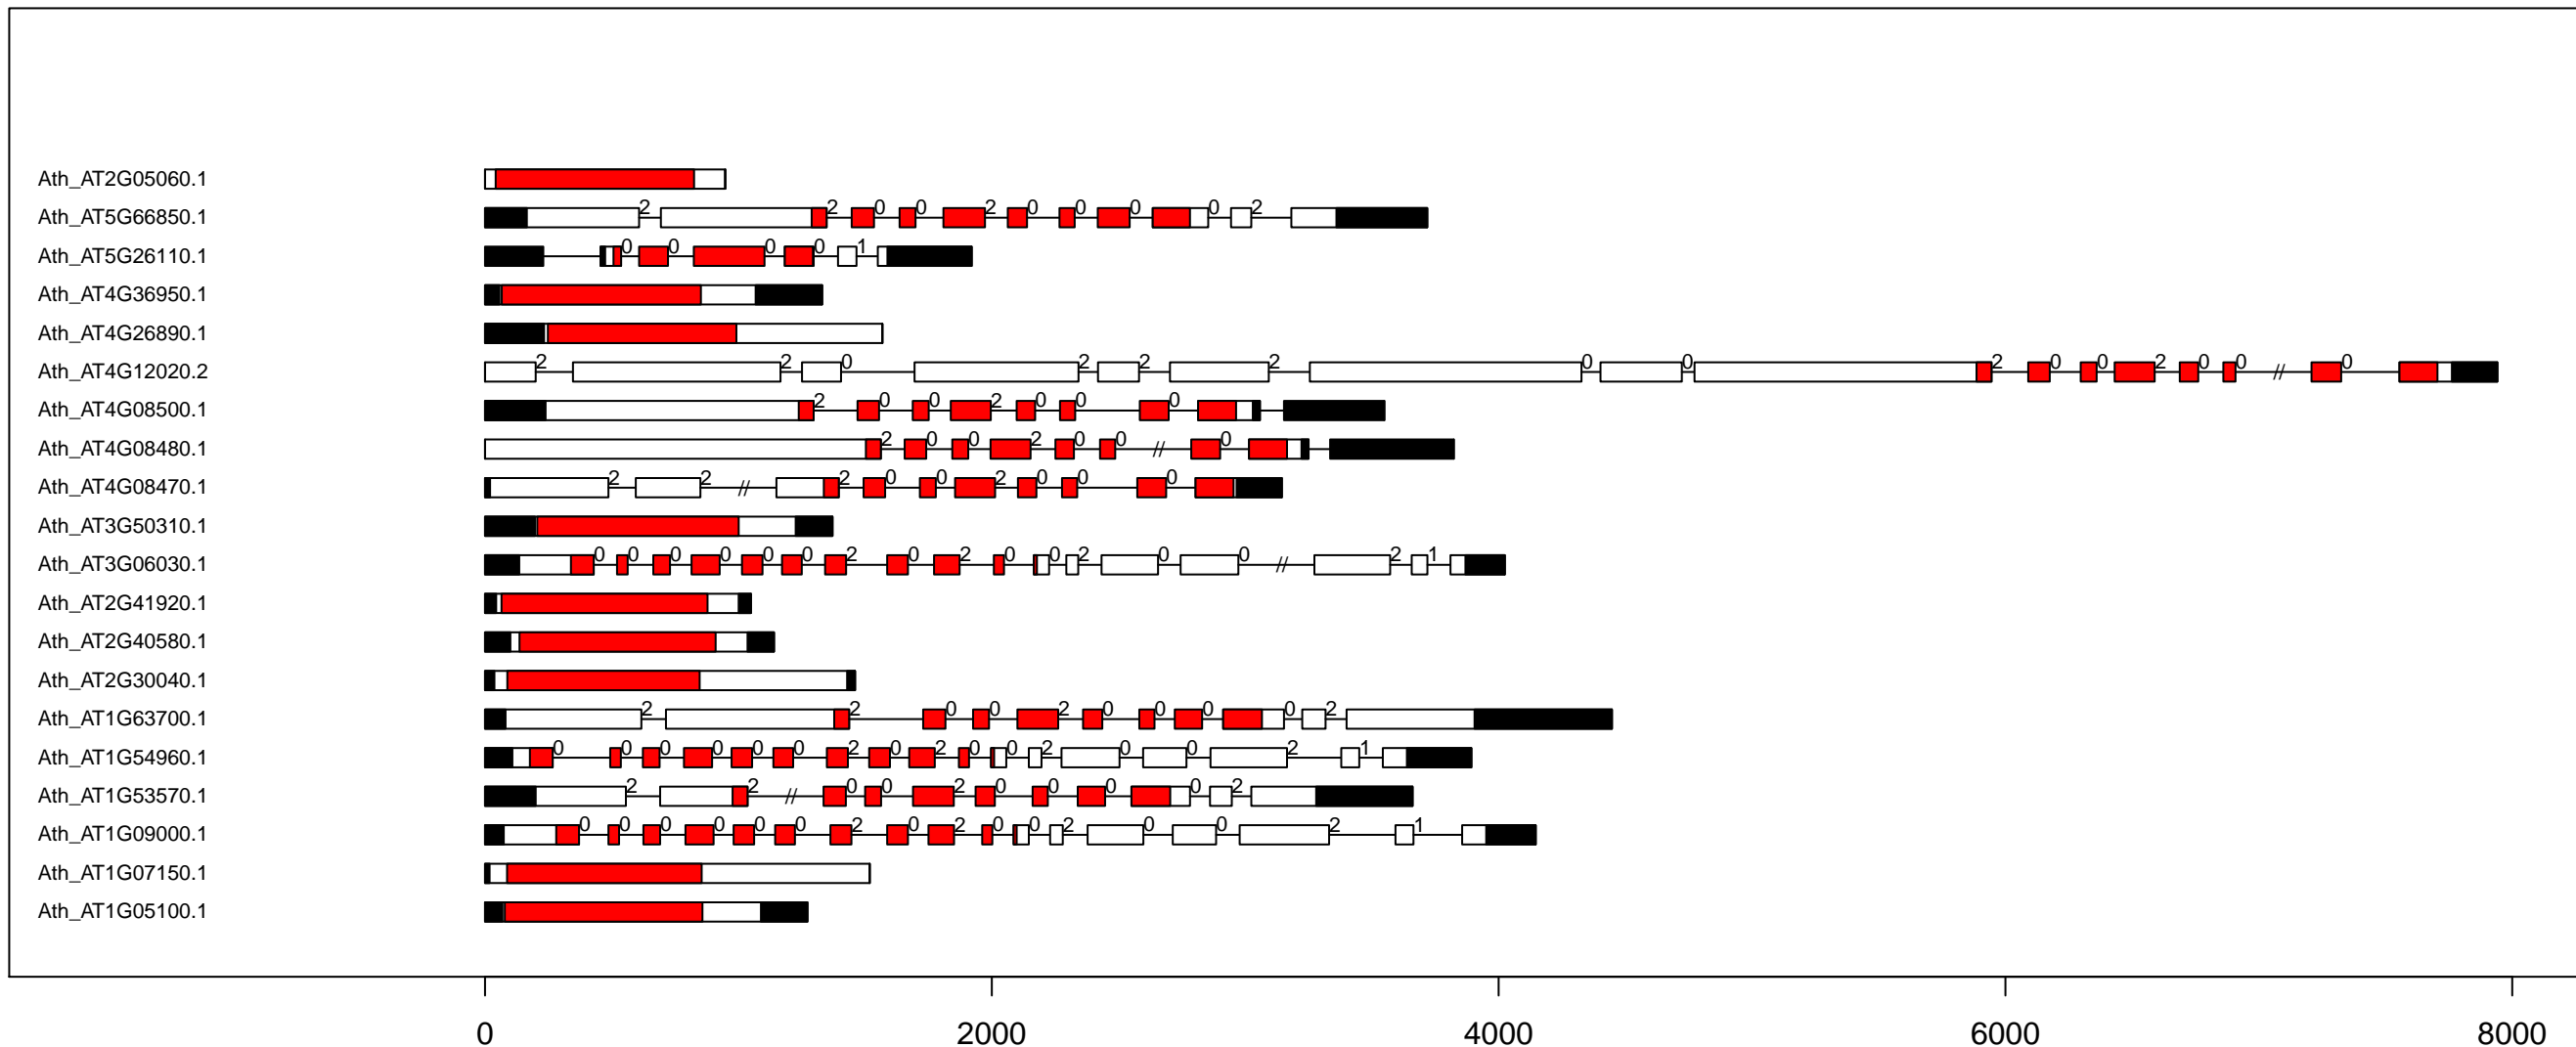

### A.th STE\_STE11 exon-intron and kinase domain diagram (part 2)

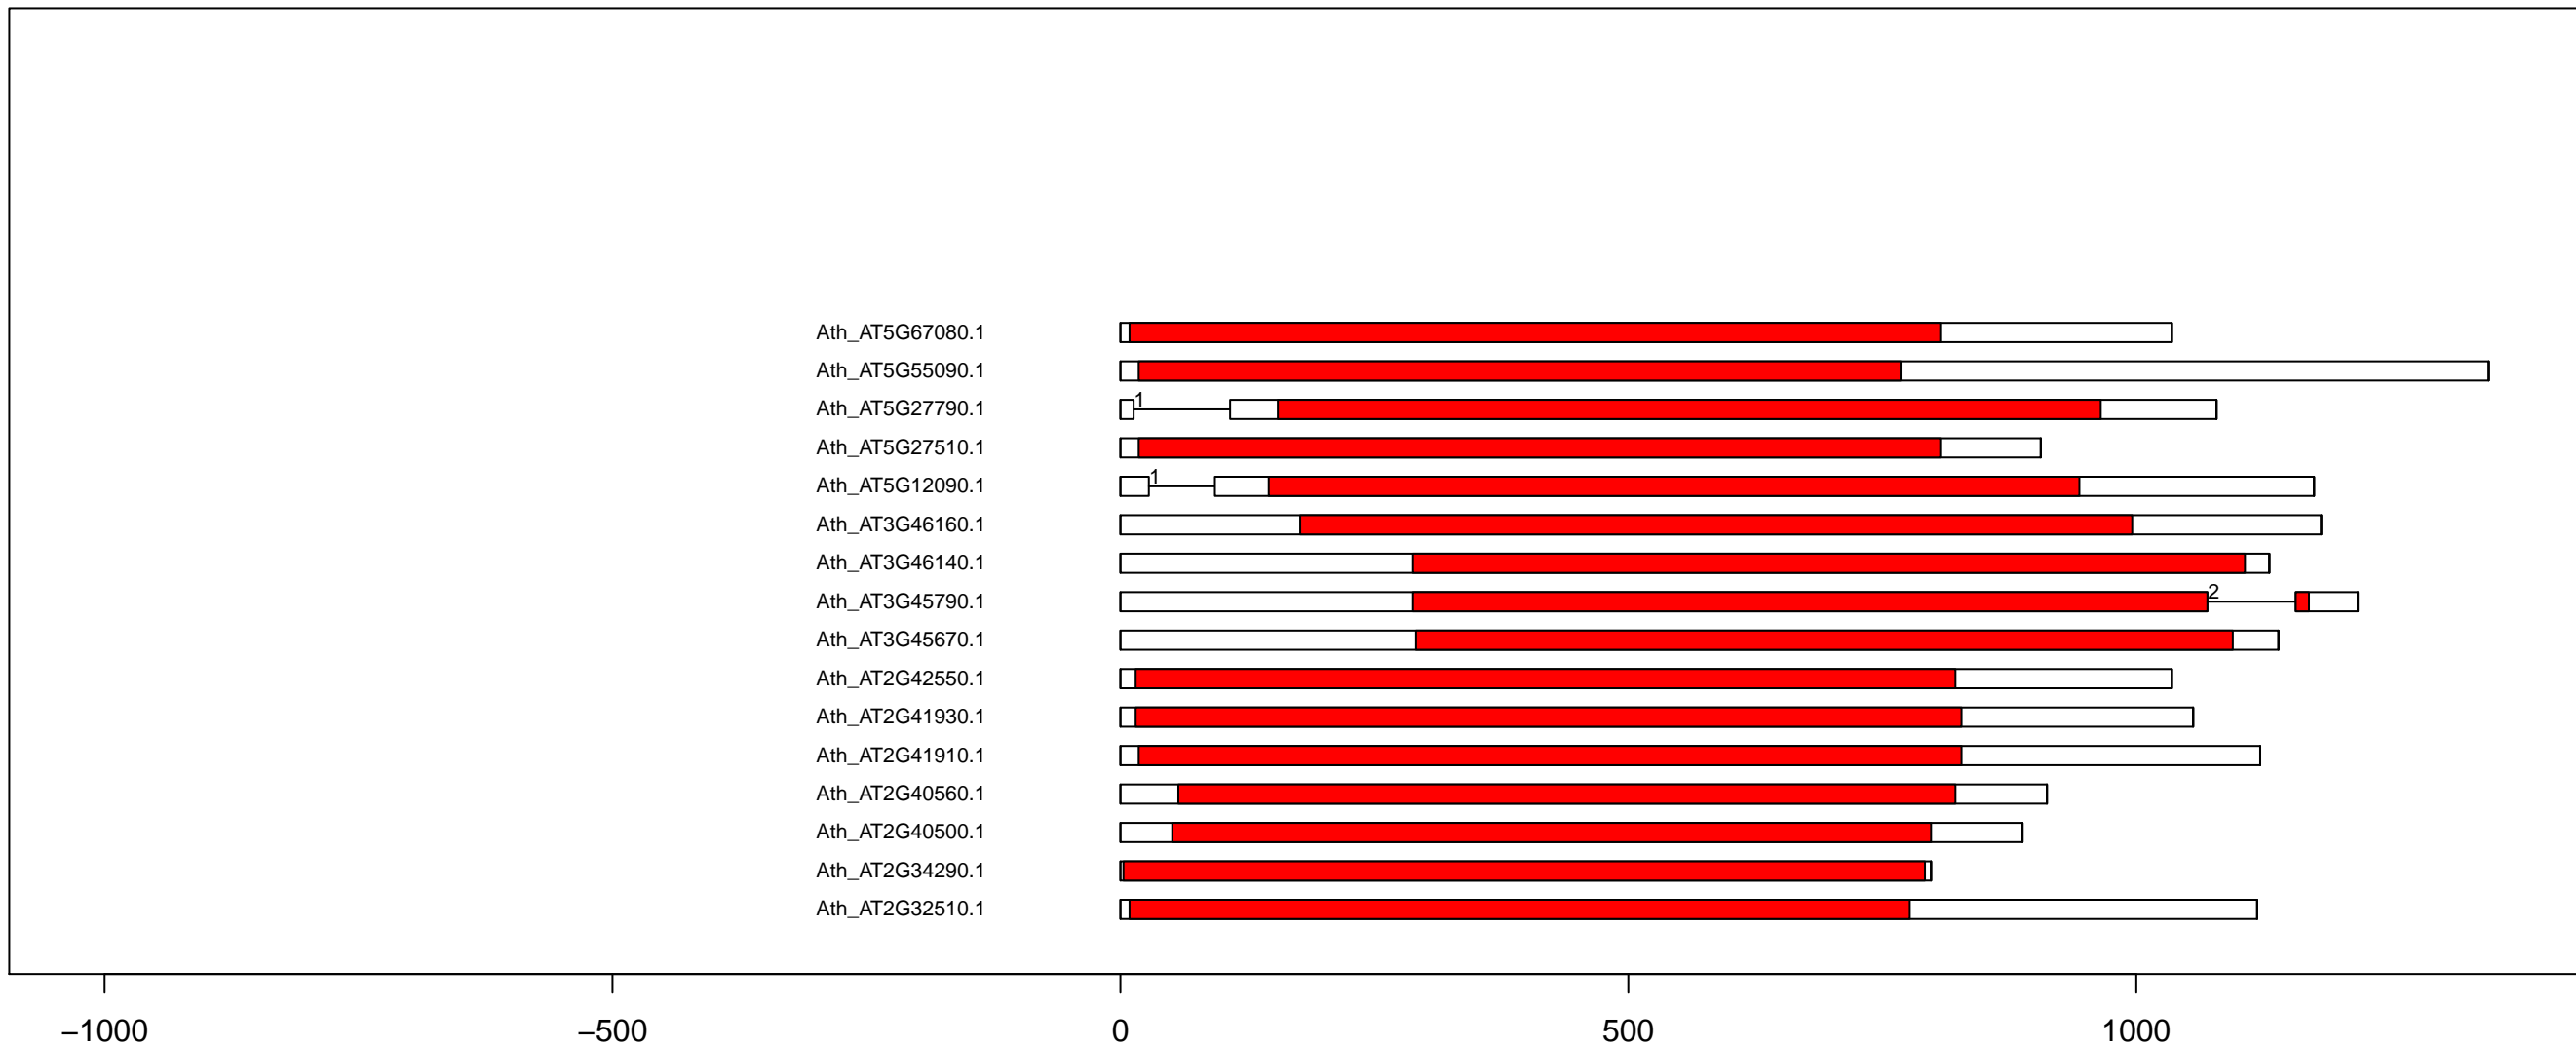



# A.th STE\_STE20-Fray exon-intron and kinase domain diagram (all)

Ath\_AT4G14480.1

Ath\_AT1G23700.1

Ath\_AT5G14720.1

Ath\_AT4G24100.1

Ath\_AT4G10730.1

Ath\_AT1G79640.1

Ath\_AT1G70430.1

-1000

0

1000

2000

3000

4000

5000

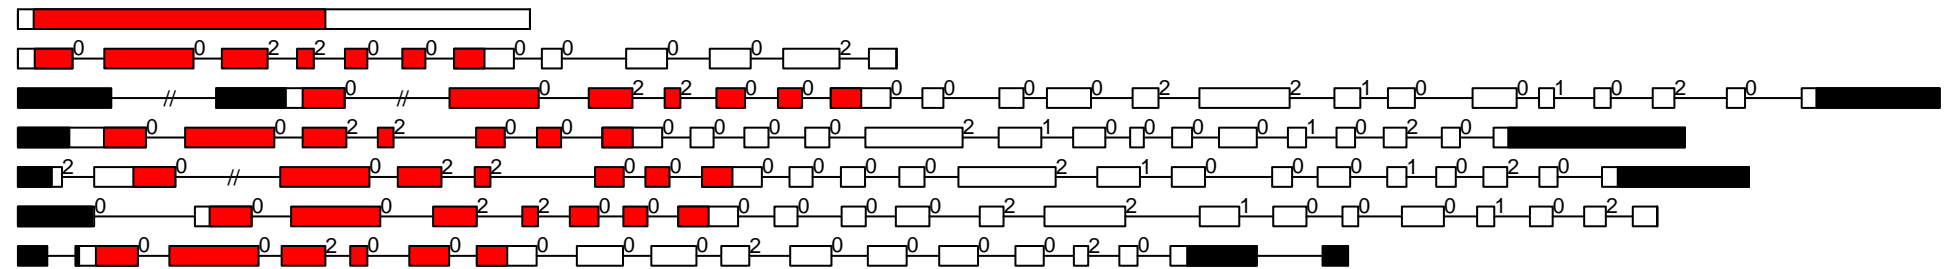

# A.th STE\_STE20-PI exon-intron and kinase domain diagram (all)

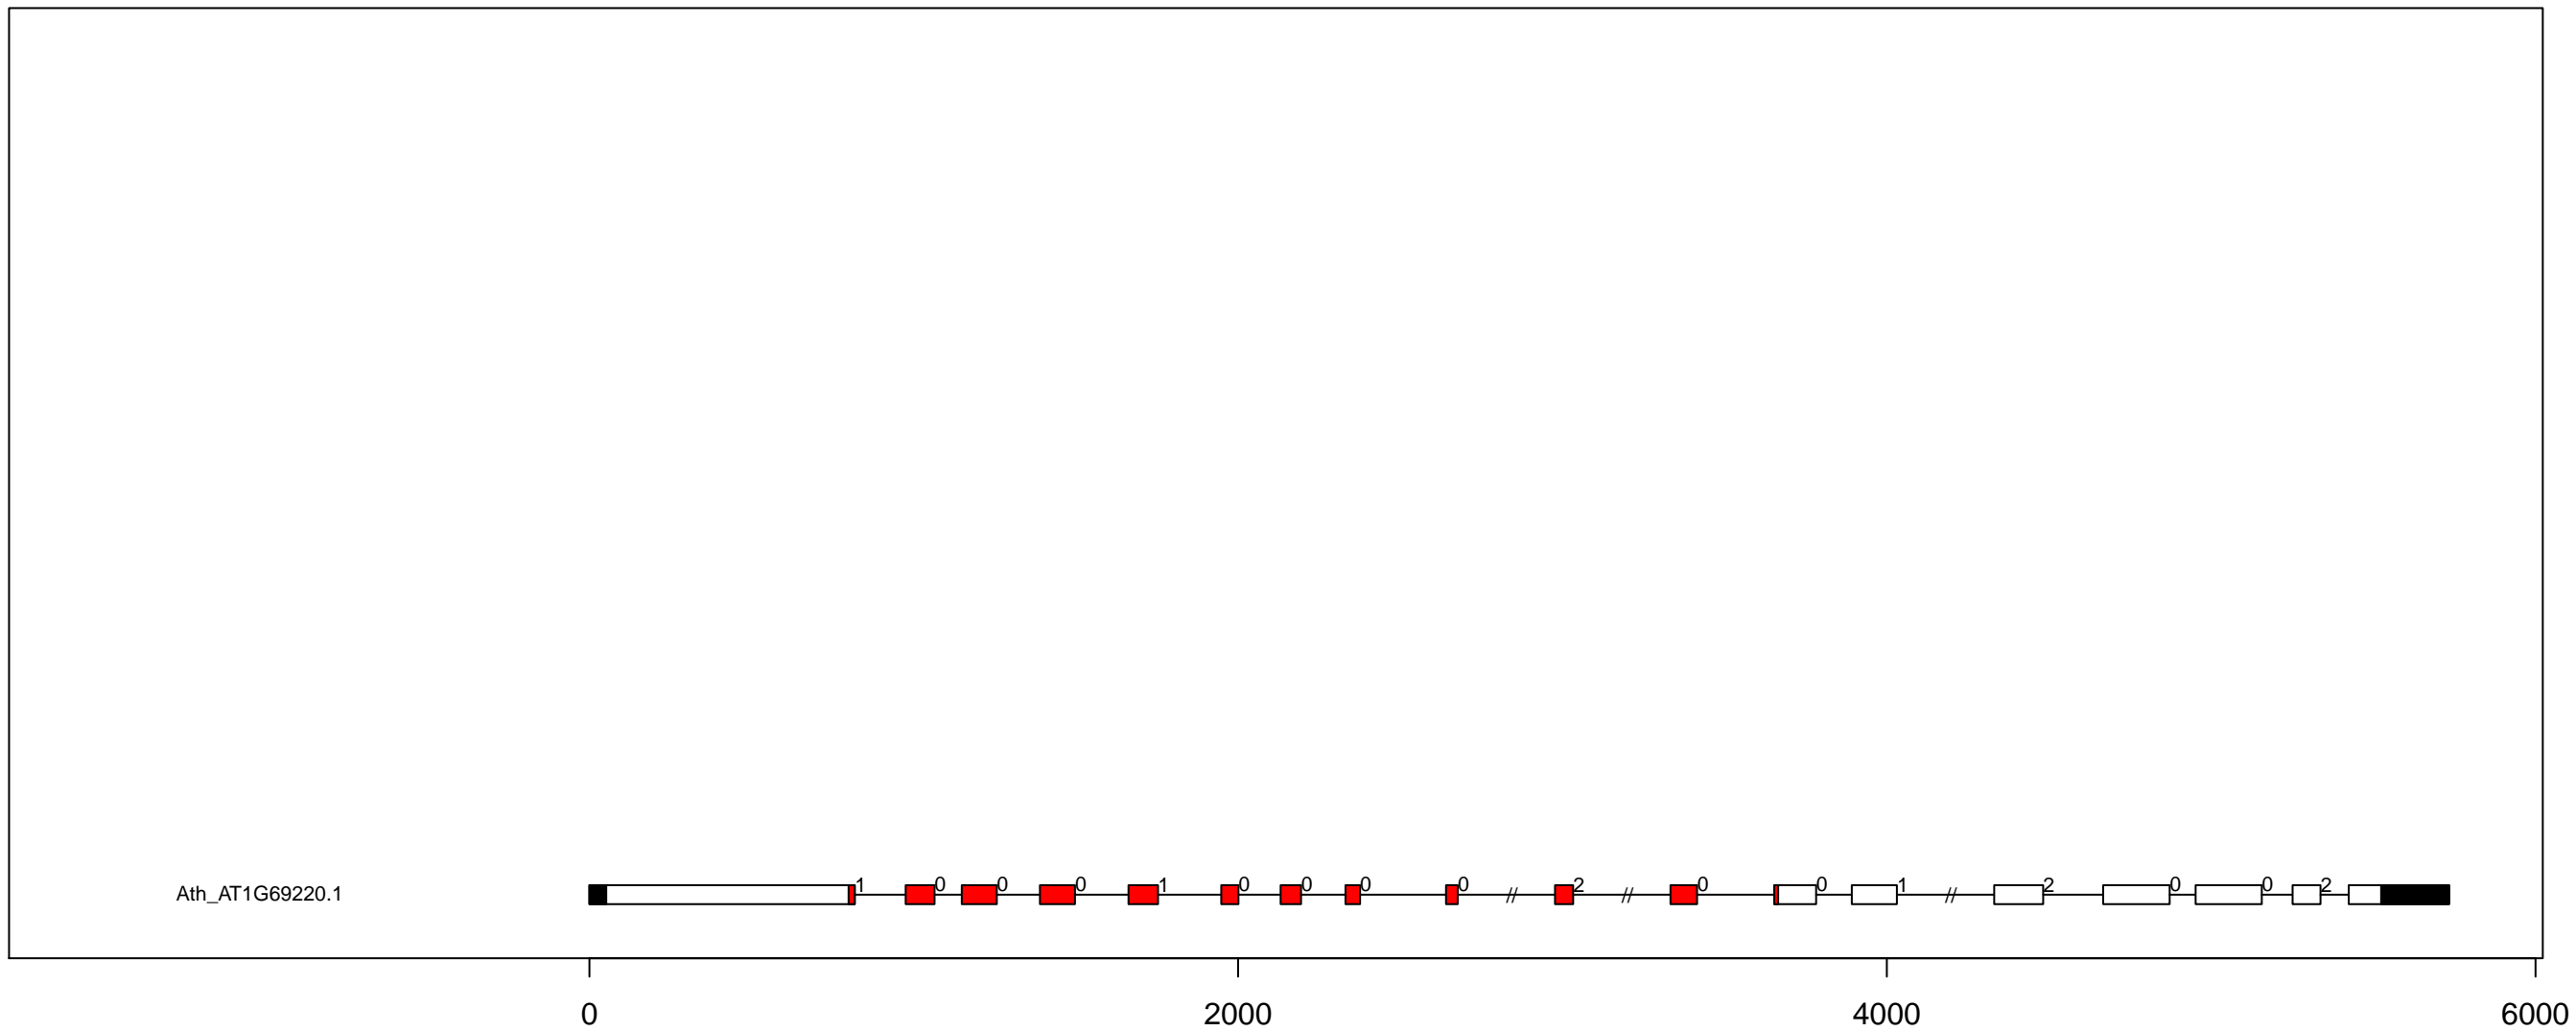

# A.th STE\_STE20-YSK exon-intron and kinase domain diagram (all)

Ath\_AT3G15220.1

Ath\_AT1G53165.3

-1000

0

1000

2000

3000

4000

5000

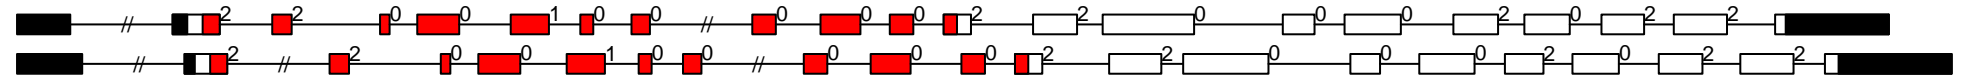

# A.th STE\_STE7 exon-intron and kinase domain diagram (all)

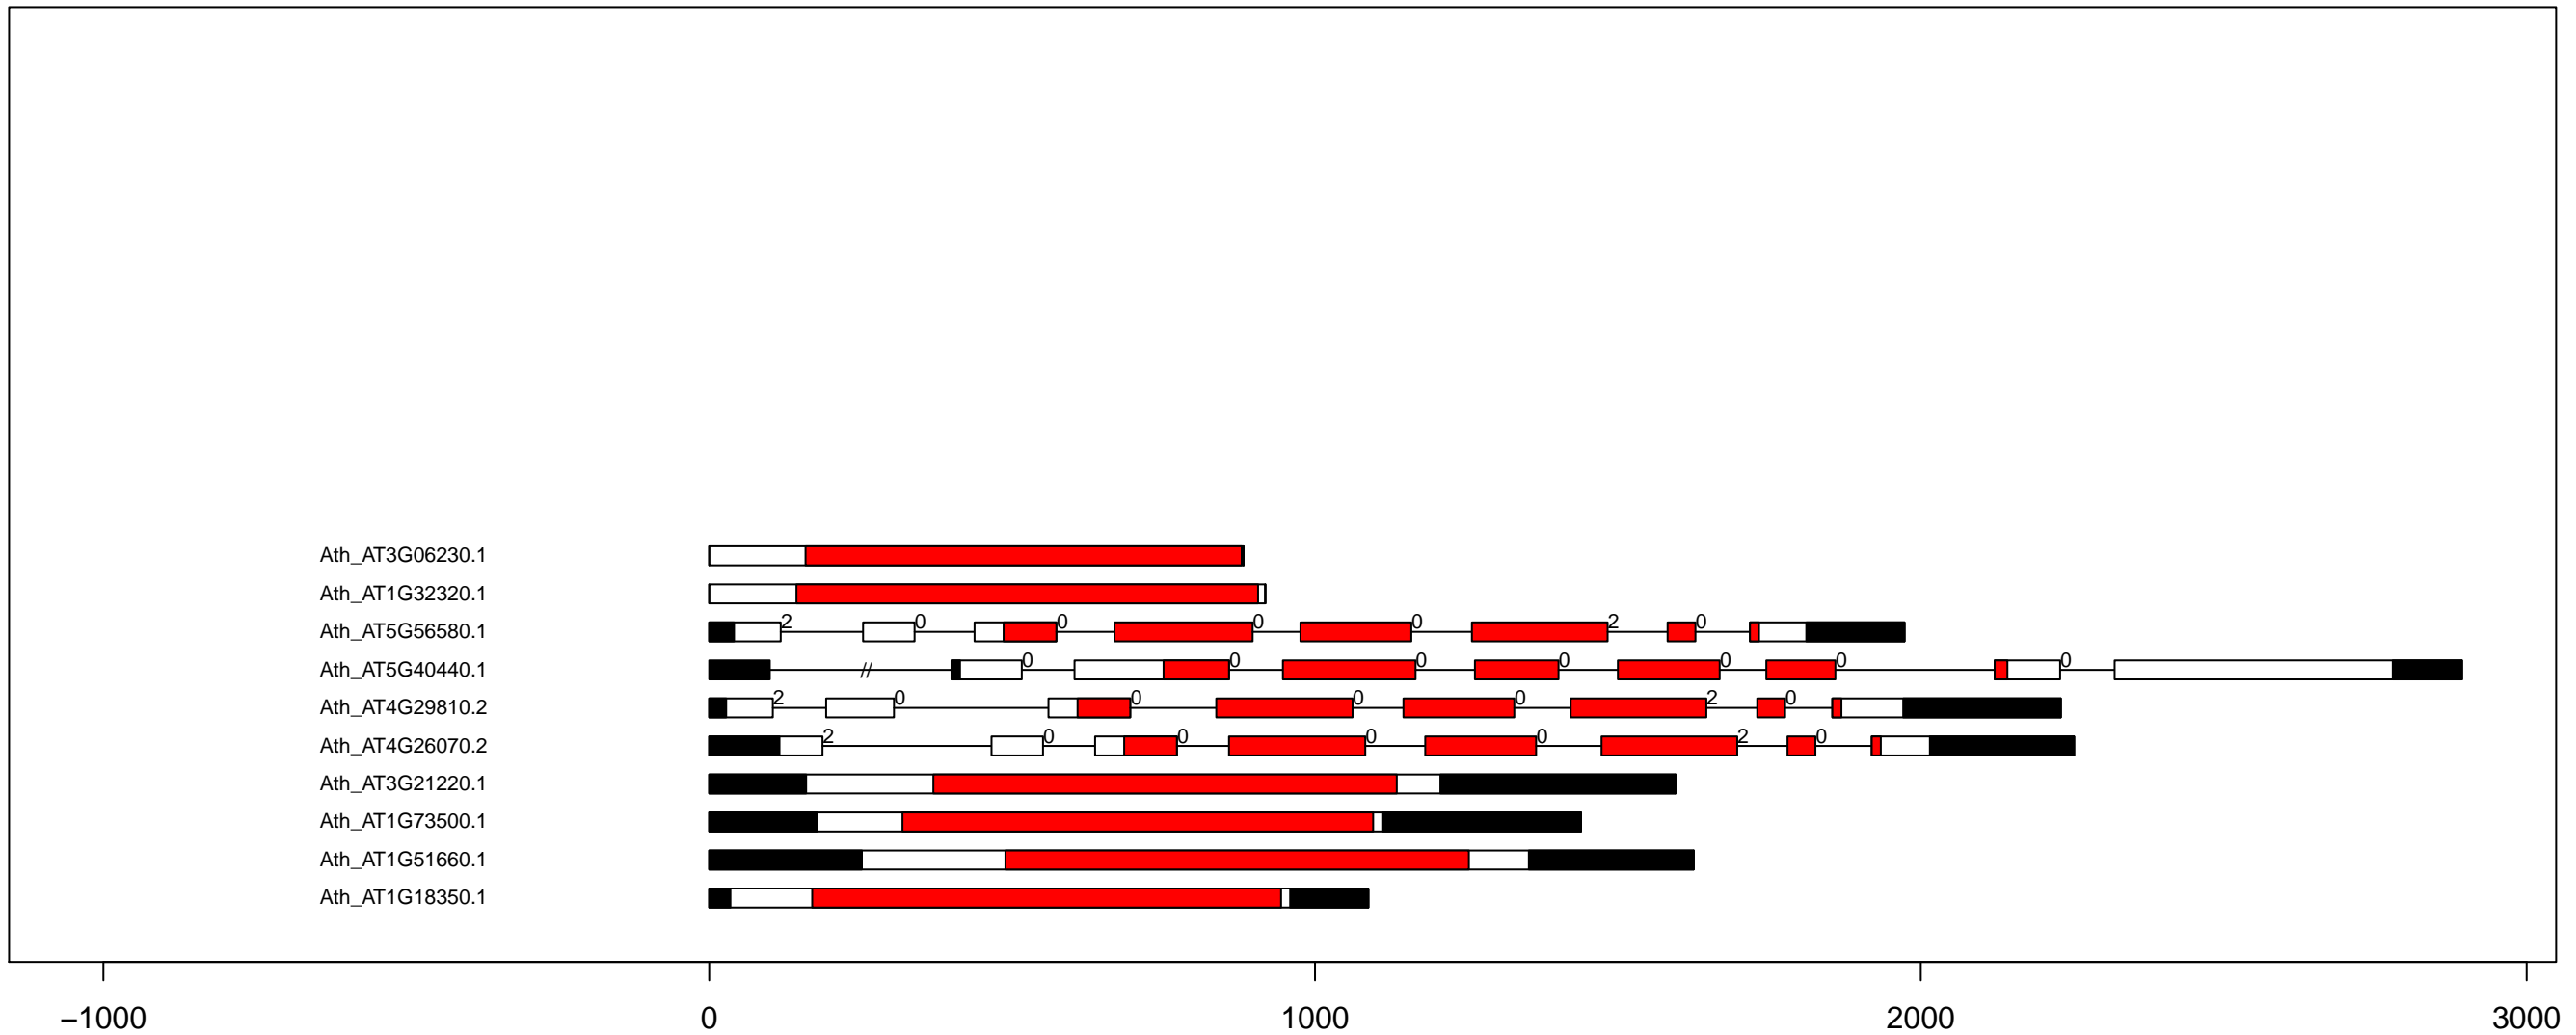

# A.th STE\_STE-PI exon-intron and kinase domain diagram (all)

Ath\_AT3G13530.1

Ath\_AT3G07980.1

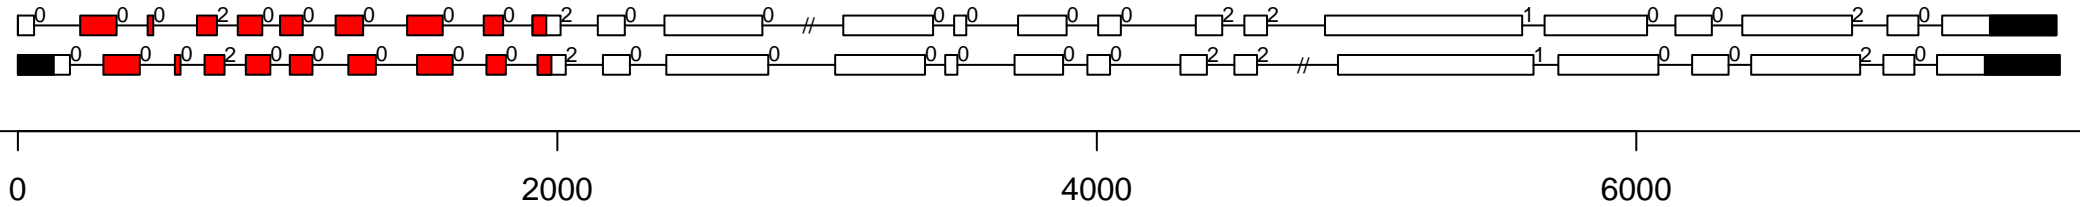

A.th TKL\_CTRL-DRK-1 exon-intron and kinase domain diagram (all)

Ath\_AT3G58640.1  
Ath\_AT2G42640.1  
Ath\_AT2G31010.1

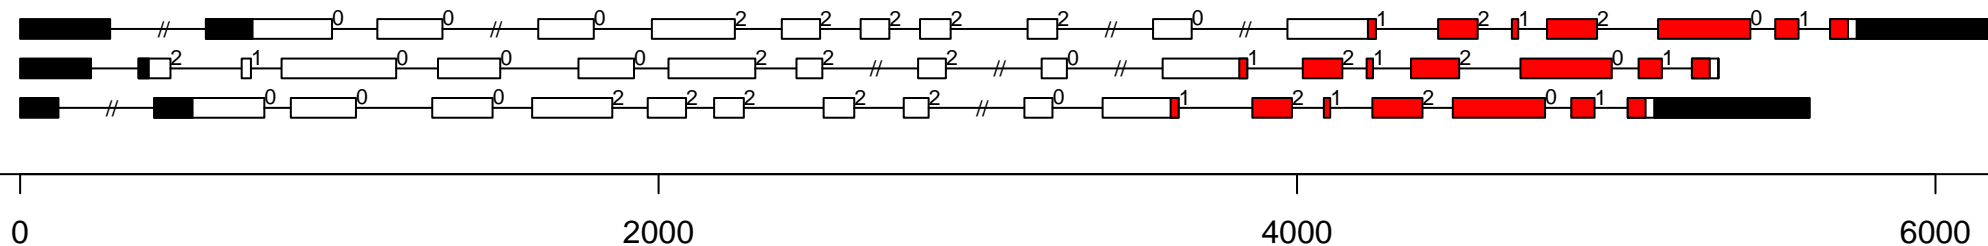

# A.th TKL\_CTR1-DRK-2 exon-intron and kinase domain diagram (all)

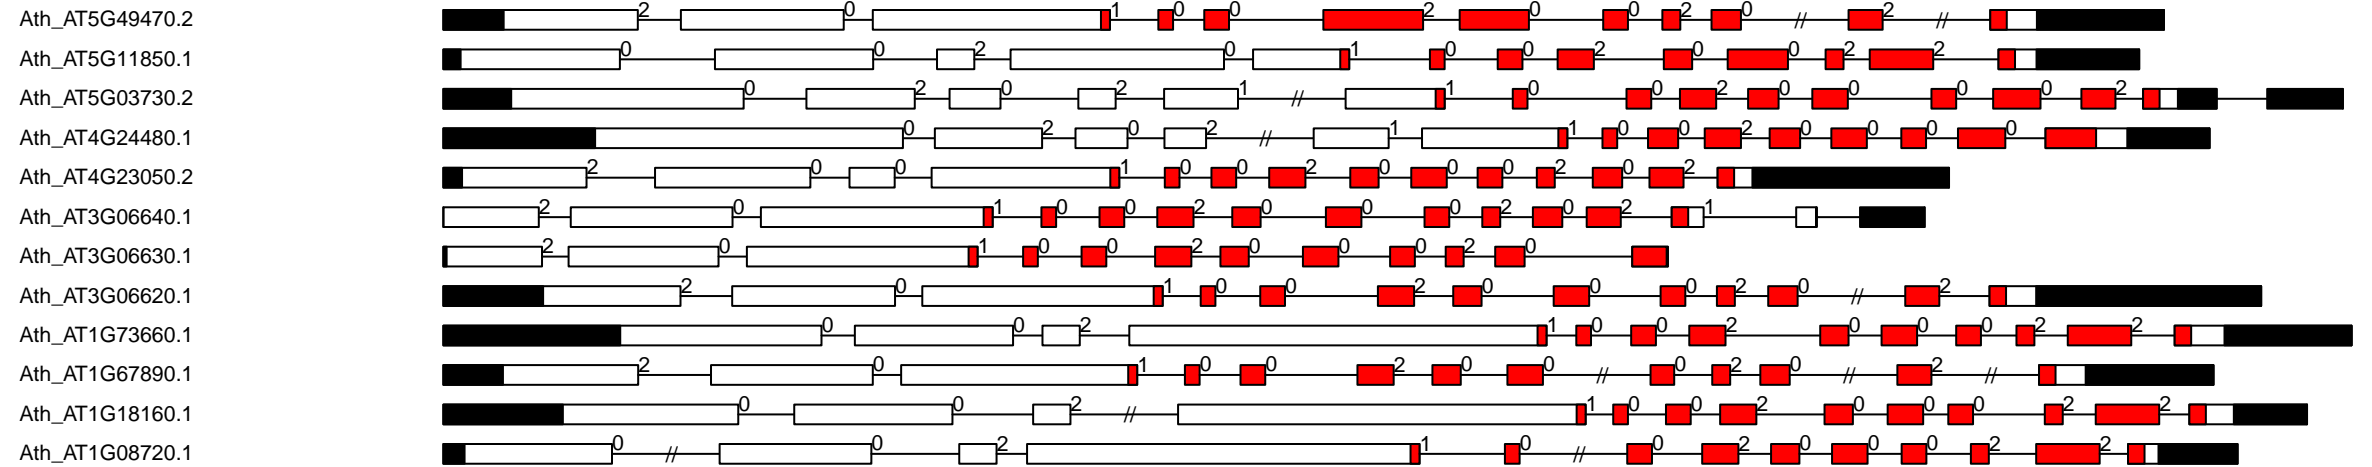

-1000

0

1000

2000

3000

4000

5000

# A.th TKL\_Gdt exon-intron and kinase domain diagram (all)

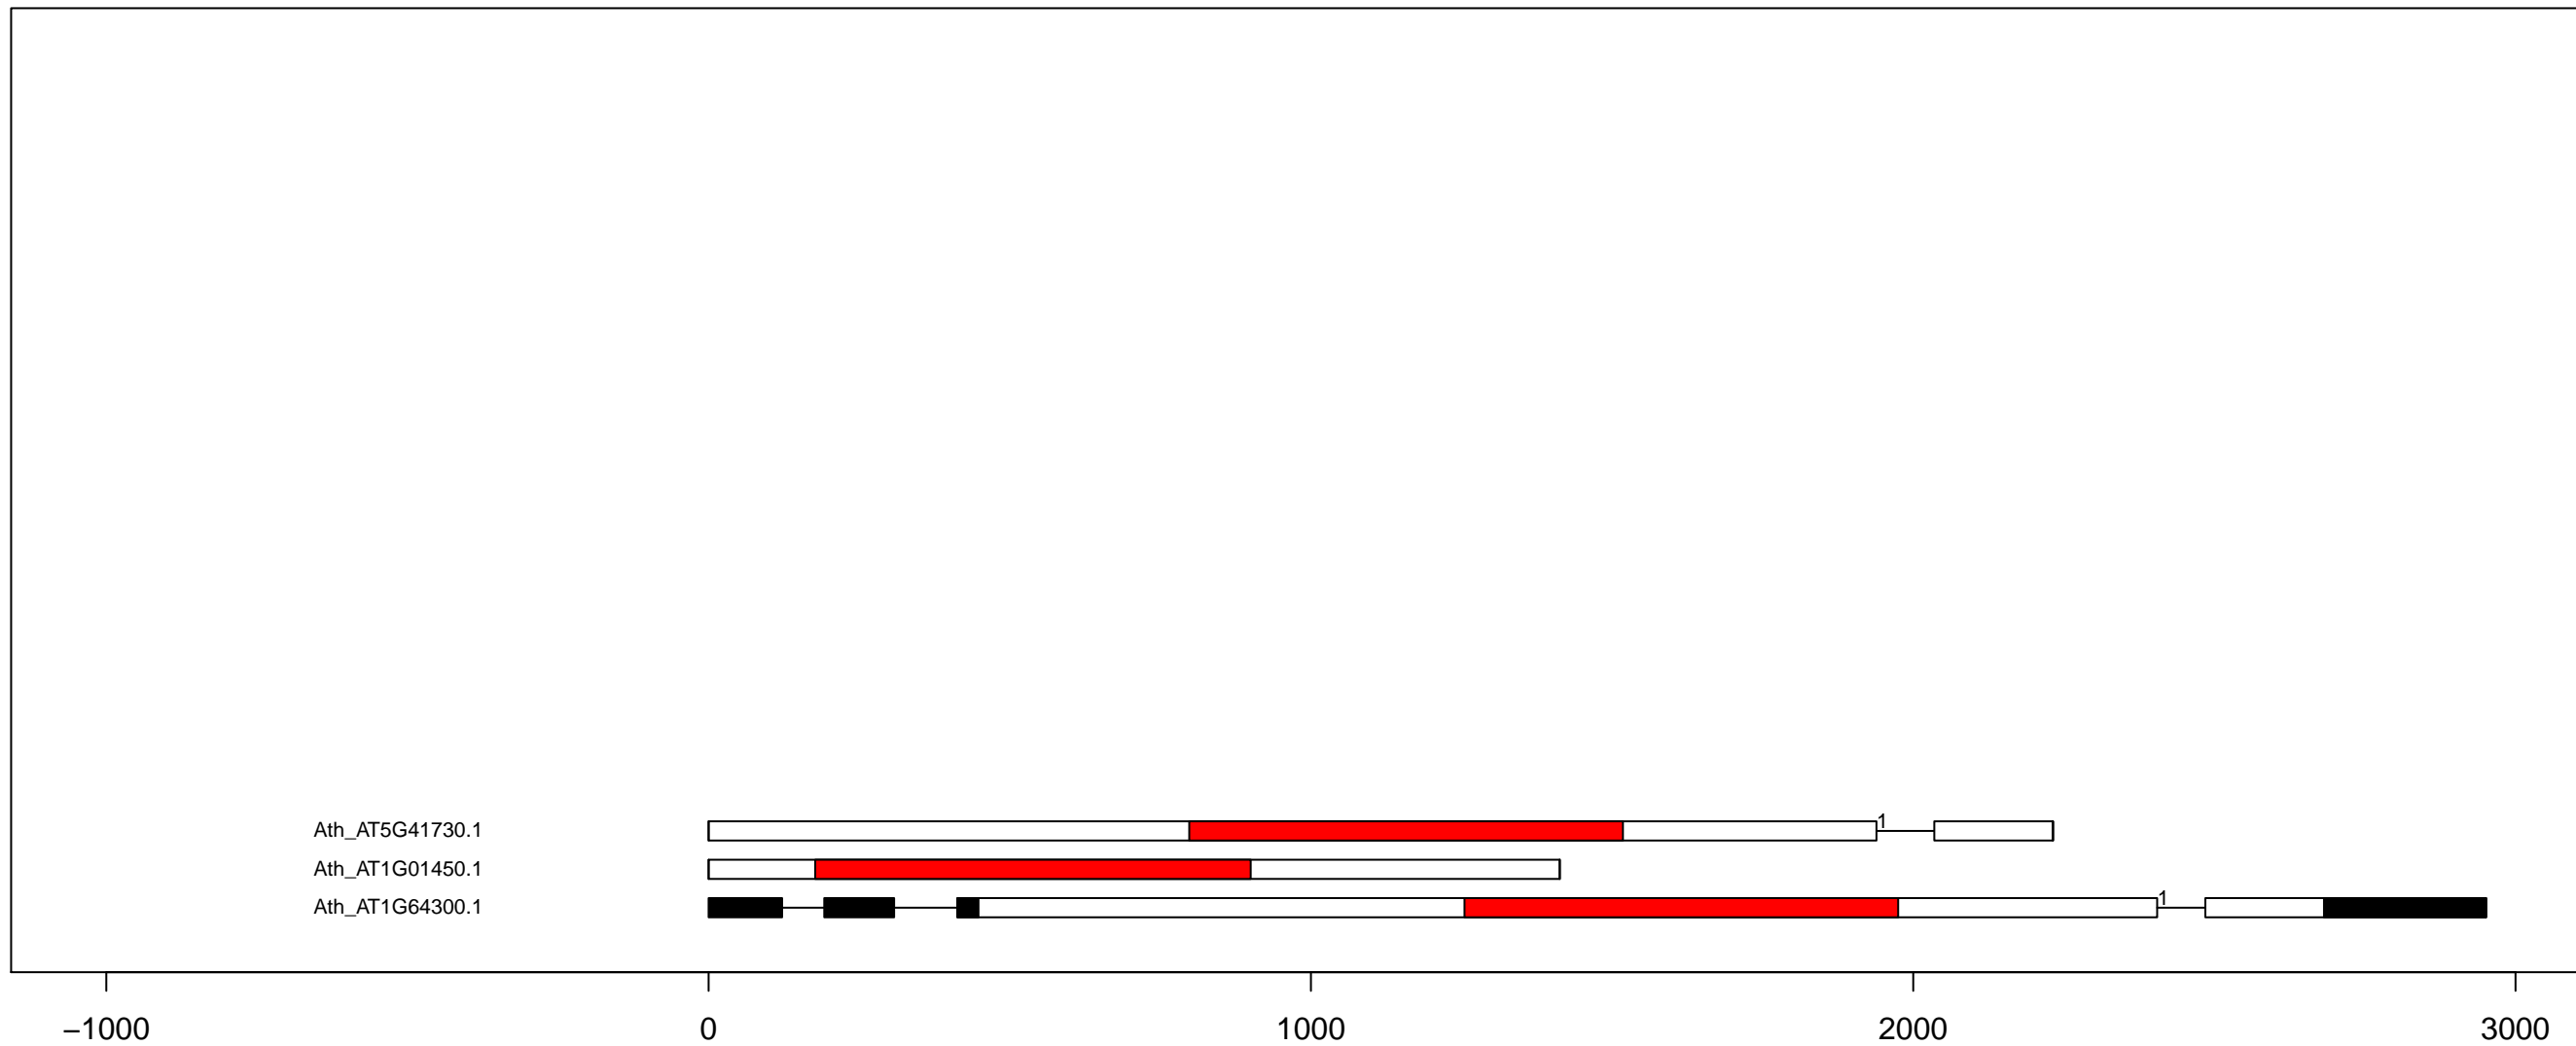



# A.th TKL-PI-1 exon-intron and kinase domain diagram (all)

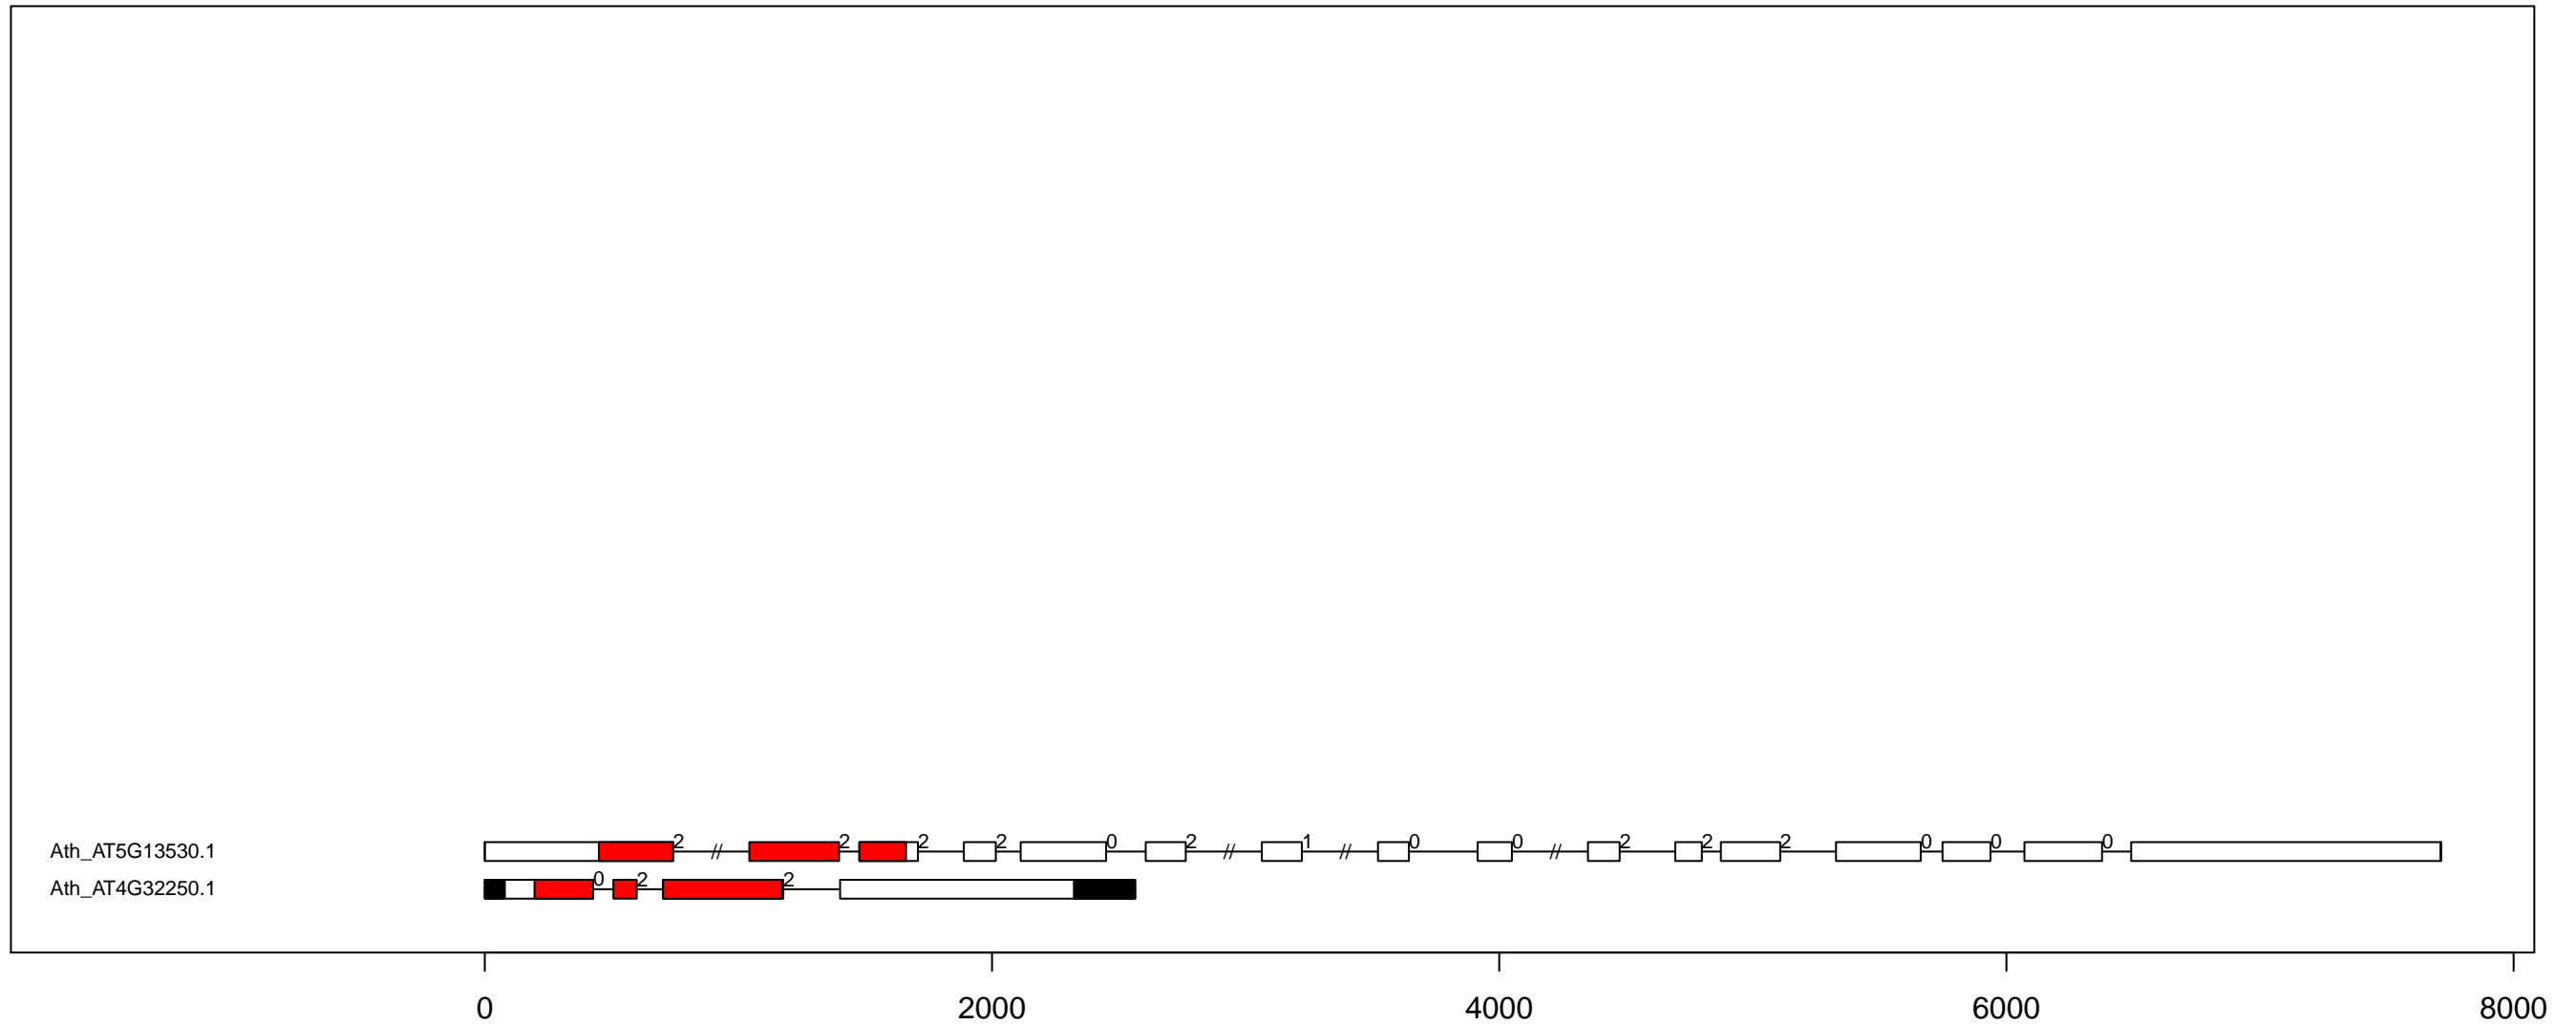

# A.th TKL-PI-2 exon-intron and kinase domain diagram (all)

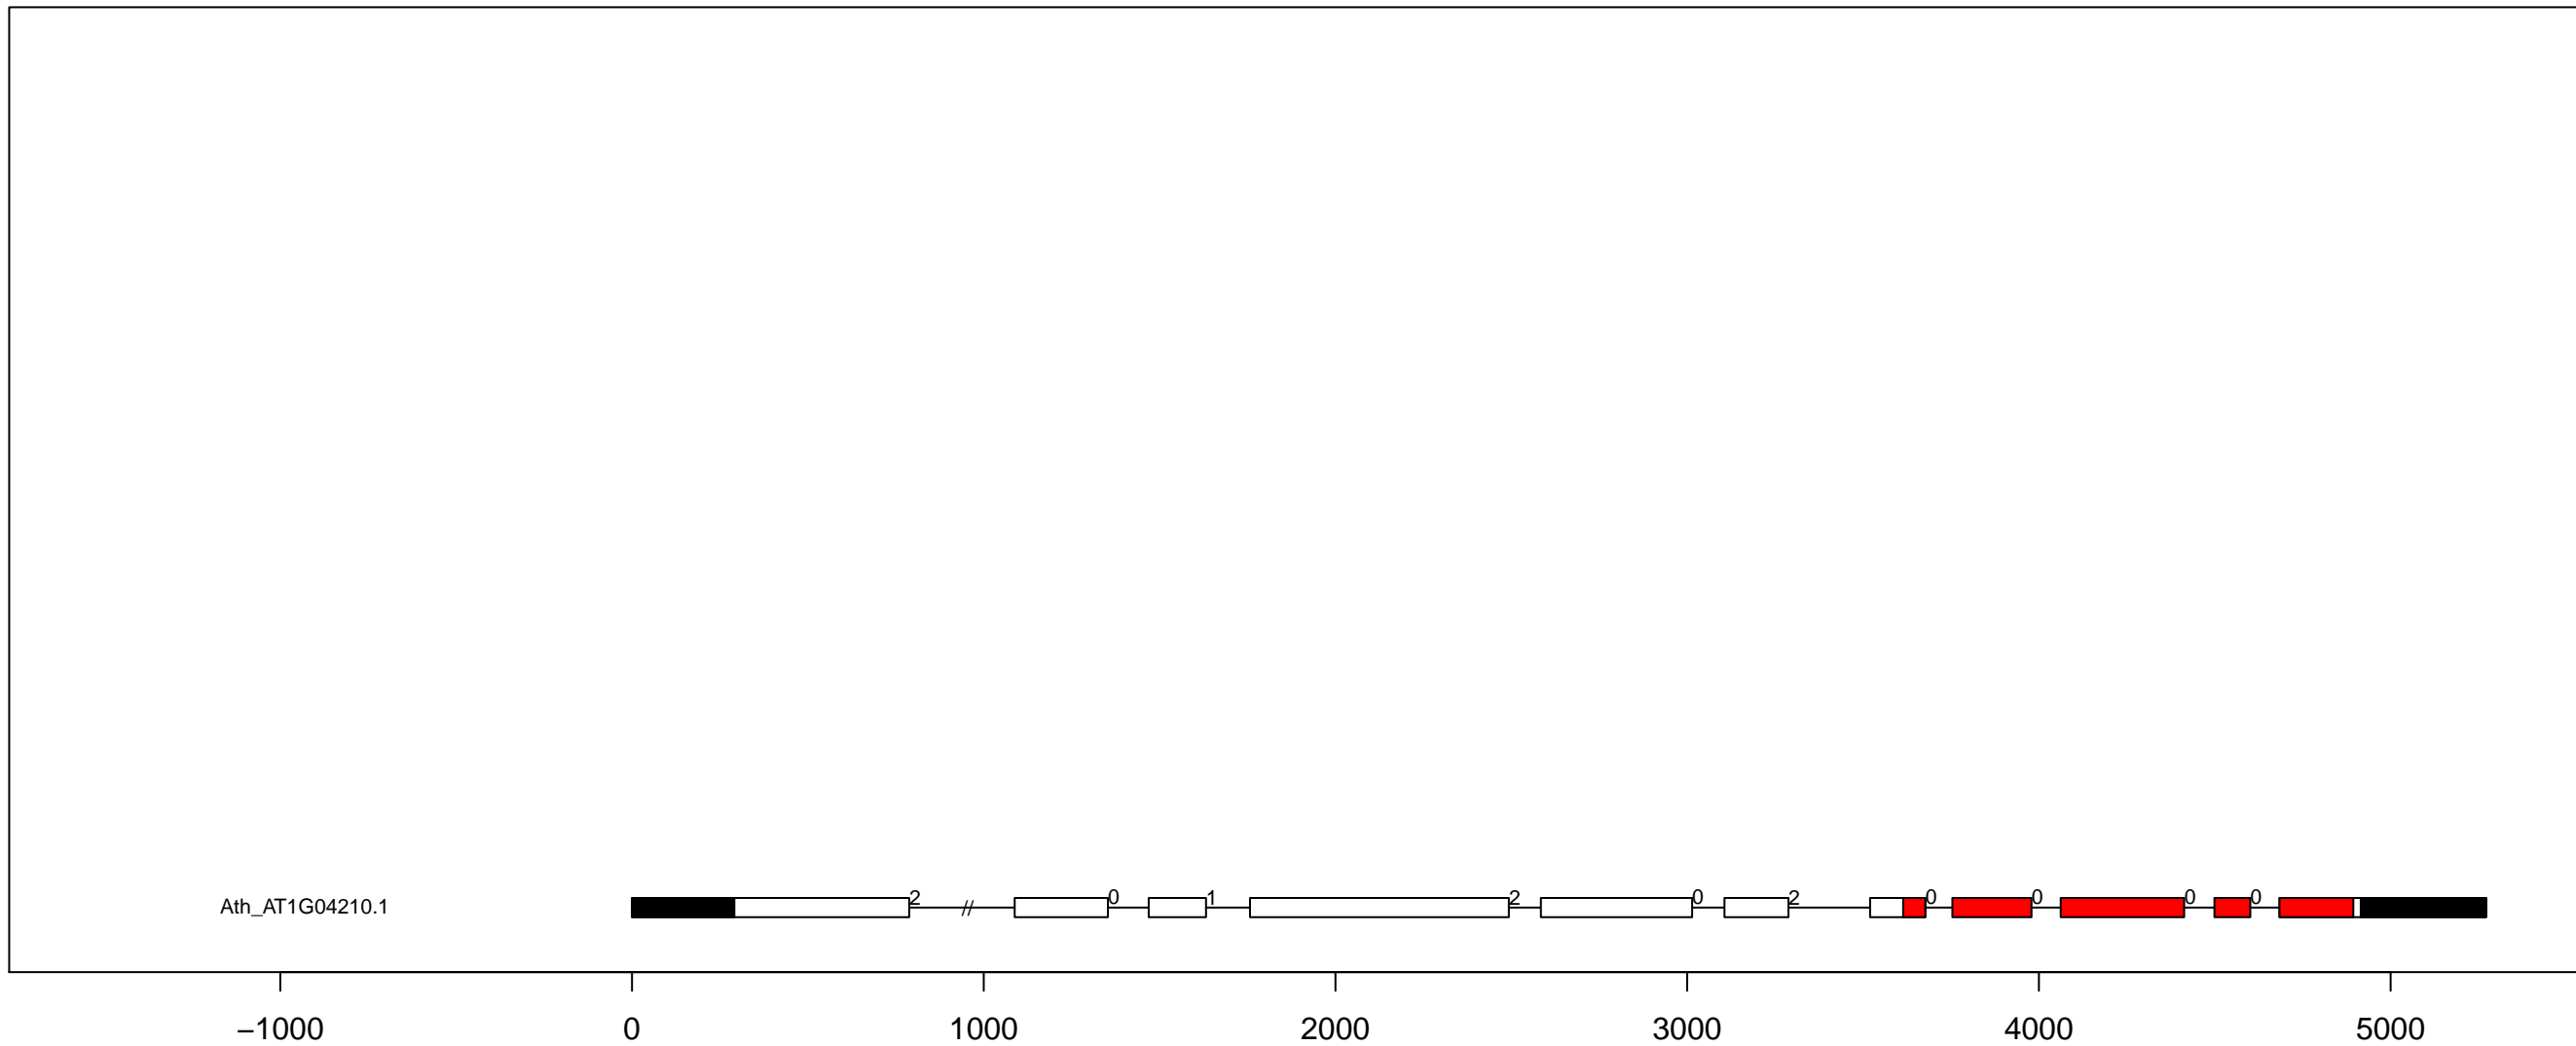

# A.th TKL-PI-3 exon-intron and kinase domain diagram (all)

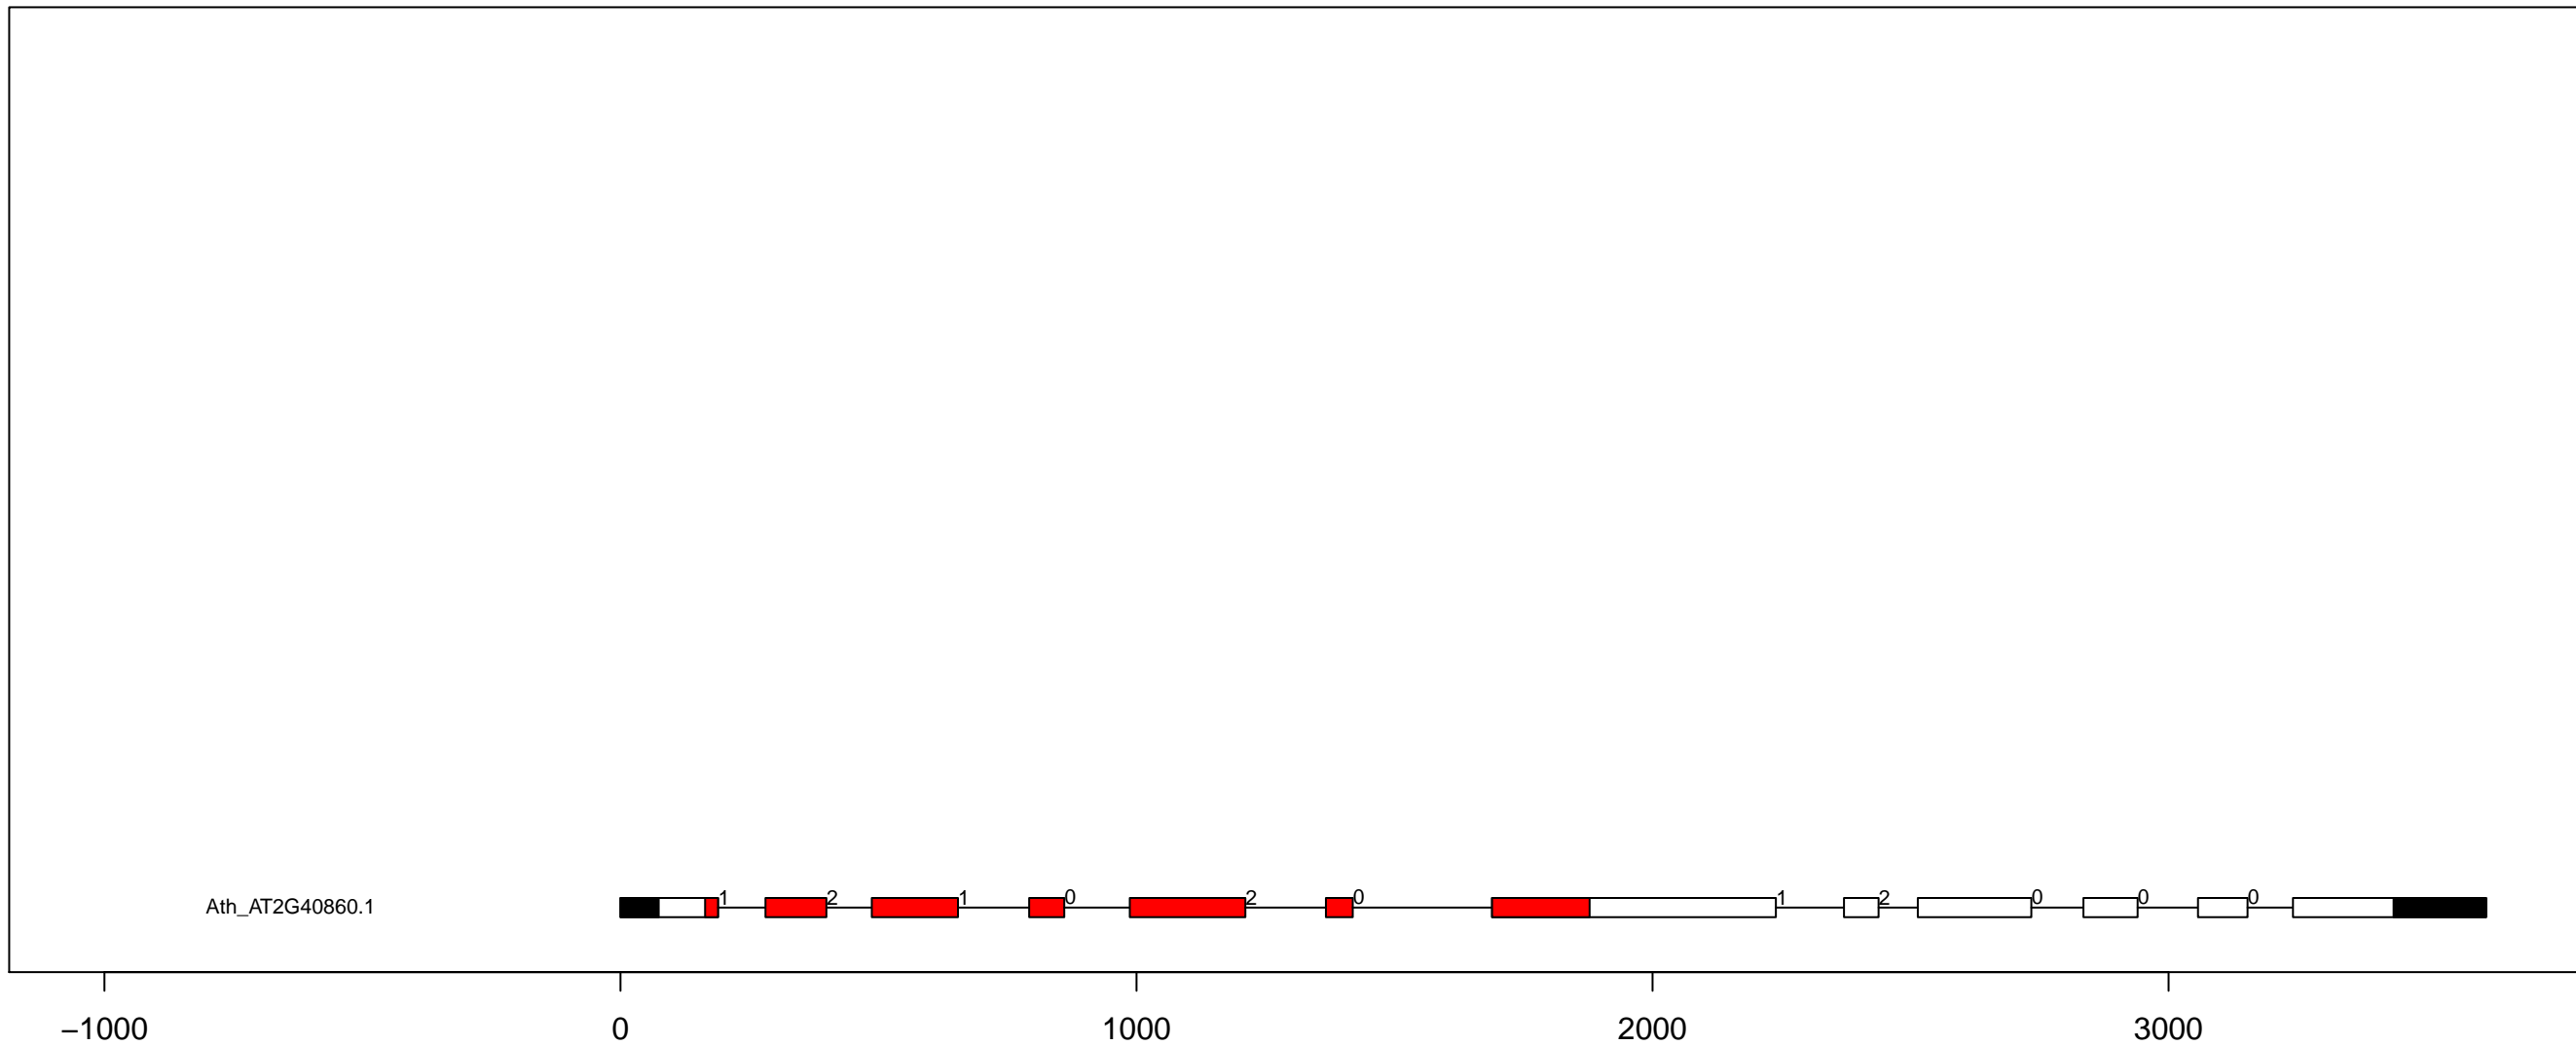

### A.th TKL-PI-4 exon-intron and kinase domain diagram (all)

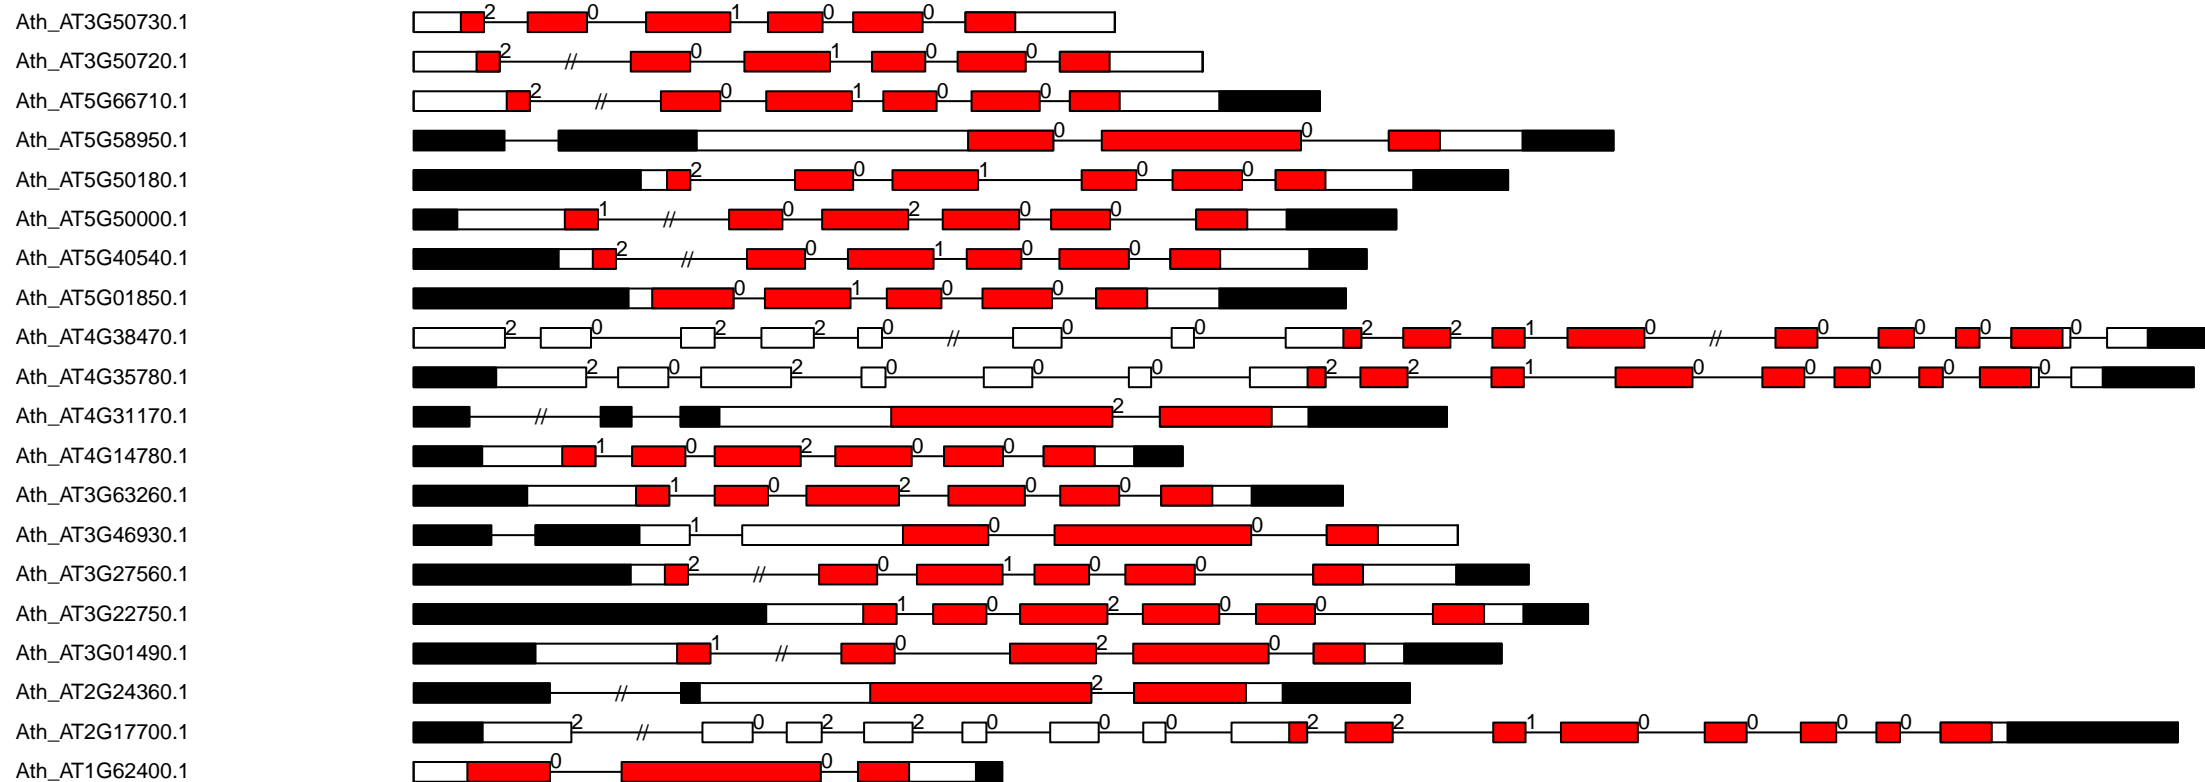

# A.th TKL-PI-5 exon-intron and kinase domain diagram (all)

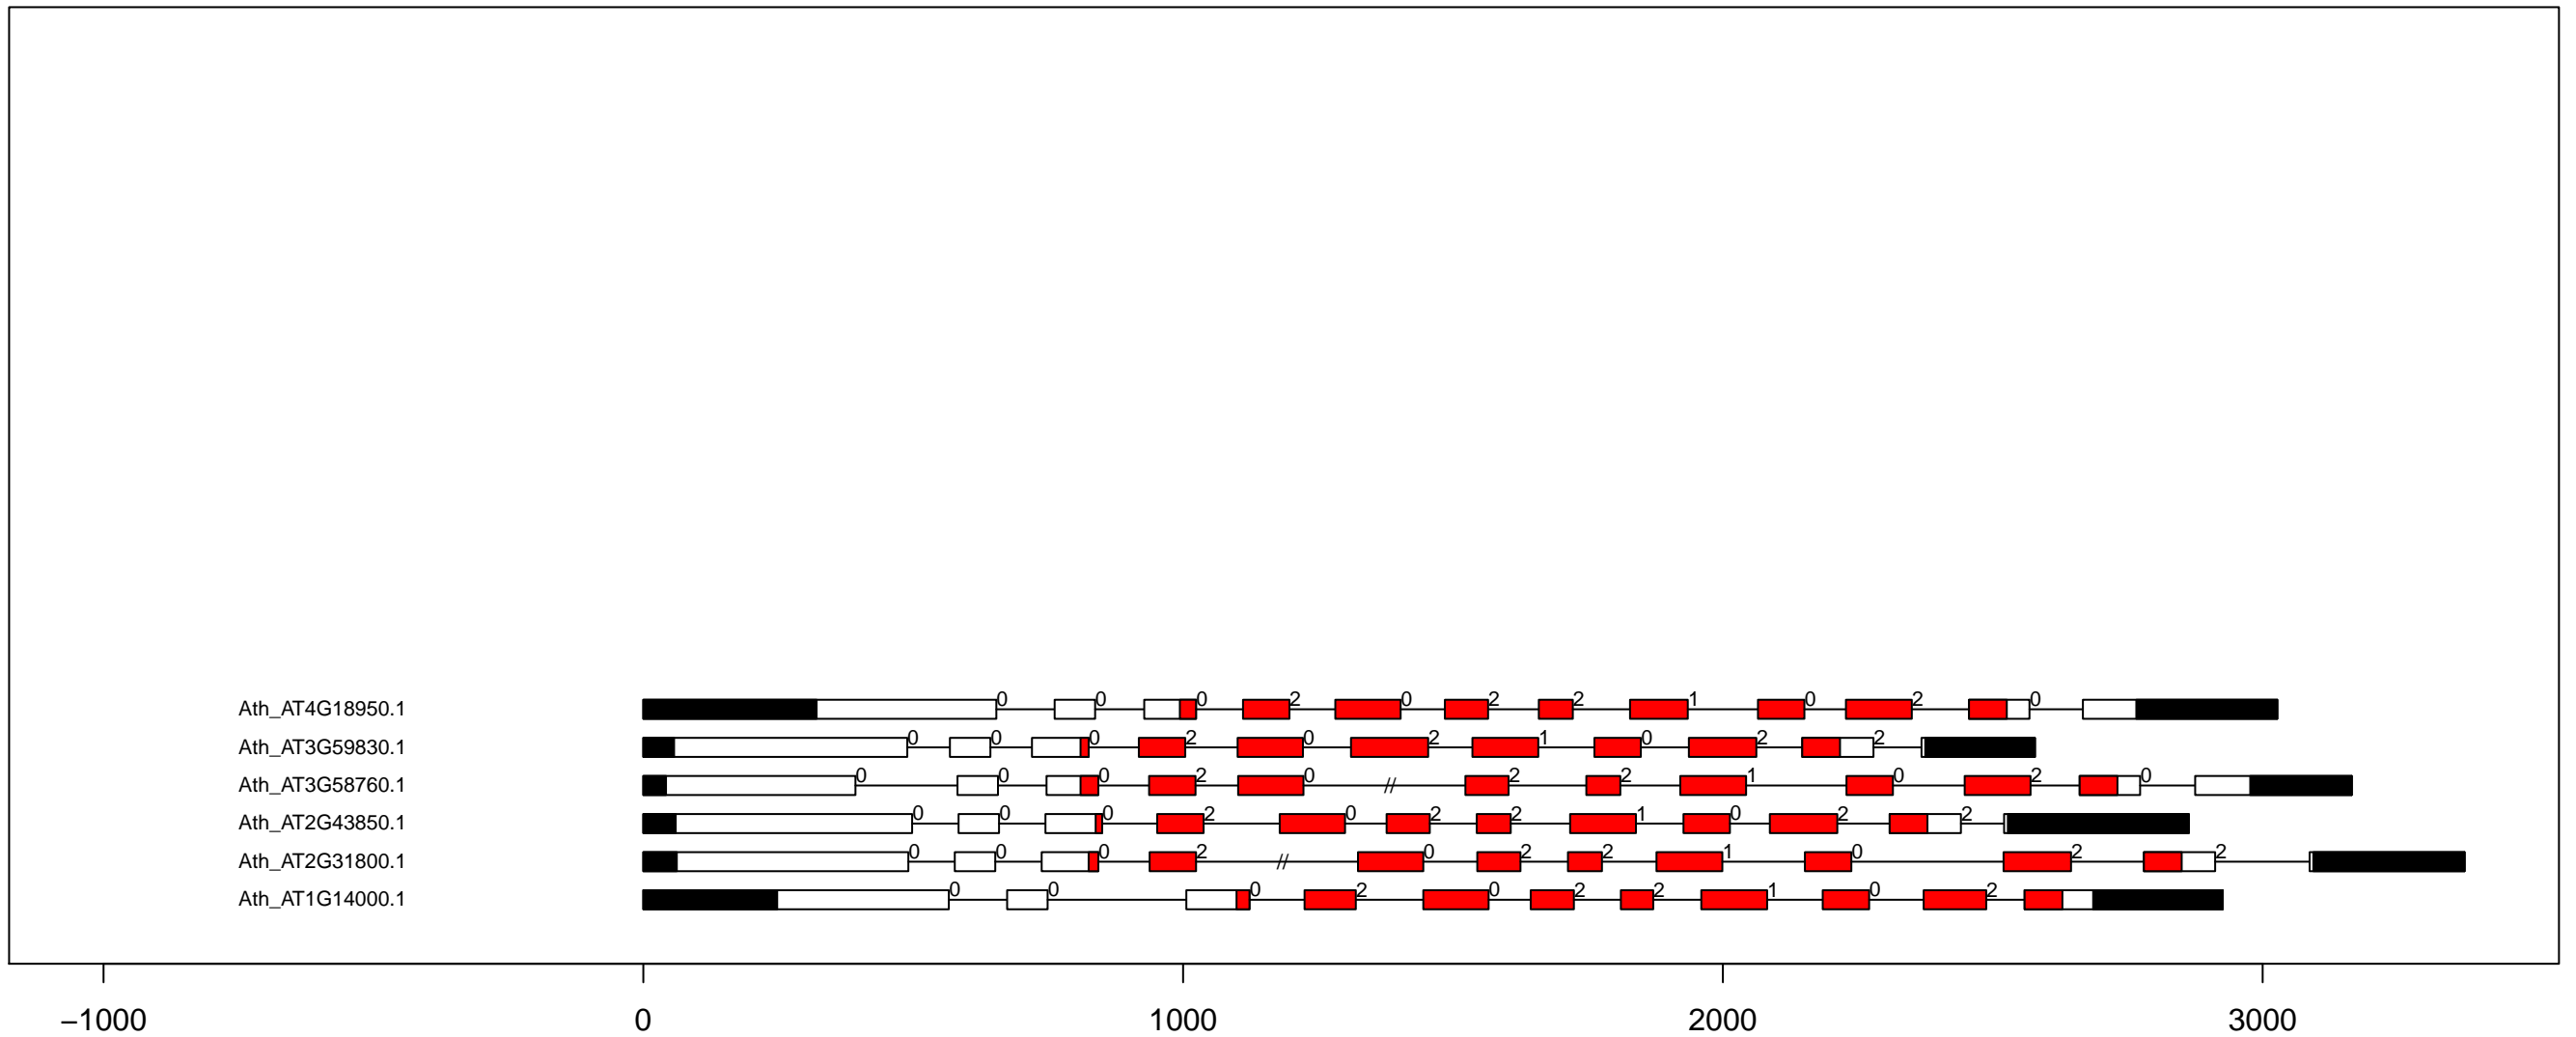

### A.th TKL-PI-6 exon-intron and kinase domain diagram (all)

Ath\_AT3G46920.1  
 Ath\_AT3G24715.1  
 Ath\_AT5G57610.1  
 Ath\_AT2G35050.1  
 Ath\_AT1G79570.1  
 Ath\_AT1G16270.1  
 Ath\_AT1G04700.1

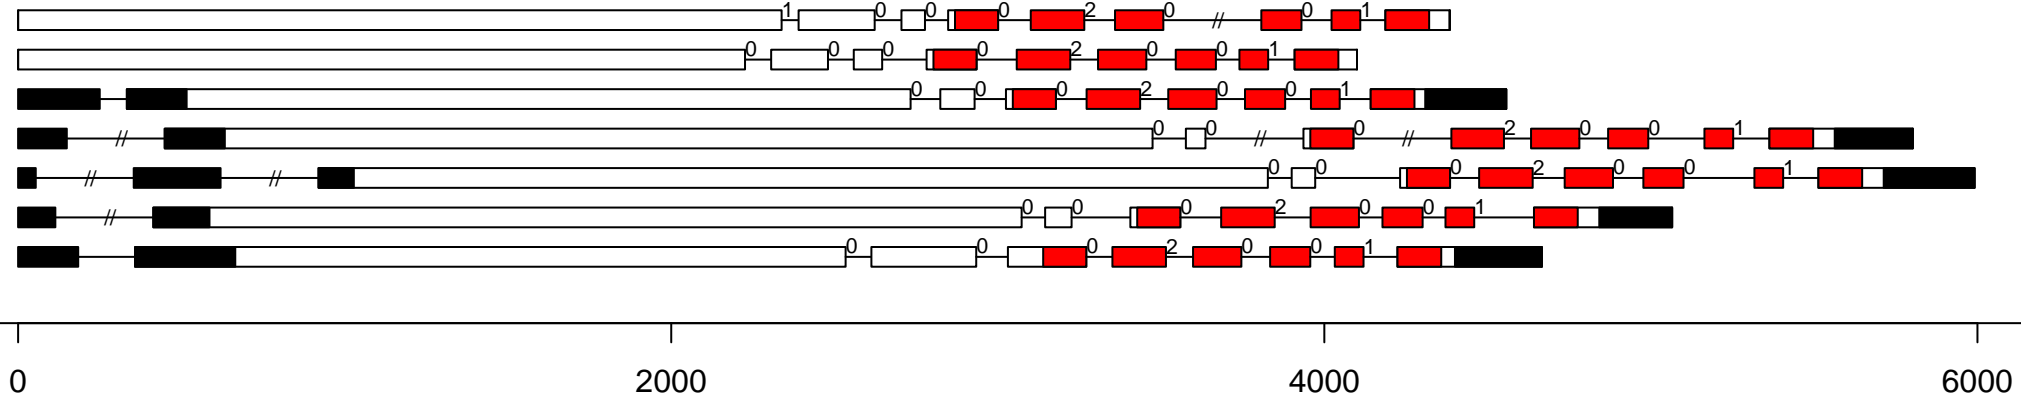

# A.th TKL-PI-7 exon-intron and kinase domain diagram (all)

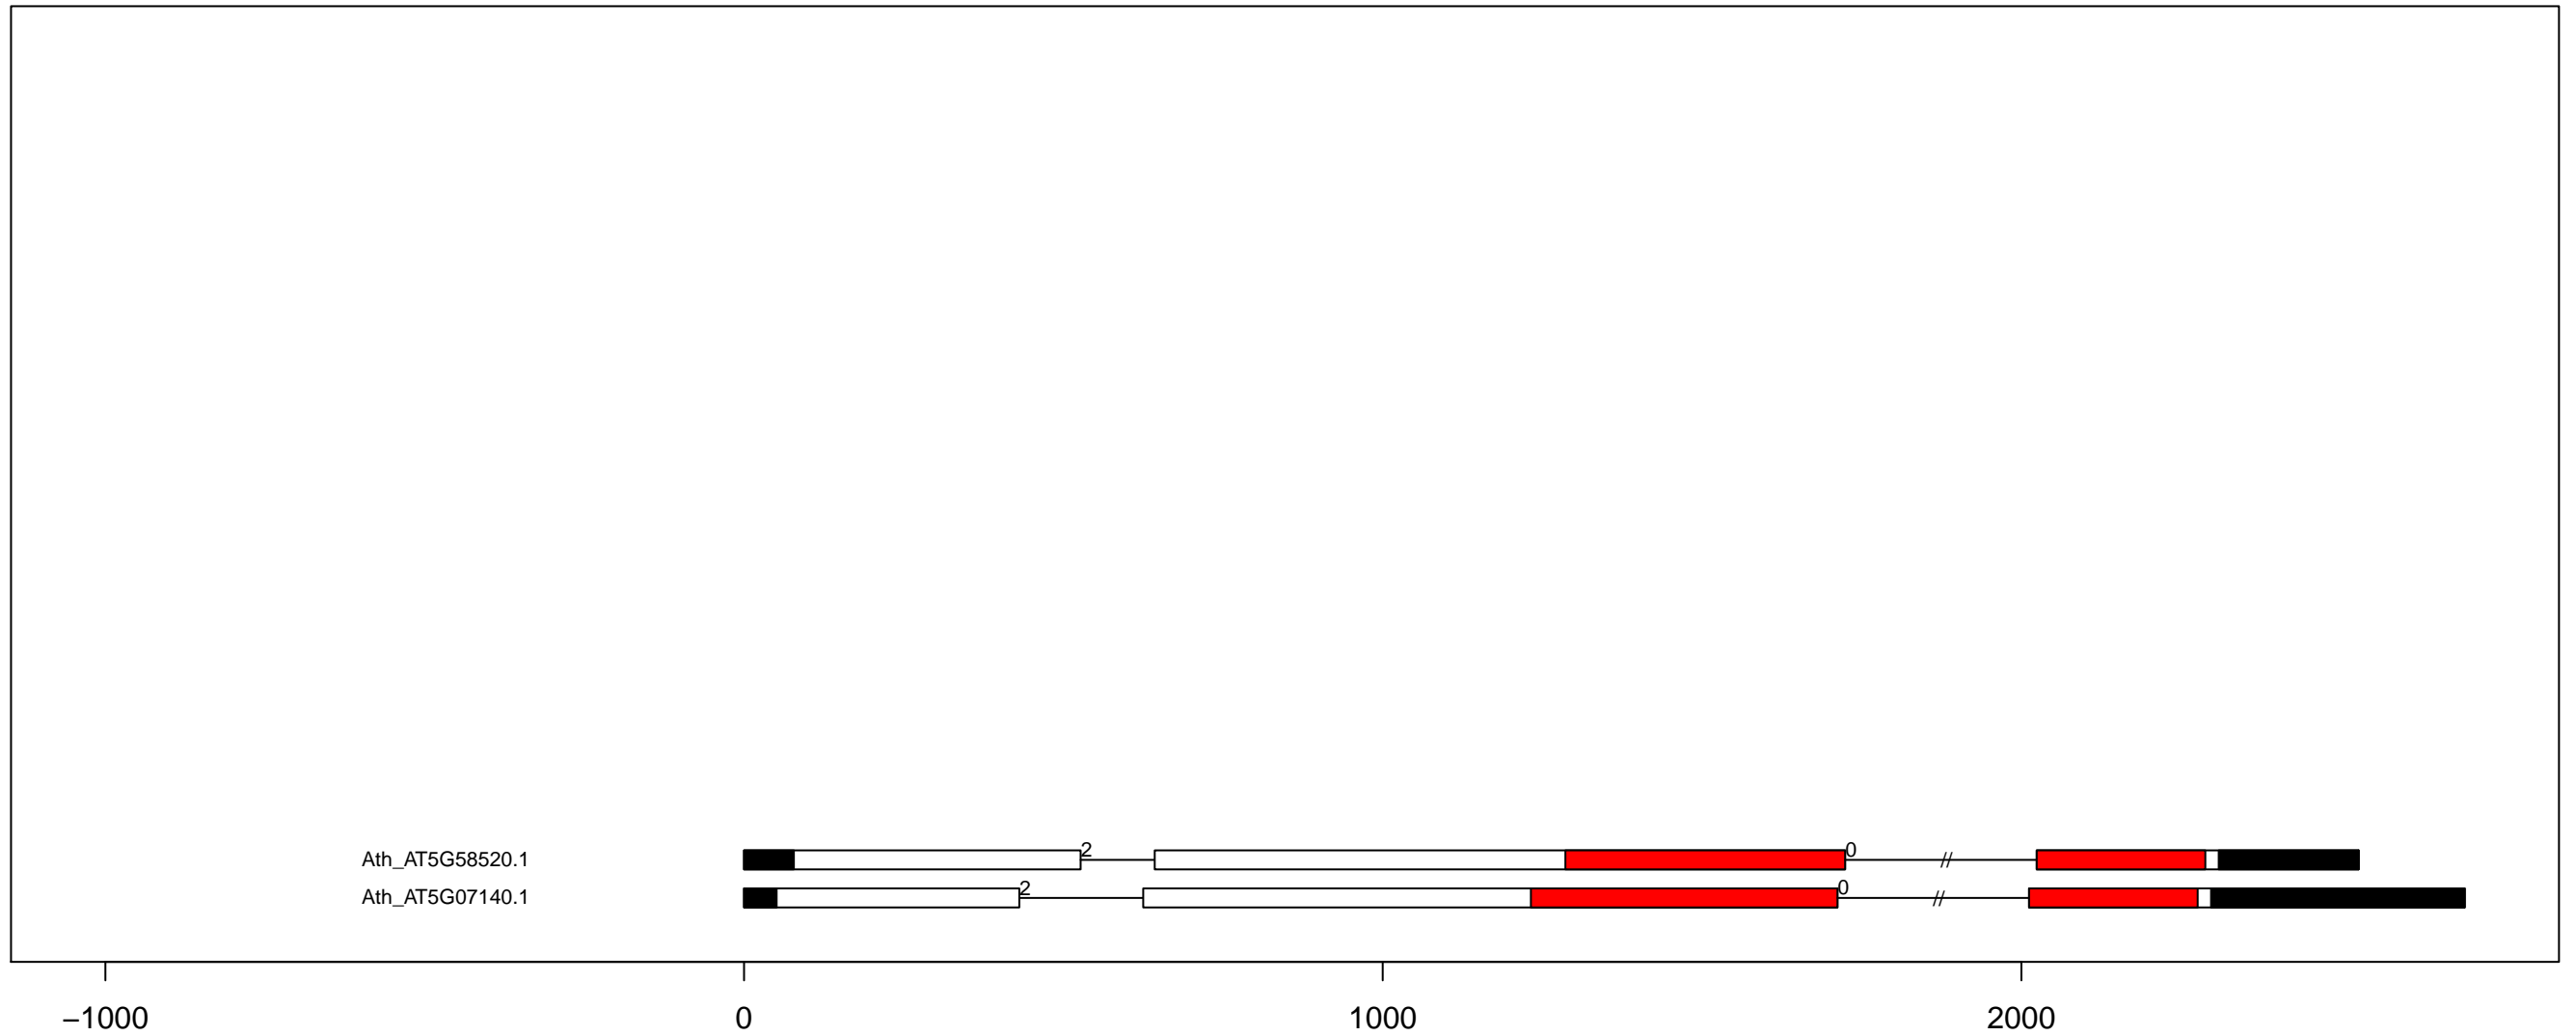

# A.th TLK exon-intron and kinase domain diagram (all)

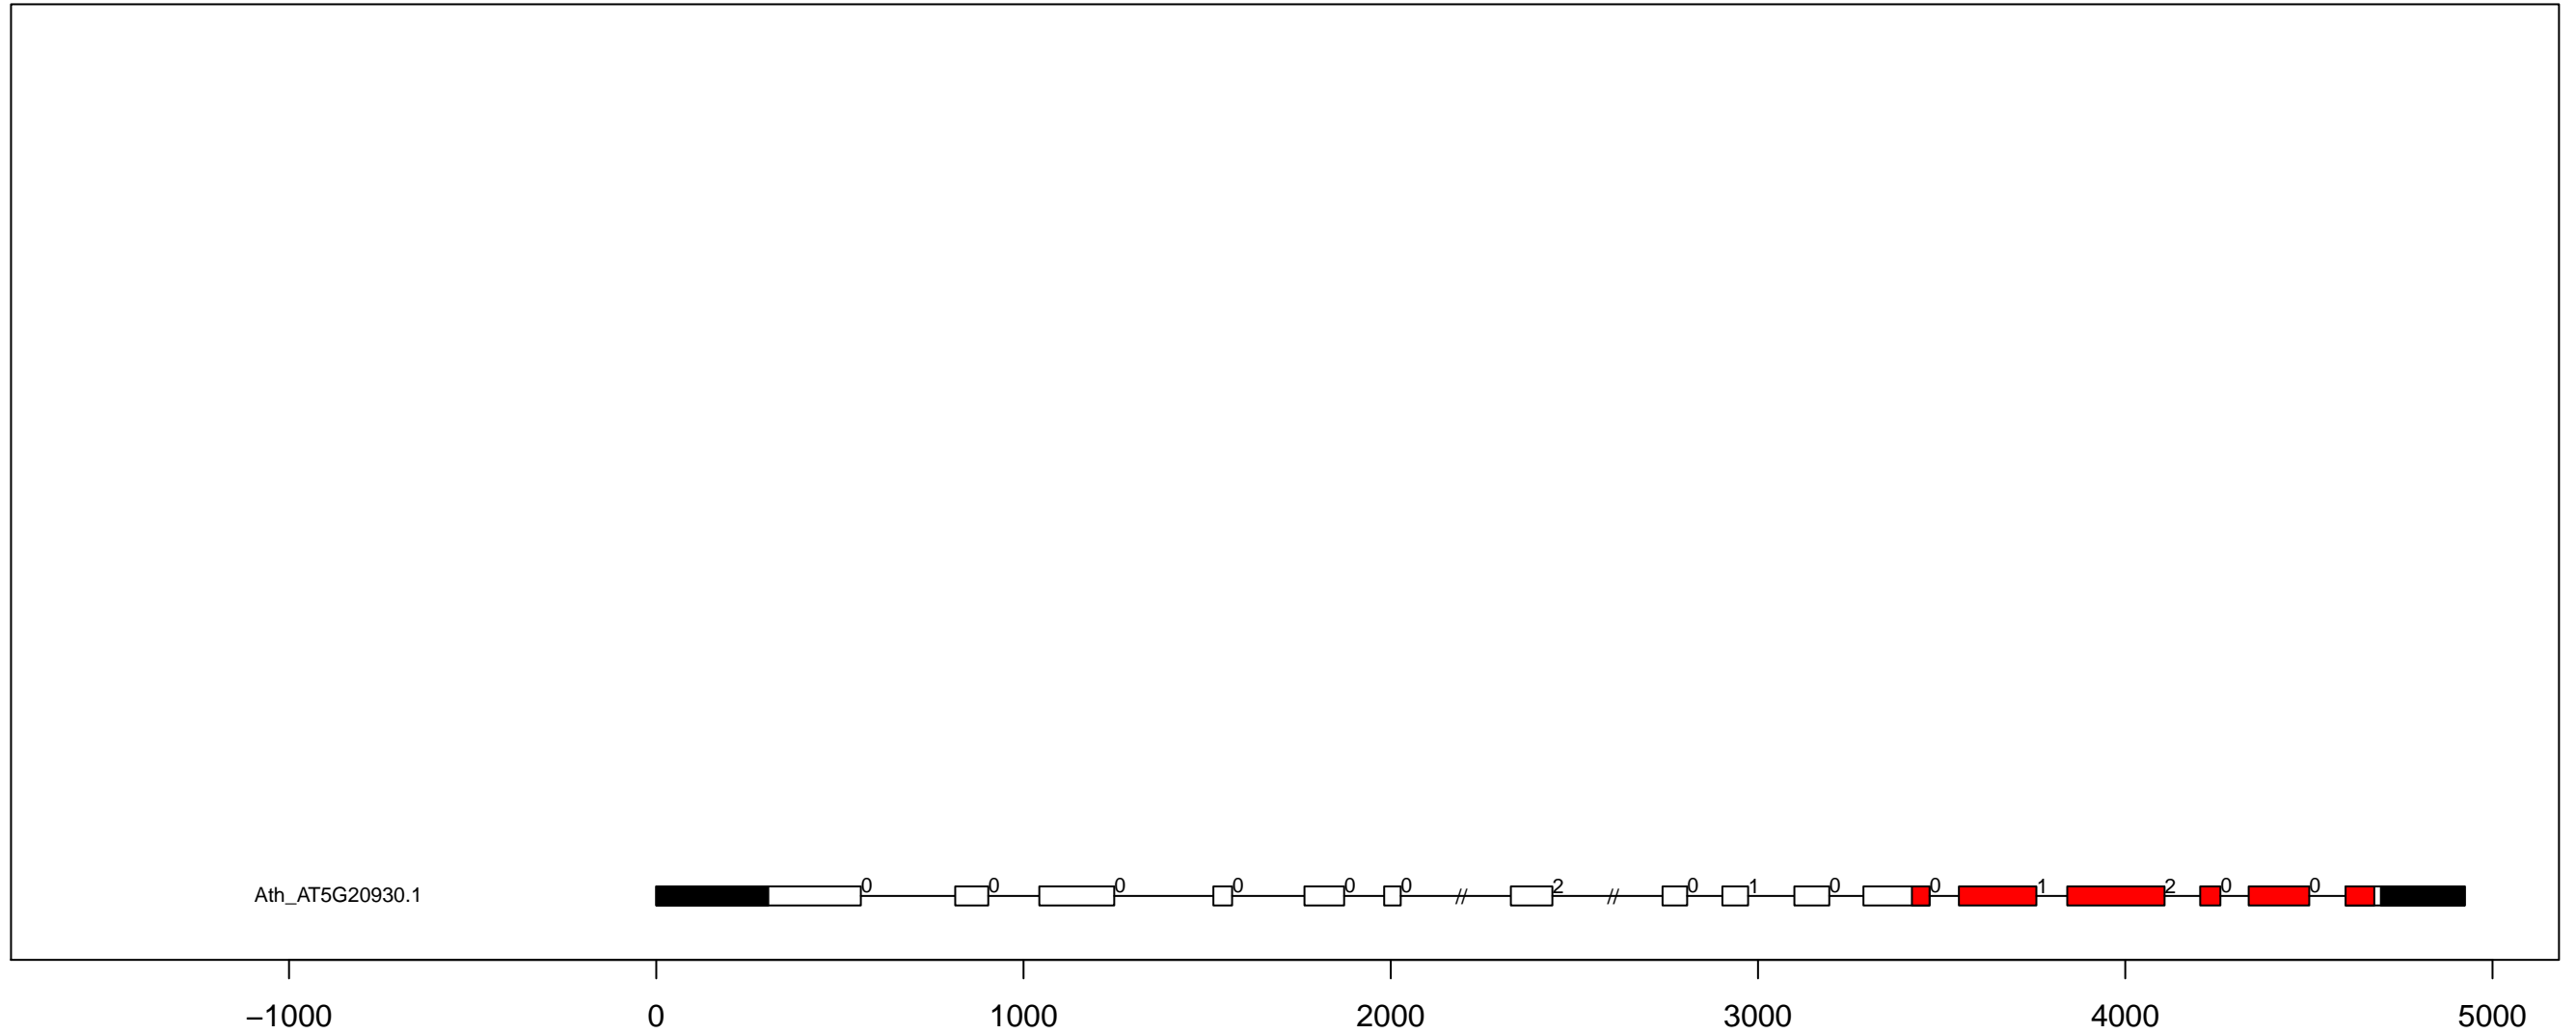



# A.th TTK exon-intron and kinase domain diagram (all)

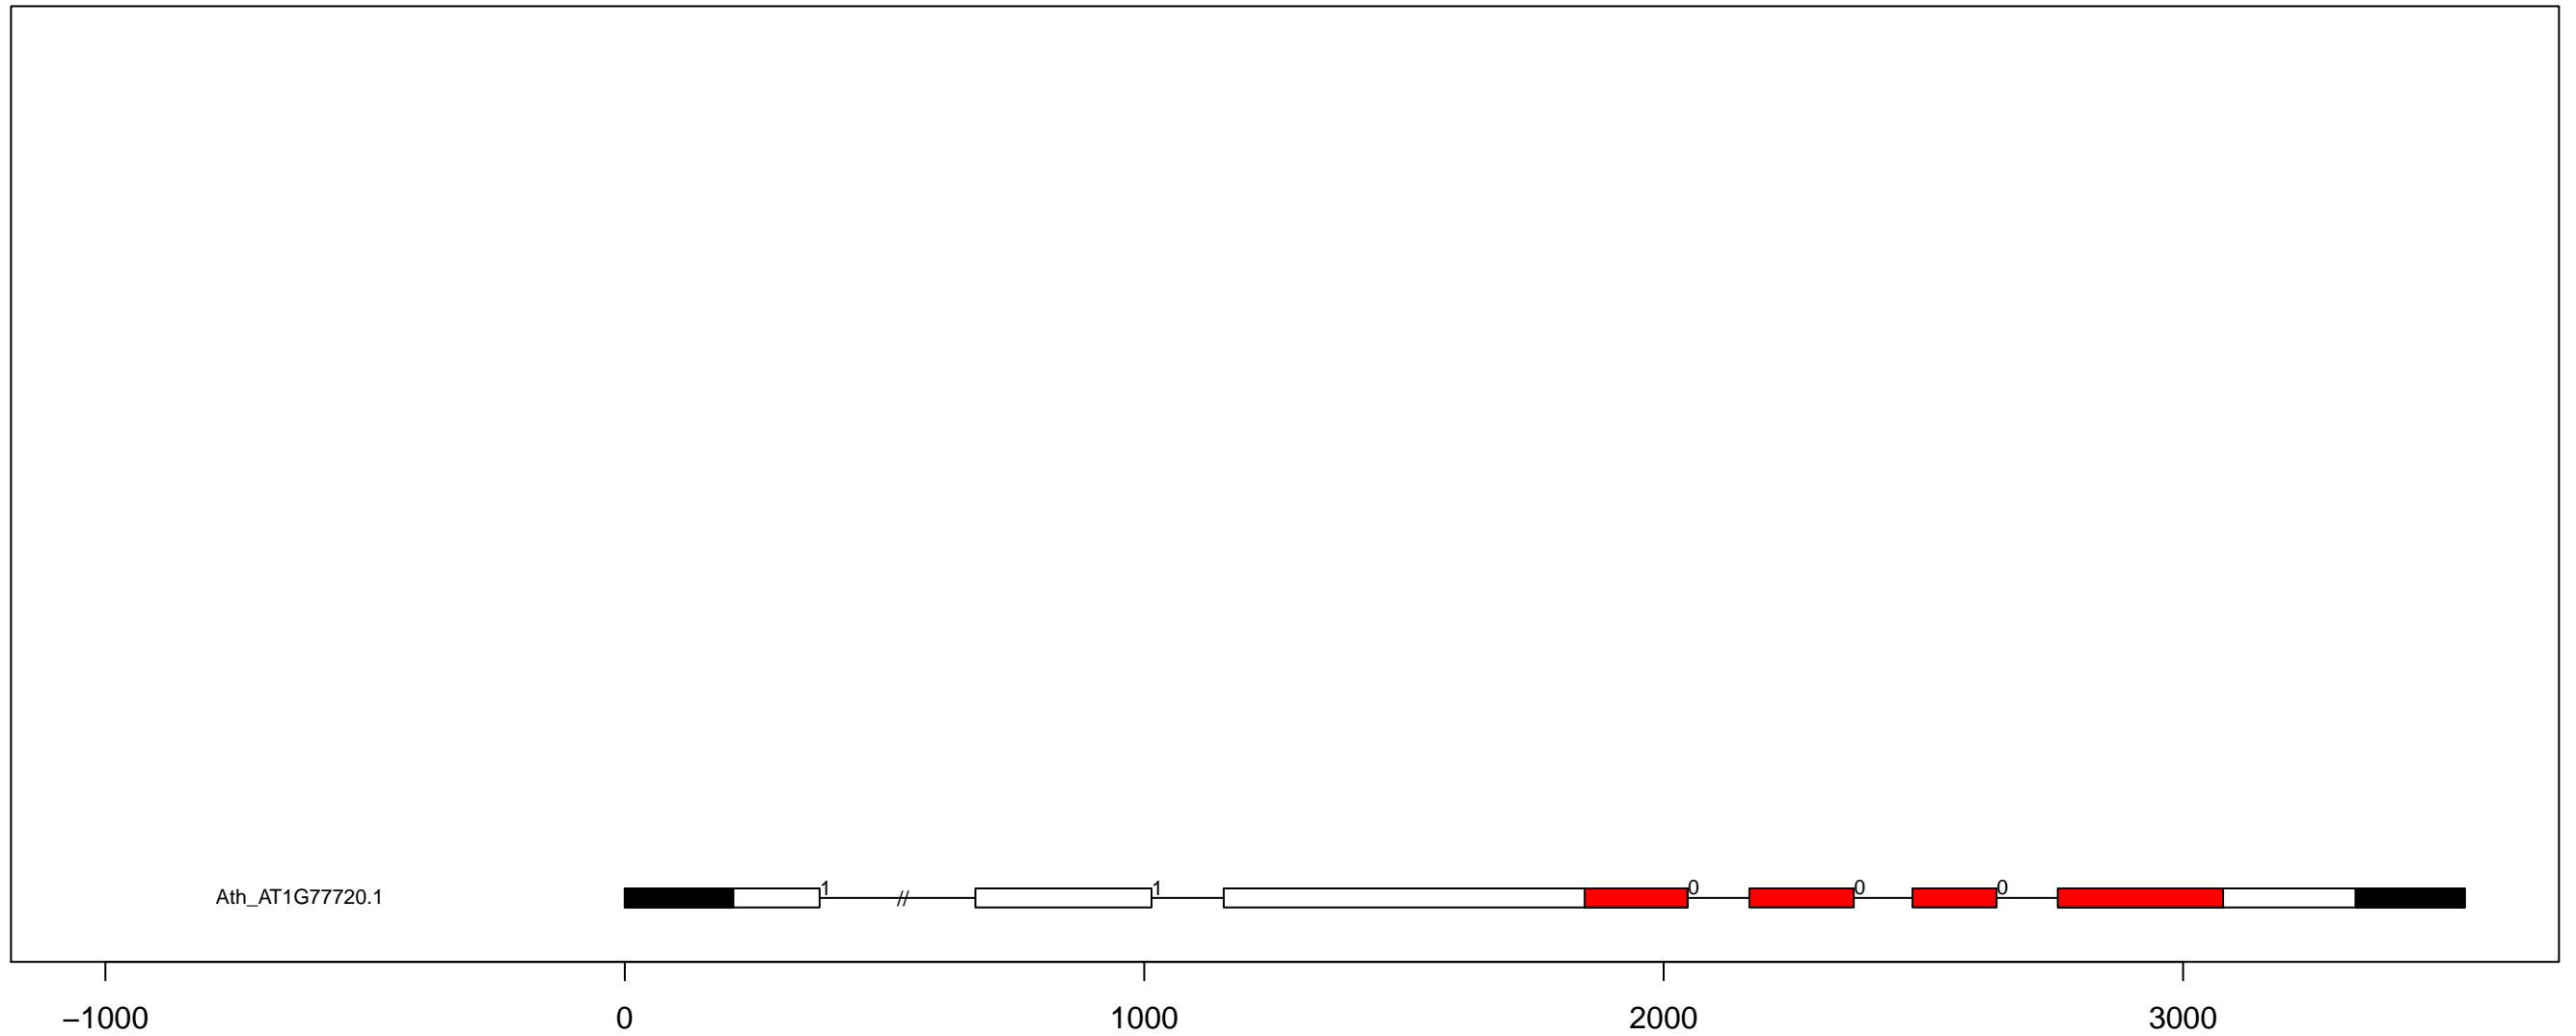

# A.th ULK\_Fused exon-intron and kinase domain diagram (all)

Ath\_AT1G50240.2

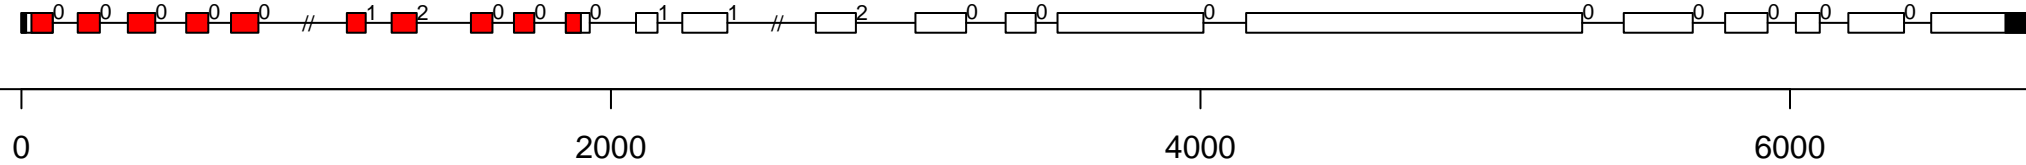

A.th ULK\_ULK4 exon-intron and kinase domain diagram (all)

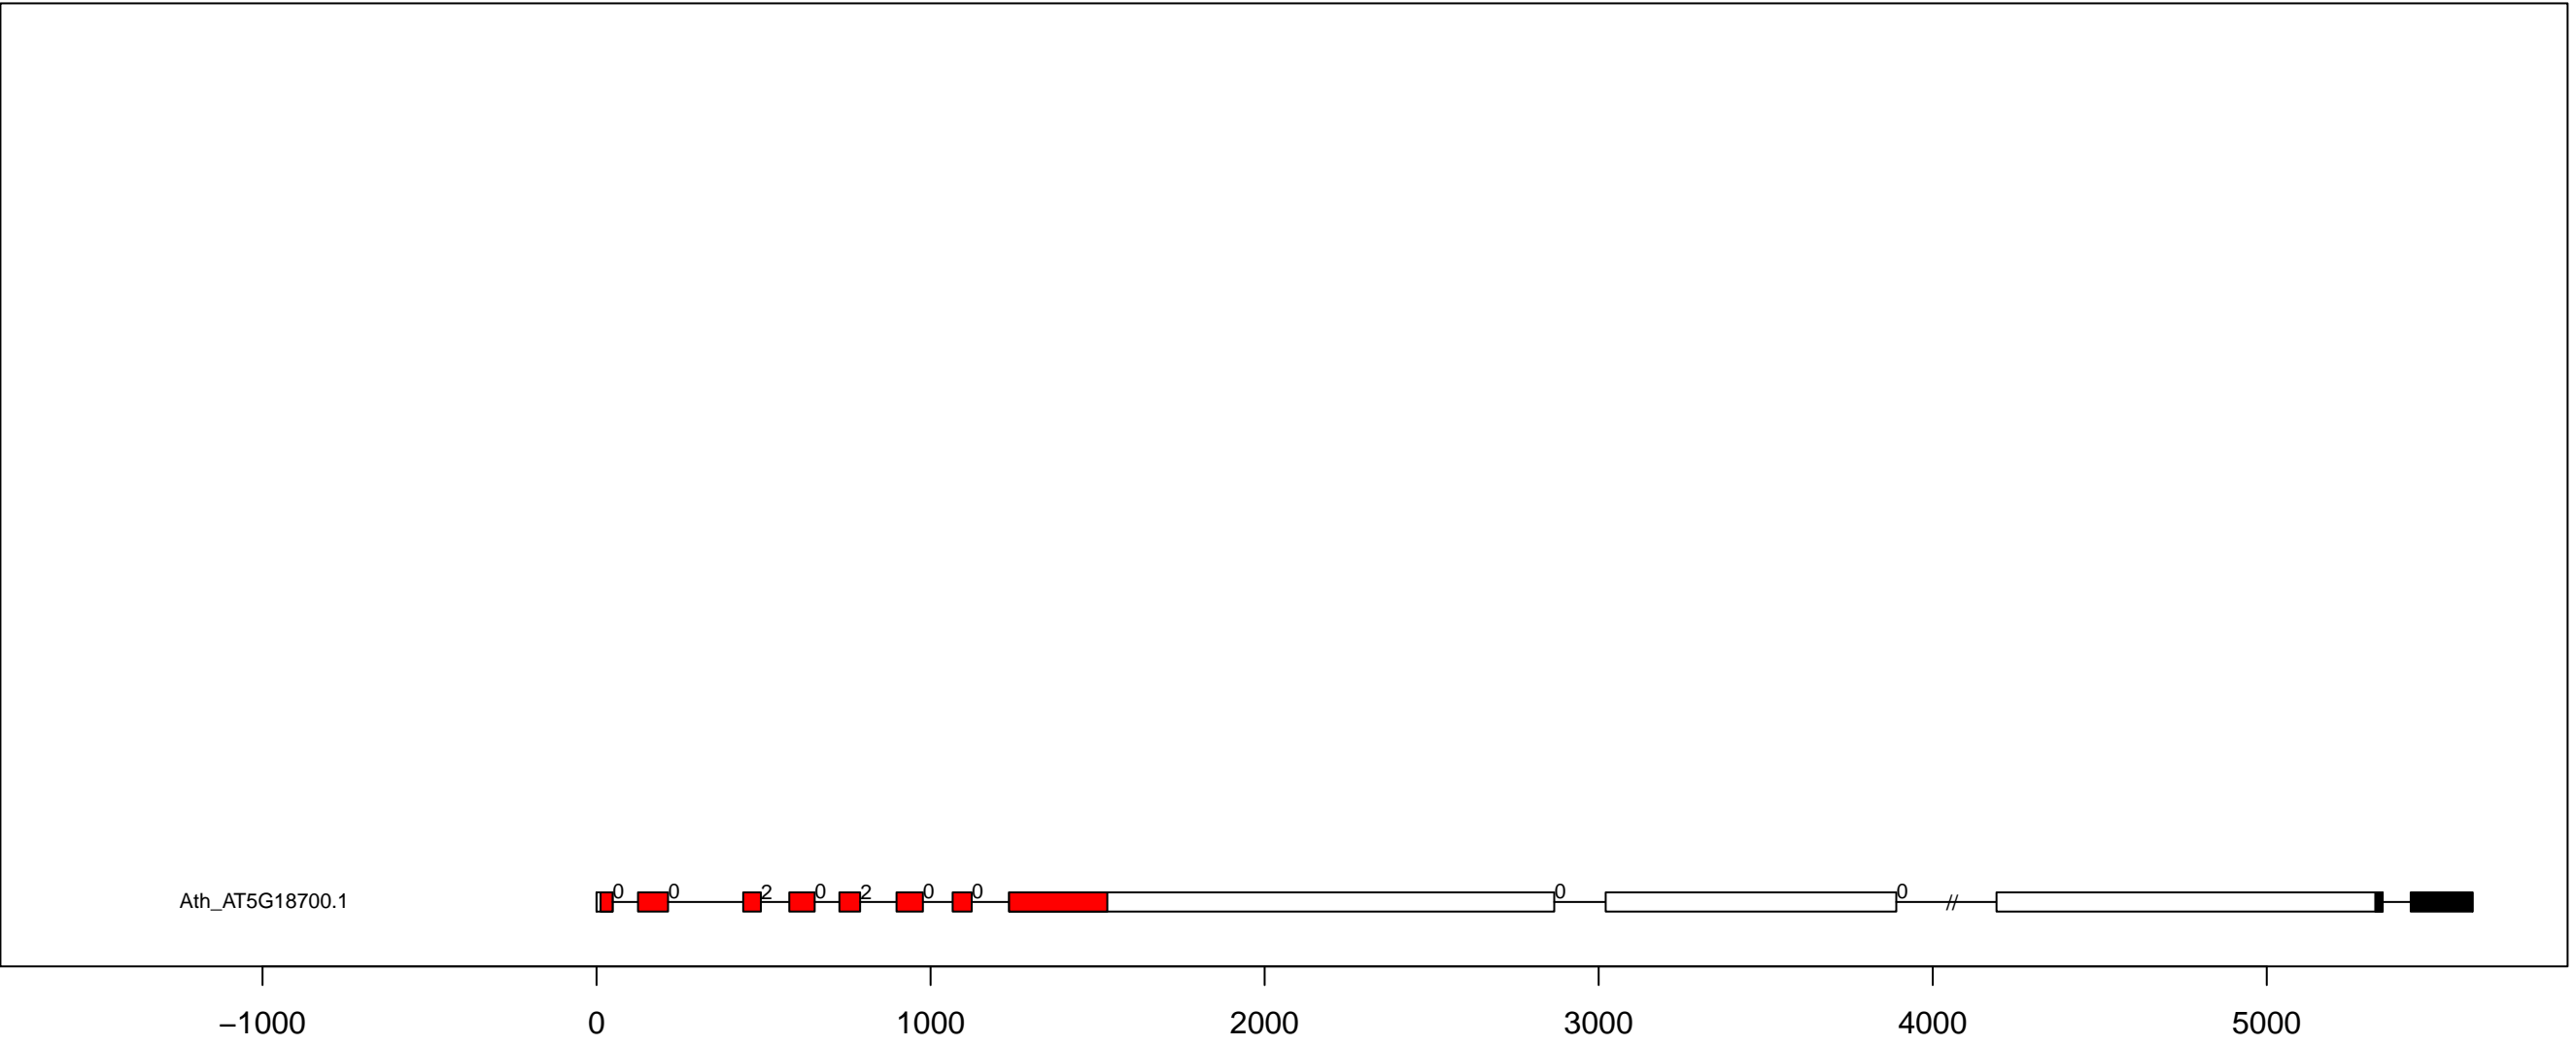

A.th WEE exon-intron and kinase domain diagram (all)

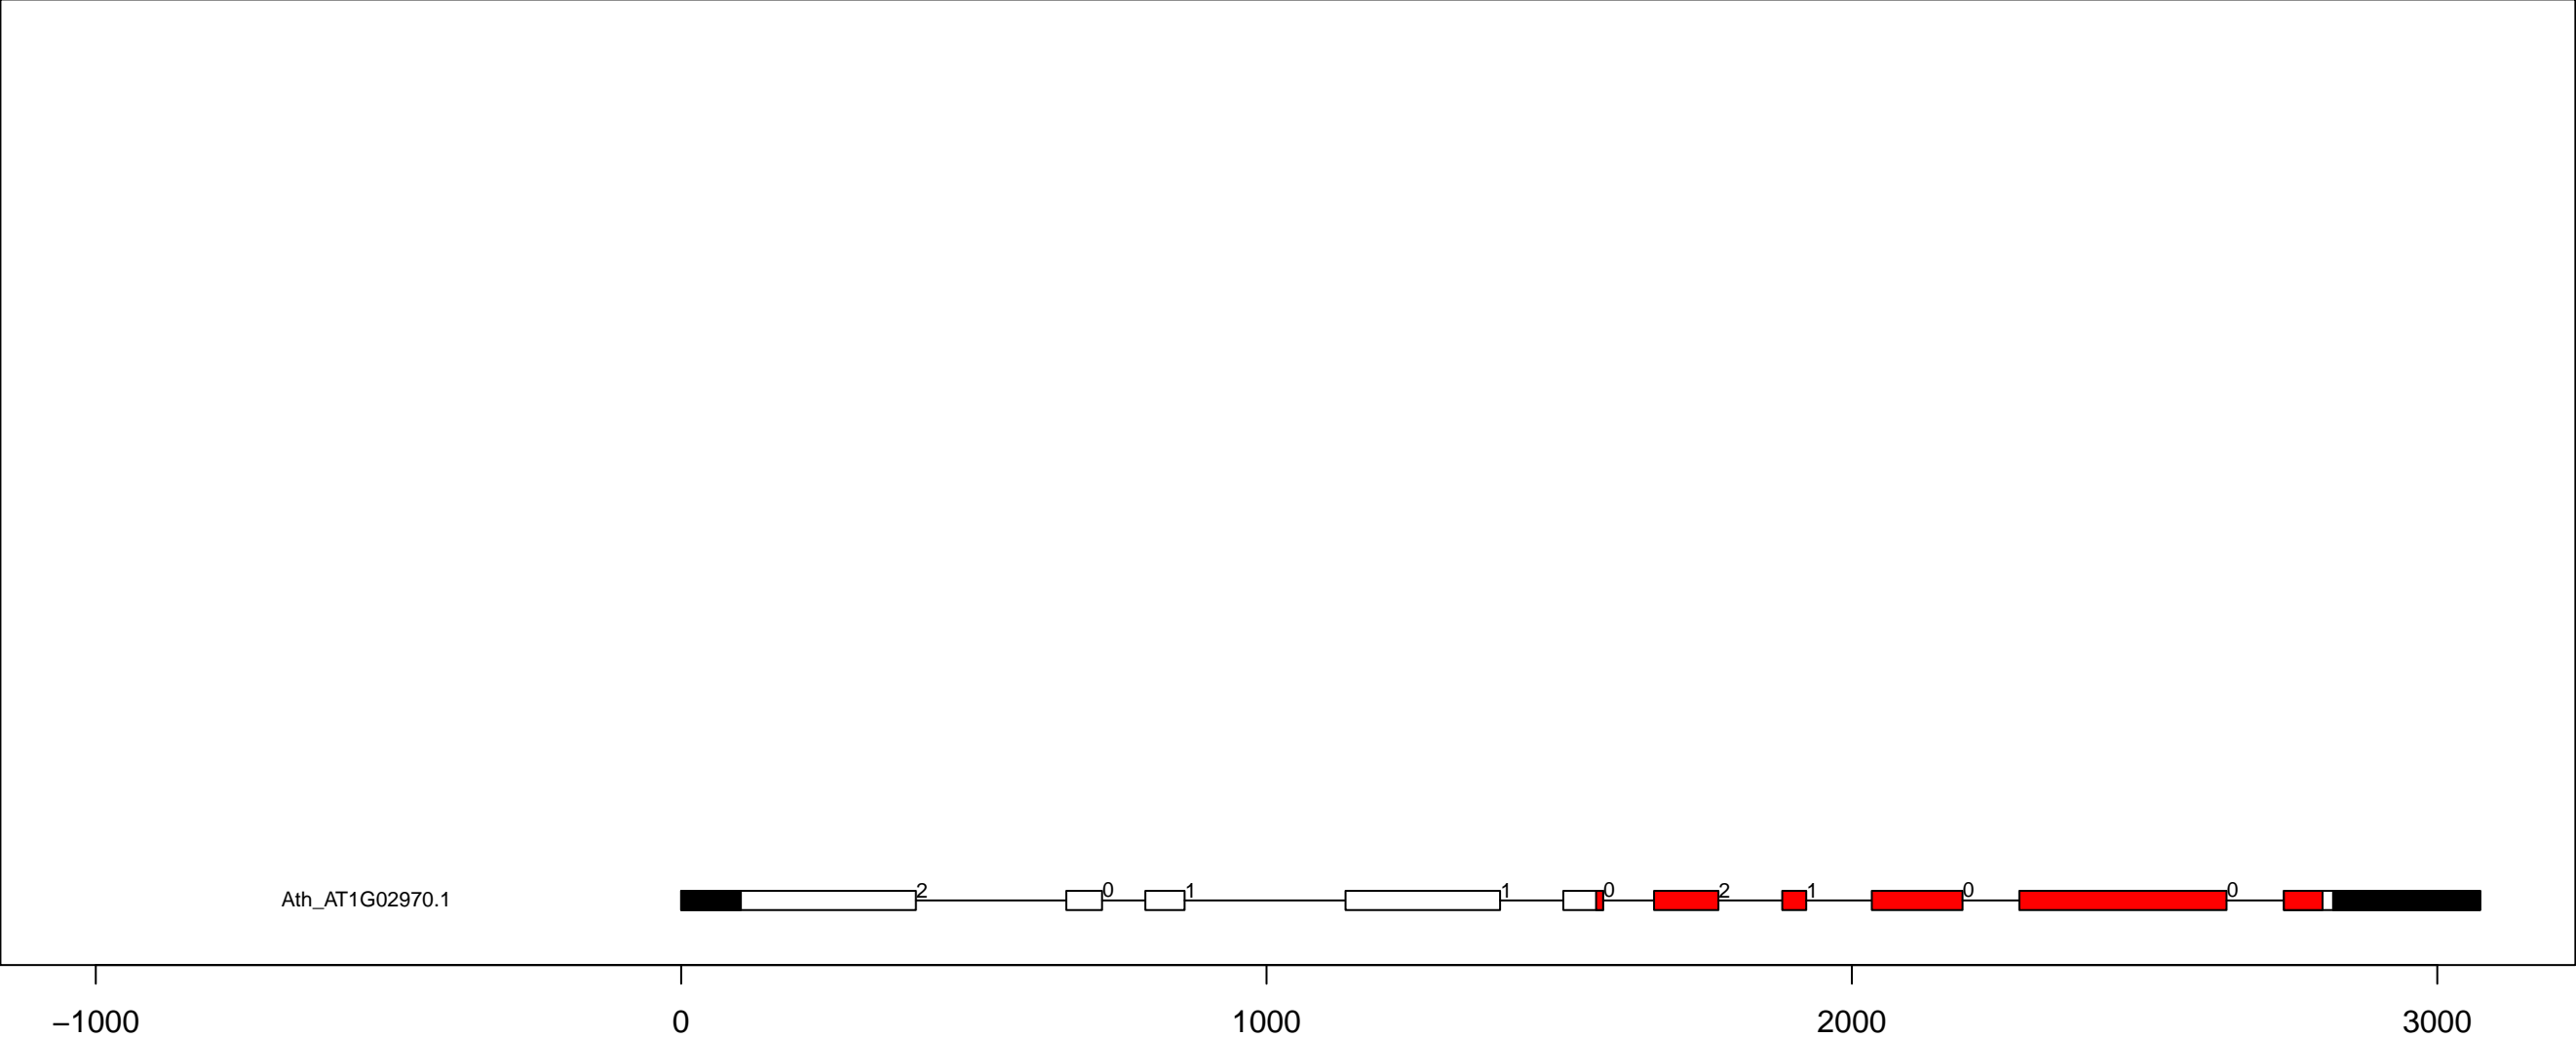



# V.vi AGC\_MAST exon-intron and domain diagram (all)

Vvi\_GSVIVT01018574001

Vvi\_GSVIVT01008473001

Vvi\_GSVIVT01009685001

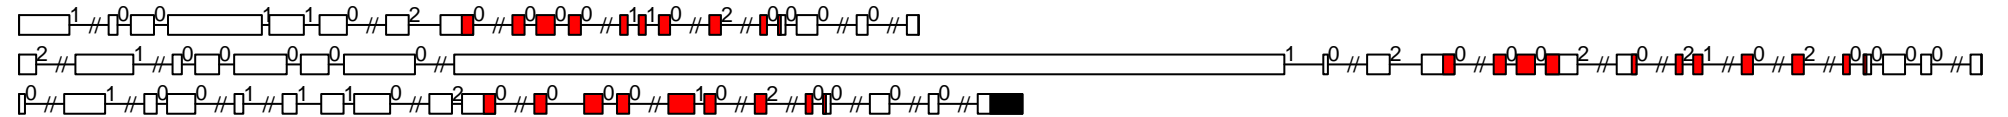

0

5000

10000

15000

# V.vi AGC\_NDR exon-intron and domain diagram (all)

Vvi\_GSVIVT01035418001  
Vvi\_GSVIVT01028361001  
Vvi\_GSVIVT01027833001  
Vvi\_GSVIVT01021759001  
Vvi\_GSVIVT01015159001  
Vvi\_GSVIVT01009489001

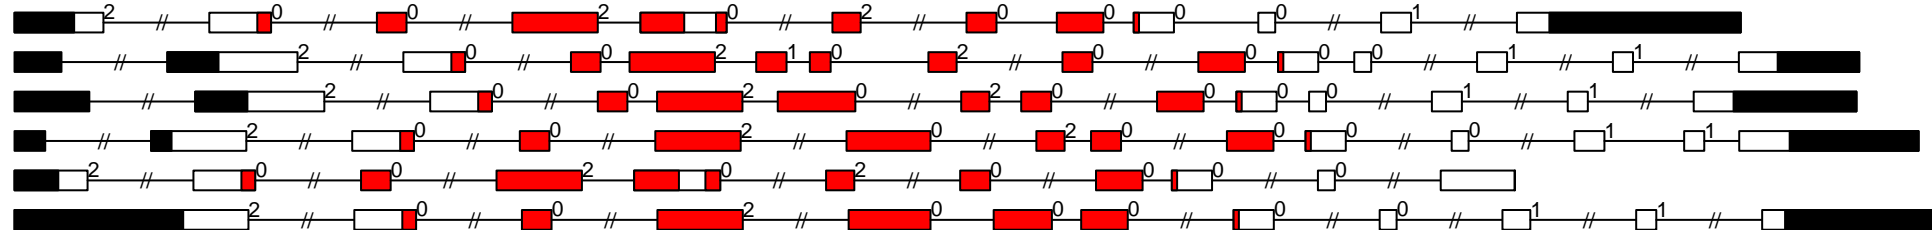

-1000

0

1000

2000

3000

4000

5000

# V.vi AGC\_PDK1 exon-intron and domain diagram (all)

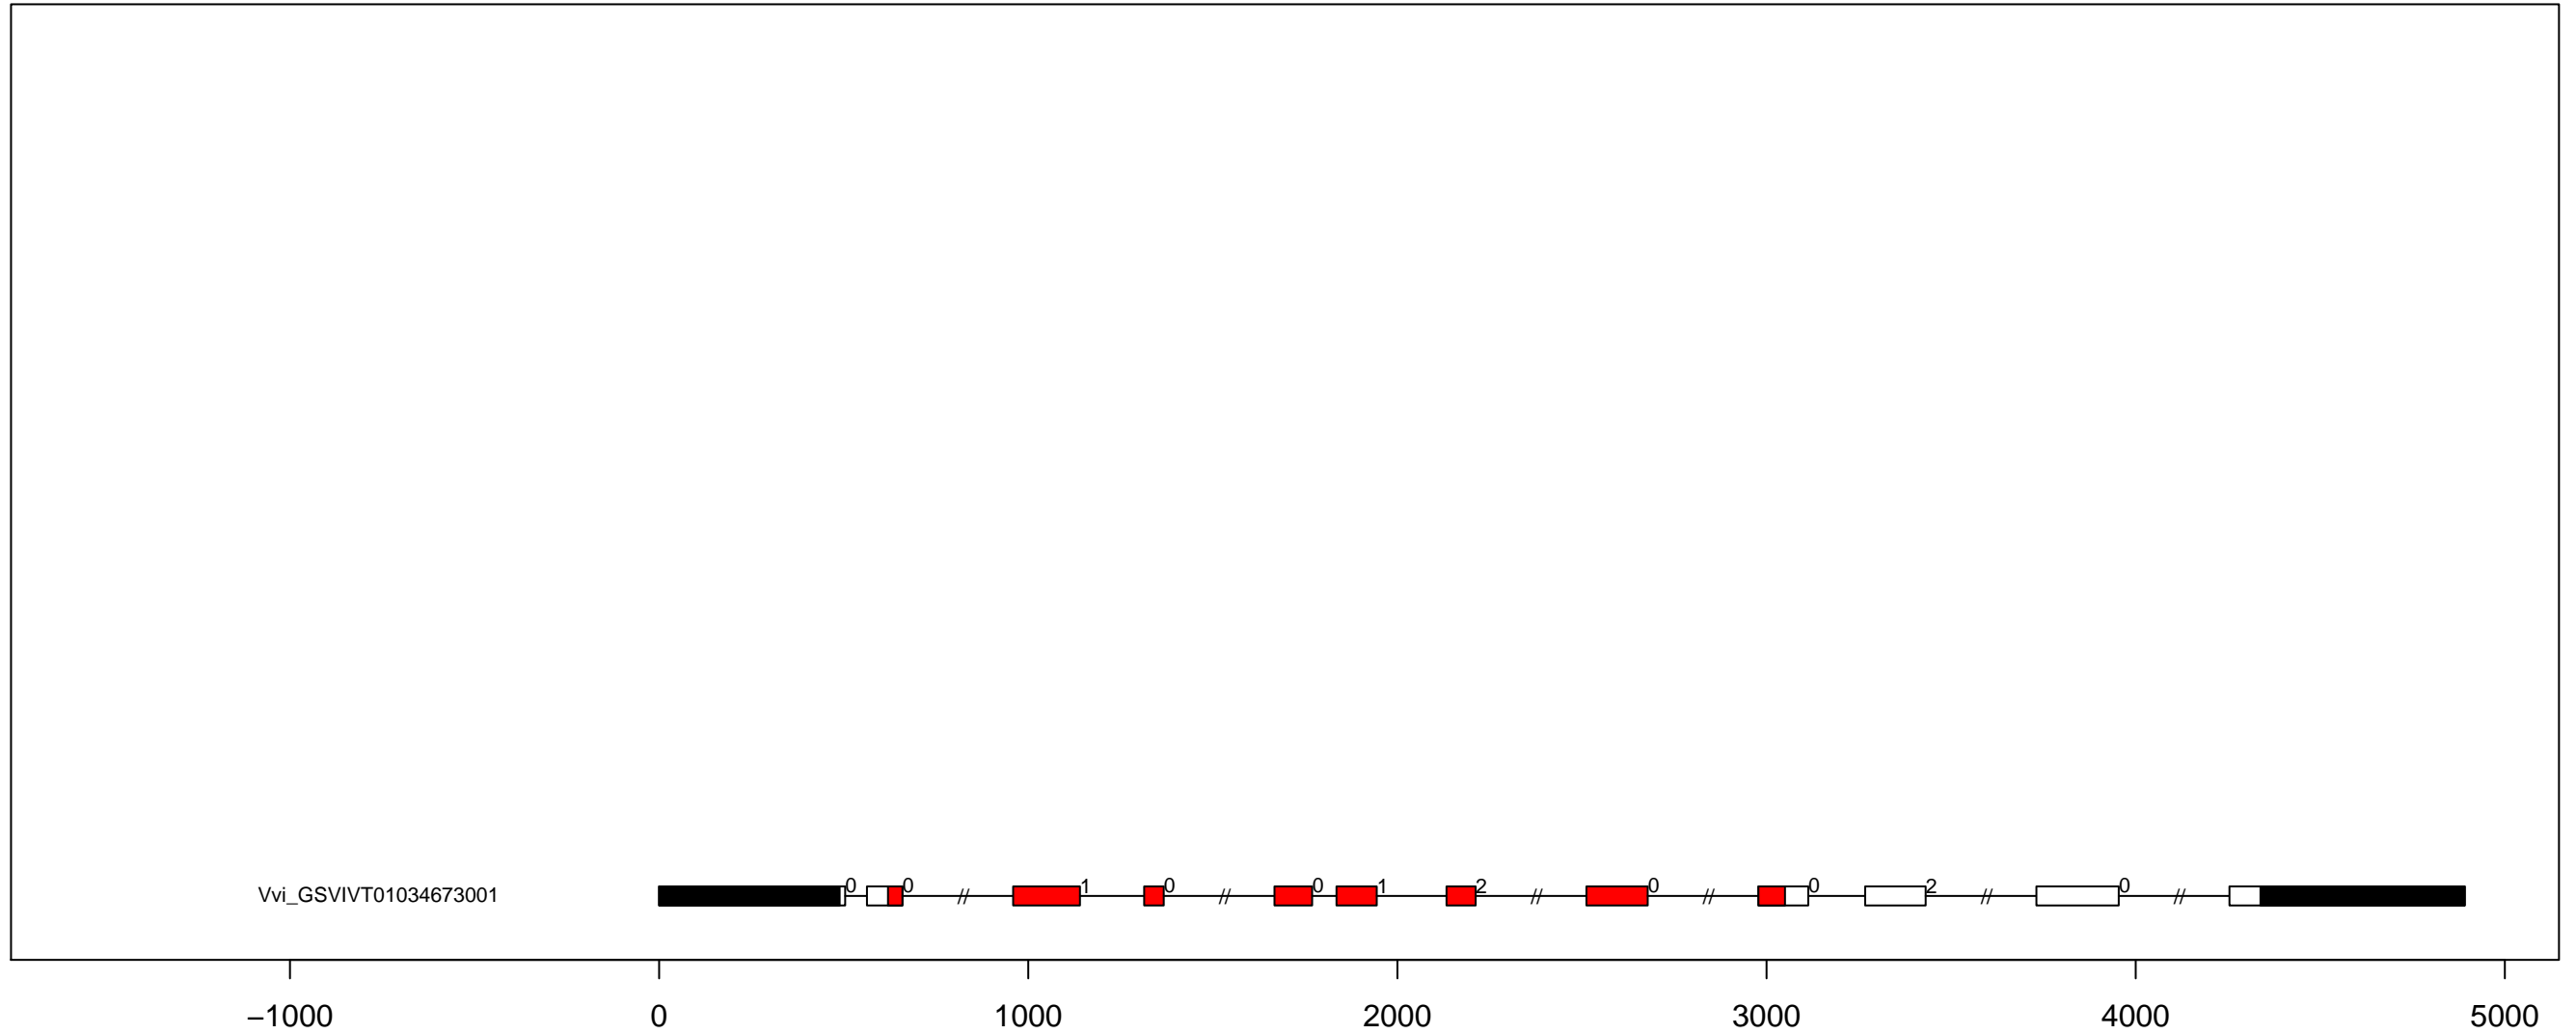



# V.vi AGC\_PKA-PKG exon-intron and domain diagram (all)

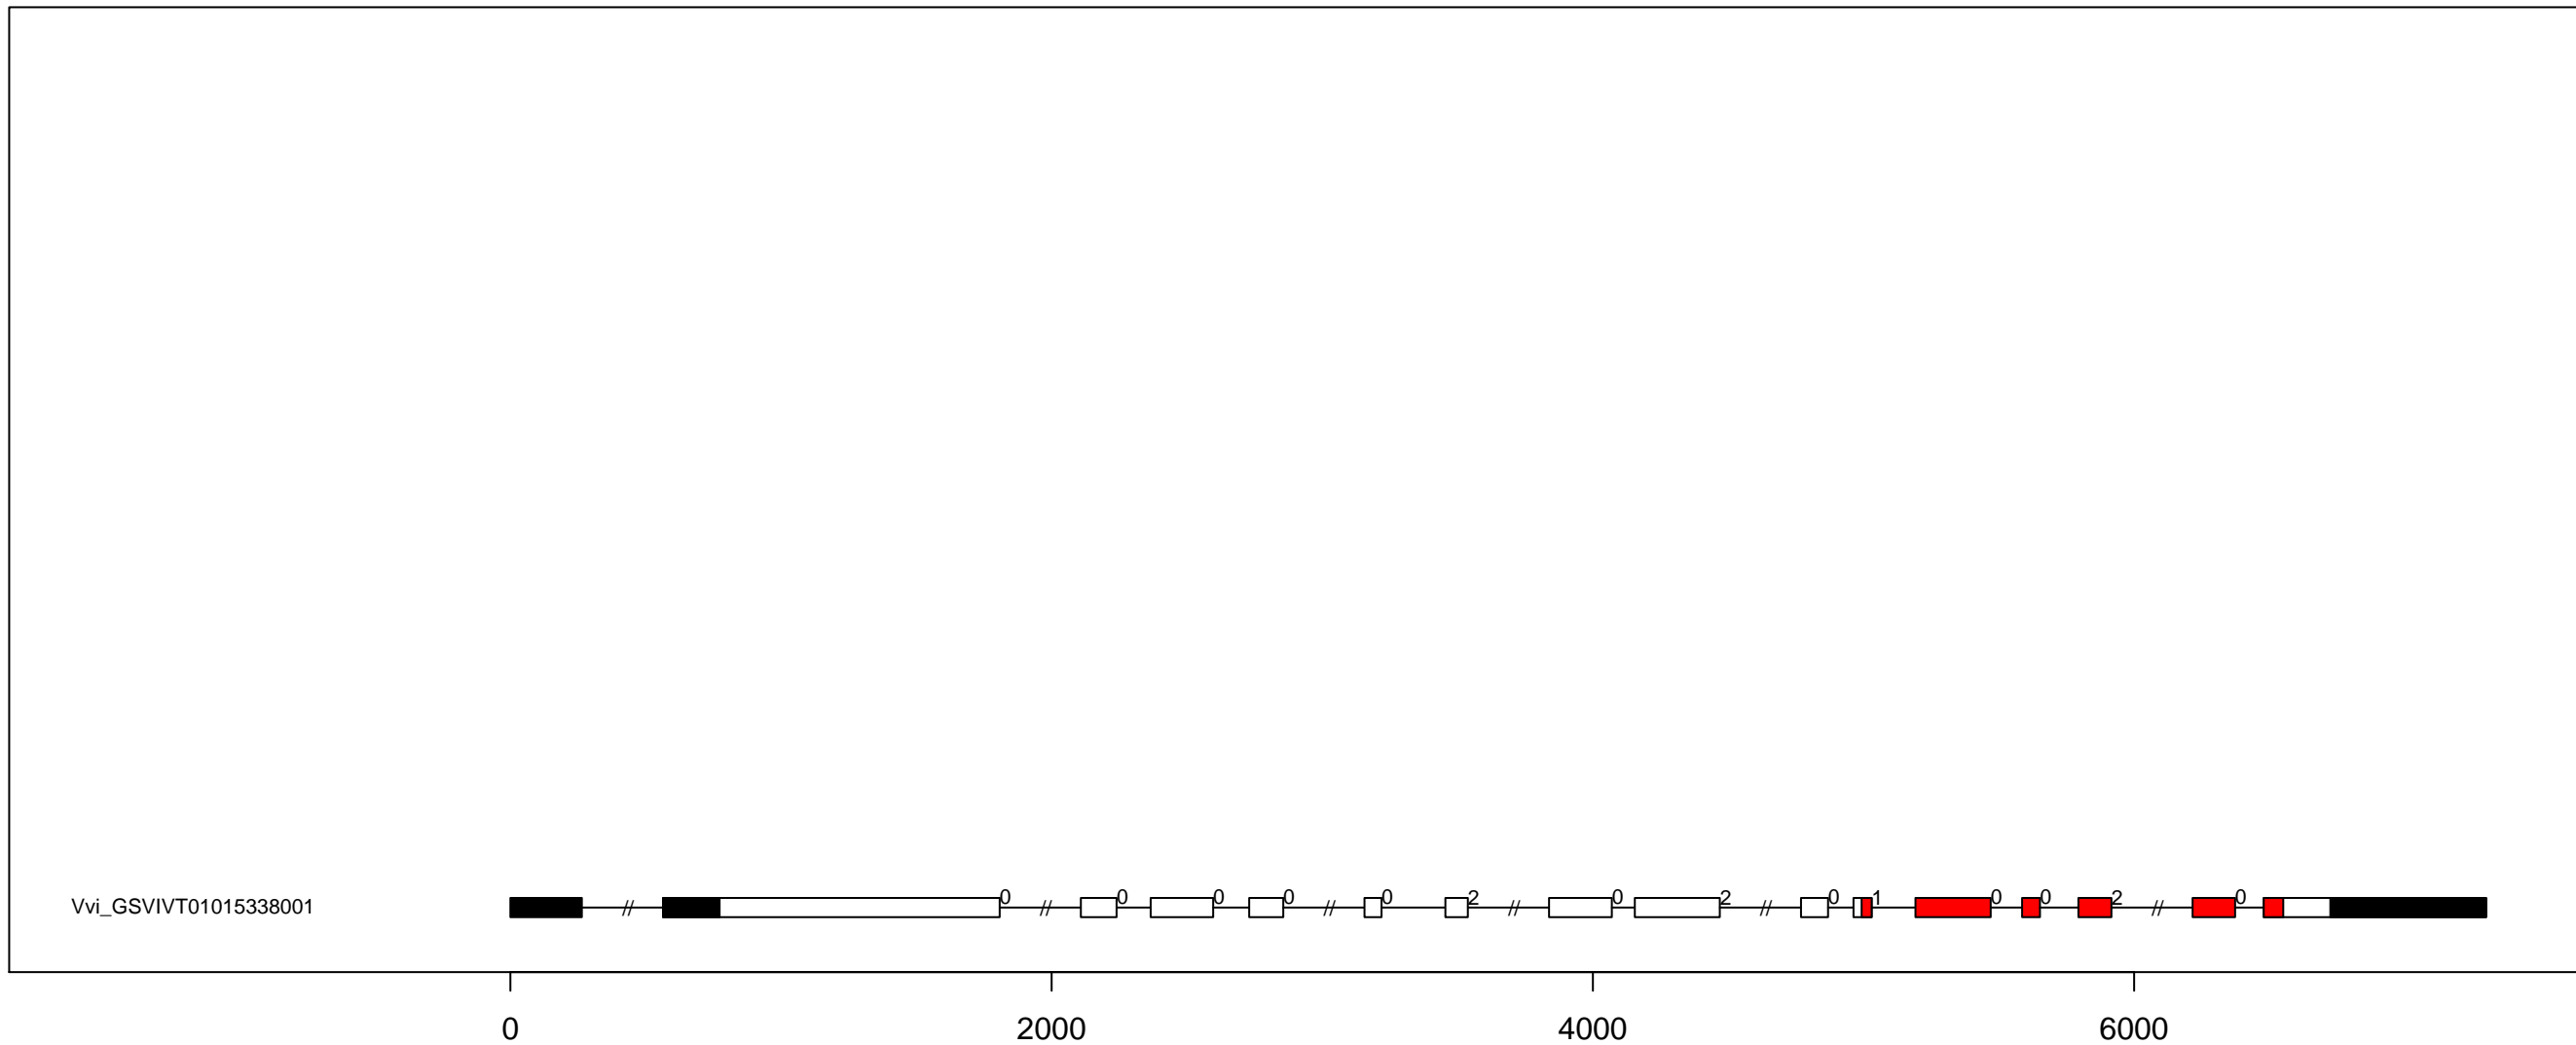

### V.vi AGC\_RSK-2 exon-intron and domain diagram (all)

Vvi\_GSVIVT01036690001  
 Vvi\_GSVIVT01032561001  
 Vvi\_GSVIVT01025309001  
 Vvi\_GSVIVT01021582001  
 Vvi\_GSVIVT01020511001  
 Vvi\_GSVIVT01015496001  
 Vvi\_GSVIVT01034755001  
 Vvi\_GSVIVT01033816001  
 Vvi\_GSVIVT01032399001  
 Vvi\_GSVIVT01031372001  
 Vvi\_GSVIVT01031370001  
 Vvi\_GSVIVT01025082001  
 Vvi\_GSVIVT01023842001  
 Vvi\_GSVIVT01018278001  
 Vvi\_GSVIVT01002205001

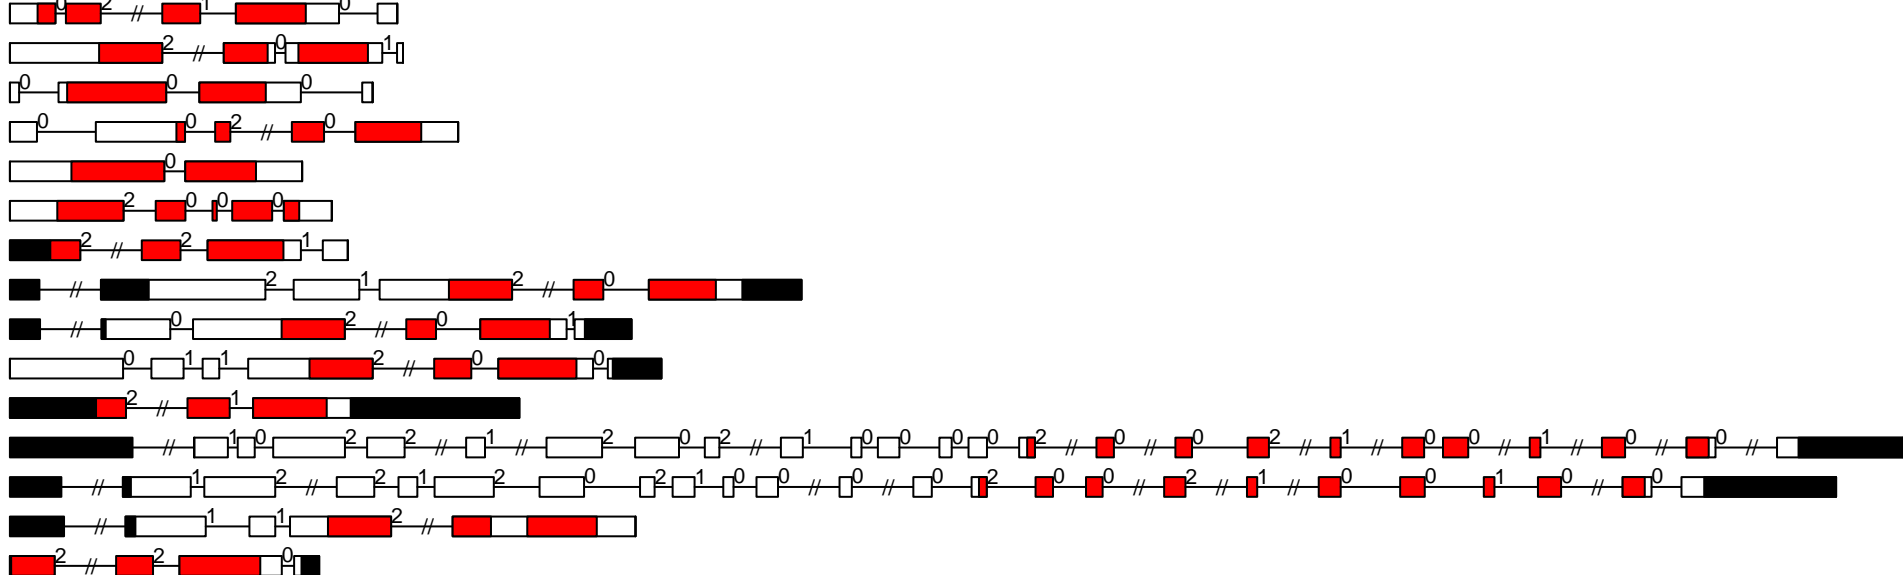

# V.vi AGC-PI exon-intron and domain diagram (all)

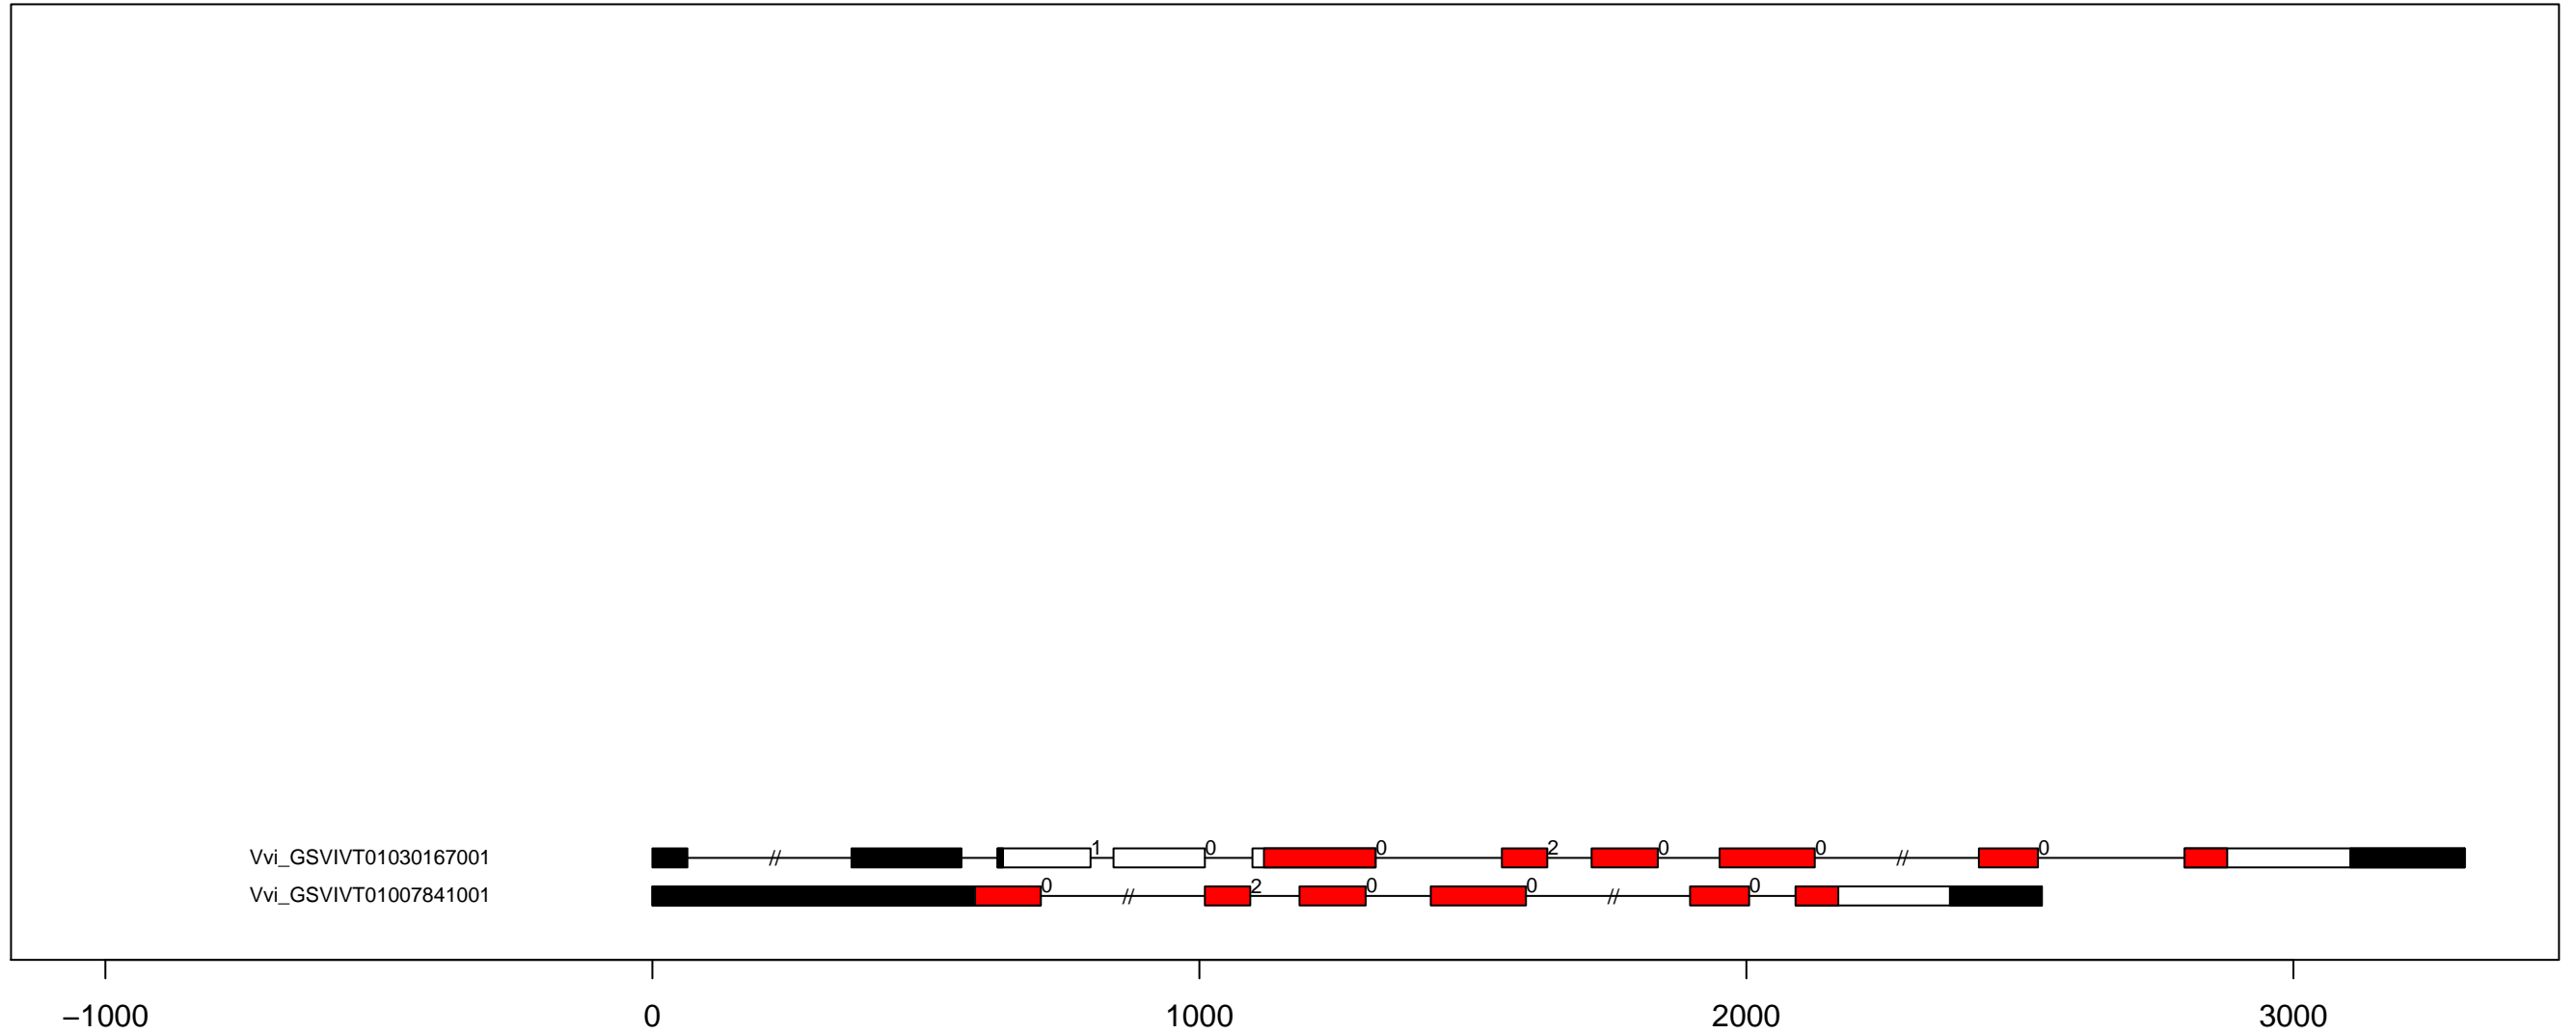

# V.vi Aur exon-intron and domain diagram (all)

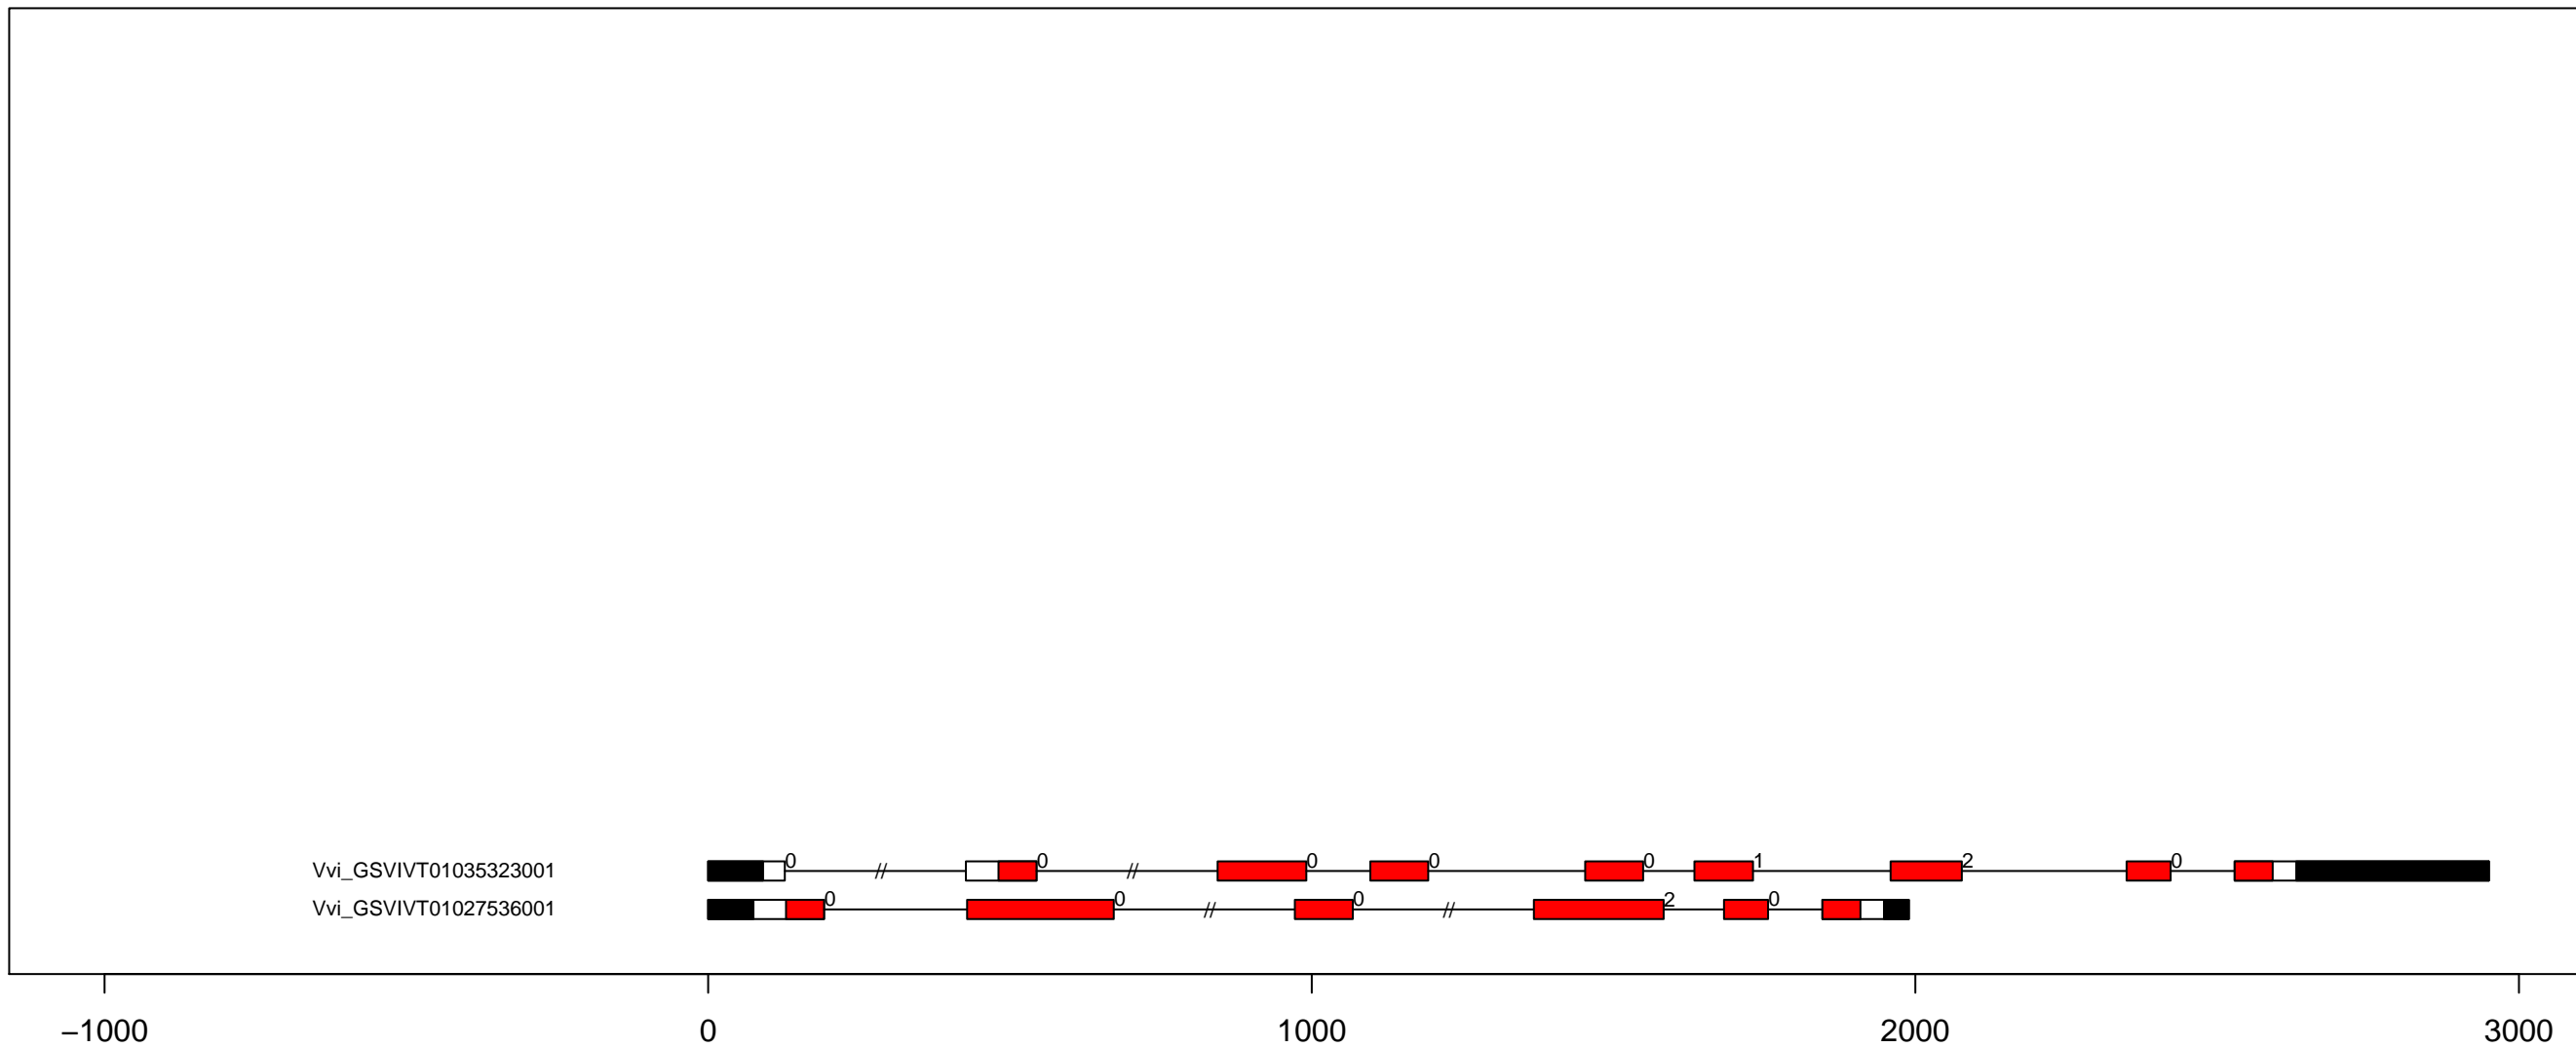

# V.vi CAMK\_AMPK exon-intron and domain diagram (all)

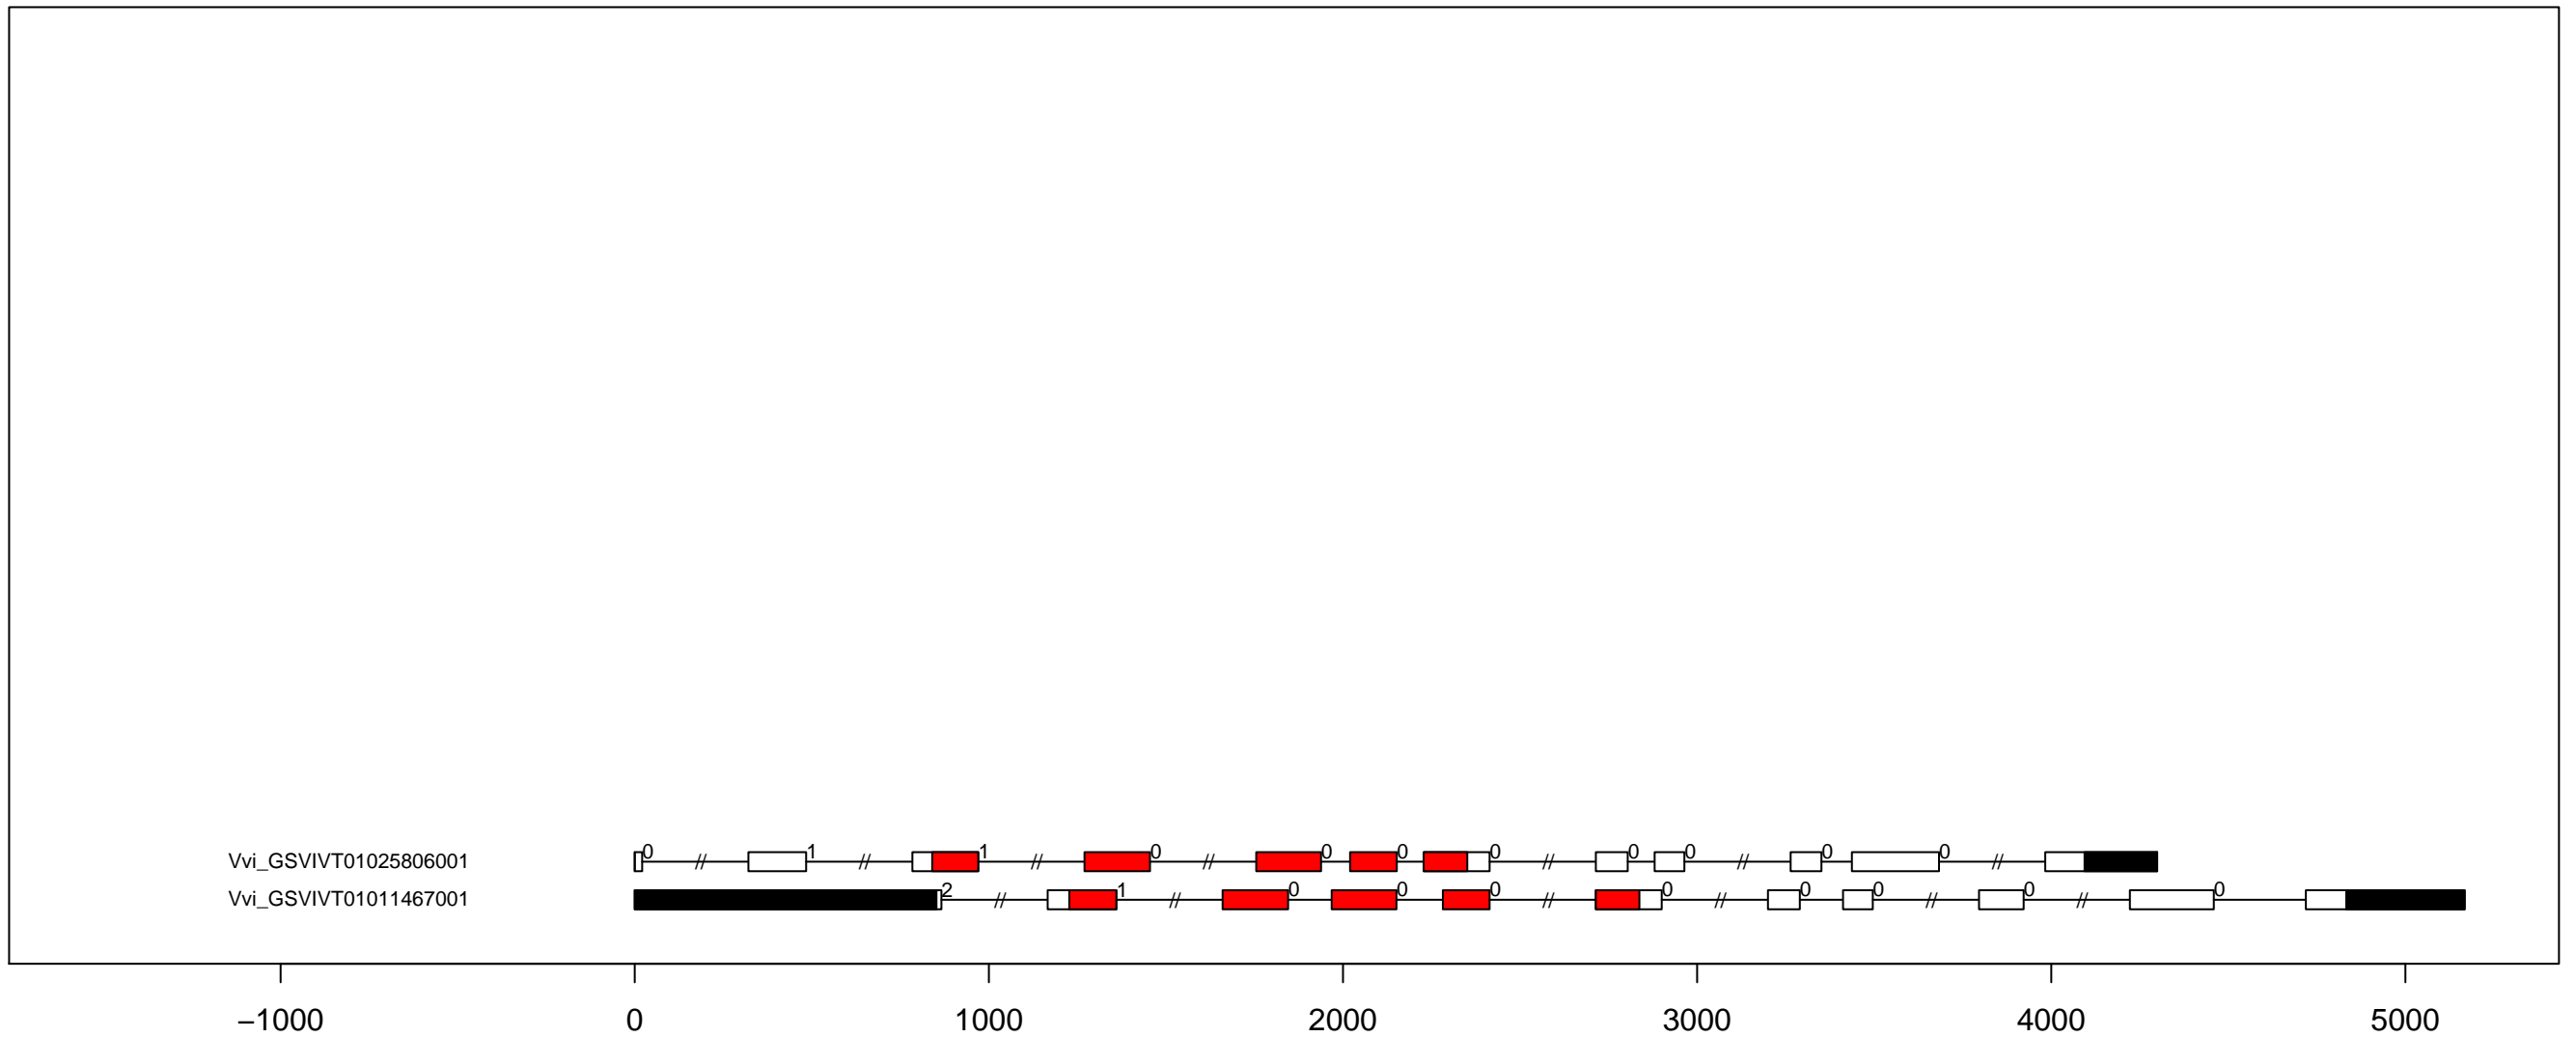

# V.vi CAMK\_CAMK1-DCAMKL exon-intron and domain diagram (all)

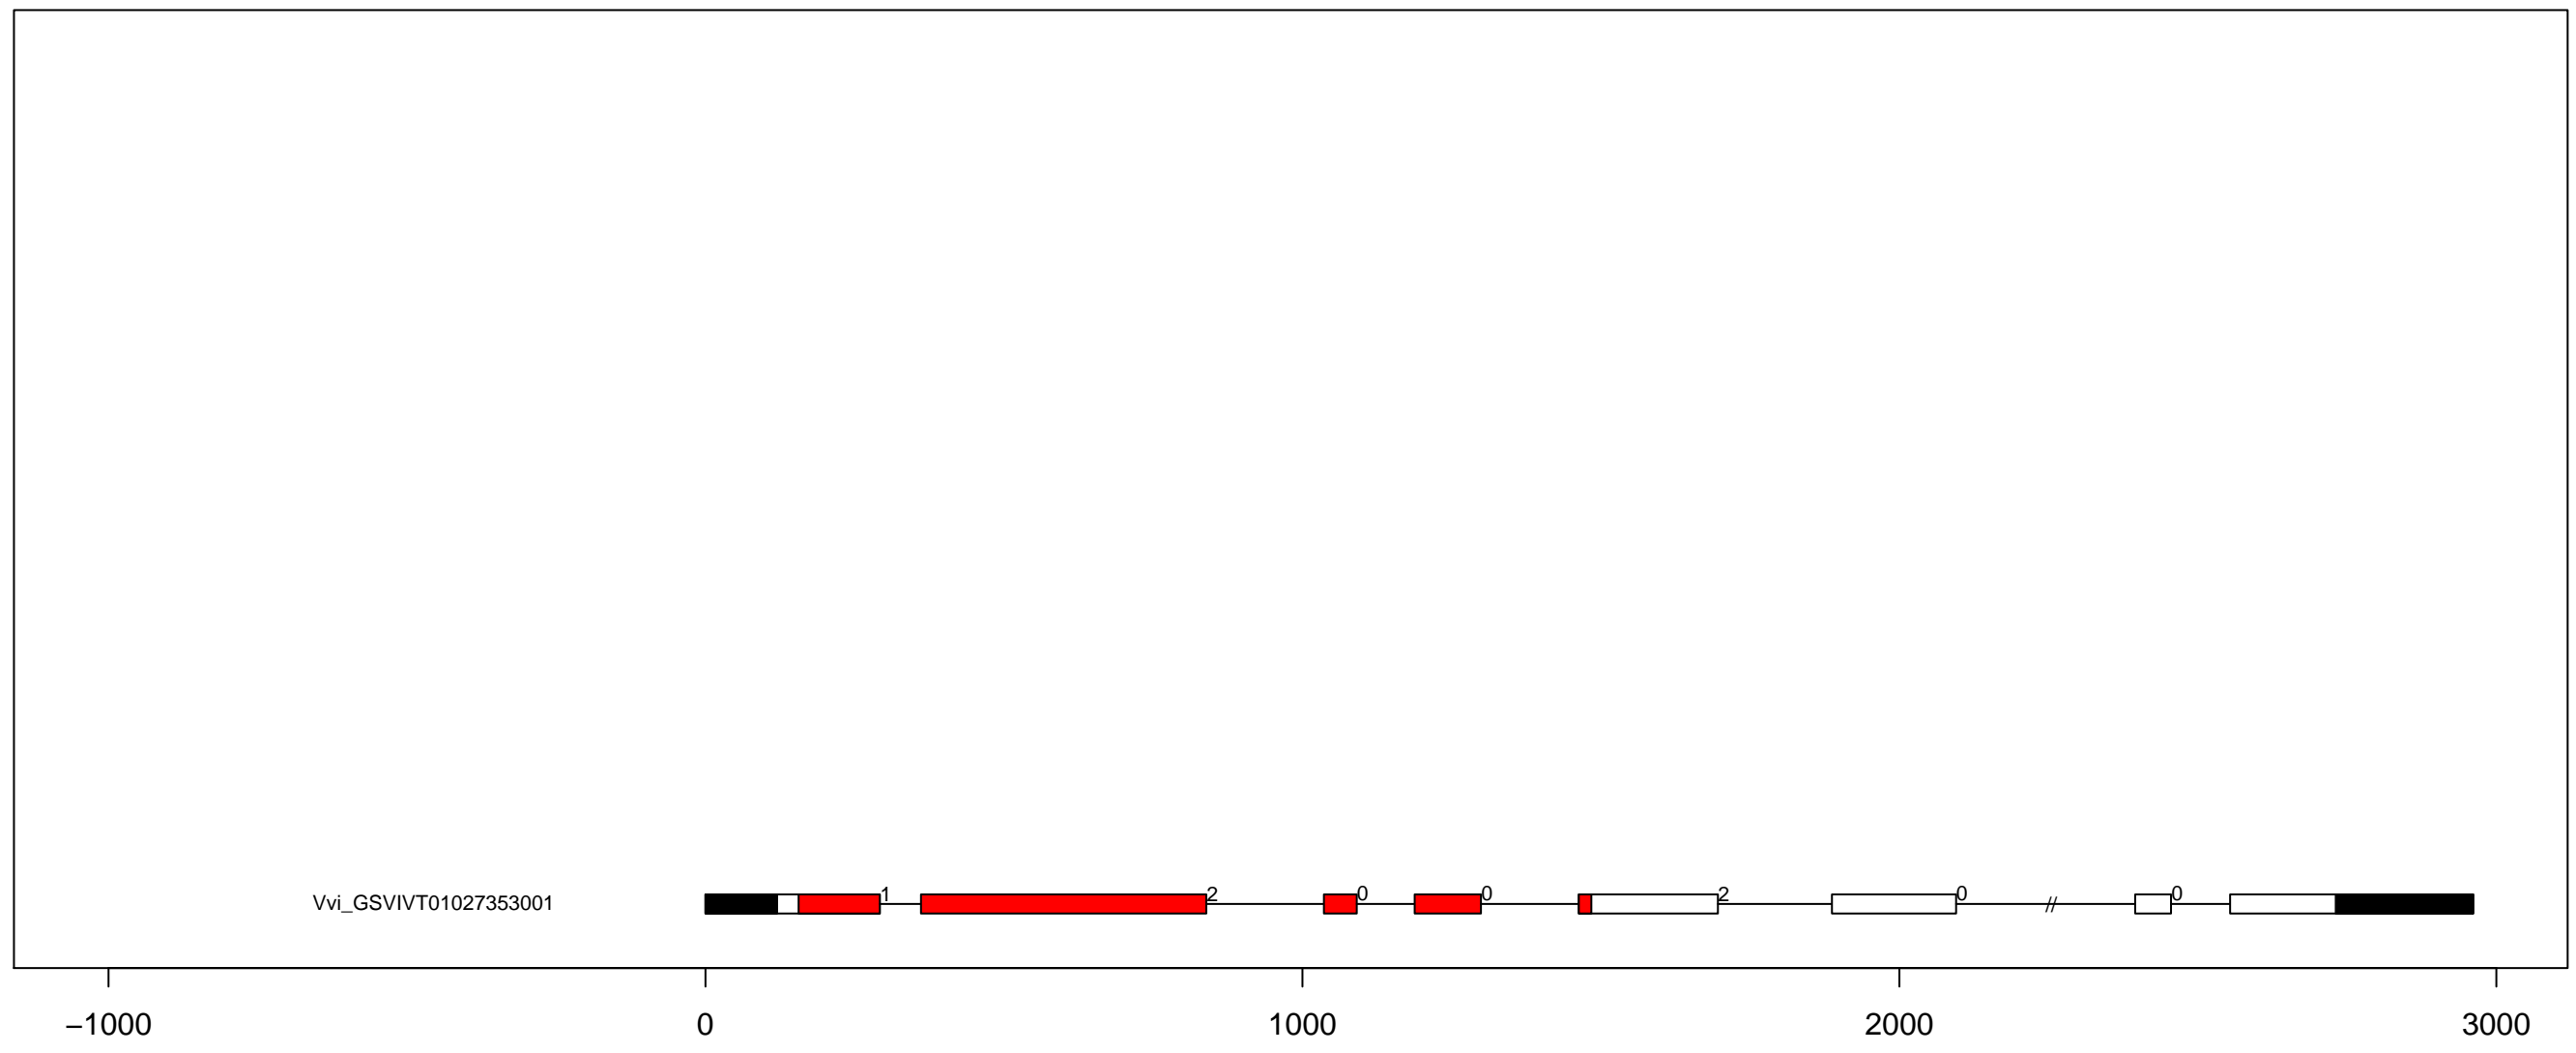

### V.vi CAMK\_CAMKL-CHK1 exon-intron and domain diagram (all)

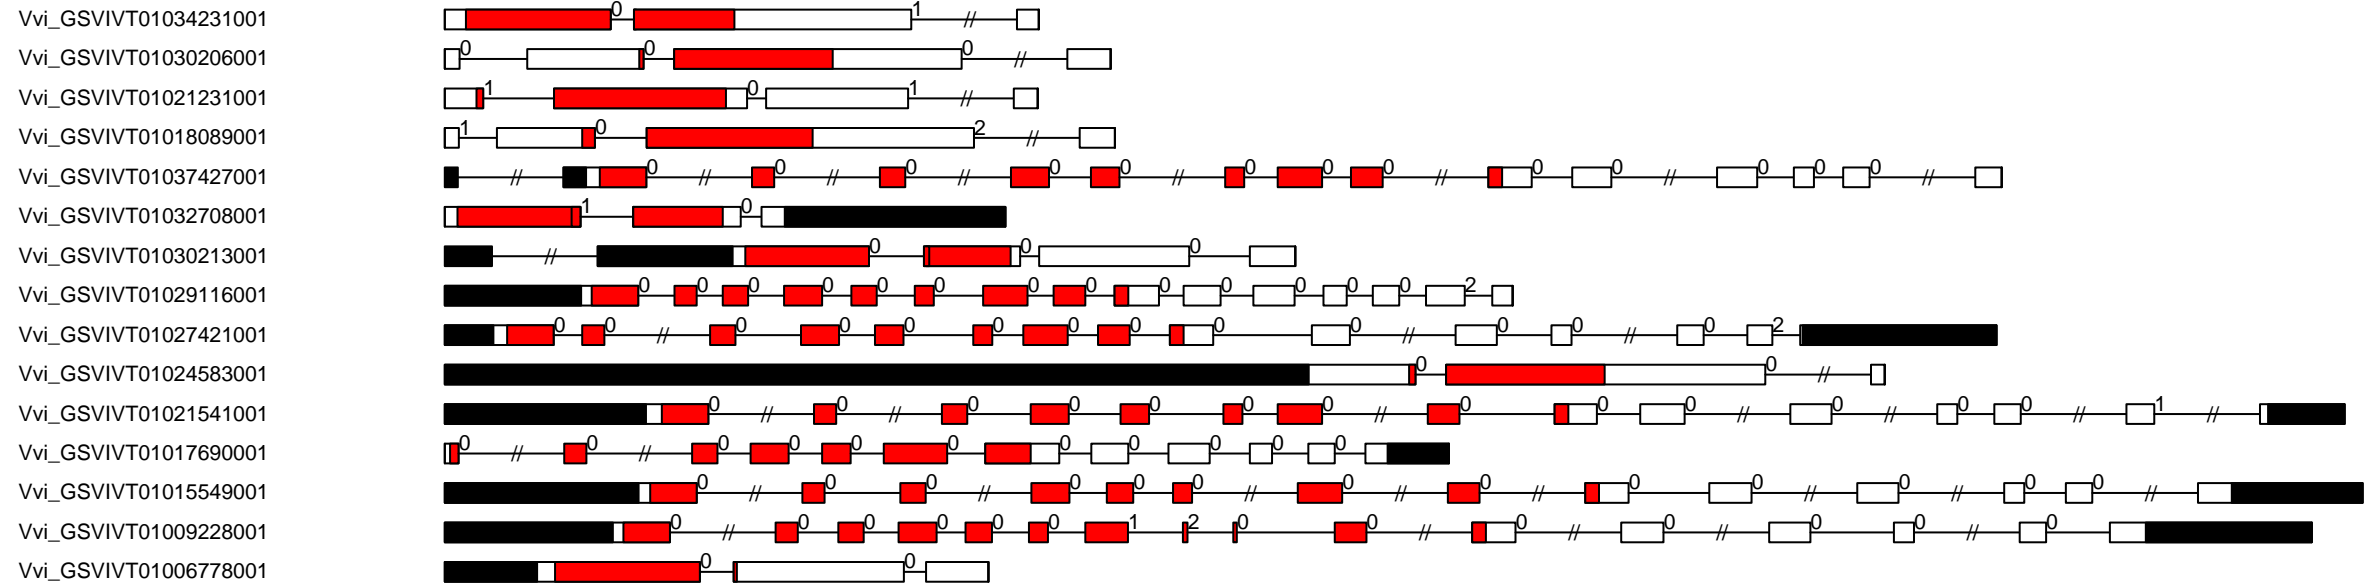

# V.vi CAMK\_CAMKL-LKB exon-intron and domain diagram (all)

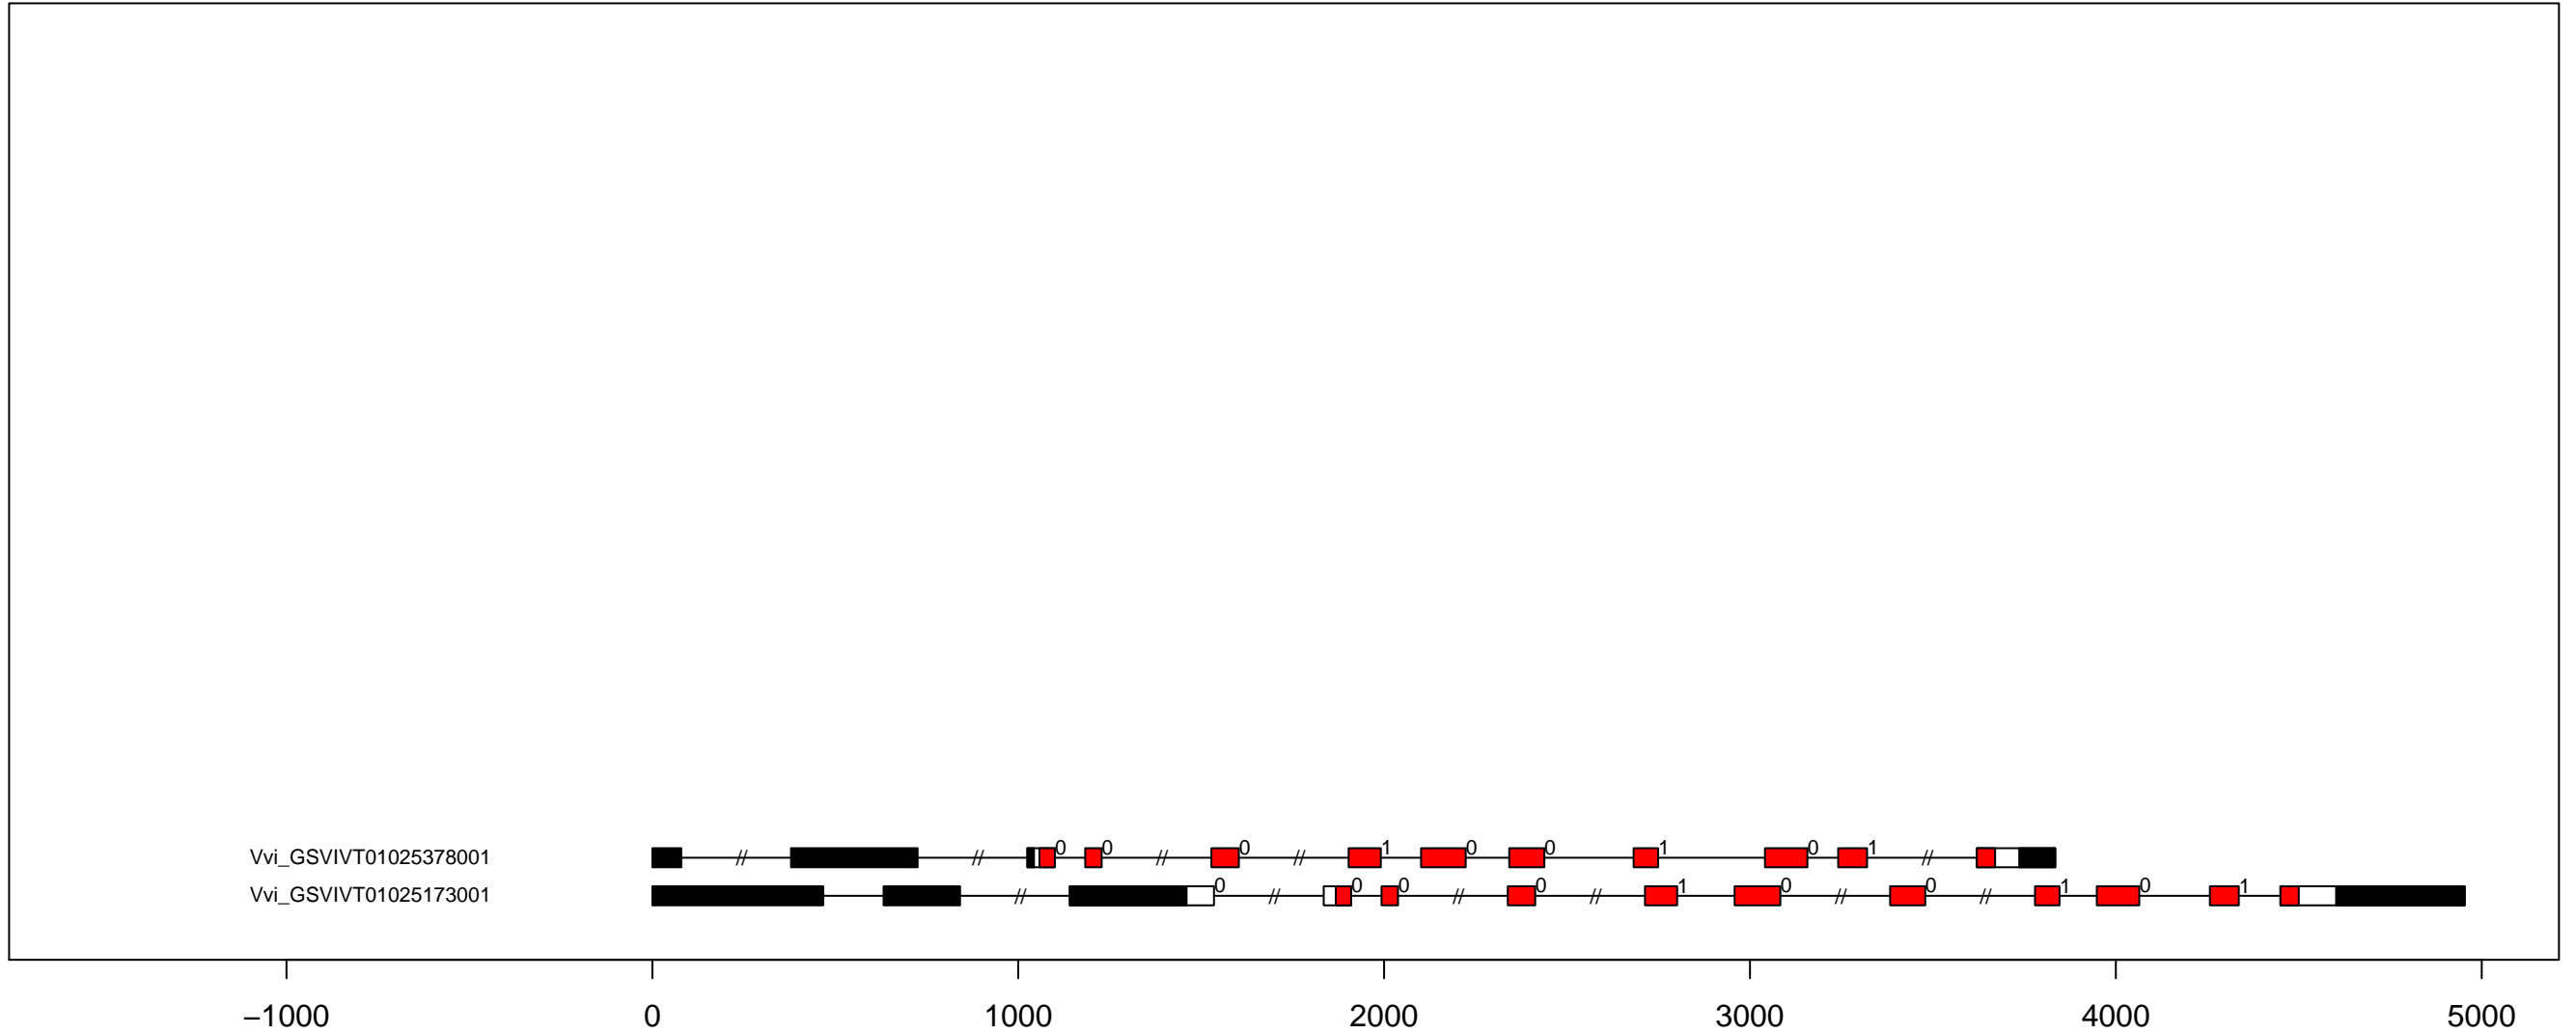



### V.vi CAMK\_CDPK exon-intron and domain diagram (part 1)

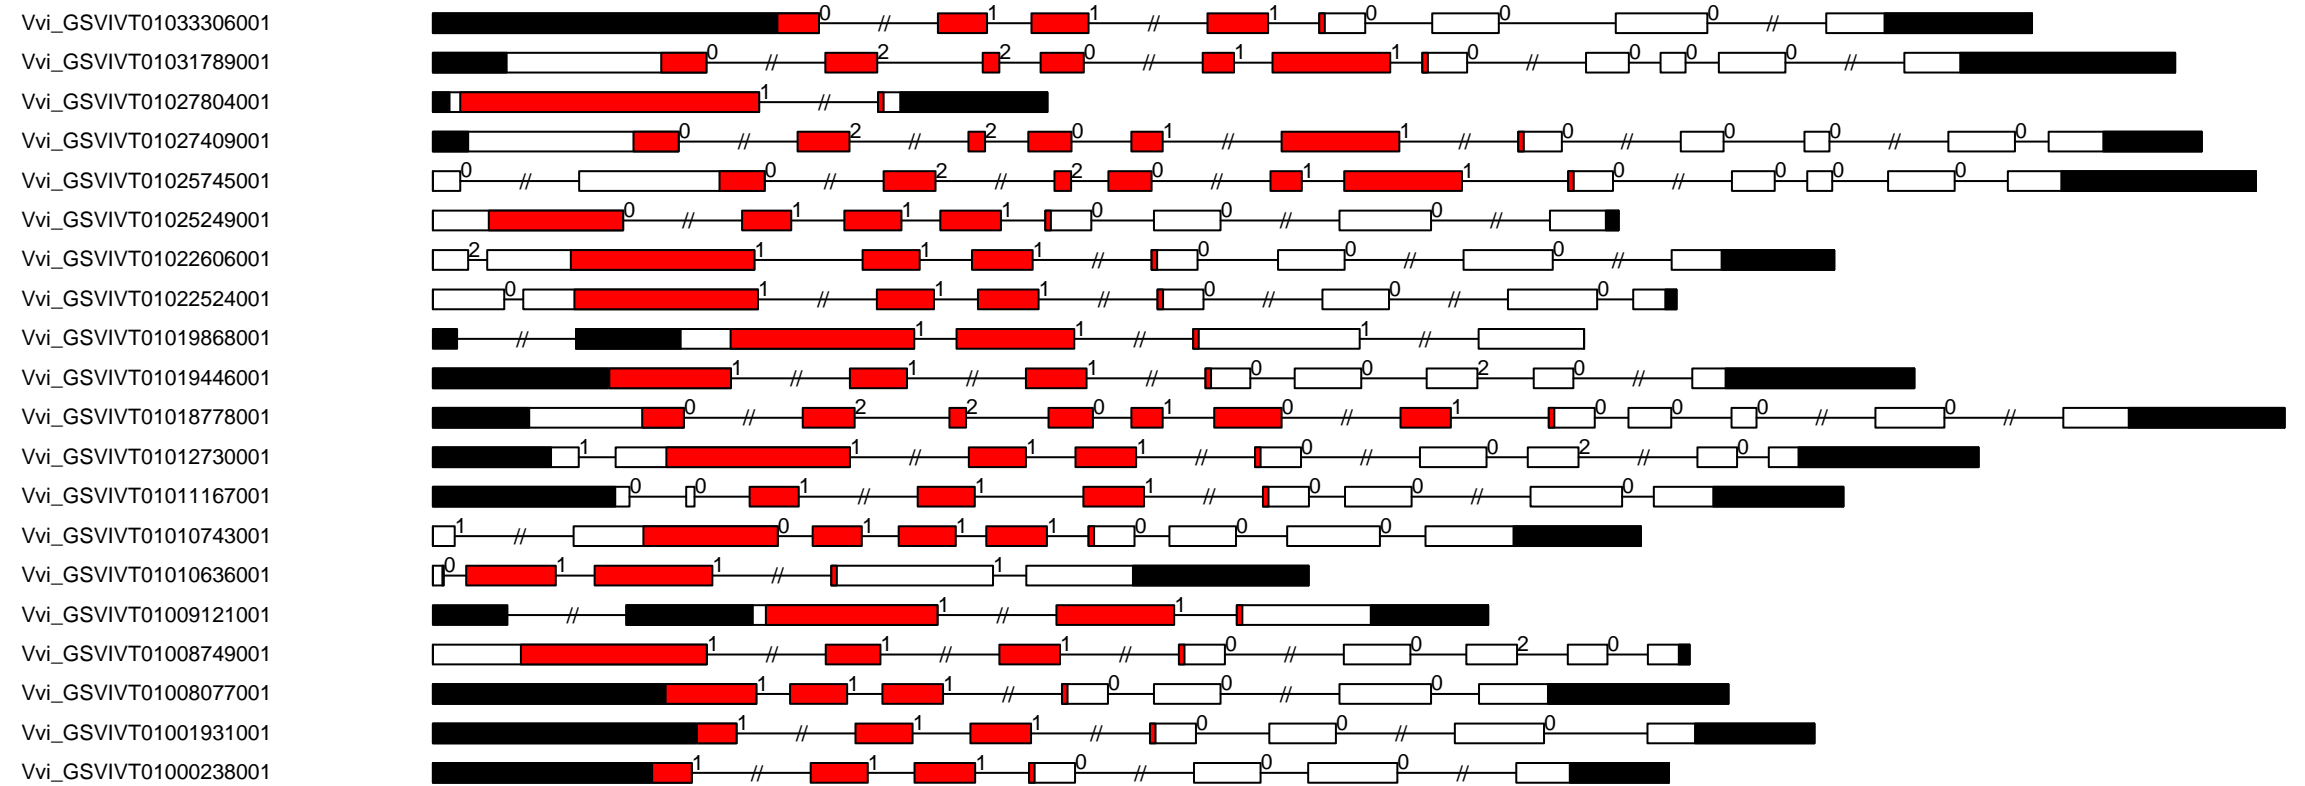



# V.vi CAMK\_OST1L exon-intron and domain diagram (all)

Vvi\_GSVIVT01031806001  
Vvi\_GSVIVT01023339001  
Vvi\_GSVIVT01022427001  
Vvi\_GSVIVT01009074001  
Vvi\_GSVIVT01004839001  
Vvi\_GSVIVT01003554001  
Vvi\_GSVIVT01003419001  
Vvi\_GSVIVT01002389001

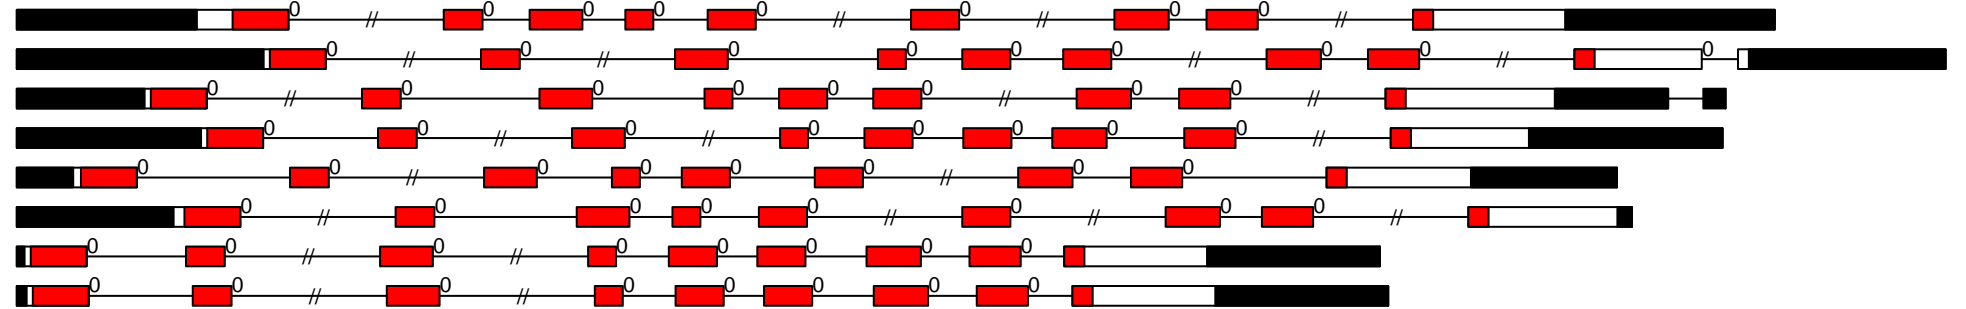

-1000

0

1000

2000

3000

# V.vi CK1\_CK1 exon-intron and domain diagram (all)

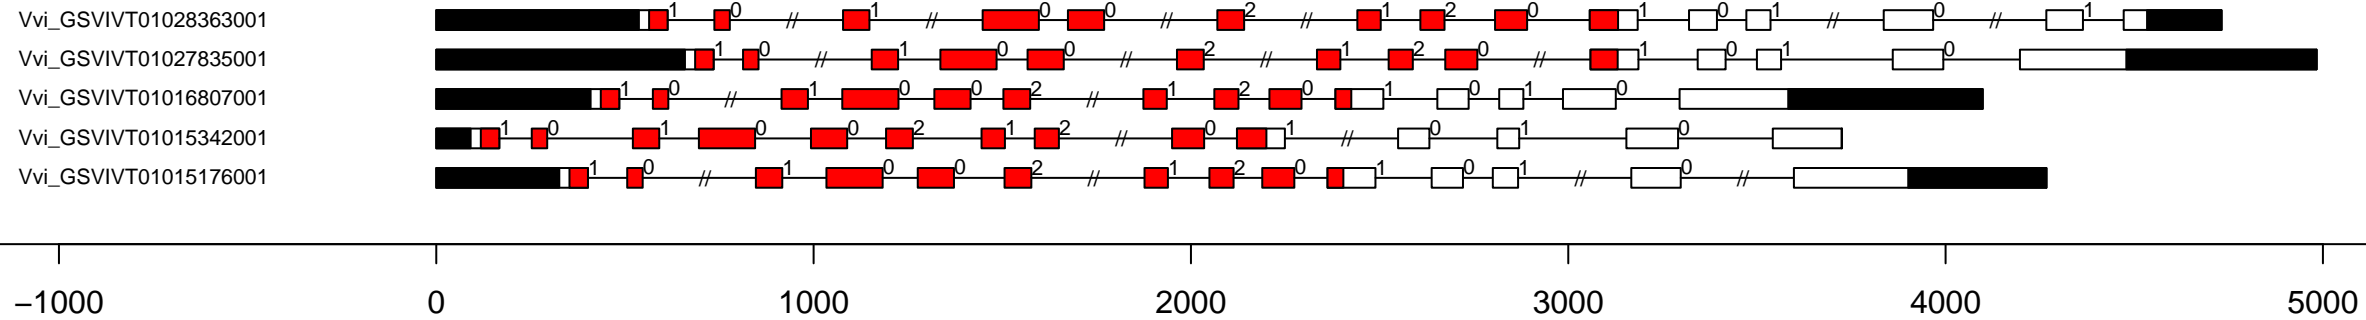

# V.vi CK1-CK1-PI exon-intron and domain diagram (all)

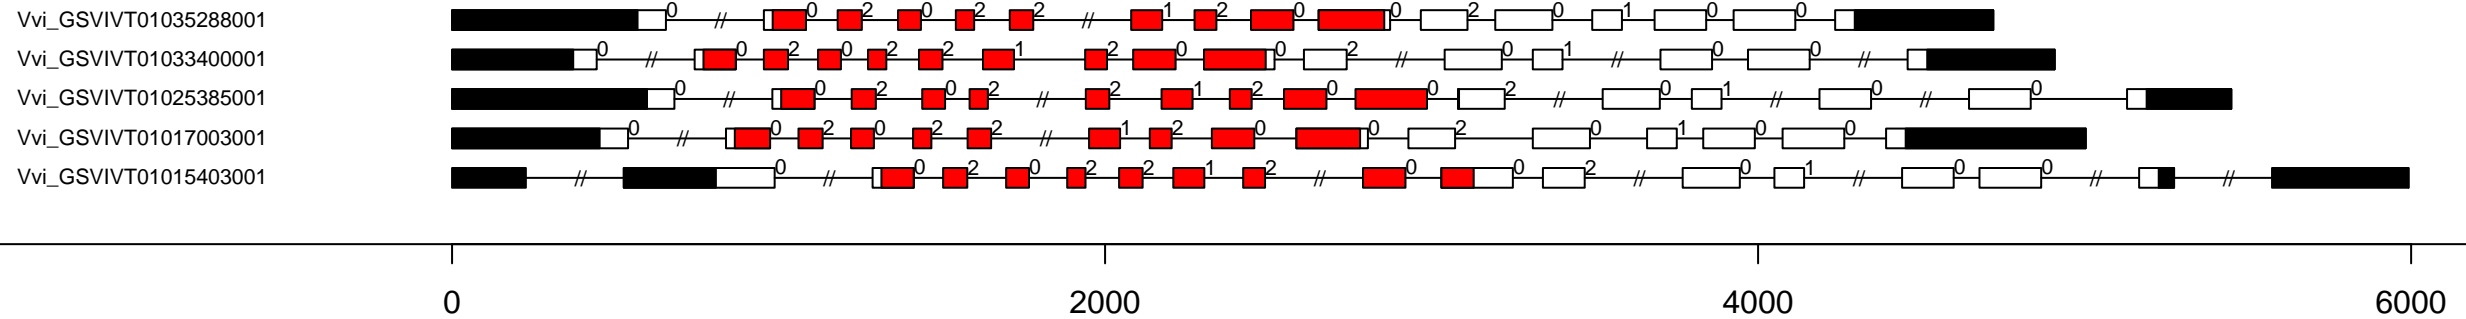

### V.vi CMGC\_CDK-CDK7 exon-intron and domain diagram (all)

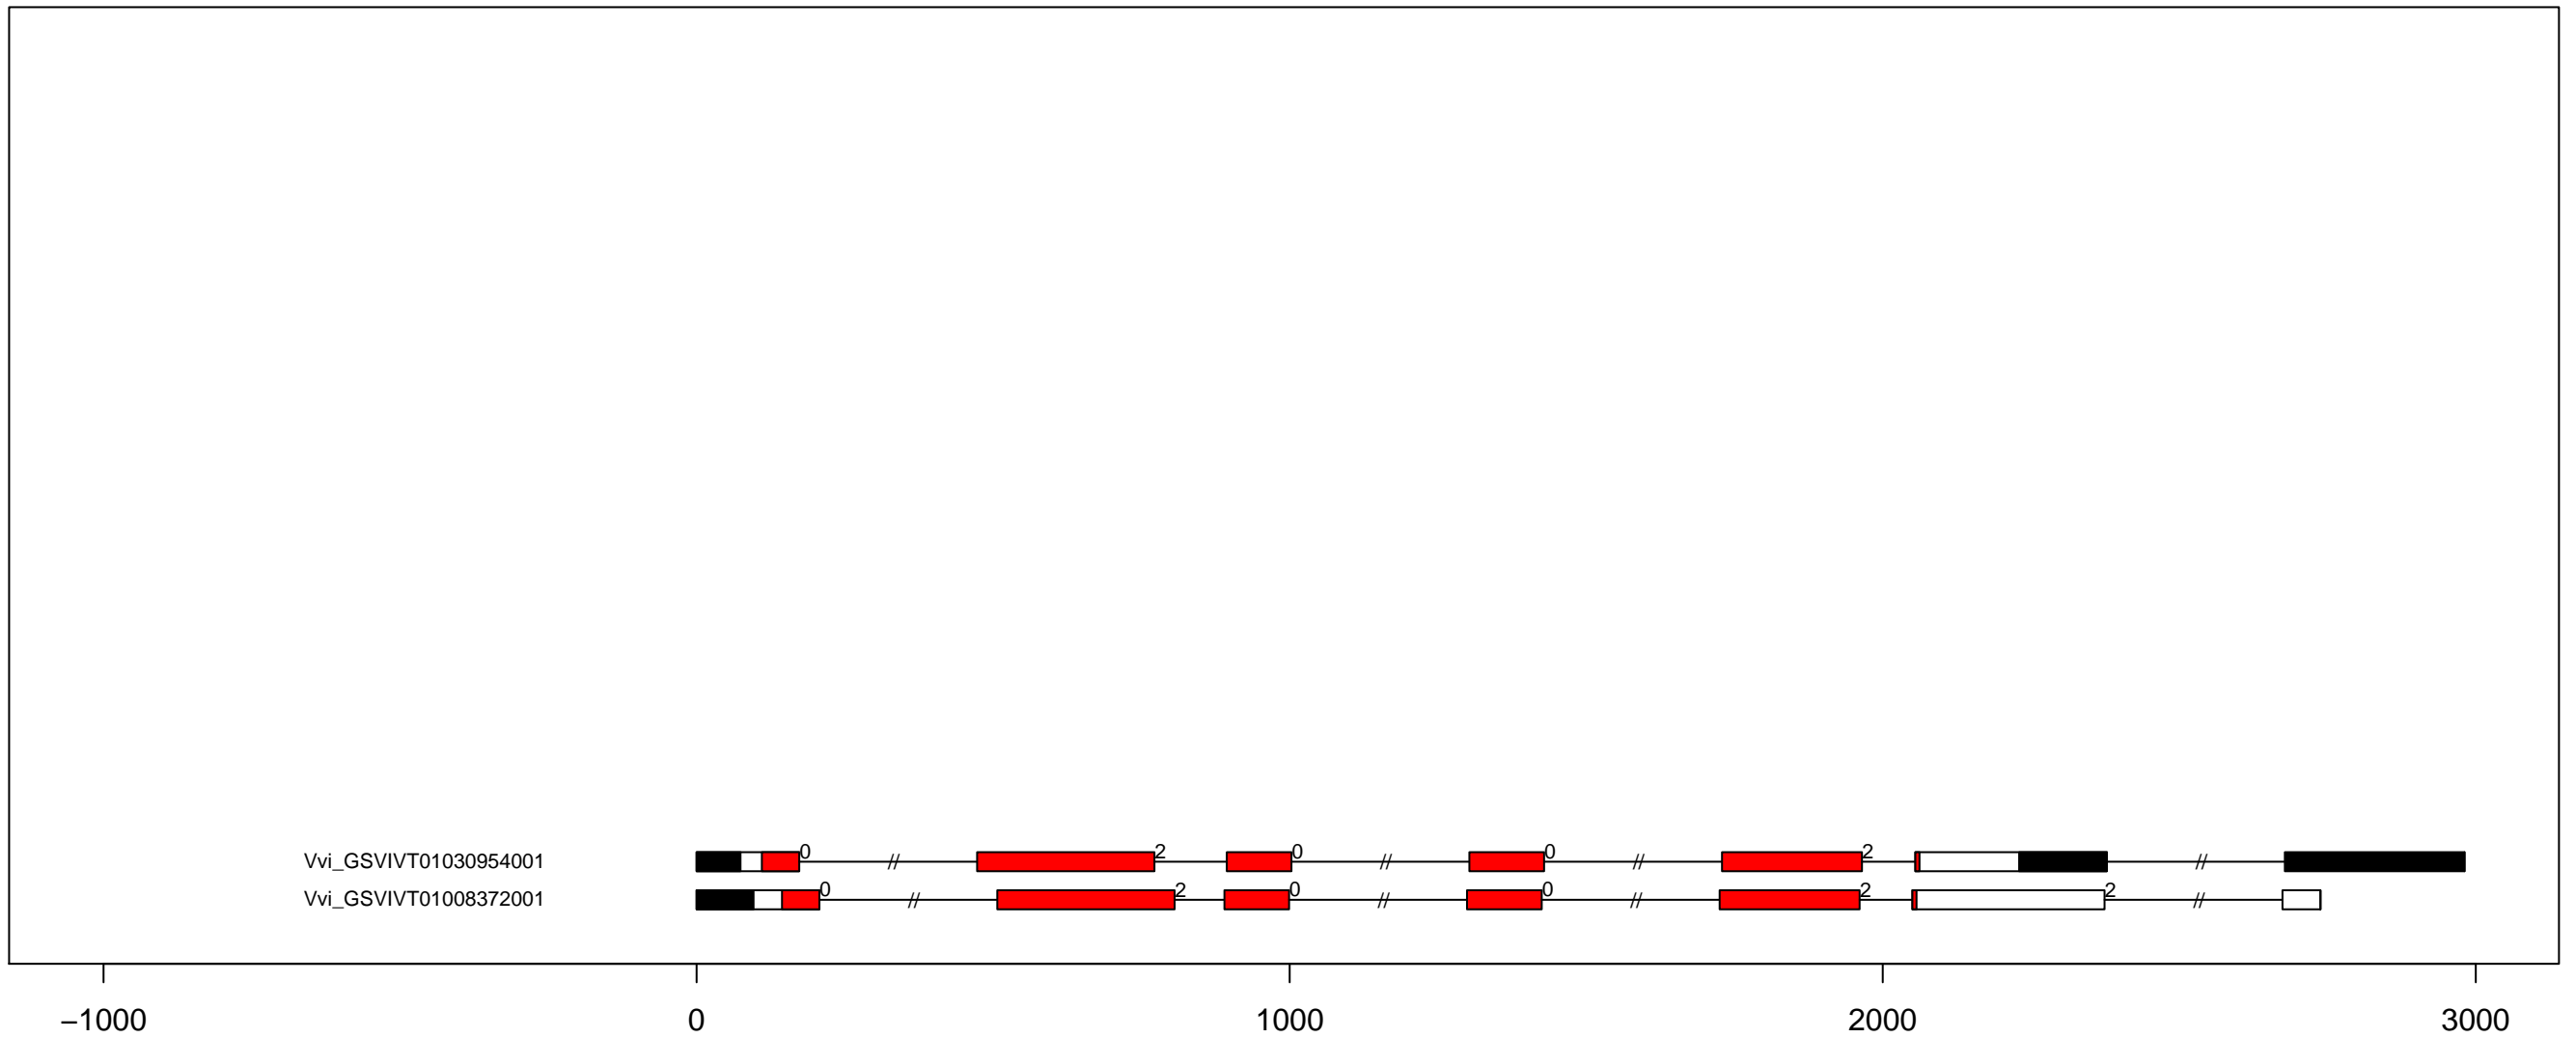

# V.vi CMGC\_CDK-CDK8 exon-intron and domain diagram (all)

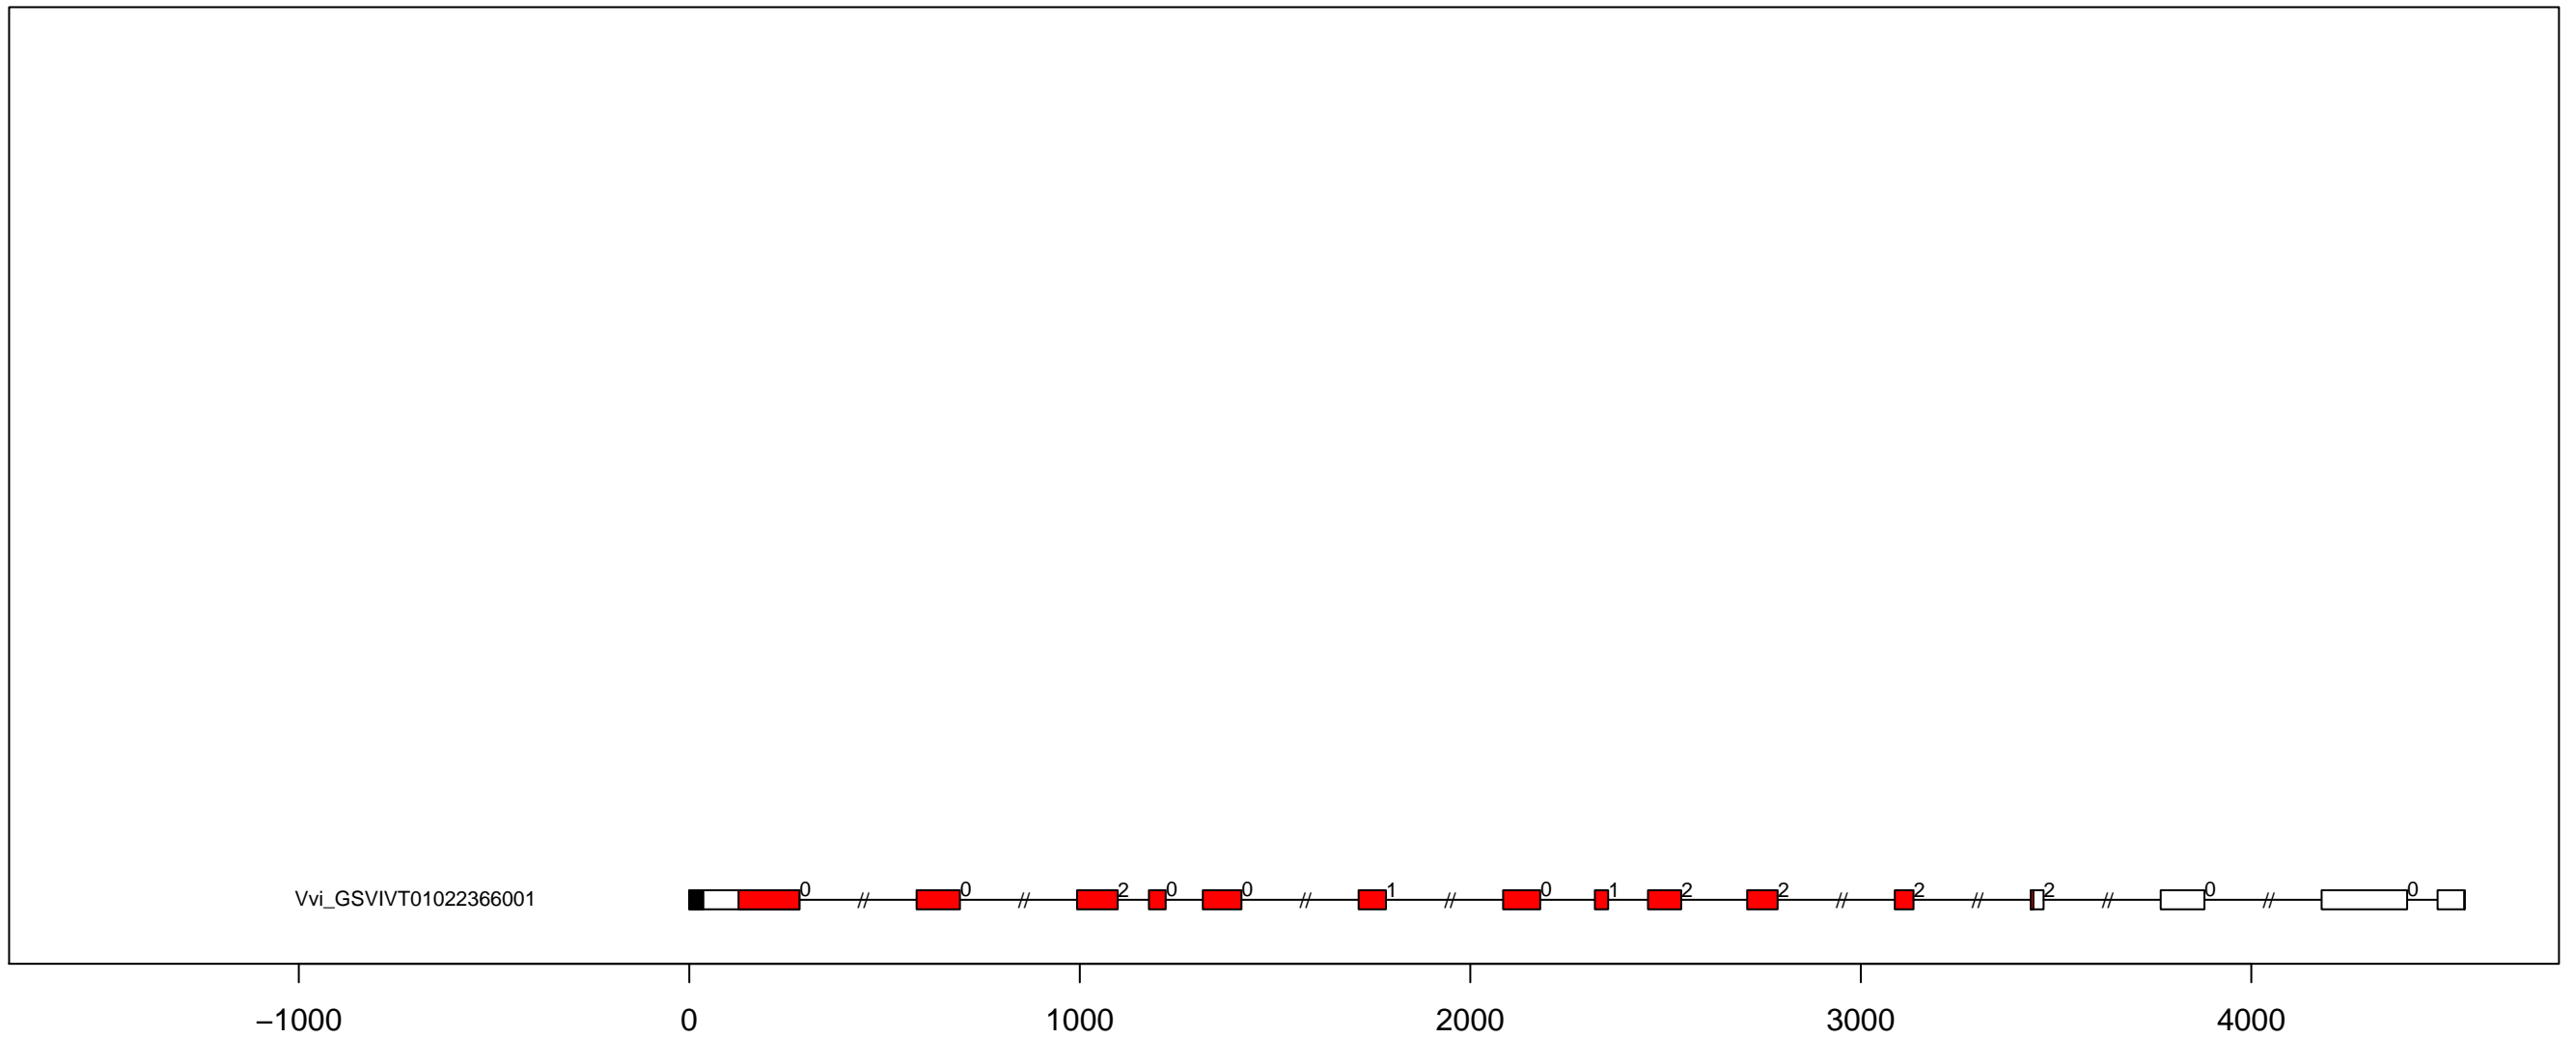

### V.vi CMGC\_CDK-CRK7-CDK9 exon-intron and domain diagram (all)

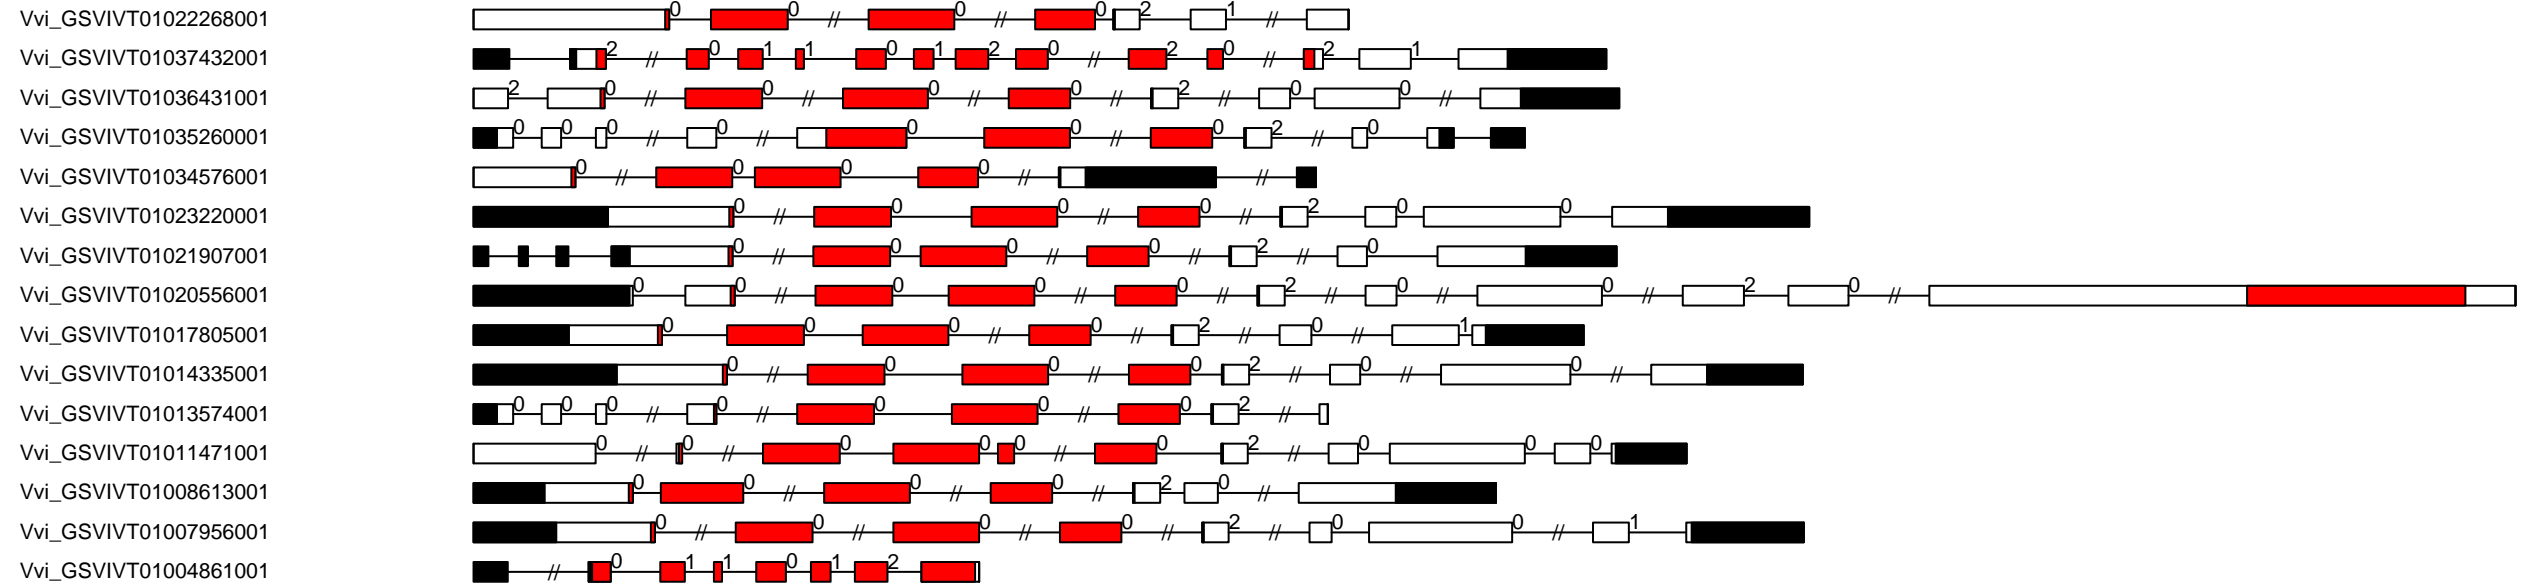

0

2000

4000

6000



V.vi CMGC\_CDK-PITSLRE exon-intron and domain diagram (all)

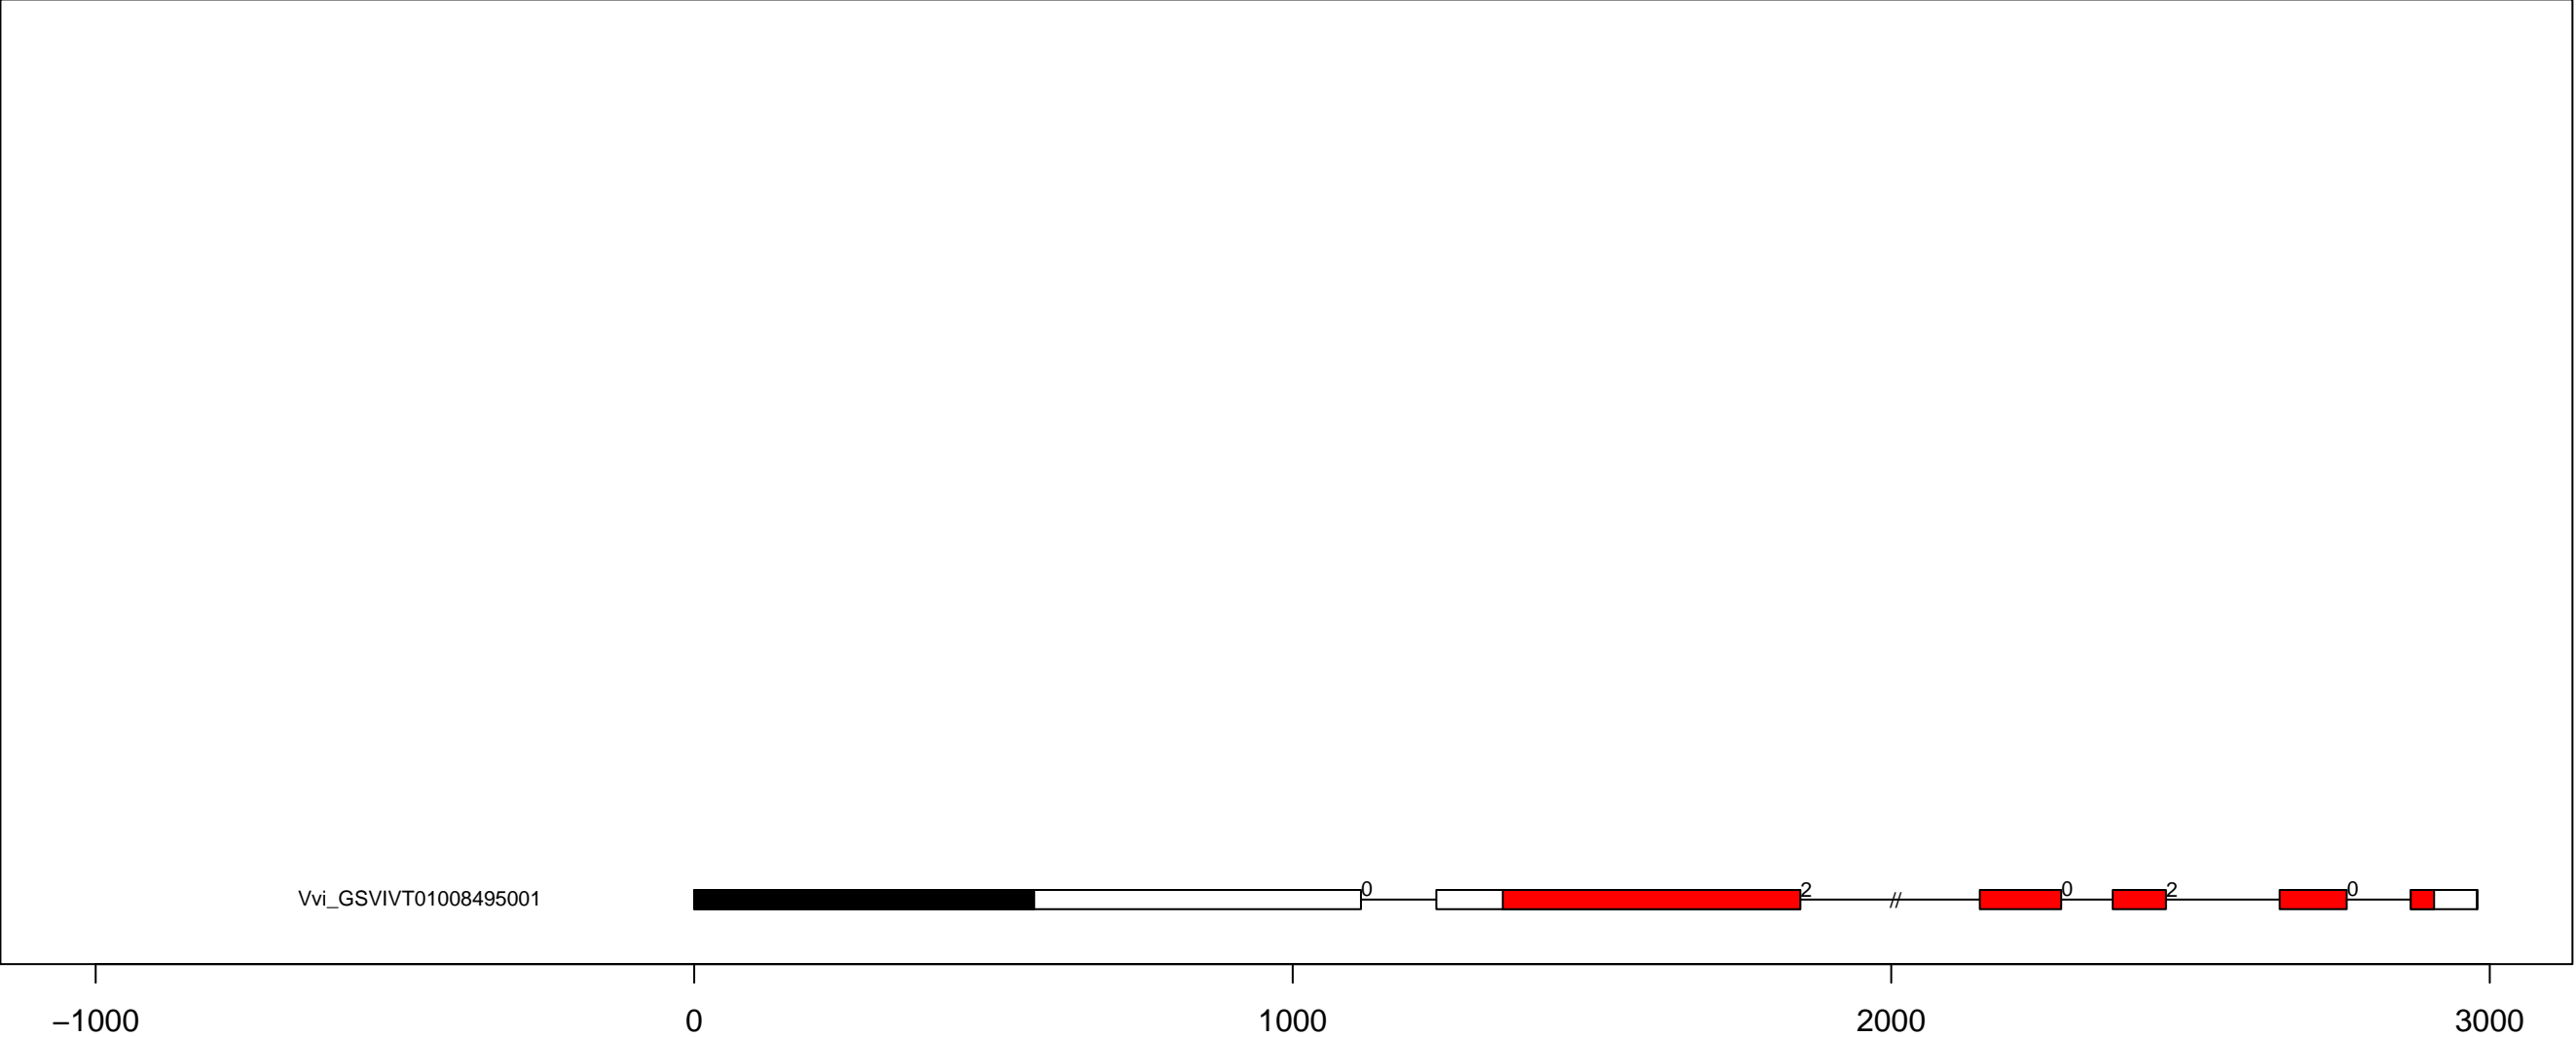



# V.vi CMGC\_CK2 exon-intron and domain diagram (all)

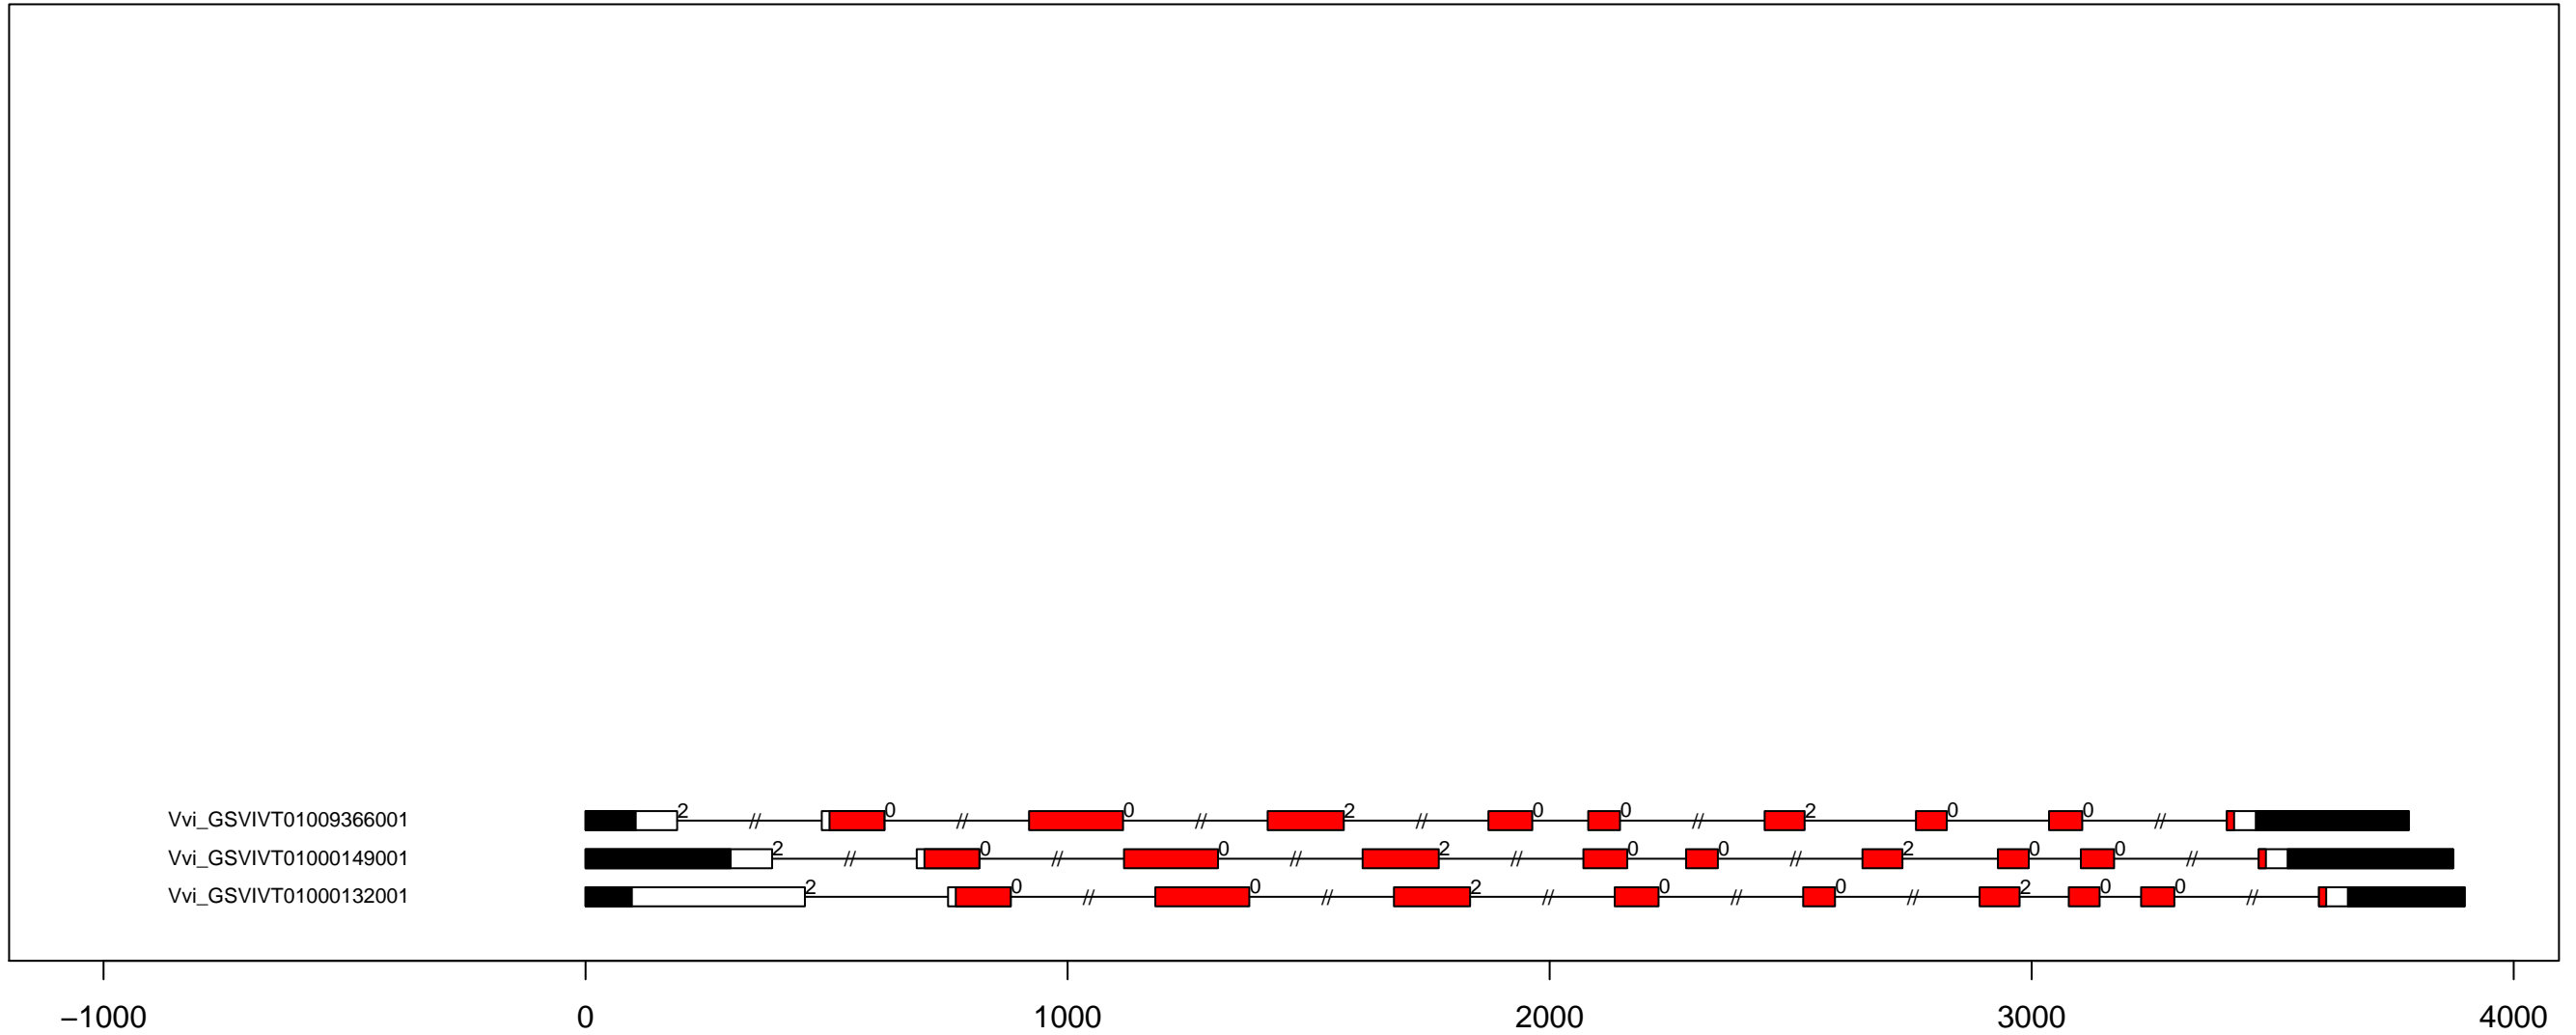



# V.vi CMGC\_DYRK-PRP4 exon-intron and domain diagram (all)

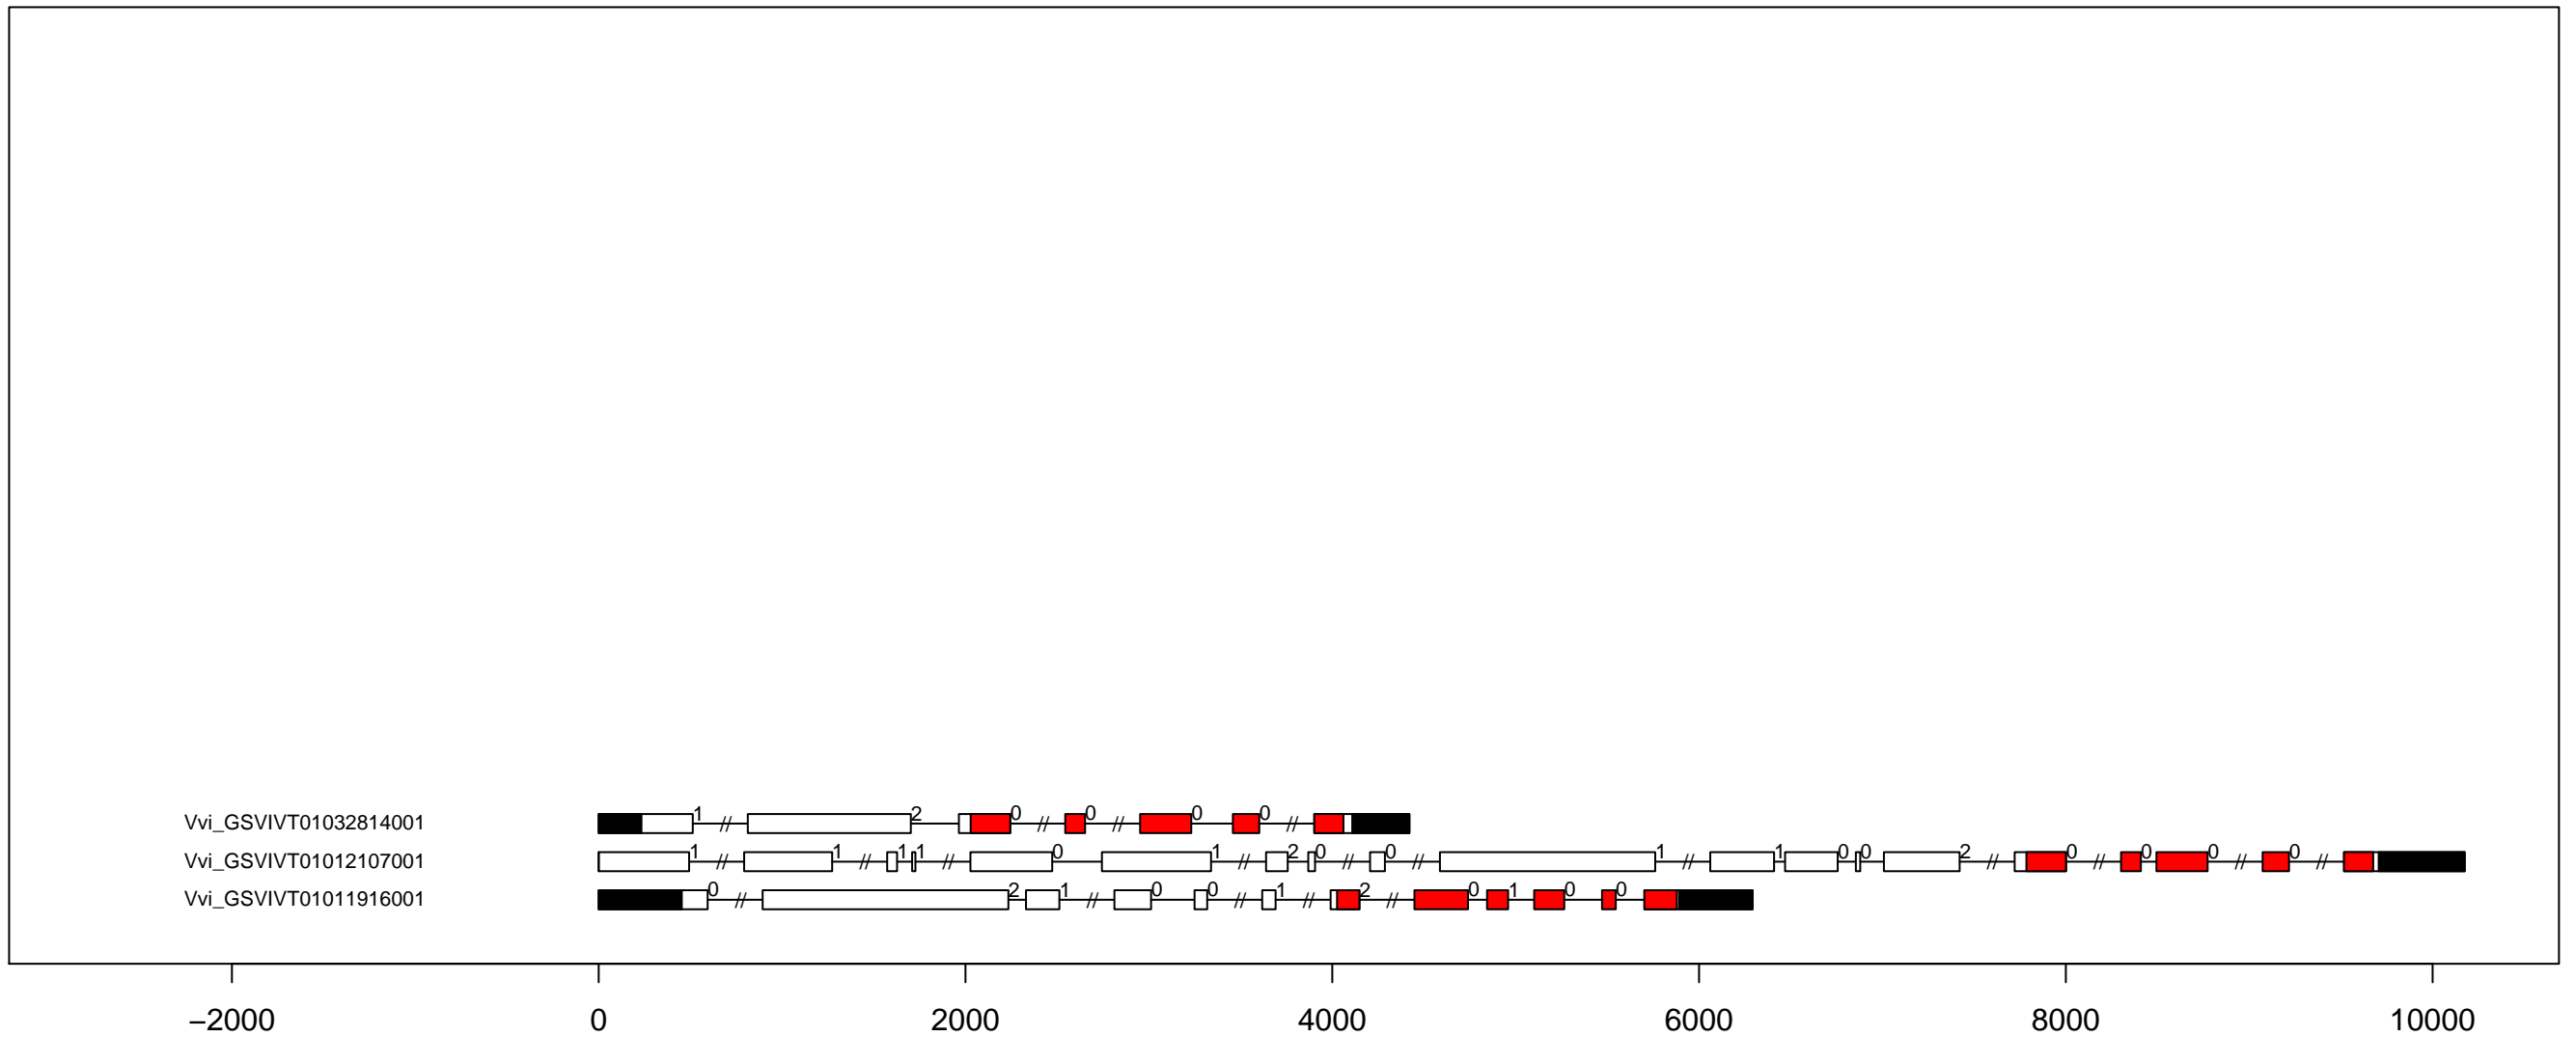

V.vi CMGC\_DYRK-YAK exon-intron and domain diagram (all)

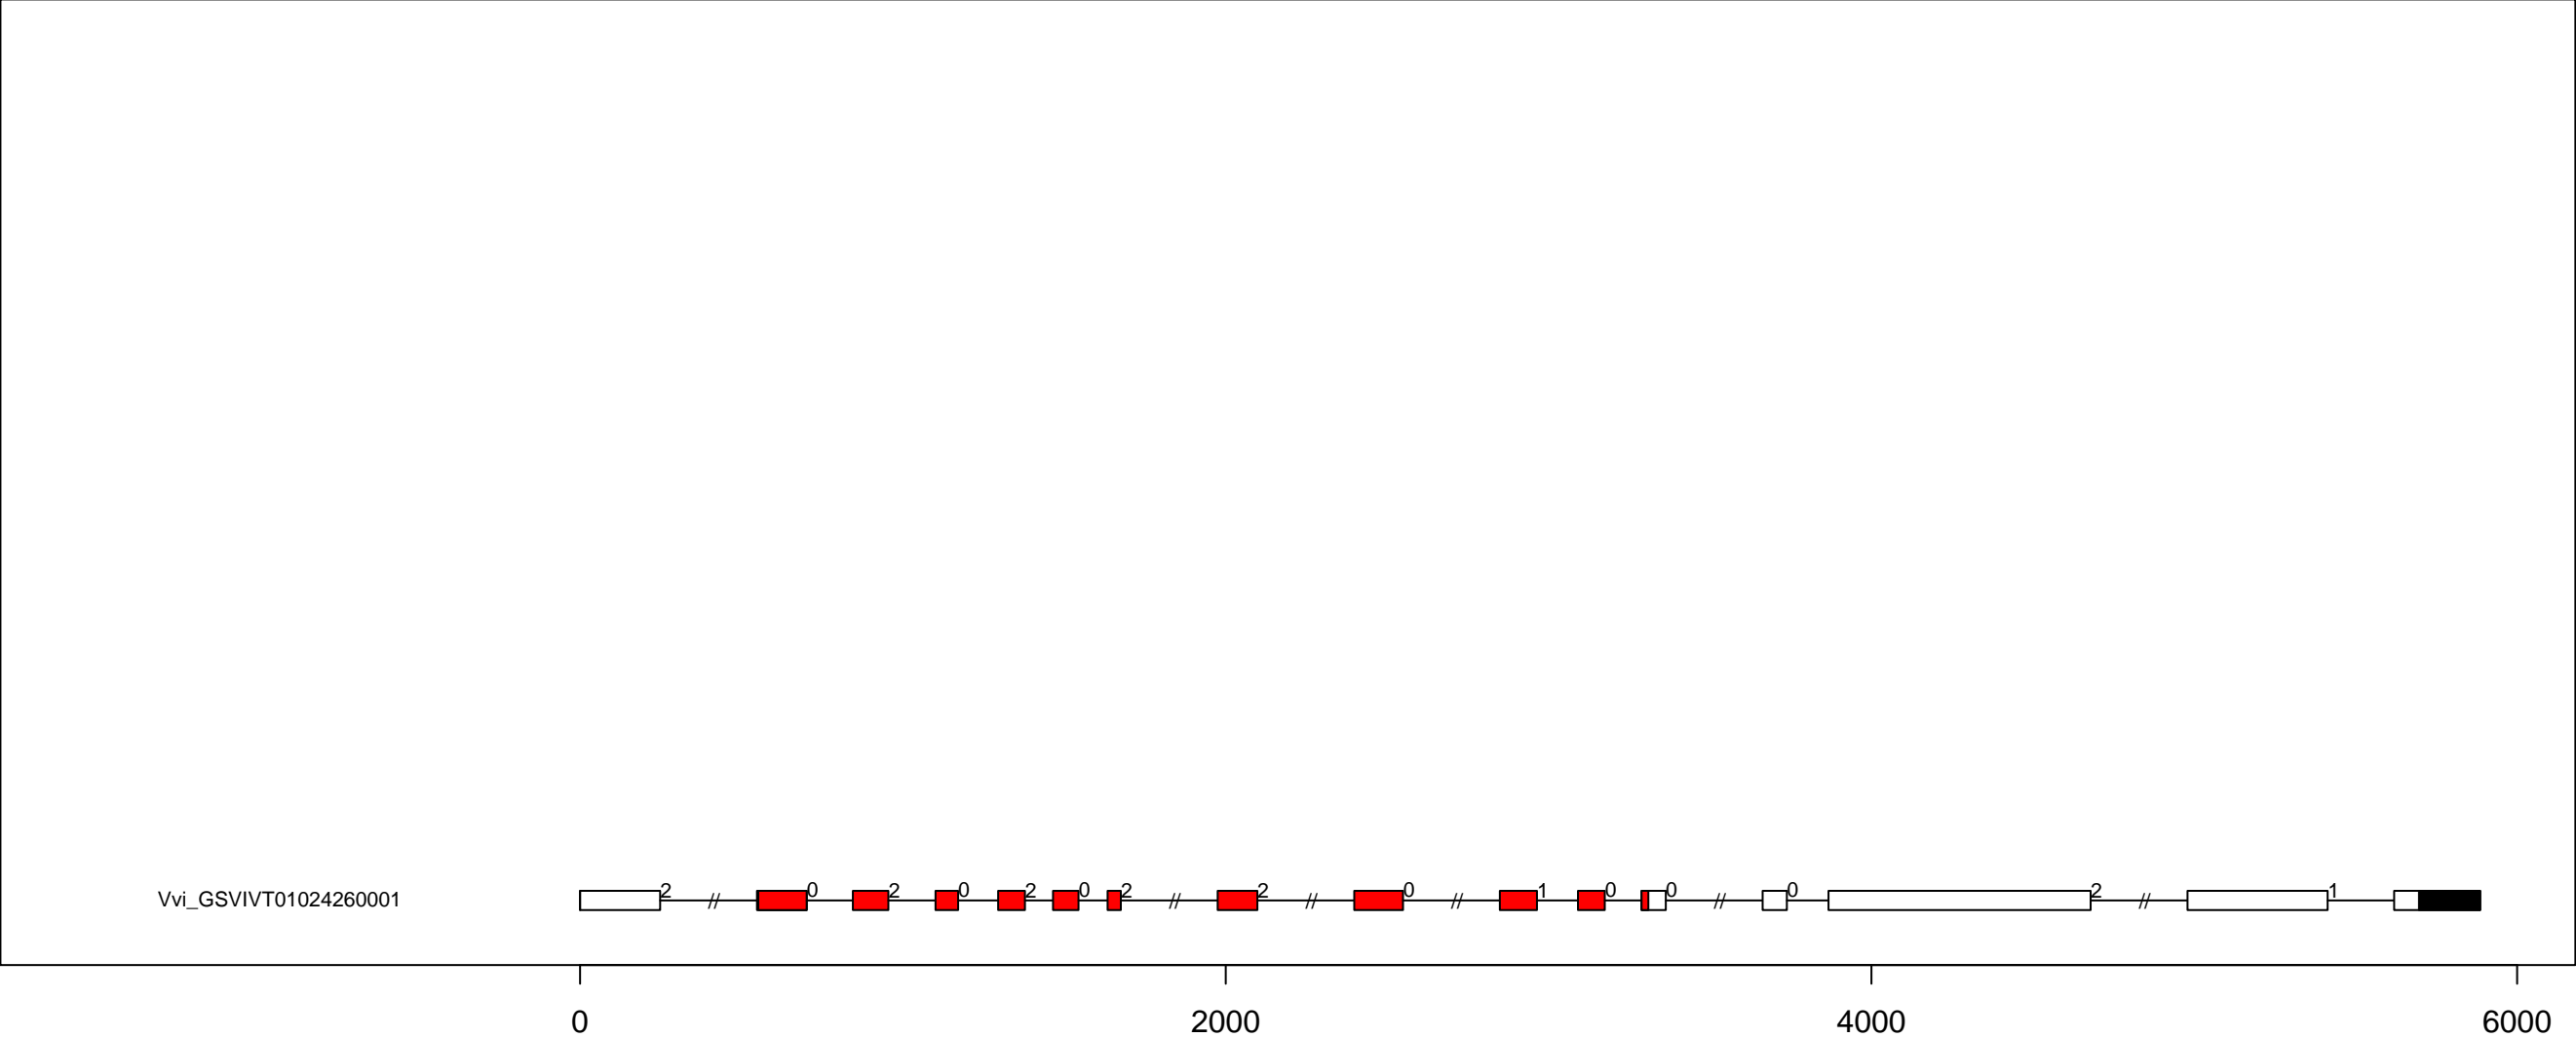

# V.vi CMGC\_GSK exon-intron and domain diagram (all)

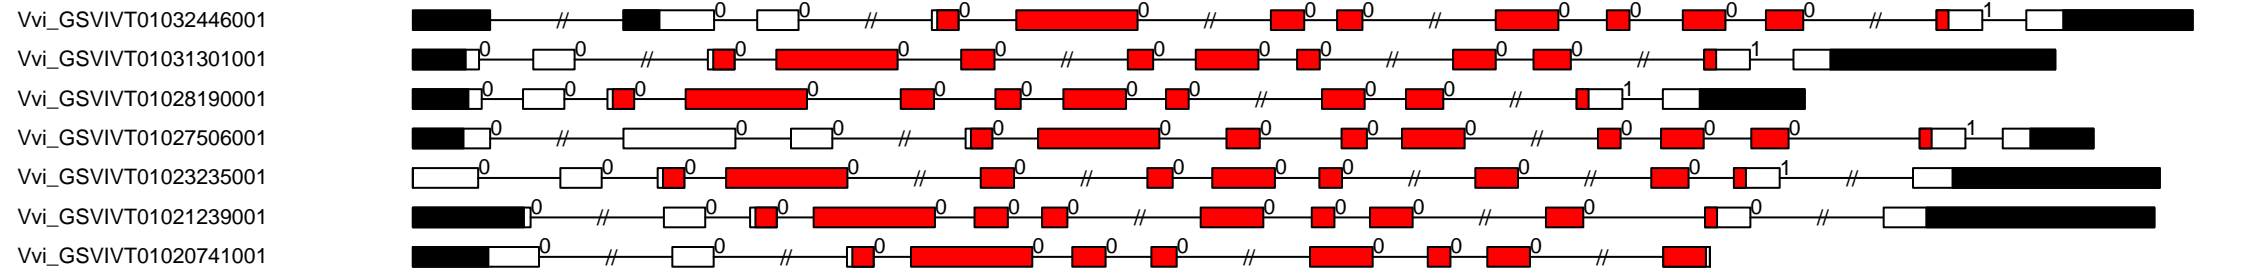

### V.vi CMGC\_MAPK exon-intron and domain diagram (all)

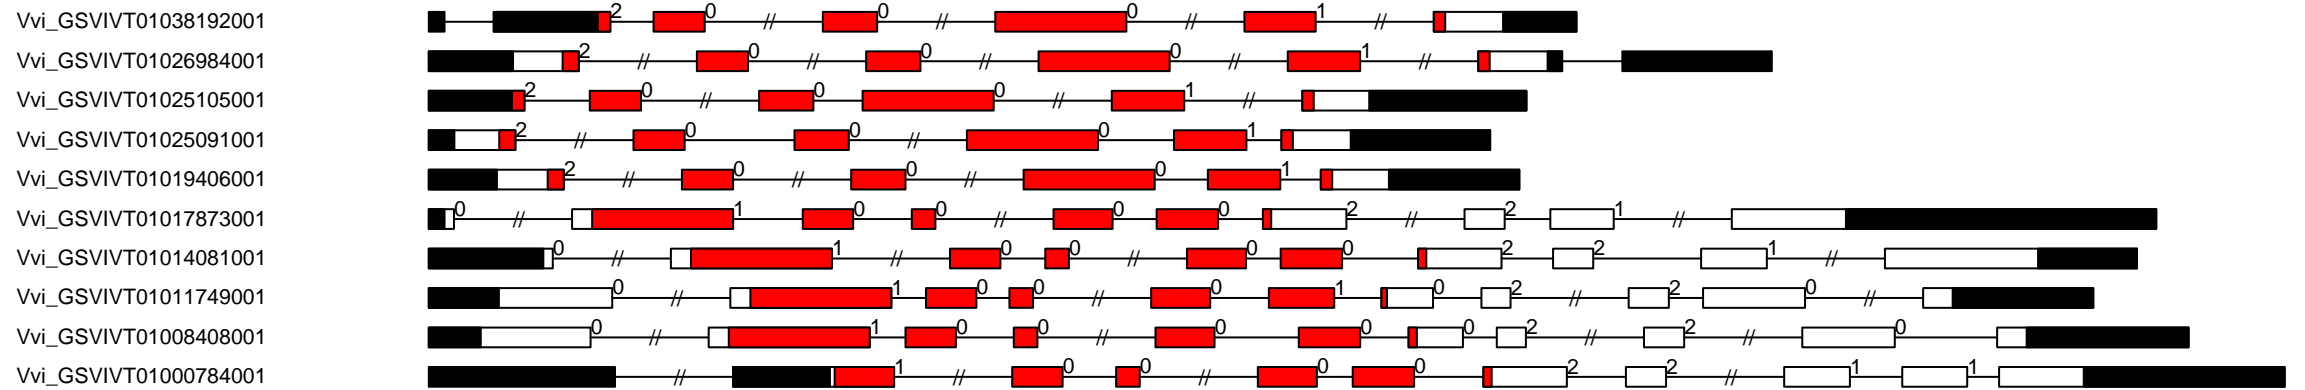

-1000

0

1000

2000

3000

4000



# V.vi CMGC\_PI-Tthe exon-intron and domain diagram (all)

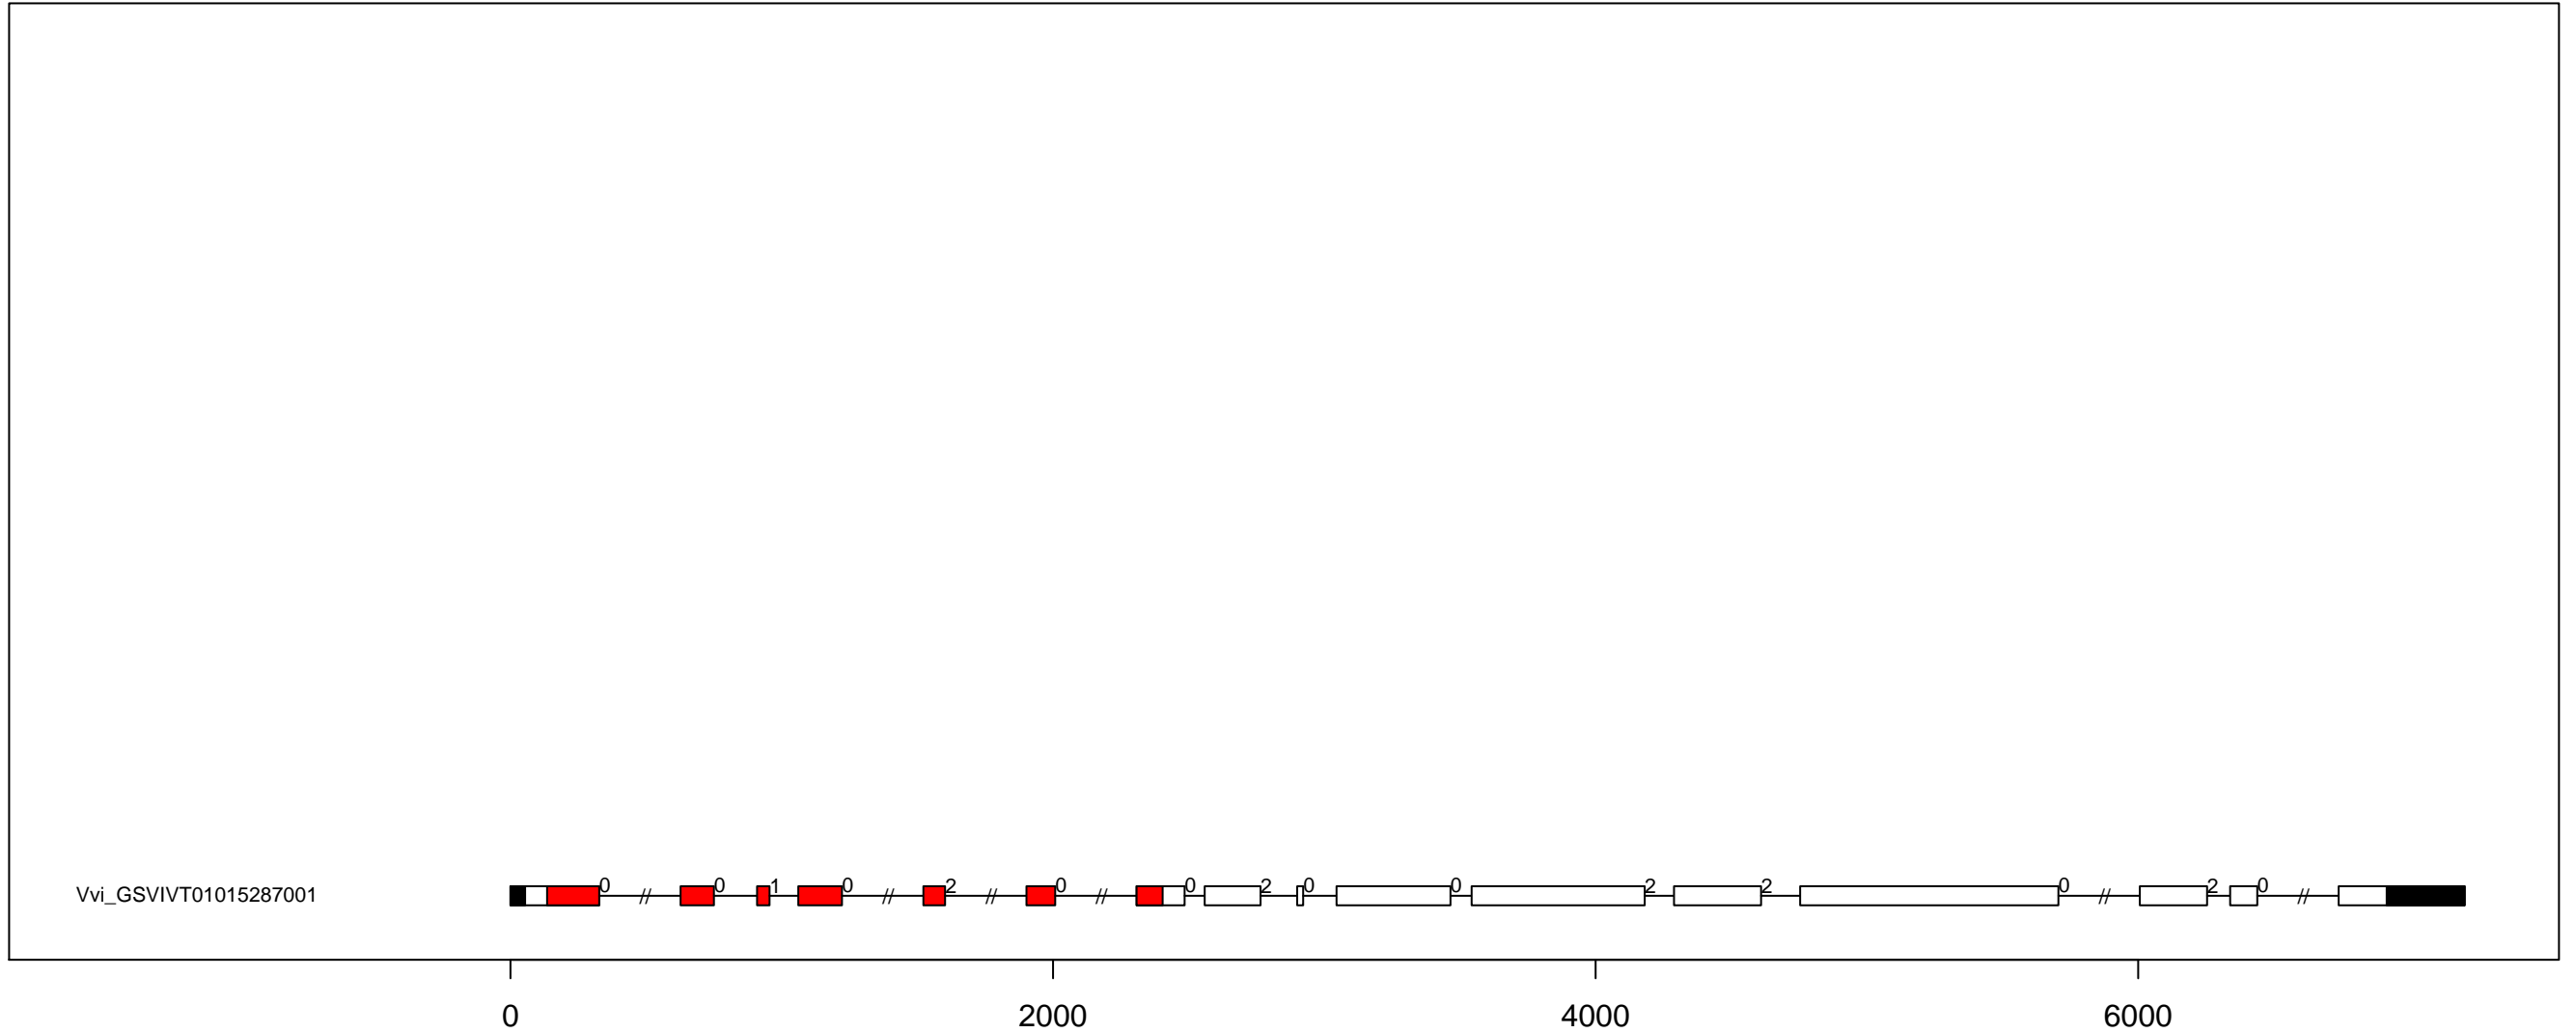

# V.vi CMGC\_RCK exon-intron and domain diagram (all)

Vvi\_GSVIVT01022771001

Vvi\_GSVIVT01005924001

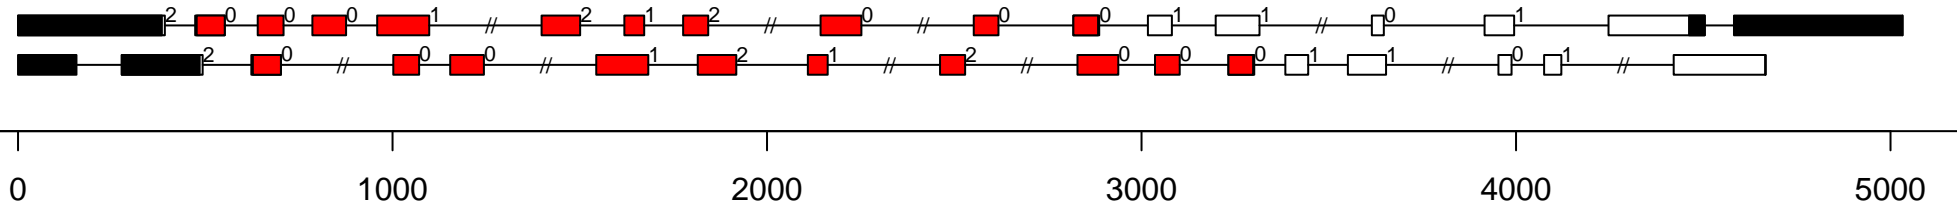

# V.vi CMGC\_SRPK exon-intron and domain diagram (all)

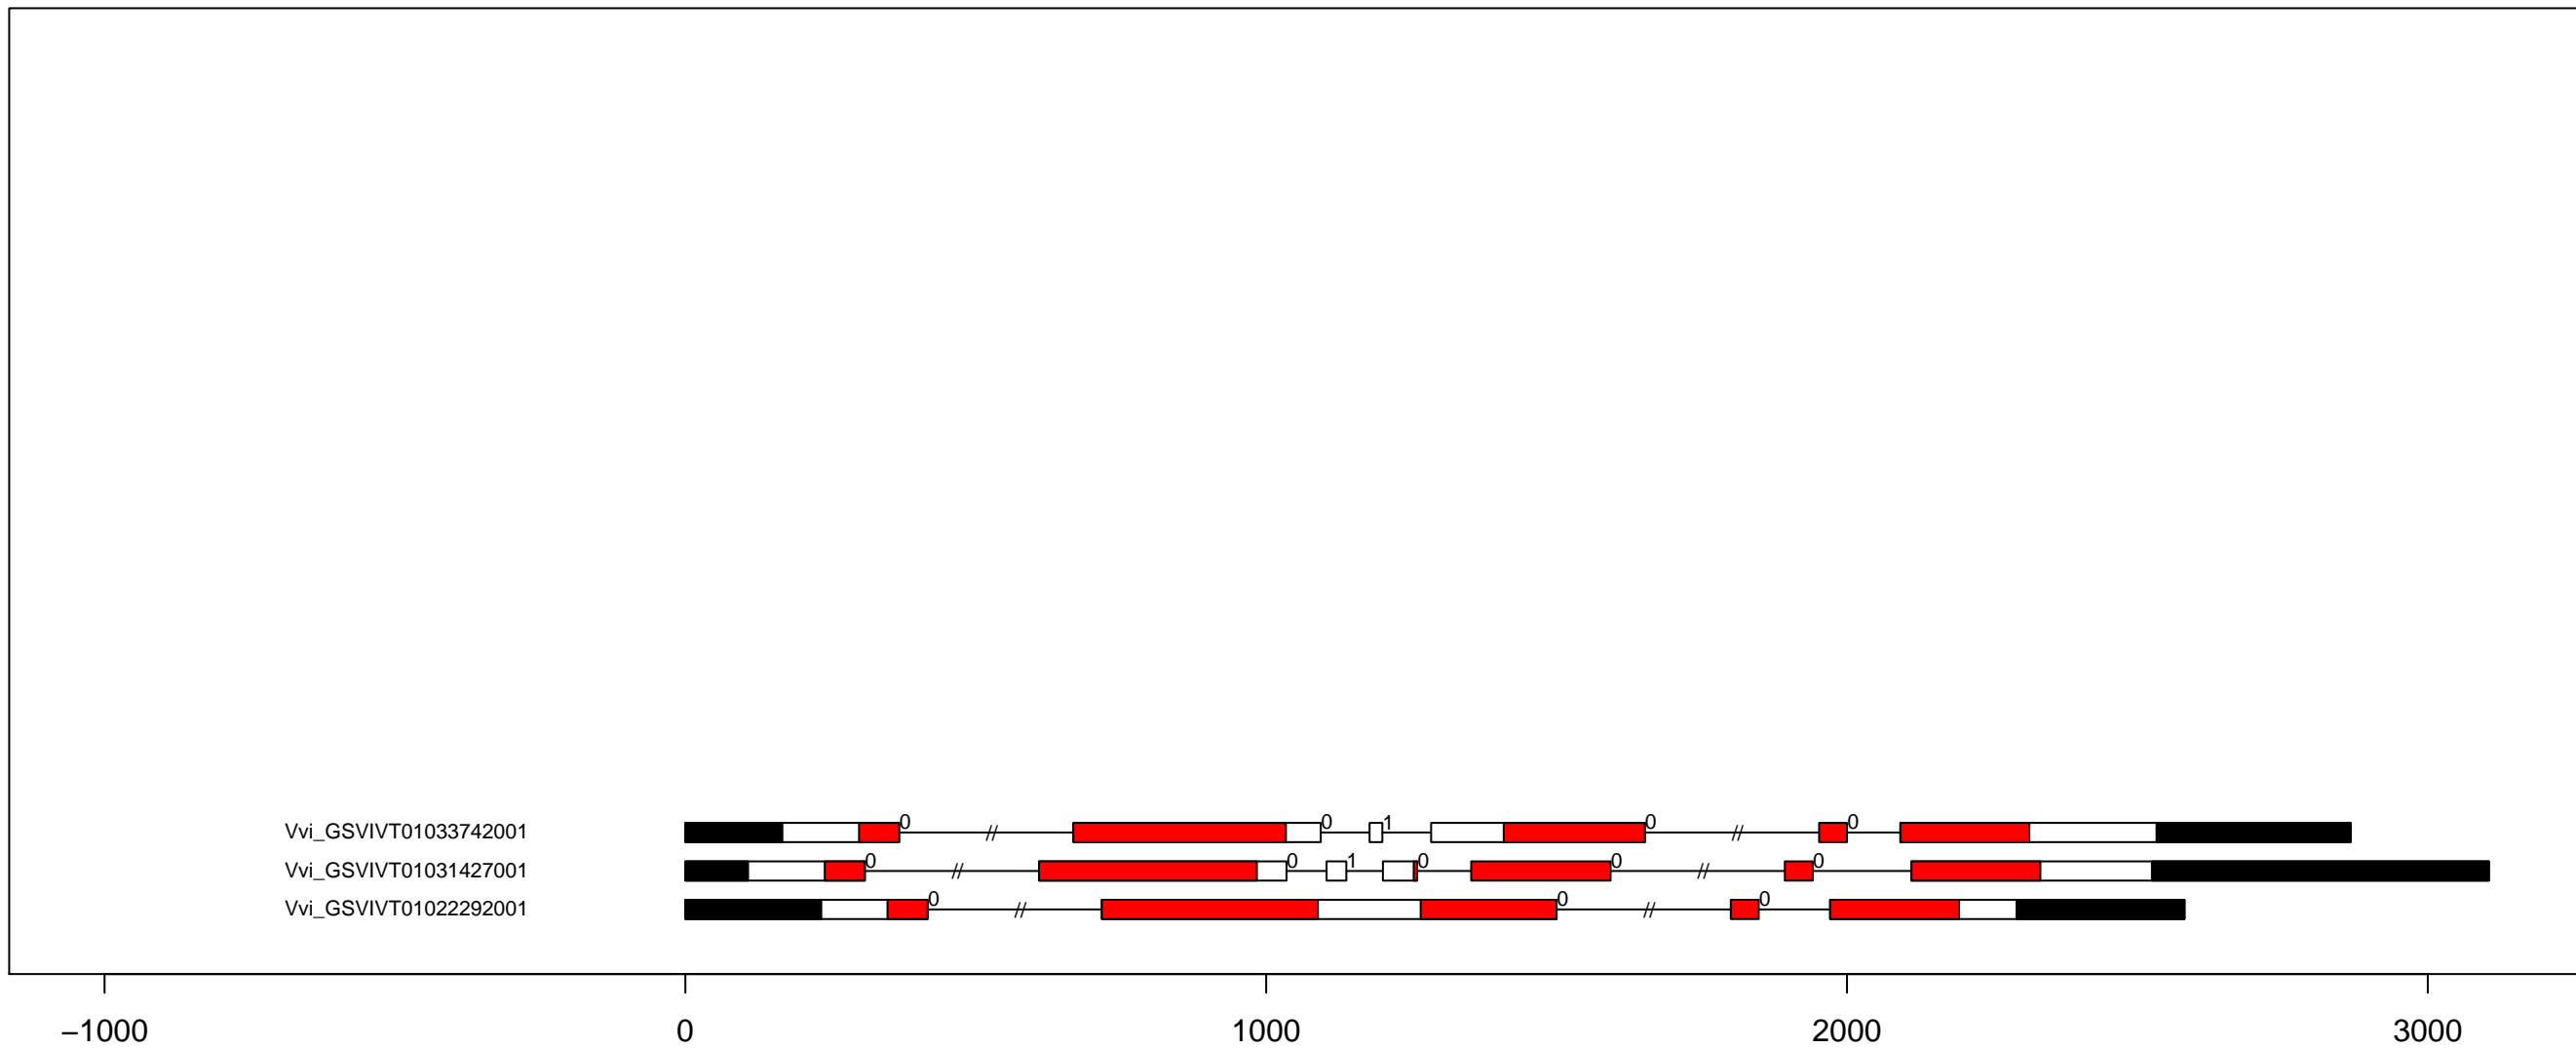

# V.vi Group-PI-2 exon-intron and domain diagram (all)

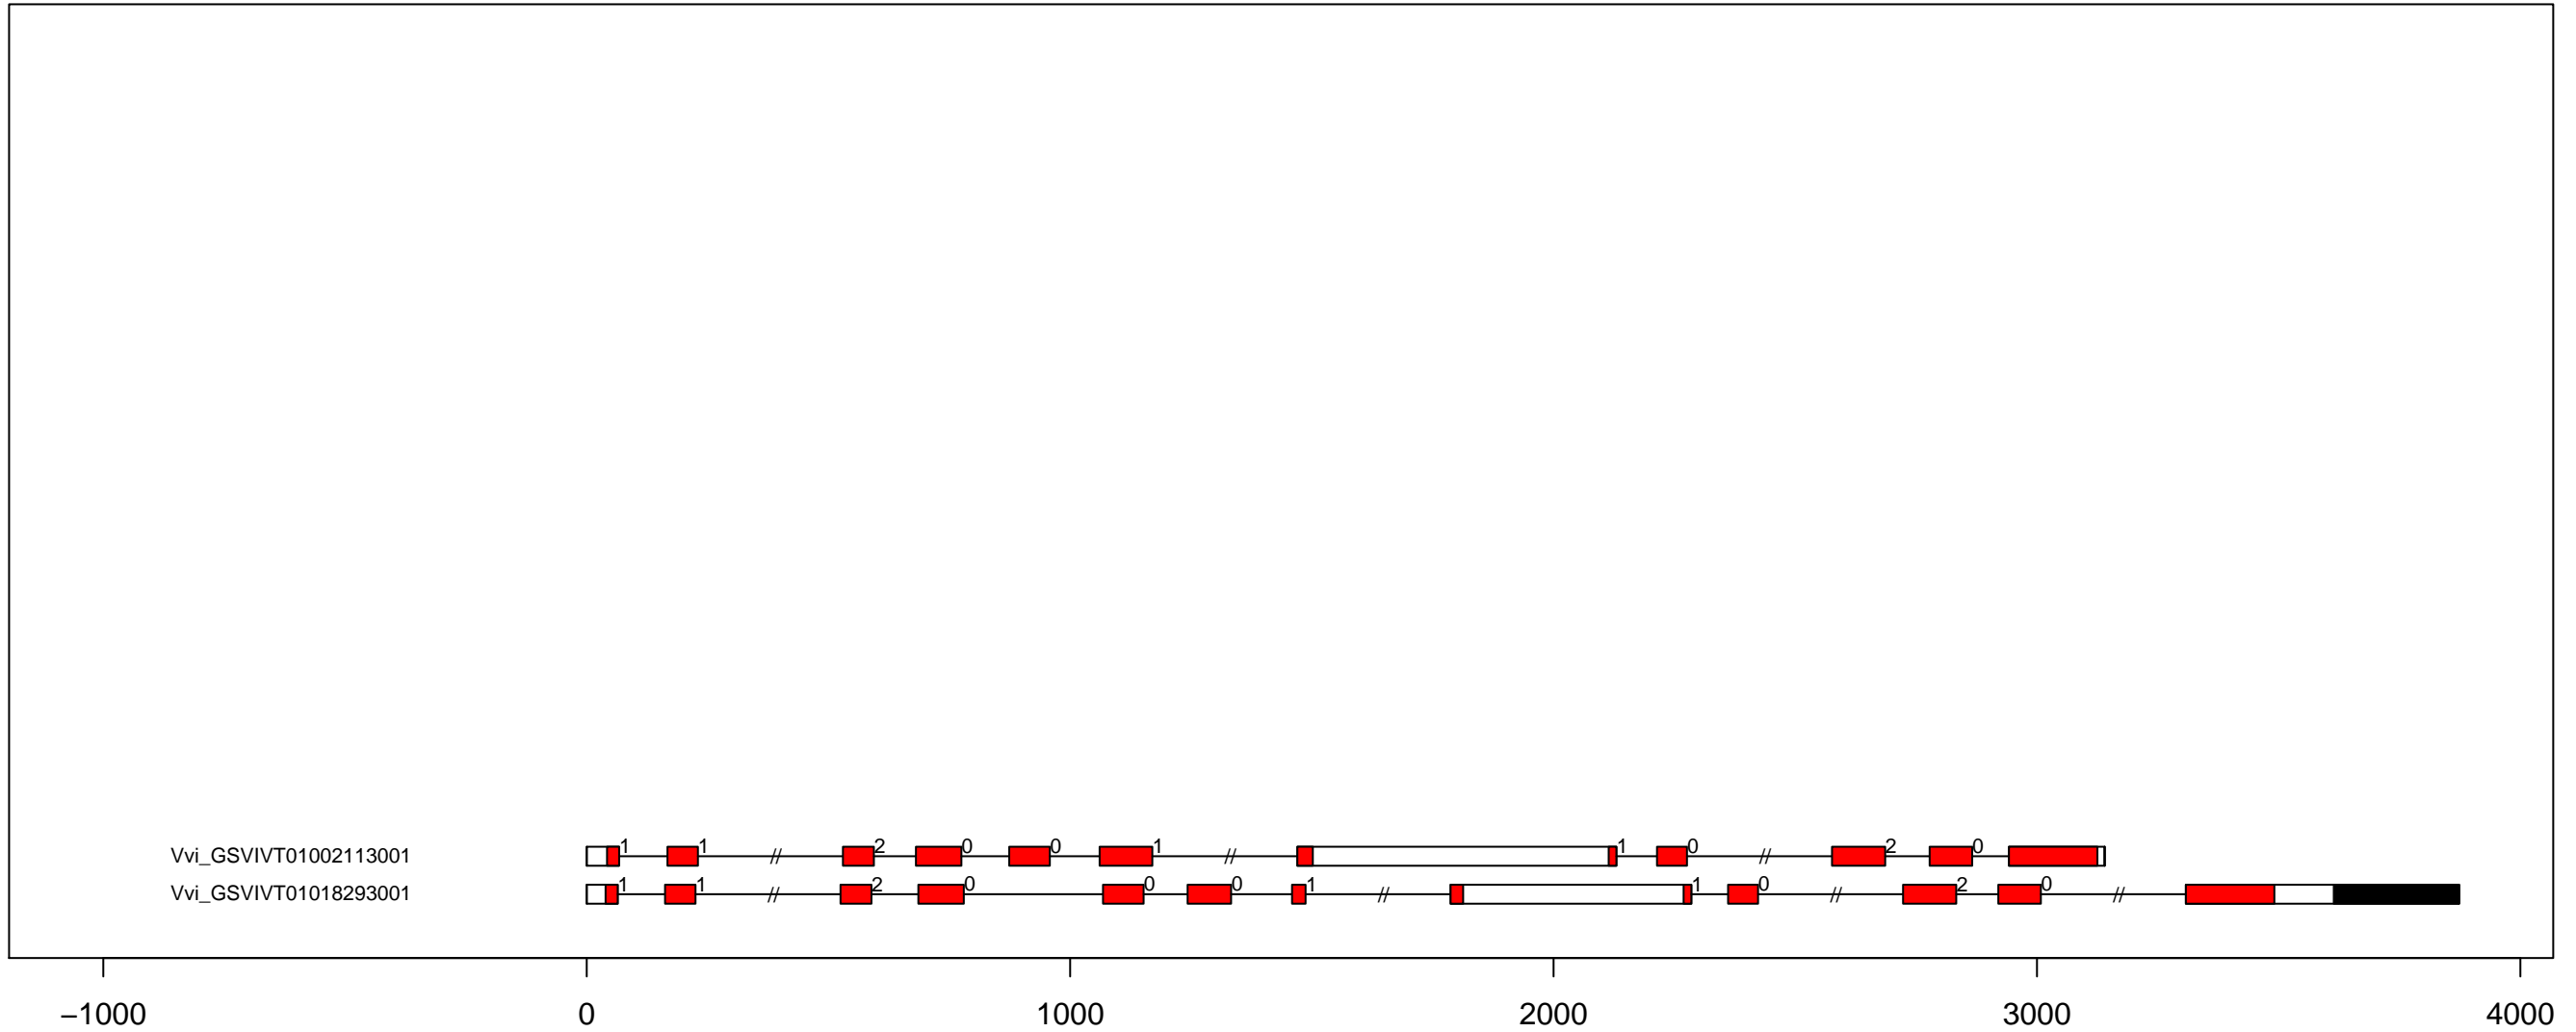

# V.vi Group-PI-3 exon-intron and domain diagram (all)

Vvi\_GSVIVT01034089001  
Vvi\_GSVIVT01027458001  
Vvi\_GSVIVT01026573001

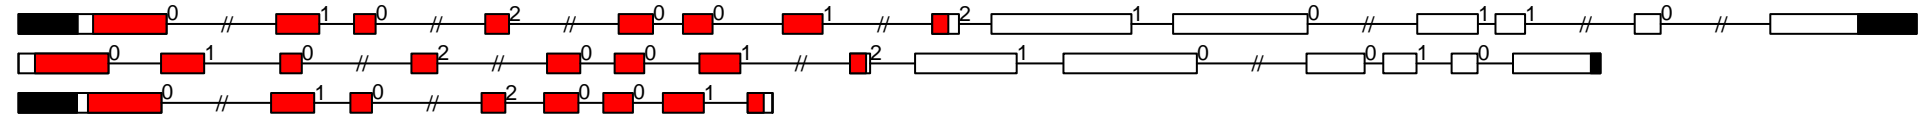

-1000

0

1000

2000

3000

4000

5000

# V.vi Group-PI-4 exon-intron and domain diagram (all)

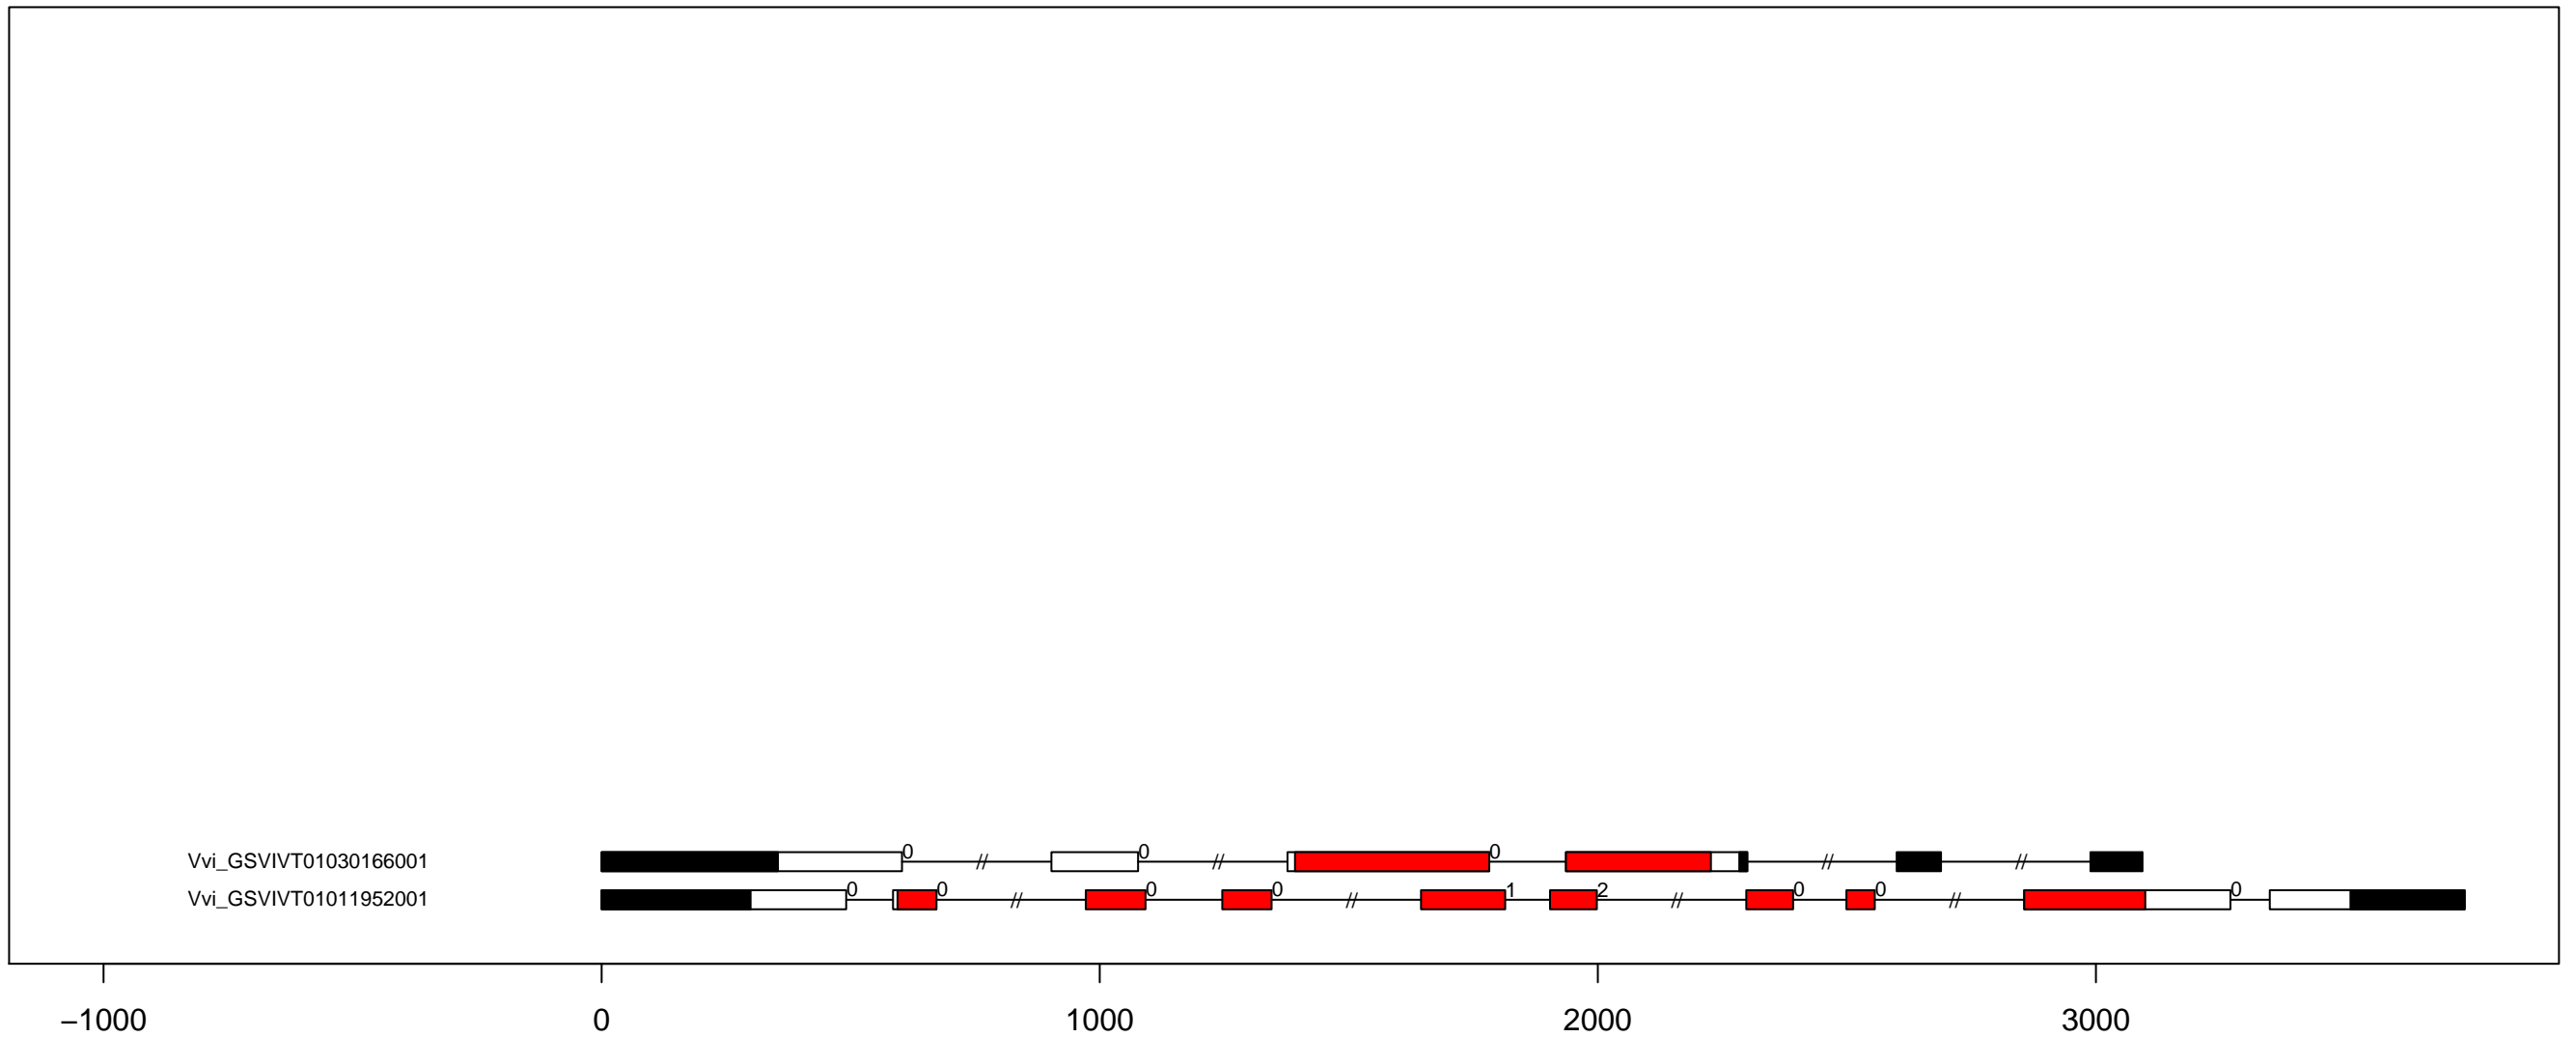

# V.vi IRE1 exon-intron and domain diagram (all)

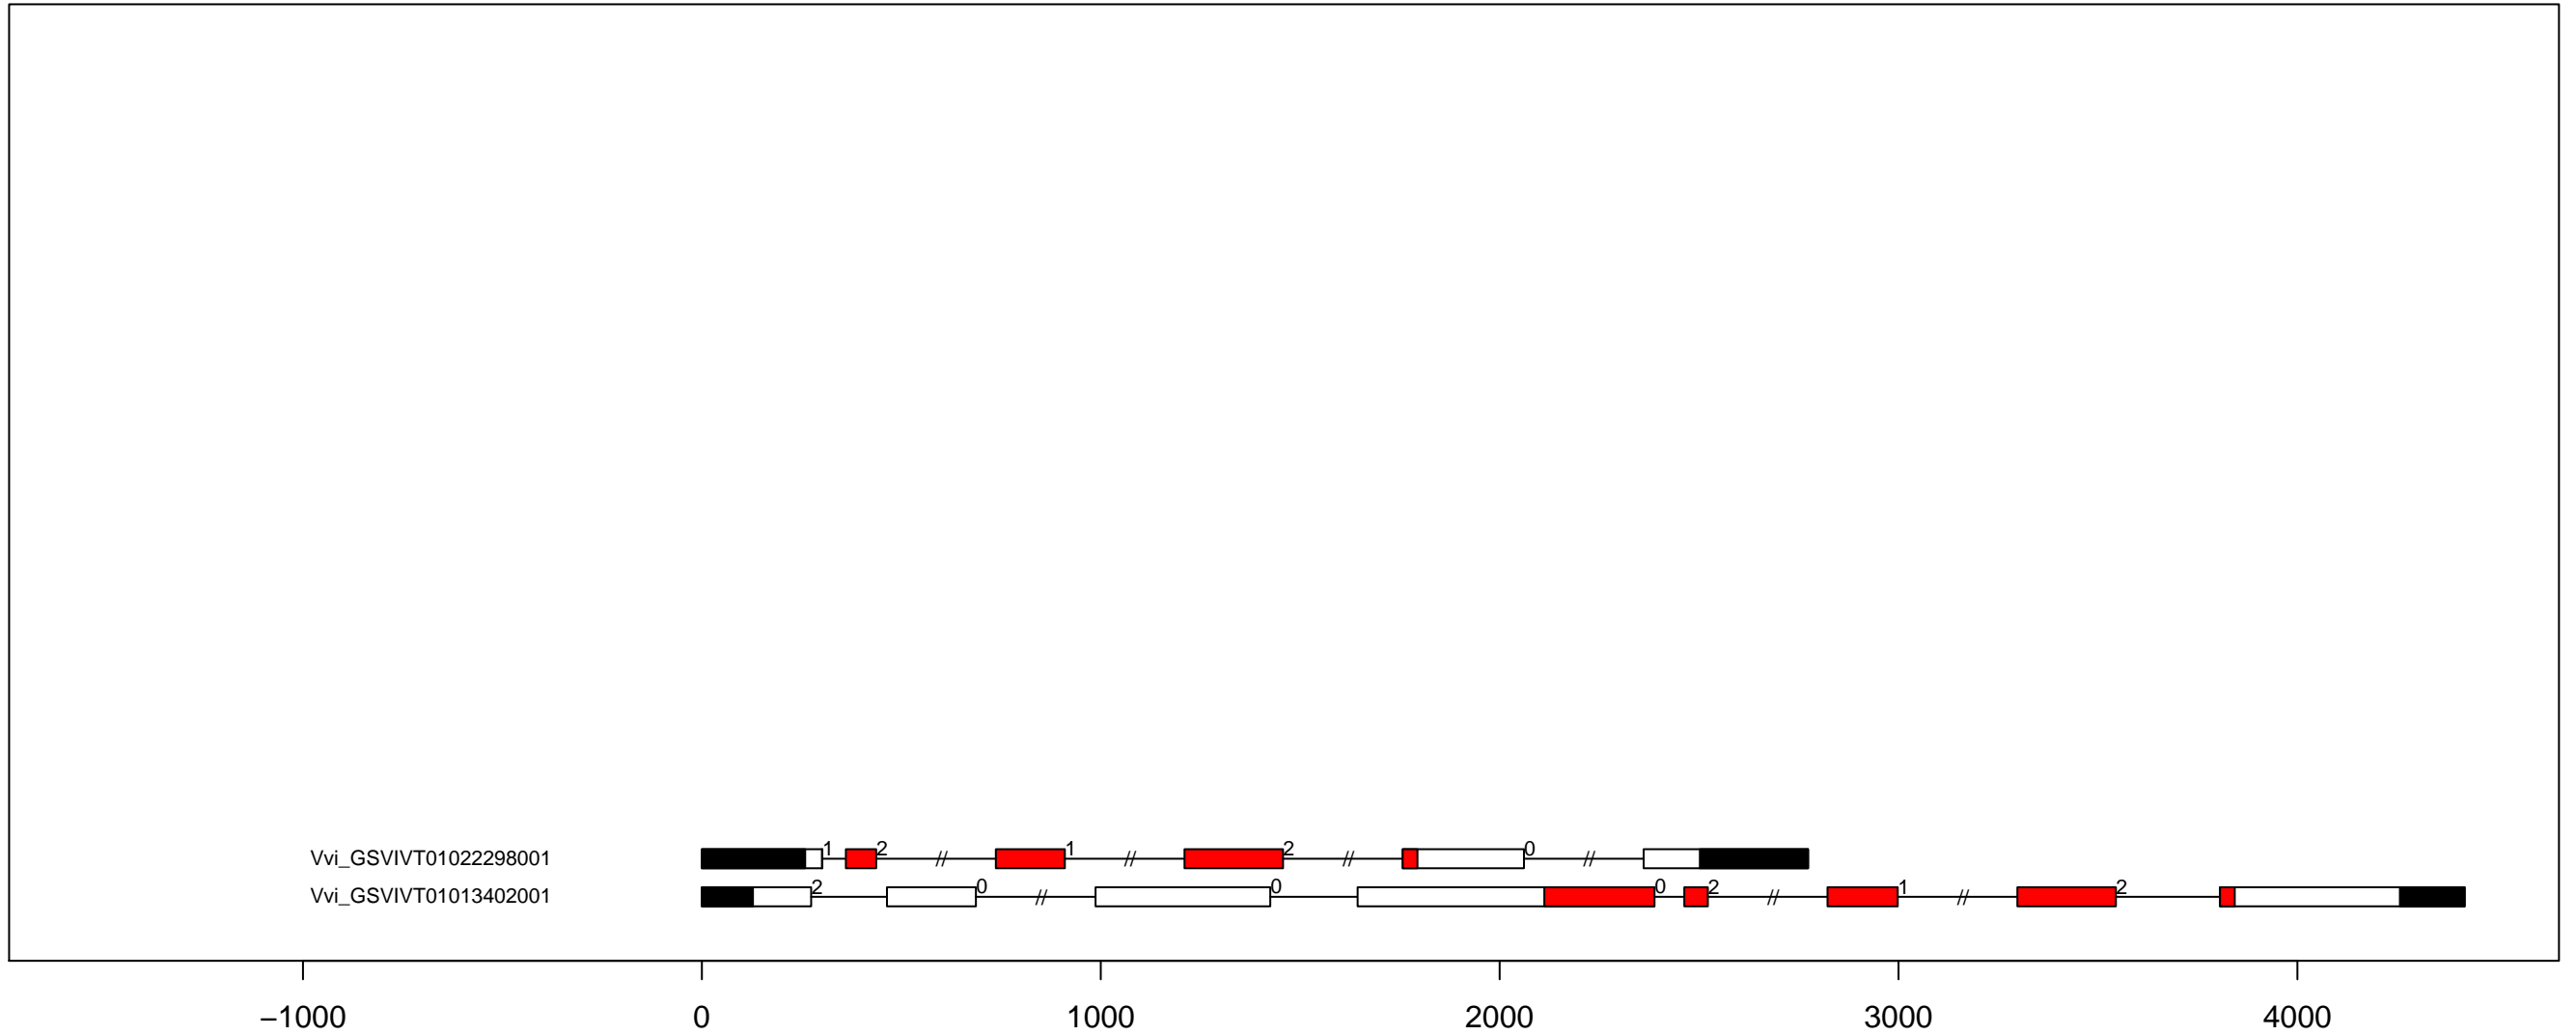

# V.vi NAK exon-intron and domain diagram (all)

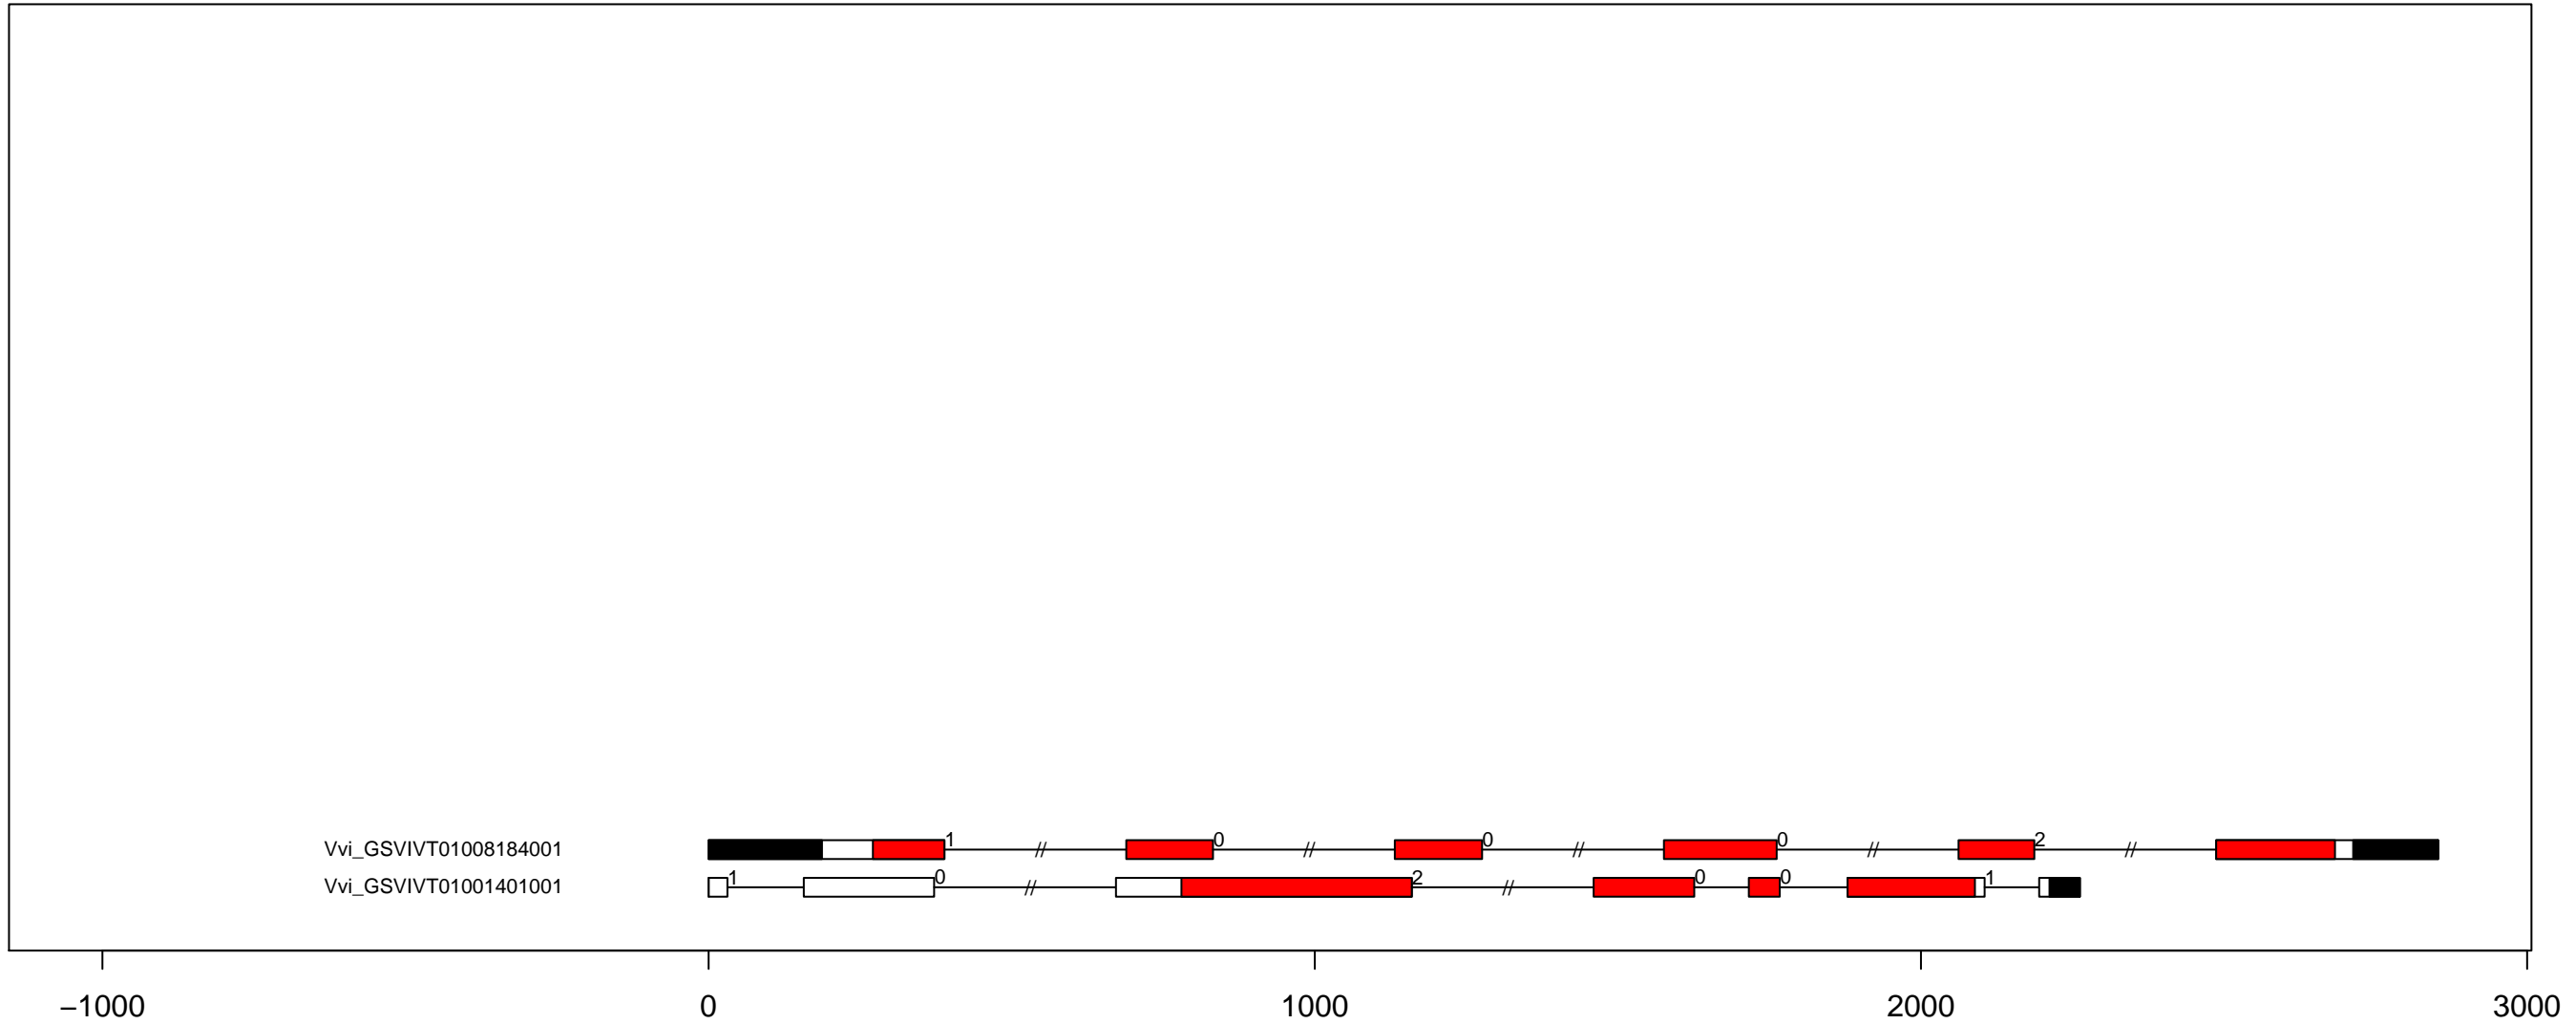



# V.vi NEK exon-intron and domain diagram (all)

Vvi\_GSVIVT01033338001  
Vvi\_GSVIVT01037558001  
Vvi\_GSVIVT01025304001  
Vvi\_GSVIVT01021831001  
Vvi\_GSVIVT01001199001

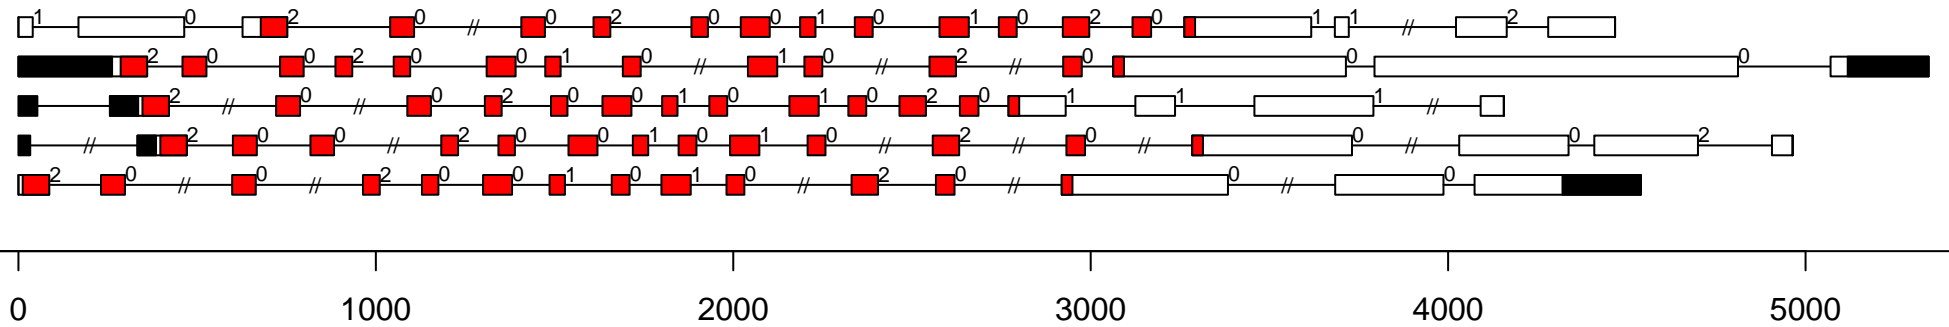

# V.vi PEK\_GCIN2 exon-intron and domain diagram (all)

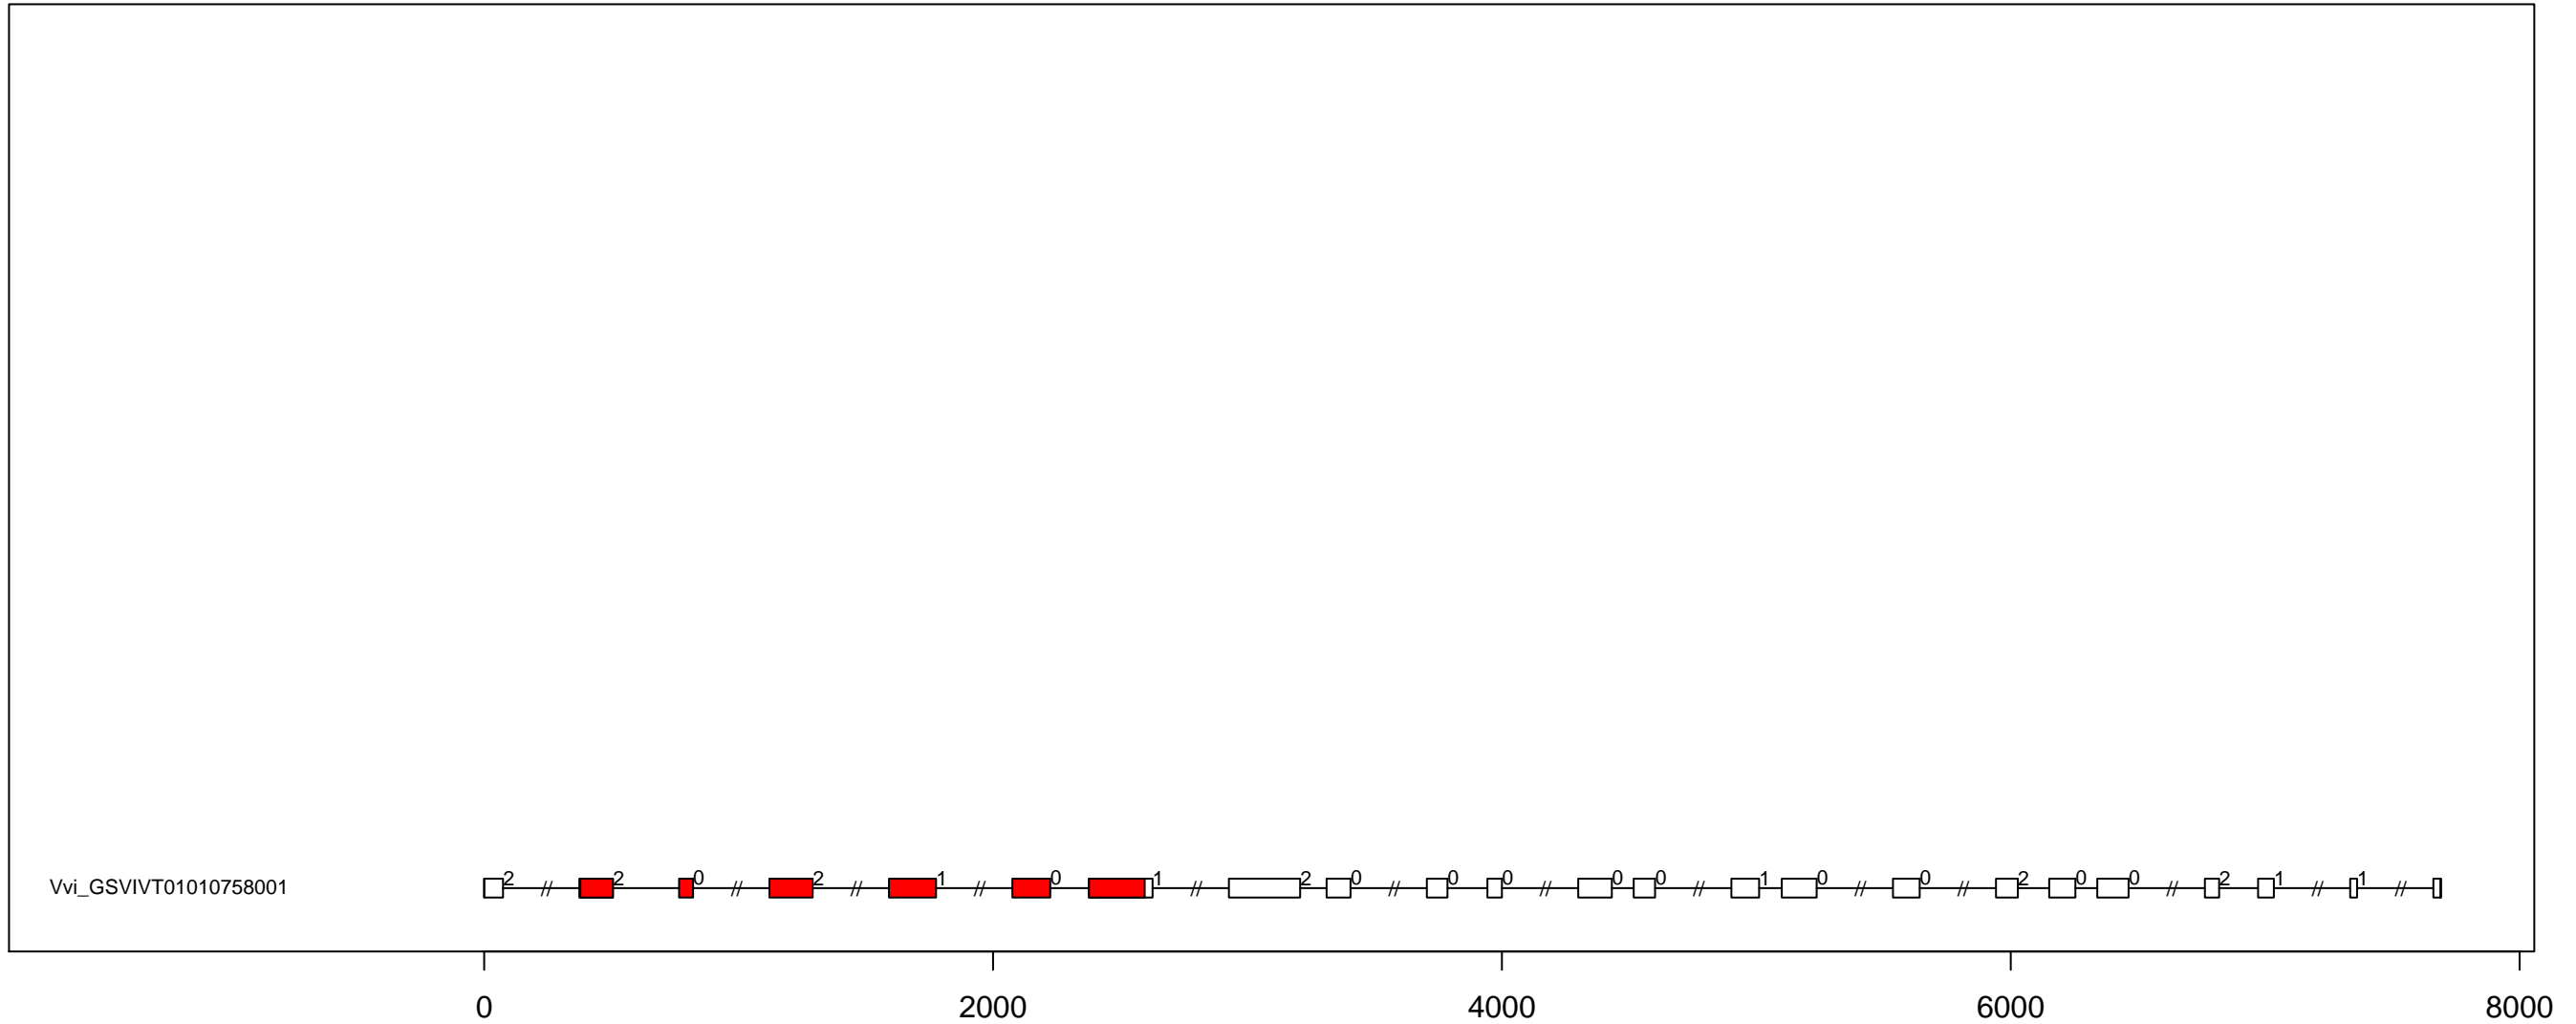

# V.vi RLK-Pelle\_C-LEC exon-intron and domain diagram (all)

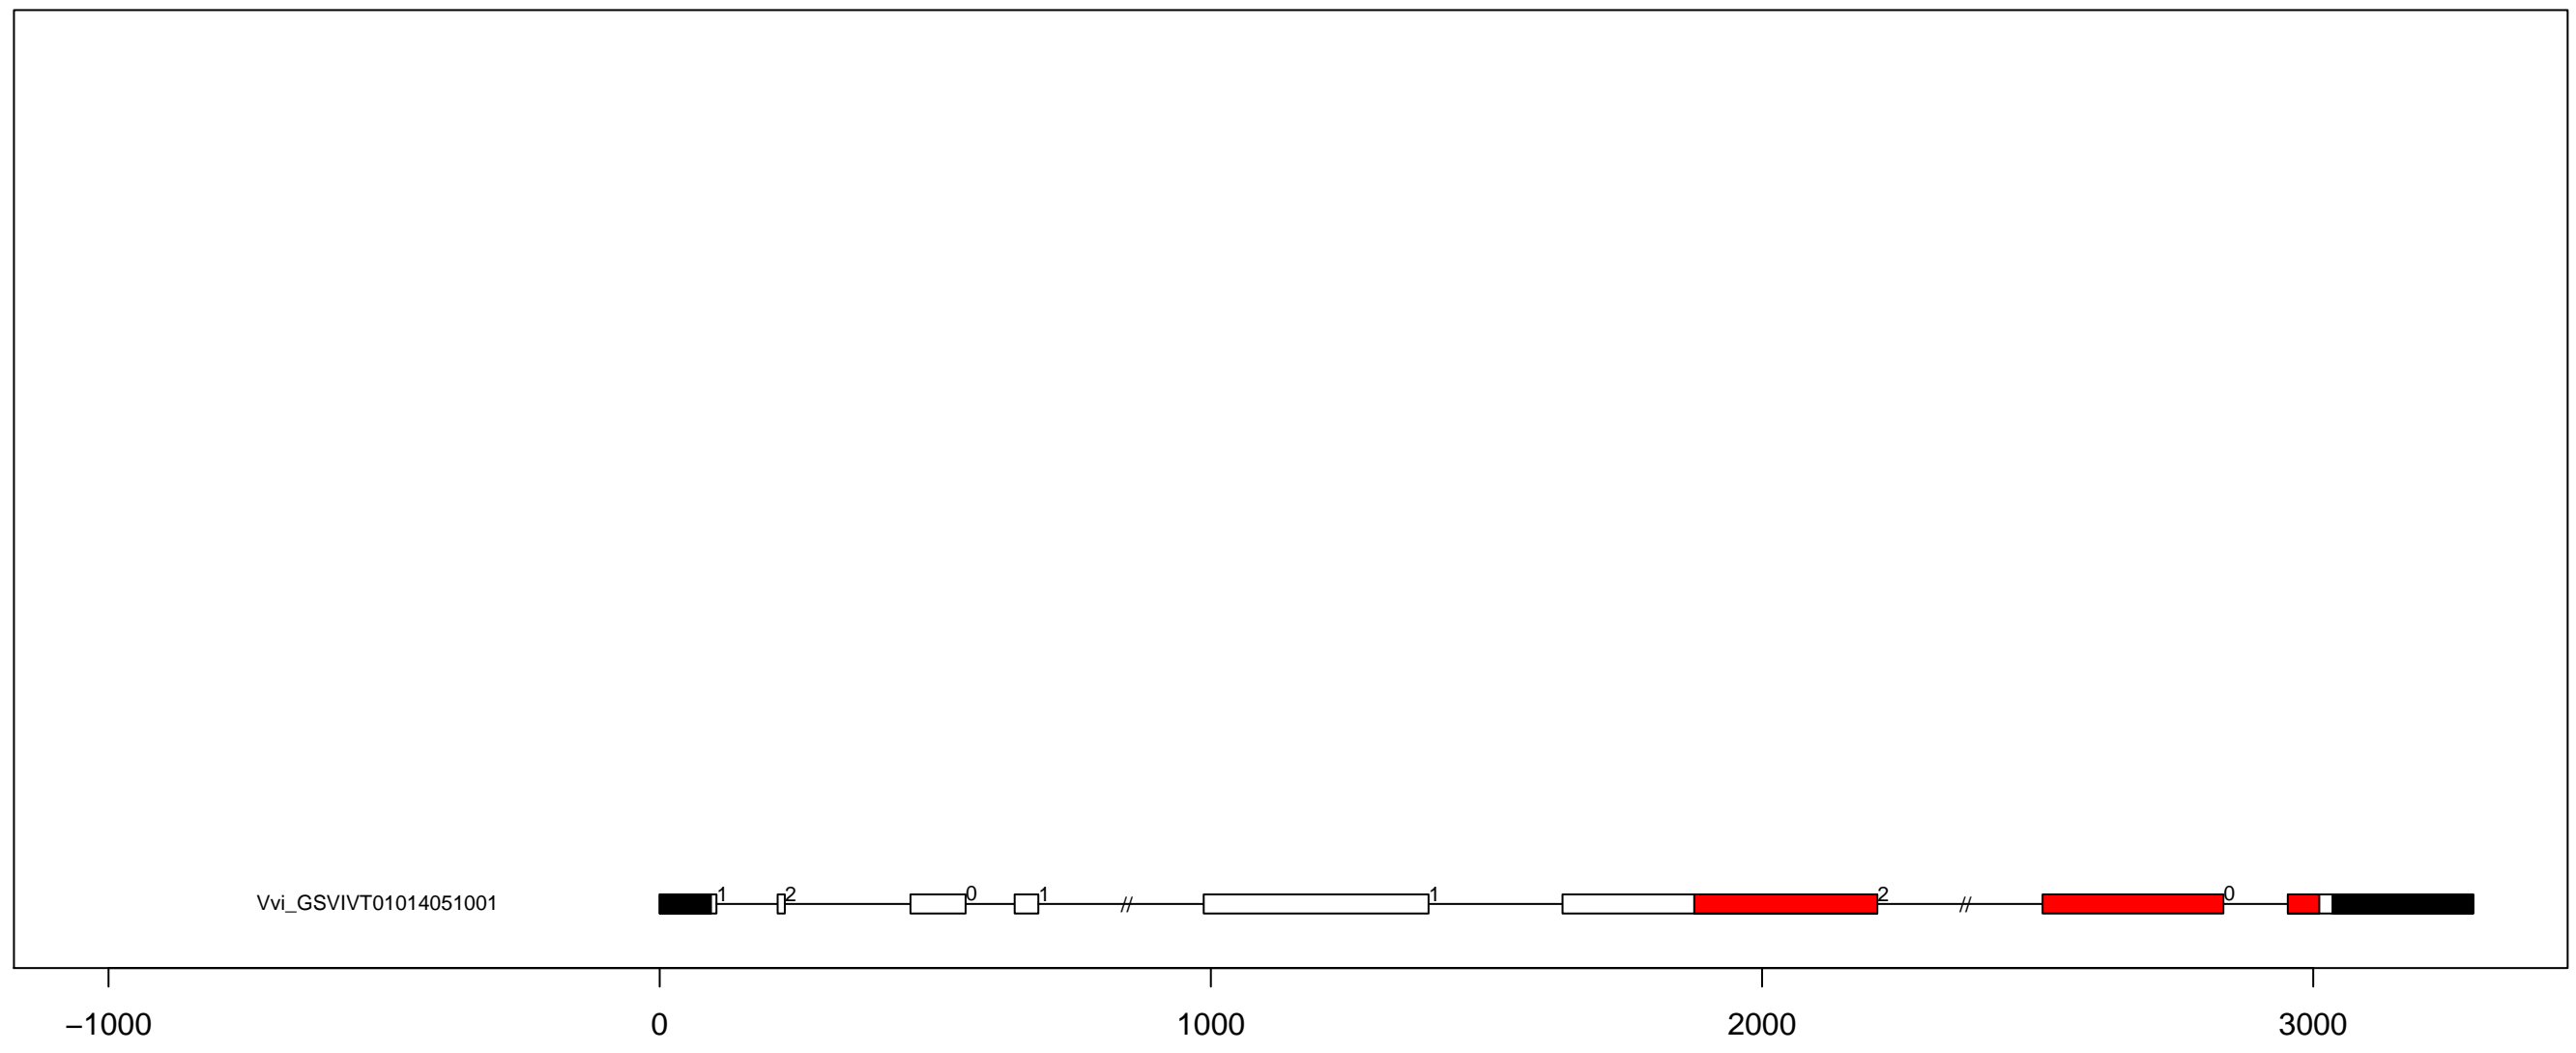

# V.vi RLK-Pelle\_CR4L exon-intron and domain diagram (all)

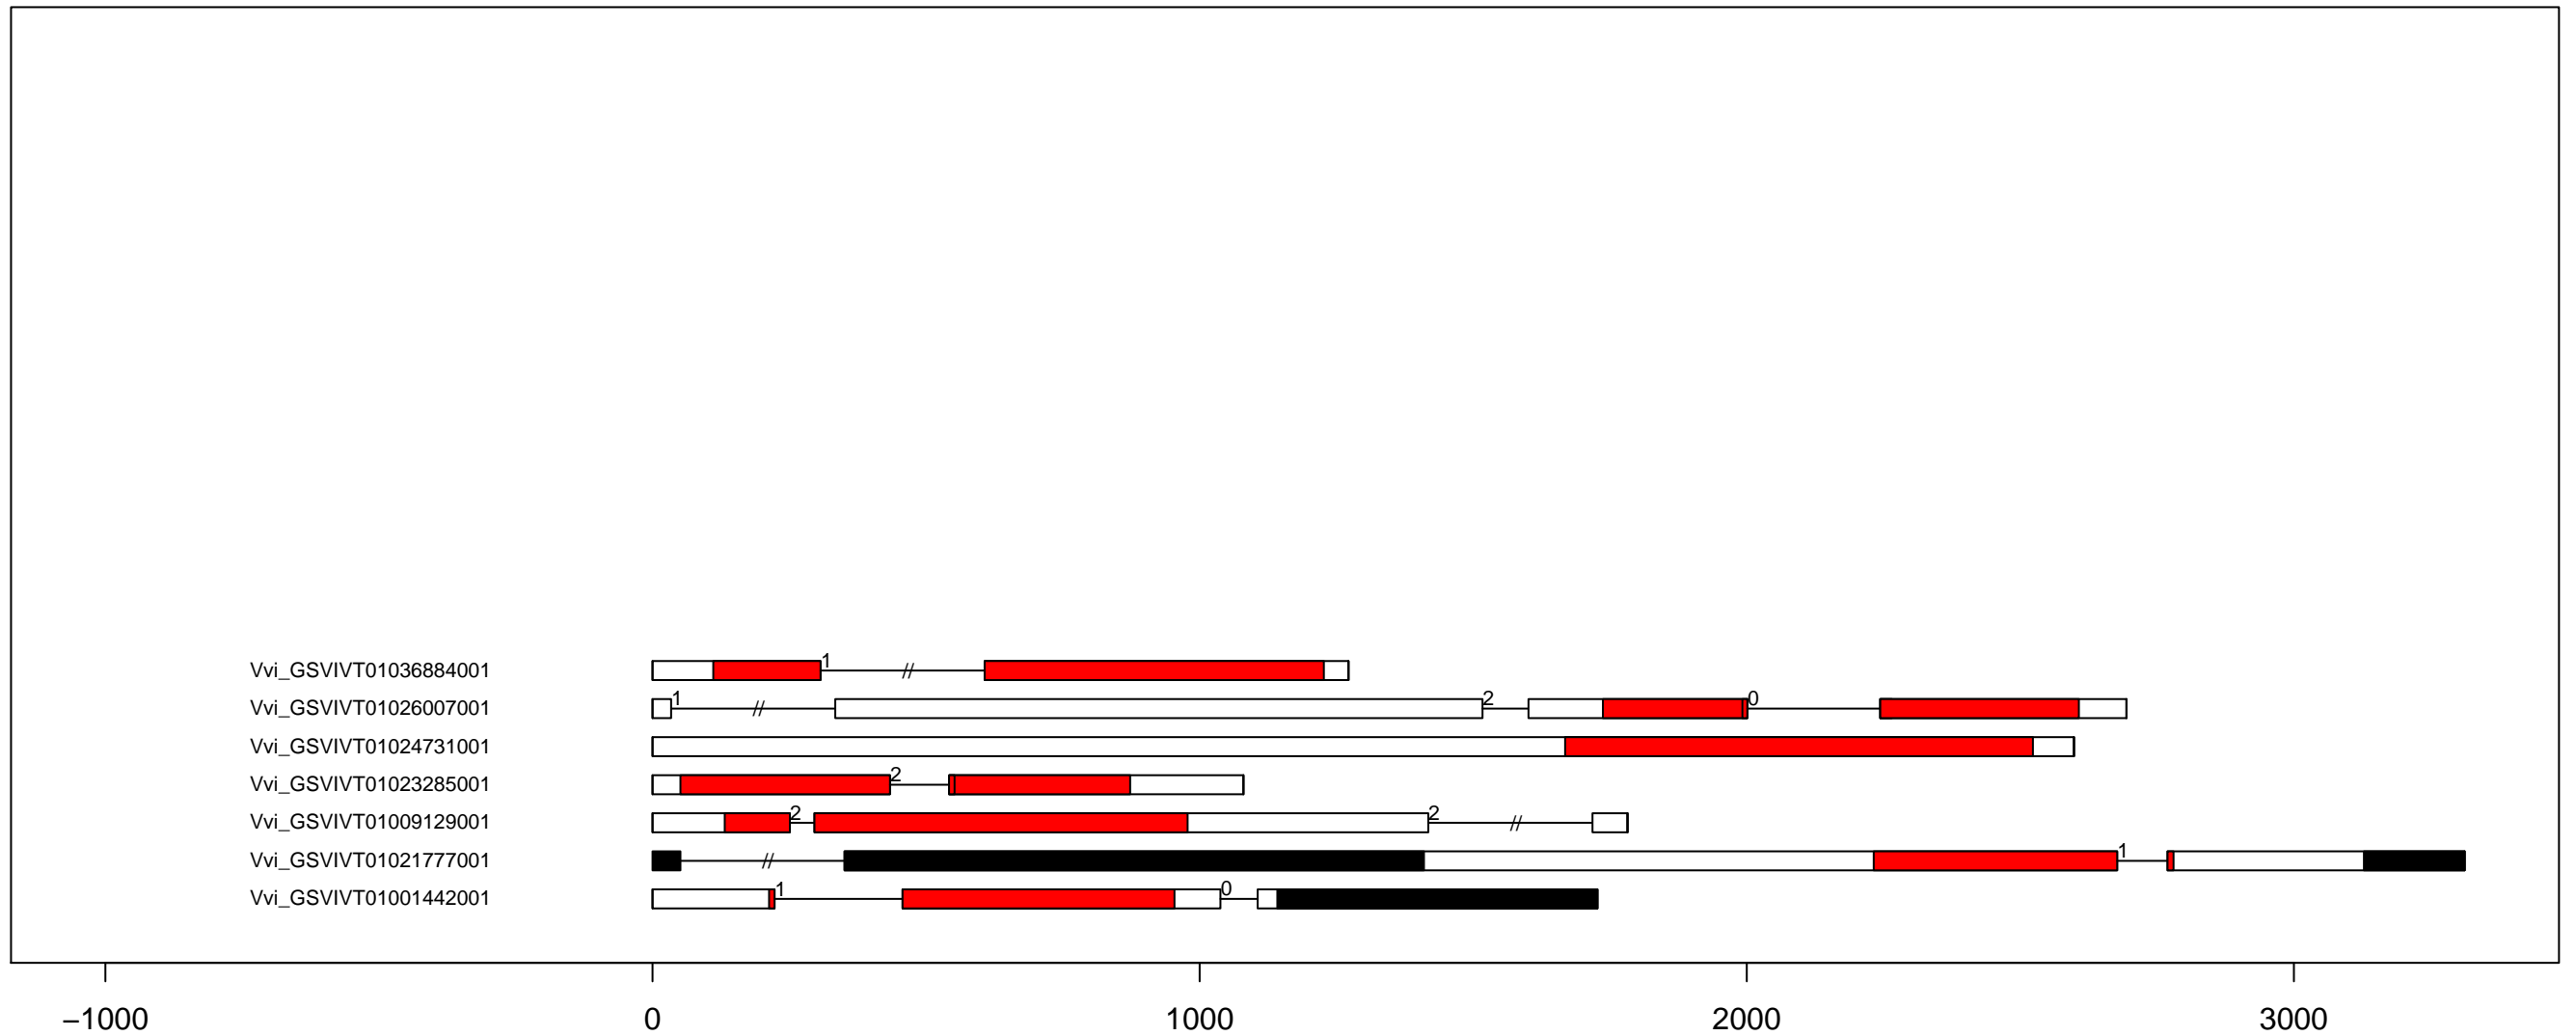

# V.vi RLK-Pelle\_CrRLK1L-1 exon-intron and domain diagram (all)

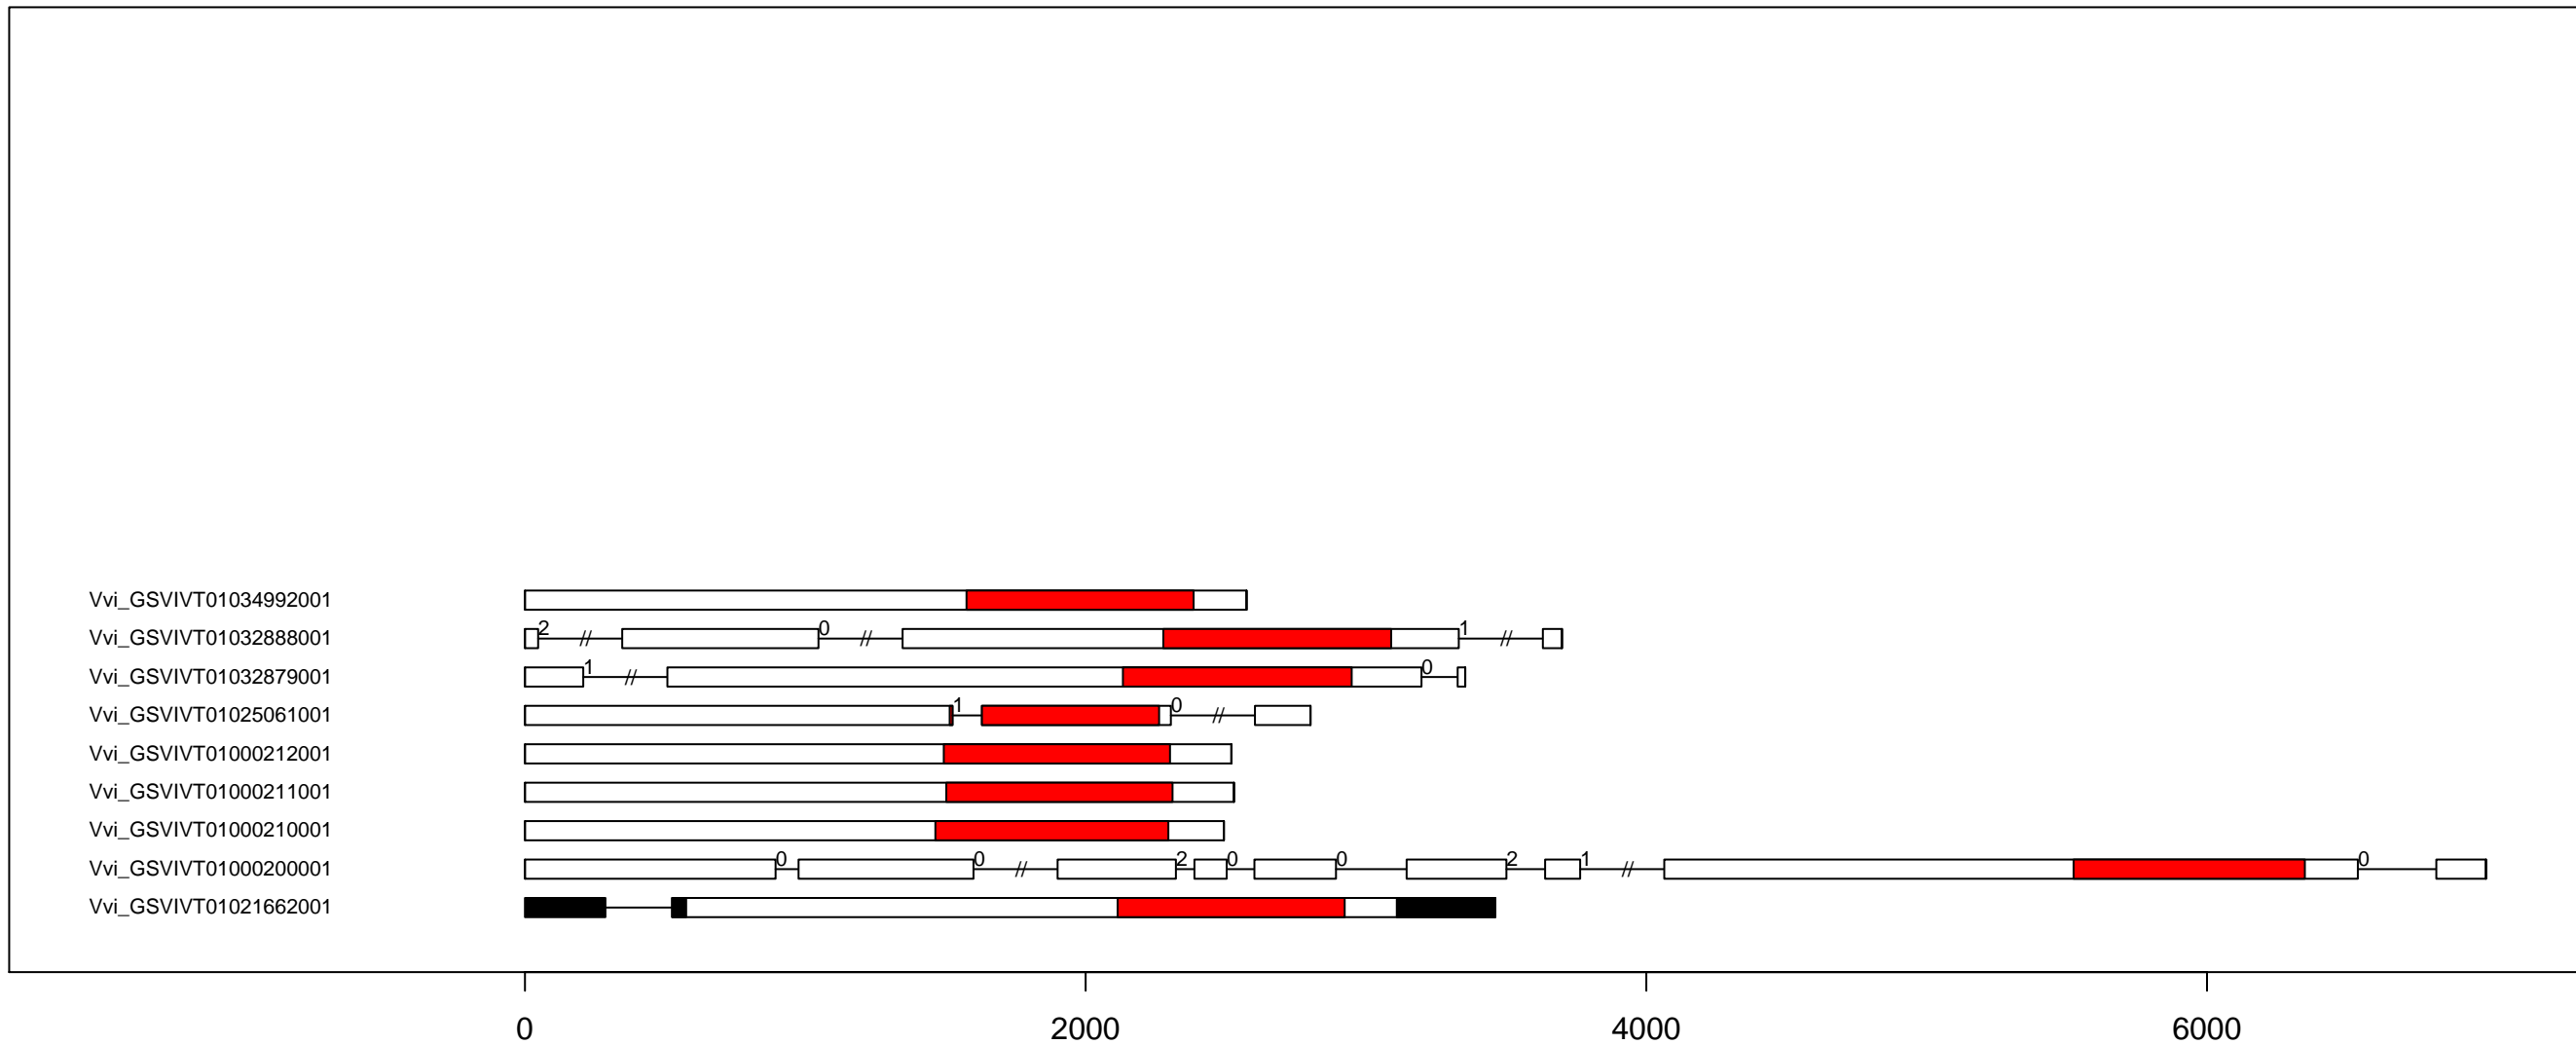

### V.vi RLK-Pelle\_DLSV exon-intron and domain diagram (part 1)

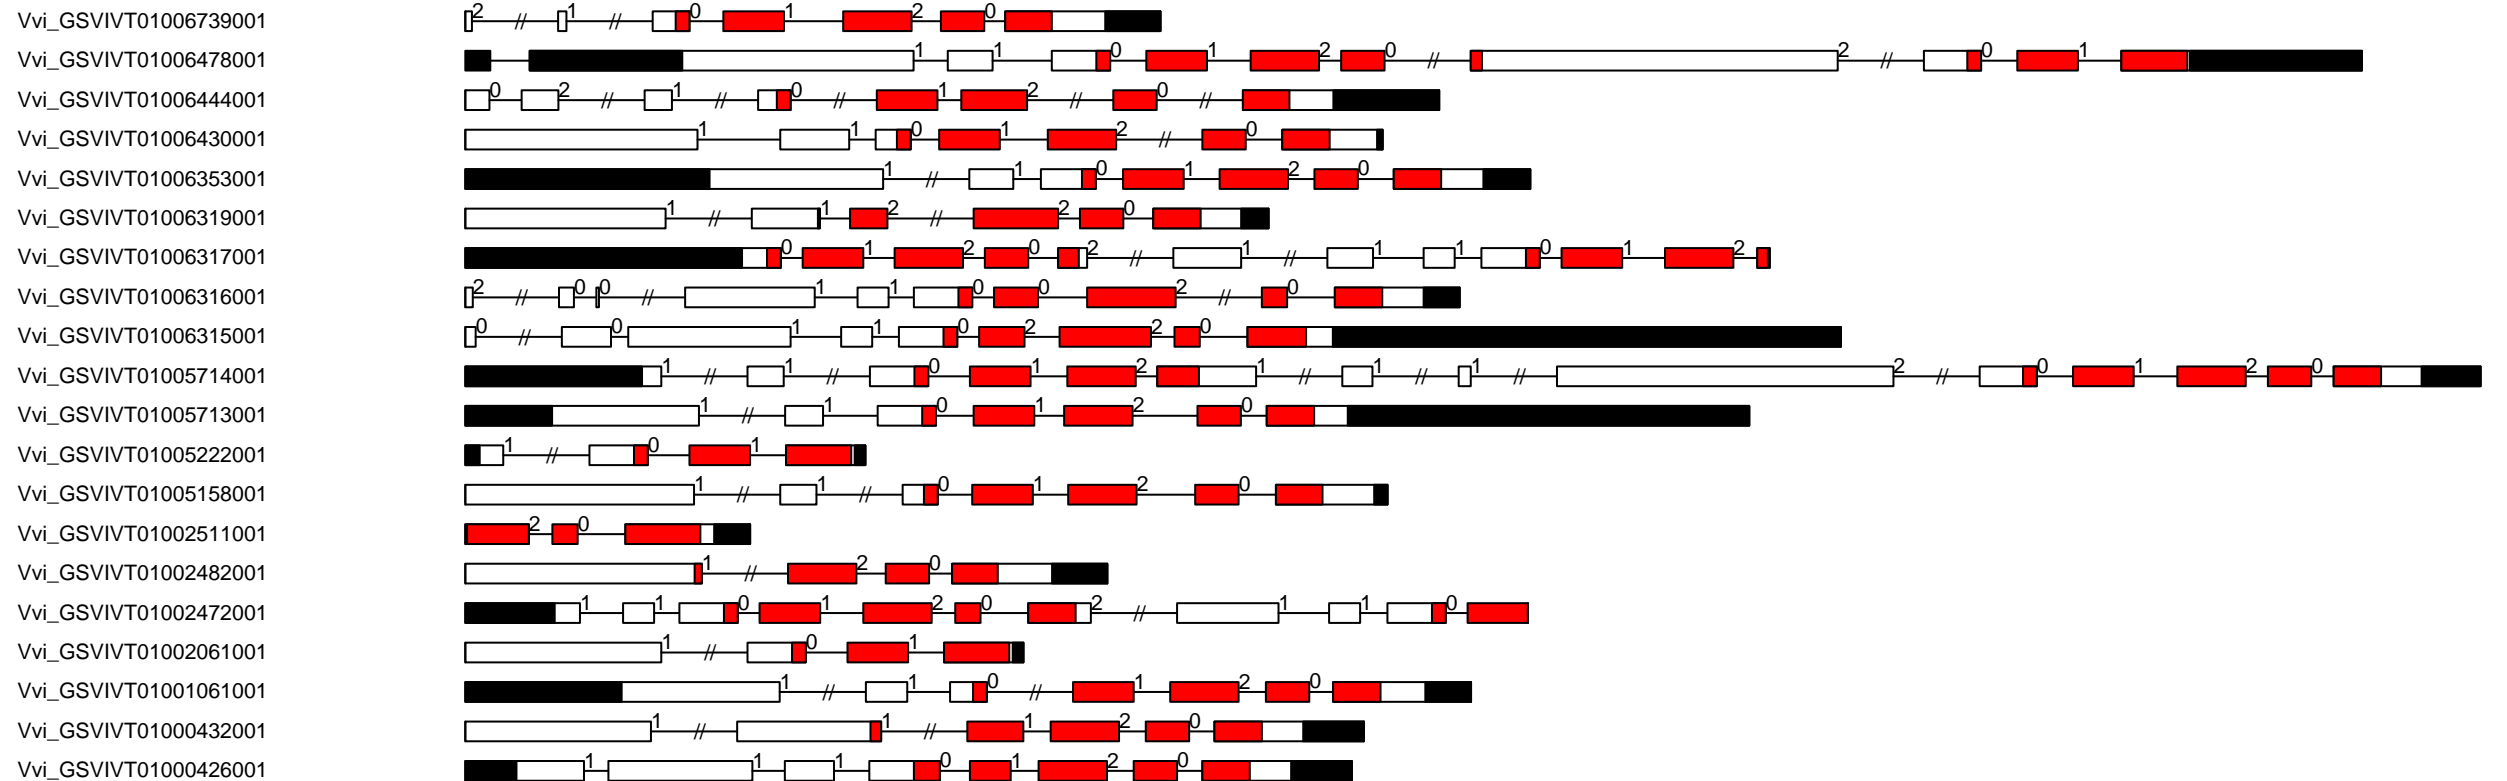

### V.vi RLK-Pelle\_DLSV exon-intron and domain diagram (part 2)

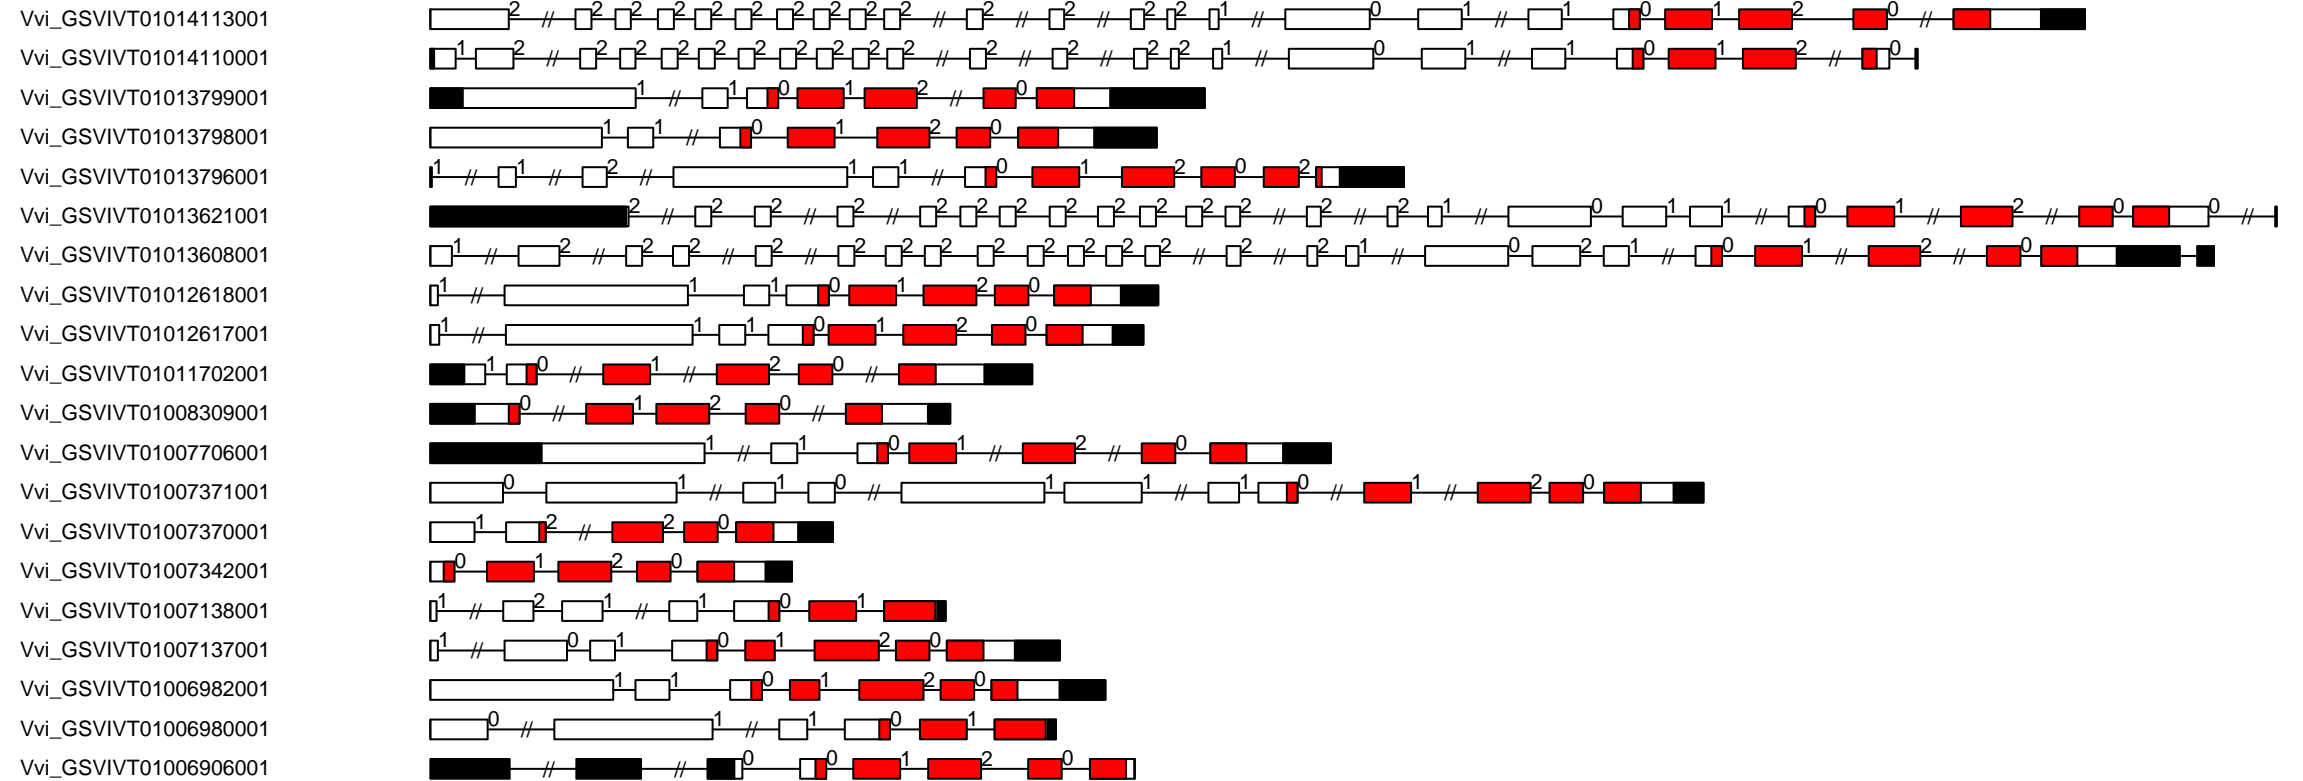

### V.vi RLK-Pelle\_DLSV exon-intron and domain diagram (part 3)

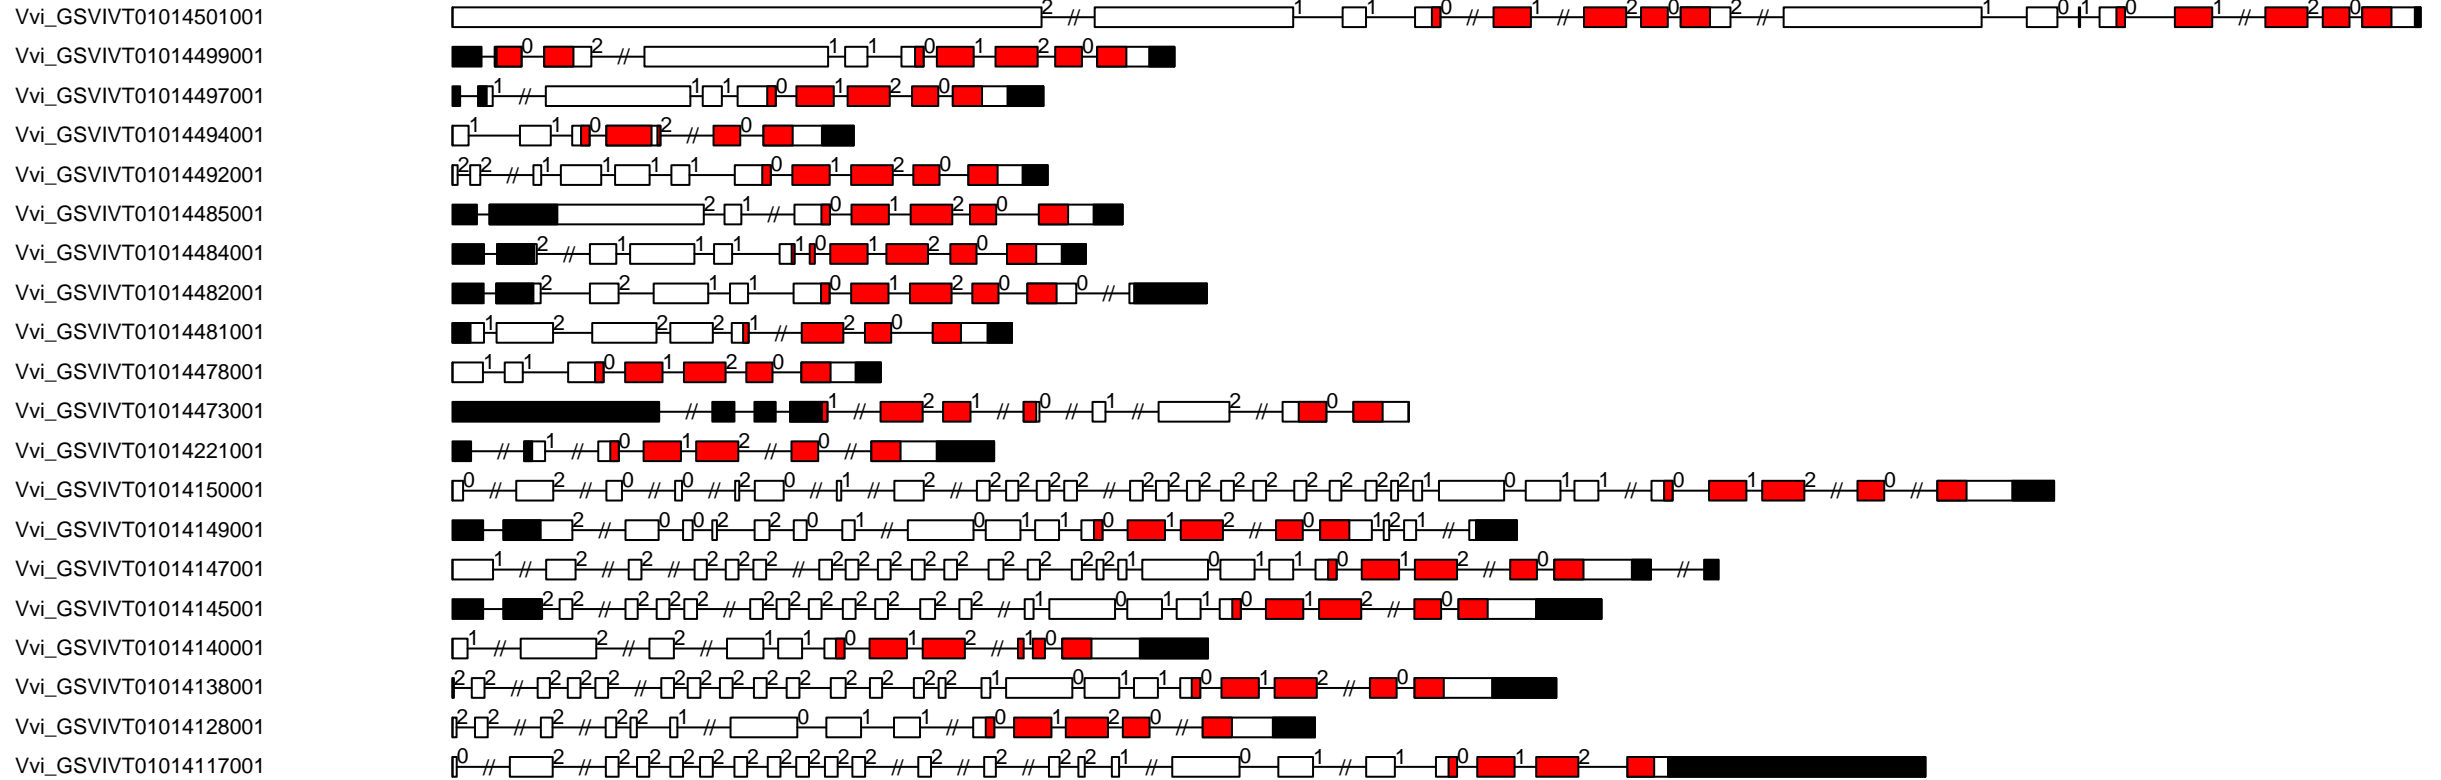



### V.vi RLK-Pelle\_DLSV exon-intron and domain diagram (part 4)

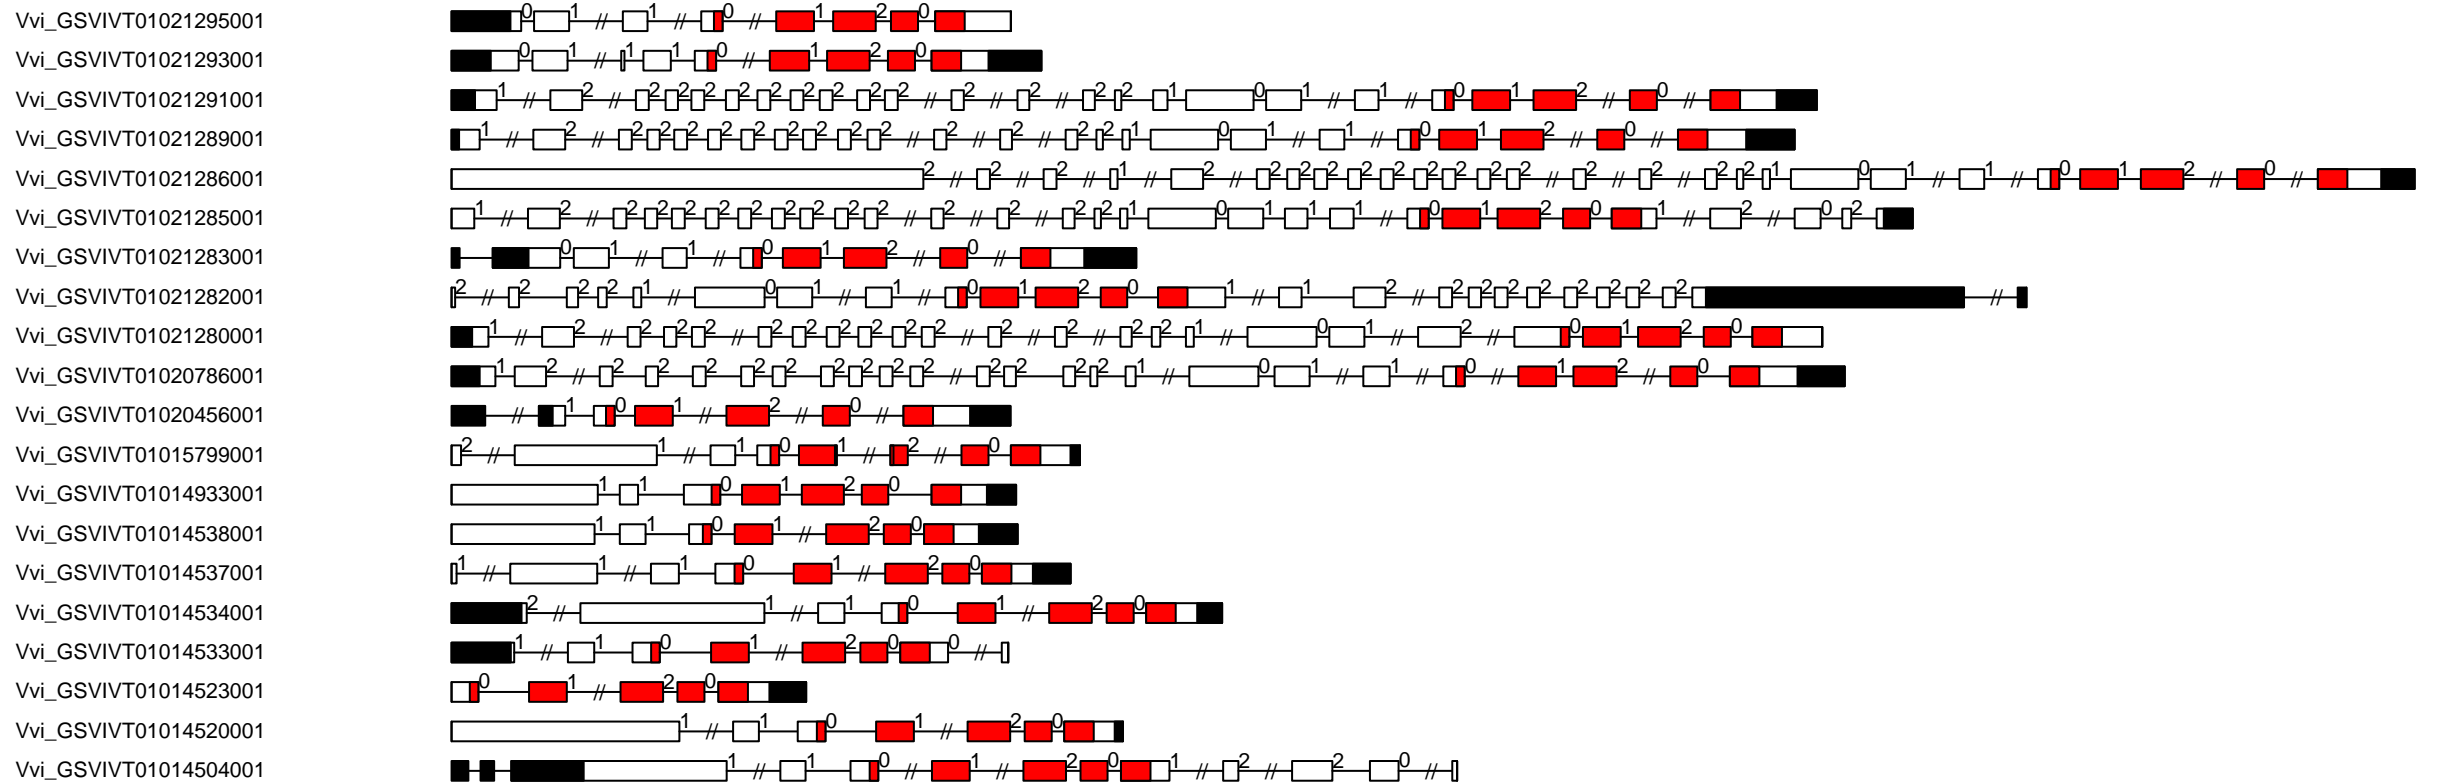

# V.vi RLK-Pelle\_DLSV exon-intron and domain diagram (part 5)

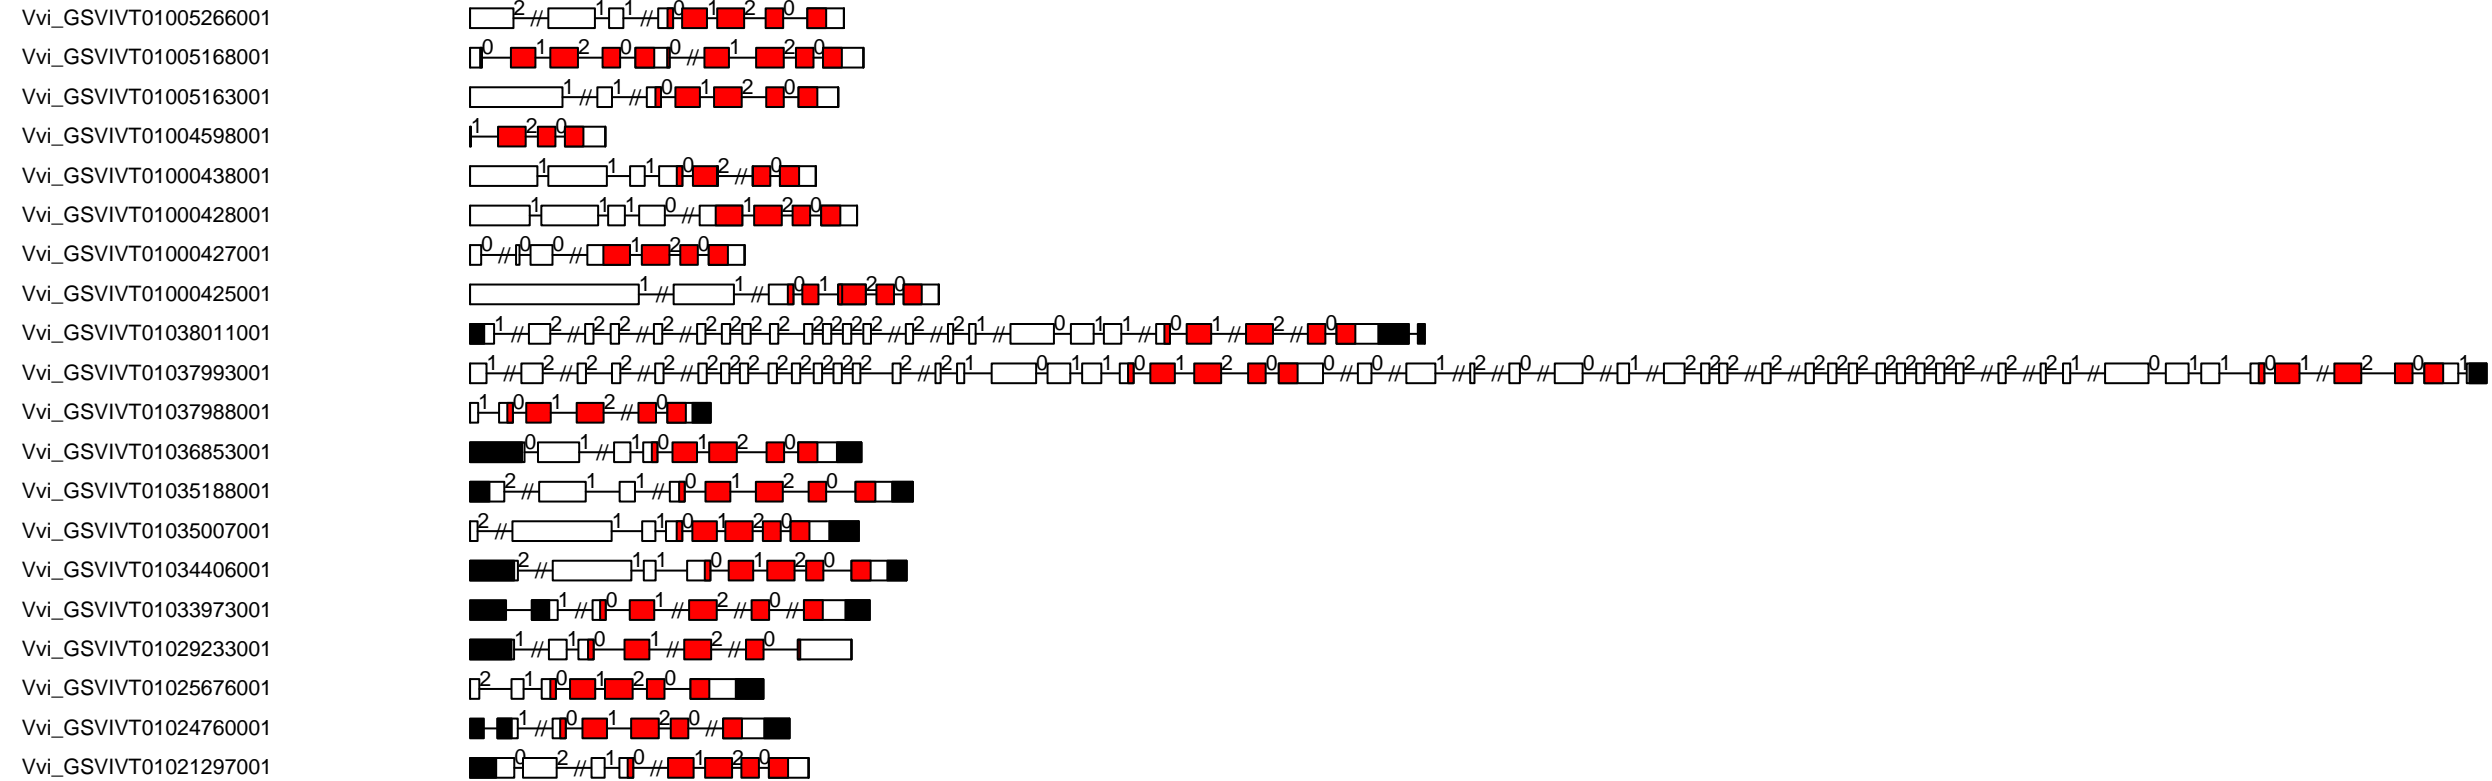

### V.vi RLK-Pelle\_DLSV exon-intron and domain diagram (part 6)

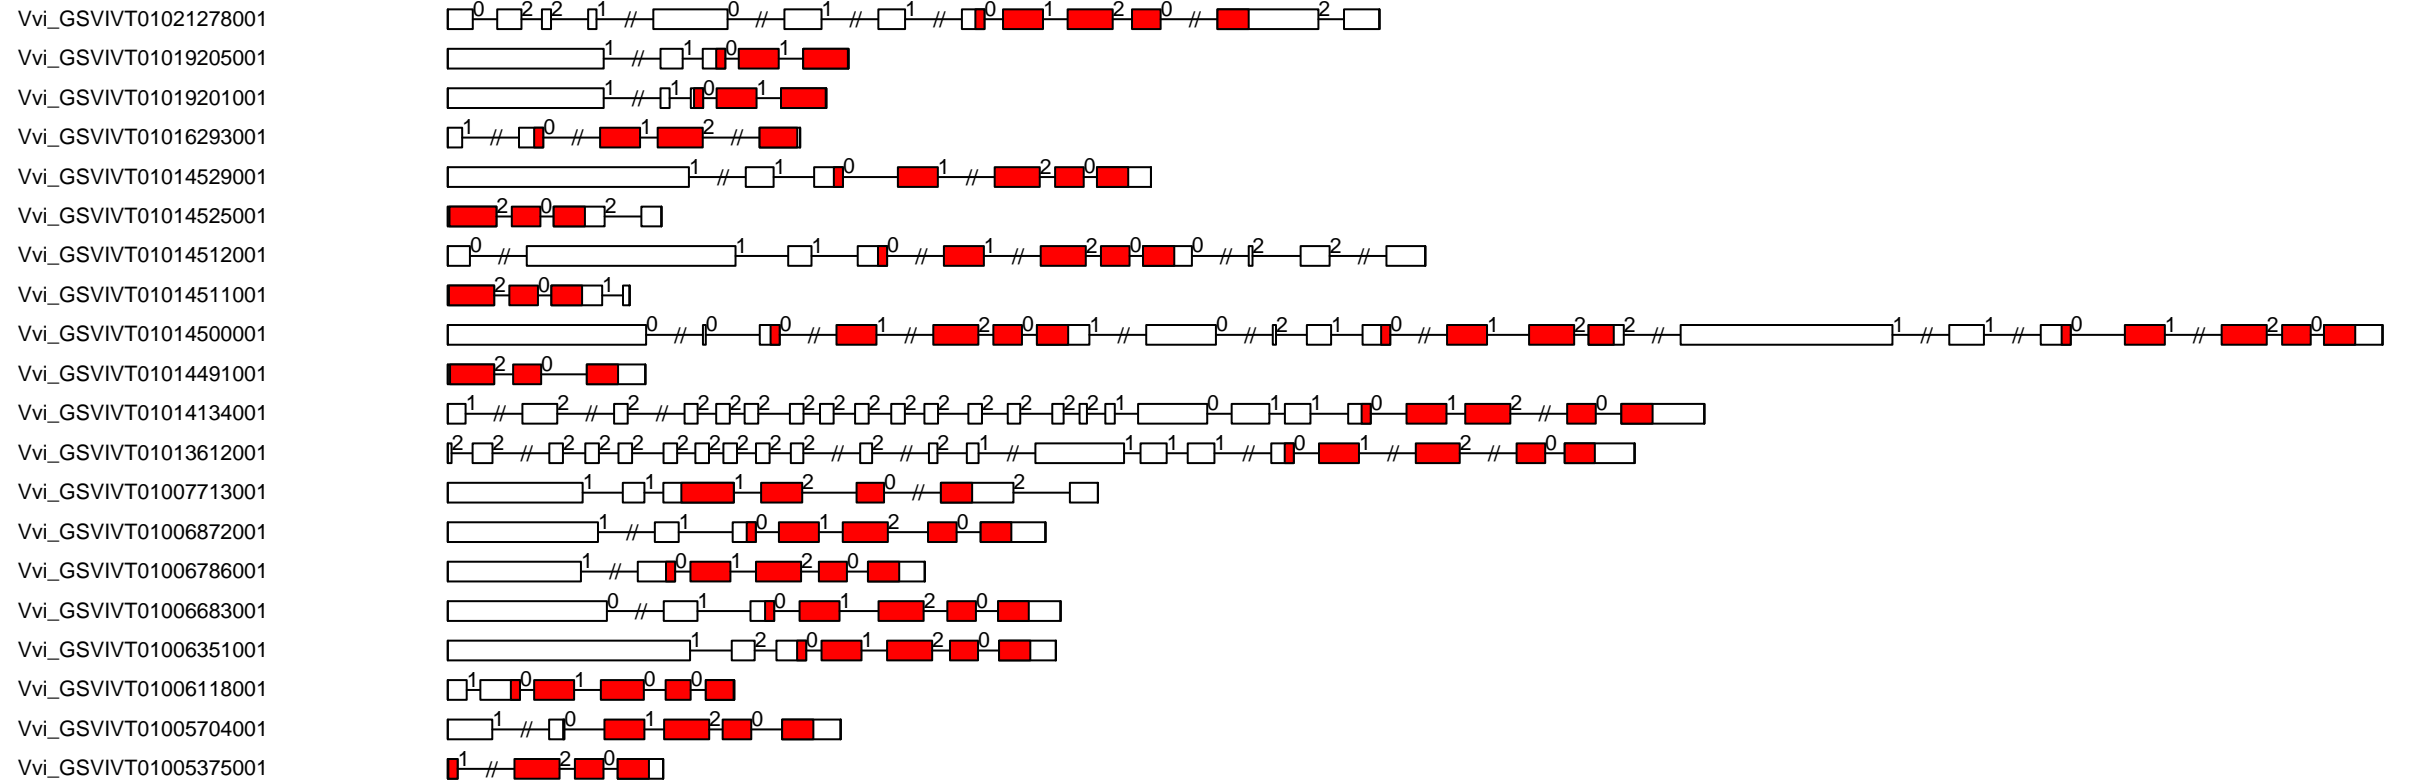

# V.vi RLK-Pelle\_DLSV exon-intron and domain diagram (part 7)

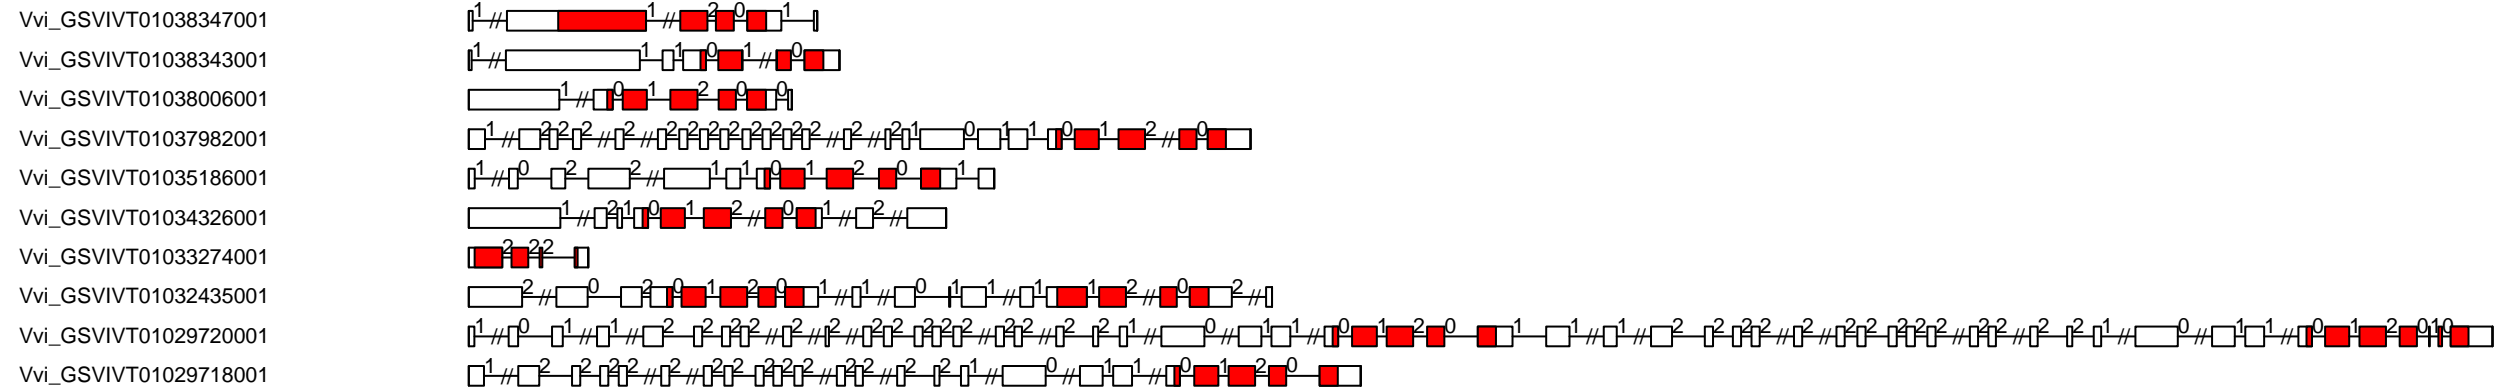

**V.vi RLK-Pelle\_Extensin exon-intron and domain diagram (all)**

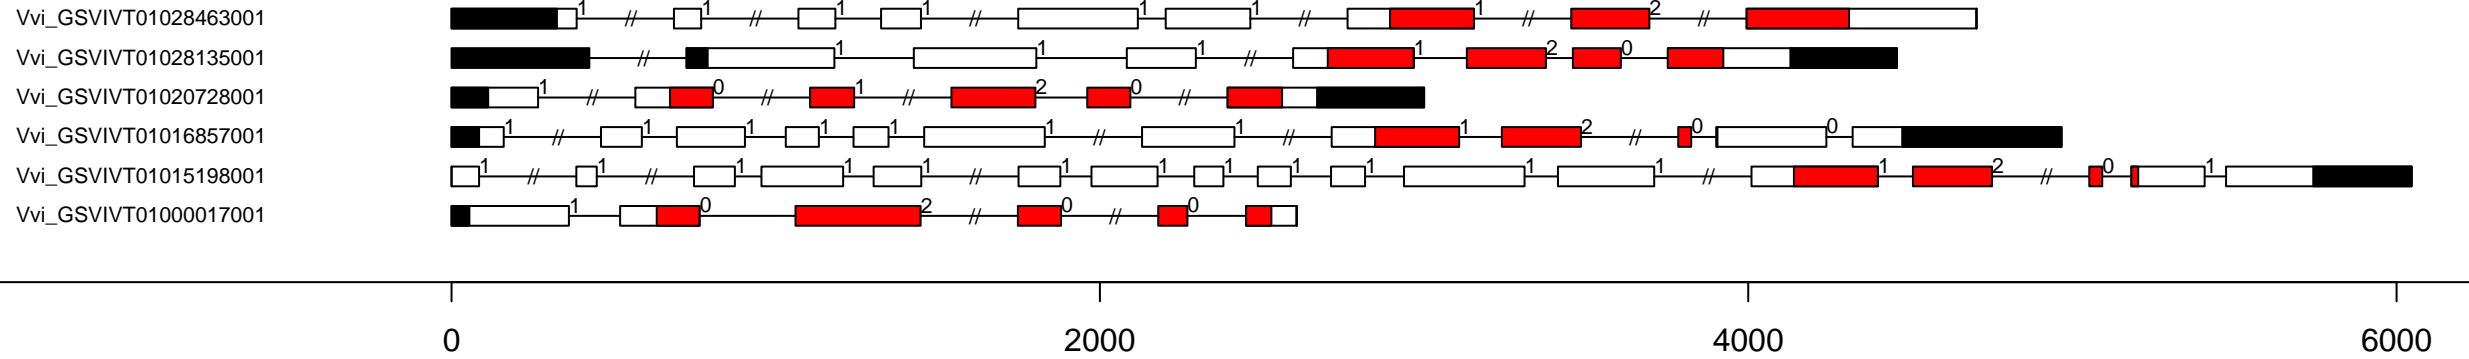





### V.vi RLK-Pelle\_LRR-I-1 exon-intron and domain diagram (all)

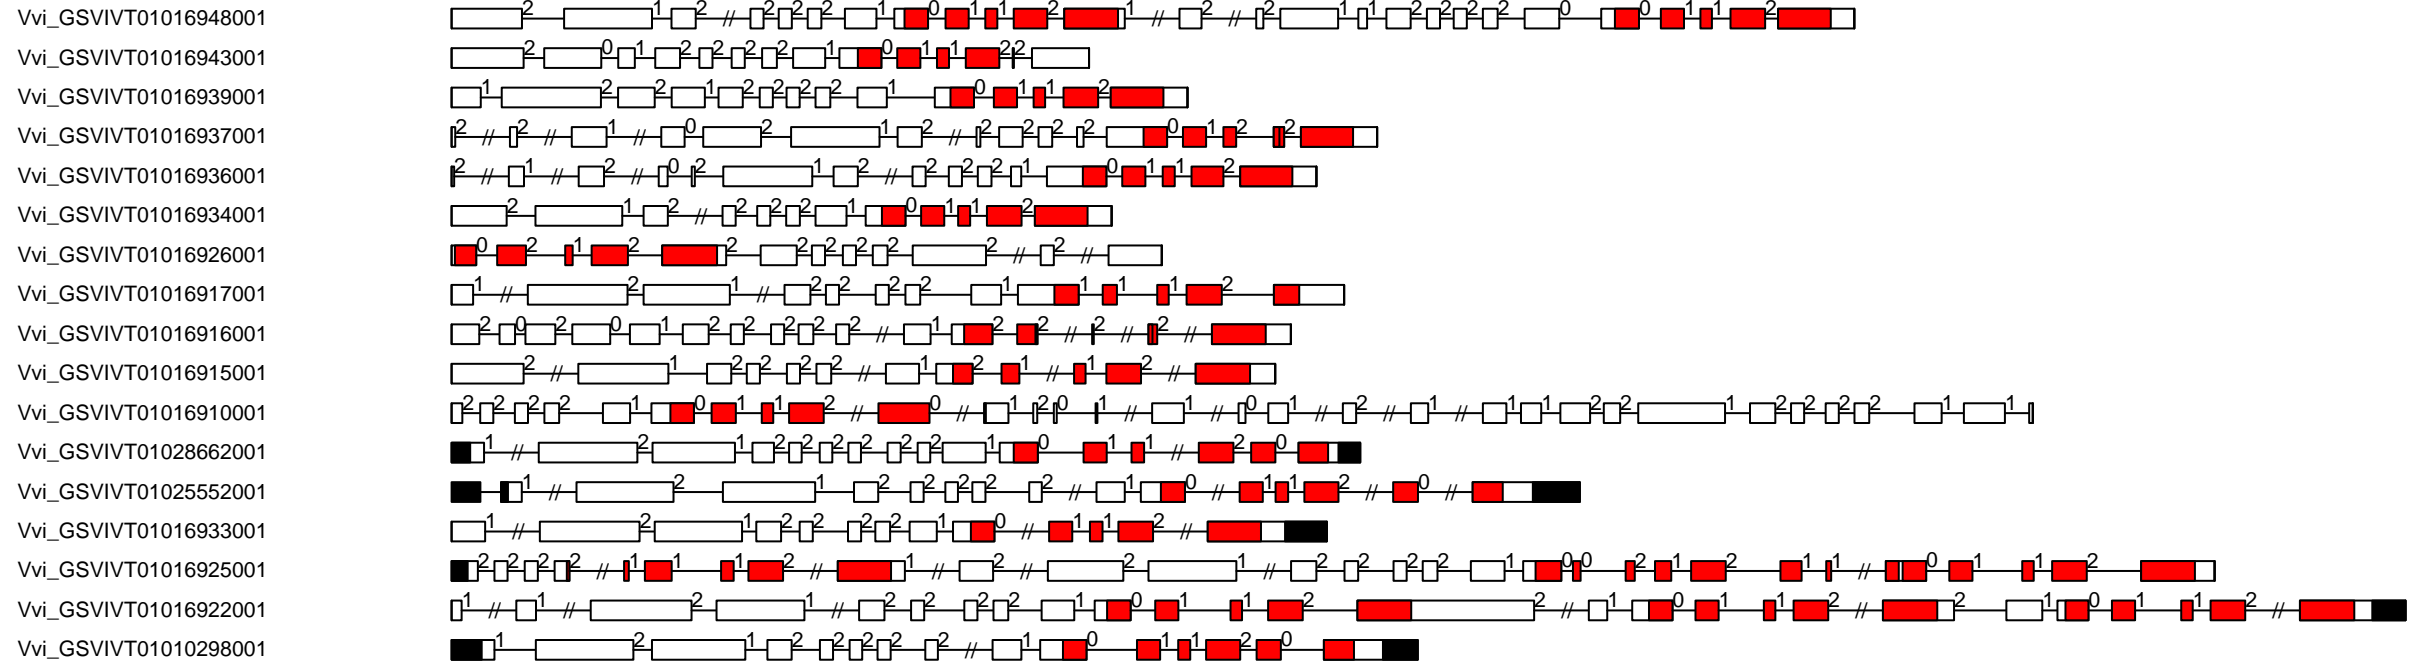



# V.vi RLK-Pelle\_LRR-I-2 exon-intron and domain diagram (all)

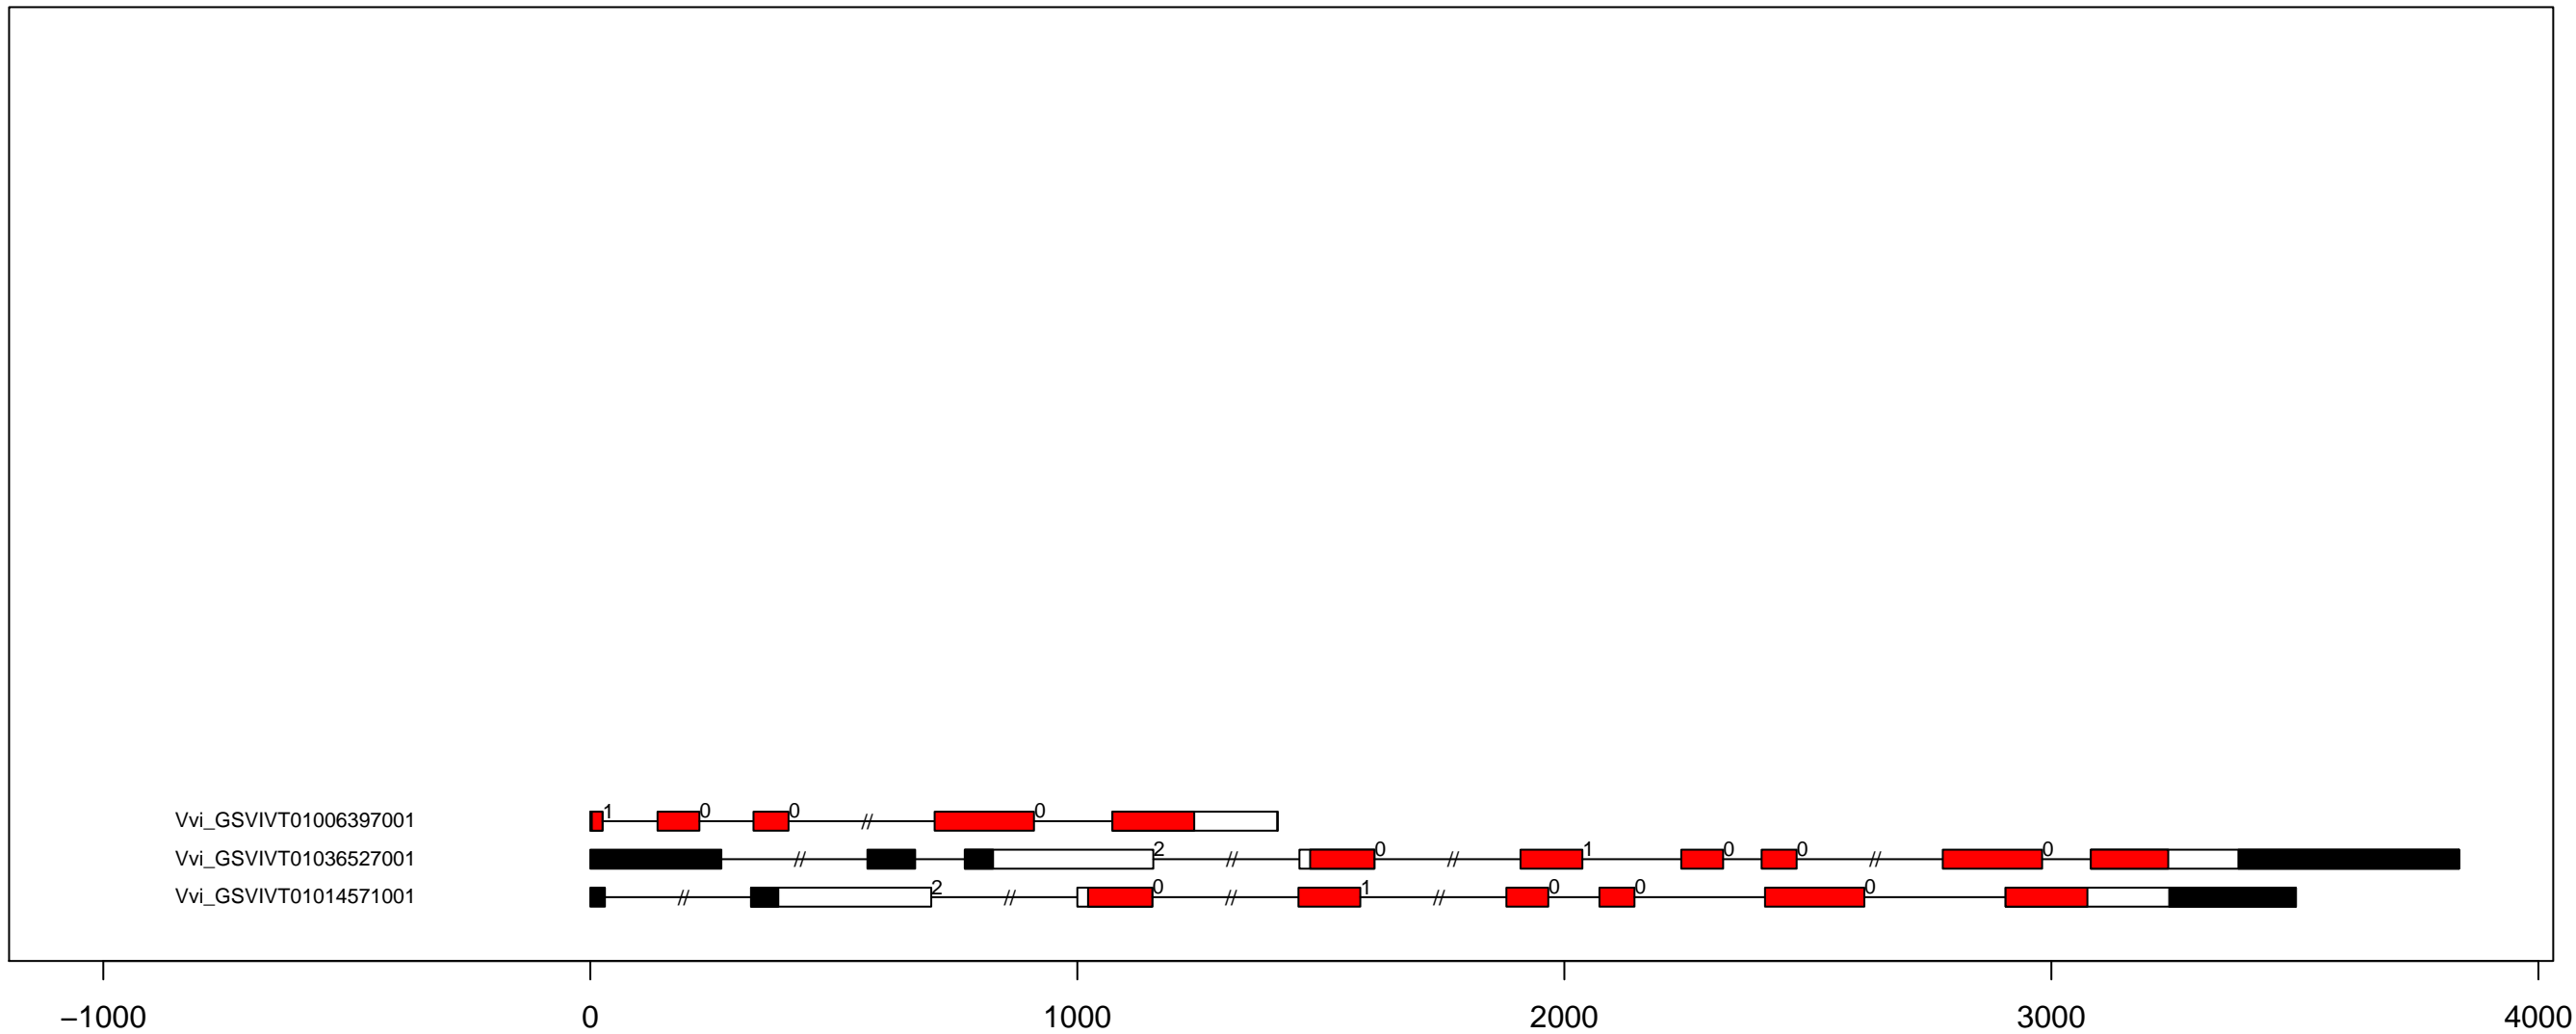

### V.vi RLK-Pelle\_LRR-III exon-intron and domain diagram (part 1)

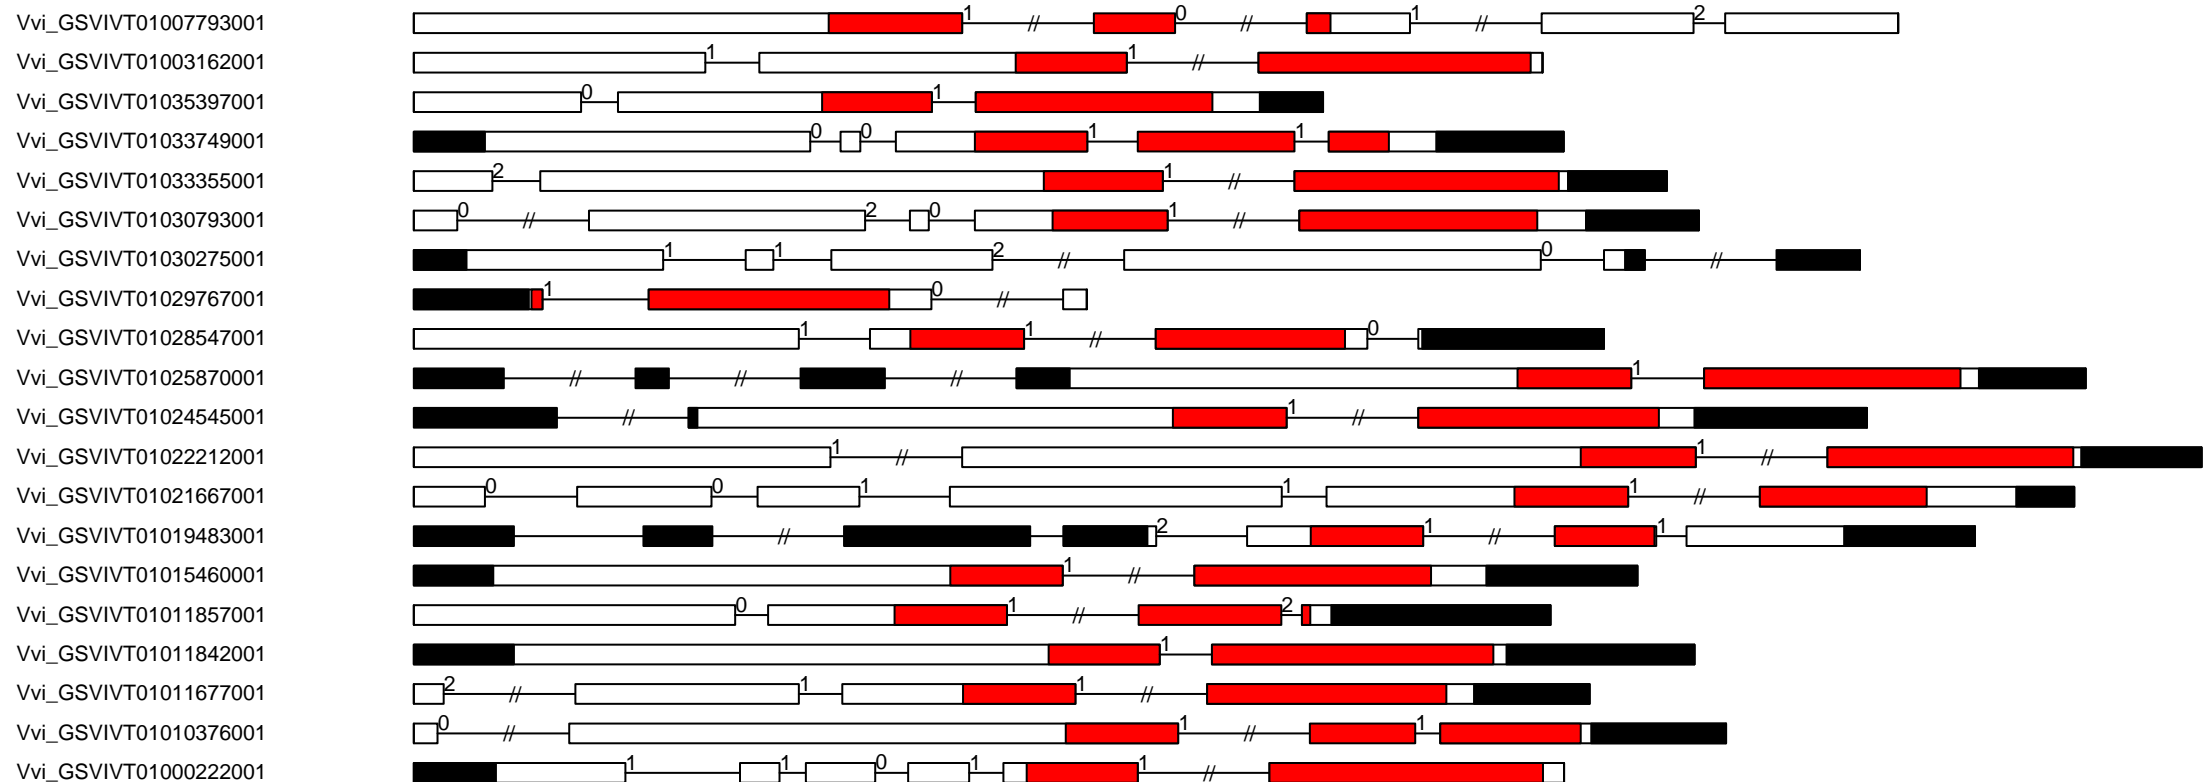

### V.vi RLK-Pelle\_LRR-III exon-intron and domain diagram (part 2)

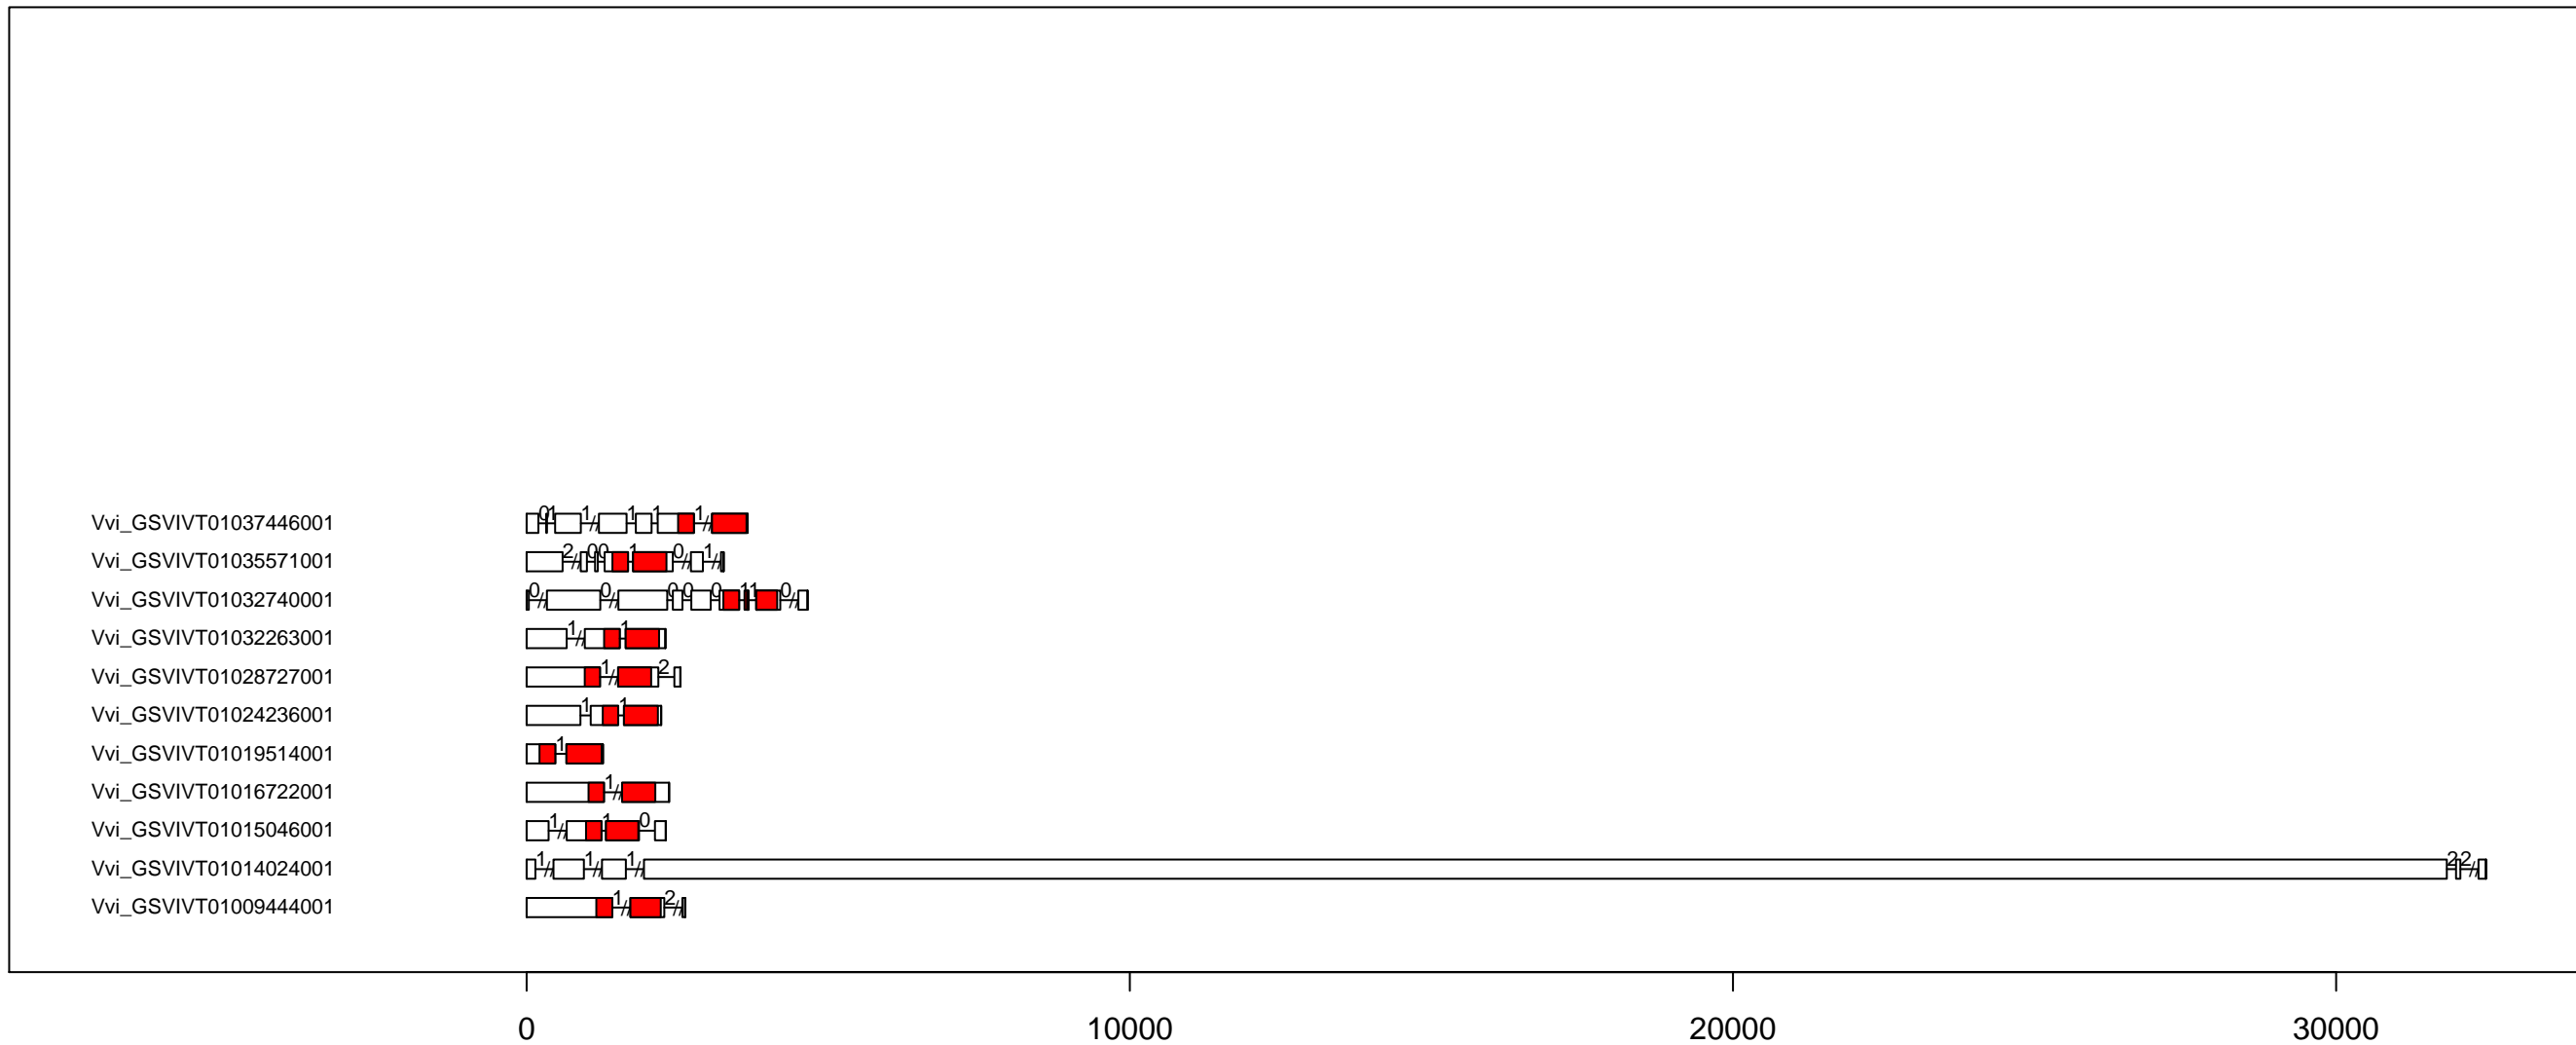

### V.vi RLK-Pelle\_LRR-II exon-intron and domain diagram (all)

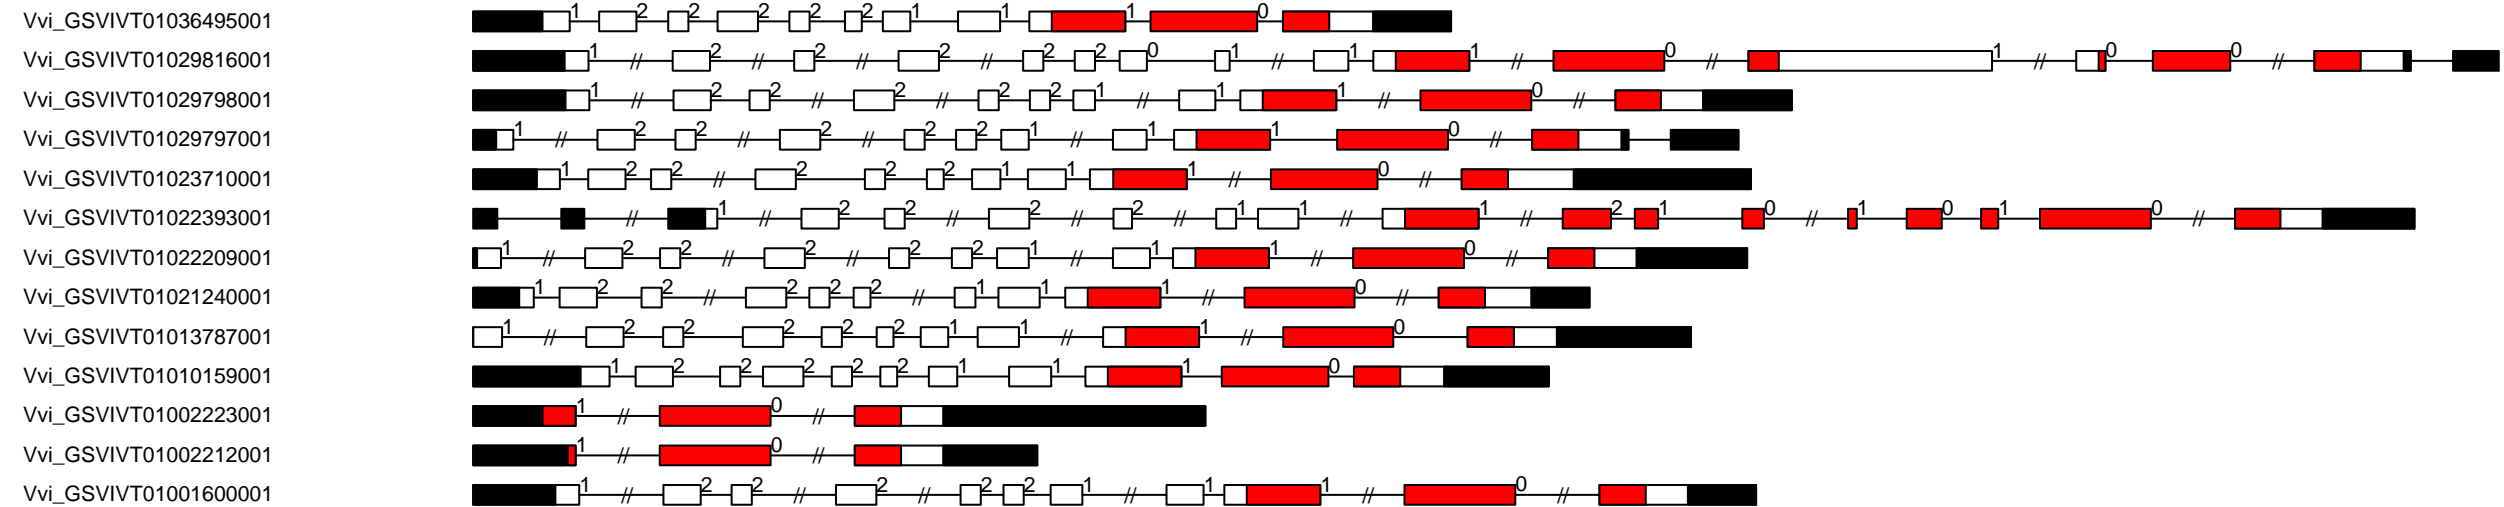

0

2000

4000

6000

# V.vi RLK-Pelle\_LRR-IV exon-intron and domain diagram (all)

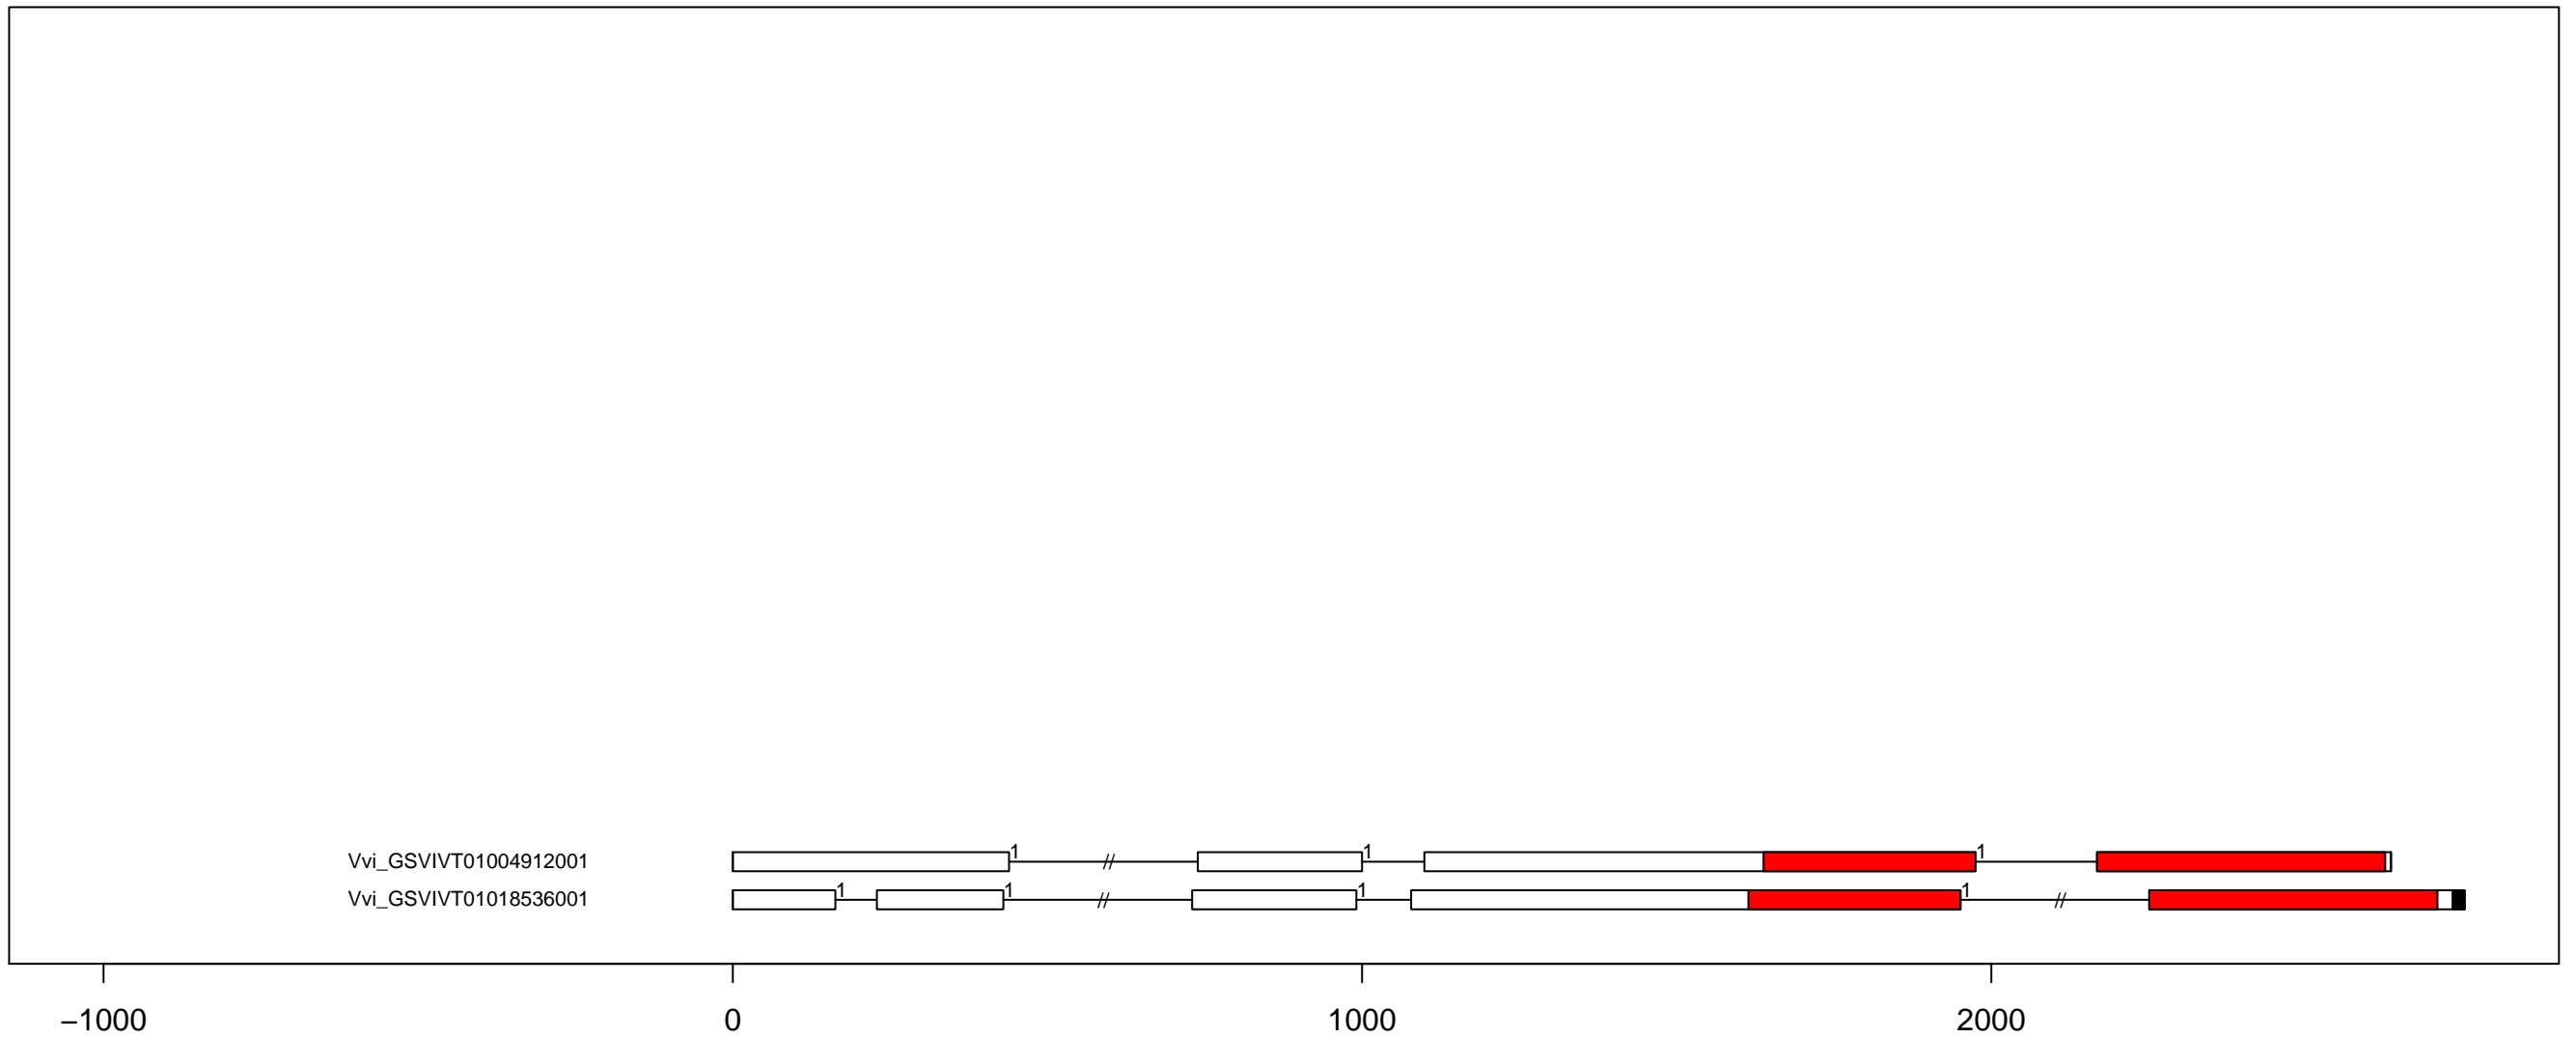

# V.vi RLK-Pelle\_LRR-IX exon-intron and domain diagram (all)

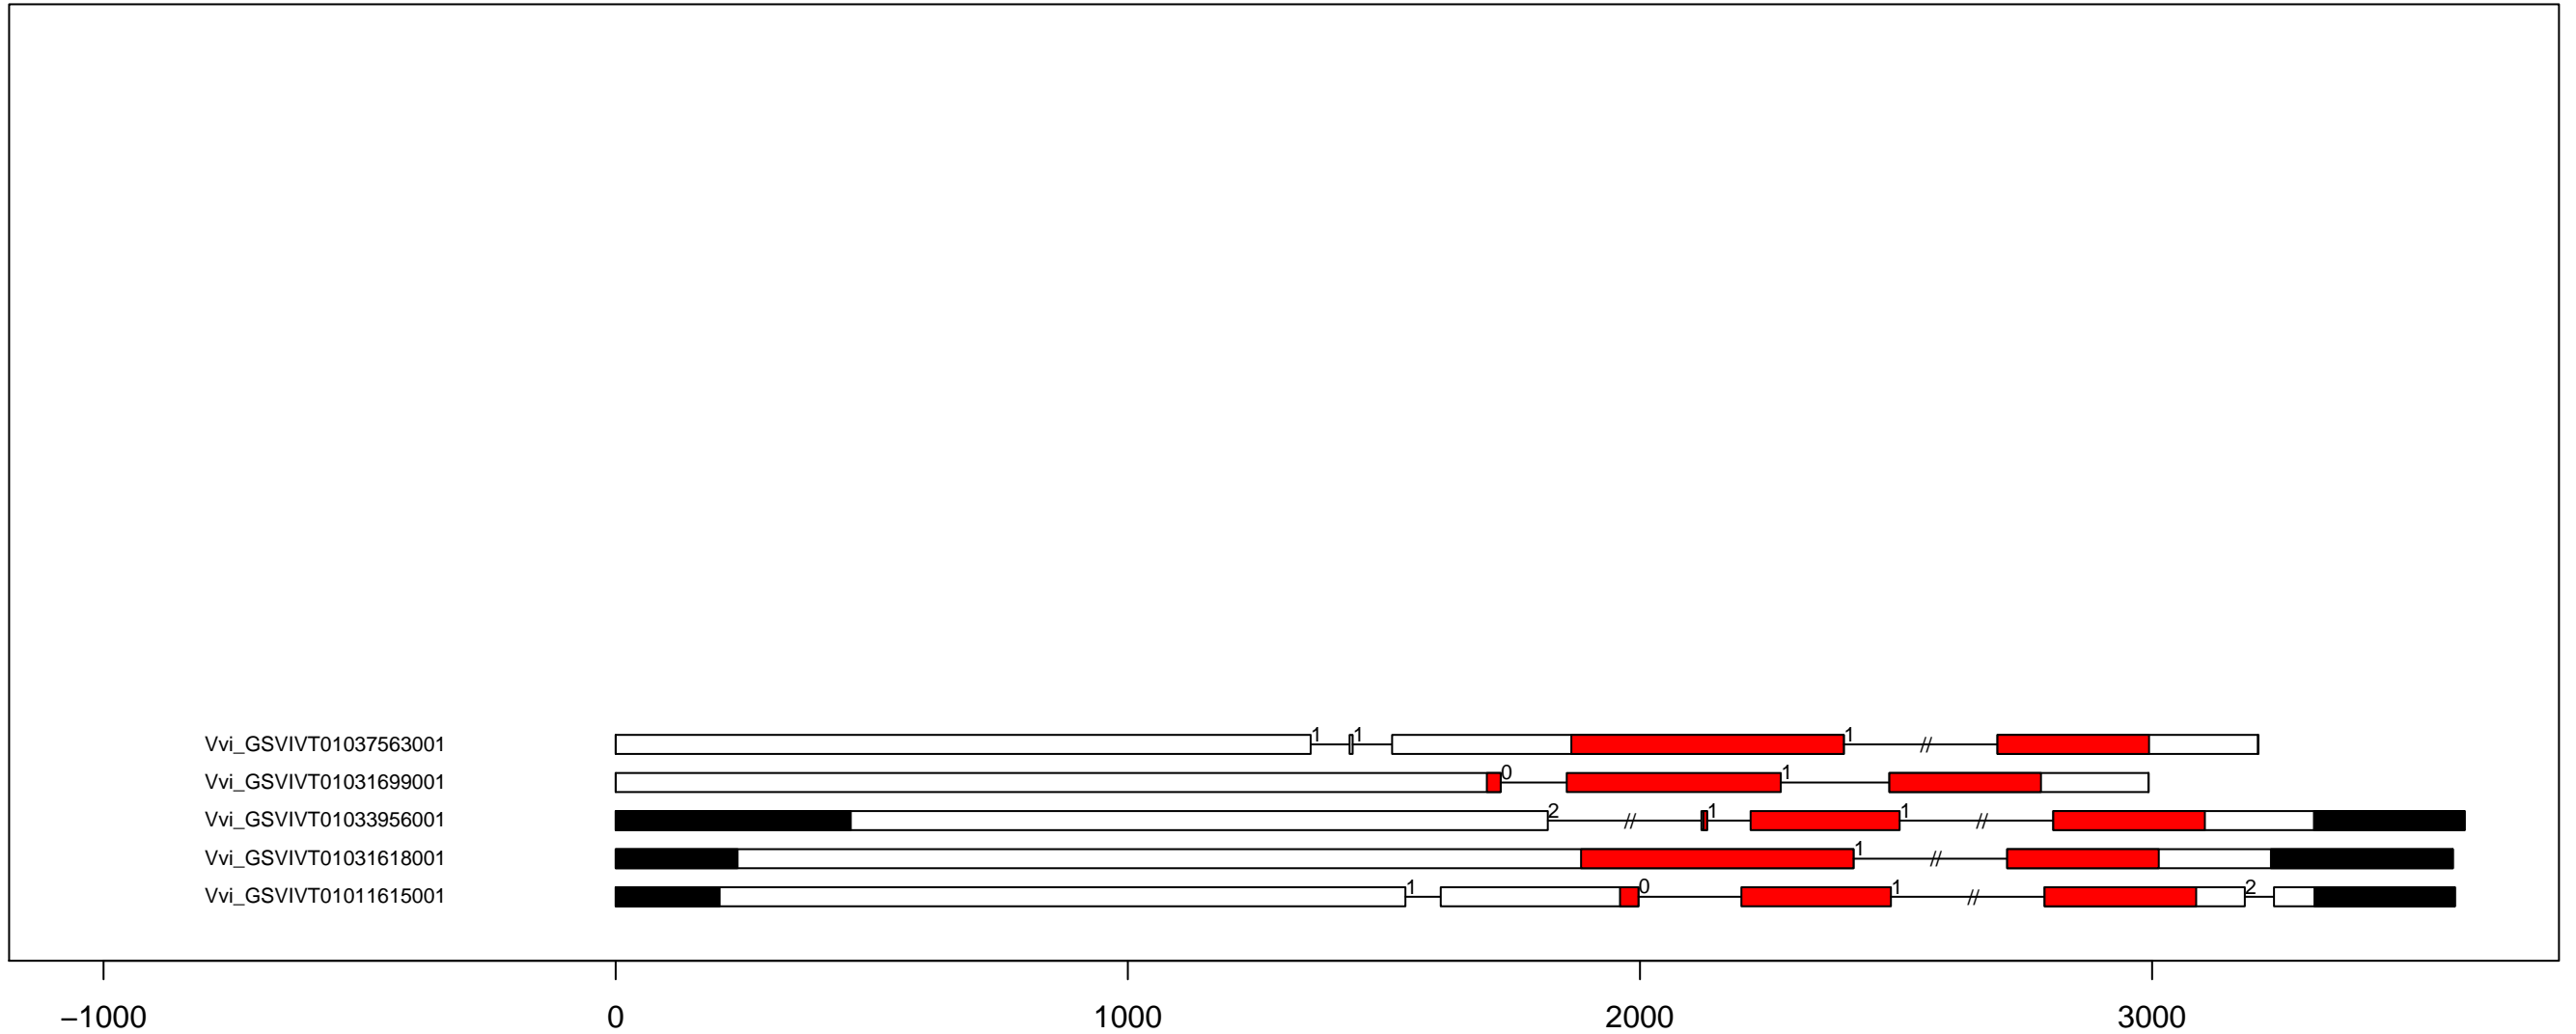

# V.vi RLK-Pelle\_LRR-VI-1 exon-intron and domain diagram (all)

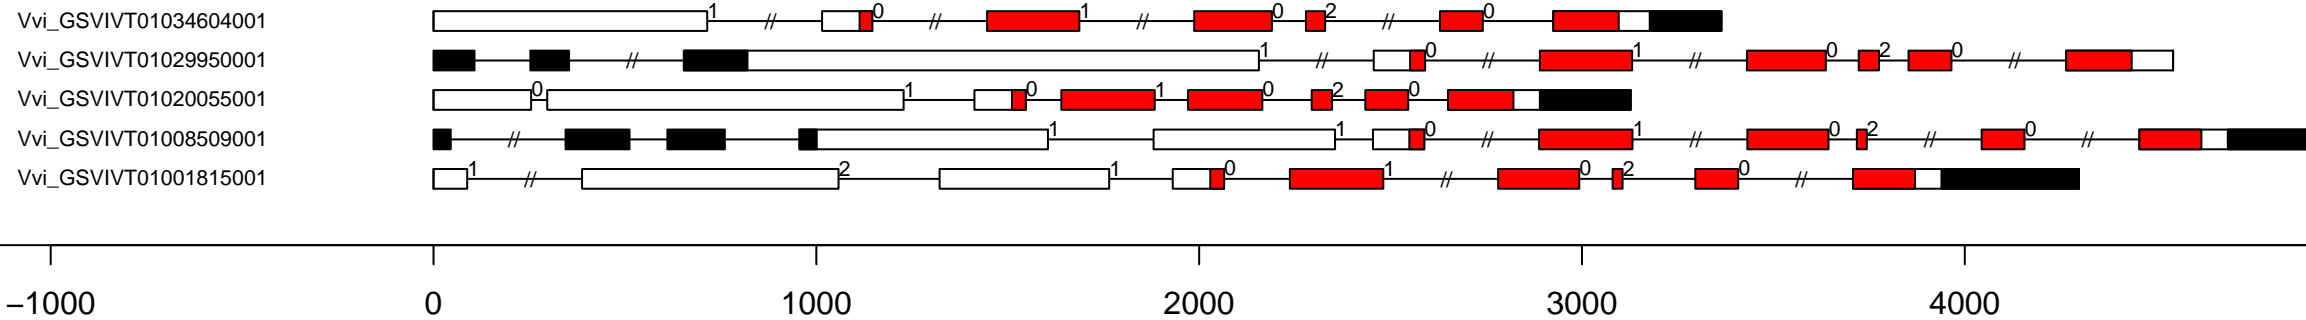

# V.vi RLK-Pelle\_LRR-VI-2 exon-intron and domain diagram (all)

Vvi\_GSVIVT01014189001

Vvi\_GSVIVT01032772001

Vvi\_GSVIVT01024684001

Vvi\_GSVIVT01021228001

Vvi\_GSVIVT01019778001

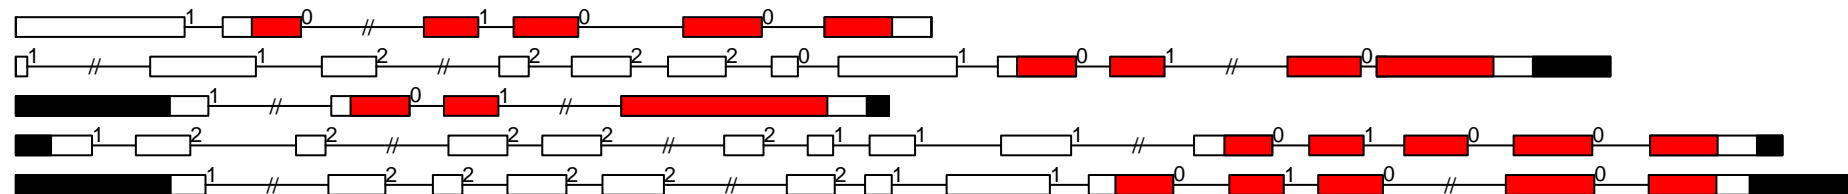

-1000

0

1000

2000

3000

4000



# V.vi RLK-Pelle\_LRR-VII-1 exon-intron and domain diagram (all)

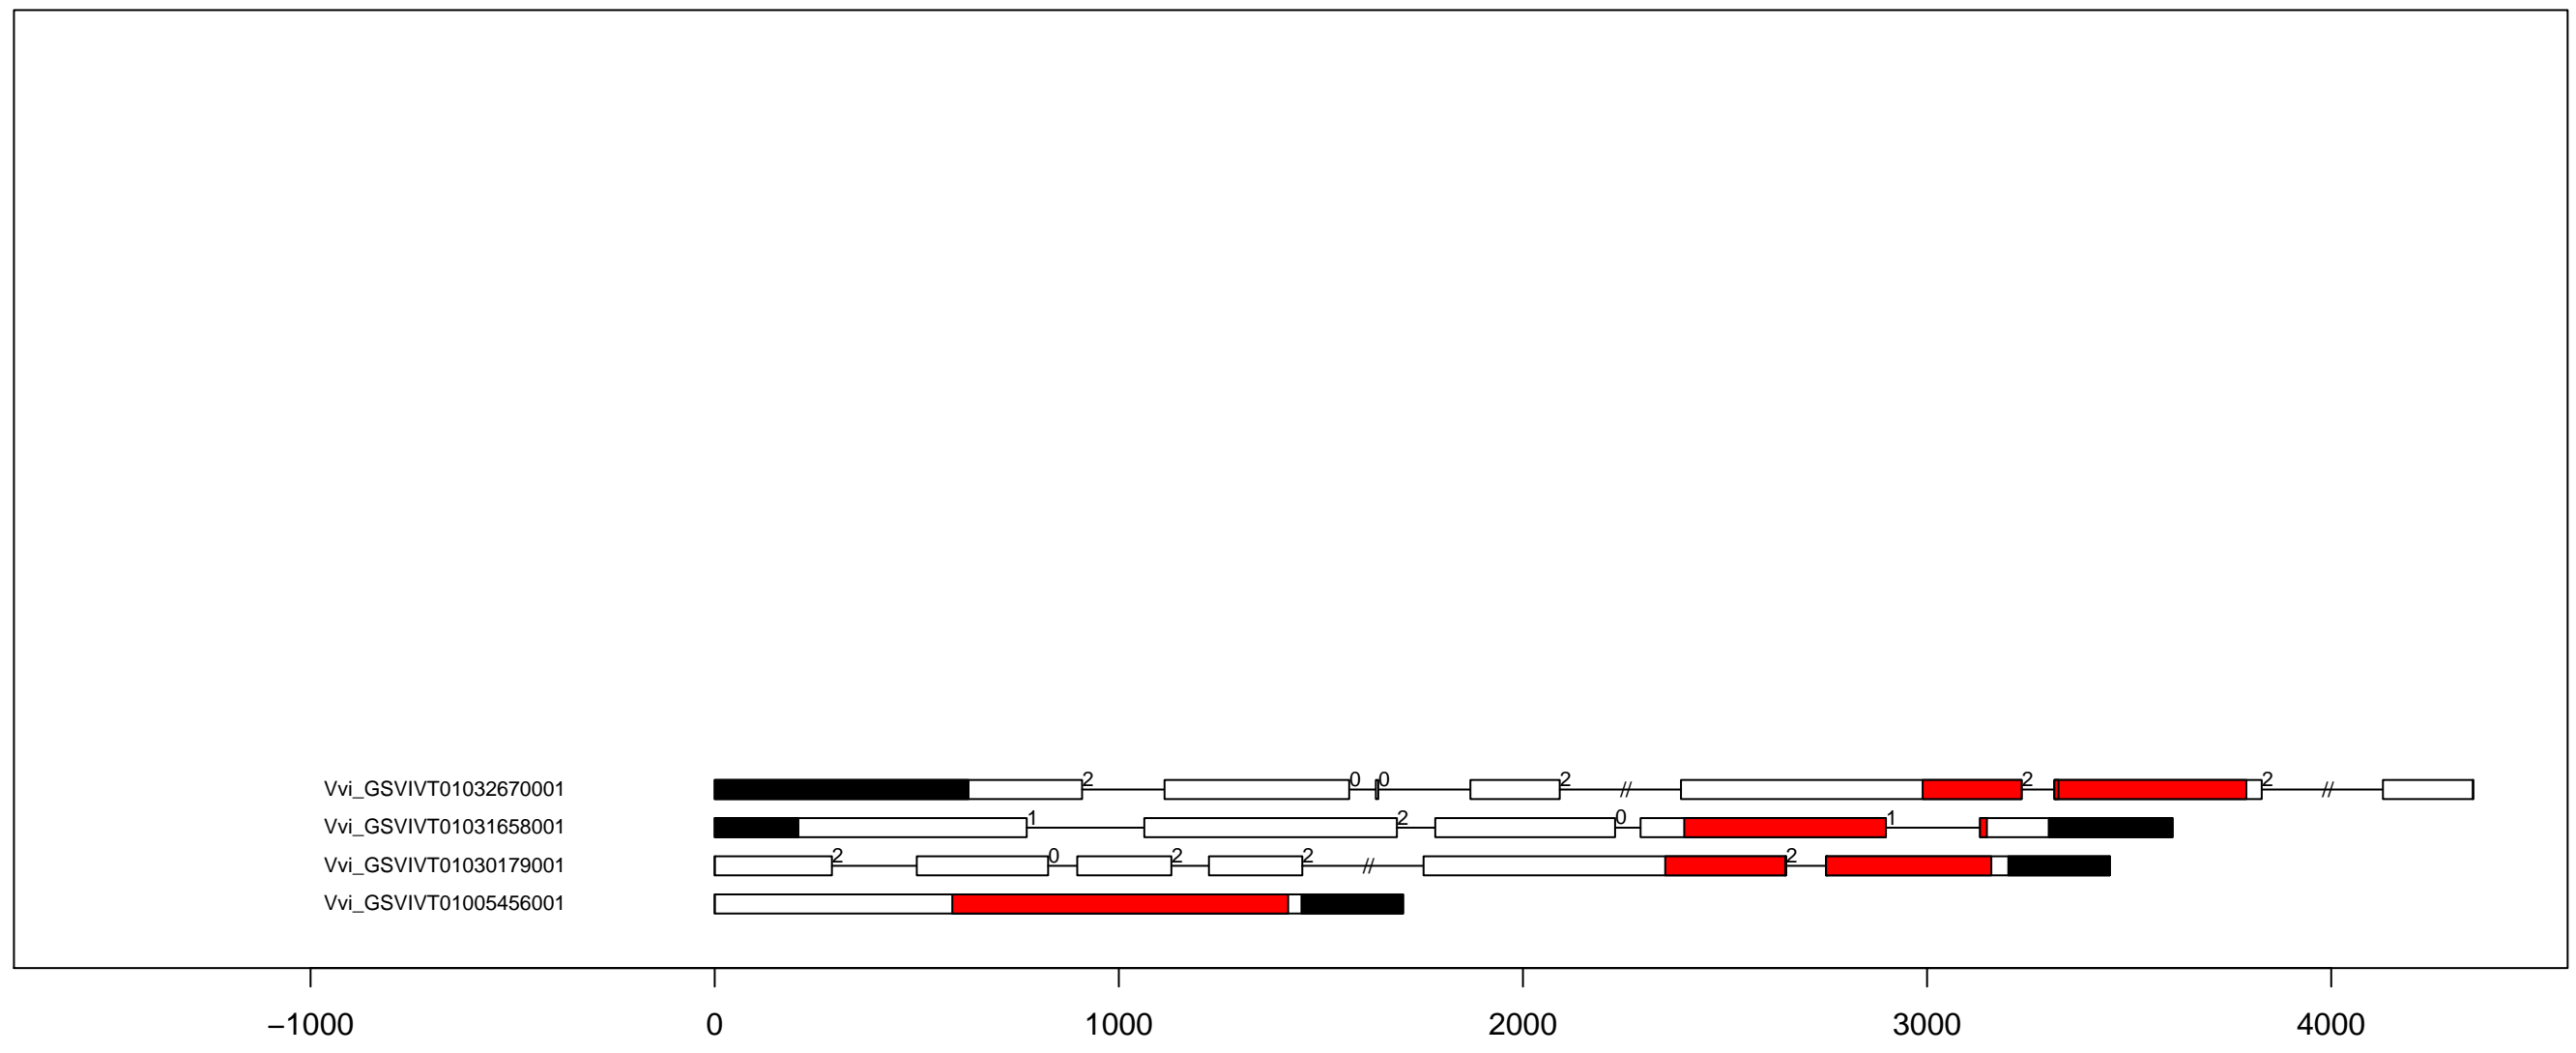

# V.vi RLK-Pelle\_LRR-VII-2 exon-intron and domain diagram (all)

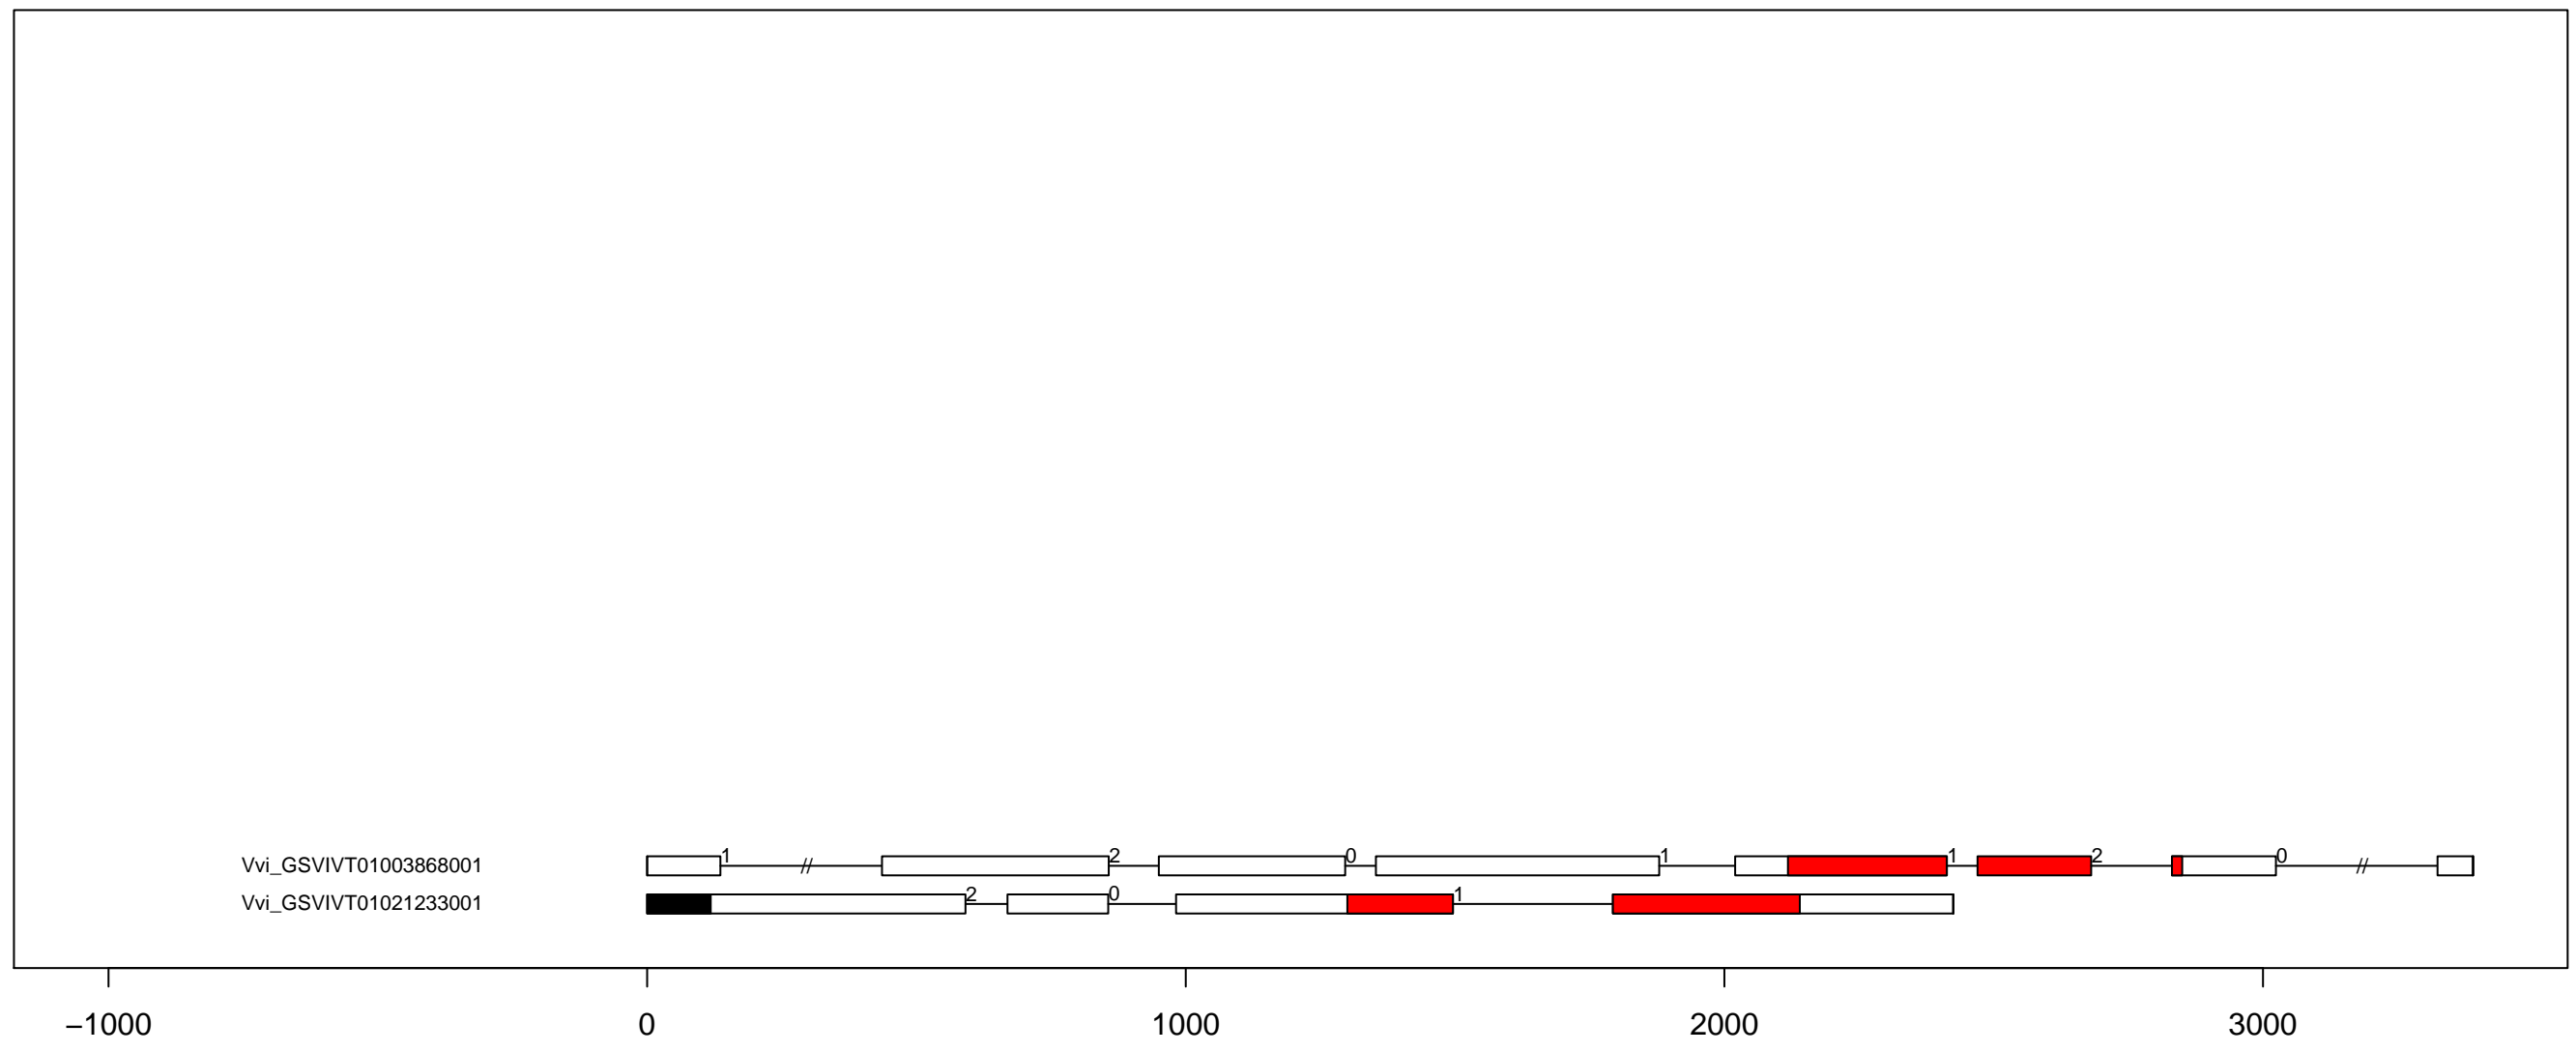

# V.vi RLK-Pelle\_LRR-VII-3 exon-intron and domain diagram (all)

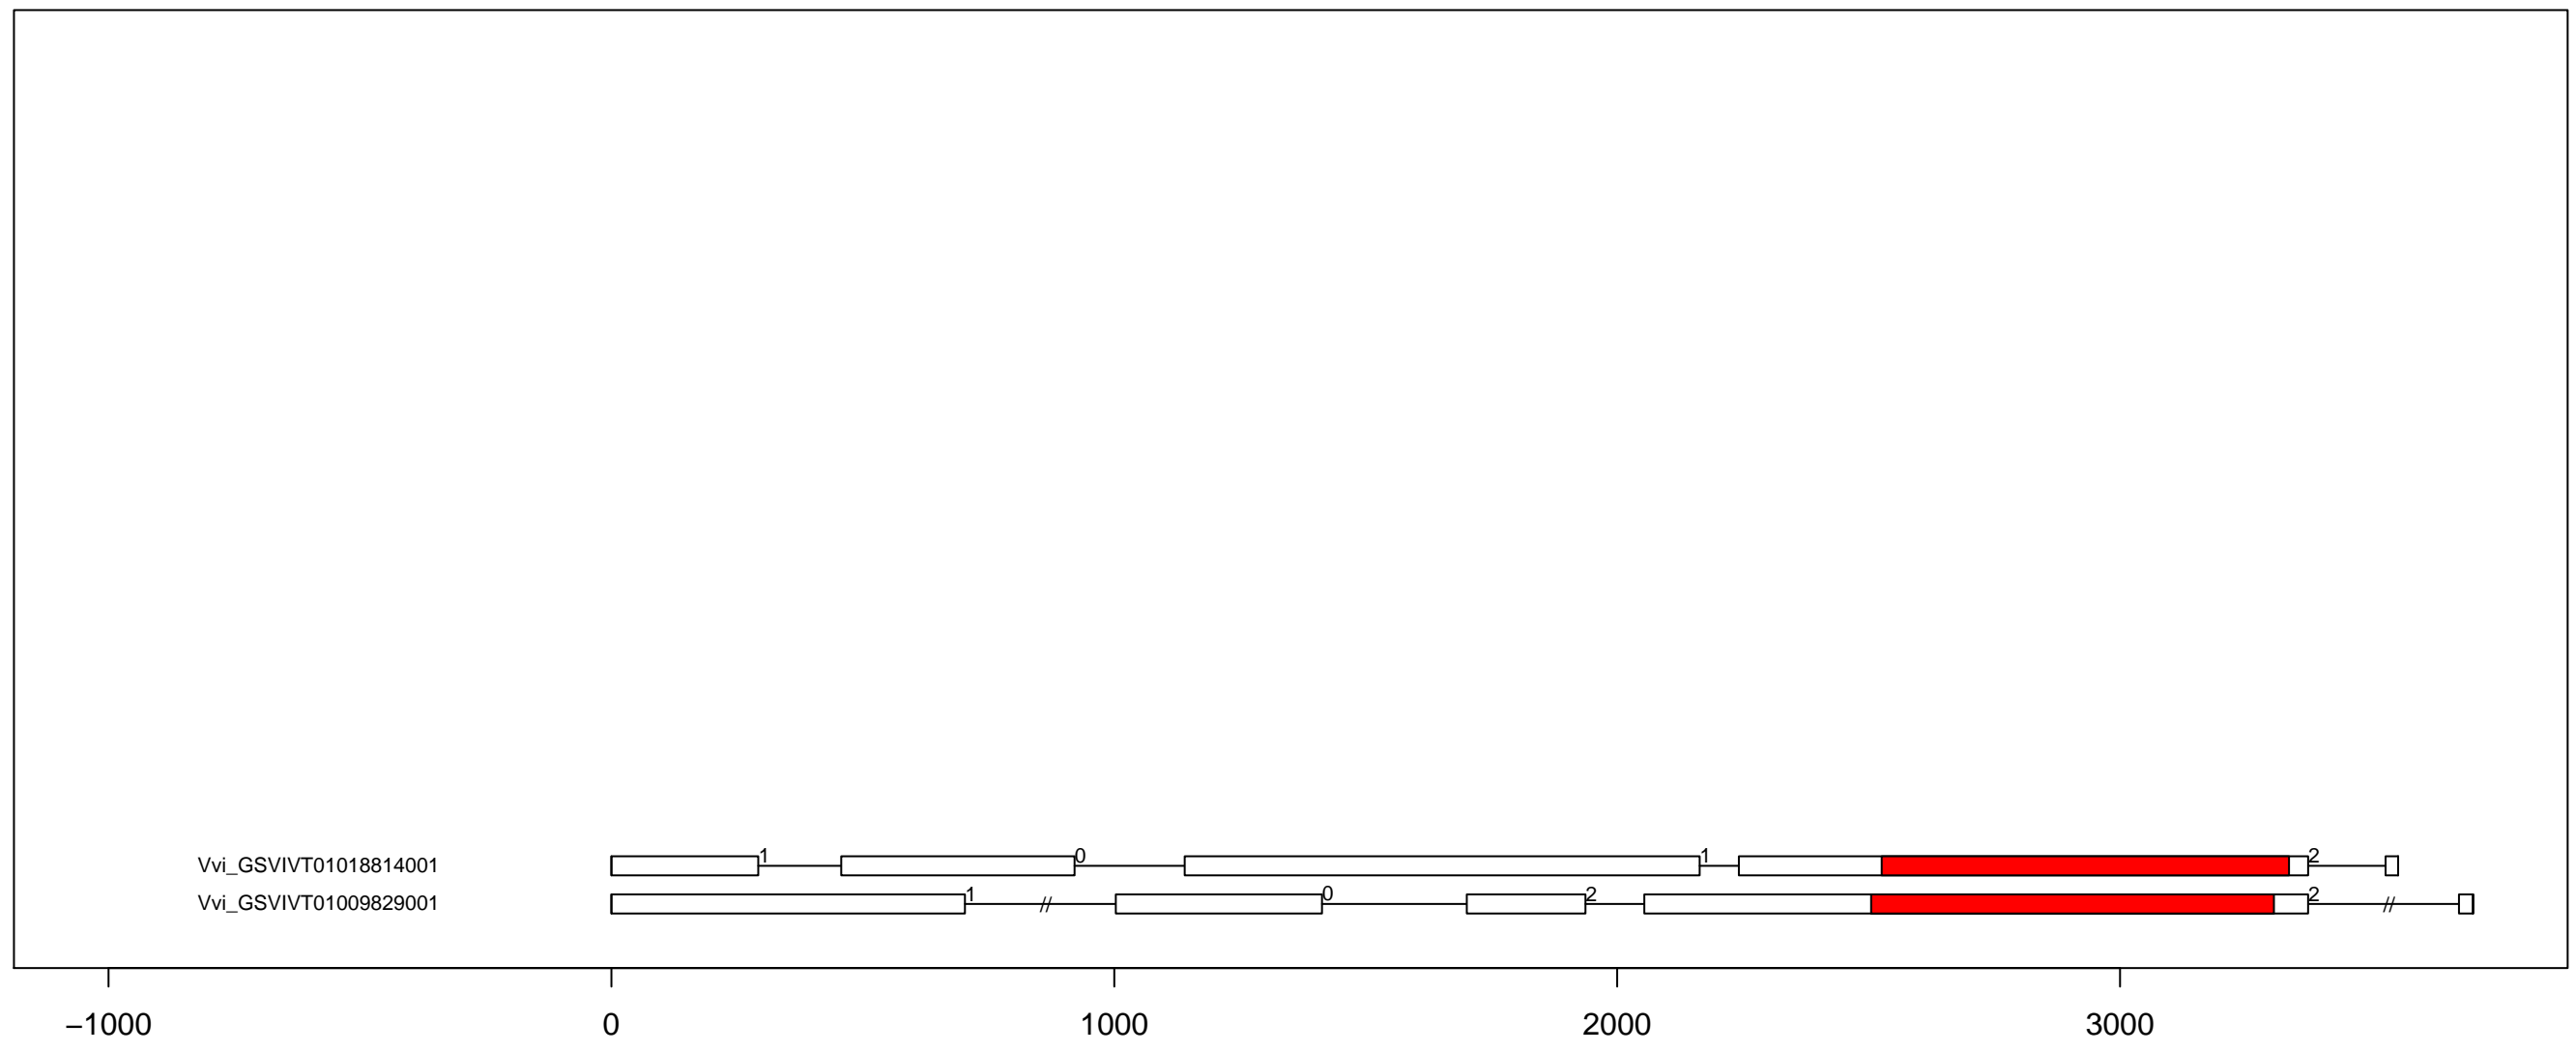

# V.vi RLK-Pelle\_LRR-VIII-1 exon-intron and domain diagram (all)

Vvi\_GSVIVT01029870001  
Vvi\_GSVIVT01029829001  
Vvi\_GSVIVT01024538001  
Vvi\_GSVIVT01023113001

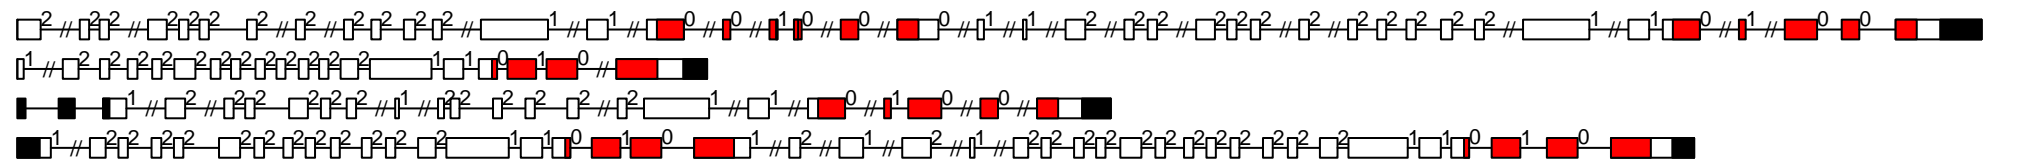

0

5000

10000

15000

### V.vi RLK-Pelle\_LRR-V exon-intron and domain diagram (all)

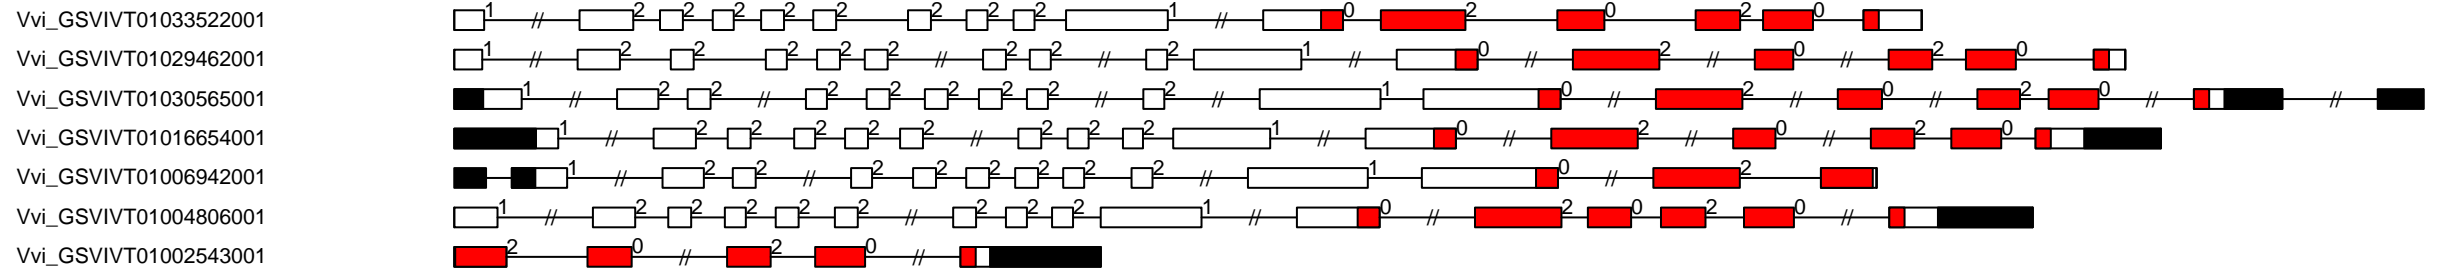

0

2000

4000

6000

# V.vi RLK-Pelle\_LRR-Xa exon-intron and domain diagram (all)

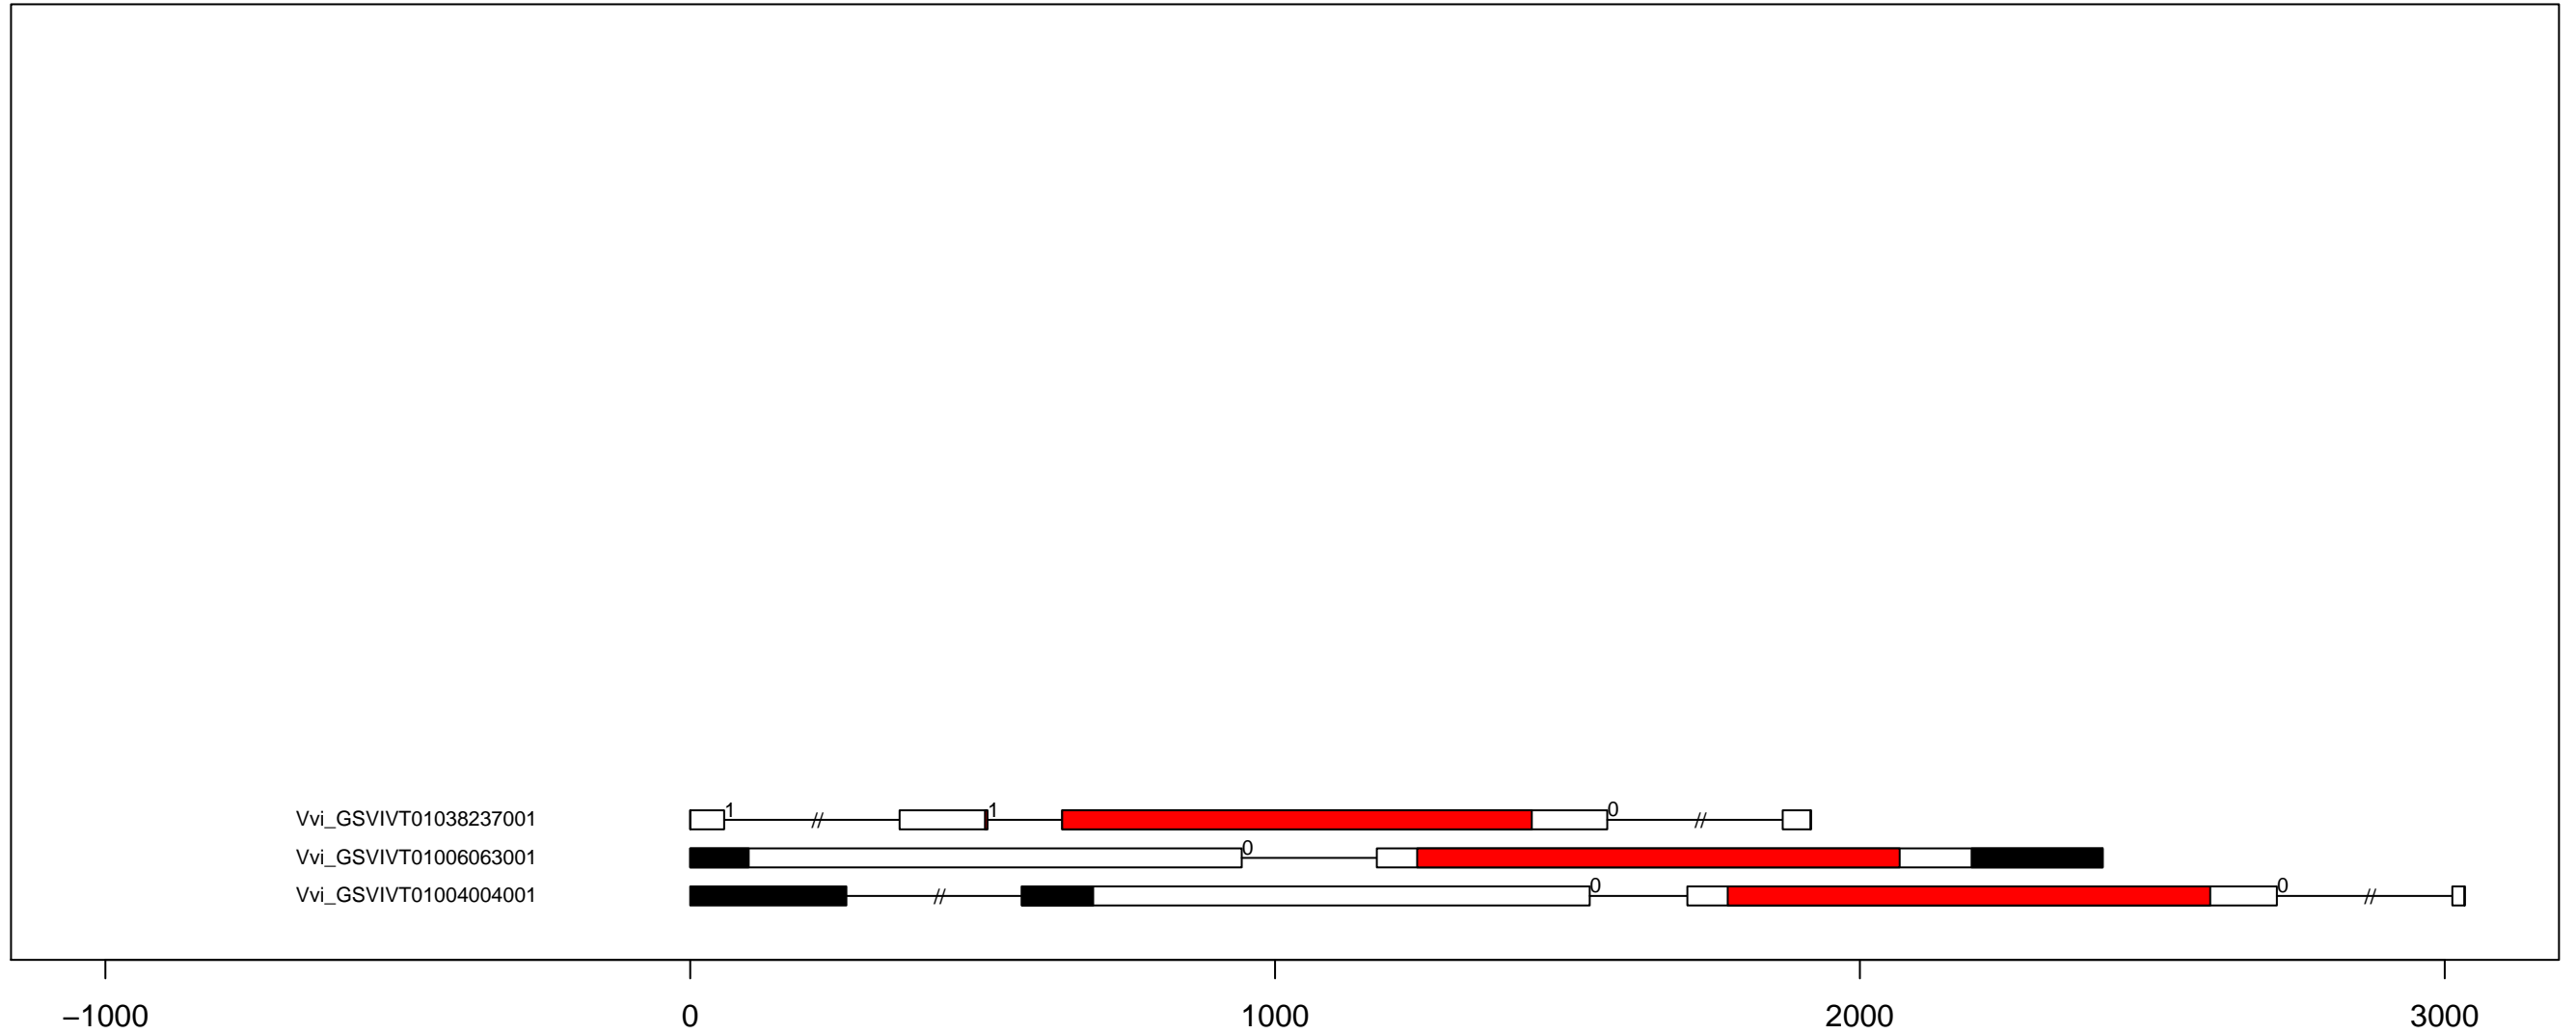

### V.vi RLK-Pelle\_LRR-Xb-1 exon-intron and domain diagram (all)

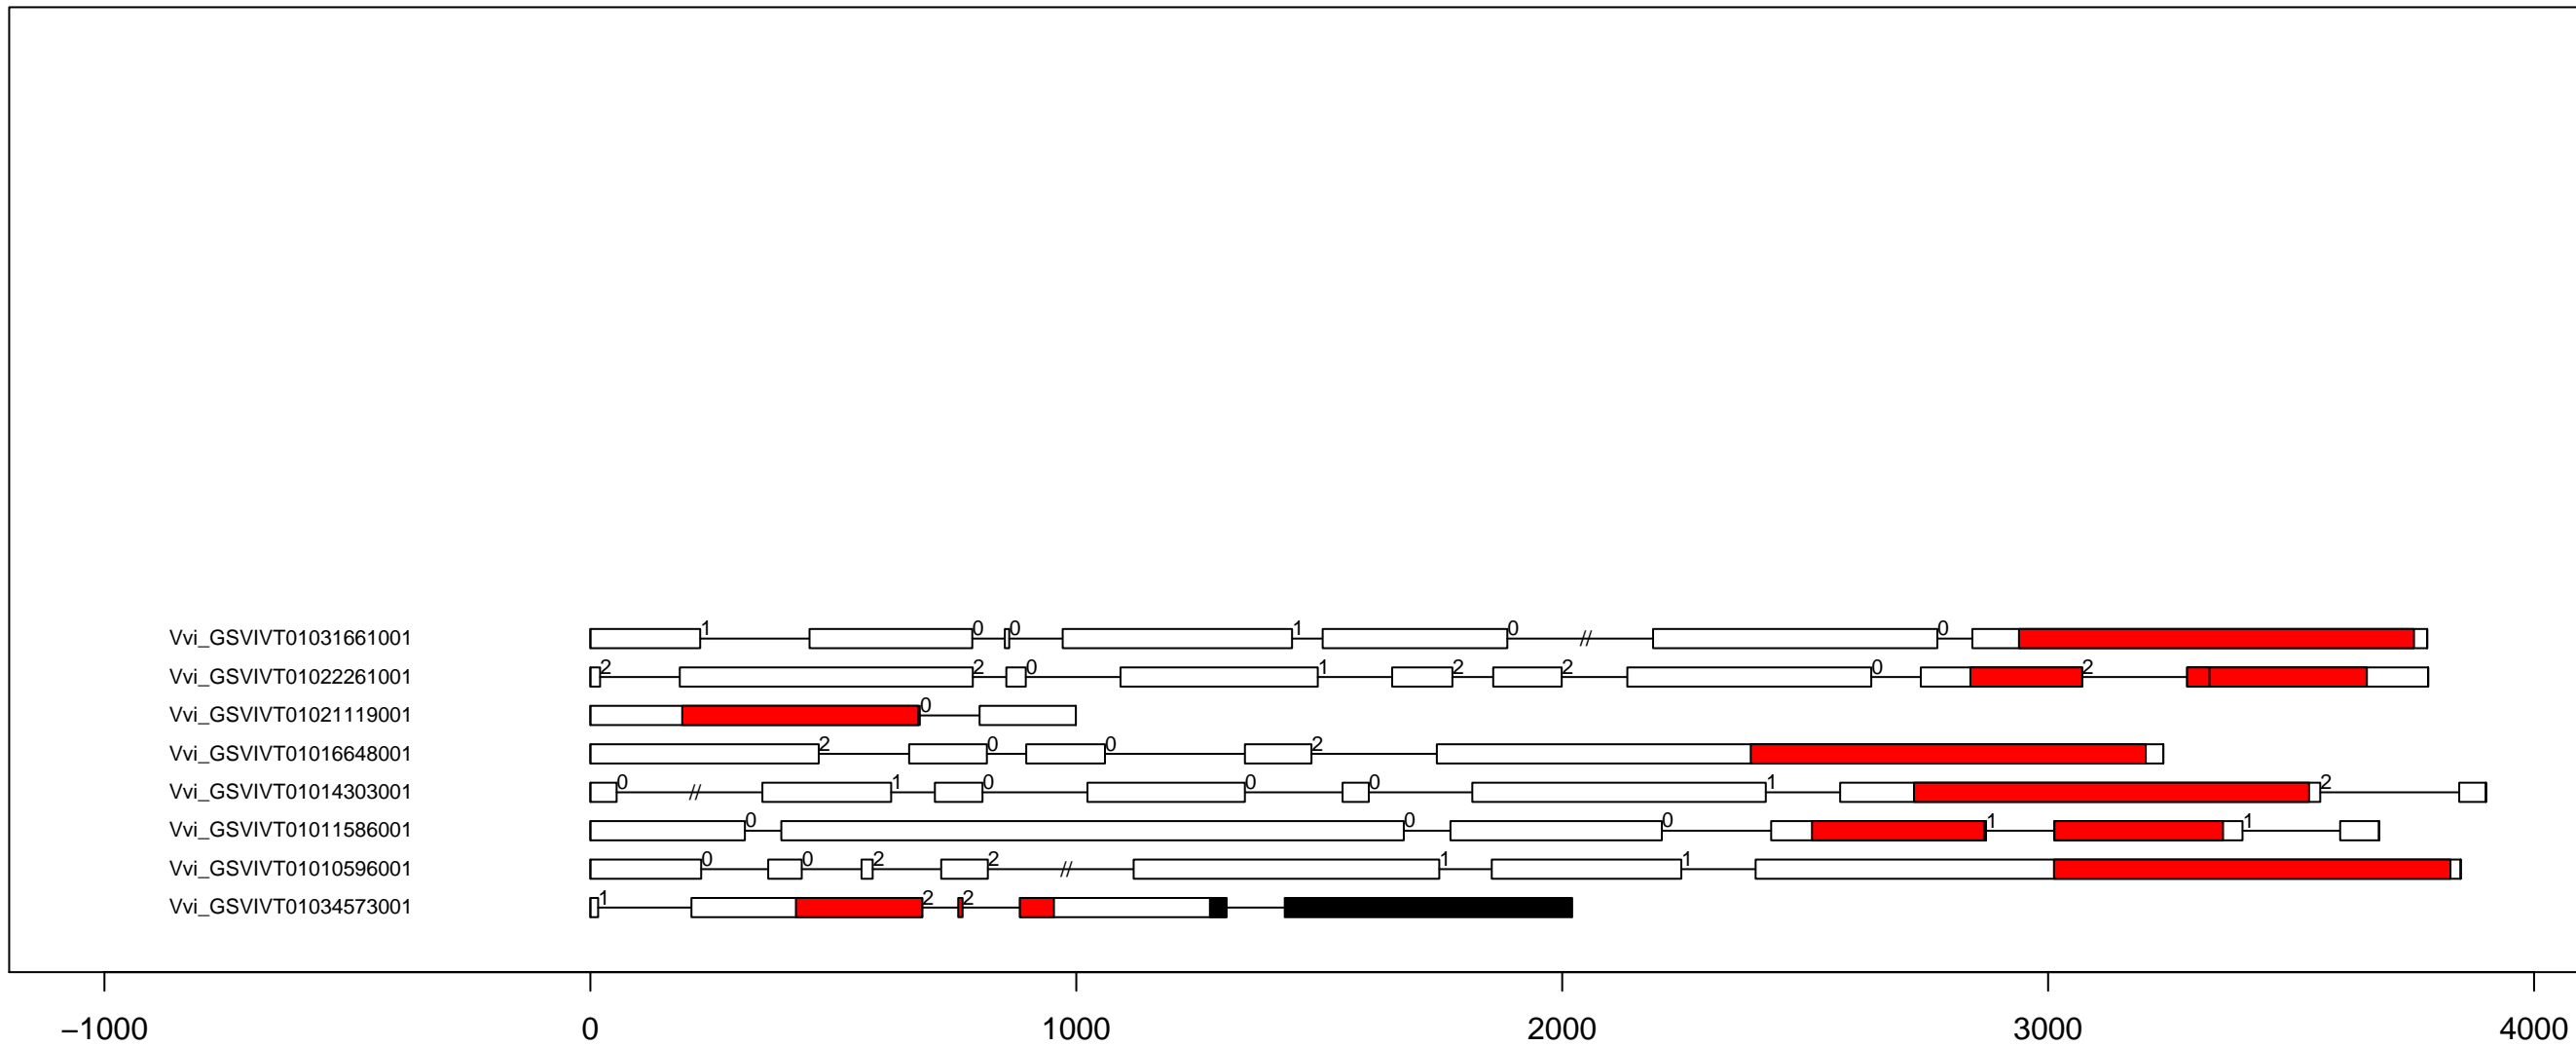

### V.vi RLK-Pelle\_LRR-XI-1 exon-intron and domain diagram (part 1)

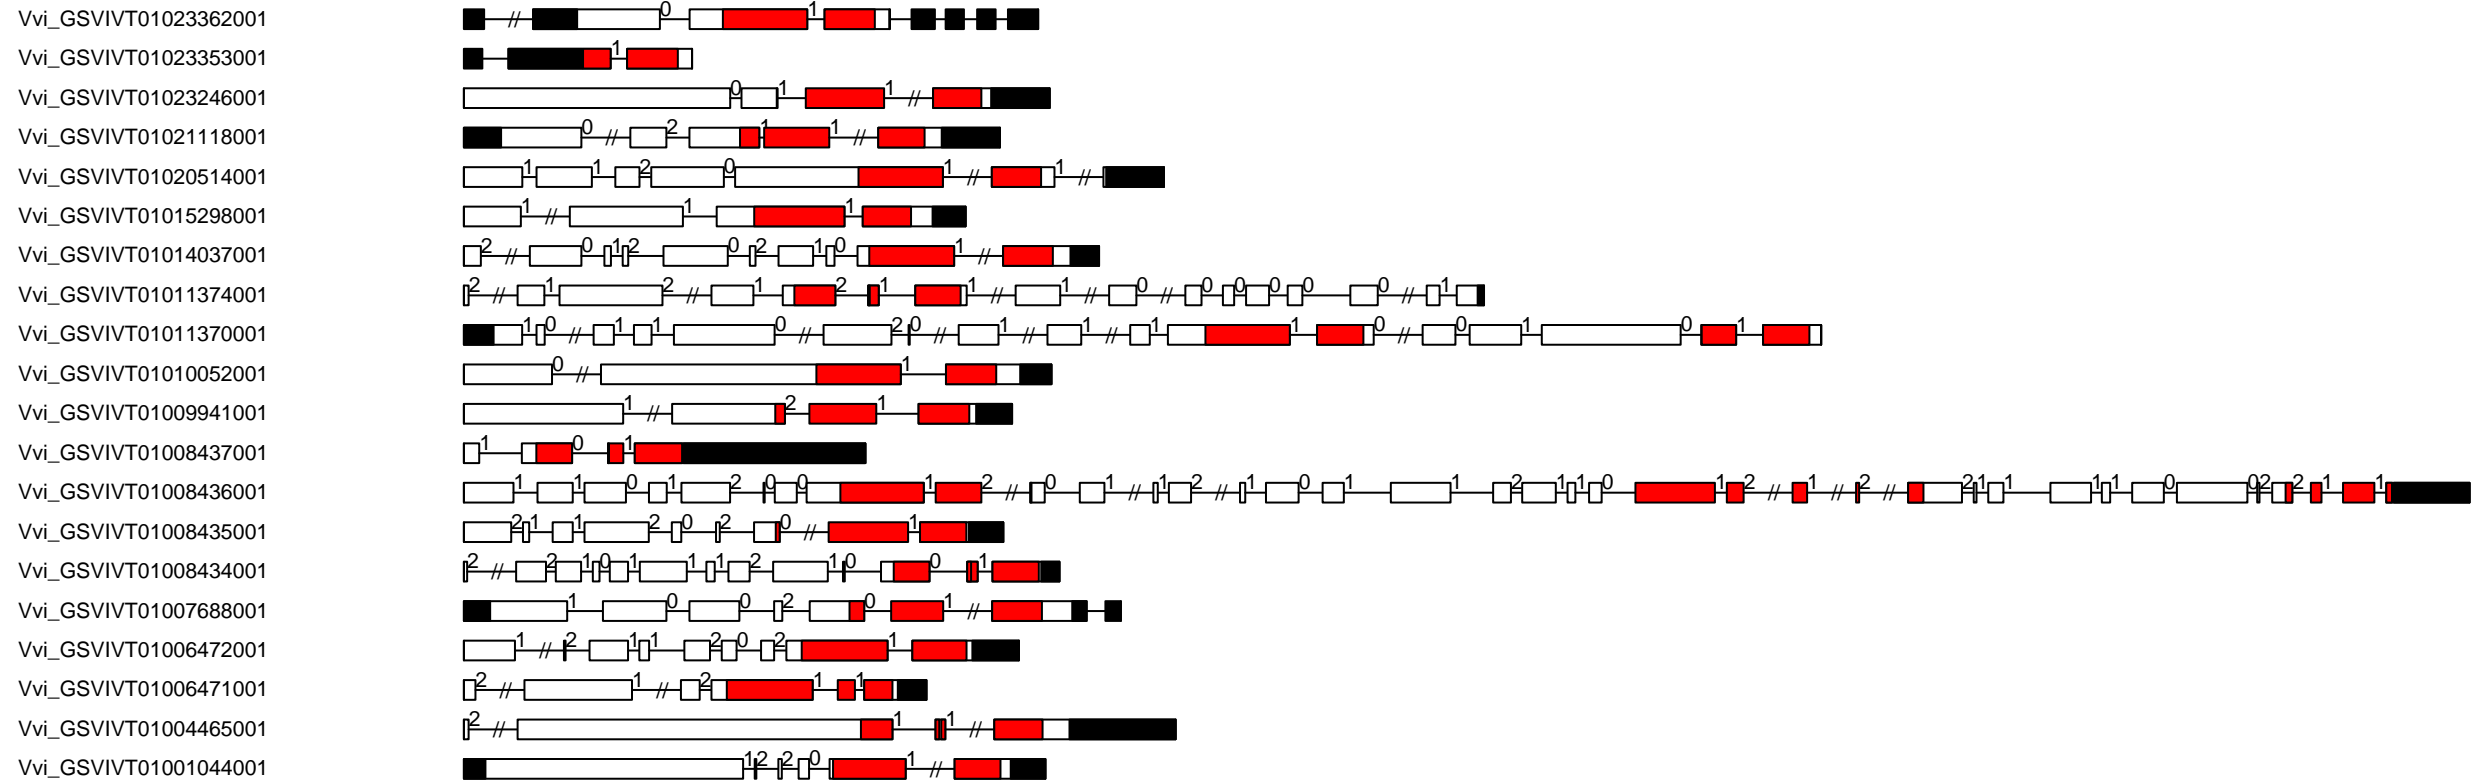



### V.vi RLK-Pelle\_LRR-XI-1 exon-intron and domain diagram (part 2)

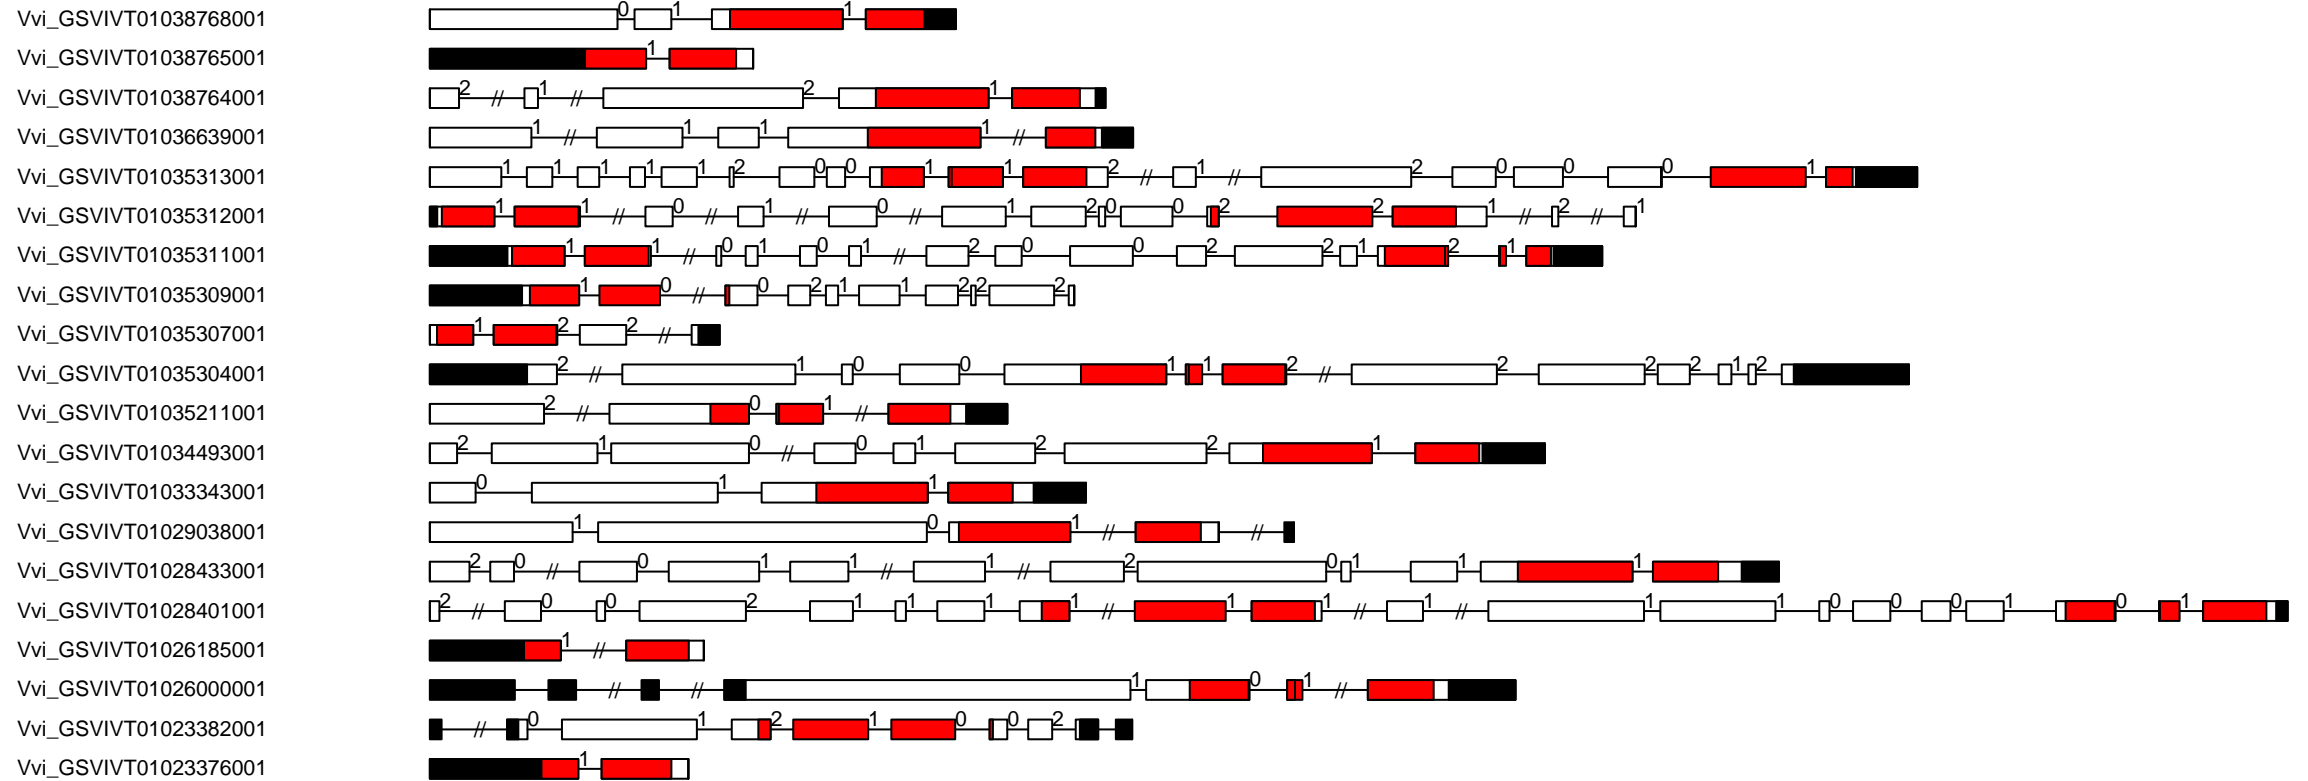

### V.vi RLK-Pelle\_LRR-XI-1 exon-intron and domain diagram (part 3)

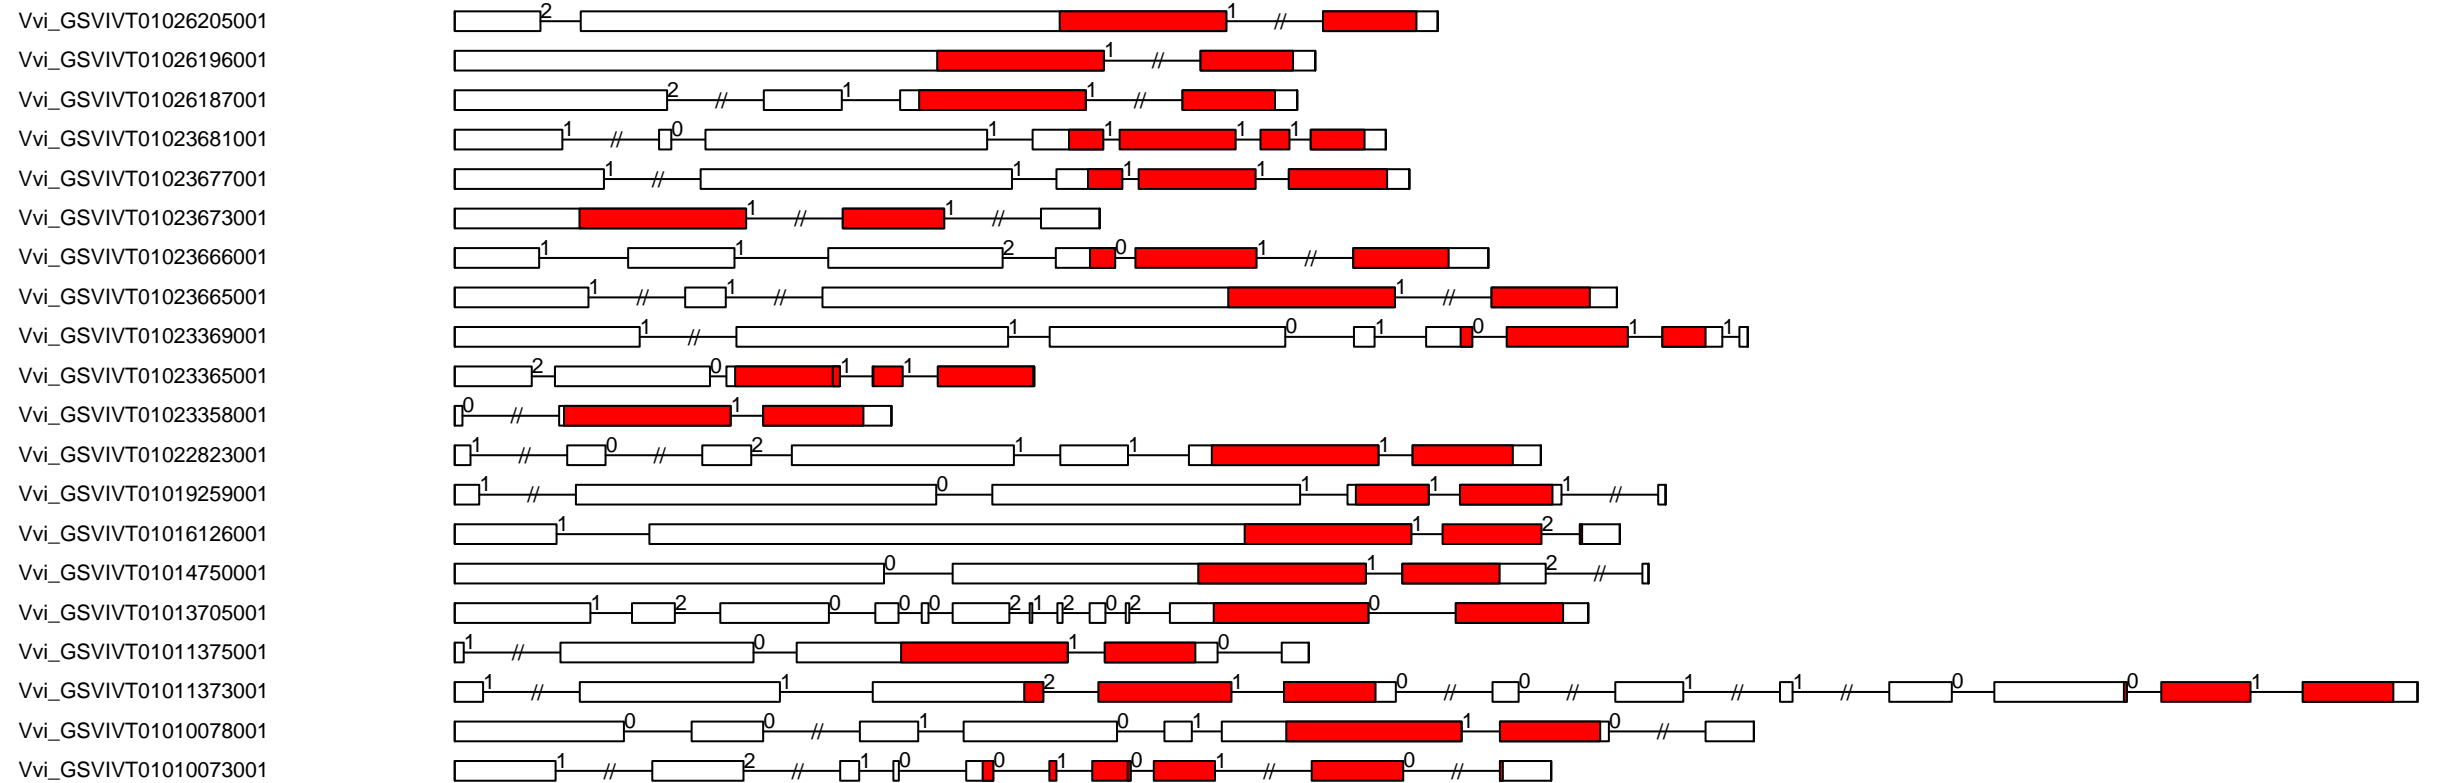

### V.vi RLK-Pelle\_LRR-XI-1 exon-intron and domain diagram (part 4)

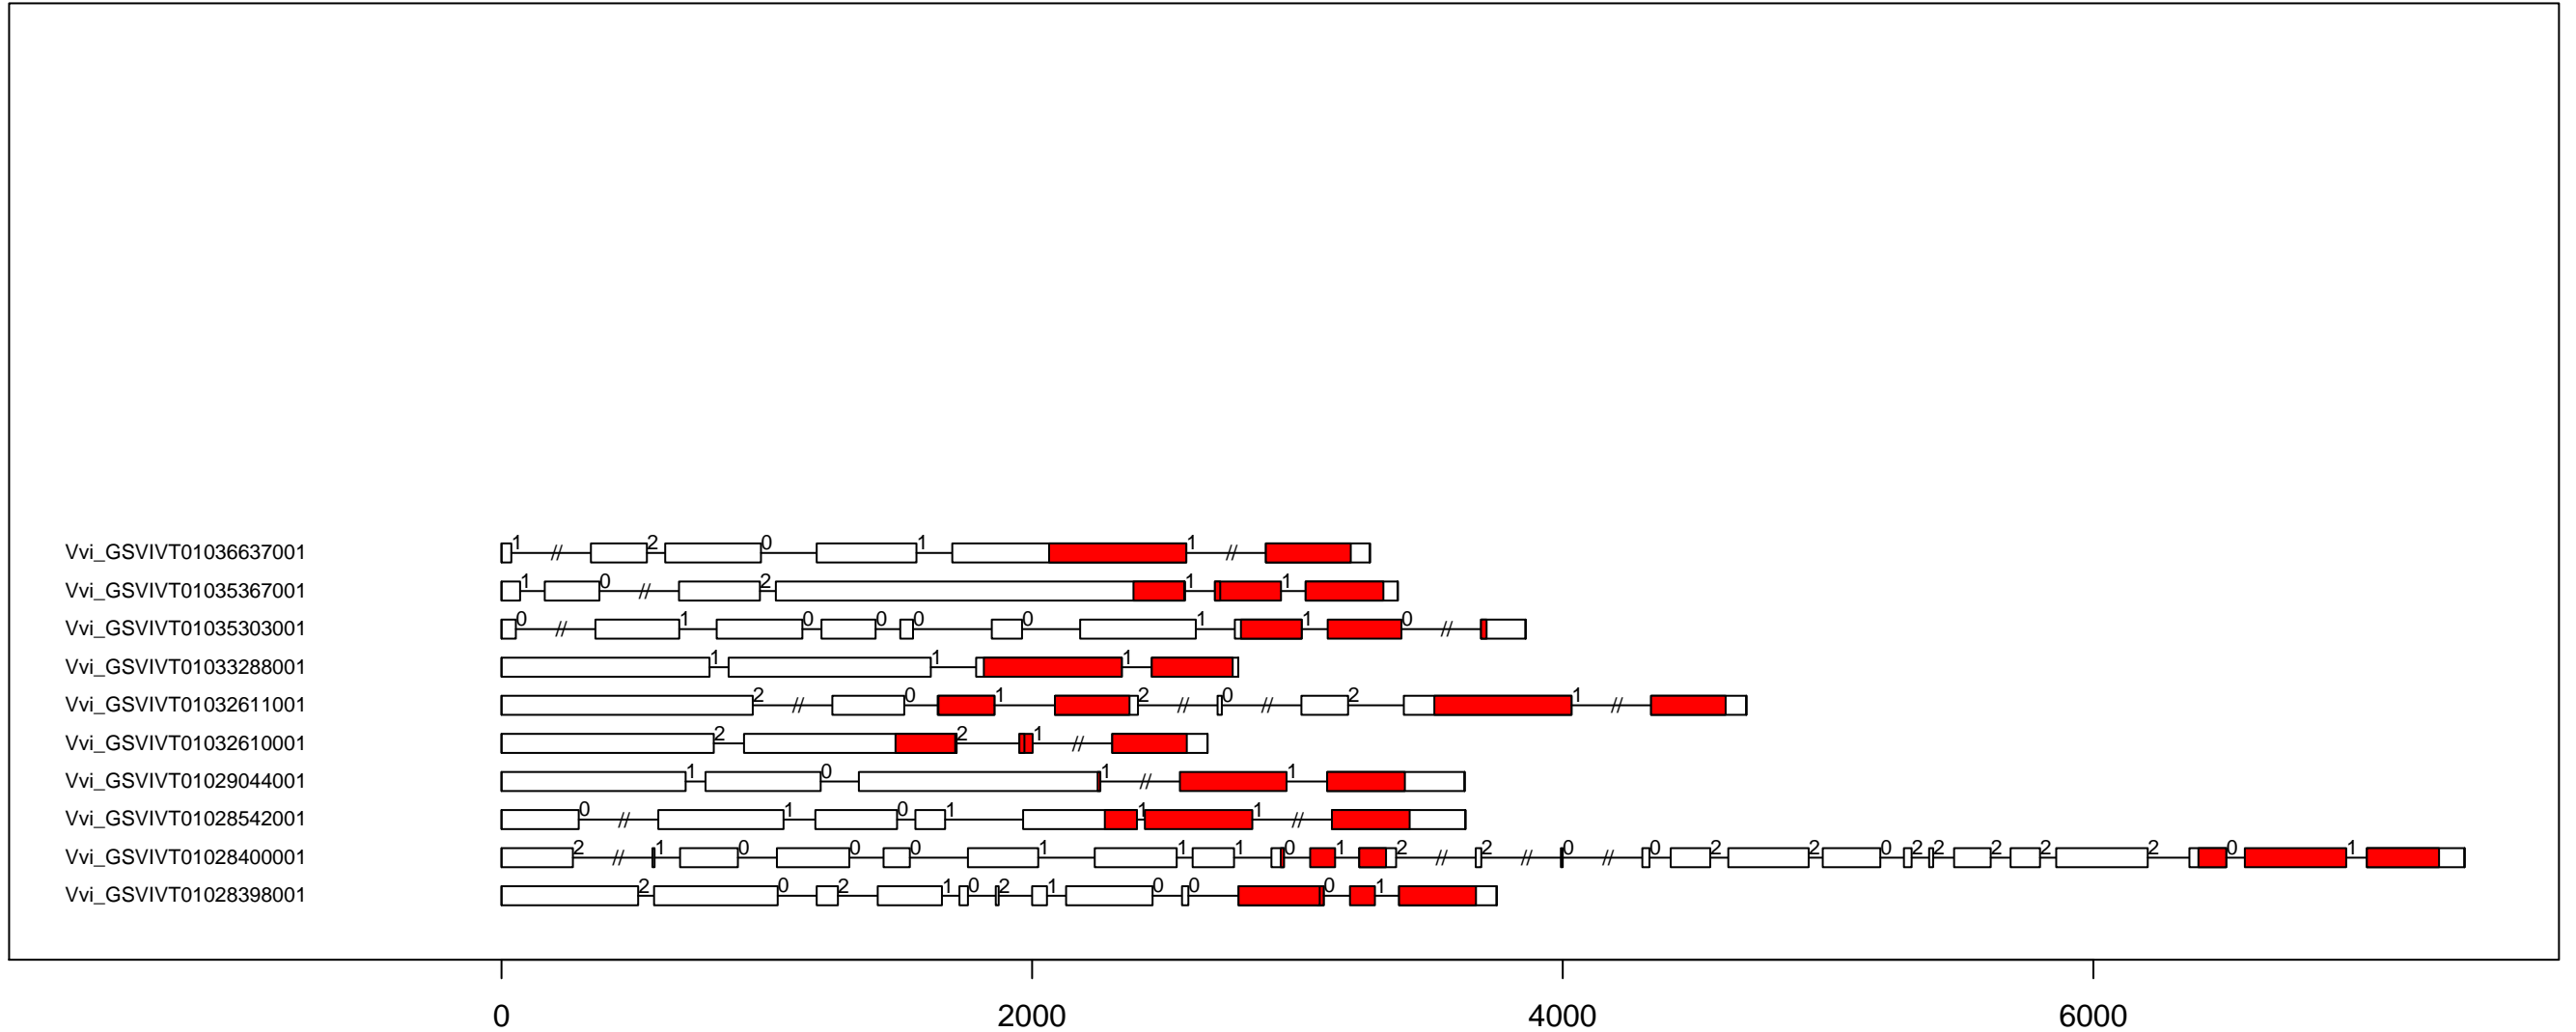

# V.vi RLK-Pelle\_LRR-XI-2 exon-intron and domain diagram (all)

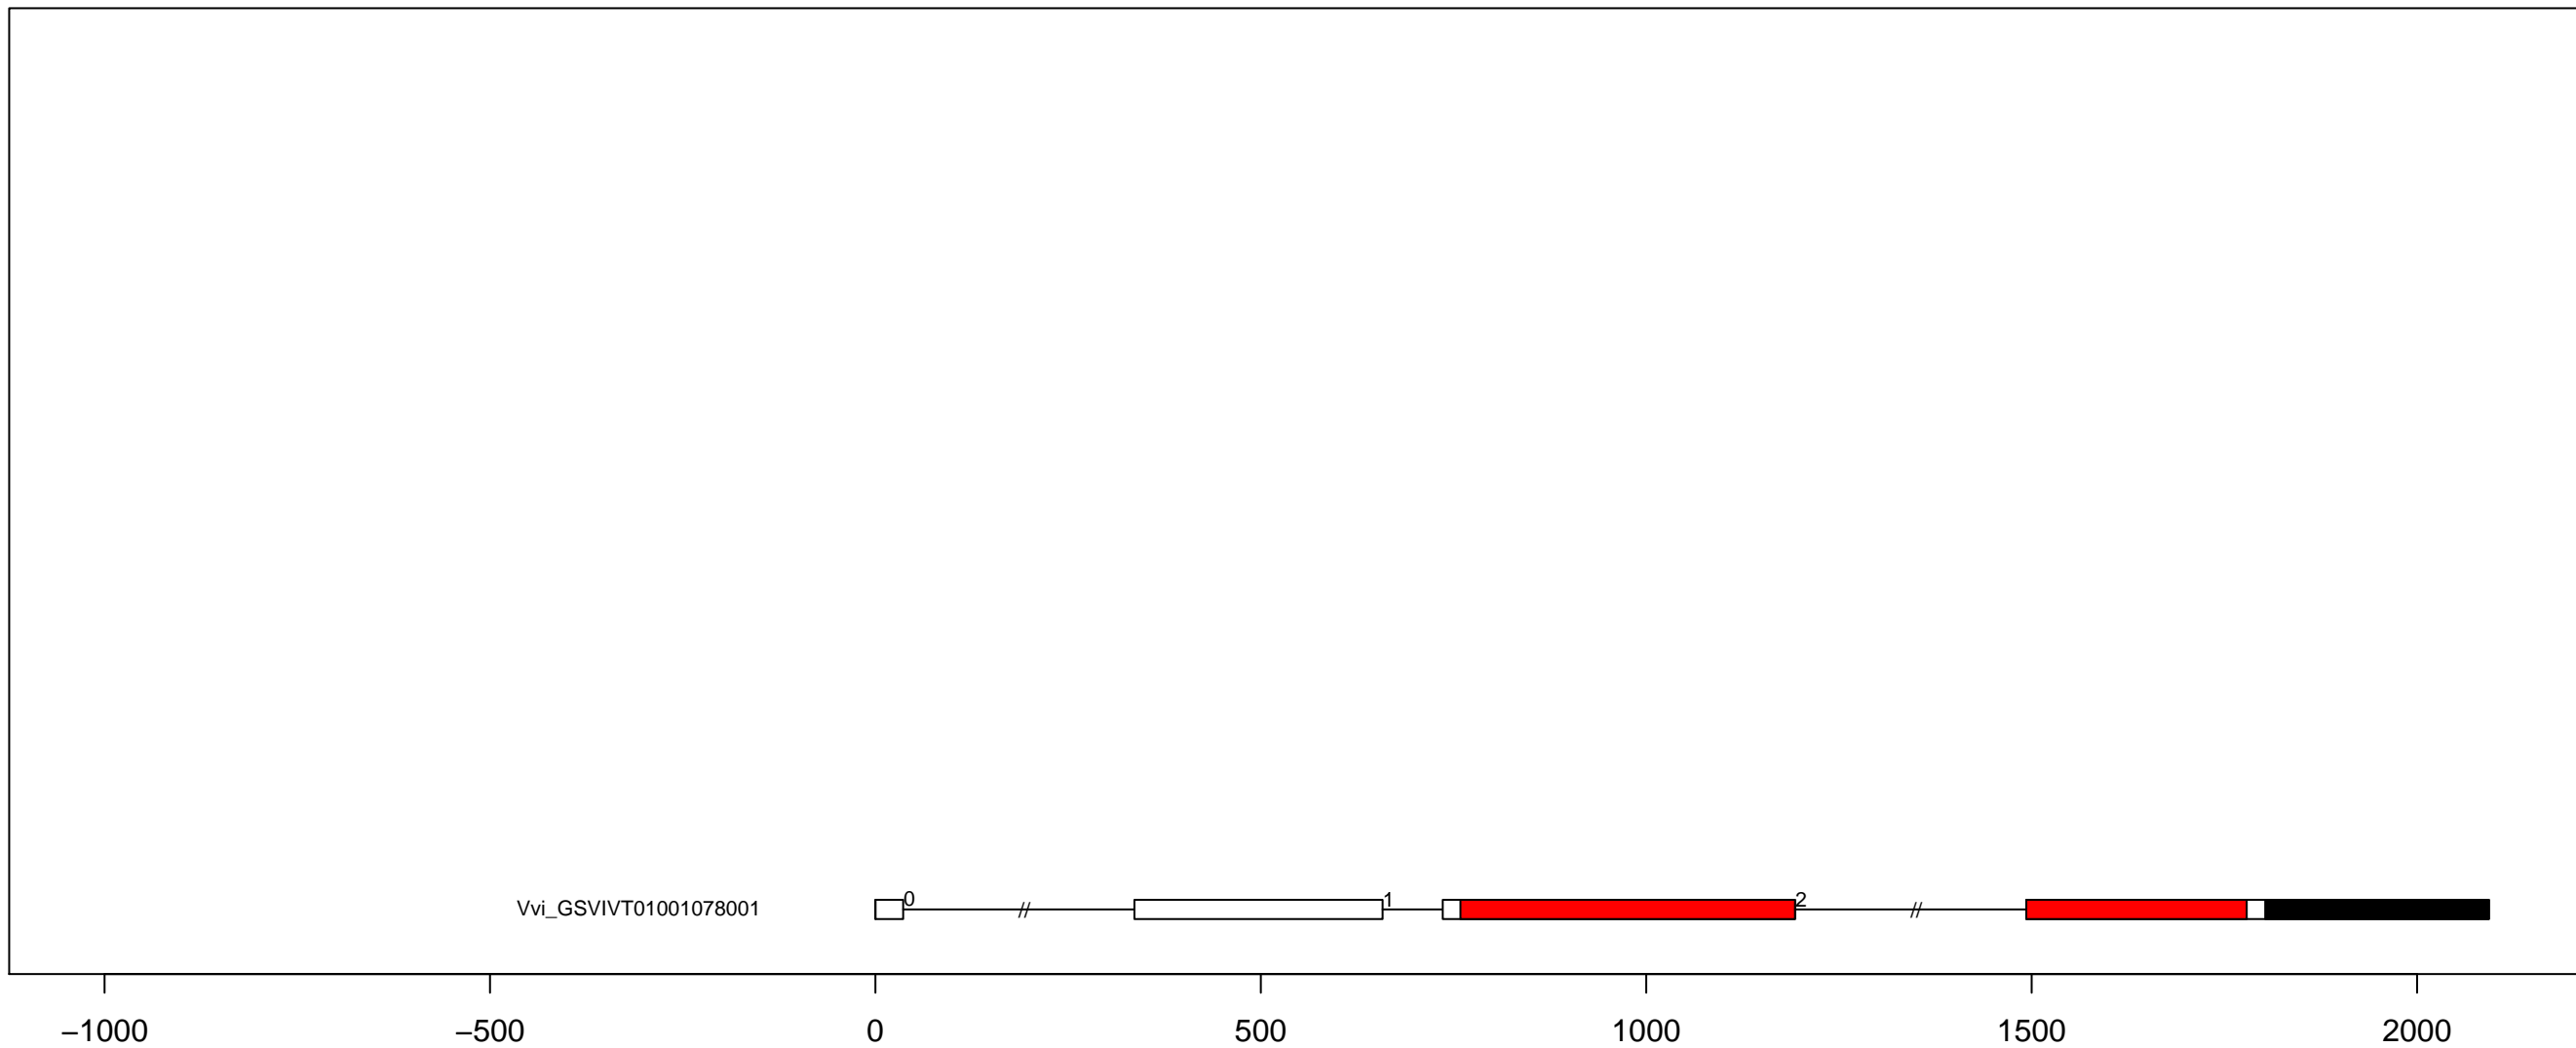

# V.vi RLK-Pelle\_LRR-XII-1 exon-intron and domain diagram (part 1)

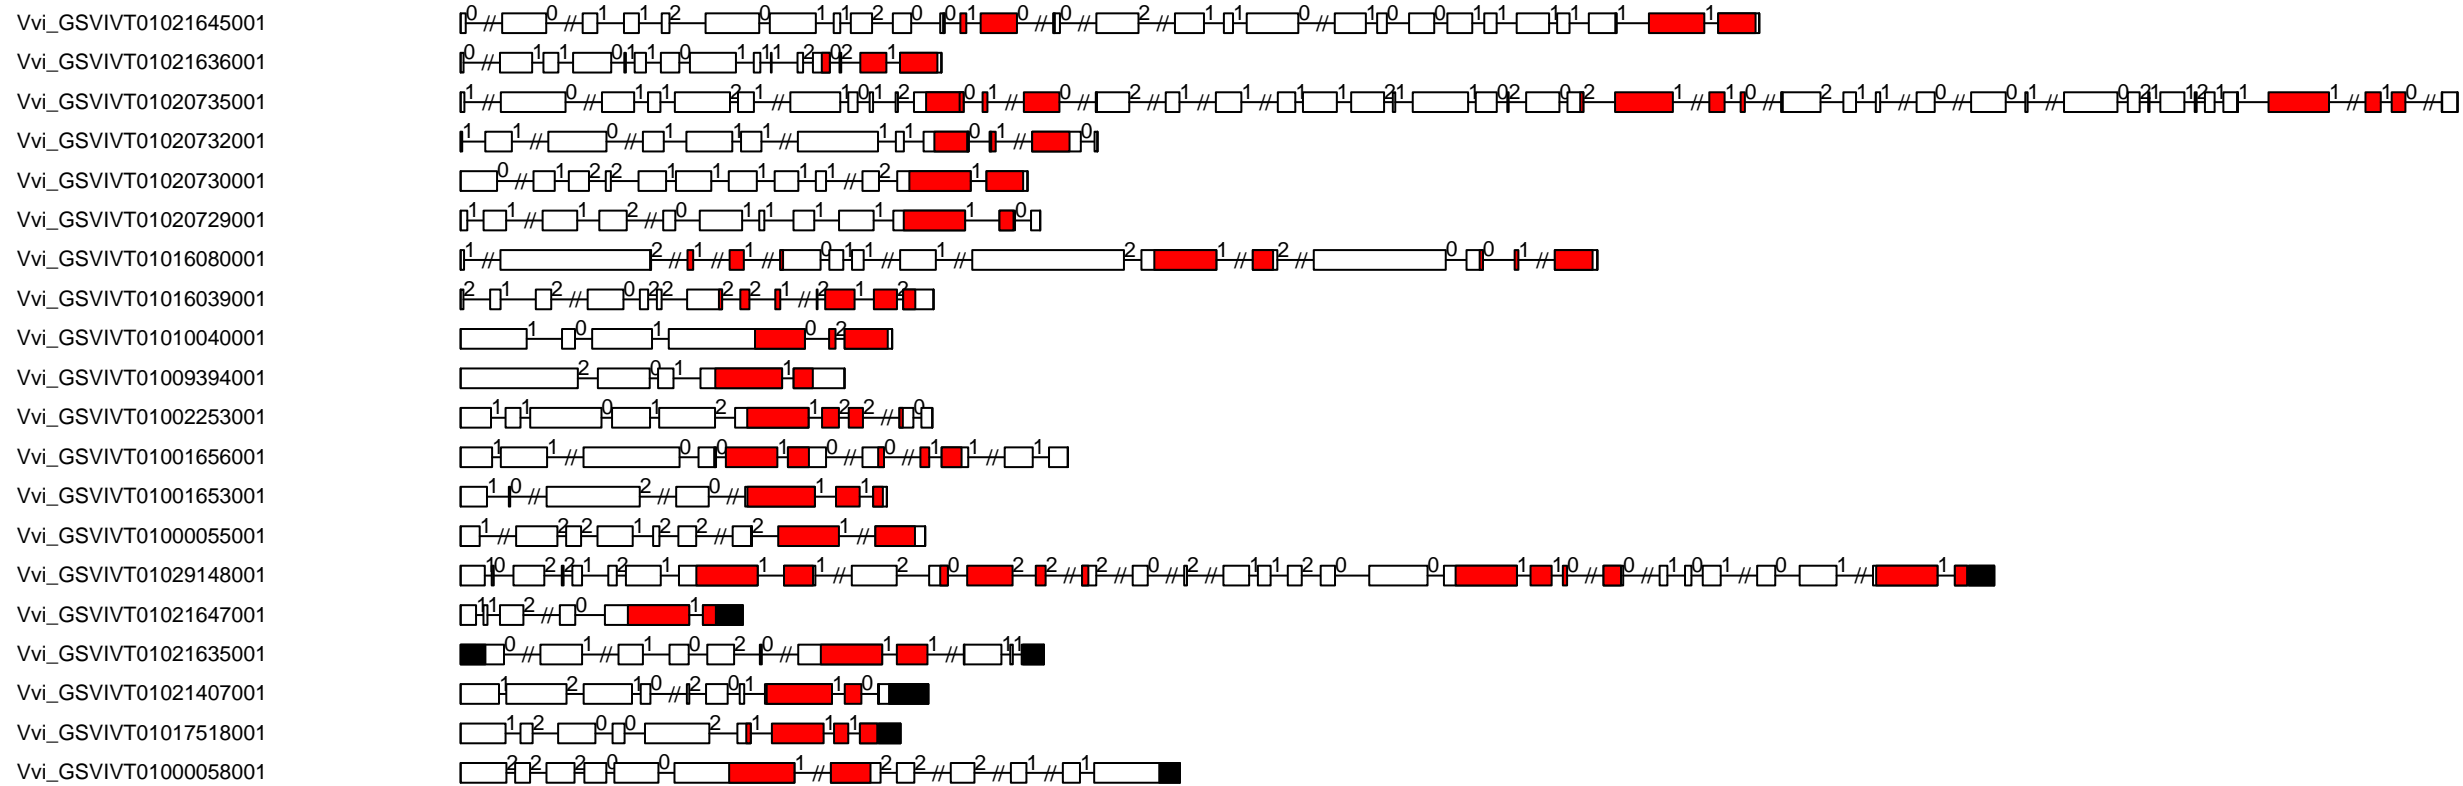

0

5000

10000

15000

### V.vi RLK-Pelle\_LRR-XII-1 exon-intron and domain diagram (part 2)

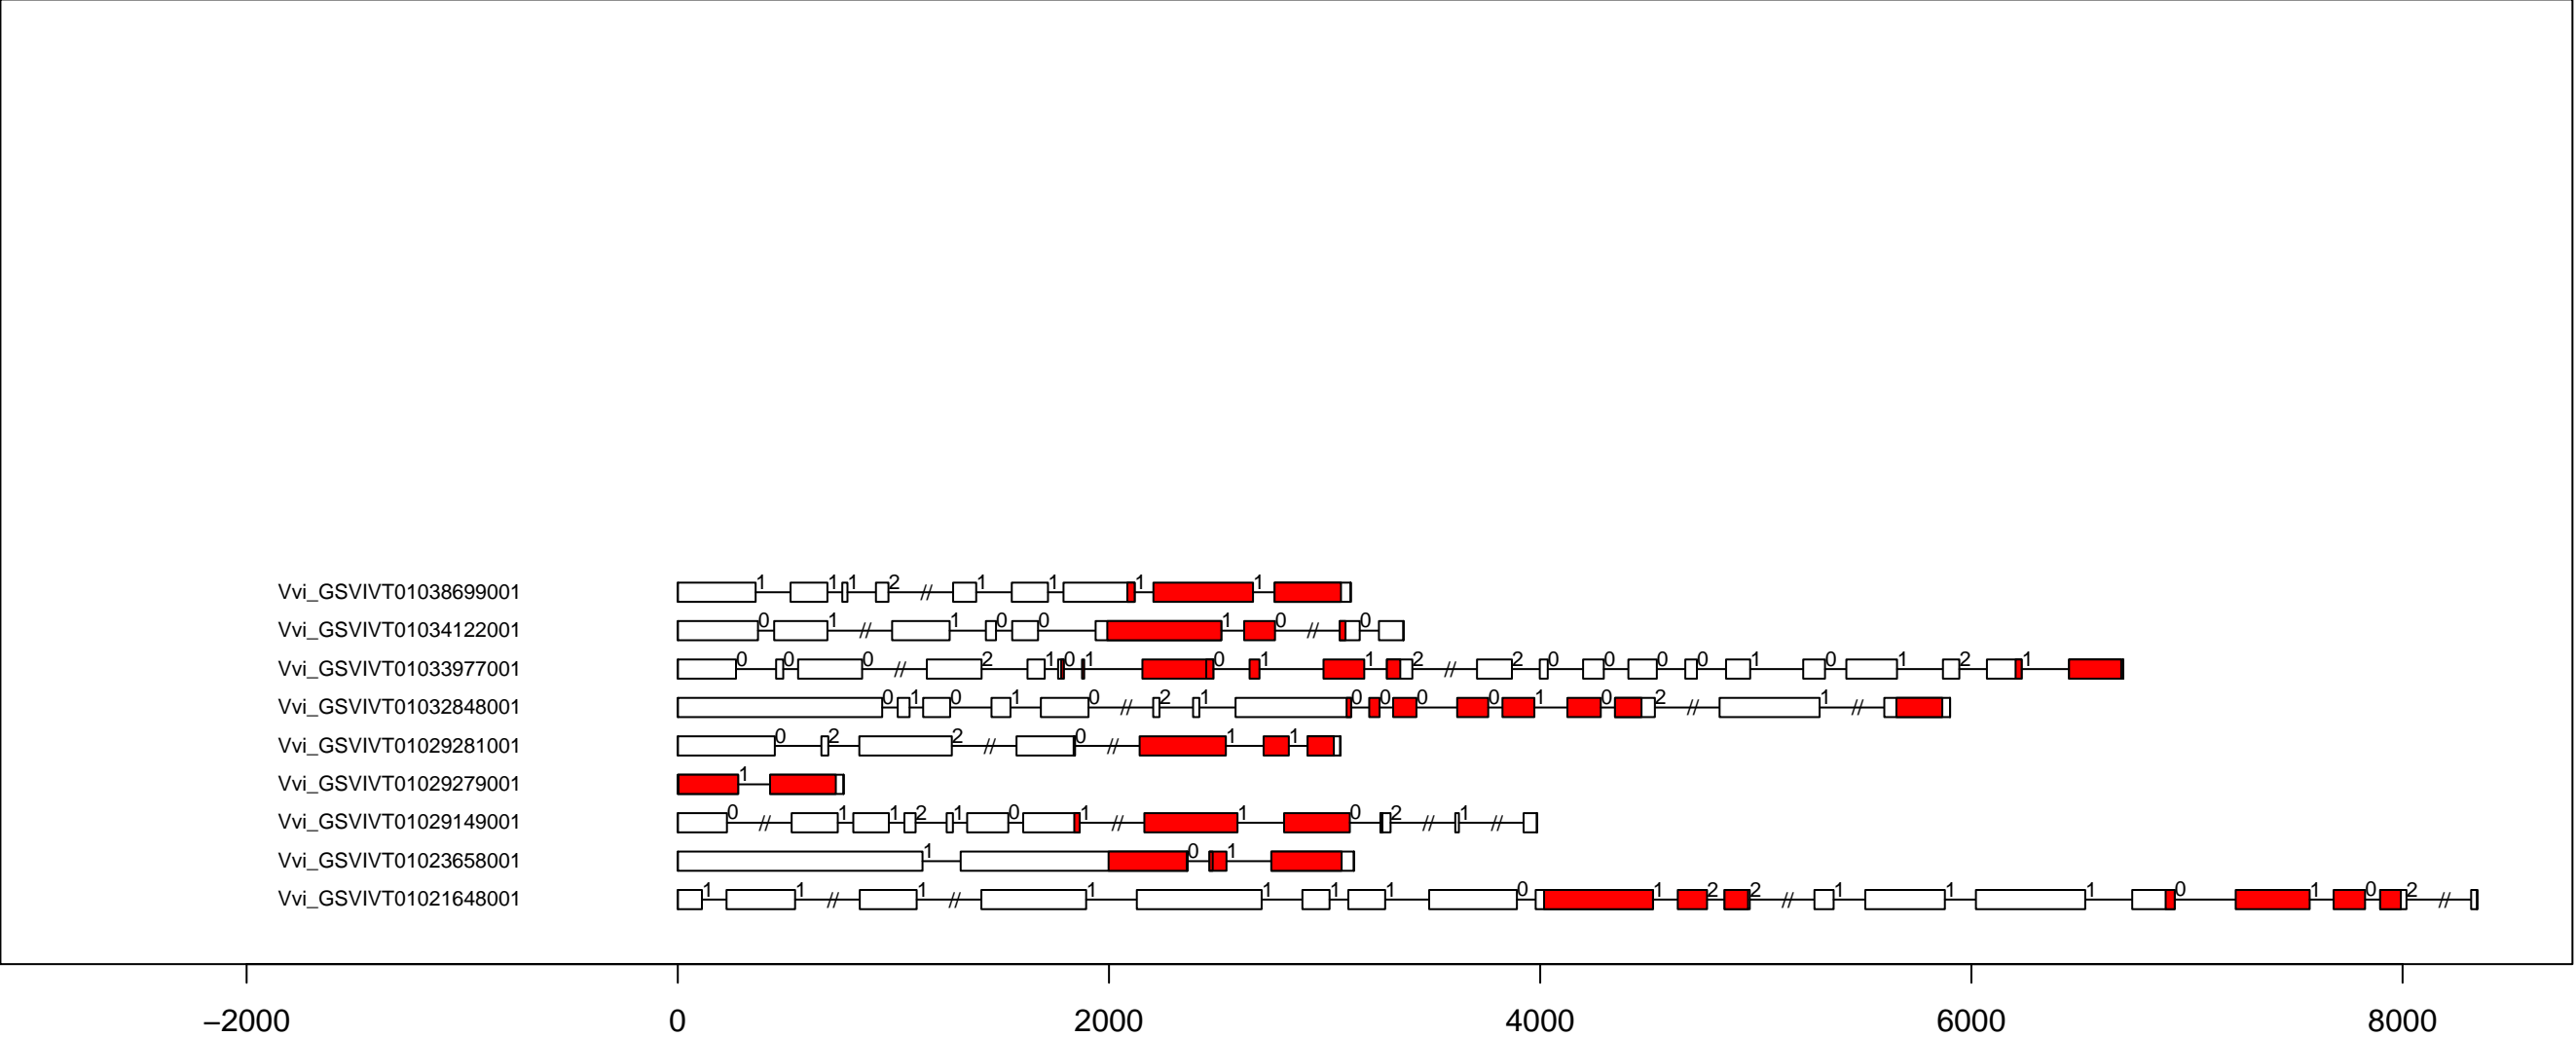

# V.vi RLK-Pelle\_LRR-XIIIa exon-intron and domain diagram (all)

Vvi\_GSVIVT01020857001  
 Vvi\_GSVIVT01036936001  
 Vvi\_GSVIVT01014070001  
 Vvi\_GSVIVT01008070001

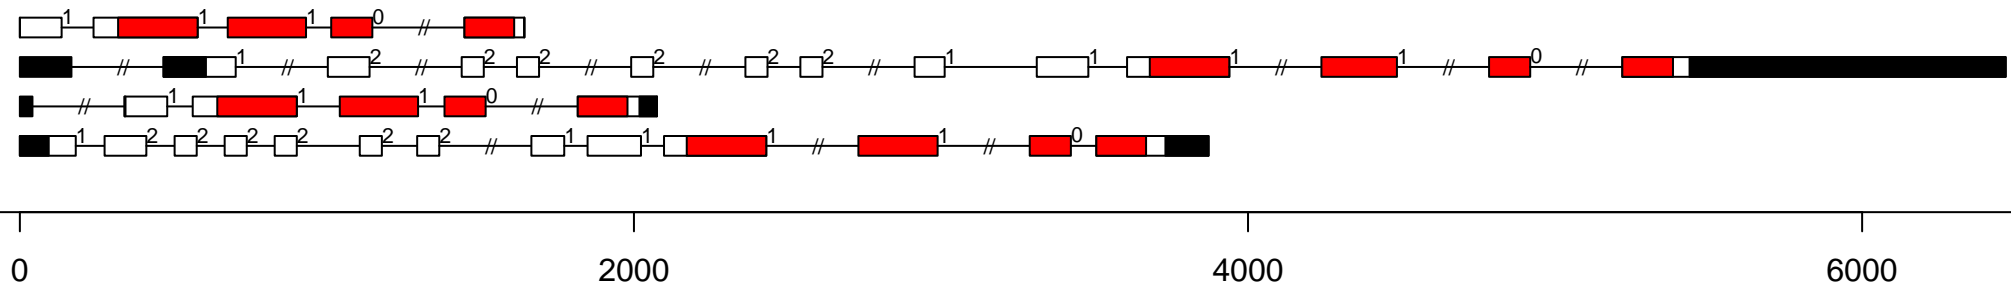

# V.vi RLK-Pelle\_LRR-XIIIb exon-intron and domain diagram (all)

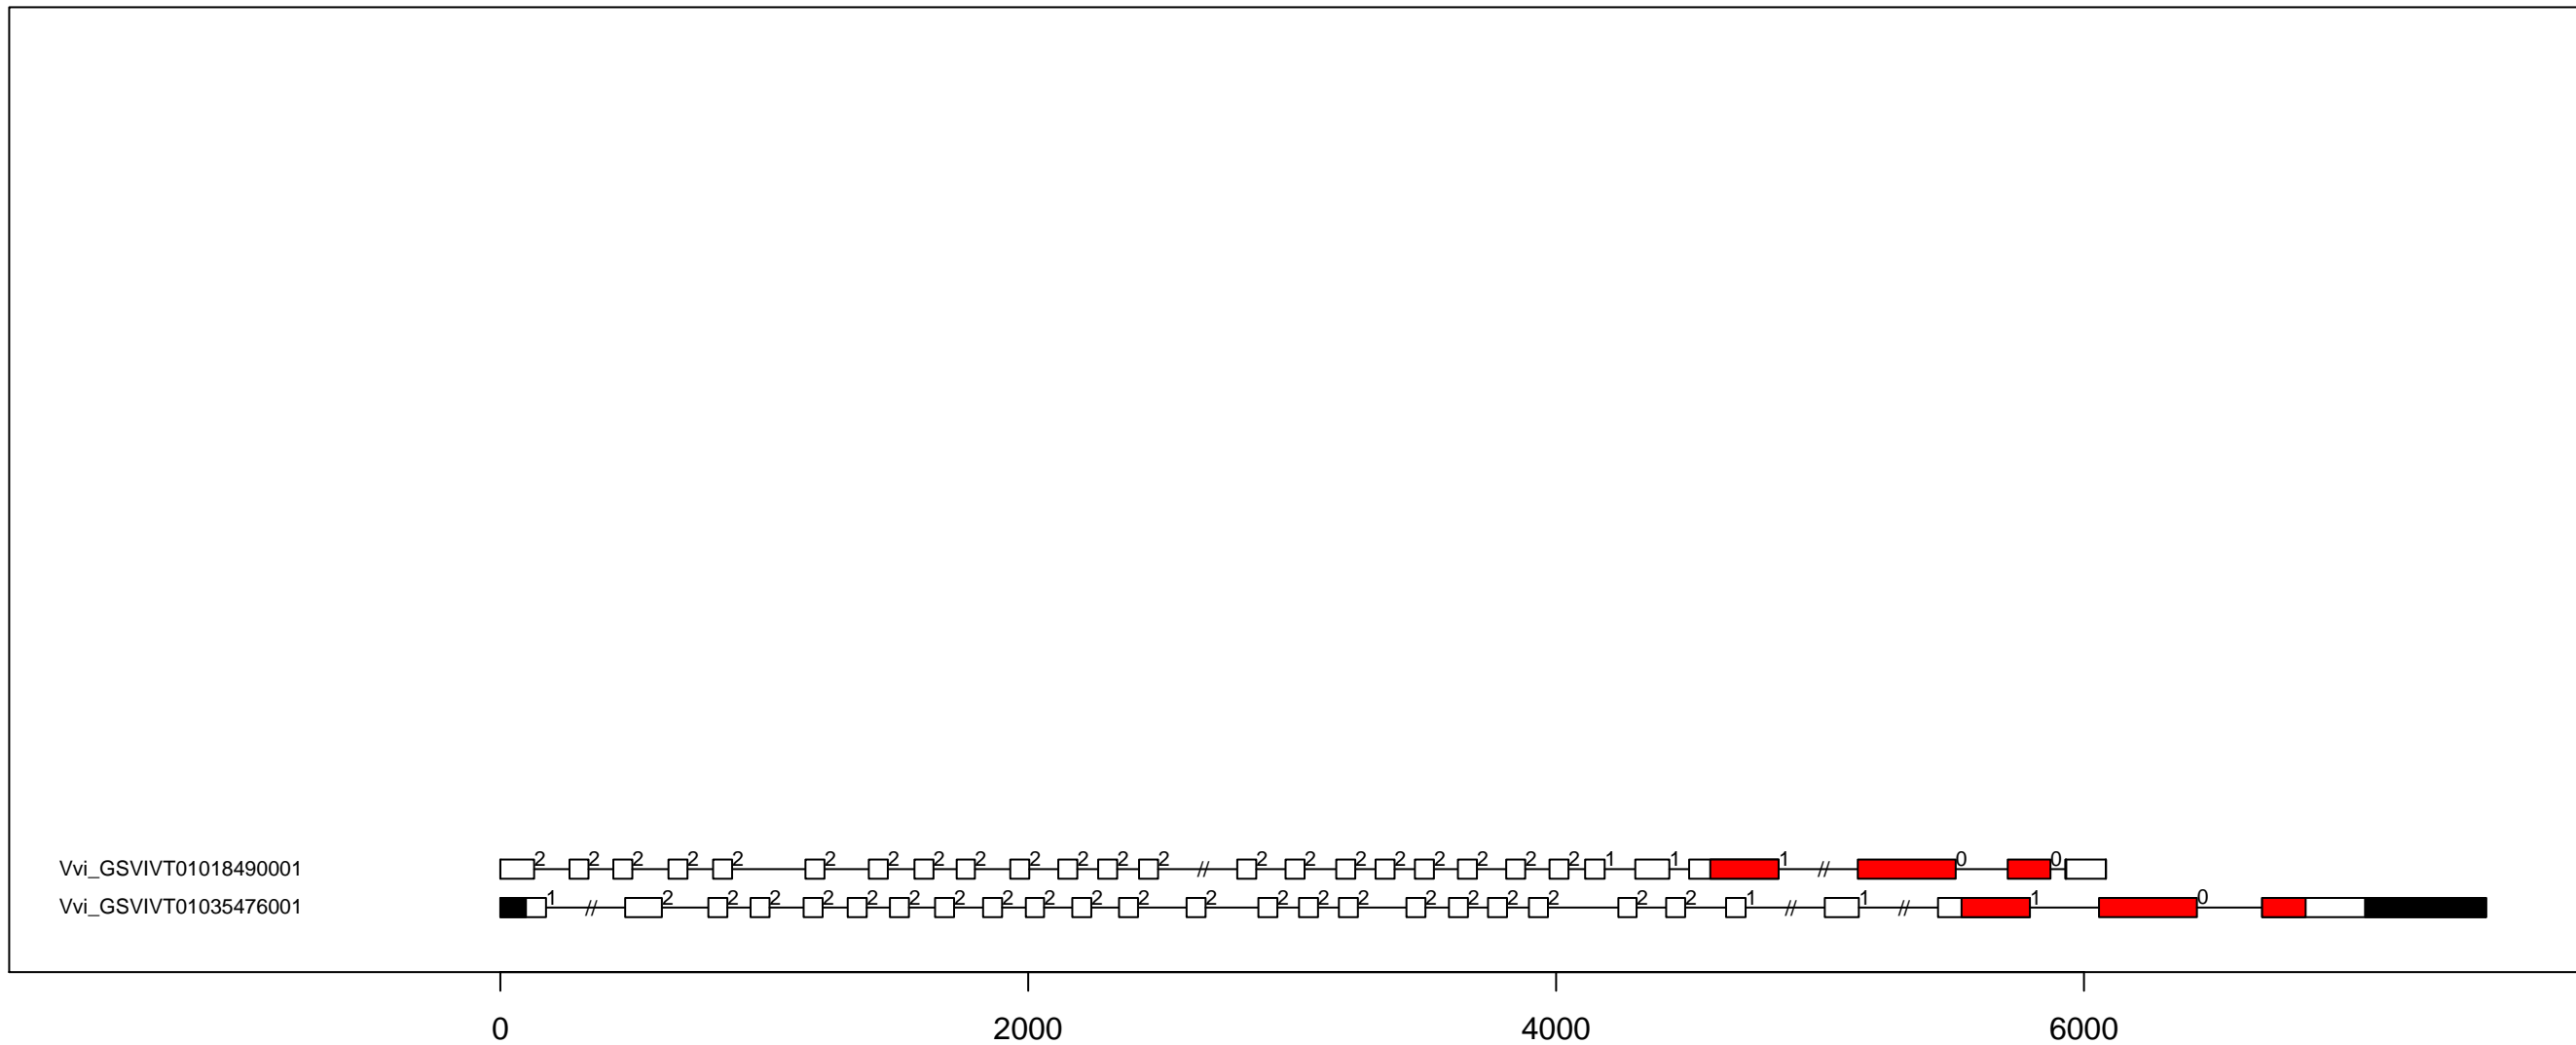



# V.vi RLK-Pelle\_LRR-XIV exon-intron and domain diagram (all)

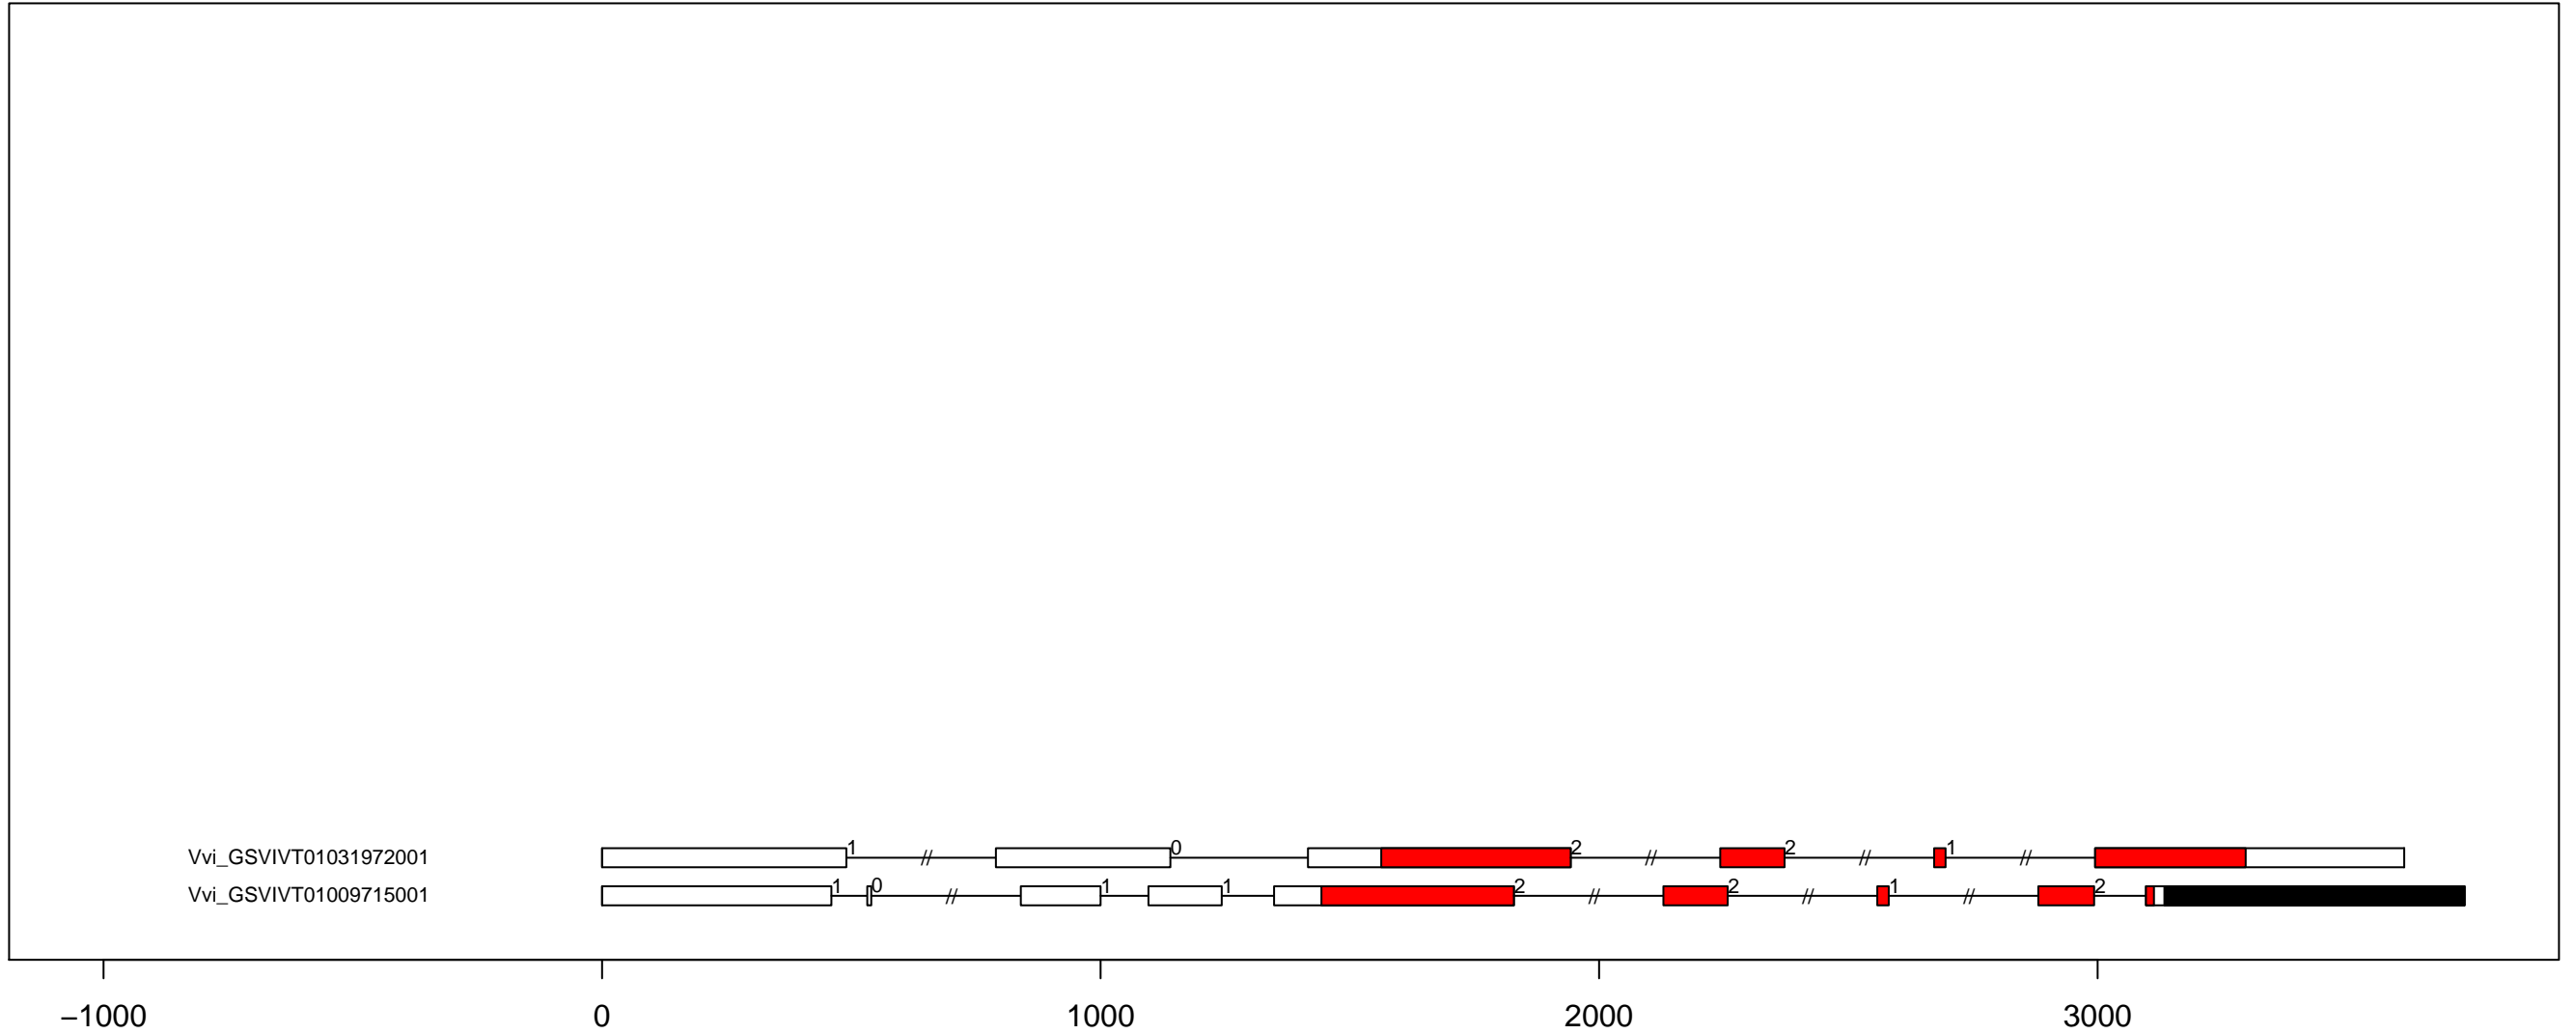

### V.vi RLK-Pelle\_LysM exon-intron and domain diagram (all)

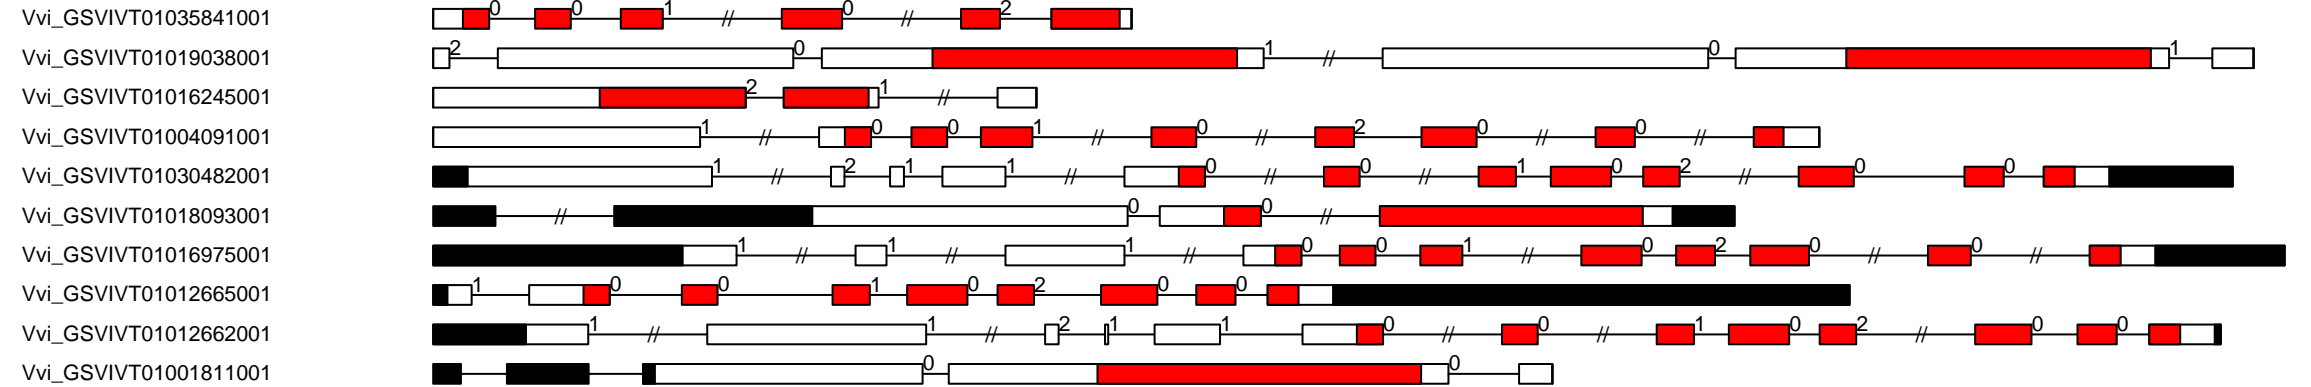

### V.vi RLK-Pelle\_PERK-1 exon-intron and domain diagram (all)

Vvi\_GSVIVT01013741001  
 Vvi\_GSVIVT01036465001  
 Vvi\_GSVIVT01031954001  
 Vvi\_GSVIVT01018982001  
 Vvi\_GSVIVT01017060001  
 Vvi\_GSVIVT01015383001  
 Vvi\_GSVIVT01012008001  
 Vvi\_GSVIVT01003848001

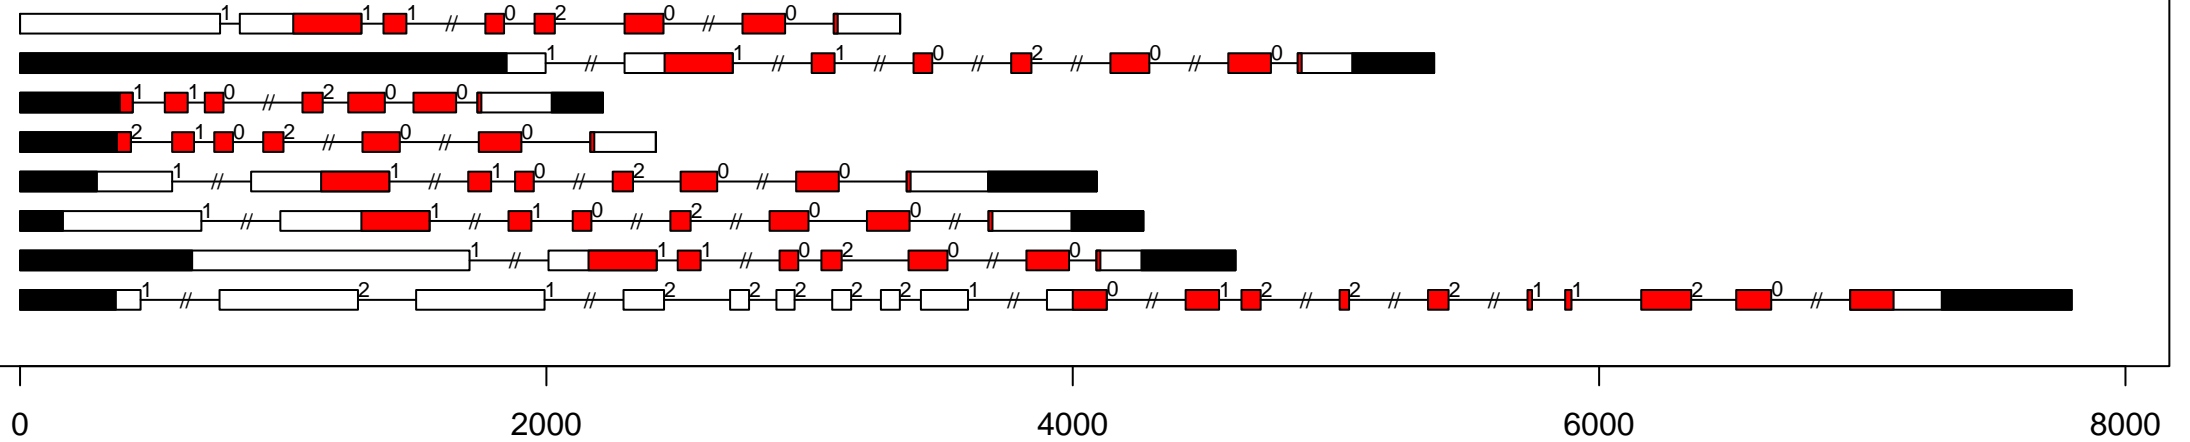

### V.vi RLK-Pelle\_PERK-2 exon-intron and domain diagram (all)

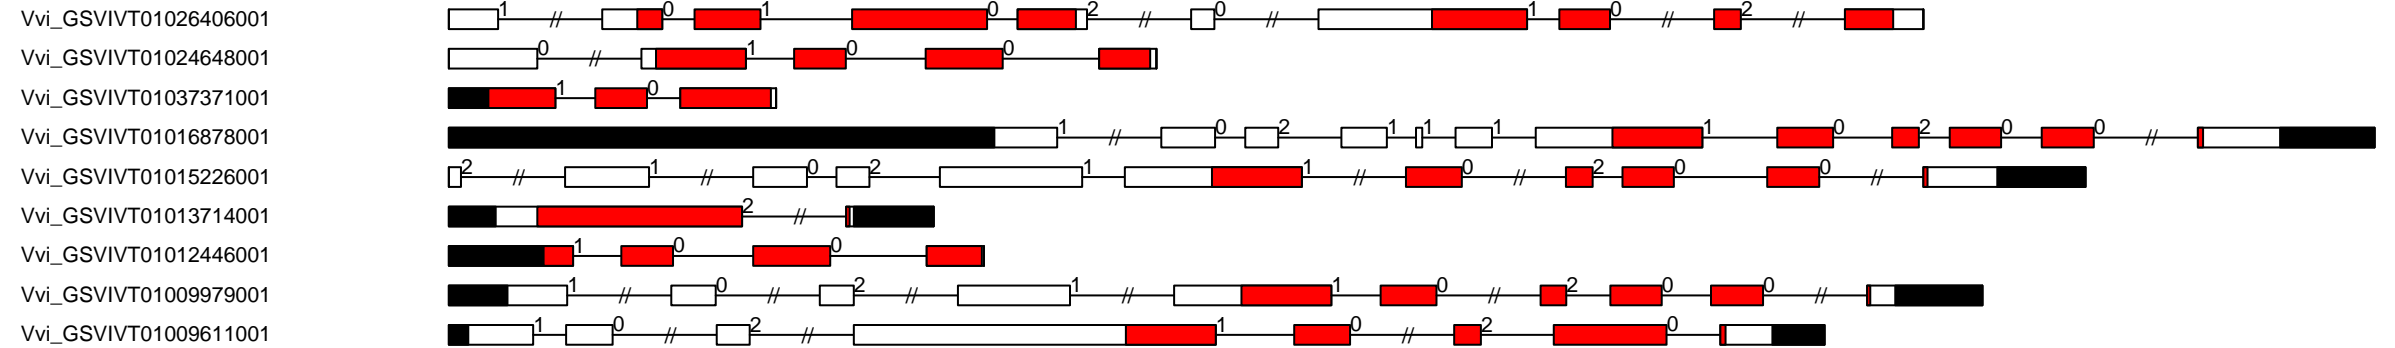

-1000

0

1000

2000

3000

4000

5000

# V.vi RLK-Pelle\_RKF3 exon-intron and domain diagram (all)

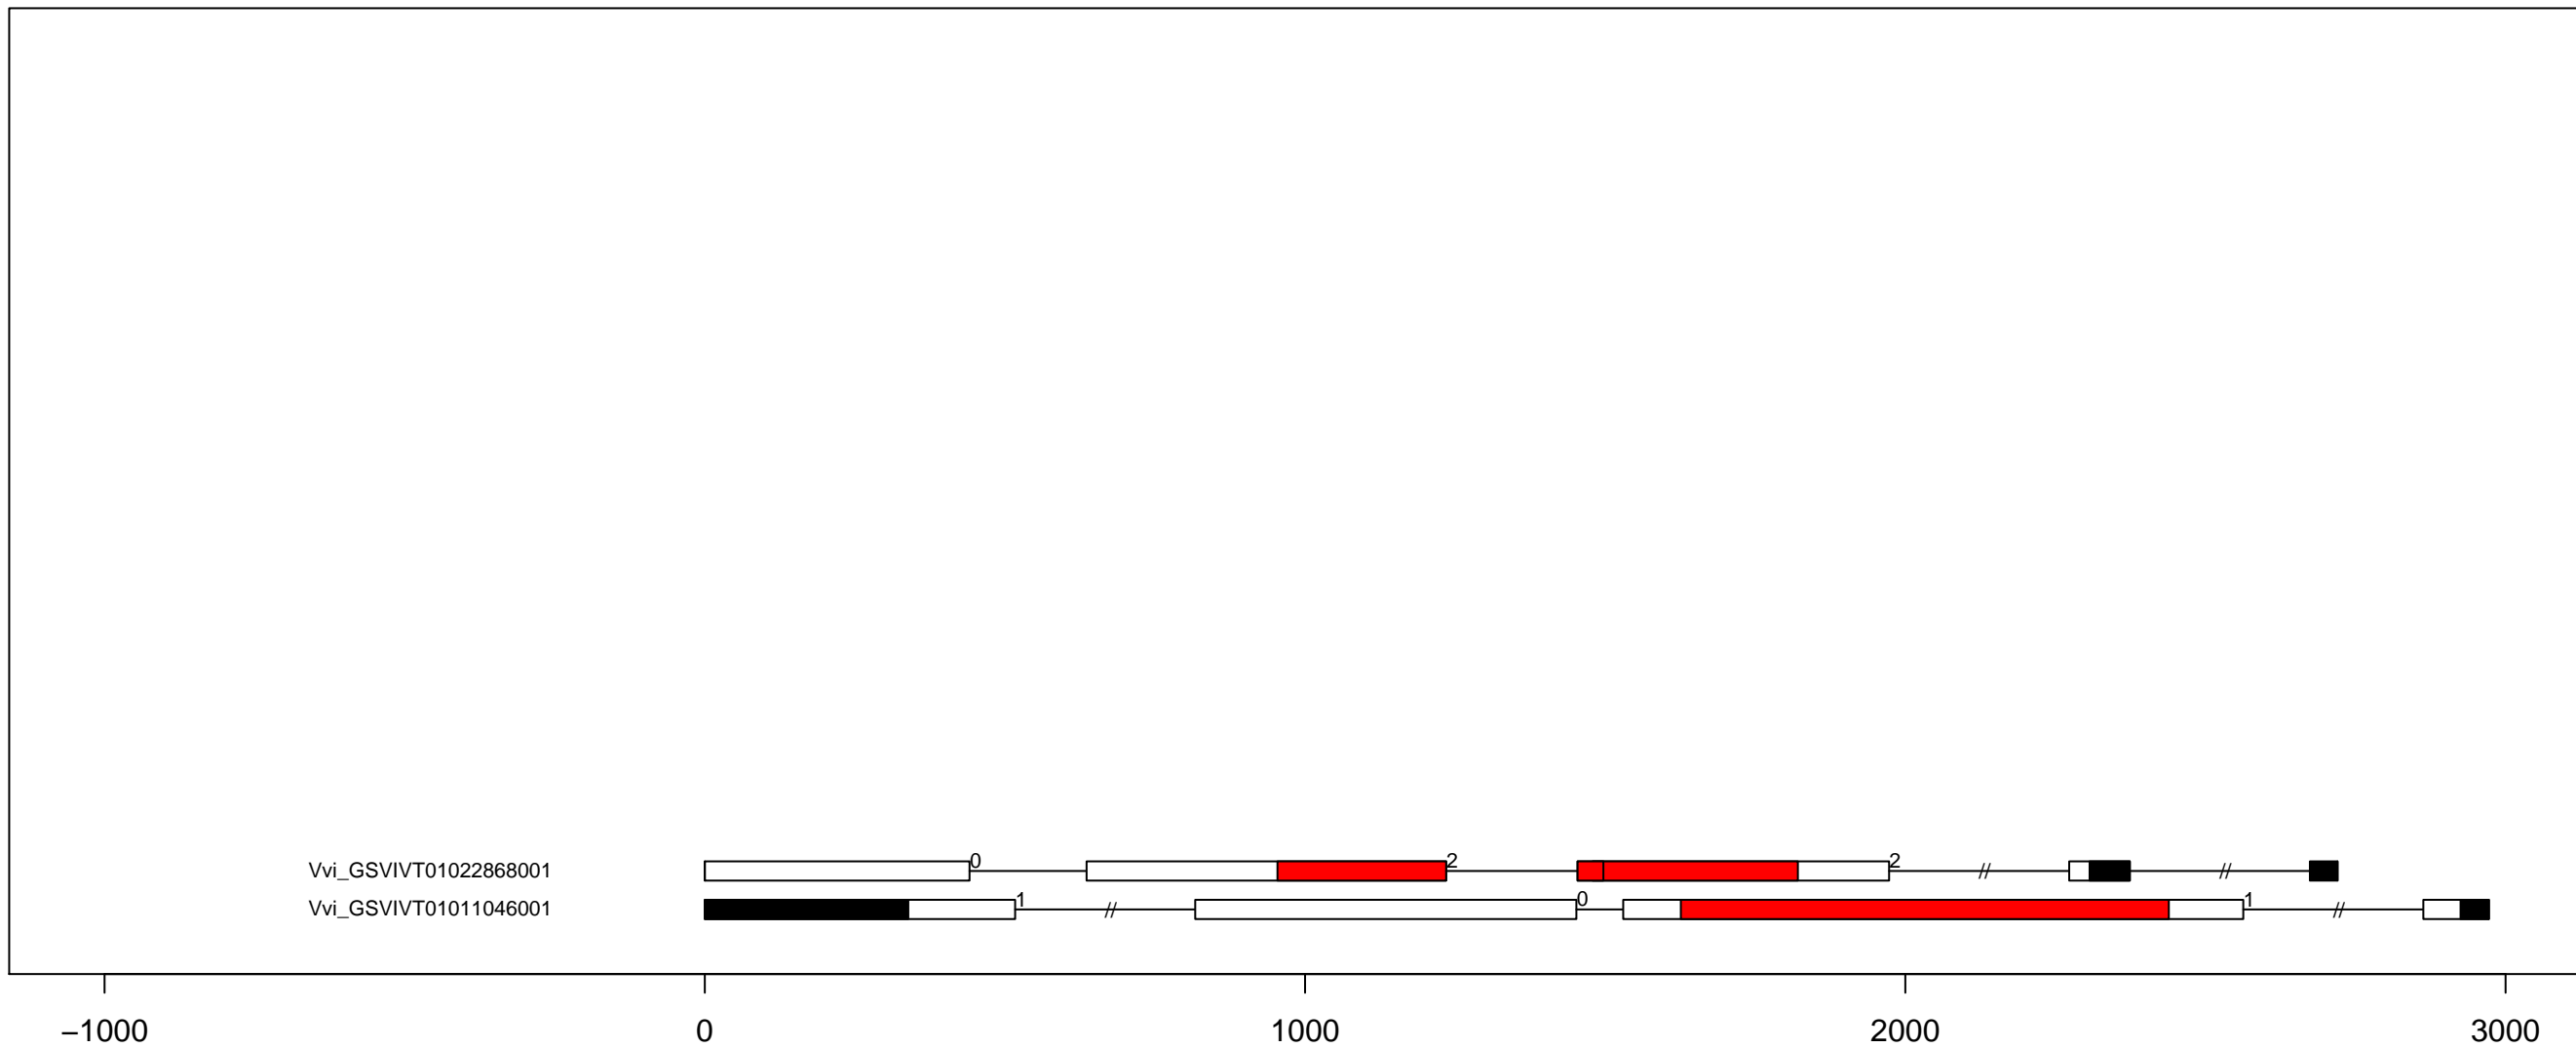

# V.vi RLK-Pelle\_RLCK-II exon-intron and domain diagram (all)

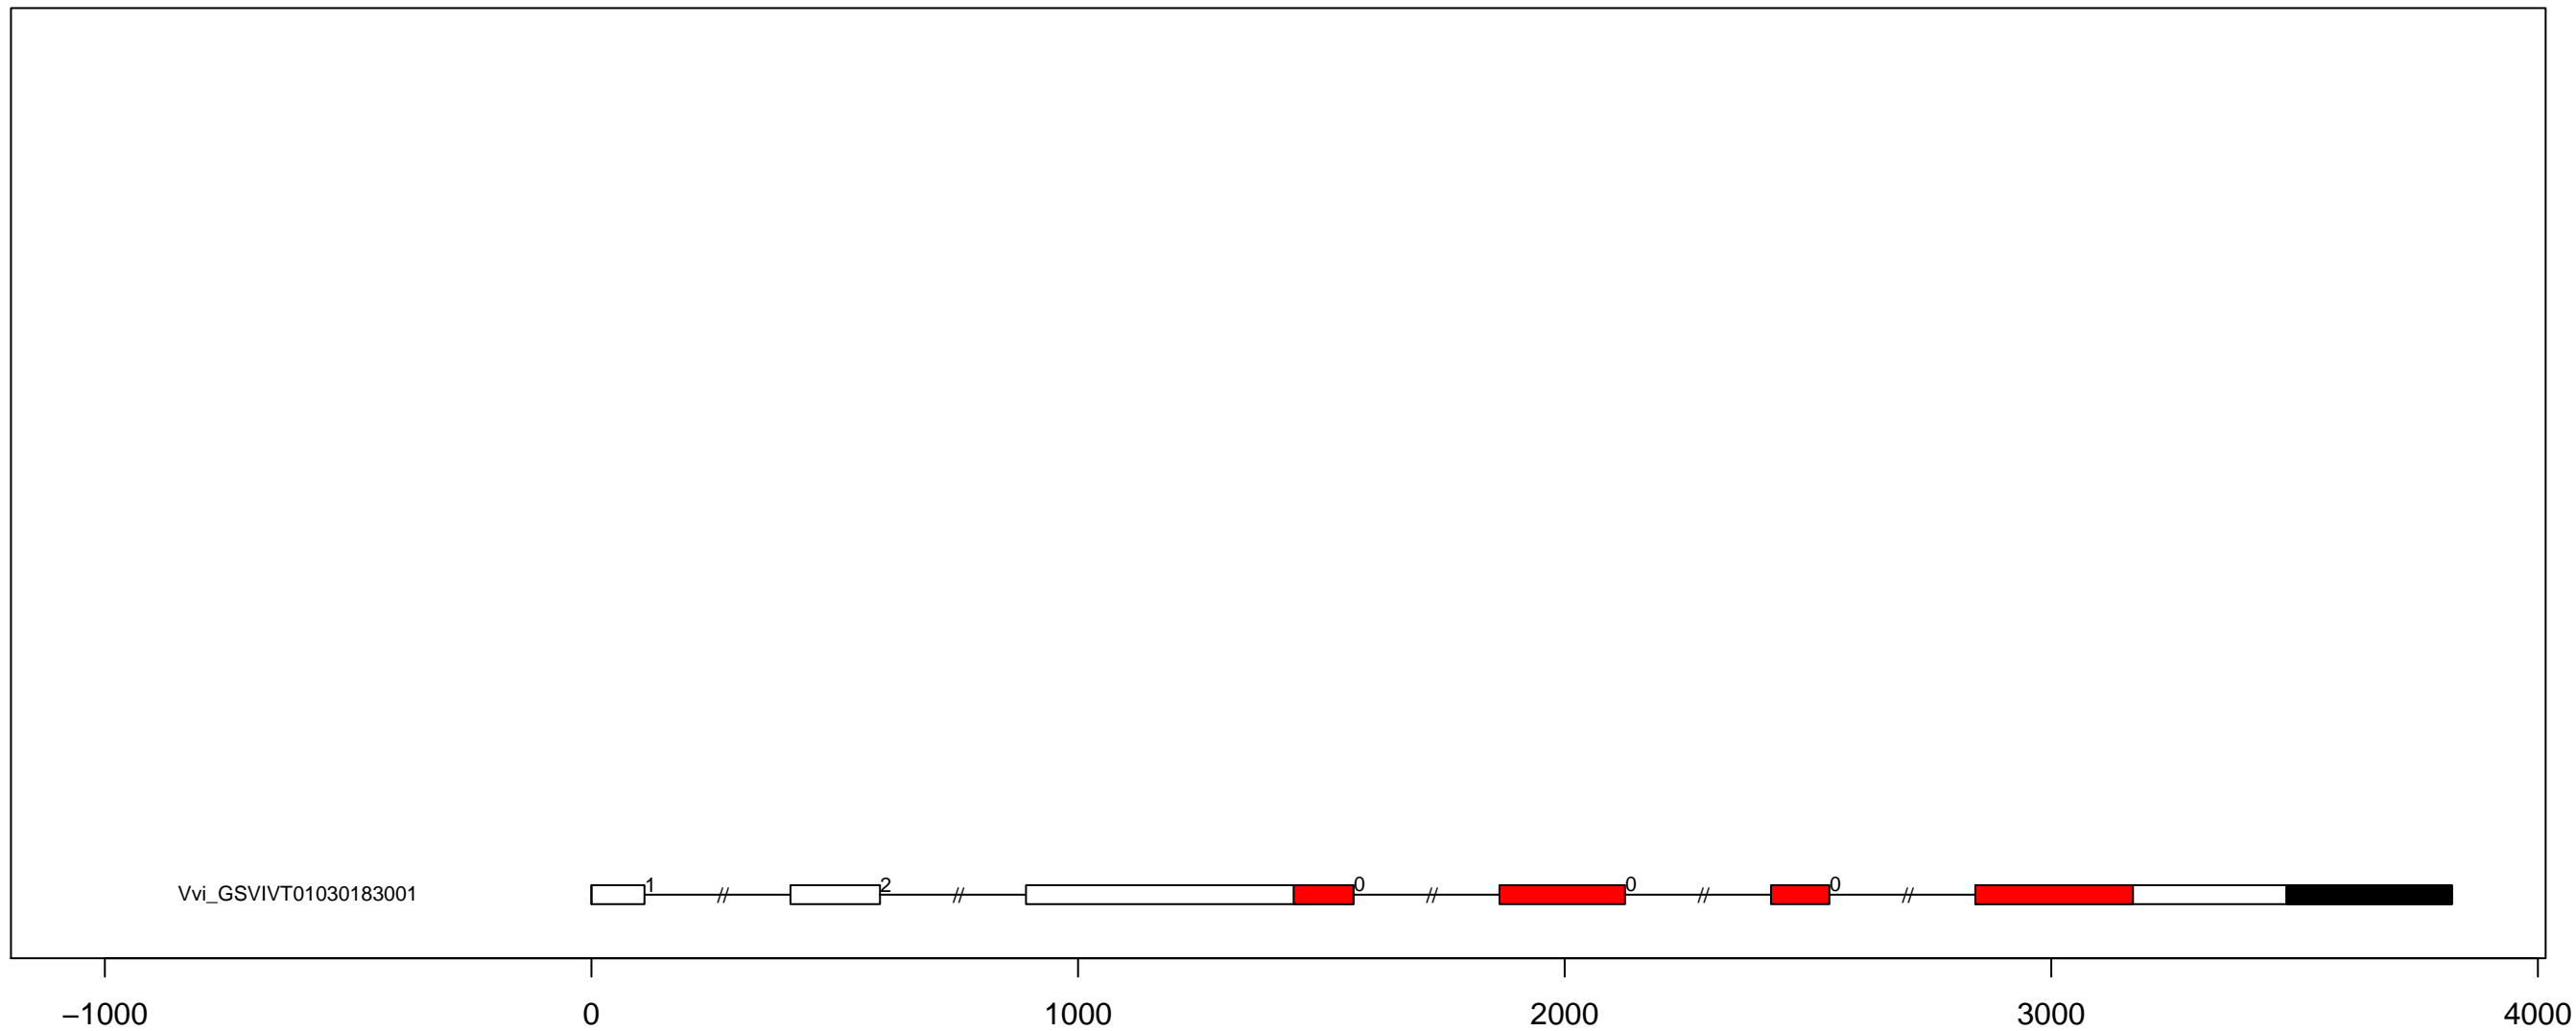

# V.vi RLK-Pelle\_RLCK-IV exon-intron and domain diagram (all)

Vvi\_GSVIVT01027001001  
Vvi\_GSVIVT01024803001  
Vvi\_GSVIVT01012827001

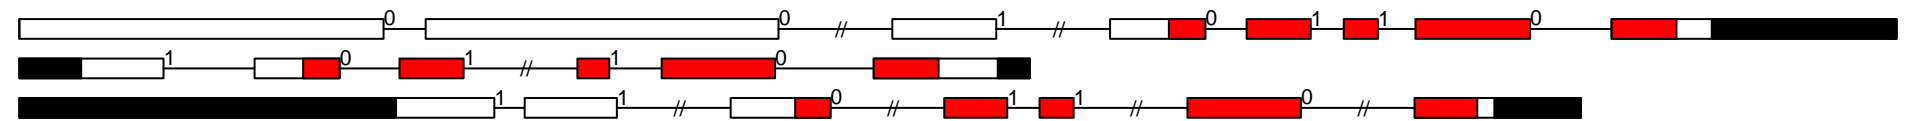

-1000

0

1000

2000

3000

4000

5000

# V.vi RLK-Pelle\_RLCK-IXa exon-intron and domain diagram (all)

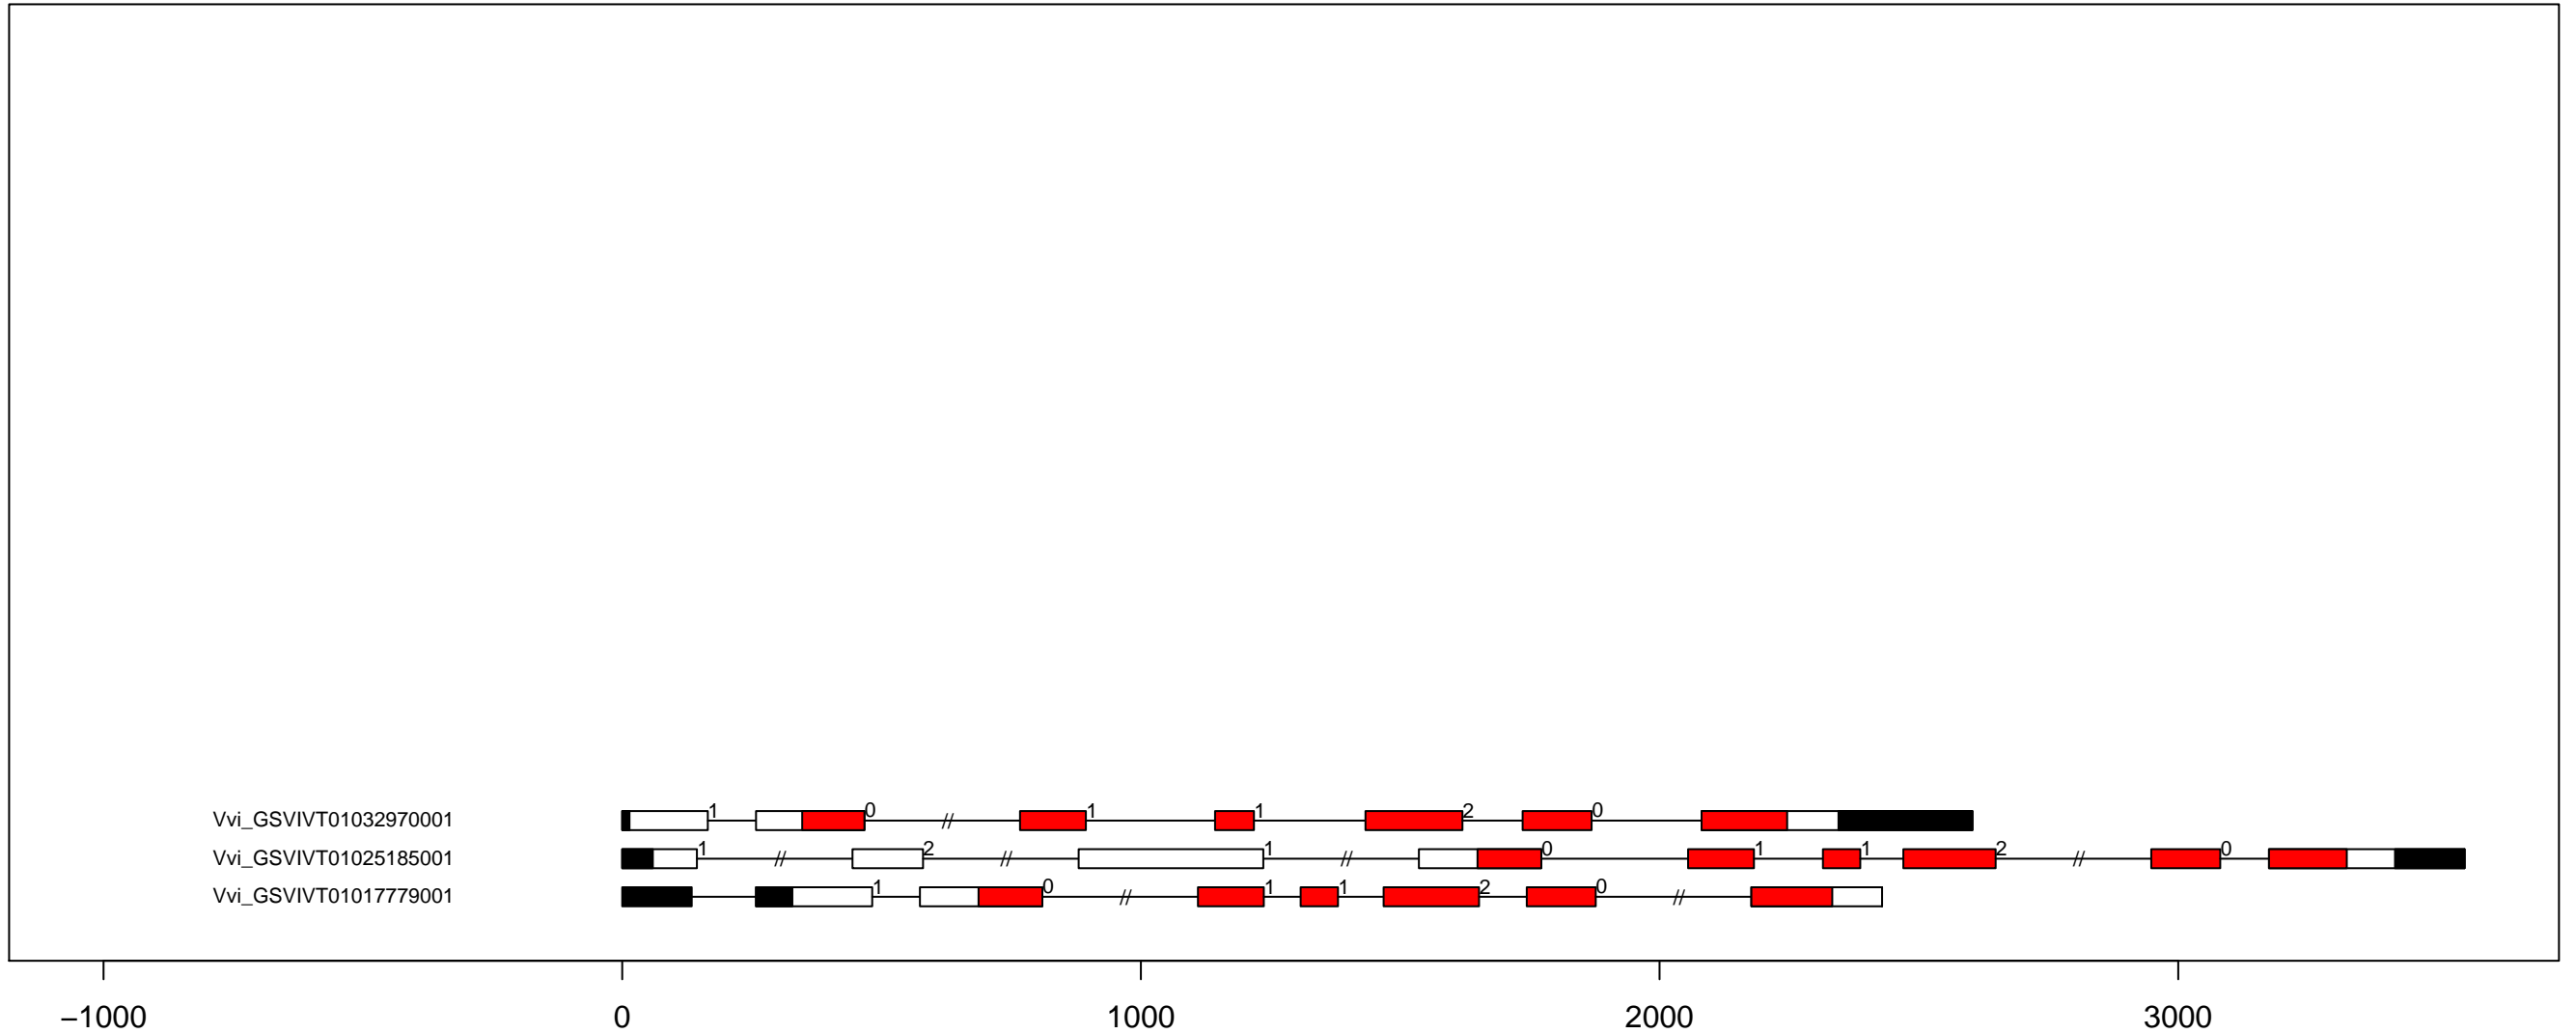



### V.vi RLK-Pelle\_RLCK-IXb exon-intron and domain diagram (all)

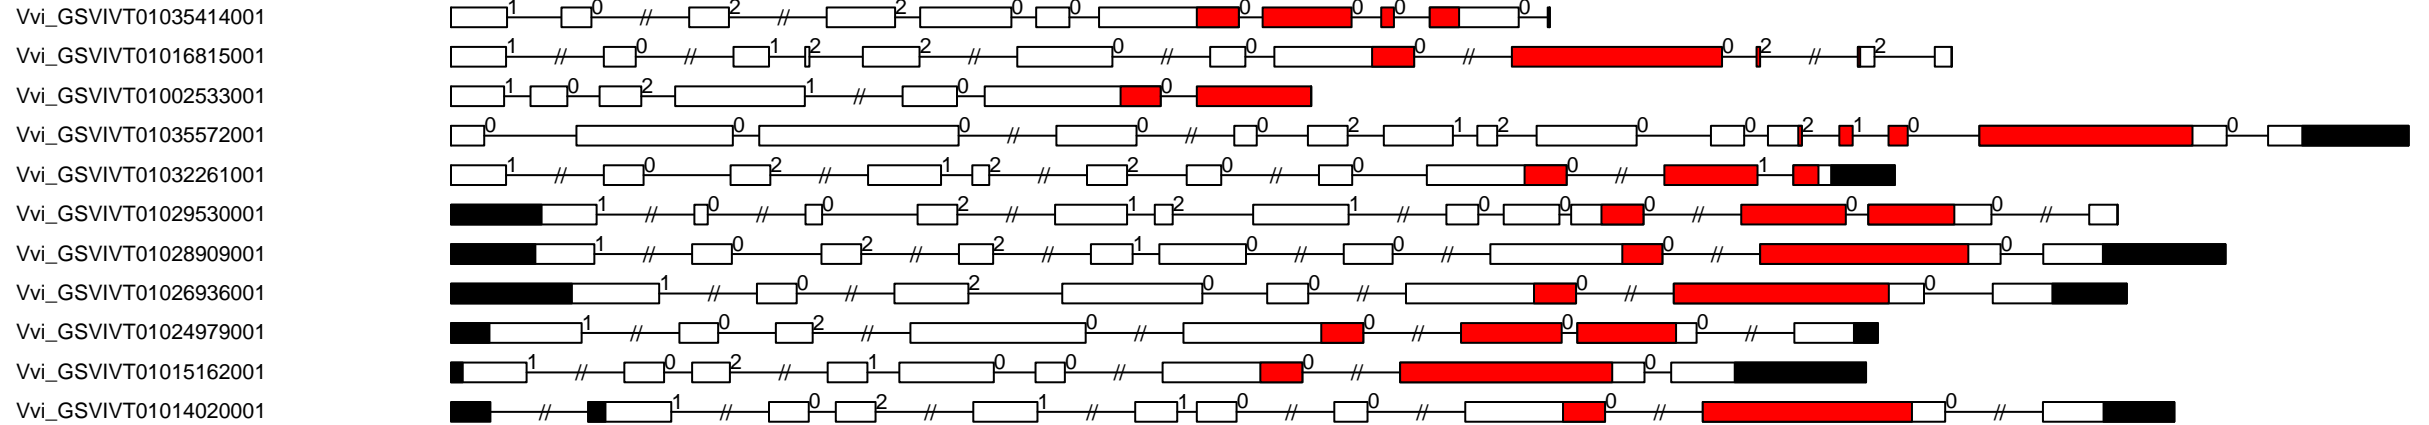



### V.vi RLK-Pelle\_RLCK-ViIa-1 exon-intron and domain diagram (all)

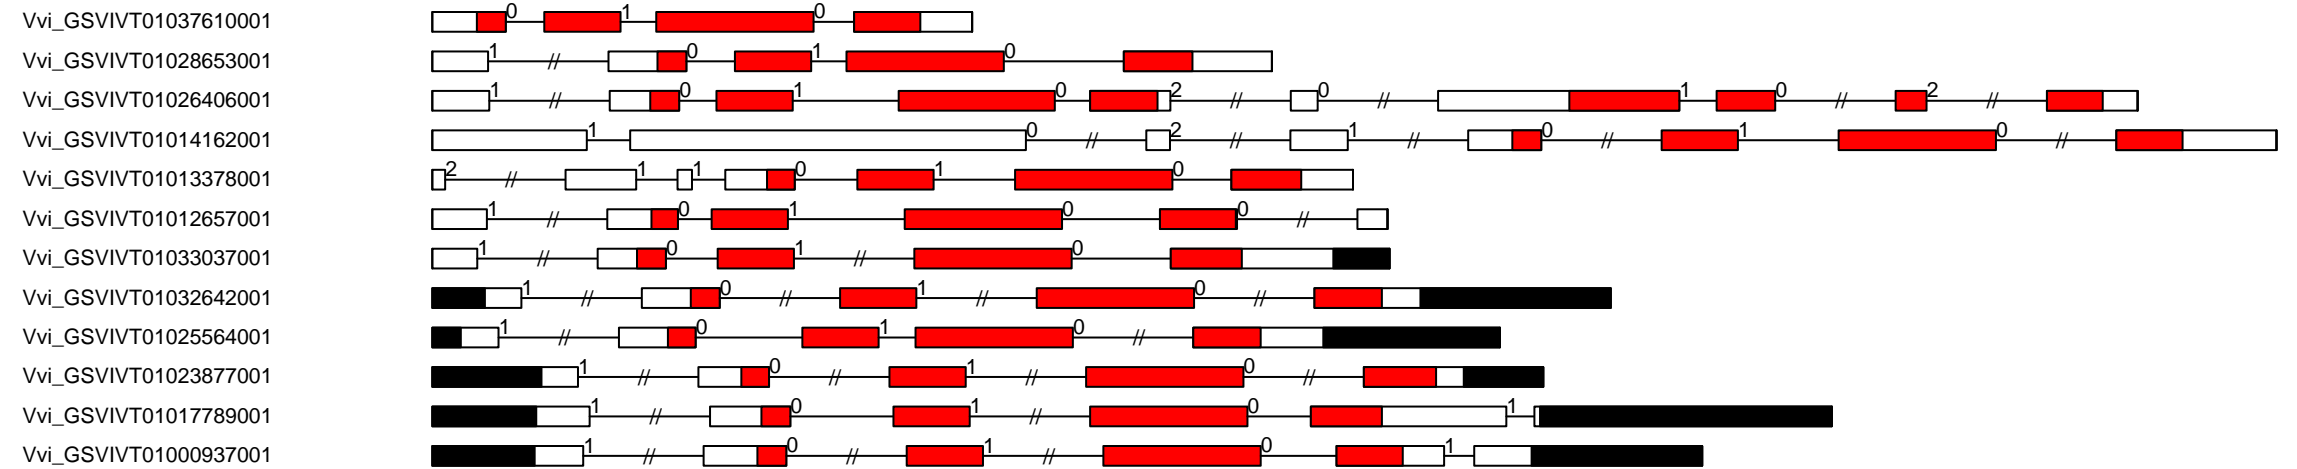

### V.vi RLK-Pelle\_RLCK-ViIa-2 exon-intron and domain diagram (part 1)

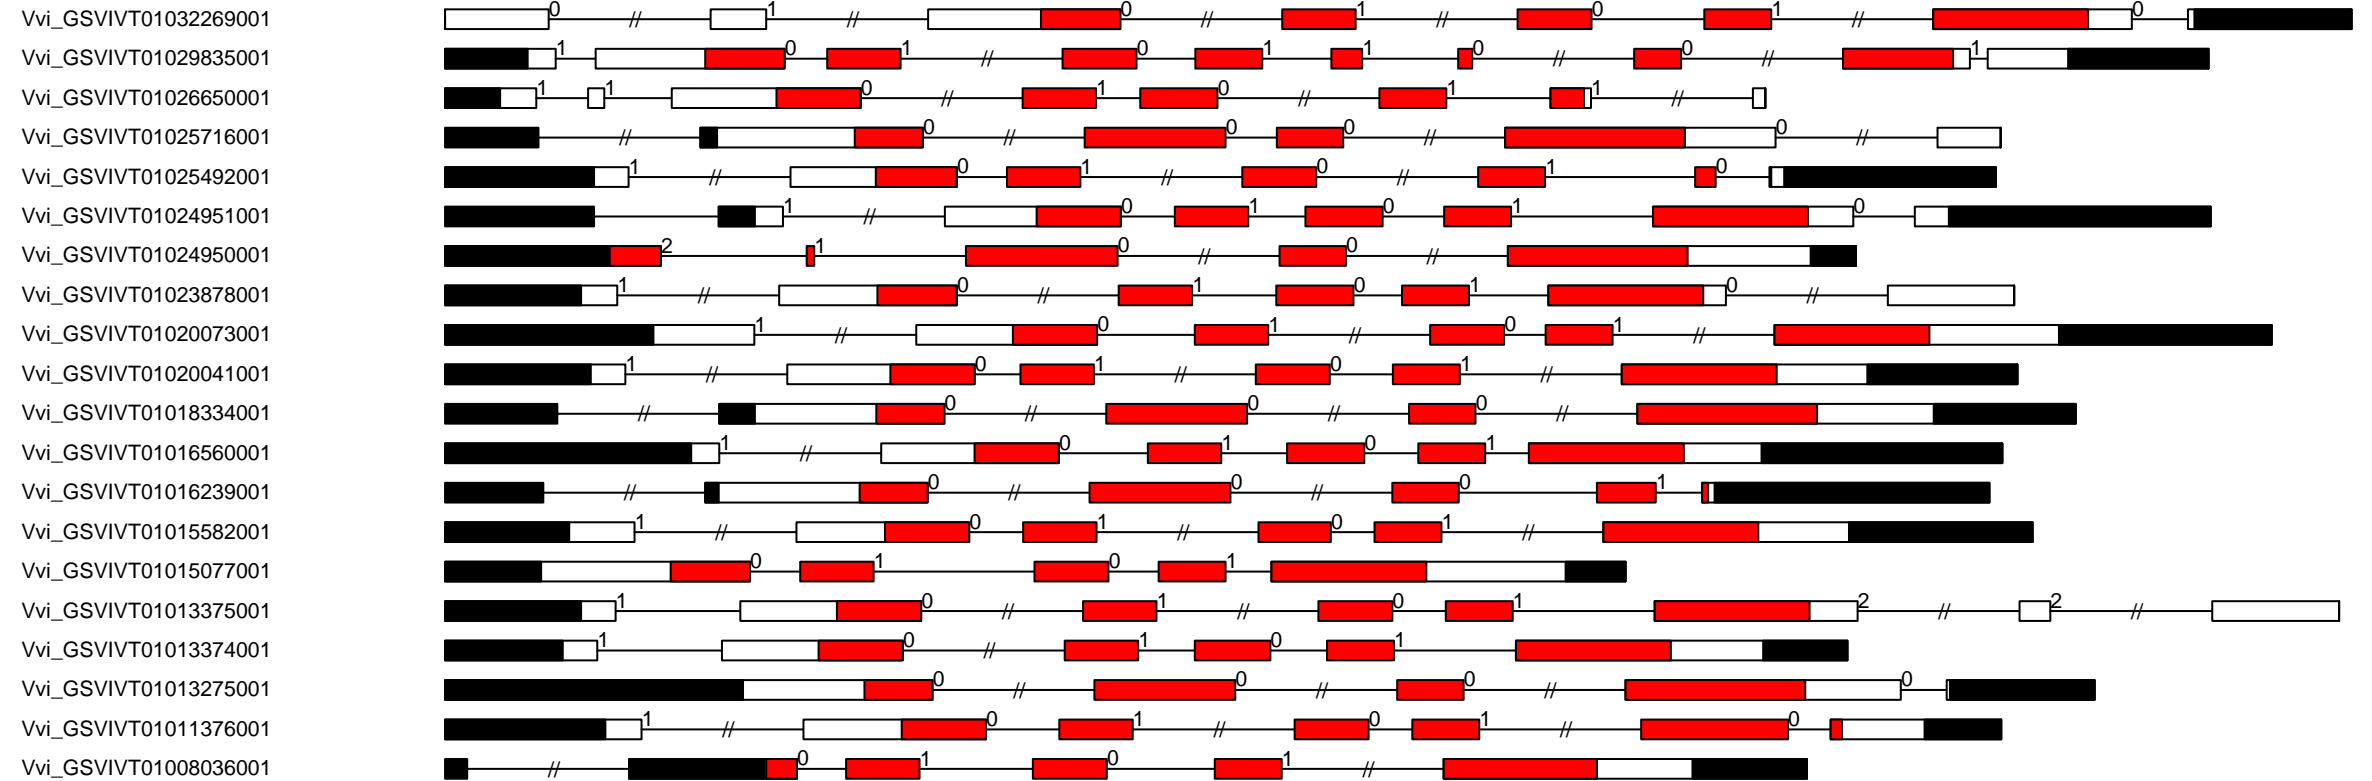

-1000

0

1000

2000

3000

# V.vi RLK-Pelle\_RLCK-VIIa-2 exon-intron and domain diagram (part 2)

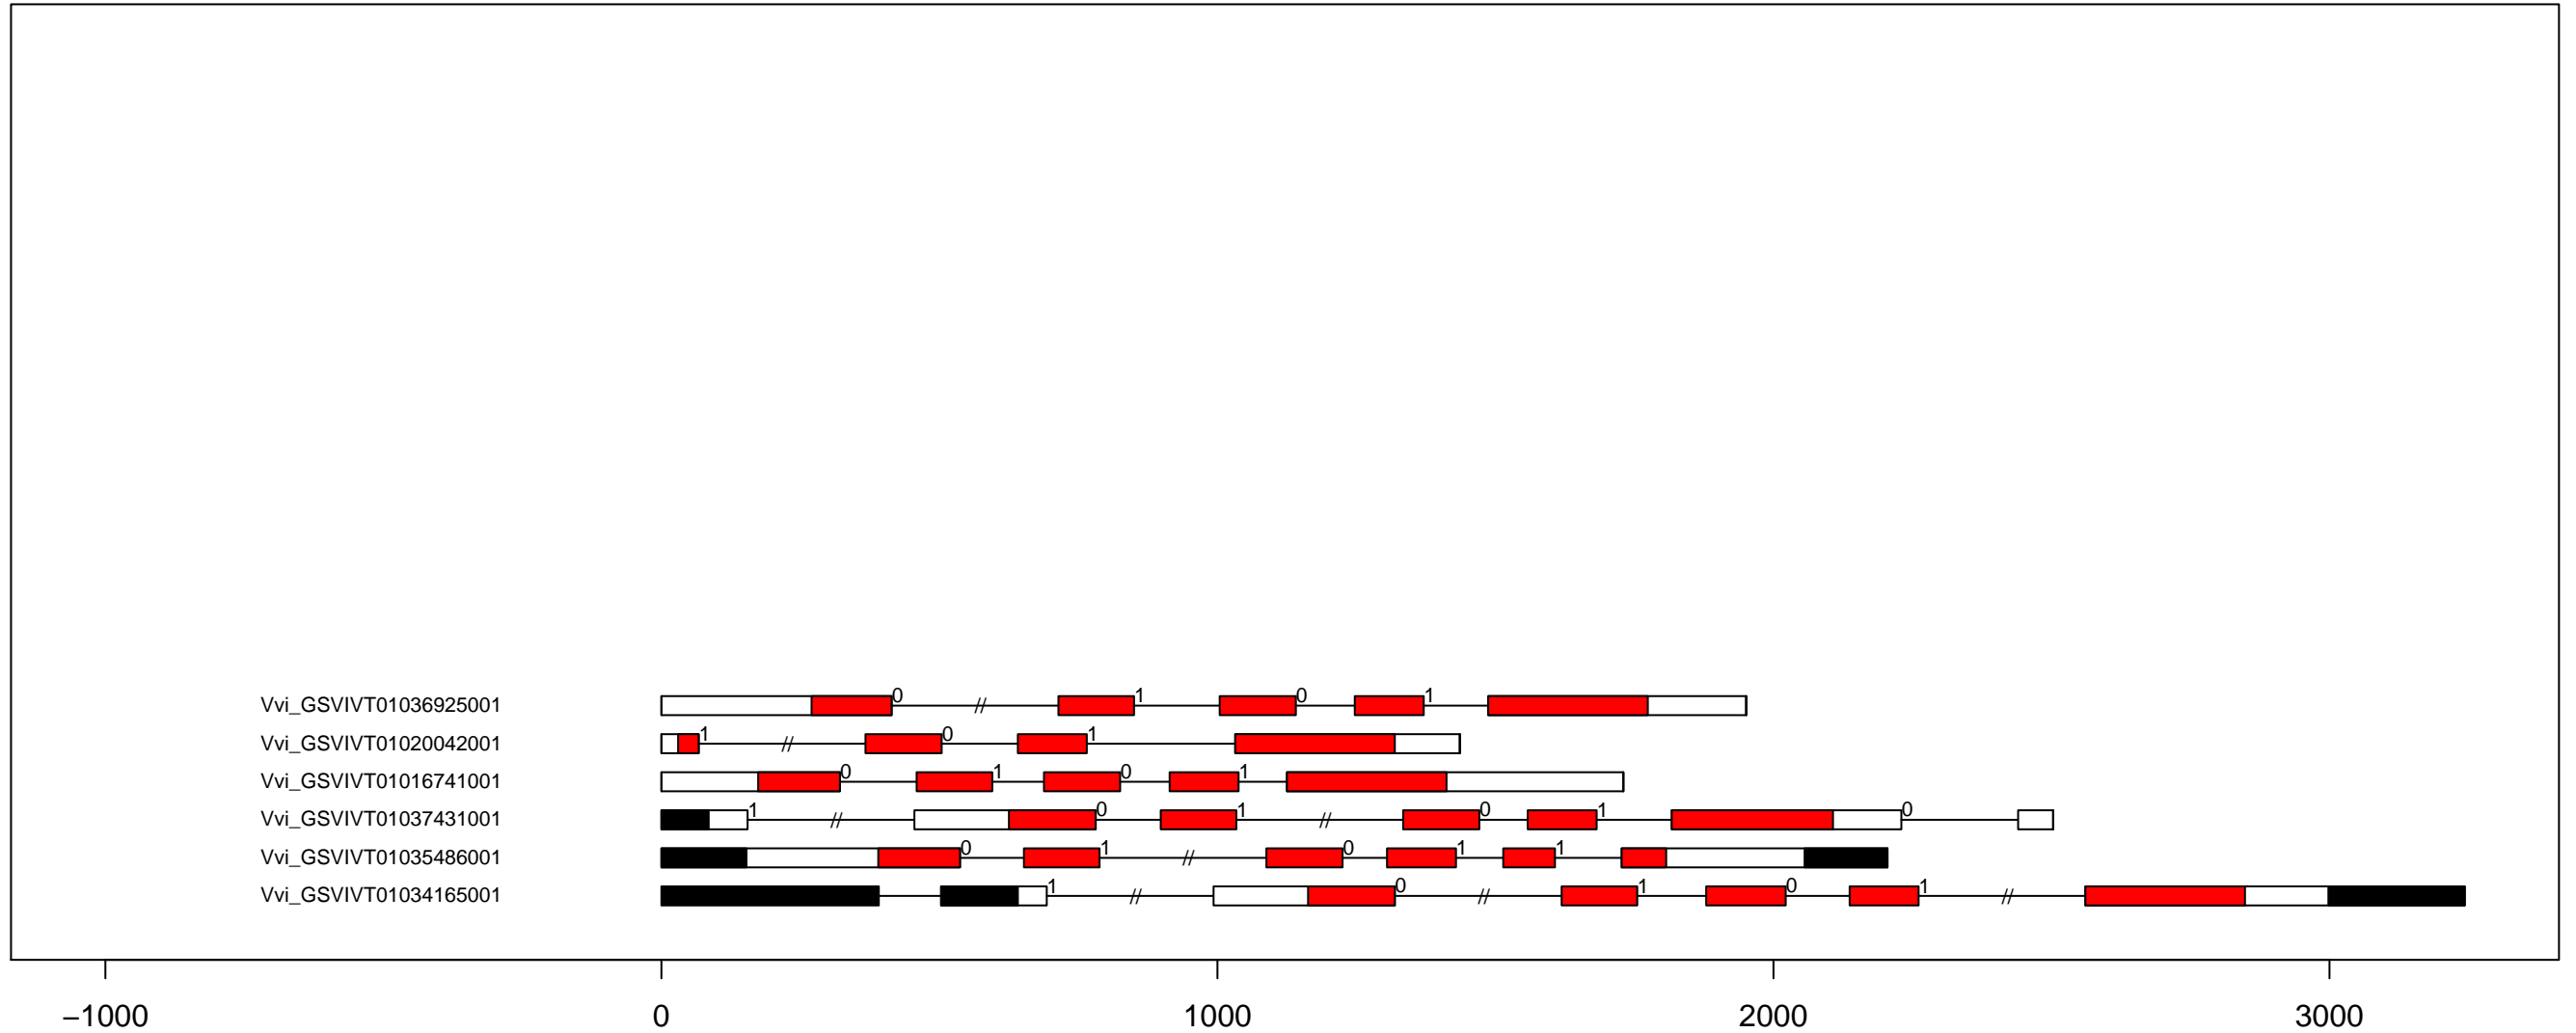

# V.vi RLK-Pelle\_RLCK-VIIb exon-intron and domain diagram (all)

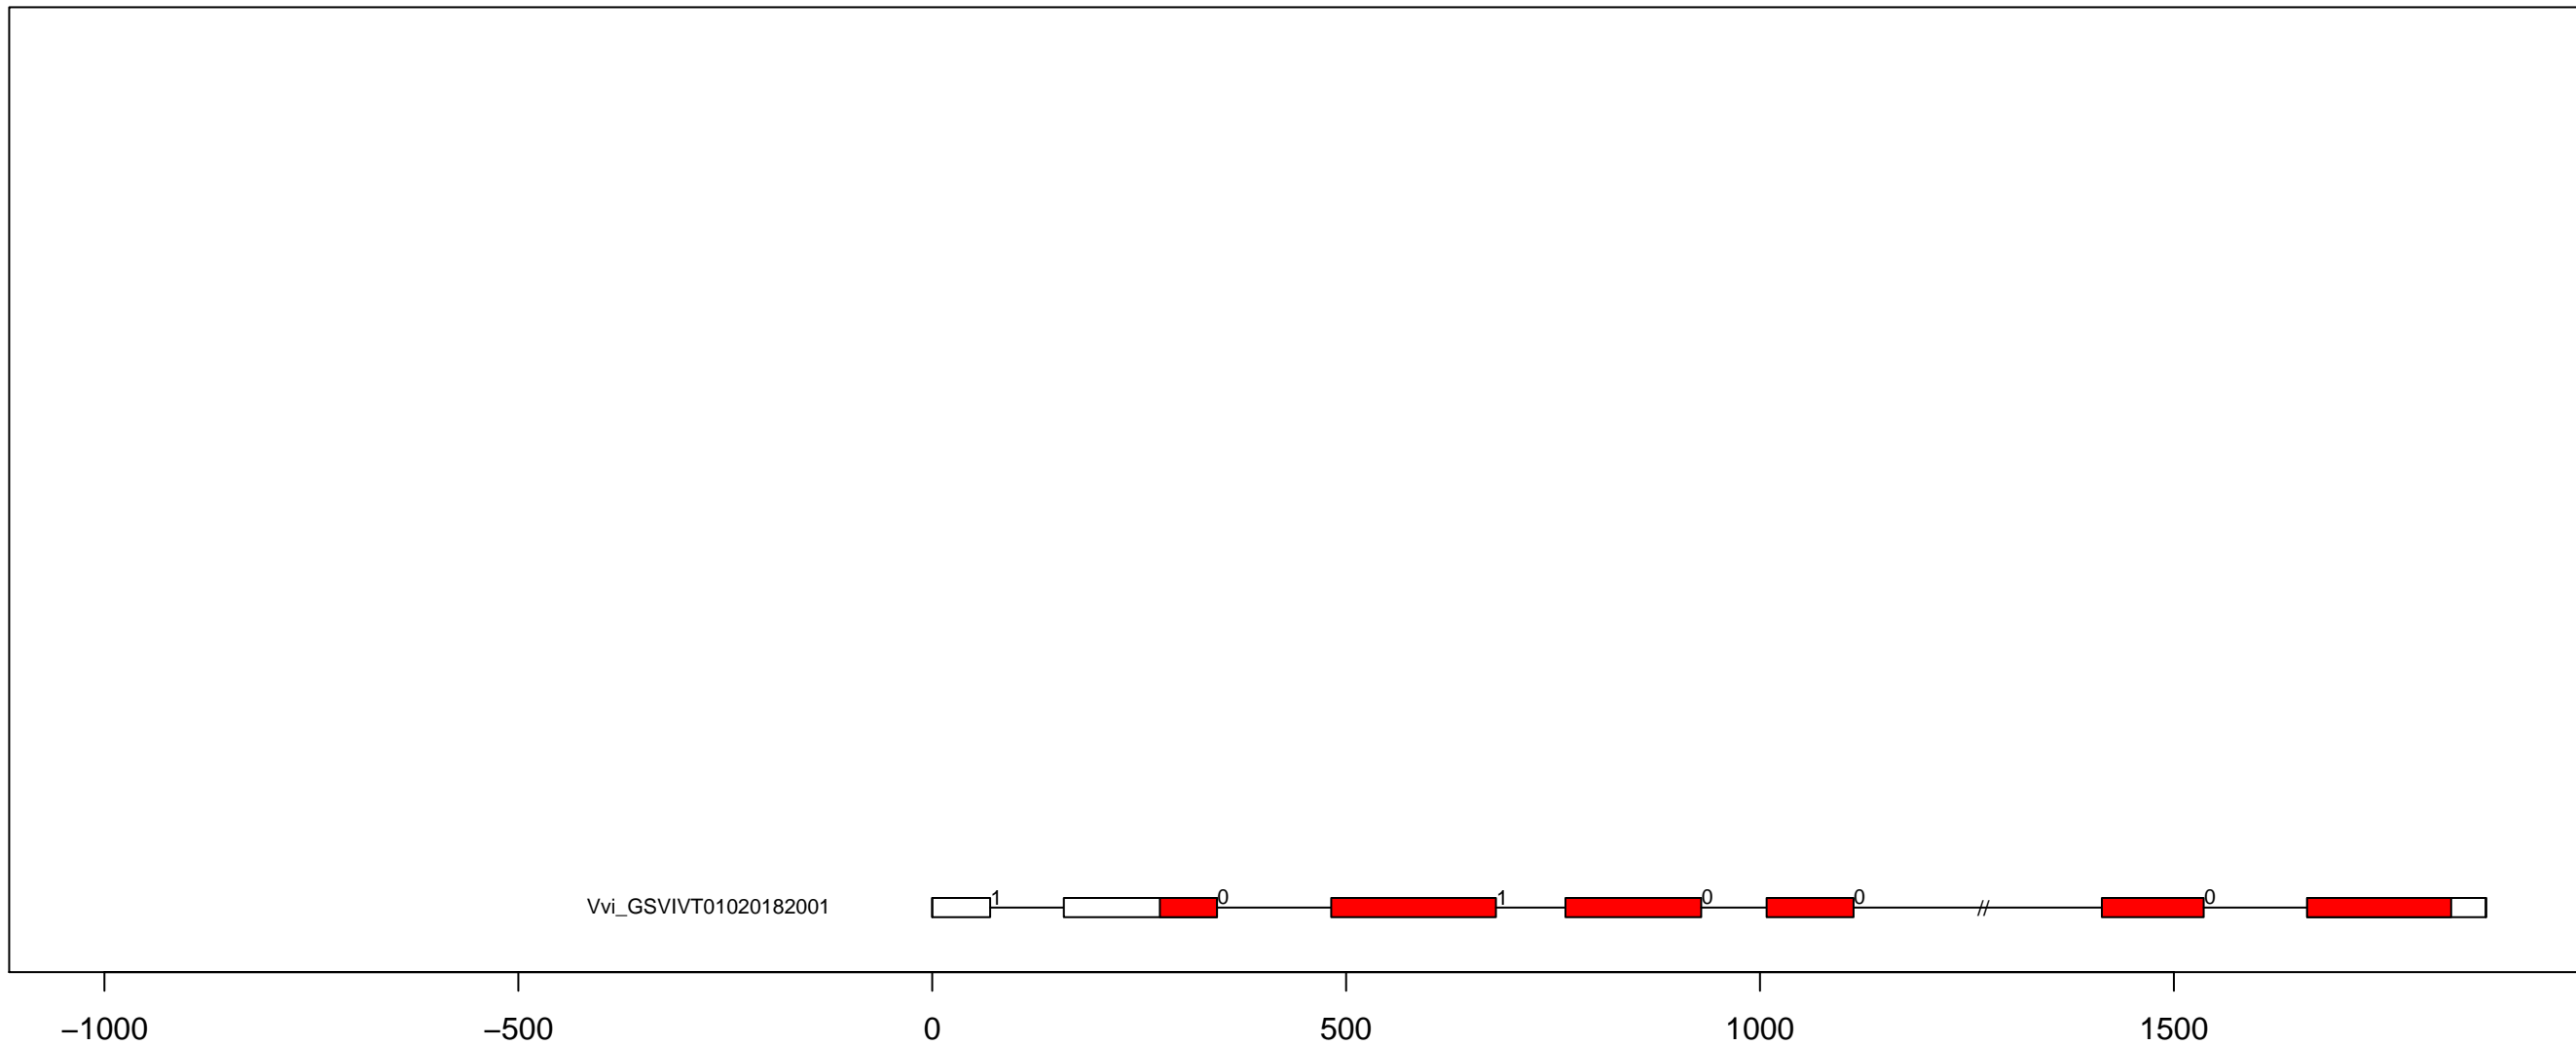

# V.vi RLK–Pelle\_RLCK–VIII exon–intron and domain diagram (all)

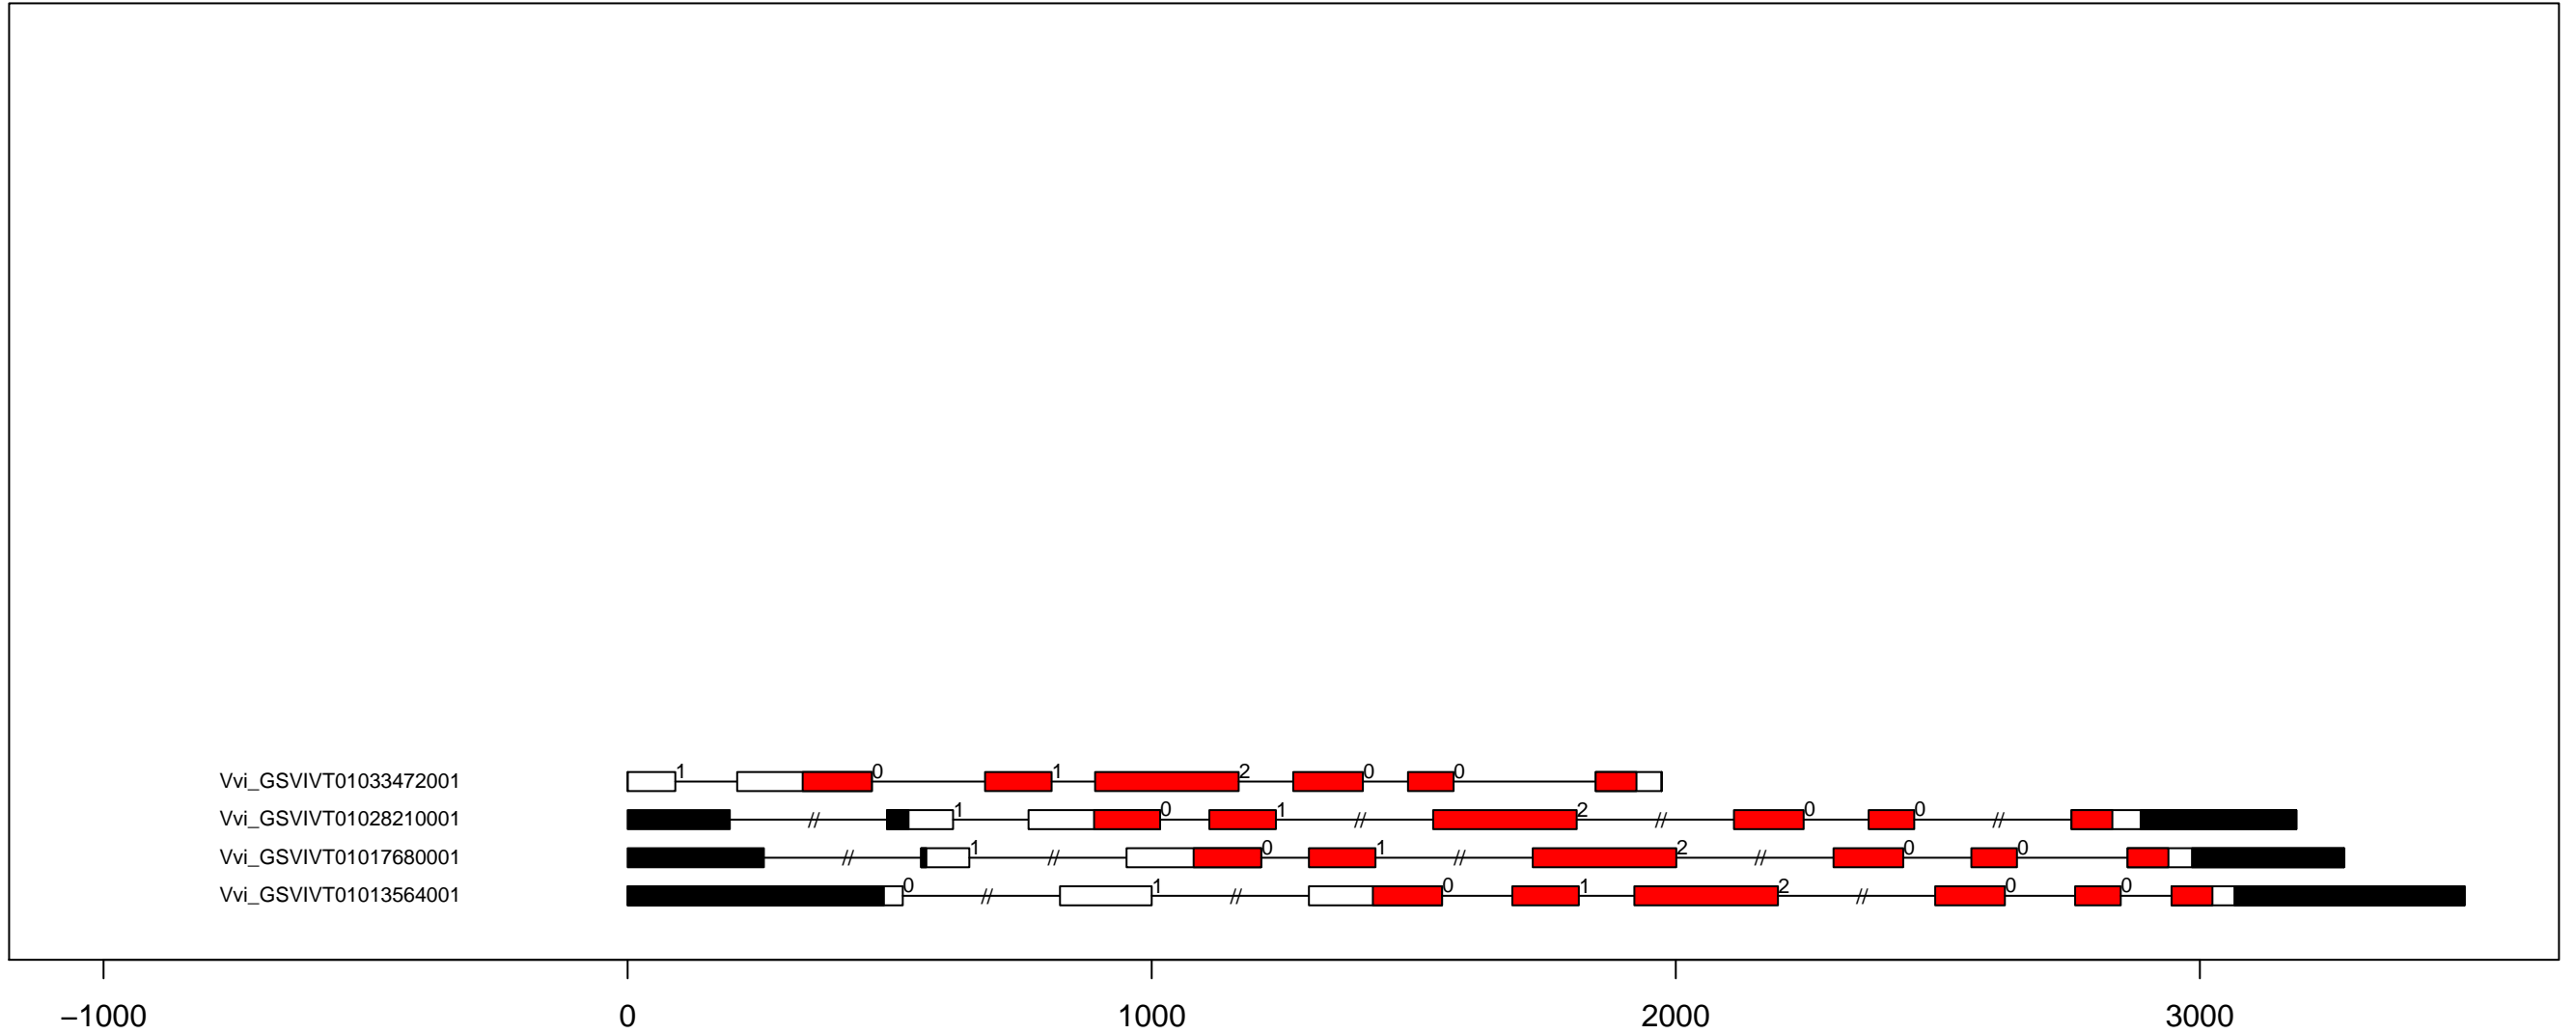

### V.vi RLK-Pelle\_RLCK-VI exon-intron and domain diagram (all)

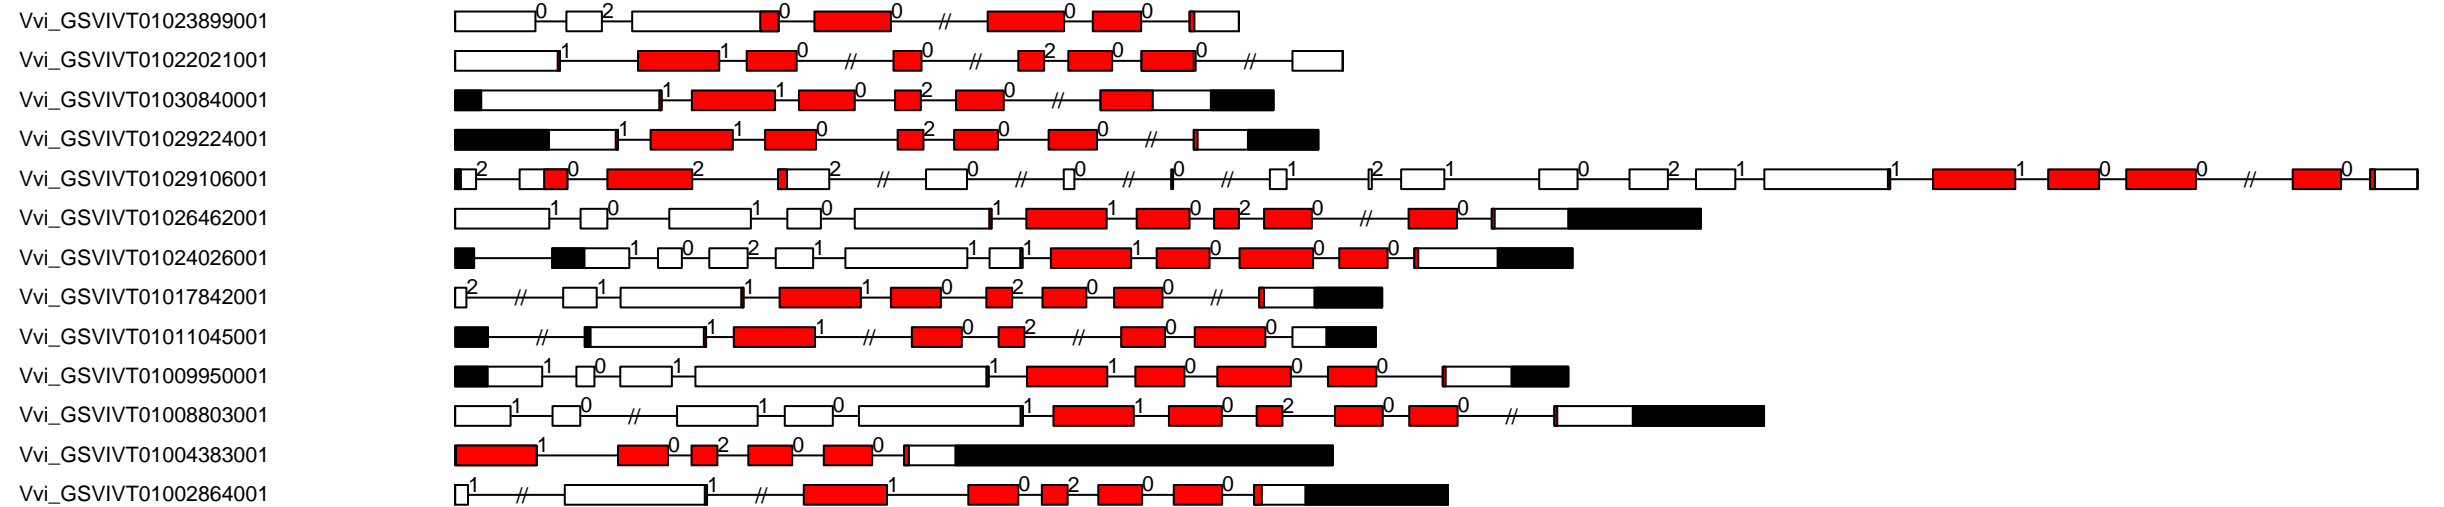



# V.vi RLK-Pelle\_RLCK-V exon-intron and domain diagram (all)

Vvi\_GSVIVT01028858001  
Vvi\_GSVIVT01031962001  
Vvi\_GSVIVT01031315001  
Vvi\_GSVIVT01026982001  
Vvi\_GSVIVT01022114001  
Vvi\_GSVIVT01020860001  
Vvi\_GSVIVT01017681001  
Vvi\_GSVIVT01009470001

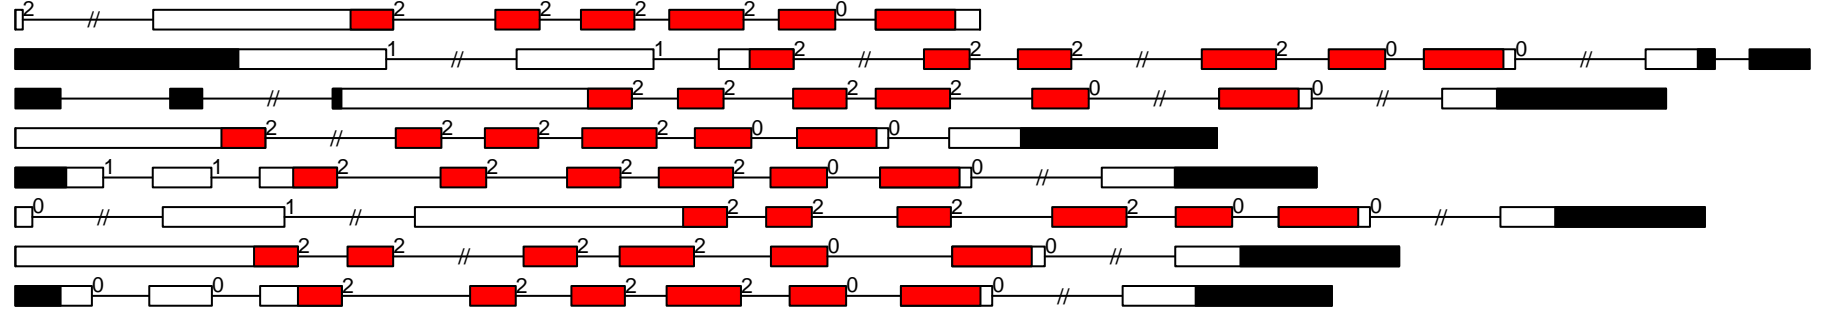

-1000

0

1000

2000

3000

4000

# V.vi RLK-Pelle\_RLCK-XII-1 exon-intron and domain diagram (all)

Vvi\_GSVIVT01034043001  
Vvi\_GSVIVT01026892001  
Vvi\_GSVIVT01024833001  
Vvi\_GSVIVT01023930001  
Vvi\_GSVIVT01019759001  
Vvi\_GSVIVT01013173001  
Vvi\_GSVIVT01008685001

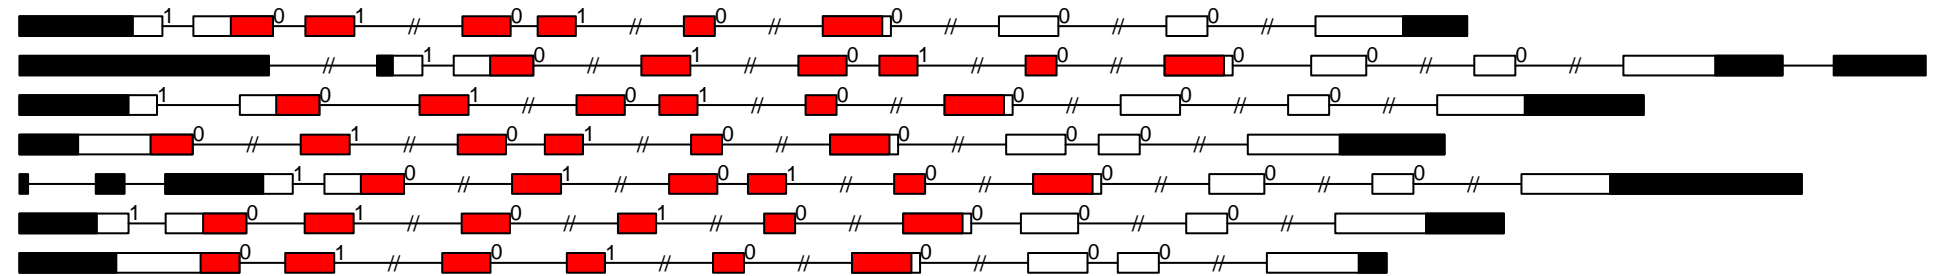

-1000

0

1000

2000

3000

4000

5000

# V.vi RLK-Pelle\_RLCK-XII-2 exon-intron and domain diagram (all)

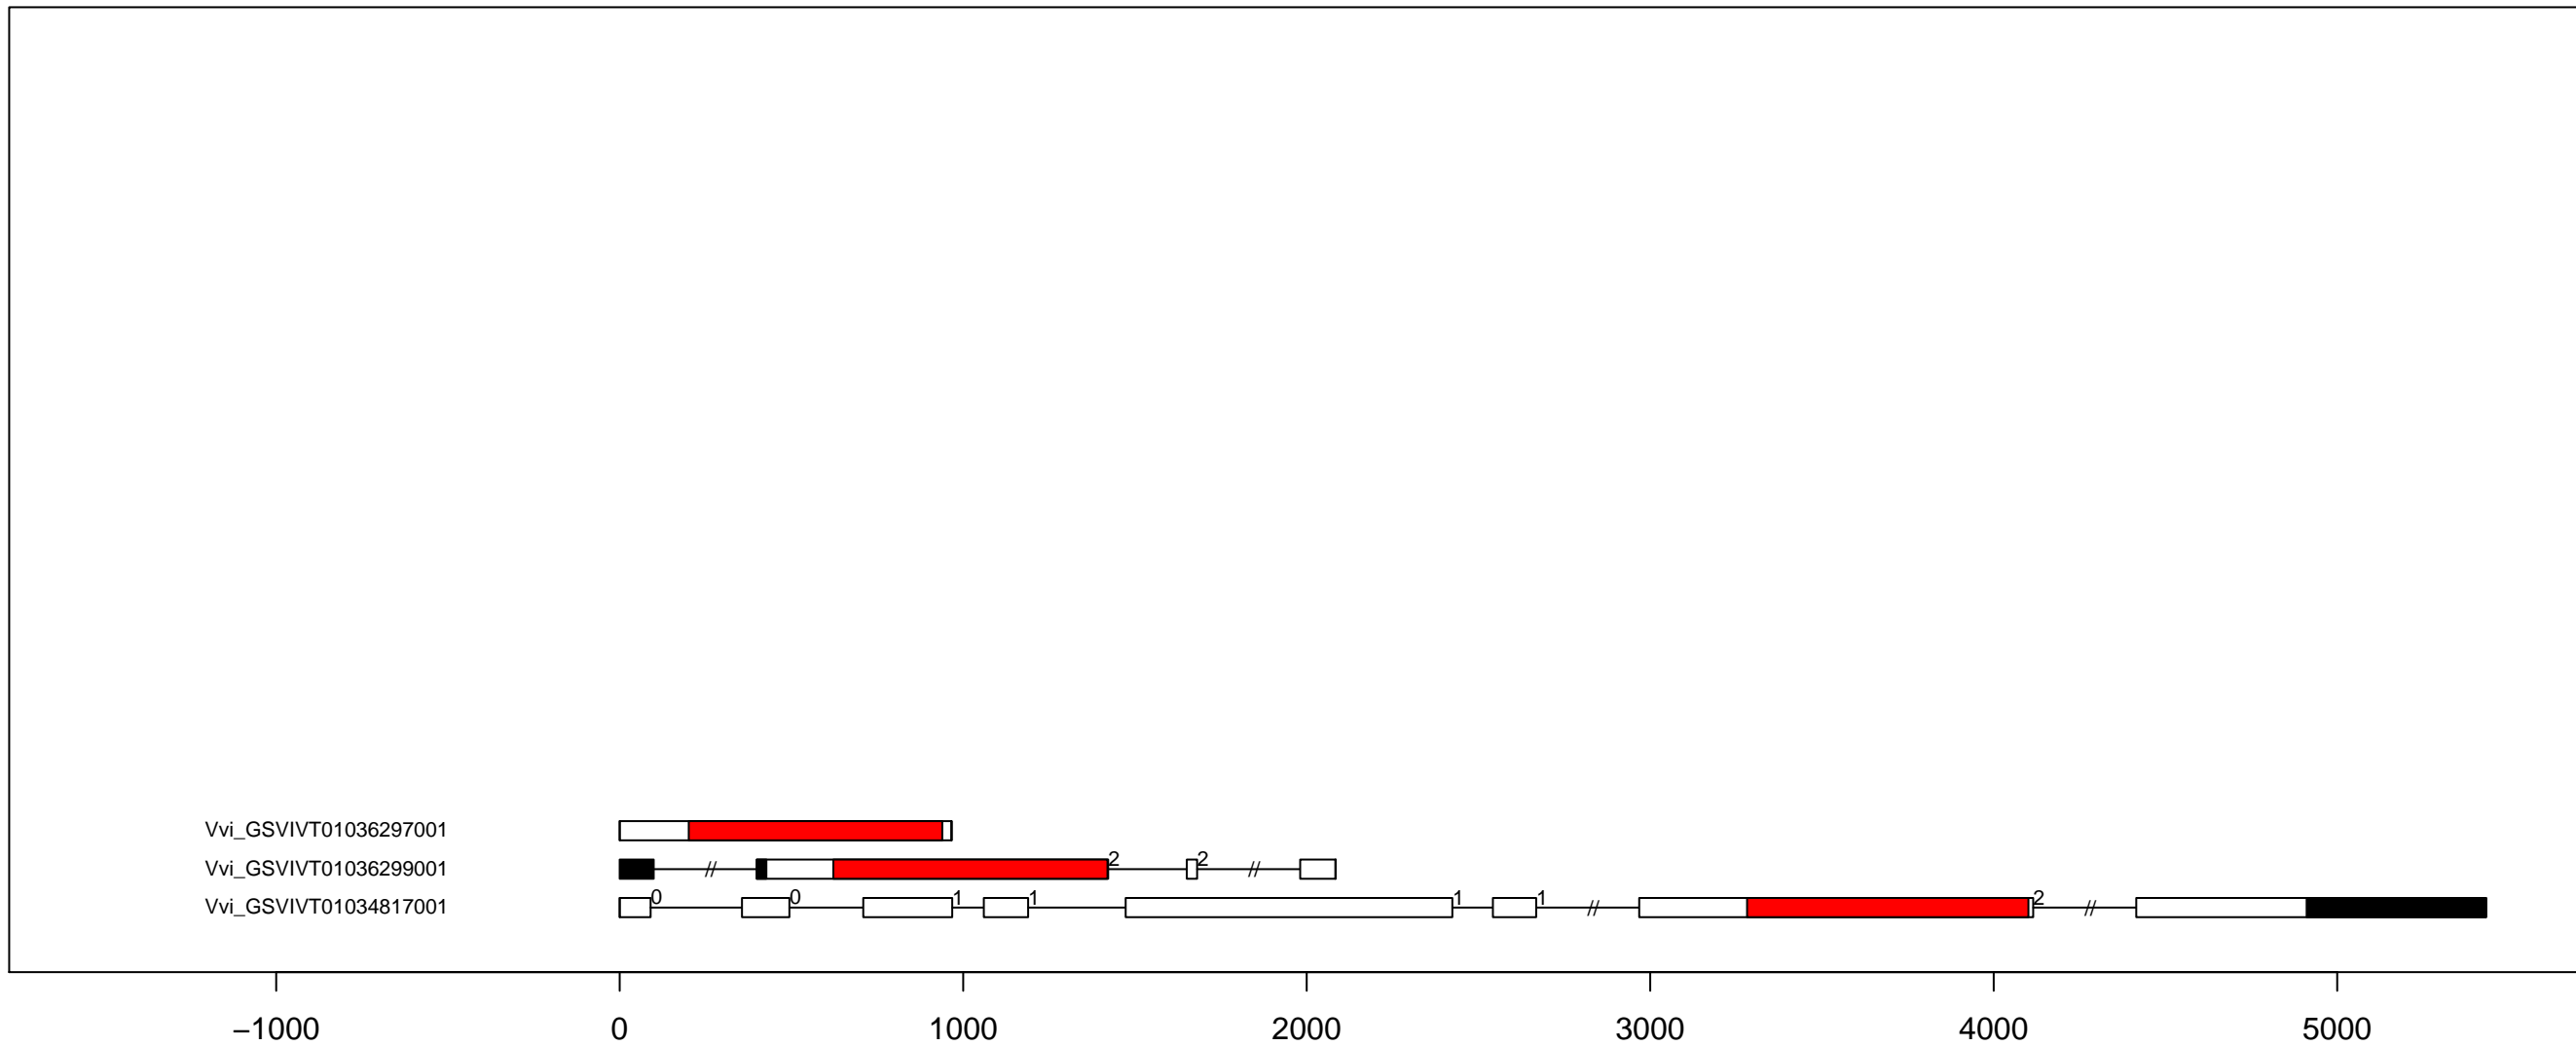

# V.vi RLK-Pelle\_RLCK-XIII exon-intron and domain diagram (all)

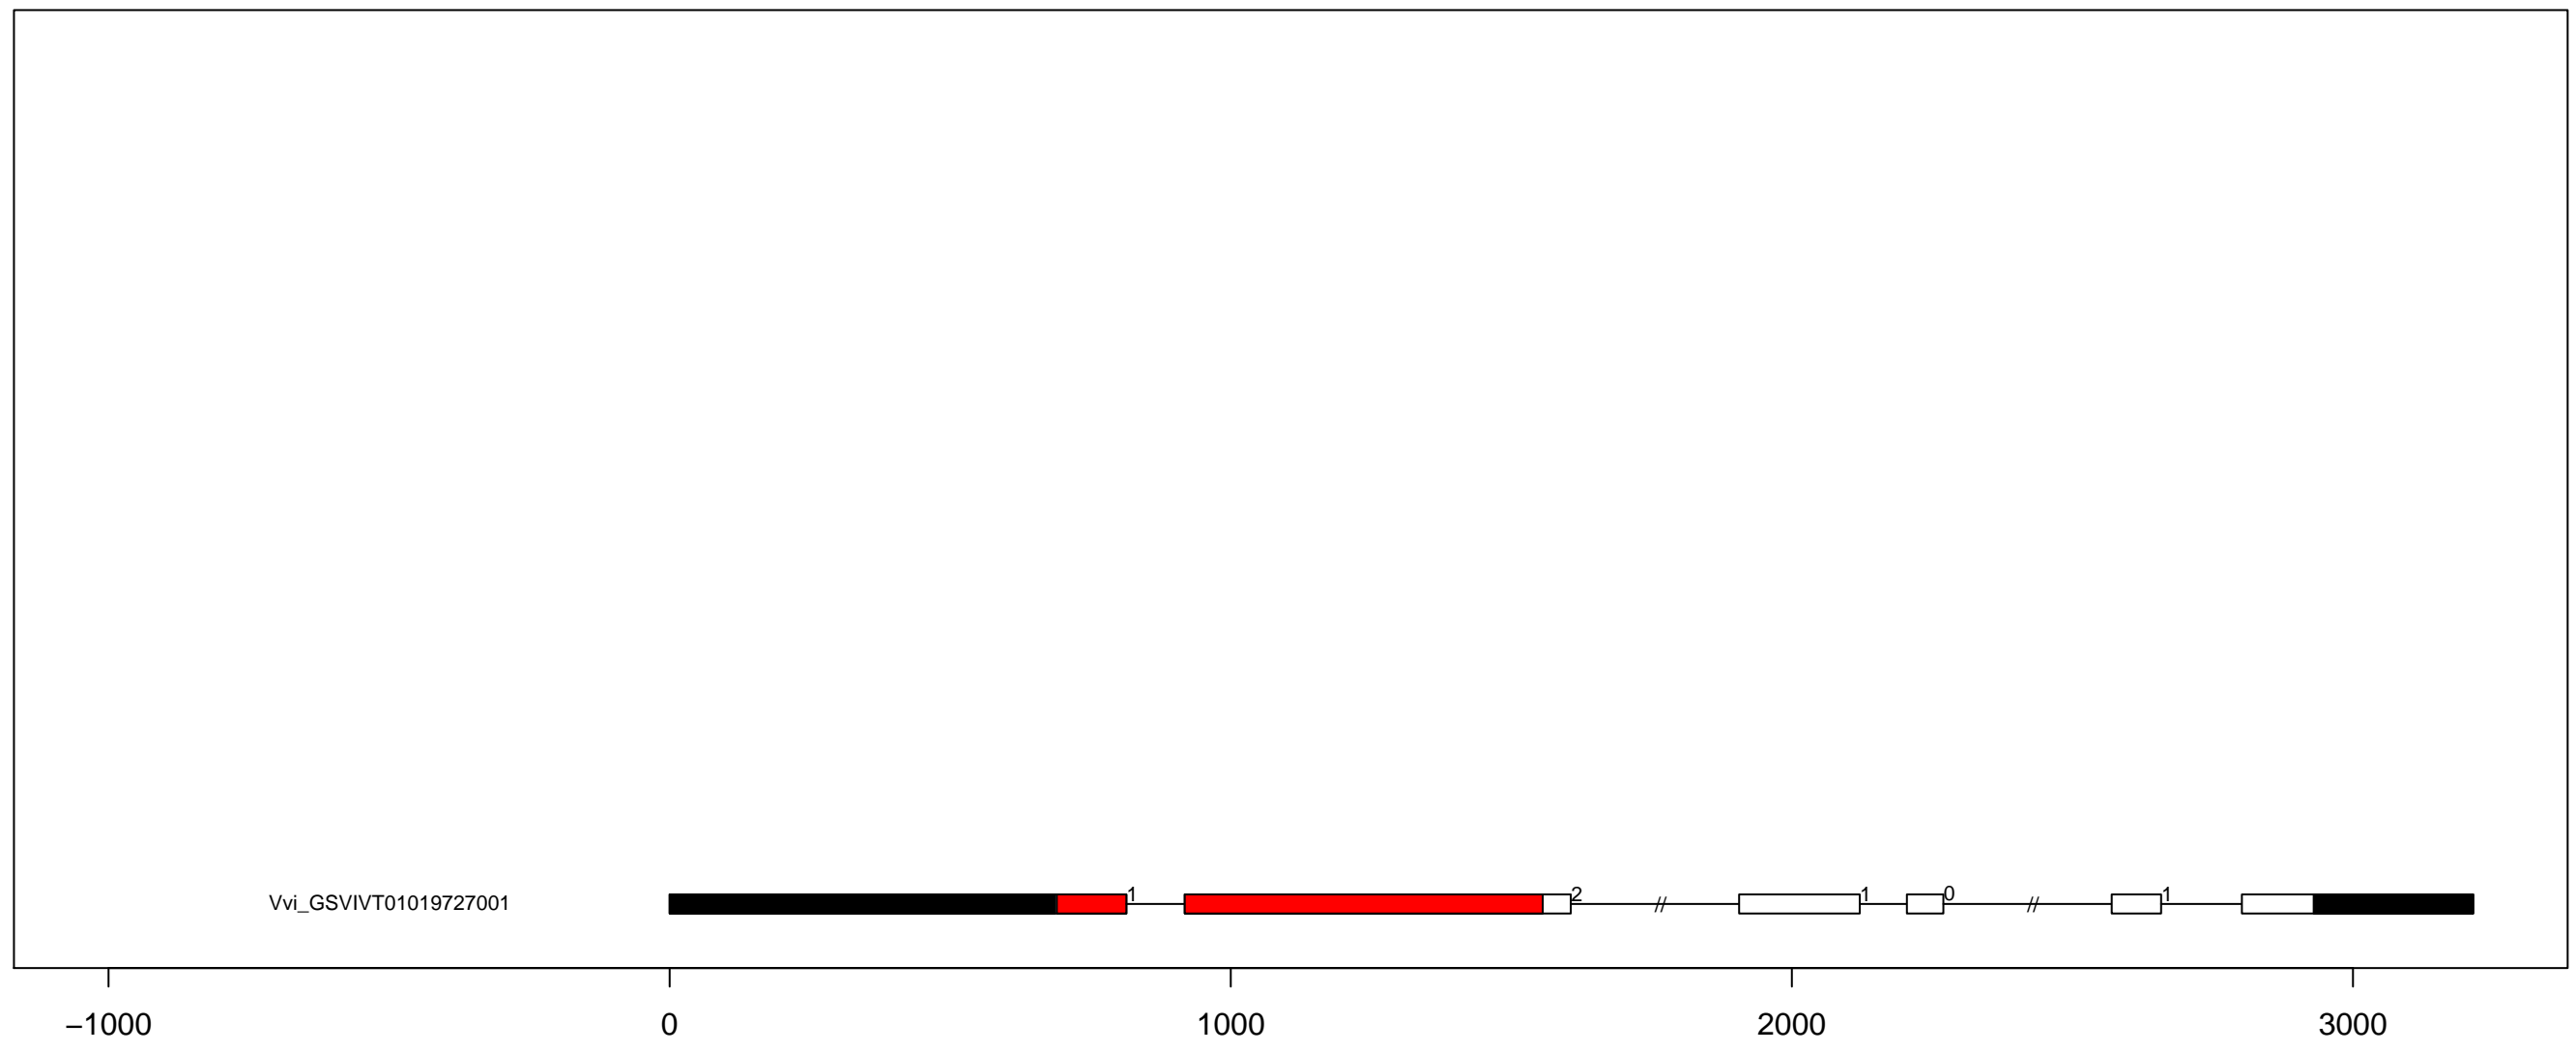

# V.vi RLK-Pelle\_RLCK-XI exon-intron and domain diagram (all)

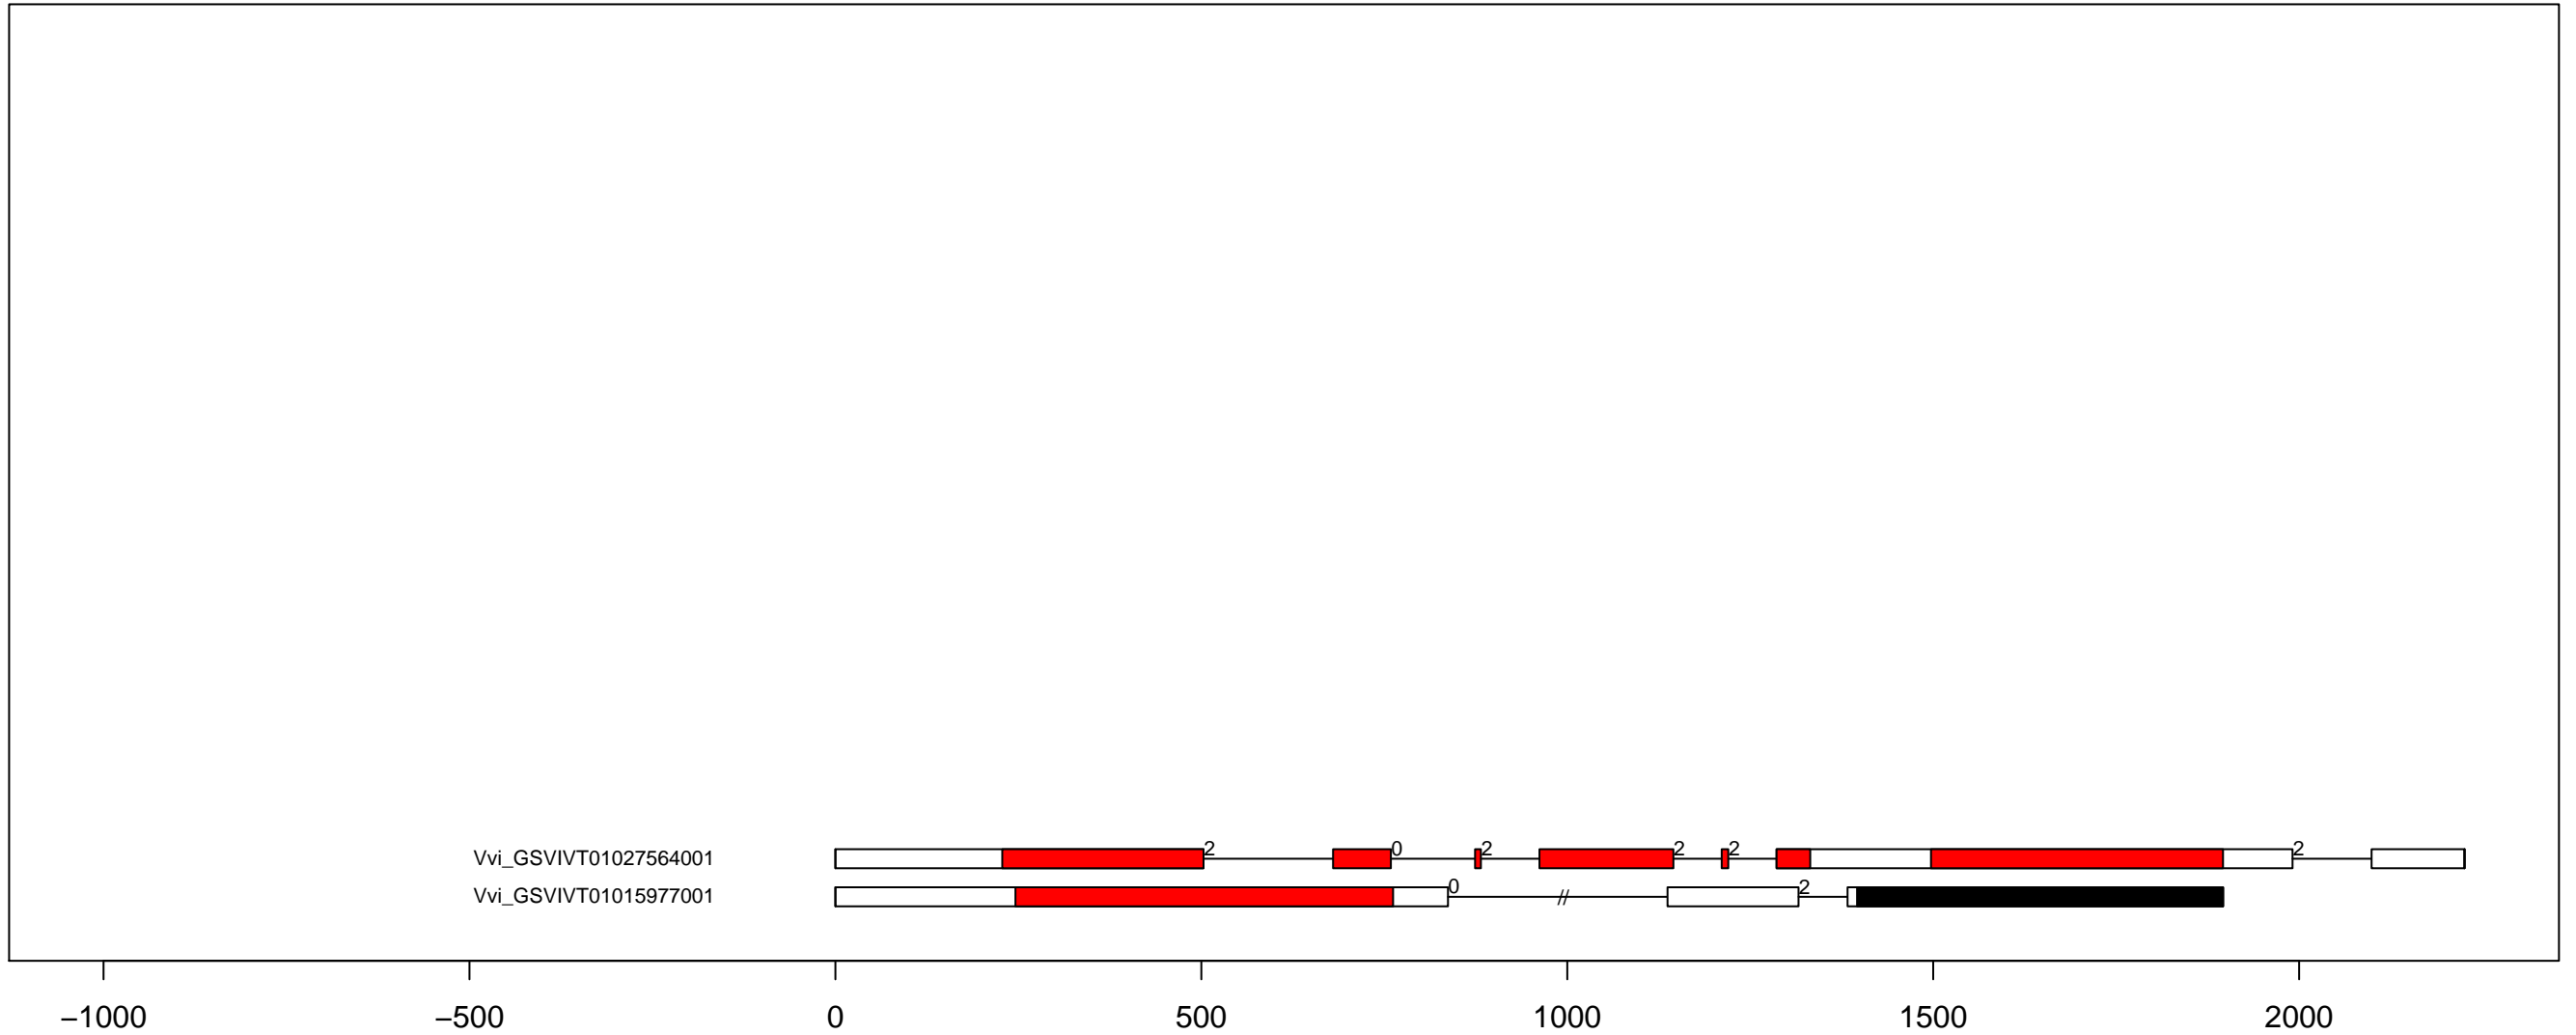

# V.vi RLK-Pelle\_RLCK-X exon-intron and domain diagram (all)

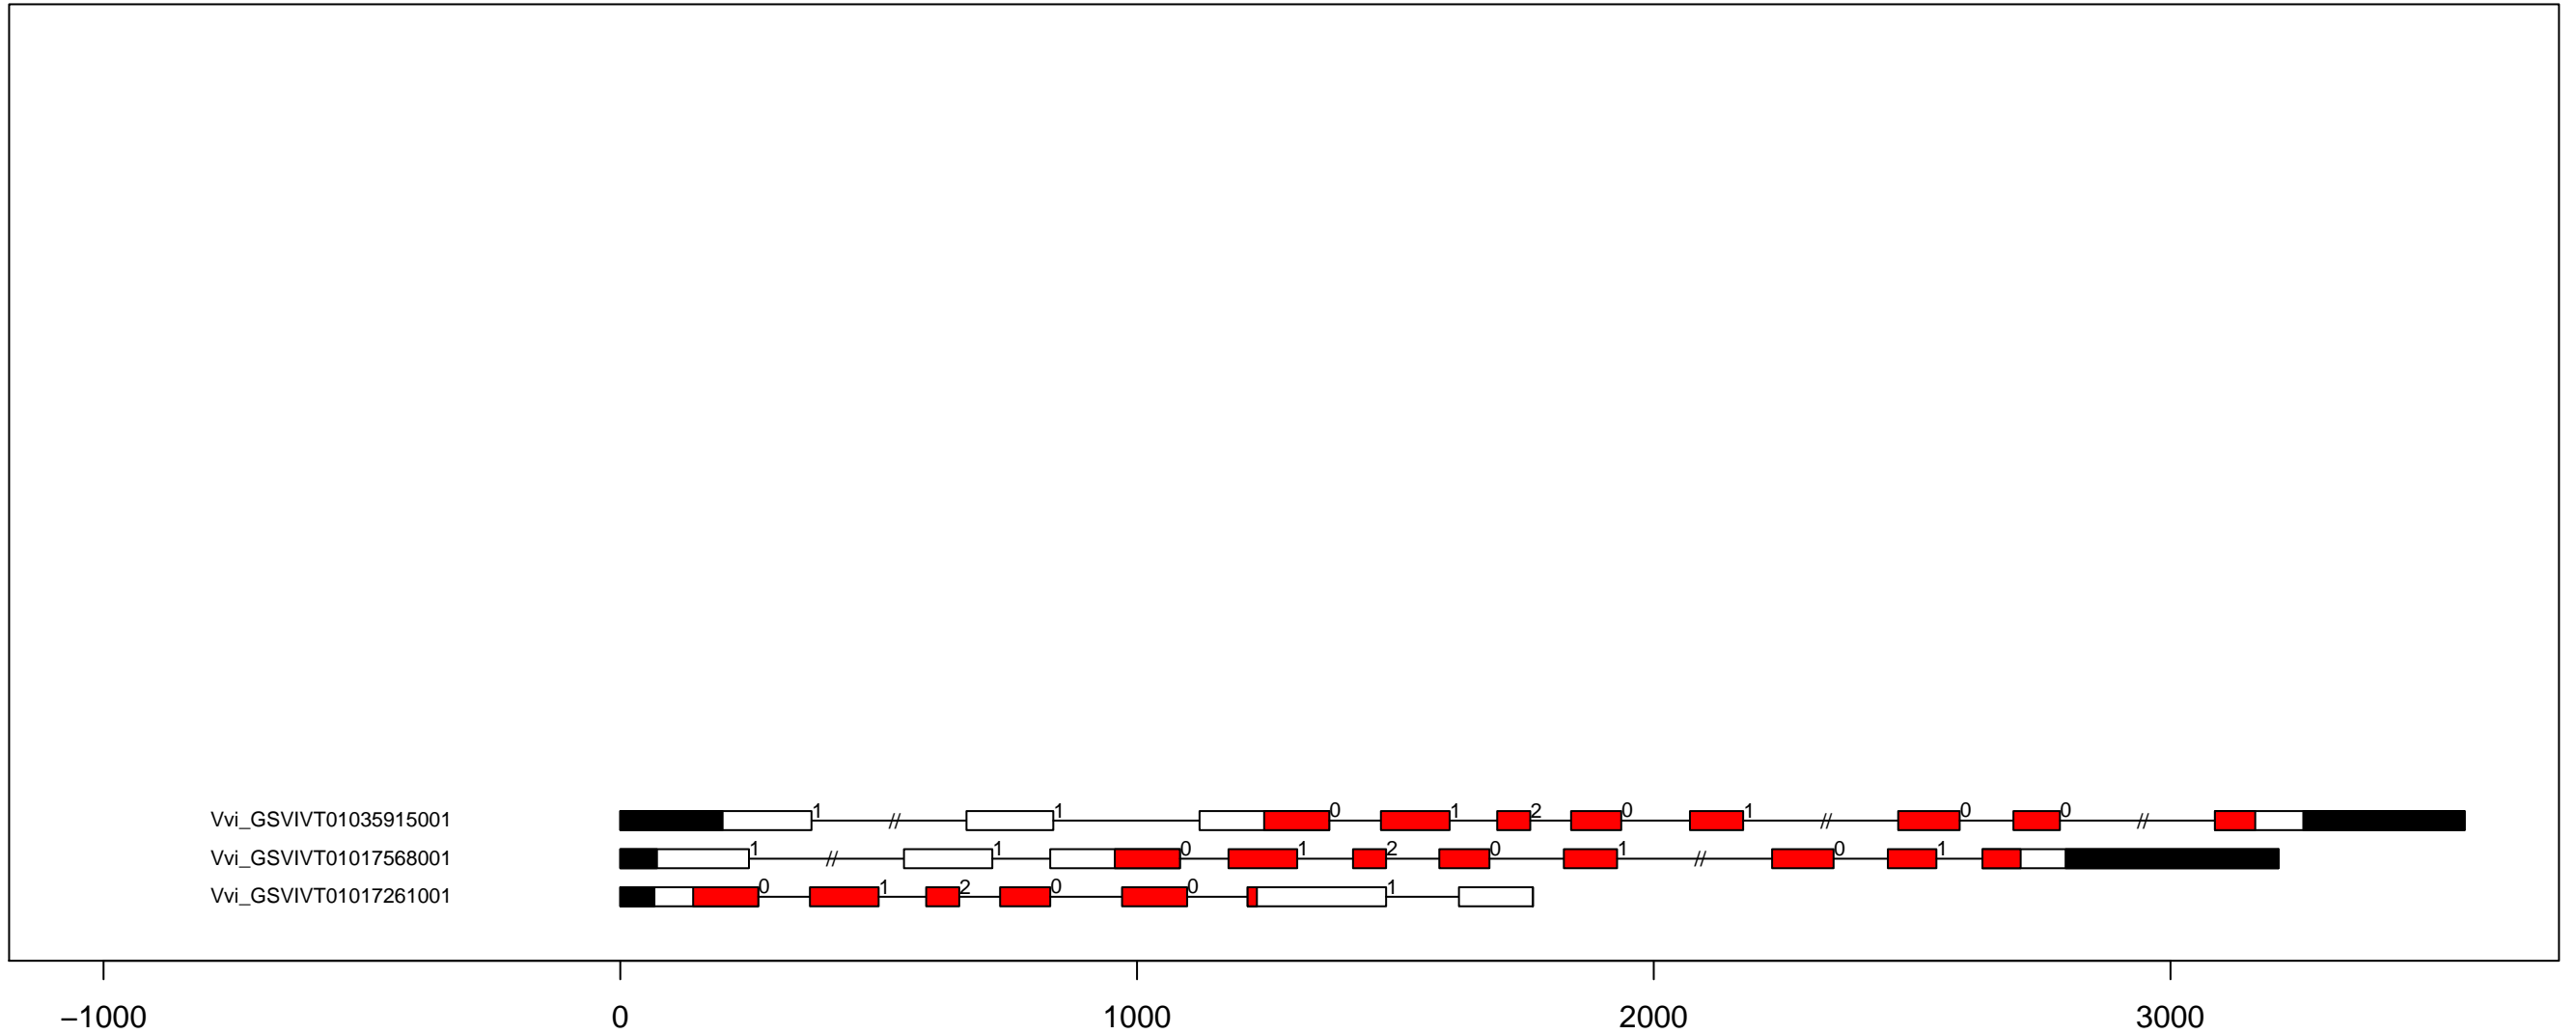

# V.vi RLK-Pelle\_RLCK-XVI exon-intron and domain diagram (all)

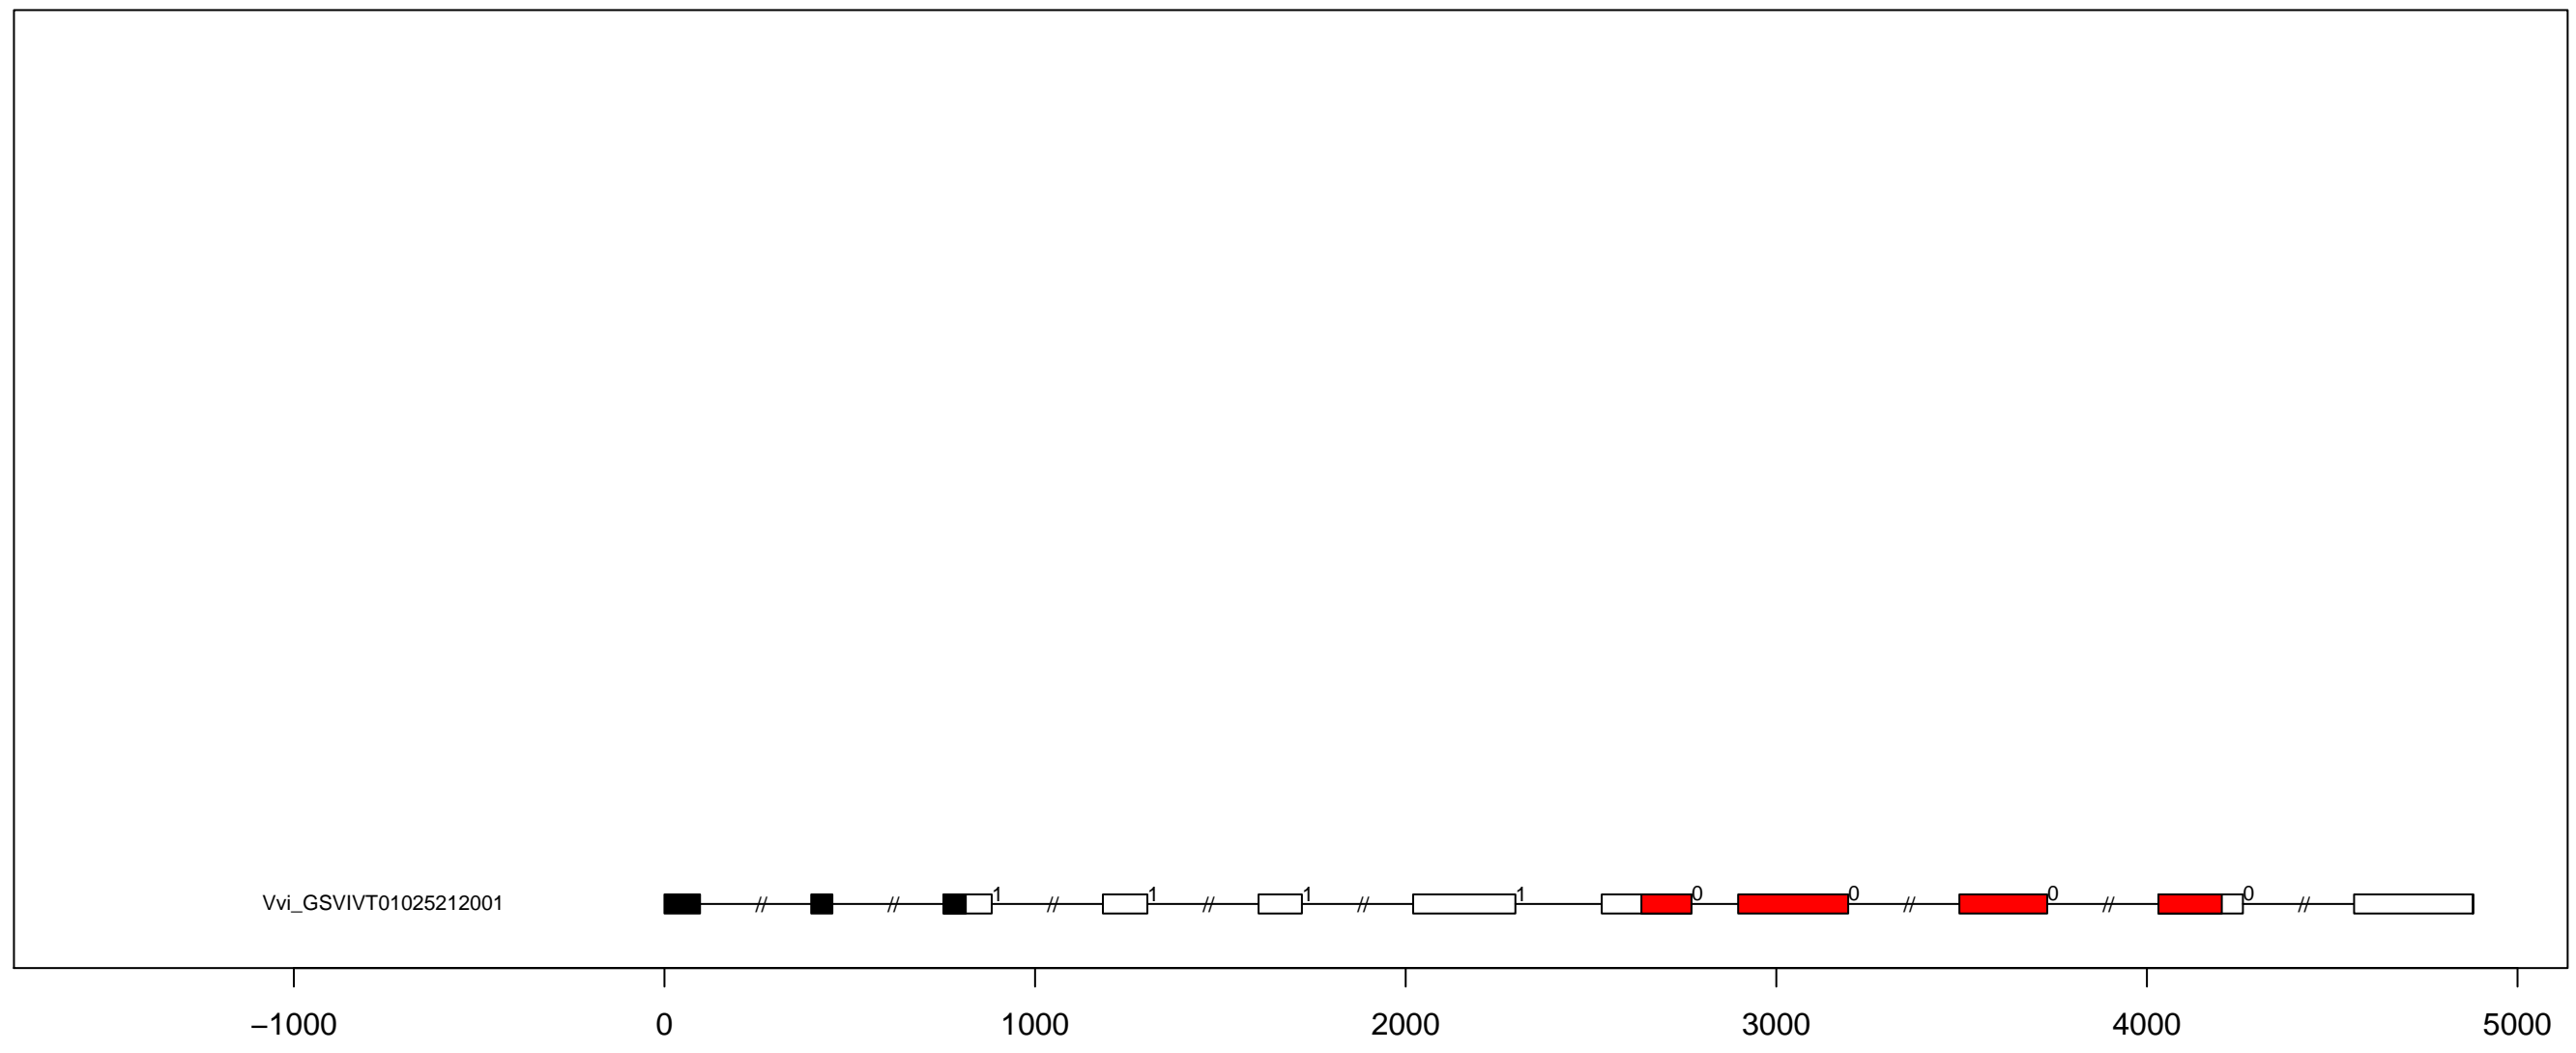

# V.vi RLK-Pelle\_RLCK-XV exon-intron and domain diagram (all)

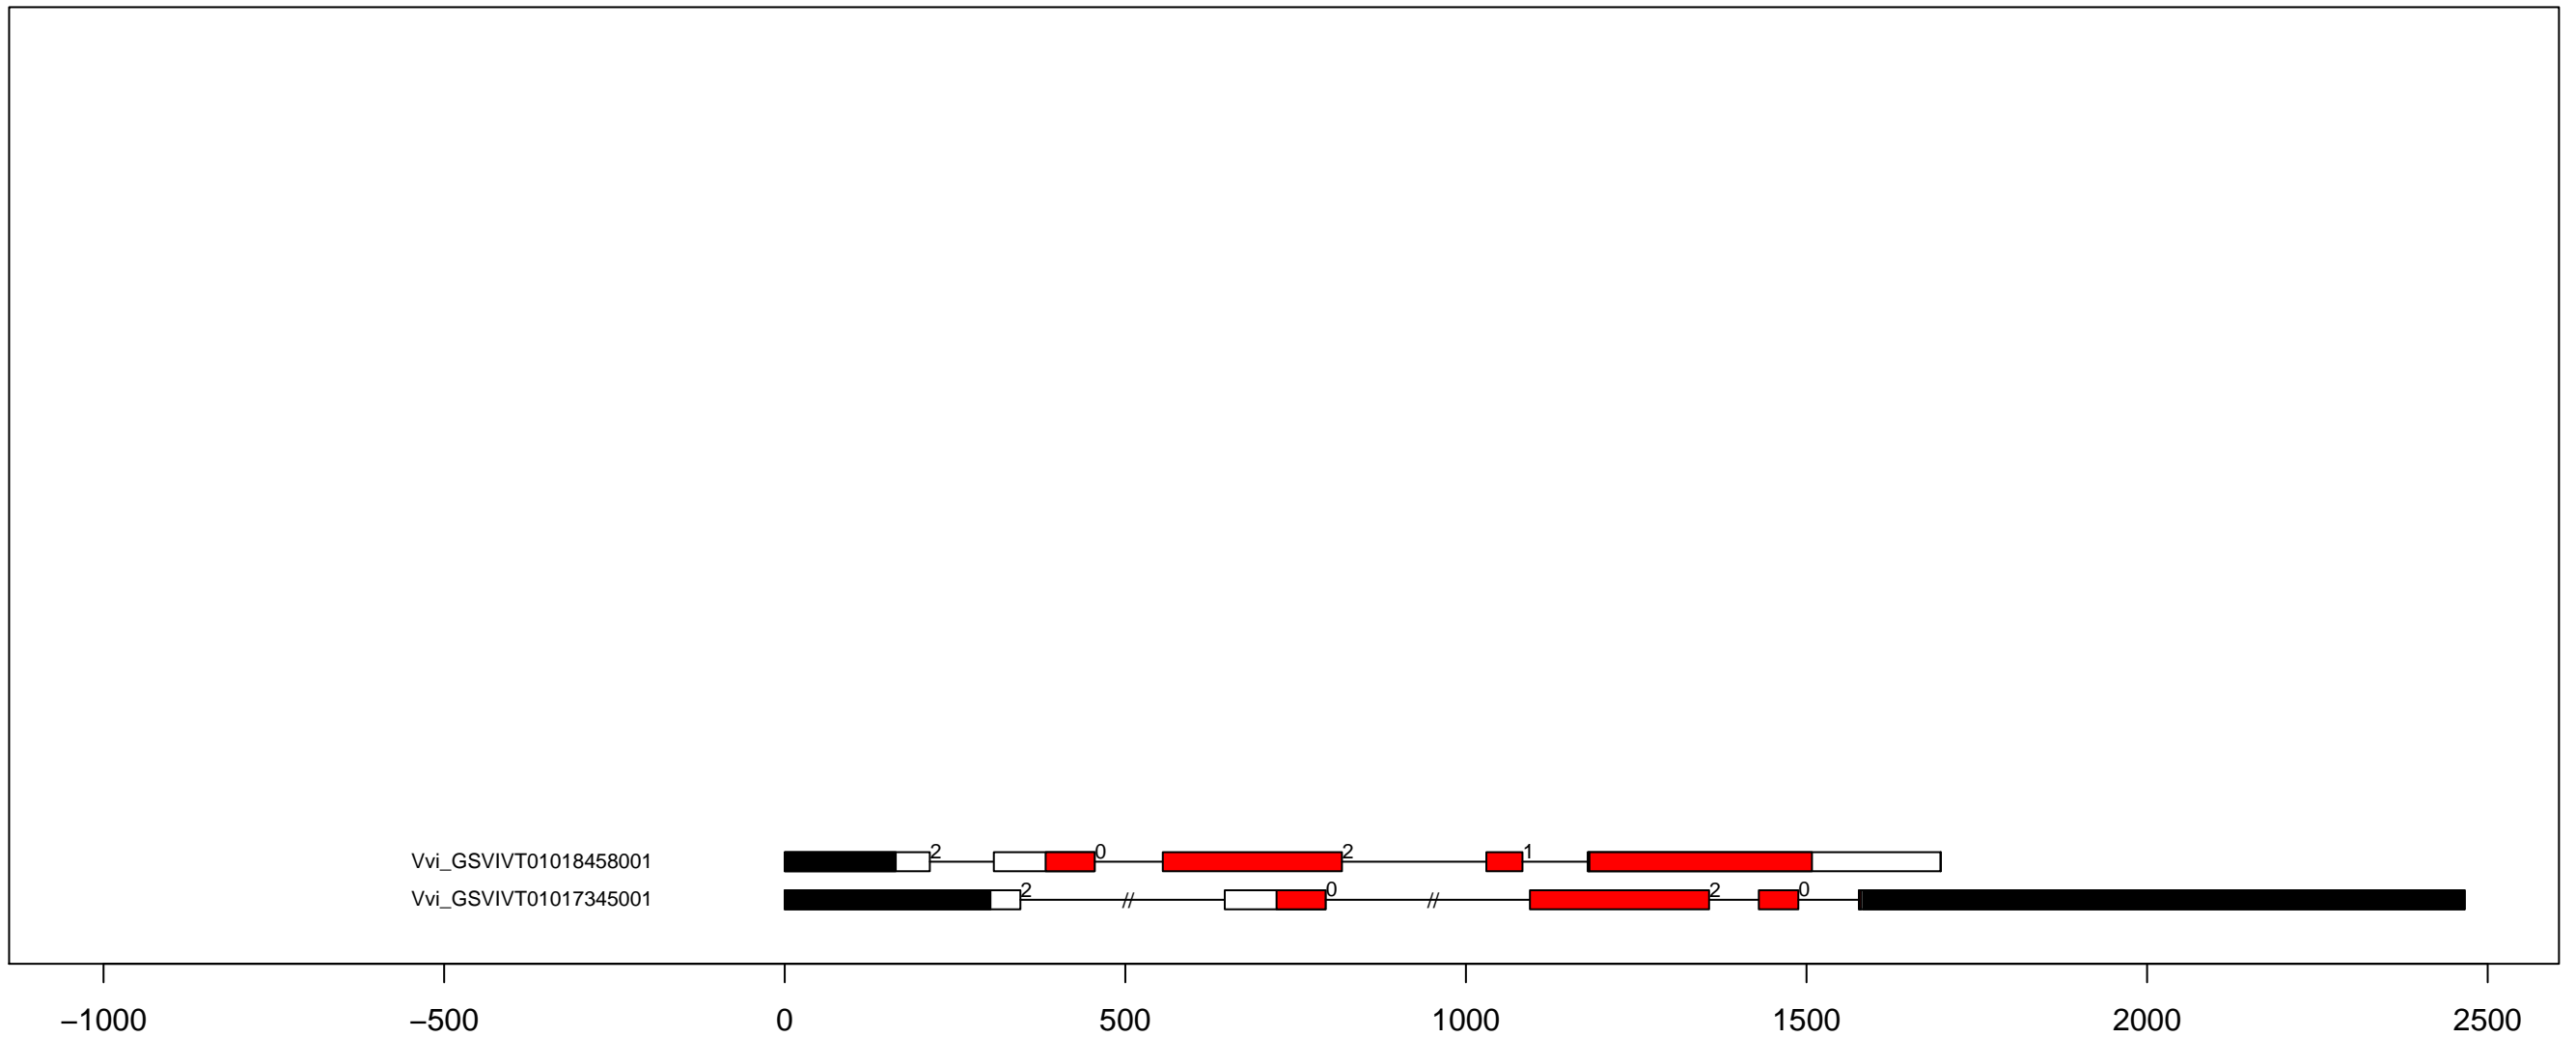



### V.vi RLK-Pelle\_SD-2b exon-intron and domain diagram (part 1)

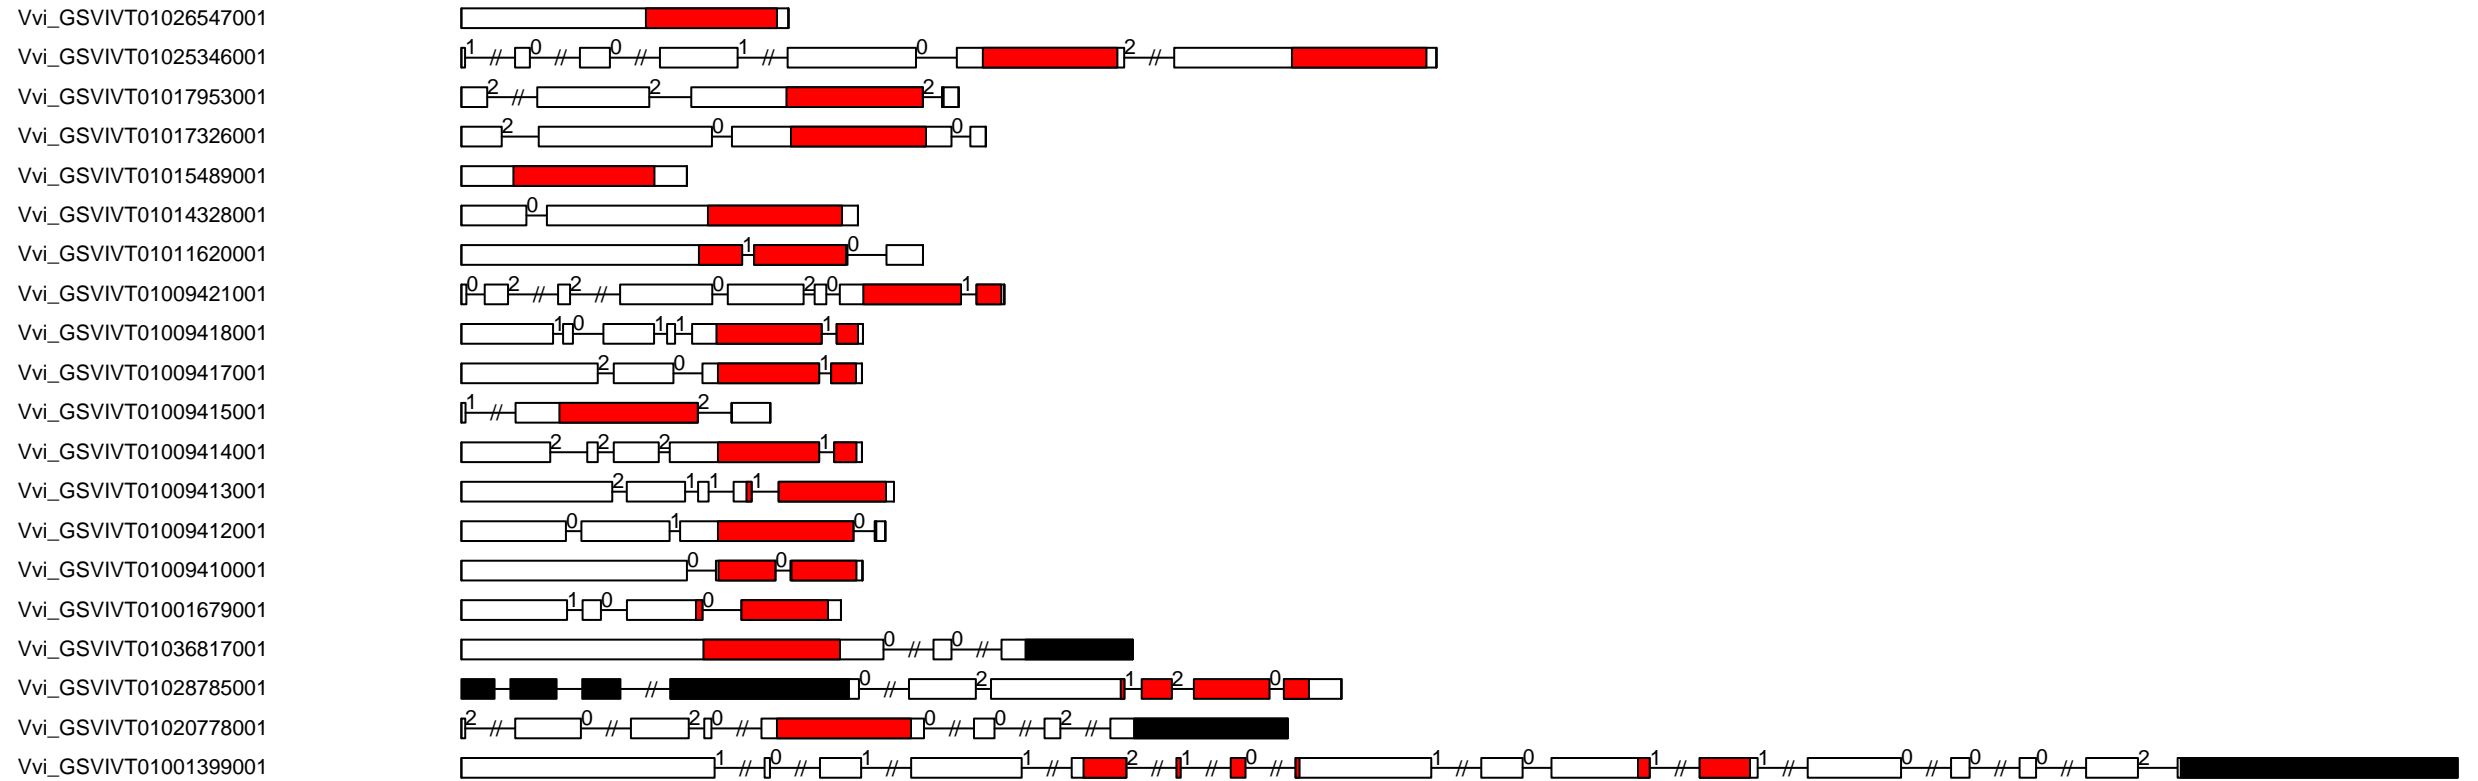

# V.vi RLK-Pelle\_SD-2b exon-intron and domain diagram (part 2)

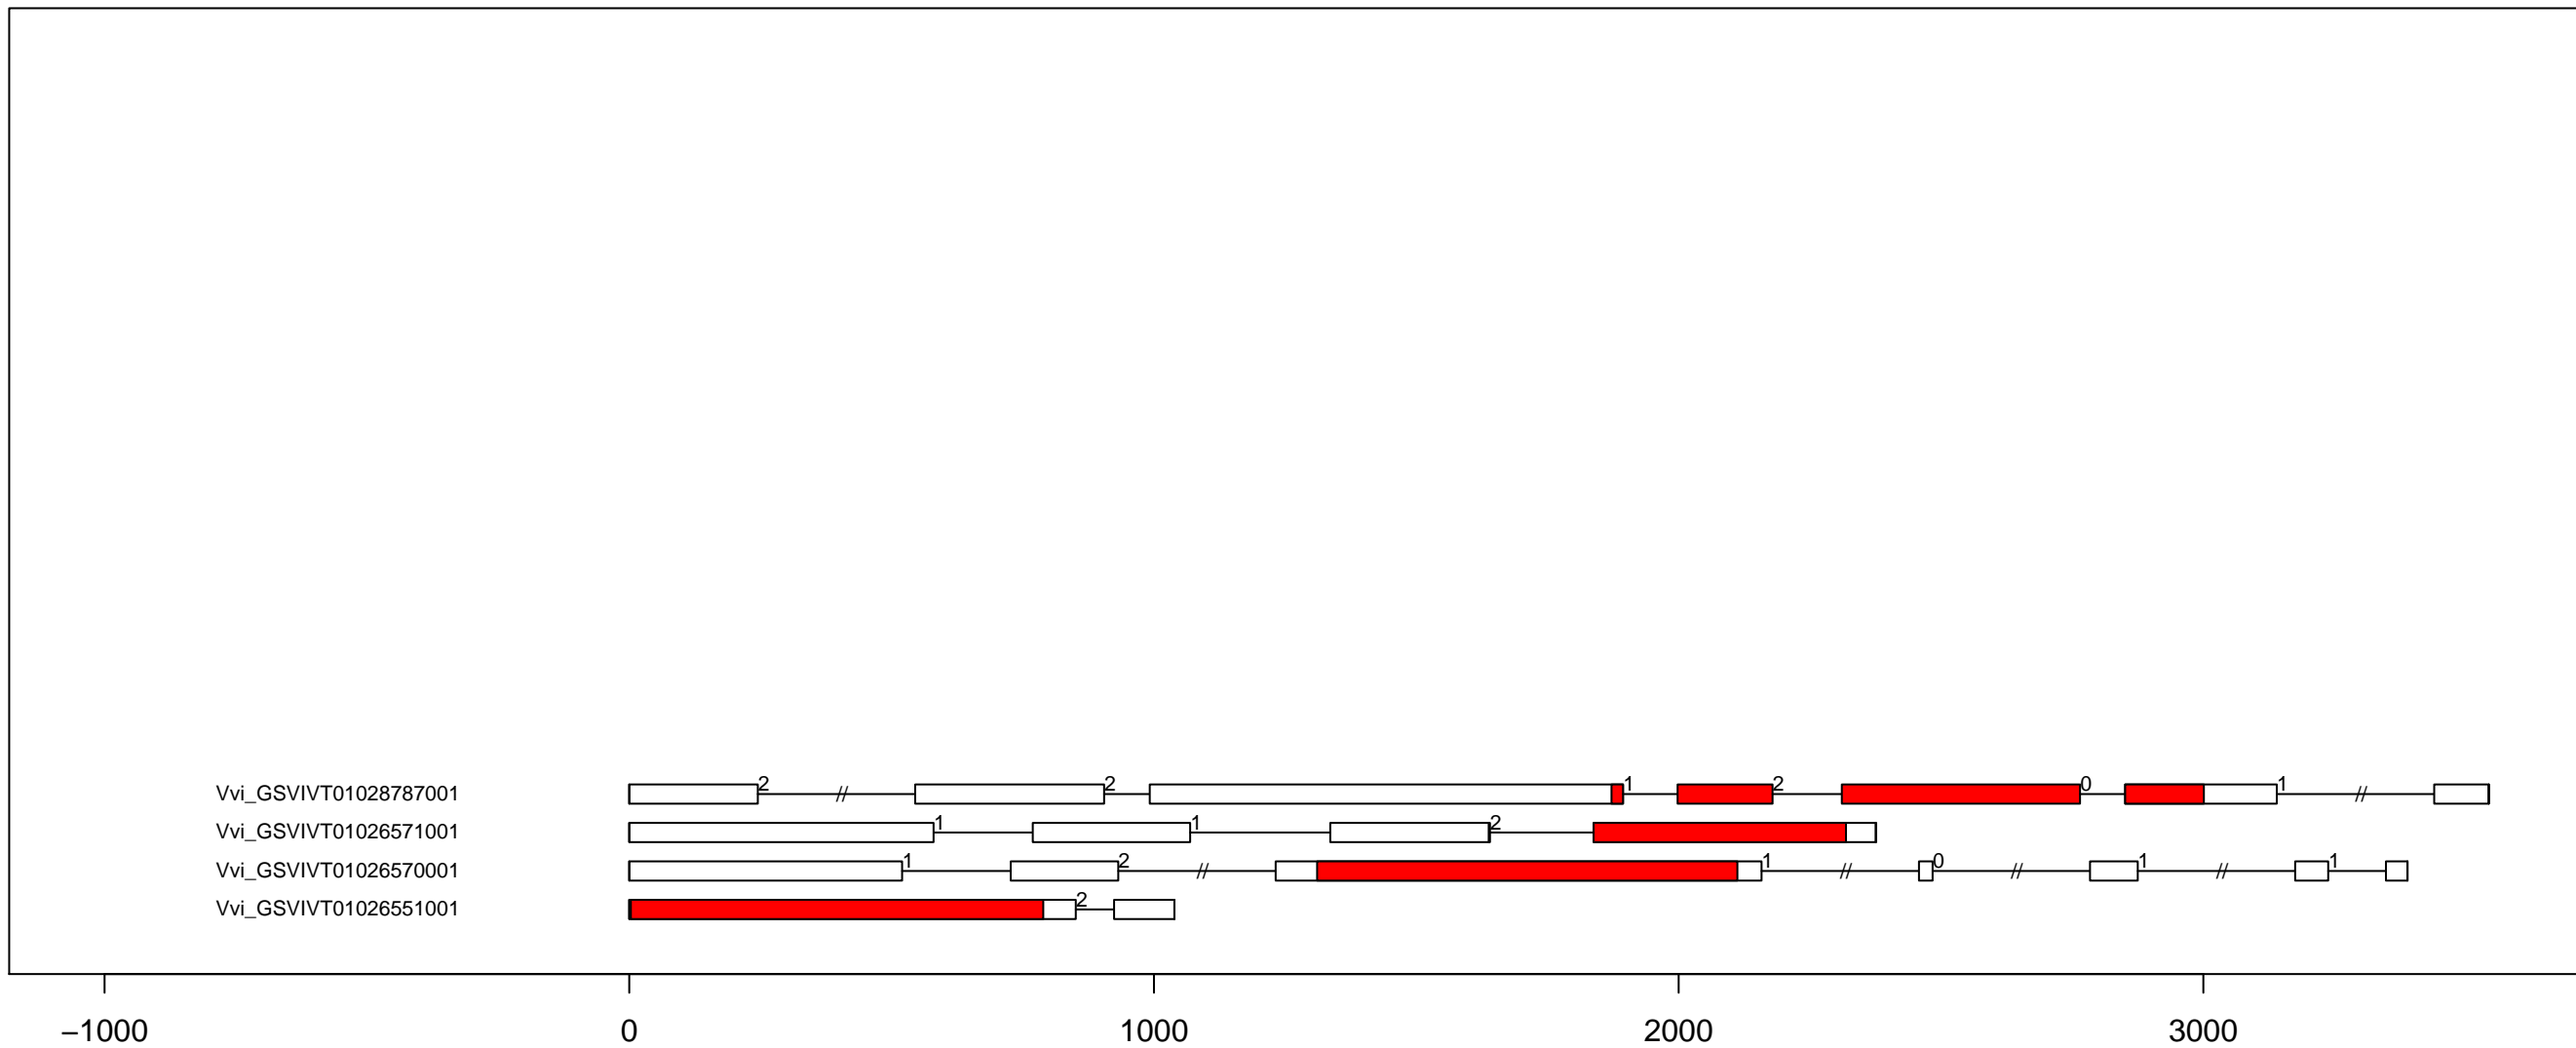

# V.vi RLK-Pelle\_Singleton exon-intron and domain diagram (all)

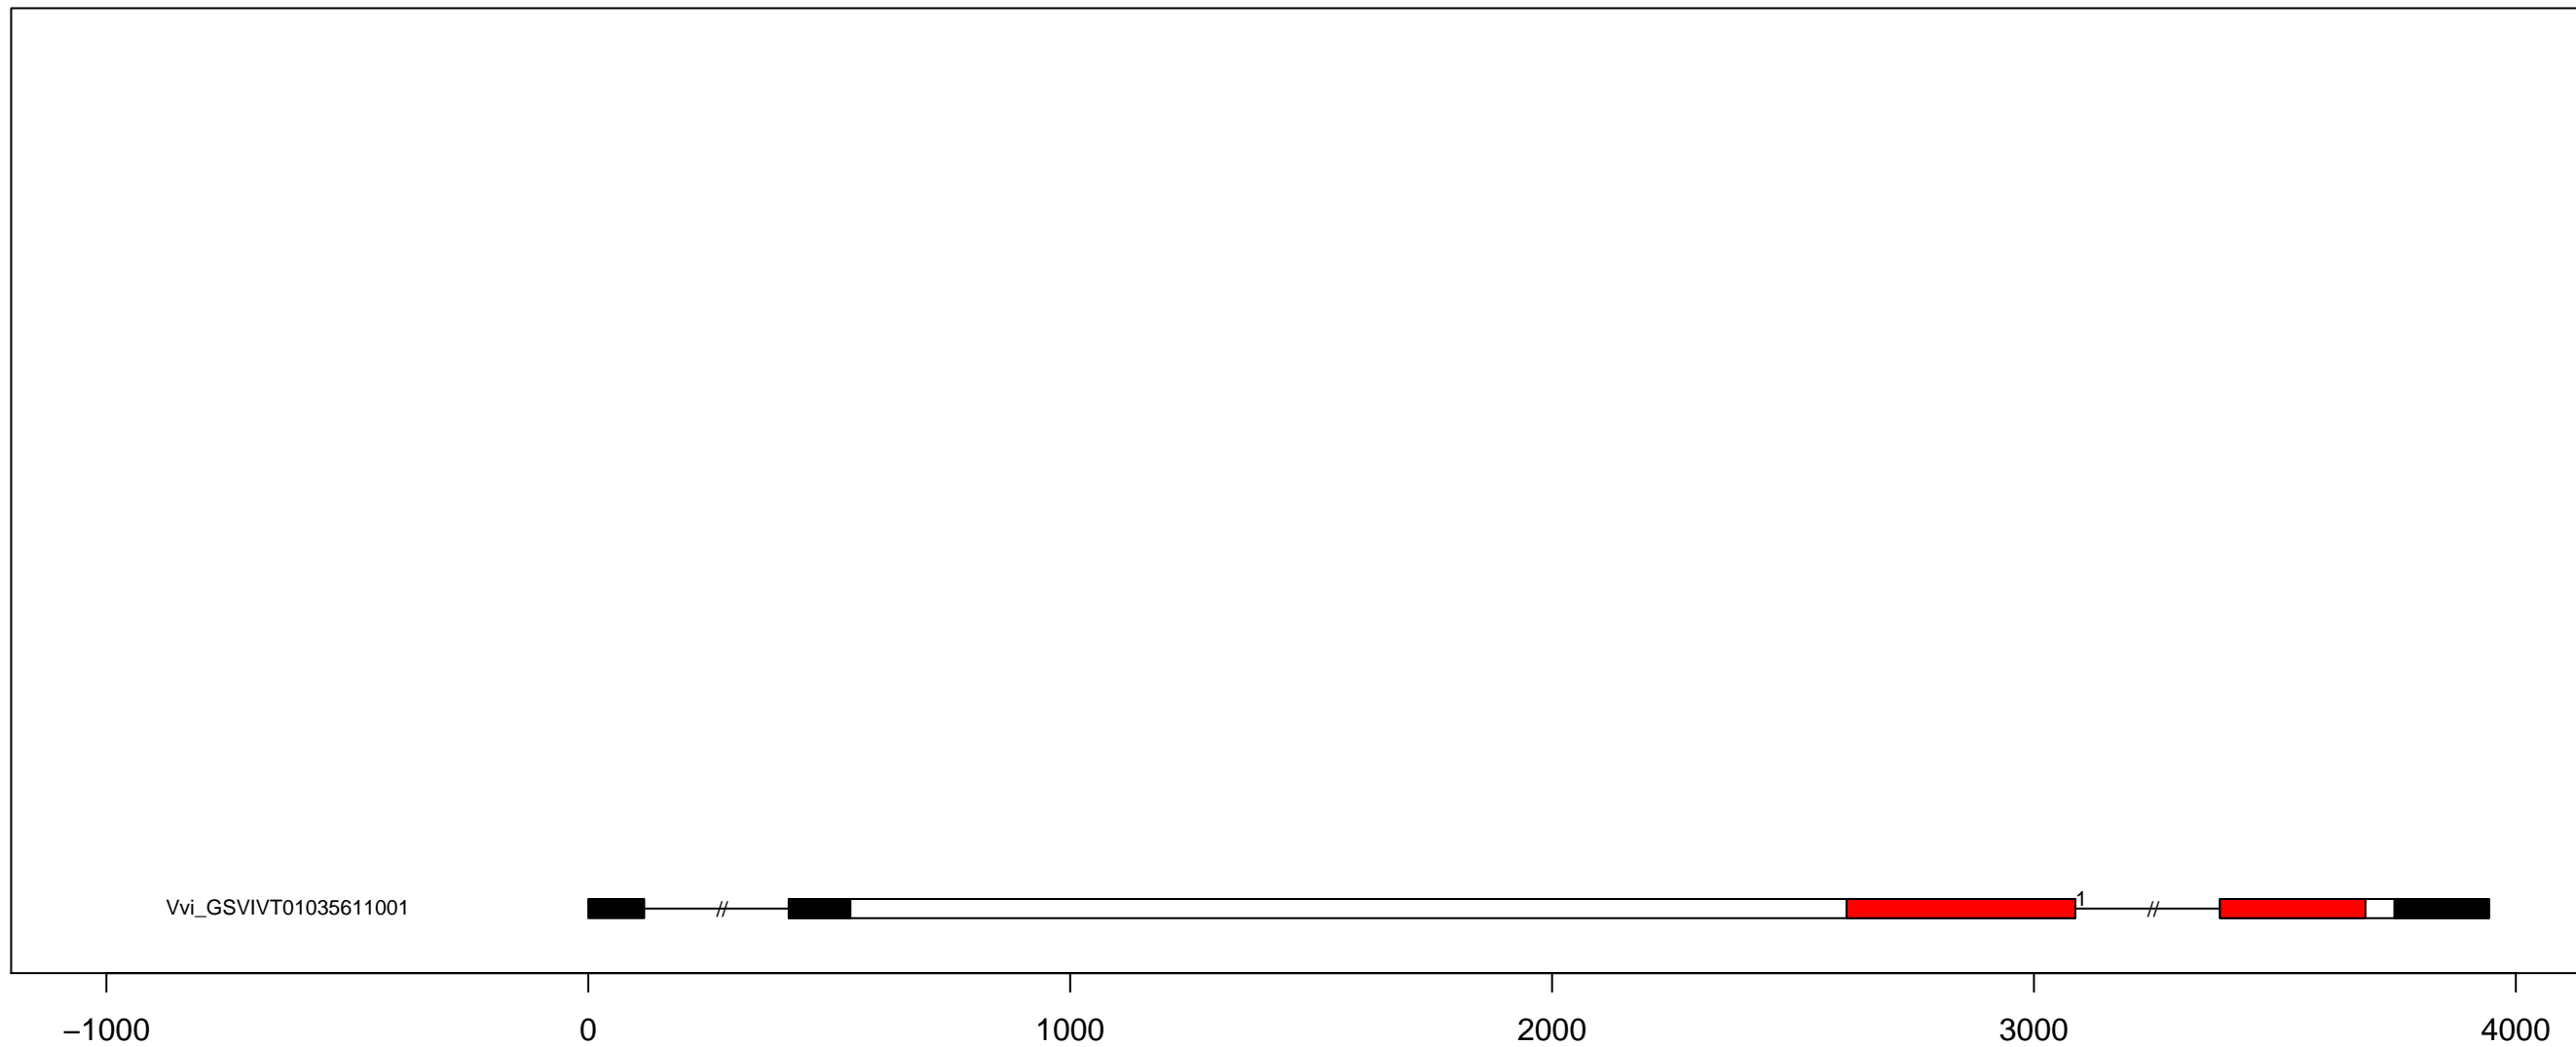

# V.vi RLK-Pelle\_URK-1 exon-intron and domain diagram (all)

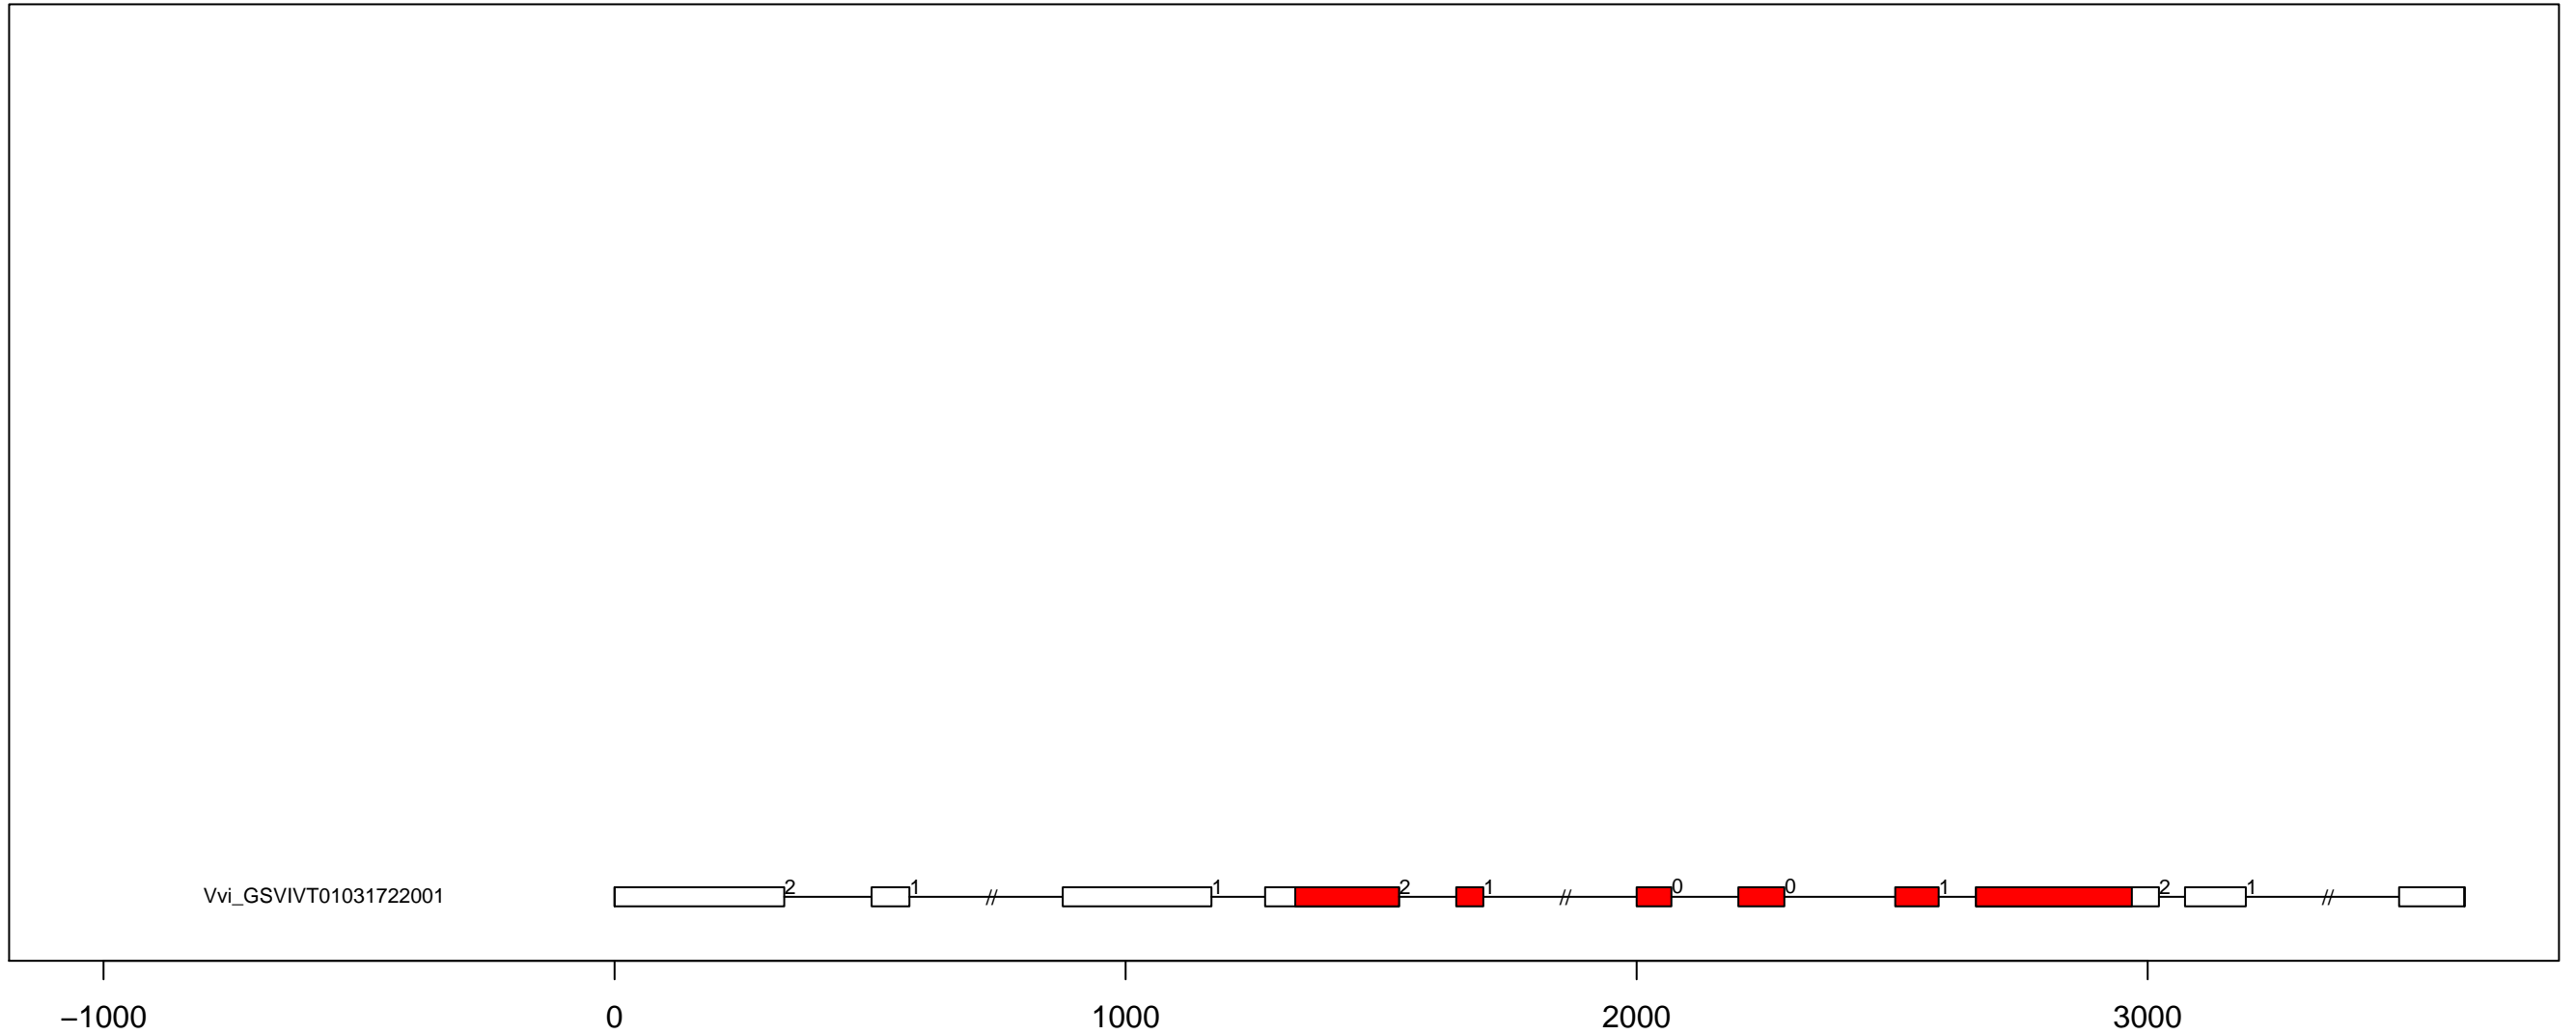

# V.vi RLK-Pelle\_URK-2 exon-intron and domain diagram (all)

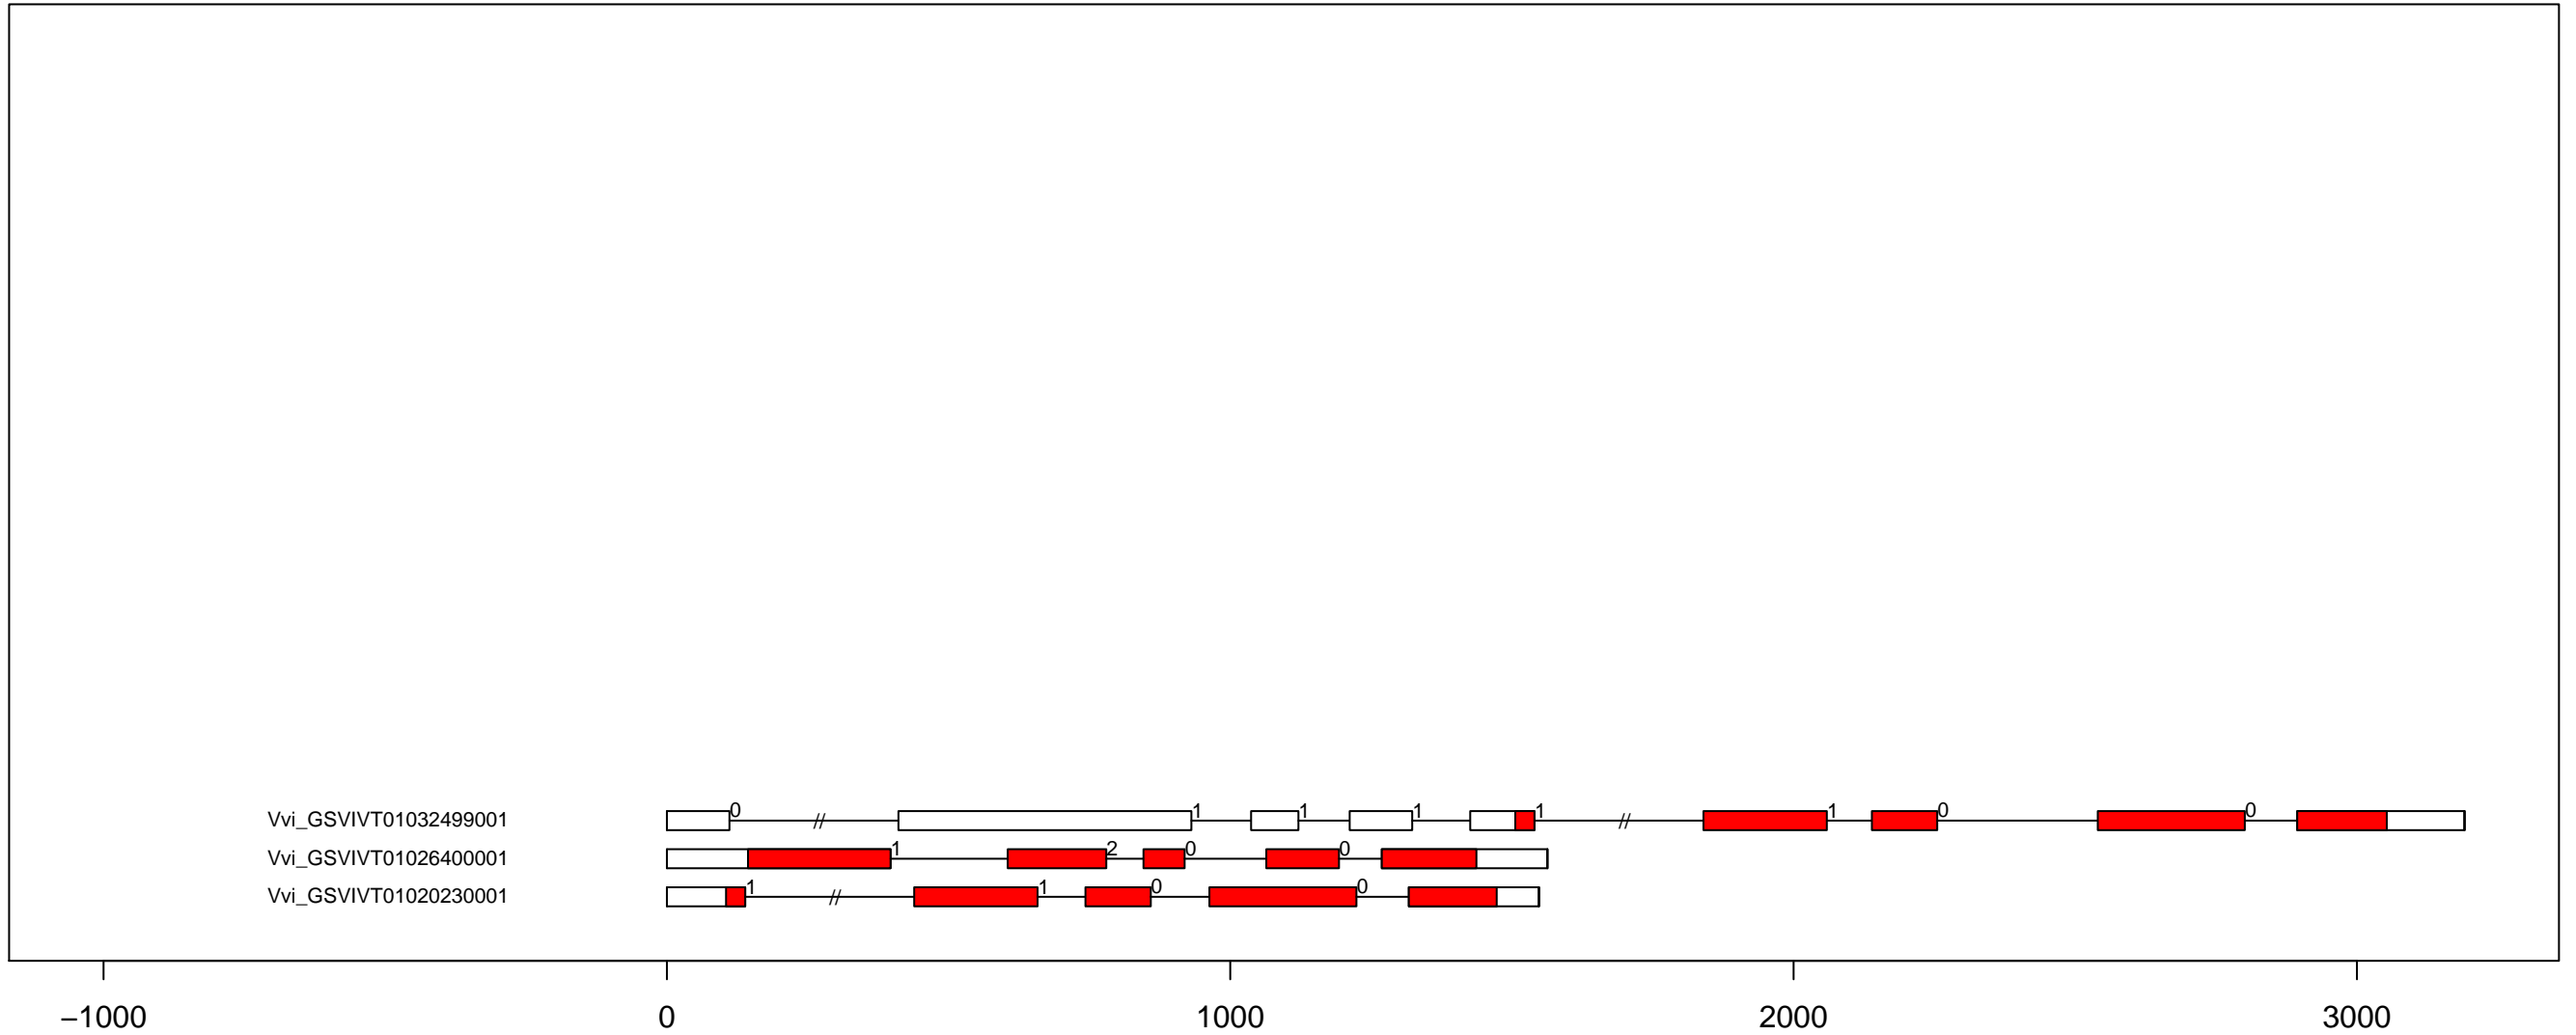

# V.vi RLK-Pelle\_URK-3 exon-intron and domain diagram (all)

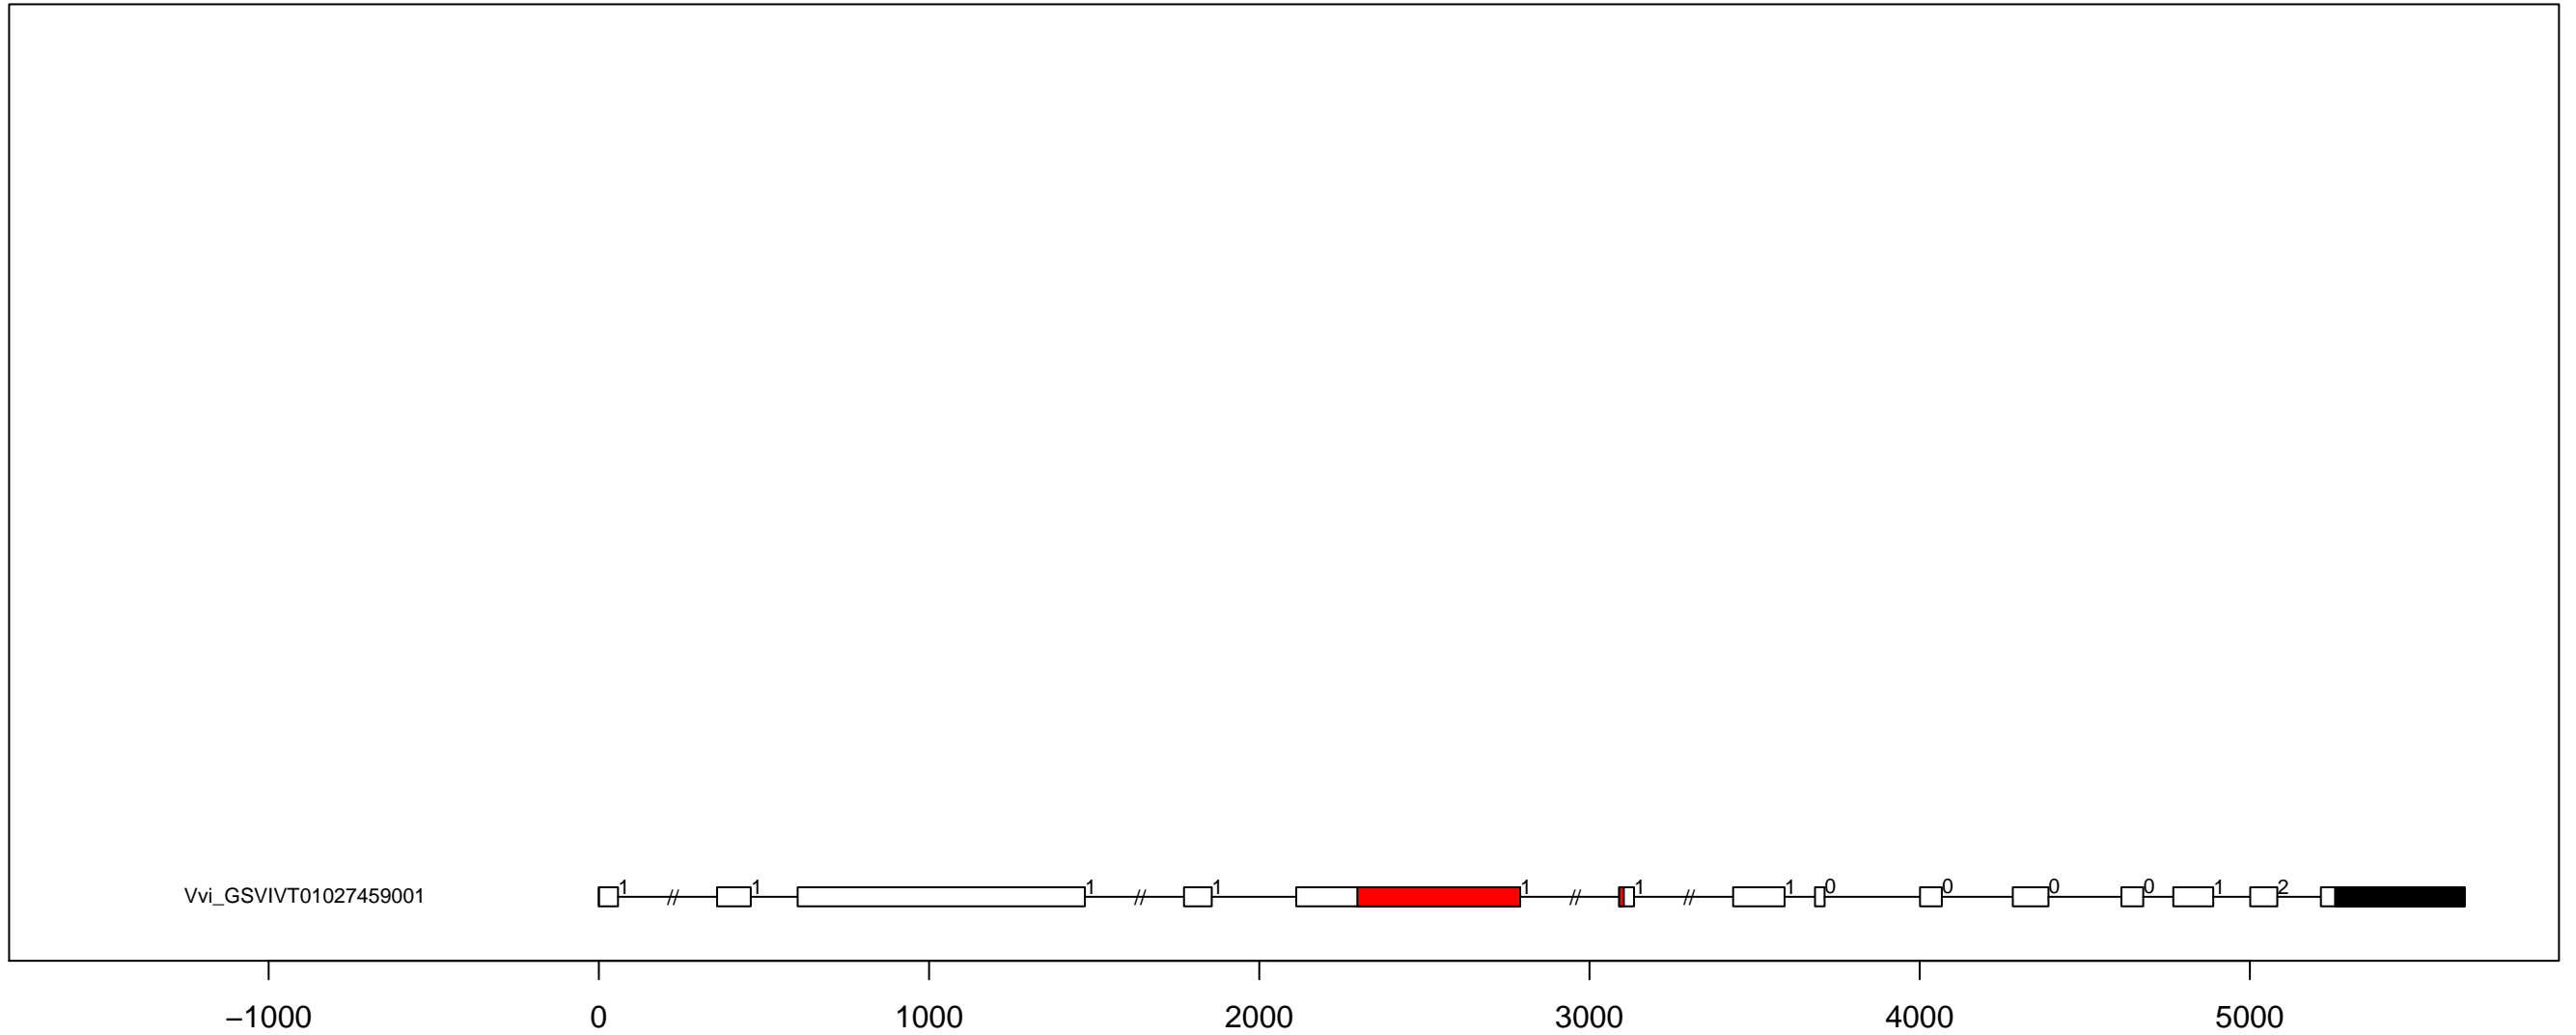

# V.vi RLK-Pelle\_WAK\_LRK10L-1 exon-intron and domain diagram (all)

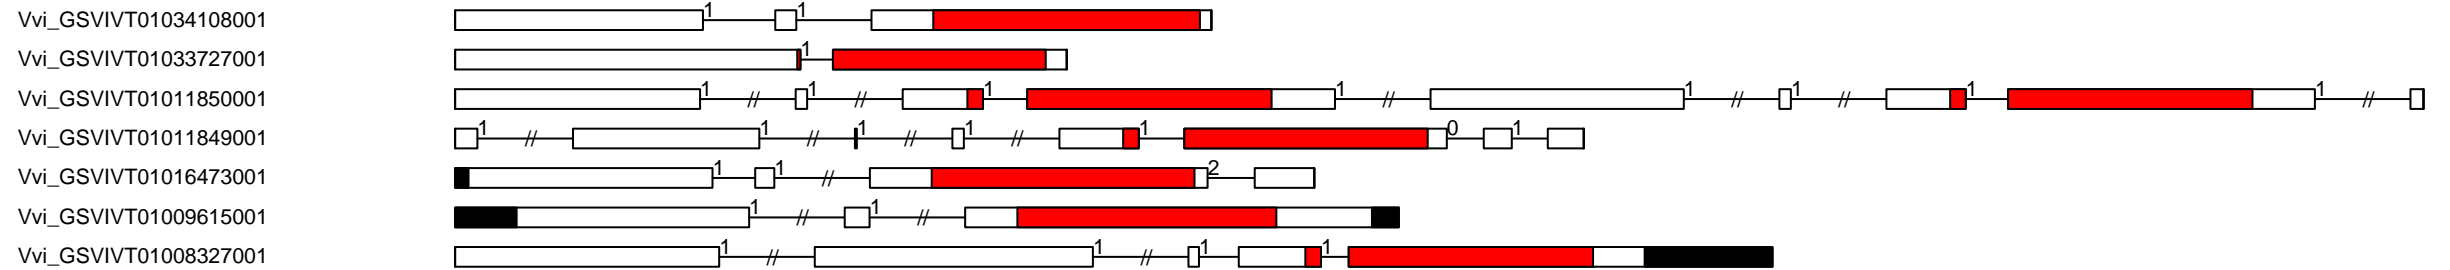

# V.vi RLK-Pelle\_WAK exon-intron and domain diagram (all)

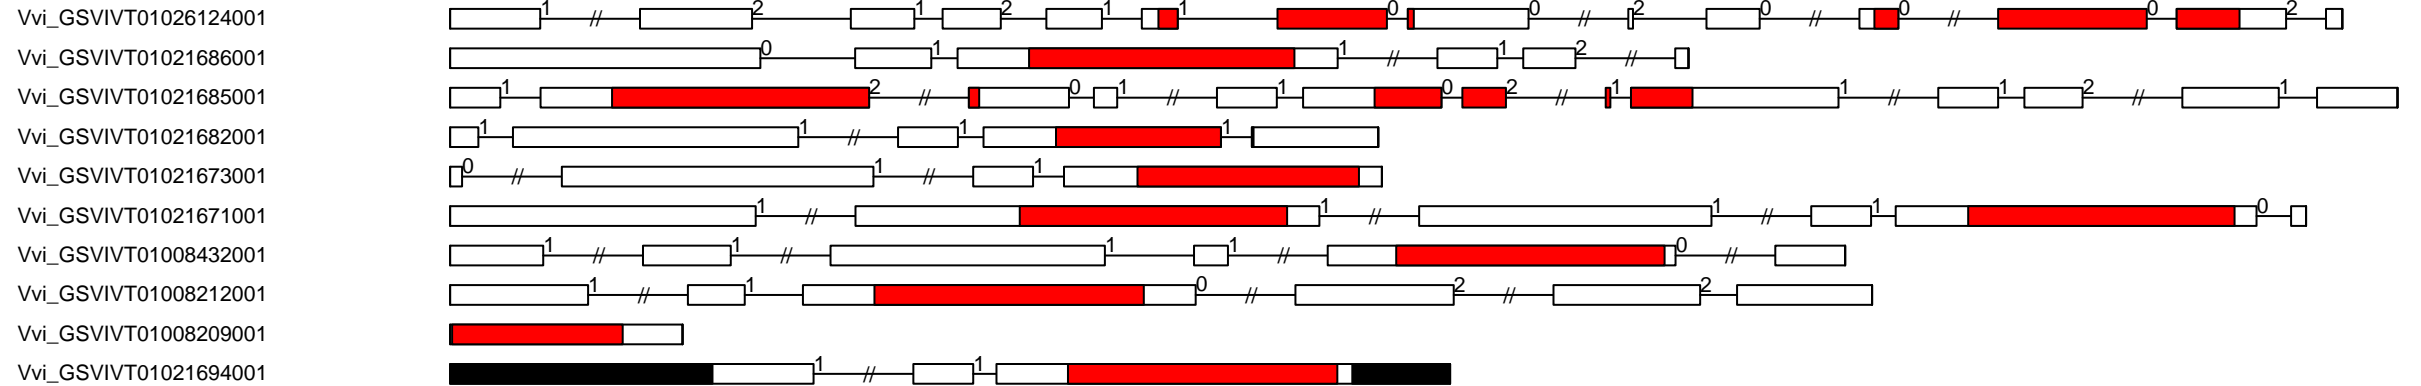

0

2000

4000

6000



# V.vi SCY1\_SCYL1 exon-intron and domain diagram (all)

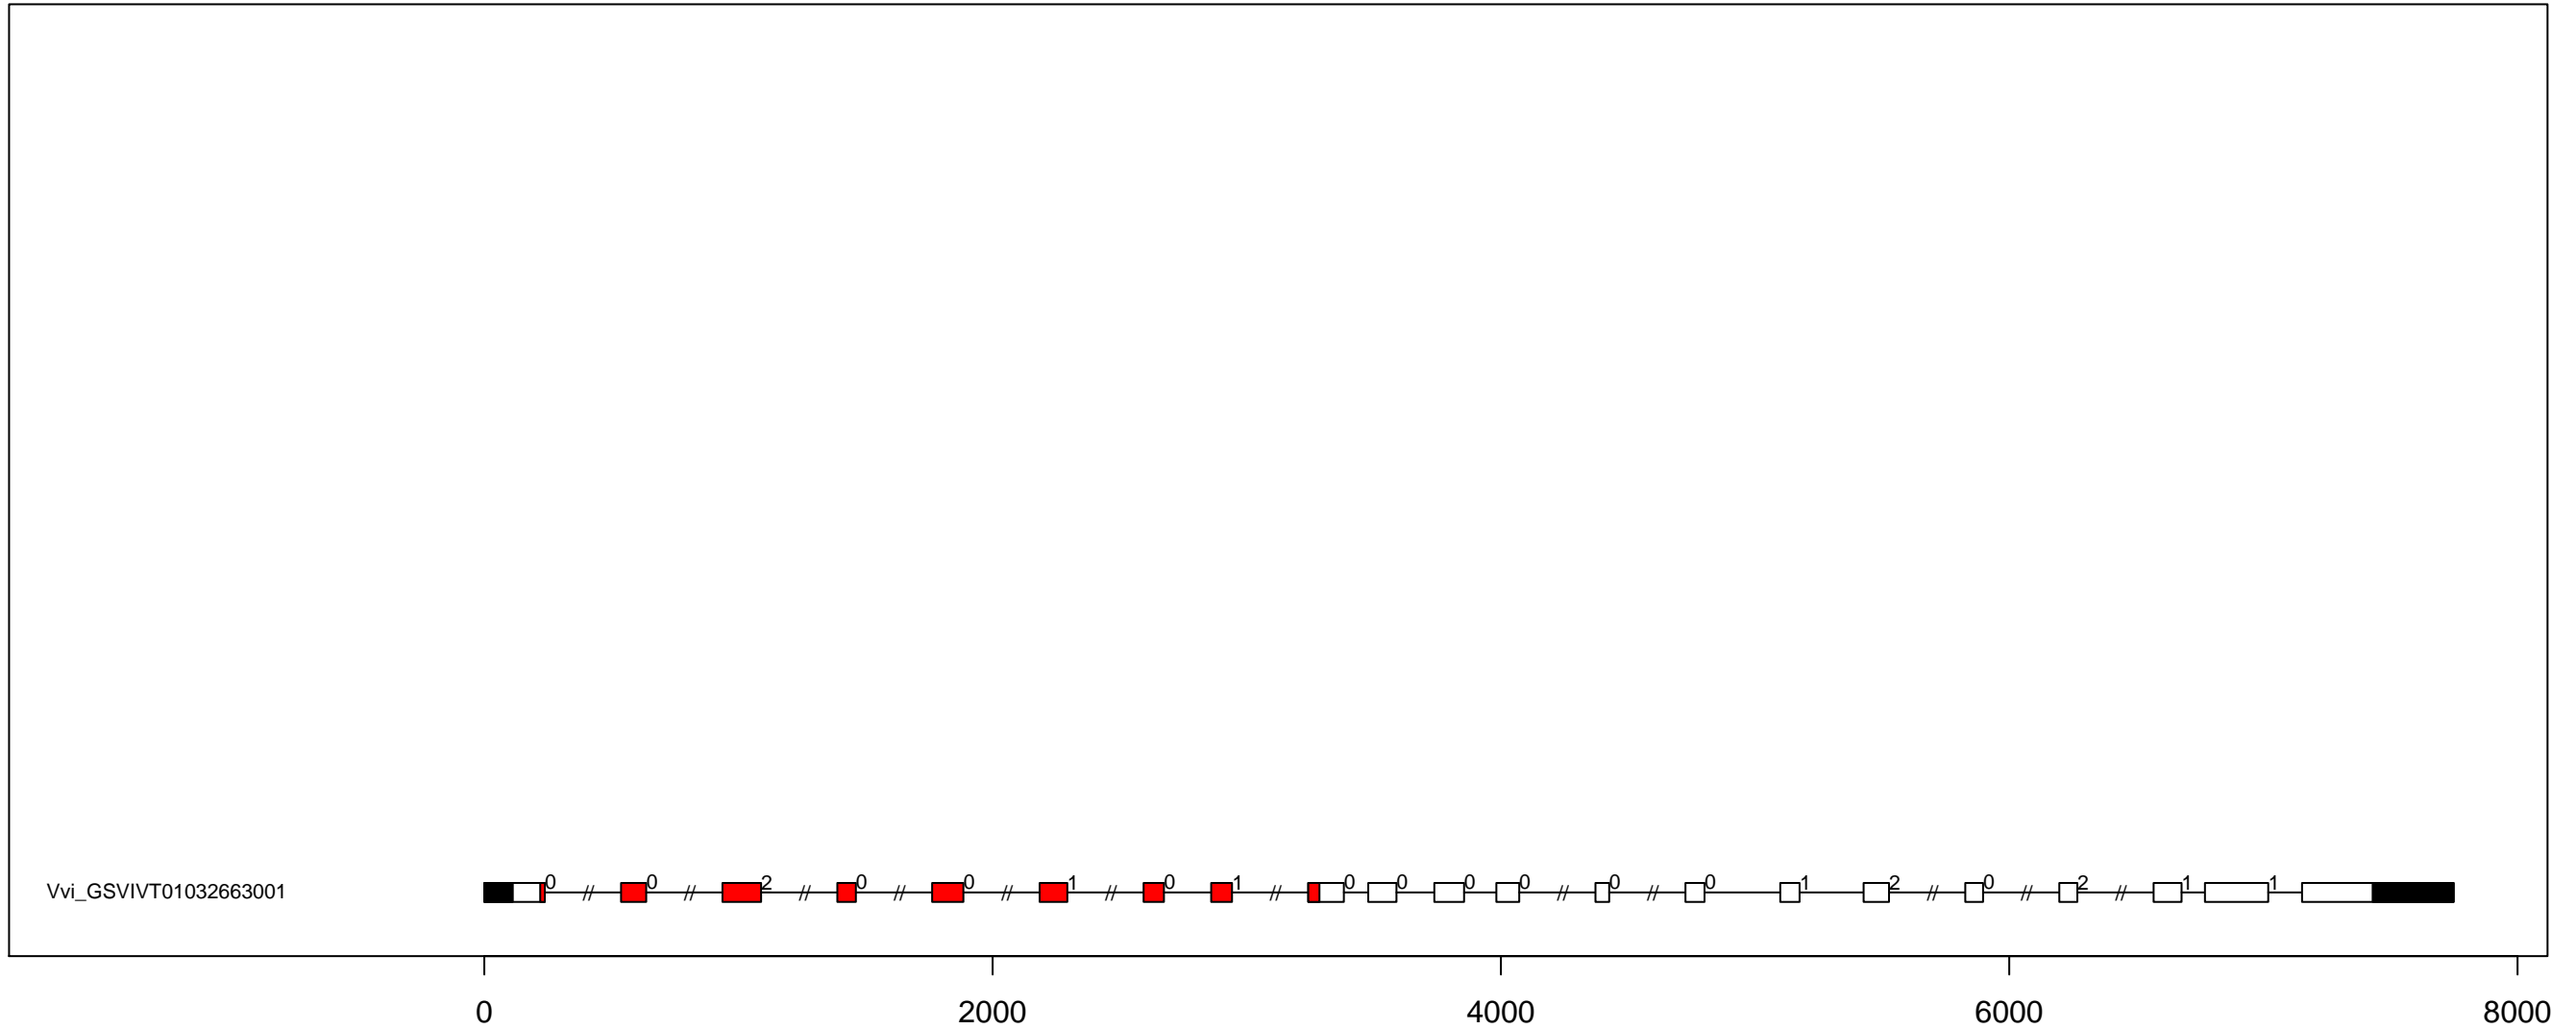

# V.vi SCY1\_SCYL2 exon-intron and domain diagram (all)

Vvi\_GSVIVT01037227001

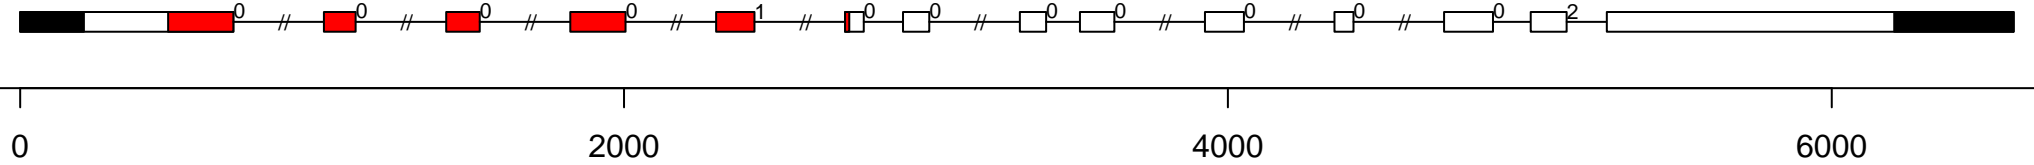

### V.vi STE\_STE11 exon-intron and domain diagram (part 1)

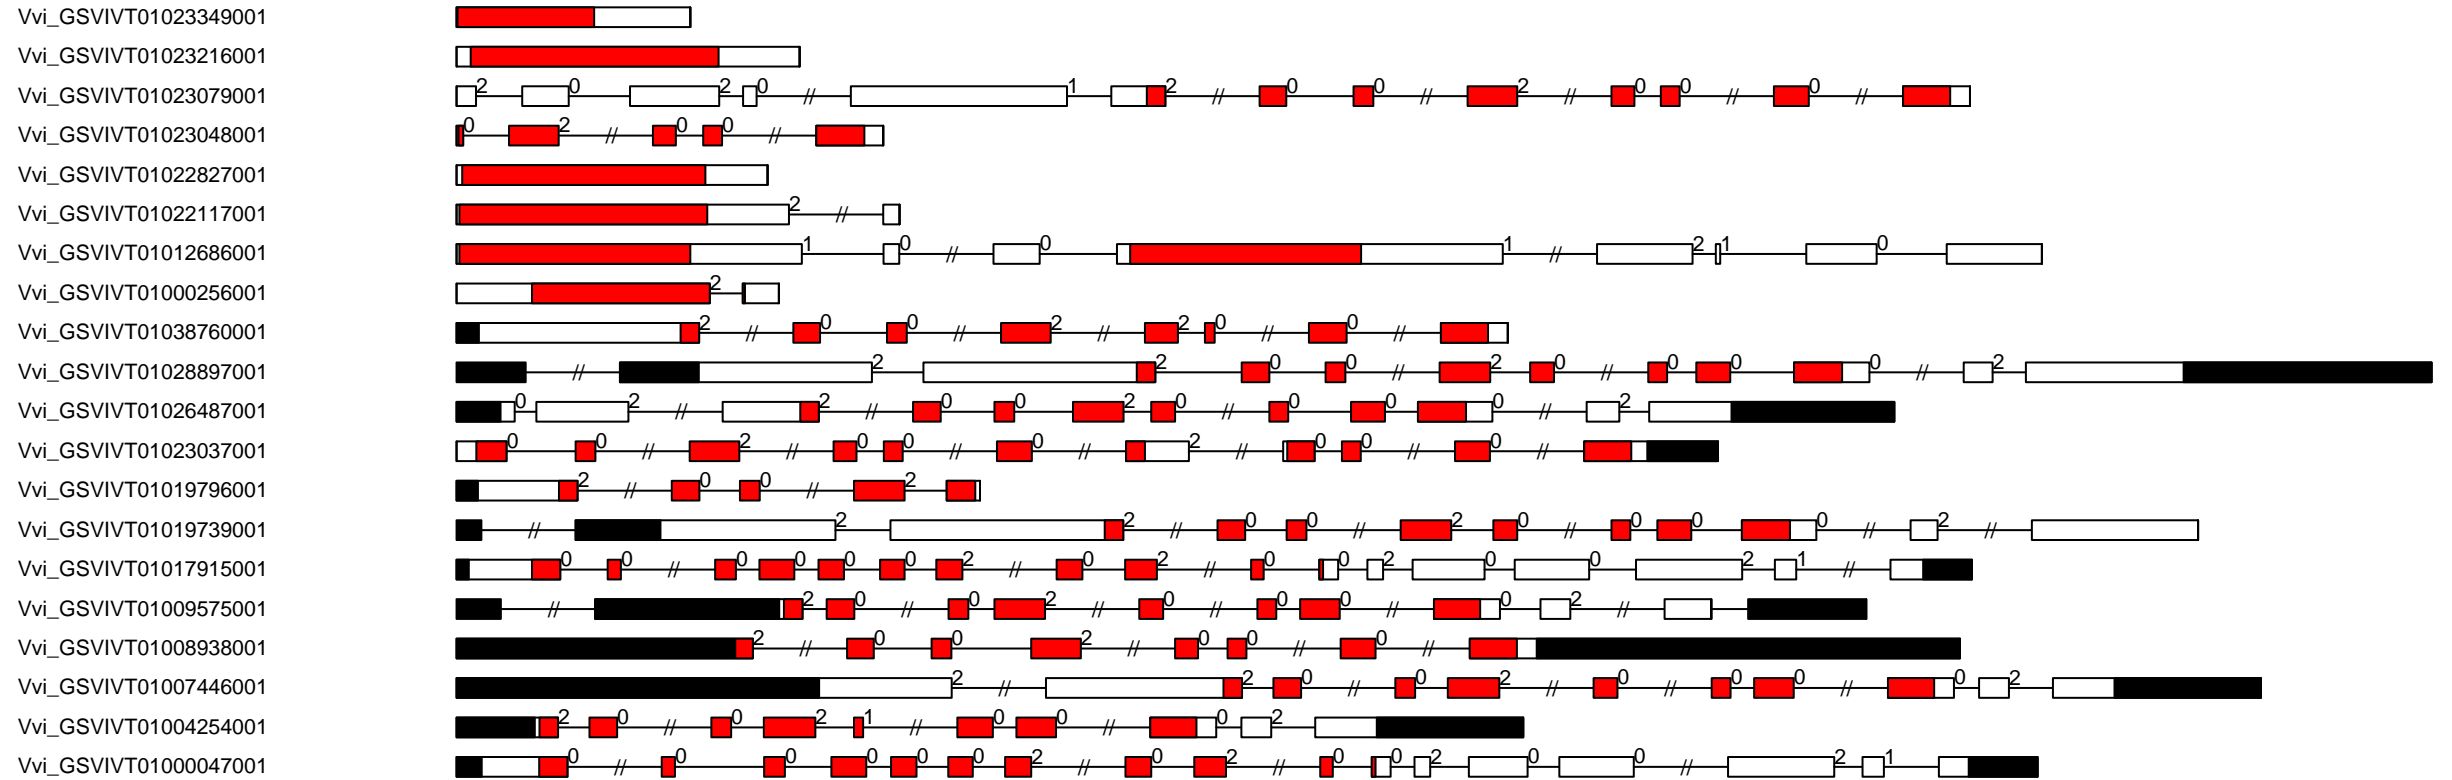

# V.vi STE\_STE11 exon-intron and domain diagram (part 2)

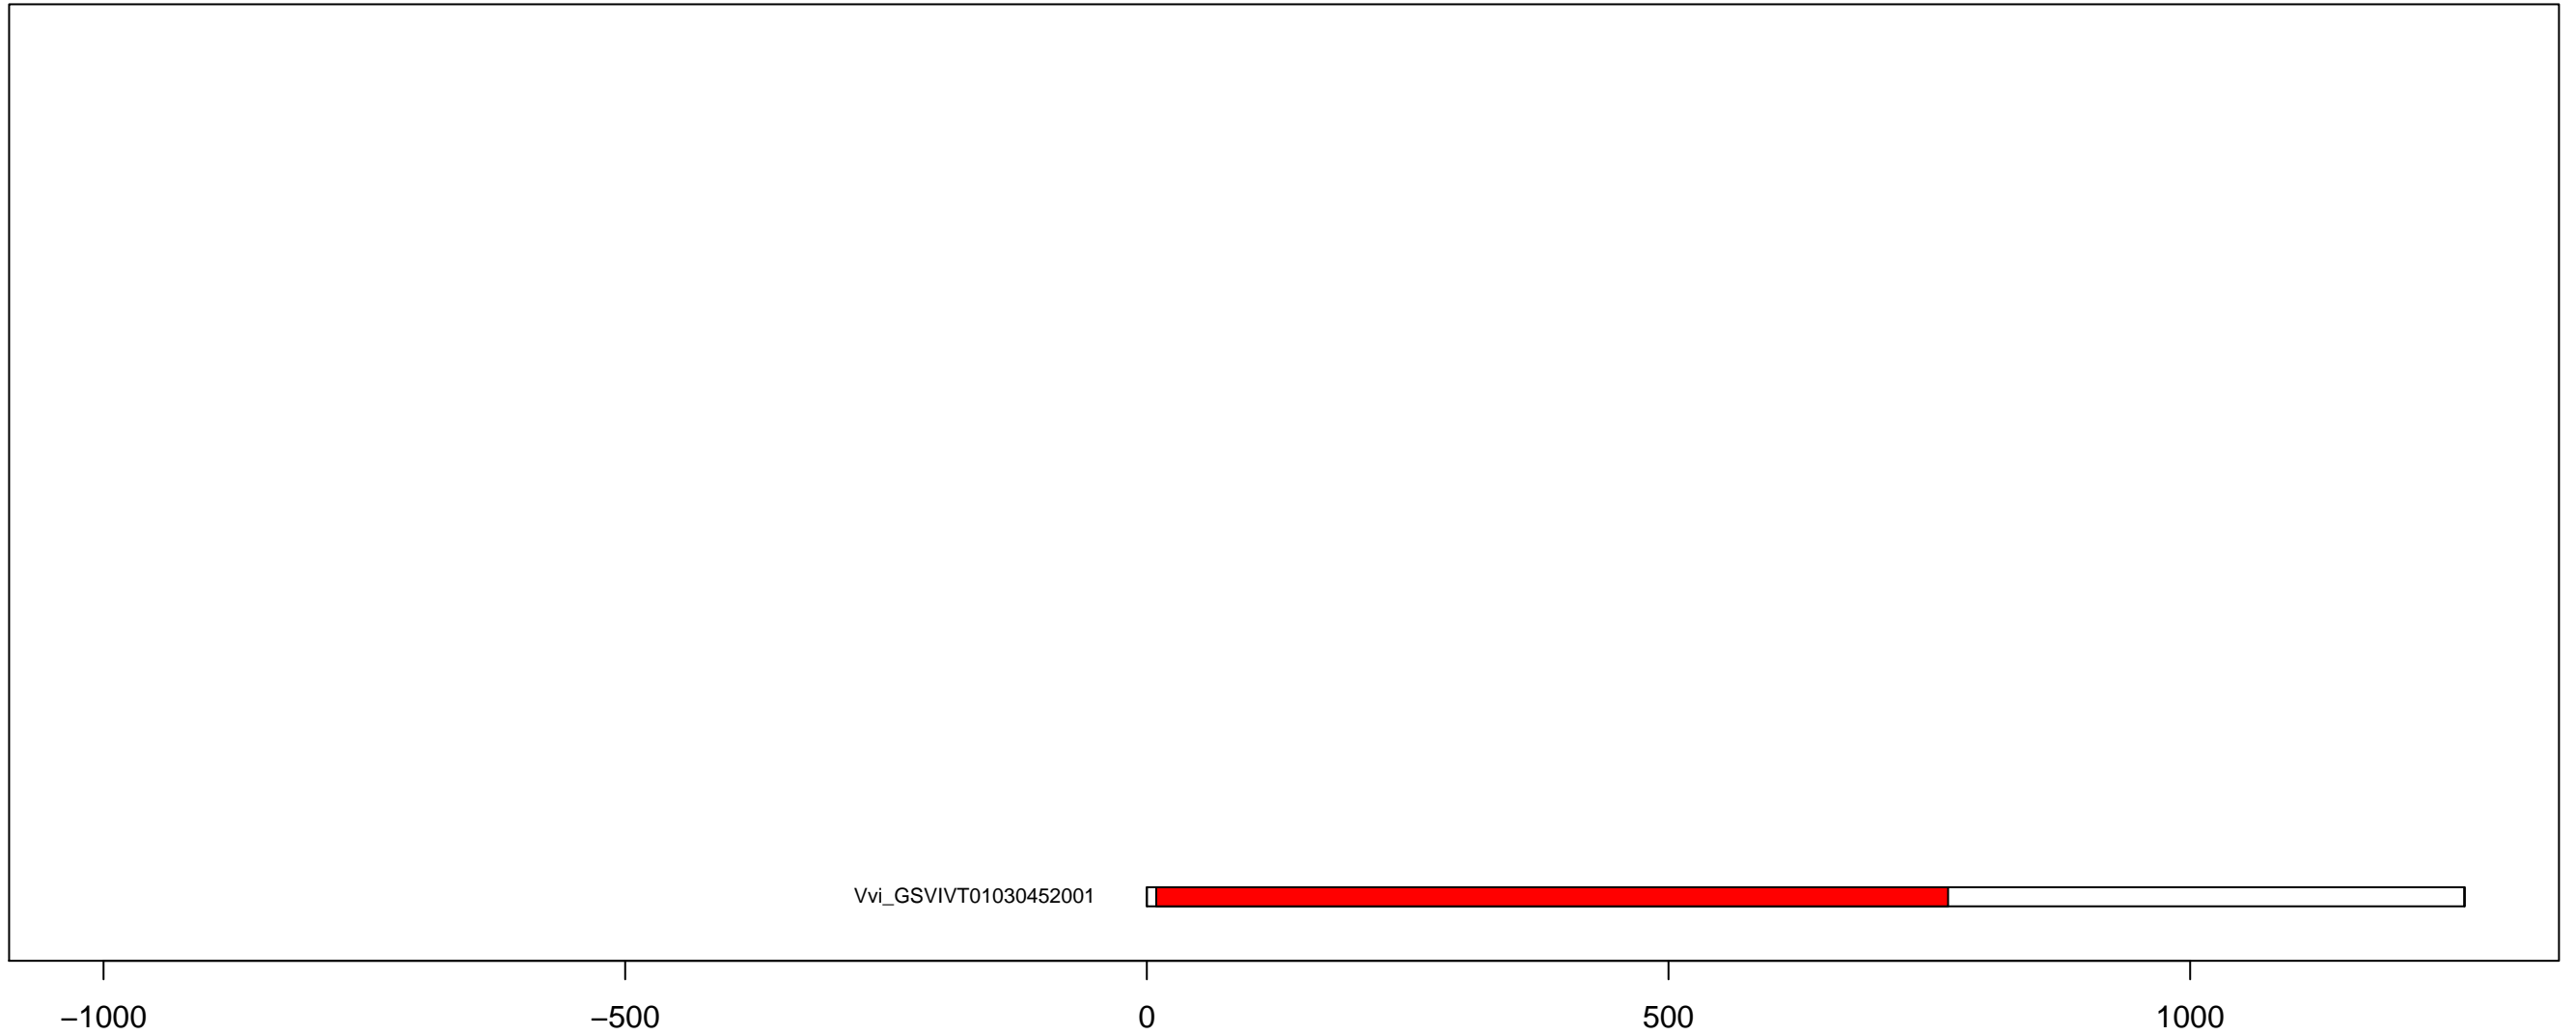

# V.vi STE\_STE20-Fray exon-intron and domain diagram (all)

Vvi\_GSVIVT01027718001

Vvi\_GSVIVT01032461001

Vvi\_GSVIVT01019643001

Vvi\_GSVIVT01016074001

Vvi\_GSVIVT01013739001

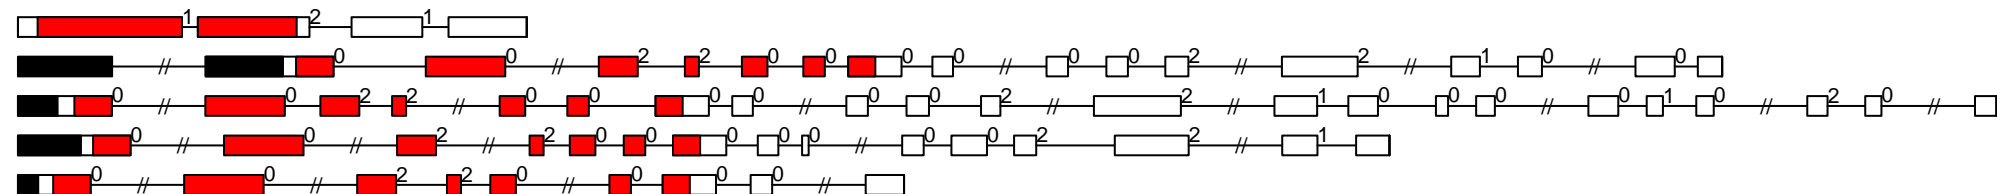

0

2000

4000

6000

# V.vi STE\_STE20-PI exon-intron and domain diagram (all)

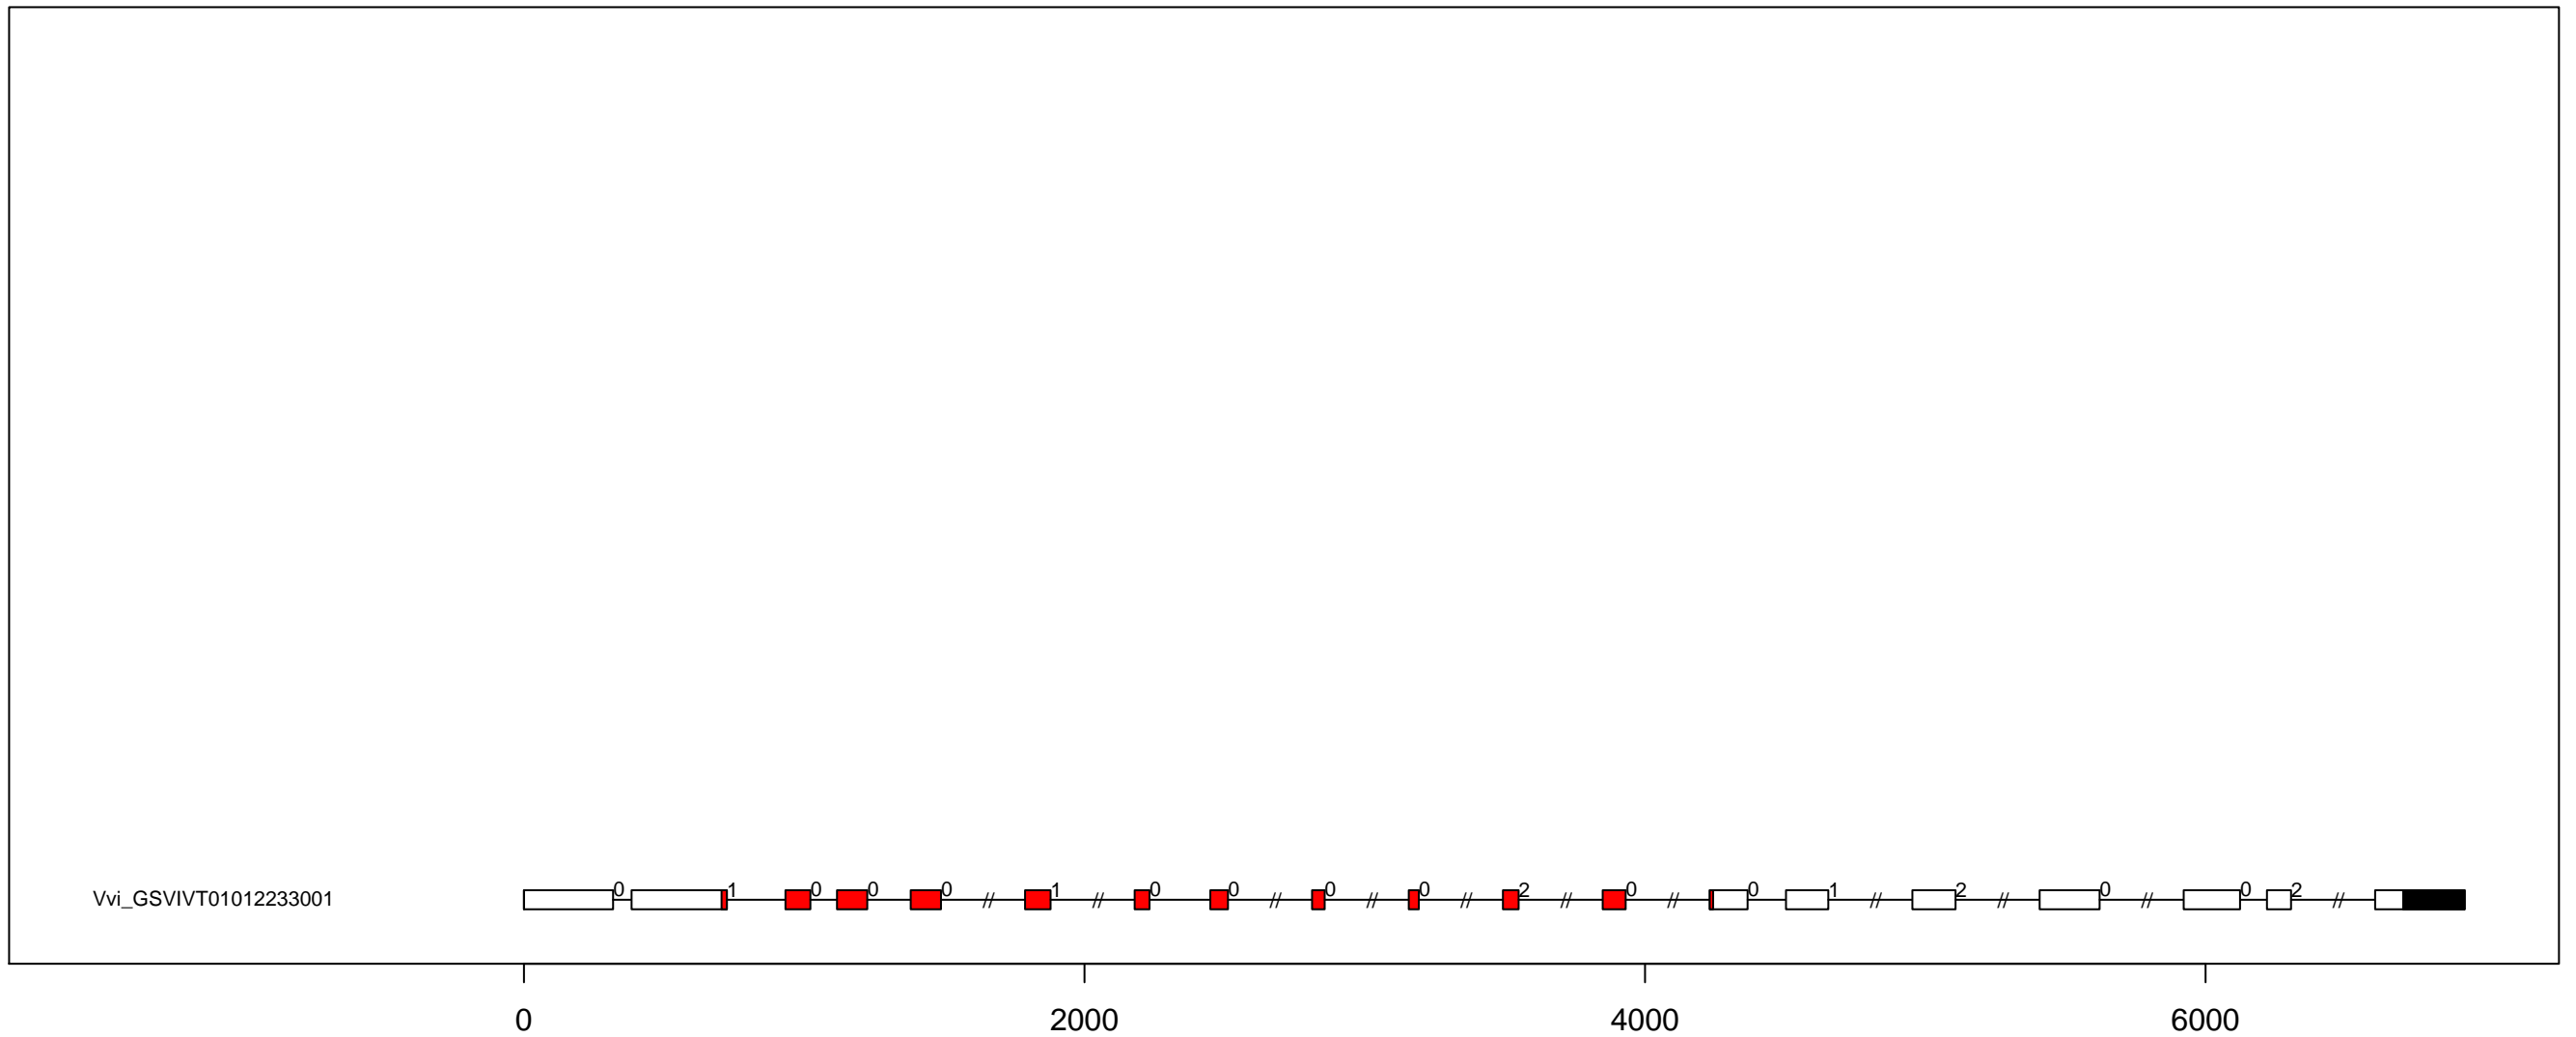

# V.vi STE\_STE20-YSK exon-intron and domain diagram (all)

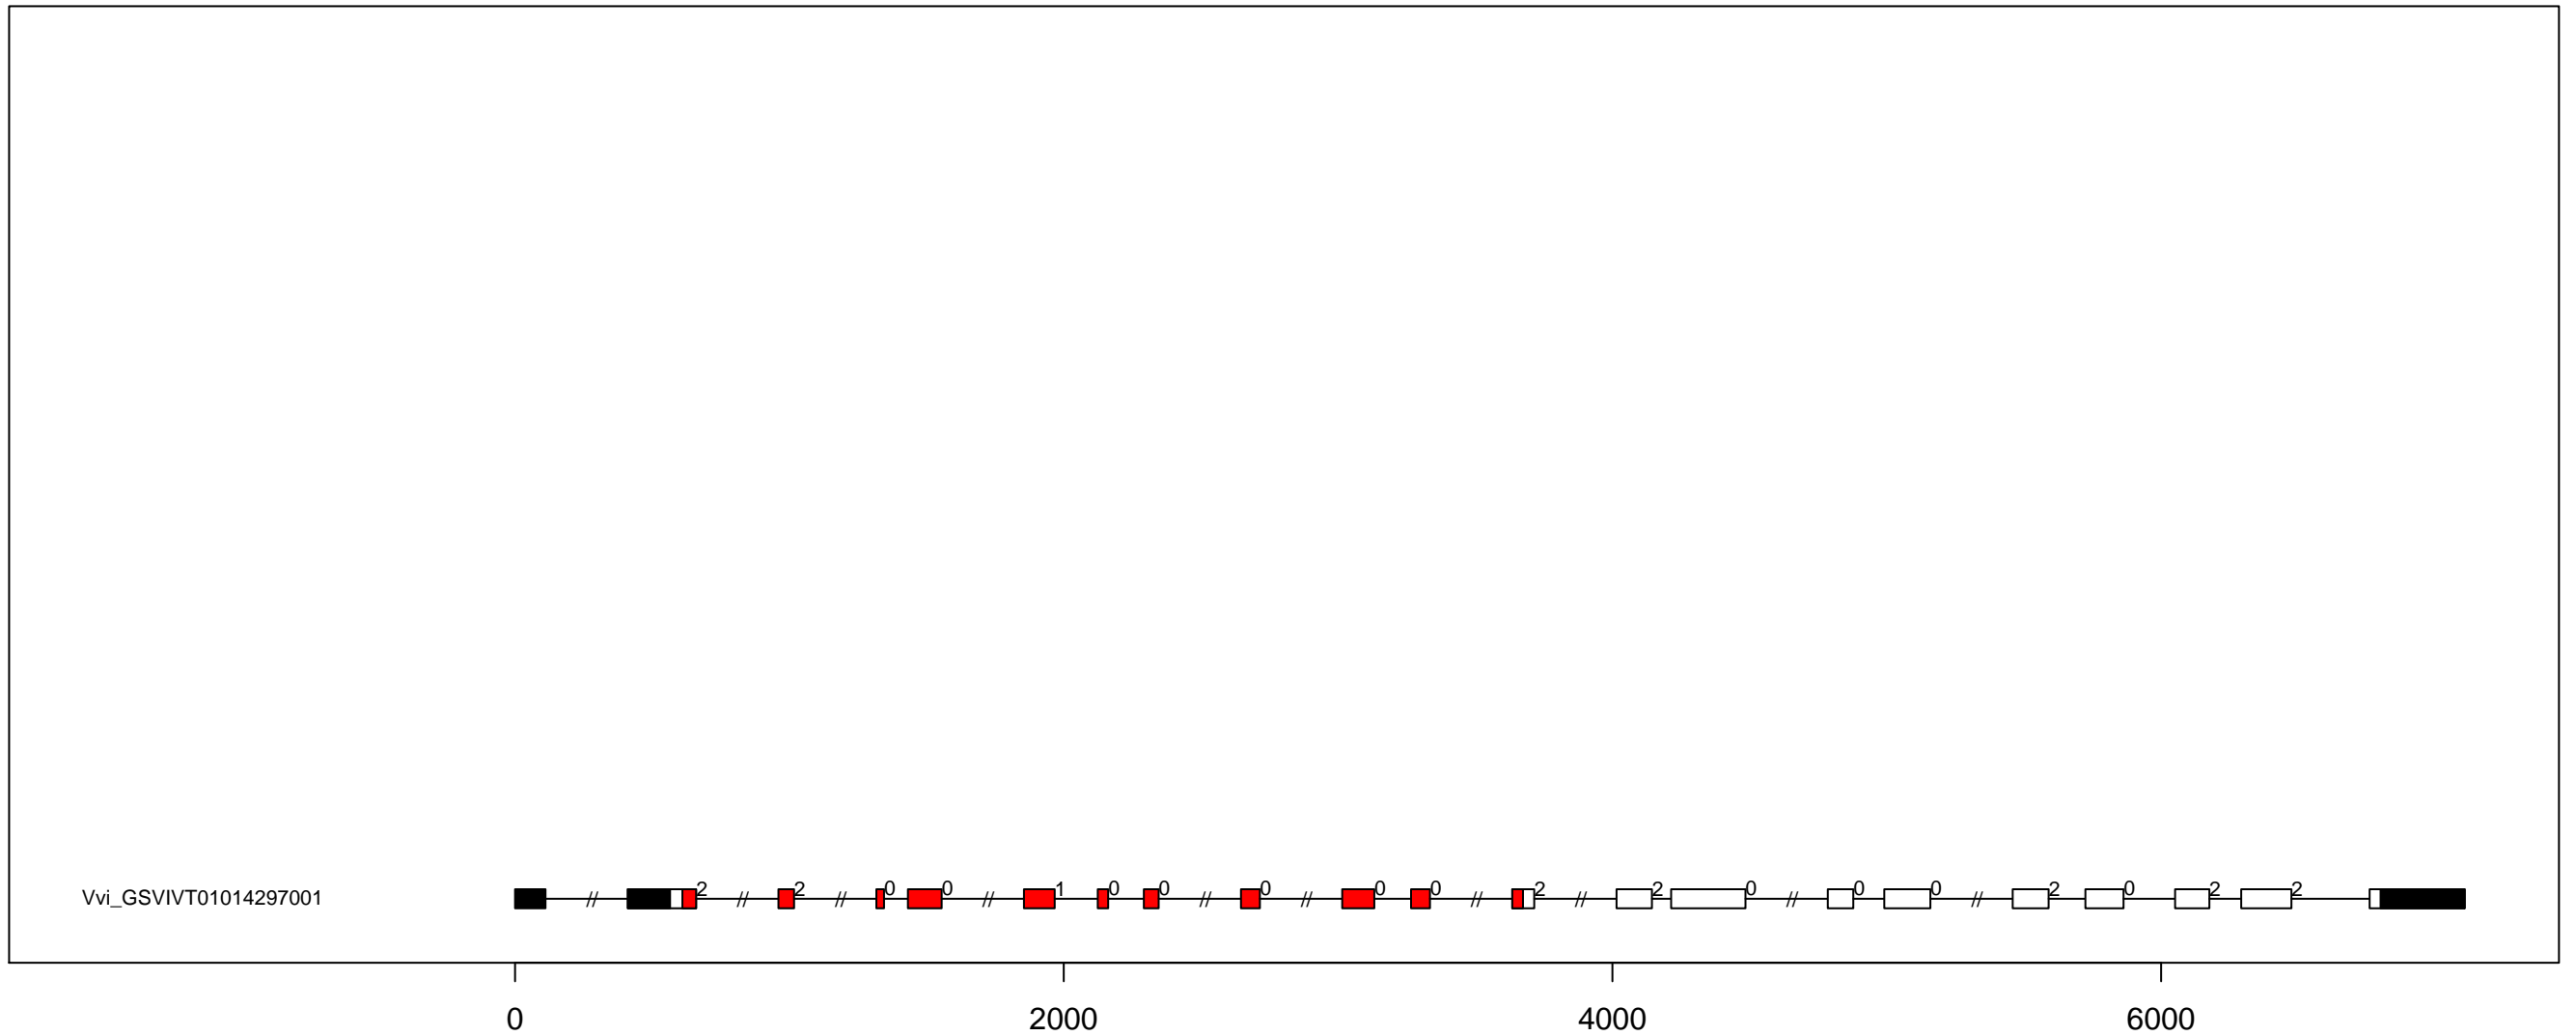

# V.vi STE\_STE7 exon-intron and domain diagram (all)

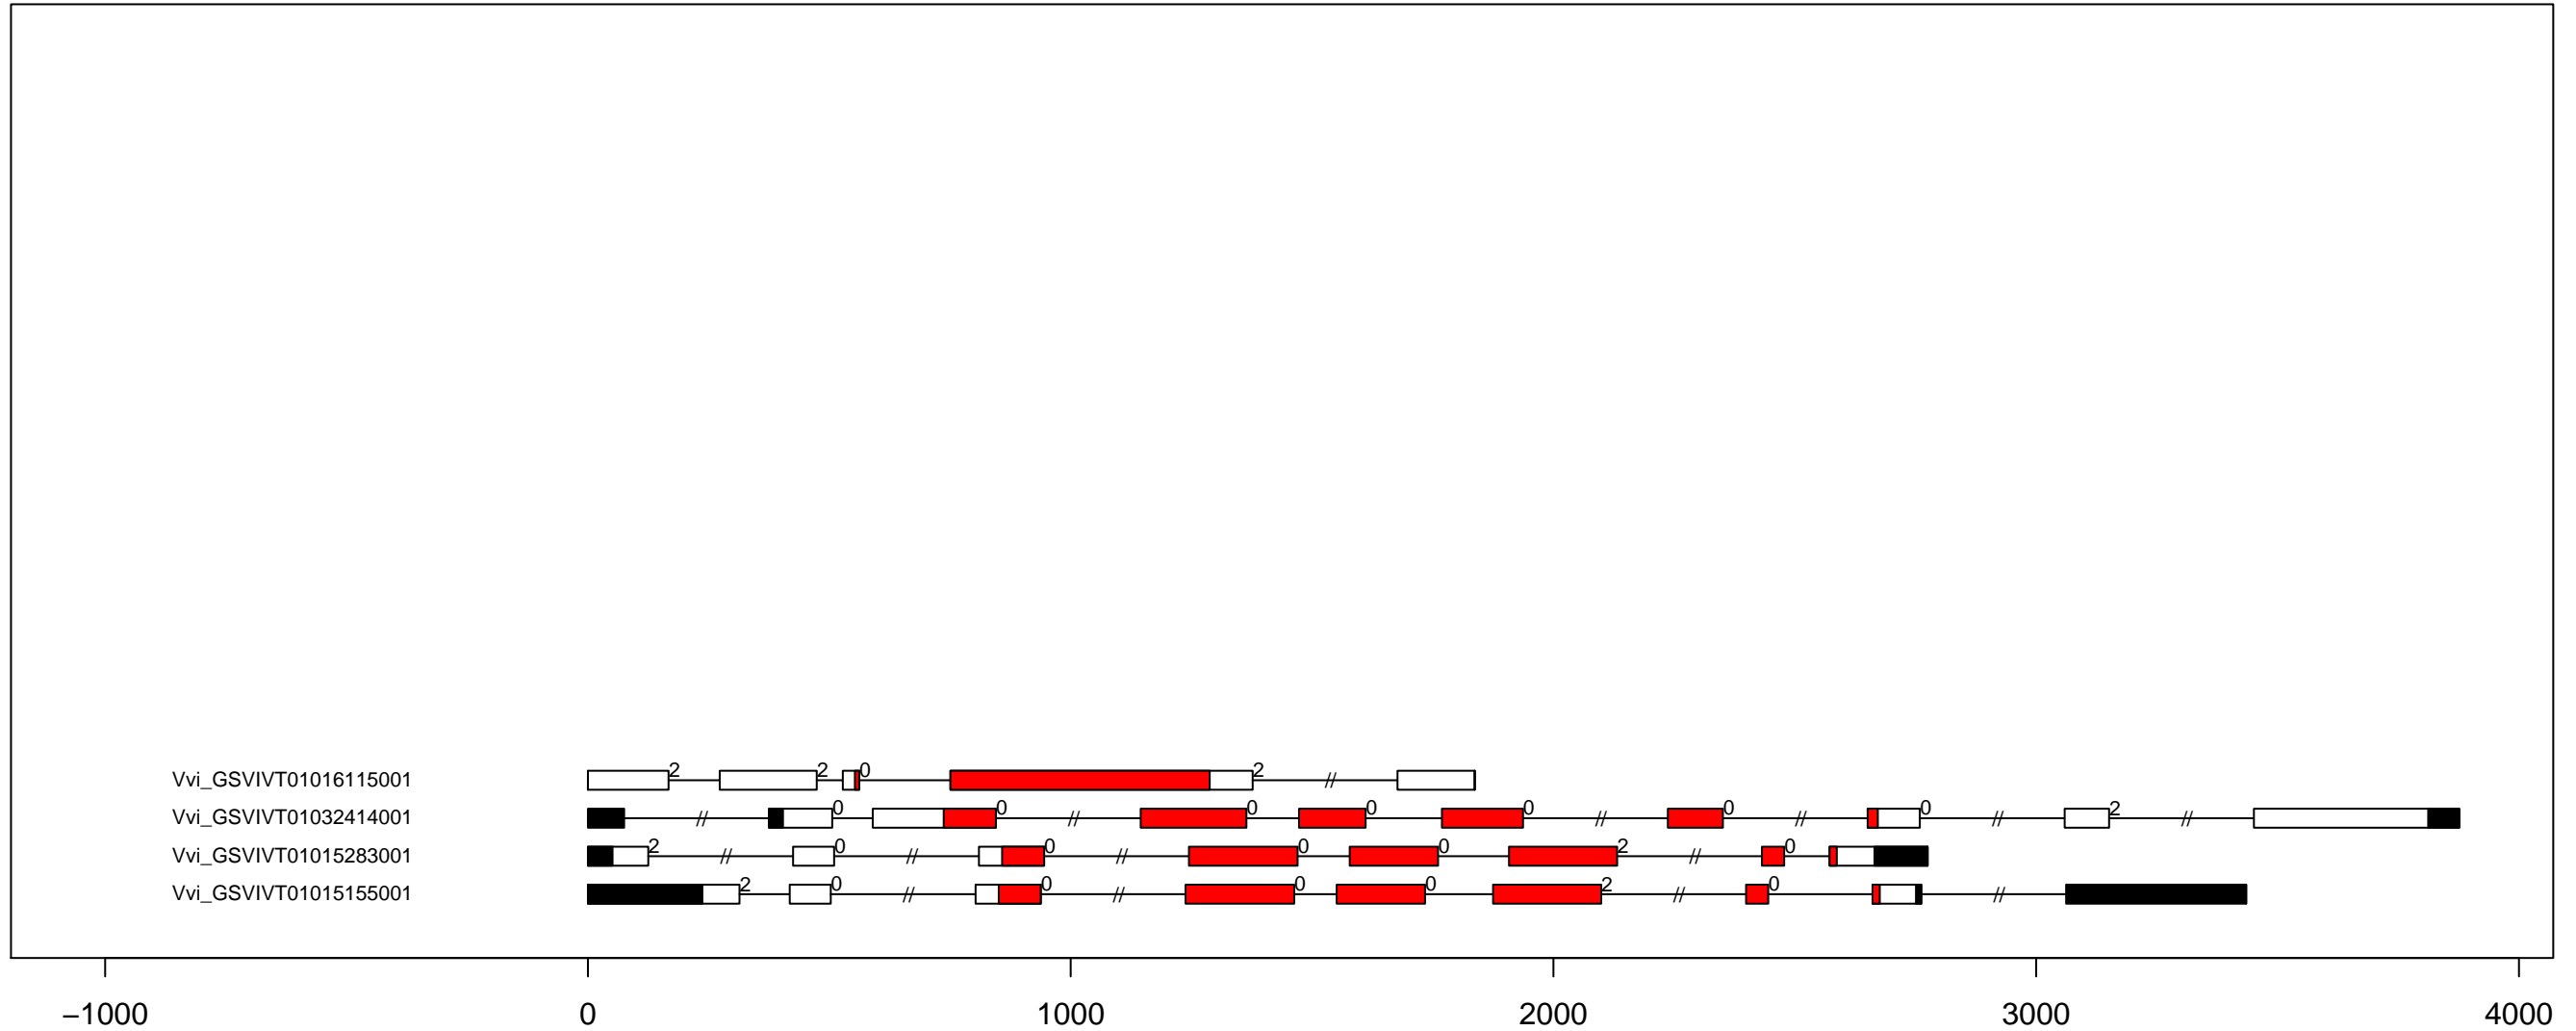



V.vi STE\_STE-PI exon-intron and domain diagram (all)

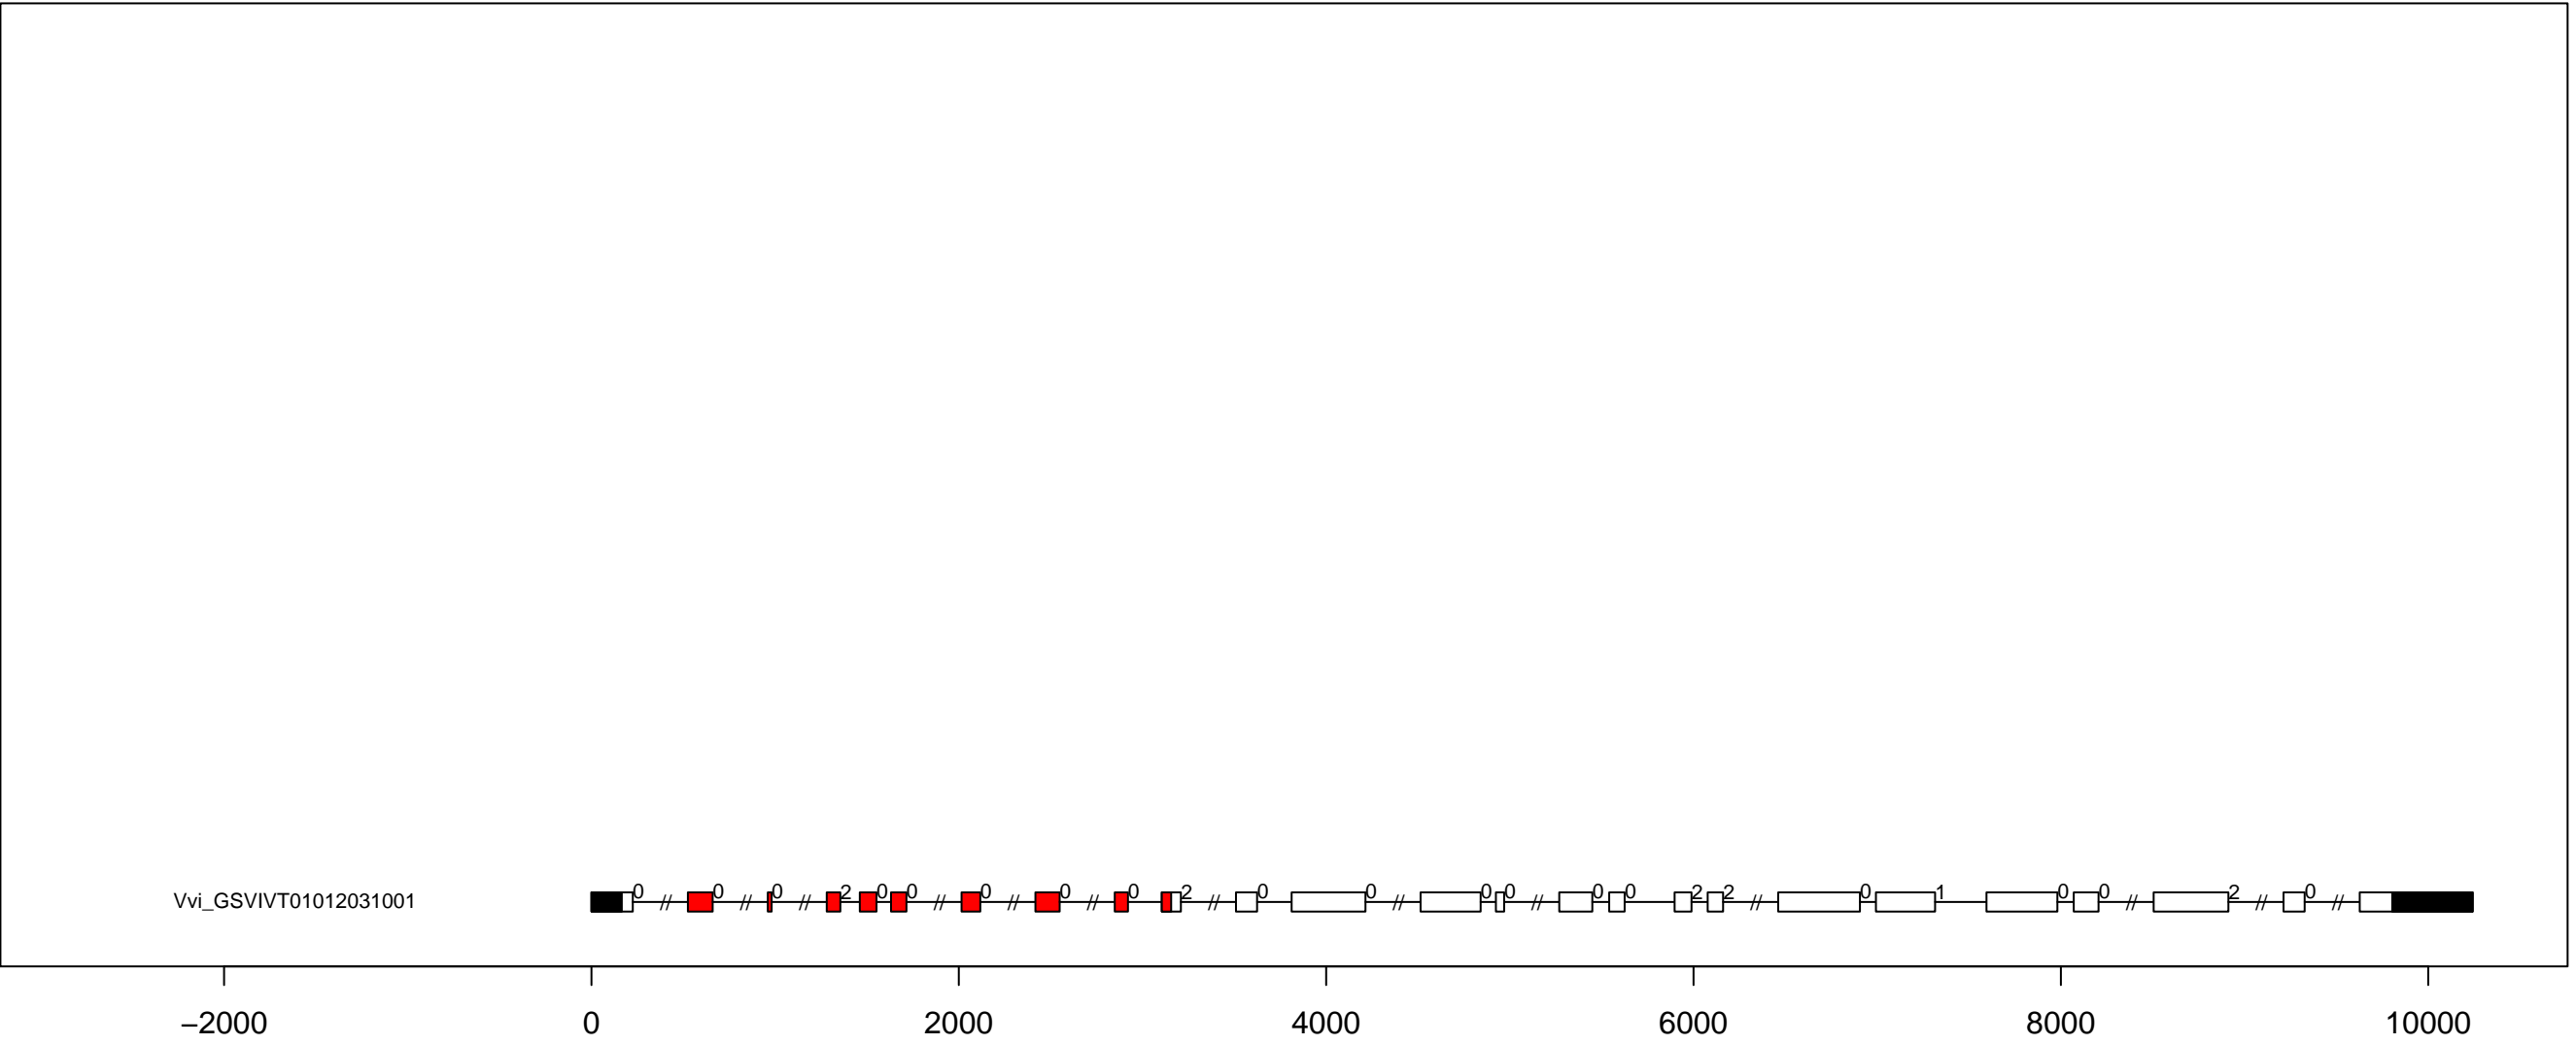

# V.vi TKL\_CTR1-DRK-1 exon-intron and domain diagram (all)

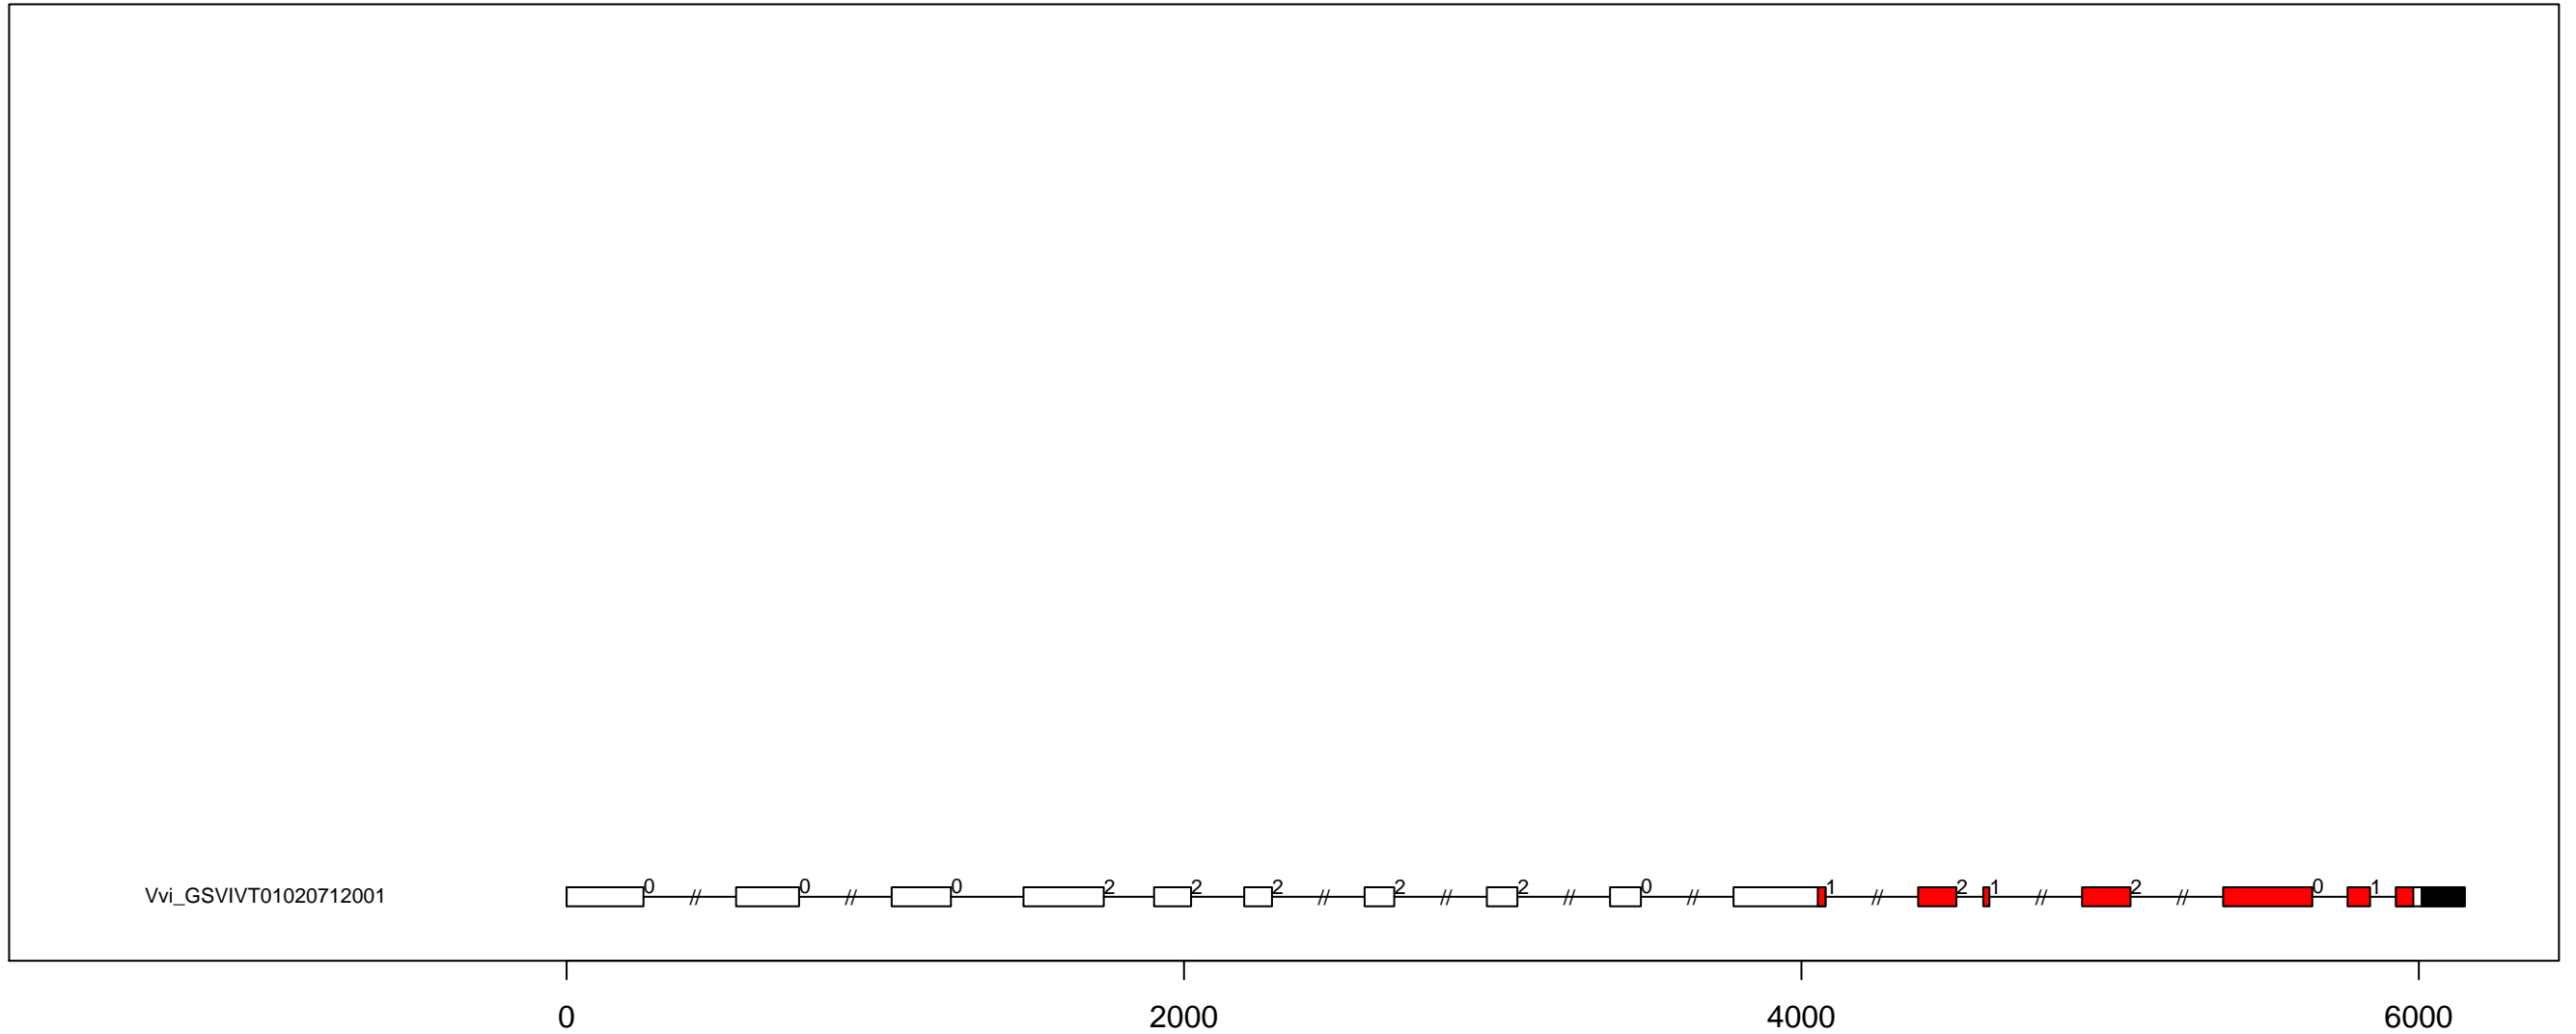

# V.vi TKL\_CTRL1-DRK-2 exon-intron and domain diagram (all)

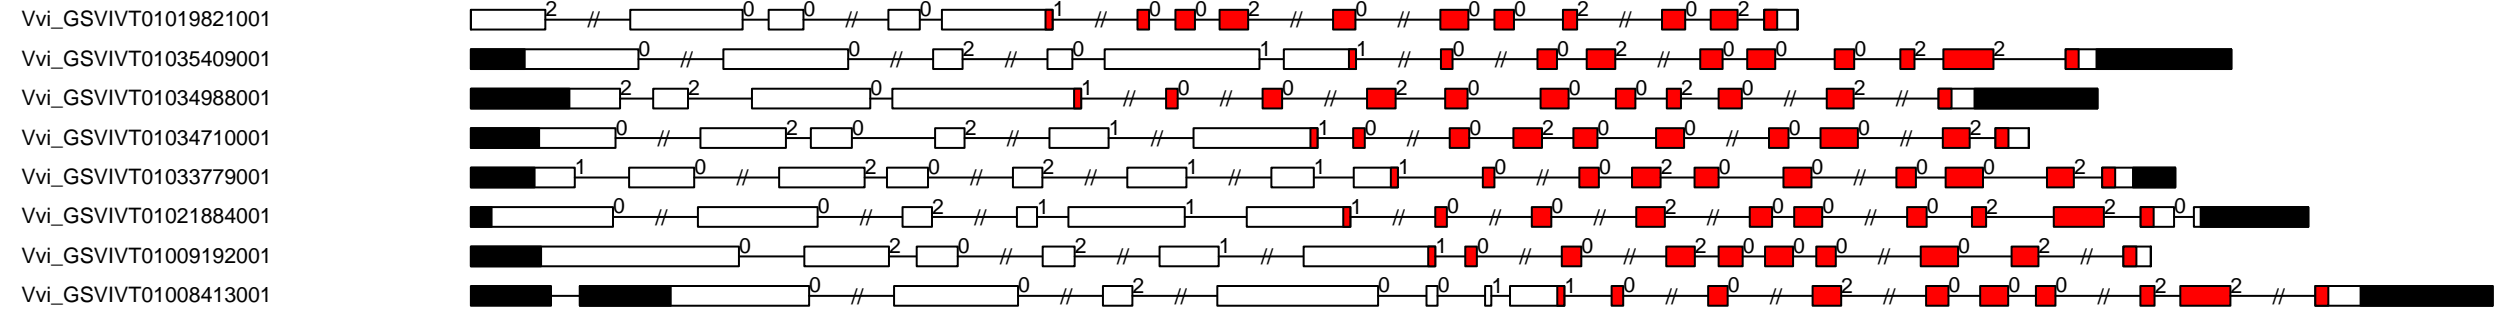

0

2000

4000

6000

# V.vi TKL\_Gdt exon-intron and domain diagram (all)

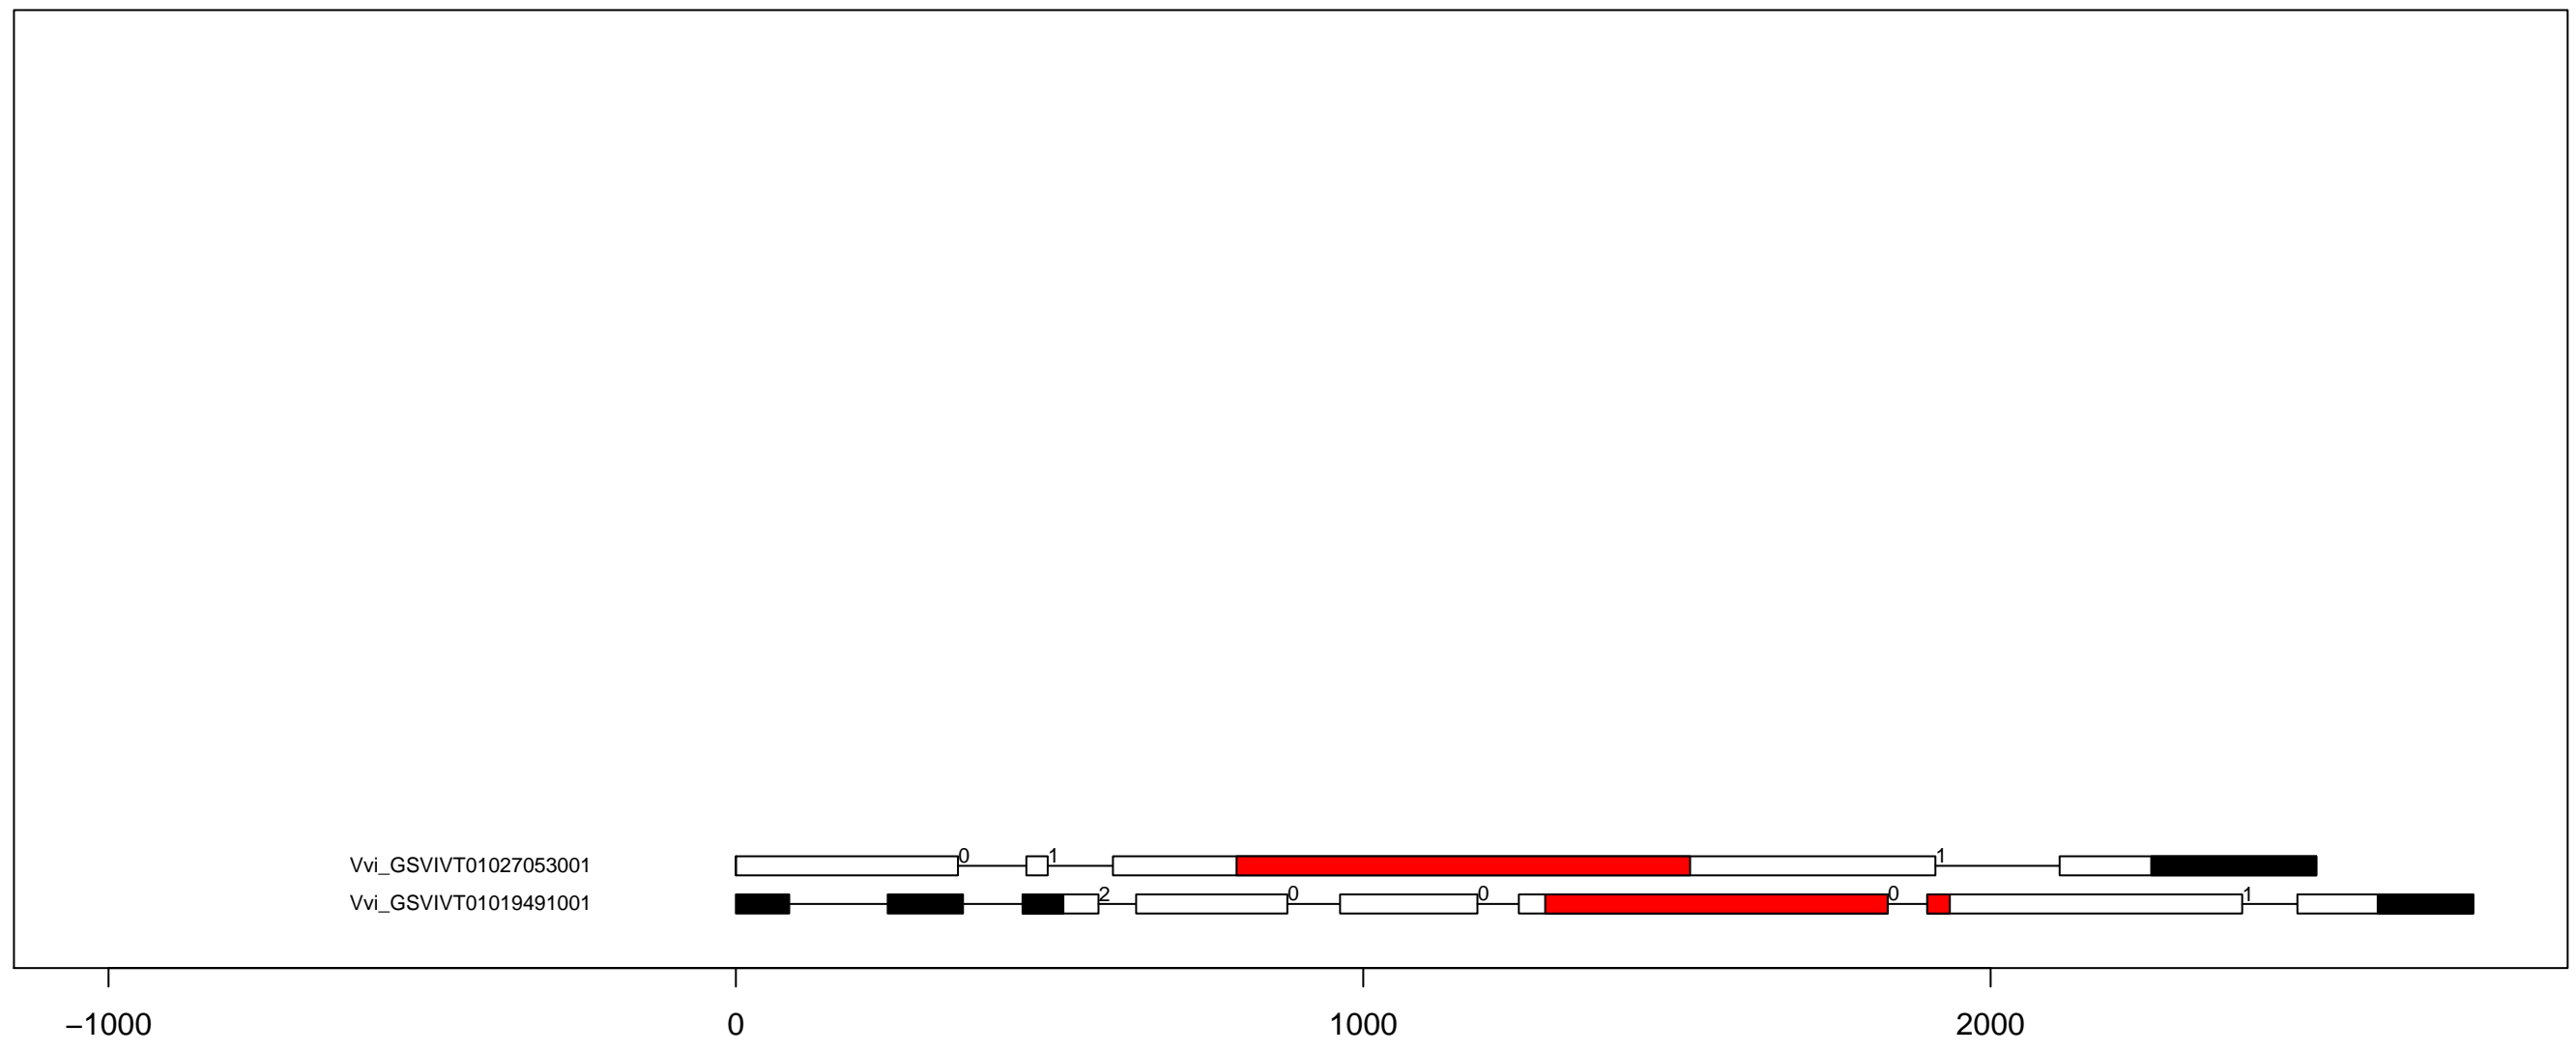

# V.vi TKL-PI-1 exon-intron and domain diagram (all)

Vvi\_GSVIVT01017348001

Vvi\_GSVIVT01036651001

Vvi\_GSVIVT01035870001

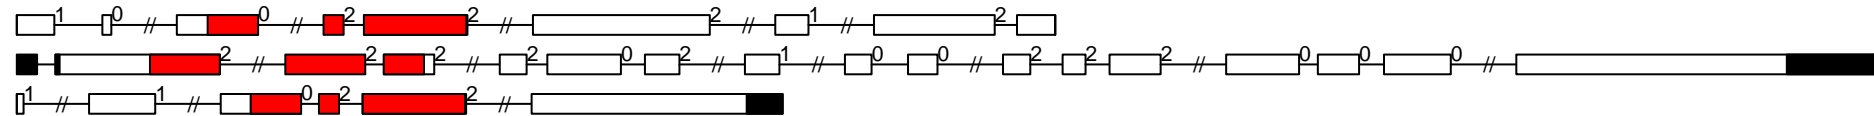

-2000

0

2000

4000

6000

8000

# V.vi TKL-PI-2 exon-intron and domain diagram (all)

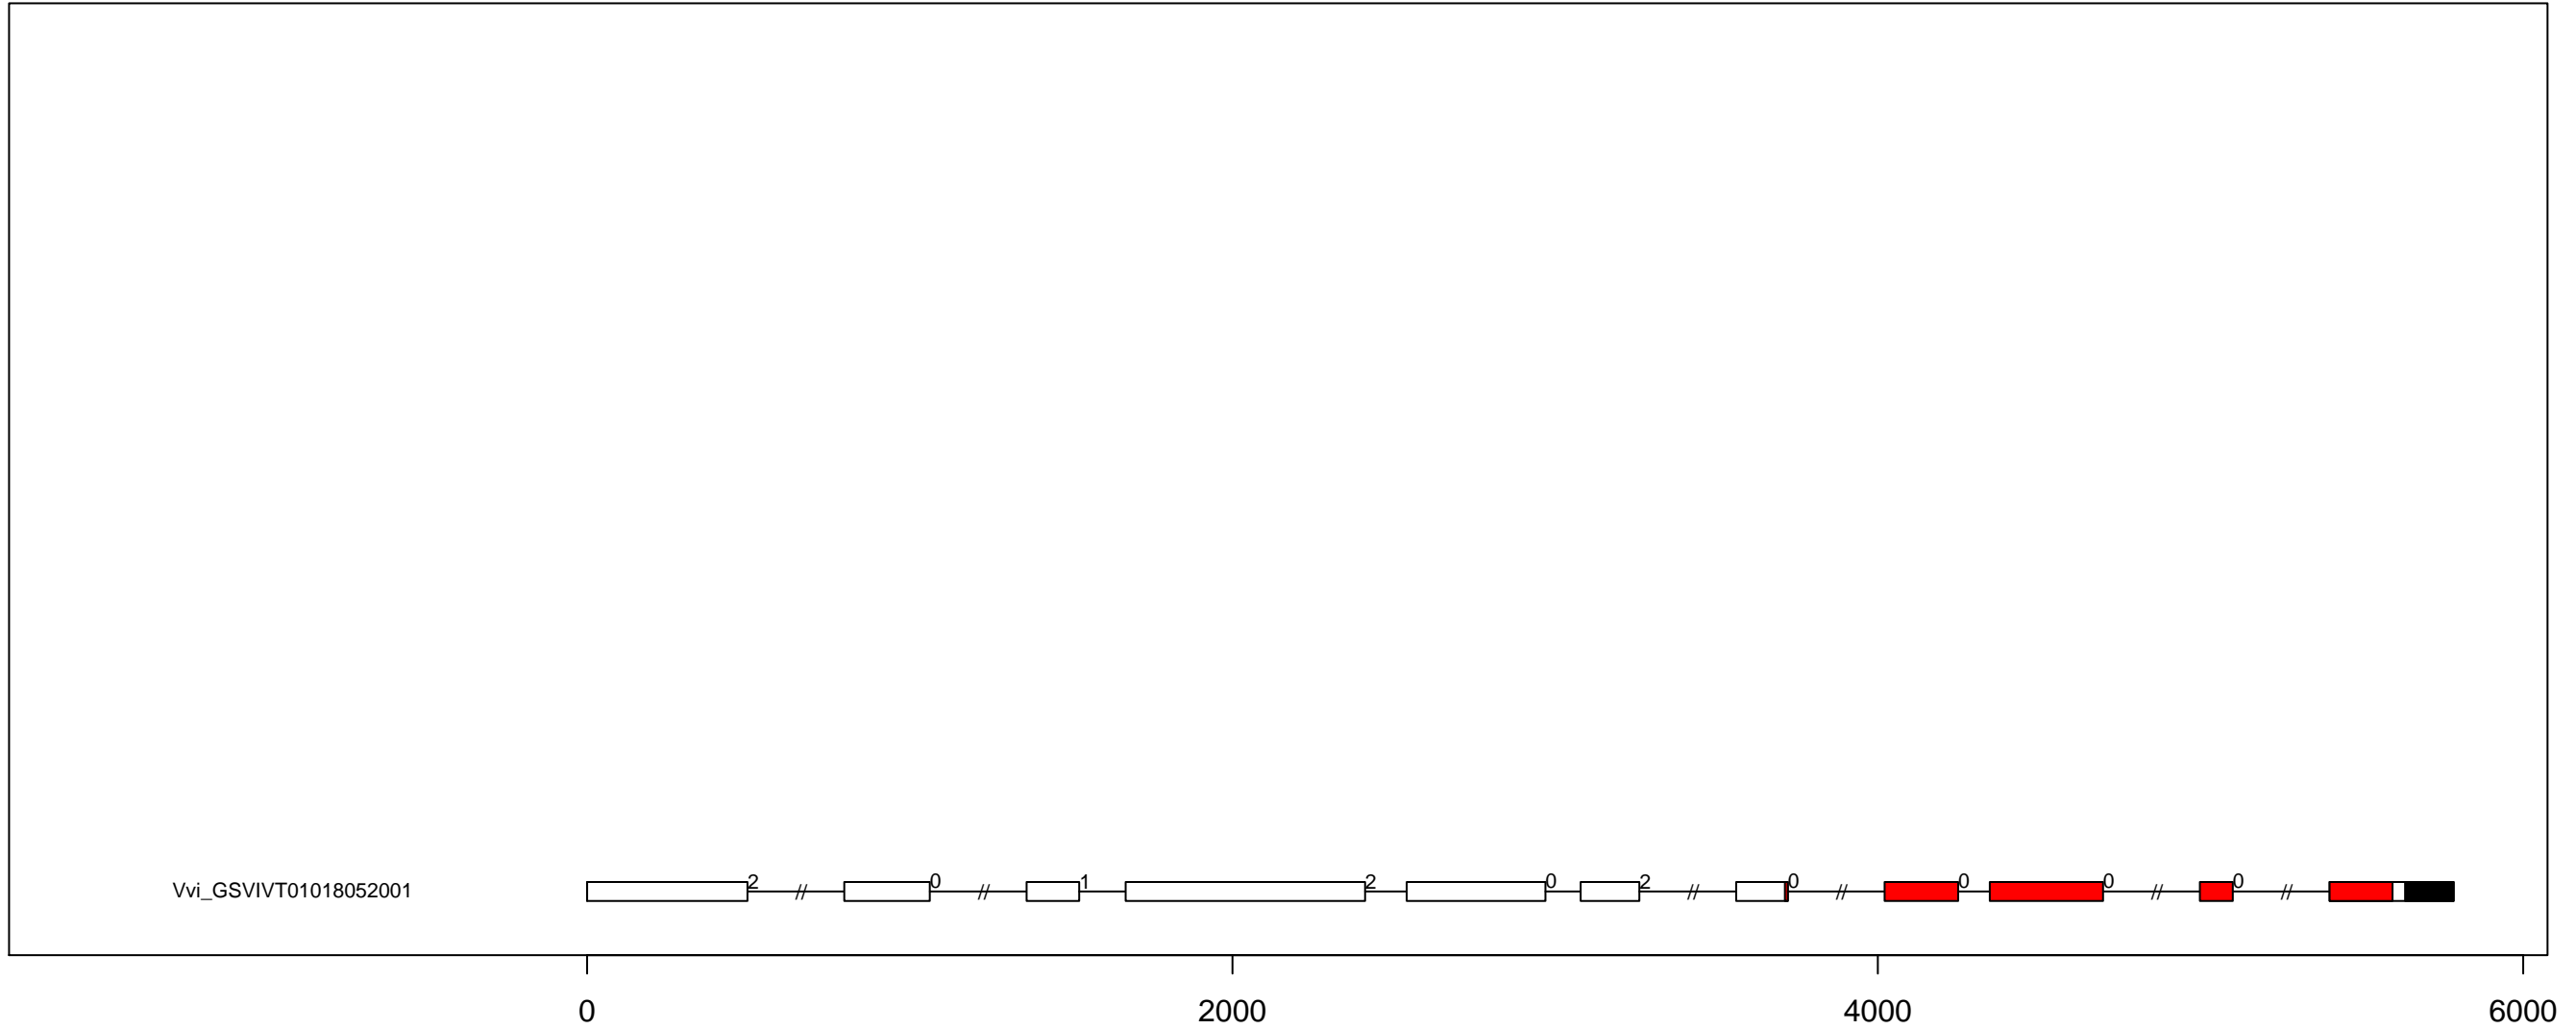

# V.vi TKL-PI-3 exon-intron and domain diagram (all)

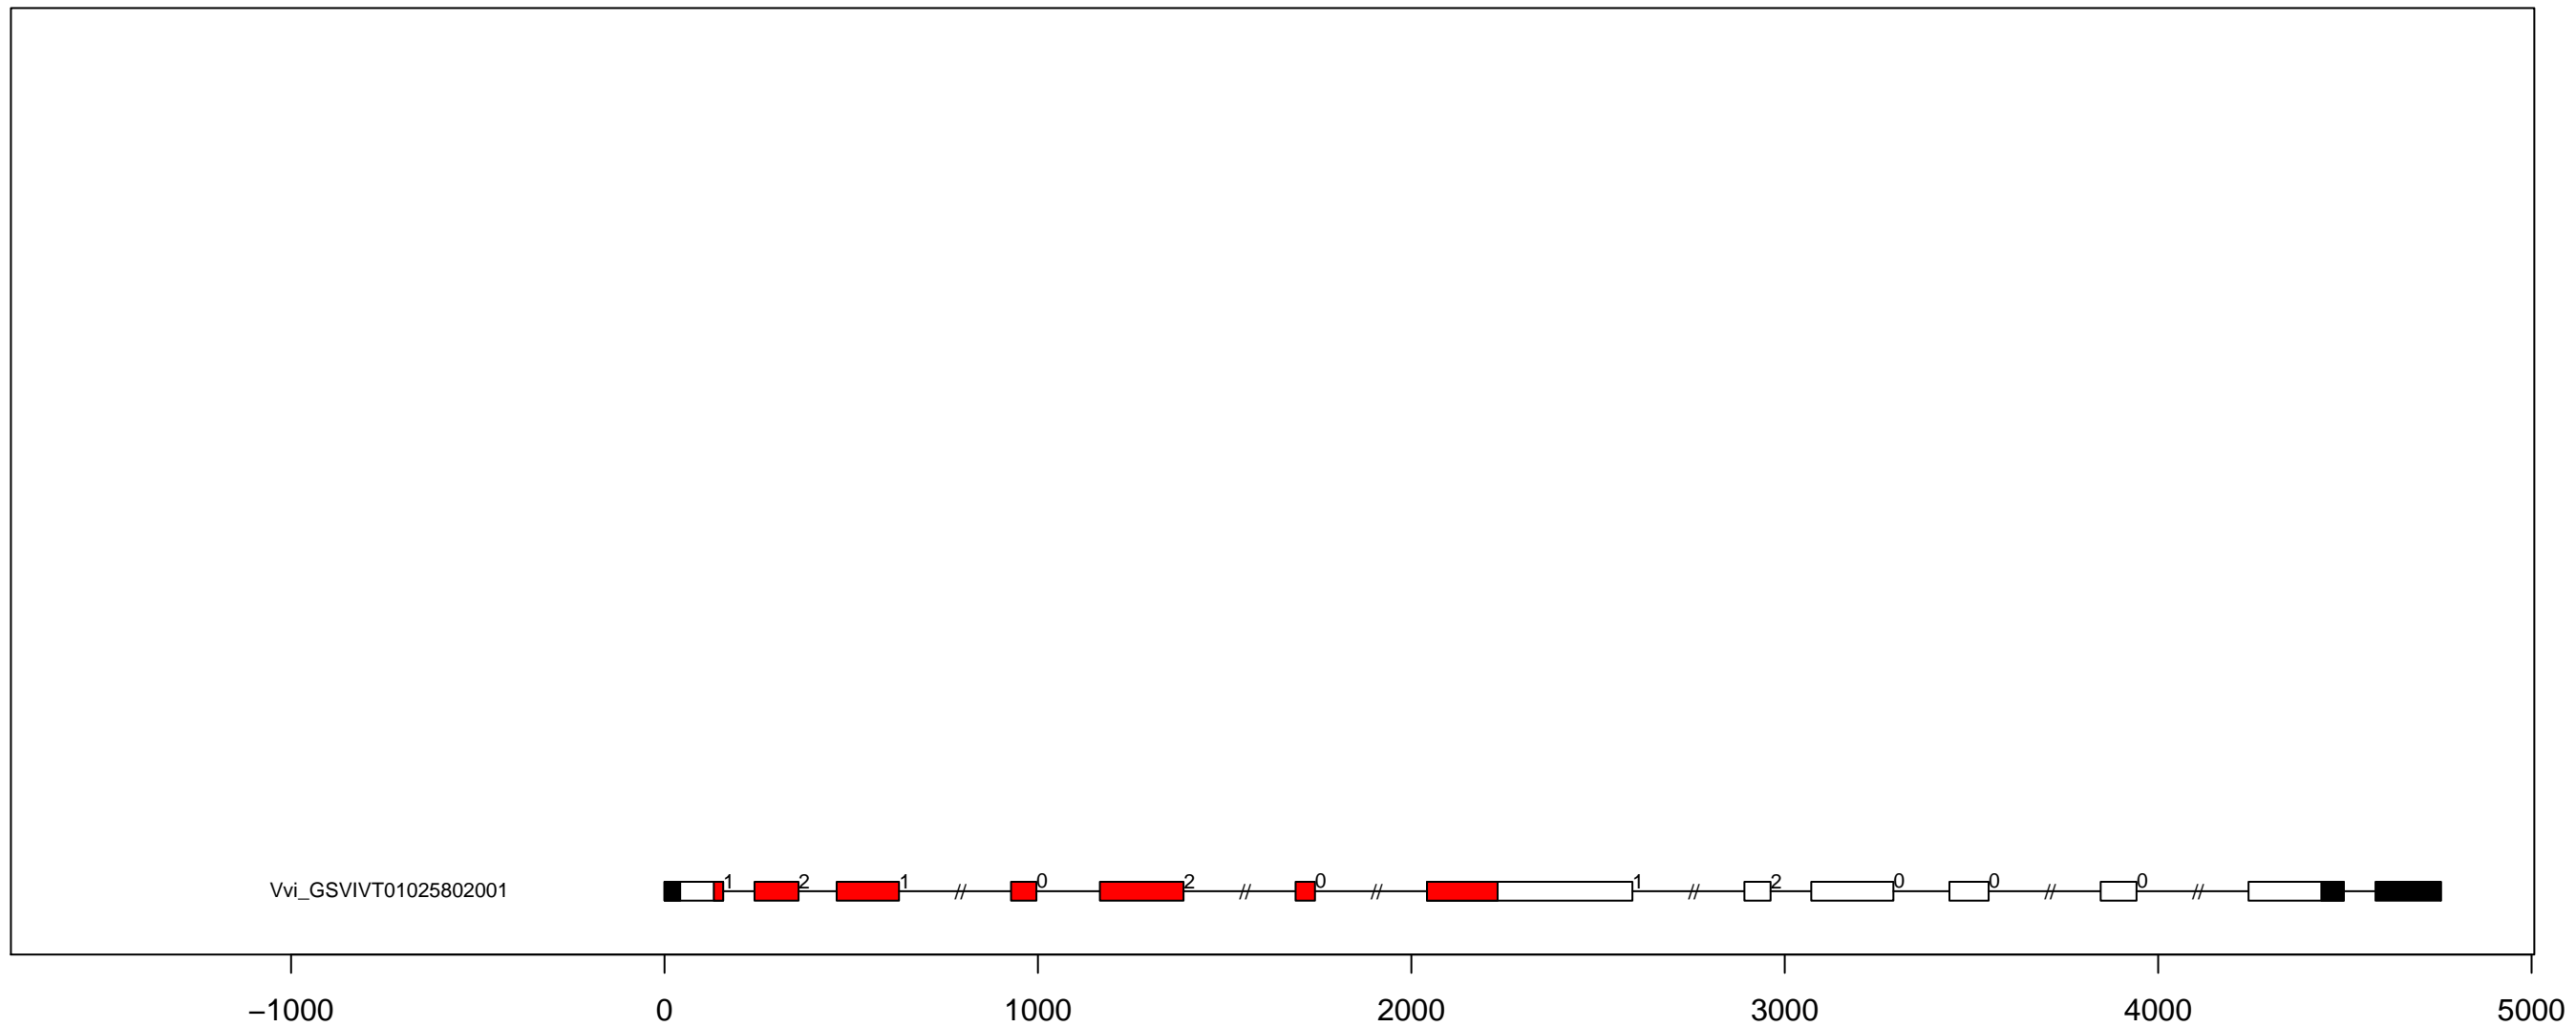

## V.vi TKL-PI-4 exon-intron and domain diagram (all)

Vvi\_GSVIVT01019010001  
 Vvi\_GSVIVT01032487001  
 Vvi\_GSVIVT01032389001  
 Vvi\_GSVIVT01030194001  
 Vvi\_GSVIVT01023958001  
 Vvi\_GSVIVT01018020001  
 Vvi\_GSVIVT01008728001  
 Vvi\_GSVIVT01007775001  
 Vvi\_GSVIVT01007762001  
 Vvi\_GSVIVT01007646001  
 Vvi\_GSVIVT01002332001  
 Vvi\_GSVIVT01001690001  
 Vvi\_GSVIVT01001193001

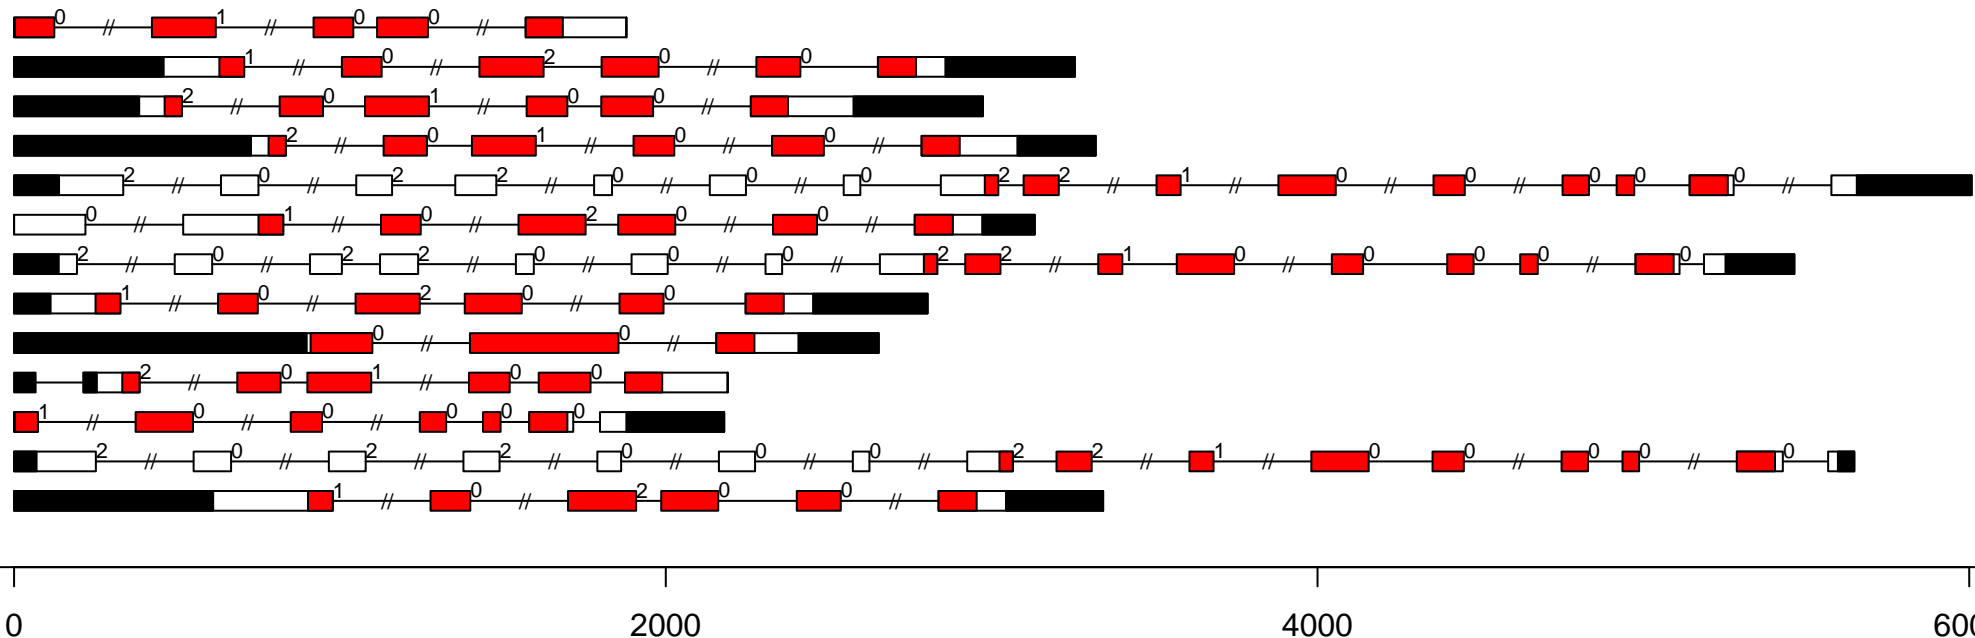



### V.vi TKL-PI-5 exon-intron and domain diagram (all)

Vvi\_GSVIVT01026899001  
 Vvi\_GSVIVT01026898001  
 Vvi\_GSVIVT01038213001  
 Vvi\_GSVIVT01021301001  
 Vvi\_GSVIVT01003214001

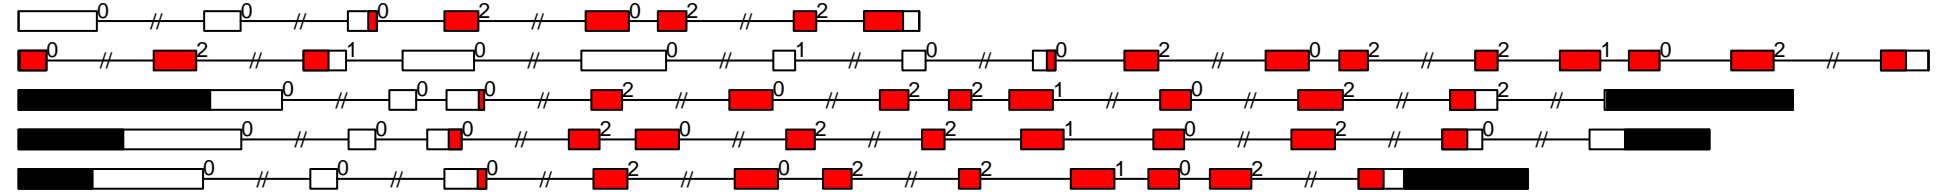

-1000

0

1000

2000

3000

4000

5000

V.vi TKL-PI-6 exon-intron and domain diagram (all)

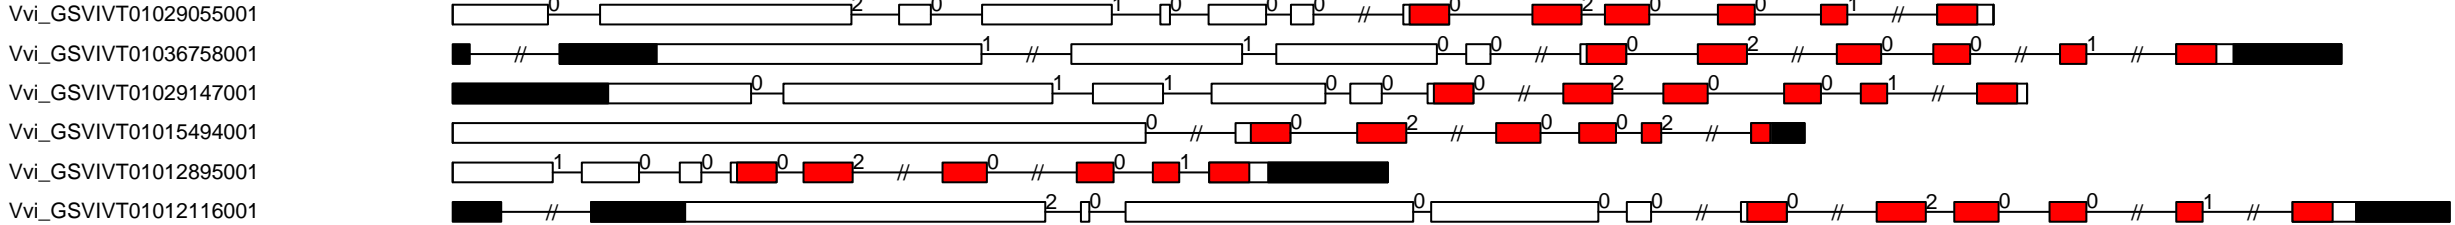

# V.vi TKL-PI-7 exon-intron and domain diagram (all)

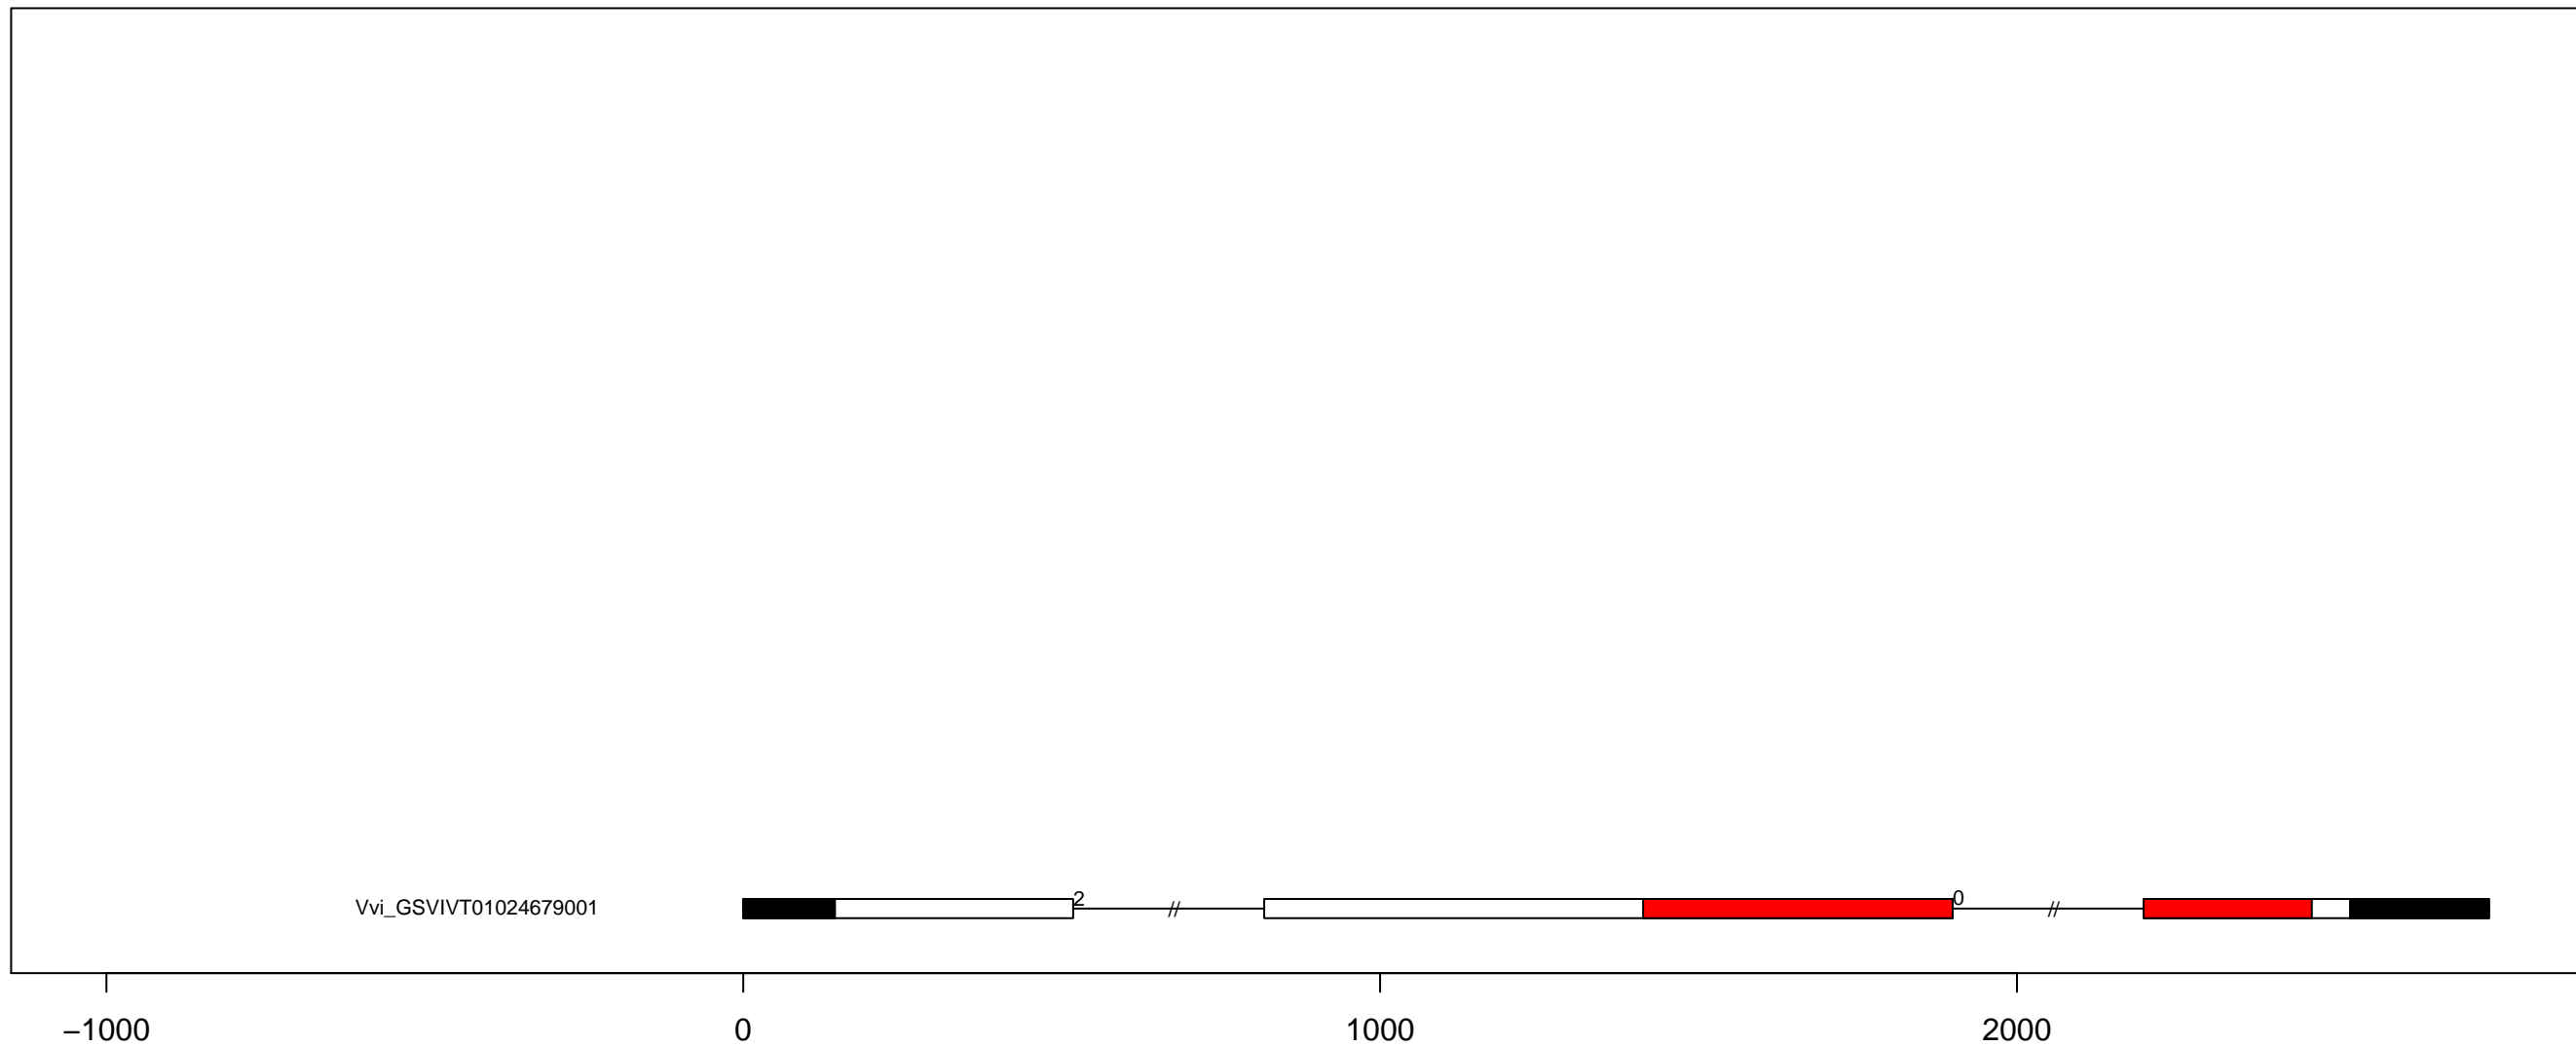

# V.vi TKL-PI-8 exon-intron and domain diagram (all)

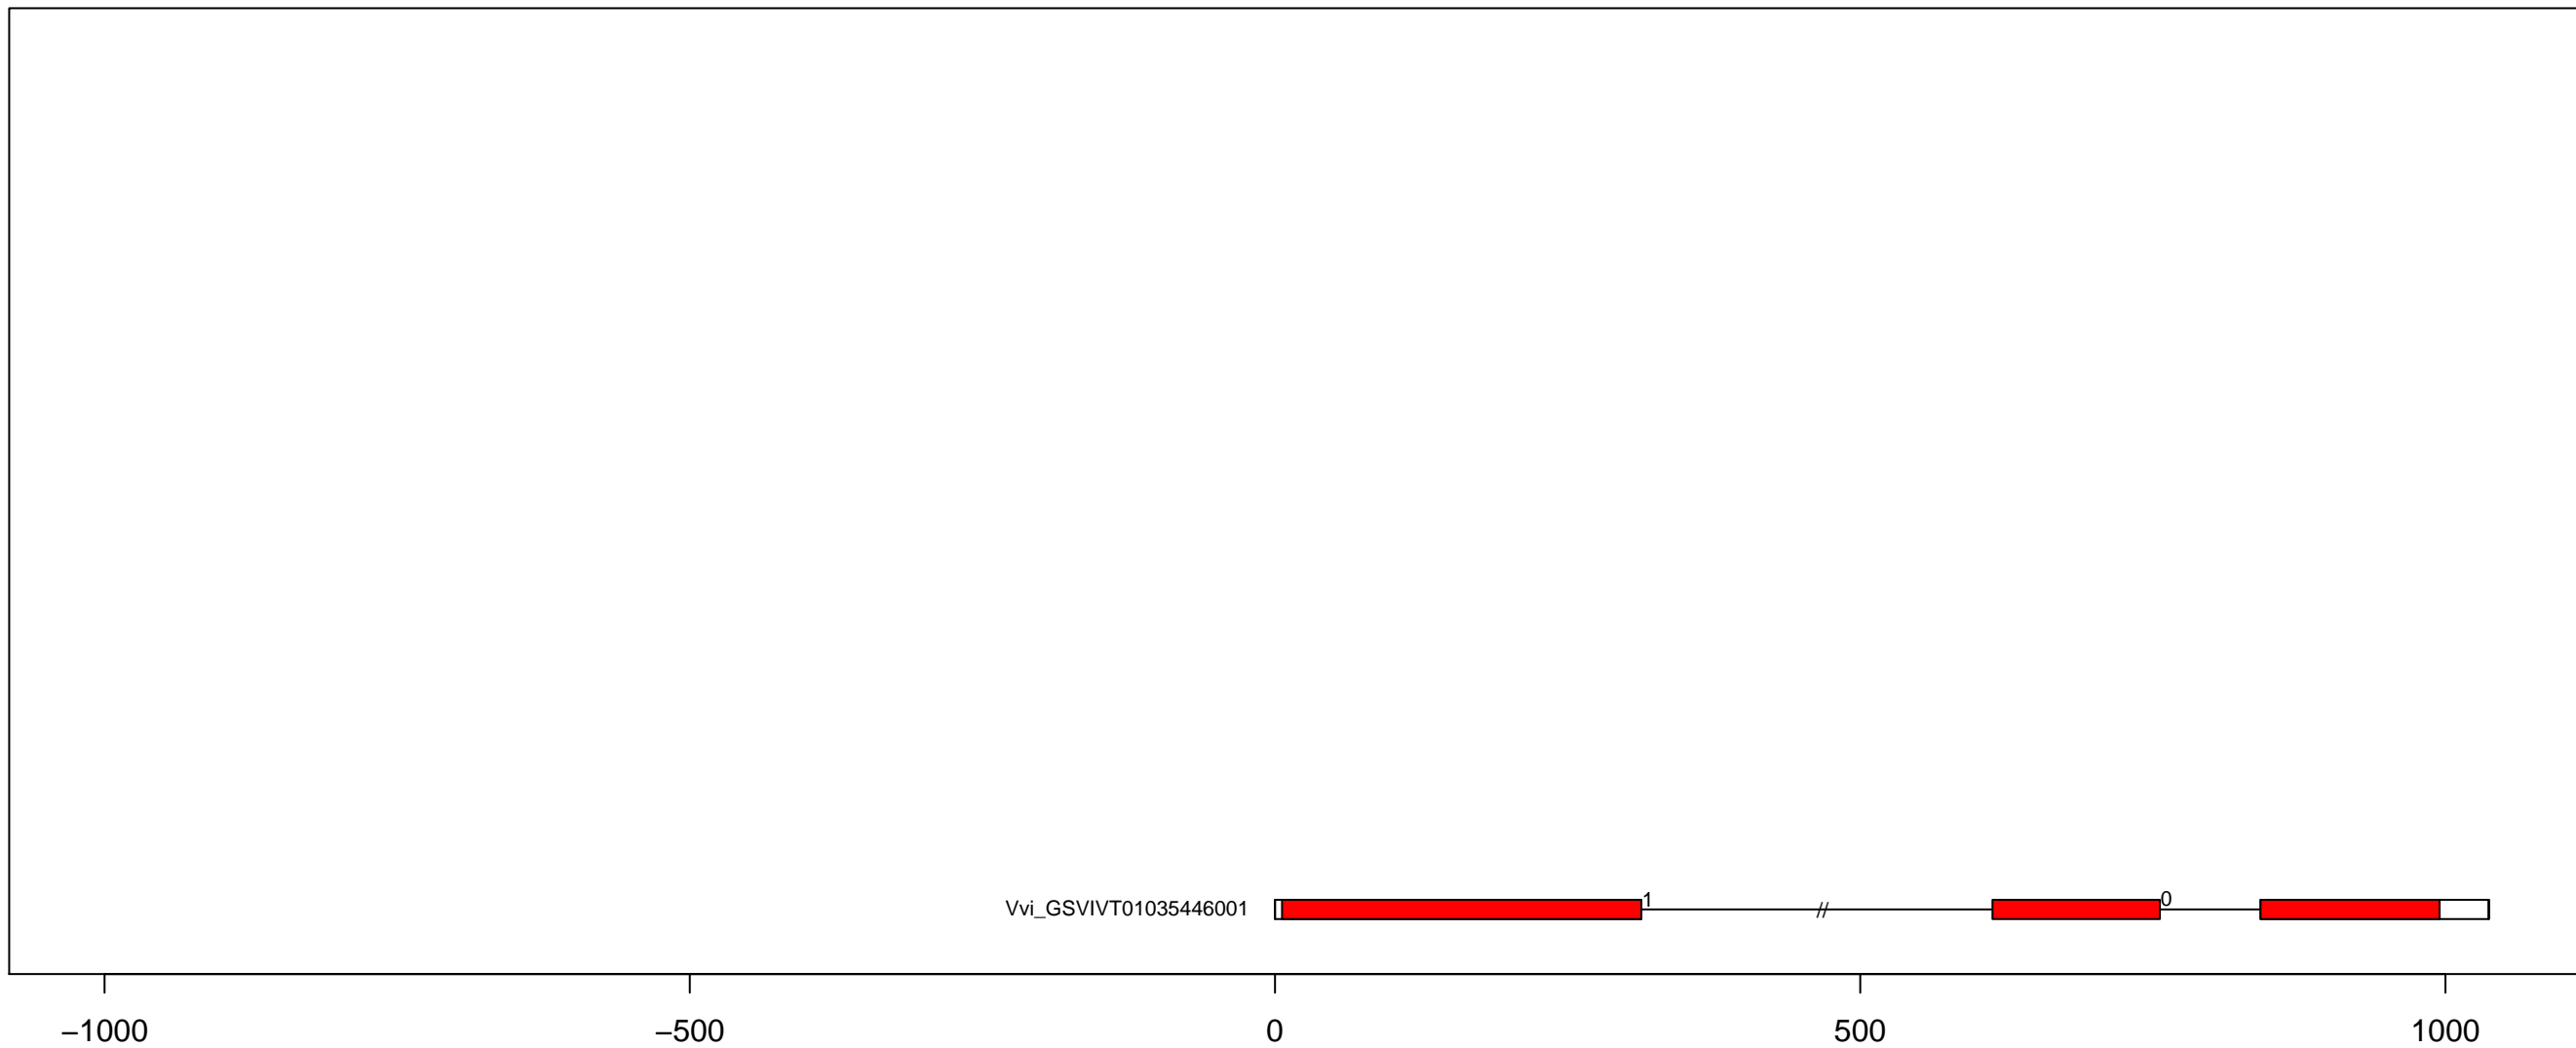

# V.vi TLK exon-intron and domain diagram (all)

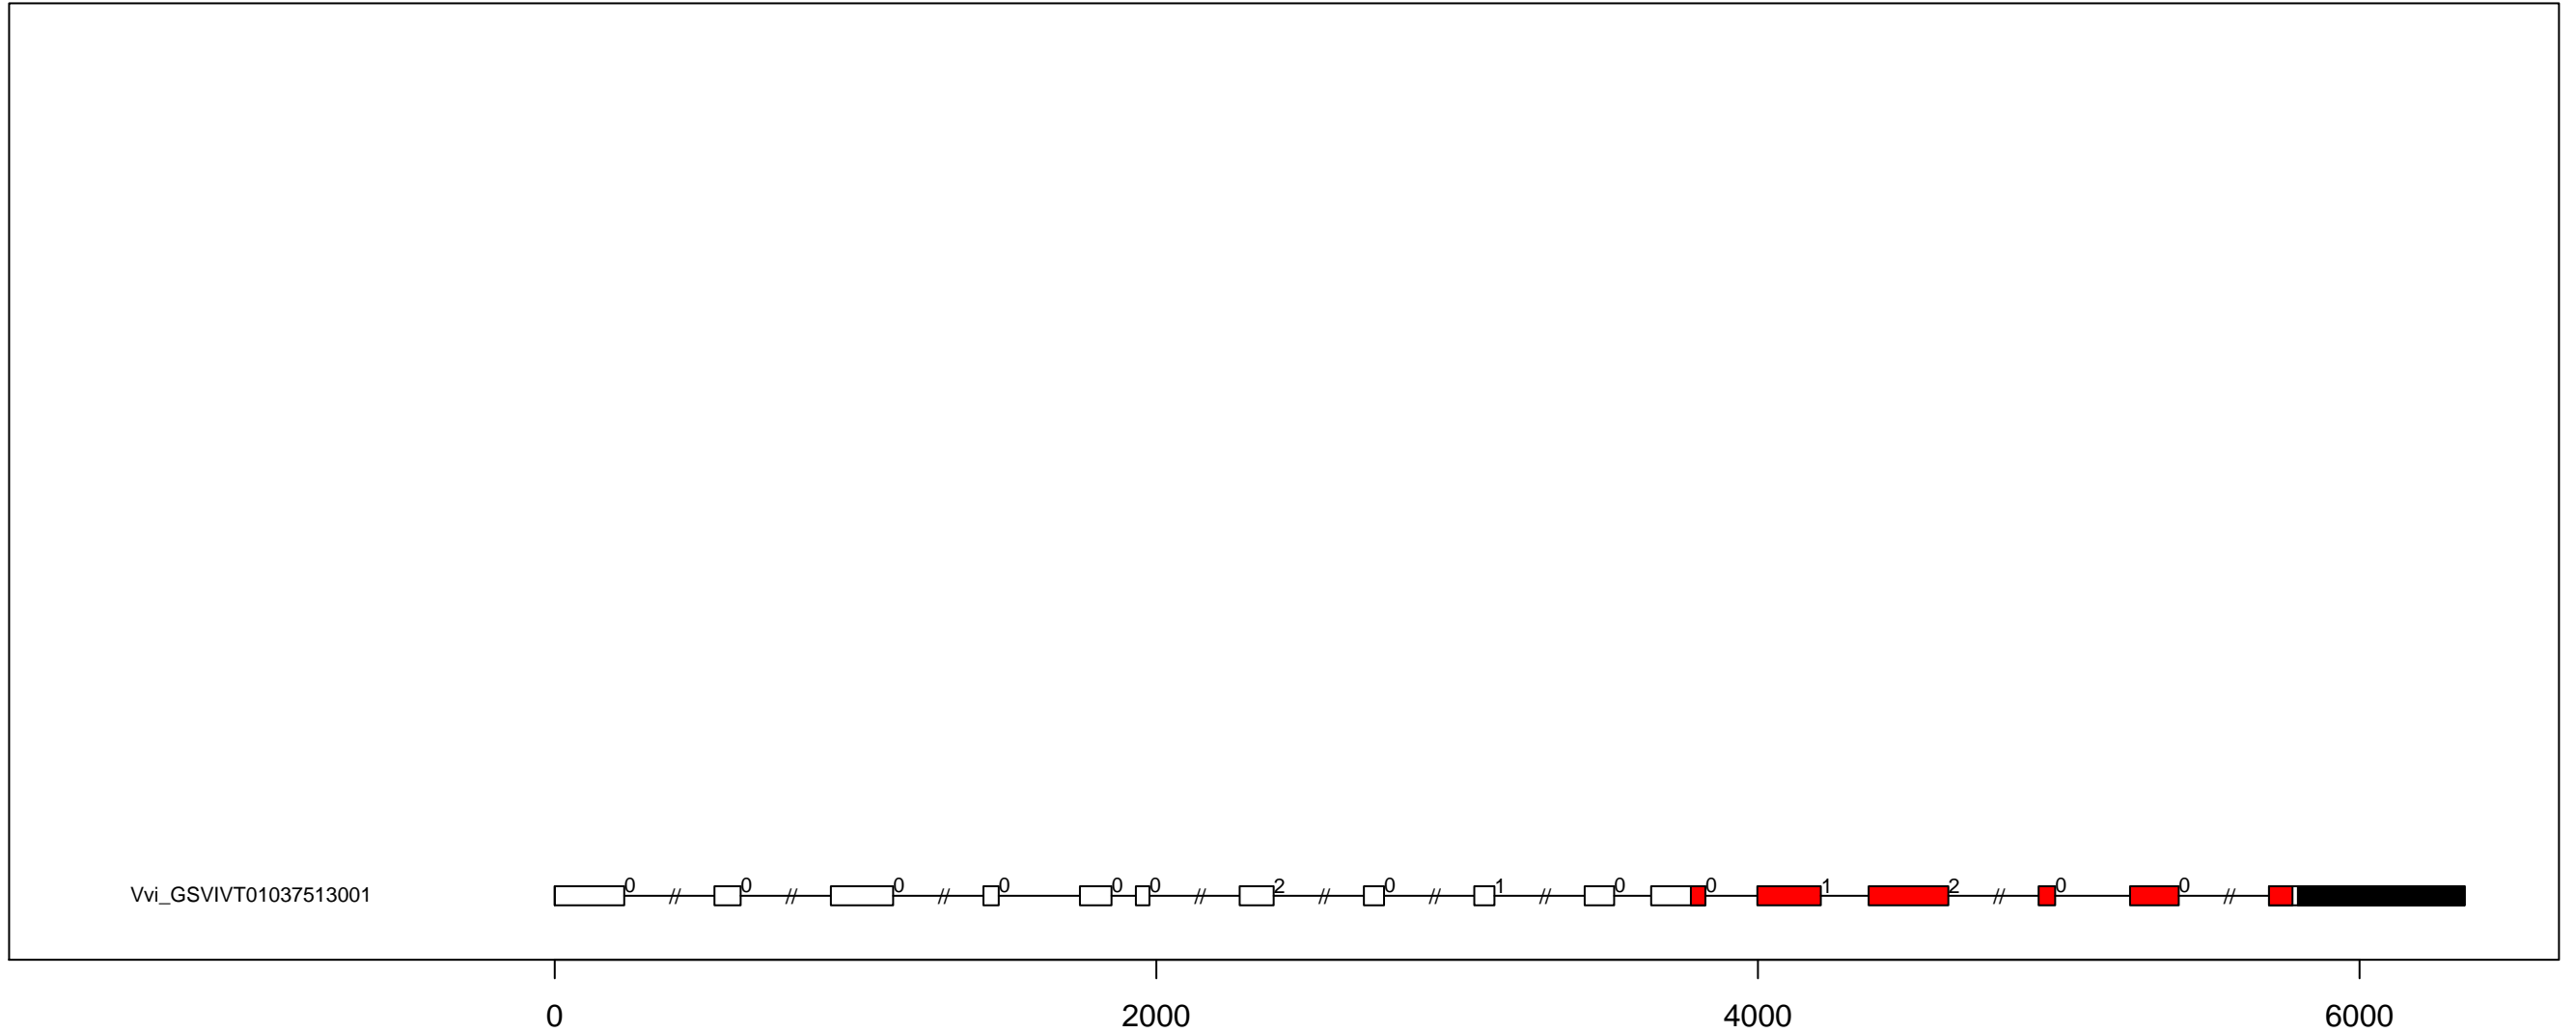

# V.vi TTK exon-intron and domain diagram (all)

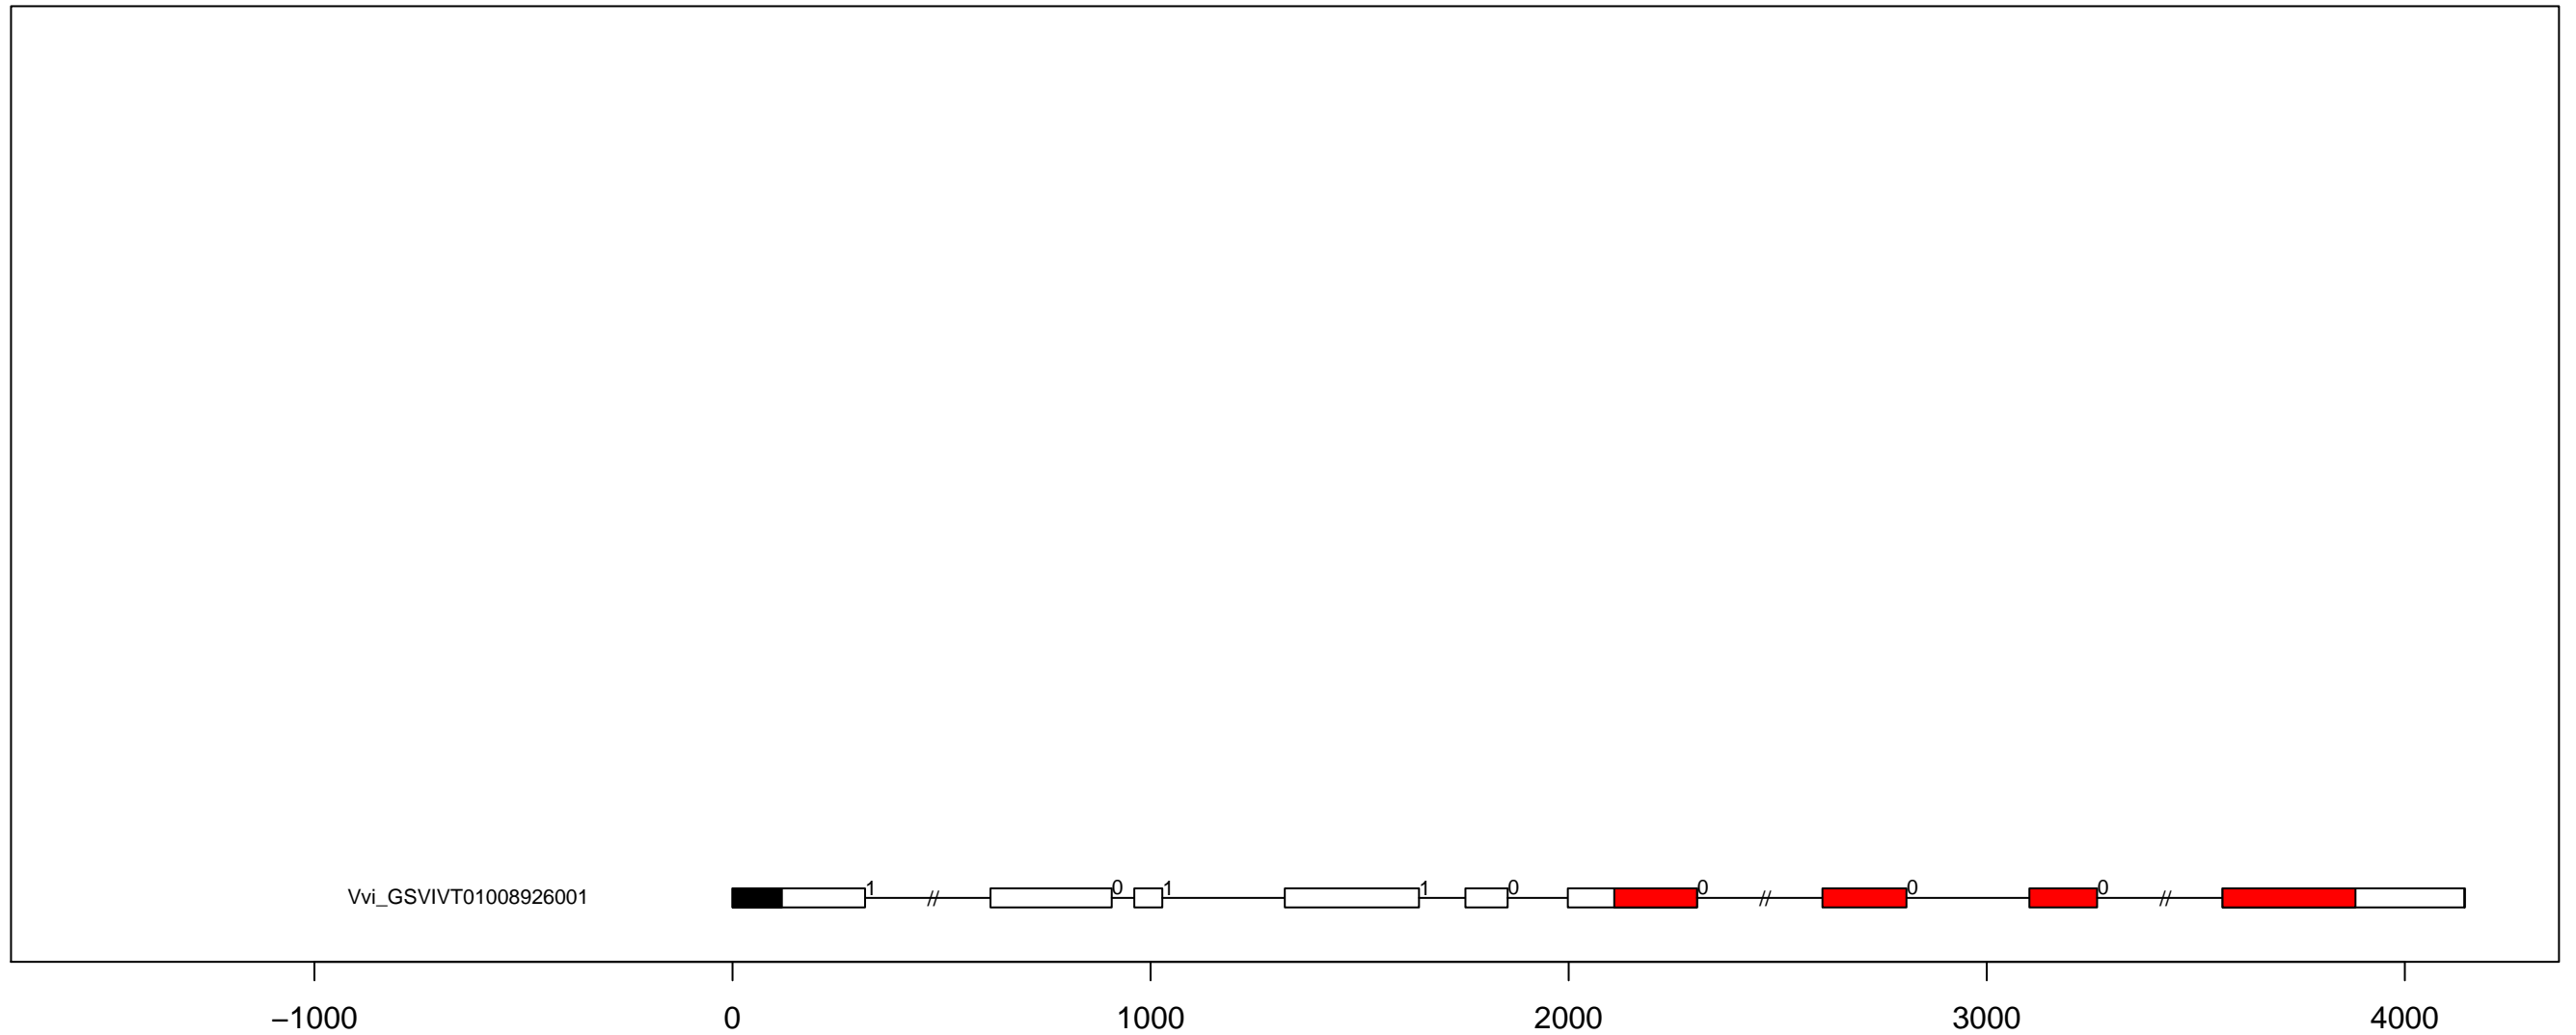

# V.vi ULK\_Fused exon-intron and domain diagram (all)

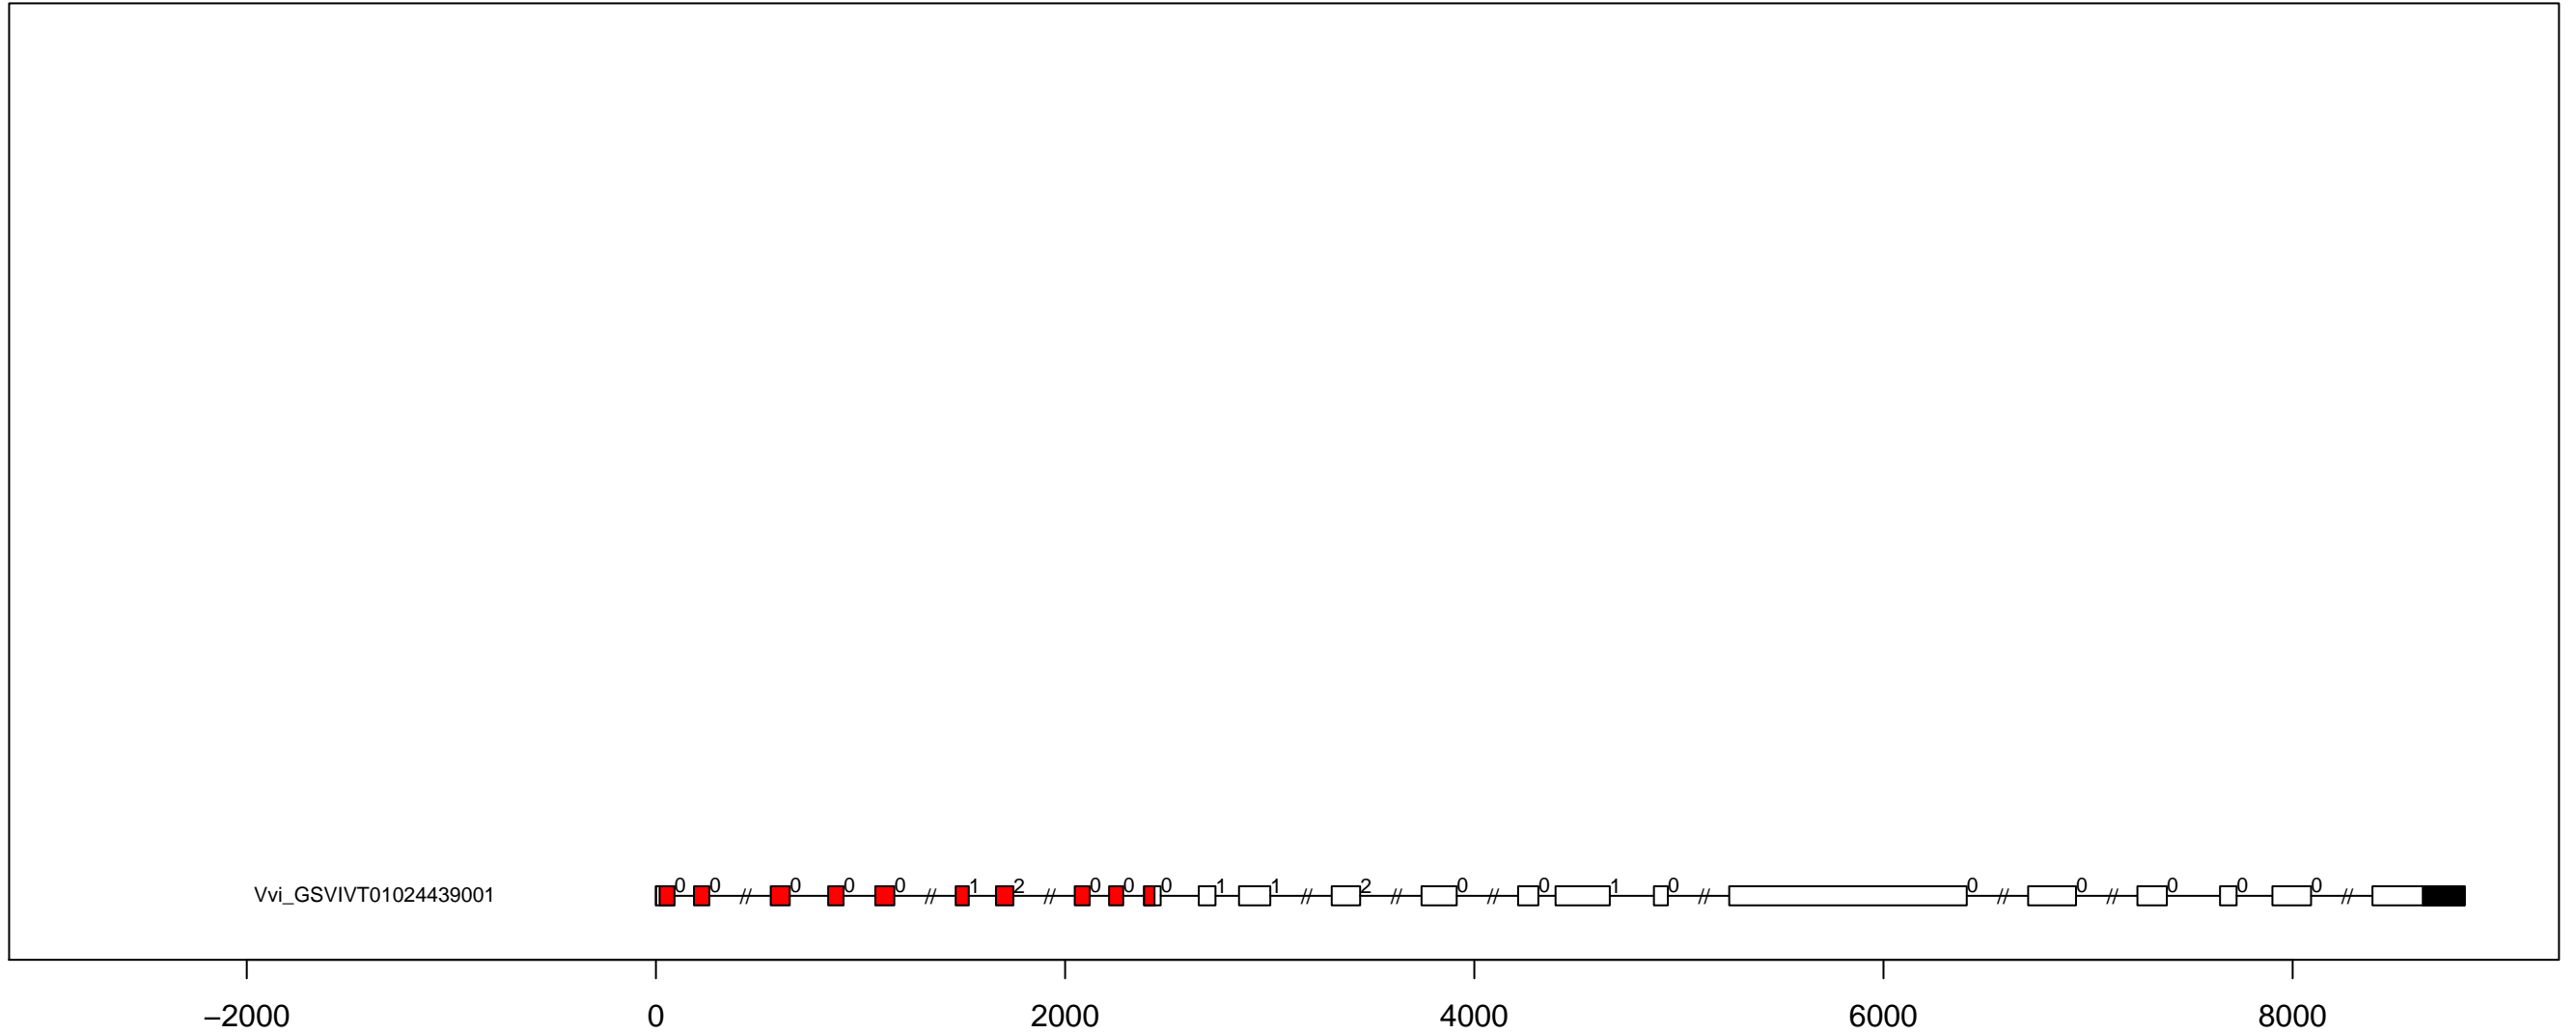

# V.vi ULK\_ULK4 exon-intron and domain diagram (all)

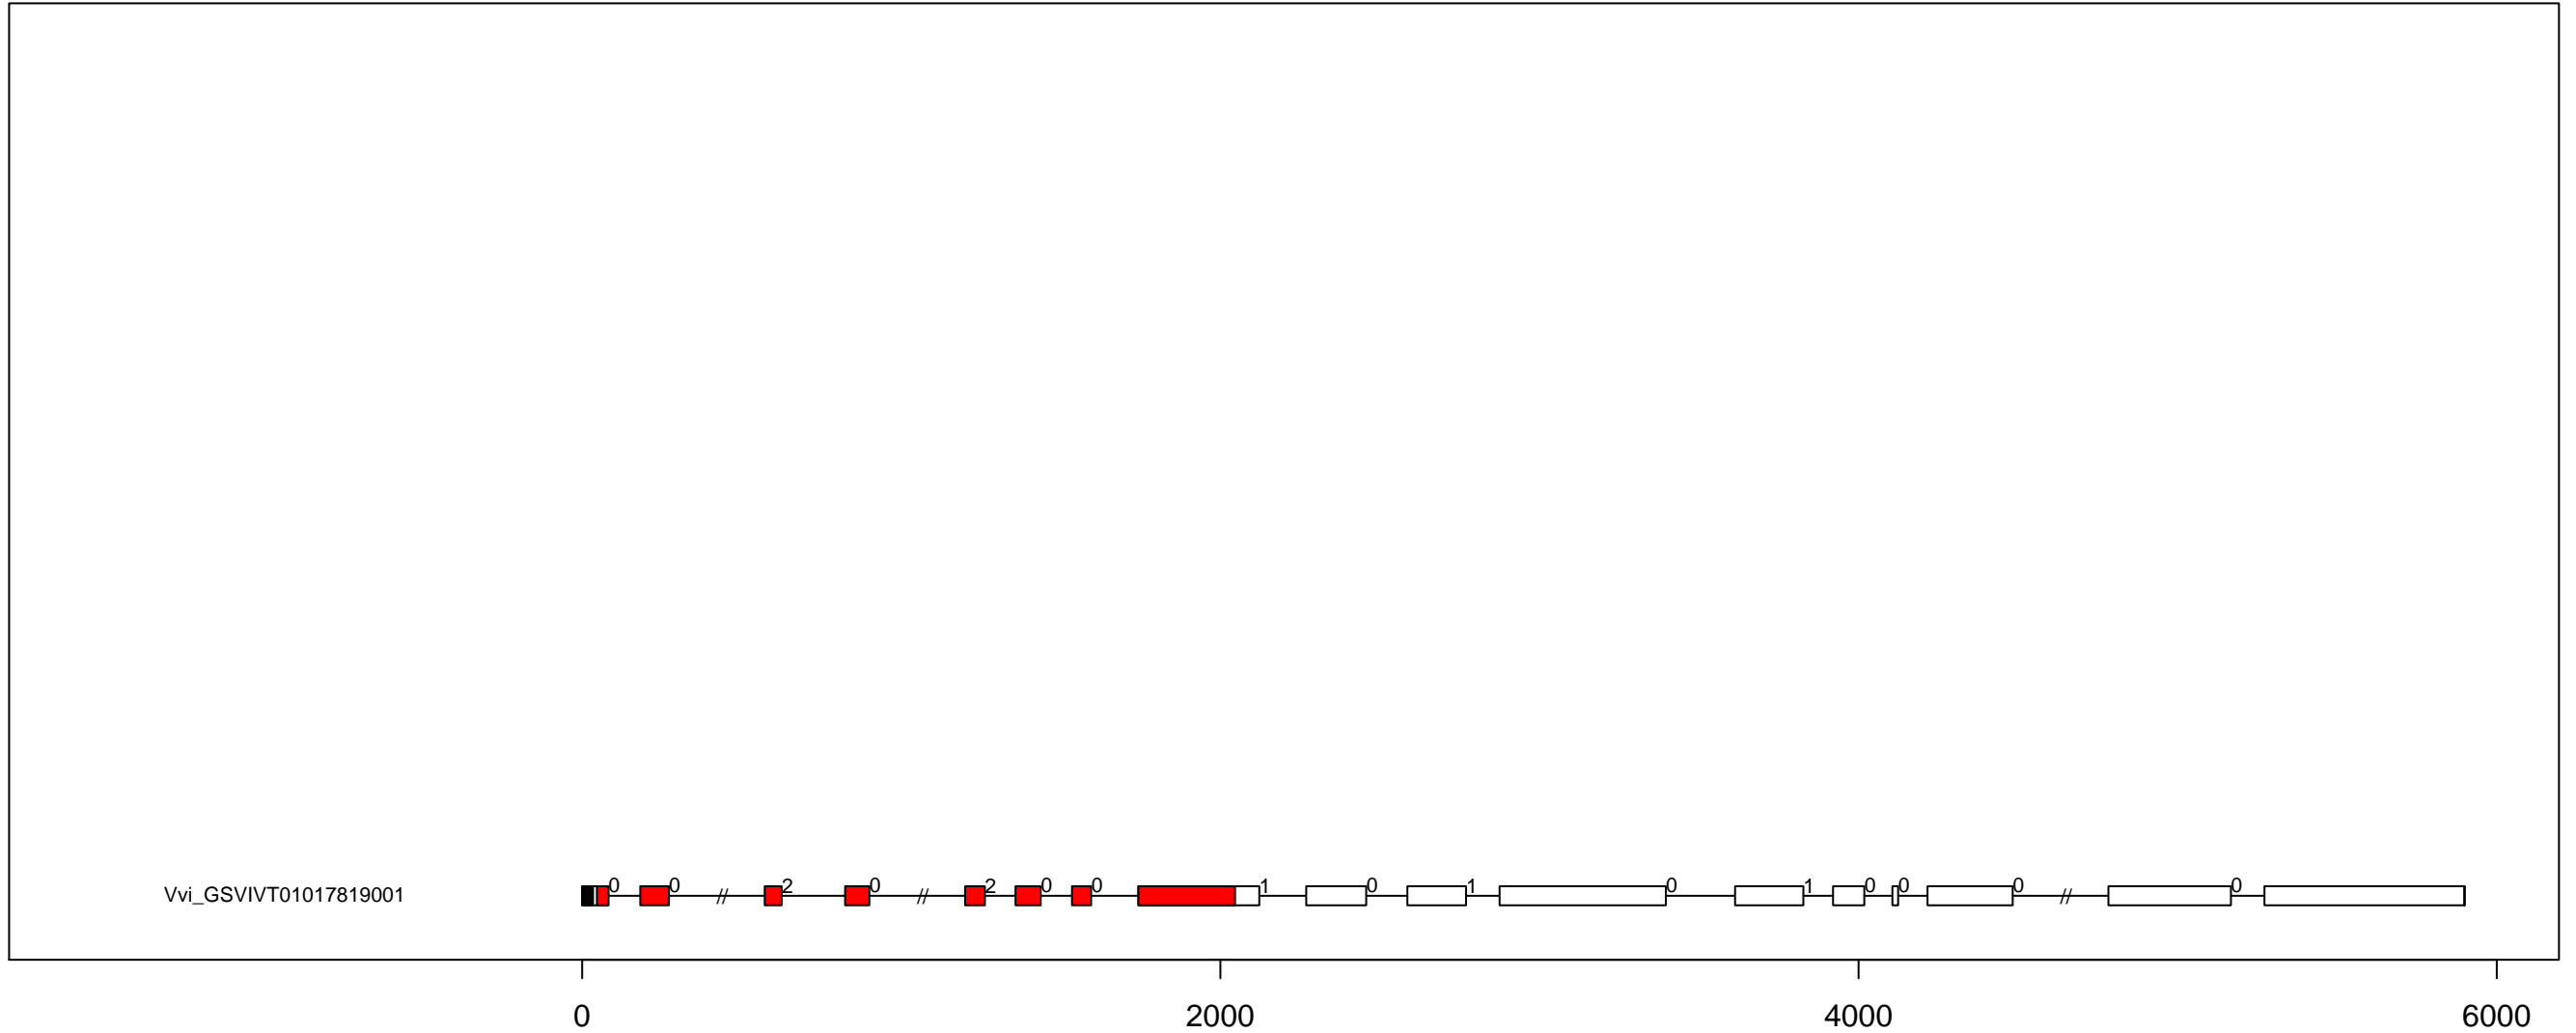



# V.vi WEE exon-intron and domain diagram (all)

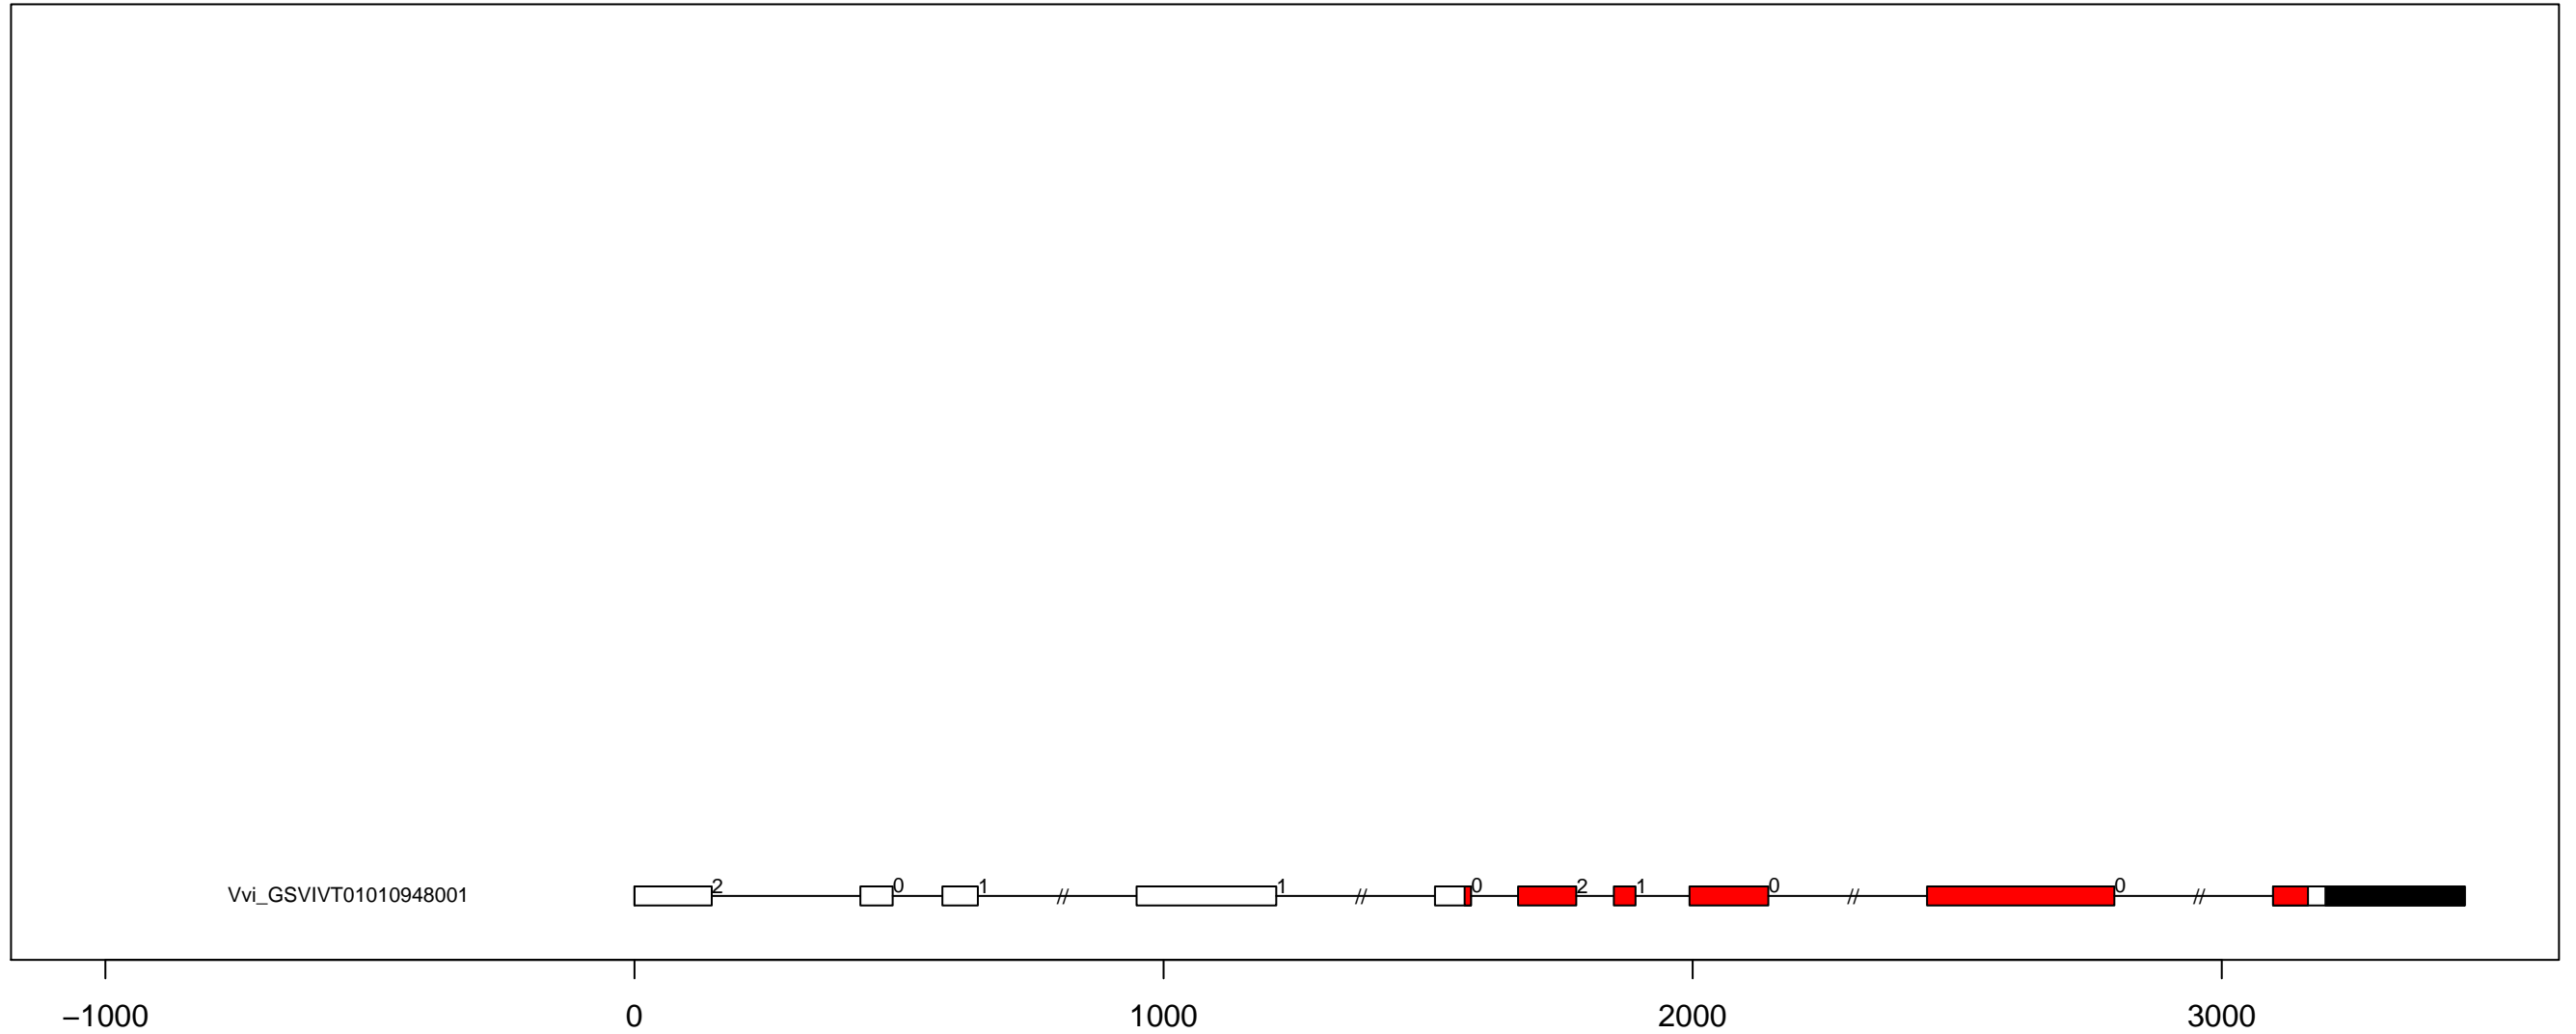

### V.vi WNK\_NRBP exon-intron and domain diagram (all)

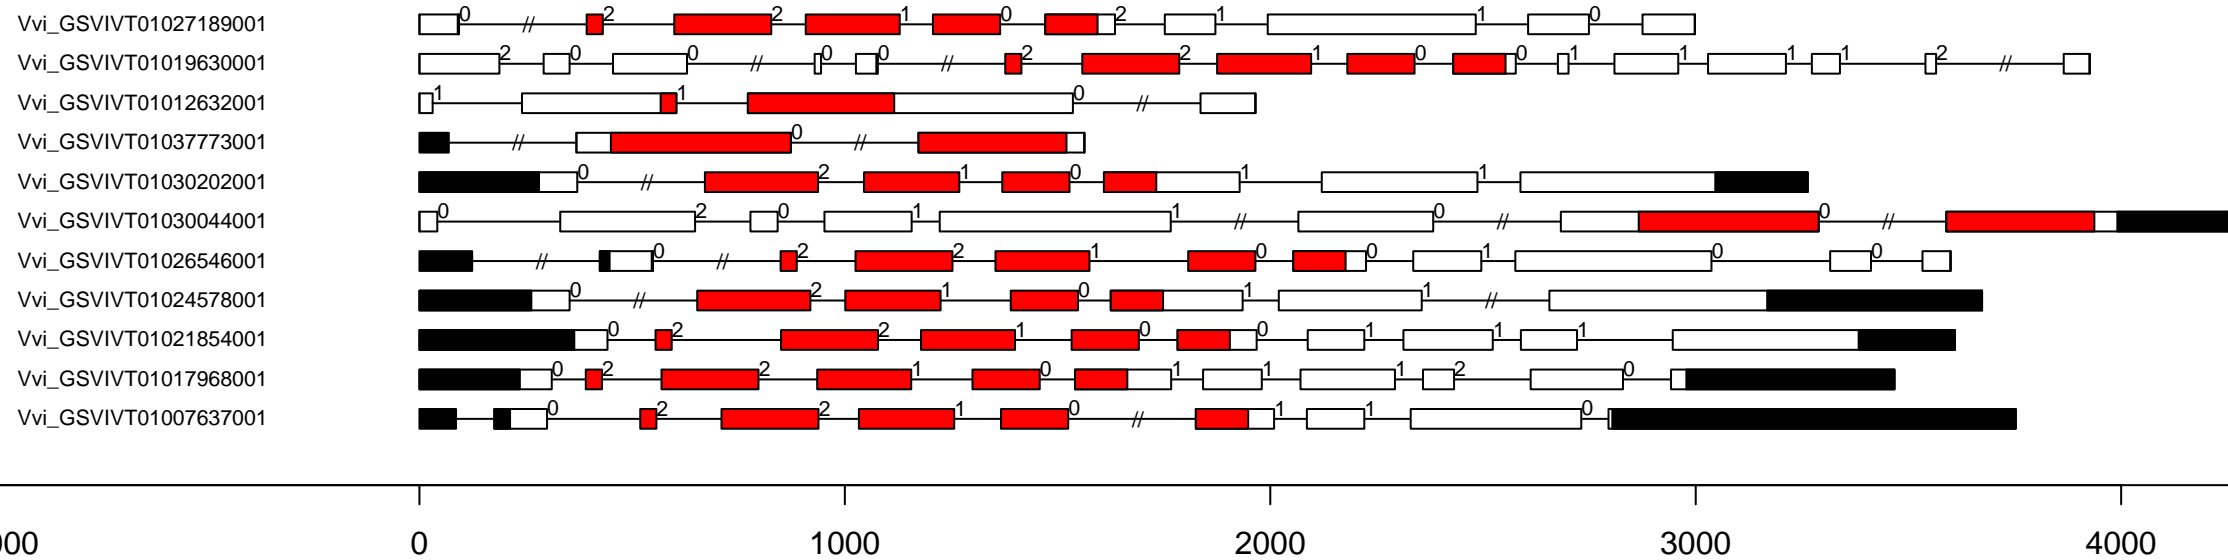

# O.sa AGC\_MAST exon-intron and kinase domain diagram (all)

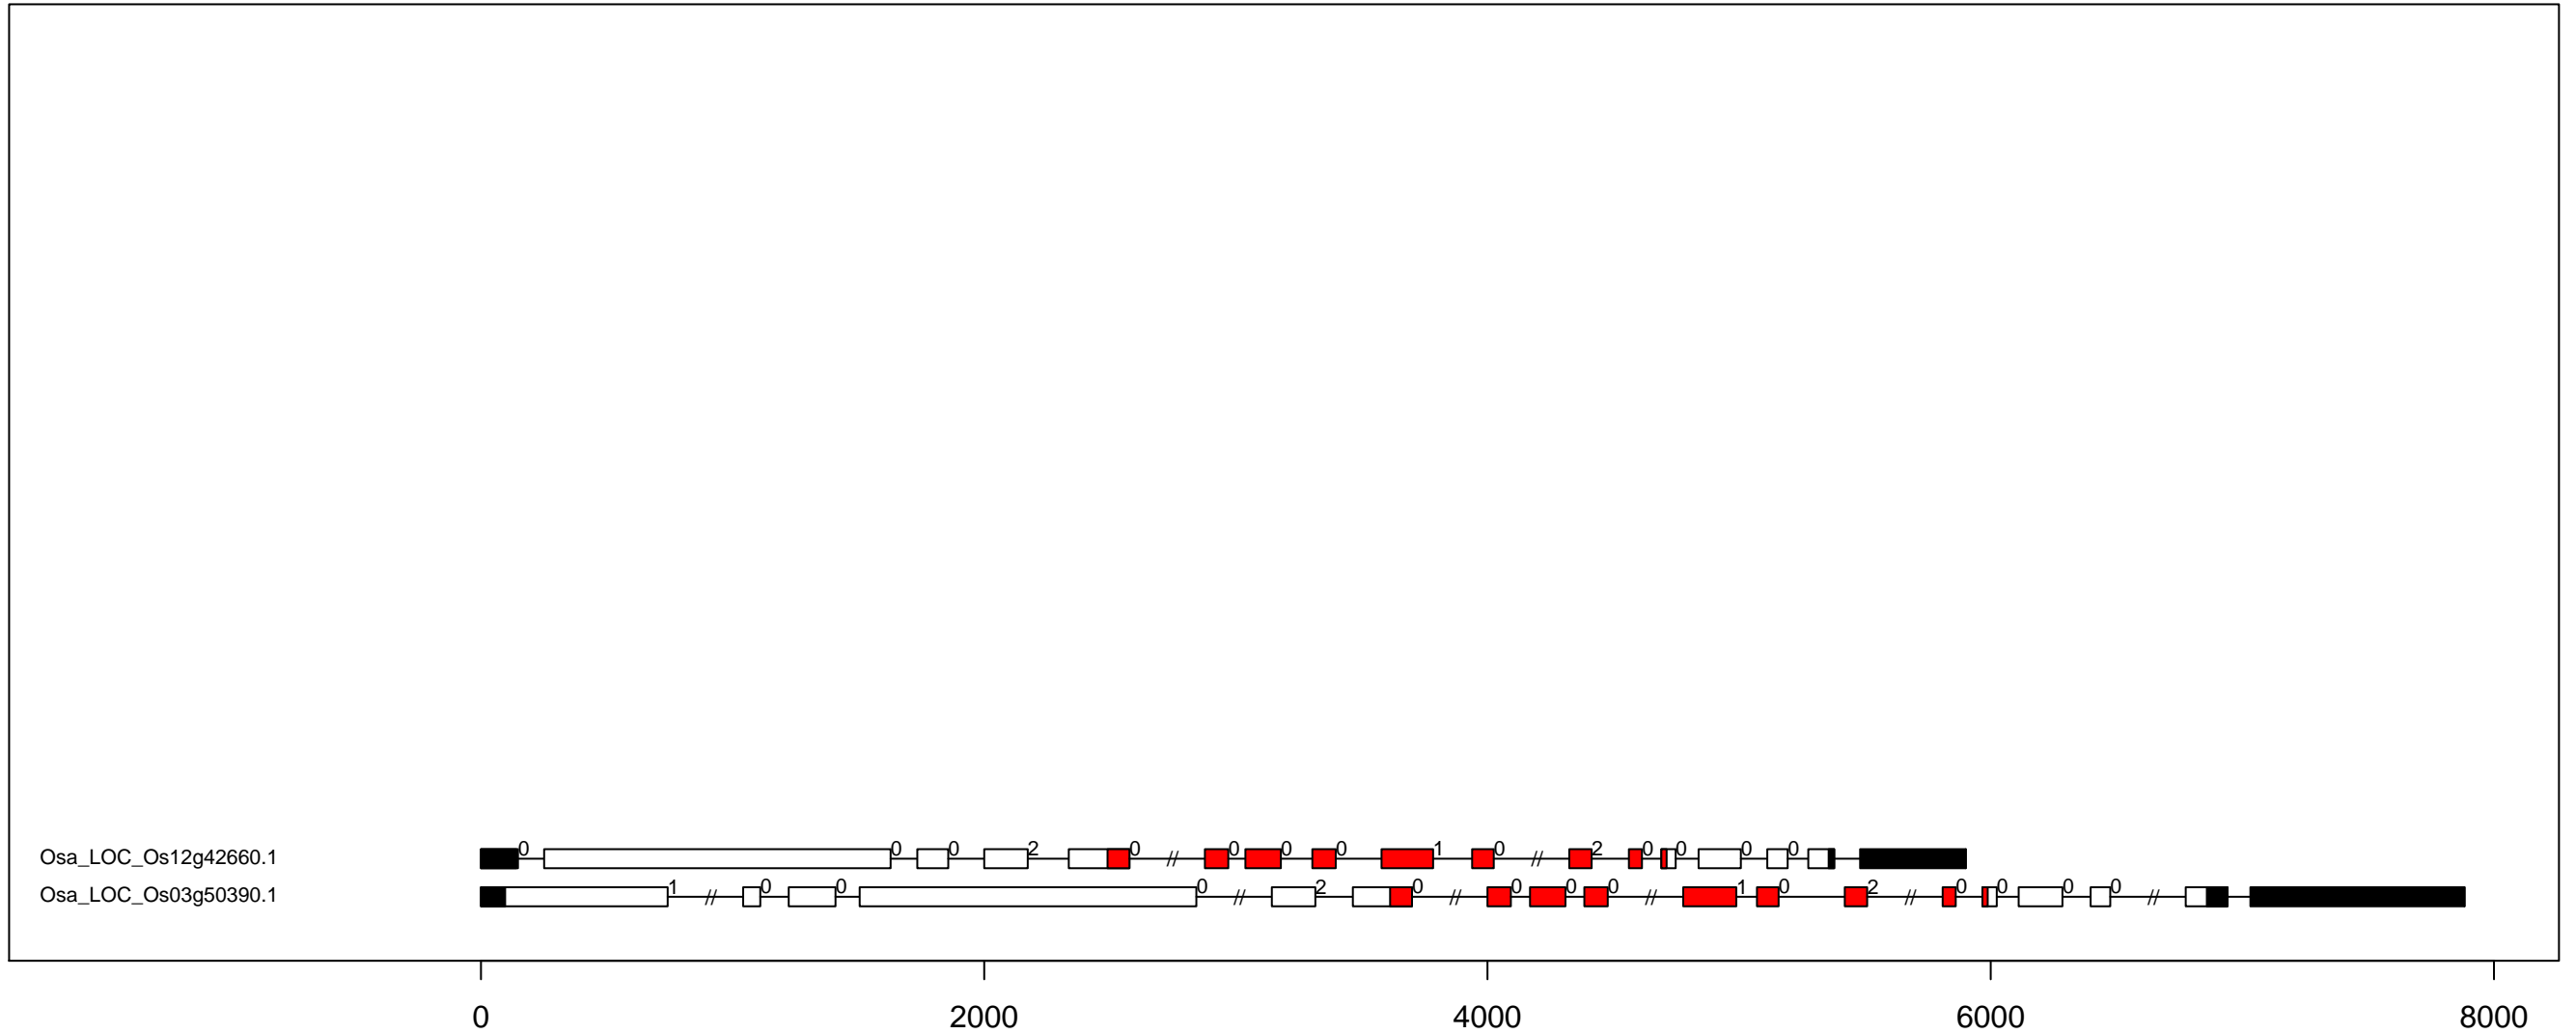

# O.sa AGC\_NDR exon-intron and kinase domain diagram (all)

Osa\_LOC\_Os10g33640.1  
Osa\_LOC\_Os12g19290.1  
Osa\_LOC\_Os05g43570.2  
Osa\_LOC\_Os01g09200.1

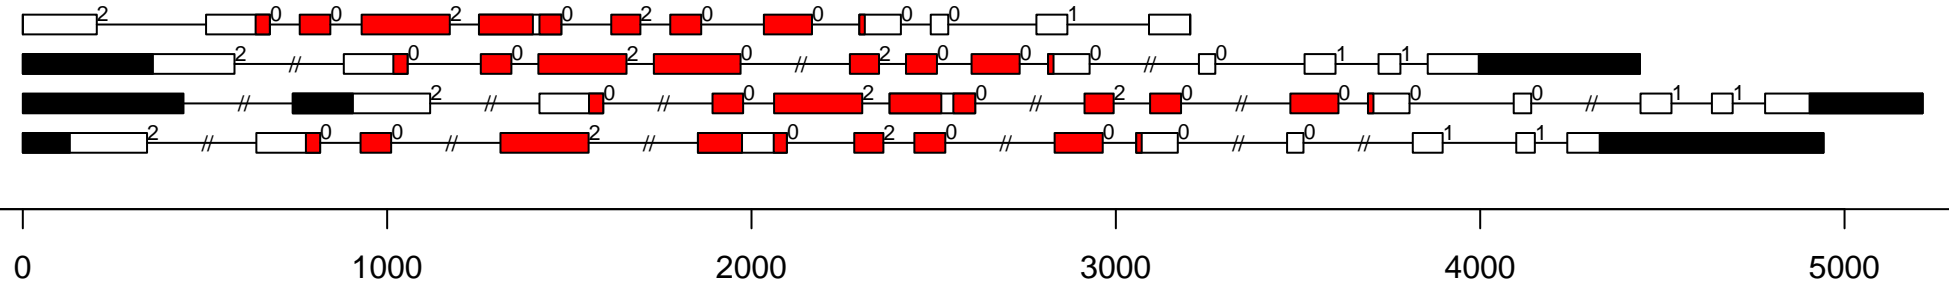

# O.sa AGC\_PDK1 exon-intron and kinase domain diagram (all)

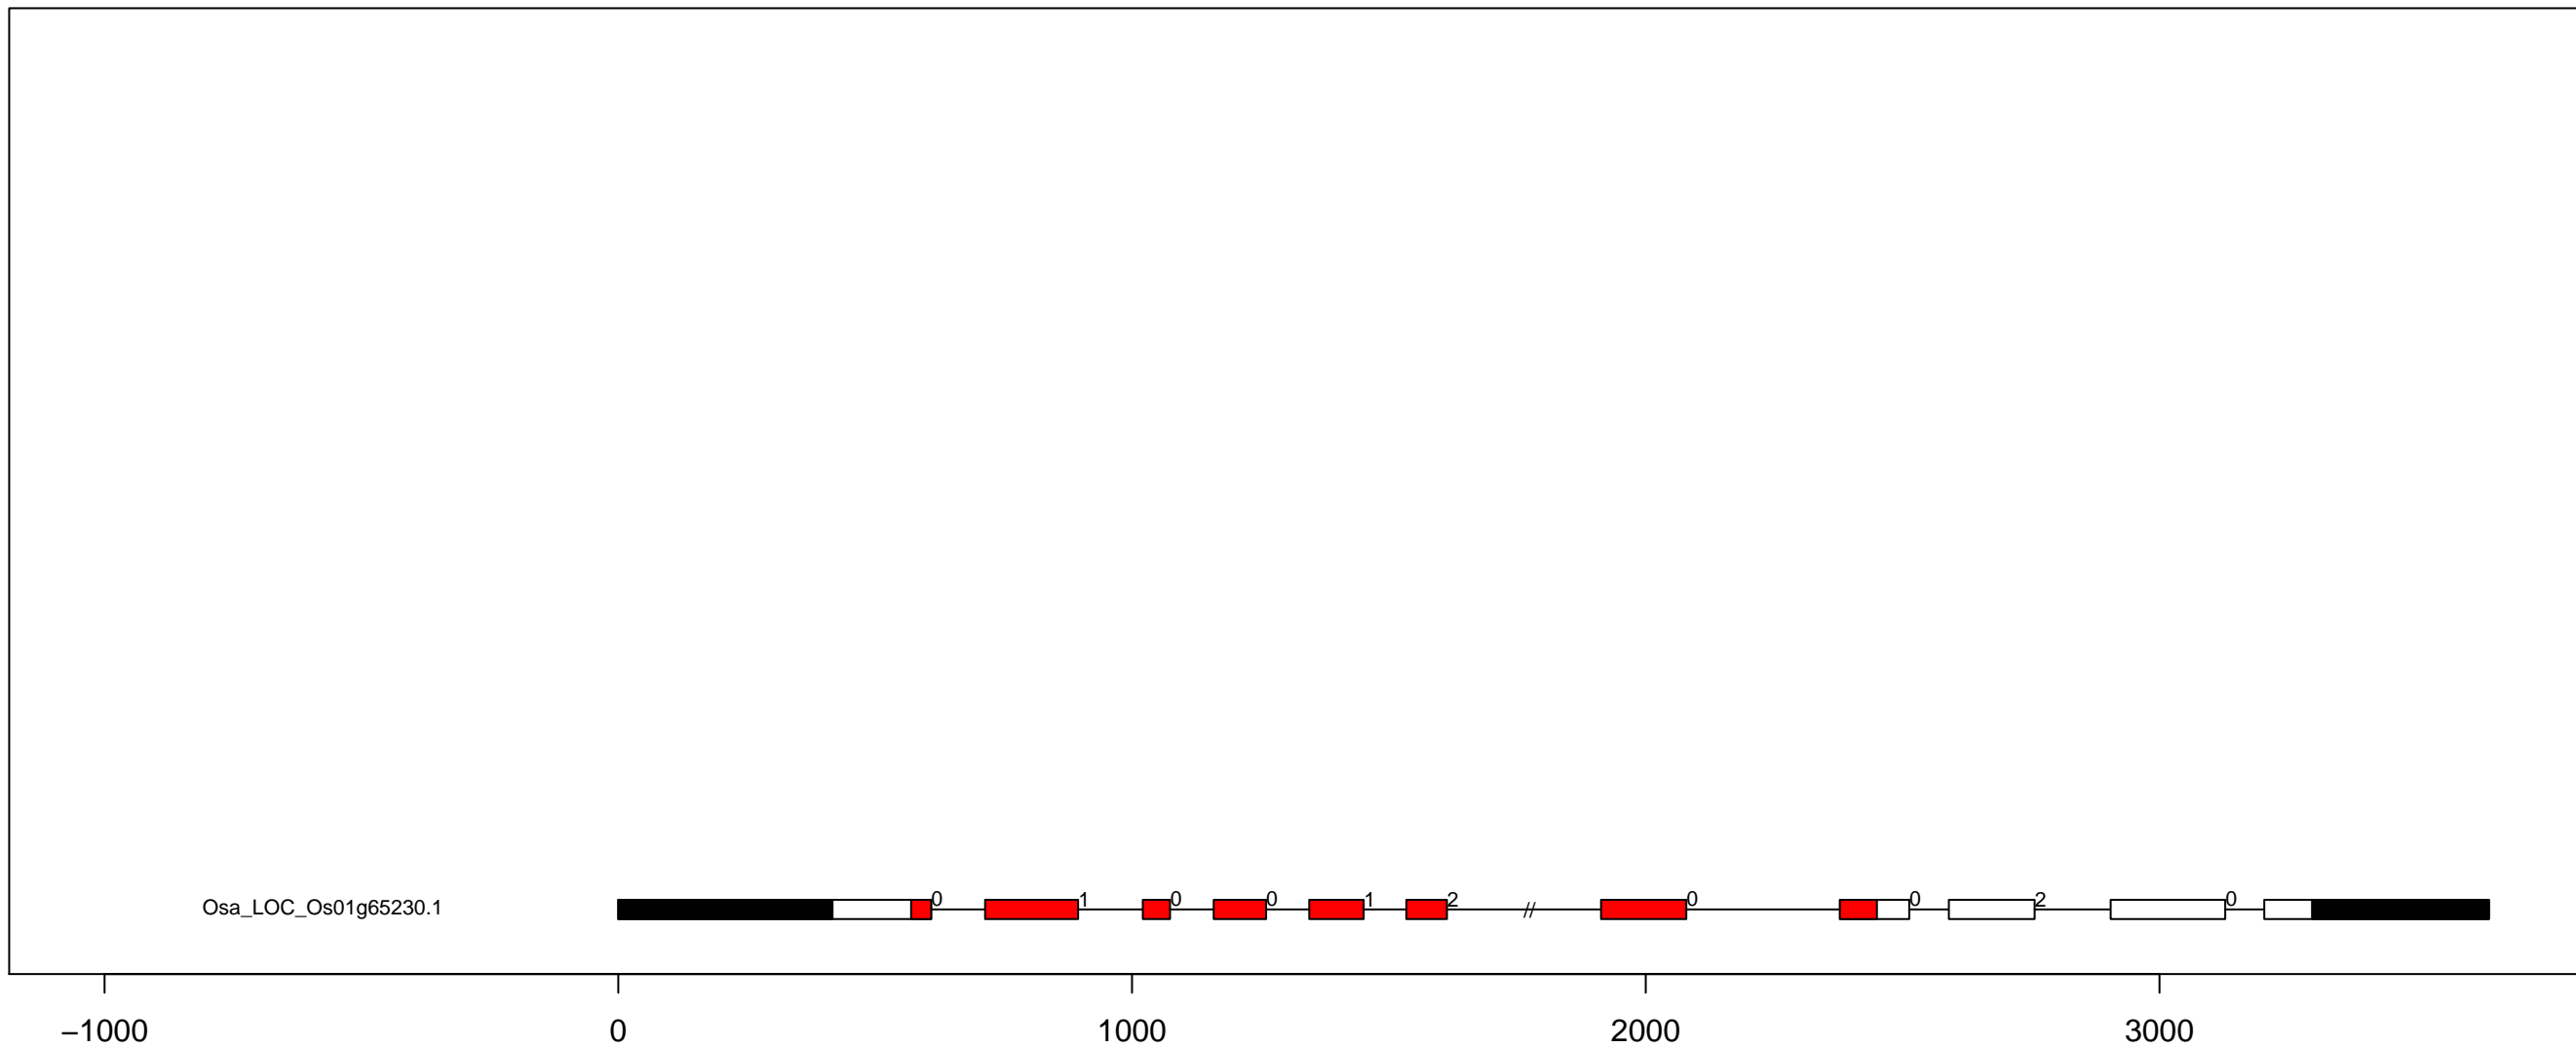

# O.sa AGC\_PKA-PKG exon-intron and kinase domain diagram (all)

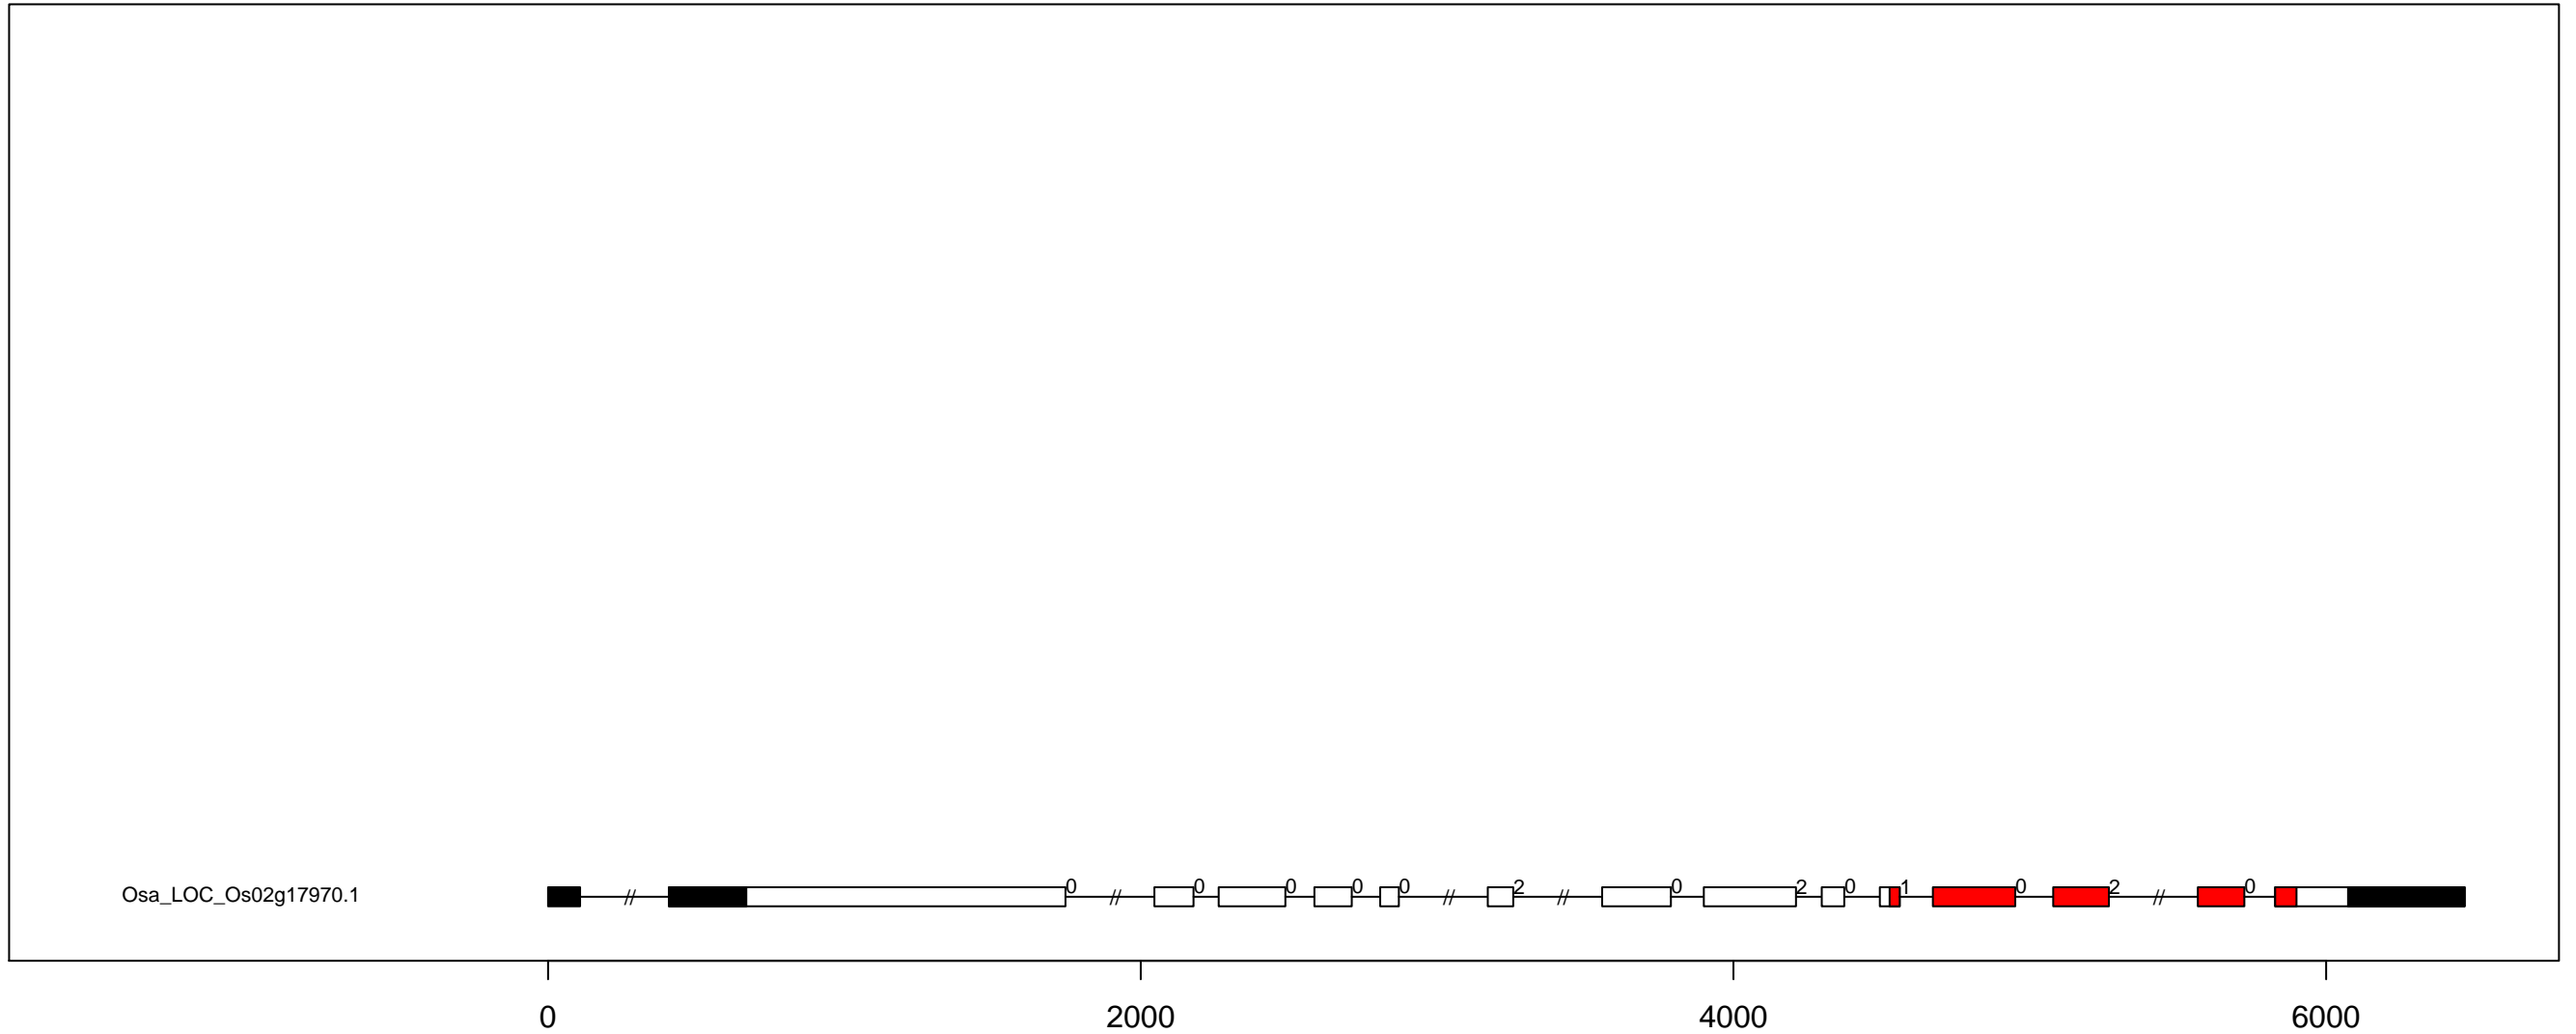

# O.sa AGC\_RSK-2 exon-intron and kinase domain diagram (part 1)

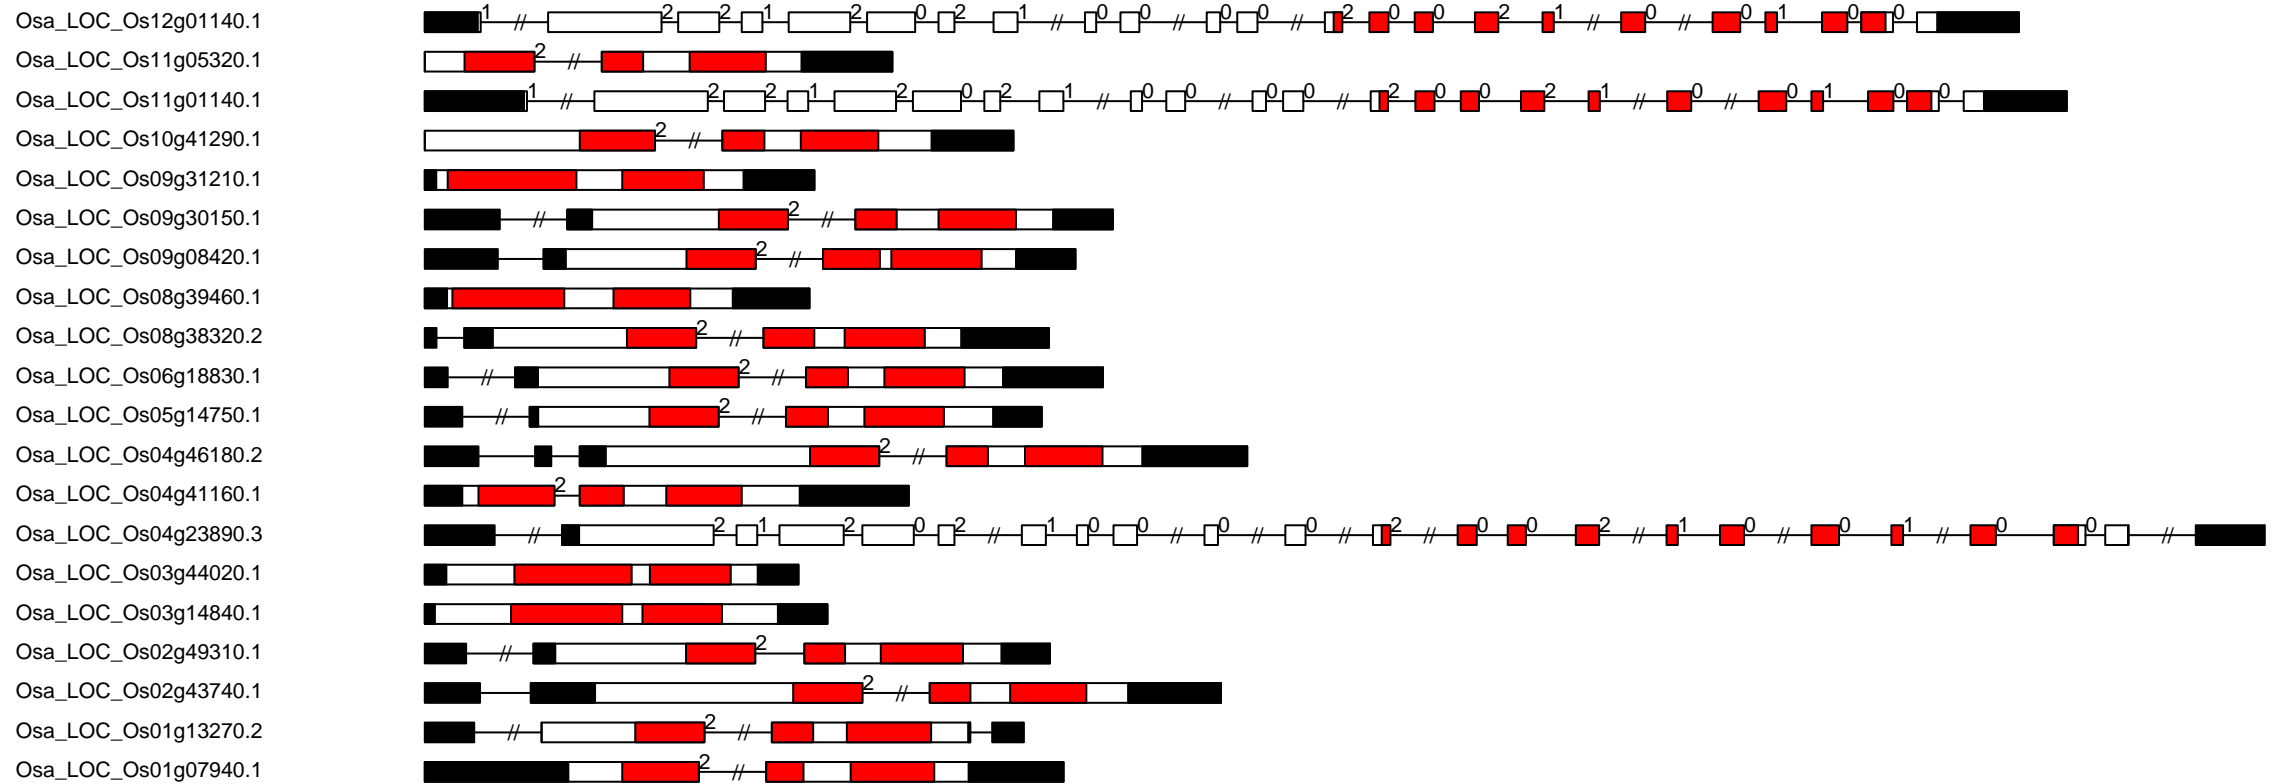

-2000

0

2000

4000

6000

8000

# O.sa AGC\_RSK-2 exon-intron and kinase domain diagram (part 2)

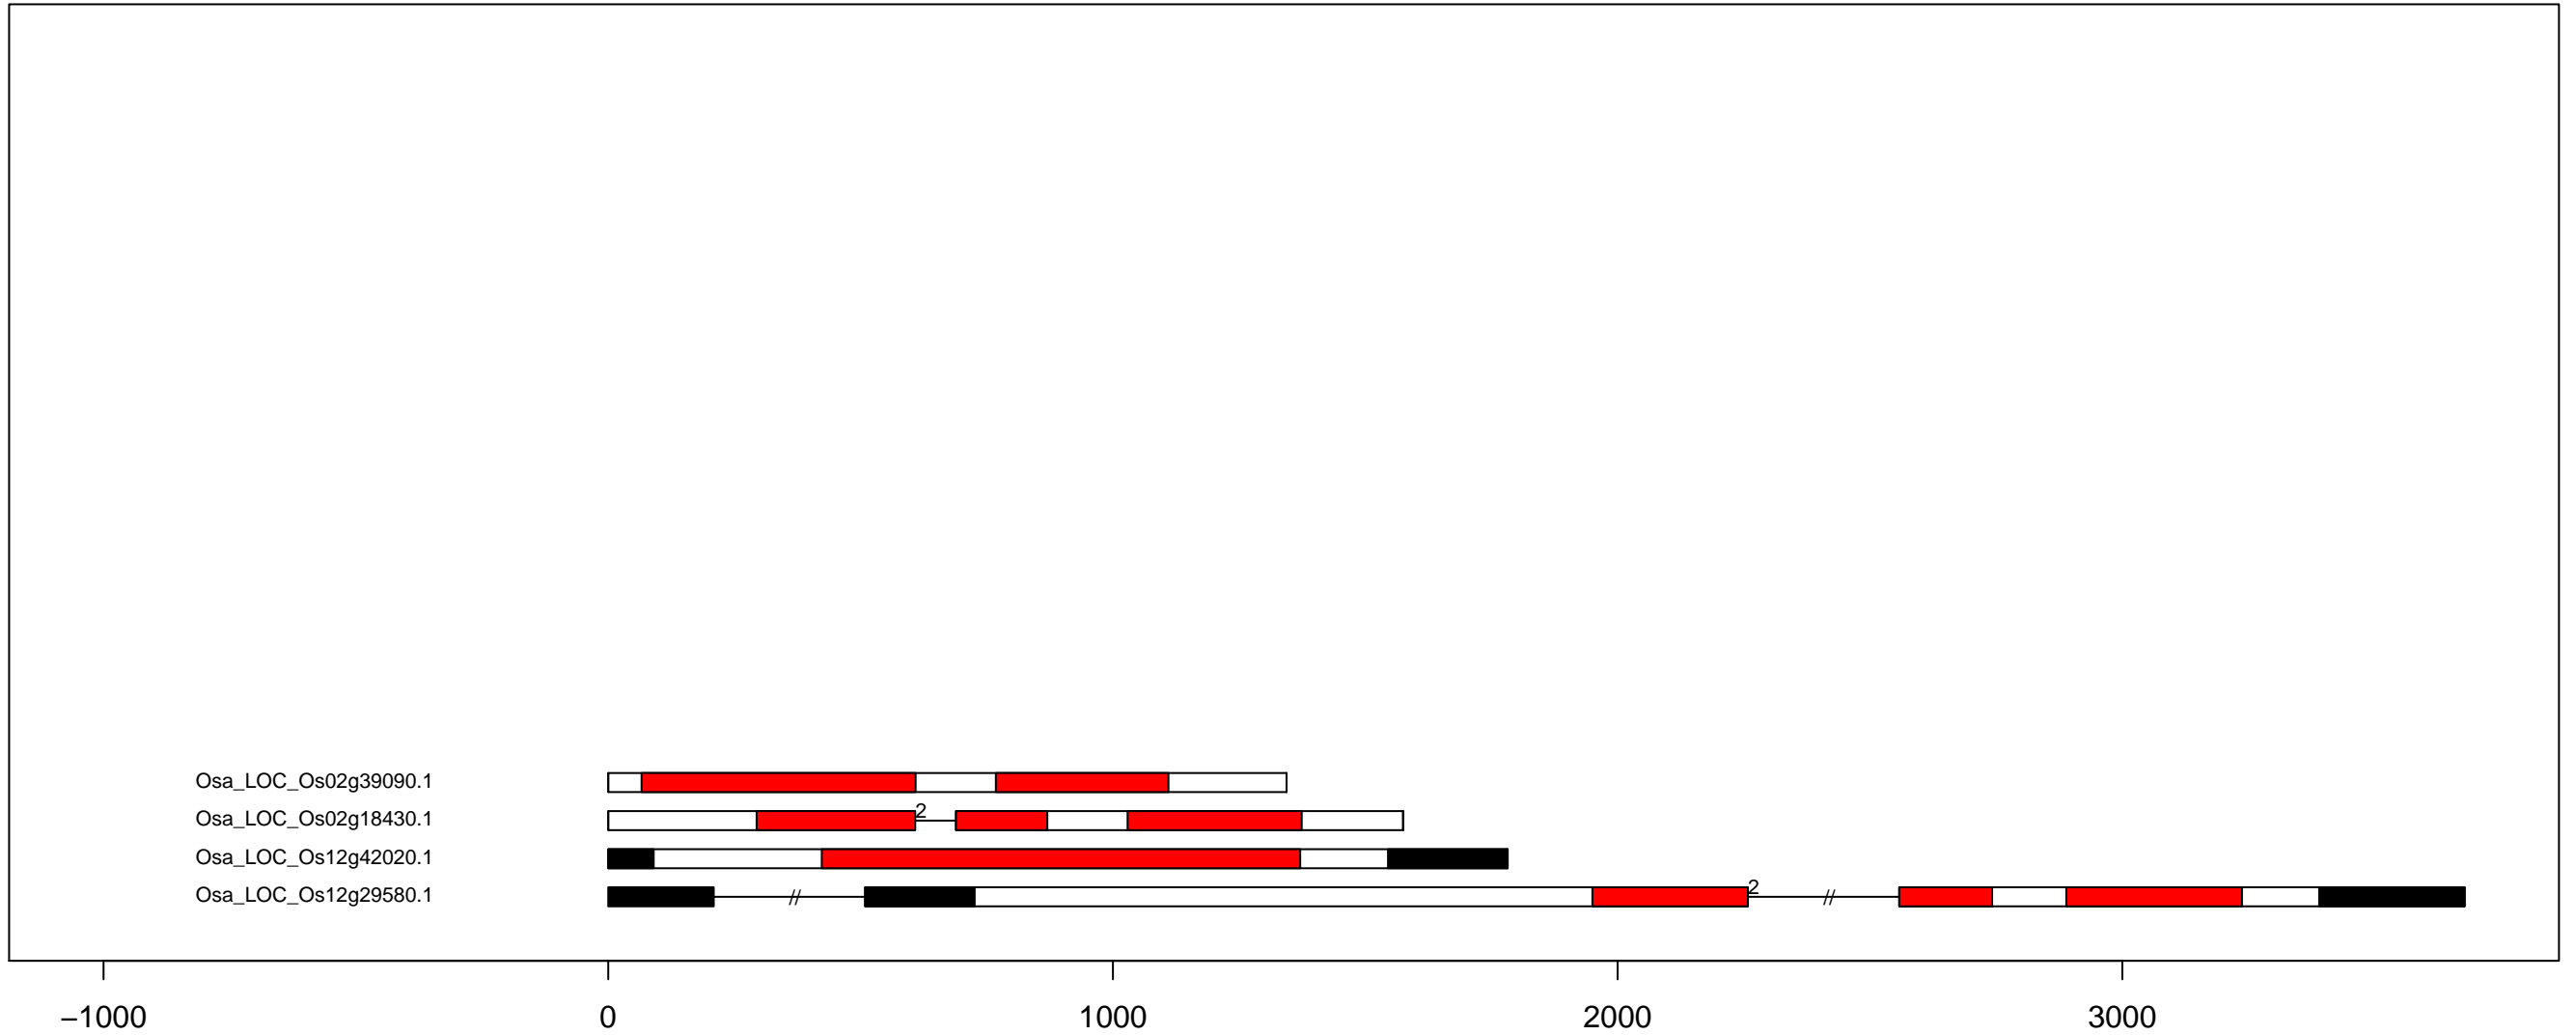



# O.sa AGC-PI exon-intron and kinase domain diagram (all)

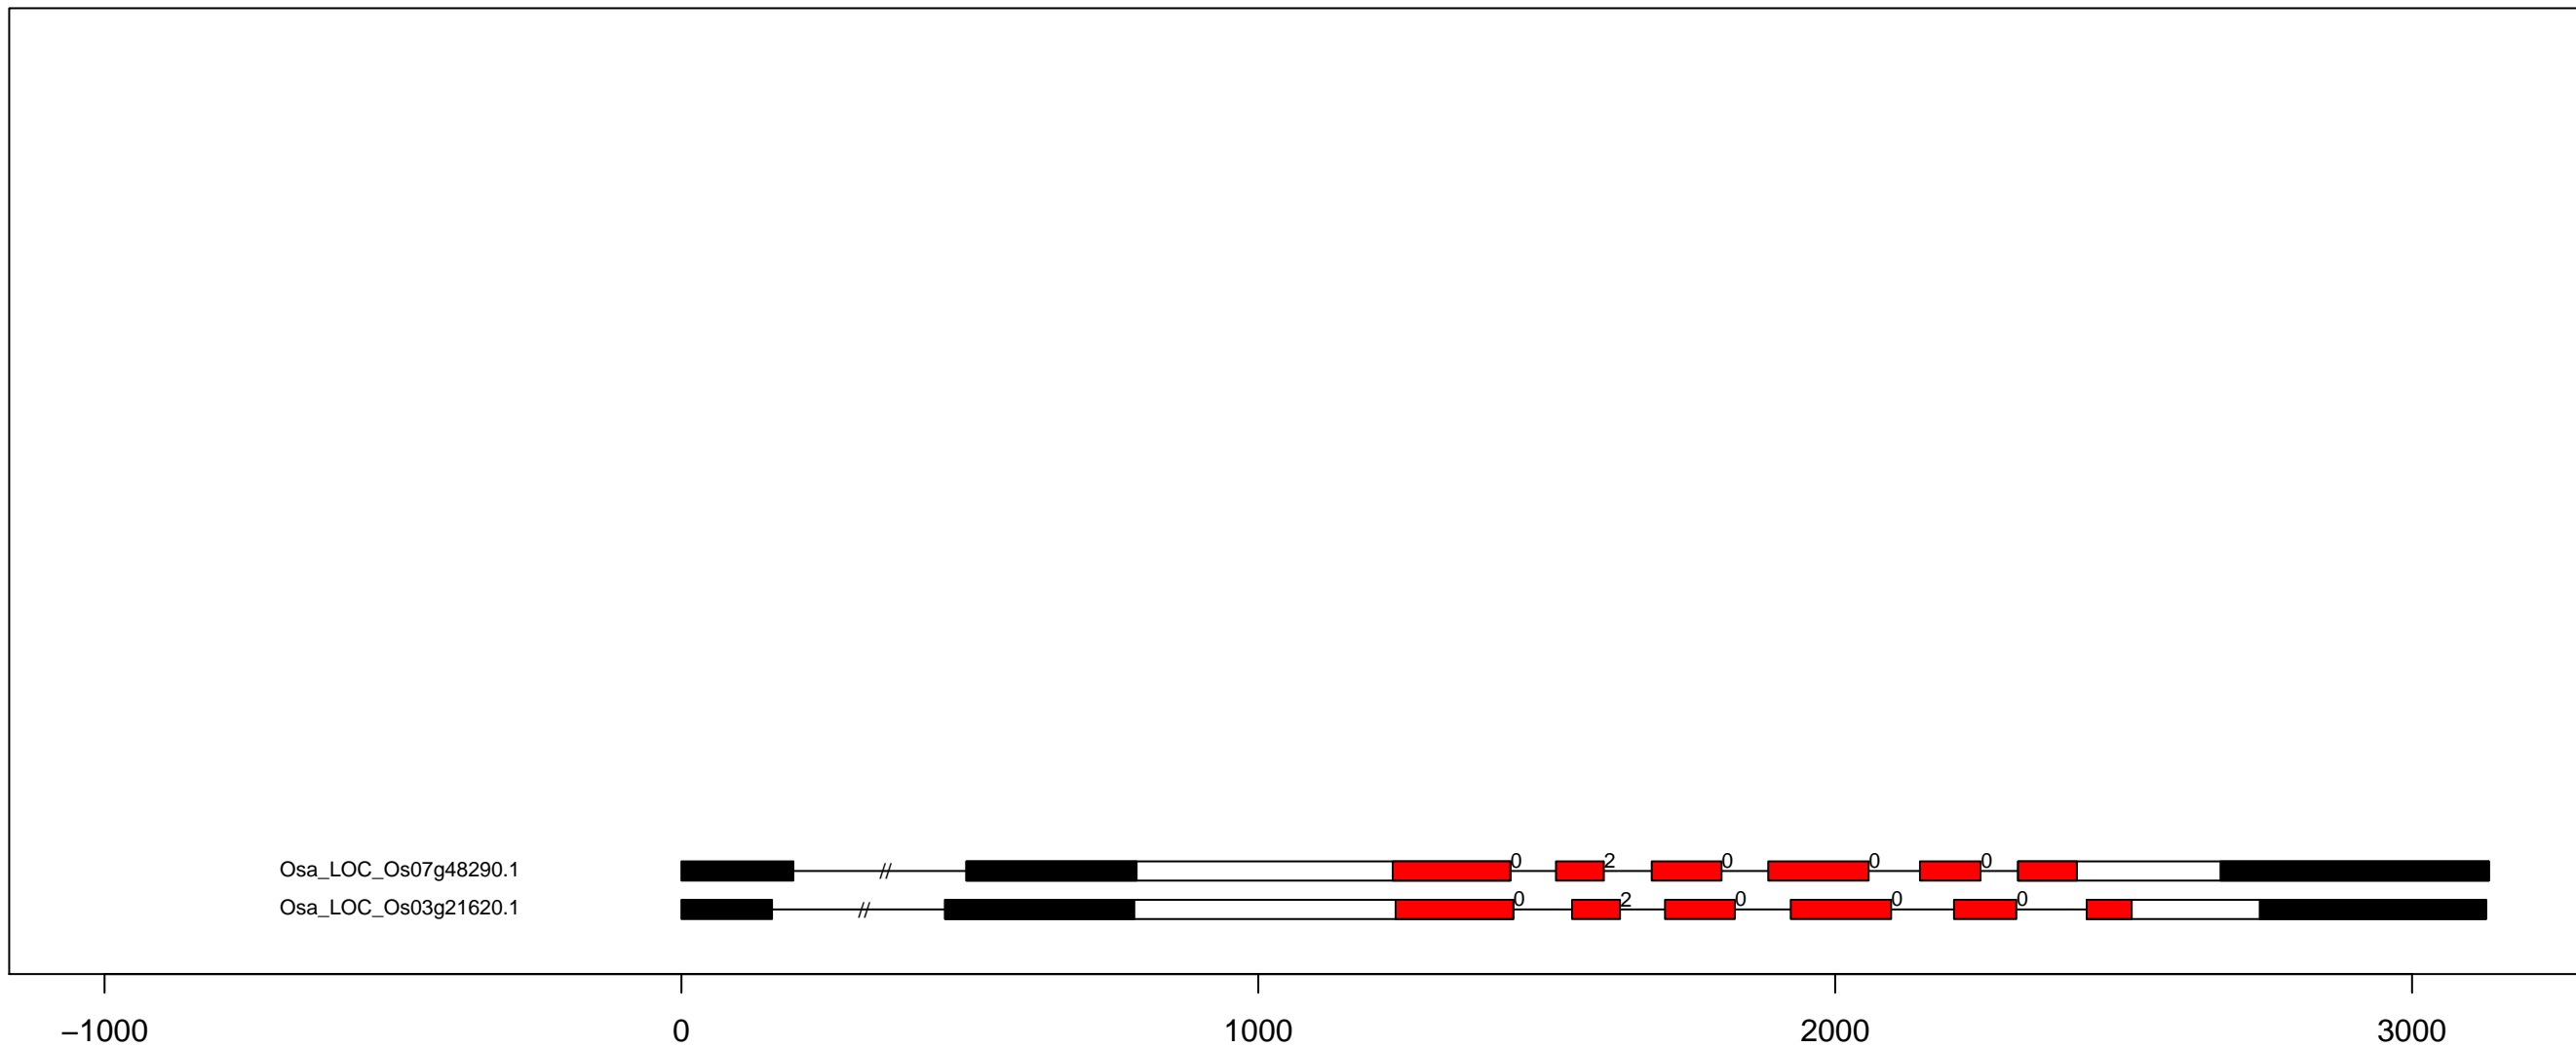

# O.sa Aur exon-intron and kinase domain diagram (all)

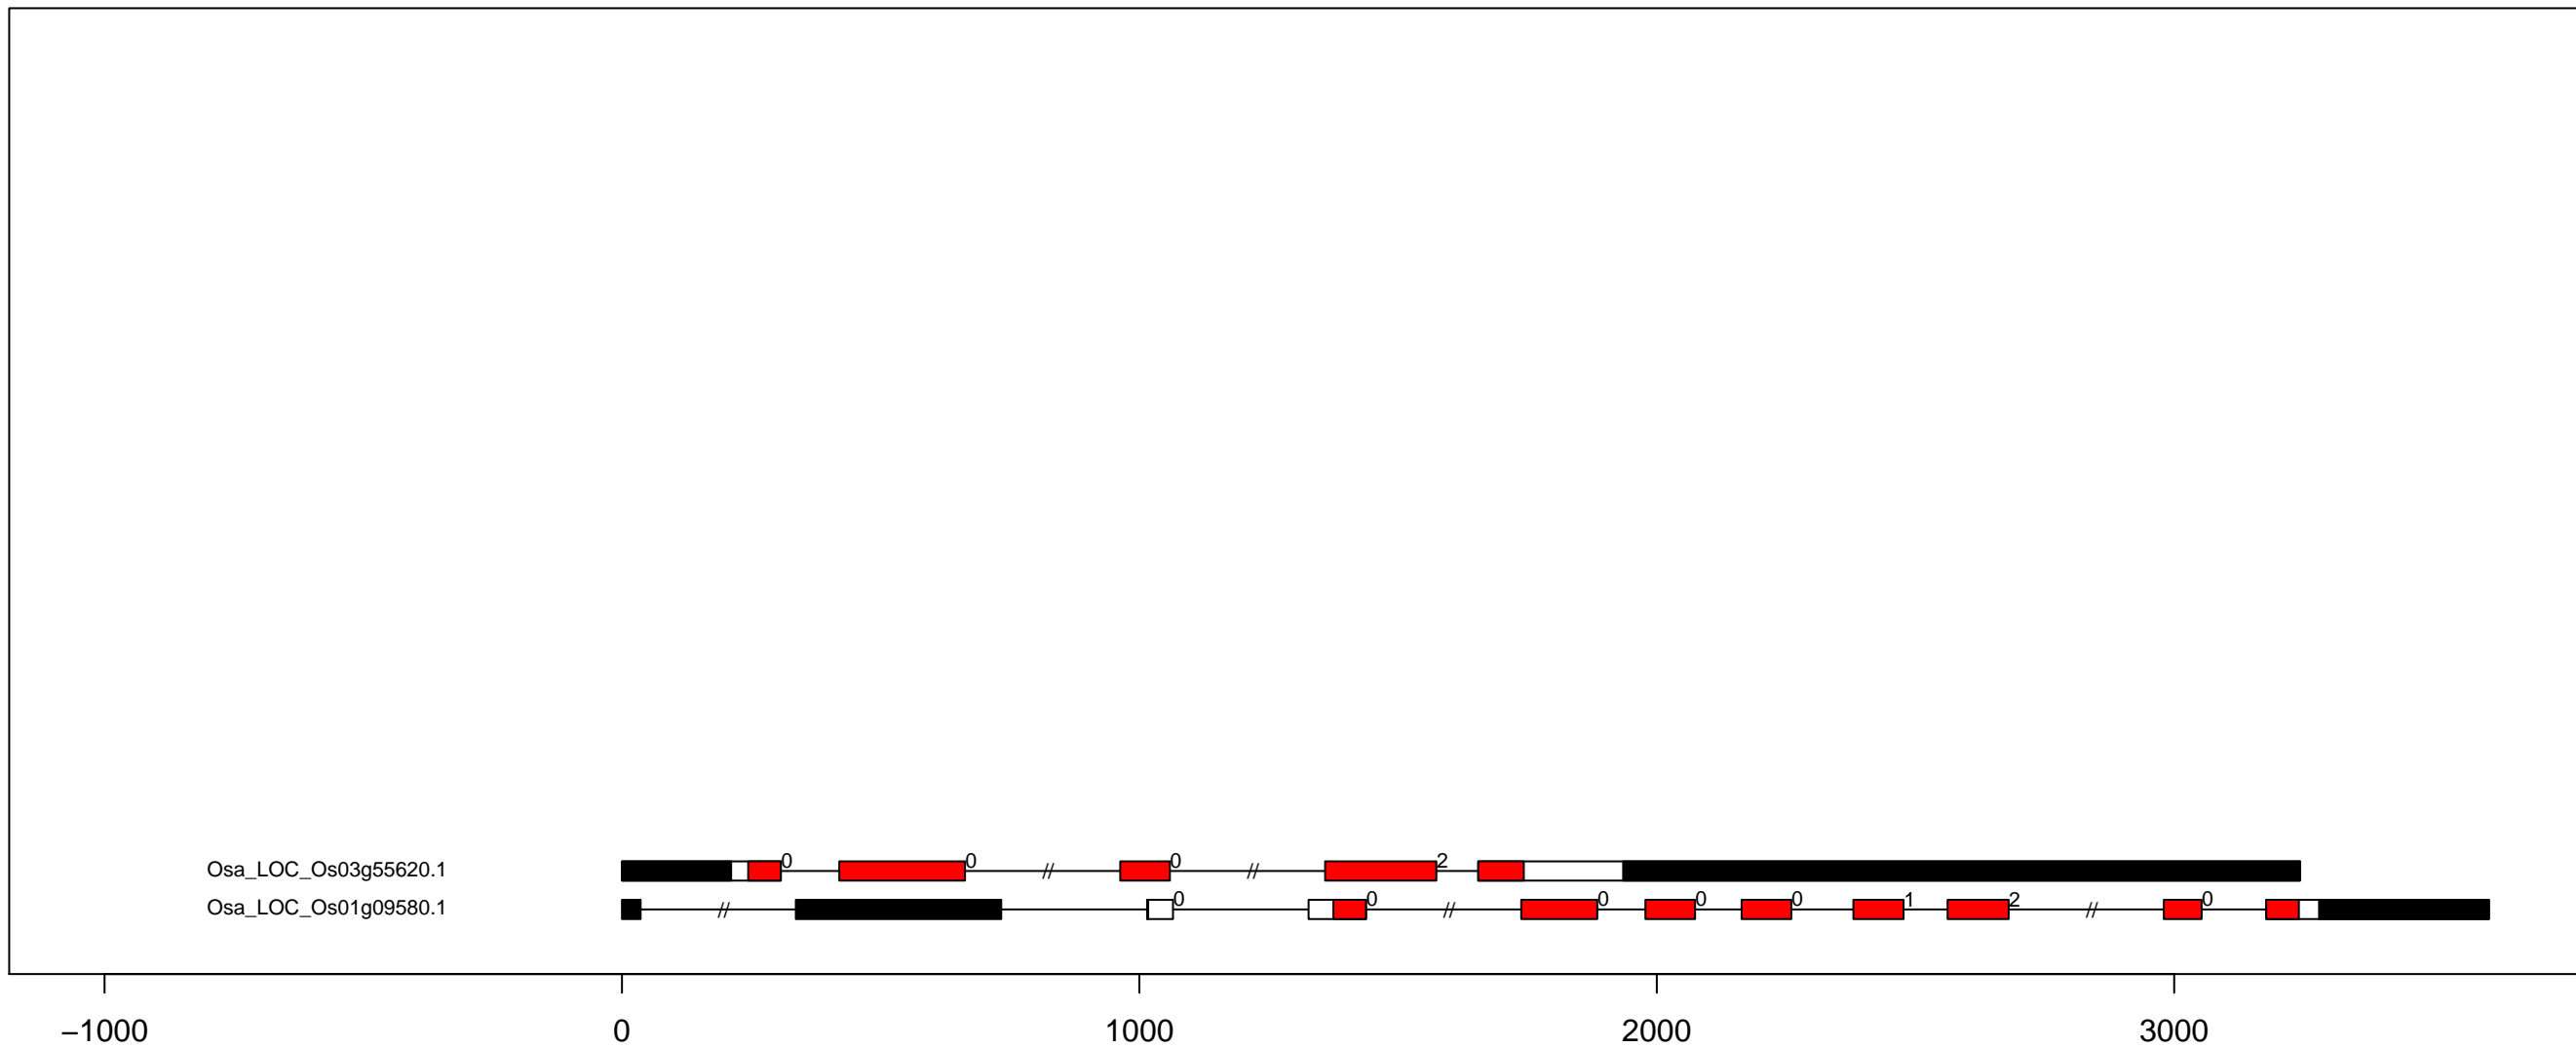

O.sa BUB exon-intron and kinase domain diagram (all)

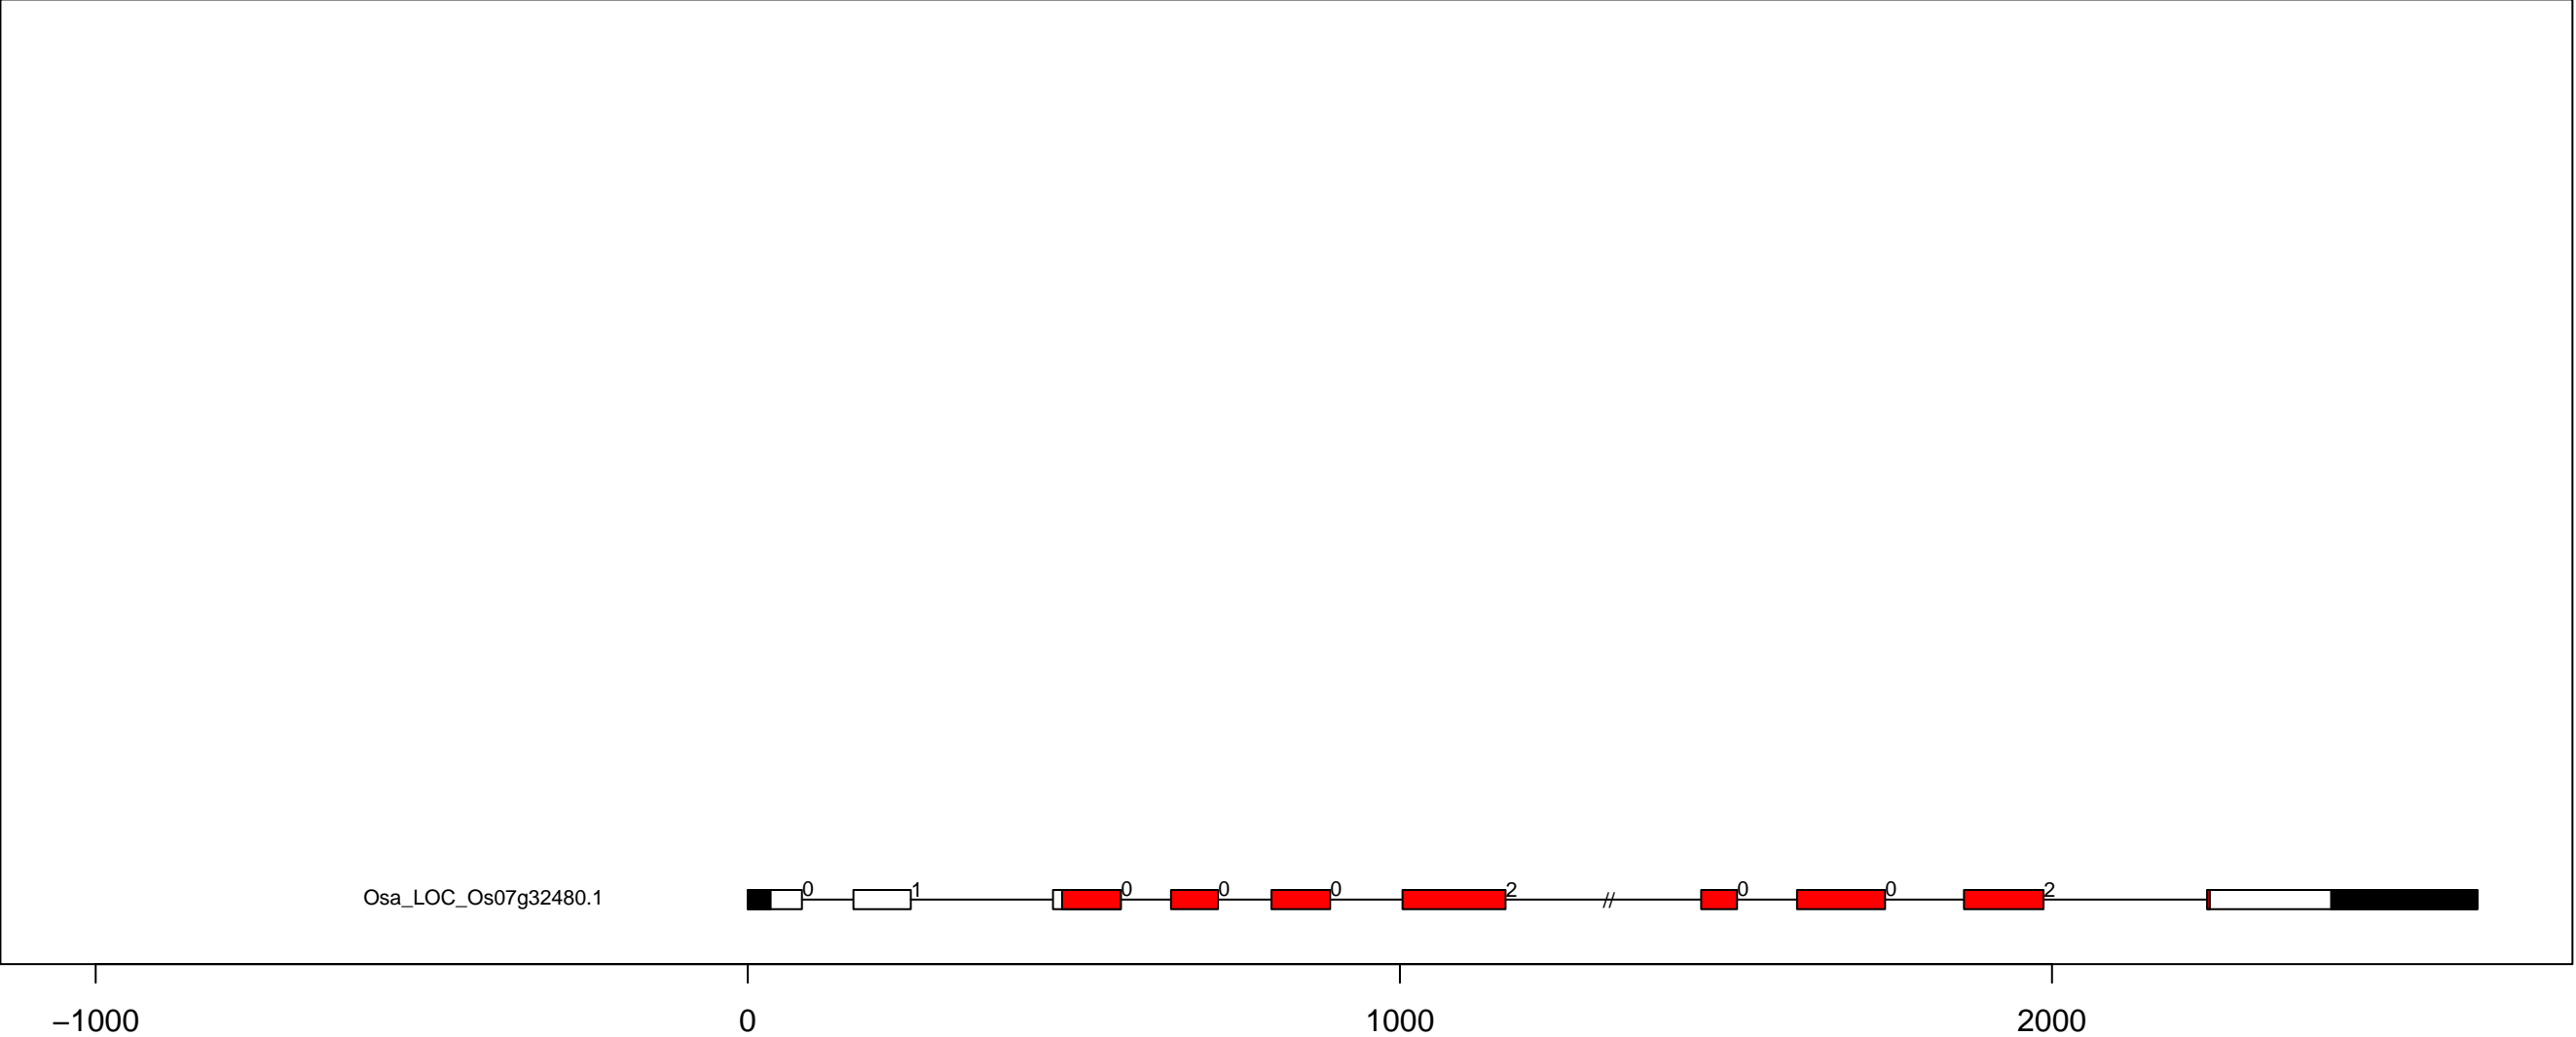

# O.sa CAMK\_AMPK exon-intron and kinase domain diagram (all)

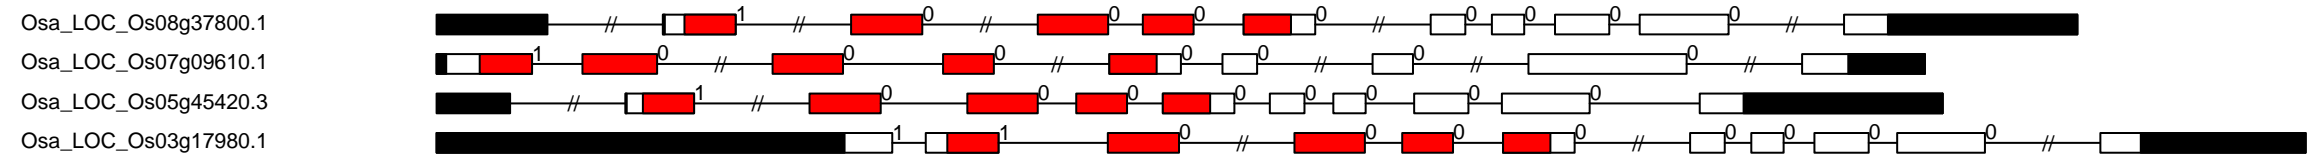

O.sa CAMK\_CAMK1-DCAMKL exon-intron and kinase domain diagram (all)

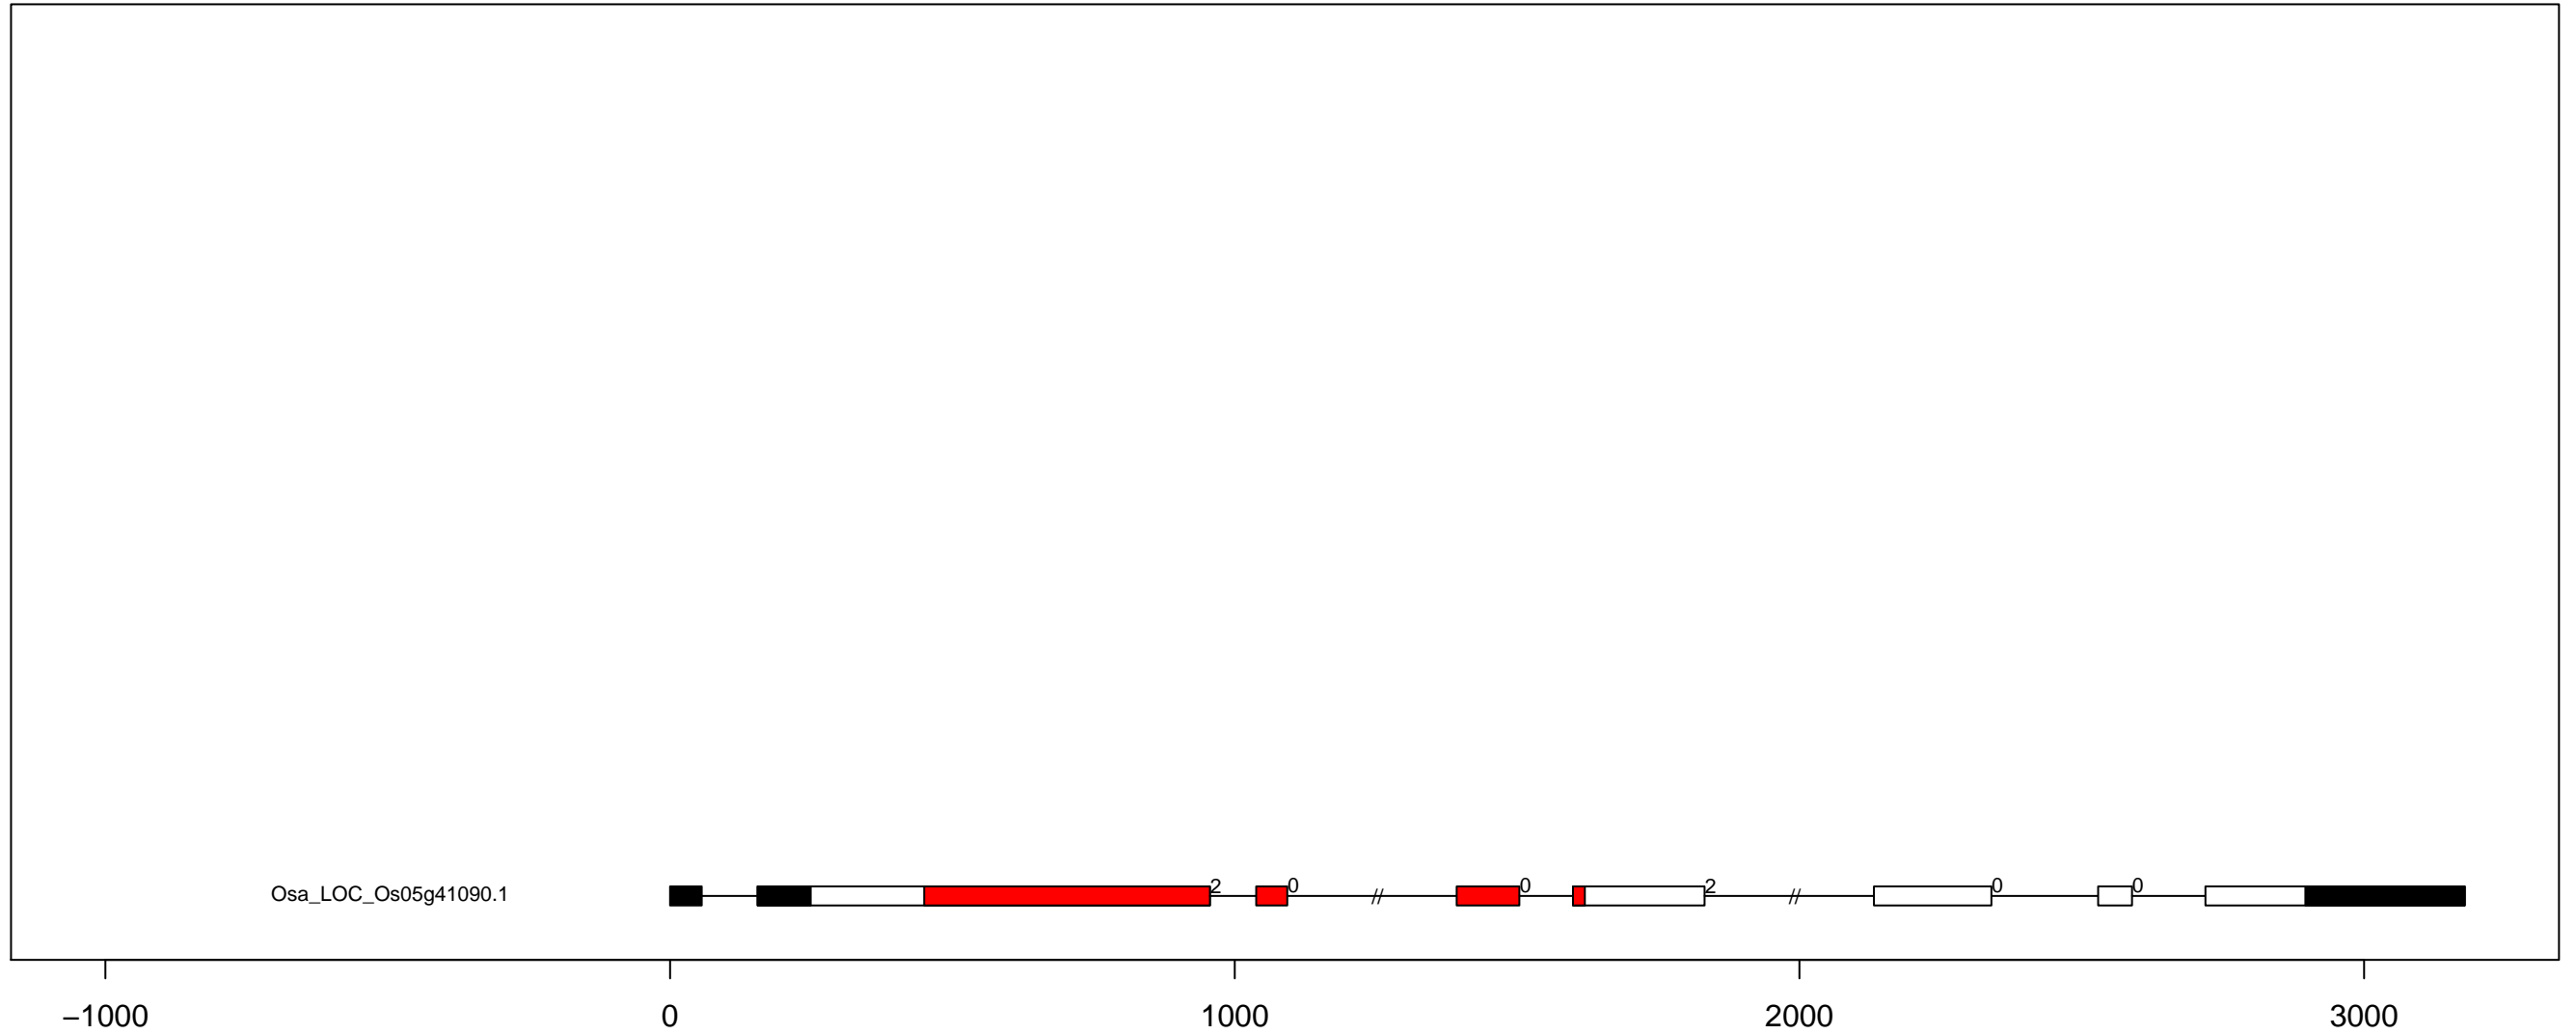

# O.sa CAMK\_CAMKL-CHK1 exon-intron and kinase domain diagram (part 1)

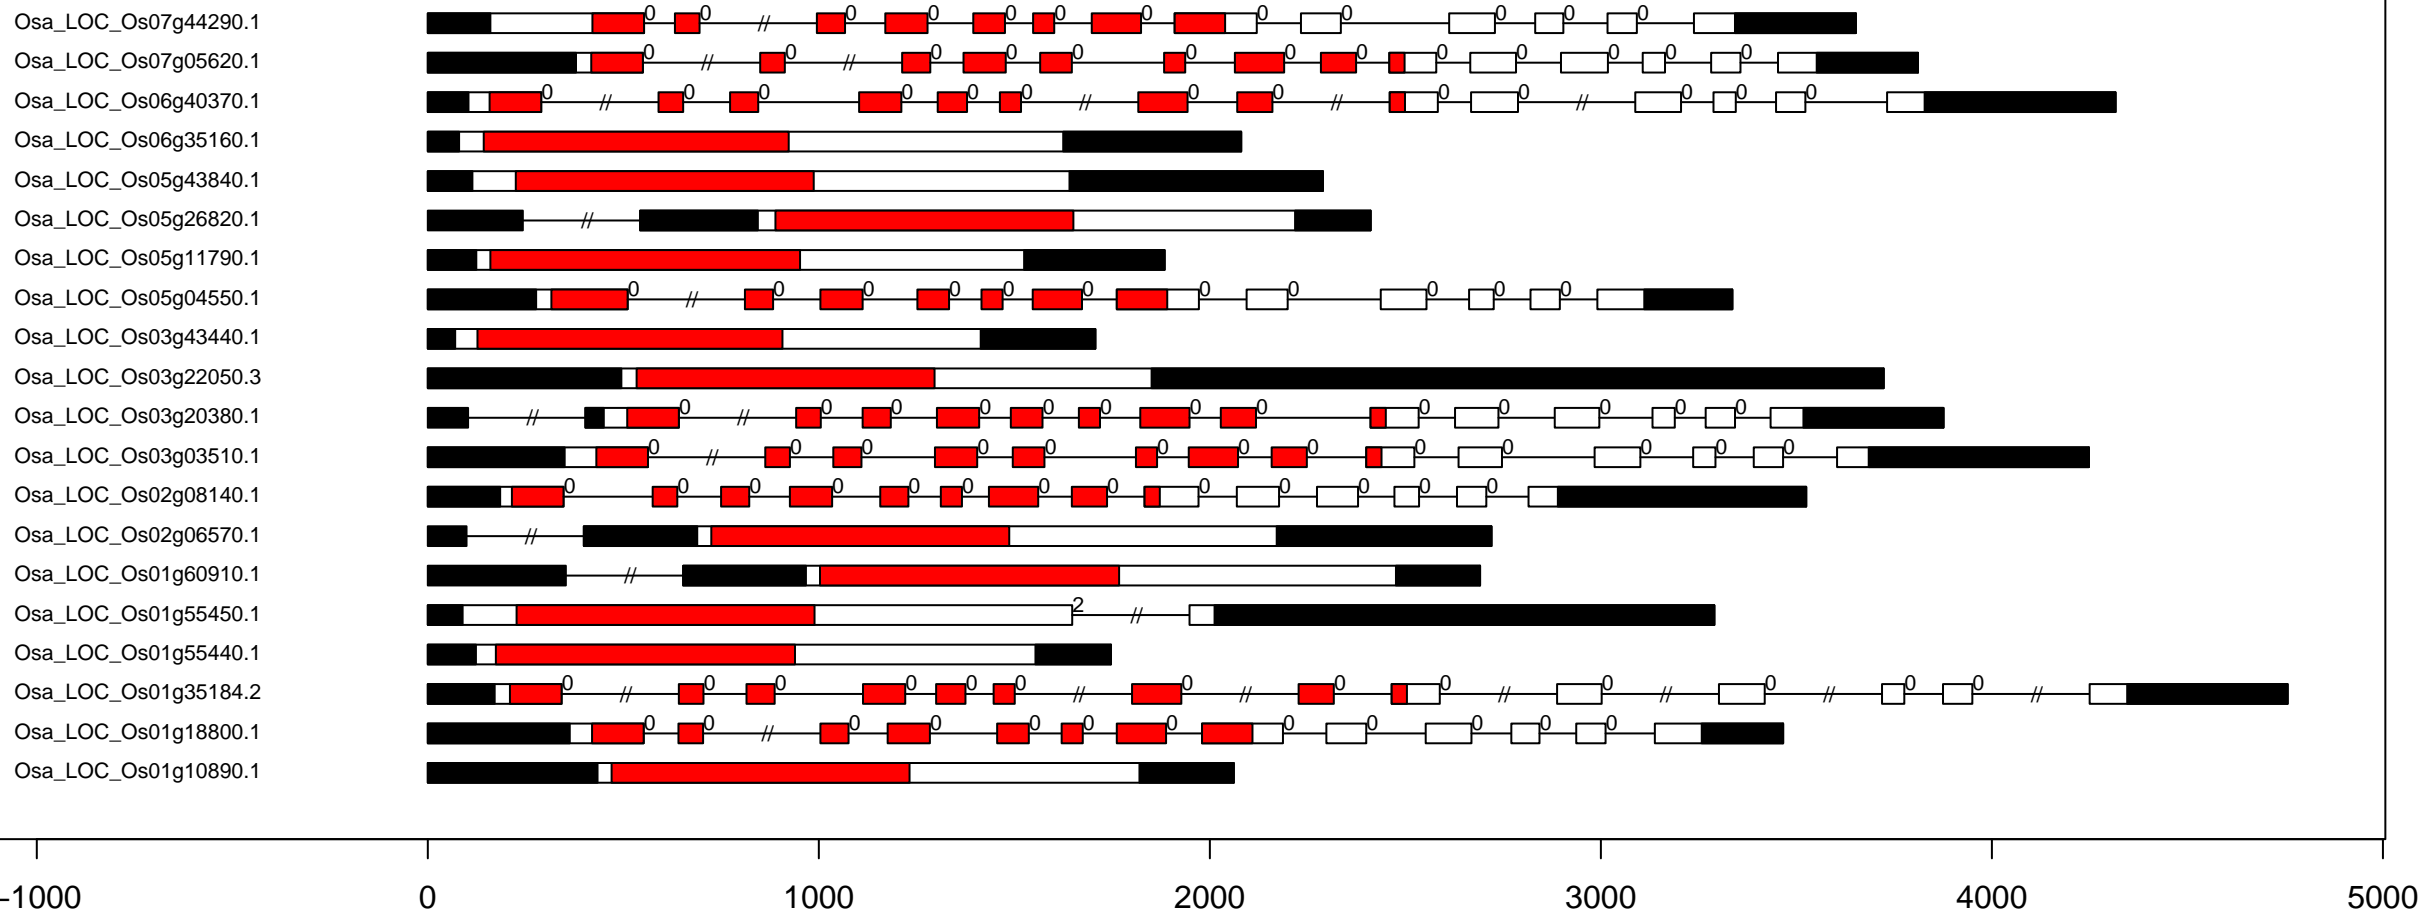

### O.sa CAMK\_CAMKL-CHK1 exon-intron and kinase domain diagram (part 2)

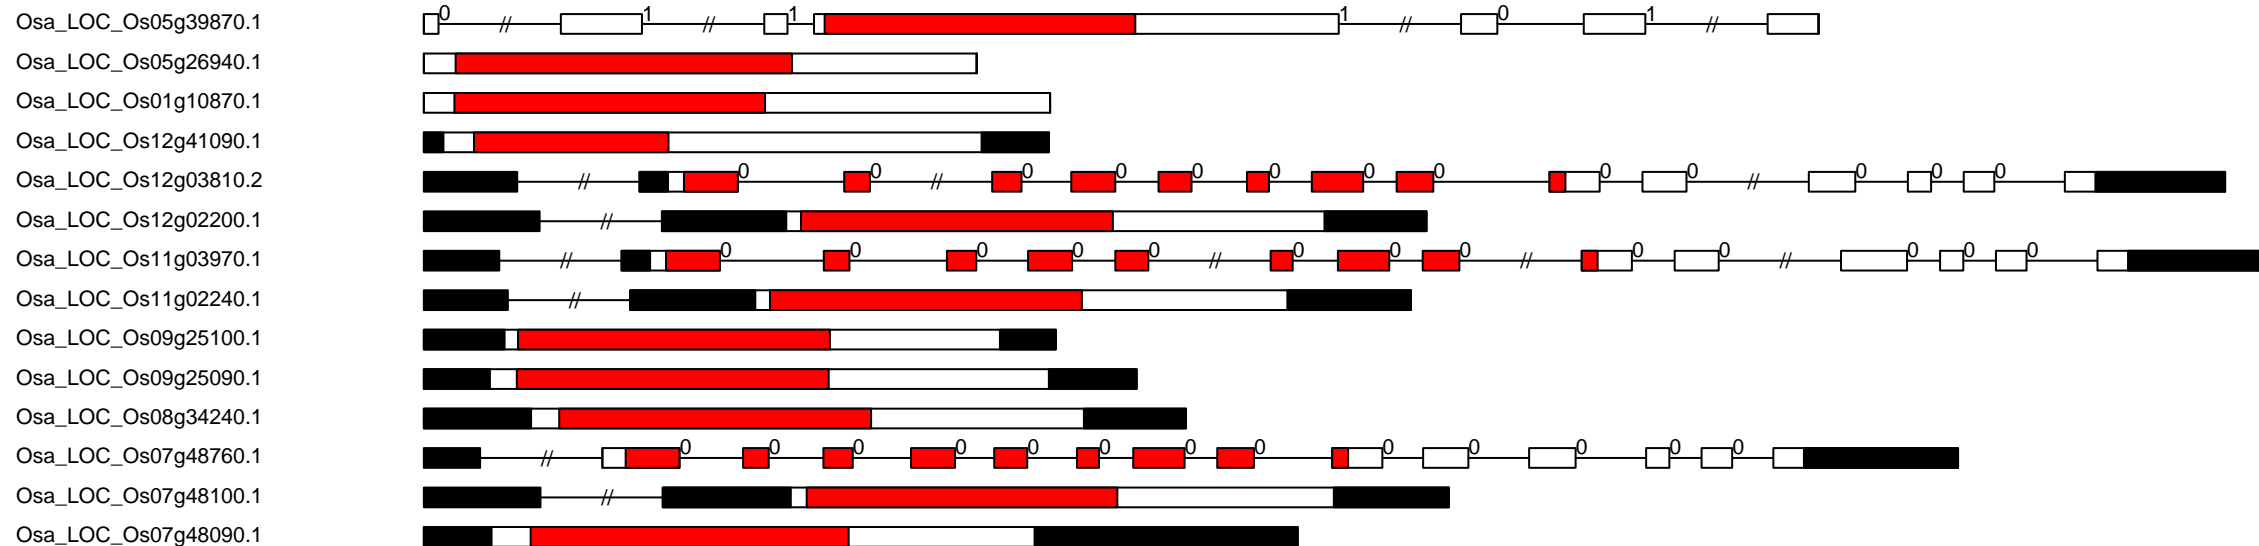

-1000

0

1000

2000

3000

4000

# O.sa CAMK\_CAMKL-LKB exon-intron and kinase domain diagram (all)

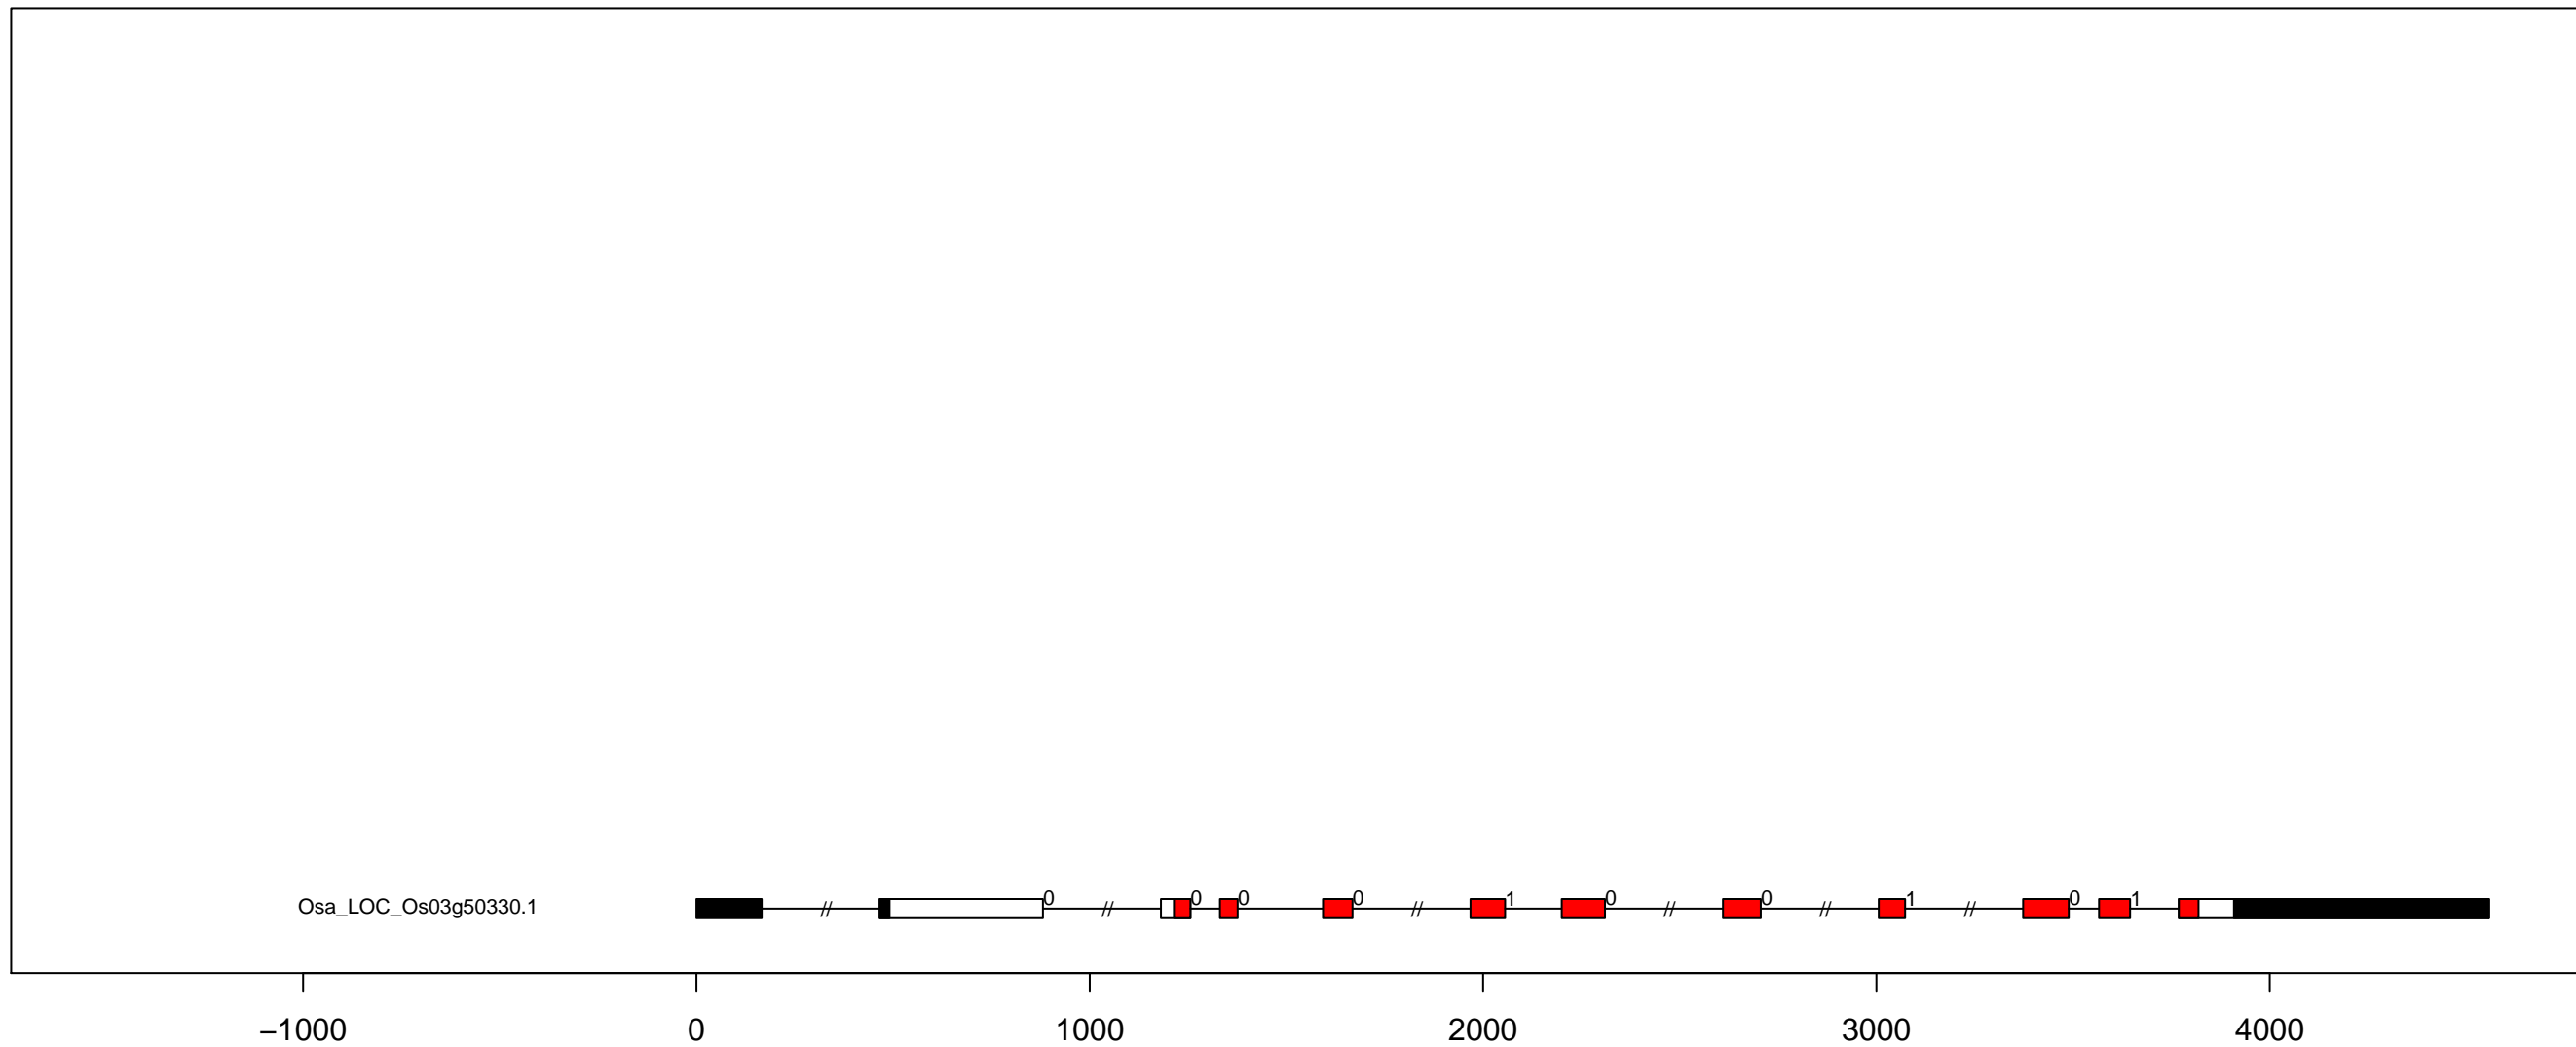



# O.sa CAMK\_CDPK exon-intron and kinase domain diagram (part 1)

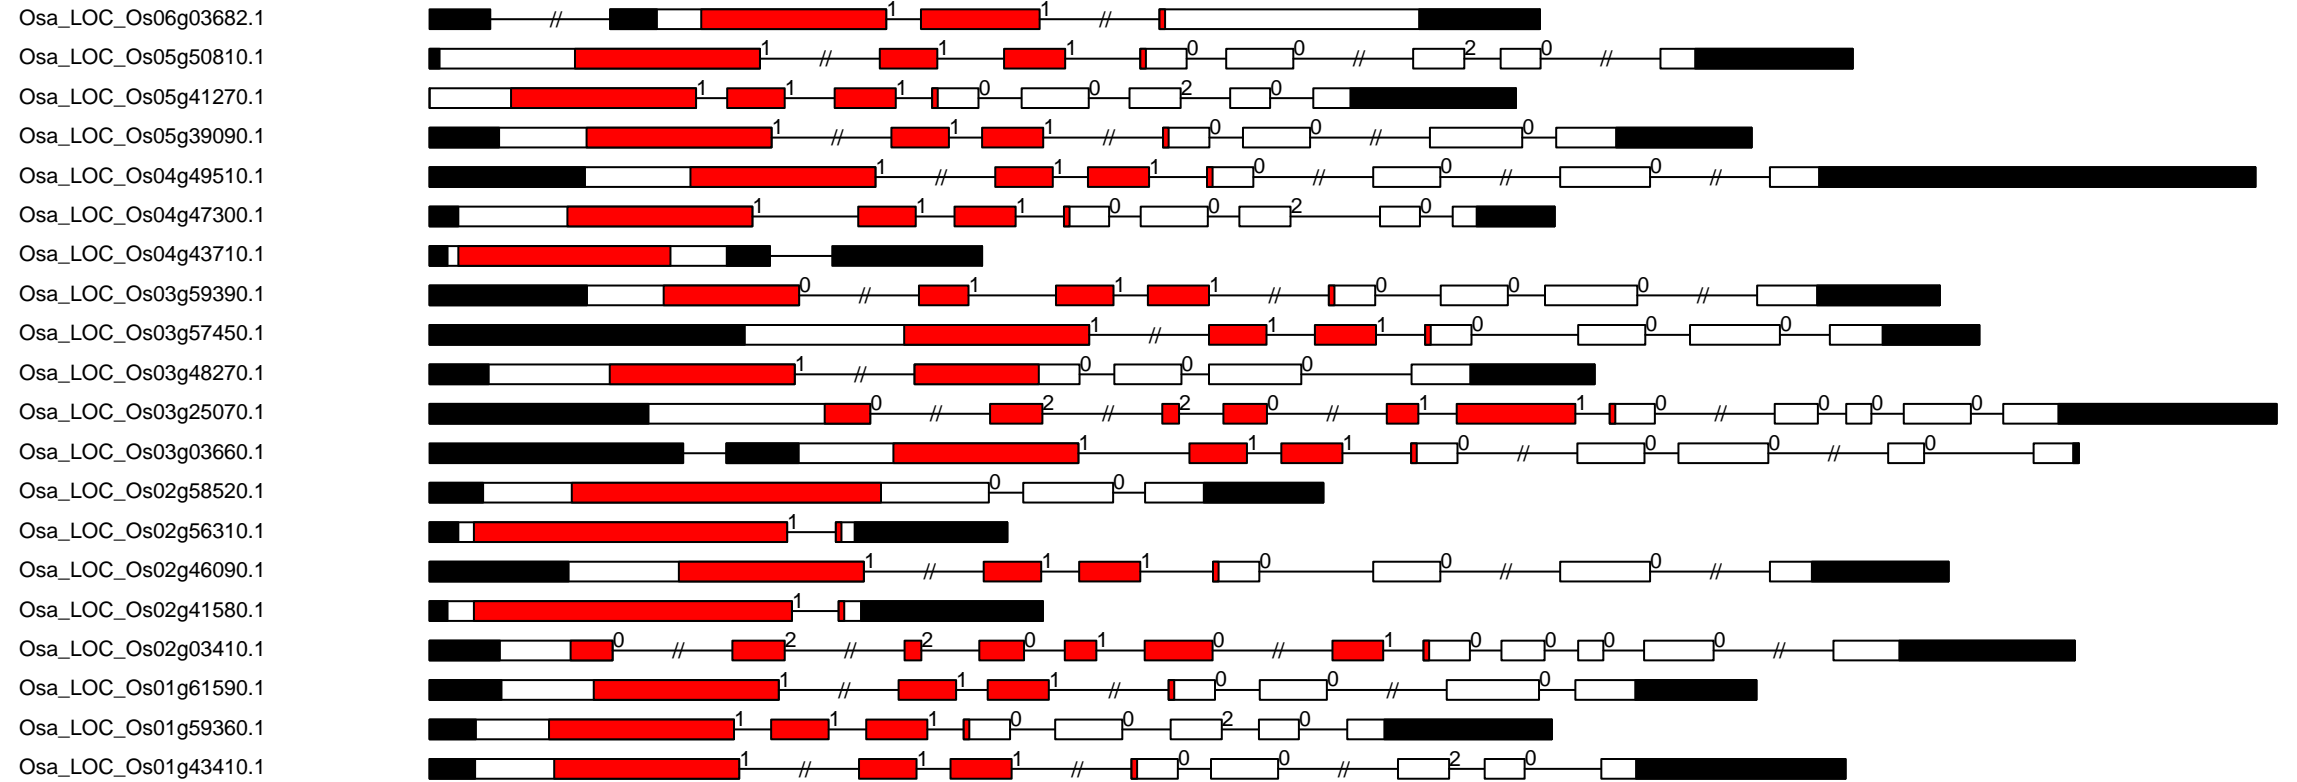

# O.sa CAMK\_CDPK exon-intron and kinase domain diagram (part 2)

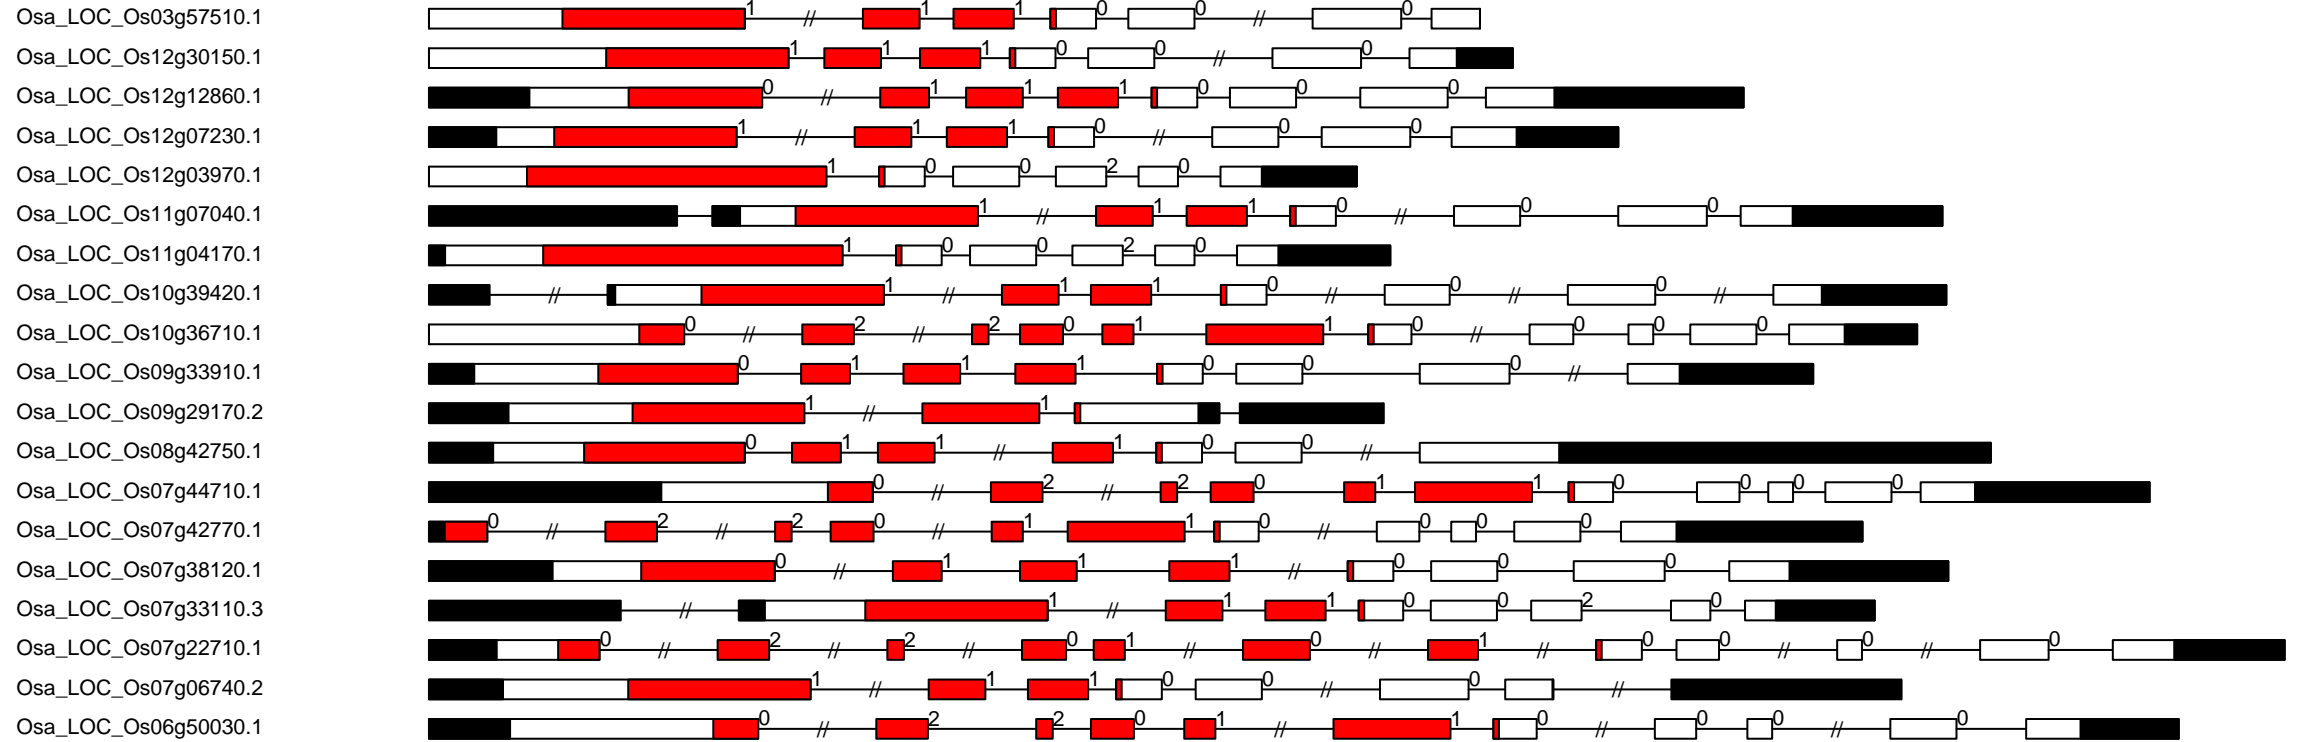

-1000

0

1000

2000

3000

4000

O.sa CAMK\_OST1L exon-intron and kinase domain diagram (all)

Osa\_LOC\_Os05g35770.1  
Osa\_LOC\_Os12g39630.1  
Osa\_LOC\_Os10g41490.1  
Osa\_LOC\_Os07g42940.1  
Osa\_LOC\_Os04g59450.1  
Osa\_LOC\_Os04g35240.1  
Osa\_LOC\_Os03g55600.1  
Osa\_LOC\_Os03g41460.1  
Osa\_LOC\_Os03g27280.1  
Osa\_LOC\_Os02g34600.1  
Osa\_LOC\_Os01g64970.1

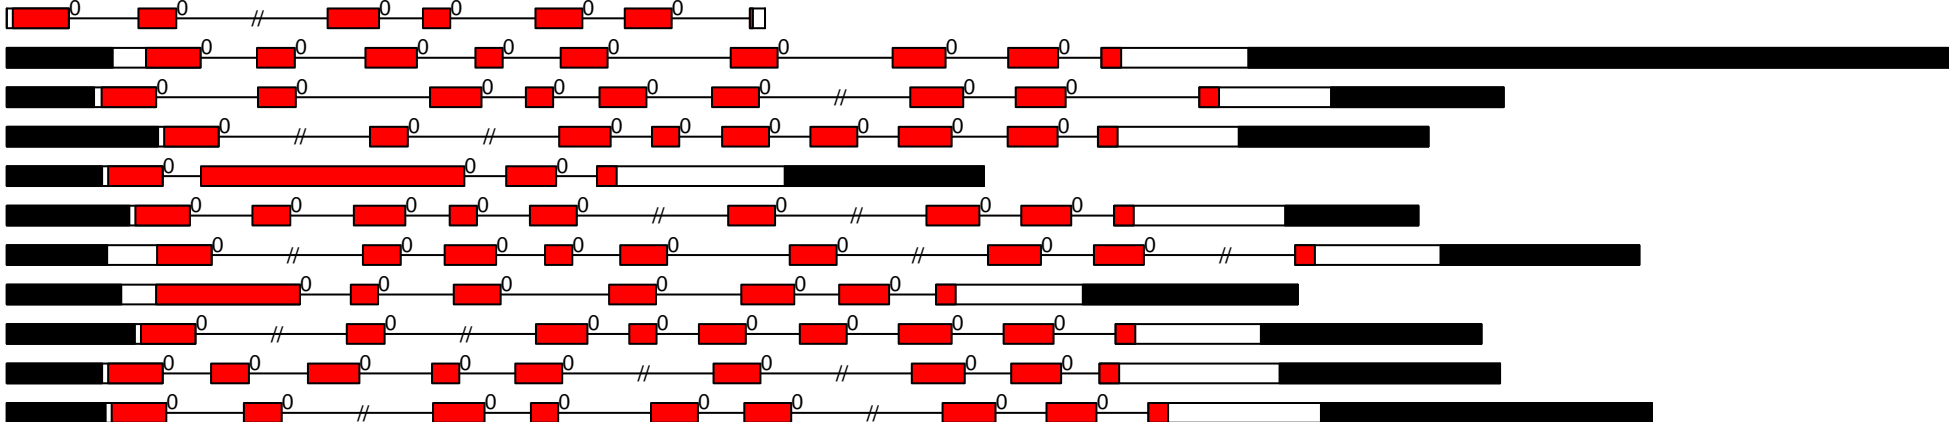

-1000

0

1000

2000

3000

4000

# O.sa CK1\_CK1 exon-intron and kinase domain diagram (all)

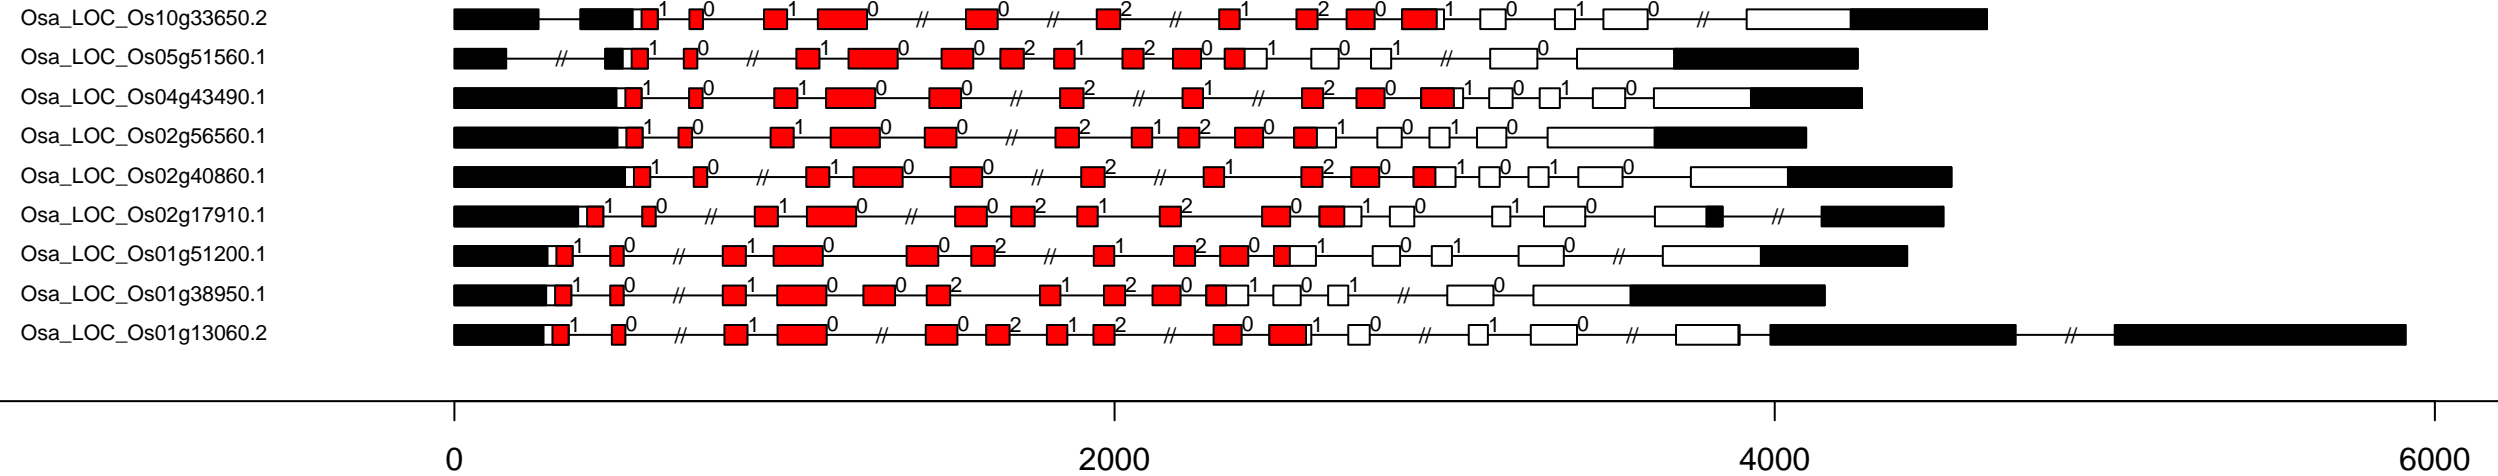

### O.sa CK1\_CK1-PI exon-intron and kinase domain diagram (all)

Osa\_LOC\_Os07g07560.2  
Osa\_LOC\_Os05g11140.1  
Osa\_LOC\_Os03g57940.1  
Osa\_LOC\_Os01g56580.2  
Osa\_LOC\_Os01g54100.1  
Osa\_LOC\_Os01g10150.1

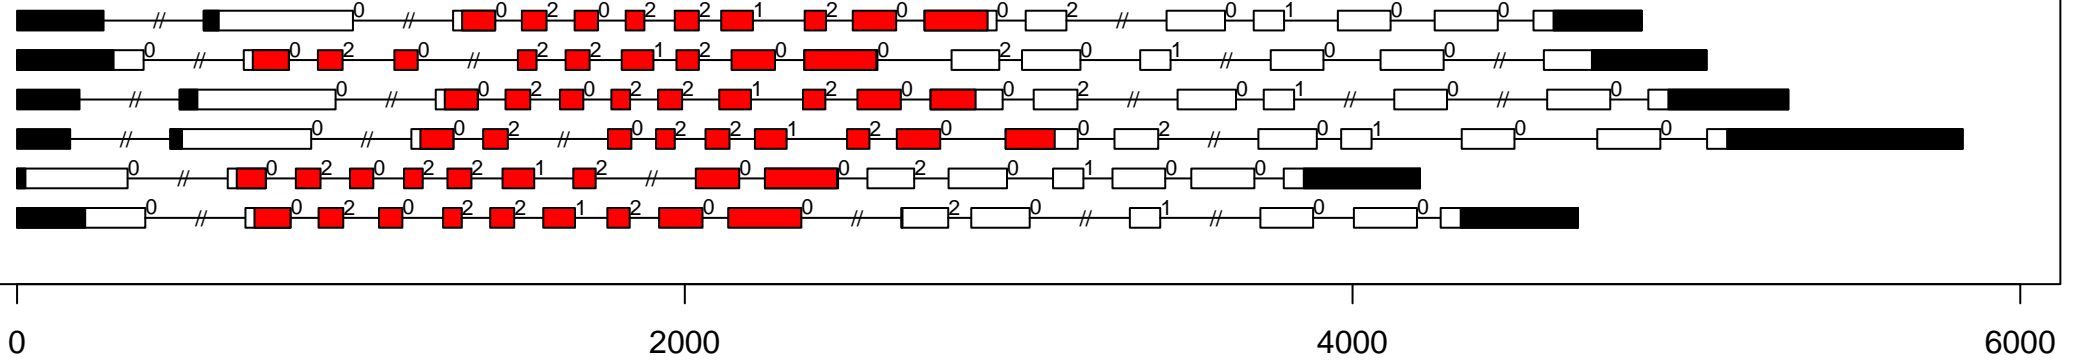

# O.sa CMGC\_CDK-CCRK exon-intron and kinase domain diagram (all)

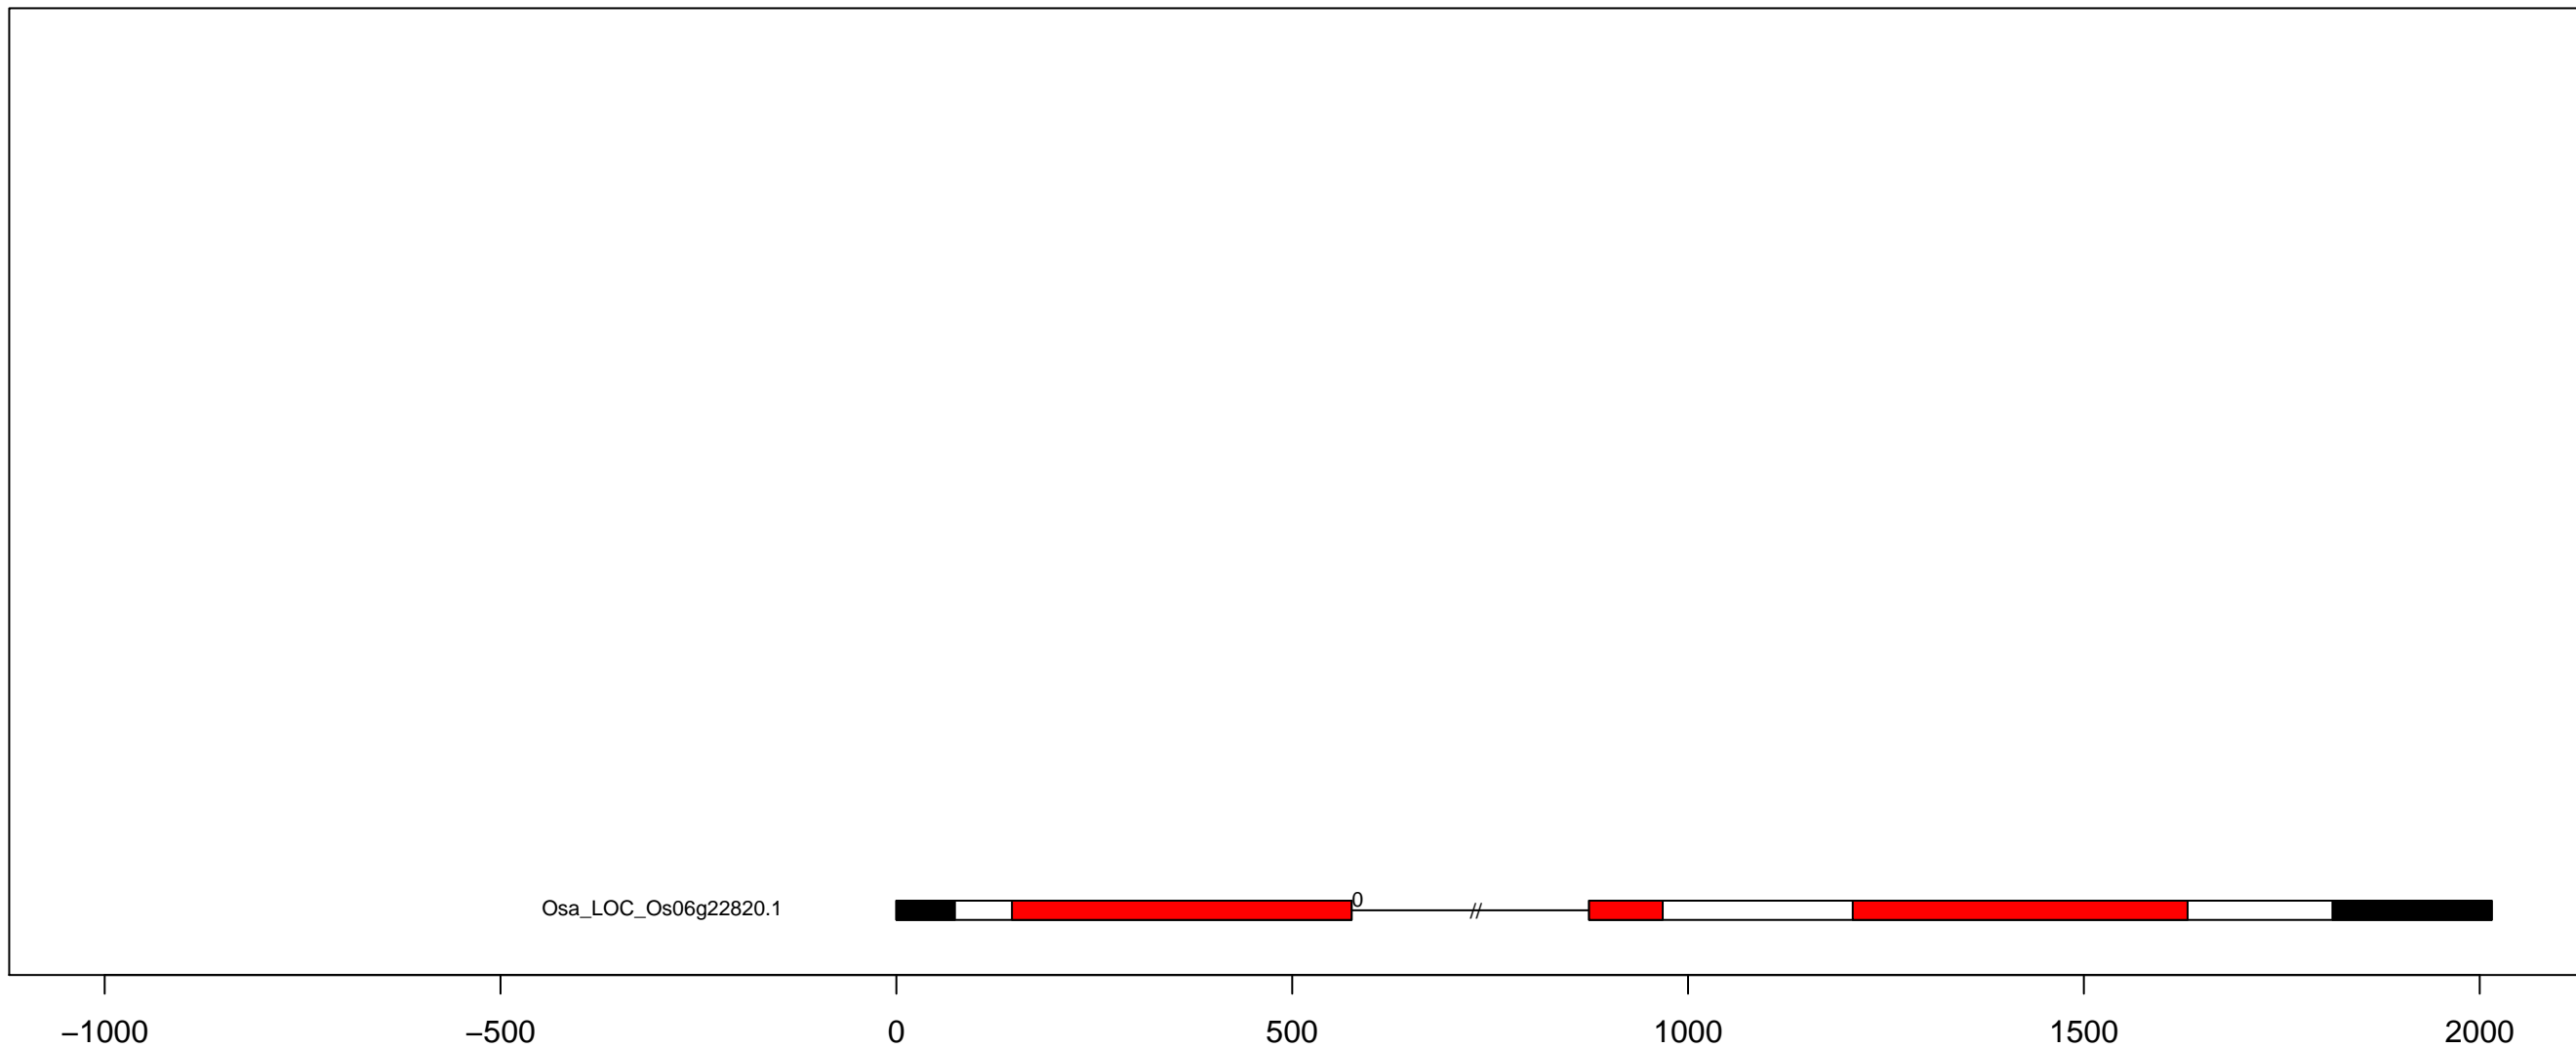

# O.sa CMGC\_CDK-CDK7 exon-intron and kinase domain diagram (all)

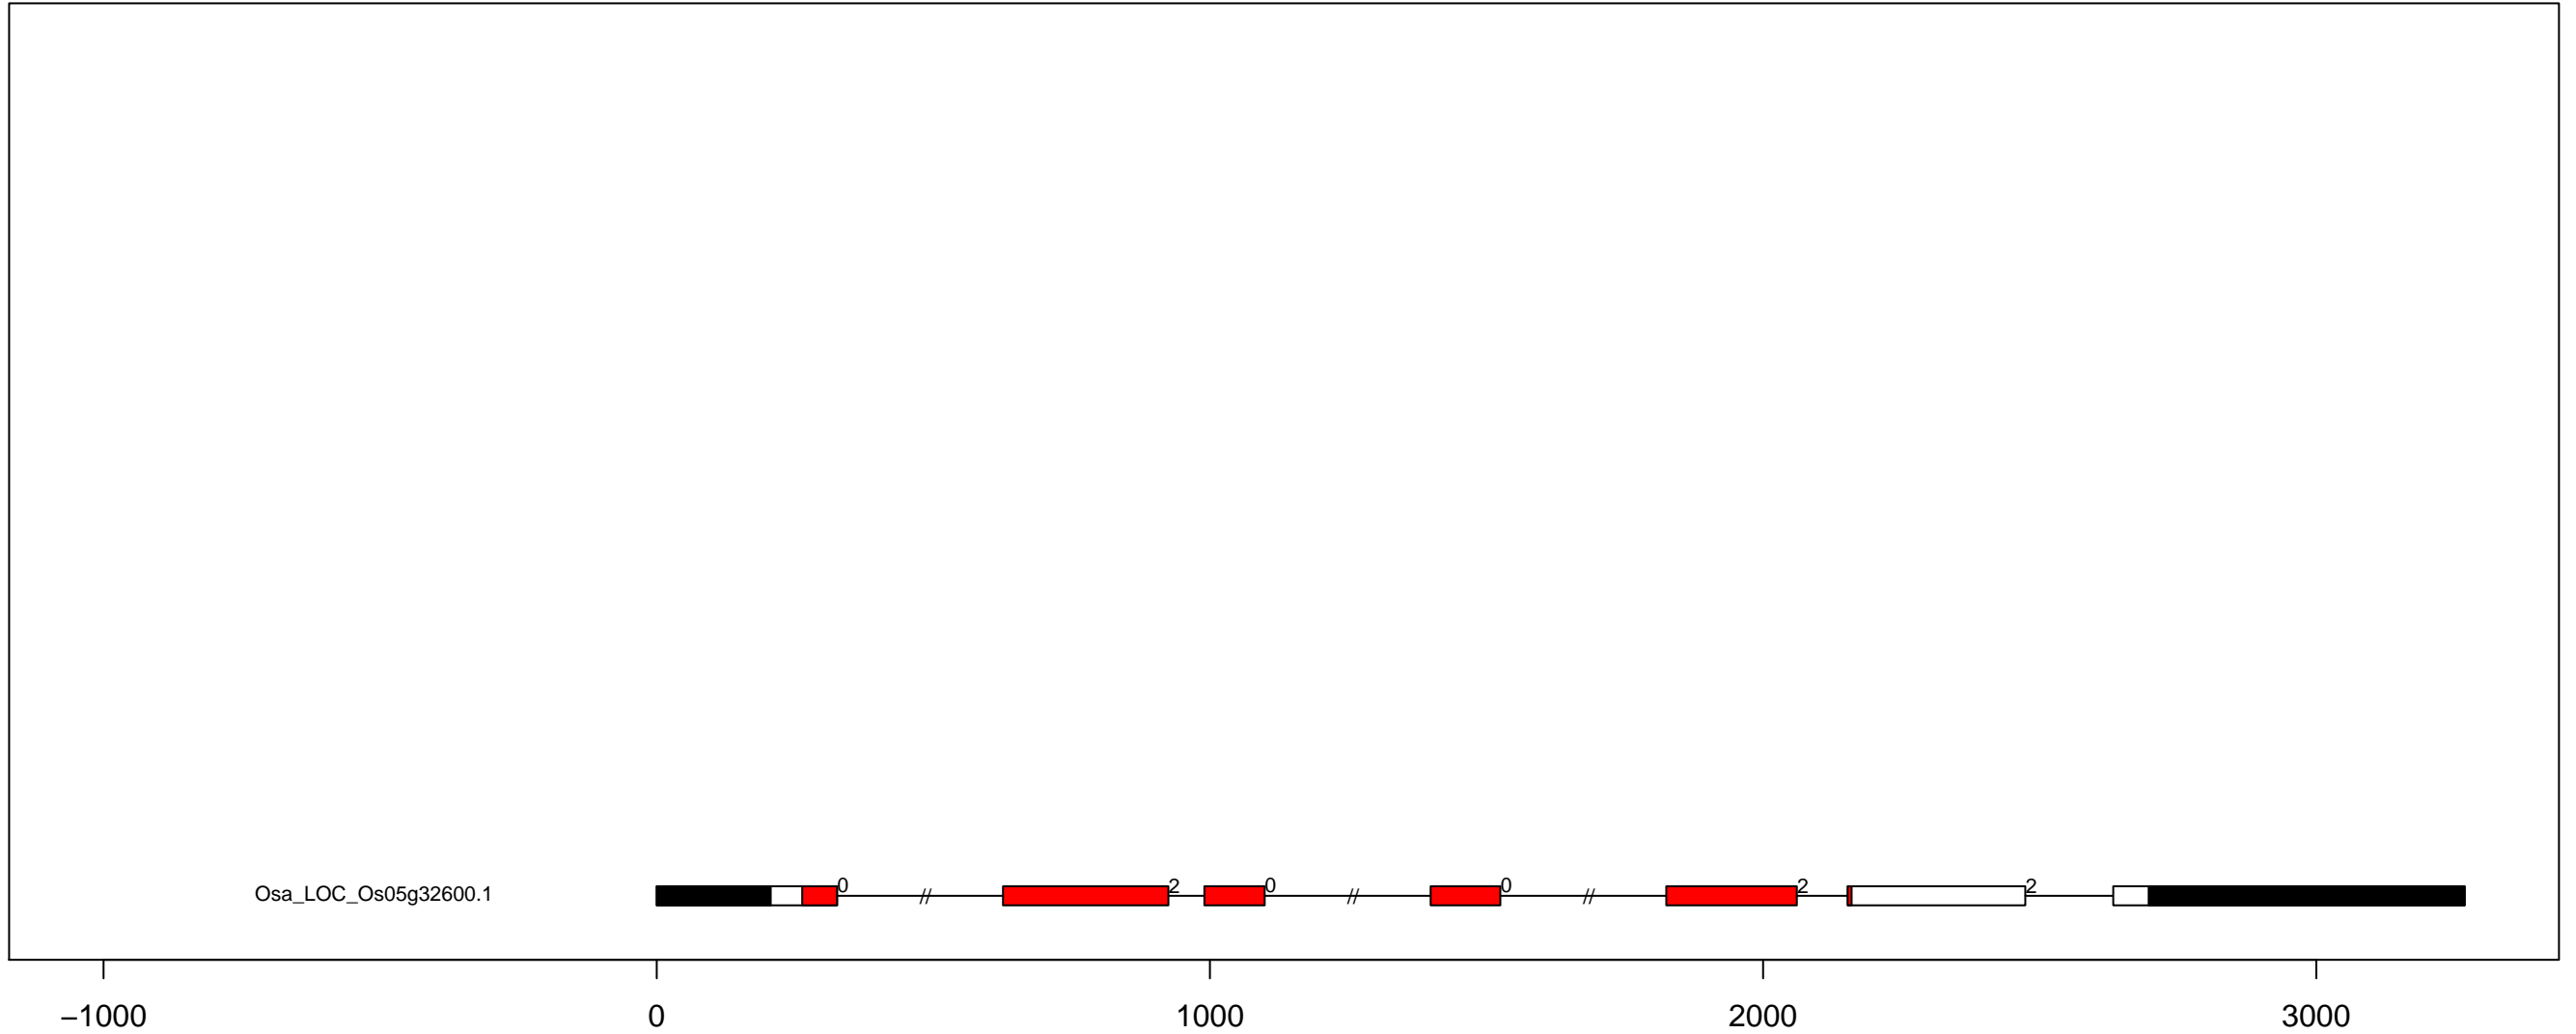

# O.sa CMGC\_CDK-CDK8 exon-intron and kinase domain diagram (all)

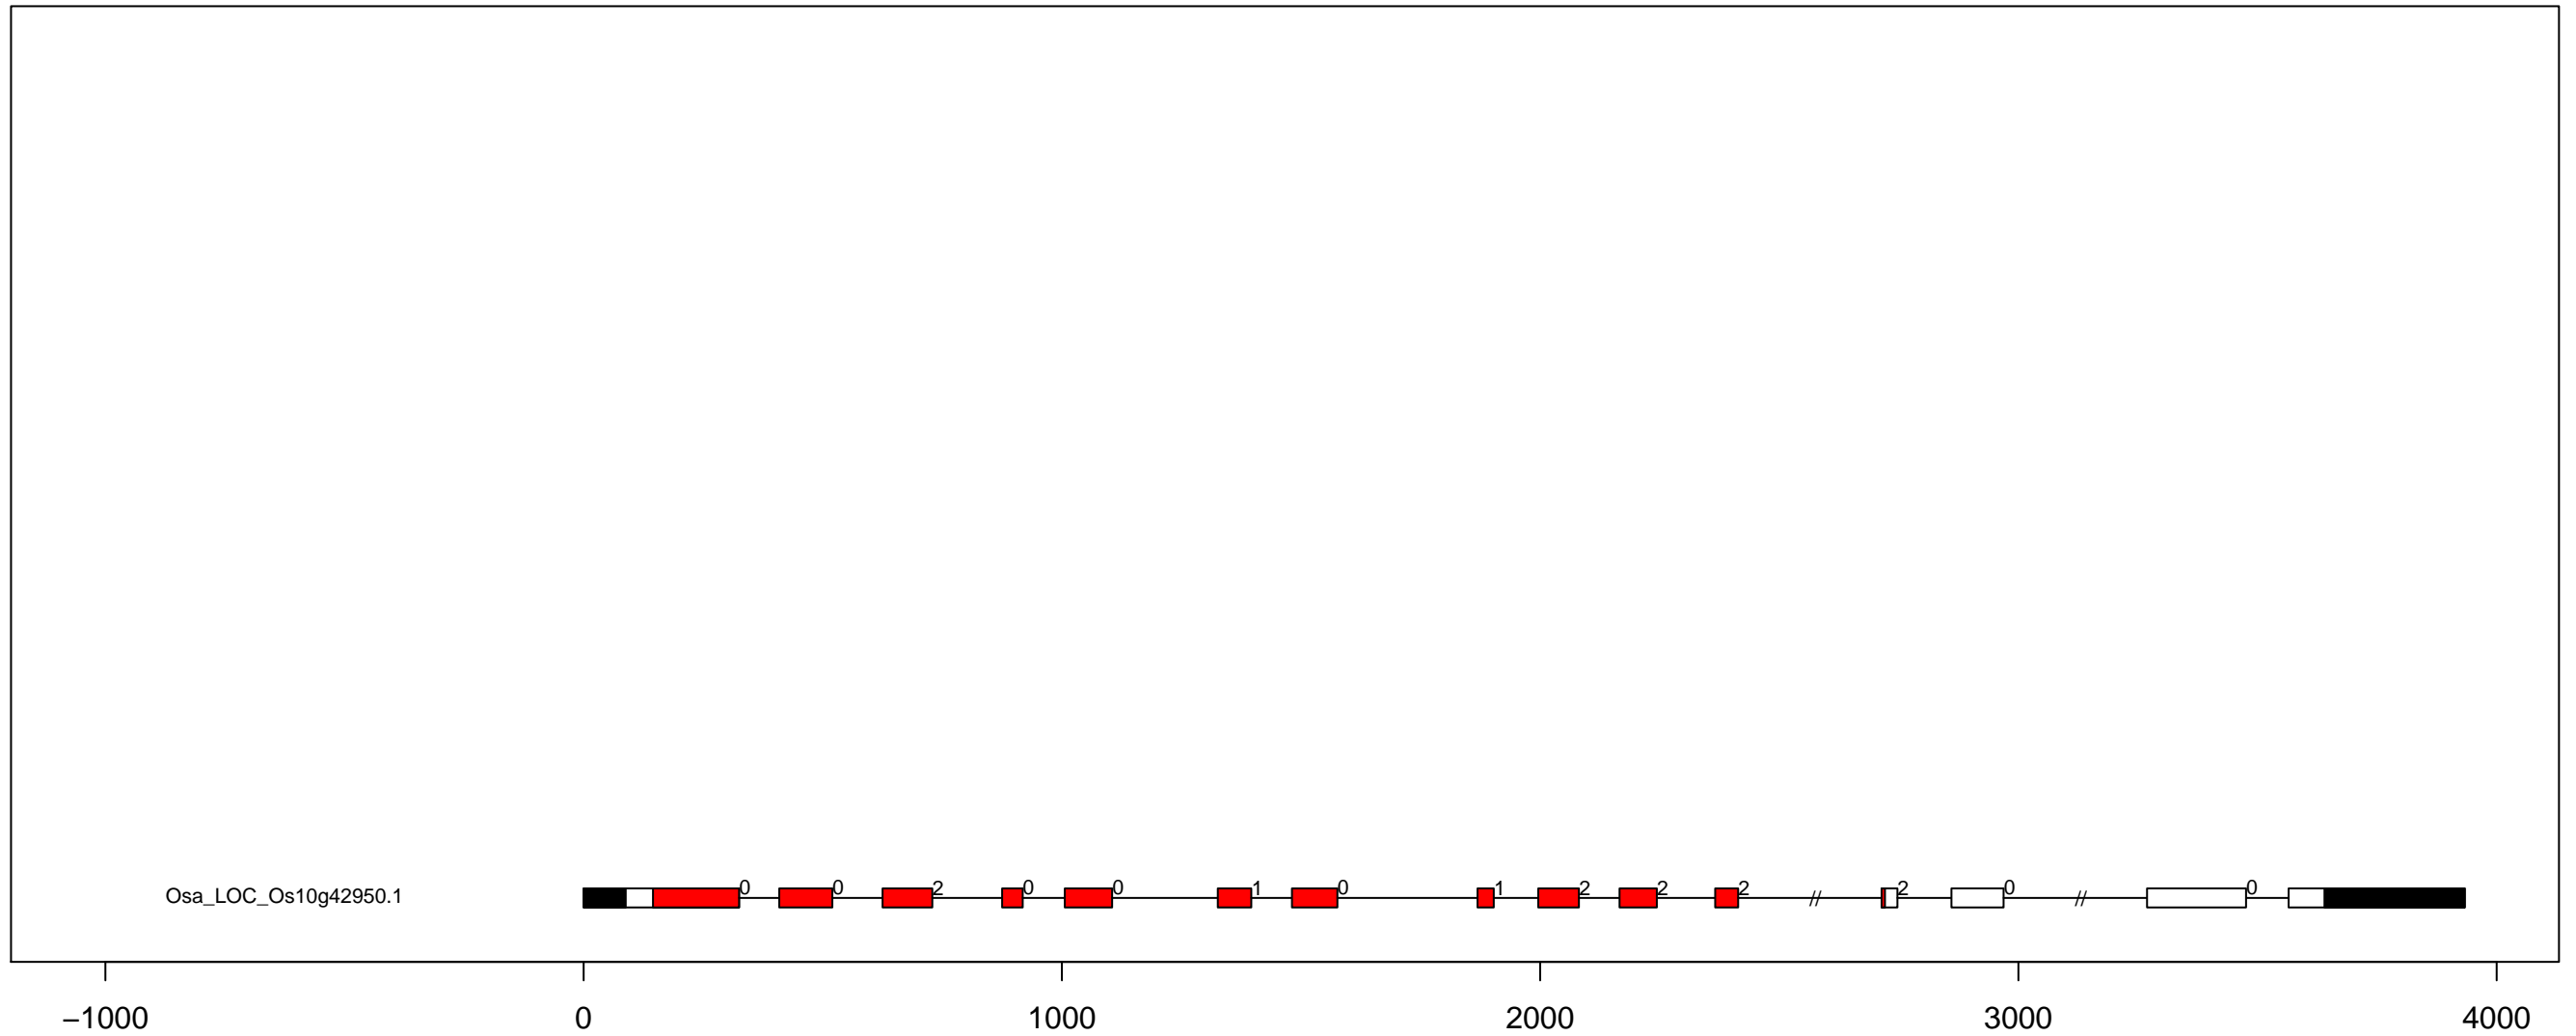



# O.sa CMGC\_CDK-CRK7-CDK9 exon-intron and kinase domain diagram (all)

Osa\_LOC\_Os02g20140.1  
Osa\_LOC\_Os08g35220.1  
Osa\_LOC\_Os08g02050.1  
Osa\_LOC\_Os07g40550.1  
Osa\_LOC\_Os05g32360.1  
Osa\_LOC\_Os01g72790.1  
Osa\_LOC\_Os01g70130.1  
Osa\_LOC\_Os01g10430.1

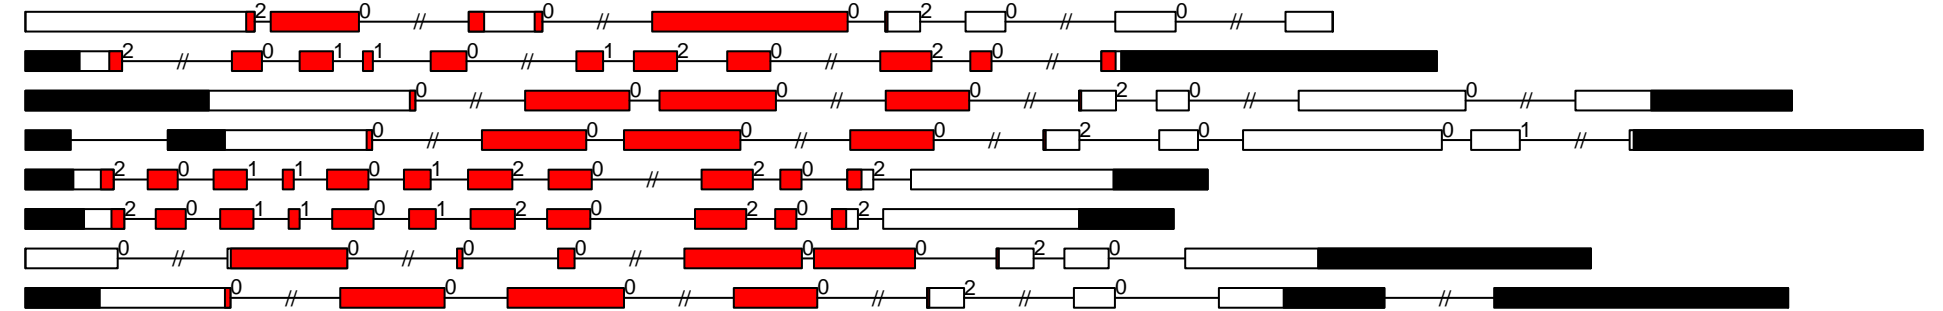

-1000

0

1000

2000

3000

4000

5000

### O.sa CMGC\_CDKL-Os exon-intron and kinase domain diagram (all)

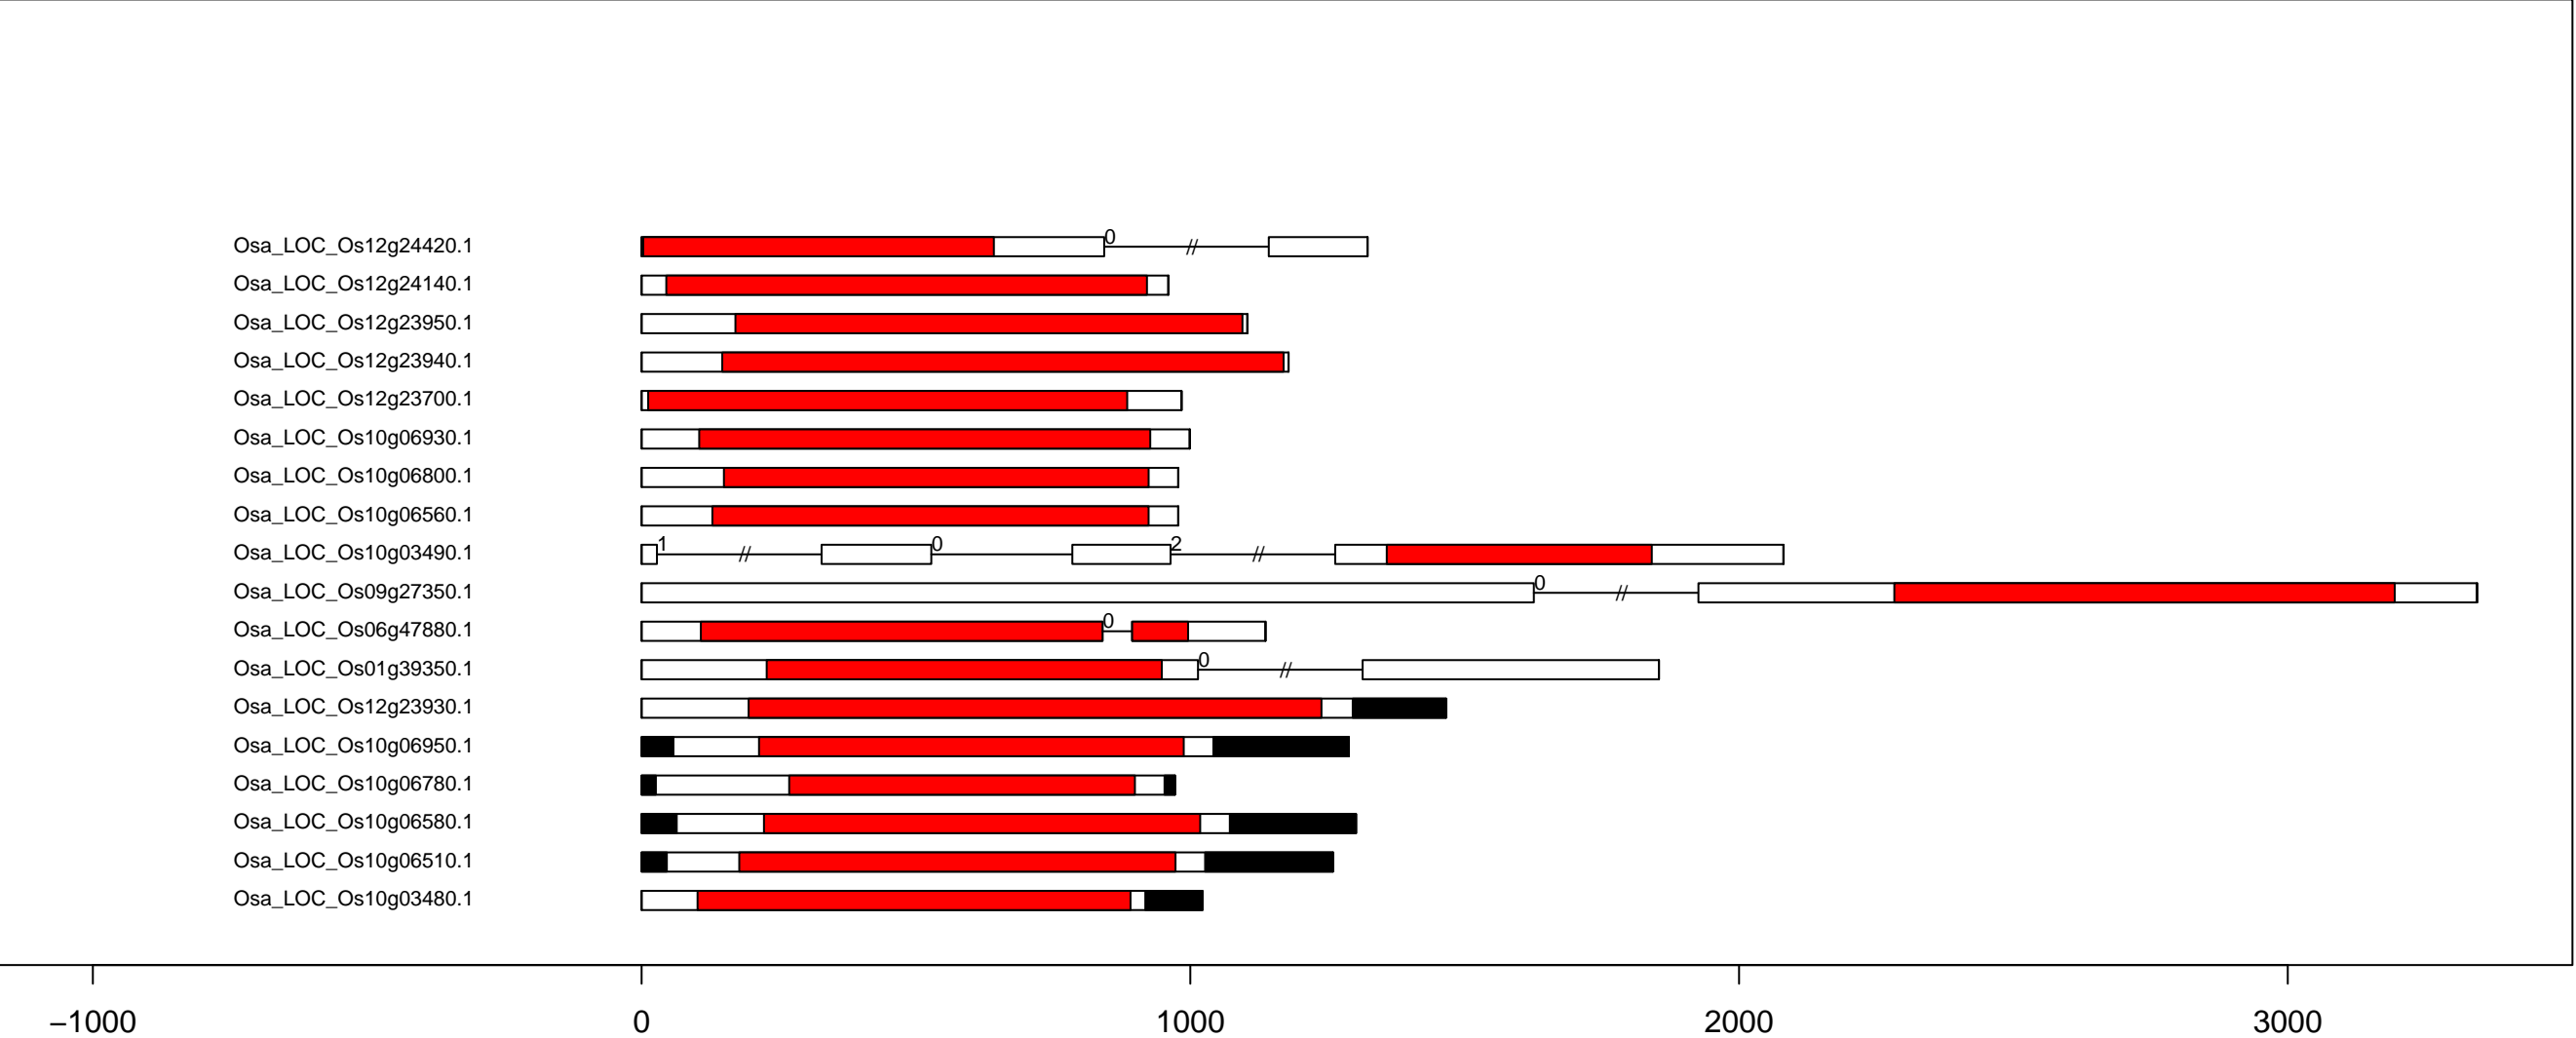

# O.sa CMGC\_CDK-PITSLRE exon-intron and kinase domain diagram (all)

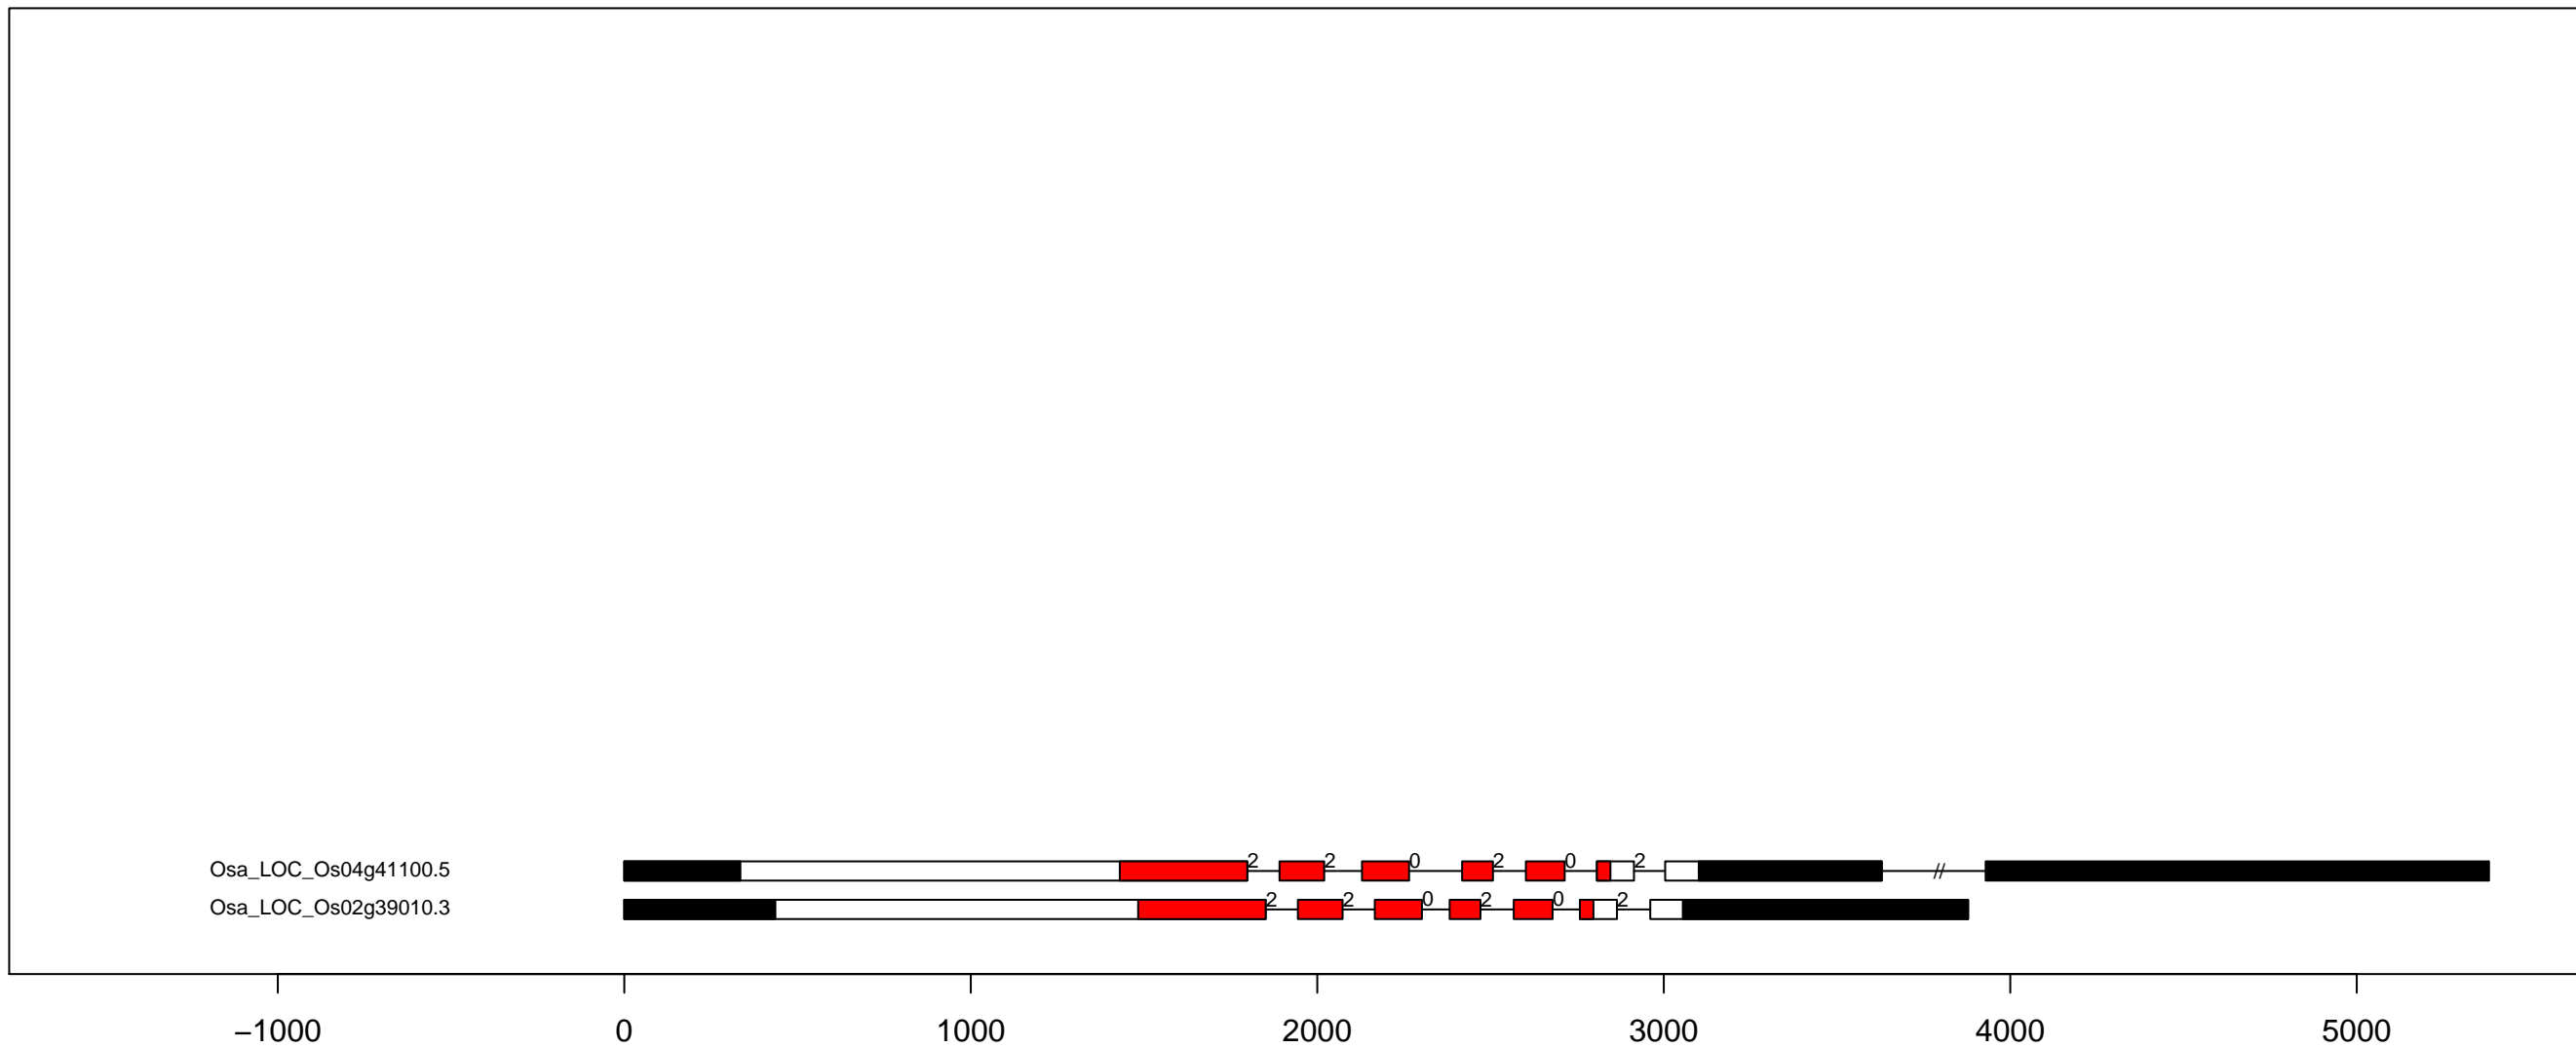

# O.sa CMGC\_CDK-PI exon-intron and kinase domain diagram (all)

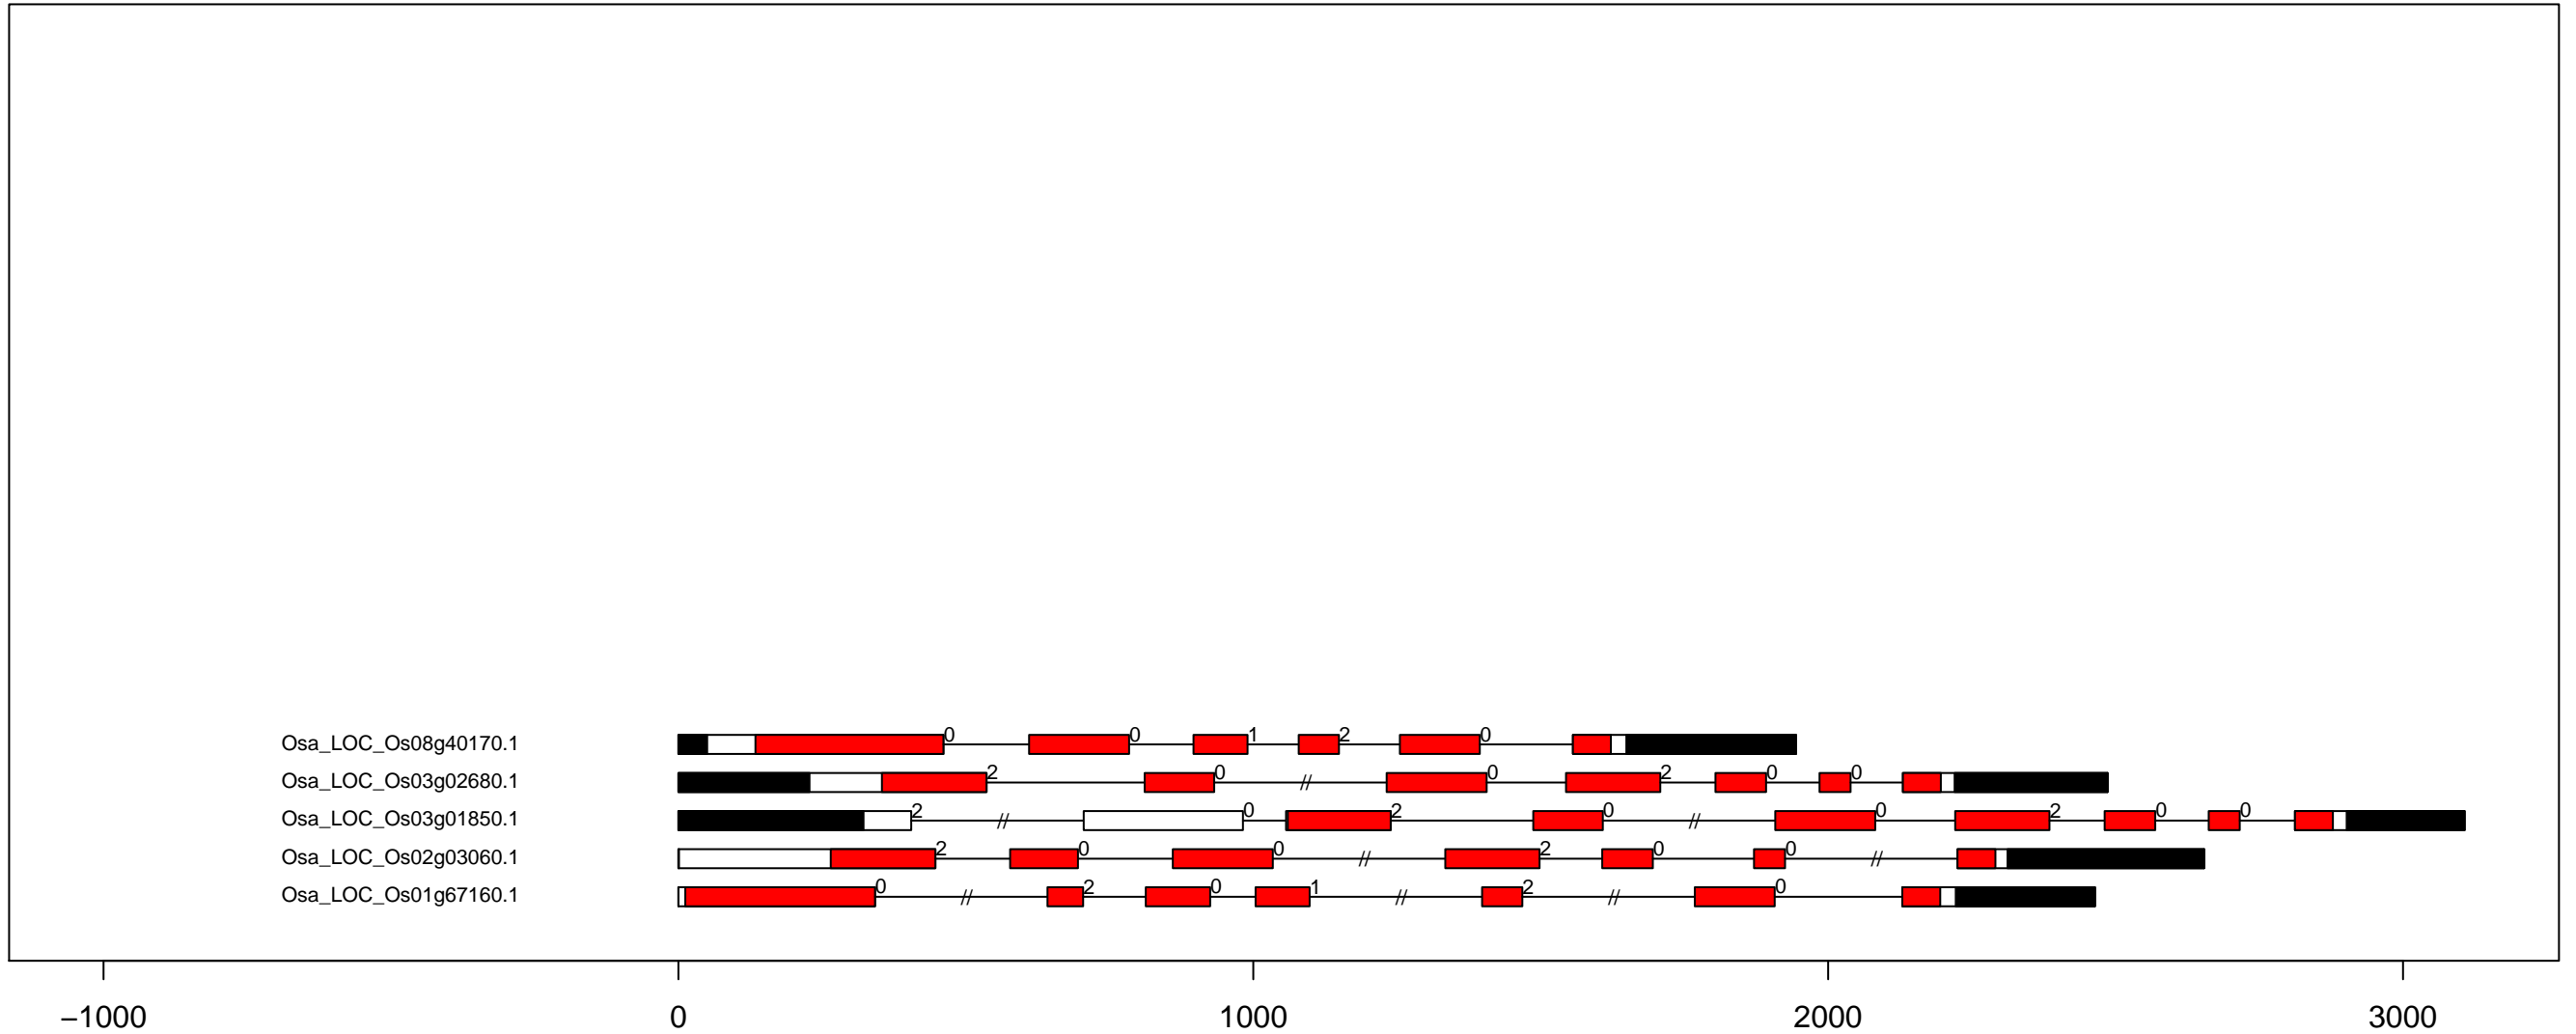

# O.sa CMGC\_CK2 exon-intron and kinase domain diagram (all)

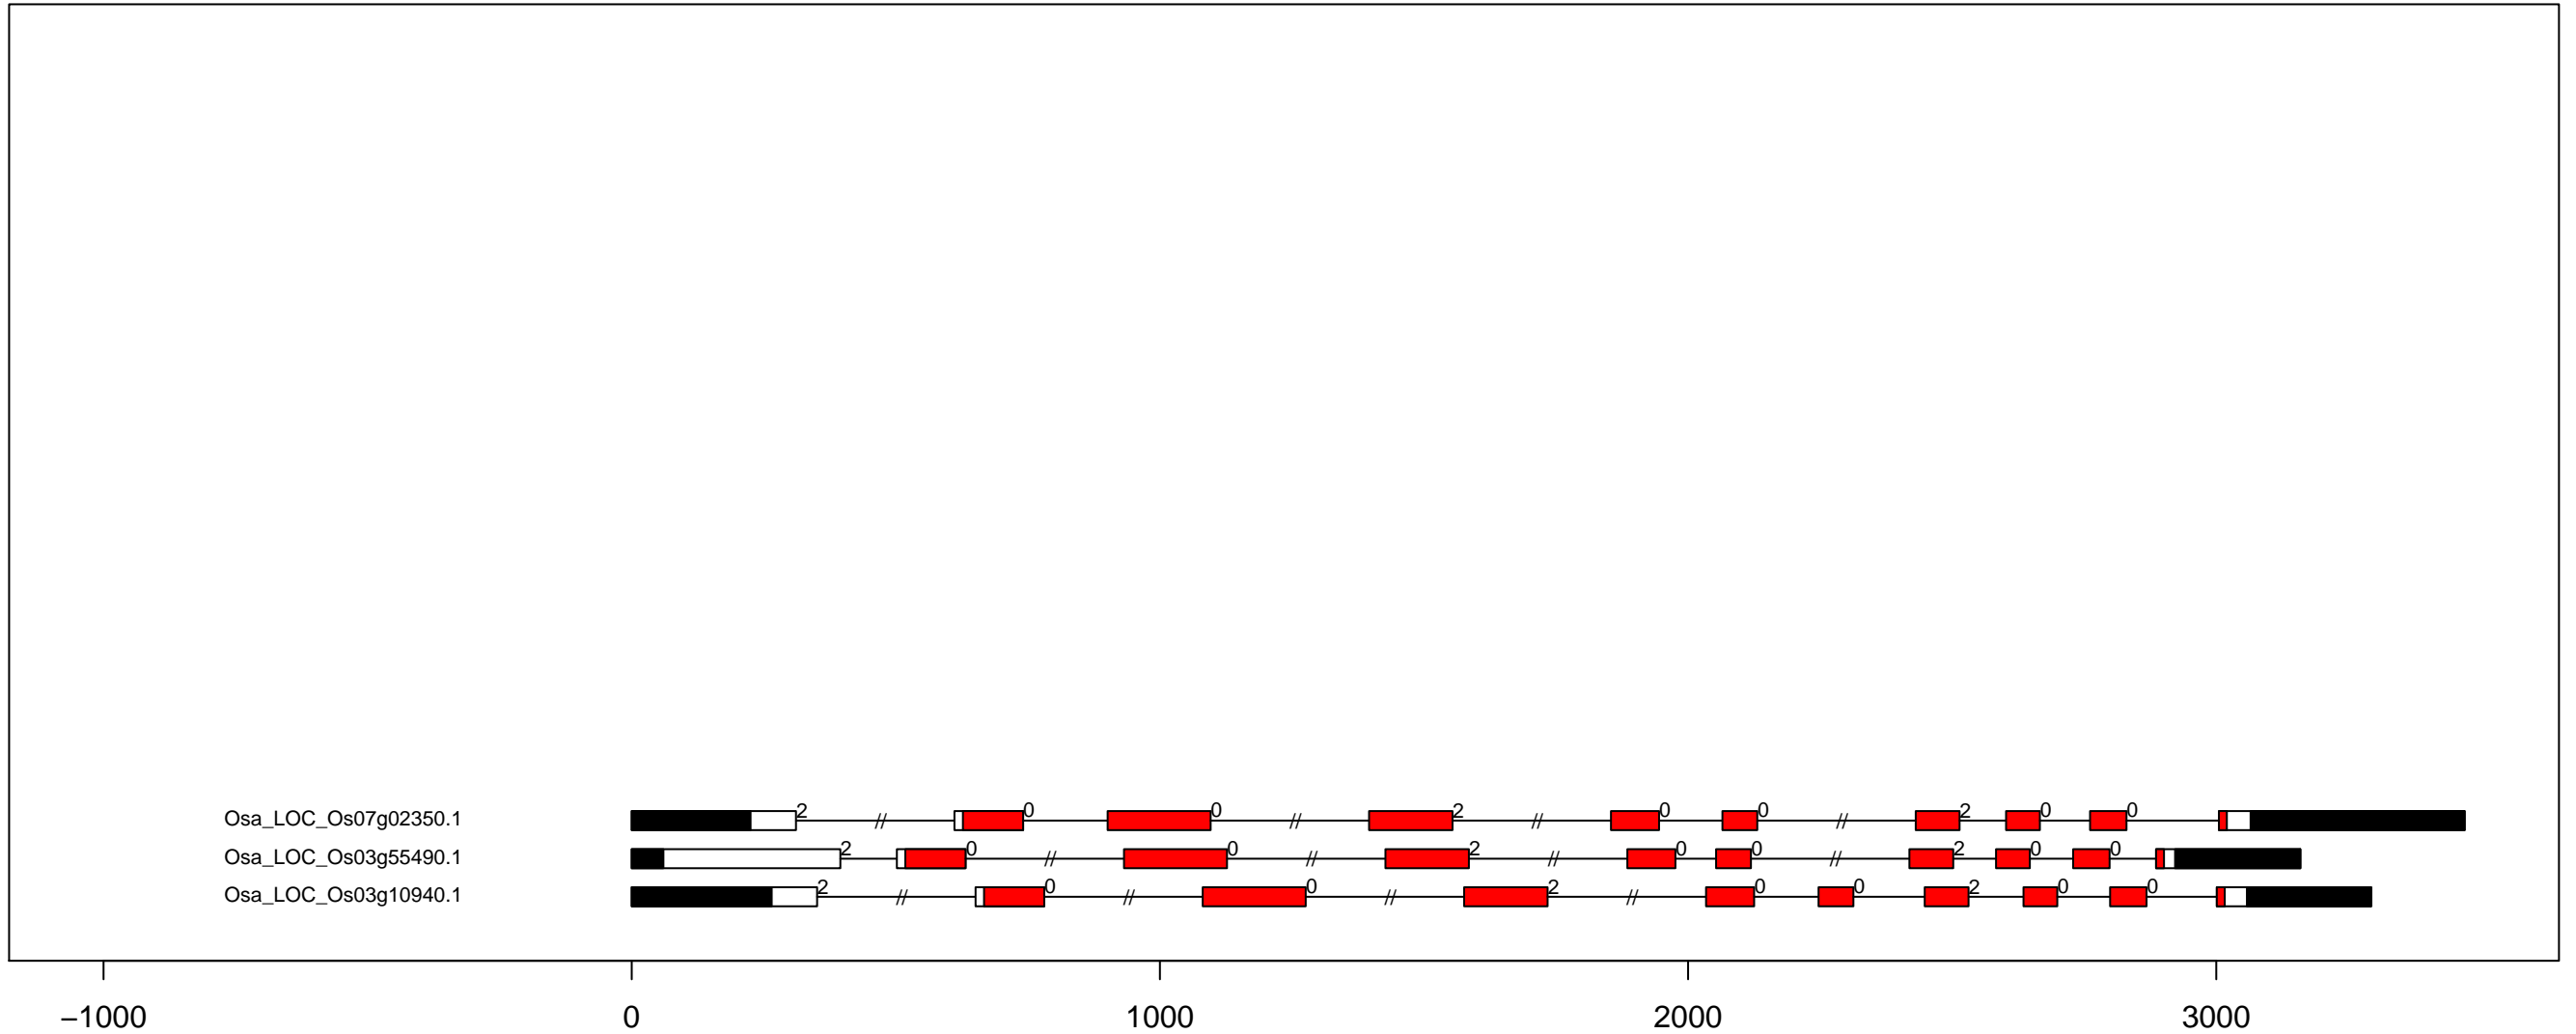

# O.sa CMGC\_CLK exon-intron and kinase domain diagram (all)

Osa\_LOC\_Os12g27520.1  
Osa\_LOC\_Os01g62080.2  
Osa\_LOC\_Os01g40840.1

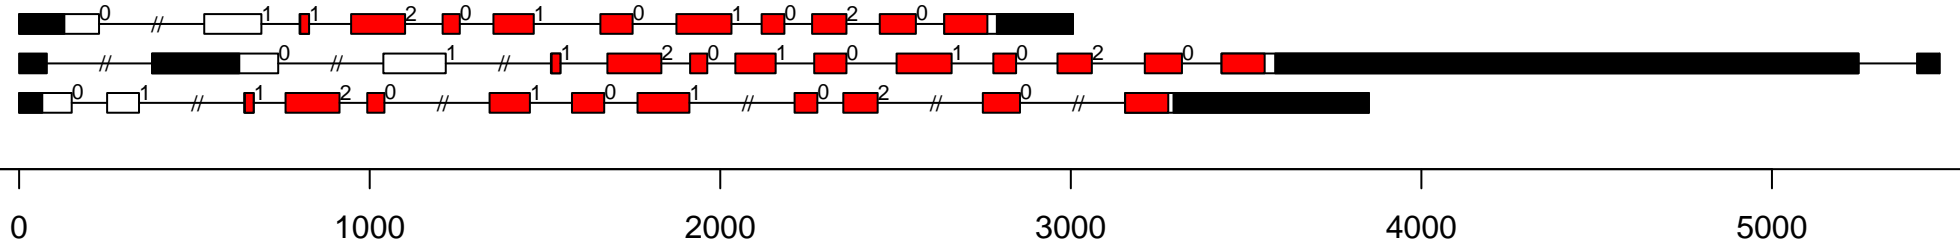

# O.sa CMGC\_DYRK-PRP4 exon-intron and kinase domain diagram (all)

Osa\_LOC\_Os12g44330.1  
Osa\_LOC\_Os05g39080.1  
Osa\_LOC\_Os03g51020.1  
Osa\_LOC\_Os03g50230.1  
Osa\_LOC\_Os01g61620.1

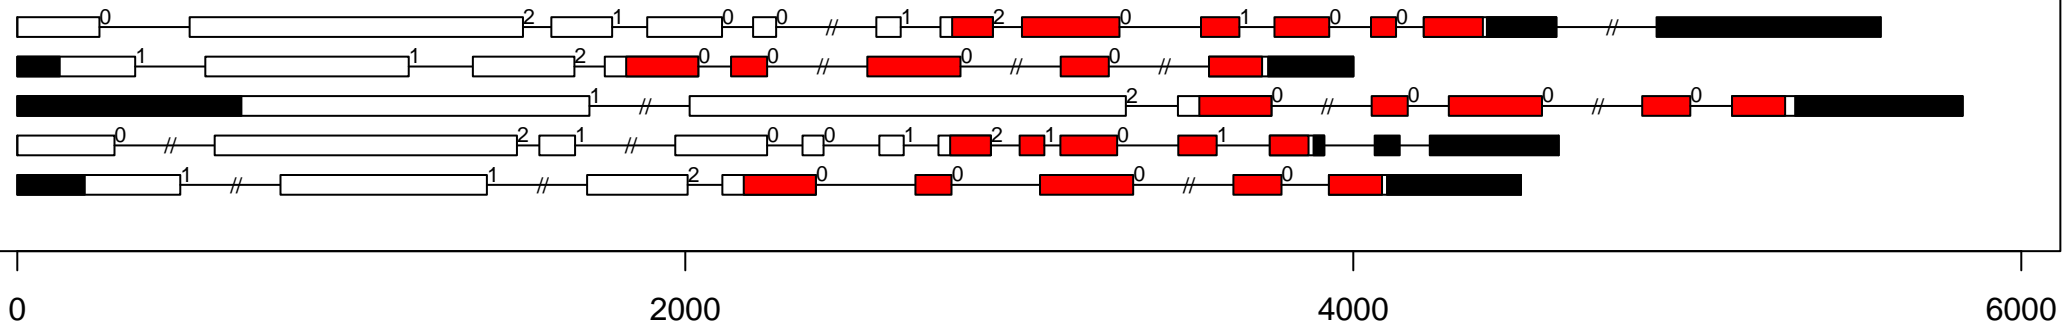

# O.sa CMGC\_DYRK-YAK exon-intron and kinase domain diagram (all)

Osa\_LOC\_Os04g51370.1

Osa\_LOC\_Os02g47410.1

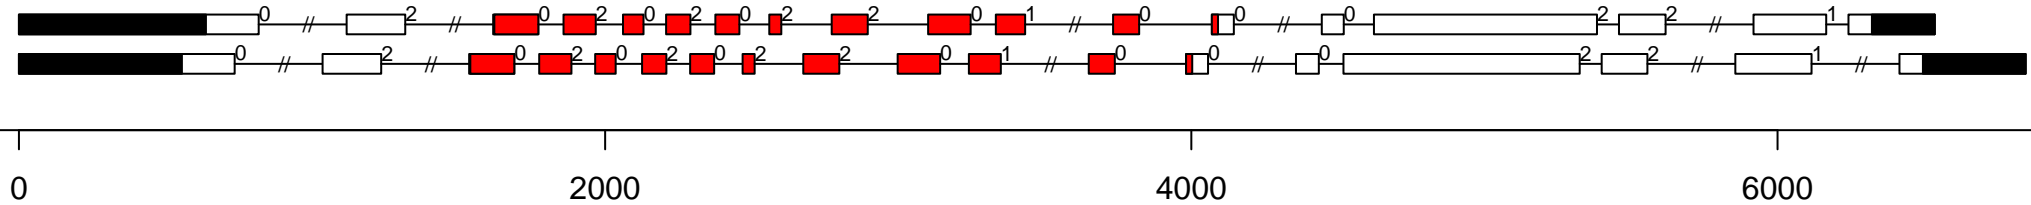



# O.sa CMGC\_GSK exon-intron and kinase domain diagram (all)

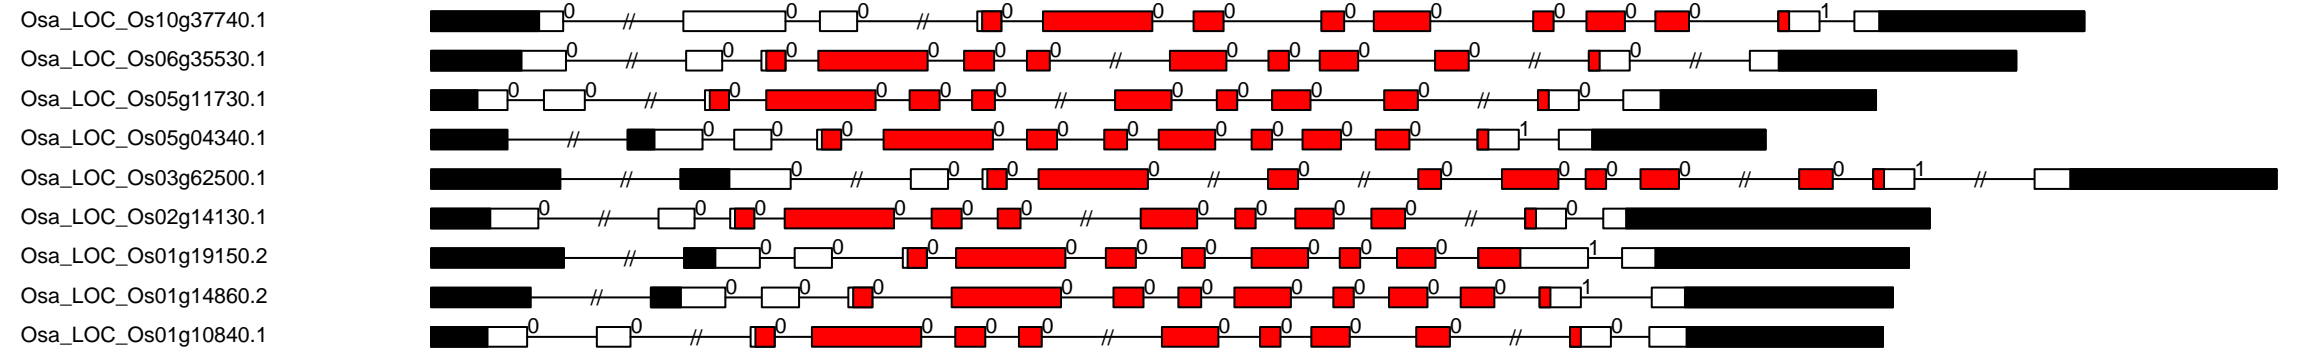

-1000

0

1000

2000

3000

4000

### O.sa CMGC\_MAPK exon-intron and kinase domain diagram (all)

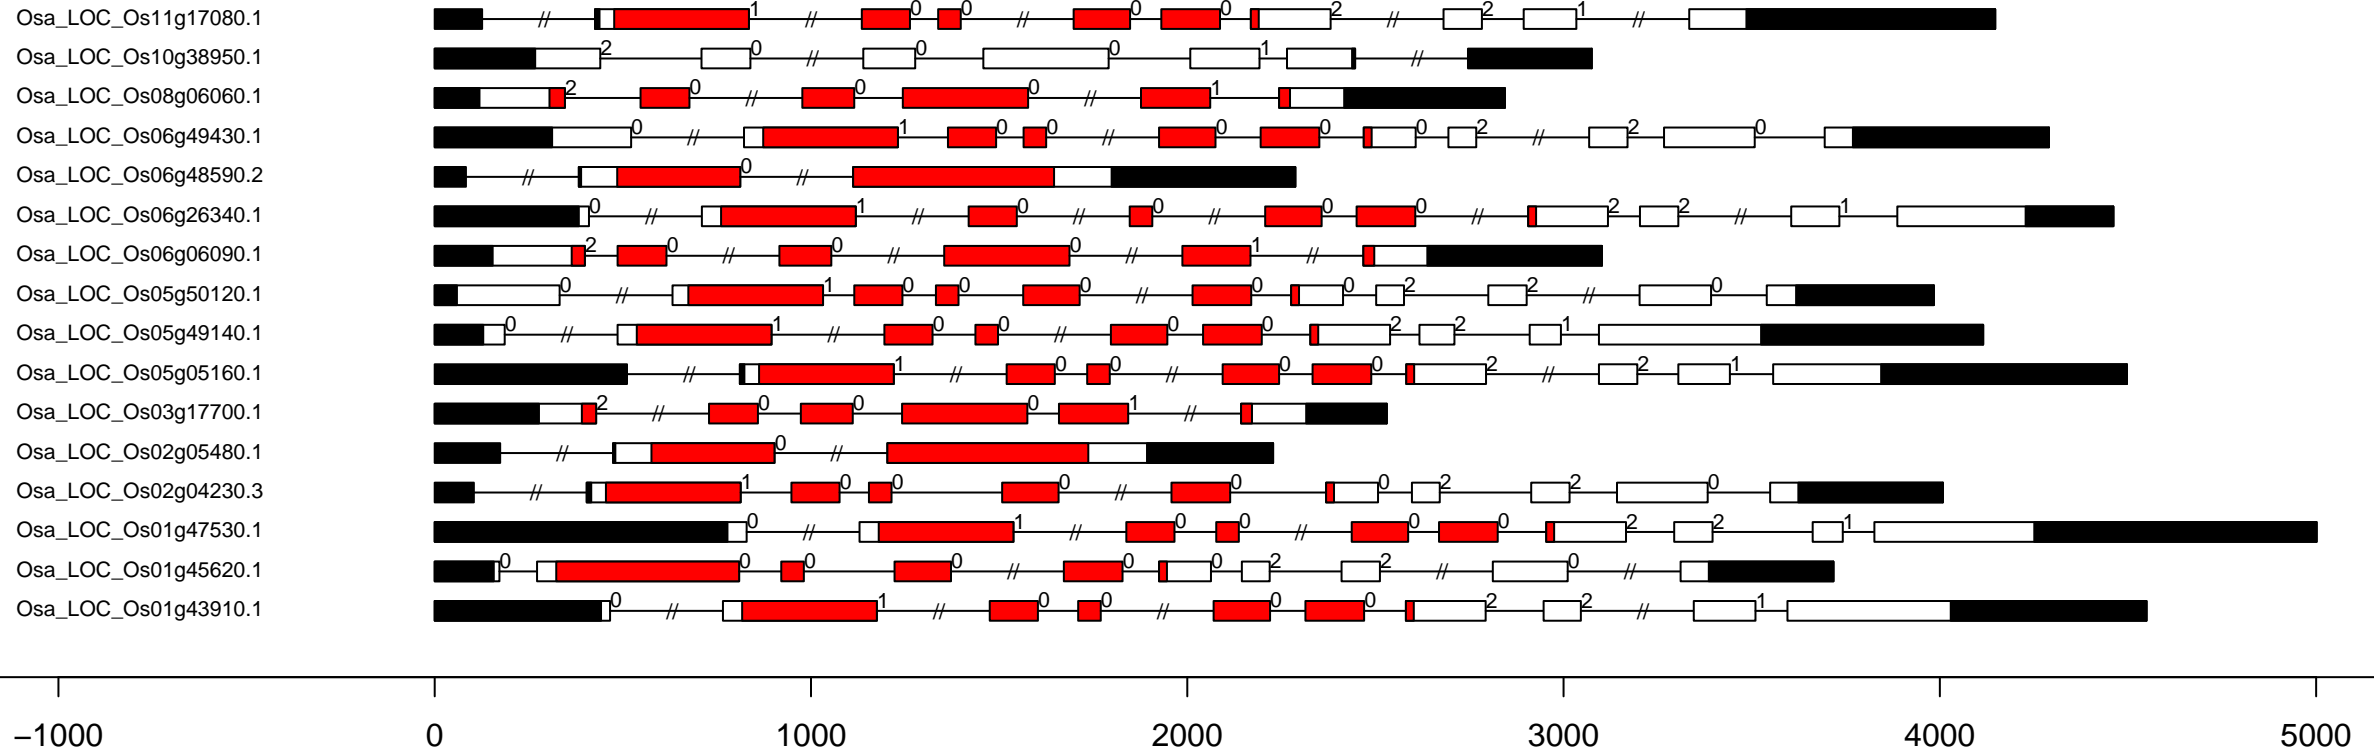

O.sa CMGC\_PI-Tthe exon-intron and kinase domain diagram (all)

Osa\_LOC\_Os02g55340.1

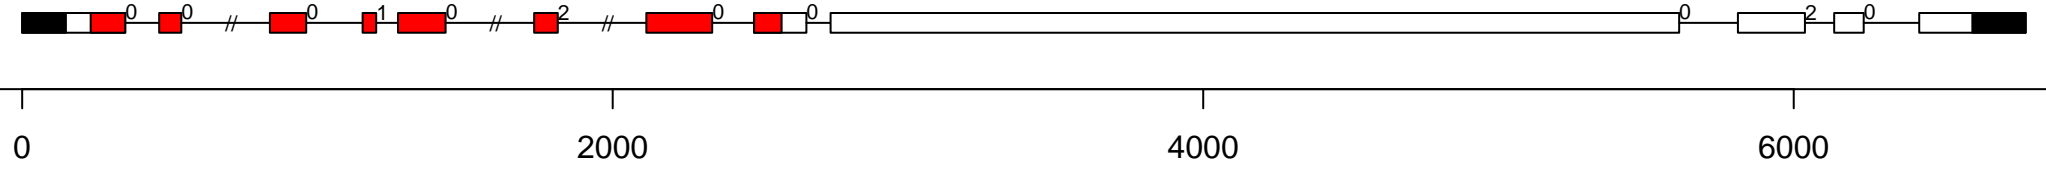

# O.sa CMGC\_RCK exon-intron and kinase domain diagram (all)

Osa\_LOC\_Os06g02550.2

Osa\_LOC\_Os03g63020.1

Osa\_LOC\_Os02g47220.1

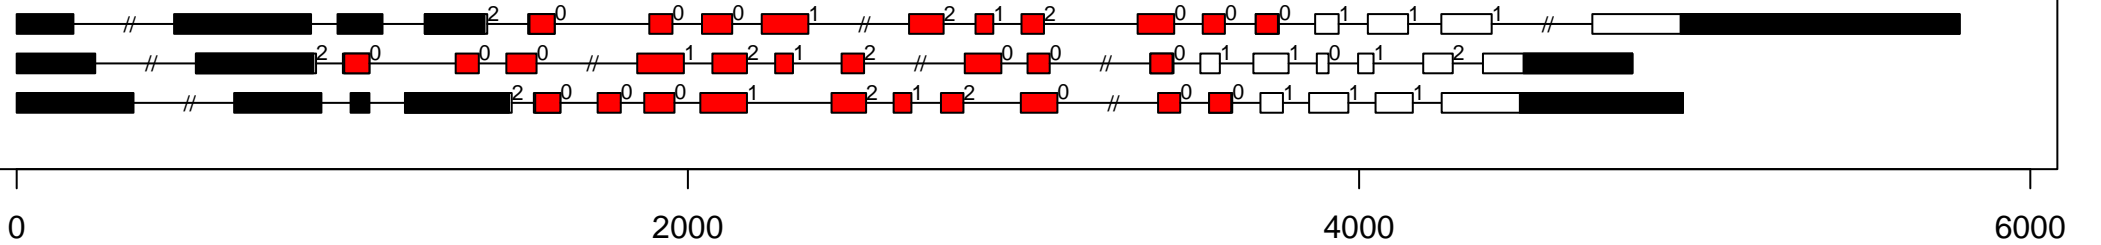

# O.sa CMGC\_SRPK exon-intron and kinase domain diagram (all)

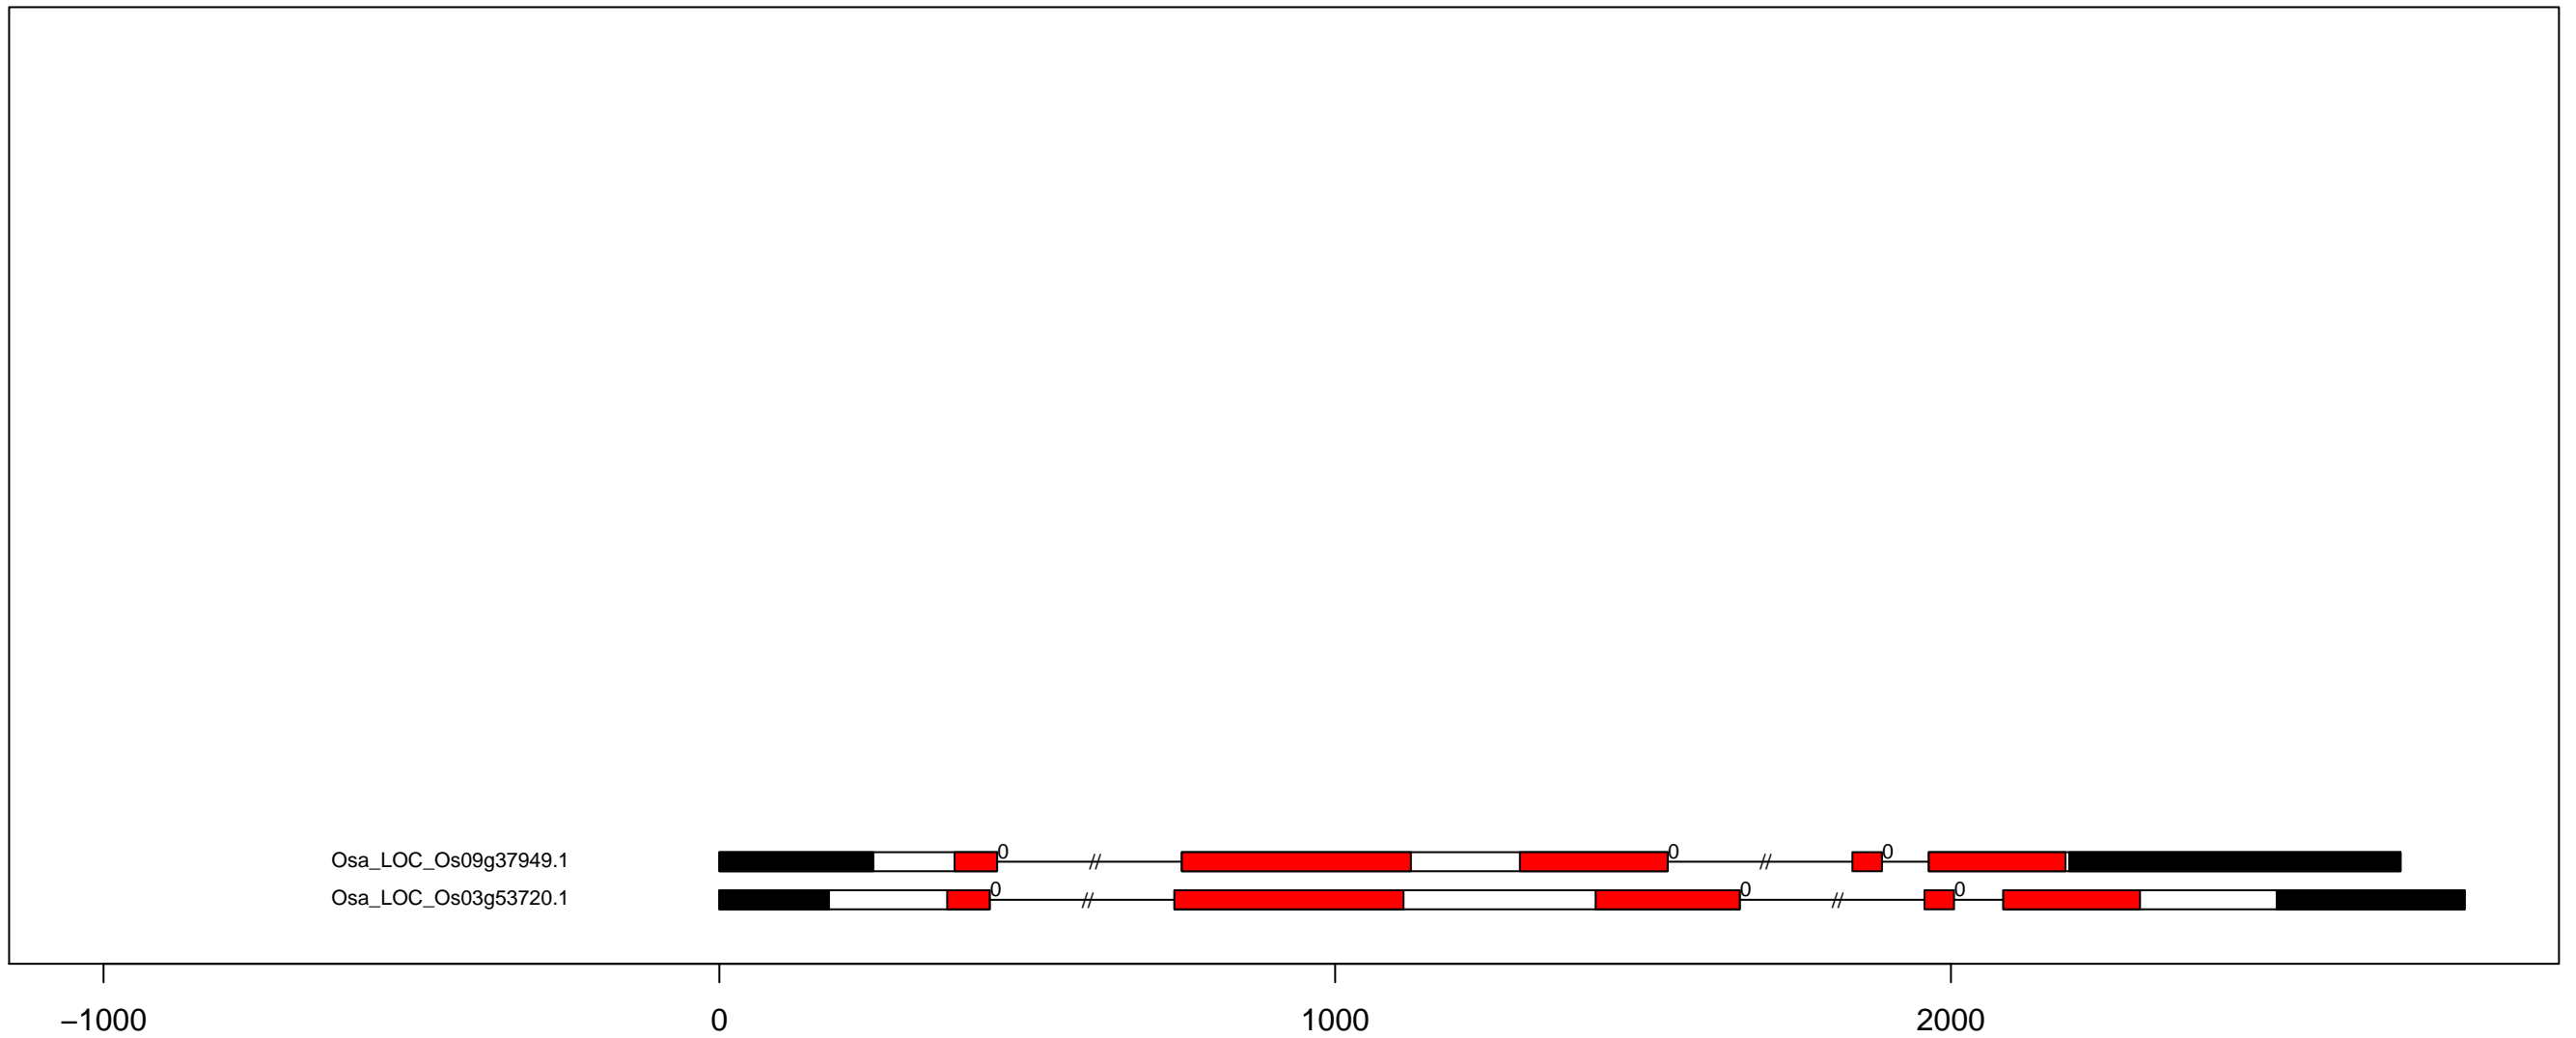

# O.sa Group-PI-2 exon-intron and kinase domain diagram (all)

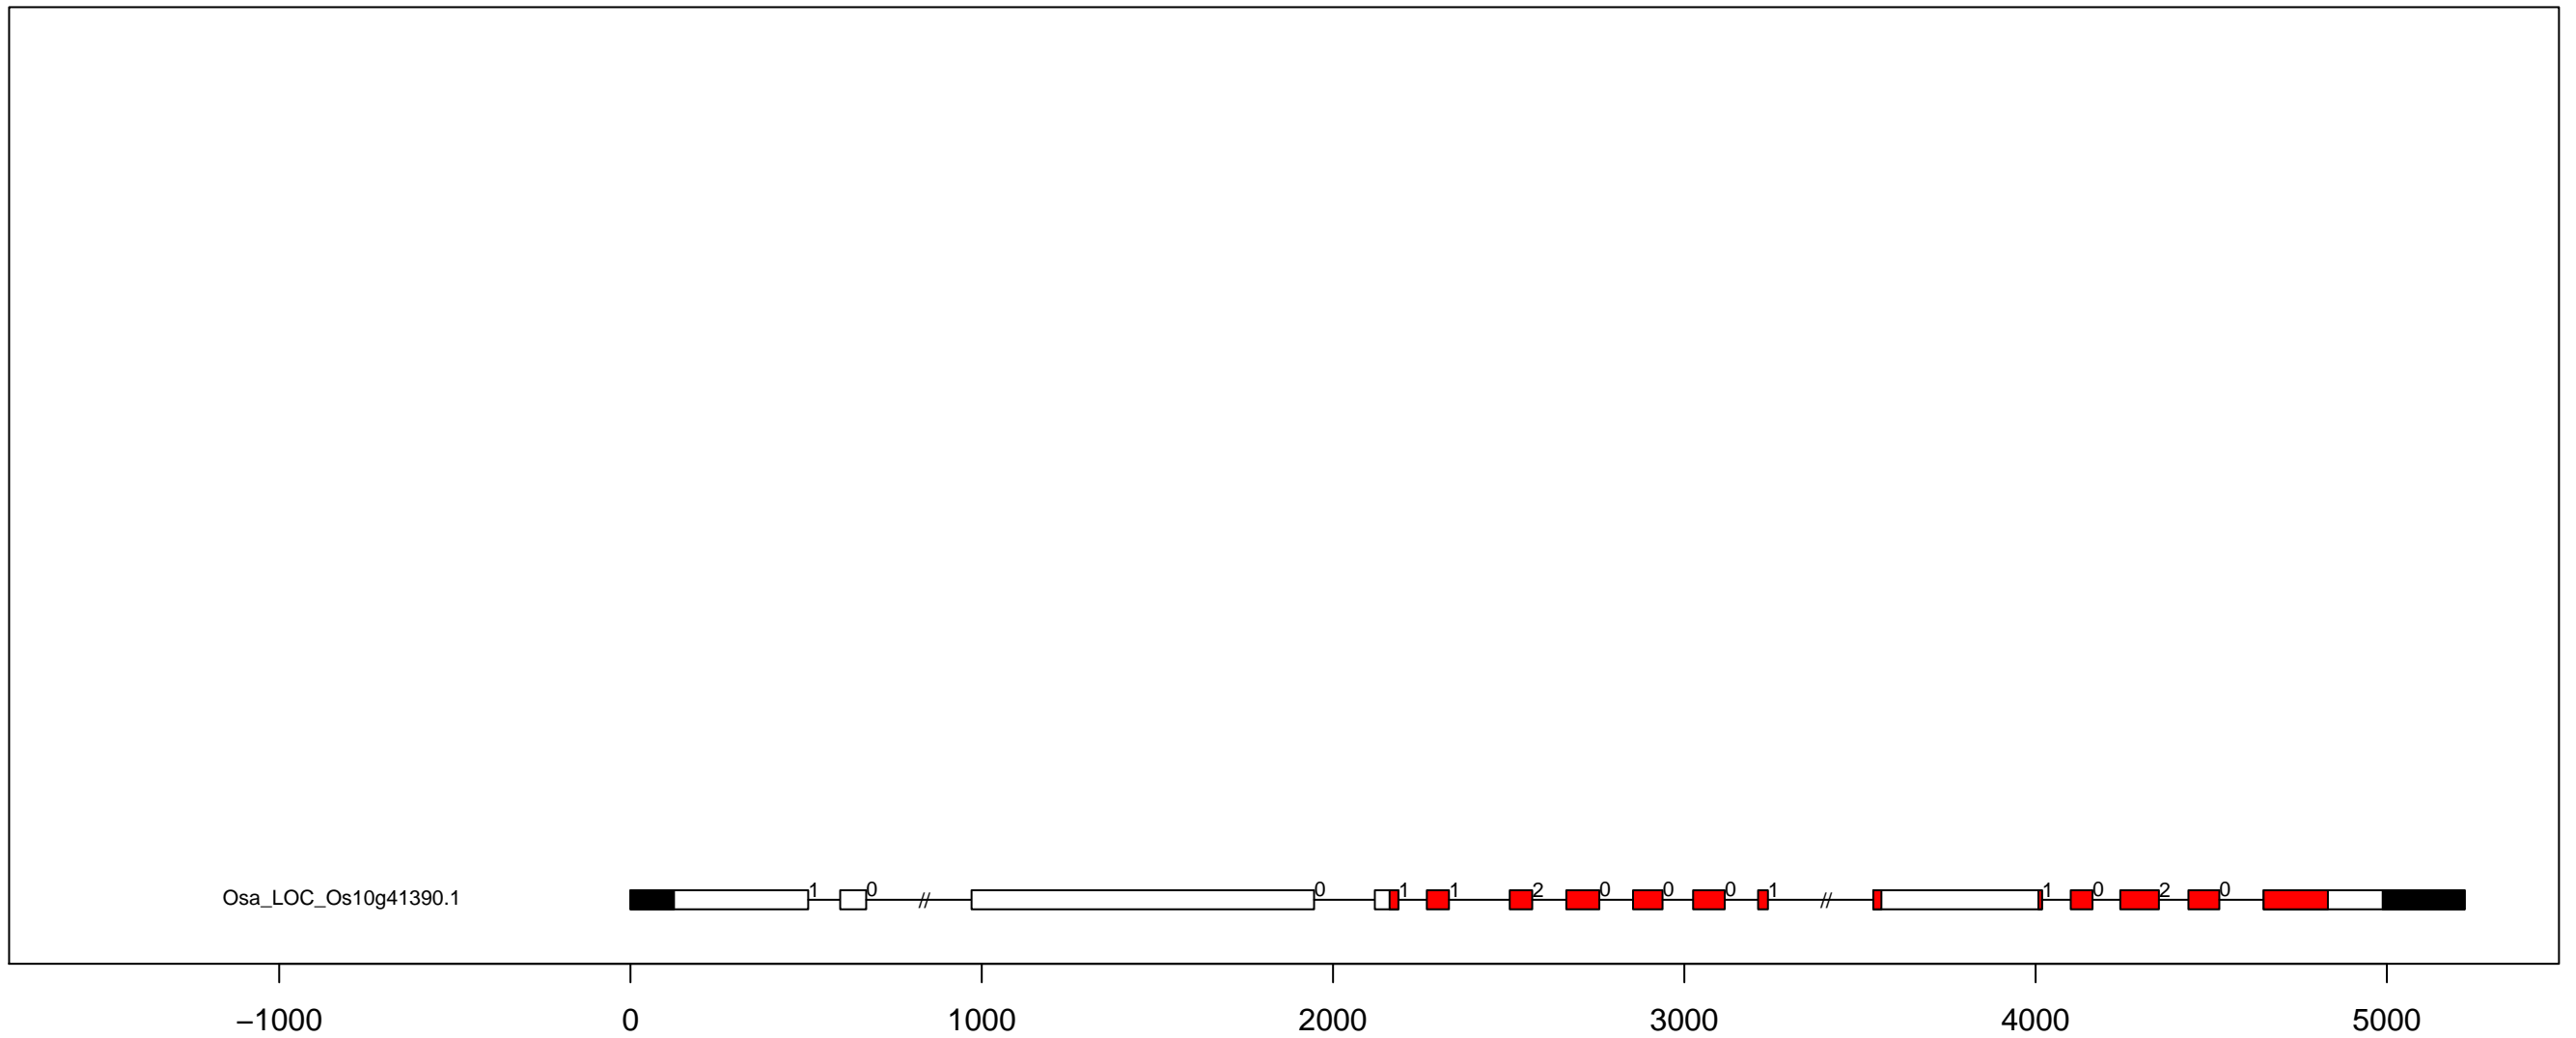

# O.sa Group-PI-3 exon-intron and kinase domain diagram (all)

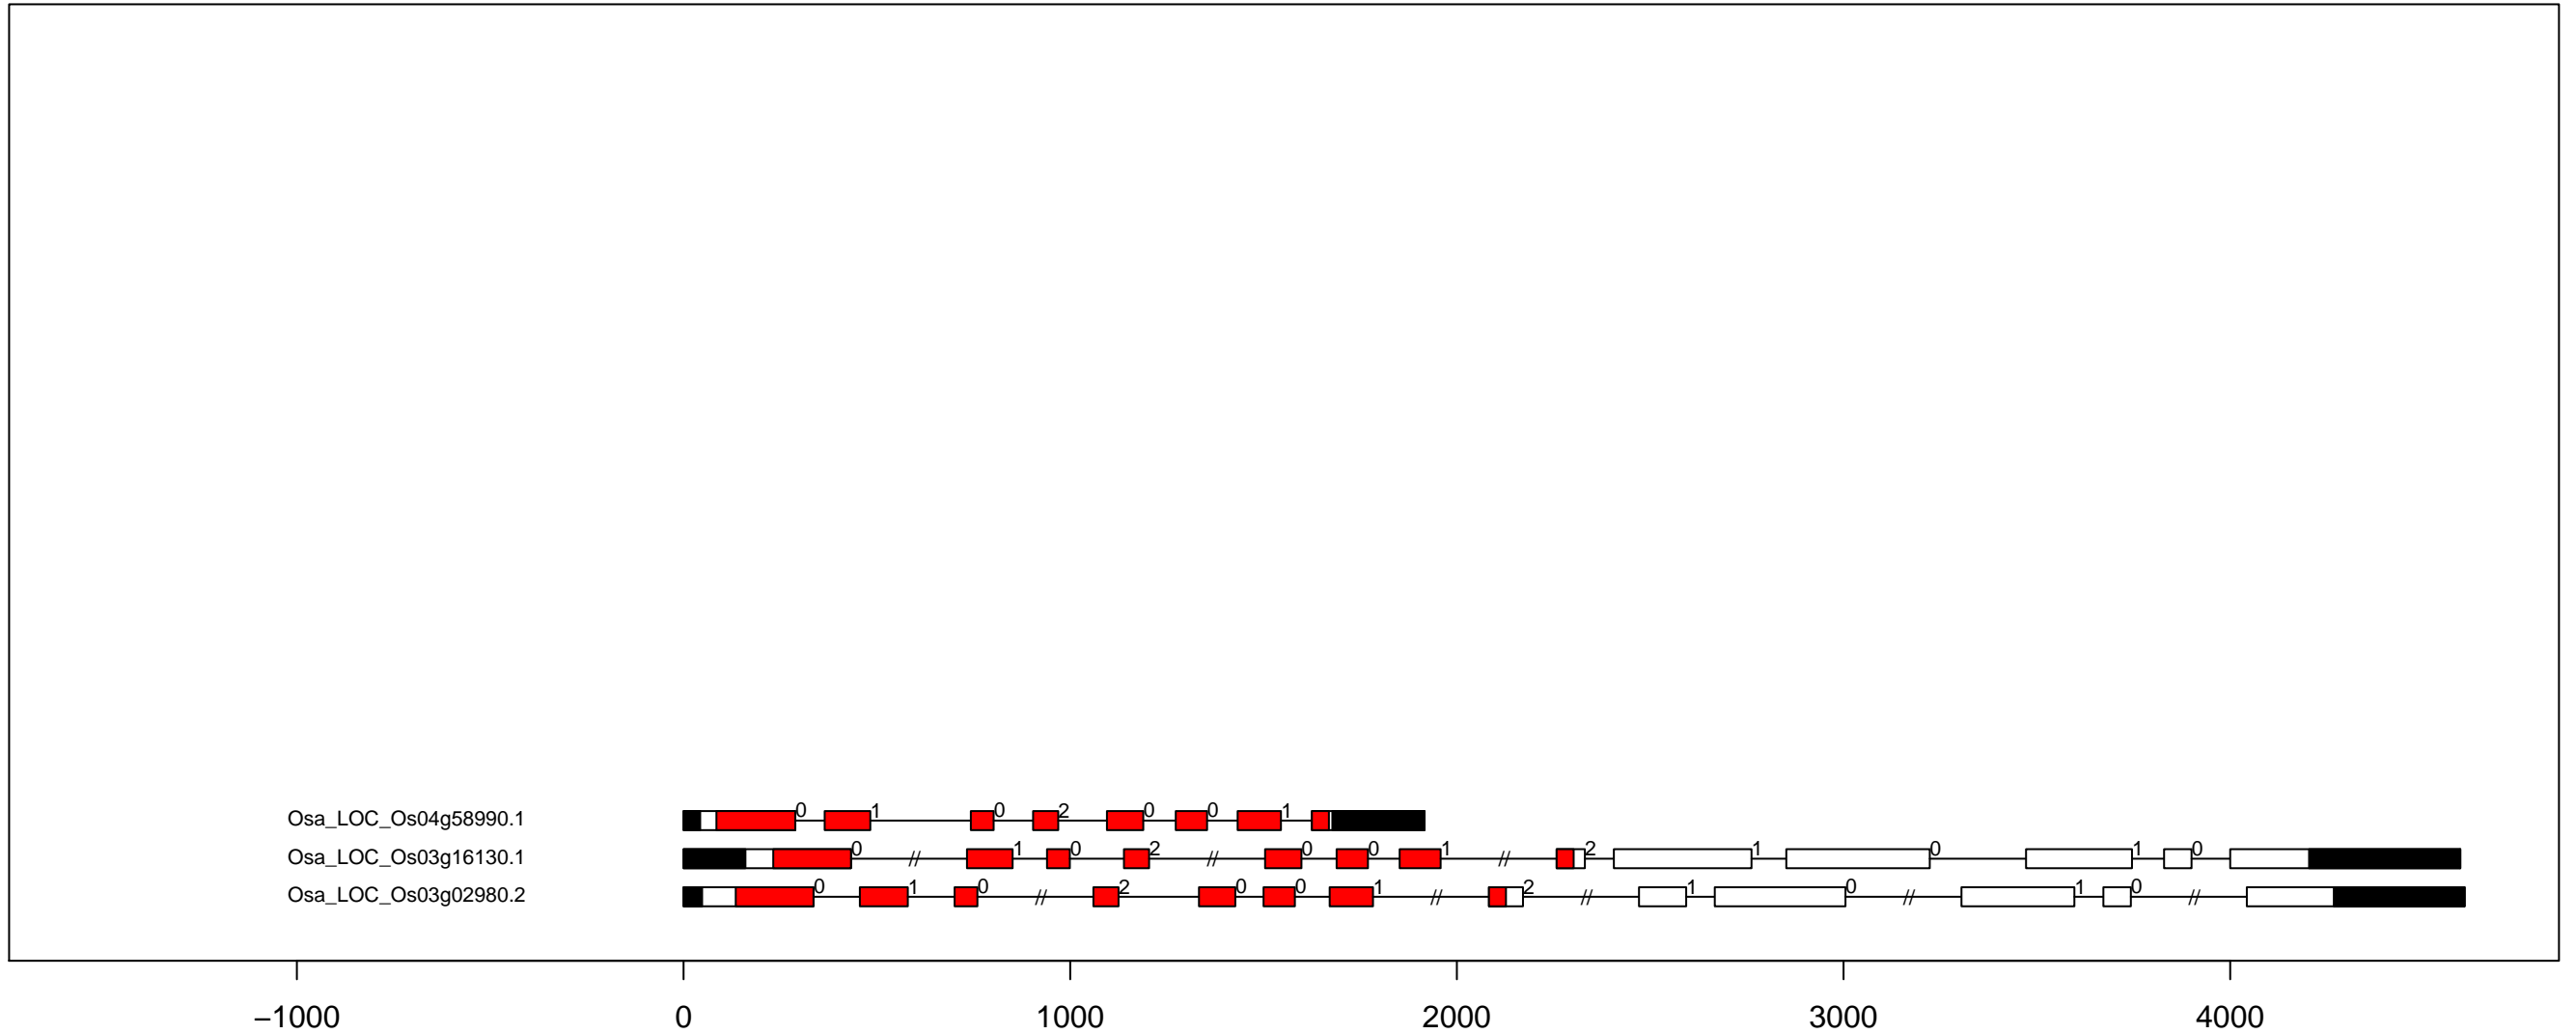

# O.sa Group-PI-4 exon-intron and kinase domain diagram (all)

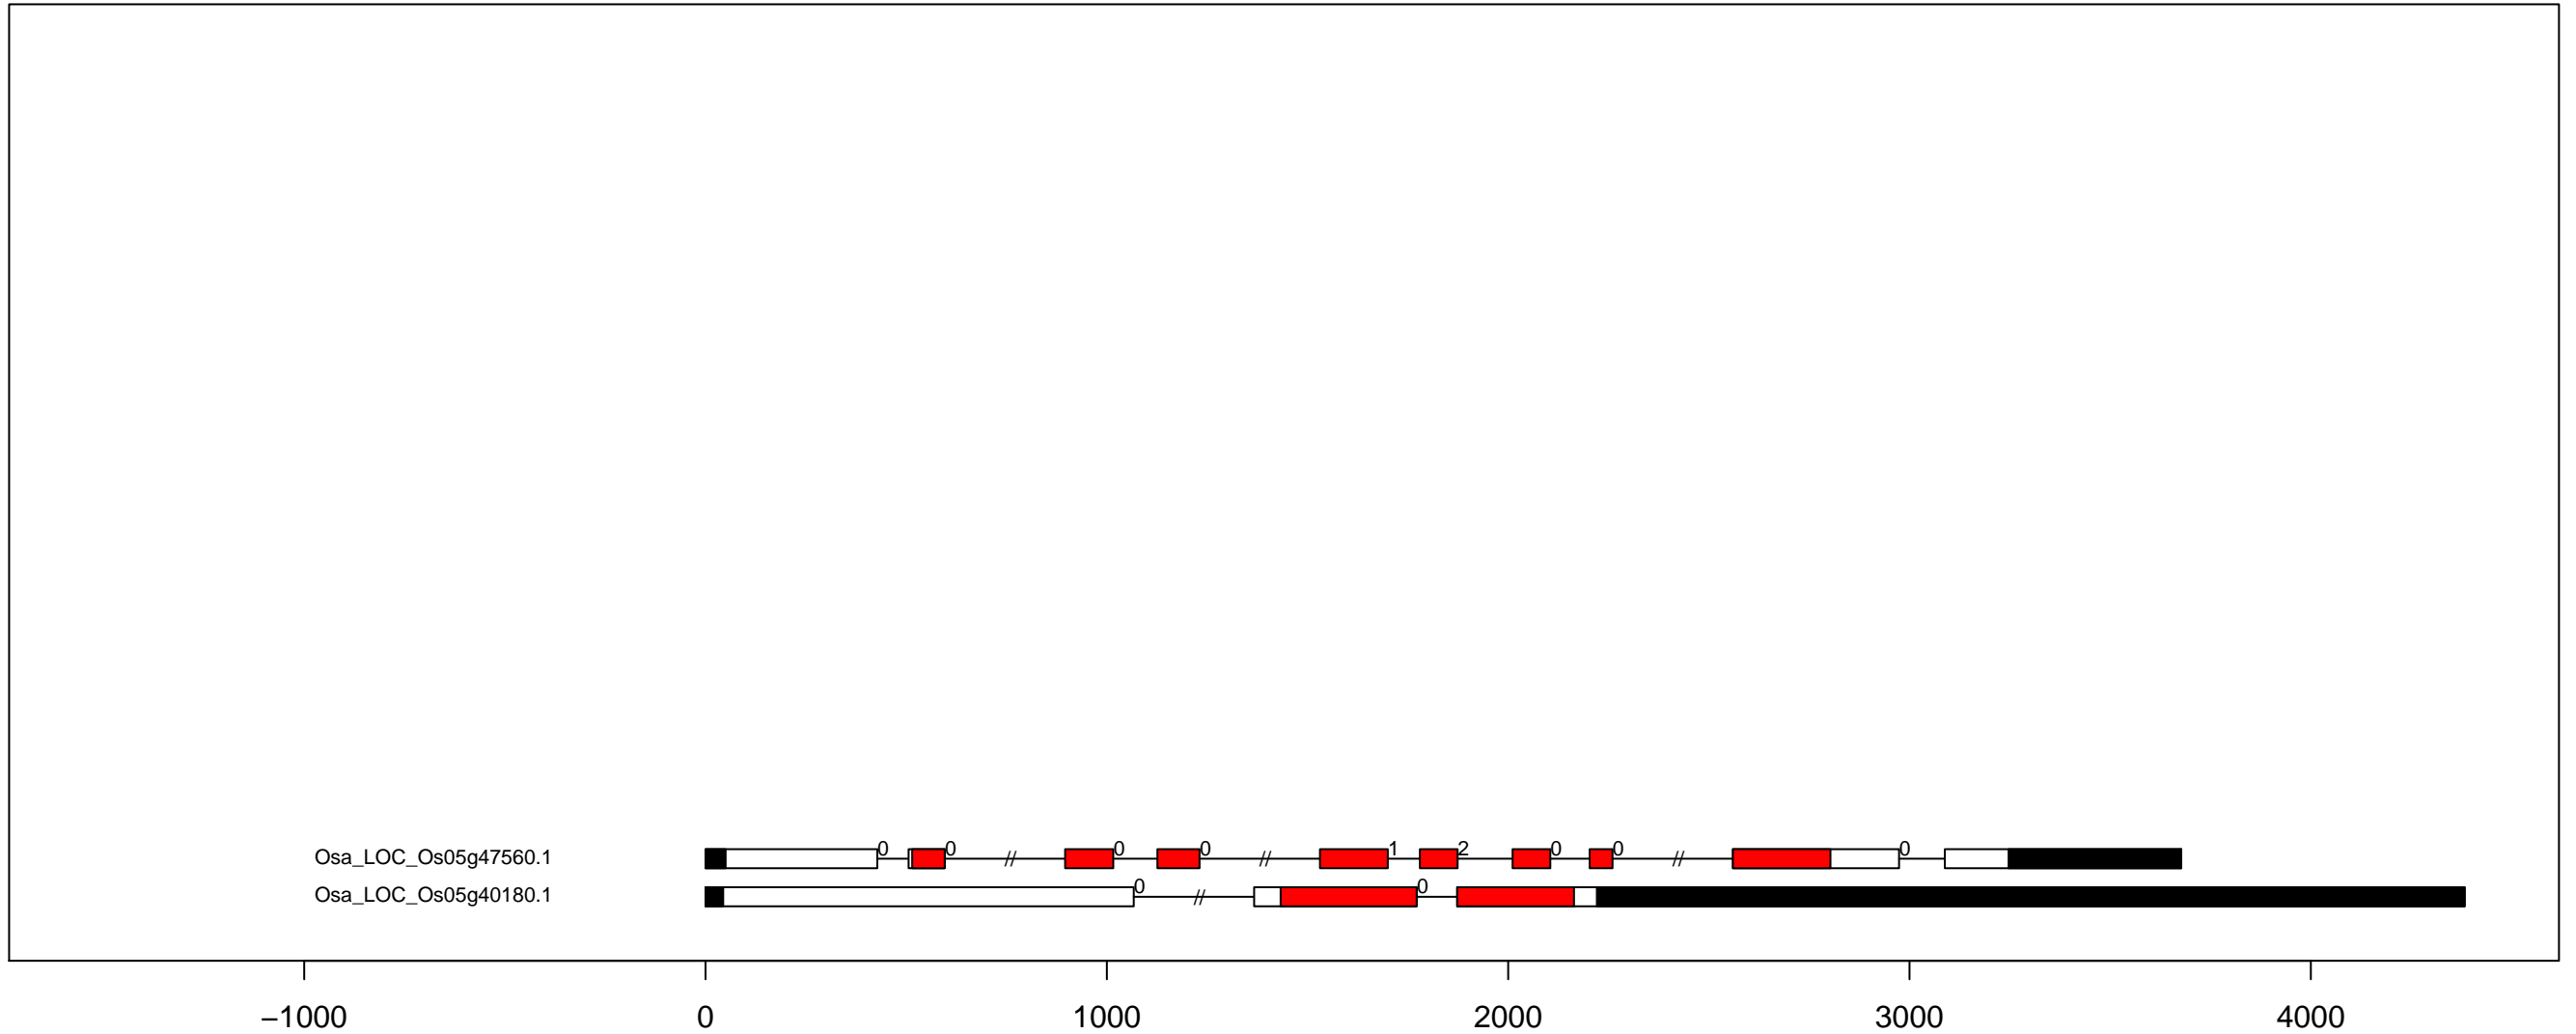



# O.sa IRE1 exon-intron and kinase domain diagram (all)

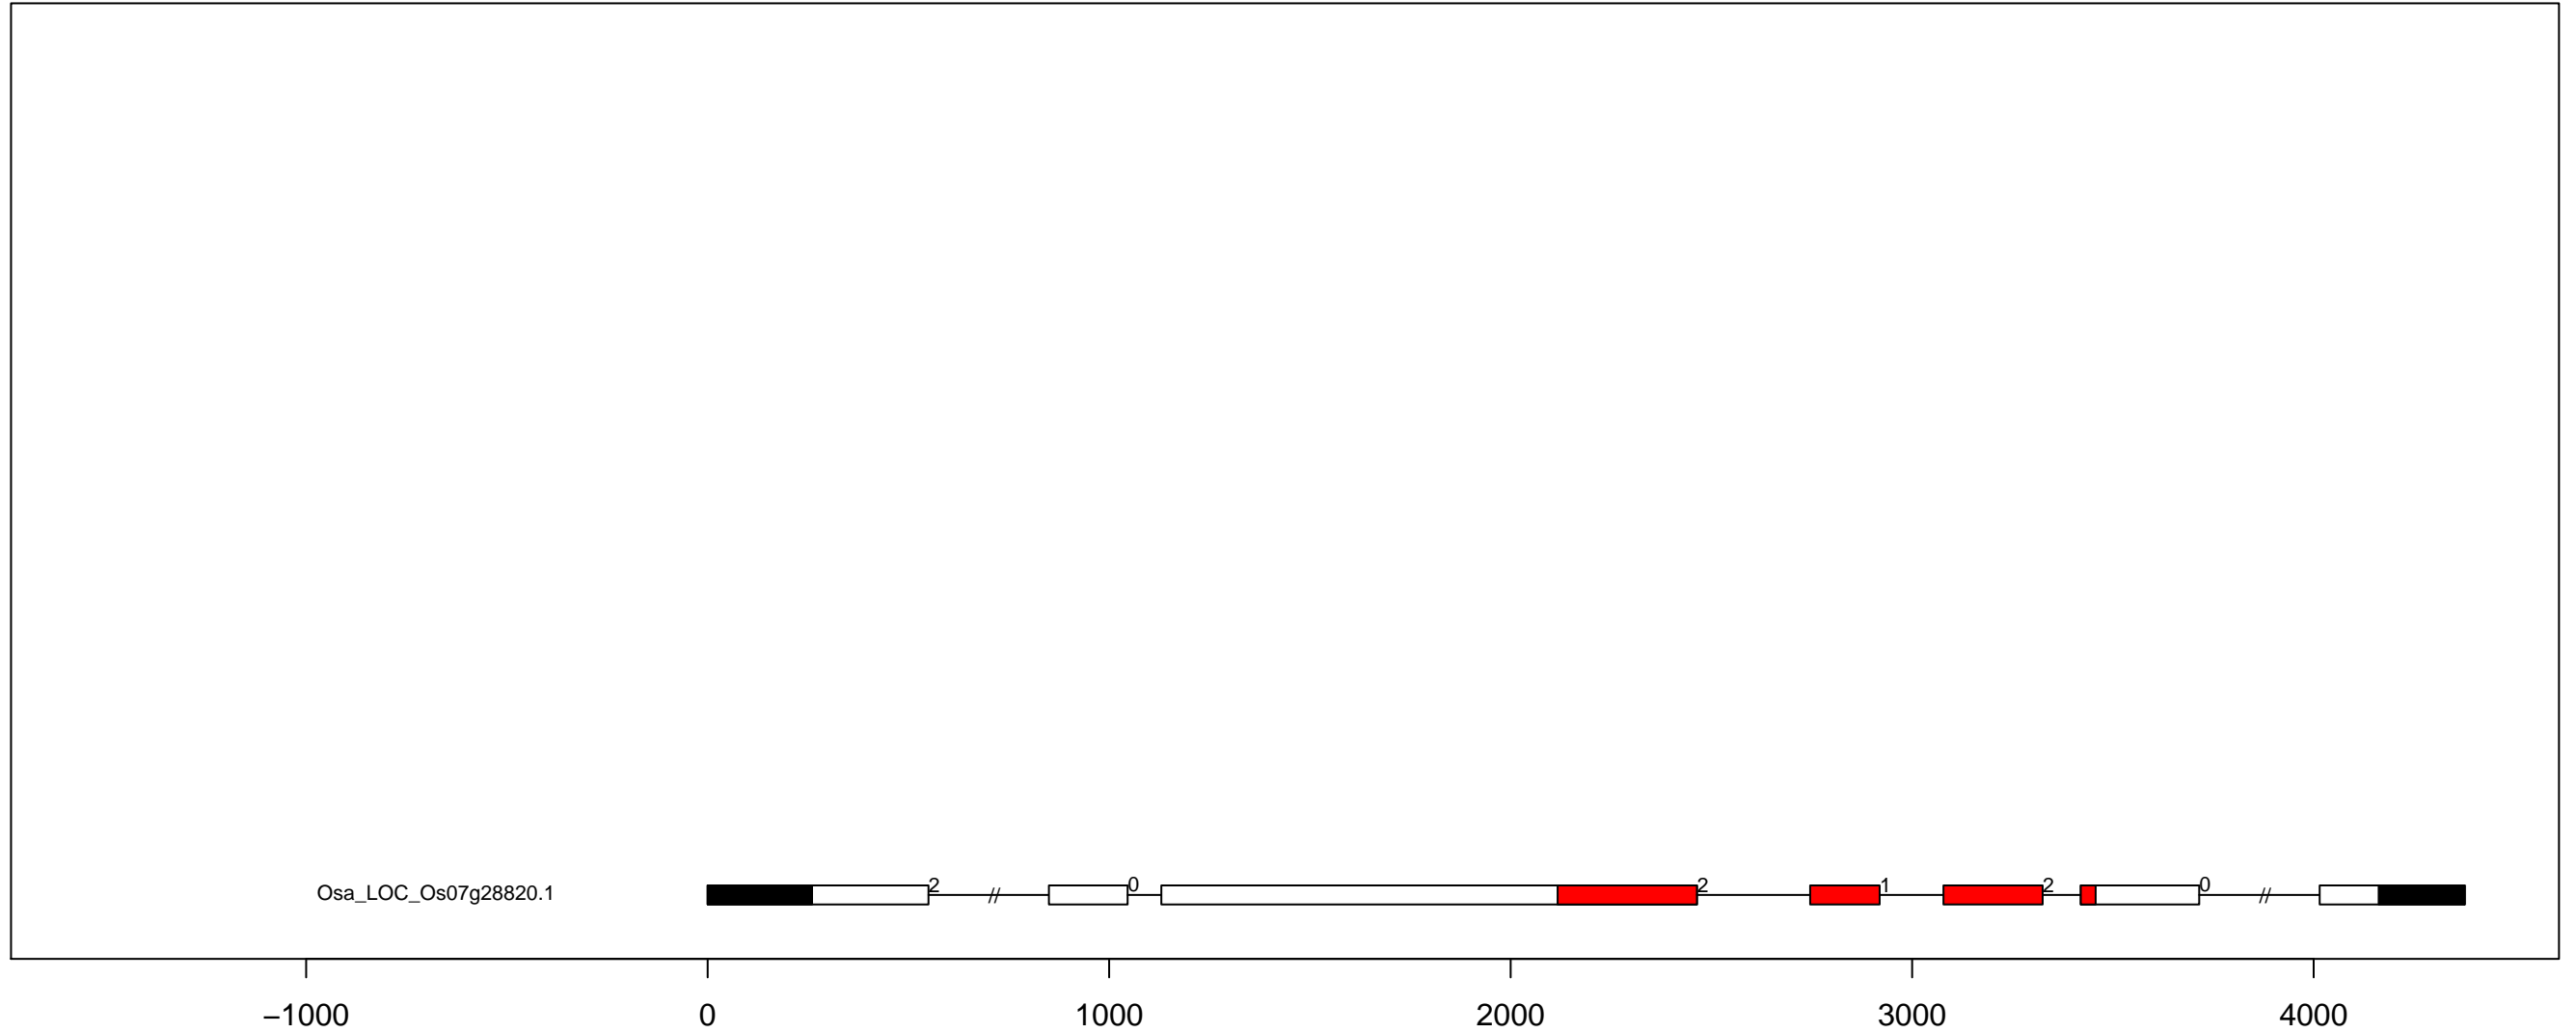

# O.sa NAK exon-intron and kinase domain diagram (all)

Osa\_LOC\_Os09g20640.1  
Osa\_LOC\_Os09g10720.1  
Osa\_LOC\_Os09g06230.1  
Osa\_LOC\_Os02g37880.3

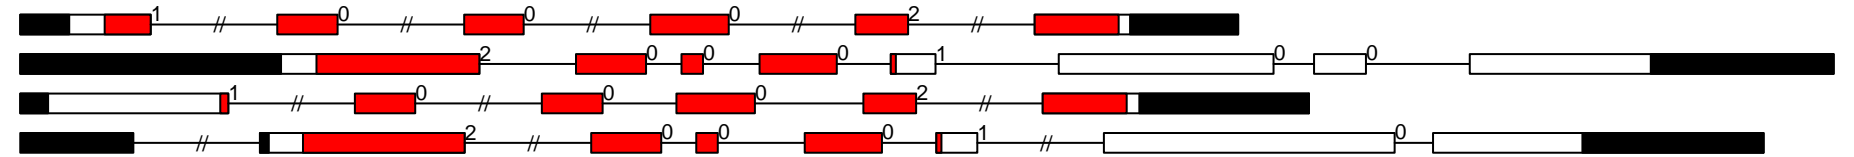

-1000

0

1000

2000

3000

4000

O.sa NEK exon-intron and kinase domain diagram (all)

Osa\_LOC\_Os12g41180.1  
Osa\_LOC\_Os07g08000.1  
Osa\_LOC\_Os05g36960.1  
Osa\_LOC\_Os03g43590.1  
Osa\_LOC\_Os02g37830.1  
Osa\_LOC\_Os01g64490.1

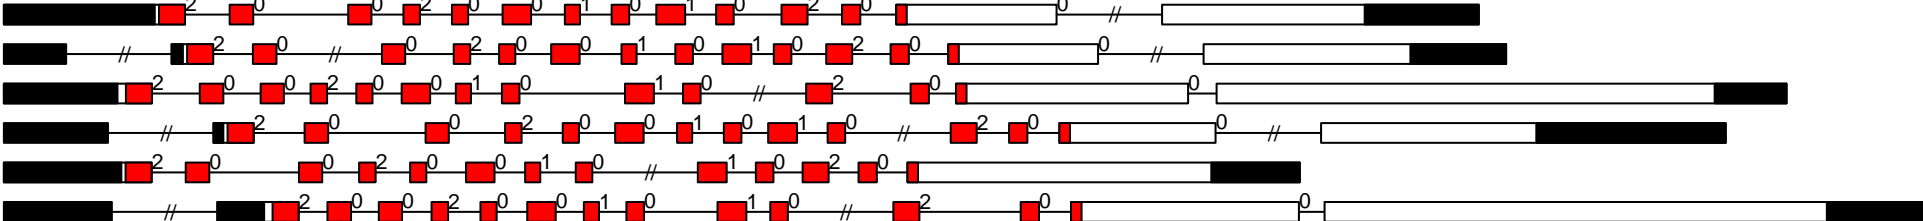

-1000

0

1000

2000

3000

4000

5000

# O.sa PEK\_GCN2 exon-intron and kinase domain diagram (all)

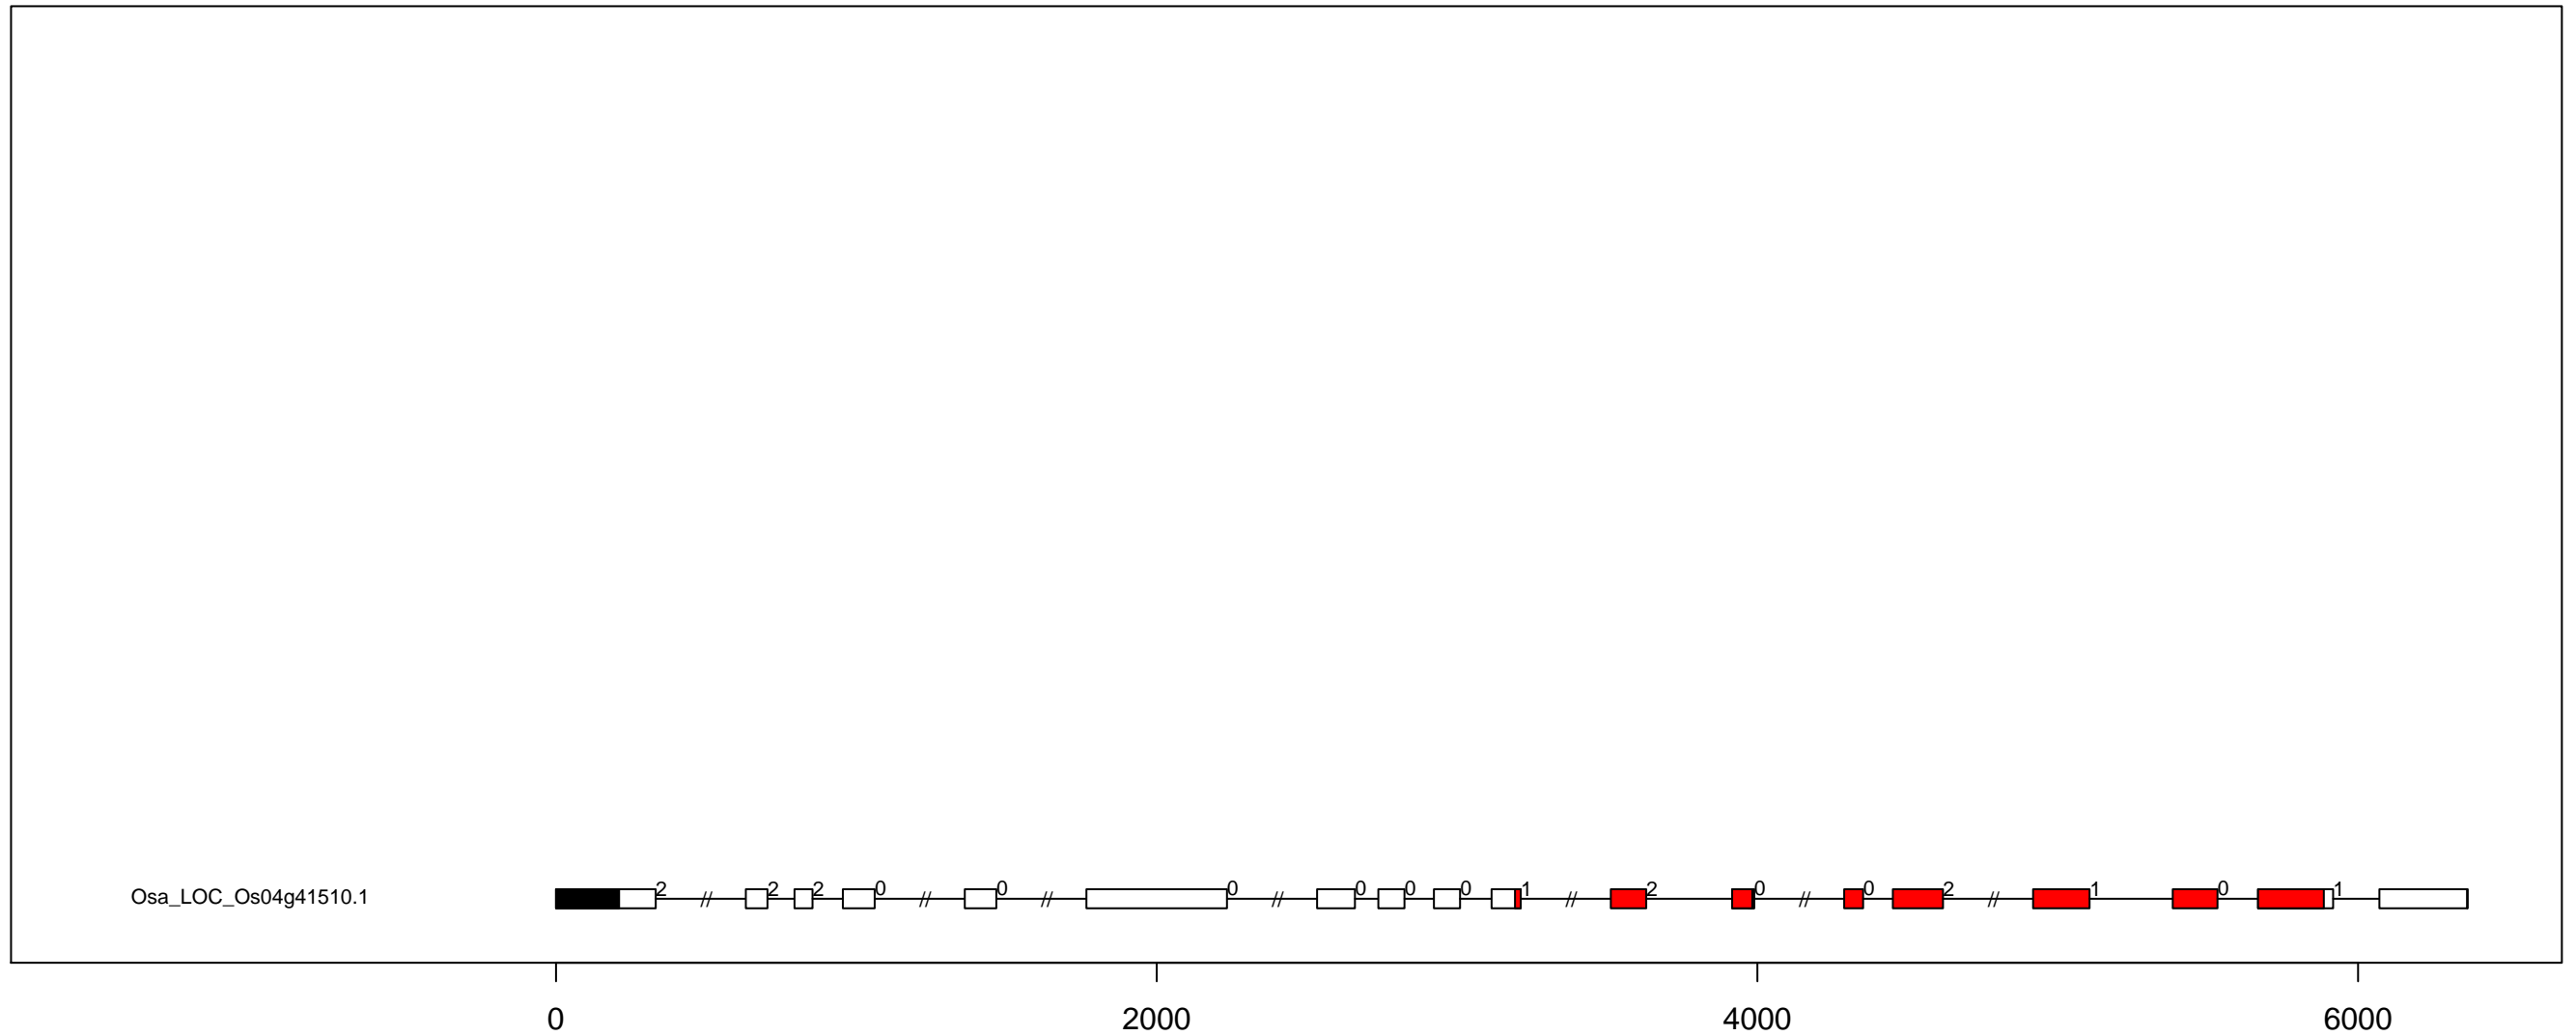

# O.sa RLK-Pelle\_C-LEC exon-intron and kinase domain diagram (all)

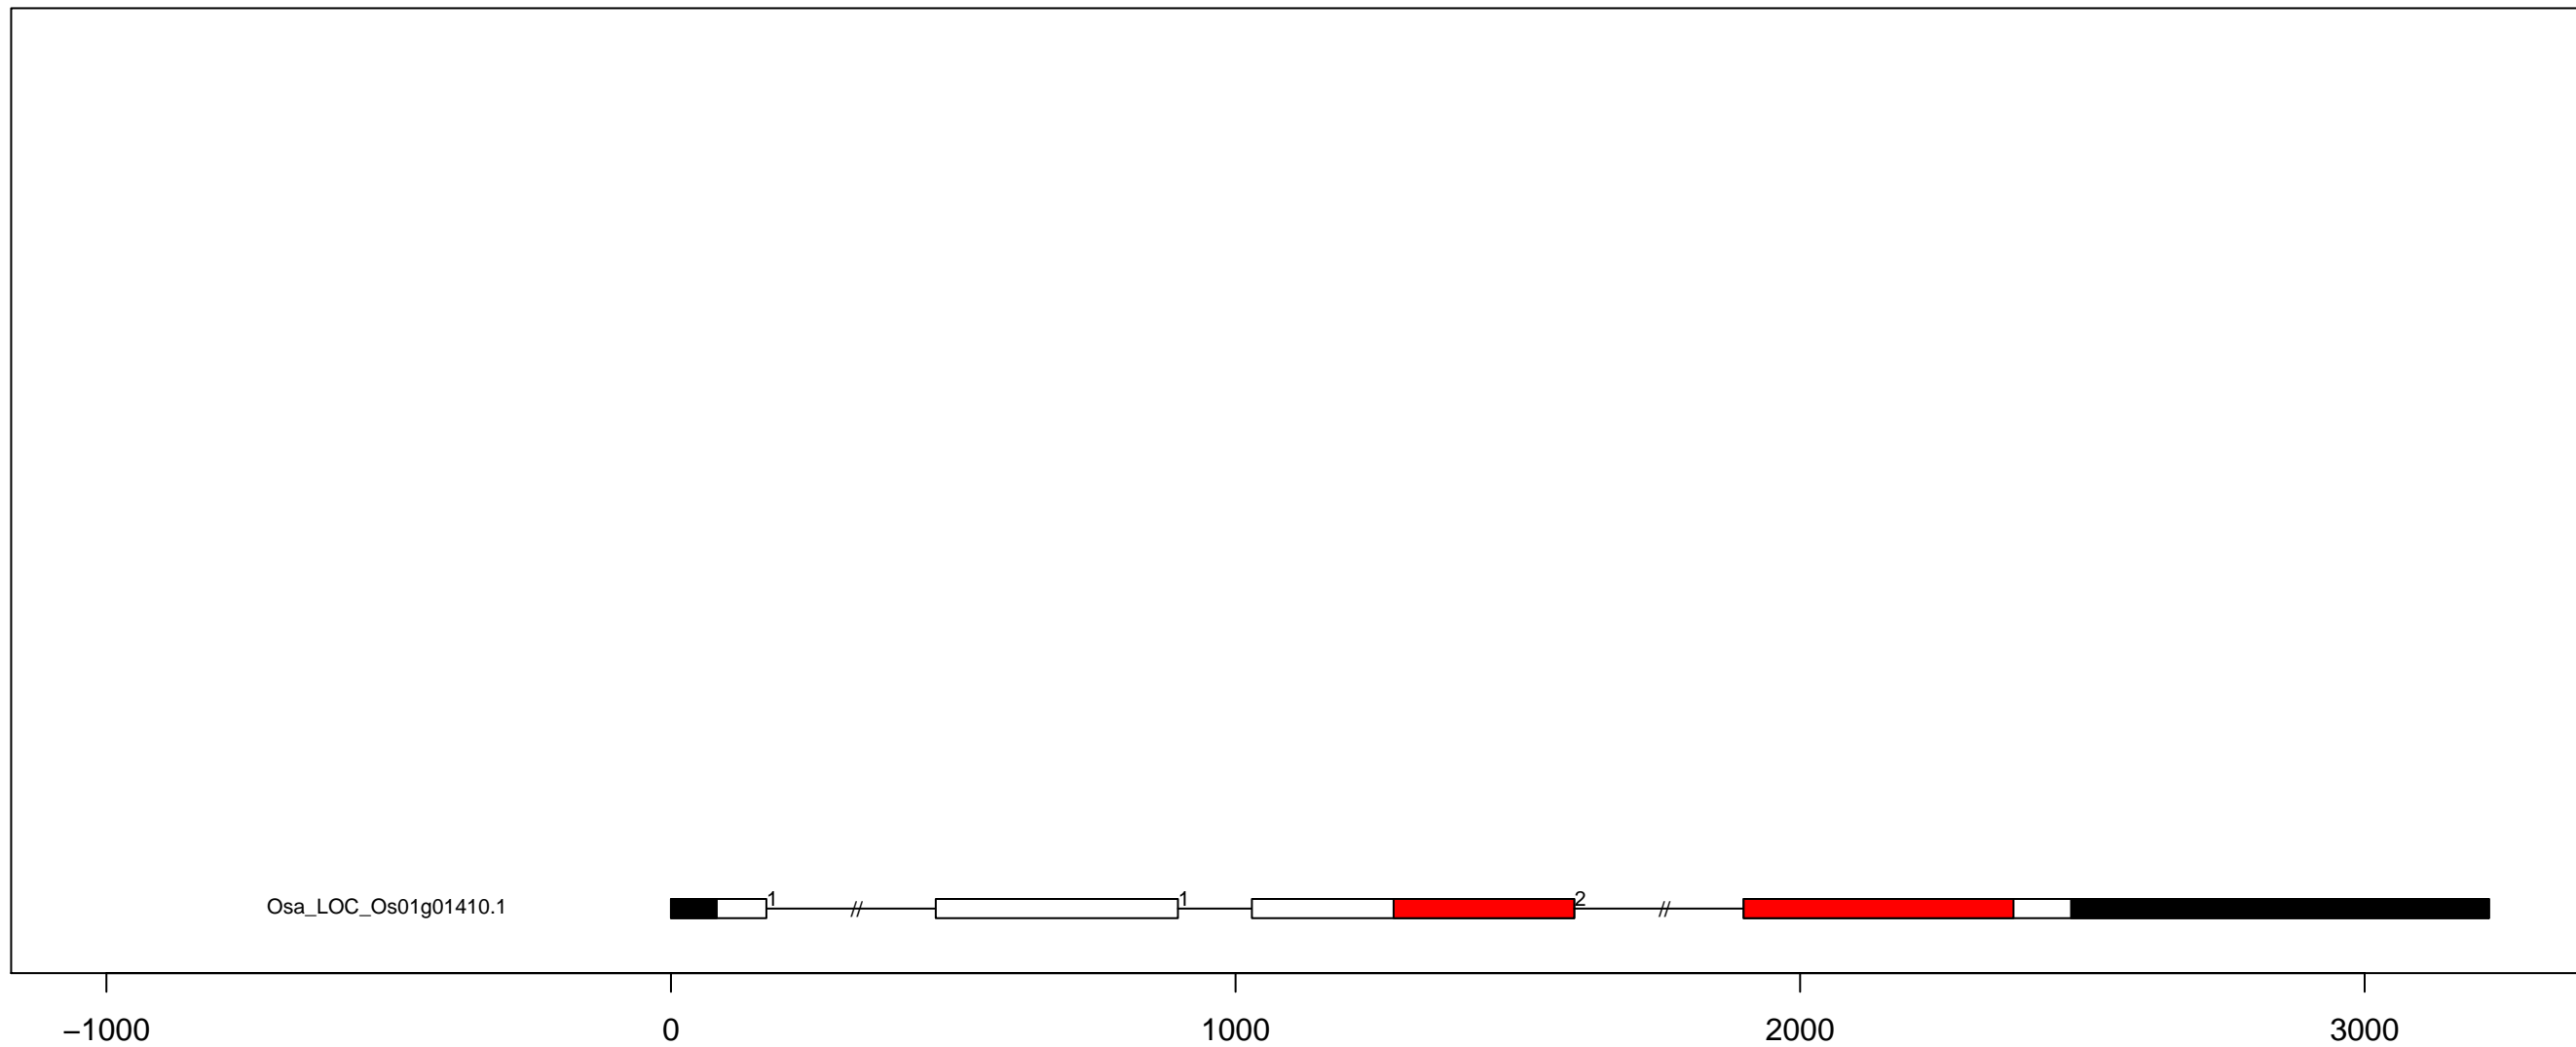

# O.sa RLK-Pelle\_CR4L exon-intron and kinase domain diagram (all)

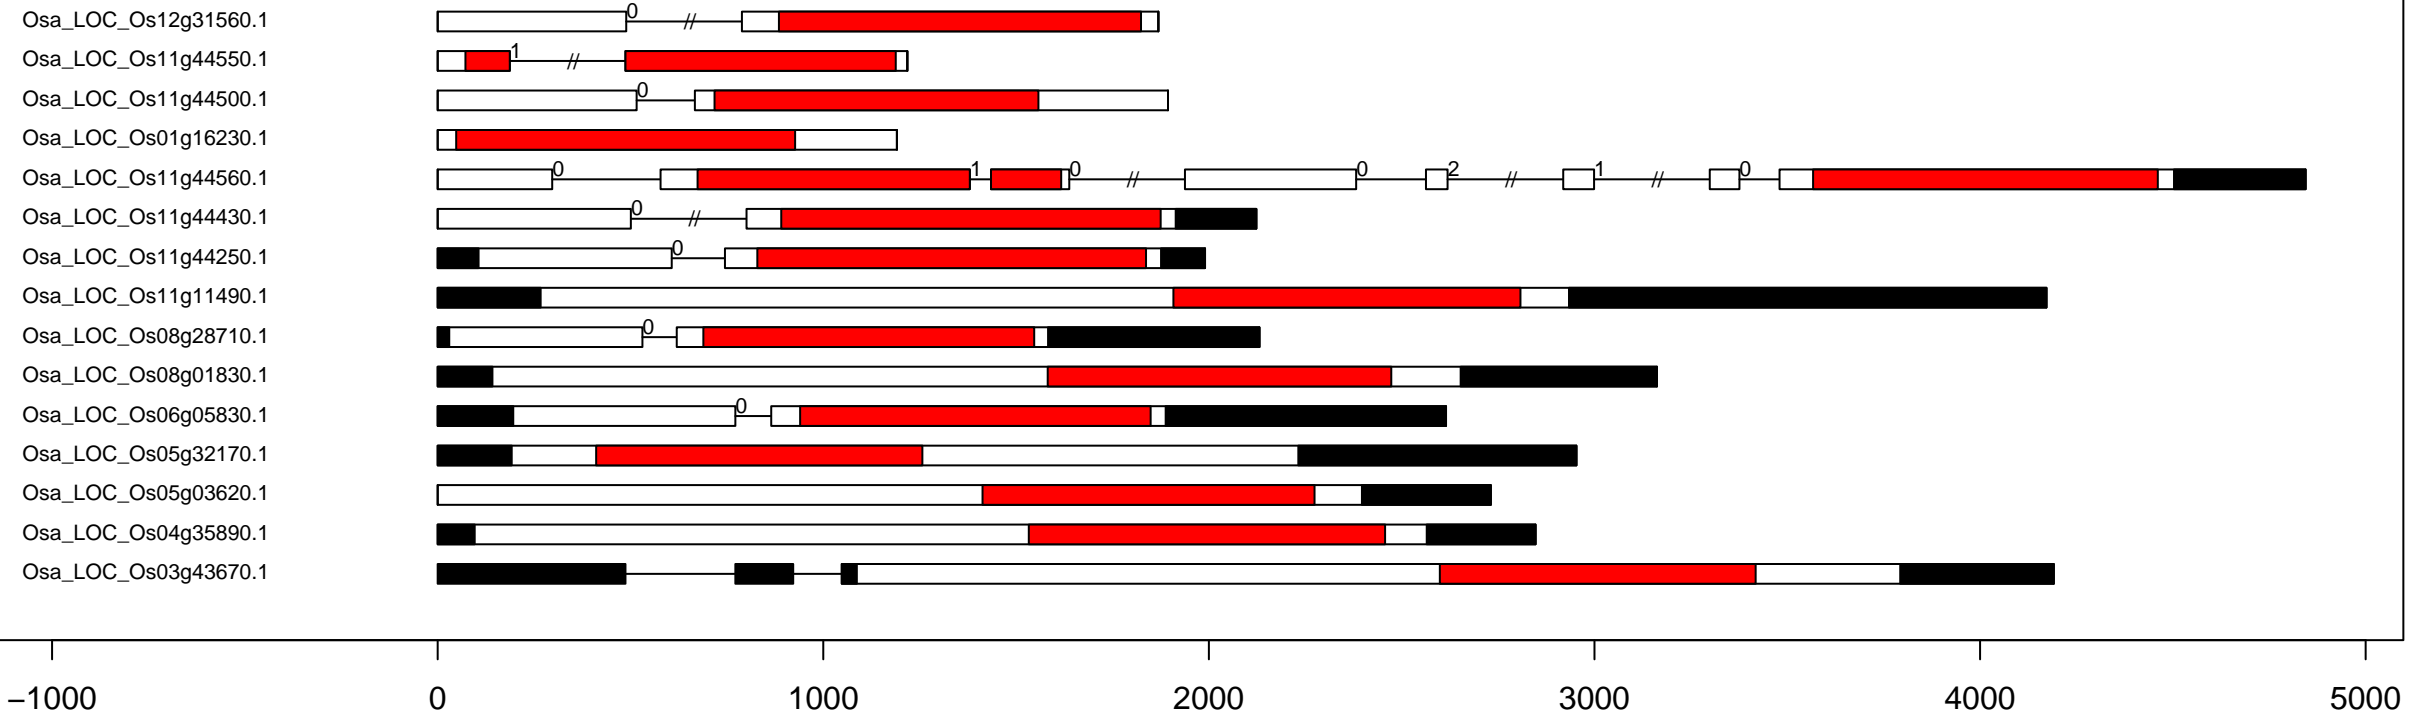

# O.sa RLK-Pelle\_CrRLK1L-1 exon-intron and kinase domain diagram (all)

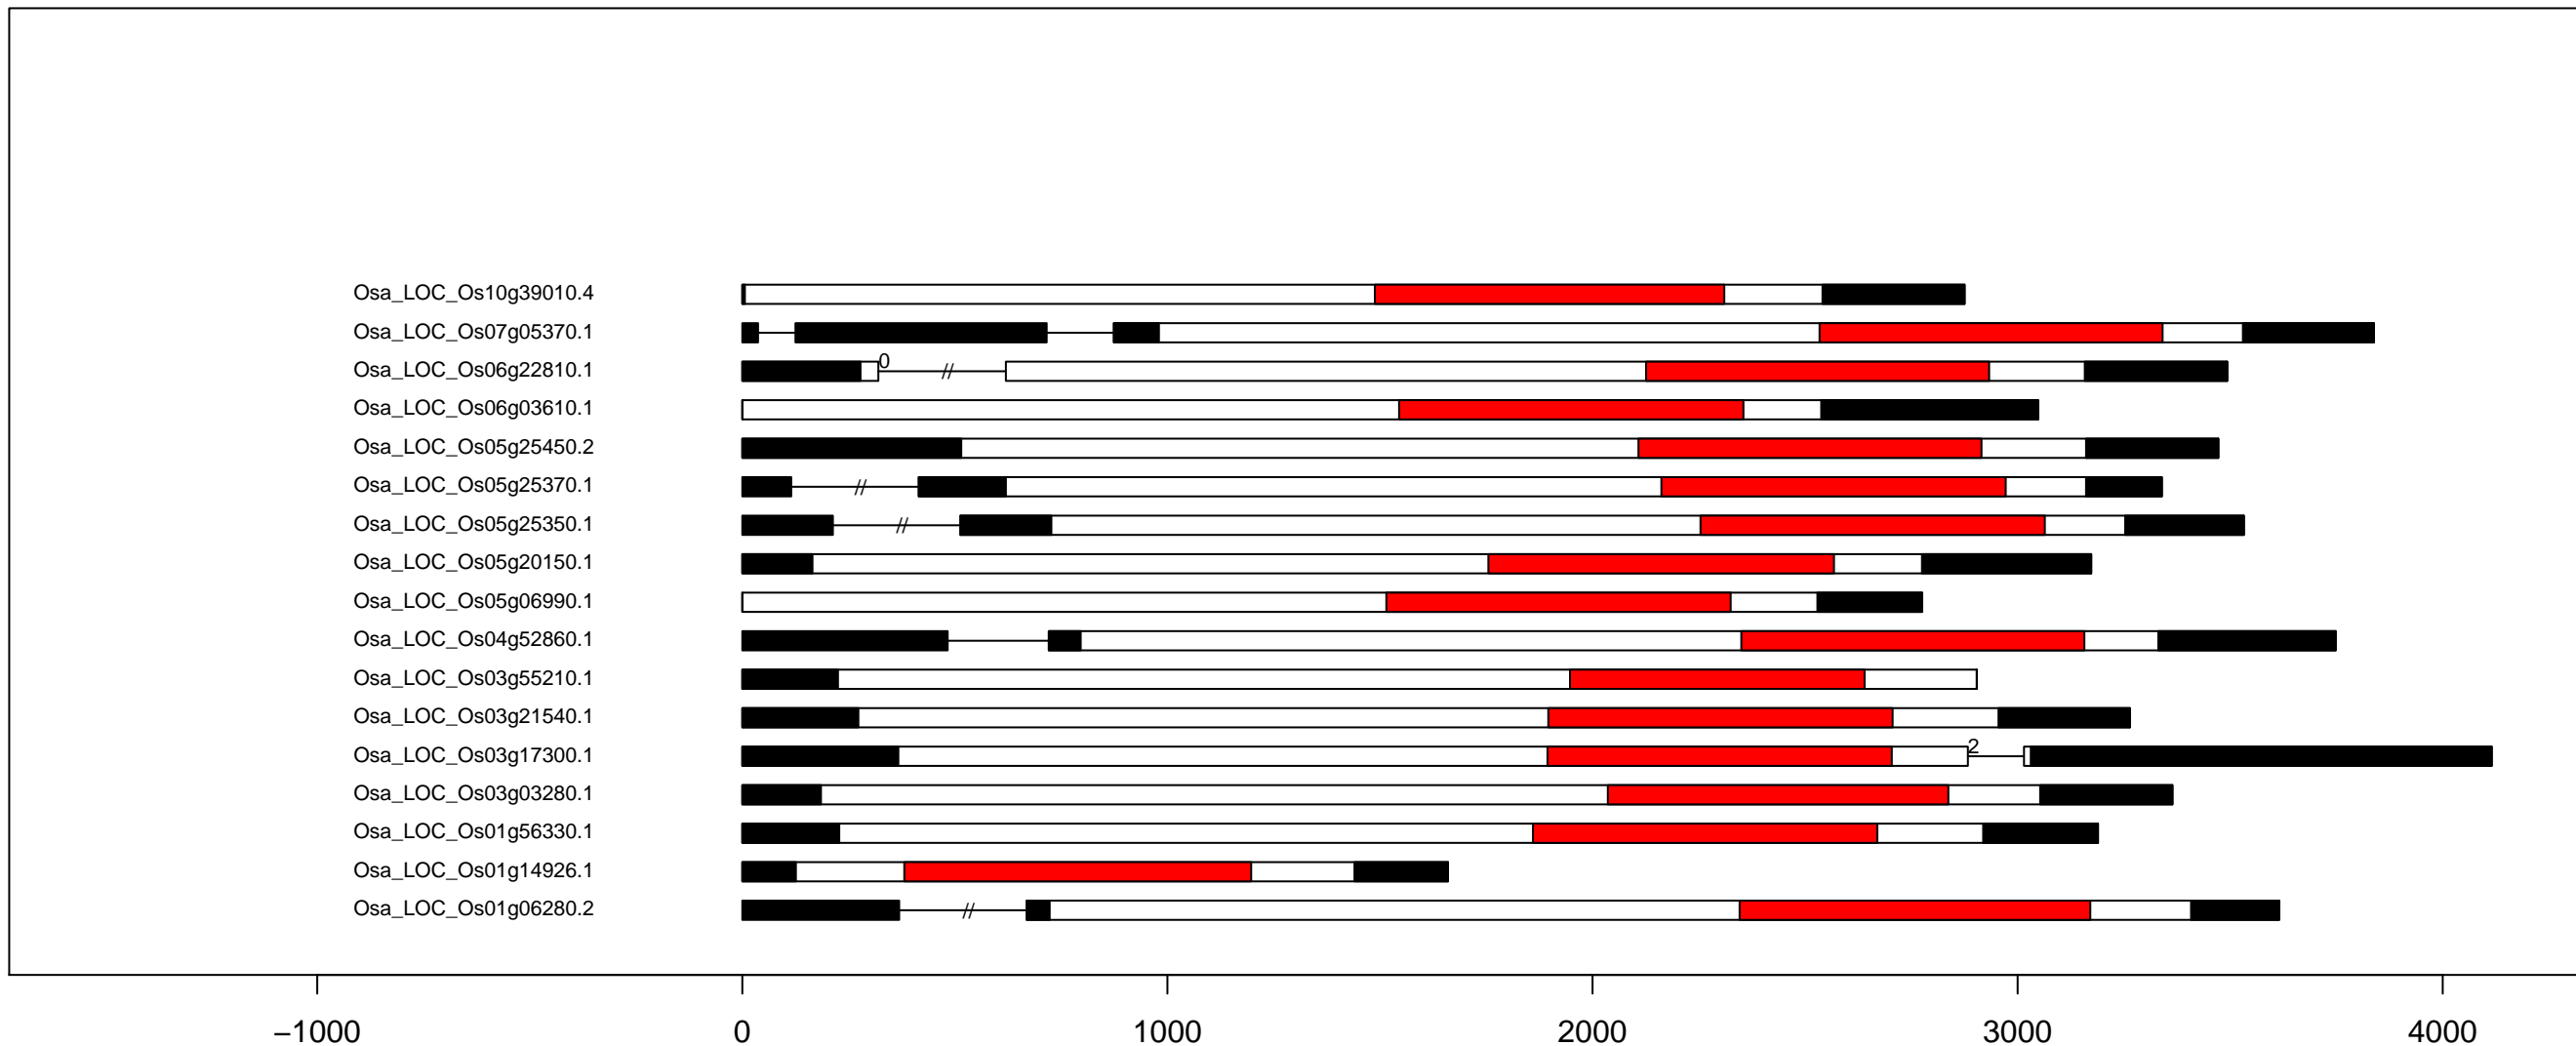

# O.sa RLK-Pelle\_DLSV exon-intron and kinase domain diagram (part 1)

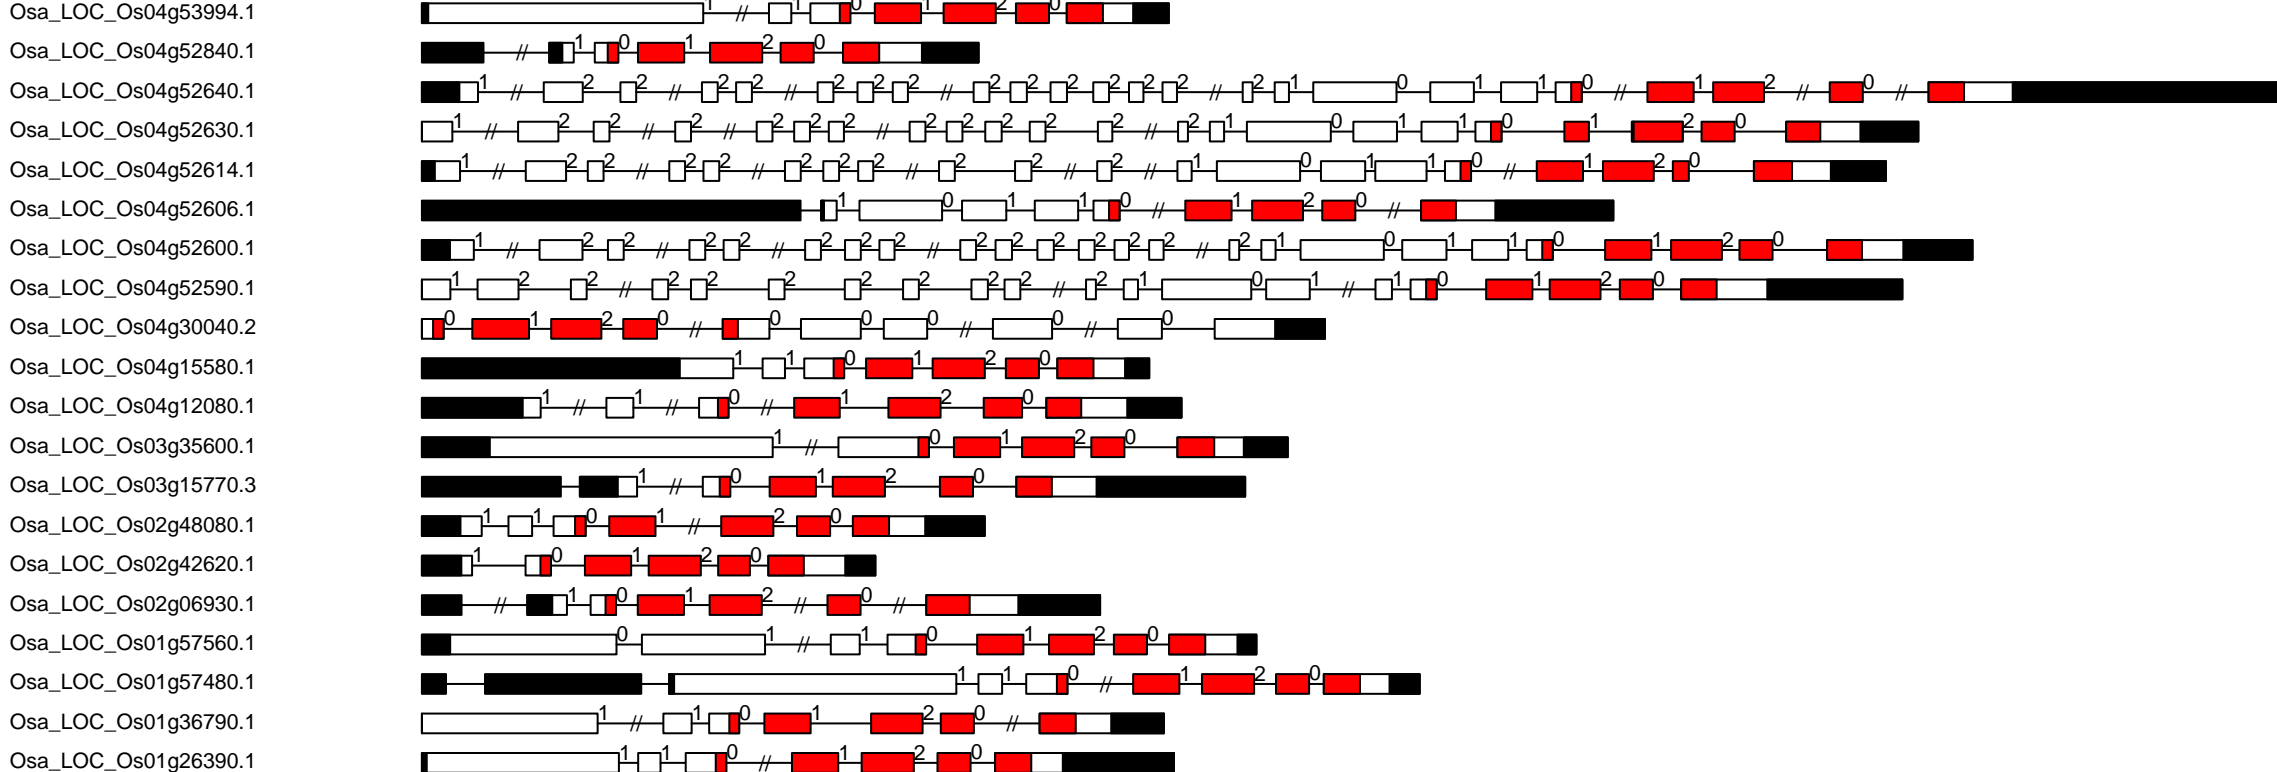

-2000

0

2000

4000

6000

8000



O.sa RLK-Pelle\_DLSV exon-intron and kinase domain diagram (part 2)

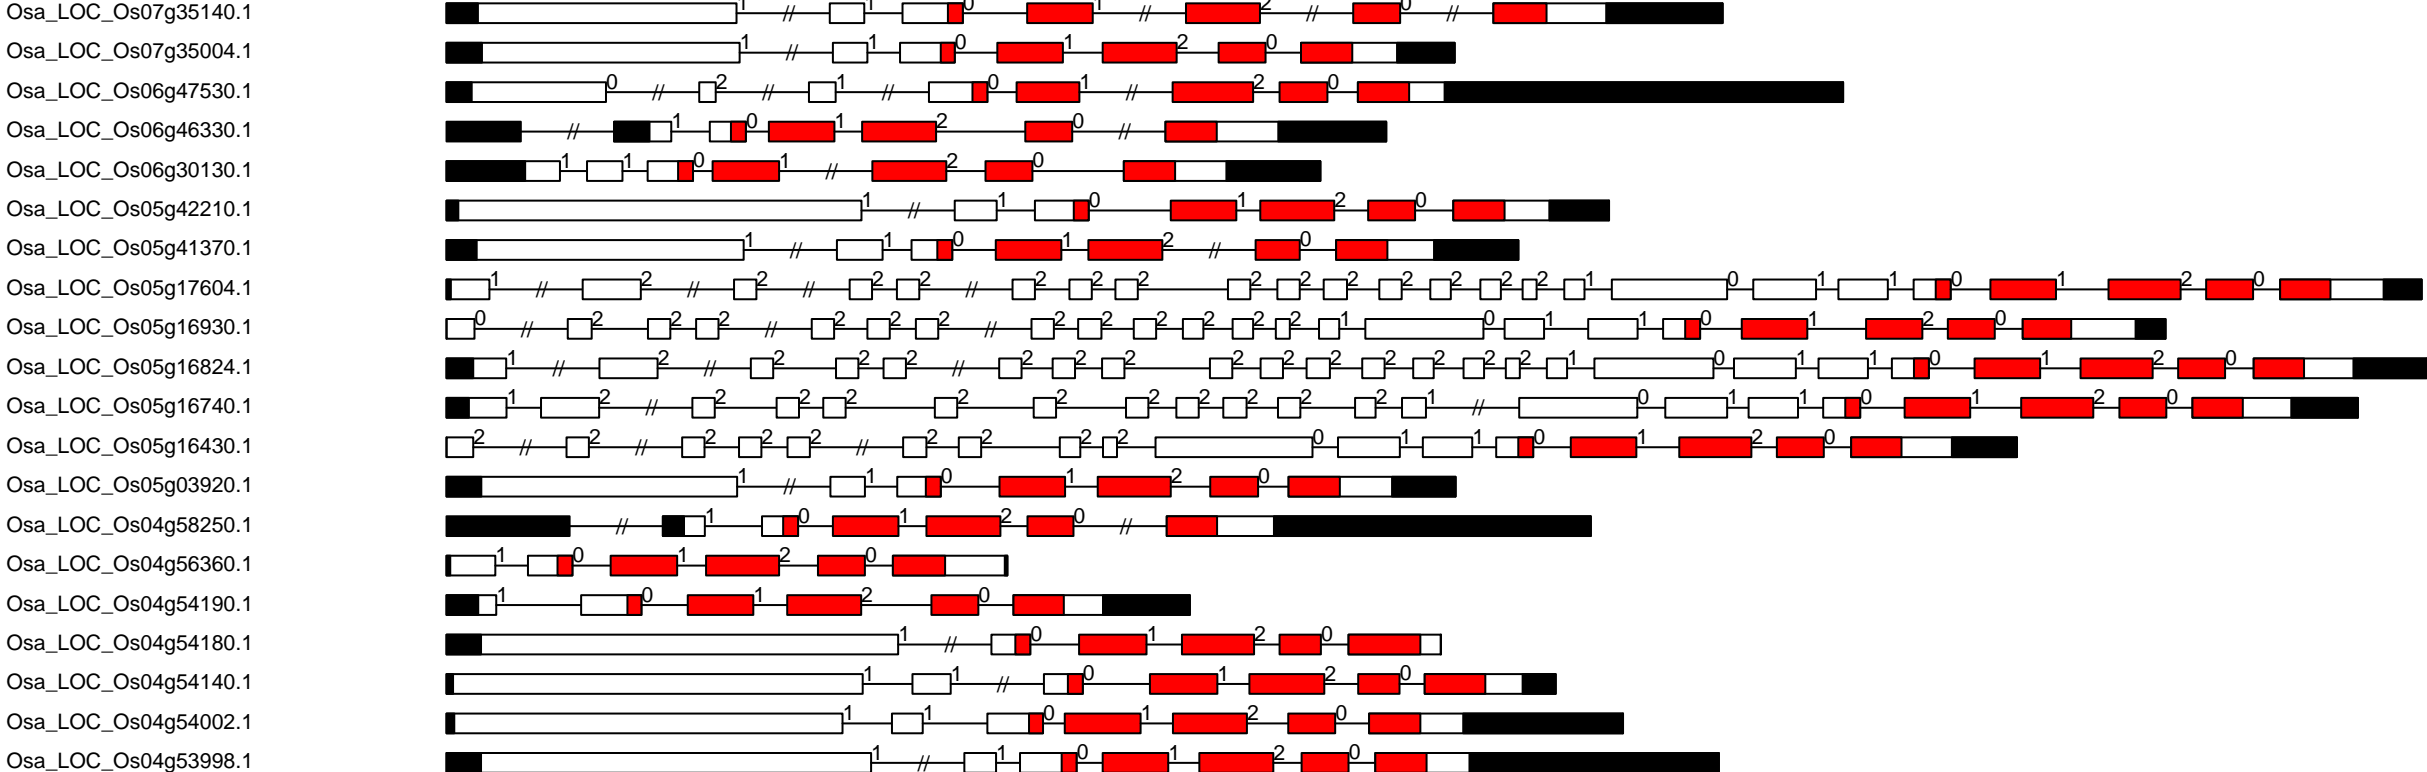

0

2000

4000

6000

### O.sa RLK-Pelle\_DLSV exon-intron and kinase domain diagram (part 3)

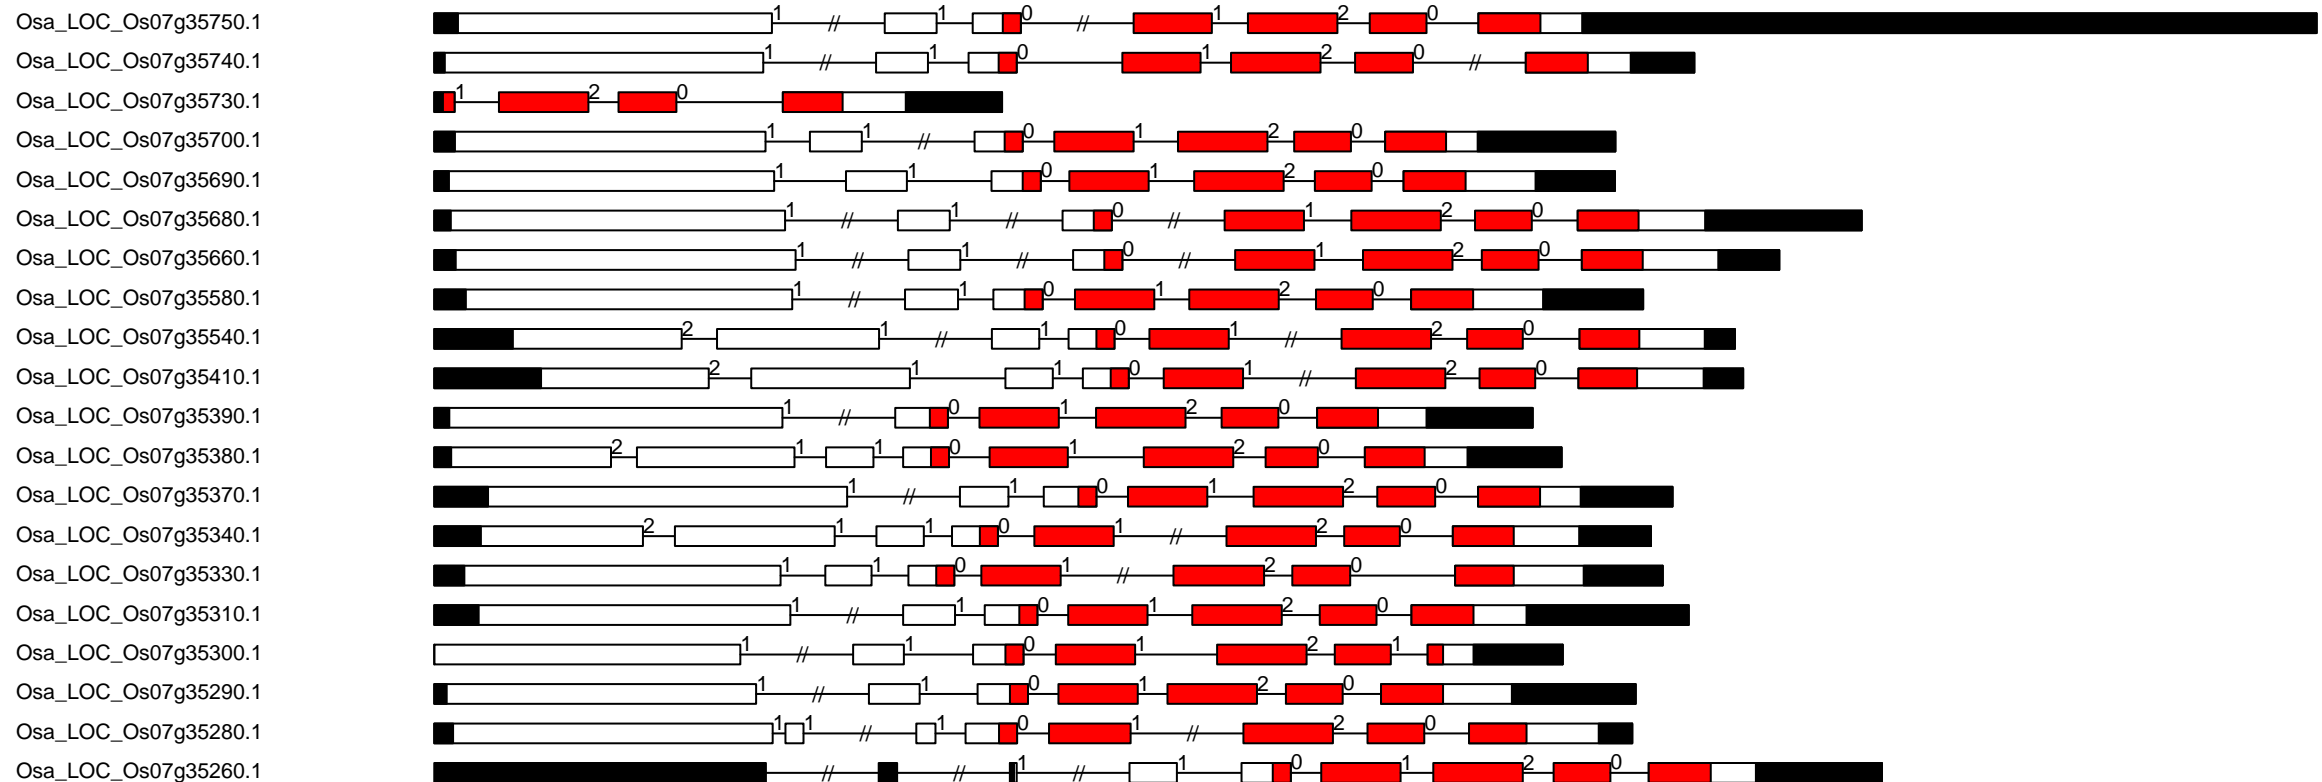

# O.sa RLK-Pelle\_DLSV exon-intron and kinase domain diagram (part 4)

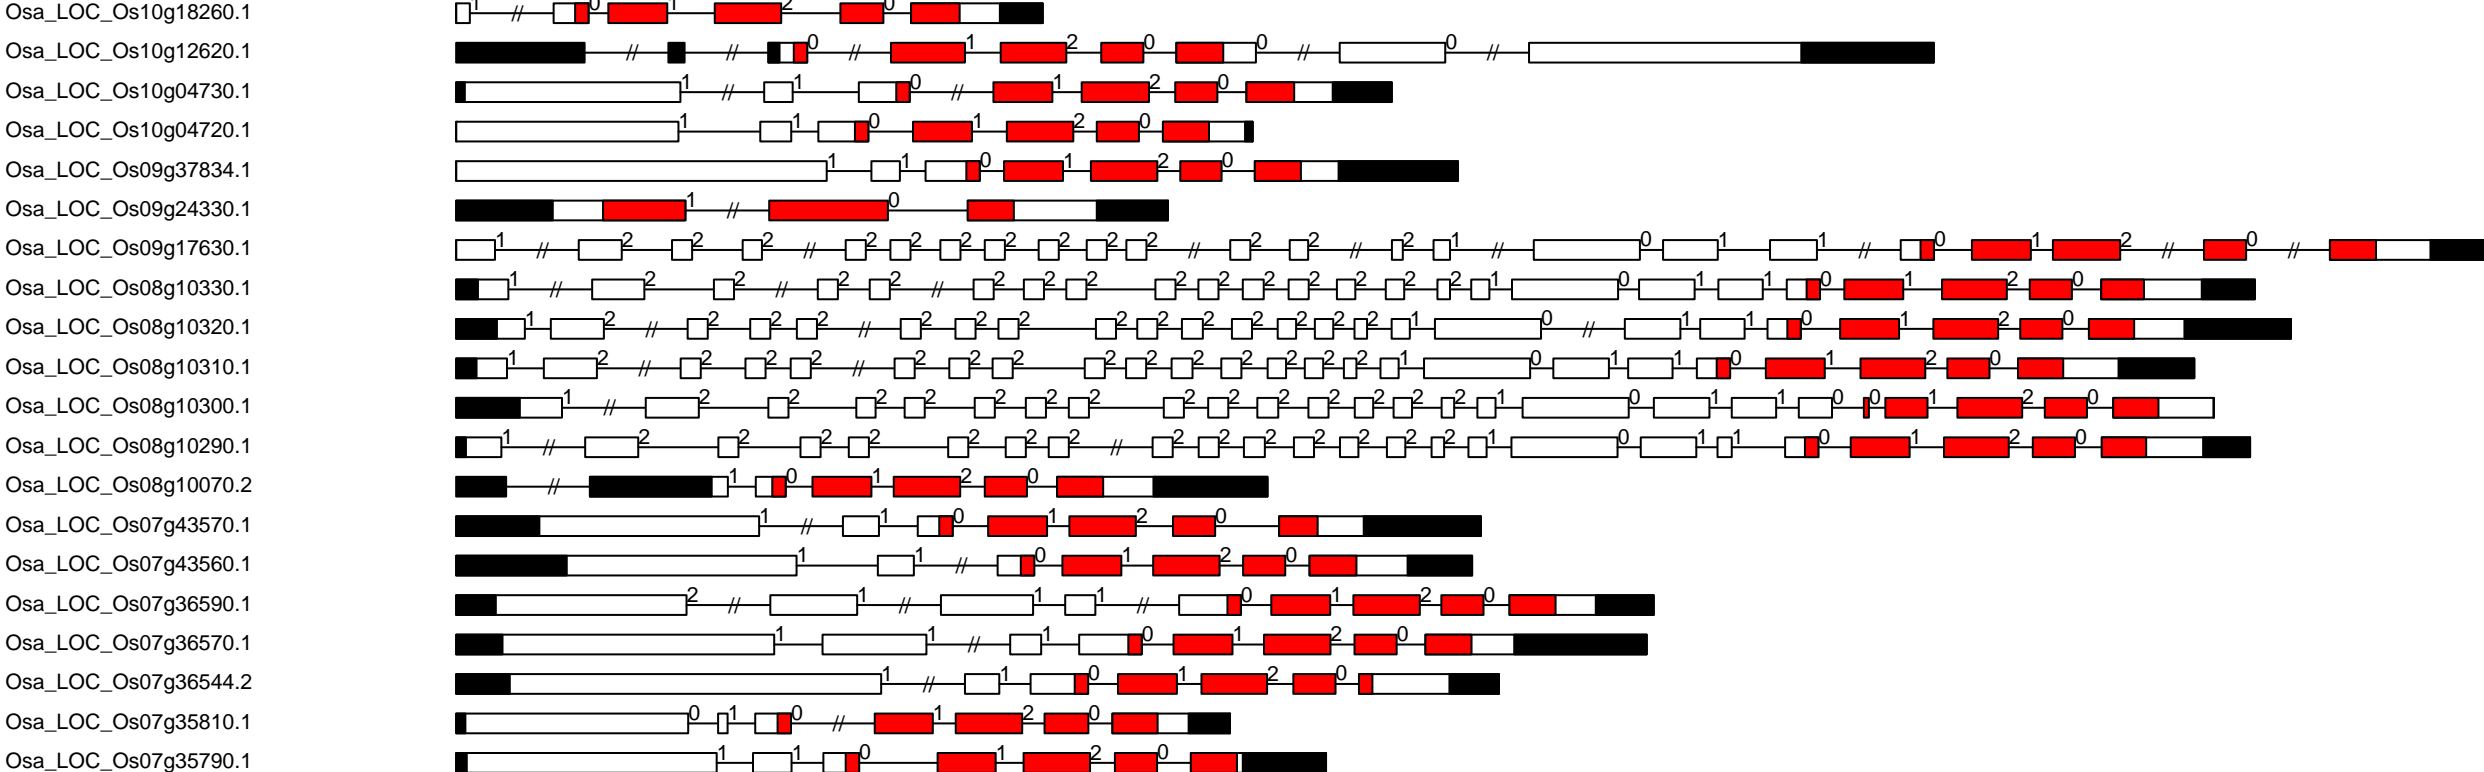

0

2000

4000

6000

O.sa RLK-Pelle\_DLSV exon-intron and kinase domain diagram (part 5)

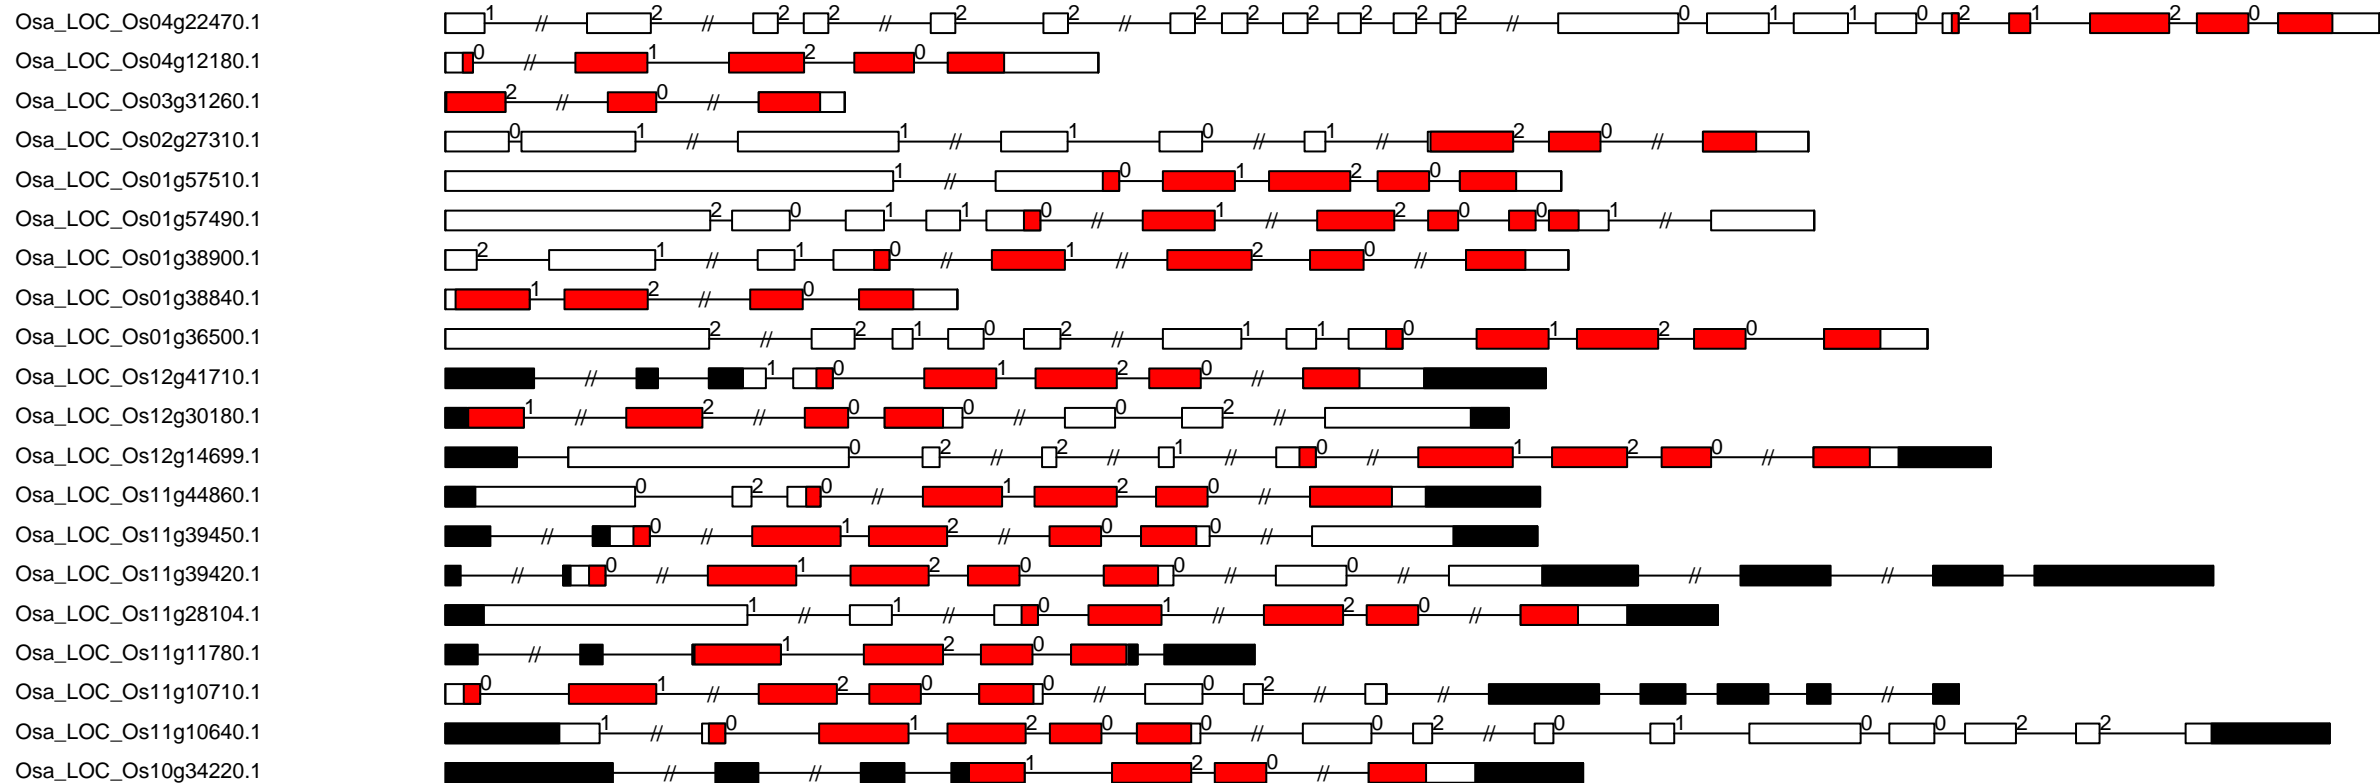

# O.sa RLK-Pelle\_DLSV exon-intron and kinase domain diagram (part 6)

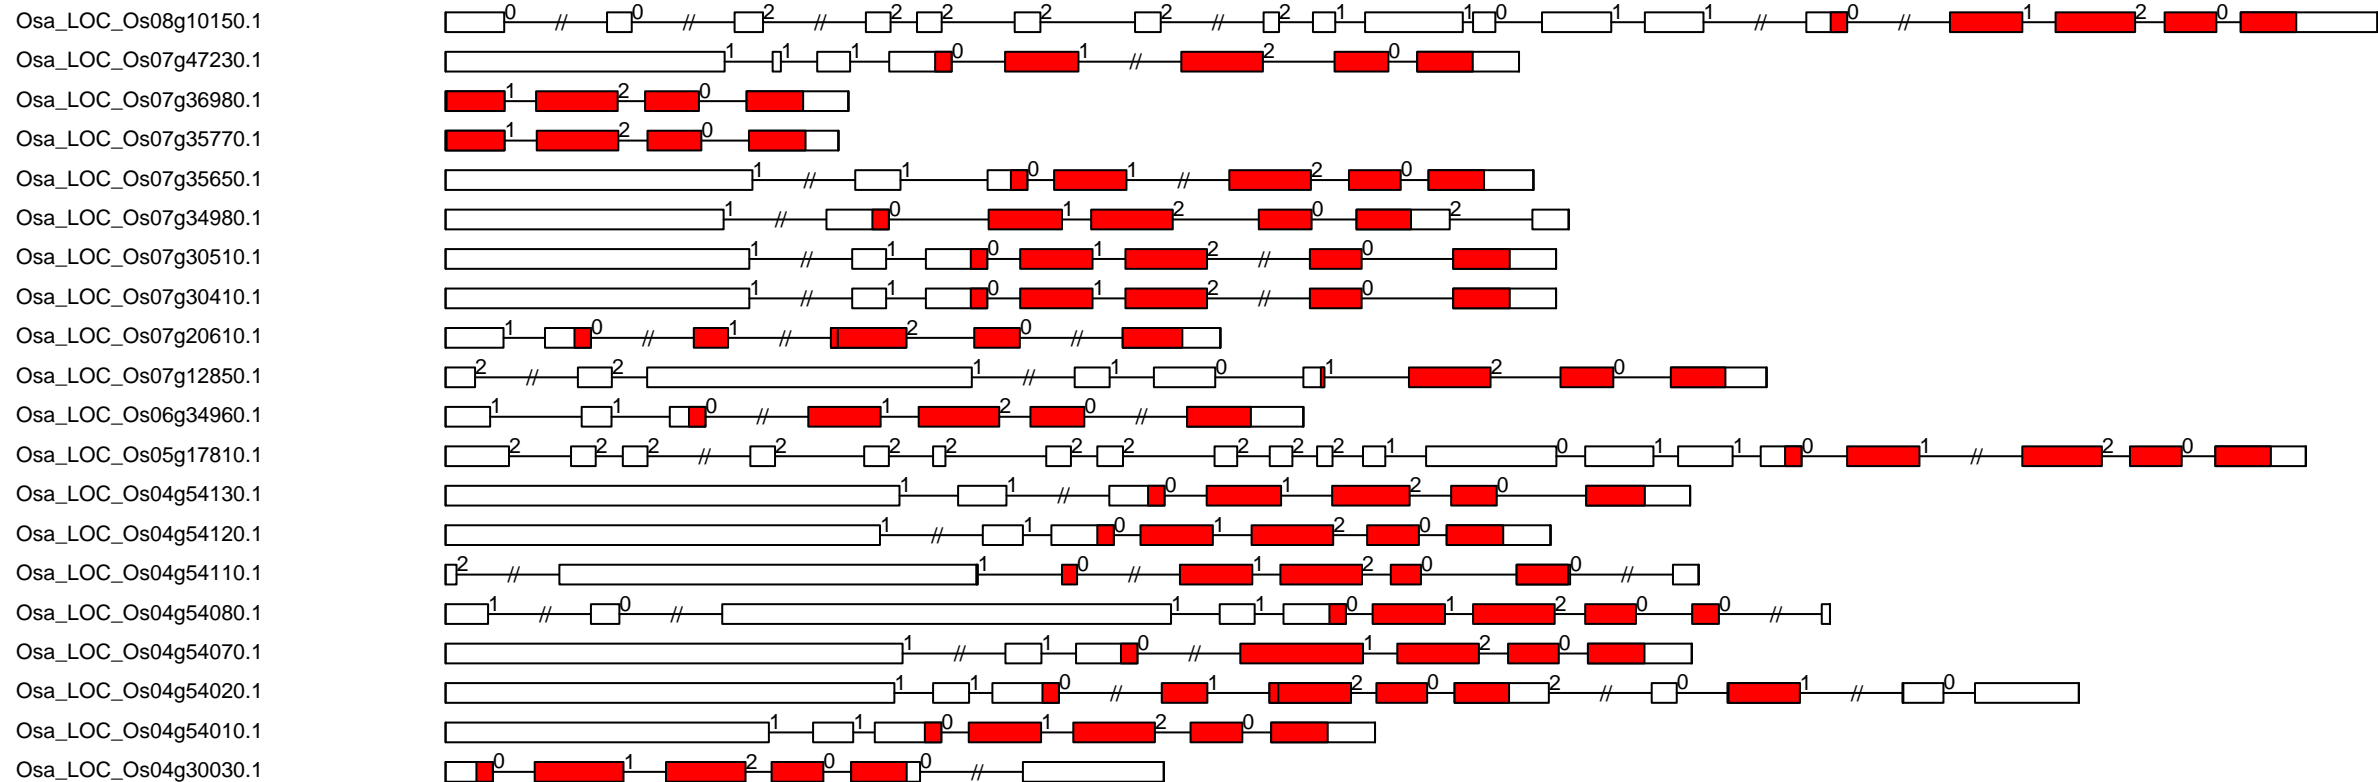

# O.sa RLK-Pelle\_DLSV exon-intron and kinase domain diagram (part 7)

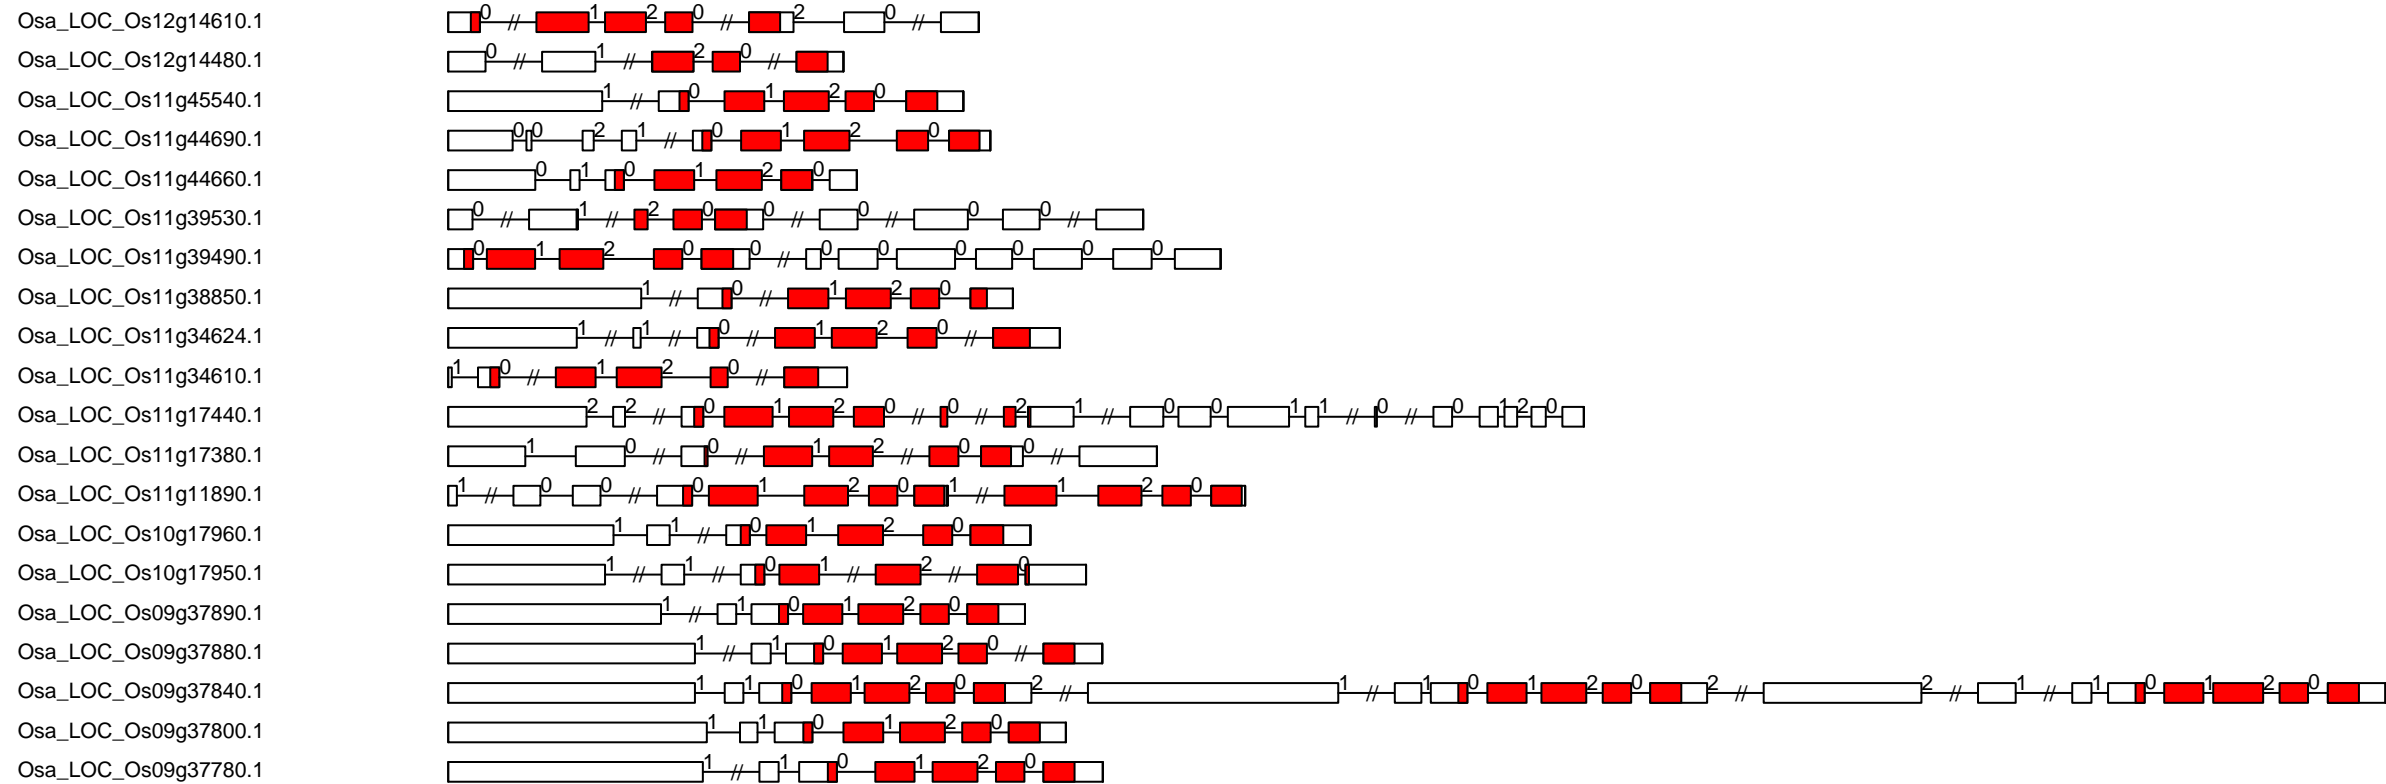

O.sa RLK-Pelle\_Extensin exon-intron and kinase domain diagram (all)

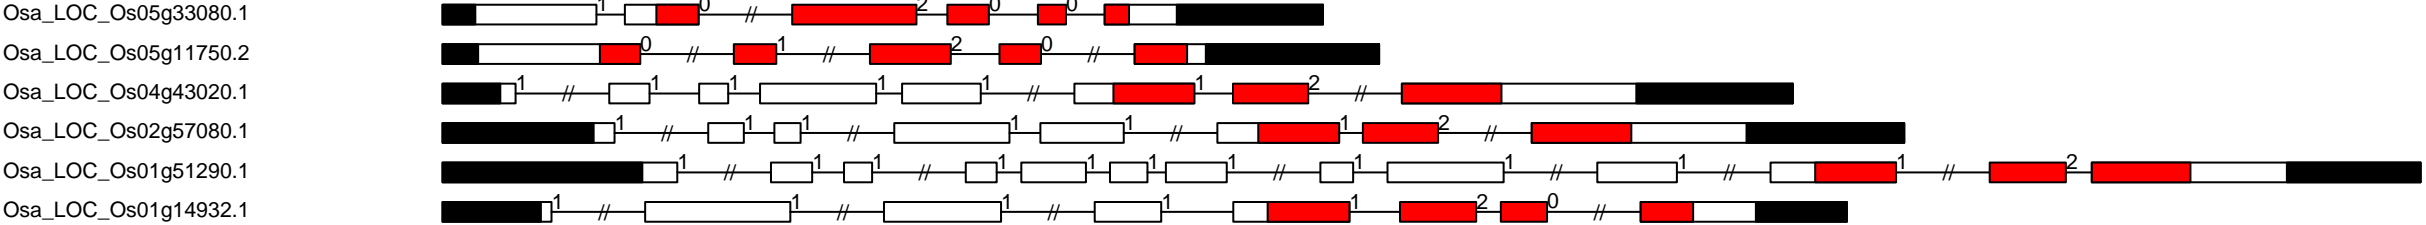

0

2000

4000

6000

# O.sa RLK-Pelle\_L-LEC exon-intron and kinase domain diagram (part 1)

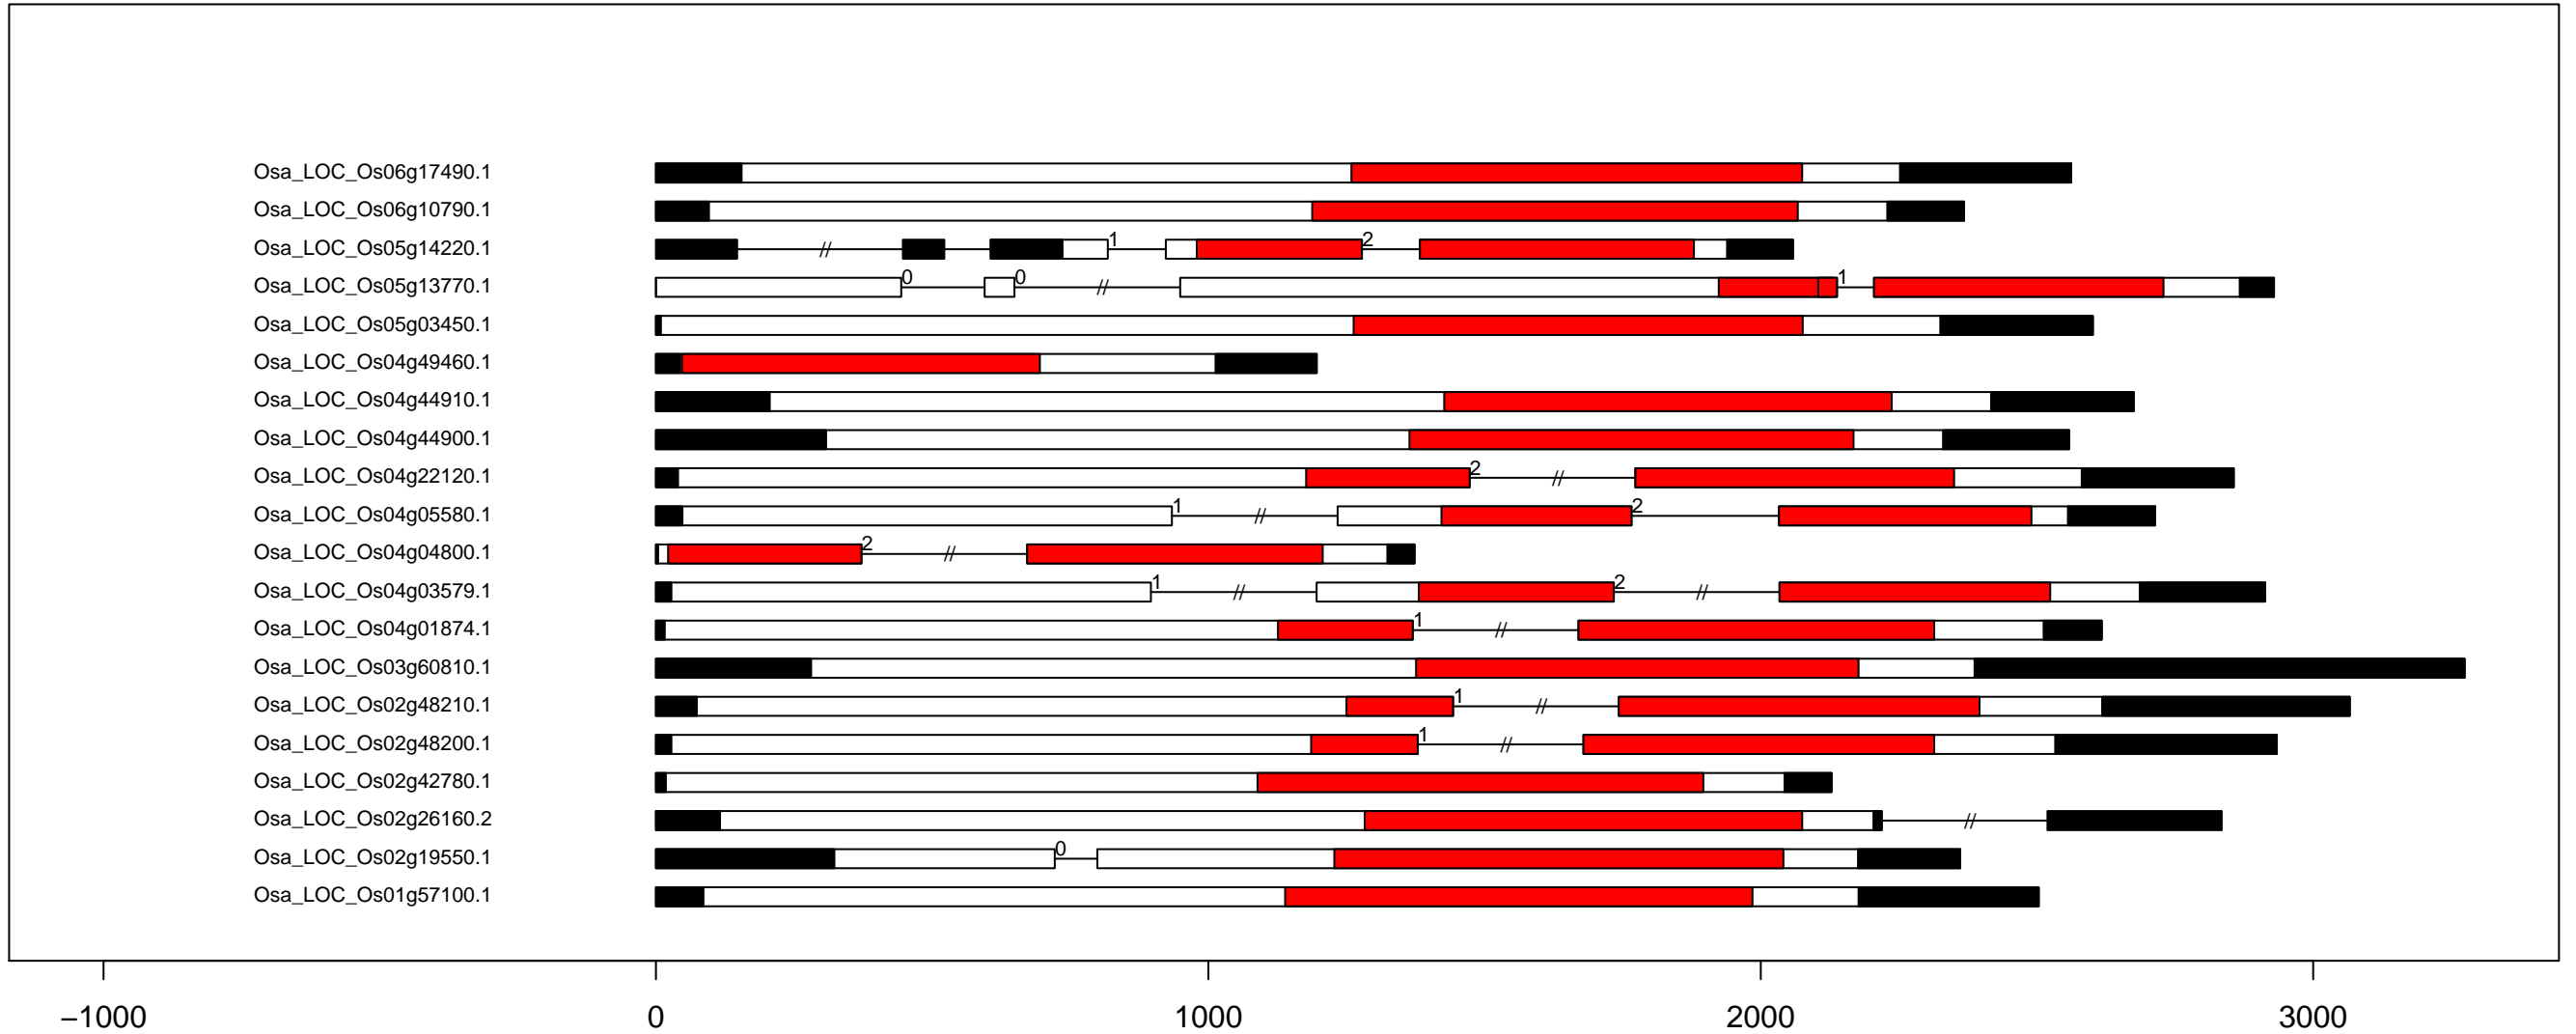



### O.sa RLK-Pelle\_L-LEC exon-intron and kinase domain diagram (part 2)

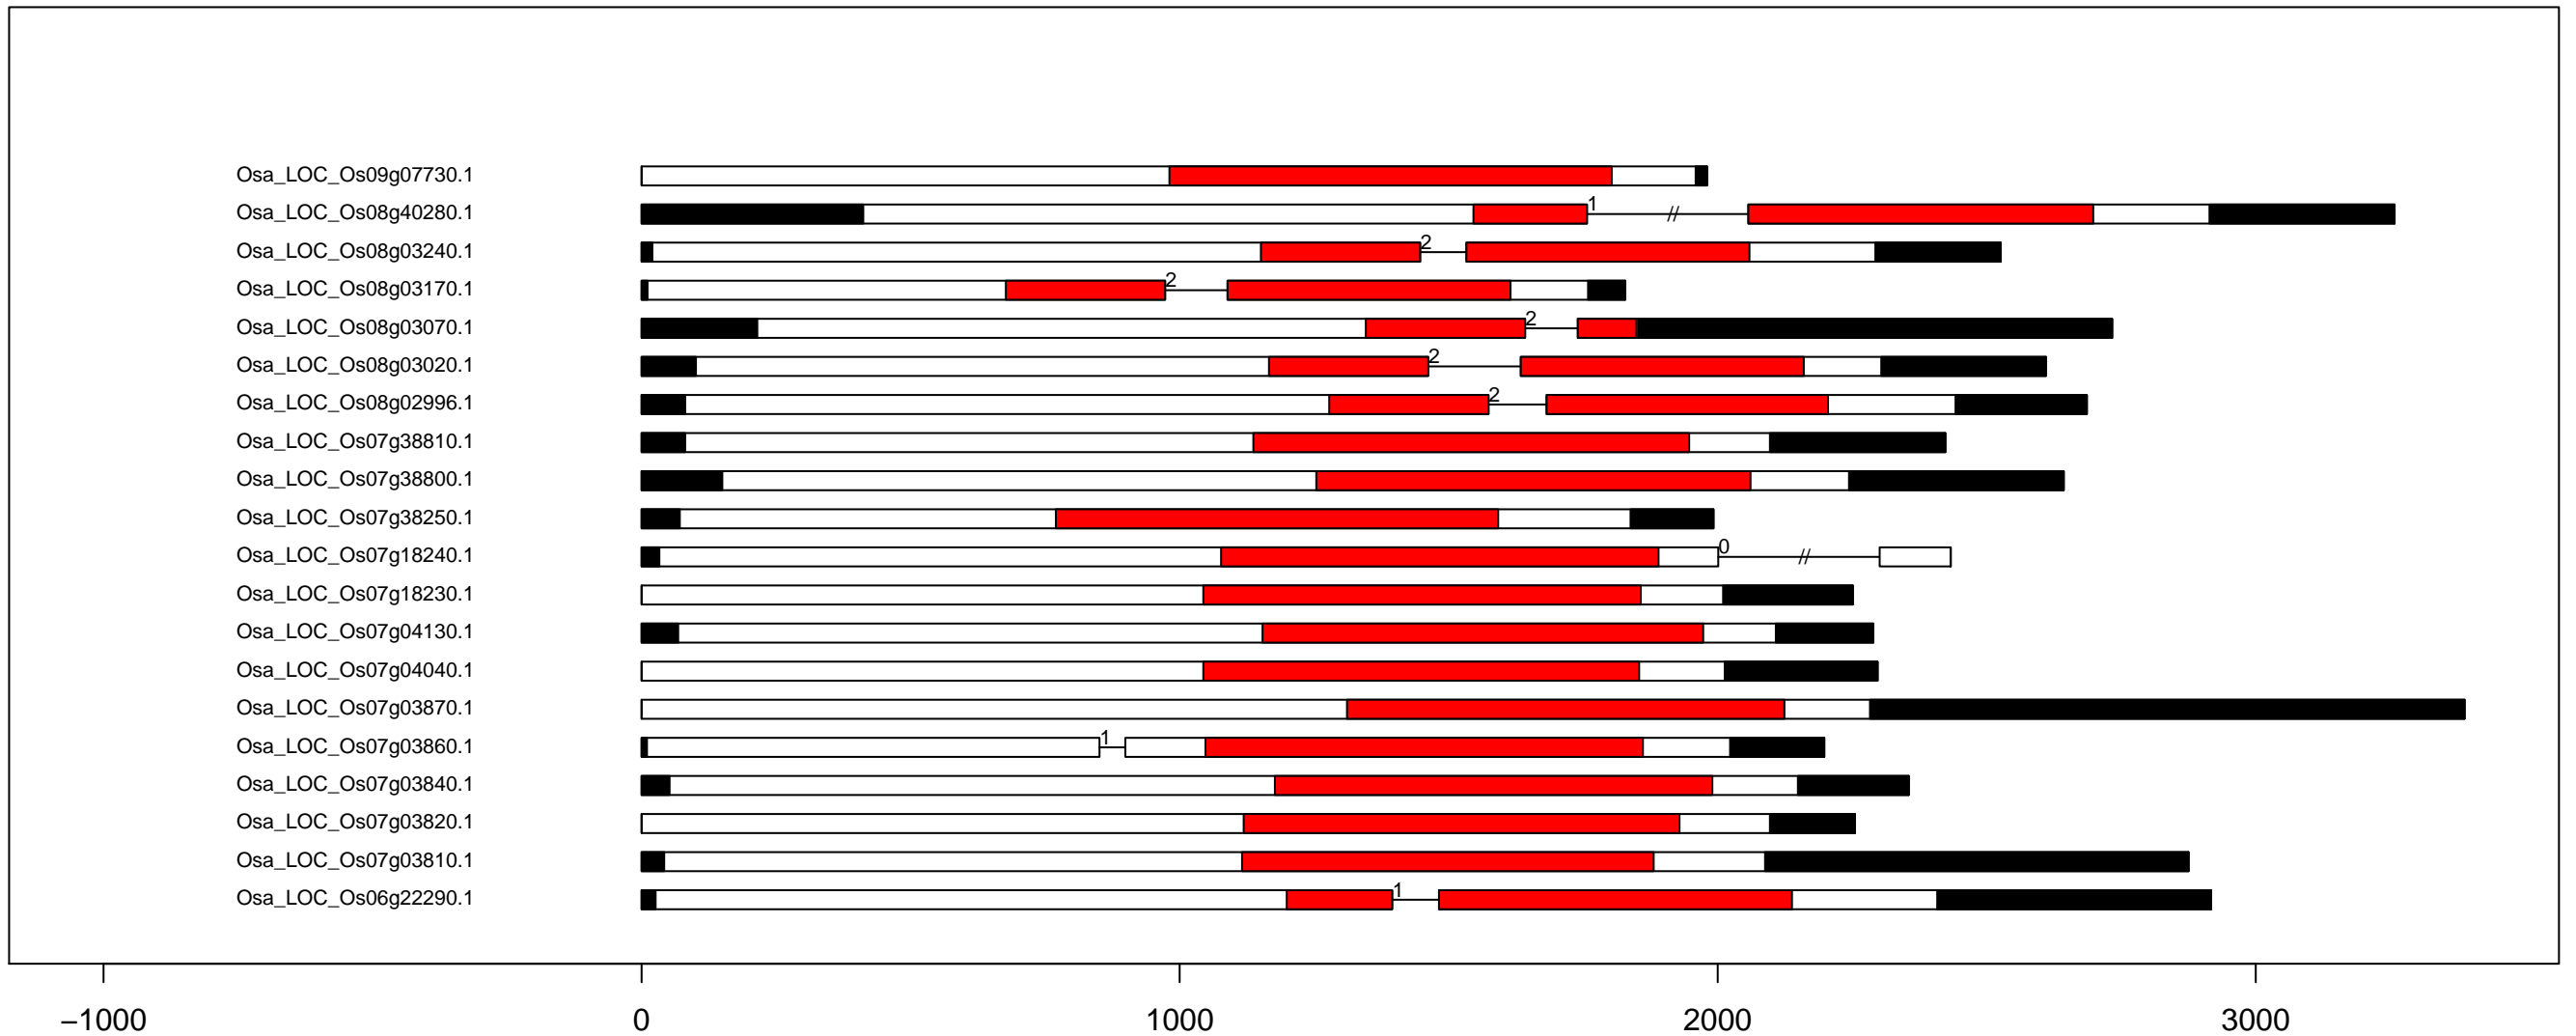

### O.sa RLK-Pelle\_L-LEC exon-intron and kinase domain diagram (part 3)

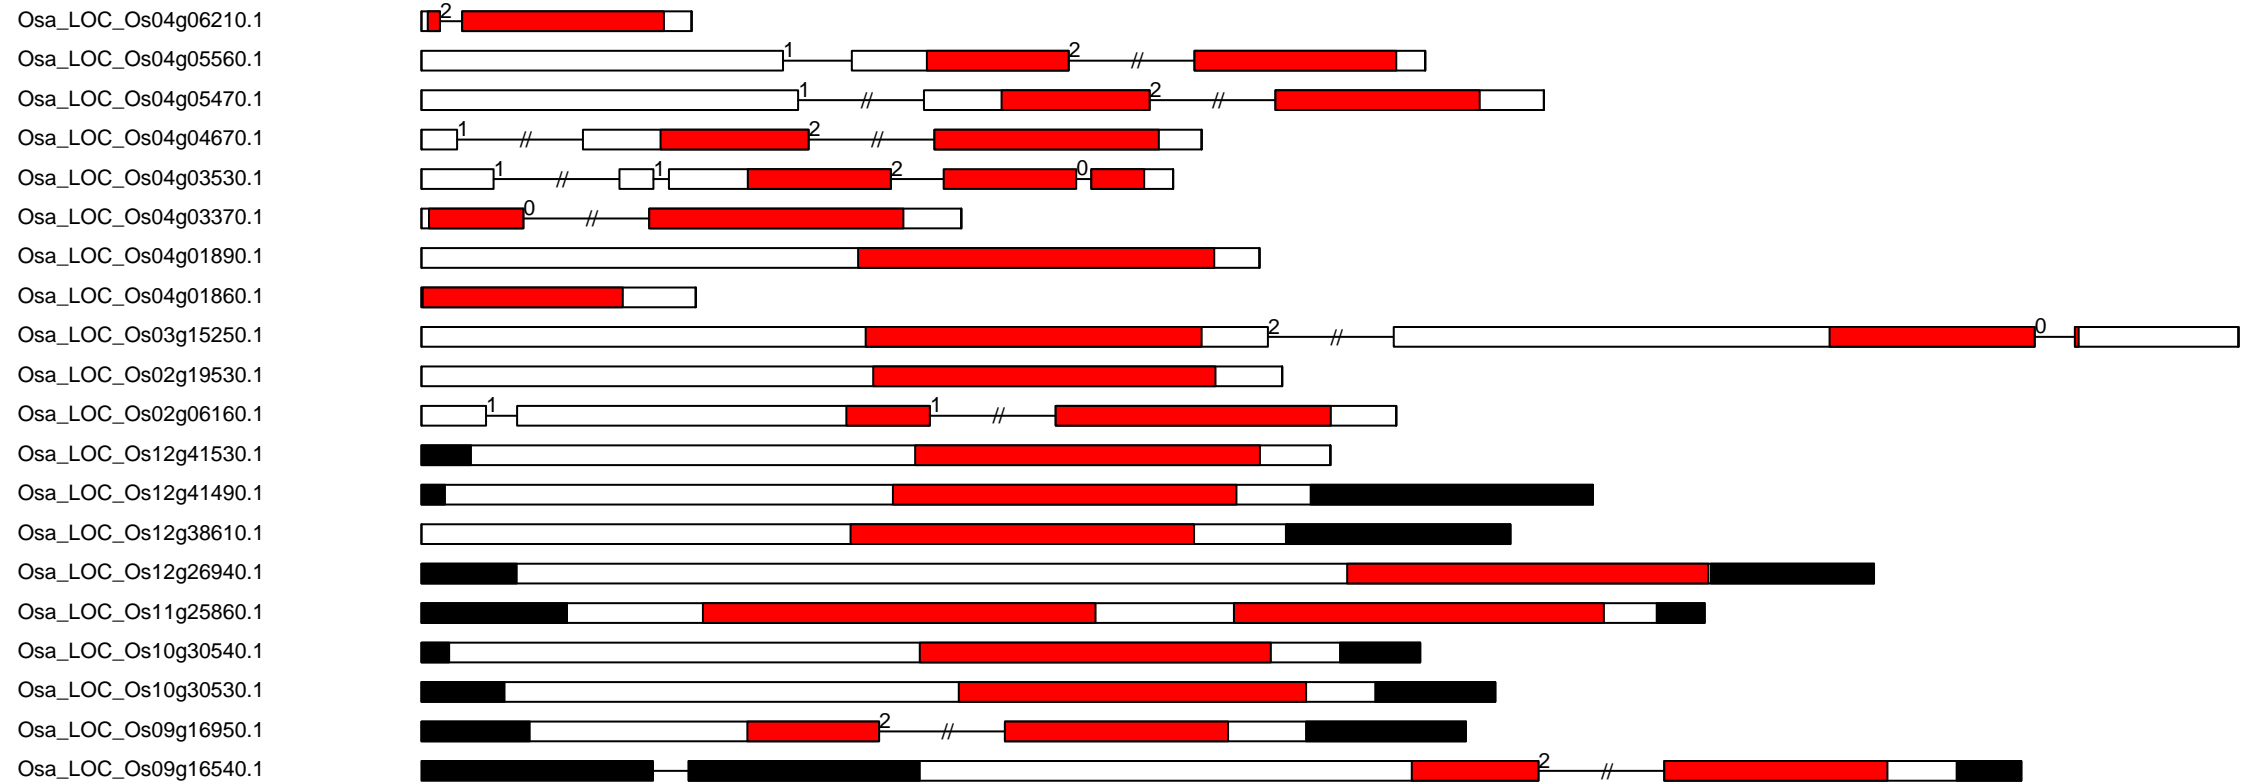

### O.sa RLK-Pelle\_L-LEC exon-intron and kinase domain diagram (part 4)

Osa\_LOC\_Os08g03150.1  
 Osa\_LOC\_Os08g03100.1  
 Osa\_LOC\_Os08g03090.1  
 Osa\_LOC\_Os08g03040.1  
 Osa\_LOC\_Os07g38820.1  
 Osa\_LOC\_Os07g15930.1  
 Osa\_LOC\_Os07g04010.1  
 Osa\_LOC\_Os07g04000.1  
 Osa\_LOC\_Os07g03970.1  
 Osa\_LOC\_Os07g03950.1  
 Osa\_LOC\_Os07g03930.1  
 Osa\_LOC\_Os07g03920.1  
 Osa\_LOC\_Os07g03900.1  
 Osa\_LOC\_Os07g03890.1  
 Osa\_LOC\_Os07g03880.1  
 Osa\_LOC\_Os07g03830.1  
 Osa\_LOC\_Os07g03790.1  
 Osa\_LOC\_Os07g03780.1  
 Osa\_LOC\_Os06g14260.1  
 Osa\_LOC\_Os04g06244.1

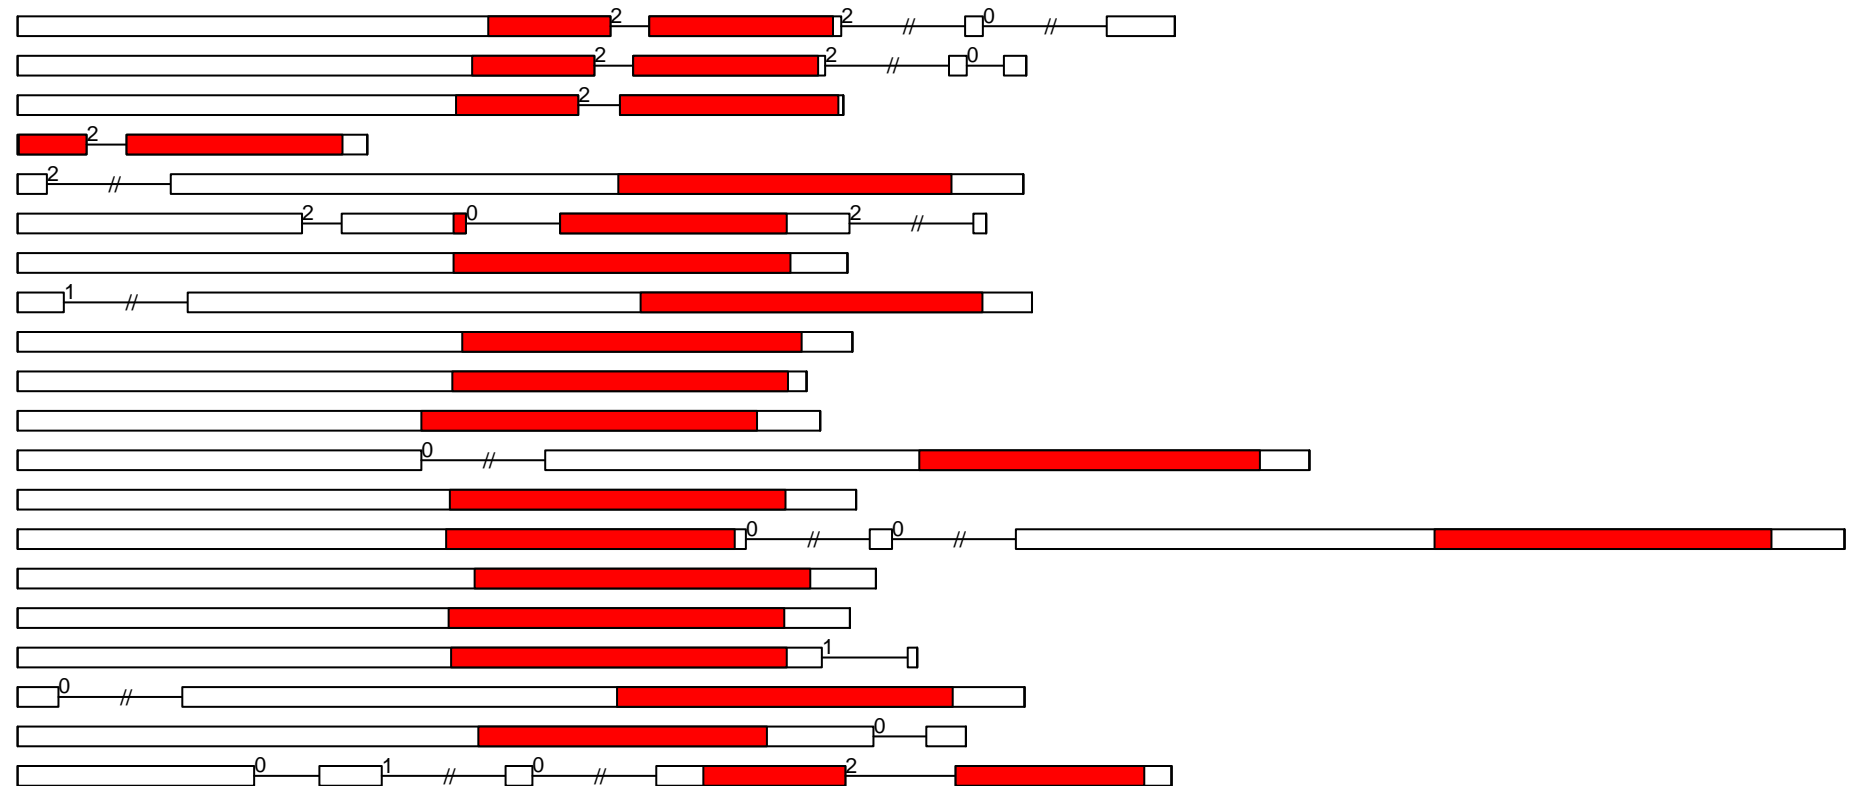

-1000

0

1000

2000

3000

4000

# O.sa RLK-Pelle\_L-LEC exon-intron and kinase domain diagram (part 5)

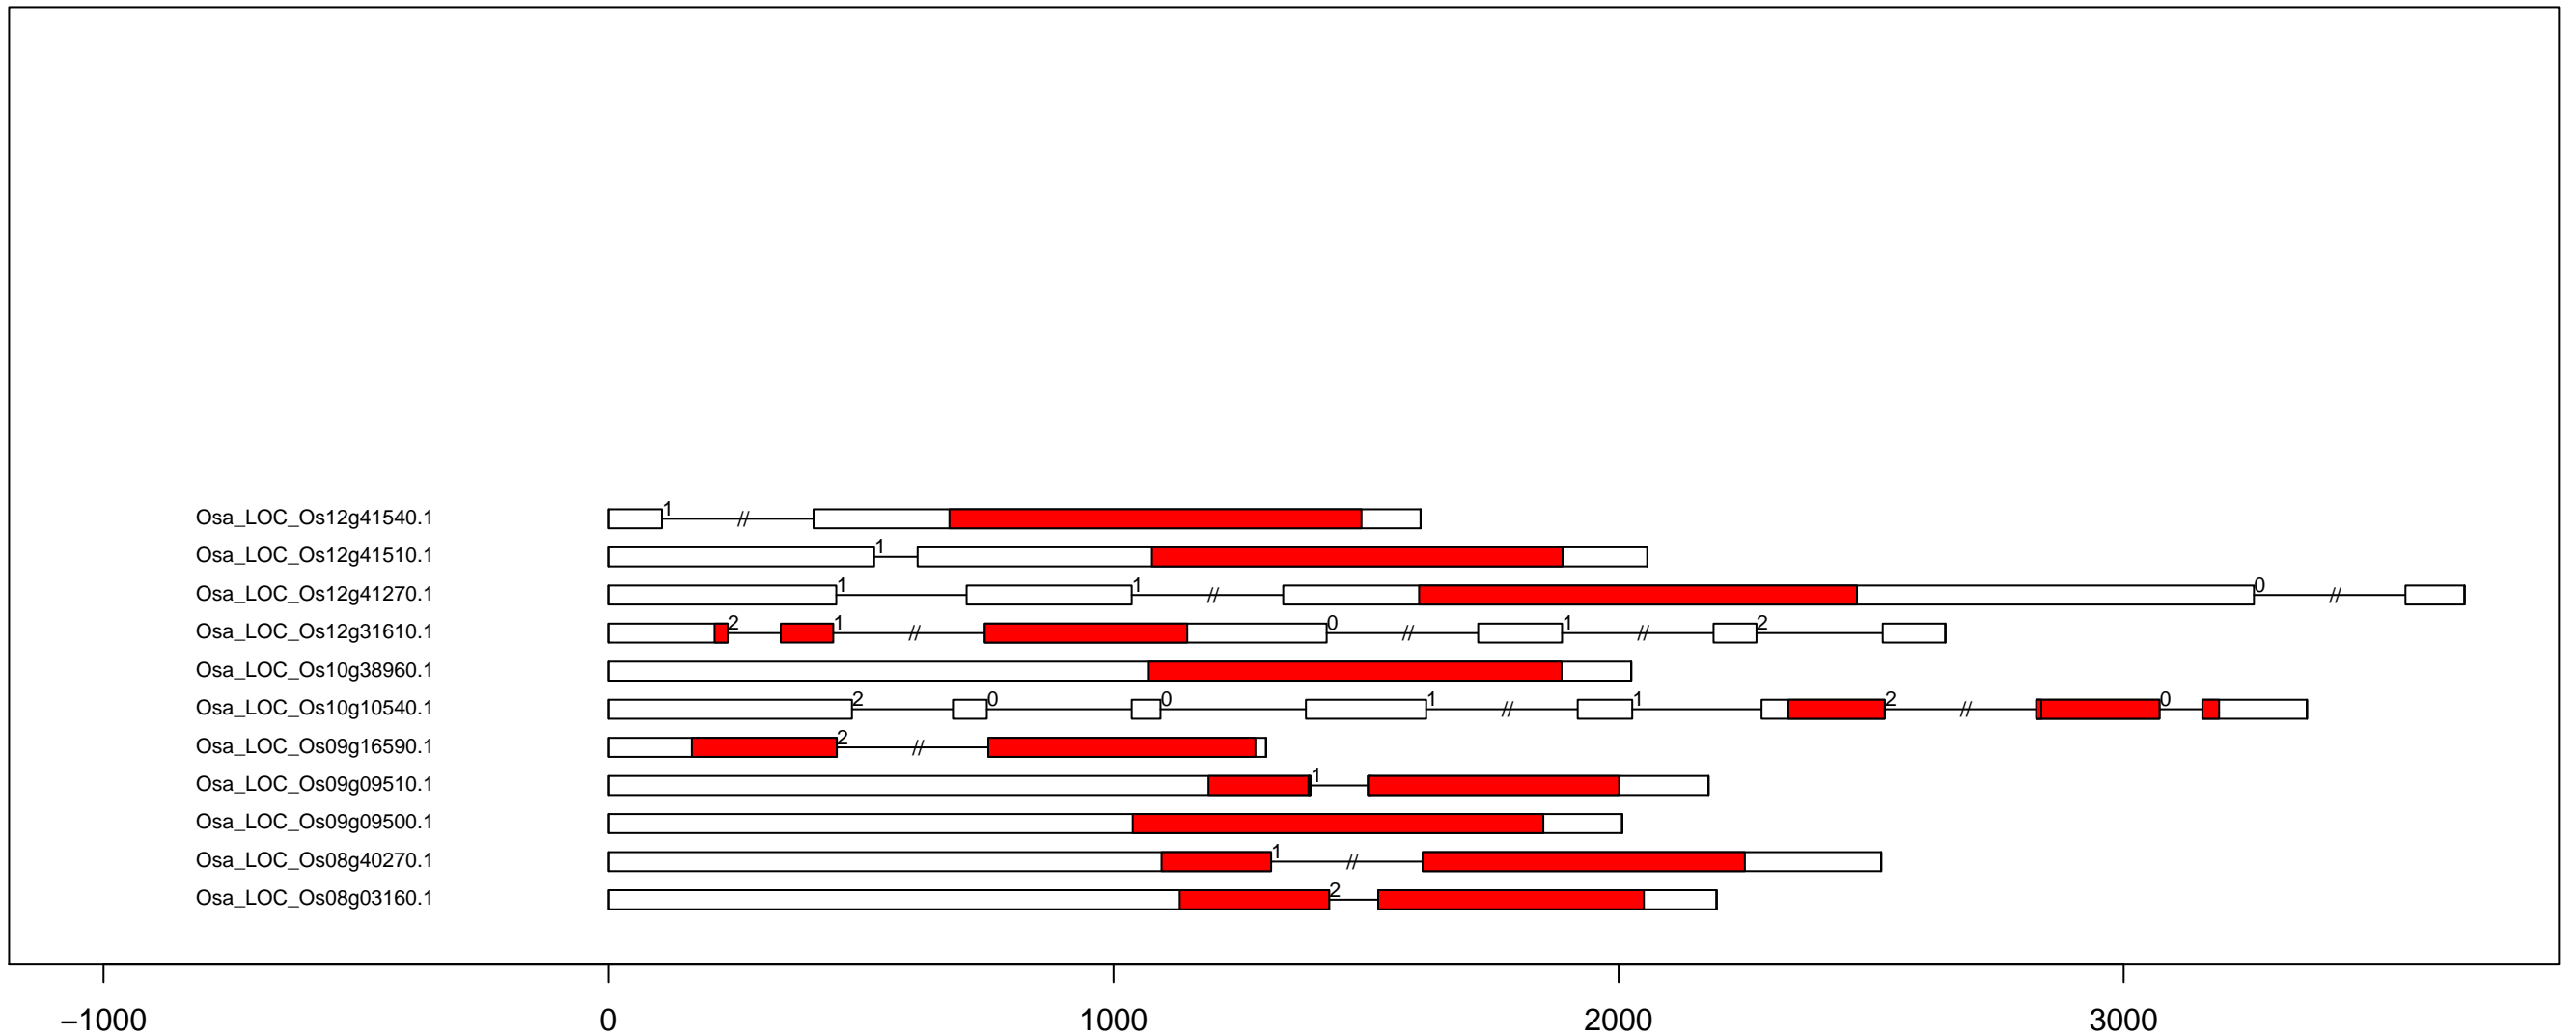

### O.sa RLK-Pelle\_LRK10L-2 exon-intron and kinase domain diagram (part 1)

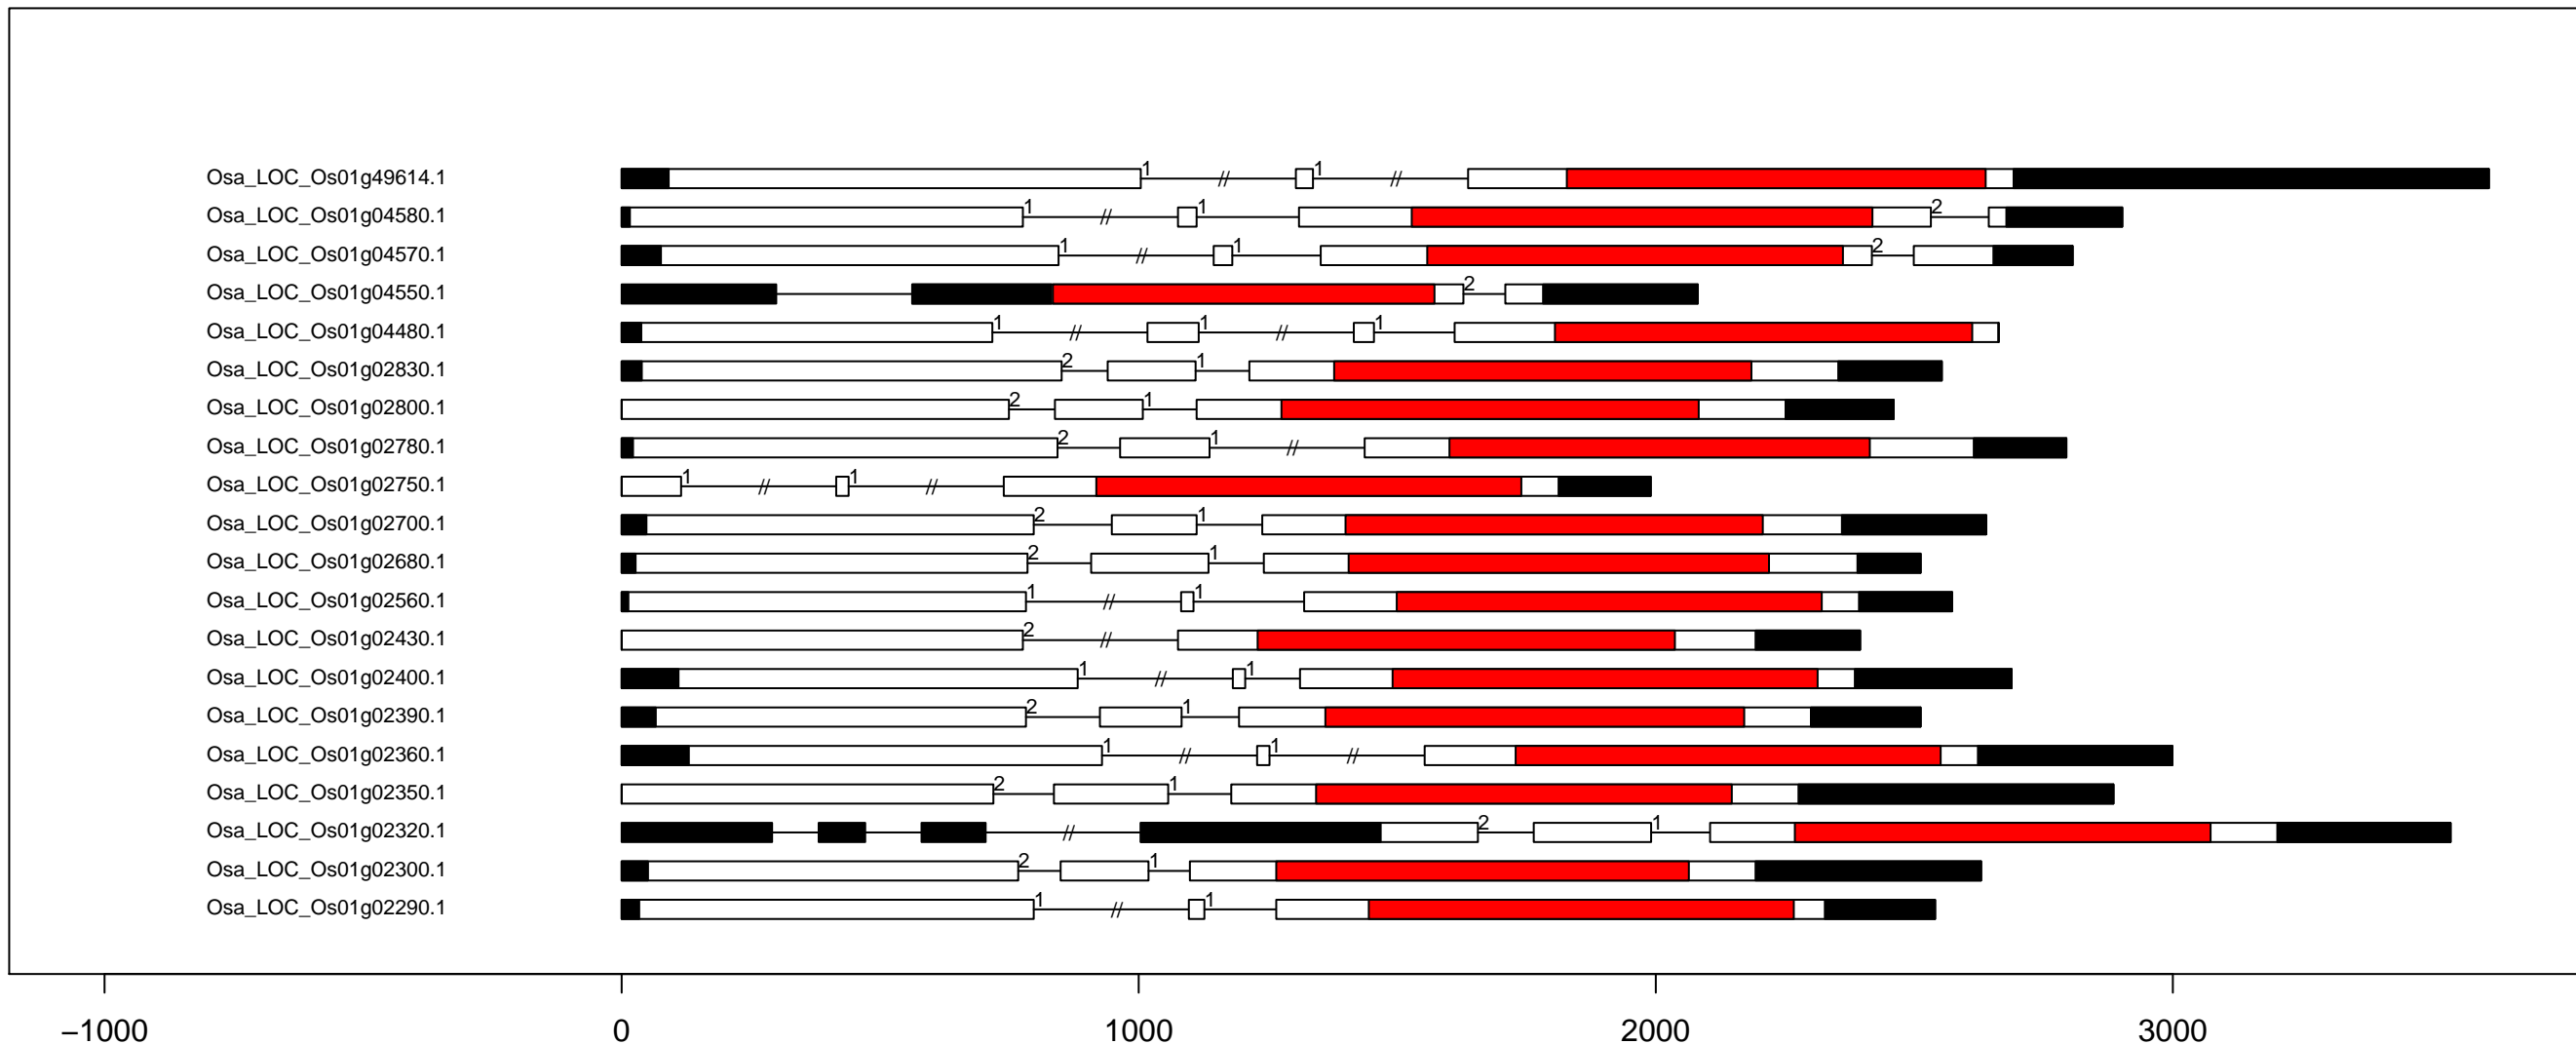

### O.sa RLK-Pelle\_LRK10L-2 exon-intron and kinase domain diagram (part 2)

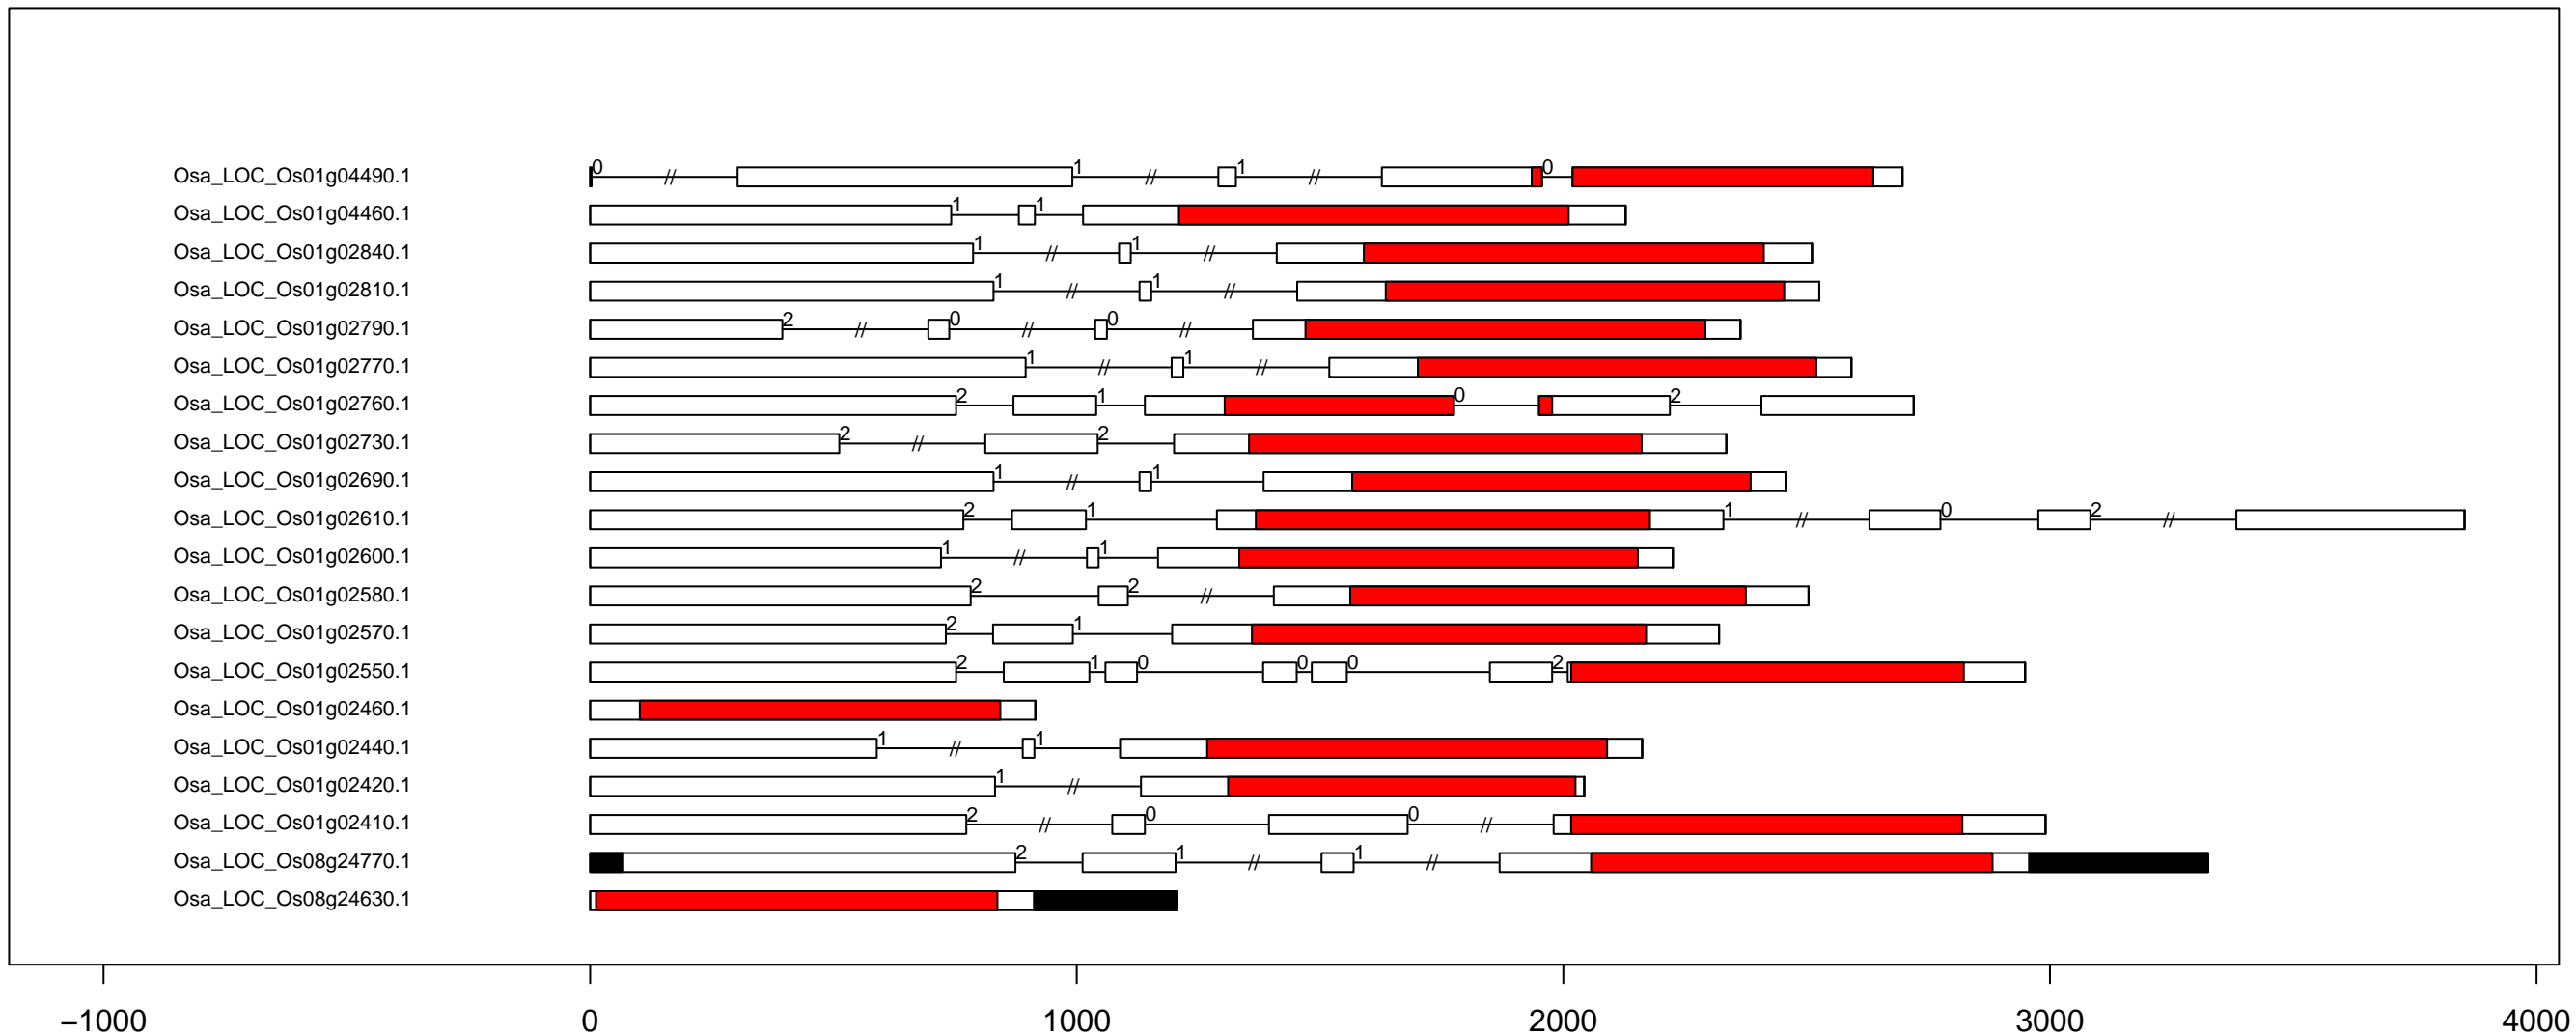



# O.sa RLK-Pelle\_LRR-I-1 exon-intron and kinase domain diagram (part 1)

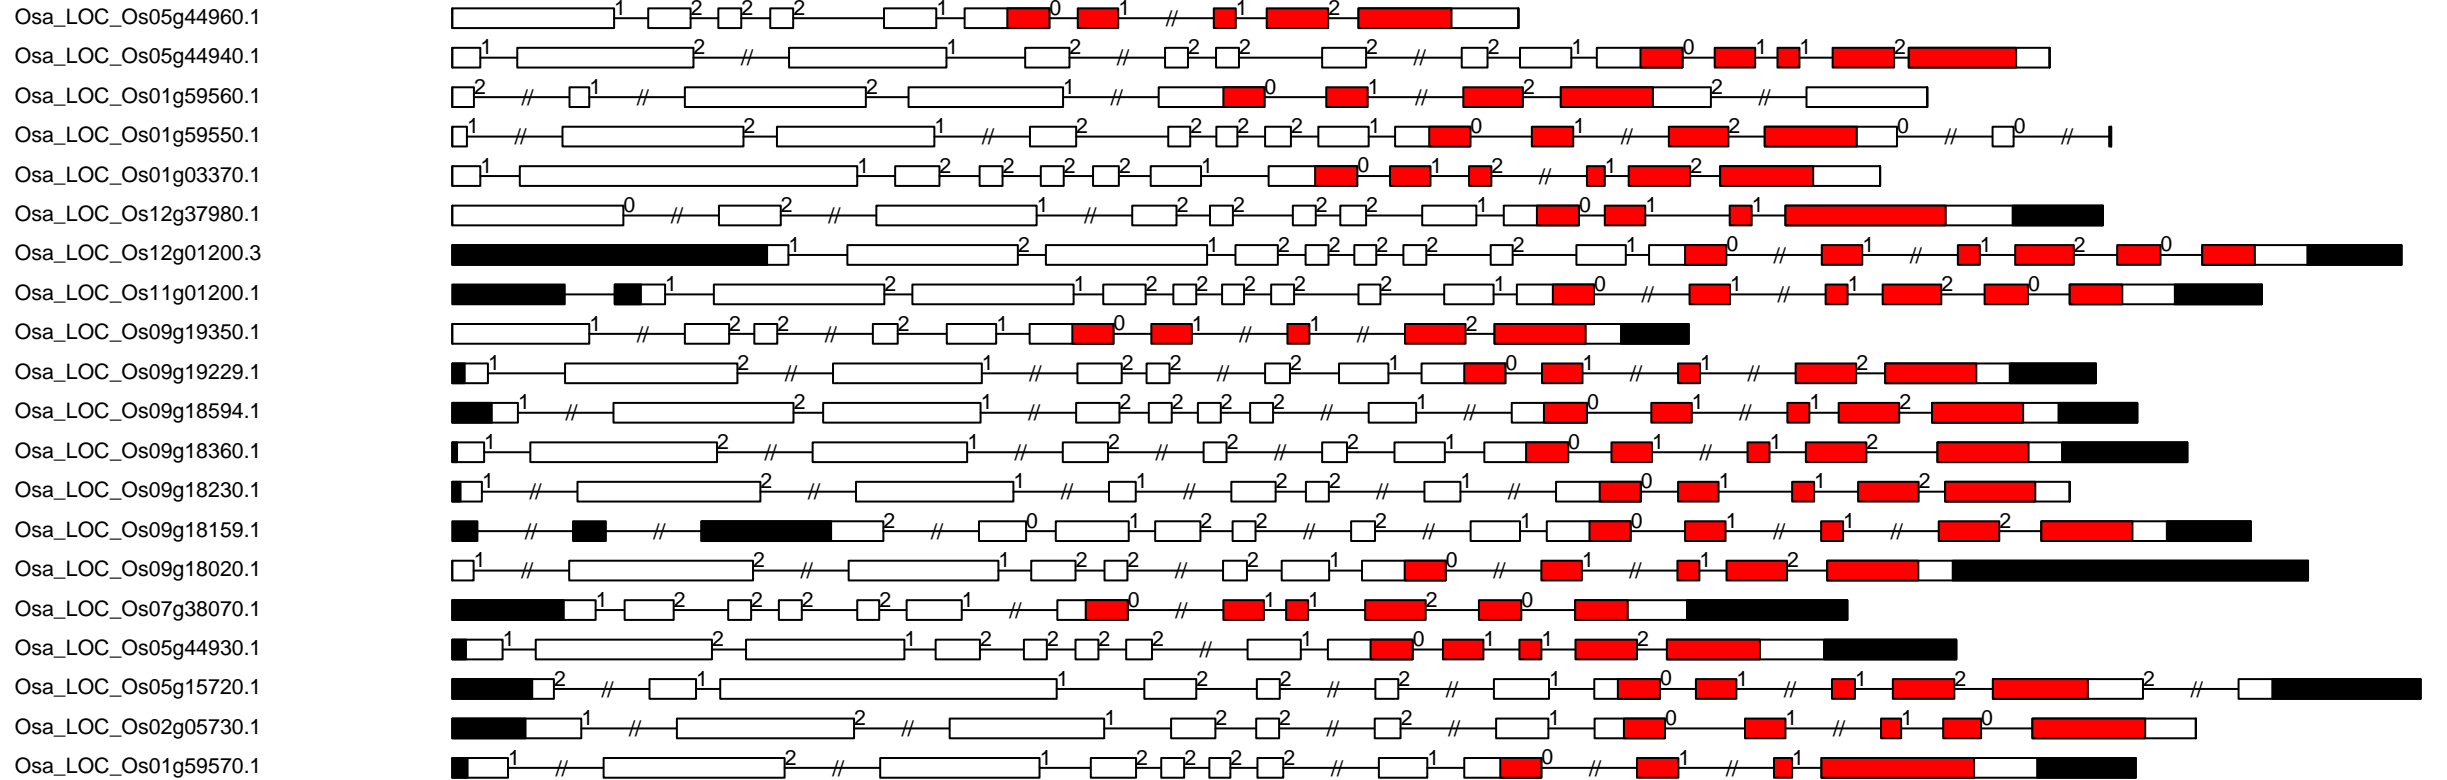

0

2000

4000

6000



# O.sa RLK-Pelle\_LRR-I-1 exon-intron and kinase domain diagram (part 2)

Osa\_LOC\_Os09g19510.1  
Osa\_LOC\_Os09g19380.1  
Osa\_LOC\_Os09g19160.1  
Osa\_LOC\_Os09g19140.1  
Osa\_LOC\_Os09g18530.1  
Osa\_LOC\_Os09g18260.1  
Osa\_LOC\_Os09g18010.1  
Osa\_LOC\_Os09g17970.1  
Osa\_LOC\_Os09g17910.1  
Osa\_LOC\_Os09g09220.1  
Osa\_LOC\_Os08g40650.1  
Osa\_LOC\_Os05g44990.1  
Osa\_LOC\_Os05g44970.1

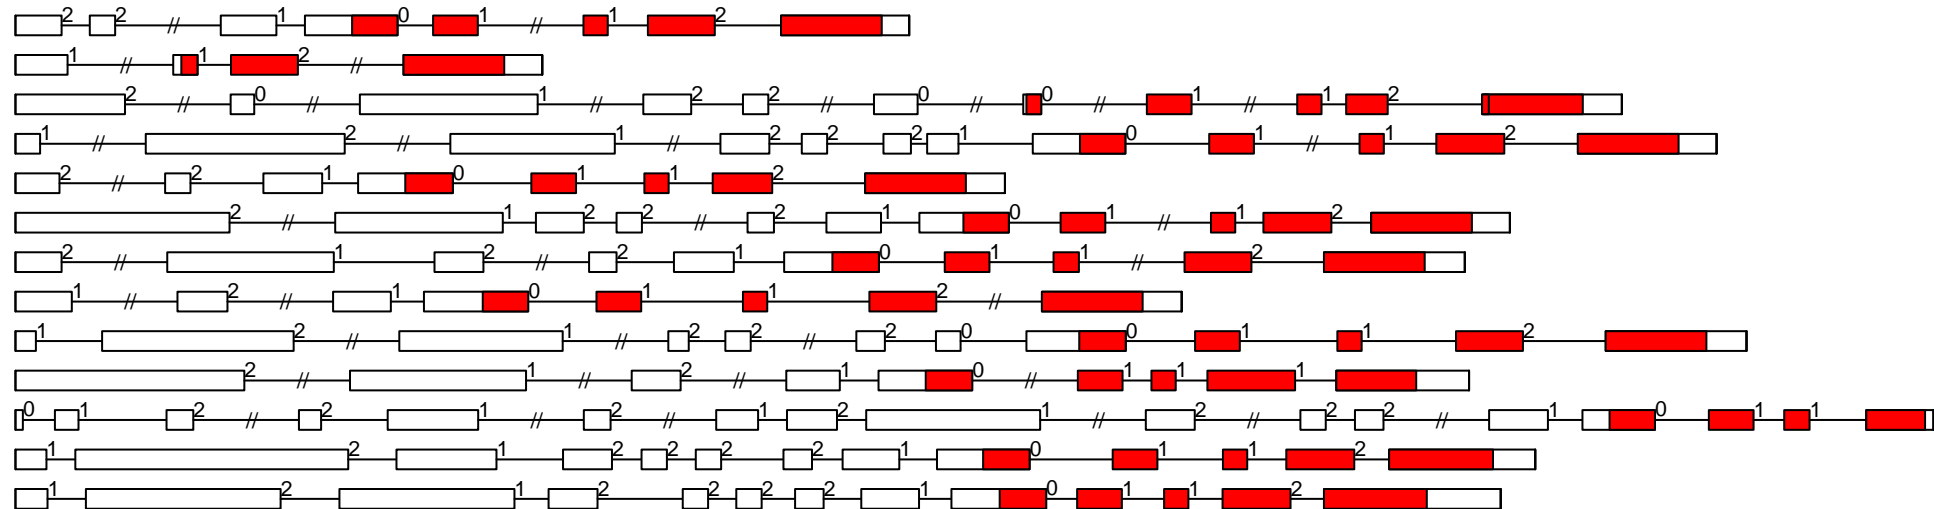

-1000

0

1000

2000

3000

4000

5000

# O.sa RLK-Pelle\_LRR-I-2 exon-intron and kinase domain diagram (all)

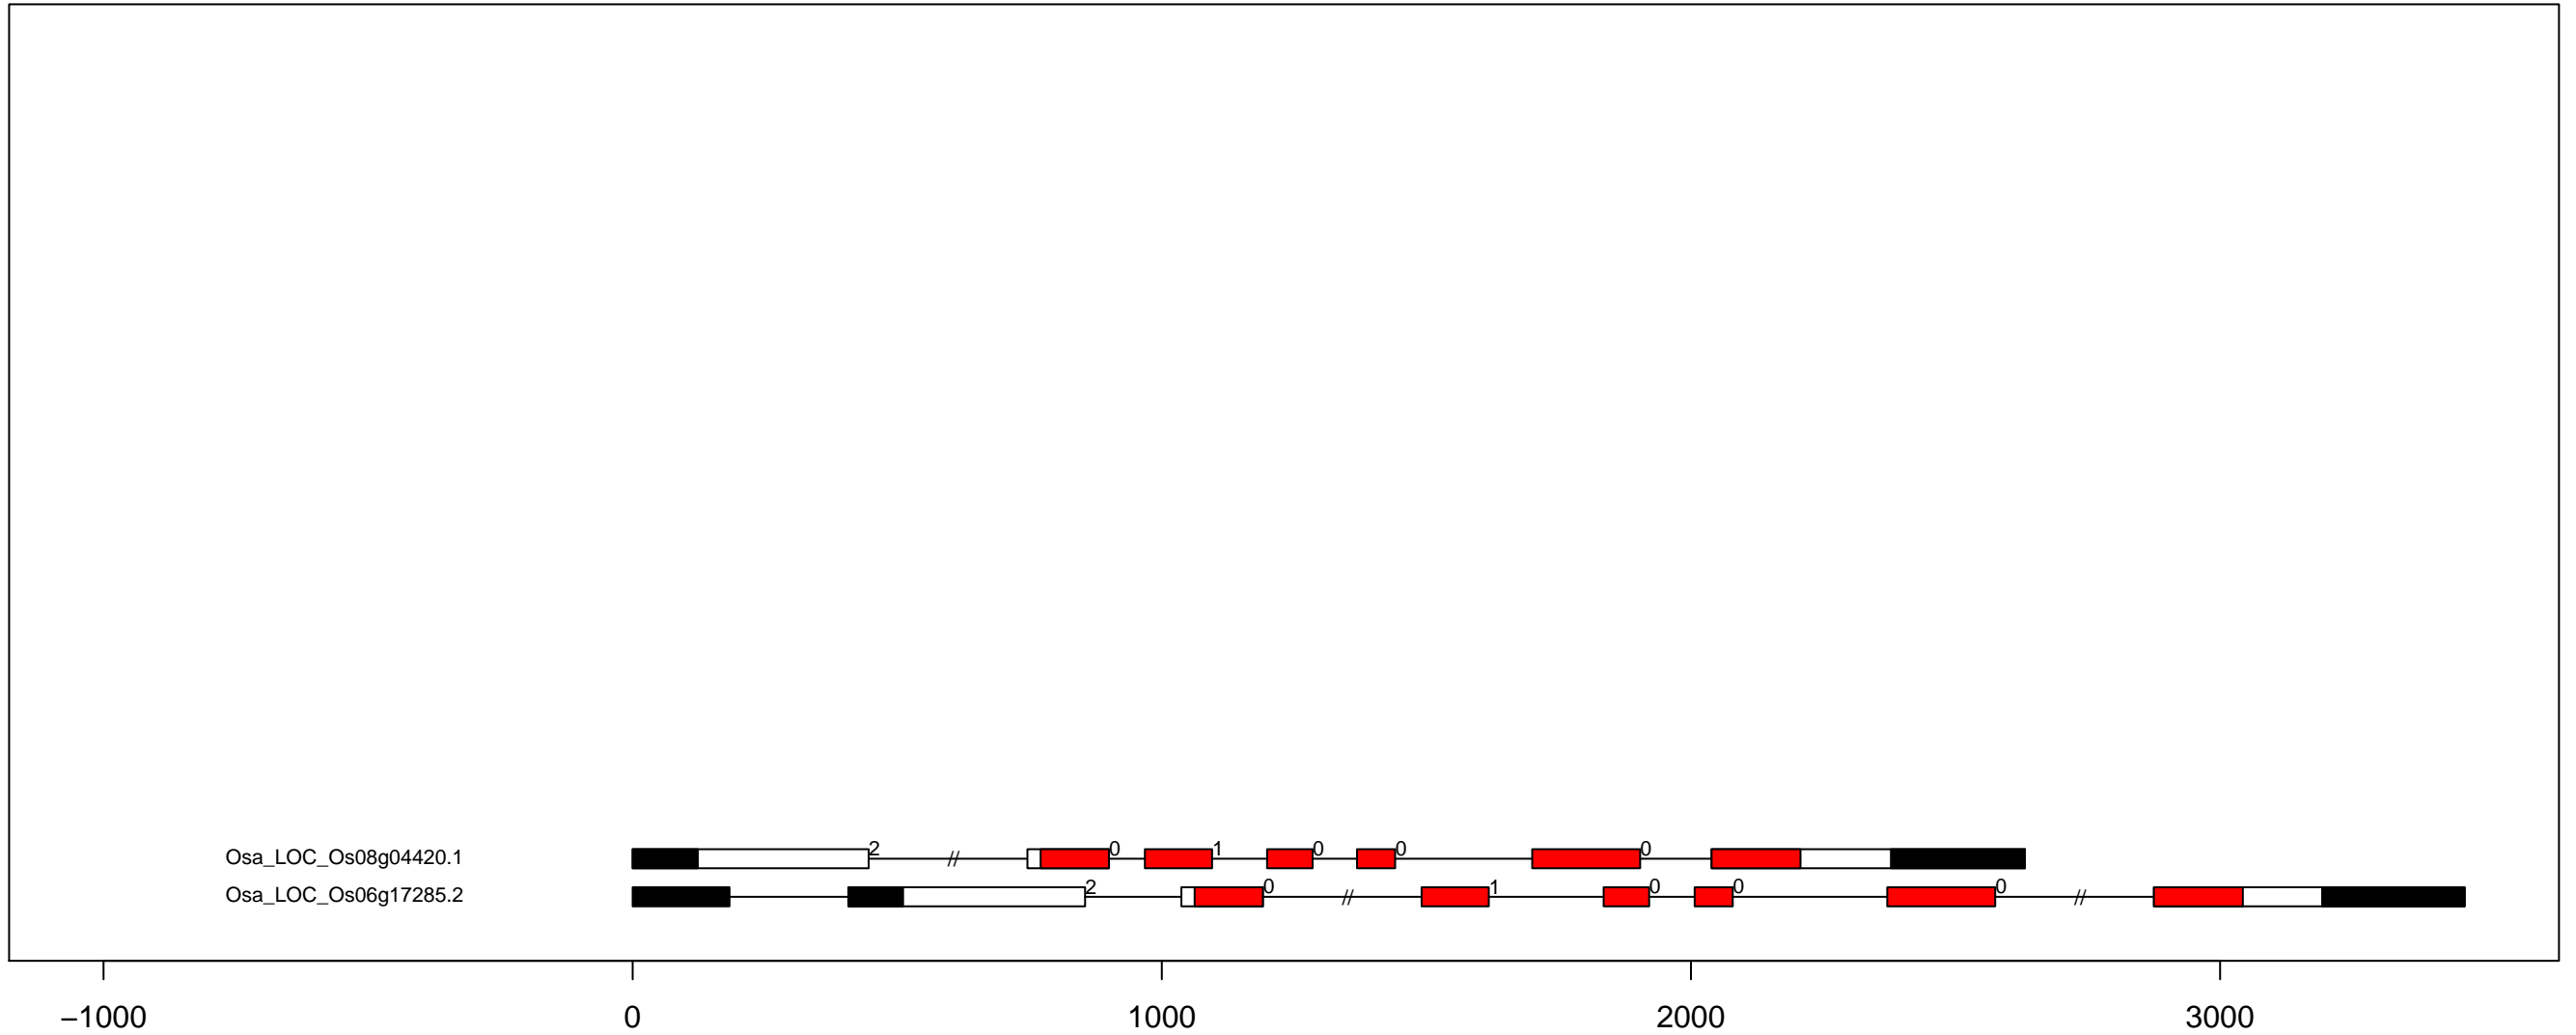

# O.sa RLK-Pelle\_LRR-III exon-intron and kinase domain diagram (part 1)

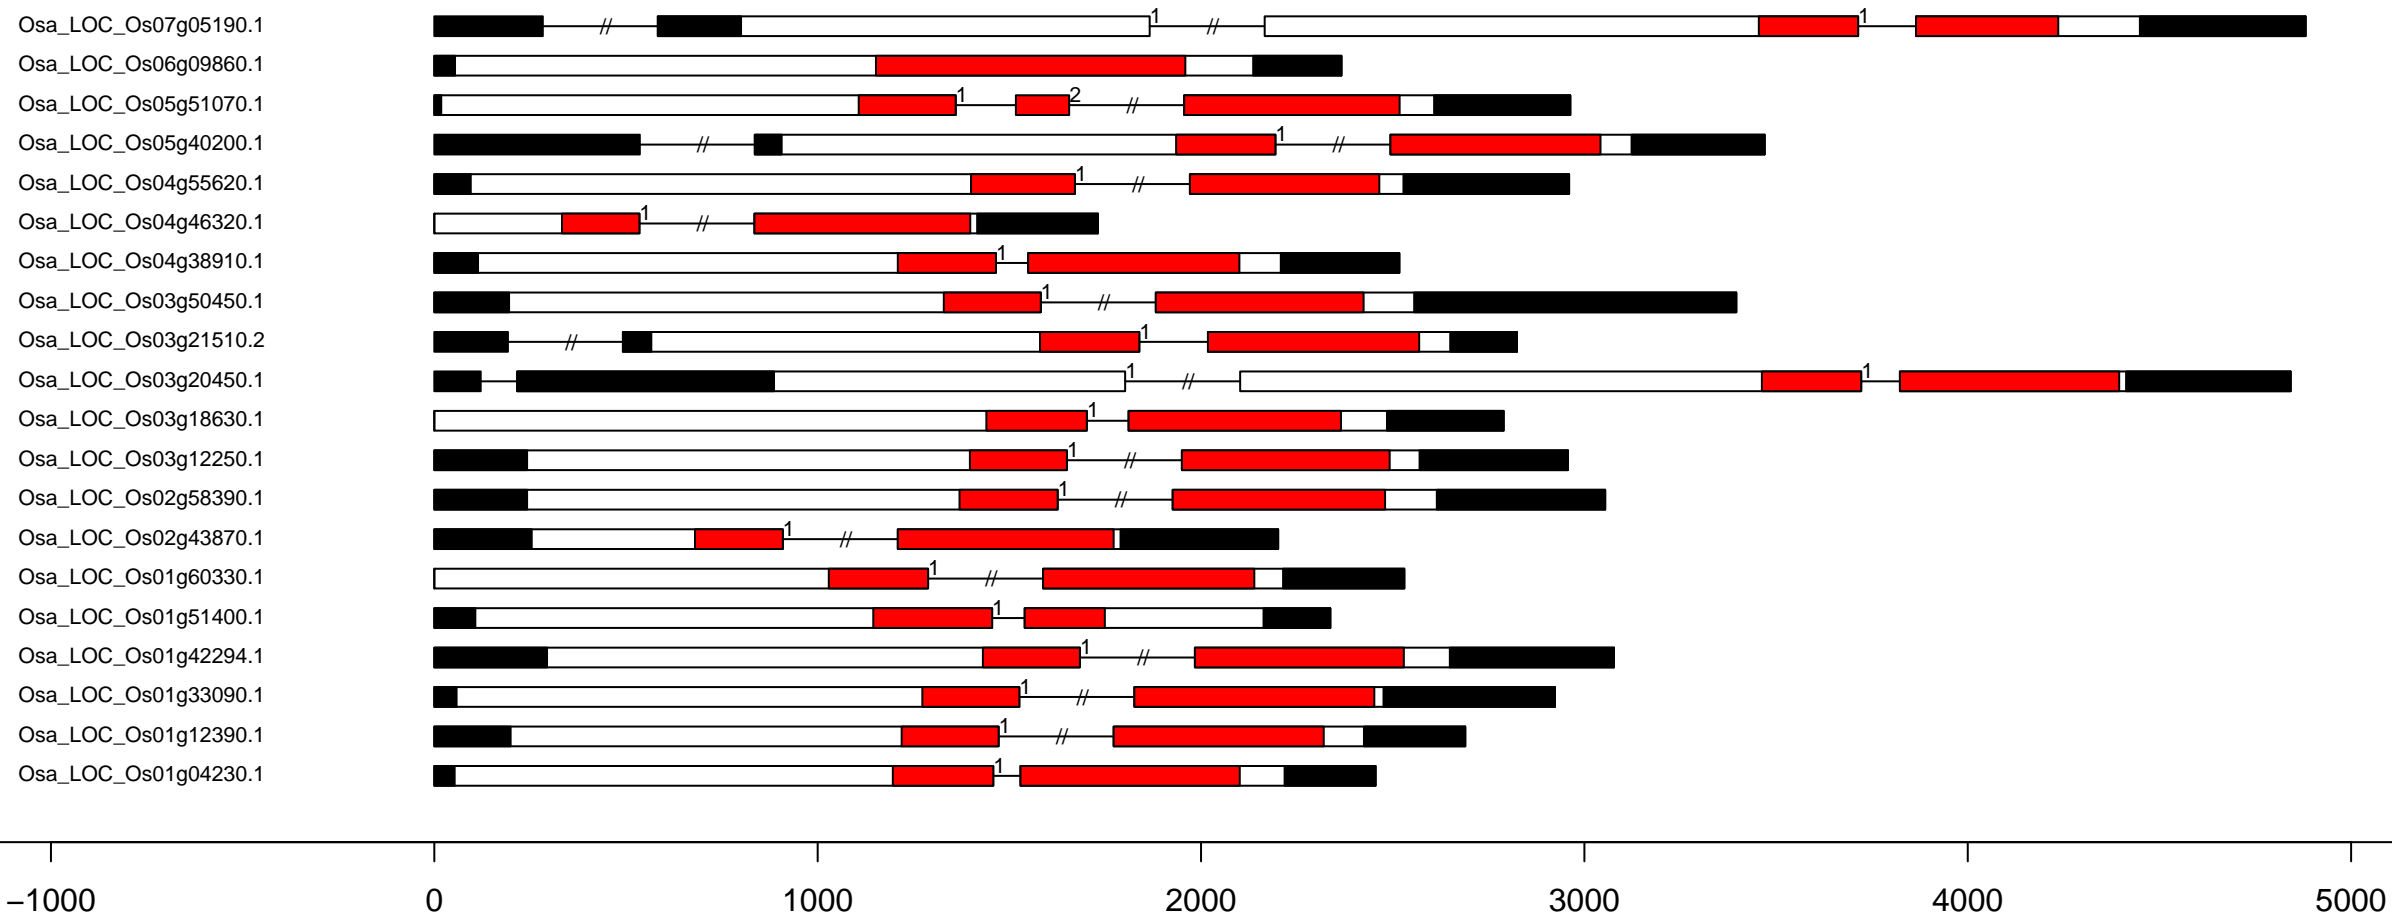



### O.sa RLK-Pelle\_LRR-II exon-intron and kinase domain diagram (all)

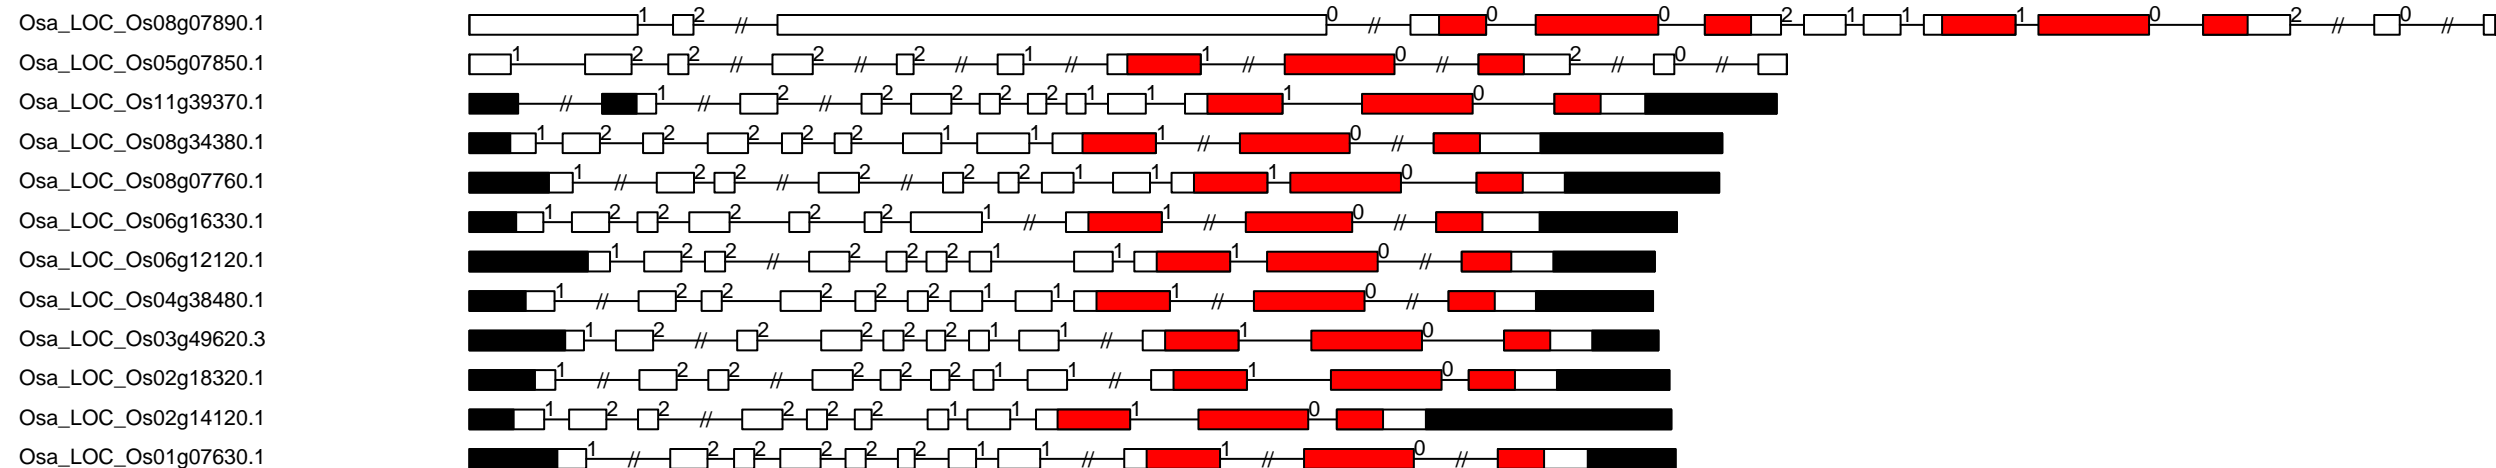

0

2000

4000

6000

# O.sa RLK-Pelle\_LRR-IV exon-intron and kinase domain diagram (all)

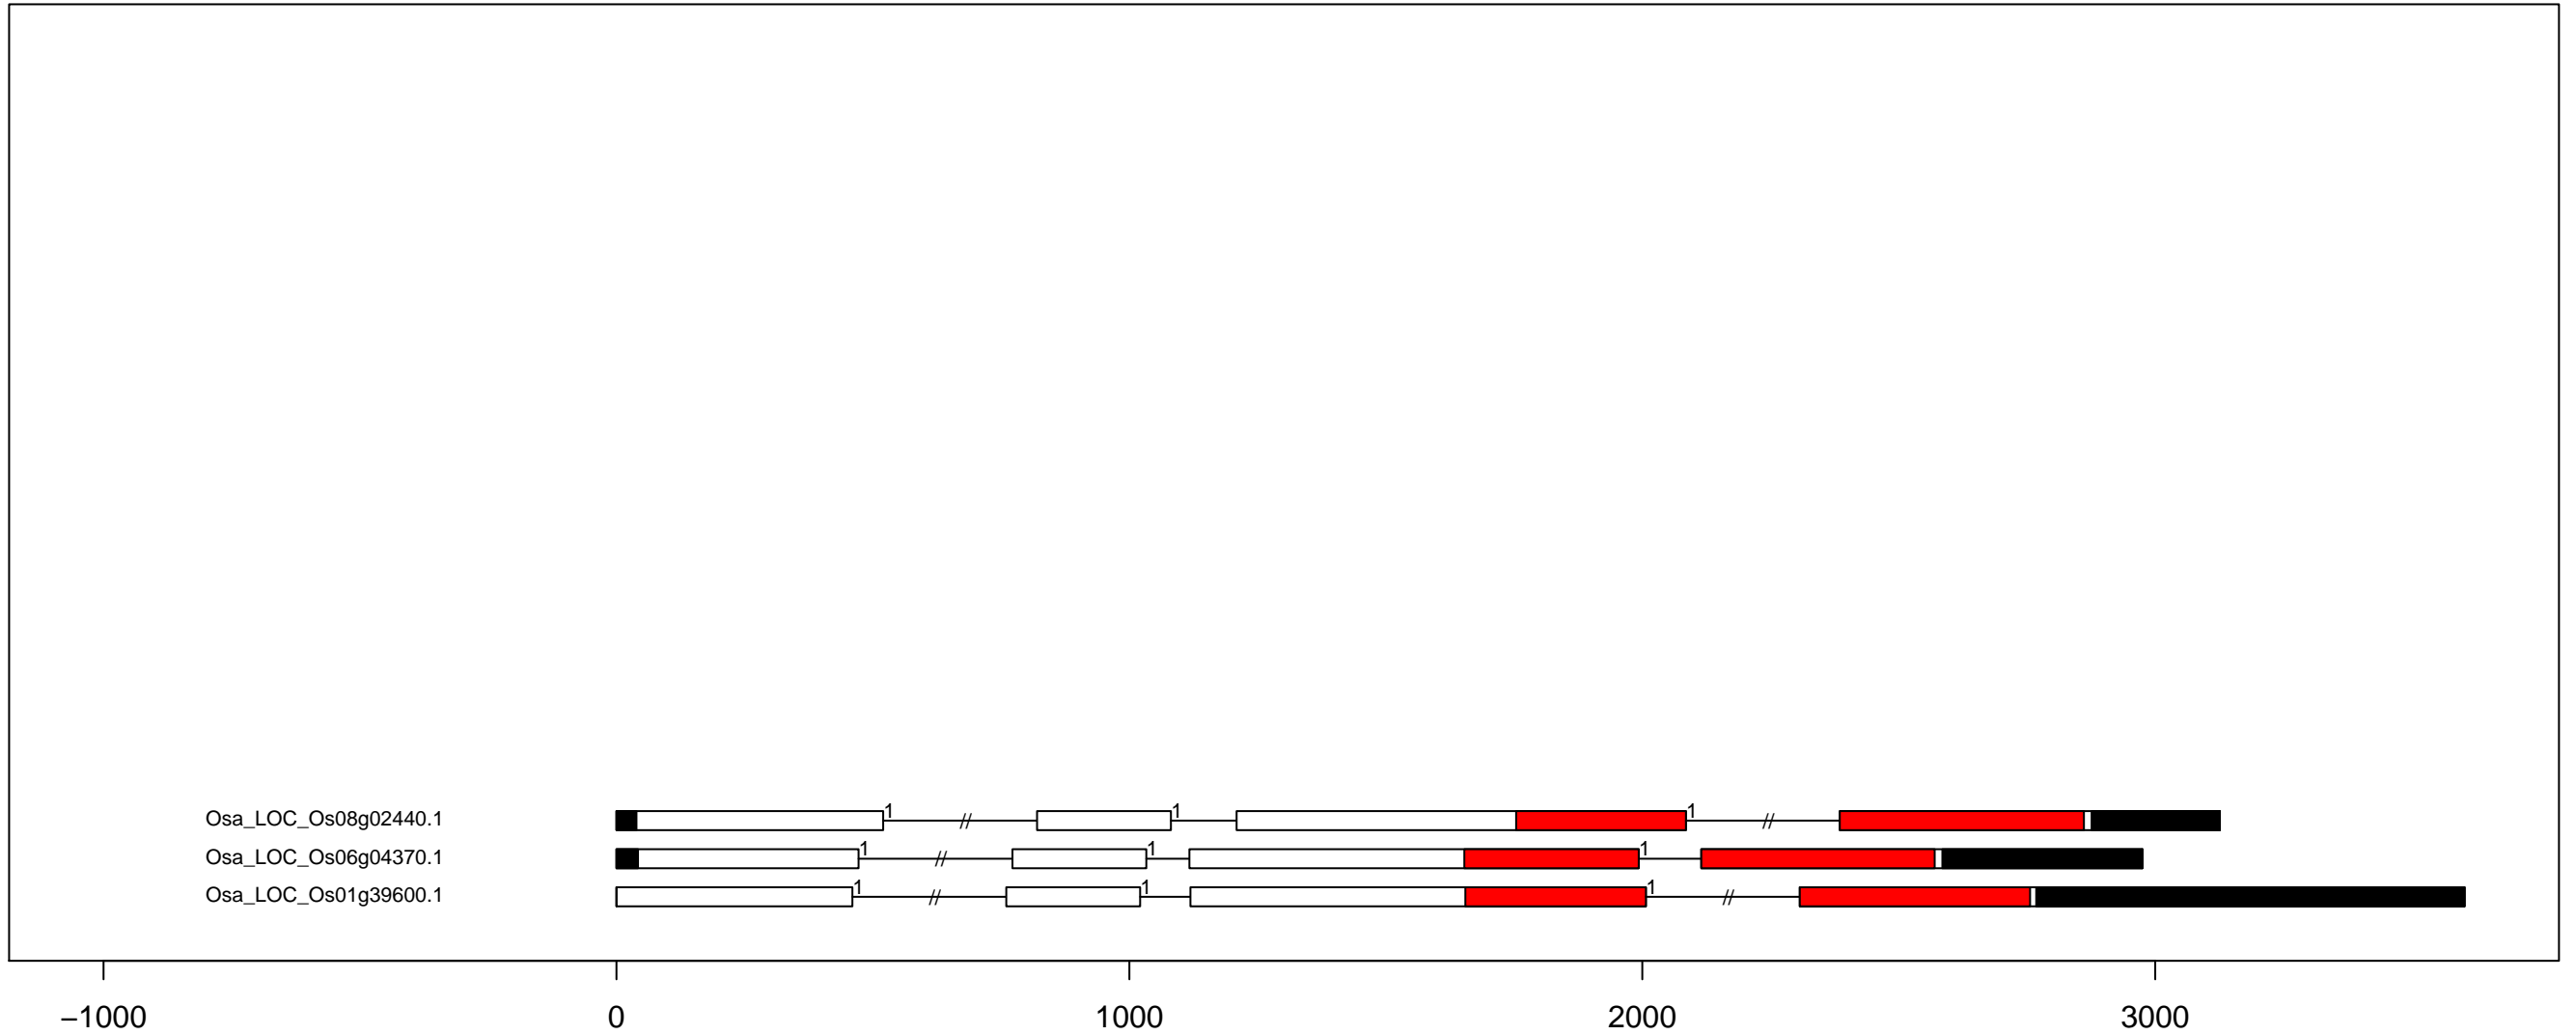

# O.sa RLK-Pelle\_LRR-IX exon-intron and kinase domain diagram (all)

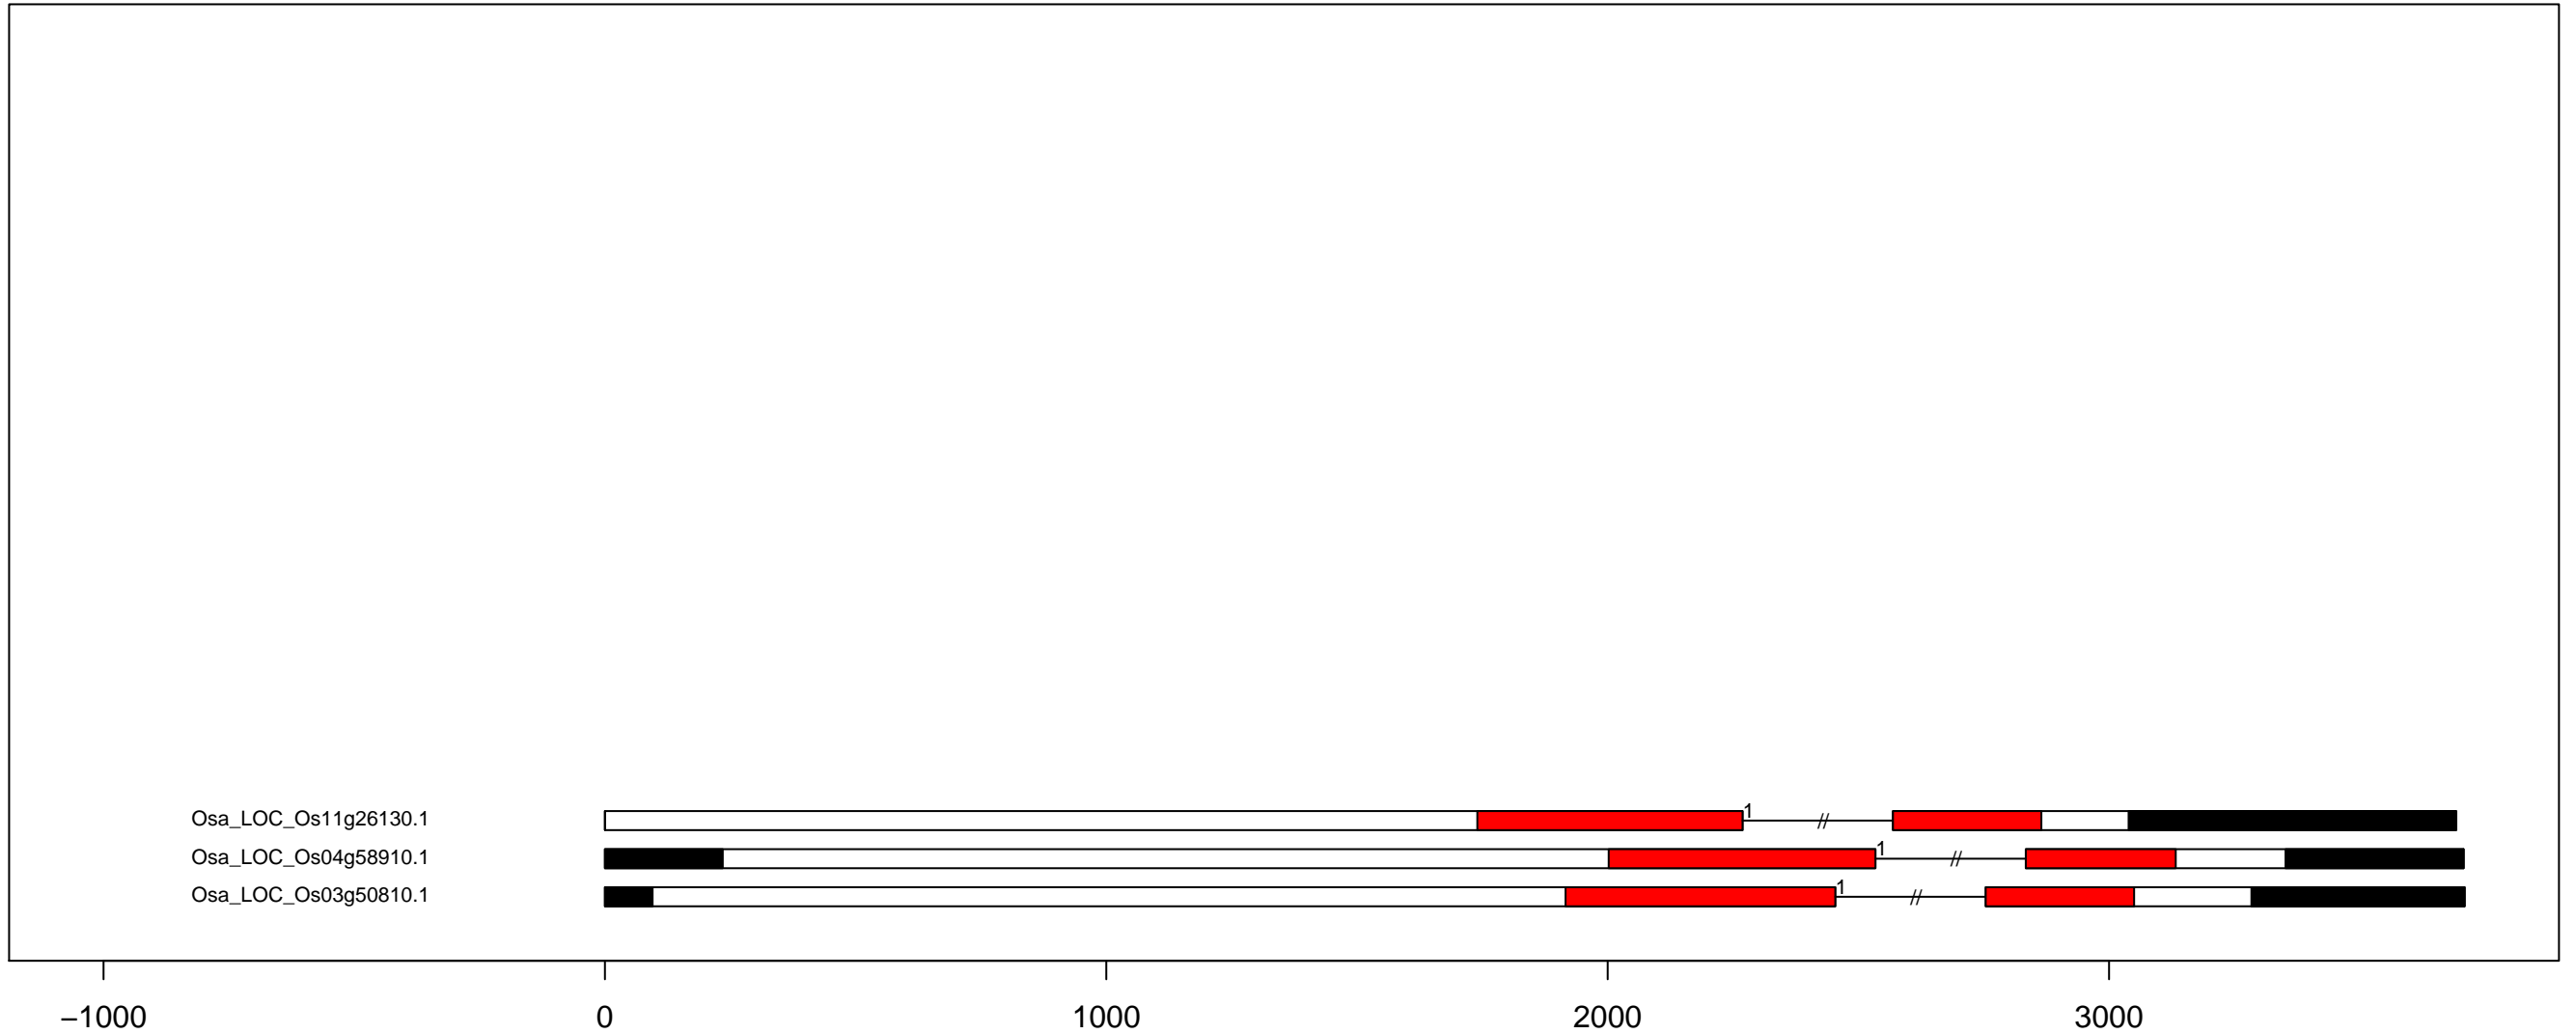

# O.sa RLK-Pelle\_LRR-VI-1 exon-intron and kinase domain diagram (all)

Osa\_LOC\_Os11g20360.2  
Osa\_LOC\_Os07g07230.2  
Osa\_LOC\_Os06g38970.1  
Osa\_LOC\_Os03g57780.1

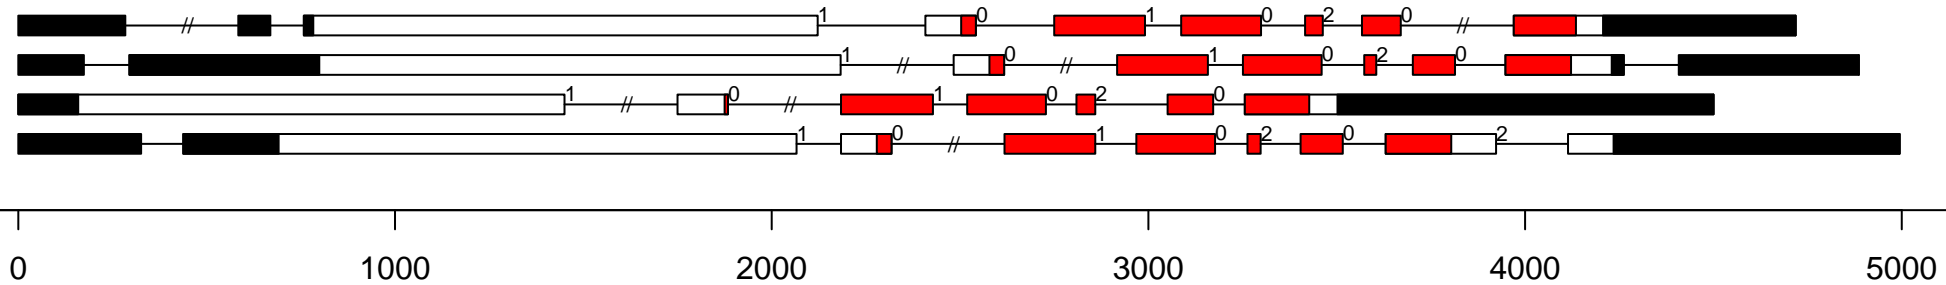



# O.sa RLK-Pelle\_LRR-VI-2 exon-intron and kinase domain diagram (all)

Osa\_LOC\_Os12g01510.1  
 Osa\_LOC\_Os07g49240.1  
 Osa\_LOC\_Os05g48660.2  
 Osa\_LOC\_Os05g39410.1  
 Osa\_LOC\_Os05g28520.1  
 Osa\_LOC\_Os04g58700.1  
 Osa\_LOC\_Os03g18370.1  
 Osa\_LOC\_Os01g48390.2  
 Osa\_LOC\_Os01g10900.1

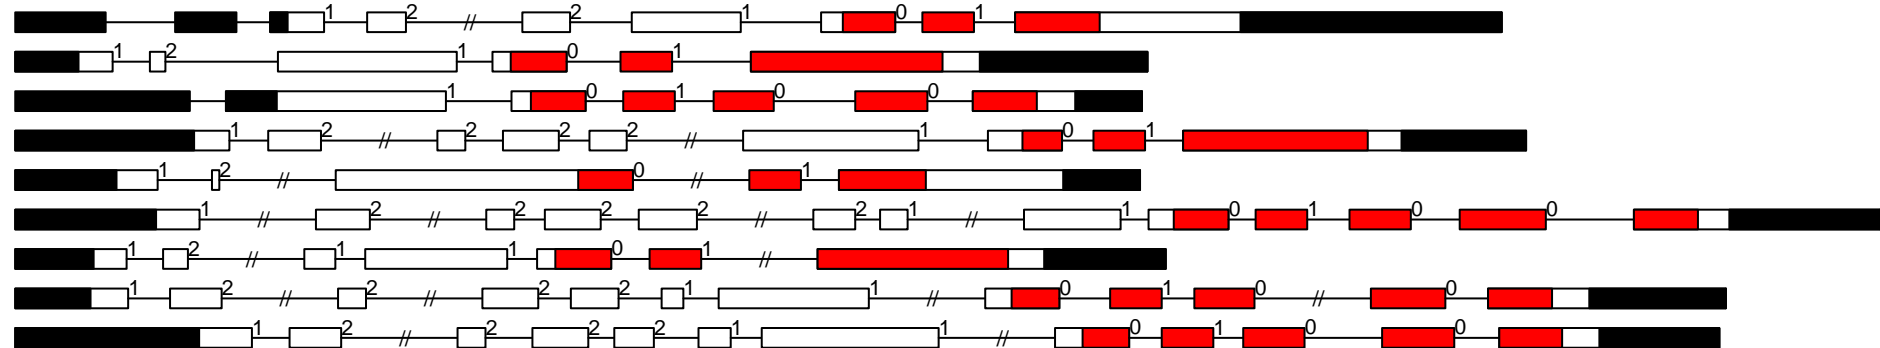

-1000

0

1000

2000

3000

4000

5000

# O.sa RLK-Pelle\_LRR-VII-1 exon-intron and kinase domain diagram (all)

Osa\_LOC\_Os10g38800.1

Osa\_LOC\_Os05g40050.1

Osa\_LOC\_Os03g21730.1

Osa\_LOC\_Os03g03570.2

Osa\_LOC\_Os01g72700.1

Osa\_LOC\_Os01g60670.1

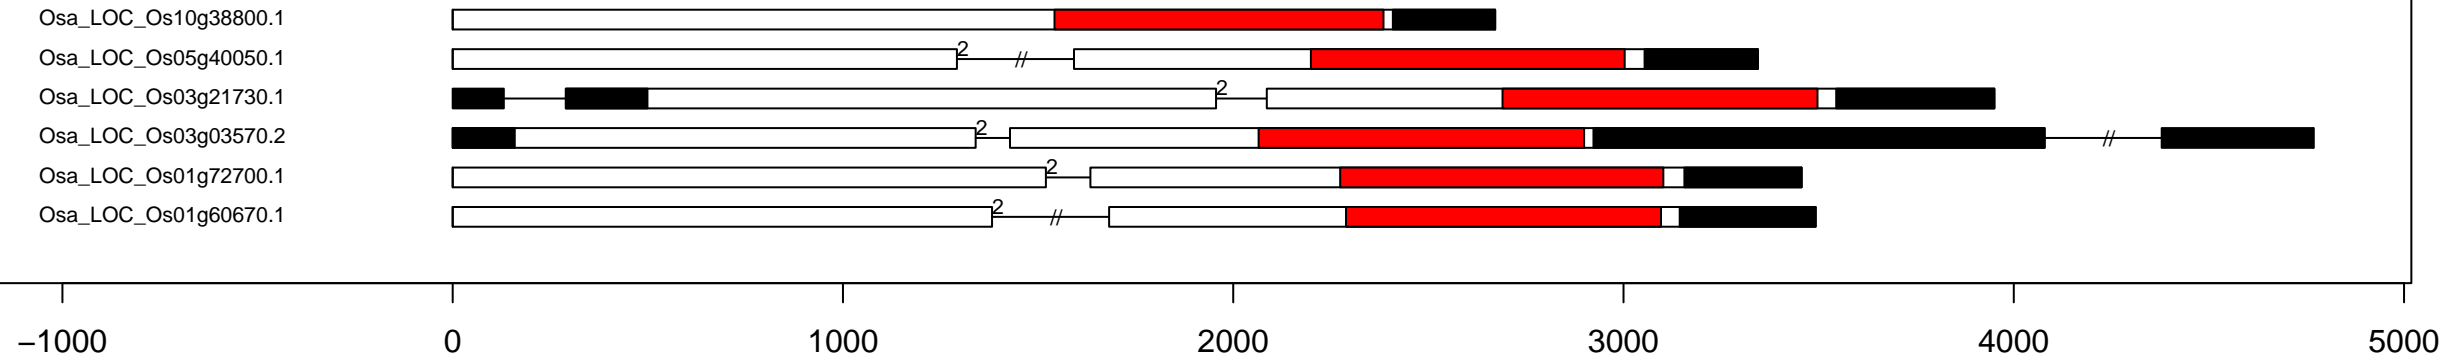

# O.sa RLK-Pelle\_LRR-VII-2 exon-intron and kinase domain diagram (all)

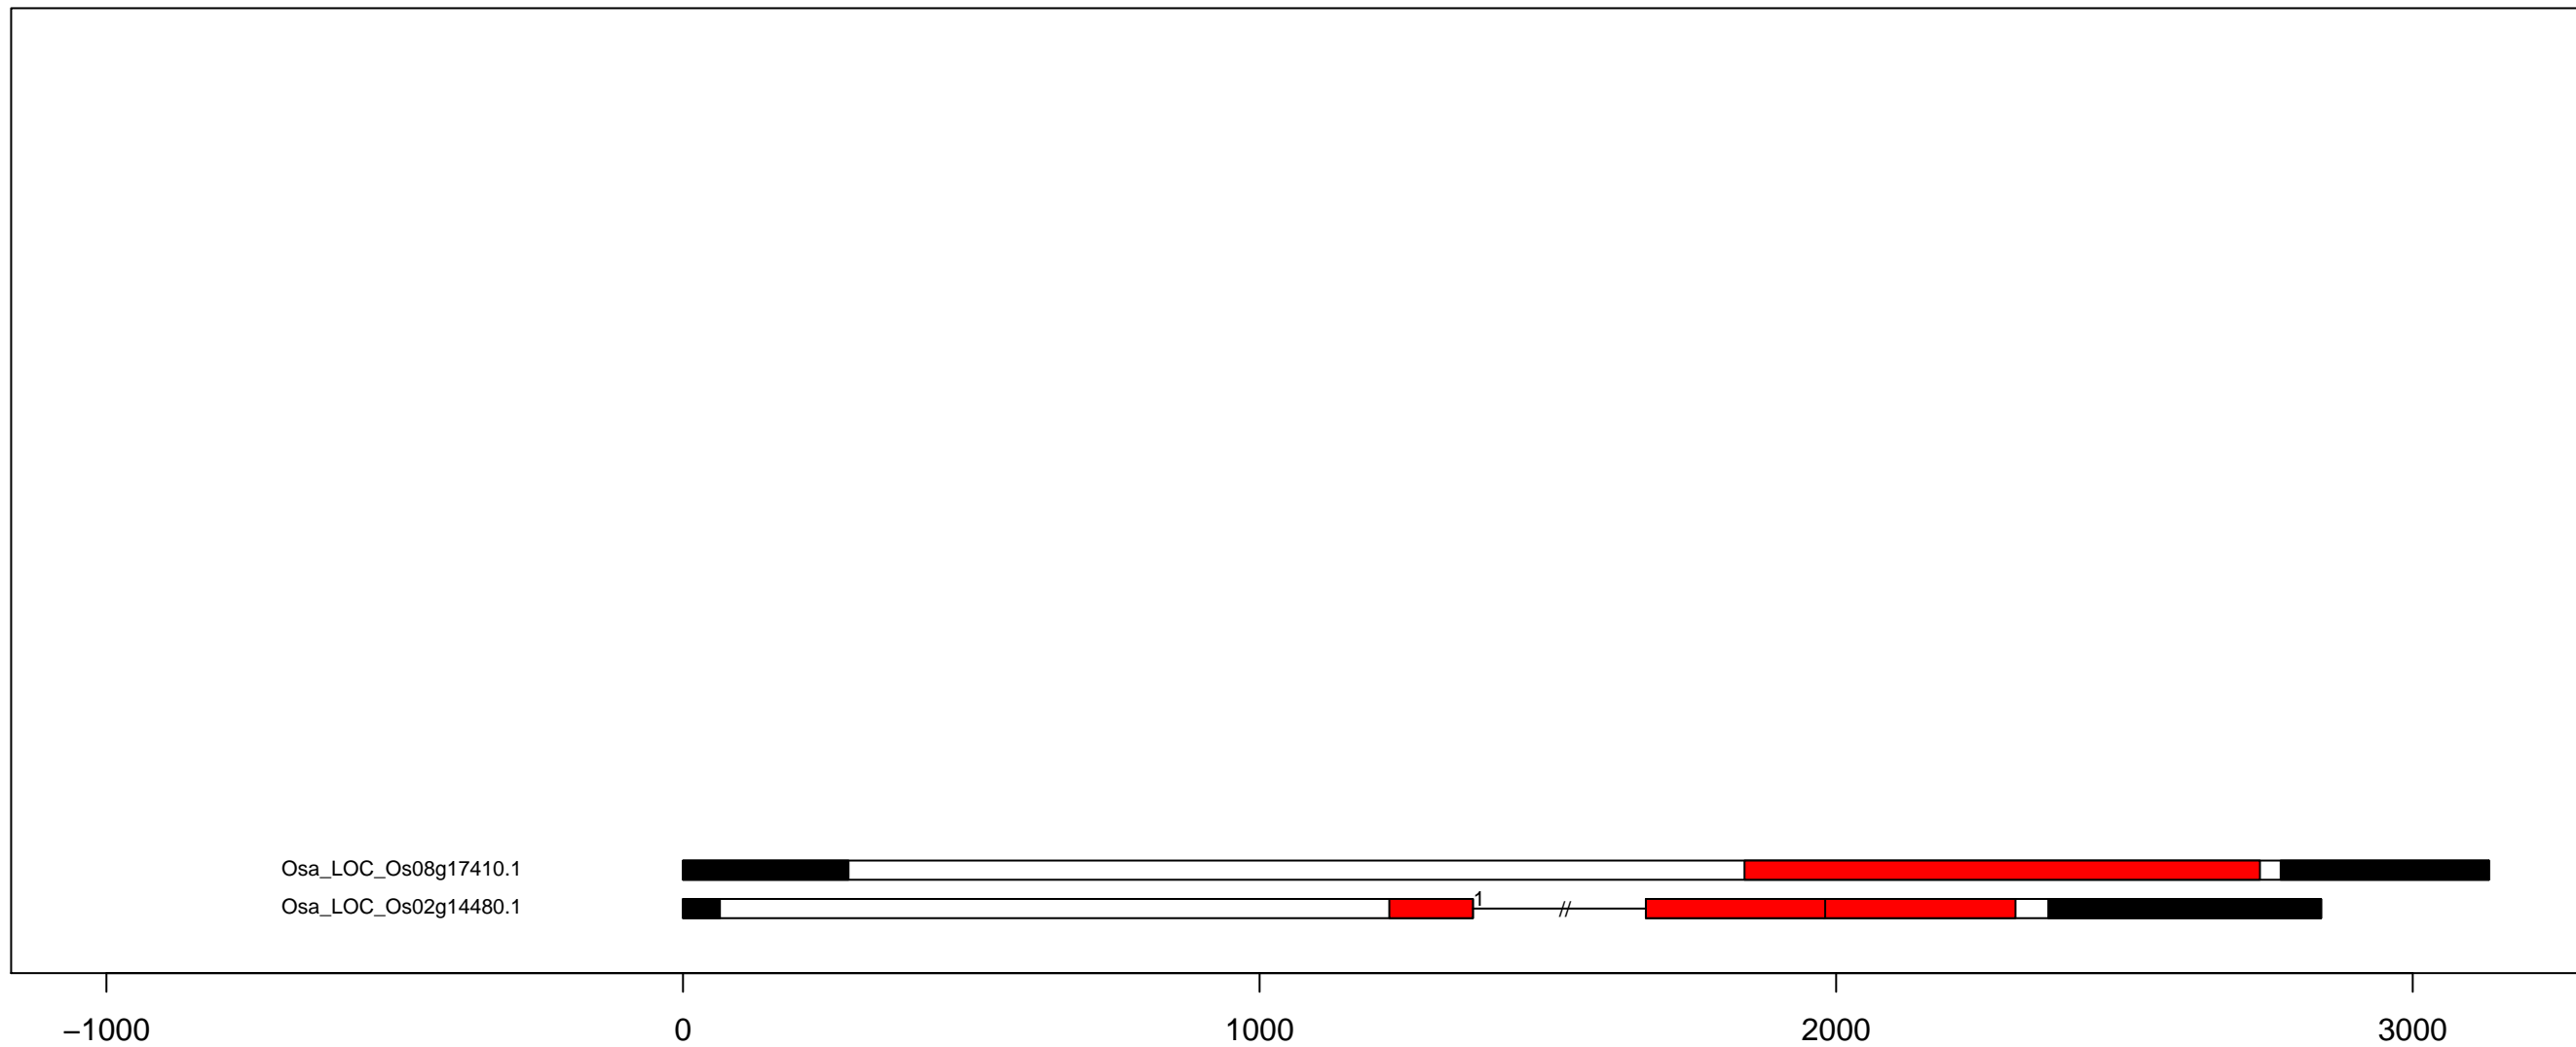

O.sa RLK-Pelle\_LRR-VII-3 exon-intron and kinase domain diagram (all)

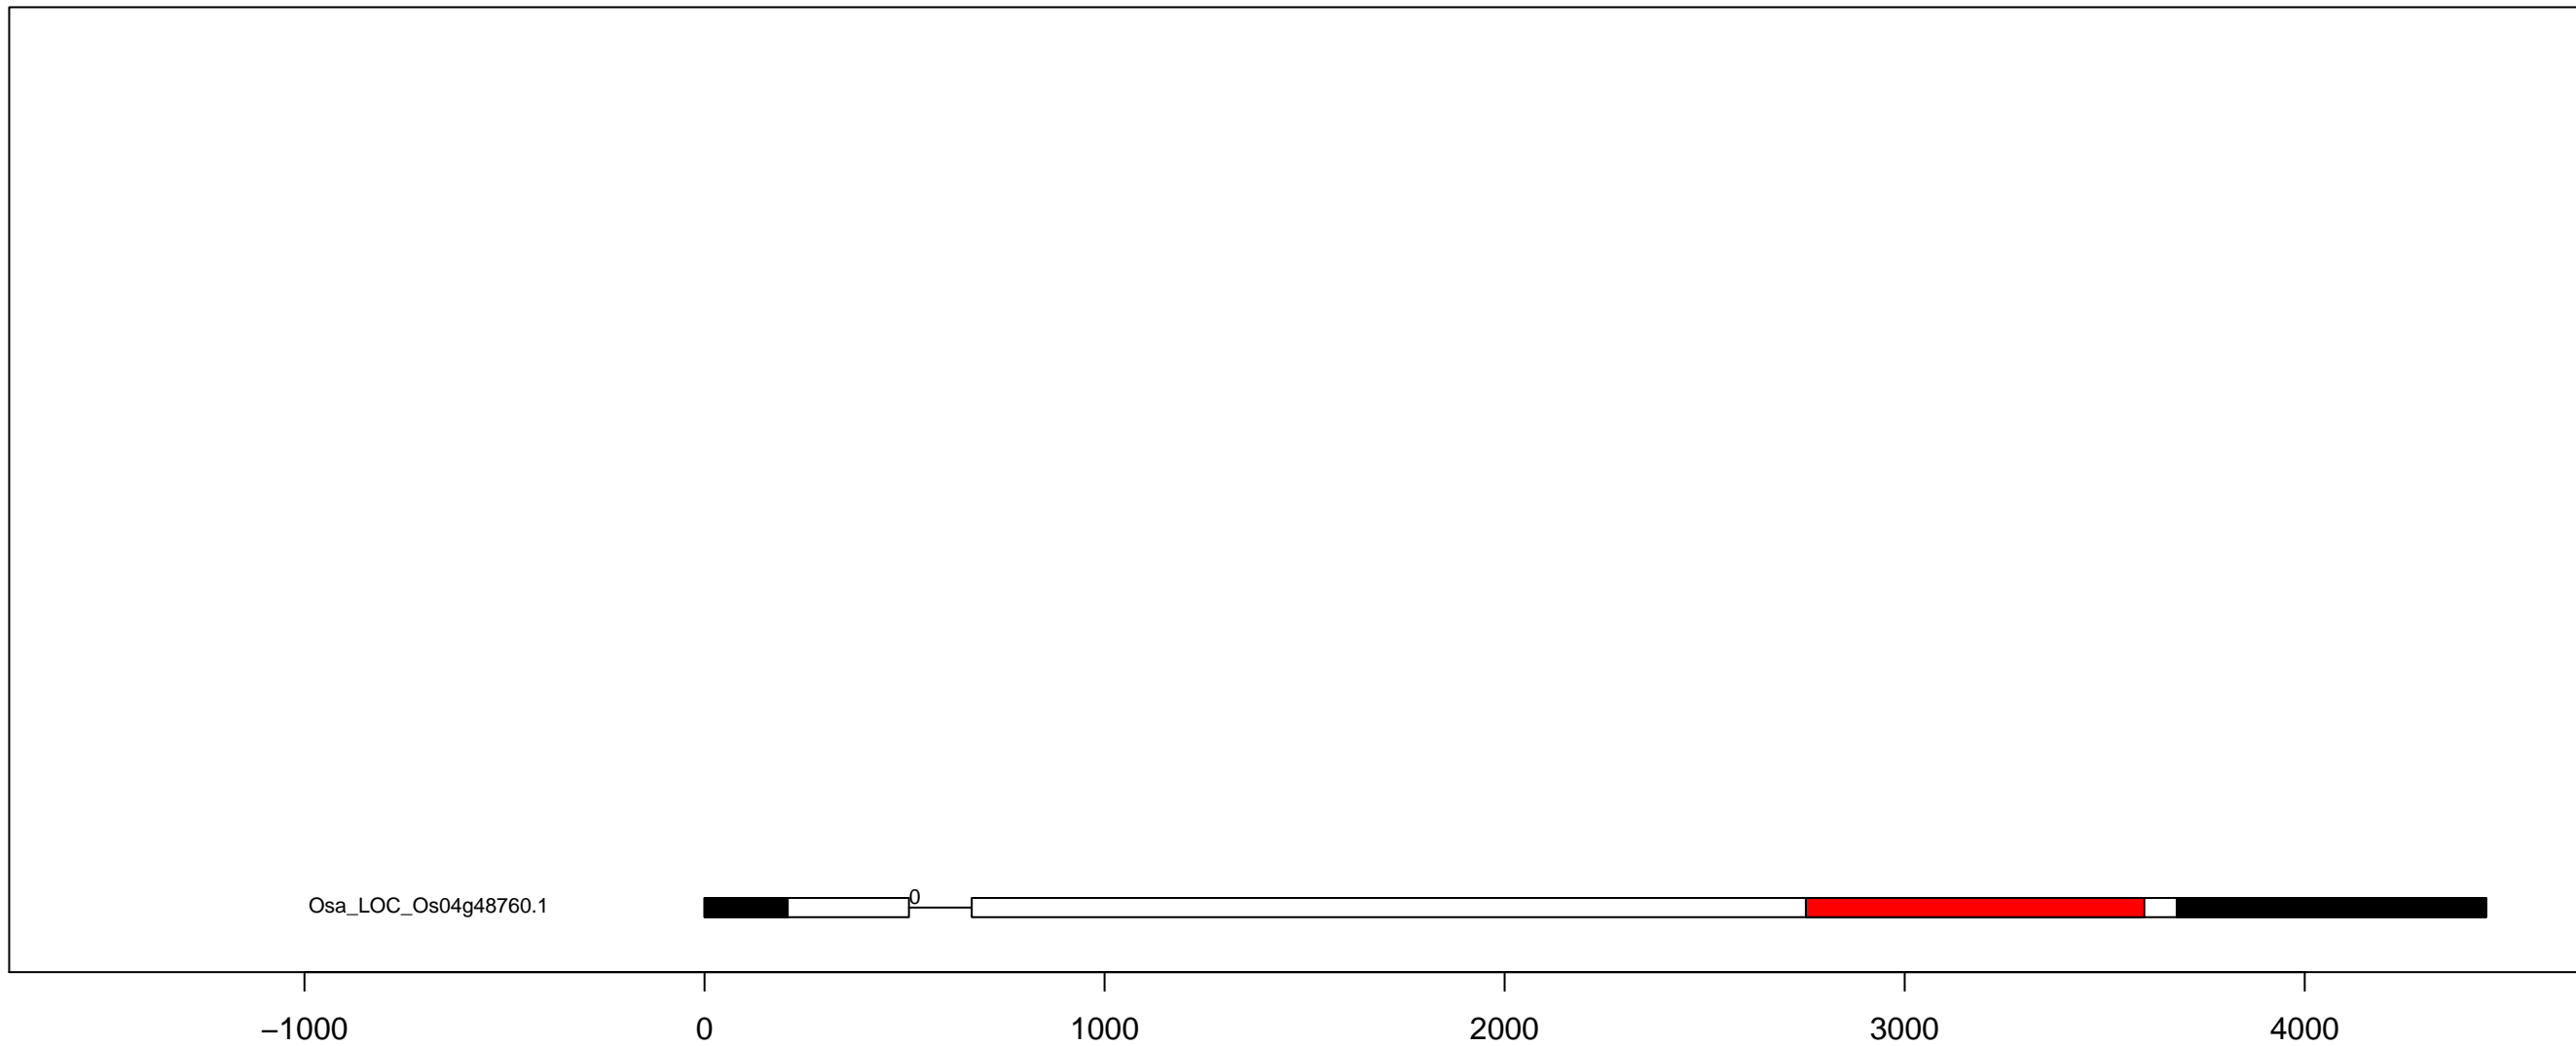

### O.sa RLK-Pelle\_LRR-VIII-1 exon-intron and kinase domain diagram (all)

Osa\_LOC\_Os12g10740.1  
 Osa\_LOC\_Os11g14050.1  
 Osa\_LOC\_Os05g40770.1  
 Osa\_LOC\_Os05g40270.5  
 Osa\_LOC\_Os05g24010.1  
 Osa\_LOC\_Os03g21230.1  
 Osa\_LOC\_Os01g72990.2  
 Osa\_LOC\_Os01g60280.1  
 Osa\_LOC\_Os01g60060.1

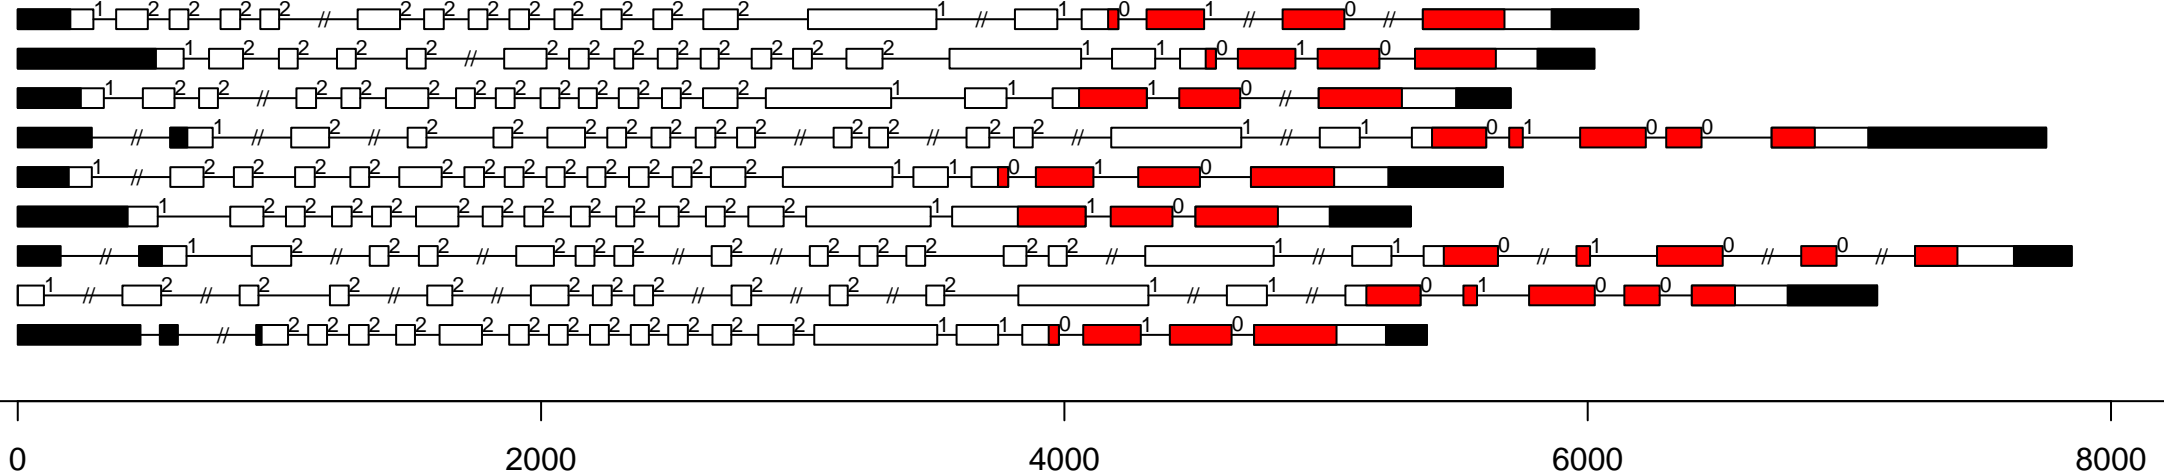

# O.sa RLK-Pelle\_LRR-V exon-intron and kinase domain diagram (all)

Osa\_LOC\_Os10g25090.1  
Osa\_LOC\_Os09g38700.1  
Osa\_LOC\_Os07g42626.1  
Osa\_LOC\_Os07g37810.1  
Osa\_LOC\_Os06g45020.1  
Osa\_LOC\_Os06g42800.1  
Osa\_LOC\_Os03g27990.1  
Osa\_LOC\_Os03g08550.1  
Osa\_LOC\_Os02g10110.1  
Osa\_LOC\_Os02g09740.1  
Osa\_LOC\_Os02g07960.4  
Osa\_LOC\_Os02g04430.1

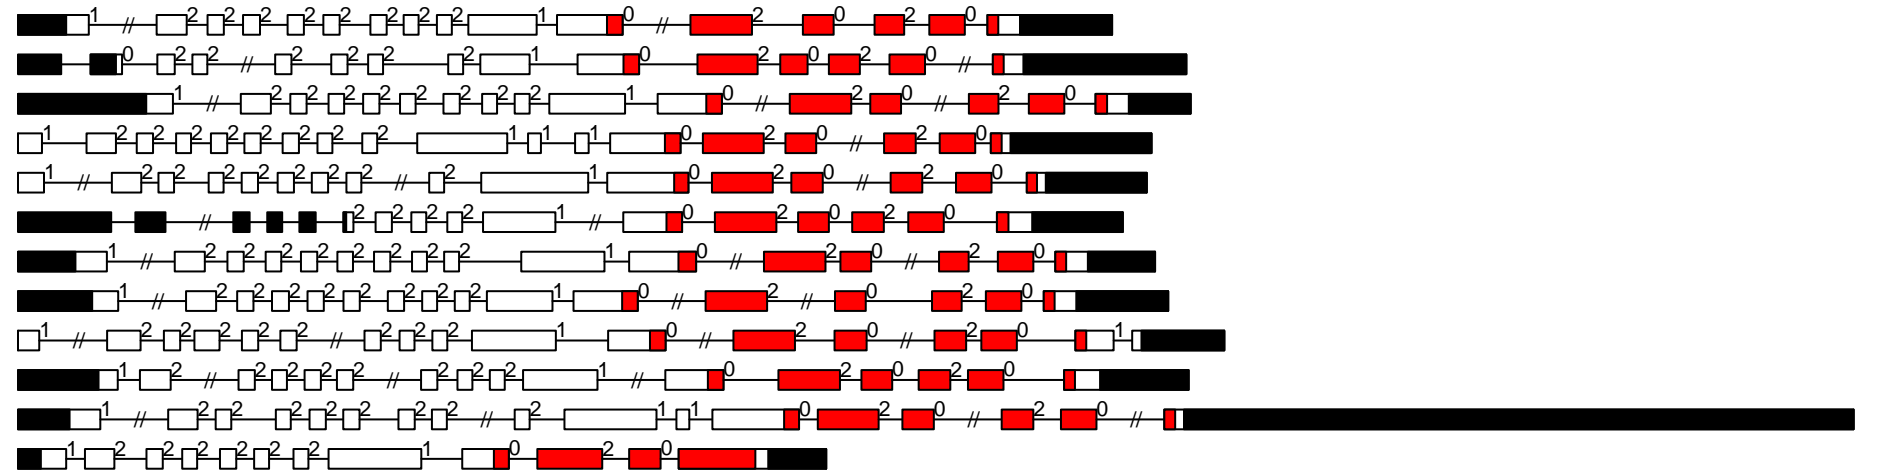

# O.sa RLK-Pelle\_LRR-Xa exon-intron and kinase domain diagram (all)

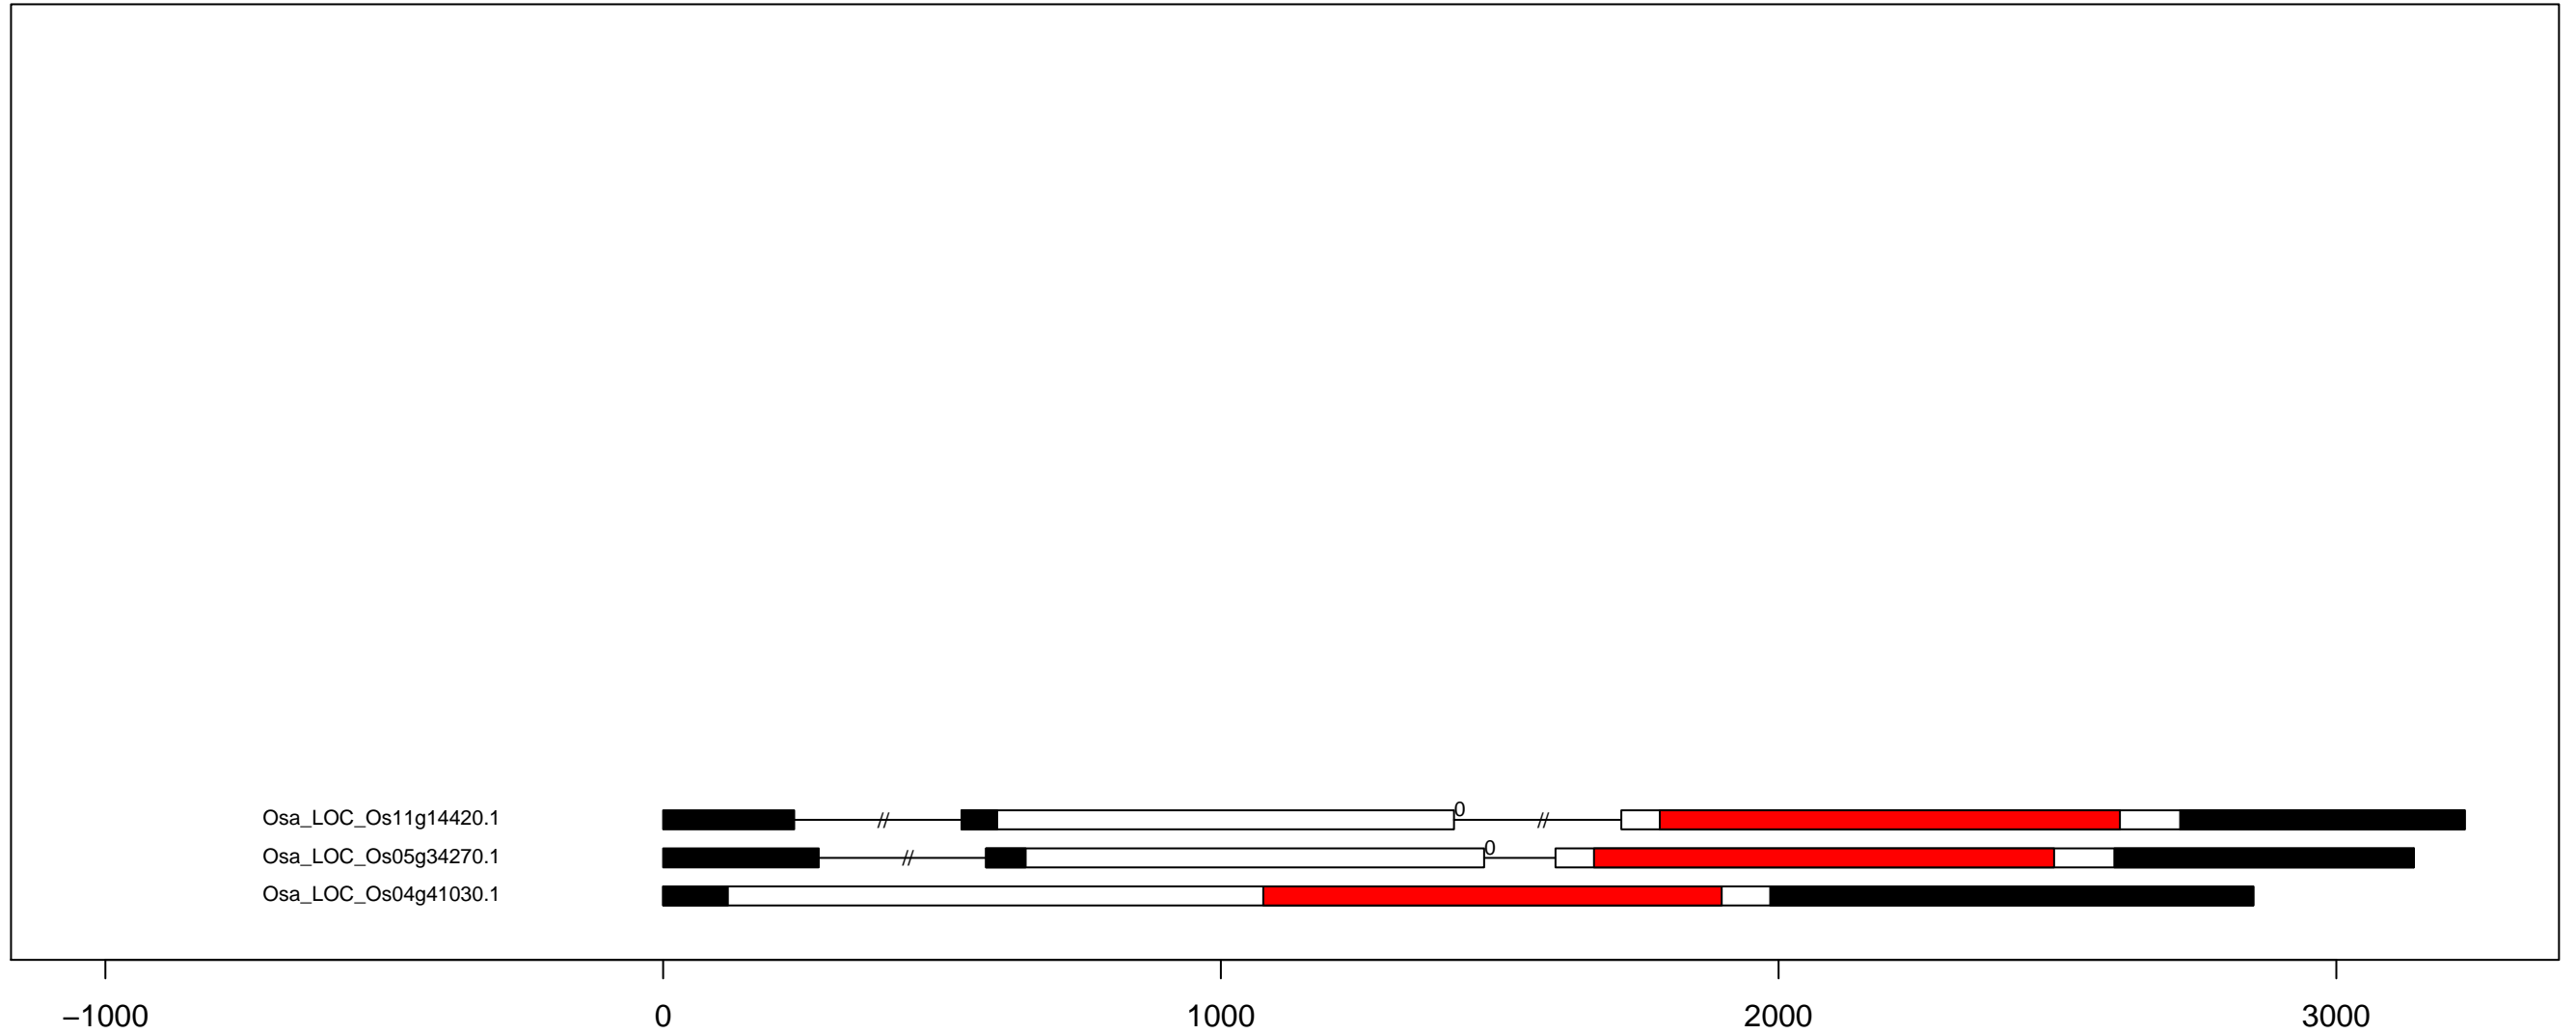

# O.sa RLK-Pelle\_LRR-Xb-1 exon-intron and kinase domain diagram (part 1)

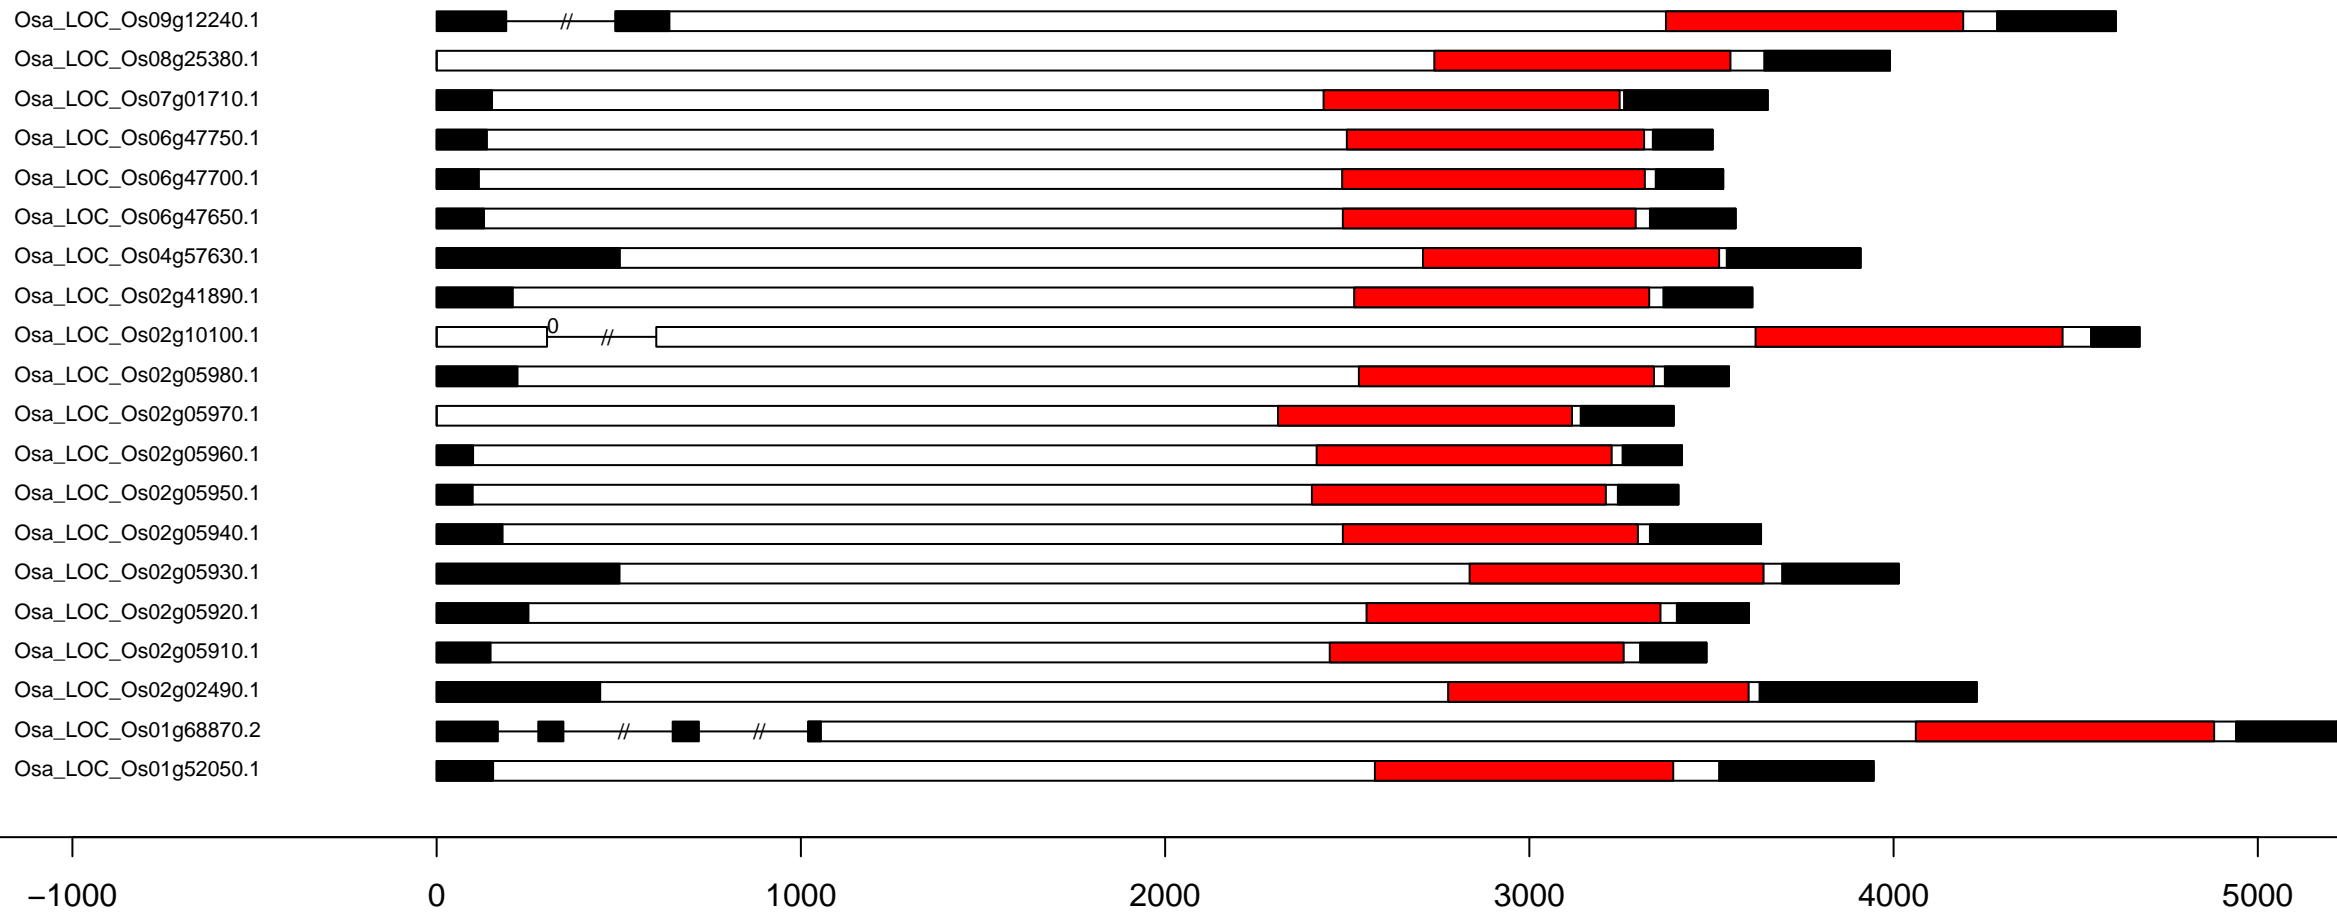



# O.sa RLK-Pelle\_LRR-Xb-1 exon-intron and kinase domain diagram (part 2)

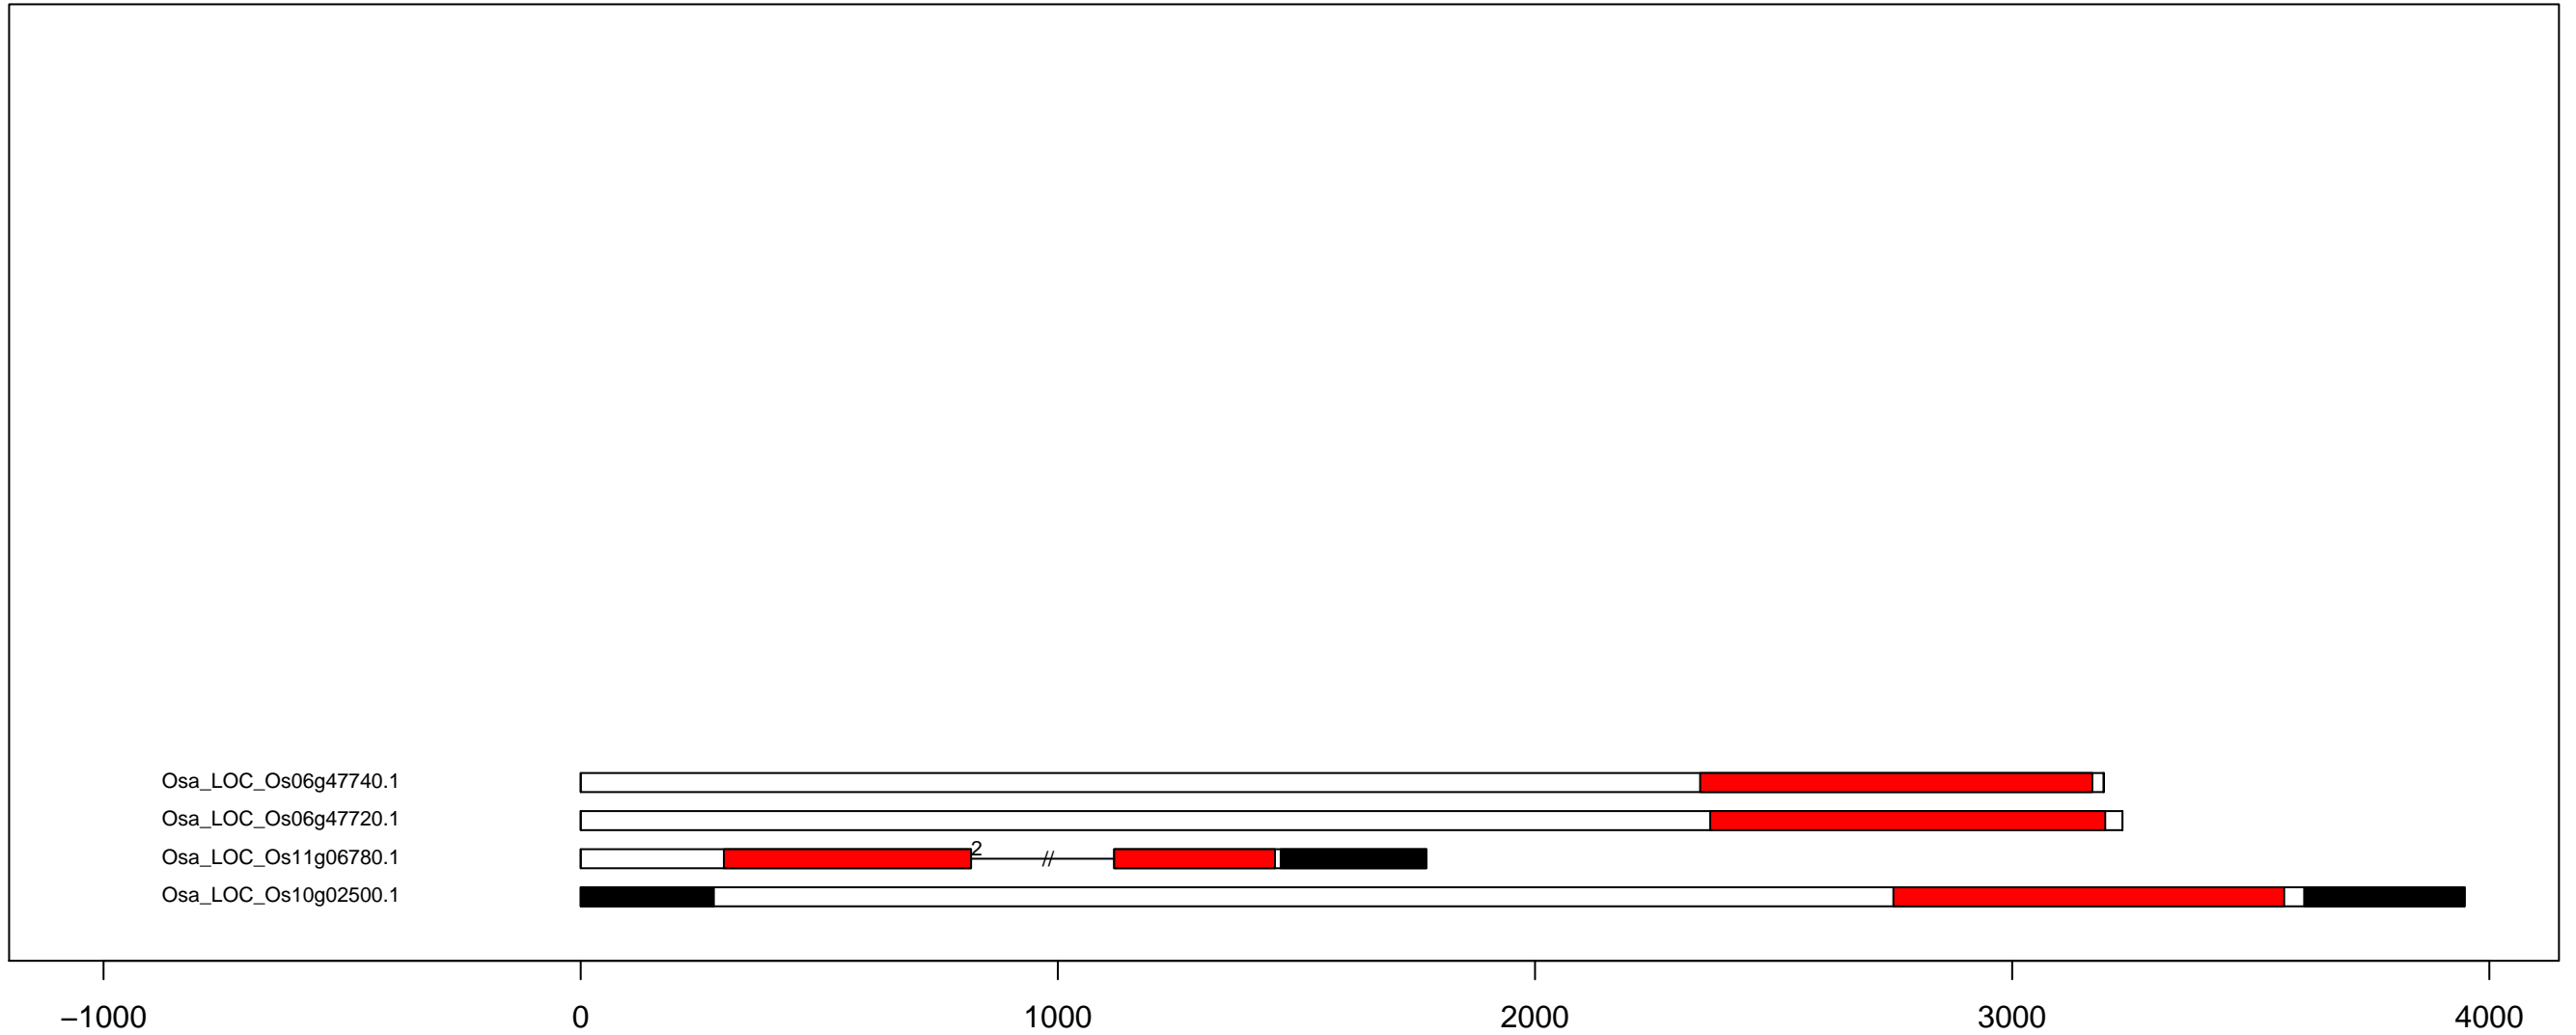

O.sa RLK-Pelle\_LRR-Xb-2 exon-intron and kinase domain diagram (all)

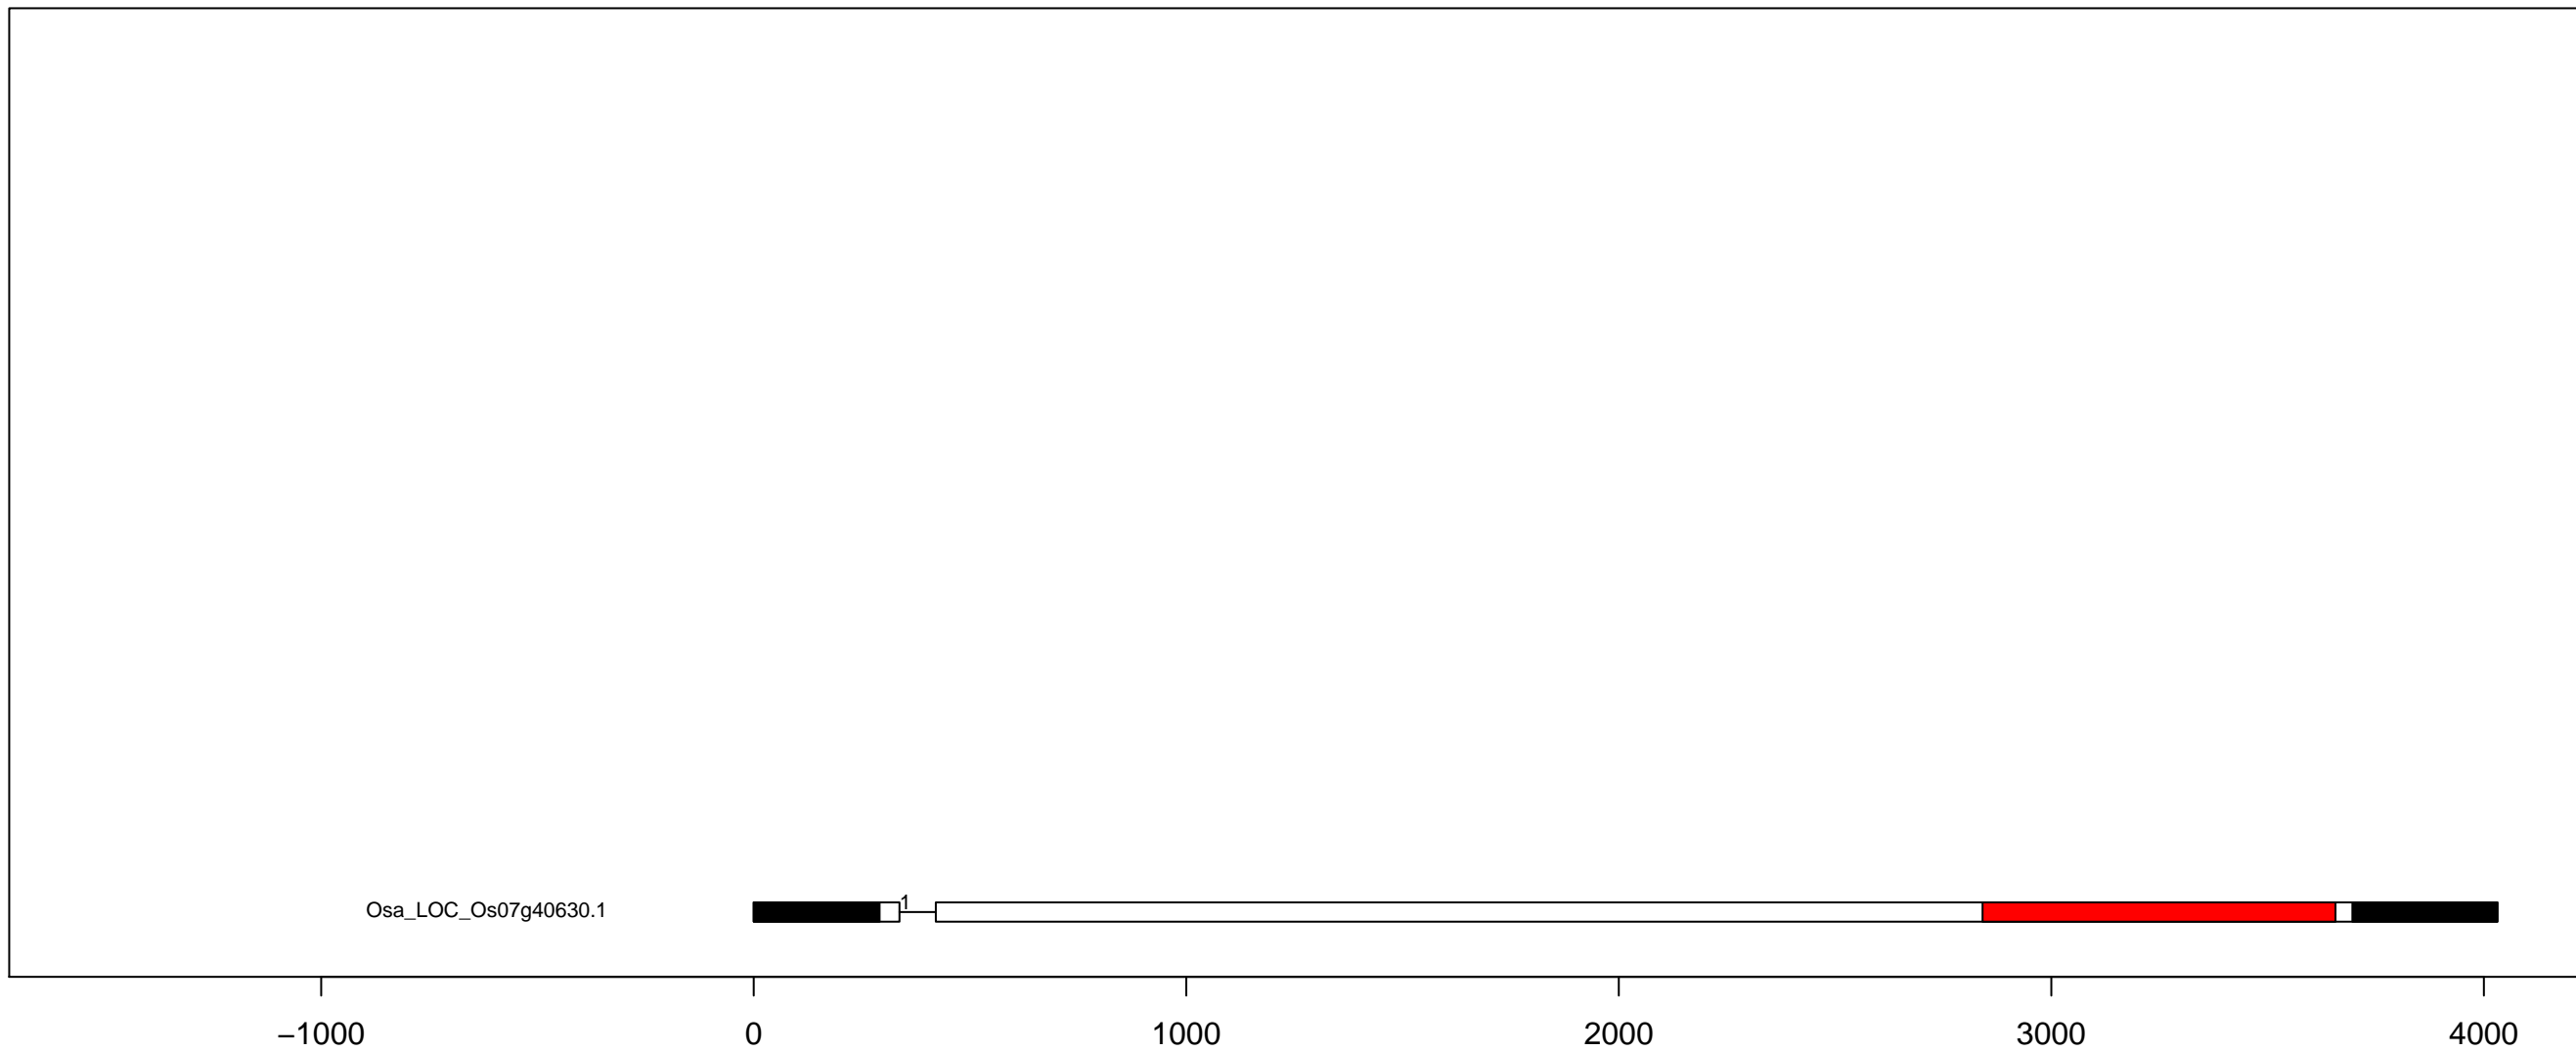

# O.sa RLK-Pelle\_LRR-XI-1 exon-intron and kinase domain diagram (part 1)

Osa\_LOC\_Os06g36270.2  
 Osa\_LOC\_Os05g51740.1  
 Osa\_LOC\_Os05g44770.1  
 Osa\_LOC\_Os05g07740.1  
 Osa\_LOC\_Os04g42700.1  
 Osa\_LOC\_Os04g39650.1  
 Osa\_LOC\_Os04g04330.2  
 Osa\_LOC\_Os03g56270.2  
 Osa\_LOC\_Os03g12730.1  
 Osa\_LOC\_Os02g34790.1  
 Osa\_LOC\_Os02g34750.2  
 Osa\_LOC\_Os02g13510.1  
 Osa\_LOC\_Os02g13430.1  
 Osa\_LOC\_Os02g02140.1  
 Osa\_LOC\_Os01g65650.1  
 Osa\_LOC\_Os01g53920.1  
 Osa\_LOC\_Os01g33110.1  
 Osa\_LOC\_Os01g19160.2  
 Osa\_LOC\_Os01g13800.1  
 Osa\_LOC\_Os01g07560.1

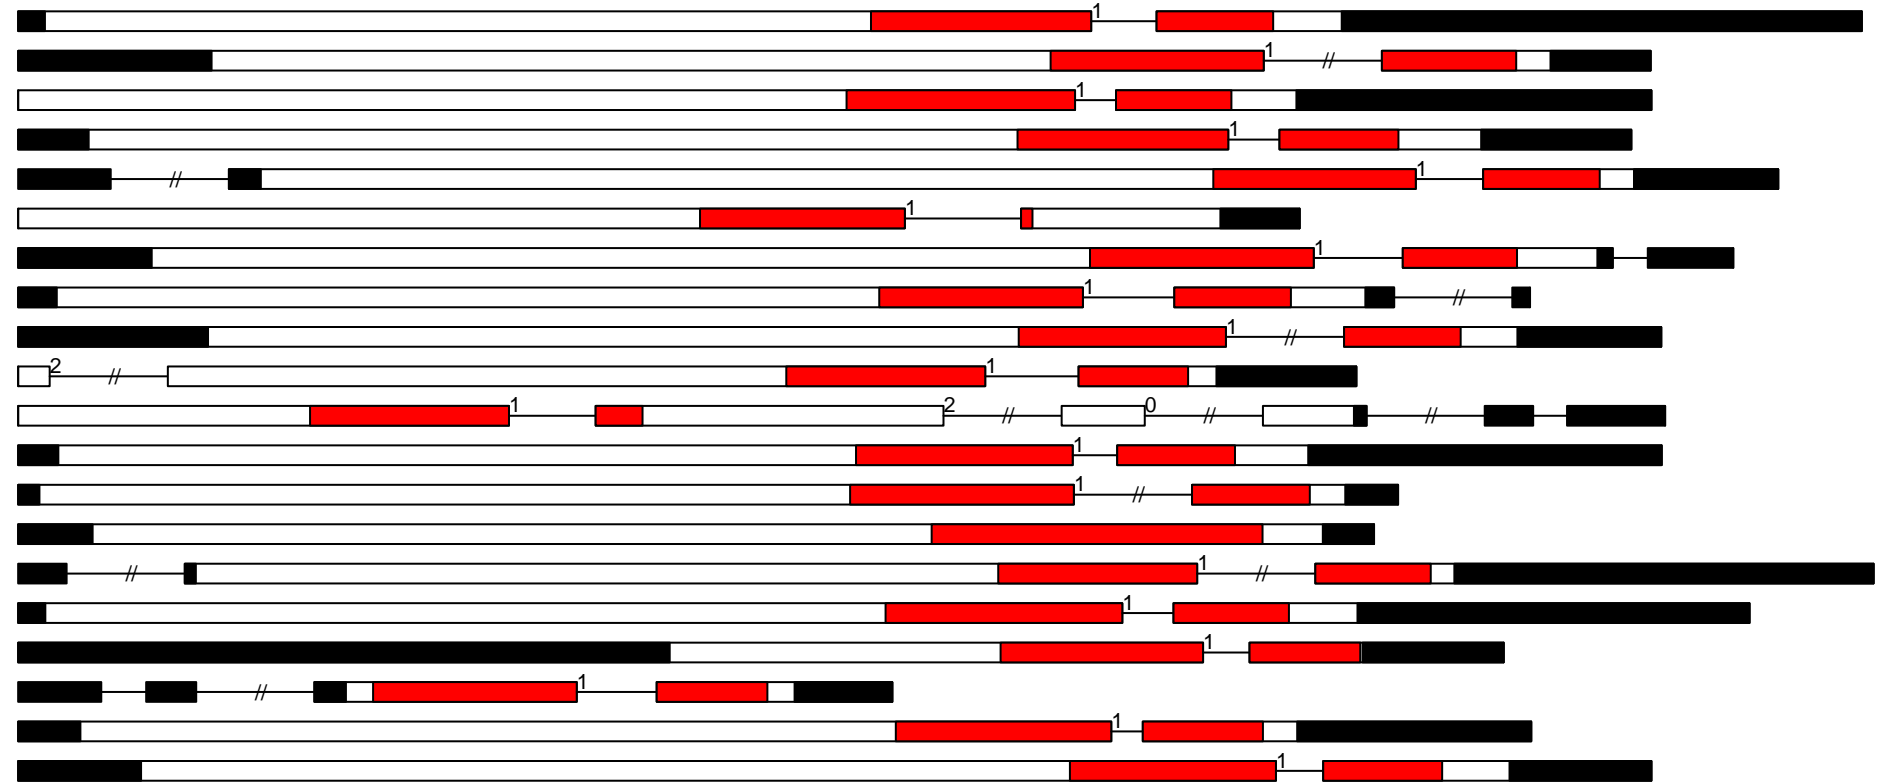

-1000

0

1000

2000

3000

4000

### O.sa RLK-Pelle\_LRR-XI-1 exon-intron and kinase domain diagram (part 2)

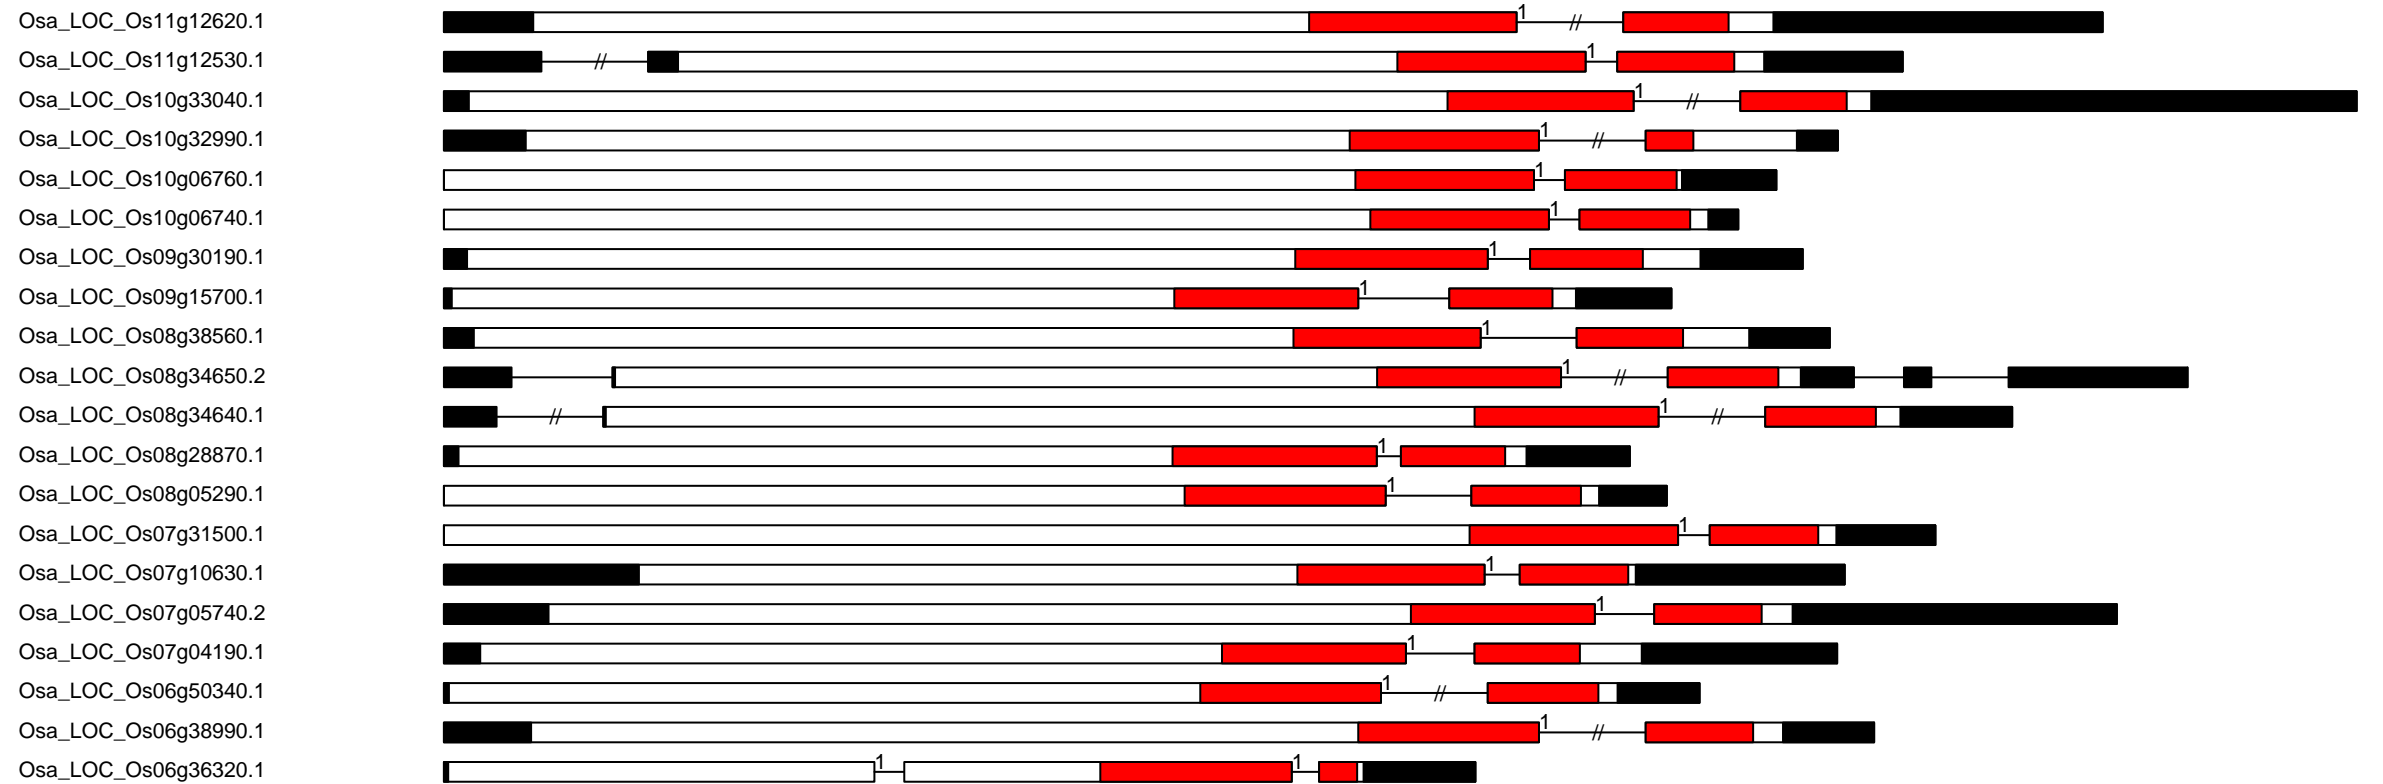

### O.sa RLK-Pelle\_LRR-XI-1 exon-intron and kinase domain diagram (part 3)

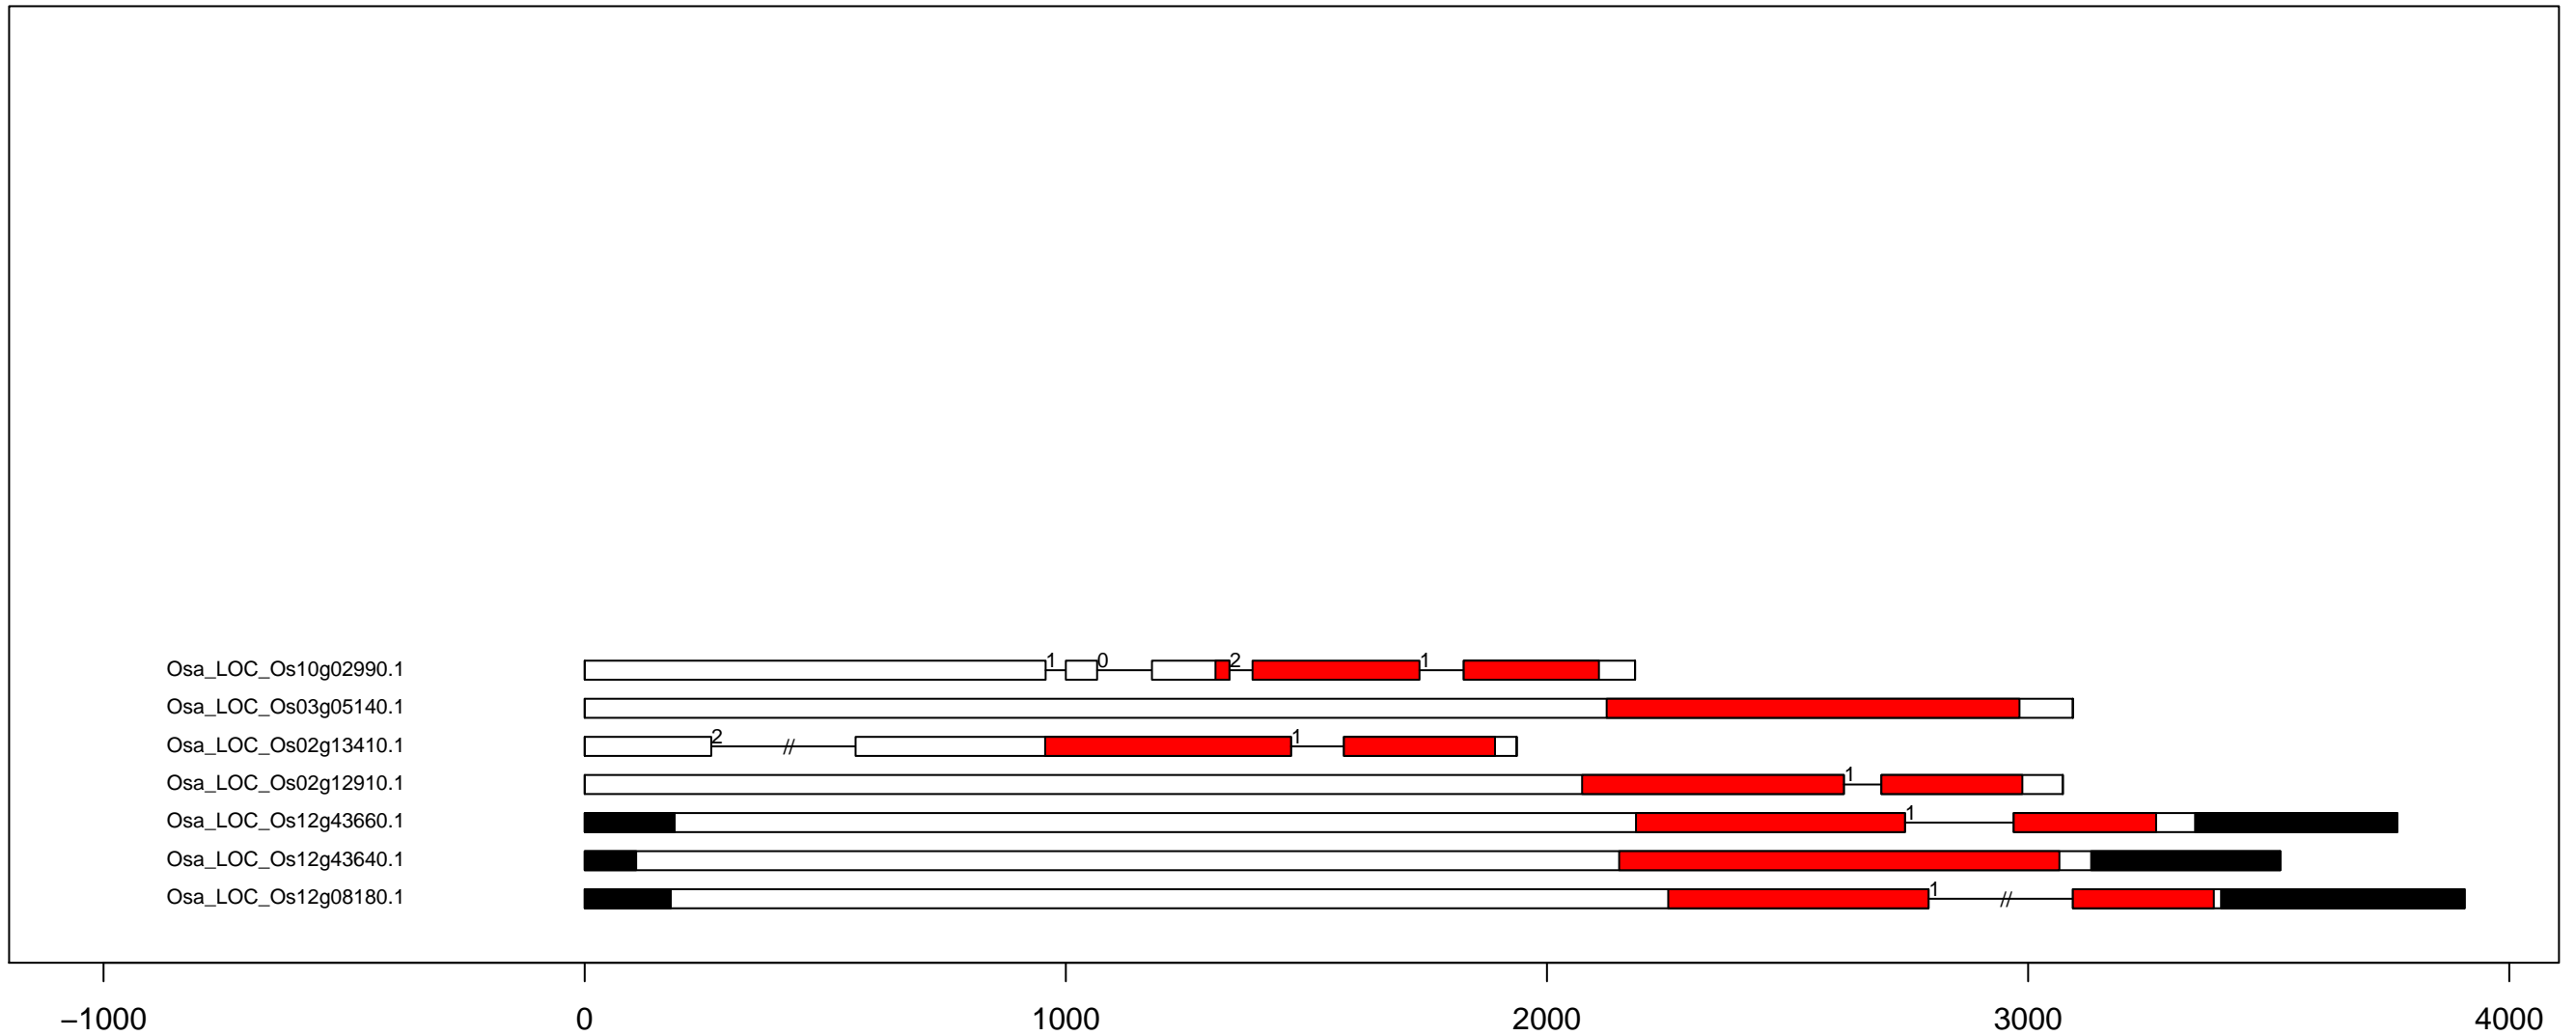

# O.sa RLK-Pelle\_LRR-XI-2 exon-intron and kinase domain diagram (all)

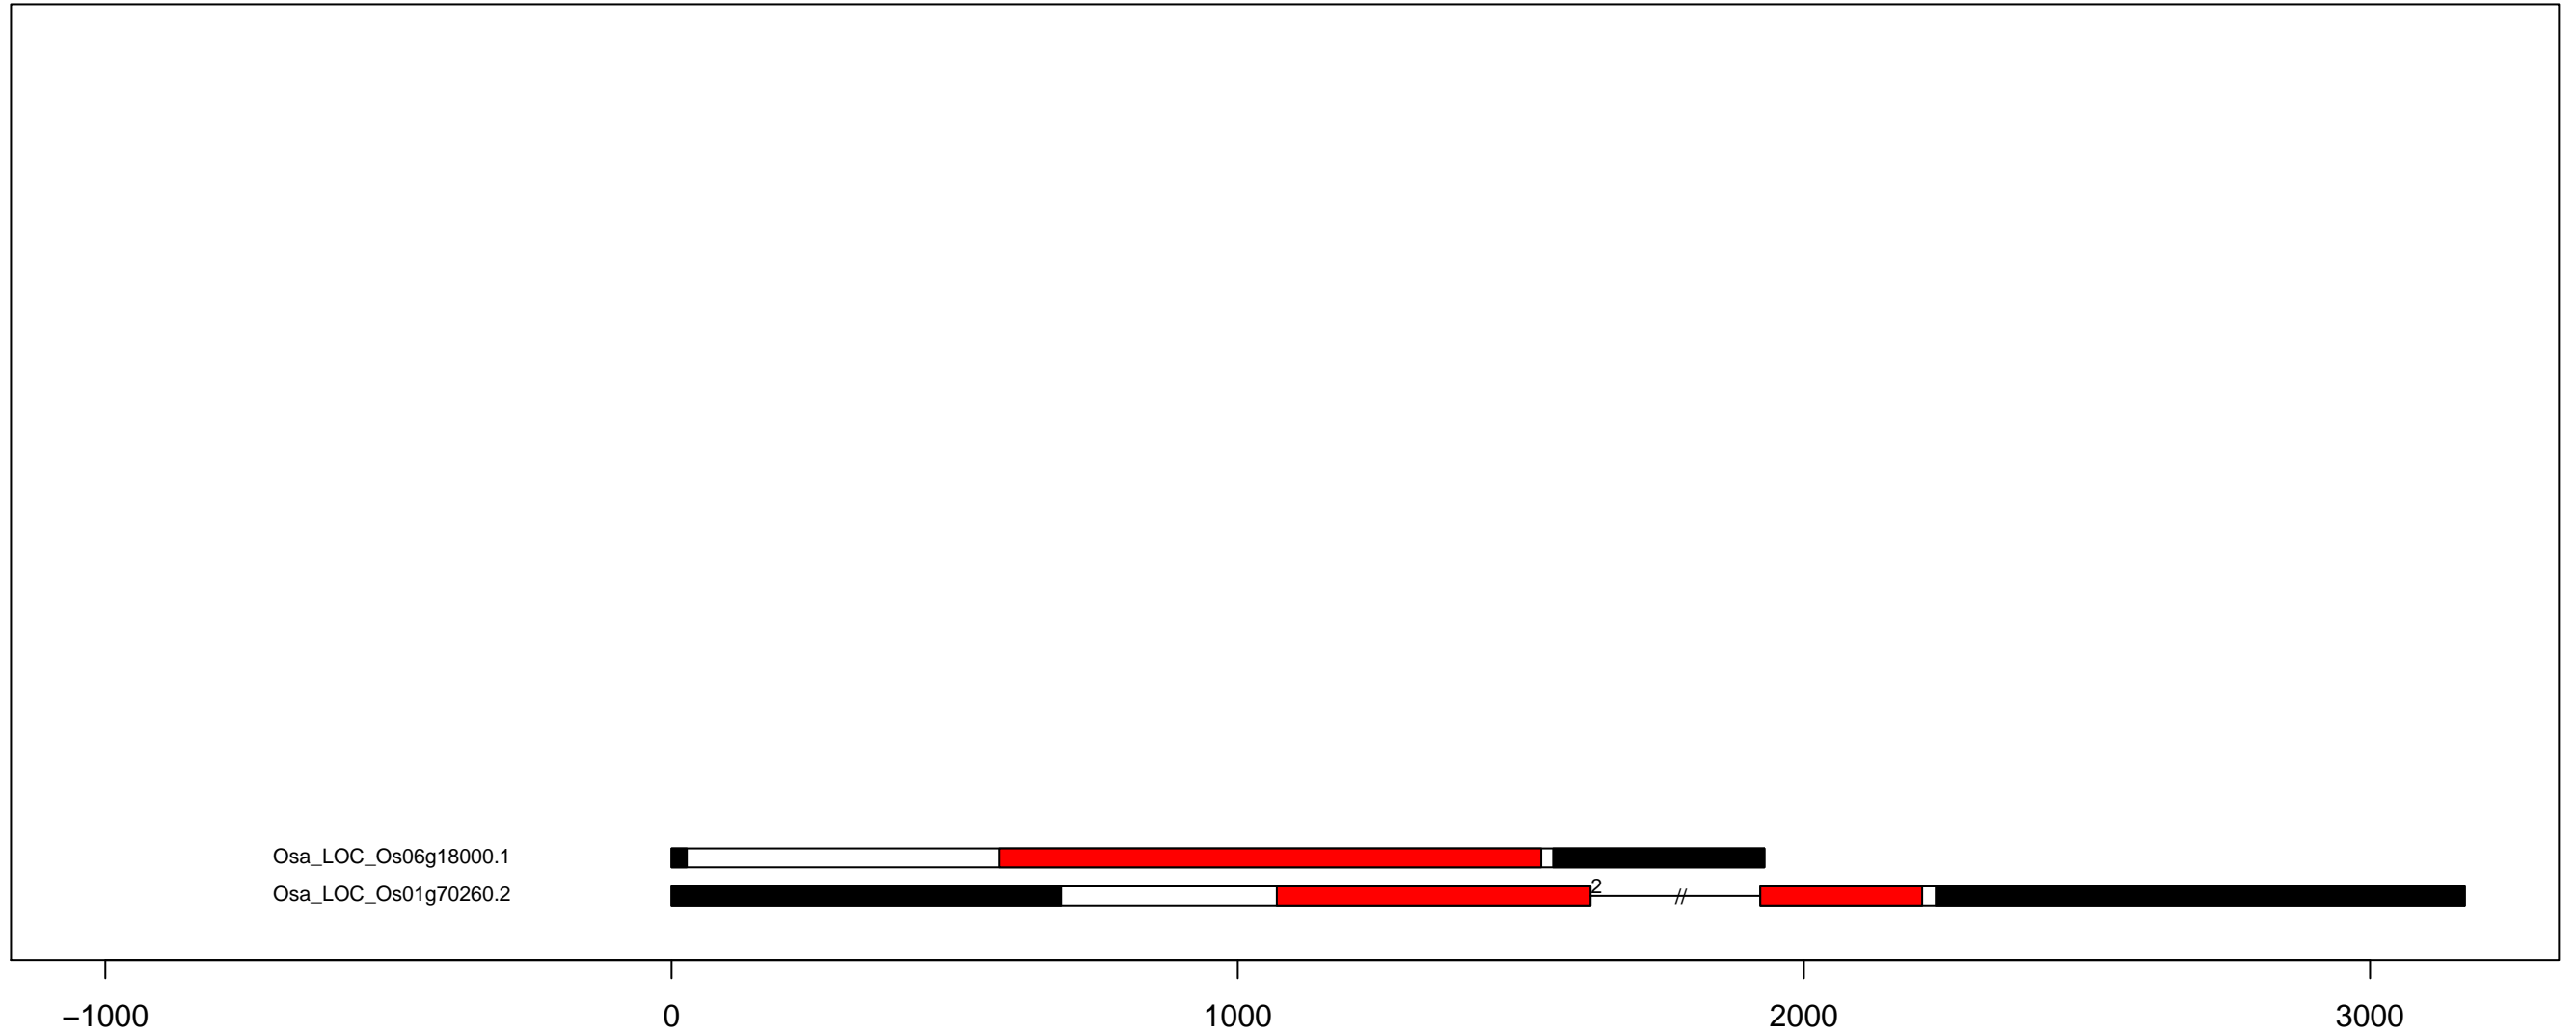

### O.sa RLK-Pelle\_LRR-XII-1 exon-intron and kinase domain diagram (part 1)

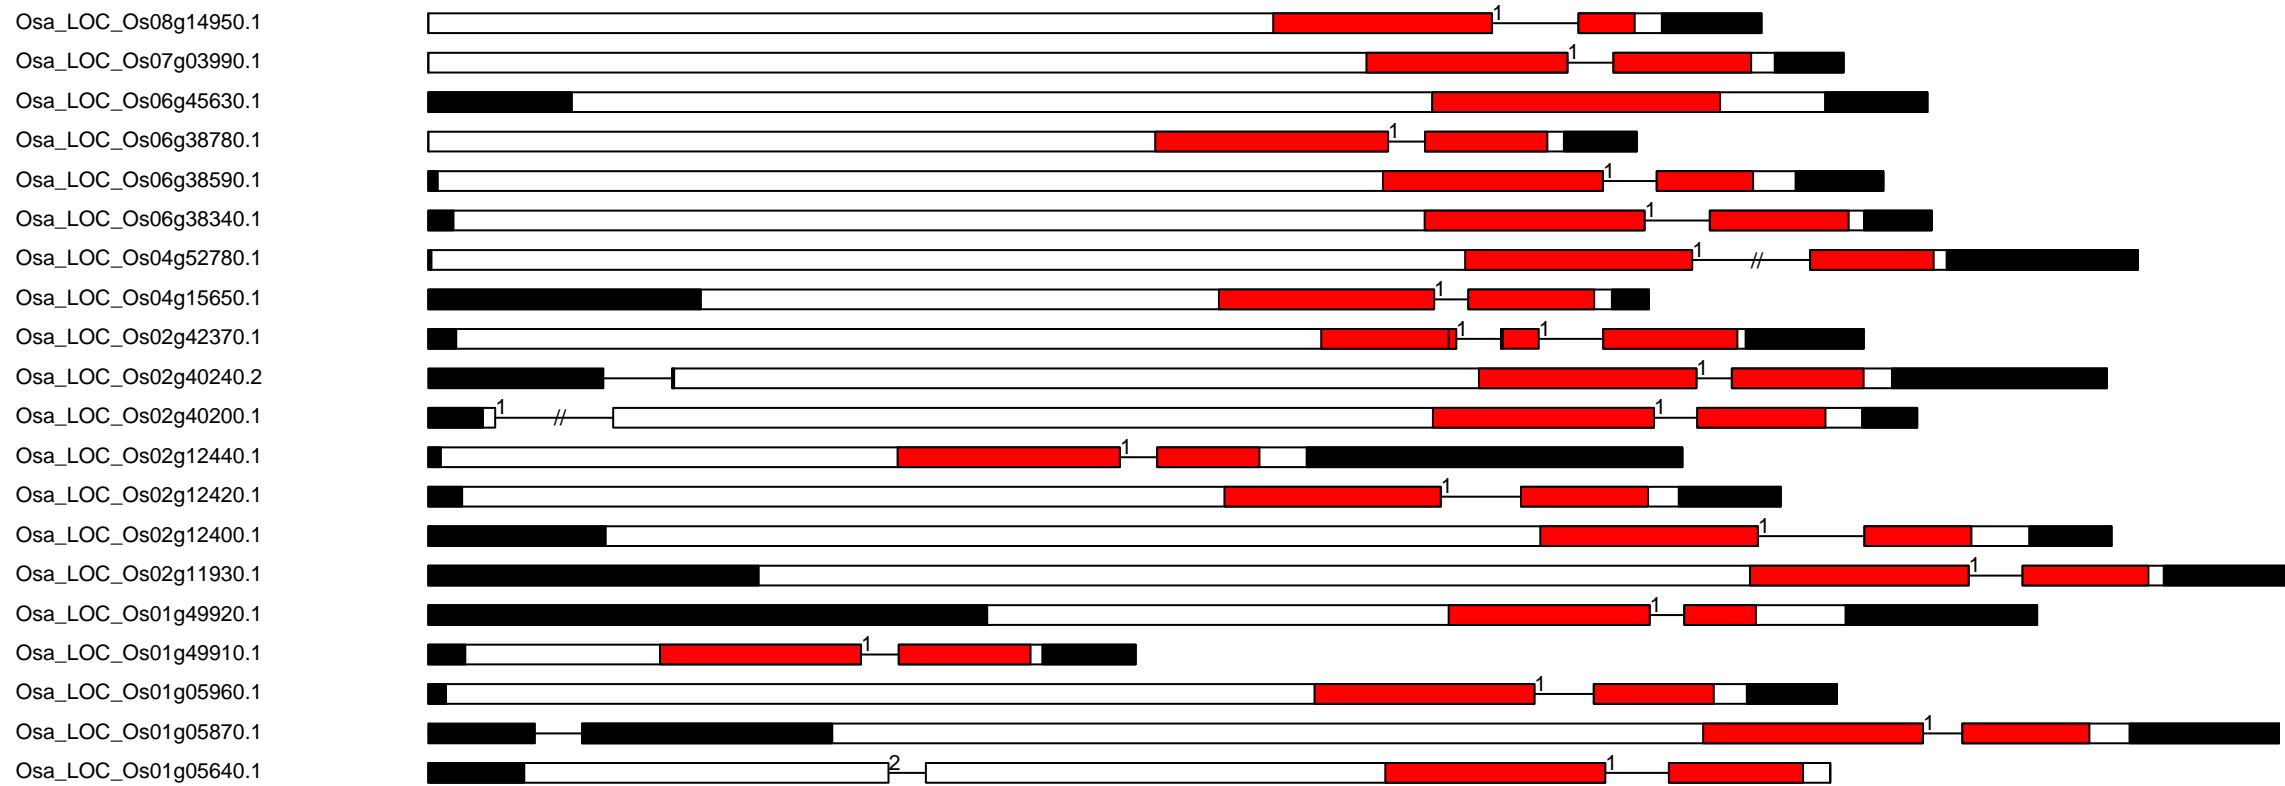

-1000

0

1000

2000

3000

4000

### O.sa RLK-Pelle\_LRR-XII-1 exon-intron and kinase domain diagram (part 2)

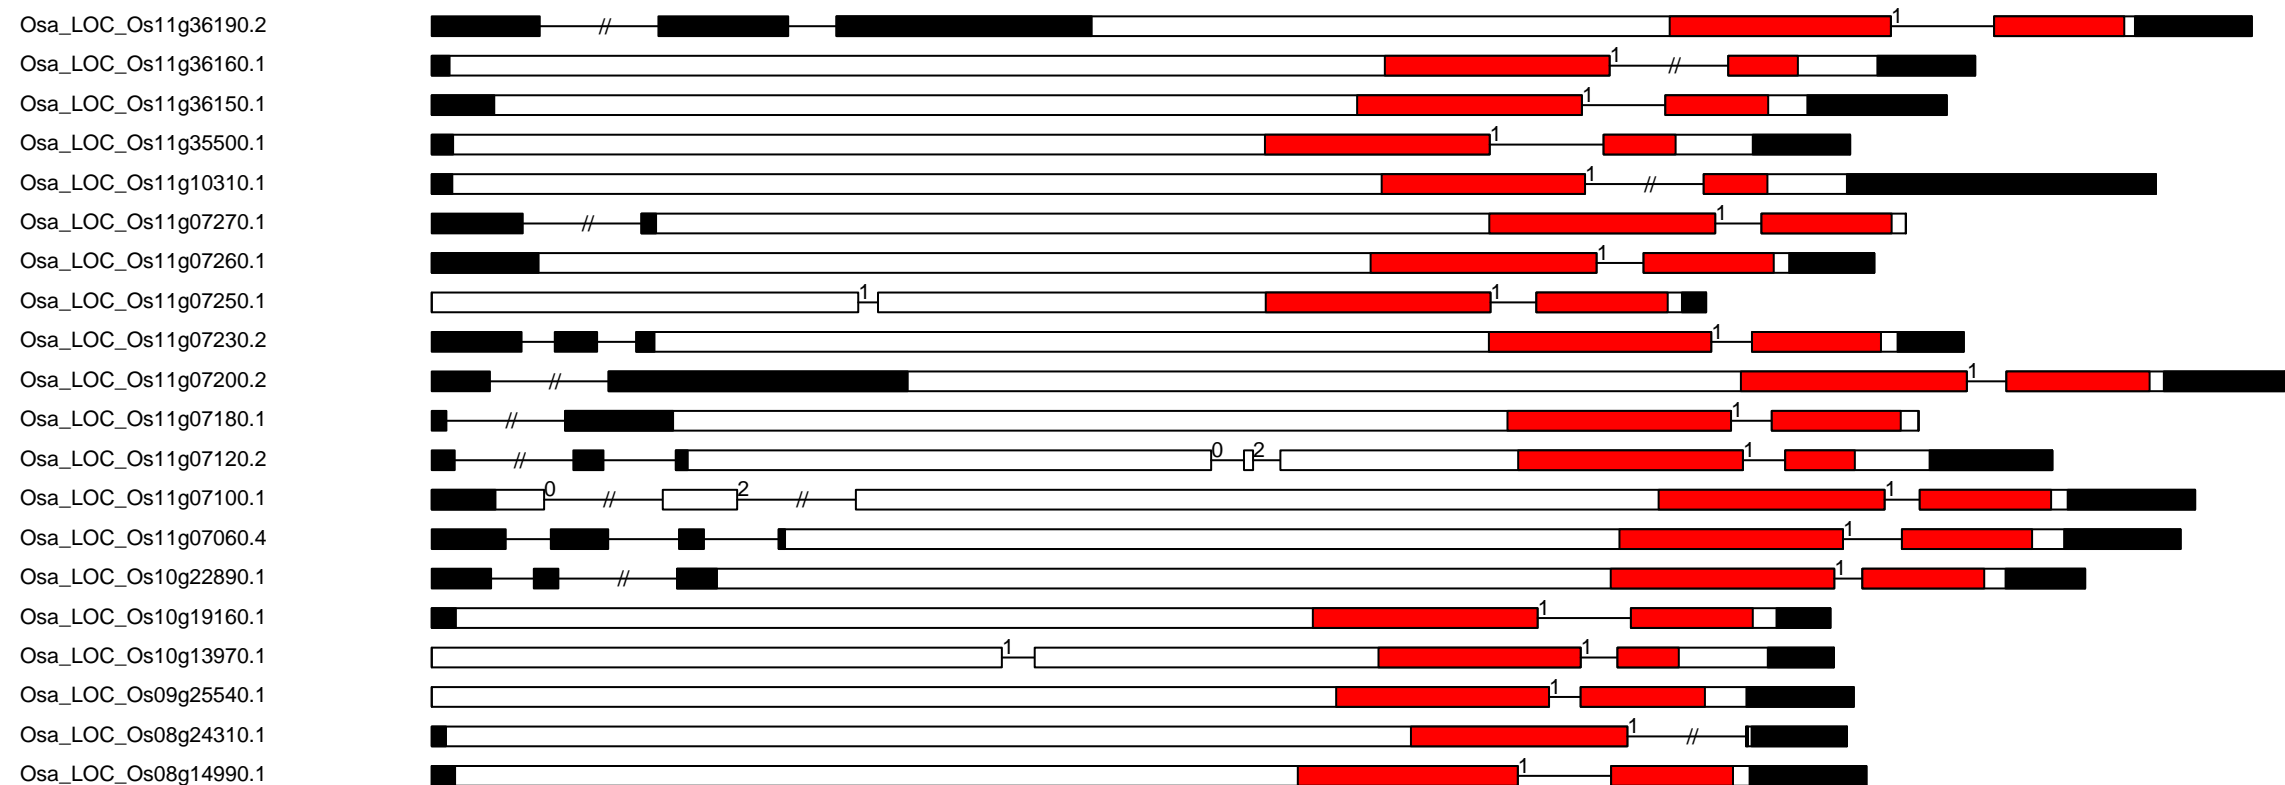



### O.sa RLK-Pelle\_LRR-XII-1 exon-intron and kinase domain diagram (part 3)

Osa\_LOC\_Os06g08690.1  
Osa\_LOC\_Os04g15660.1  
Osa\_LOC\_Os04g15630.1  
Osa\_LOC\_Os04g13640.1  
Osa\_LOC\_Os04g03210.1  
Osa\_LOC\_Os02g40180.1  
Osa\_LOC\_Os02g30540.1  
Osa\_LOC\_Os02g13780.1  
Osa\_LOC\_Os02g12450.1  
Osa\_LOC\_Os02g12030.1  
Osa\_LOC\_Os02g11980.1  
Osa\_LOC\_Os02g01800.1  
Osa\_LOC\_Os01g33950.1  
Osa\_LOC\_Os01g12790.1  
Osa\_LOC\_Os01g05980.1  
Osa\_LOC\_Os01g05940.1  
Osa\_LOC\_Os11g47310.1  
Osa\_LOC\_Os11g47240.1  
Osa\_LOC\_Os11g40970.1  
Osa\_LOC\_Os11g40890.1

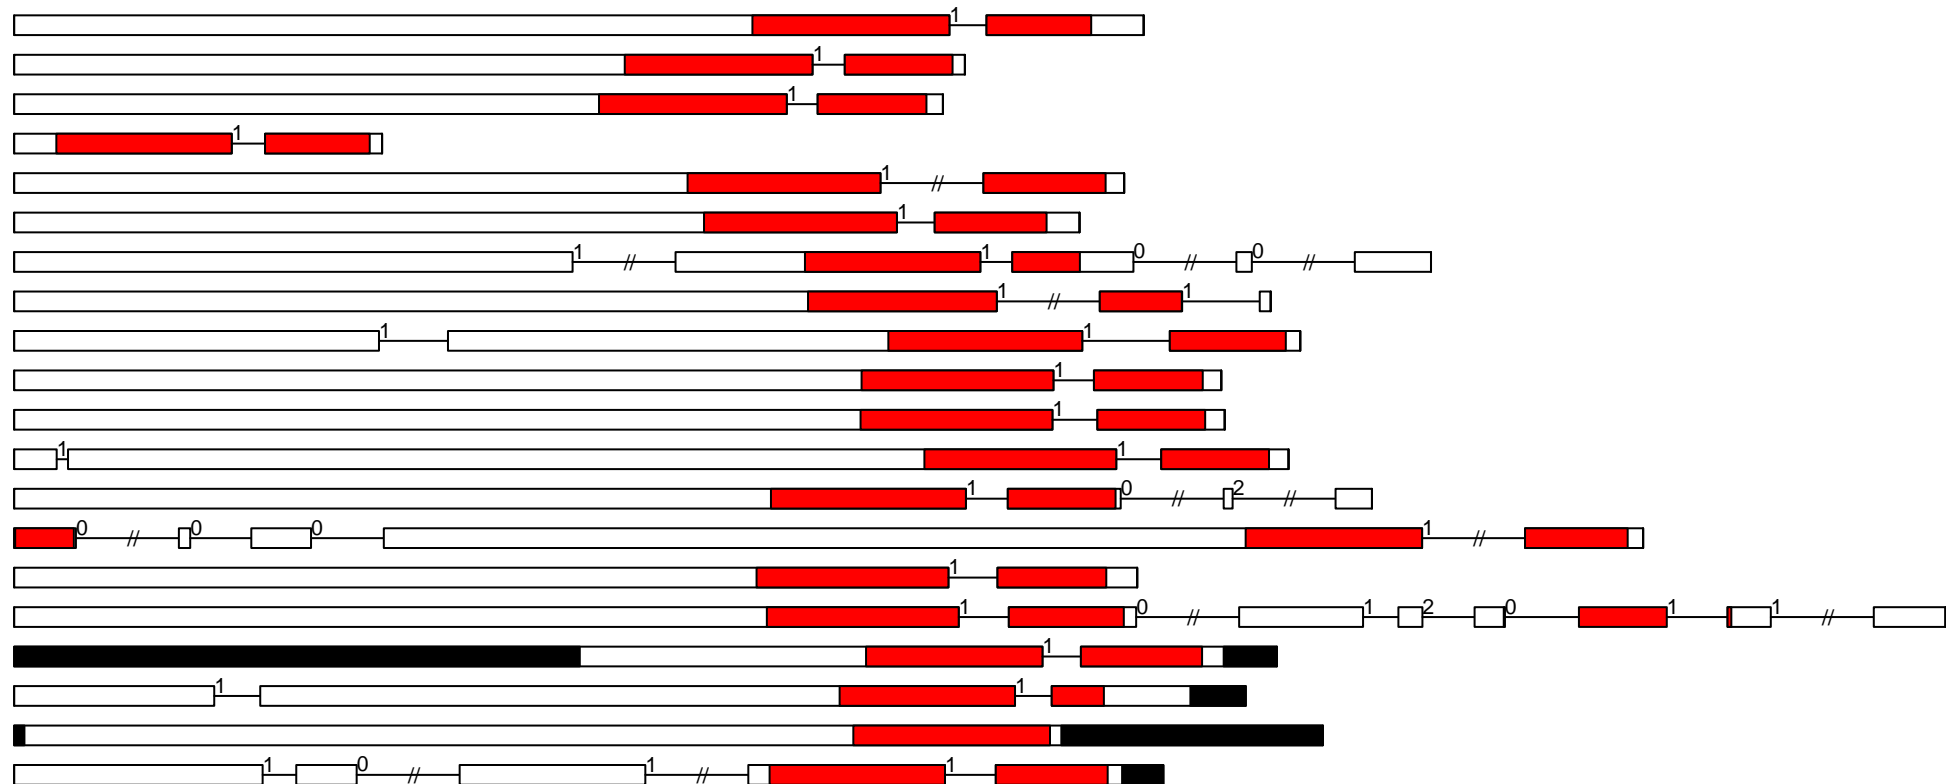

-1000

0

1000

2000

3000

4000

5000

### O.sa RLK-Pelle\_LRR-XII-1 exon-intron and kinase domain diagram (part 4)

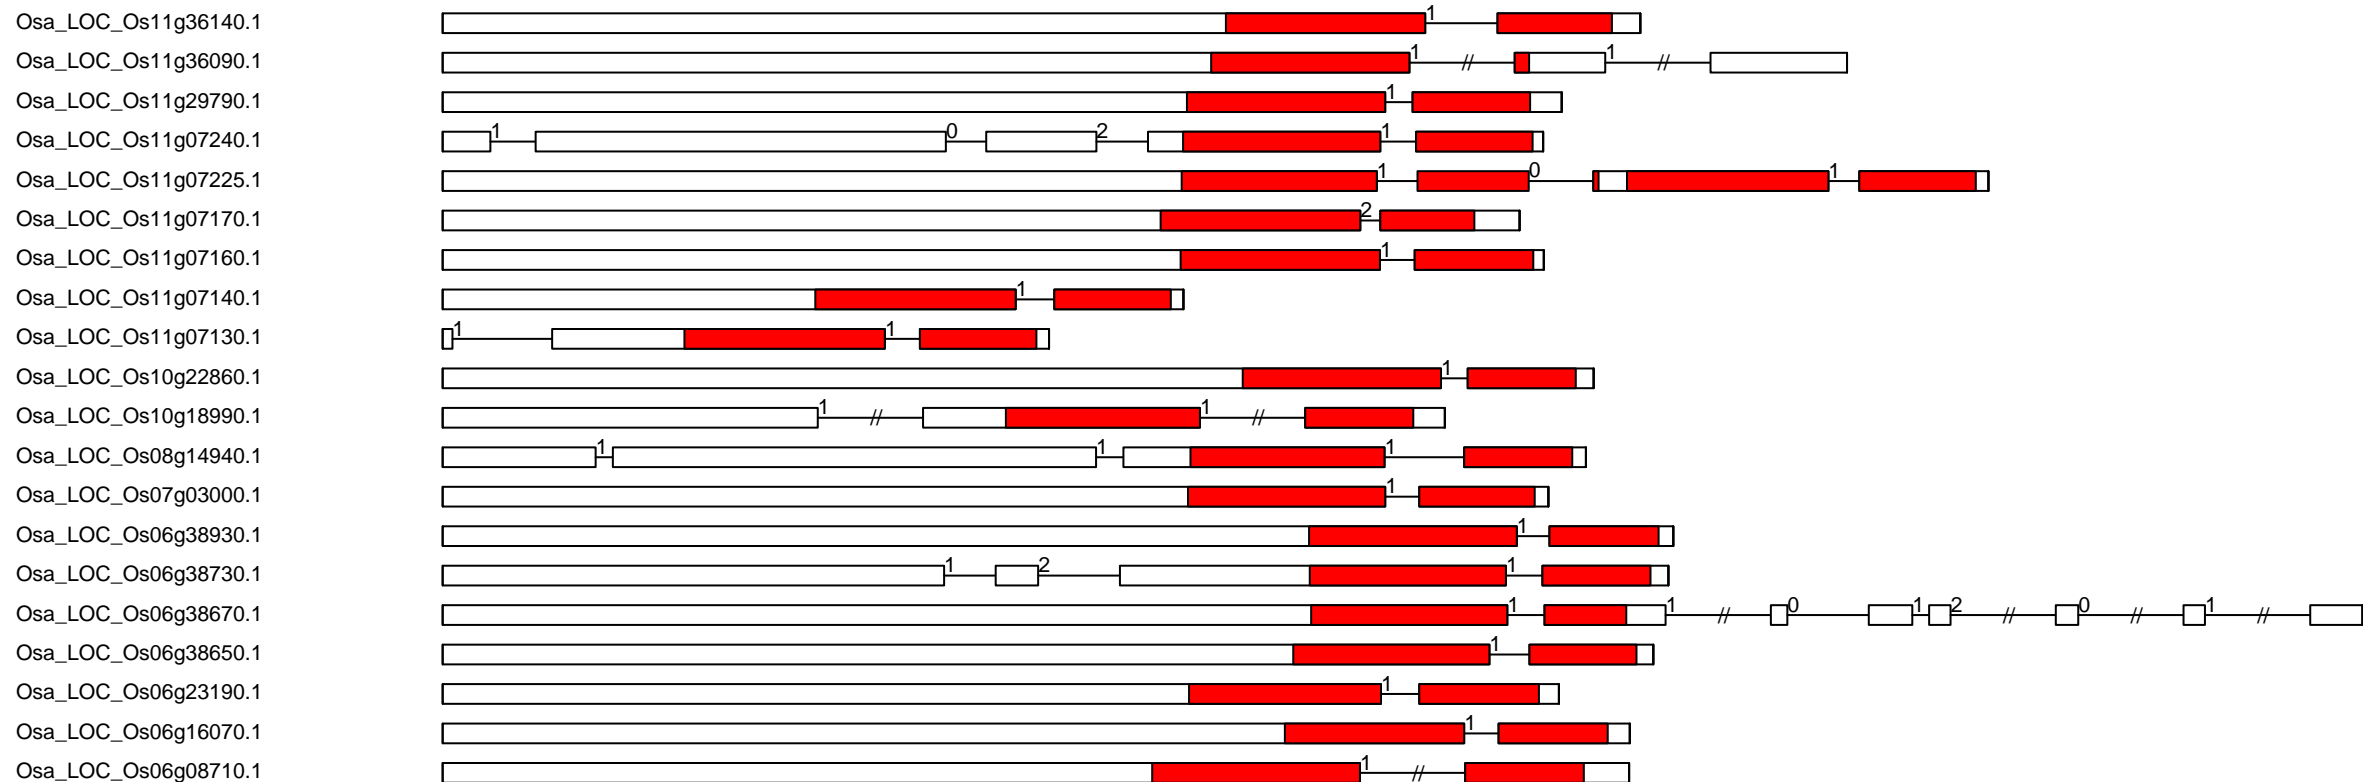

### O.sa RLK-Pelle\_LRR-XII-1 exon-intron and kinase domain diagram (part 5)

Osa\_LOC\_Os12g42520.1  
 Osa\_LOC\_Os11g47300.1  
 Osa\_LOC\_Os11g47290.1  
 Osa\_LOC\_Os11g47210.1  
 Osa\_LOC\_Os11g47180.1  
 Osa\_LOC\_Os11g47030.1  
 Osa\_LOC\_Os11g47000.1  
 Osa\_LOC\_Os11g46980.1  
 Osa\_LOC\_Os11g46970.1  
 Osa\_LOC\_Os11g41100.1  
 Osa\_LOC\_Os11g40810.1  
 Osa\_LOC\_Os11g36180.1

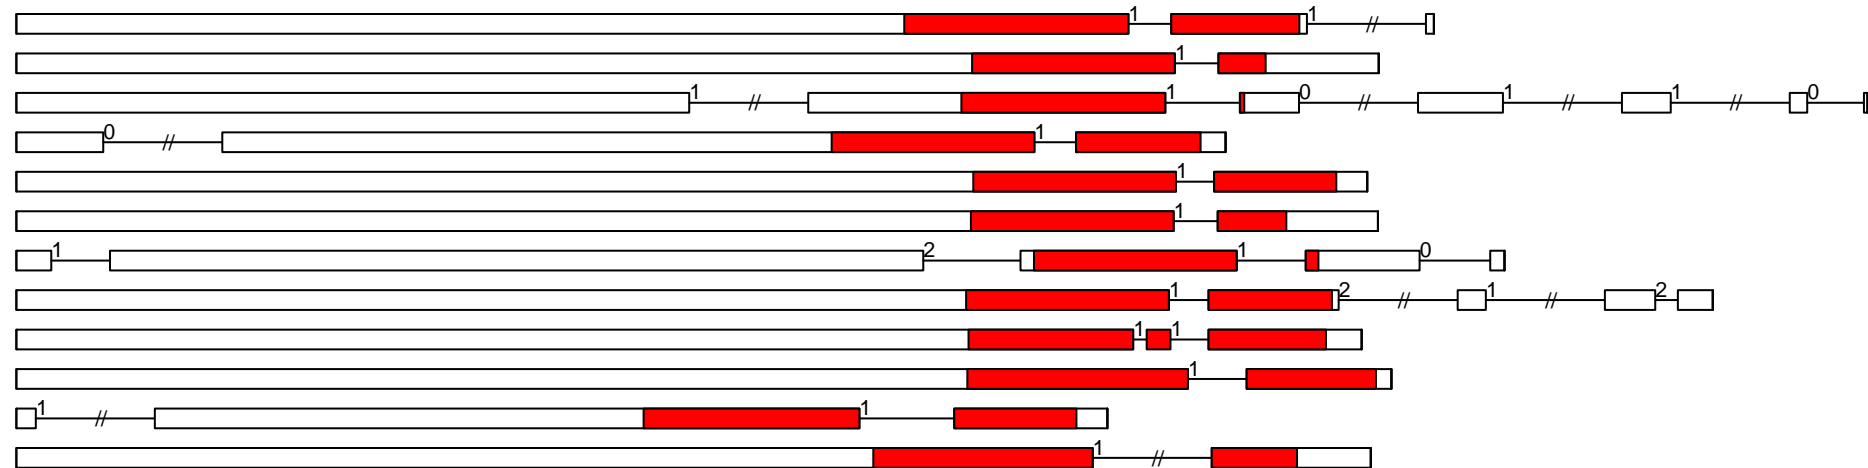

-1000

0

1000

2000

3000

4000

# O.sa RLK-Pelle\_LRR-XIIIa exon-intron and kinase domain diagram (all)

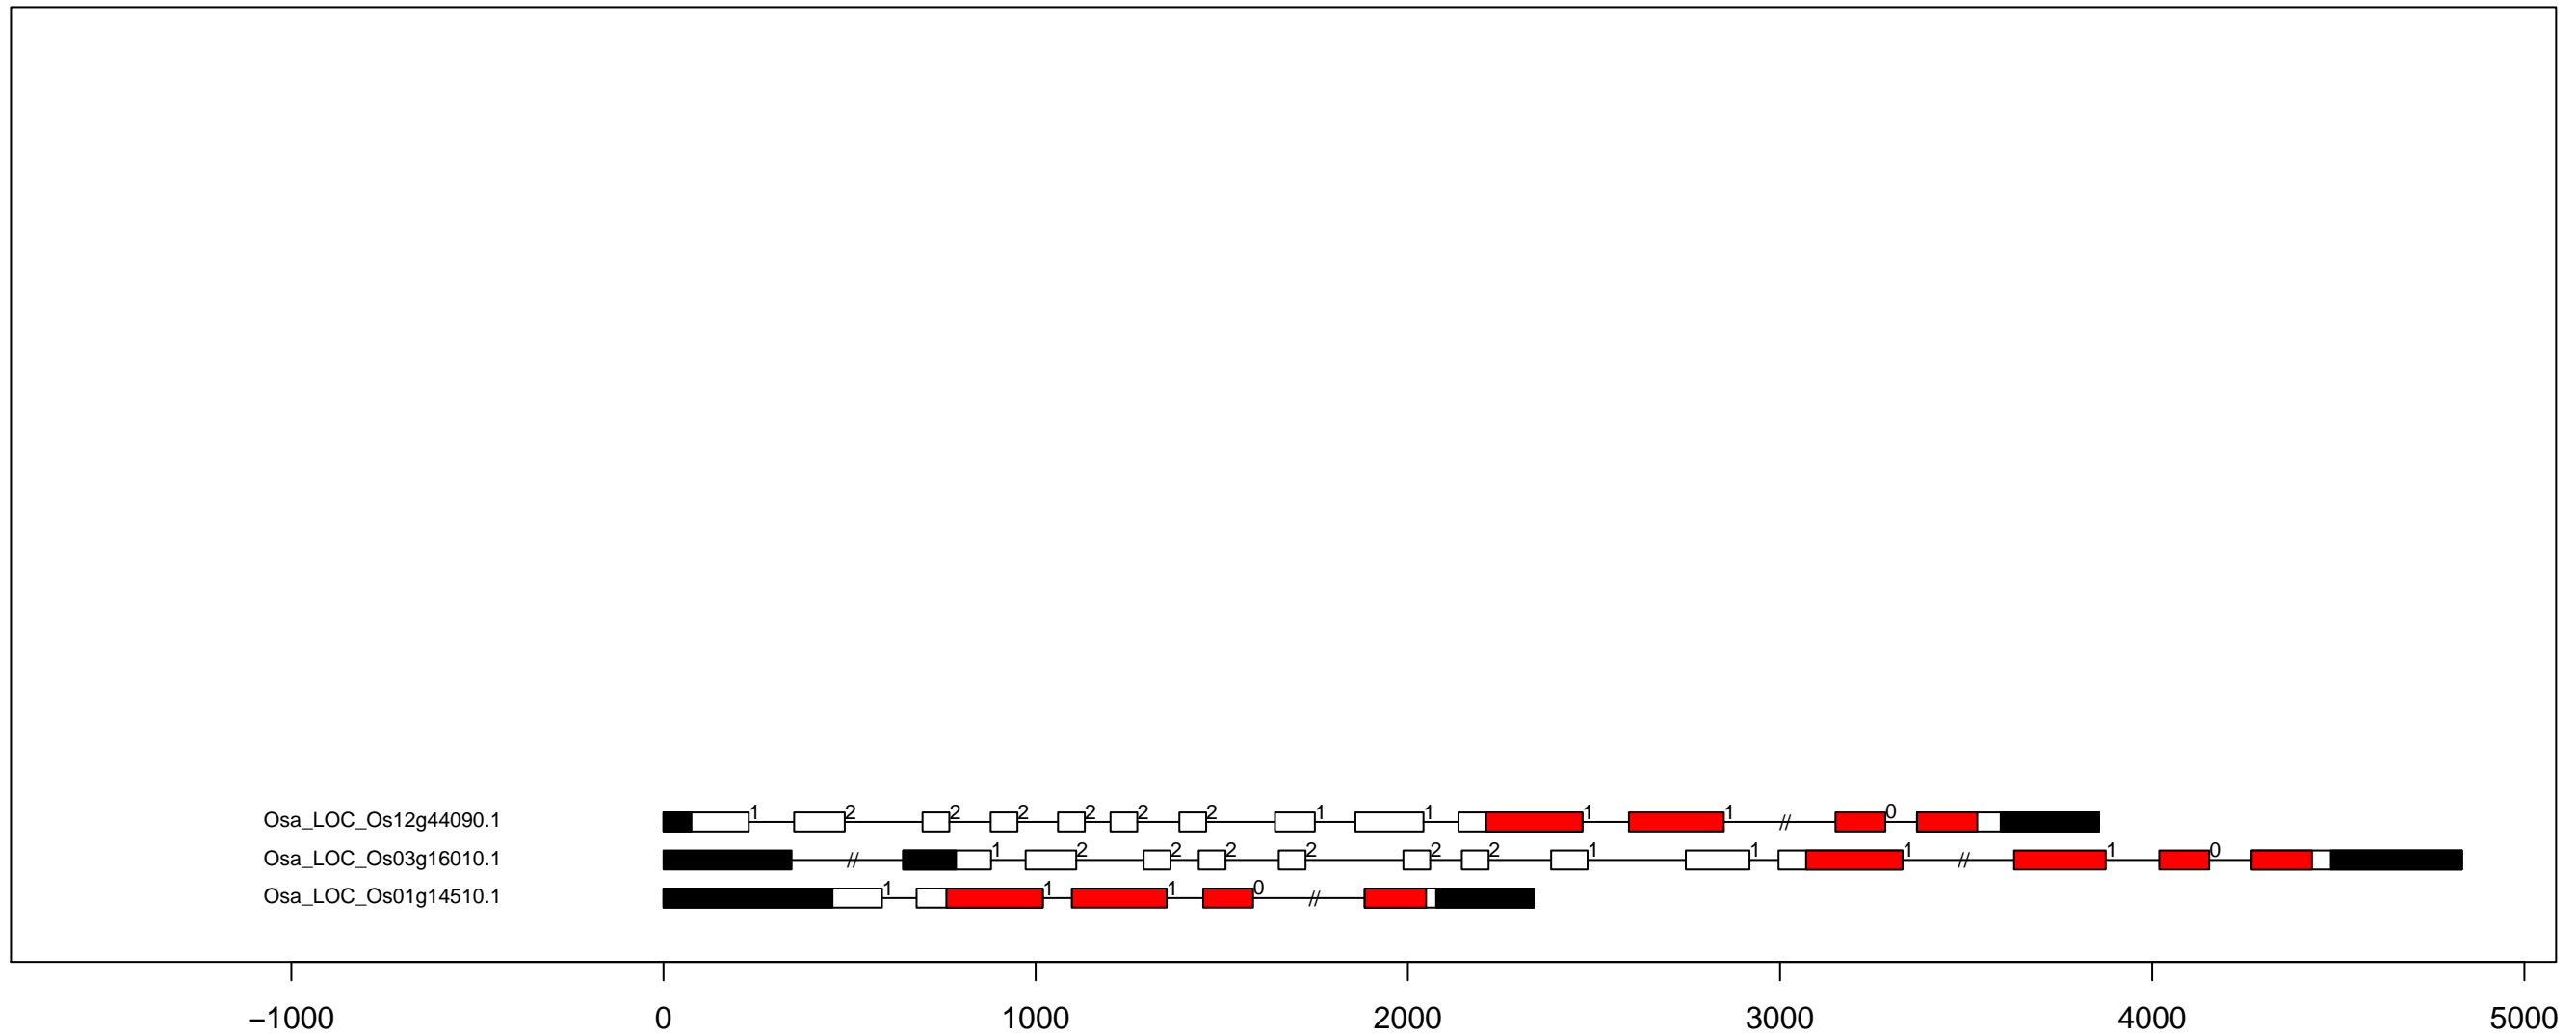

# O.sa RLK-Pelle\_LRR-XIIIb exon-intron and kinase domain diagram (all)

Osa\_LOC\_Os06g10230.1

Osa\_LOC\_Os06g03970.1

Osa\_LOC\_Os02g53720.2

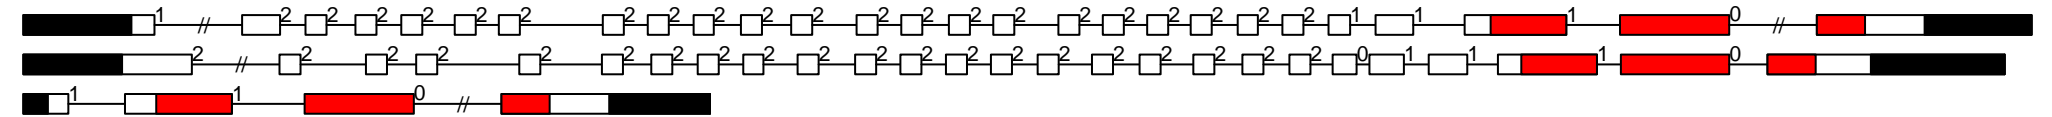

0

2000

4000

6000

# O.sa RLK-Pelle\_LRR-XIV exon-intron and kinase domain diagram (all)

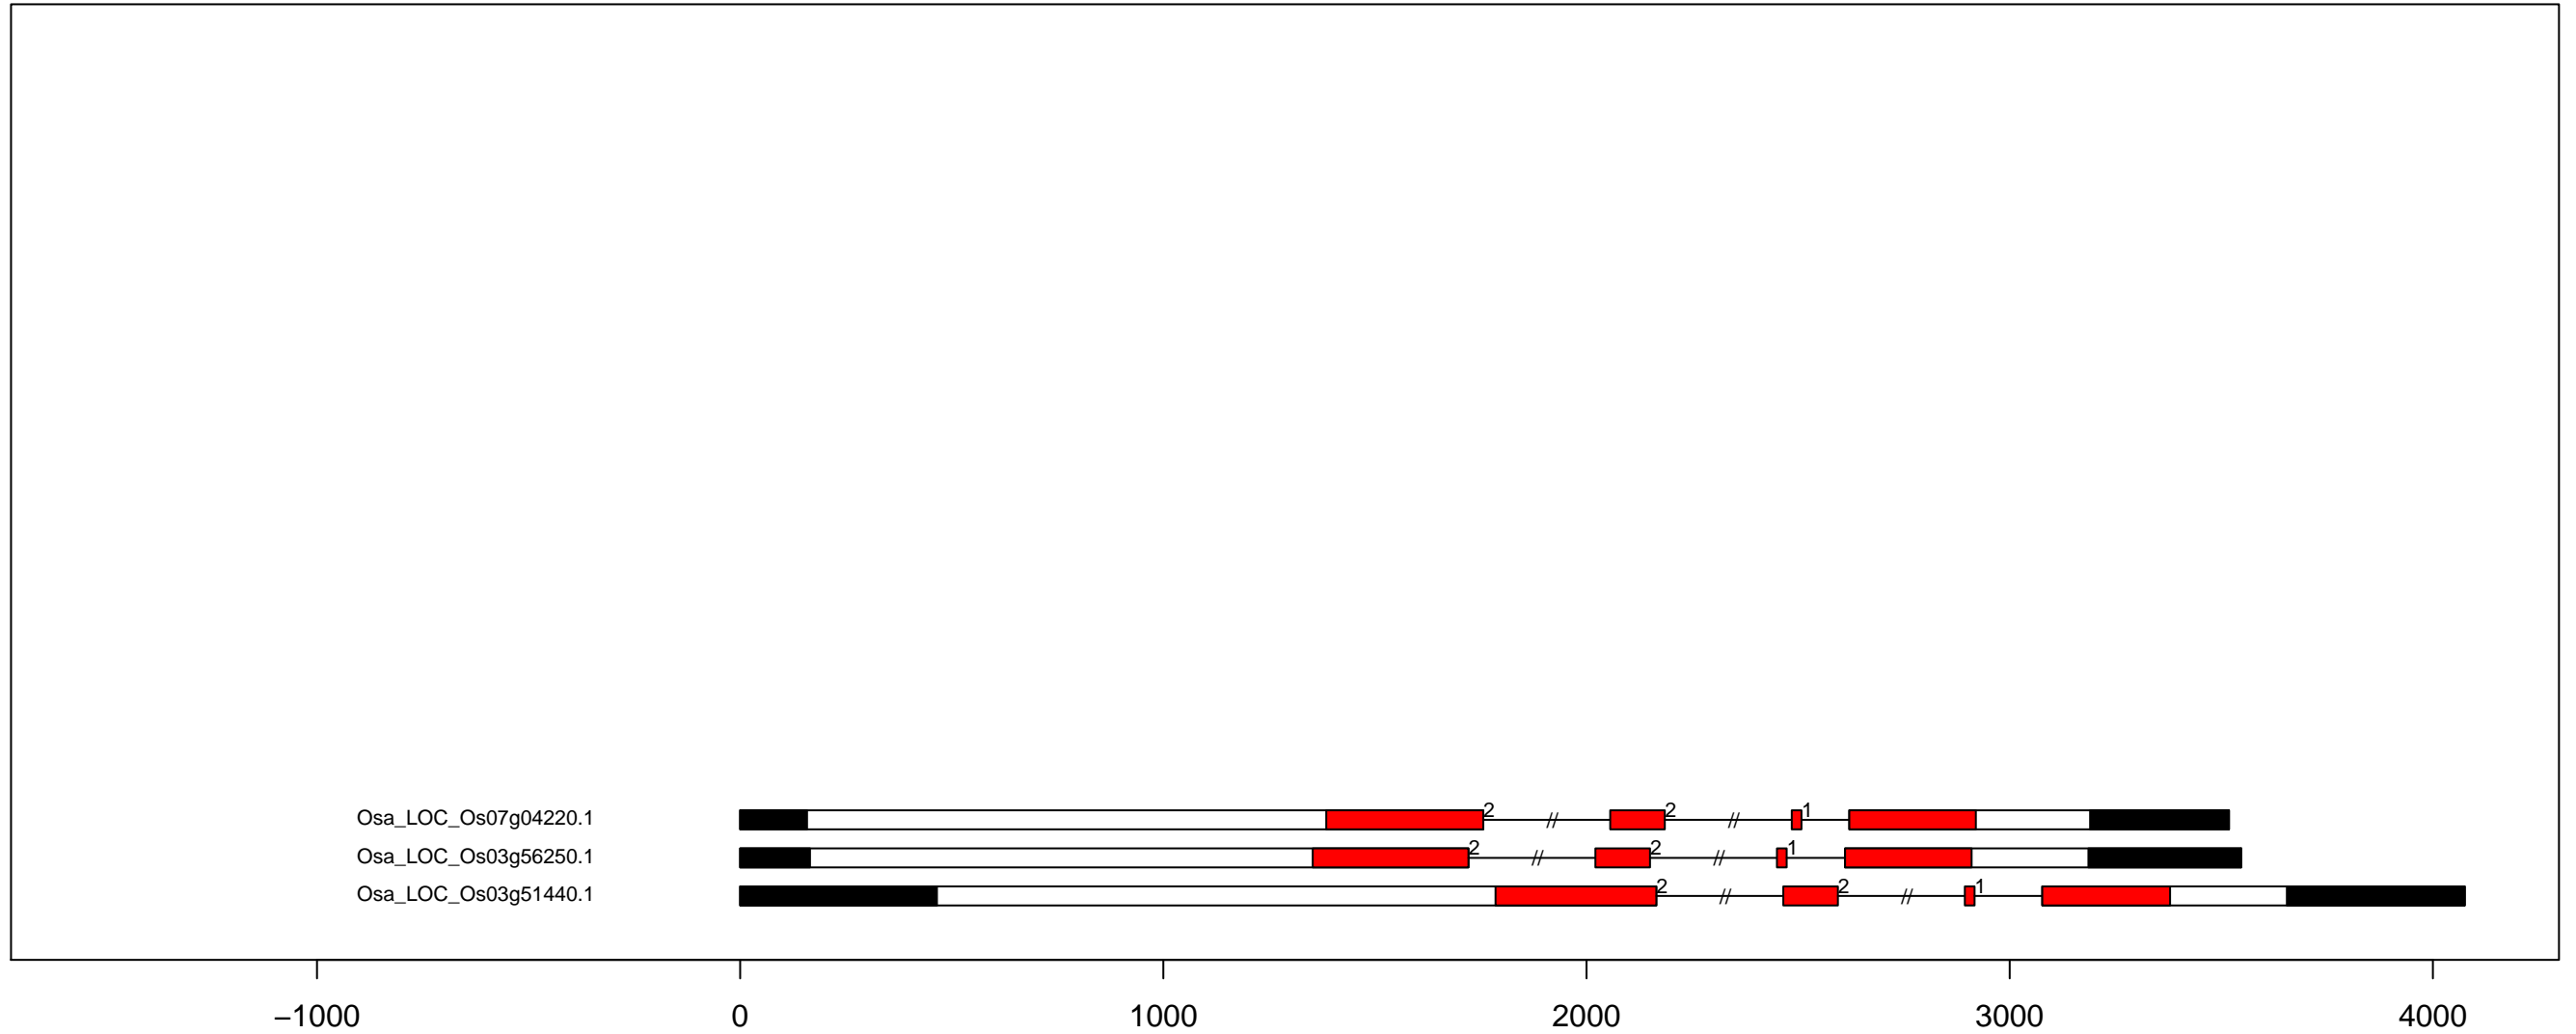

# O.sa RLK-Pelle\_LRR-XV exon-intron and kinase domain diagram (all)

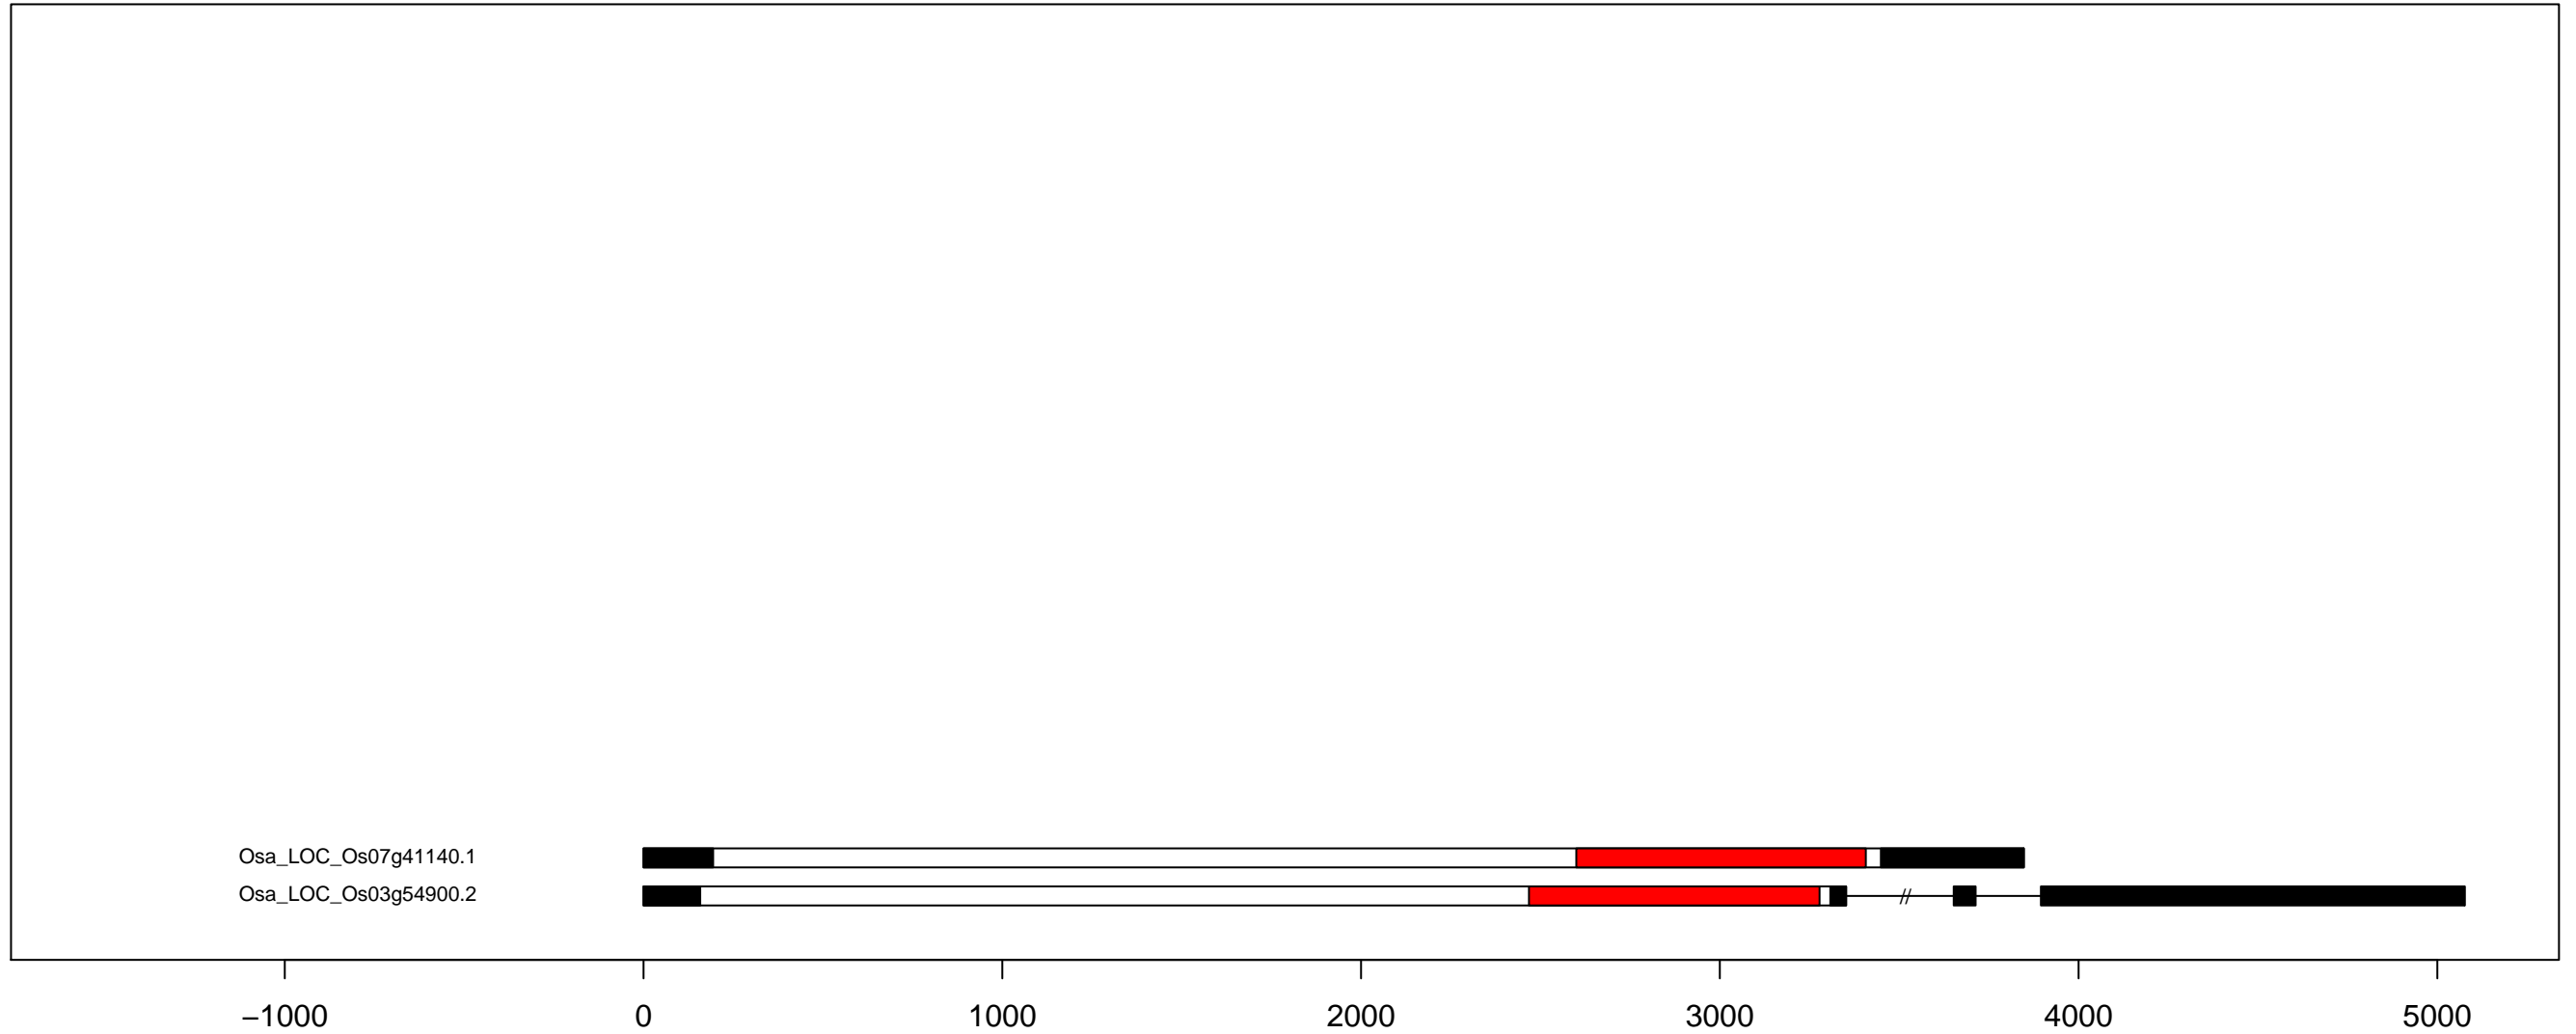

# O.sa RLK-Pelle\_LysM exon-intron and kinase domain diagram (all)

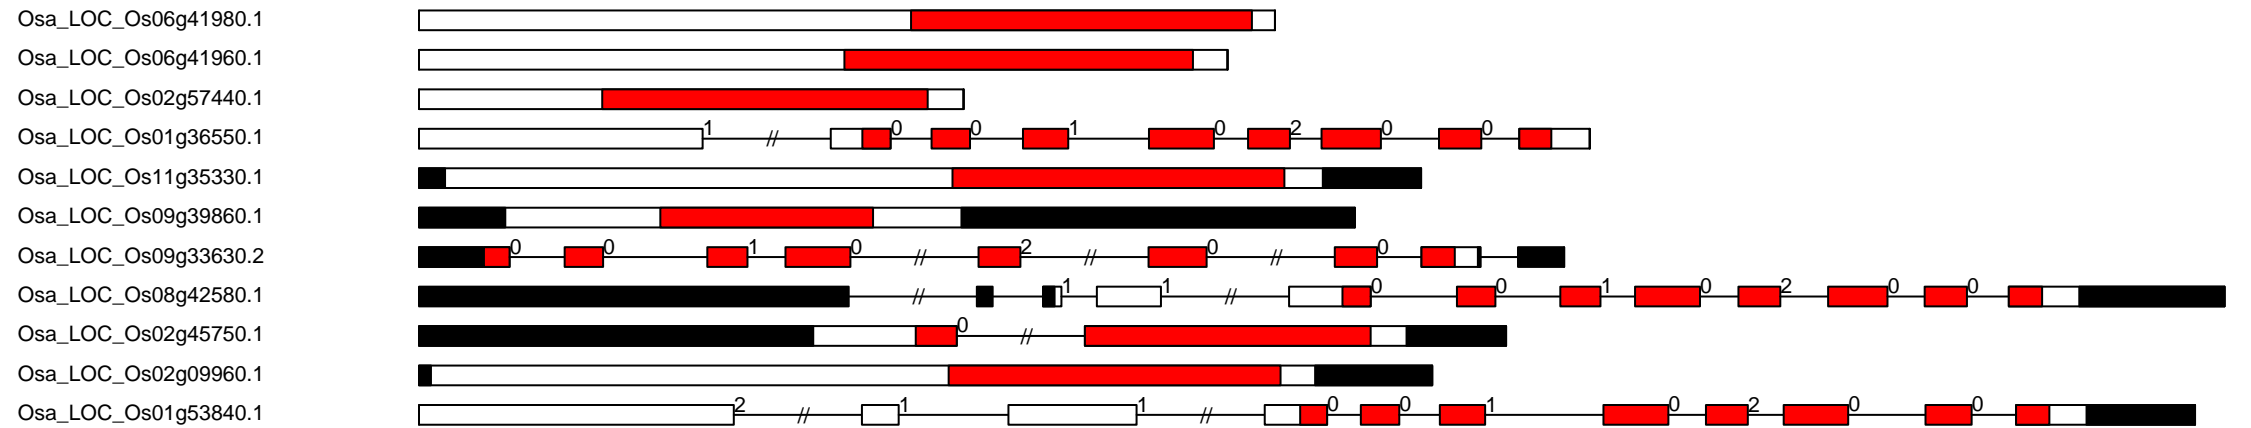



# O.sa RLK-Pelle\_PERK-1 exon-intron and kinase domain diagram (all)

Osa\_LOC\_Os09g14580.1

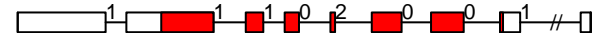

Osa\_LOC\_Os05g44030.1

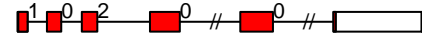

Osa\_LOC\_Os03g38710.1

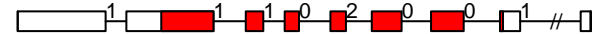

Osa\_LOC\_Os10g01560.1

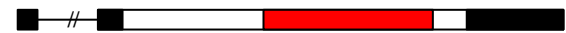

Osa\_LOC\_Os07g04520.1

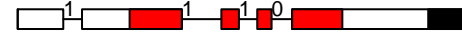

Osa\_LOC\_Os06g29080.1

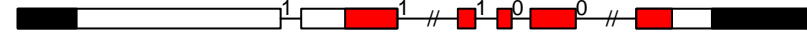

Osa\_LOC\_Os05g01040.3

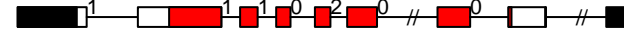

Osa\_LOC\_Os03g56470.1

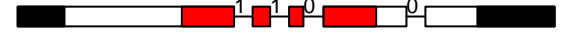

Osa\_LOC\_Os03g16260.1

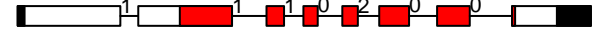

Osa\_LOC\_Os03g12570.1

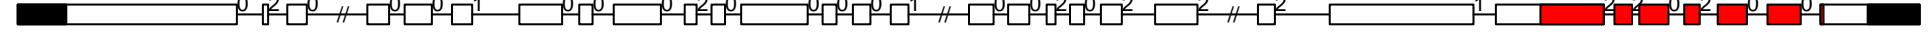

Osa\_LOC\_Os01g12720.1

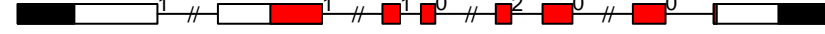

-2000

0

2000

4000

6000

8000

# O.sa RLK-Pelle\_PERK-2 exon-intron and kinase domain diagram (all)

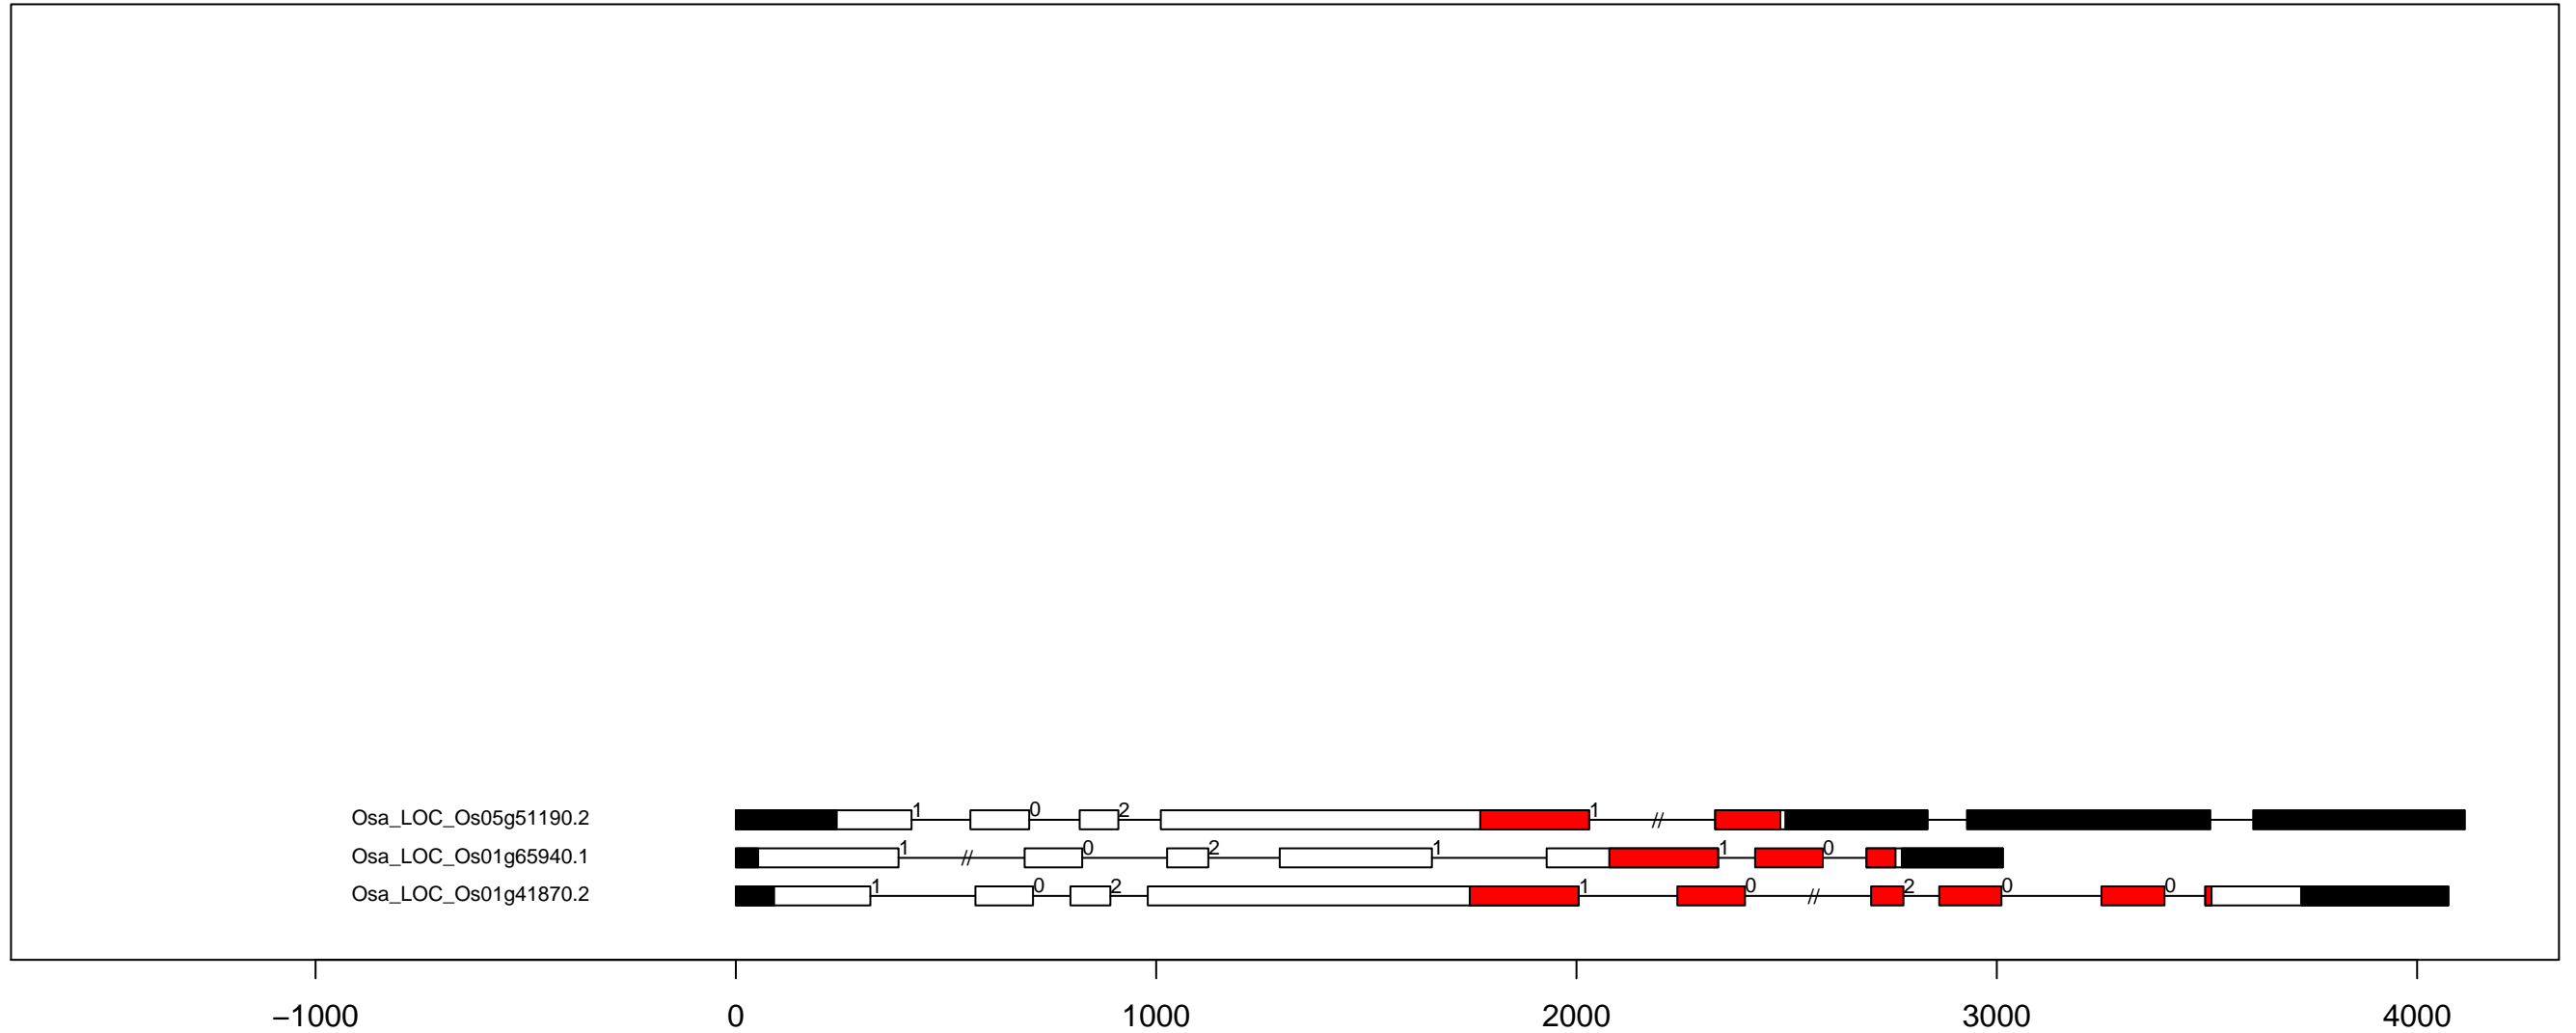

# O.sa RLK-Pelle\_RKF3 exon-intron and kinase domain diagram (all)

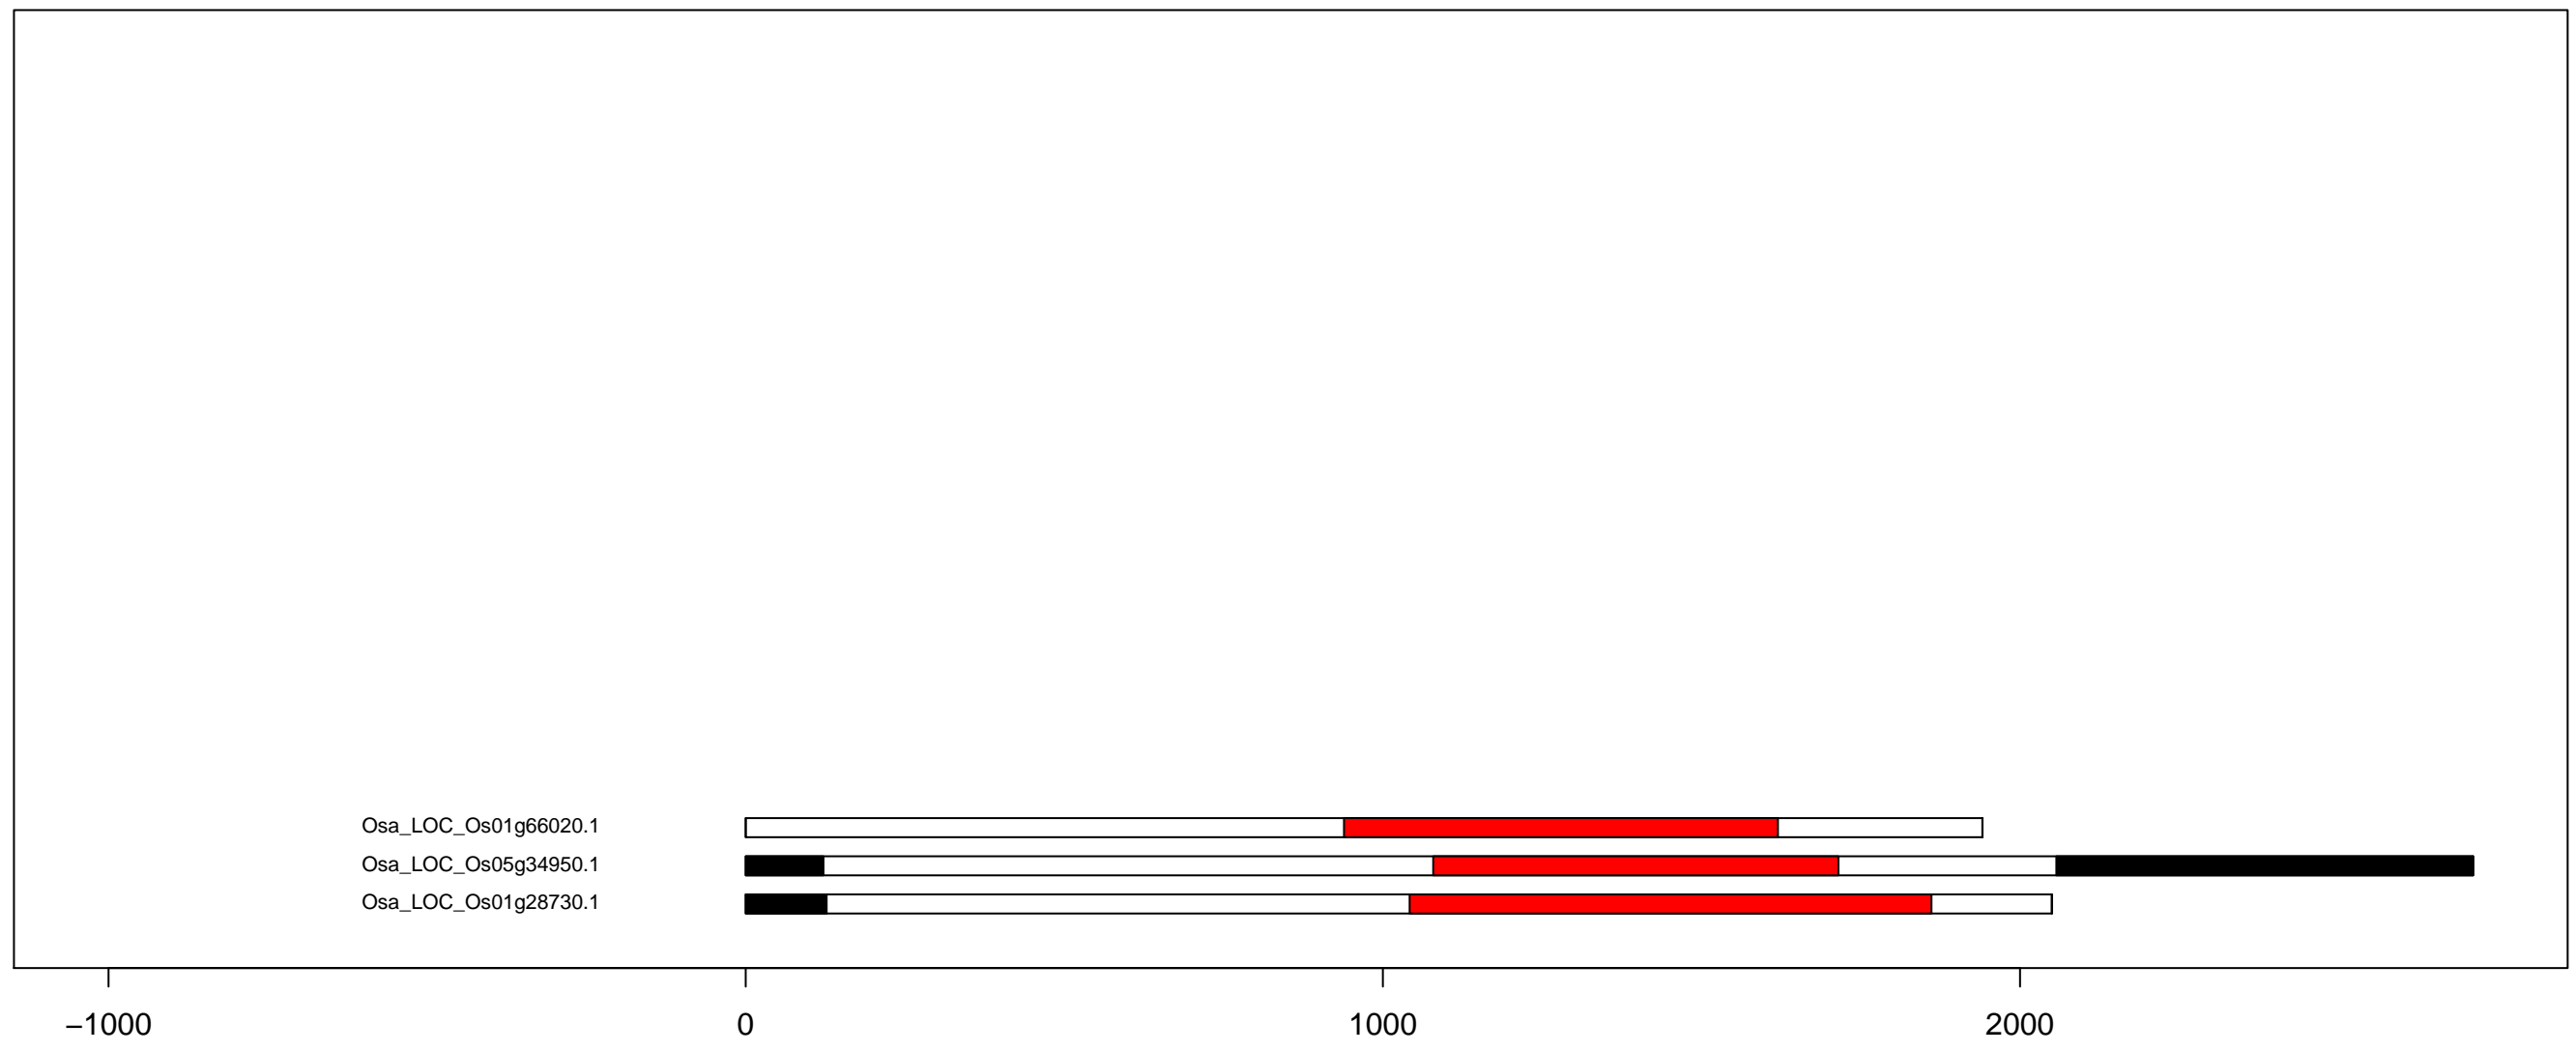

O.sa RLK-Pelle\_RLCK-II exon-intron and kinase domain diagram (all)

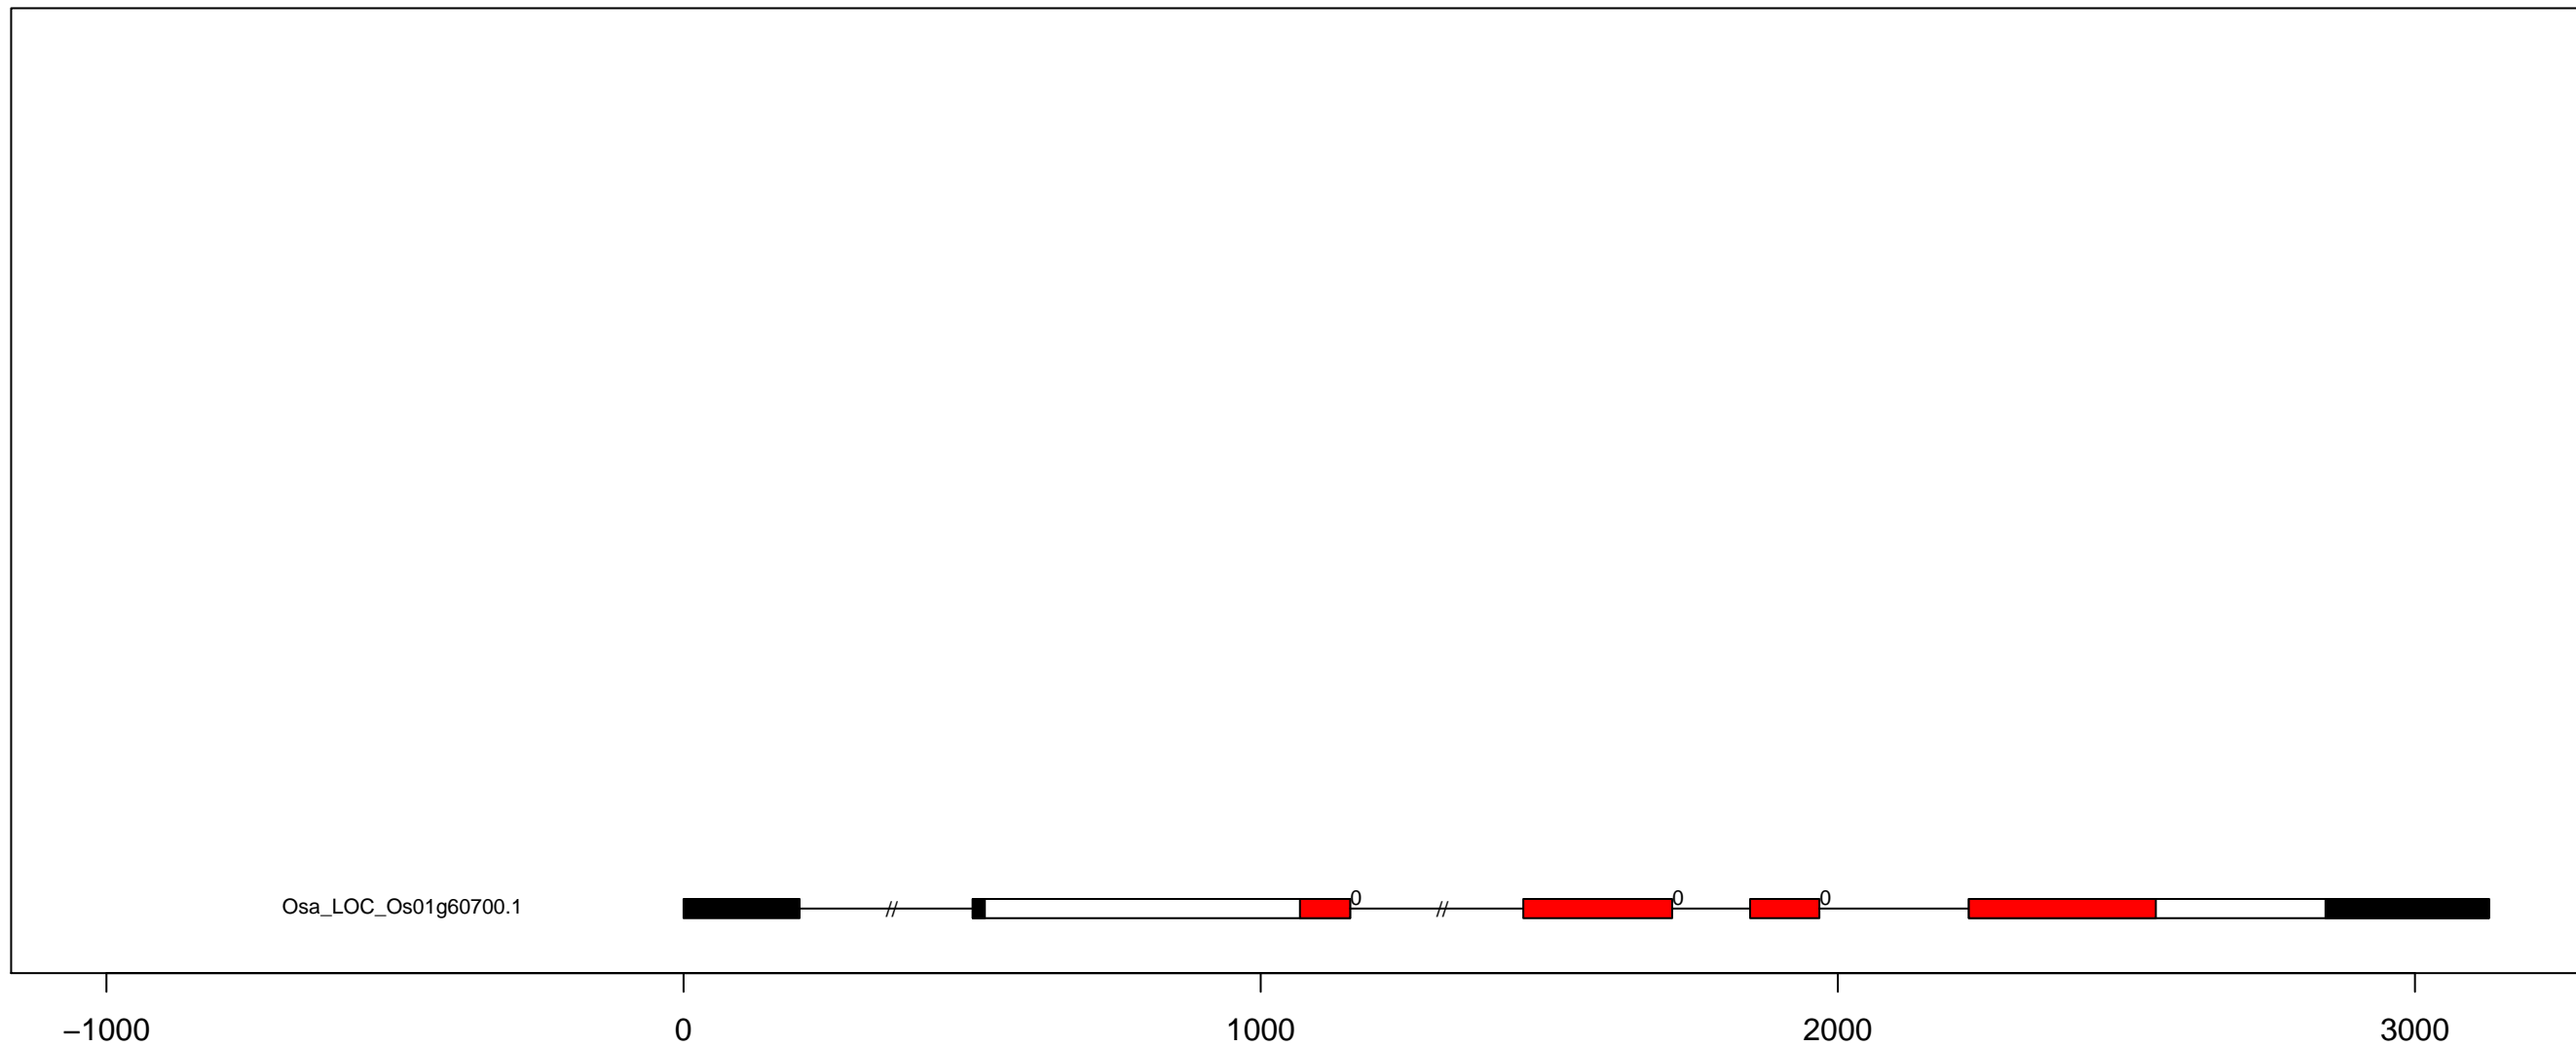

# O.sa RLK-Pelle\_RLCK-IV exon-intron and kinase domain diagram (all)

Osa\_LOC\_Os09g03620.1  
Osa\_LOC\_Os04g42480.1  
Osa\_LOC\_Os03g61060.1  
Osa\_LOC\_Os03g05470.1  
Osa\_LOC\_Os02g57560.1  
Osa\_LOC\_Os01g63280.2

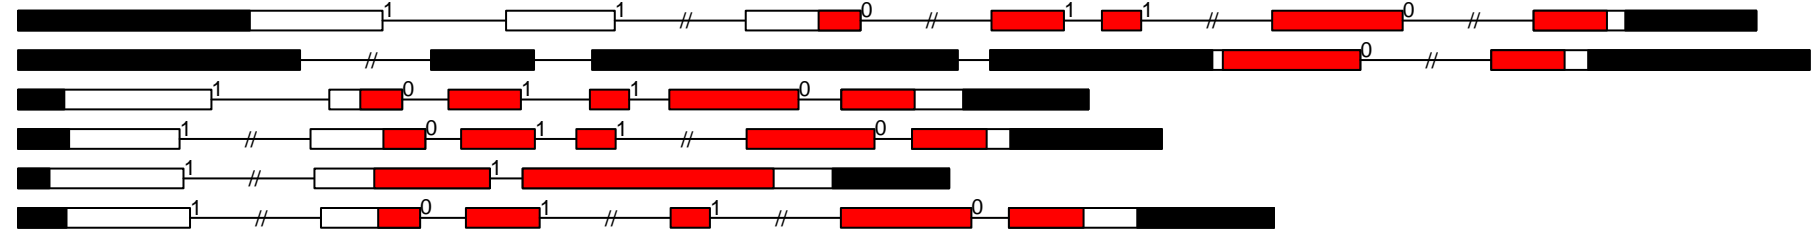

-1000

0

1000

2000

3000

4000

# O.sa RLK-Pelle\_RLCK-IXa exon-intron and kinase domain diagram (all)

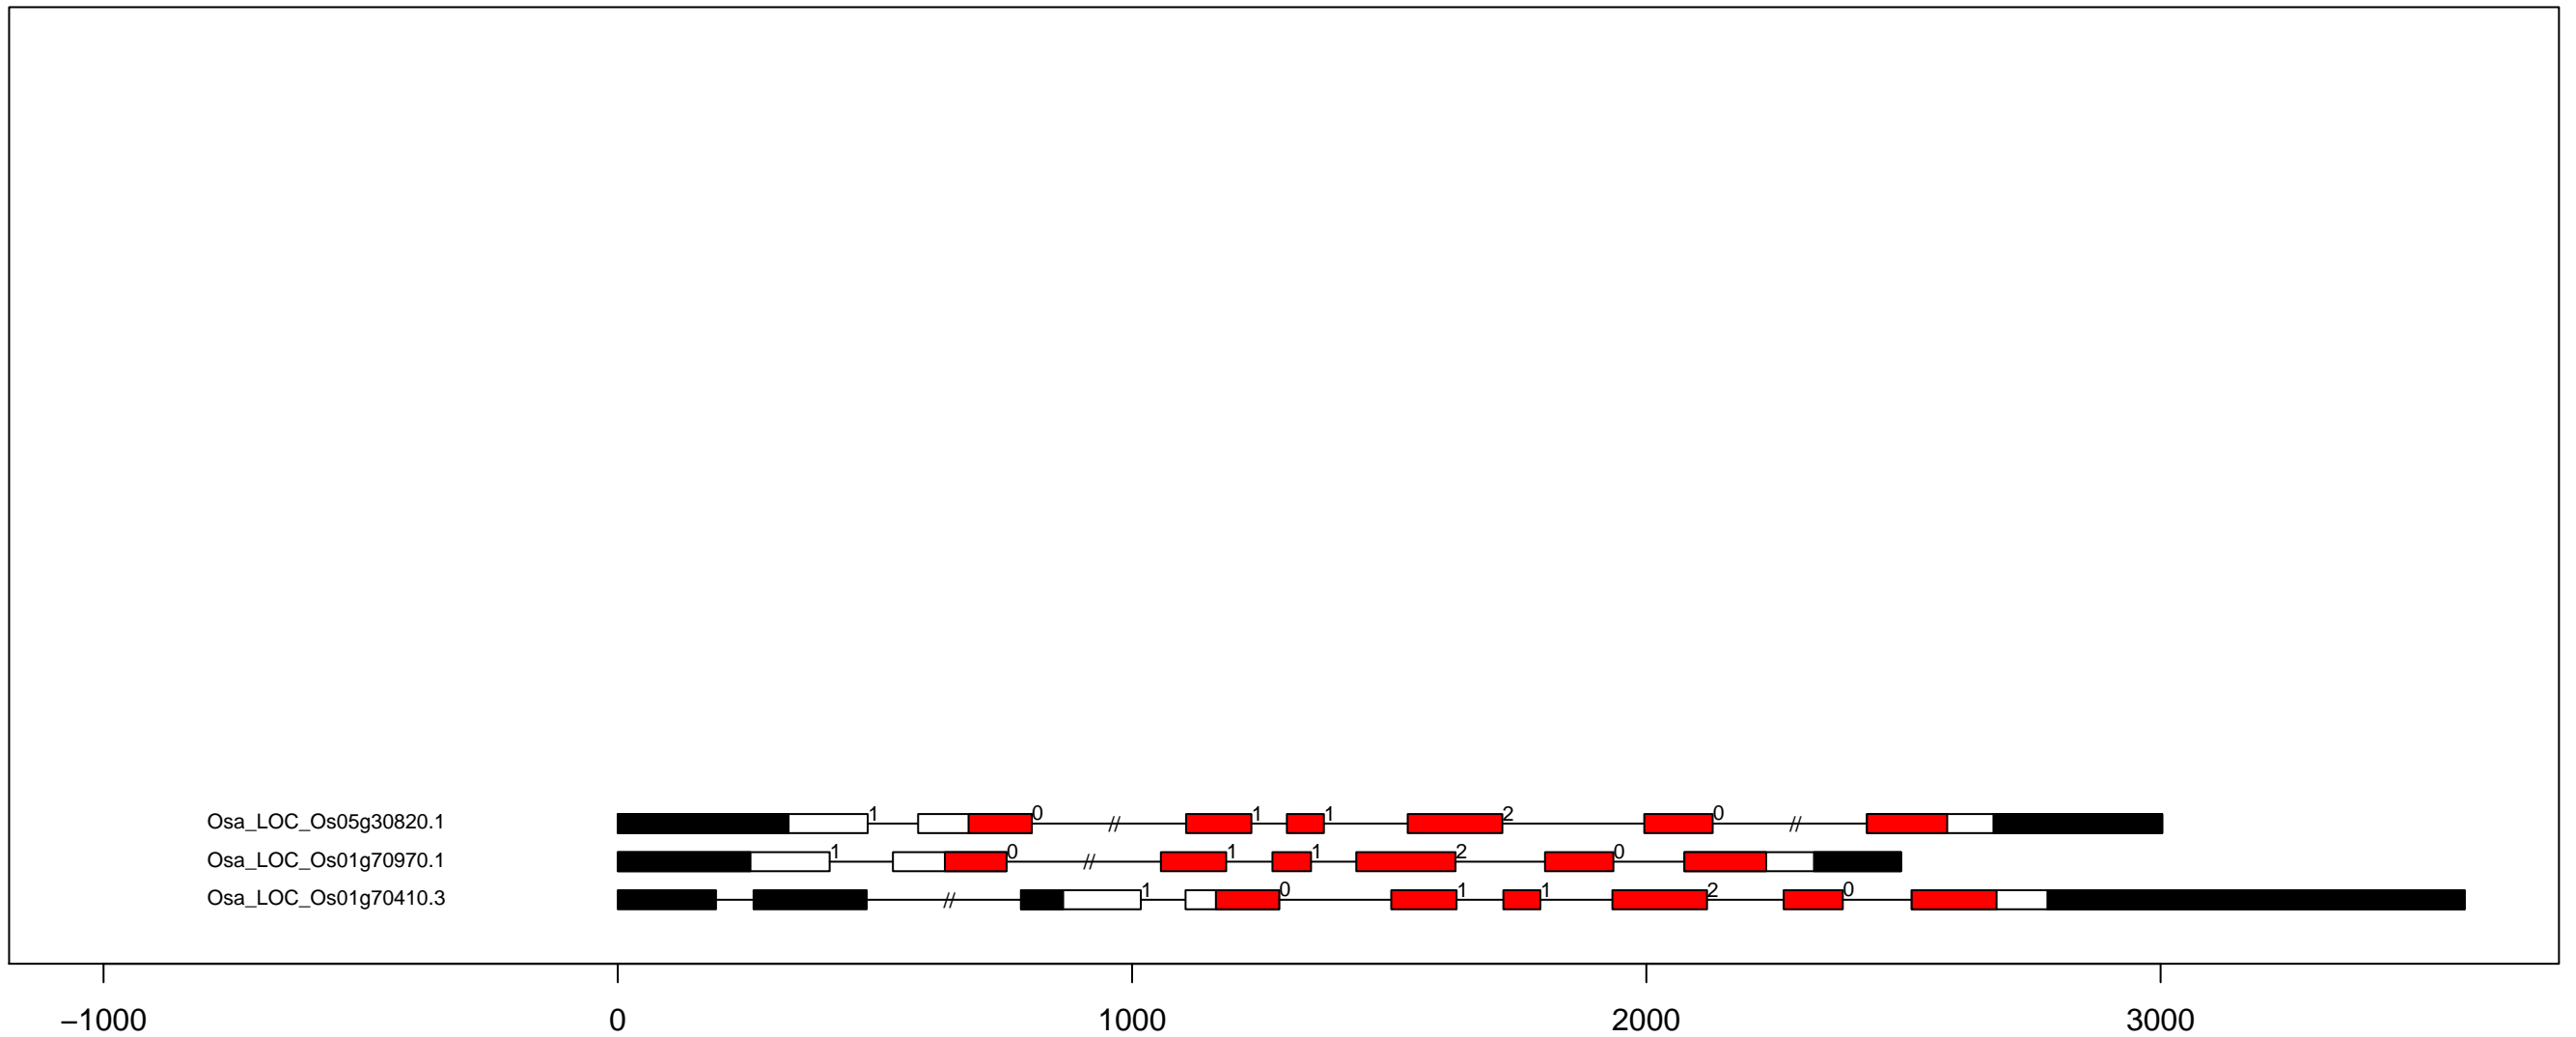

# O.sa RLK-Pelle\_RLCK-IXb exon-intron and kinase domain diagram (part 1)

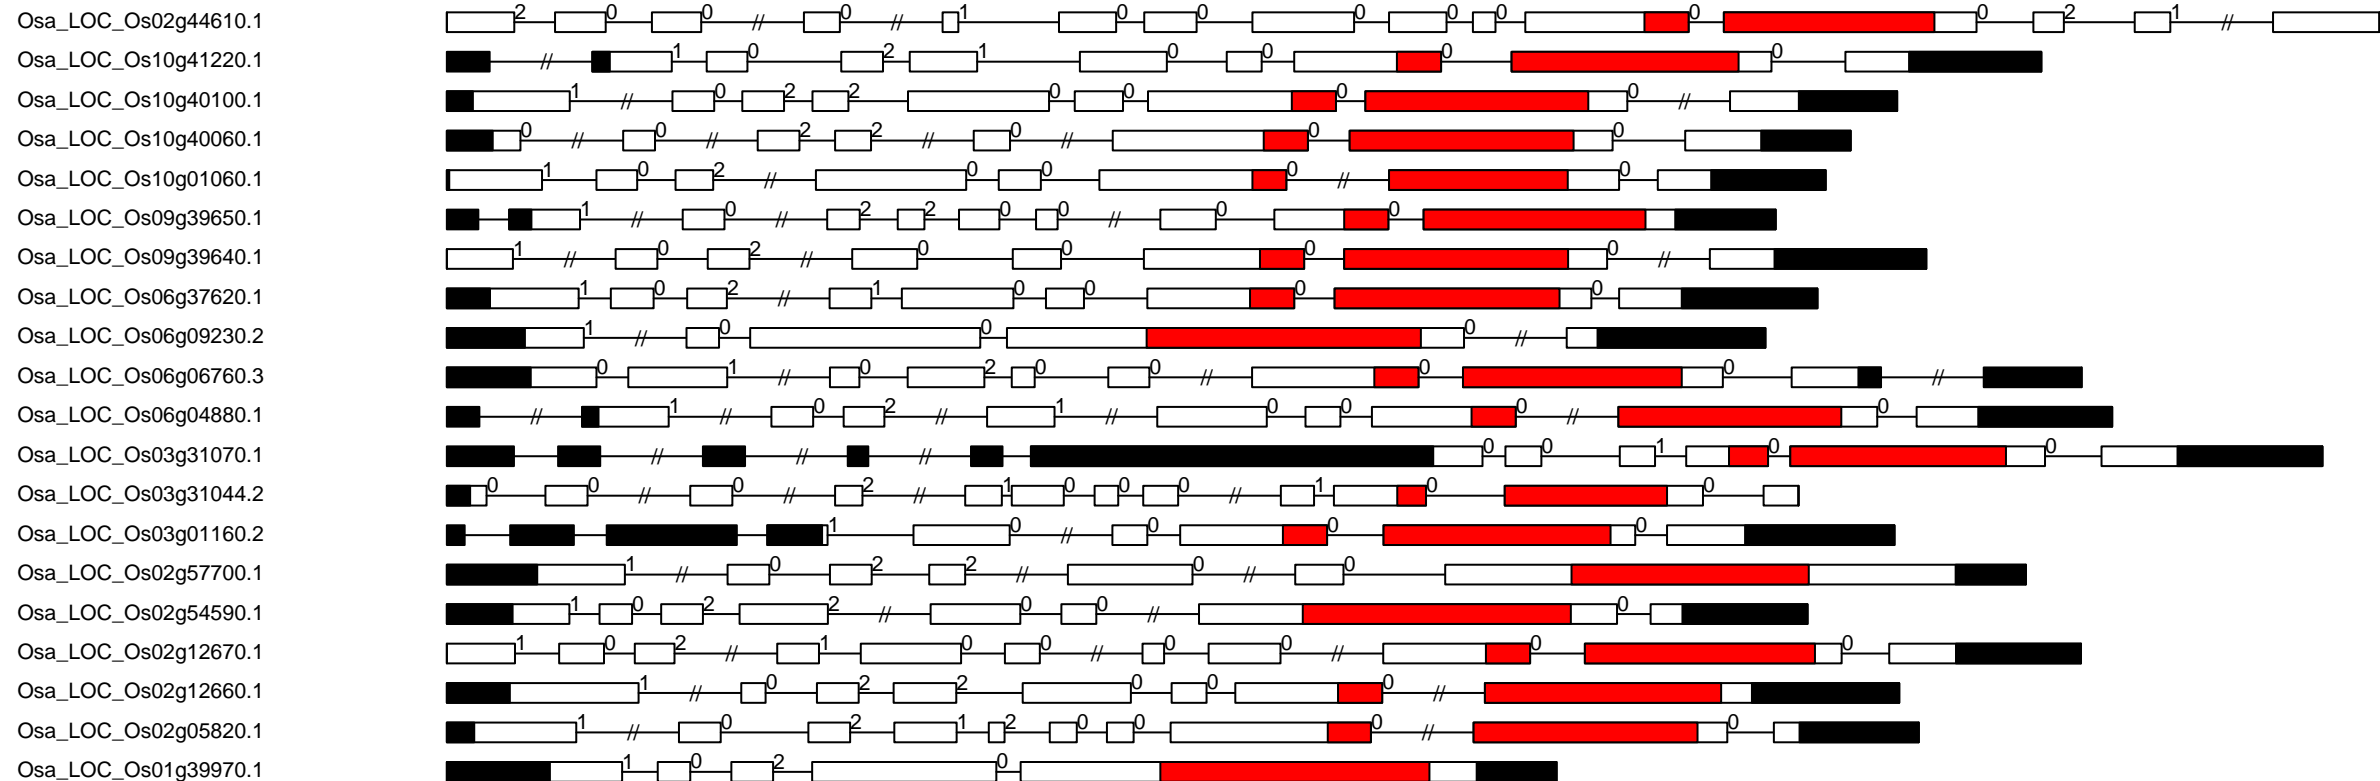

-1000

0

1000

2000

3000

4000

5000

# O.sa RLK-Pelle\_RLCK-IXb exon-intron and kinase domain diagram (part 2)

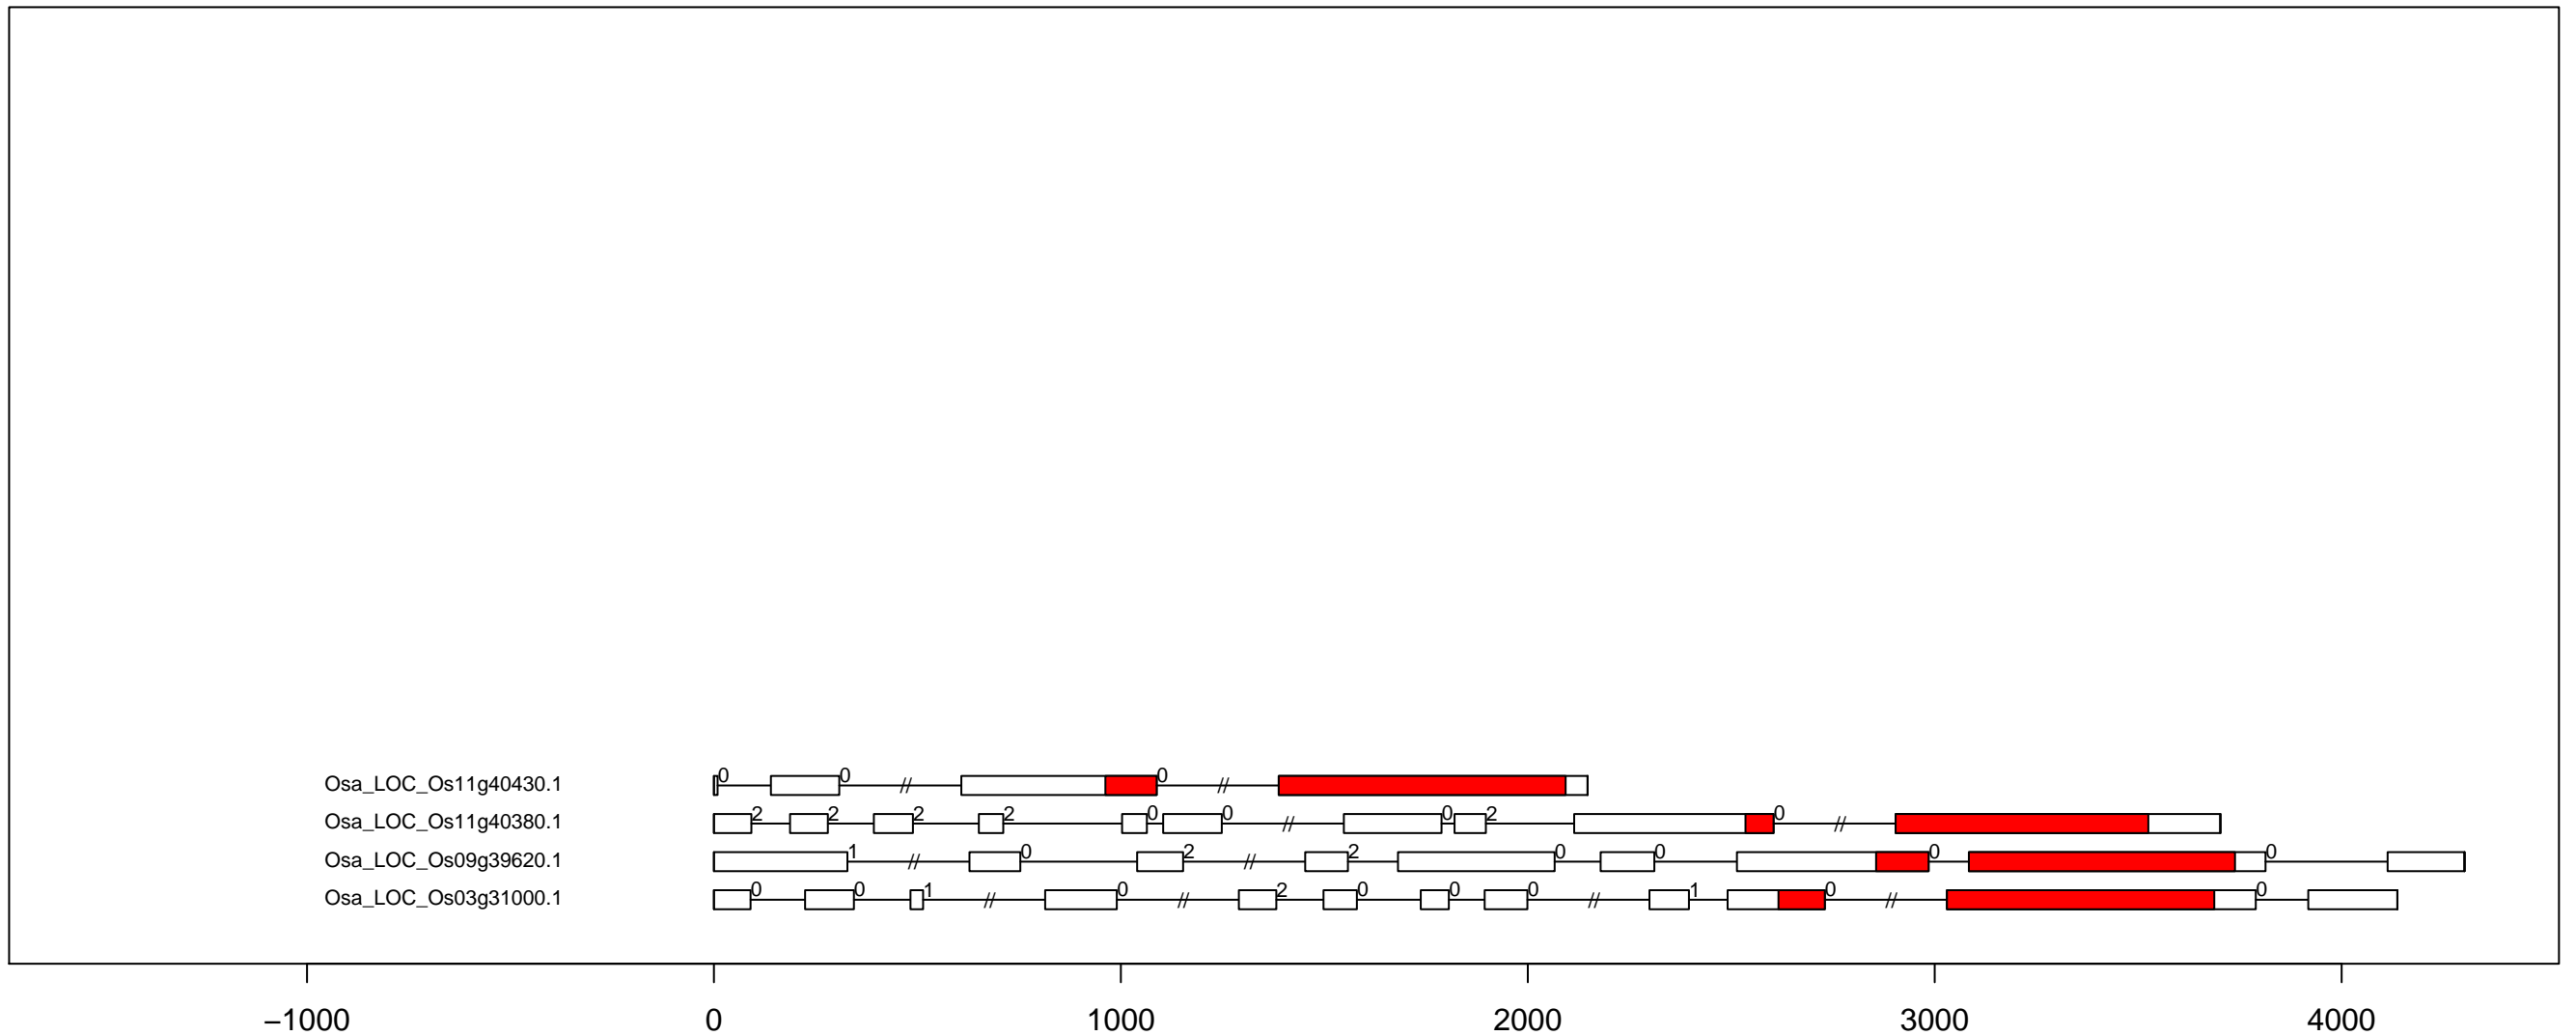



# O.sa RLK-Pelle\_RLCK-Os exon-intron and kinase domain diagram (all)

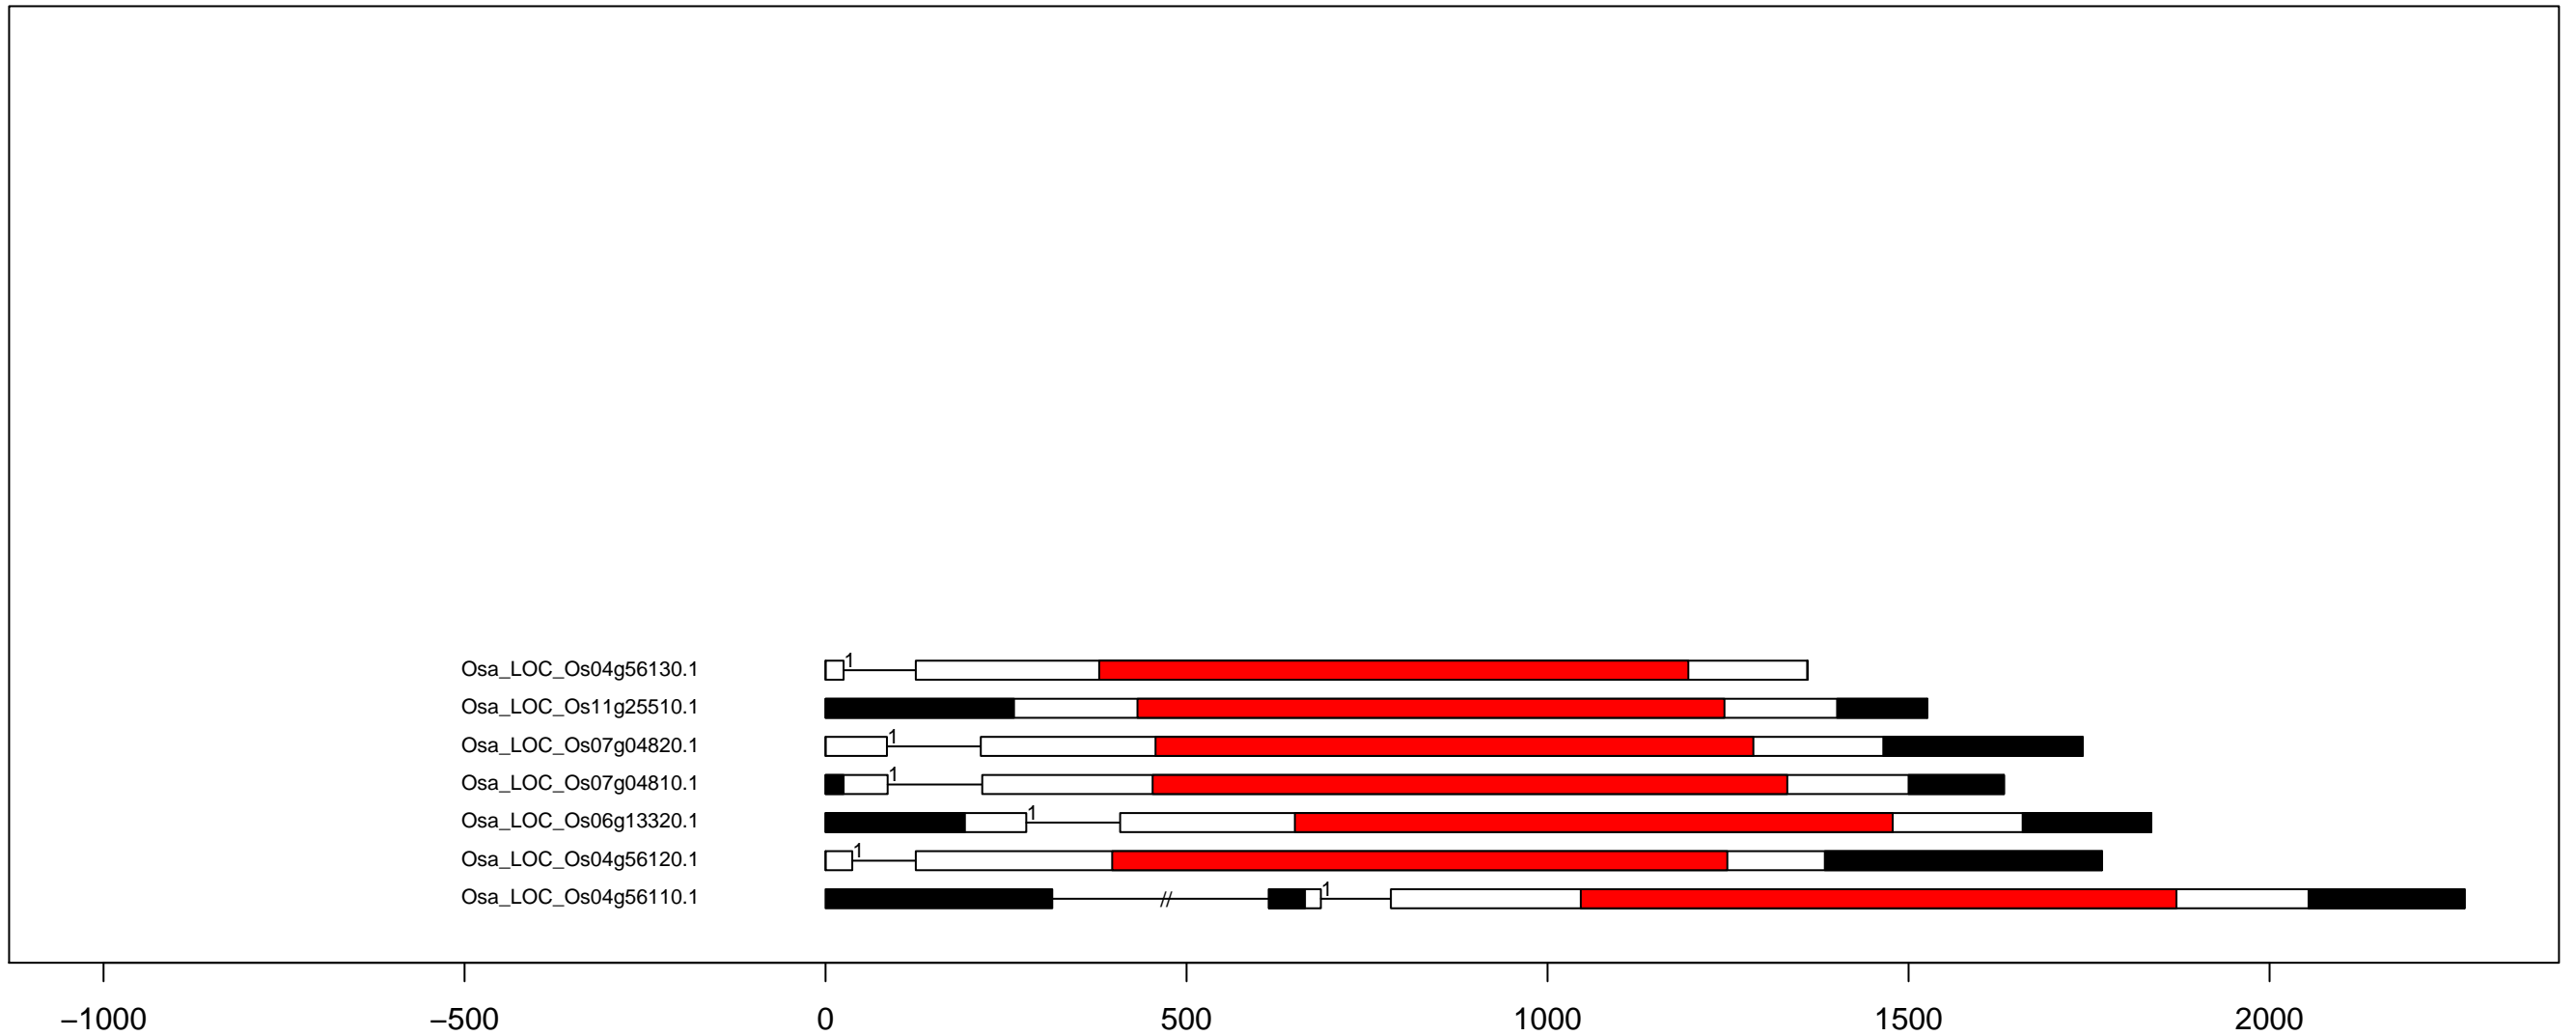

# O.sa RLK-Pelle\_RLCK-VIIa-1 exon-intron and kinase domain diagram (all)

Osa\_LOC\_Os05g03460.1  
 Osa\_LOC\_Os09g39930.1  
 Osa\_LOC\_Os07g49470.1  
 Osa\_LOC\_Os07g47270.1  
 Osa\_LOC\_Os05g41950.1  
 Osa\_LOC\_Os05g38770.1  
 Osa\_LOC\_Os05g30870.1  
 Osa\_LOC\_Os04g32310.1  
 Osa\_LOC\_Os03g17550.1  
 Osa\_LOC\_Os03g03880.1  
 Osa\_LOC\_Os02g58610.1  
 Osa\_LOC\_Os02g30900.1  
 Osa\_LOC\_Os01g71000.1  
 Osa\_LOC\_Os01g57940.1  
 Osa\_LOC\_Os01g15470.1

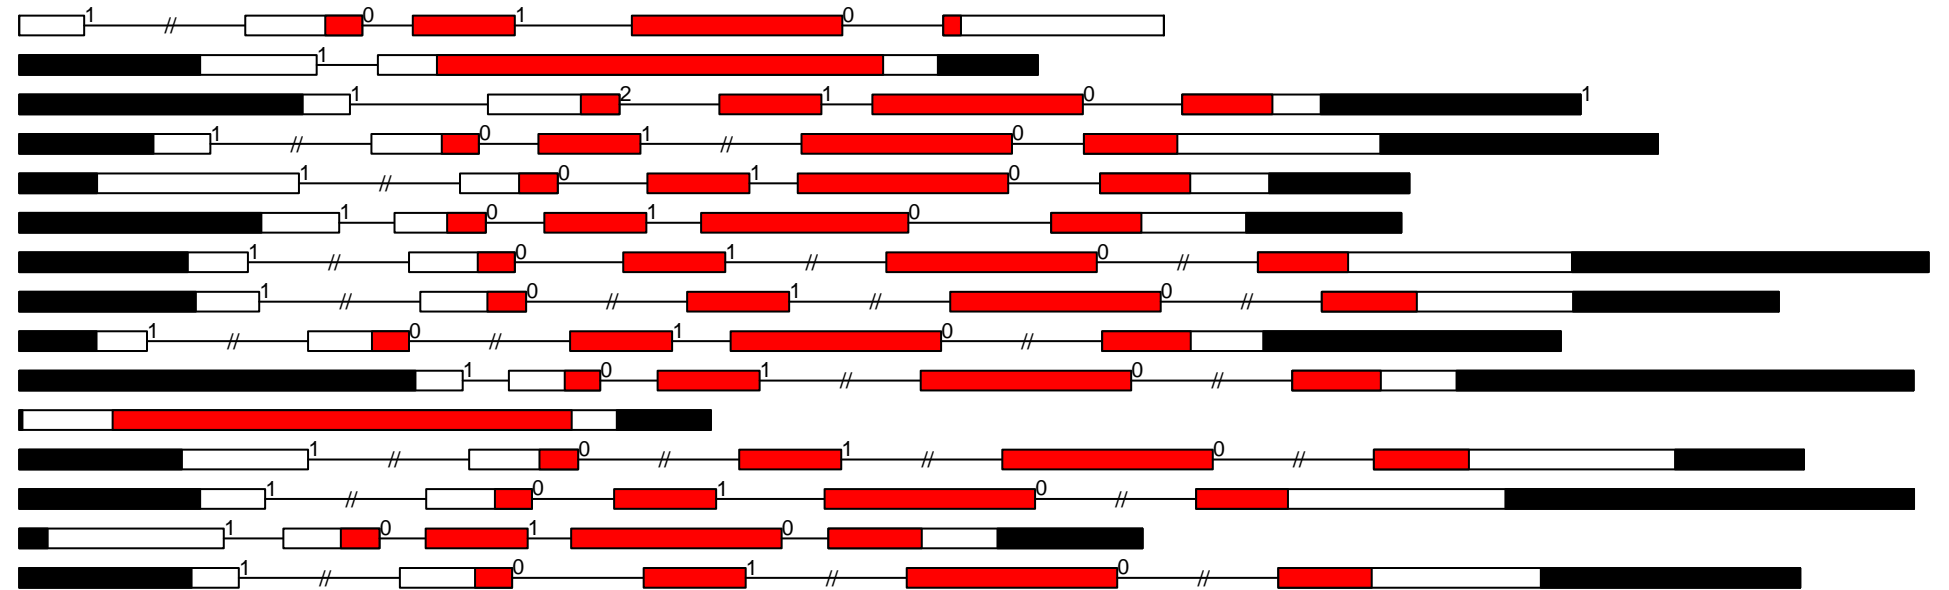

-1000

0

1000

2000

3000

# O.sa RLK-Pelle\_RLCK-VIIa-2 exon-intron and kinase domain diagram (part 1)

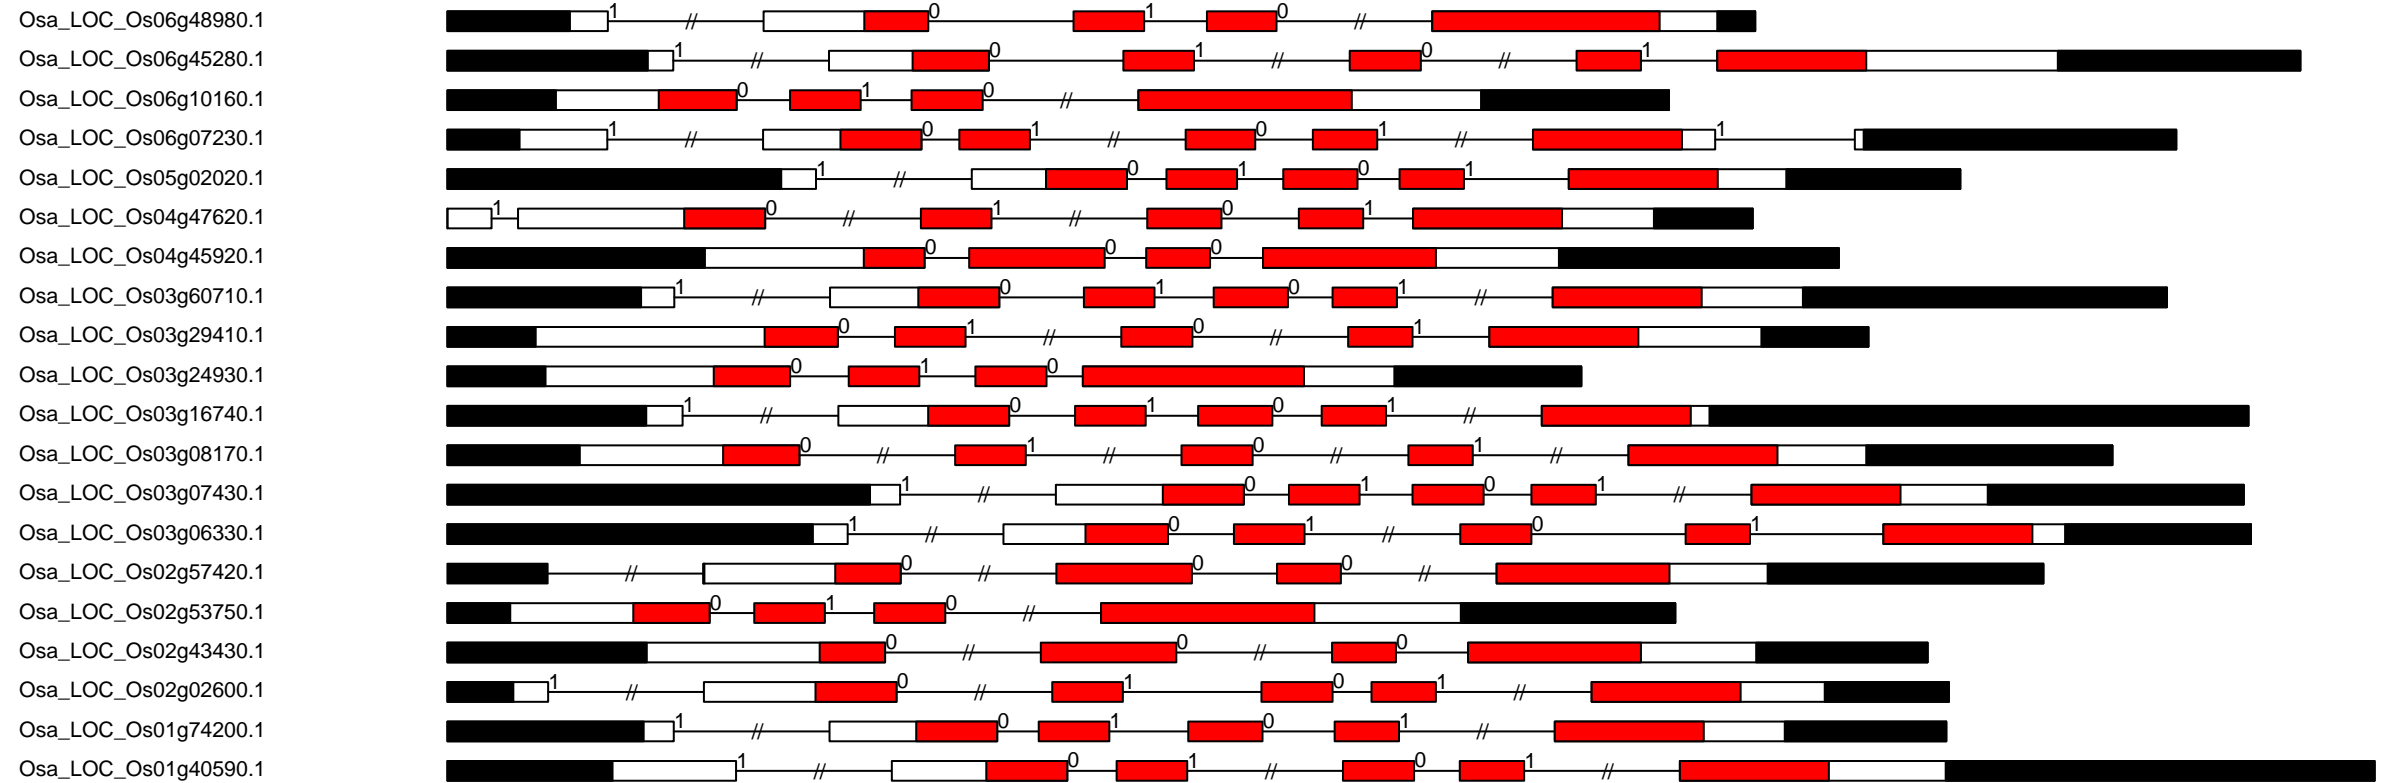

-1000

0

1000

2000

3000

# O.sa RLK-Pelle\_RLCK-VIIa-2 exon-intron and kinase domain diagram (part 2)

Osa\_LOC\_Os07g31290.1  
 Osa\_LOC\_Os05g51400.1  
 Osa\_LOC\_Os03g03890.1  
 Osa\_LOC\_Os02g44920.1  
 Osa\_LOC\_Os12g02810.1  
 Osa\_LOC\_Os11g02830.1  
 Osa\_LOC\_Os10g30600.1  
 Osa\_LOC\_Os10g29620.1  
 Osa\_LOC\_Os10g26520.1  
 Osa\_LOC\_Os10g25550.1  
 Osa\_LOC\_Os09g36320.1  
 Osa\_LOC\_Os09g27010.1  
 Osa\_LOC\_Os09g19700.1  
 Osa\_LOC\_Os08g35600.1  
 Osa\_LOC\_Os07g48730.1  
 Osa\_LOC\_Os07g42200.1  
 Osa\_LOC\_Os06g51170.1  
 Osa\_LOC\_Os06g50100.1

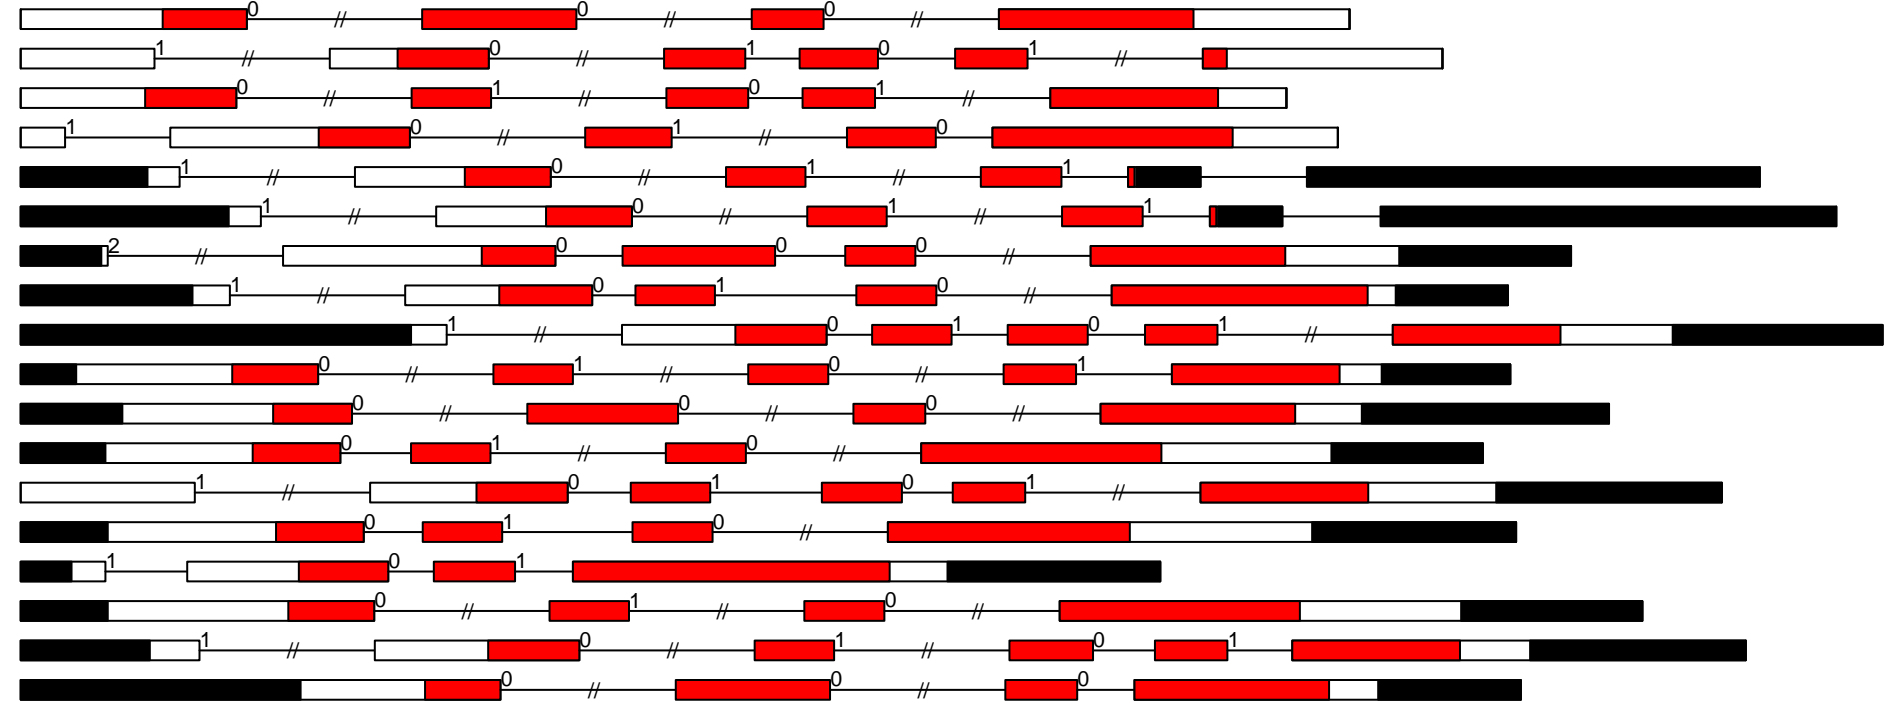

-1000

0

1000

2000

3000

# O.sa RLK-Pelle\_RLCK-VIIb exon-intron and kinase domain diagram (all)

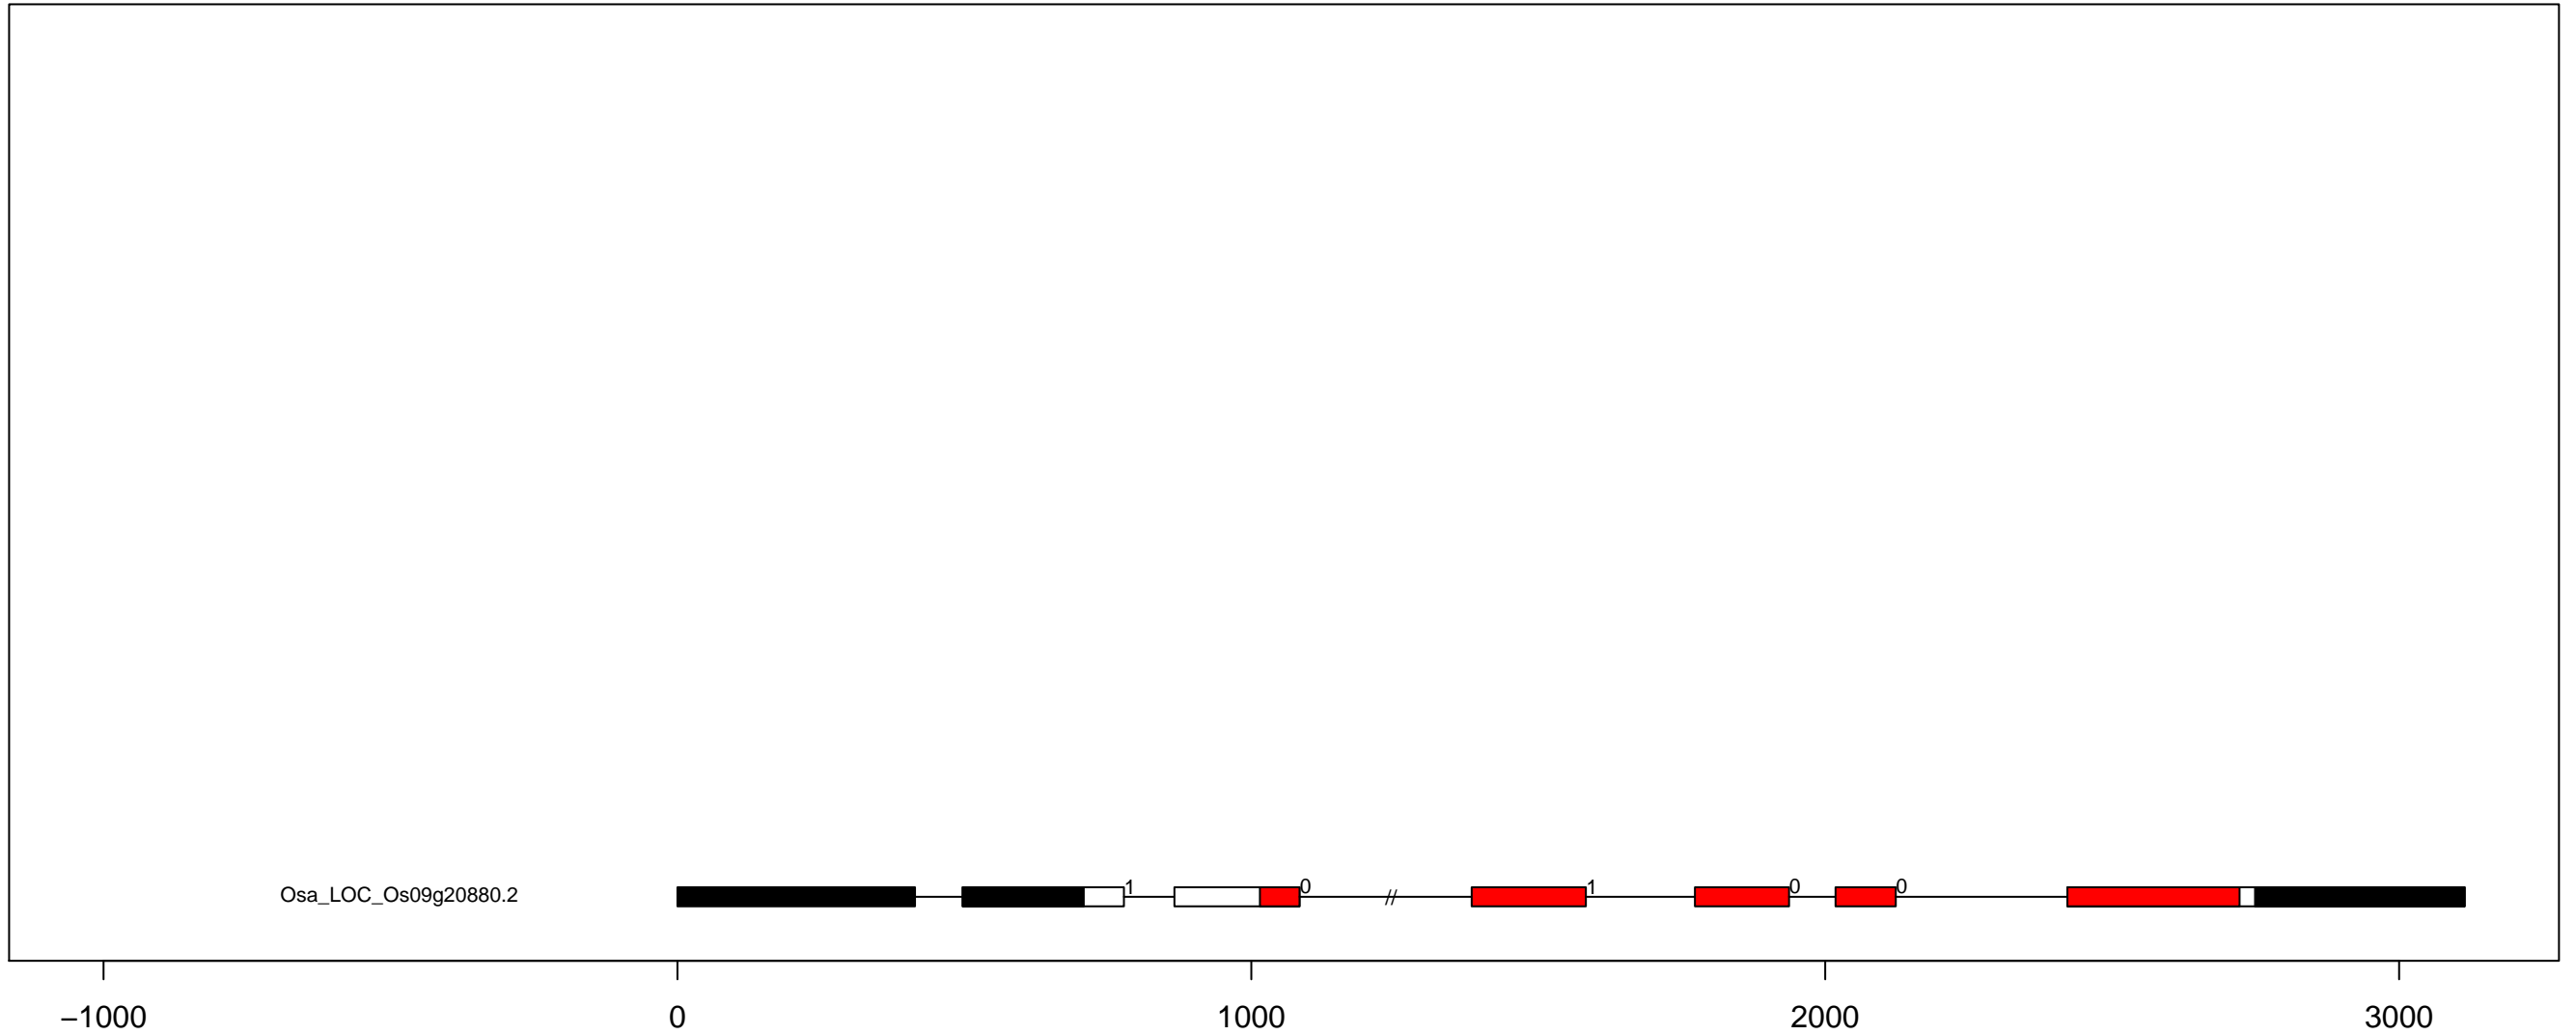



# O.sa RLK-Pelle\_RLCK-VI exon-intron and kinase domain diagram (all)

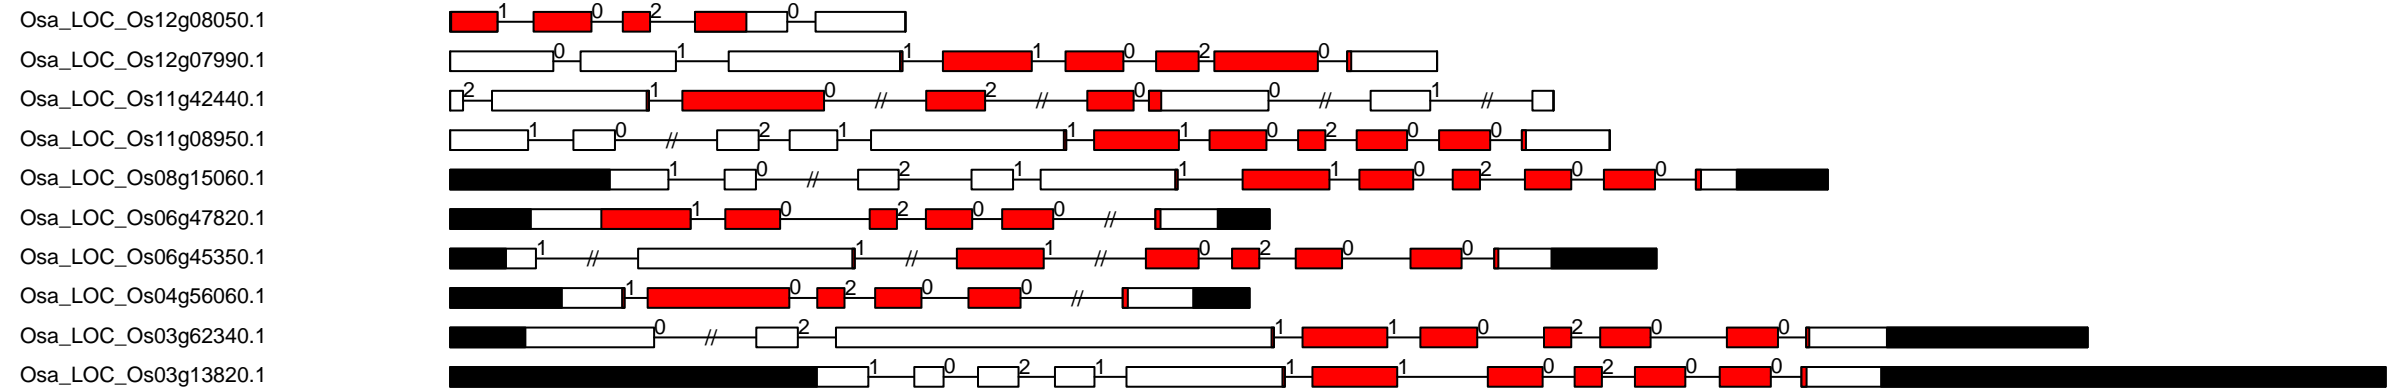

-1000

0

1000

2000

3000

4000

5000

# O.sa RLK-Pelle\_RLCK-V exon-intron and kinase domain diagram (all)

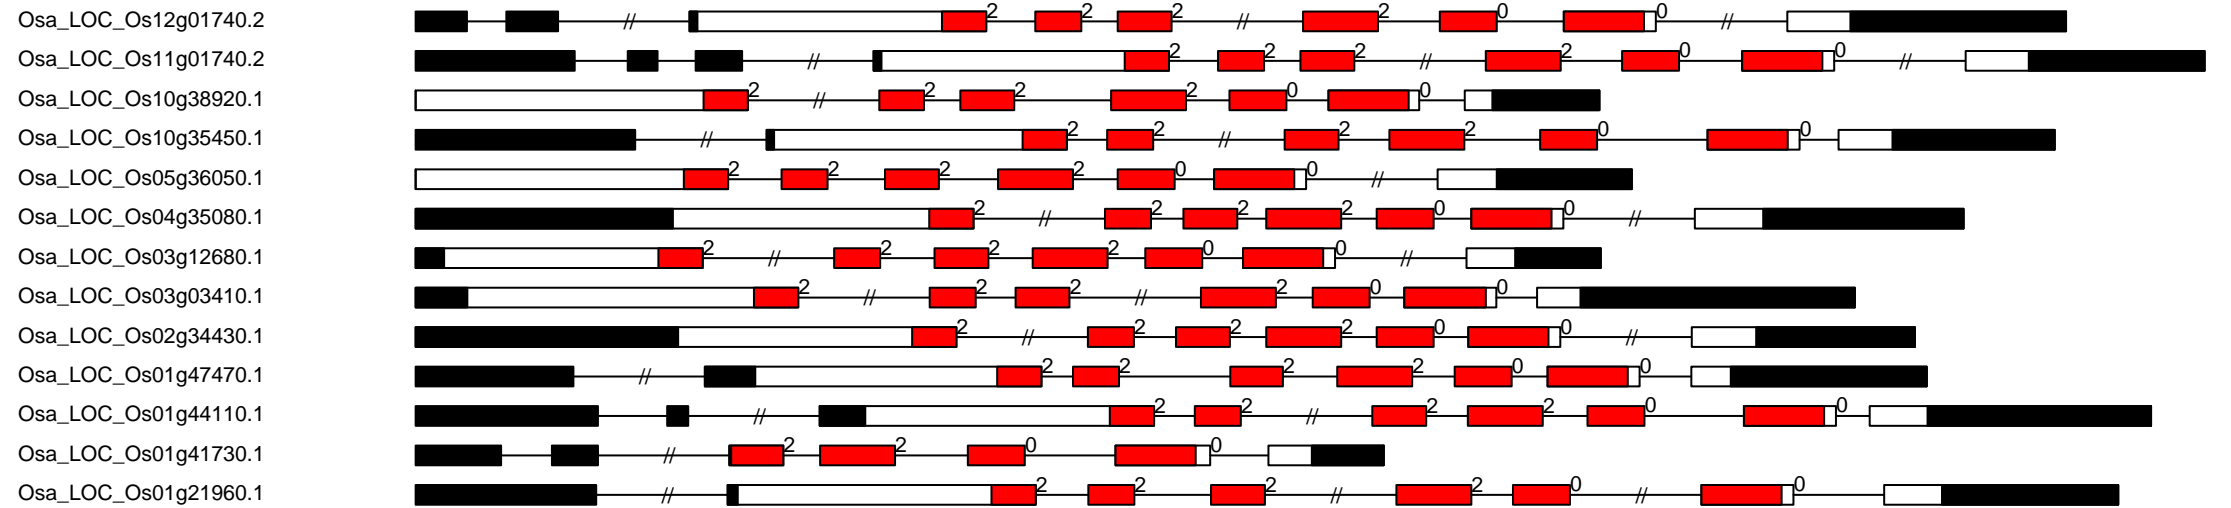

-1000

0

1000

2000

3000

4000



# O.sa RLK-Pelle\_RLCK-XII-1 exon-intron and kinase domain diagram (all)

Osa\_LOC\_Os10g42110.1

Osa\_LOC\_Os10g39670.1

Osa\_LOC\_Os04g58750.1

Osa\_LOC\_Os03g61010.1

Osa\_LOC\_Os03g04050.1

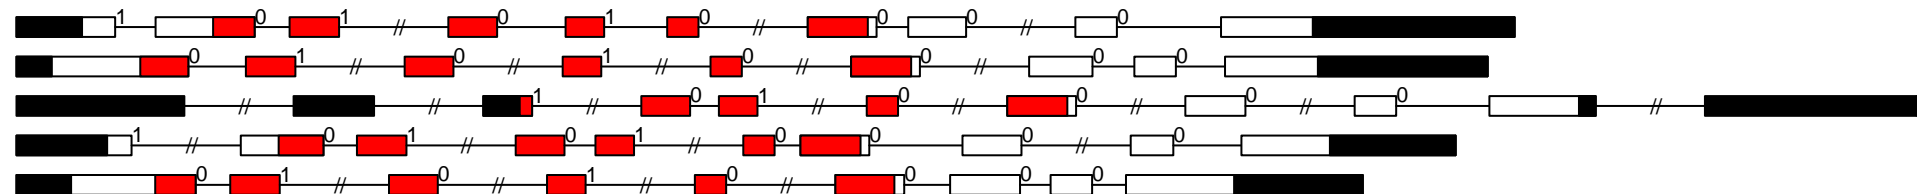

-1000

0

1000

2000

3000

4000

5000

# O.sa RLK-Pelle\_RLCK-XIII exon-intron and kinase domain diagram (all)

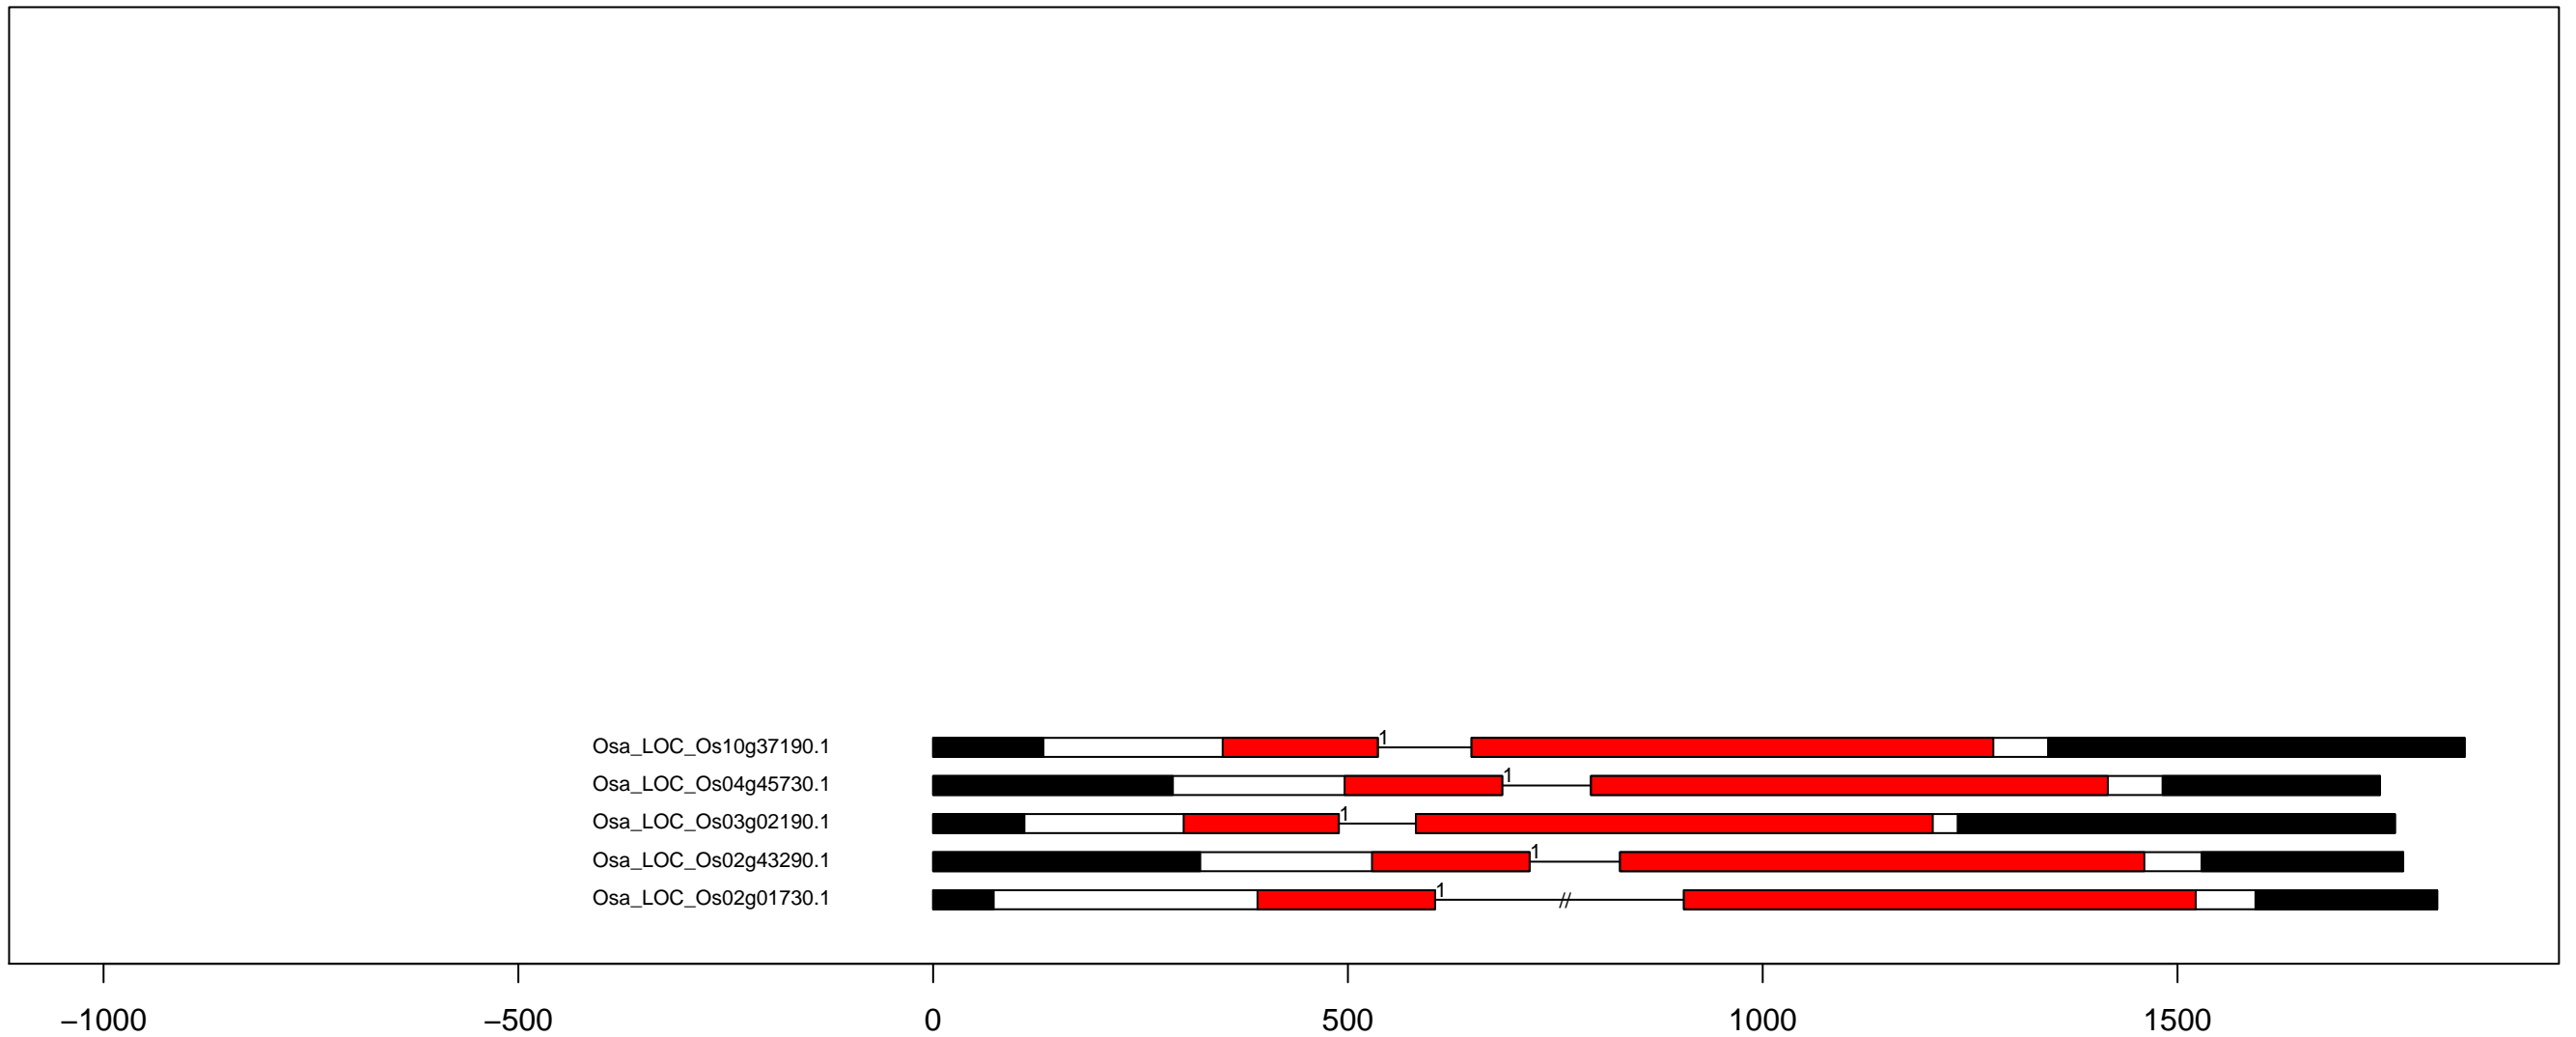

# O.sa RLK-Pelle\_RLCK-X exon-intron and kinase domain diagram (all)

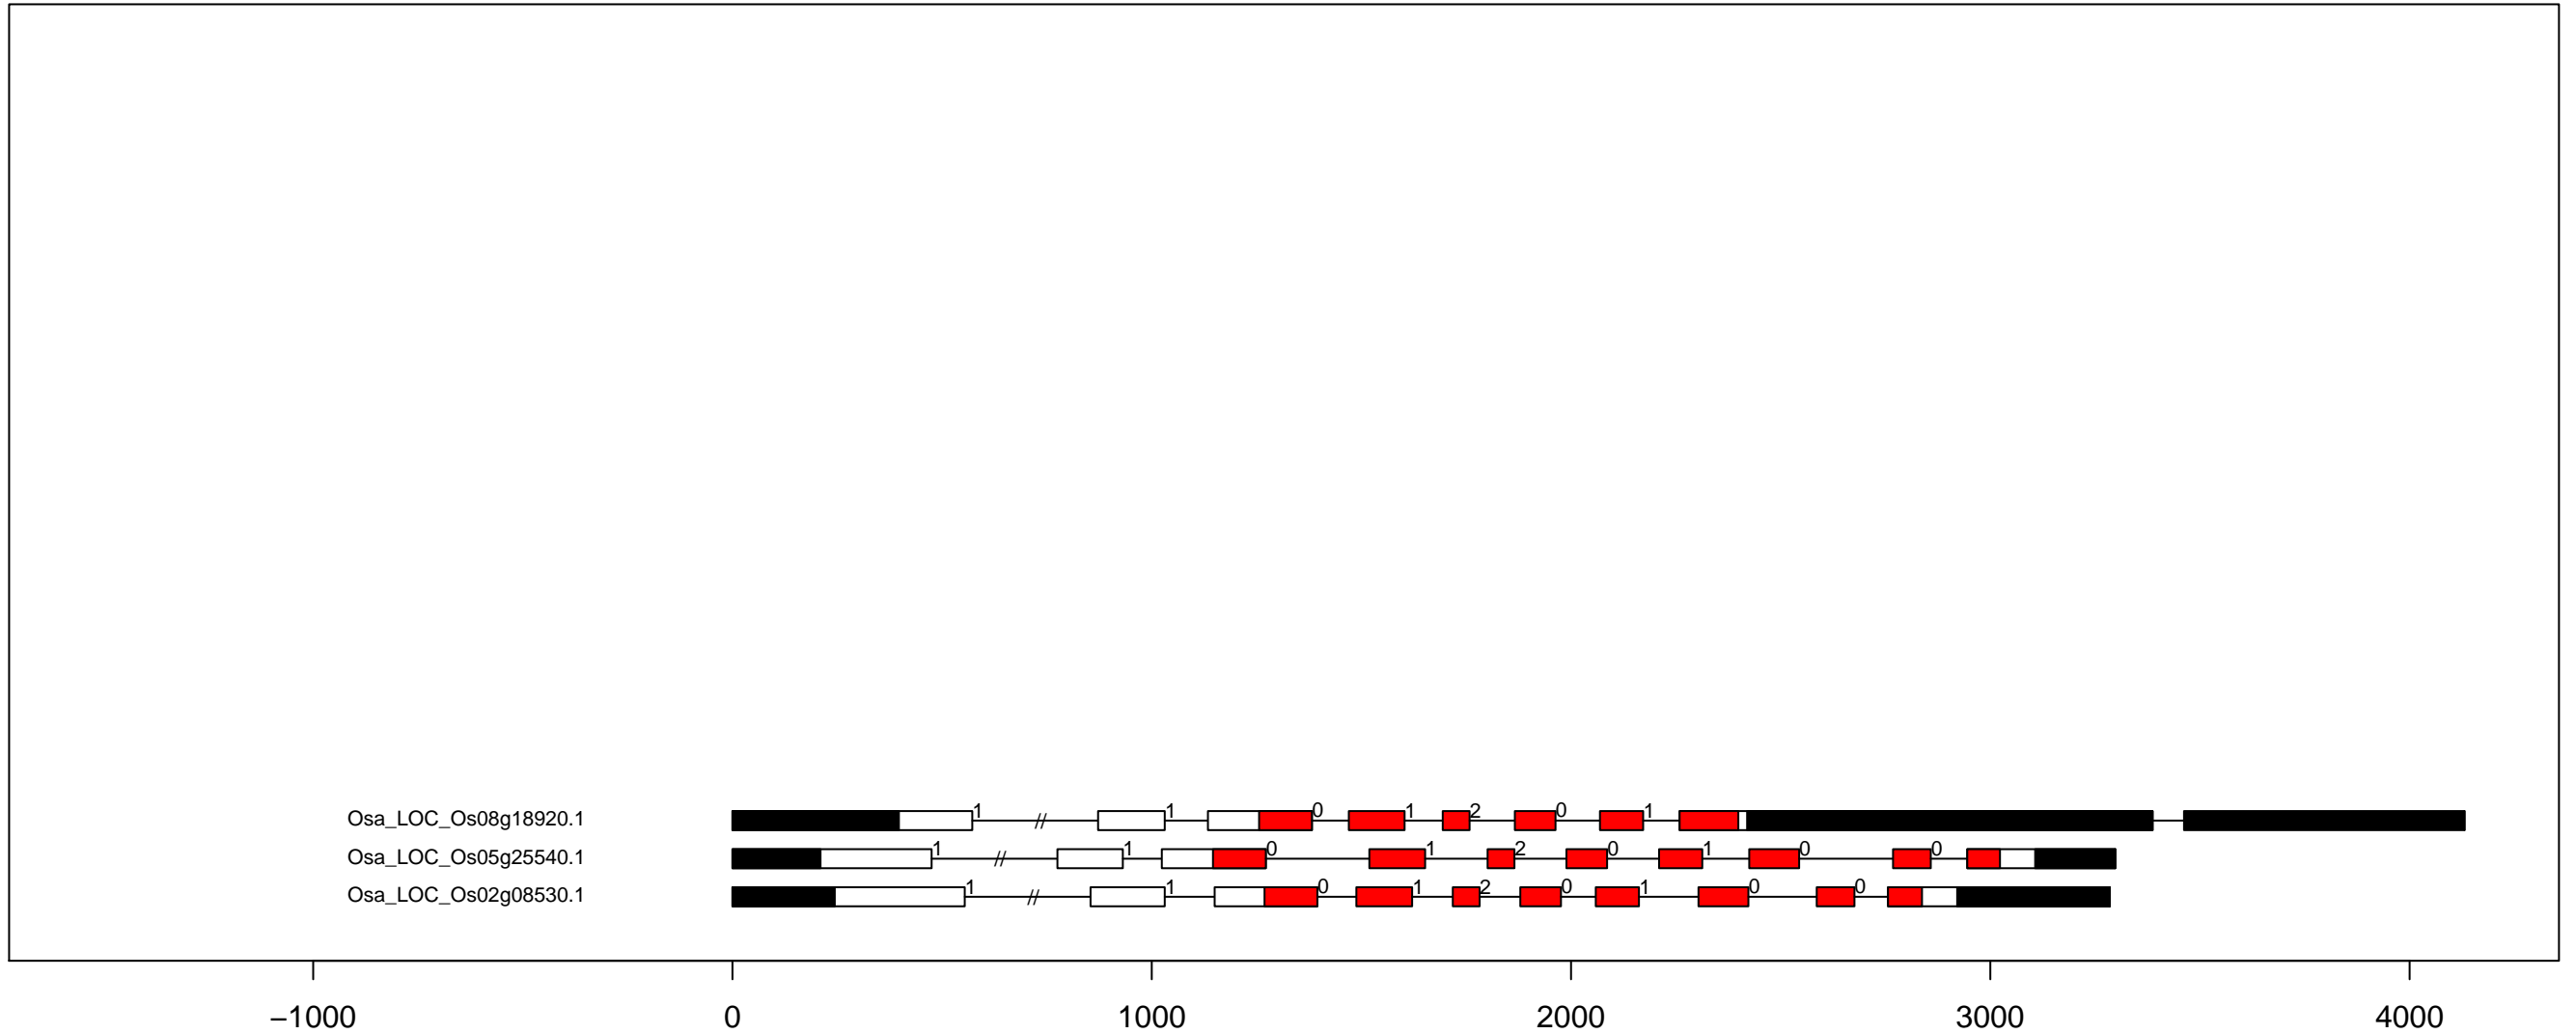

# O.sa RLK-Pelle\_RLCK-XVI exon-intron and kinase domain diagram (all)

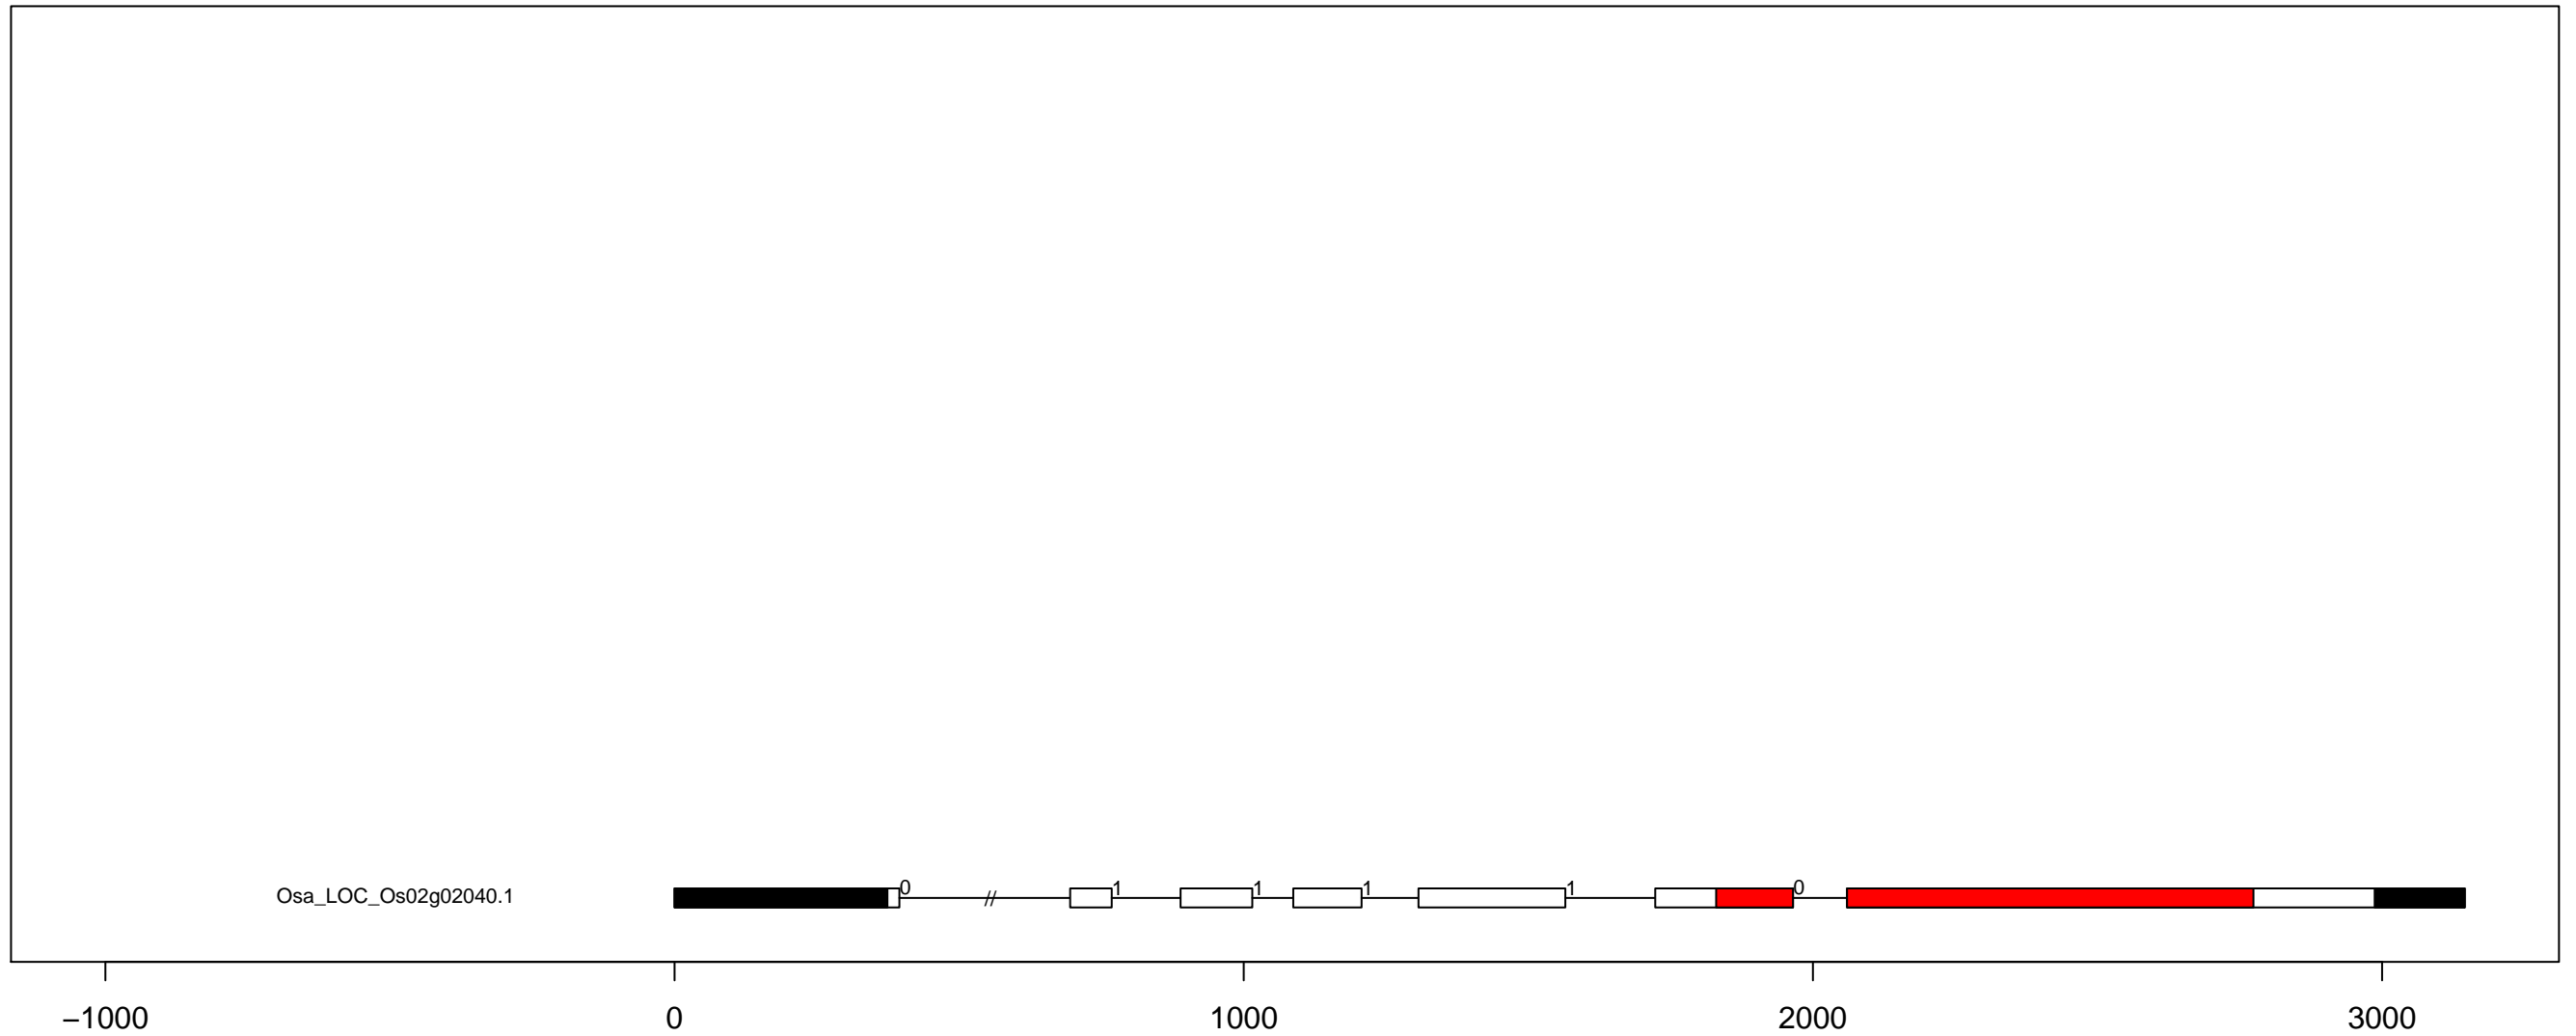

# O.sa RLK-Pelle\_RLCK-XV exon-intron and kinase domain diagram (all)

Osa\_LOC\_Os09g36180.1  
 Osa\_LOC\_Os06g44430.1  
 Osa\_LOC\_Os06g07070.1  
 Osa\_LOC\_Os02g09359.1

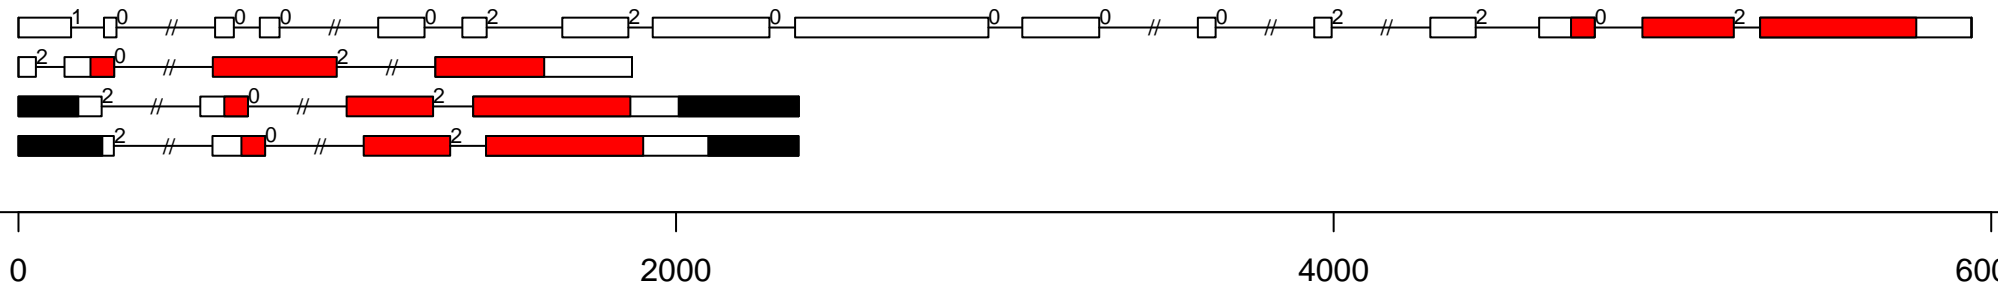

### O.sa RLK-Pelle\_SD-2b exon-intron and kinase domain diagram (part 1)

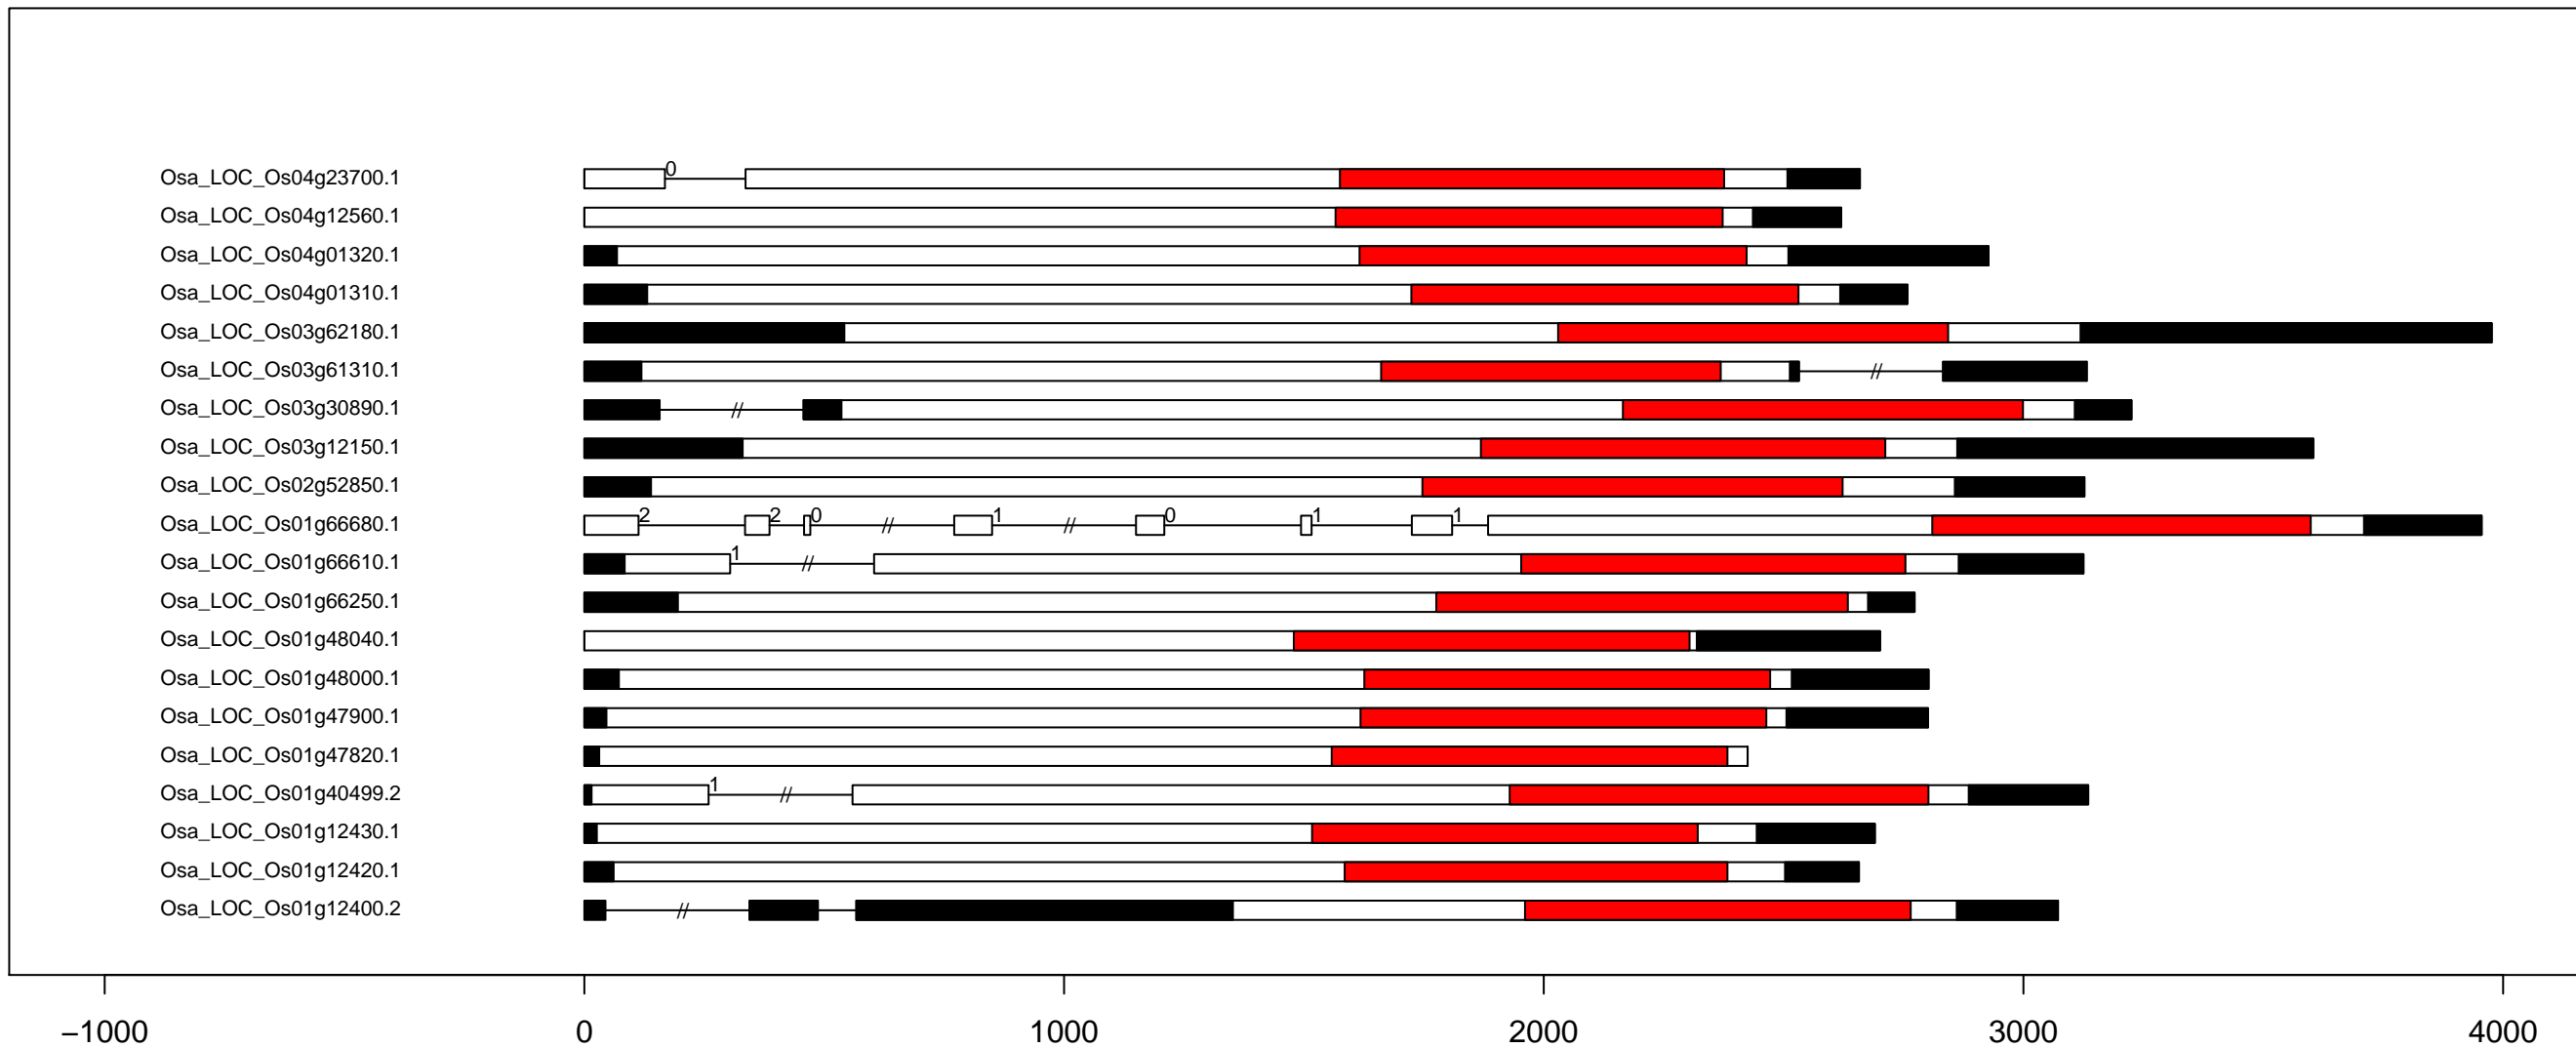

# O.sa RLK-Pelle\_SD-2b exon-intron and kinase domain diagram (part 2)

Osa\_LOC\_Os10g20160.1  
Osa\_LOC\_Os10g01100.1  
Osa\_LOC\_Os09g28180.1  
Osa\_LOC\_Os07g36780.1  
Osa\_LOC\_Os06g41560.1  
Osa\_LOC\_Os06g40030.1  
Osa\_LOC\_Os06g37750.1  
Osa\_LOC\_Os06g37670.1  
Osa\_LOC\_Os06g35850.2  
Osa\_LOC\_Os06g29810.3  
Osa\_LOC\_Os06g06960.1  
Osa\_LOC\_Os06g06940.1  
Osa\_LOC\_Os06g05070.1  
Osa\_LOC\_Os05g07420.1  
Osa\_LOC\_Os05g07300.1  
Osa\_LOC\_Os04g34370.1  
Osa\_LOC\_Os04g34360.1  
Osa\_LOC\_Os04g34270.1  
Osa\_LOC\_Os04g34250.1  
Osa\_LOC\_Os04g28780.1

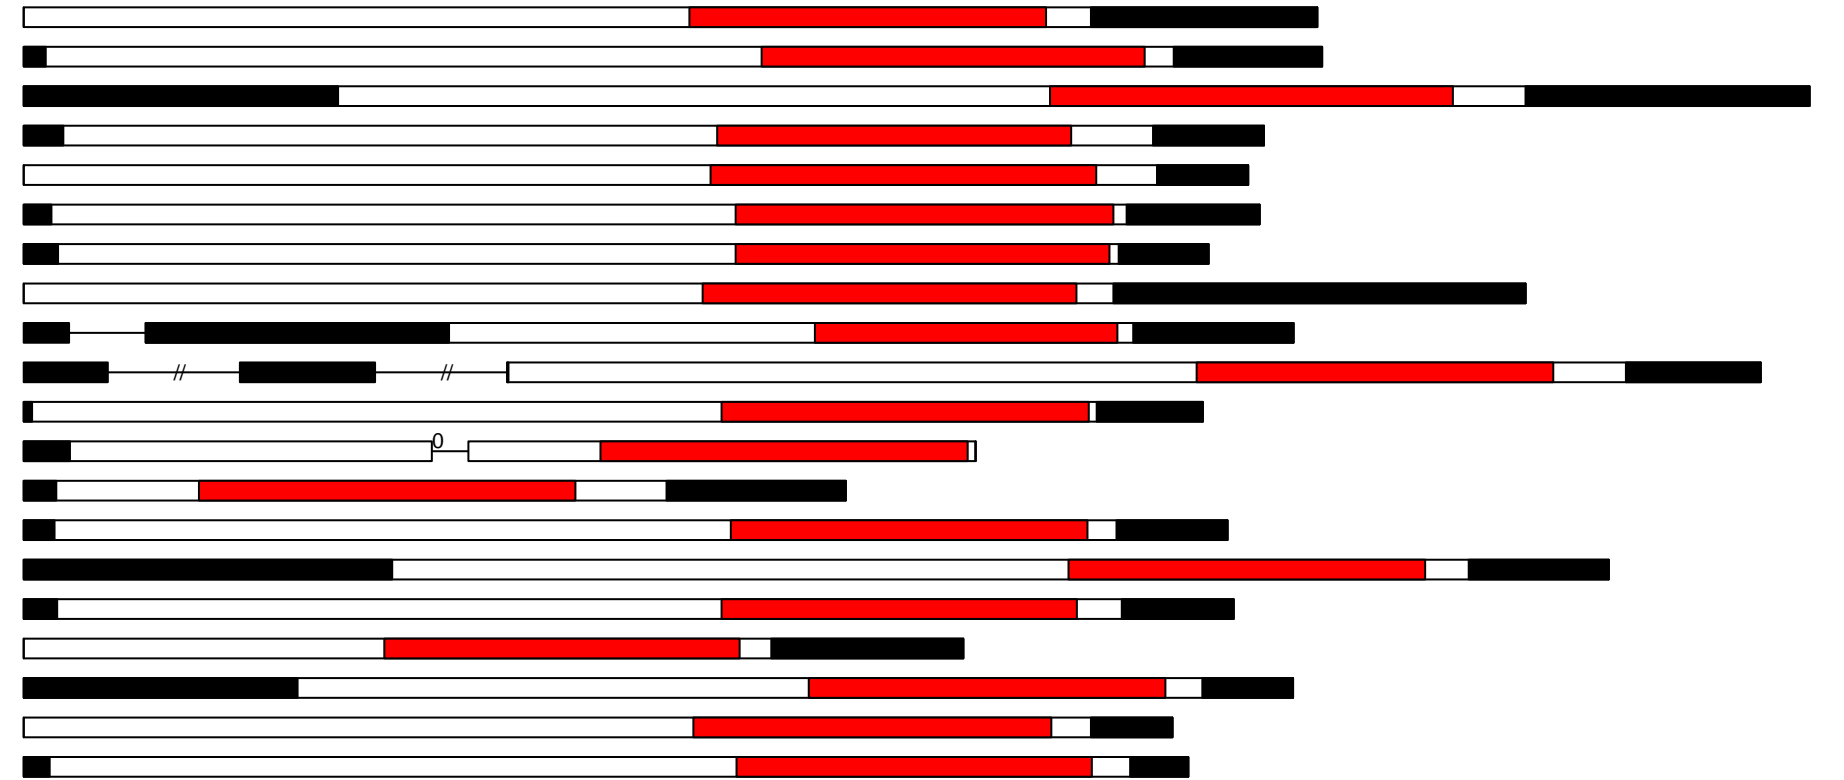

### O.sa RLK-Pelle\_SD-2b exon-intron and kinase domain diagram (part 3)

Osa\_LOC\_Os01g65060.1  
 Osa\_LOC\_Os01g65010.1  
 Osa\_LOC\_Os01g48020.1  
 Osa\_LOC\_Os01g47840.1  
 Osa\_LOC\_Os01g47810.1  
 Osa\_LOC\_Os01g46030.1  
 Osa\_LOC\_Os01g45520.1  
 Osa\_LOC\_Os01g12410.1  
 Osa\_LOC\_Os01g12290.1  
 Osa\_LOC\_Os01g10710.1  
 Osa\_LOC\_Os01g10700.1  
 Osa\_LOC\_Os01g06240.1  
 Osa\_LOC\_Os01g02310.1  
 Osa\_LOC\_Os12g44320.1  
 Osa\_LOC\_Os12g34320.1  
 Osa\_LOC\_Os12g07800.1  
 Osa\_LOC\_Os12g03640.1  
 Osa\_LOC\_Os11g03880.1  
 Osa\_LOC\_Os11g03840.1  
 Osa\_LOC\_Os11g03820.1

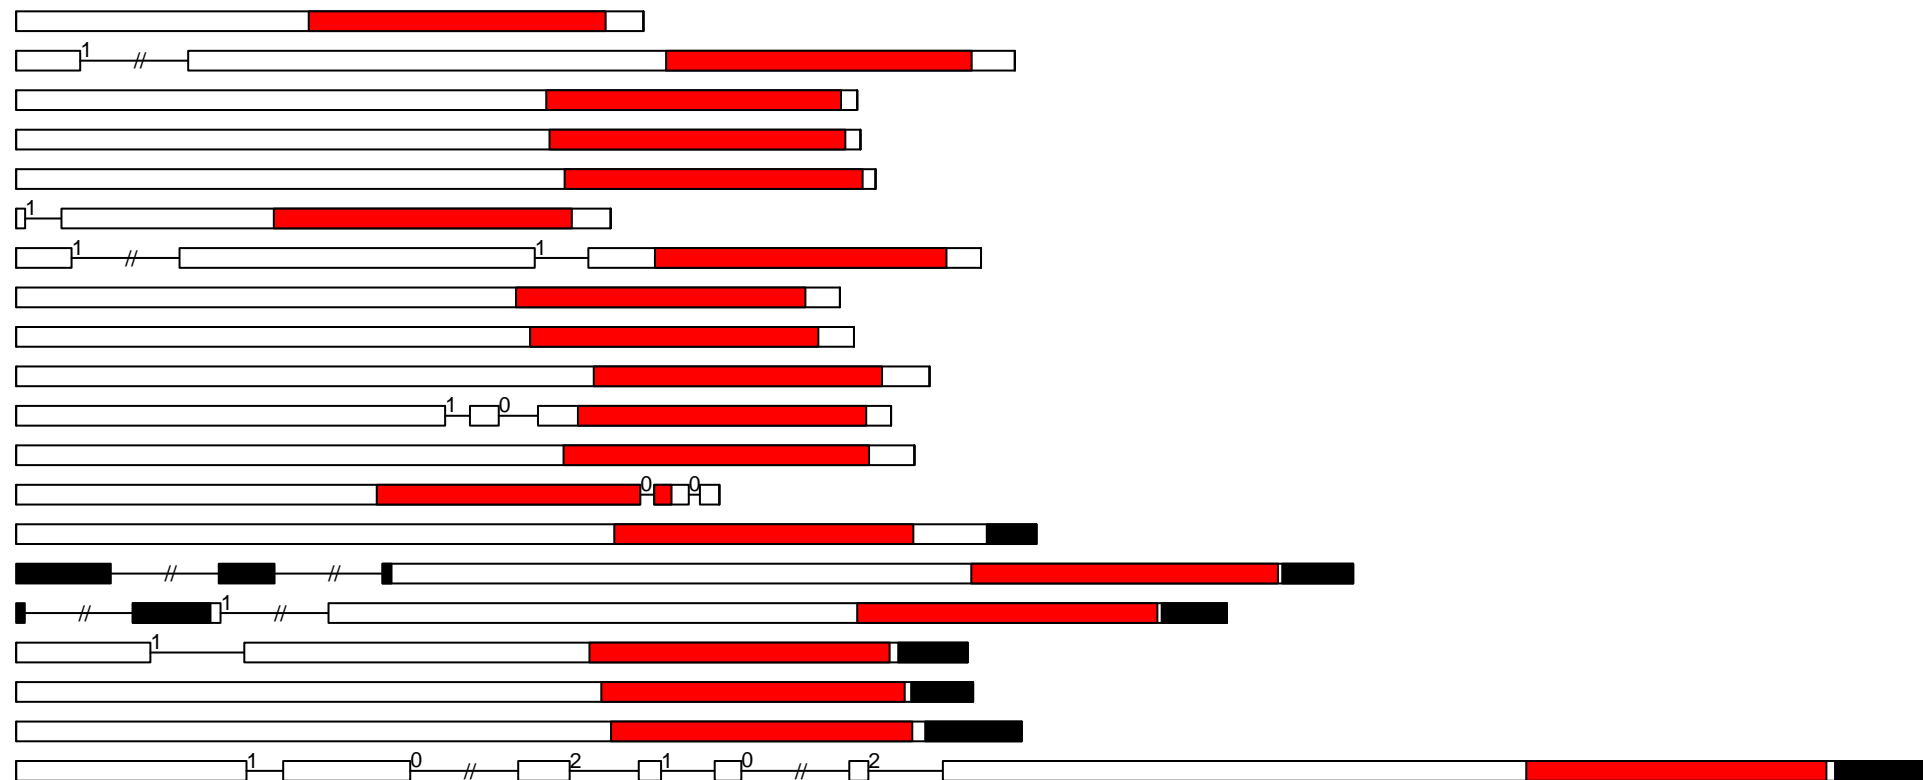



### O.sa RLK-Pelle\_SD-2b exon-intron and kinase domain diagram (part 4)

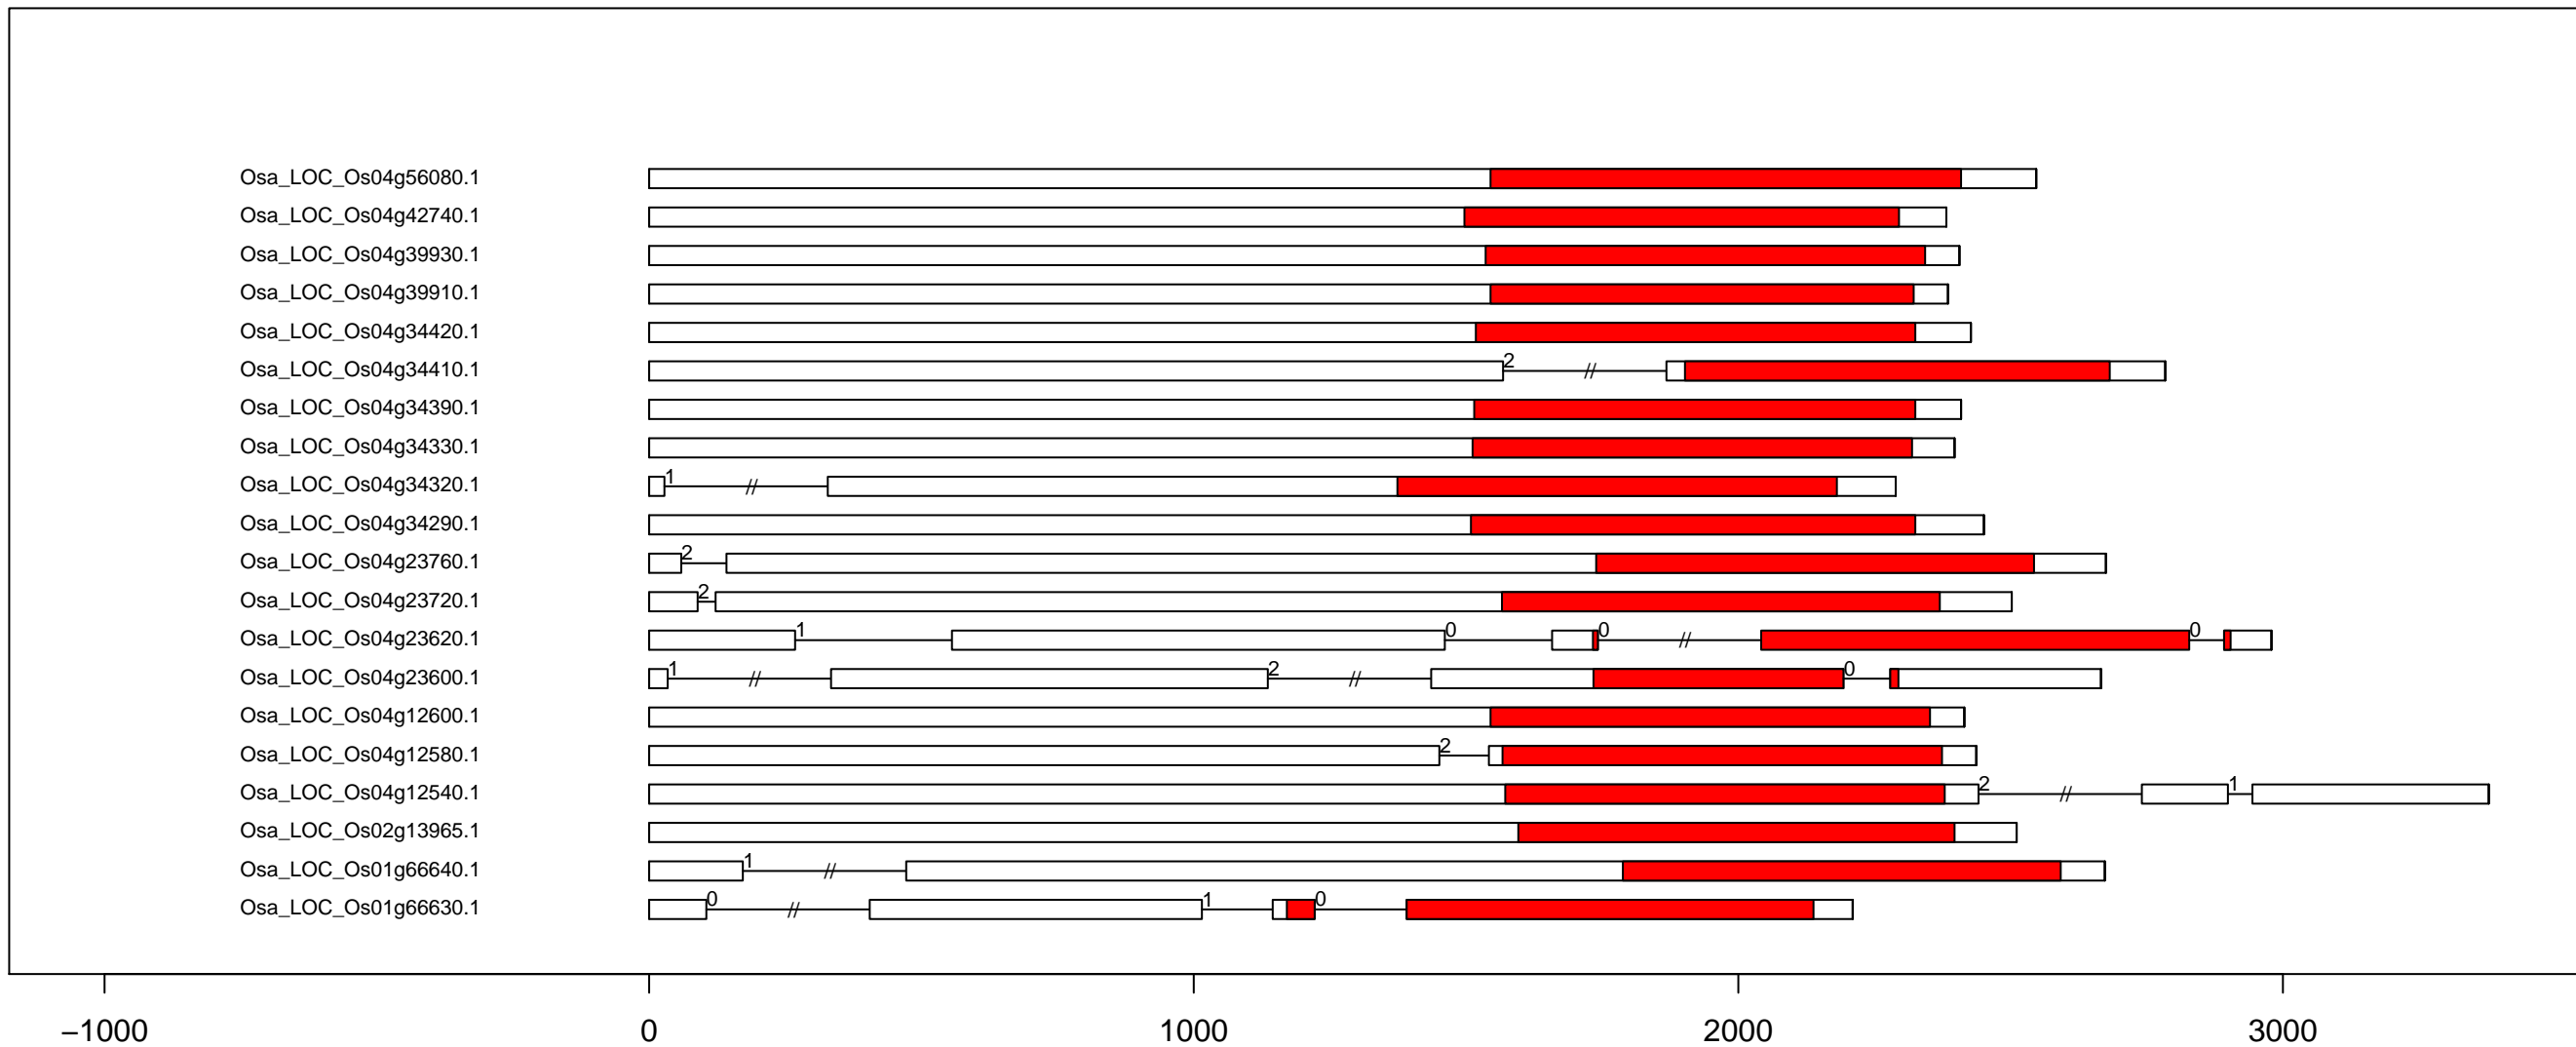



# O.sa RLK-Pelle\_URK-1 exon-intron and kinase domain diagram (all)

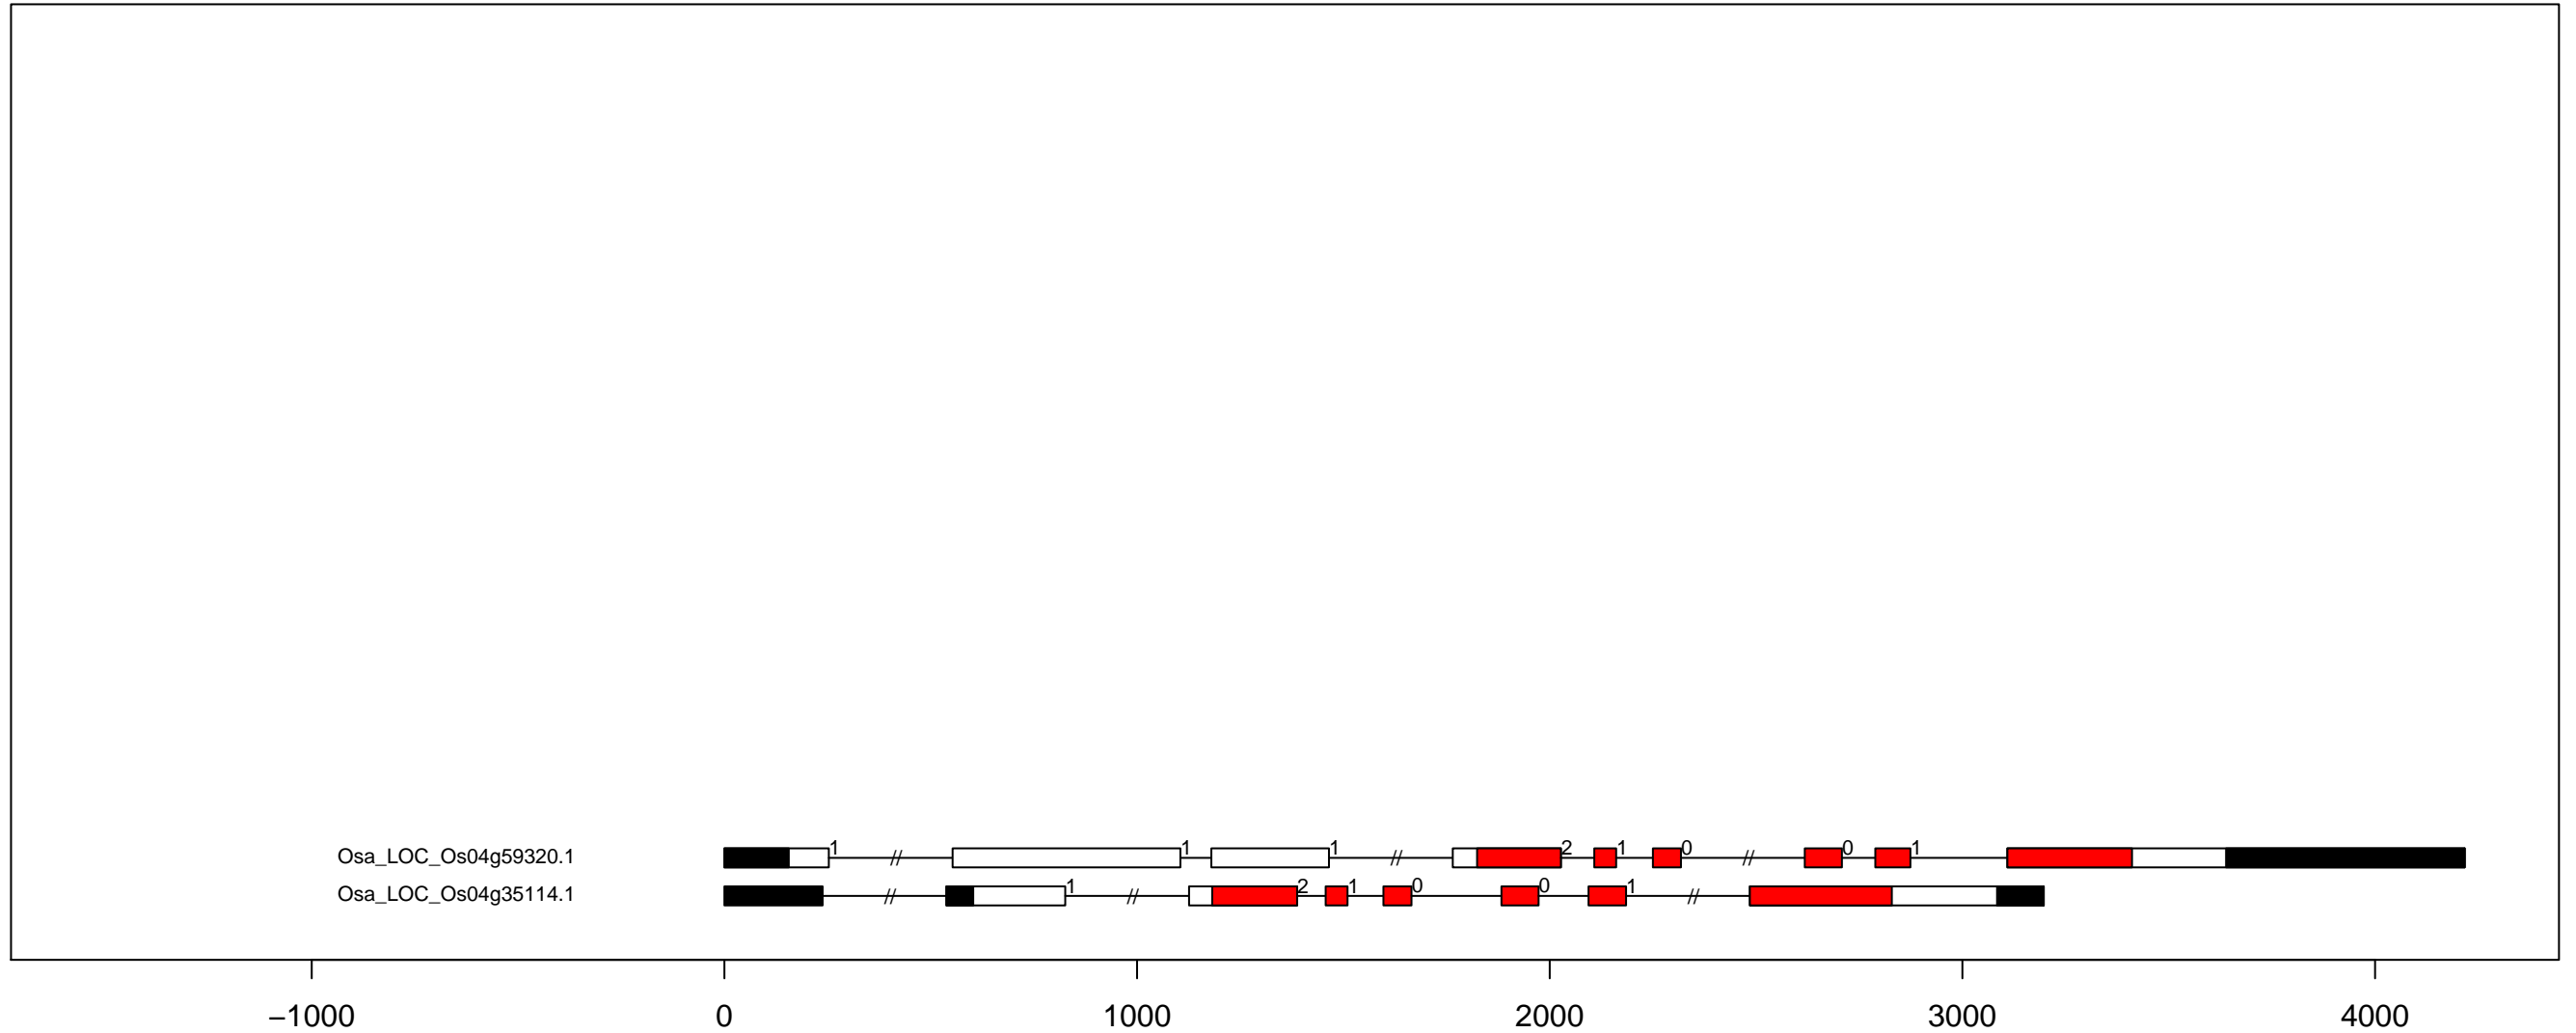

# O.sa RLK-Pelle\_URK-2 exon-intron and kinase domain diagram (all)

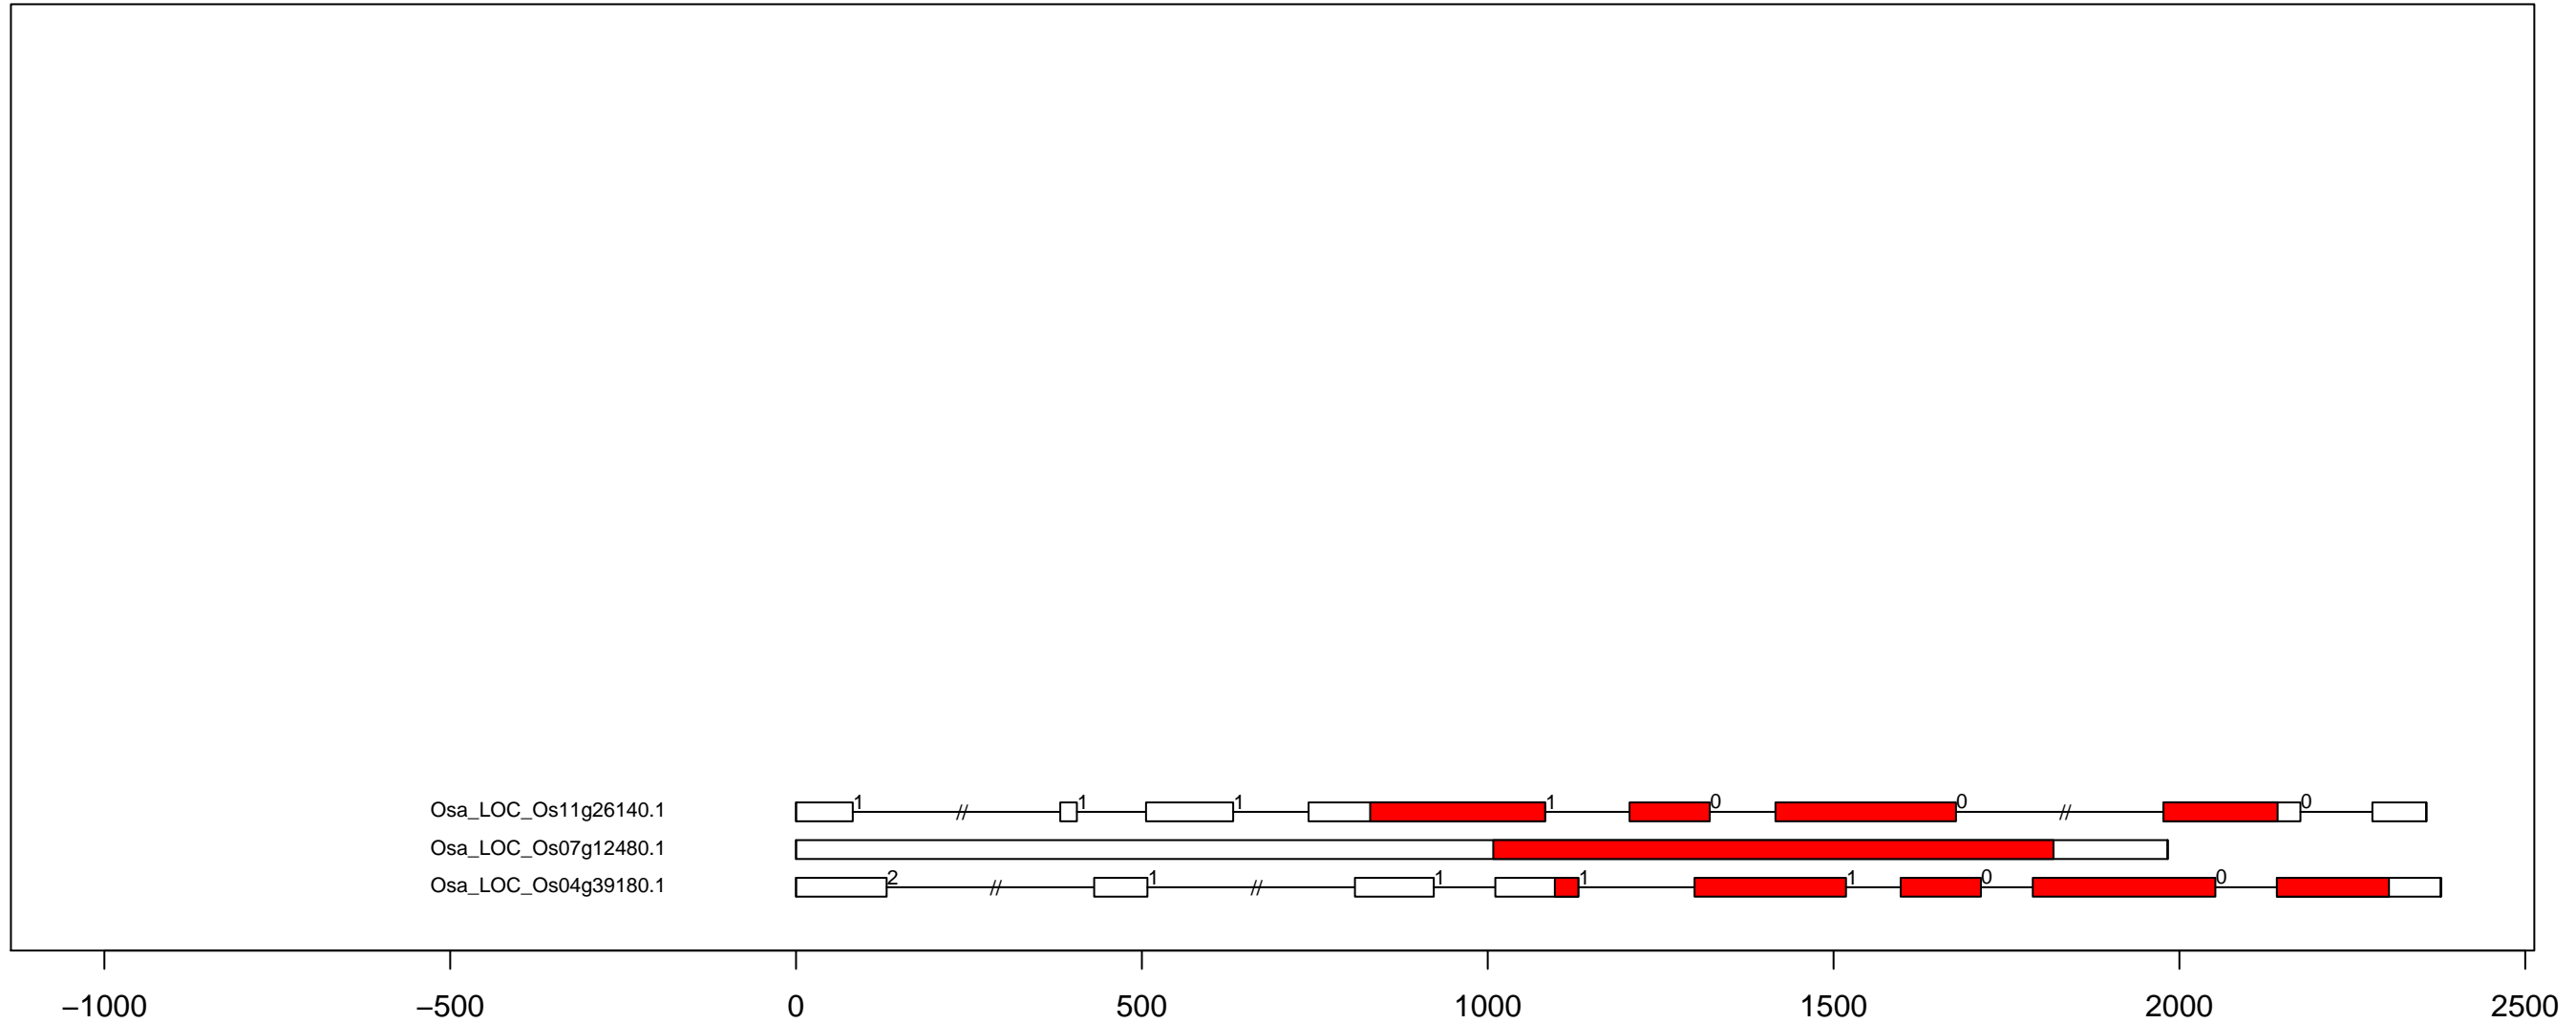

# O.sa RLK-Pelle\_URK-3 exon-intron and kinase domain diagram (all)

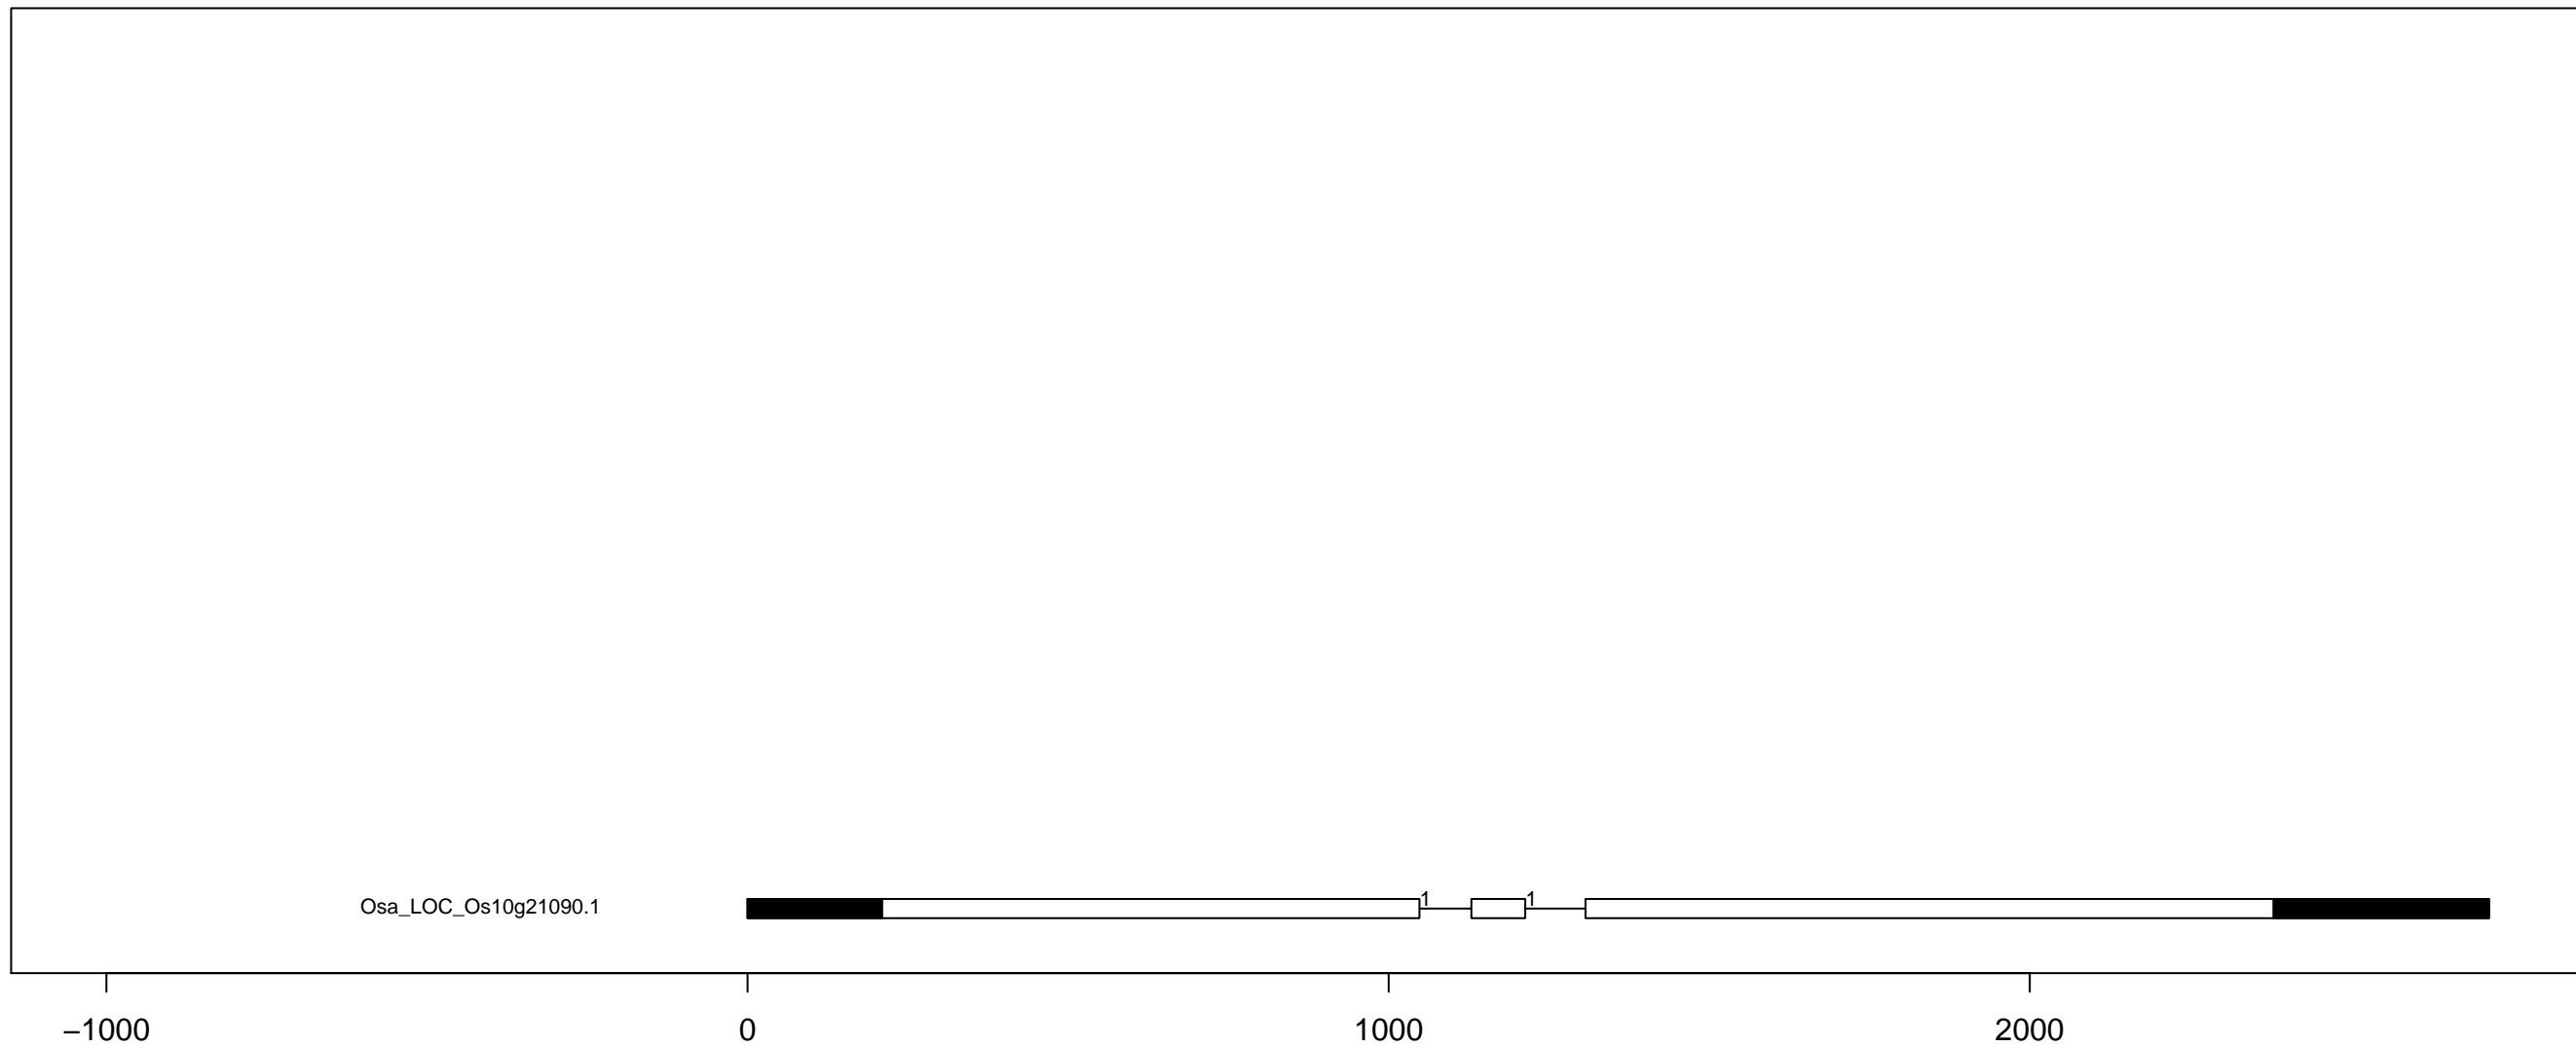

# O.sa RLK-Pelle\_WAK\_LRK10L-1 exon-intron and kinase domain diagram (all)

Osa\_LOC\_Os12g40419.1  
Osa\_LOC\_Os05g47770.1  
Osa\_LOC\_Os05g25390.1  
Osa\_LOC\_Os03g58750.1  
Osa\_LOC\_Os03g12470.1  
Osa\_LOC\_Os01g49529.1  
Osa\_LOC\_Os01g04450.1  
Osa\_LOC\_Os01g04409.1

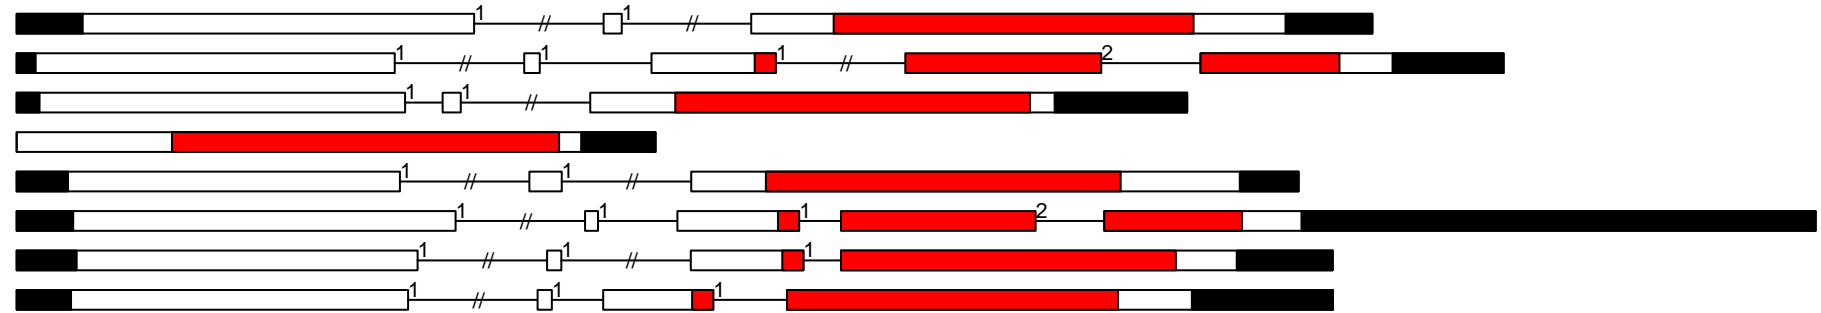

-1000

0

1000

2000

3000

4000

# O.sa RLK-Pelle\_WAK exon-intron and kinase domain diagram (part 1)

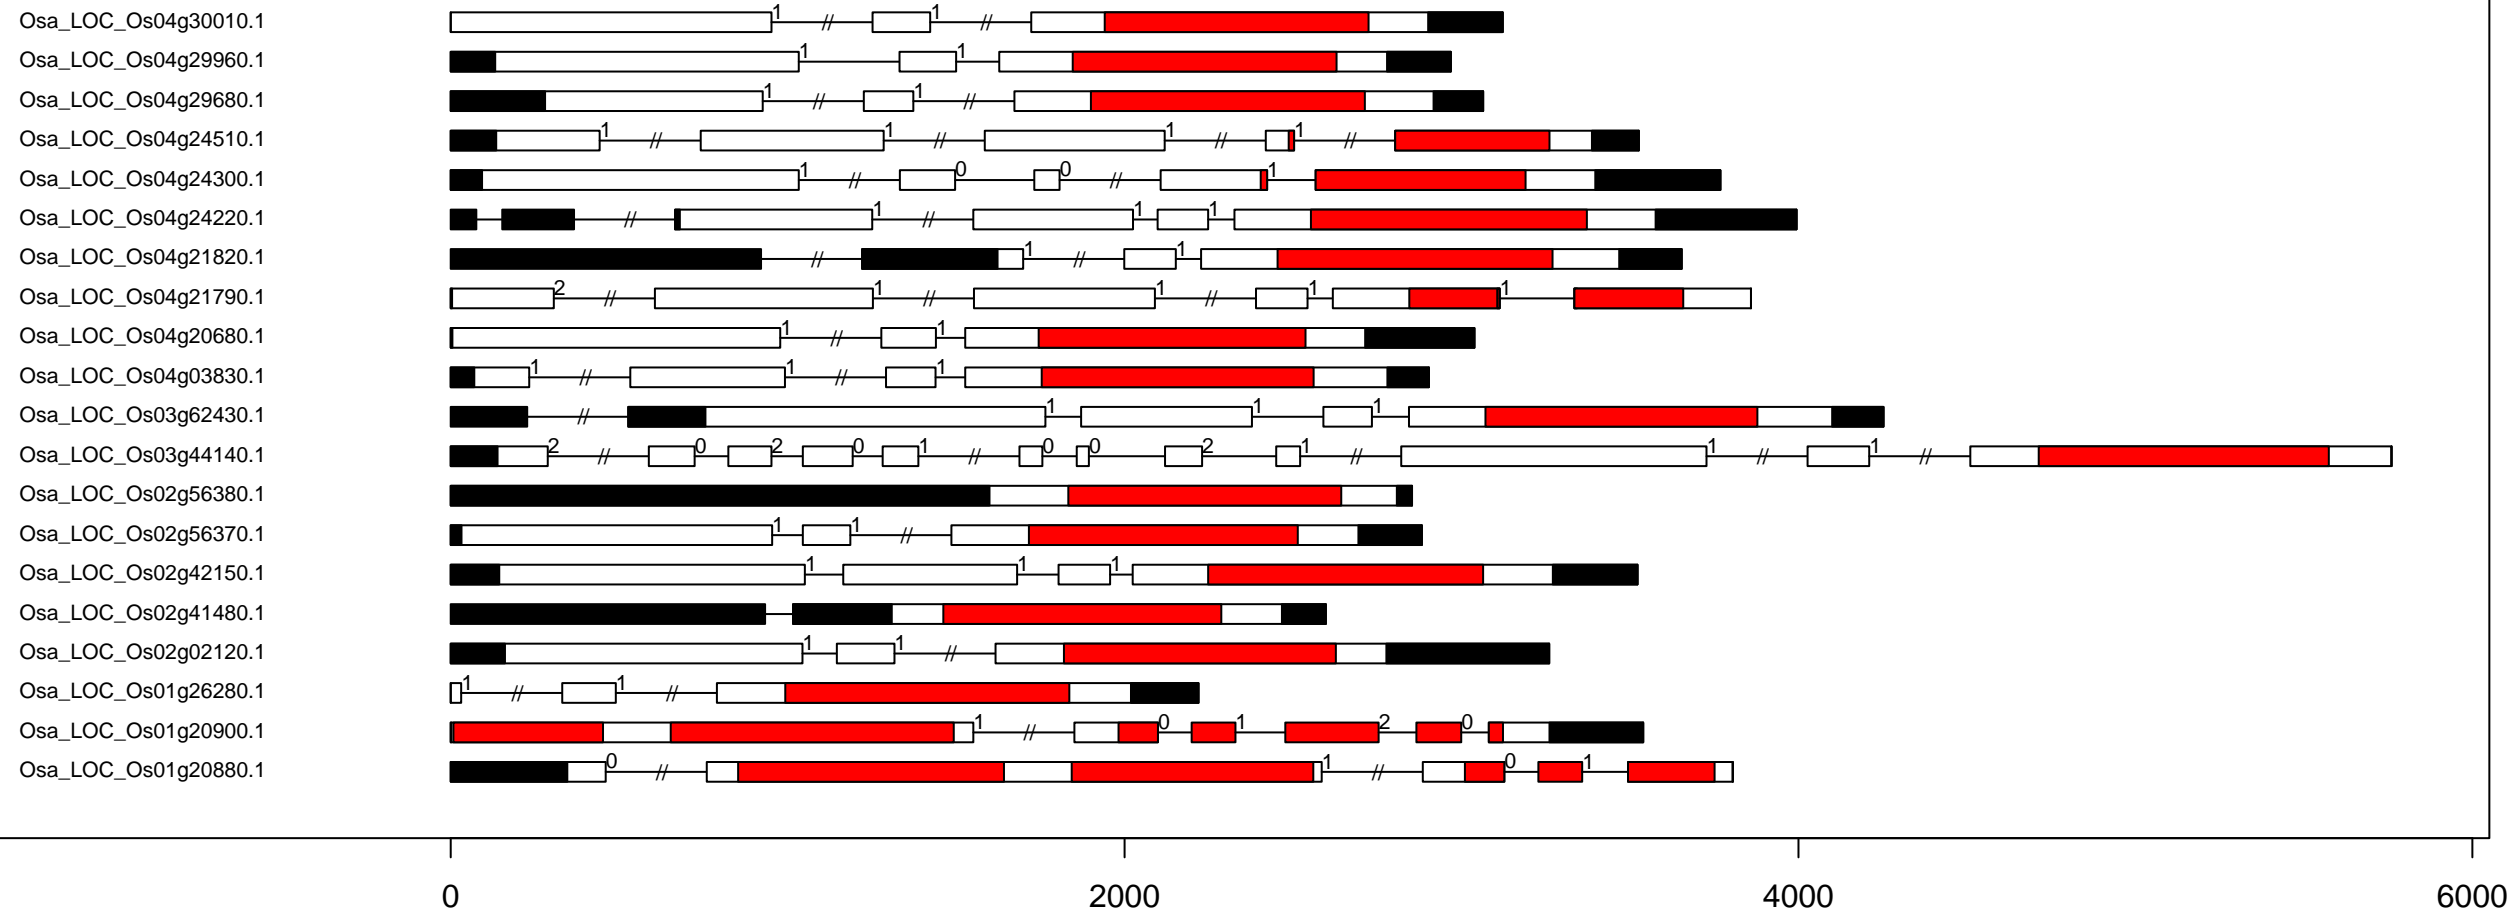

### O.sa RLK-Pelle\_WAK exon-intron and kinase domain diagram (part 2)

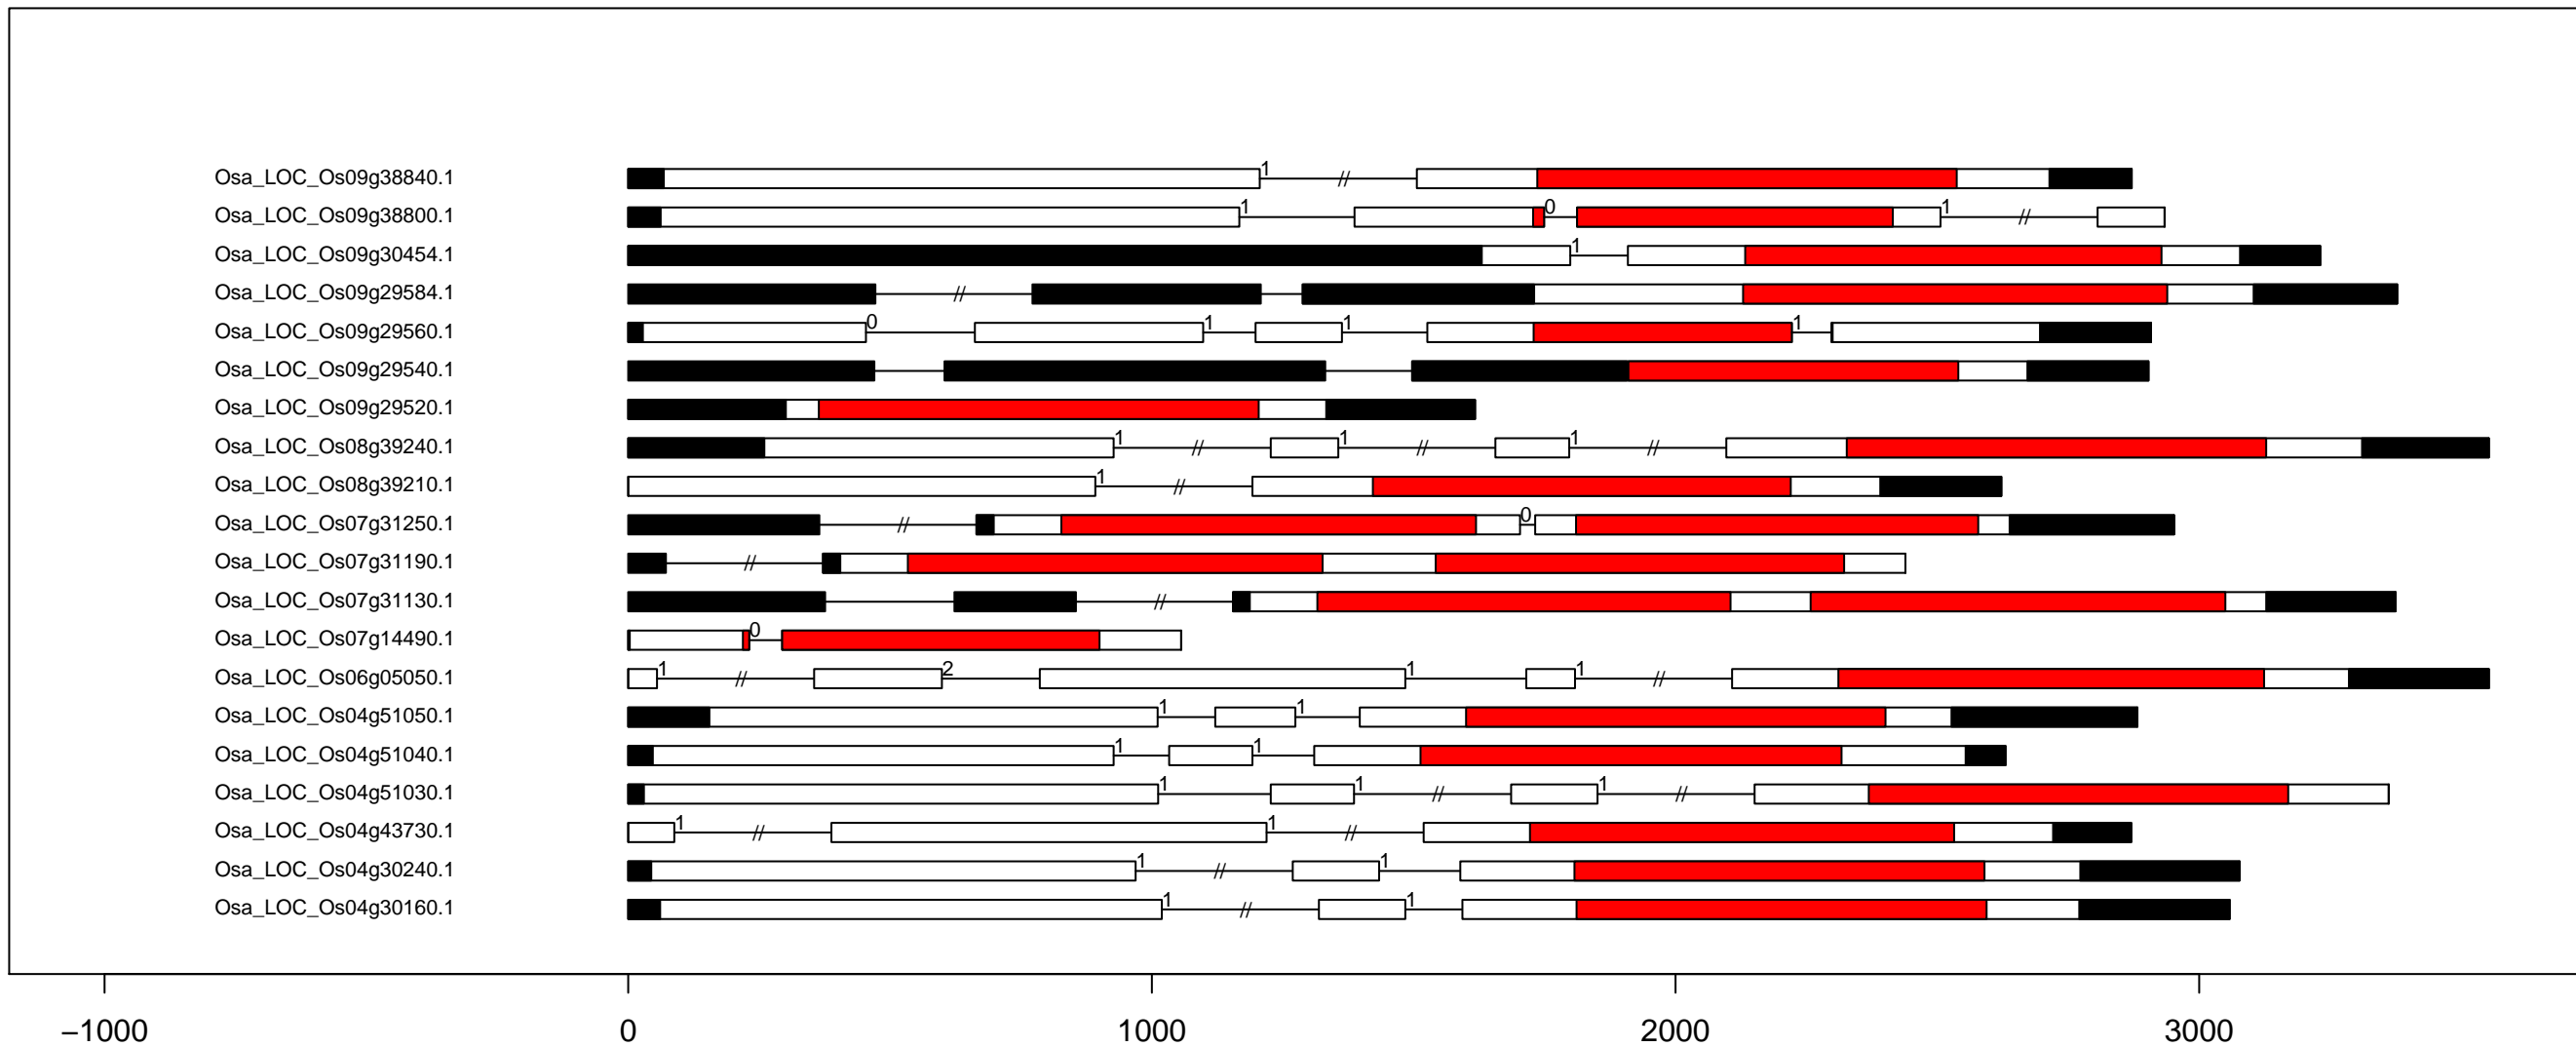



### O.sa RLK-Pelle\_WAK exon-intron and kinase domain diagram (part 3)

Osa\_LOC\_Os01g26300.1  
 Osa\_LOC\_Os01g26210.1  
 Osa\_LOC\_Os01g26174.1  
 Osa\_LOC\_Os12g42070.1  
 Osa\_LOC\_Os12g42060.1  
 Osa\_LOC\_Os12g16520.1  
 Osa\_LOC\_Os11g47140.1  
 Osa\_LOC\_Os11g46950.1  
 Osa\_LOC\_Os11g46860.1  
 Osa\_LOC\_Os11g35274.1  
 Osa\_LOC\_Os11g35220.1  
 Osa\_LOC\_Os10g10130.1  
 Osa\_LOC\_Os10g10030.1  
 Osa\_LOC\_Os10g07556.1  
 Osa\_LOC\_Os10g06140.1  
 Osa\_LOC\_Os10g05250.1  
 Osa\_LOC\_Os10g02720.1  
 Osa\_LOC\_Os10g02360.1  
 Osa\_LOC\_Os09g38910.1  
 Osa\_LOC\_Os09g38850.1

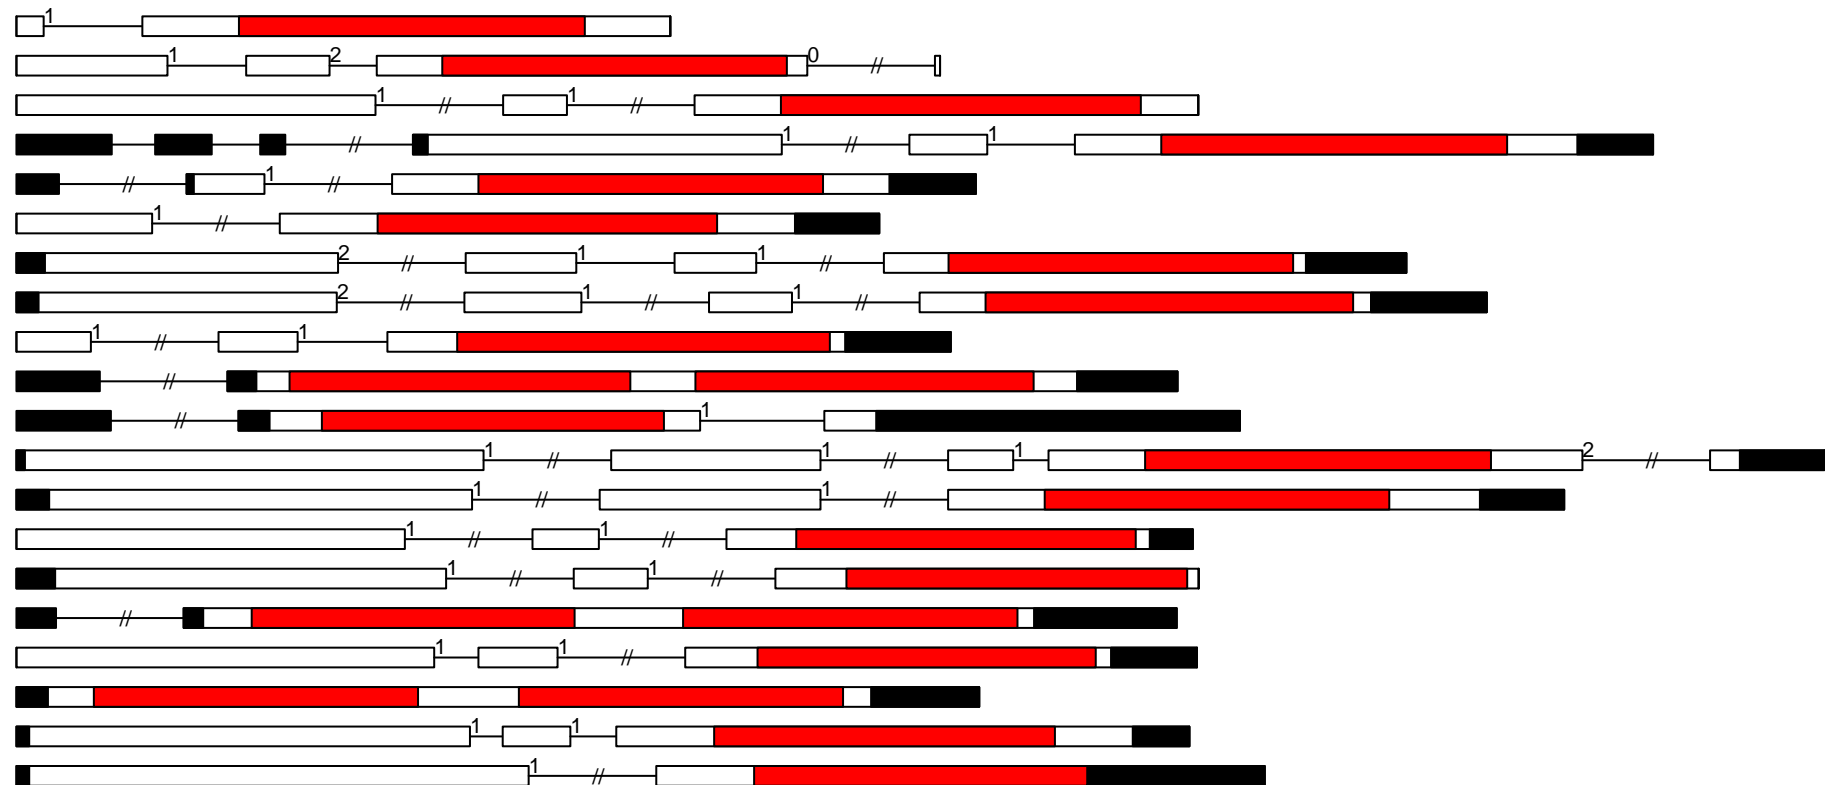

-1000

0

1000

2000

3000

4000

### O.sa RLK-Pelle\_WAK exon-intron and kinase domain diagram (part 4)

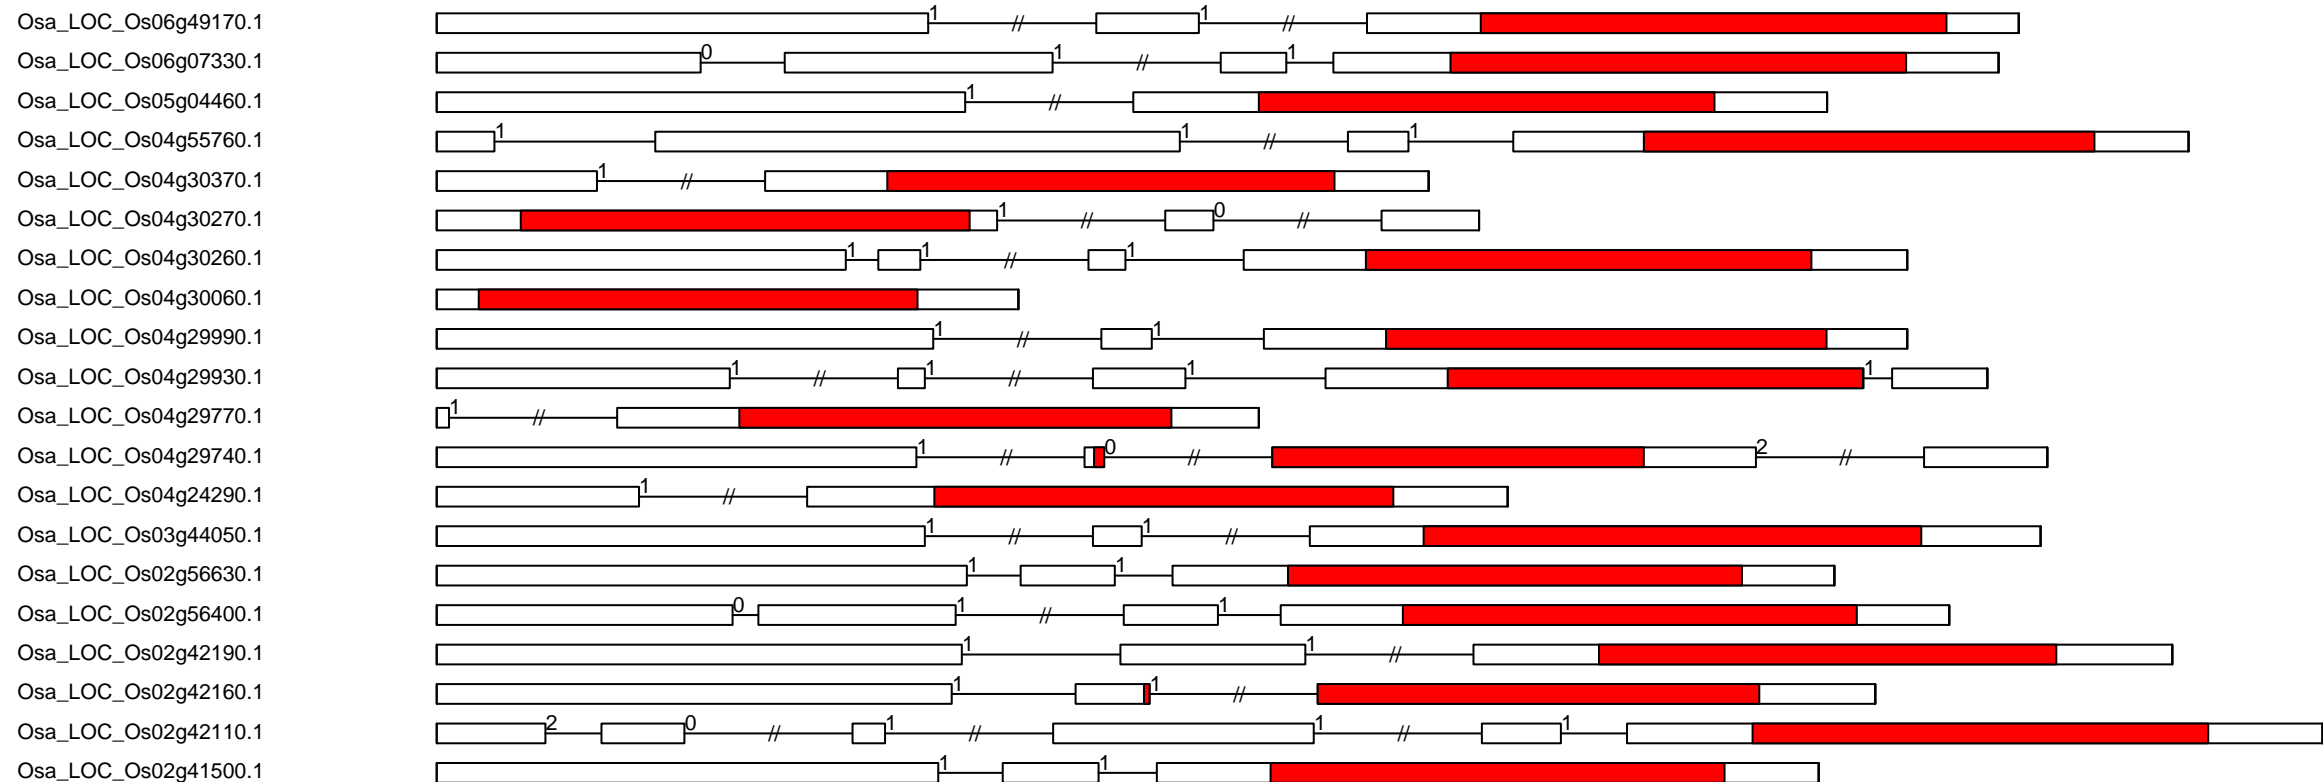

-1000

0

1000

2000

3000

# O.sa RLK-Pelle\_WAK exon-intron and kinase domain diagram (part 5)

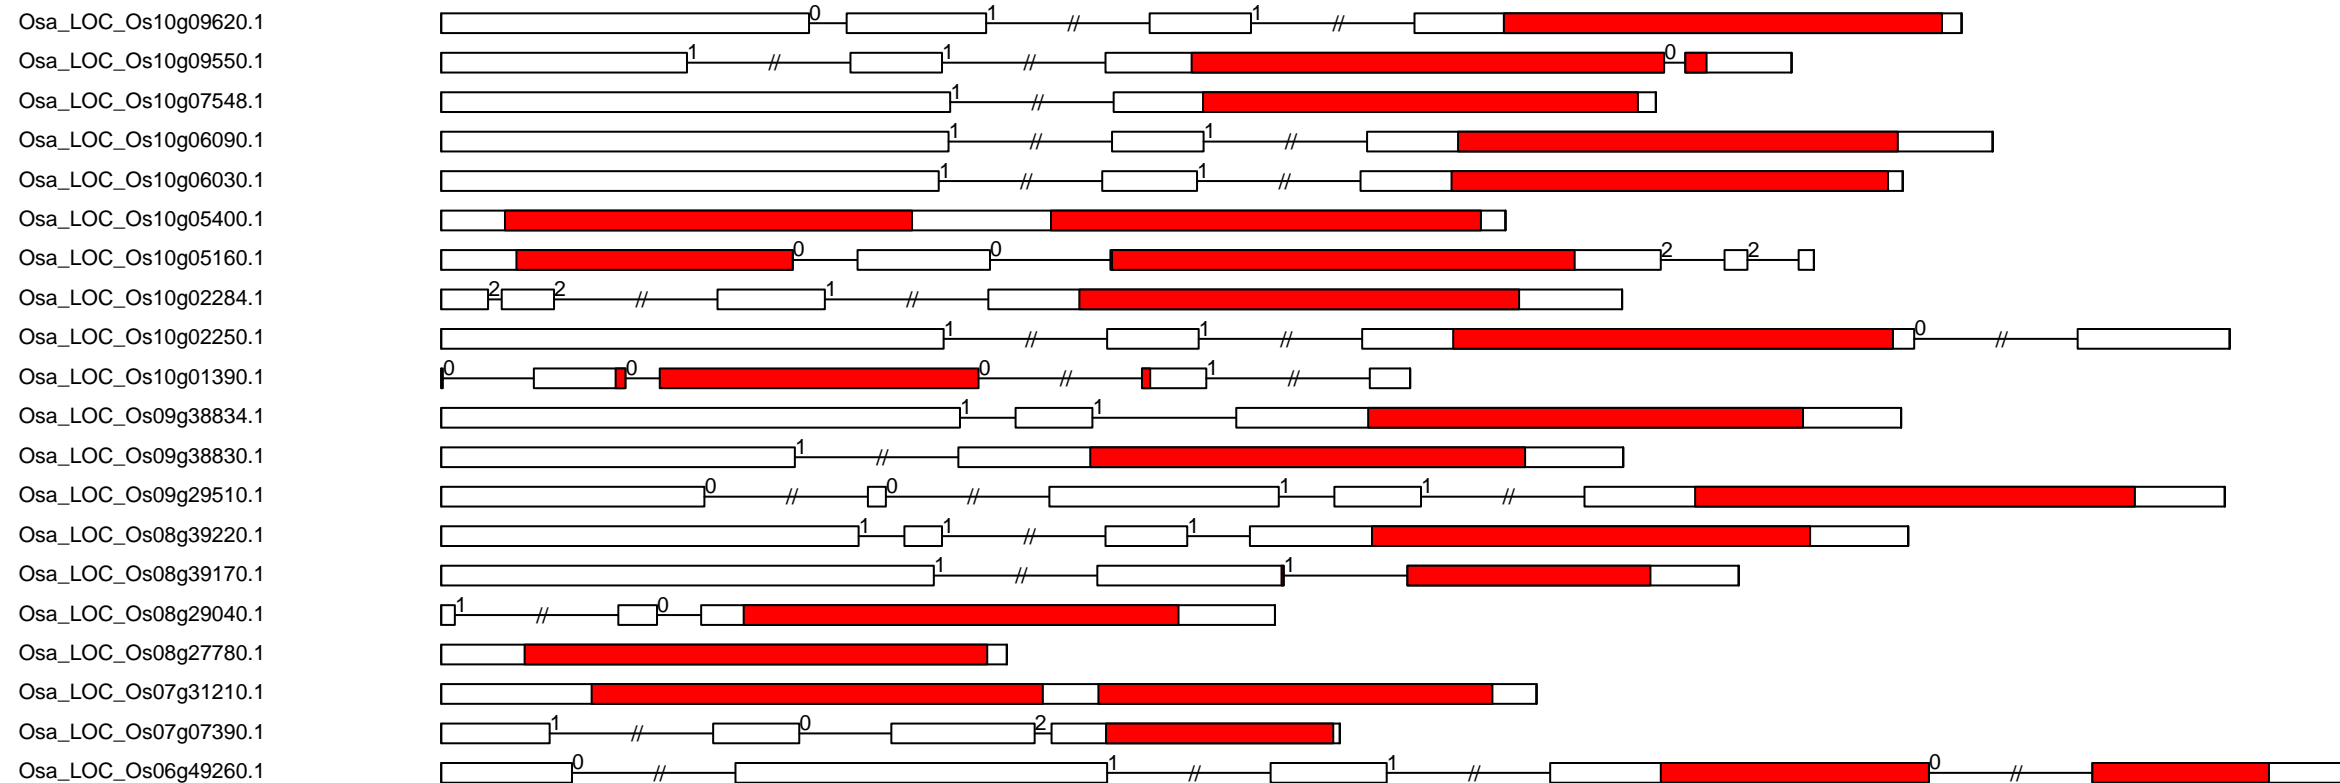

-1000

0

1000

2000

3000

# O.sa RLK-Pelle\_WAK exon-intron and kinase domain diagram (part 6)

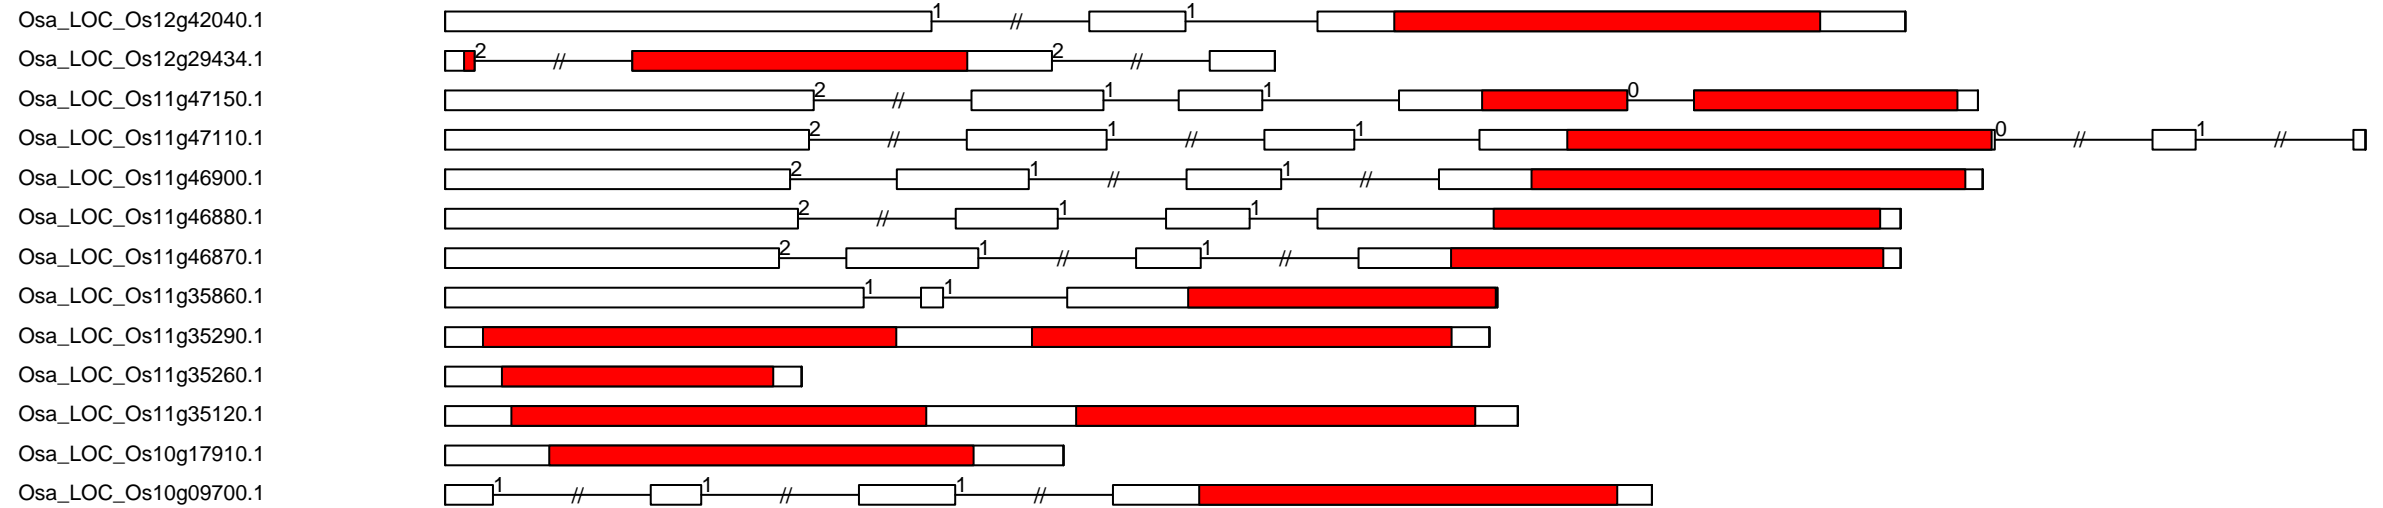

-1000

0

1000

2000

3000

# O.sa SCY1\_SCYL1 exon-intron and kinase domain diagram (all)

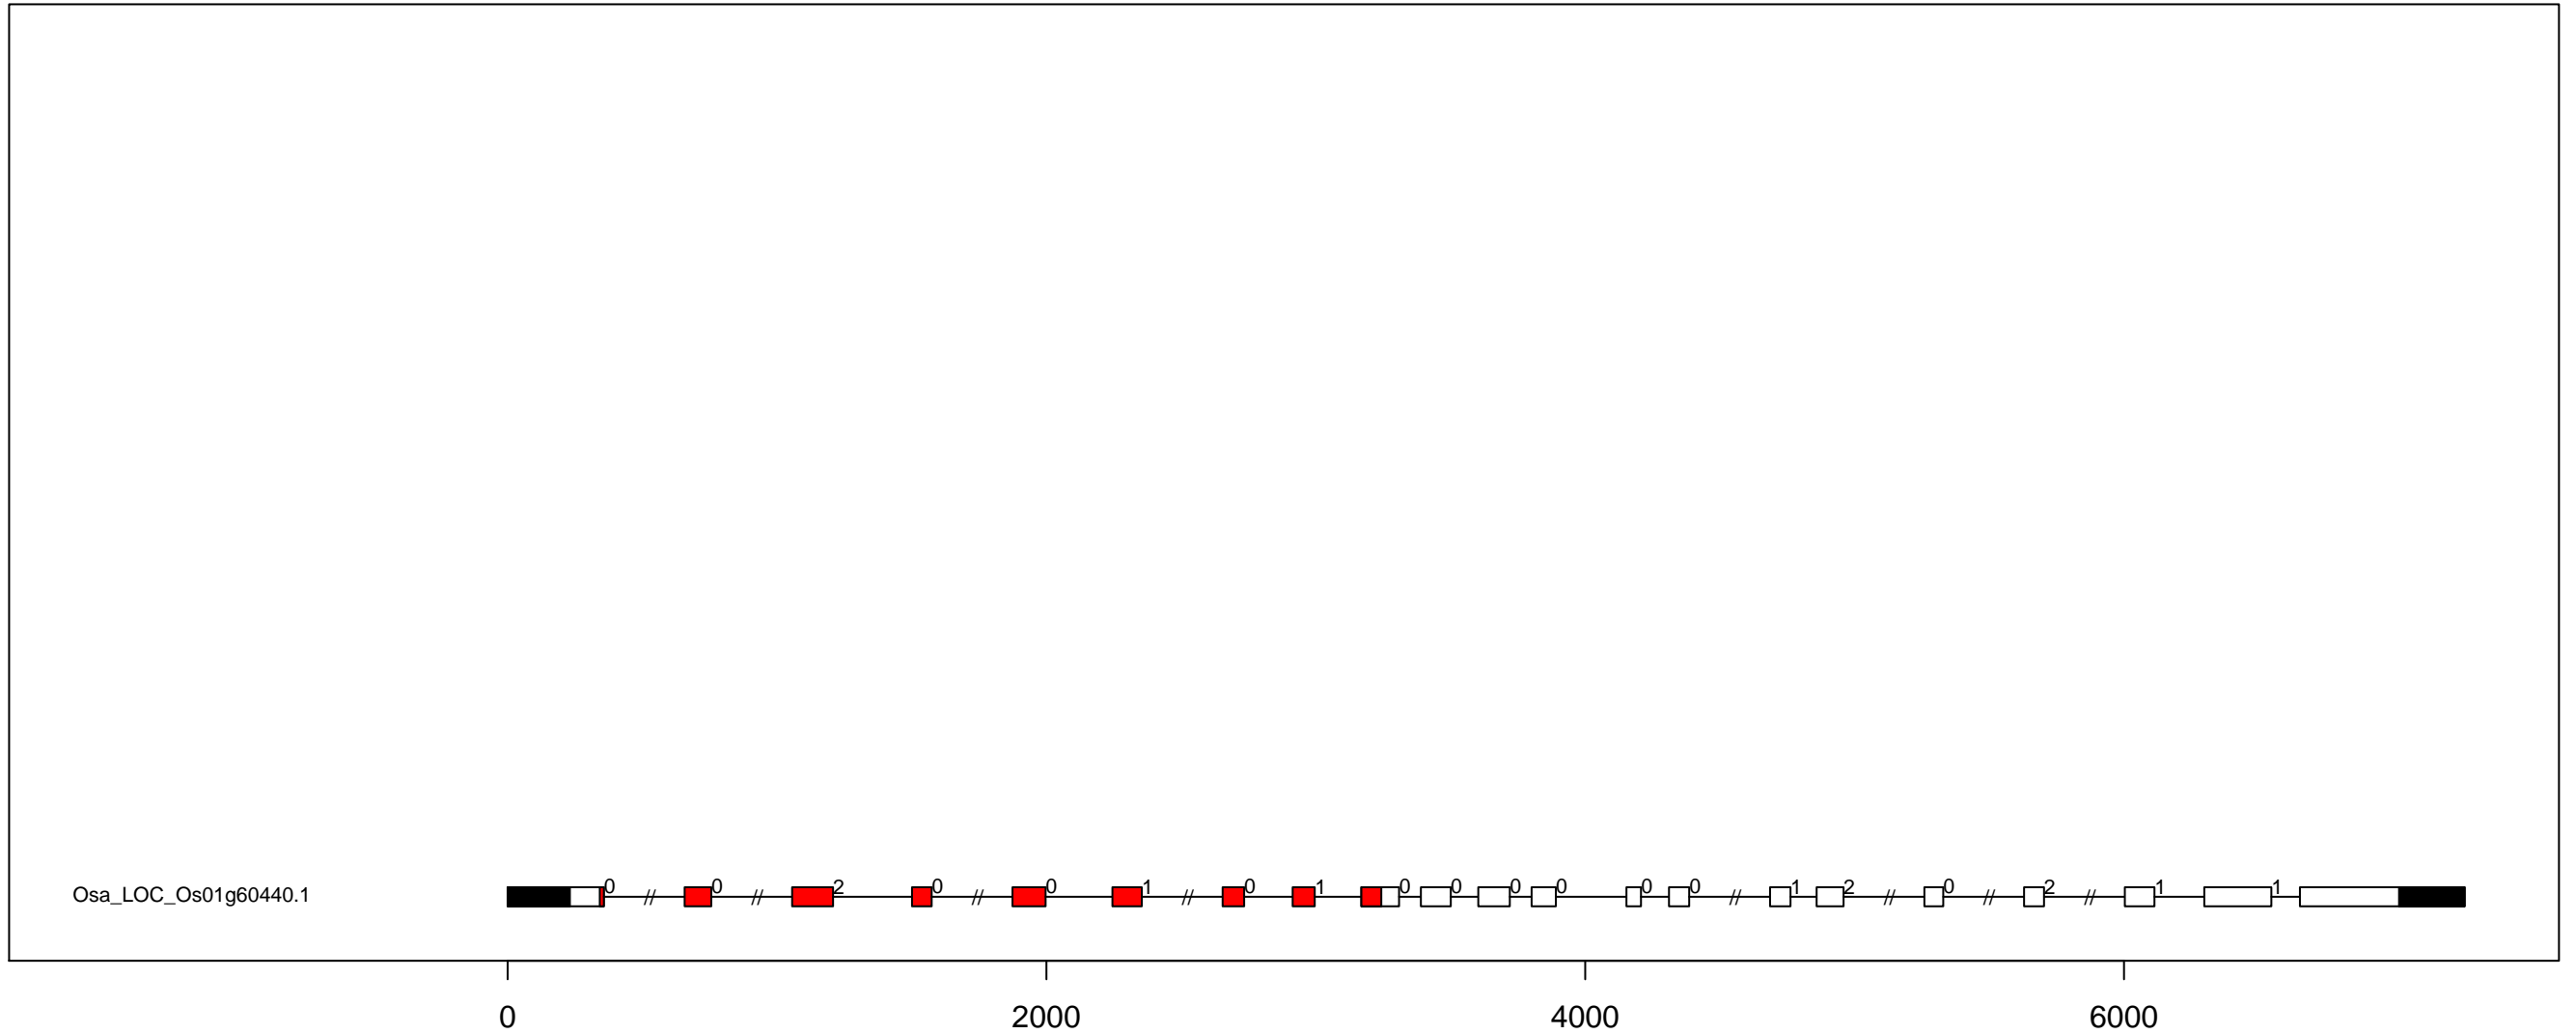

# O.sa SCY1\_SCYL2 exon-intron and kinase domain diagram (all)

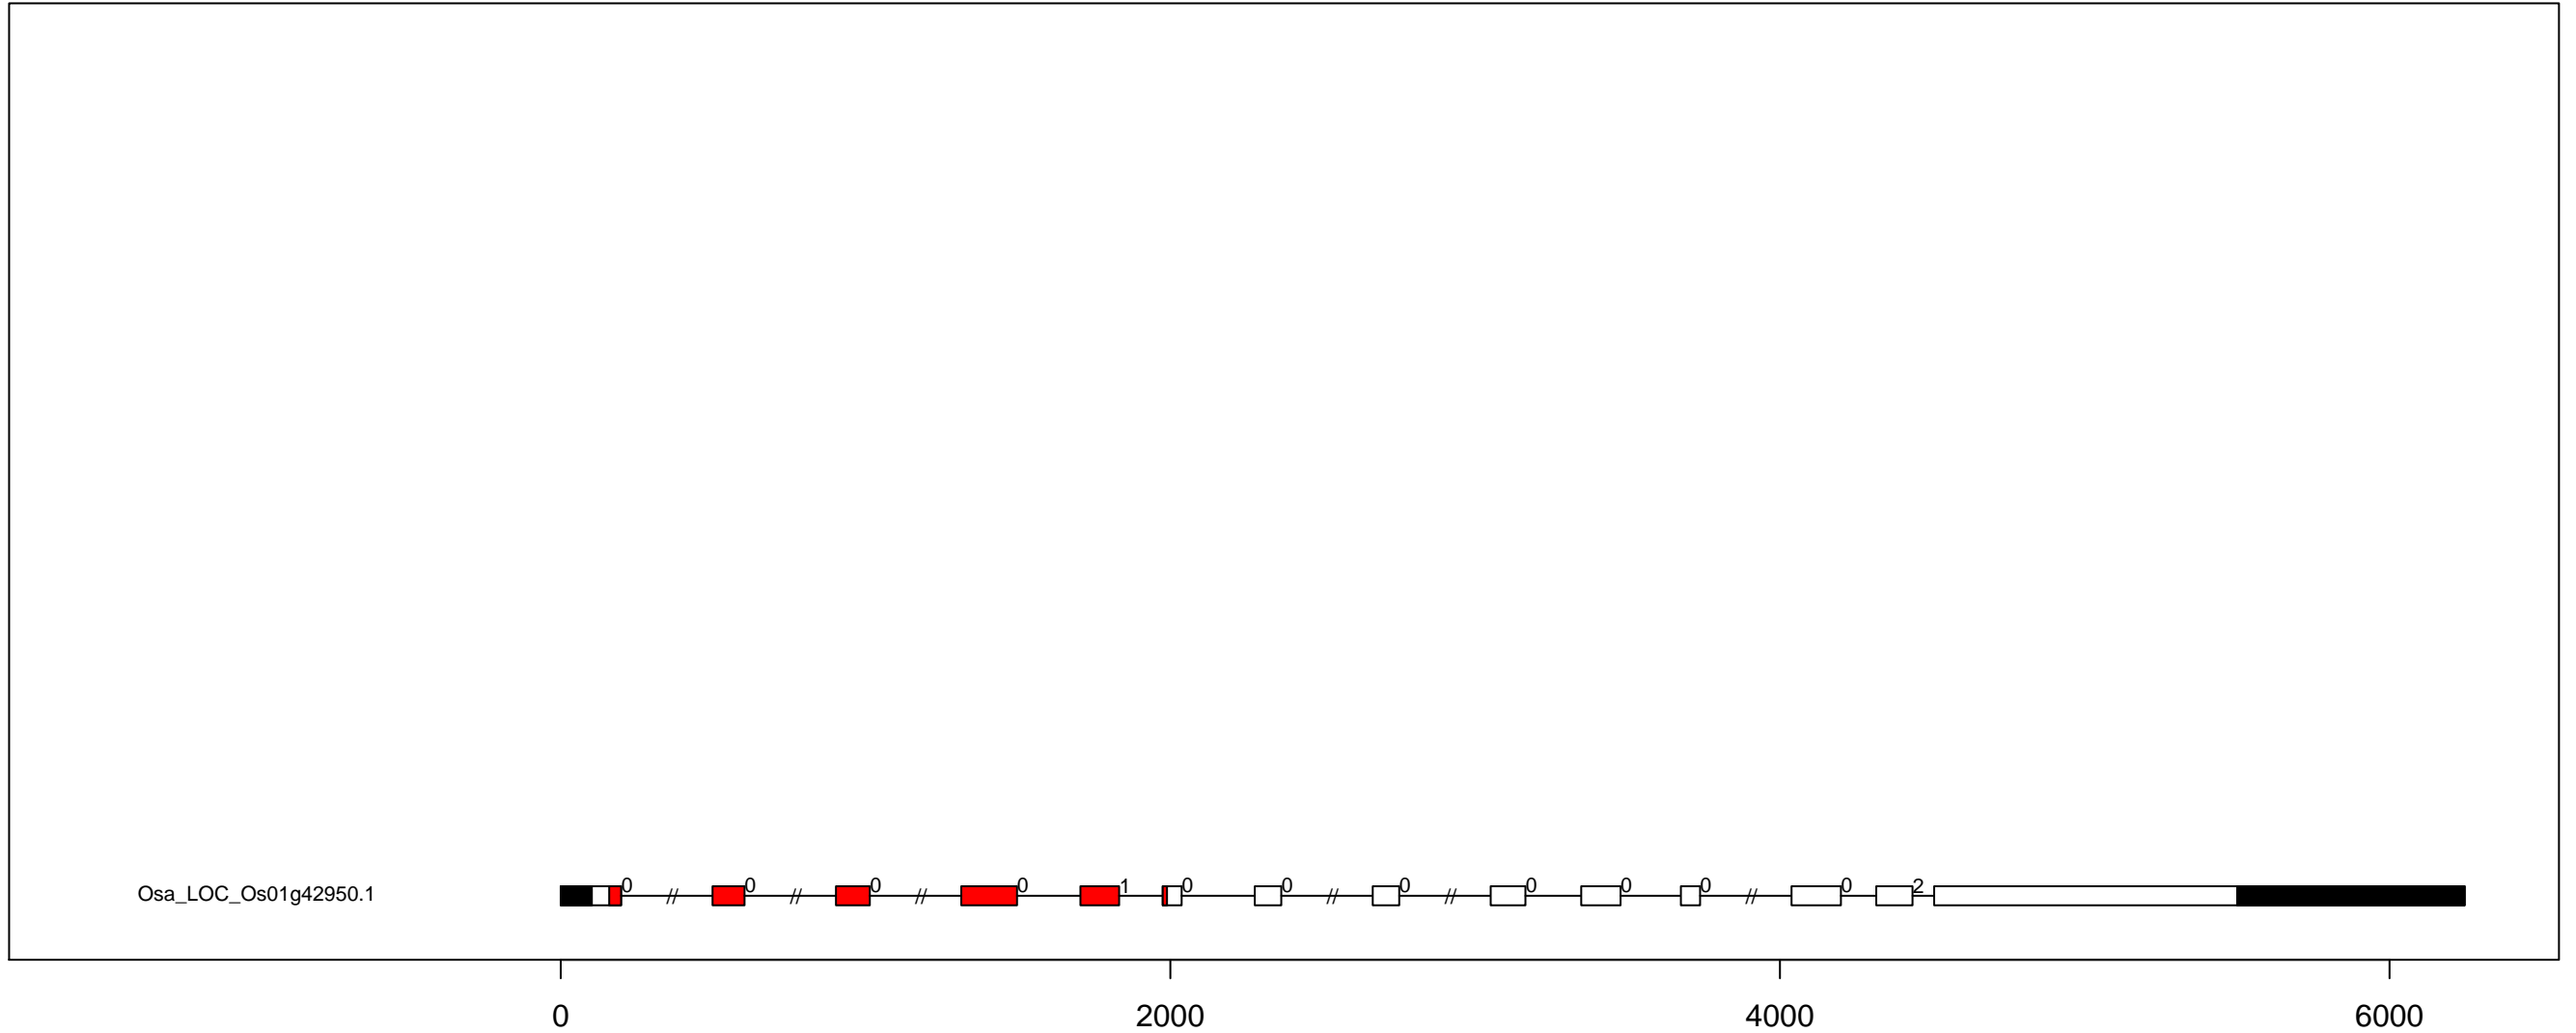

# O.sa STE\_STE11 exon-intron and kinase domain diagram (part 1)

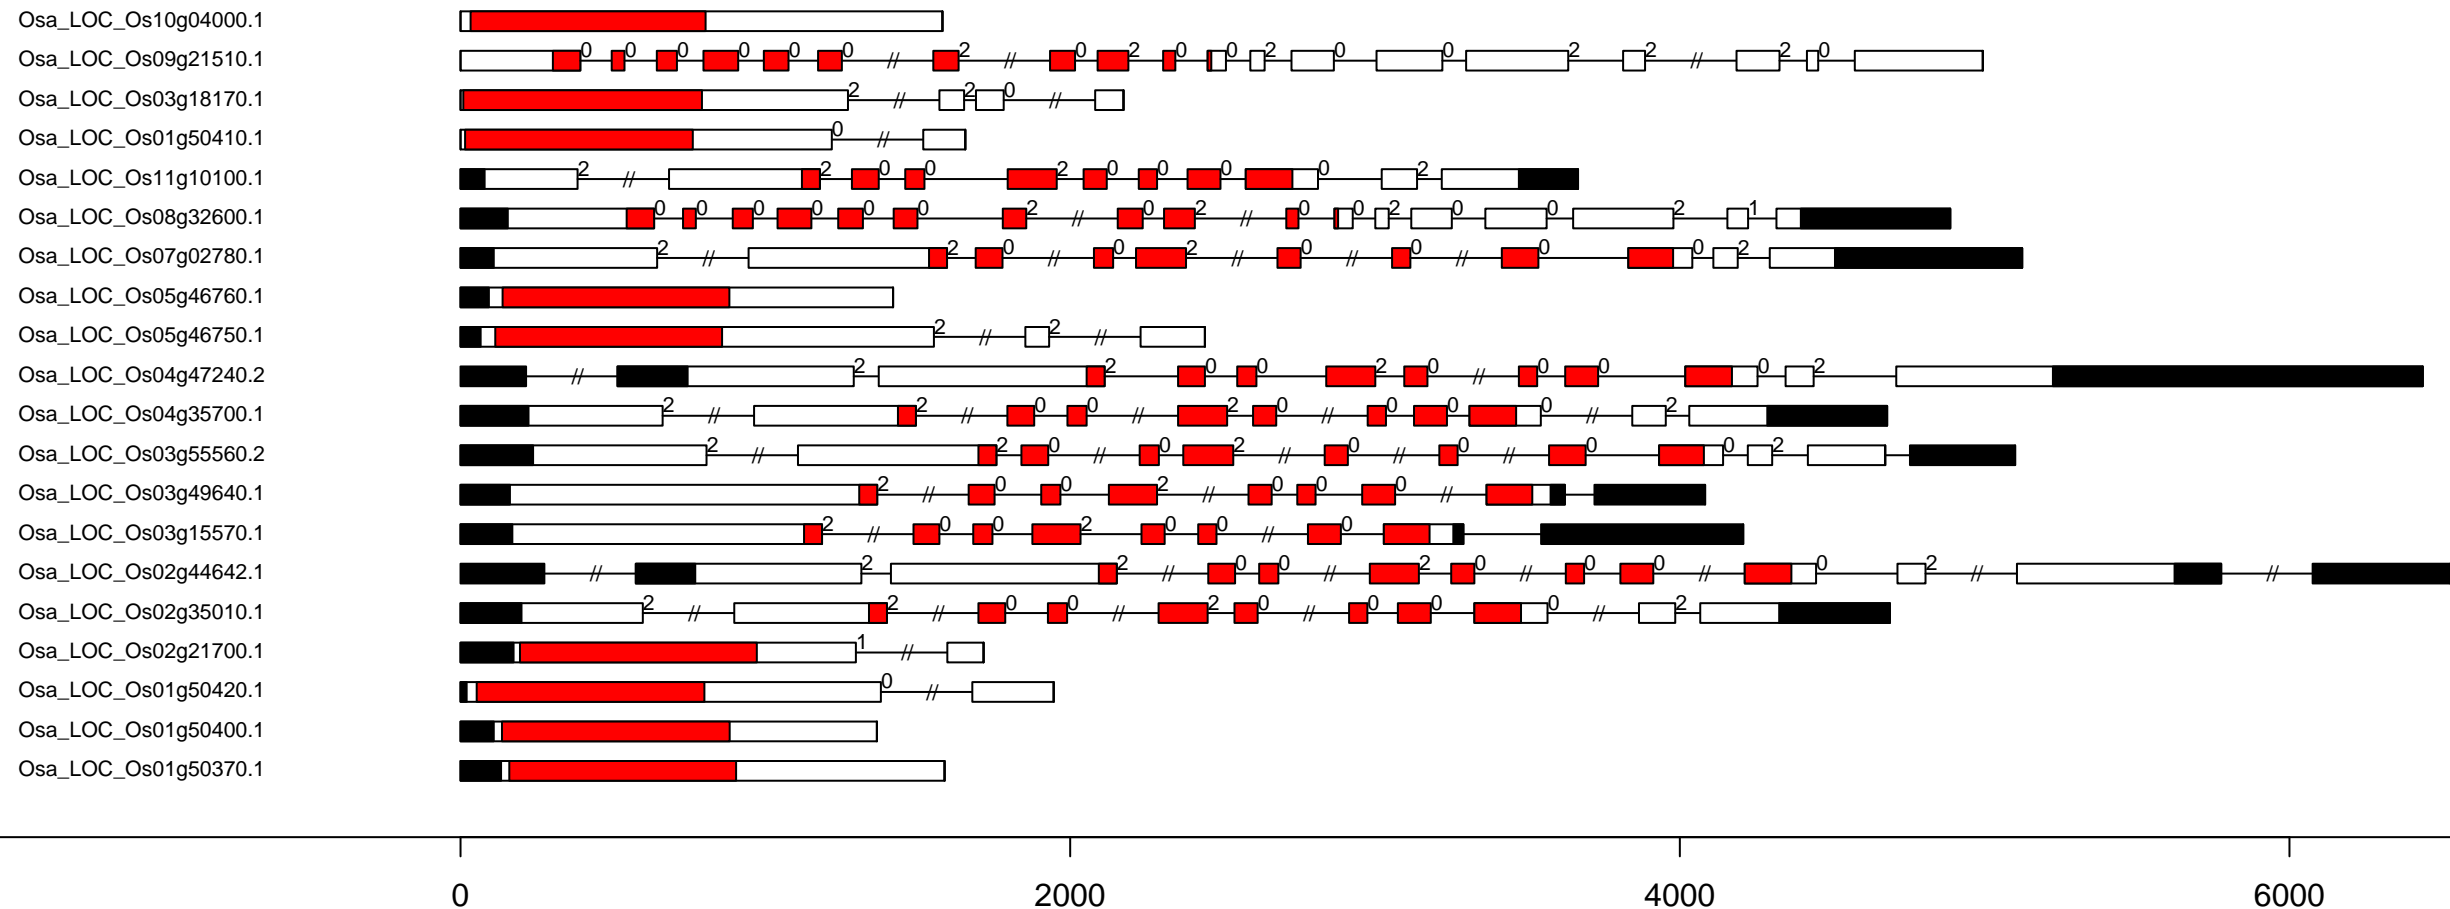

# O.sa STE\_STE11 exon-intron and kinase domain diagram (part 2)

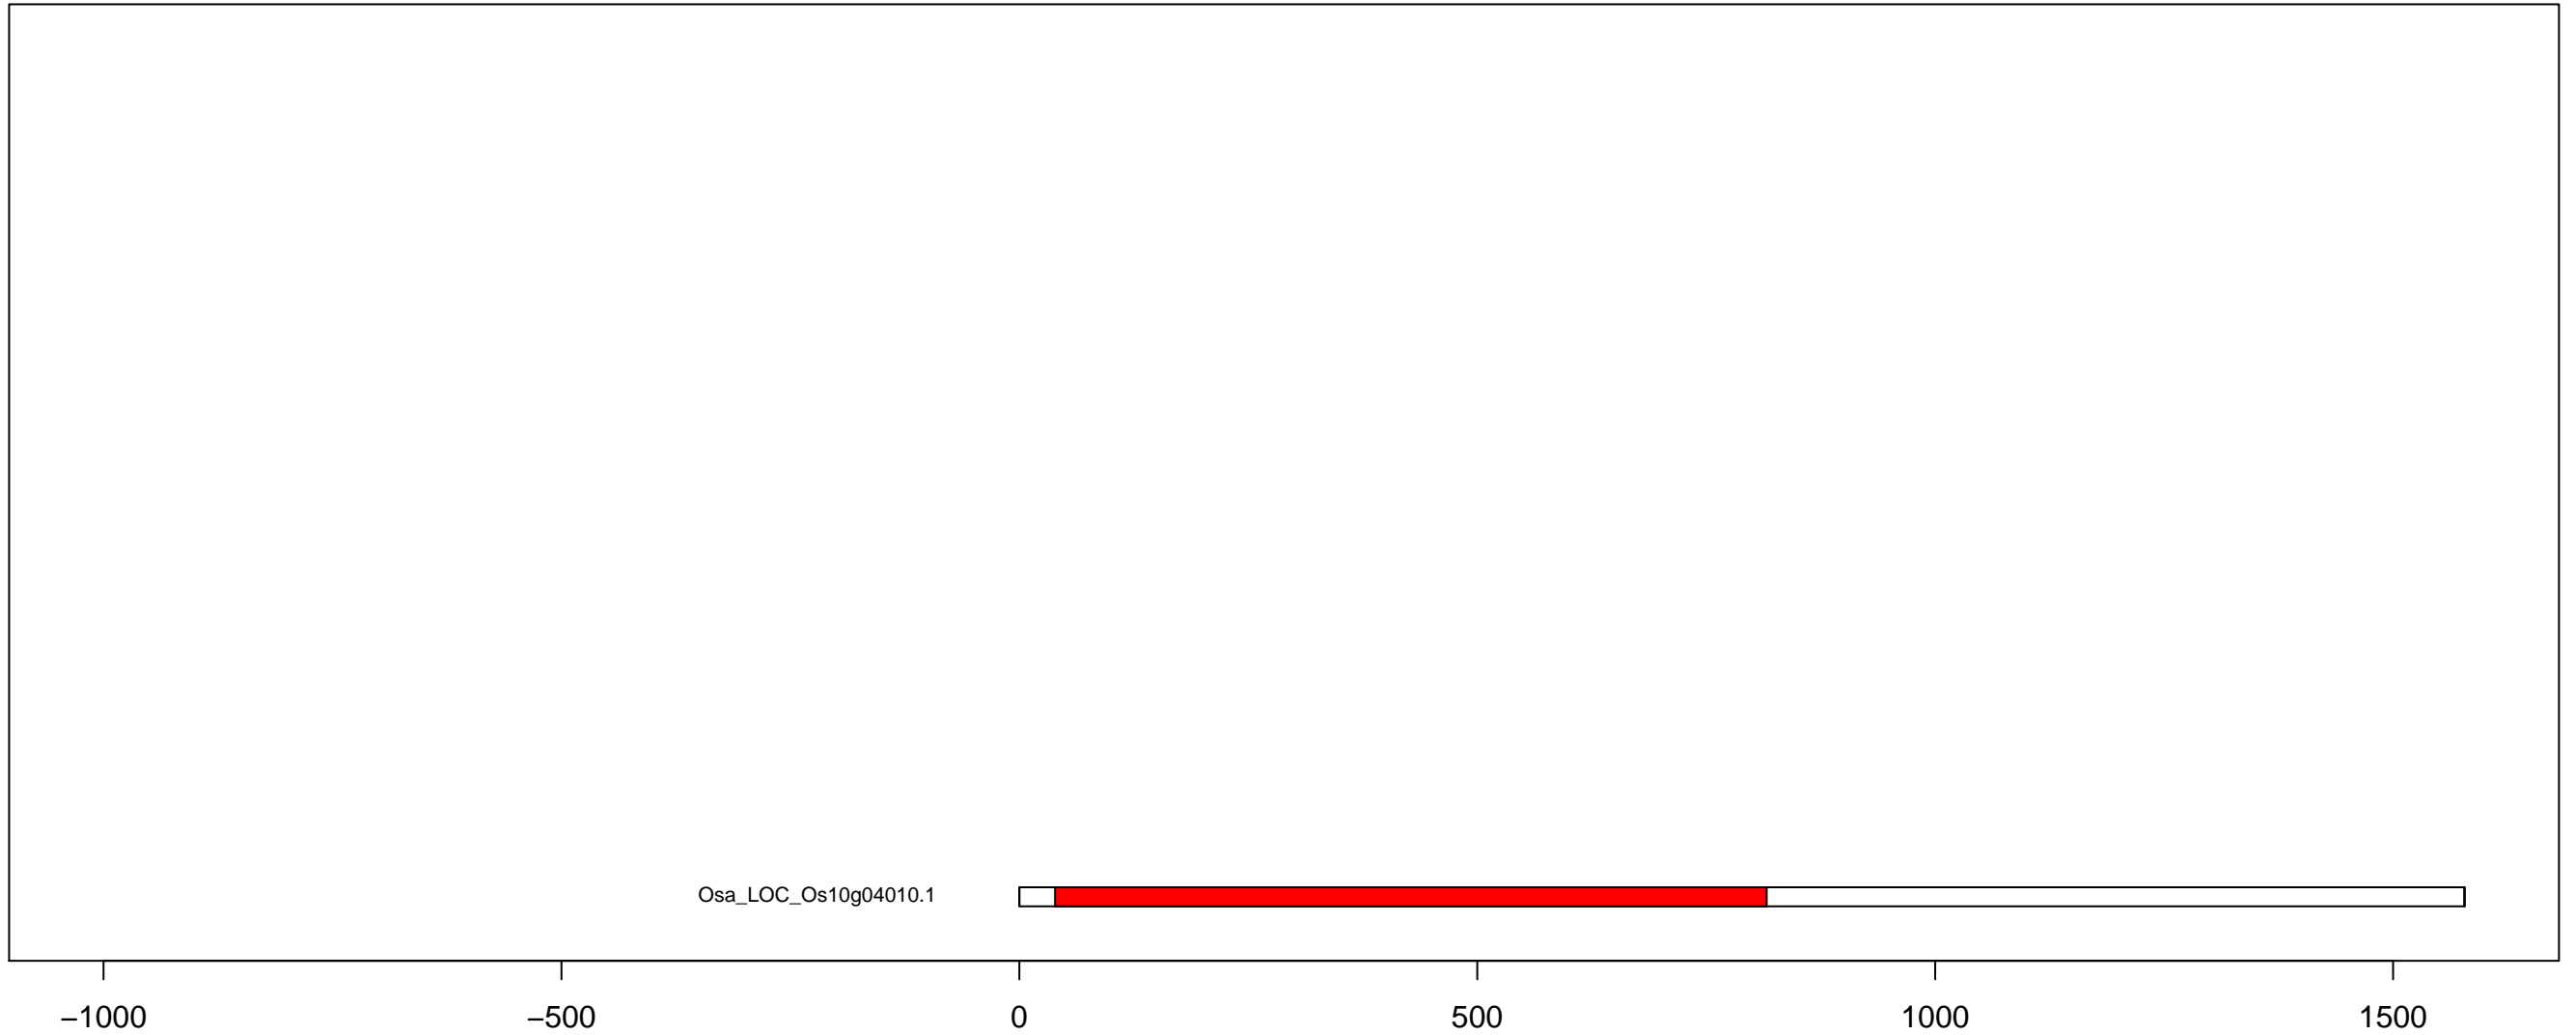



# O.sa STE\_STE20-Fray exon-intron and kinase domain diagram (all)

Osa\_LOC\_Os03g47470.1  
 Osa\_LOC\_Os02g08240.1  
 Osa\_LOC\_Os10g37480.1  
 Osa\_LOC\_Os06g29120.2  
 Osa\_LOC\_Os03g02320.1  
 Osa\_LOC\_Os02g54900.1

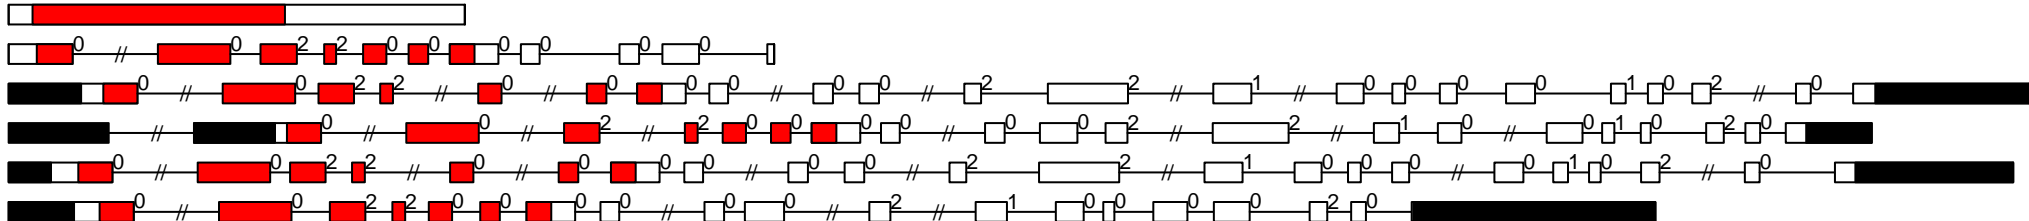

0

2000

4000

6000

# O.sa STE\_STE20-PI exon-intron and kinase domain diagram (all)

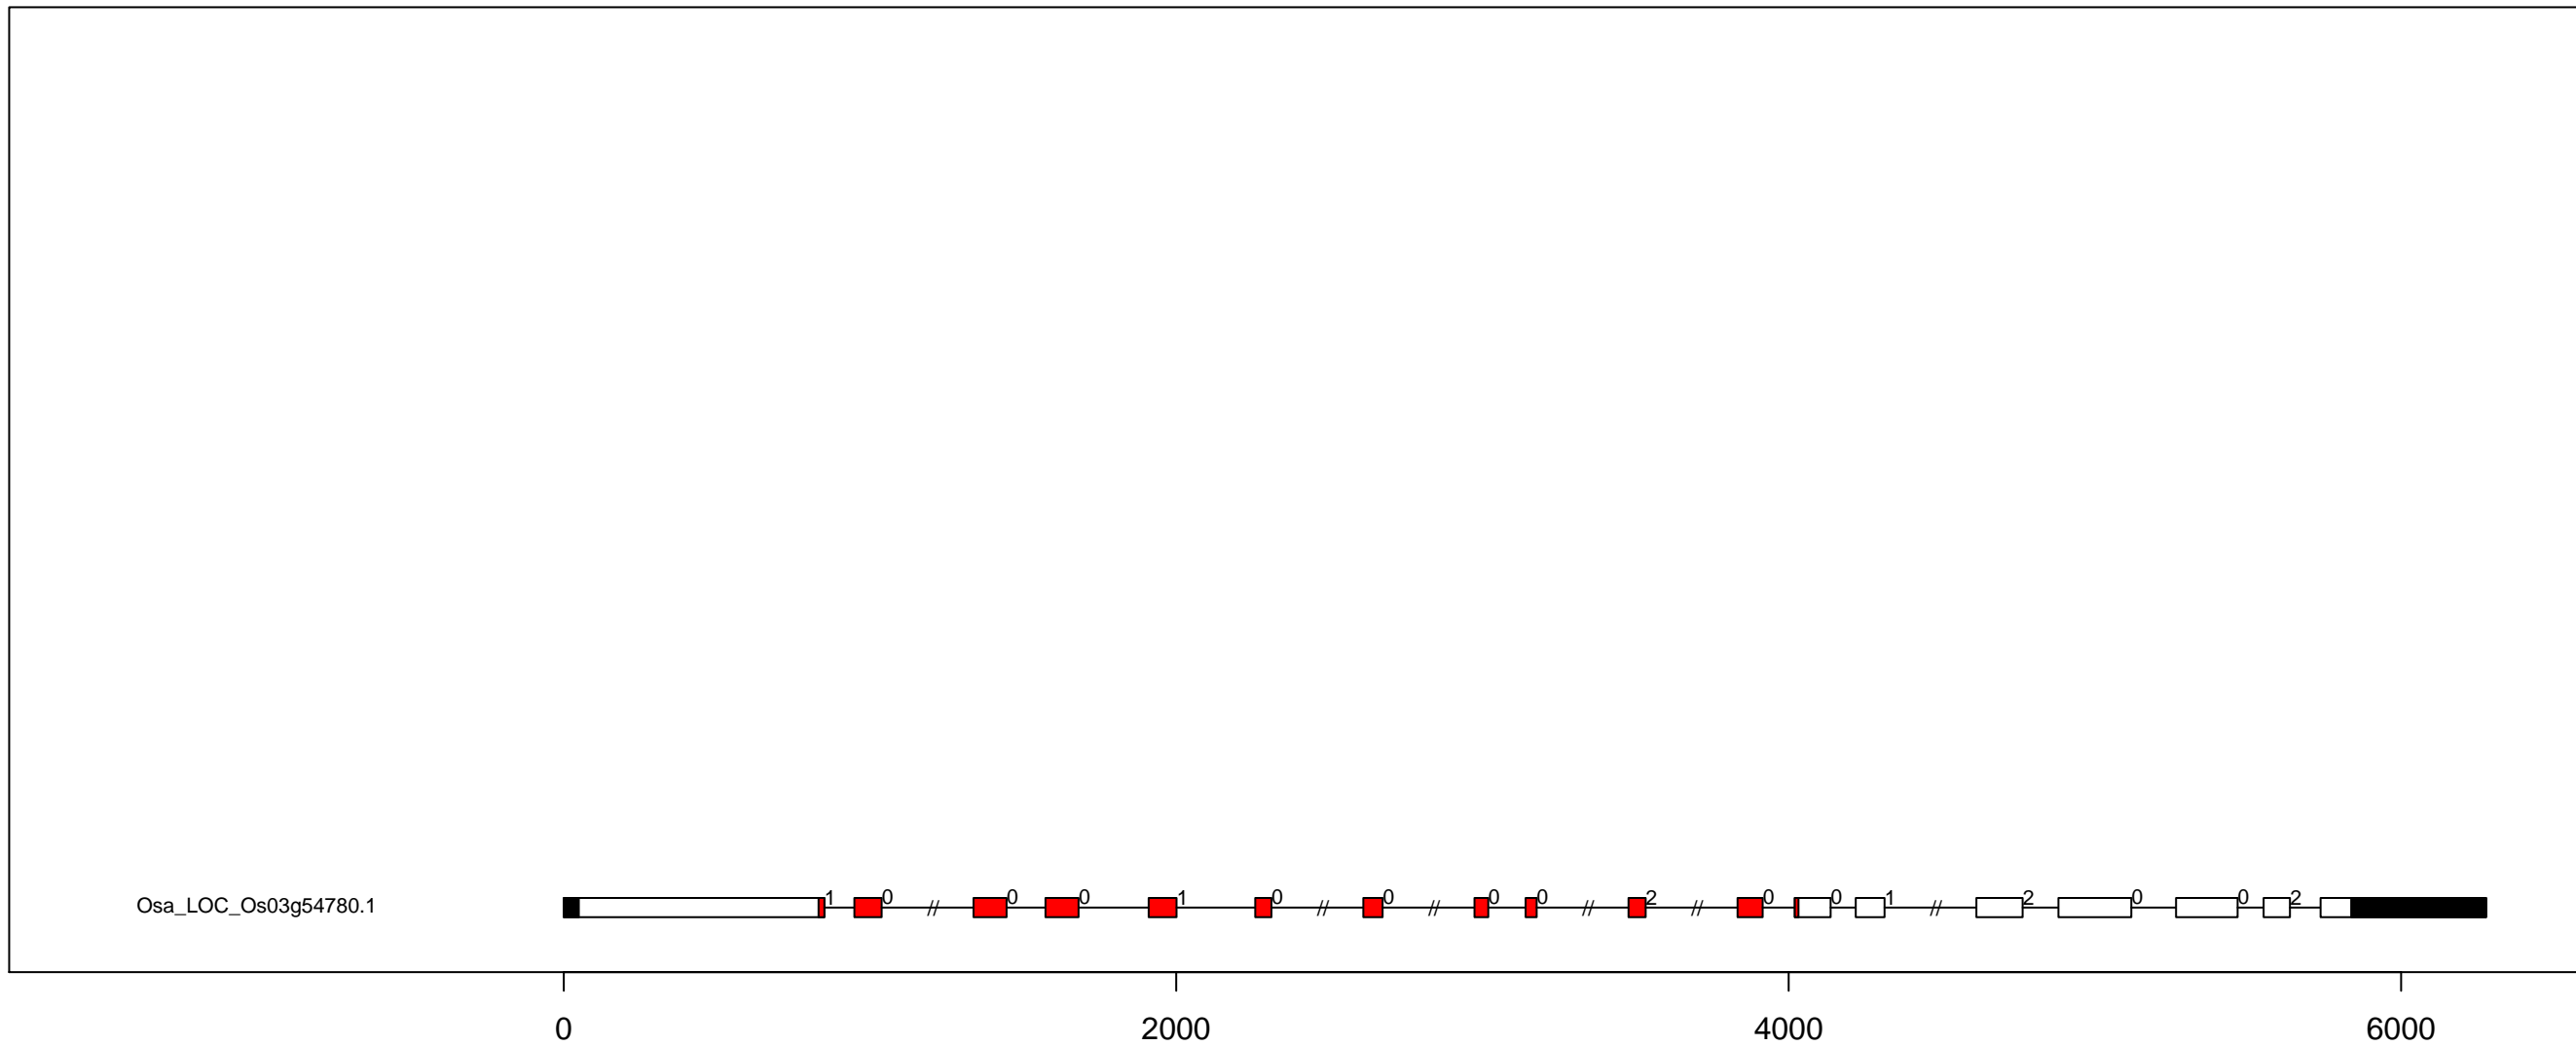

O.sa STE\_STE20-YSK exon-intron and kinase domain diagram (all)

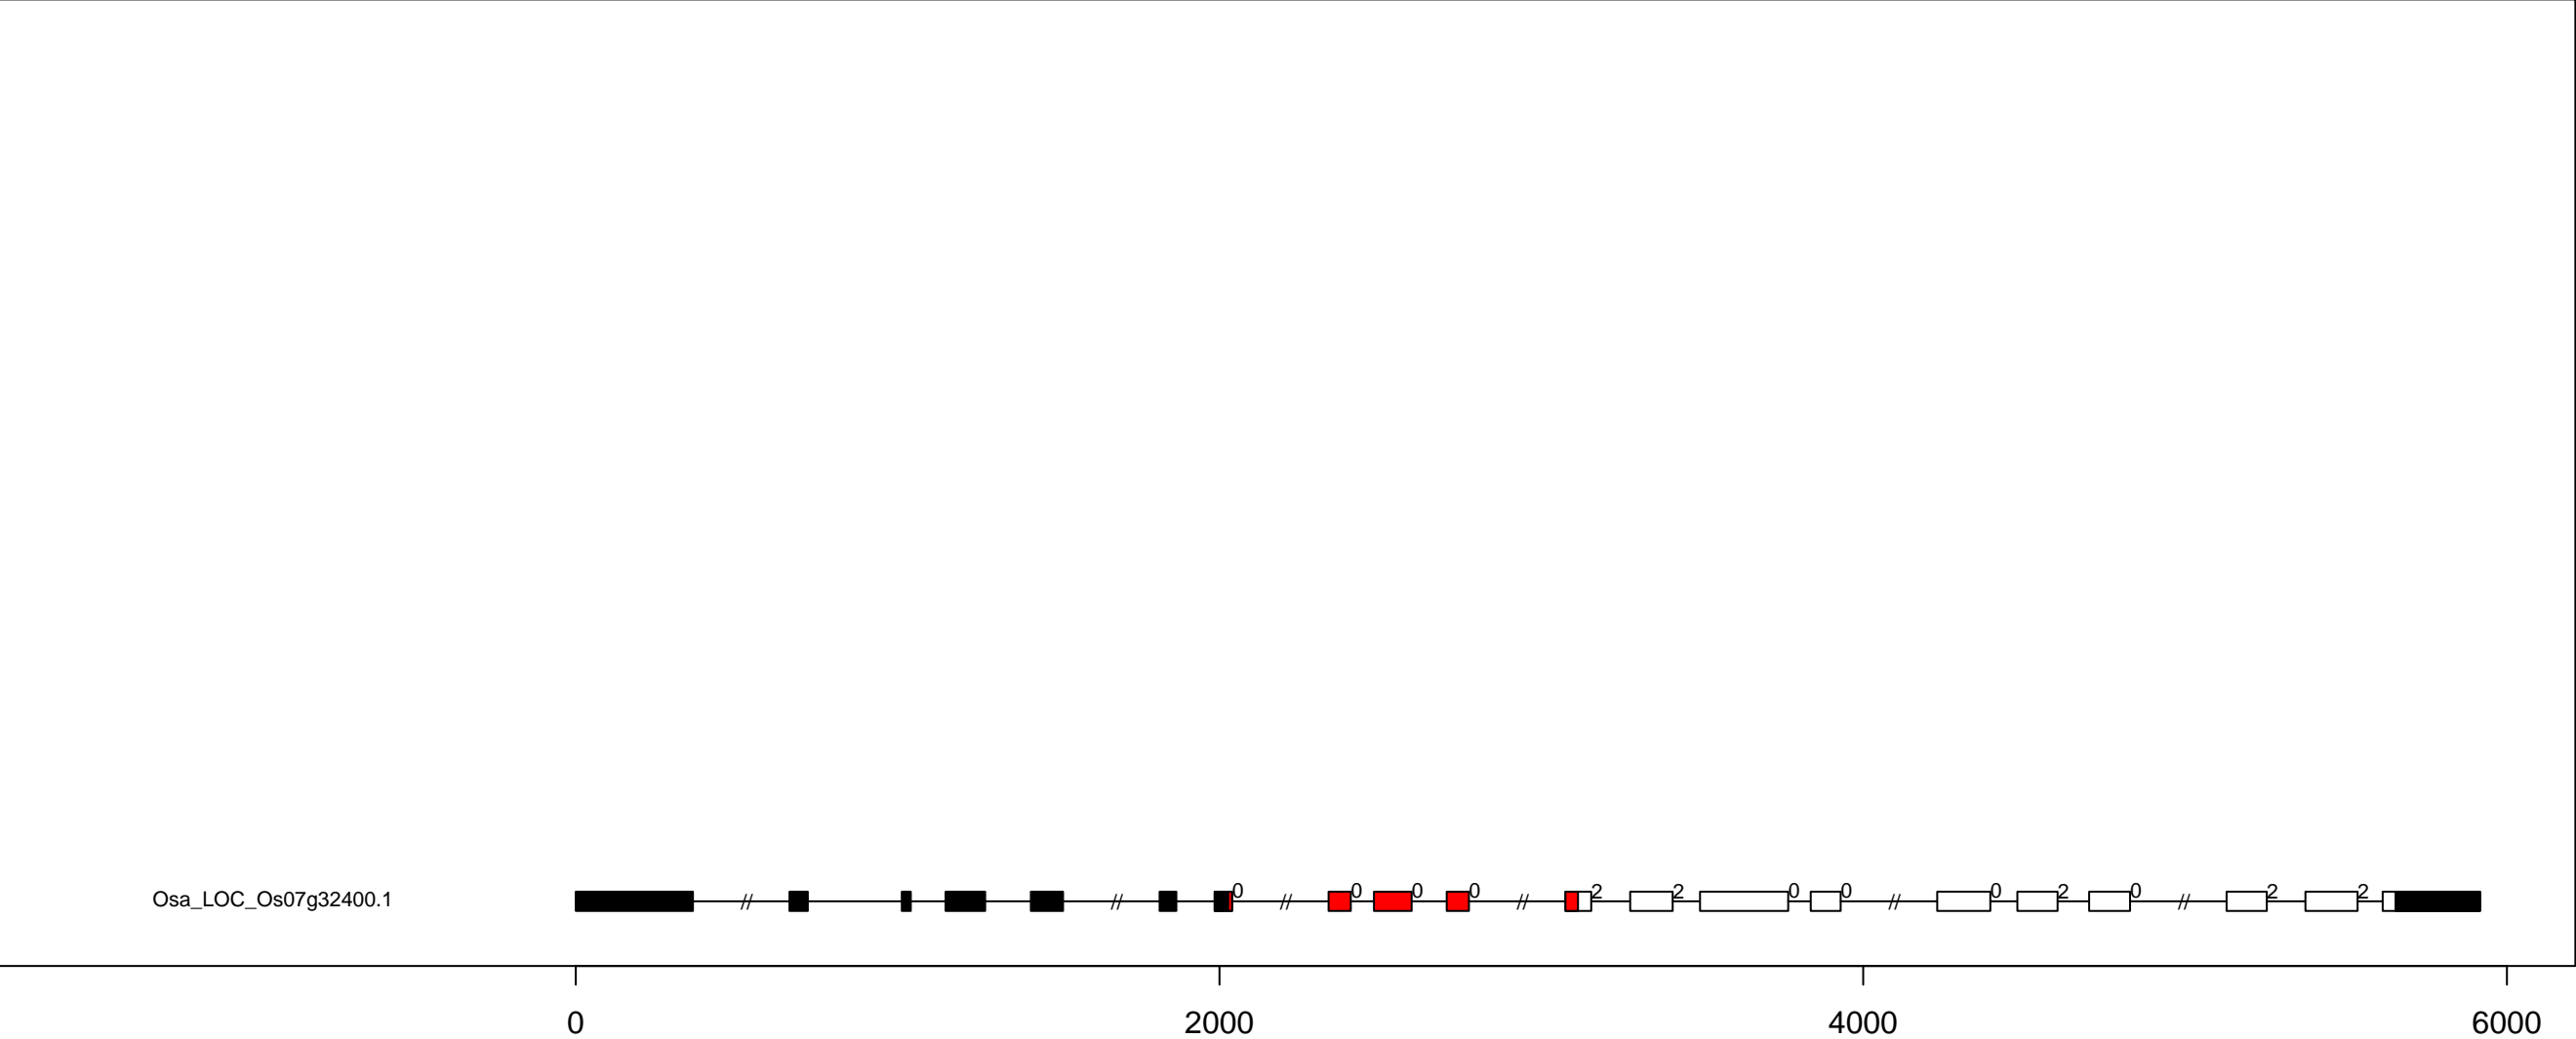

### O.sa STE\_STE7 exon-intron and kinase domain diagram (all)

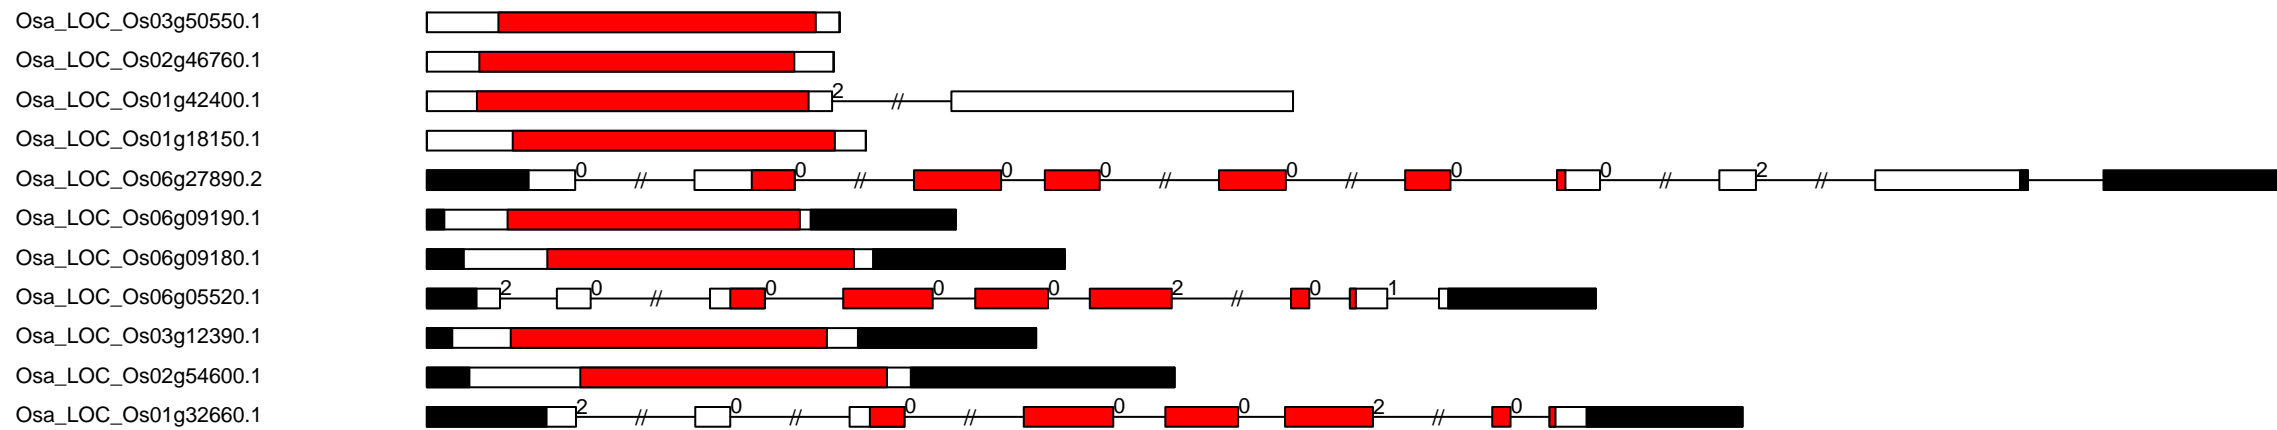

# O.sa STE\_STE-PI exon-intron and kinase domain diagram (all)

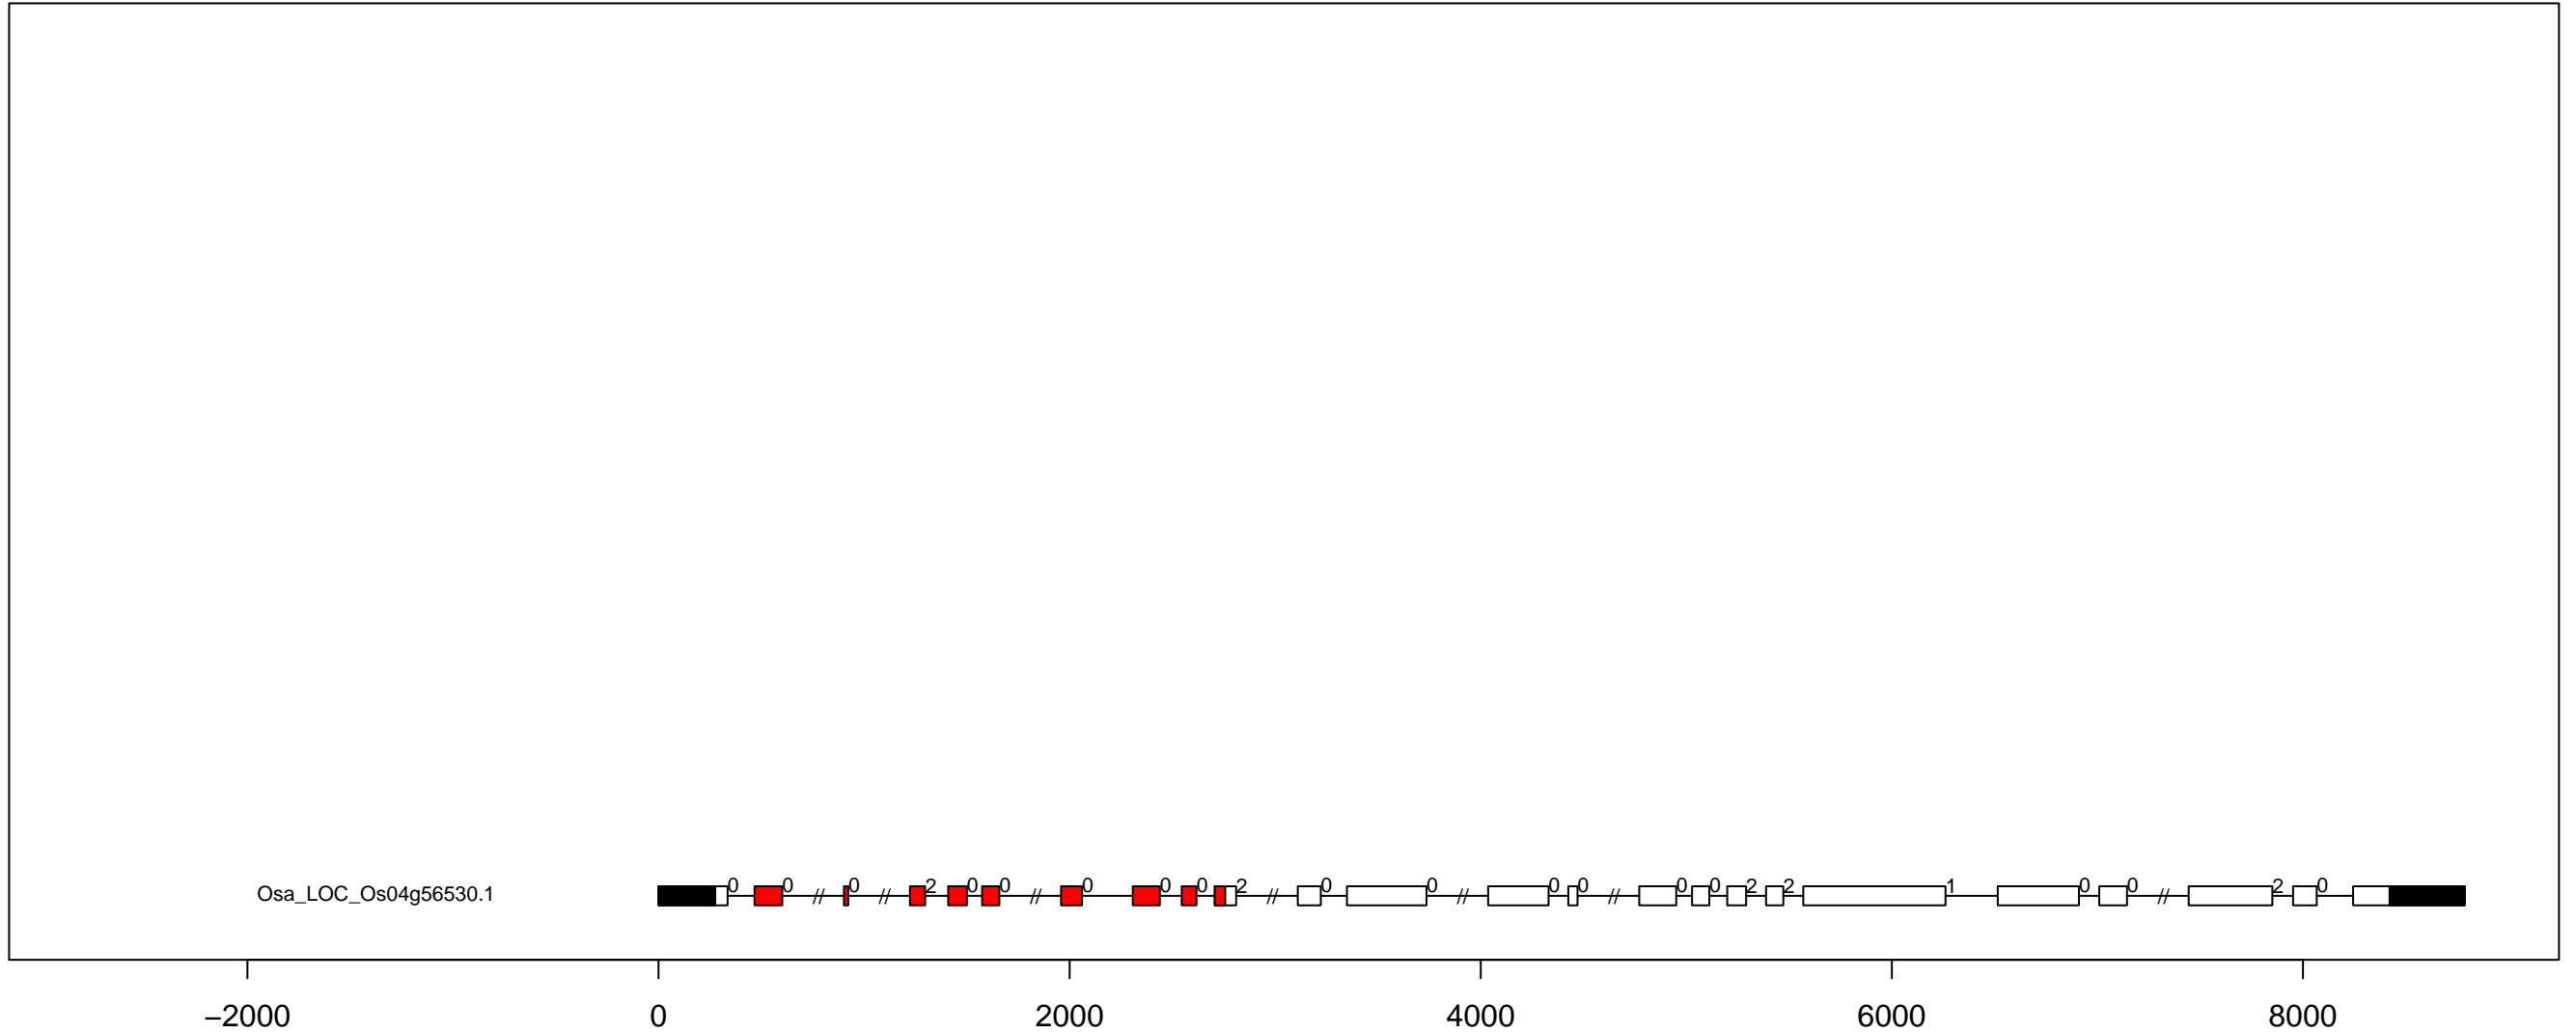

# O.sa TKL\_CTR1-DRK-1 exon-intron and kinase domain diagram (all)

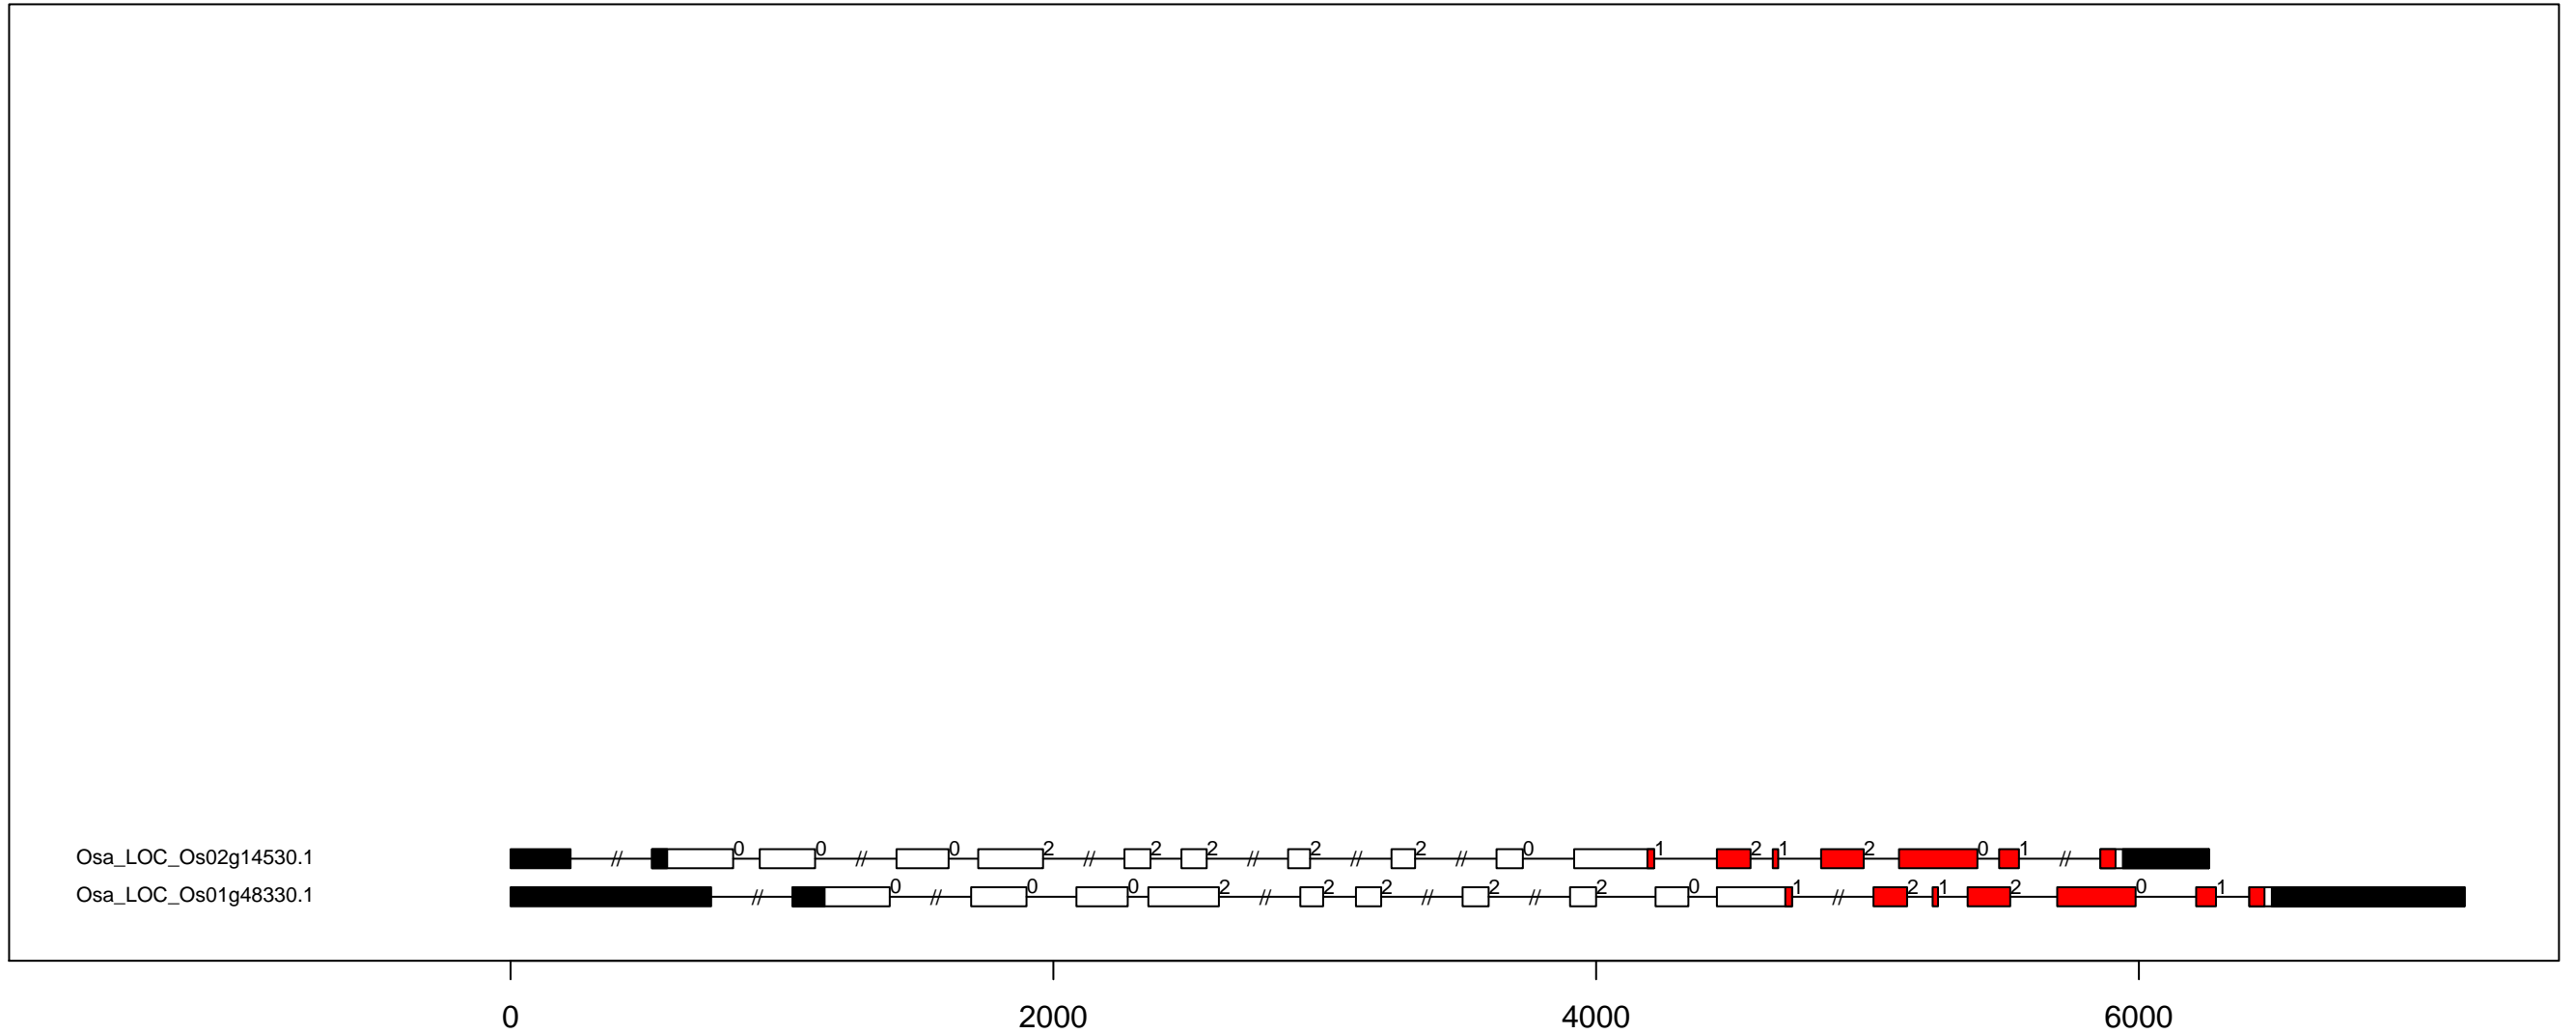

# O.sa TKL\_CTR1-DRK-2 exon-intron and kinase domain diagram (all)

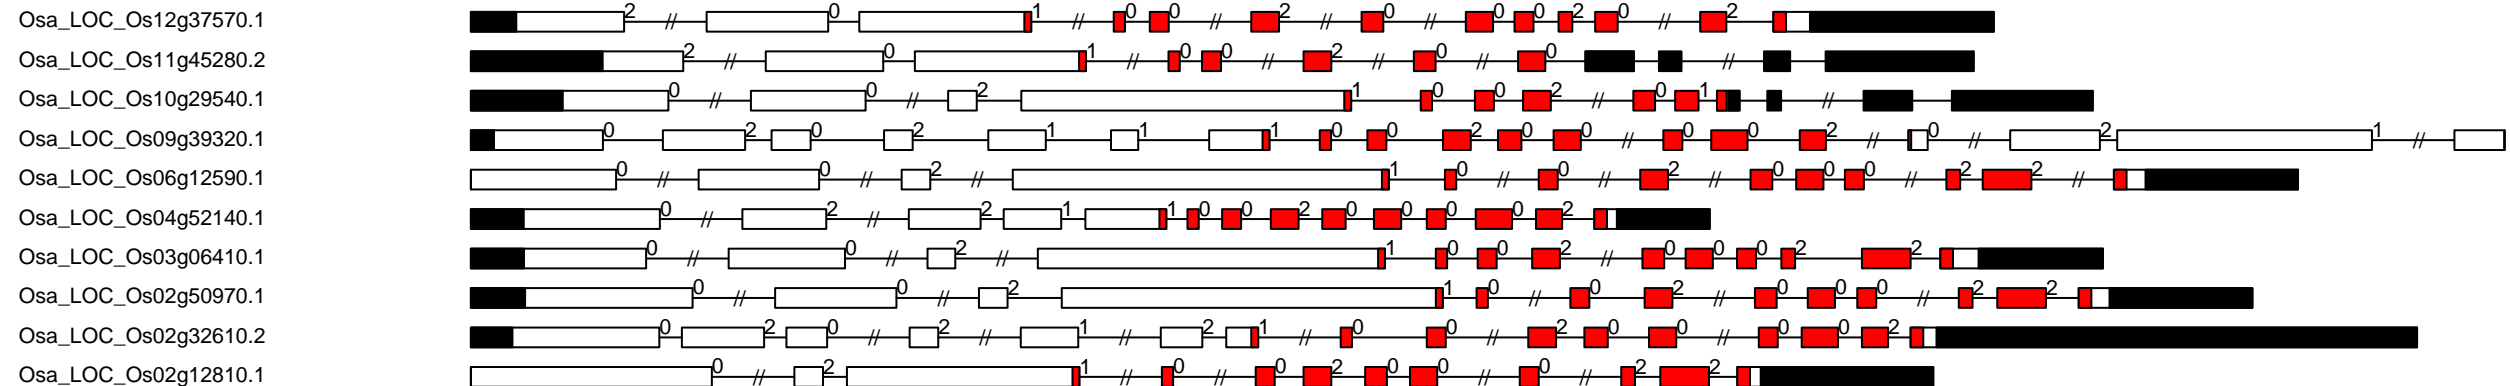

0

2000

4000

6000

# O.sa TKL\_Gdt exon-intron and kinase domain diagram (all)

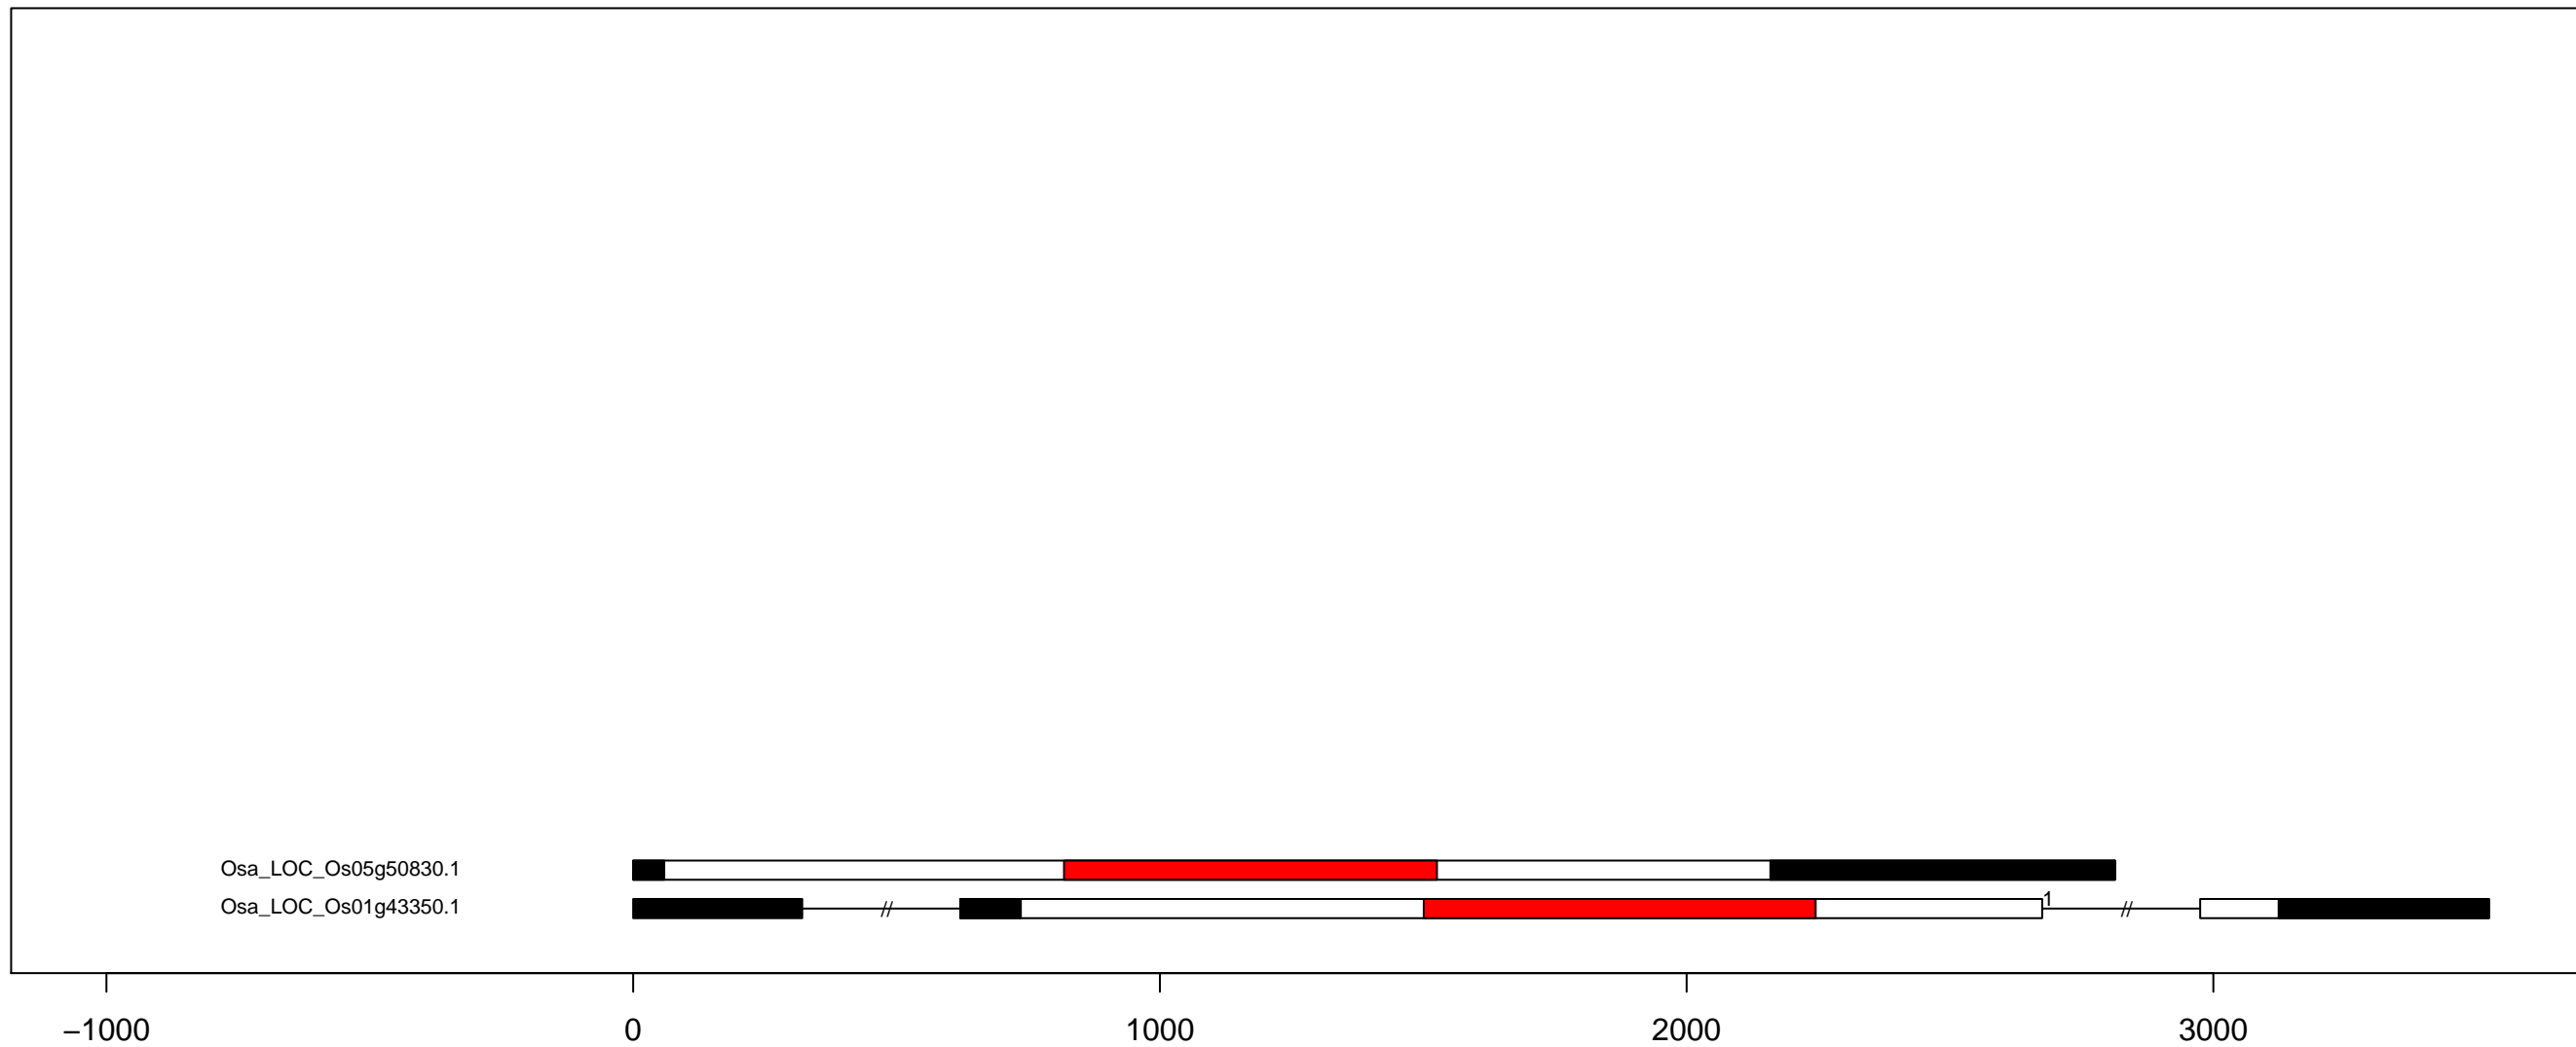



# O.sa TKL-PI-1 exon-intron and kinase domain diagram (all)

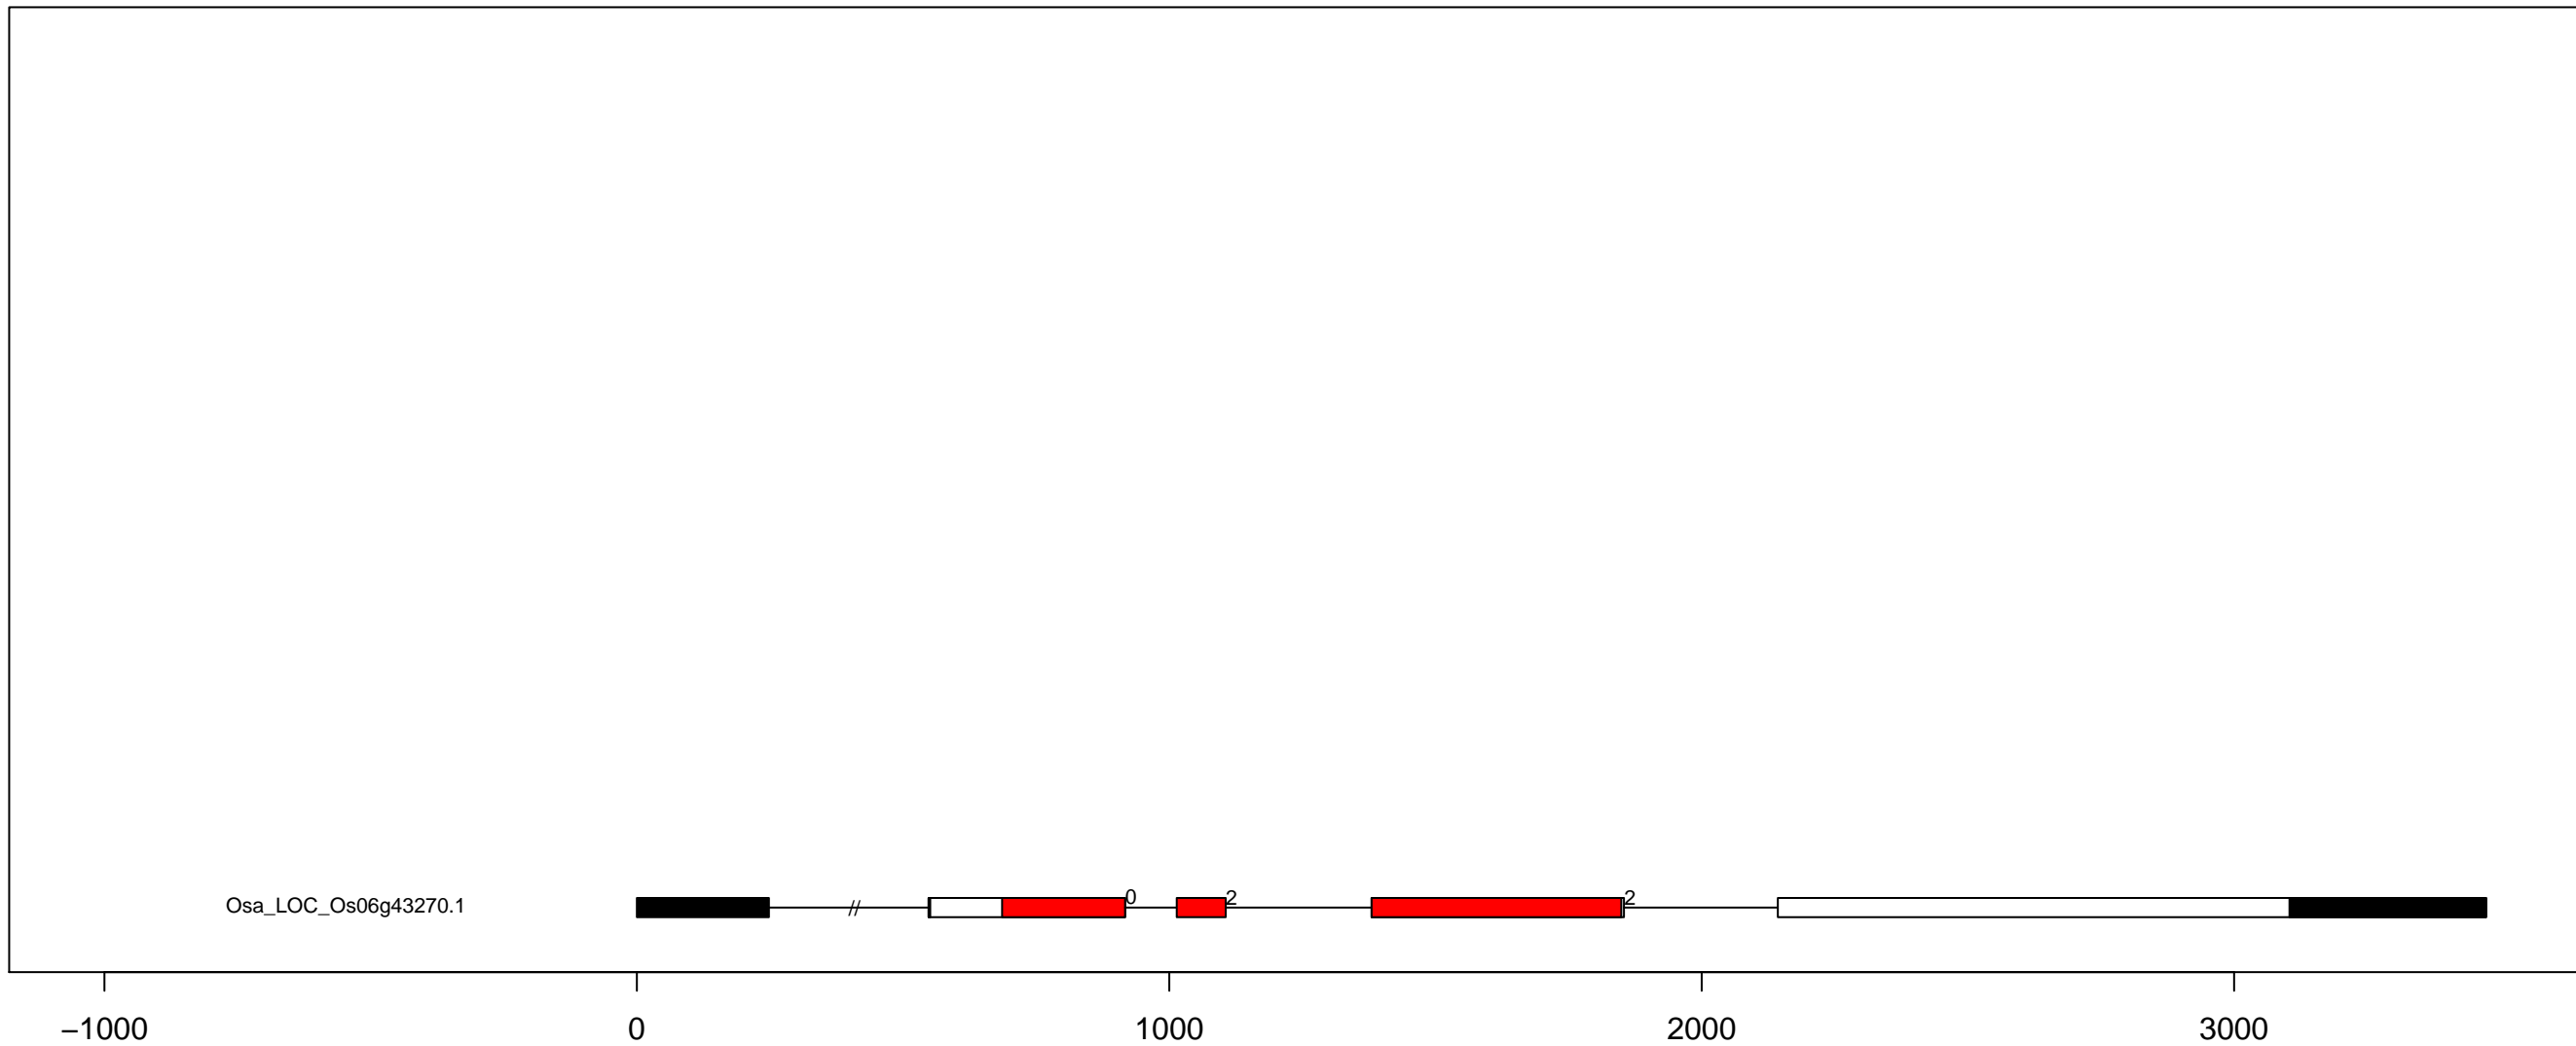

# O.sa TKL-PI-2 exon-intron and kinase domain diagram (all)

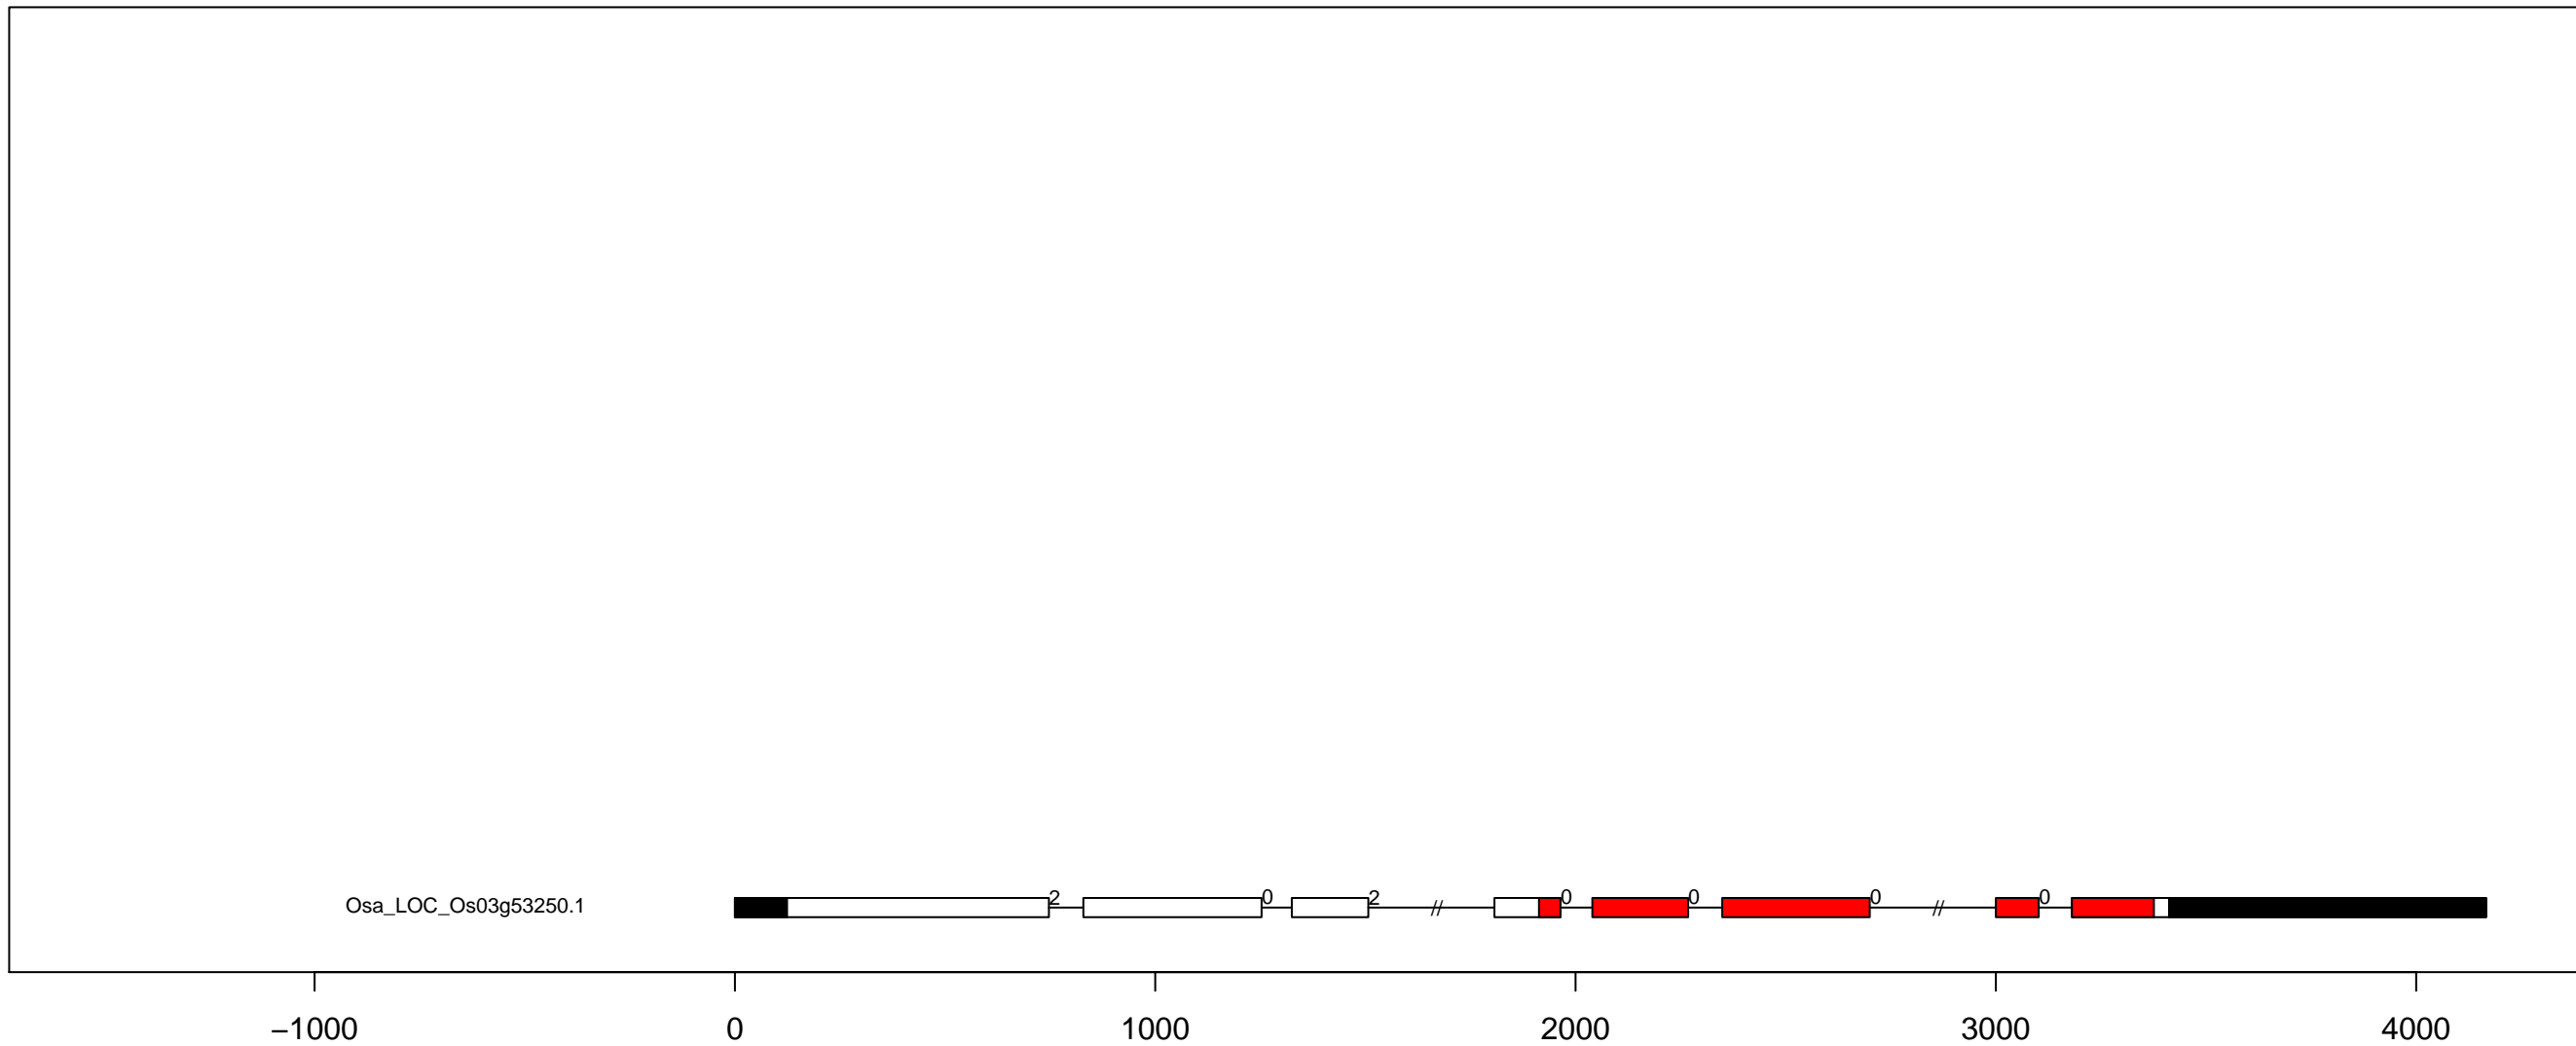

# O.sa TKL-PI-4 exon-intron and kinase domain diagram (part 1)

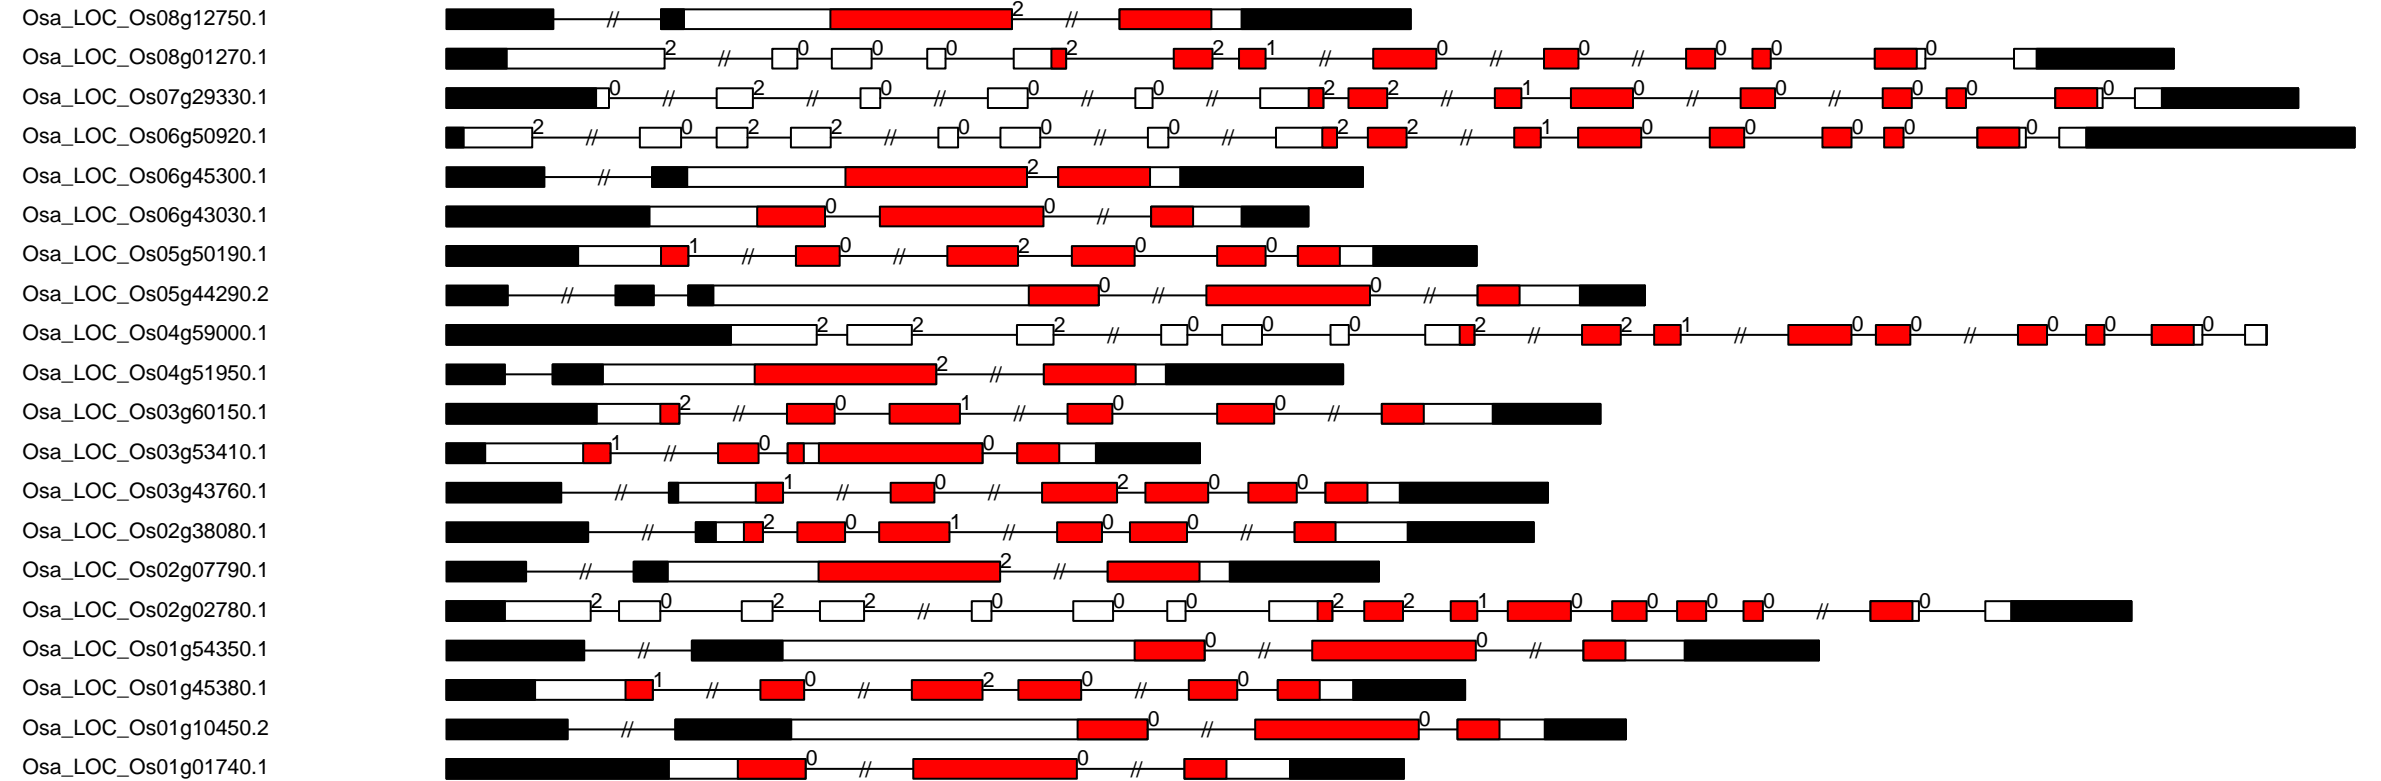

# O.sa TKL-PI-4 exon-intron and kinase domain diagram (part 2)

Osa\_LOC\_Os12g30570.1

Osa\_LOC\_Os07g10400.1

Osa\_LOC\_Os03g39150.1

Osa\_LOC\_Os12g41260.1

Osa\_LOC\_Os12g06670.1

Osa\_LOC\_Os09g37230.1

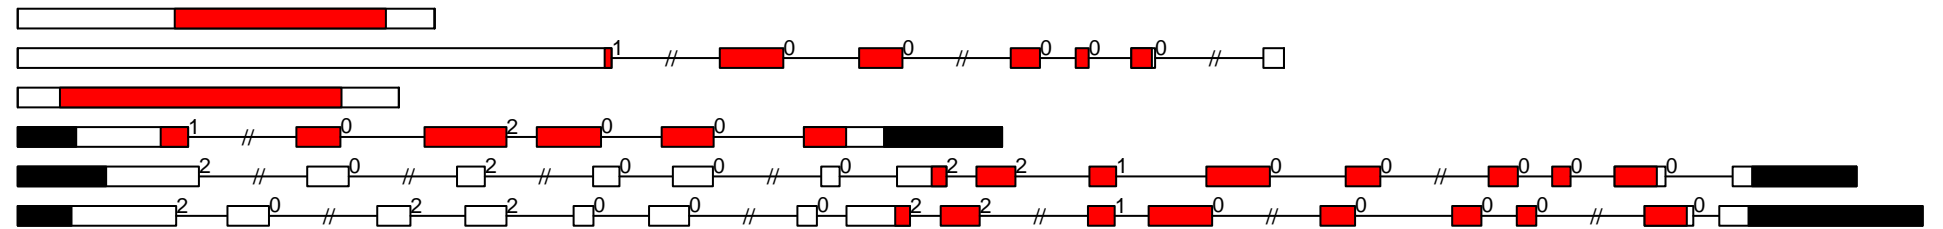

-1000

0

1000

2000

3000

4000

5000

### O.sa TKL-PI-5 exon-intron and kinase domain diagram (all)

Osa\_LOC\_Os07g43900.1  
 Osa\_LOC\_Os02g39560.1  
 Osa\_LOC\_Os01g66860.2  
 Osa\_LOC\_Os01g54480.1

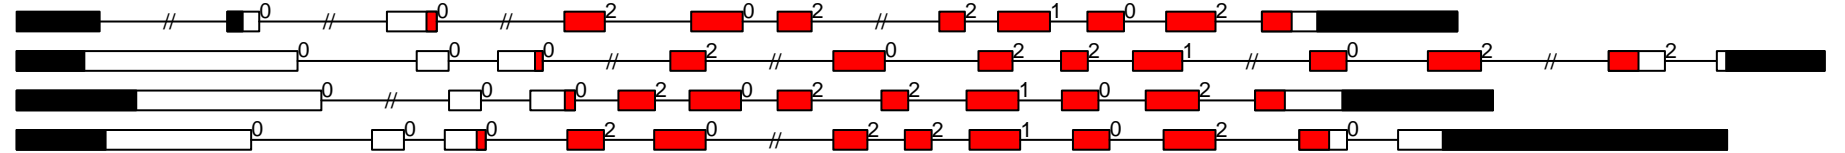

-1000

0

1000

2000

3000

4000

# O.sa TKL-PI-6 exon-intron and kinase domain diagram (all)

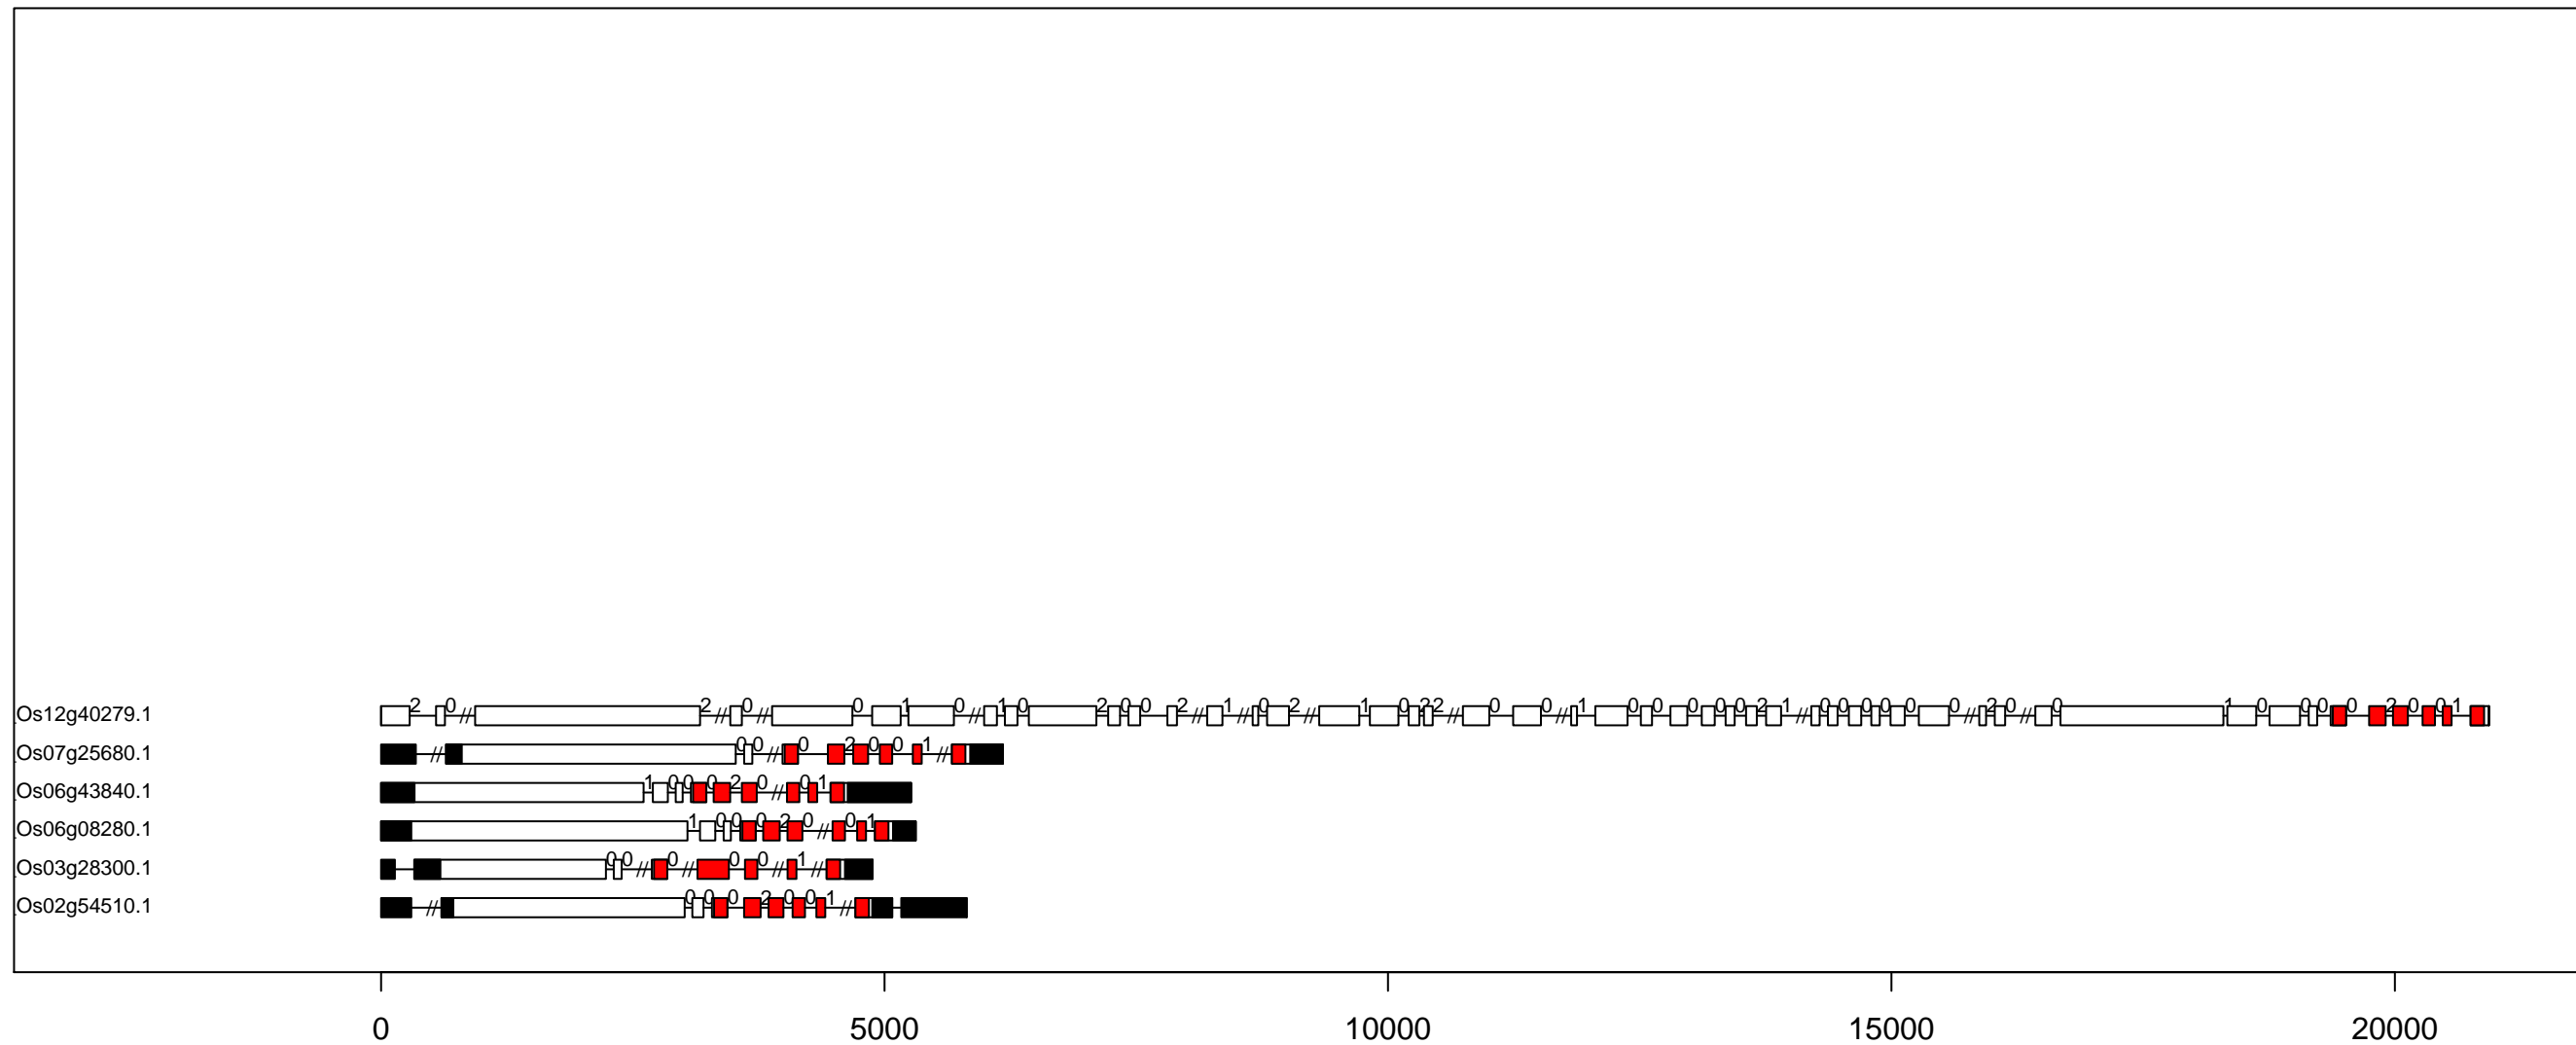

# O.sa TKL-PI-7 exon-intron and kinase domain diagram (all)

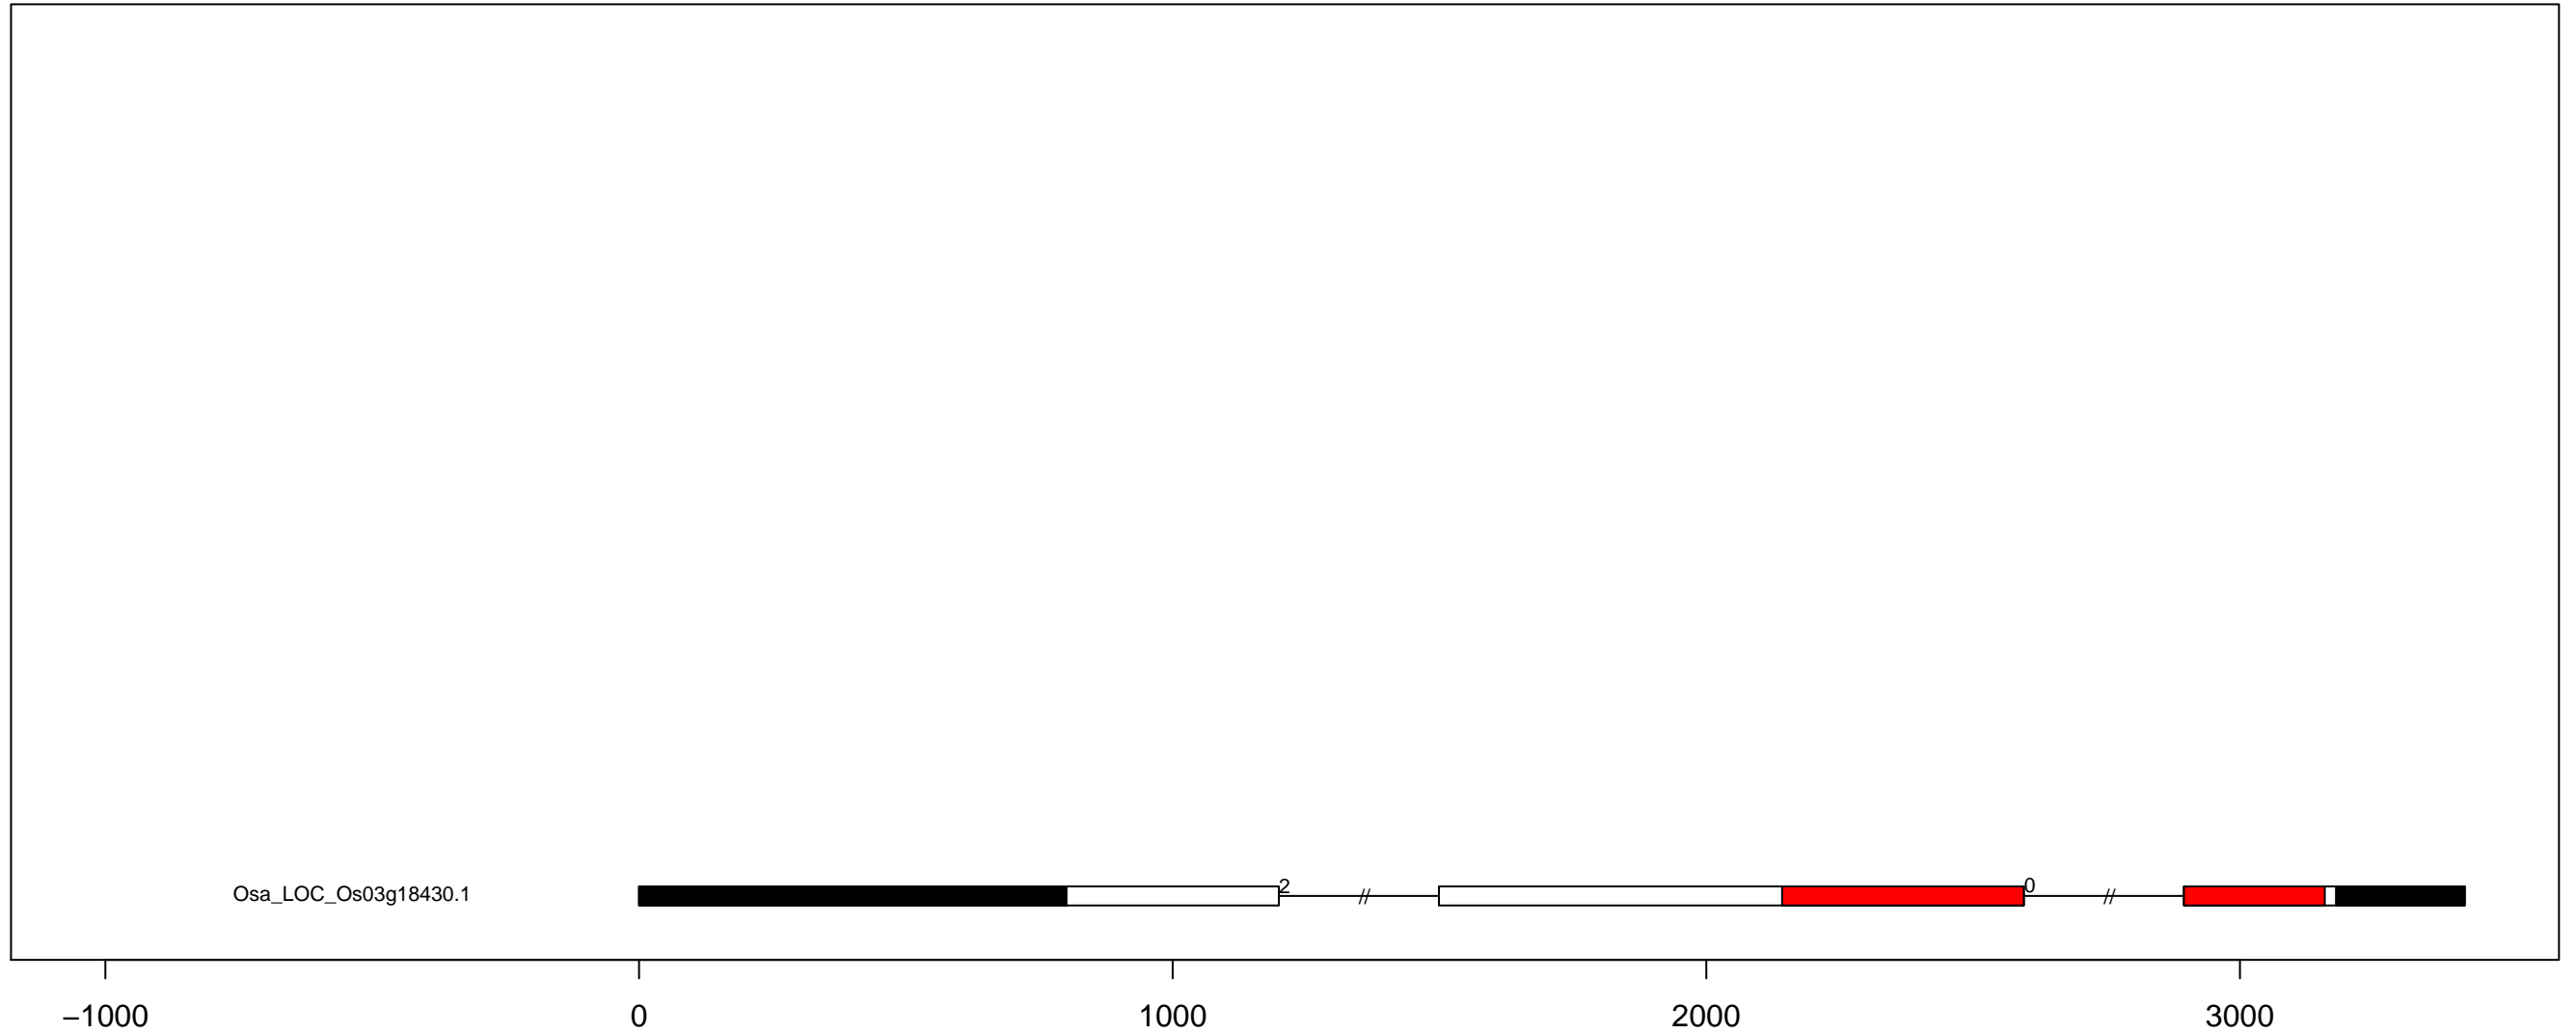

# O.sa TKL-PI-8 exon-intron and kinase domain diagram (all)

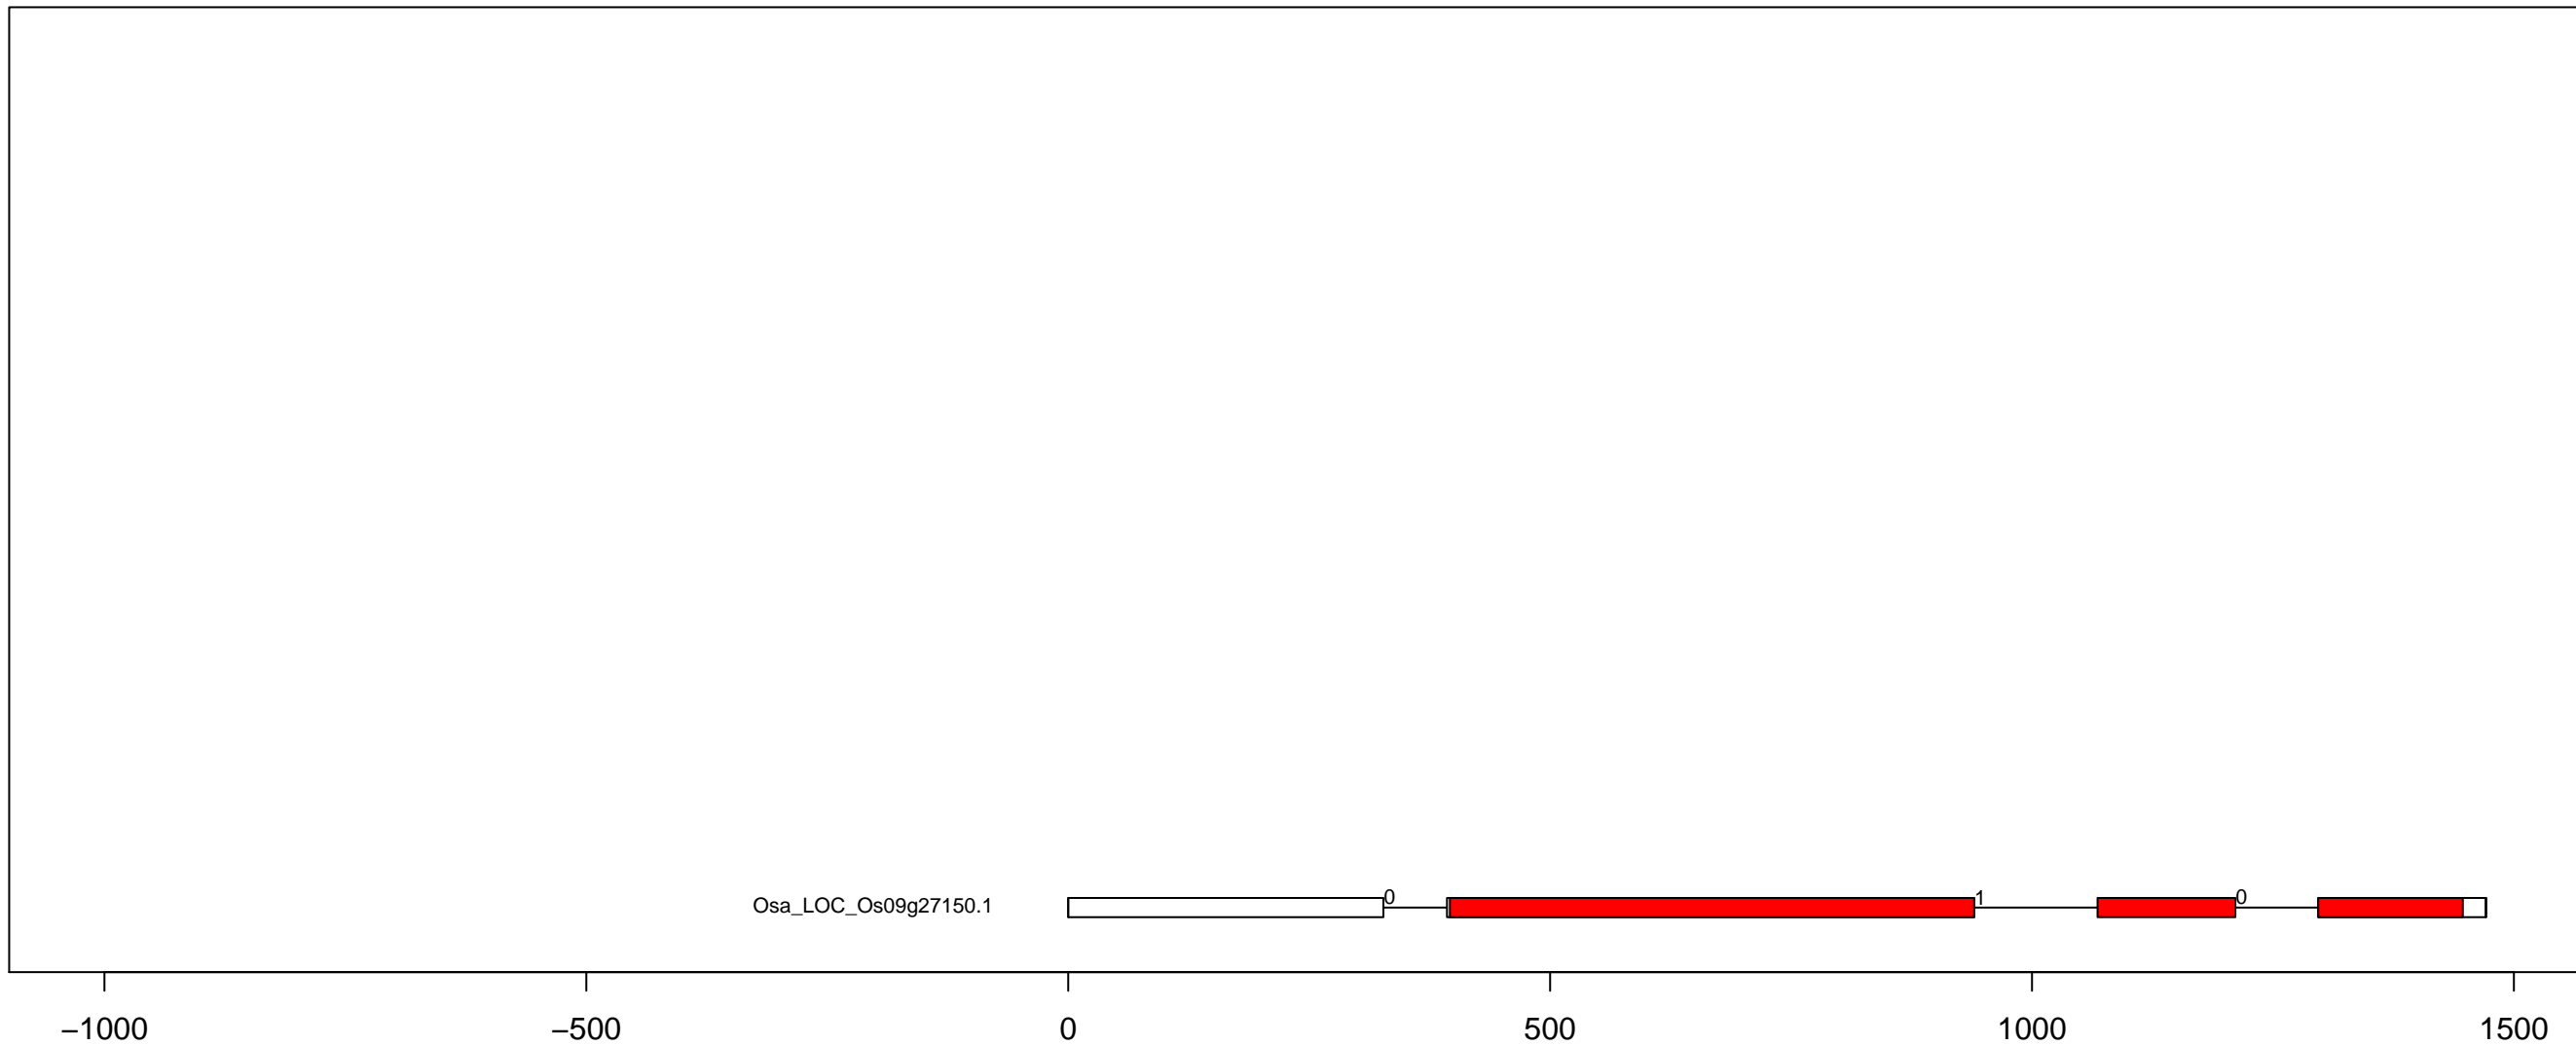



# O.sa TLK exon-intron and kinase domain diagram (all)

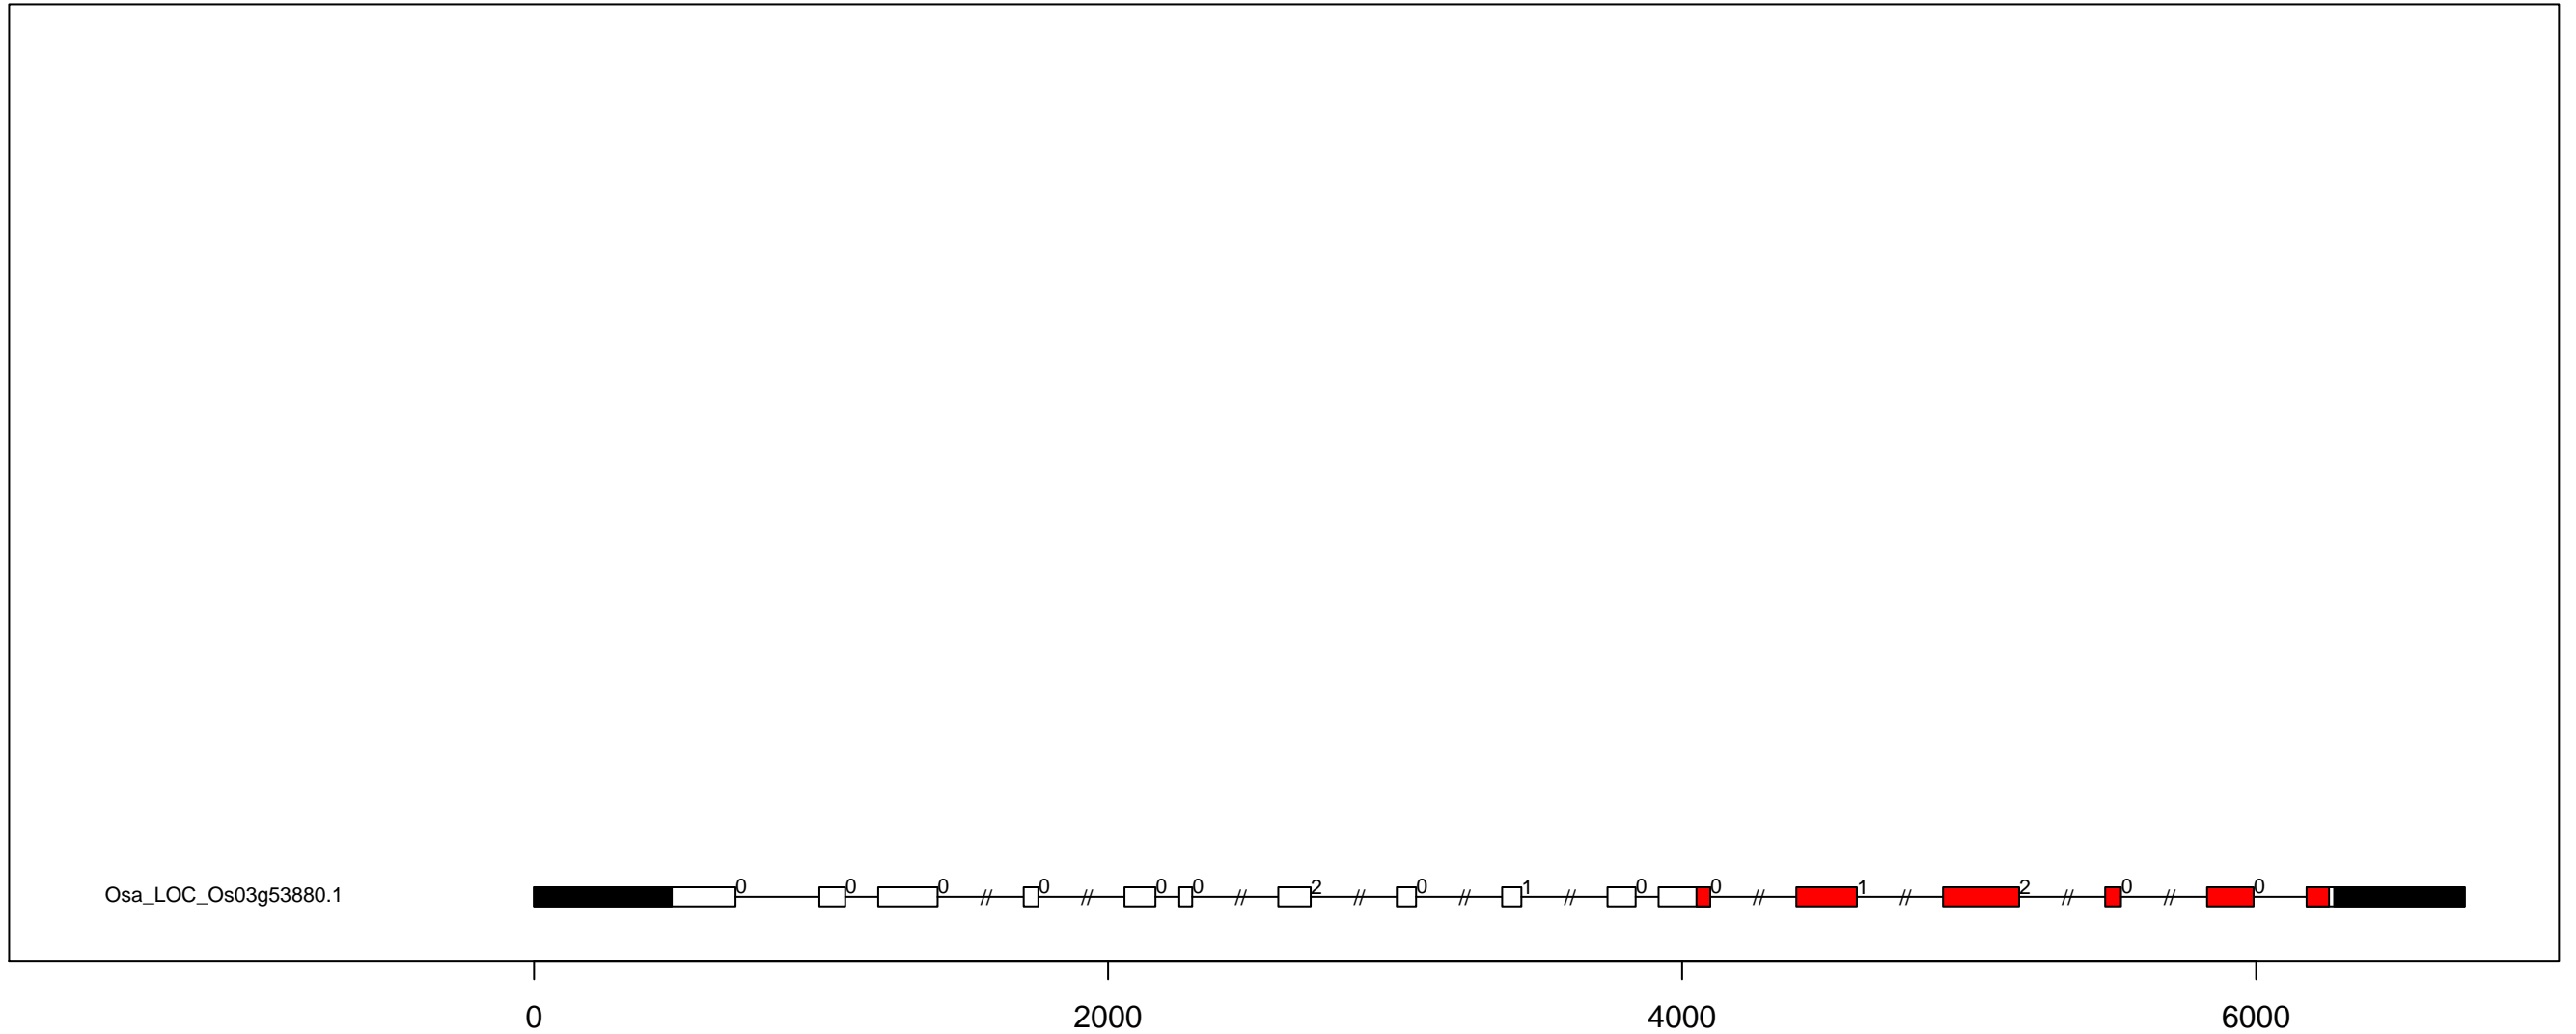

# O.sa TTK exon-intron and kinase domain diagram (all)

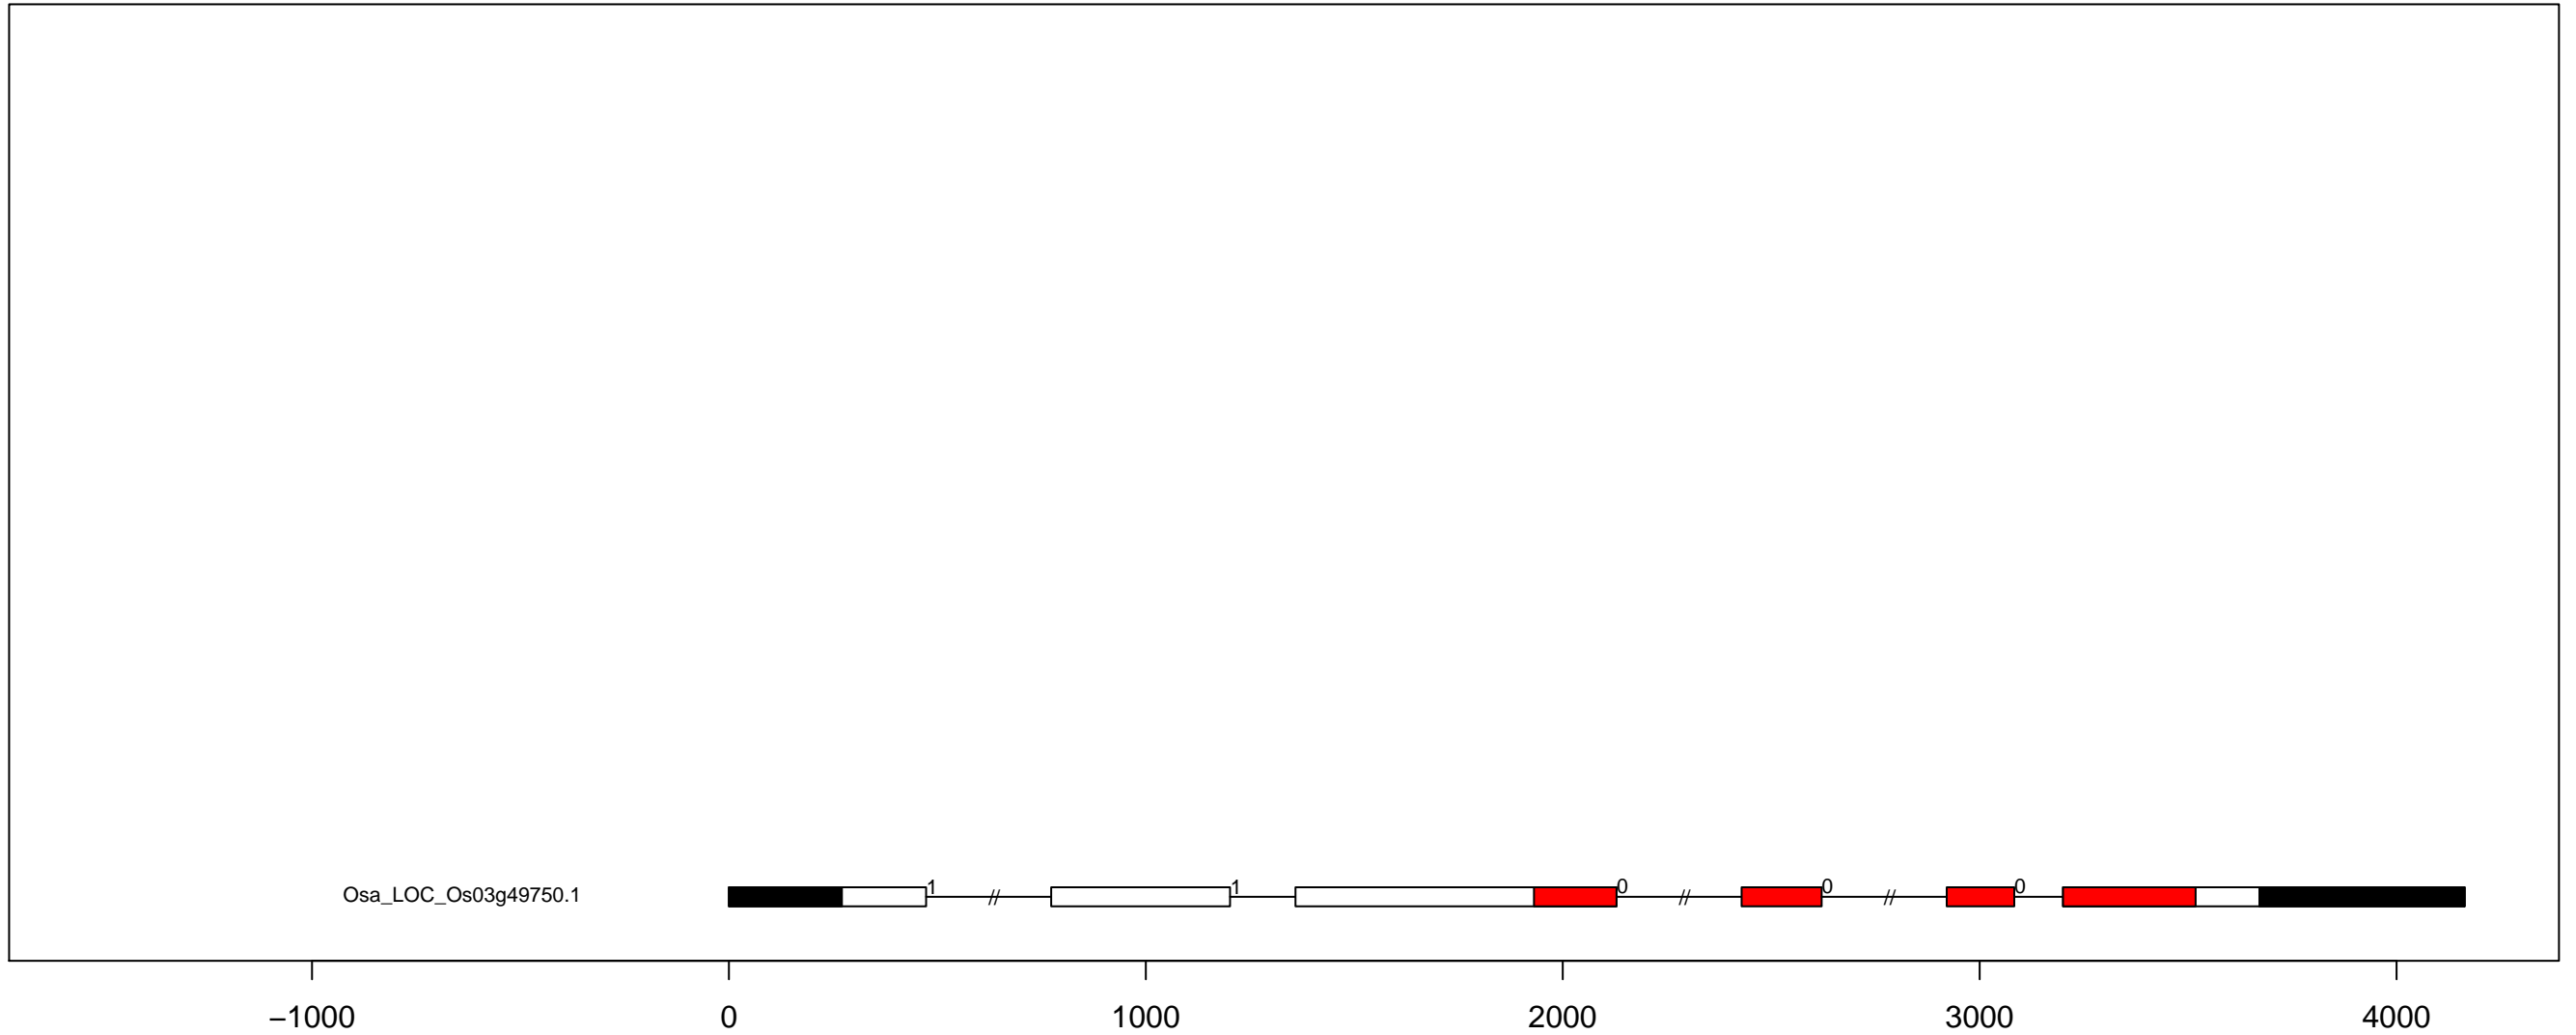

# O.sa ULK\_Fused exon-intron and kinase domain diagram (all)

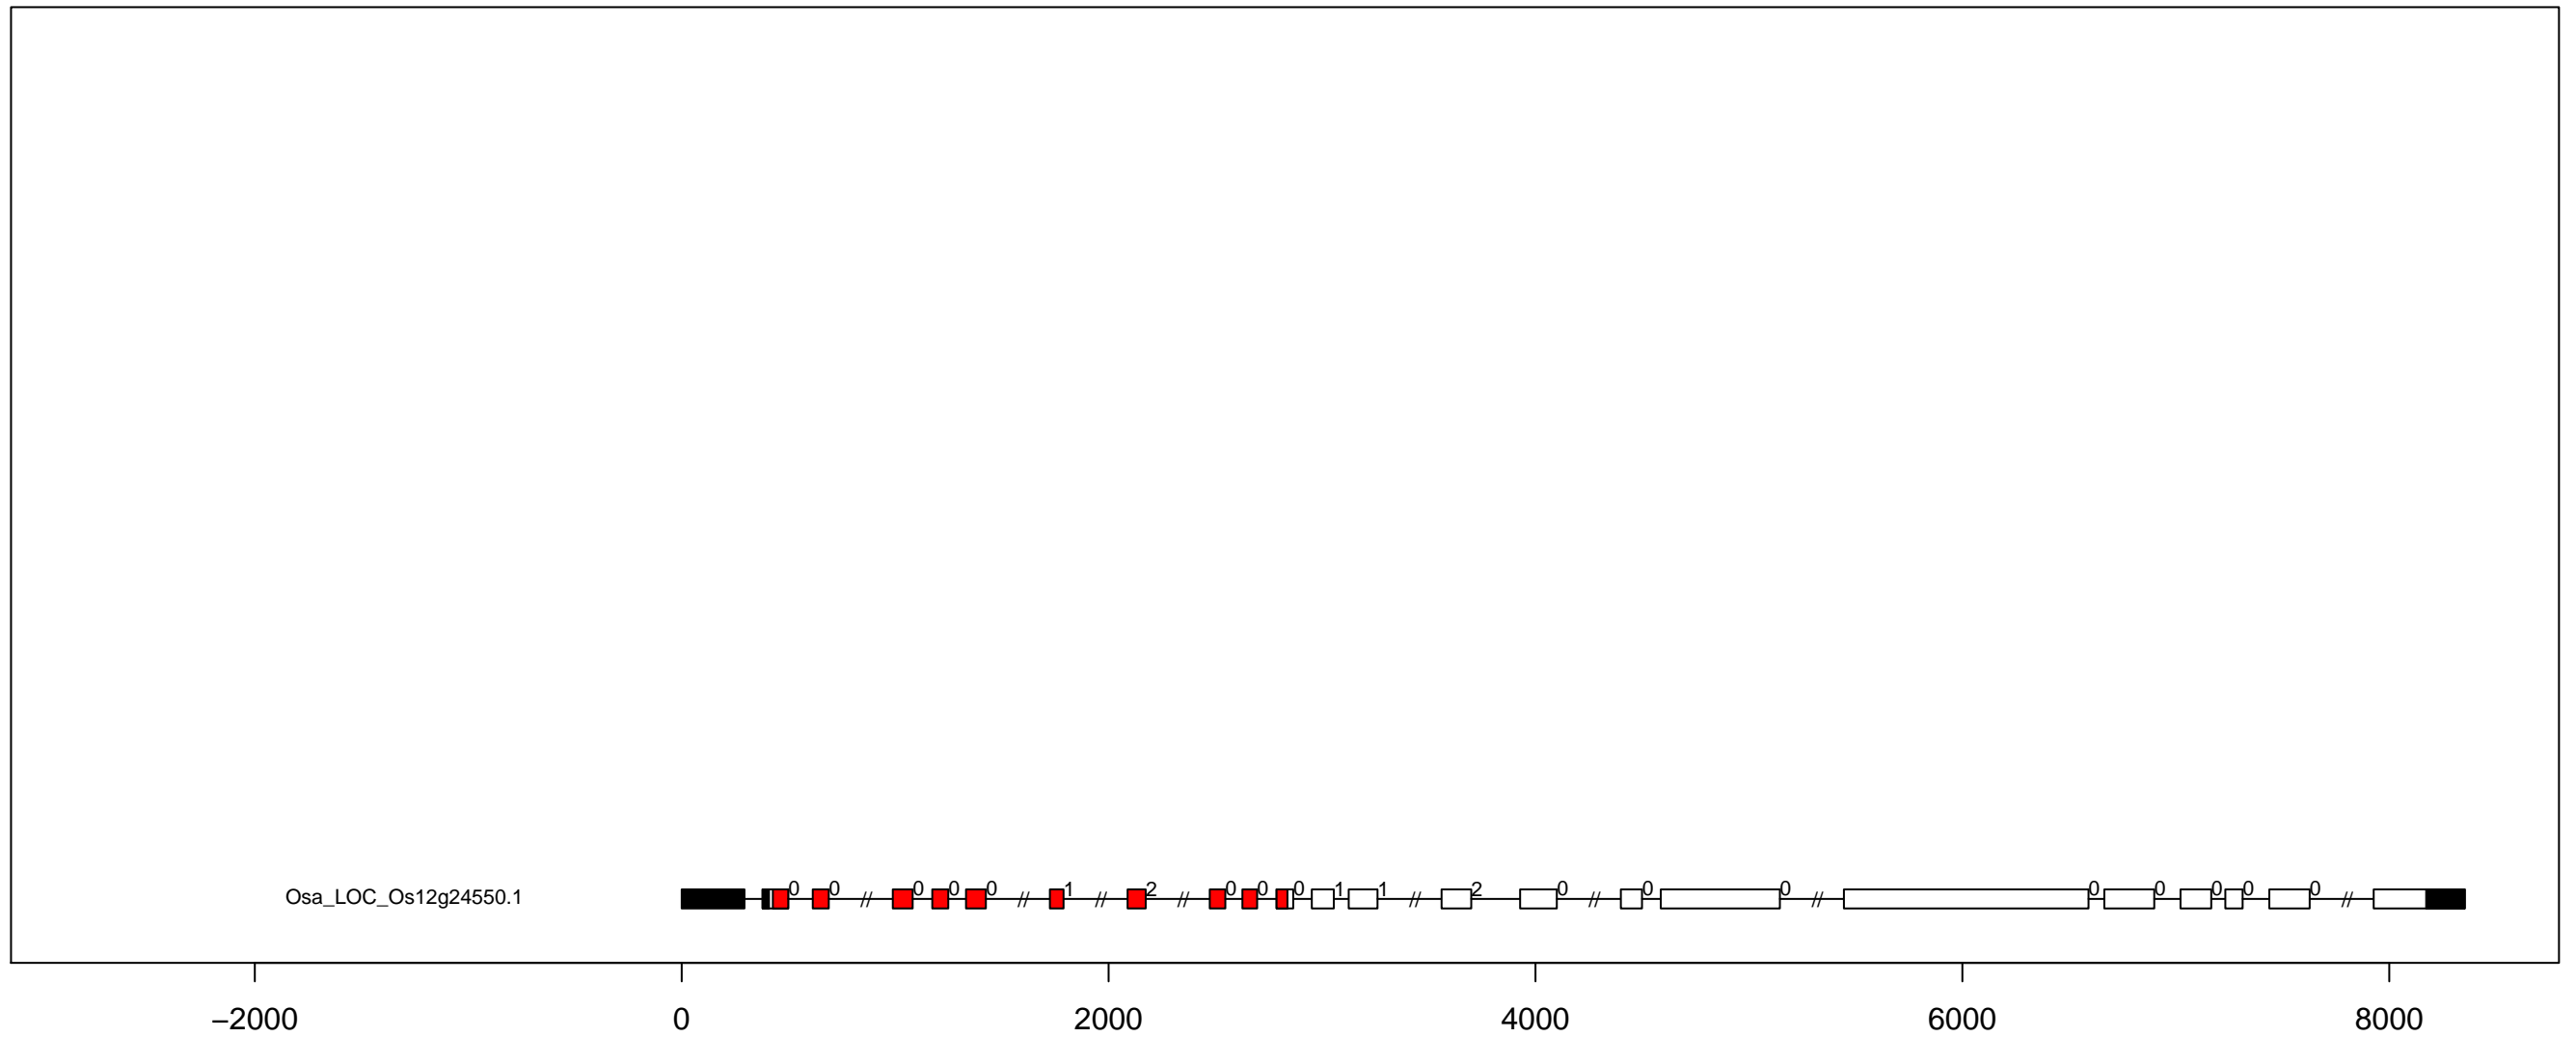

# O.sa ULK\_ULK4 exon-intron and kinase domain diagram (all)

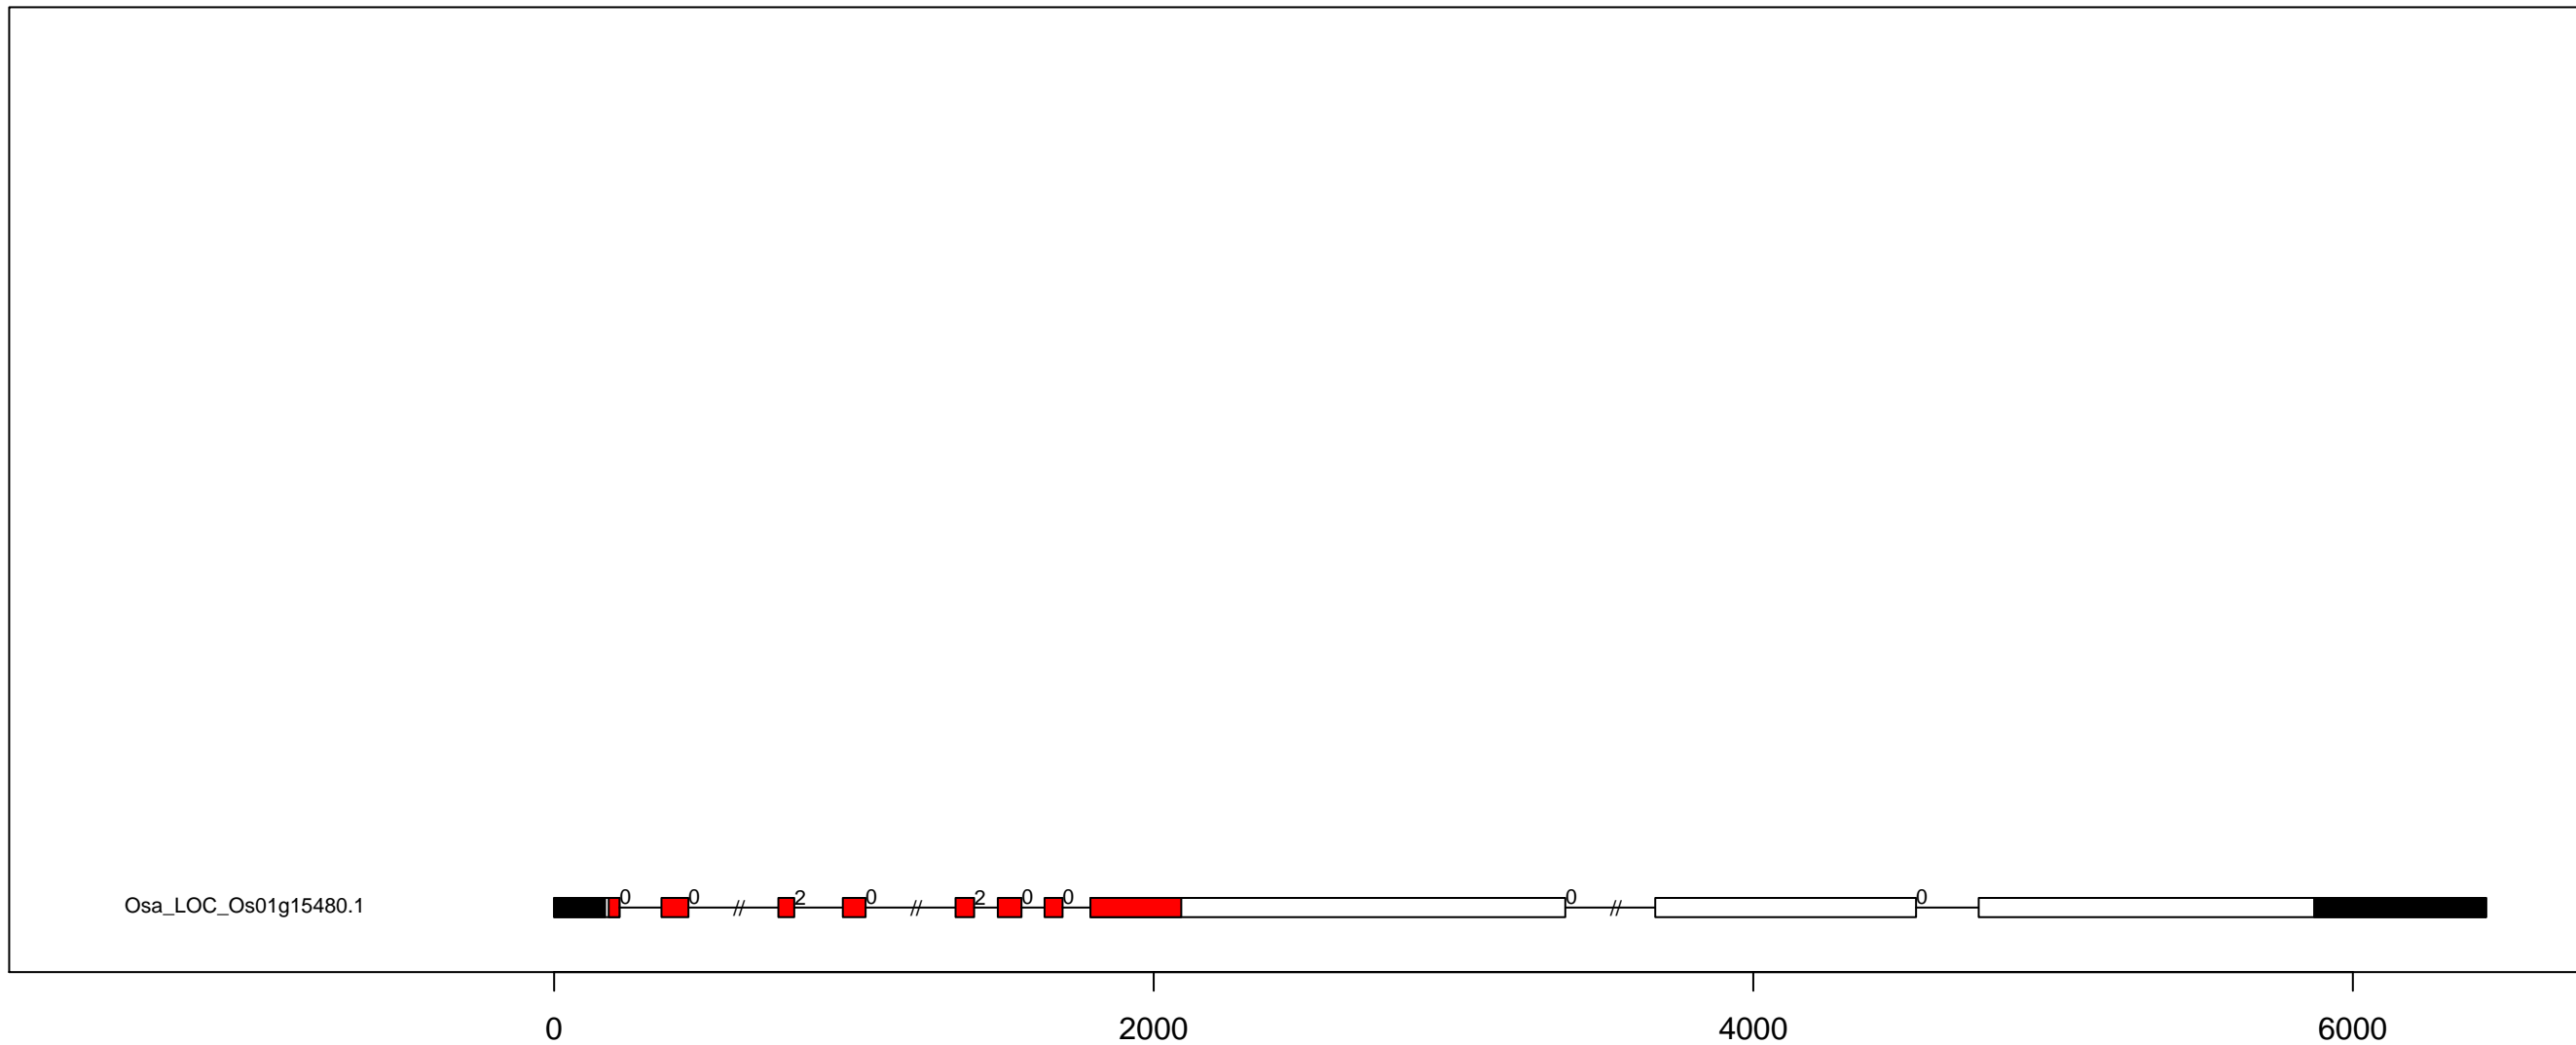

# O.sa WEE exon-intron and kinase domain diagram (all)

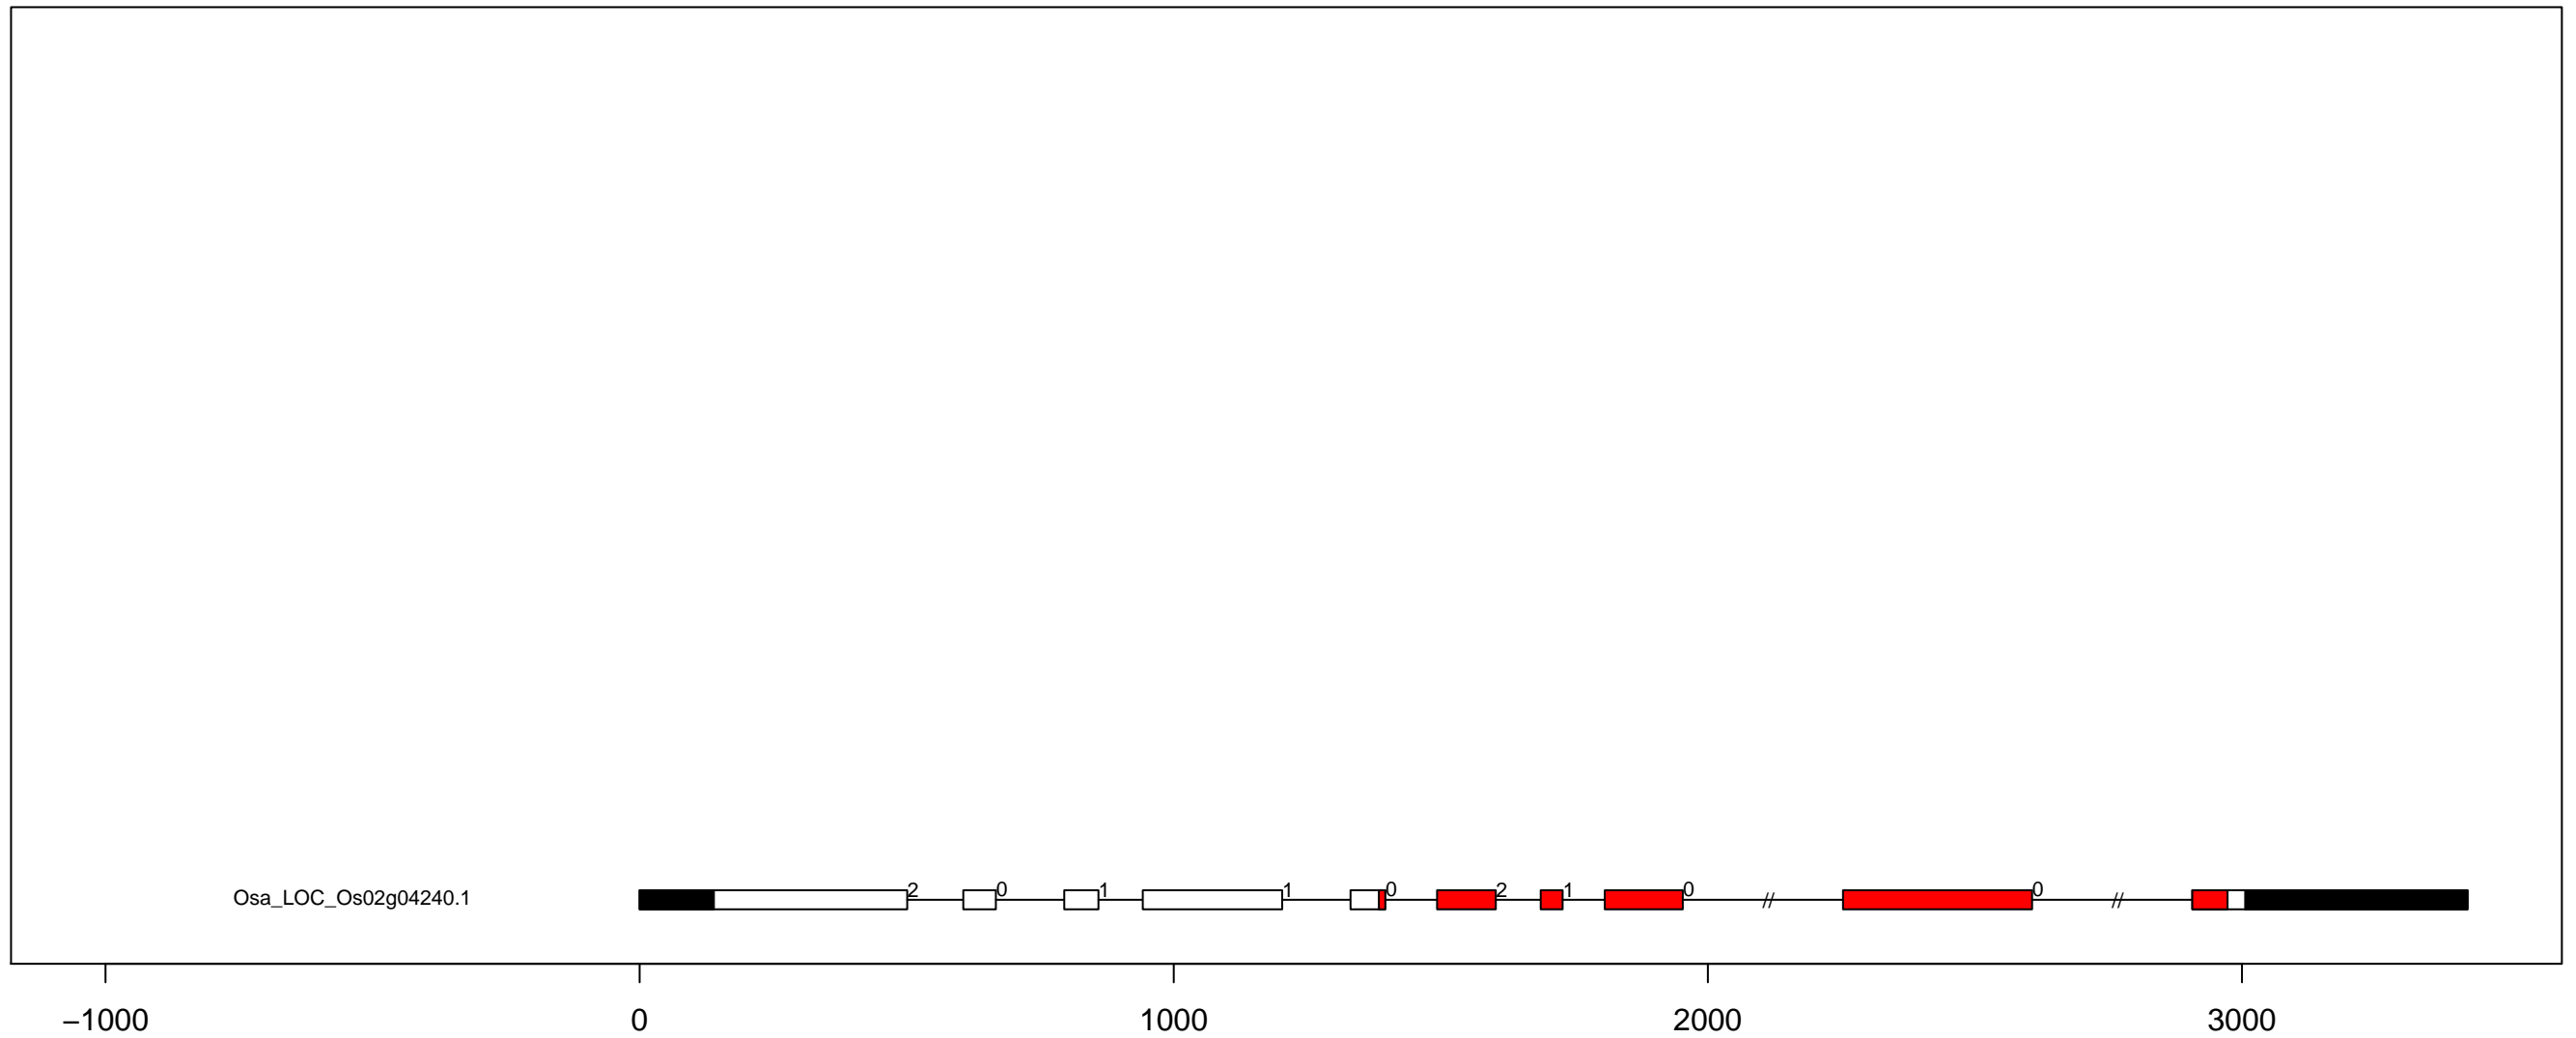

### O.sa WNK\_NRBP exon-intron and kinase domain diagram (all)

Osa\_LOC\_Os11g02305.1  
 Osa\_LOC\_Os12g06490.1  
 Osa\_LOC\_Os12g02250.1  
 Osa\_LOC\_Os11g06140.1  
 Osa\_LOC\_Os07g39520.1  
 Osa\_LOC\_Os07g38530.1  
 Osa\_LOC\_Os07g08750.1  
 Osa\_LOC\_Os05g01780.1  
 Osa\_LOC\_Os02g45130.1

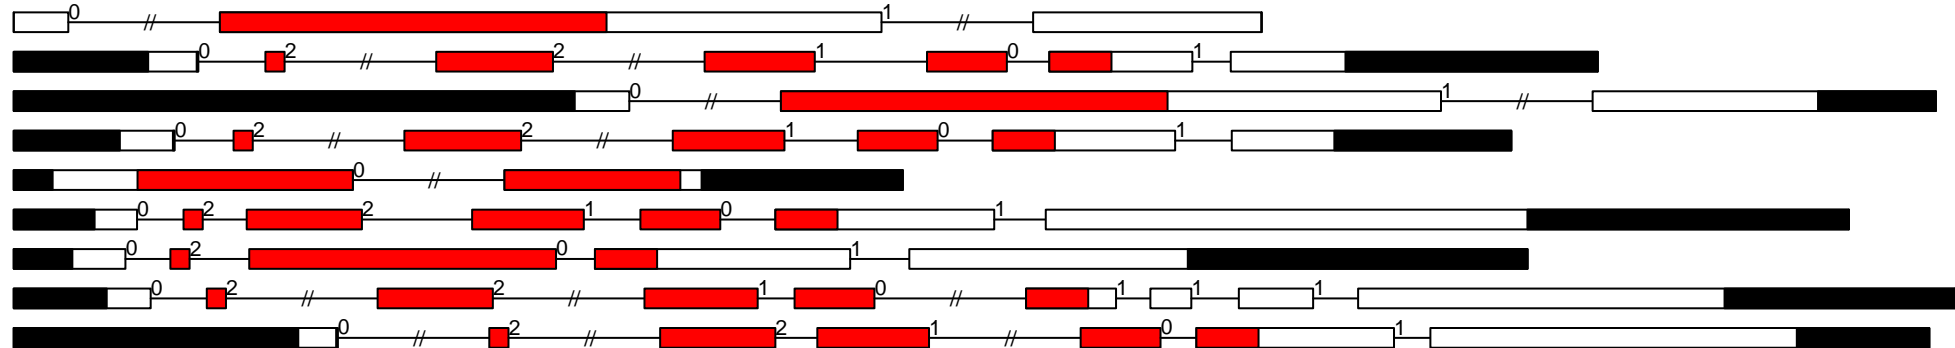

-1000

0

1000

2000

3000

4000

# S.mo AGC\_MAST exon-intron and kinase domain diagram (all)

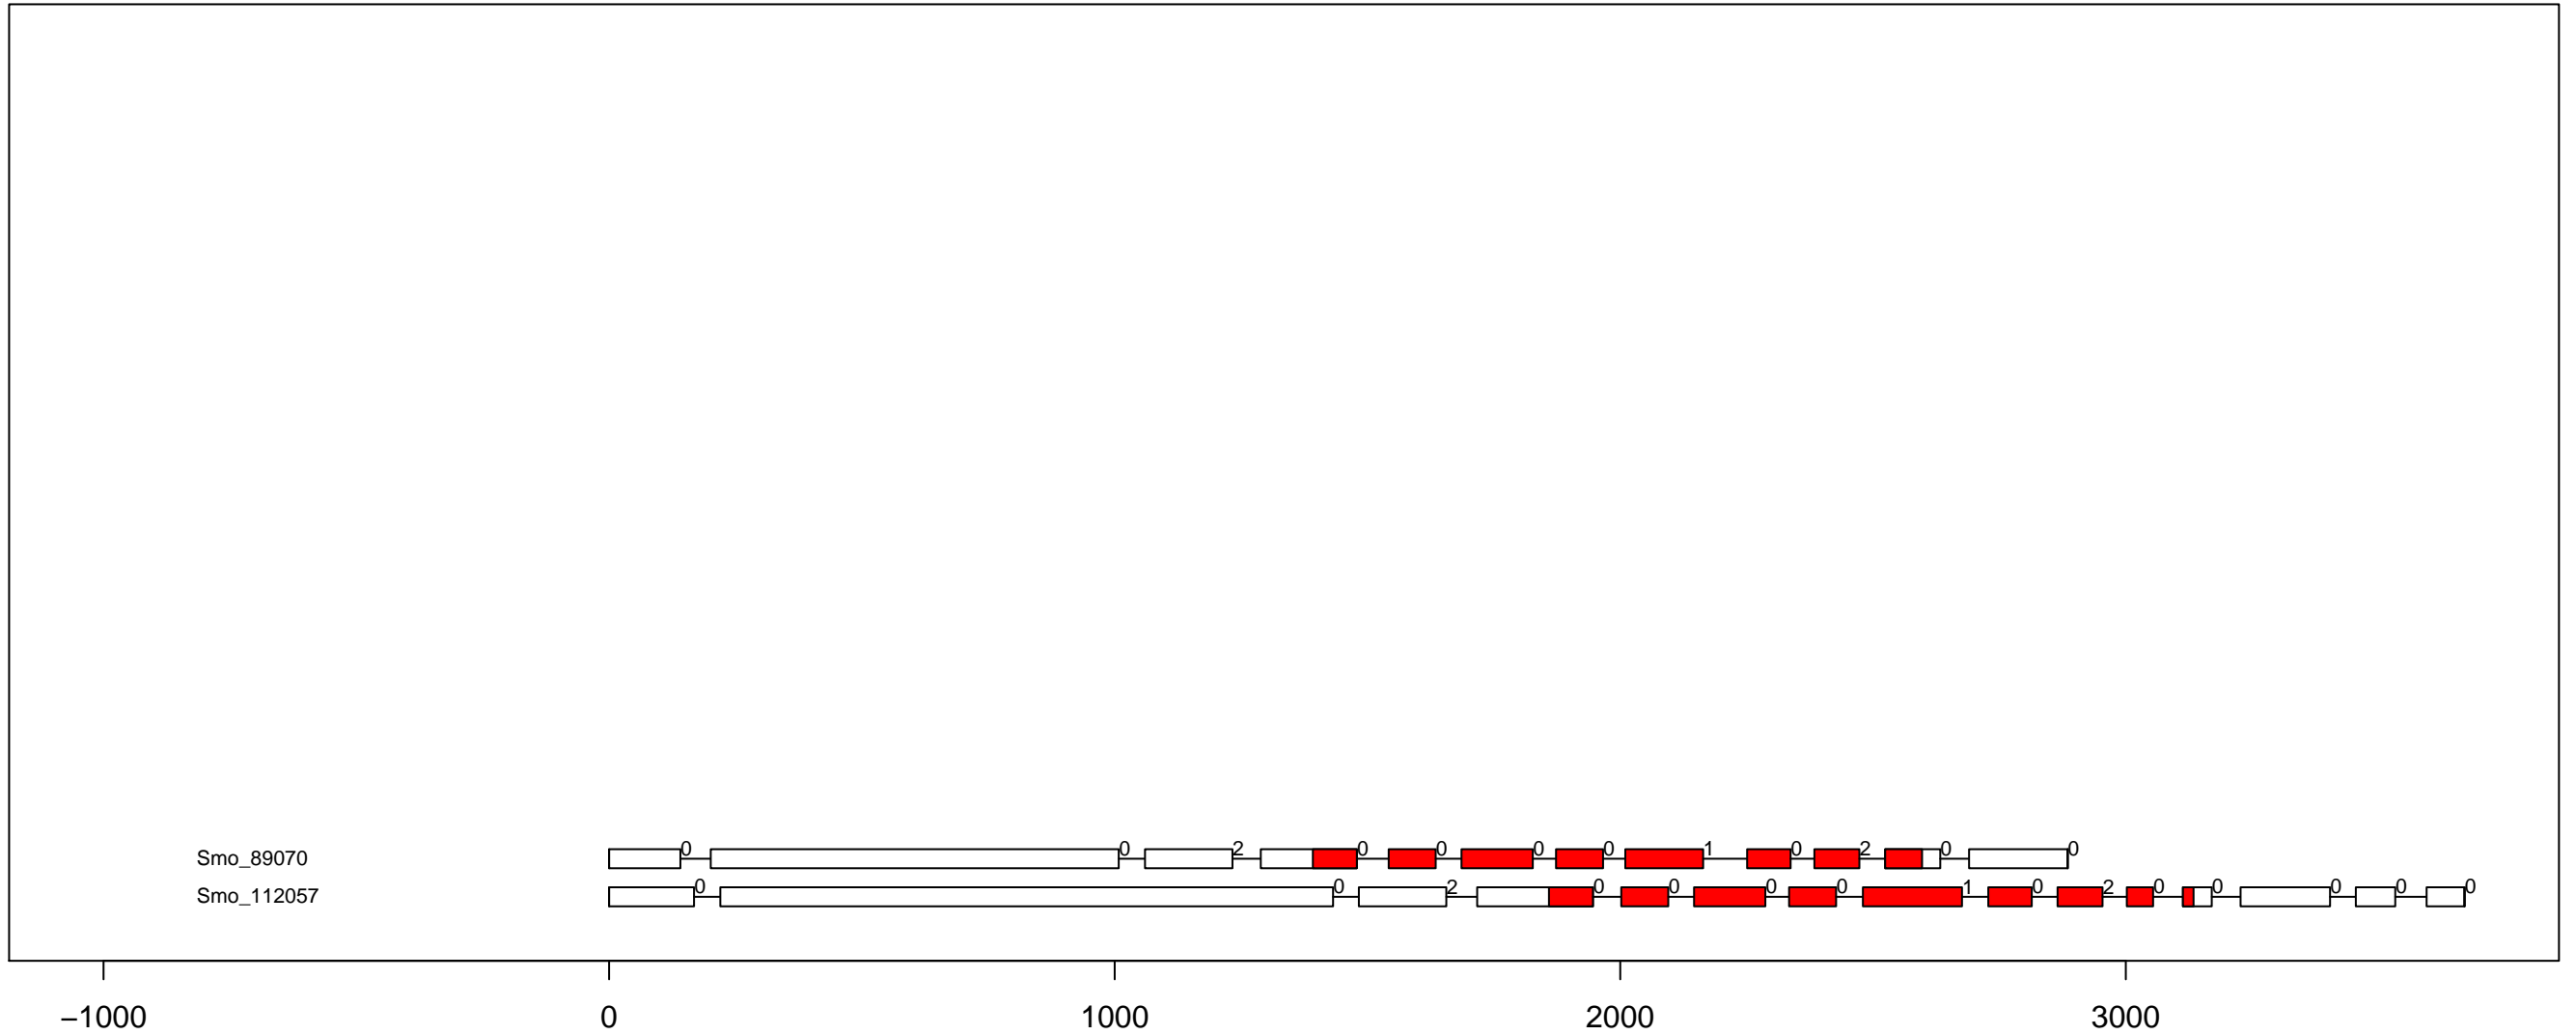

# S.mo AGC\_NDR exon-intron and kinase domain diagram (all)

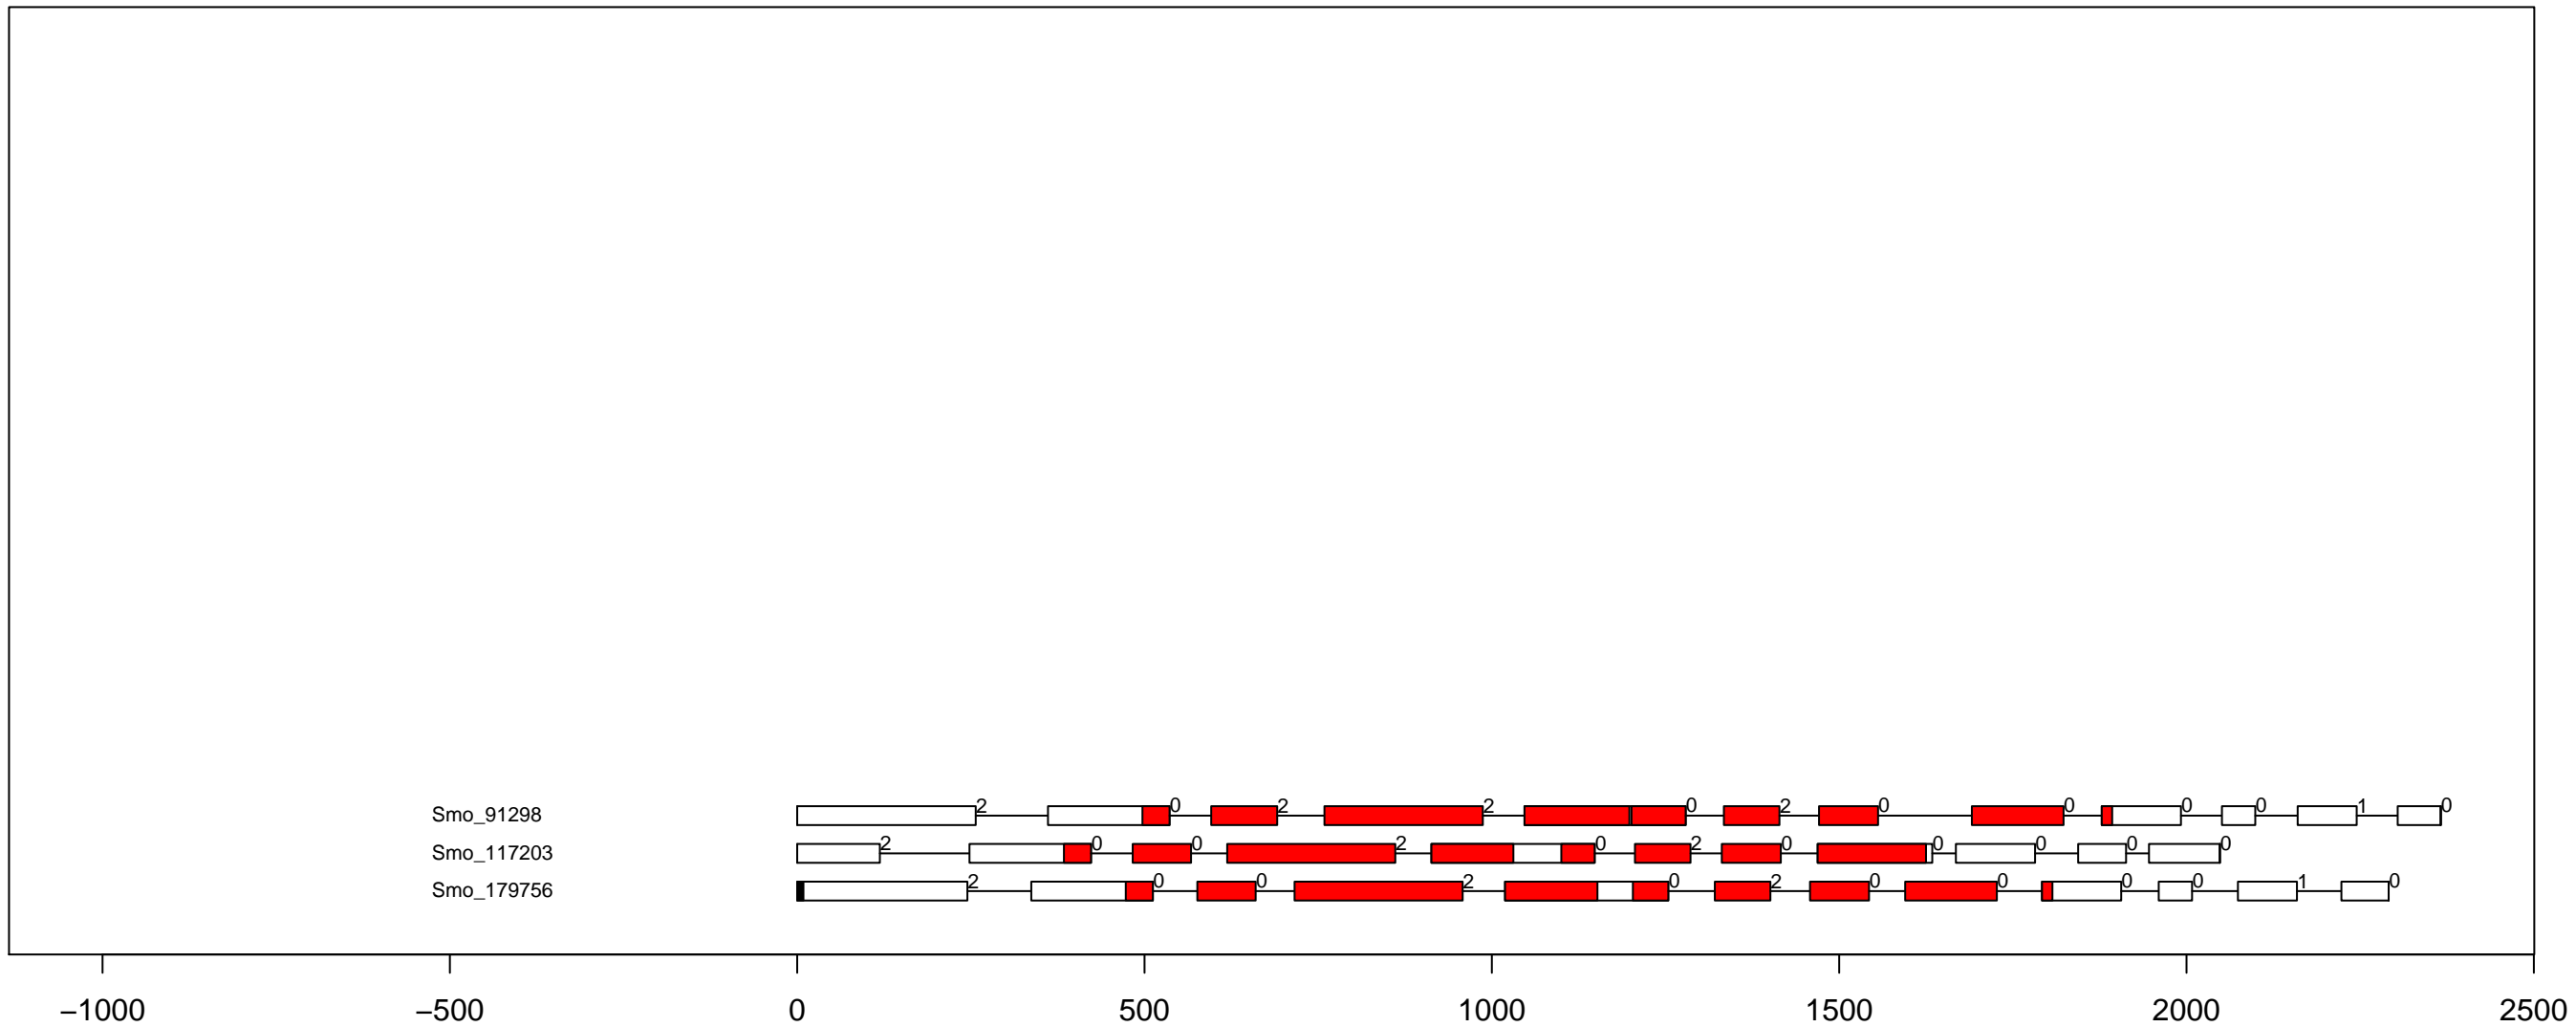



# S.mo AGC\_PDK1 exon-intron and kinase domain diagram (all)

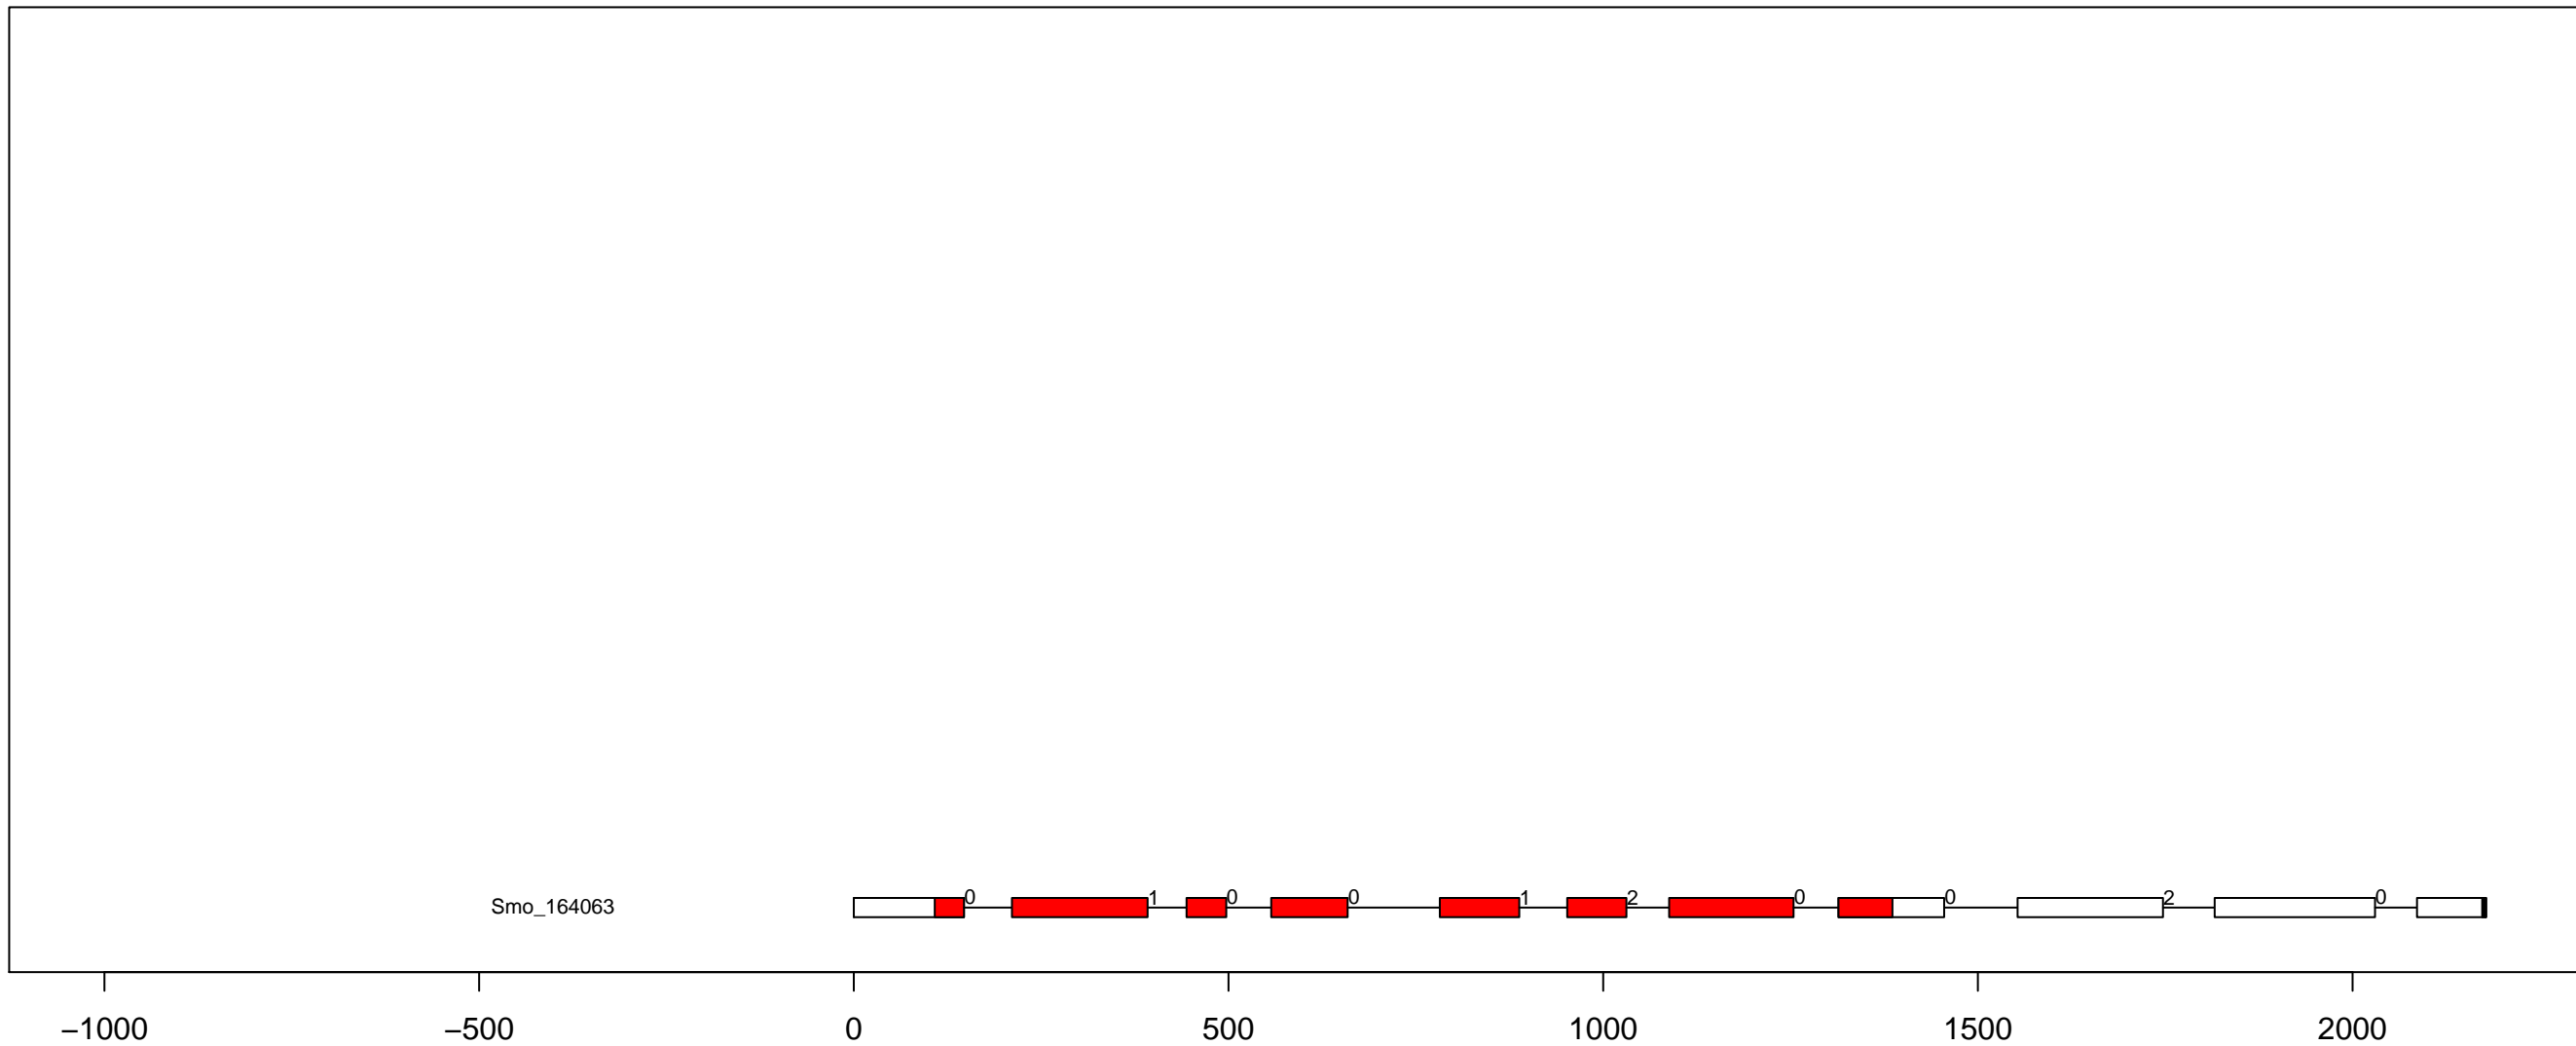

# S.mo AGC\_PKA-PKG exon-intron and kinase domain diagram (all)

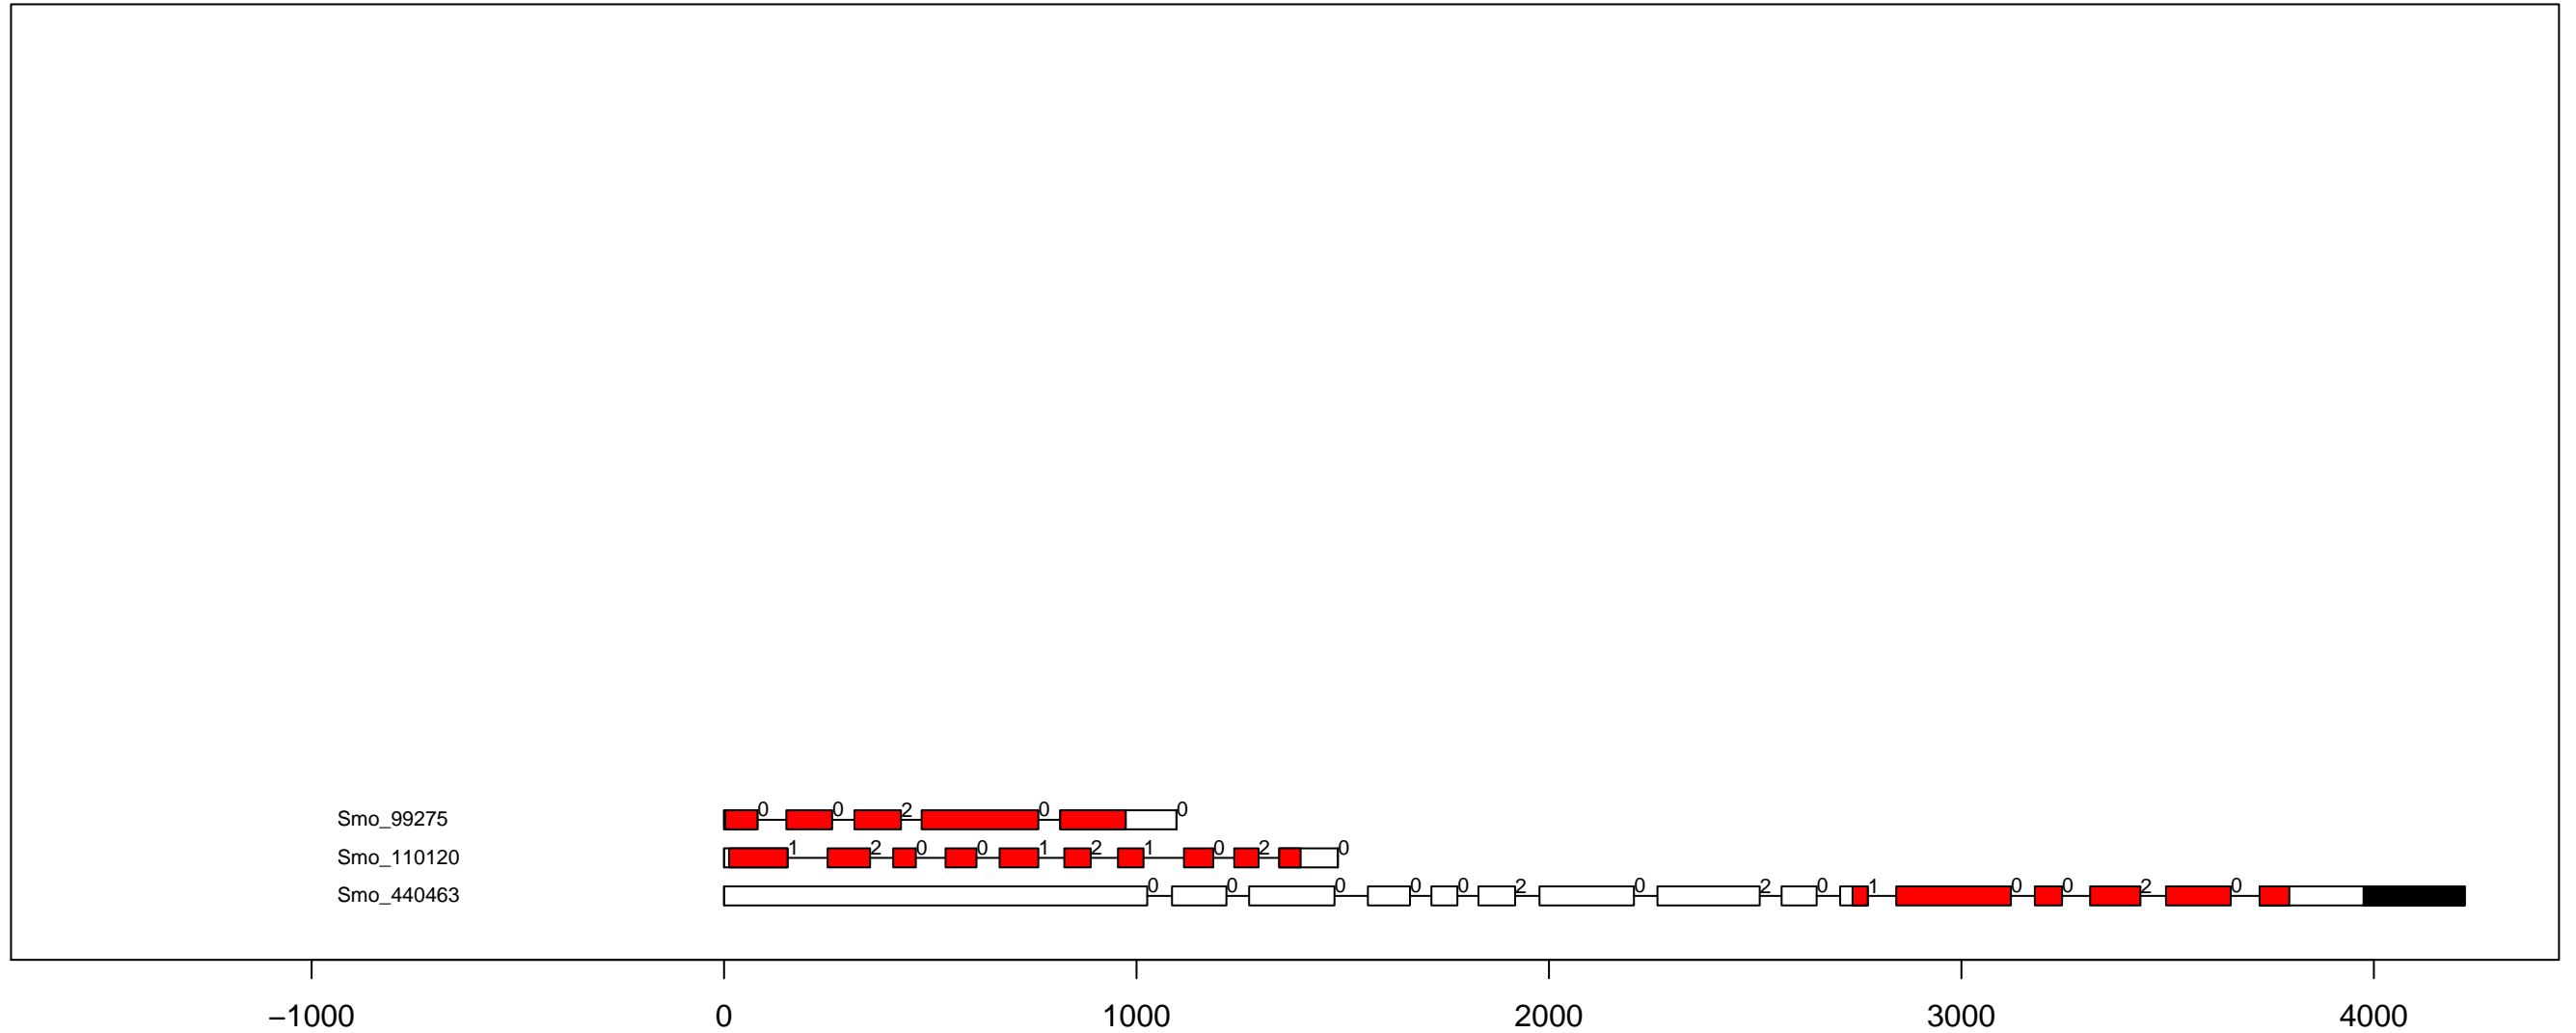

### S.mo AGC\_RSK-2 exon-intron and kinase domain diagram (all)

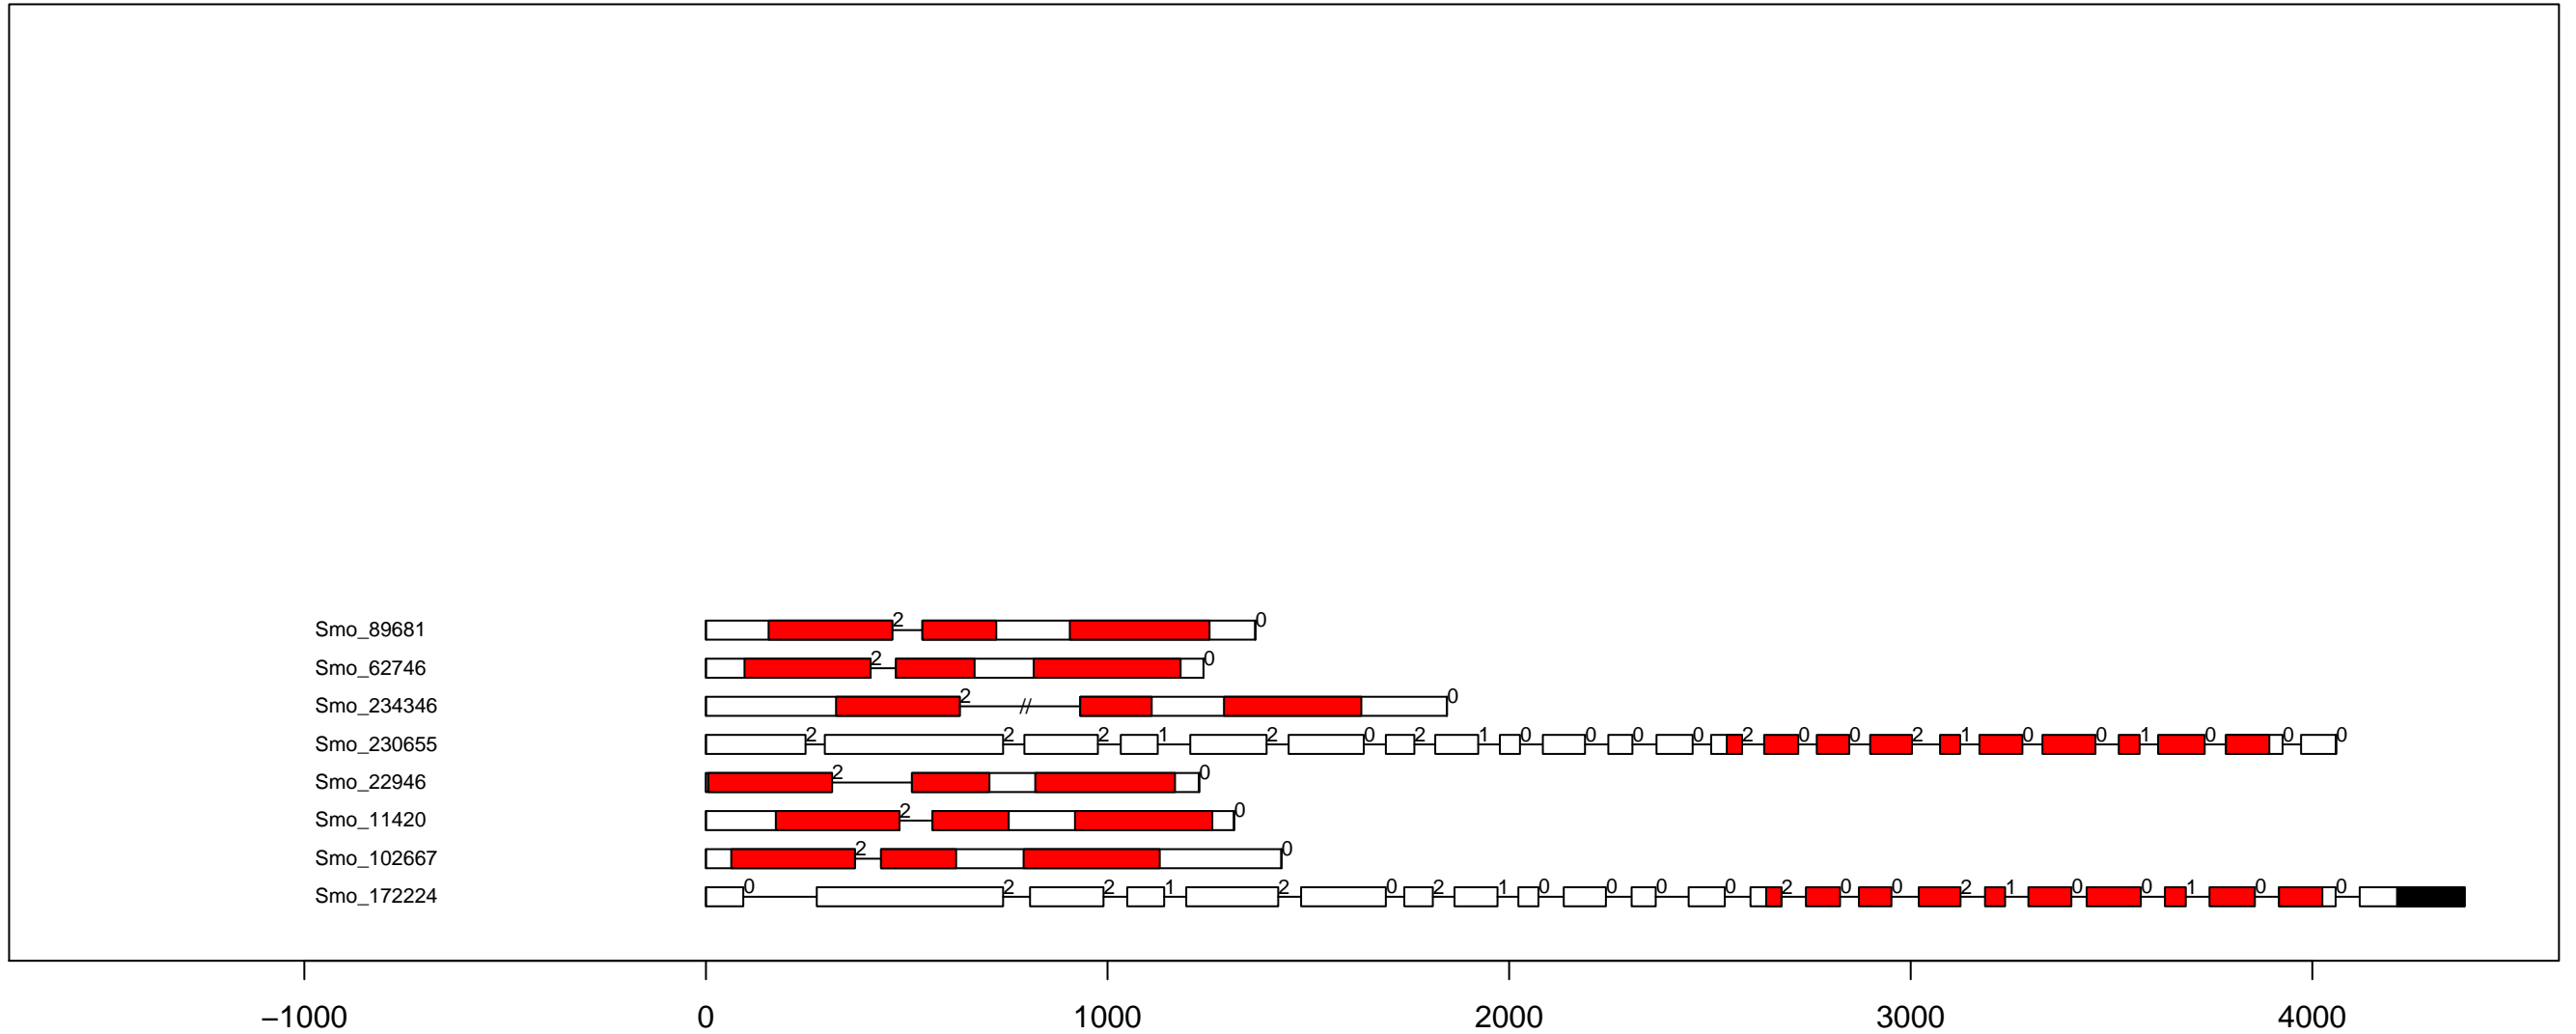

# S.mo AGC-PI exon-intron and kinase domain diagram (all)

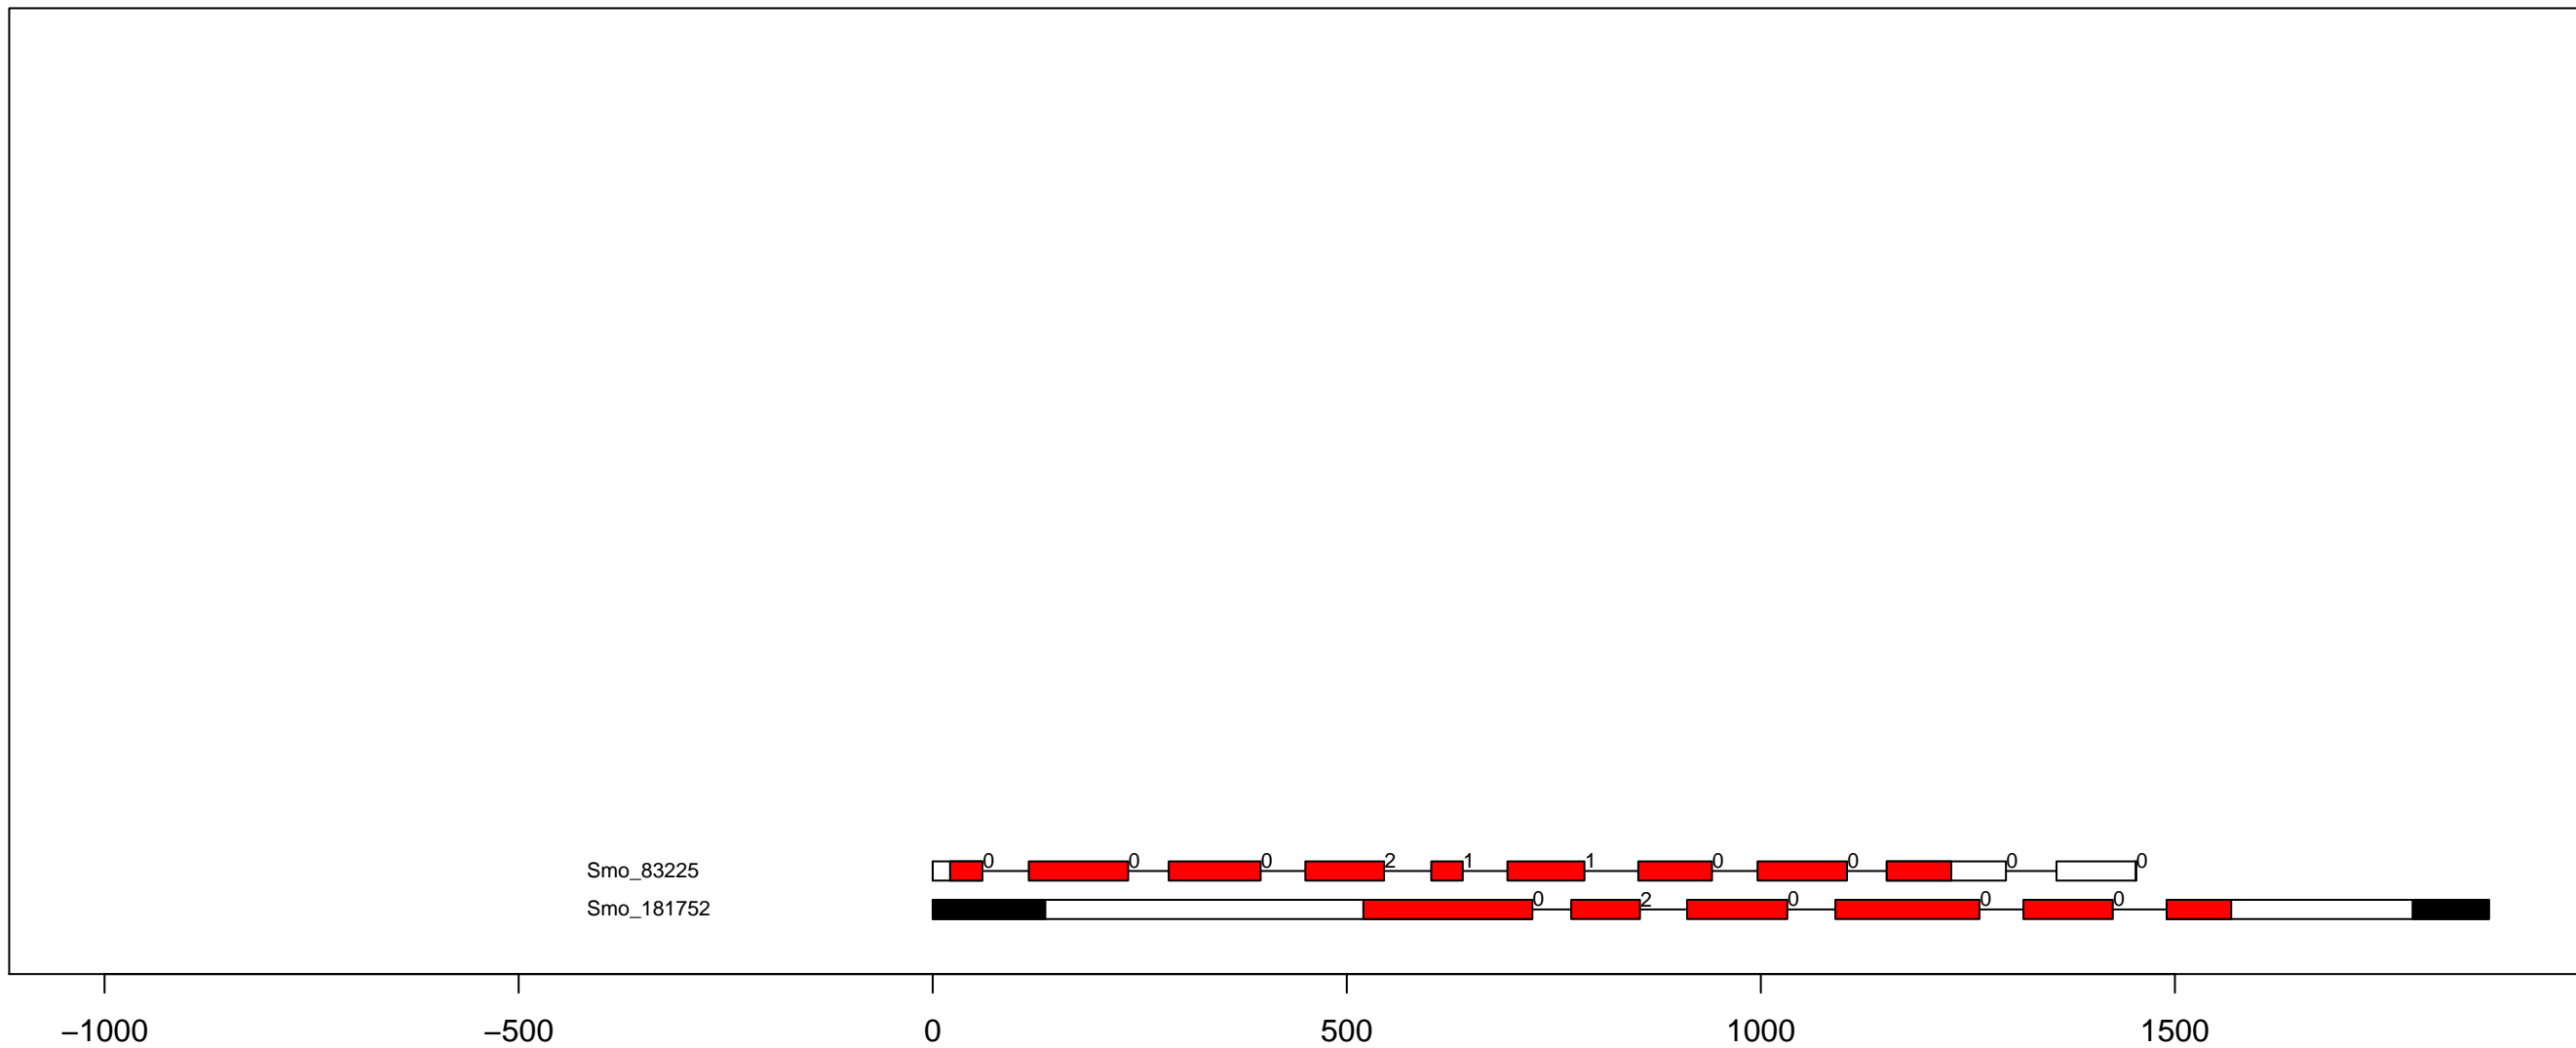

# S.mo AurL-Cr-1 exon-intron and kinase domain diagram (all)

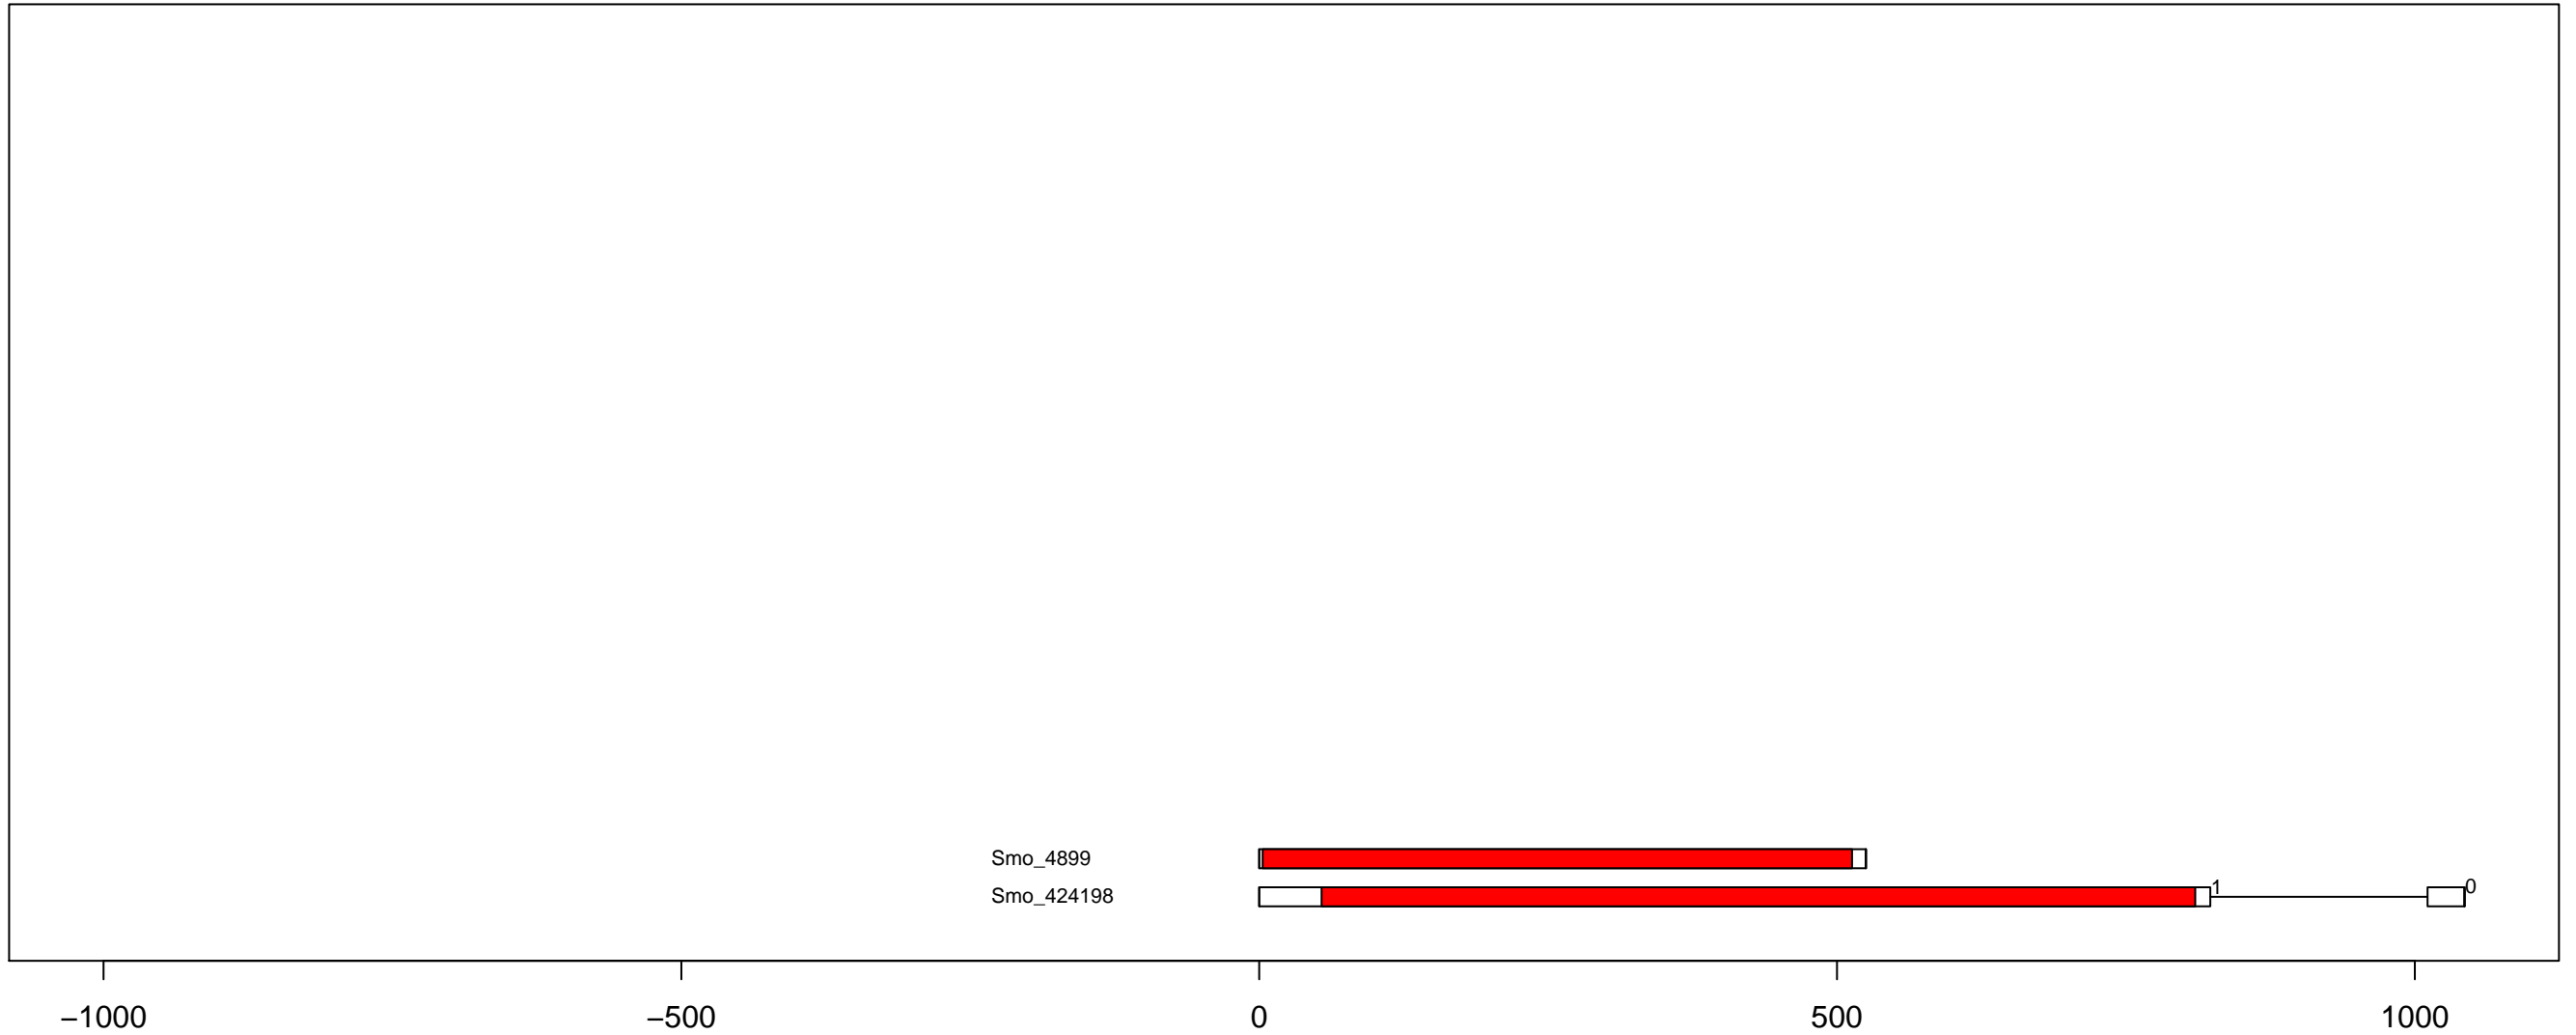

# S.mo Aur exon-intron and kinase domain diagram (all)

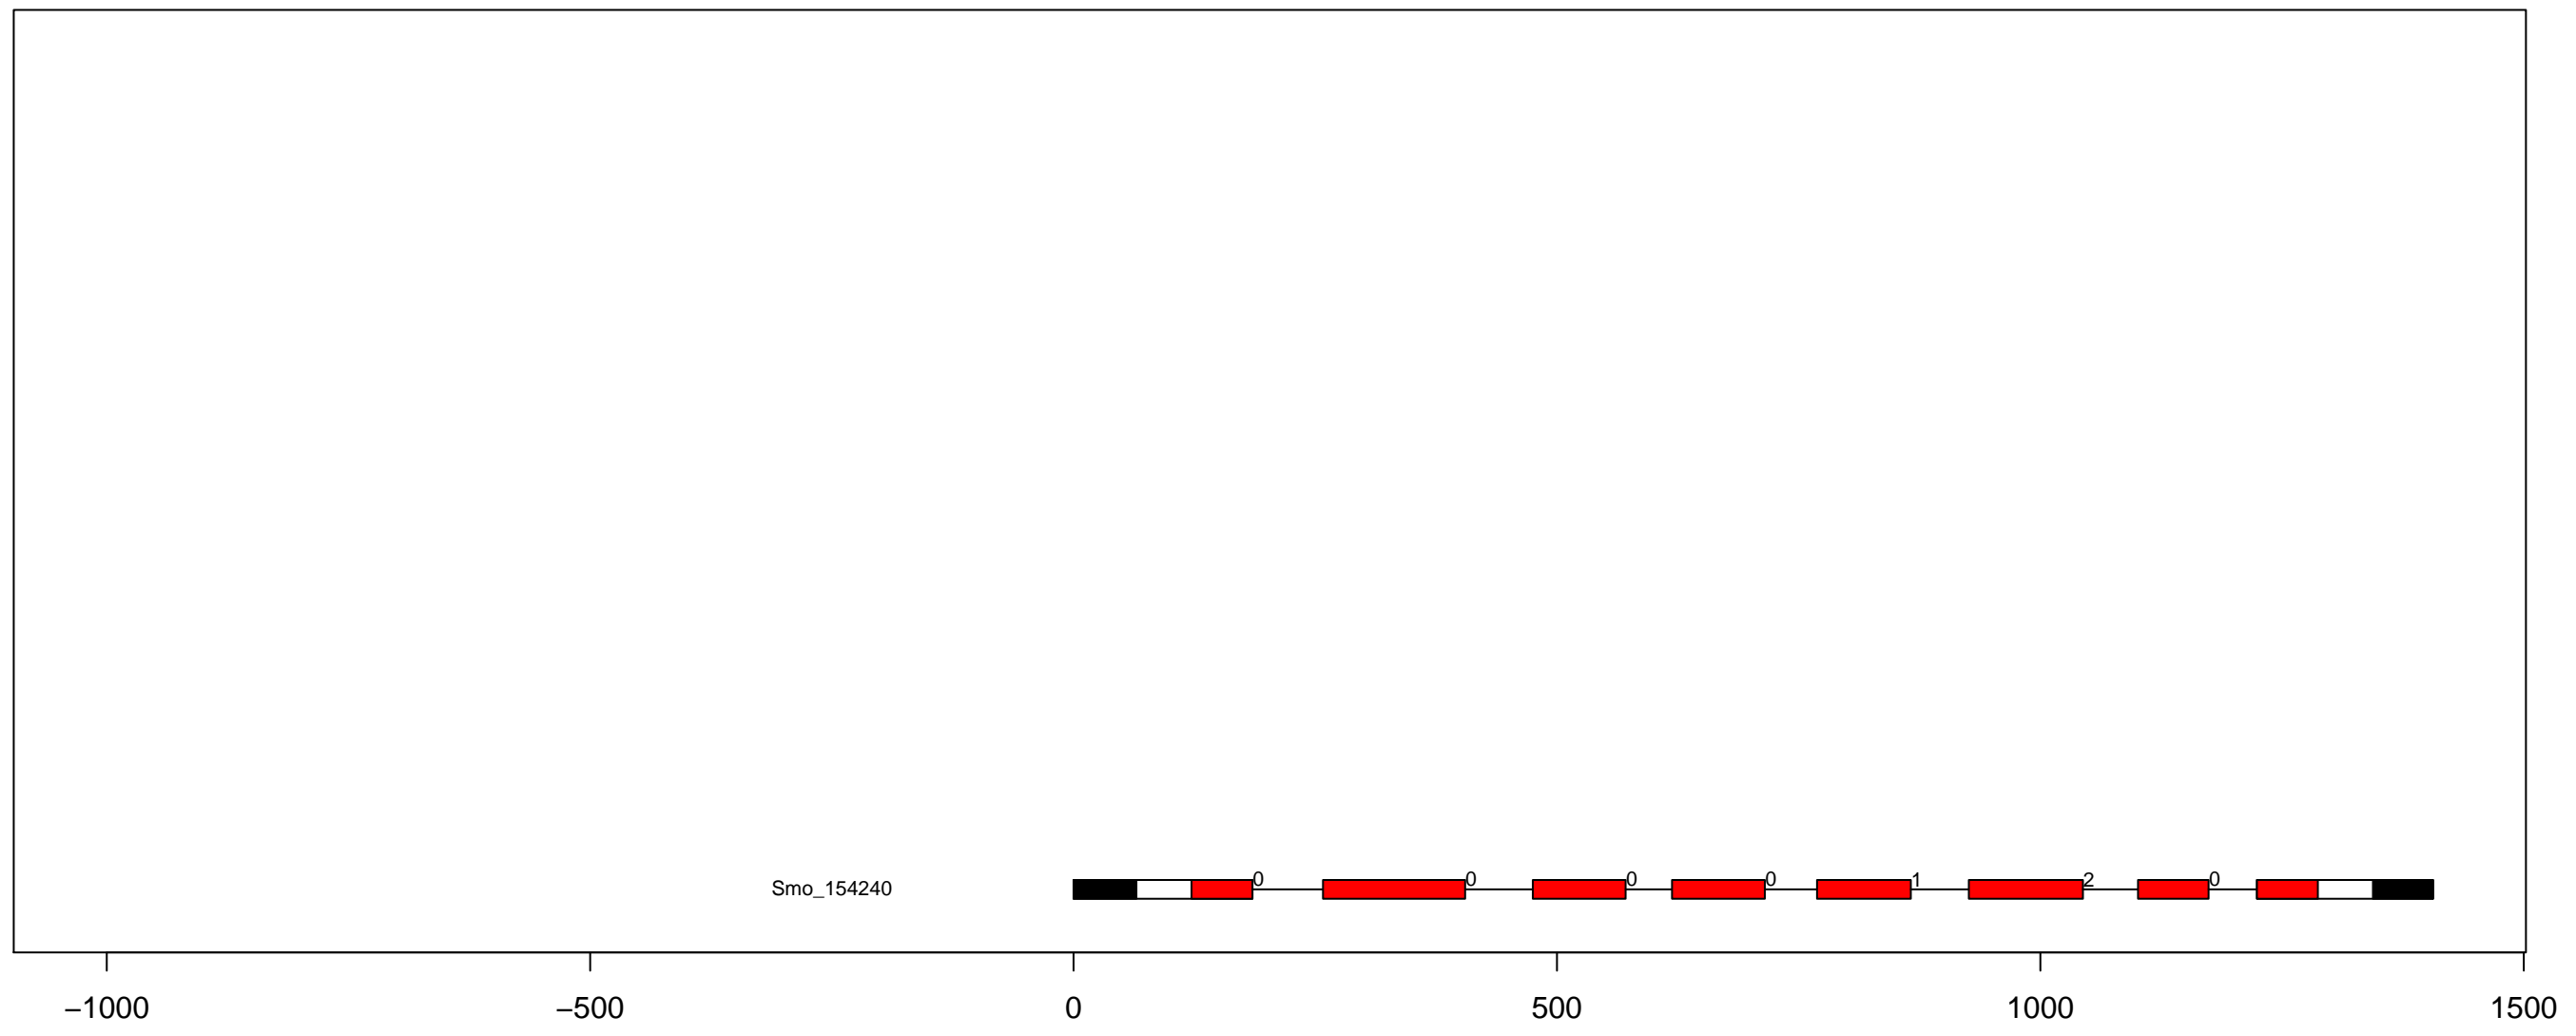

S.mo CAMK\_AMPK exon-intron and kinase domain diagram (all)

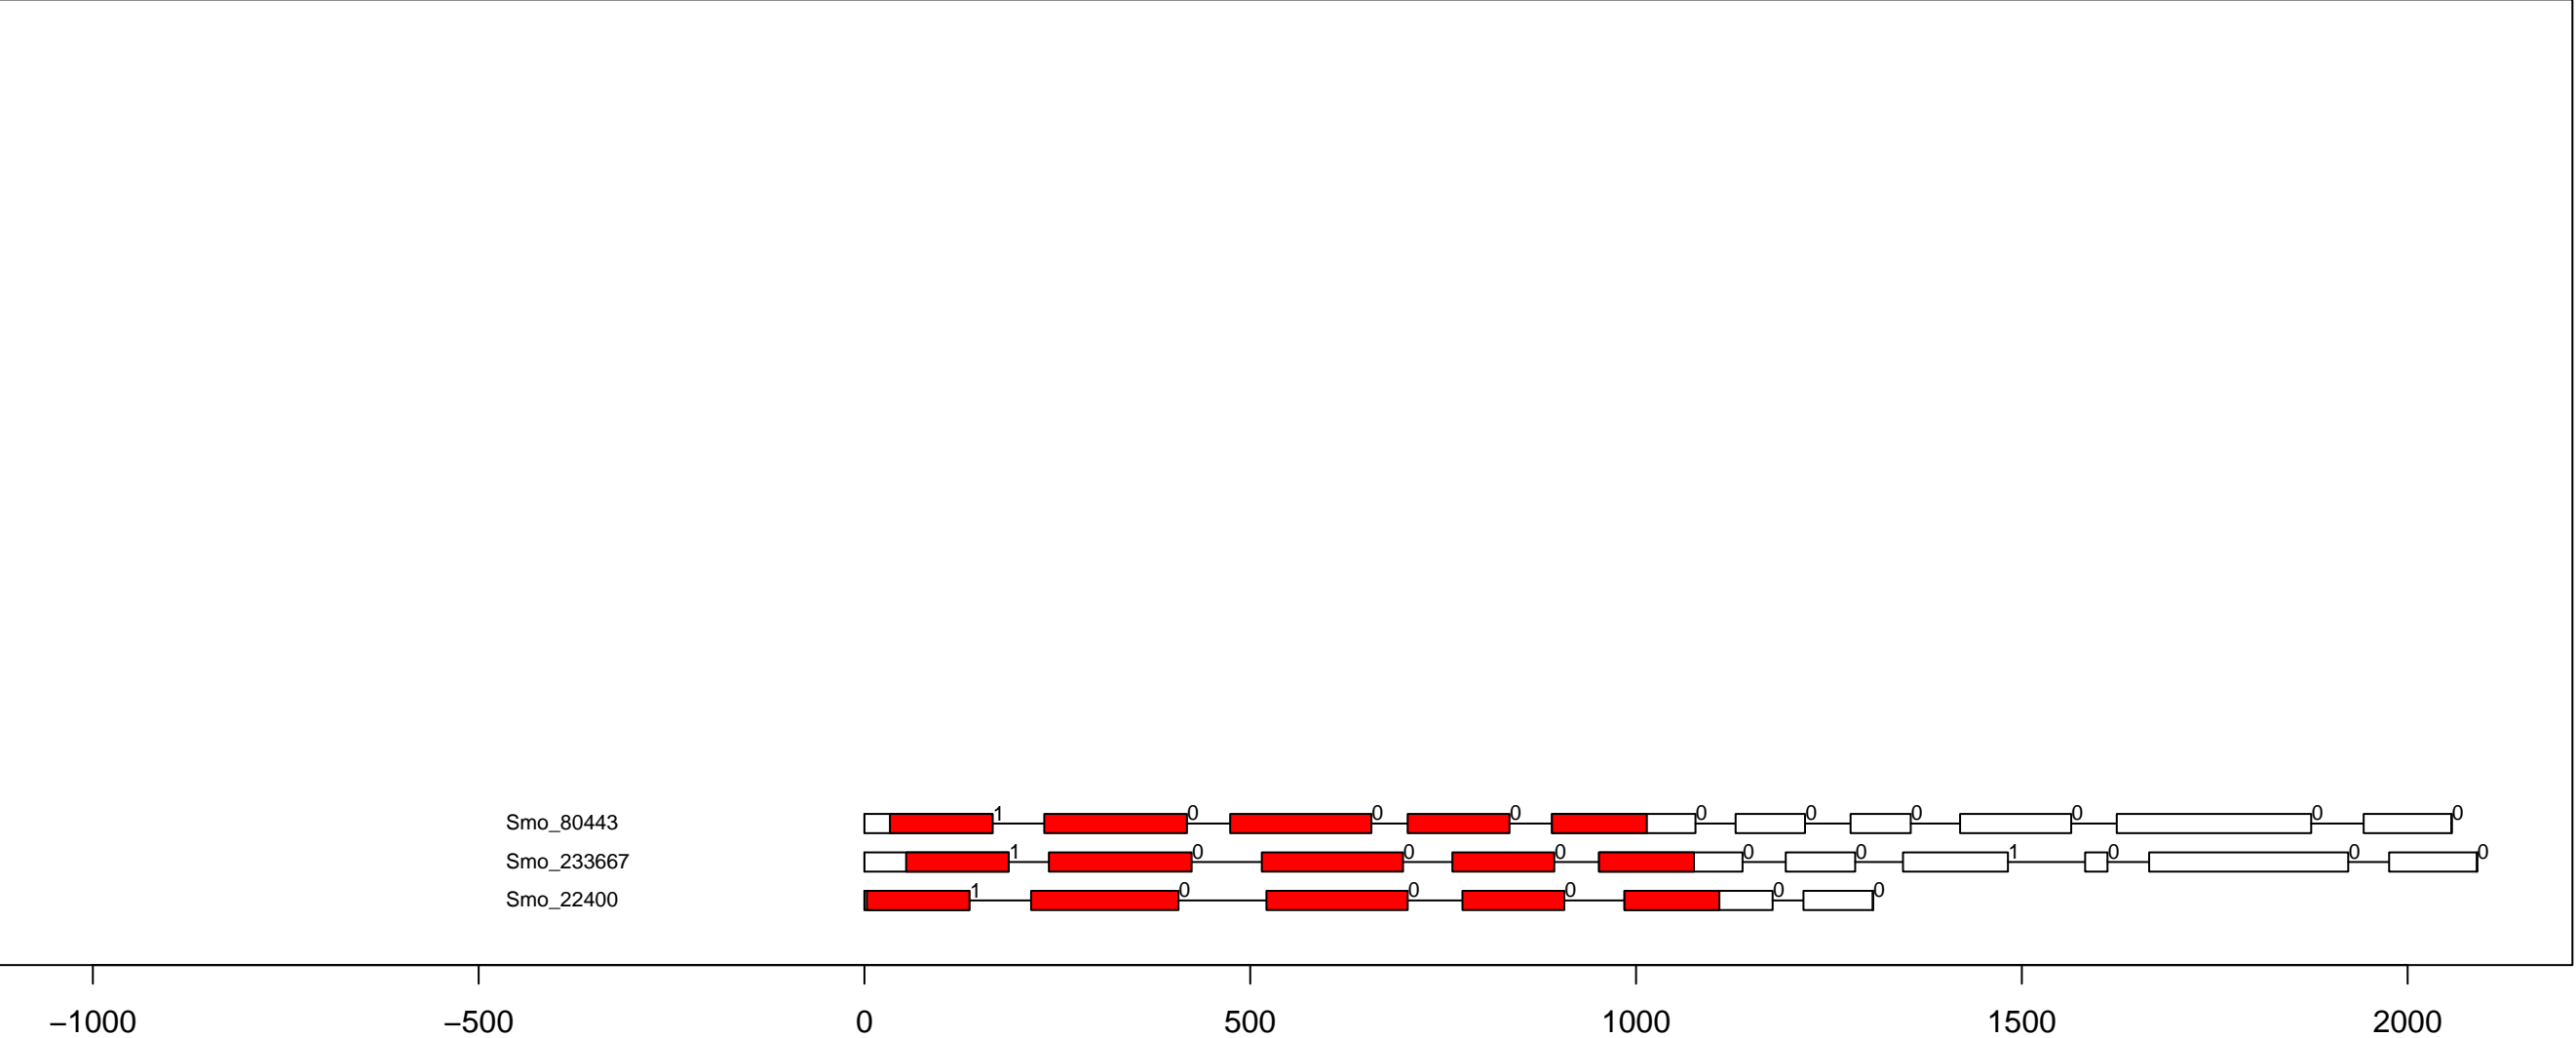

# S.mo CAMK\_CAMK1-DCAMKL exon-intron and kinase domain diagram (all)

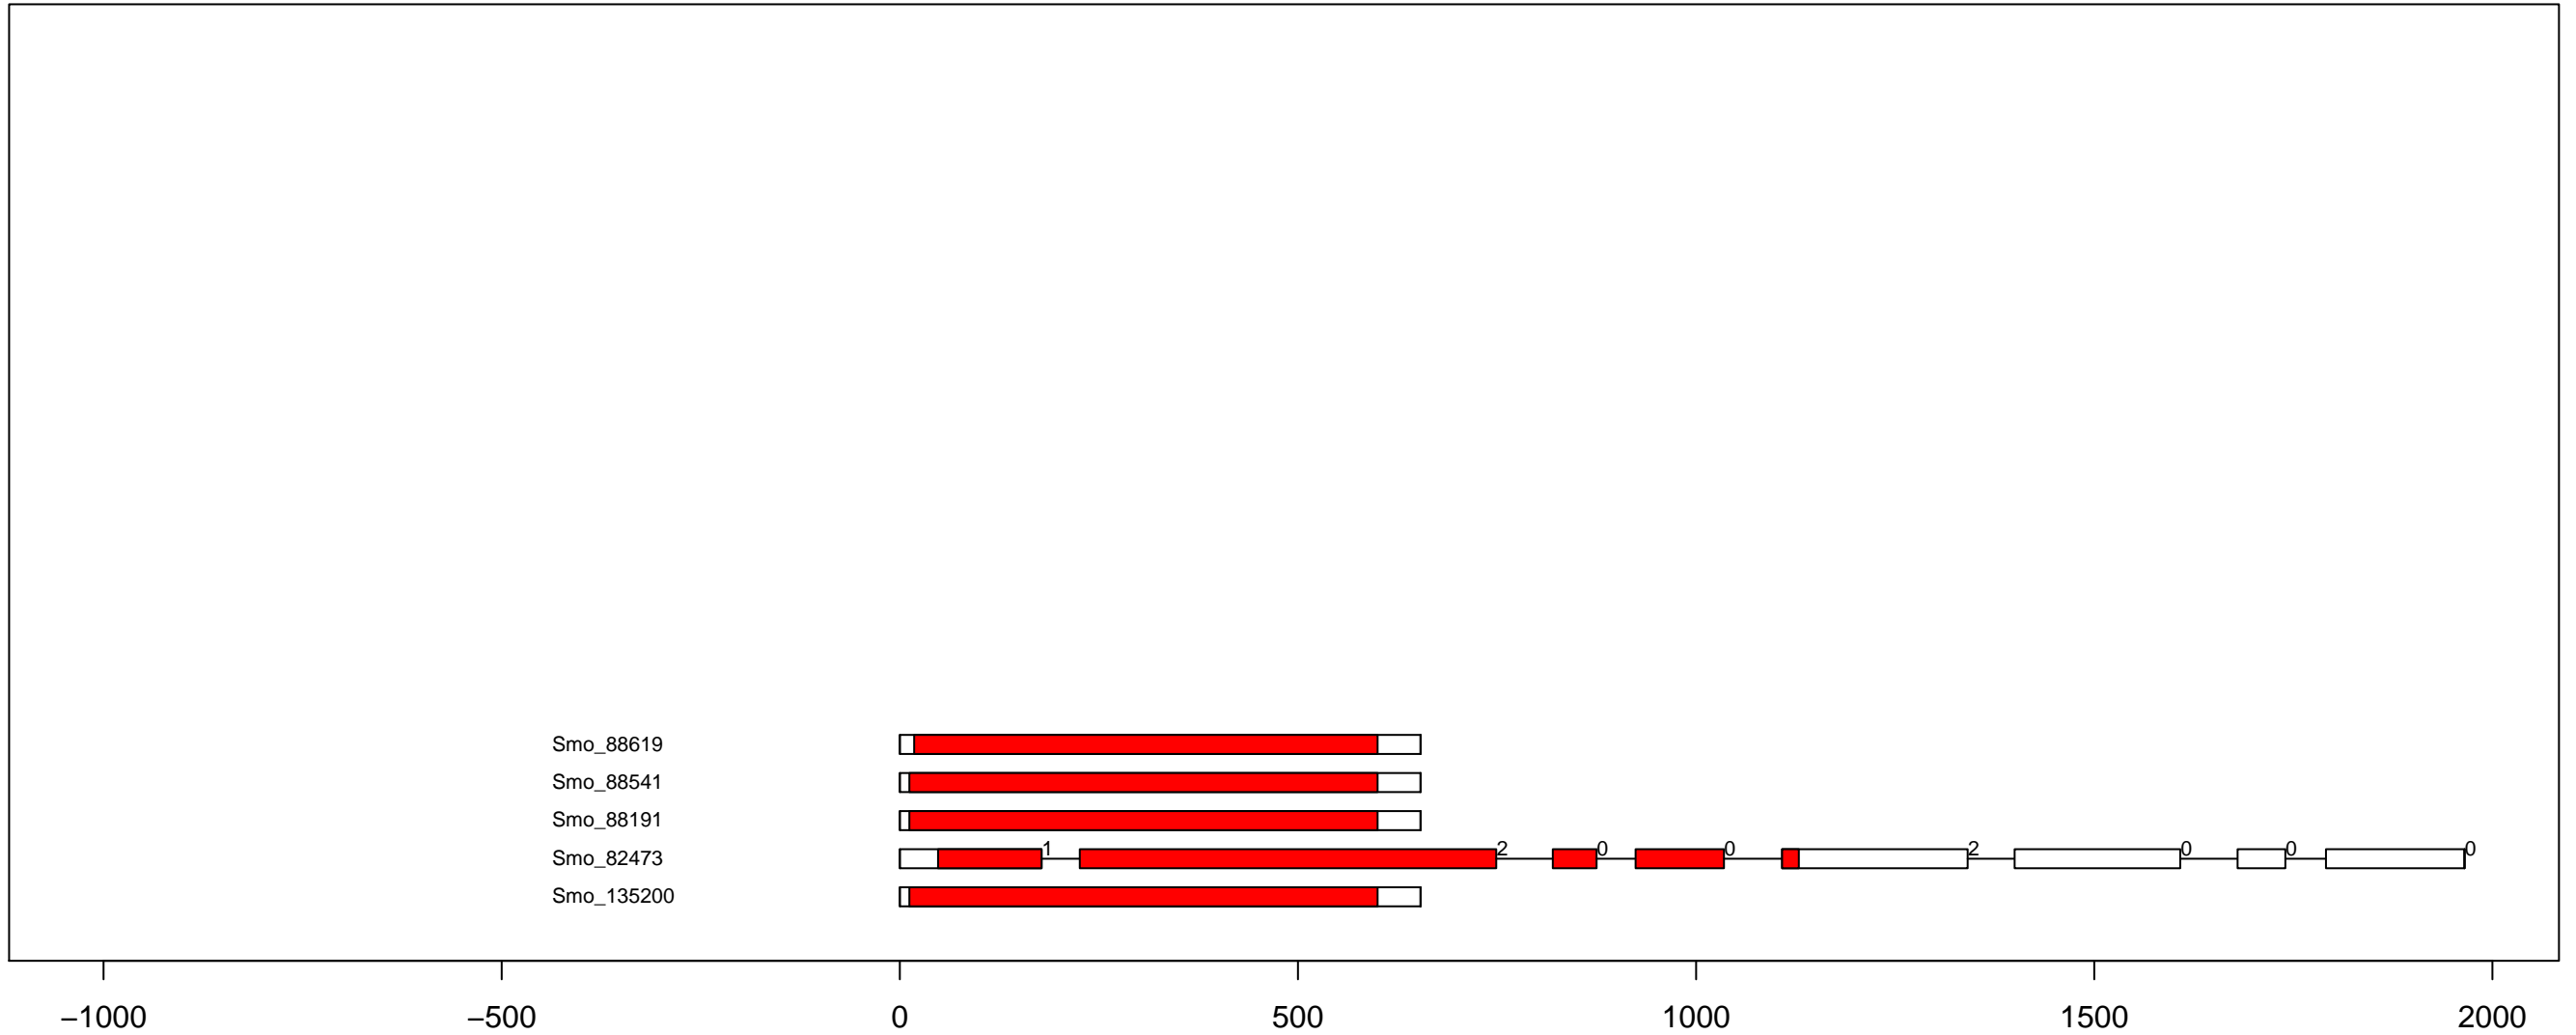



S.mo CAMK\_CAMK1-Tthe exon-intron and kinase domain diagram (all)

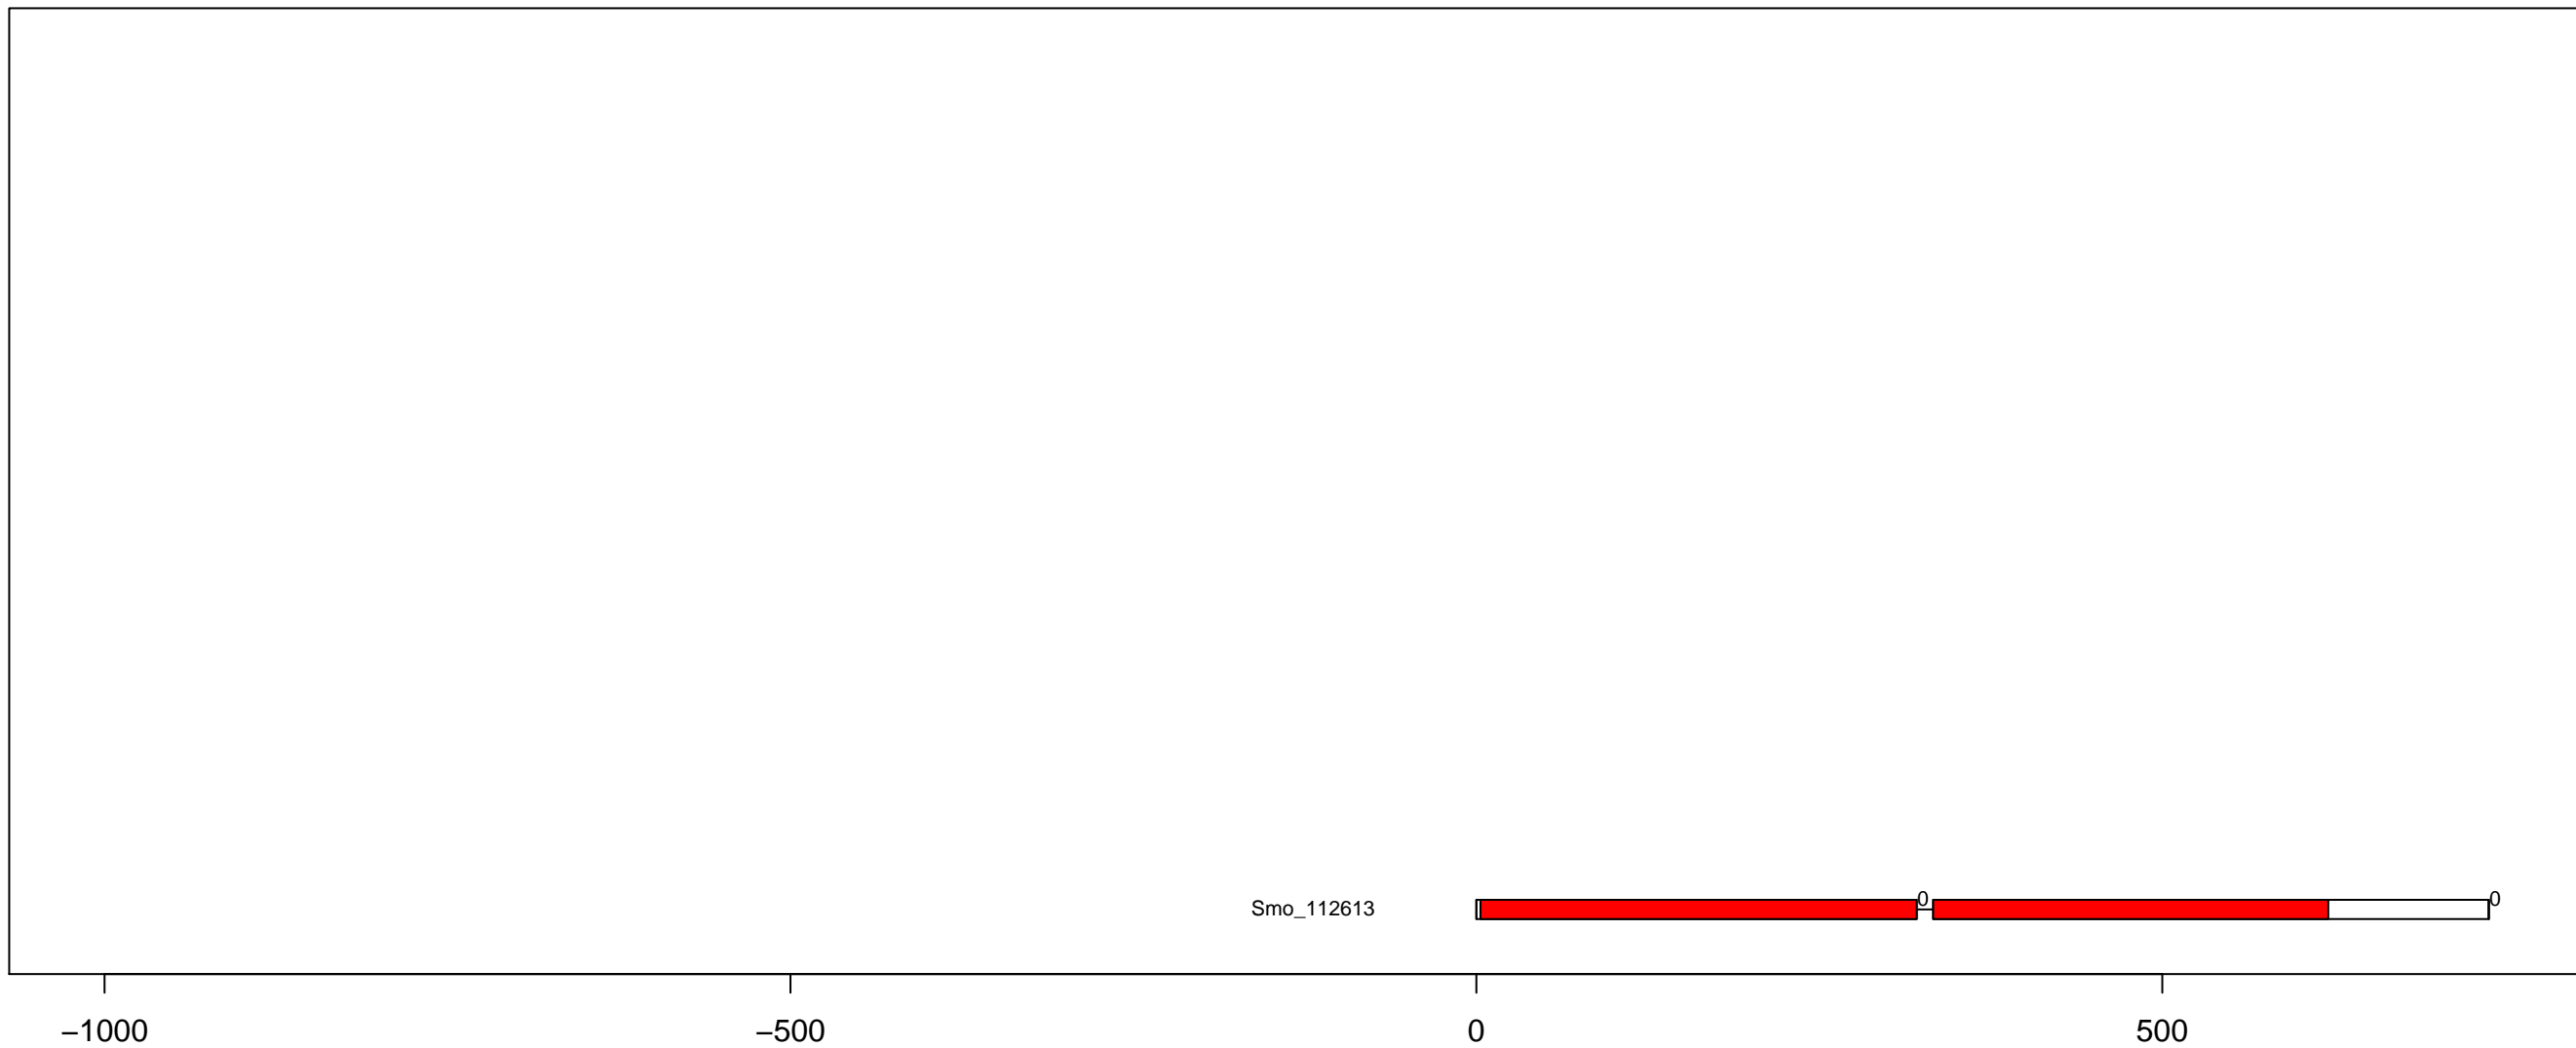

# S.mo CAMK\_CAMKL-CHK1 exon-intron and kinase domain diagram (all)

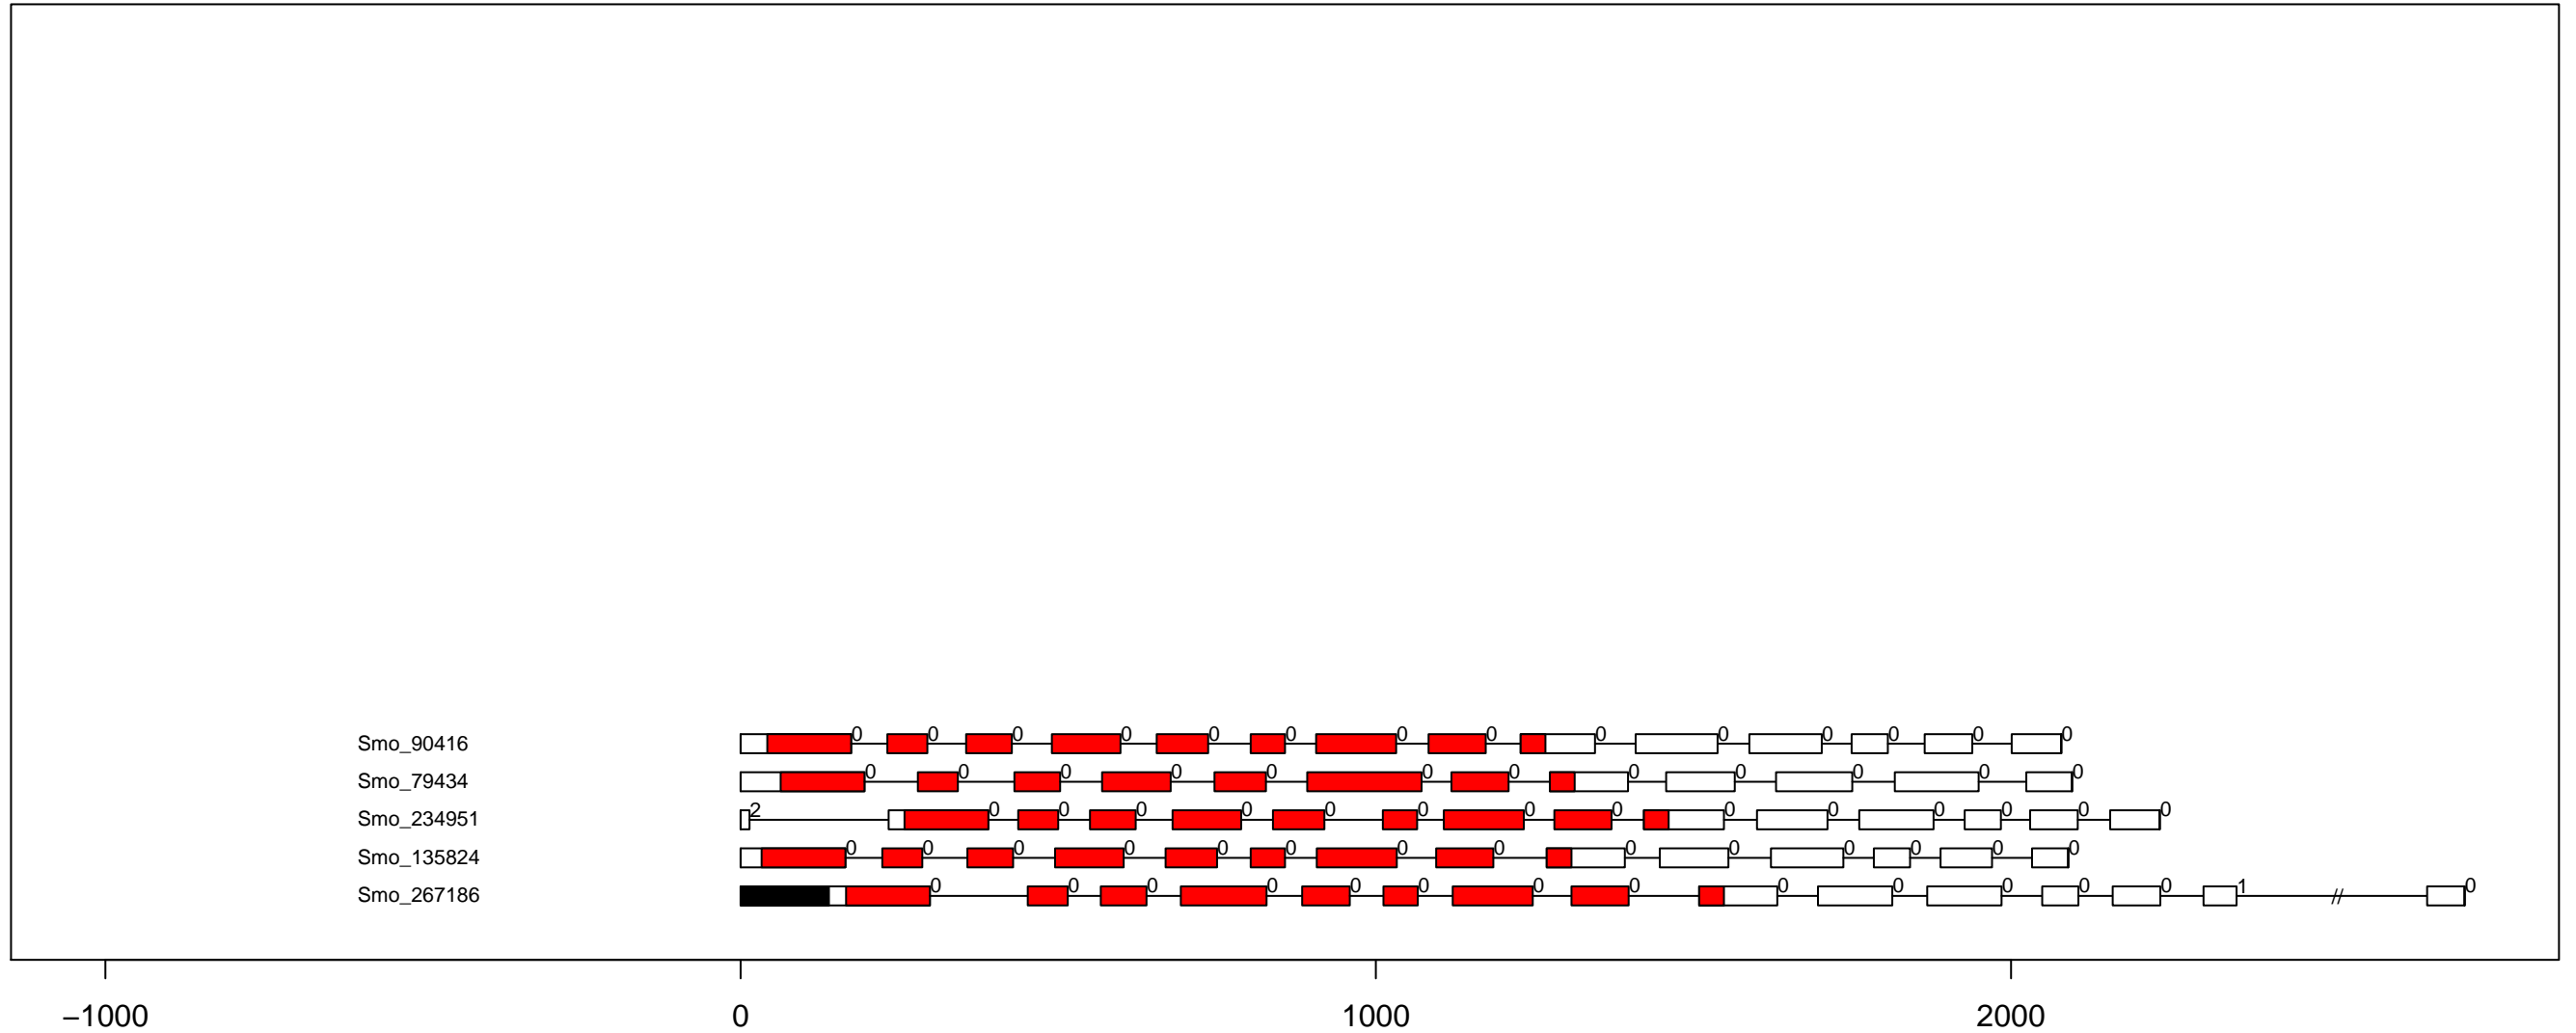

# S.mo CAMK\_CAMKL-LKB exon-intron and kinase domain diagram (all)

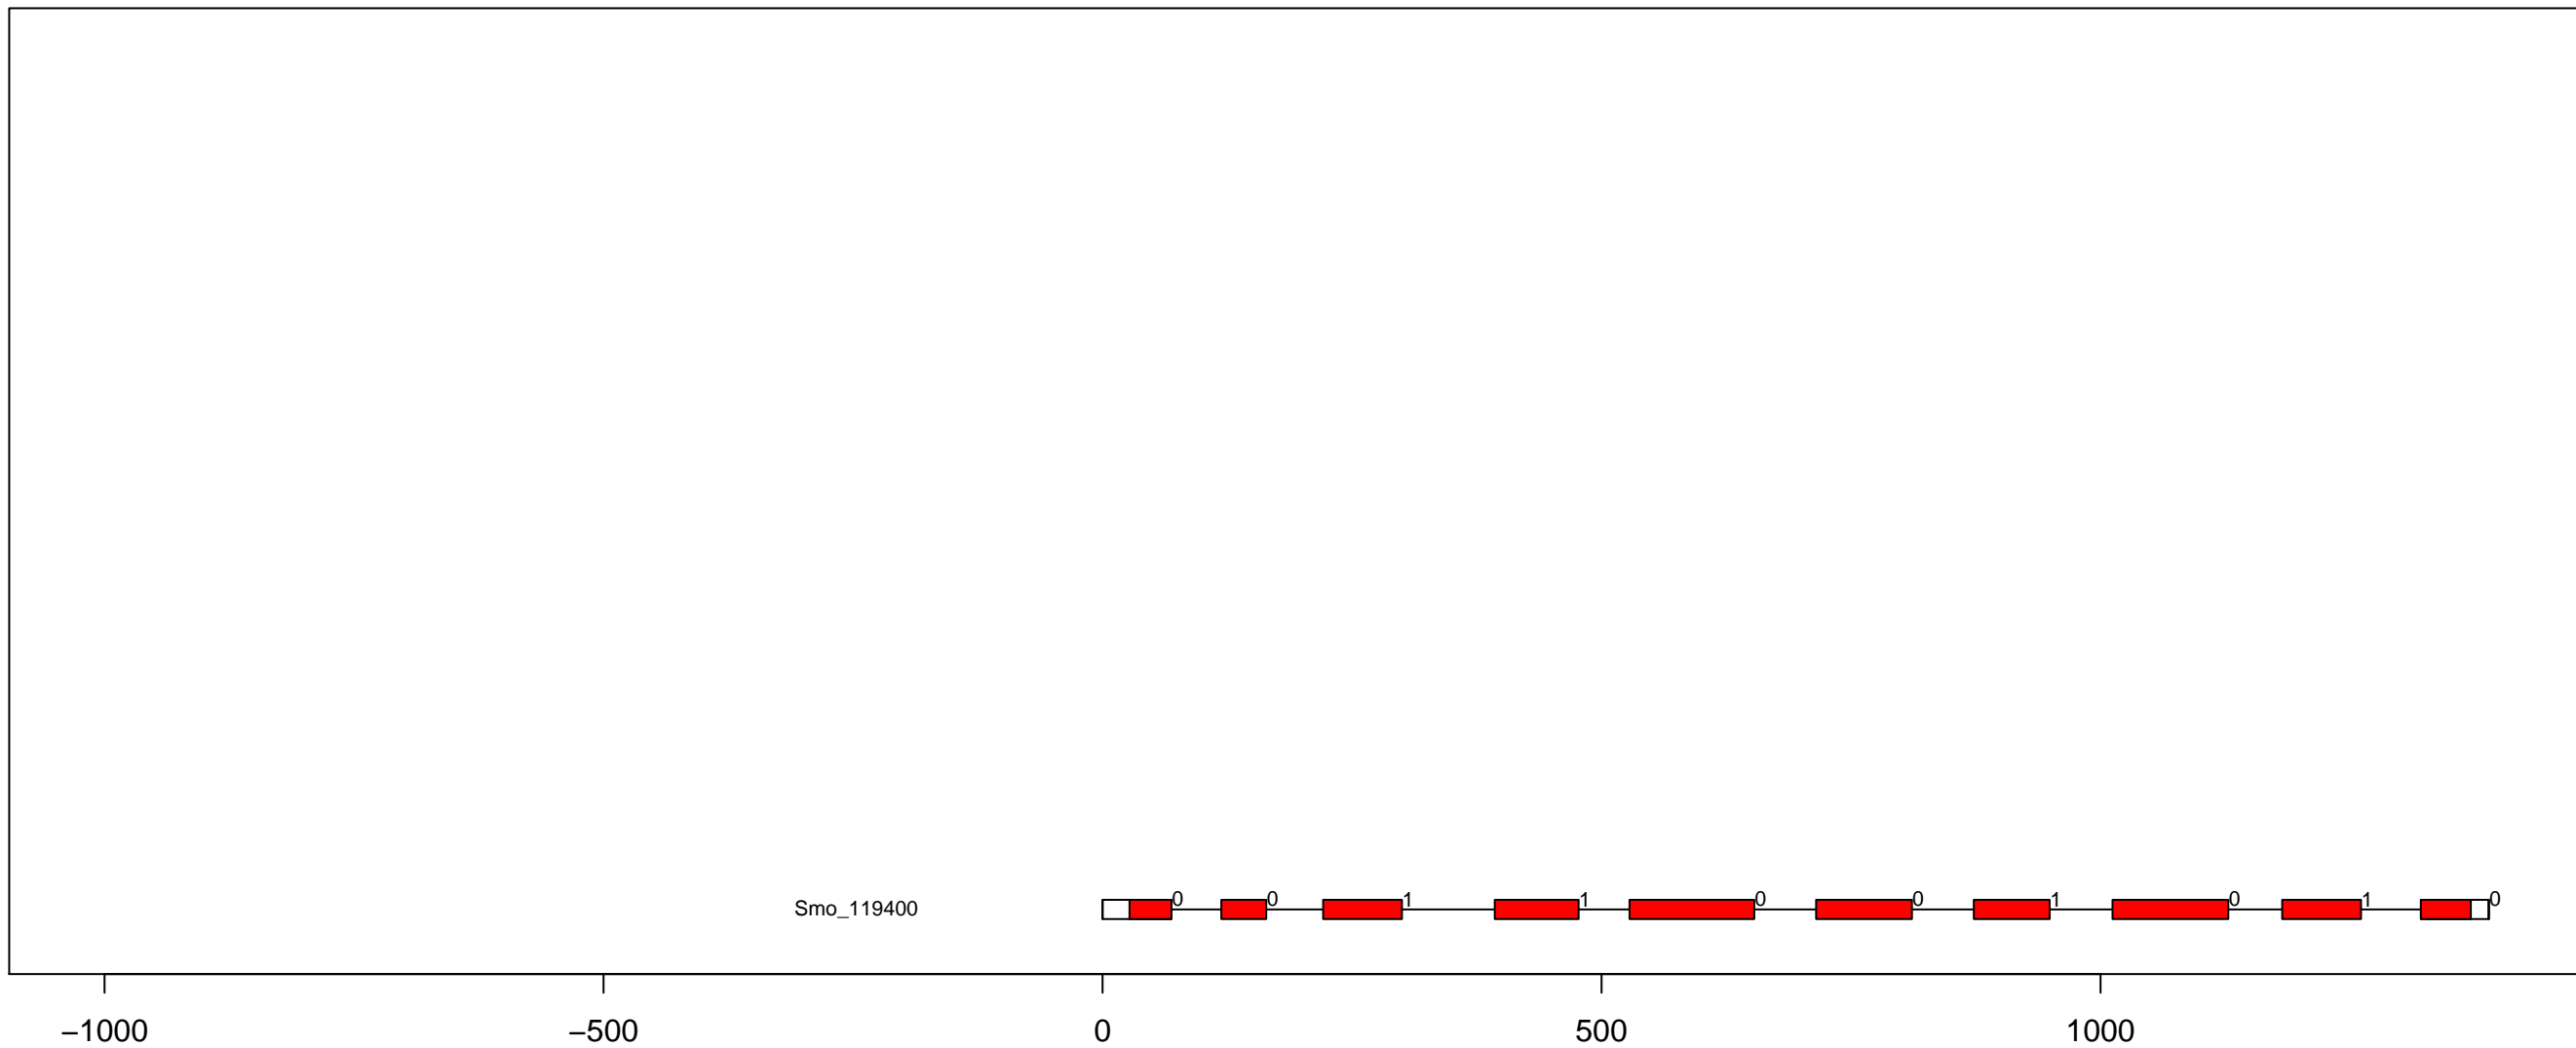

### S.mo CAMK\_CDPK exon-intron and kinase domain diagram (part 1)

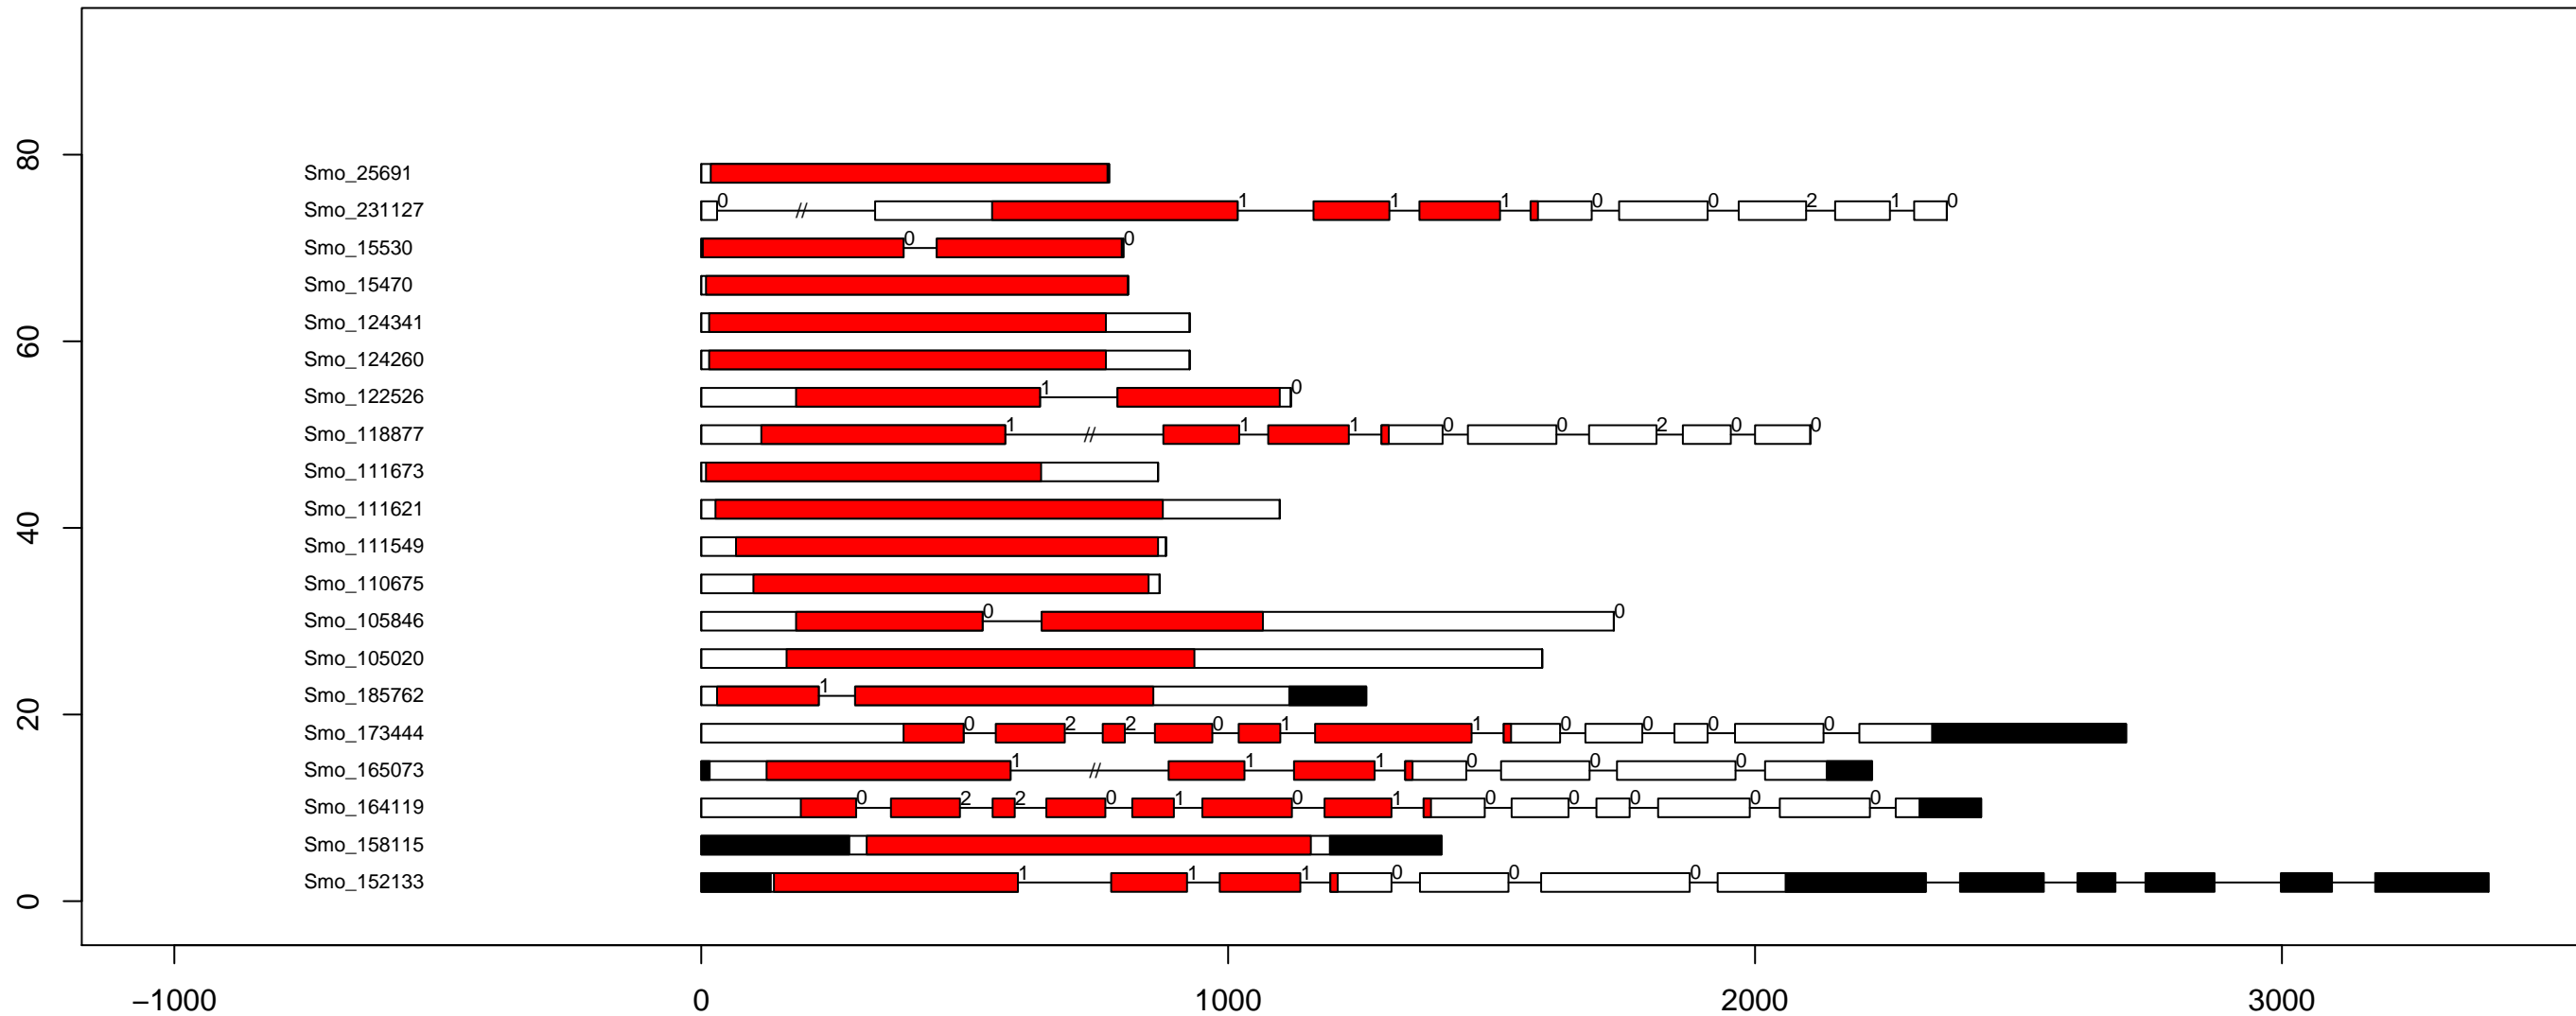

### S.mo CAMK\_CDPK exon-intron and kinase domain diagram (part 2)

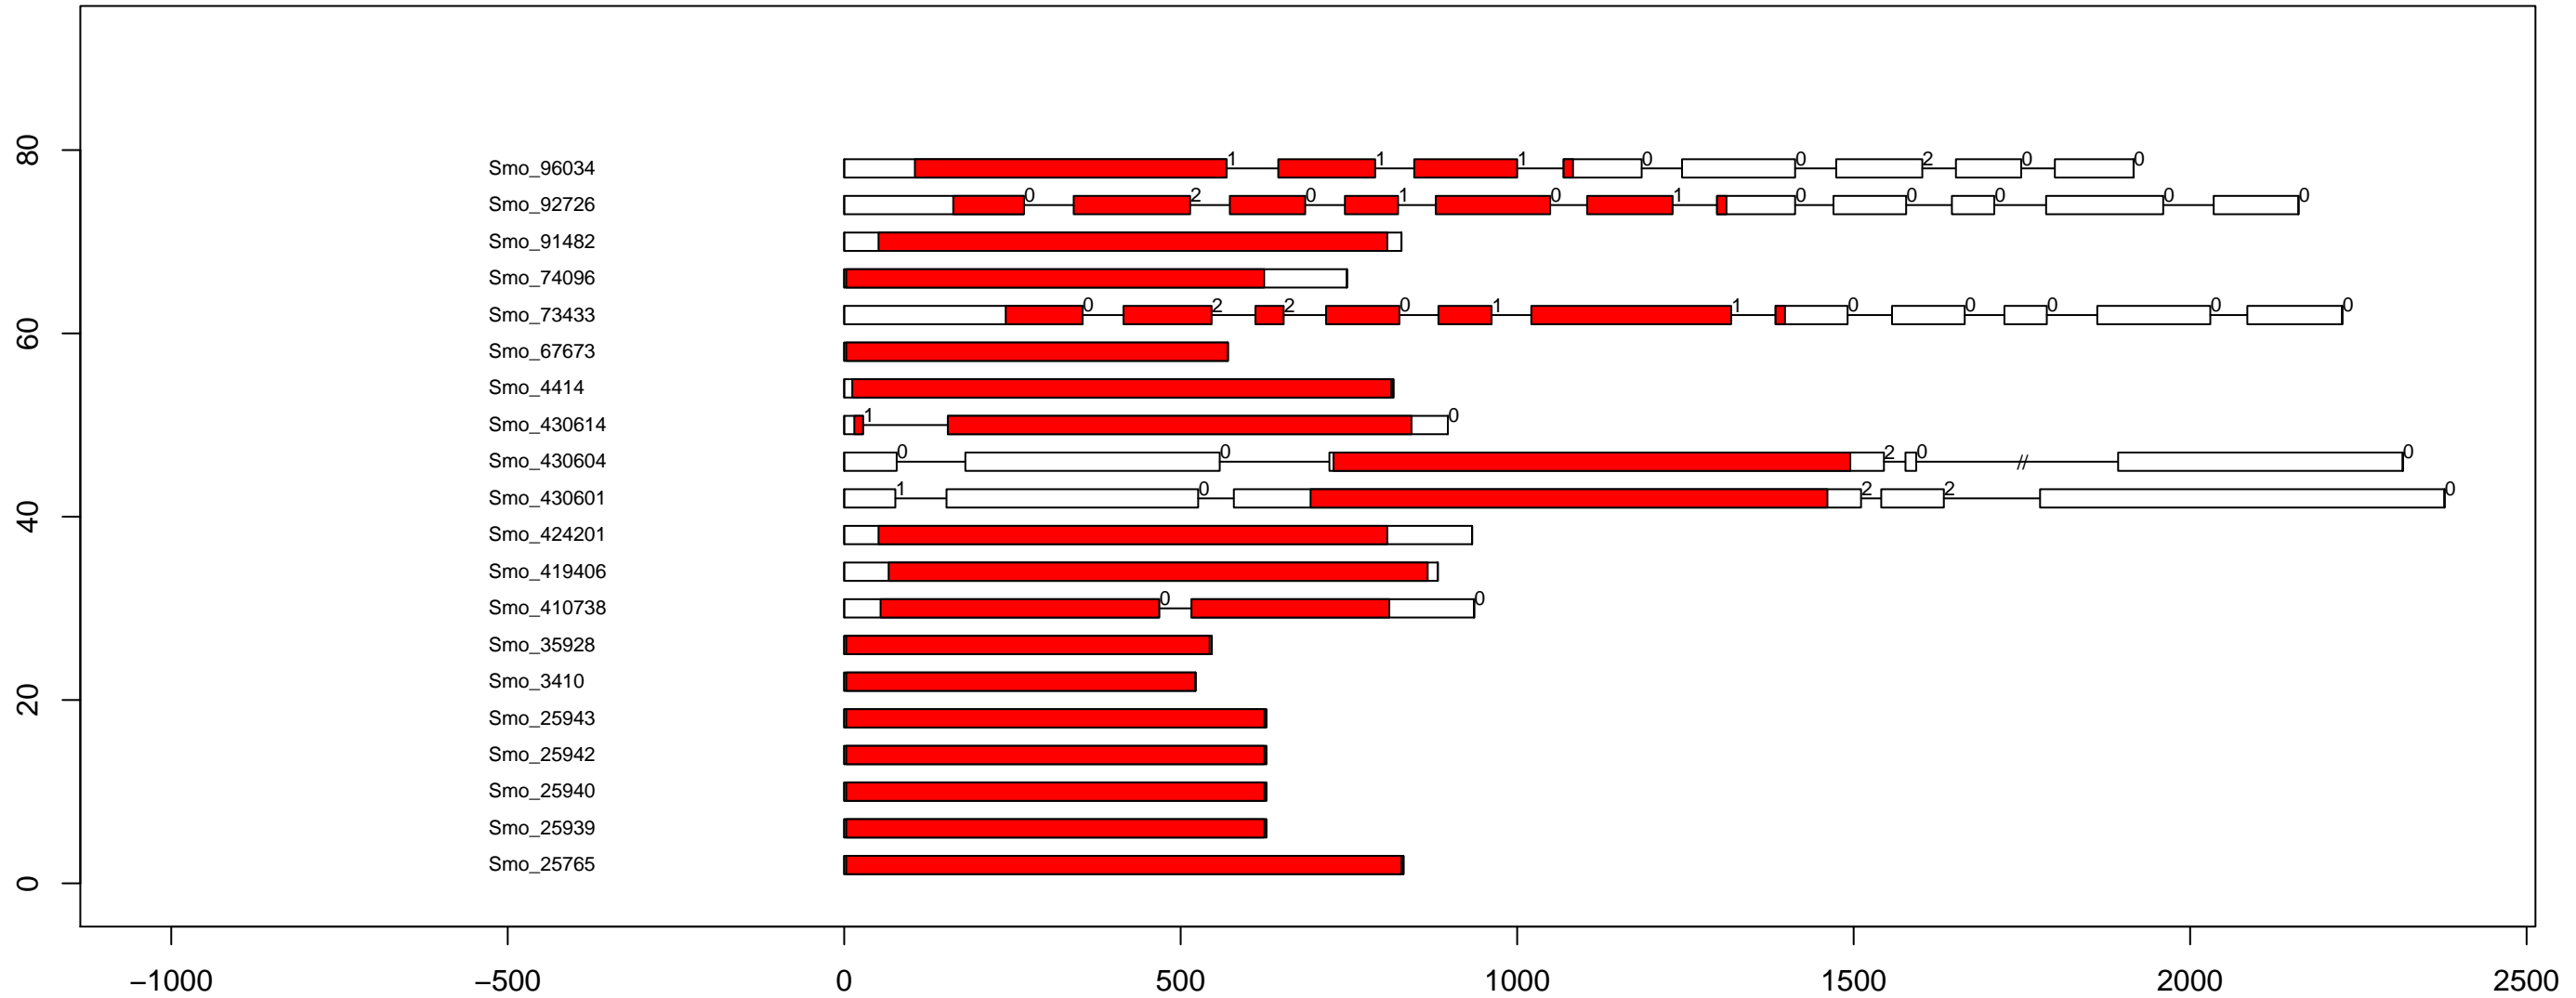



# S.mo CAMK\_OST1L exon-intron and kinase domain diagram (all)

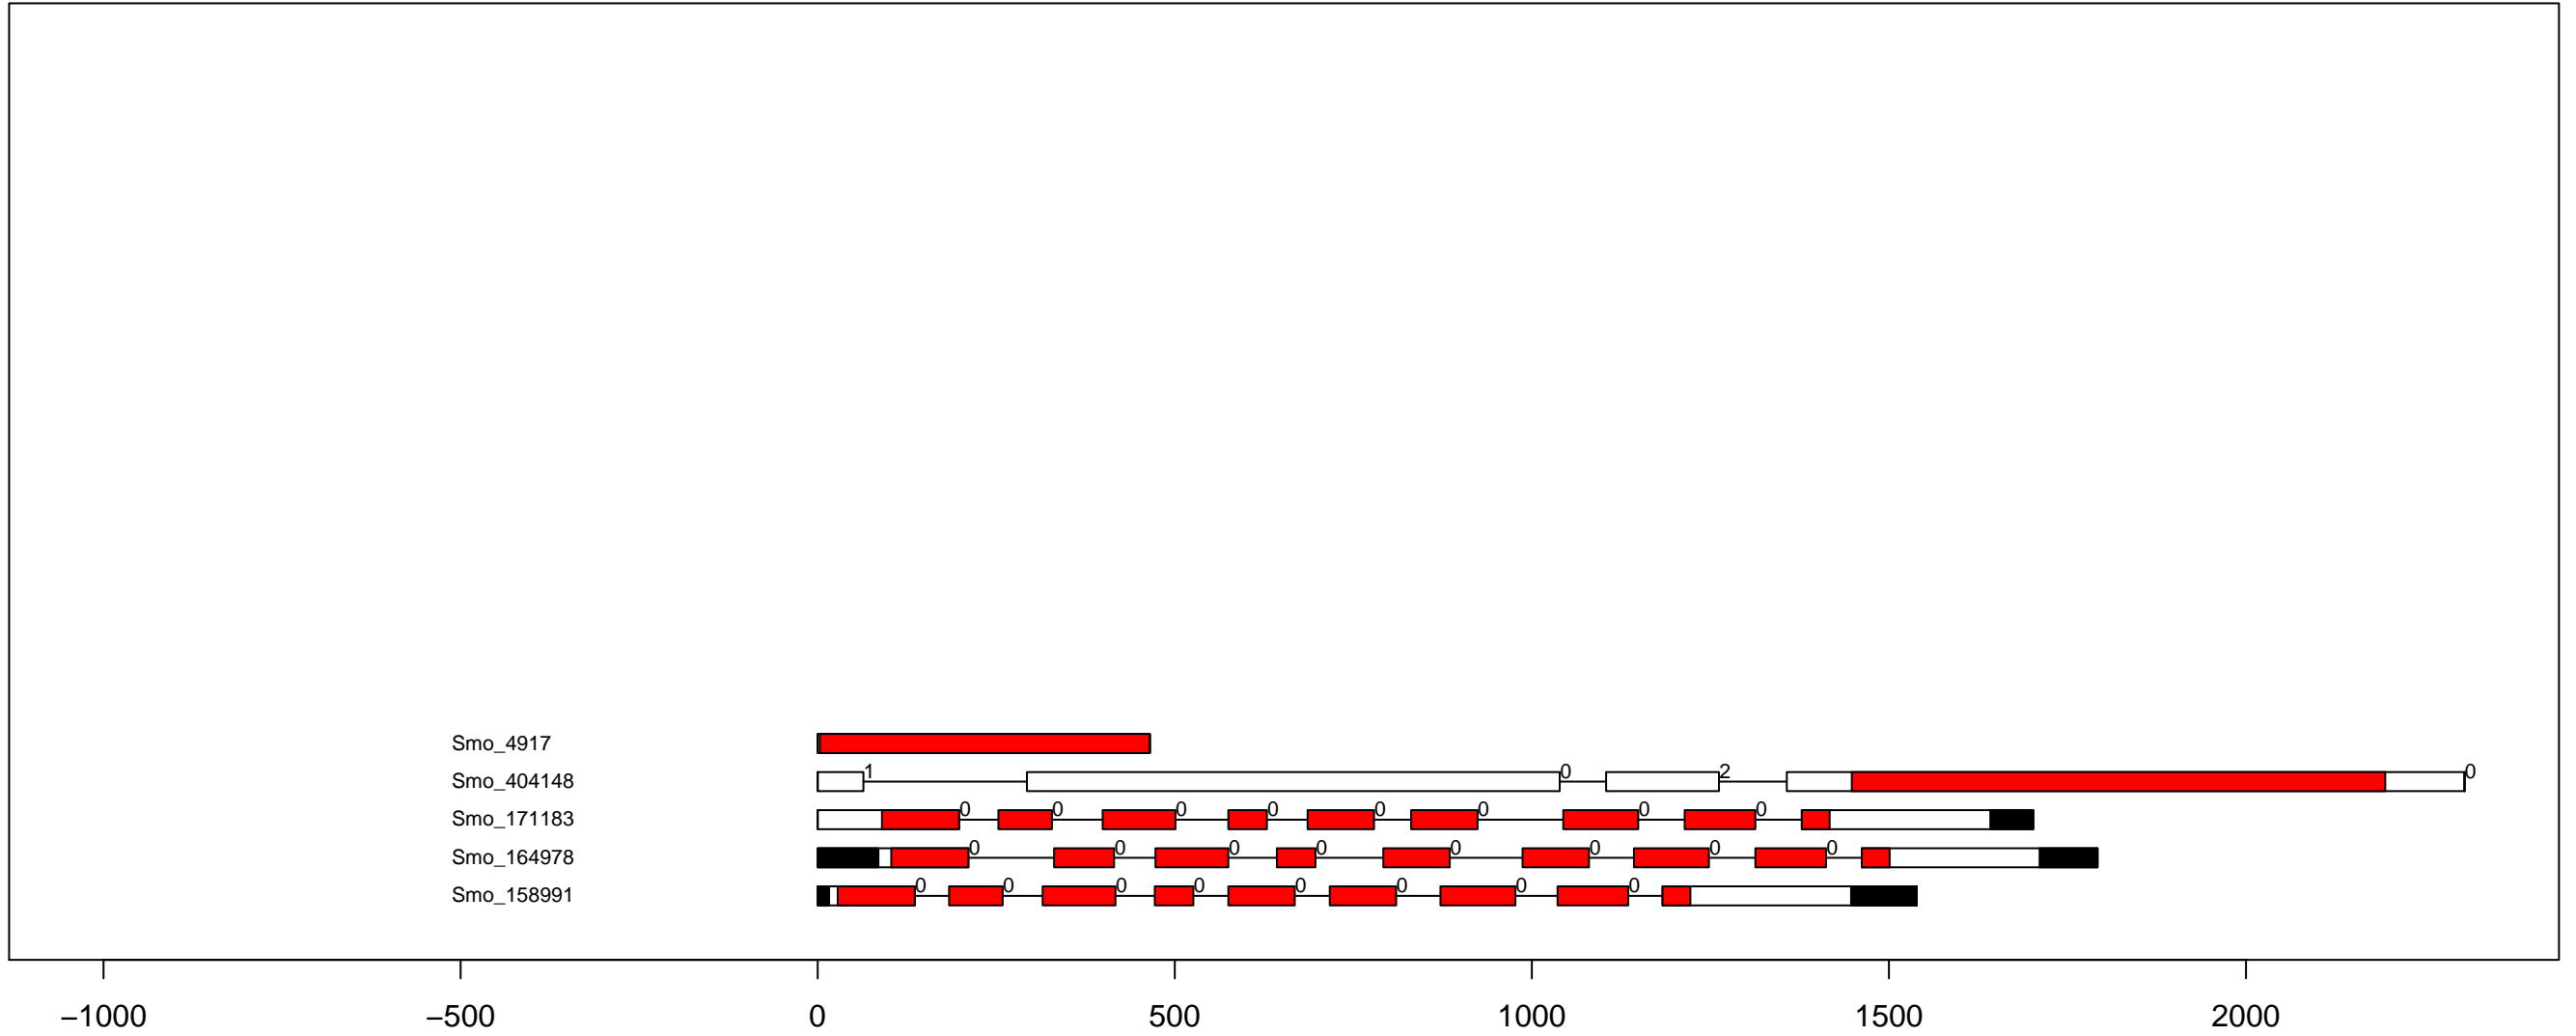





# S.mo CK1\_CK1-PI exon-intron and kinase domain diagram (all)

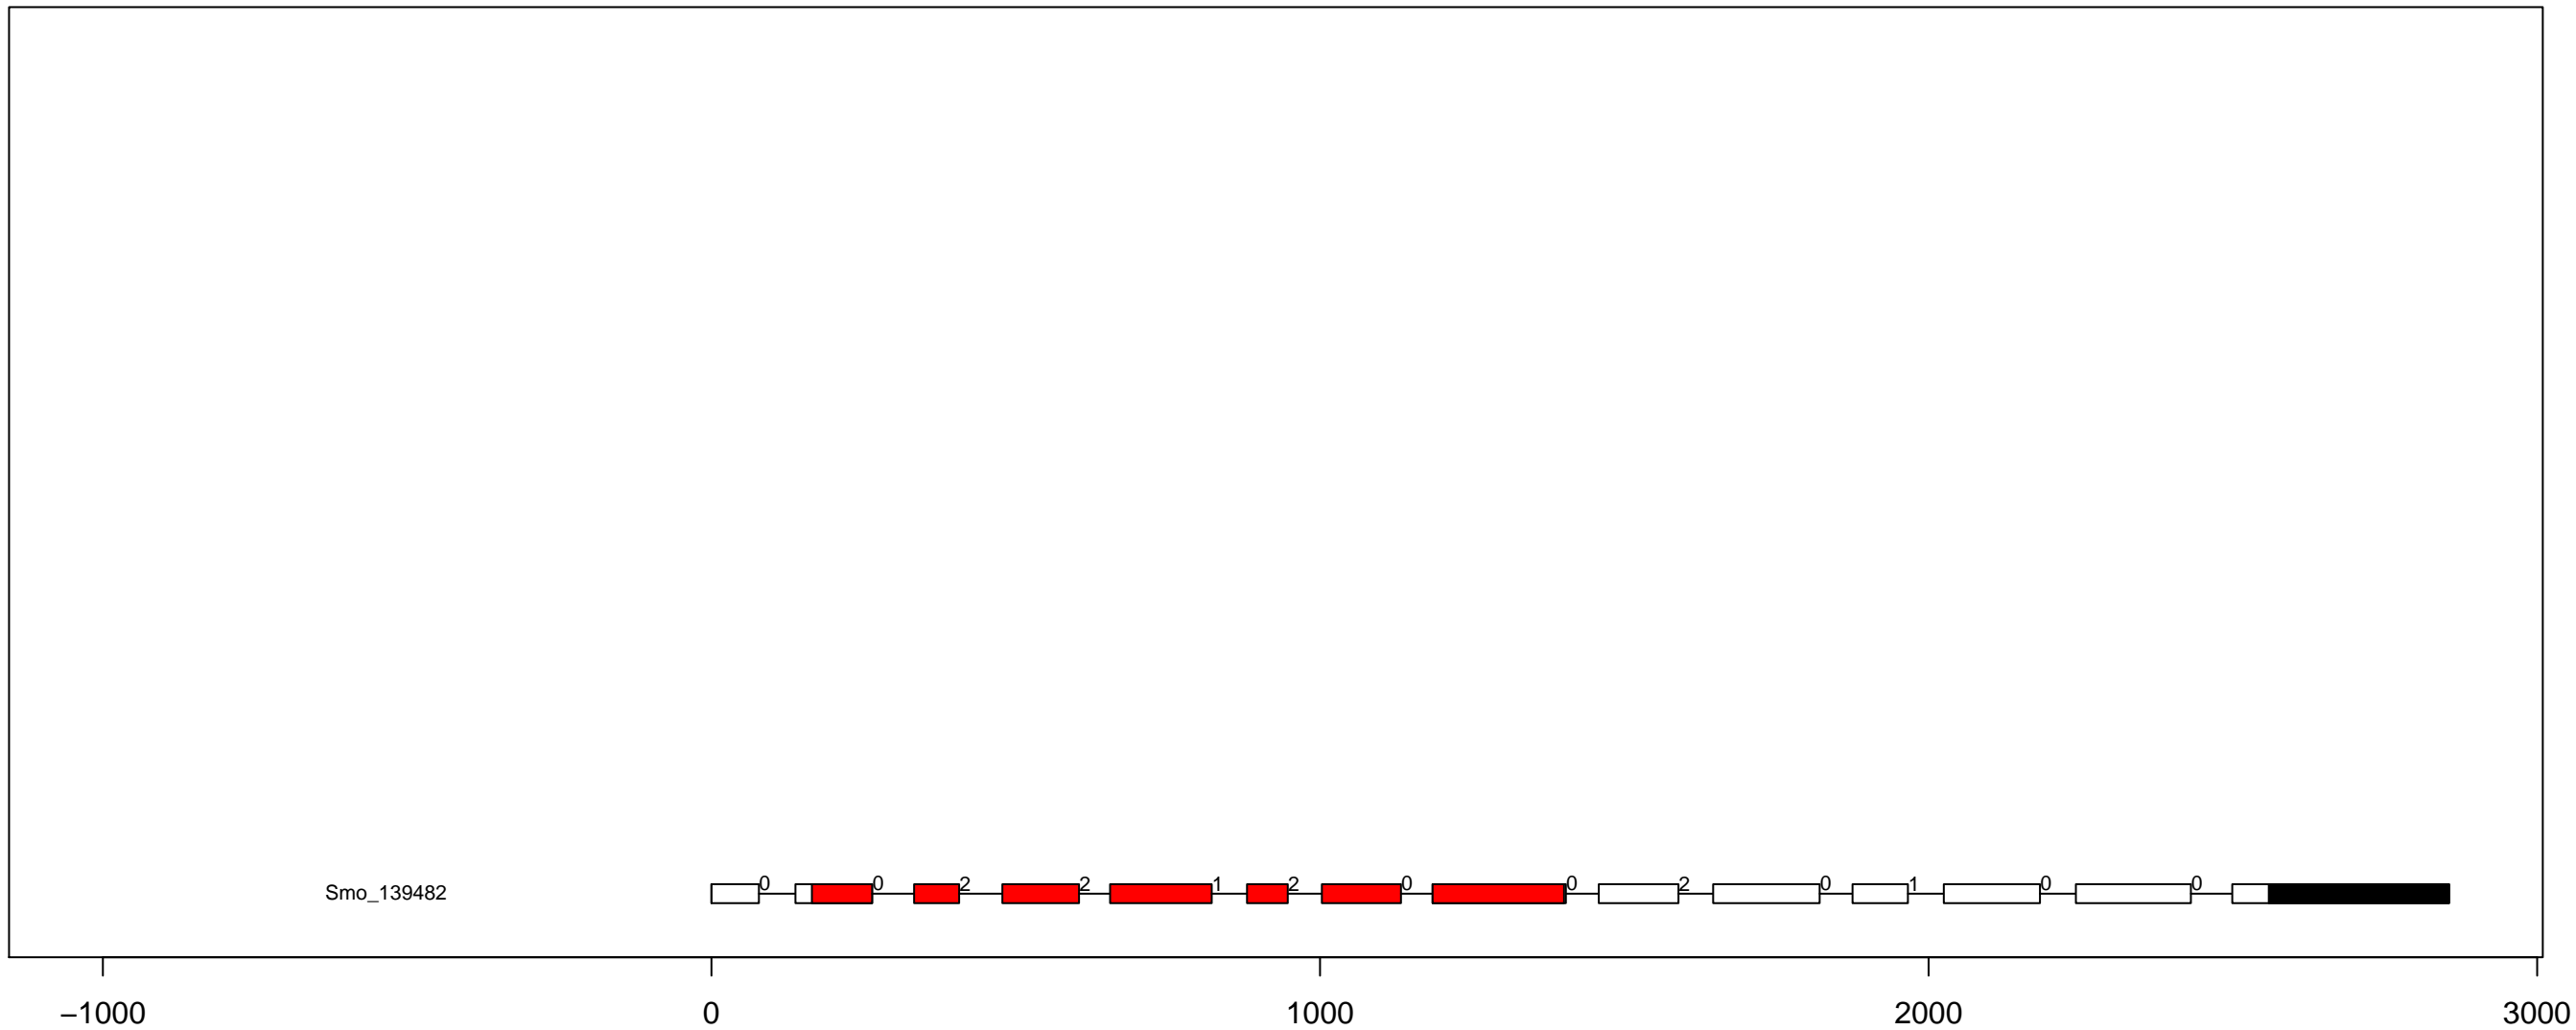

S.mo CMGC\_CDK-CCRK exon-intron and kinase domain diagram (all)

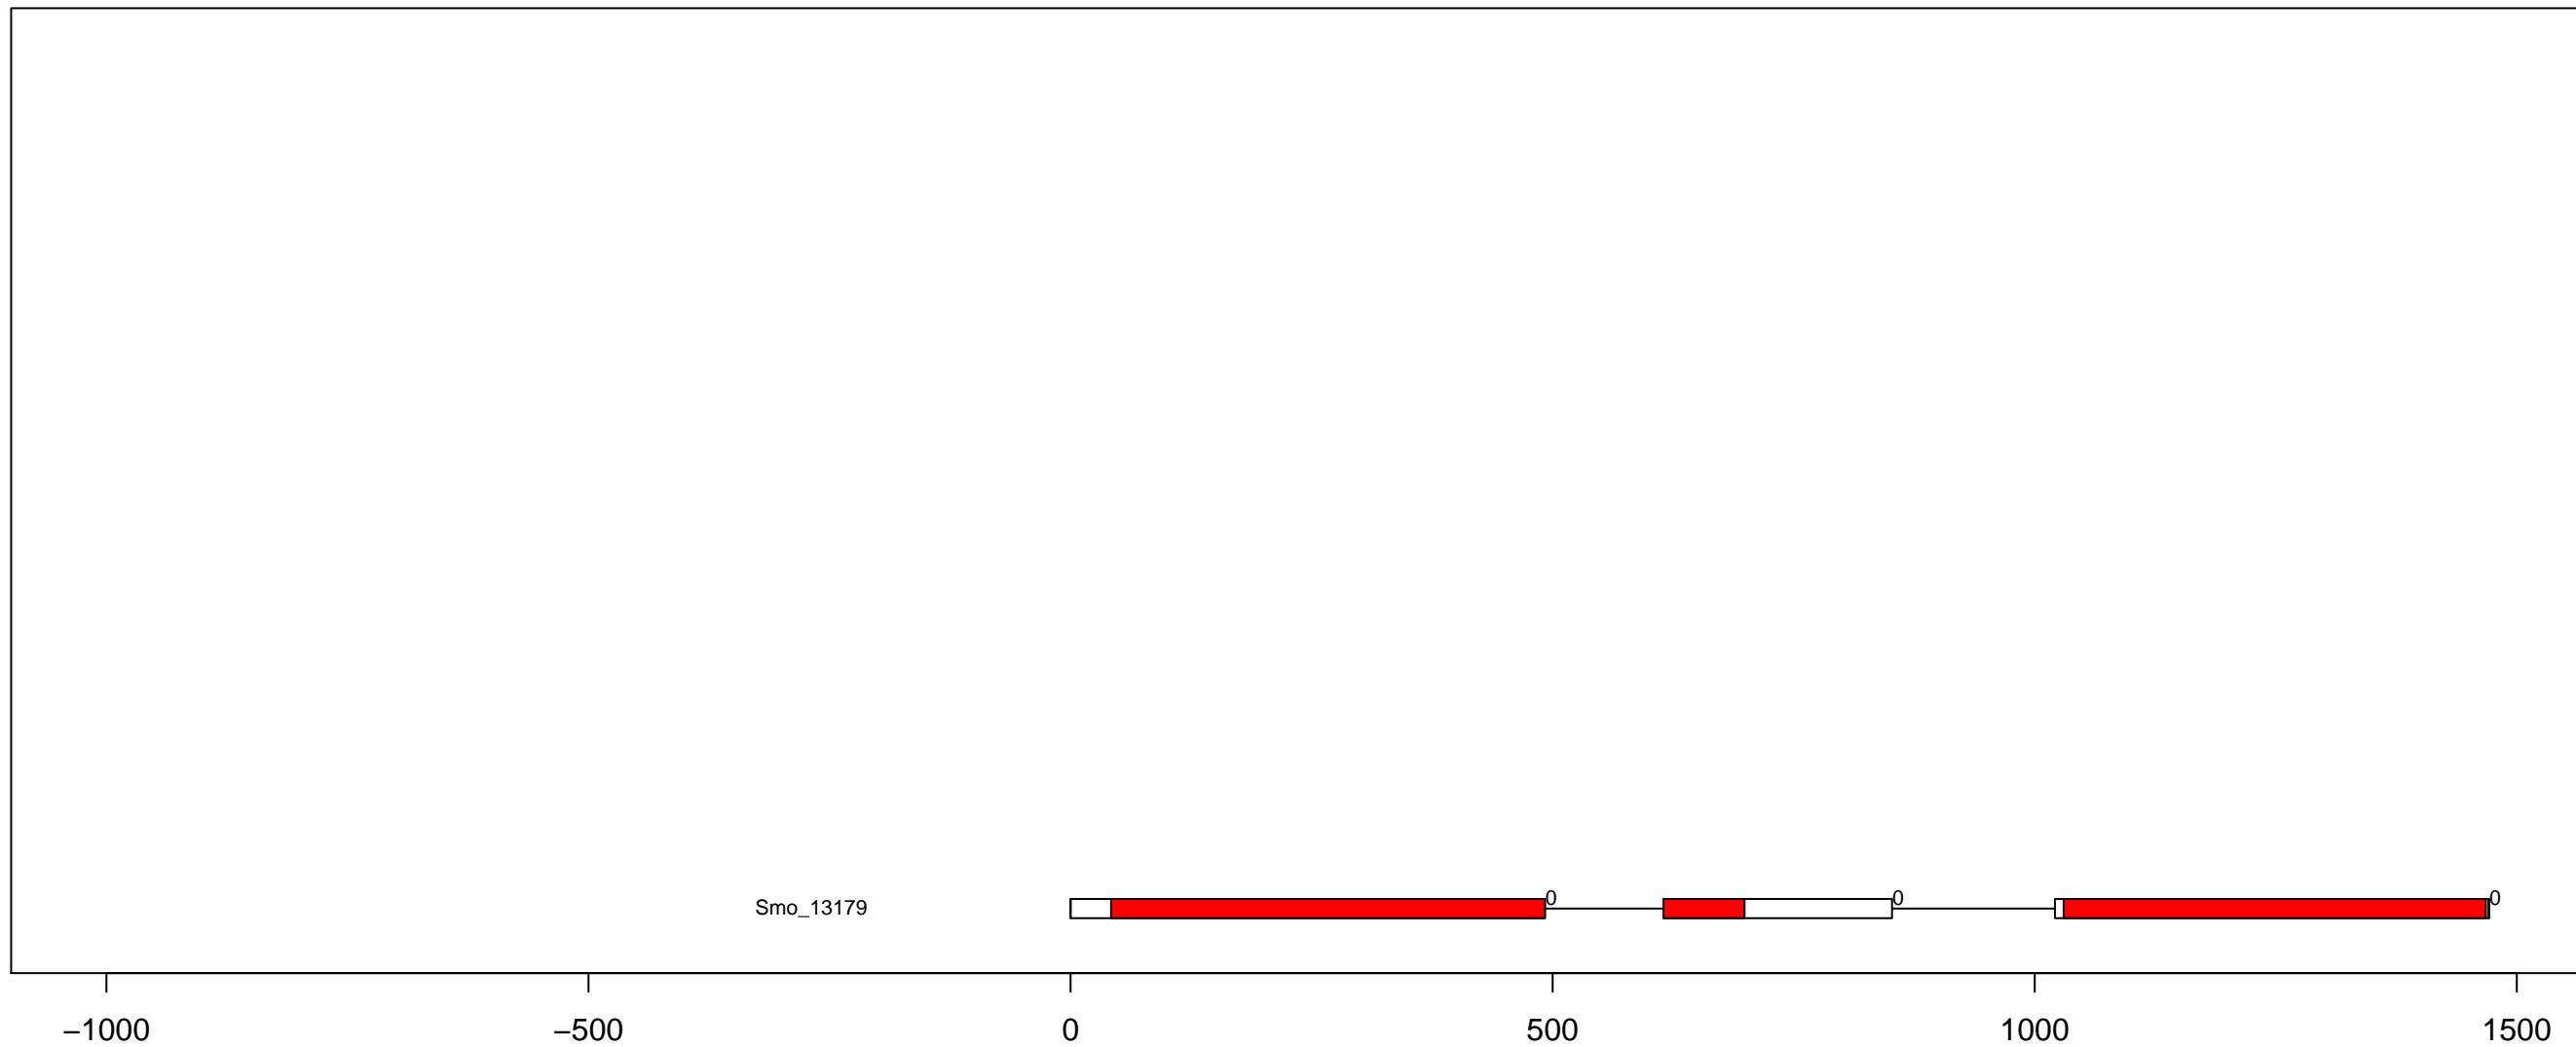

# S.mo CMGC\_CDK-CDK7 exon-intron and kinase domain diagram (all)

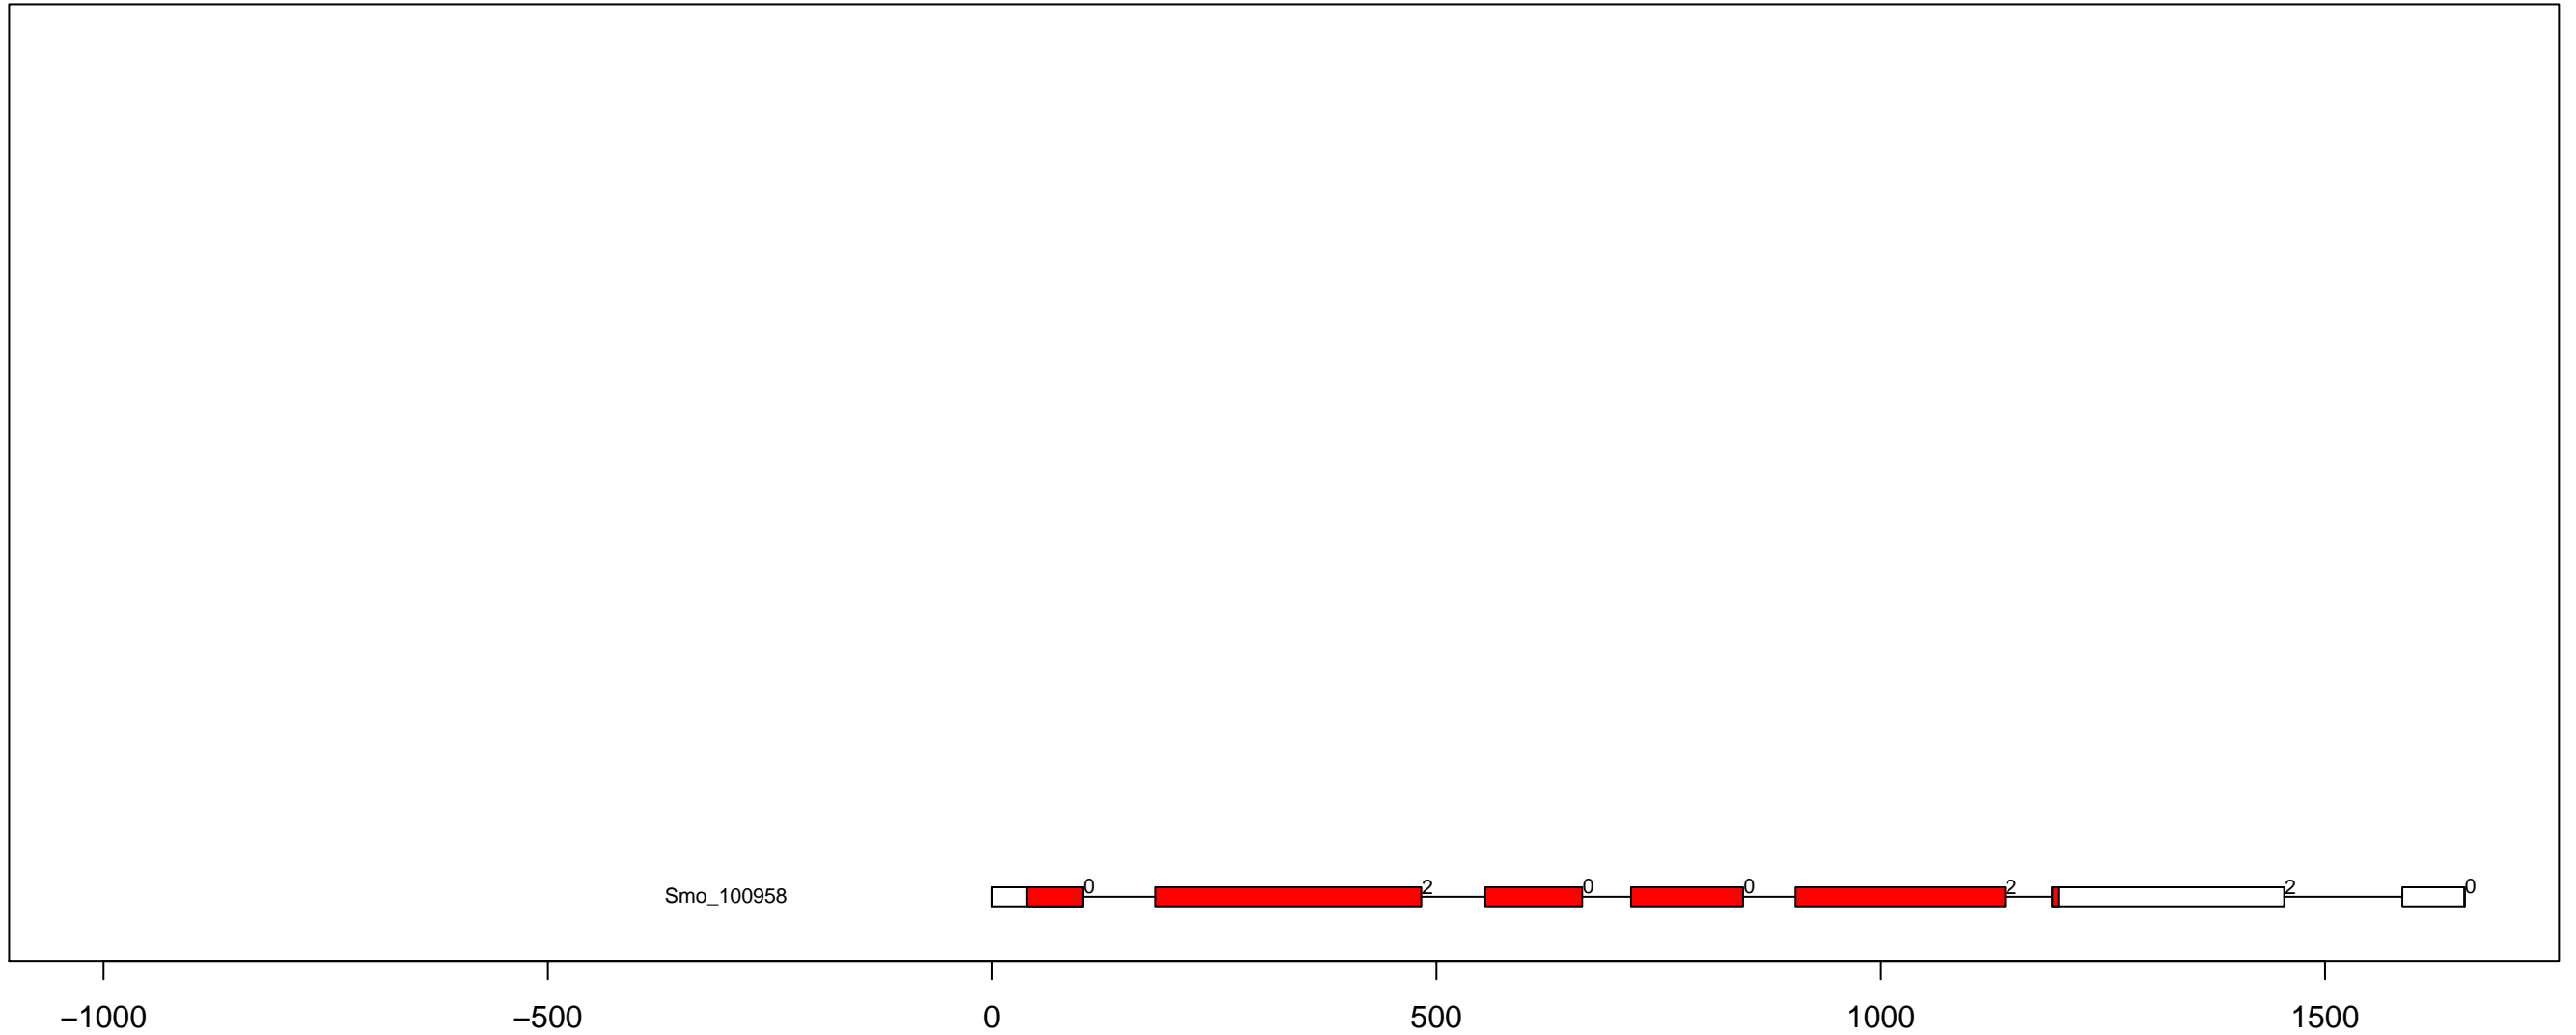

# S.mo CMGC\_CDK-CDK8 exon-intron and kinase domain diagram (all)

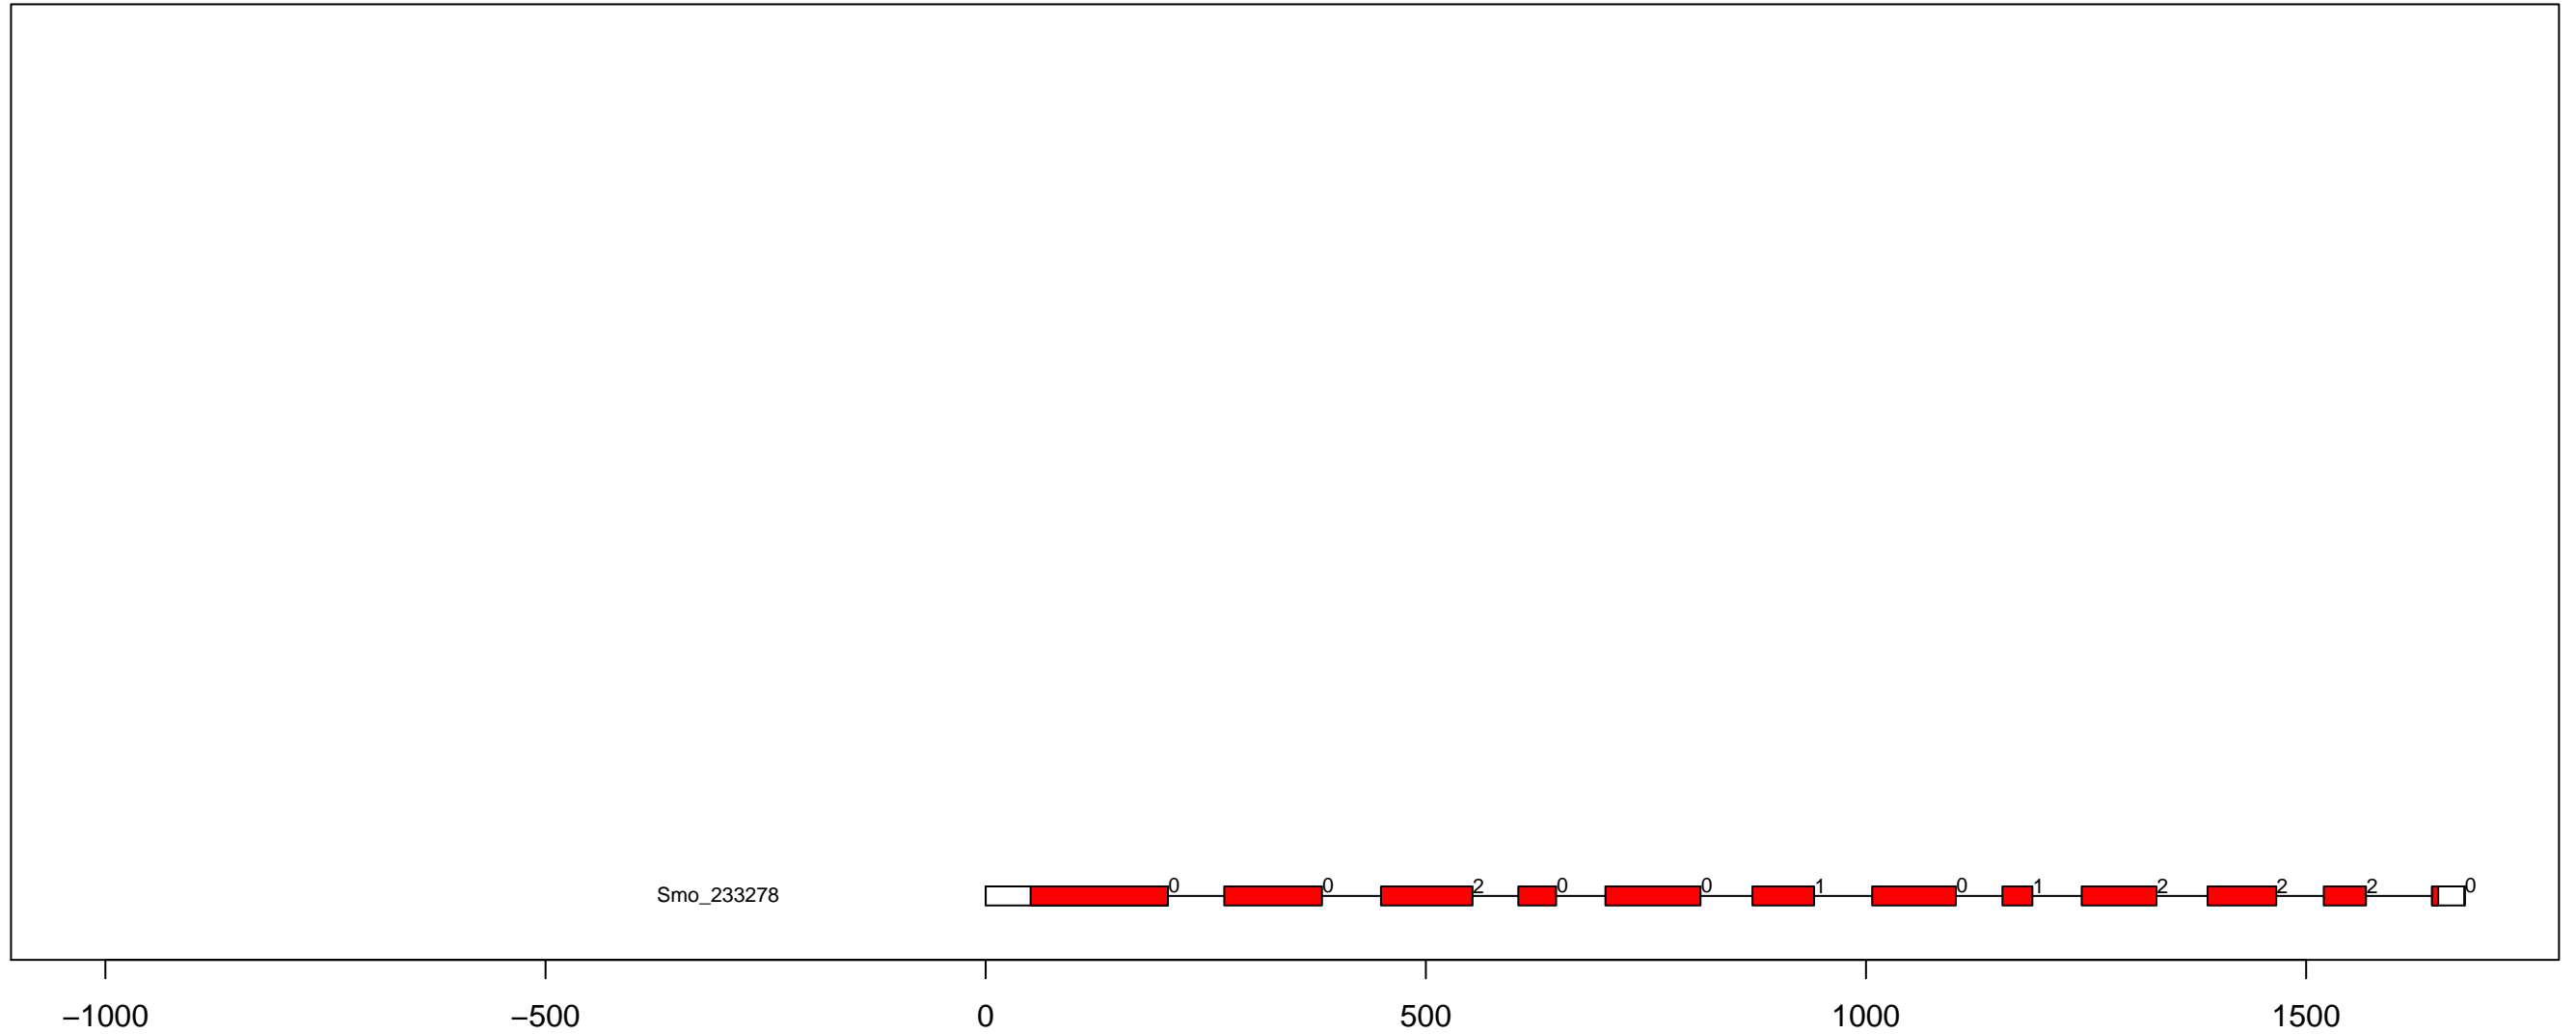

# S.mo CMGC\_CDK-CRK7-CDK9 exon-intron and kinase domain diagram (all)

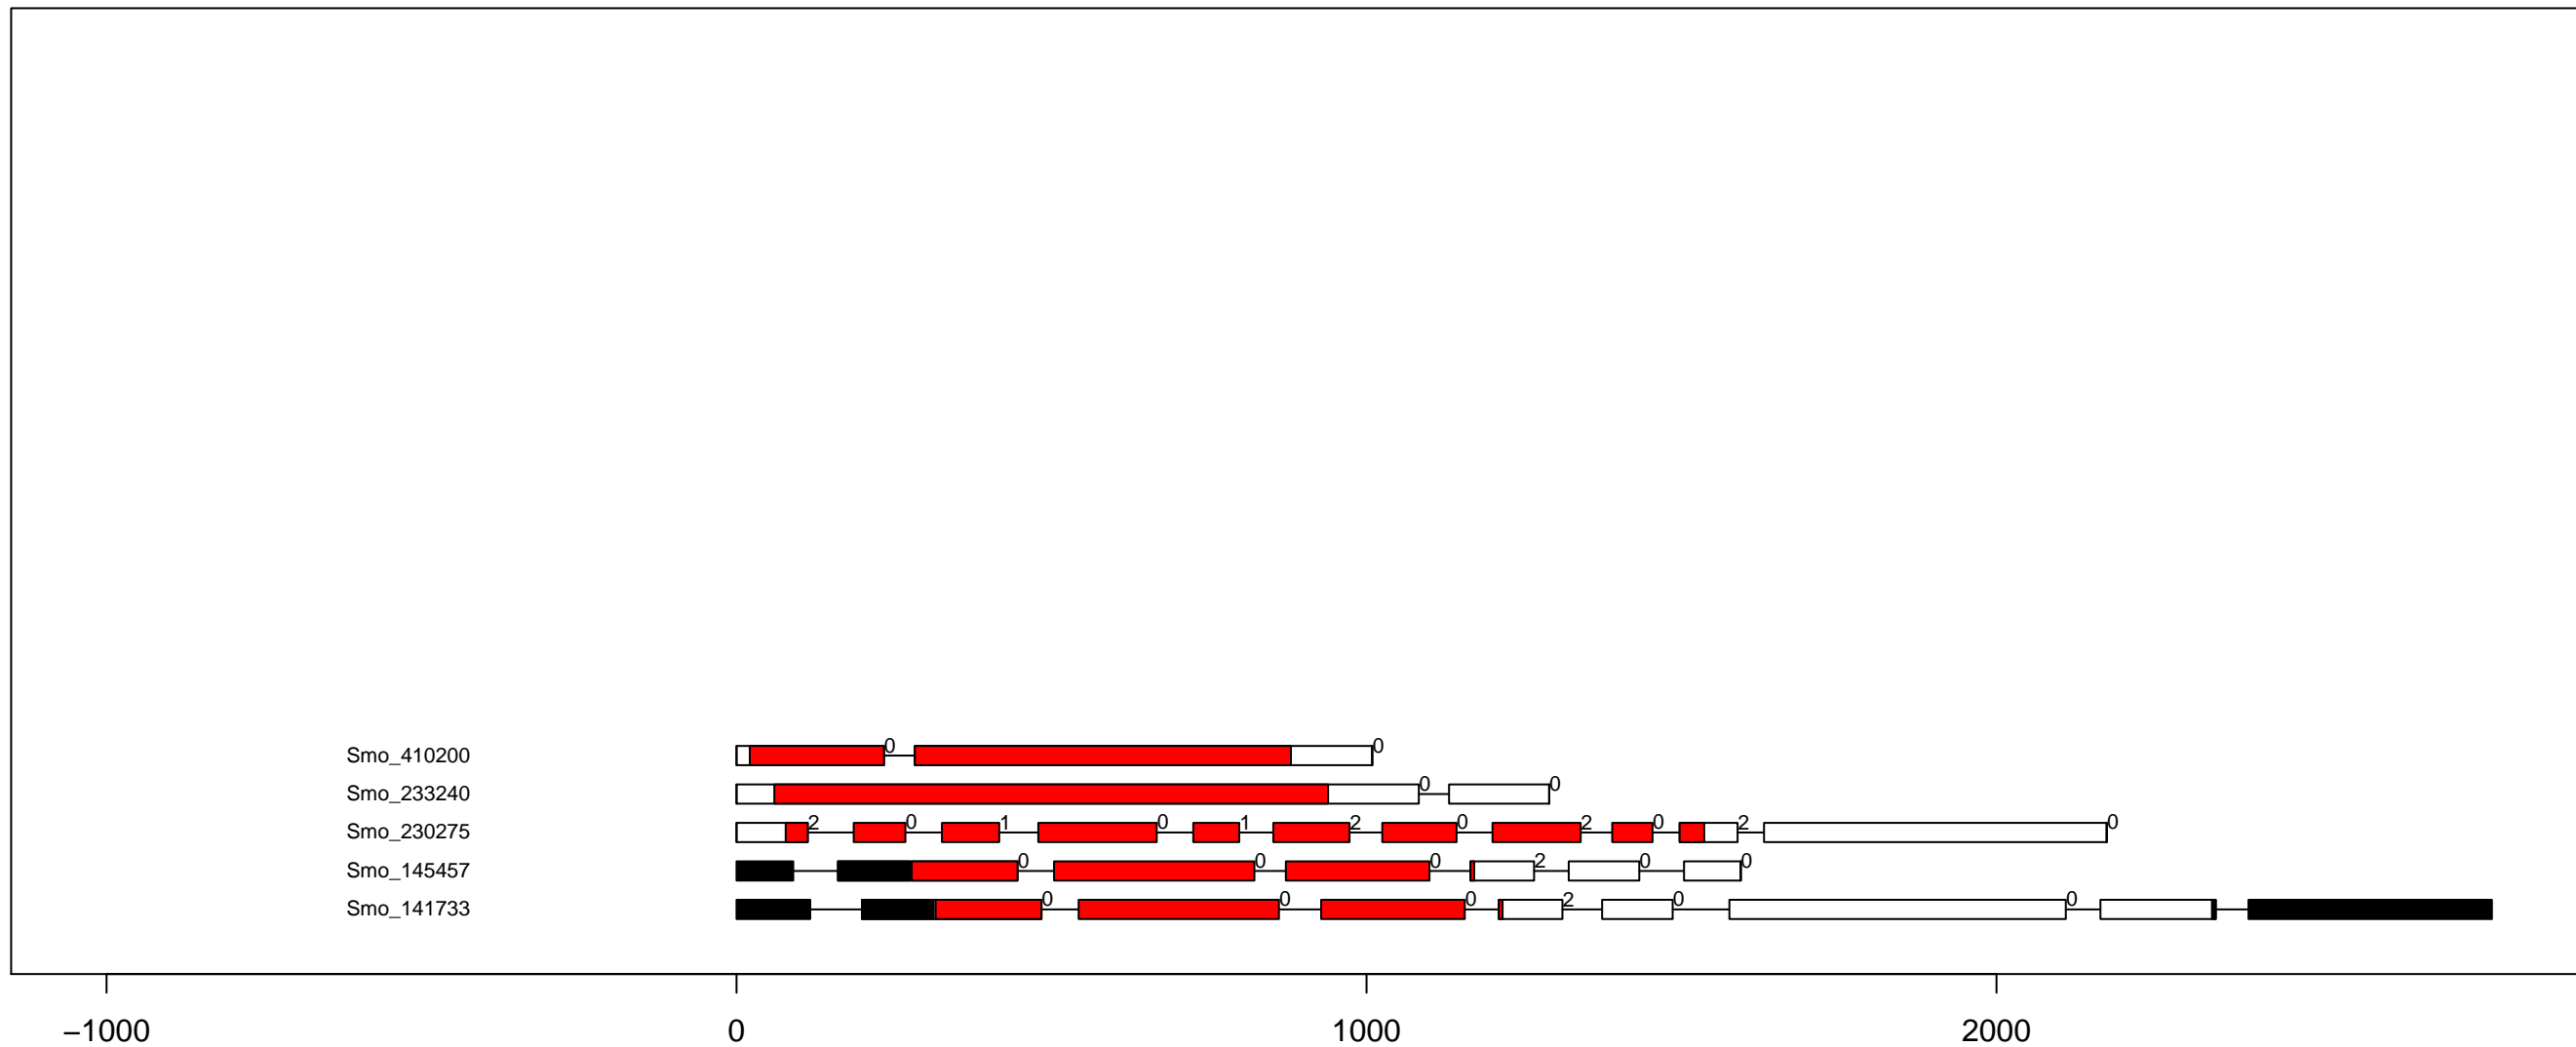

# S.mo CMGC\_CDKL-Cr exon-intron and kinase domain diagram (all)

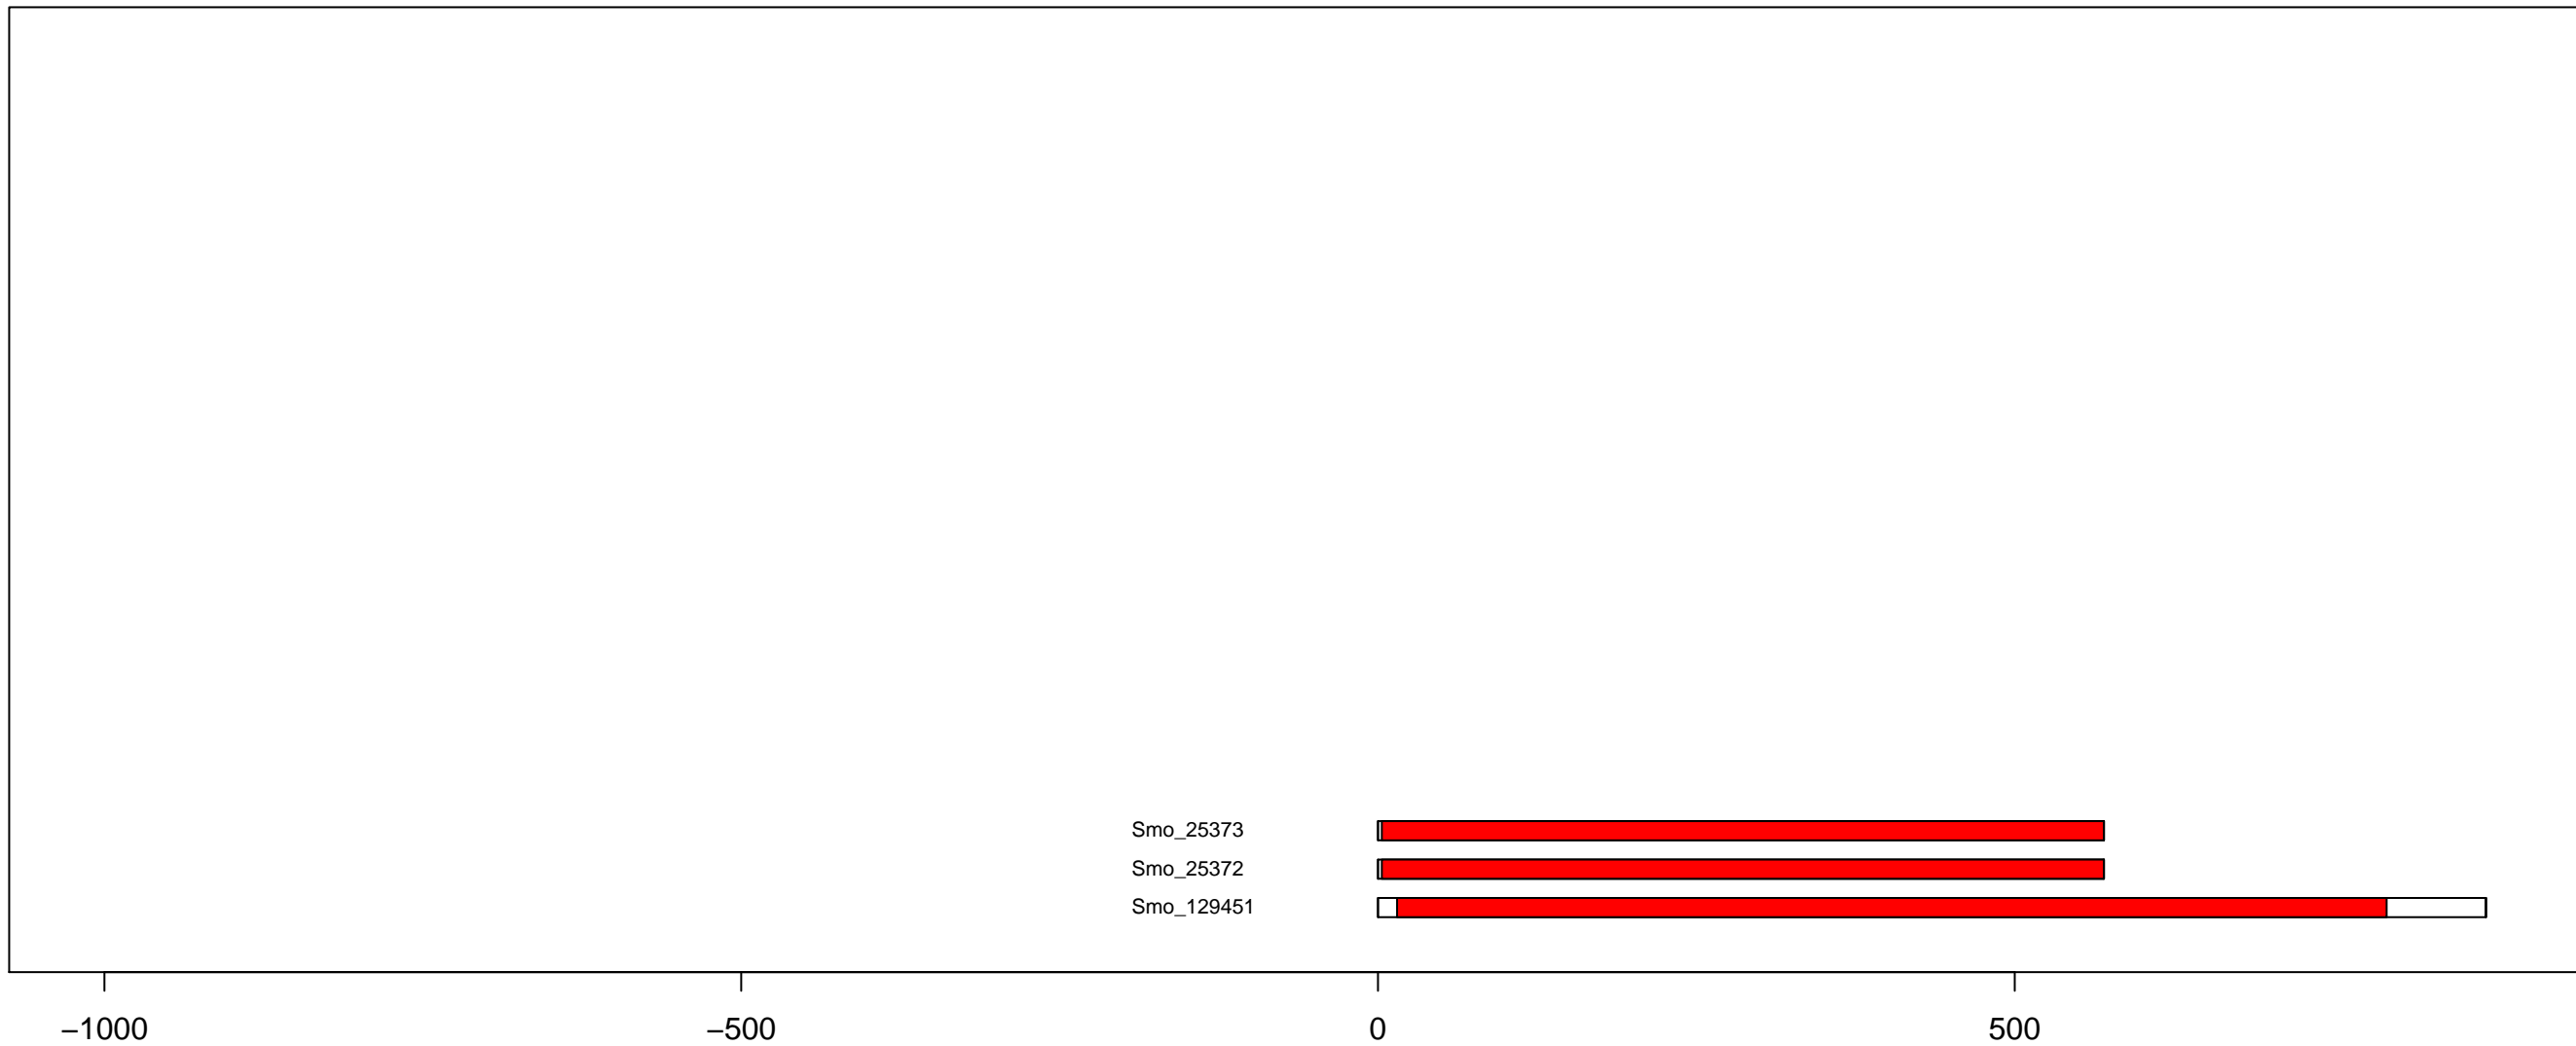



# S.mo CMGC\_CDK-PITSLRE exon-intron and kinase domain diagram (all)

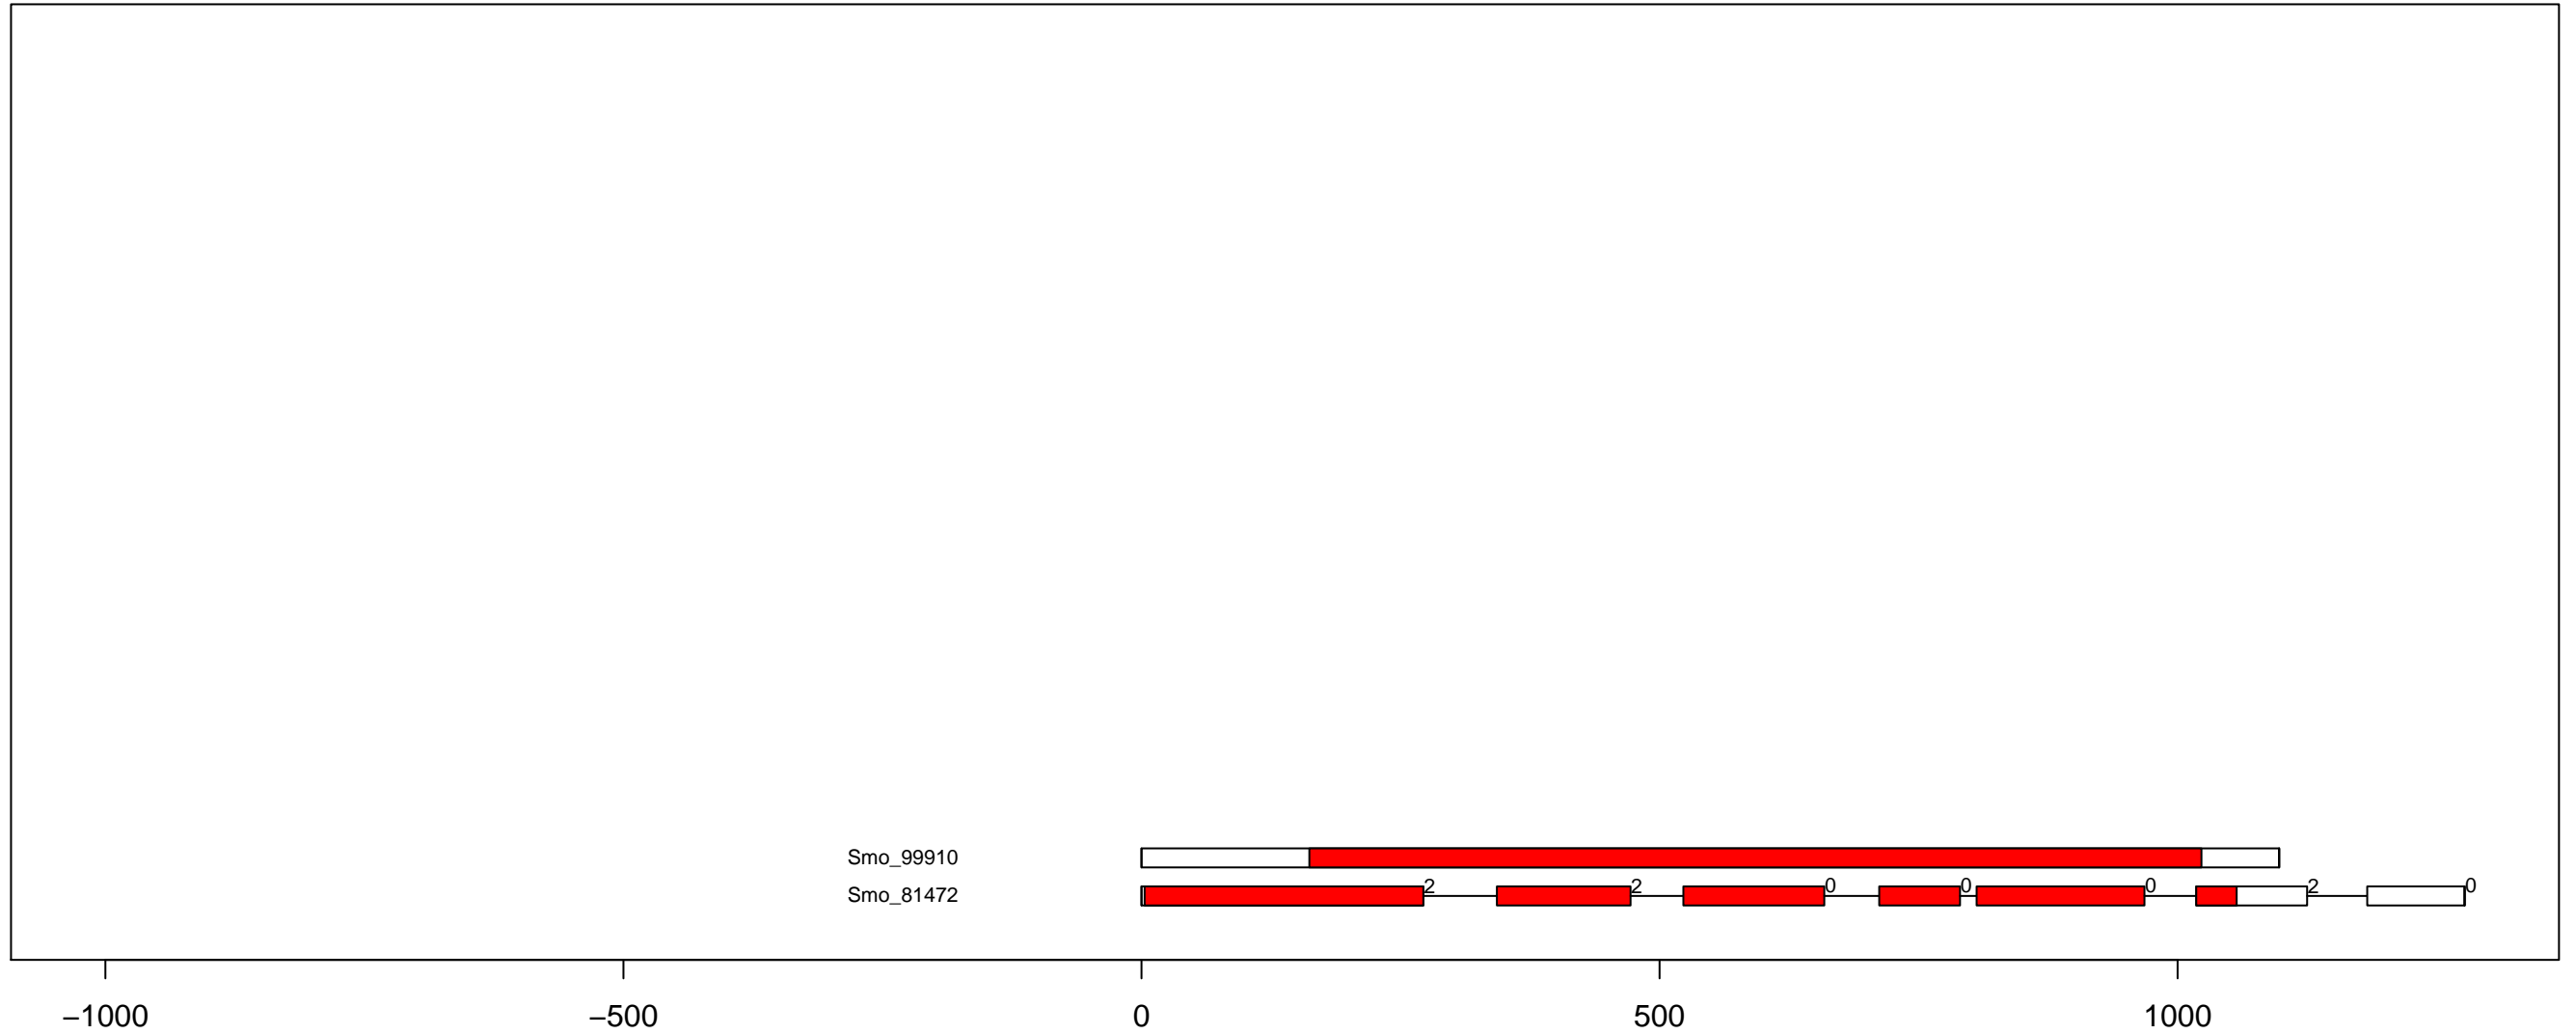



# S.mo CMGC\_CDK-PI exon-intron and kinase domain diagram (all)

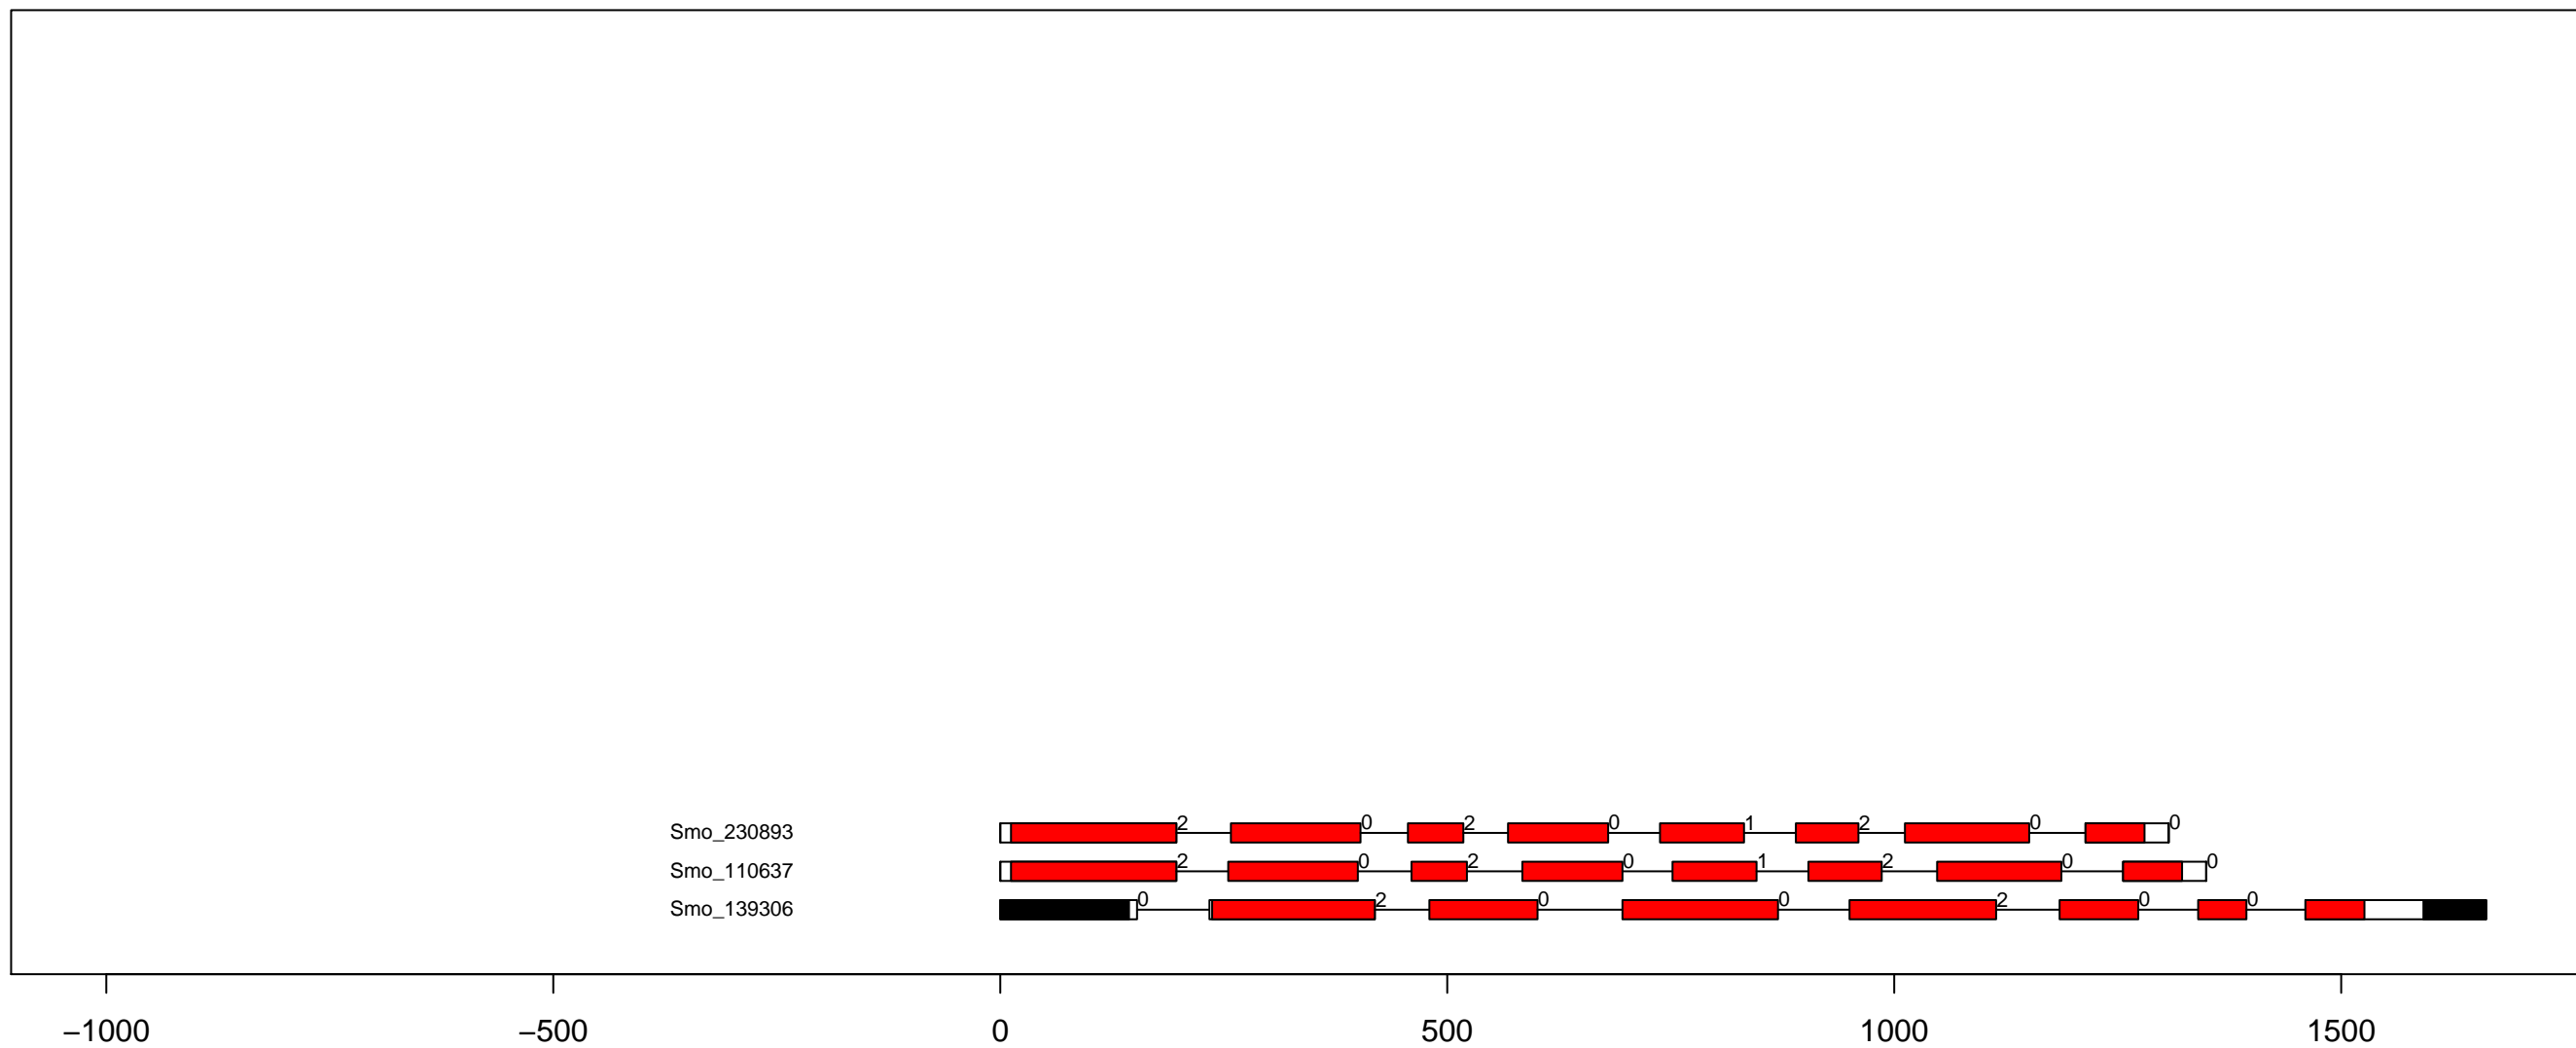

# S.mo CMGC\_CK2 exon-intron and kinase domain diagram (all)

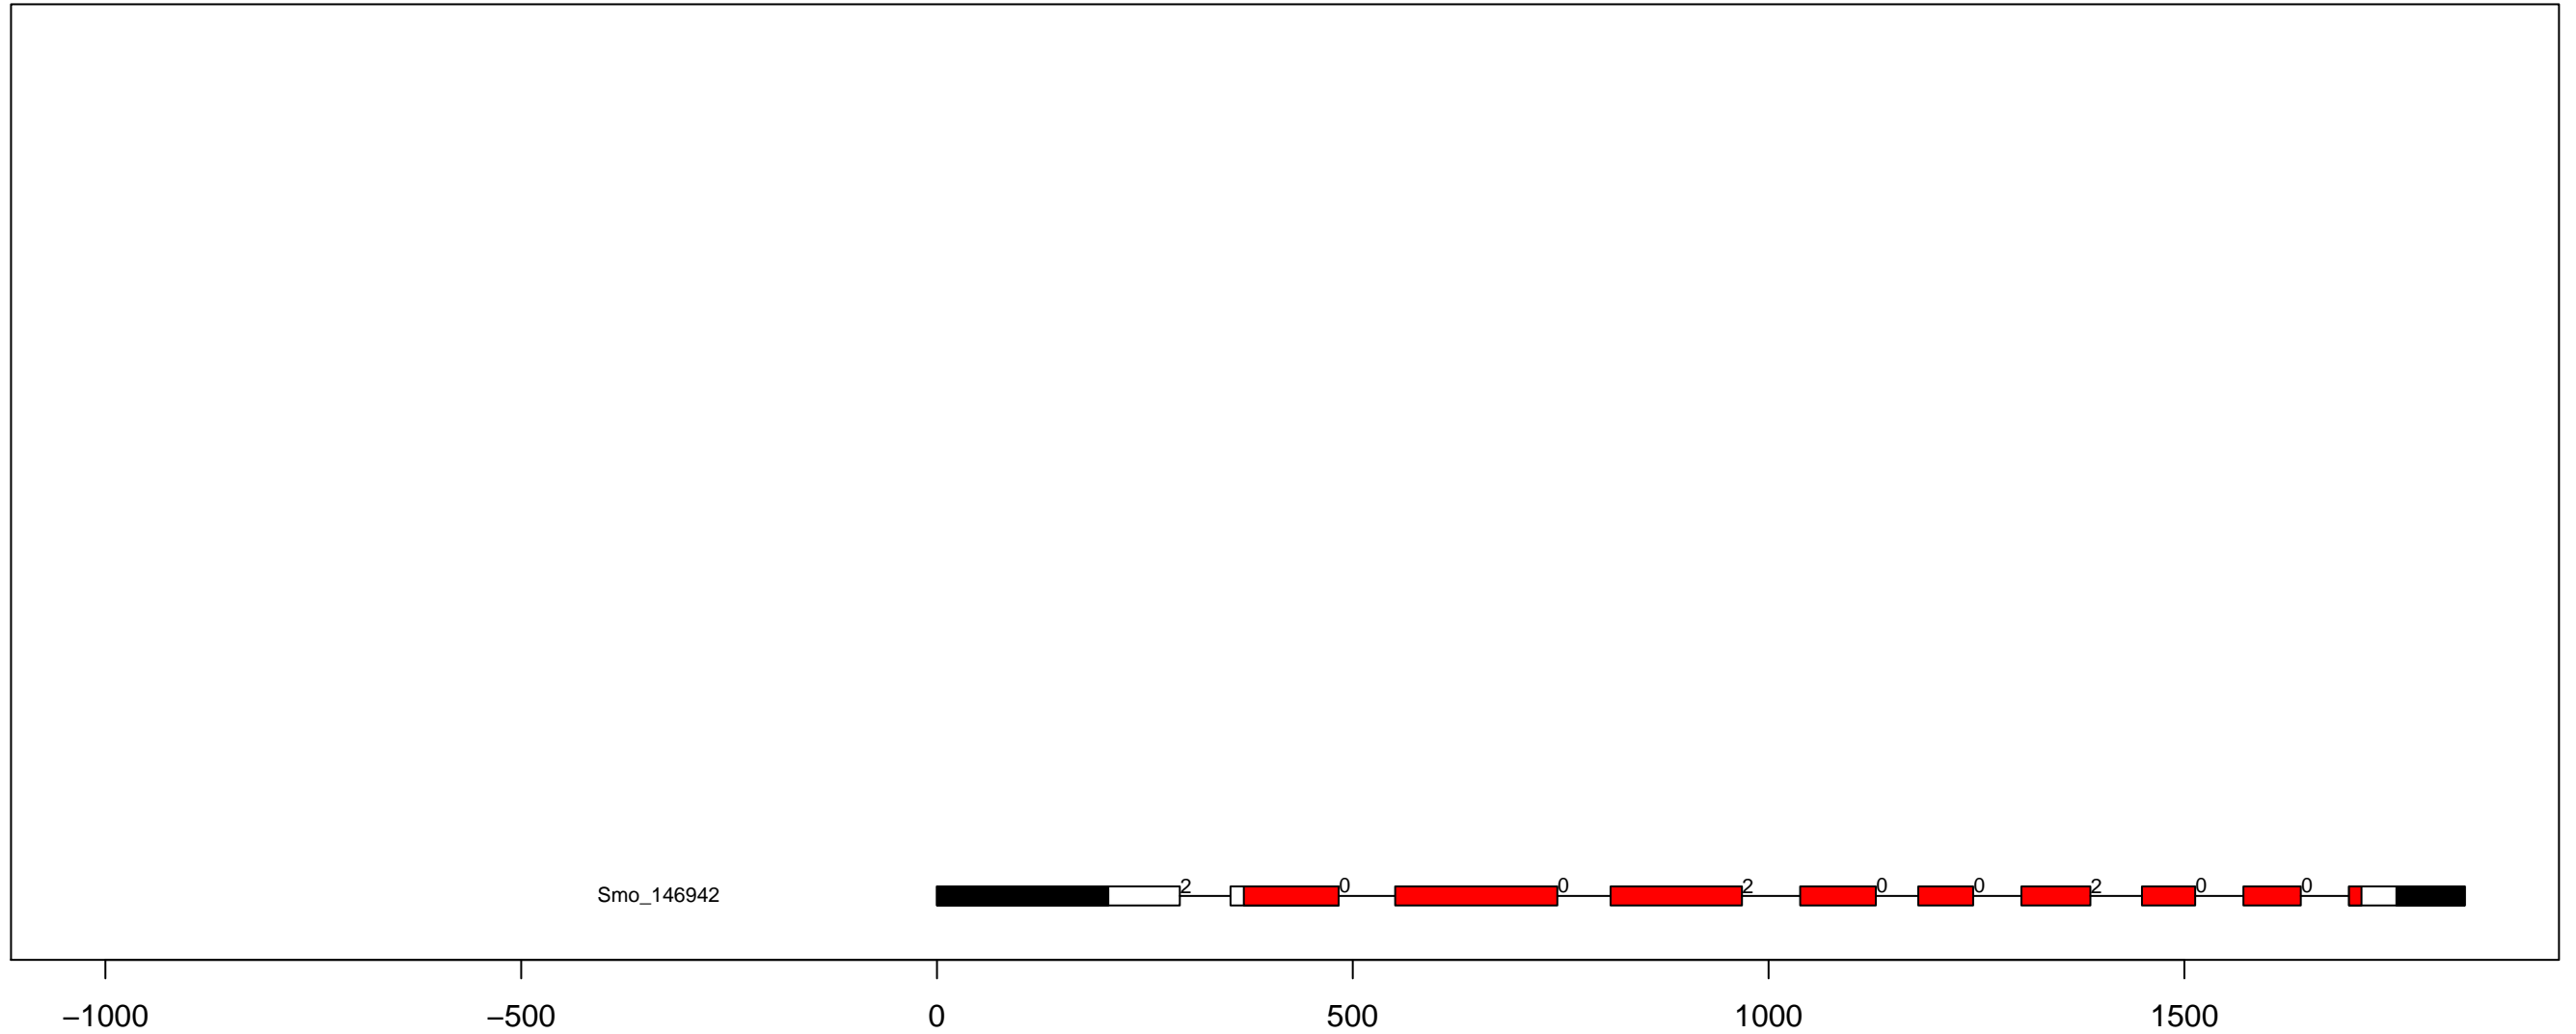

### S.mo CMGC\_CLK exon-intron and kinase domain diagram (all)

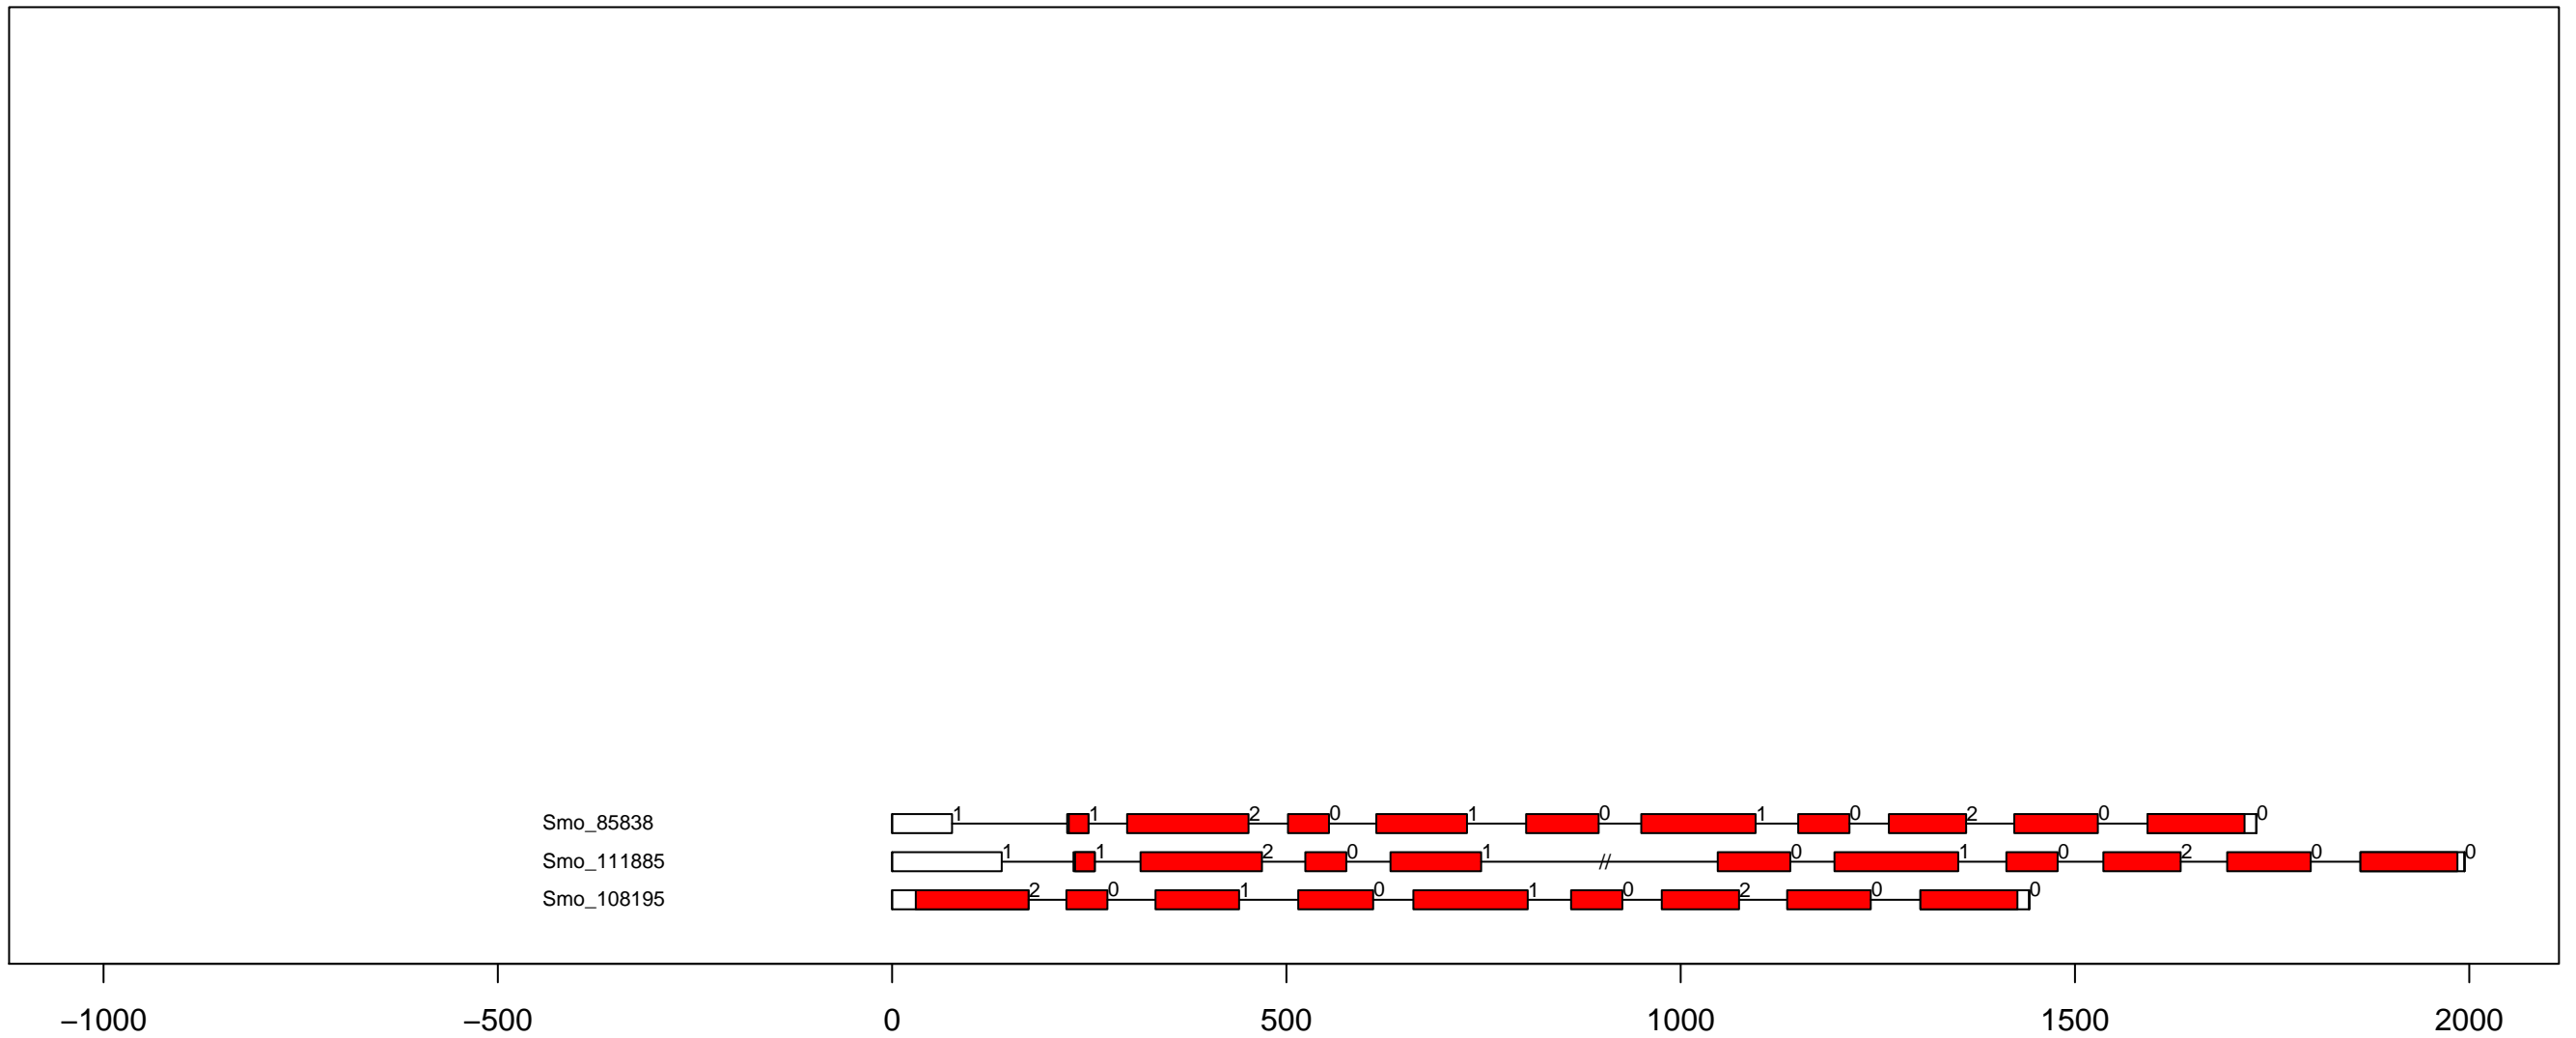

# S.mo CMGC\_DYRK-DRYK2 exon-intron and kinase domain diagram (all)

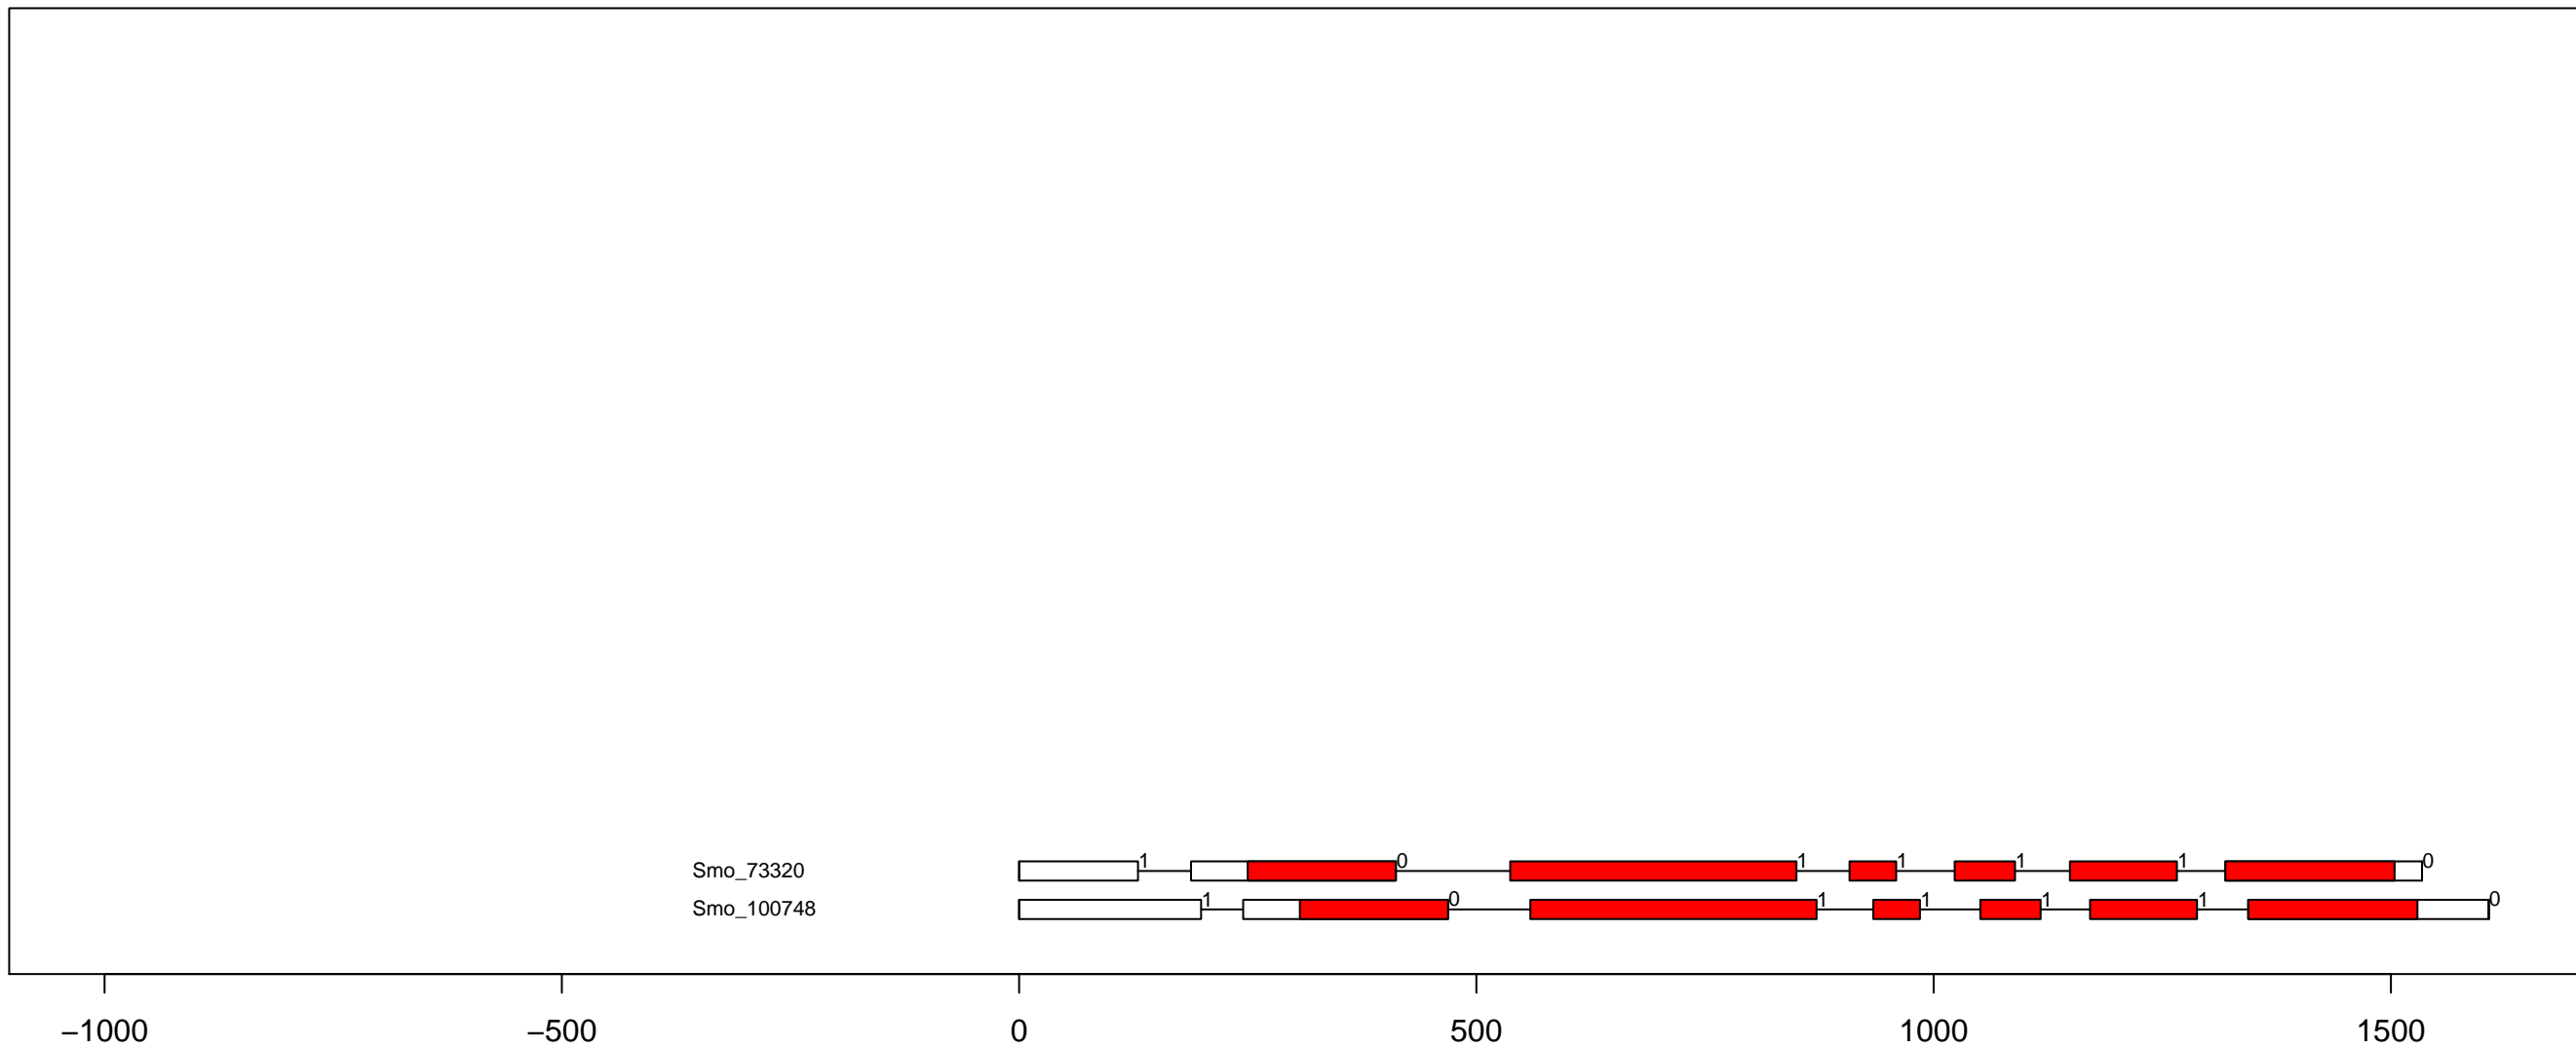



# S.mo CMGC\_DYRK-YAK exon-intron and kinase domain diagram (all)

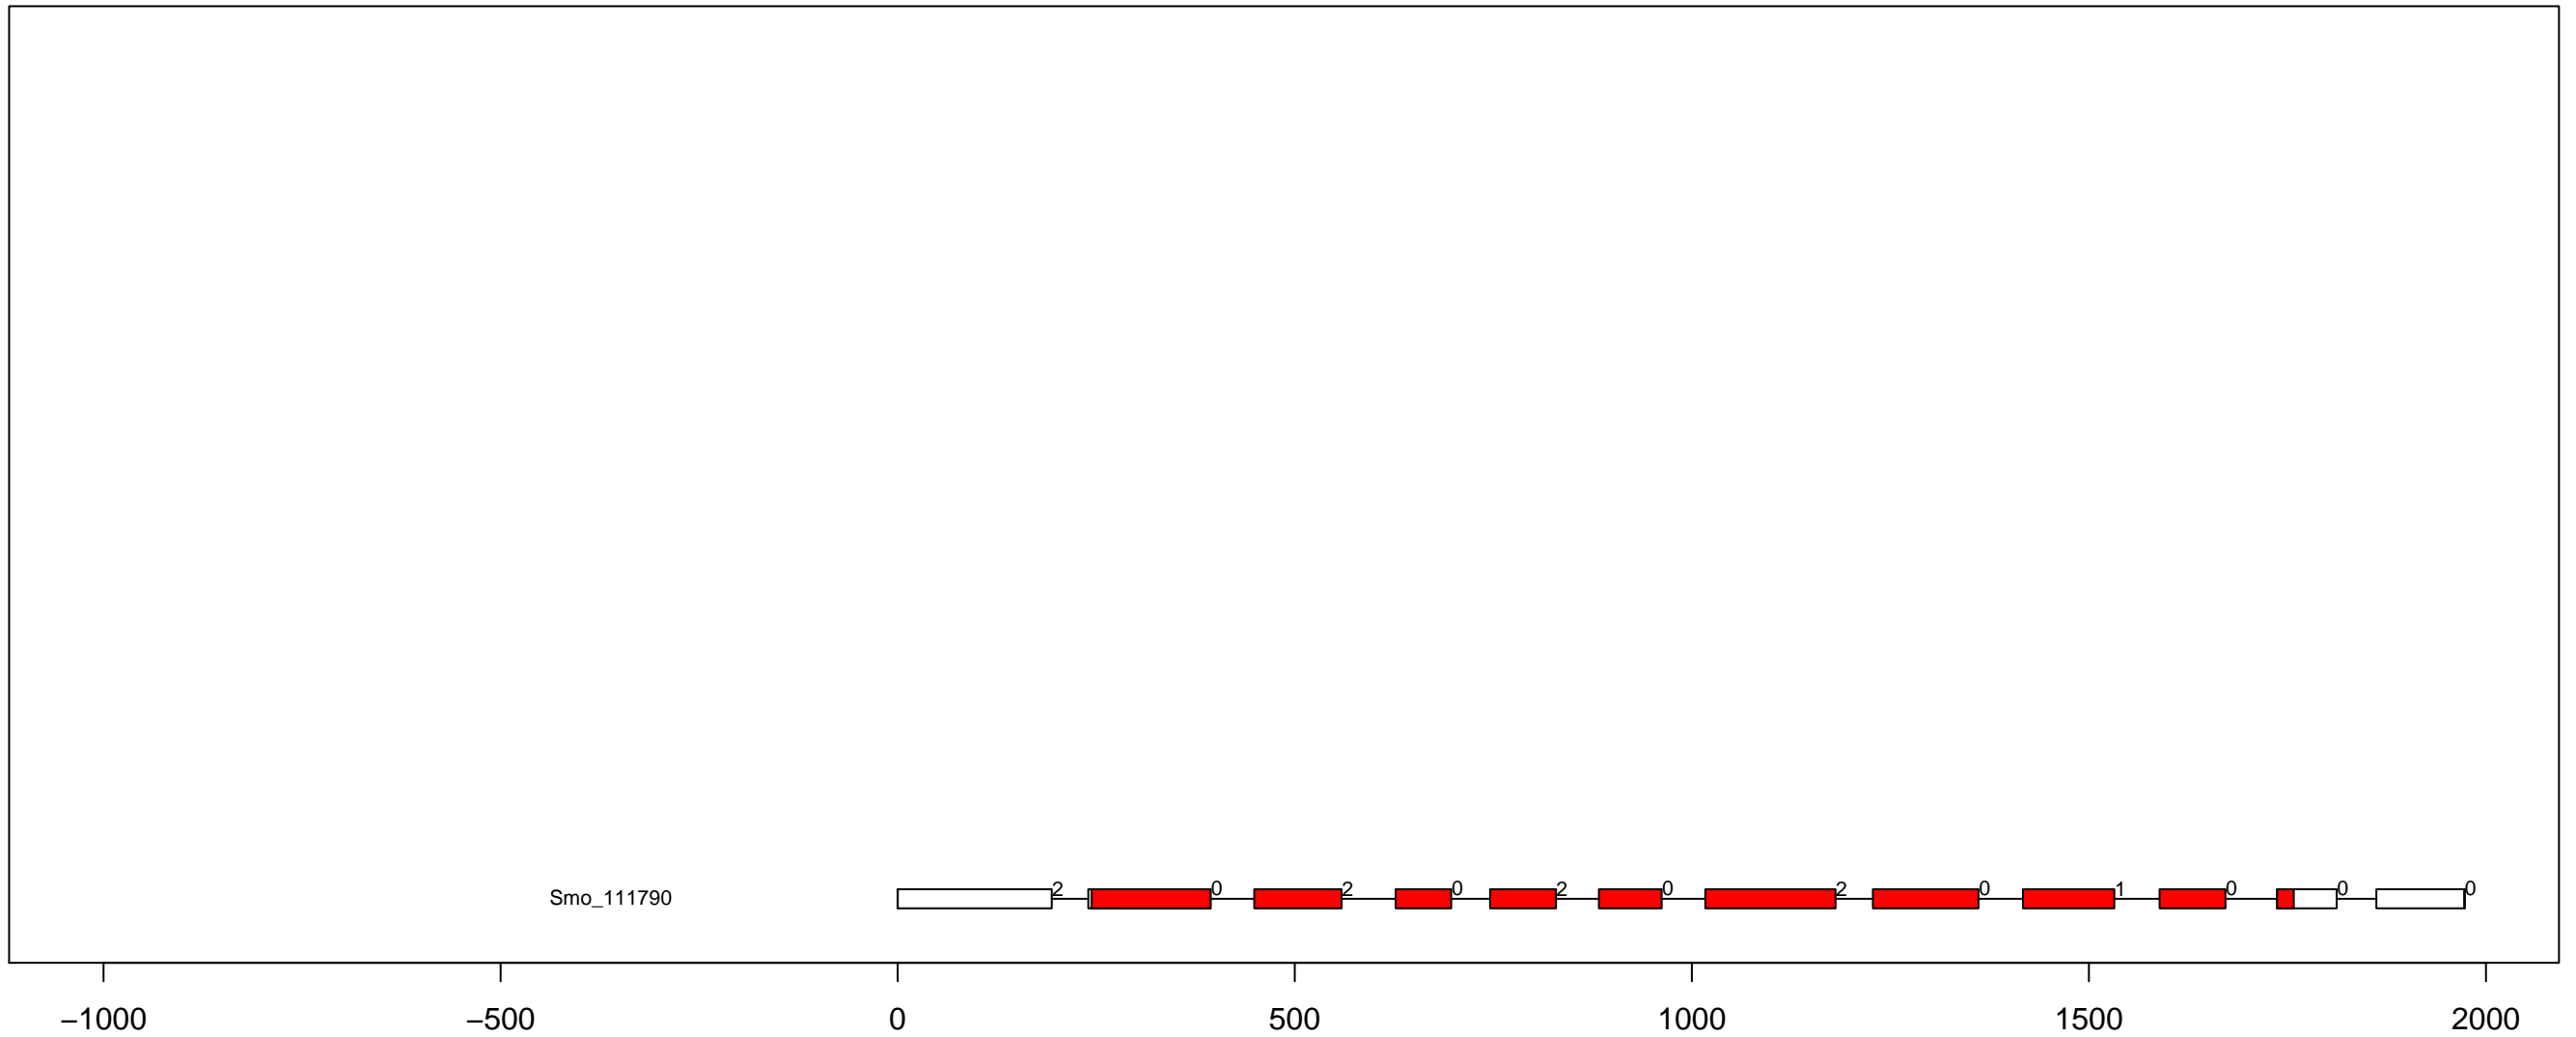

S.mo CMGC\_GSKL exon-intron and kinase domain diagram (all)

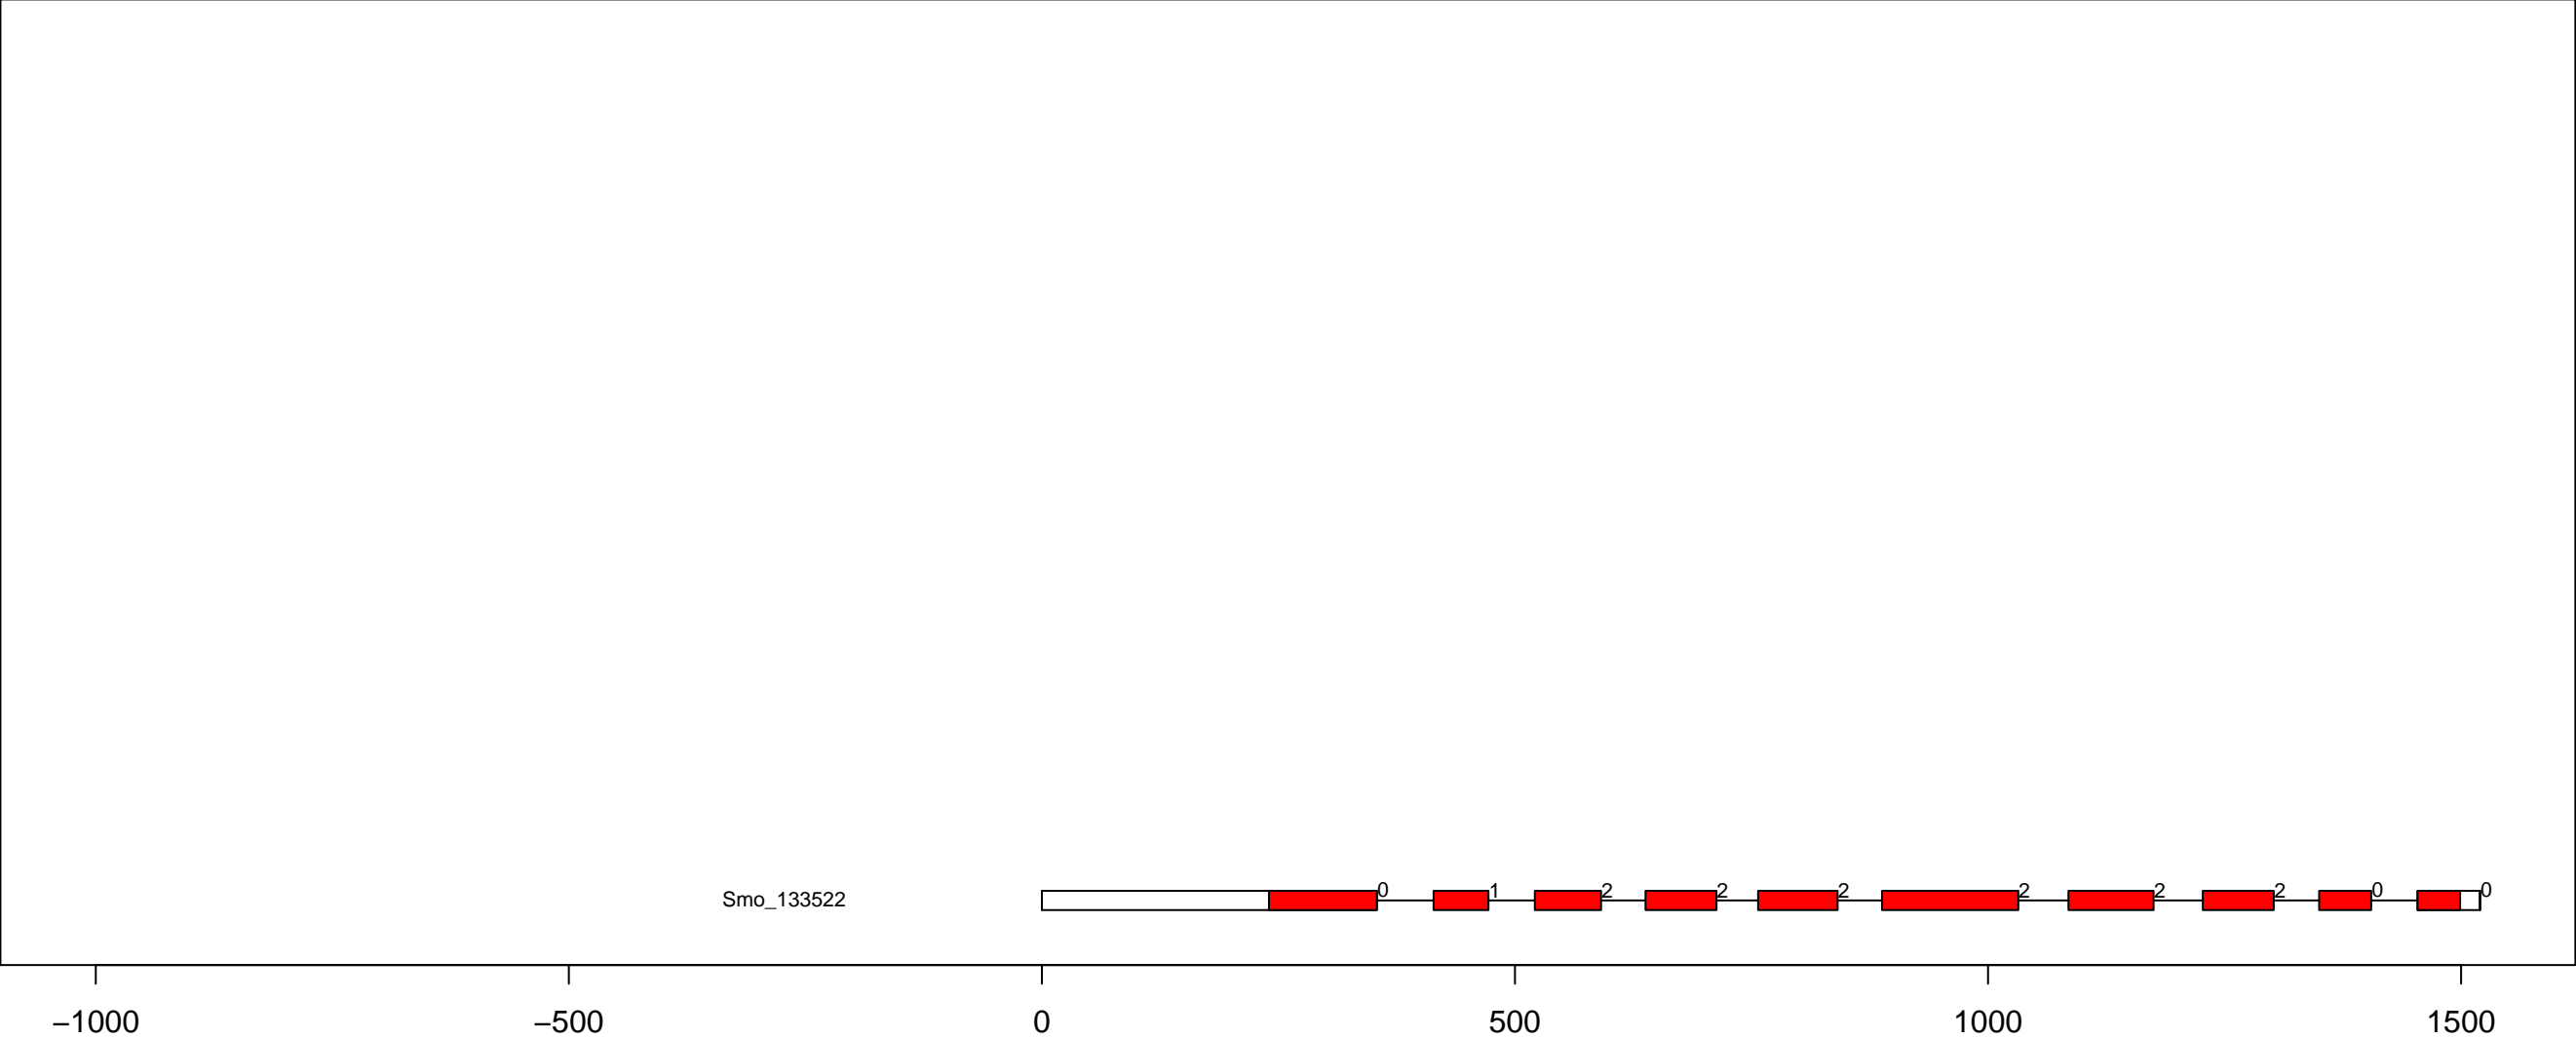

# S.mo CMGC\_GSK exon-intron and kinase domain diagram (all)

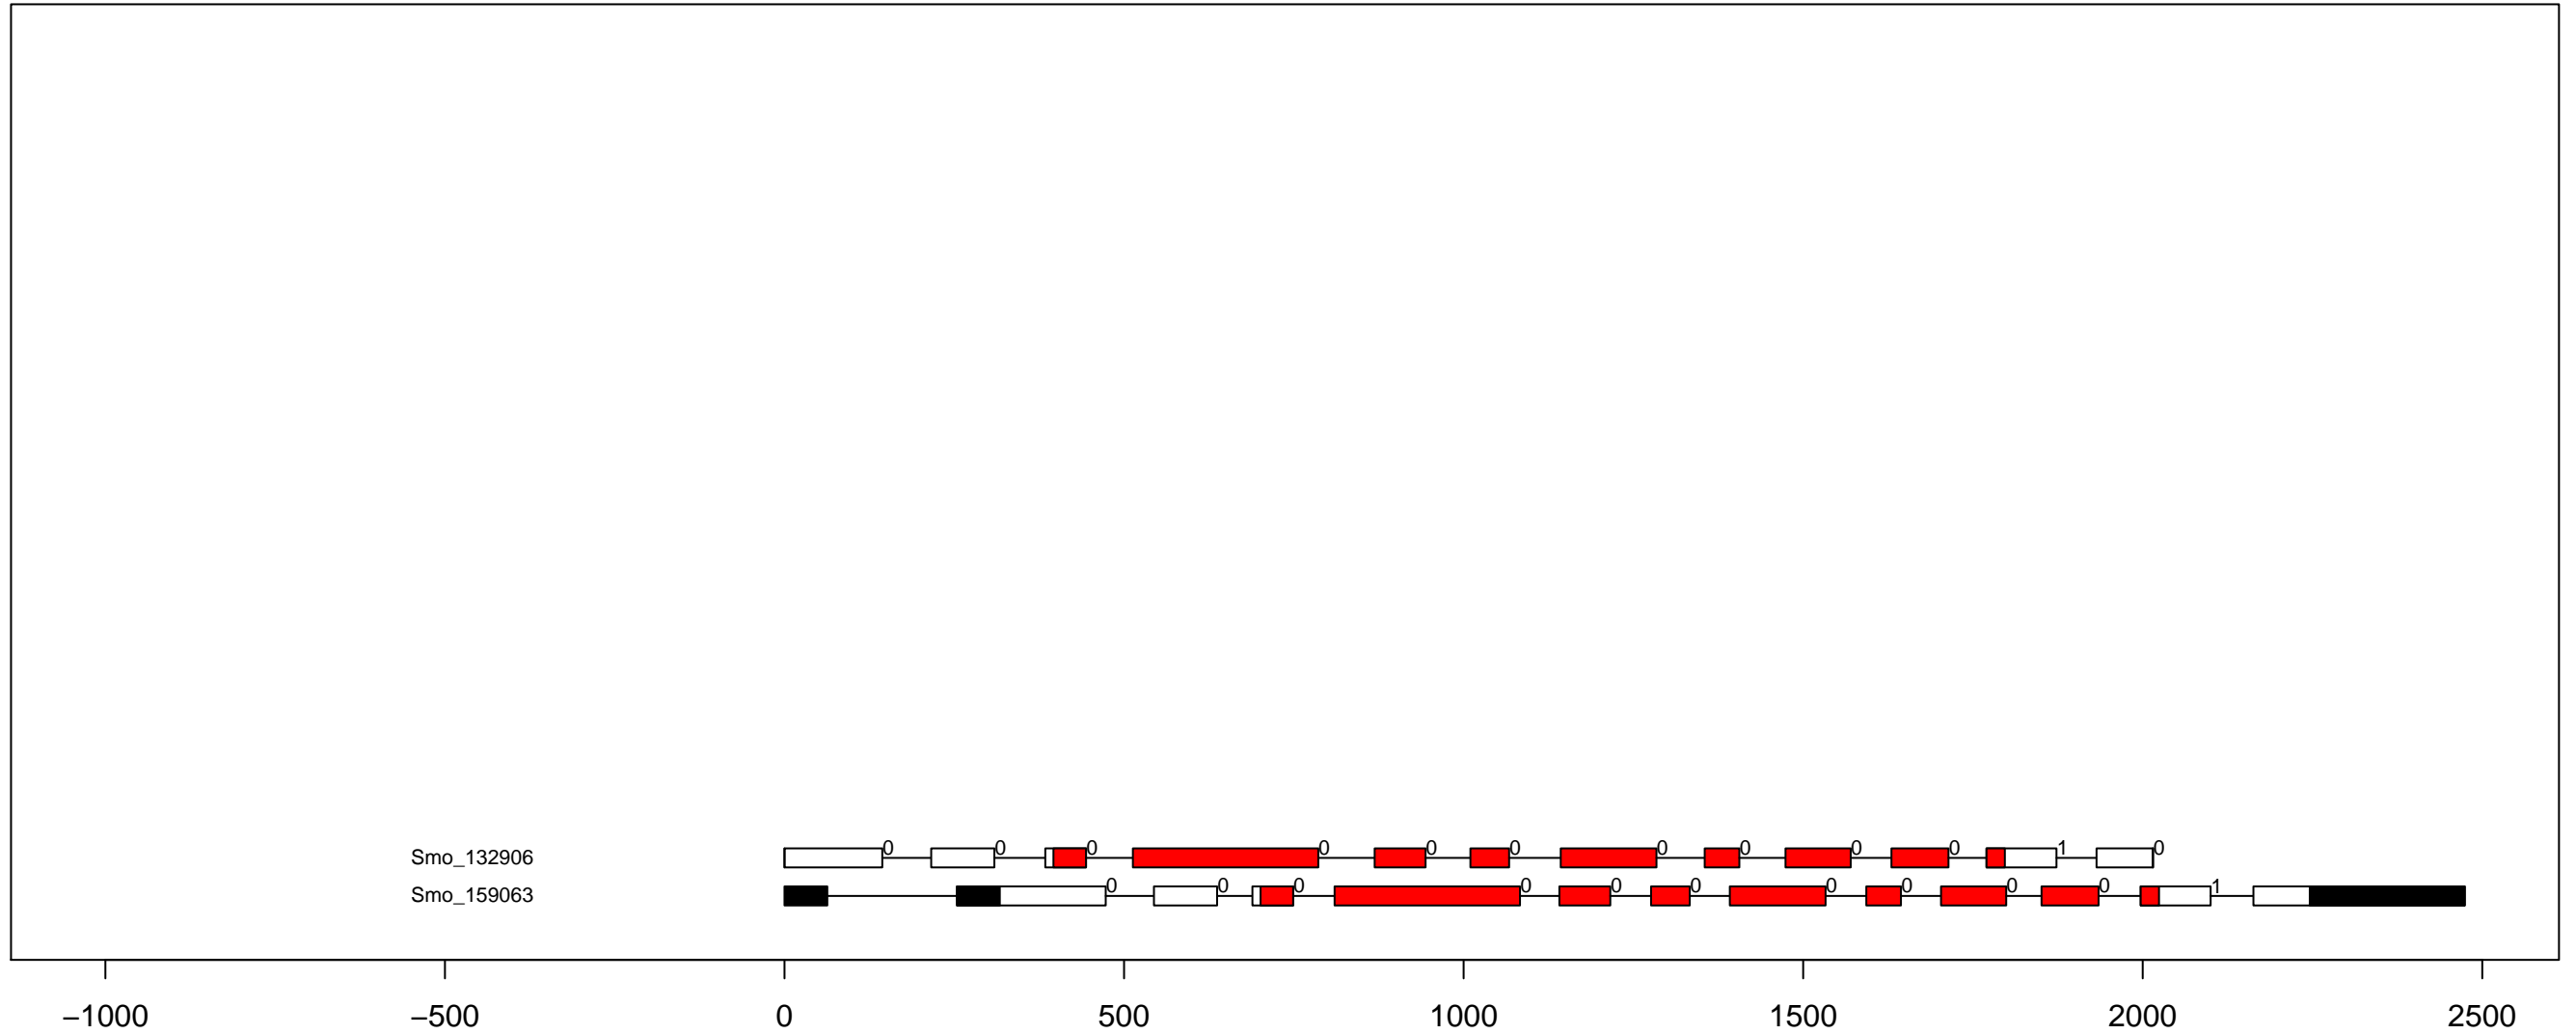



### S.mo CMGC\_MAPK exon-intron and kinase domain diagram (all)

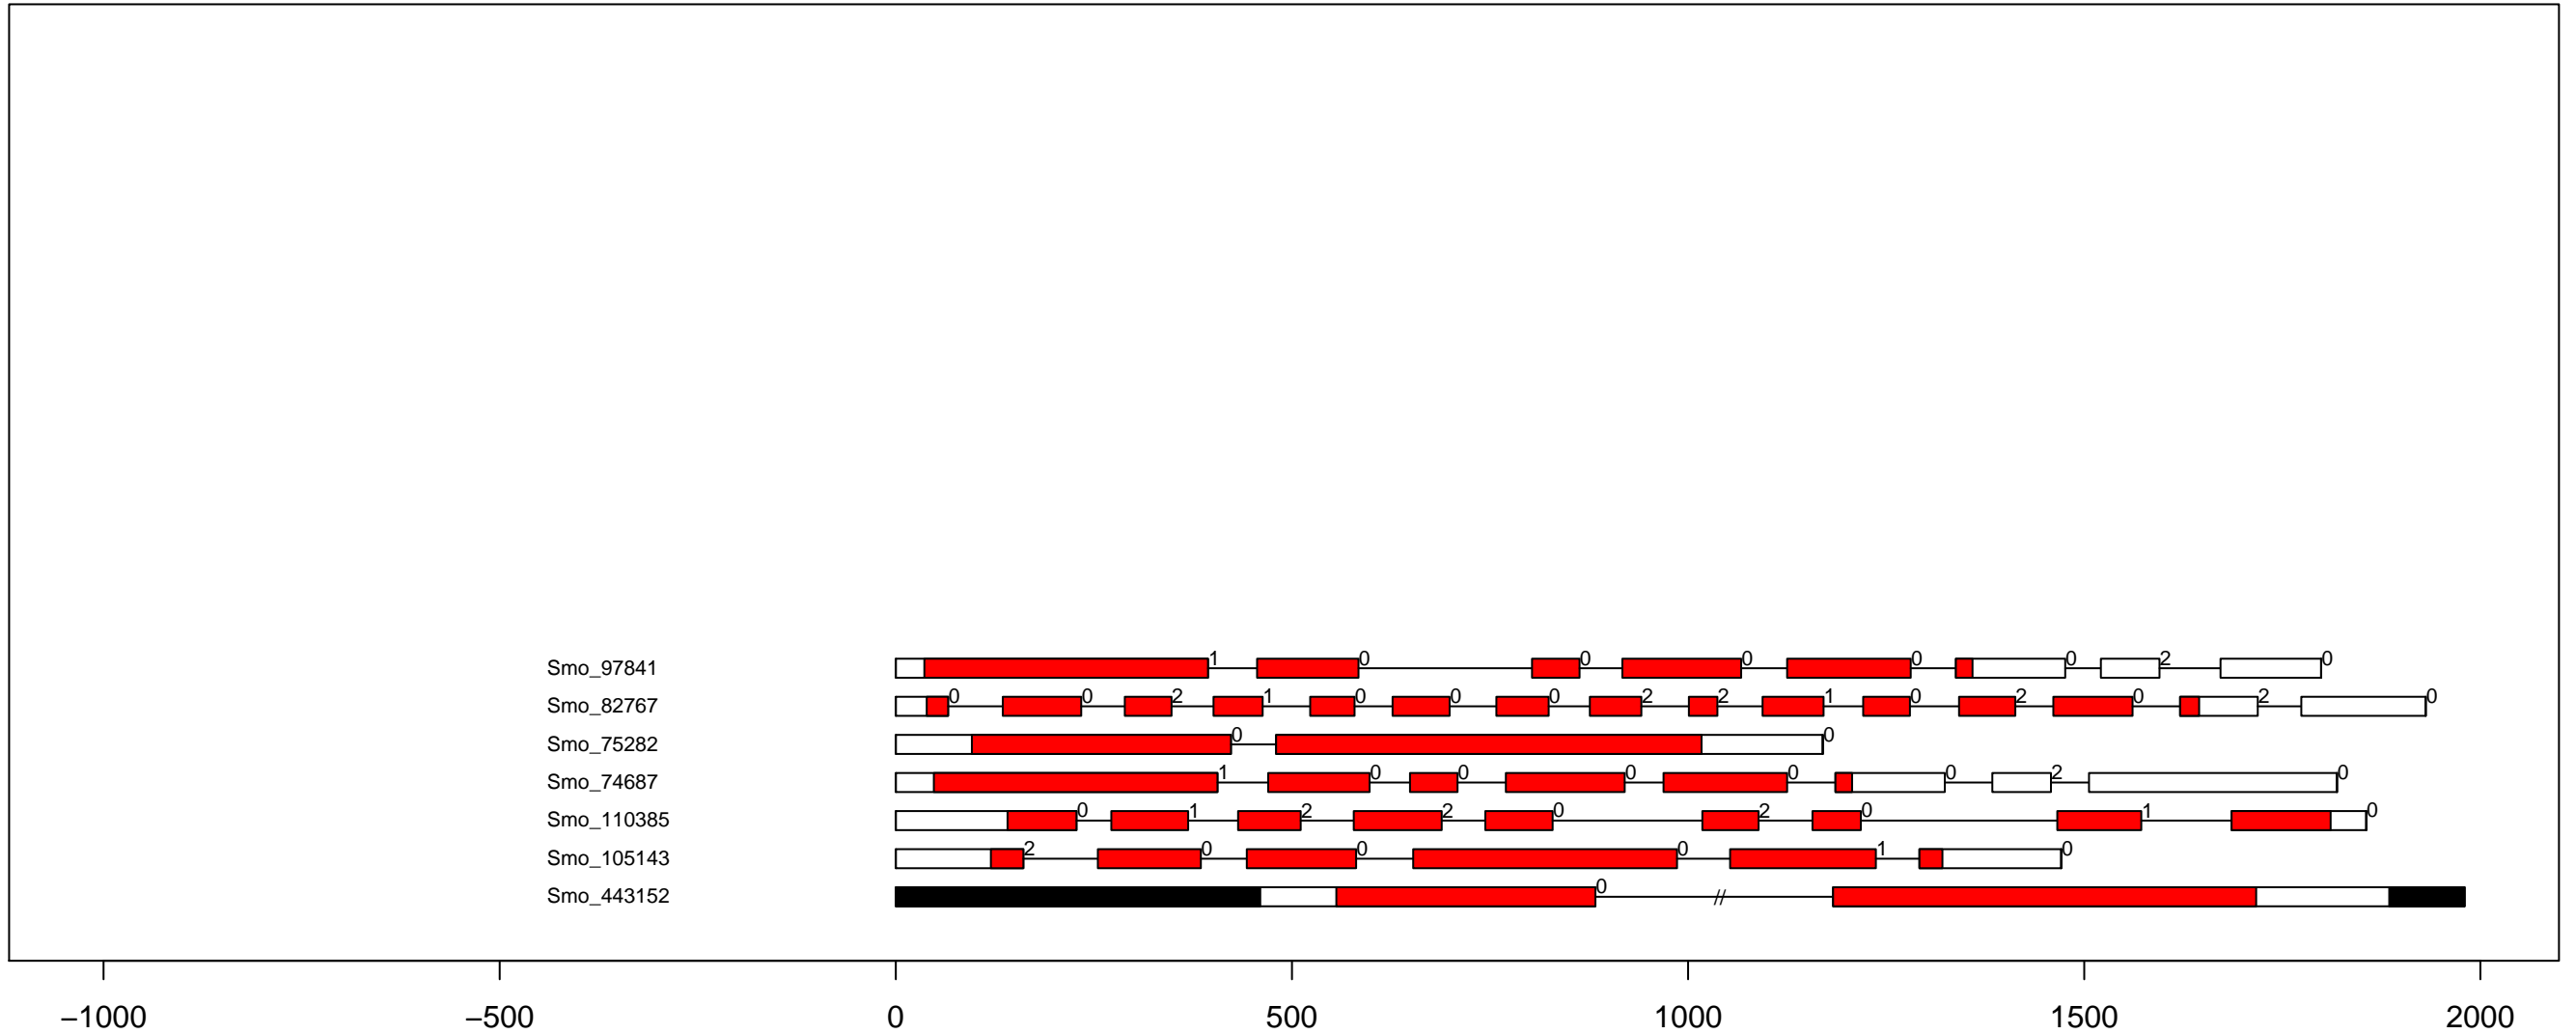

# S.mo CMGC\_RCK exon-intron and kinase domain diagram (all)

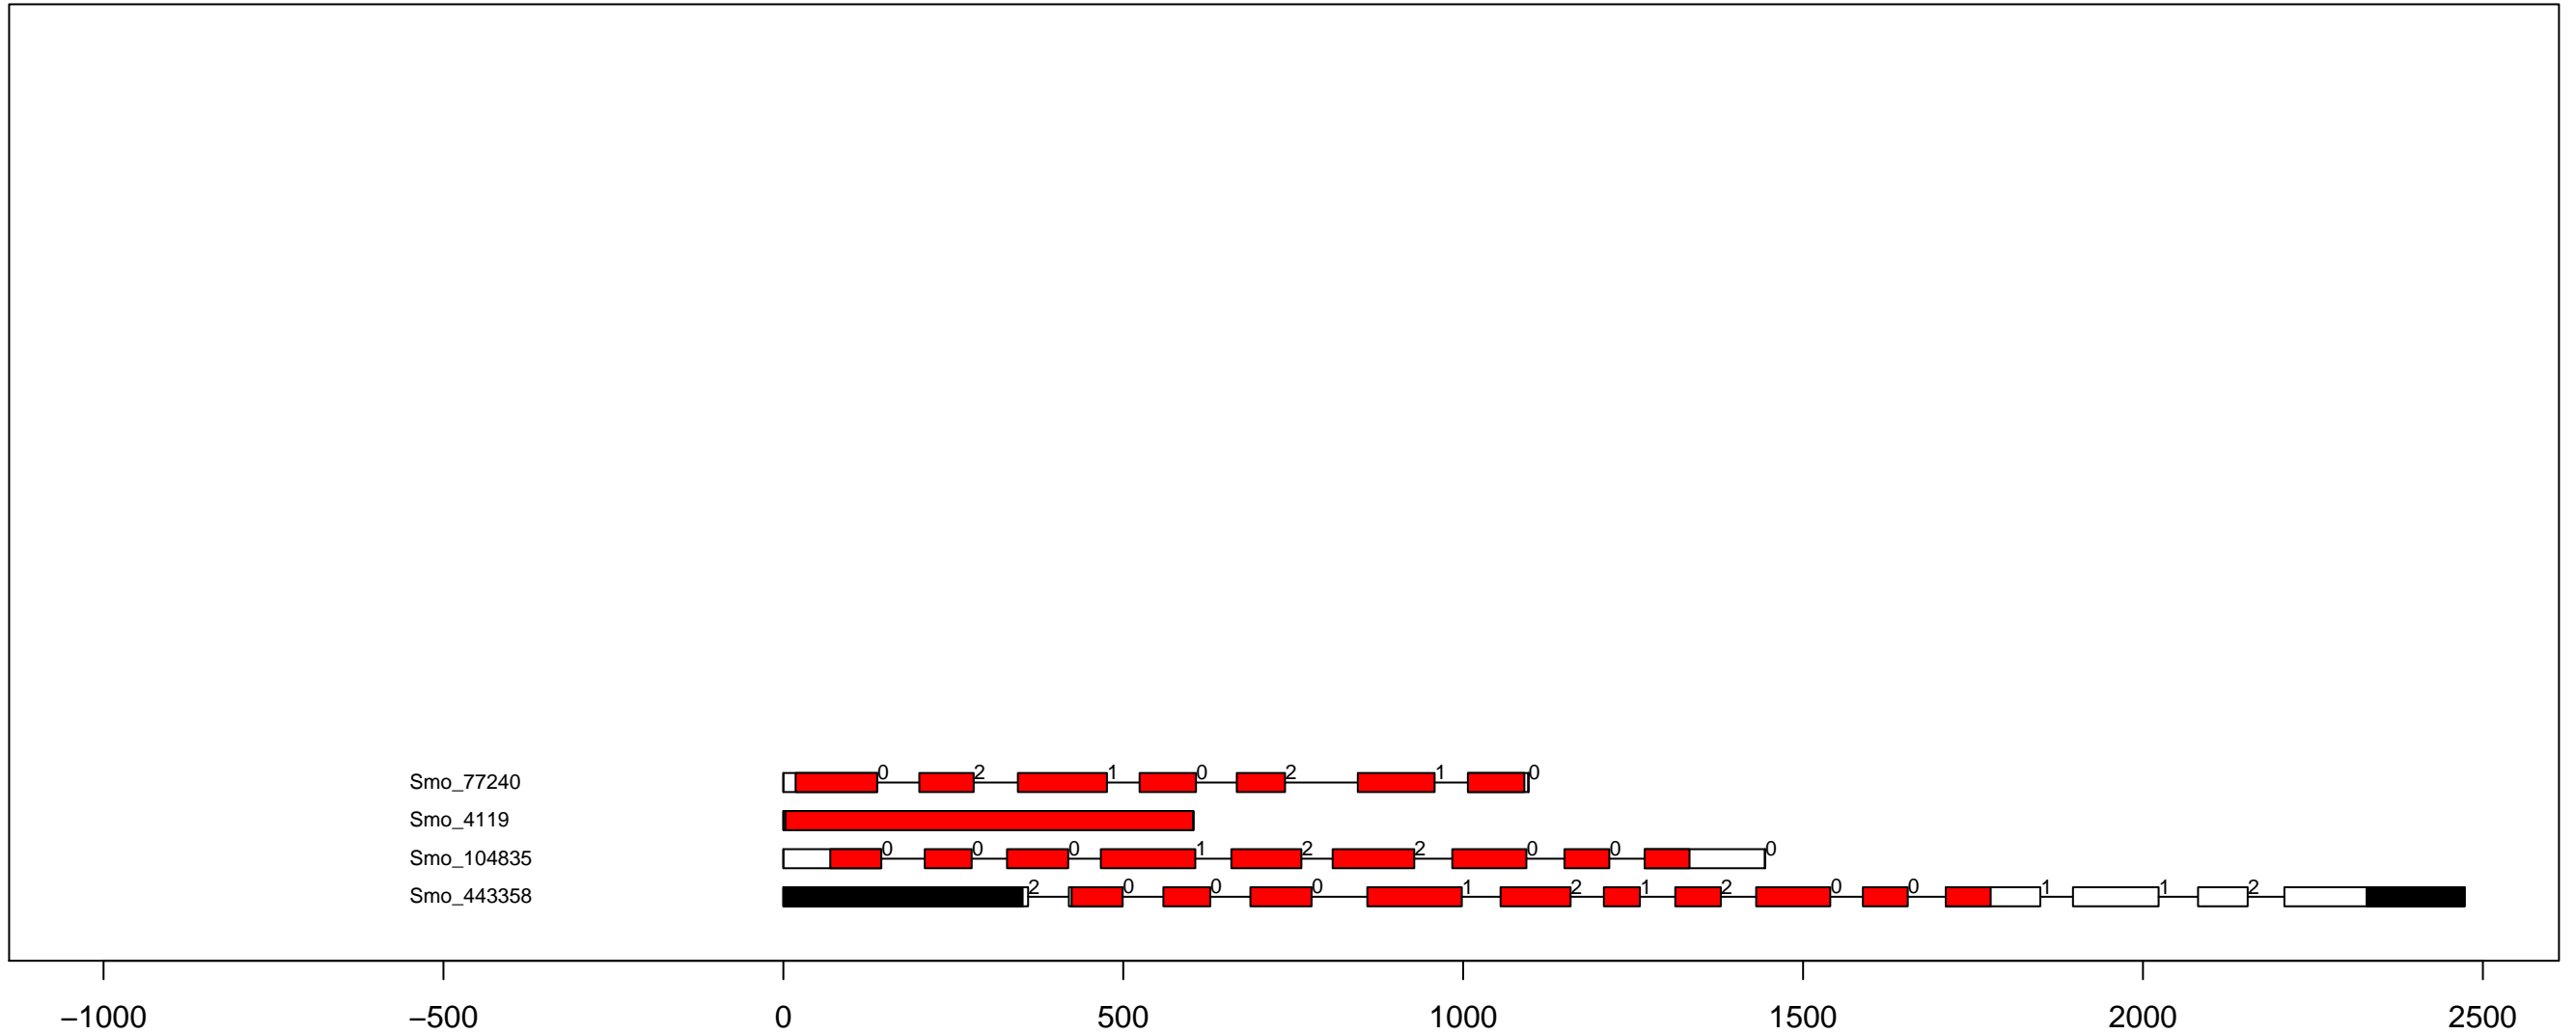

# S.mo CMGC\_SRPK exon-intron and kinase domain diagram (all)

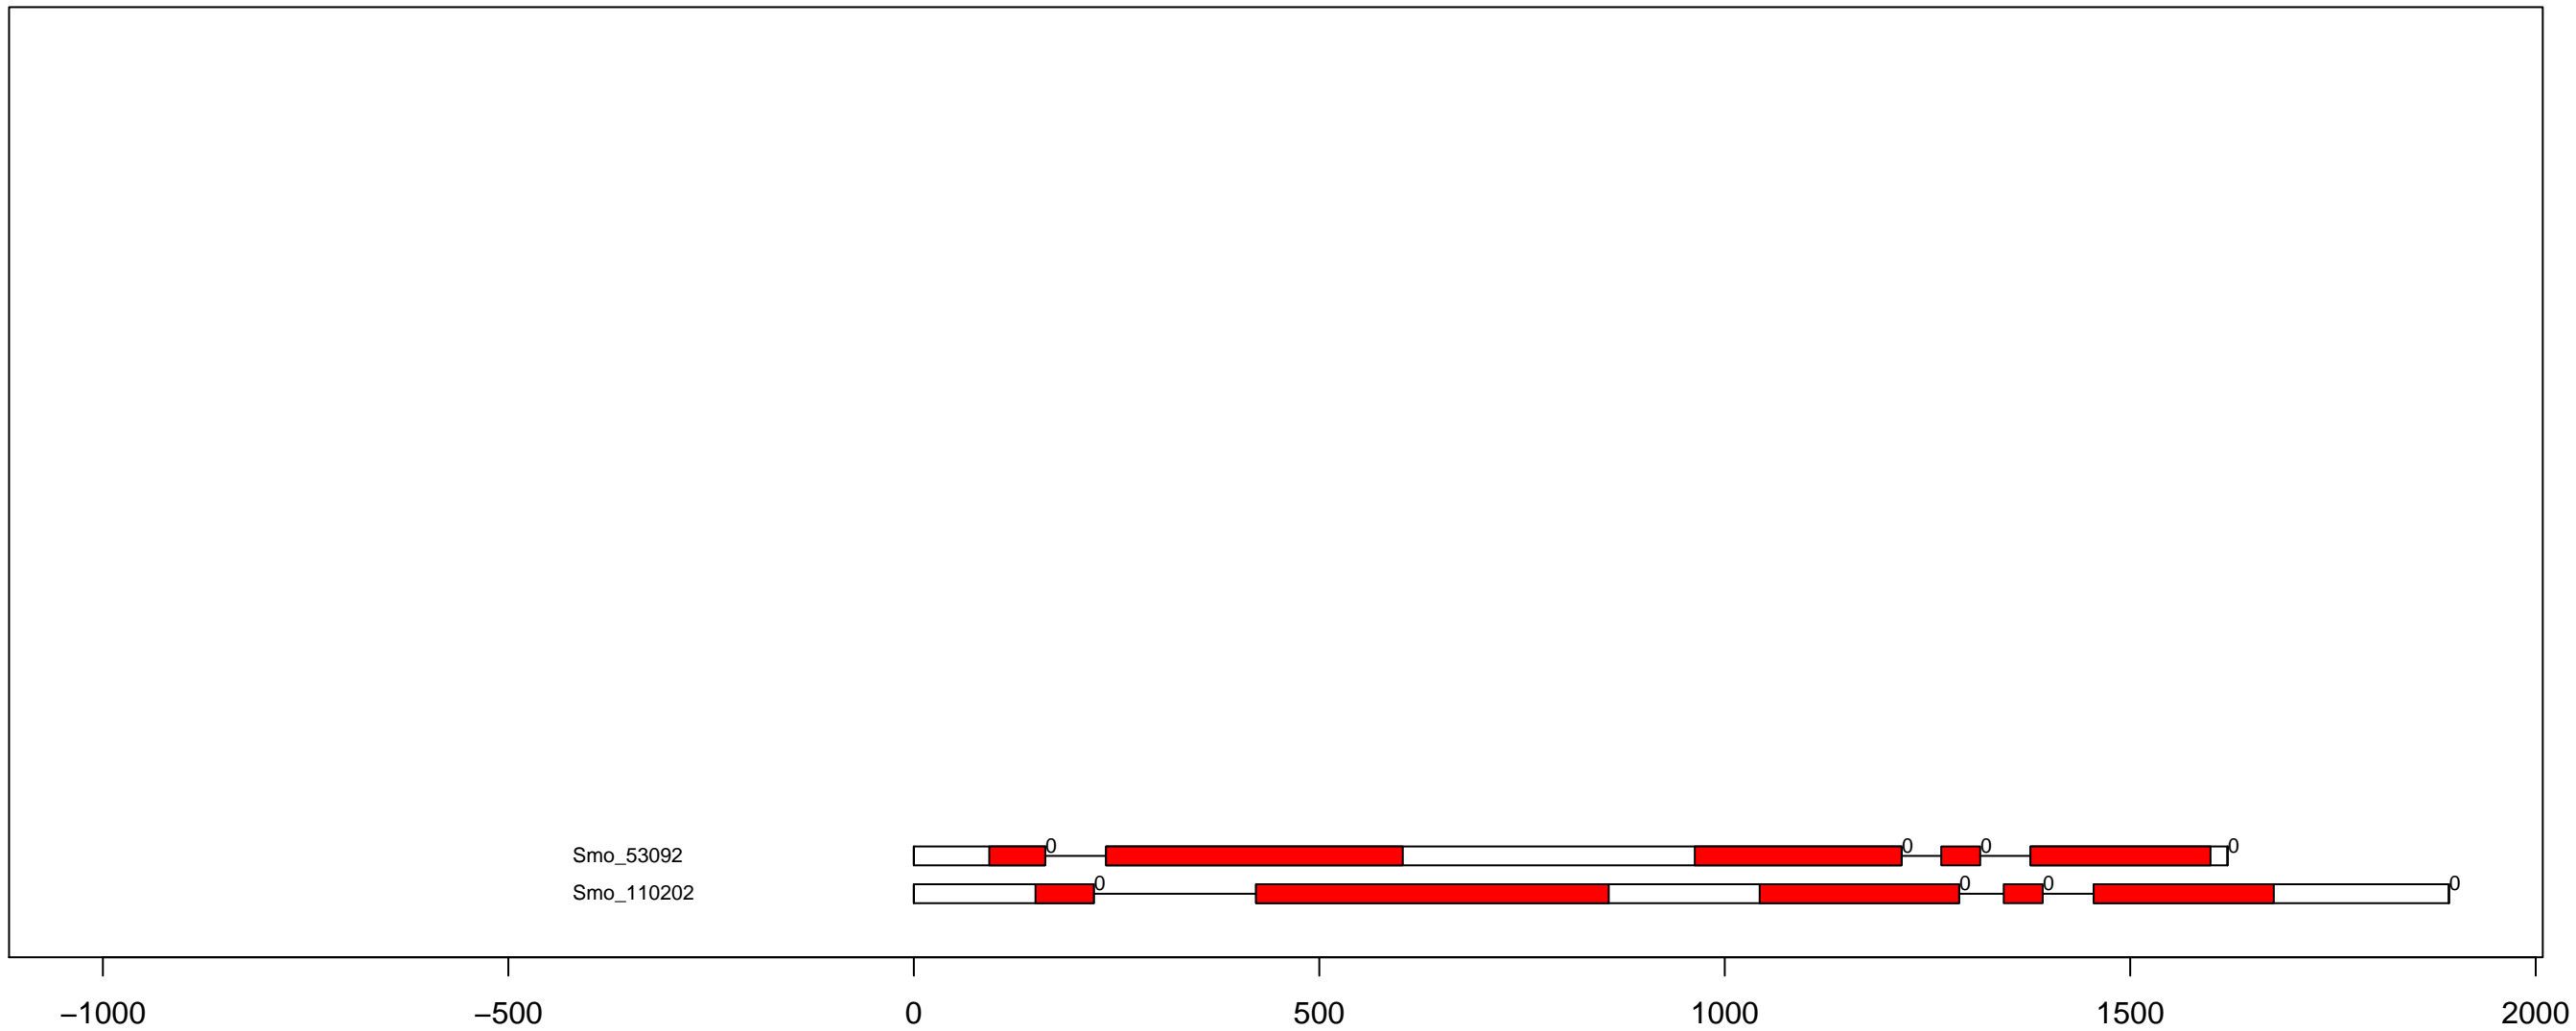

# S.mo Group-Cr-1 exon-intron and kinase domain diagram (all)

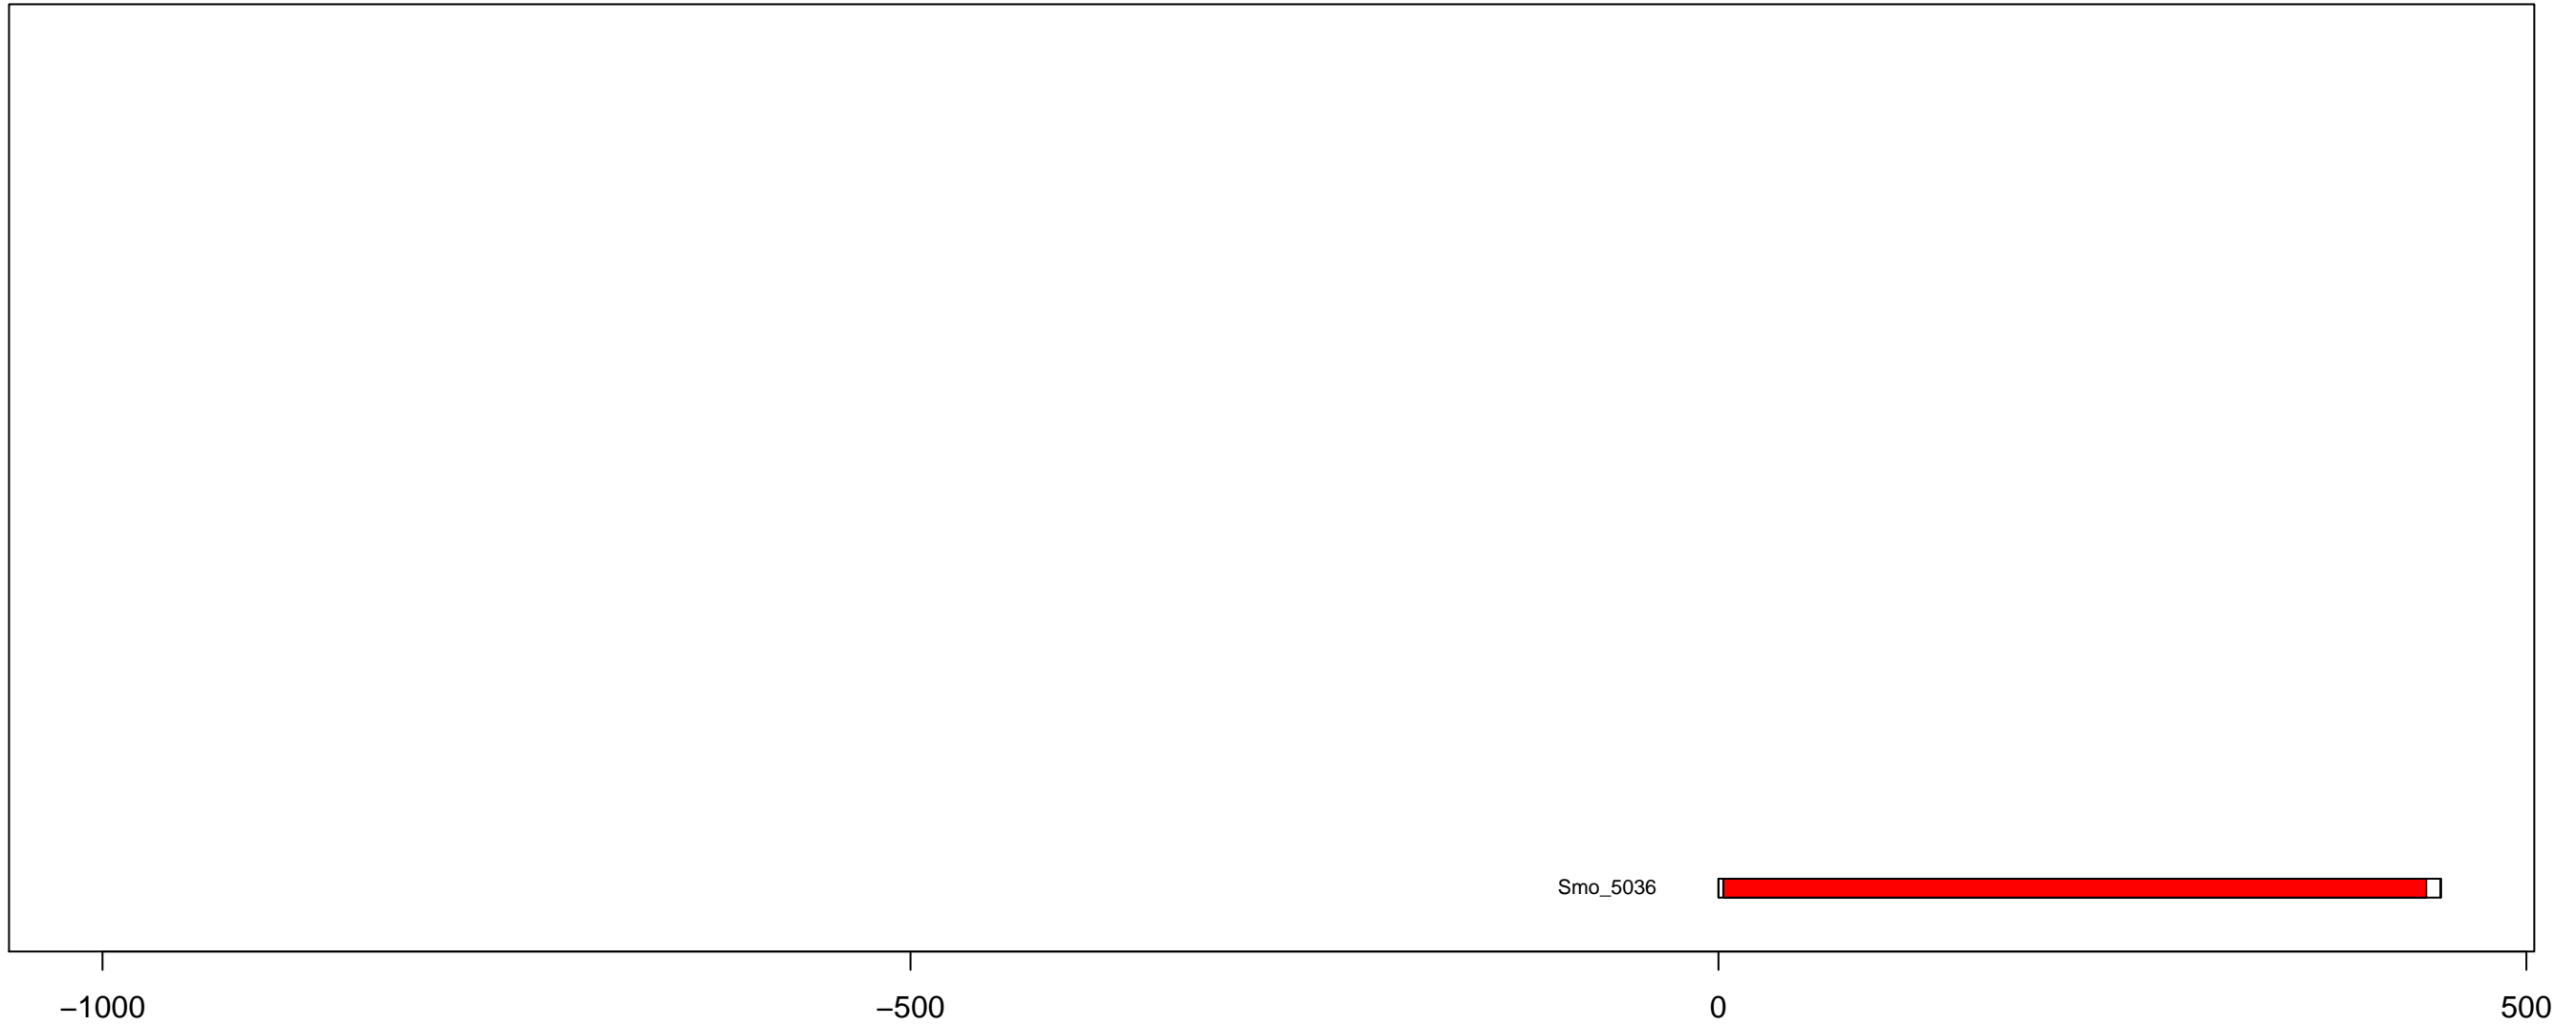

# S.mo Group-PI-1 exon-intron and kinase domain diagram (all)

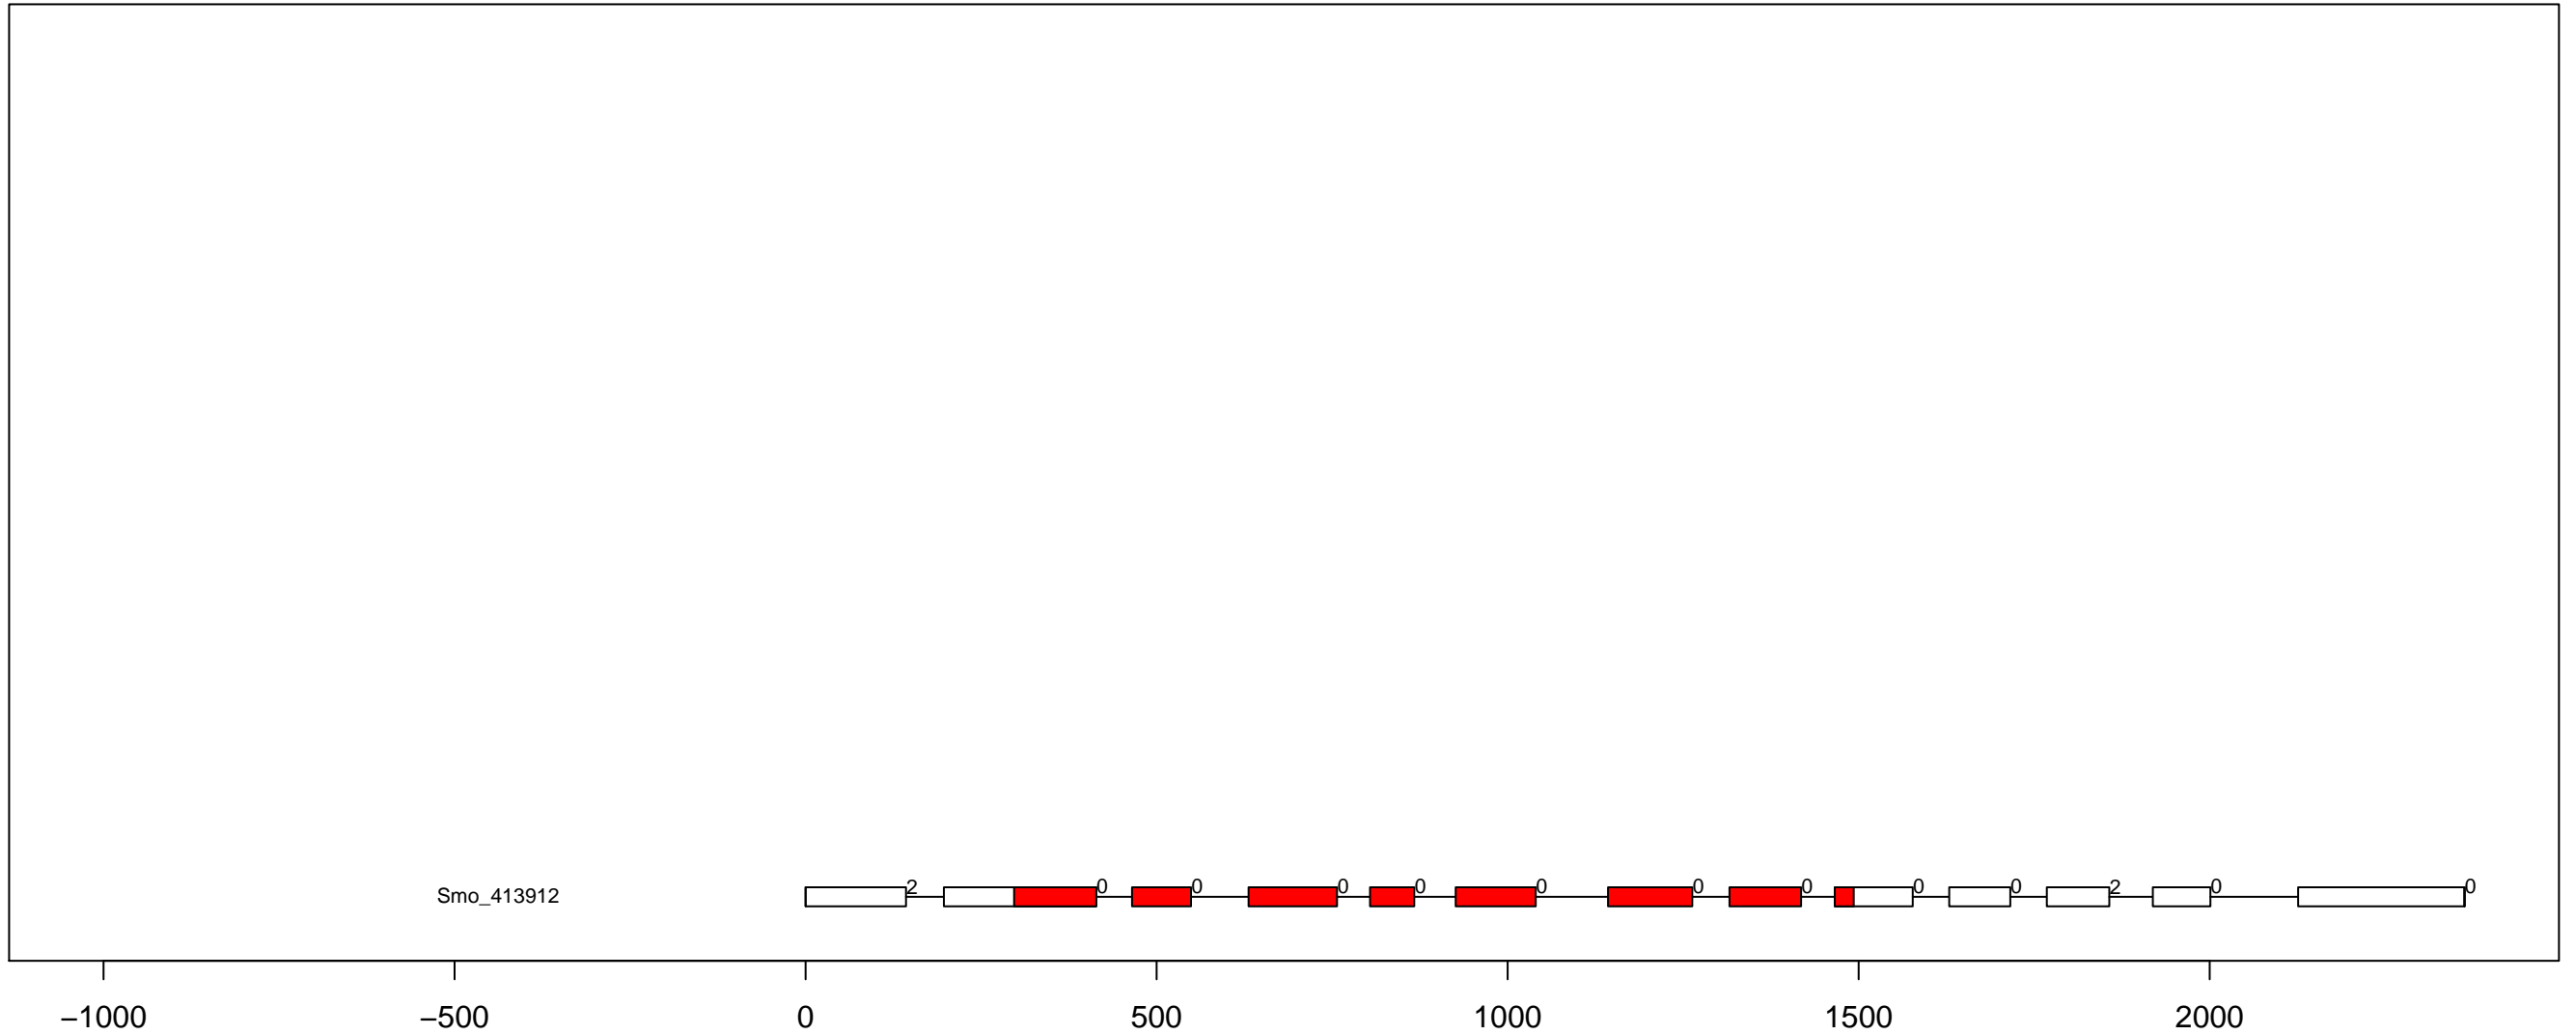

# S.mo Group-PI-3 exon-intron and kinase domain diagram (all)

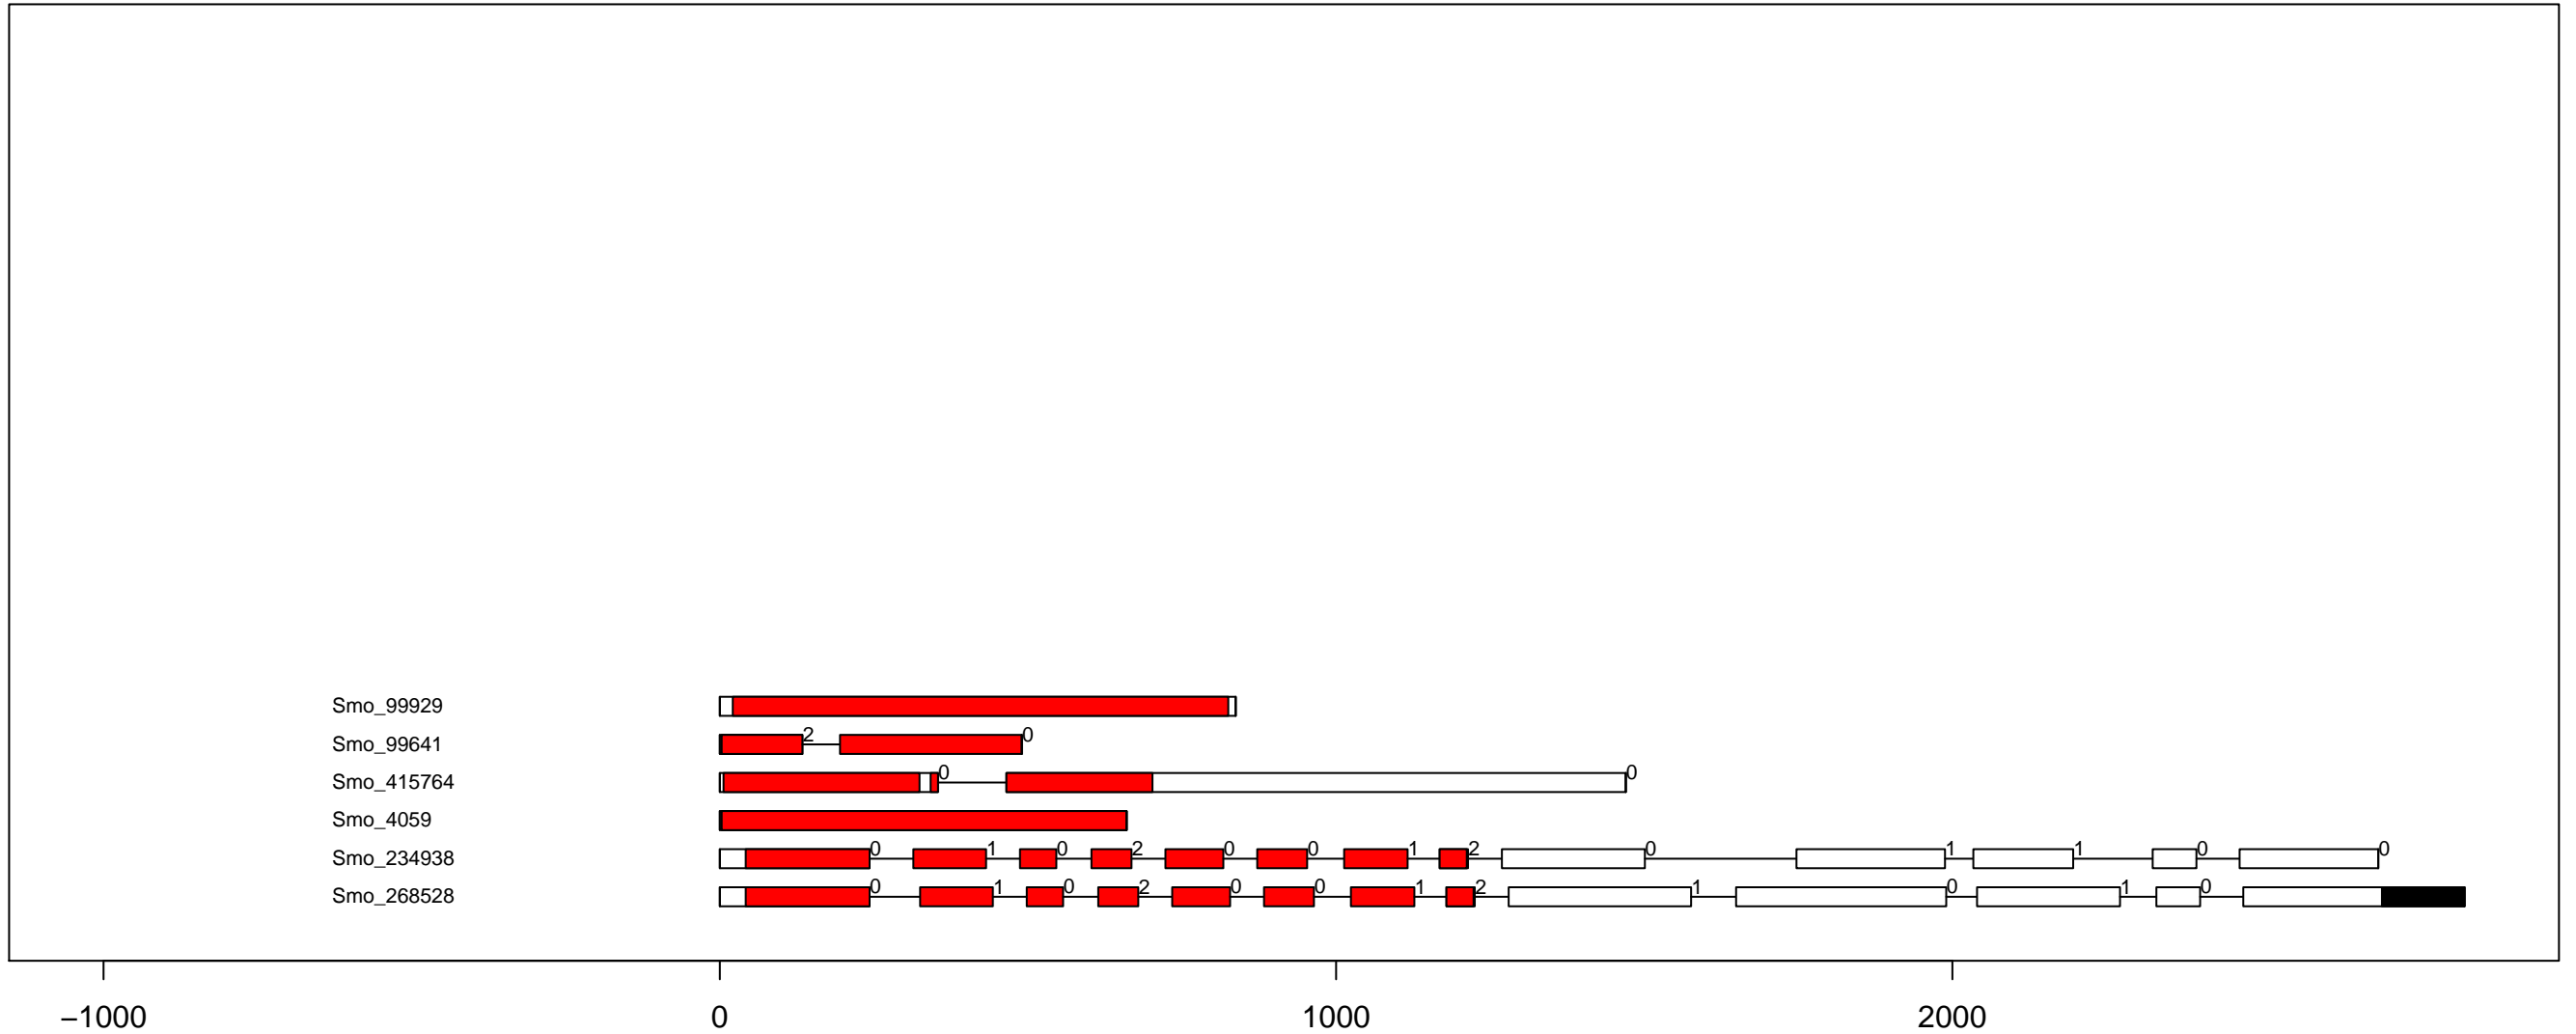

# S.mo Group-PI-4 exon-intron and kinase domain diagram (all)

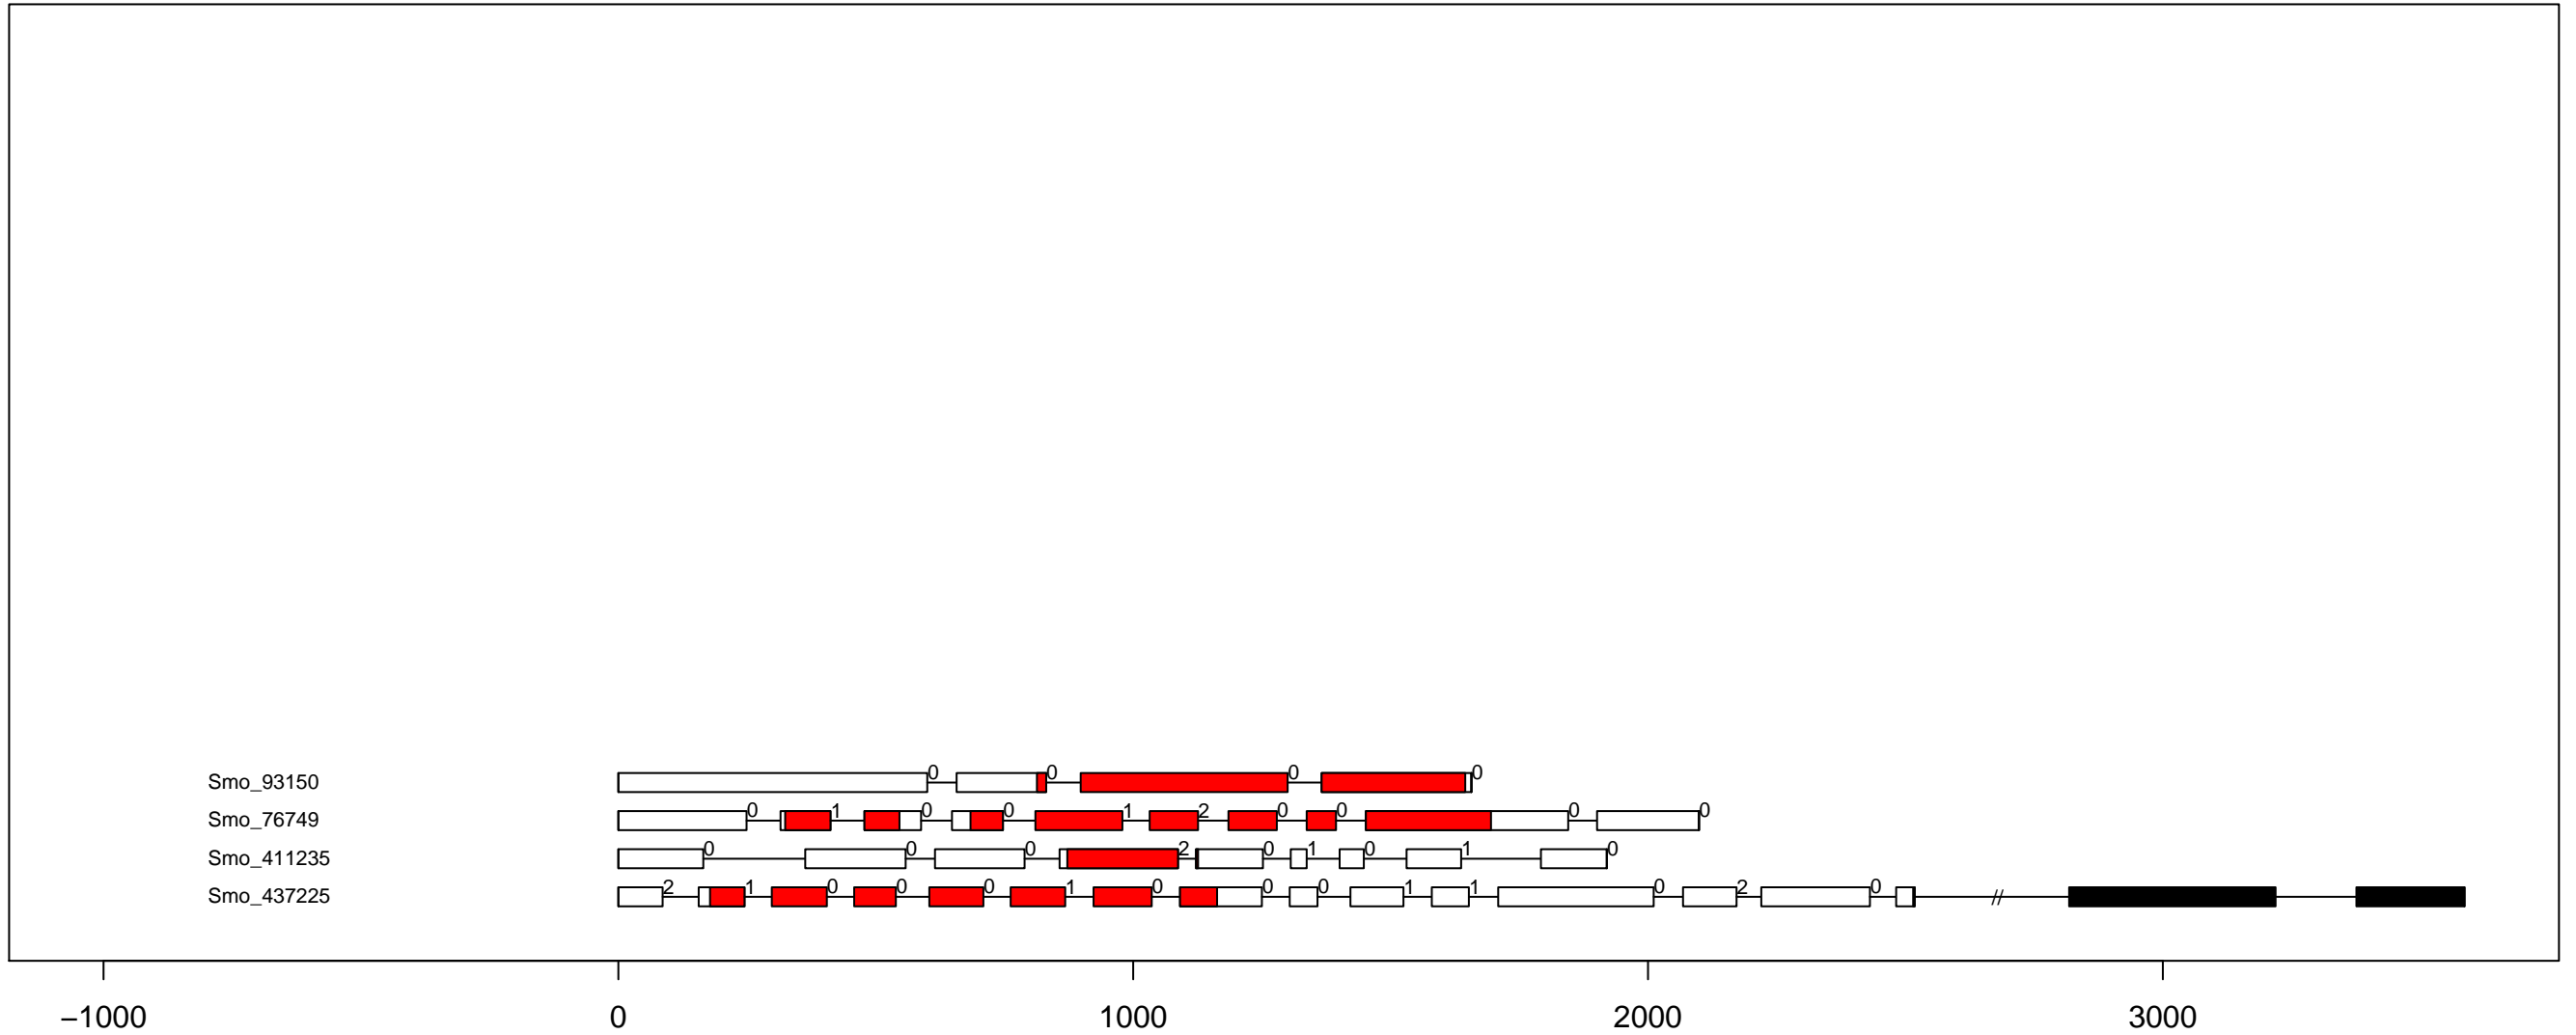

# S.mo NAK exon-intron and kinase domain diagram (all)

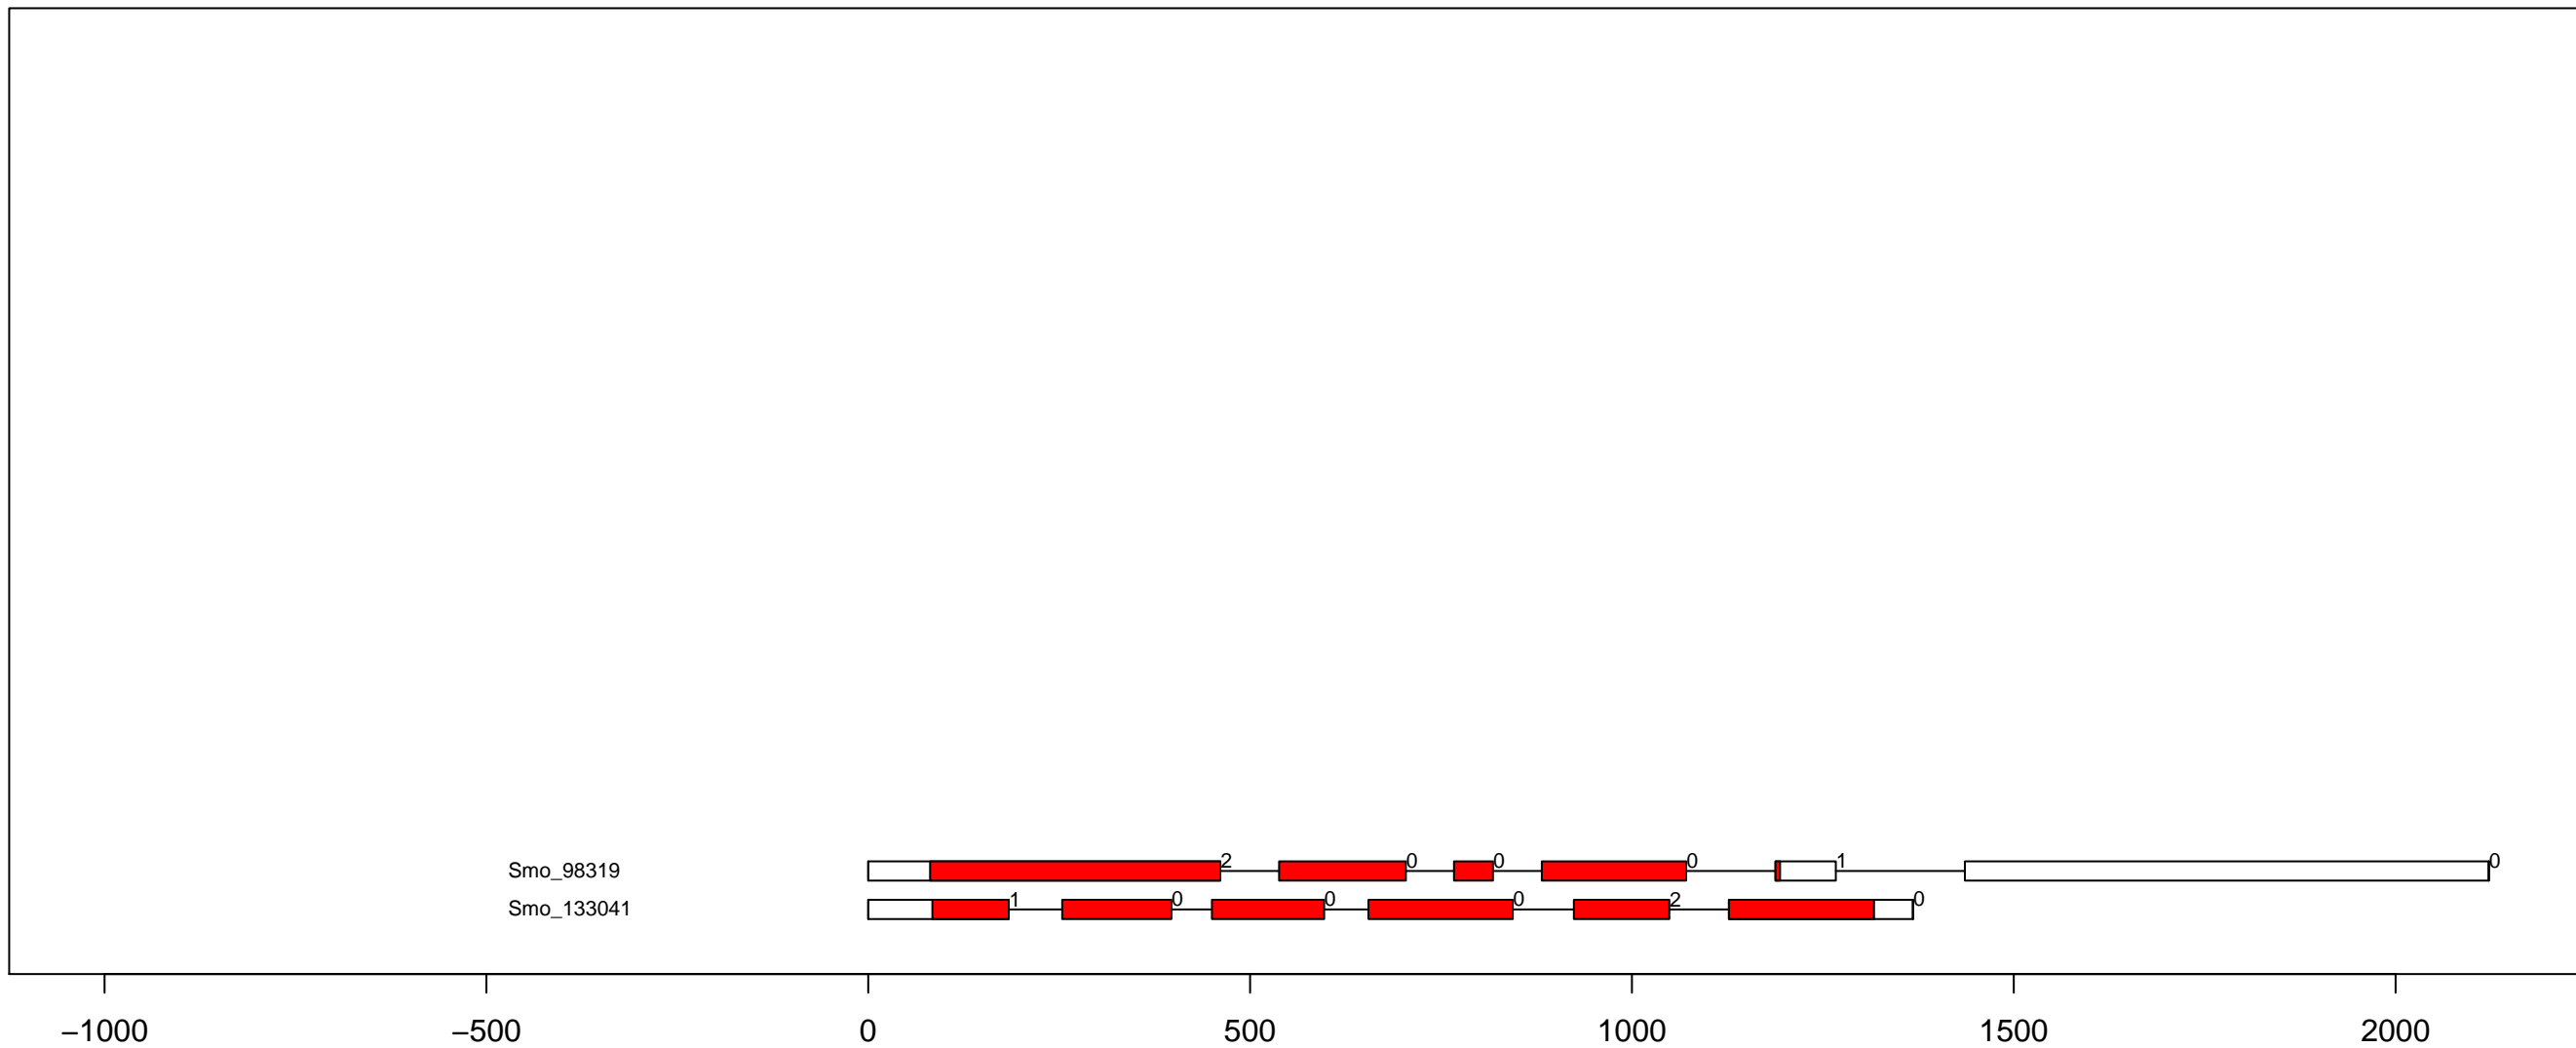





# S.mo PEK\_GCIN2 exon-intron and kinase domain diagram (all)

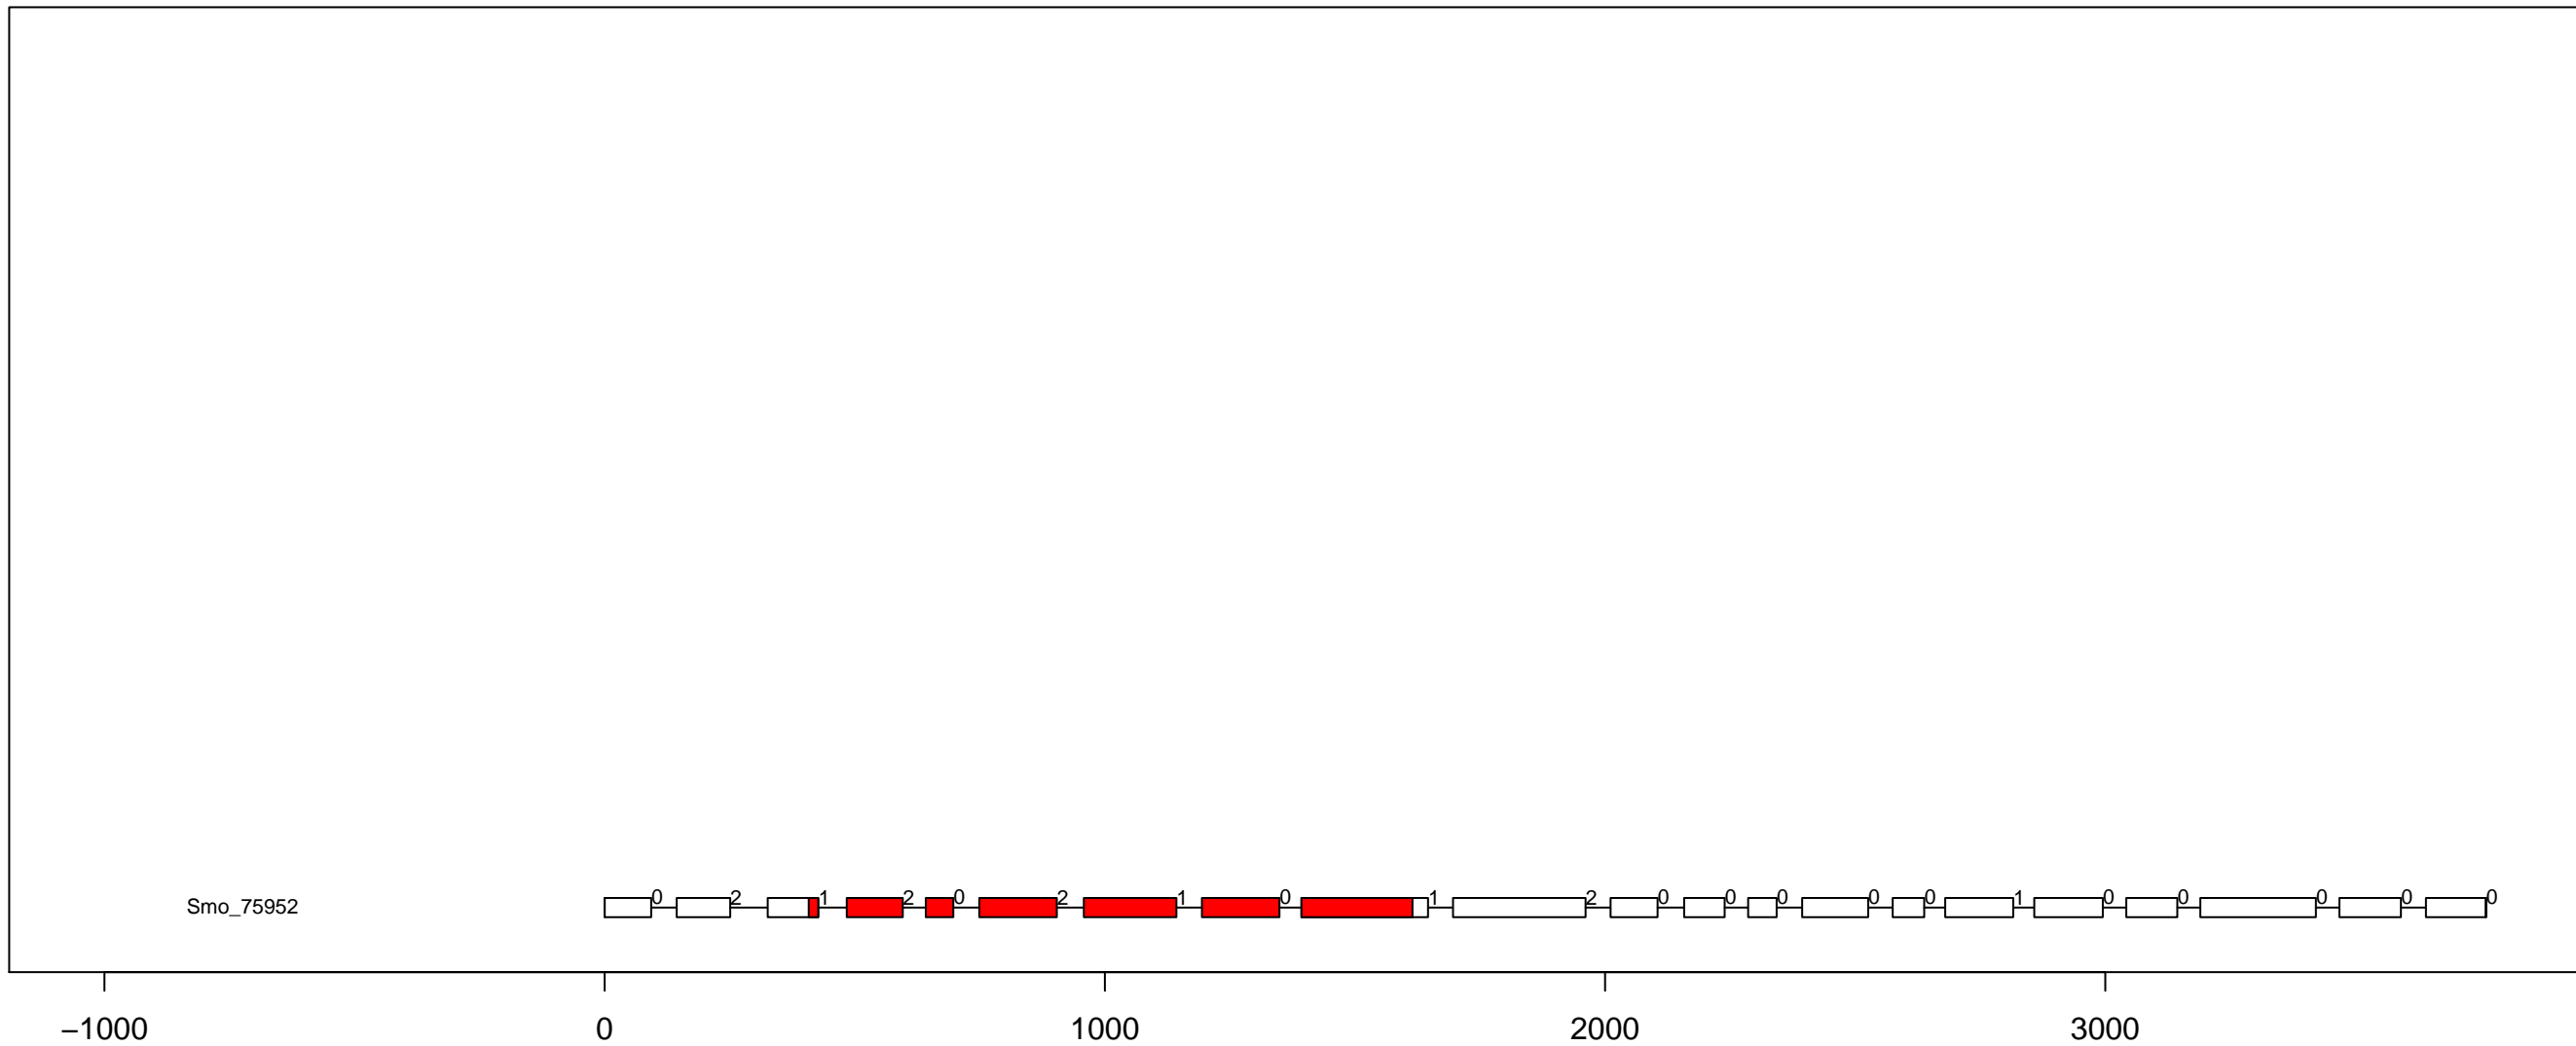

# S.mo PEK\_PEK exon-intron and kinase domain diagram (all)

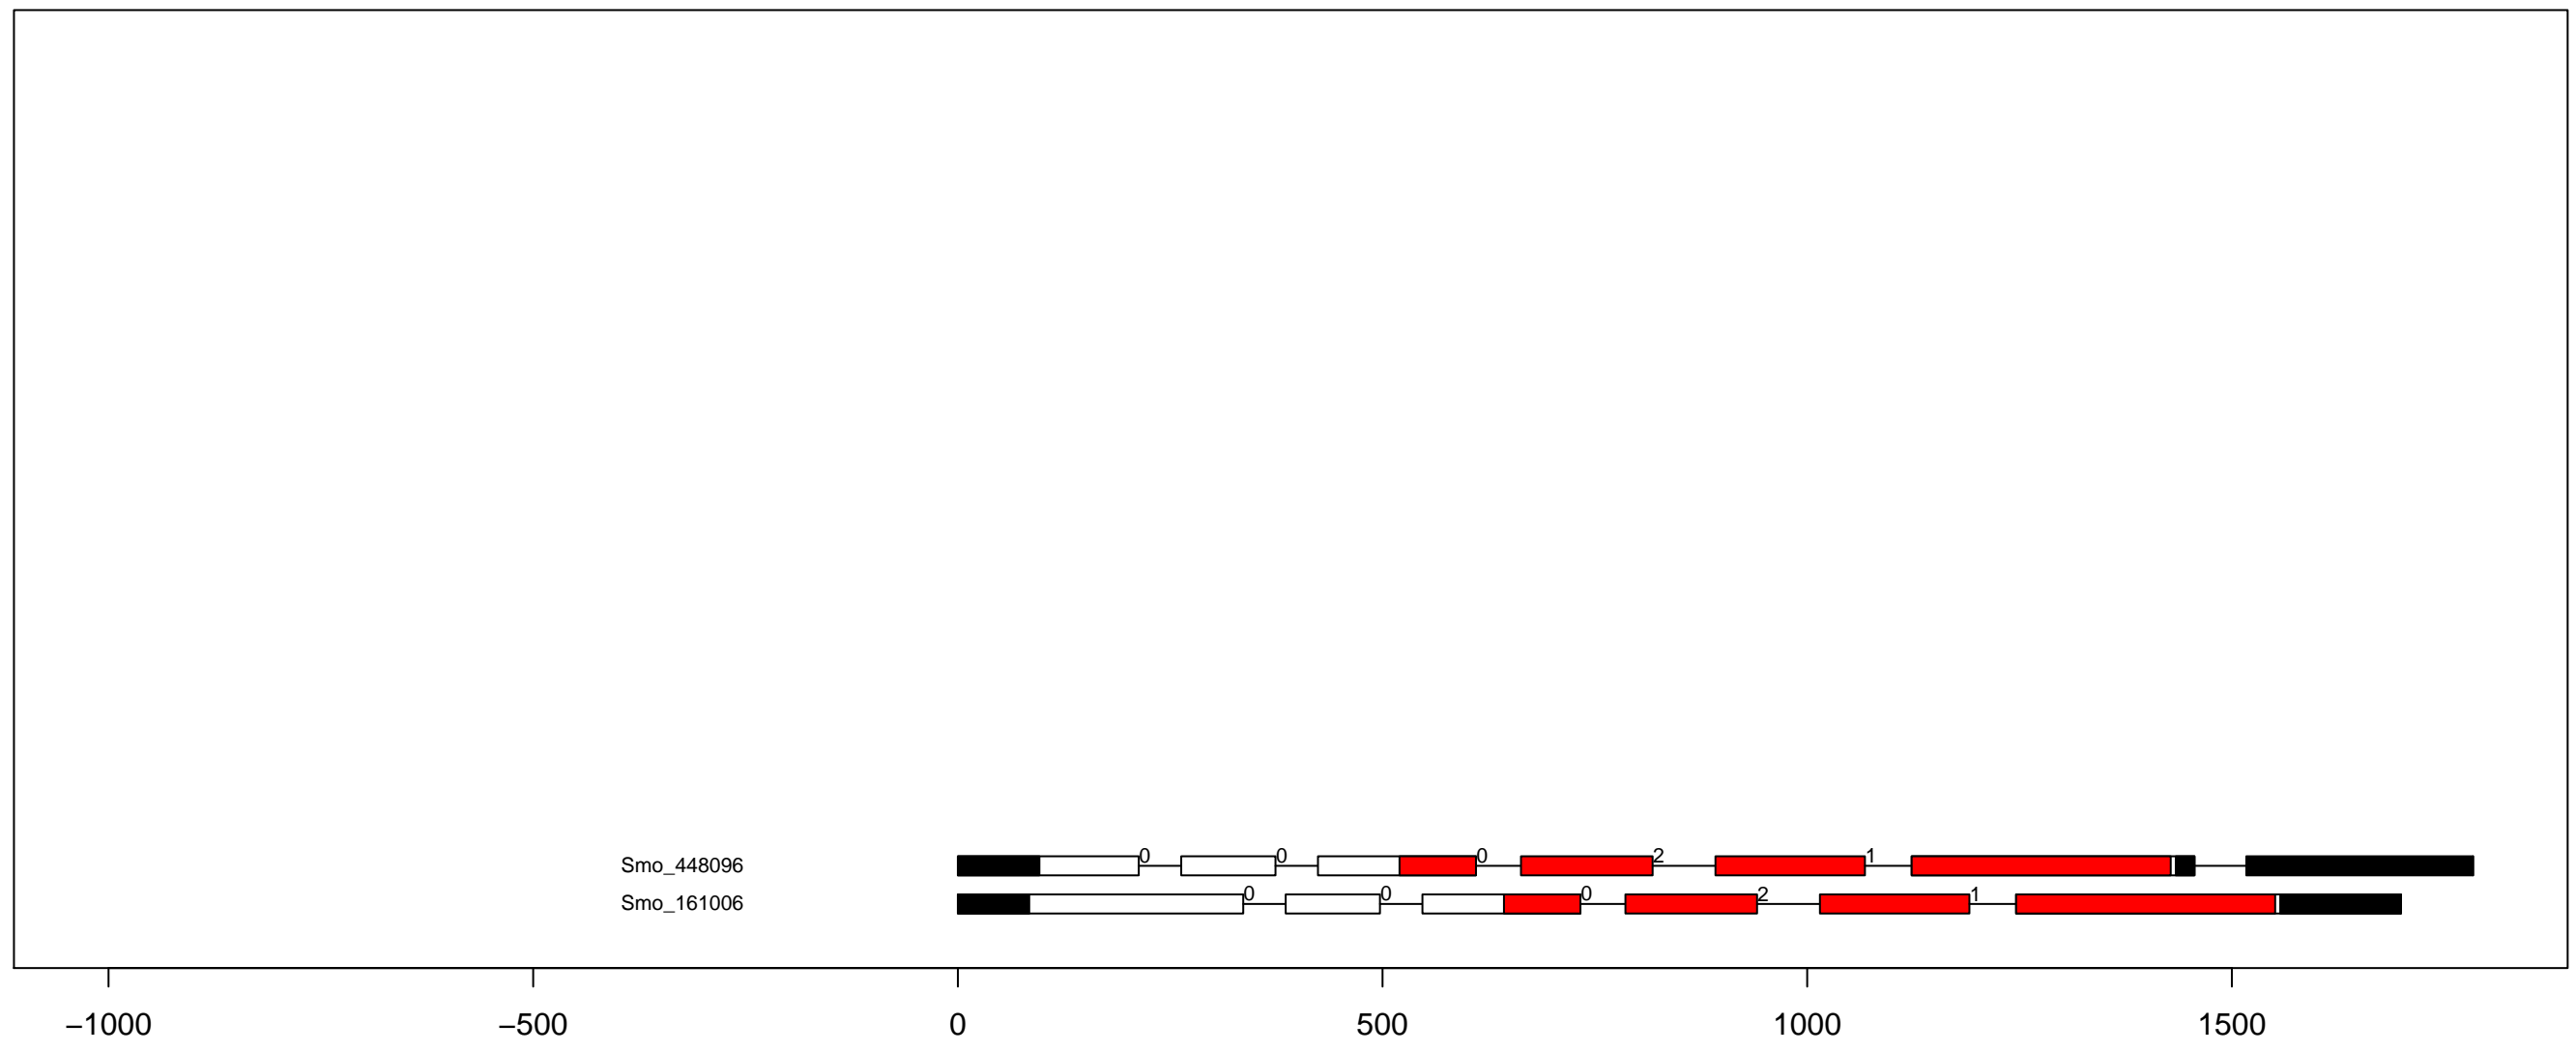

# S.mo RLK-Pelle\_C-LEC exon-intron and kinase domain diagram (all)

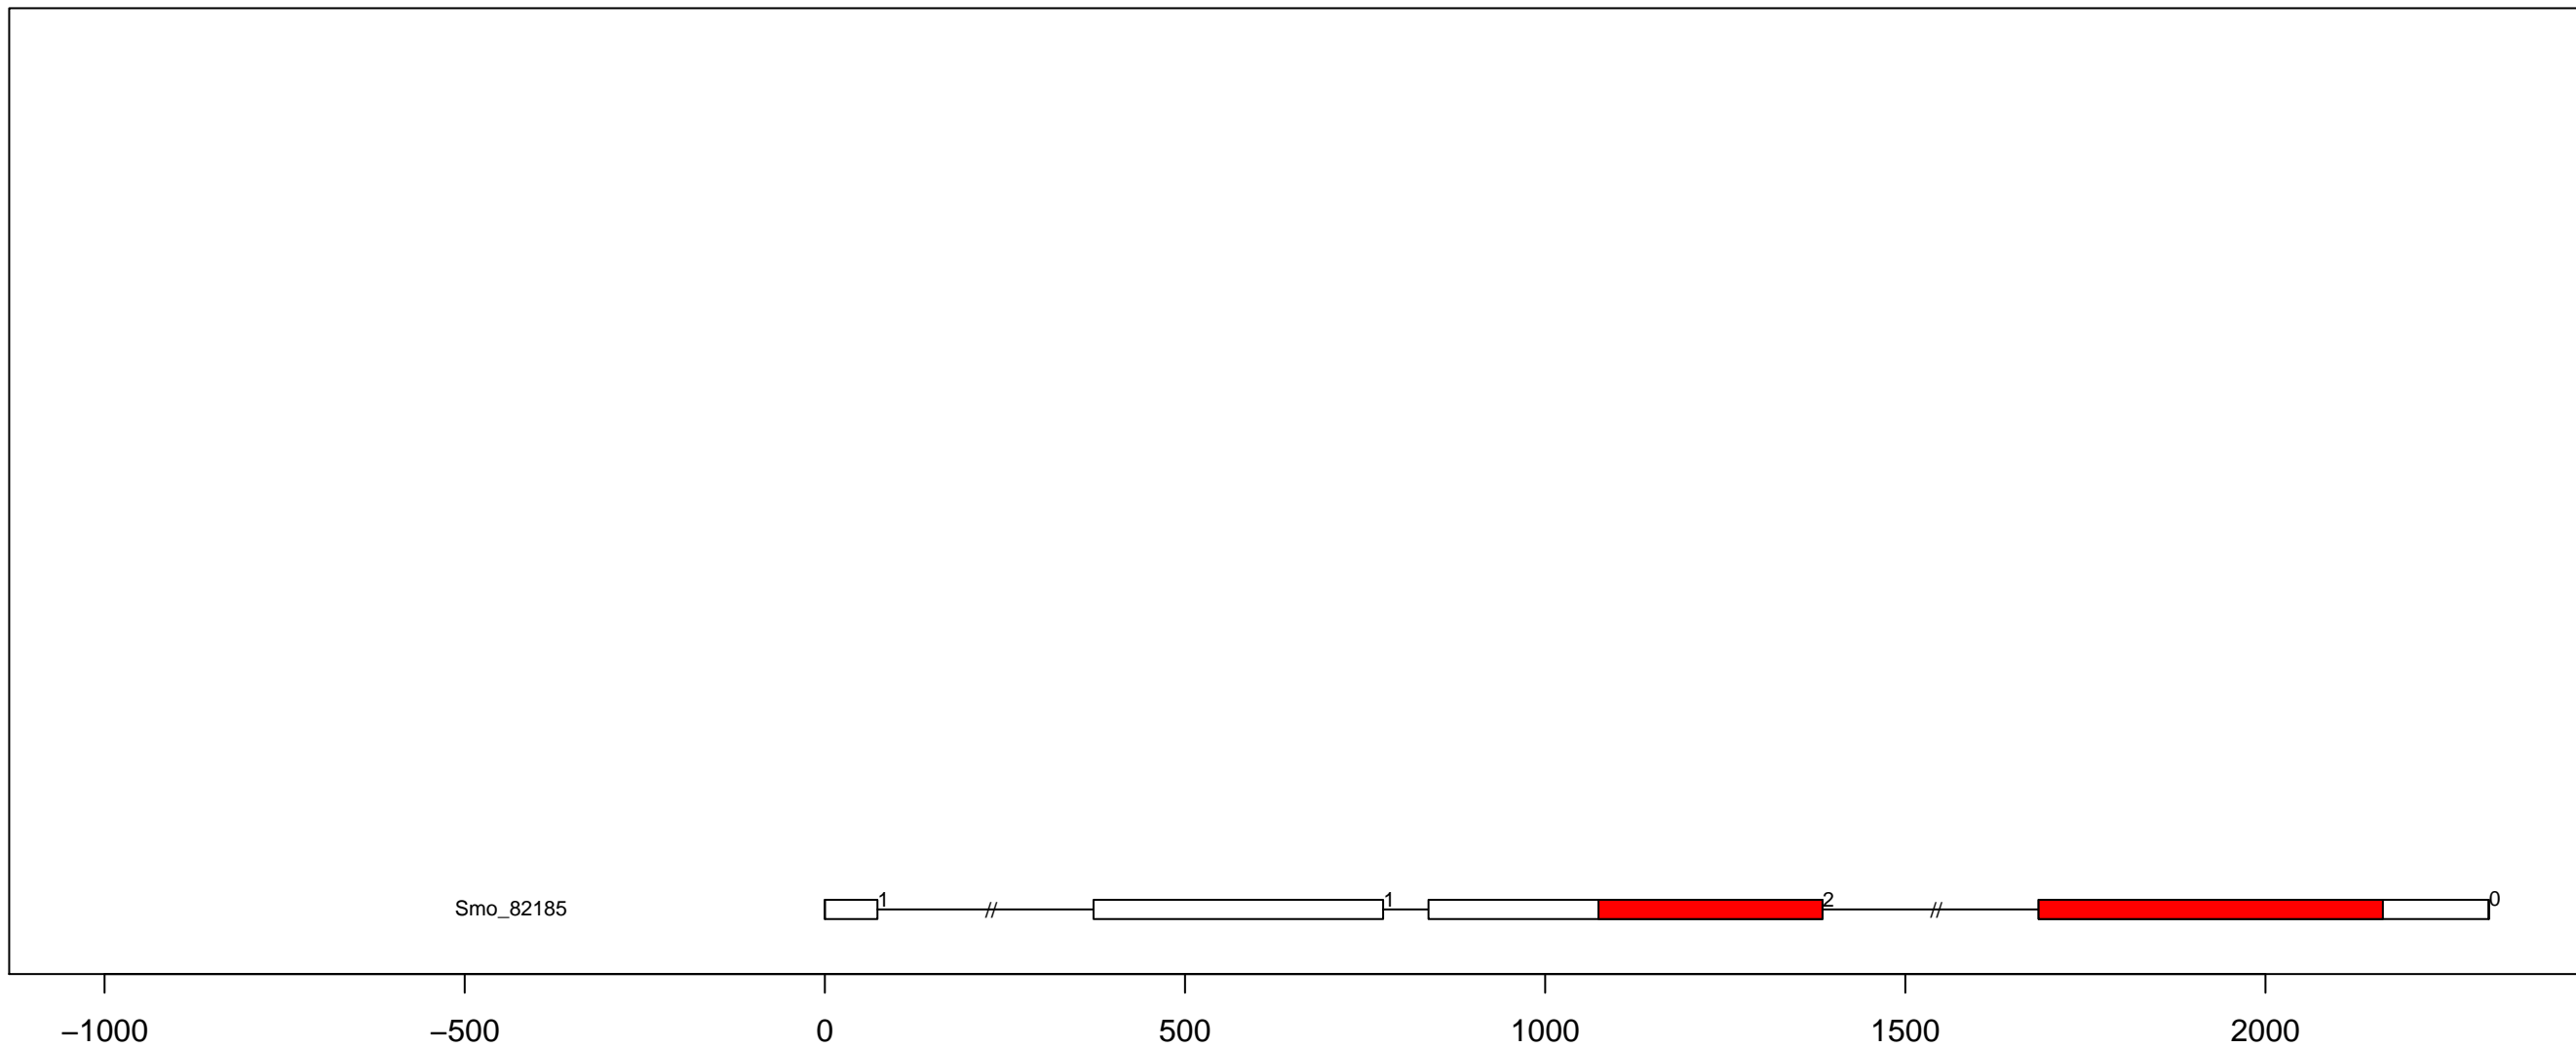

# S.mo RLK-Pelle\_CR4L exon-intron and kinase domain diagram (all)

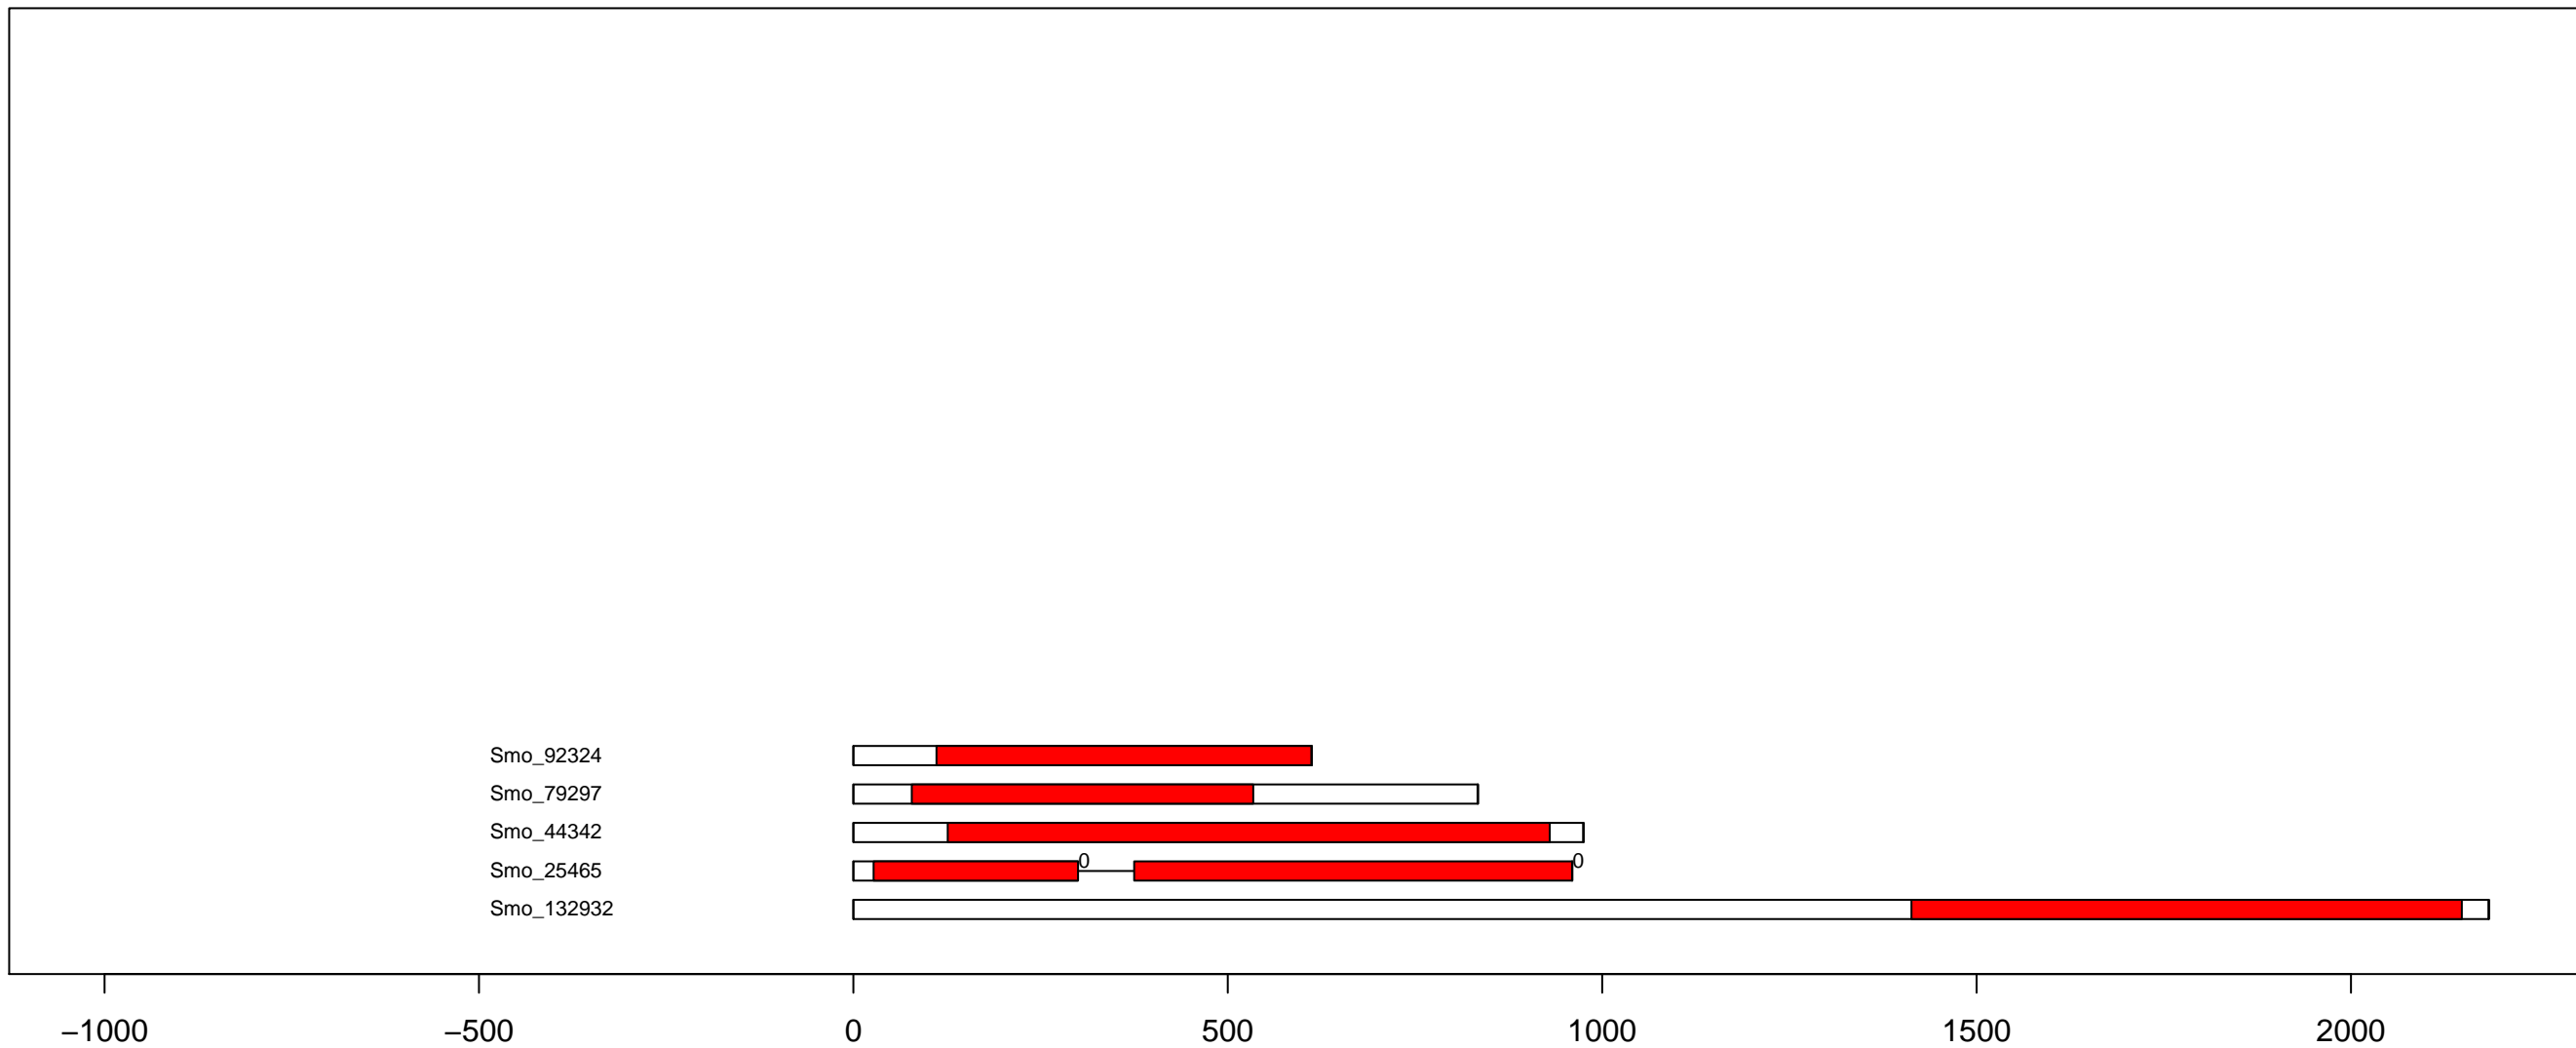

S.mo RLK-Pelle\_CrRLK1L-1 exon-intron and kinase domain diagram (all)

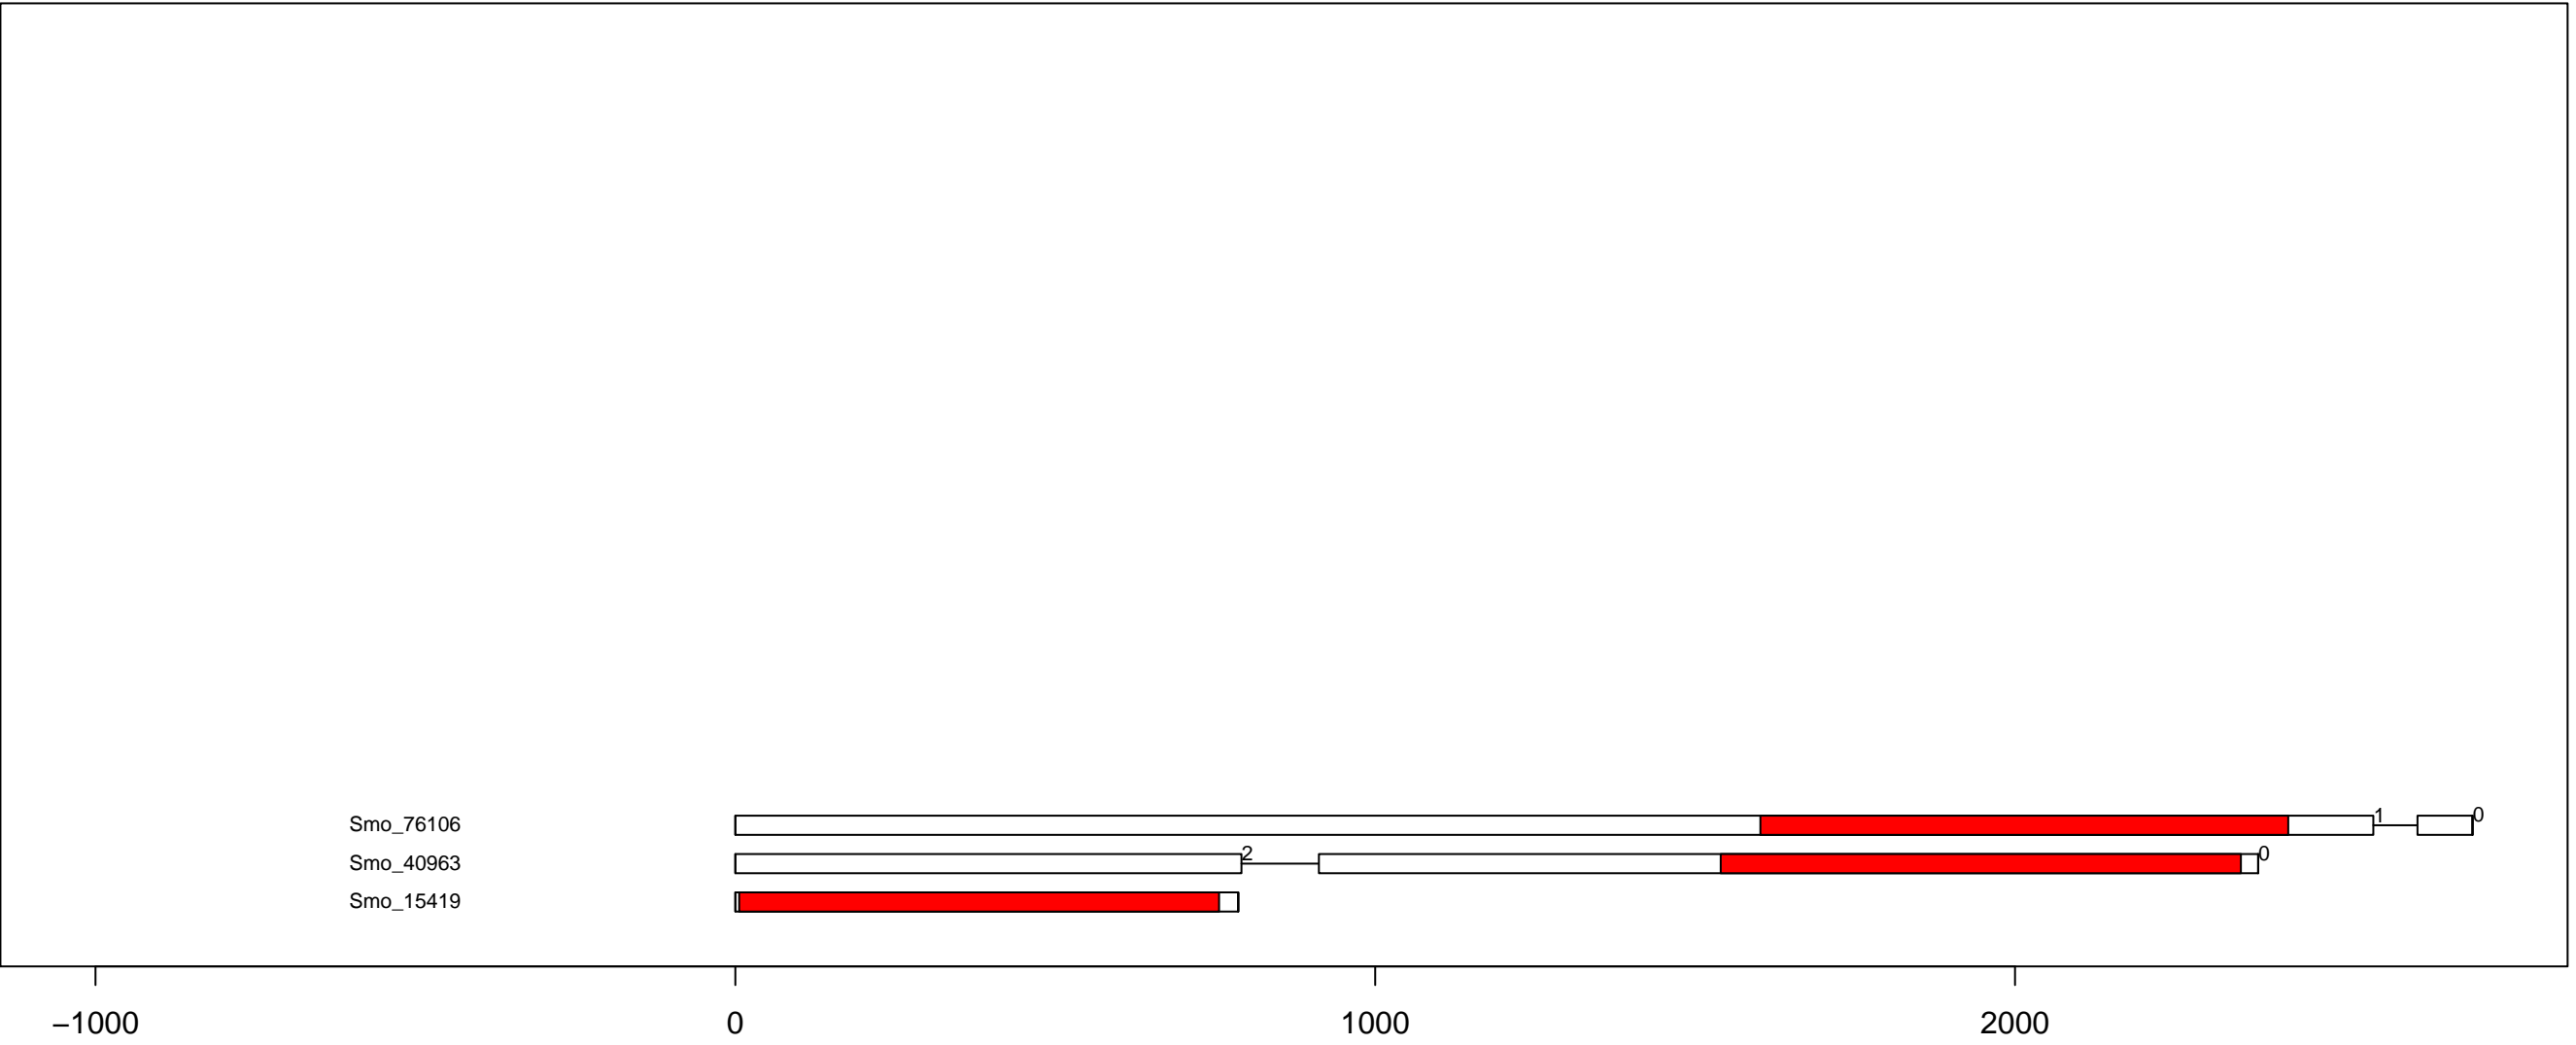

### S.mo RLK-Pelle\_DLSV exon-intron and kinase domain diagram (all)

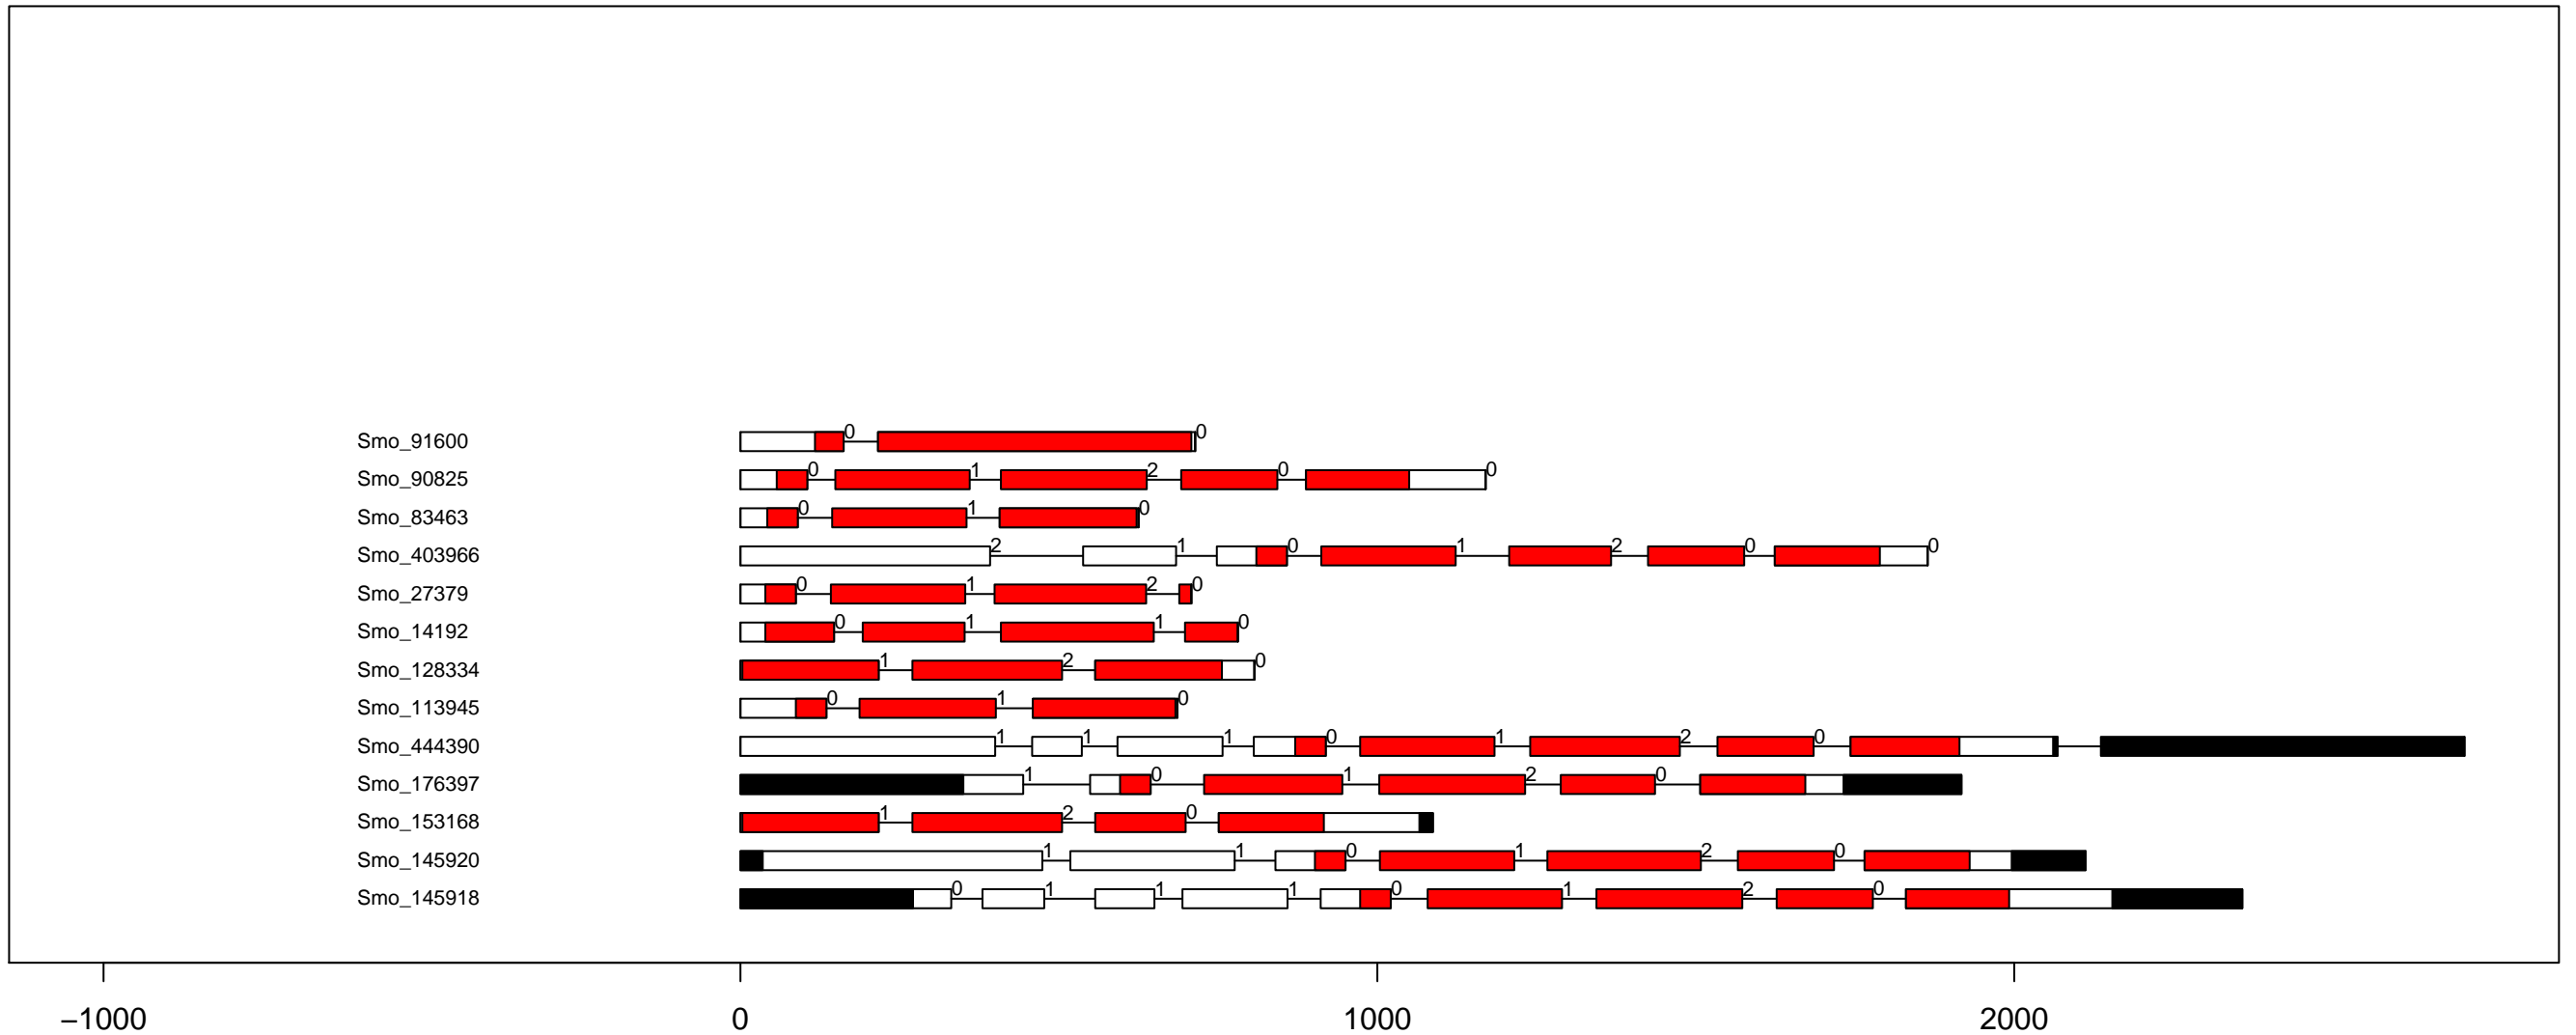

# S.mo RLK-Pelle\_Extensin exon-intron and kinase domain diagram (all)

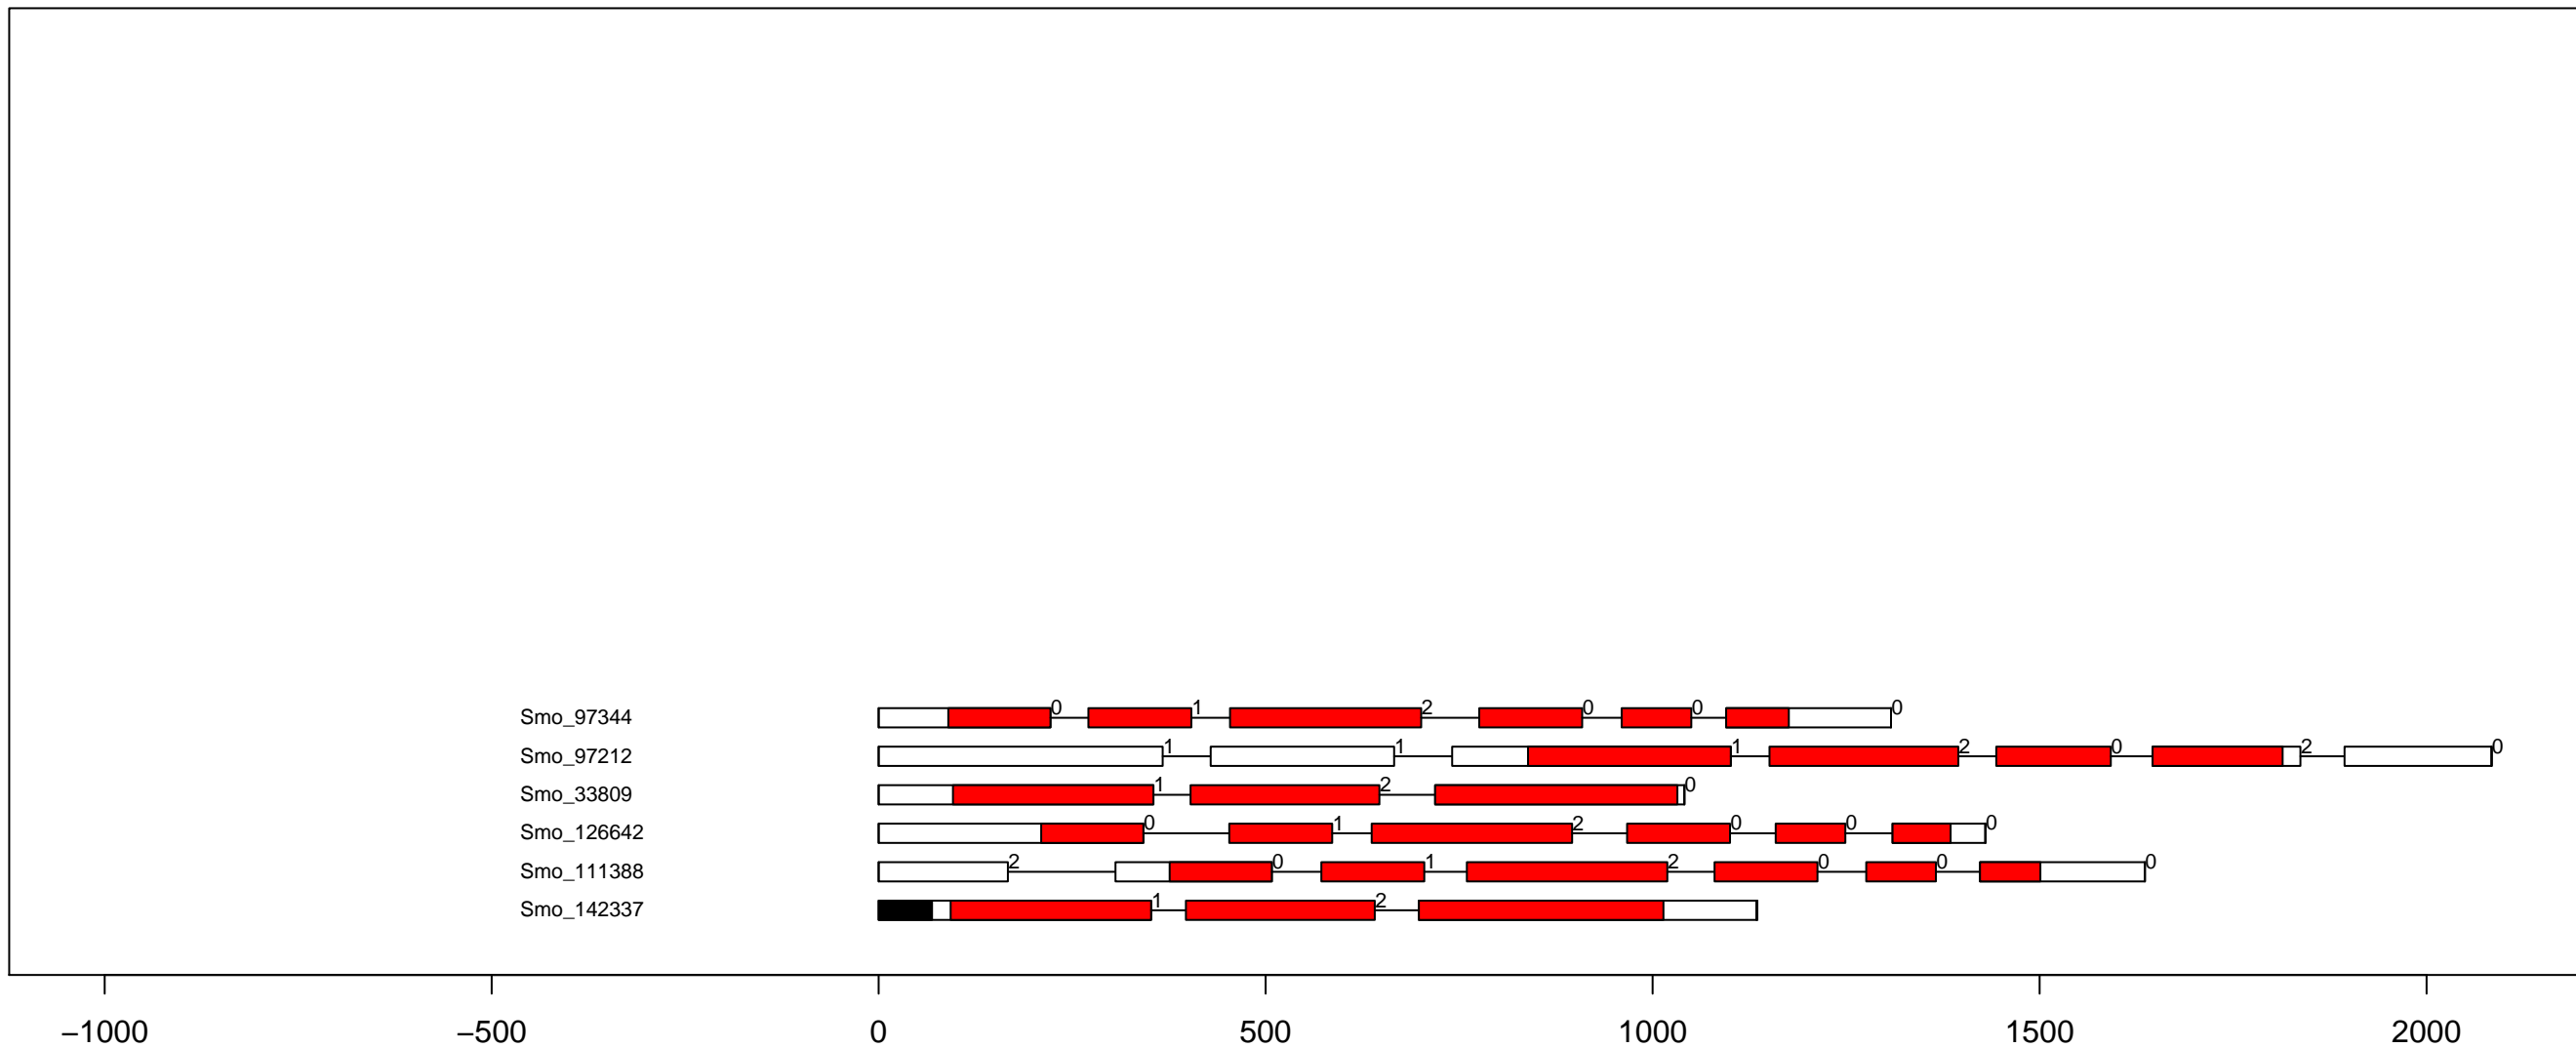



### S.mo RLK-Pelle\_L-LEC exon-intron and kinase domain diagram (all)

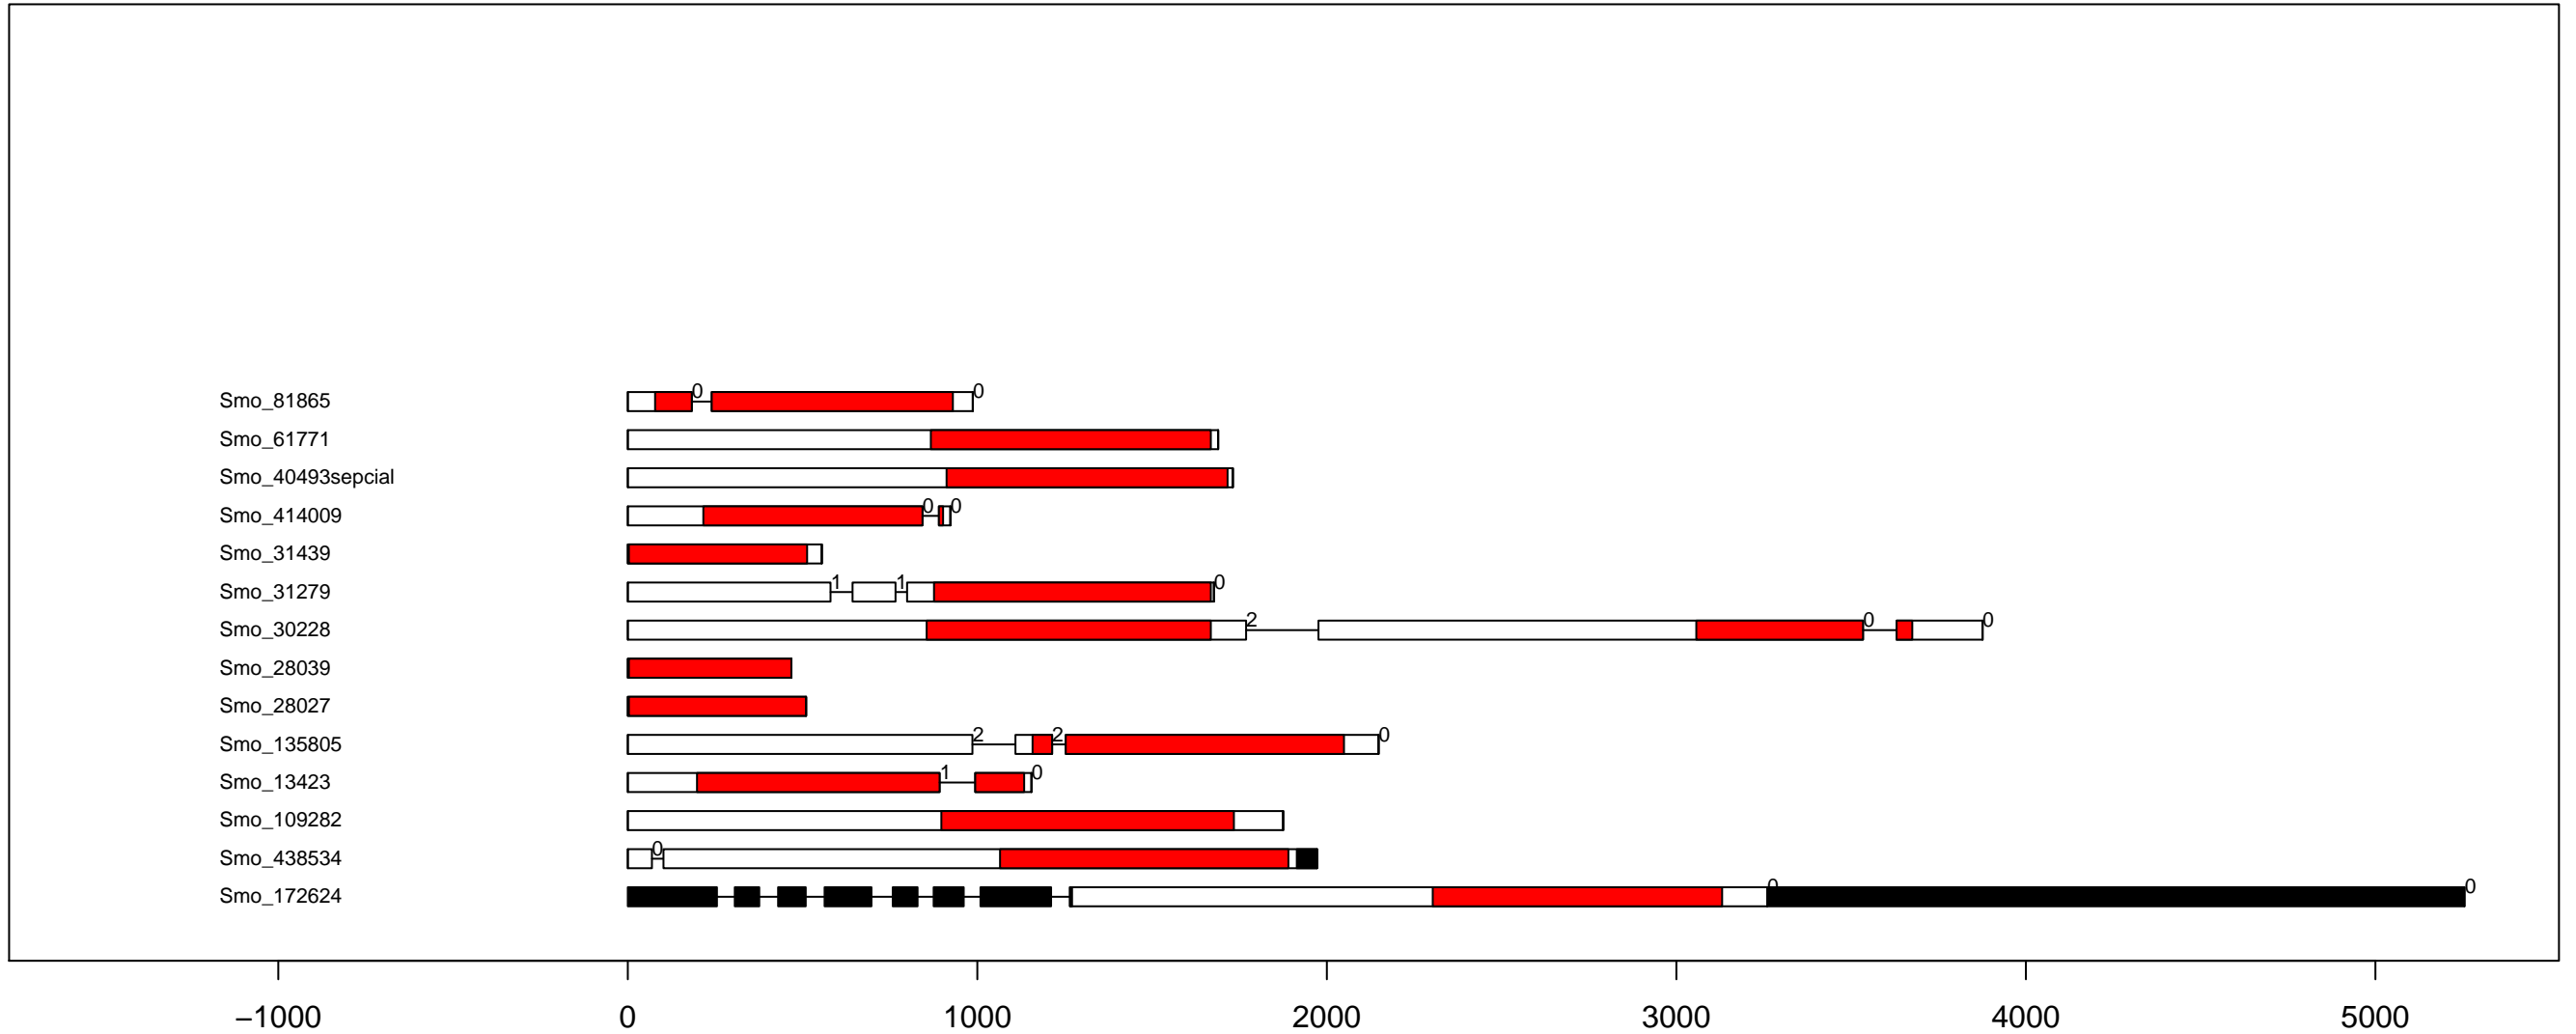



# S.mo RLK-Pelle\_LRR-I-2 exon-intron and kinase domain diagram (all)

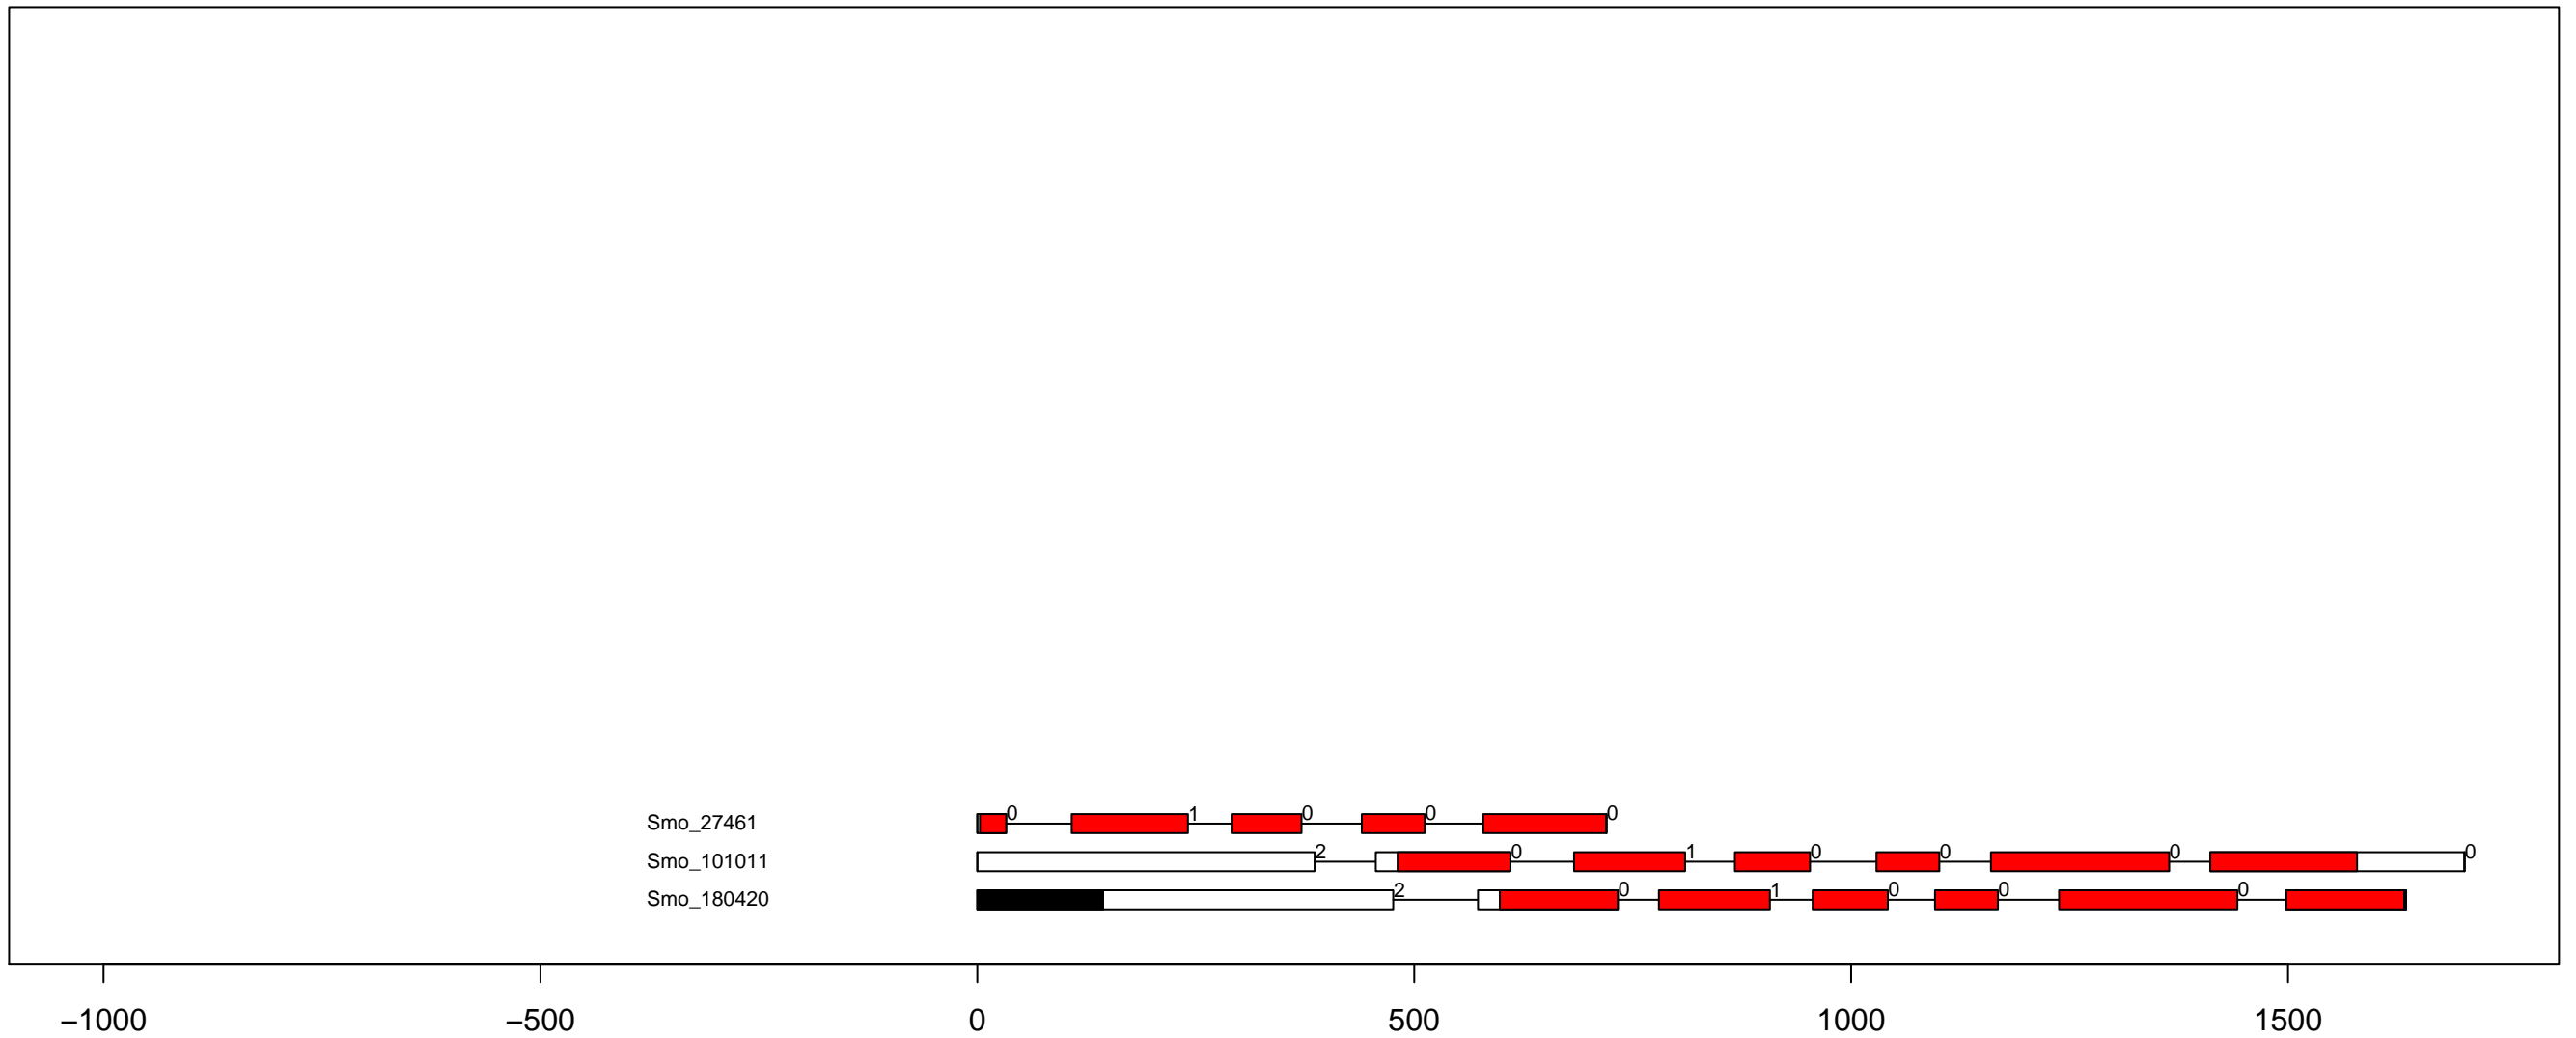

### S.mo RLK-Pelle\_LRR-III exon-intron and kinase domain diagram (all)

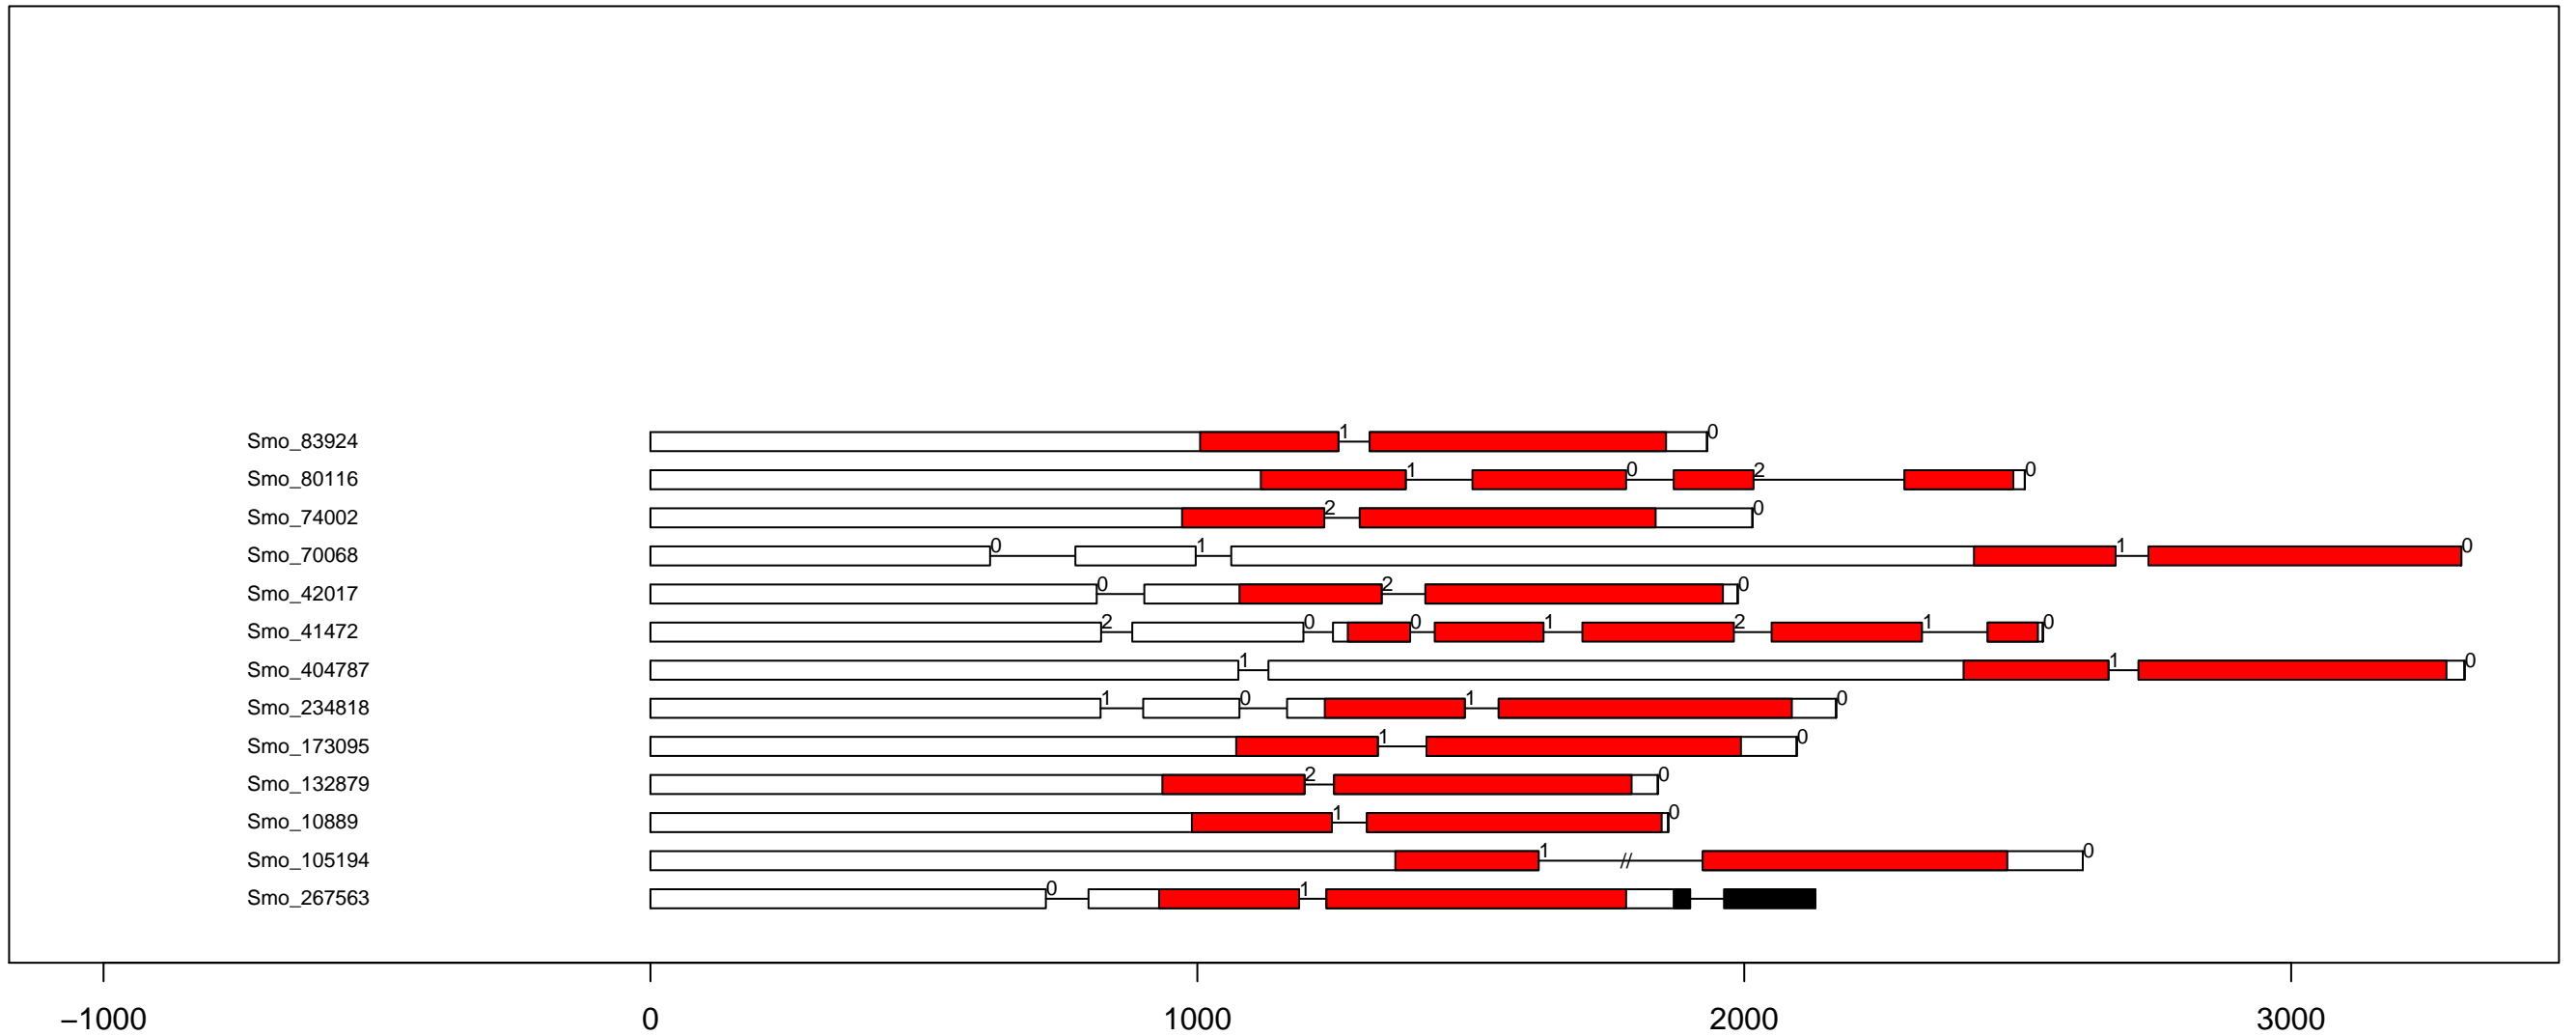



# S.mo RLK-Pelle\_LRR-IV exon-intron and kinase domain diagram (all)

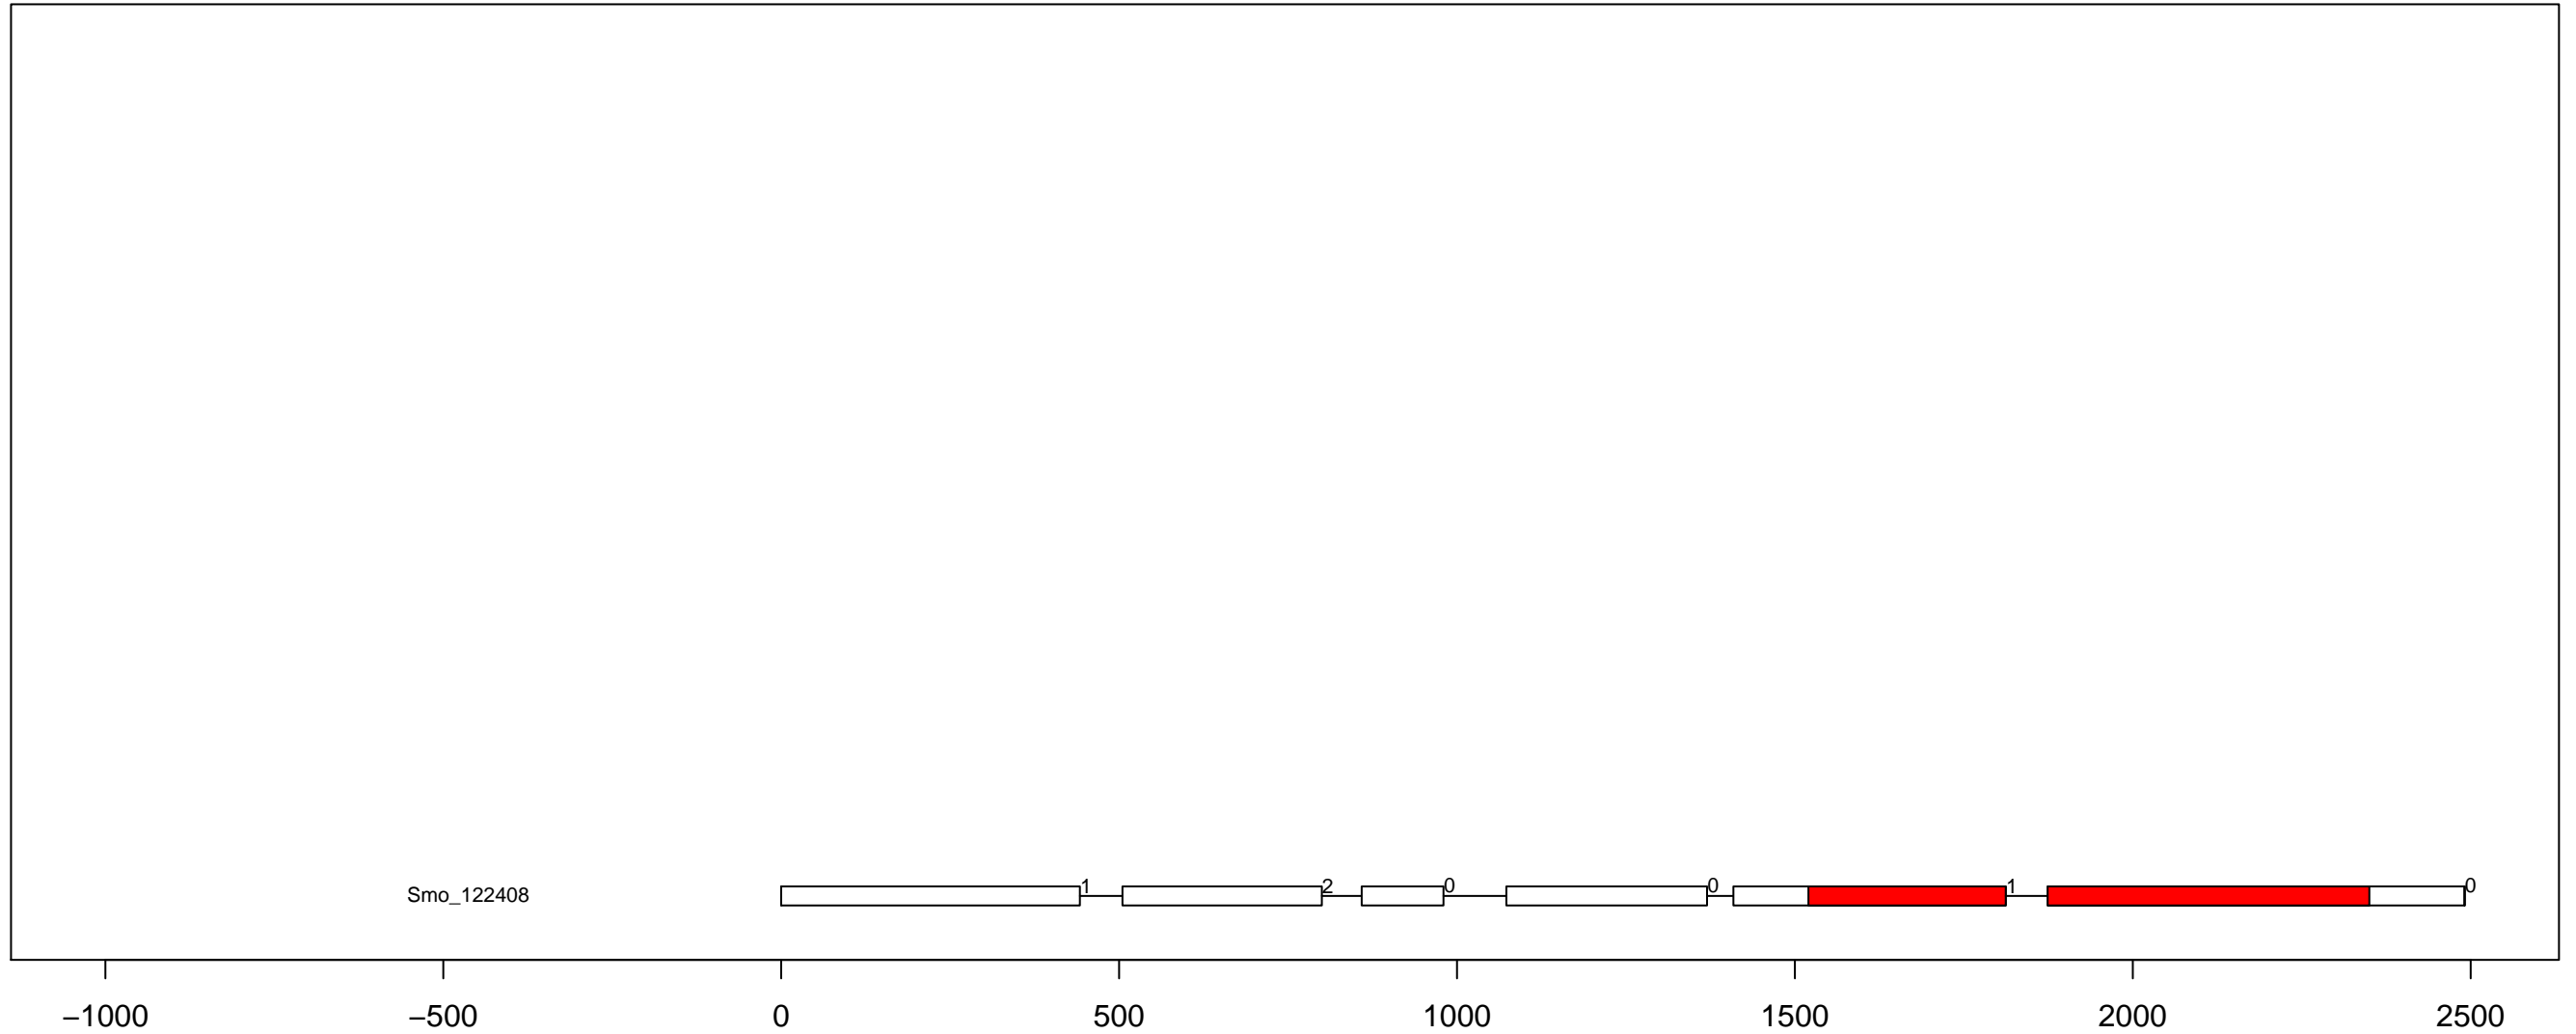

# S.mo RLK-Pelle\_LRR-IX exon-intron and kinase domain diagram (all)

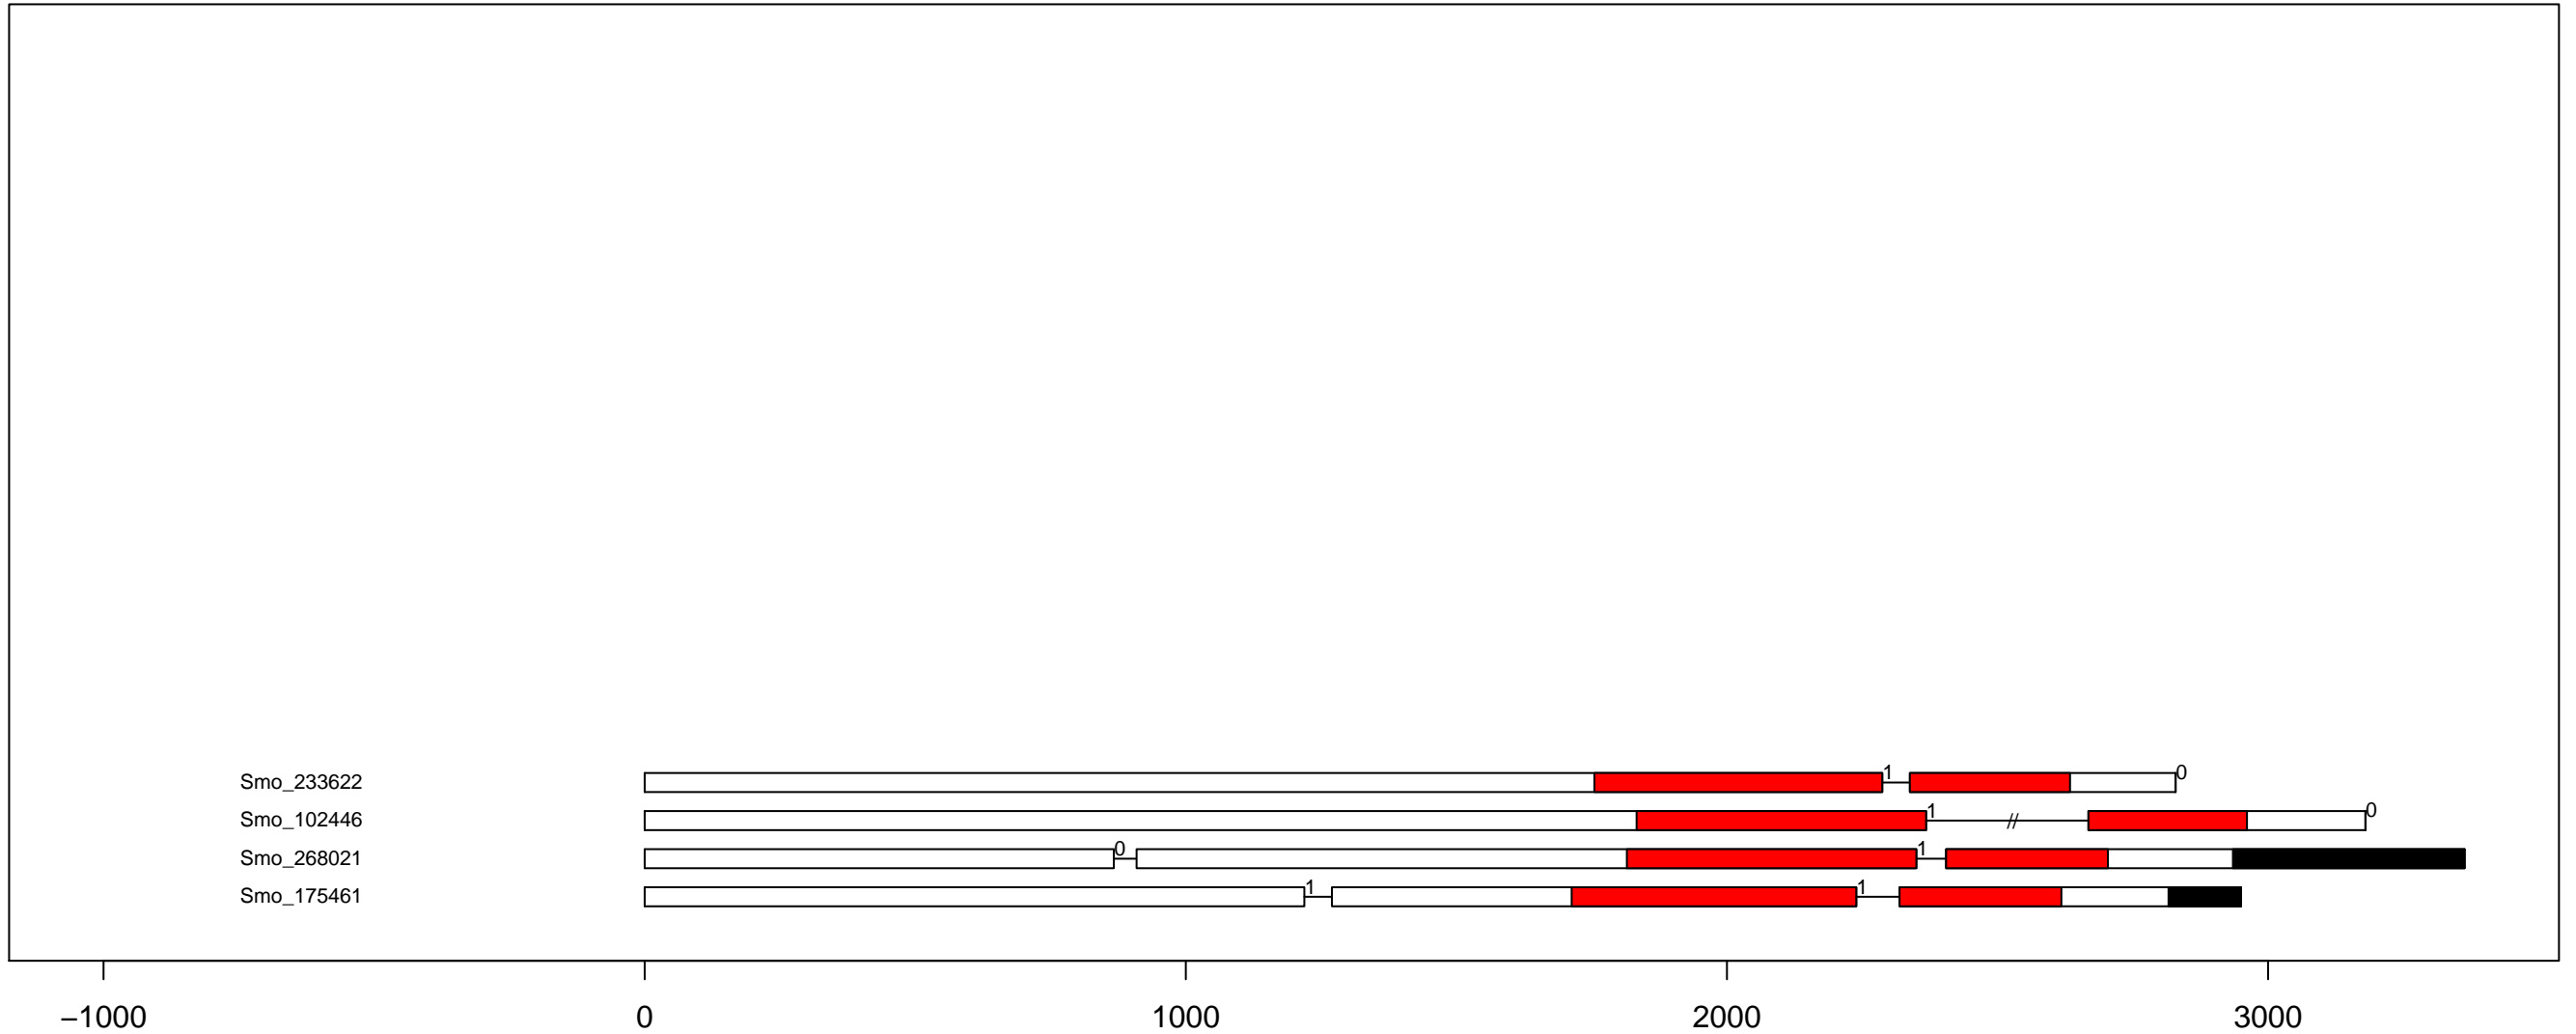

# S.mo RLK-Pelle\_LRR-VI-1 exon-intron and kinase domain diagram (all)

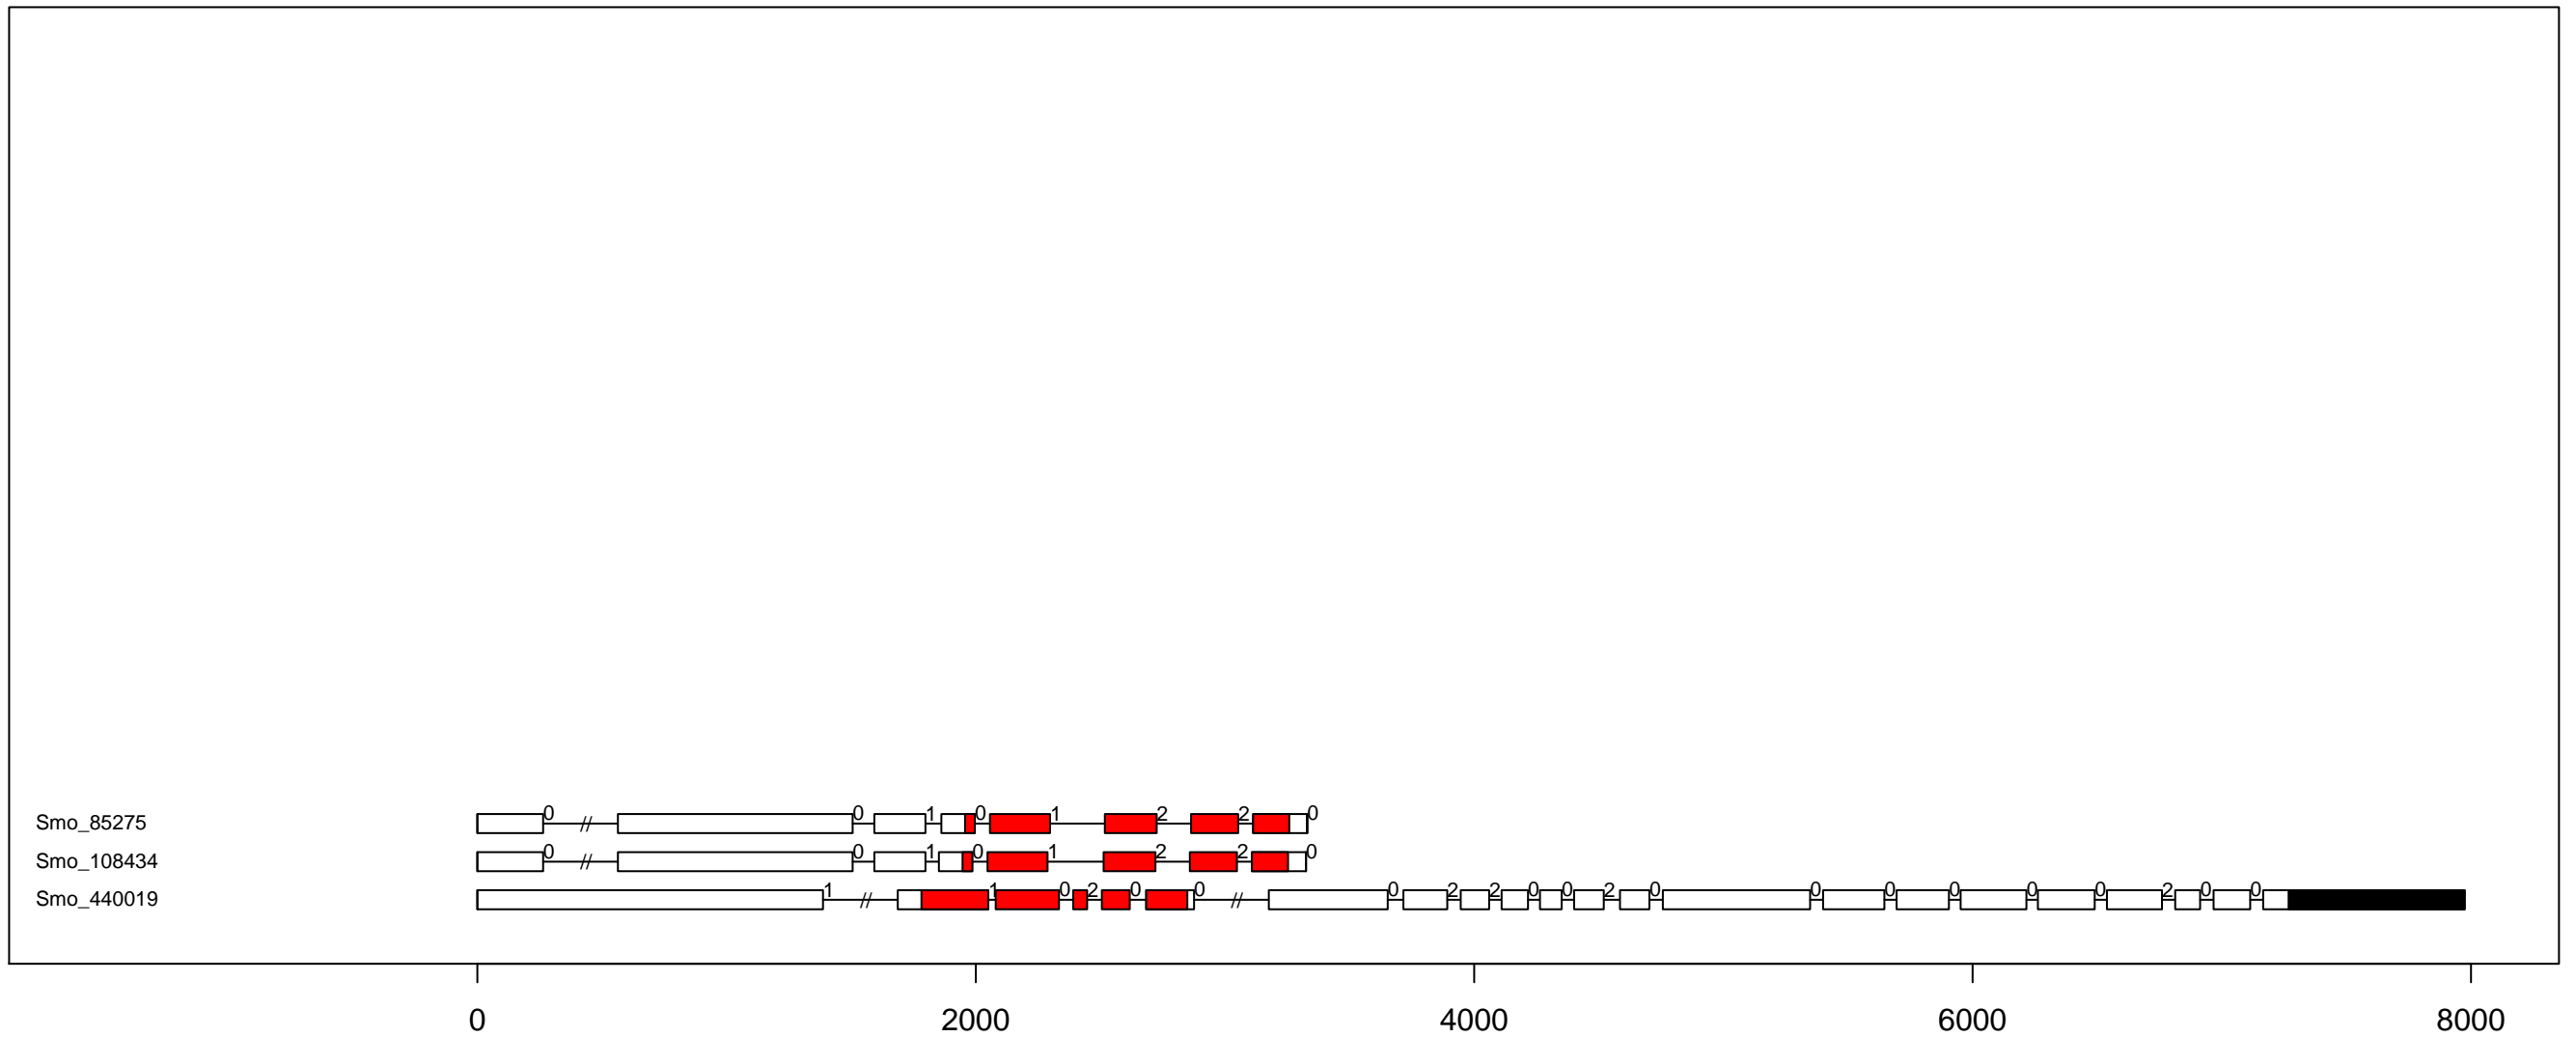



# S.mo RLK-Pelle\_LRR-VI-2 exon-intron and kinase domain diagram (all)

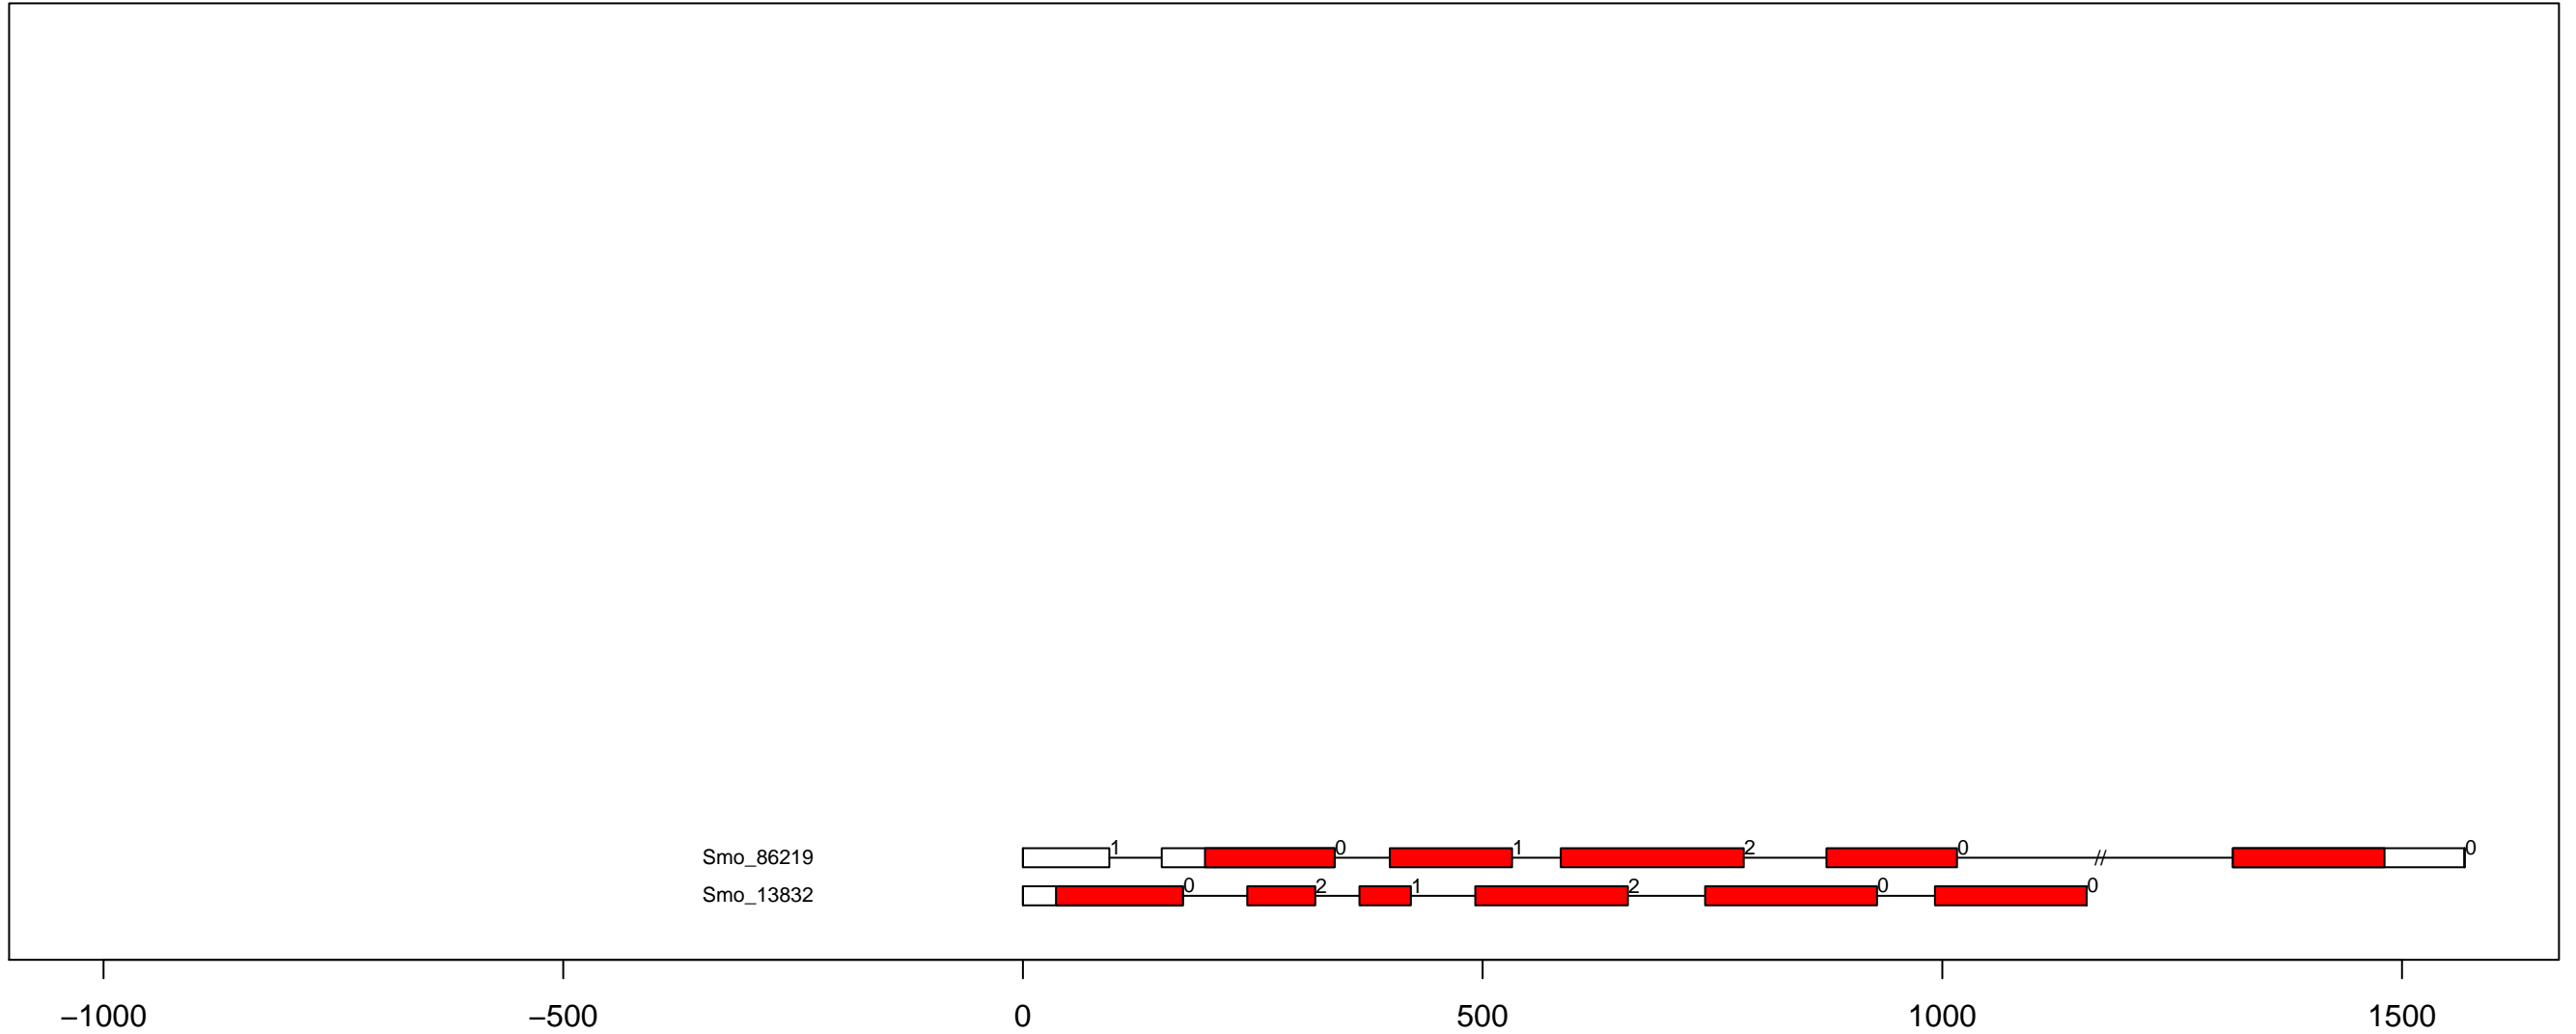

# S.mo RLK-Pelle\_LRR-VII-1 exon-intron and kinase domain diagram (all)

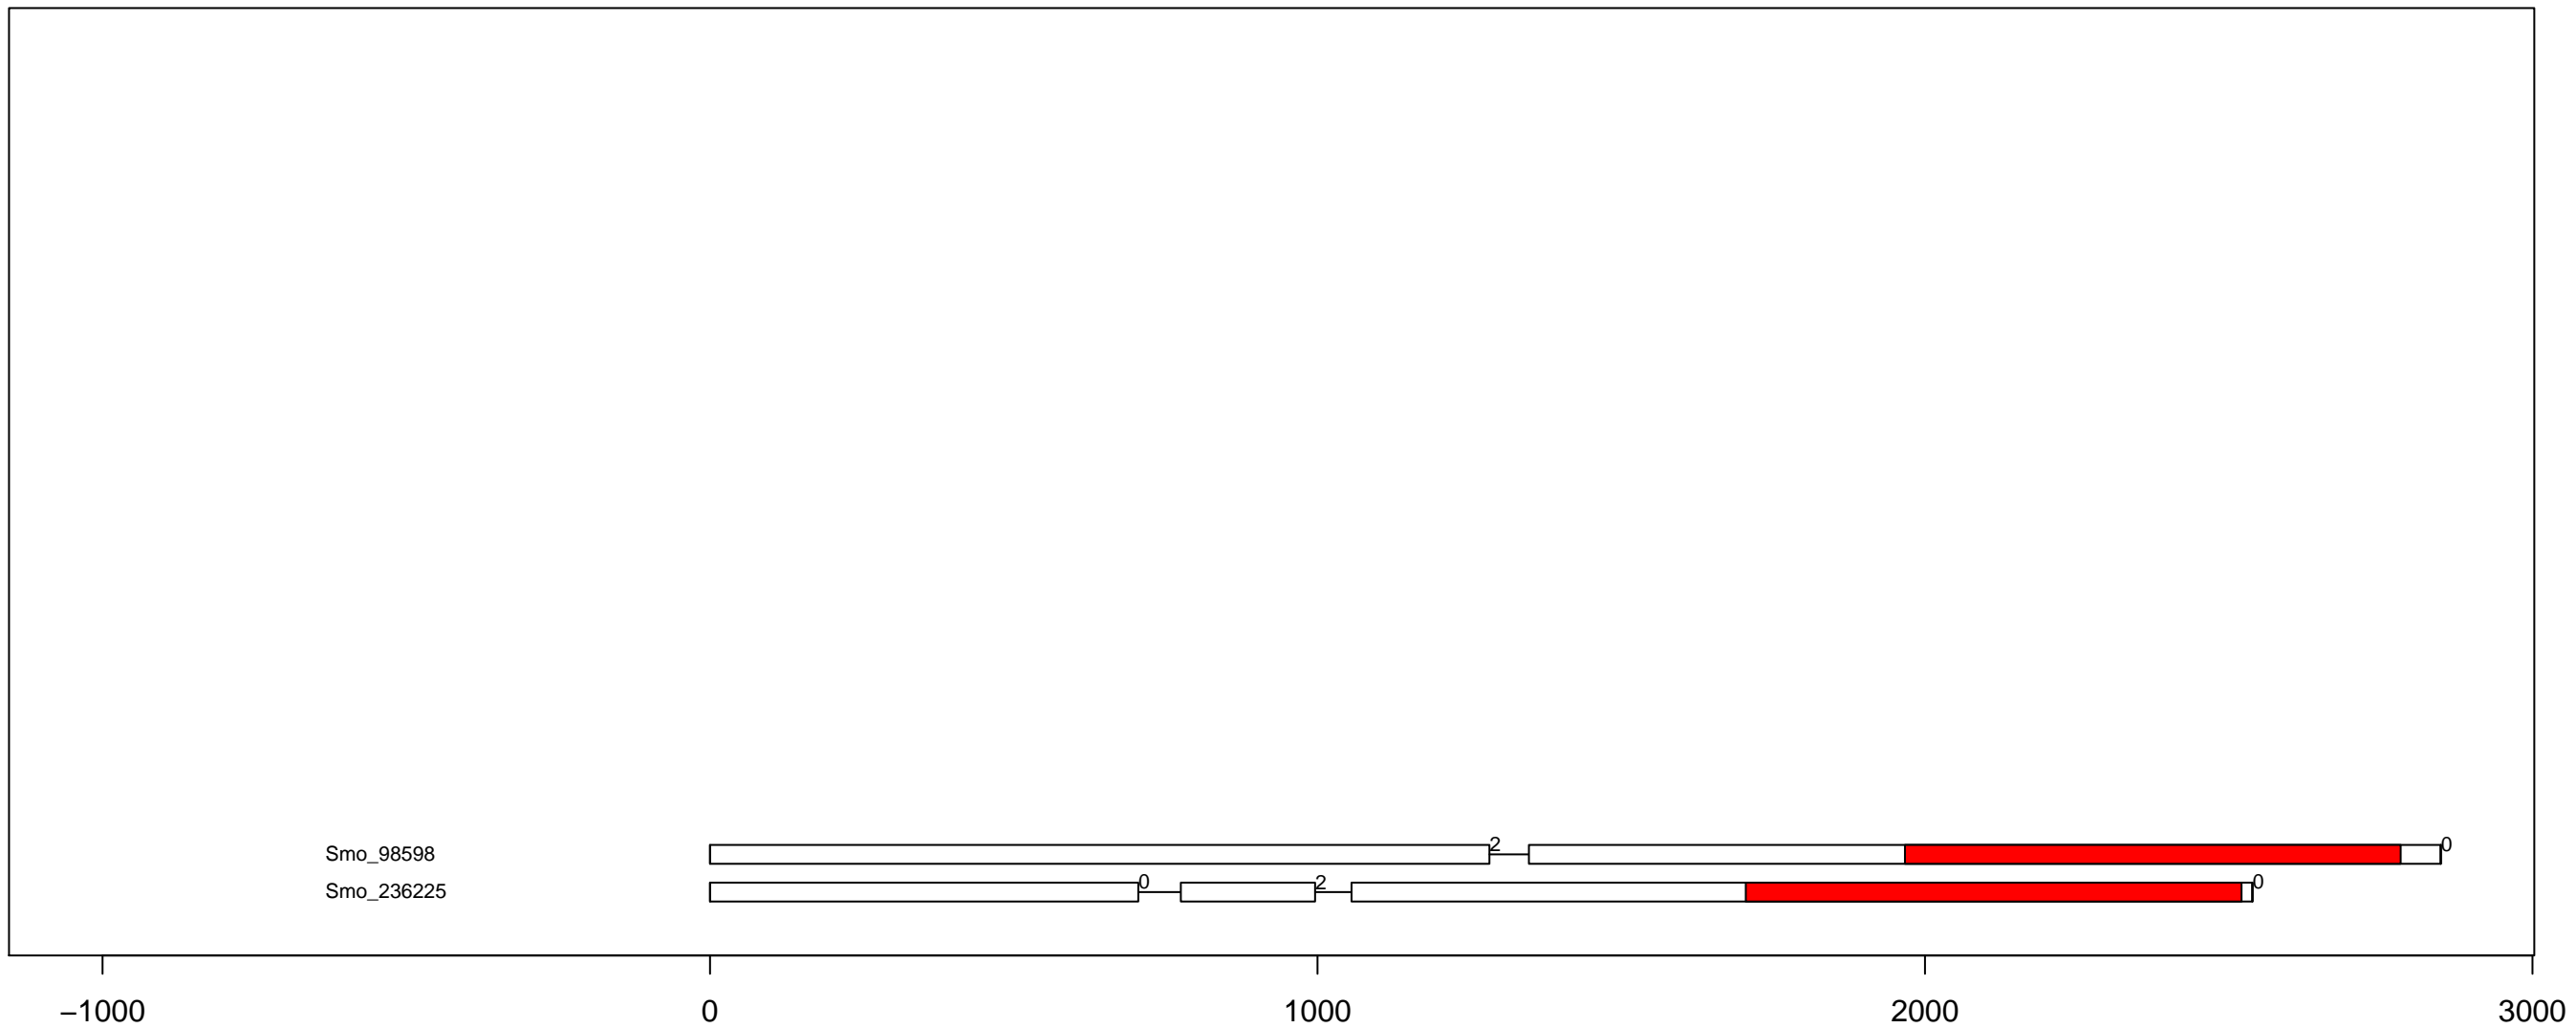

# S.mo RLK-Pelle\_LRR-VII-2 exon-intron and kinase domain diagram (all)

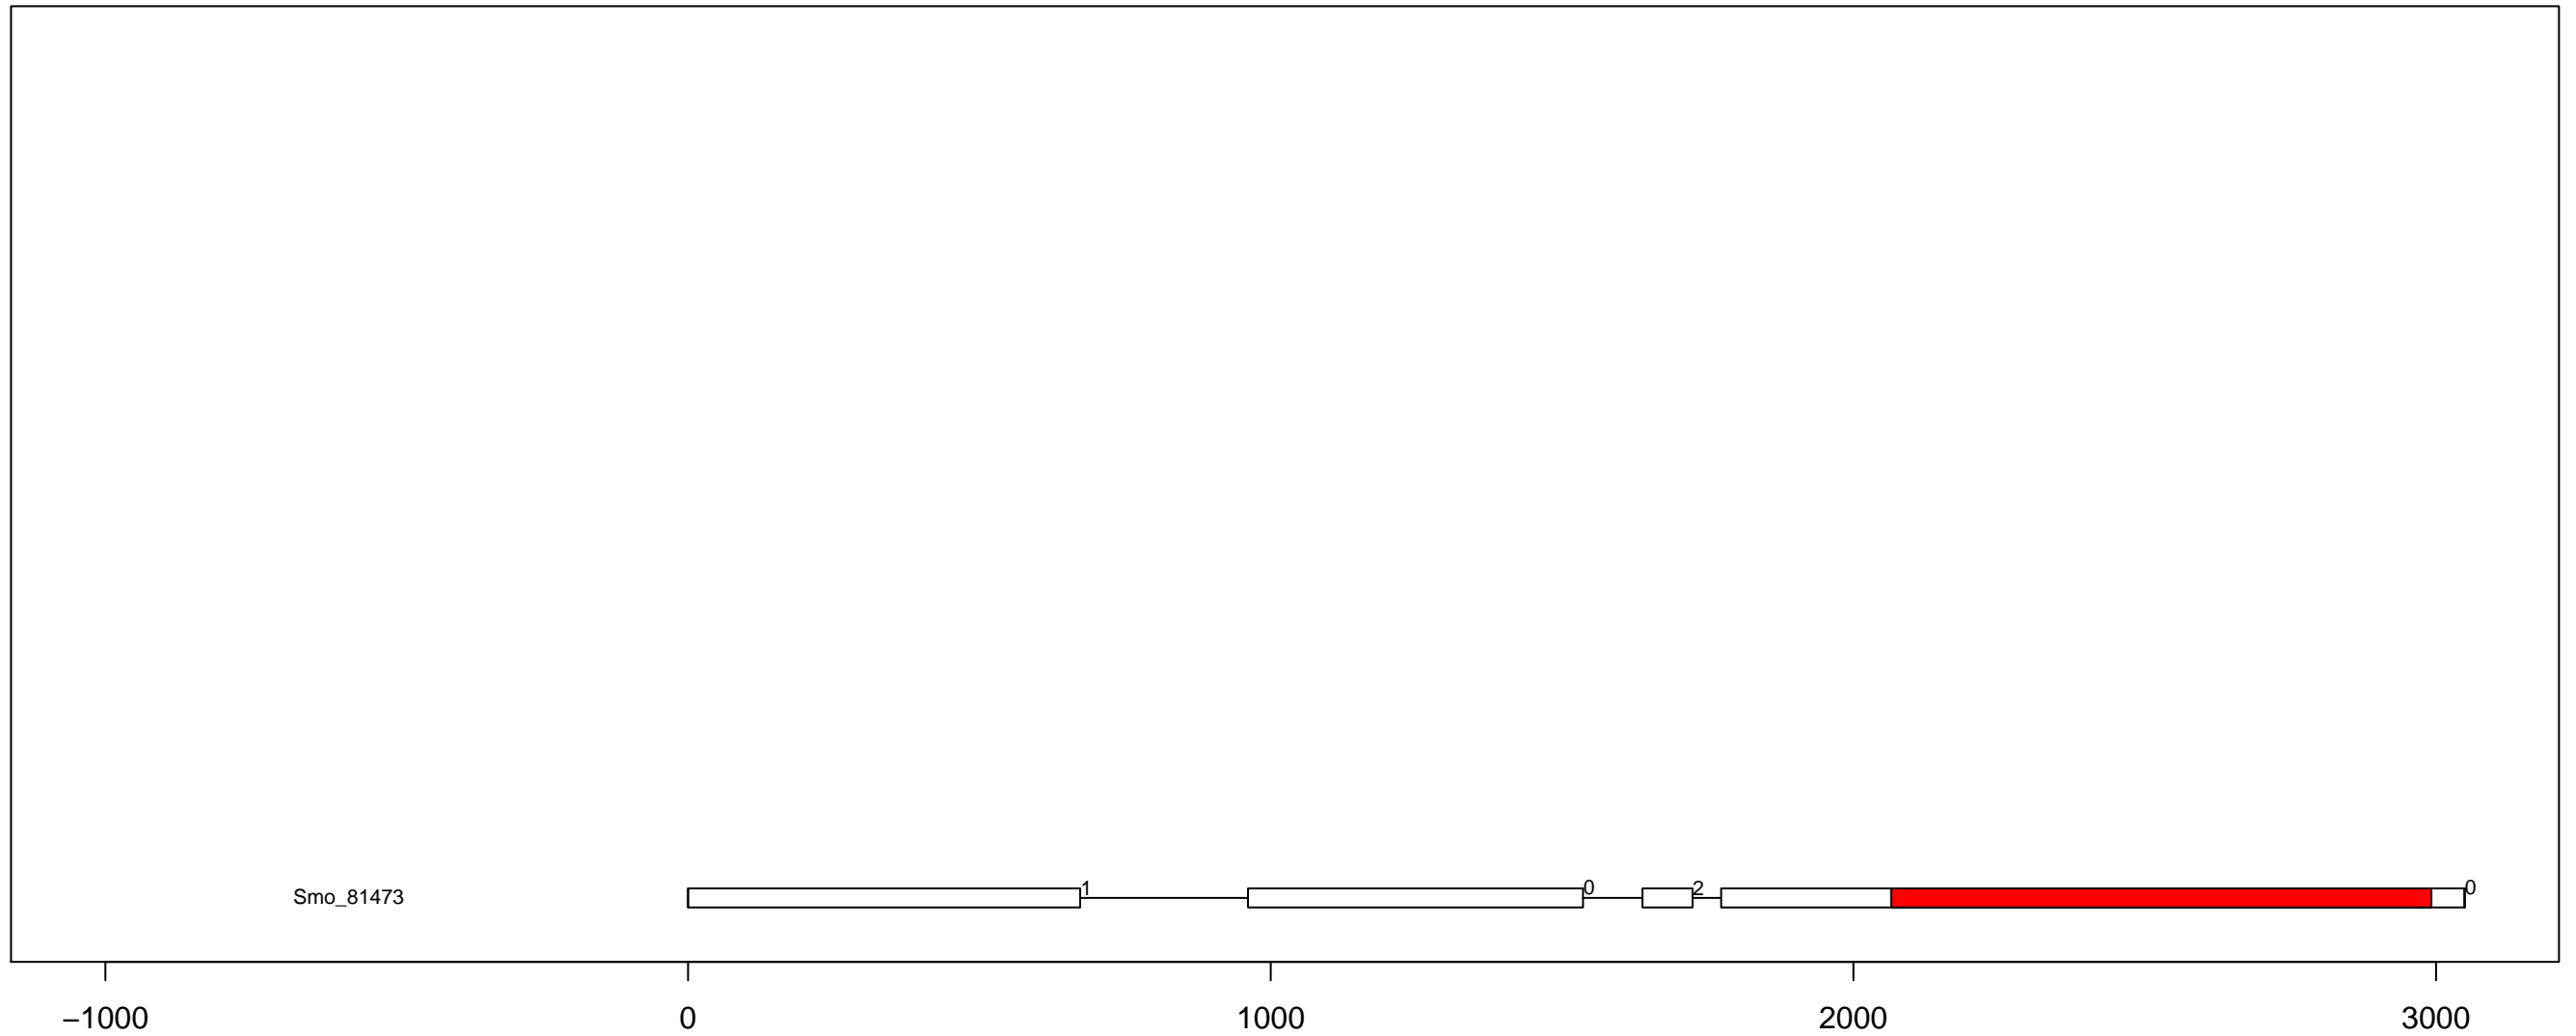

# S.mo RLK-Pelle\_LRR-VII-3 exon-intron and kinase domain diagram (all)

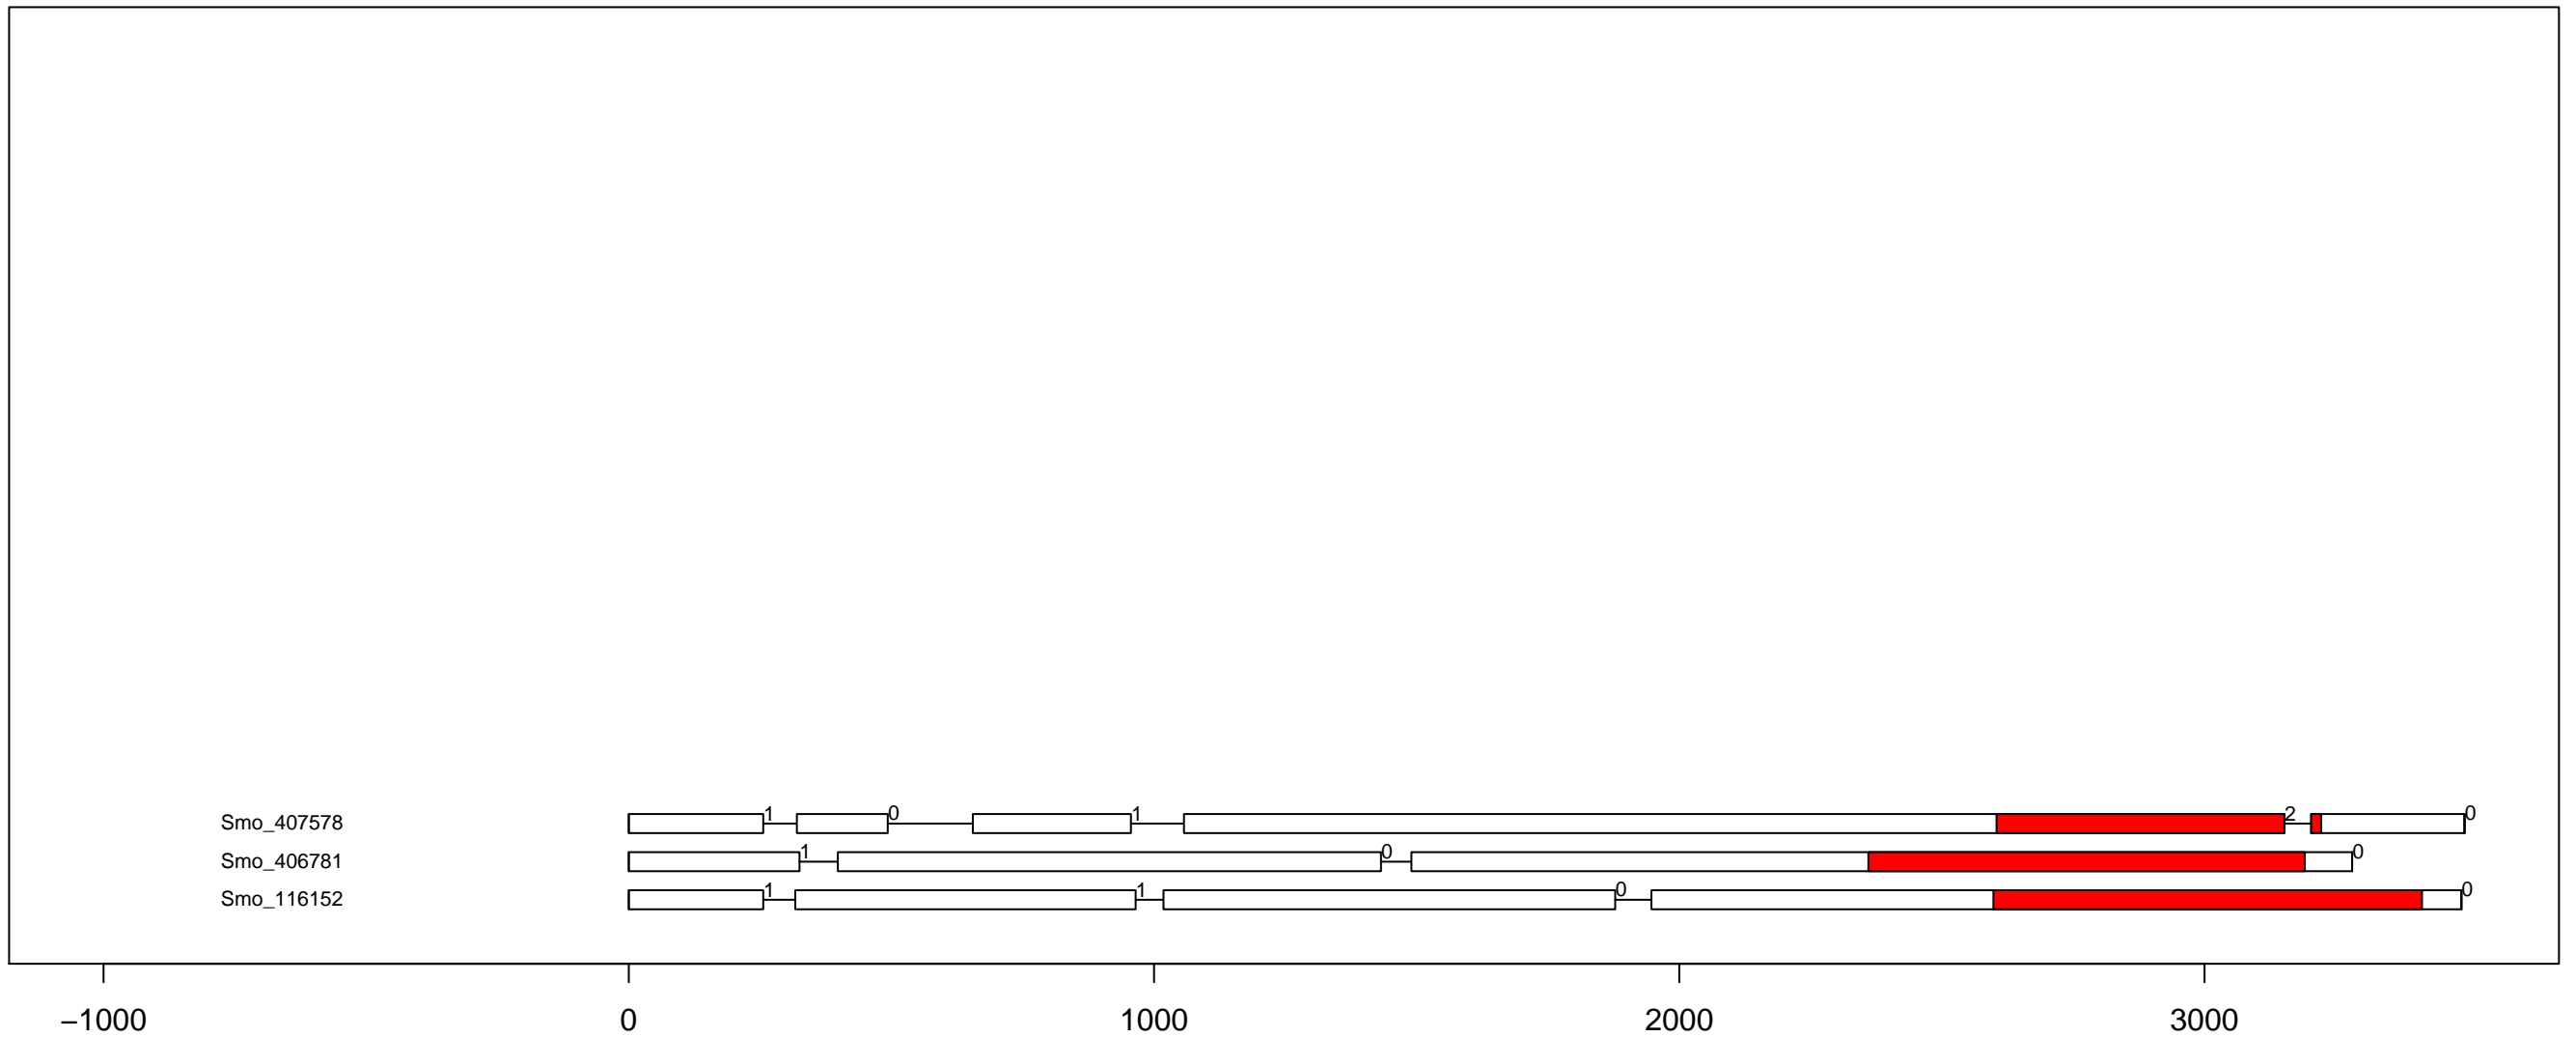

# S.mo RLK-Pelle\_LRR-VIII-1 exon-intron and kinase domain diagram (all)

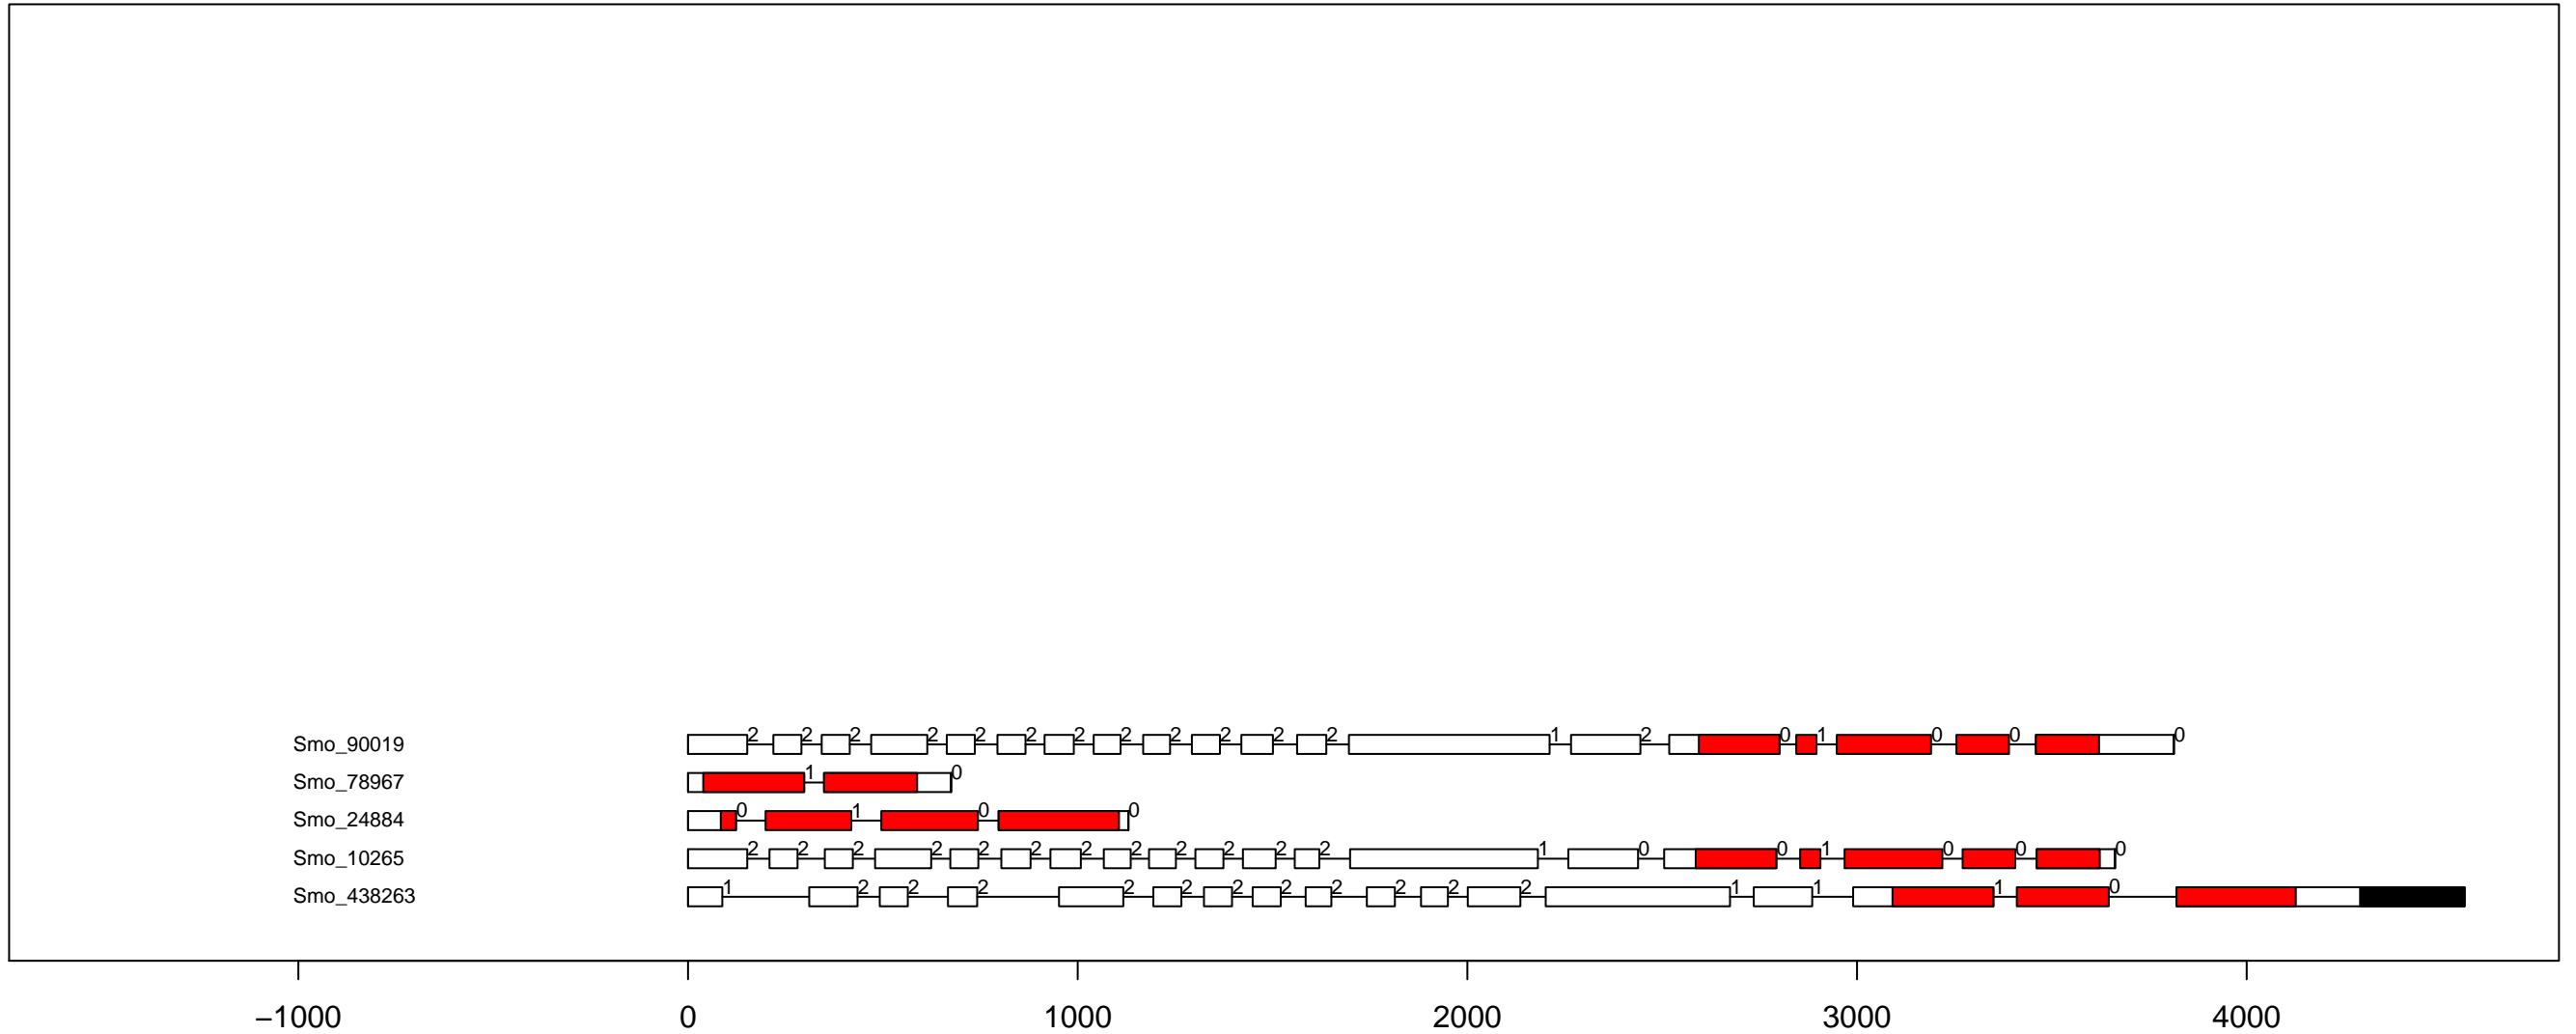

# S.mo RLK-Pelle\_LRR-V exon-intron and kinase domain diagram (all)

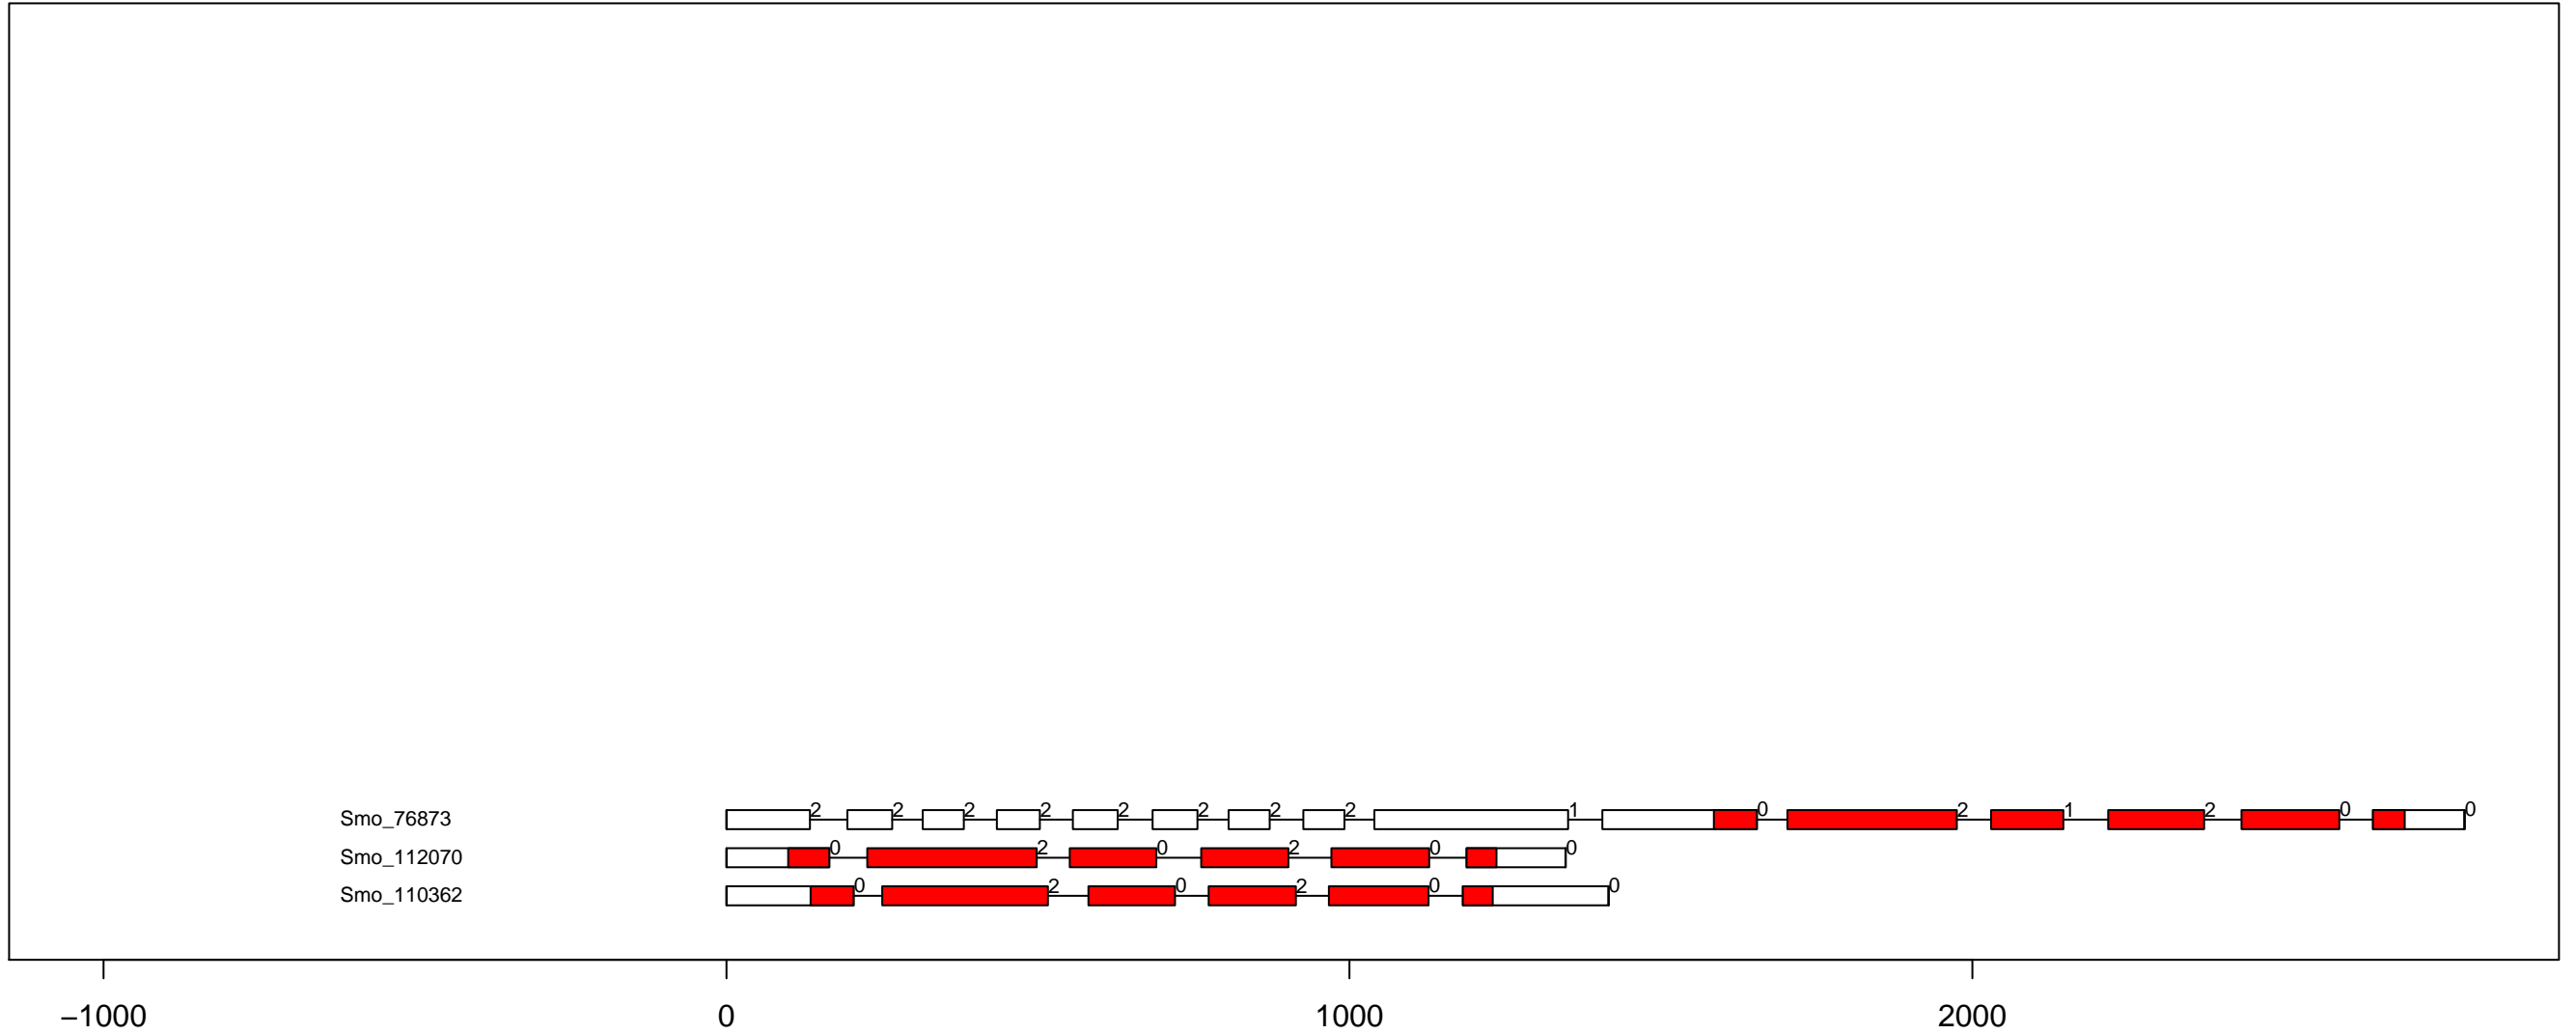

# S.mo RLK-Pelle\_LRR-Xa exon-intron and kinase domain diagram (all)

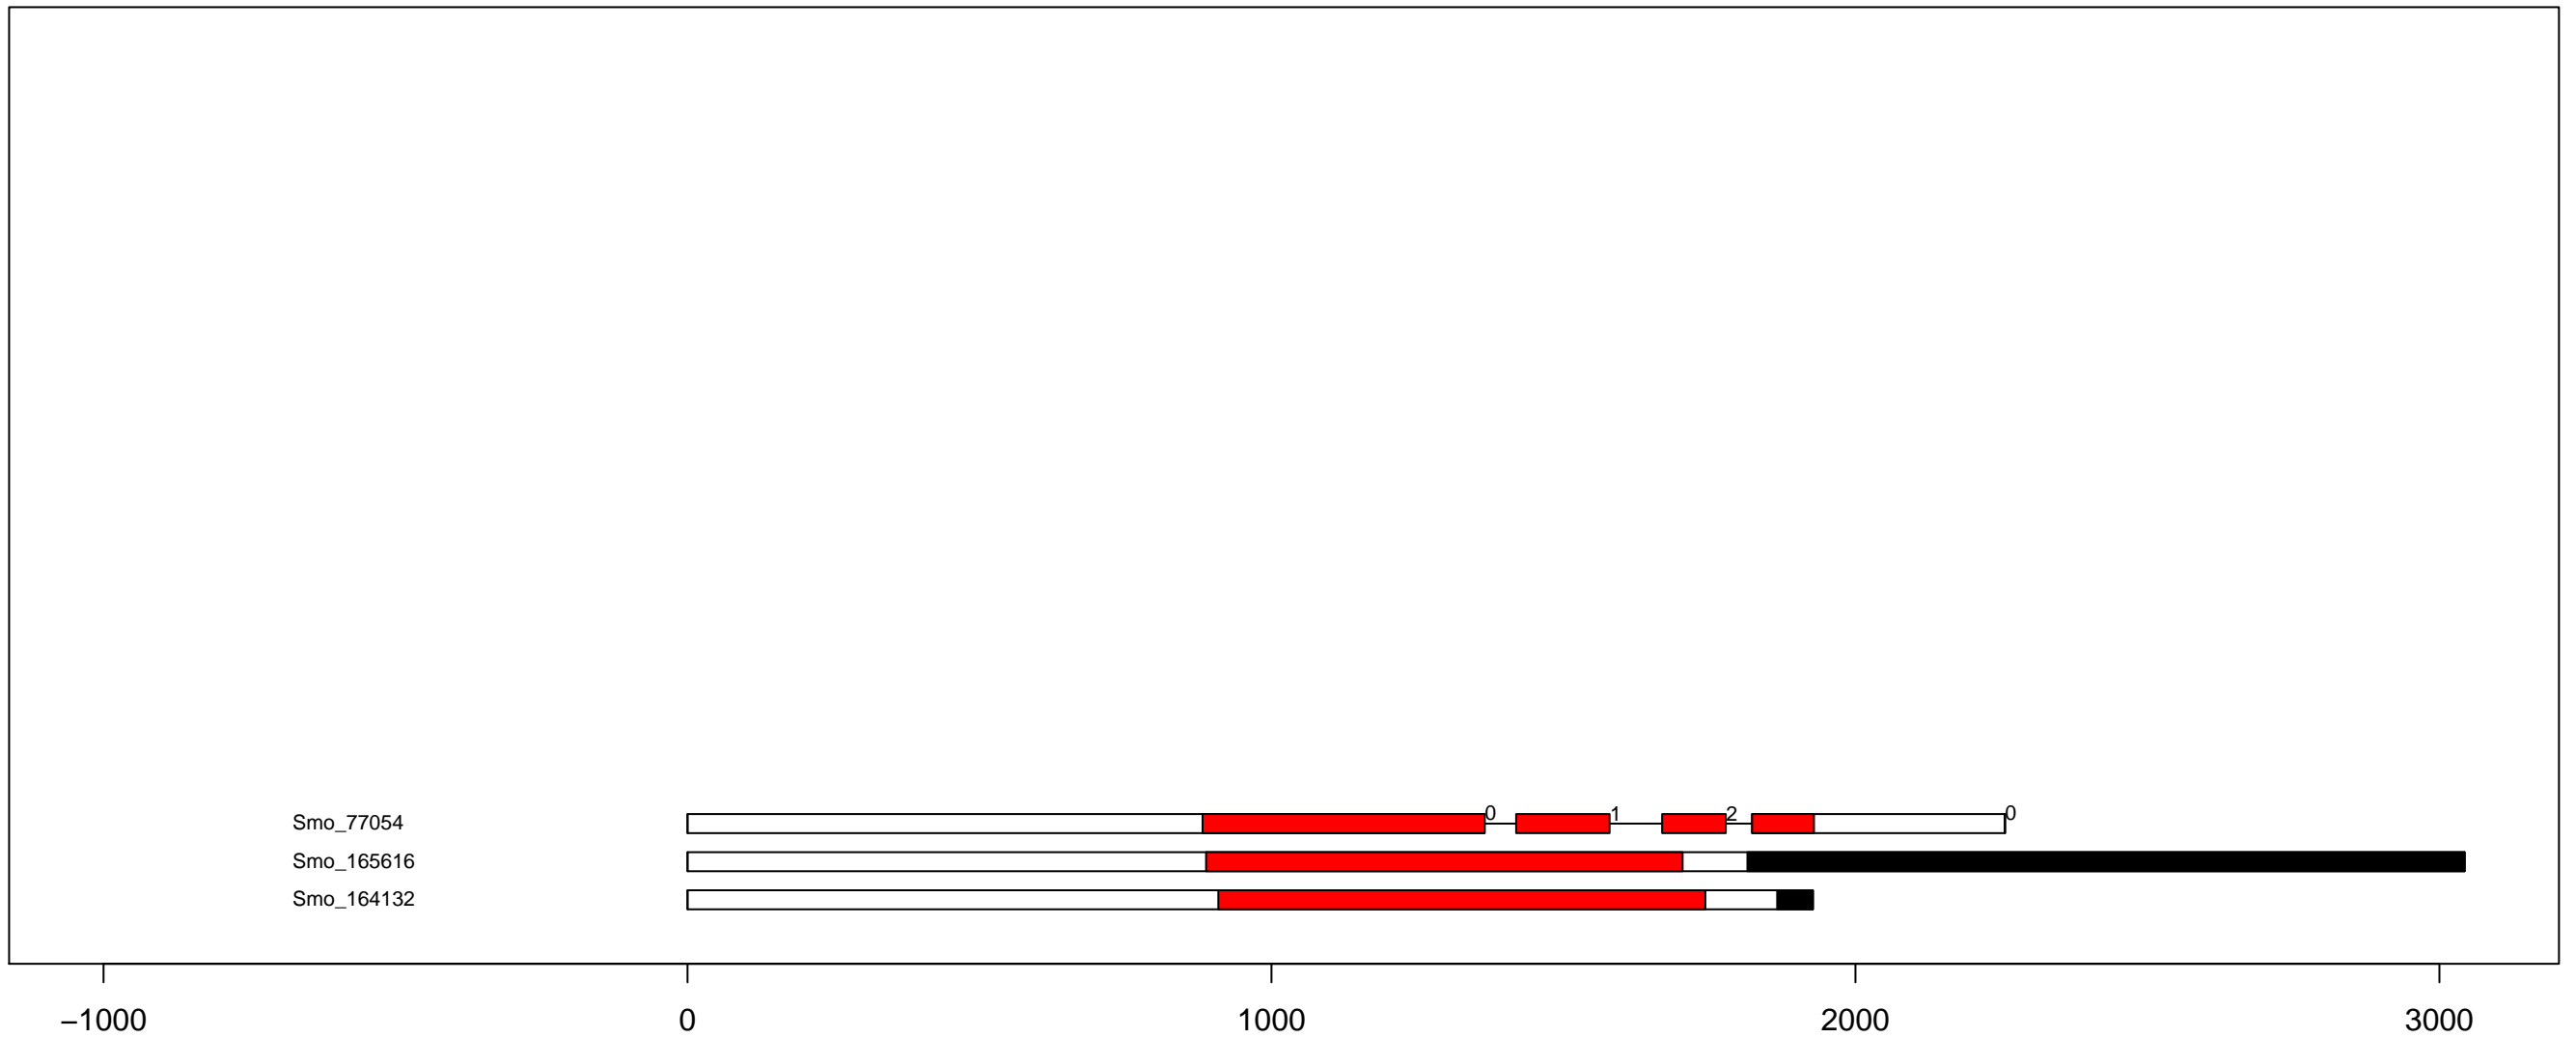

# S.mo RLK-Pelle\_LRR-Xb-1 exon-intron and kinase domain diagram (all)

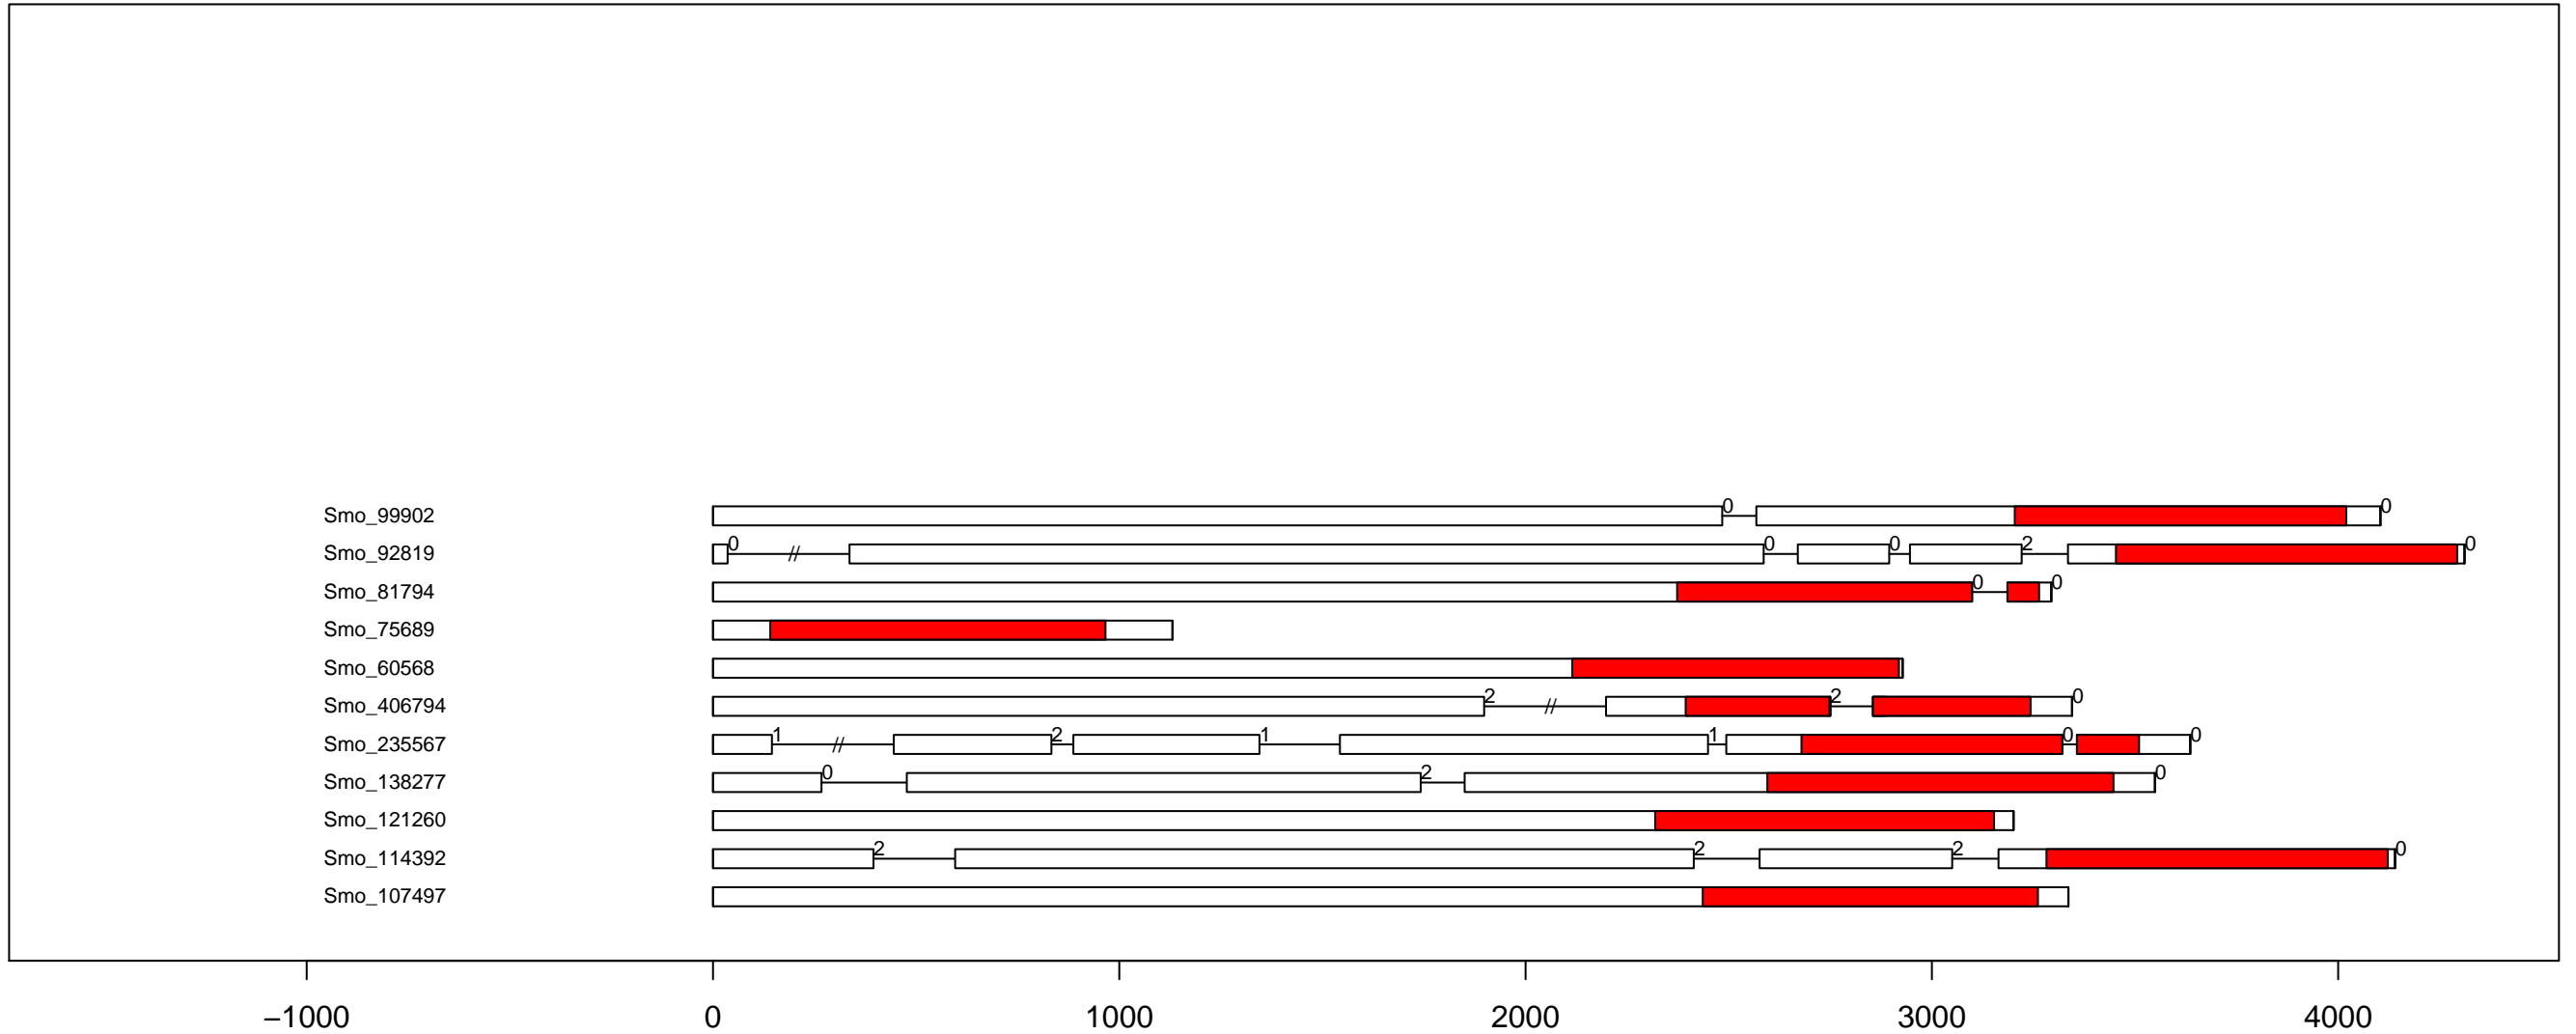







# S.mo RLK-Pelle\_LRR-XI-2 exon-intron and kinase domain diagram (all)

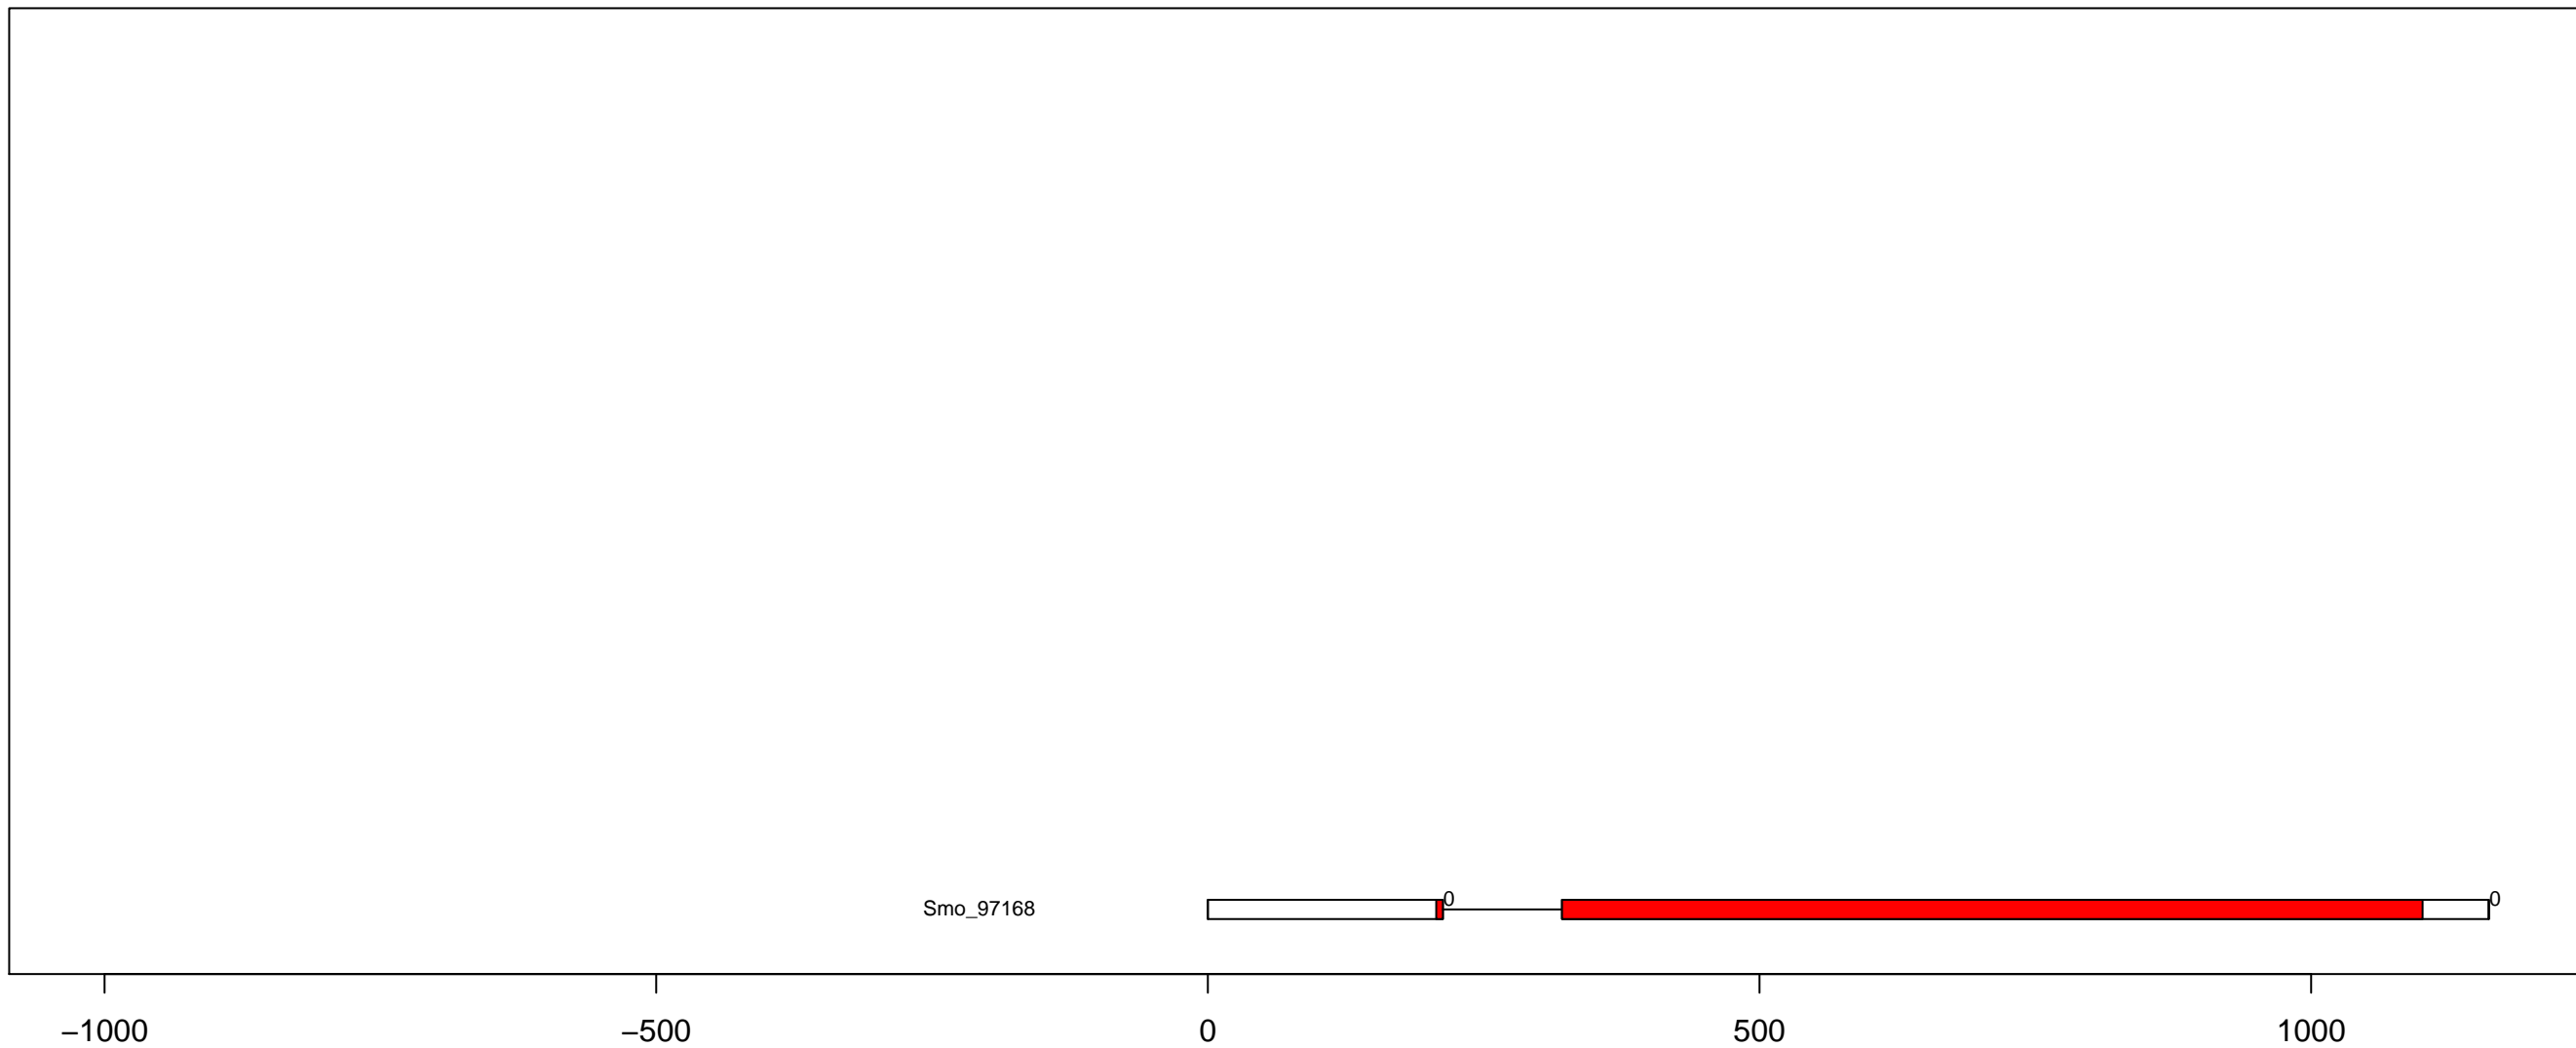



# S.mo RLK-Pelle\_LRR-XIIIa exon-intron and kinase domain diagram (all)

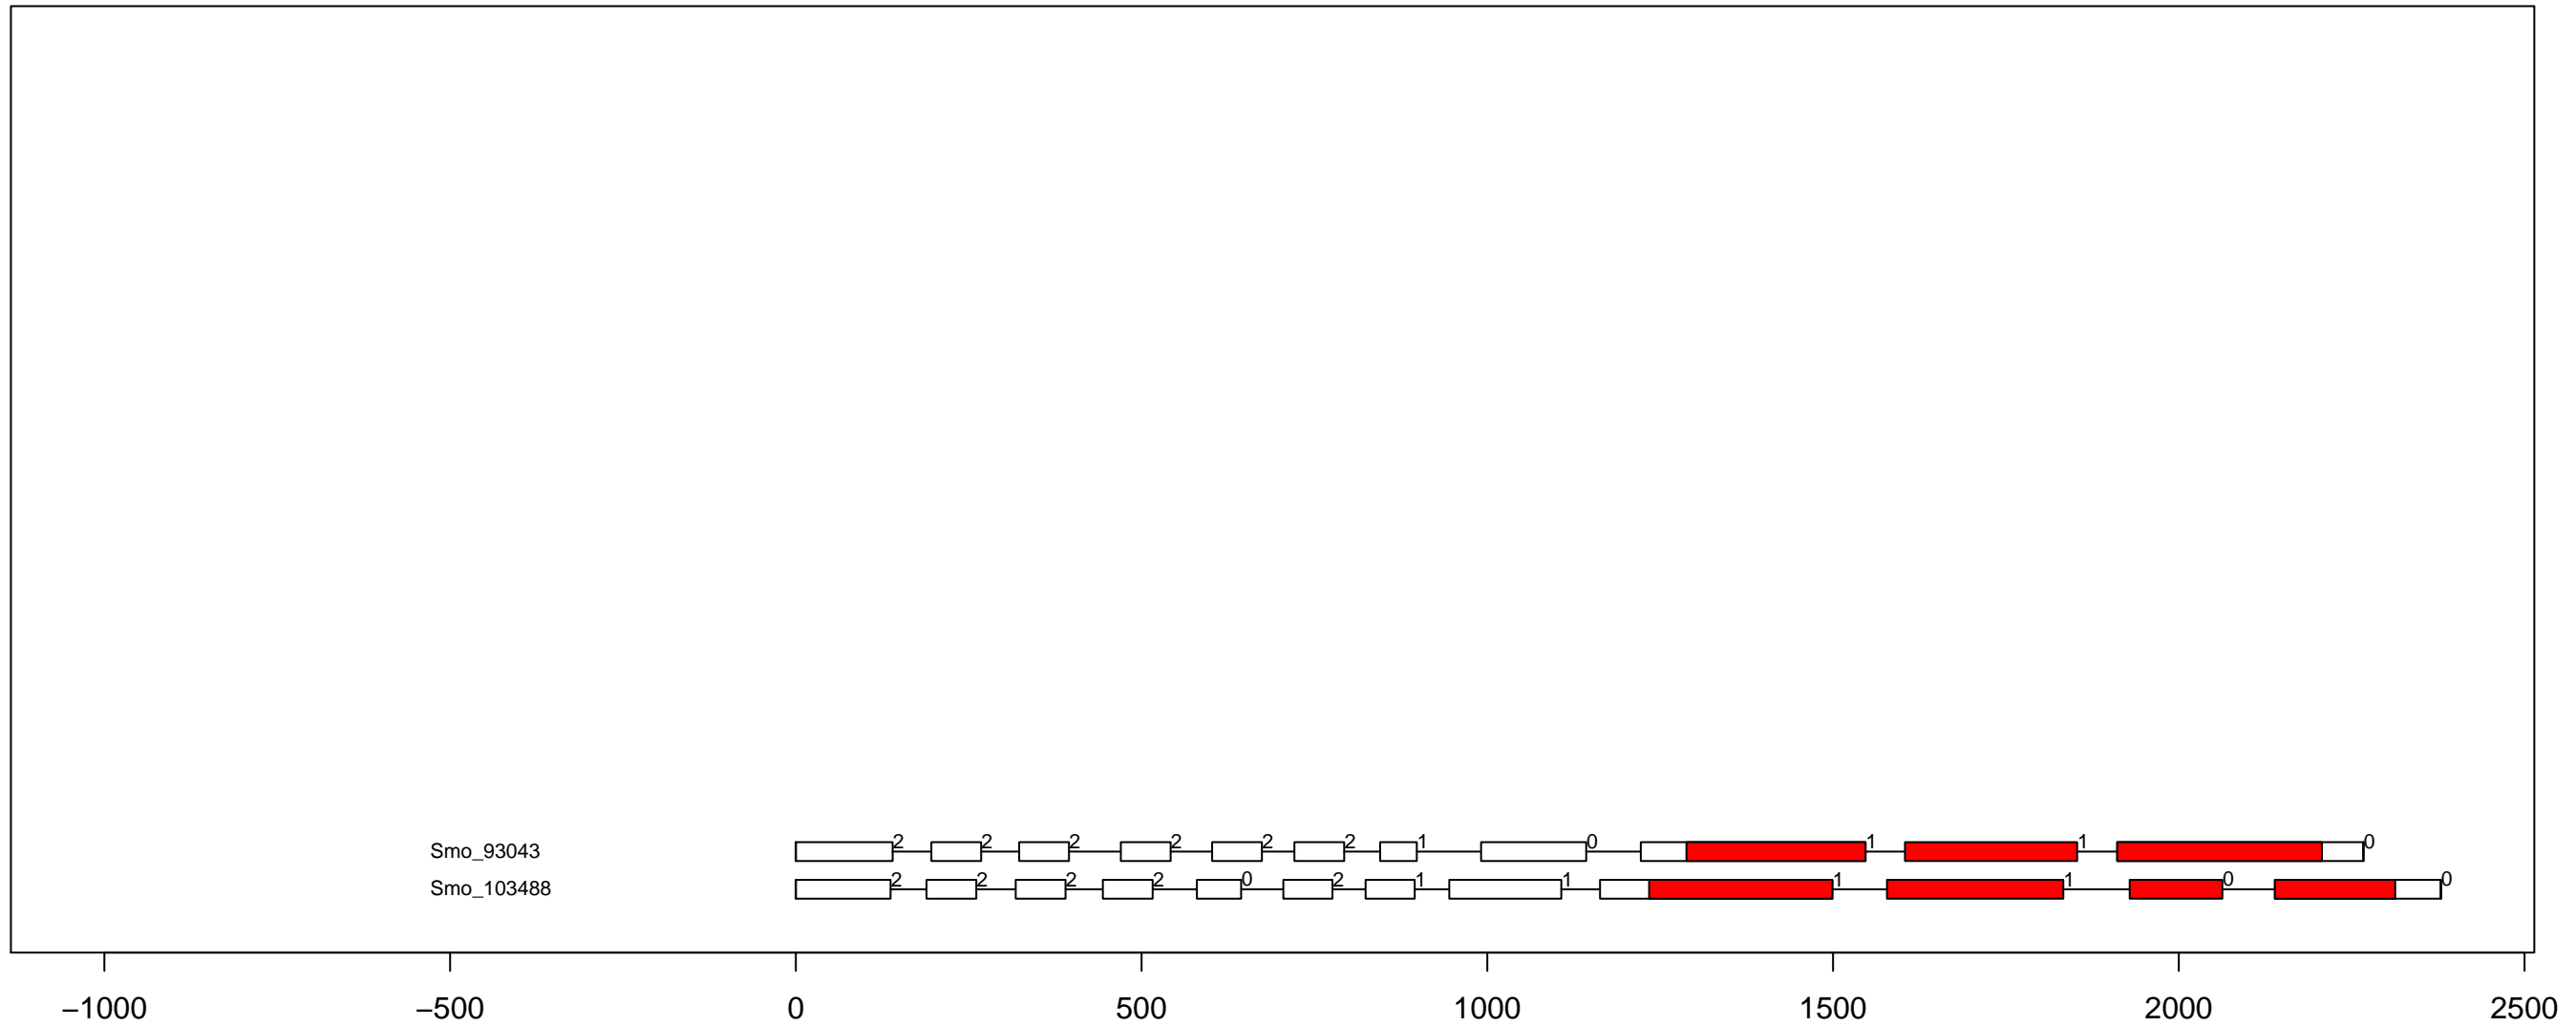

# S.mo RLK-Pelle\_LRR-XIIIb exon-intron and kinase domain diagram (all)

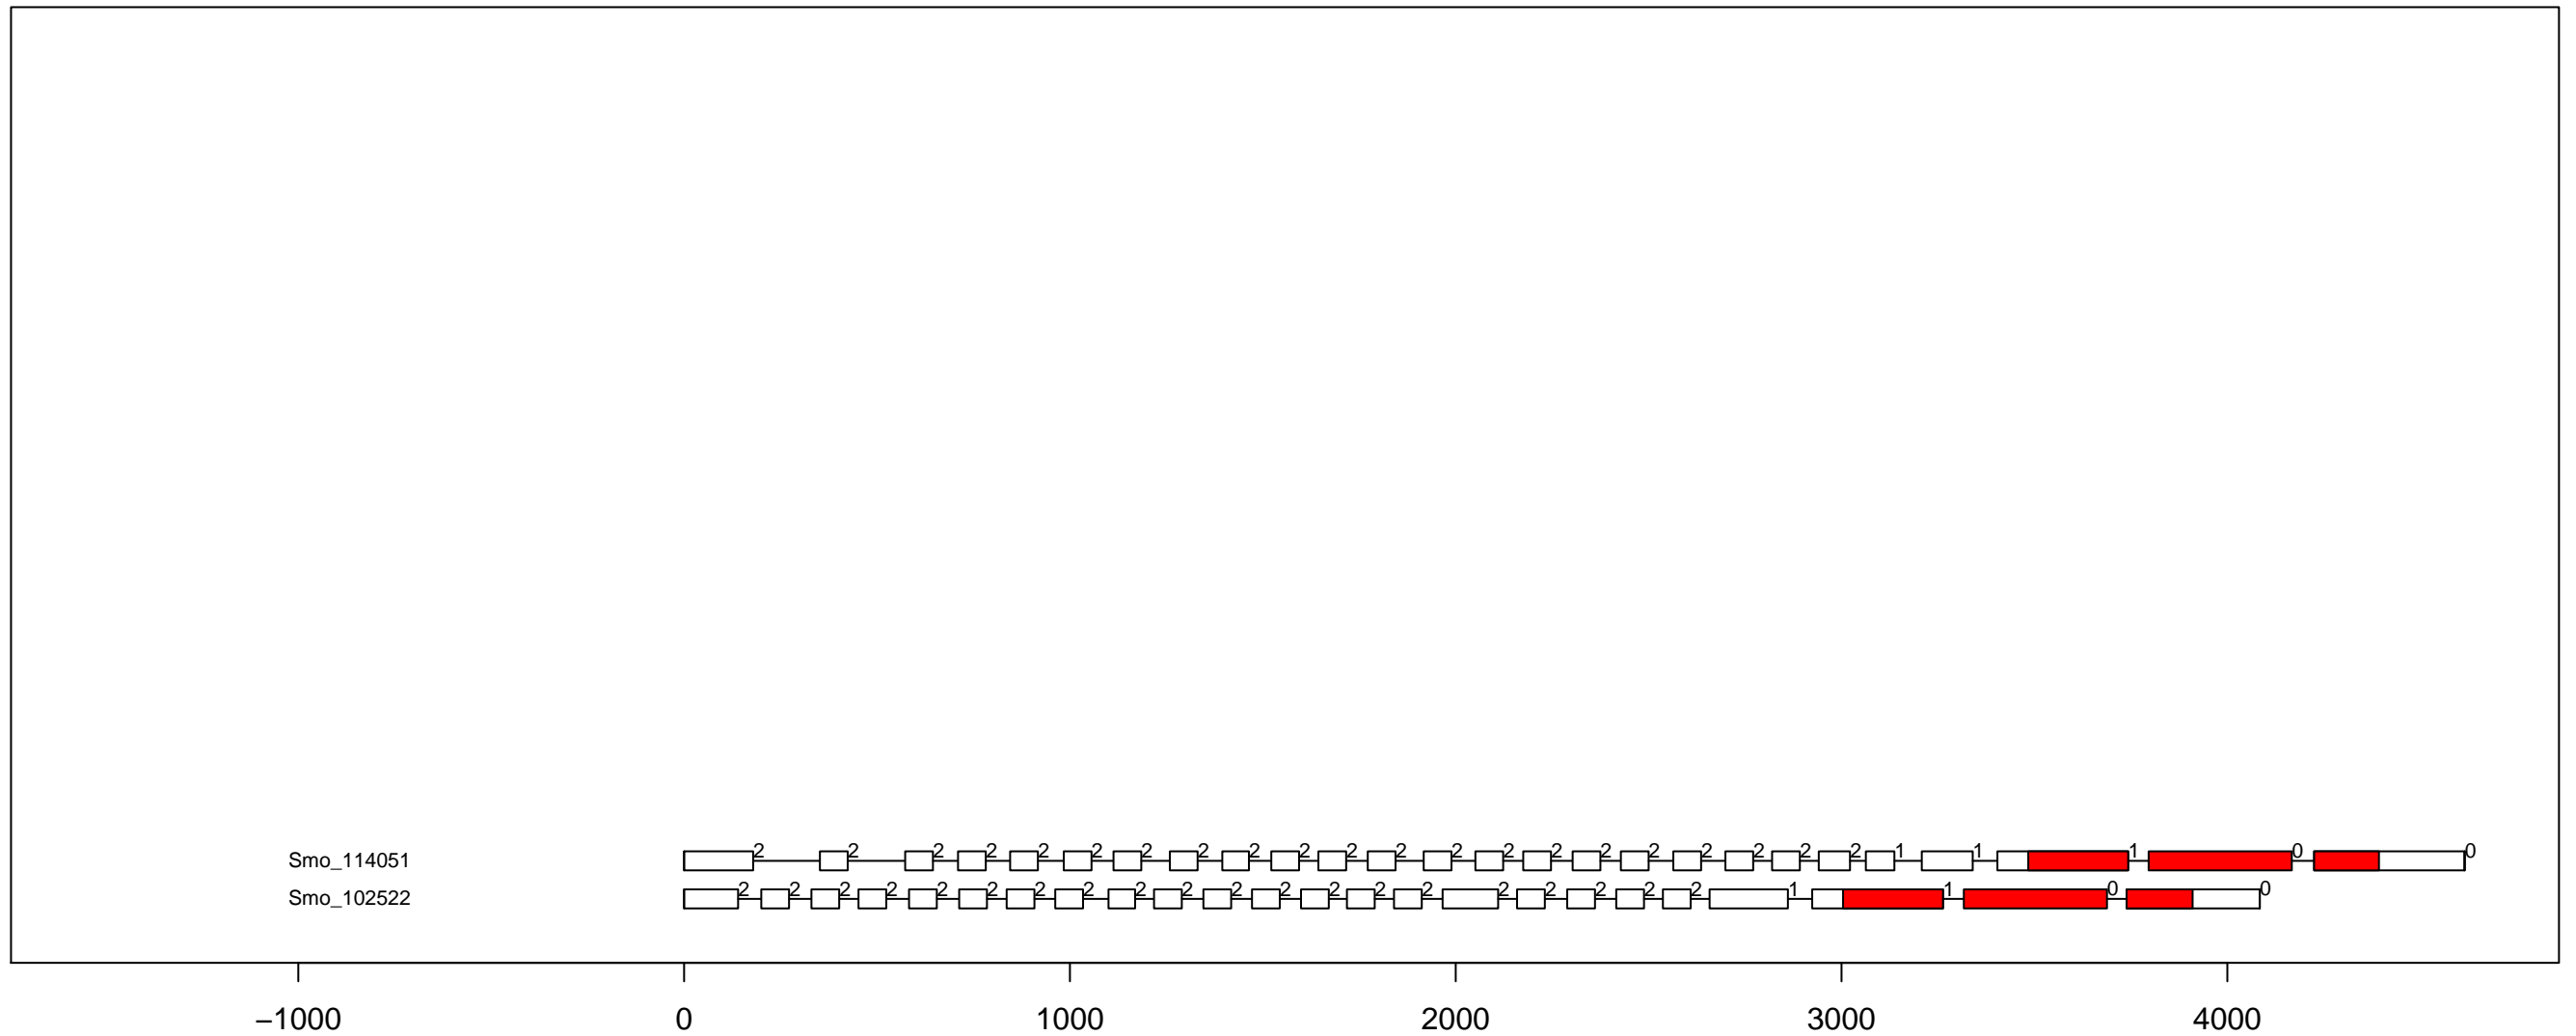

# S.mo RLK-Pelle\_LRR-XIV exon-intron and kinase domain diagram (all)

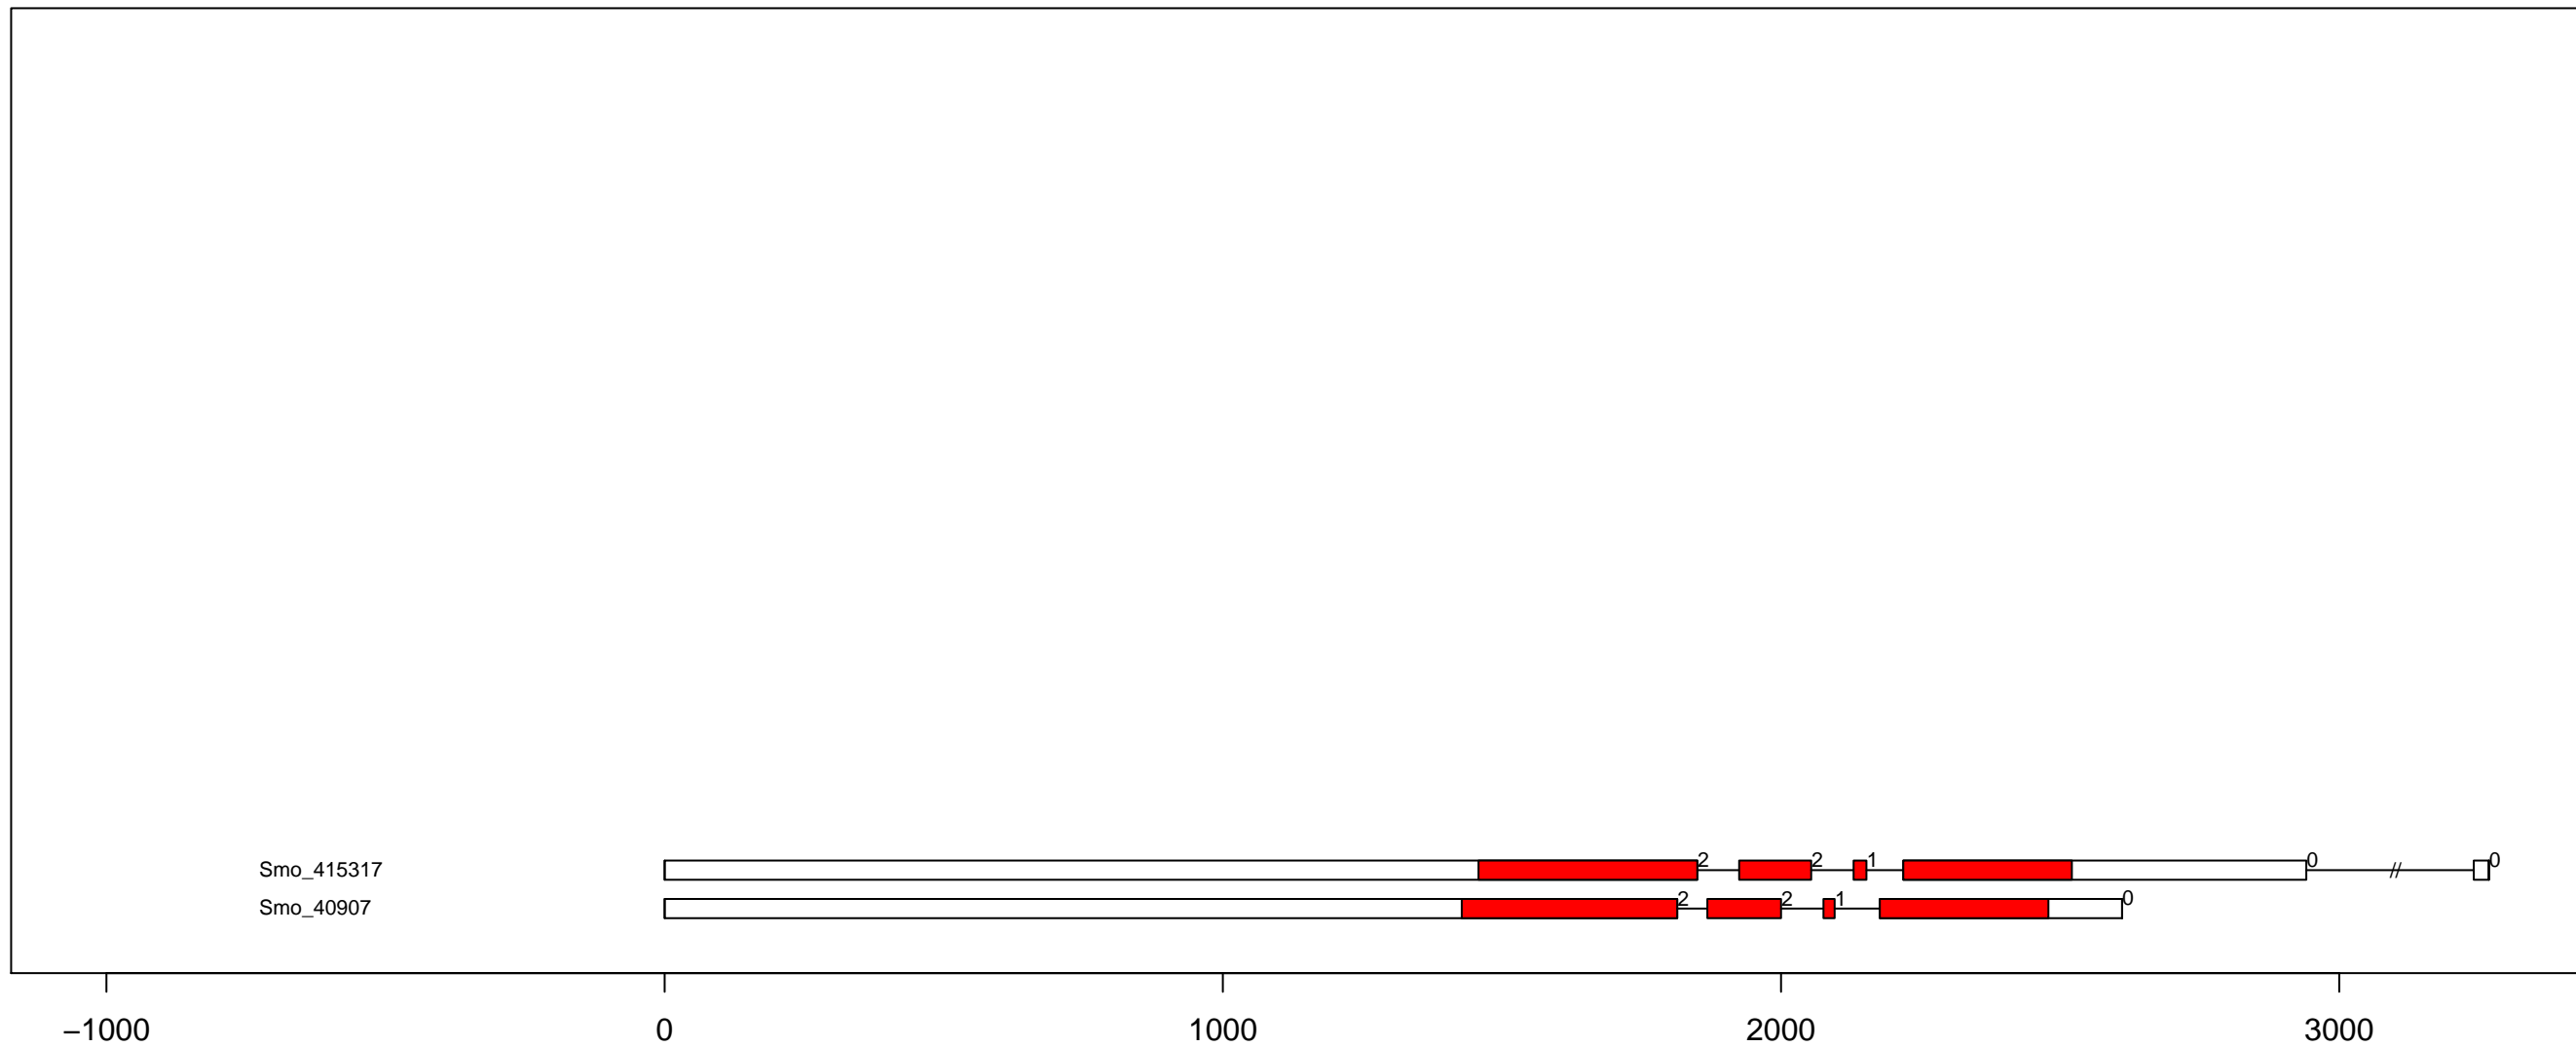

# S.mo RLK-Pelle\_LRR-XV exon-intron and kinase domain diagram (all)

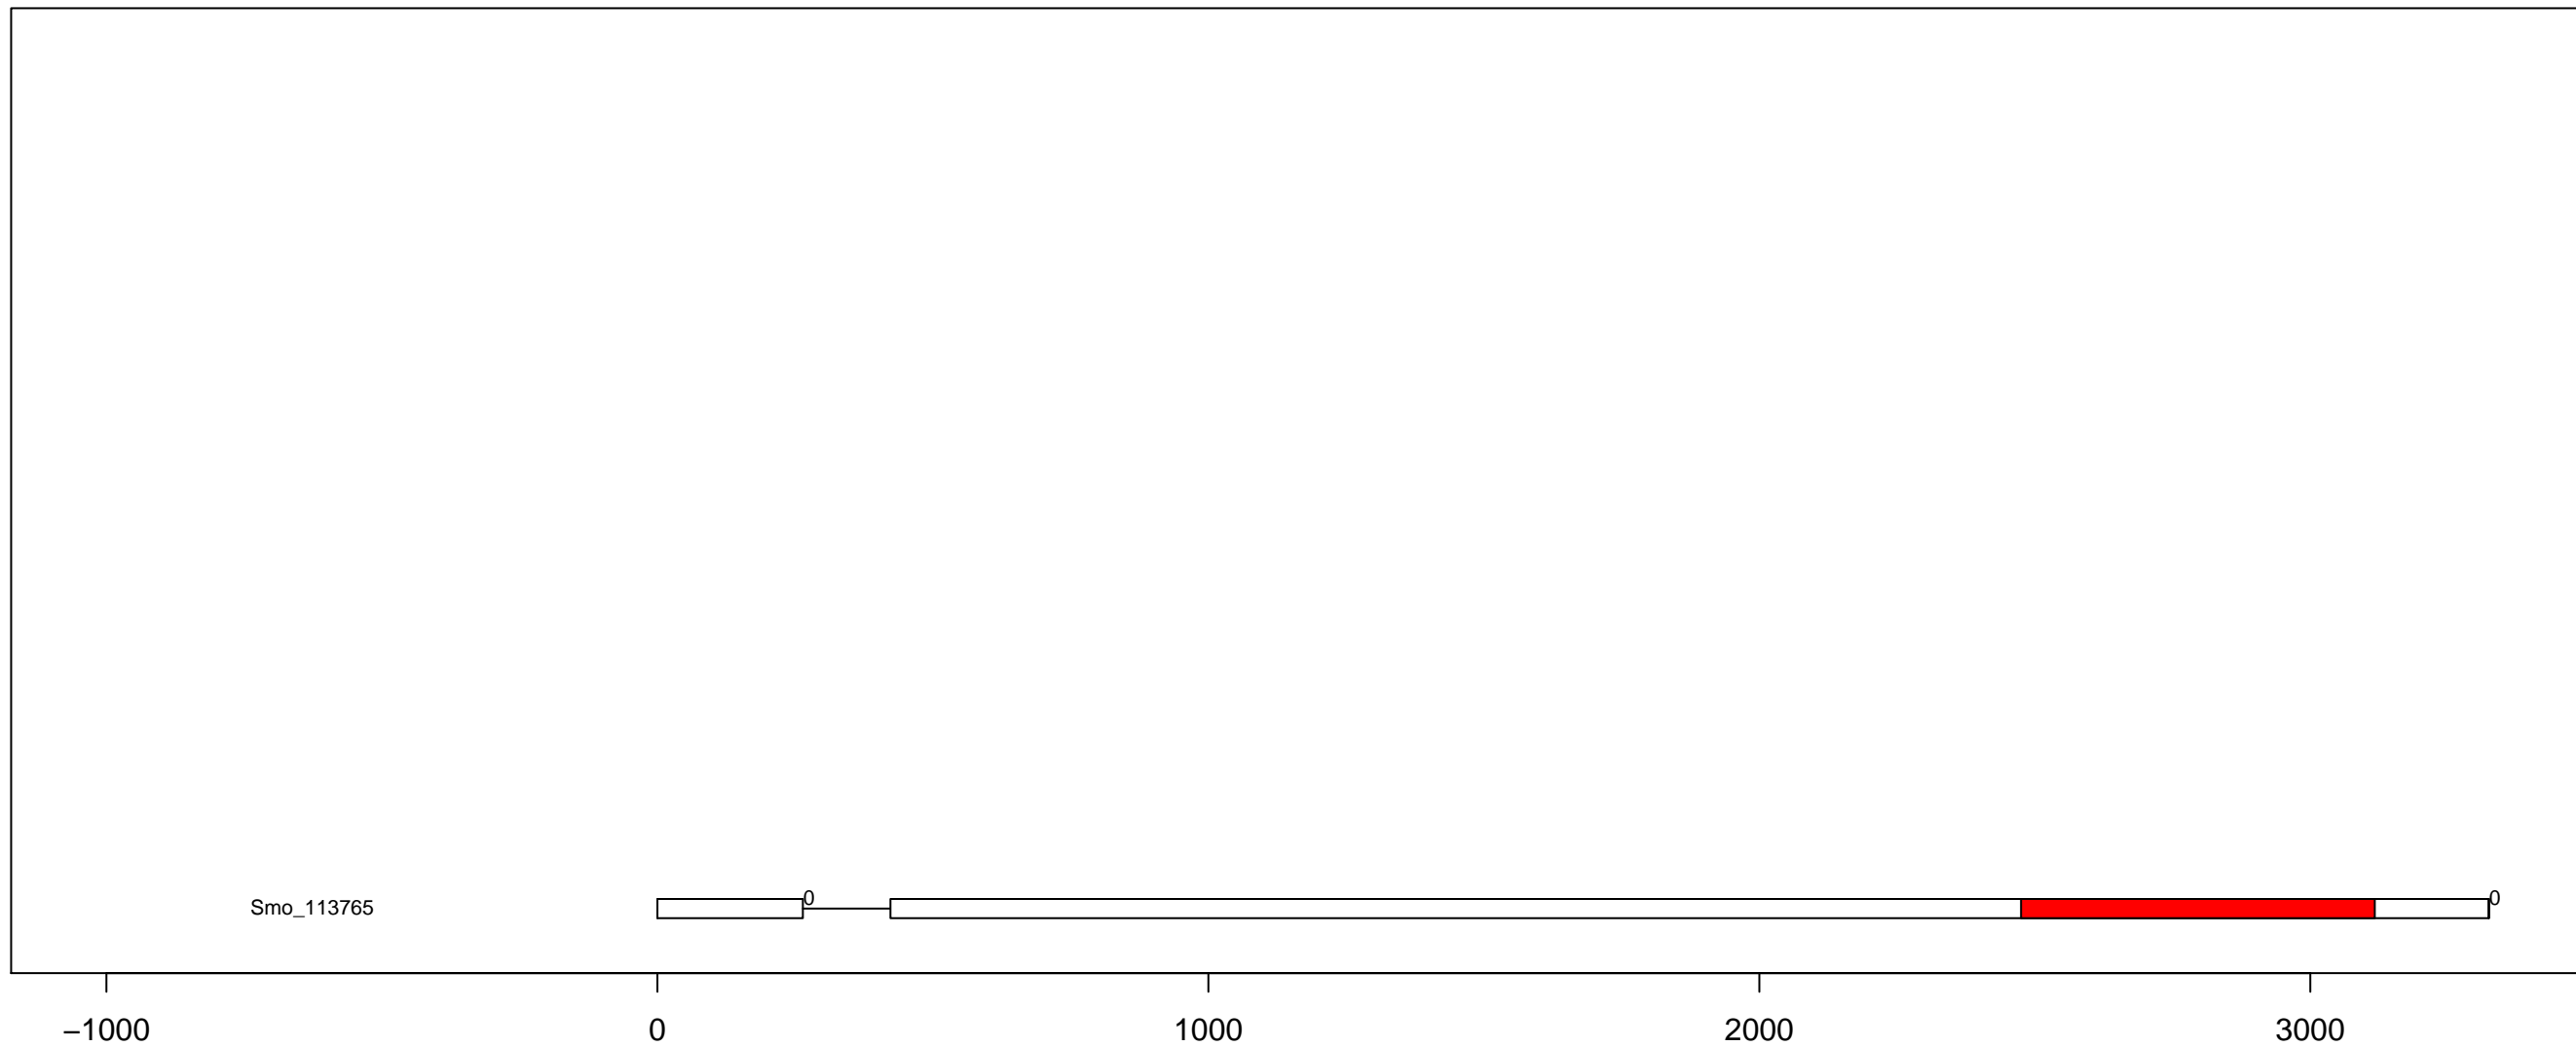



S.mo RLK-Pelle\_LysM exon-intron and kinase domain diagram (all)

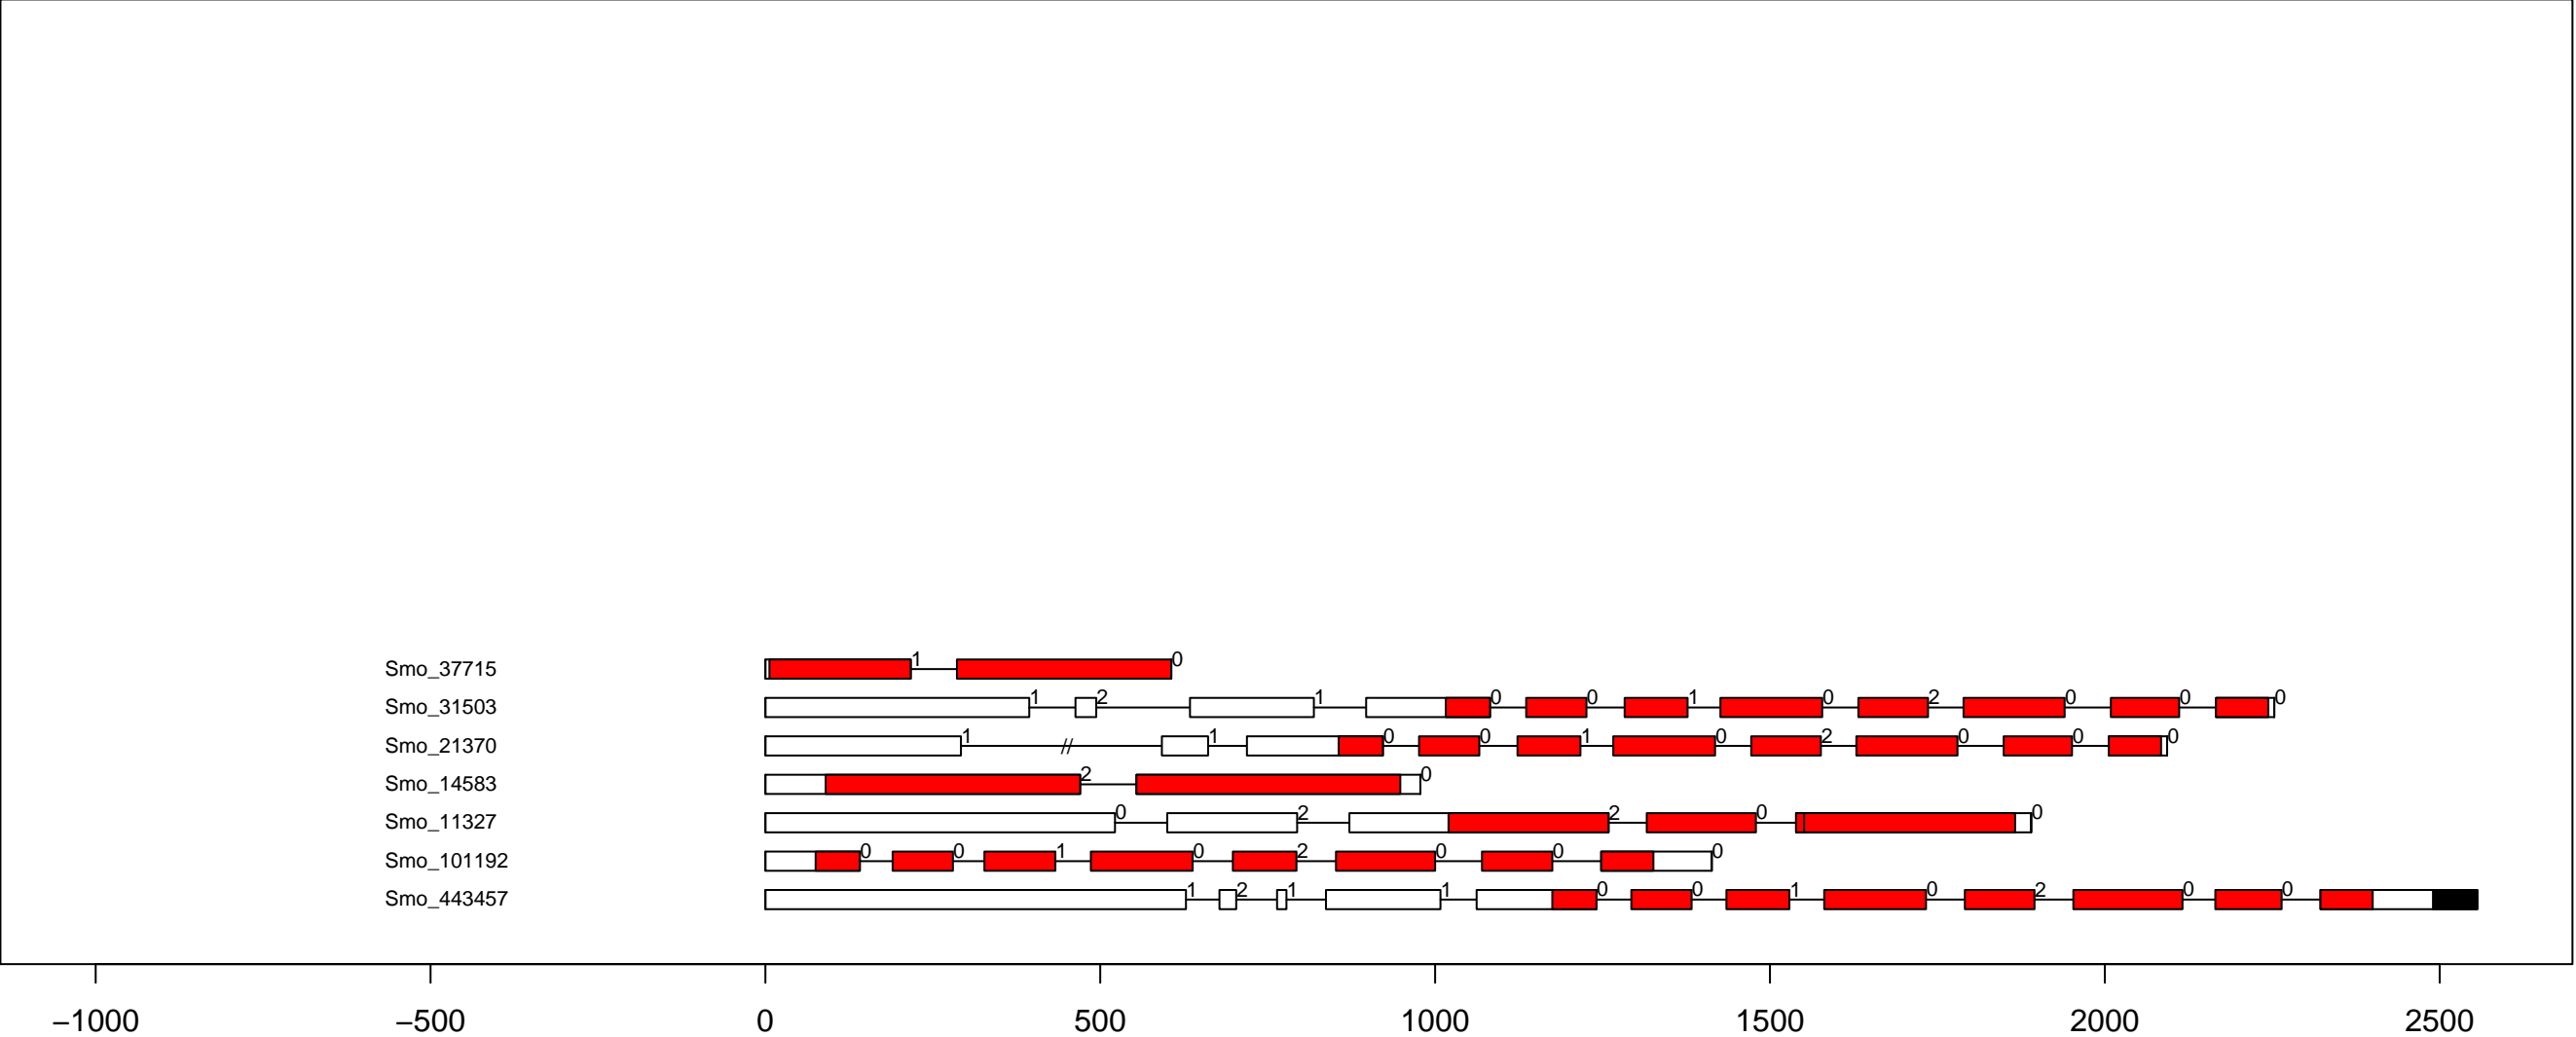



S.mo RLK-Pelle\_PERK-2 exon-intron and kinase domain diagram (all)

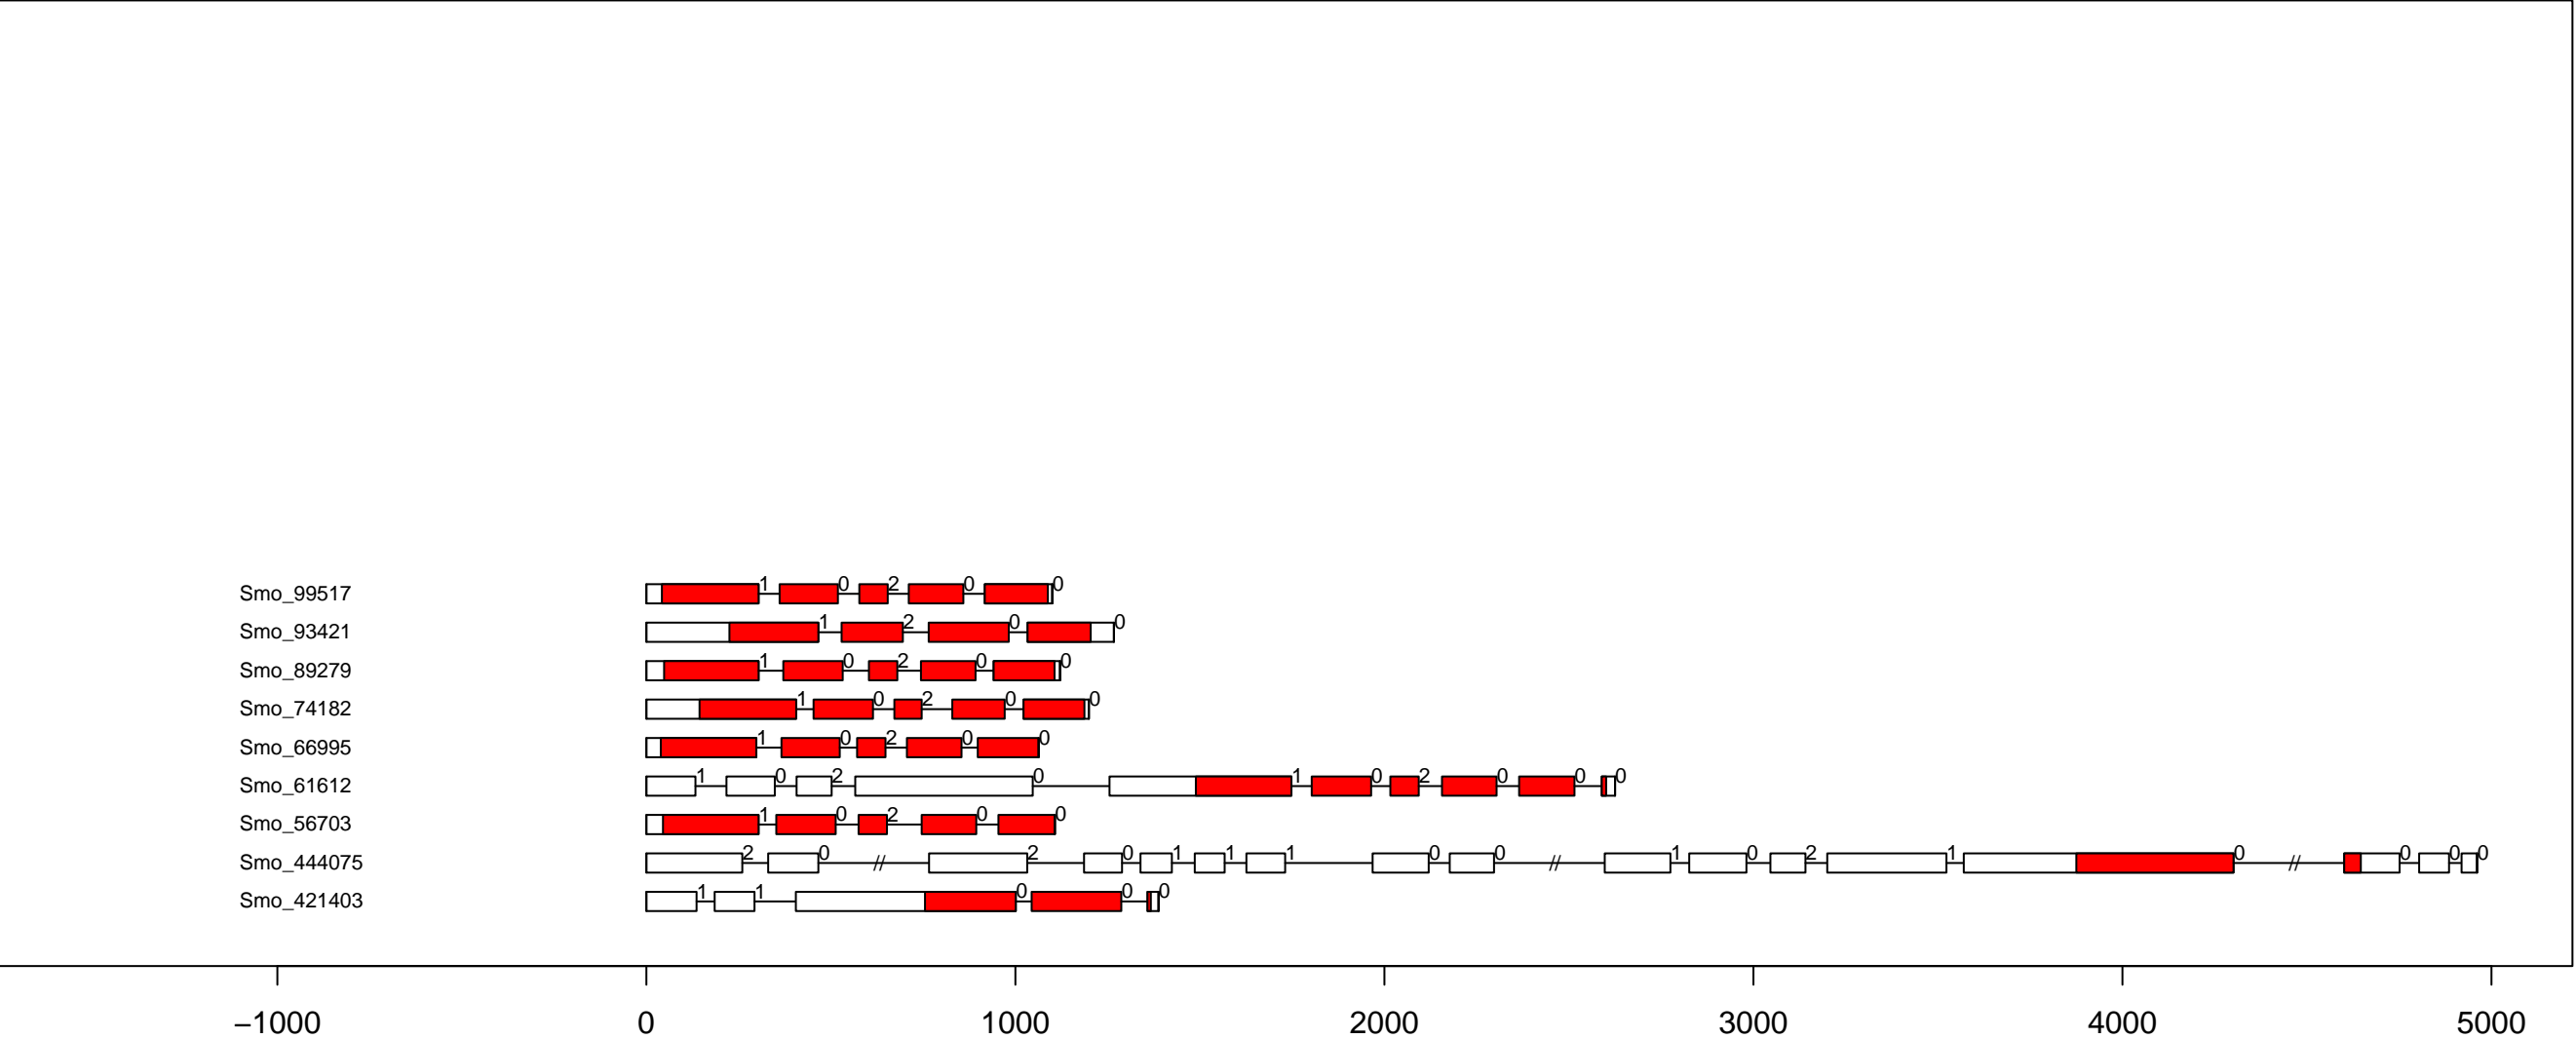

# S.mo RLK-Pelle\_RKF3 exon-intron and kinase domain diagram (all)

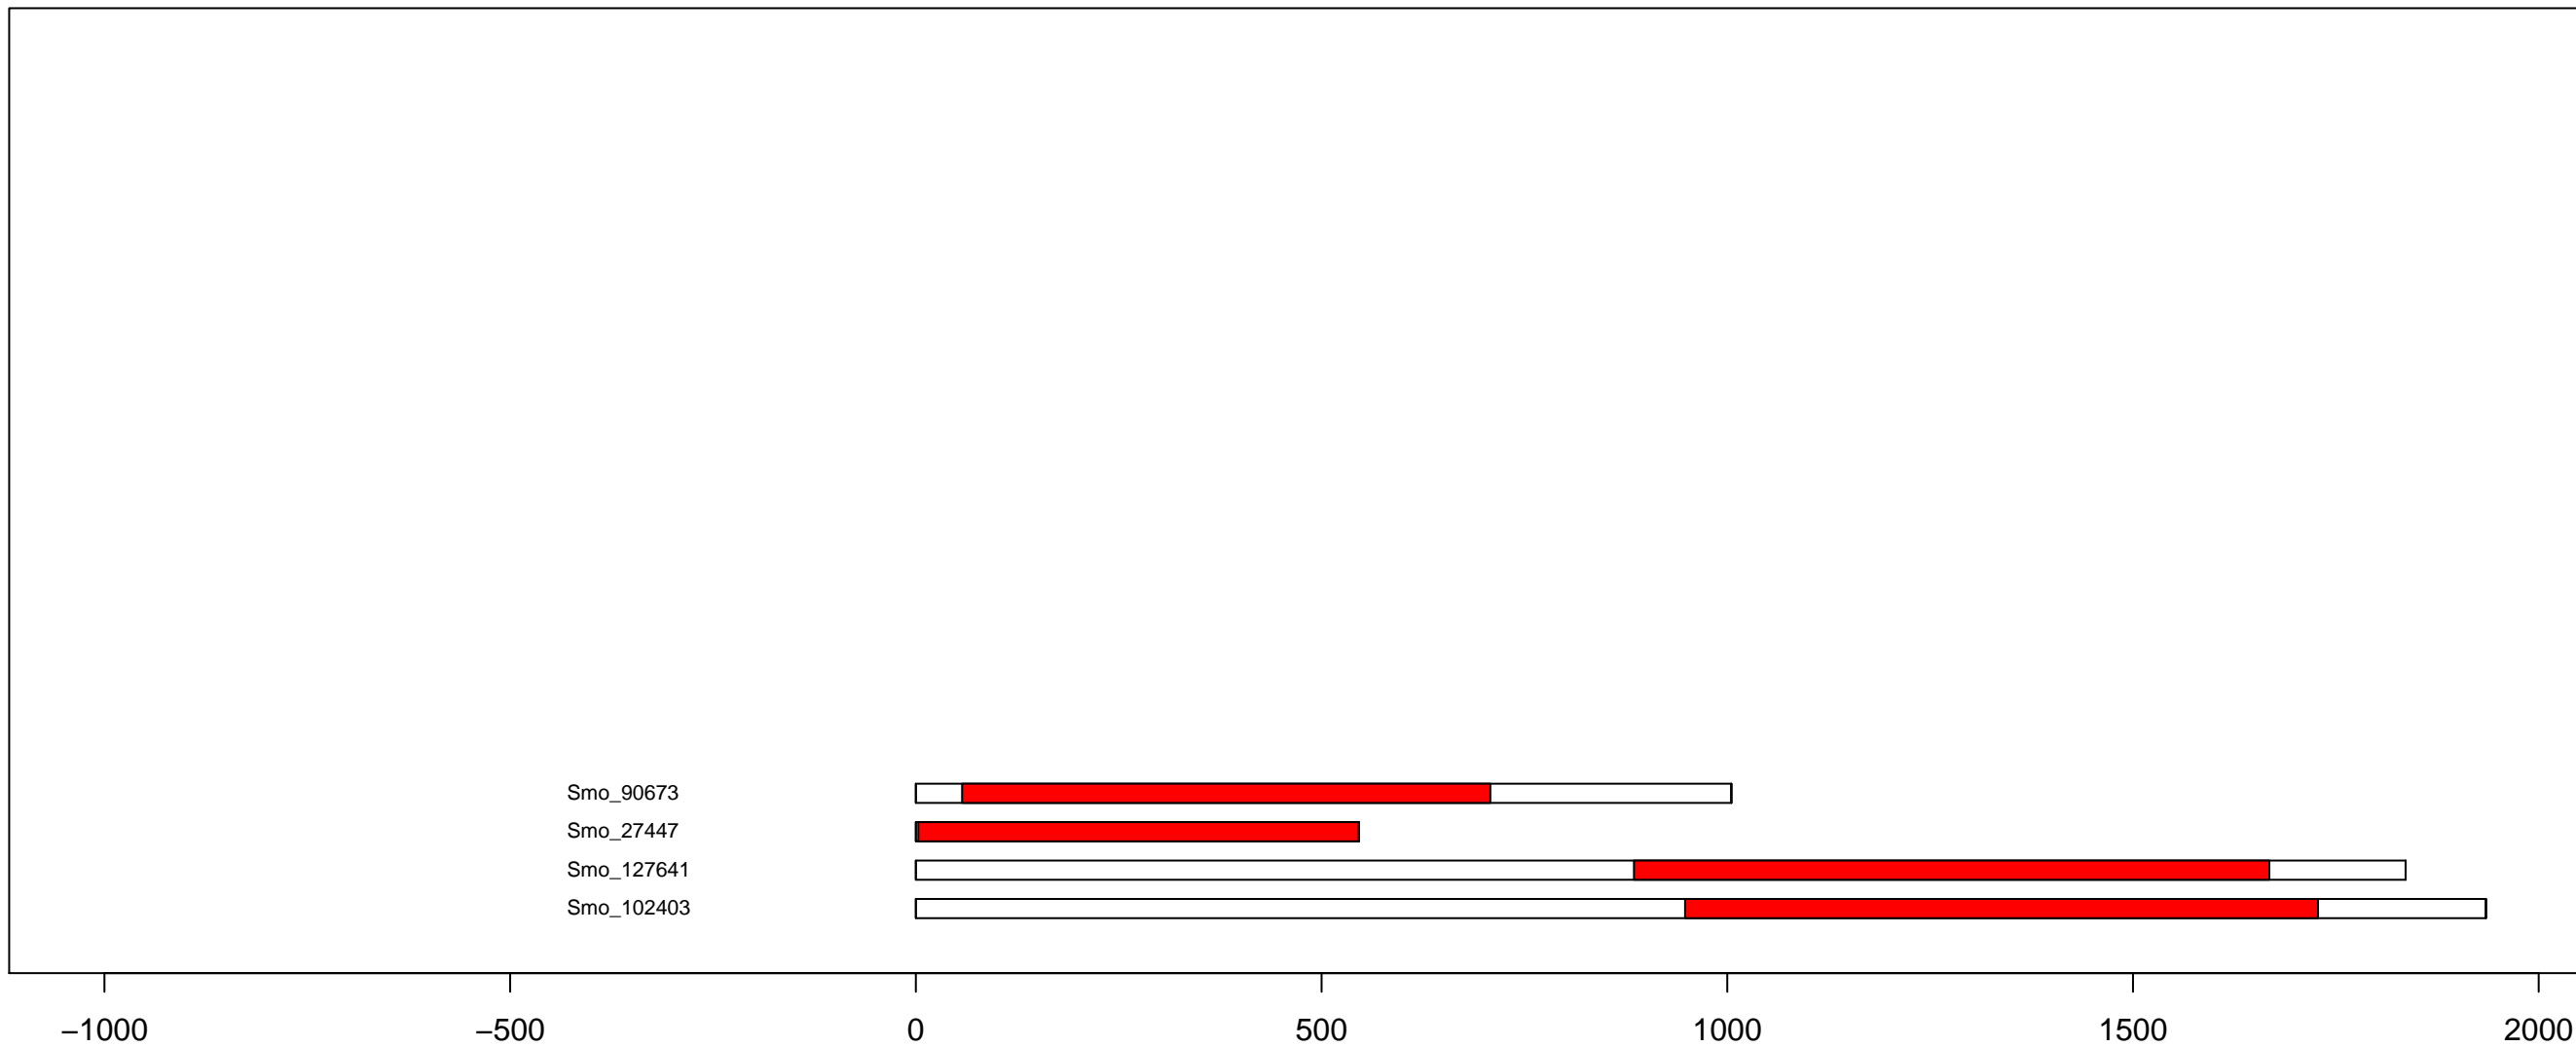

S.mo RLK-Pelle\_RLCK-II exon-intron and kinase domain diagram (all)

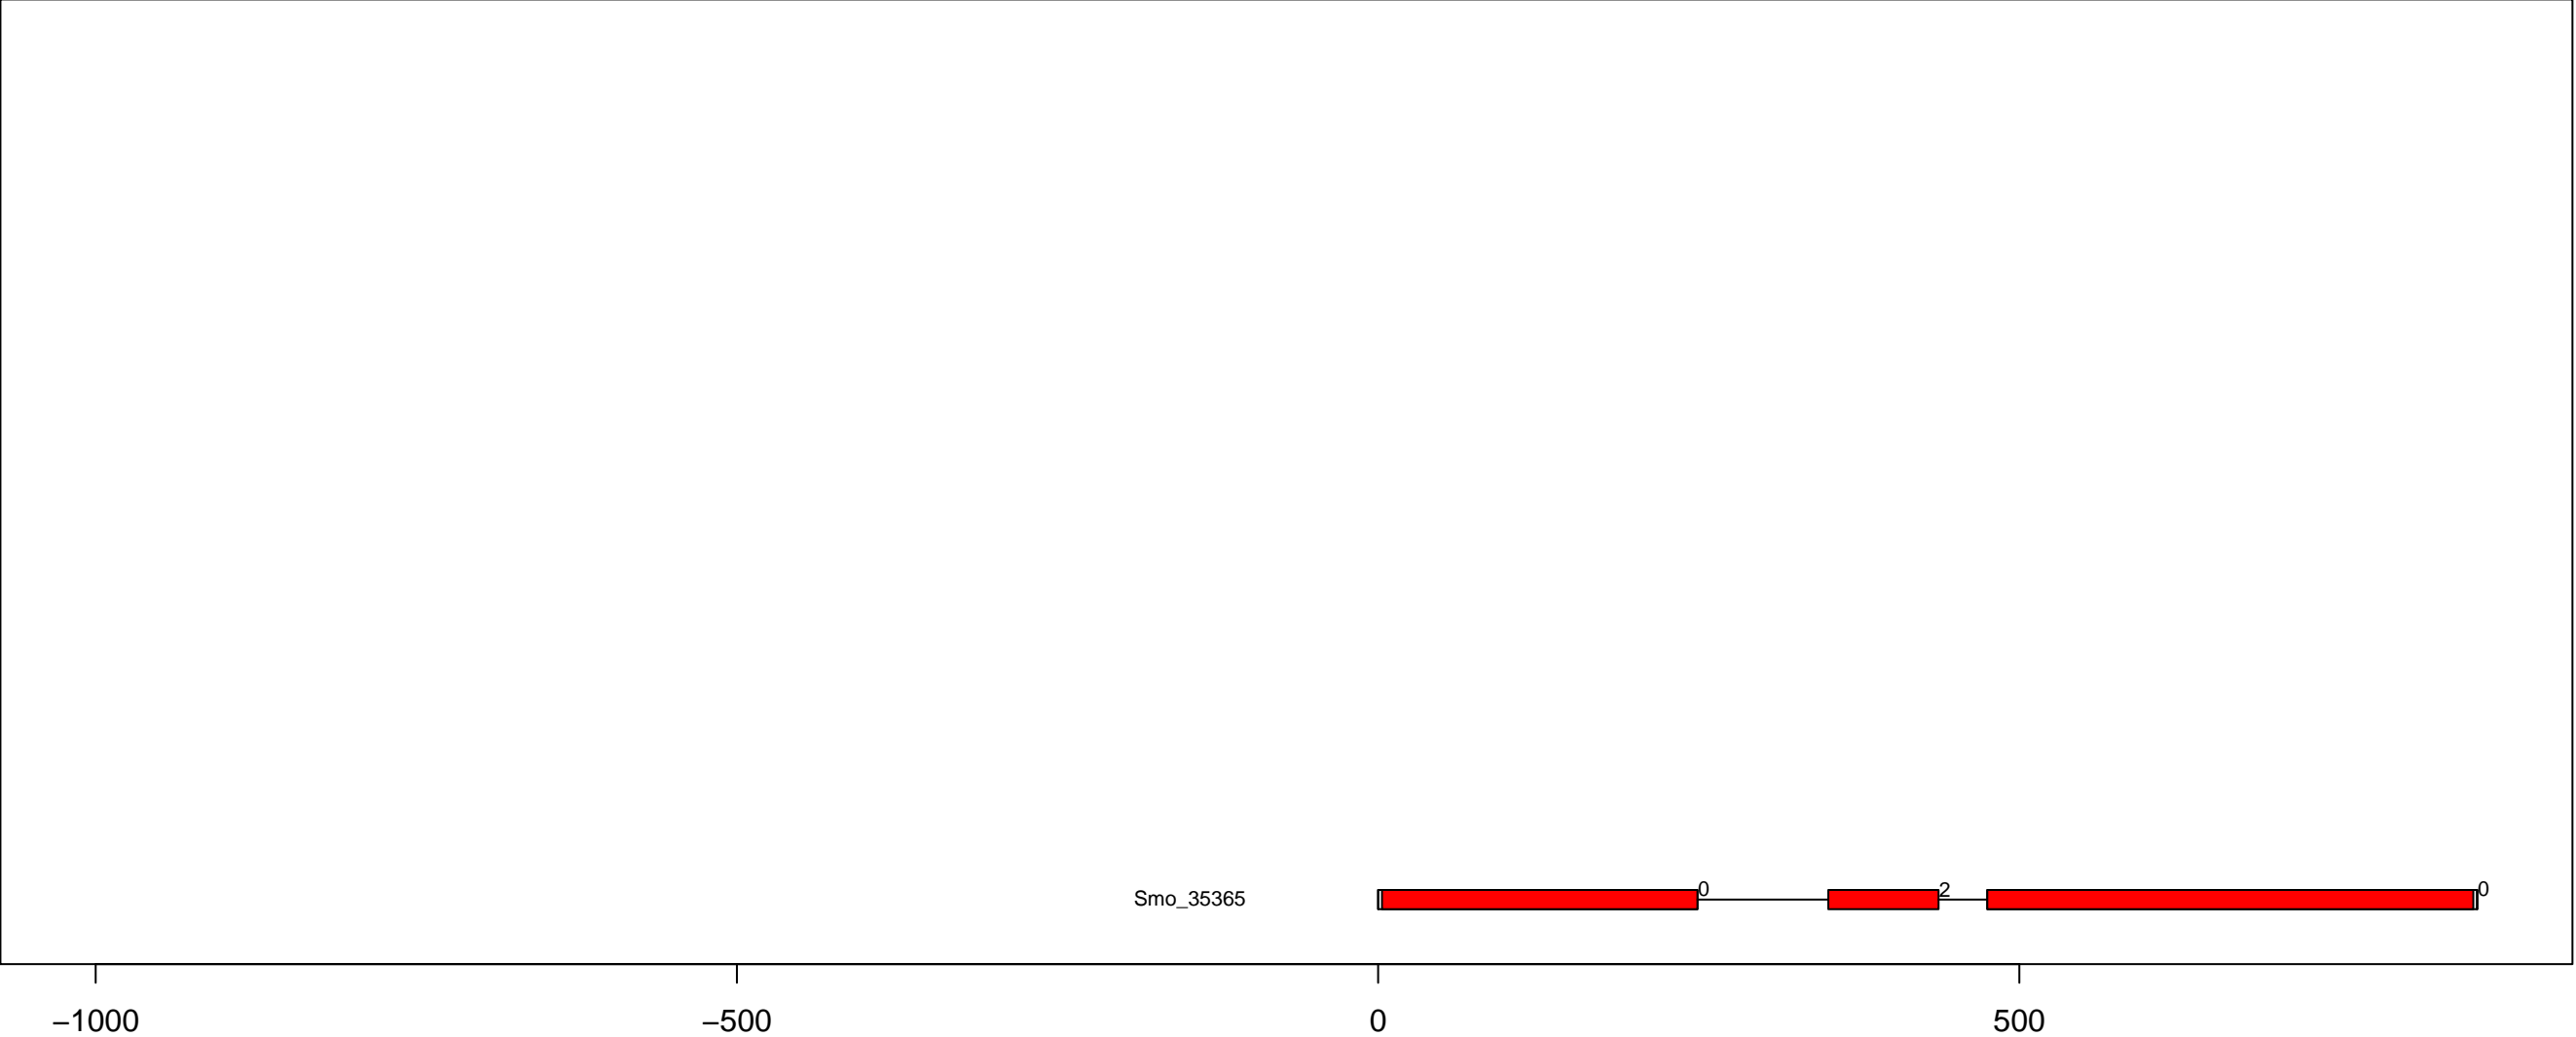

# S.mo RLK-Pelle\_RLCK-IV exon-intron and kinase domain diagram (all)

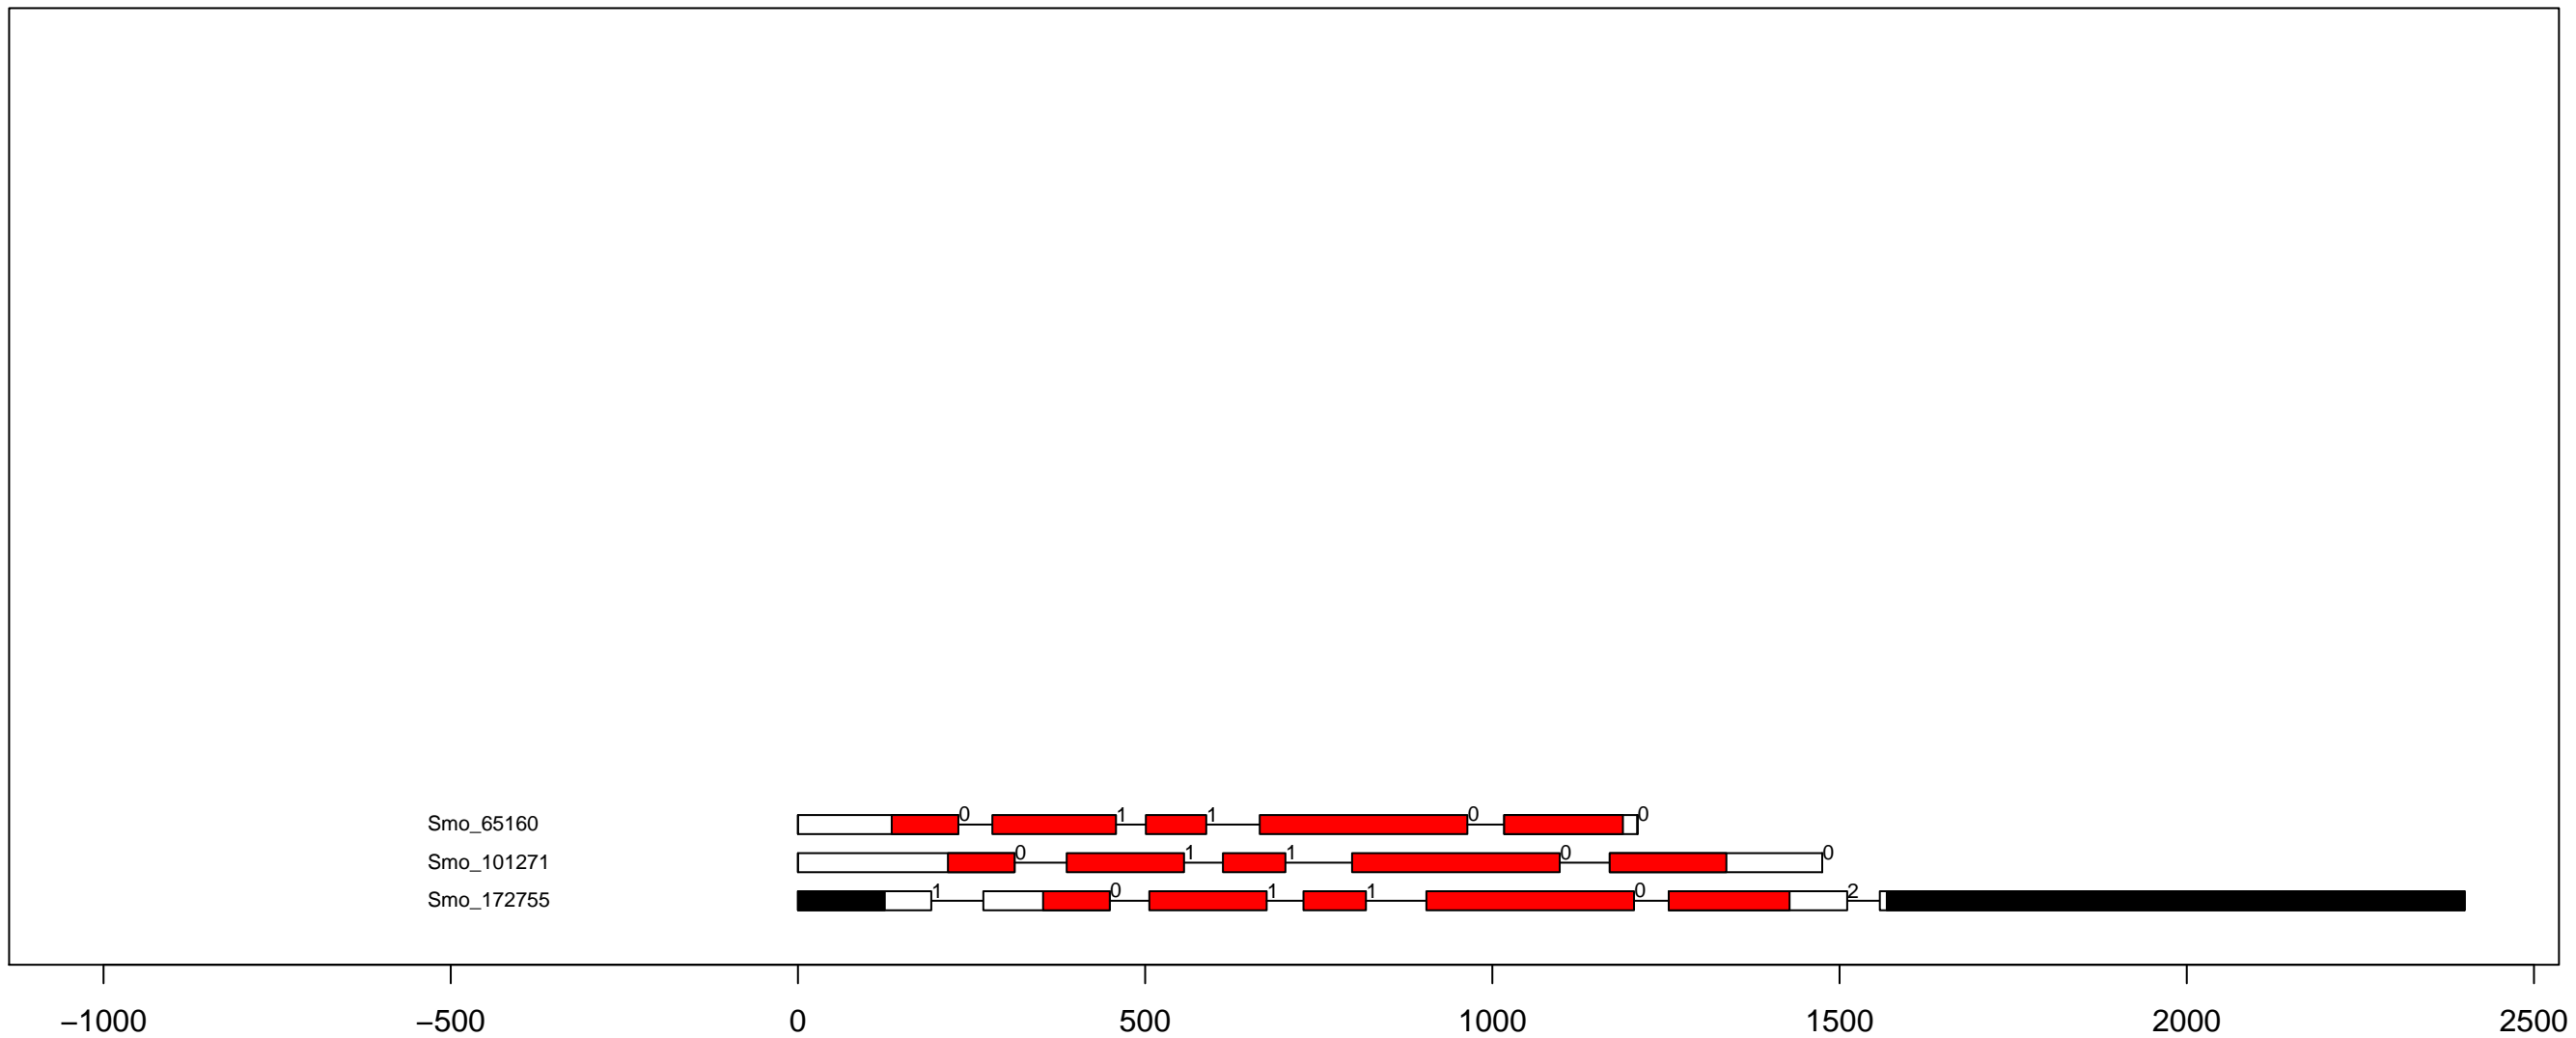

**S.mo RLK-Pelle\_RLCK-IXa exon-intron and kinase domain diagram (all)**

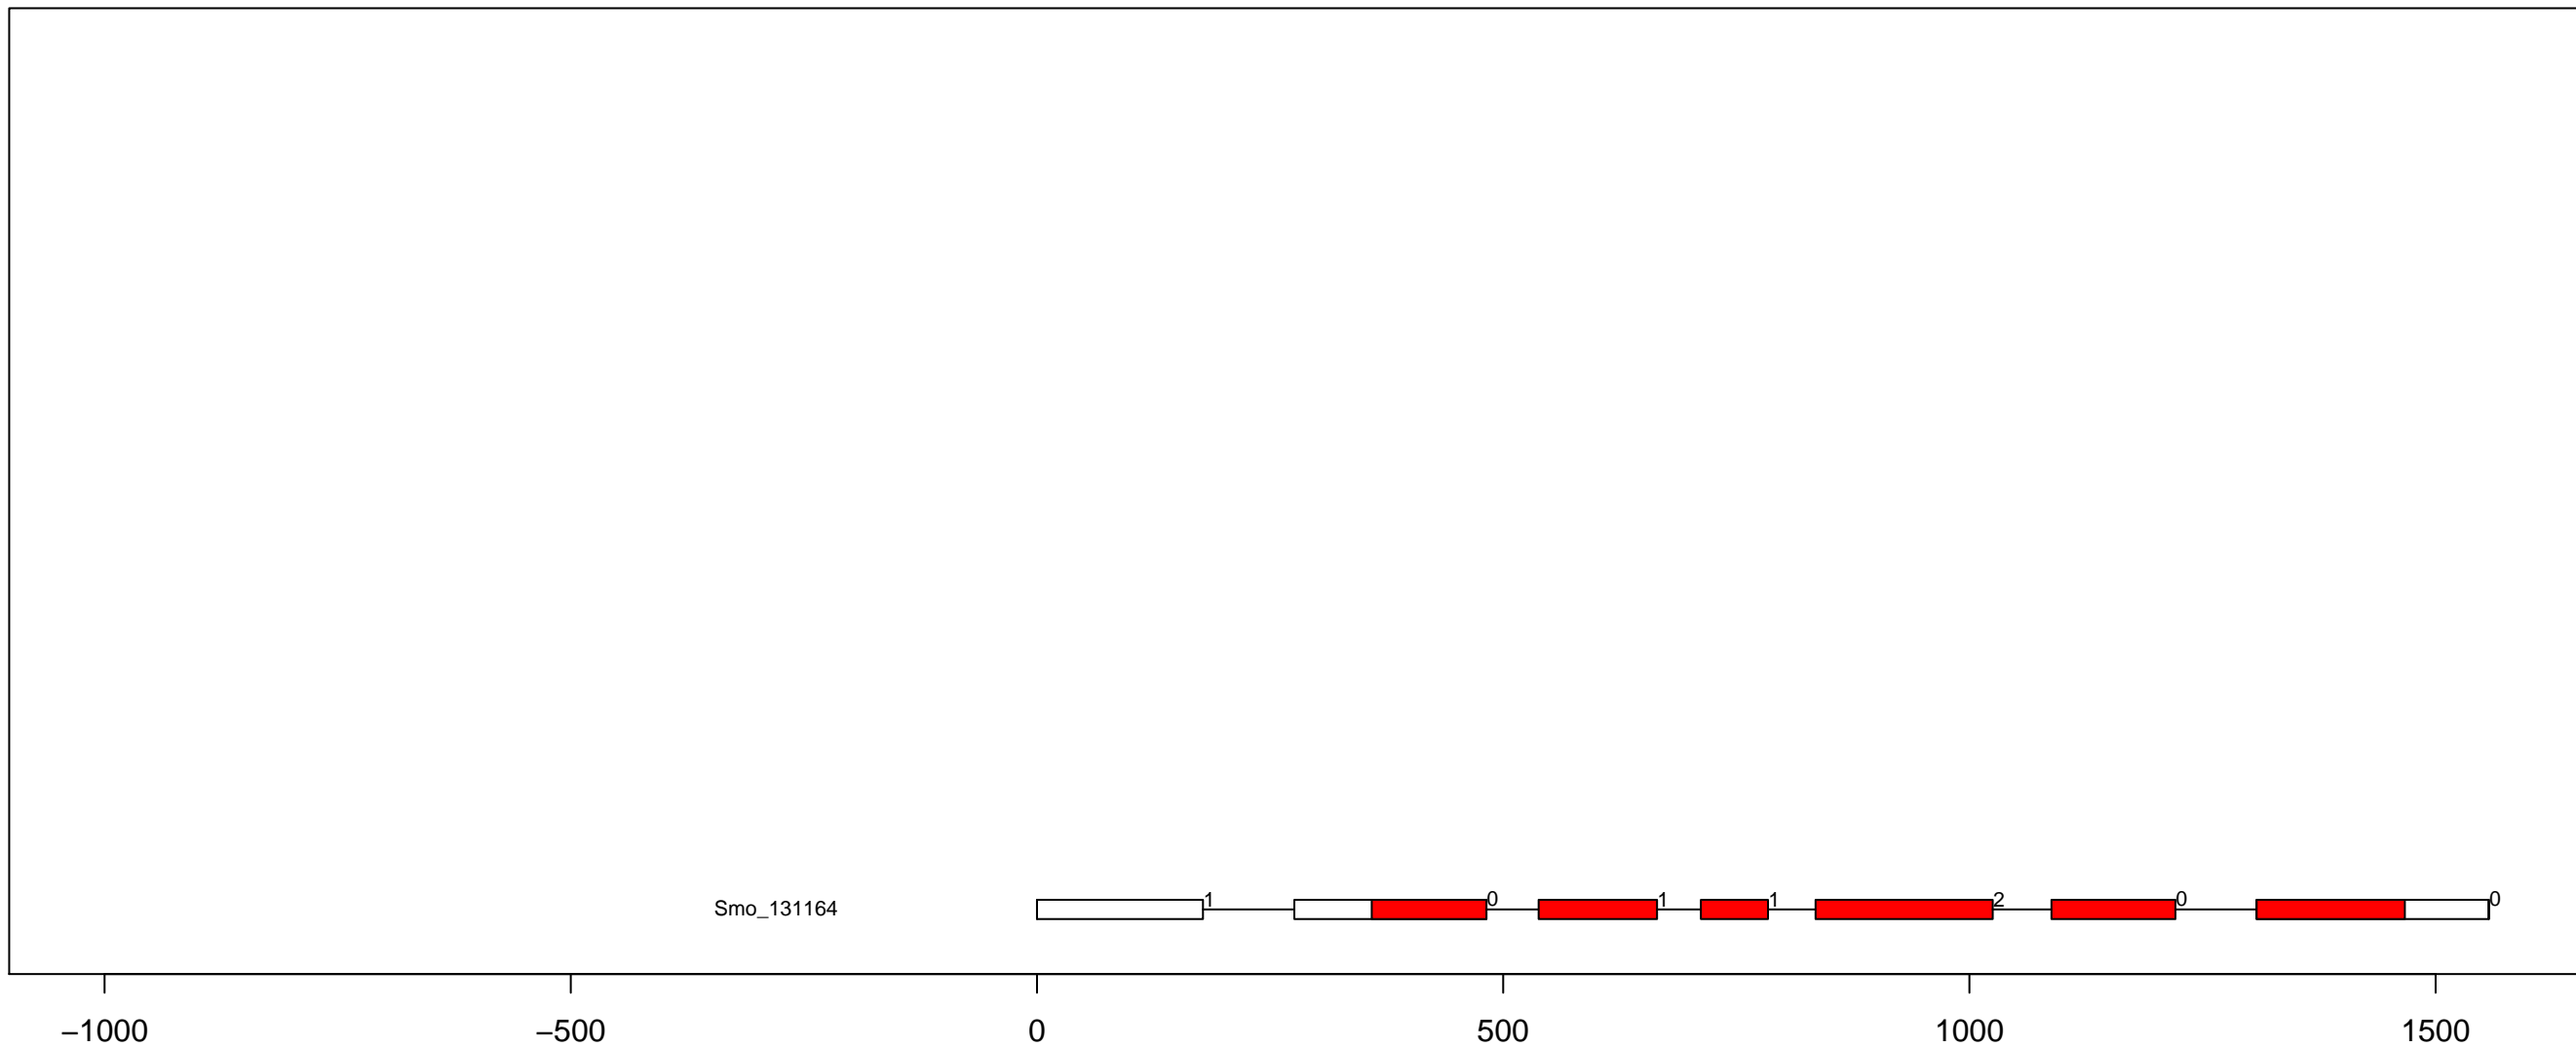

# S.mo RLK-Pelle\_RLCK-IXb exon-intron and kinase domain diagram (all)

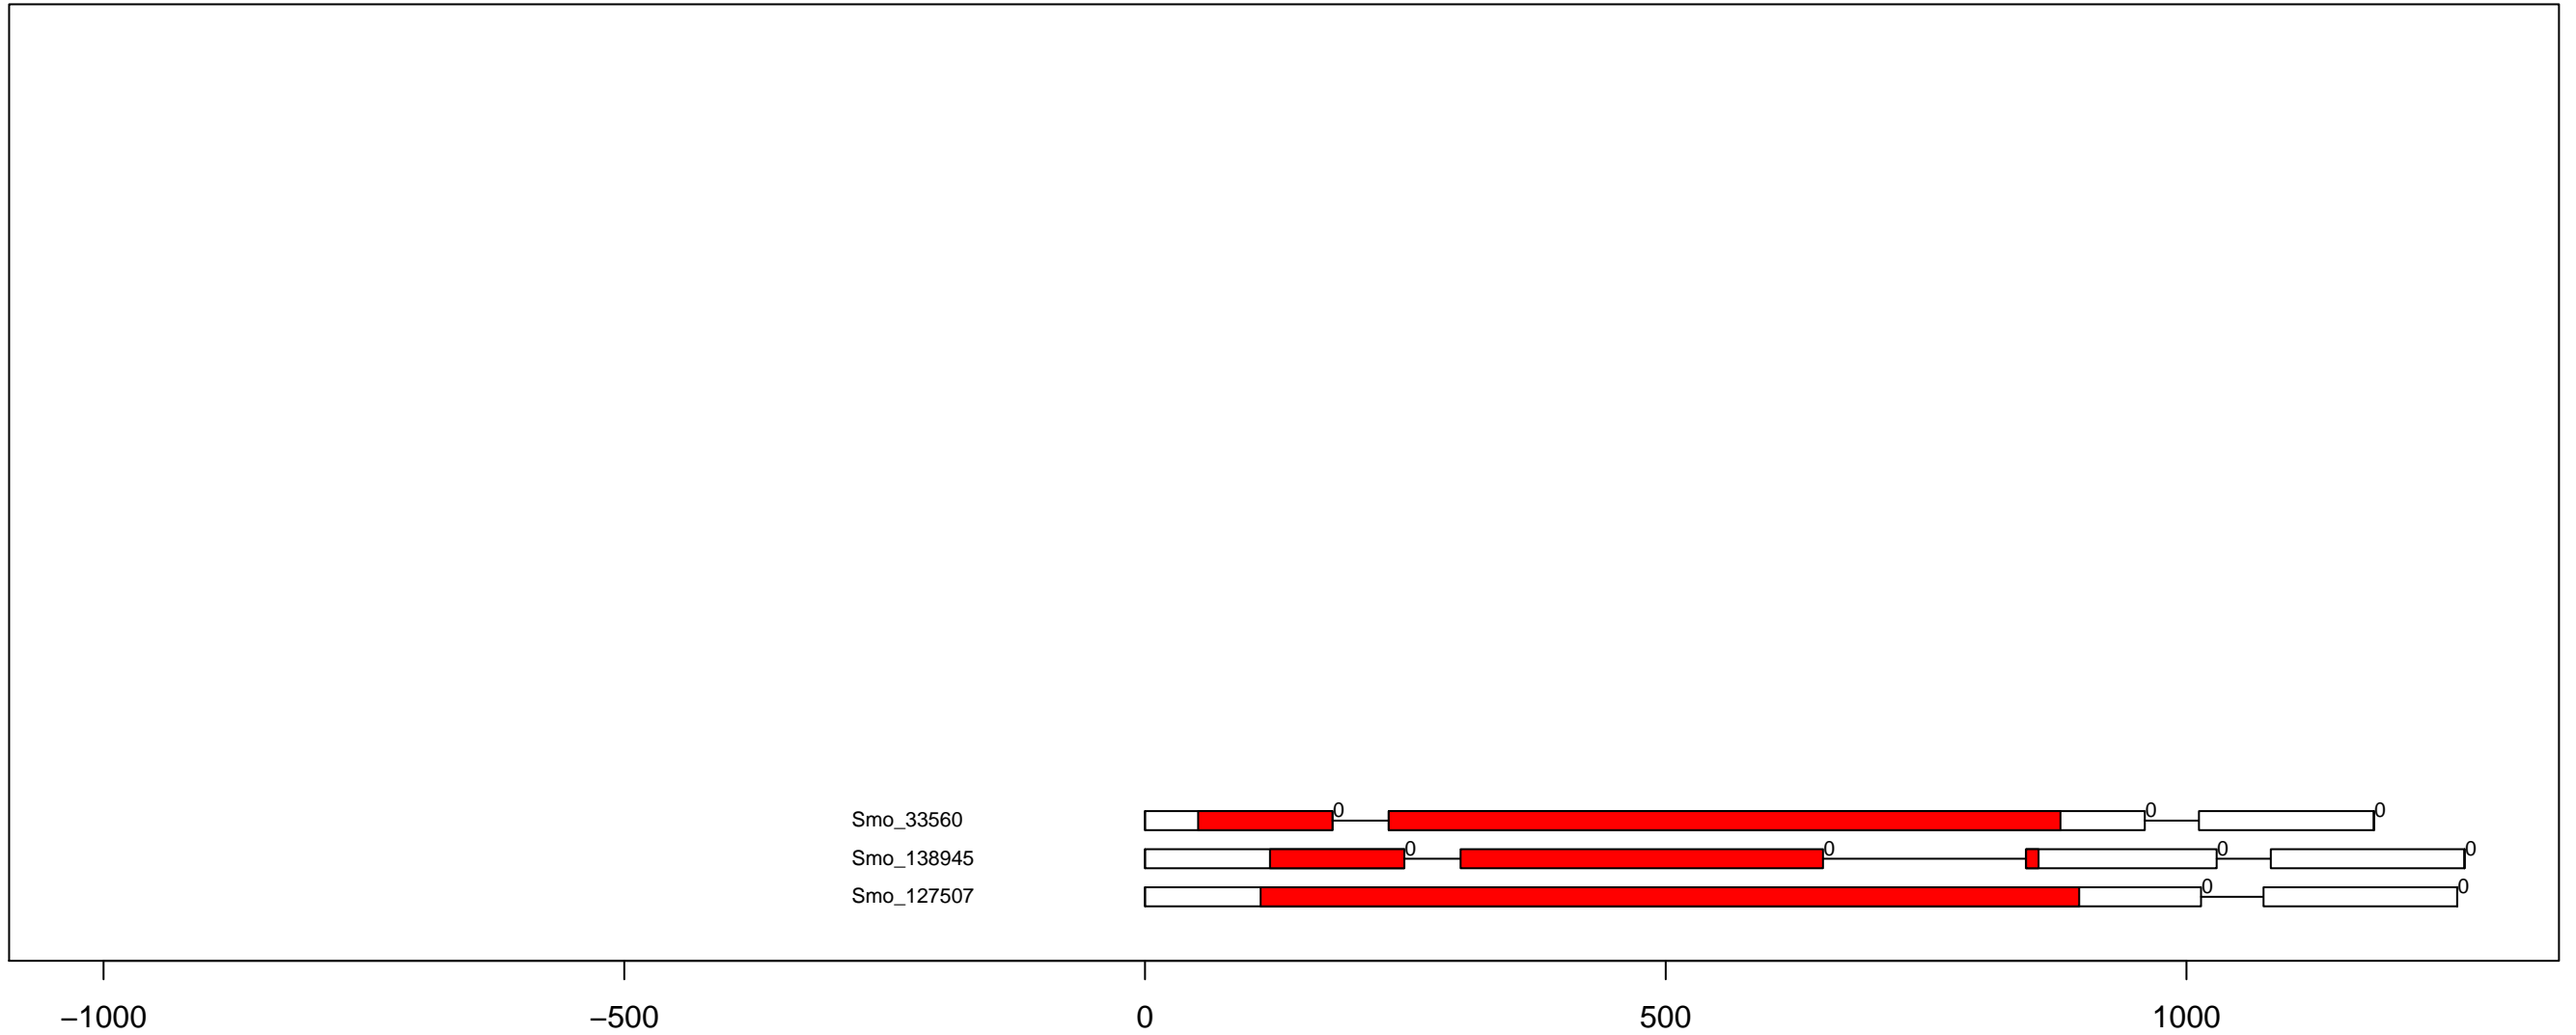



# S.mo RLK-Pelle\_RLCK-VIIa-1 exon-intron and kinase domain diagram (all)

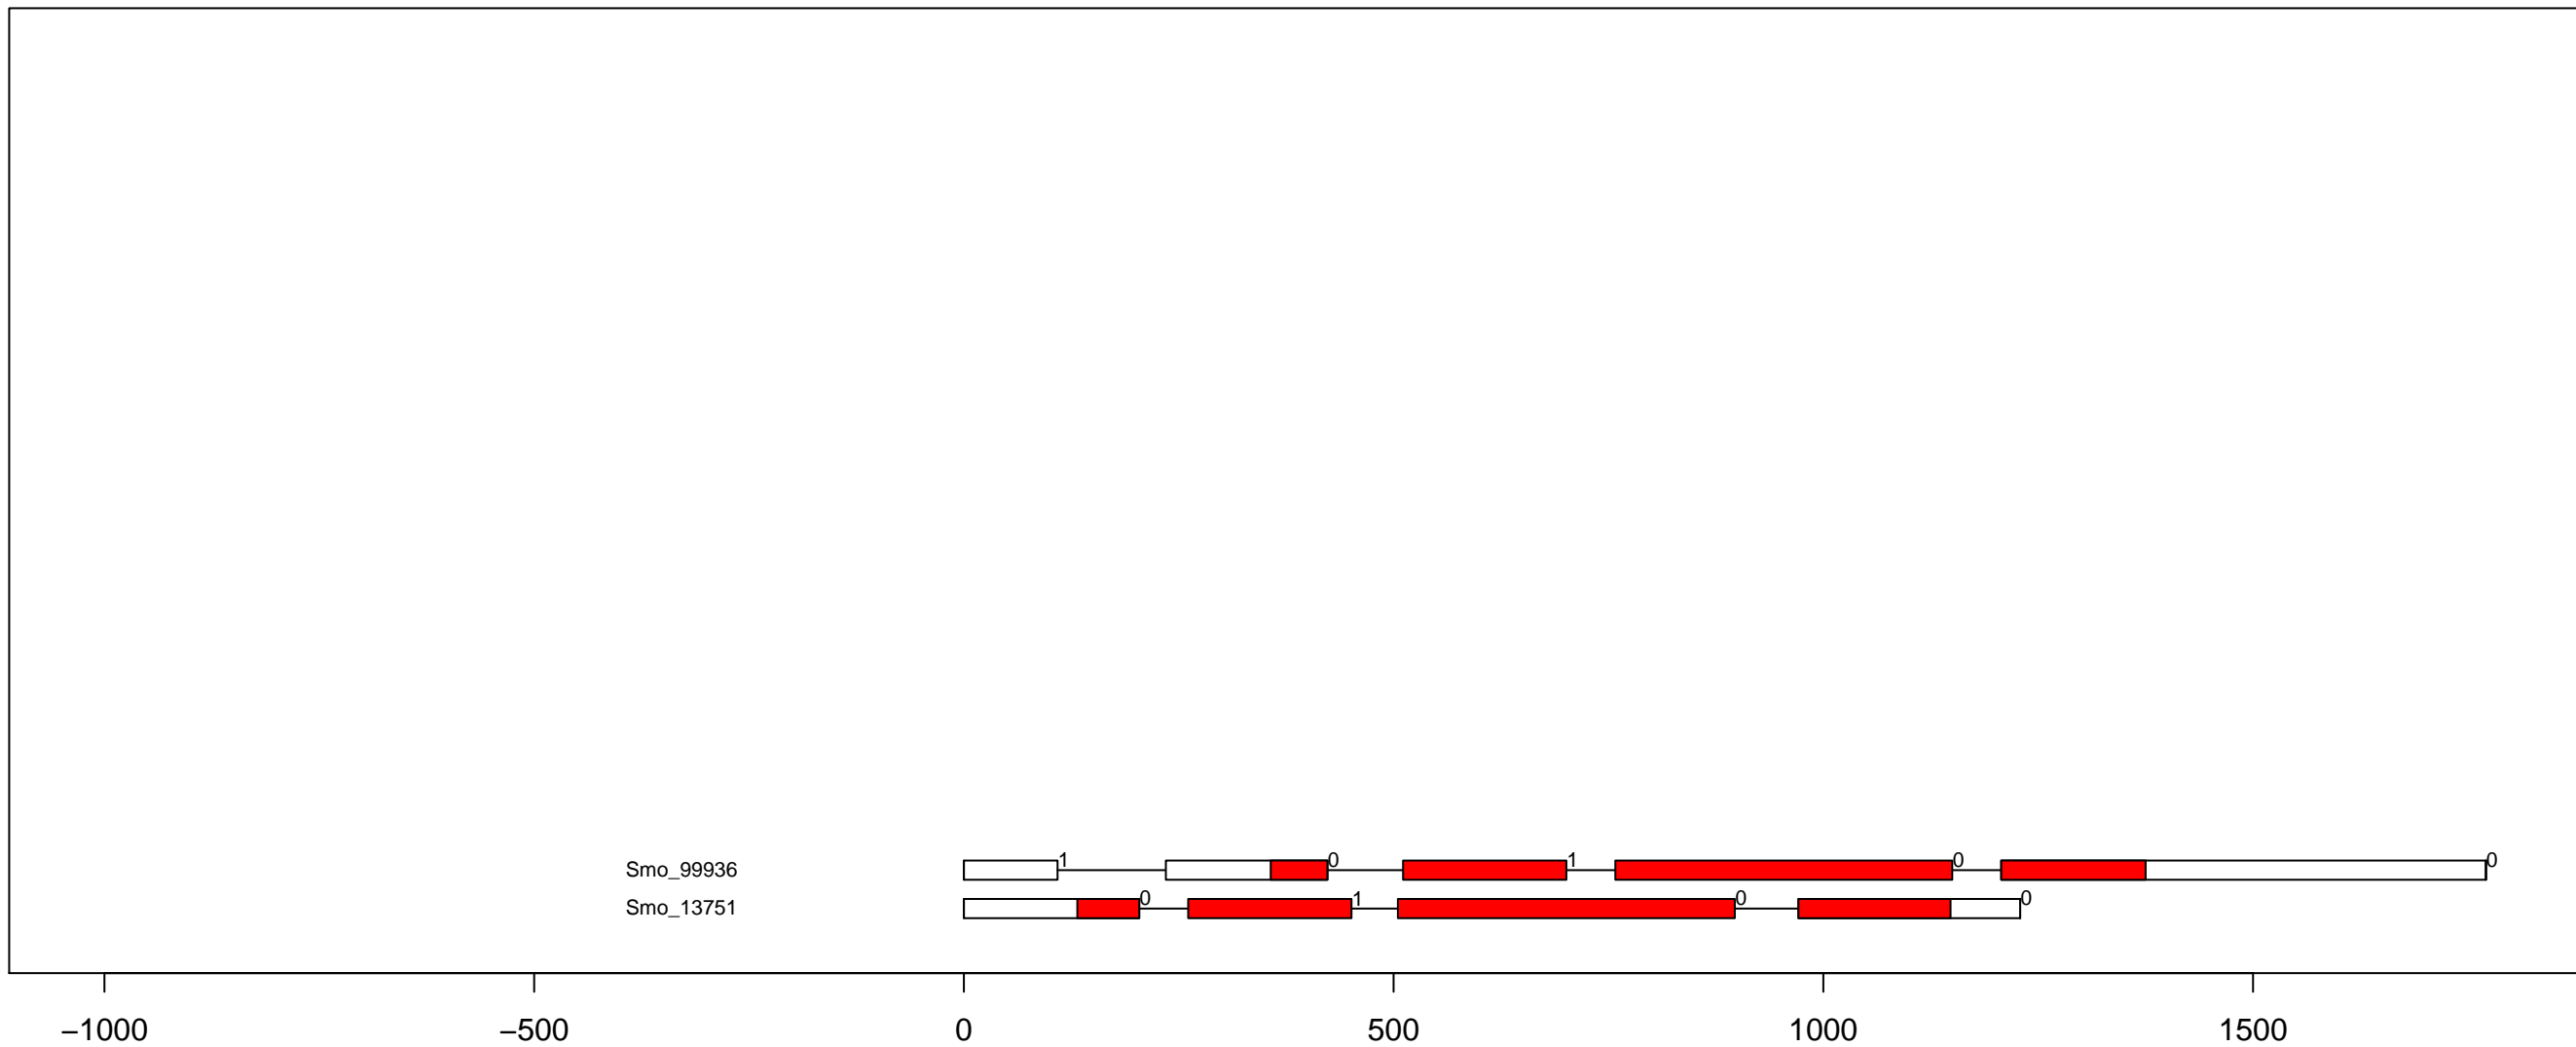

# S.mo RLK-Pelle\_RLCK-VIIa-2 exon-intron and kinase domain diagram (all)

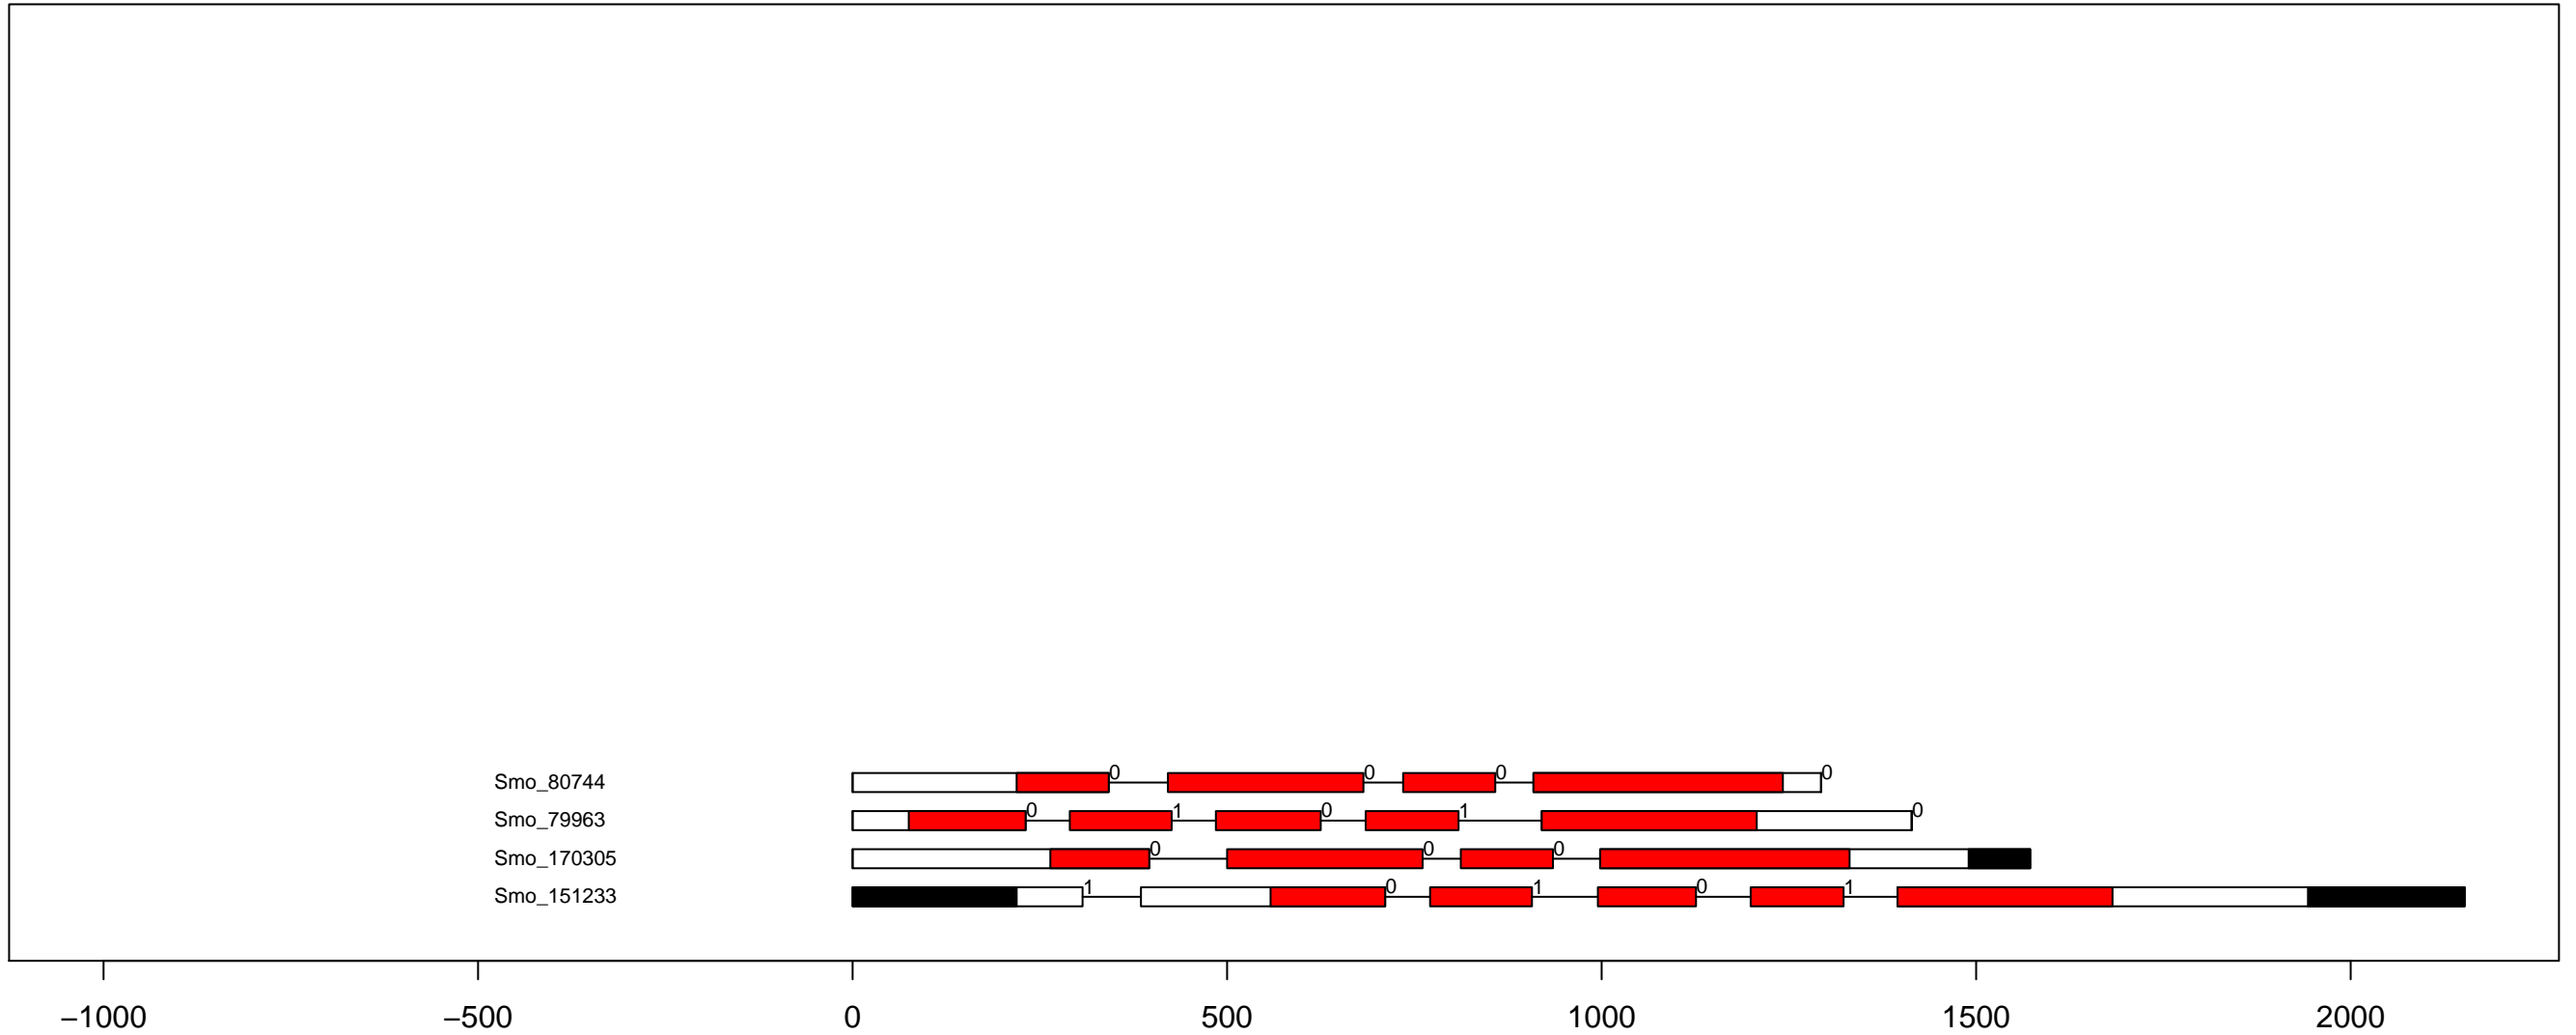

# S.mo RLK-Pelle\_RLCK-VIIb exon-intron and kinase domain diagram (all)

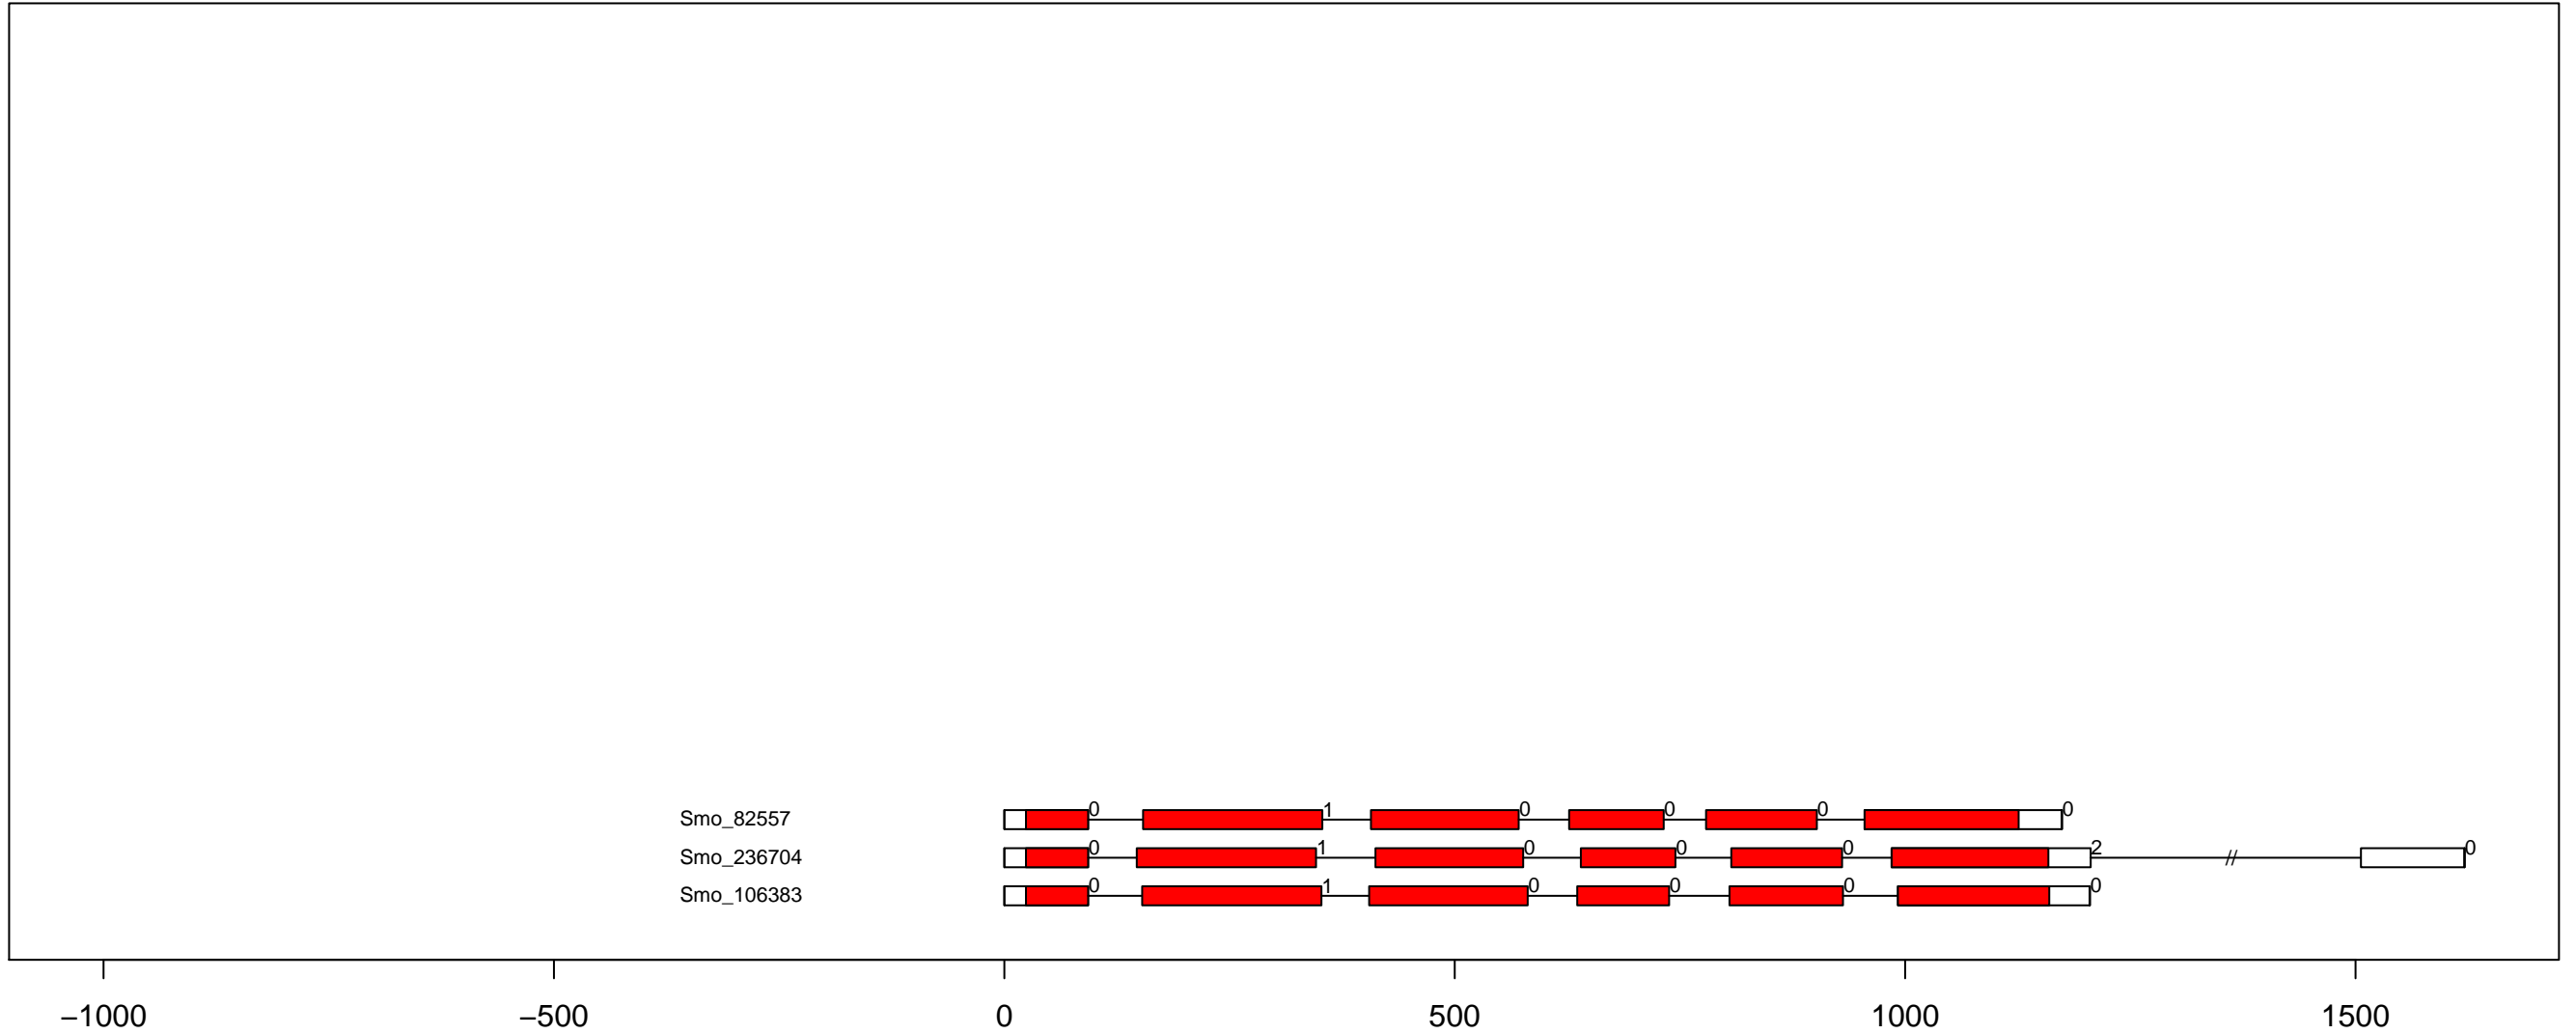

# S.mo RLK-Pelle\_RLCK-VIII exon-intron and kinase domain diagram (all)

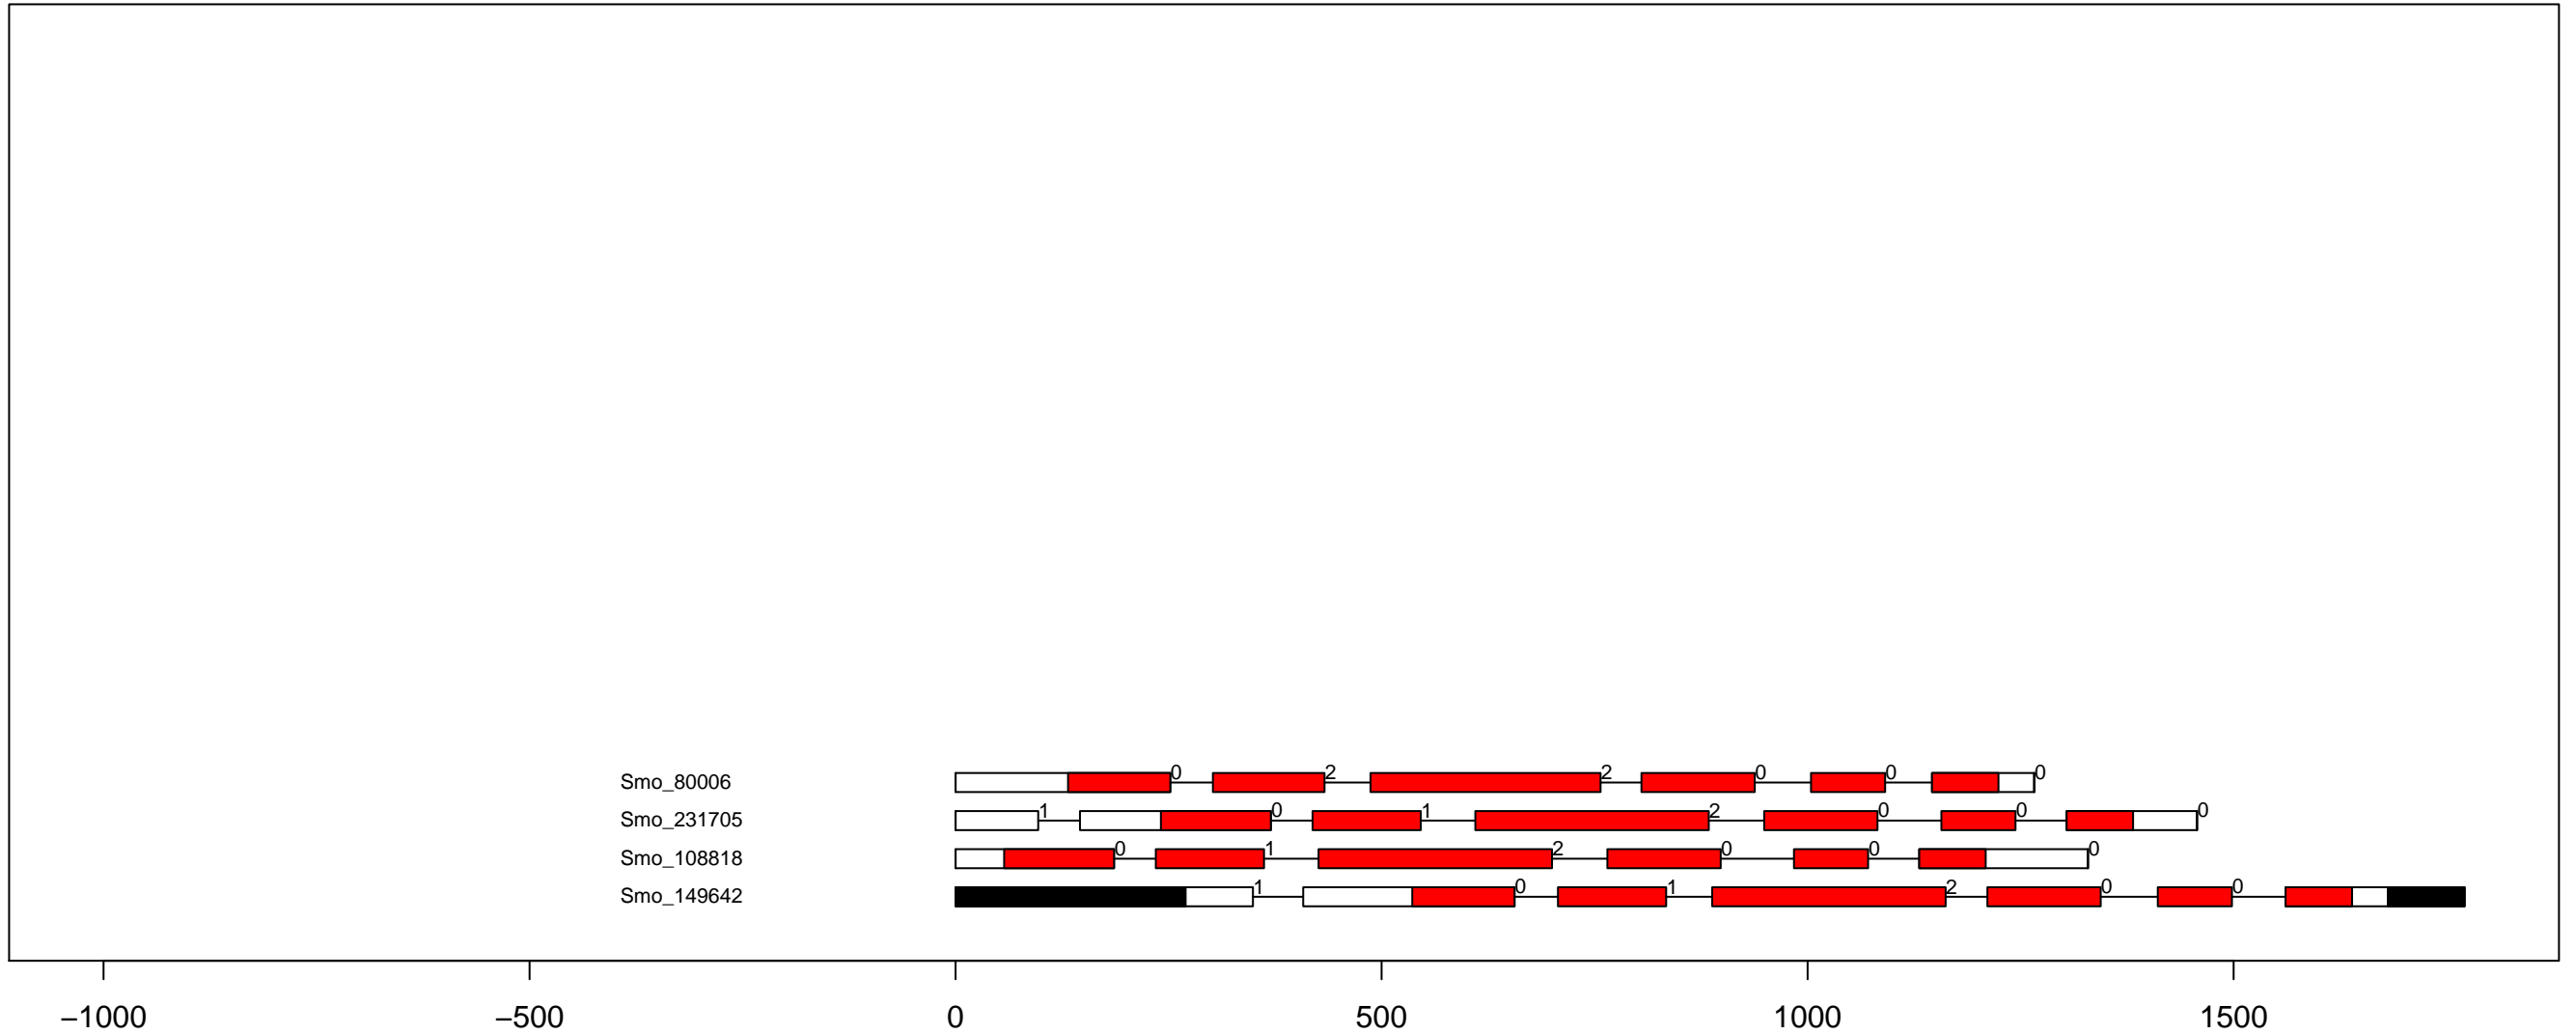

# S.mo RLK-Pelle\_RLCK-VI exon-intron and kinase domain diagram (all)

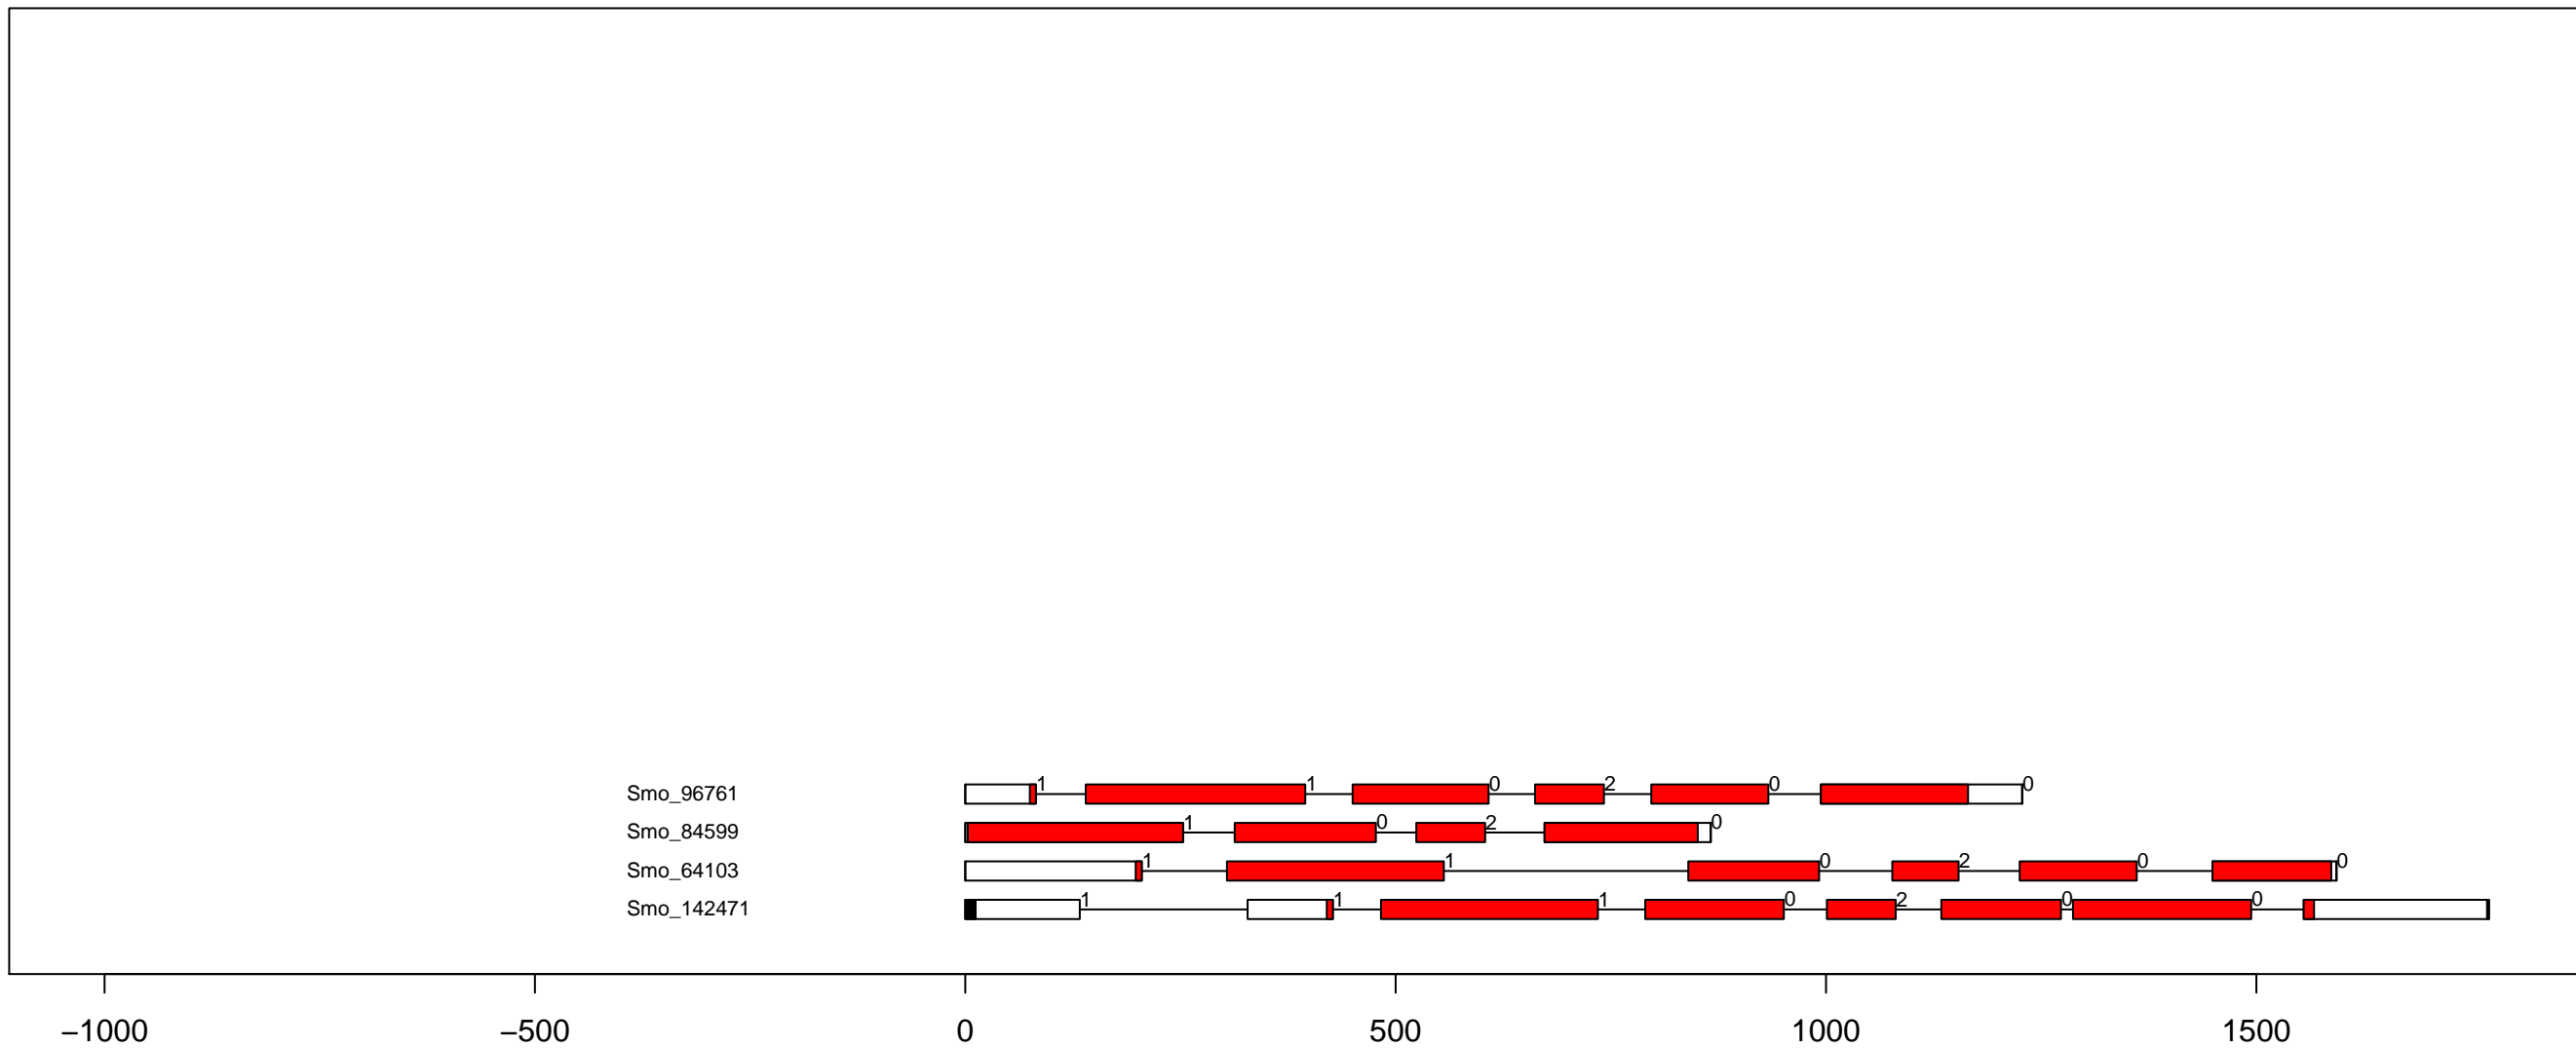

# S.mo RLK-Pelle\_RLCK-V exon-intron and kinase domain diagram (all)

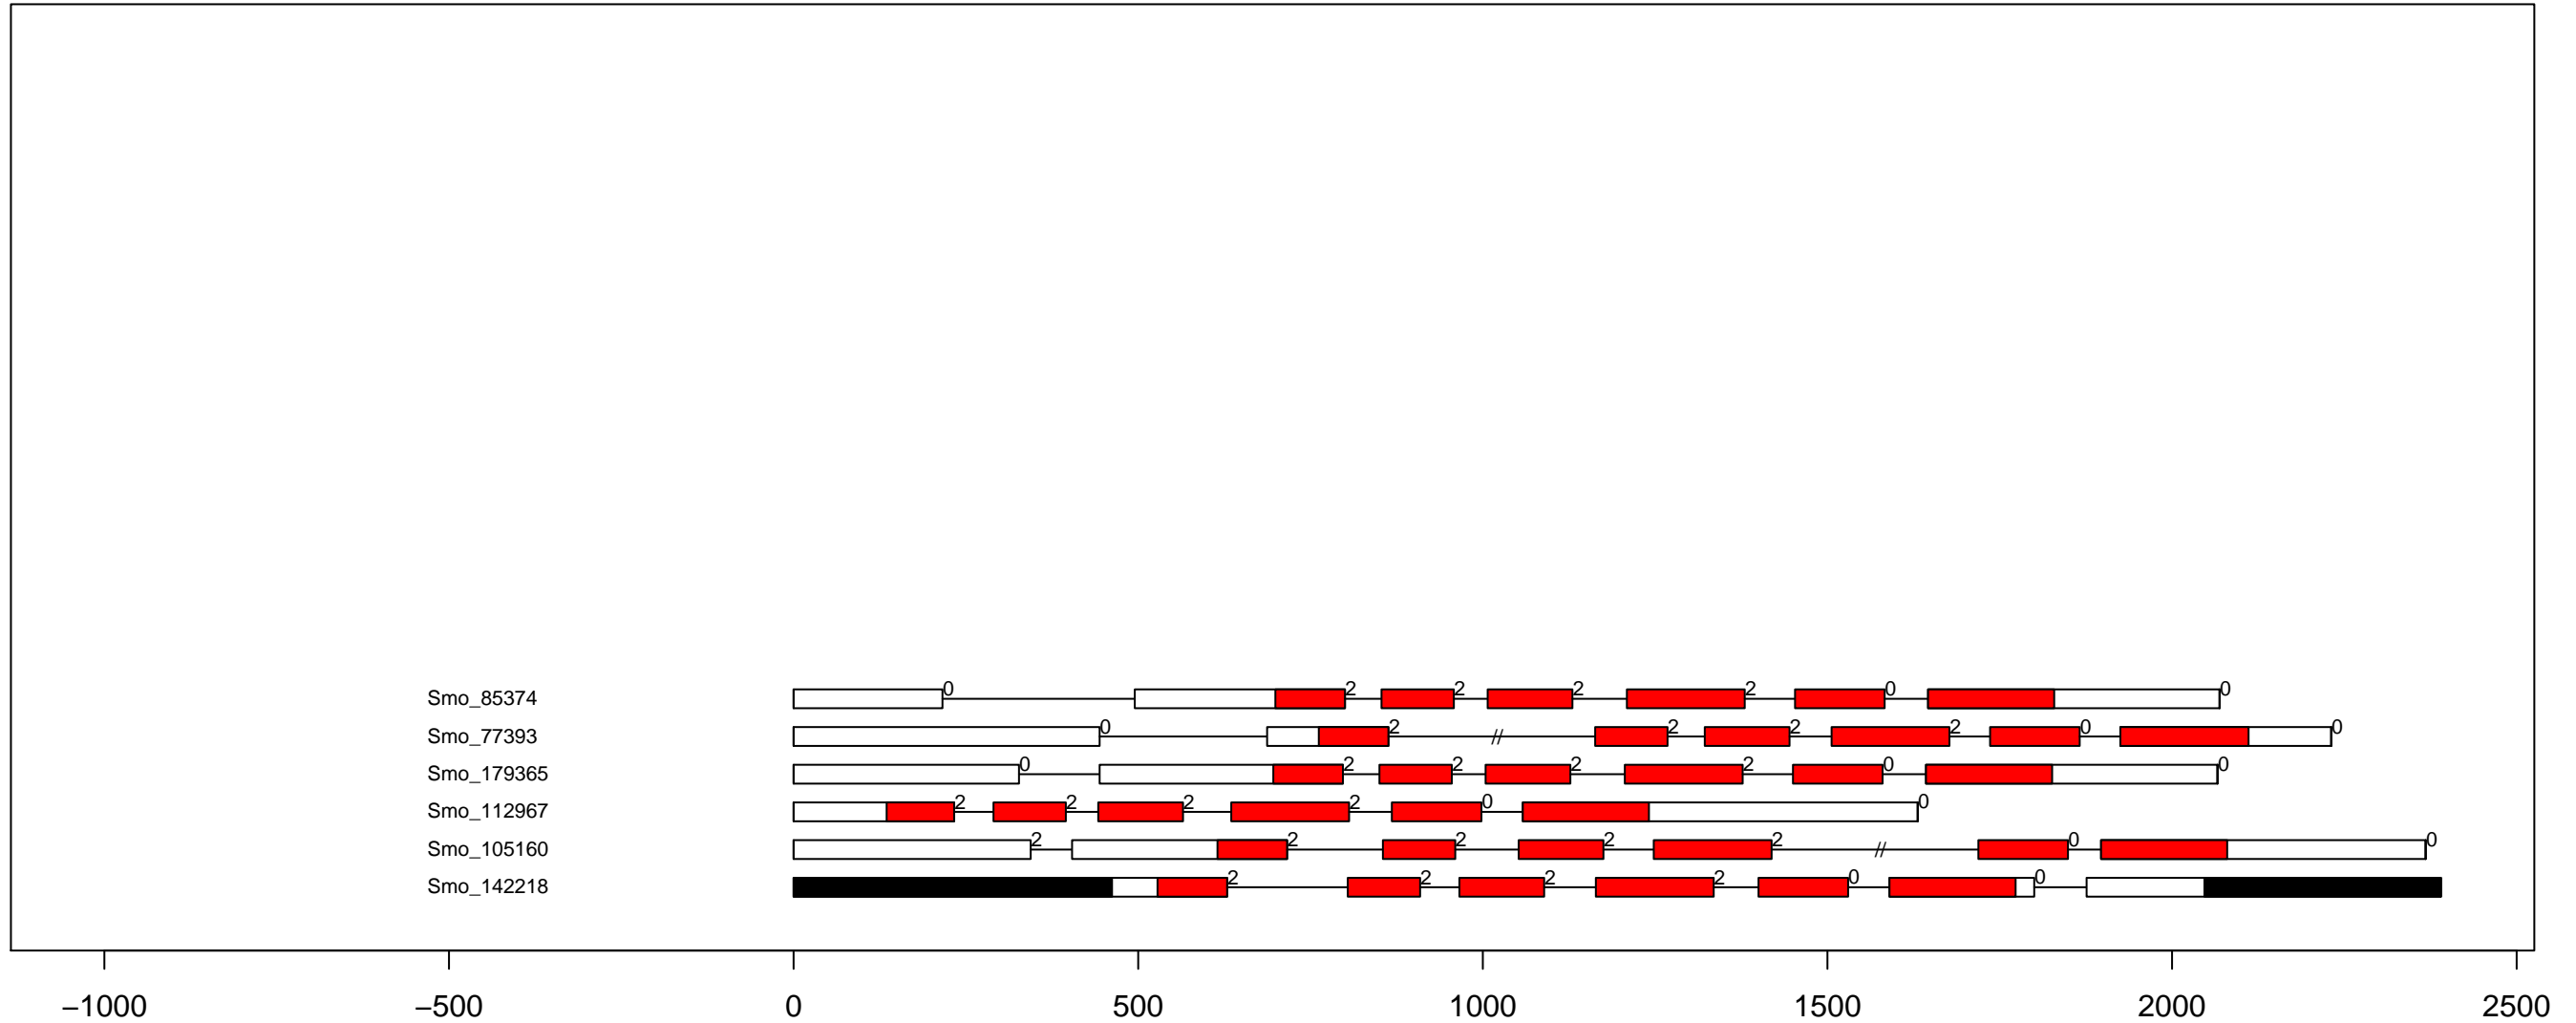

# S.mo RLK-Pelle\_RLCK-XII-1 exon-intron and kinase domain diagram (all)

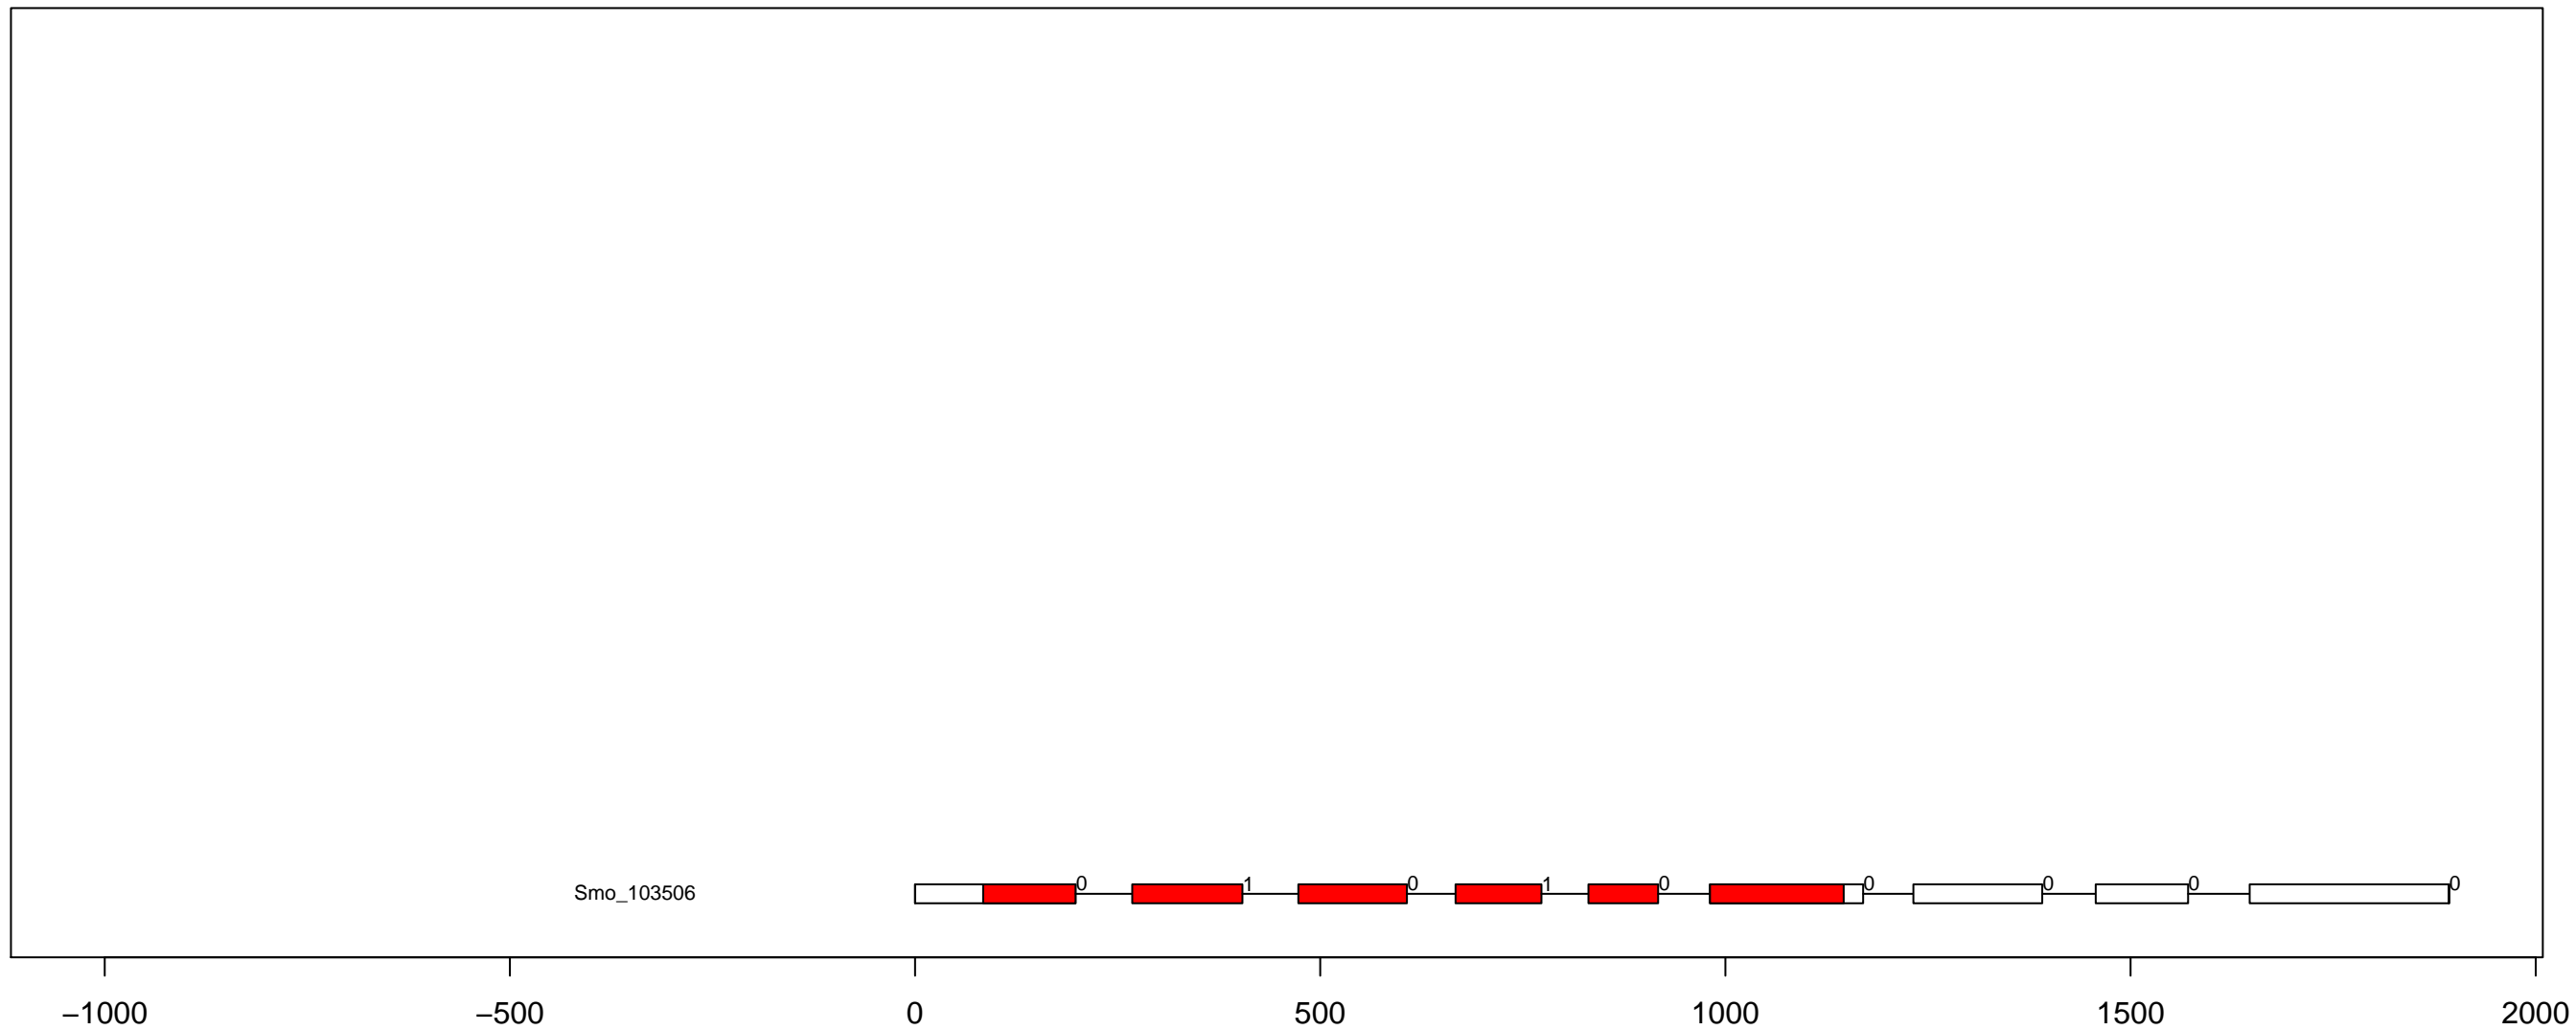

# S.mo RLK-Pelle\_RLCK-XI exon-intron and kinase domain diagram (all)

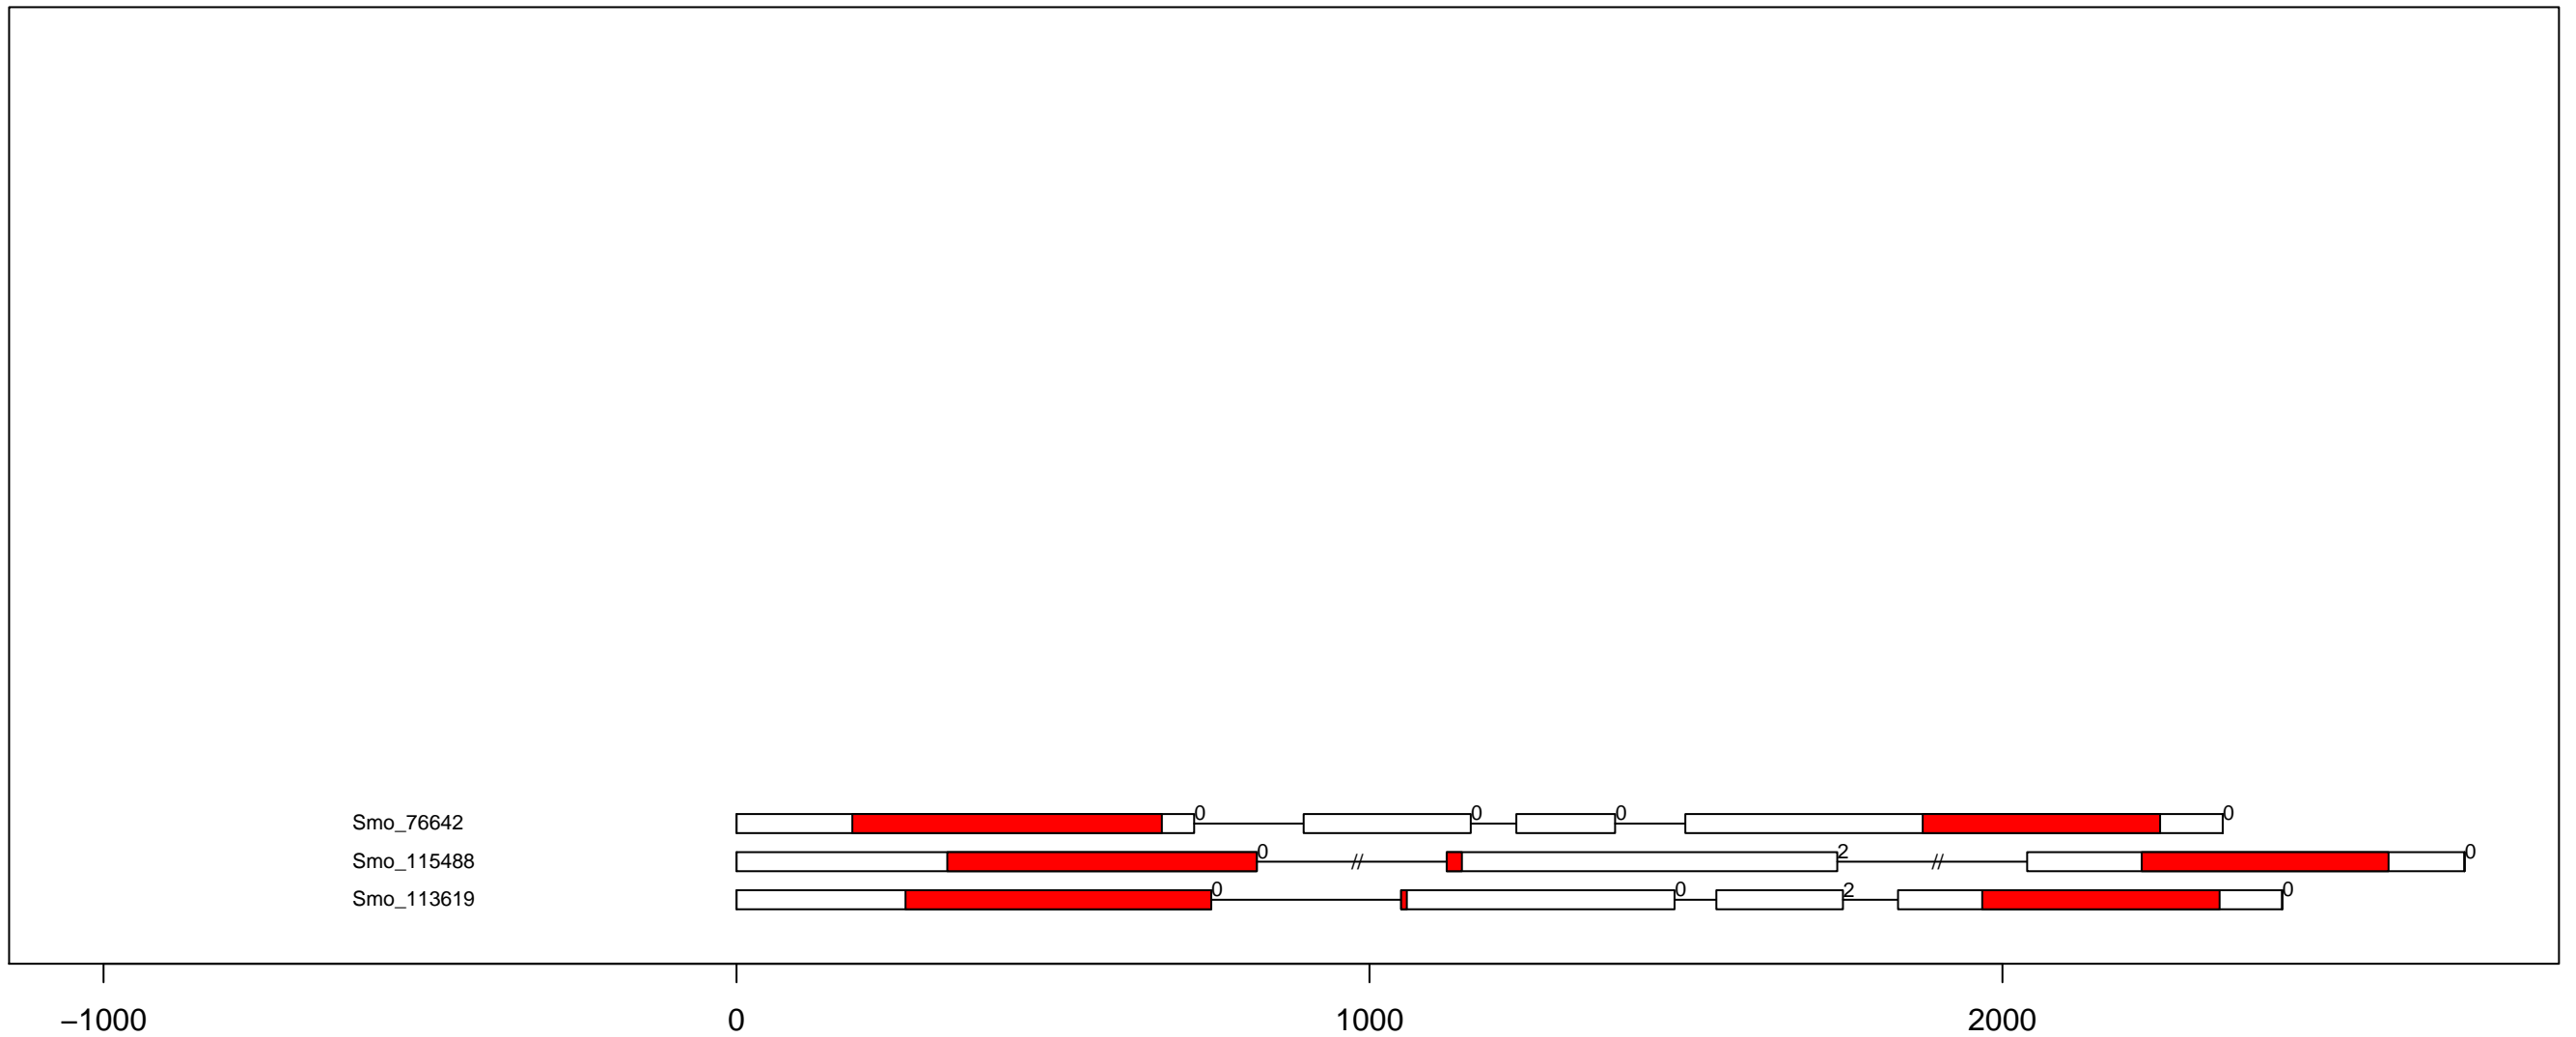



# S.mo RLK-Pelle\_RLCK-X exon-intron and kinase domain diagram (all)

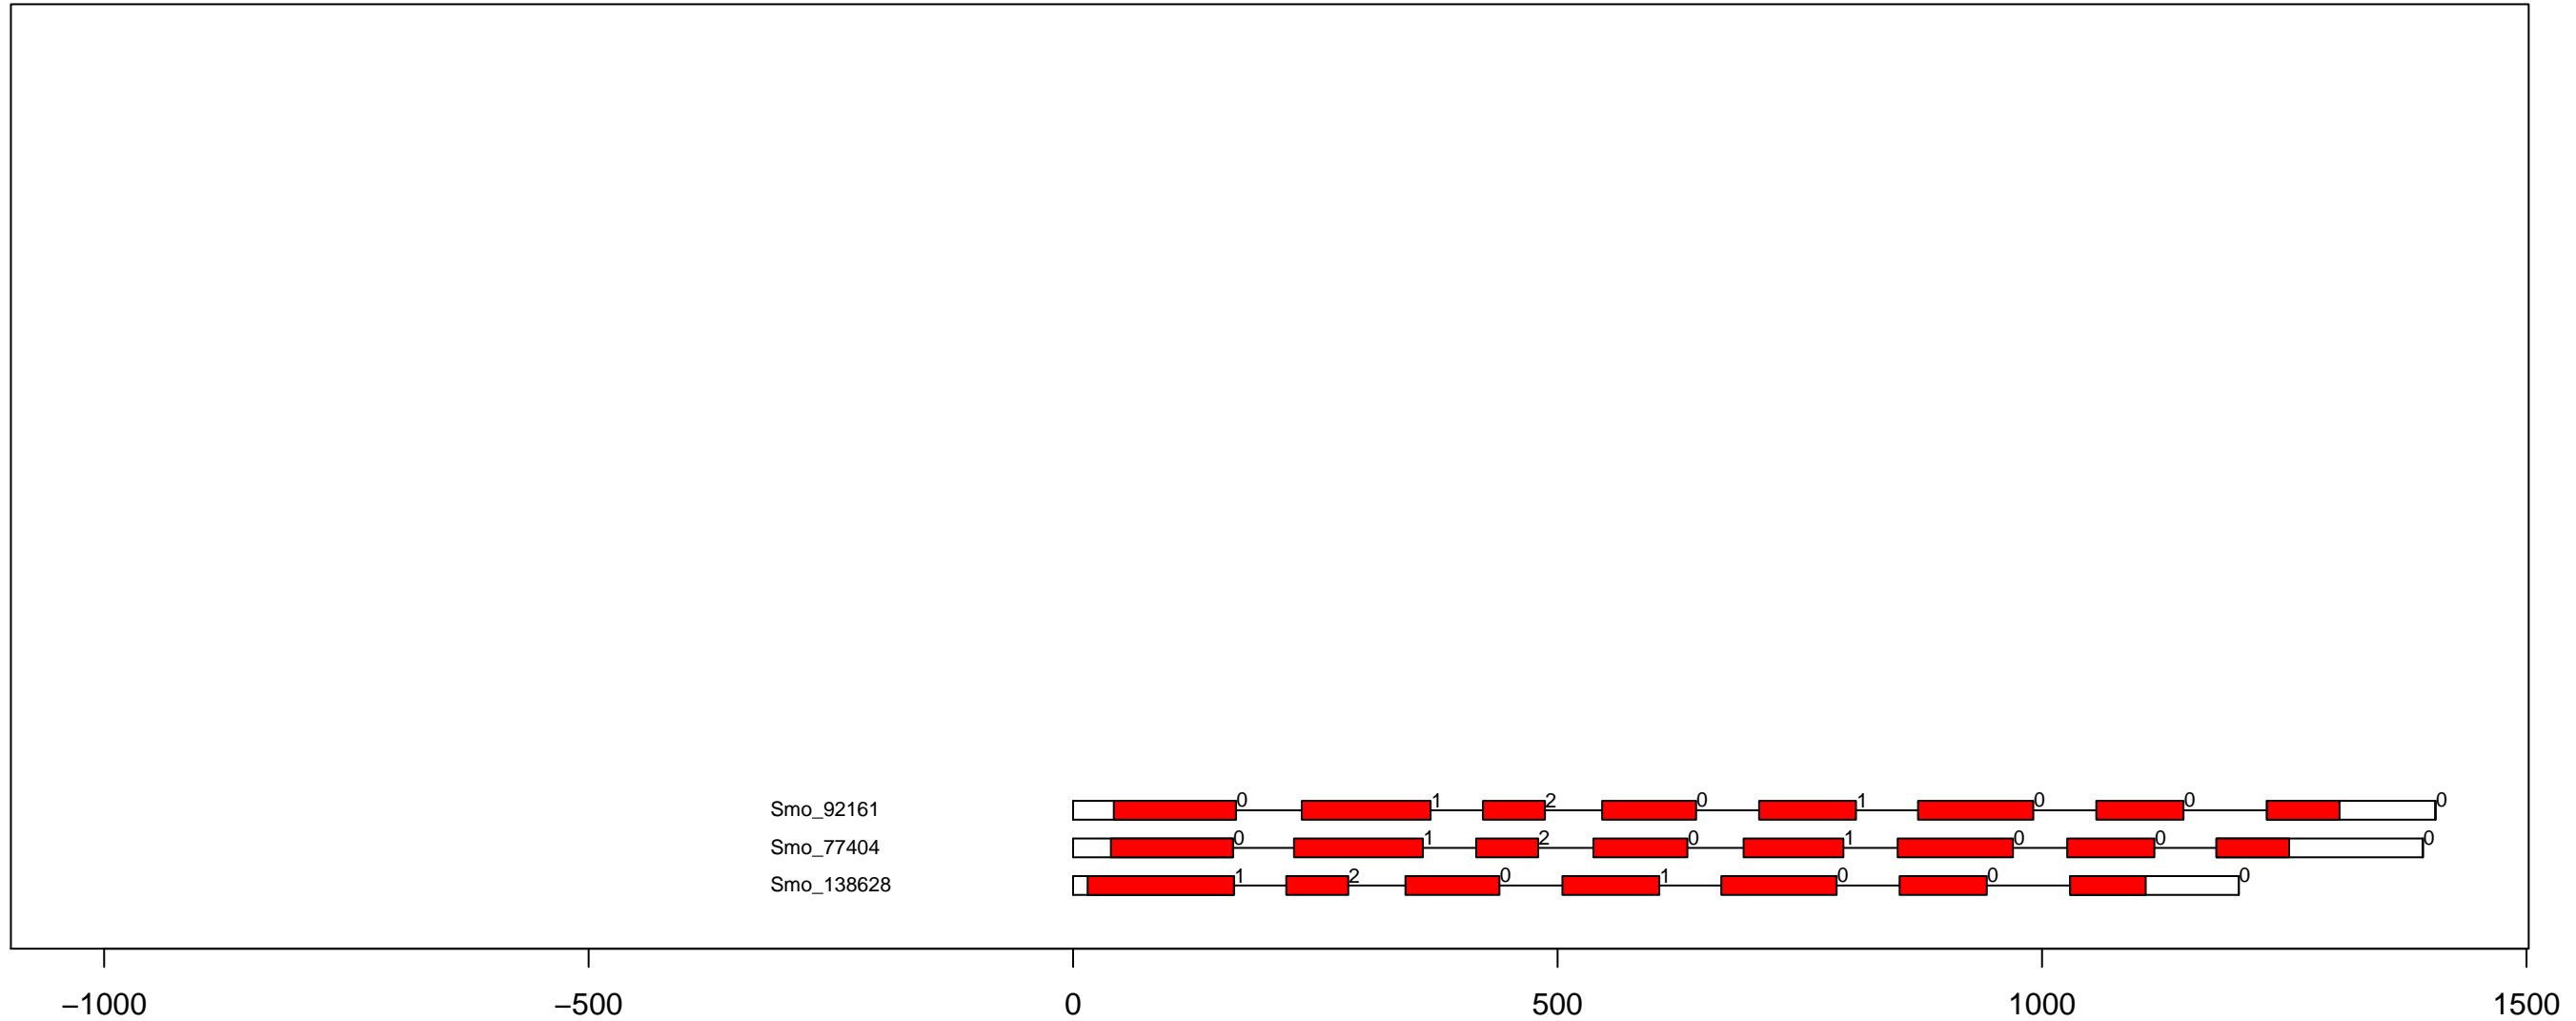



### S.mo RLK-Pelle\_SD-2b exon-intron and kinase domain diagram (part 1)

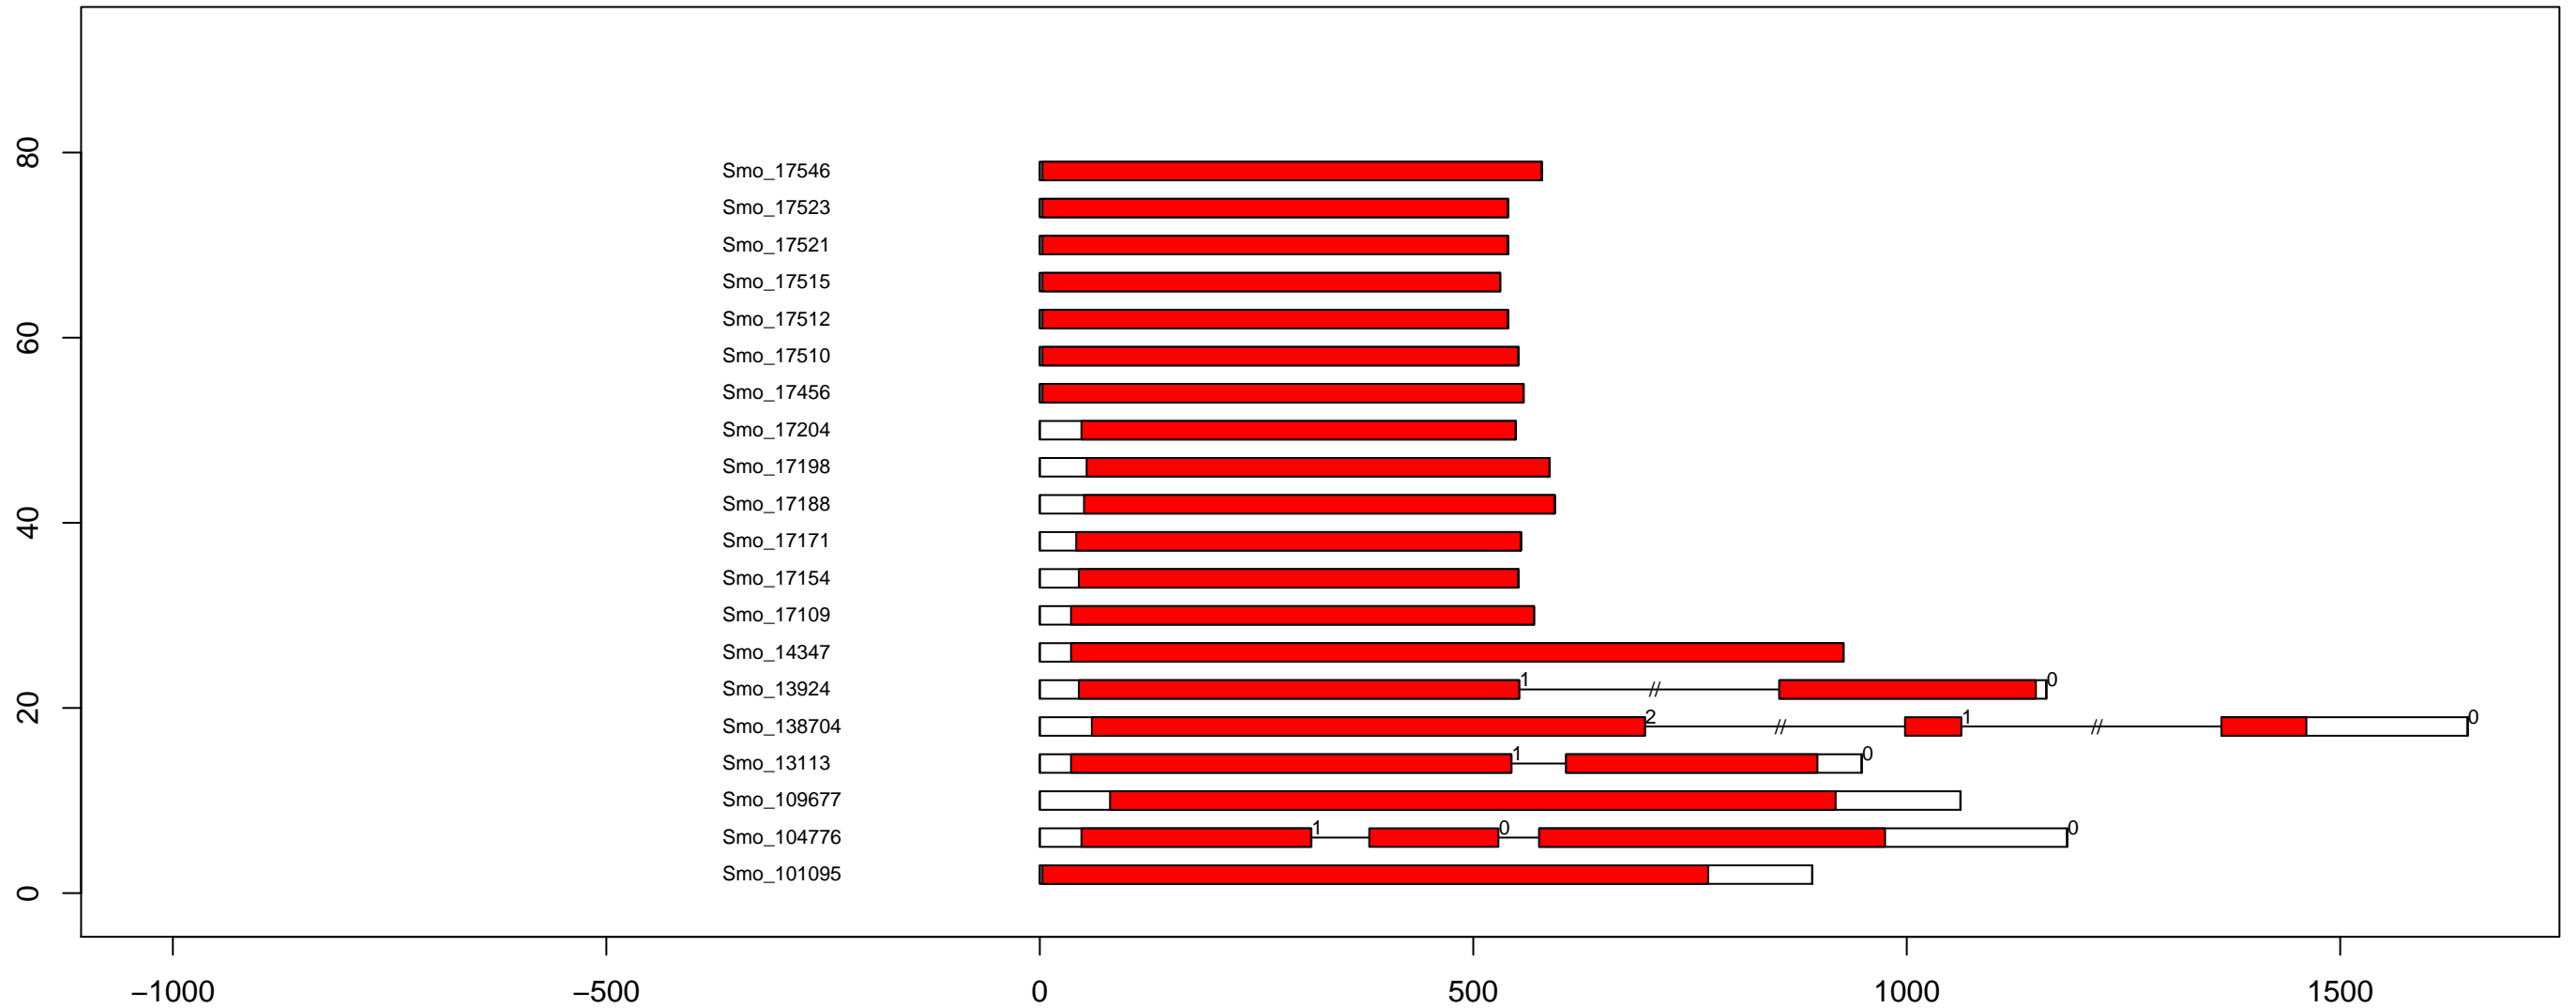

### S.mo RLK-Pelle\_SD-2b exon-intron and kinase domain diagram (part 2)

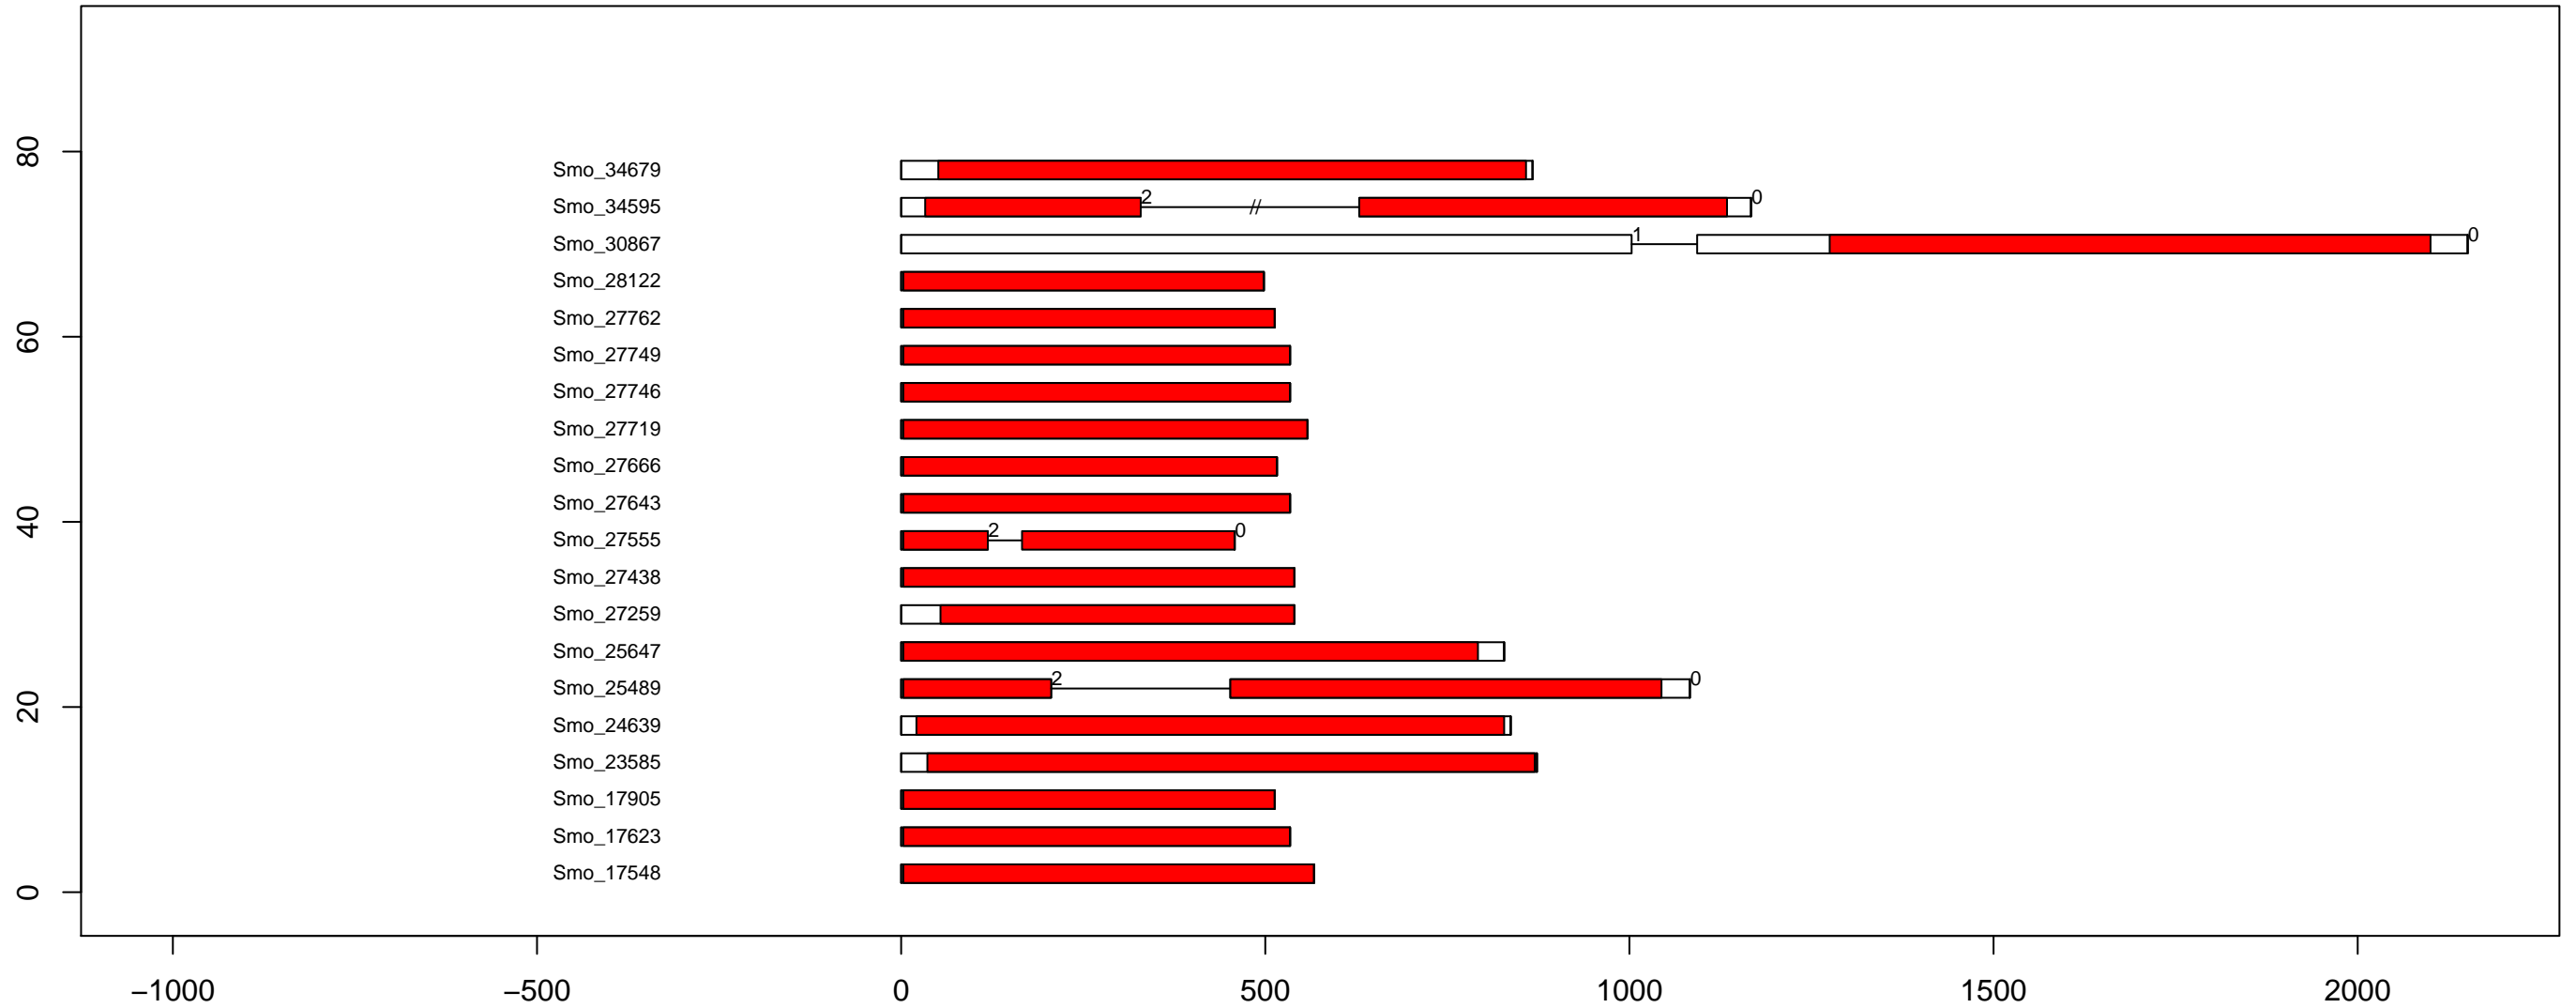



### S.mo RLK-Pelle\_SD-2b exon-intron and kinase domain diagram (part 4)

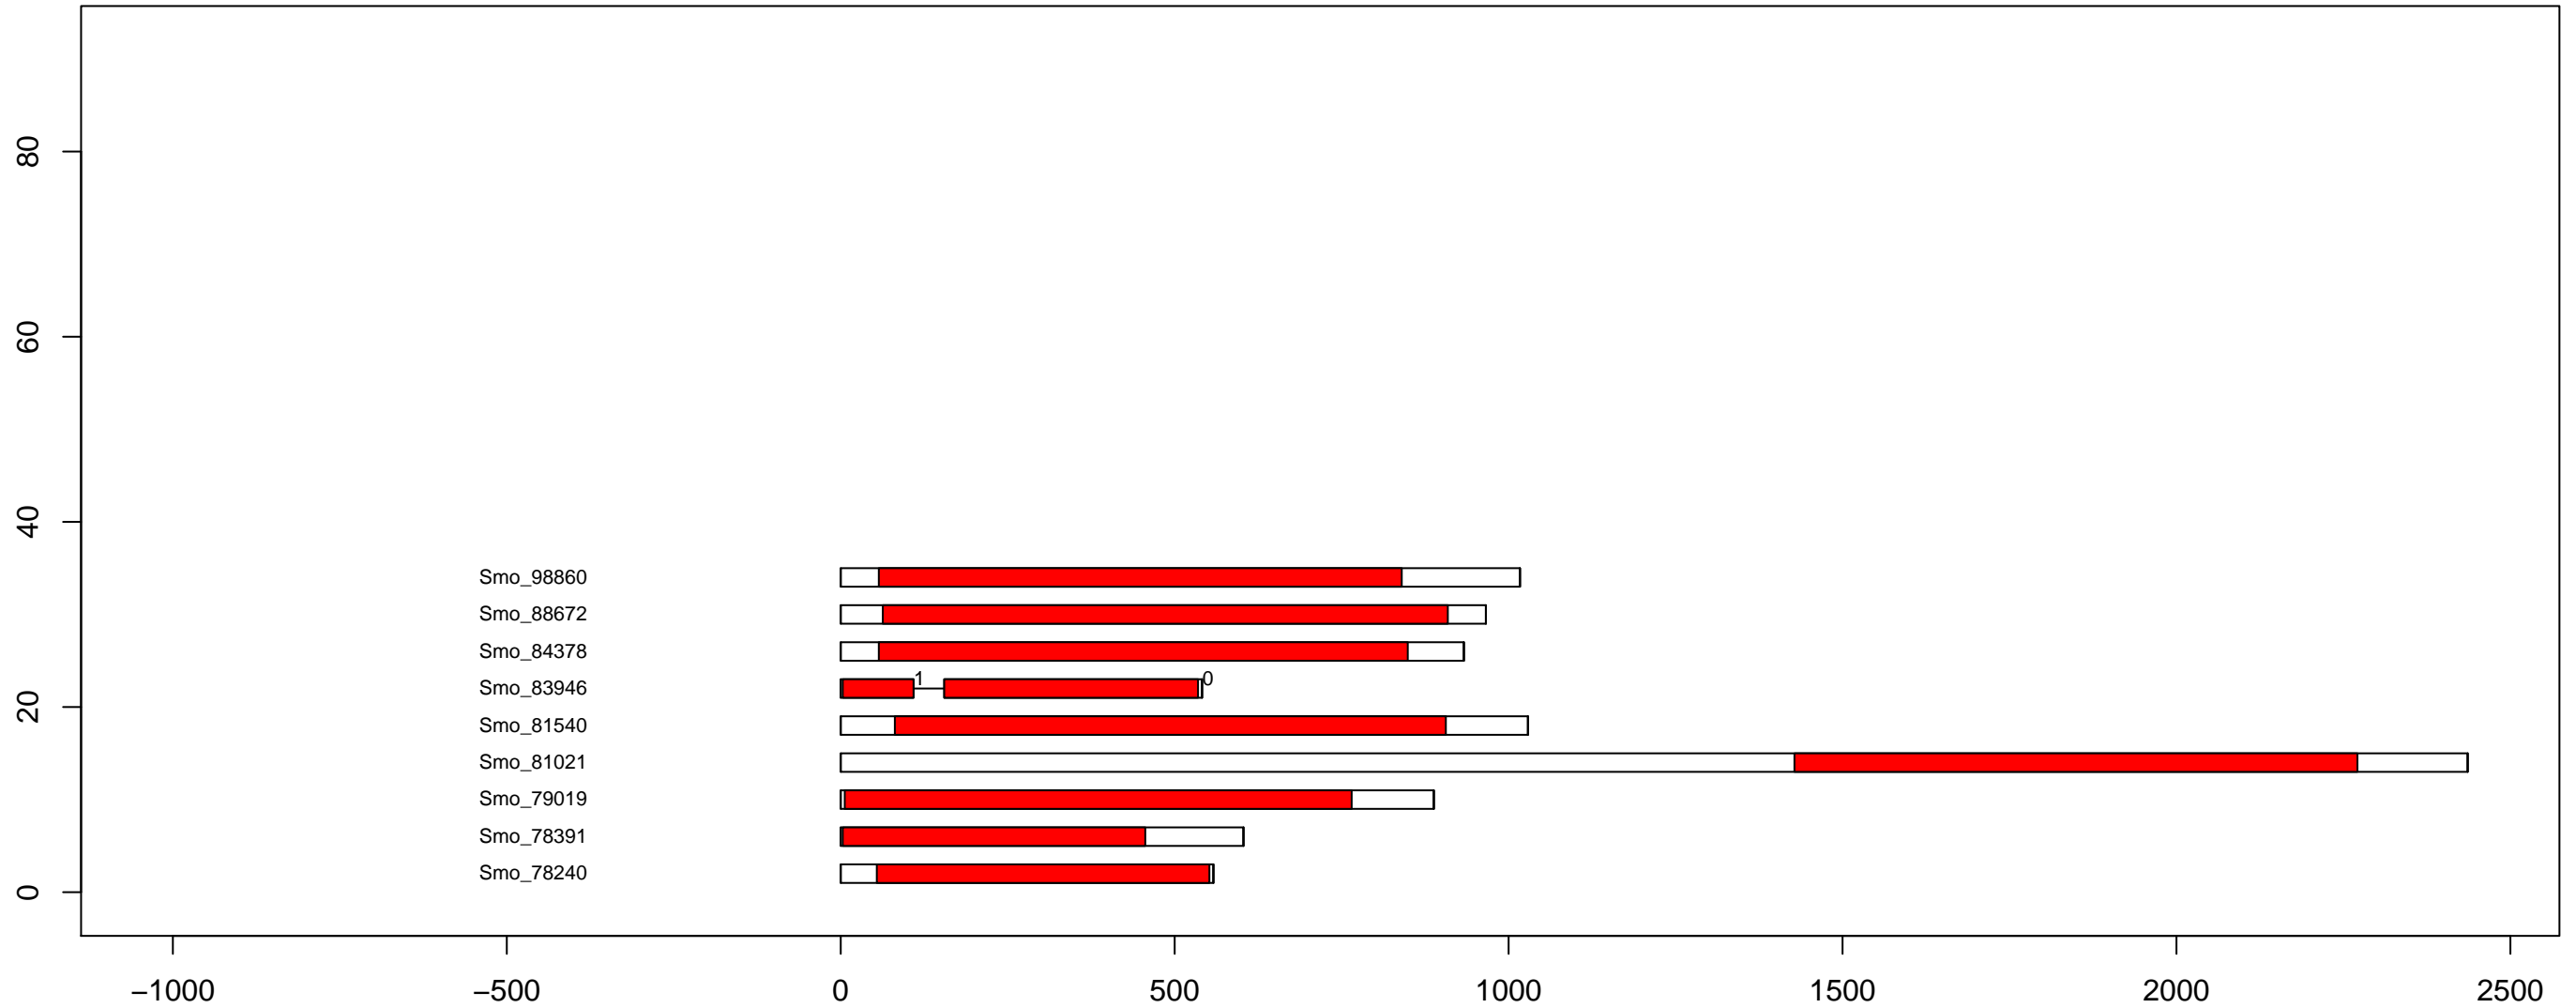

# S.mo RLK-Pelle\_URK-1 exon-intron and kinase domain diagram (all)

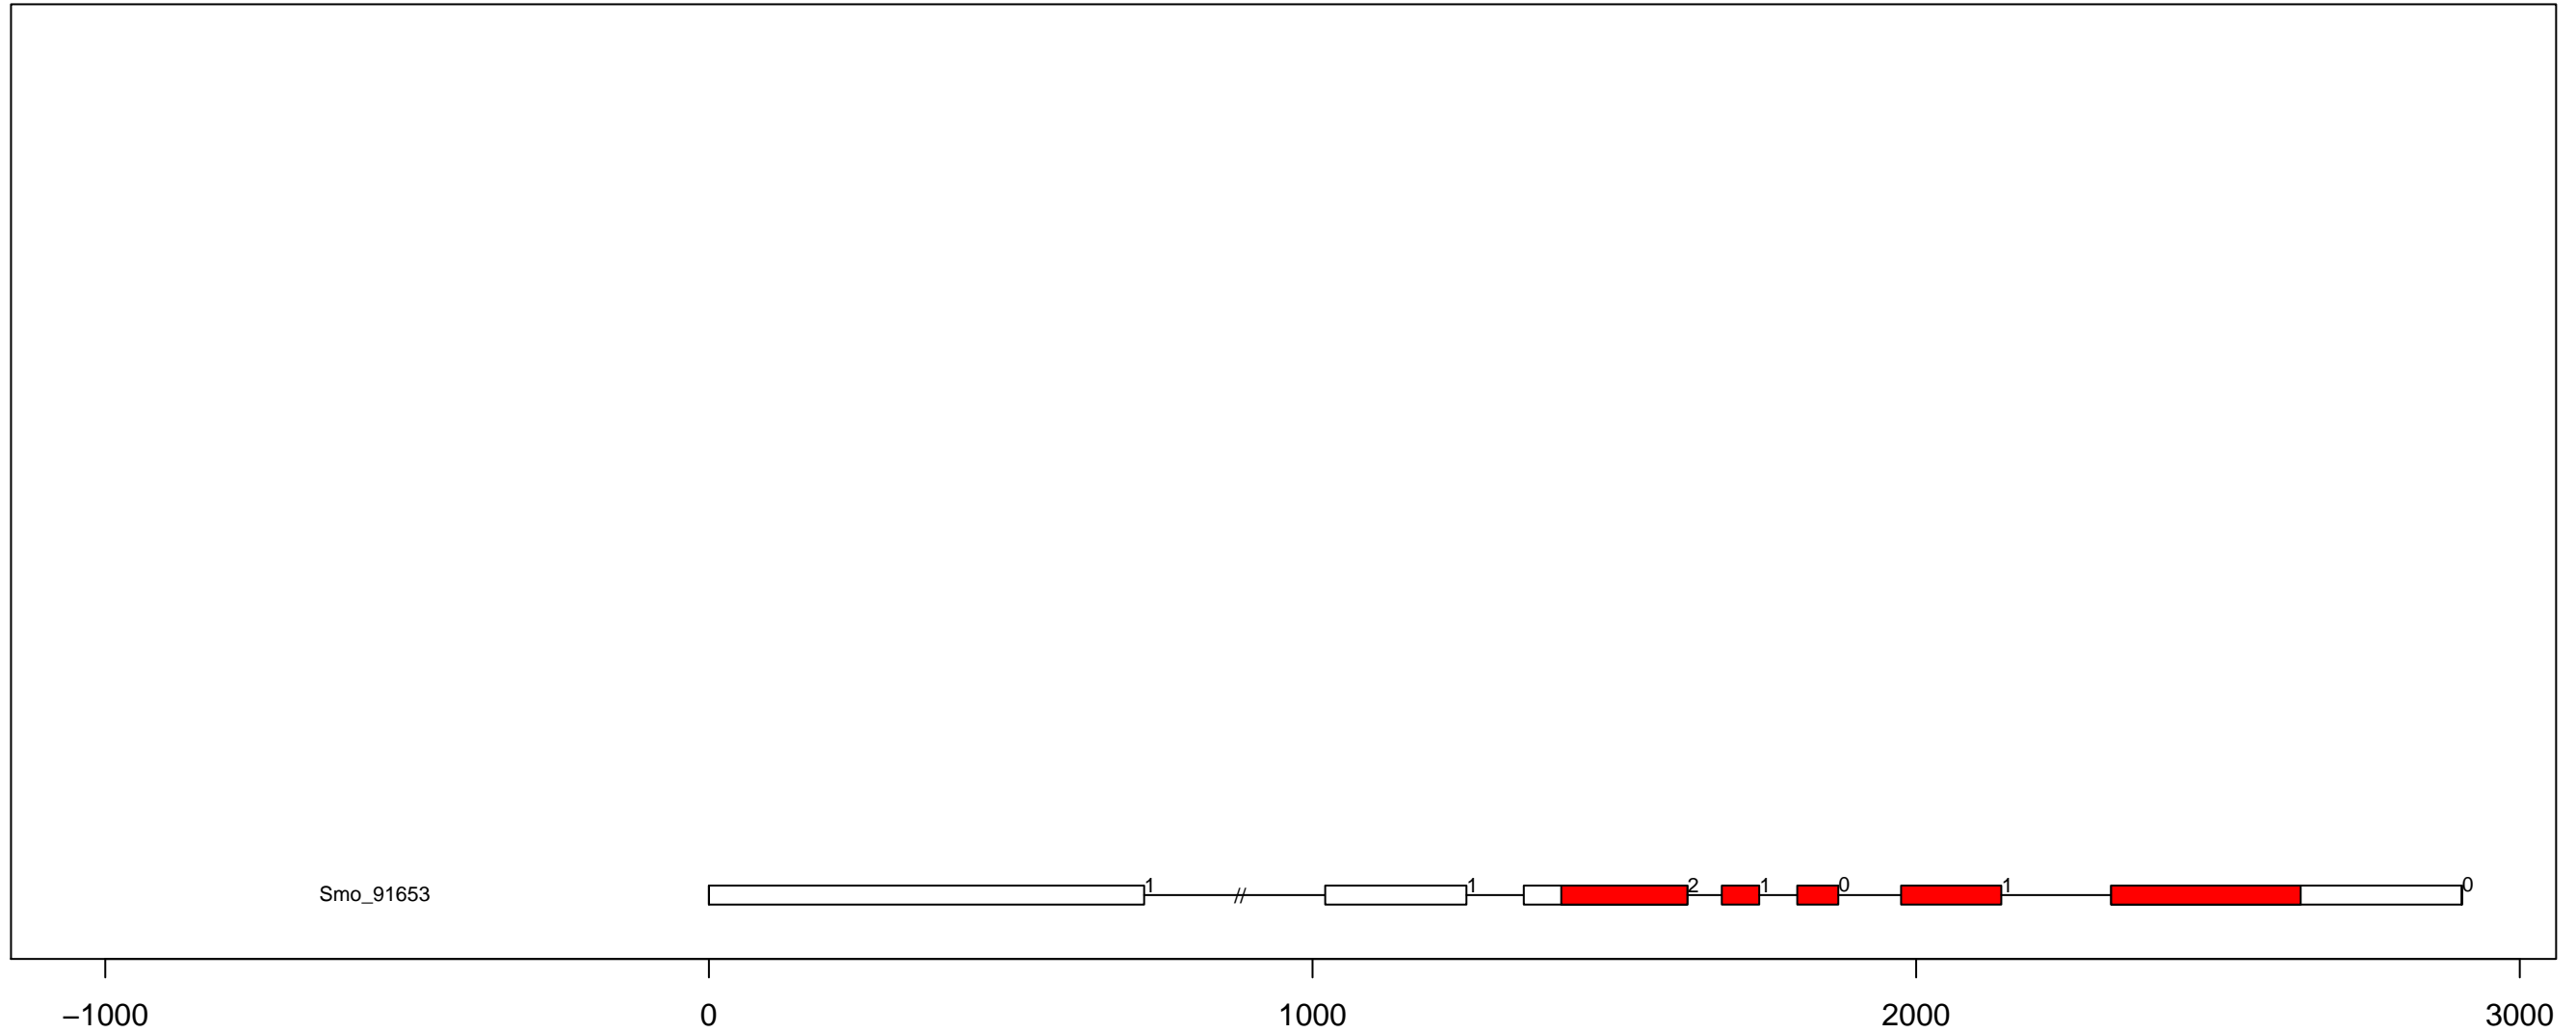

# S.mo RLK-Pelle\_URK-2 exon-intron and kinase domain diagram (all)

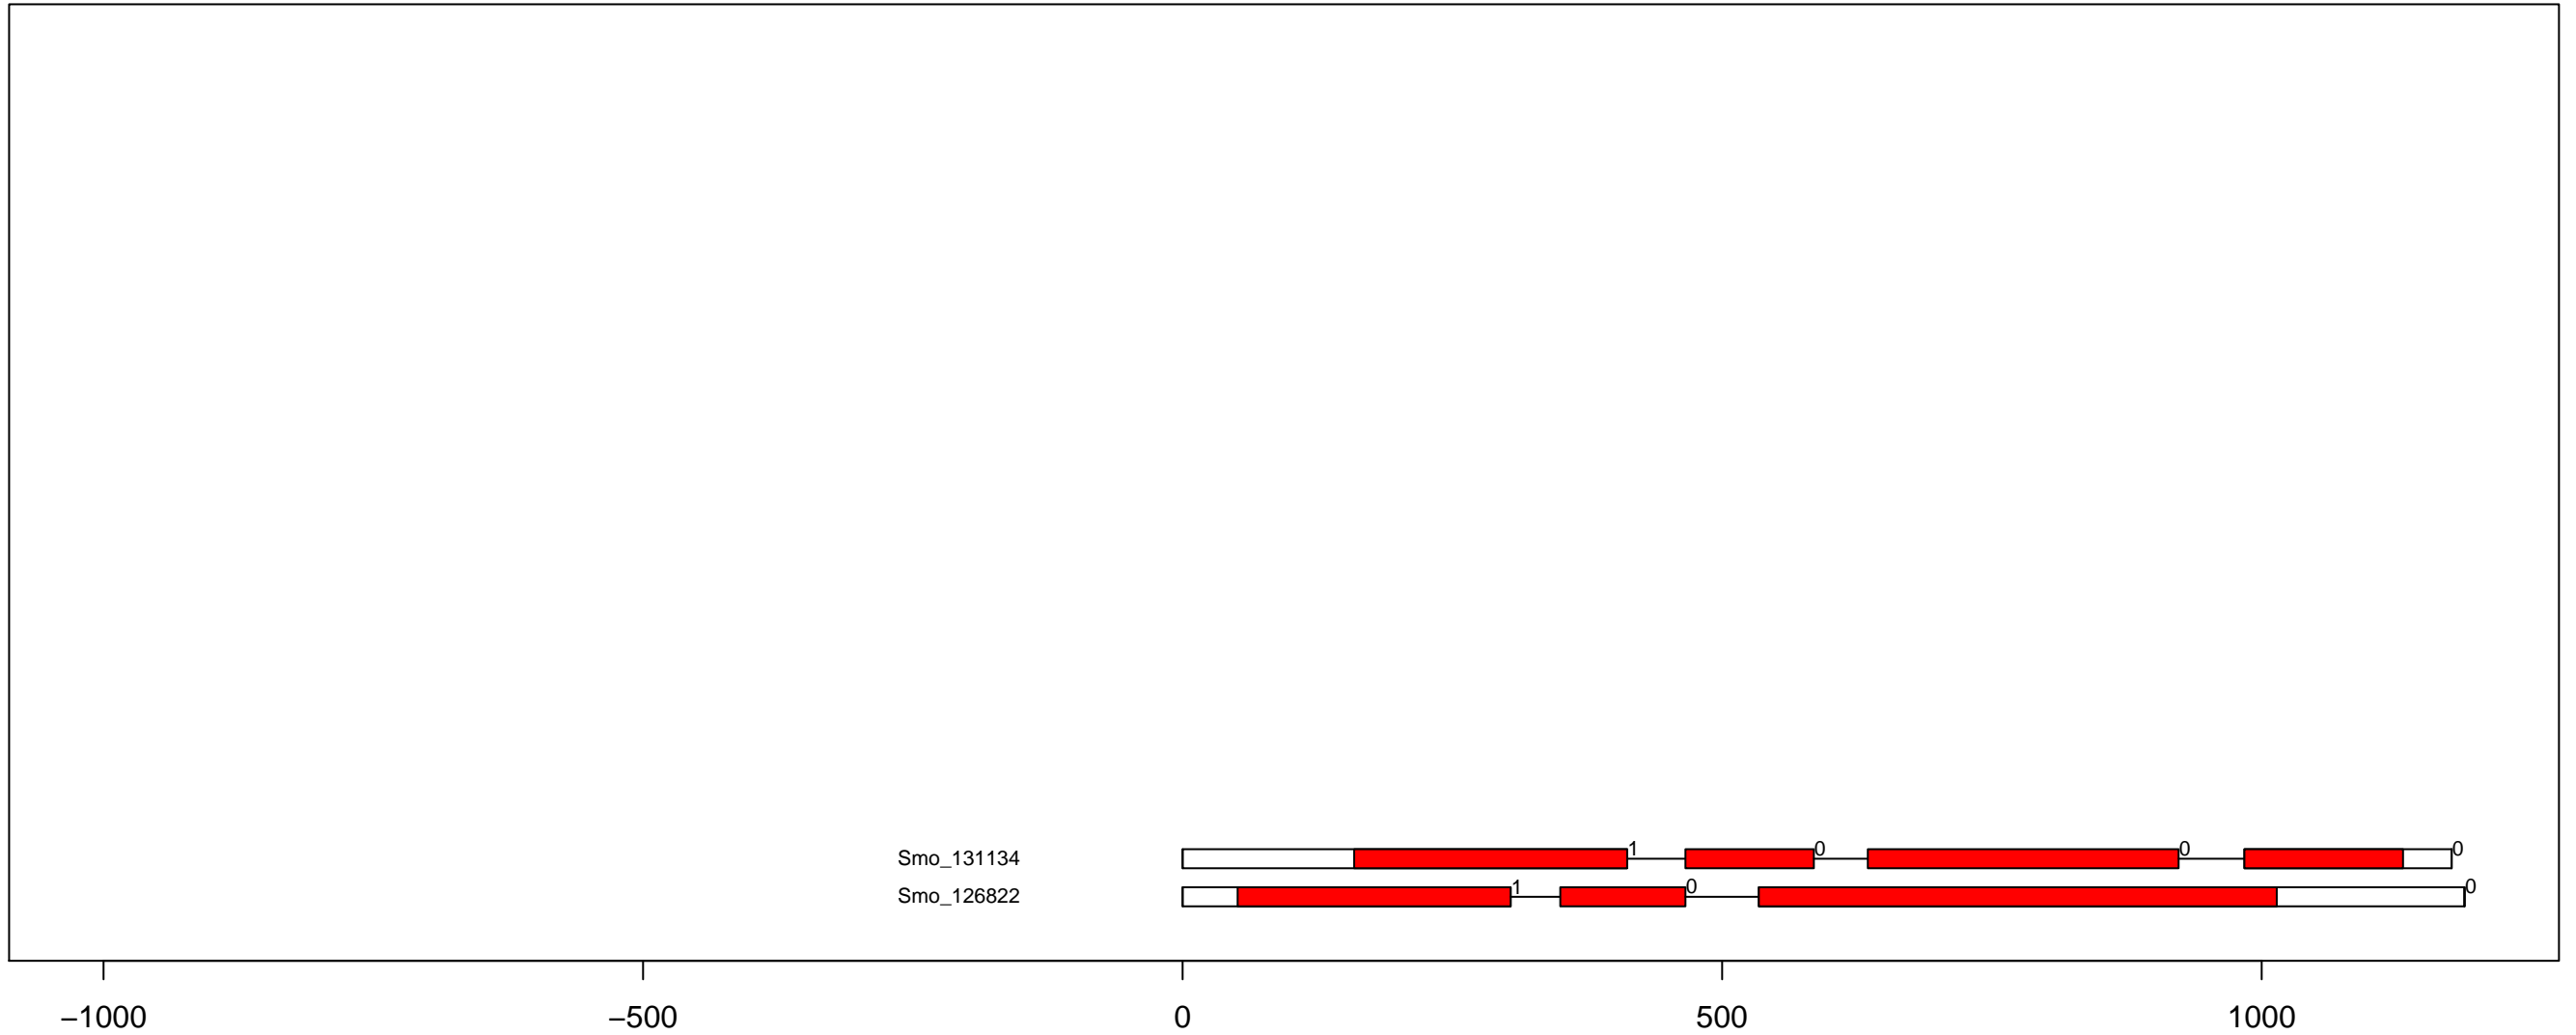



S.mo RLK-Pelle\_URK-Pp-1 exon-intron and kinase domain diagram (all)

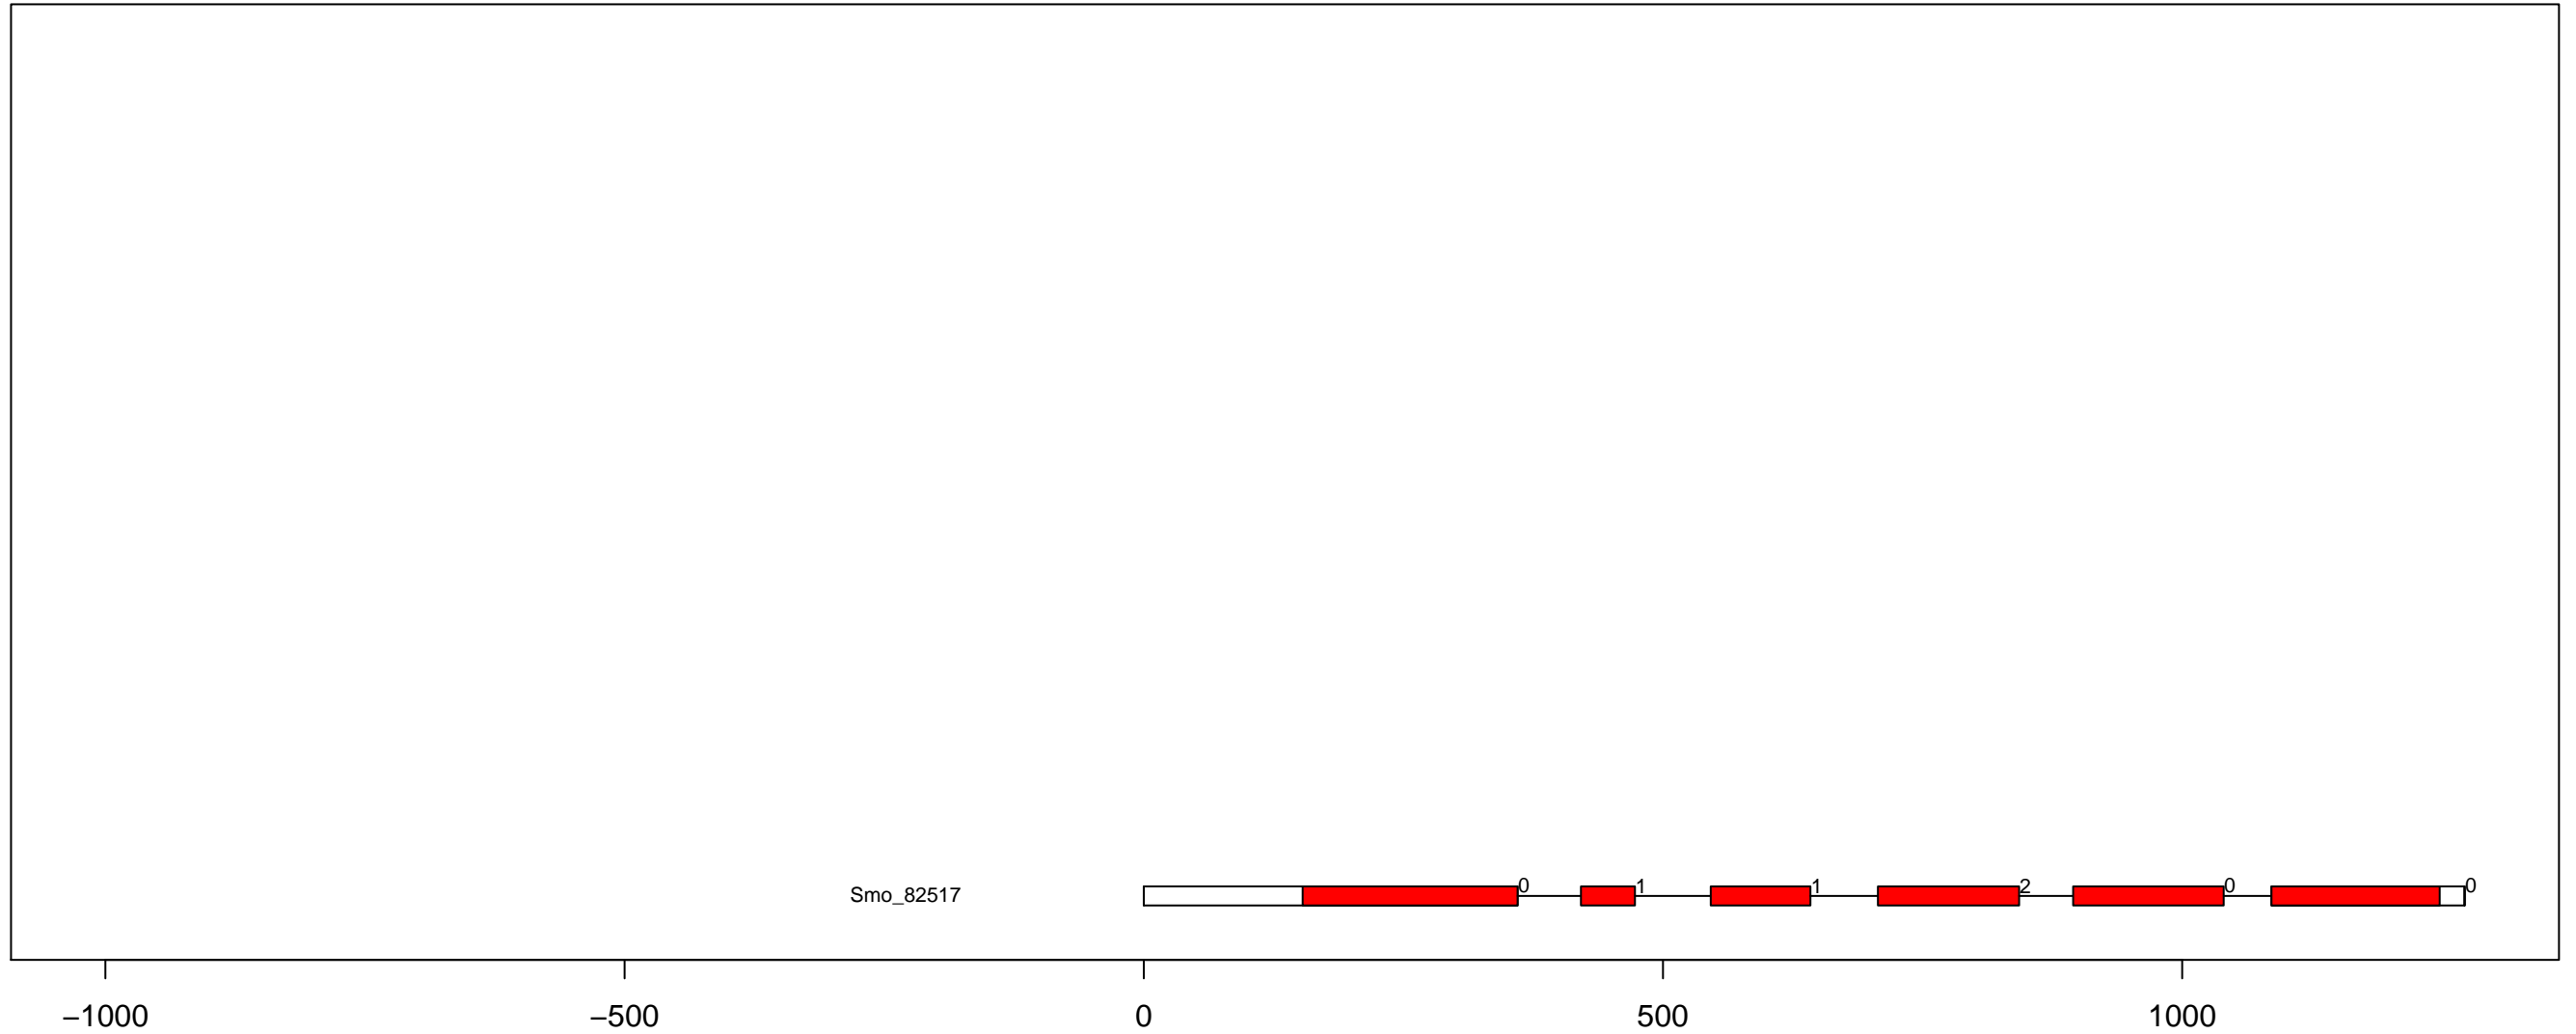

# S.mo RLK-Pelle\_WAK\_LRK10L-1 exon-intron and kinase domain diagram (all)

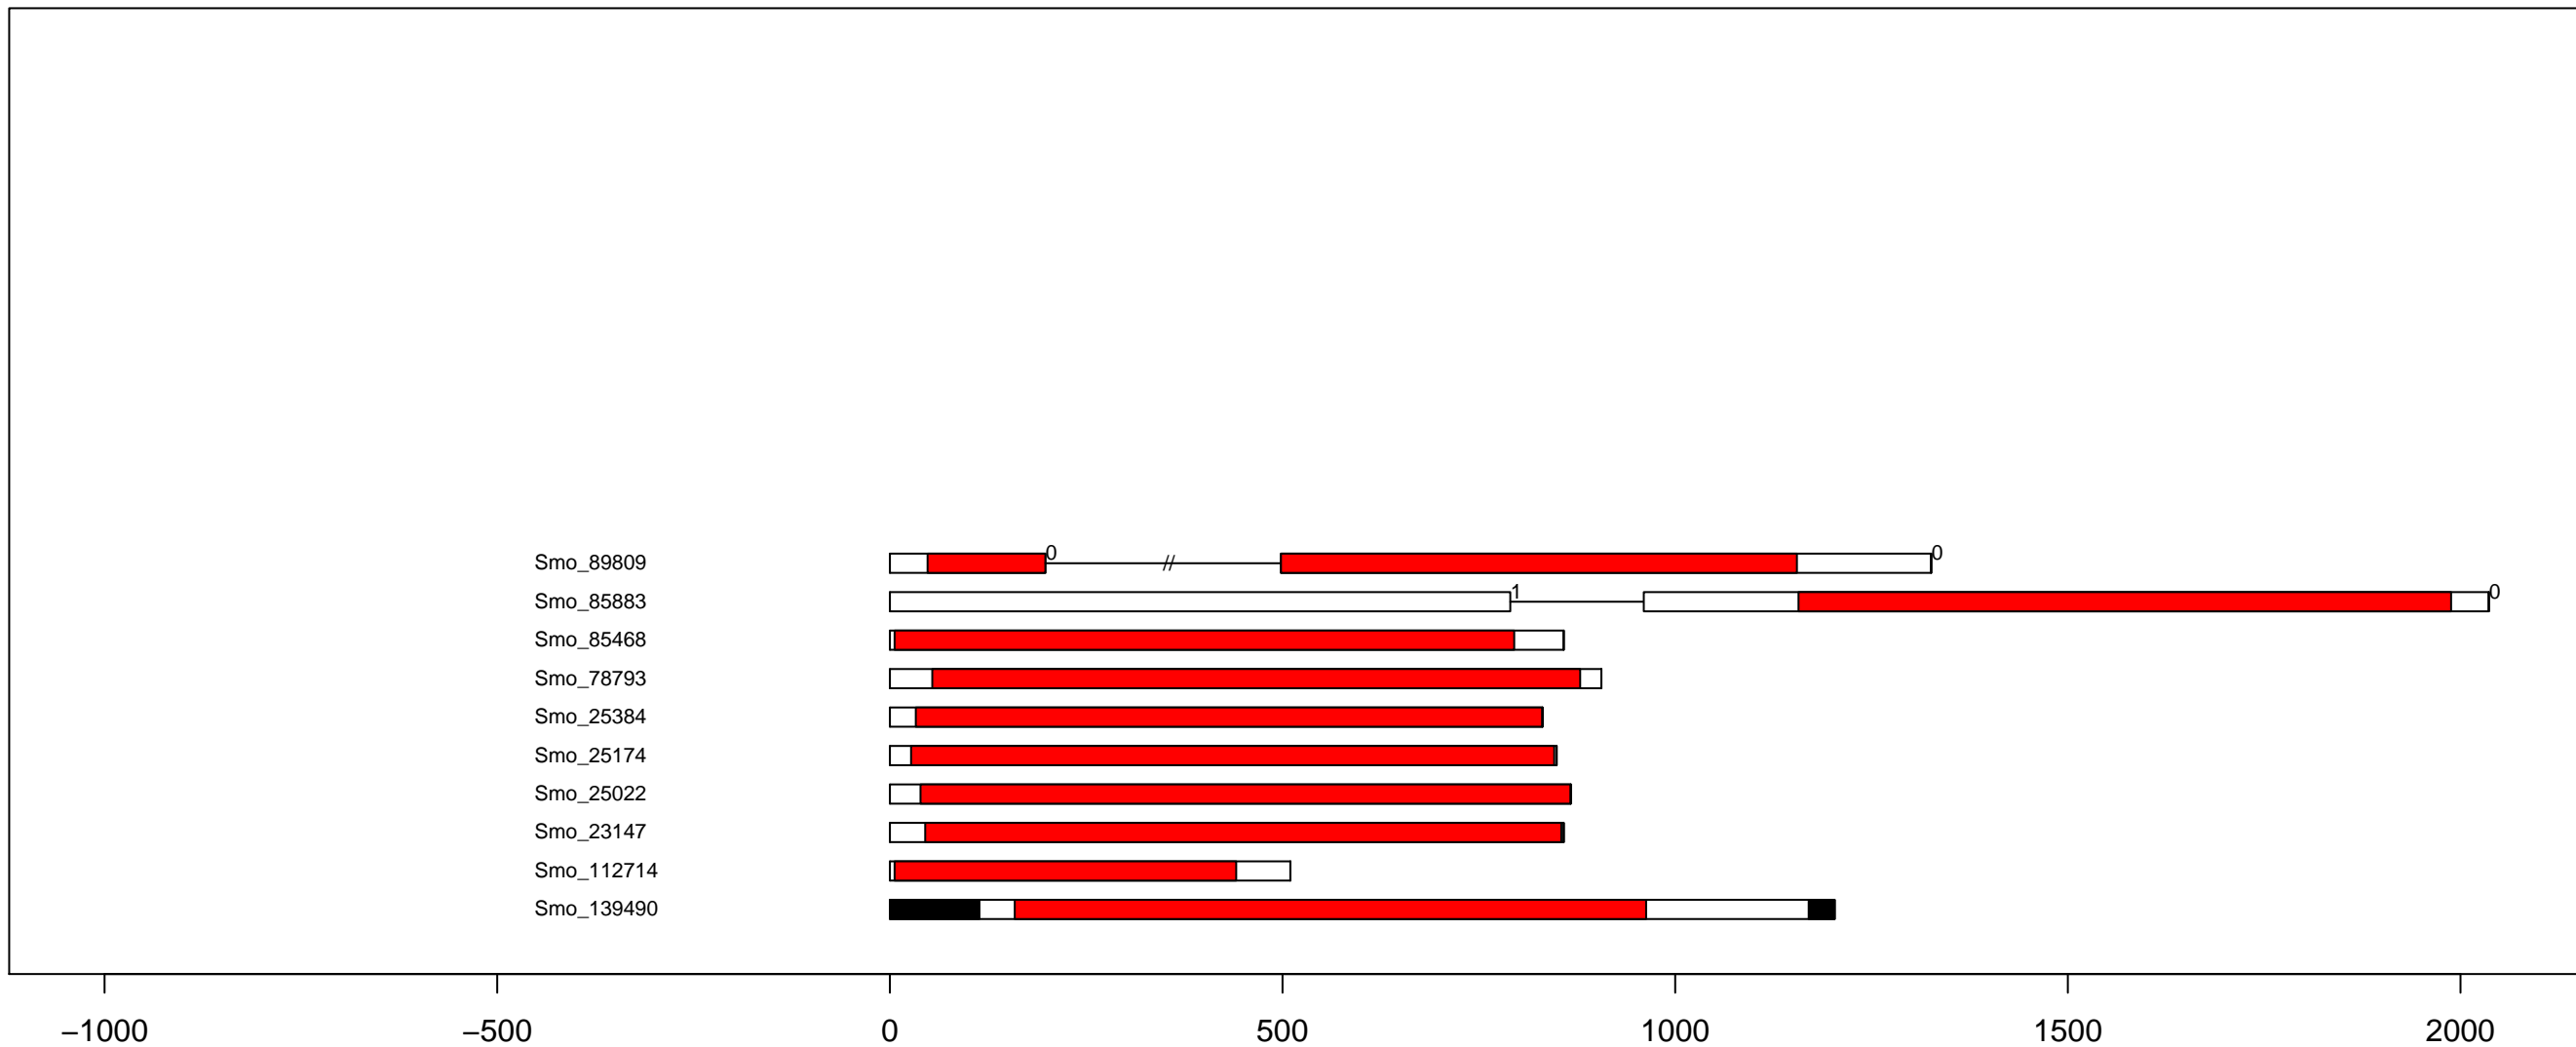

S.mo RLK-Pelle\_WAK exon-intron and kinase domain diagram (all)

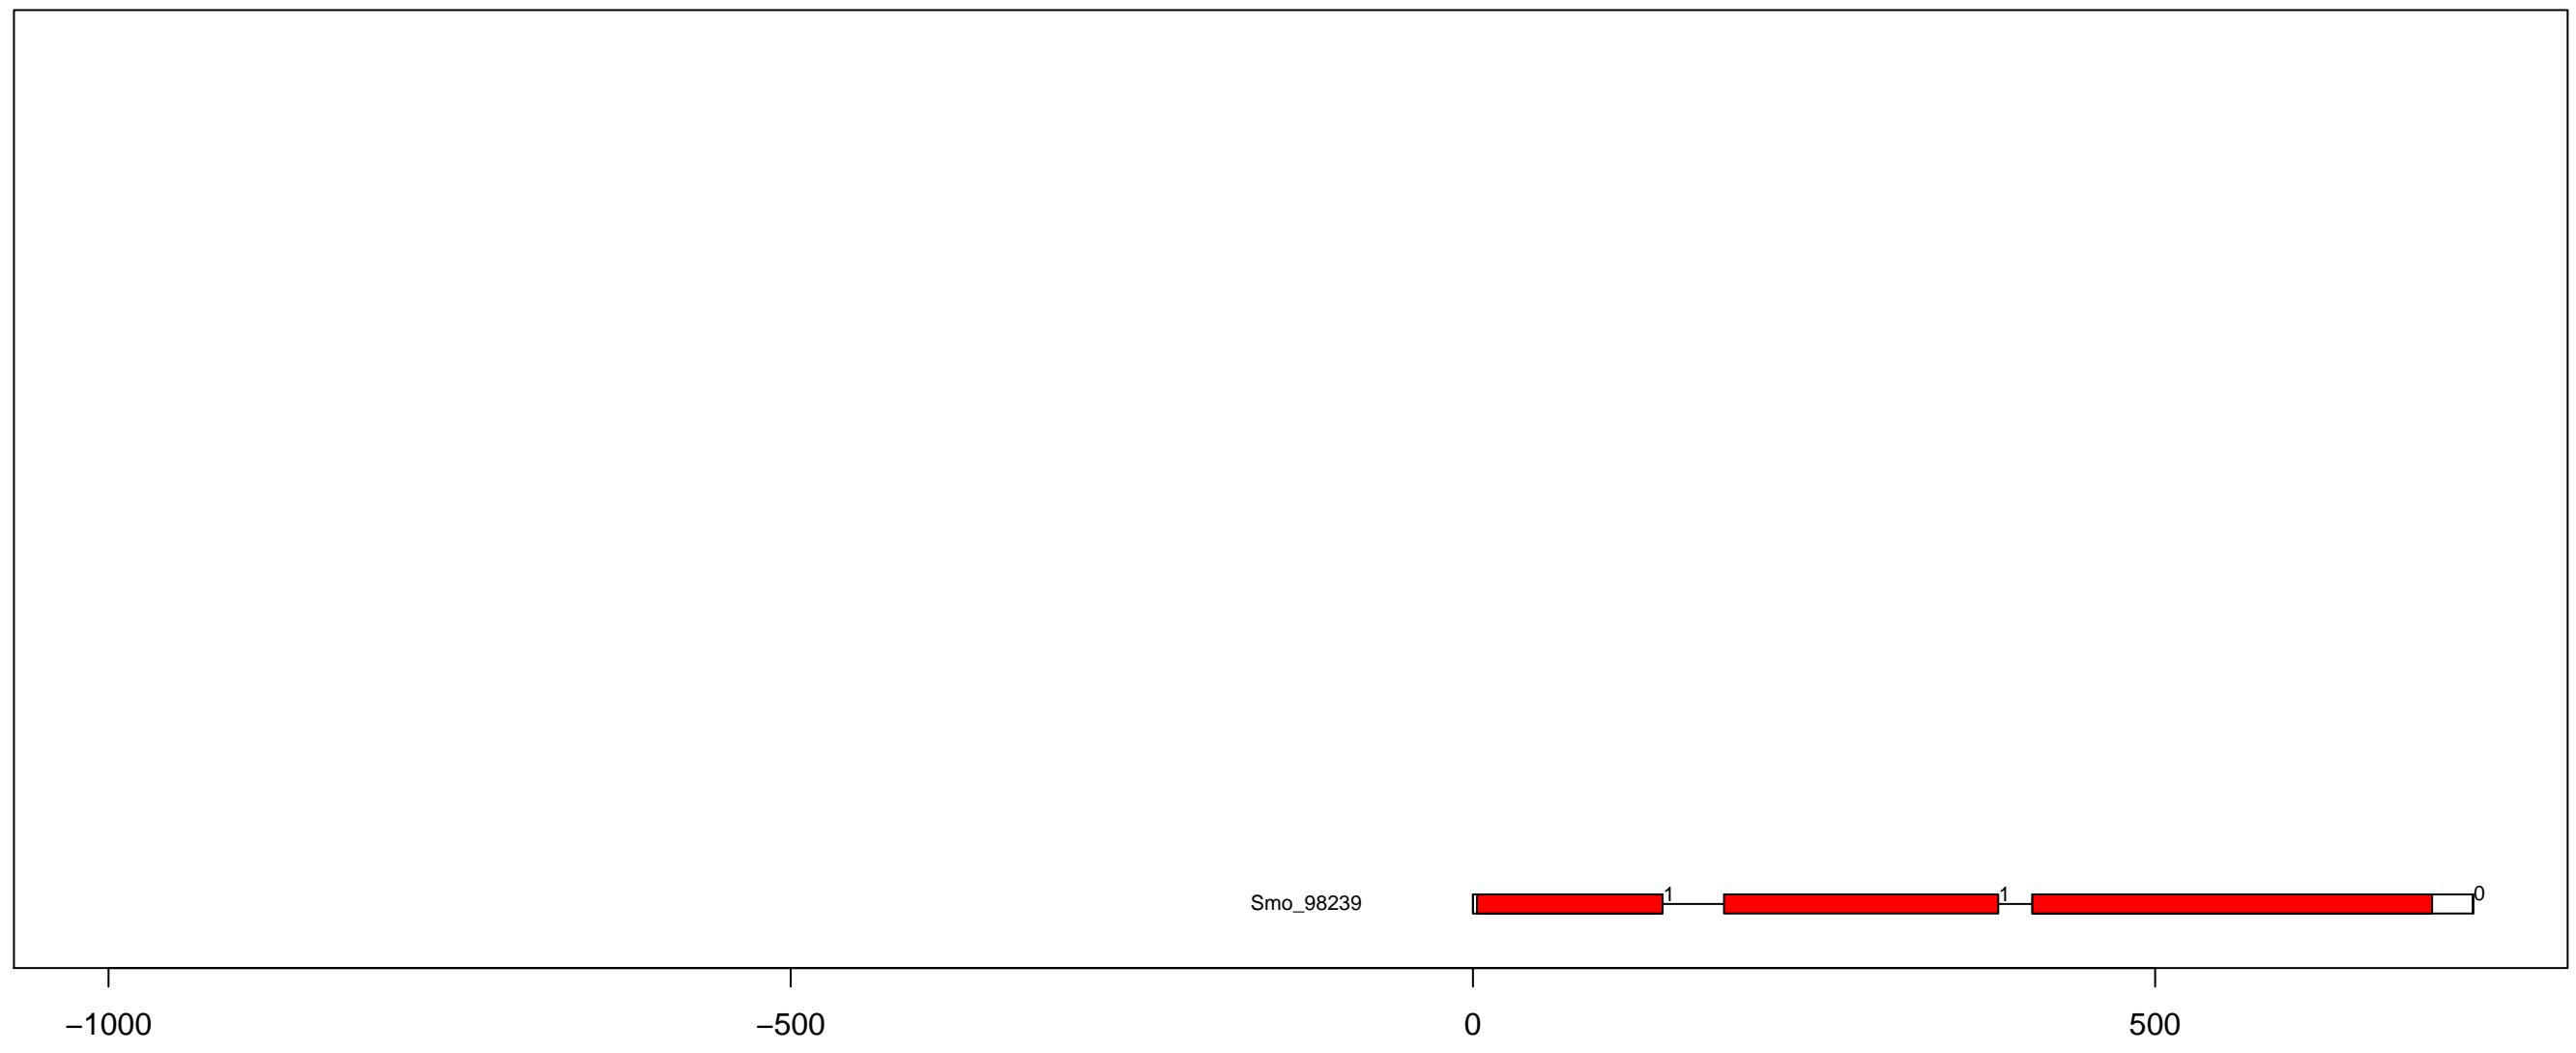

S.mo SCY1\_SCYL1 exon-intron and kinase domain diagram (all)

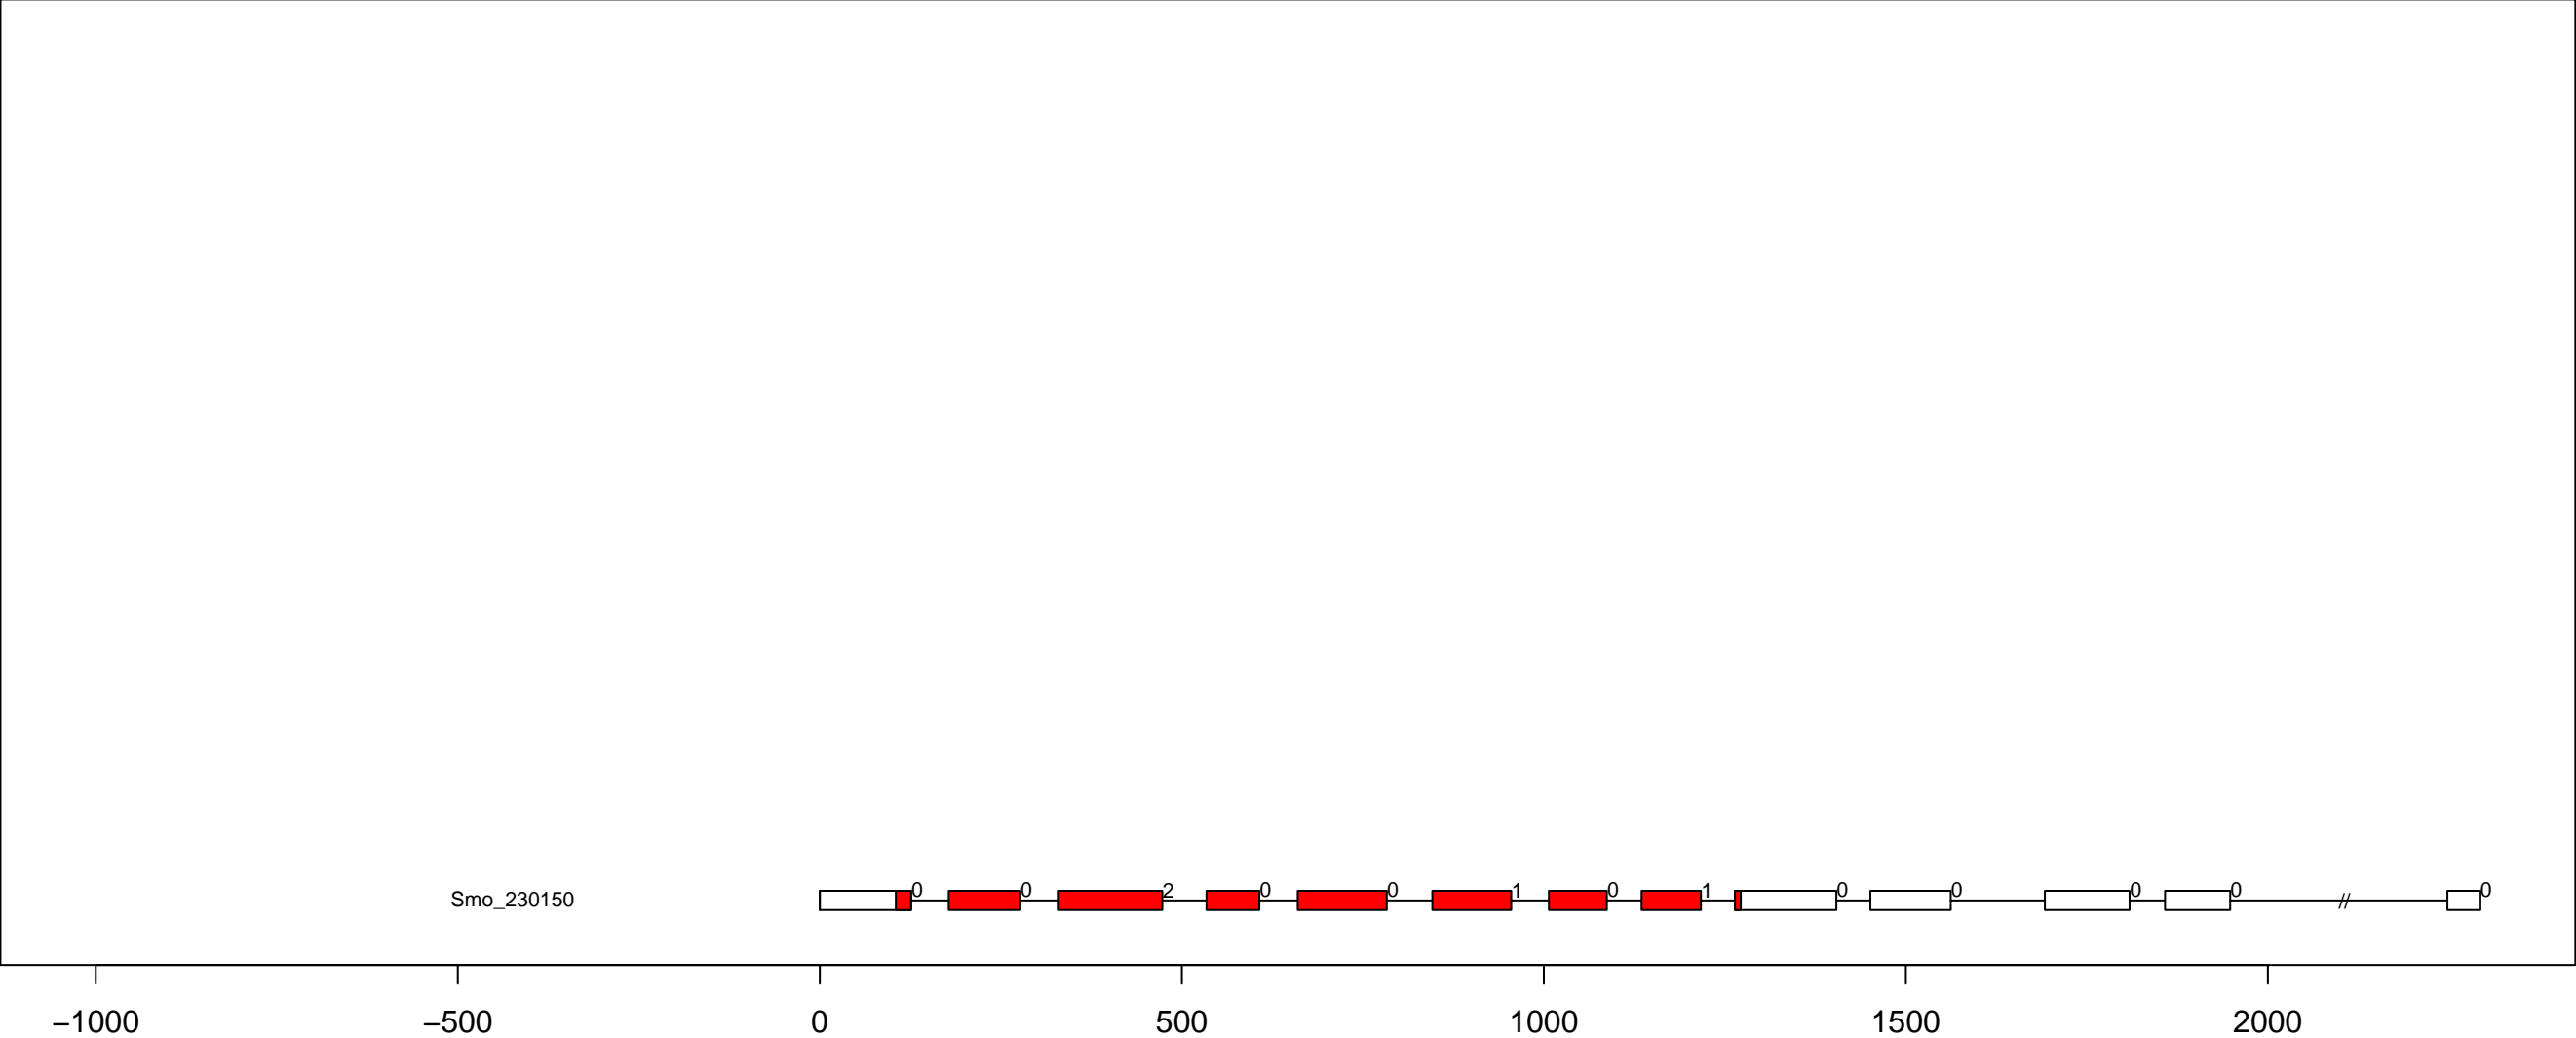

S.mo SCY1\_SCYL2 exon-intron and kinase domain diagram (all)

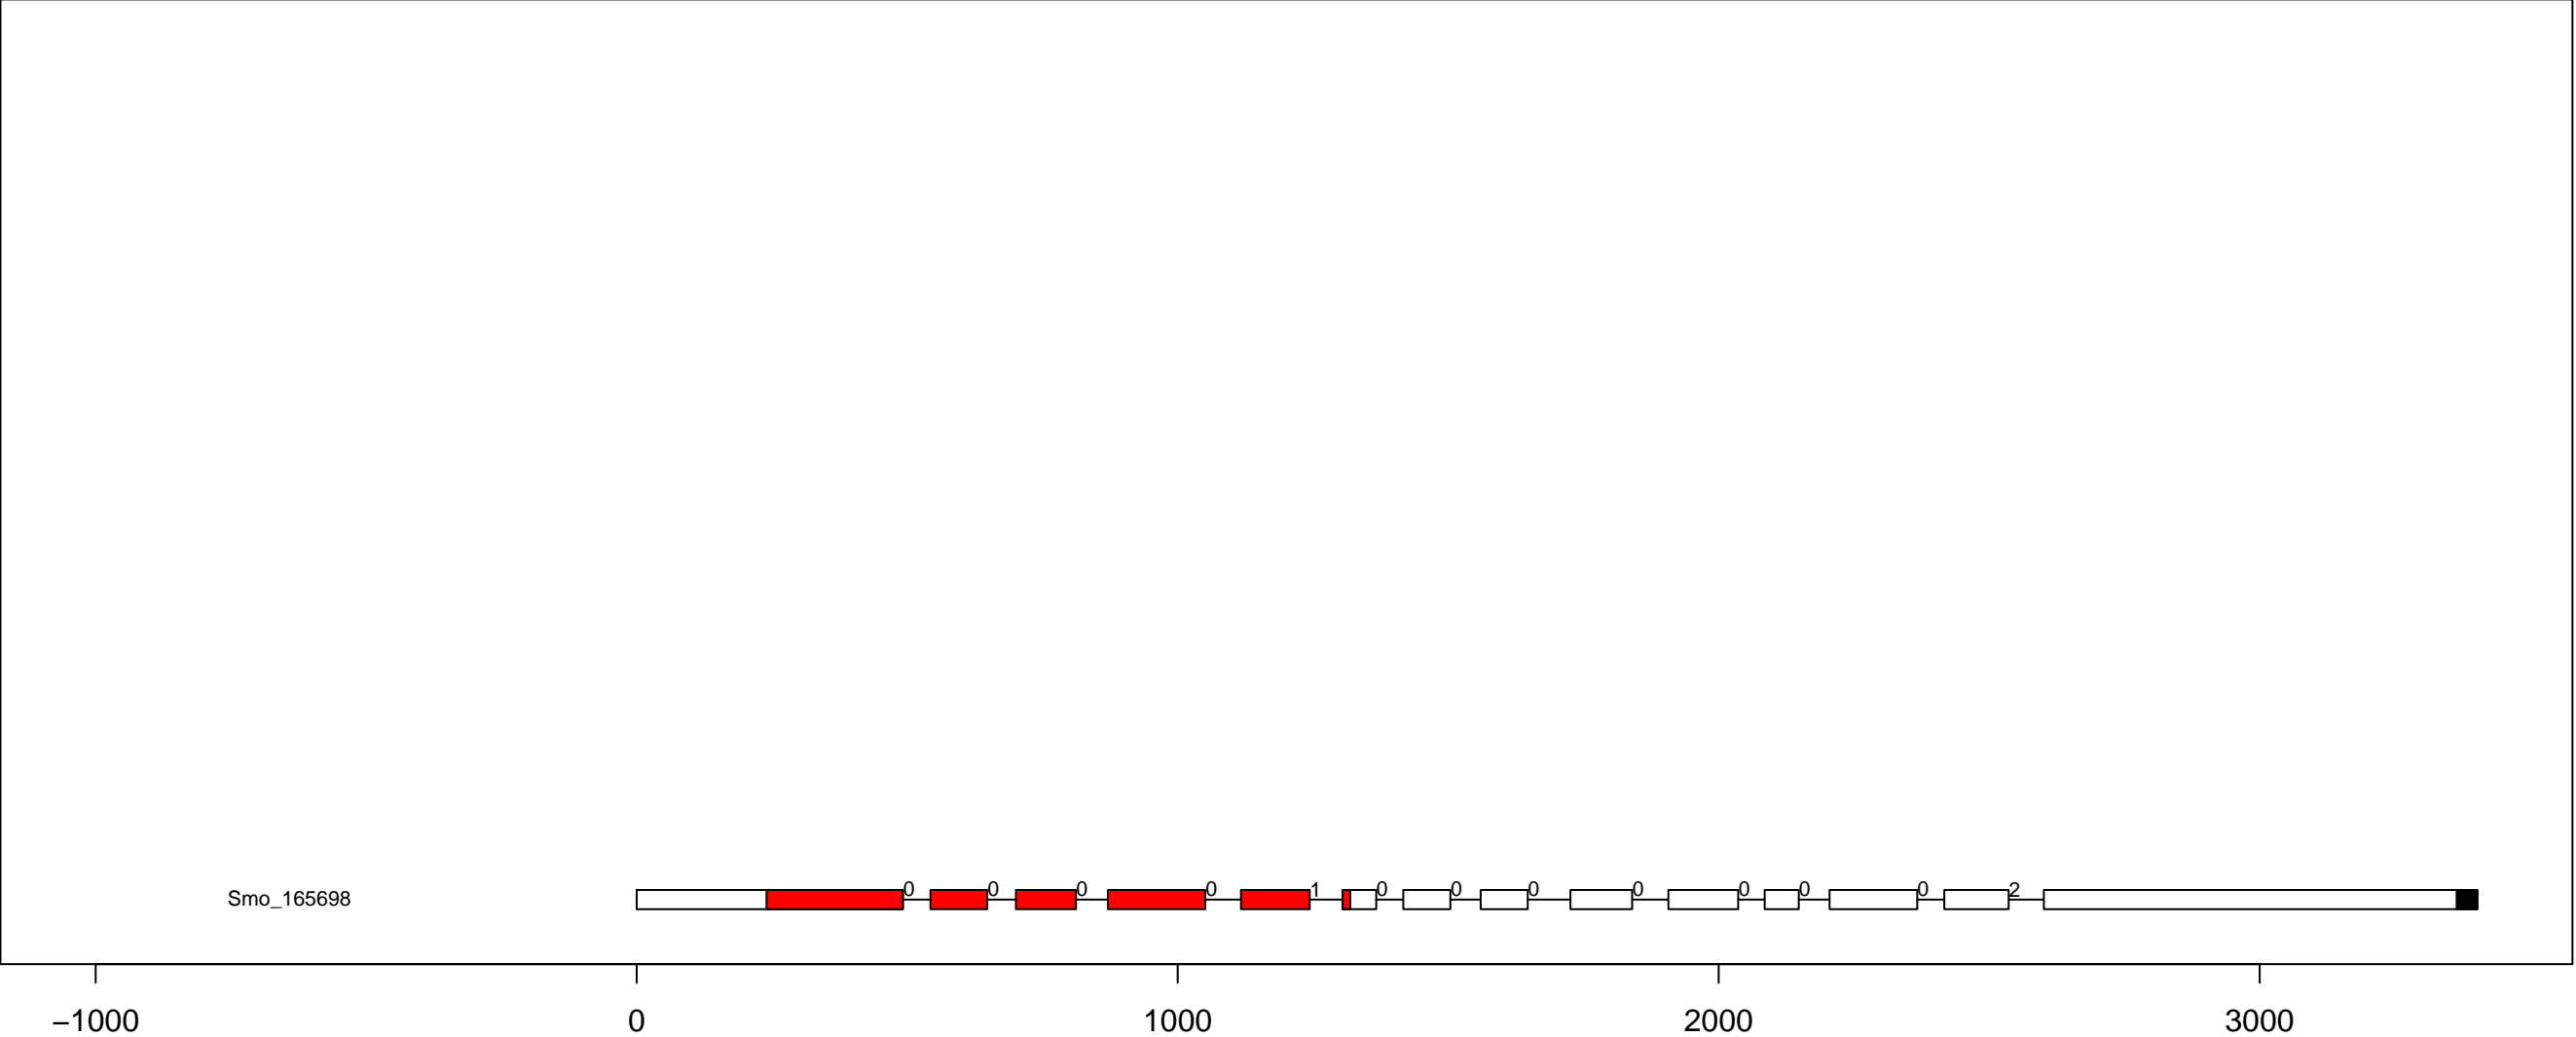

### S.mo STE\_STE11 exon-intron and kinase domain diagram (all)

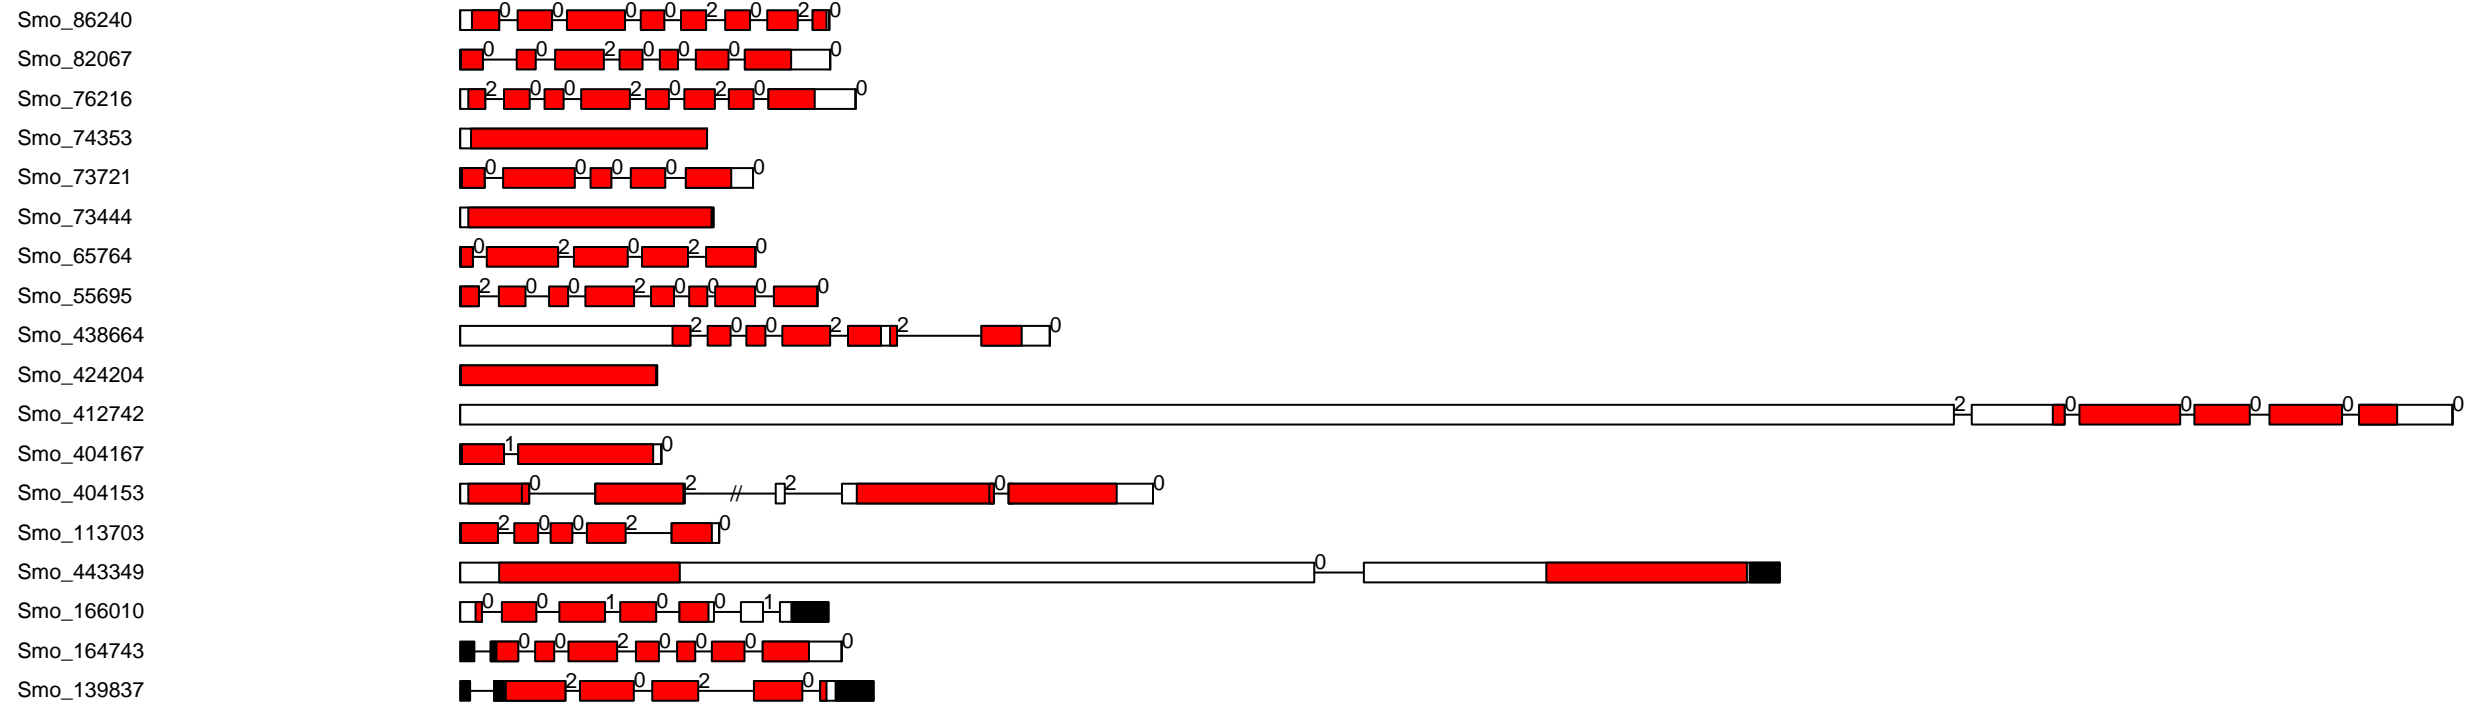



# S.mo STE\_STE20-PI exon-intron and kinase domain diagram (all)

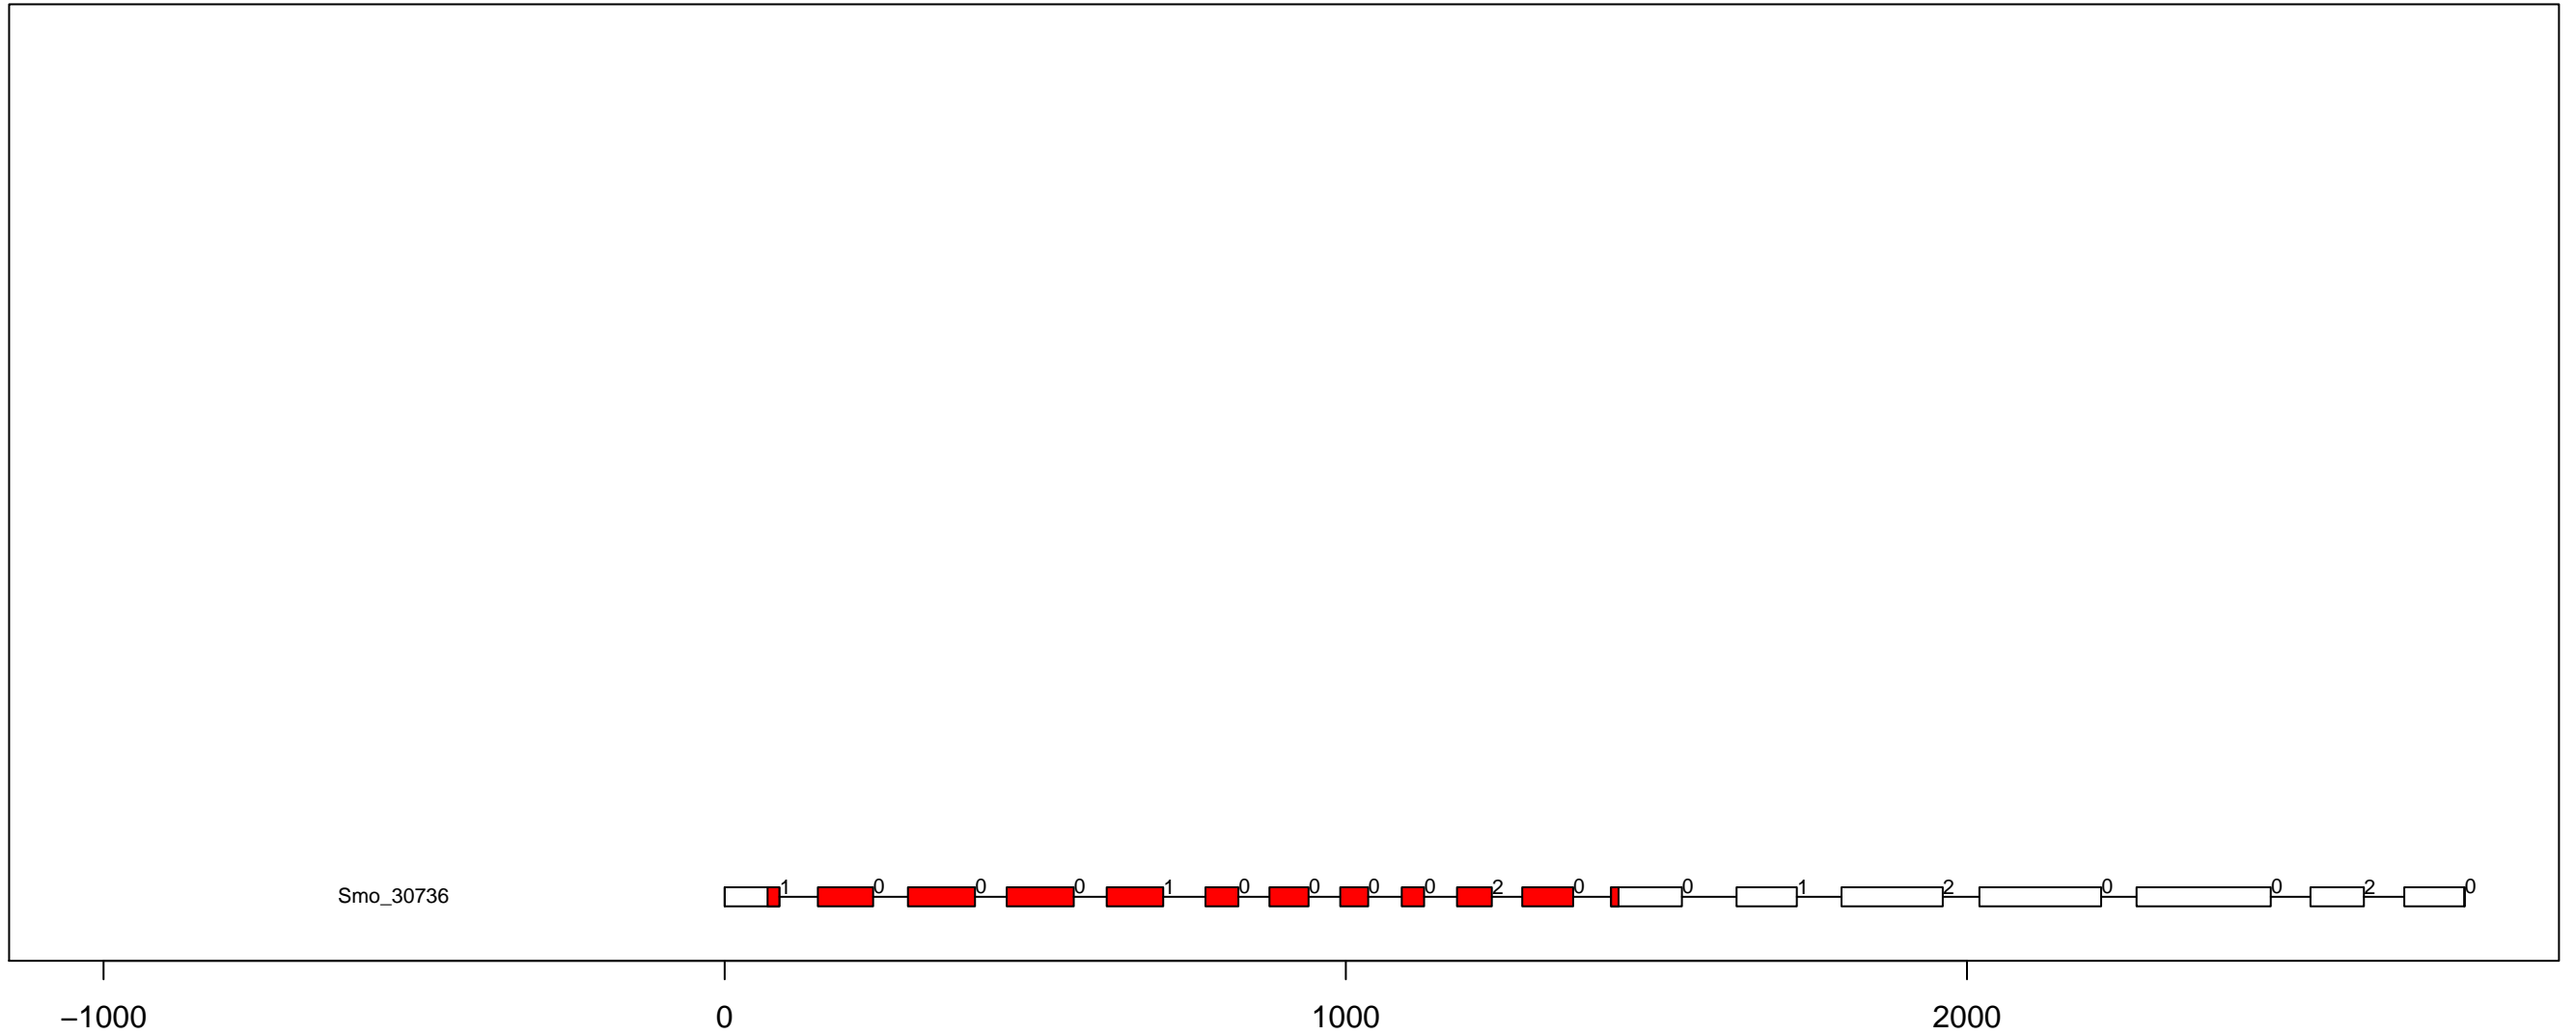



# S.mo STE\_STE20-YSK exon-intron and kinase domain diagram (all)

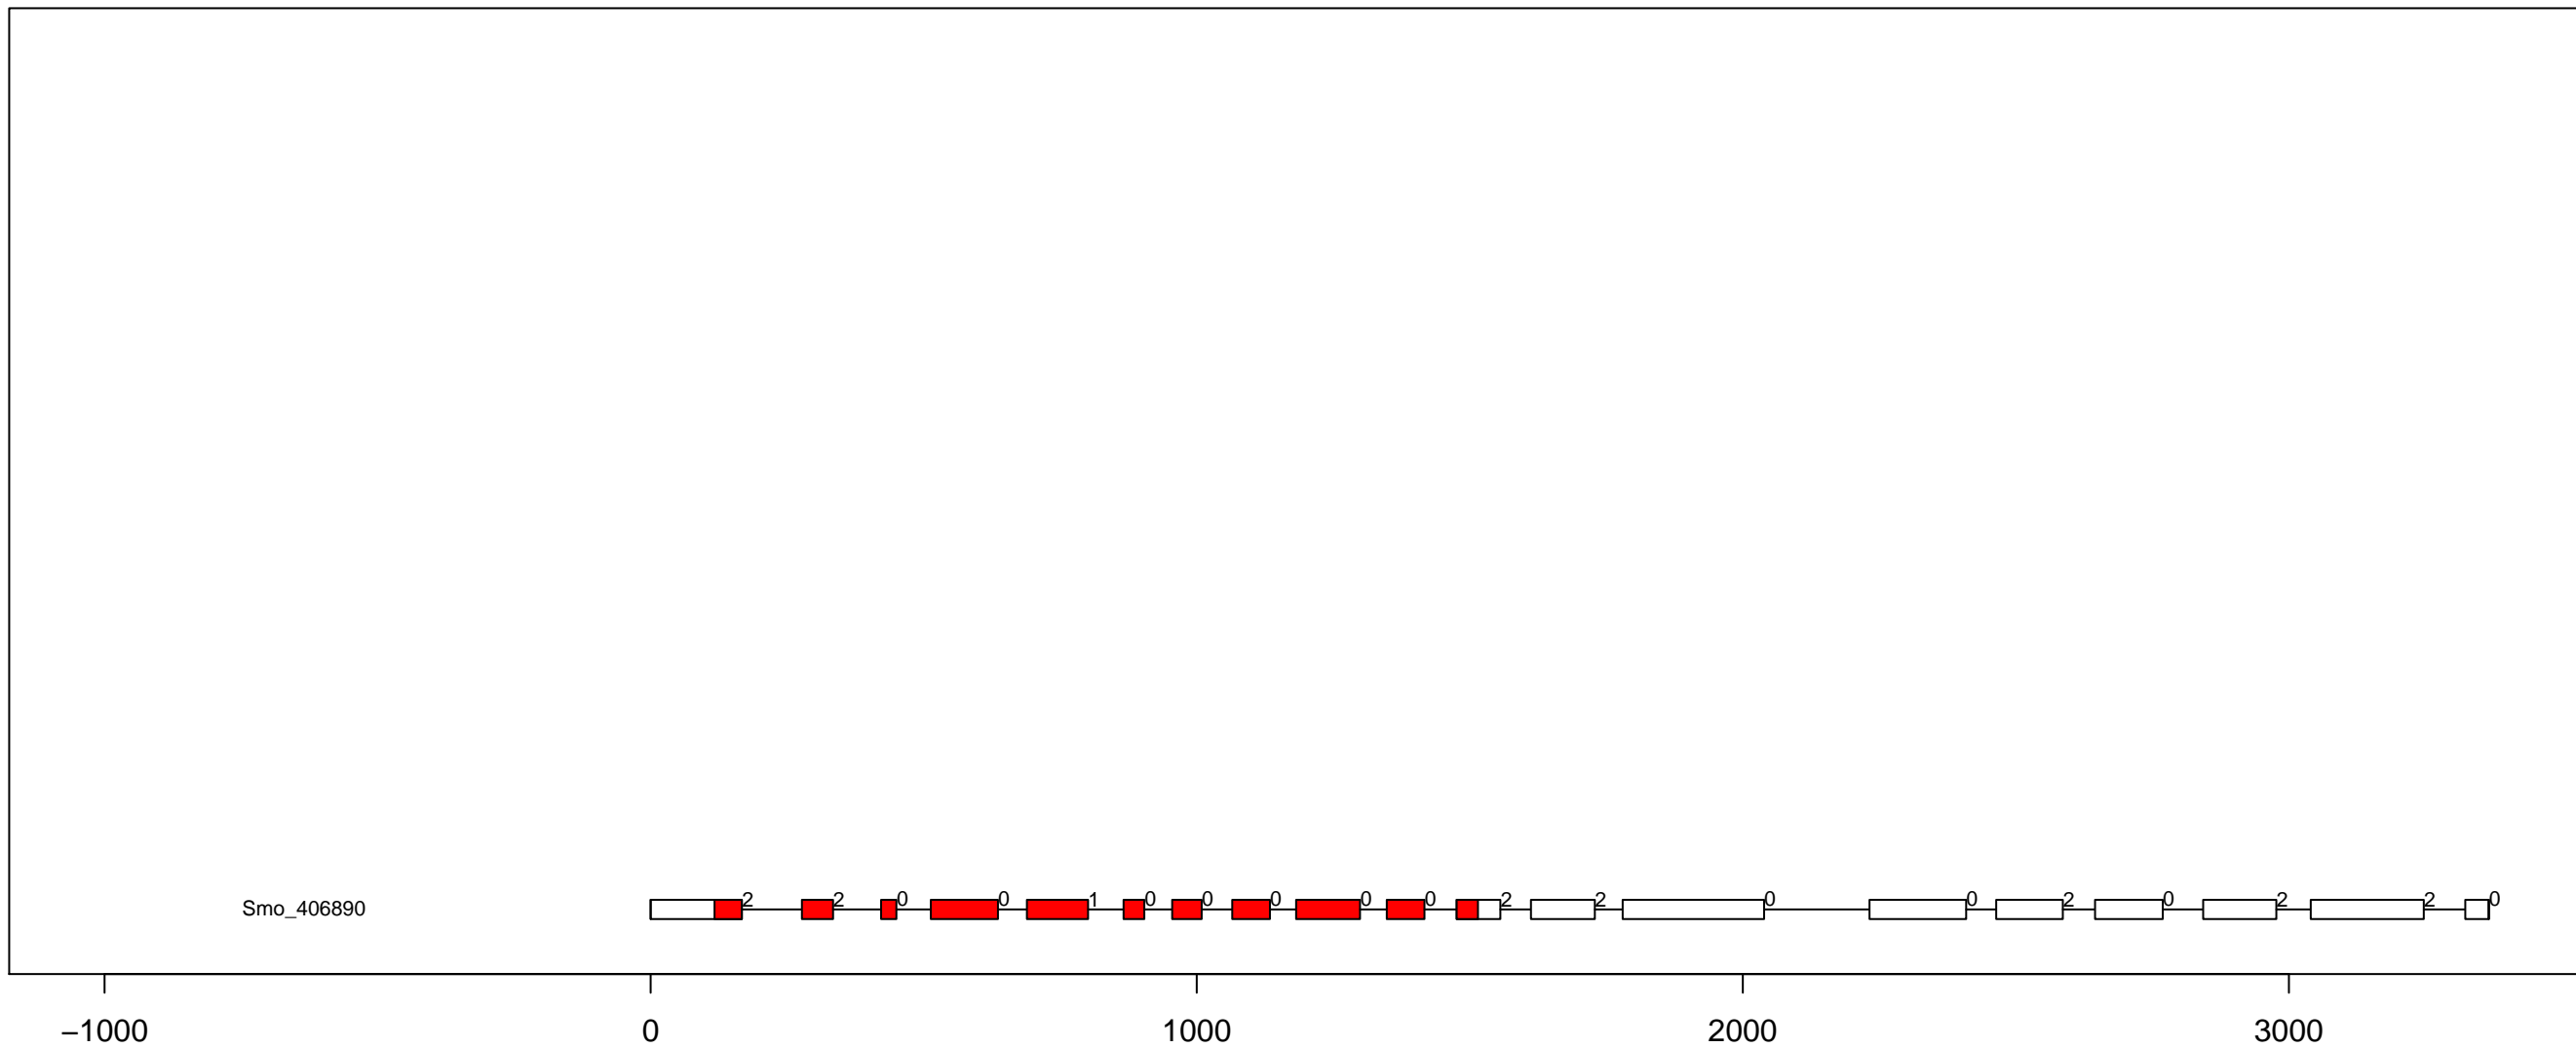

# S.mo STE\_STE7 exon-intron and kinase domain diagram (all)

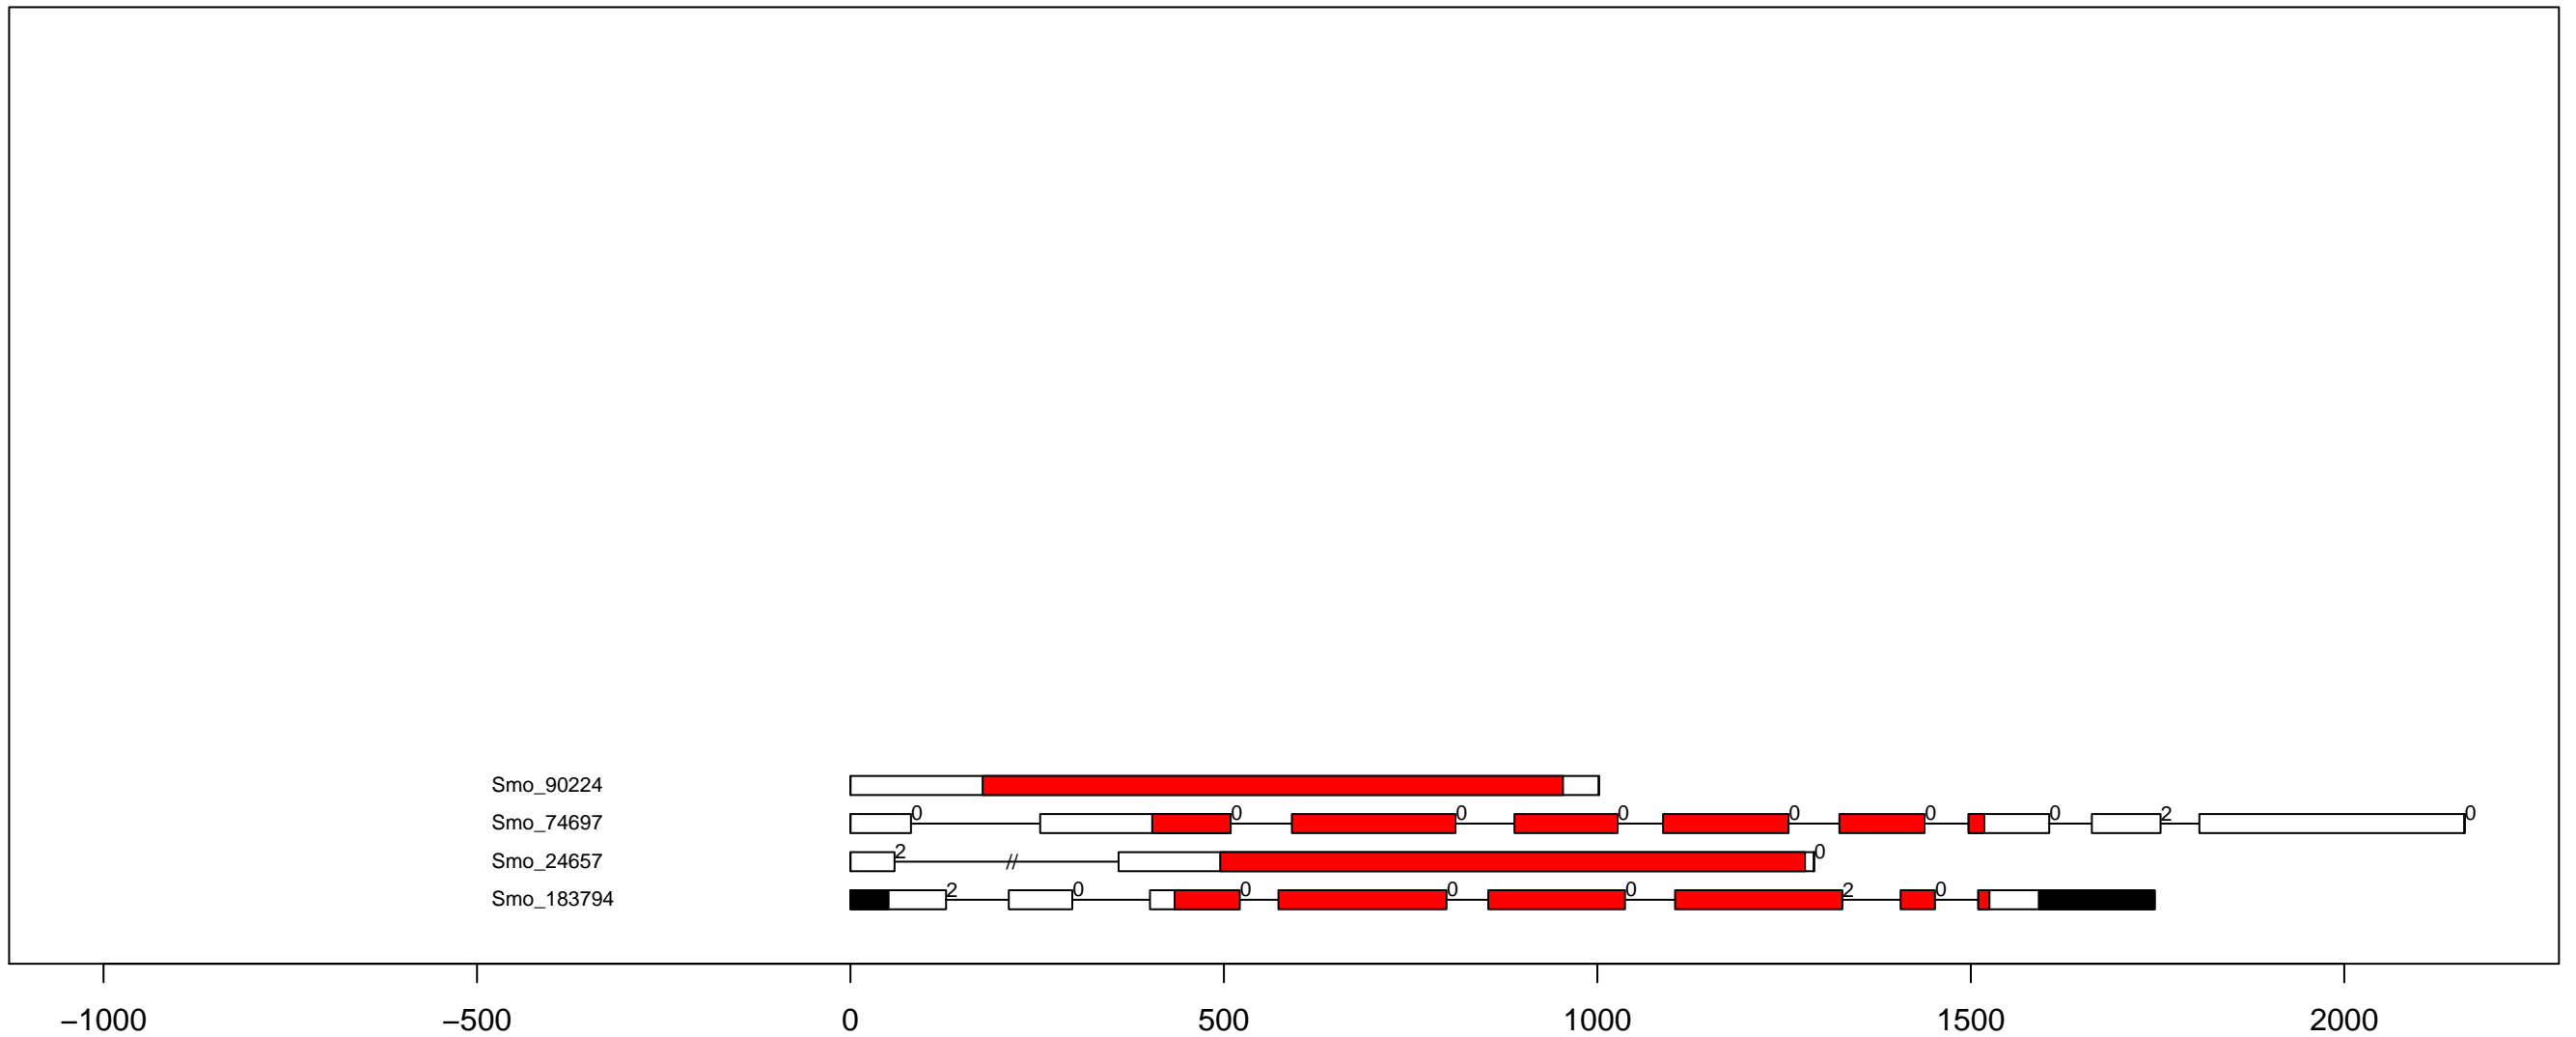

# S.mo STE\_STE-PI exon-intron and kinase domain diagram (all)

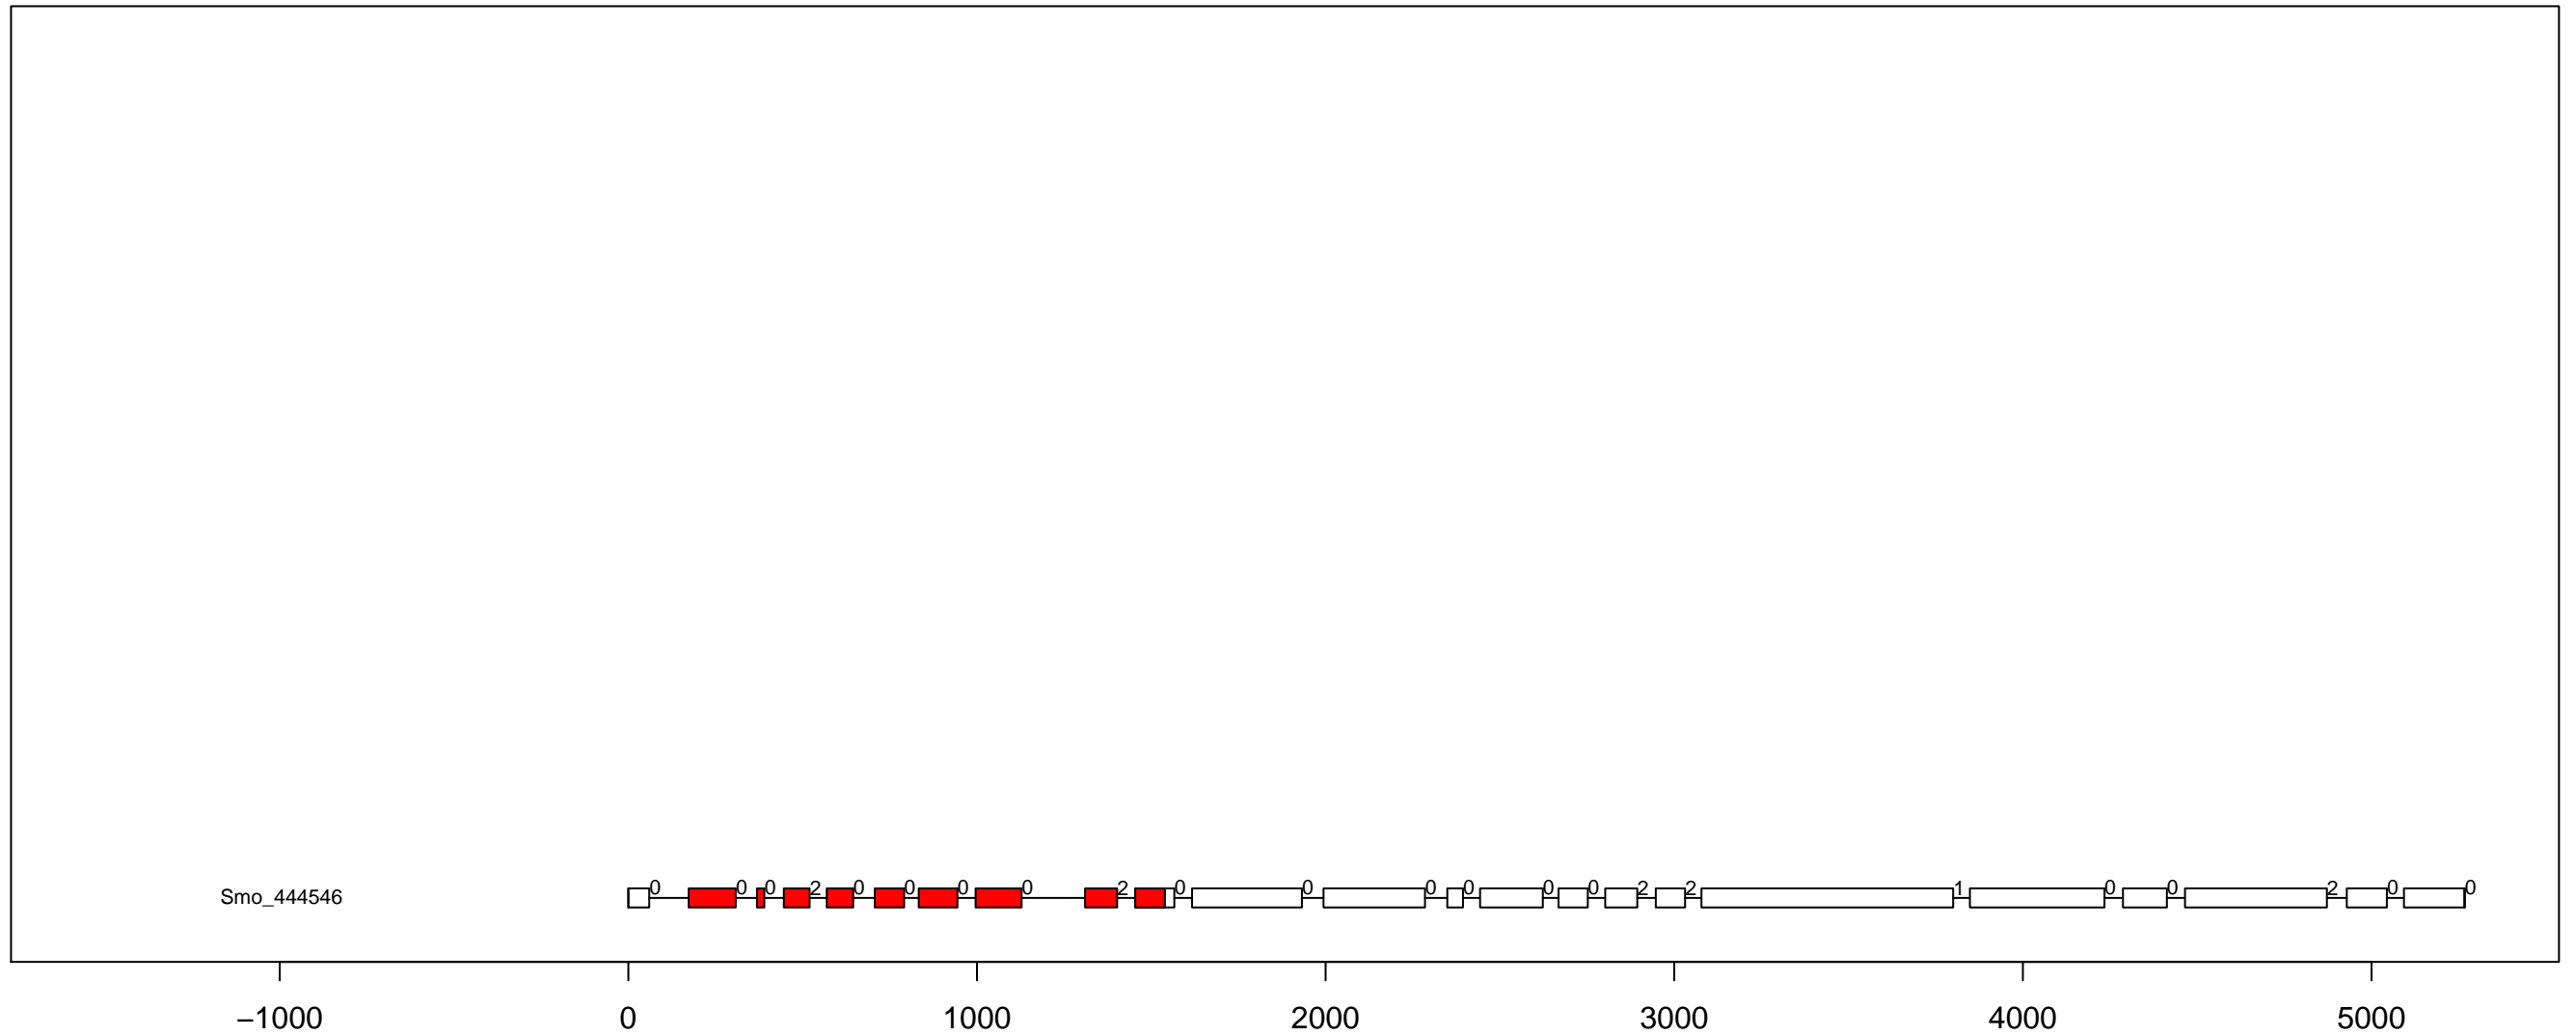

**S.mo TKL\_CTR1-DRK-1 exon-intron and kinase domain diagram (all)**

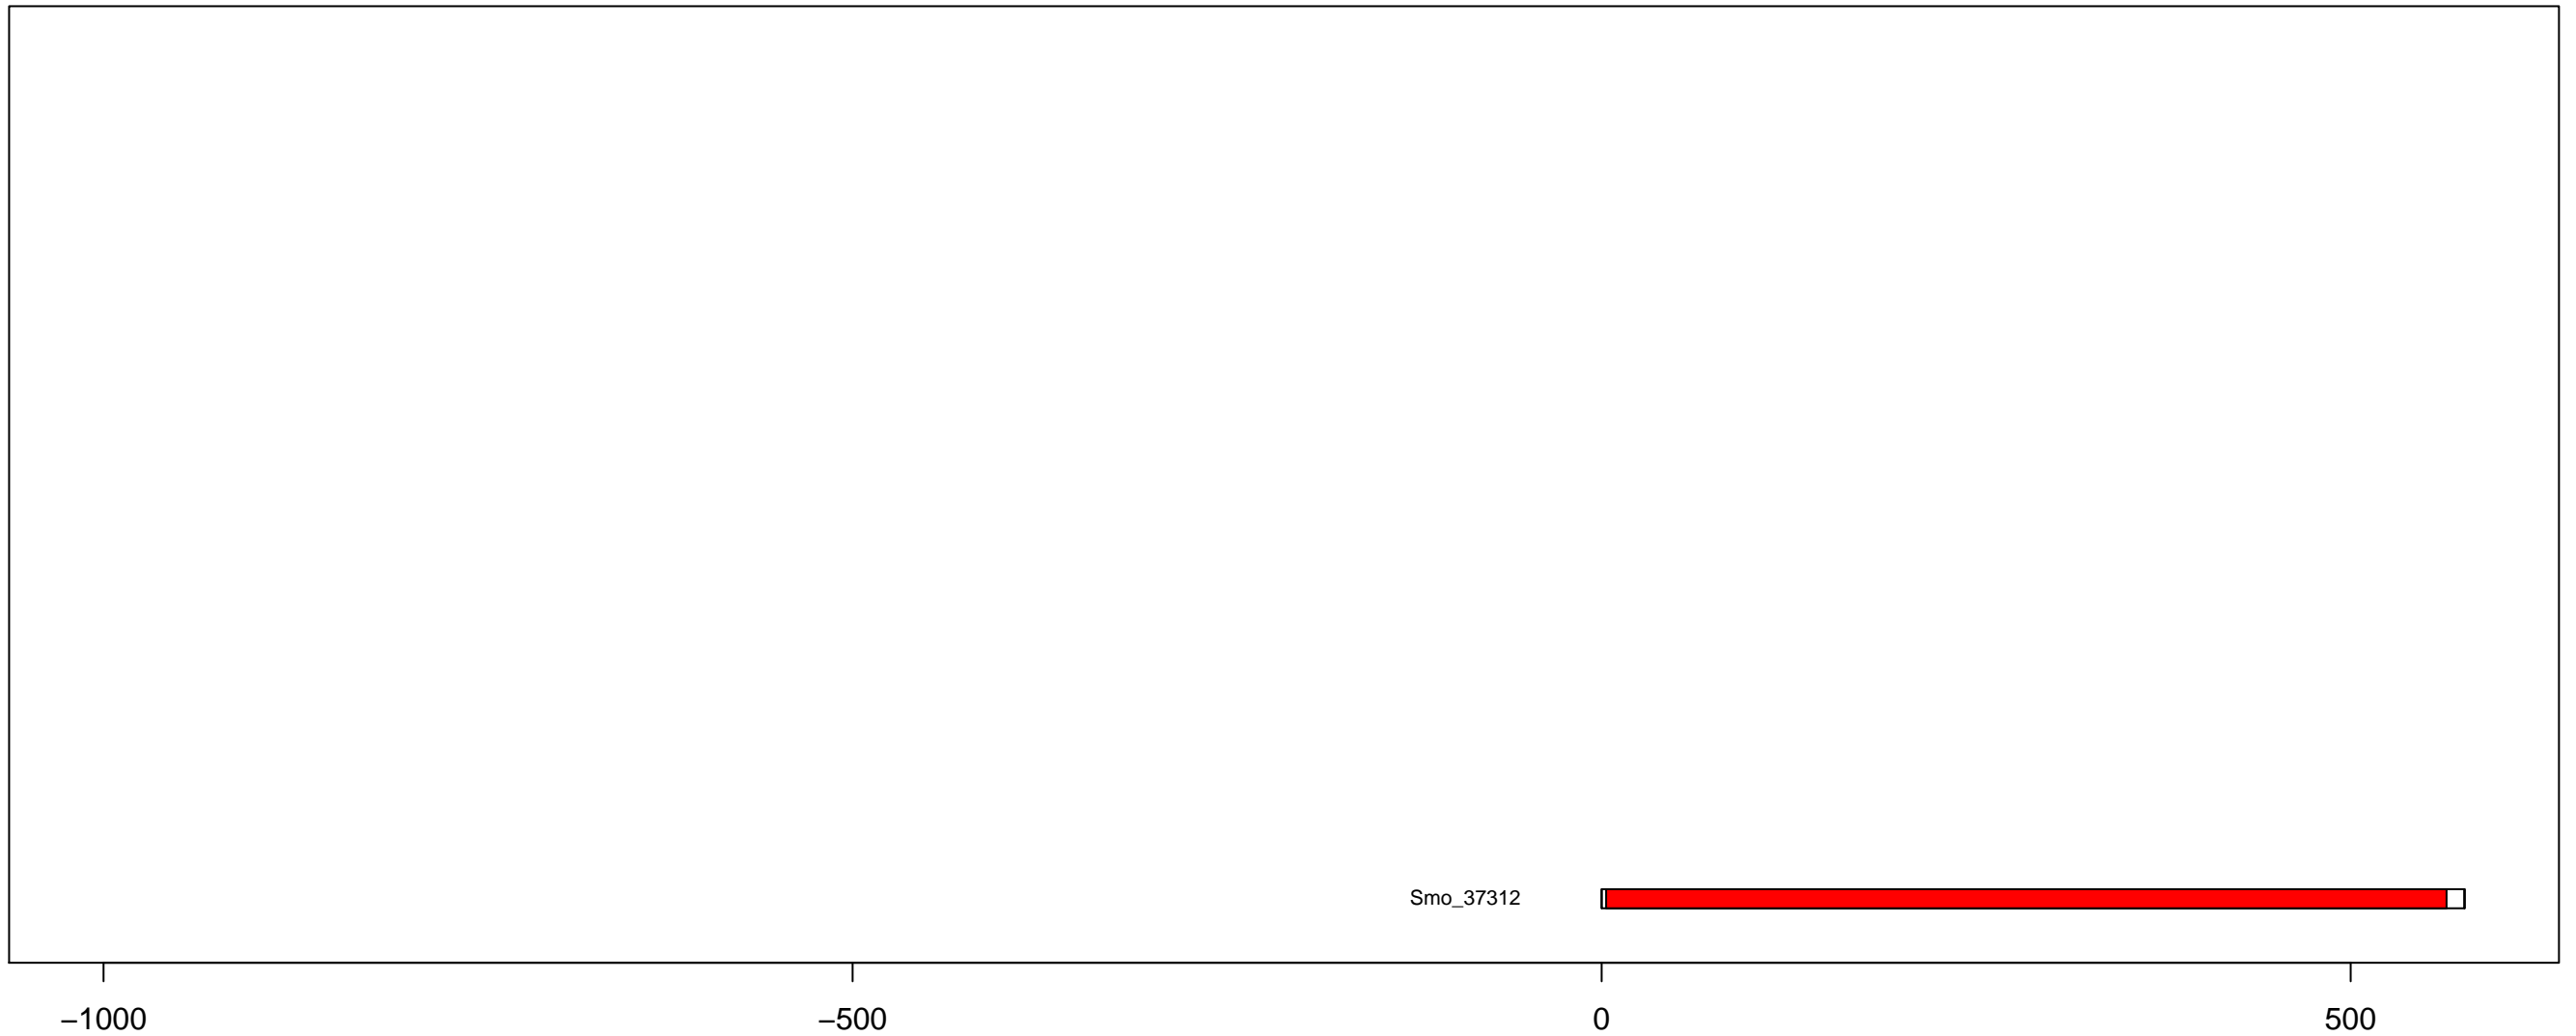

# S.mo TKL\_CTR1-DRK-2 exon-intron and kinase domain diagram (all)

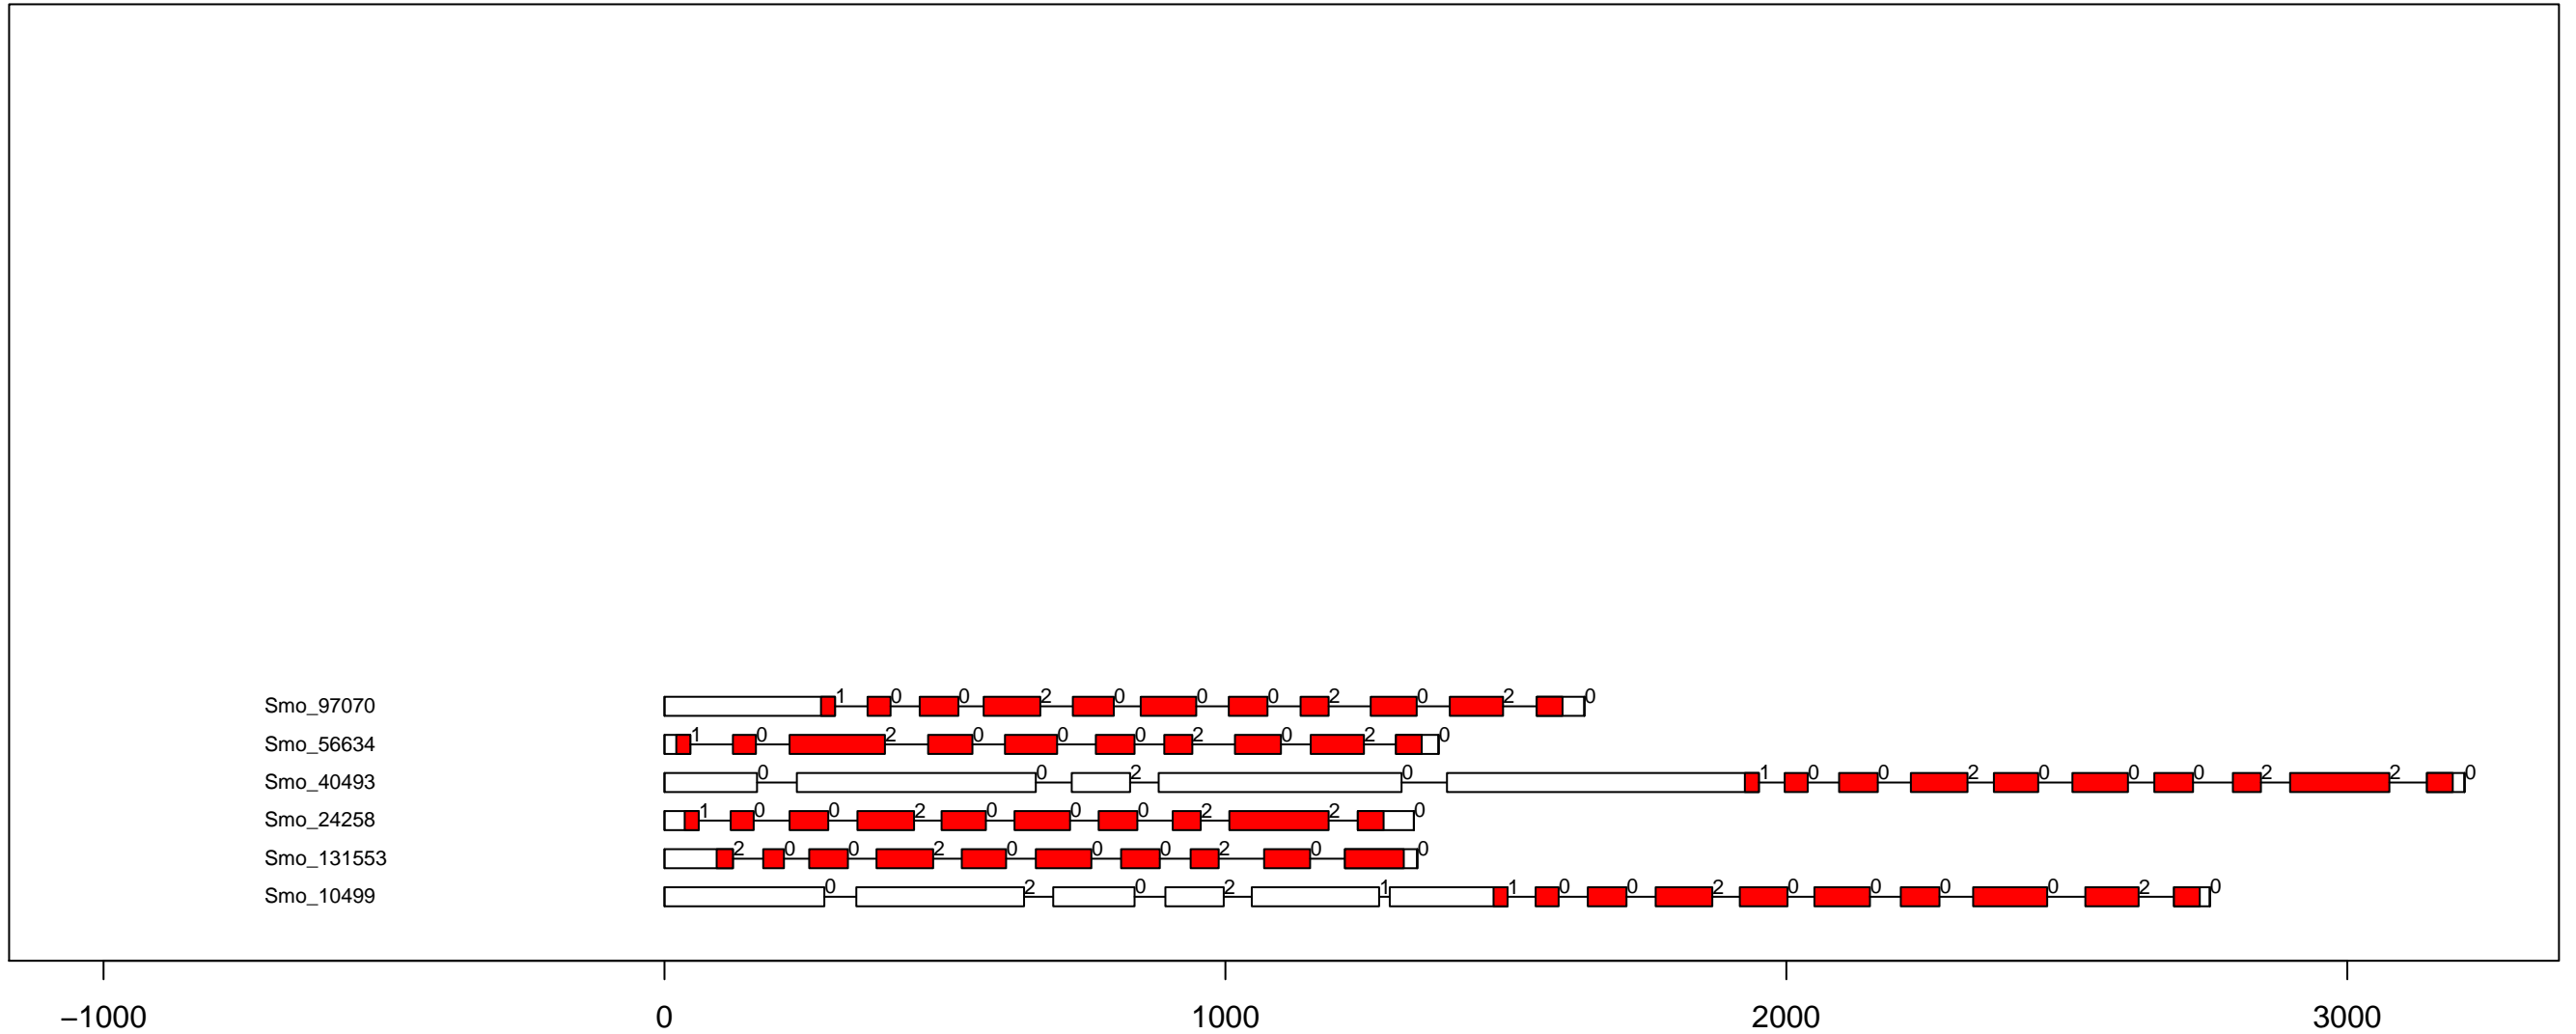

# S.mo TKL\_Gdt exon-intron and kinase domain diagram (all)

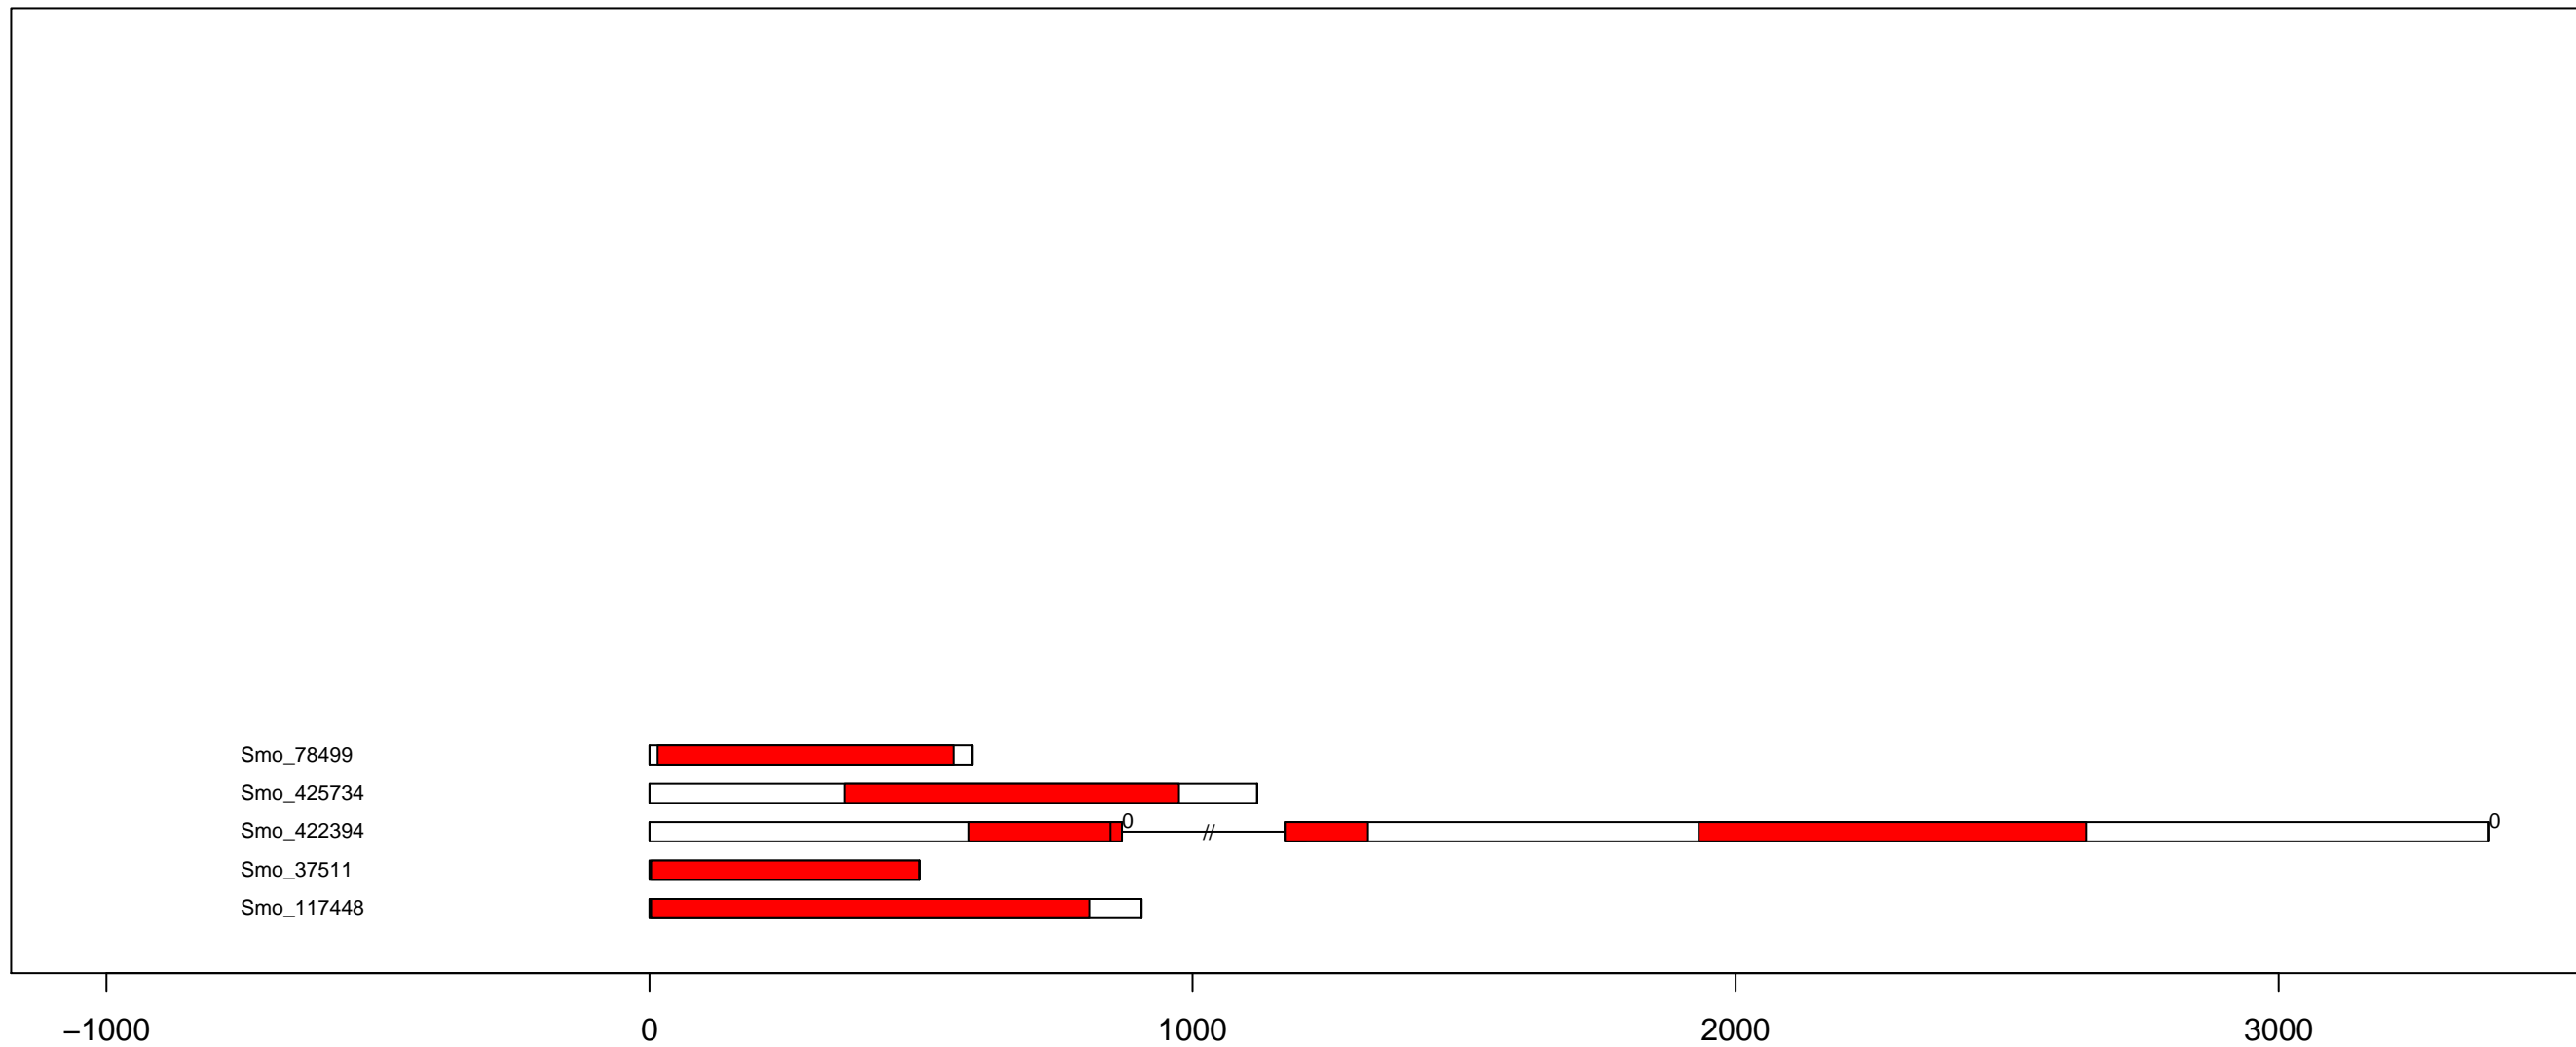

S.mo TKL-Cr-3 exon-intron and kinase domain diagram (all)

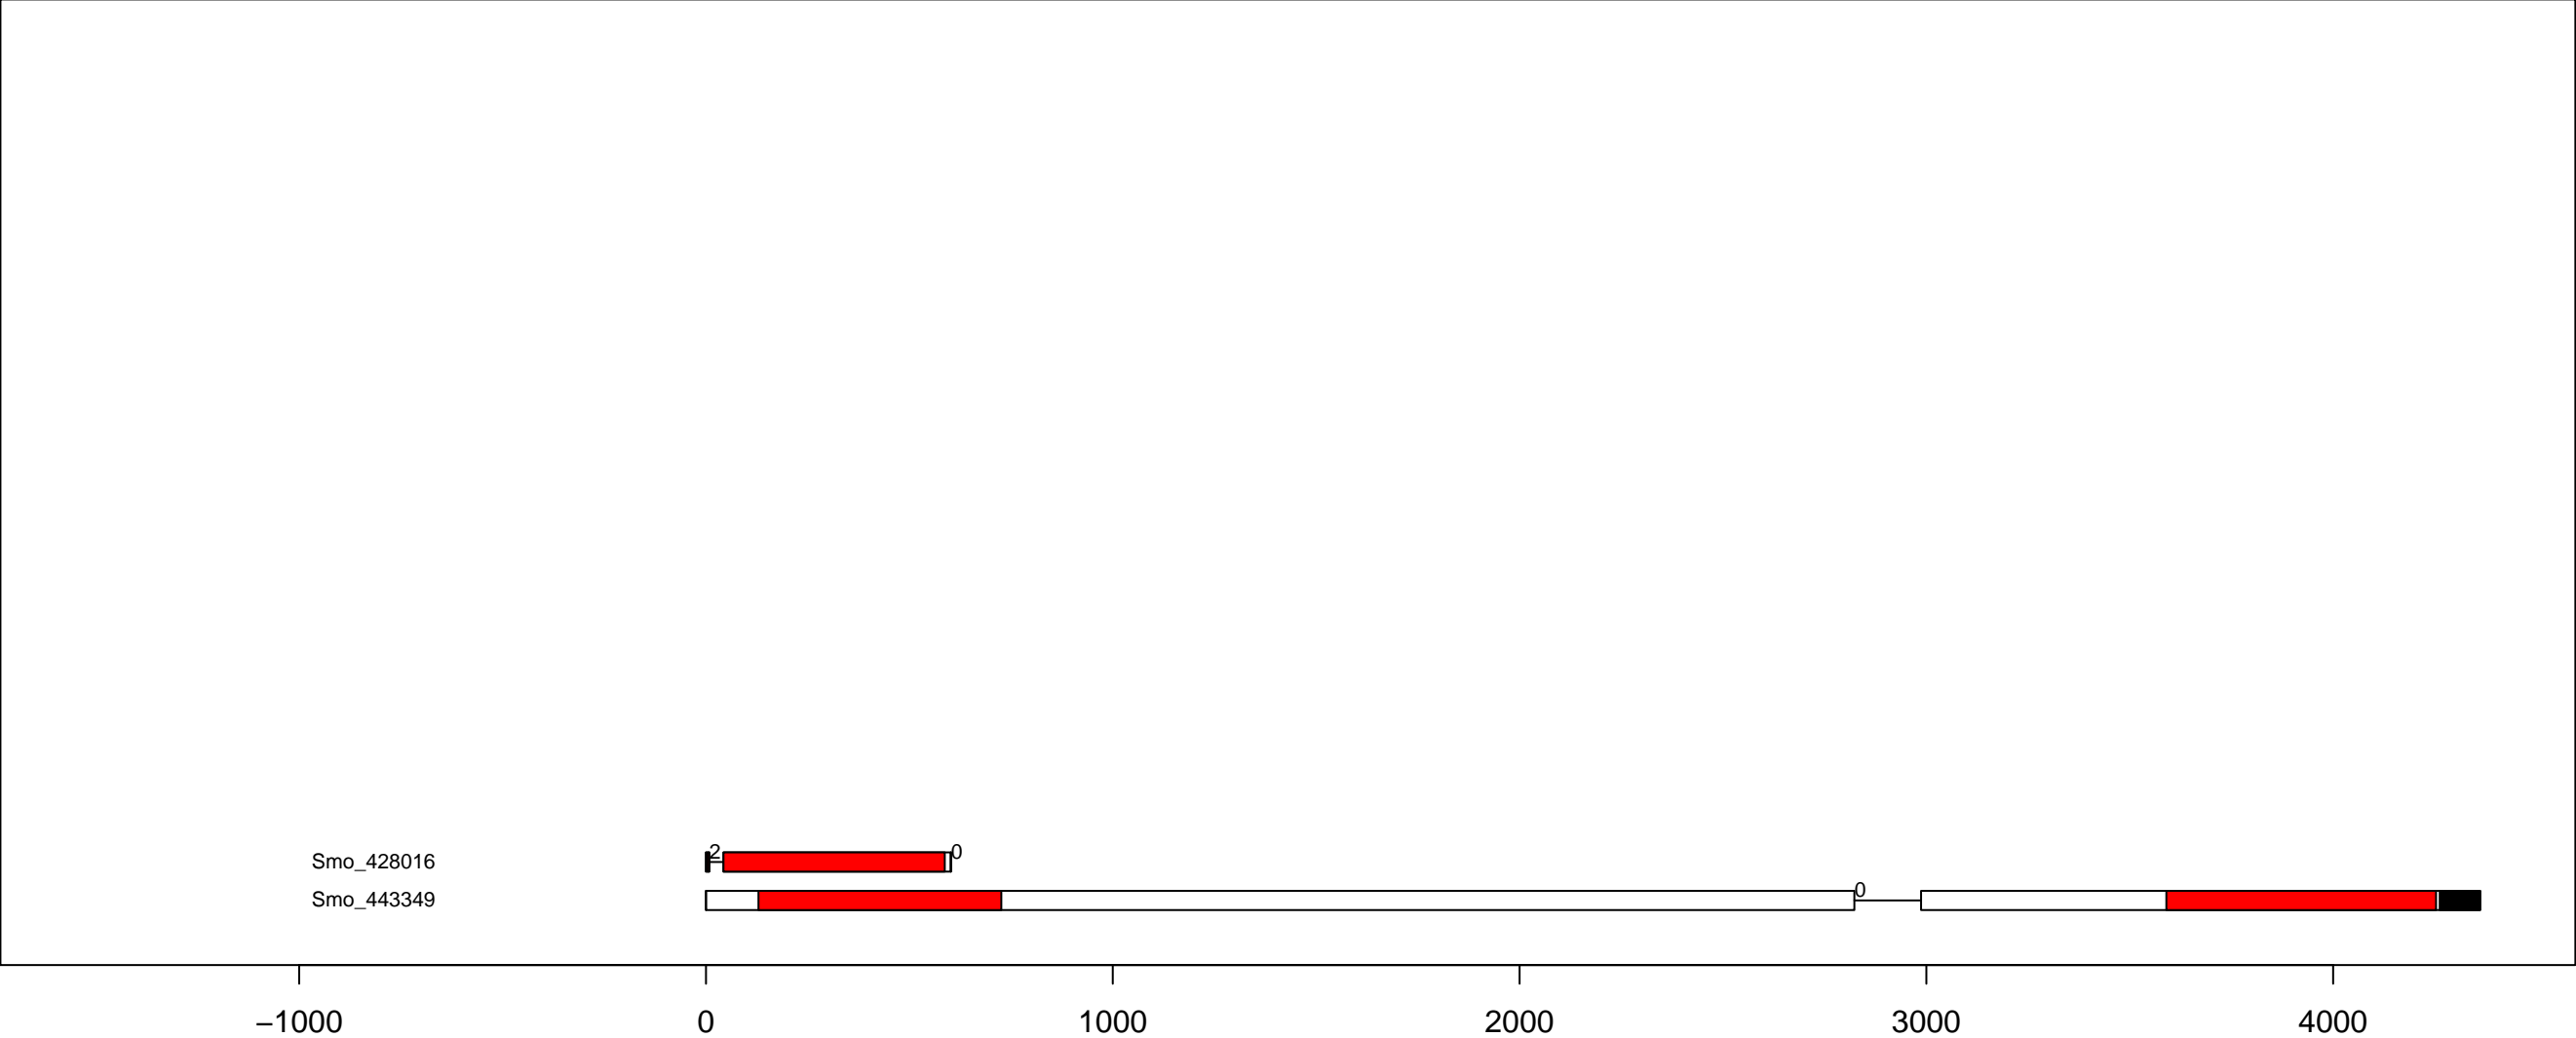

# S.mo TKL-PI-1 exon-intron and kinase domain diagram (all)

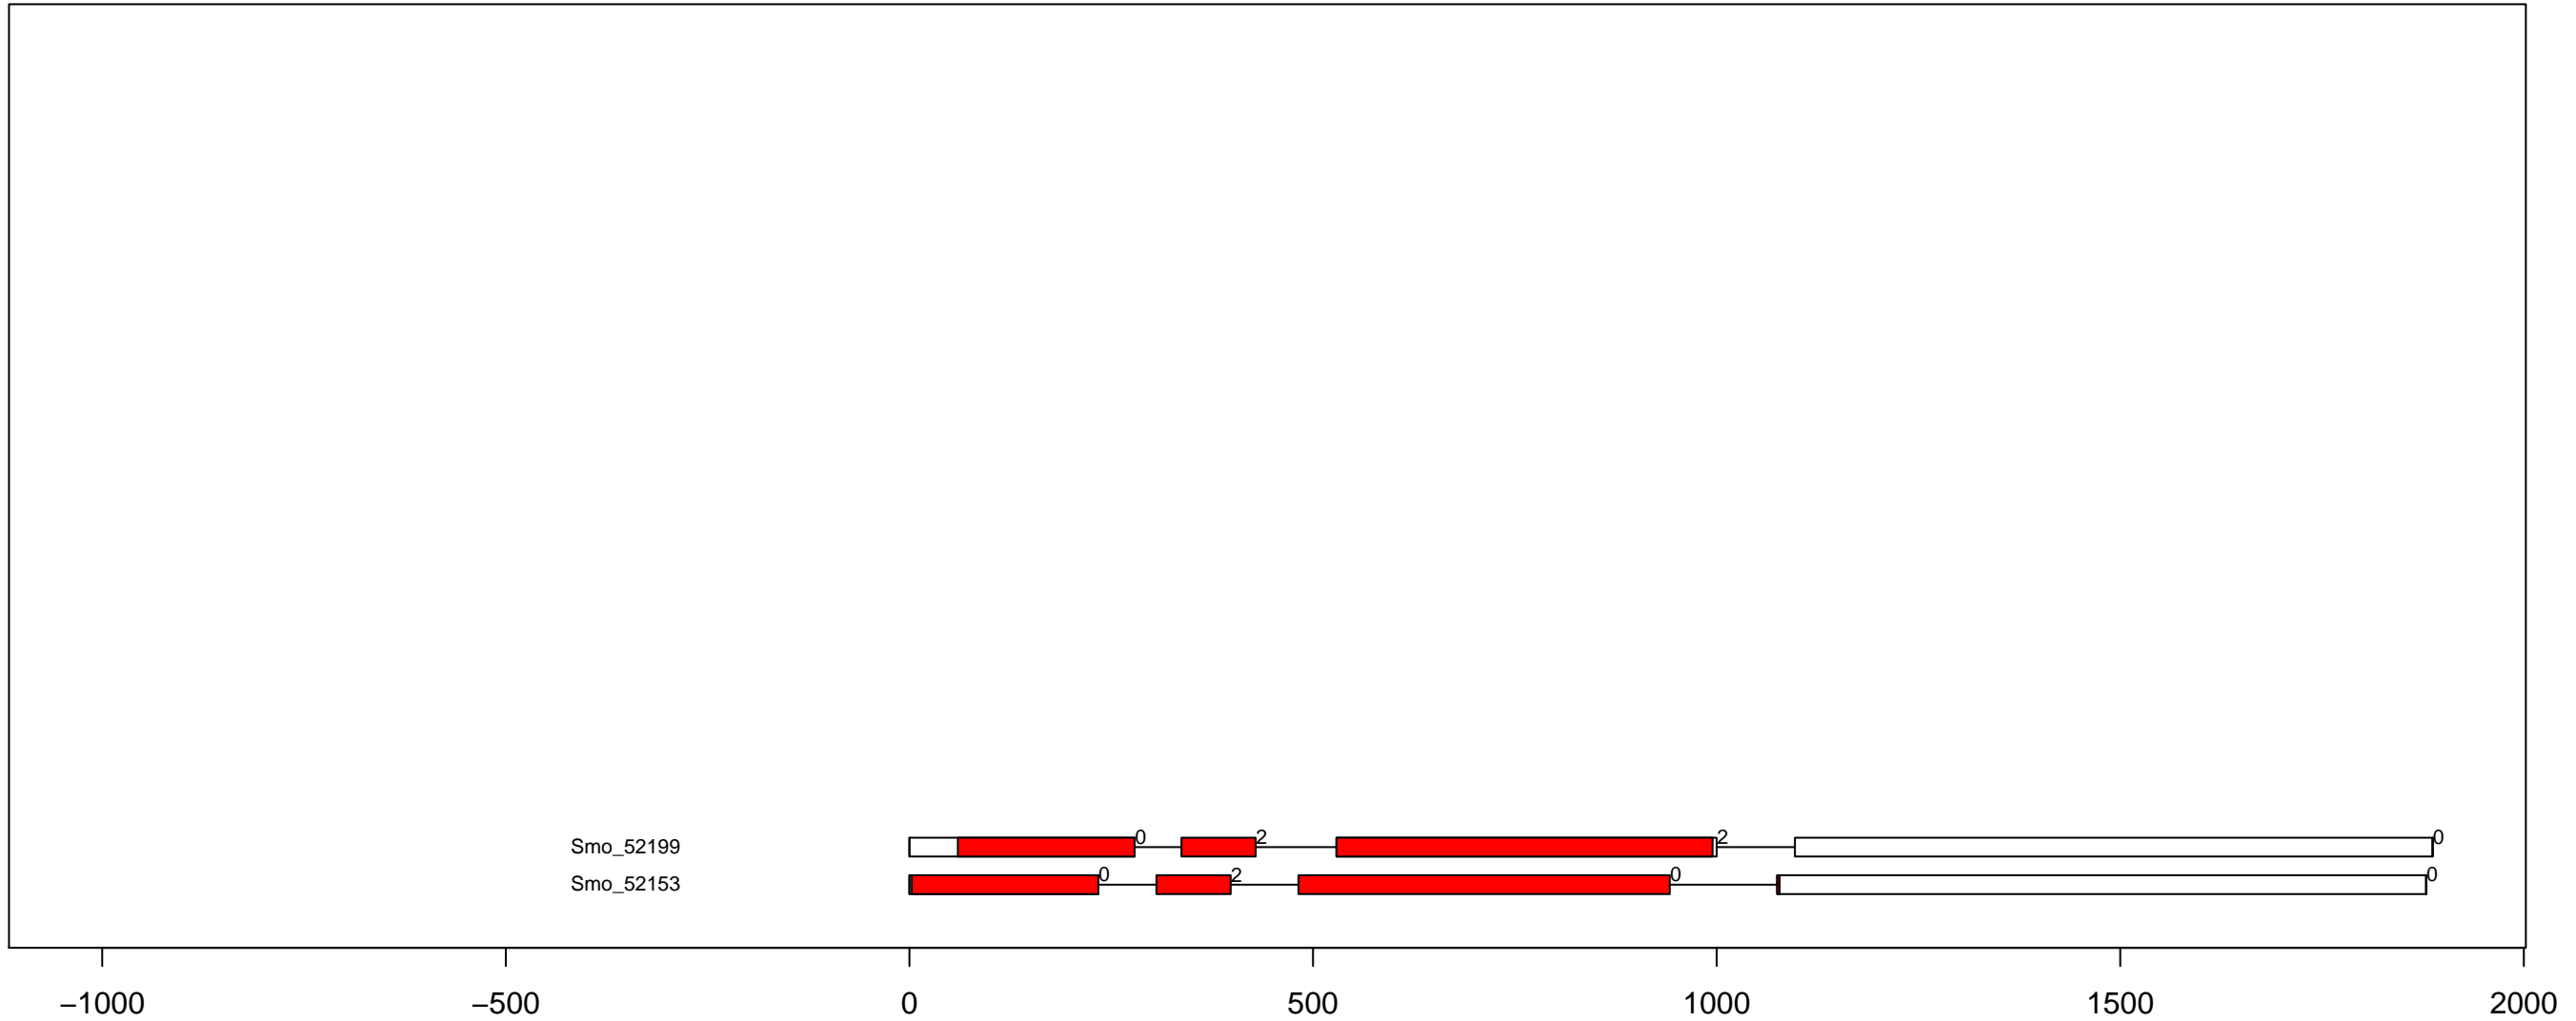



# S.mo TKL-PI-2 exon-intron and kinase domain diagram (all)

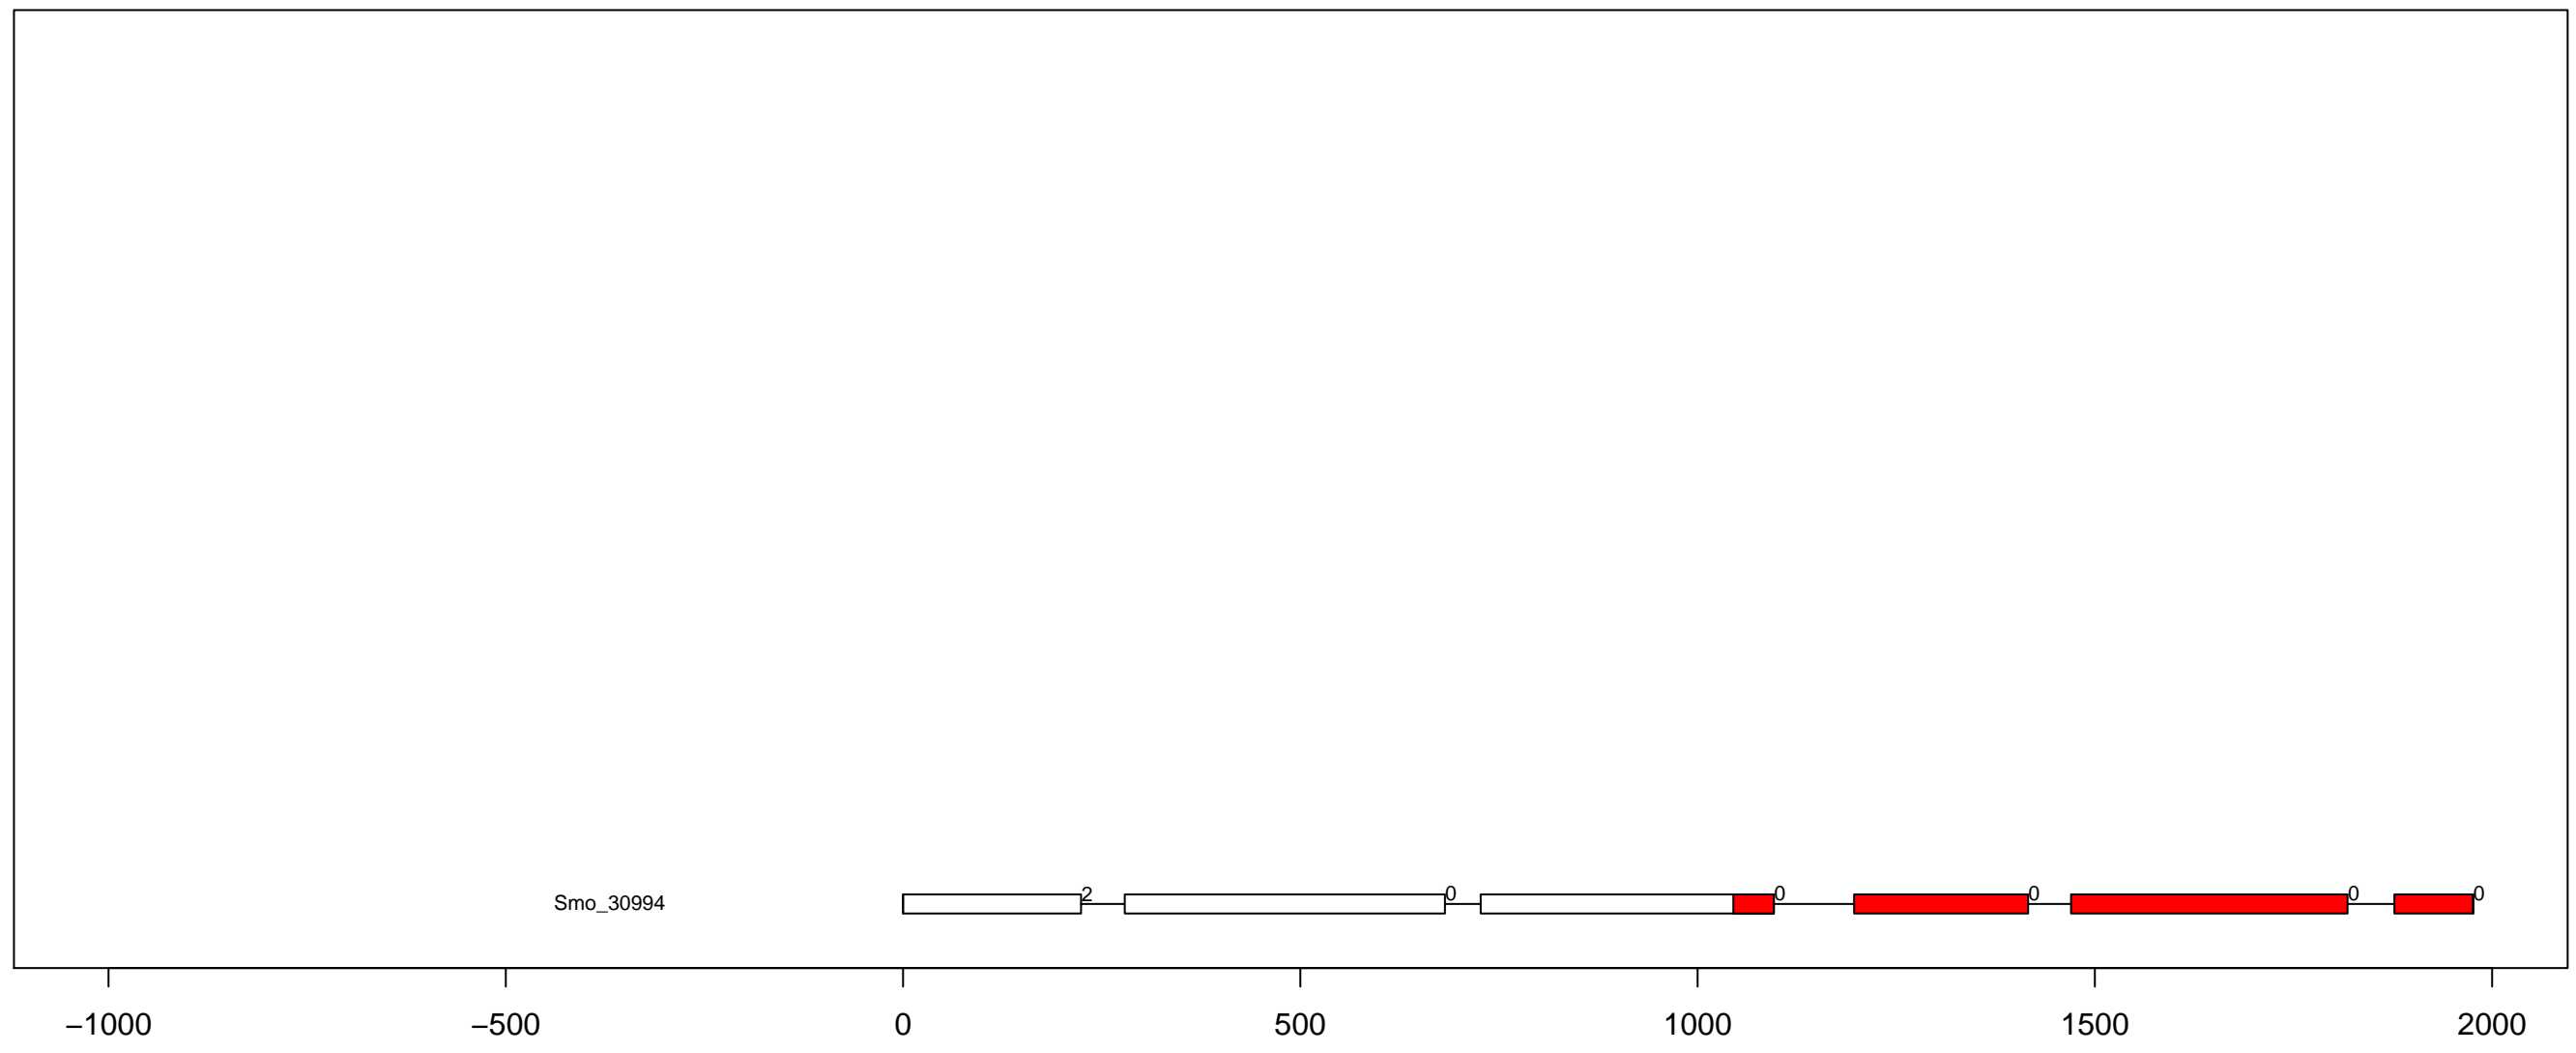

S.mo TKL-PI-3 exon-intron and kinase domain diagram (all)

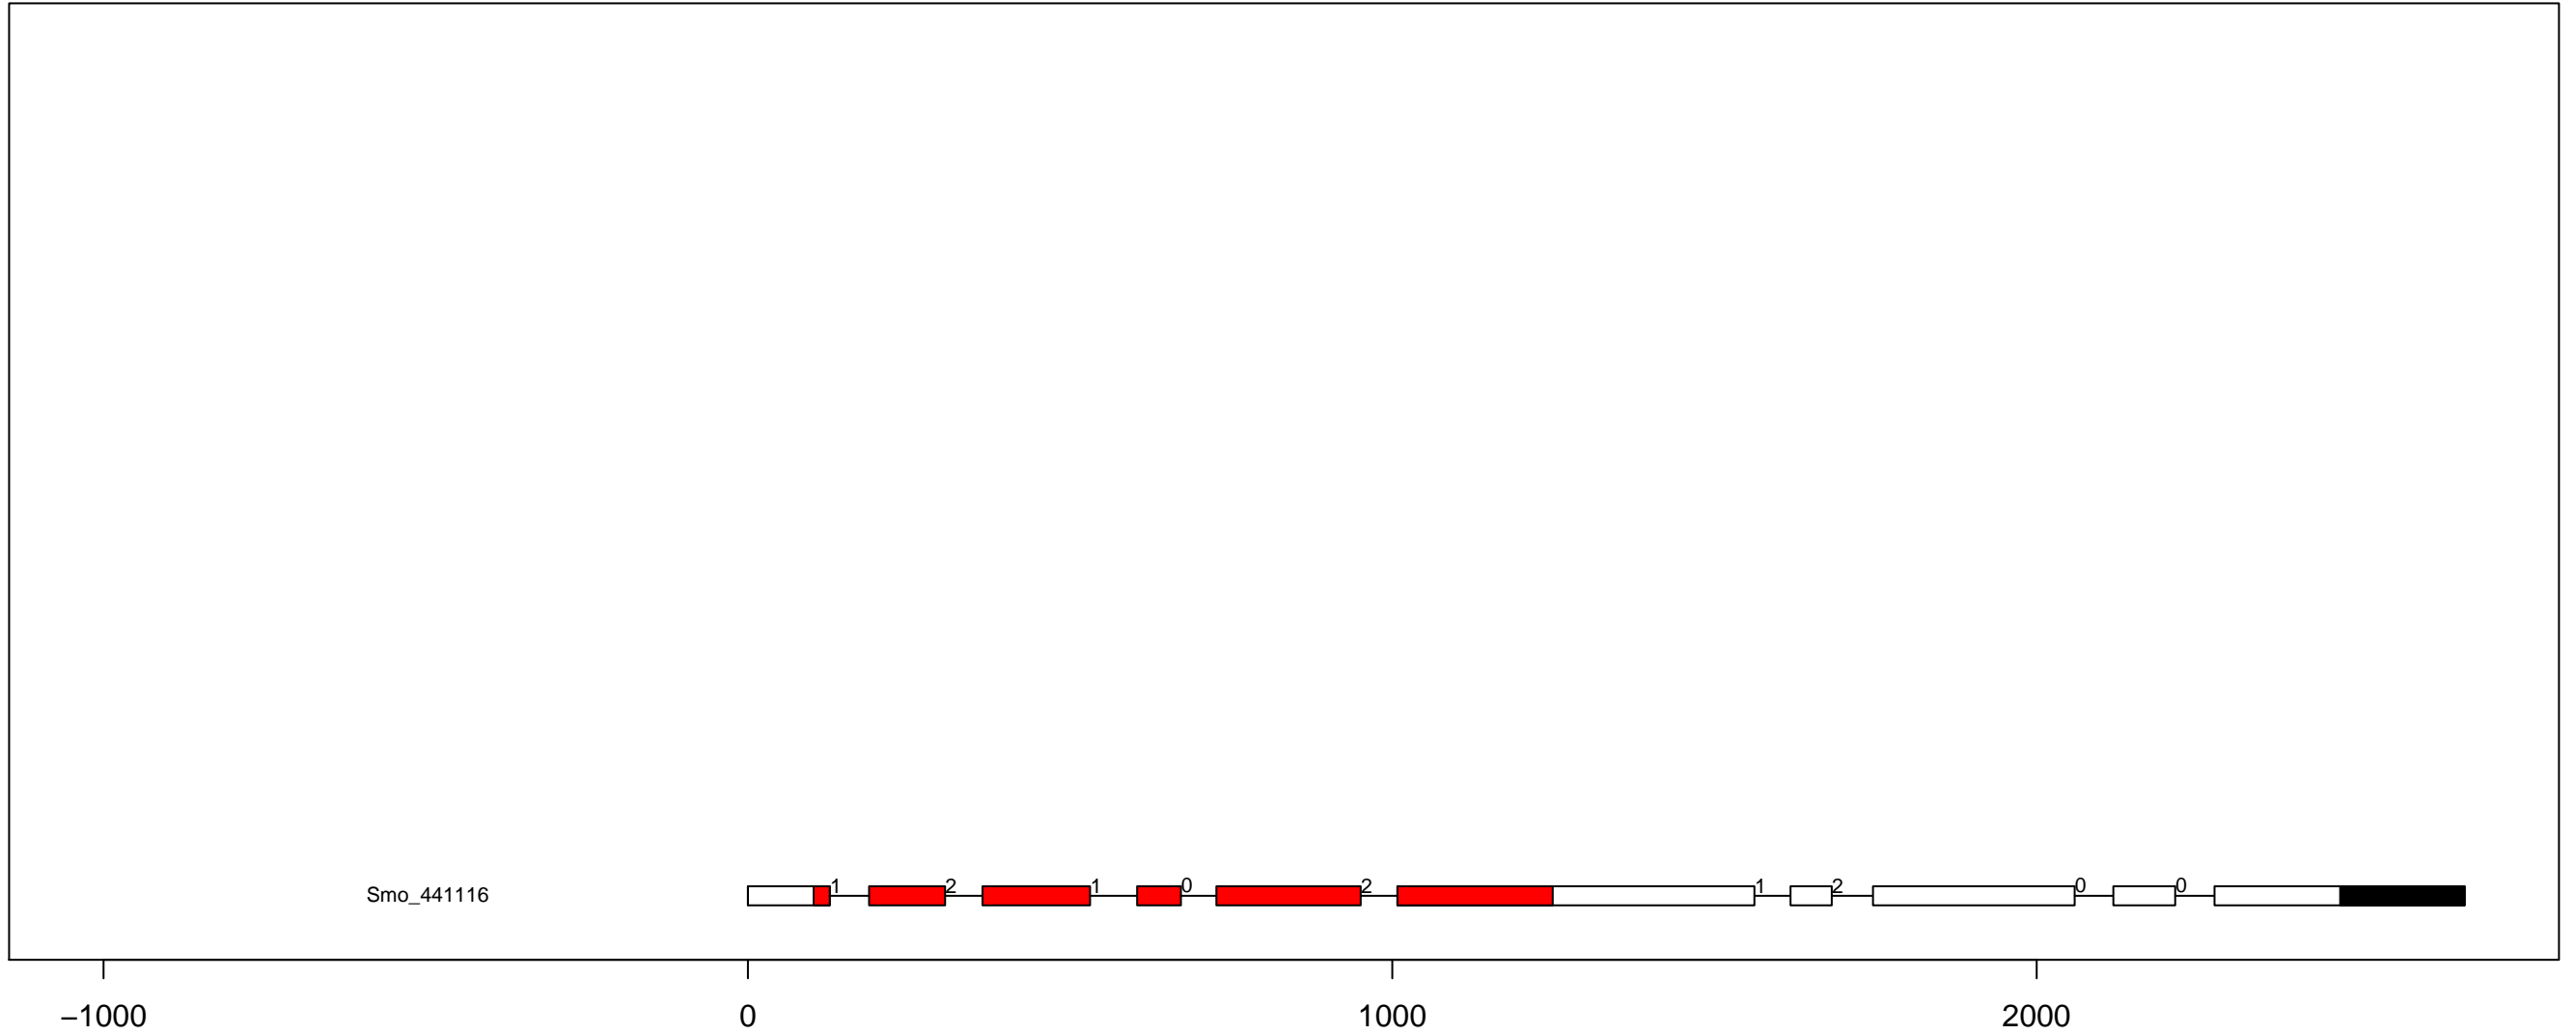

### S.mo TKL-PI-4 exon-intron and kinase domain diagram (all)

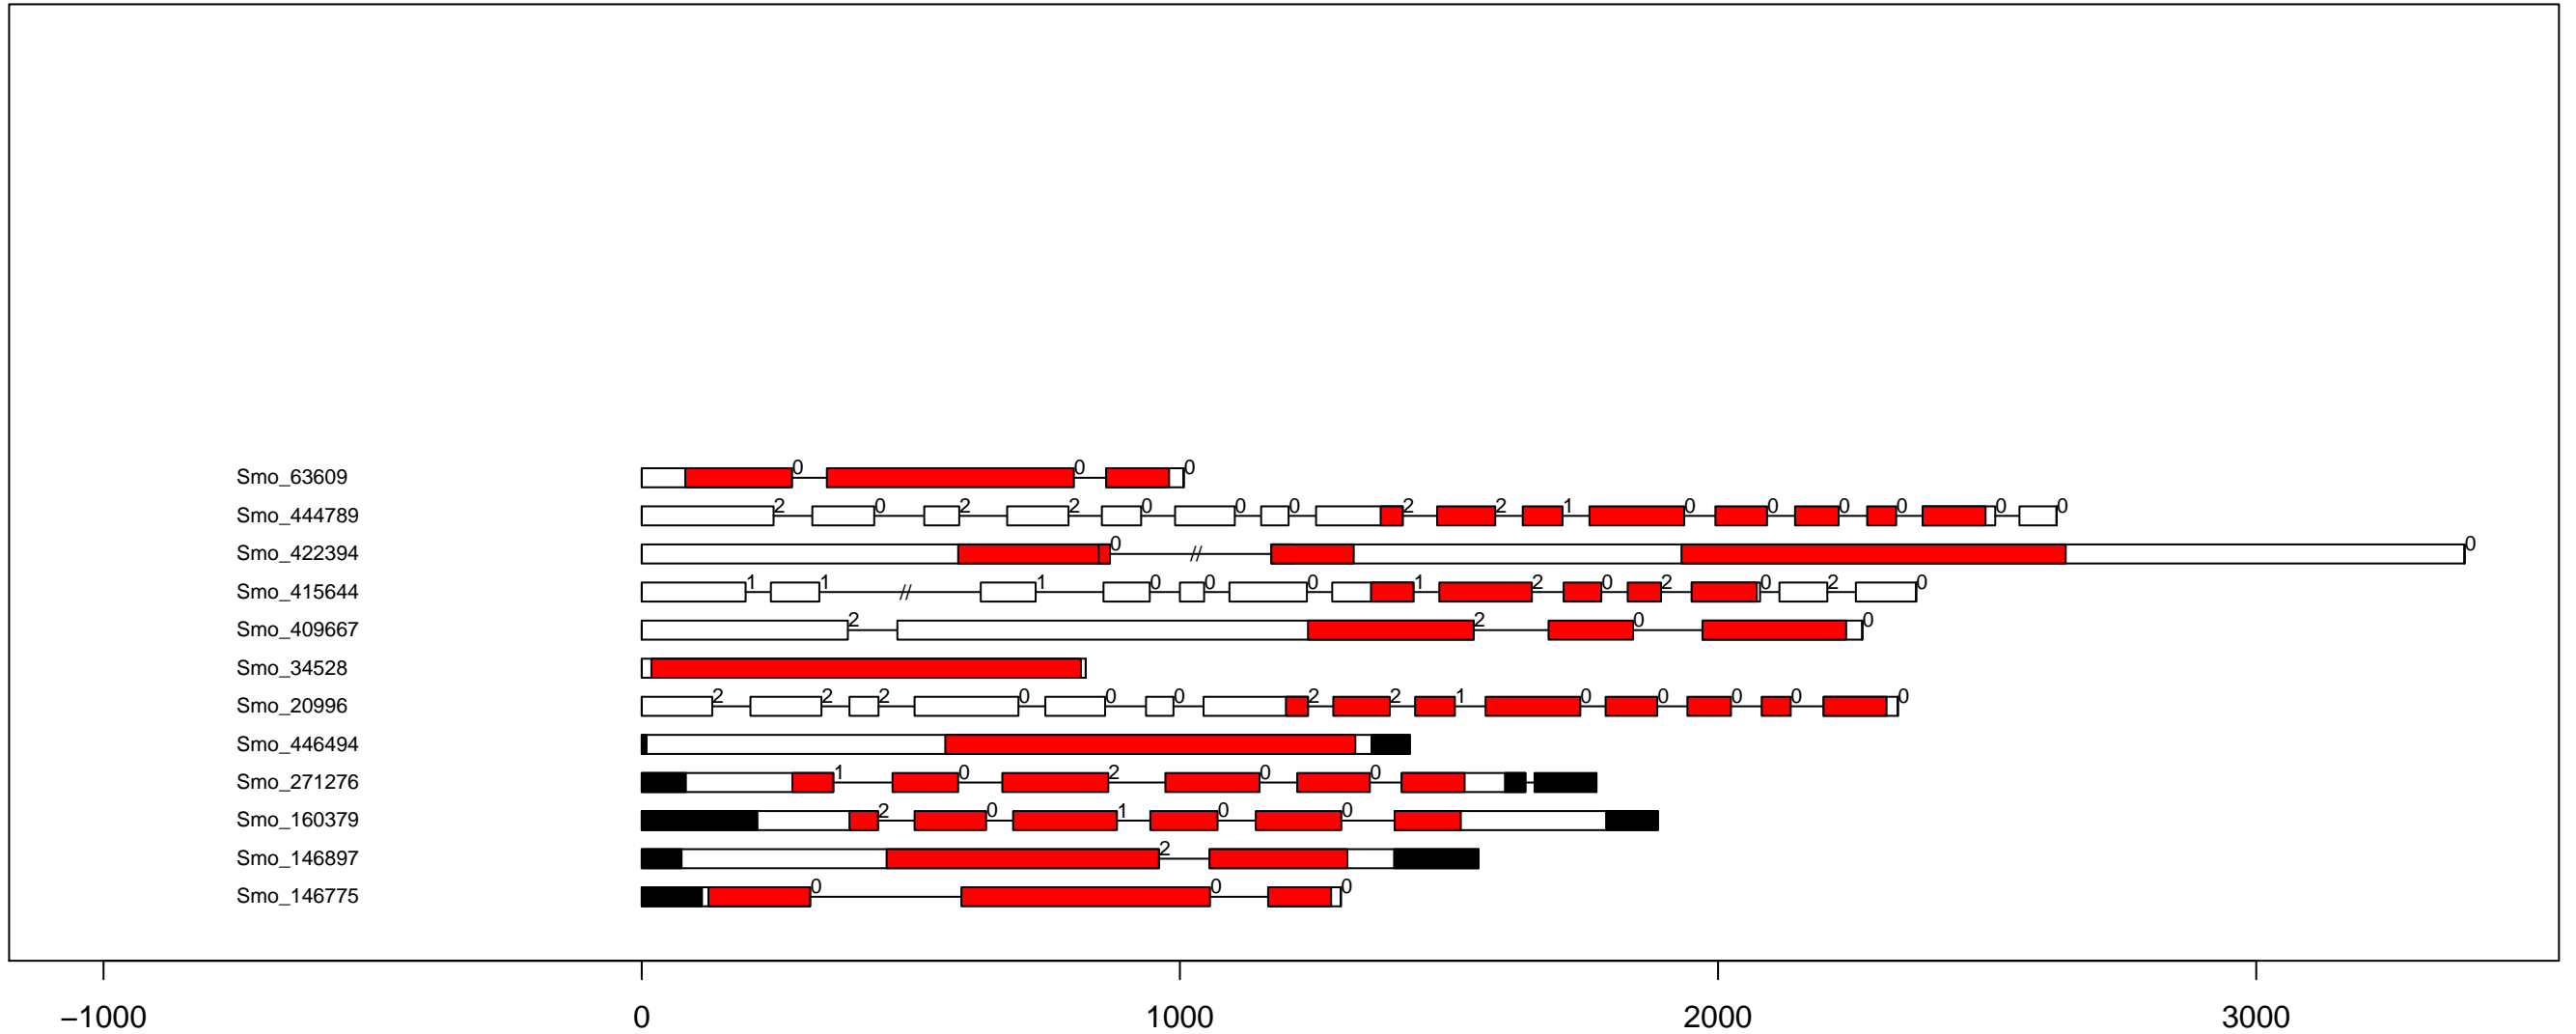

# S.mo TKL-PI-5 exon-intron and kinase domain diagram (all)

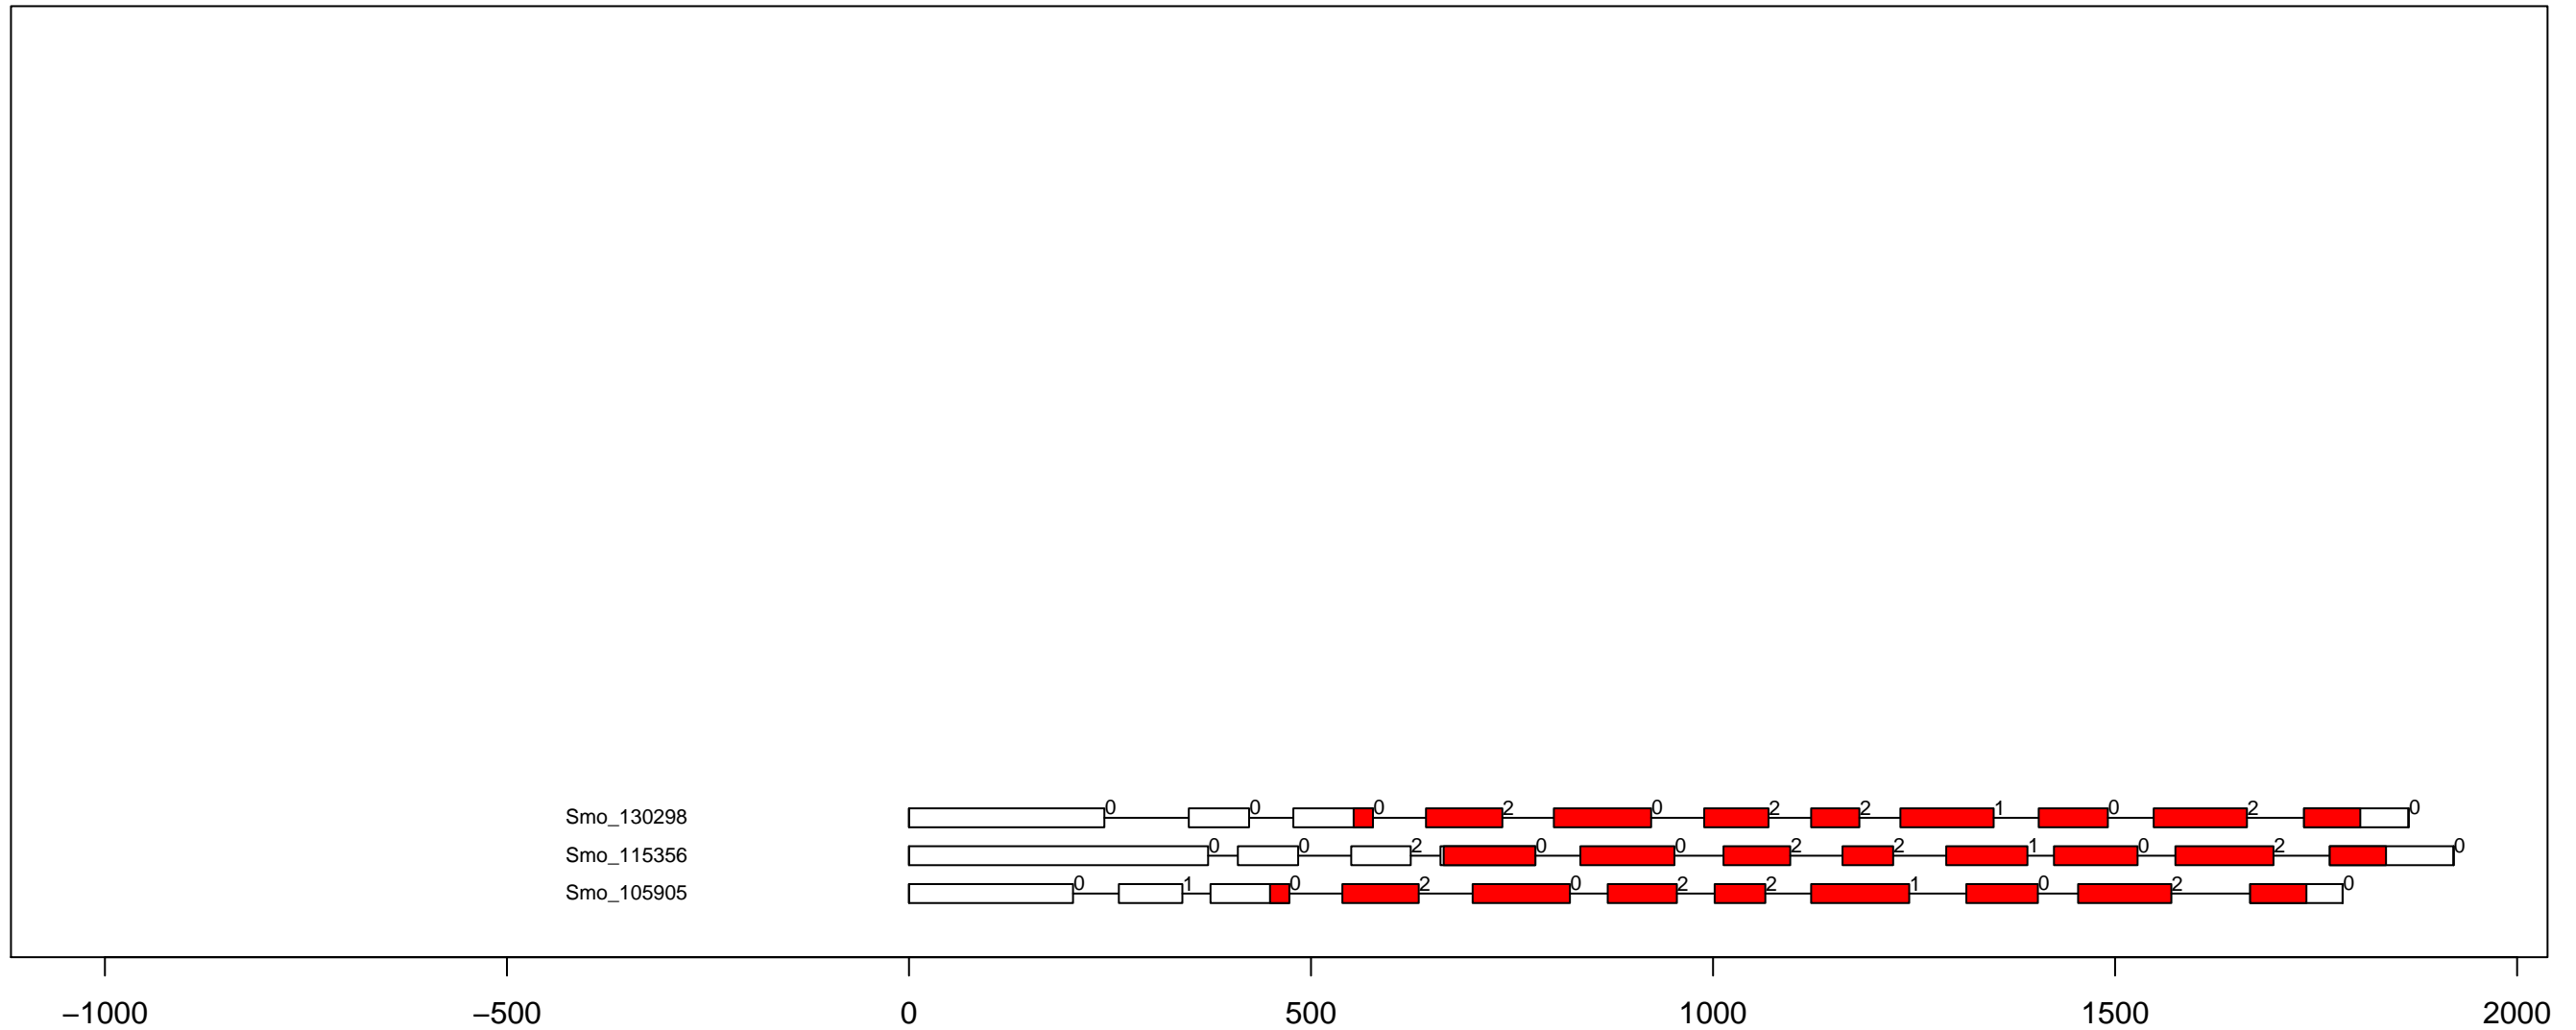

# S.mo TKL-PI-6 exon-intron and kinase domain diagram (all)

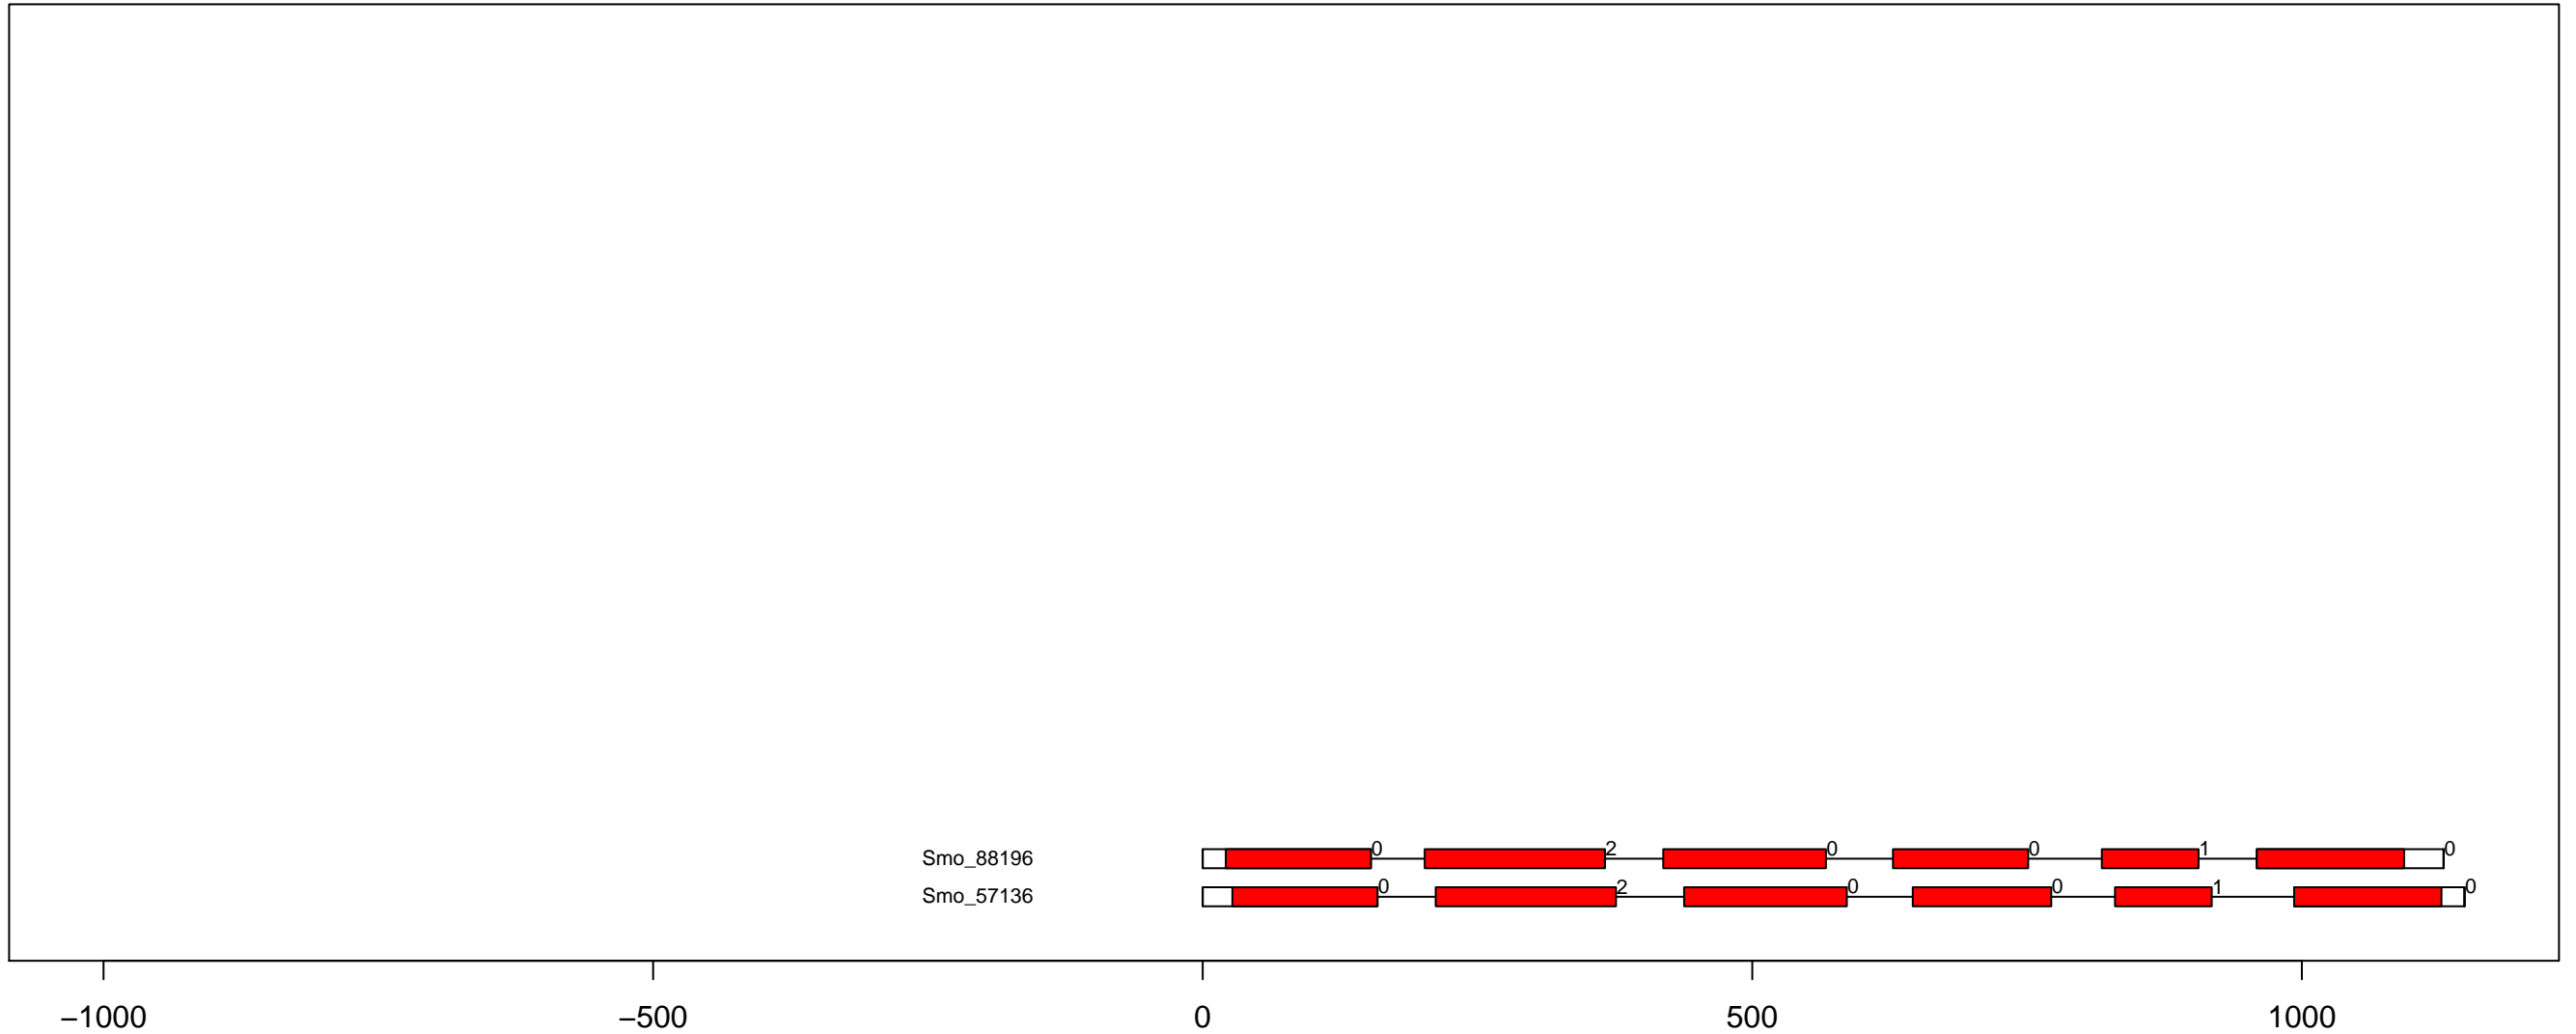

# S.mo TKL-PI-8 exon-intron and kinase domain diagram (all)

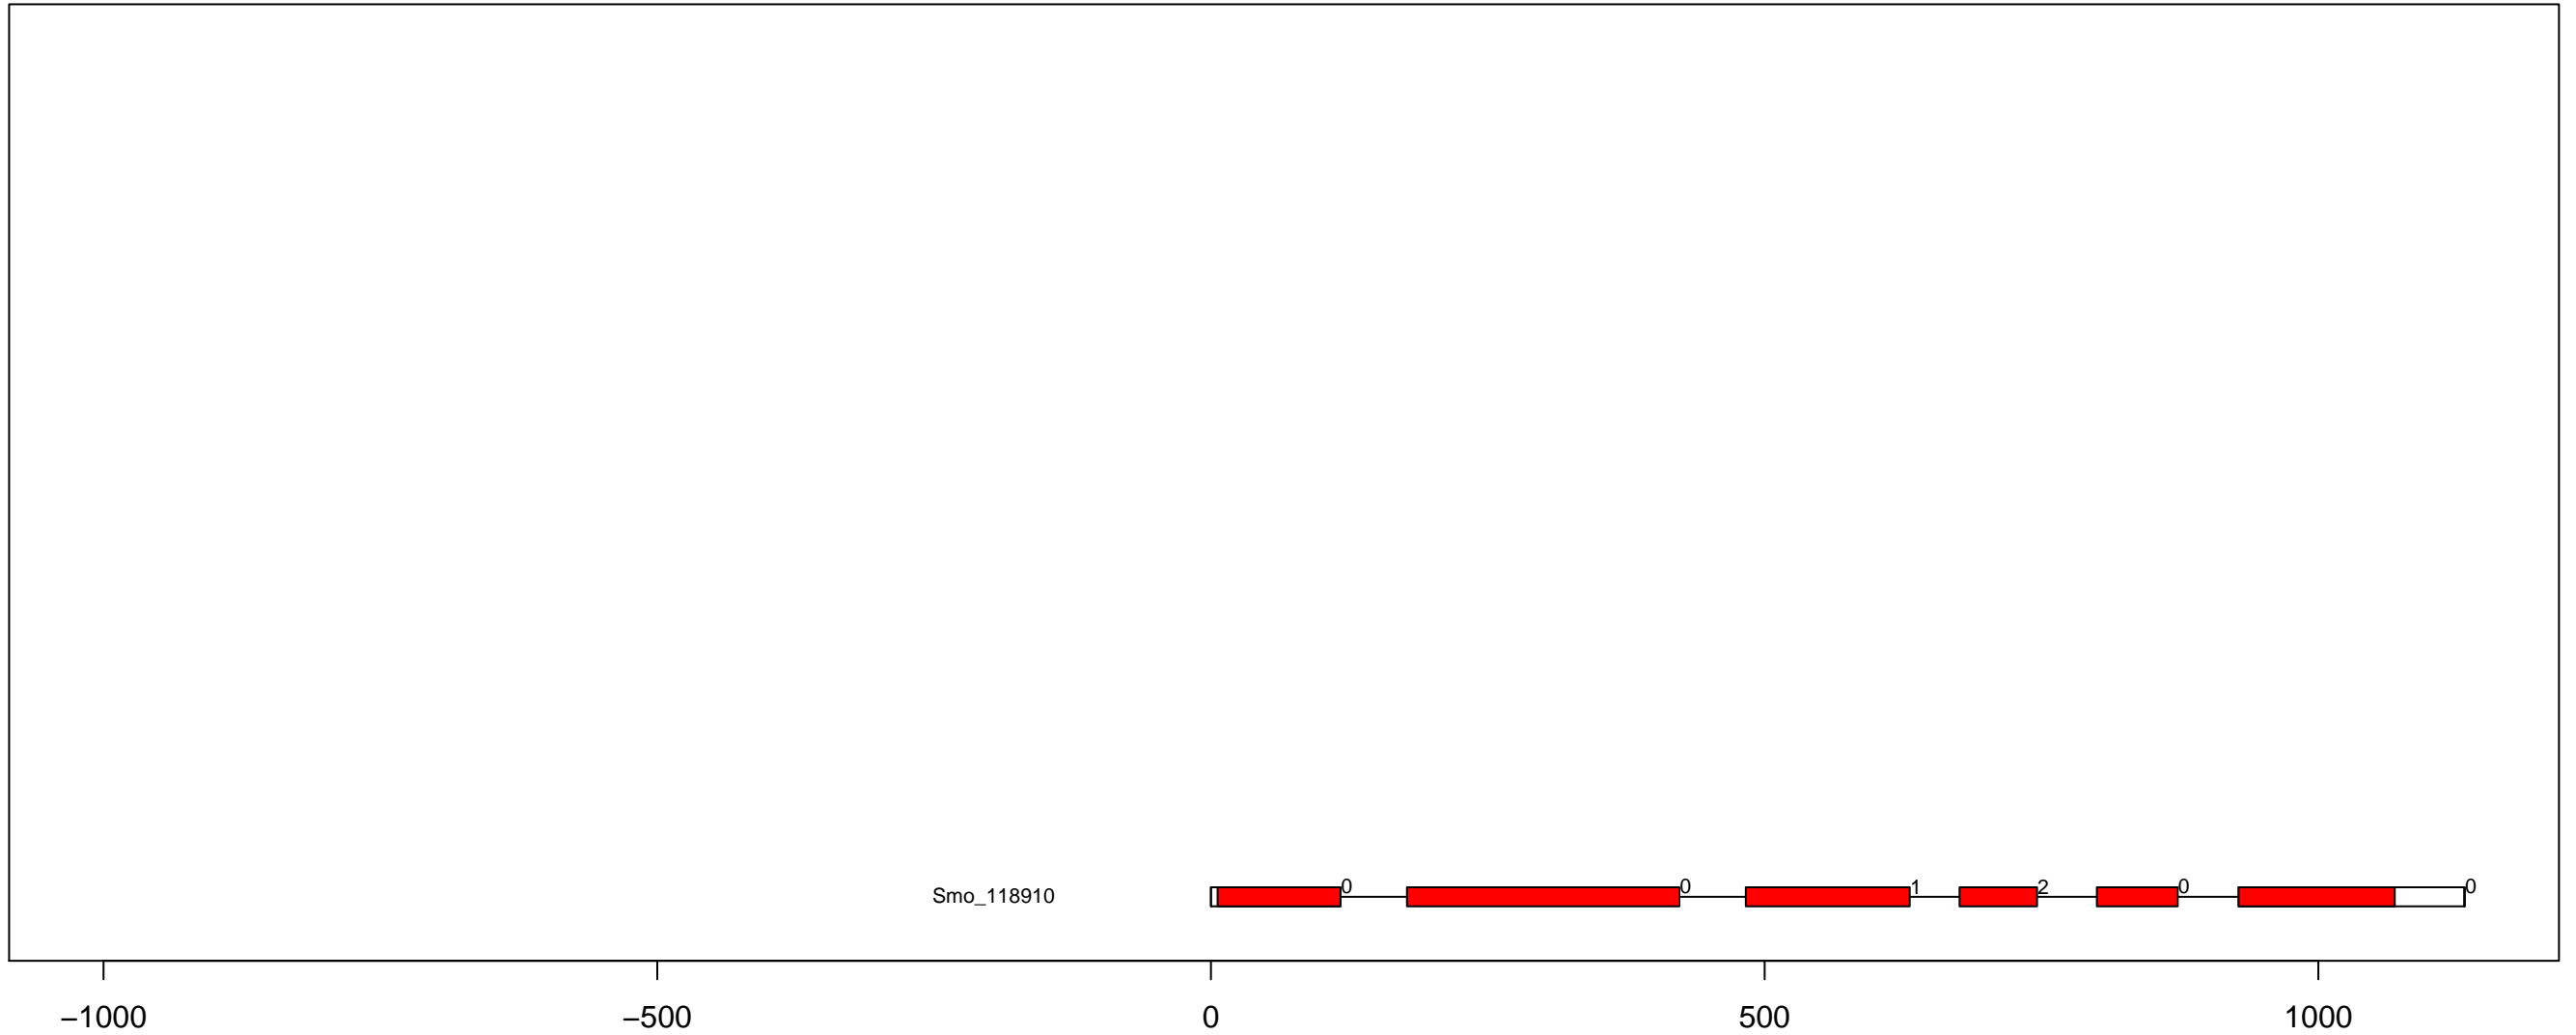

# S.mo TLK exon-intron and kinase domain diagram (all)

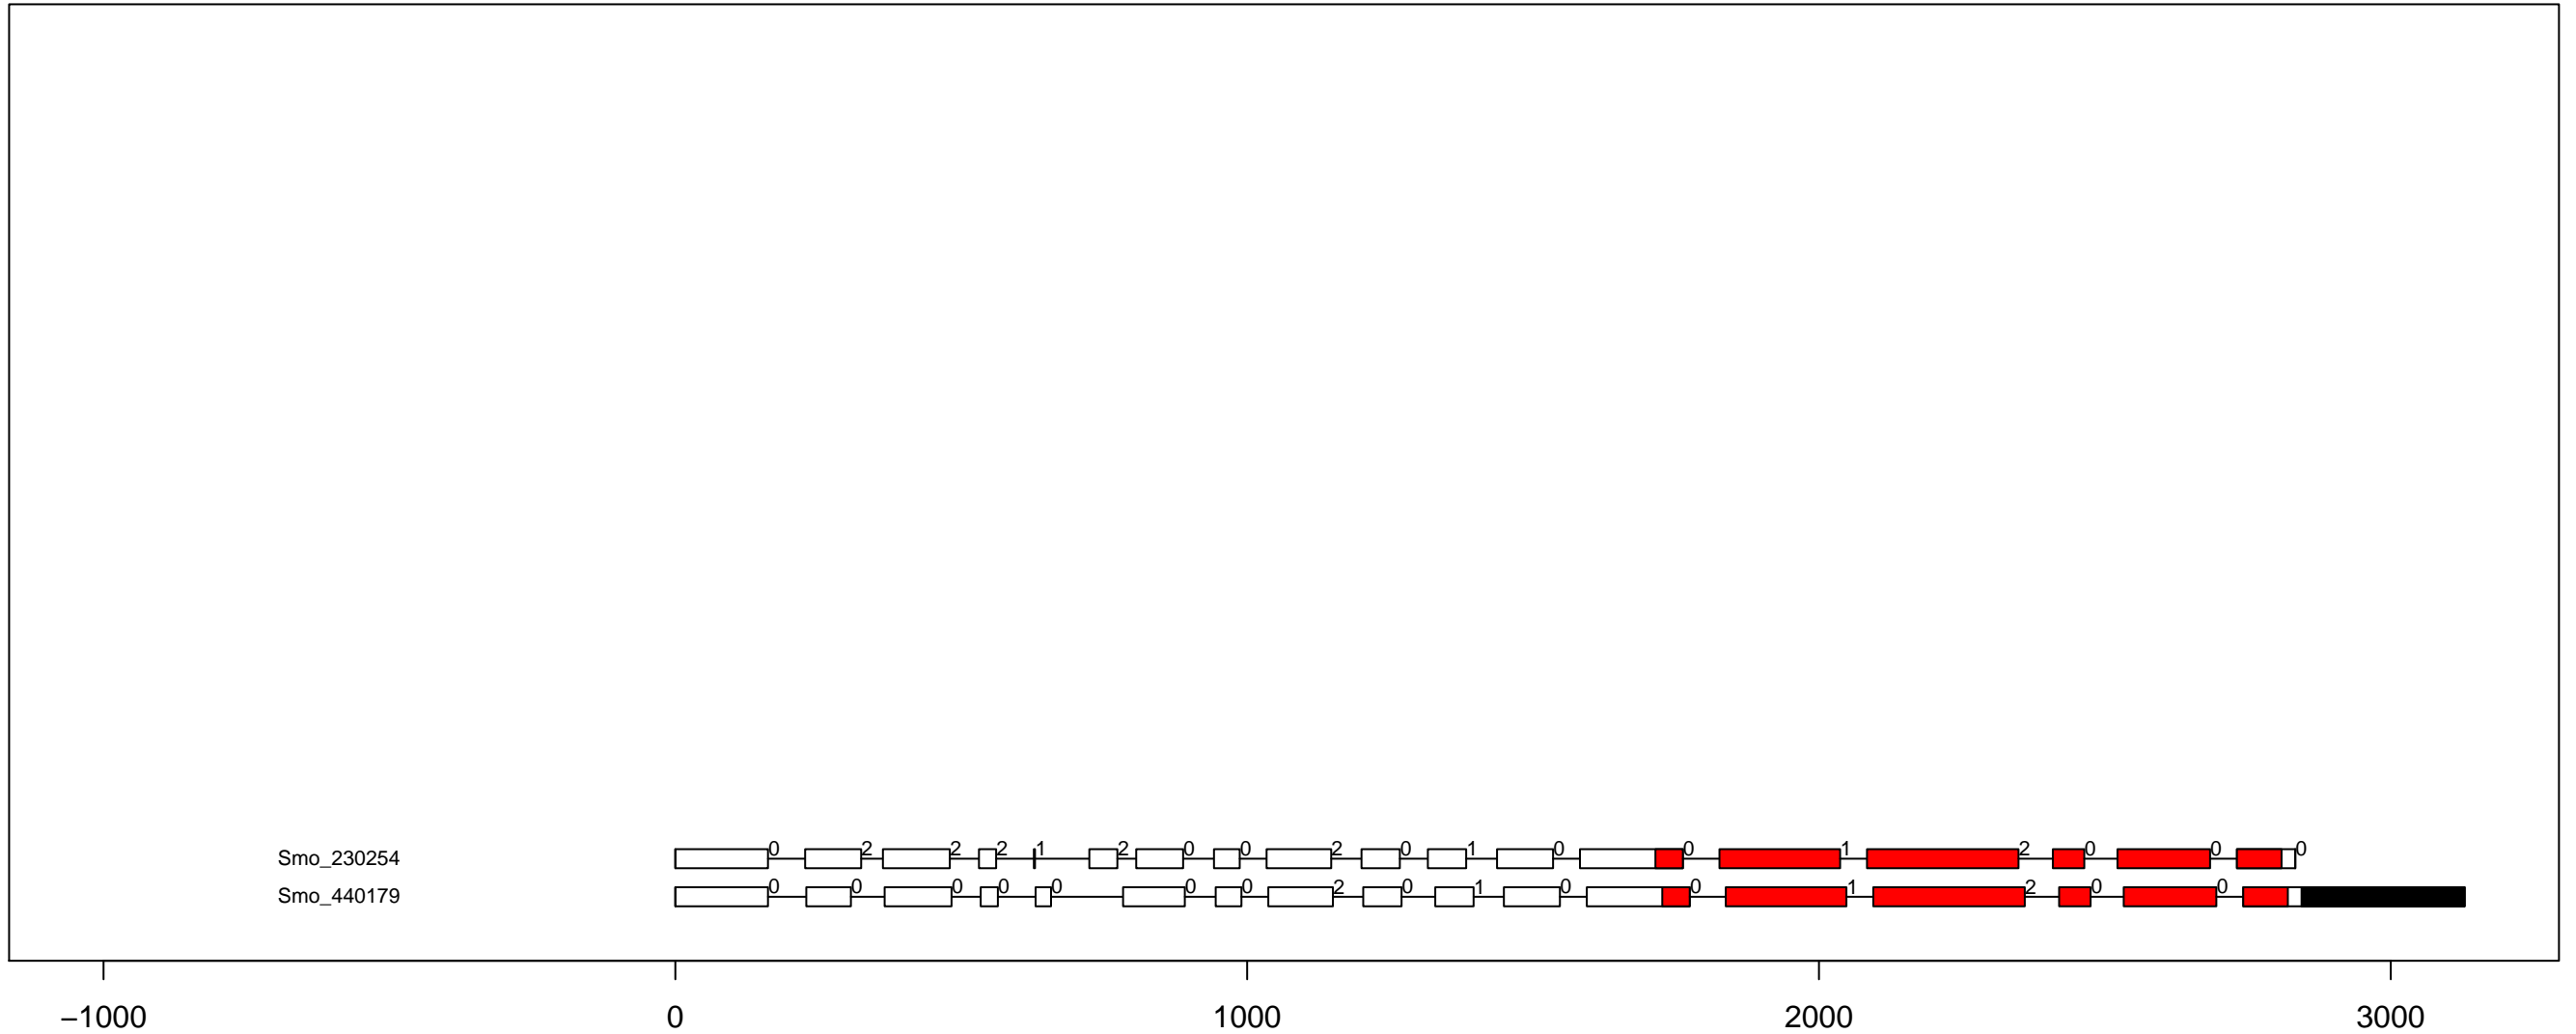

**S.mo TTK exon-intron and kinase domain diagram (all)**

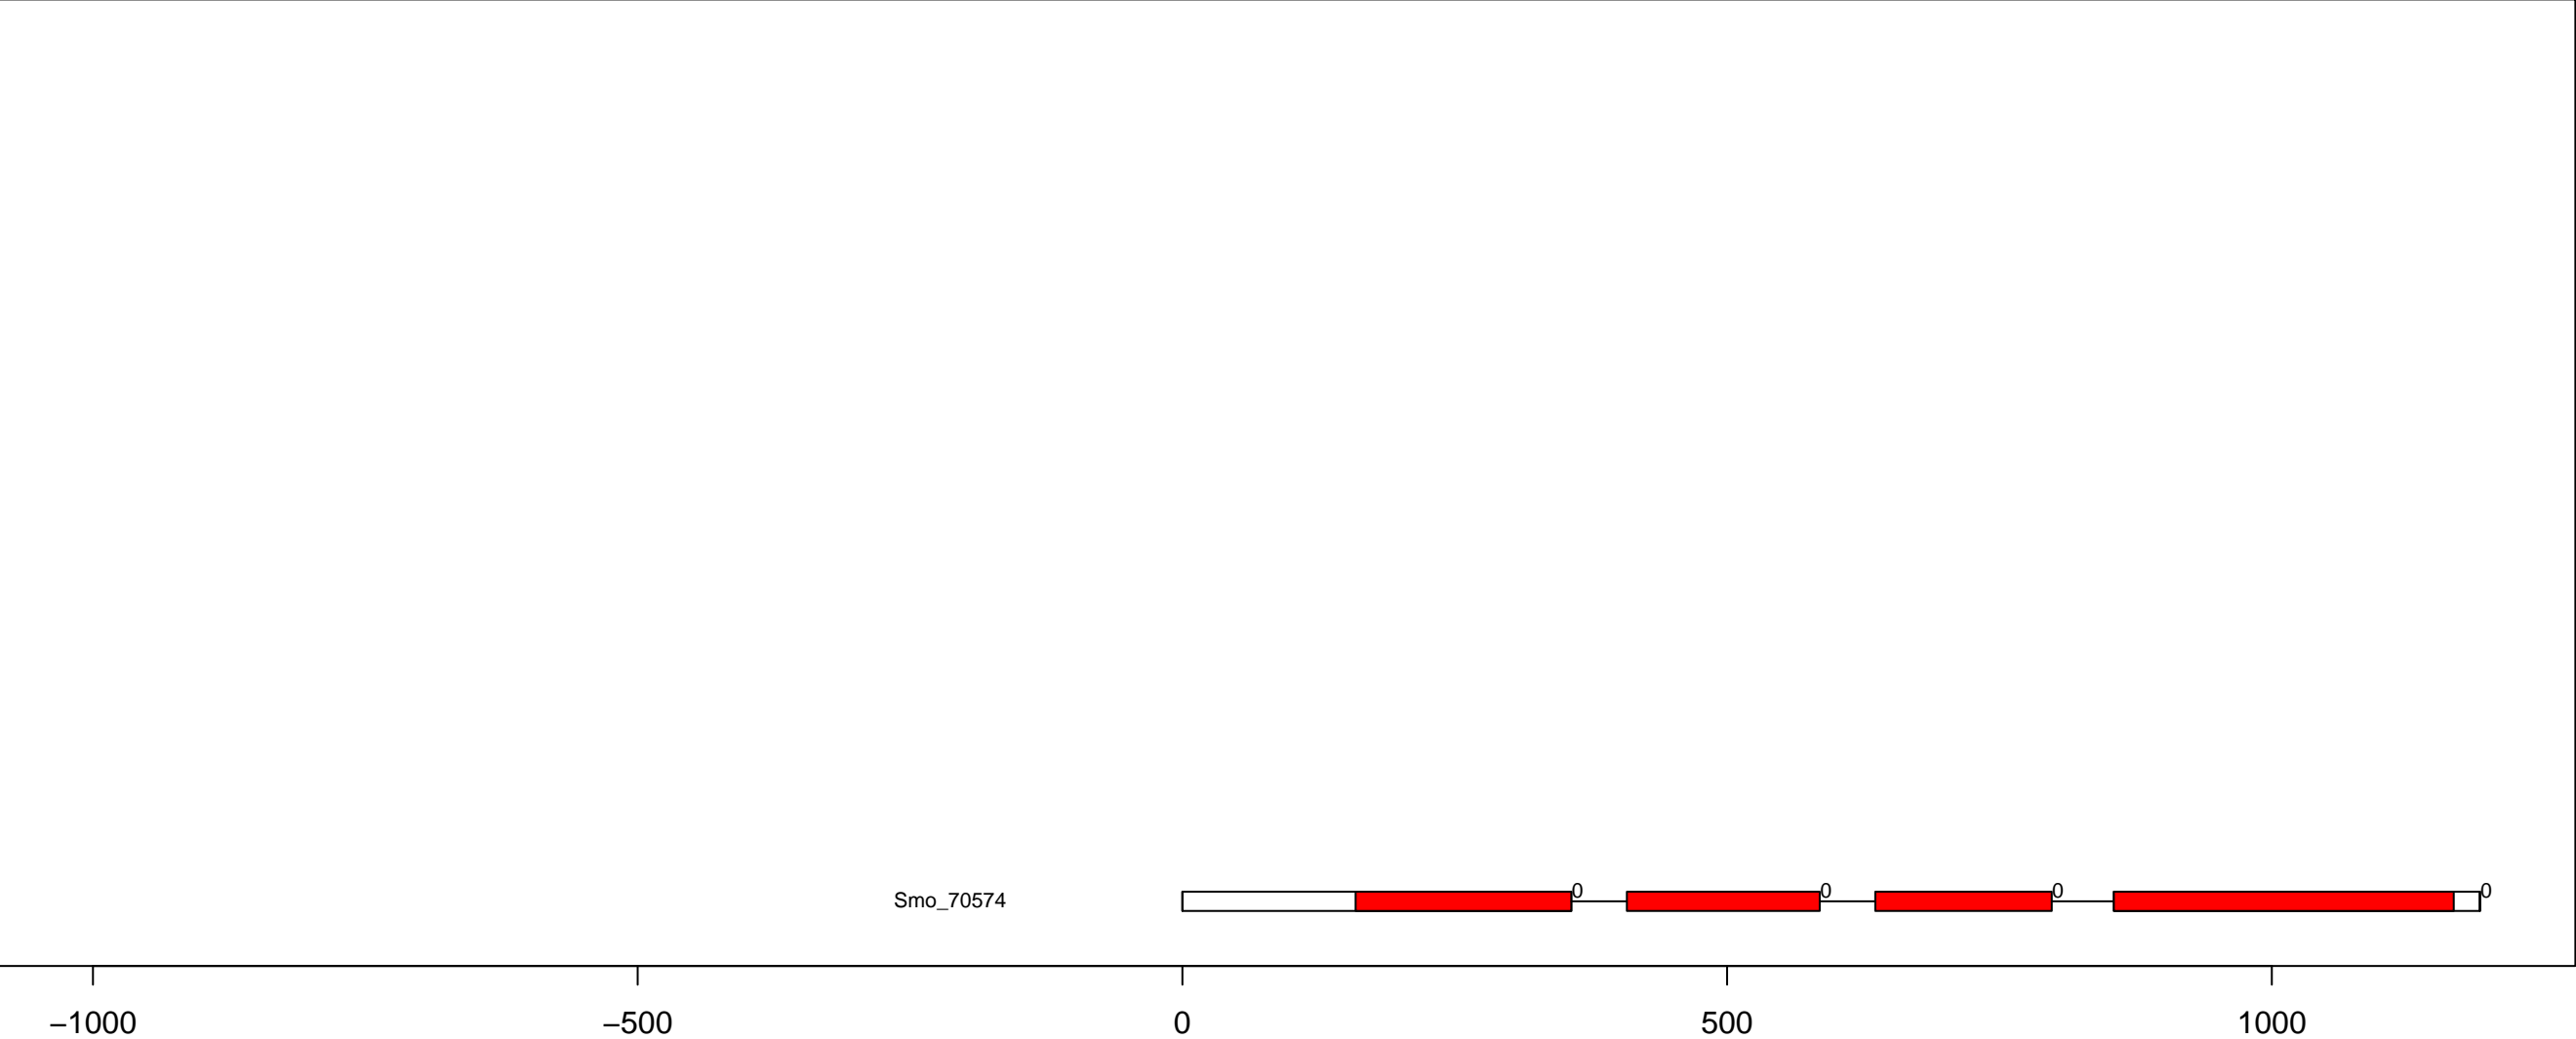



# S.mo ULK\_Fused exon-intron and kinase domain diagram (all)

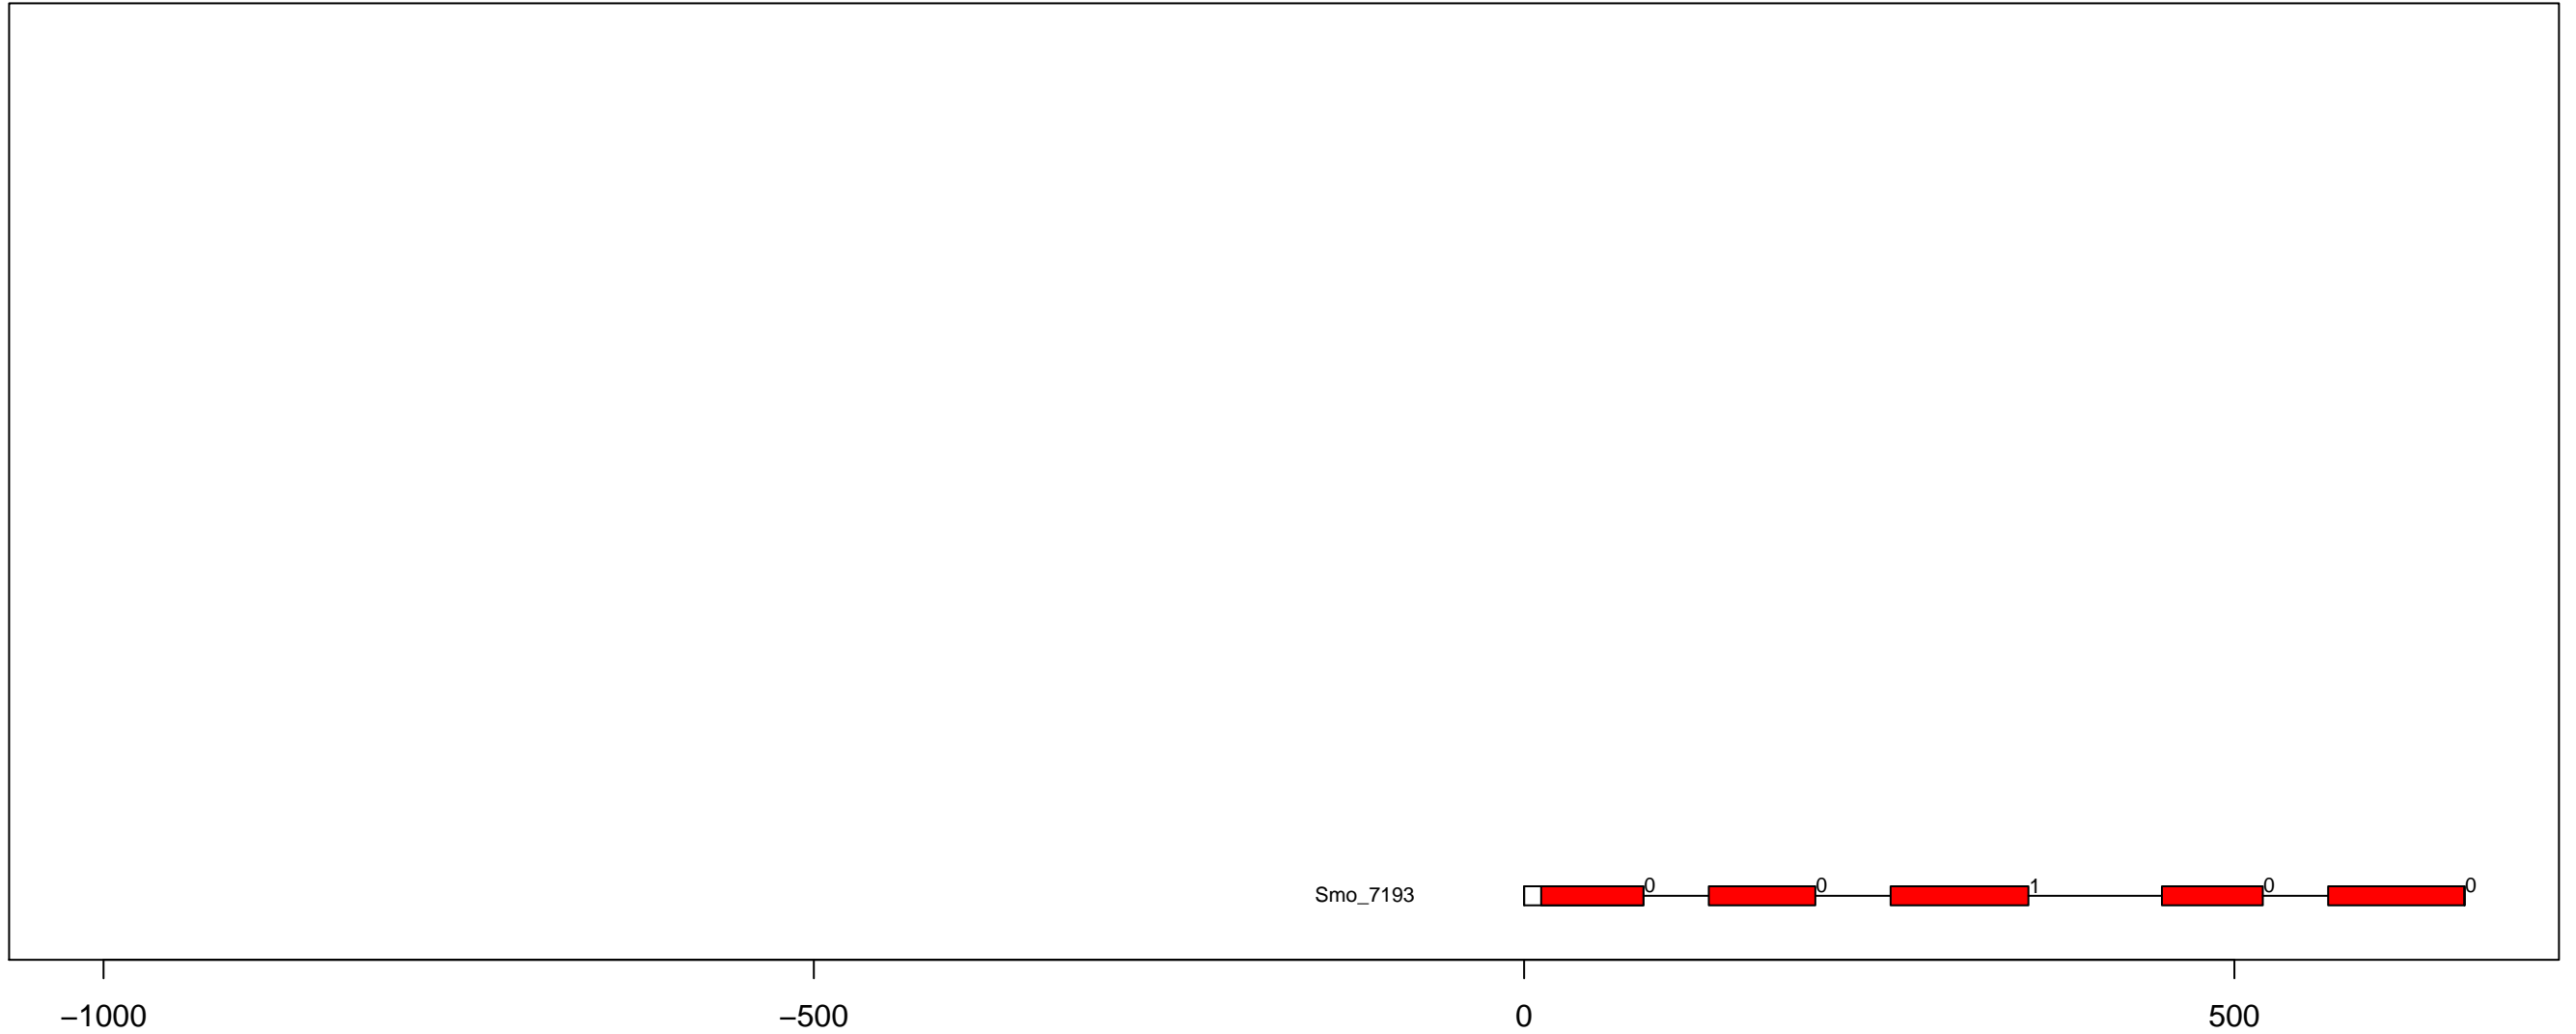

# S.mo WEE exon-intron and kinase domain diagram (all)

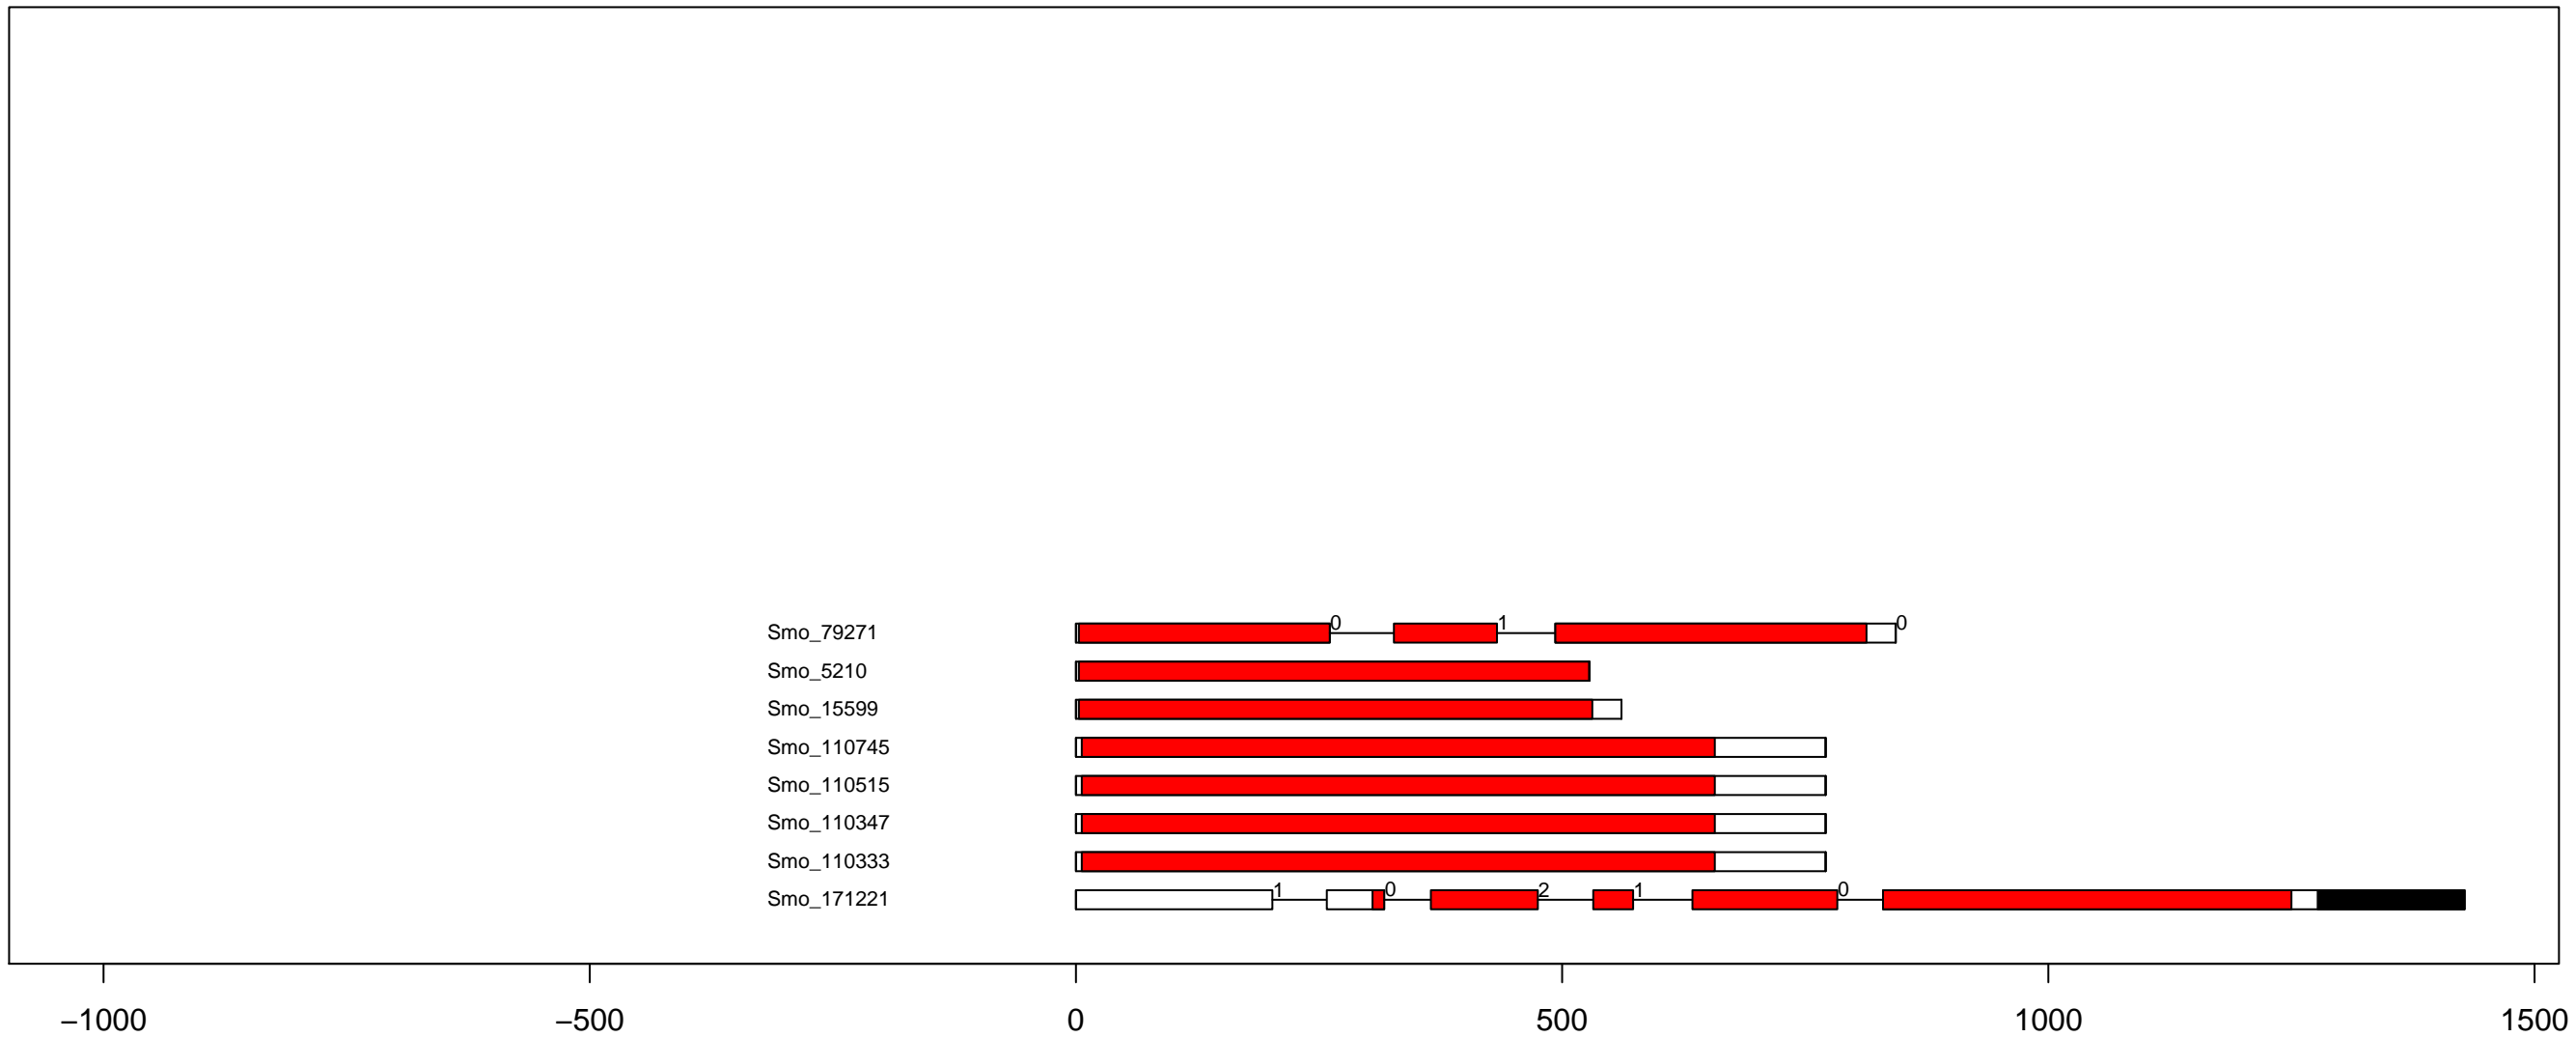

# S.mo WNK\_NRBP exon-intron and kinase domain diagram (all)

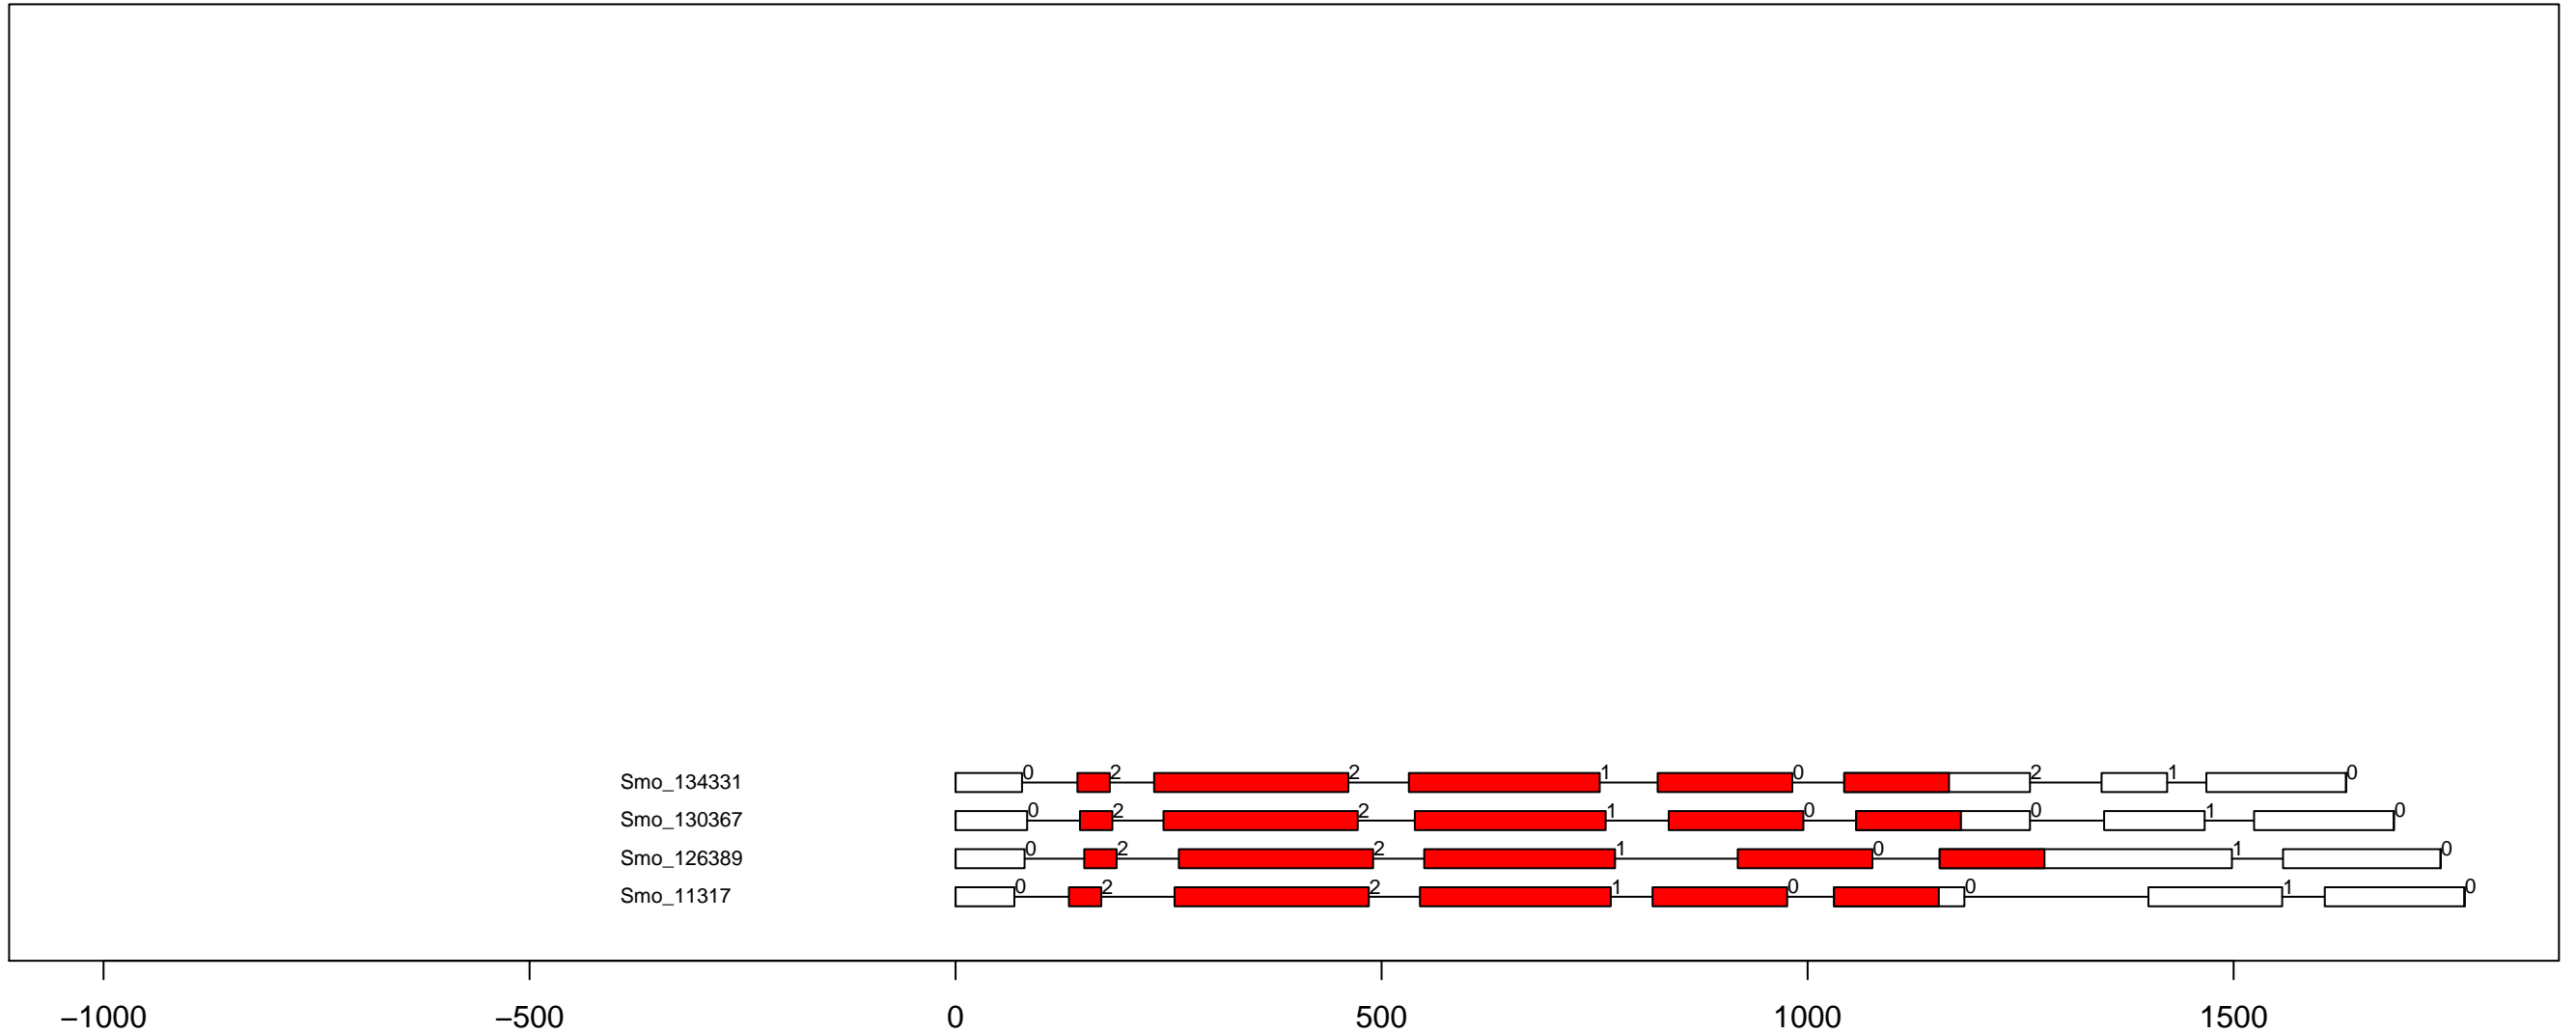

# P.pa AGC\_MAST exon-intron and kinase domain diagram (all)

Ppa\_Pp1s285\_54V6

Ppa\_Pp1s275\_5V6

Ppa\_Pp1s172\_42V6

Ppa\_Pp1s353\_26V6

Ppa\_Pp1s323\_77V6

-2000

0

2000

4000

6000

8000

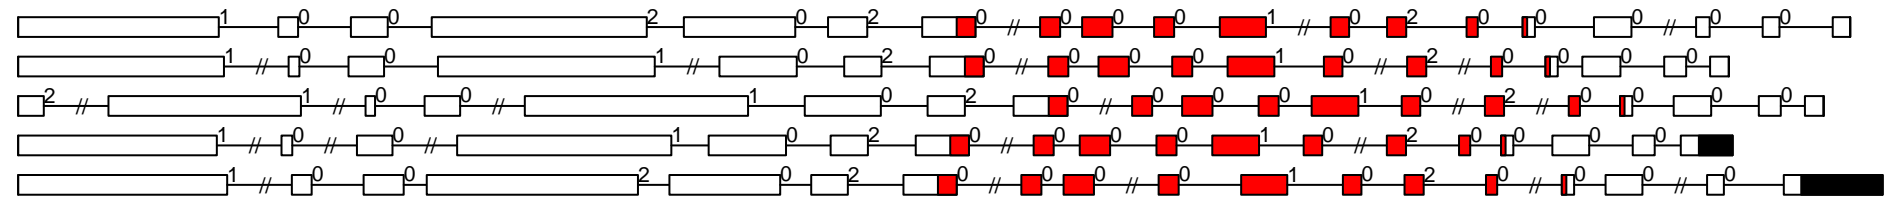

# P.pa AGC\_NDR exon-intron and kinase domain diagram (all)

Ppa\_Pp1s87\_129V6  
Ppa\_Pp1s86\_95V6  
Ppa\_Pp1s86\_100V6  
Ppa\_Pp1s22\_429V6  
Ppa\_Pp1s22\_423V6  
Ppa\_Pp1s11\_341V6

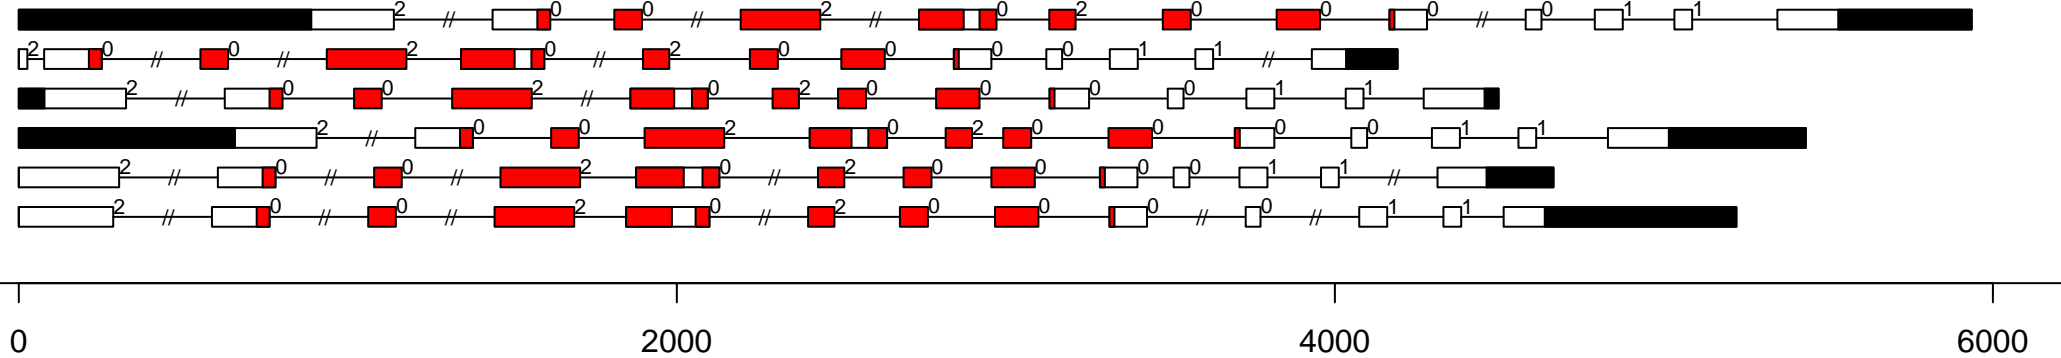

# P.pa AGC\_PDK1 exon-intron and kinase domain diagram (all)

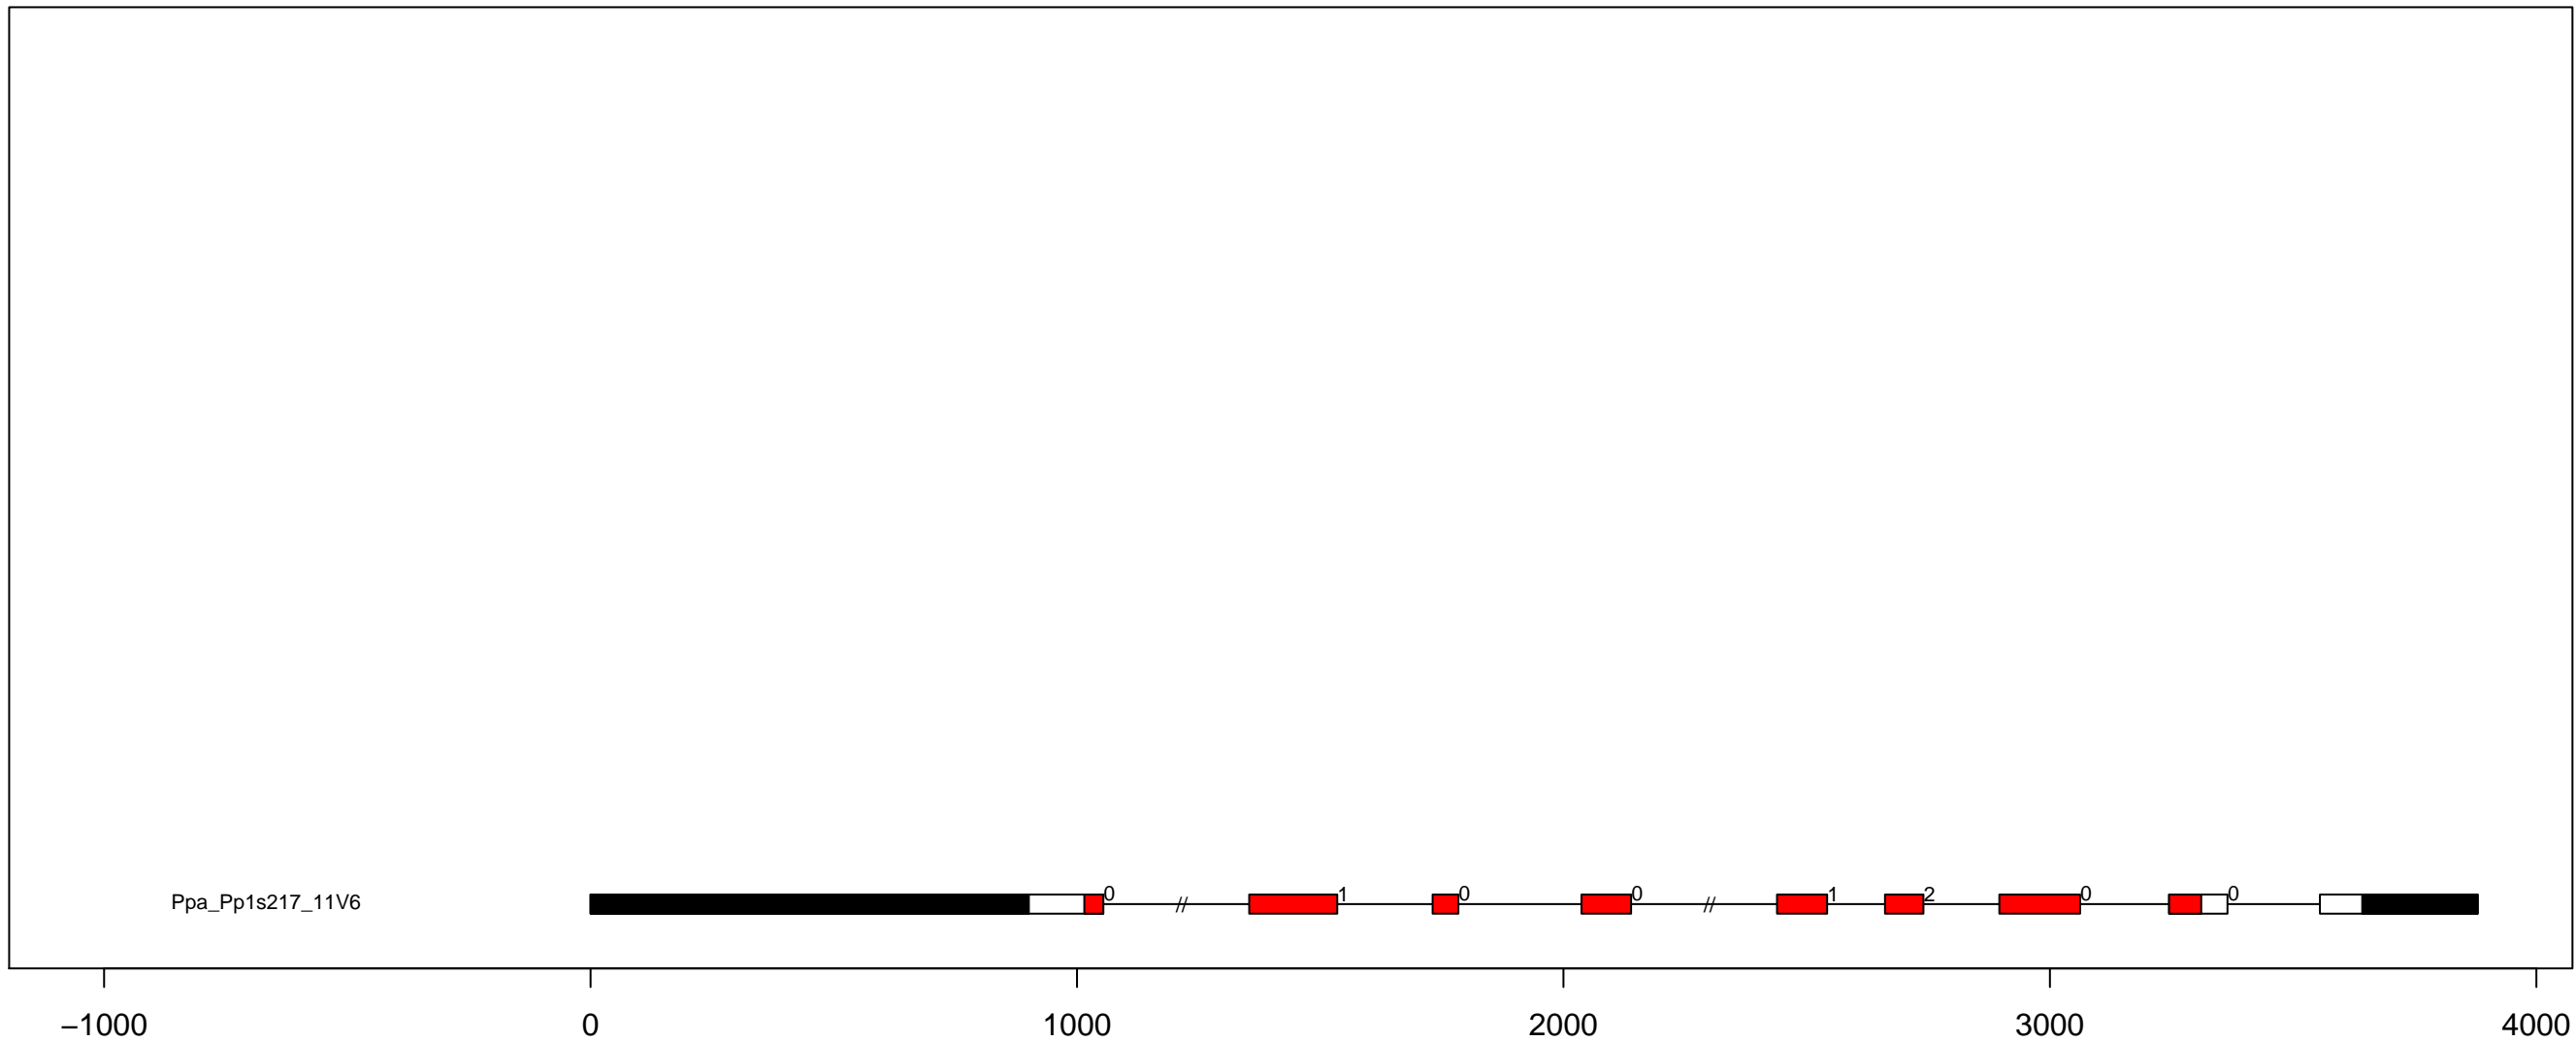

# P.pa AGC\_PKA-PKG exon-intron and kinase domain diagram (all)

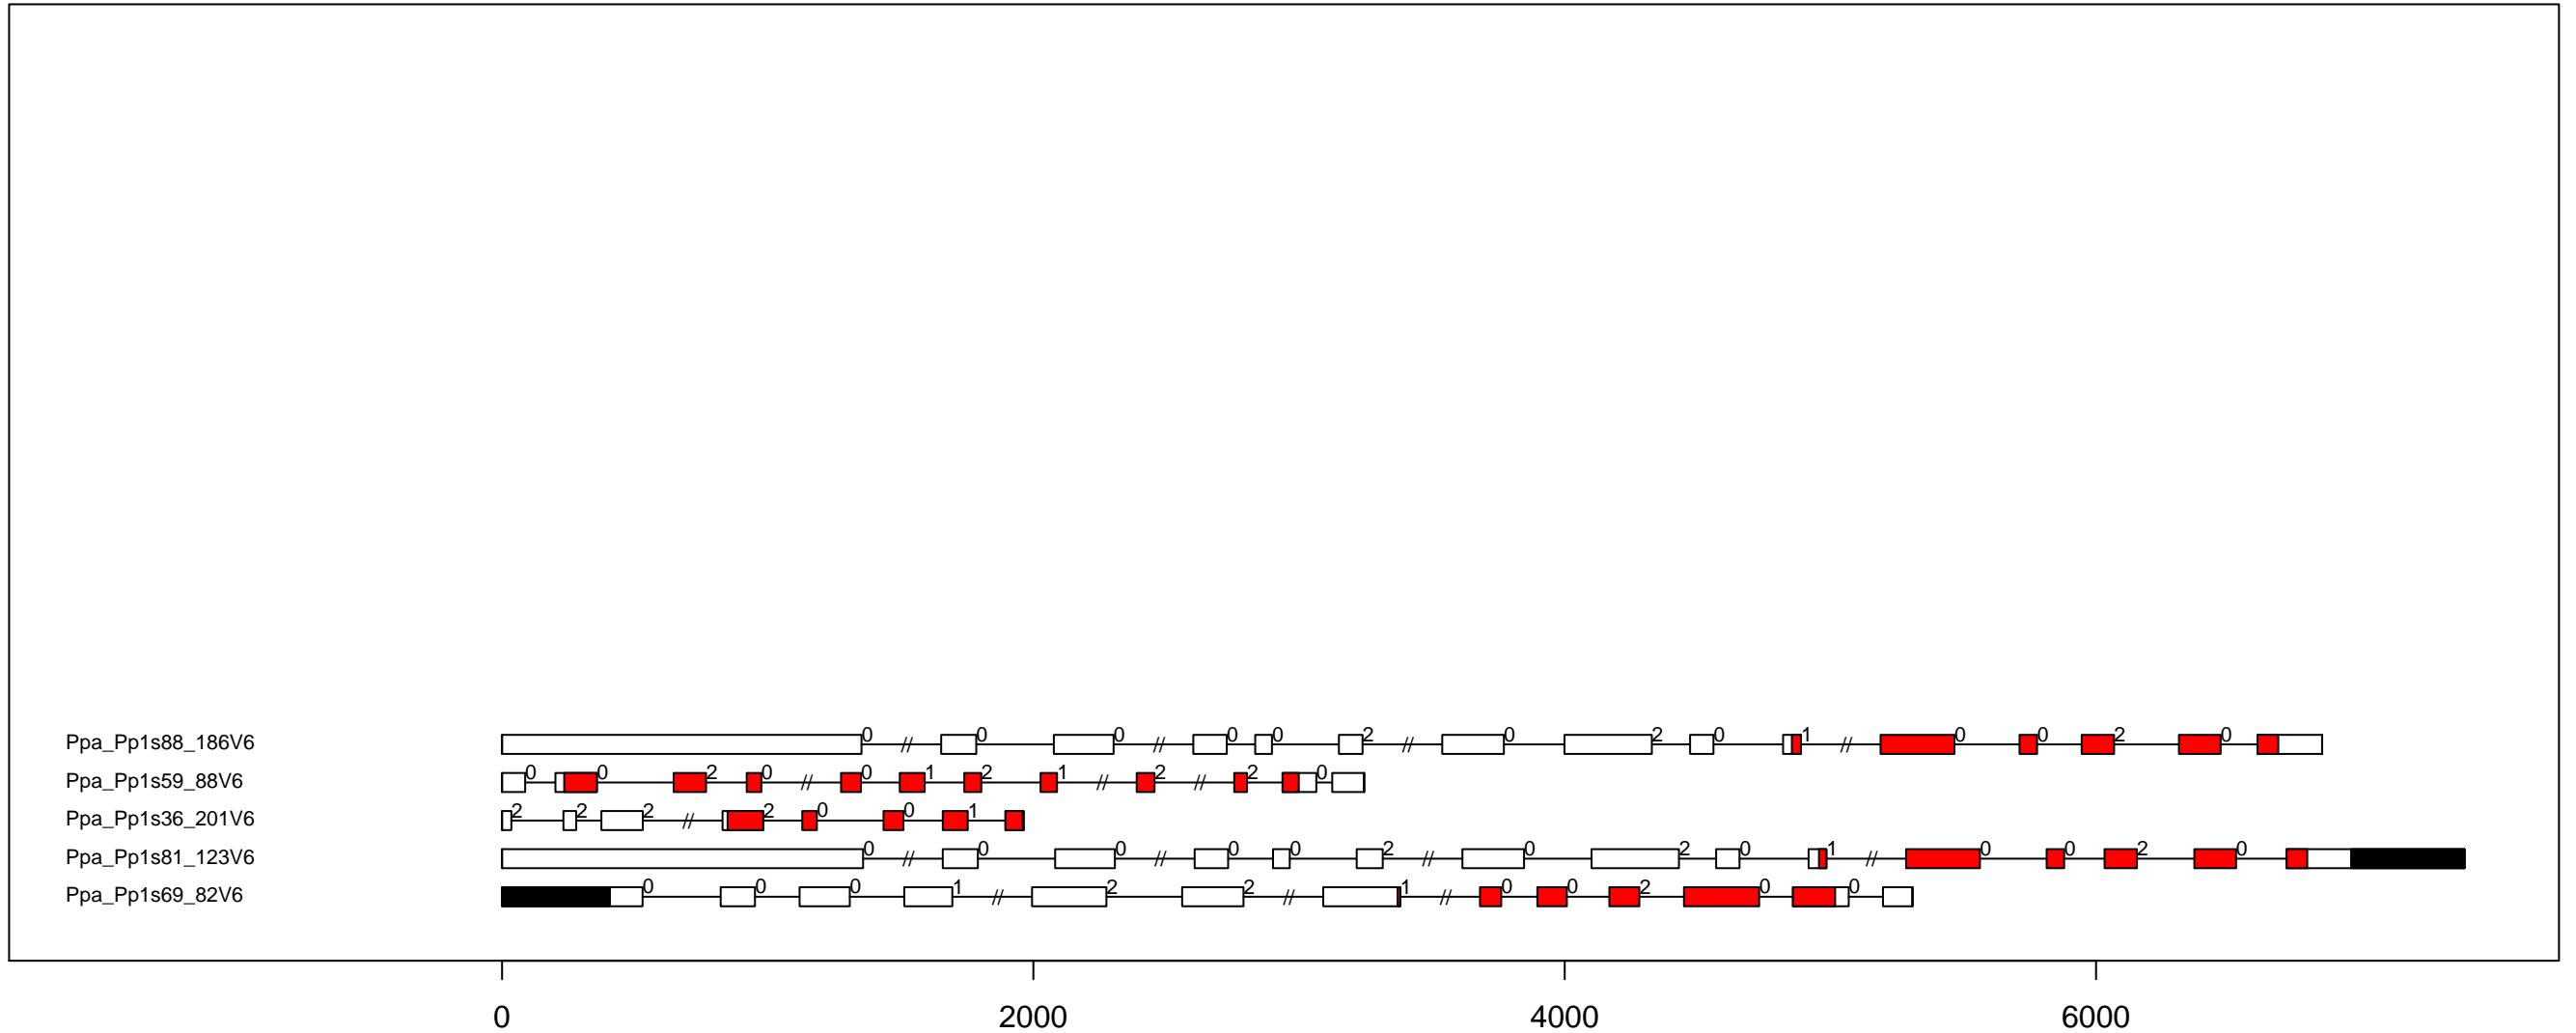

# P.pa AGC\_RSK-2 exon-intron and kinase domain diagram (all)

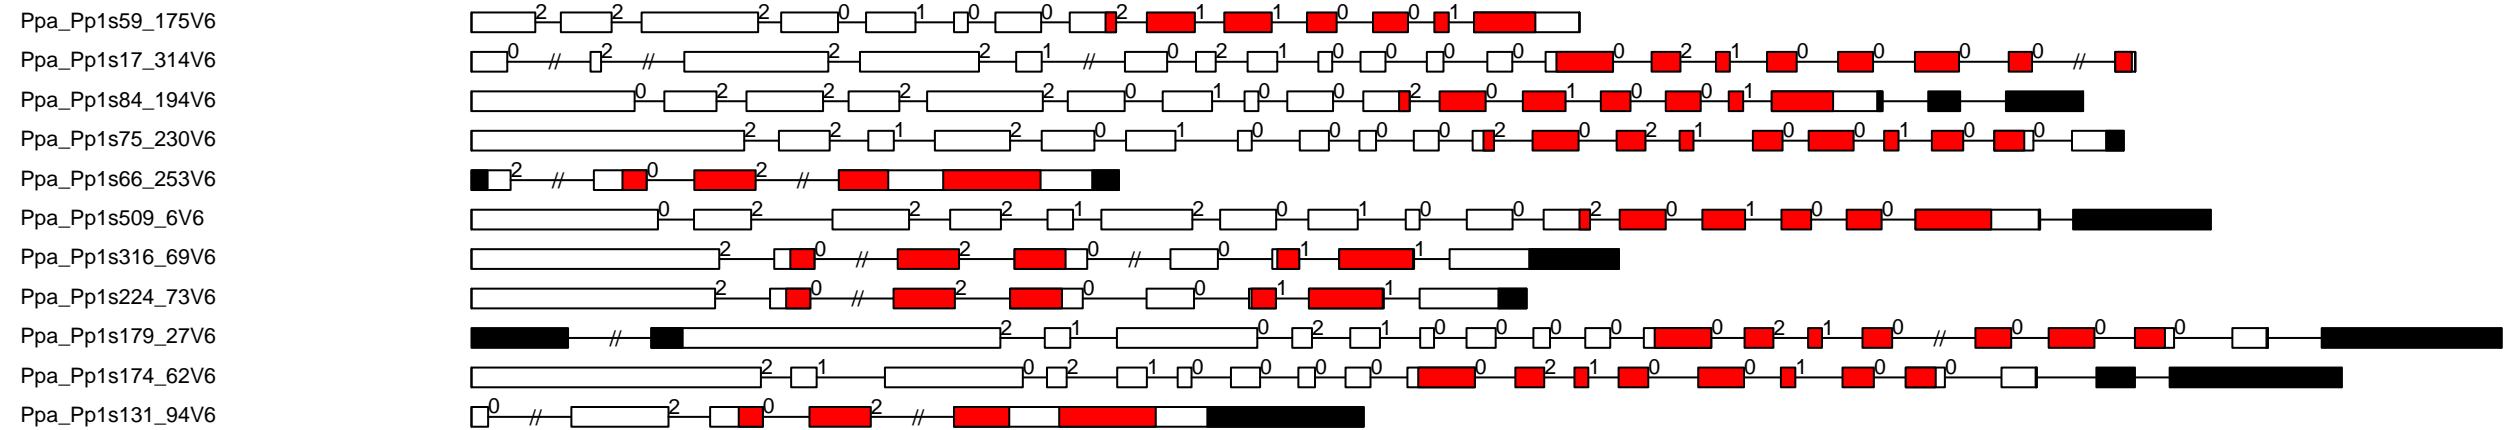

0

2000

4000

6000



# P.pa AGC-PI exon-intron and kinase domain diagram (all)

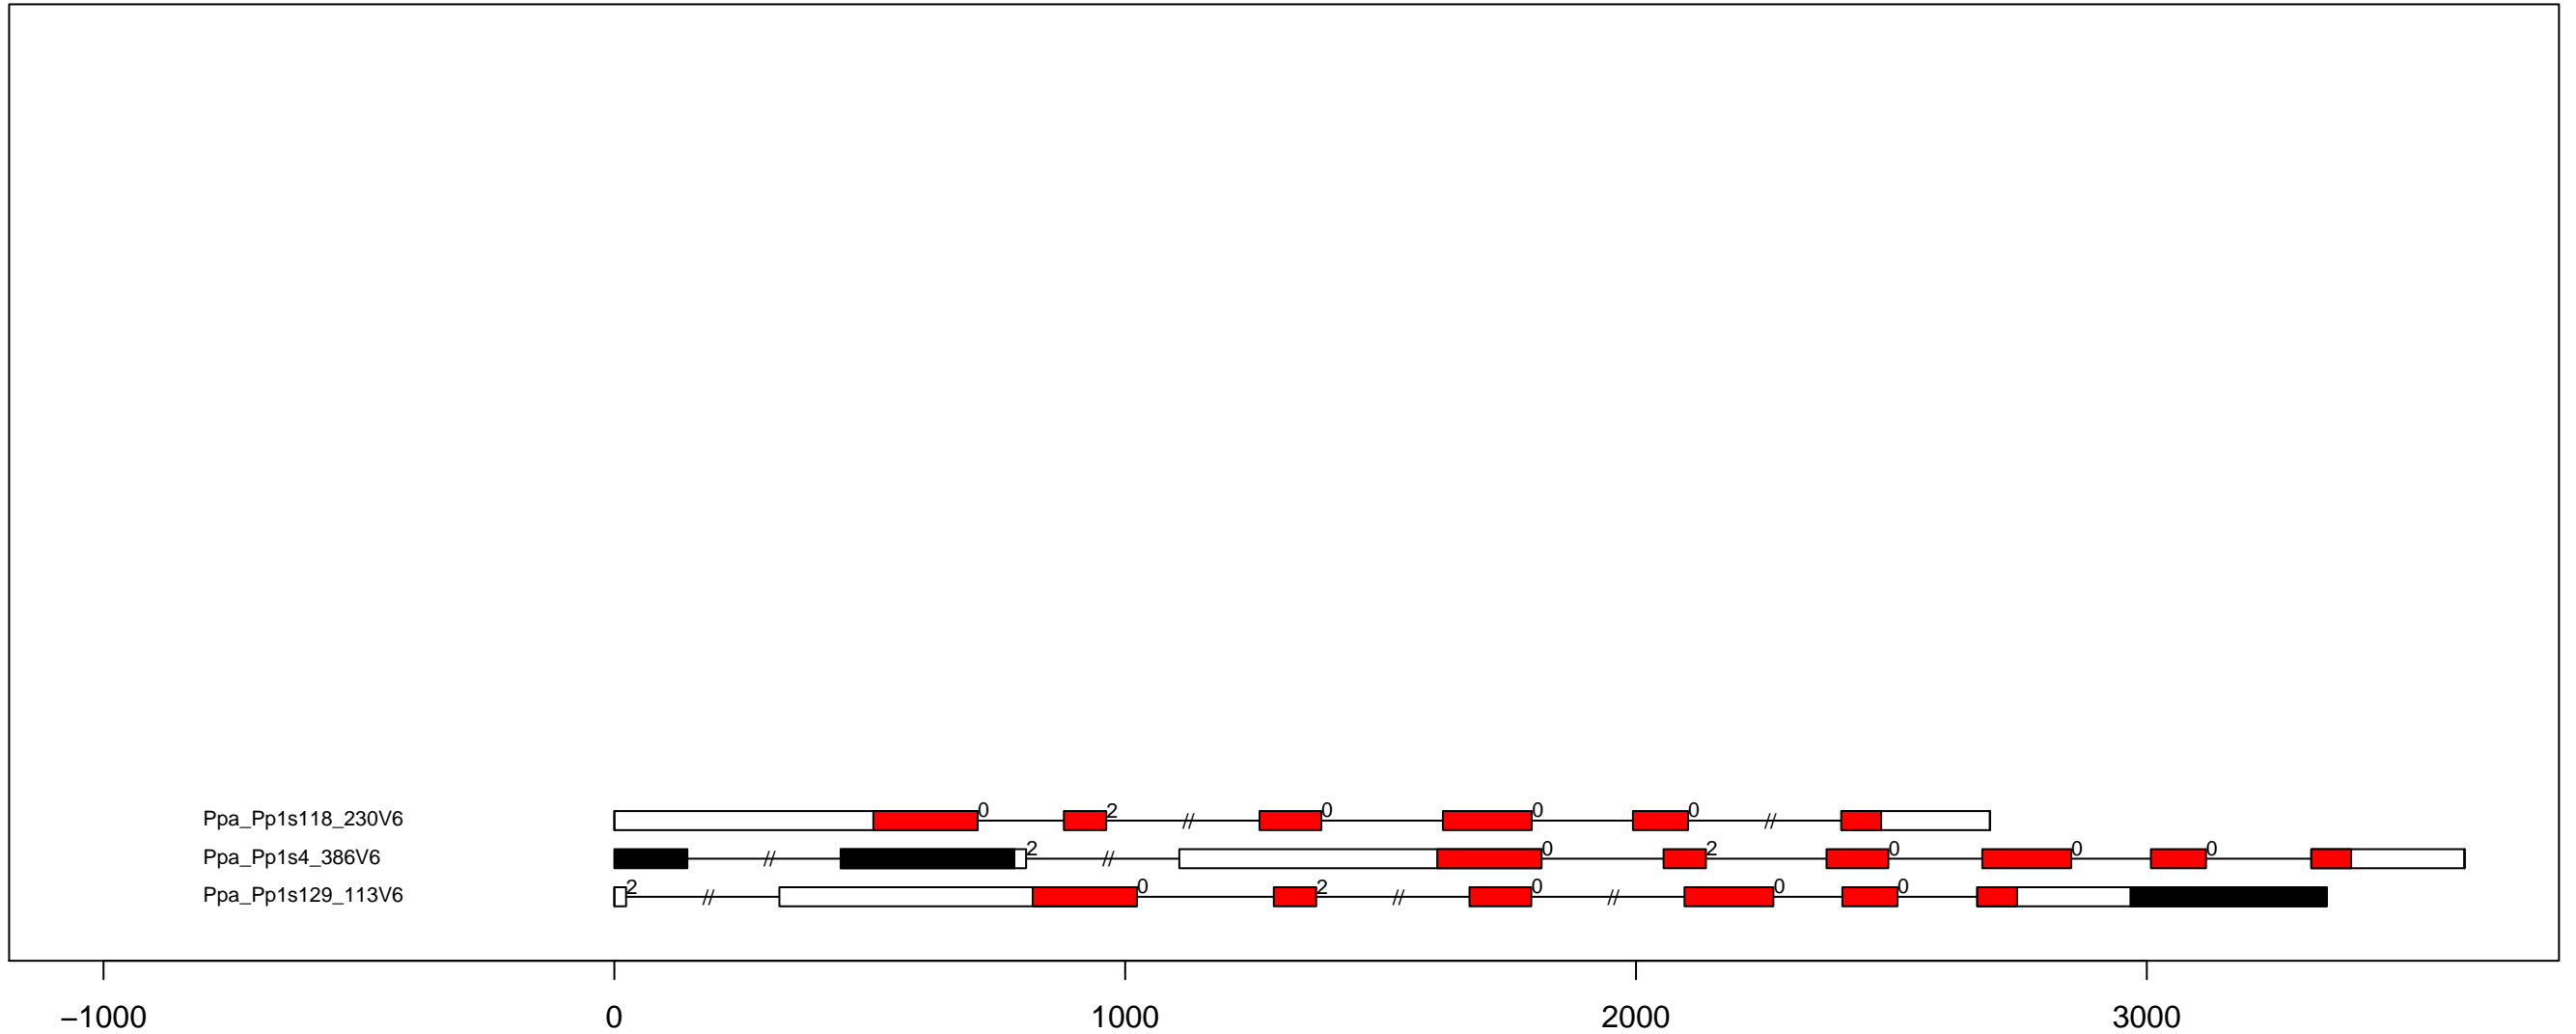

# P.pa Aur exon-intron and kinase domain diagram (all)

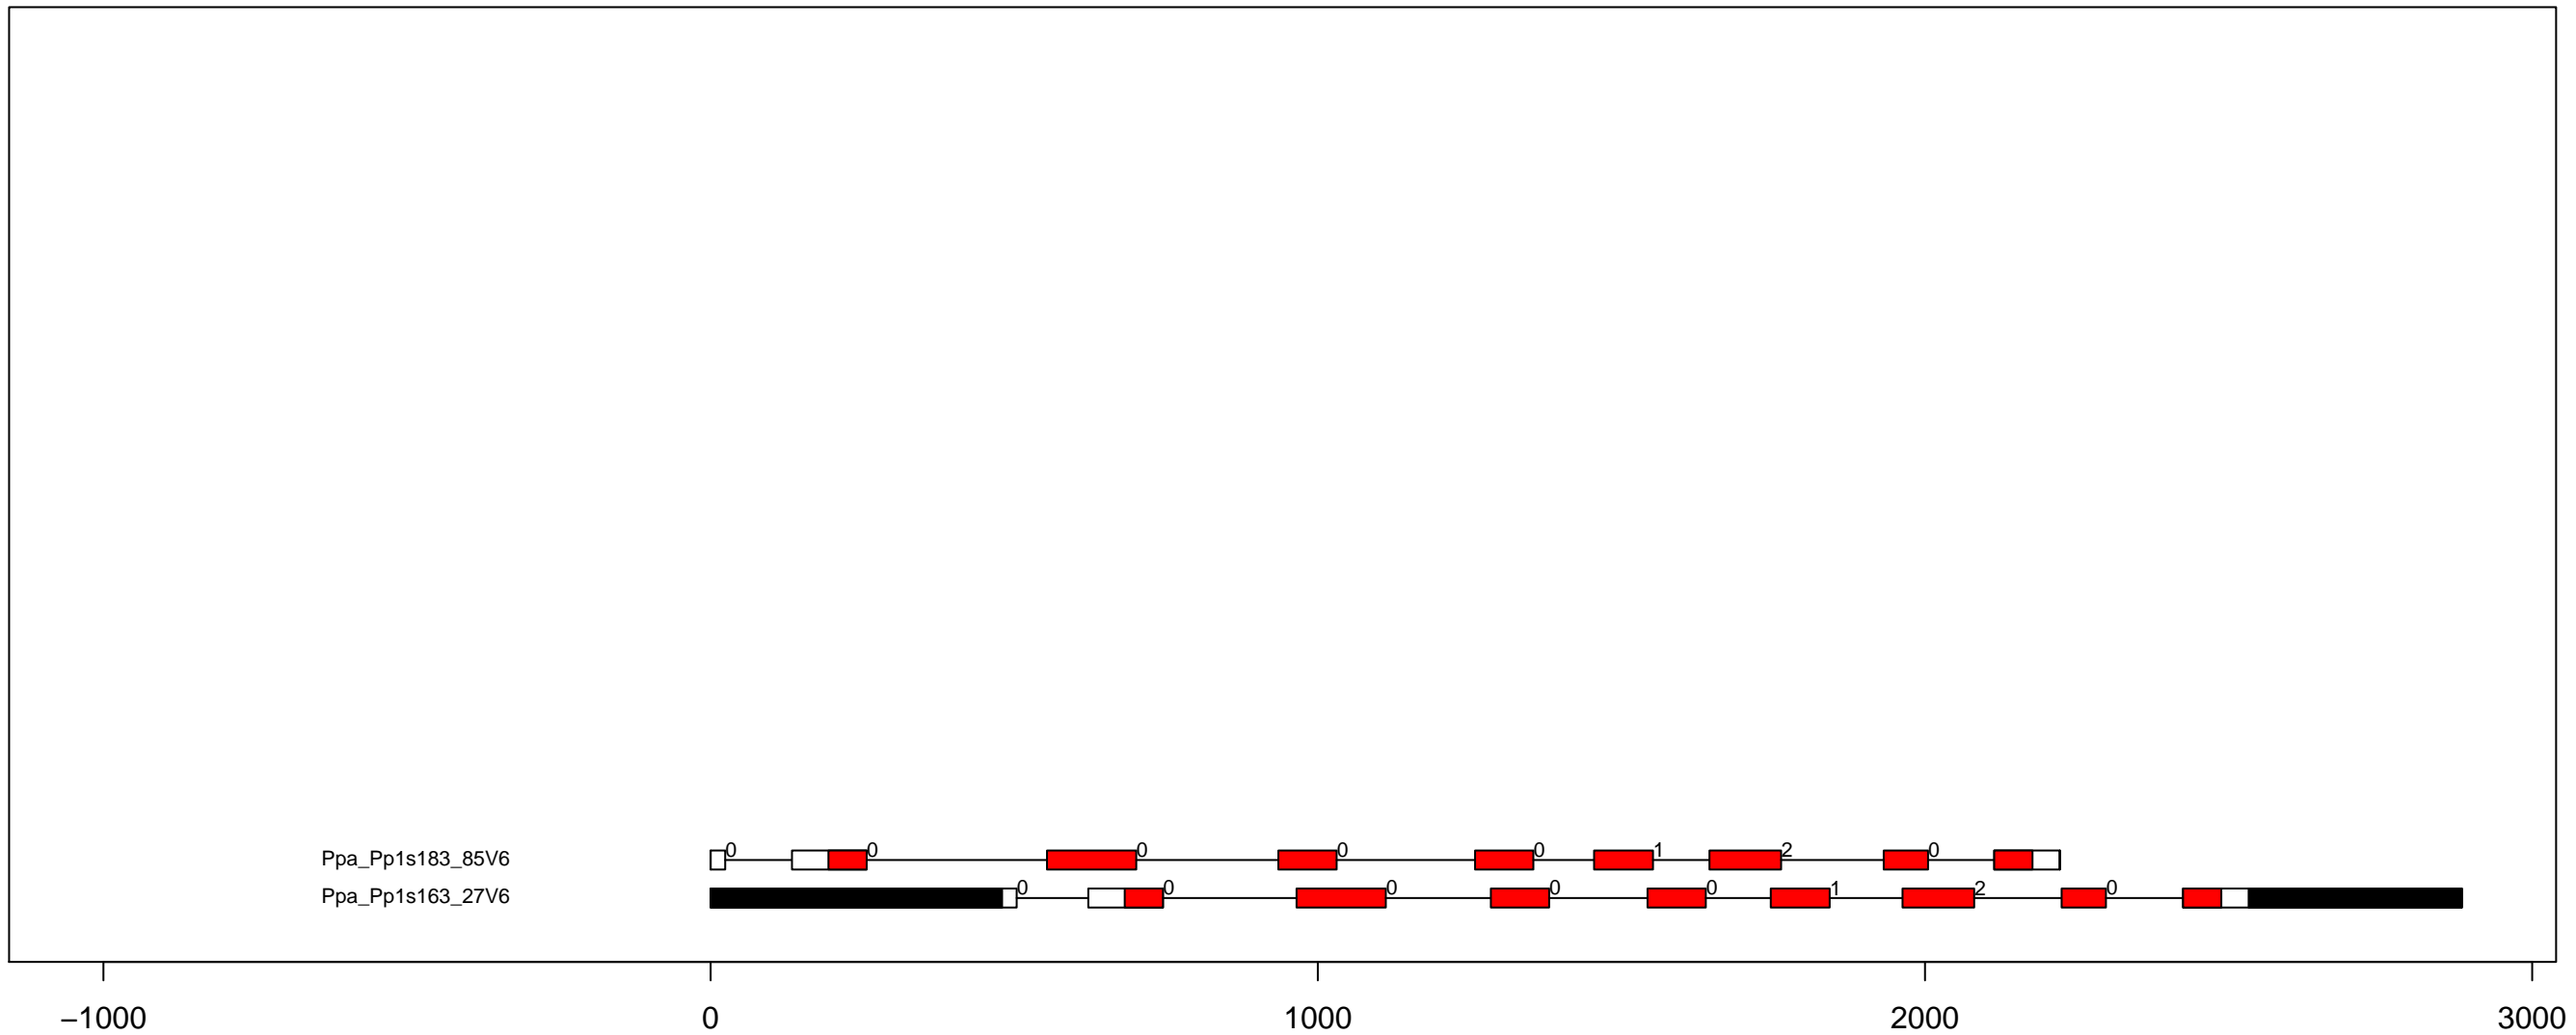

# P.pa CAMK\_AMPK exon-intron and kinase domain diagram (all)

Ppa\_Pp1s3\_550V6  
Ppa\_Pp1s7\_365V6  
Ppa\_Pp1s28\_12V6  
Ppa\_Pp1s1\_782V6  
Ppa\_Pp1s107\_182V6

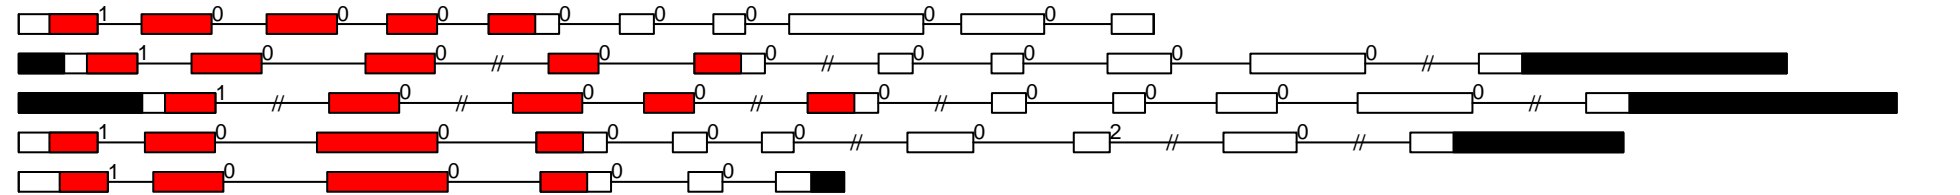

-1000

0

1000

2000

3000

4000

5000

# P.pa CAMK\_CAMK1-DCAMKL exon-intron and kinase domain diagram (all)

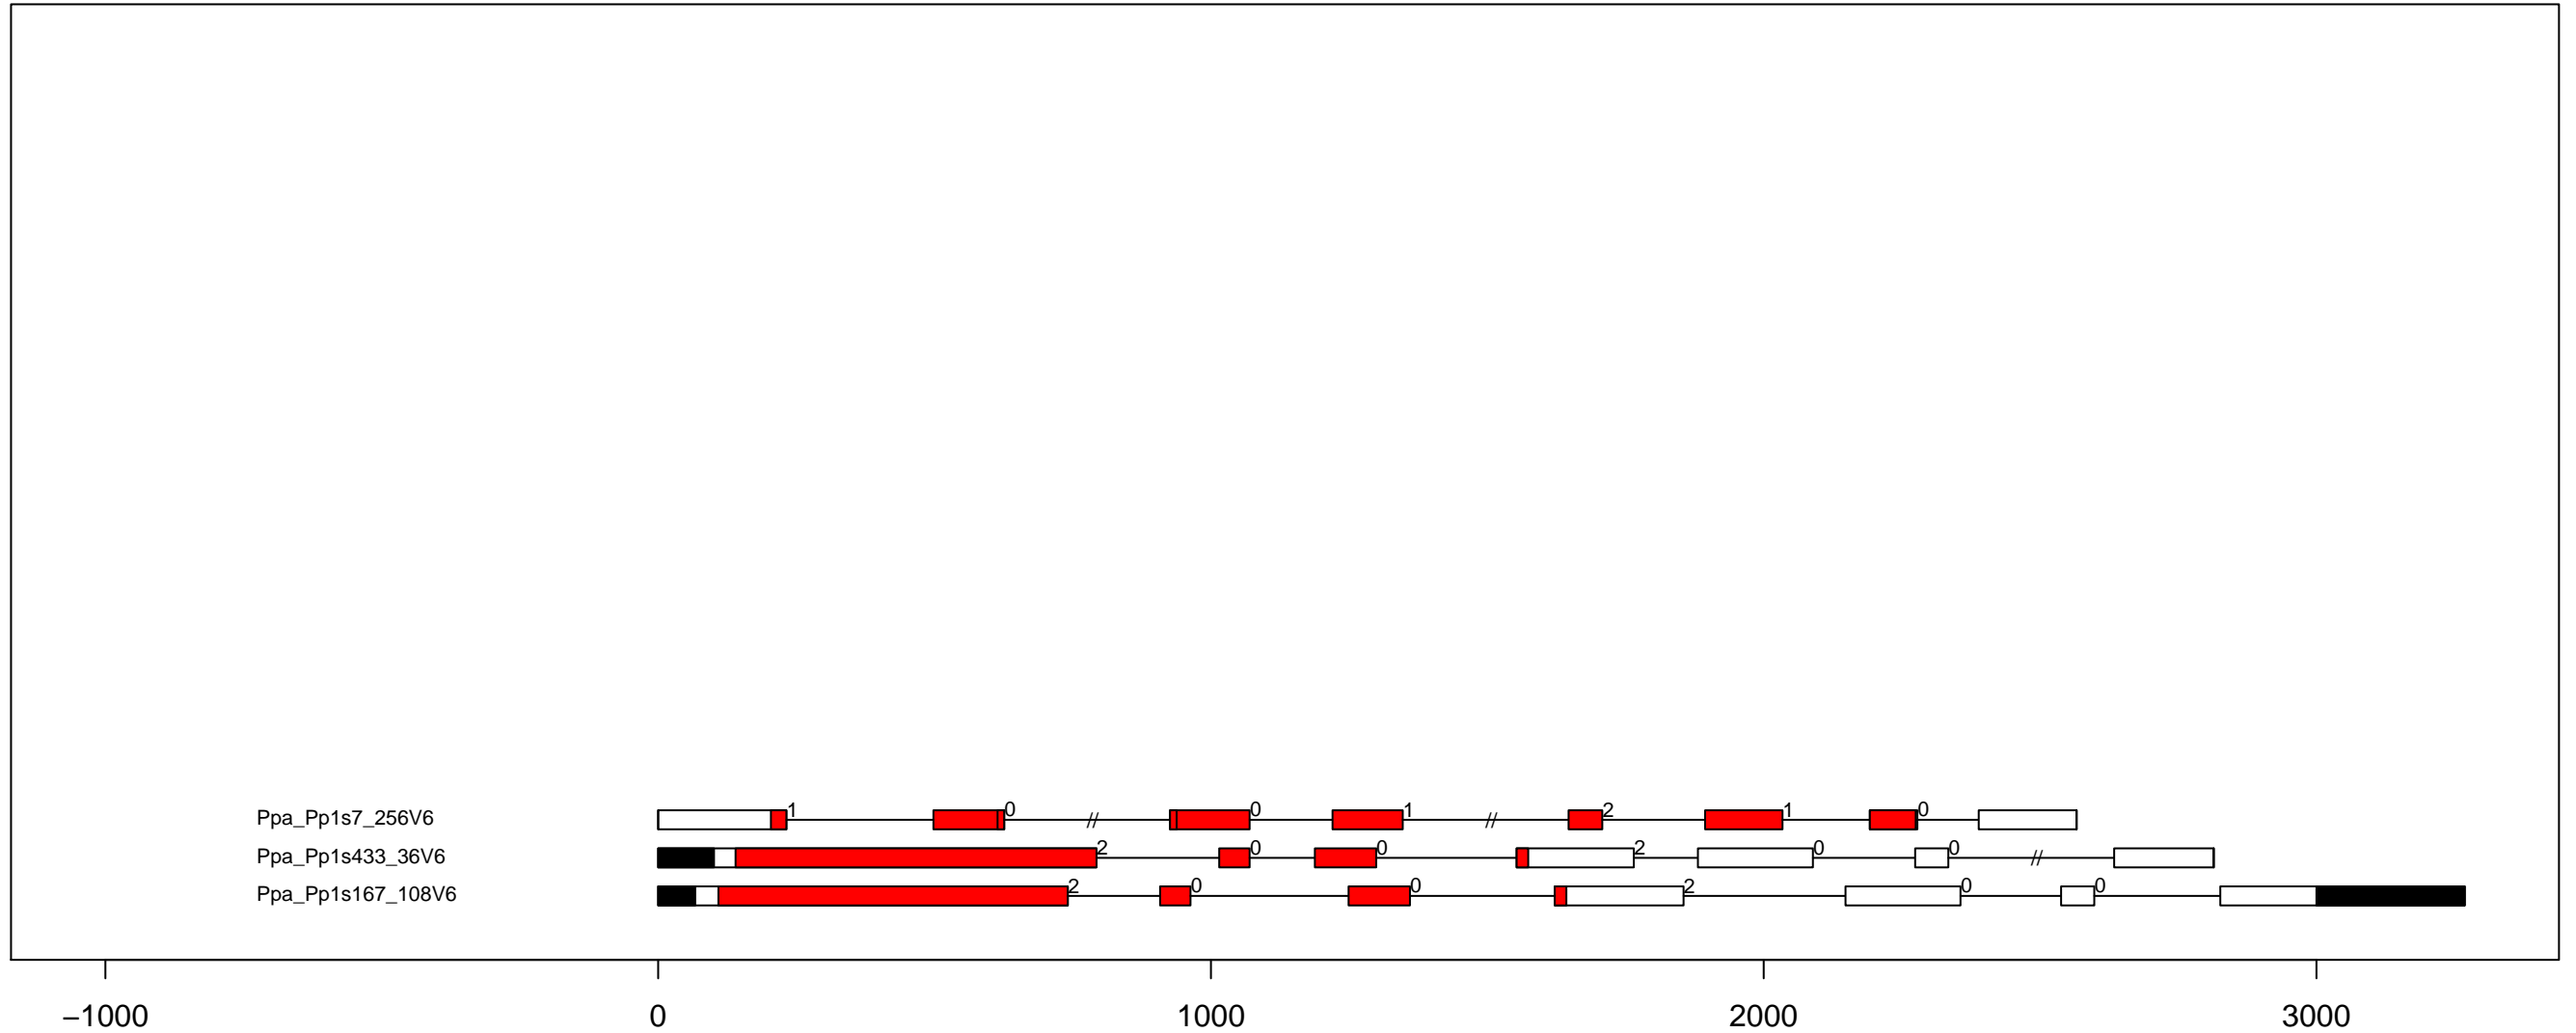

# P.pa CAMK\_CAMKL-CHK1 exon-intron and kinase domain diagram (all)

Ppa\_Pp1s211\_132V6  
Ppa\_Pp1s186\_77V6  
Ppa\_Pp1s79\_209V6  
Ppa\_Pp1s58\_13V6  
Ppa\_Pp1s30\_102V6  
Ppa\_Pp1s205\_16V6  
Ppa\_Pp1s15\_28V6

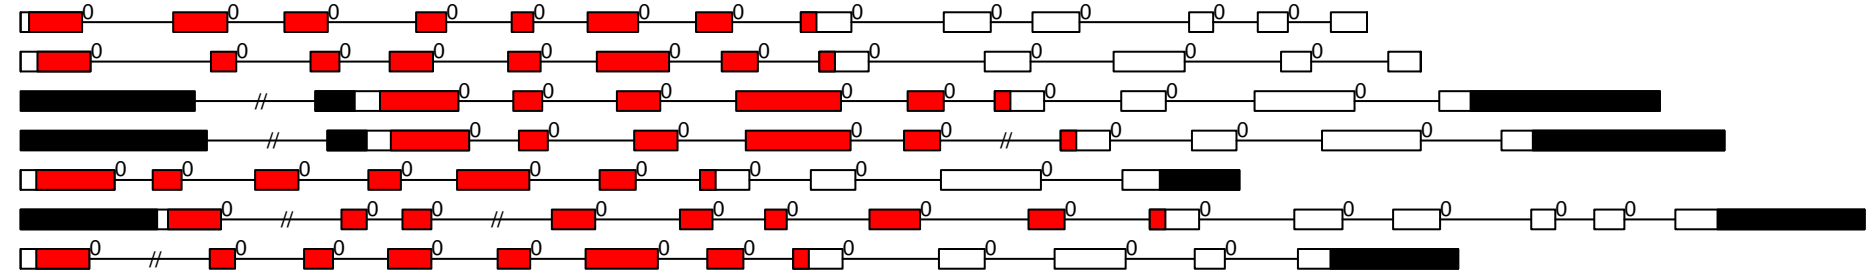

P.pa CAMK\_CAMKL-LKB exon-intron and kinase domain diagram (all)

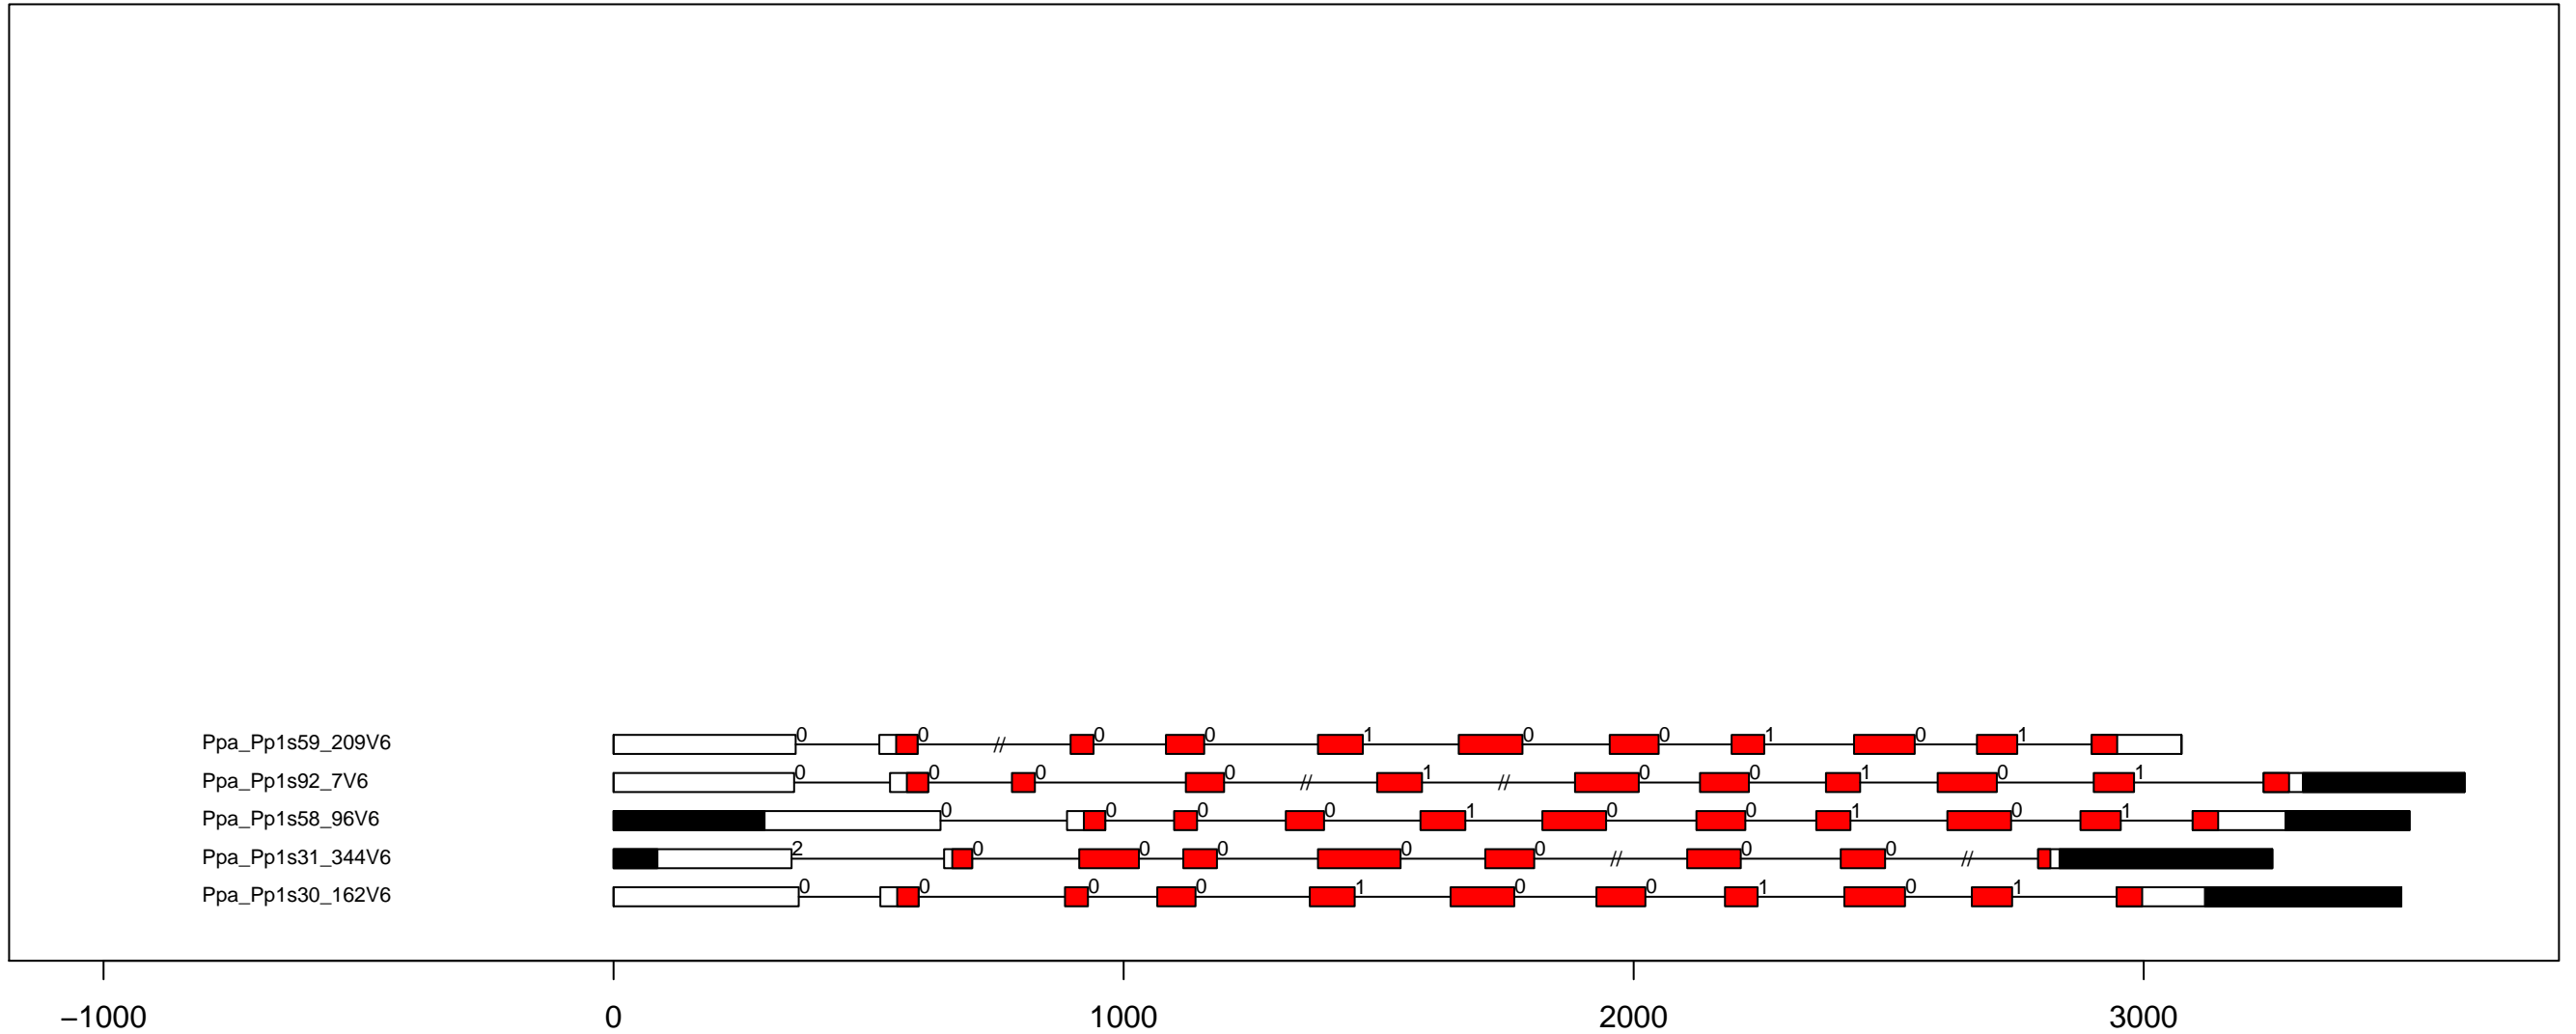

# P.pa CAMK\_CDPK exon-intron and kinase domain diagram (part 1)

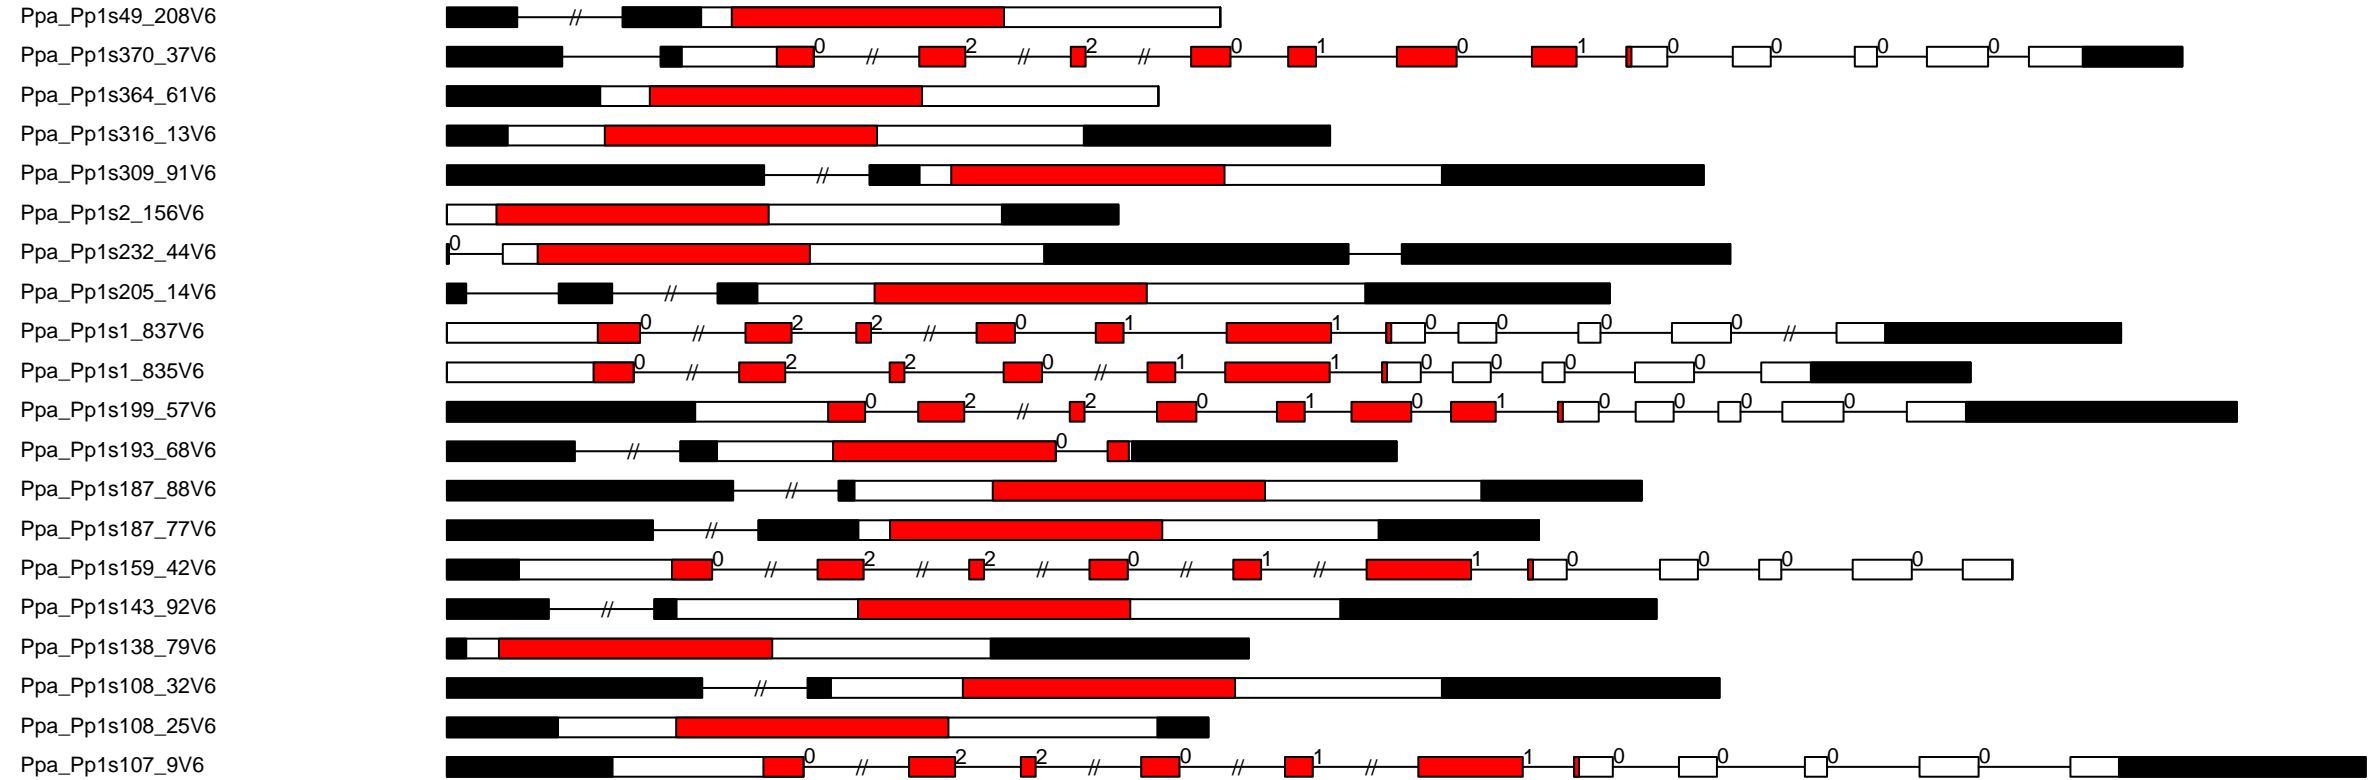

### P.pa CAMK\_CDPK exon-intron and kinase domain diagram (part 2)

Ppa\_Pp1s49\_200V6  
Ppa\_Pp1s364\_58V6  
Ppa\_Pp1s325\_31V6  
Ppa\_Pp1s2\_191V6  
Ppa\_Pp1s166\_57V6  
Ppa\_Pp1s97\_71V6  
Ppa\_Pp1s96\_216V6  
Ppa\_Pp1s83\_8V6  
Ppa\_Pp1s83\_172V6  
Ppa\_Pp1s60\_259V6

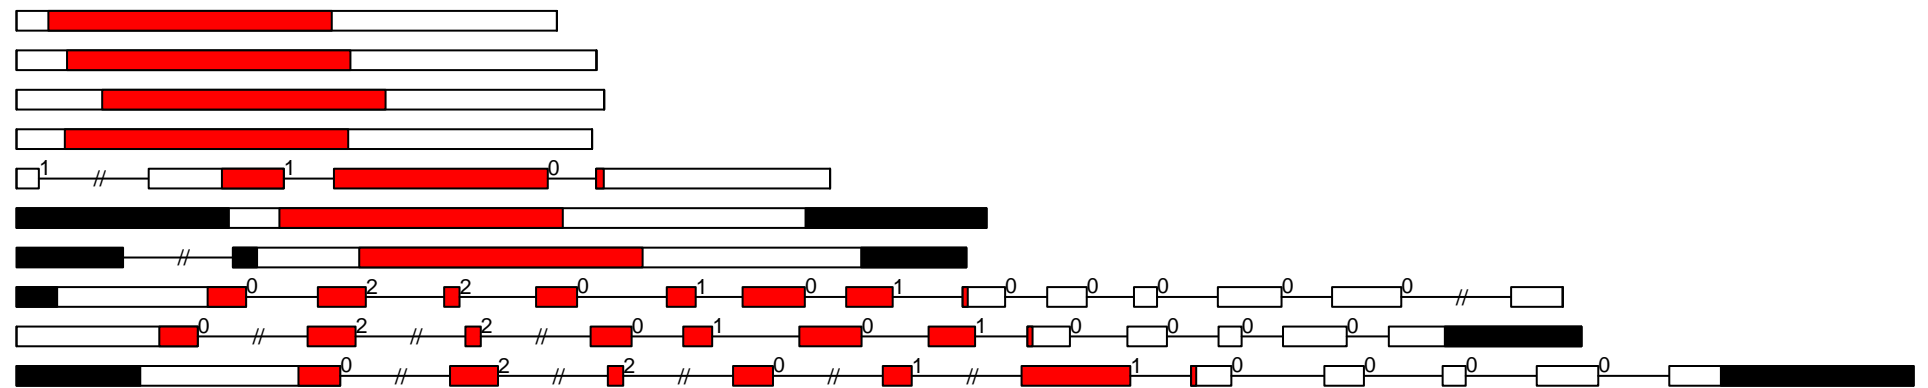

-1000

0

1000

2000

3000

4000

5000



# P.pa CAMK\_CDPK-Pp exon-intron and kinase domain diagram (all)

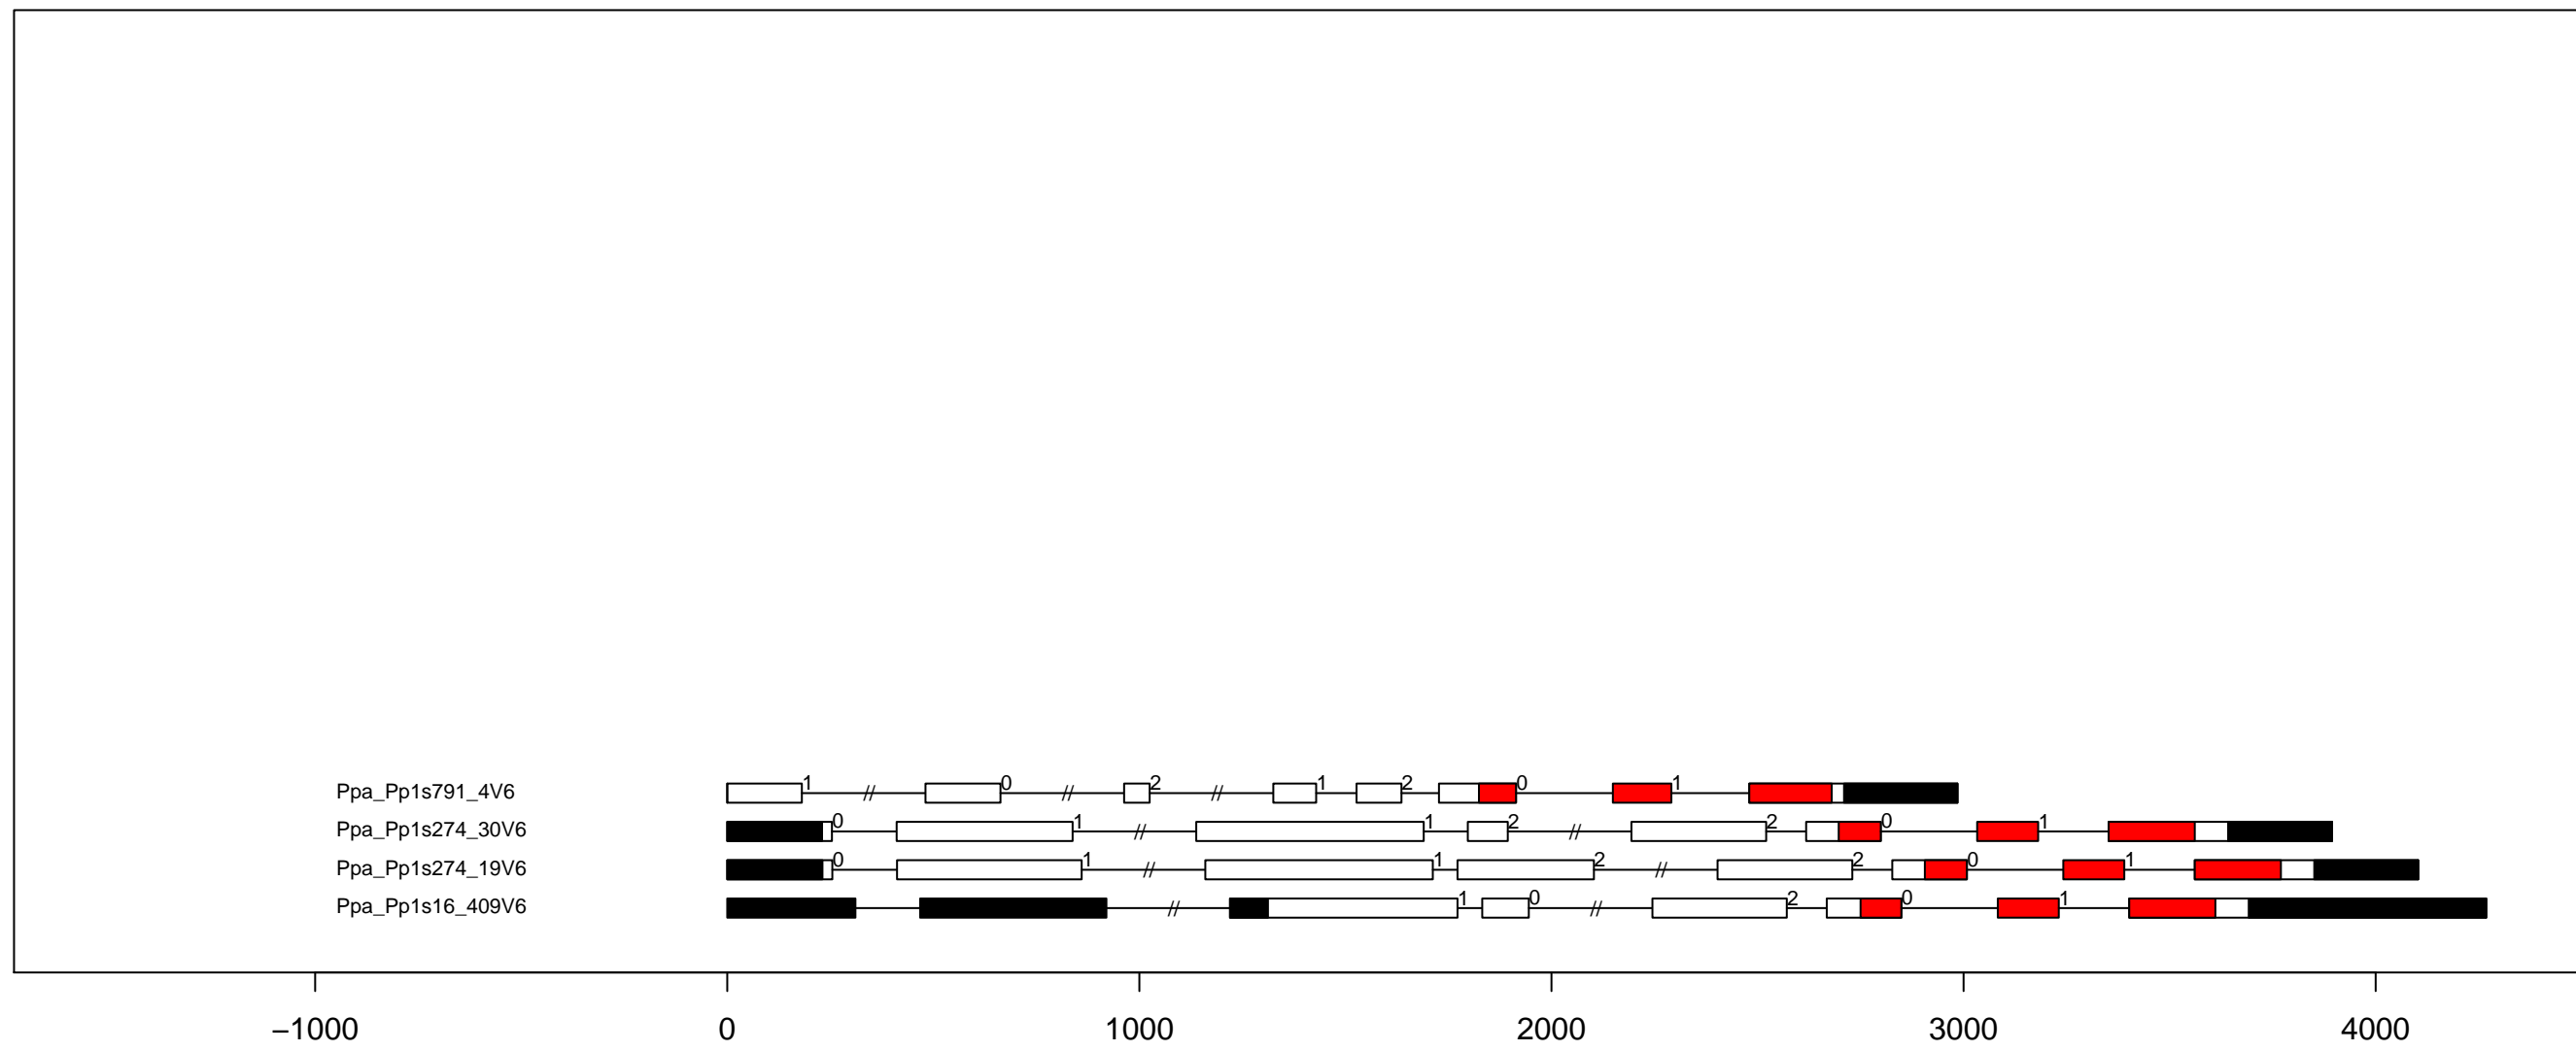

P.pa CAMK\_OST1L exon-intron and kinase domain diagram (all)

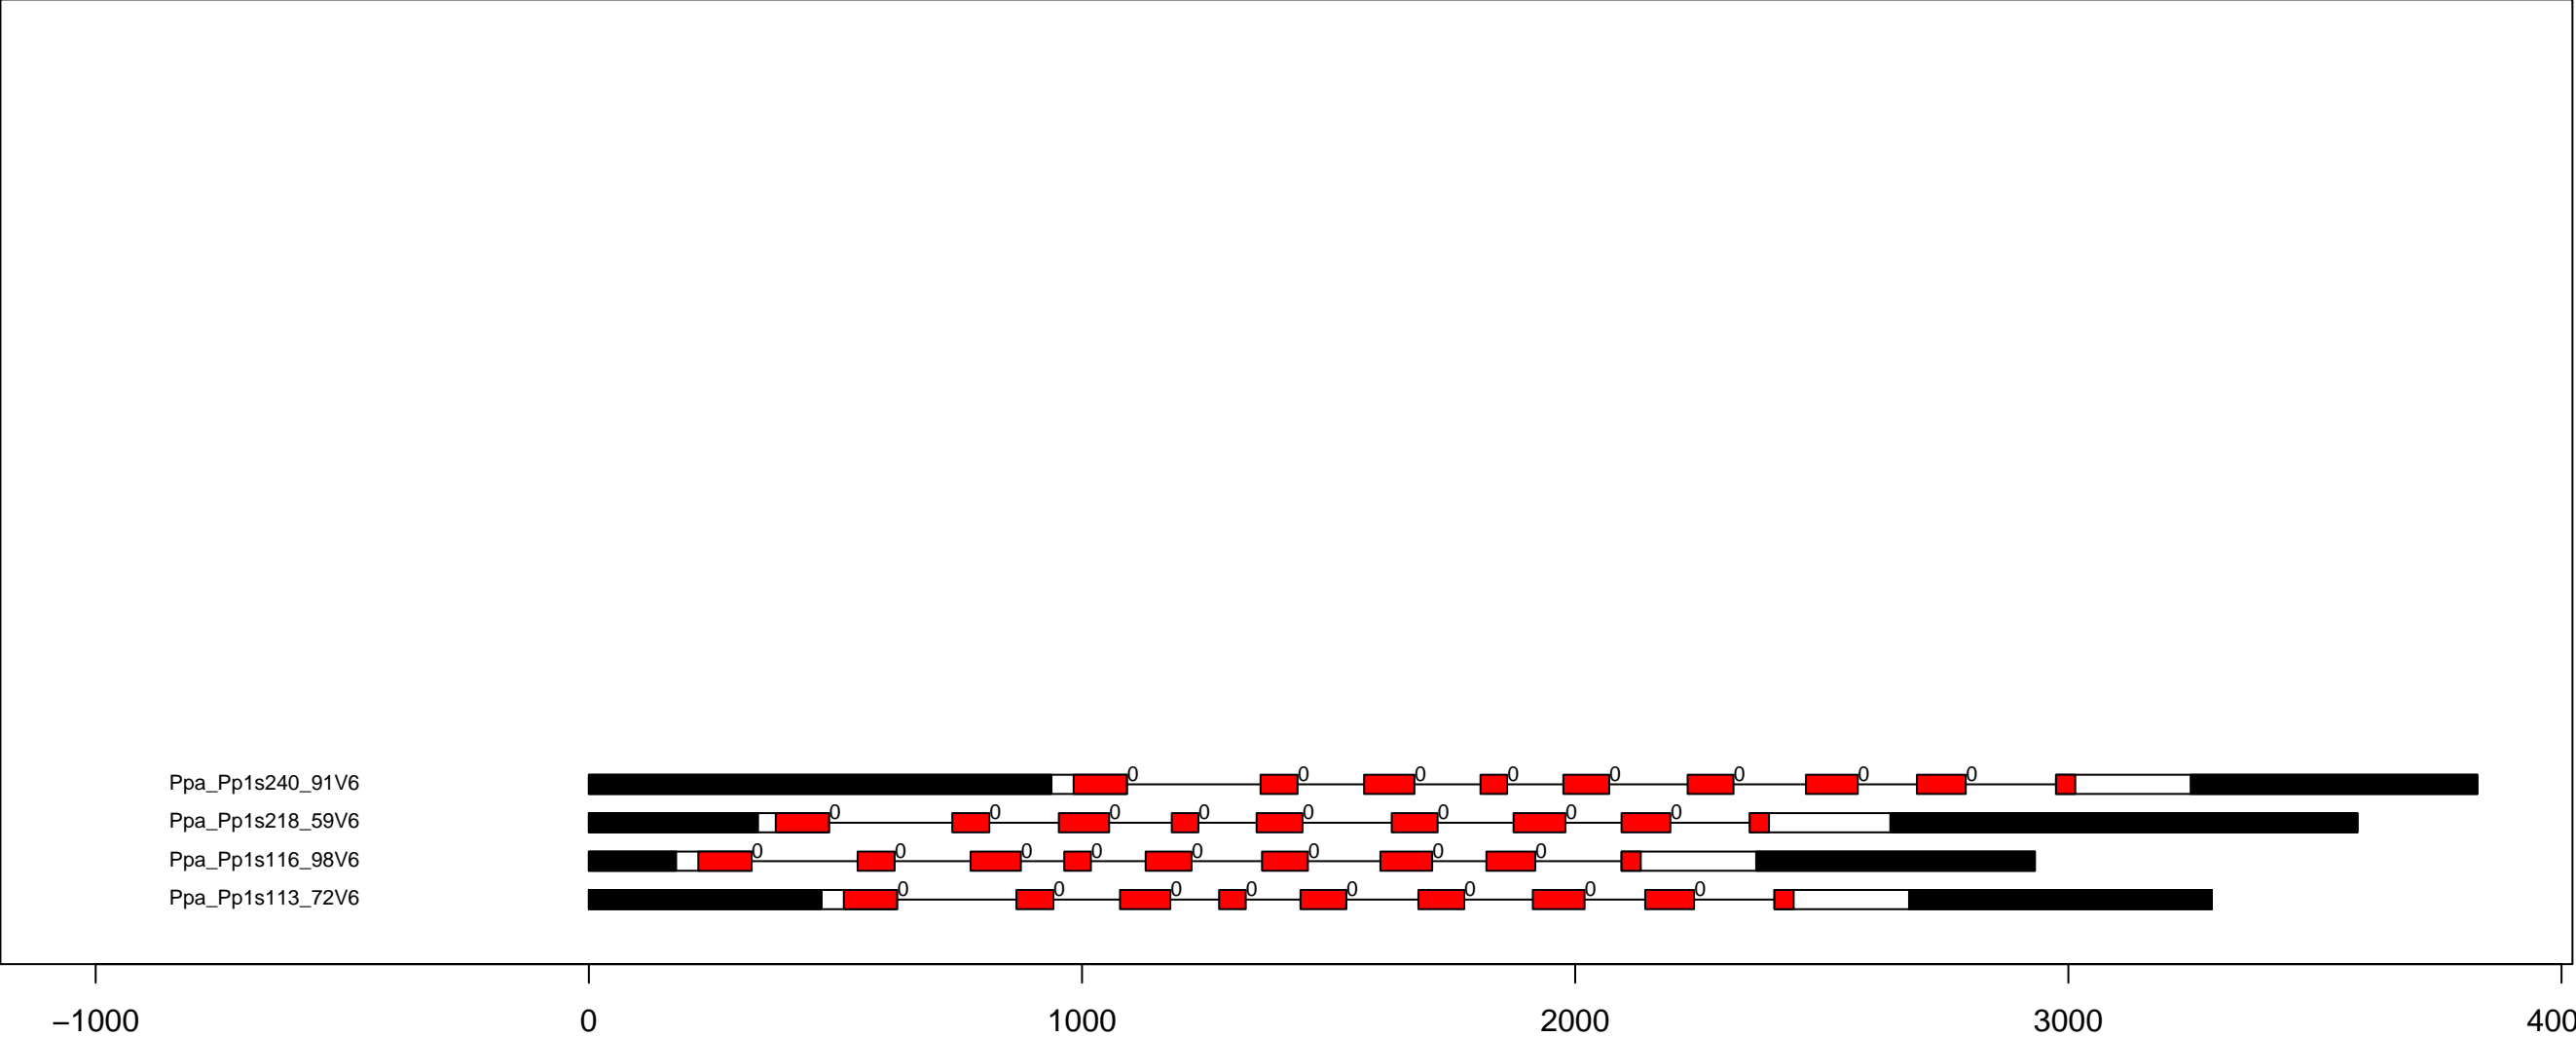

# P.pa CK1\_CK1 exon-intron and kinase domain diagram (all)

Ppa\_Pp1s114\_178V6  
 Ppa\_Pp1s430\_12V6  
 Ppa\_Pp1s216\_7V6  
 Ppa\_Pp1s182\_90V6  
 Ppa\_Pp1s182\_82V6  
 Ppa\_Pp1s151\_38V6

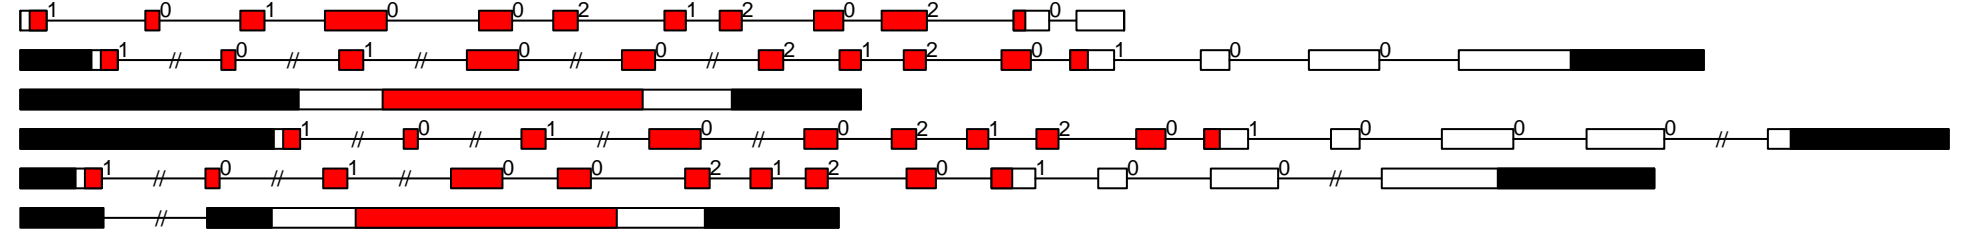

-1000

0

1000

2000

3000

4000

5000

# P.pa CK1-CK1-PI exon-intron and kinase domain diagram (all)

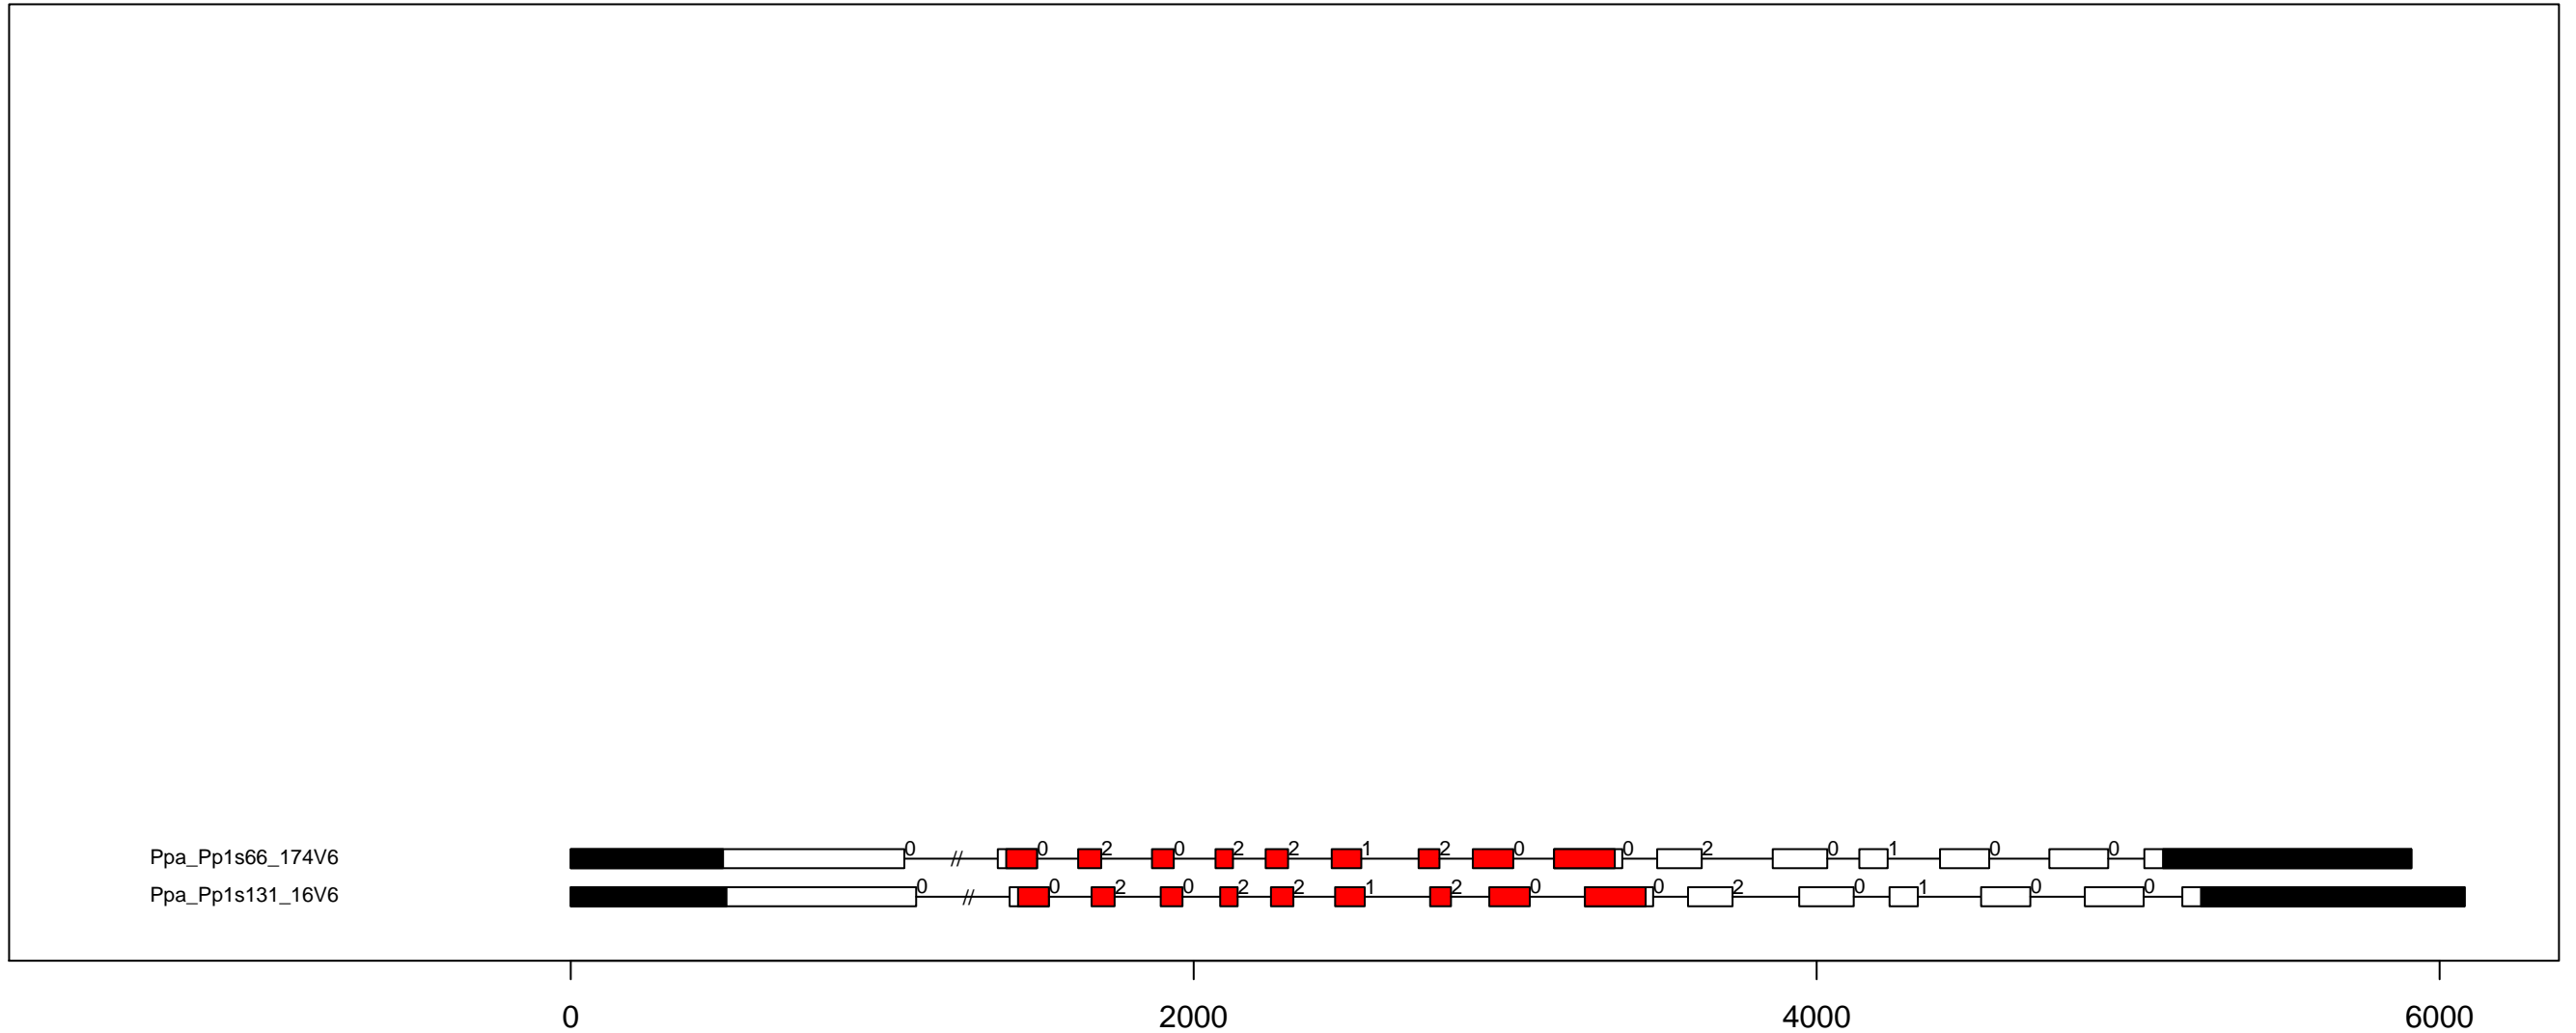

**P.pa CMGC\_CDK-CCRK exon-intron and kinase domain diagram (all)**

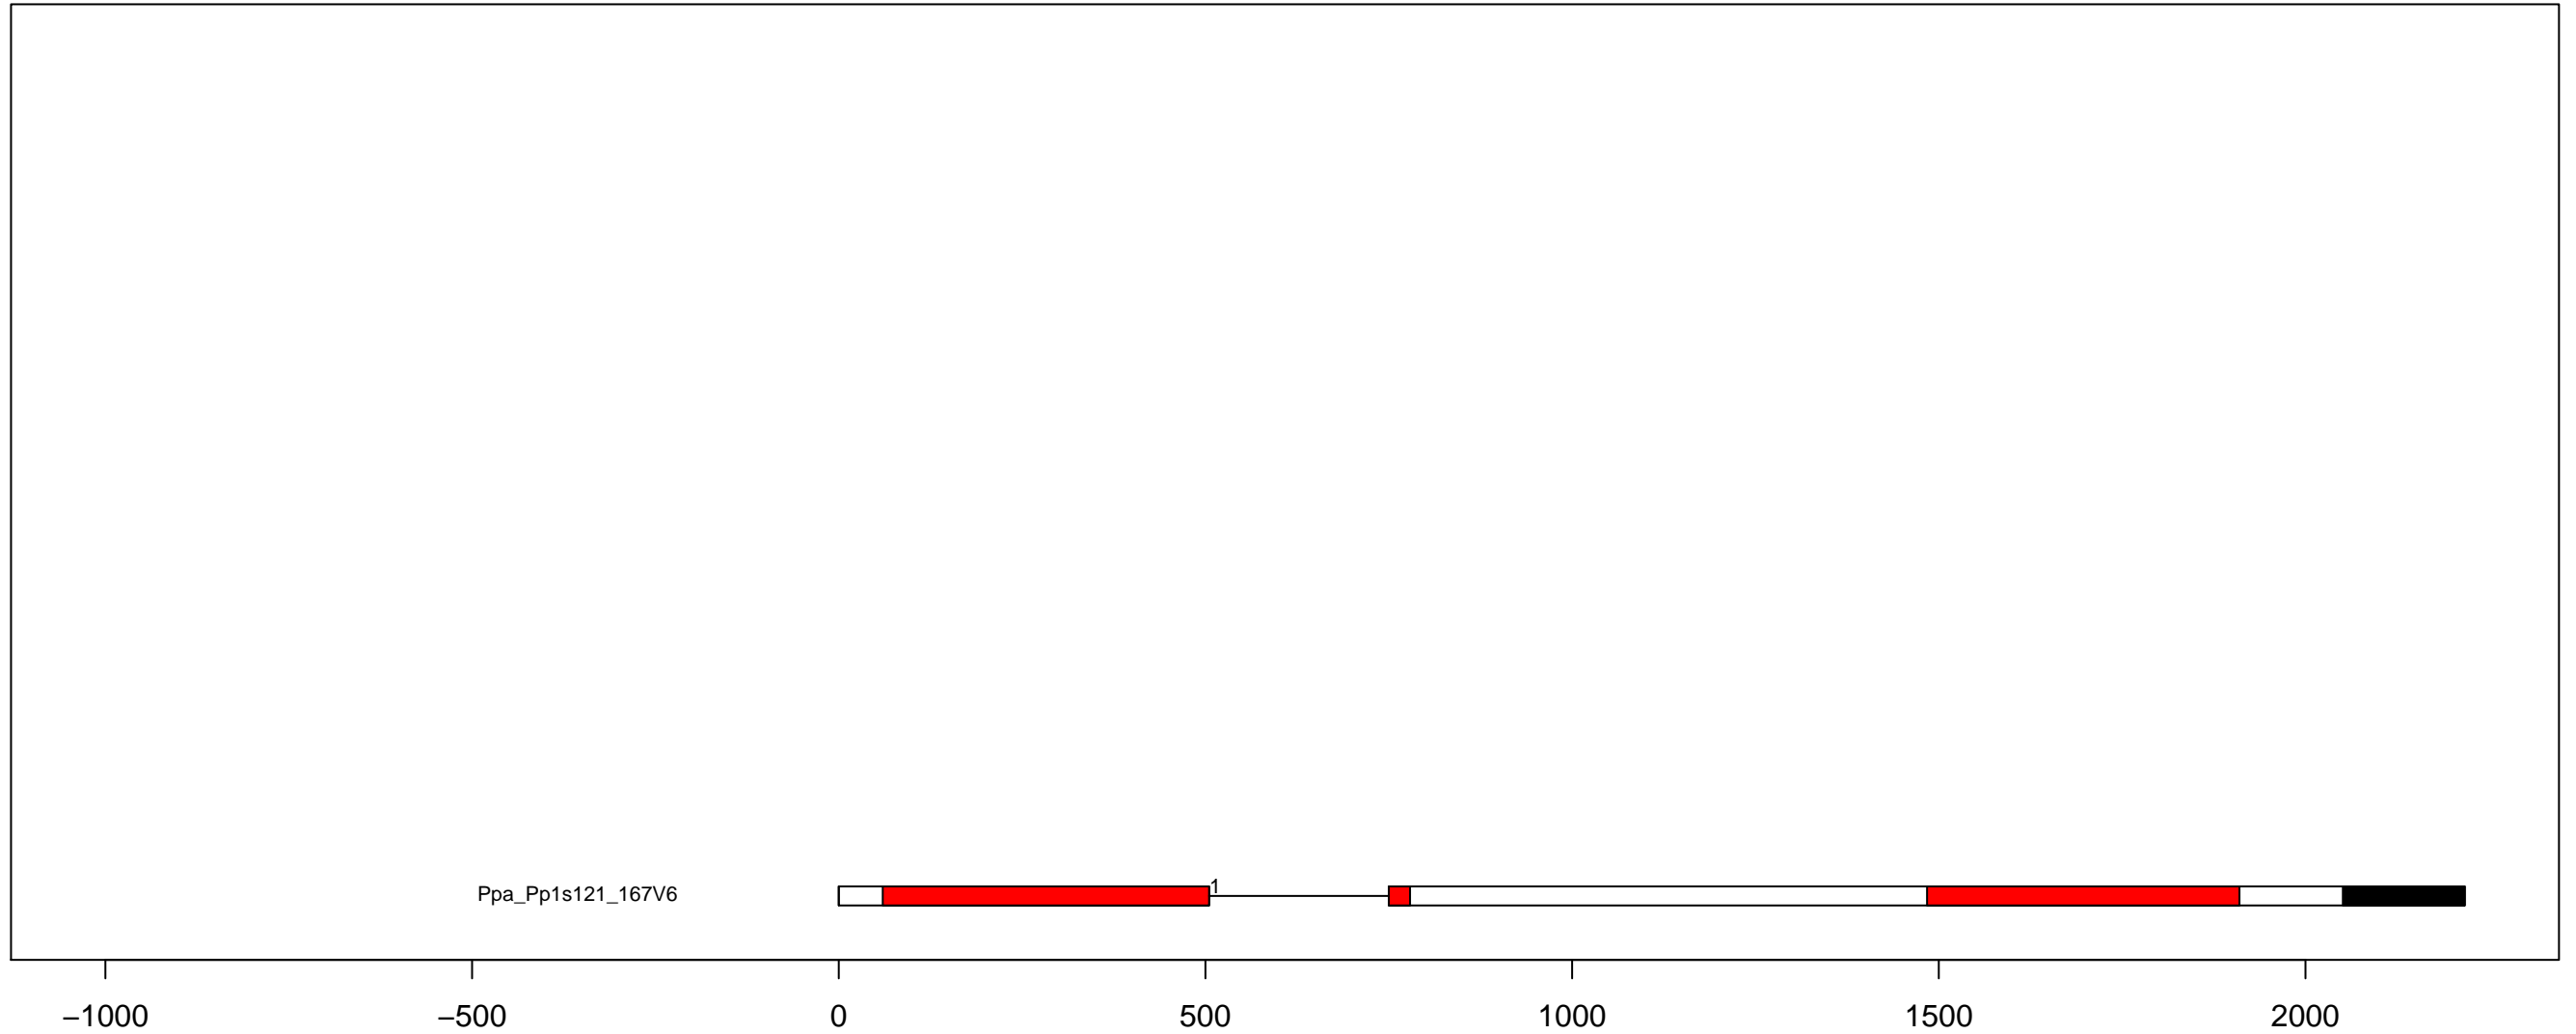

# P.pa CMGC\_CDK-CDK7 exon-intron and kinase domain diagram (all)

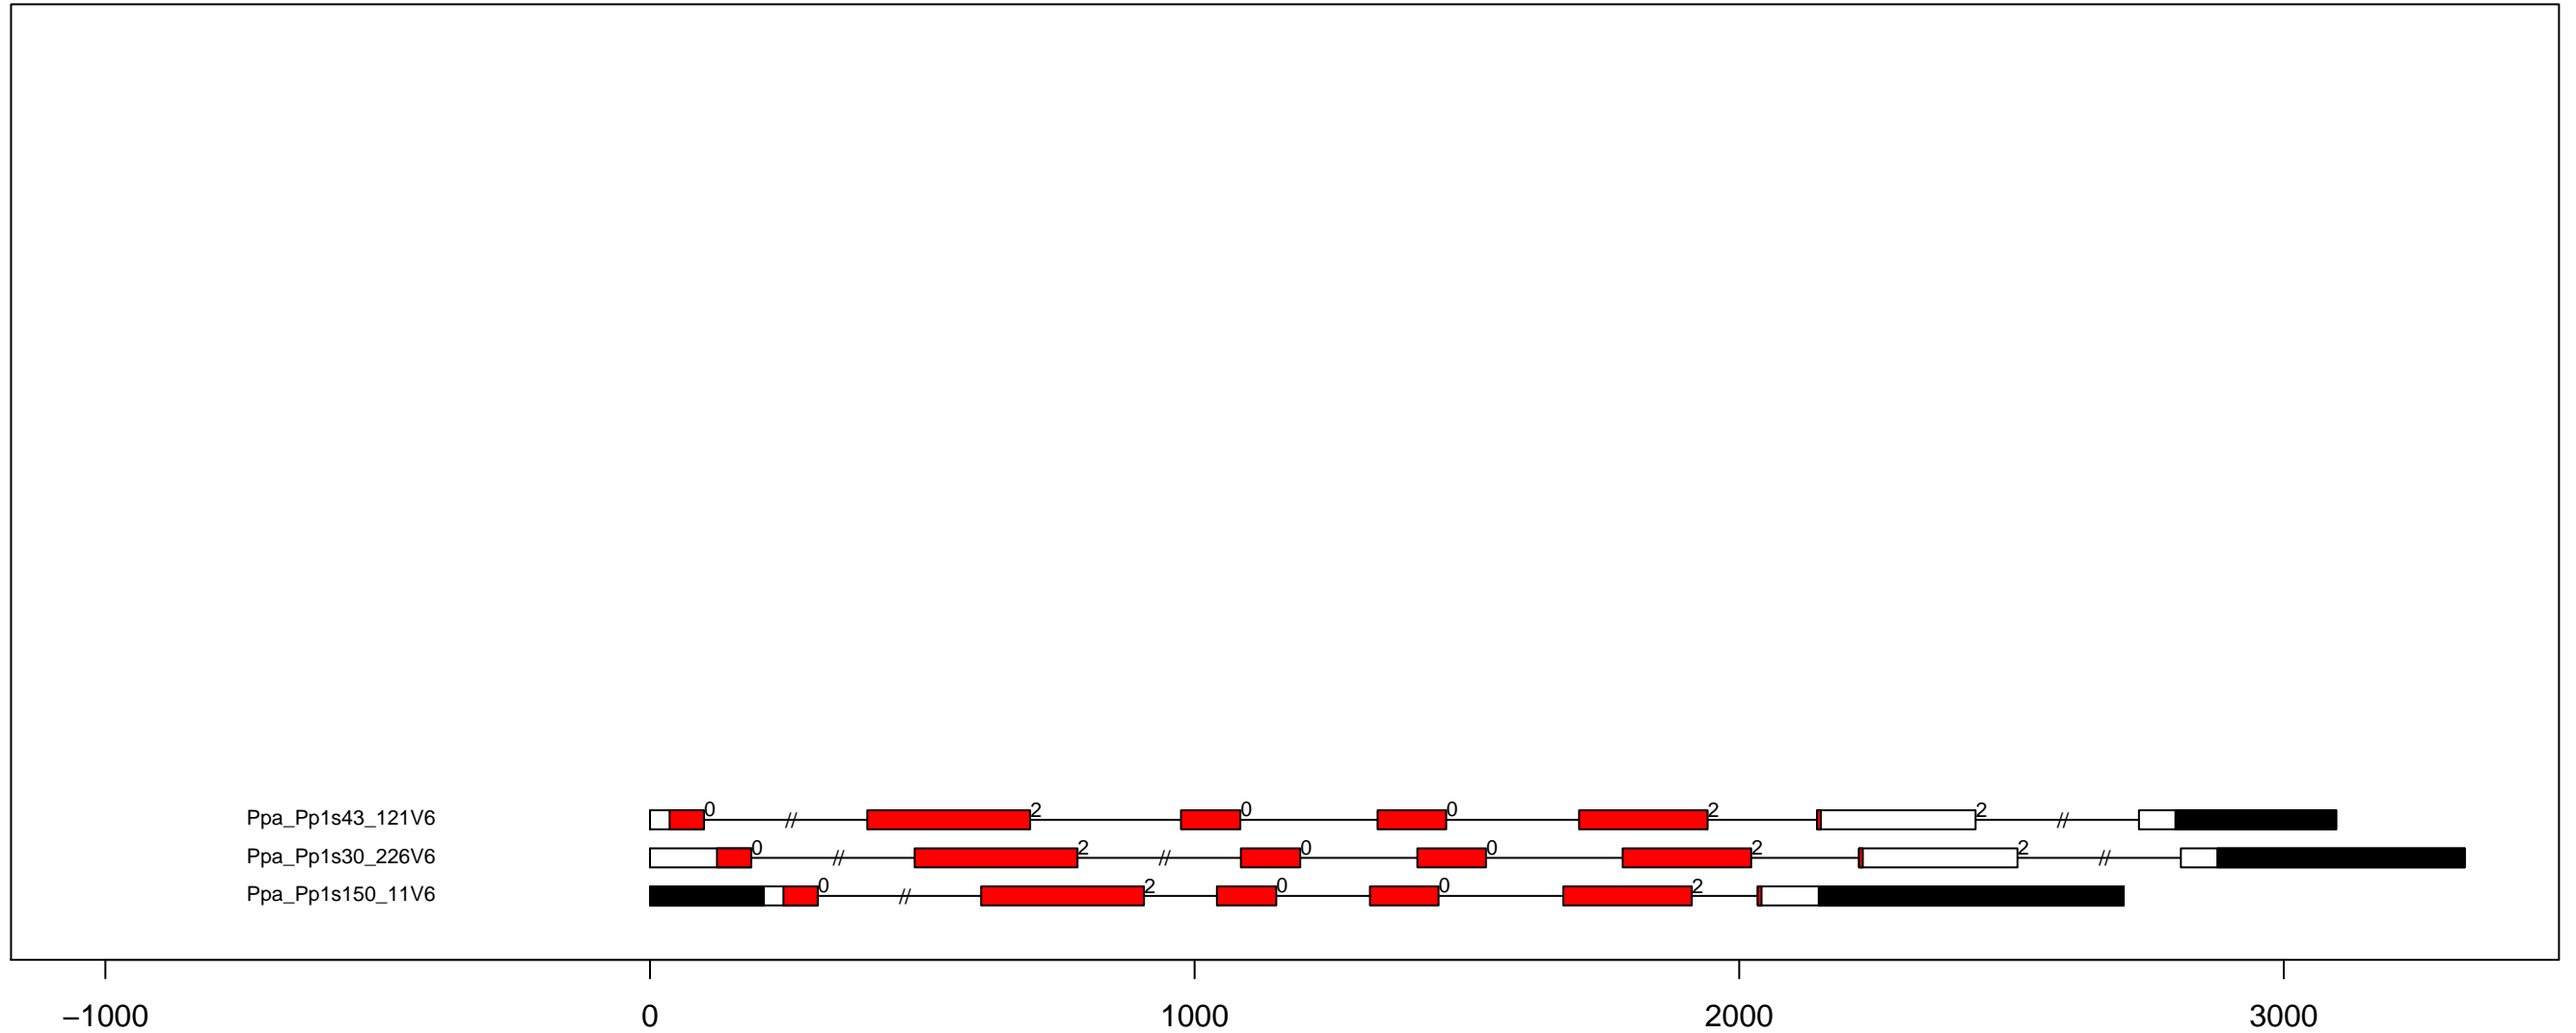

# P.pa CMGC\_CDK-CDK8 exon-intron and kinase domain diagram (all)

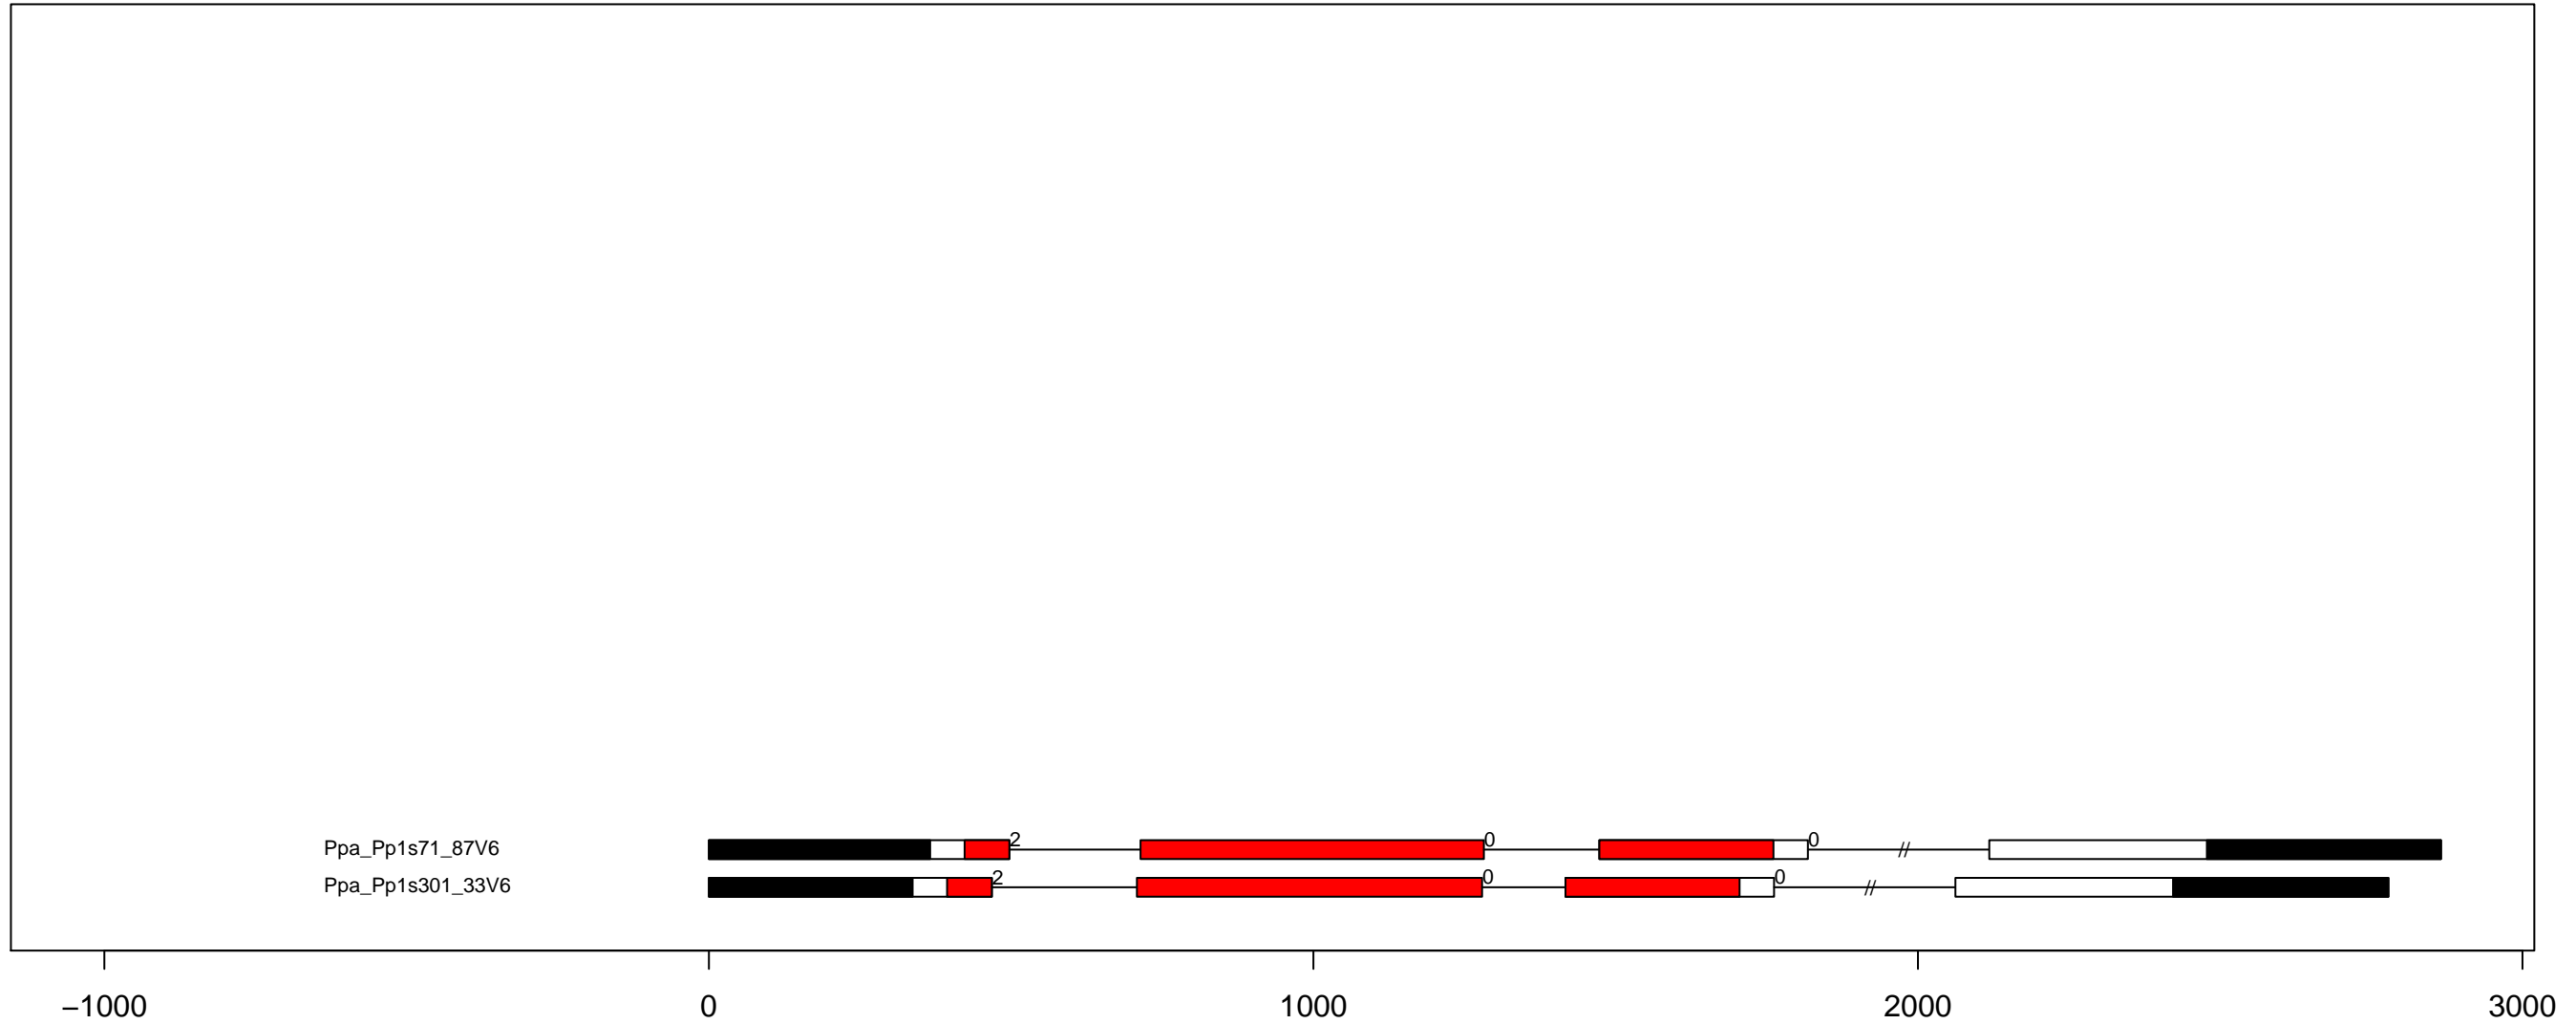

# P.pa CMGC\_CDK-CRK7-CDK9 exon-intron and kinase domain diagram (all)

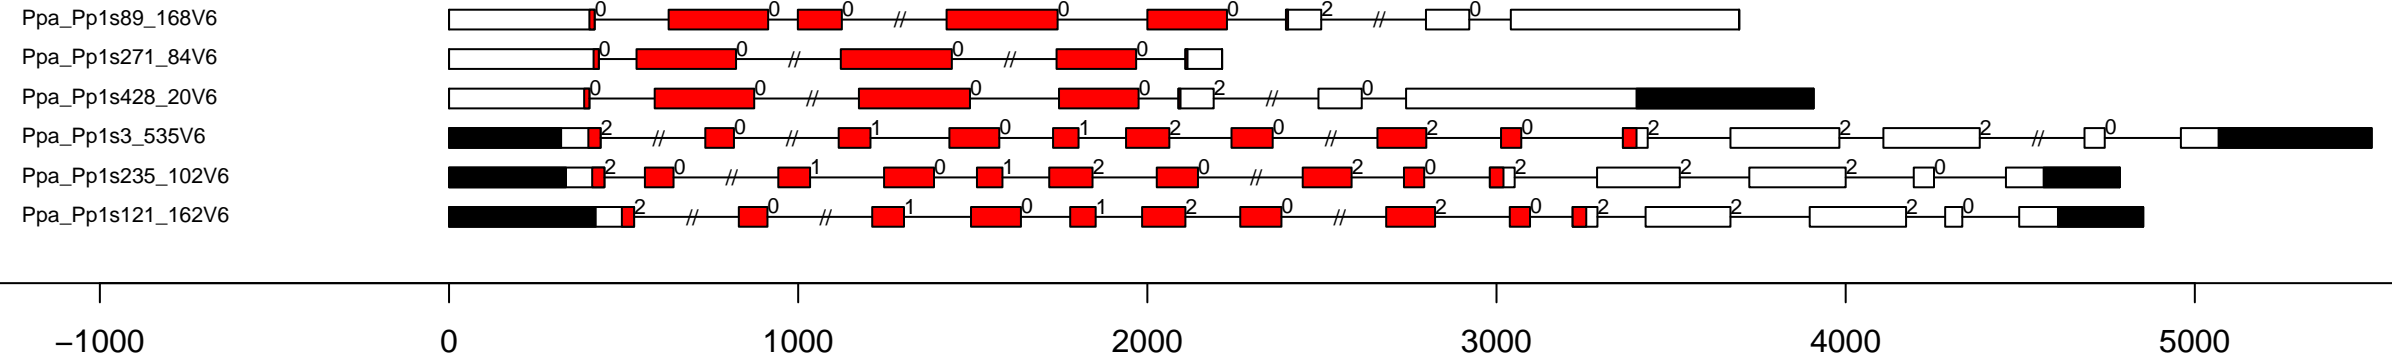



# P.pa CMGC\_CDK-PITSLRE exon-intron and kinase domain diagram (all)

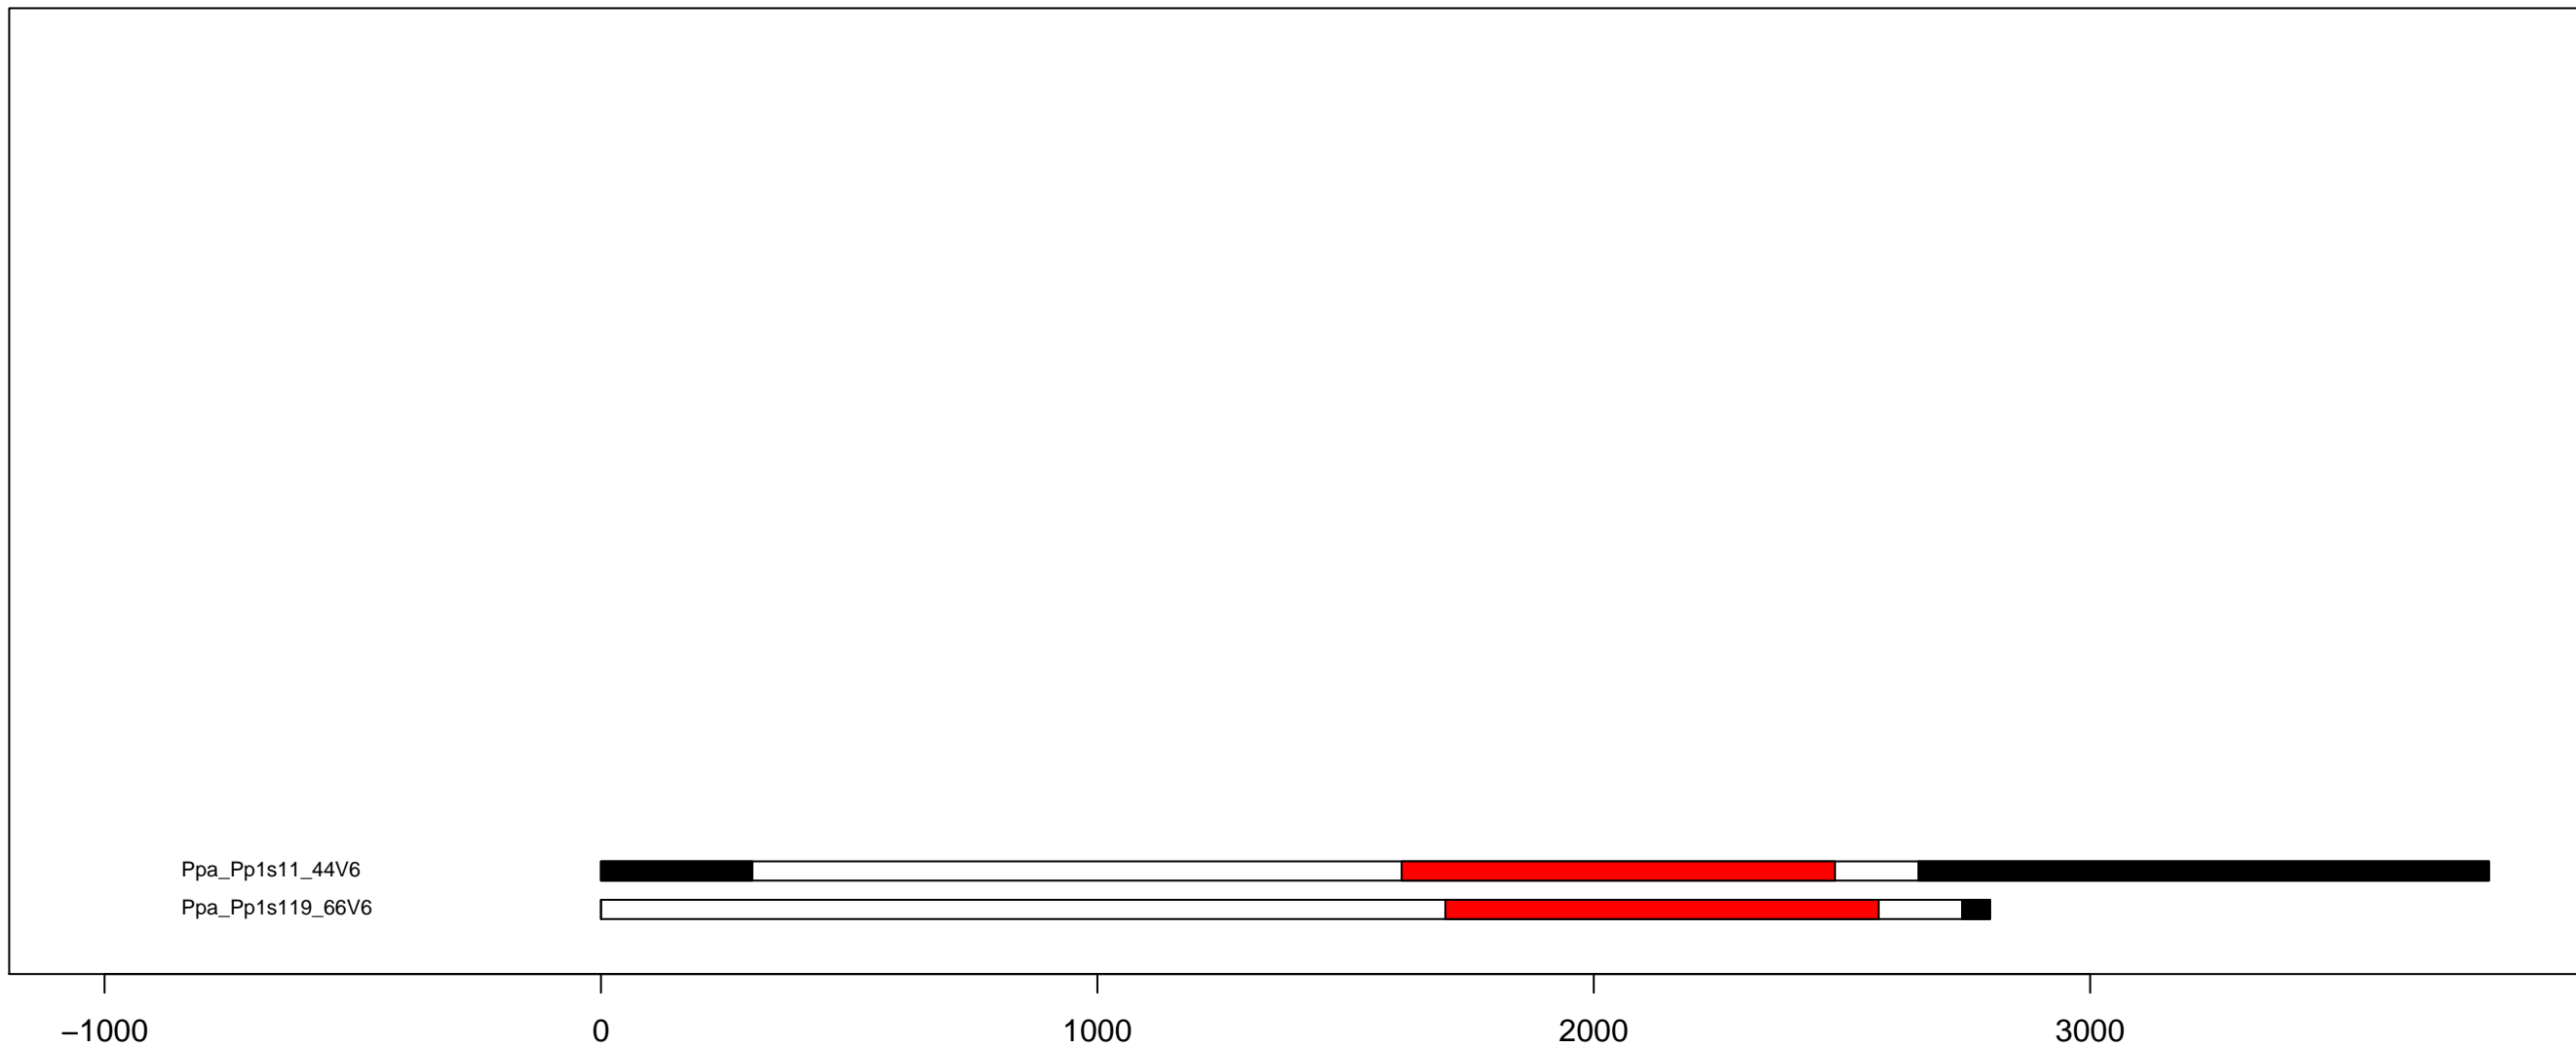

# P.pa CMGC\_CDK-PI exon-intron and kinase domain diagram (all)

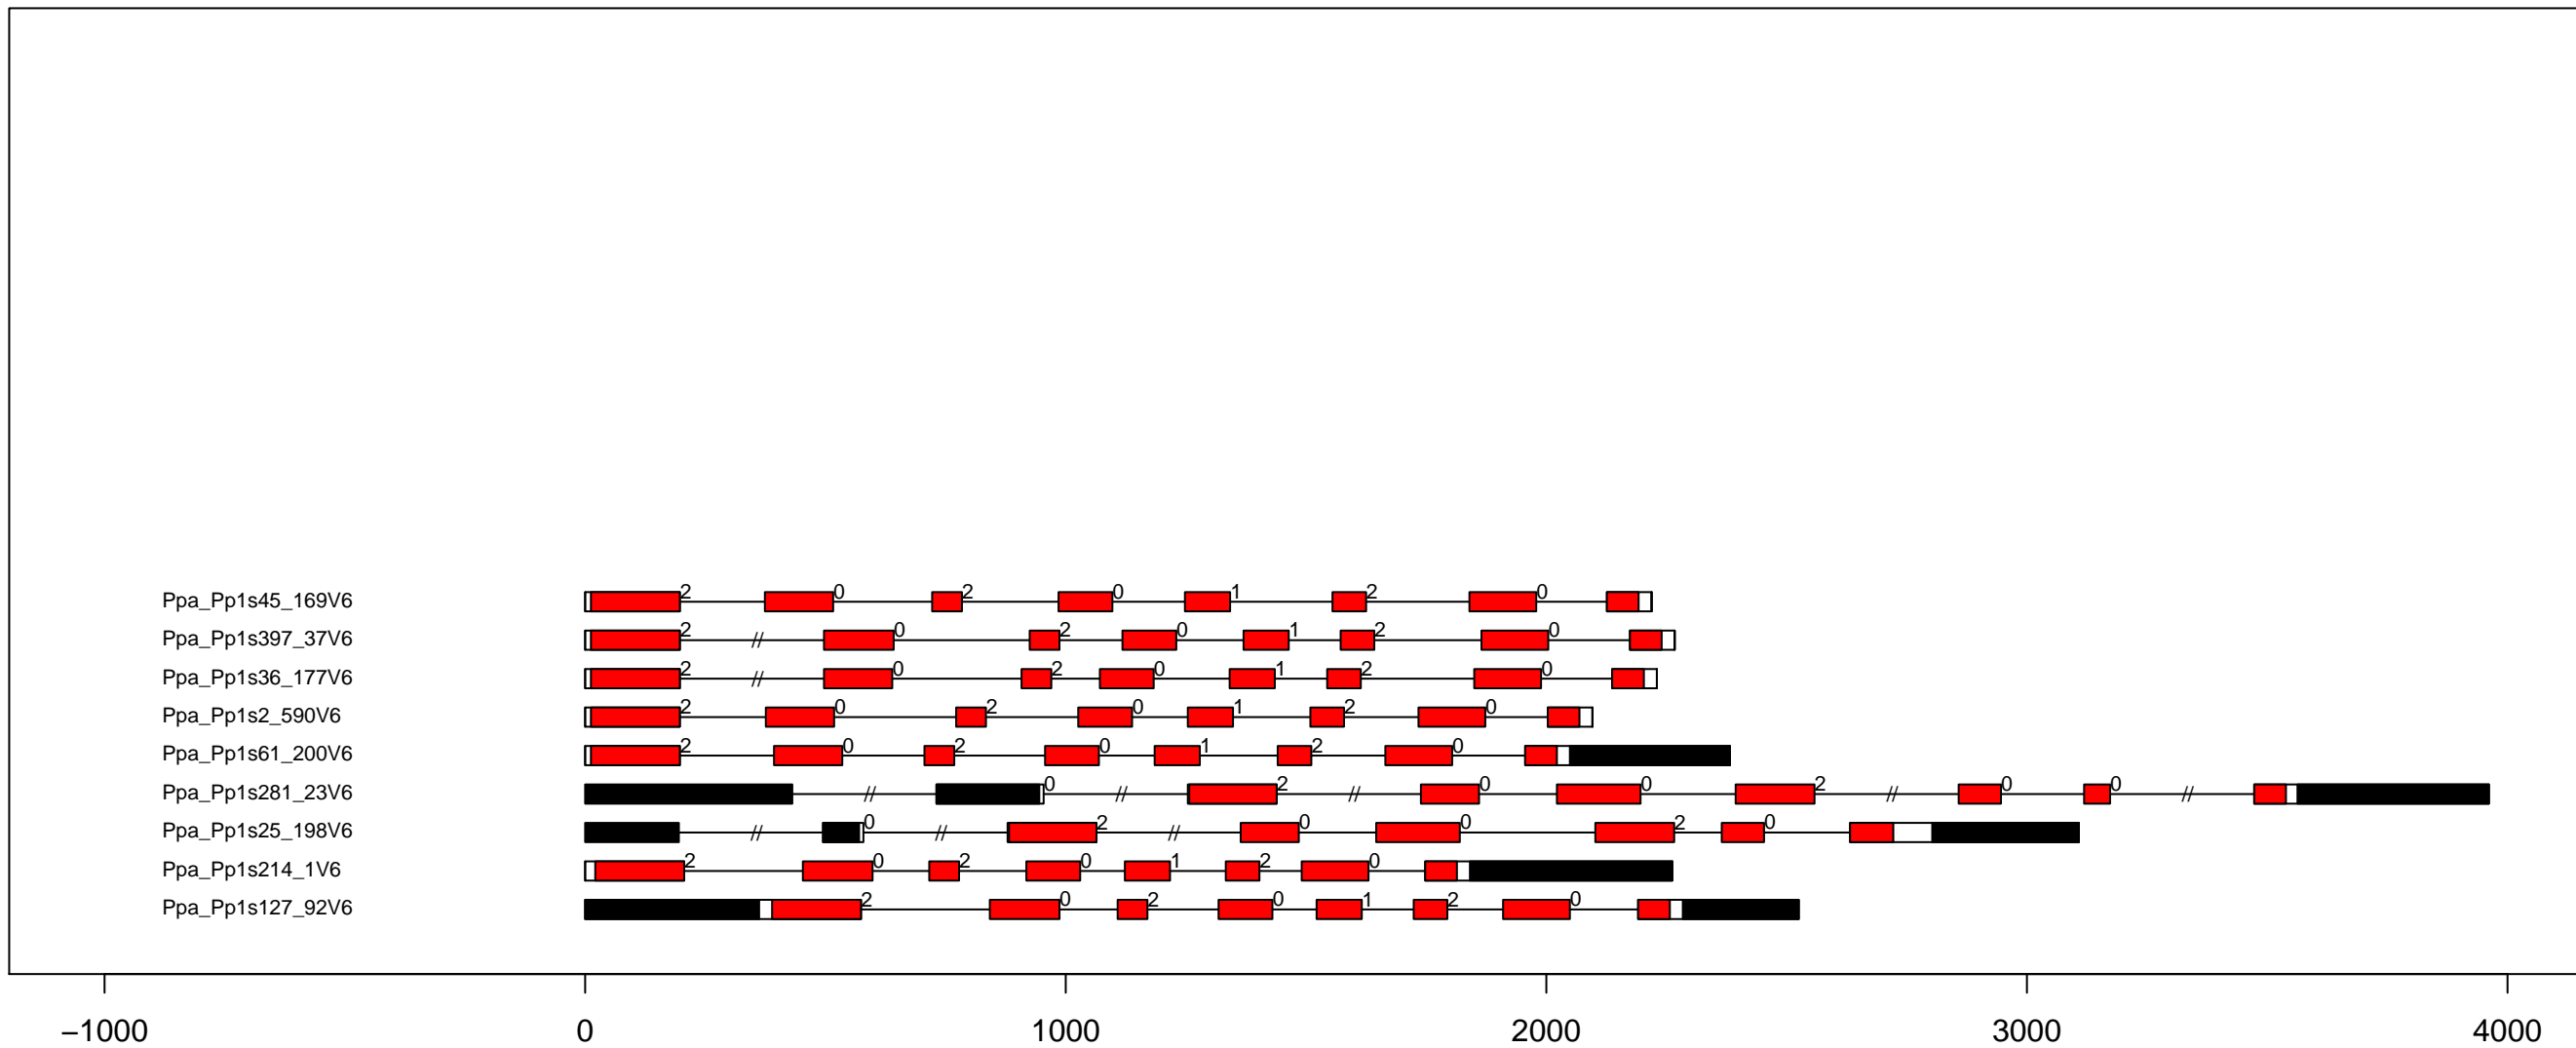

# P.pa CMGC\_CK2 exon-intron and kinase domain diagram (all)

Ppa\_Pp1s63\_208V6  
Ppa\_Pp1s230\_93V6  
Ppa\_Pp1s165\_119V6  
Ppa\_Pp1s165\_107V6

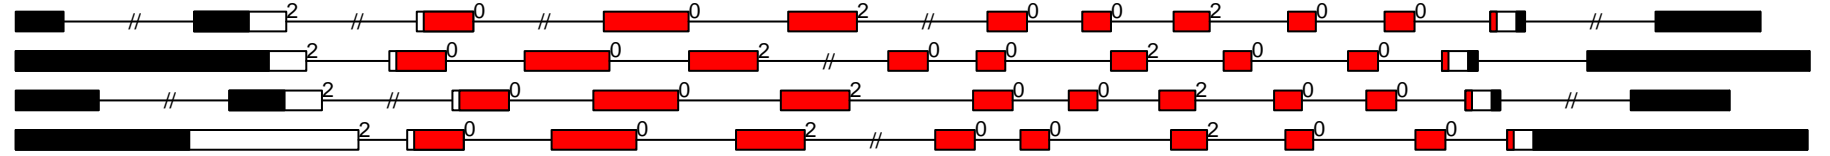

-1000

0

1000

2000

3000

4000

# P.pa CMGC\_CLK exon-intron and kinase domain diagram (all)

Ppa\_Pp1s132\_58V6  
 Ppa\_Pp1s425\_6V6  
 Ppa\_Pp1s100\_121V6

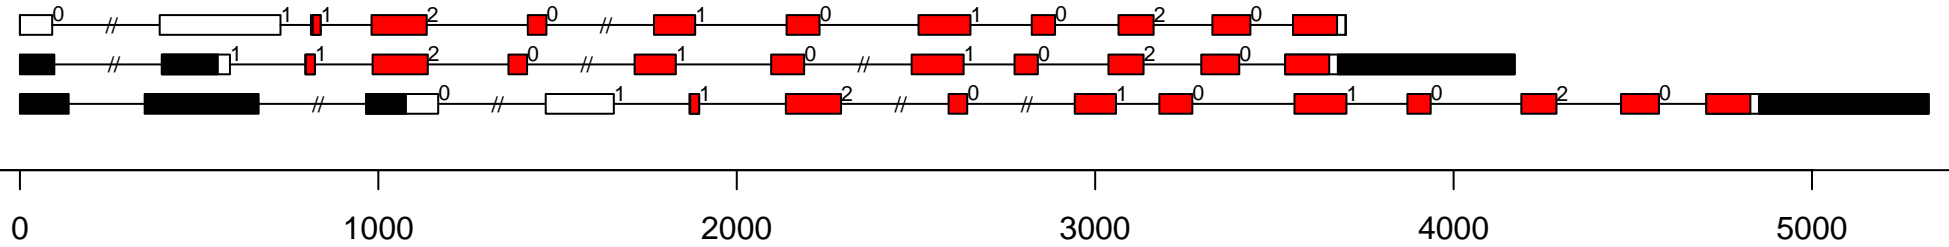

# P.pa CMGC\_DYRK–DRYK2 exon–intron and kinase domain diagram (all)

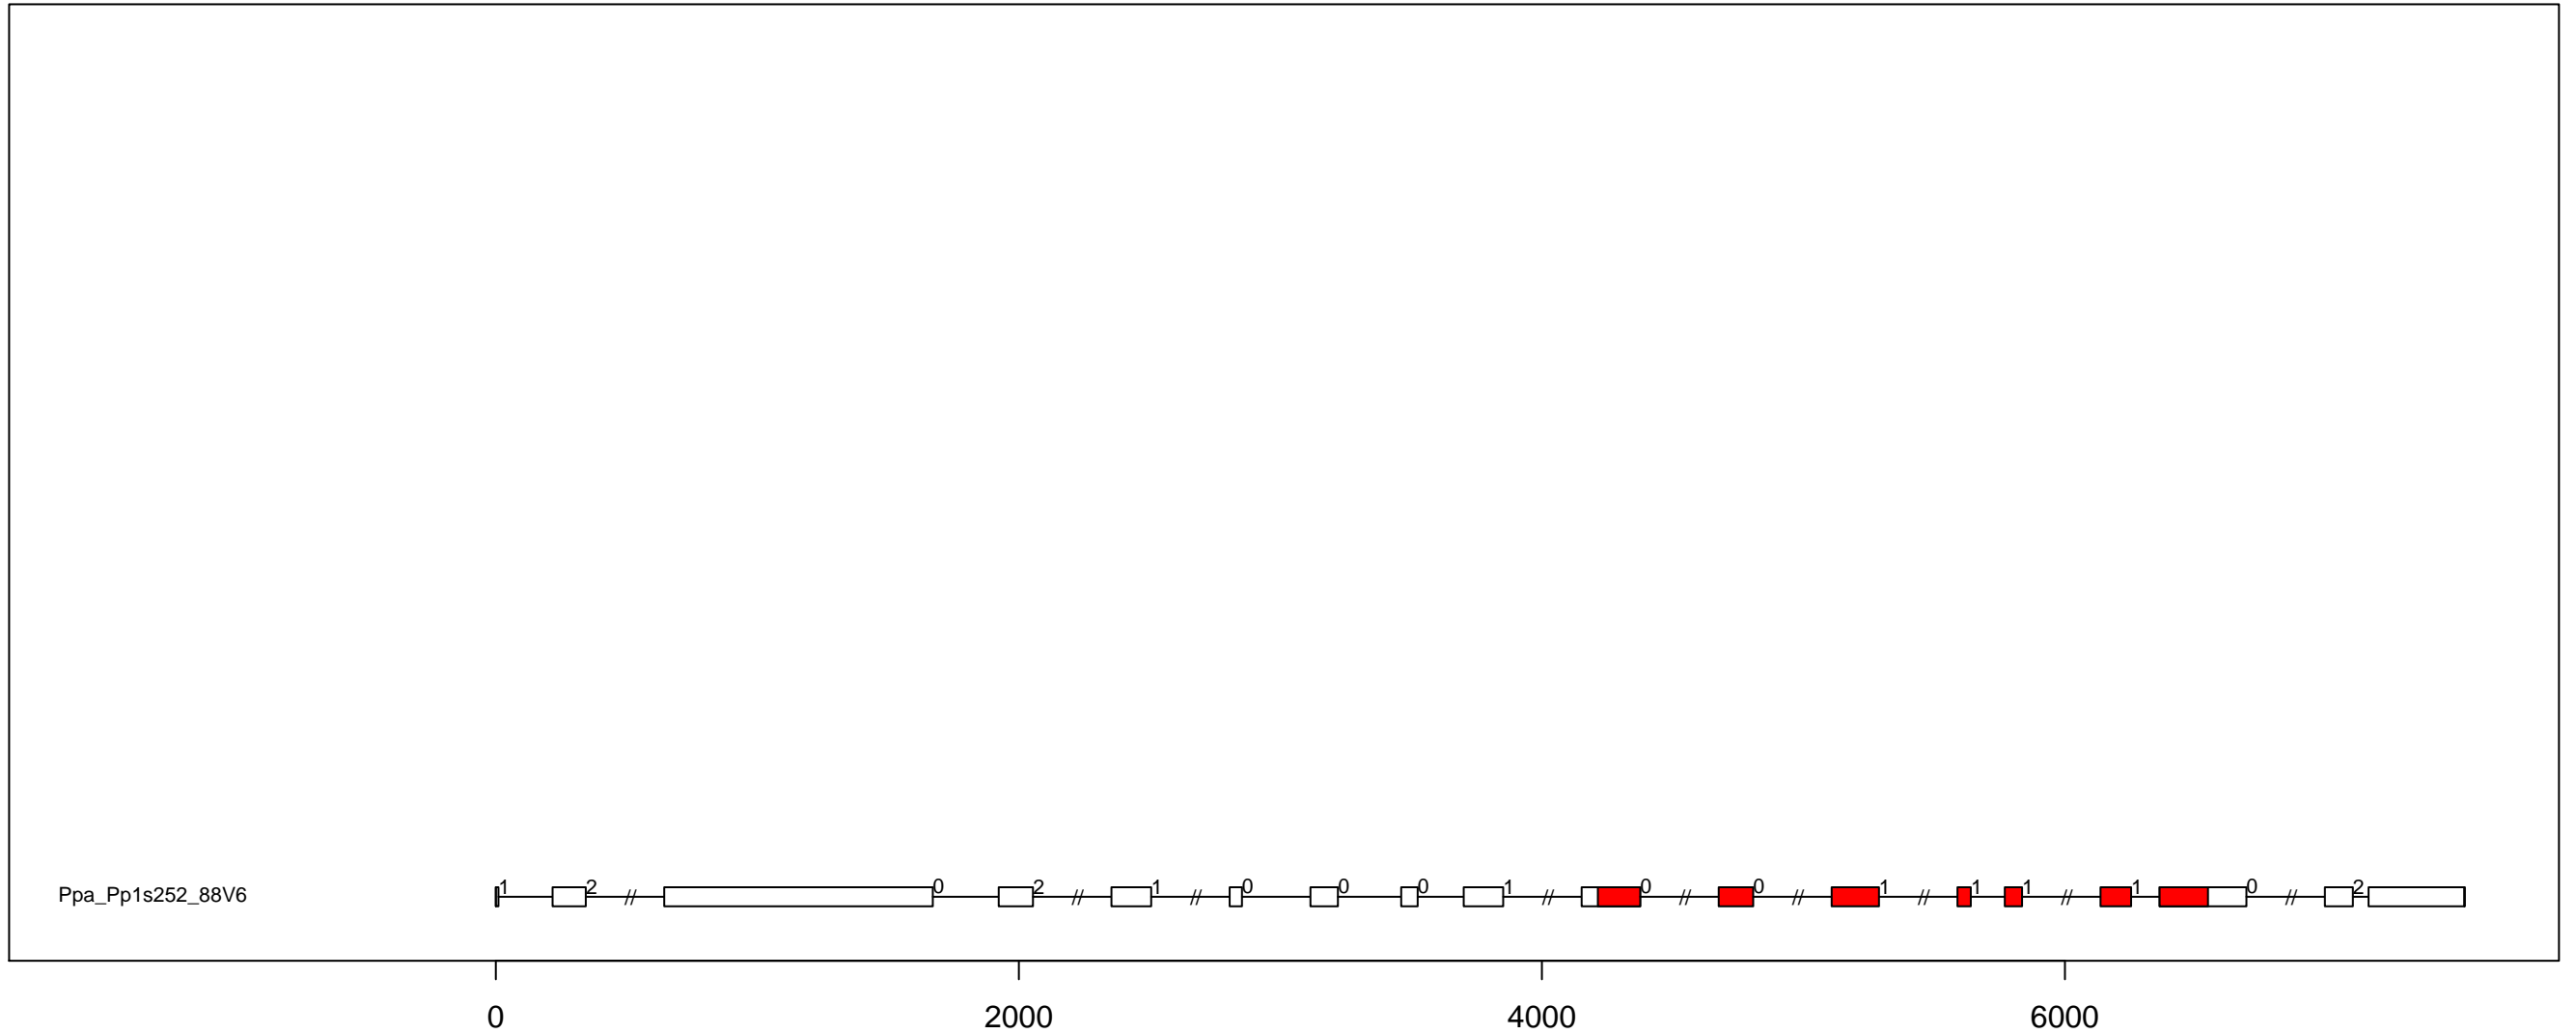

# P.pa CMGC\_DYRK-PRP4 exon-intron and kinase domain diagram (all)

Ppa\_Pp1s250\_28V6

Ppa\_Pp1s213\_125V6

Ppa\_Pp1s47\_312V6

Ppa\_Pp1s381\_39V6

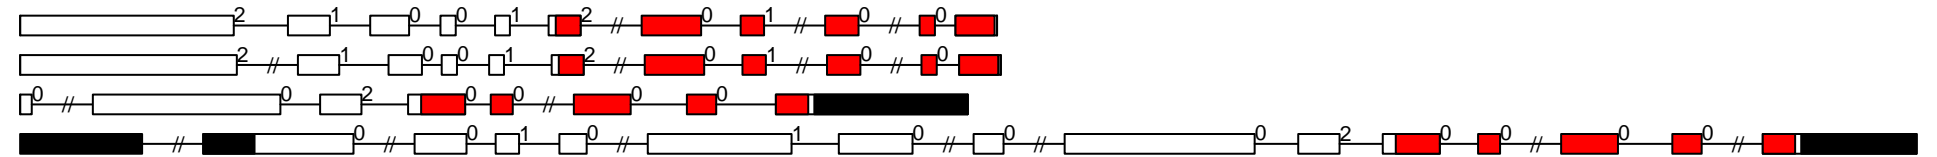

-2000

0

2000

4000

6000

8000

# P.pa CMGC\_DYRK-YAK exon-intron and kinase domain diagram (all)

Ppa\_Pp1s401\_7V6  
Ppa\_Pp1s3\_592V6  
Ppa\_Pp1s192\_46V6  
Ppa\_Pp1s16\_333V6  
Ppa\_Pp1s132\_192V6

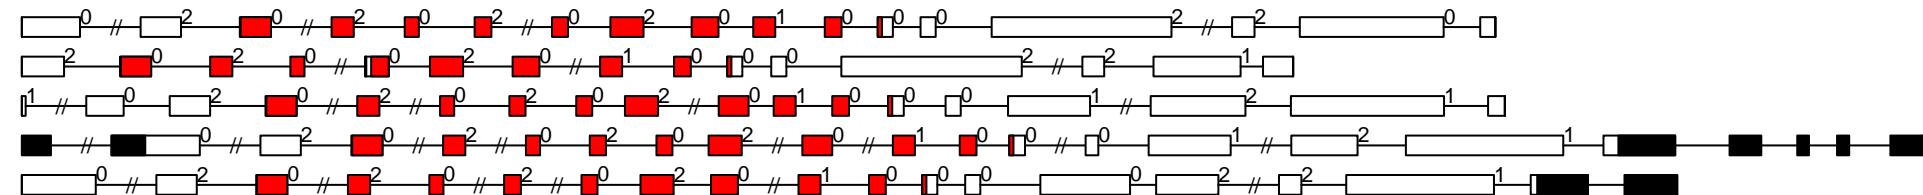

-2000

0

2000

4000

6000

8000





# P.pa CMGC\_MAPK exon-intron and kinase domain diagram (all)

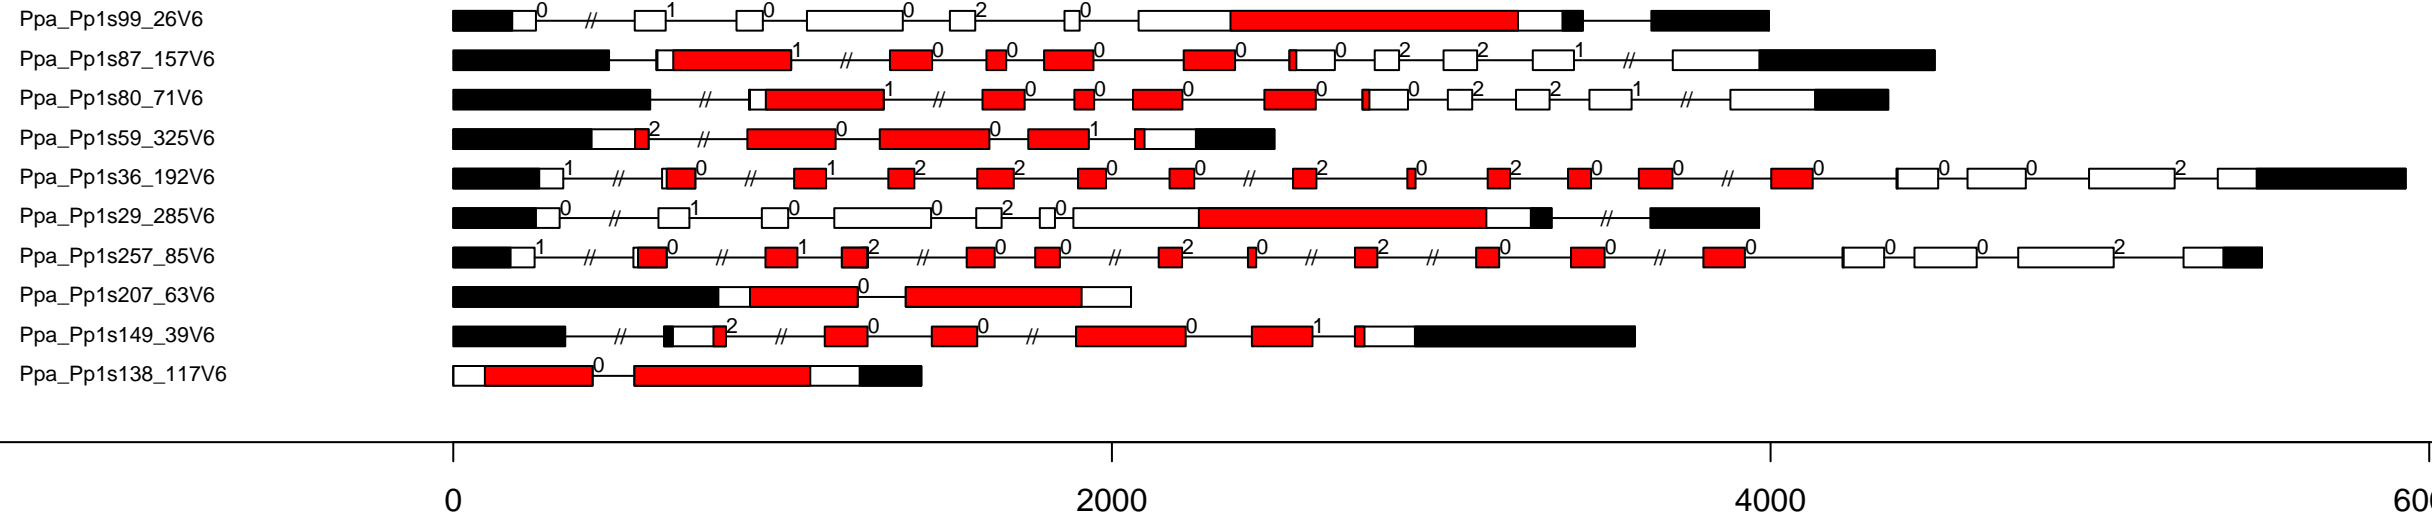

# P.pa CMGC\_PI-Tthe exon-intron and kinase domain diagram (all)

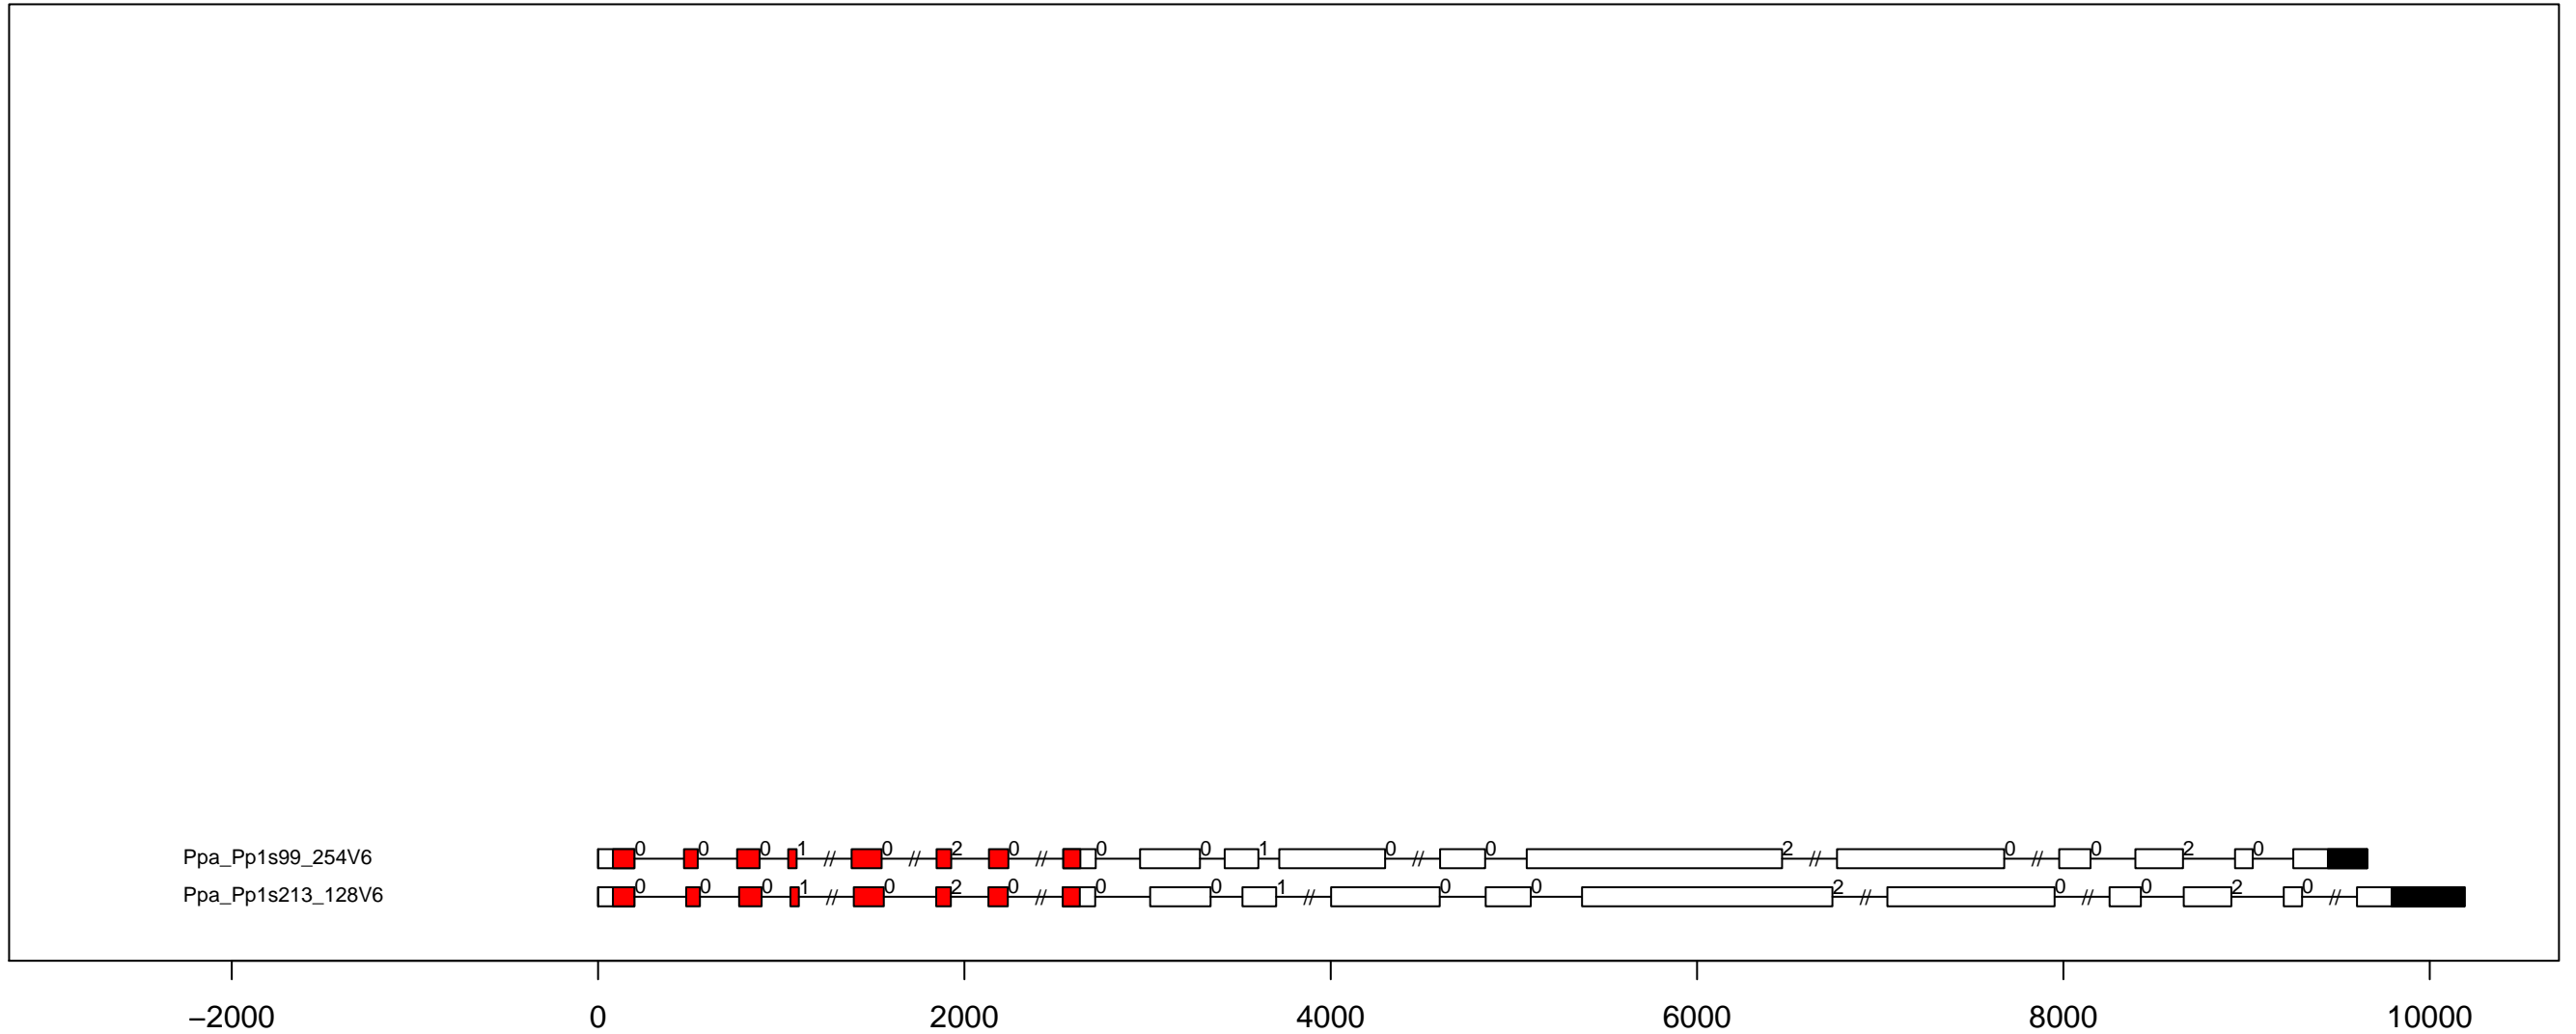

# P.pa CMGC\_RCK exon-intron and kinase domain diagram (all)

Ppa\_Pp1s34\_221V6  
Ppa\_Pp1s479\_13V6  
Ppa\_Pp1s28\_184V6  
Ppa\_Pp1s173\_136V6

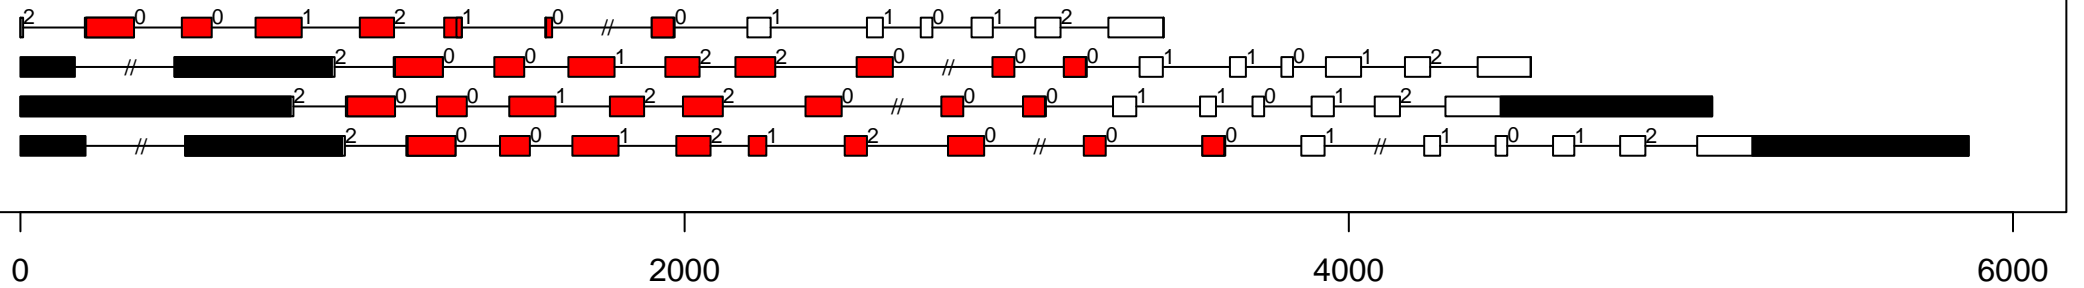

# P.pa CMGC\_SRPK exon-intron and kinase domain diagram (all)

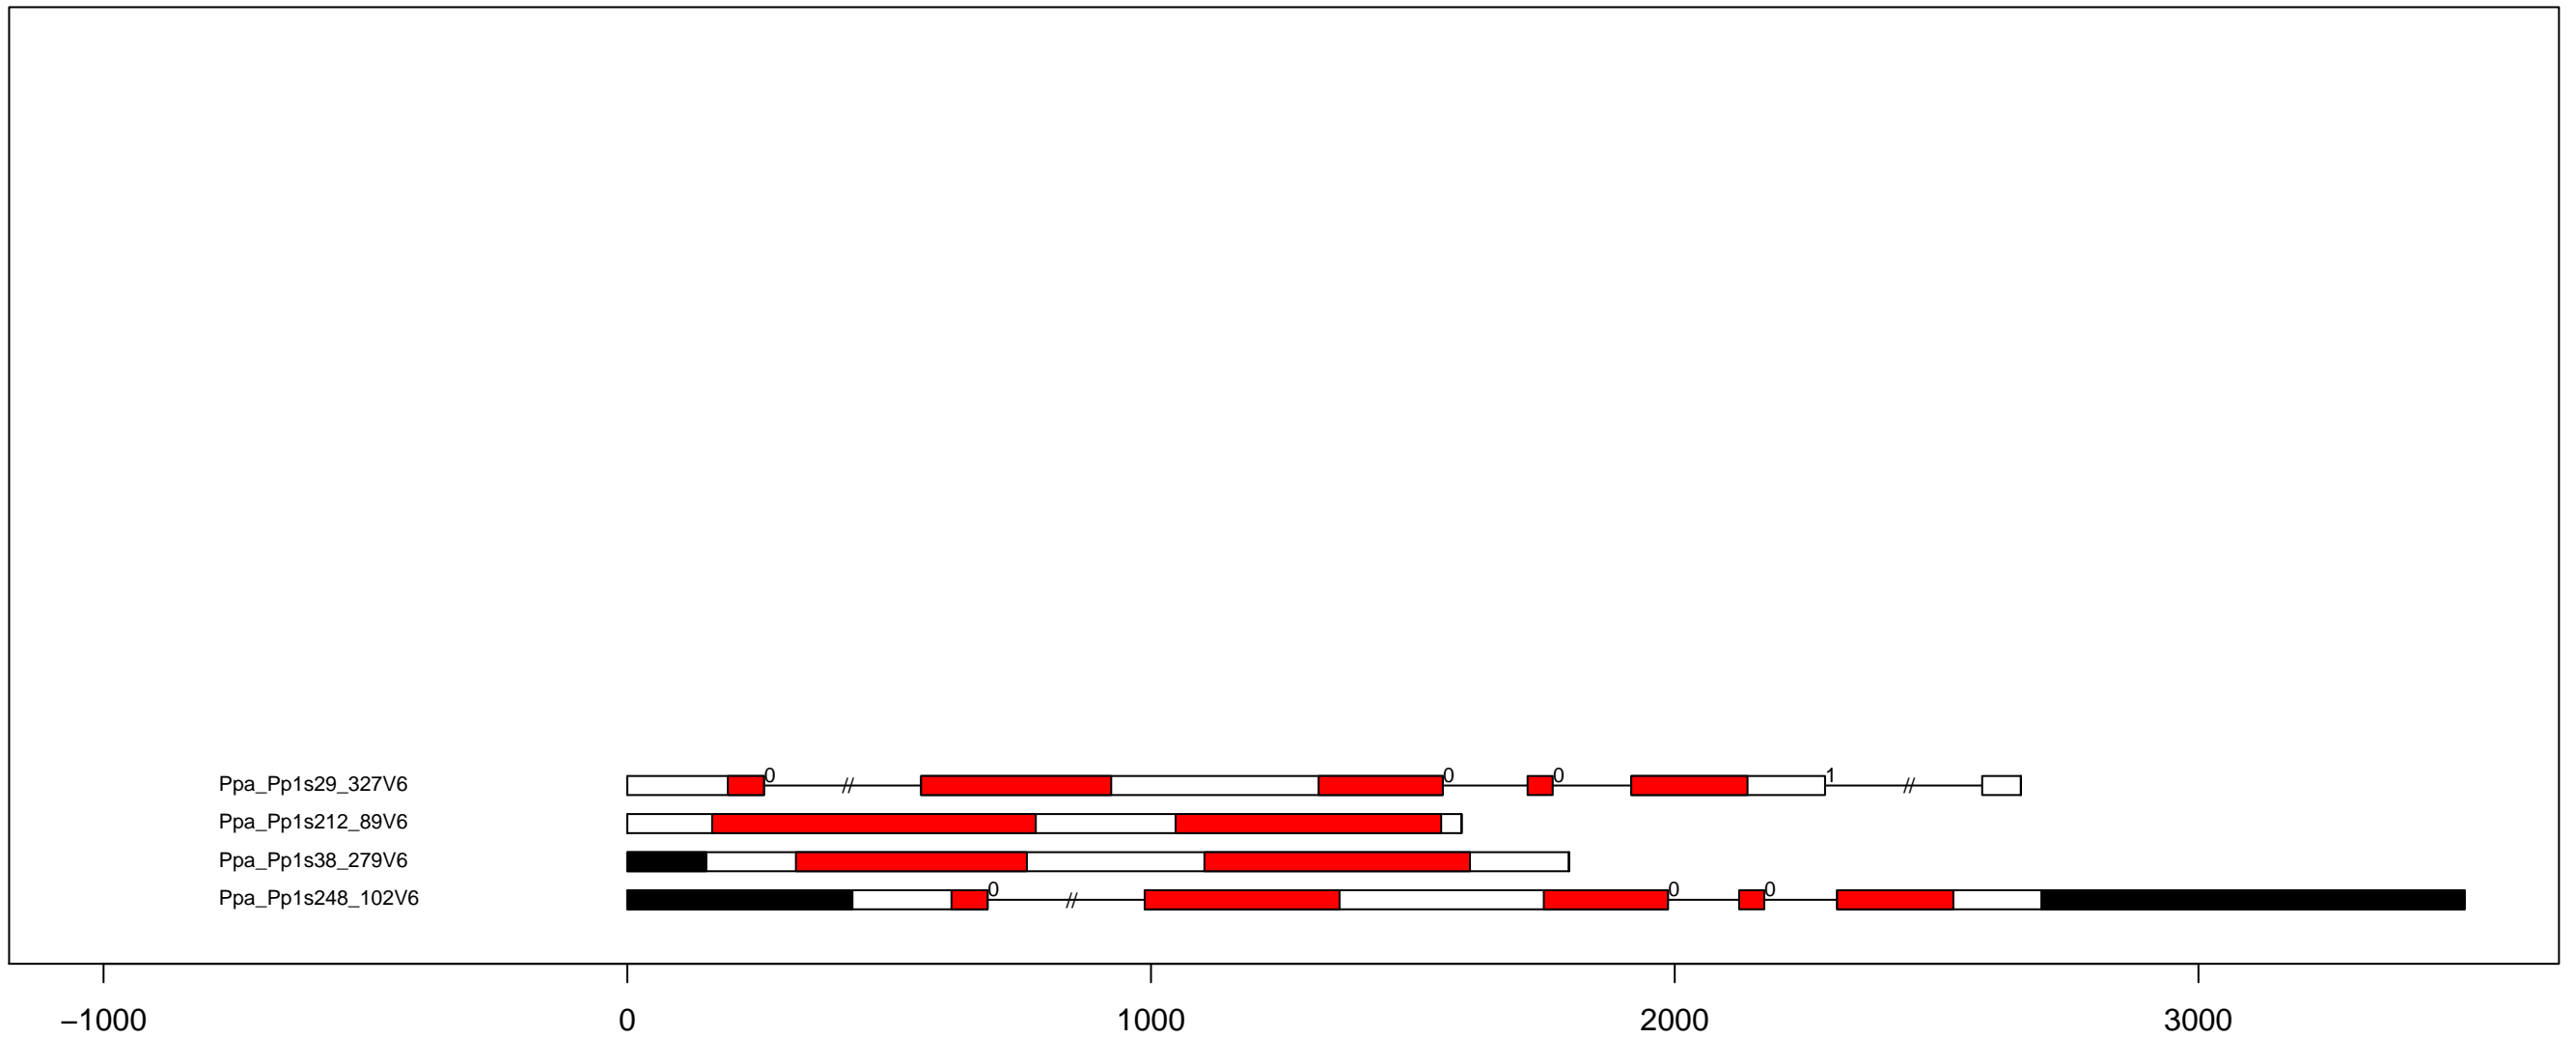

# P.pa Group-PI-1 exon-intron and kinase domain diagram (all)

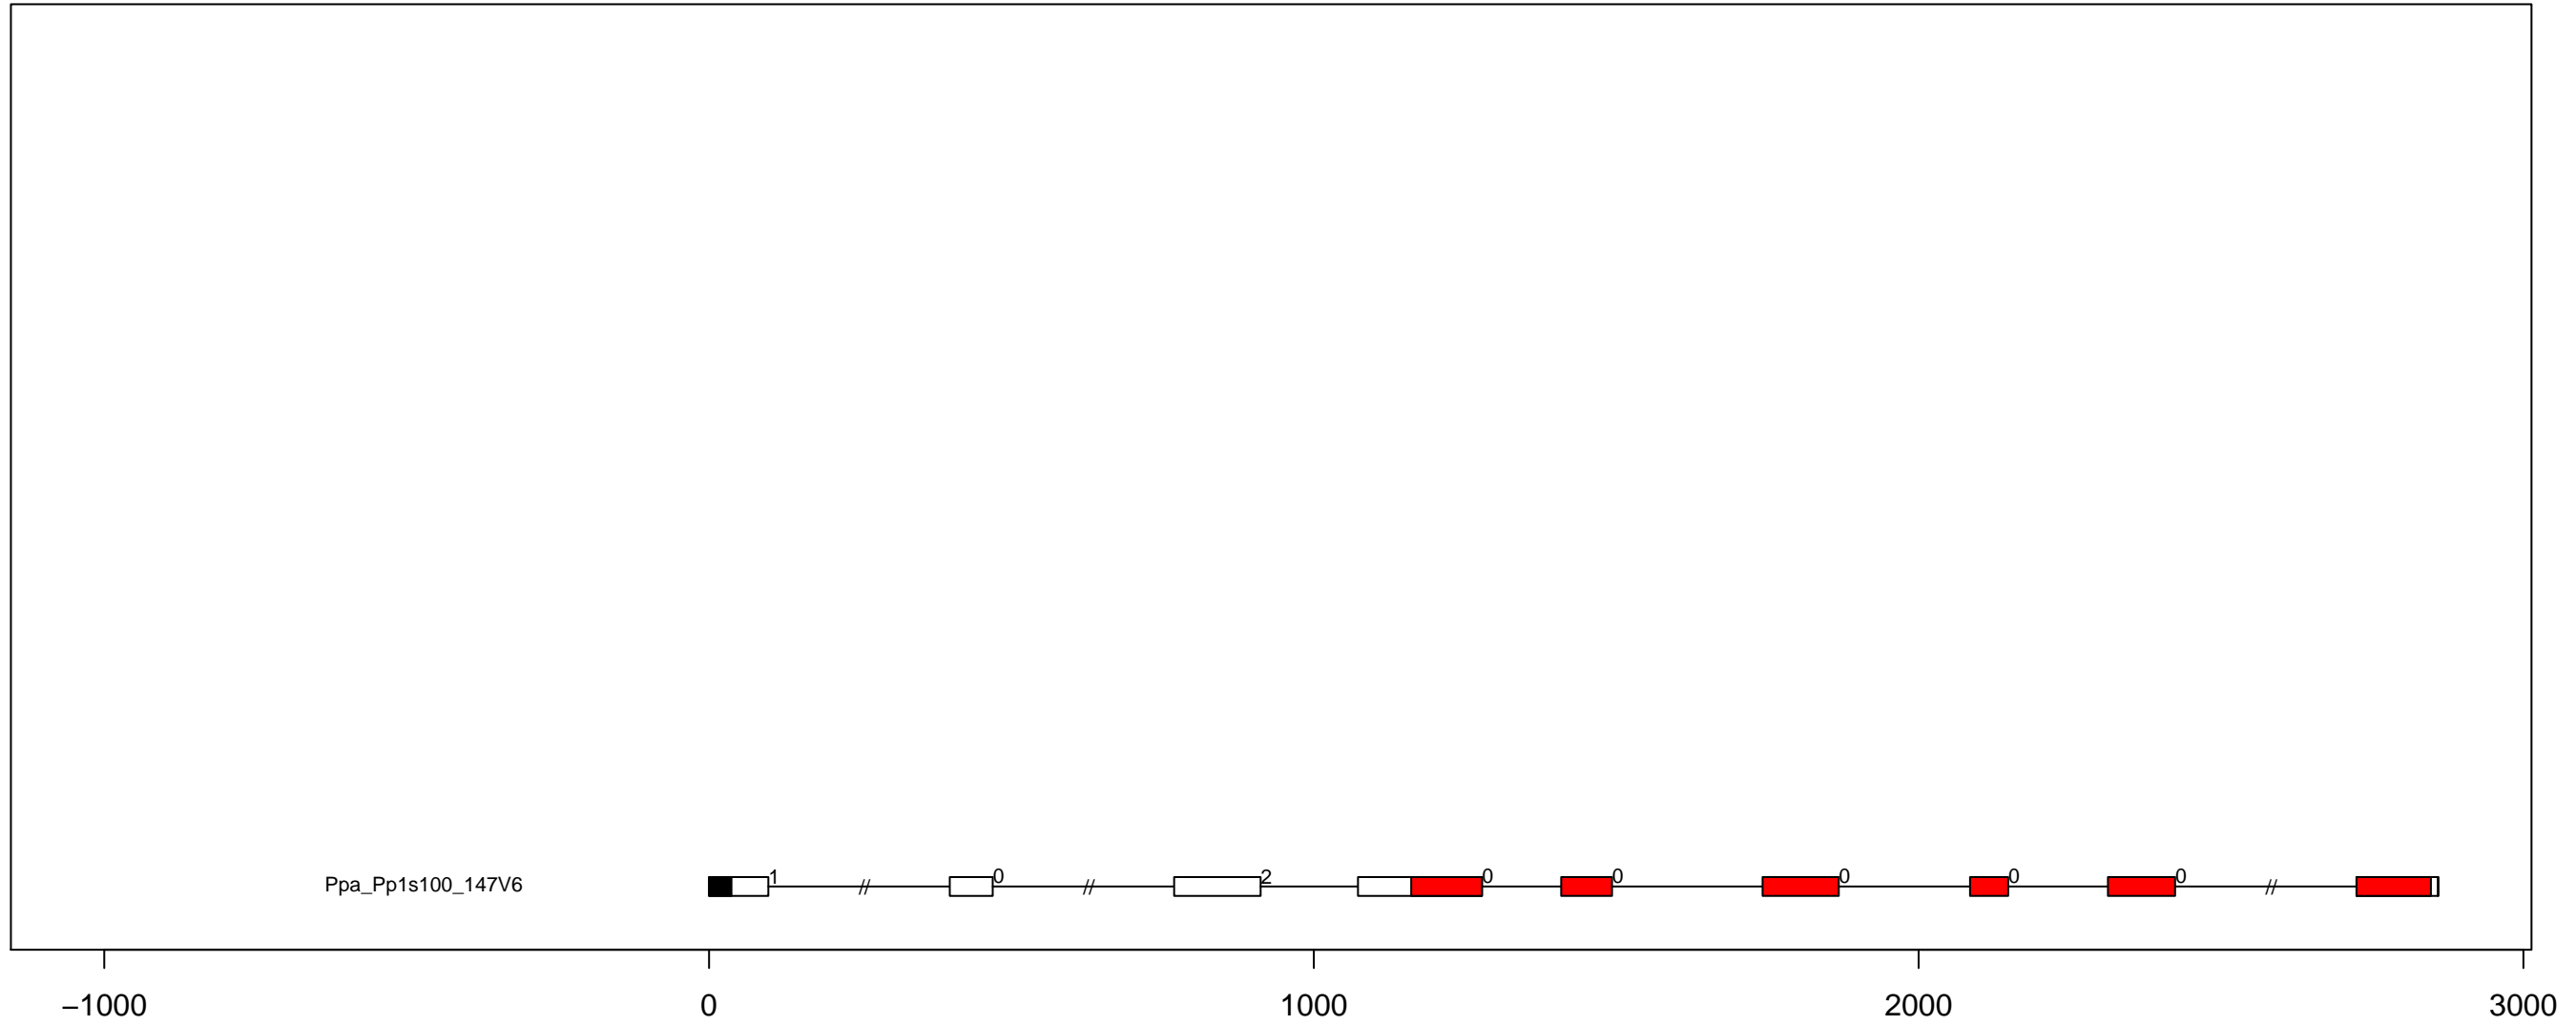

# P.pa Group-PI-3 exon-intron and kinase domain diagram (all)

Ppa\_Pp1s517\_5V6

Ppa\_Pp1s33\_270V6

Ppa\_Pp1s191\_16V6

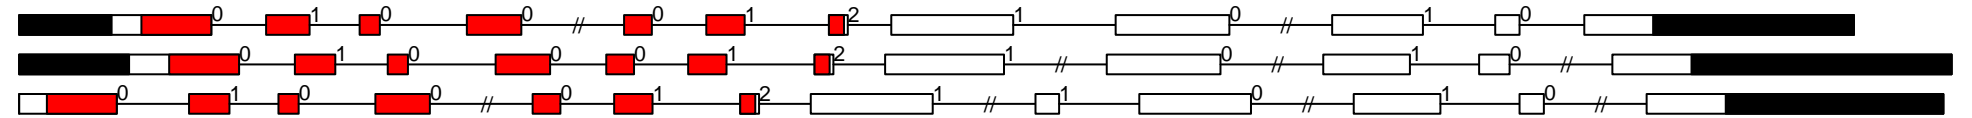

-1000

0

1000

2000

3000

4000

5000

### P.pa Group-PI-4 exon-intron and kinase domain diagram (all)

Ppa\_Pp1s38\_294V6  
 Ppa\_Pp1s293\_17V6  
 Ppa\_Pp1s159\_111V6  
 Ppa\_Pp1s110\_47V6

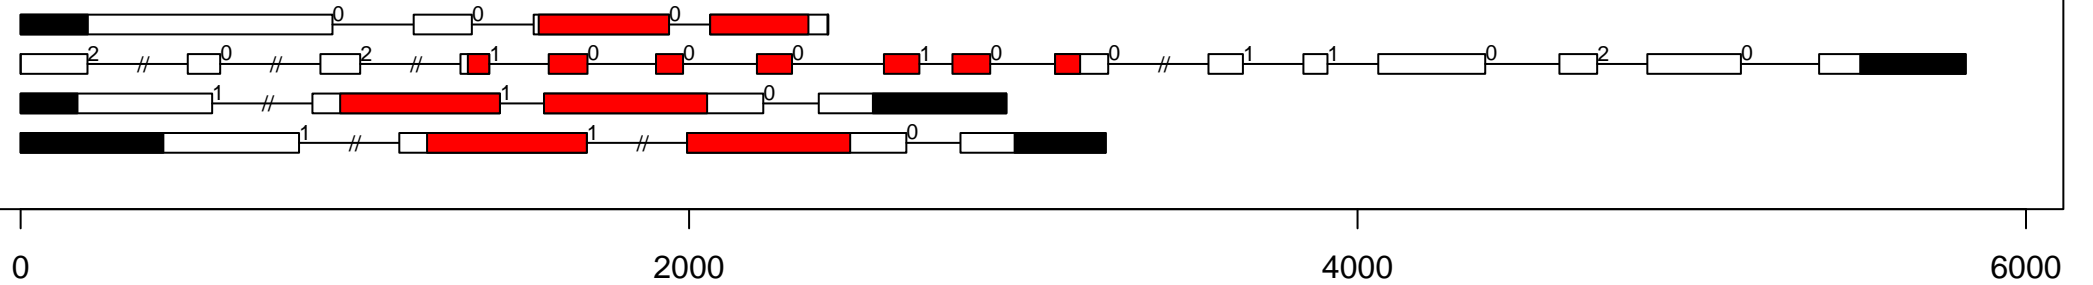

# P.pa IRE1 exon-intron and kinase domain diagram (all)

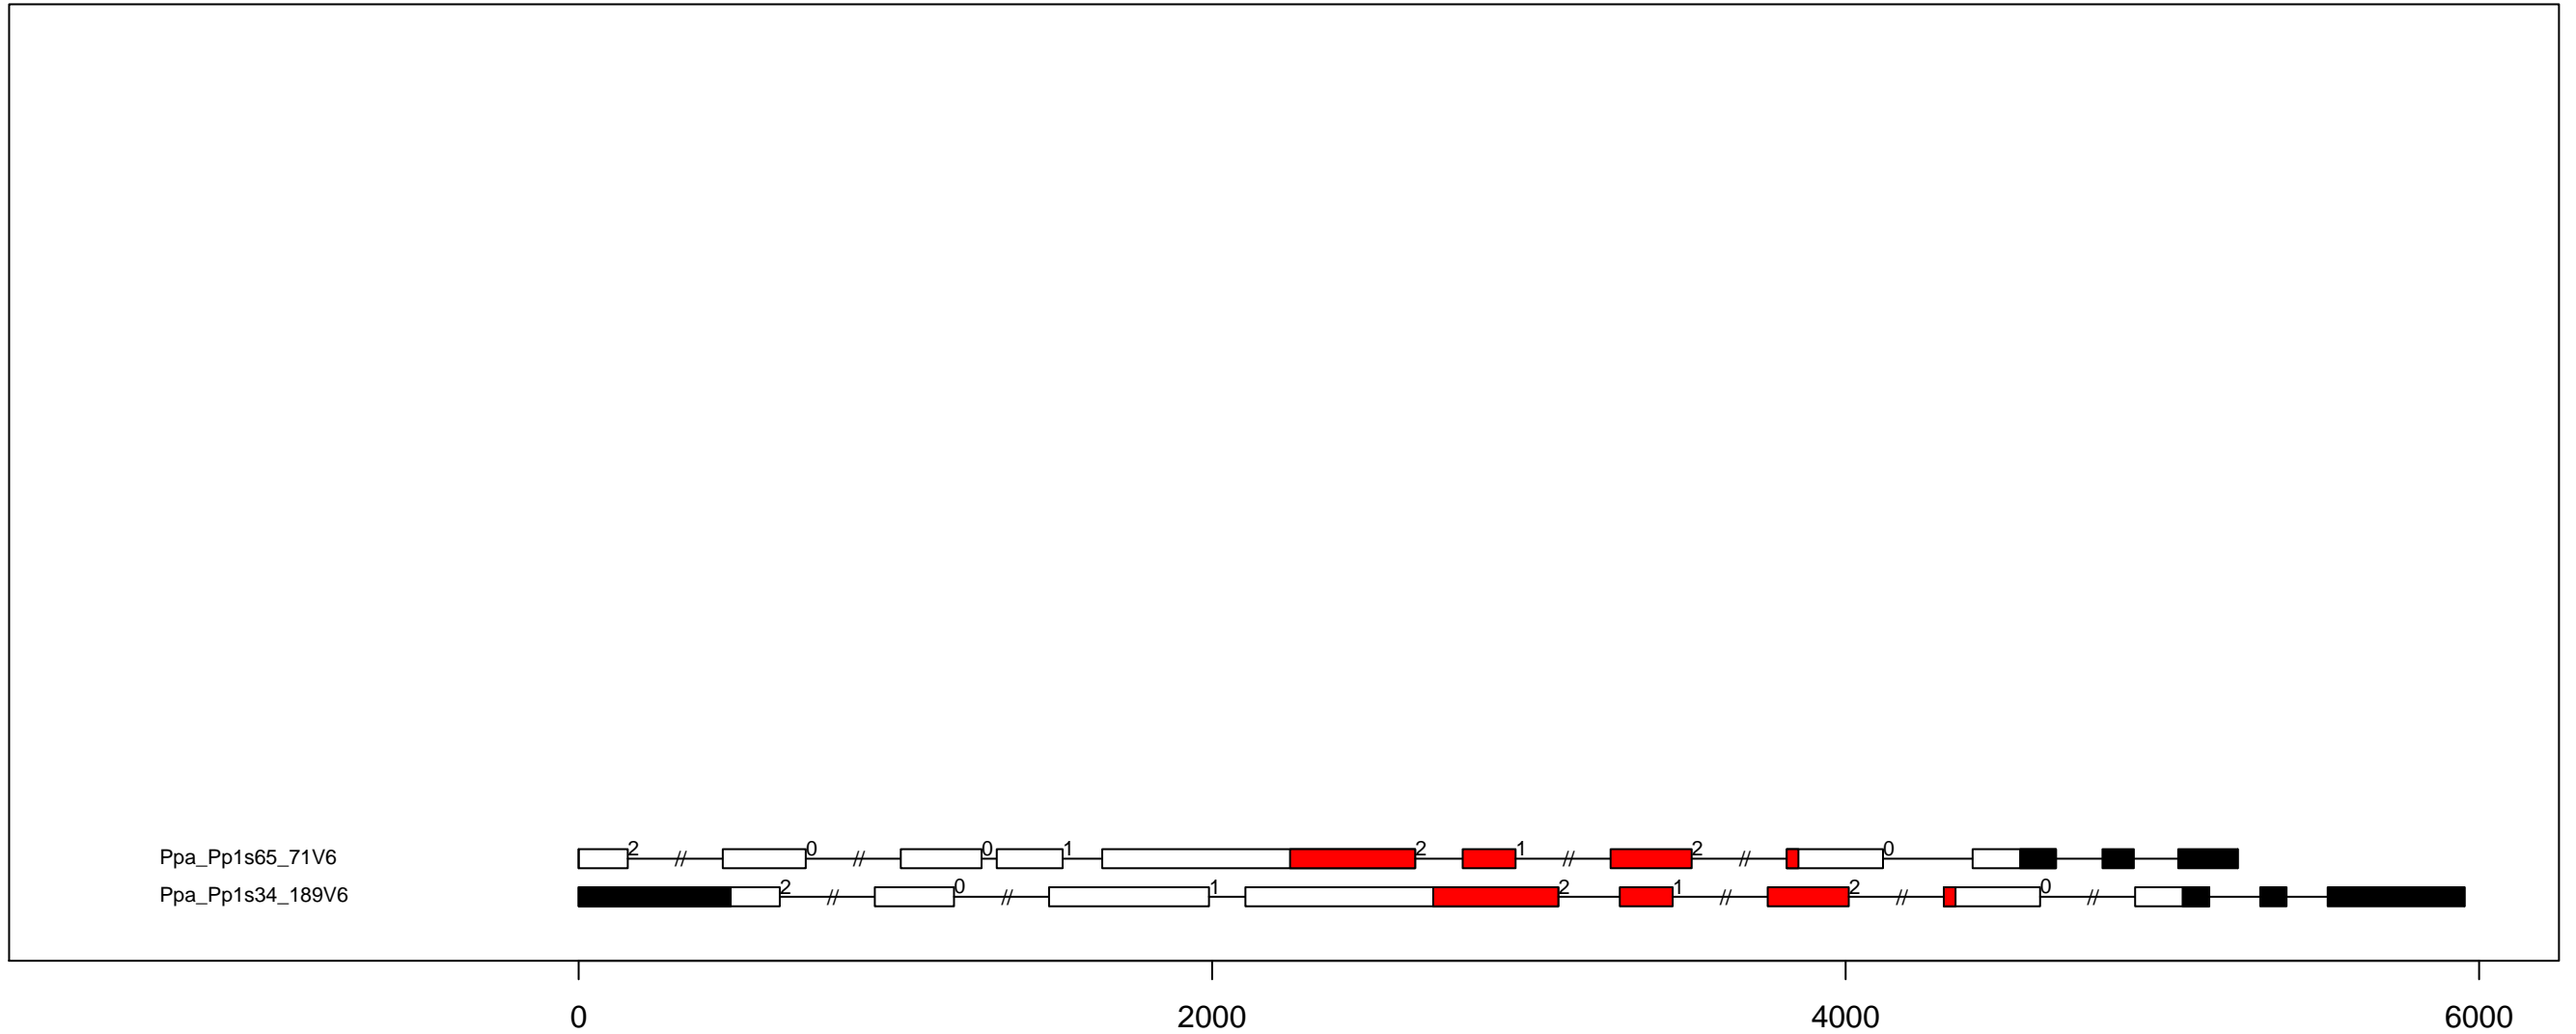



P.pa NAK exon-intron and kinase domain diagram (all)

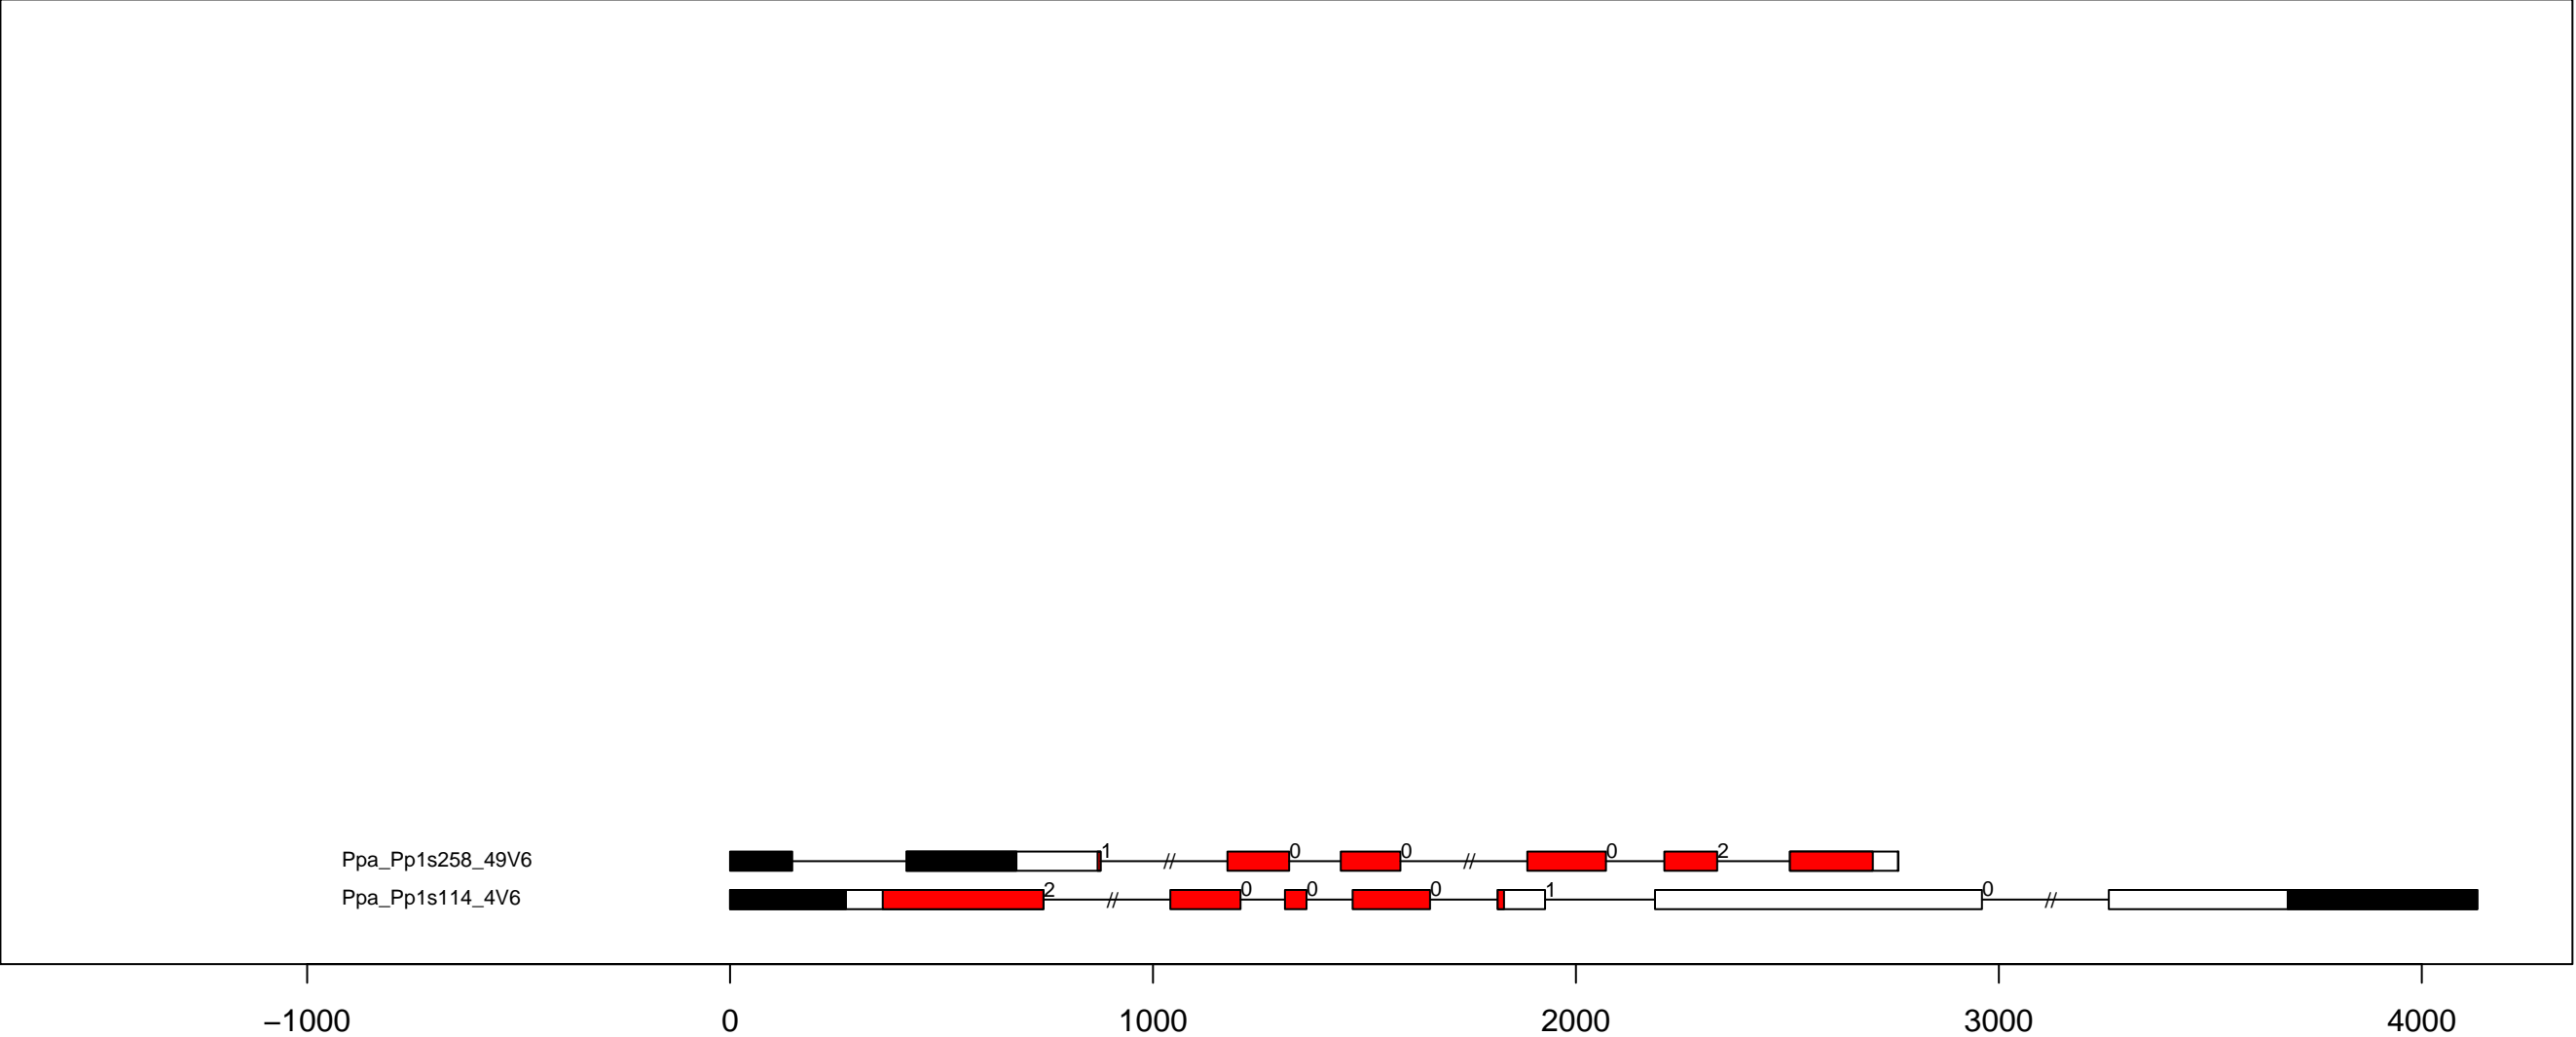

P.pa NEK exon-intron and kinase domain diagram (all)

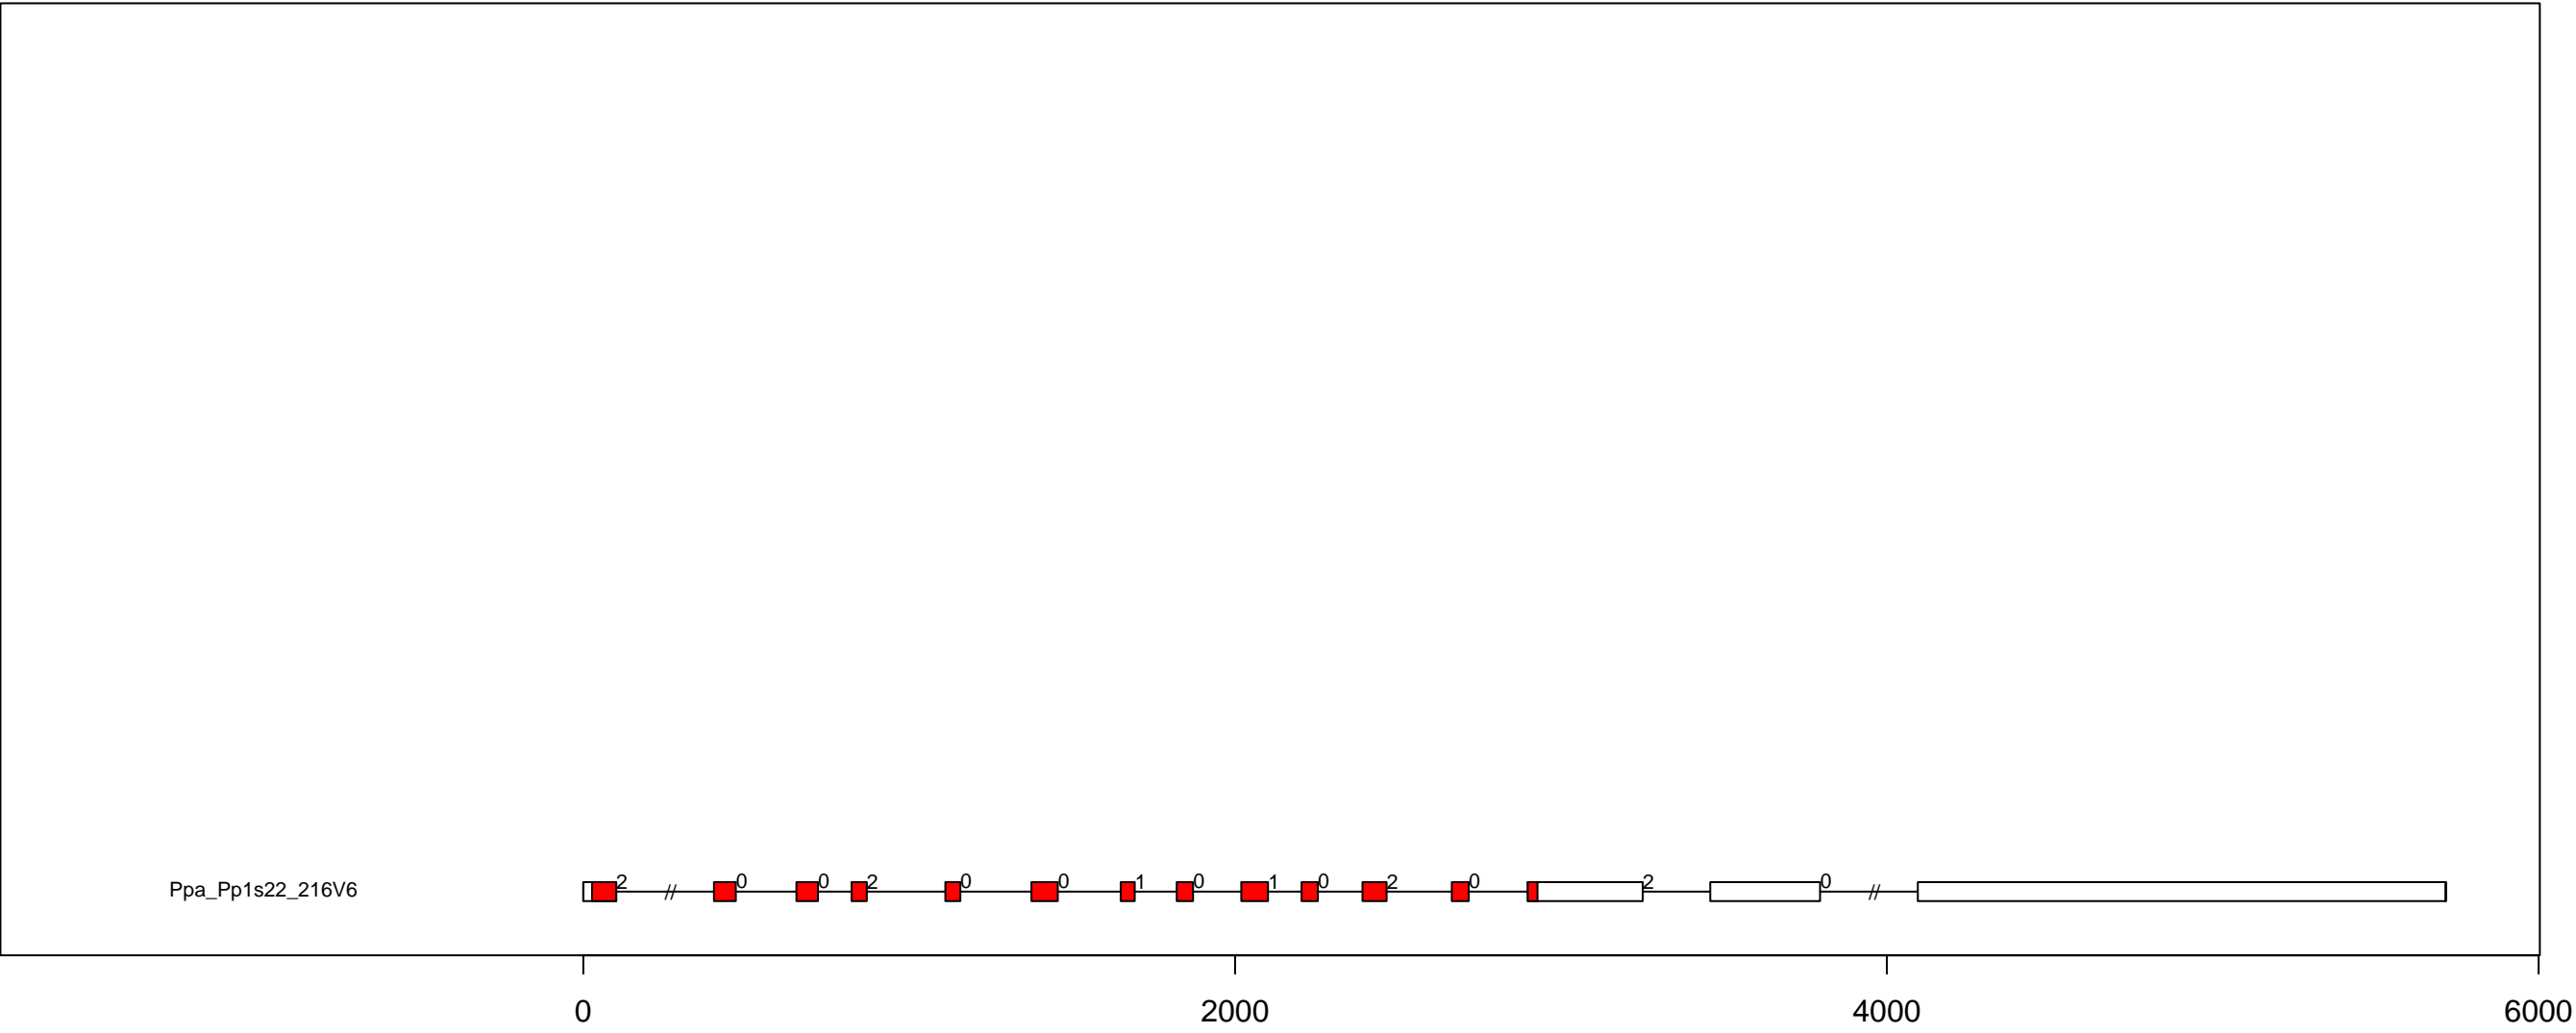

# P.pa PEK\_GCIN2 exon-intron and kinase domain diagram (all)

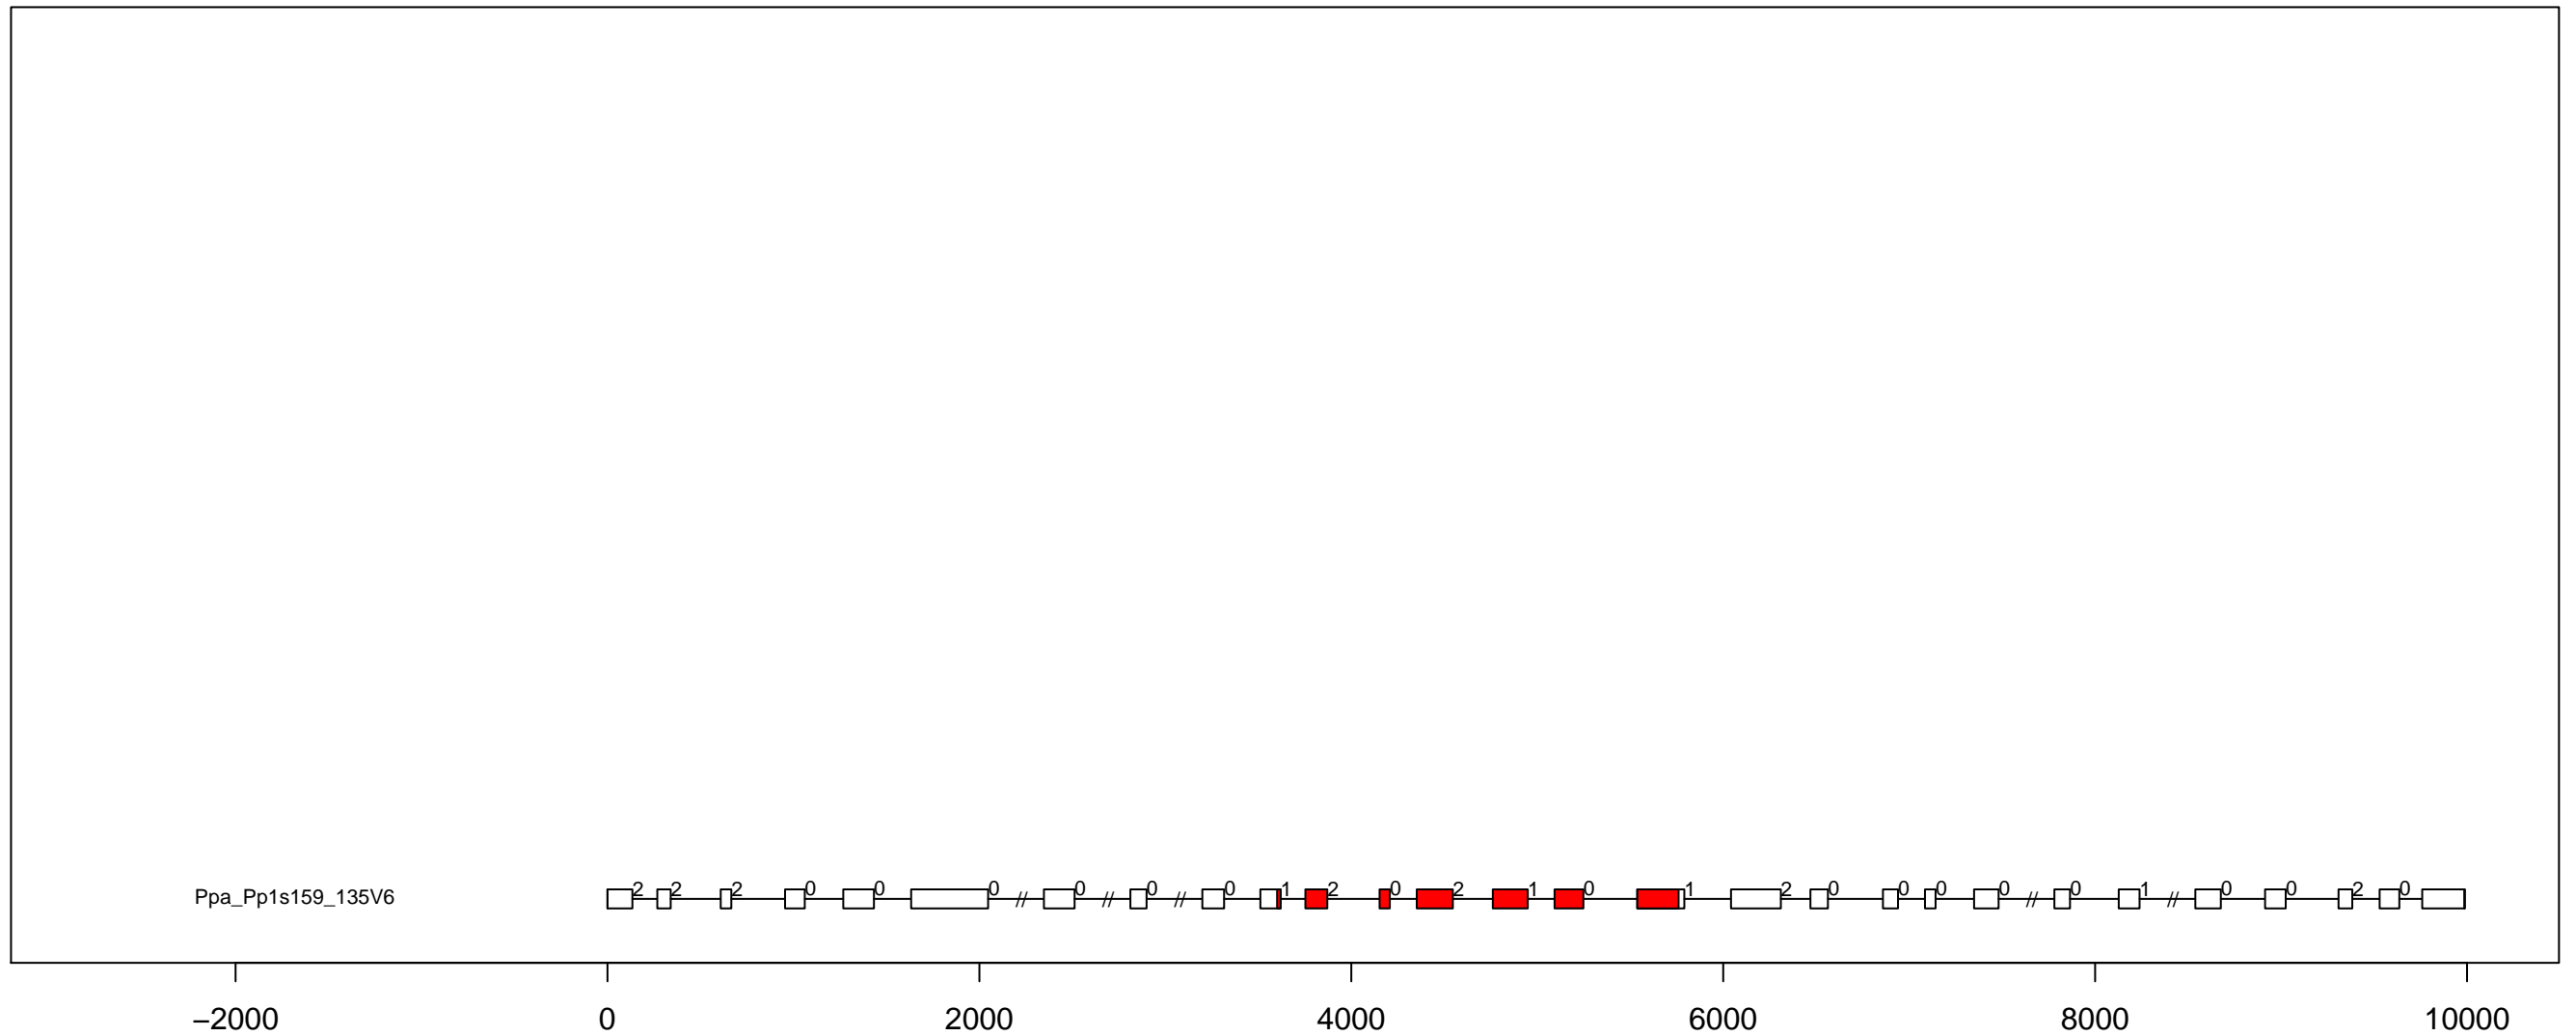

# P.pa RLK-Pelle\_C-LEC exon-intron and kinase domain diagram (all)

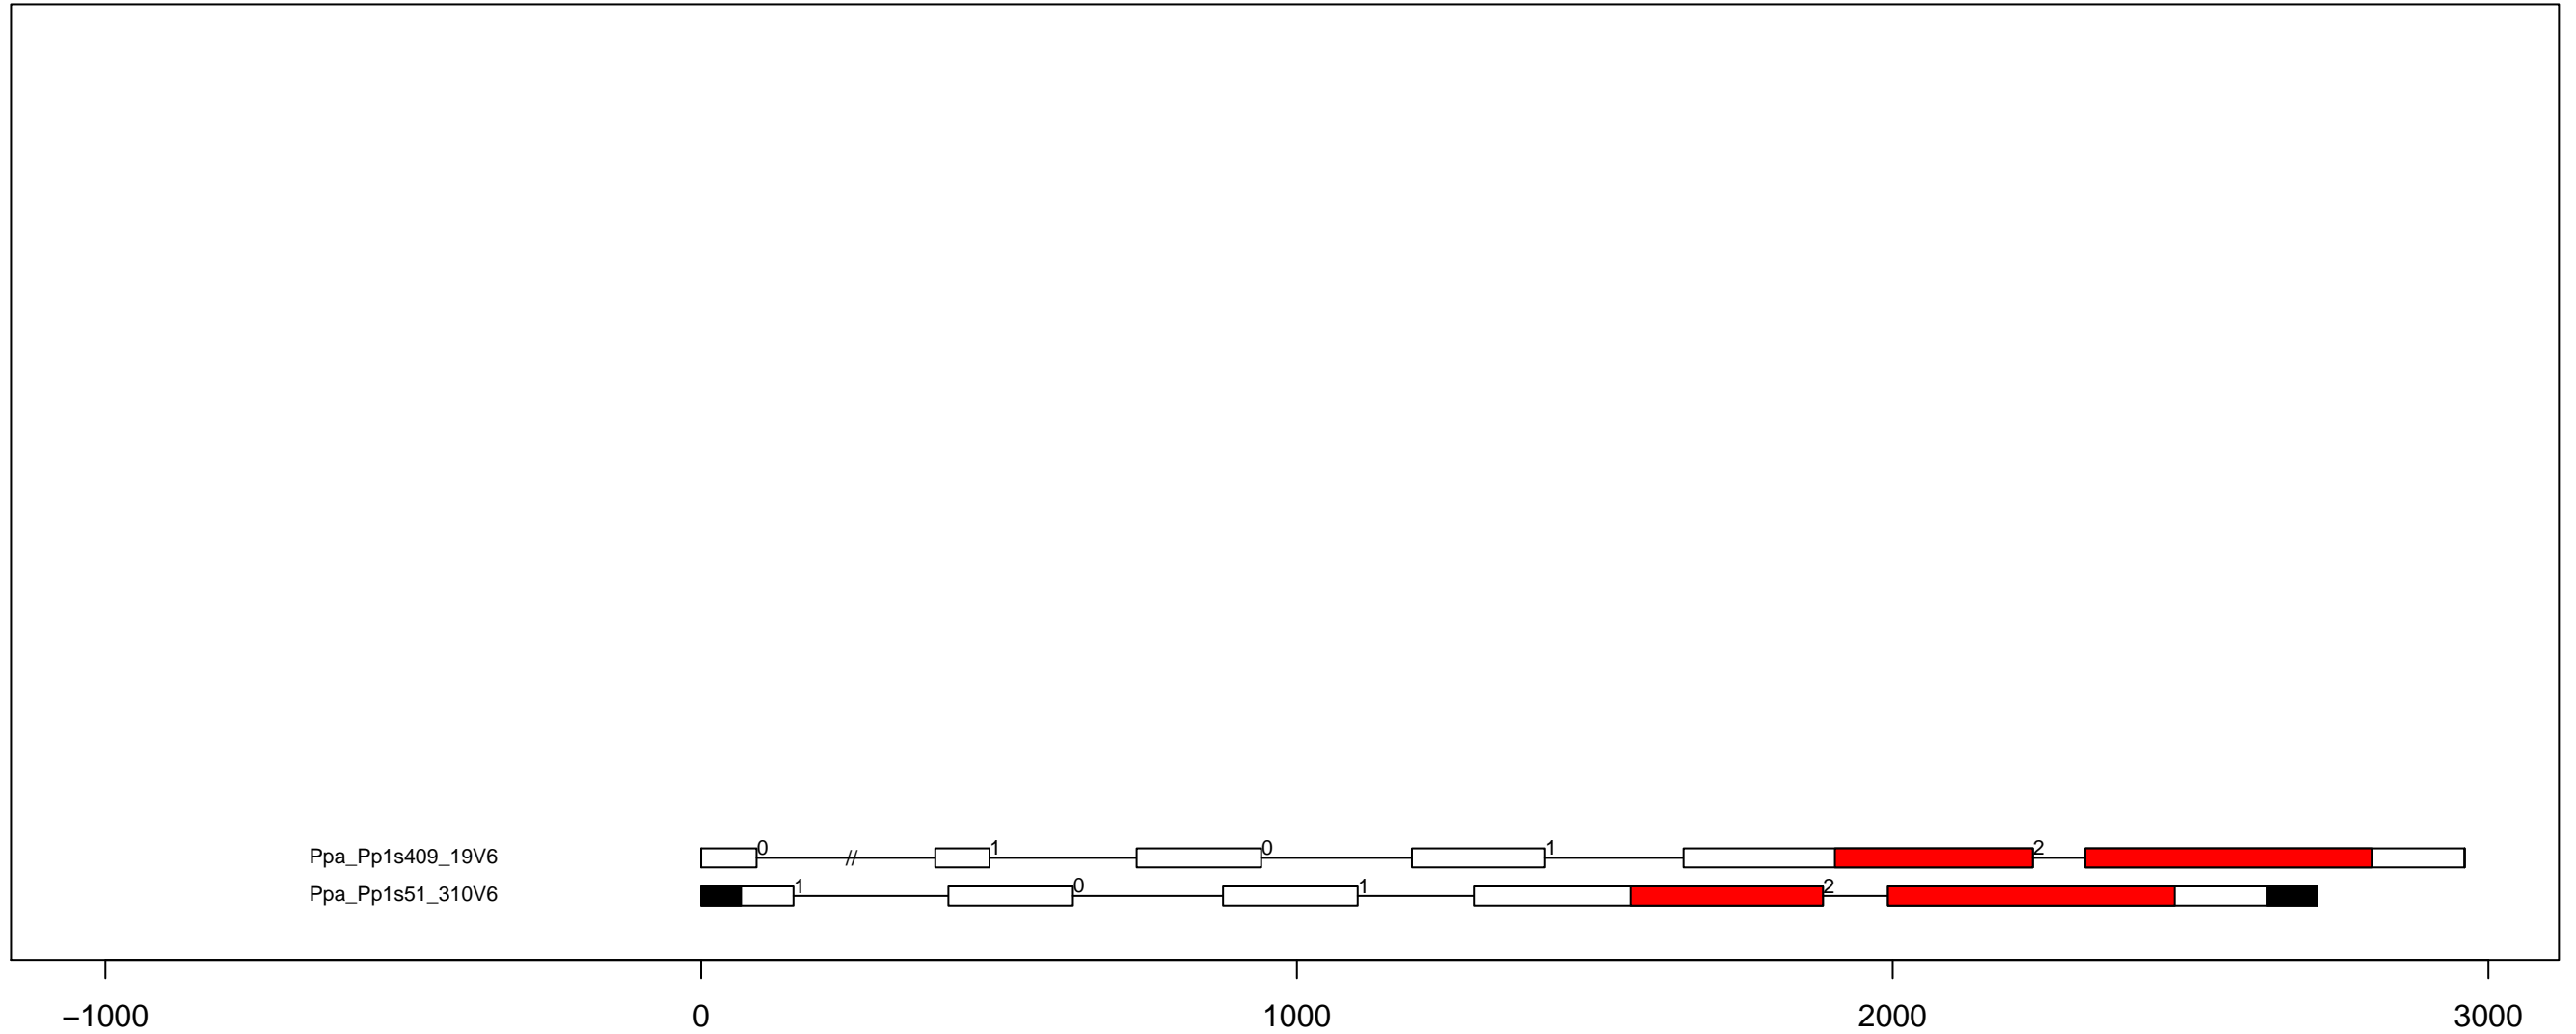

**P.pa RLK-Pelle\_CR4L exon-intron and kinase domain diagram (all)**

Ppa\_Pp1s64\_17V6  
 Ppa\_Pp1s199\_5V6  
 Ppa\_Pp1s126\_187V6  
 Ppa\_Pp1s53\_23V6  
 Ppa\_Pp1s51\_222V6  
 Ppa\_Pp1s384\_15V6  
 Ppa\_Pp1s21\_330V6  
 Ppa\_Pp1s206\_38V6  
 Ppa\_Pp1s14\_256V6  
 Ppa\_Pp1s103\_89V6

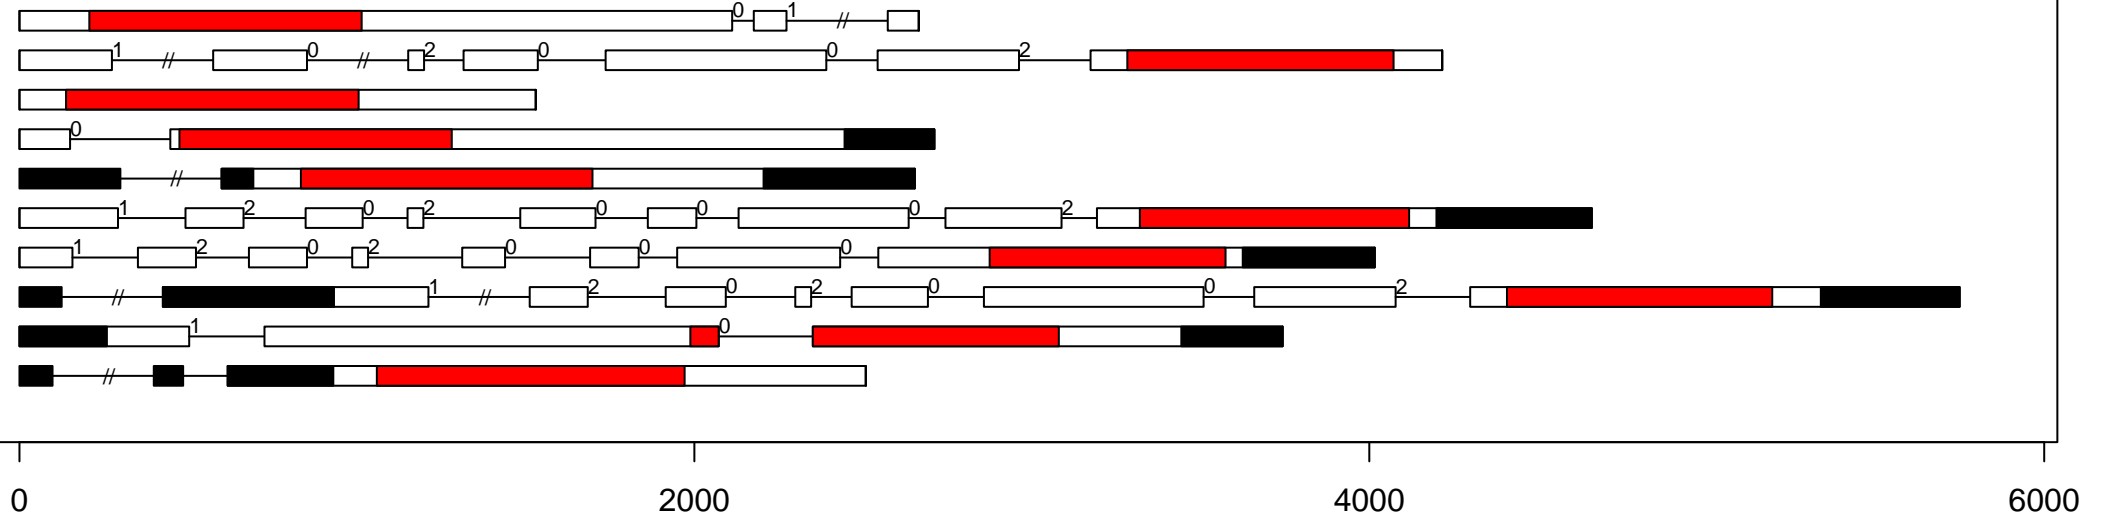

# P.pa RLK-Pelle\_CrRLK1L-1 exon-intron and kinase domain diagram (all)

Ppa\_Pp1s44\_215V6

Ppa\_Pp1s44\_178V6

Ppa\_Pp1s262\_67V6

Ppa\_Pp1s29\_343V6

Ppa\_Pp1s24\_5V6

-1000

0

1000

2000

3000

4000

5000

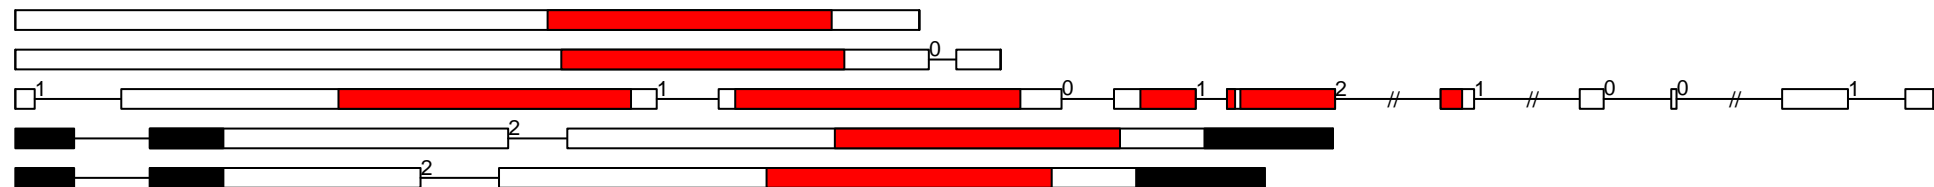

# P.pa RLK-Pelle\_DLSV exon-intron and kinase domain diagram (part 1)

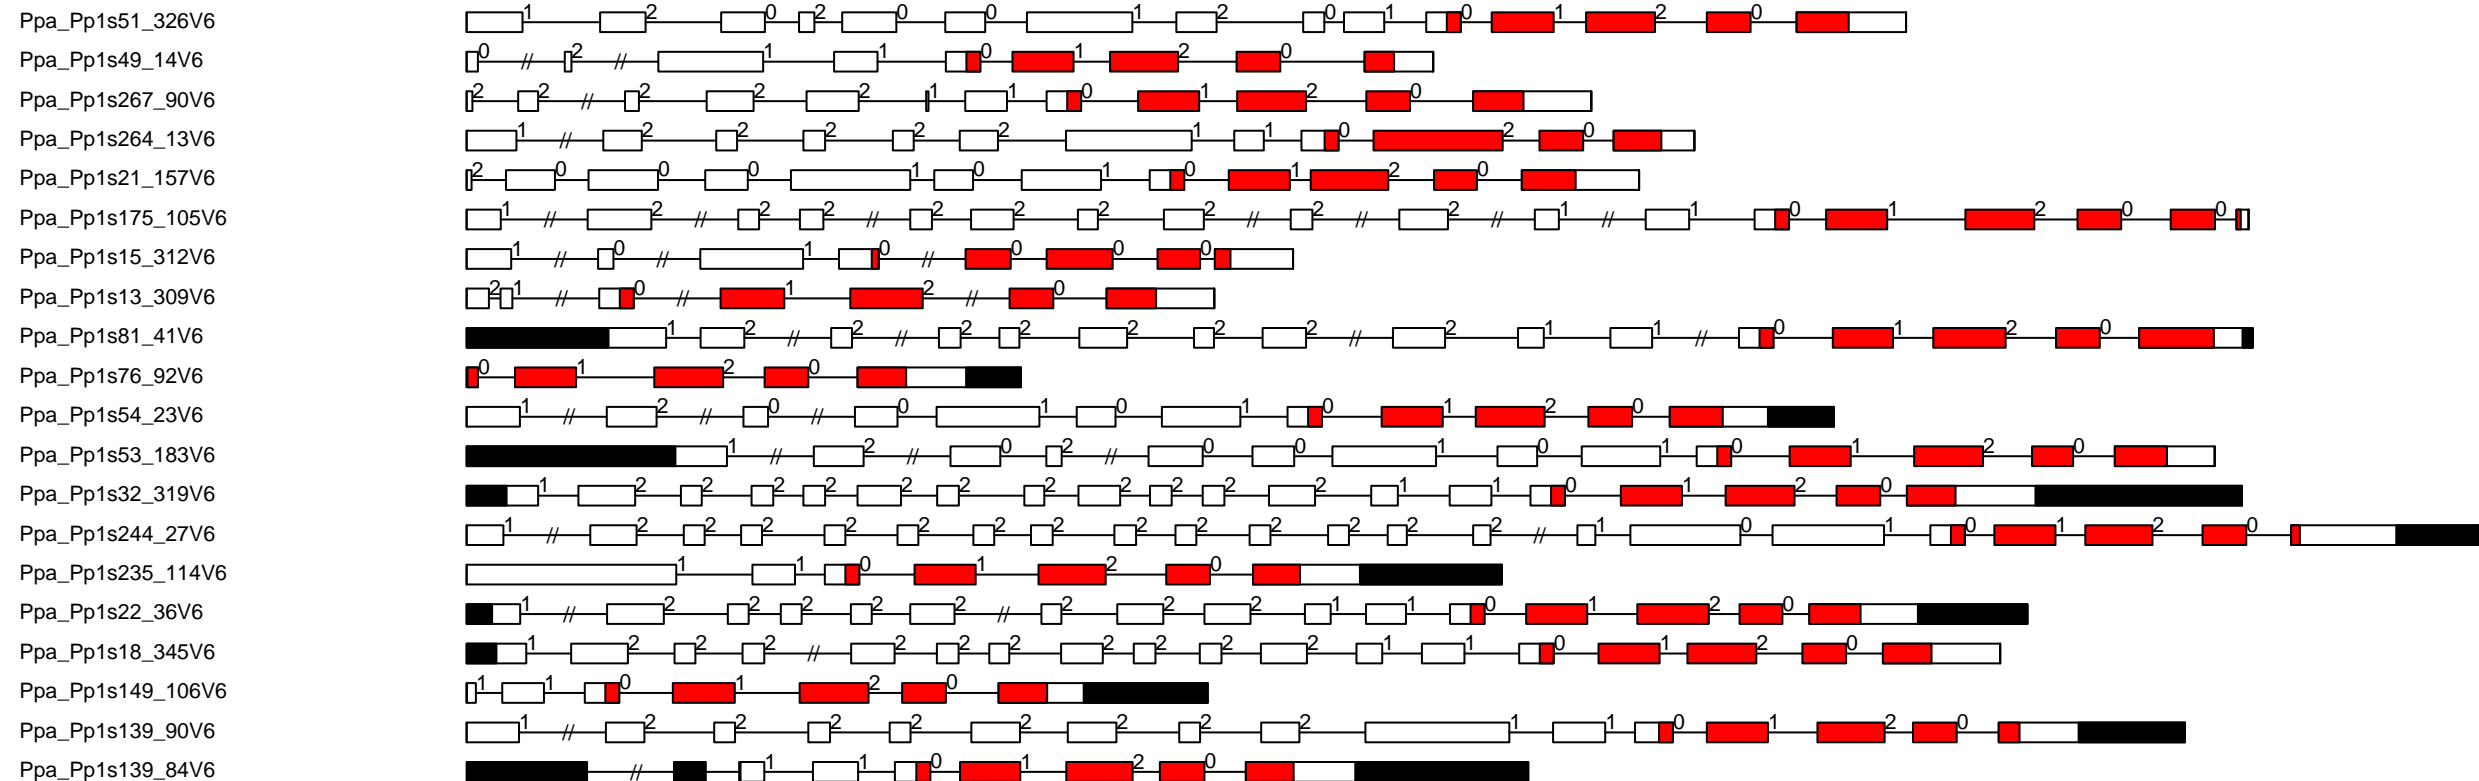

P.pa RLK-Pelle\_DLSV exon-intron and kinase domain diagram (part 2)

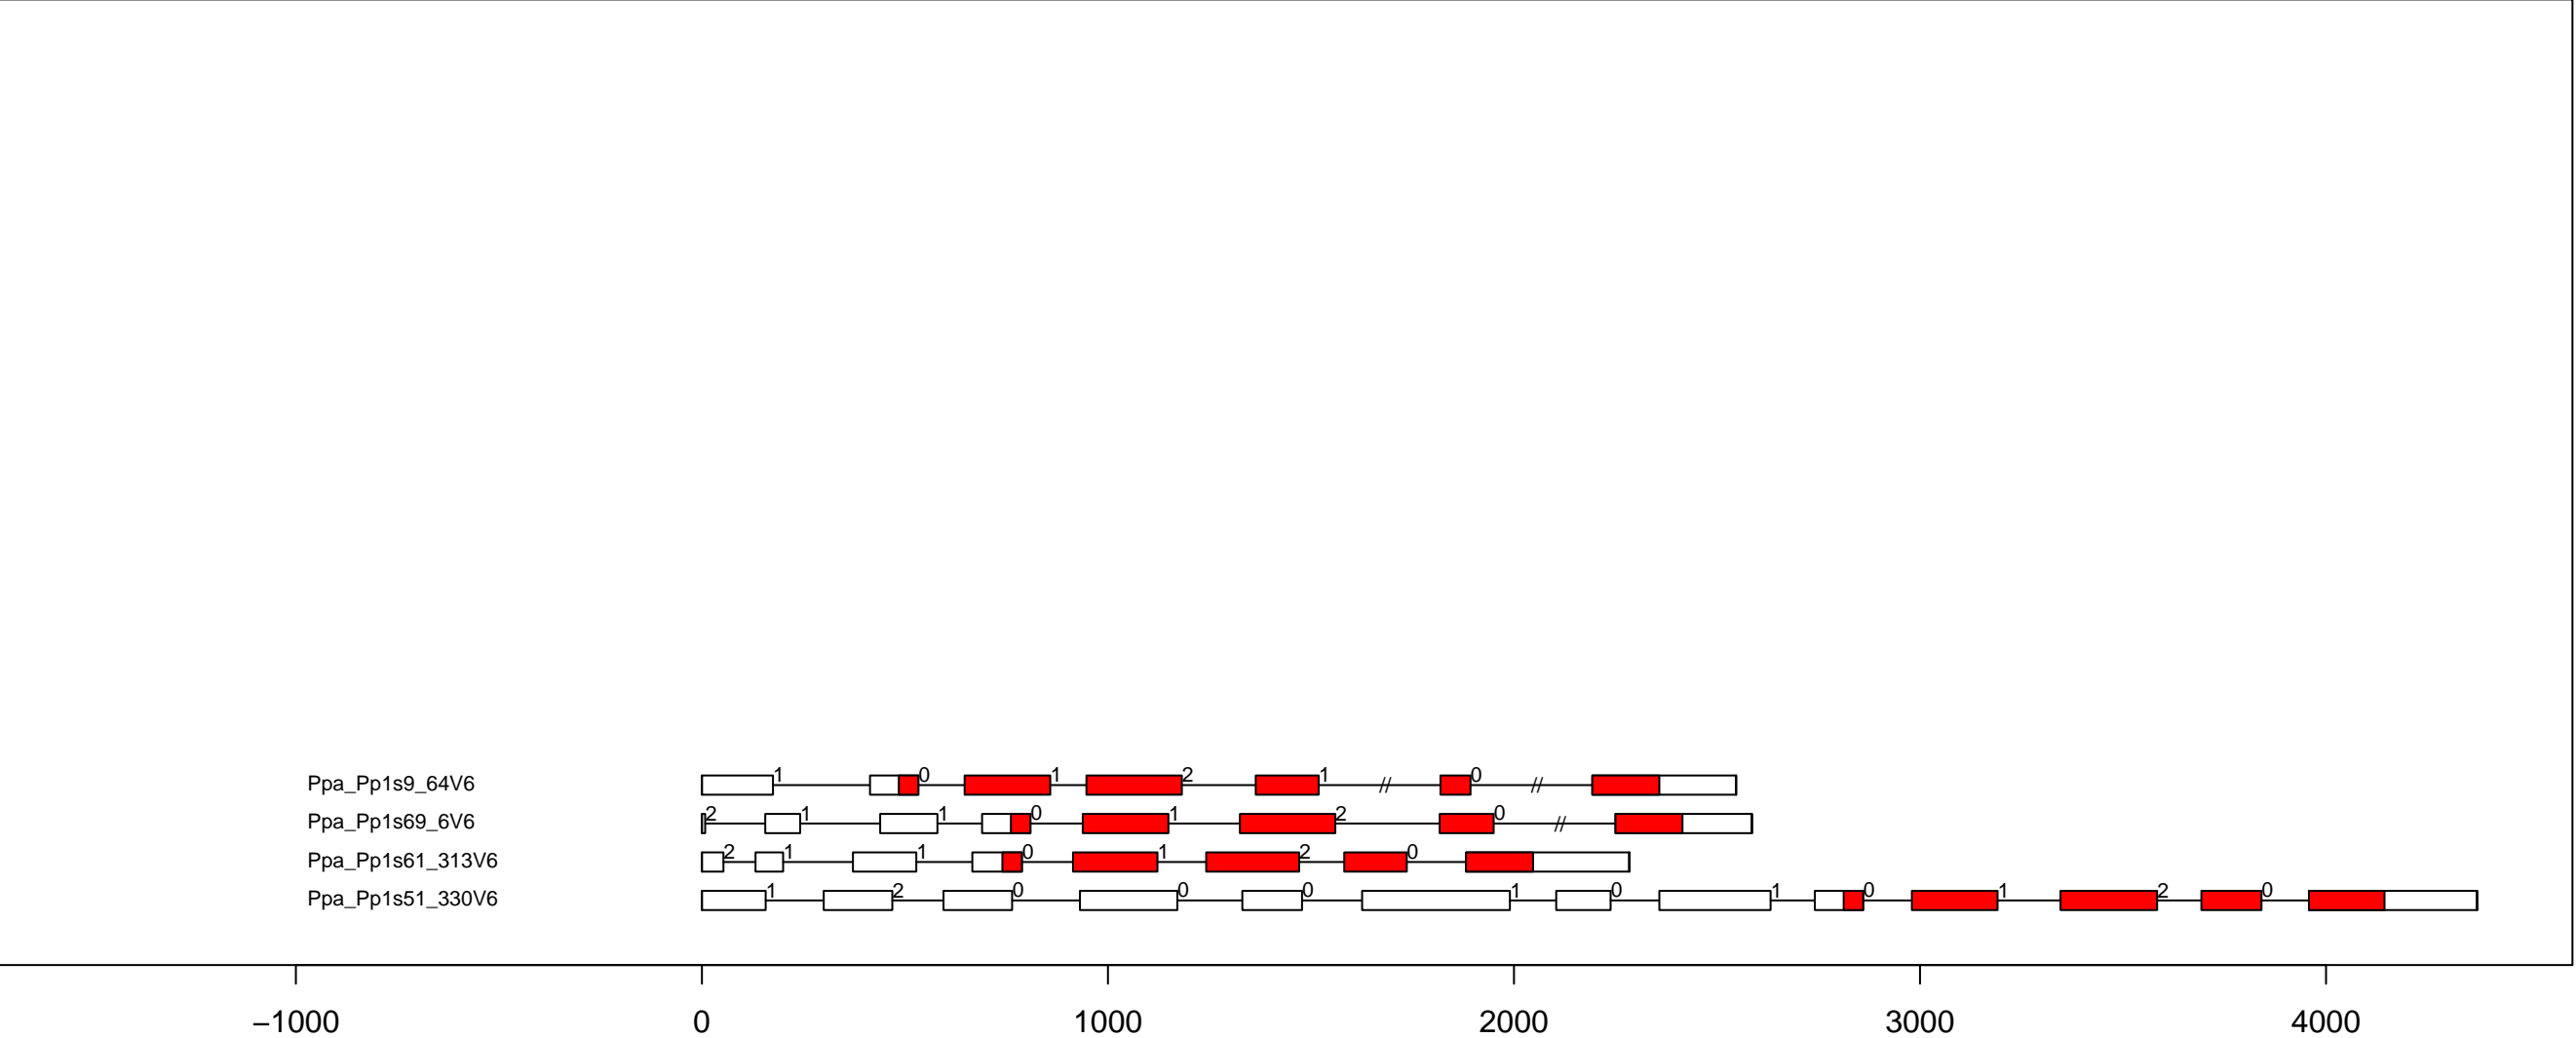



# P.pa RLK-Pelle\_DSLV exon-intron and kinase domain diagram (all)

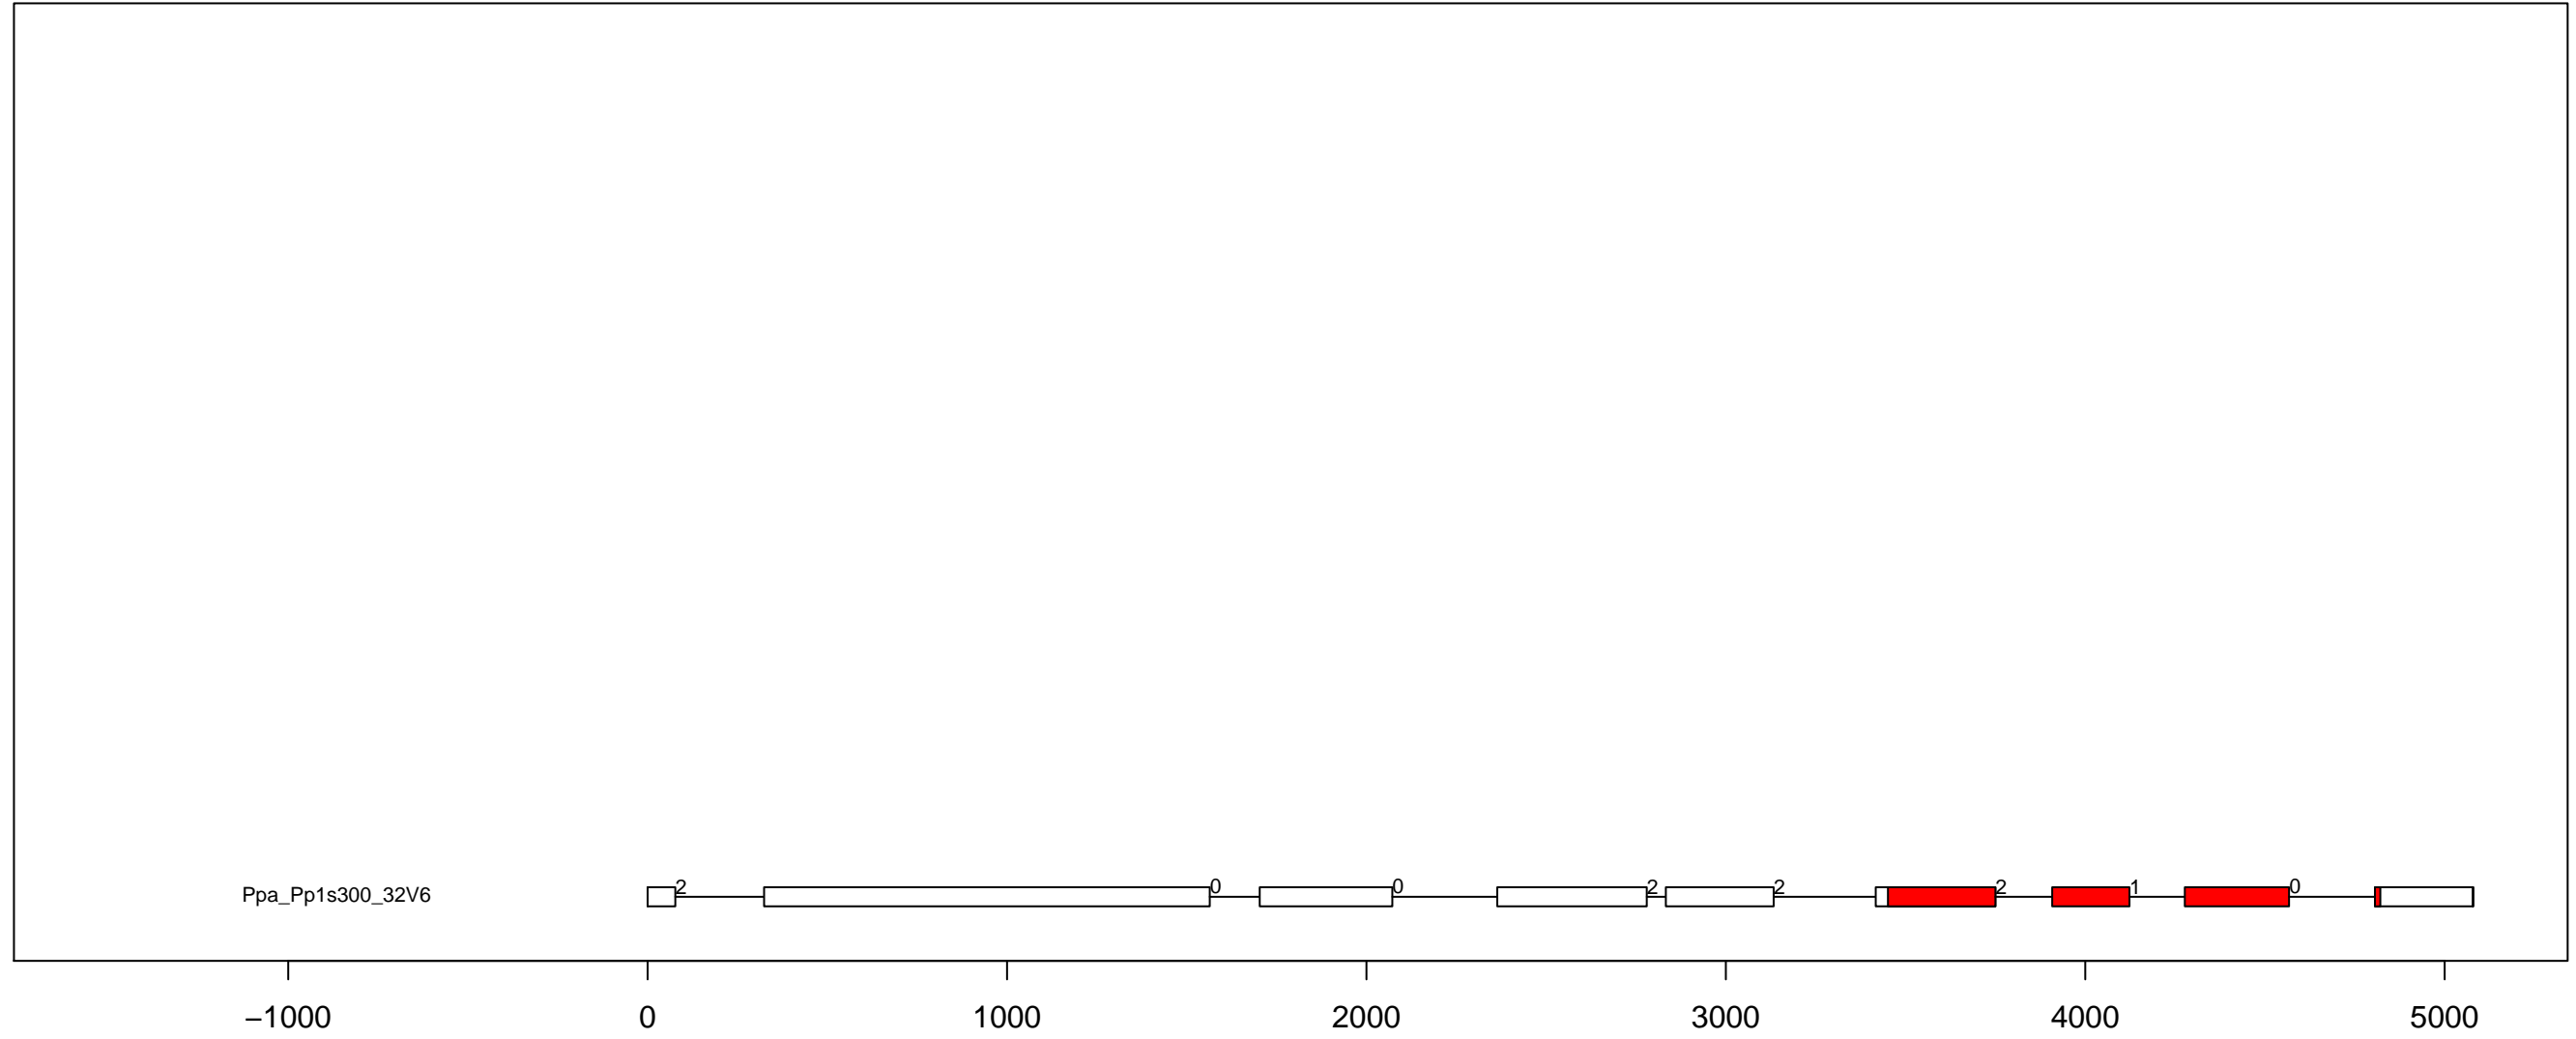

### P.pa RLK-Pelle\_Extensin exon-intron and kinase domain diagram (all)

Ppa\_Pp1s95\_115V6  
 Ppa\_Pp1s79\_45V6  
 Ppa\_Pp1s43\_35V6  
 Ppa\_Pp1s293\_24V6  
 Ppa\_Pp1s116\_191V6  
 Ppa\_Pp1s115\_198V6  
 Ppa\_Pp1s478\_19V6  
 Ppa\_Pp1s343\_14V6  
 Ppa\_Pp1s255\_47V6

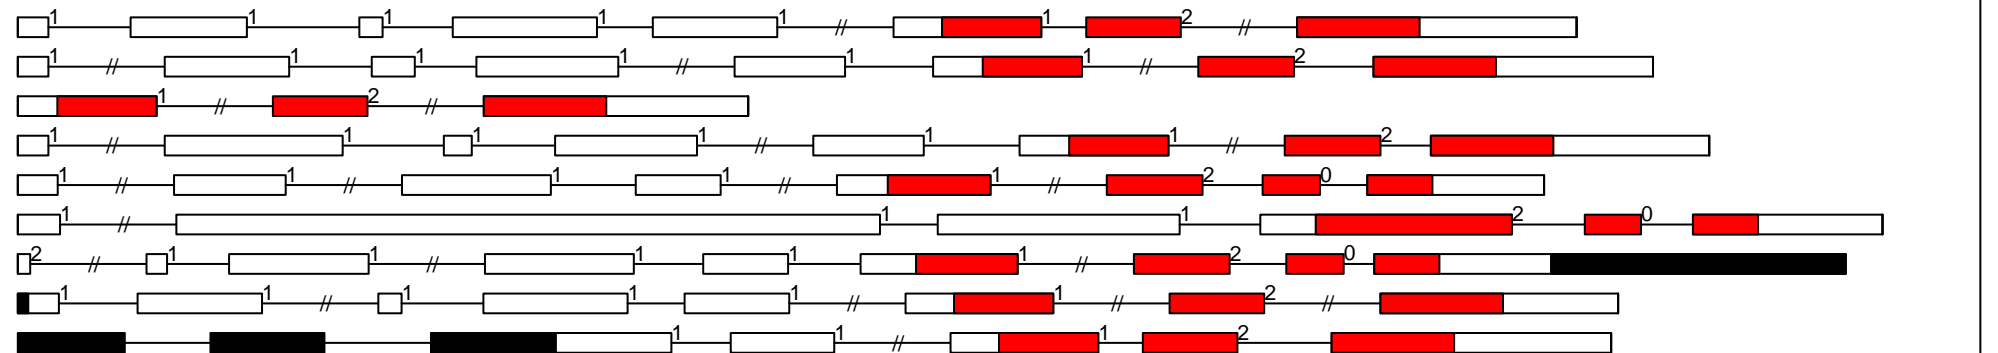

-1000

0

1000

2000

3000

4000

5000

### P.pa RLK-Pelle\_L-LEC exon-intron and kinase domain diagram (all)

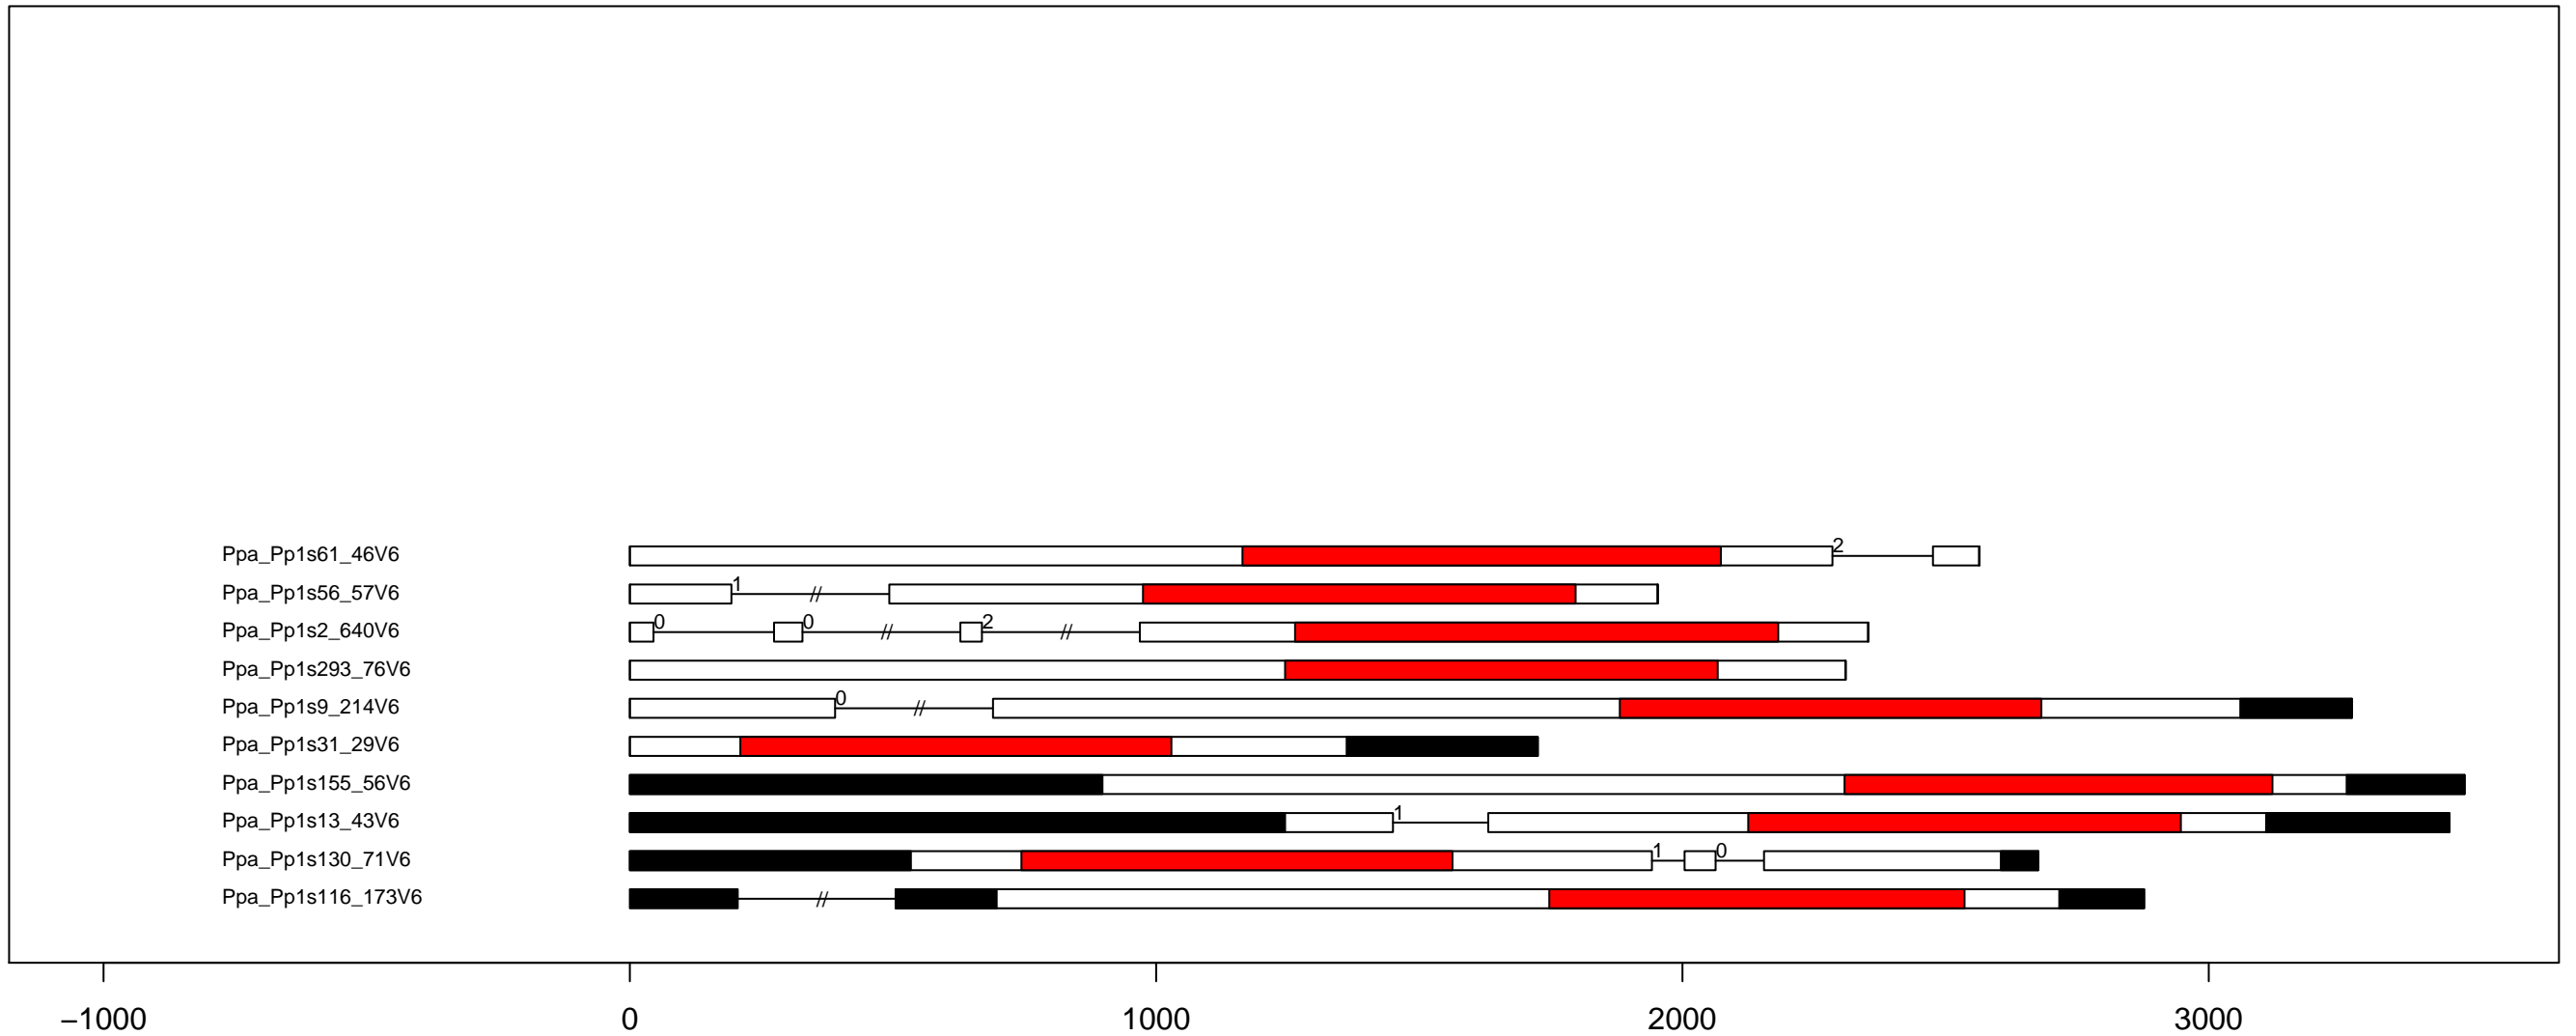

# P.pa RLK-Pelle\_LRR-I-1 exon-intron and kinase domain diagram (all)

Ppa\_Pp1s97\_232V6  
 Ppa\_Pp1s70\_10V6  
 Ppa\_Pp1s333\_16V6  
 Ppa\_Pp1s29\_130V6  
 Ppa\_Pp1s262\_62V6  
 Ppa\_Pp1s1\_213V6  
 Ppa\_Pp1s160\_39V6  
 Ppa\_Pp1s124\_7V6  
 Ppa\_Pp1s115\_69V6  
 Ppa\_Pp1s97\_129V6  
 Ppa\_Pp1s59\_282V6  
 Ppa\_Pp1s59\_264V6  
 Ppa\_Pp1s59\_259V6  
 Ppa\_Pp1s55\_6V6  
 Ppa\_Pp1s38\_96V6  
 Ppa\_Pp1s245\_95V6  
 Ppa\_Pp1s13\_83V6  
 Ppa\_Pp1s13\_72V6  
 Ppa\_Pp1s13\_59V6  
 Ppa\_Pp1s133\_62V6

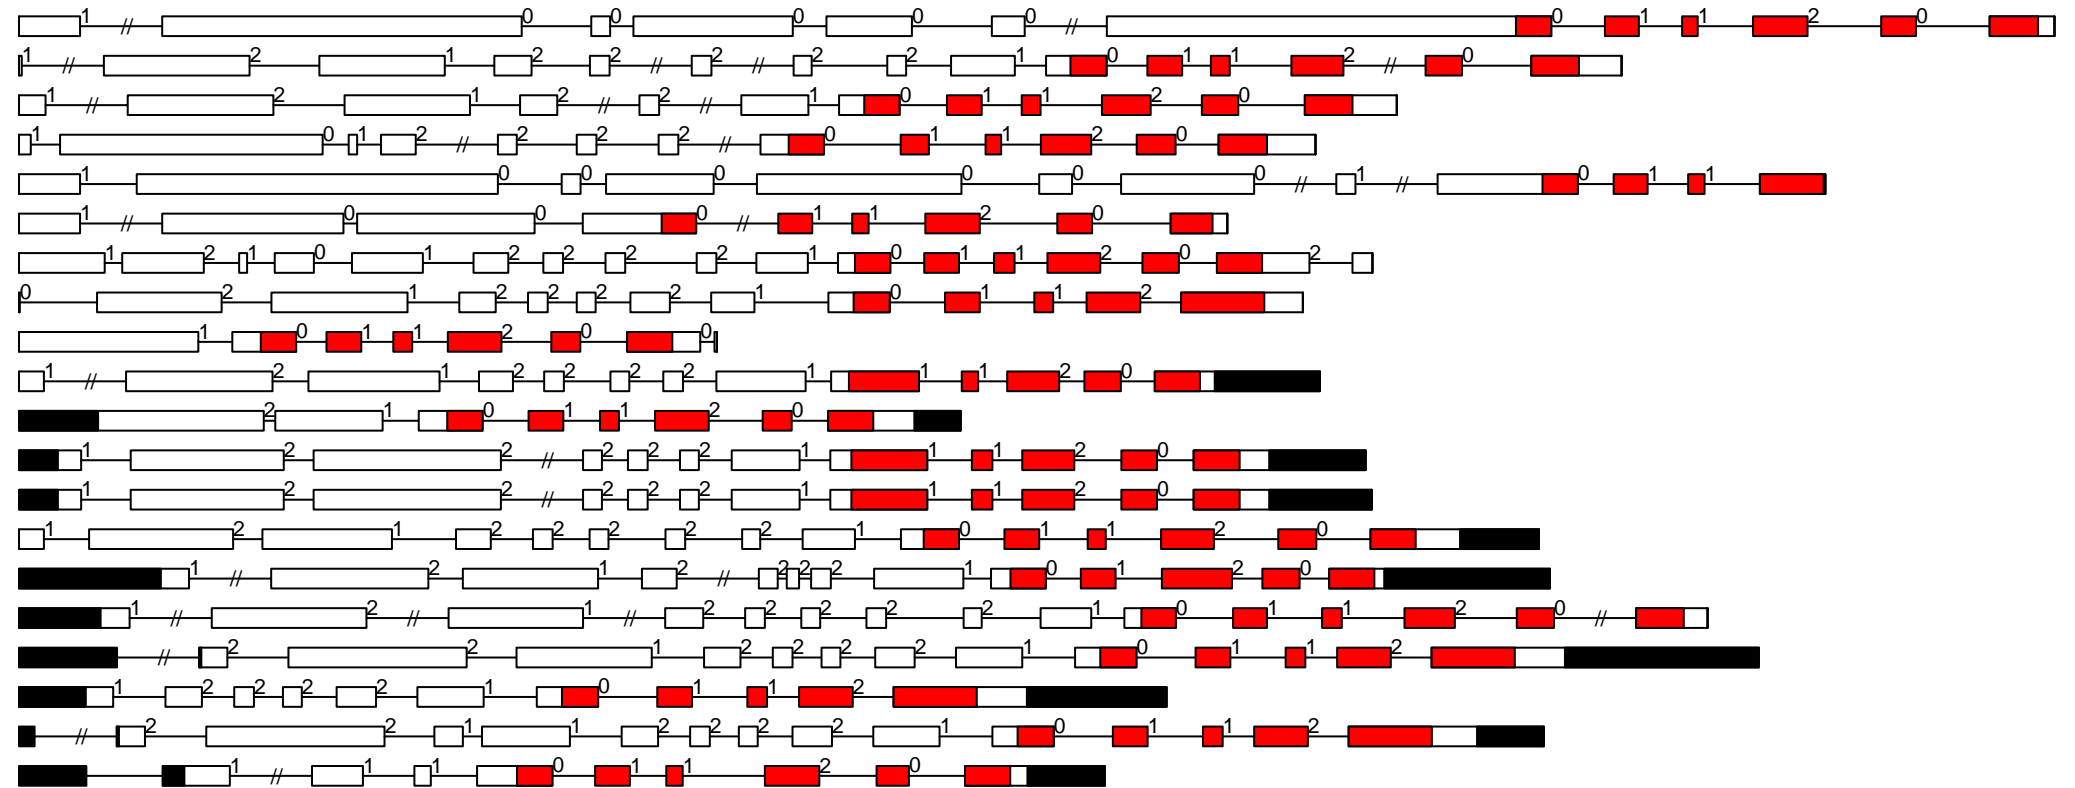

0 2000 4000 6000

# P.pa RLK-Pelle\_LRR-I-2 exon-intron and kinase domain diagram (all)

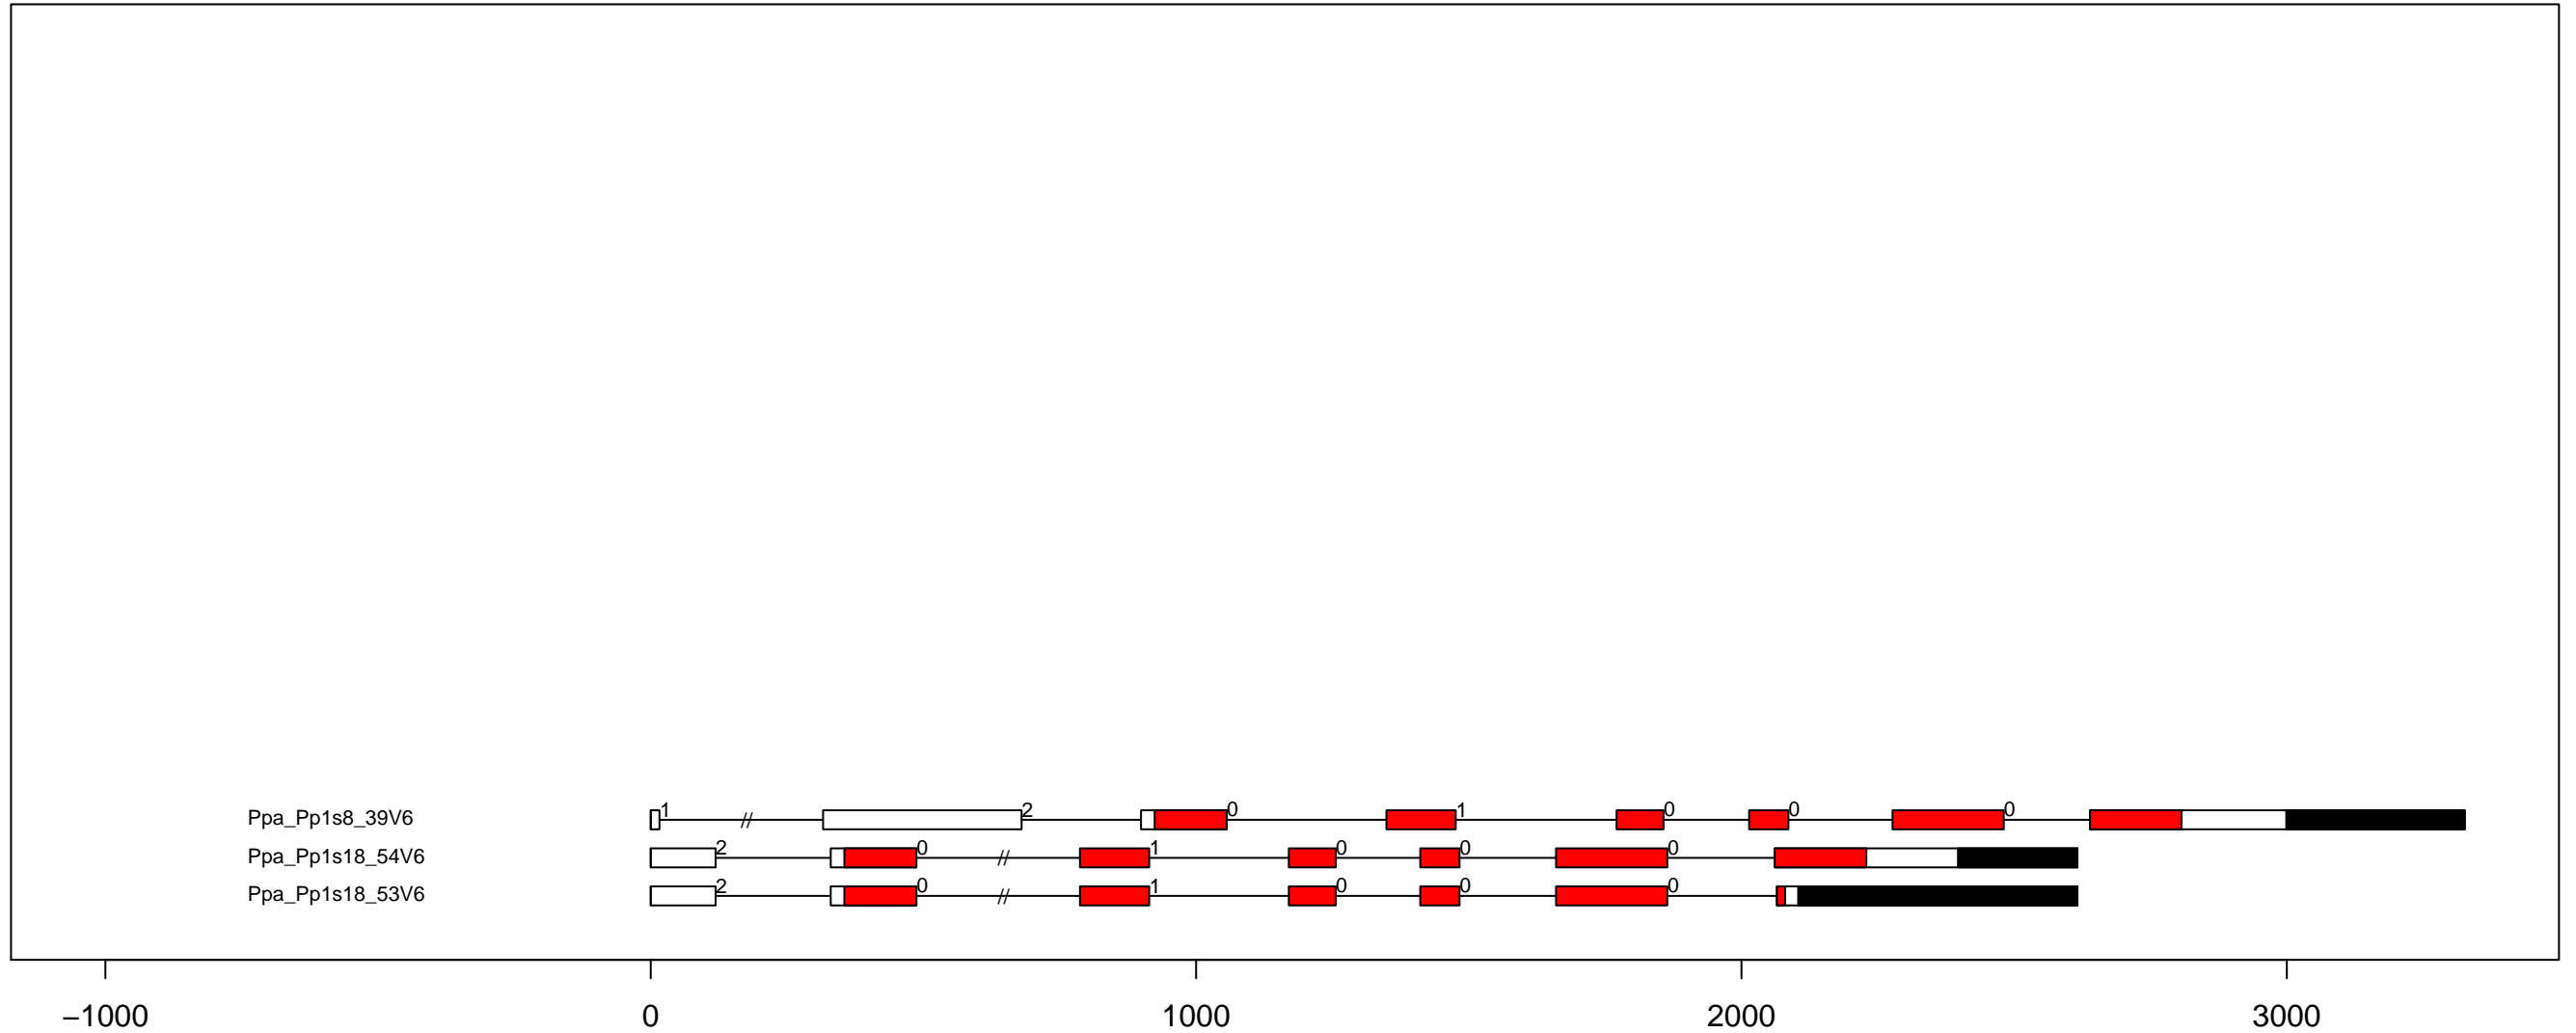

### P.pa RLK-Pelle\_LRR-III exon-intron and kinase domain diagram (all)

Ppa\_Pp1s66\_118V6  
 Ppa\_Pp1s39\_174V6  
 Ppa\_Pp1s34\_385V6  
 Ppa\_Pp1s343\_19V6  
 Ppa\_Pp1s33\_57V6  
 Ppa\_Pp1s324\_19V6  
 Ppa\_Pp1s170\_55V6  
 Ppa\_Pp1s513\_5V6  
 Ppa\_Pp1s43\_33V6  
 Ppa\_Pp1s3\_381V6  
 Ppa\_Pp1s3\_377V6  
 Ppa\_Pp1s235\_117V6  
 Ppa\_Pp1s235\_116V6  
 Ppa\_Pp1s22\_20V6  
 Ppa\_Pp1s20\_213V6  
 Ppa\_Pp1s170\_56V6  
 Ppa\_Pp1s157\_83V6  
 Ppa\_Pp1s12\_368V6  
 Ppa\_Pp1s129\_205V6  
 Ppa\_Pp1s121\_138V6

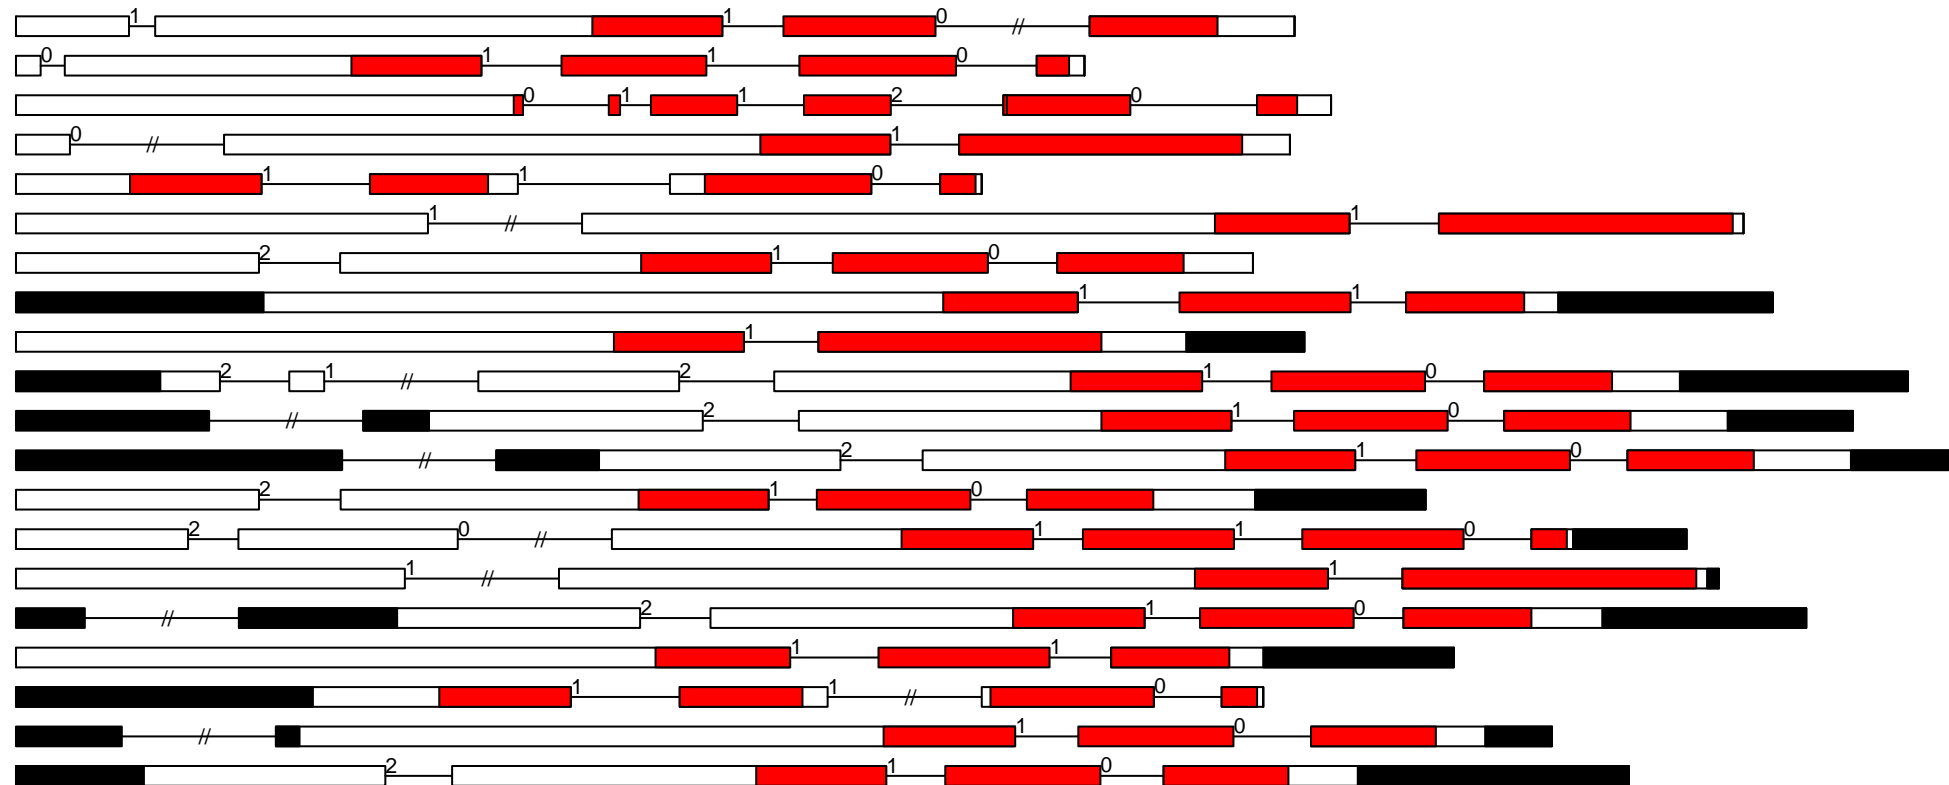

-1000

0

1000

2000

3000

# P.pa RLK-Pelle\_LRR-II exon-intron and kinase domain diagram (all)

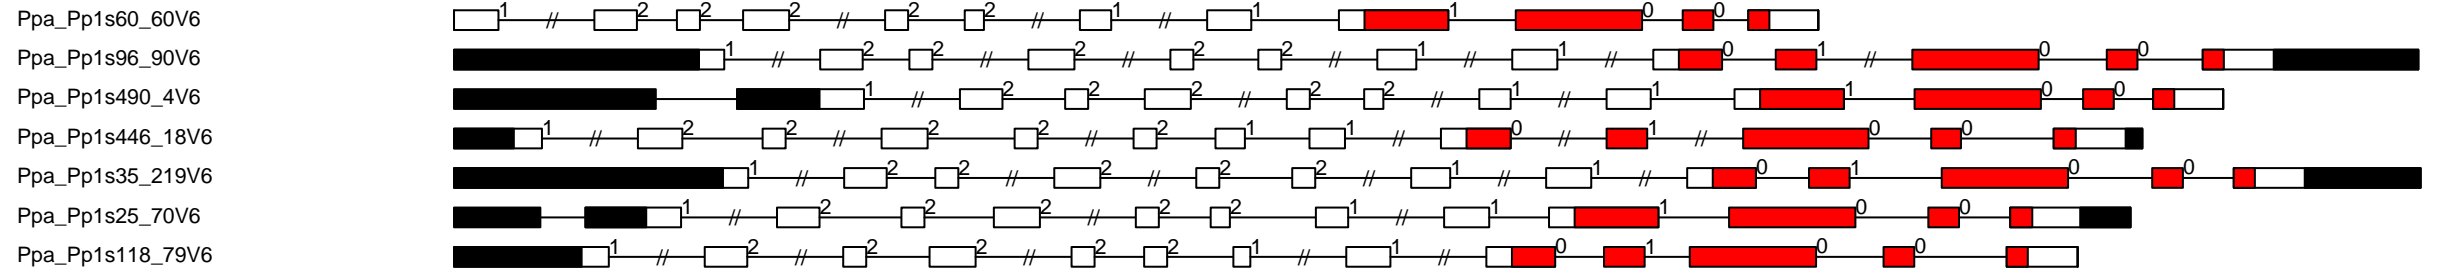

# P.pa RLK-Pelle\_LRR-IV exon-intron and kinase domain diagram (all)

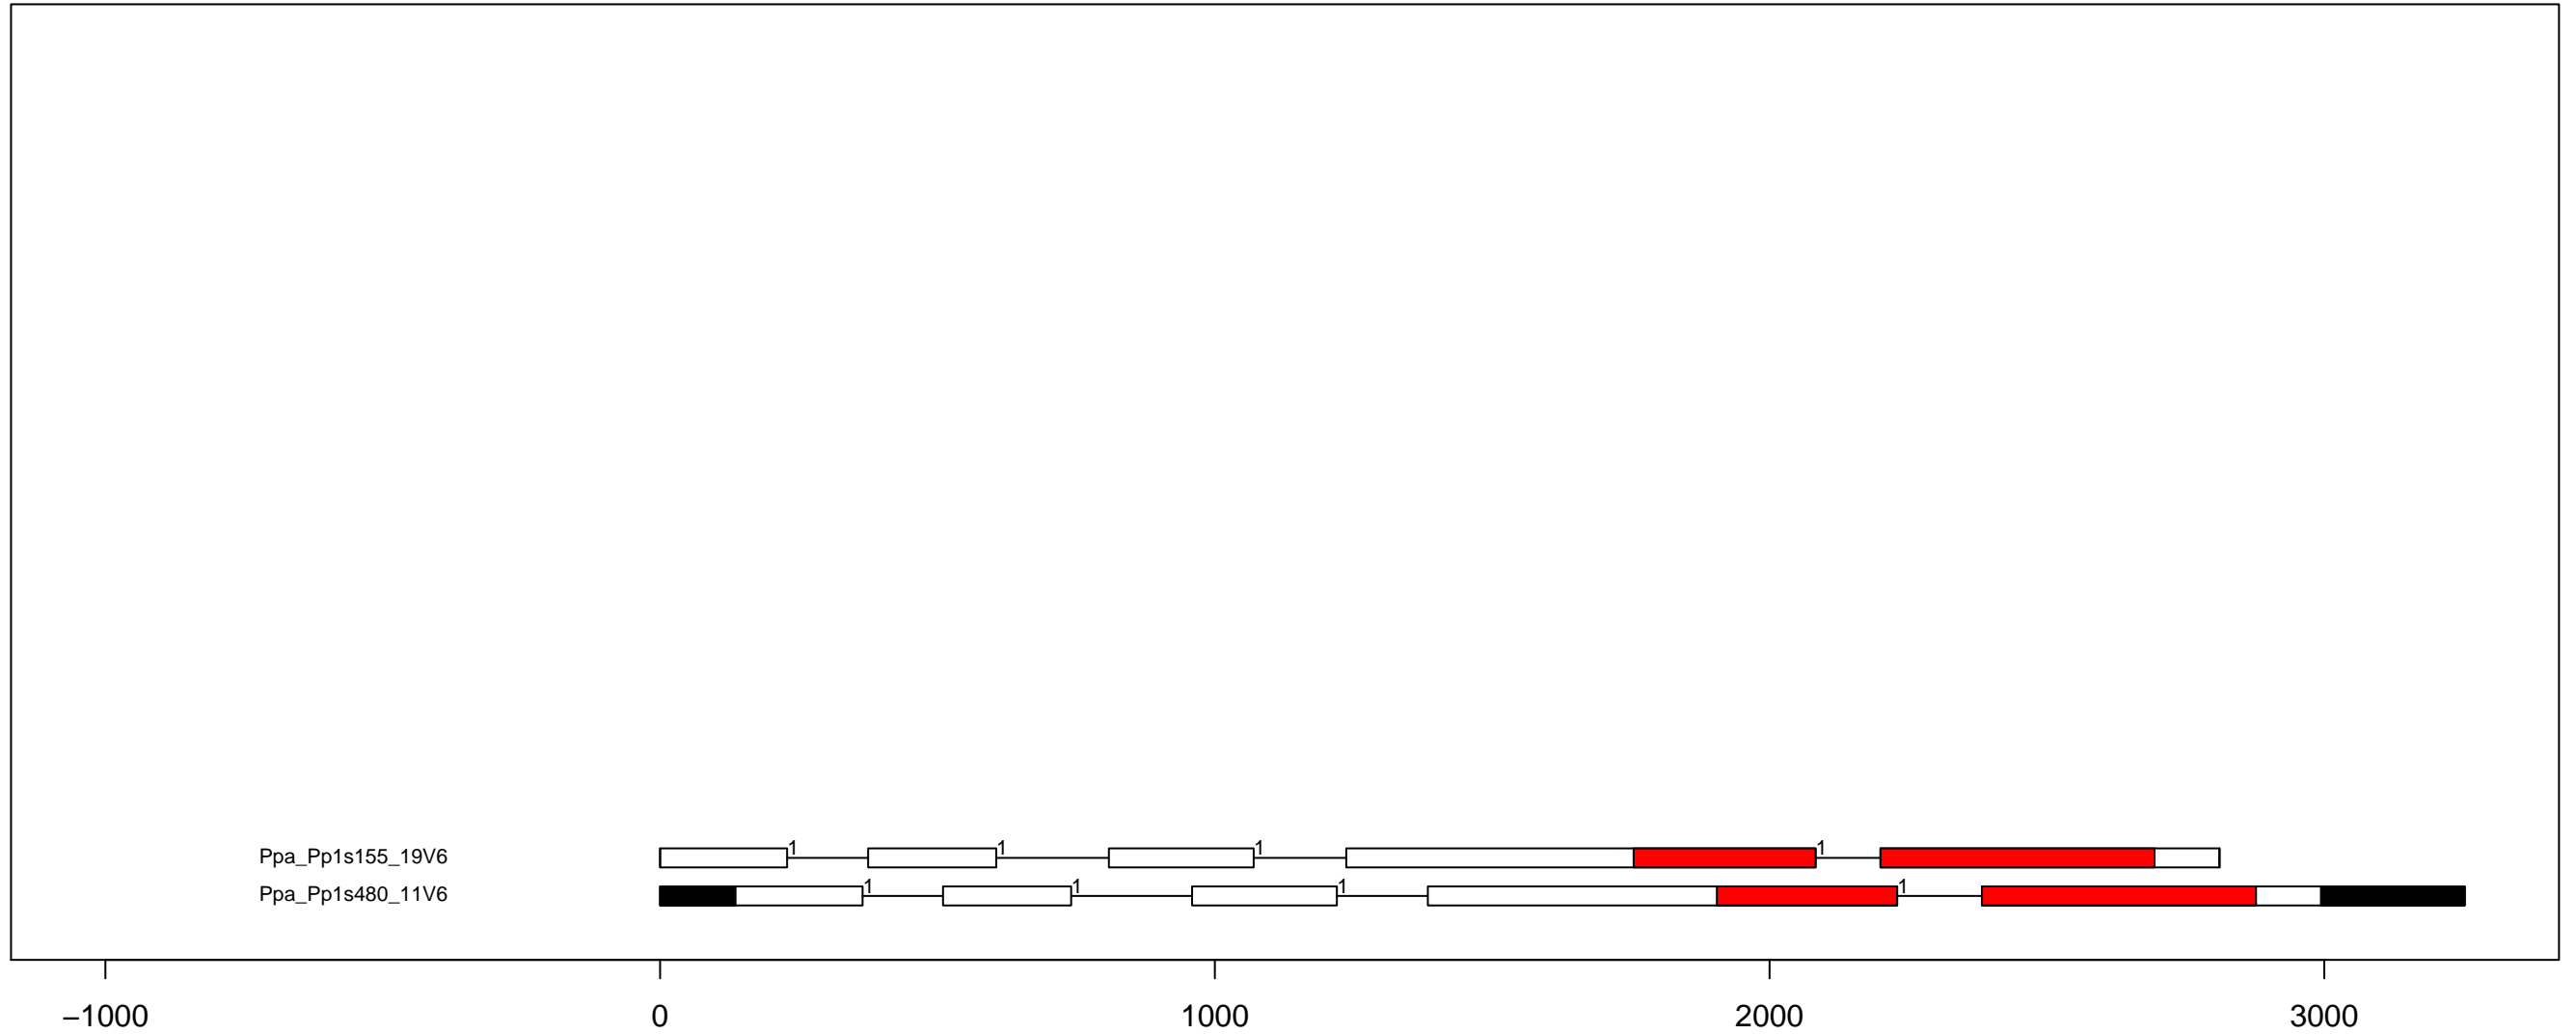



# P.pa RLK-Pelle\_LRR-IX exon-intron and kinase domain diagram (all)

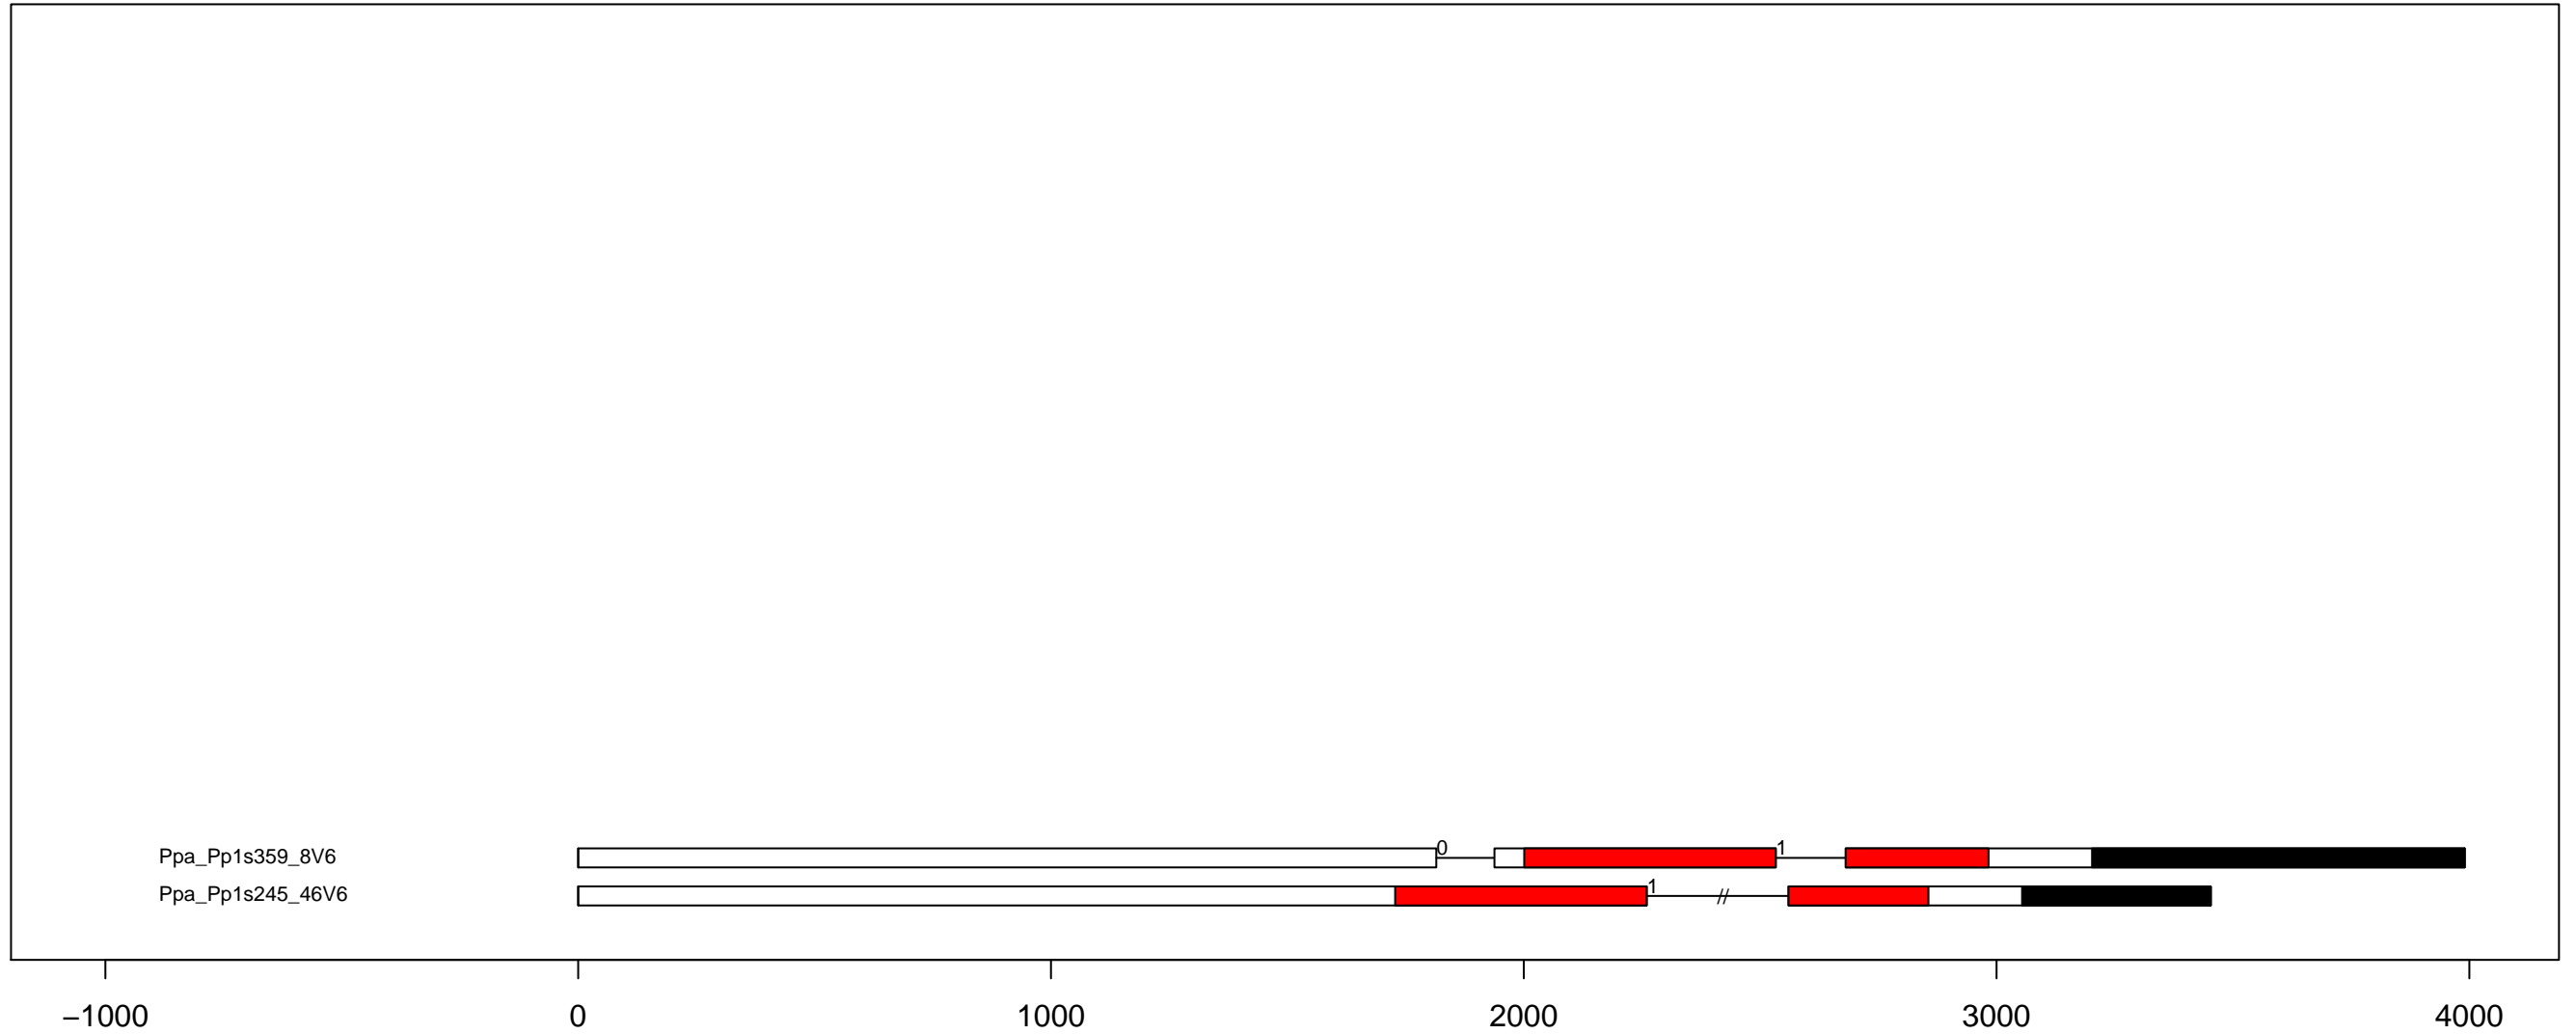

# P.pa RLK-Pelle\_LRR-VI-1 exon-intron and kinase domain diagram (all)

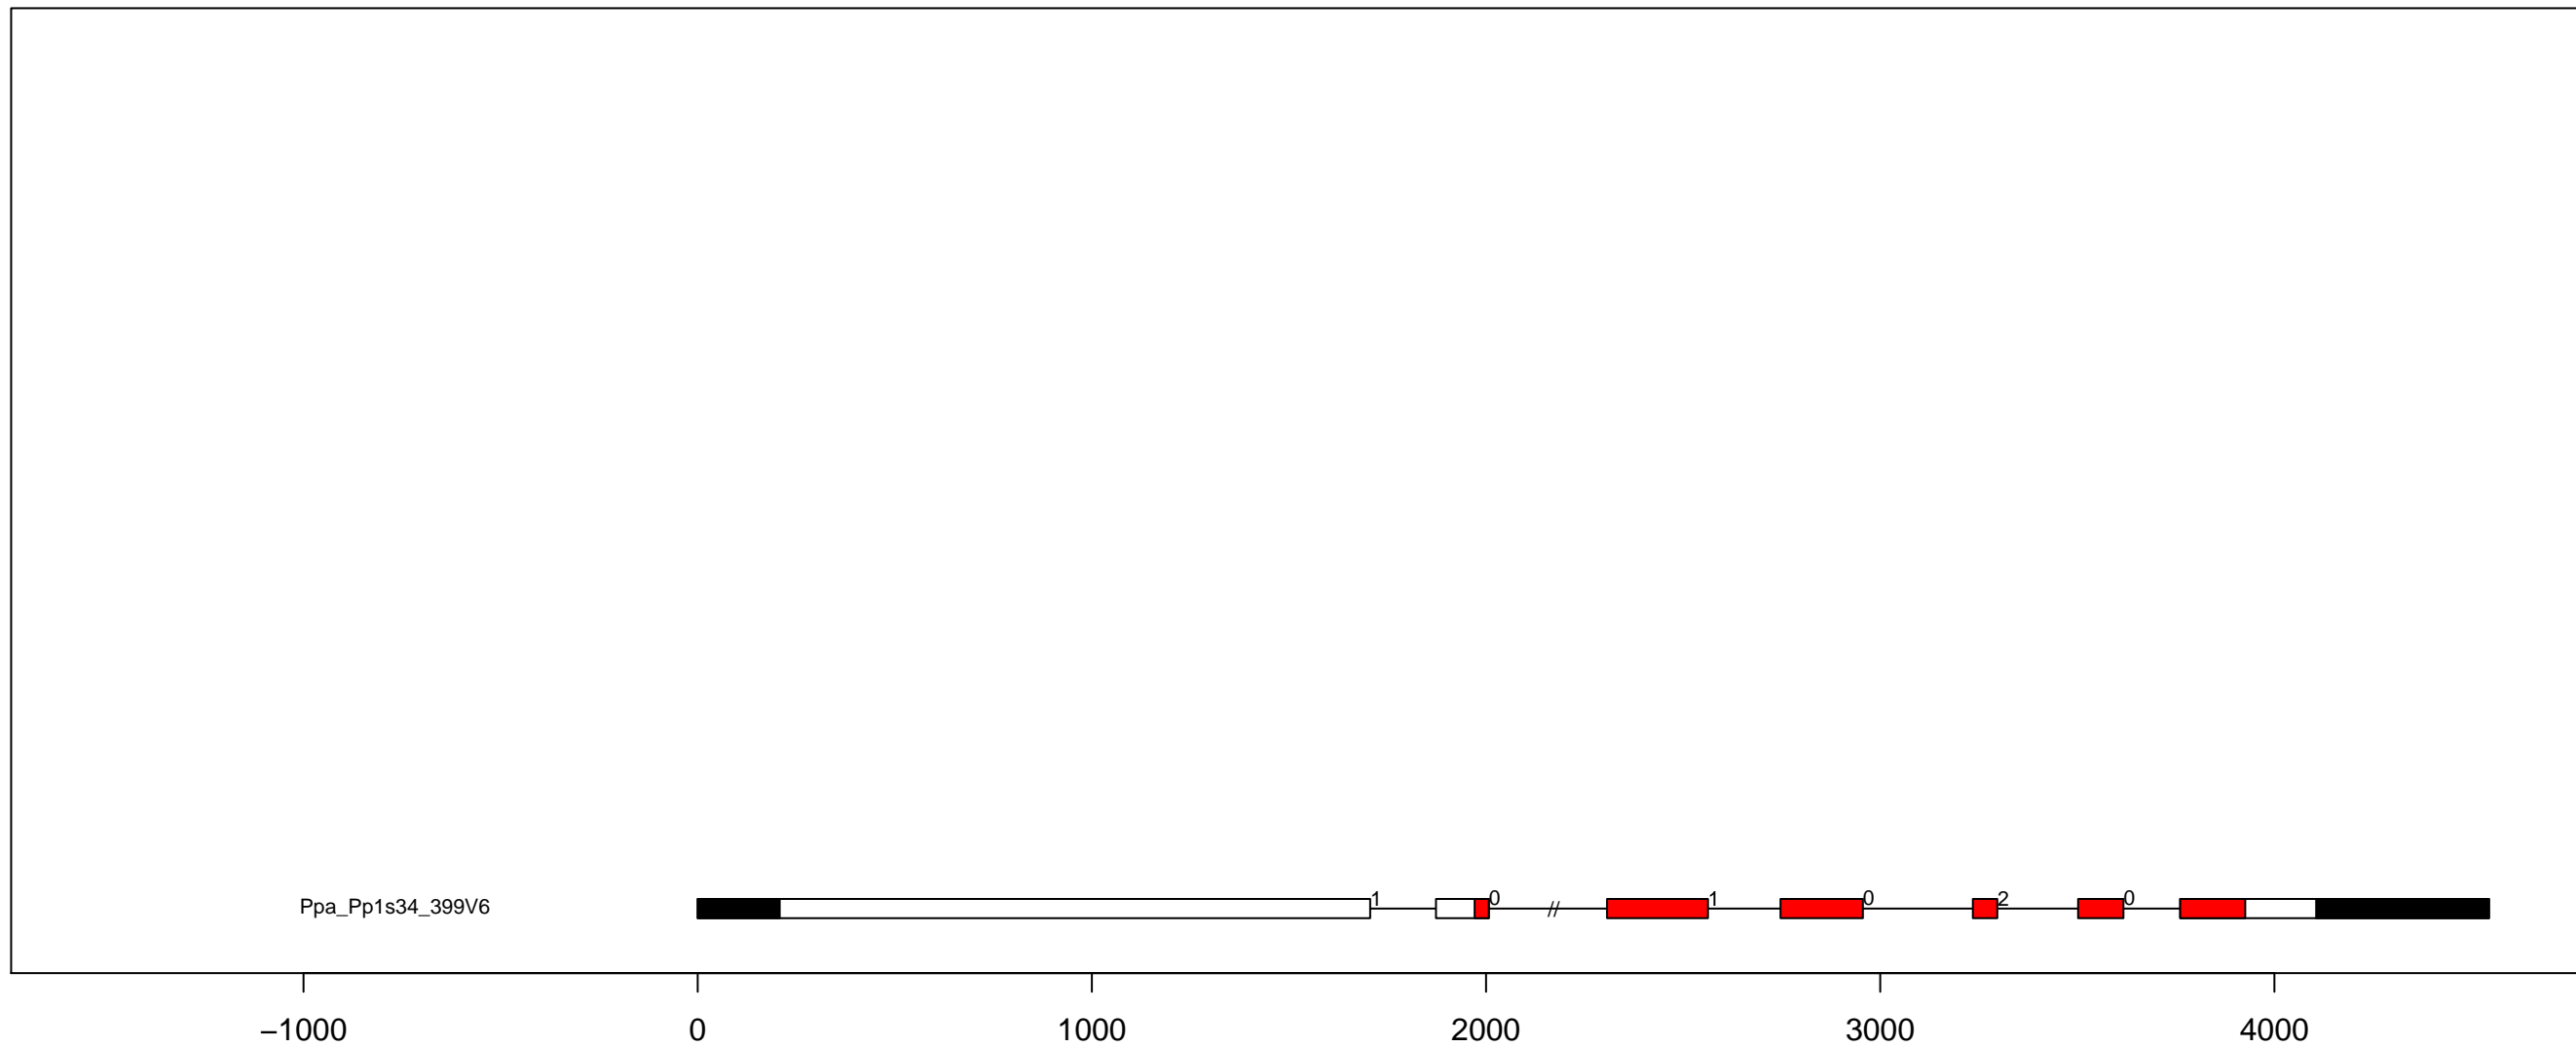

# P.pa RLK-Pelle\_LRR-VI-2 exon-intron and kinase domain diagram (all)

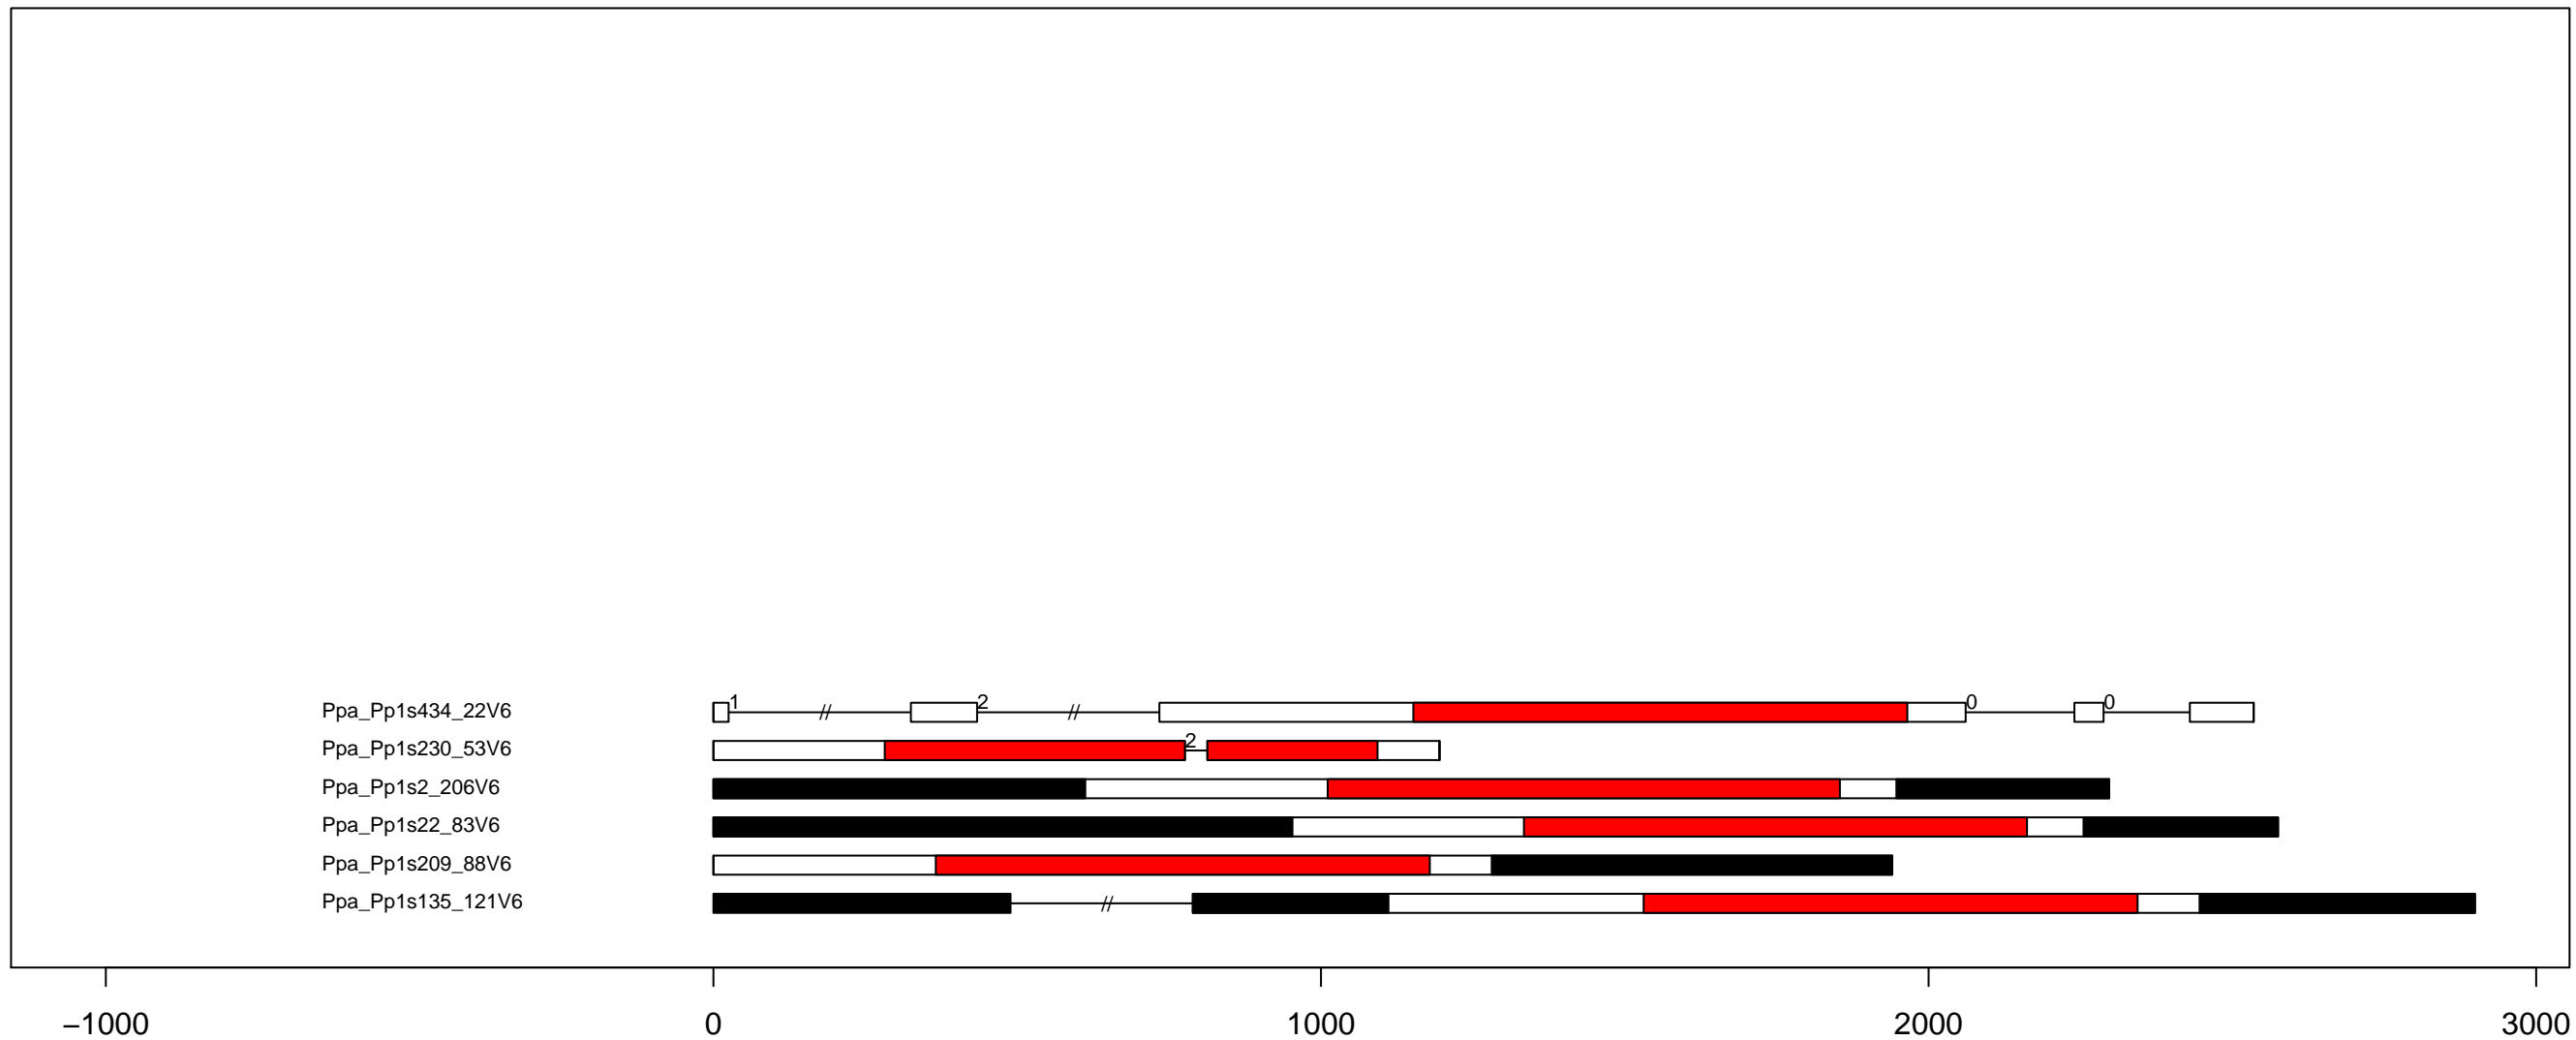

# P.pa RLK-Pelle\_LRR-VII-1 exon-intron and kinase domain diagram (all)

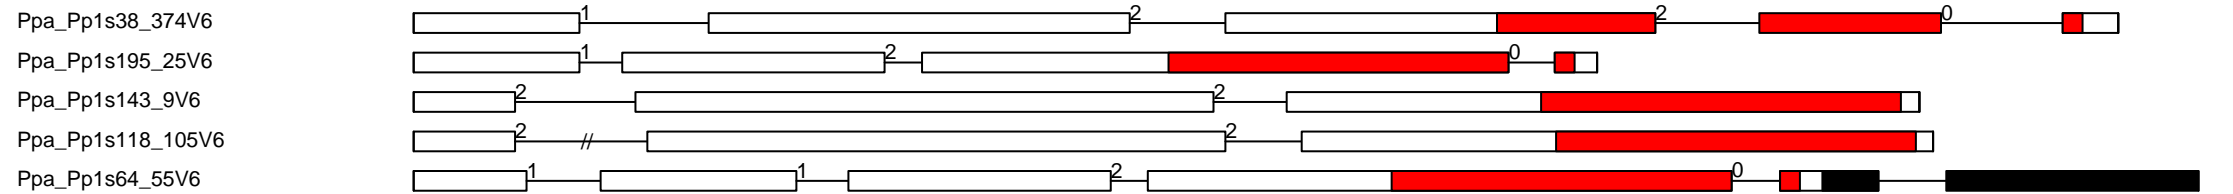

# P.pa RLK-Pelle\_LRR-VII-2 exon-intron and kinase domain diagram (all)

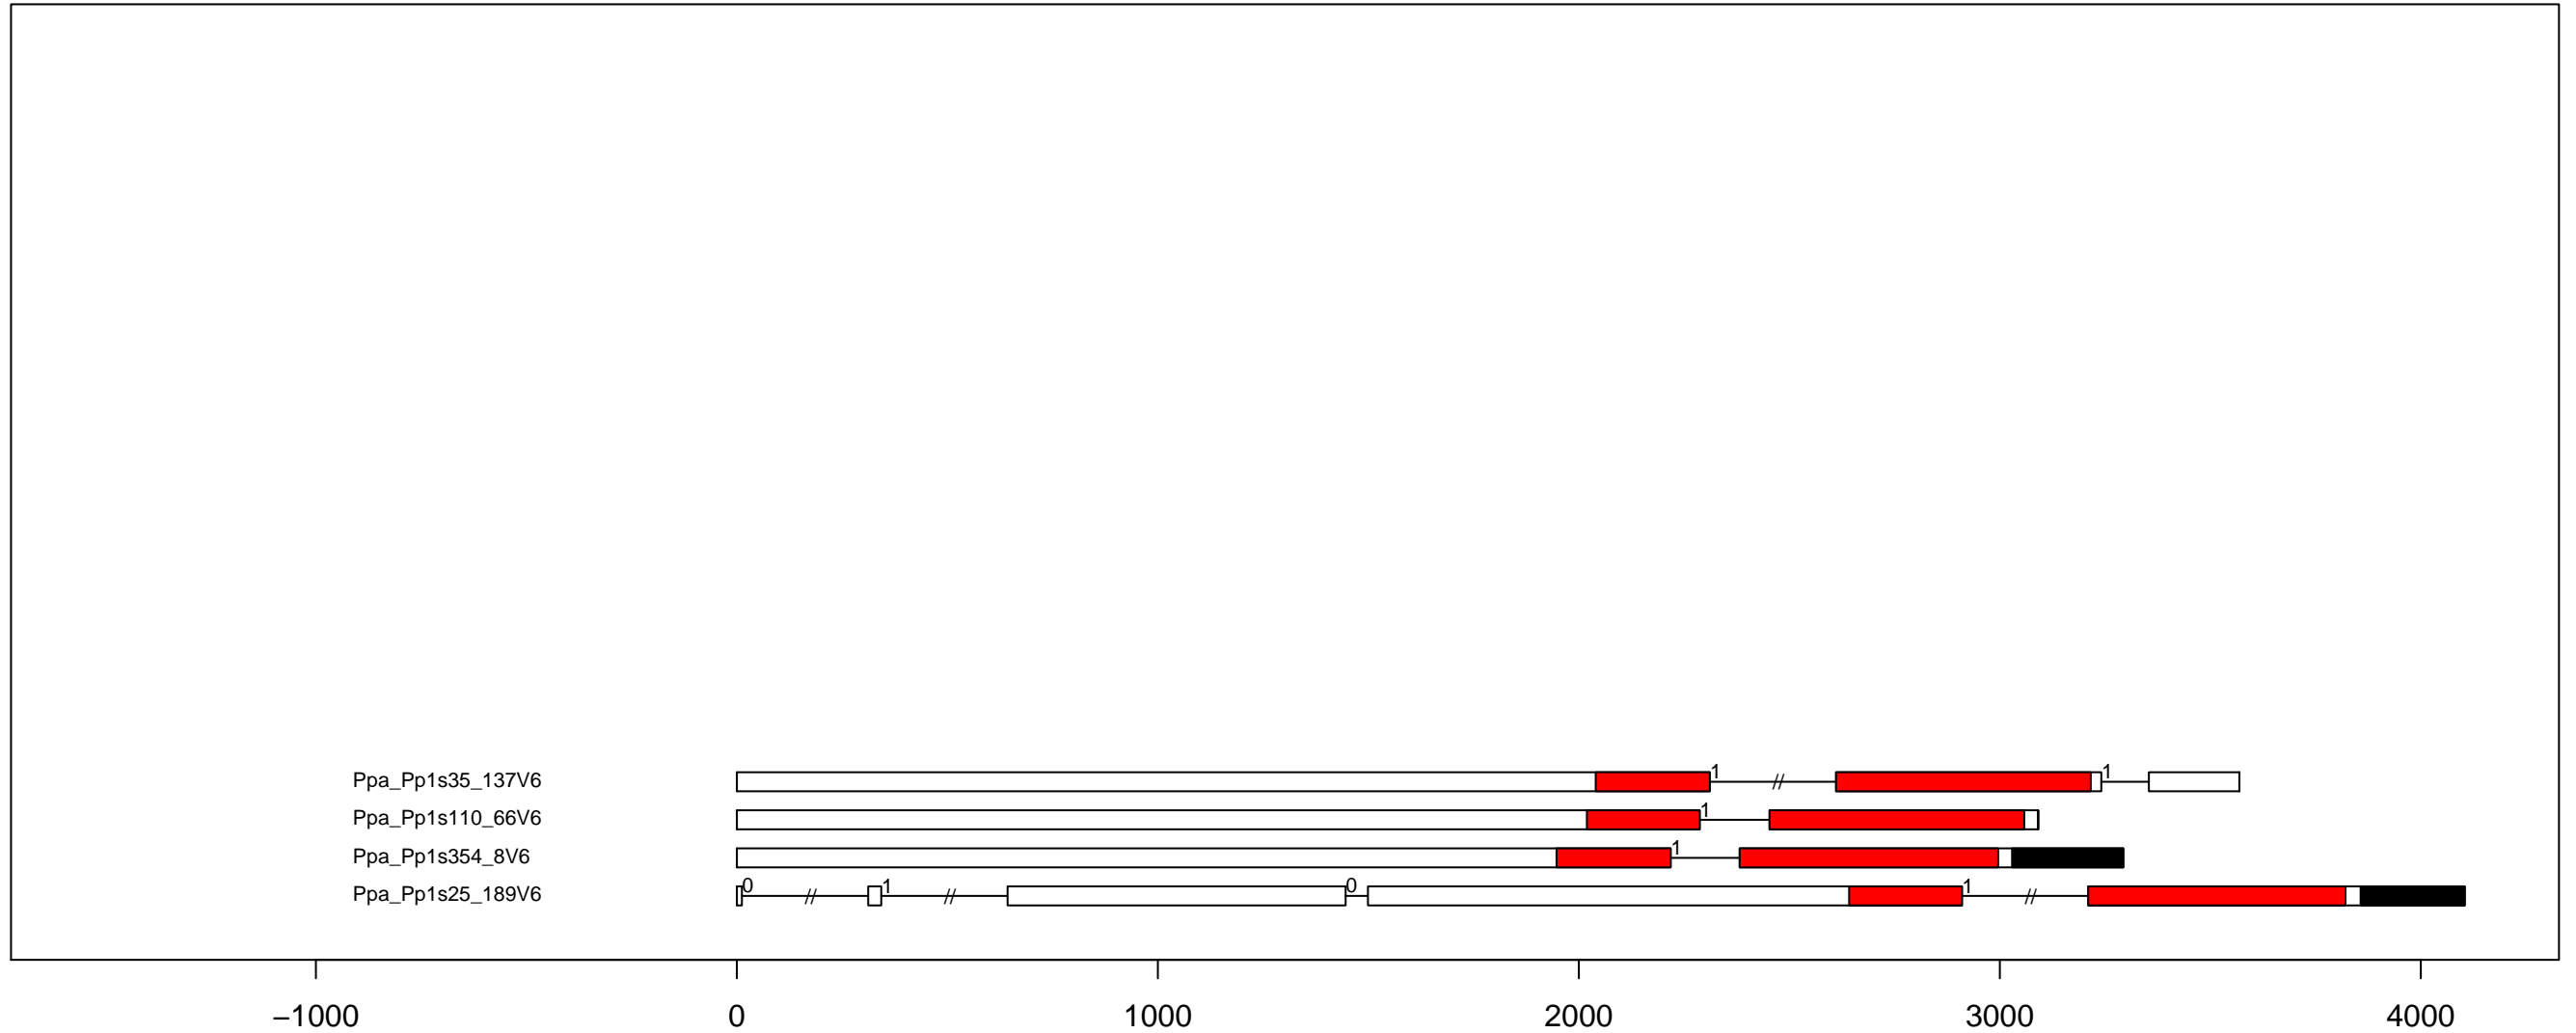

# P.pa RLK-Pelle\_LRR-VII-3 exon-intron and kinase domain diagram (all)

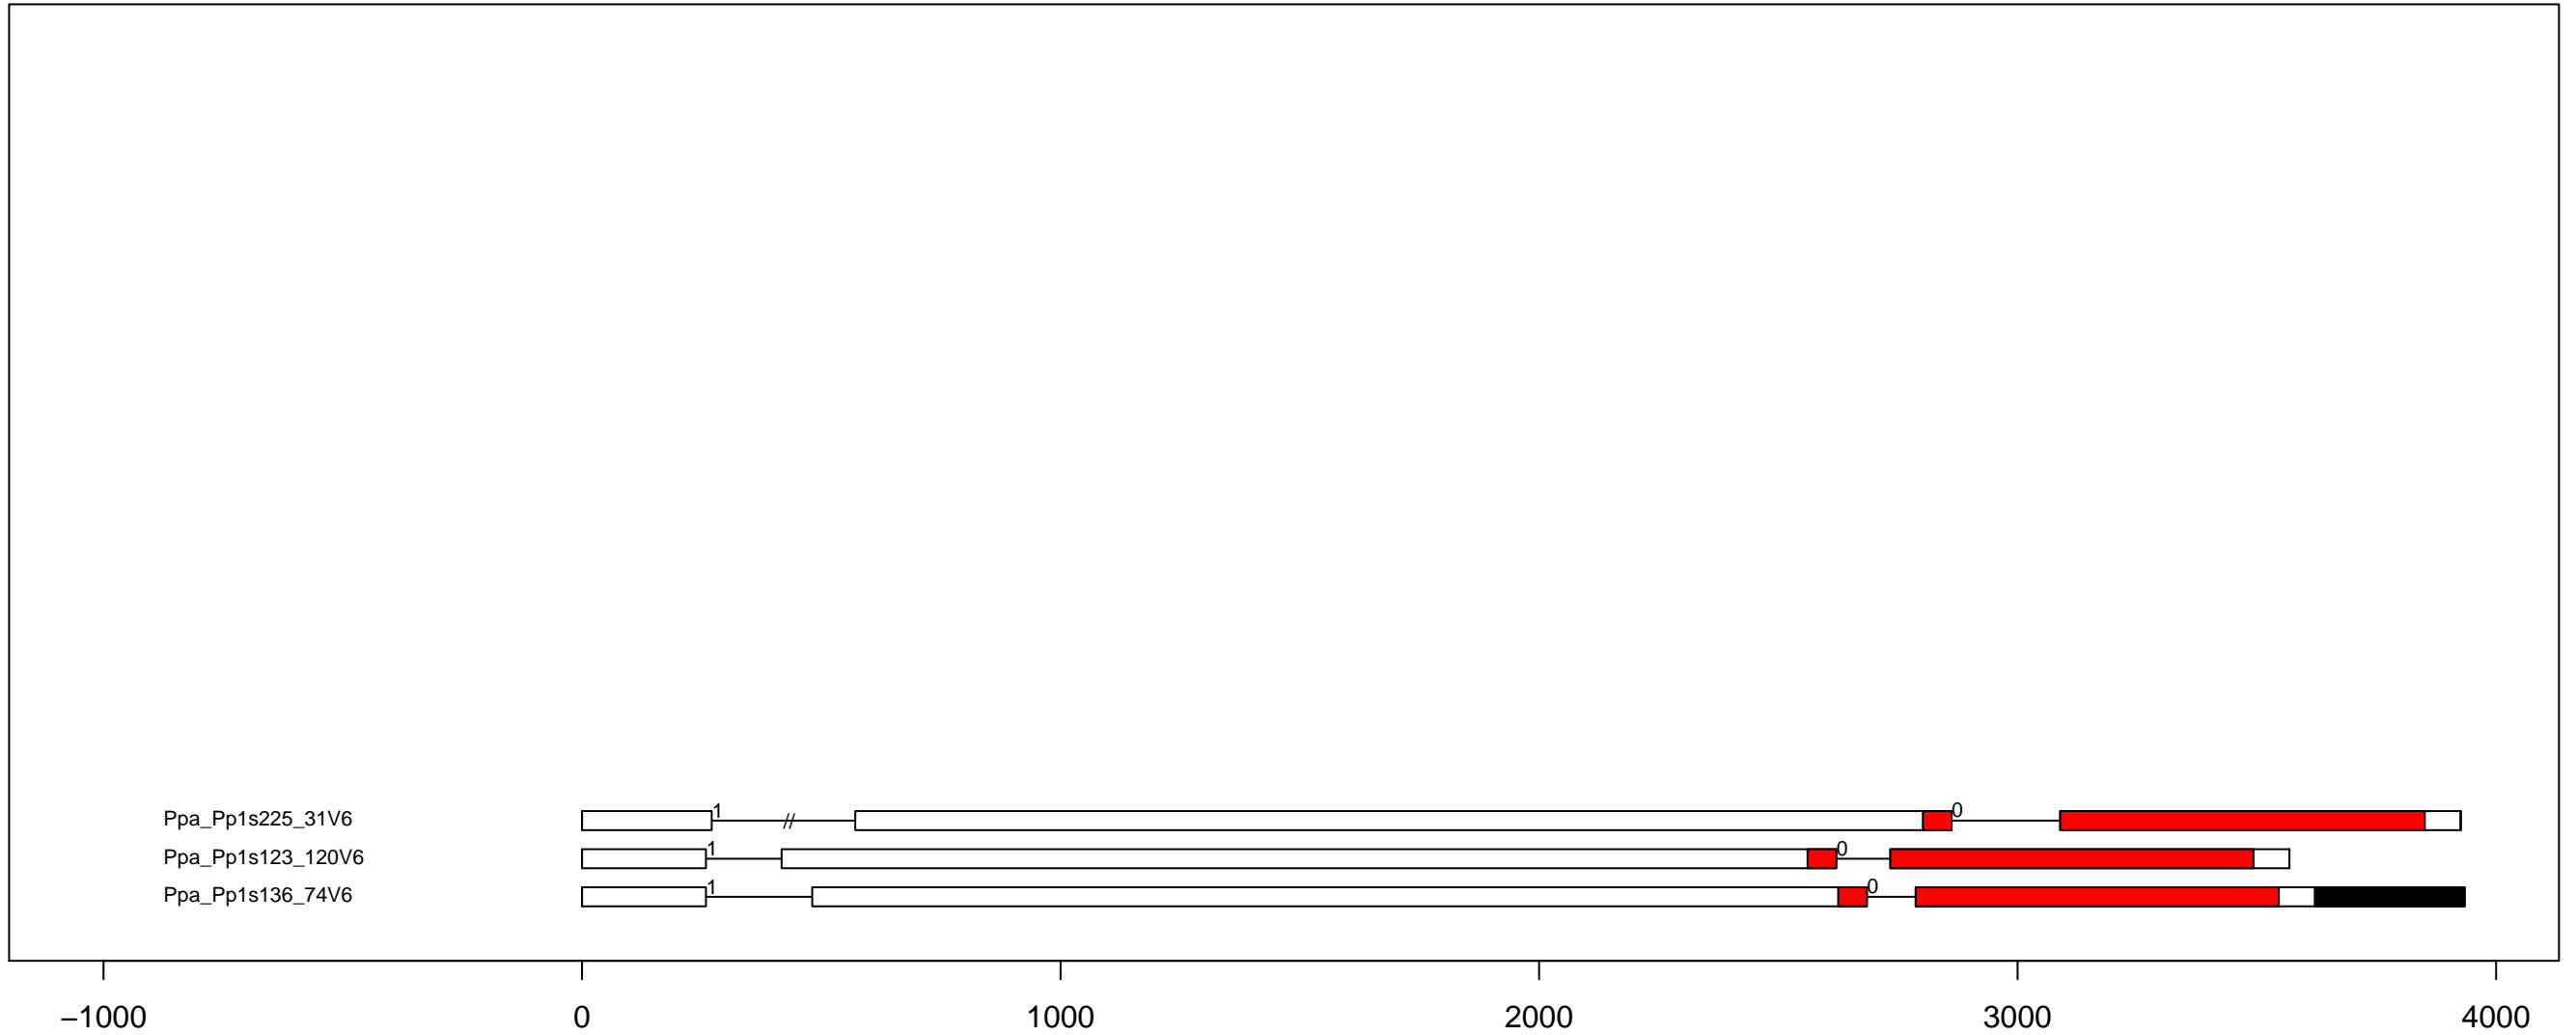

# P.pa RLK-Pelle\_LRR-VIII-1 exon-intron and kinase domain diagram (all)

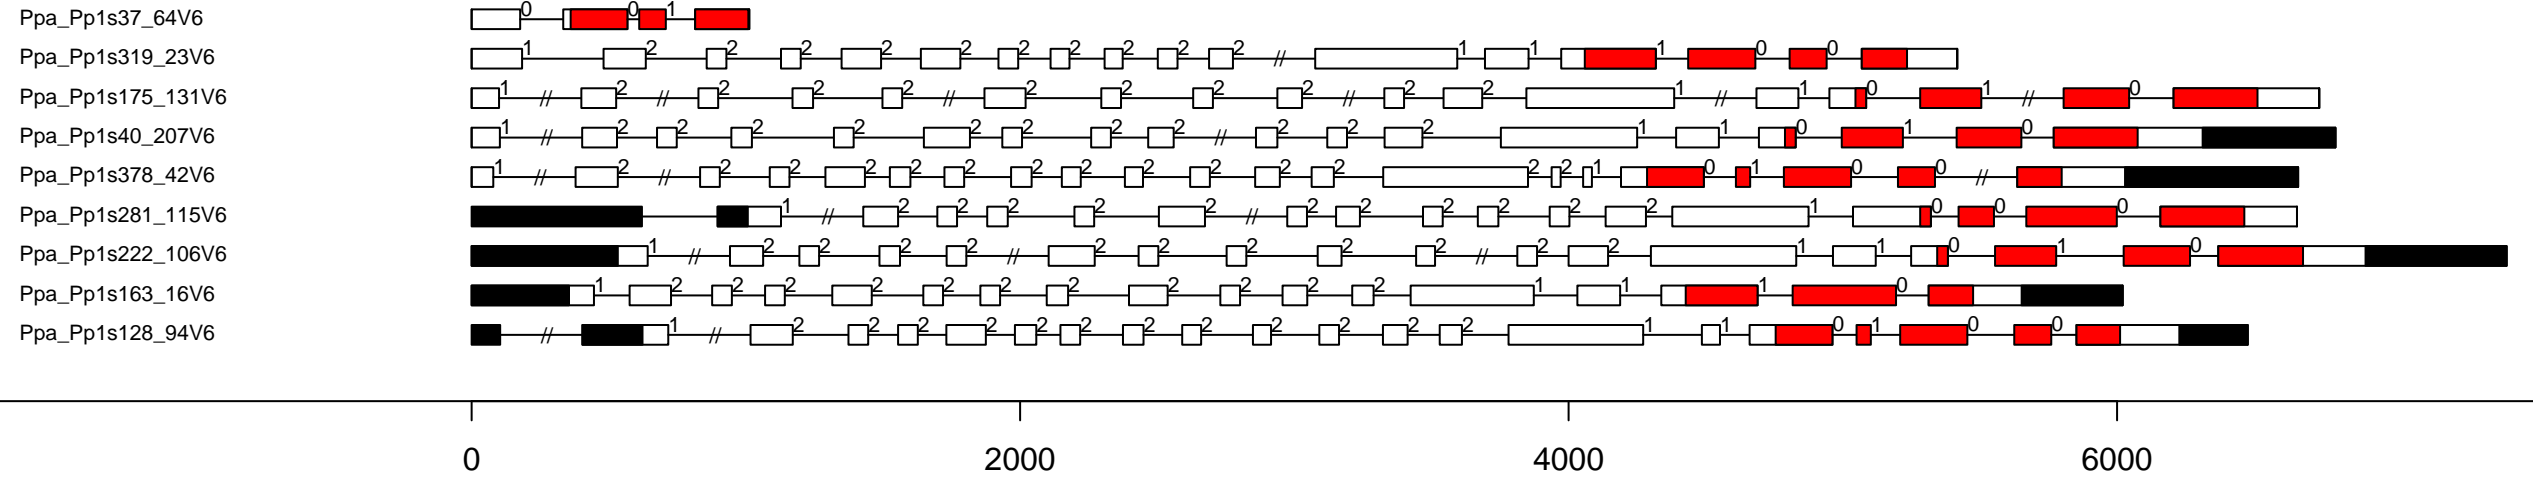

# P.pa RLK-Pelle\_LRR-V exon-intron and kinase domain diagram (all)

Ppa\_Pp1s379\_14V6

Ppa\_Pp1s279\_14V6

Ppa\_Pp1s64\_28V6

Ppa\_Pp1s284\_52V6

Ppa\_Pp1s242\_37V6

Ppa\_Pp1s204\_22V6

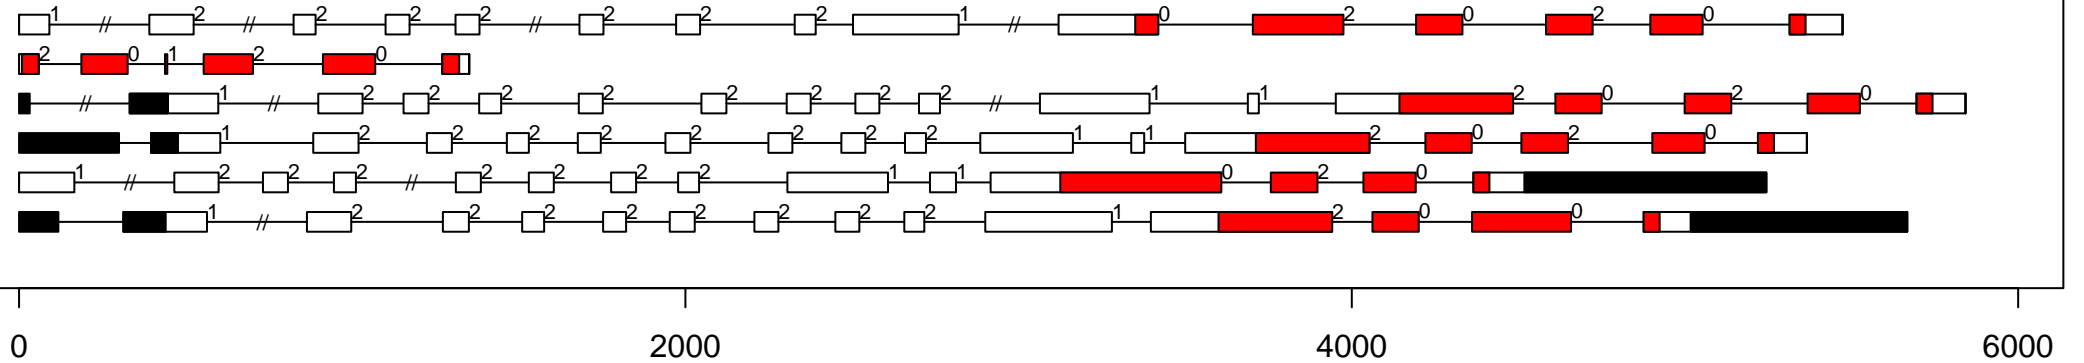



# P.pa RLK-Pelle\_LRR-Xa exon-intron and kinase domain diagram (all)

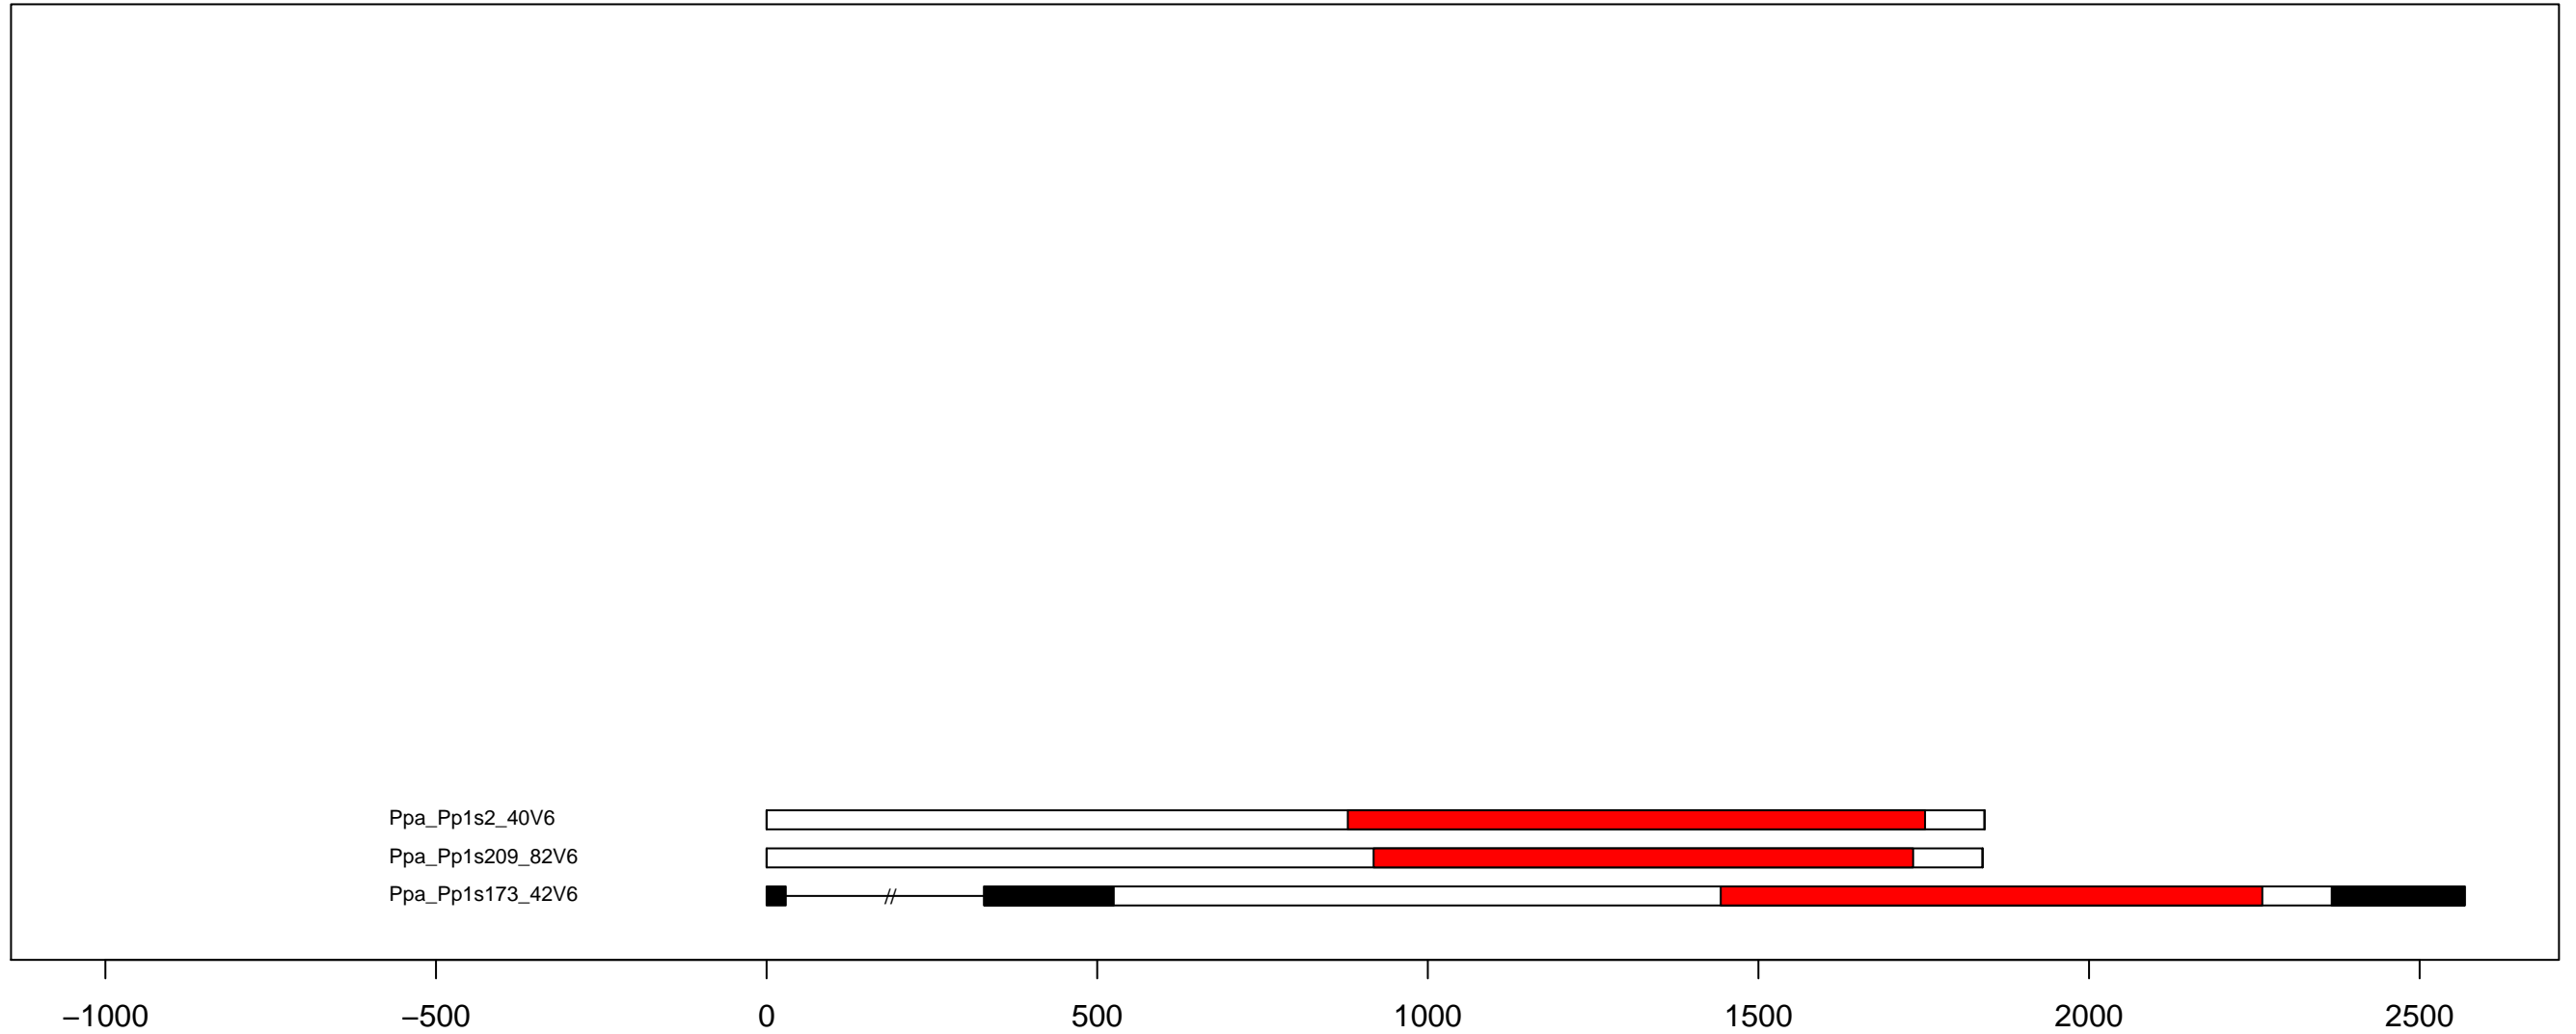

# P.pa RLK-Pelle\_LRR-Xb-1 exon-intron and kinase domain diagram (all)

Ppa\_Pp1s63\_130V6  
Ppa\_Pp1s33\_130V6  
Ppa\_Pp1s244\_6V6  
Ppa\_Pp1s172\_87V6  
Ppa\_Pp1s159\_97V6  
Ppa\_Pp1s111\_101V6  
Ppa\_Pp1s68\_46V6  
Ppa\_Pp1s48\_171V6  
Ppa\_Pp1s27\_27V6  
Ppa\_Pp1s141\_73V6

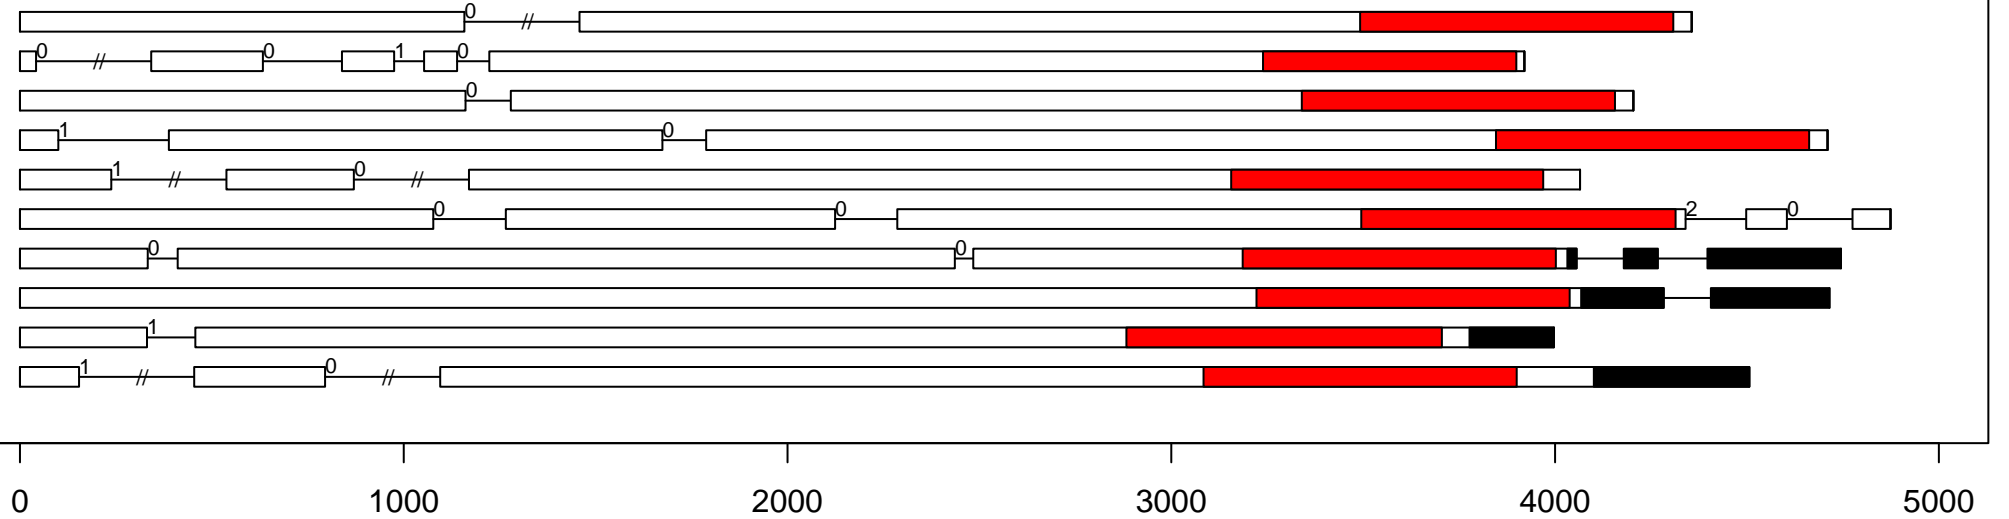

# P.pa RLK-Pelle\_LRR-XI-1 exon-intron and kinase domain diagram (all)

Ppa\_Pp1s281\_13V6  
 Ppa\_Pp1s186\_31V6  
 Ppa\_Pp1s178\_41V6  
 Ppa\_Pp1s14\_454V6  
 Ppa\_Pp1s14\_447V6  
 Ppa\_Pp1s5\_68V6  
 Ppa\_Pp1s247\_8V6  
 Ppa\_Pp1s212\_3V6  
 Ppa\_Pp1s182\_56V6  
 Ppa\_Pp1s178\_122V6  
 Ppa\_Pp1s161\_36V6  
 Ppa\_Pp1s102\_217V6

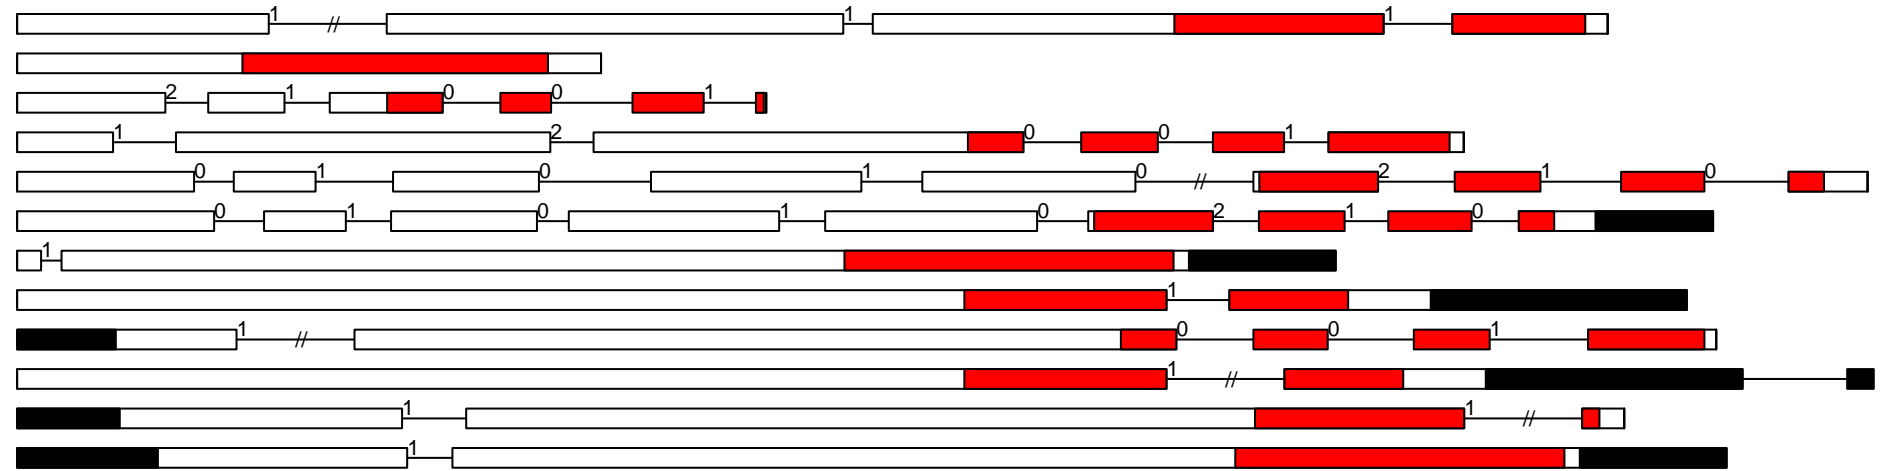

-1000

0

1000

2000

3000

4000

# P.pa RLK-Pelle\_LRR-XI-2 exon-intron and kinase domain diagram (all)

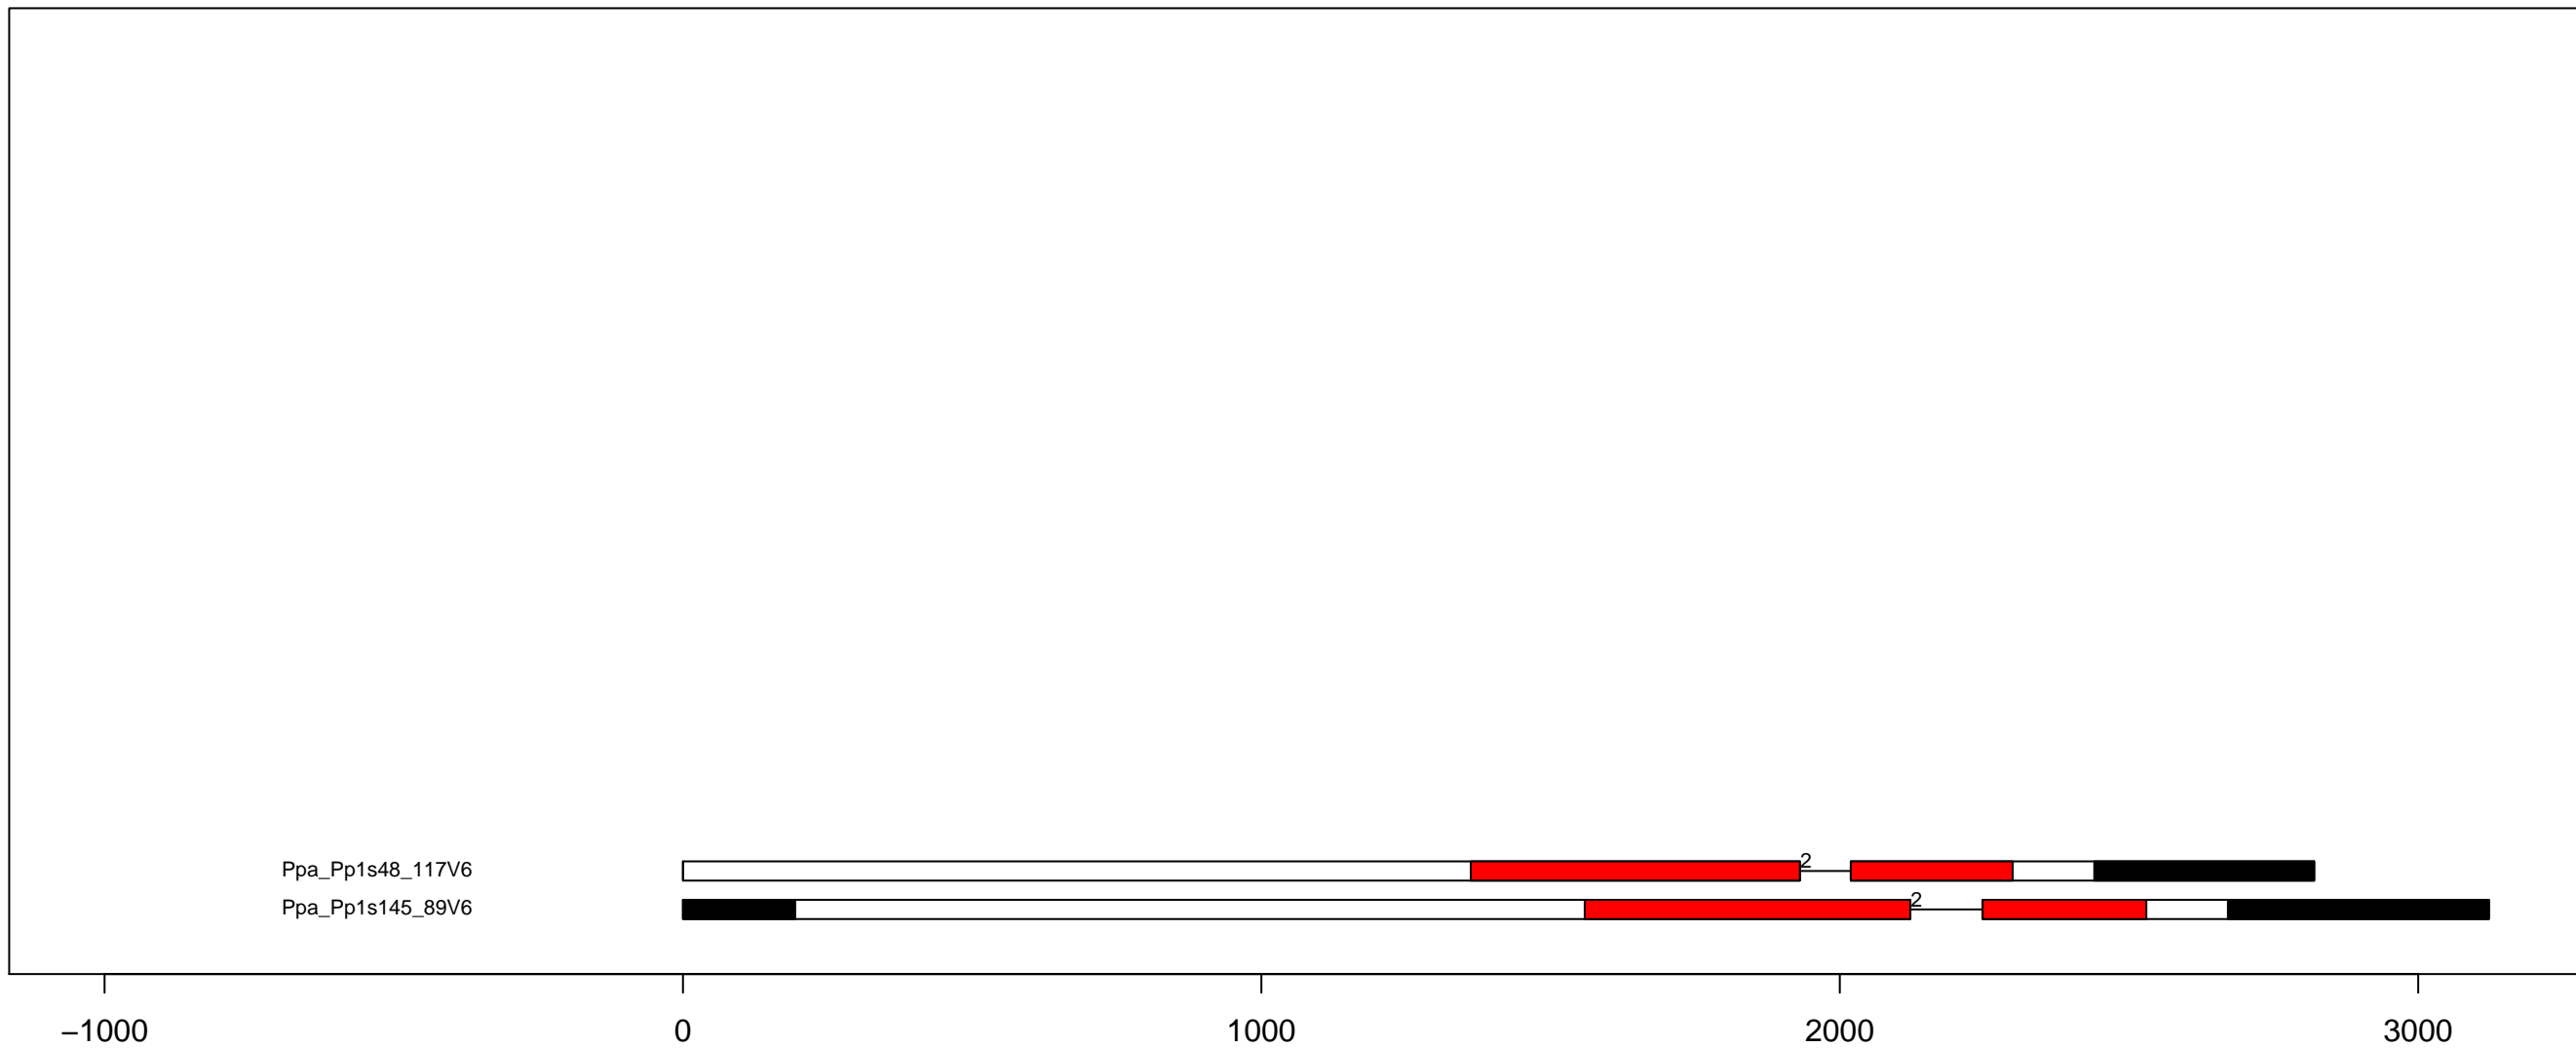

### P.pa RLK-Pelle\_LRR-XII-1 exon-intron and kinase domain diagram (all)

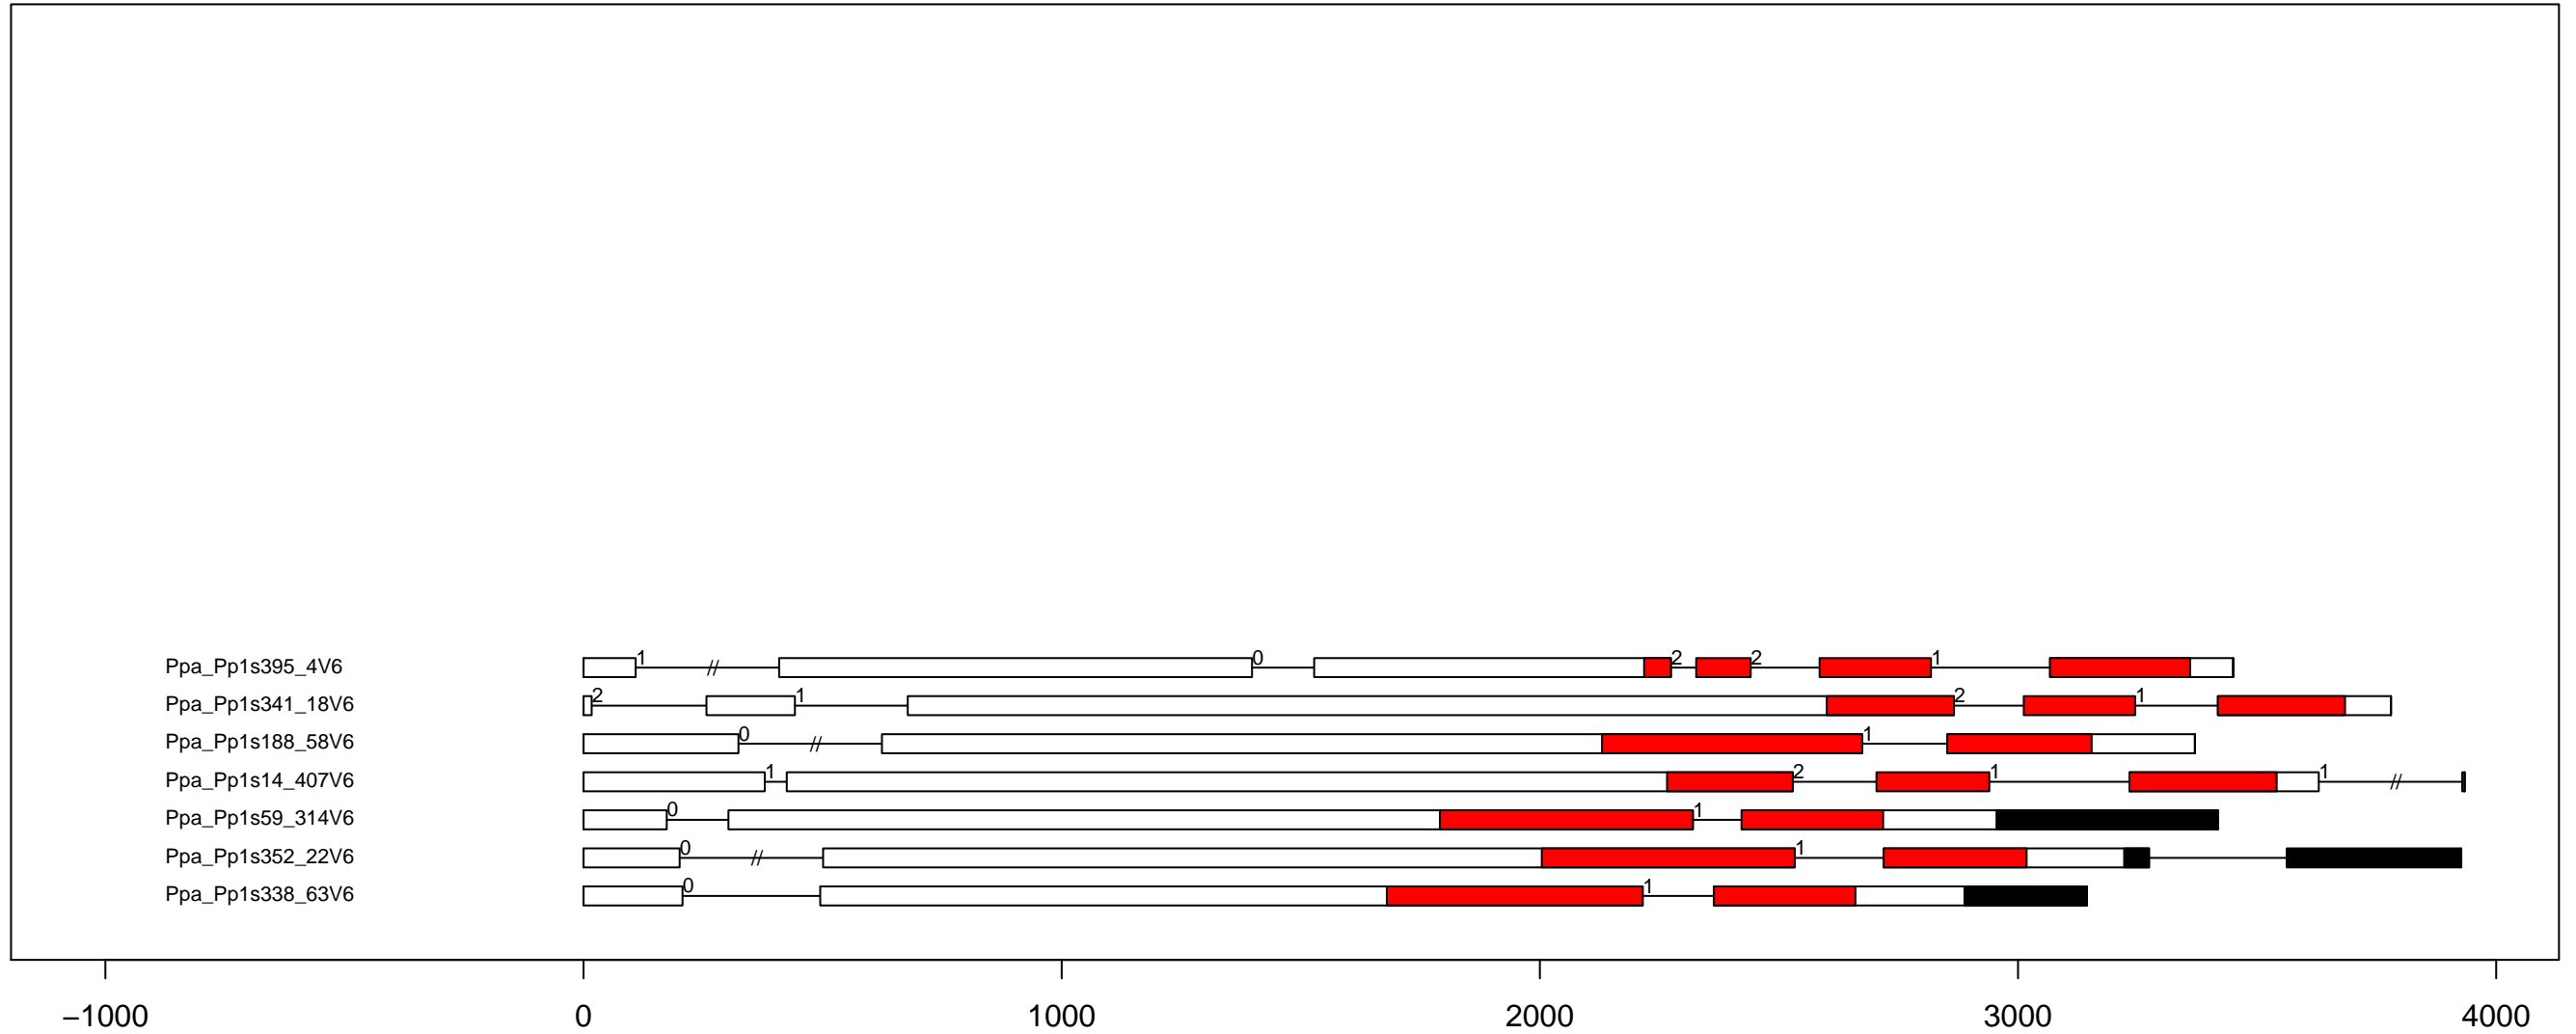

# P.pa RLK-Pelle\_LRR-XIIIa exon-intron and kinase domain diagram (all)

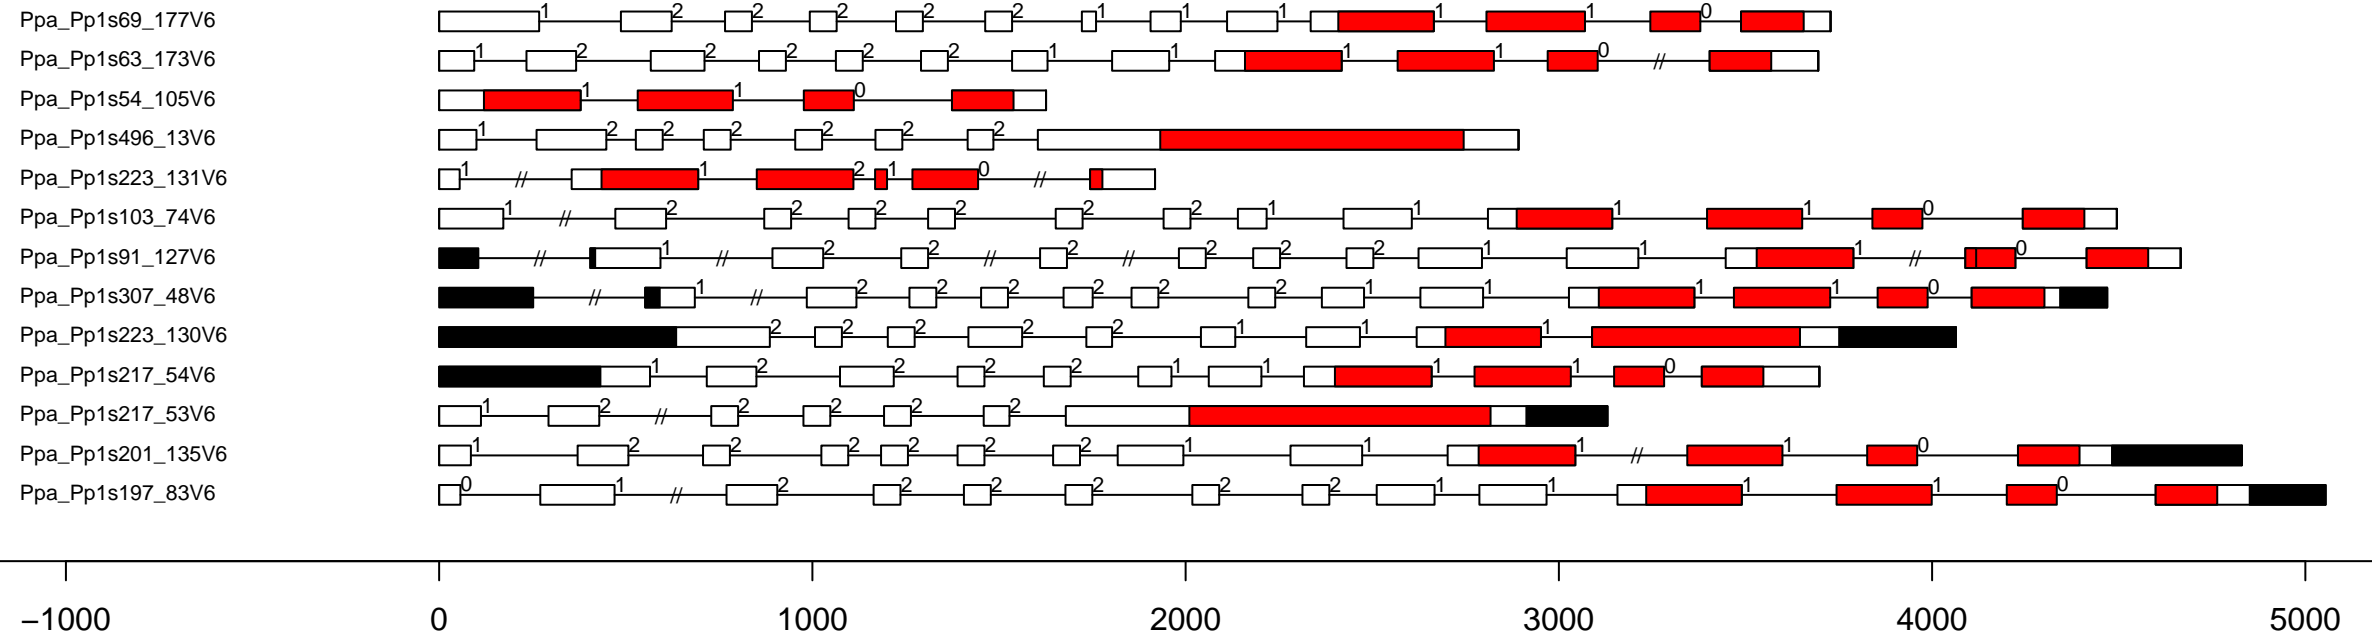

# P.pa RLK-Pelle\_LRR-XIIIb exon-intron and kinase domain diagram (all)

Ppa\_Pp1s63\_16V6  
Ppa\_Pp1s19\_291V6  
Ppa\_Pp1s125\_96V6  
Ppa\_Pp1s353\_18V6  
Ppa\_Pp1s121\_69V6

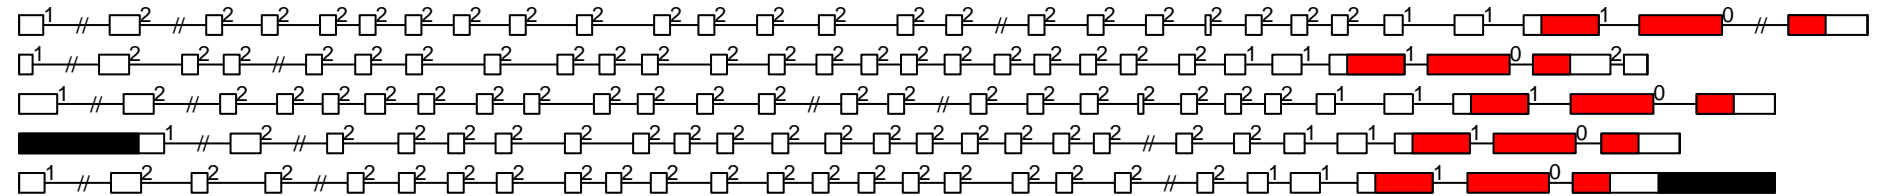

P.pa RLK-Pelle\_LRR-XIV exon-intron and kinase domain diagram (all)

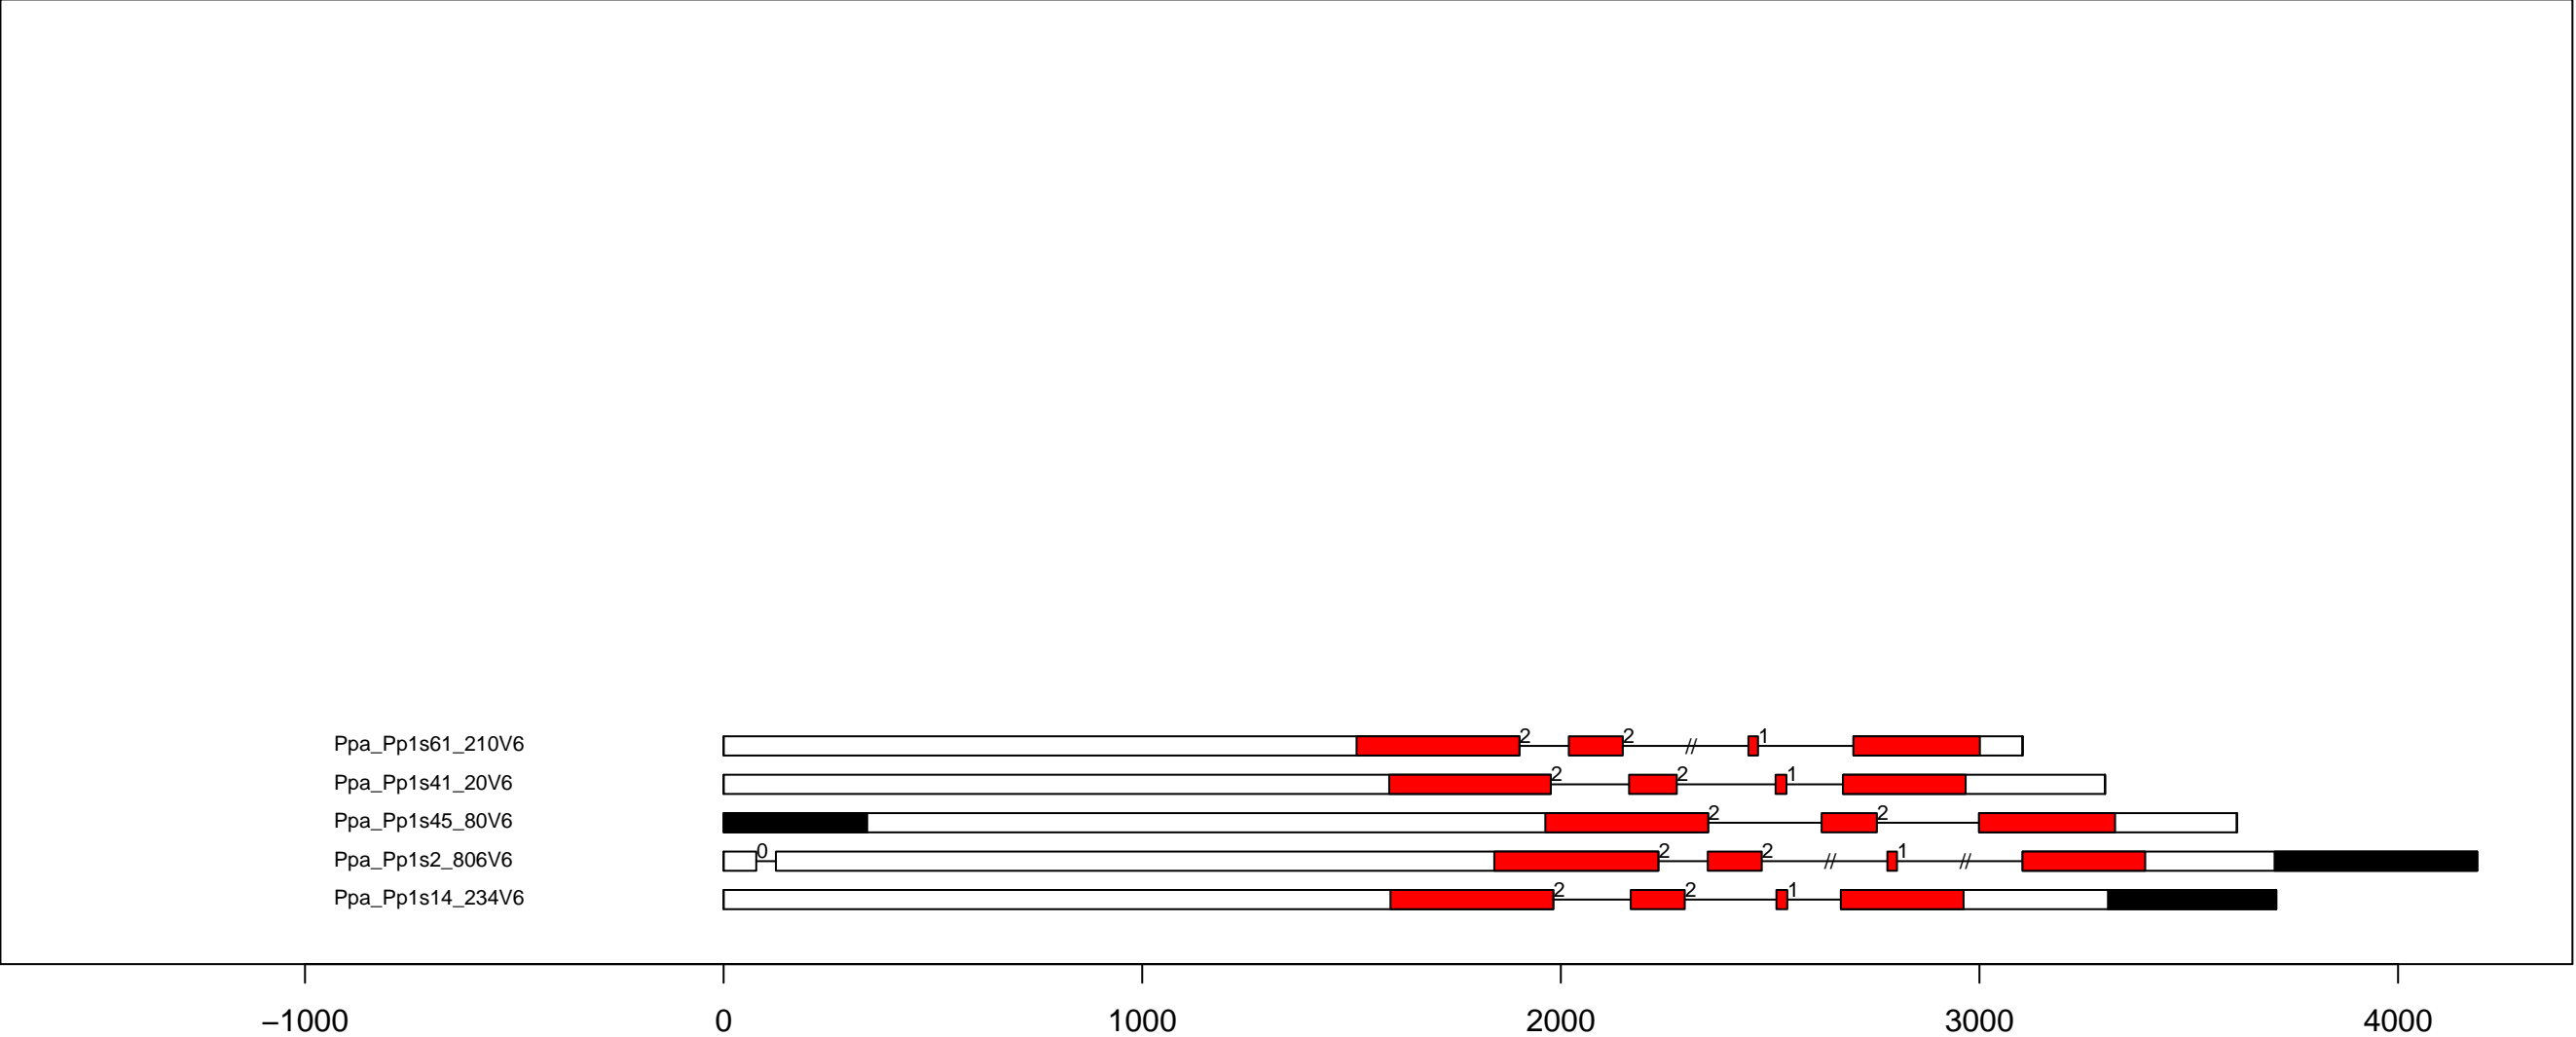



**P.pa RLK-Pelle\_LRR-XV exon-intron and kinase domain diagram (all)**

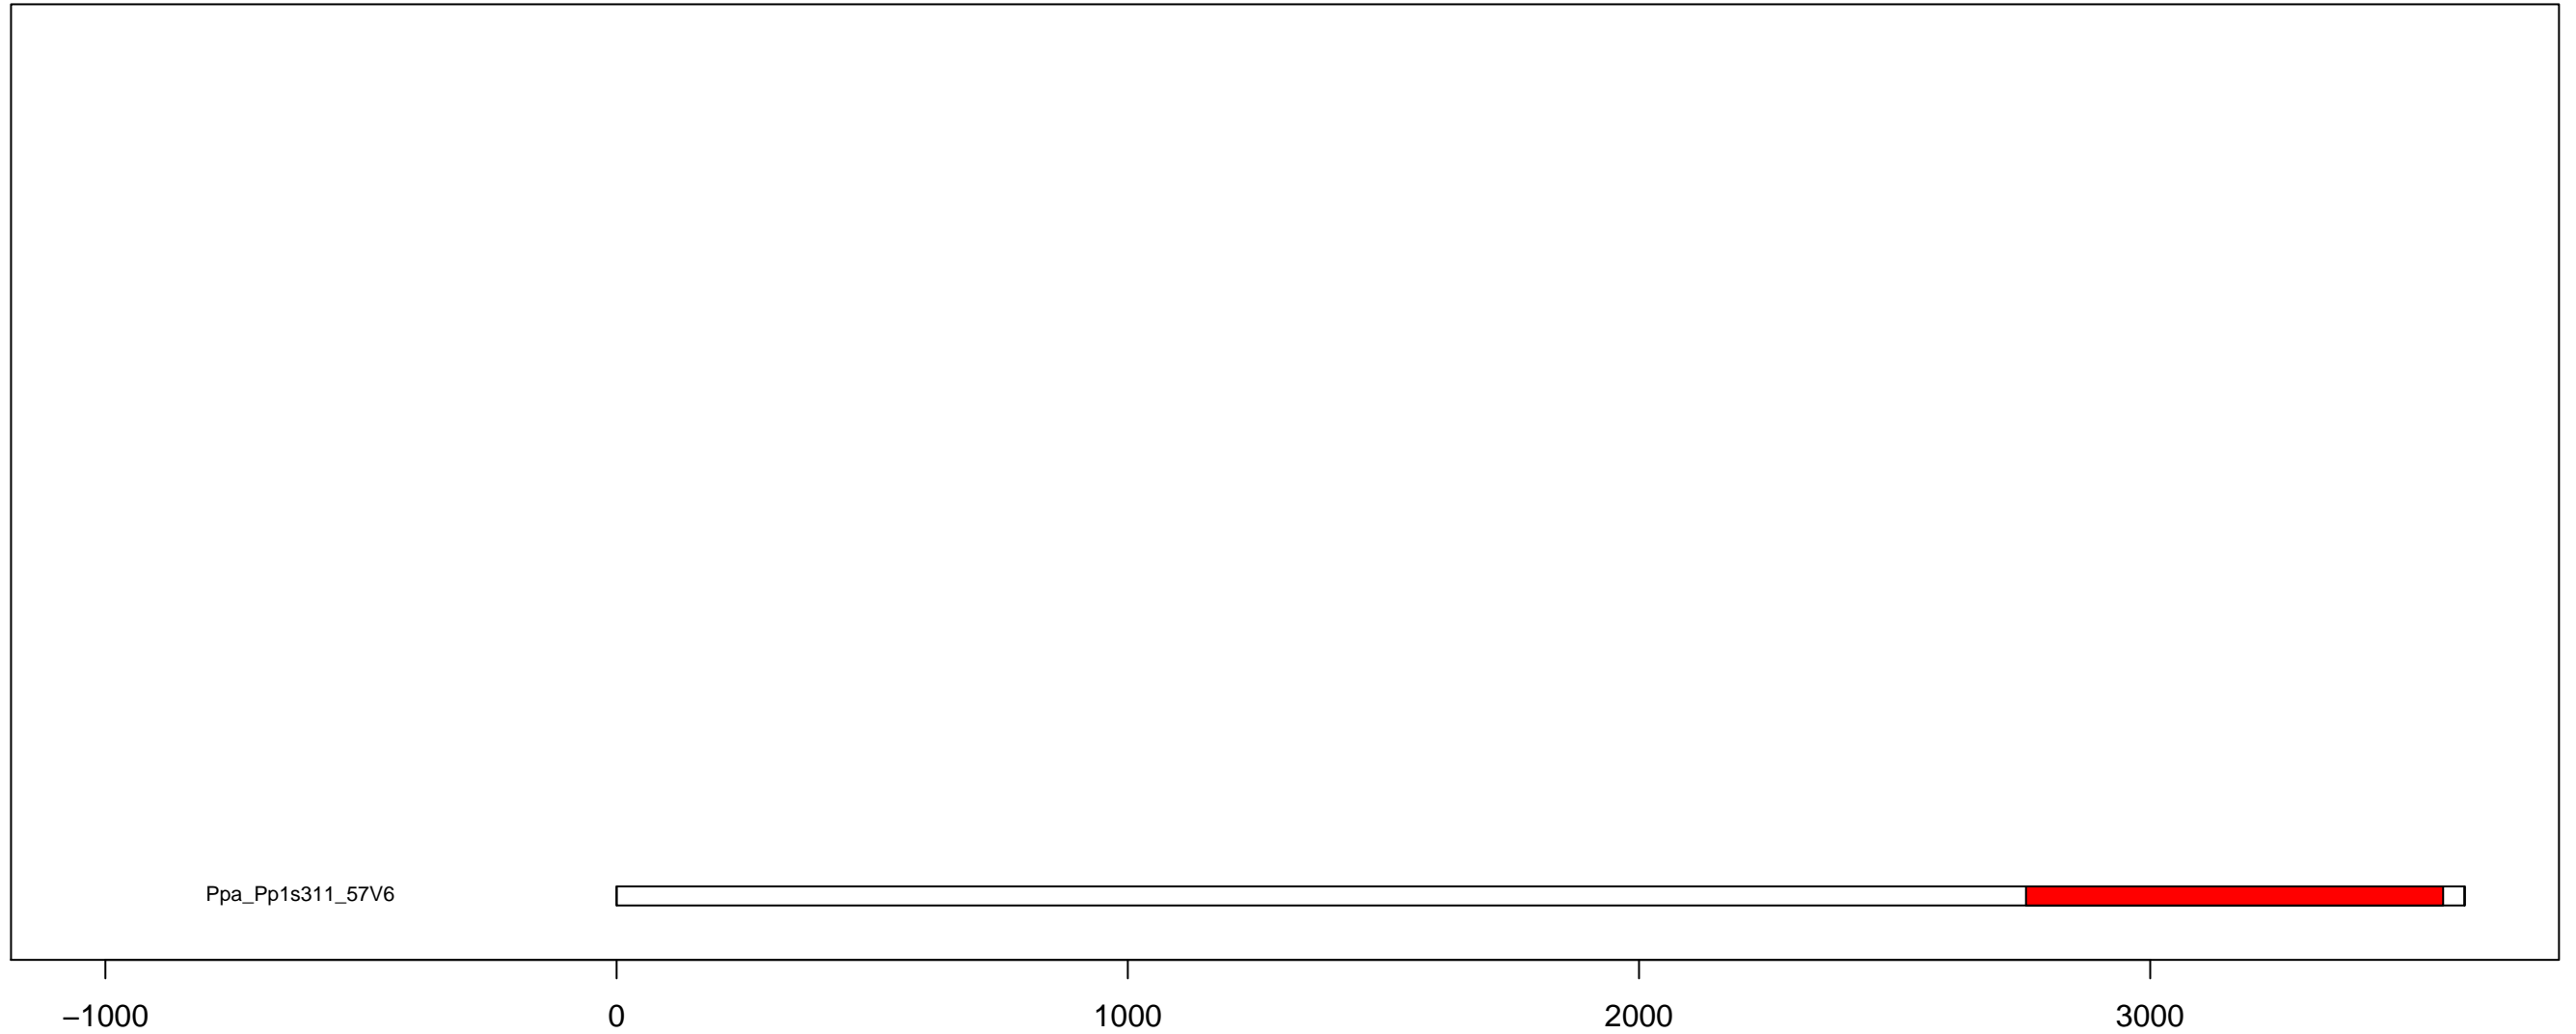

# P.pa RLK-Pelle\_LysM exon-intron and kinase domain diagram (all)

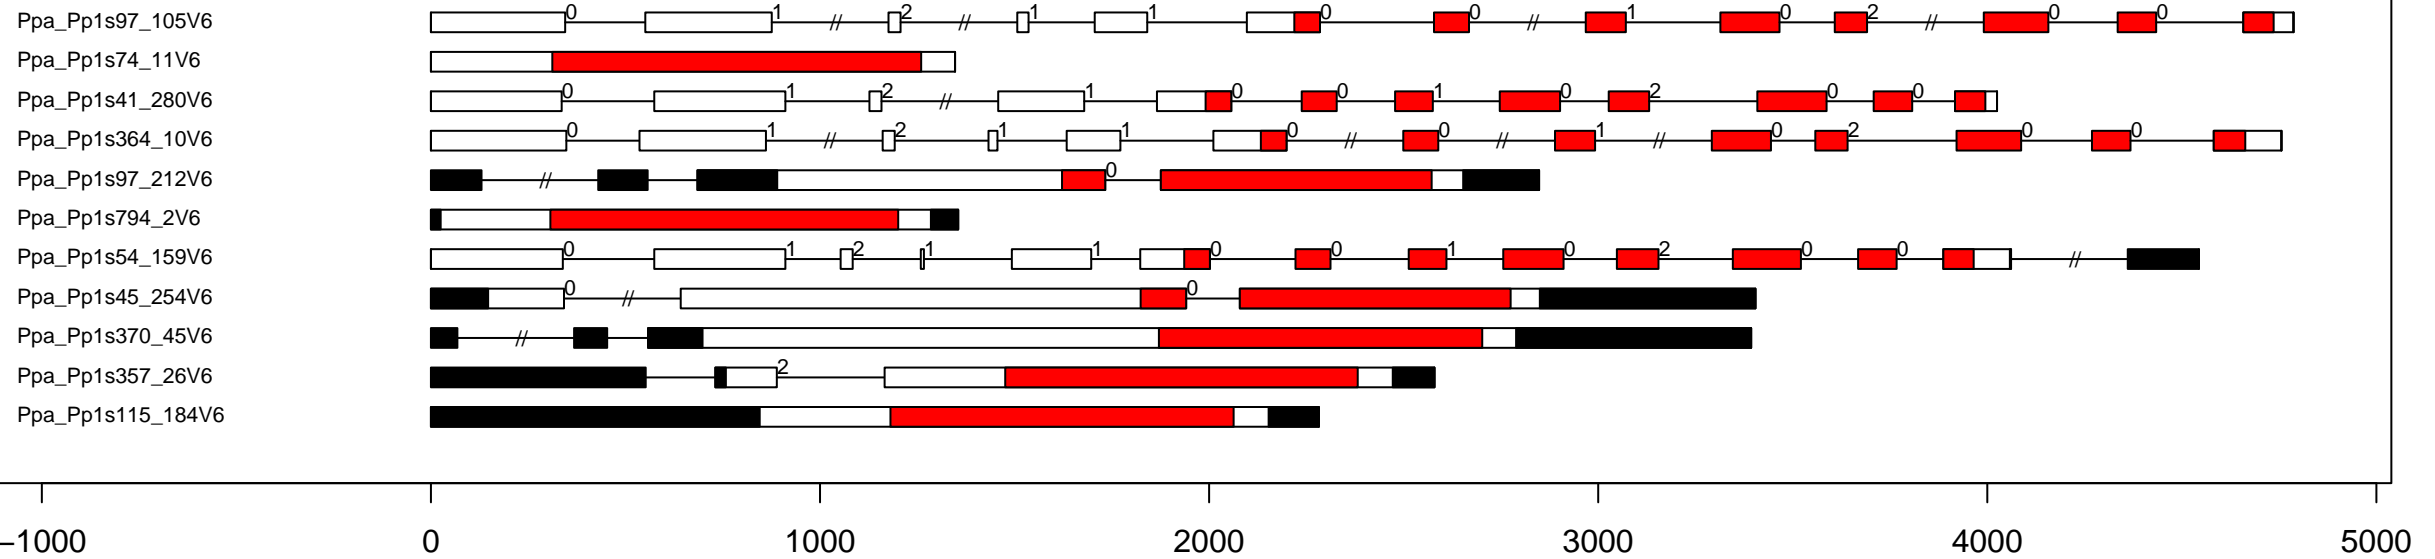

# P.pa RLK-Pelle\_PERK-1 exon-intron and kinase domain diagram (all)

Ppa\_Pp1s145\_144V6  
Ppa\_Pp1s83\_193V6  
Ppa\_Pp1s160\_128V6  
Ppa\_Pp1s134\_145V6  
Ppa\_Pp1s118\_23V6

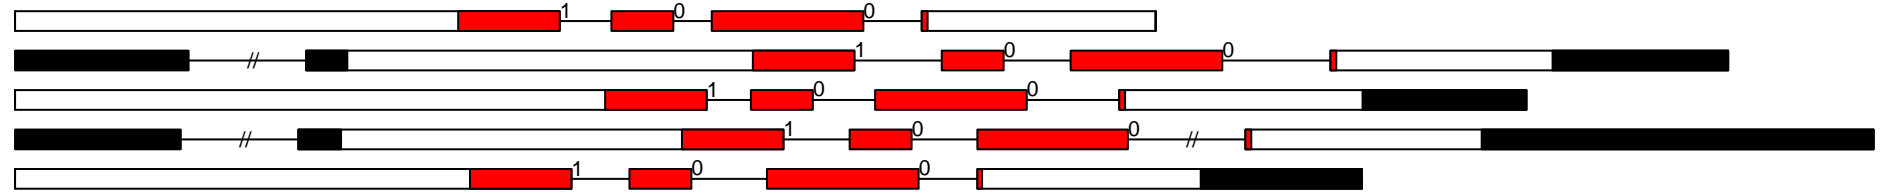

-1000

0

1000

2000

3000

4000

# P.pa RLK-Pelle\_PERK-2 exon-intron and kinase domain diagram (all)

Ppa\_Pp1s65\_158V6  
Ppa\_Pp1s533\_5V6  
Ppa\_Pp1s123\_164V6  
Ppa\_Pp1s59\_359V6  
Ppa\_Pp1s336\_36V6  
Ppa\_Pp1s136\_94V6

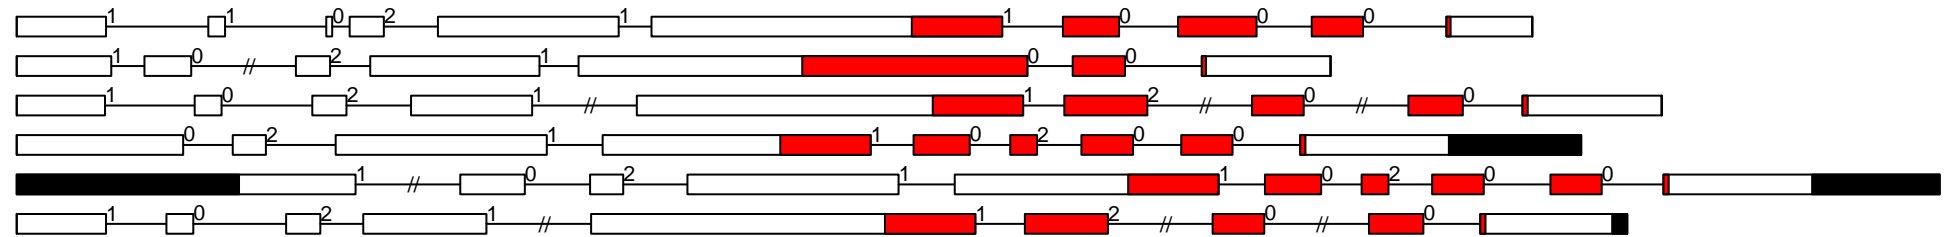

-1000

0

1000

2000

3000

4000

5000

P.pa RLK-Pelle\_Pp exon-intron and kinase domain diagram (all)

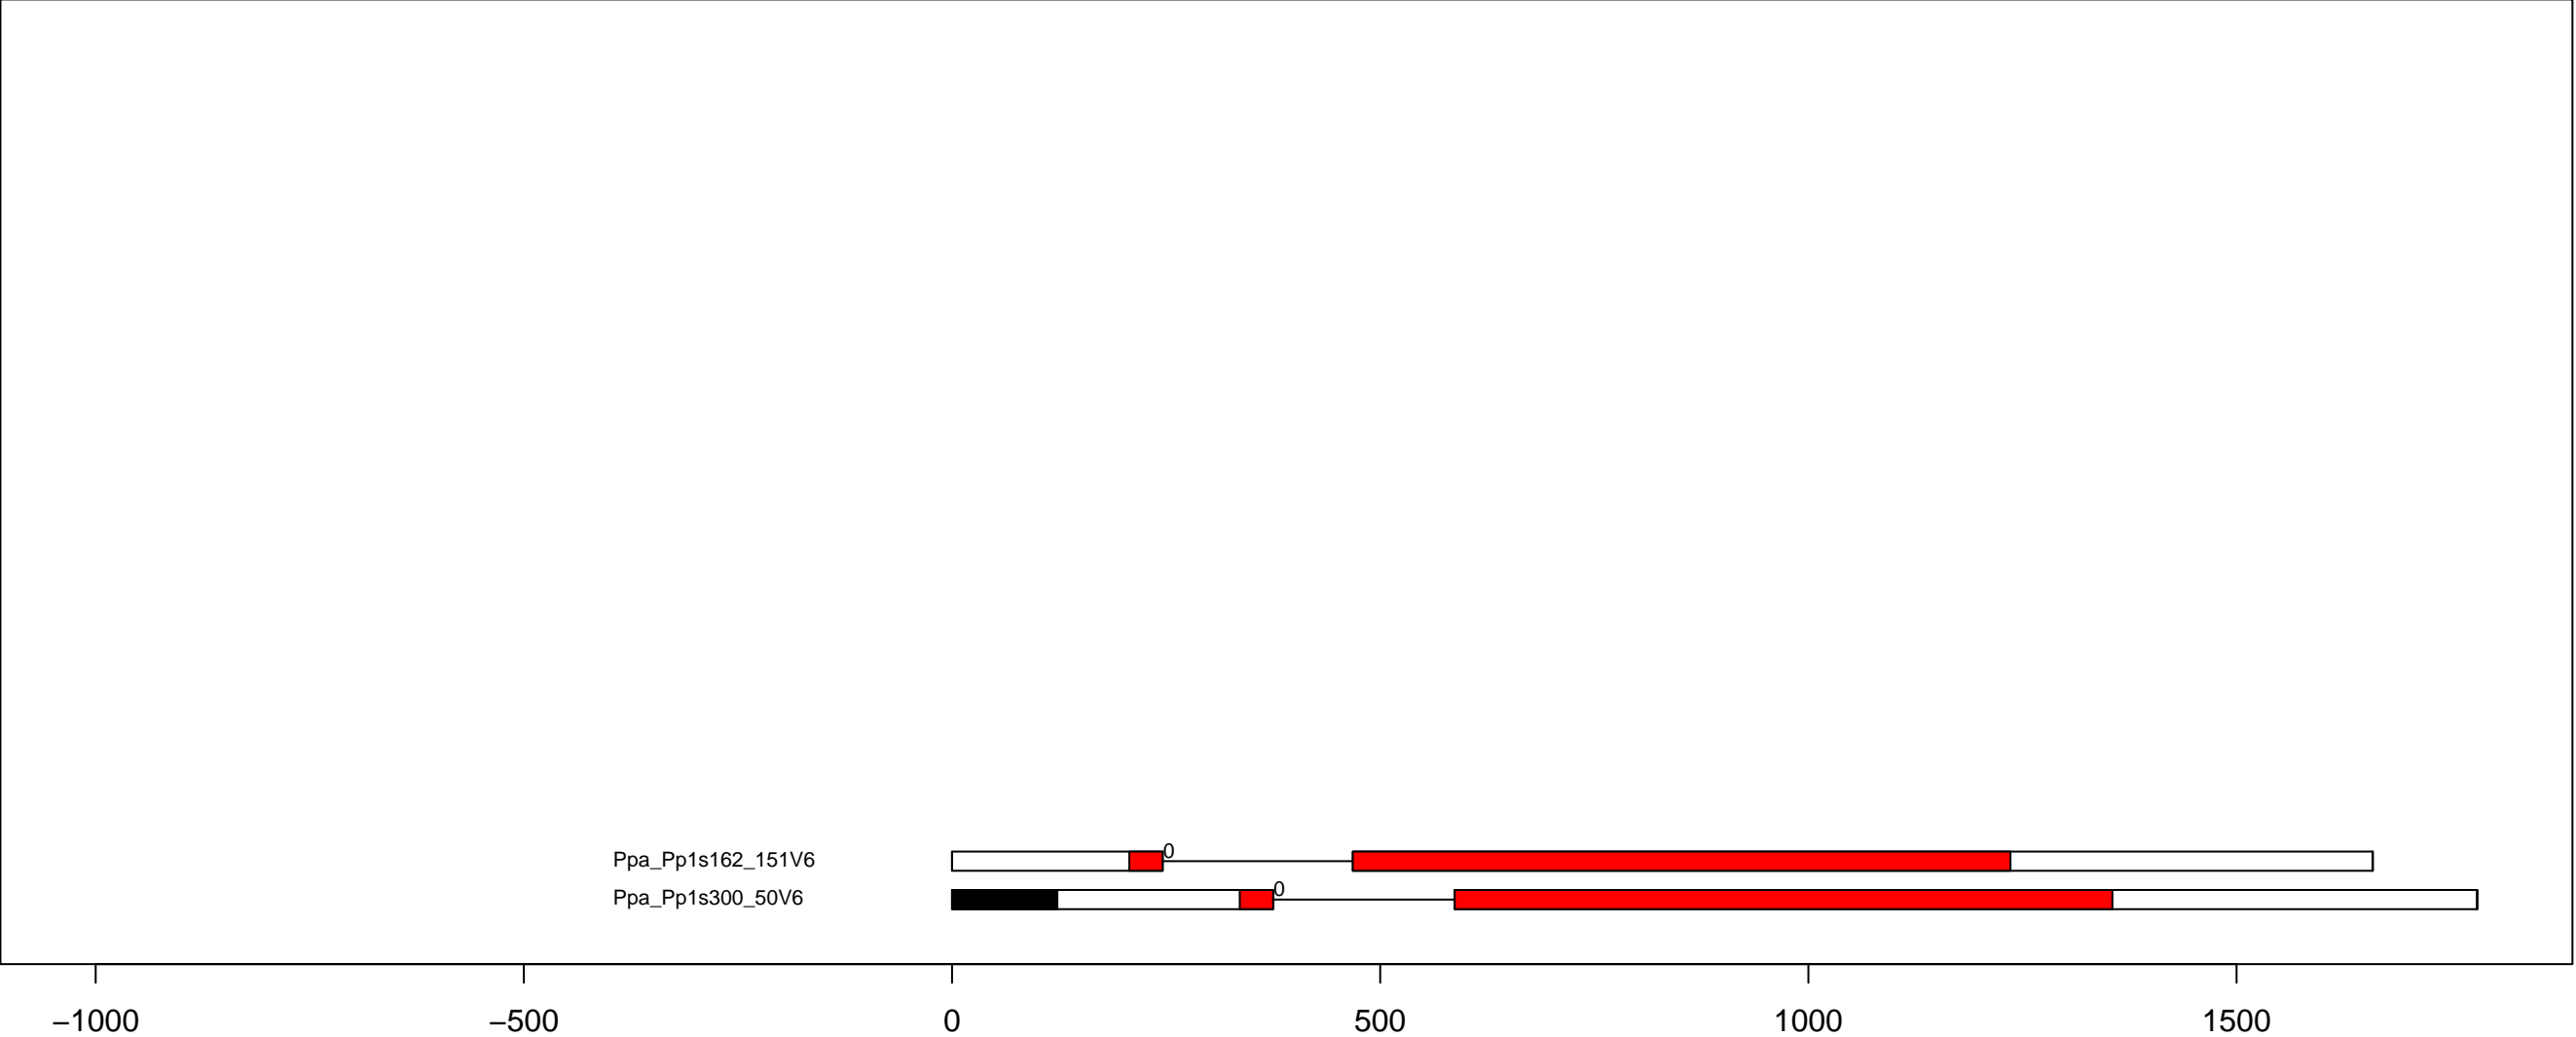

# P.pa RLK-Pelle\_RKF3 exon-intron and kinase domain diagram (all)

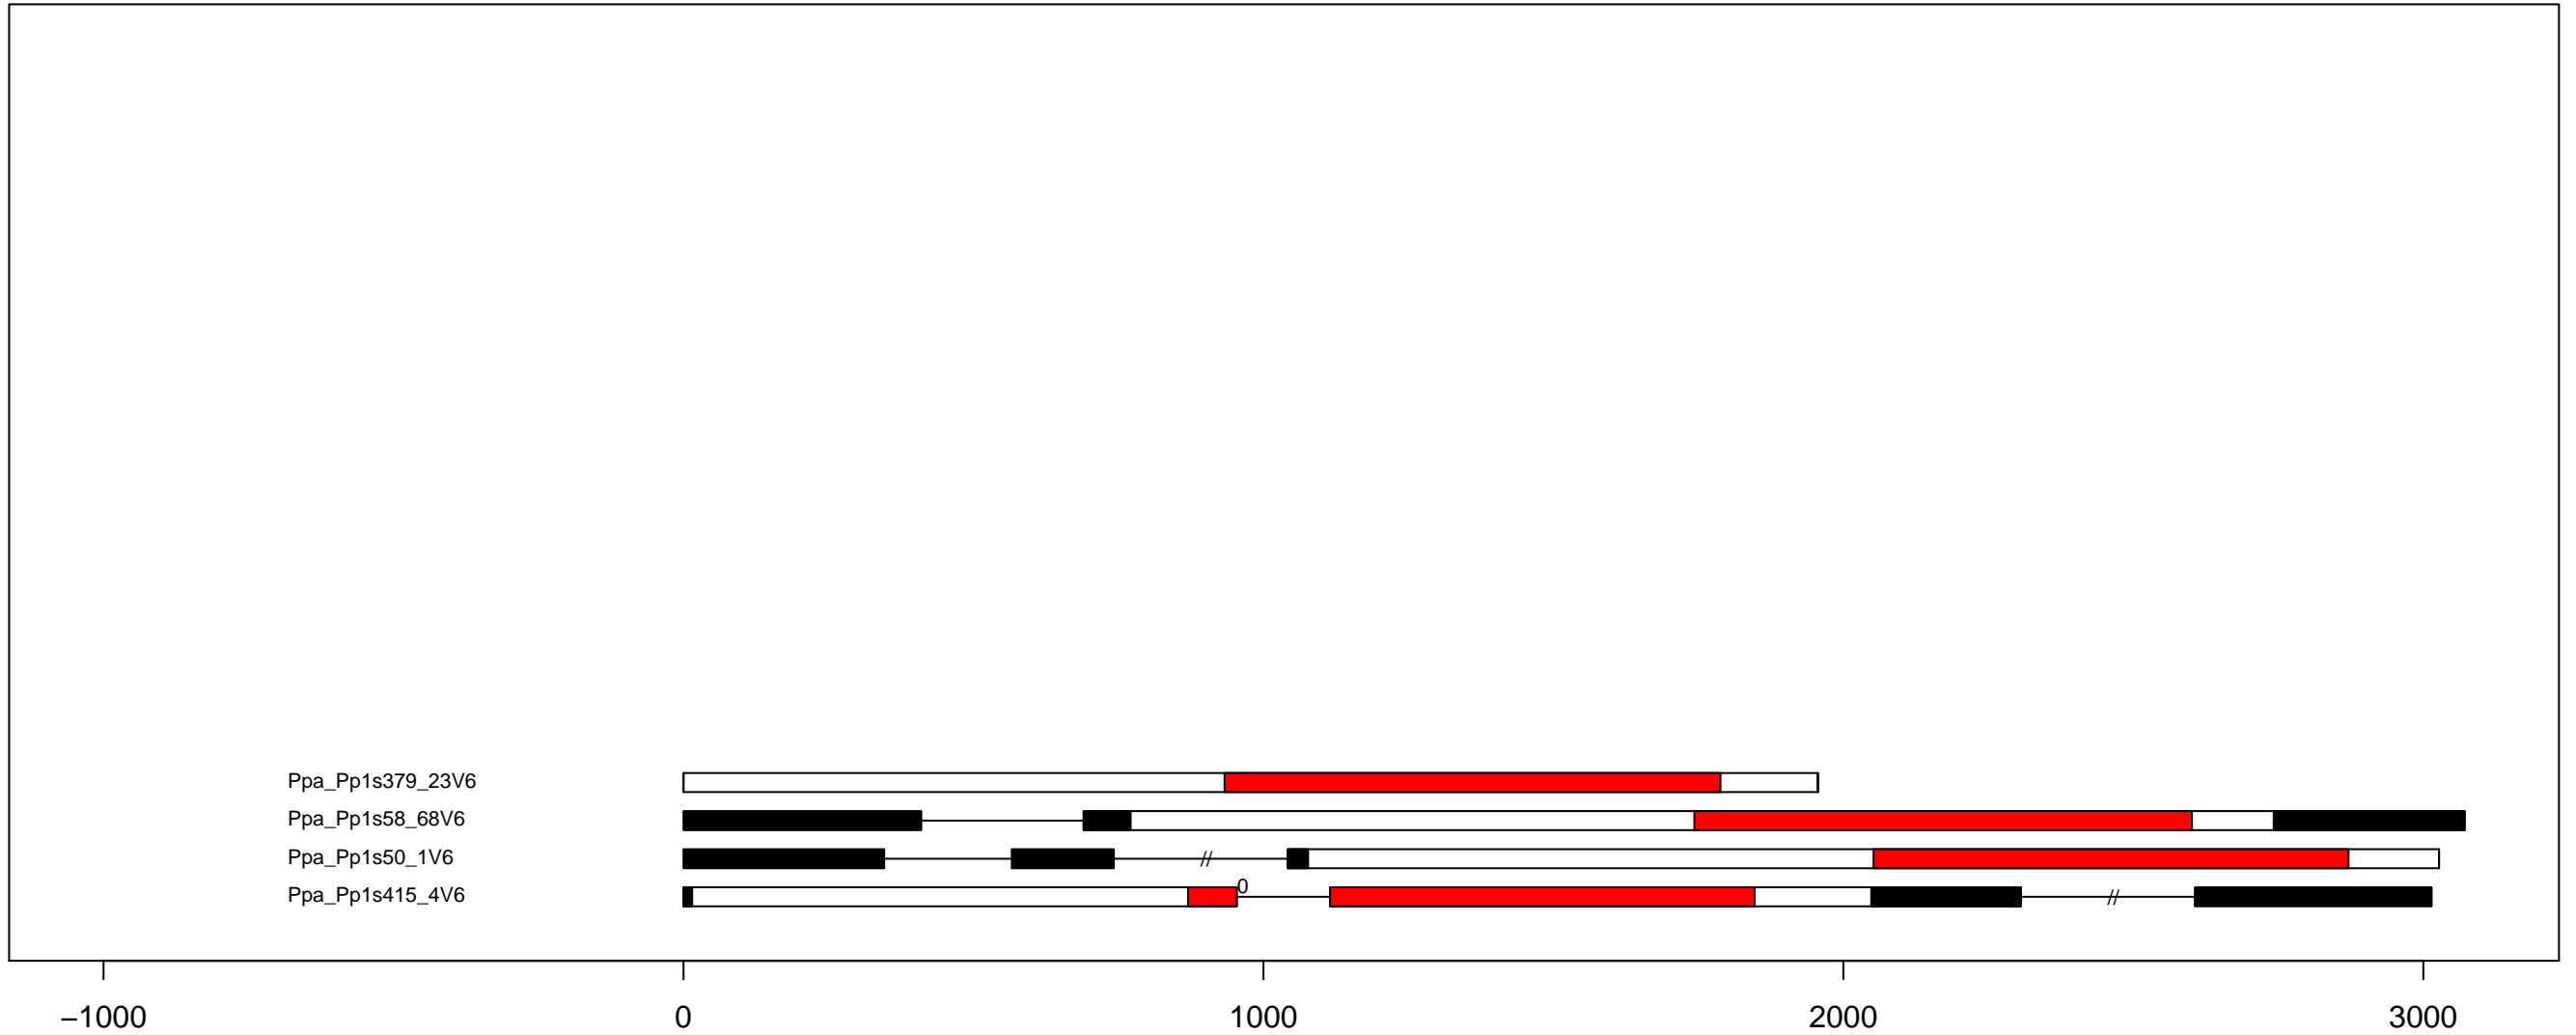

# P.pa RLK-Pelle\_RLCK-II exon-intron and kinase domain diagram (all)

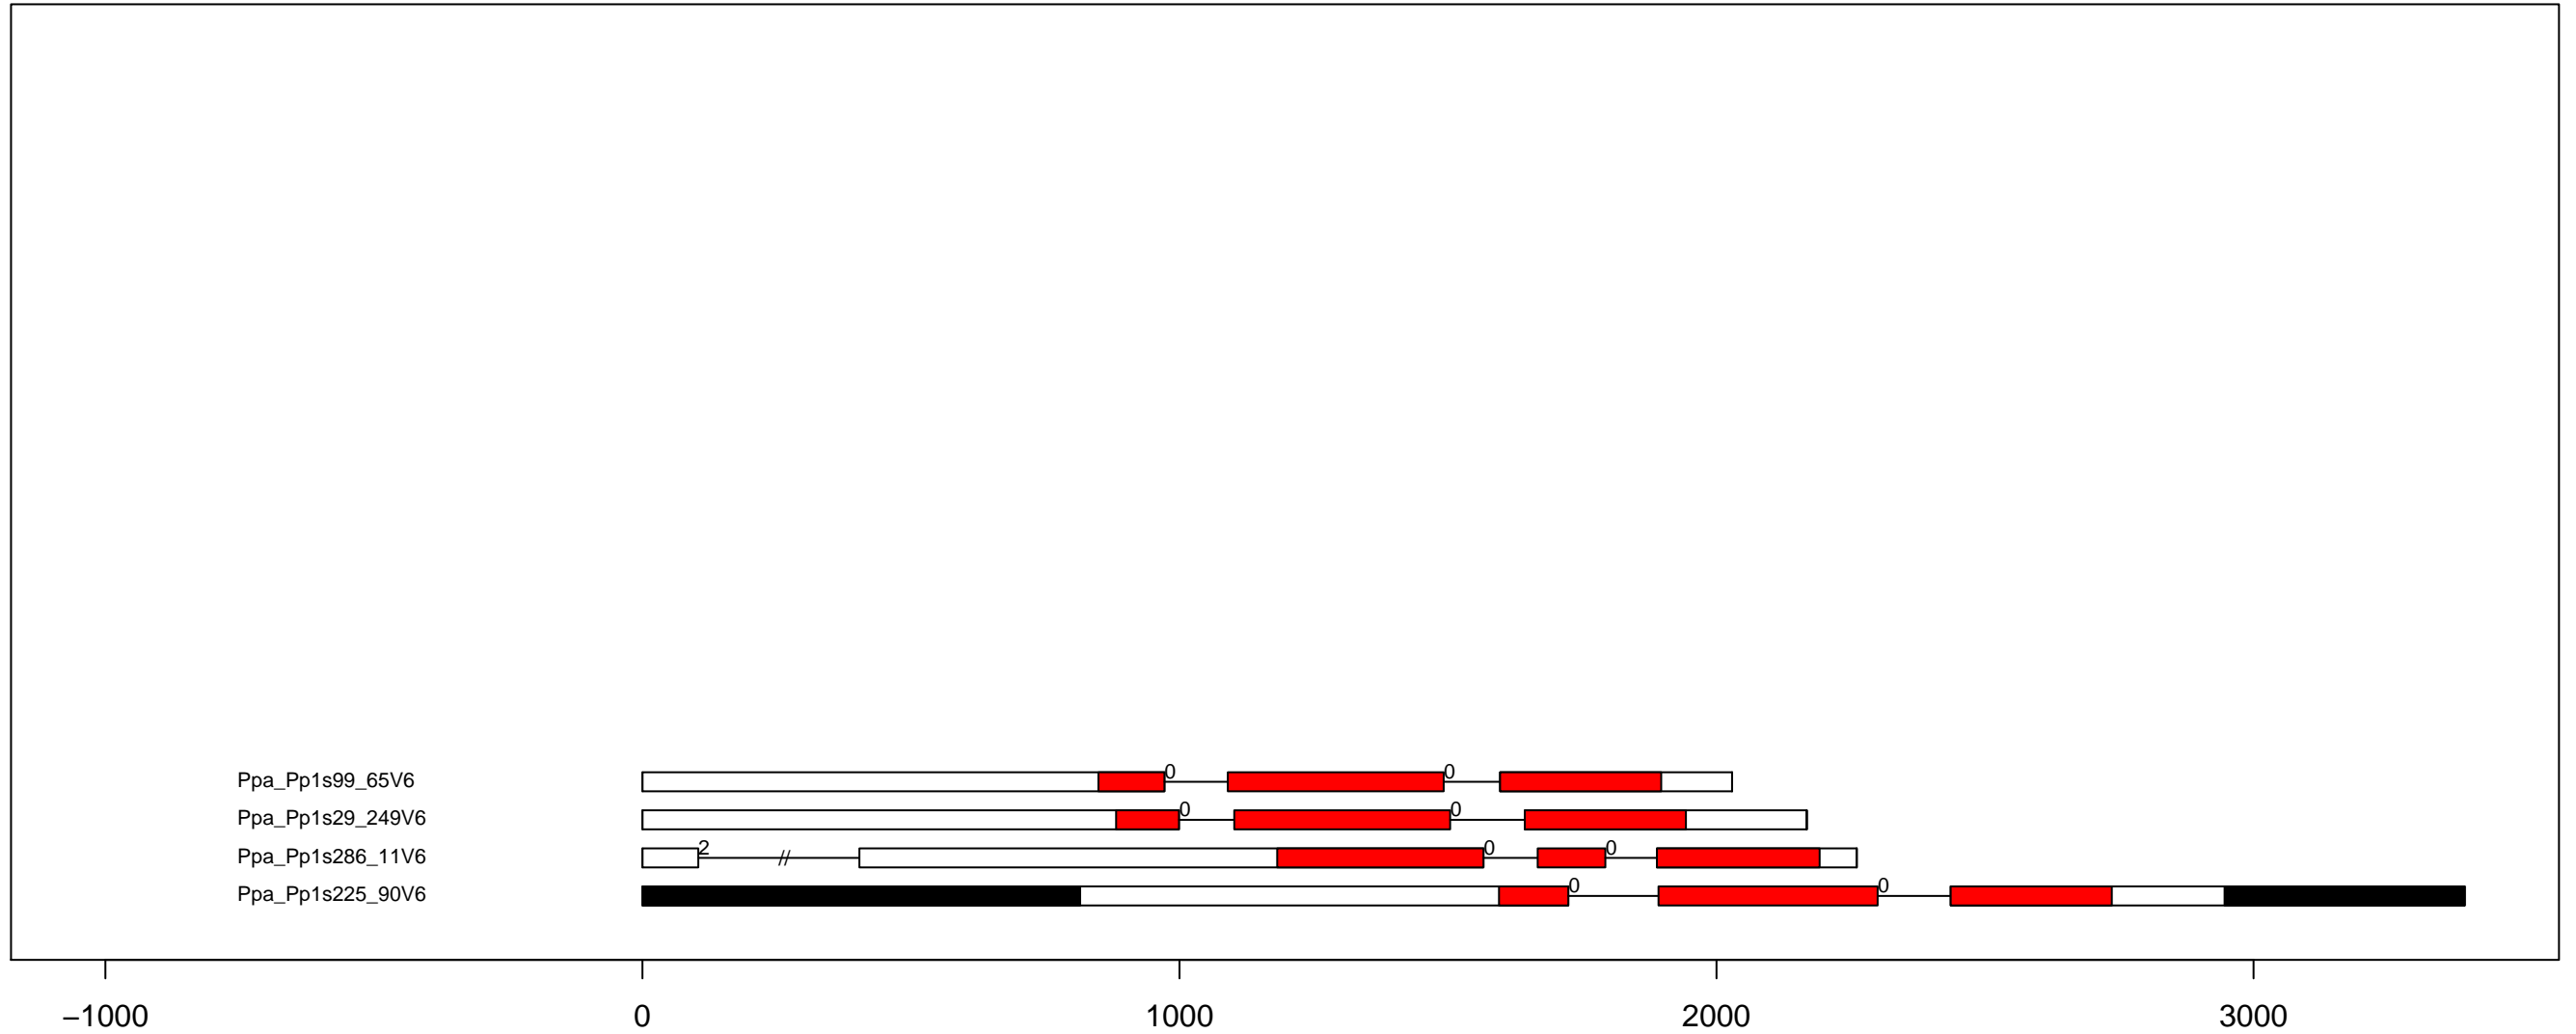

**P.pa RLK-Pelle\_RLCK-IV exon-intron and kinase domain diagram (all)**

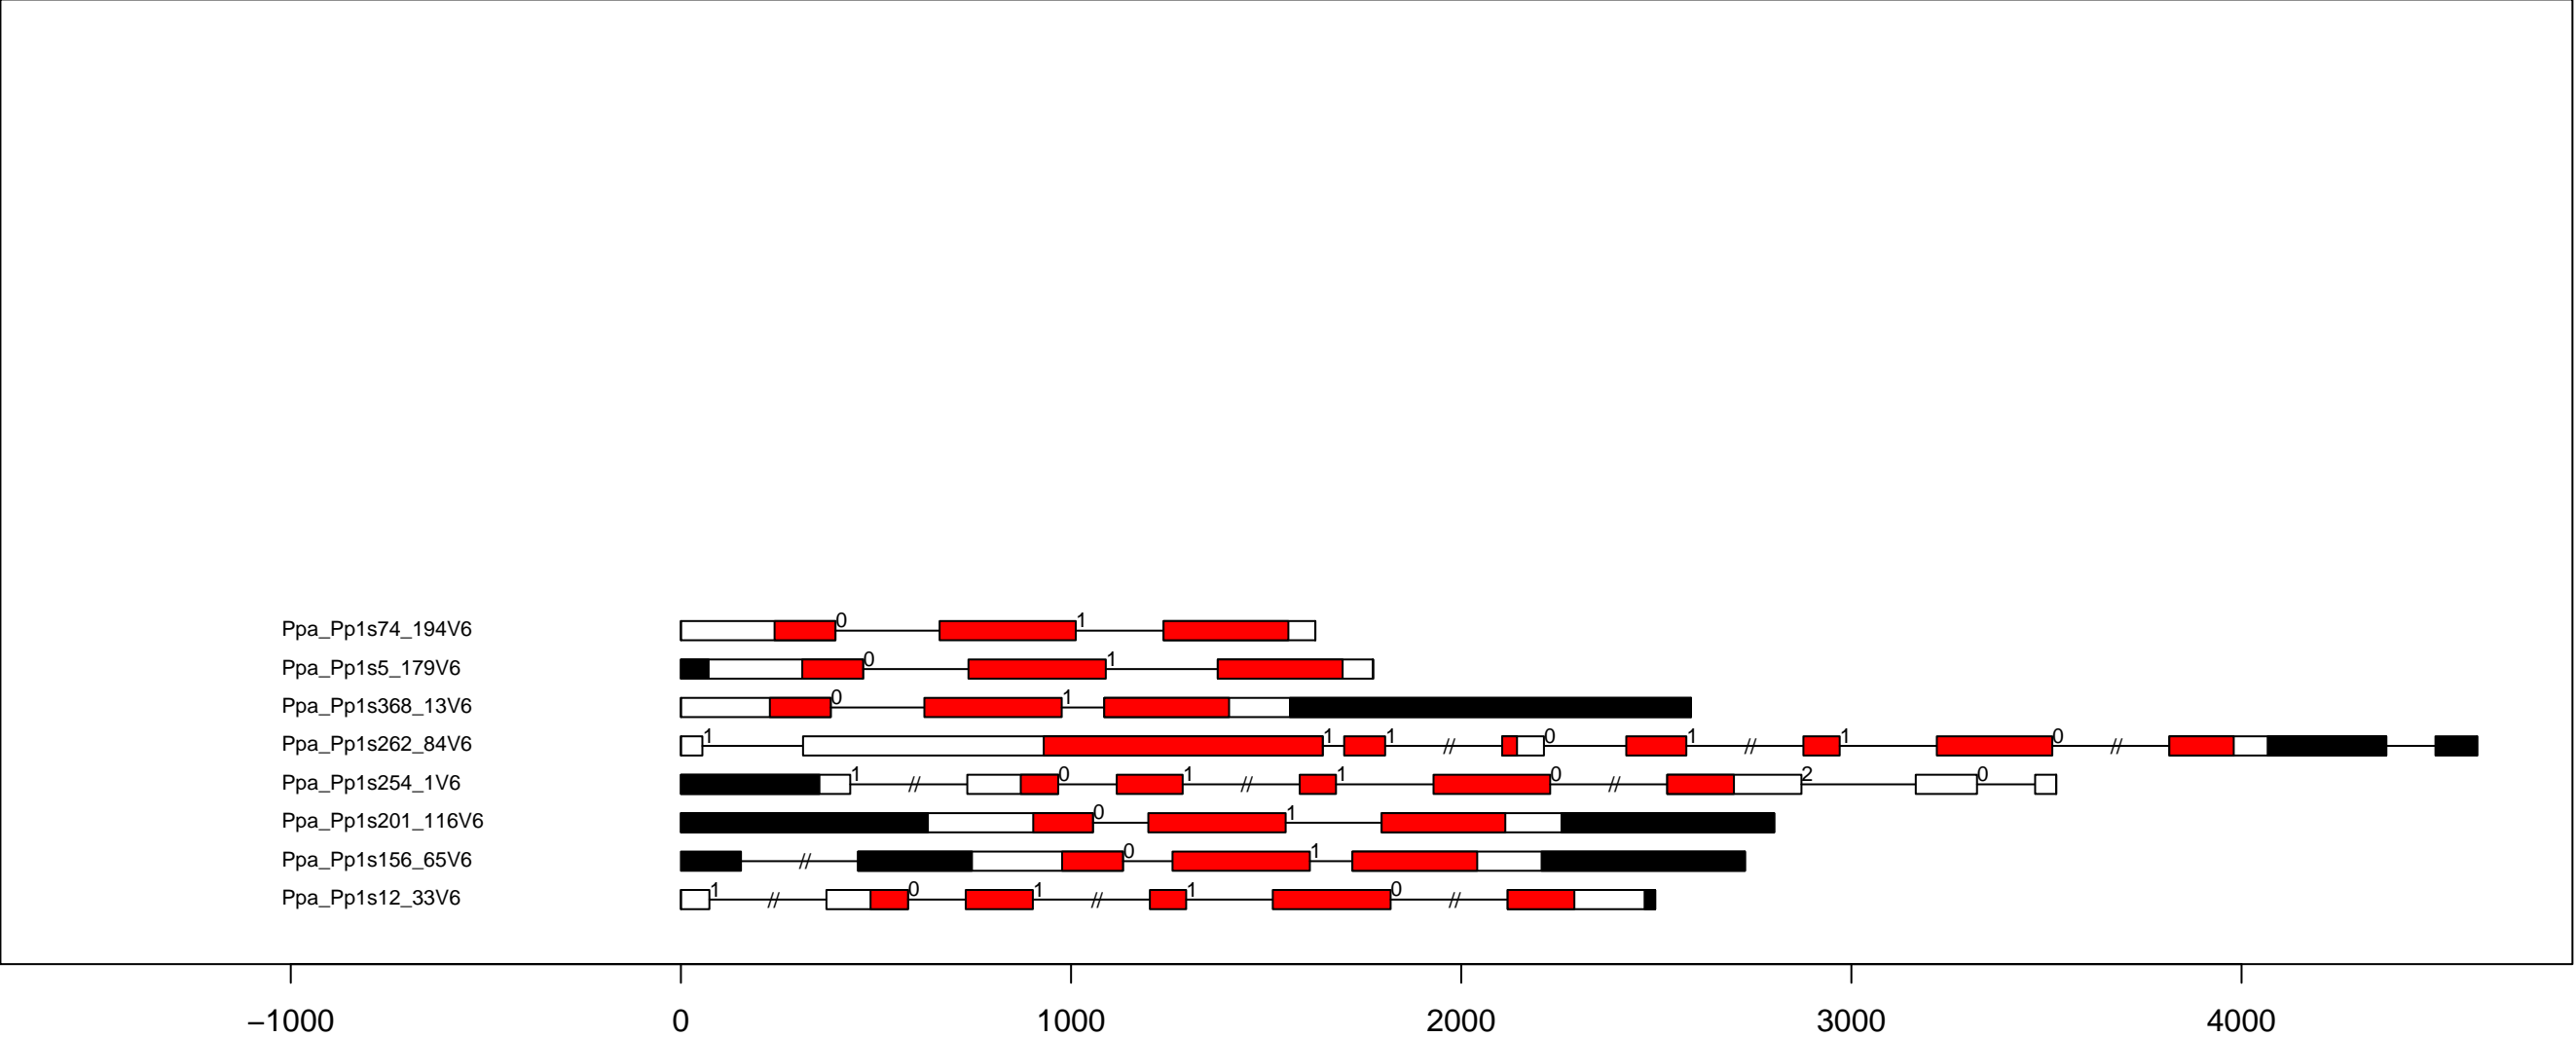





# P.pa RLK-Pelle\_RLCK-VIIa-1 exon-intron and kinase domain diagram (all)

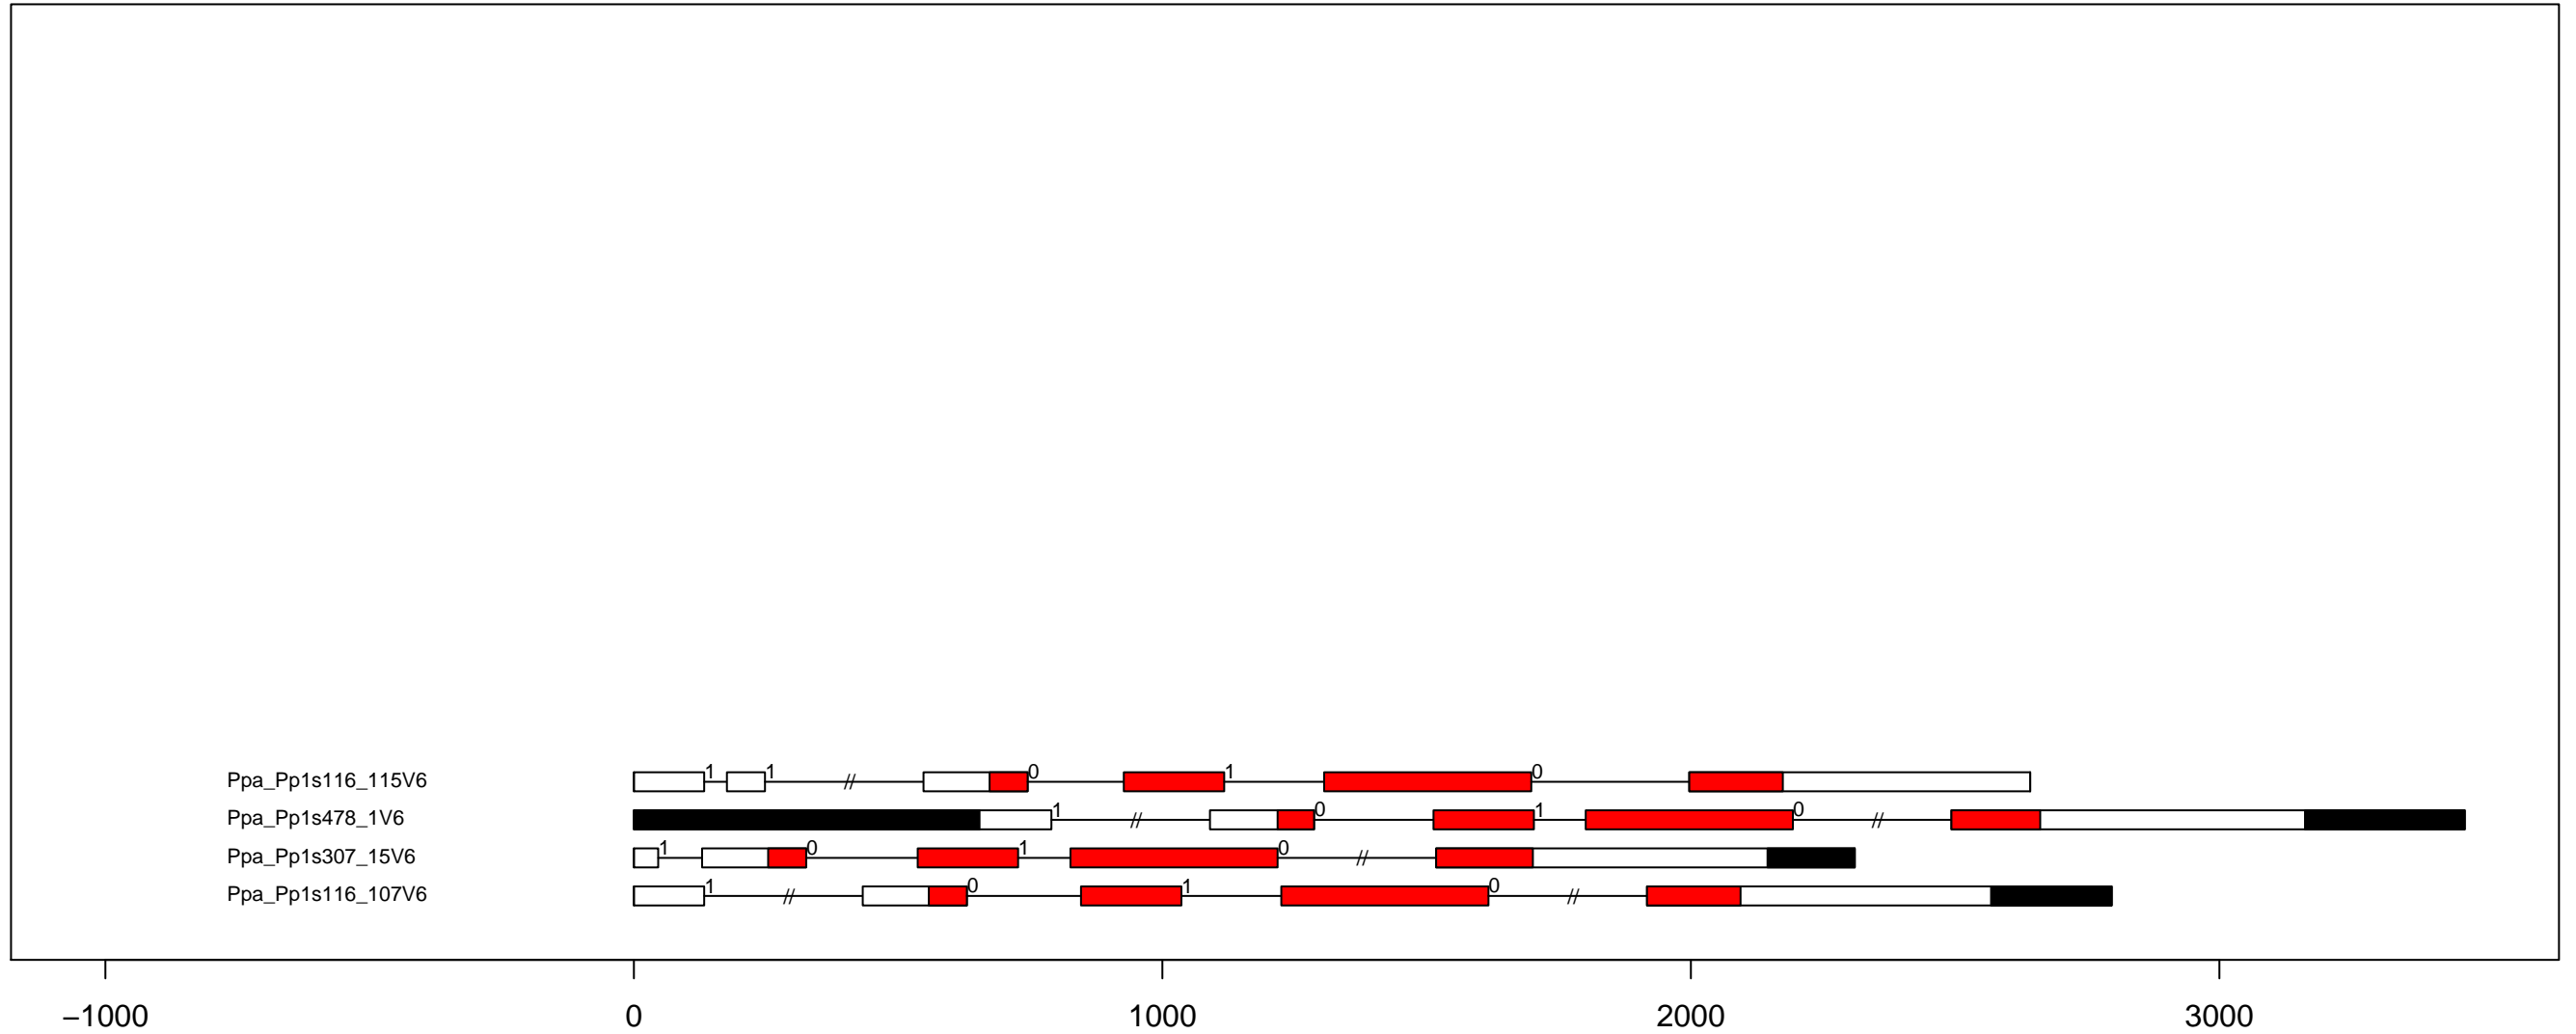

# P.pa RLK-Pelle\_RLCK-VIIa-2 exon-intron and kinase domain diagram (all)

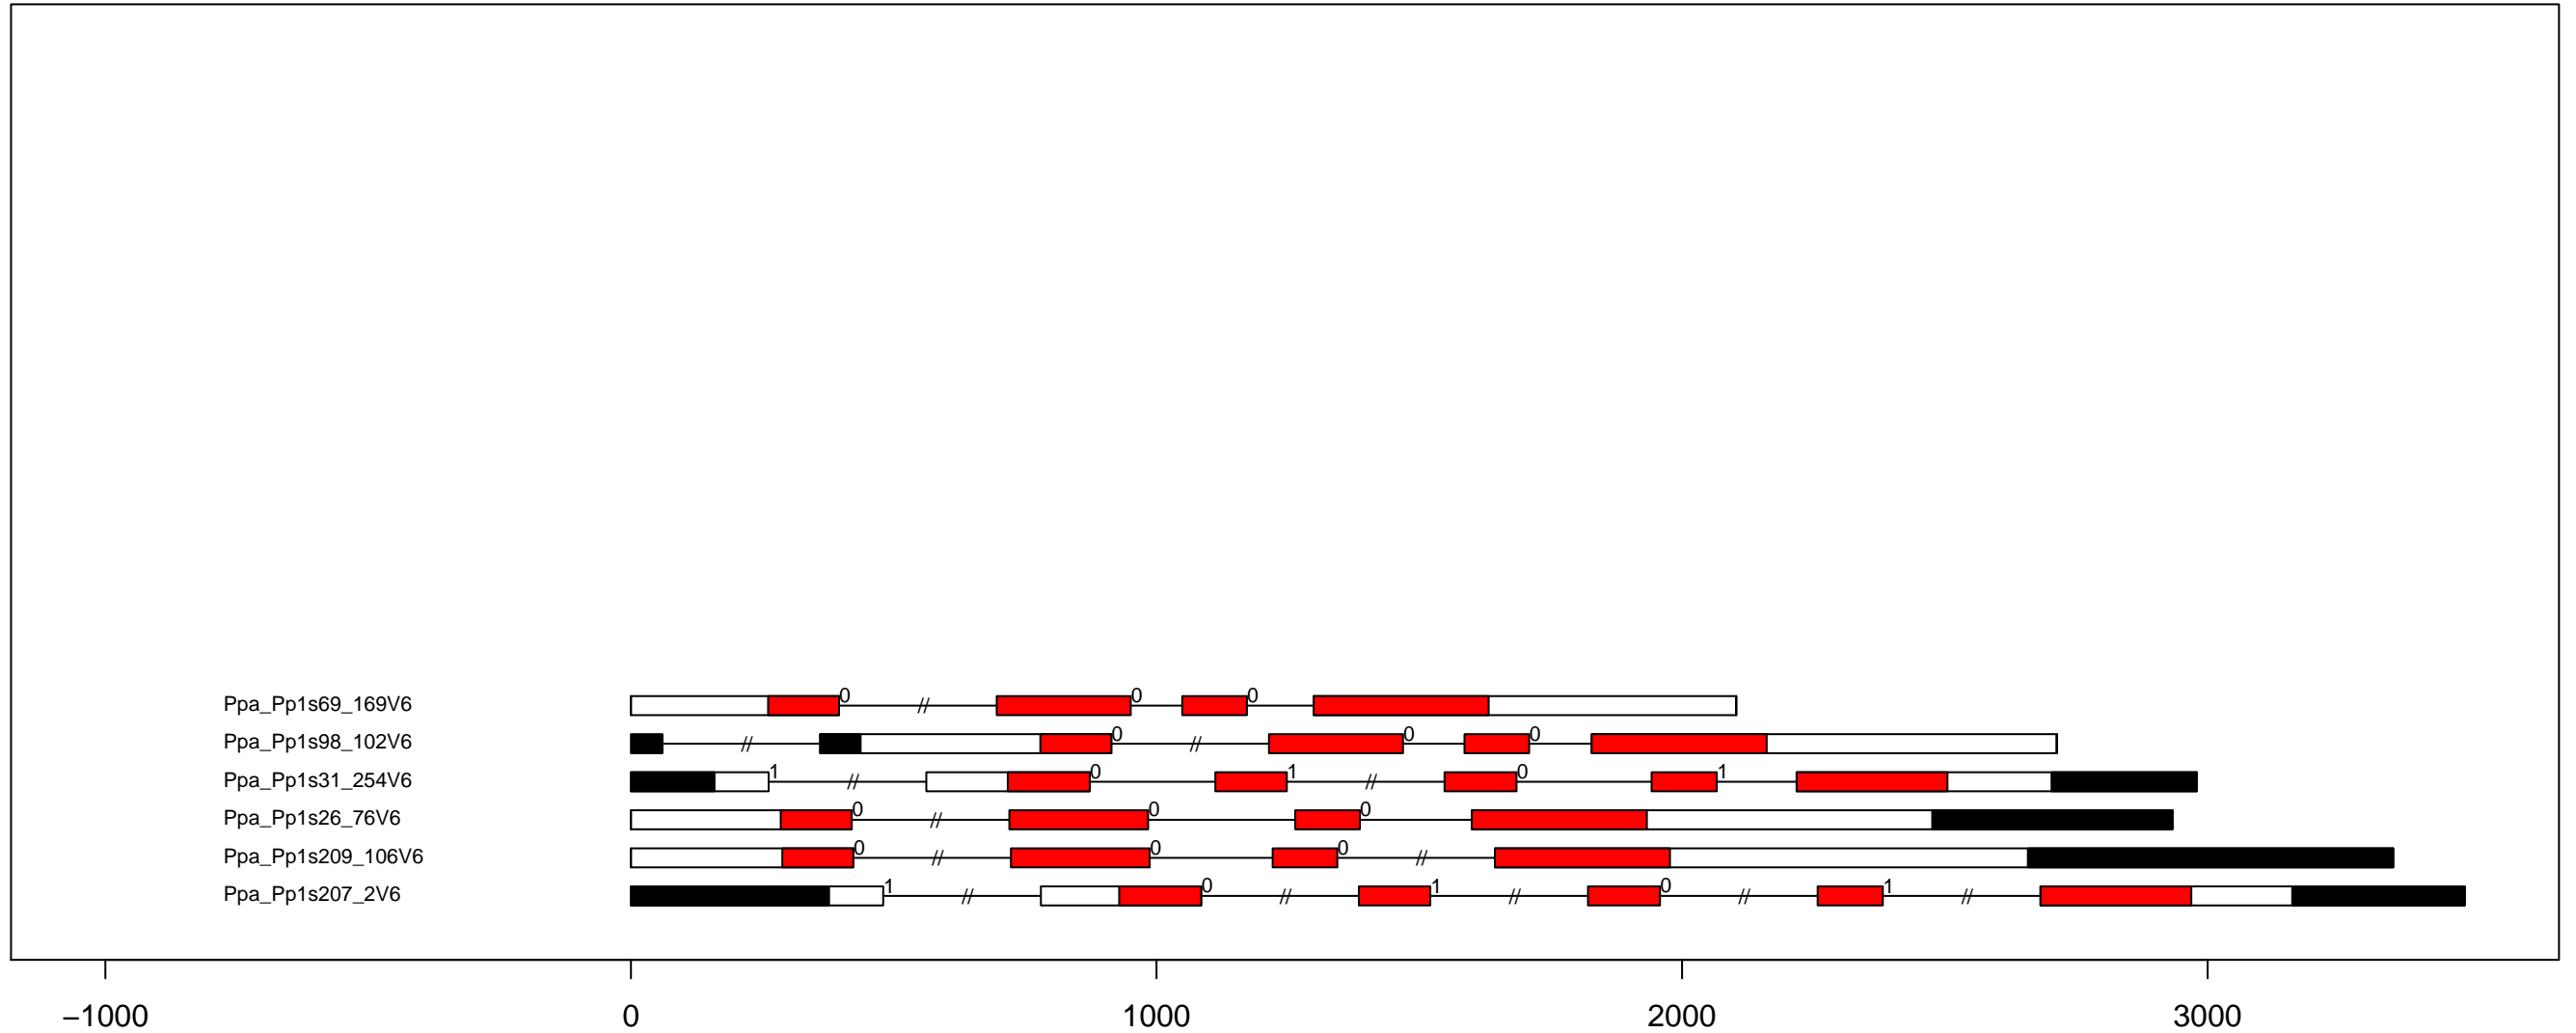

# P.pa RLK-Pelle\_RLCK-VIII exon-intron and kinase domain diagram (all)

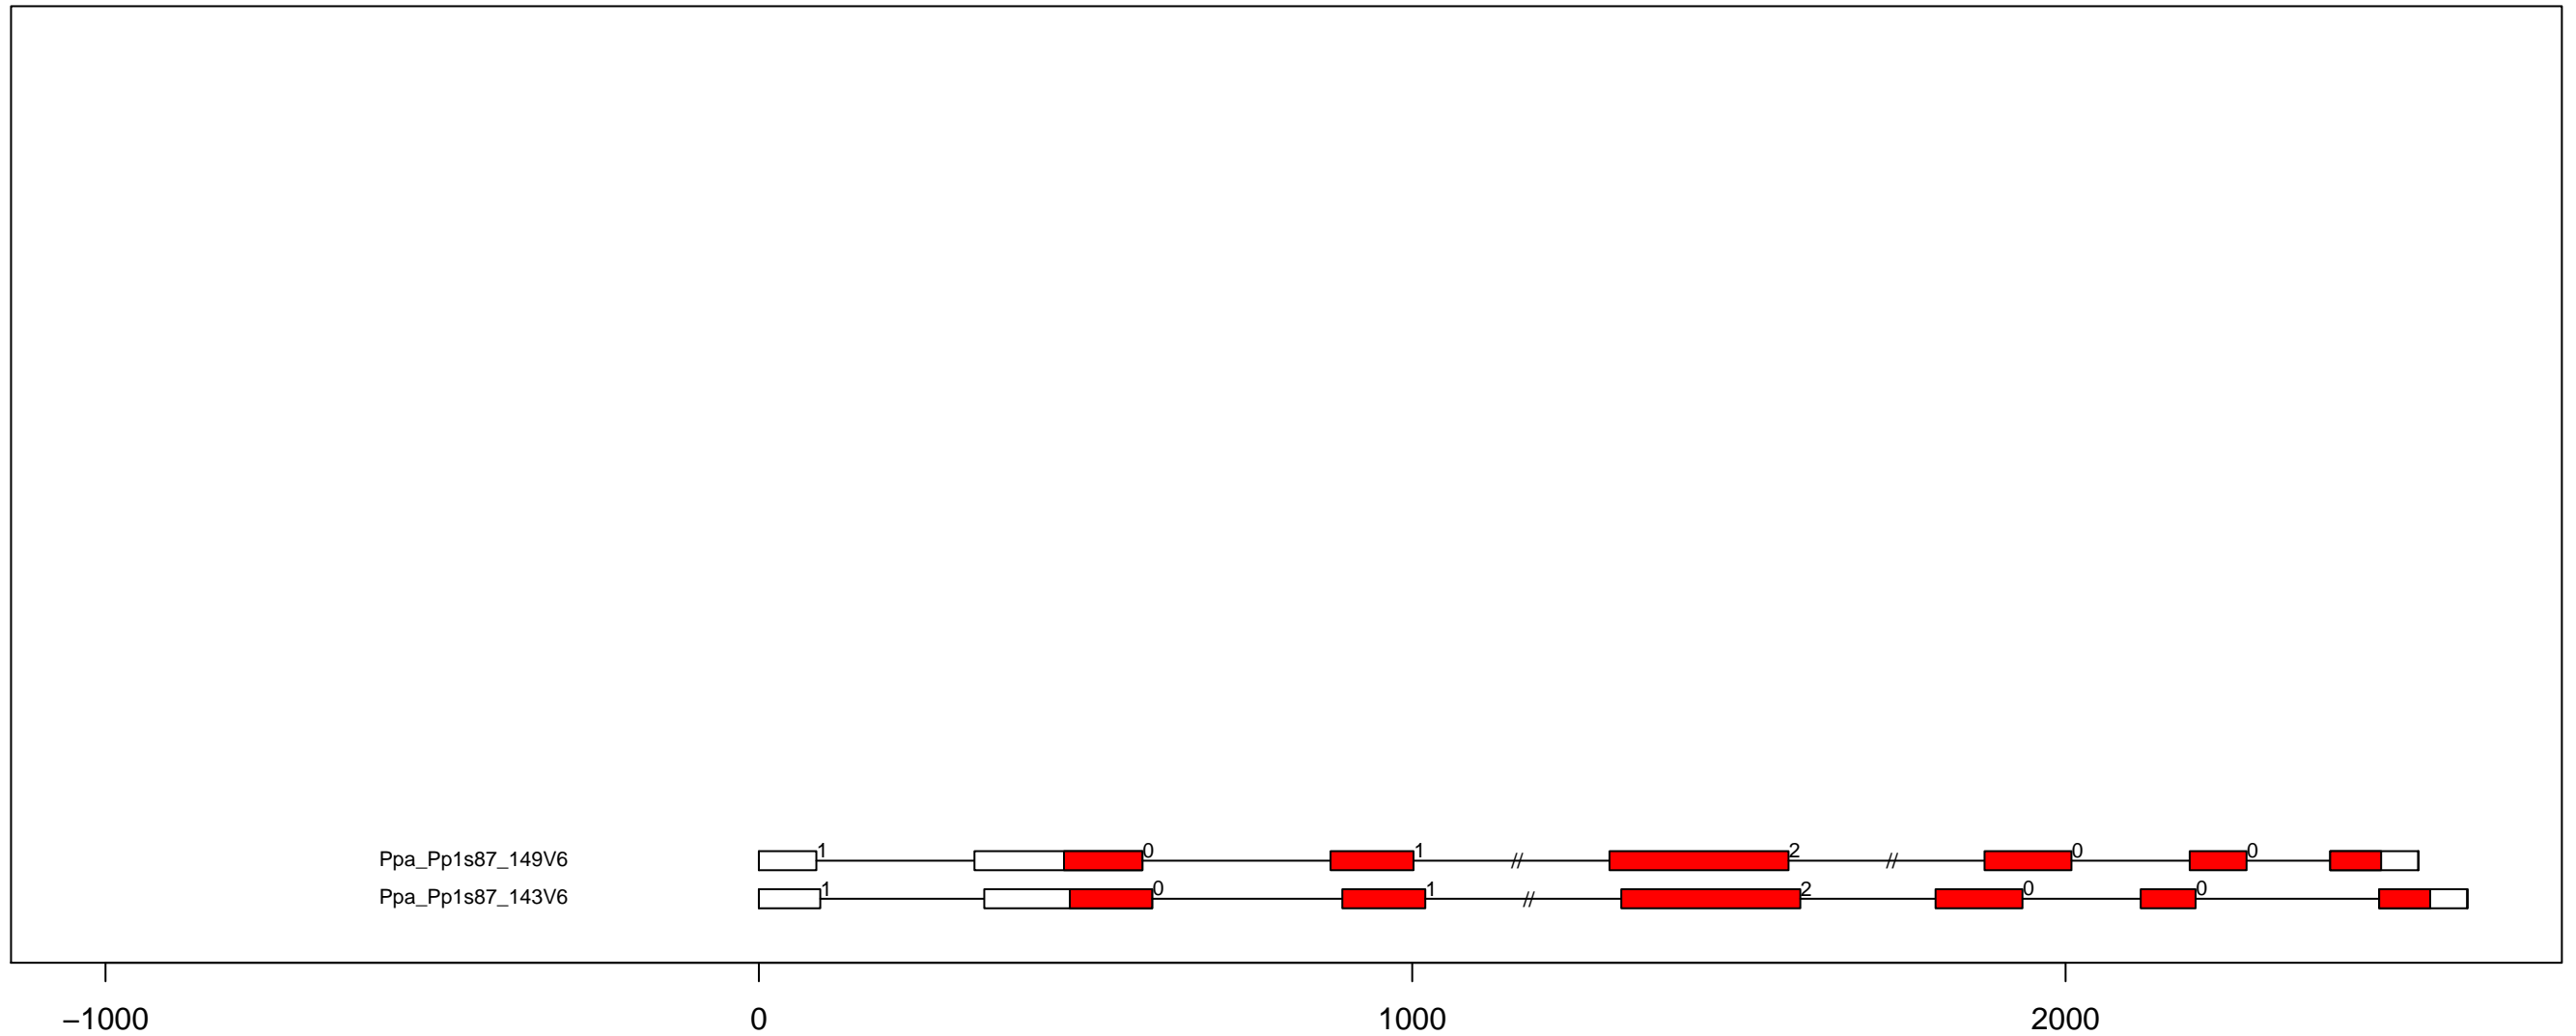

P.pa RLK-Pelle\_RLCK-VI exon-intron and kinase domain diagram (all)

- Ppa\_Pp1s9\_56V6
- Ppa\_Pp1s36\_280V6
- Ppa\_Pp1s215\_104V6
- Ppa\_Pp1s114\_107V6
- Ppa\_Pp1s111\_81V6
- Ppa\_Pp1s249\_93V6
- Ppa\_Pp1s242\_29V6
- Ppa\_Pp1s226\_111V6
- Ppa\_Pp1s16\_314V6

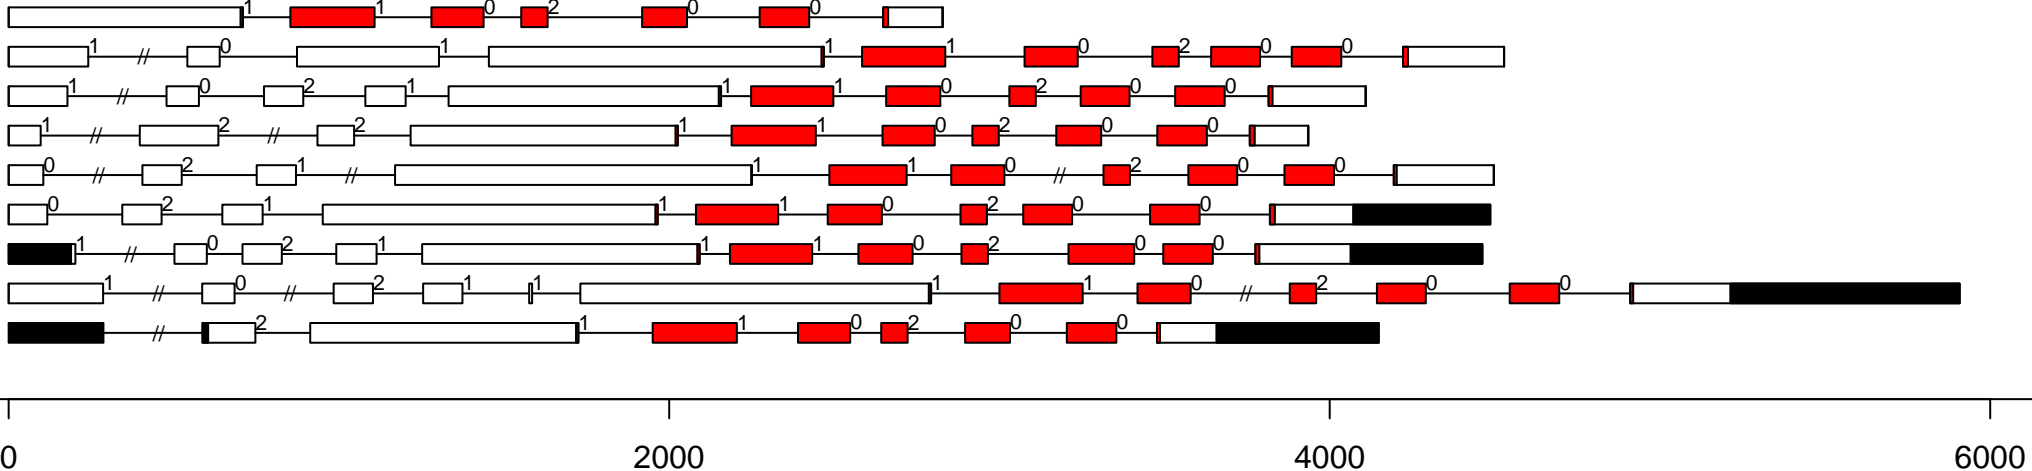

# P.pa RLK-Pelle\_RLCK-V exon-intron and kinase domain diagram (all)

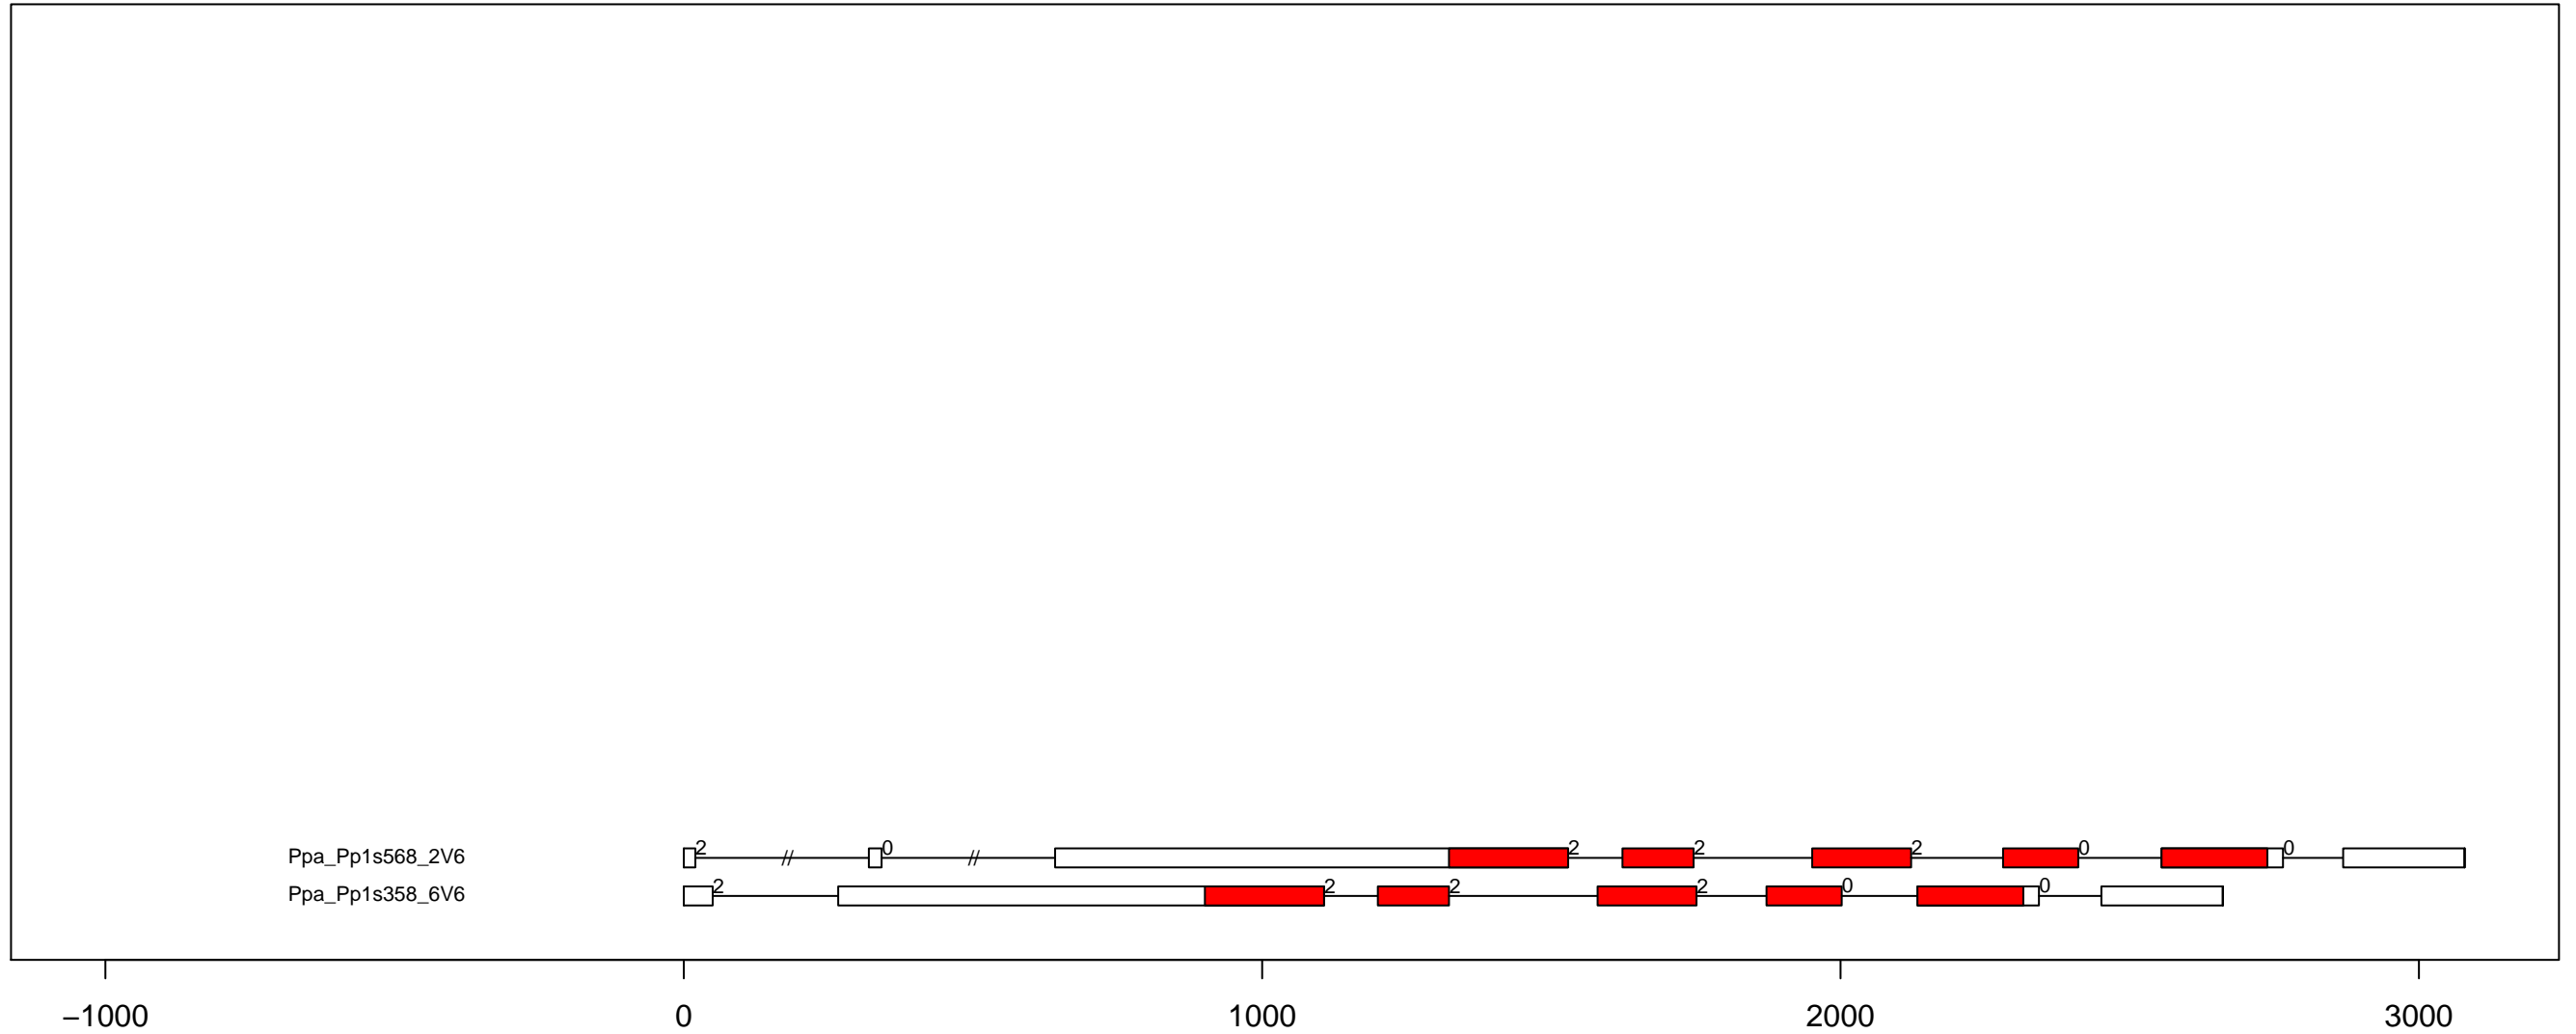

# P.pa RLK-Pelle\_RLCK-XII-1 exon-intron and kinase domain diagram (all)

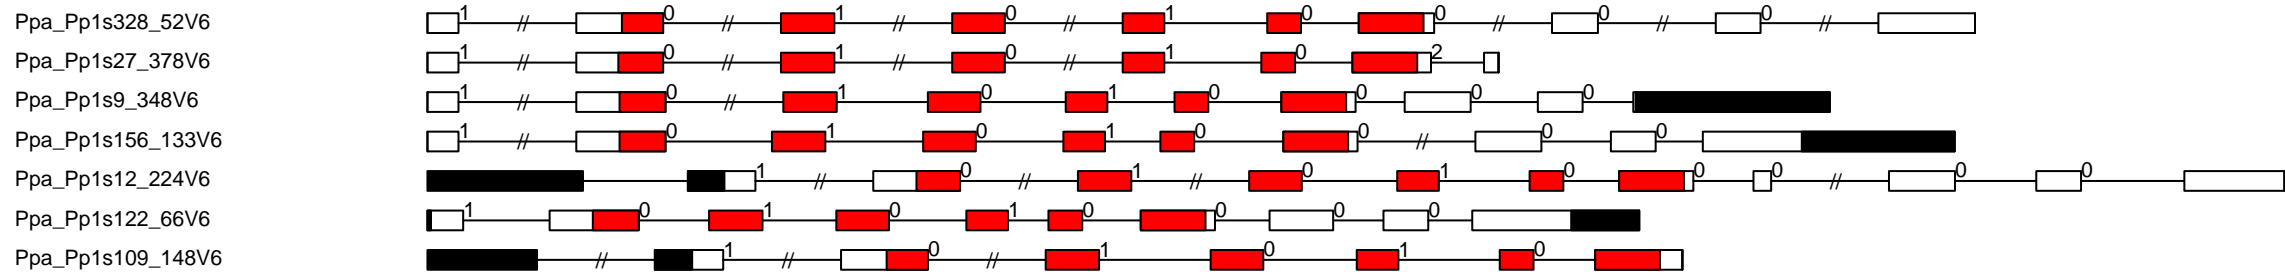

-1000

0

1000

2000

3000

4000

# P.pa RLK-Pelle\_RLCK-XI exon-intron and kinase domain diagram (all)

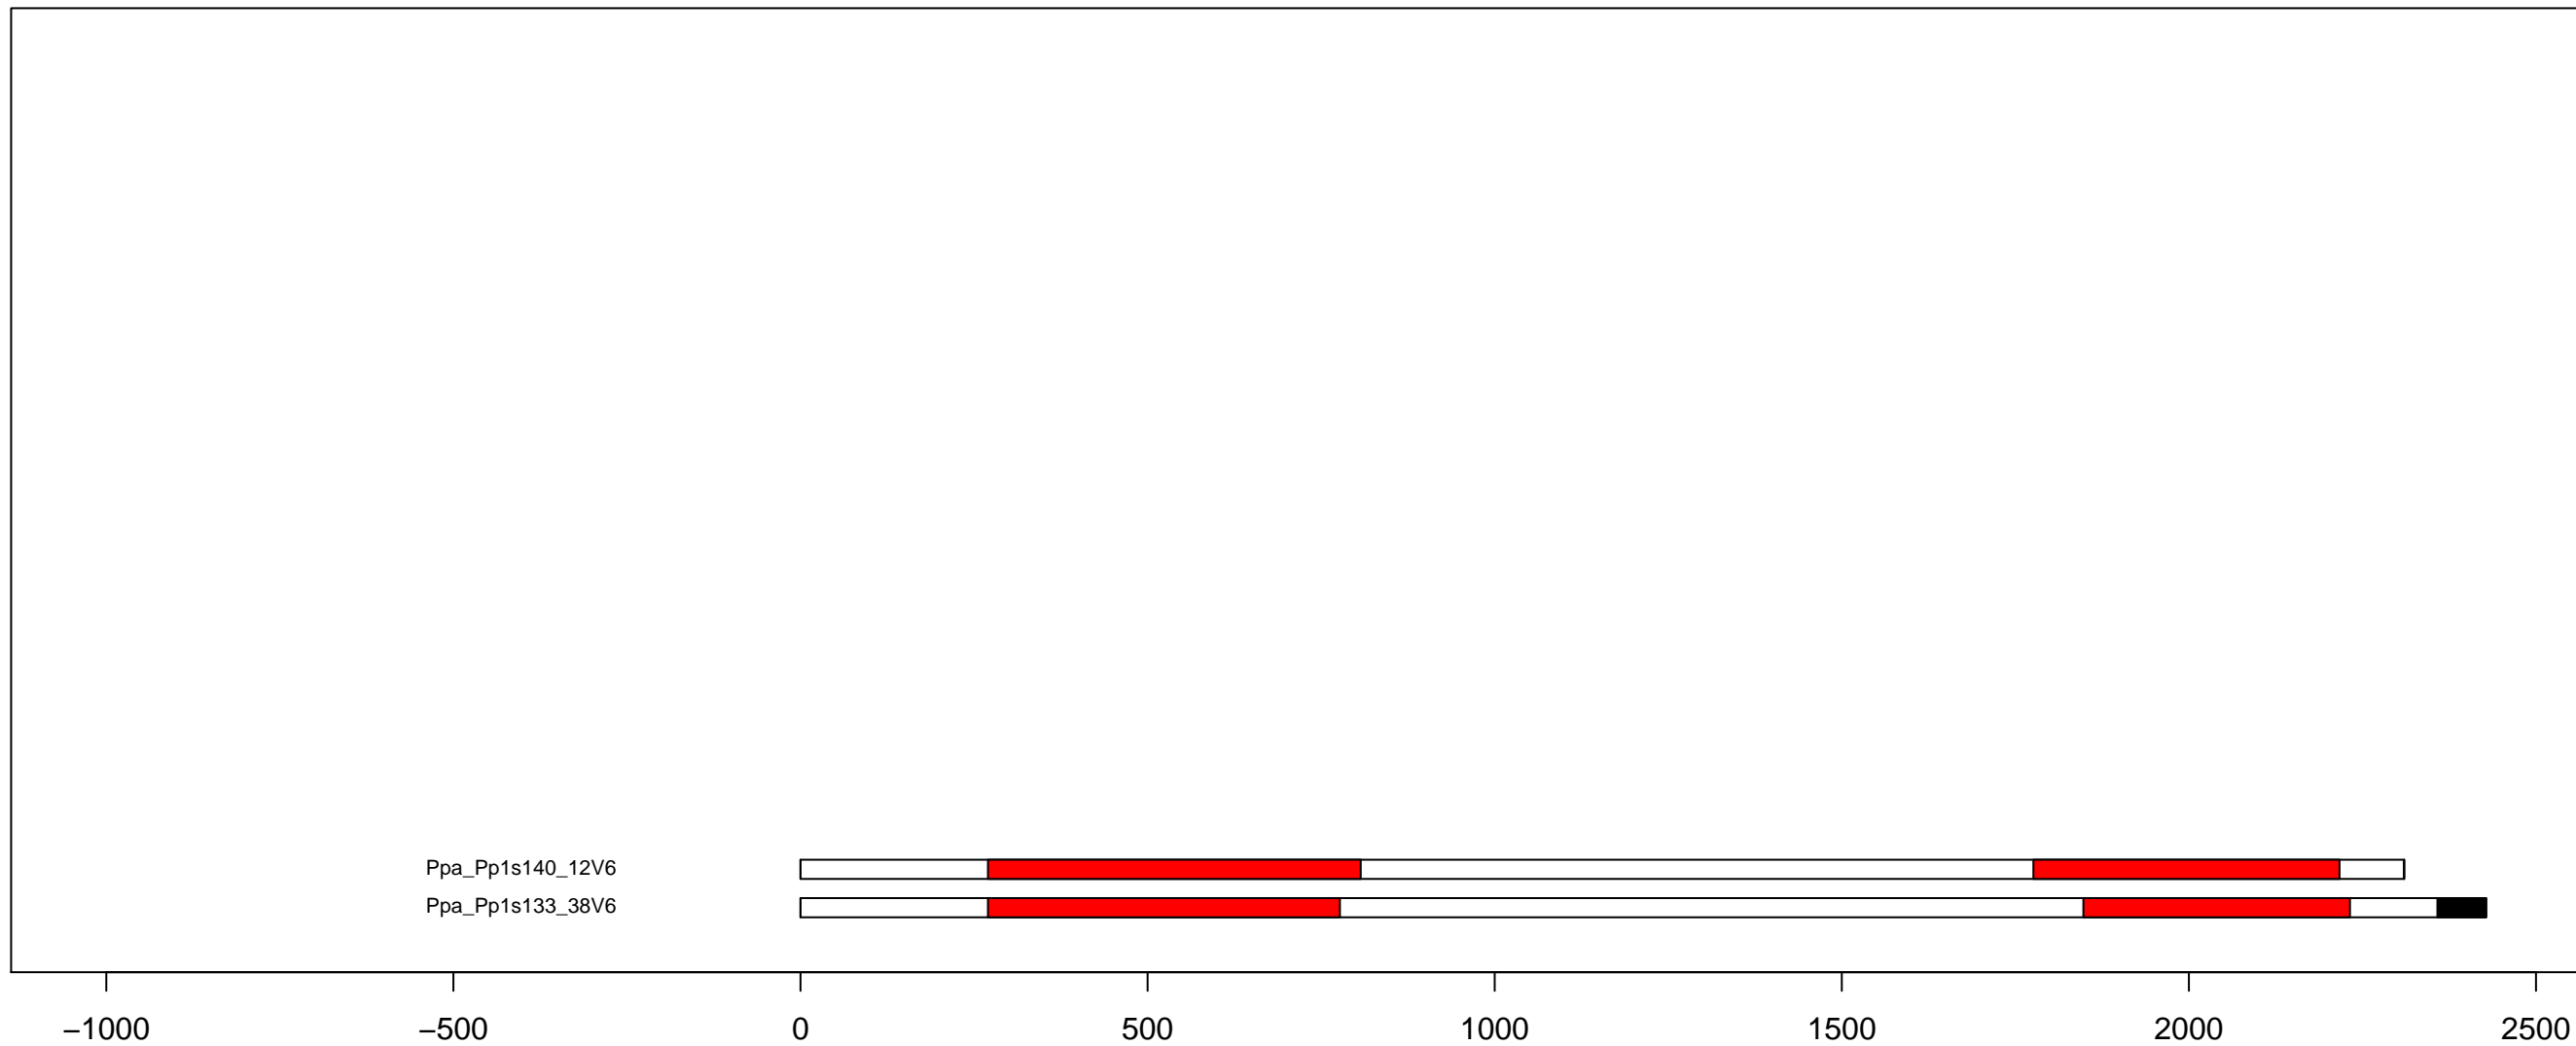



# P.pa RLK-Pelle\_RLCK-X exon-intron and kinase domain diagram (all)

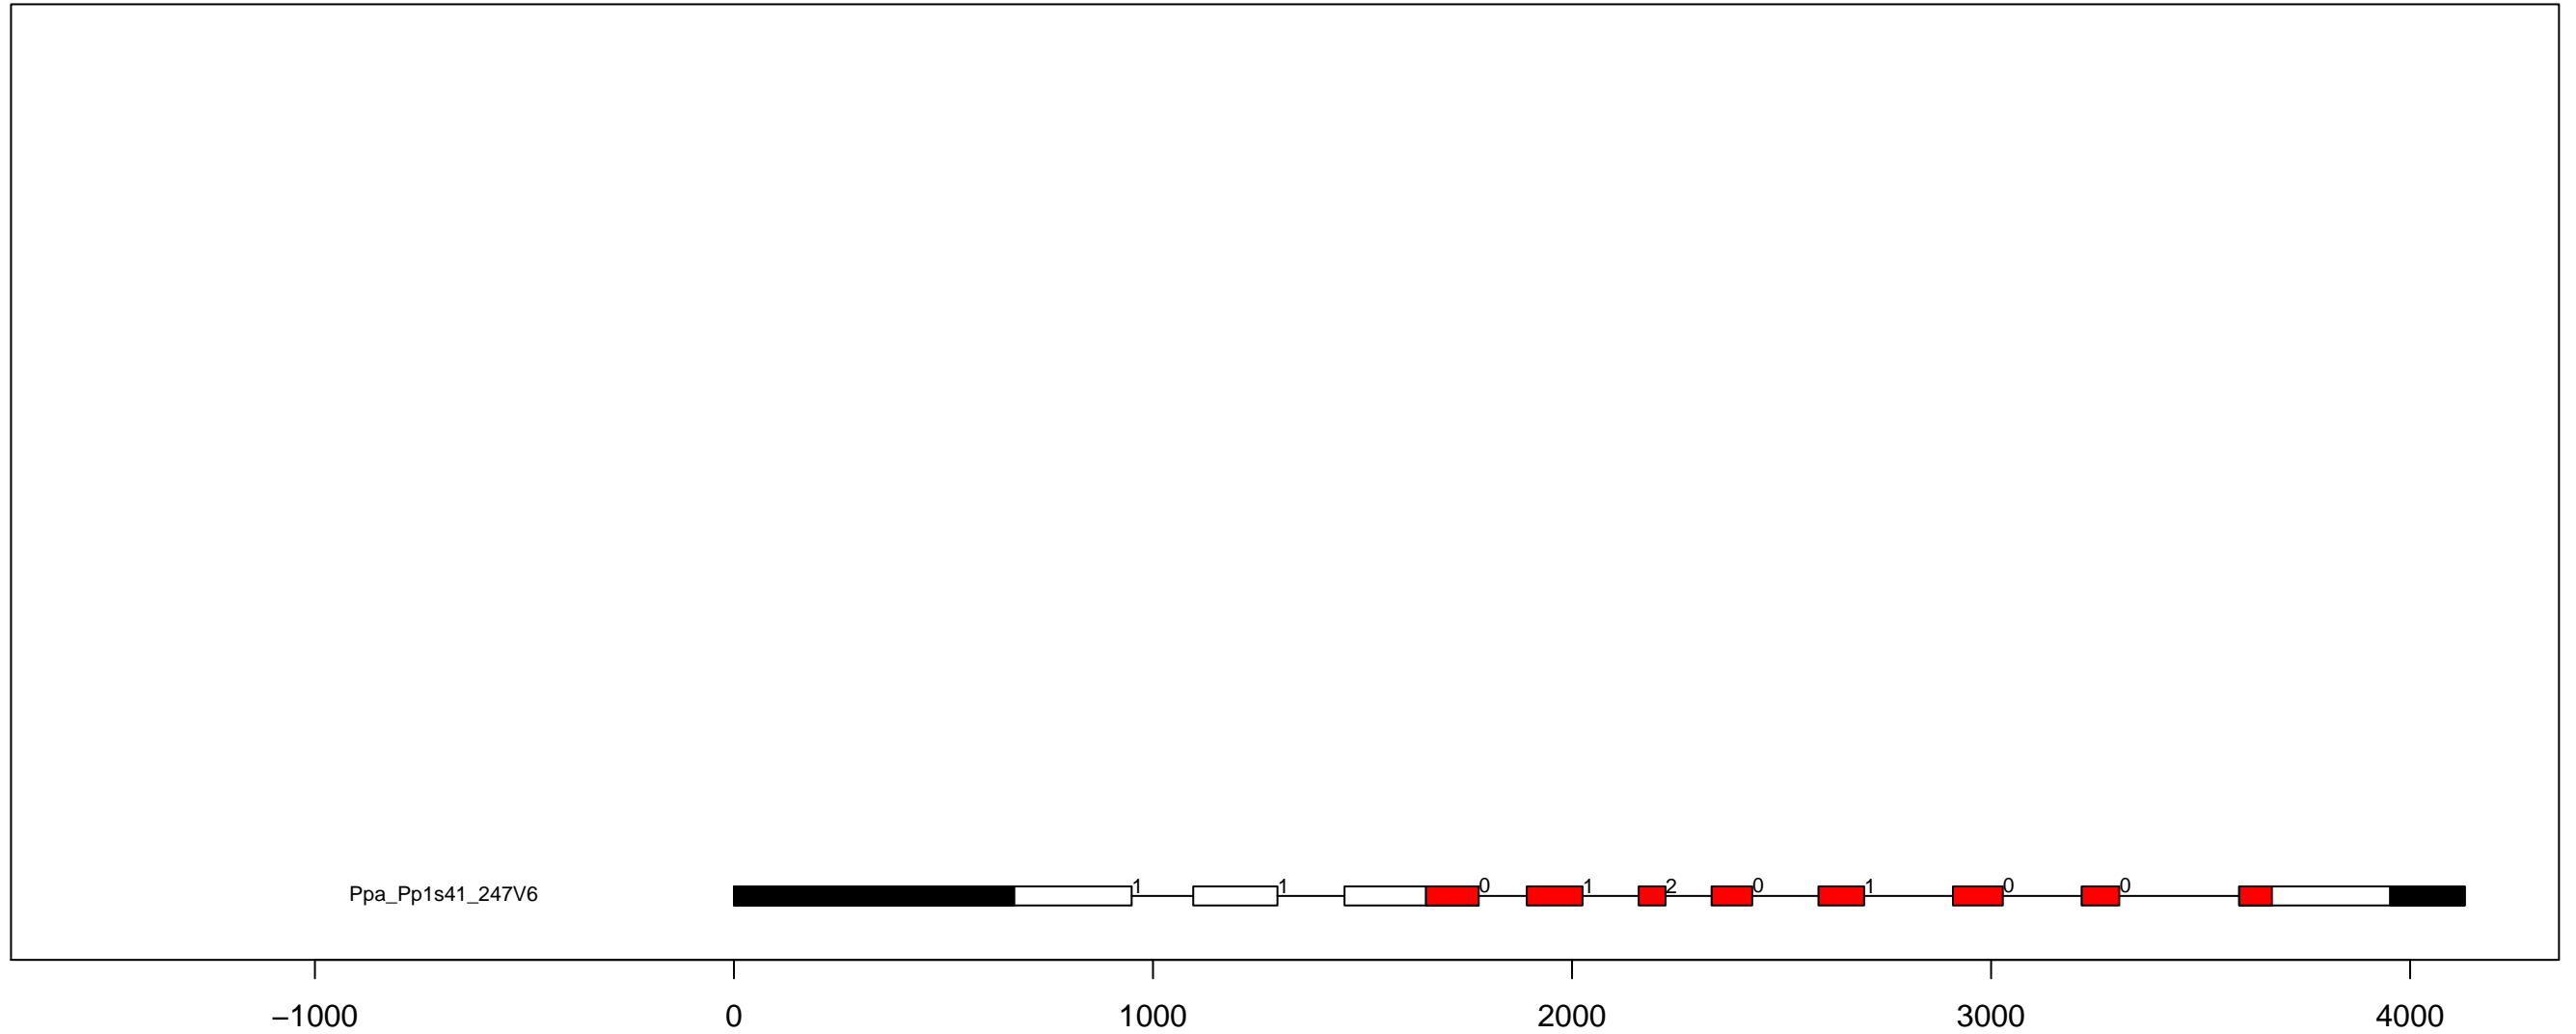

# P.pa RLK-Pelle\_RLCK-XV exon-intron and kinase domain diagram (all)

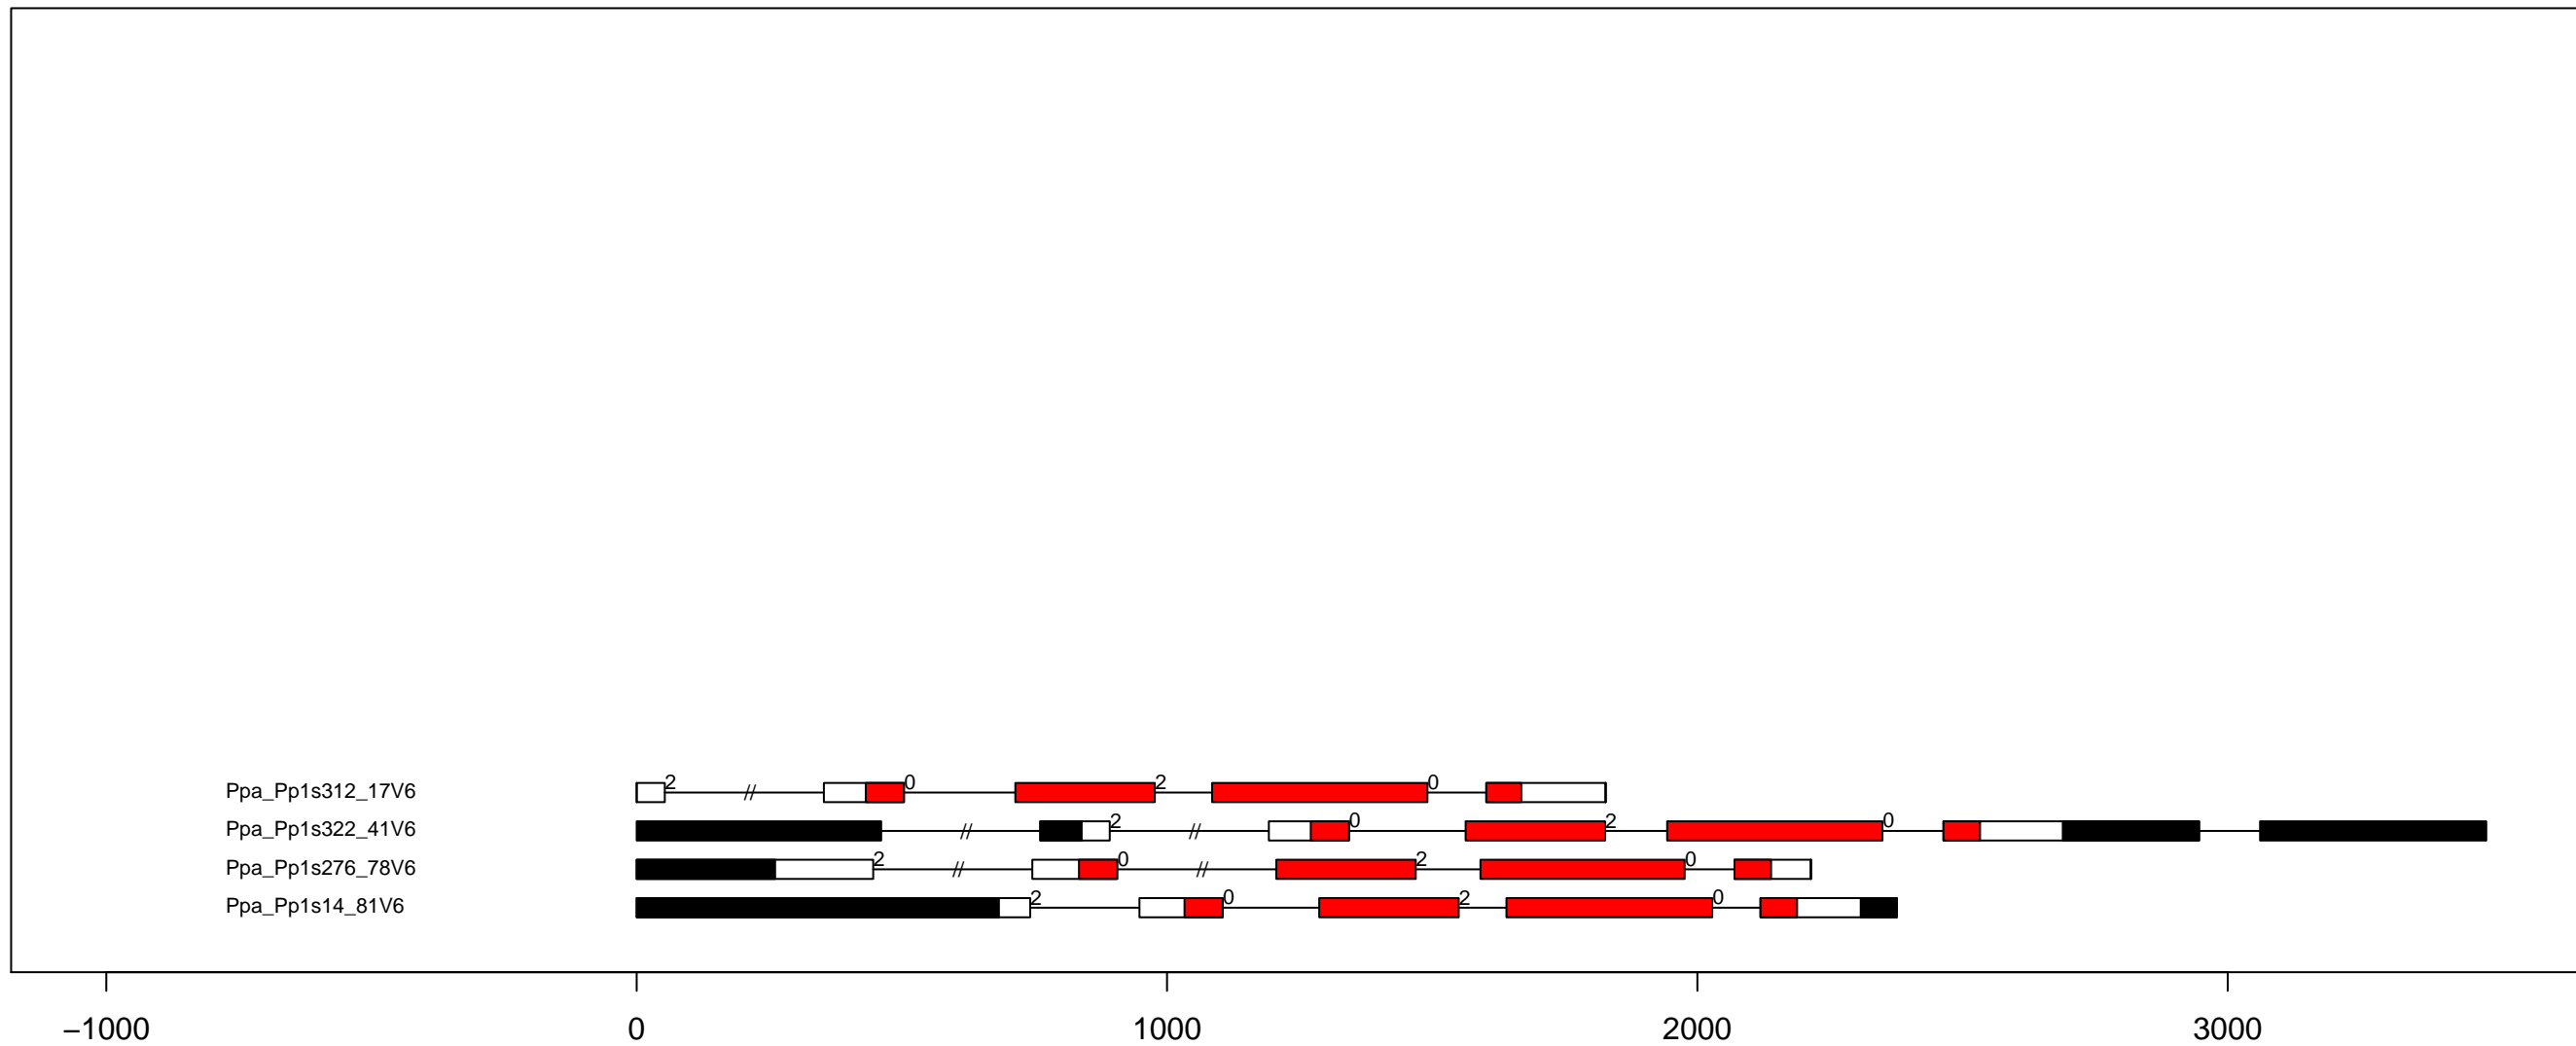

# P.pa RLK-Pelle\_SD-2b exon-intron and kinase domain diagram (all)

Ppa\_Pp1s67\_113V6  
 Ppa\_Pp1s4\_109V6  
 Ppa\_Pp1s194\_112V6  
 Ppa\_Pp1s98\_96V6  
 Ppa\_Pp1s88\_8V6  
 Ppa\_Pp1s69\_179V6  
 Ppa\_Pp1s373\_43V6  
 Ppa\_Pp1s315\_62V6  
 Ppa\_Pp1s180\_50V6  
 Ppa\_Pp1s160\_110V6  
 Ppa\_Pp1s112\_185V6

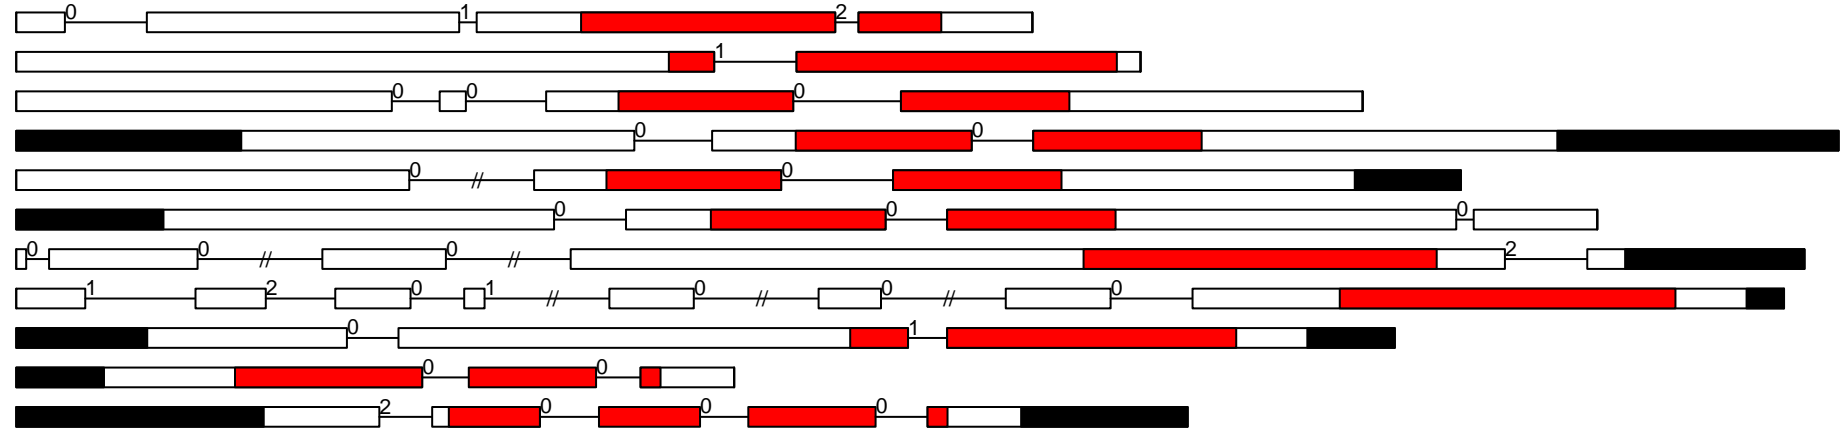

-1000

0

1000

2000

3000

4000

# P.pa RLK-Pelle\_Singleton exon-intron and kinase domain diagram (all)

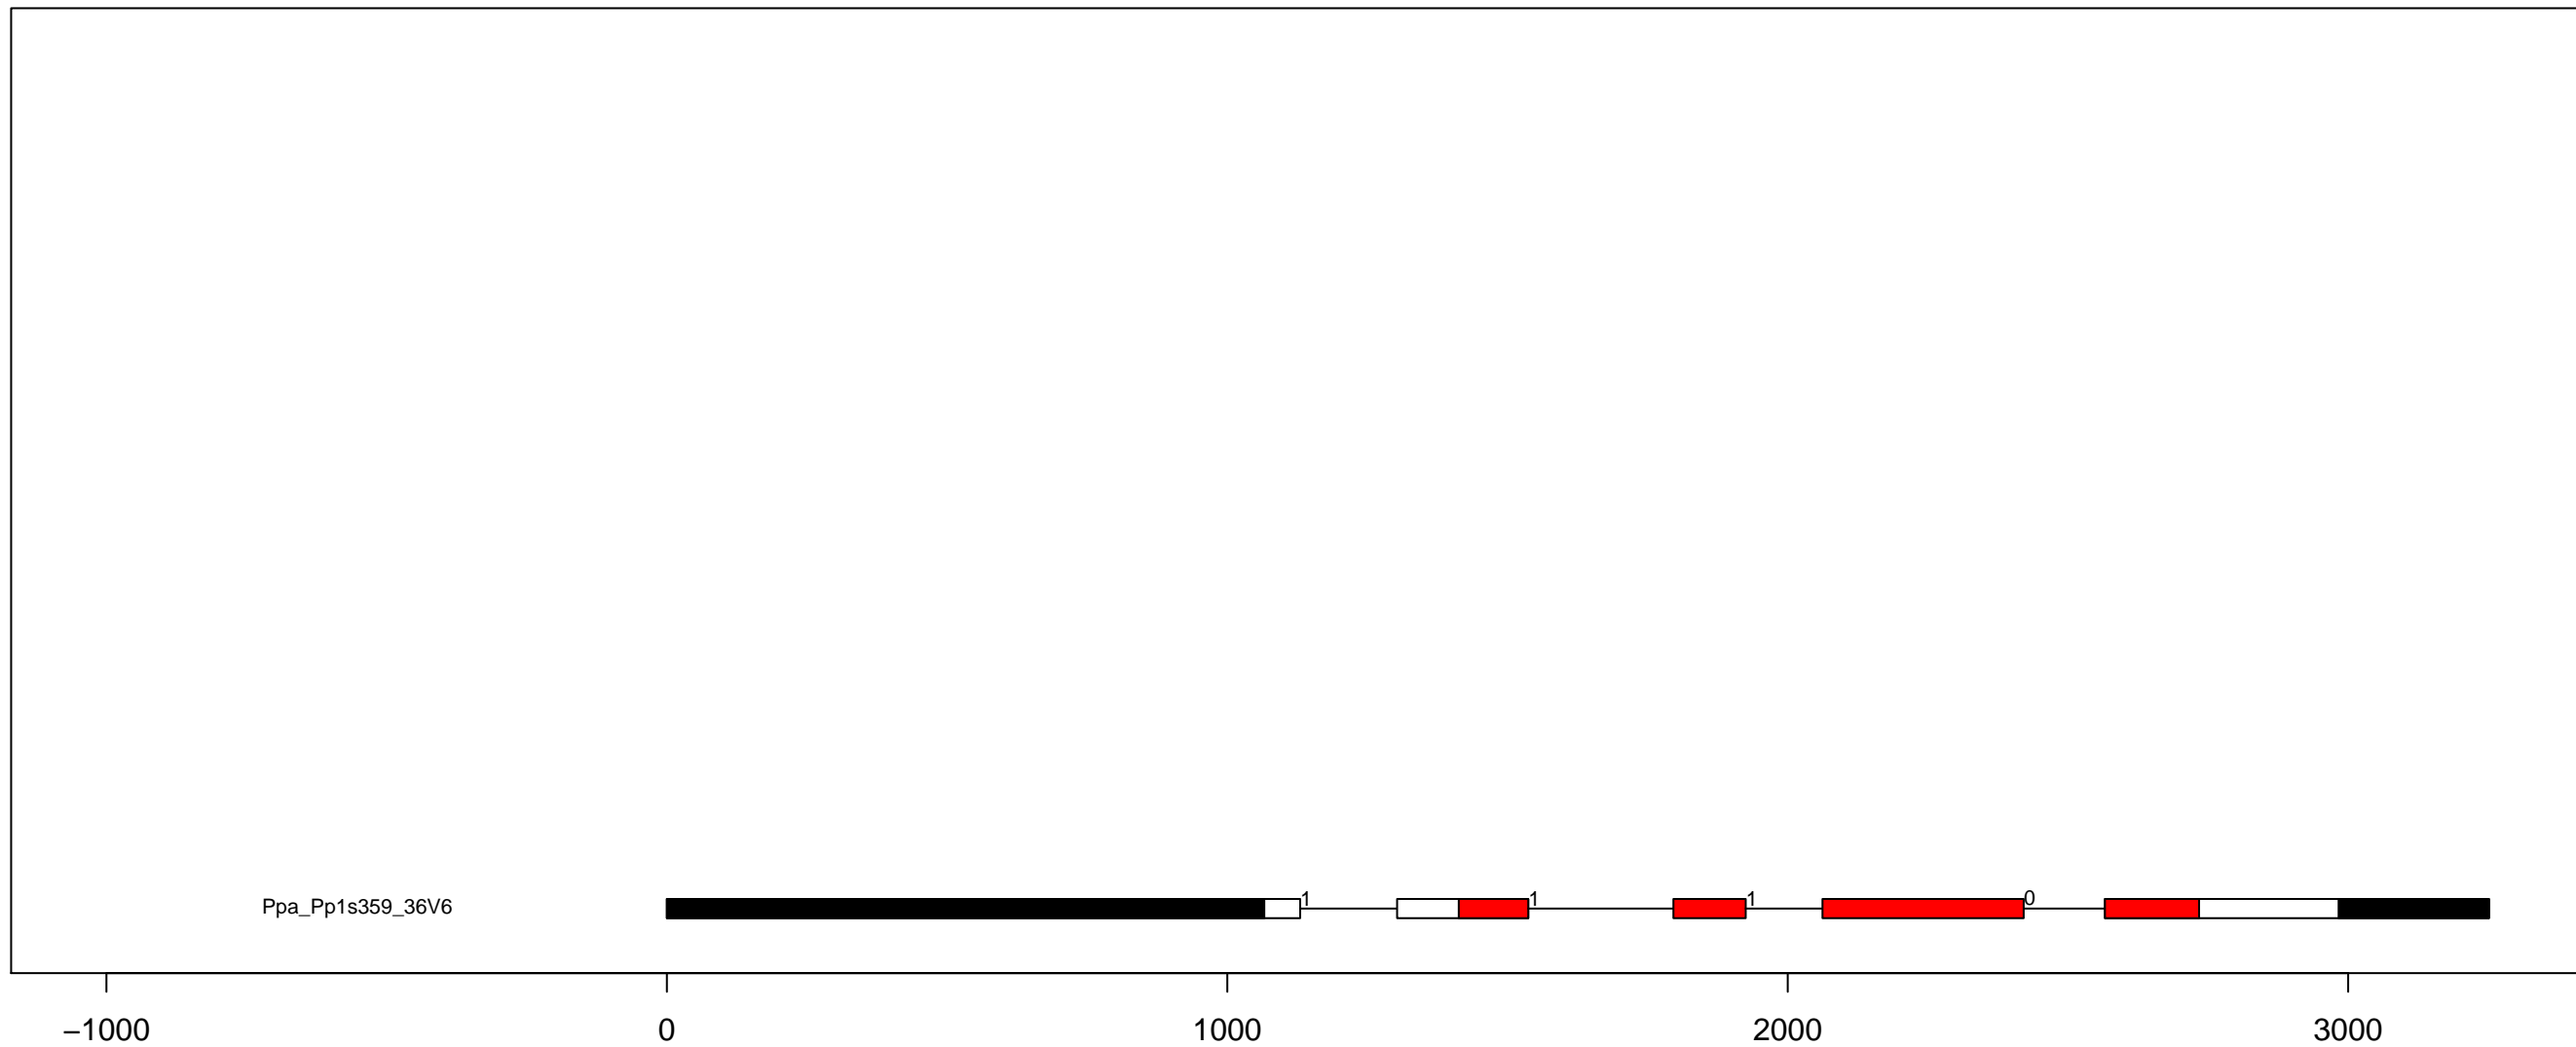

### P.pa RLK-Pelle\_URK-Pp-1 exon-intron and kinase domain diagram (all)

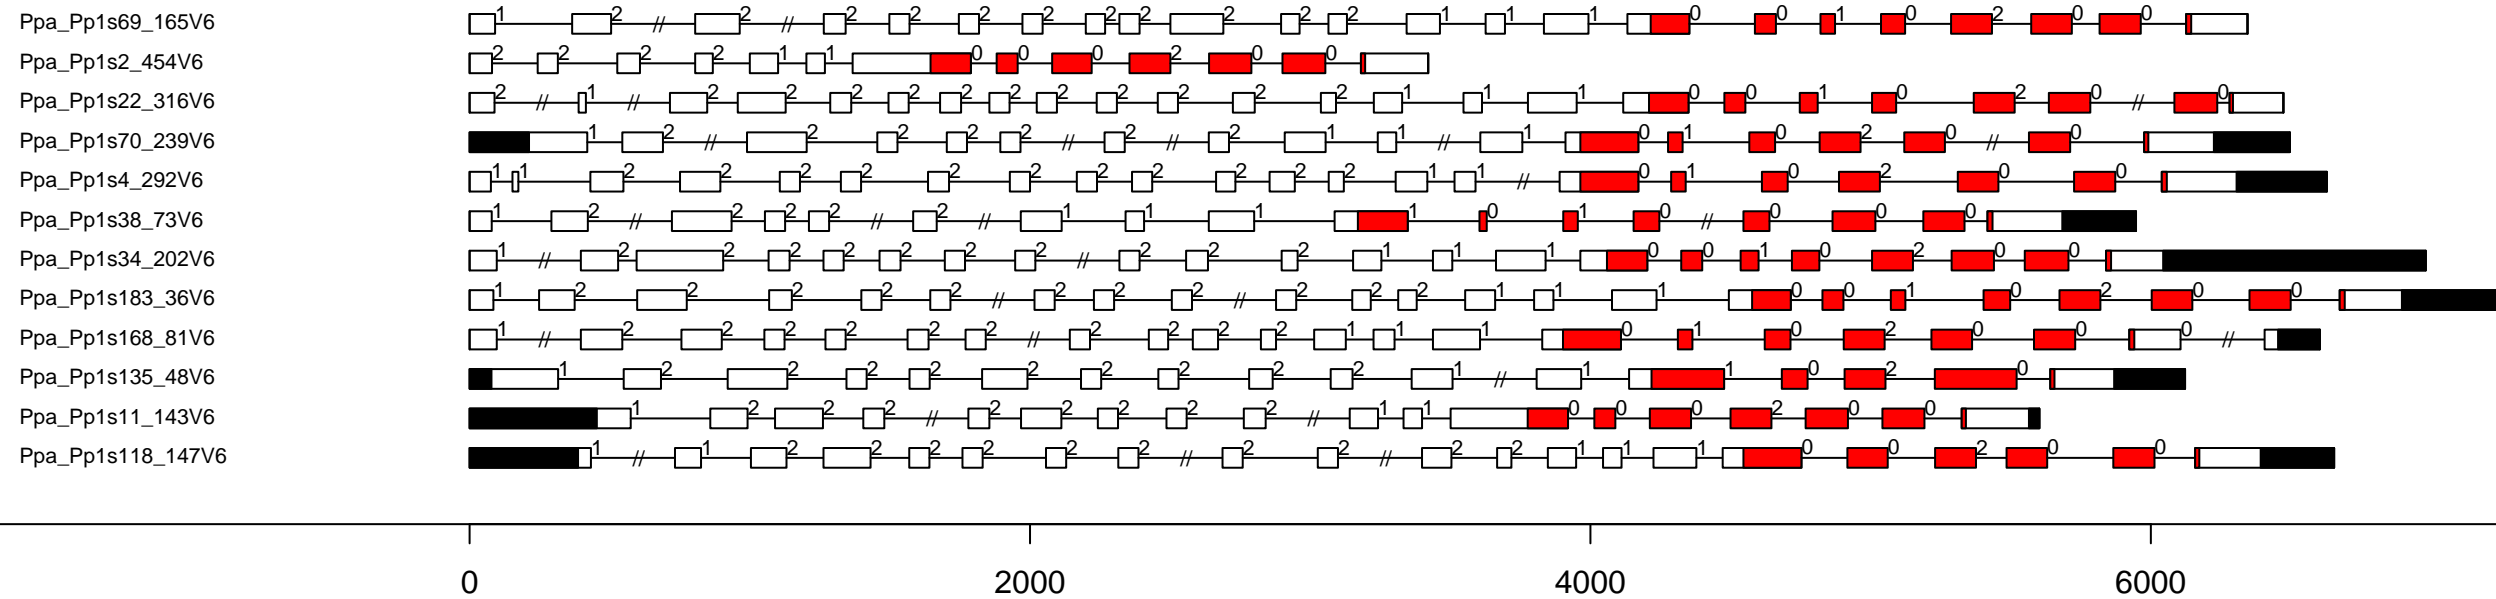

# P.pa RLK-Pelle\_URK-Pp-2 exon-intron and kinase domain diagram (all)

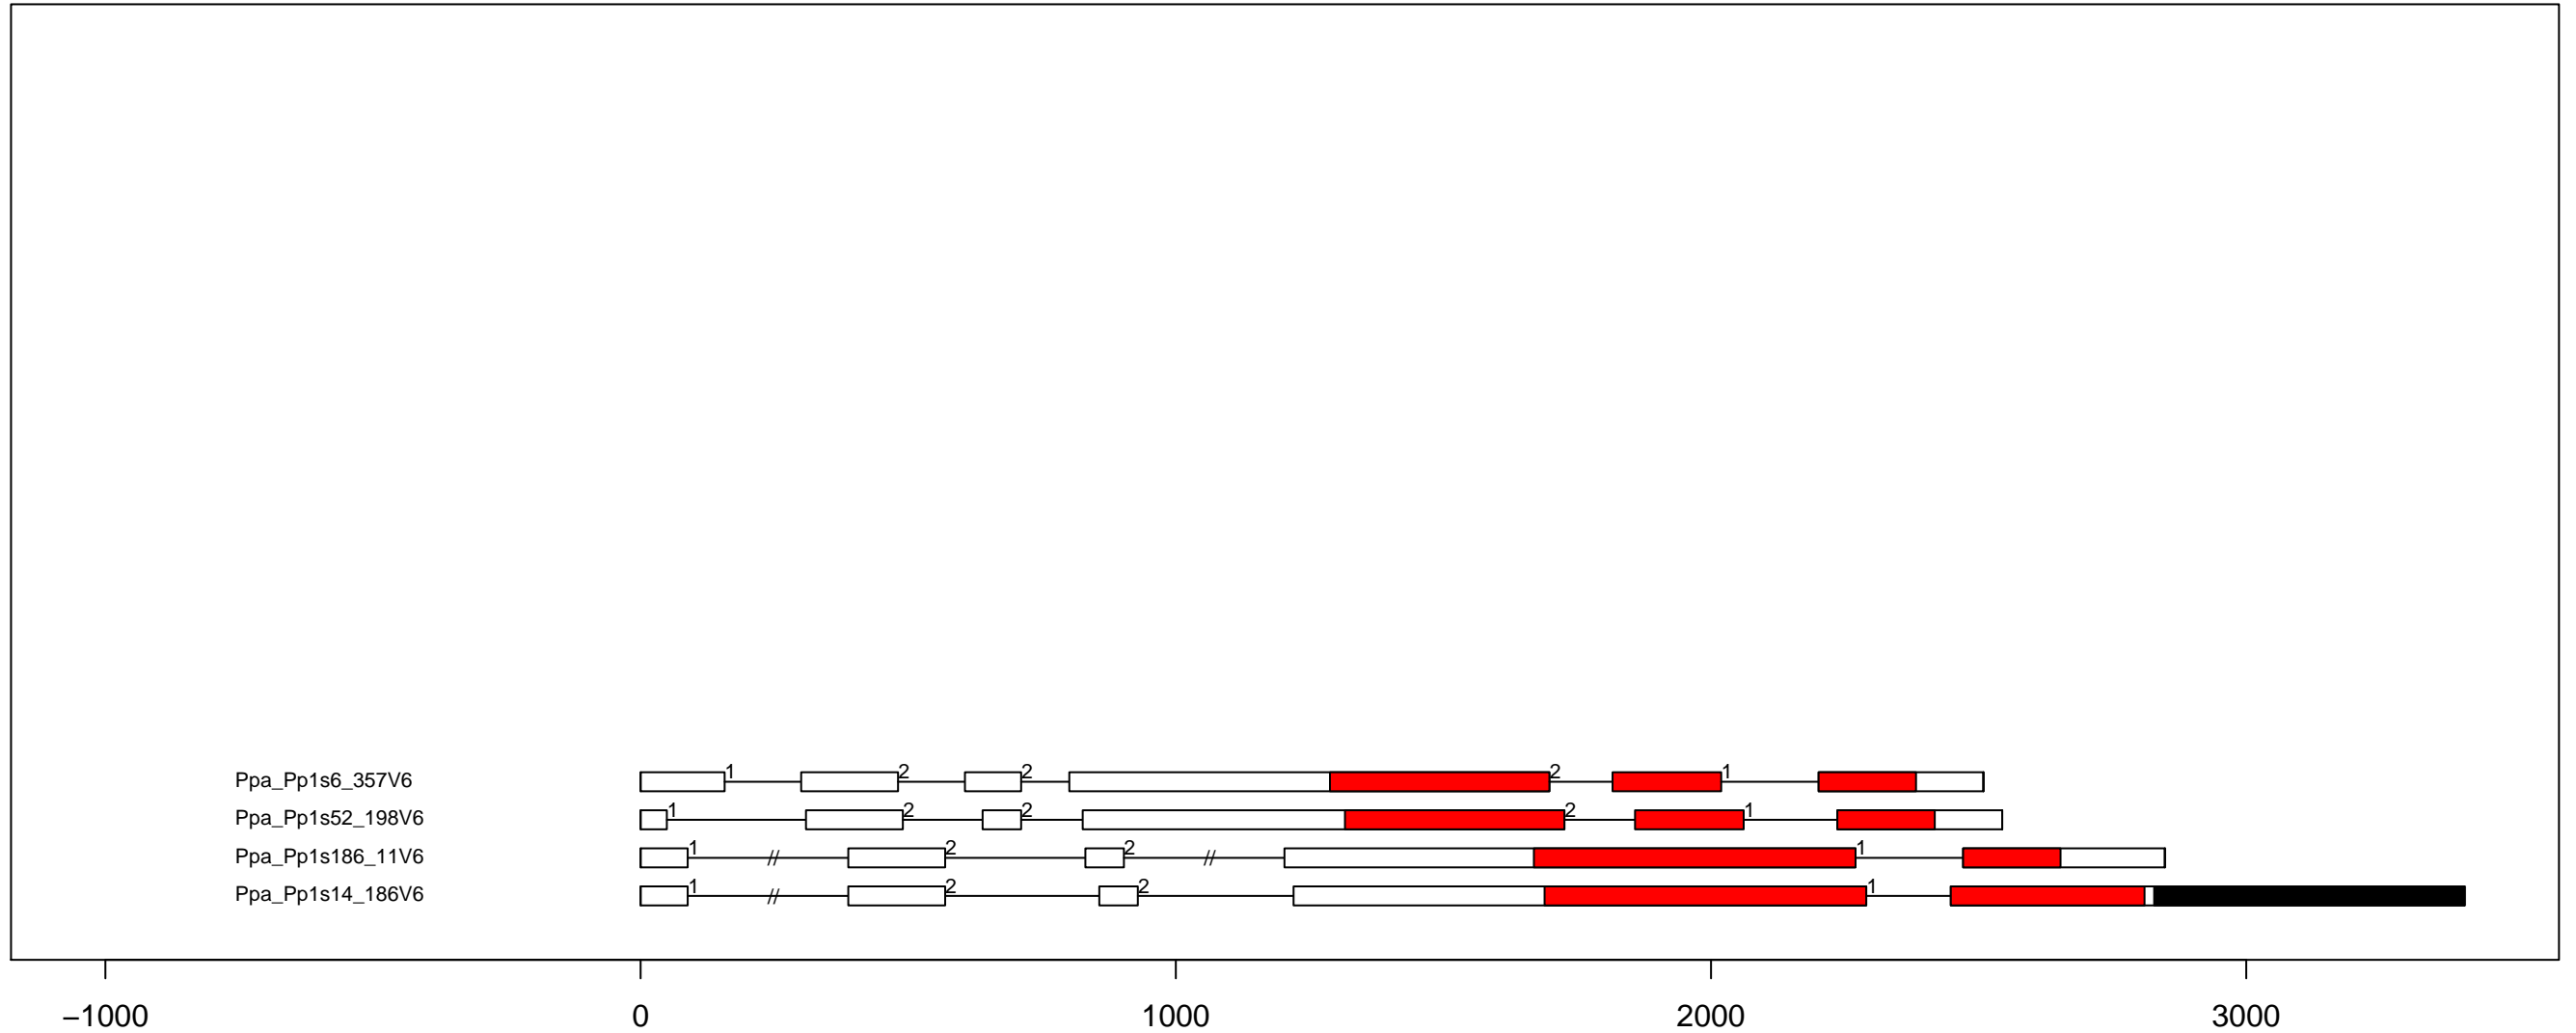

# P.pa RLK-Pelle\_WAK\_LRK10L-1 exon-intron and kinase domain diagram (all)

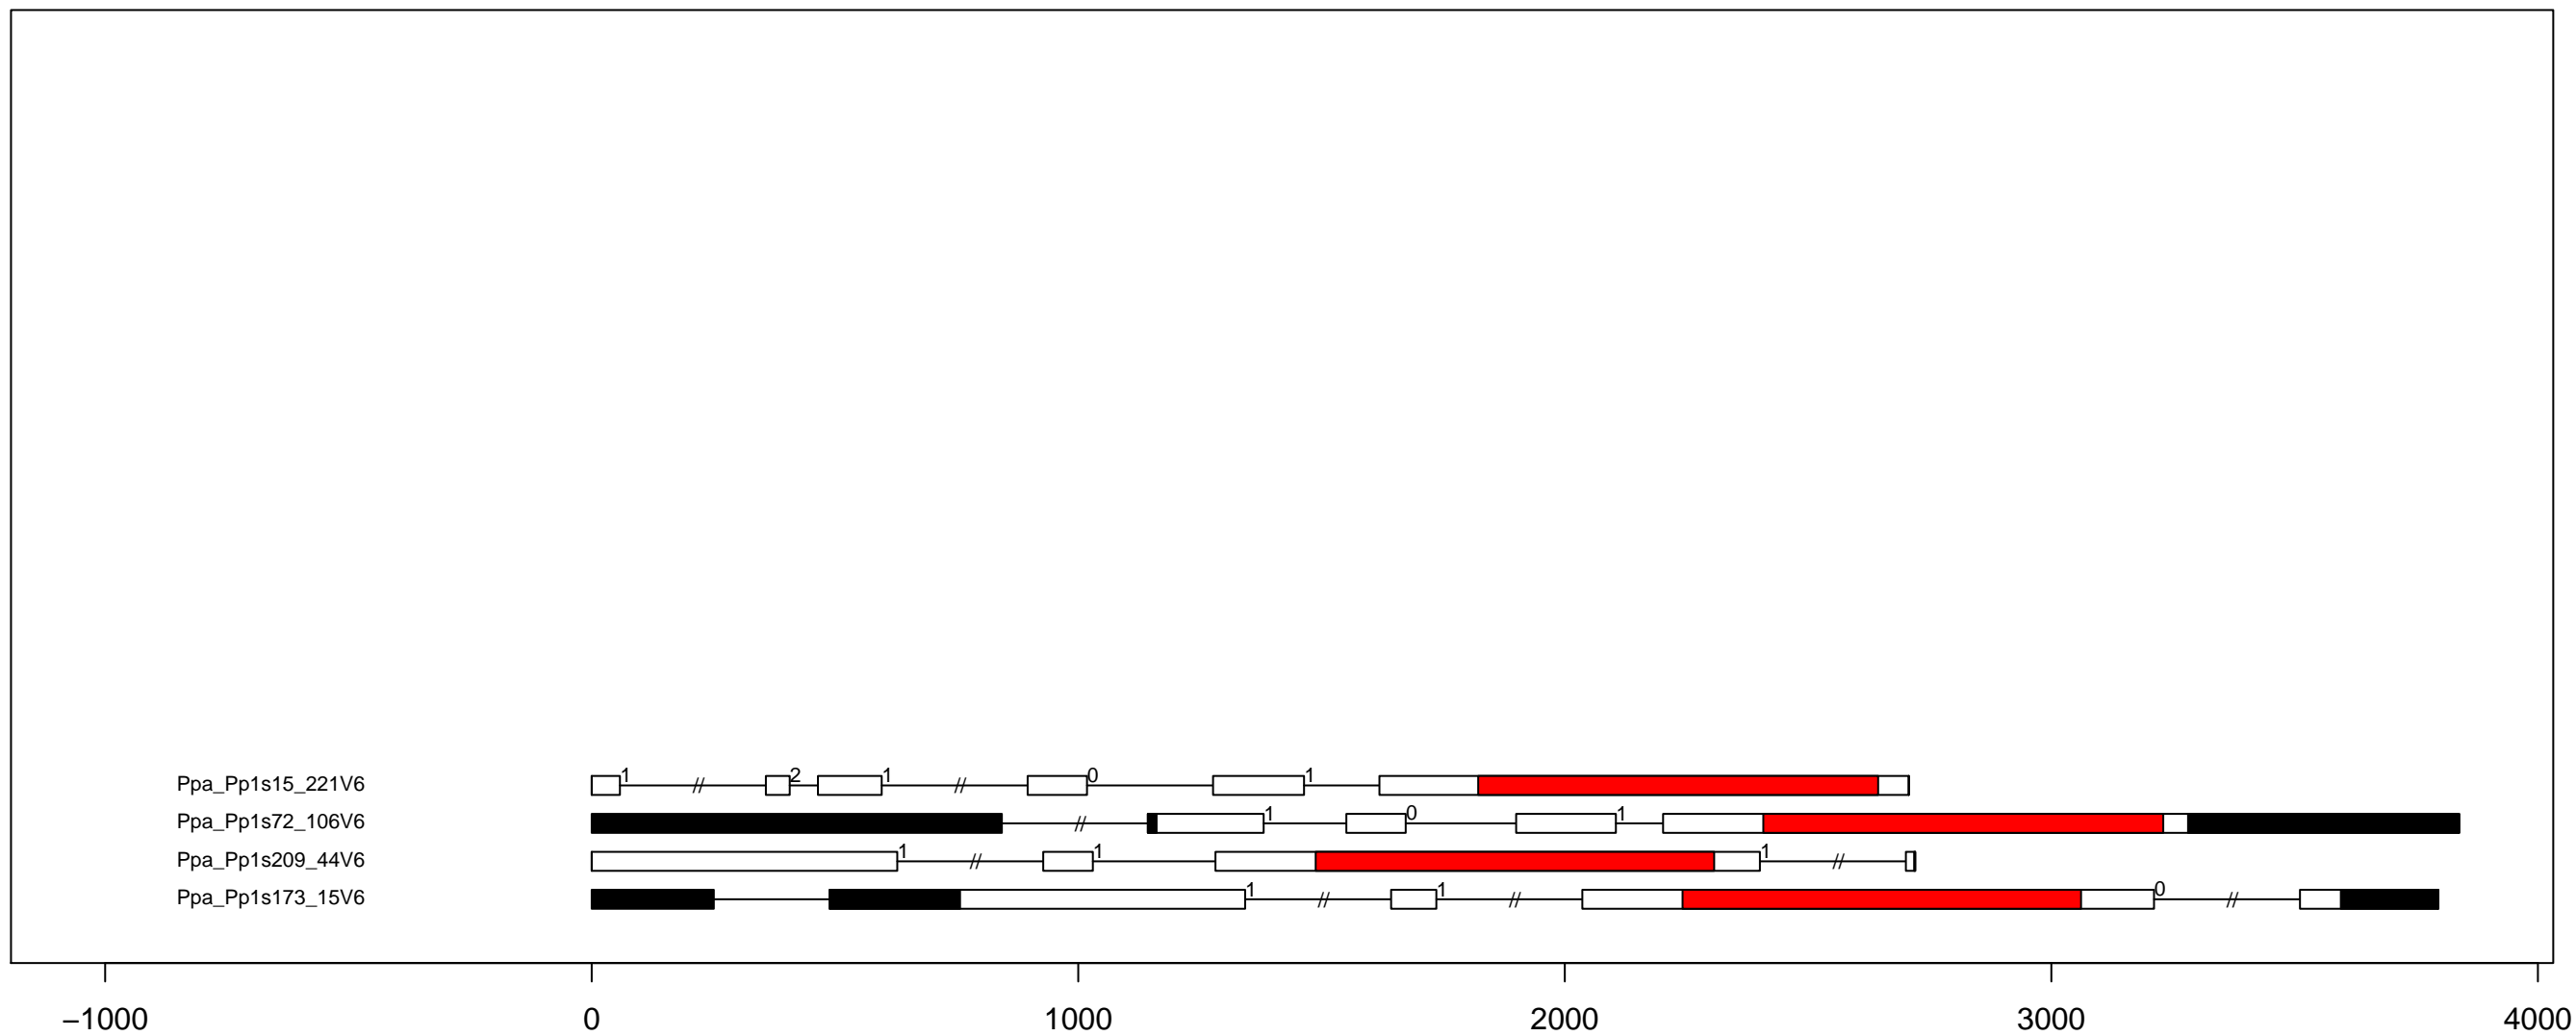

### P.pa STE\_STE11 exon-intron and kinase domain diagram (all)

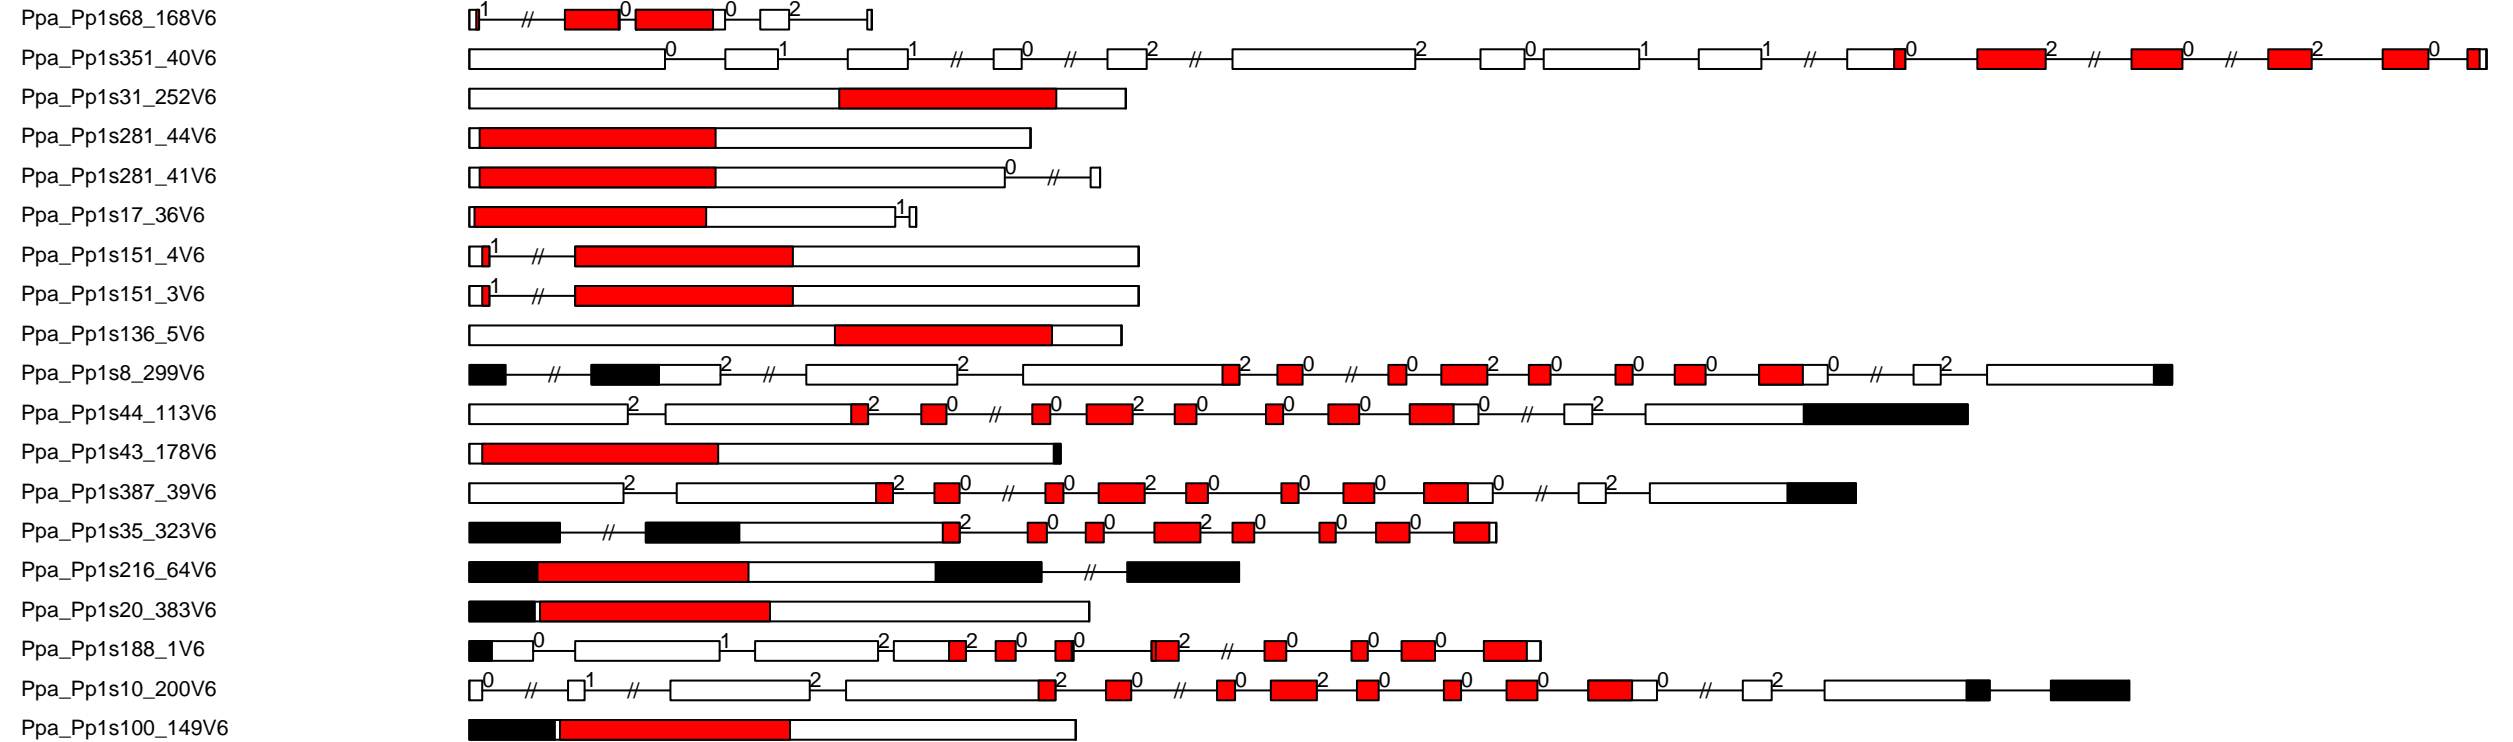



# P.pa STE\_STE20-Fray exon-intron and kinase domain diagram (all)

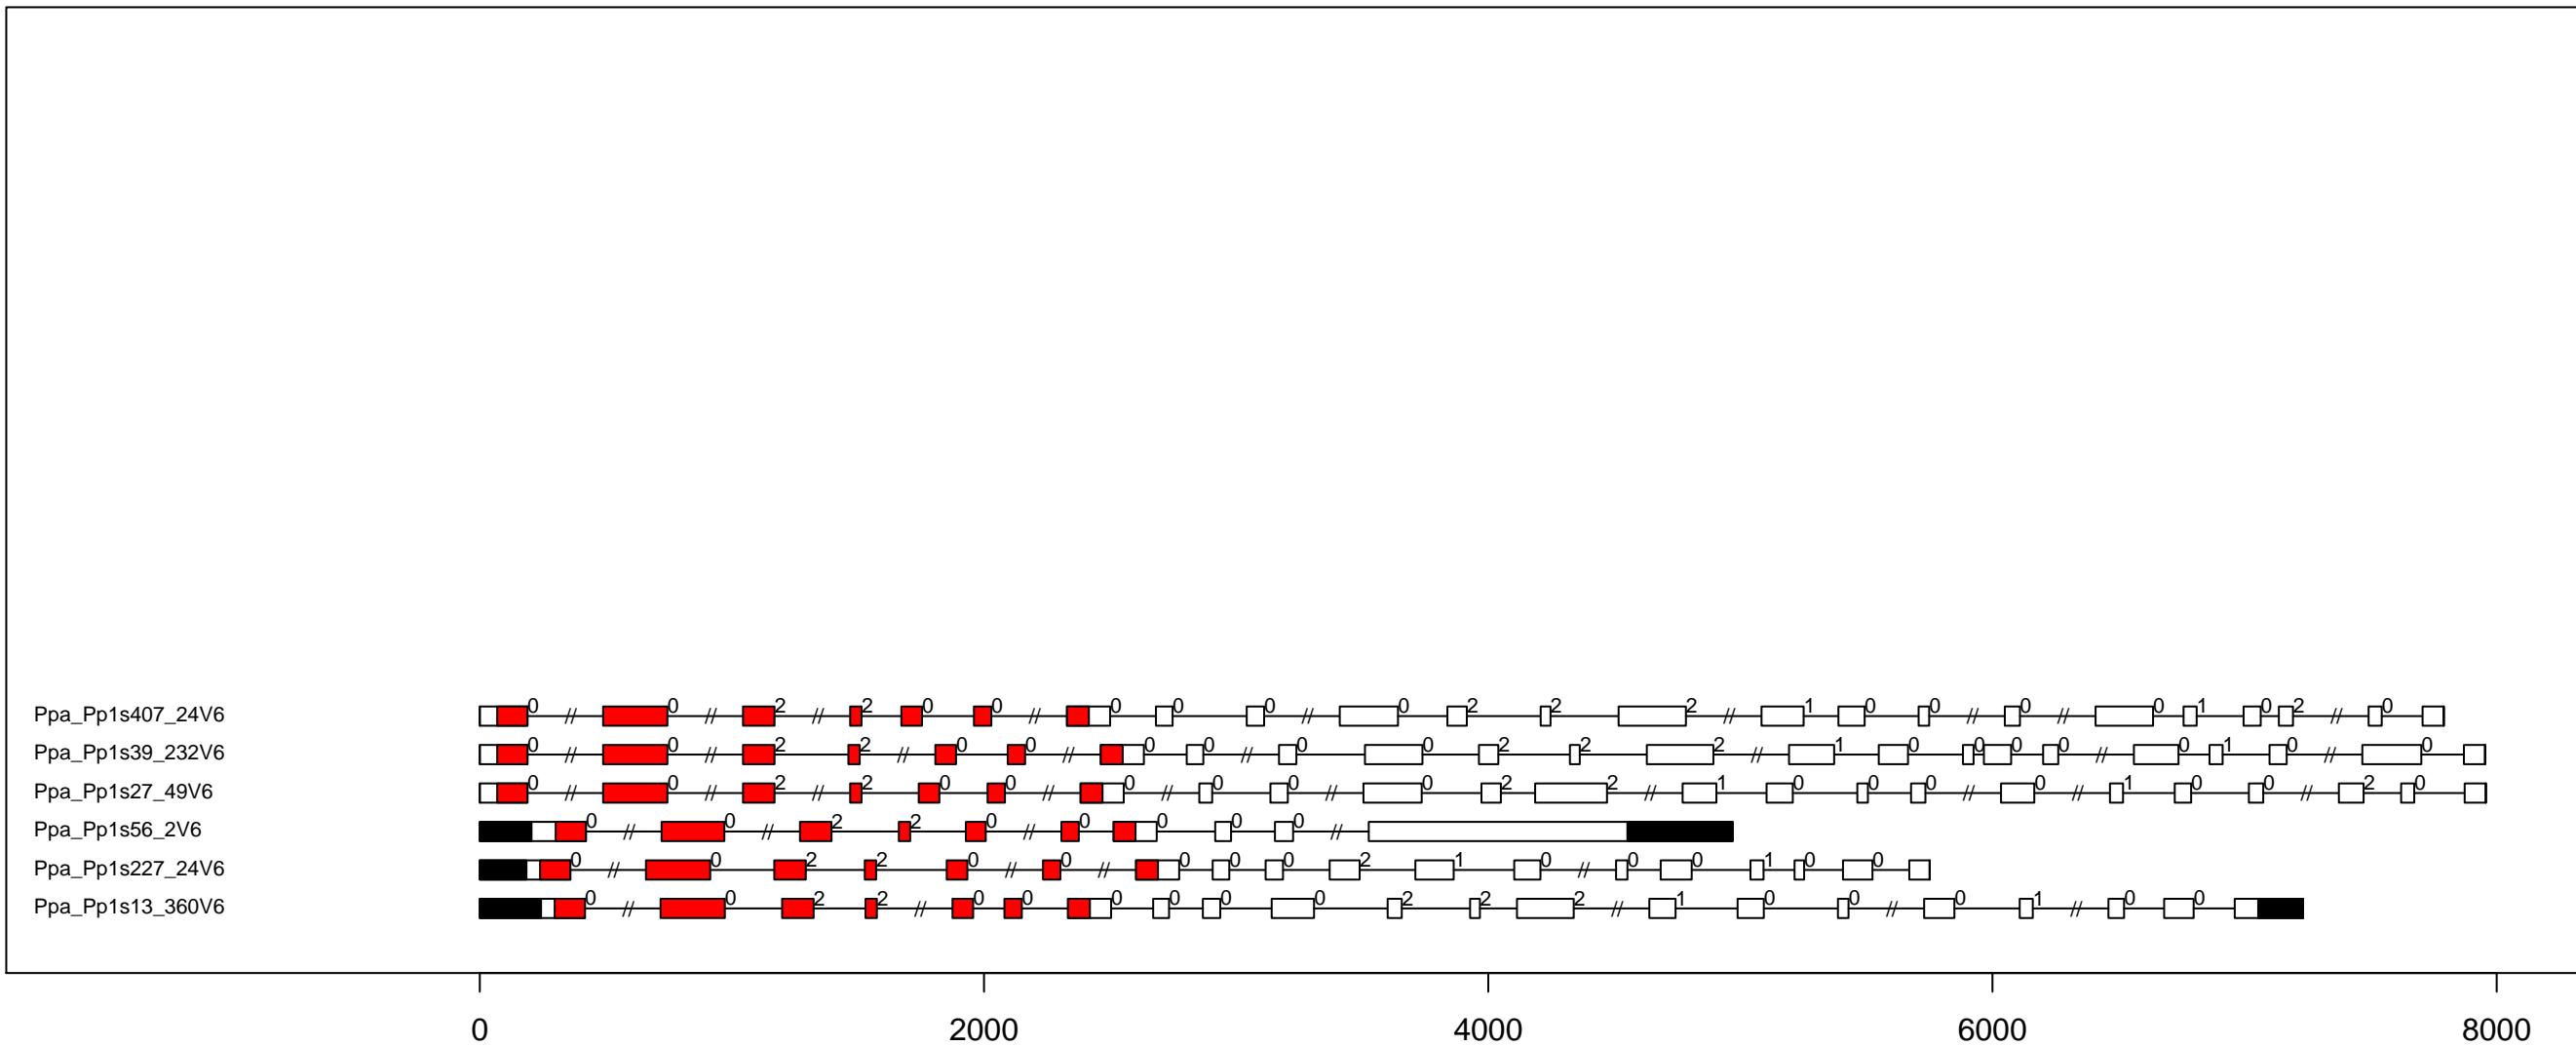

# P.pa STE\_STE20-PI exon-intron and kinase domain diagram (all)

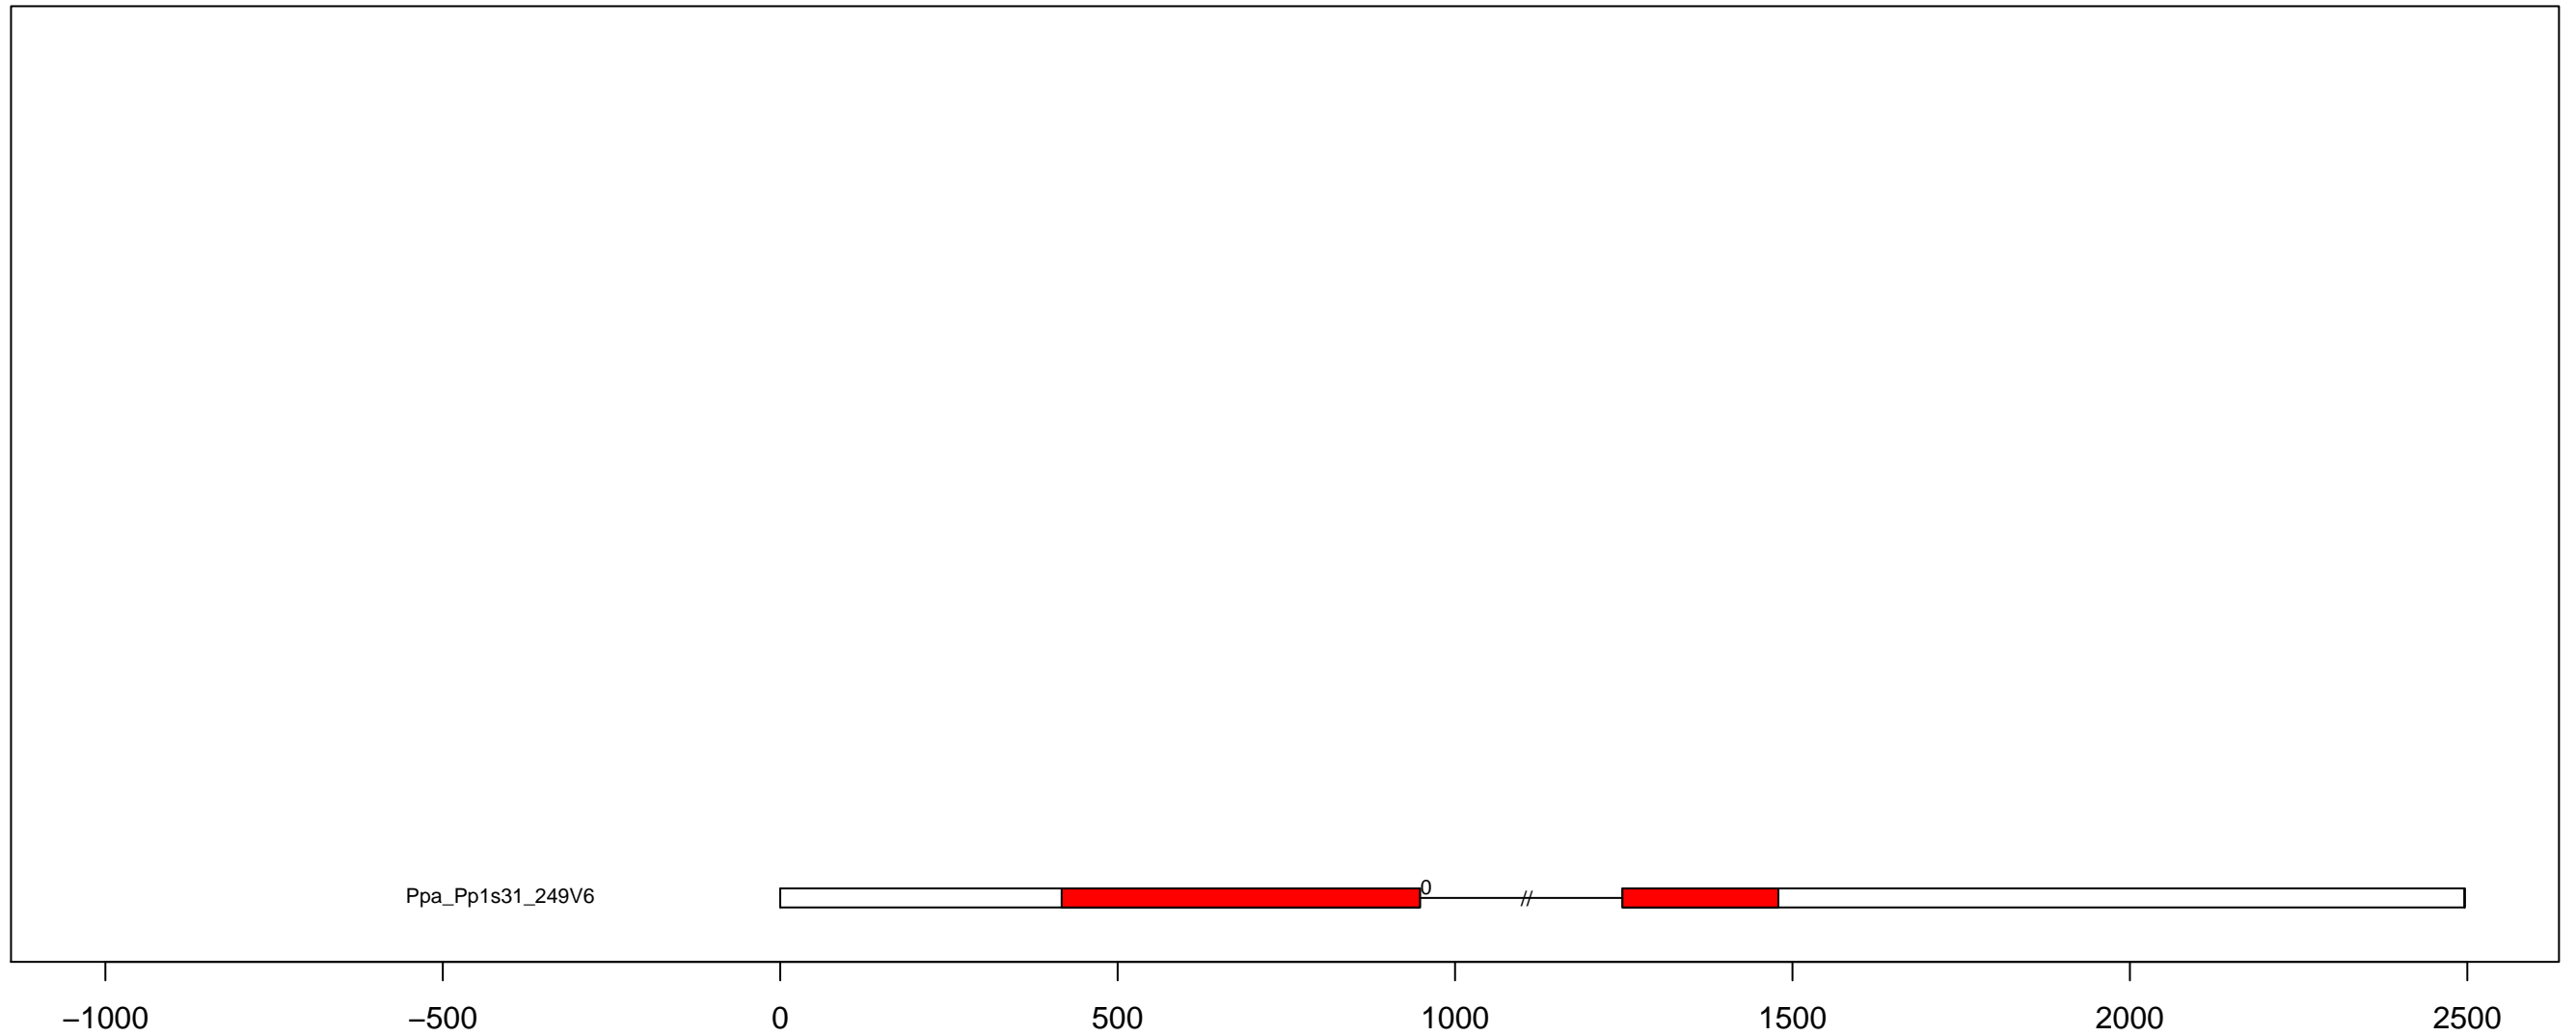

# P.pa STE\_STE20-YSK exon-intron and kinase domain diagram (all)

Ppa\_Pp1s98\_82V6  
Ppa\_Pp1s59\_173V6

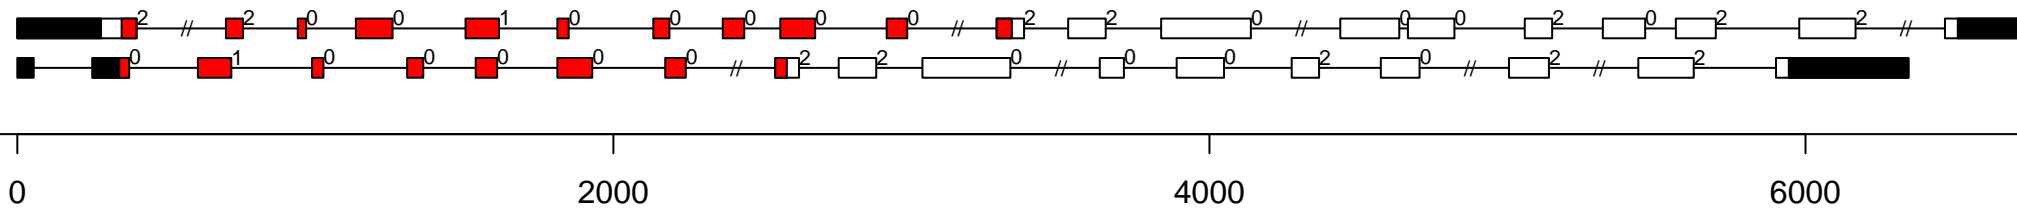

# P.pa STE\_STE7 exon-intron and kinase domain diagram (all)

Ppa\_Pp1s92\_27V6

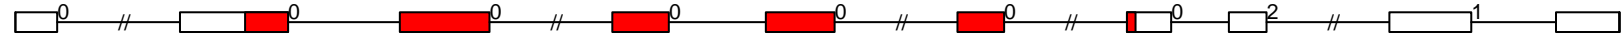

Ppa\_Pp1s106\_83V6

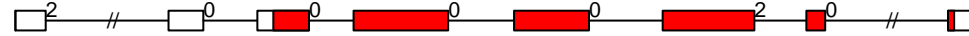

Ppa\_Pp1s50\_83V6

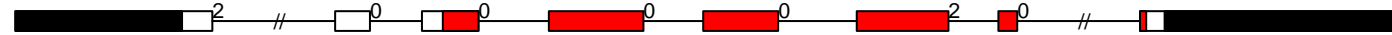

Ppa\_Pp1s32\_219V6

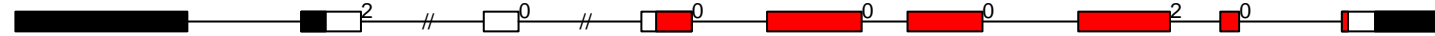

Ppa\_Pp1s16\_334V6

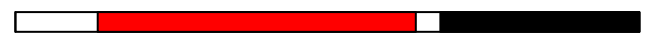

Ppa\_Pp1s151\_2V6

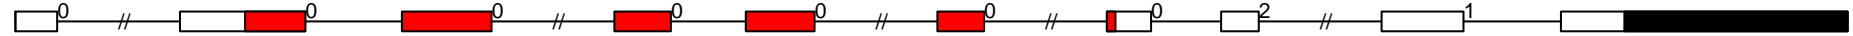

Ppa\_Pp1s114\_89V6

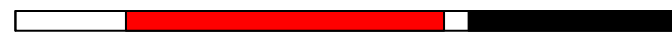

-1000

0

1000

2000

3000

4000

# P.pa STE\_STE-PI exon-intron and kinase domain diagram (all)

Ppa\_Pp1s99\_12V6

Ppa\_Pp1s66\_286V6

Ppa\_Pp1s131\_142V6

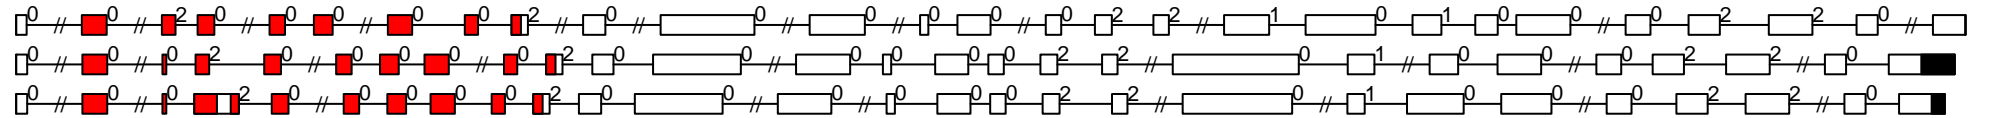

-2000

0

2000

4000

6000

8000

10000

# P.pa TKL\_CTR1-DRK-1 exon-intron and kinase domain diagram (all)

Ppa\_Pp1s63\_65V6  
Ppa\_Pp1s75\_1V6  
Ppa\_Pp1s11\_61V6

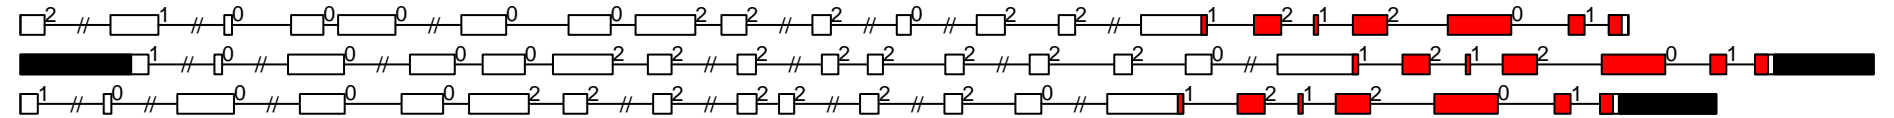

# P.pa TKL\_CTRL1-DRK-2 exon-intron and kinase domain diagram (all)

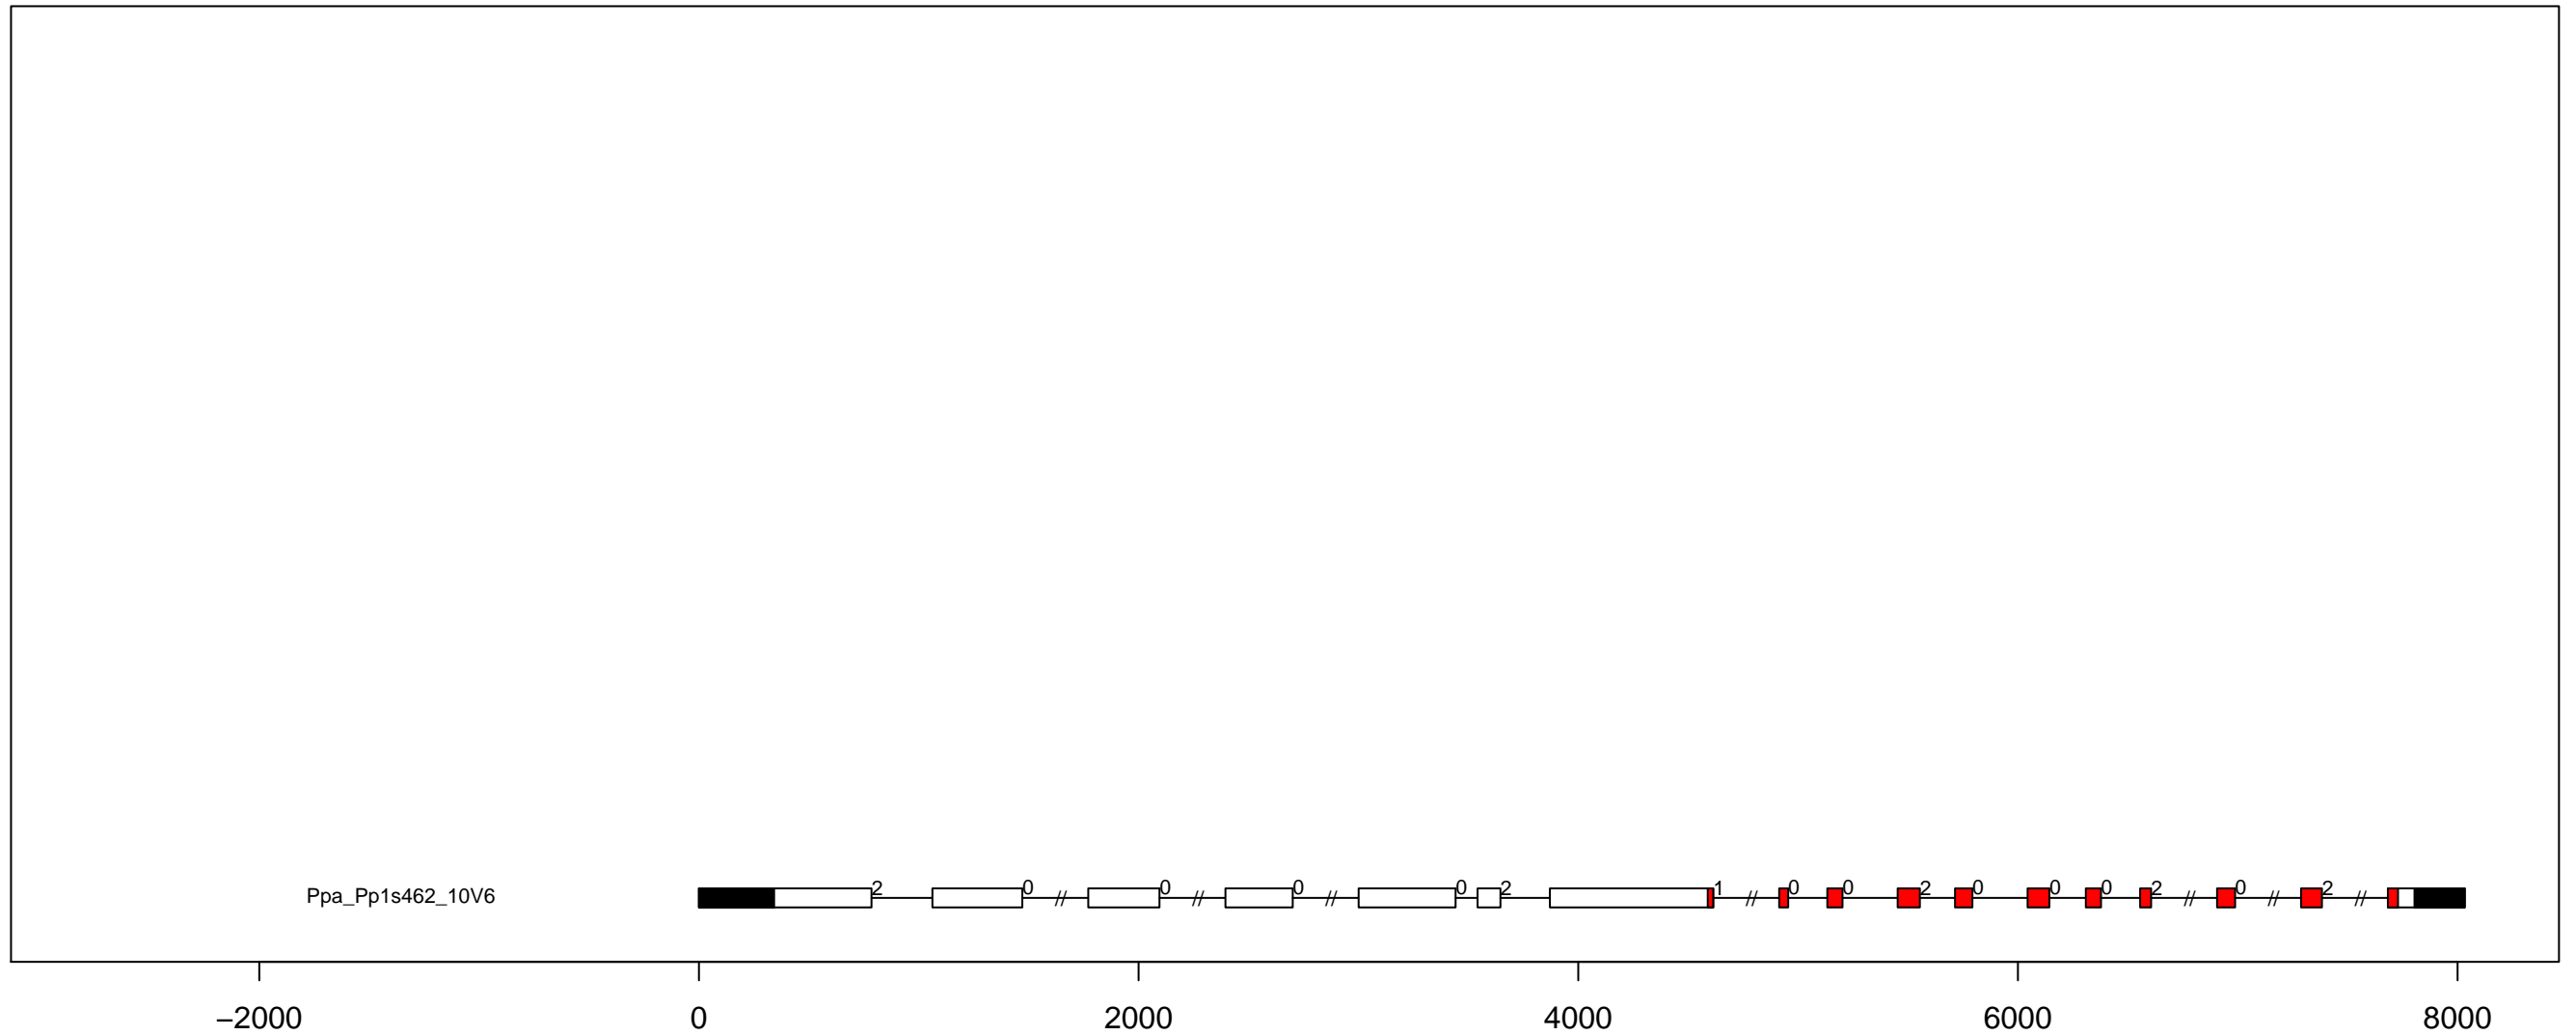

### P.pa TKL\_Gdt exon-intron and kinase domain diagram (part 1)

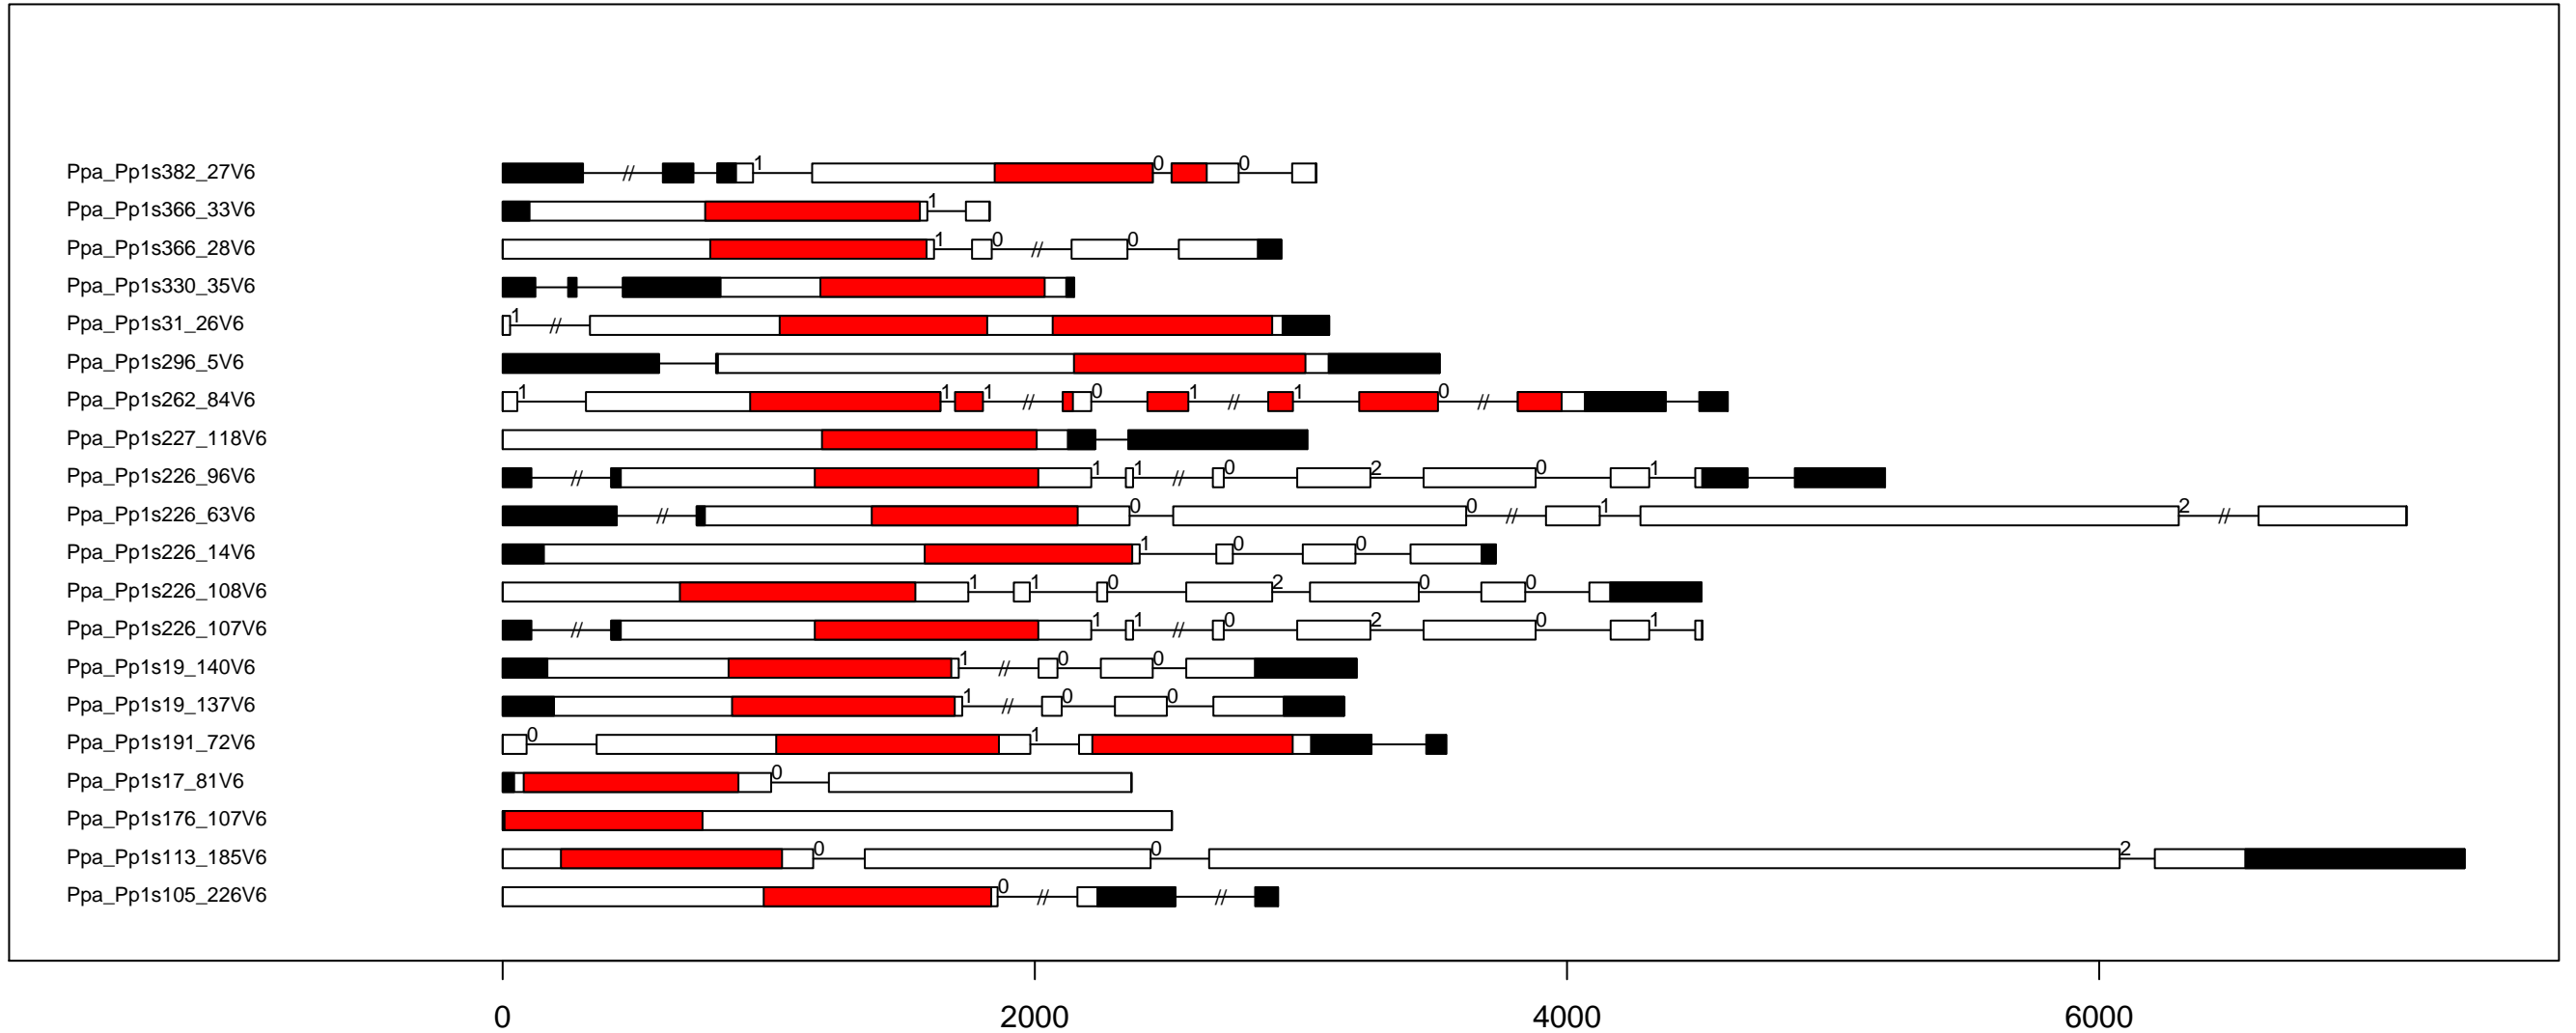



### P.pa TKL\_Gdt exon-intron and kinase domain diagram (part 2)

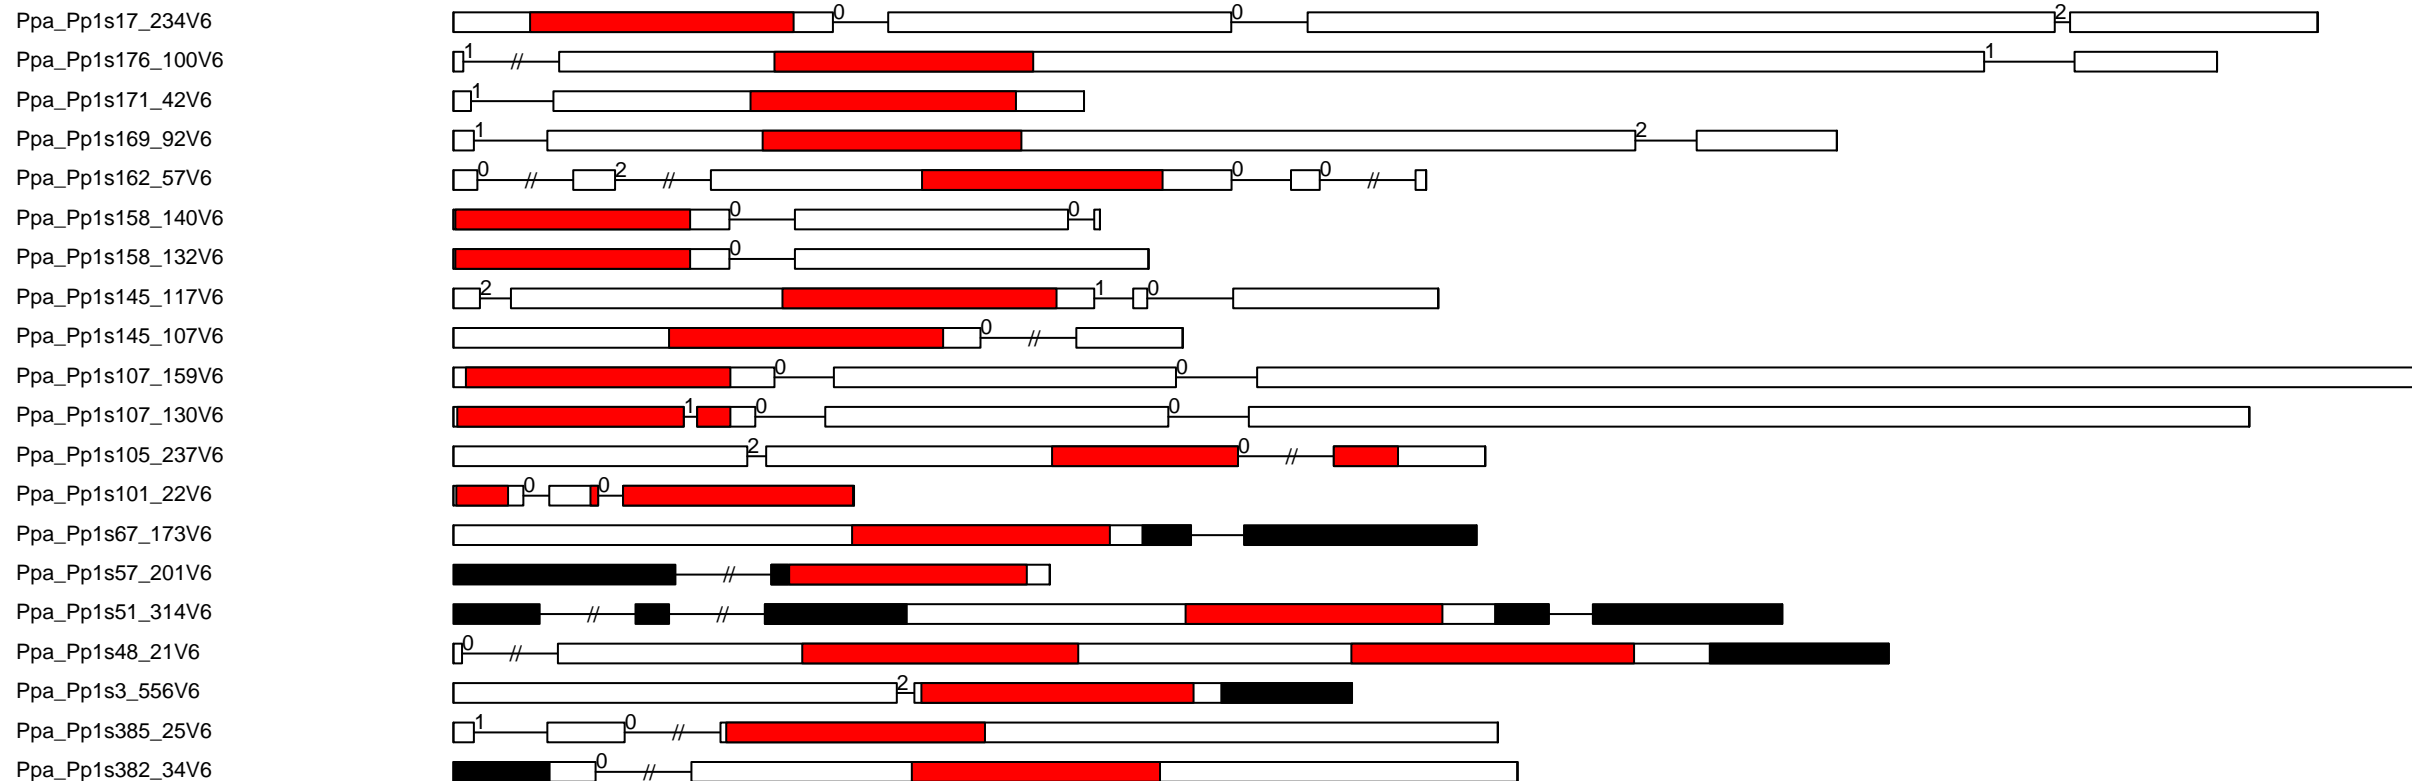

### P.pa TKL\_Gdt exon-intron and kinase domain diagram (part 3)

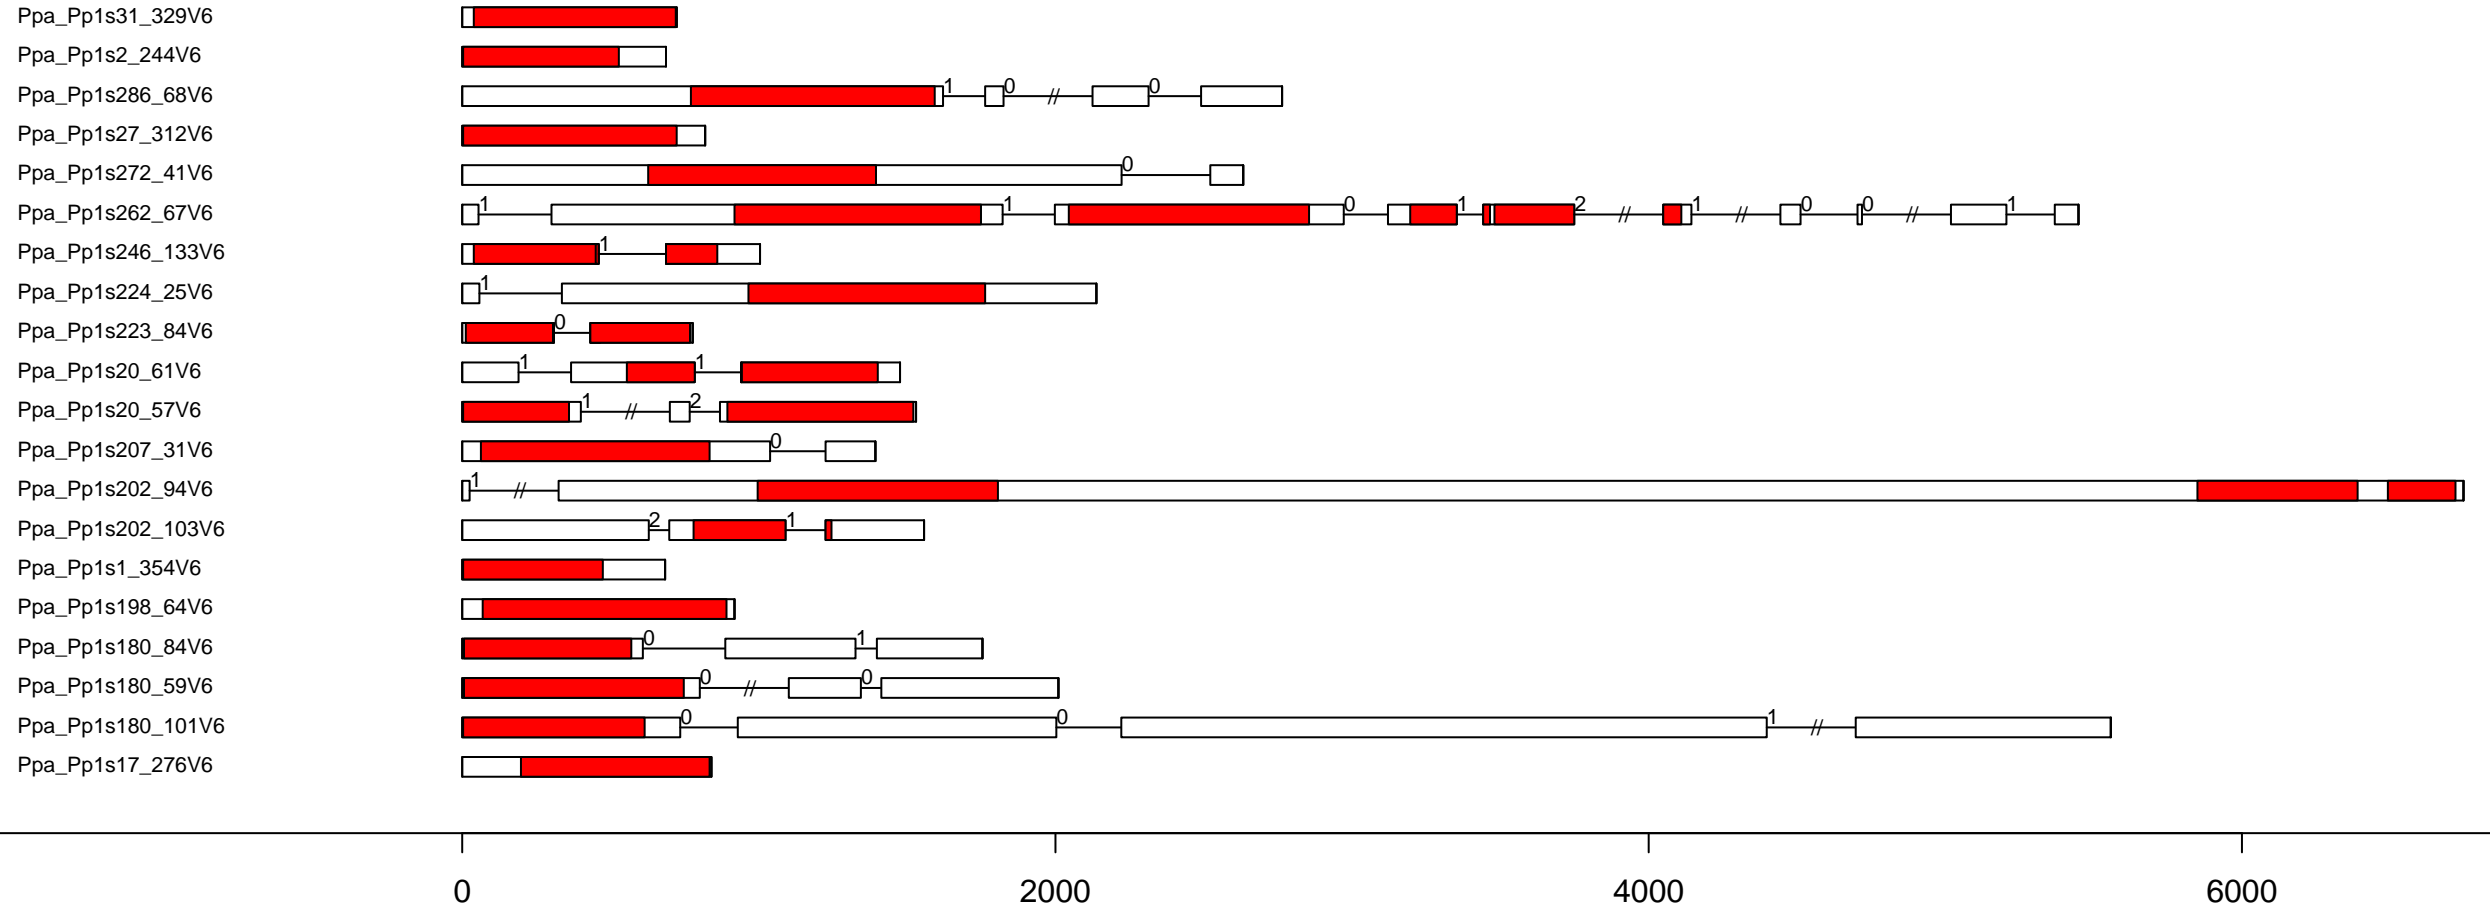



# P.pa TKL\_RIPK exon-intron and kinase domain diagram (all)

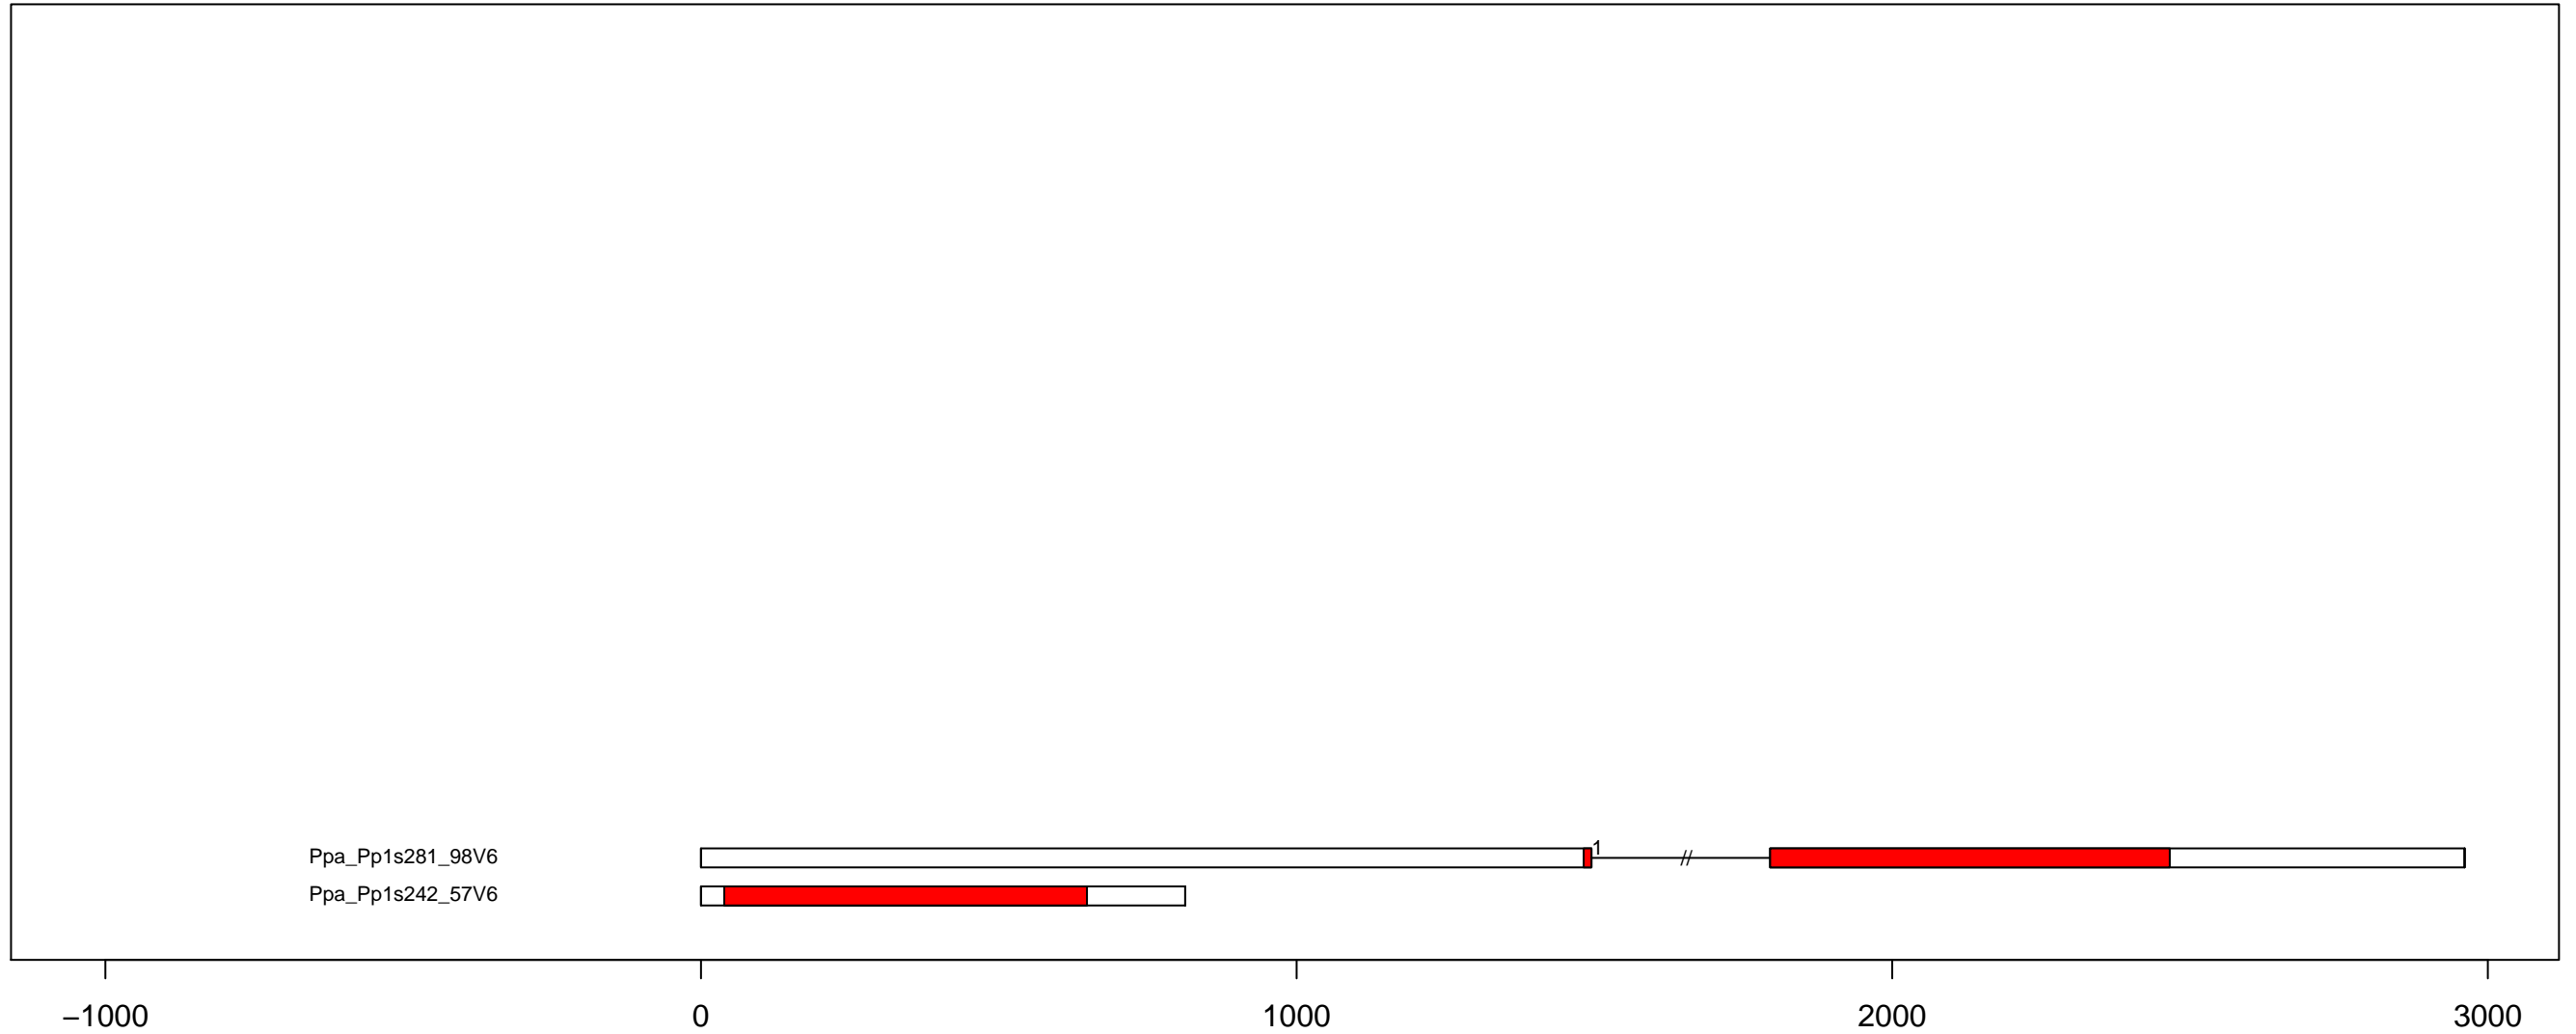

# P.pa TKL-PI-1 exon-intron and kinase domain diagram (all)

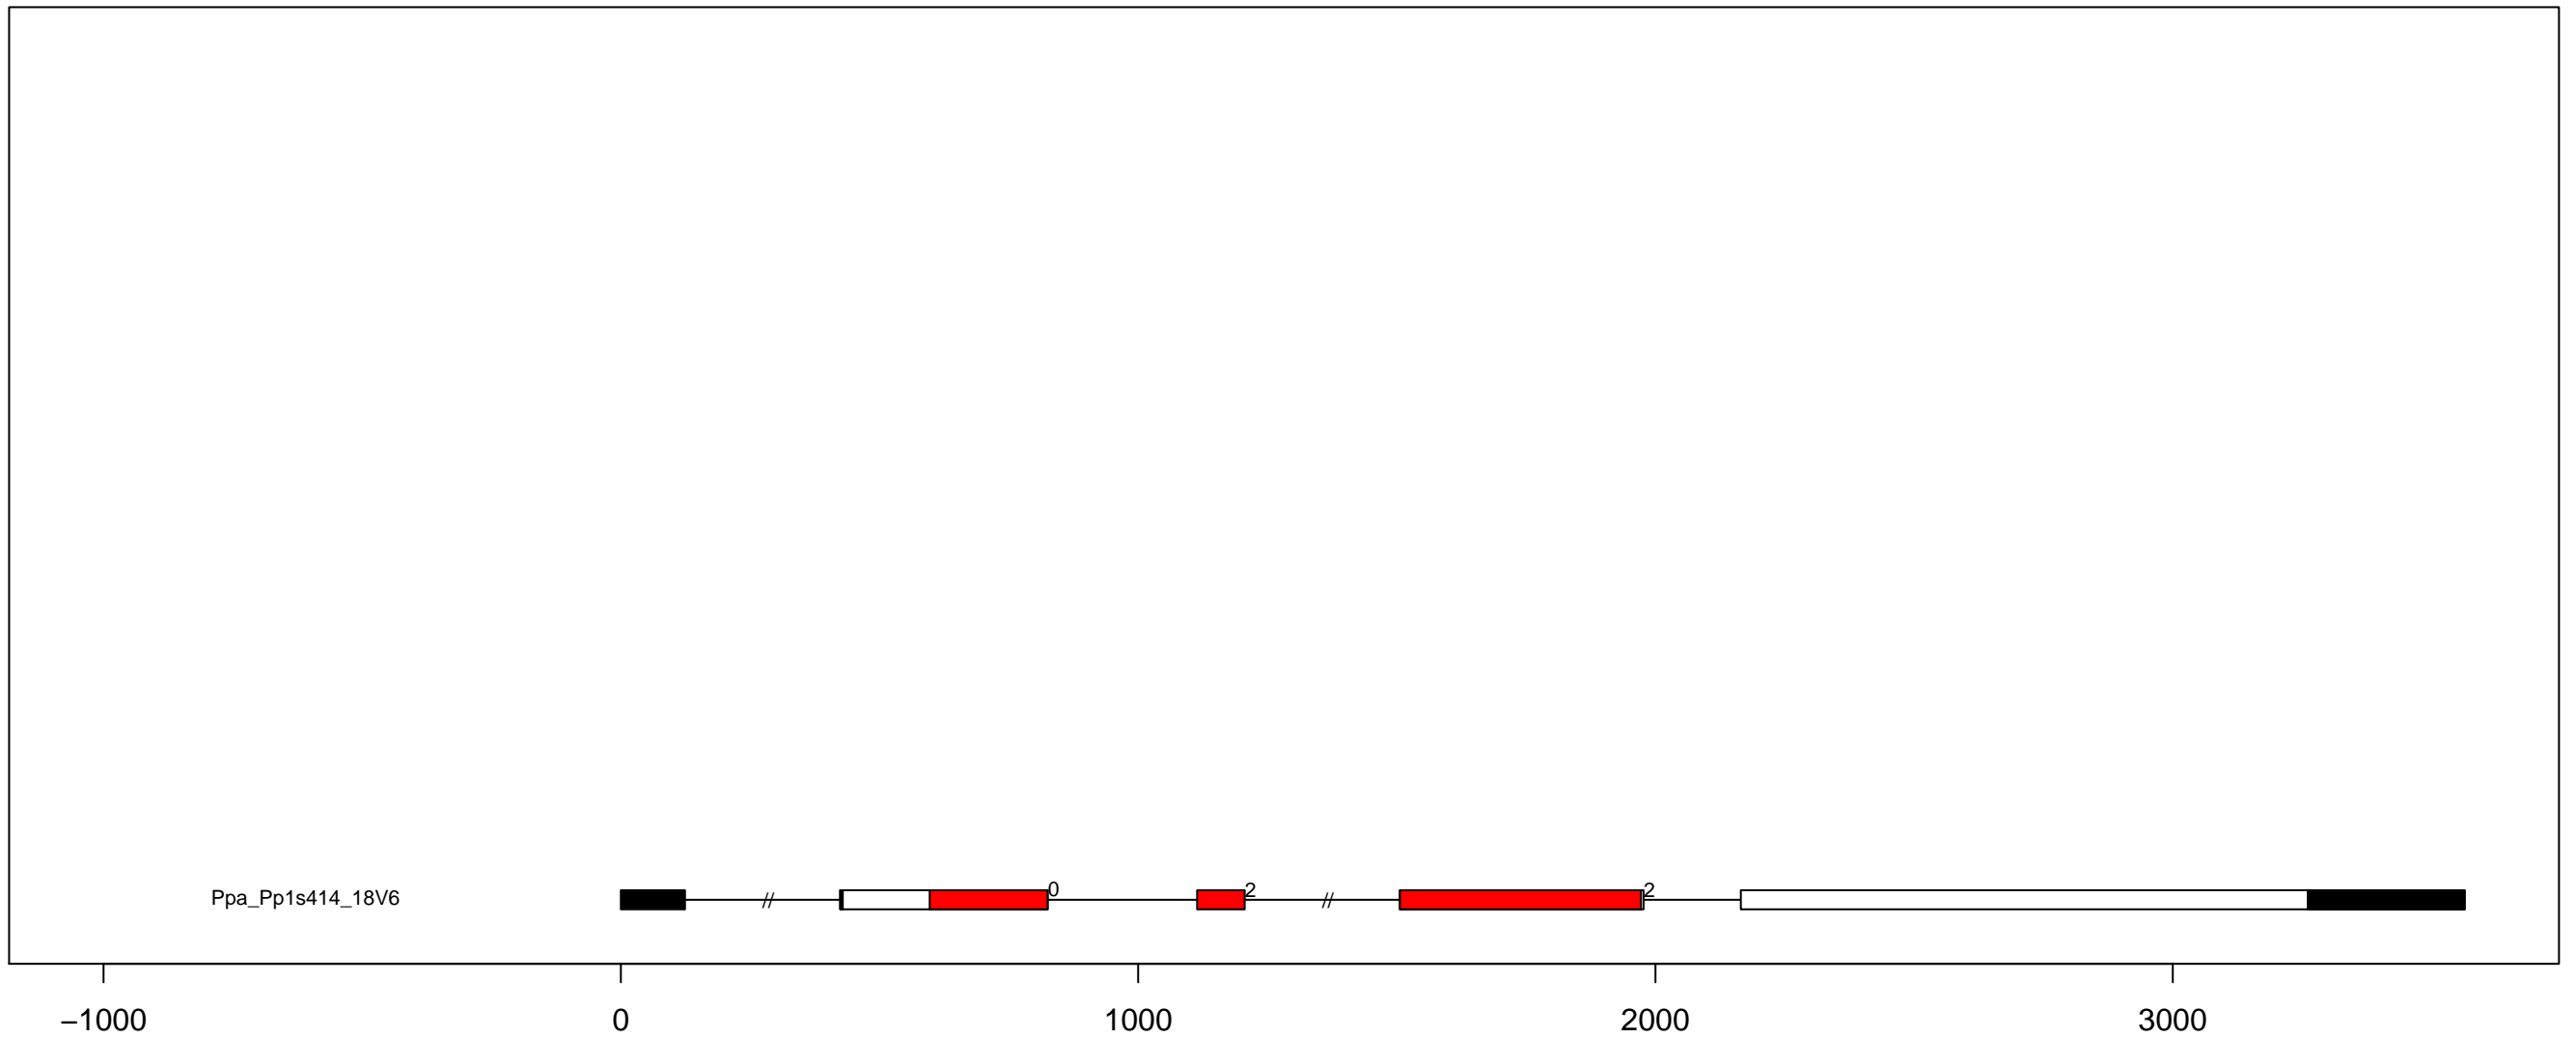

# P.pa TKL-PI-2 exon-intron and kinase domain diagram (all)

Ppa\_Pp1s134\_154V6

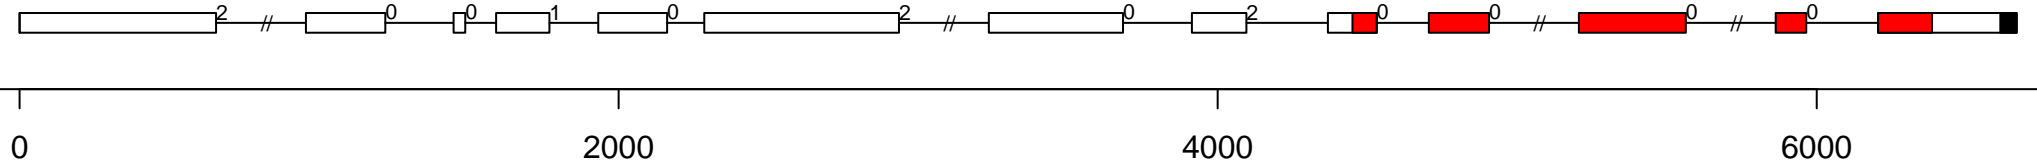

# P.pa TKL-PI-3 exon-intron and kinase domain diagram (all)

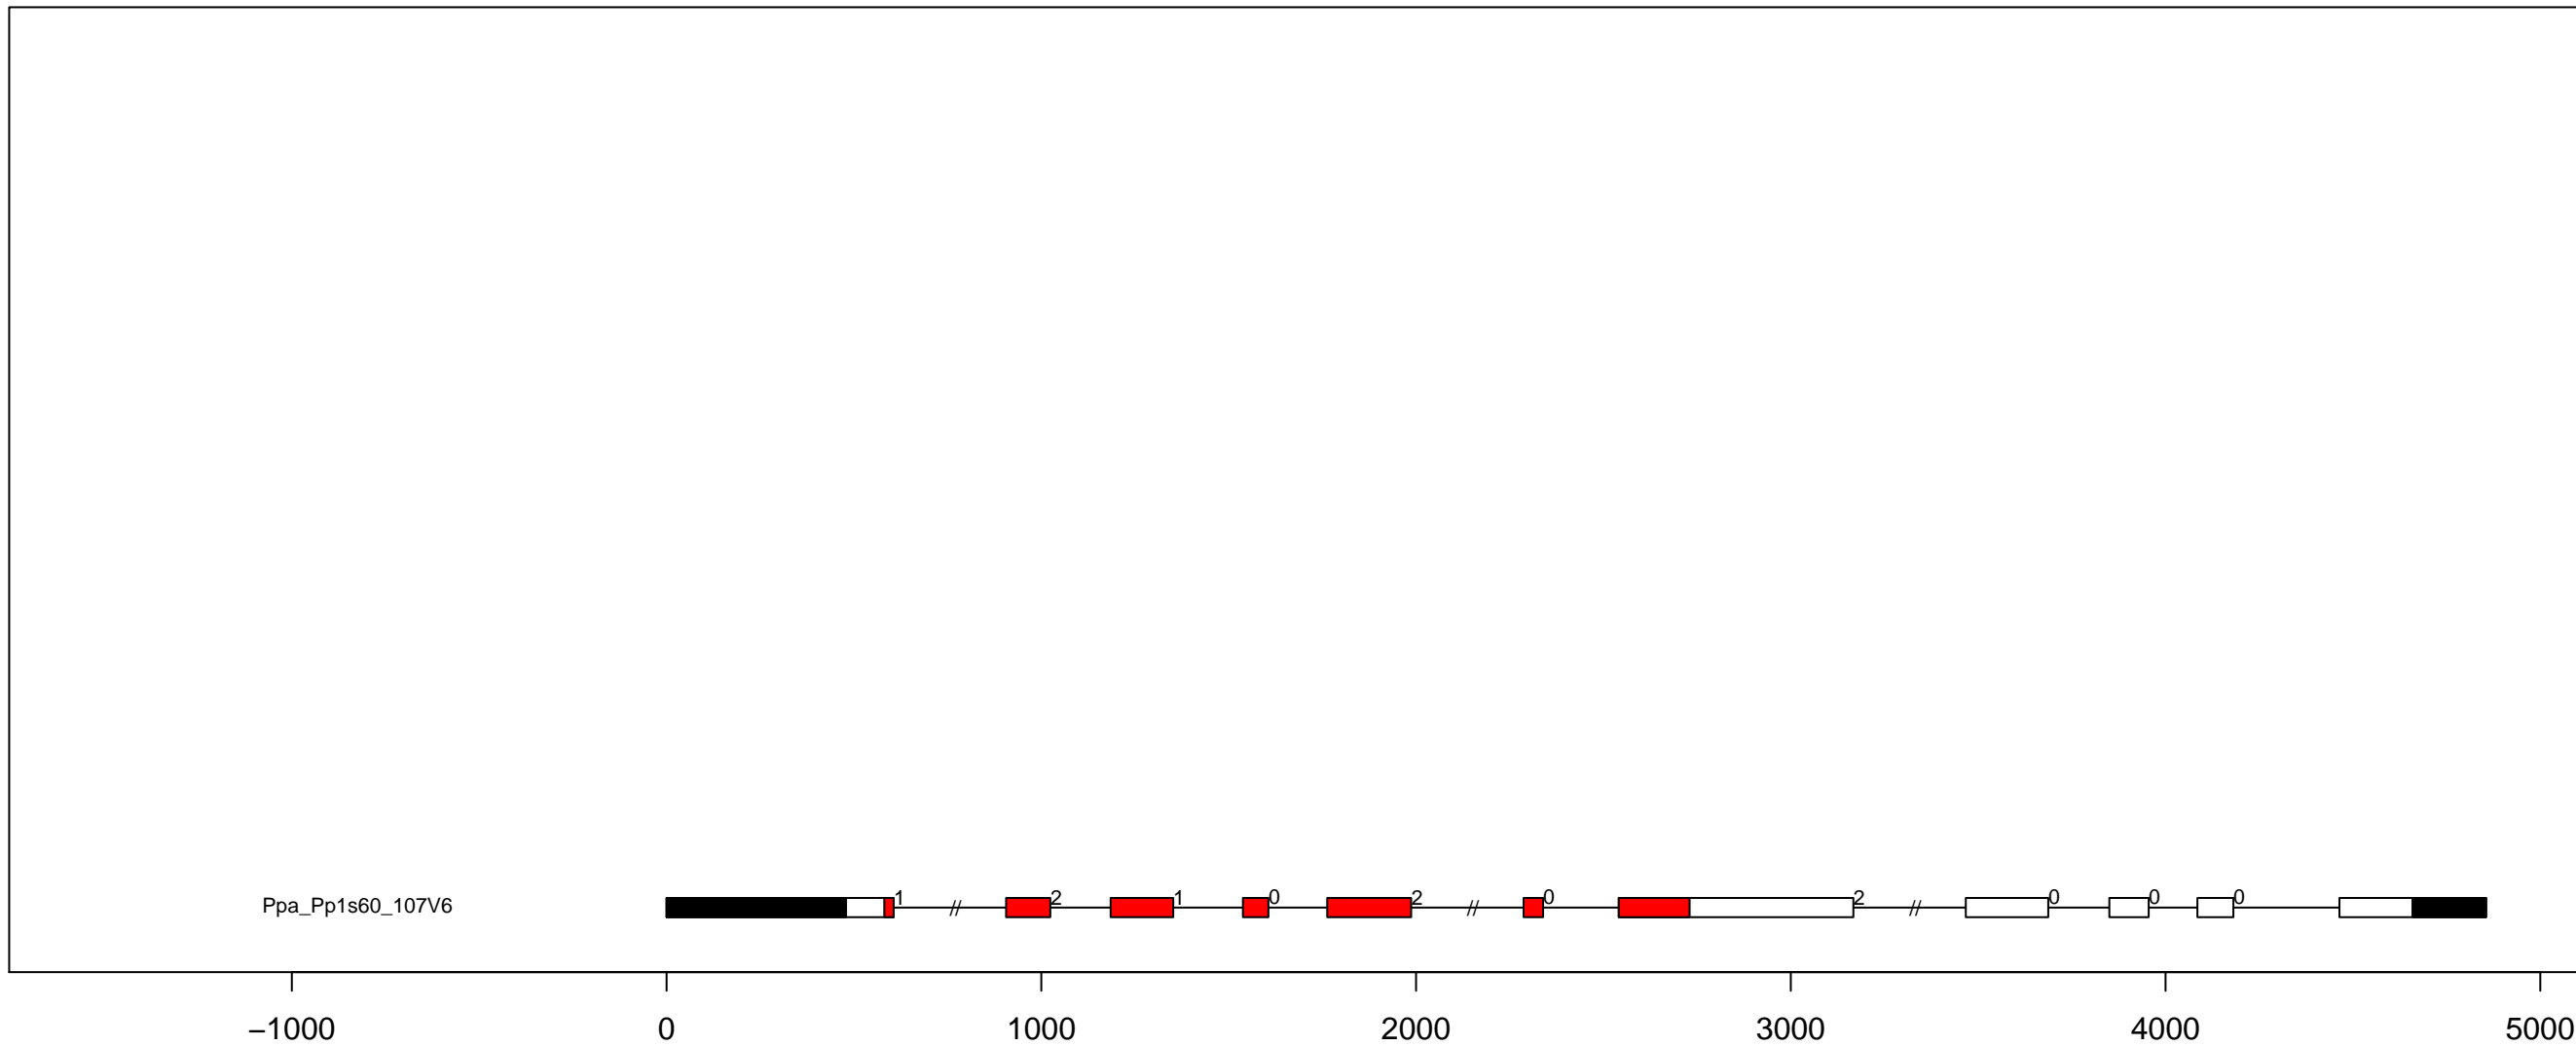

# P.pa TKL-PI-4 exon-intron and kinase domain diagram (part 1)

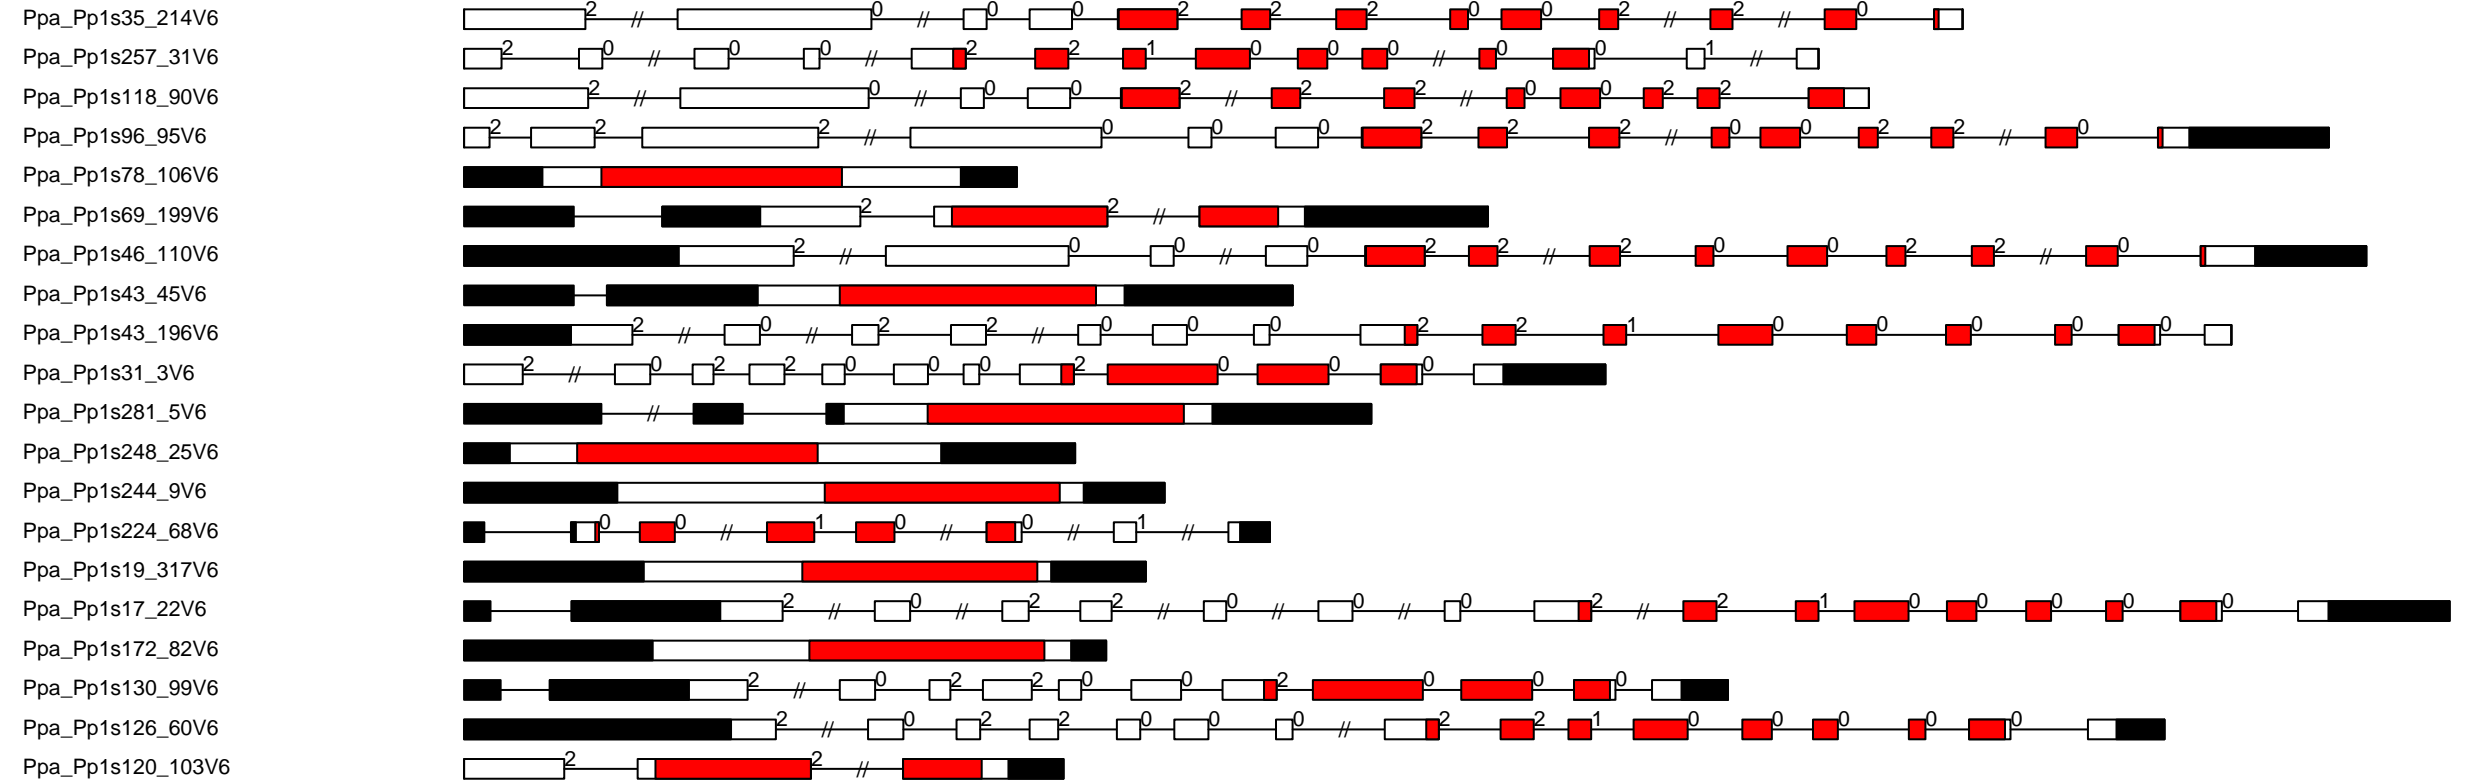



# P.pa TKL-PI-4 exon-intron and kinase domain diagram (part 2)

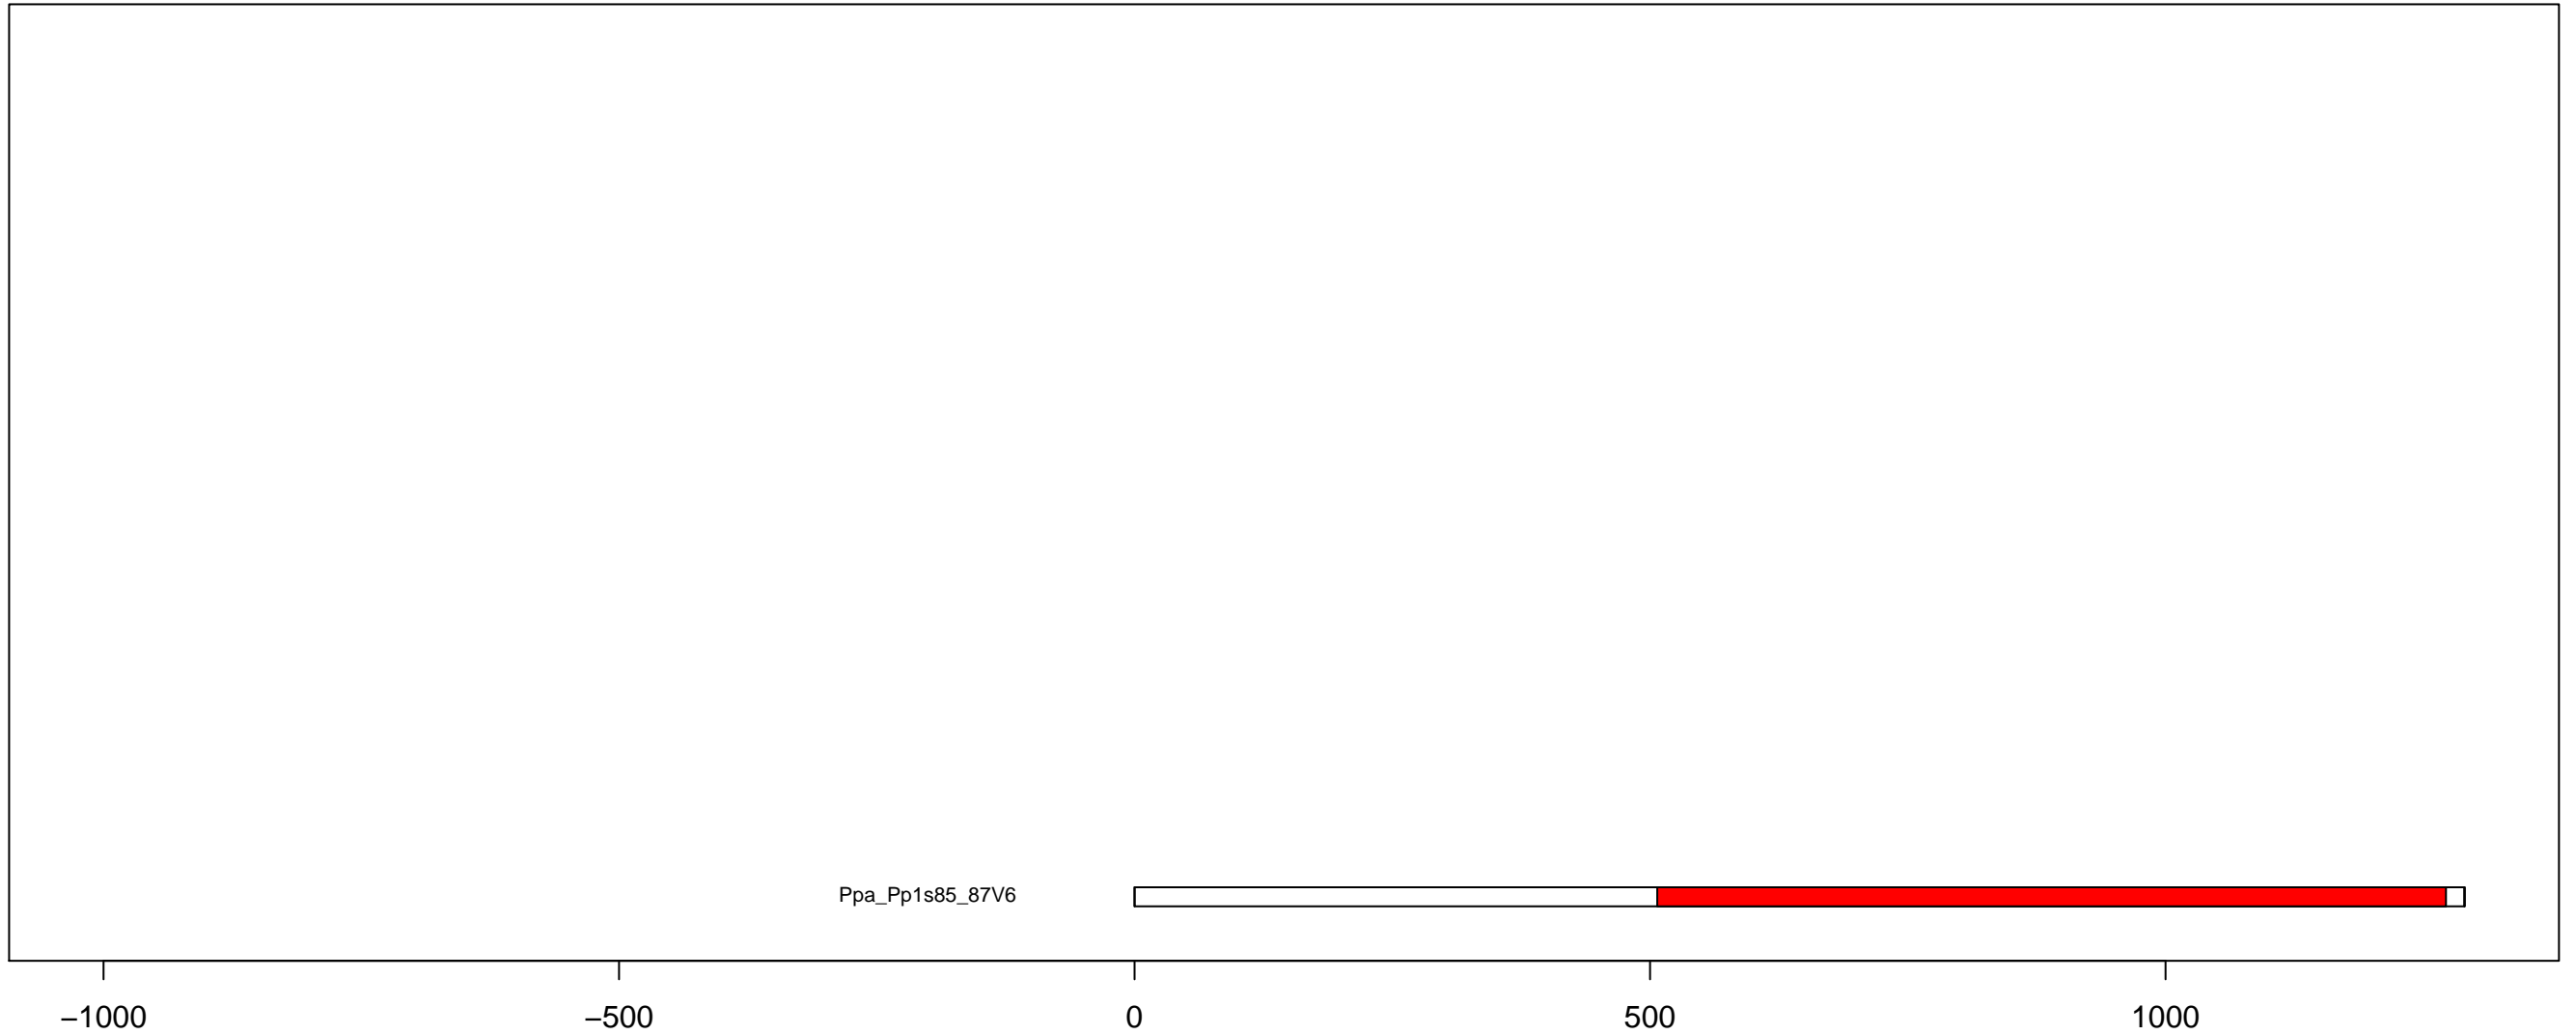

# P.pa TKL-PI-5 exon-intron and kinase domain diagram (all)

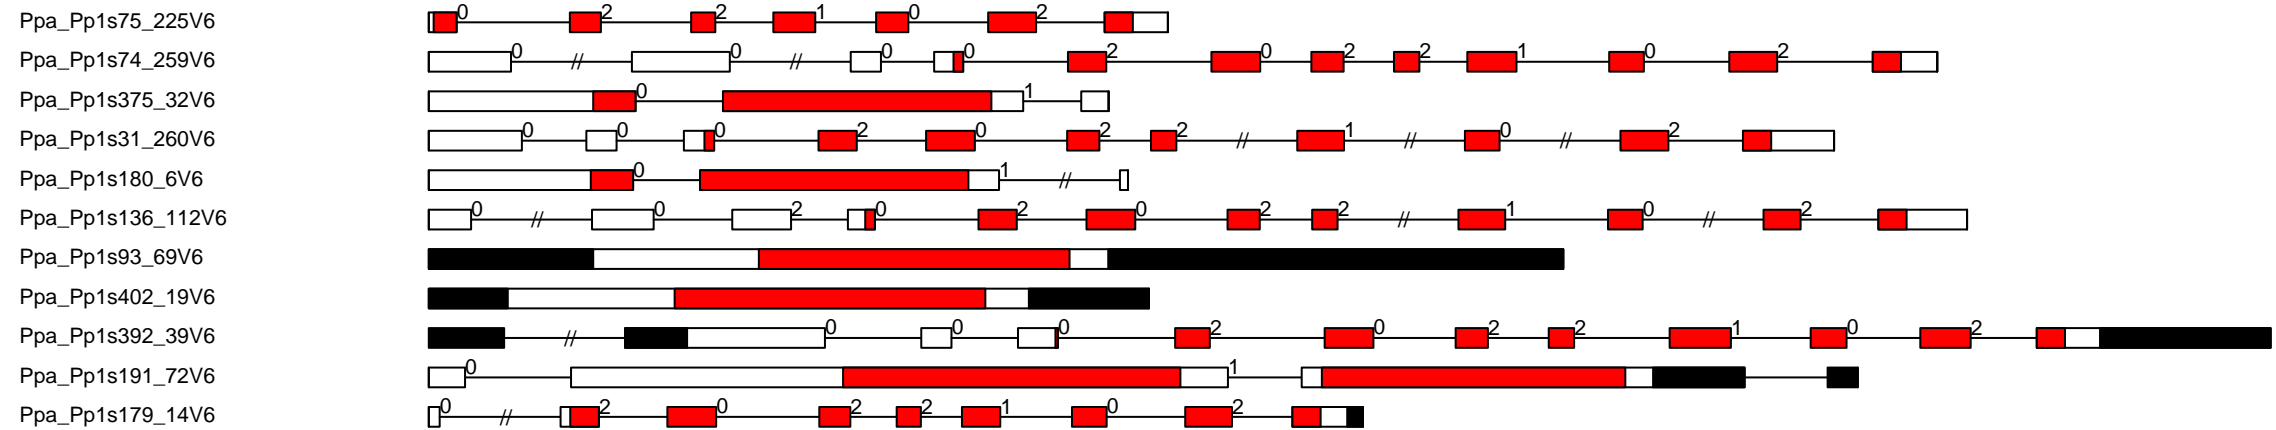

-1000

0

1000

2000

3000

4000

# P.pa TKL-PI-6 exon-intron and kinase domain diagram (all)

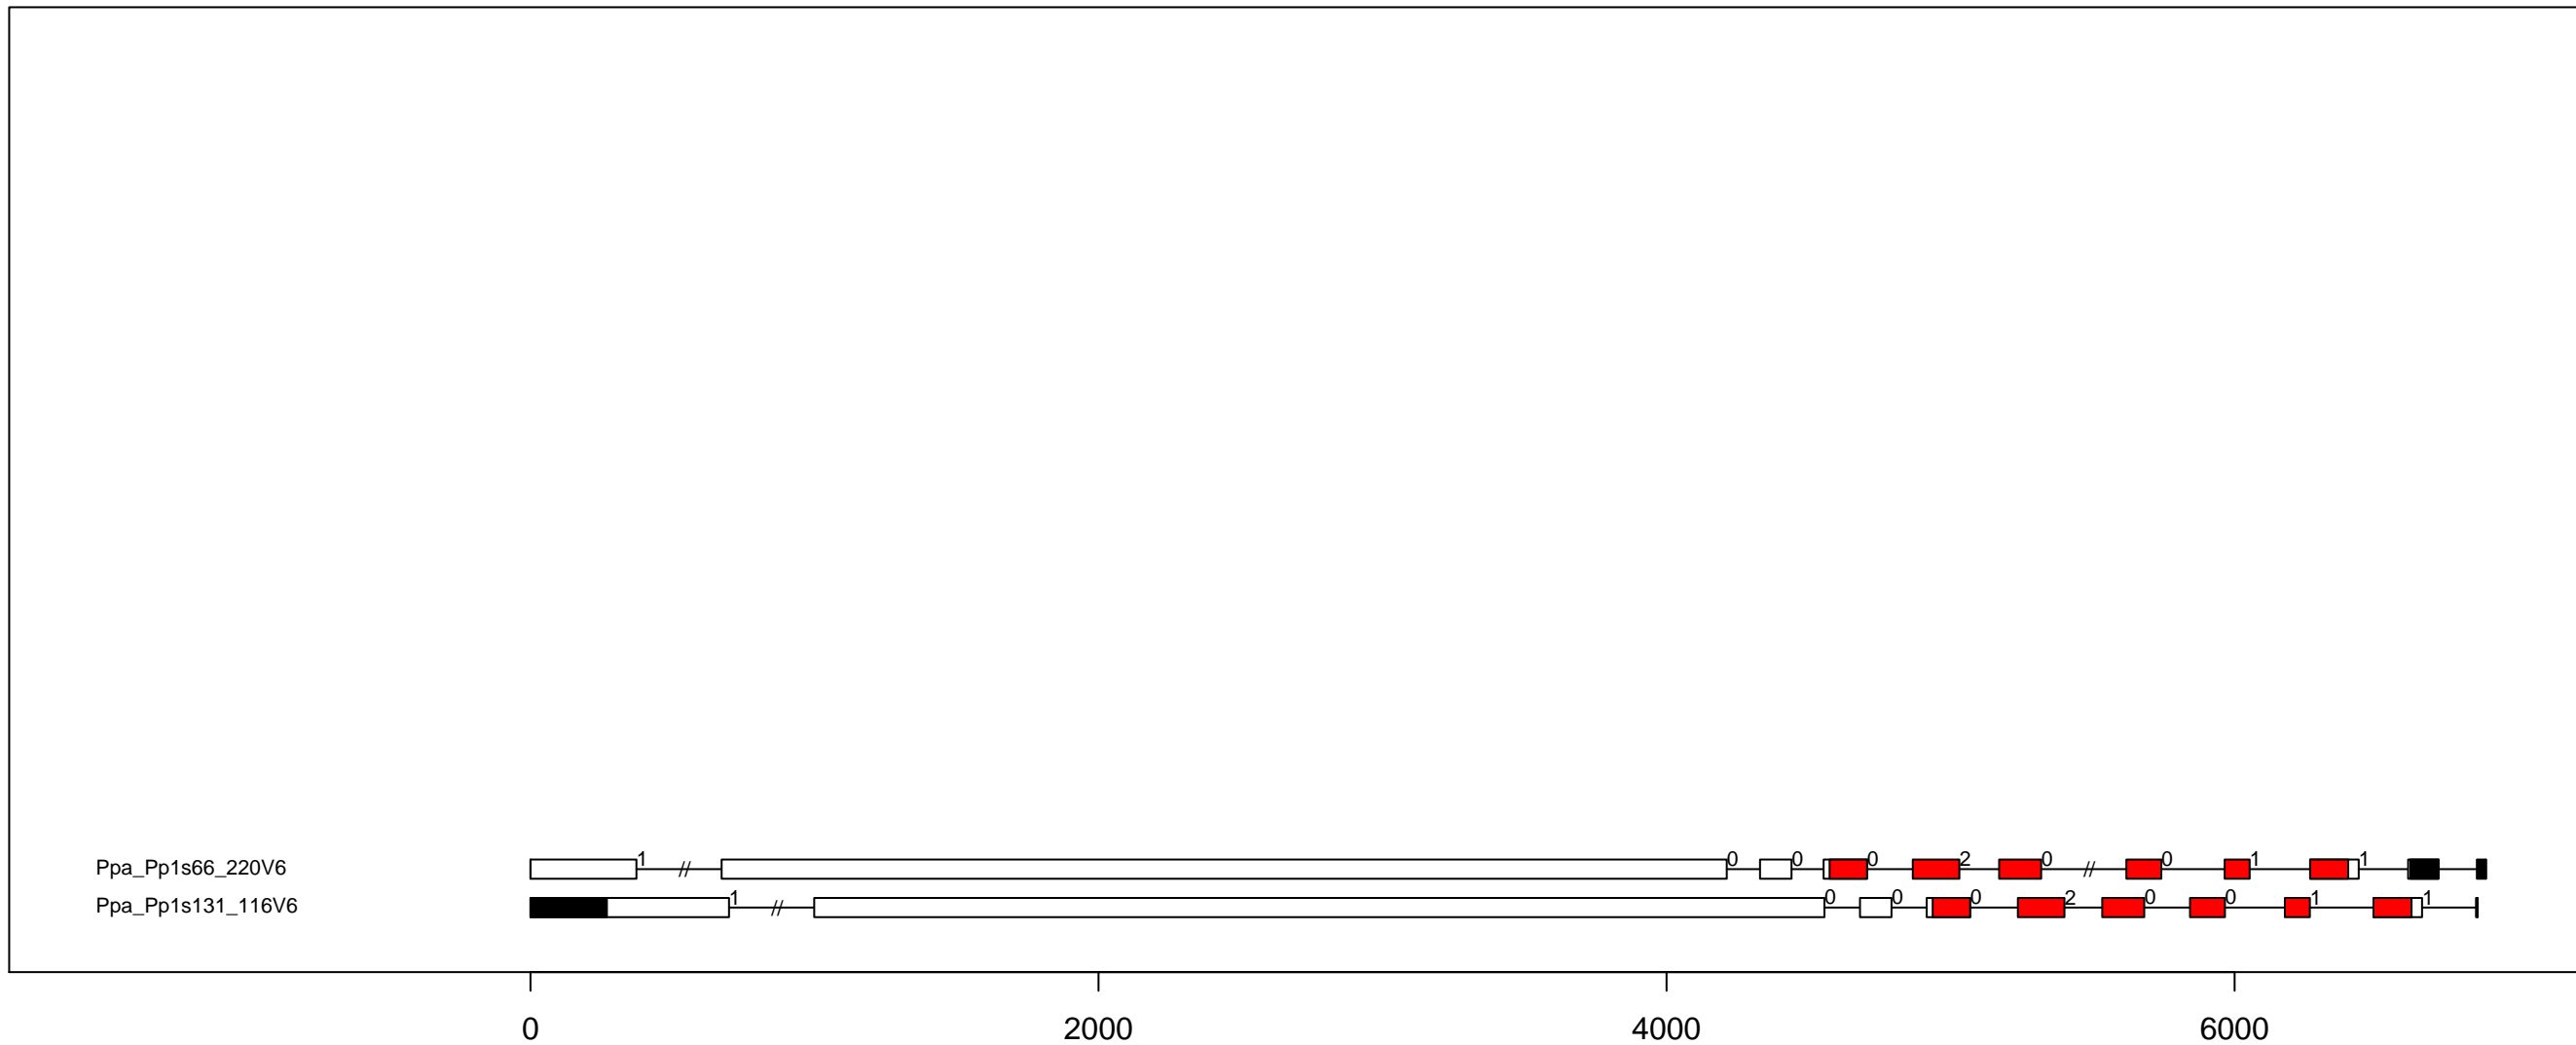

# P.pa TLK exon-intron and kinase domain diagram (all)

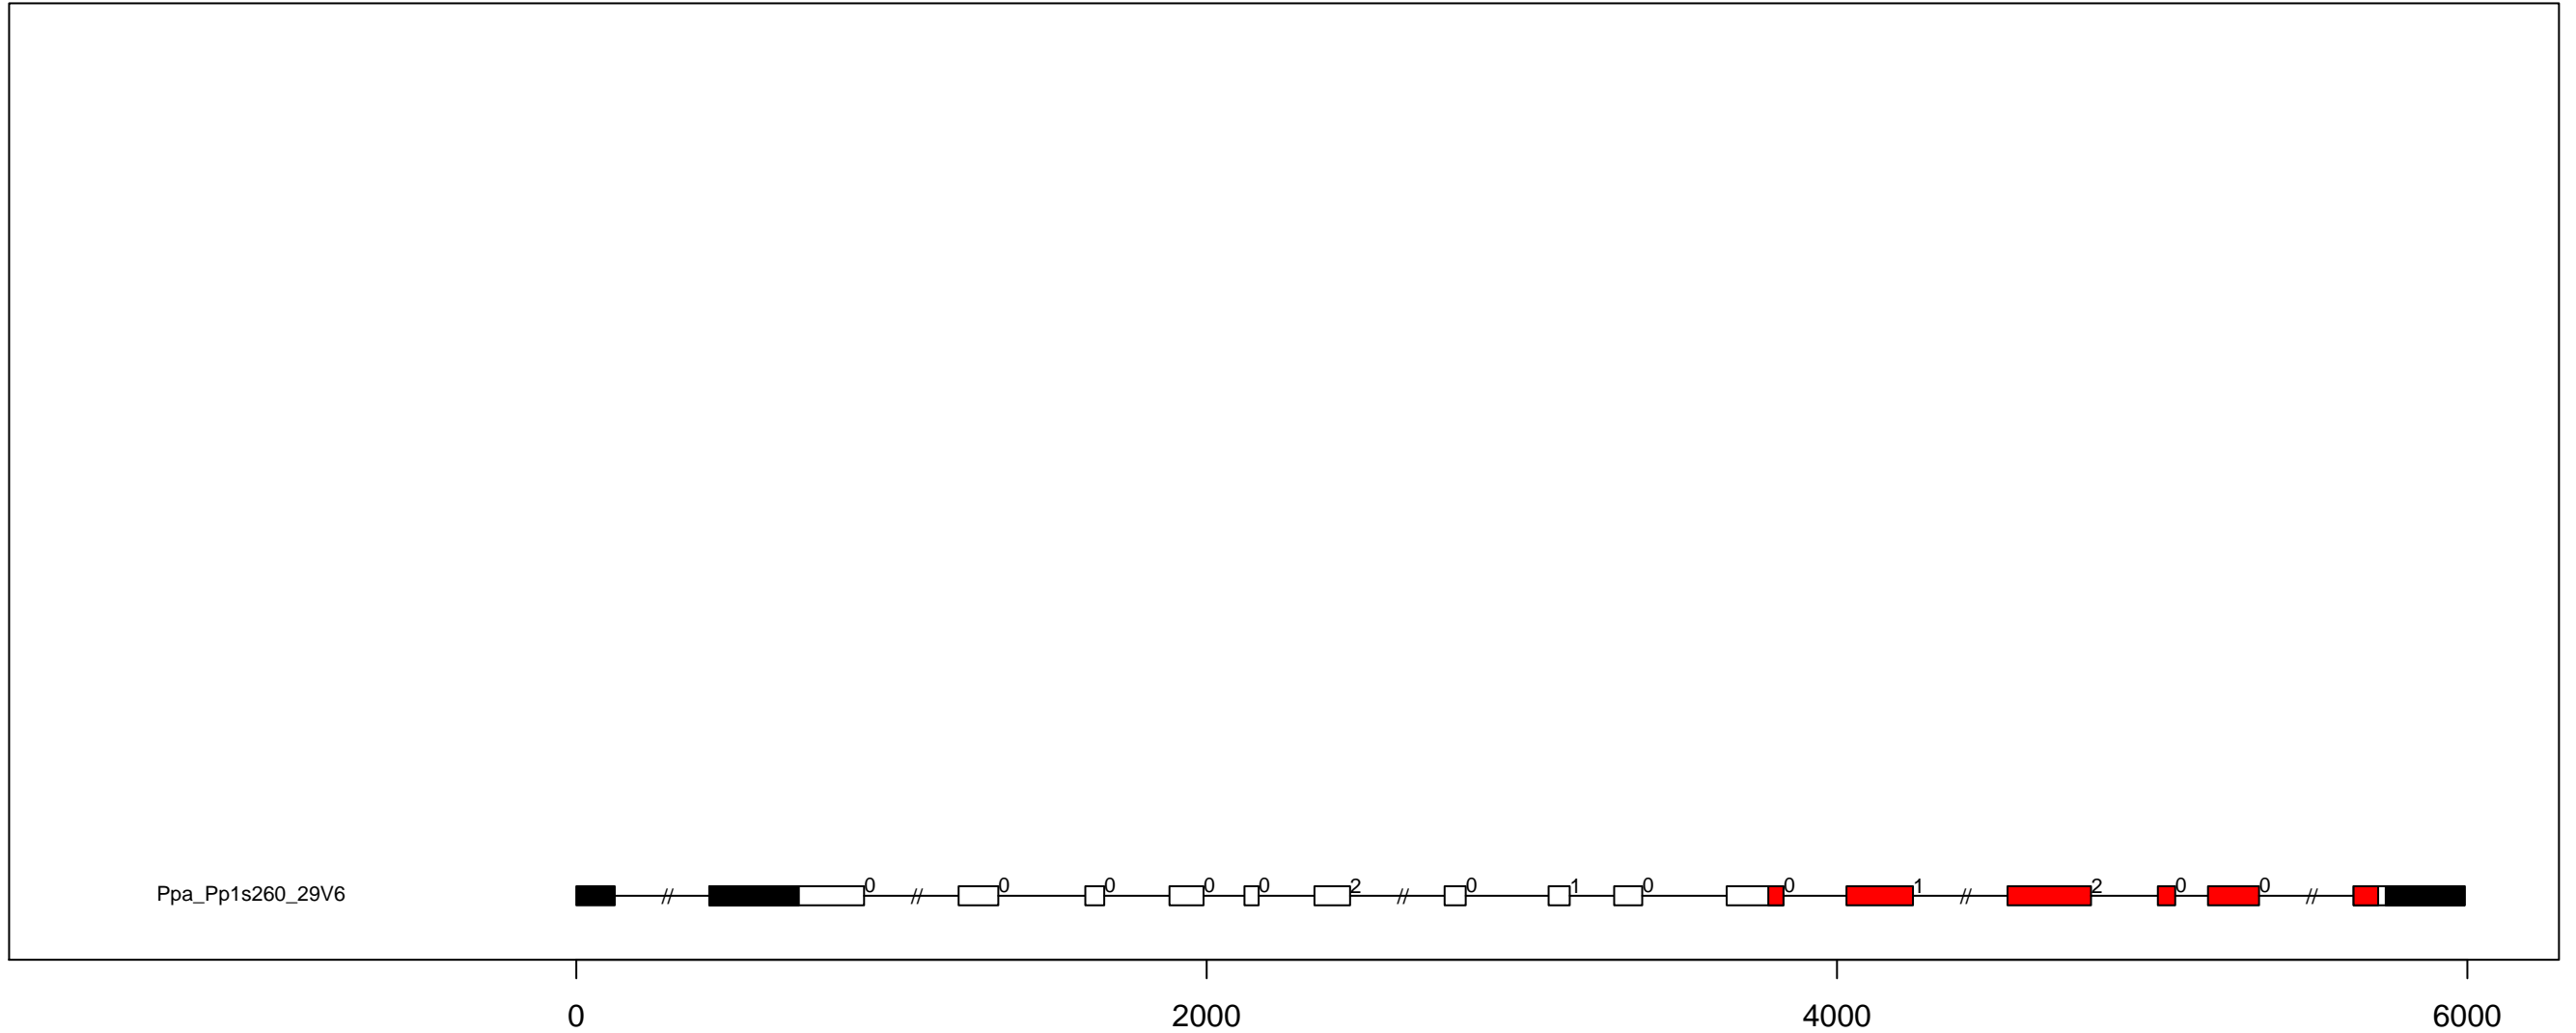

# P.pa TTK exon-intron and kinase domain diagram (all)

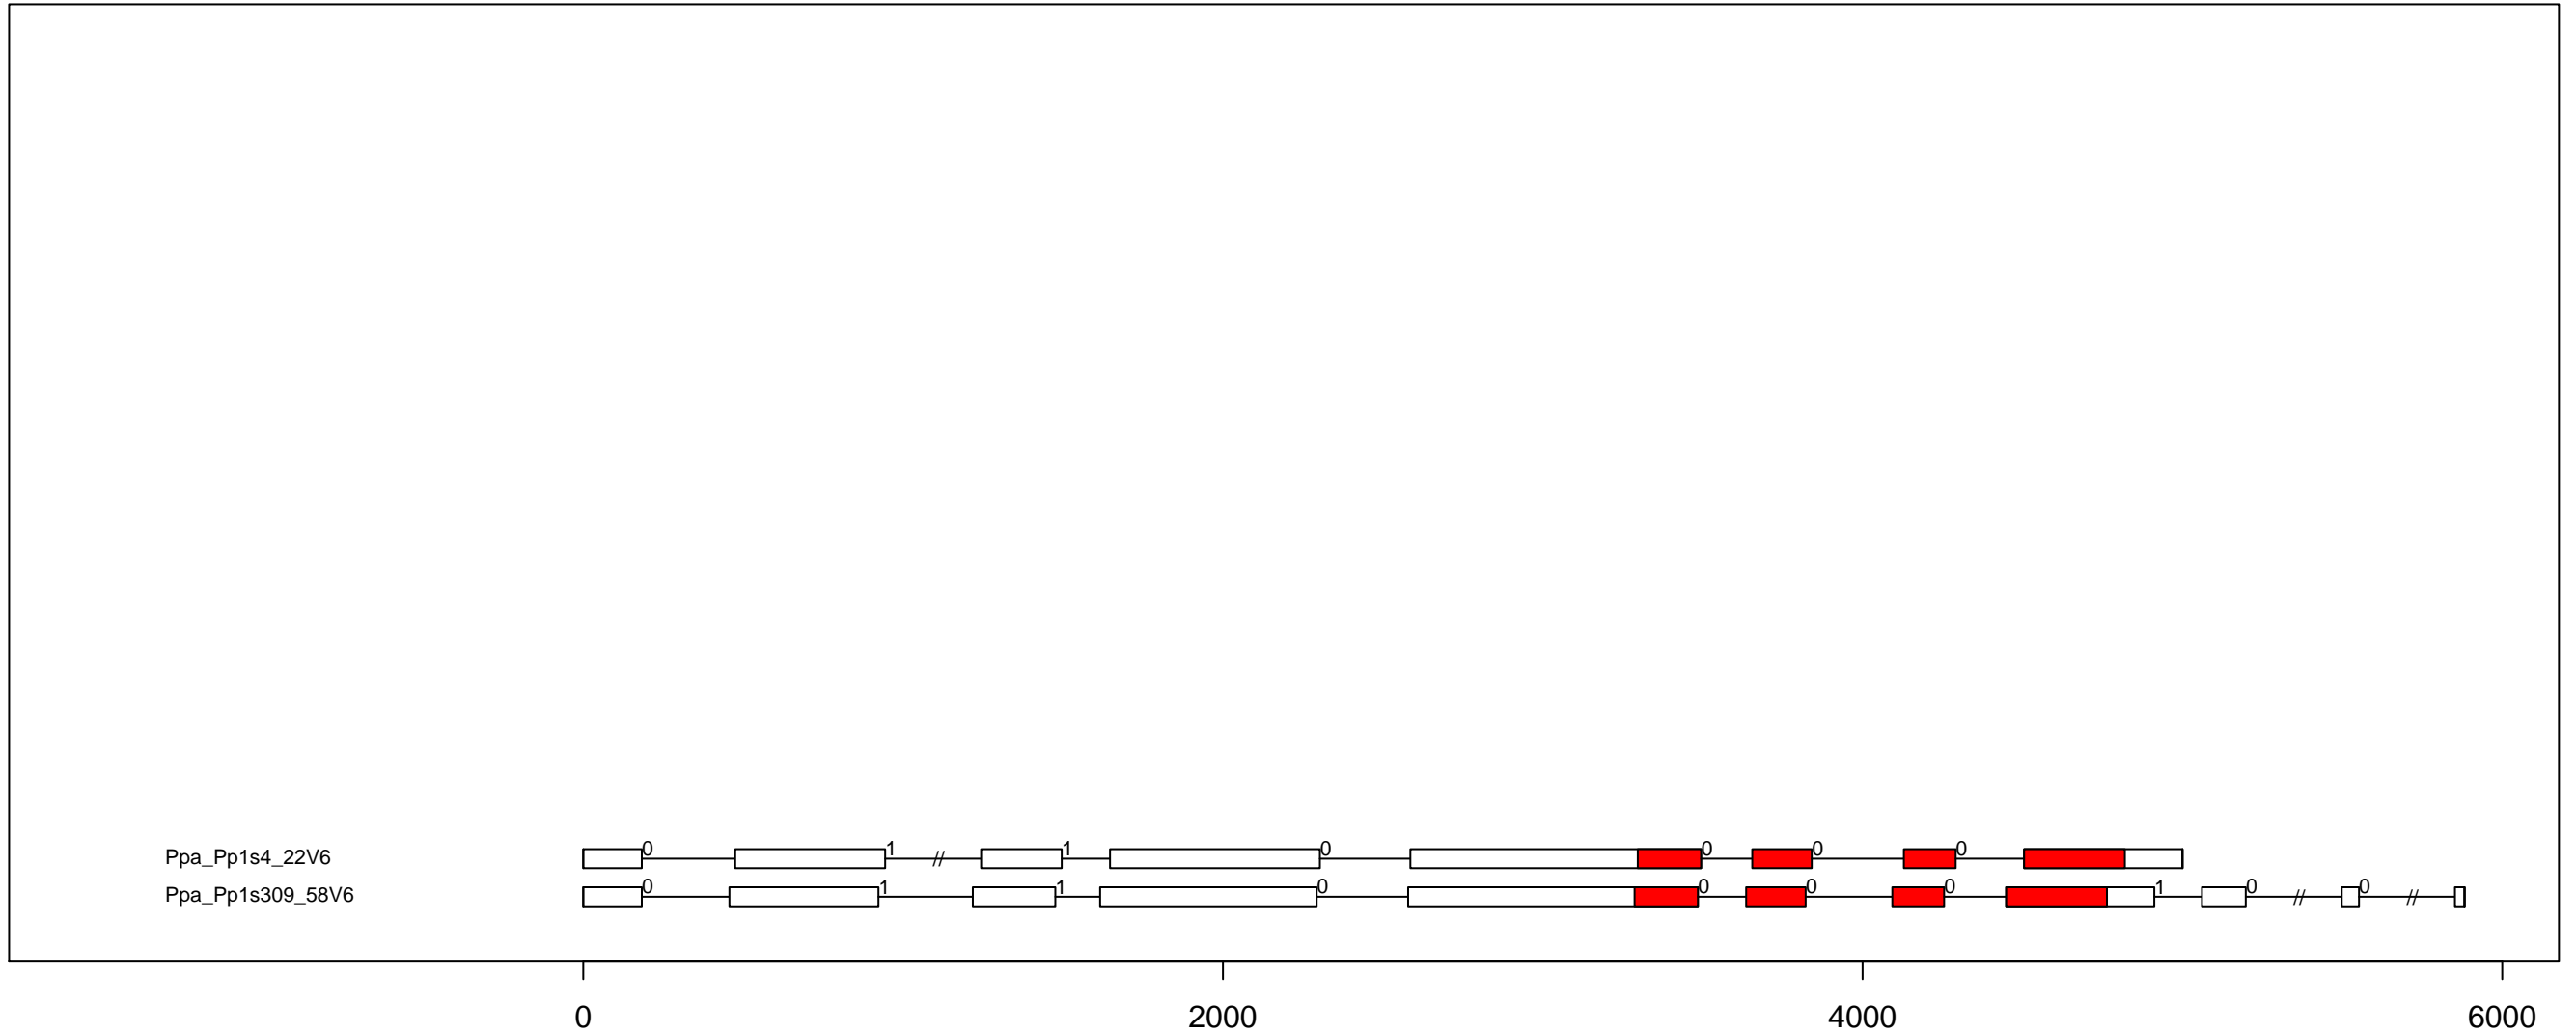

# P.pa ULK\_Fused exon-intron and kinase domain diagram (all)

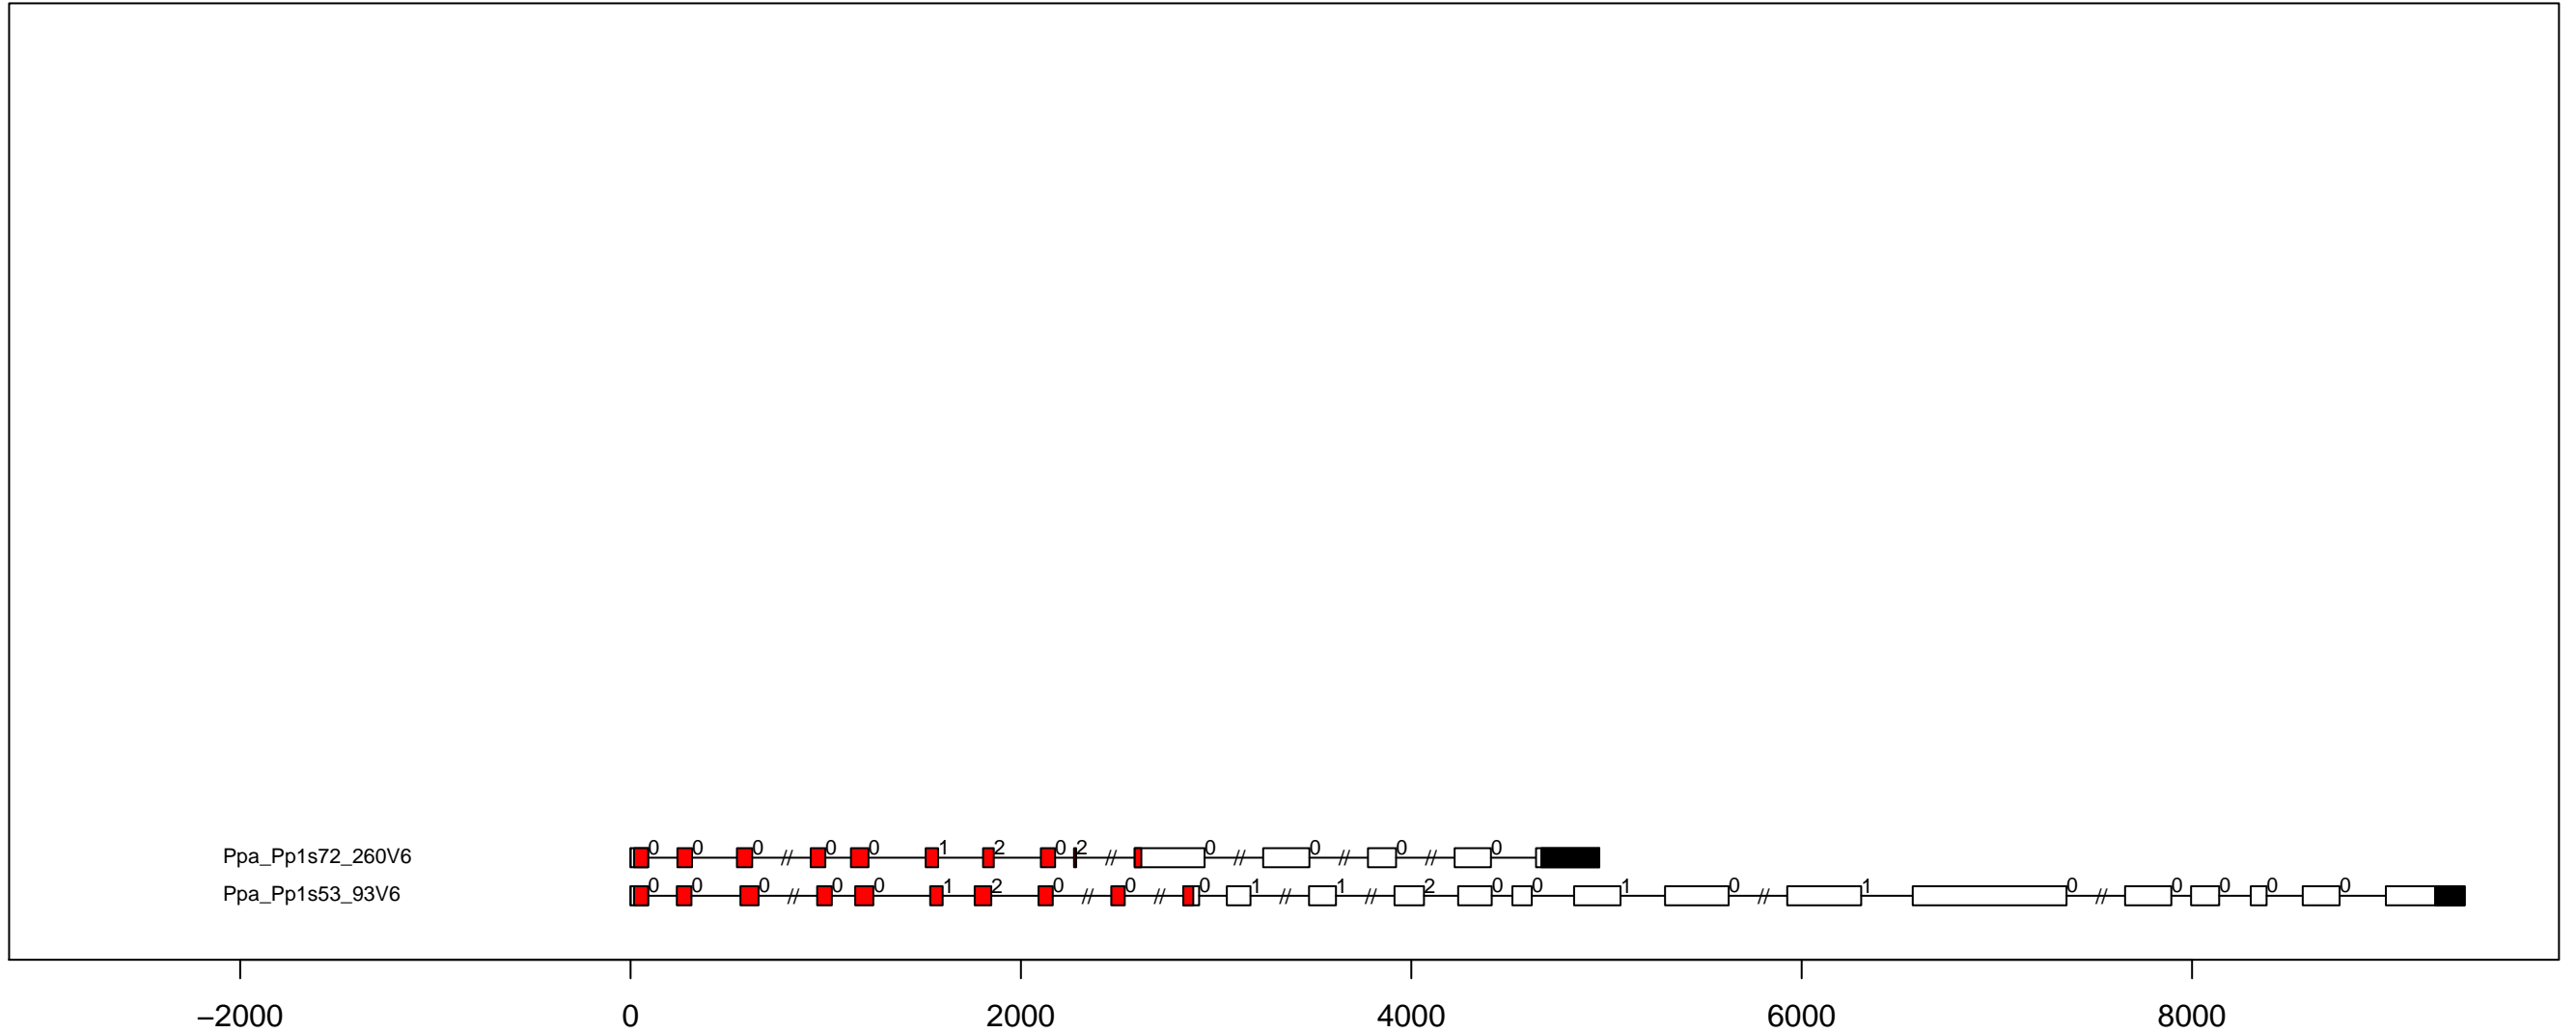

# P.pa ULK\_ULK4 exon-intron and kinase domain diagram (all)

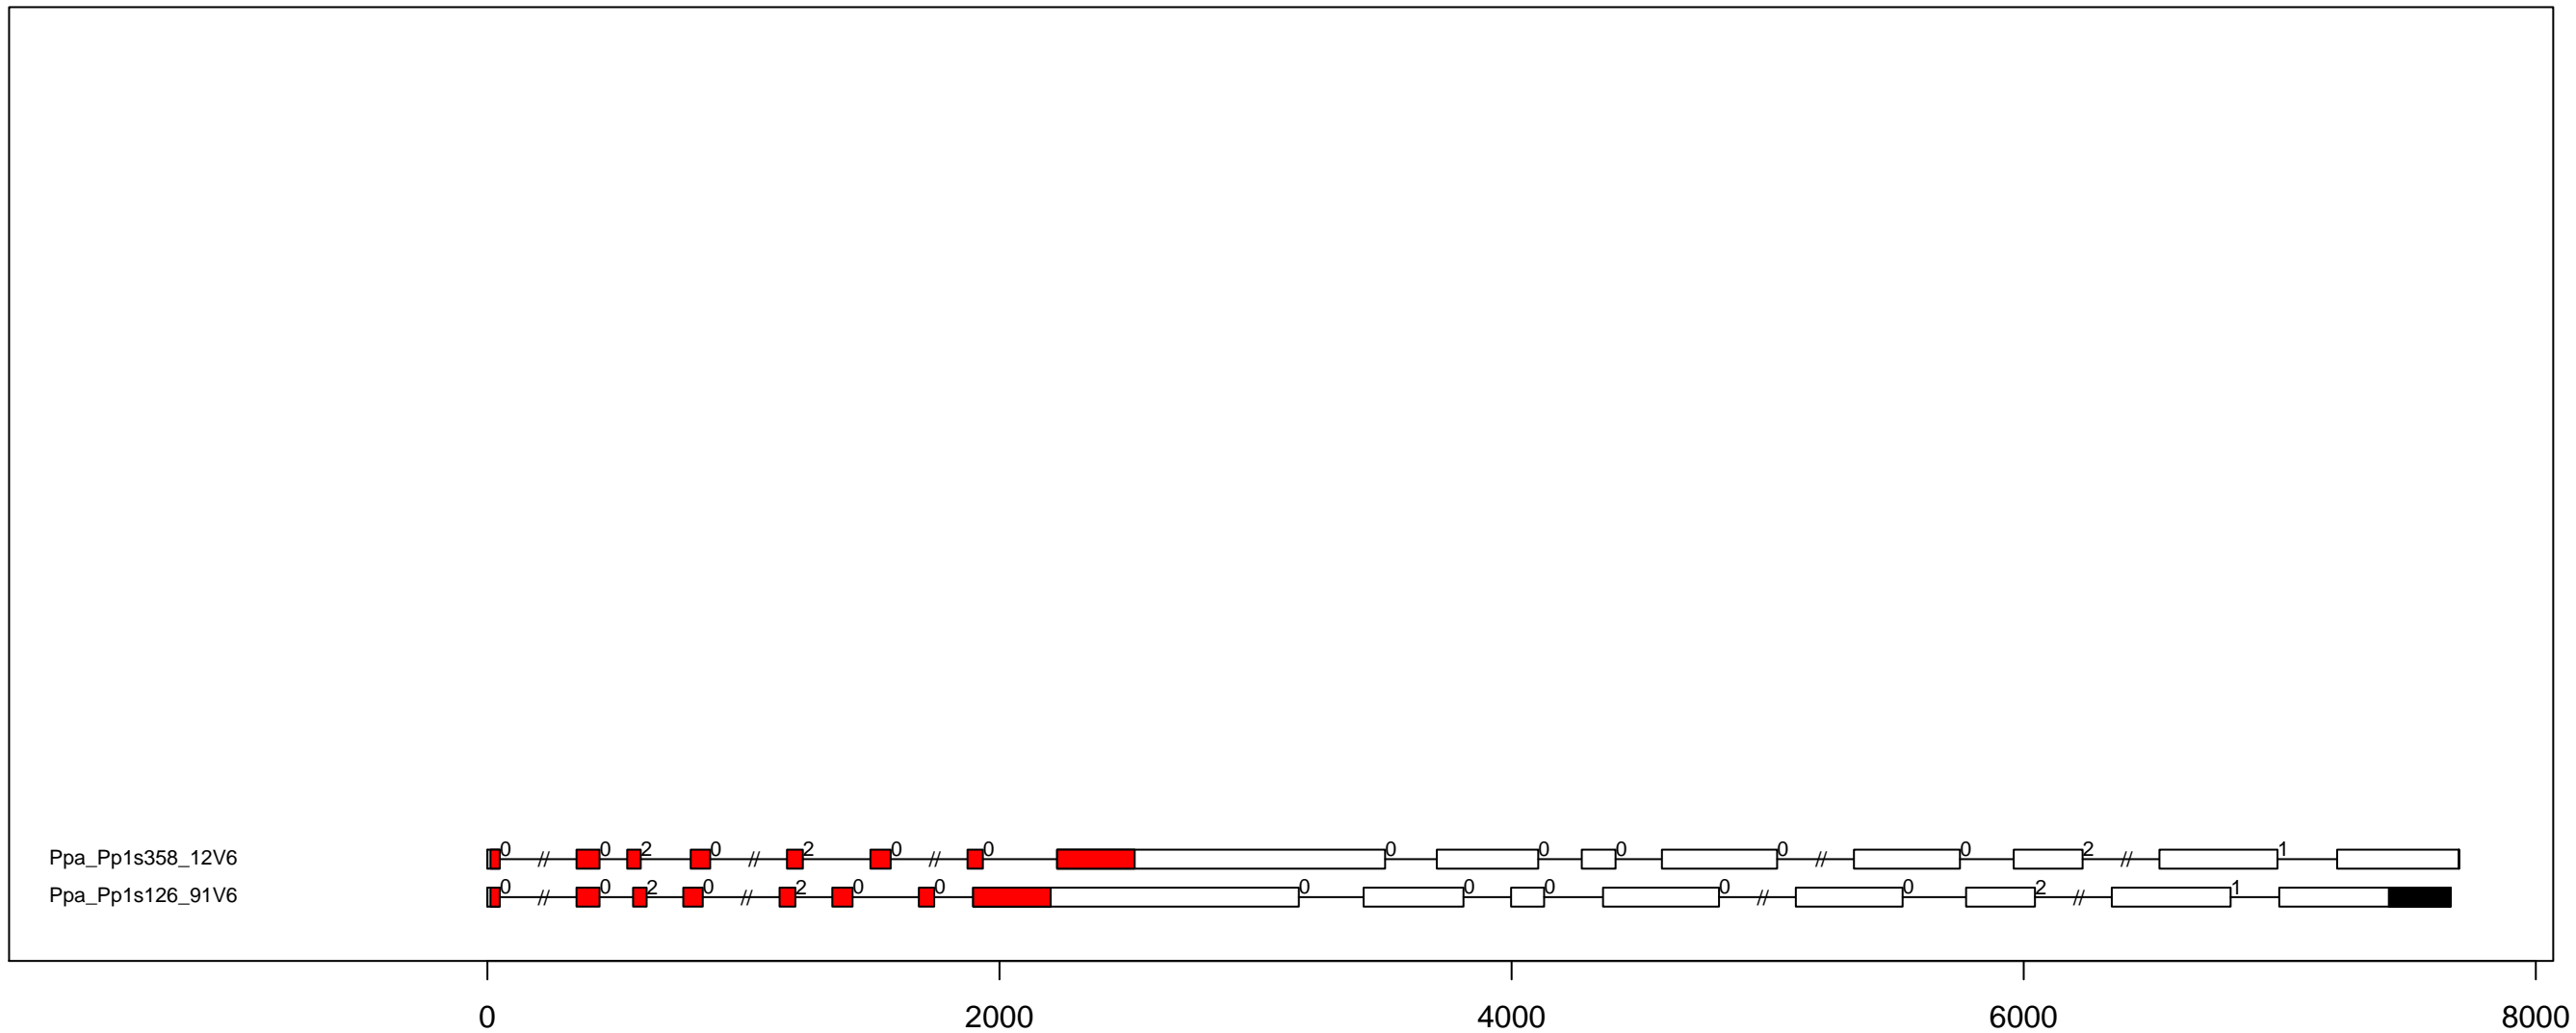

# P.pa WEE exon-intron and kinase domain diagram (all)

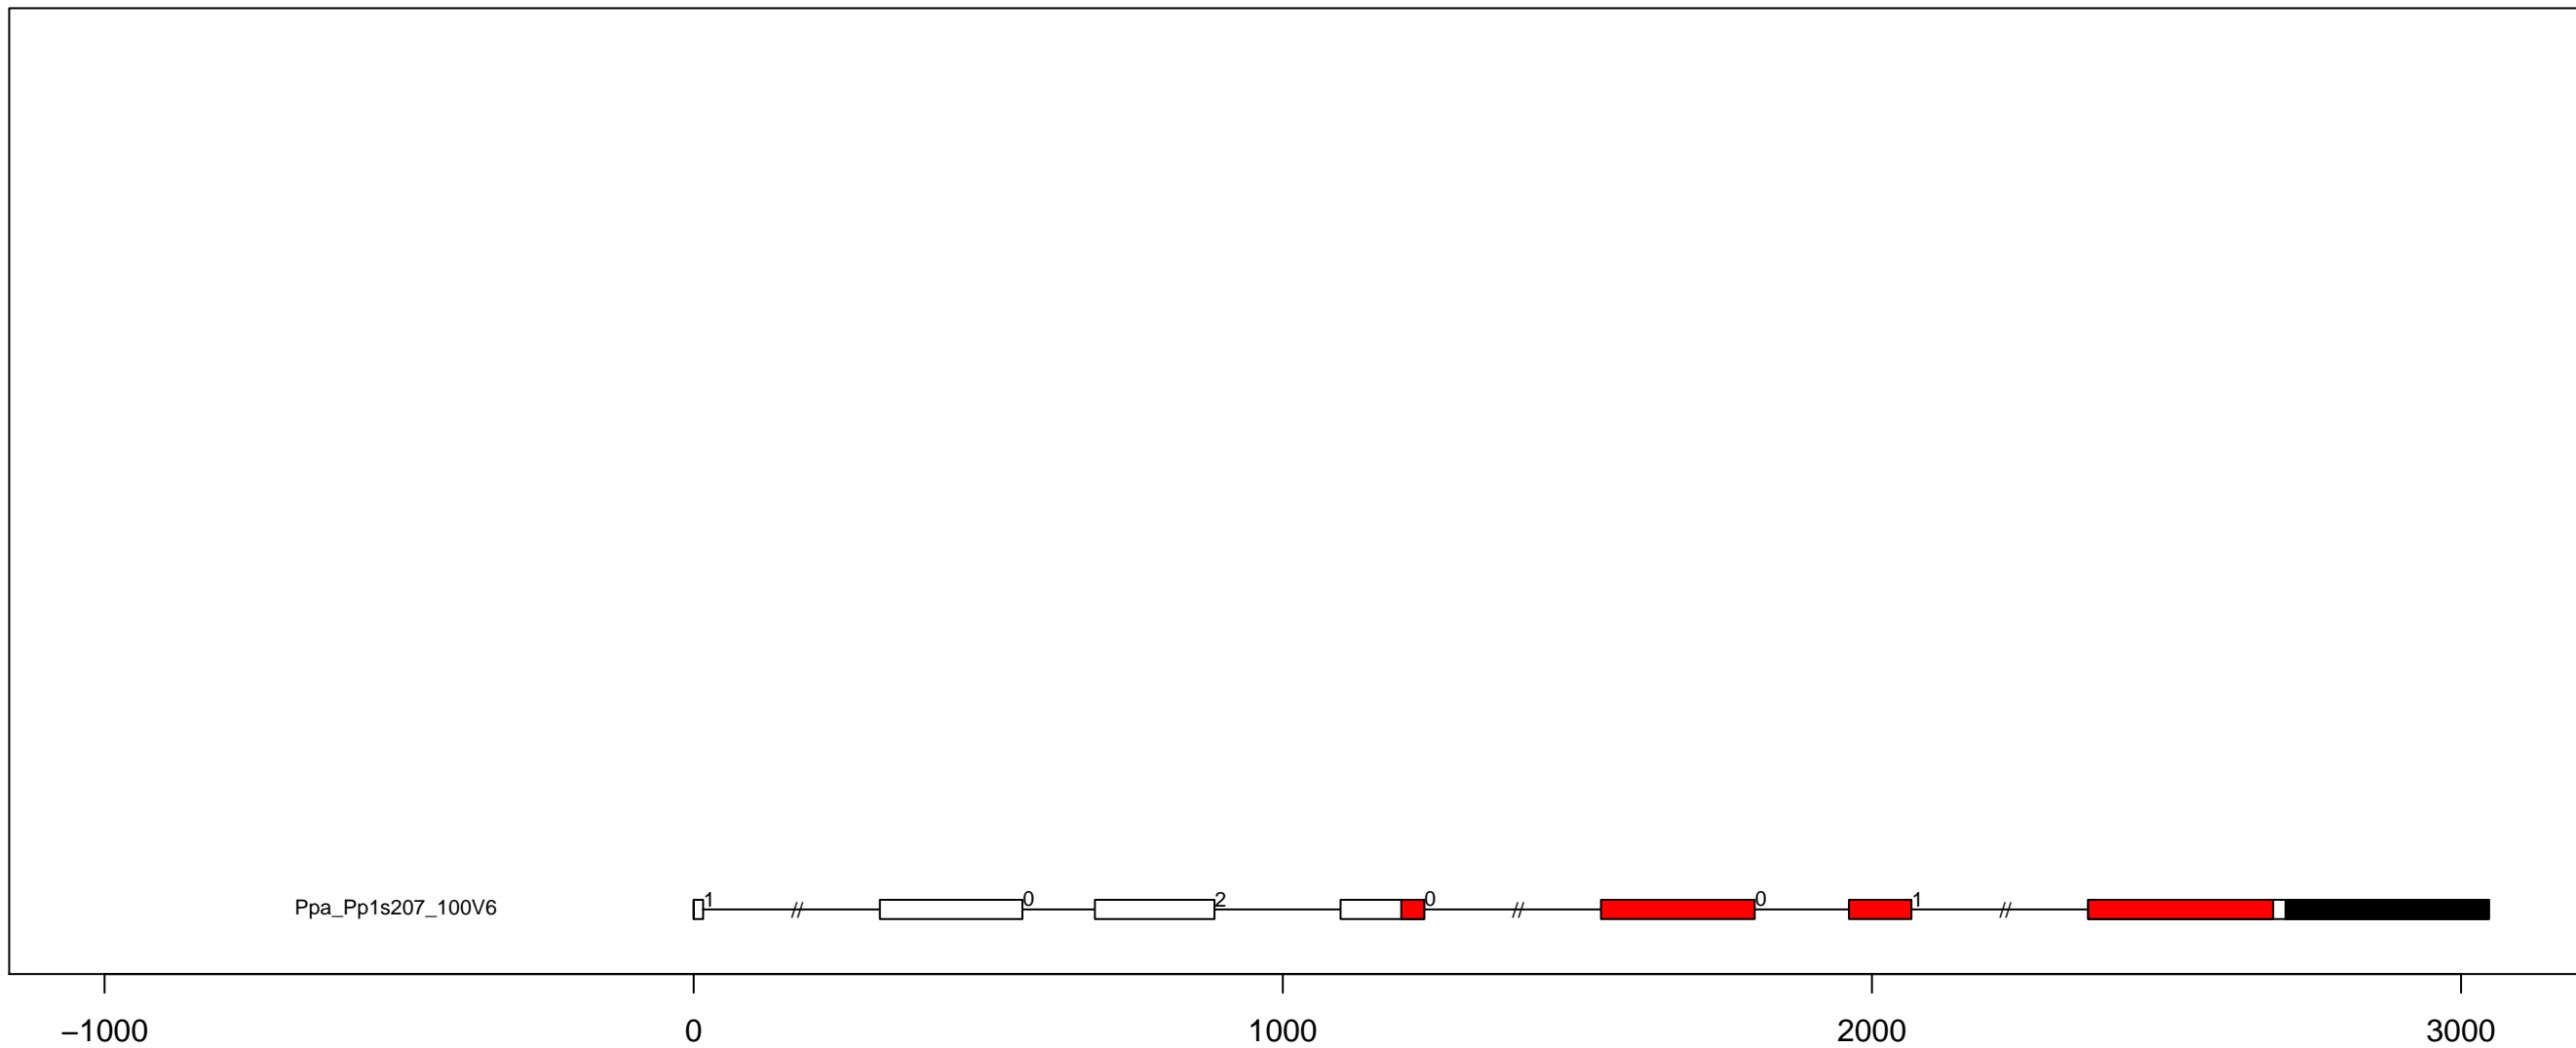





# C.re AGC\_NDR exon-intron and kinase domain diagram (all)

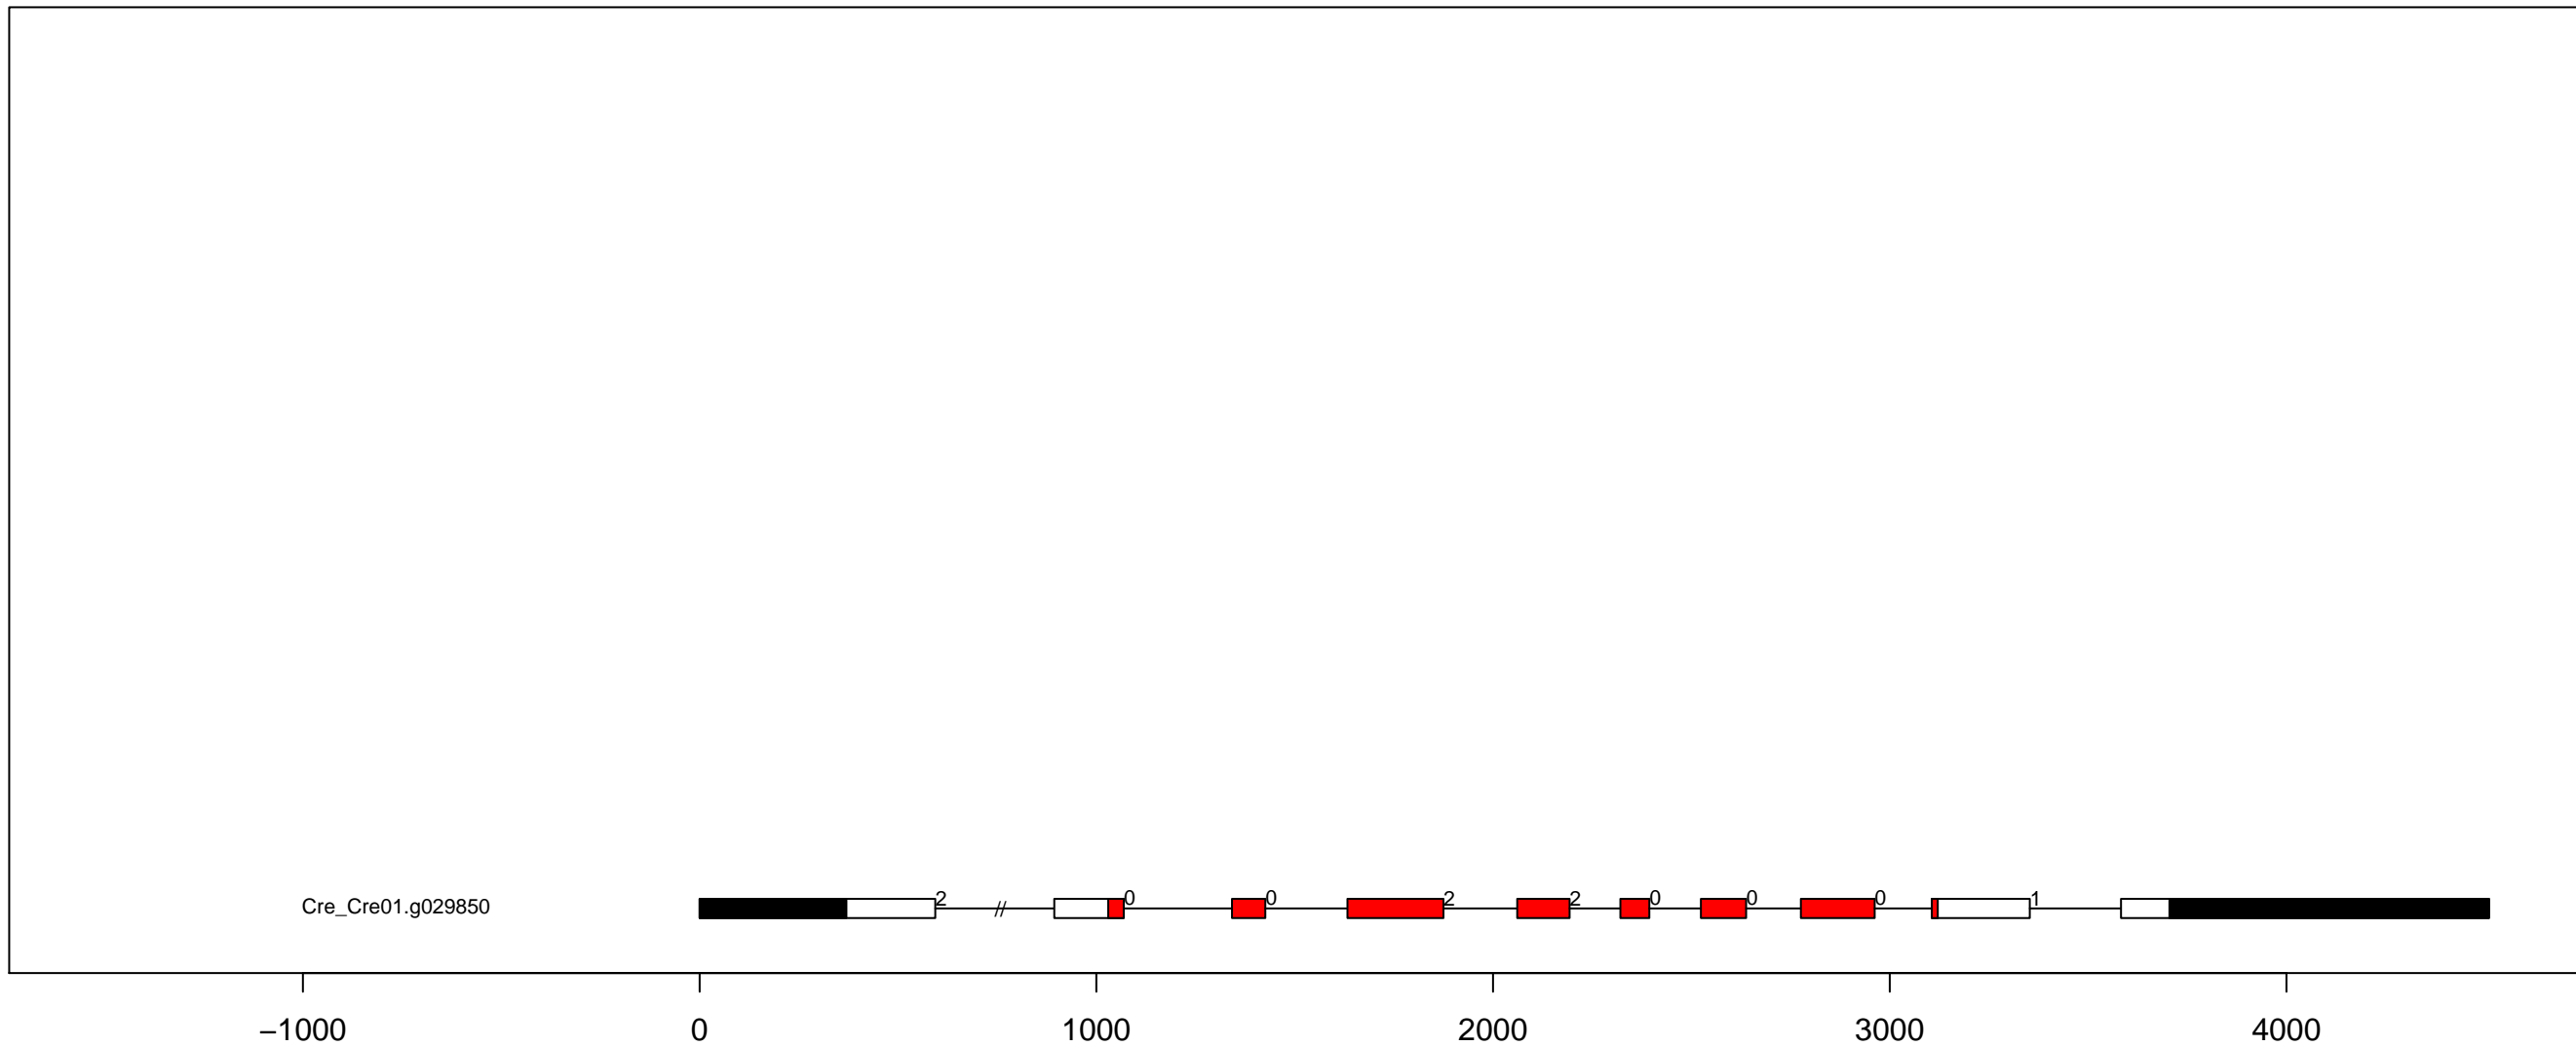

# C.re AGC\_PKA-PKG exon-intron and kinase domain diagram (all)

Cre\_Cre16.g669800

Cre\_Cre16.g663200

Cre\_Cre12.g493250

Cre\_Cre10.g443550

Cre\_Cre03.g199050

Cre\_Cre03.g190050

Cre\_Cre02.g076900

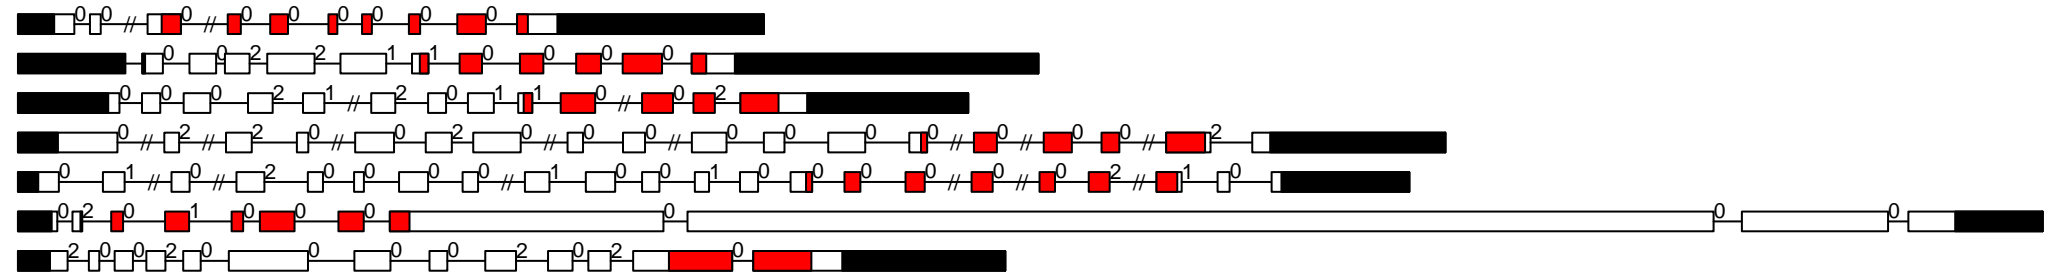

0

5000

10000

# C.re AGC\_RSK-1 exon-intron and kinase domain diagram (all)

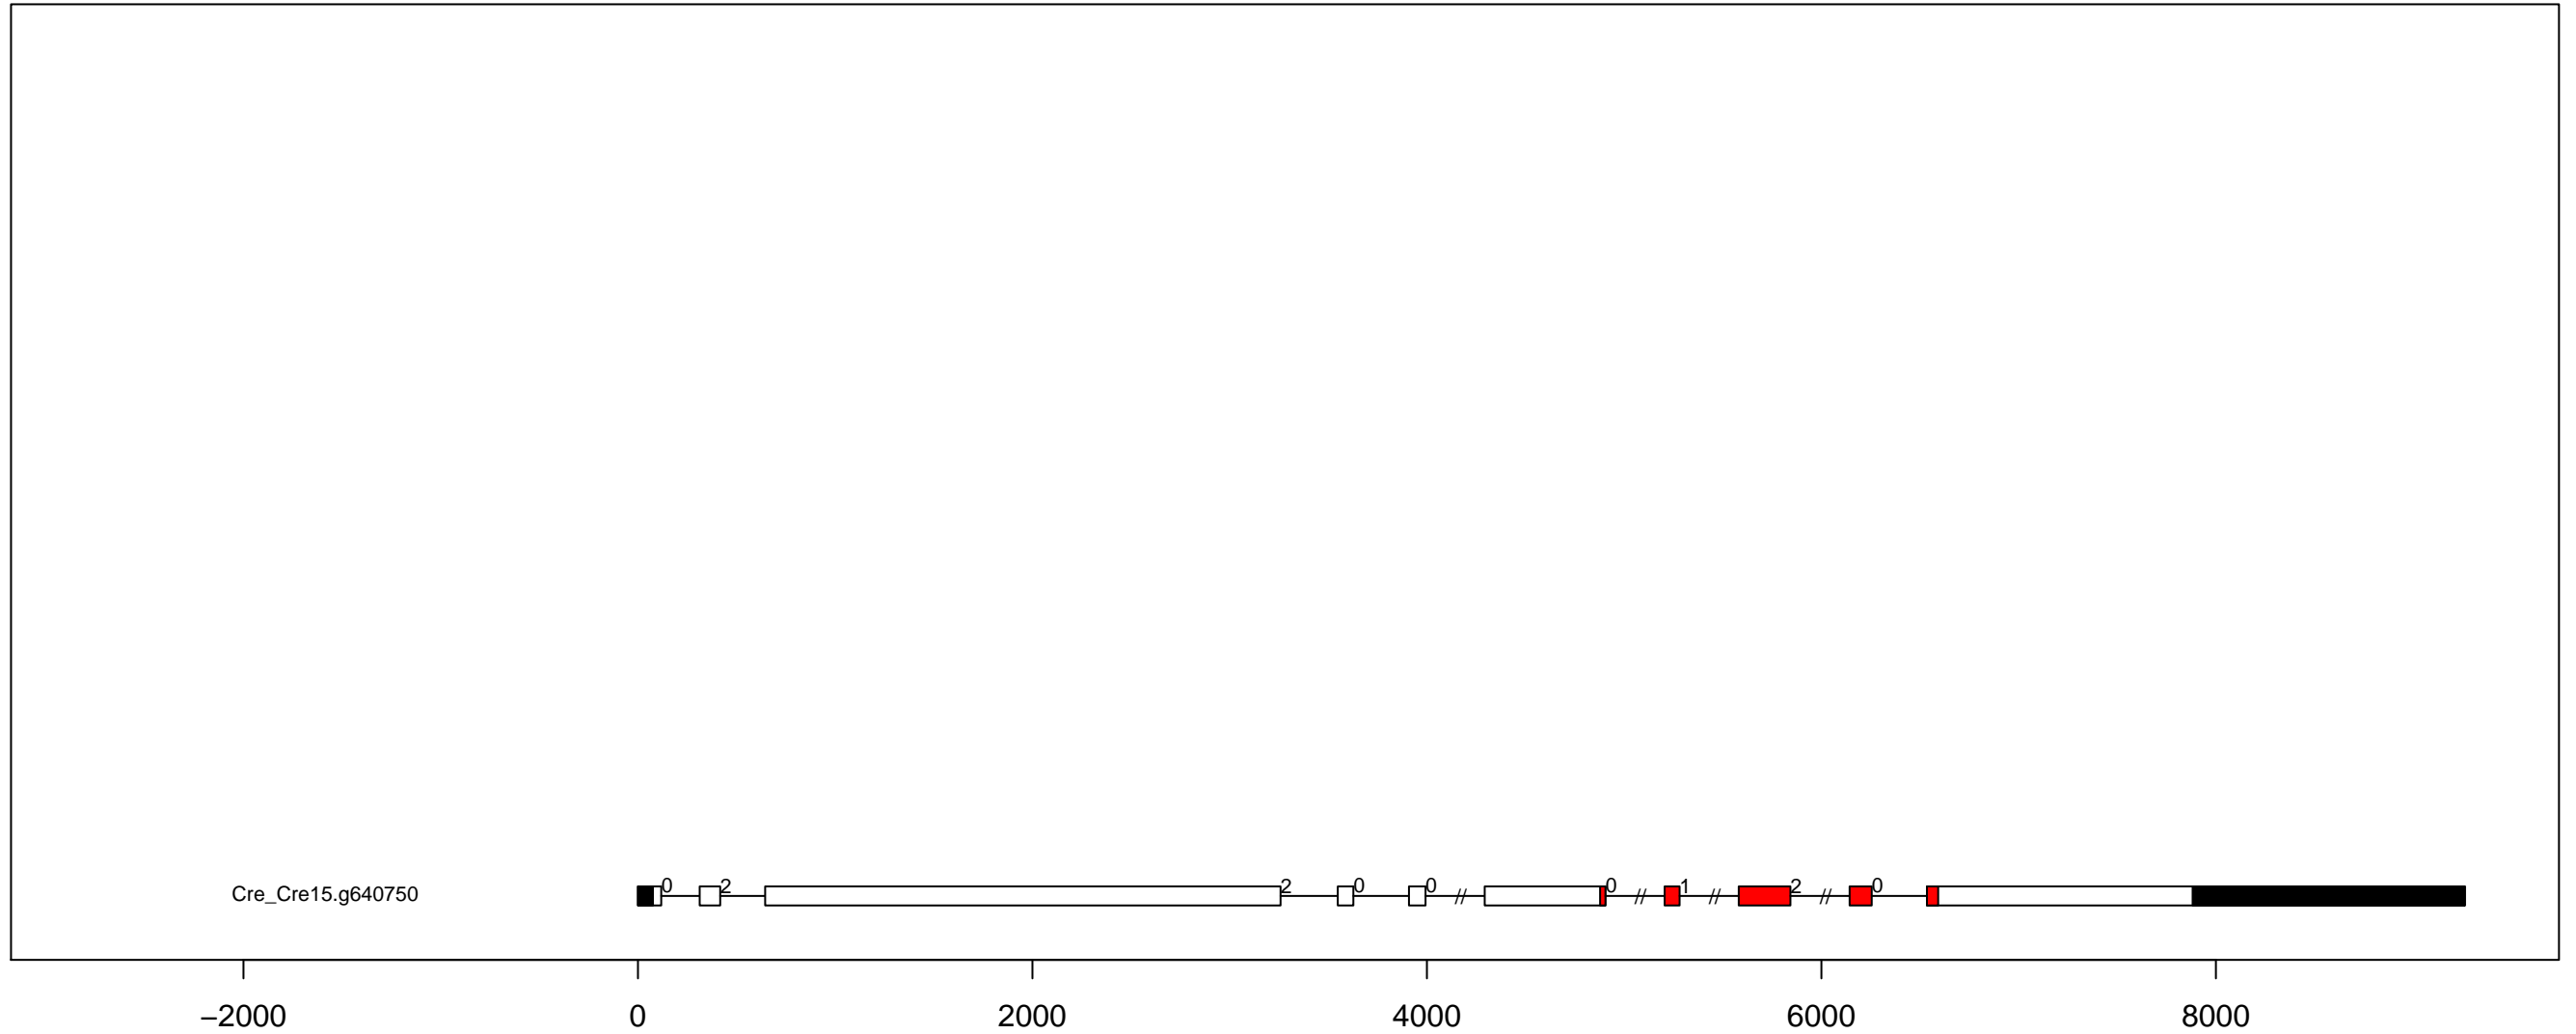

# C.re AGC\_RSK-2 exon-intron and kinase domain diagram (all)

Cre\_Cre03.g199000

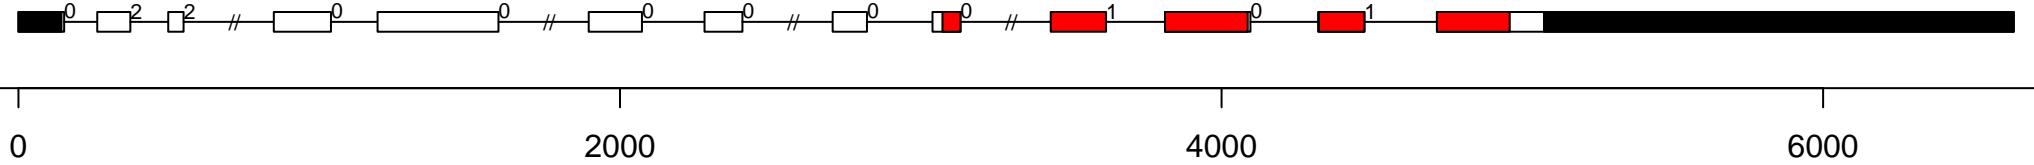

### C.re AurL-Cr-1 exon-intron and kinase domain diagram (part 1)

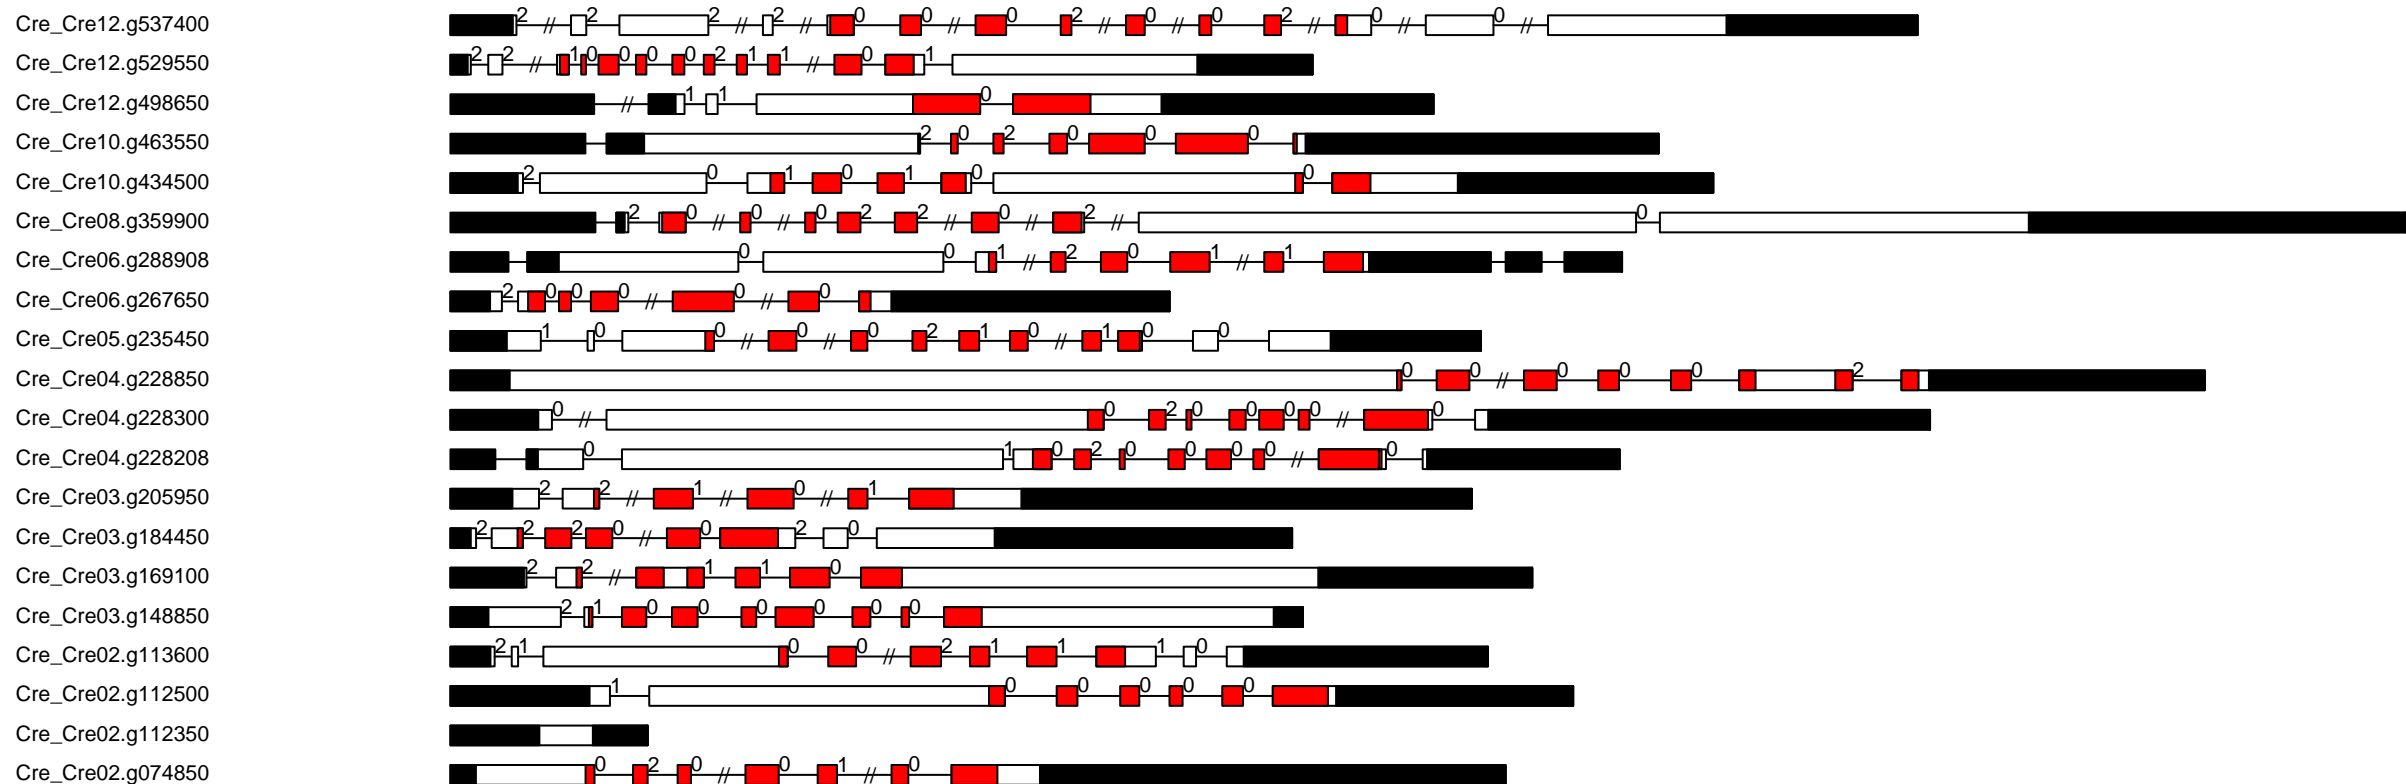

# C.re AurL-Cr-1 exon-intron and kinase domain diagram (part 2)

Cre\_Cre17.g735550  
Cre\_Cre17.g719450  
Cre\_Cre13.g592000

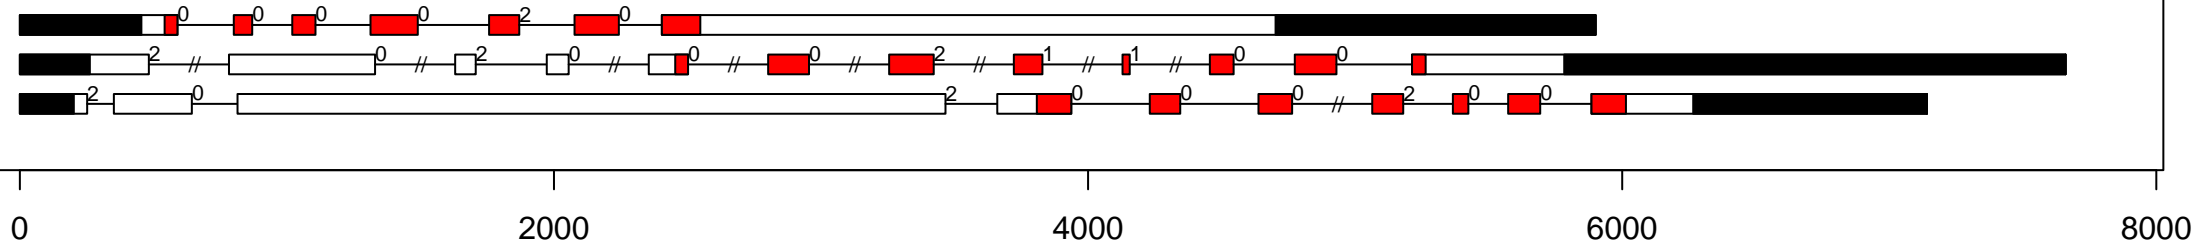

# C.re AurL-Cr-2 exon-intron and kinase domain diagram (all)

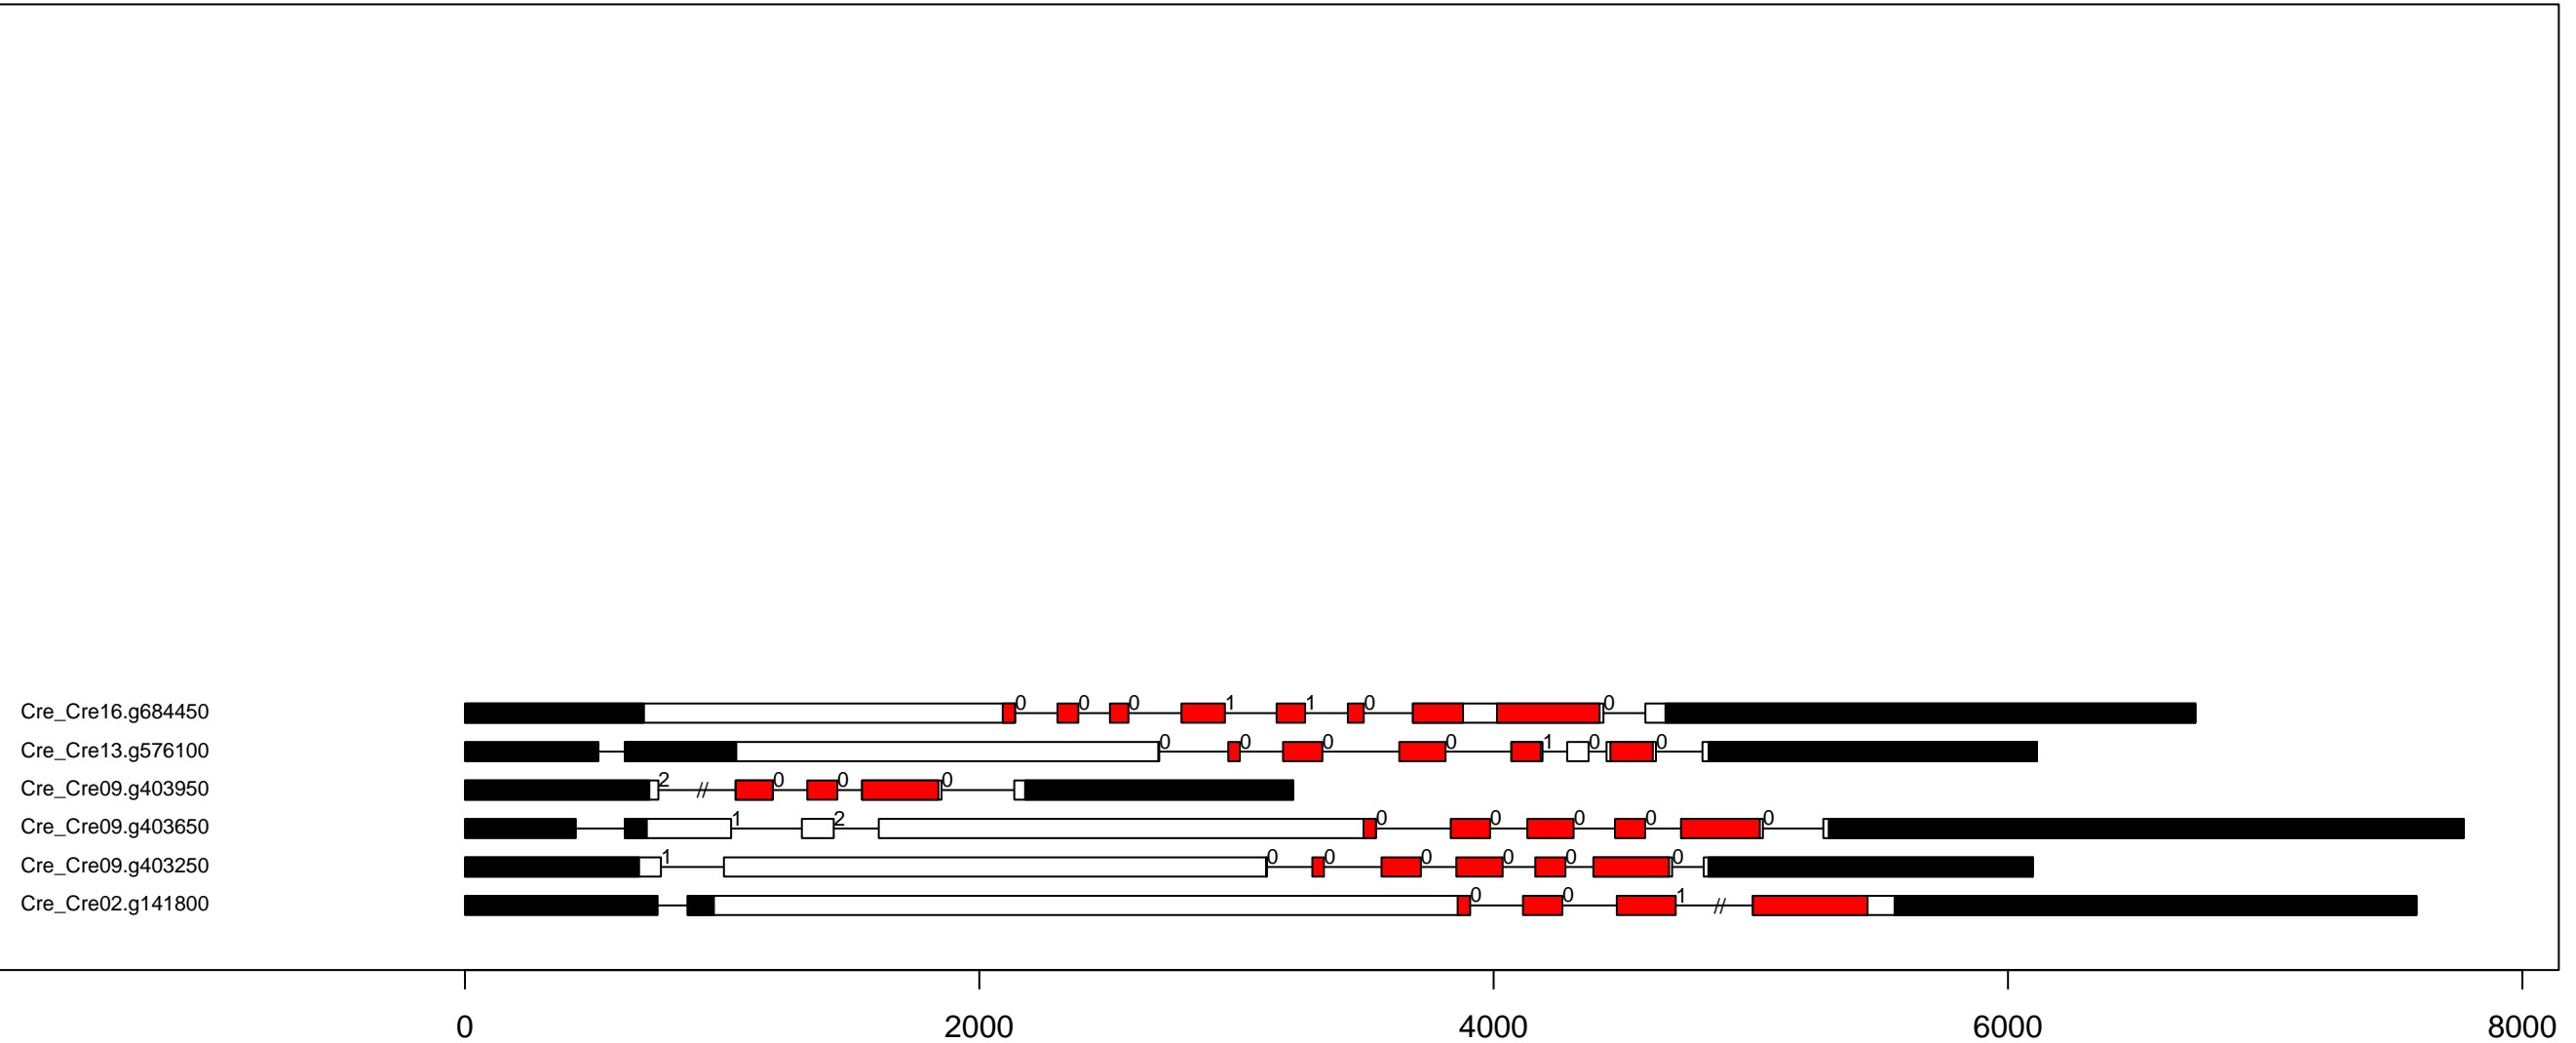



# C.re Aur exon-intron and kinase domain diagram (all)

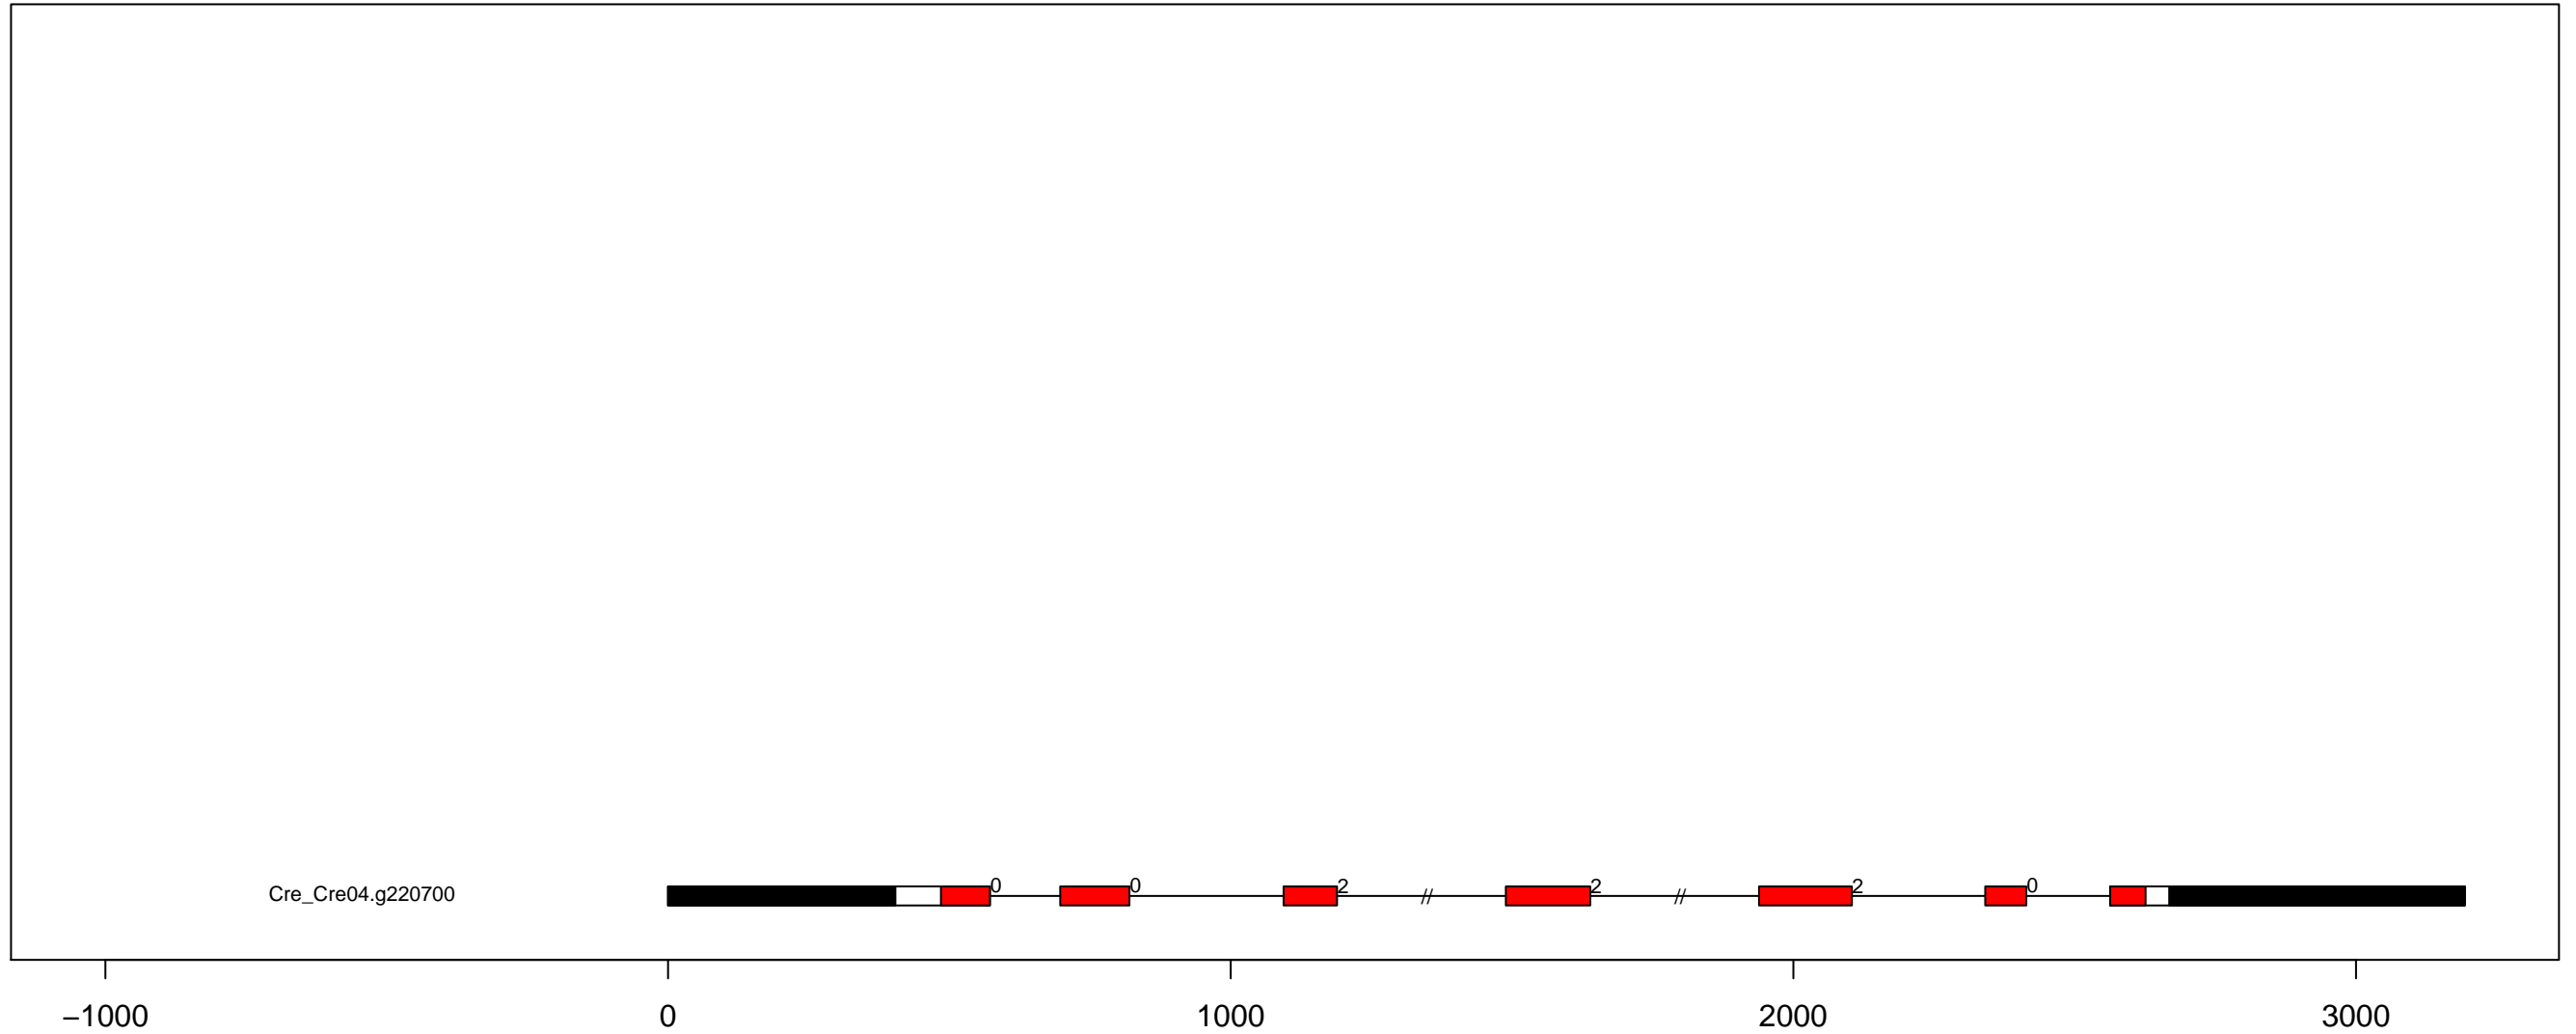

# C.re CAMK\_AMPK exon-intron and kinase domain diagram (all)

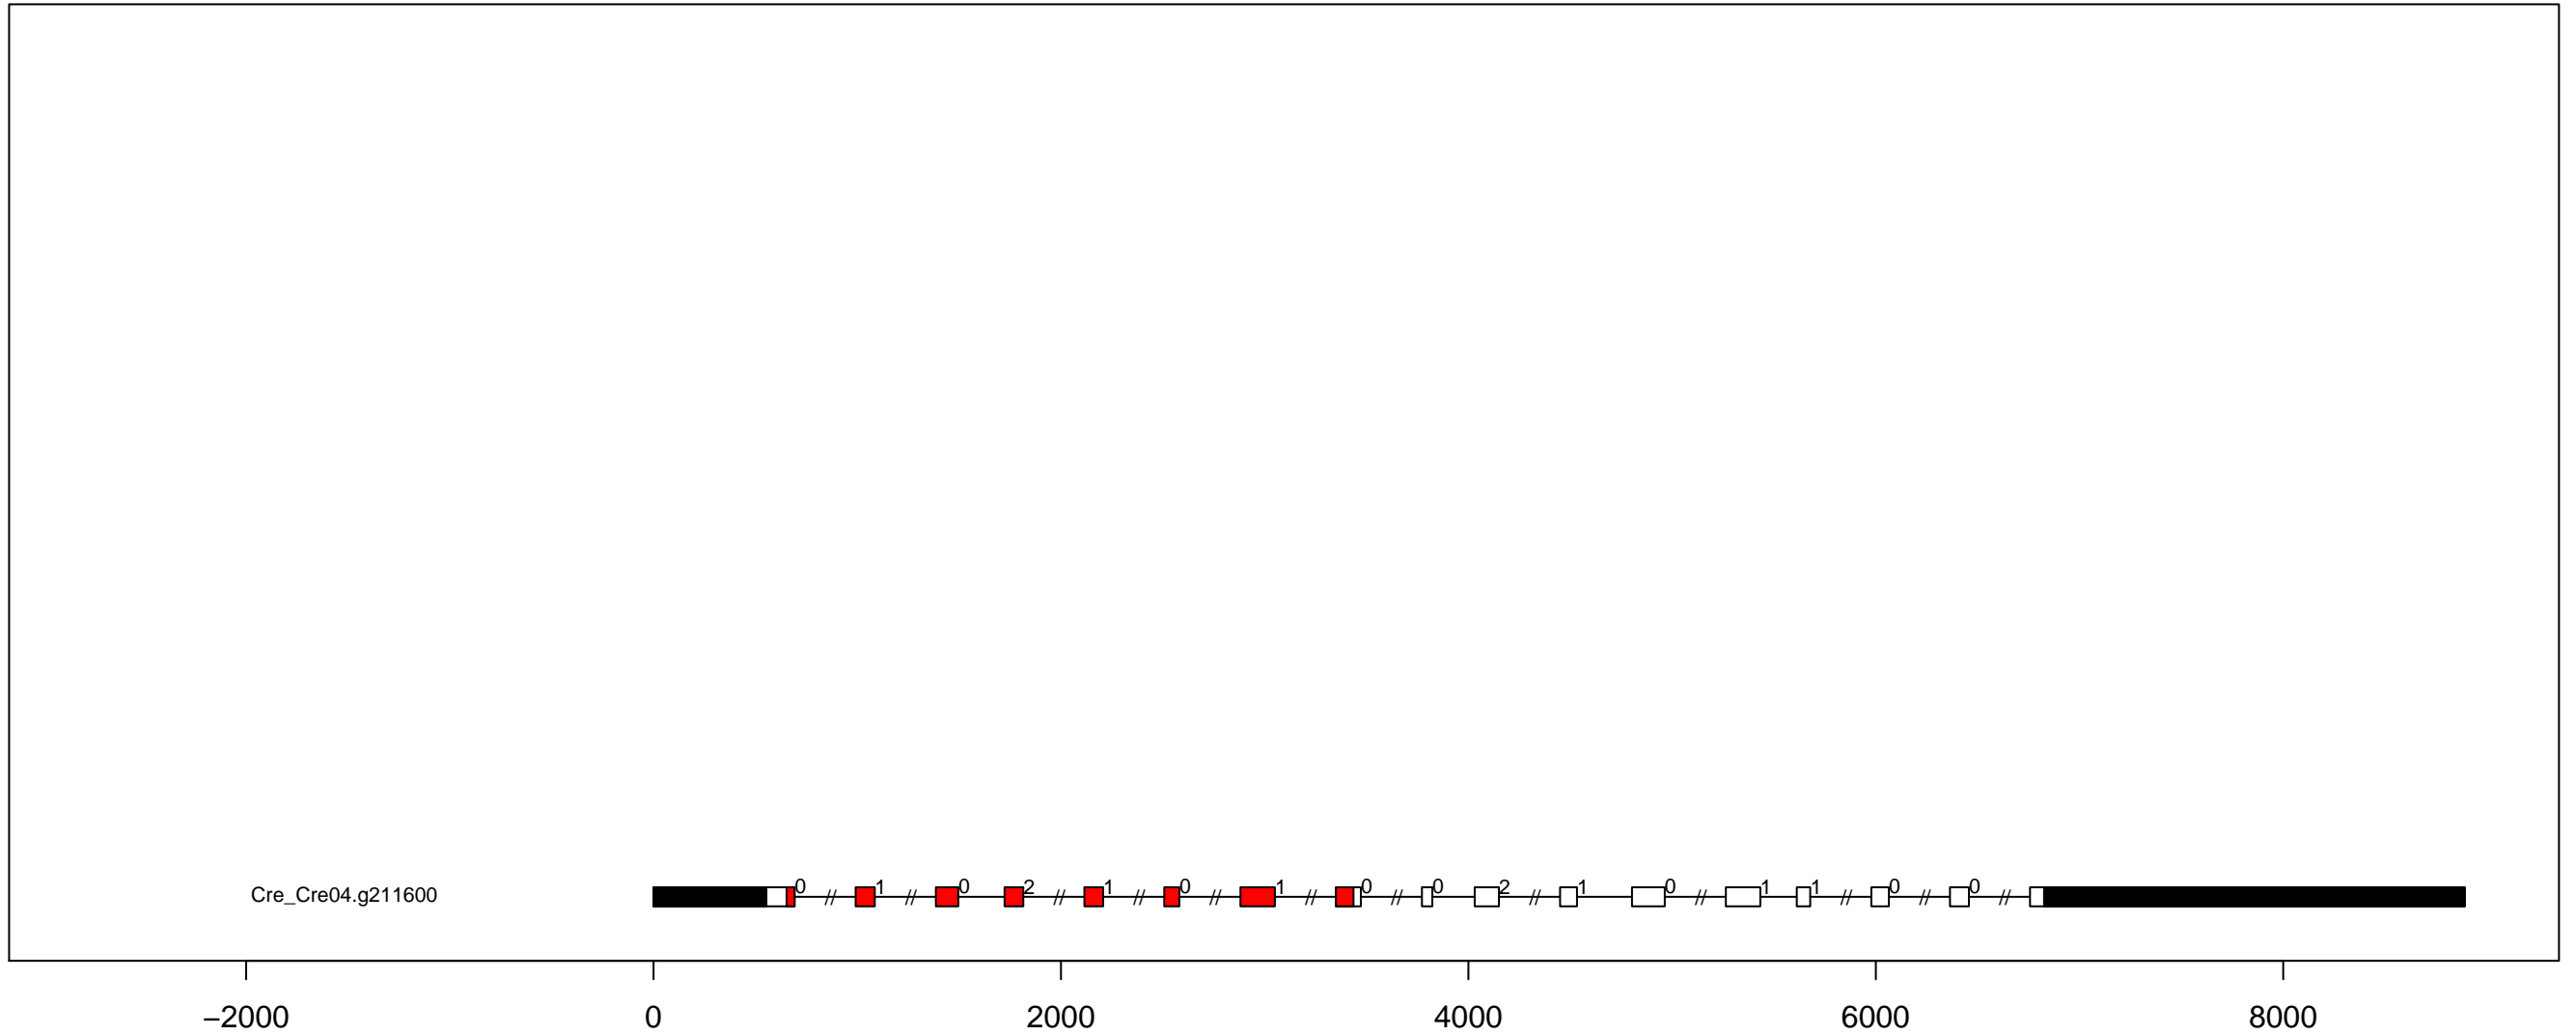

# C.re CAMK\_CAMK1-DCAMKL exon-intron and kinase domain diagram (all)

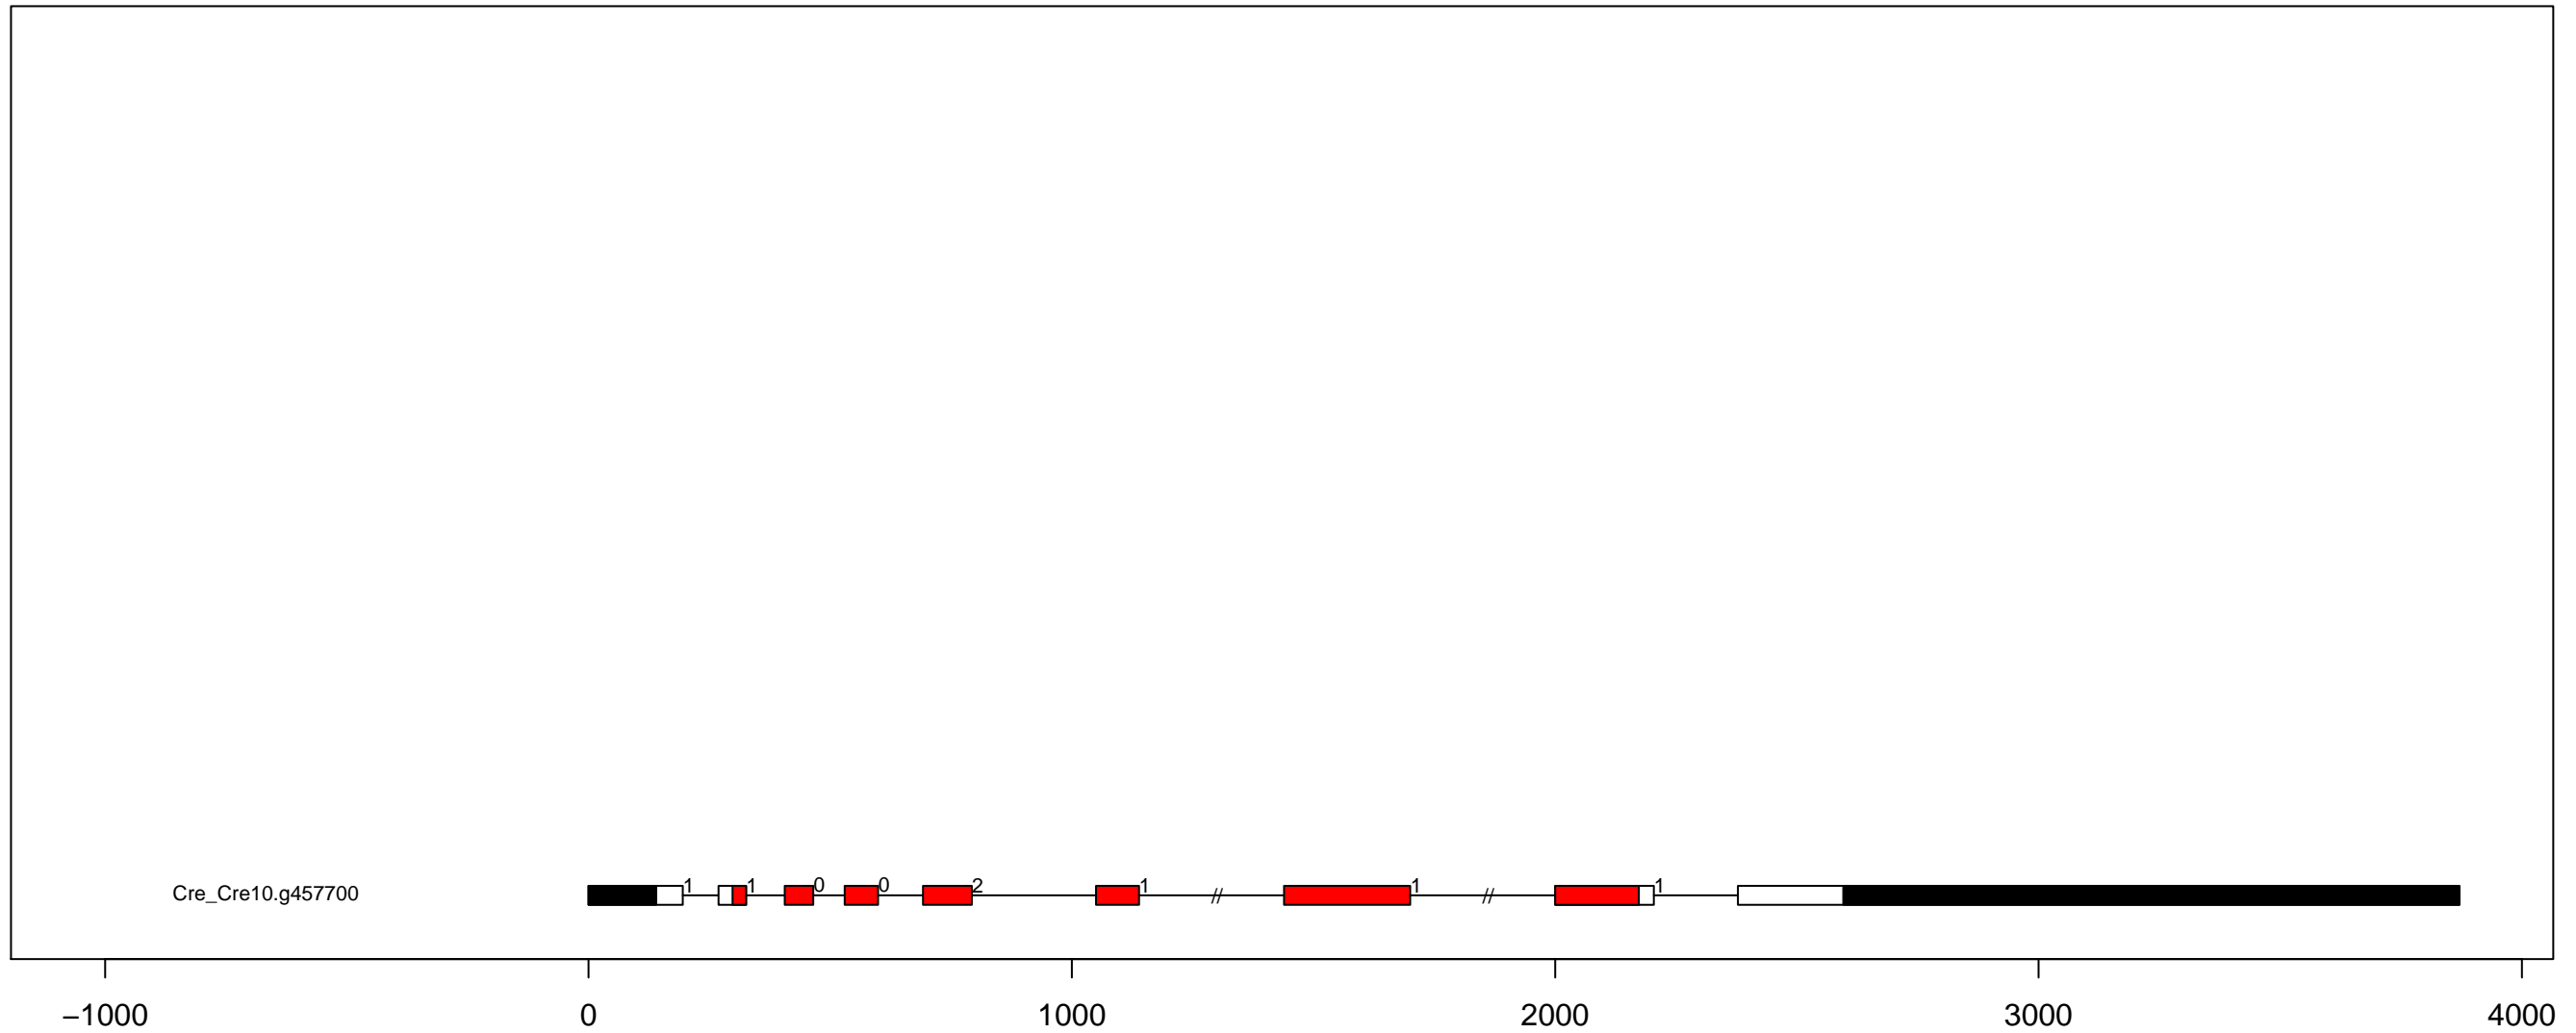

# C.re CAMK\_CAMK1–Scer exon–intron and kinase domain diagram (all)

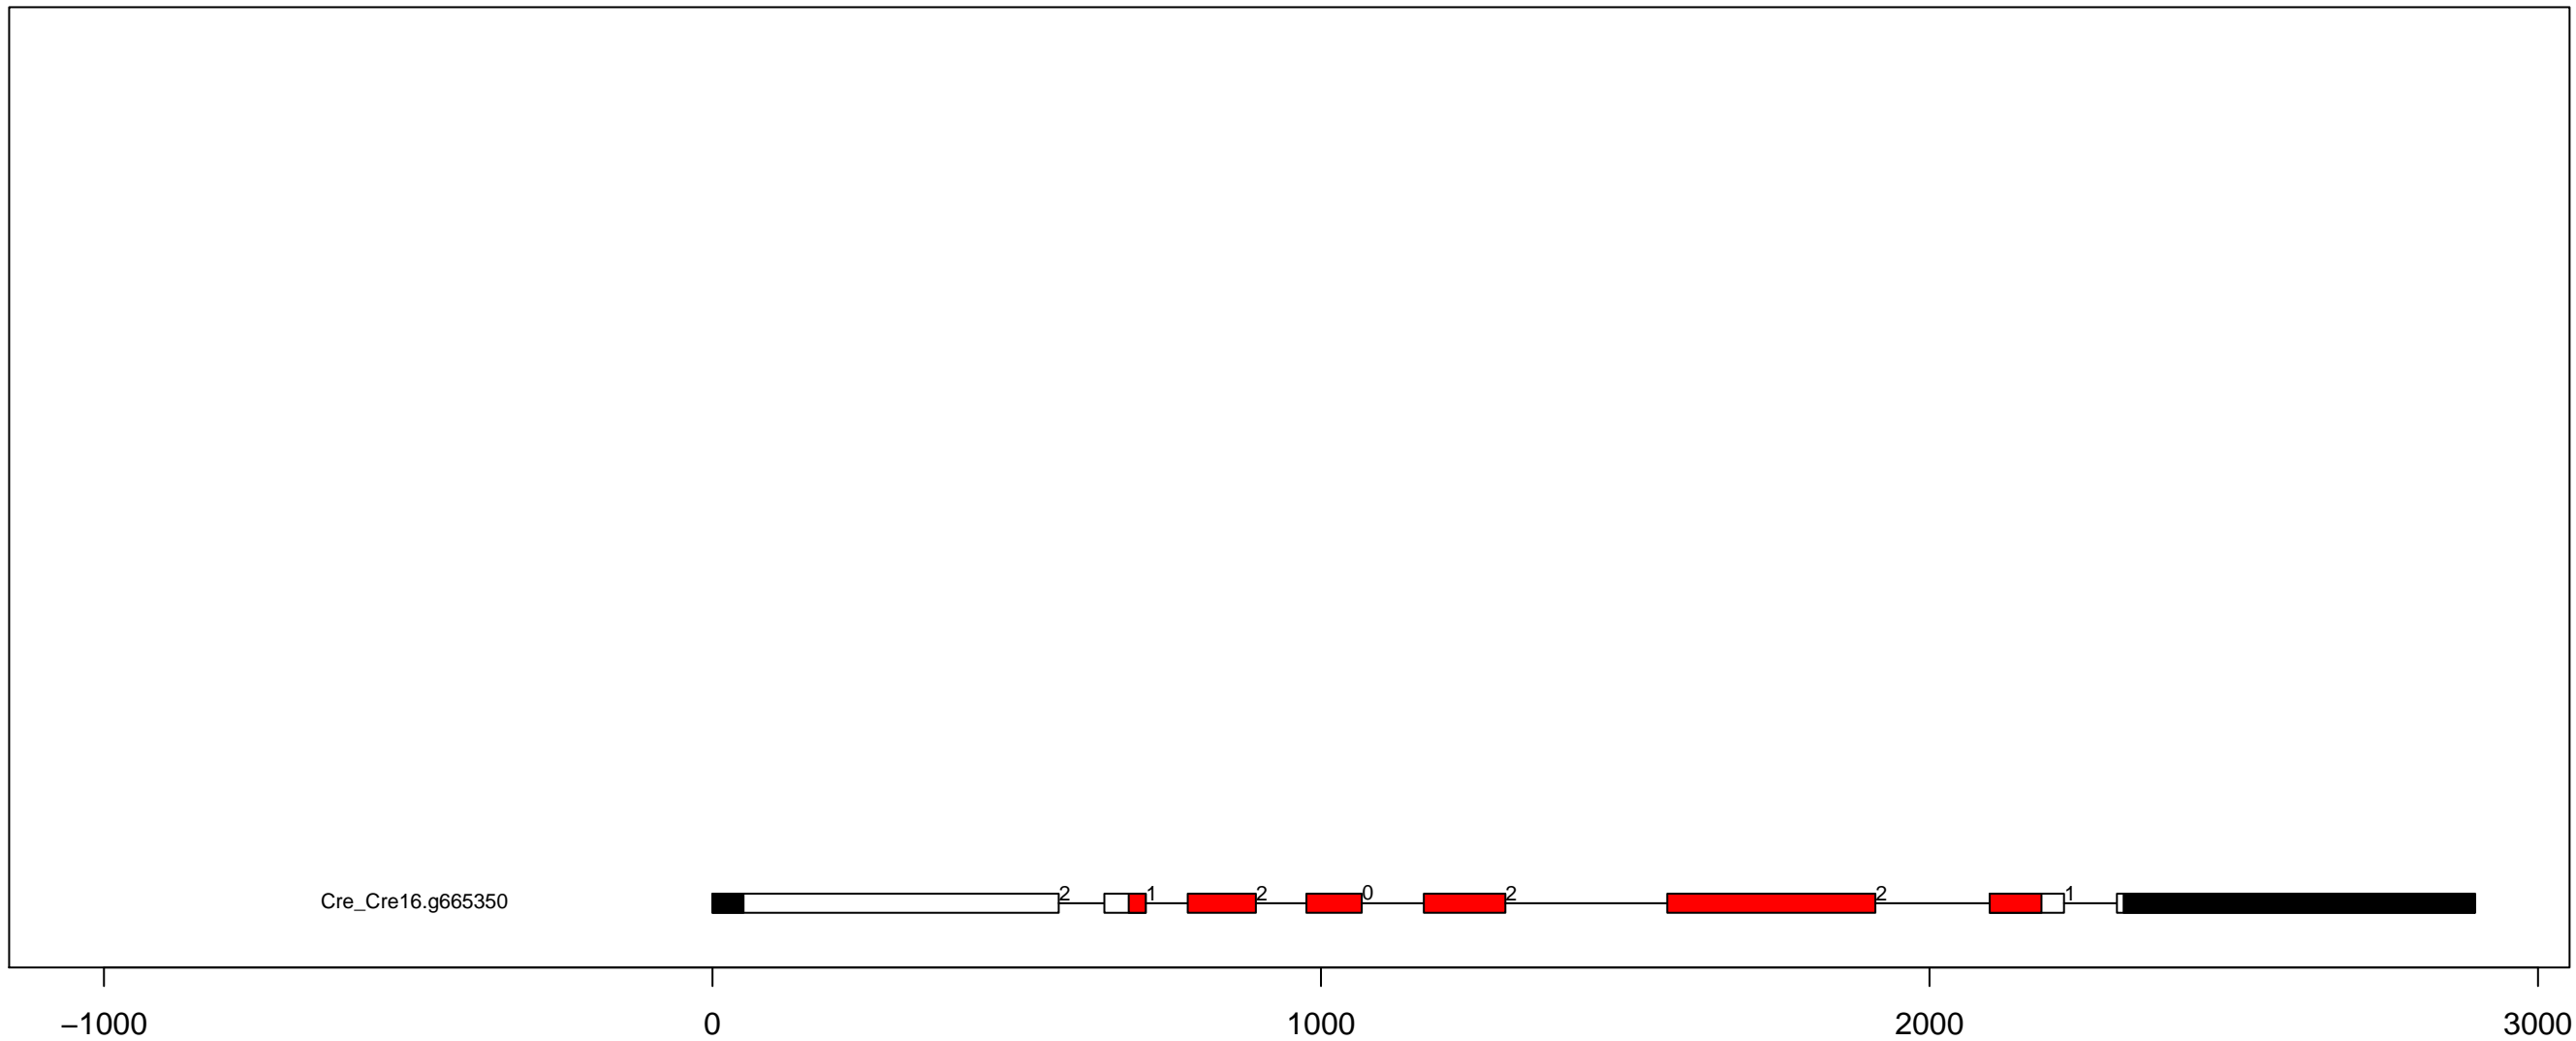

# C.re CAMK\_CAMK1-Tthe exon-intron and kinase domain diagram (all)

Cre\_Cre13.g571700

Cre\_Cre13.g564500

Cre\_Cre06.g296200

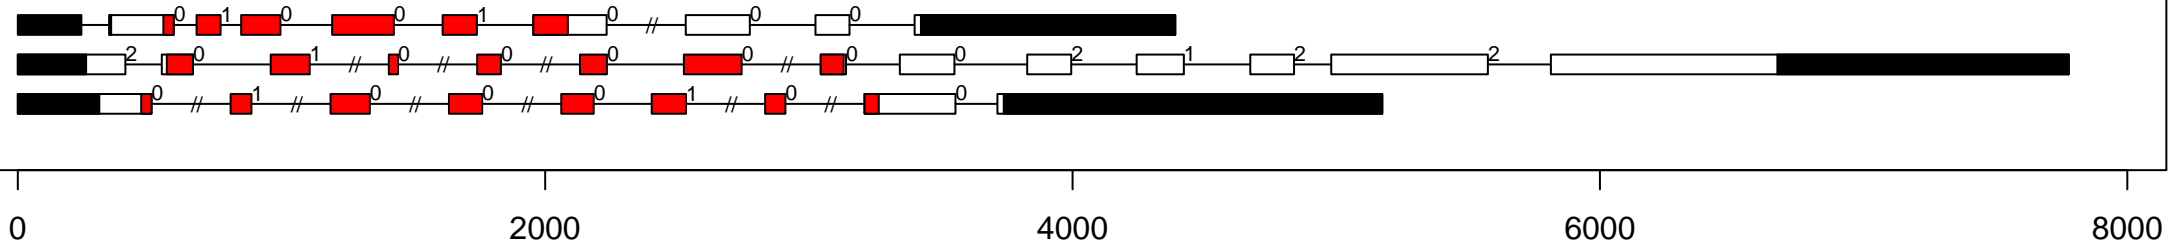

# C.re CAMK\_CAMKL-LKB exon-intron and kinase domain diagram (all)

Cre\_Cre17.g705350  
Cre\_Cre12.g486350  
Cre\_Cre10.g428650  
Cre\_Cre01.g029500

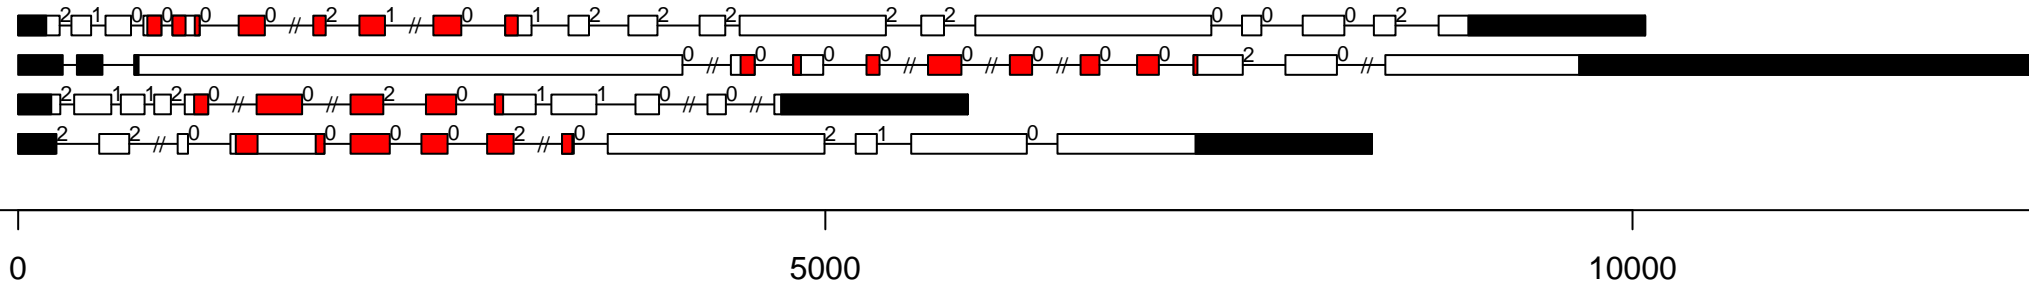

# C.re CAMK\_CAMKL-MARK-Scer exon-intron and kinase domain diagram (all)

Cre\_Cre01.g037100

Cre\_Cre01.g036700

Cre\_Cre01.g036650

Cre\_Cre01.g036250

Cre\_Cre01.g034900

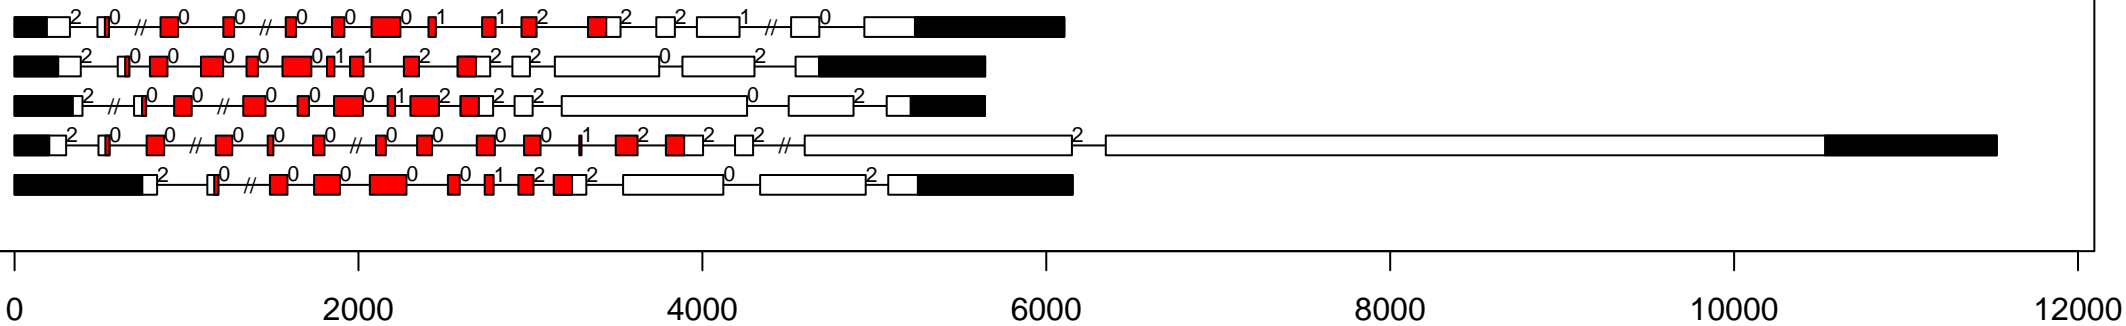

### C.re CAMK\_CDPK exon-intron and kinase domain diagram (all)

Cre\_Cre17.g705000  
 Cre\_Cre12.g527000  
 Cre\_Cre10.g418900  
 Cre\_Cre08.g382800  
 Cre\_Cre07.g348450  
 Cre\_Cre07.g328900  
 Cre\_Cre06.g265550  
 Cre\_Cre03.g206650  
 Cre\_Cre02.g114750  
 Cre\_Cre02.g106650  
 Cre\_Cre02.g074370  
 Cre\_Cre01.g048650  
 Cre\_Cre01.g031300  
 Cre\_Cre01.g009500

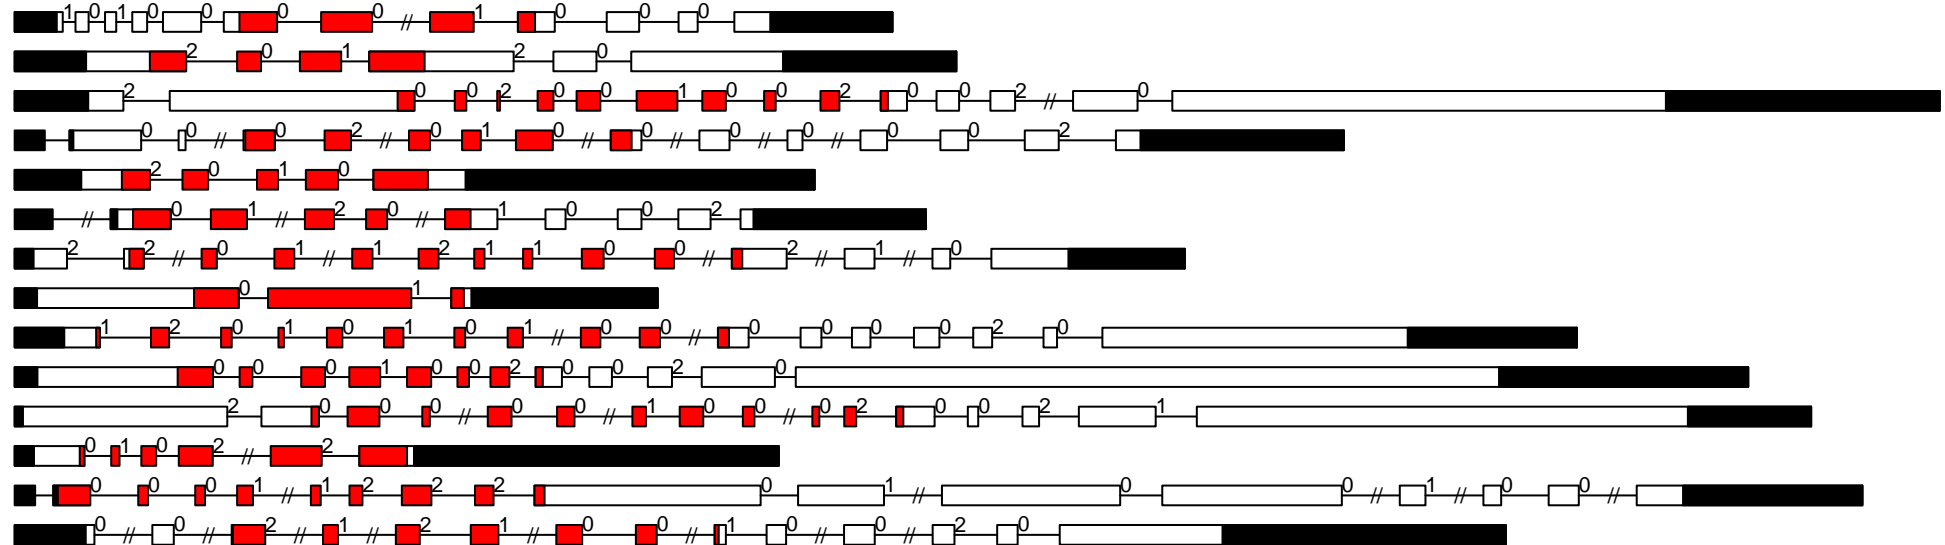

-2000

0

2000

4000

6000

8000

10000



# C.re CAMK\_Cr-1 exon-intron and kinase domain diagram (all)

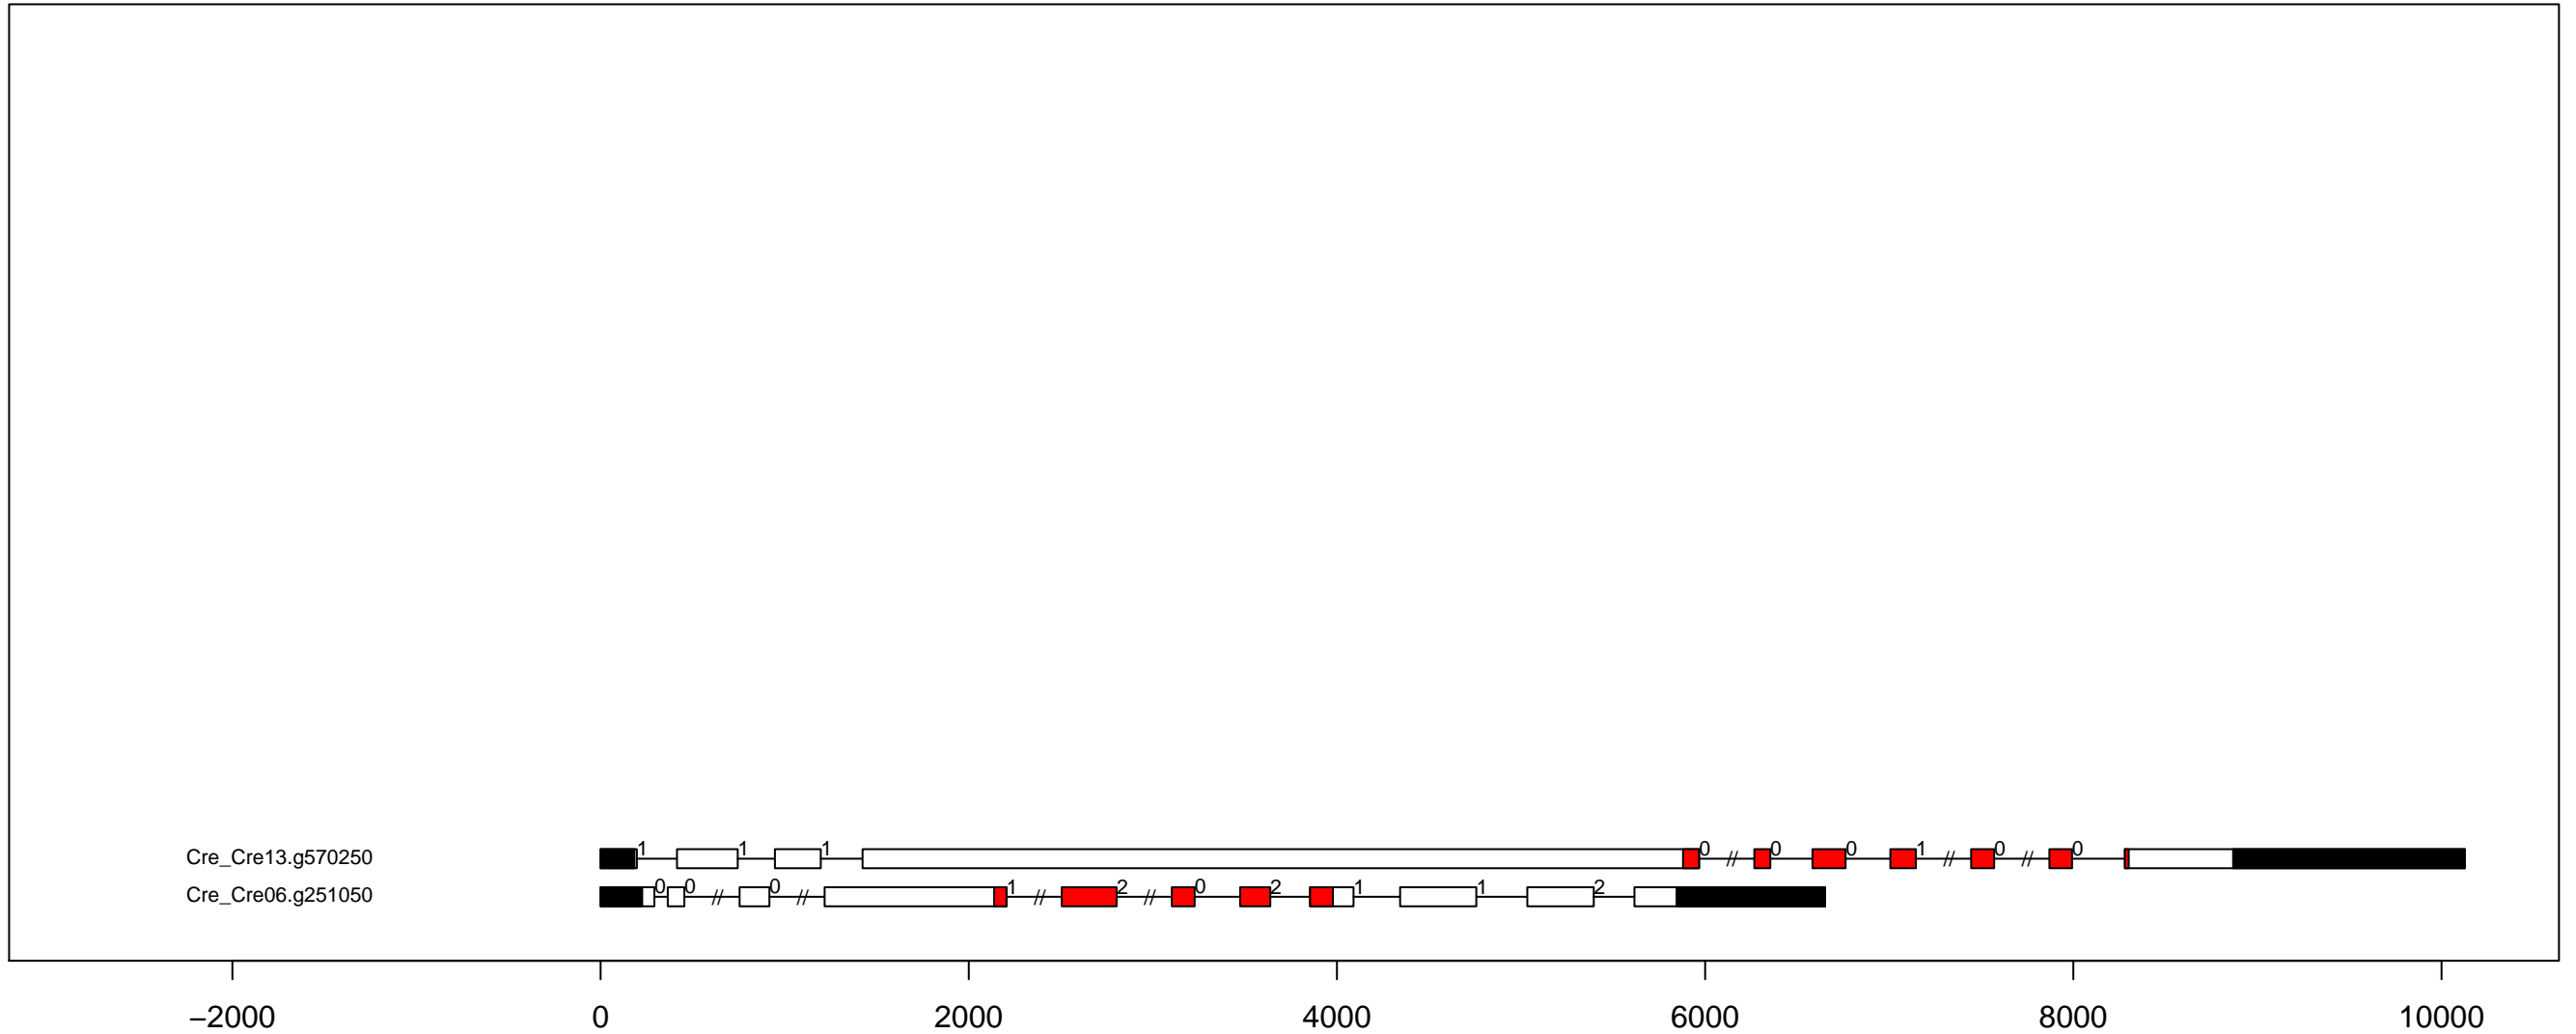

# C.re CAMK\_Cr-single exon-intron and kinase domain diagram (all)

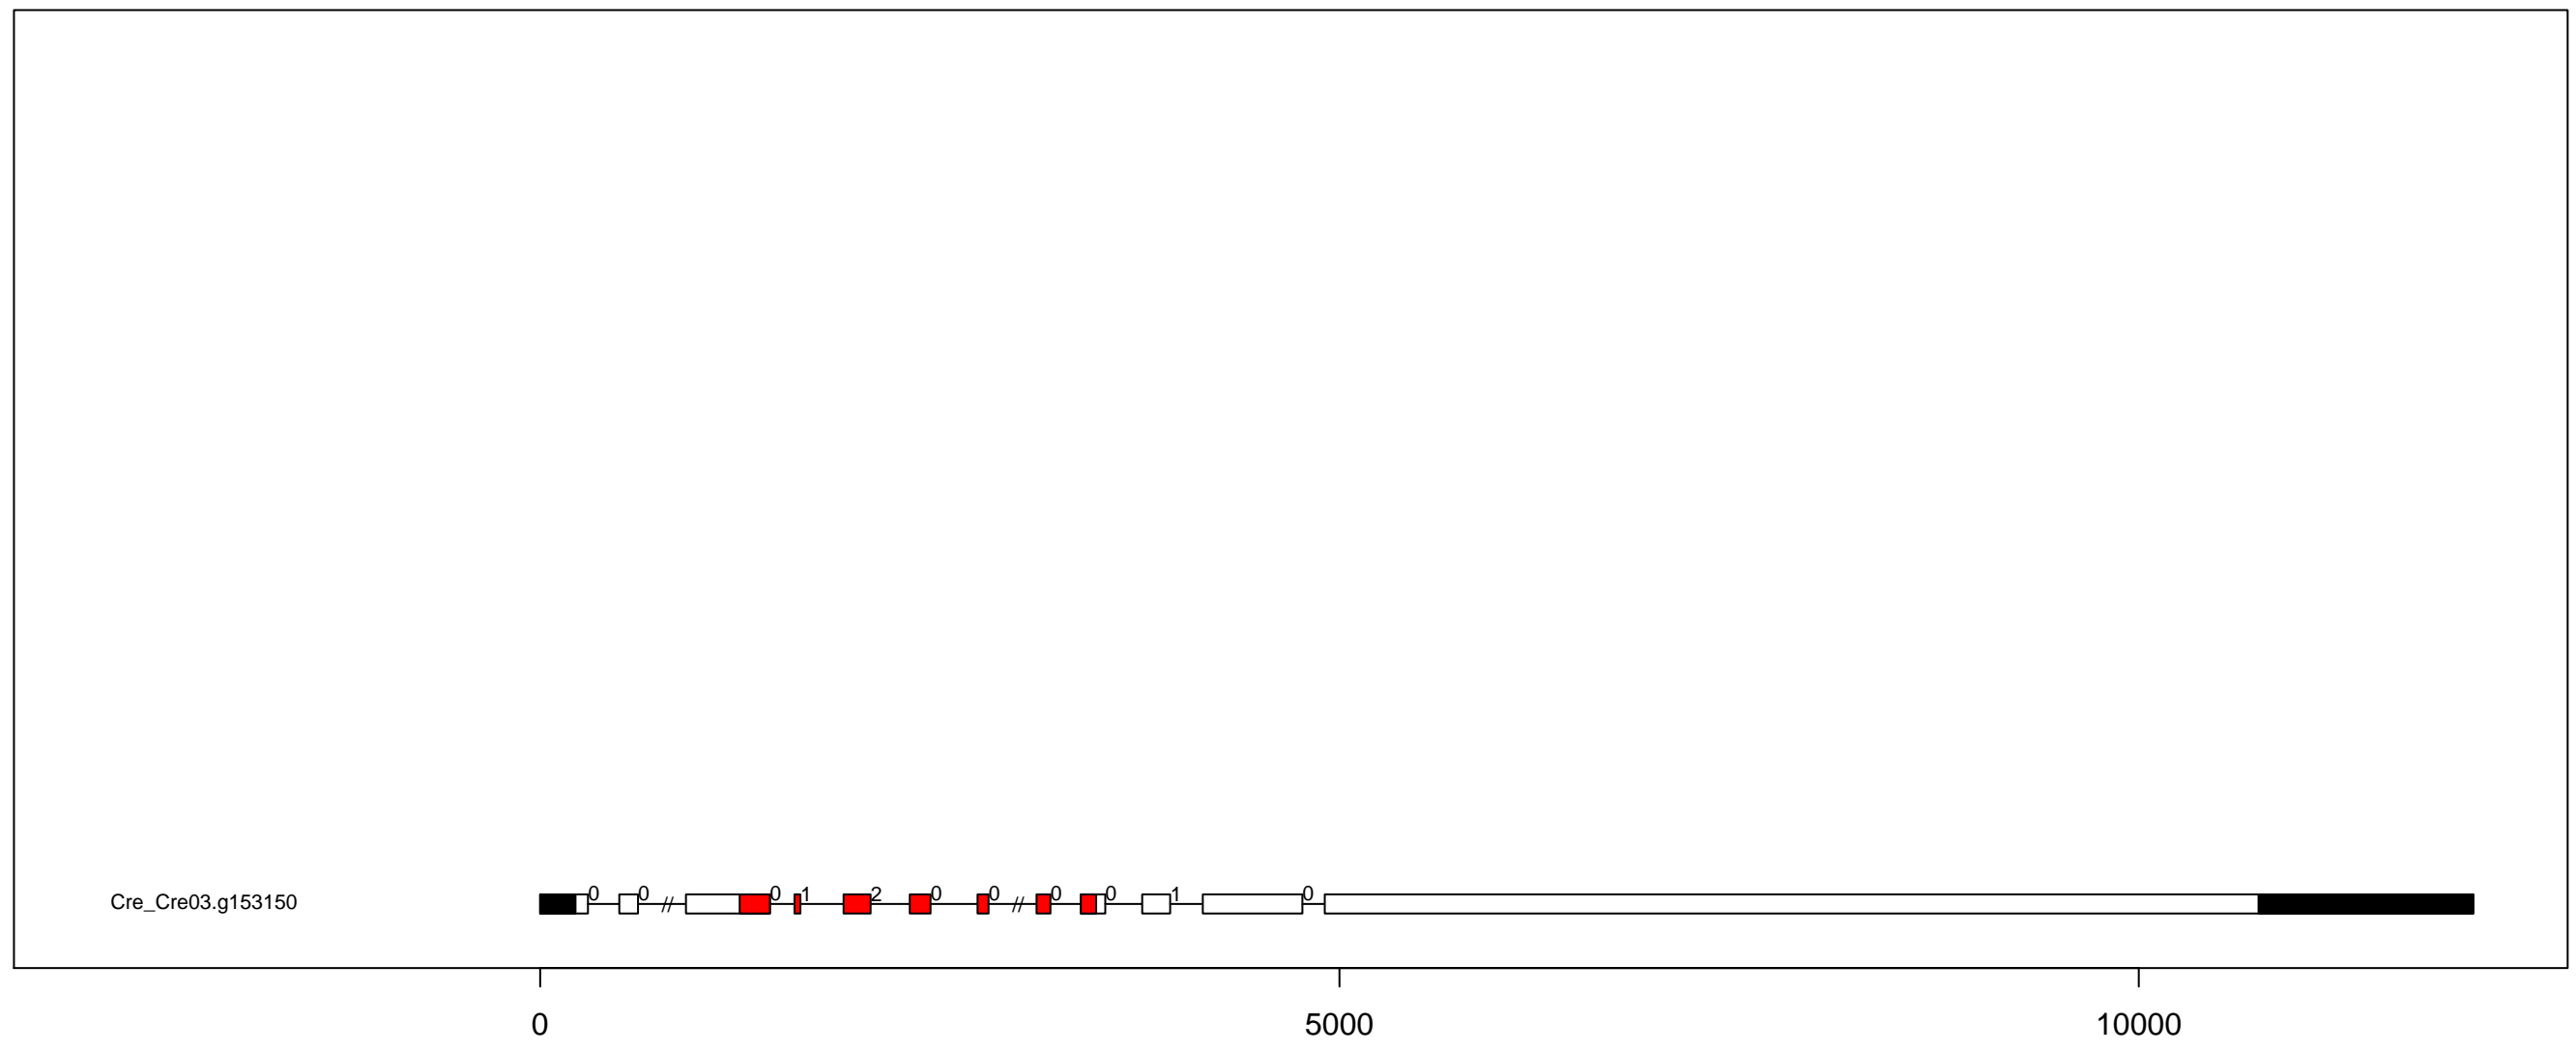



# C.re CK1\_CK1 exon-intron and kinase domain diagram (all)

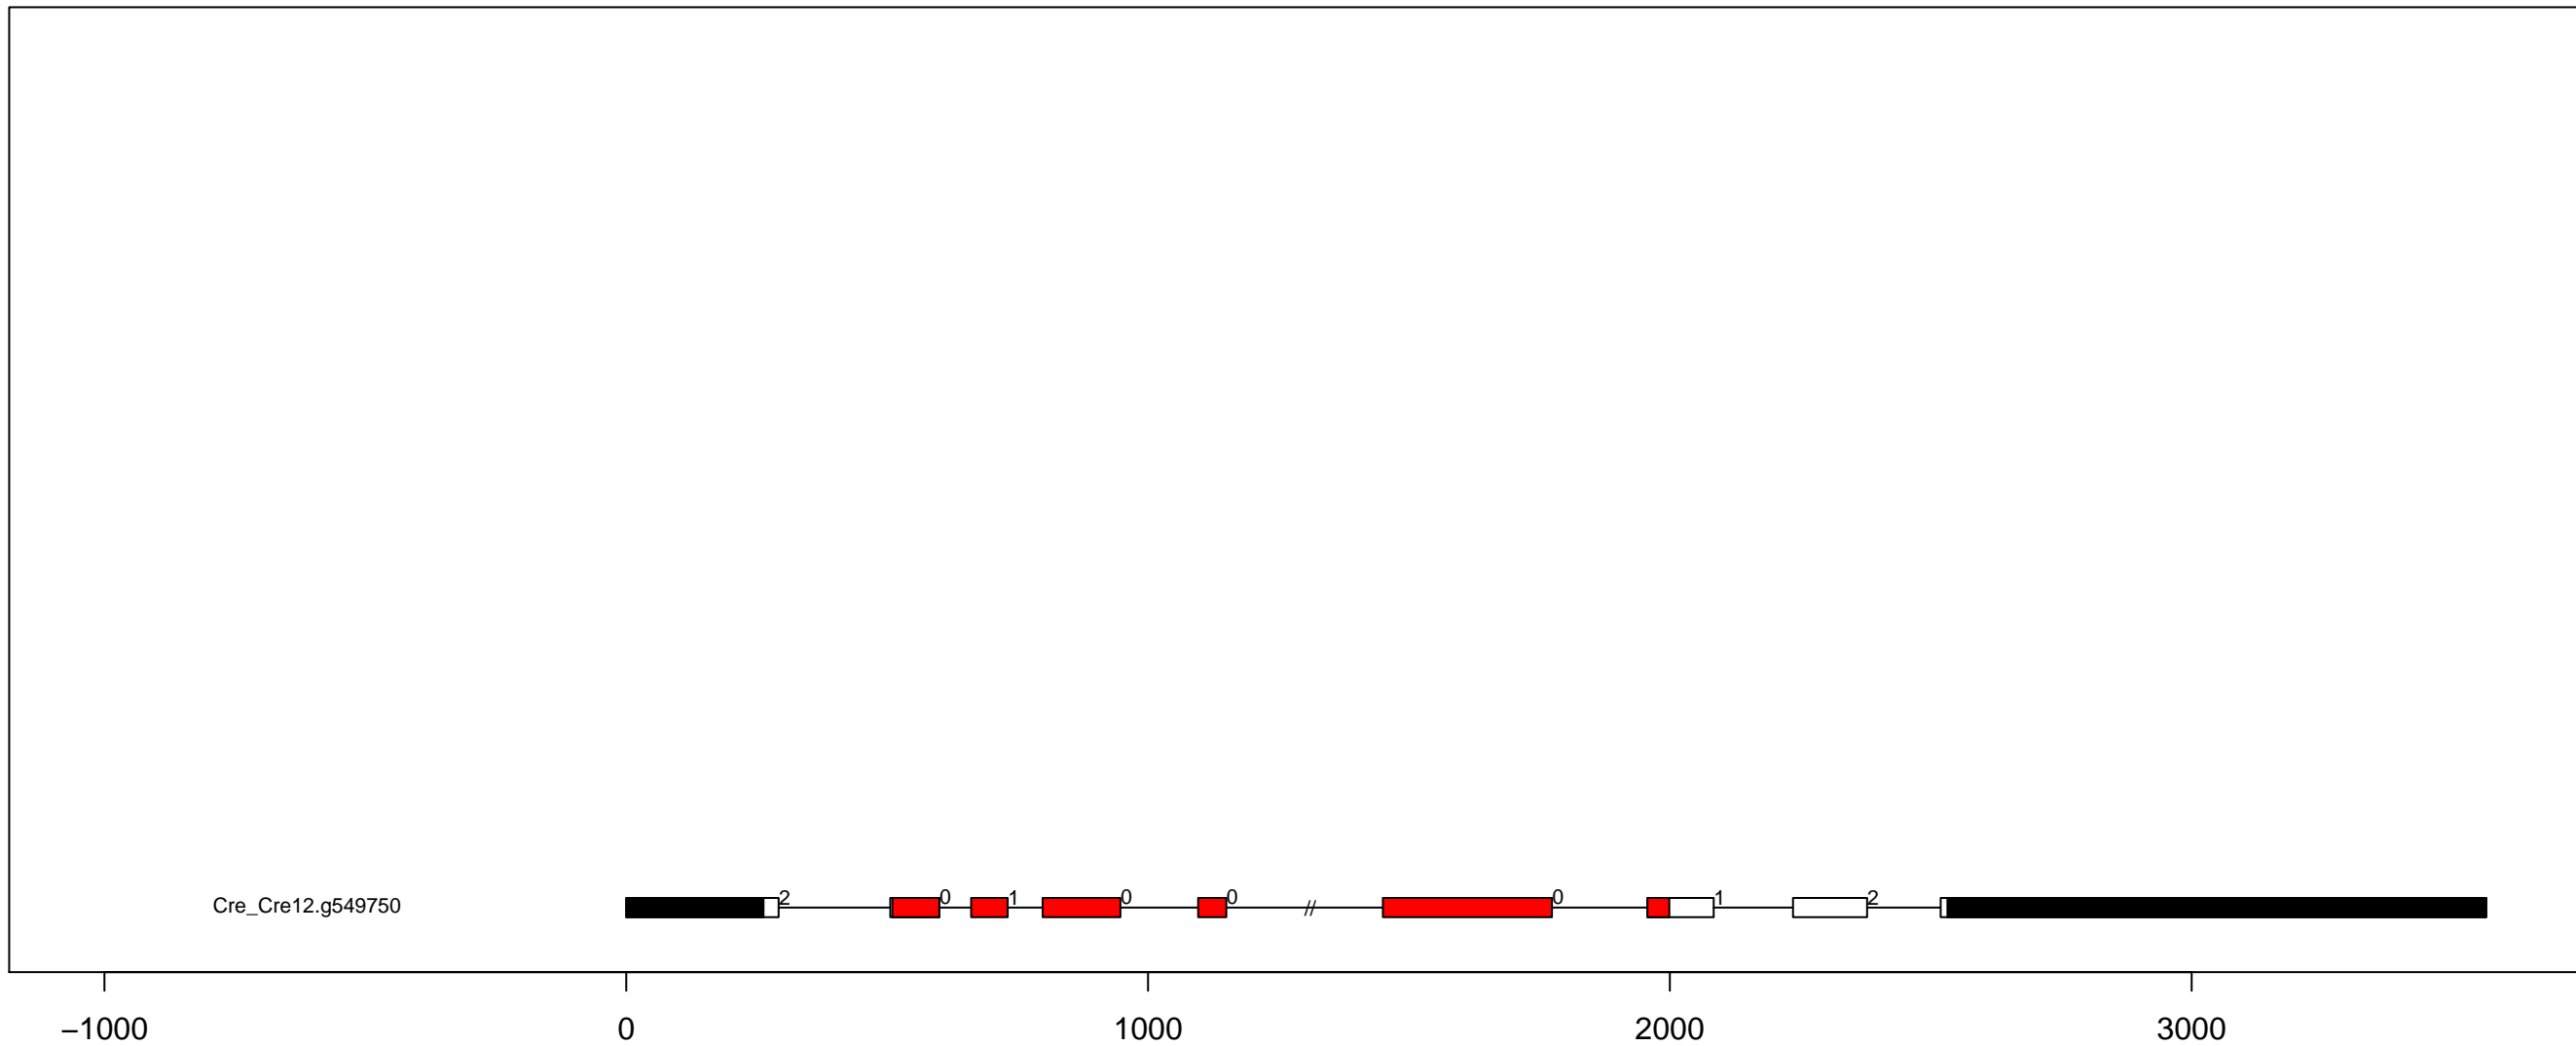

# C.re CK1-CK1-PI exon-intron and kinase domain diagram (all)

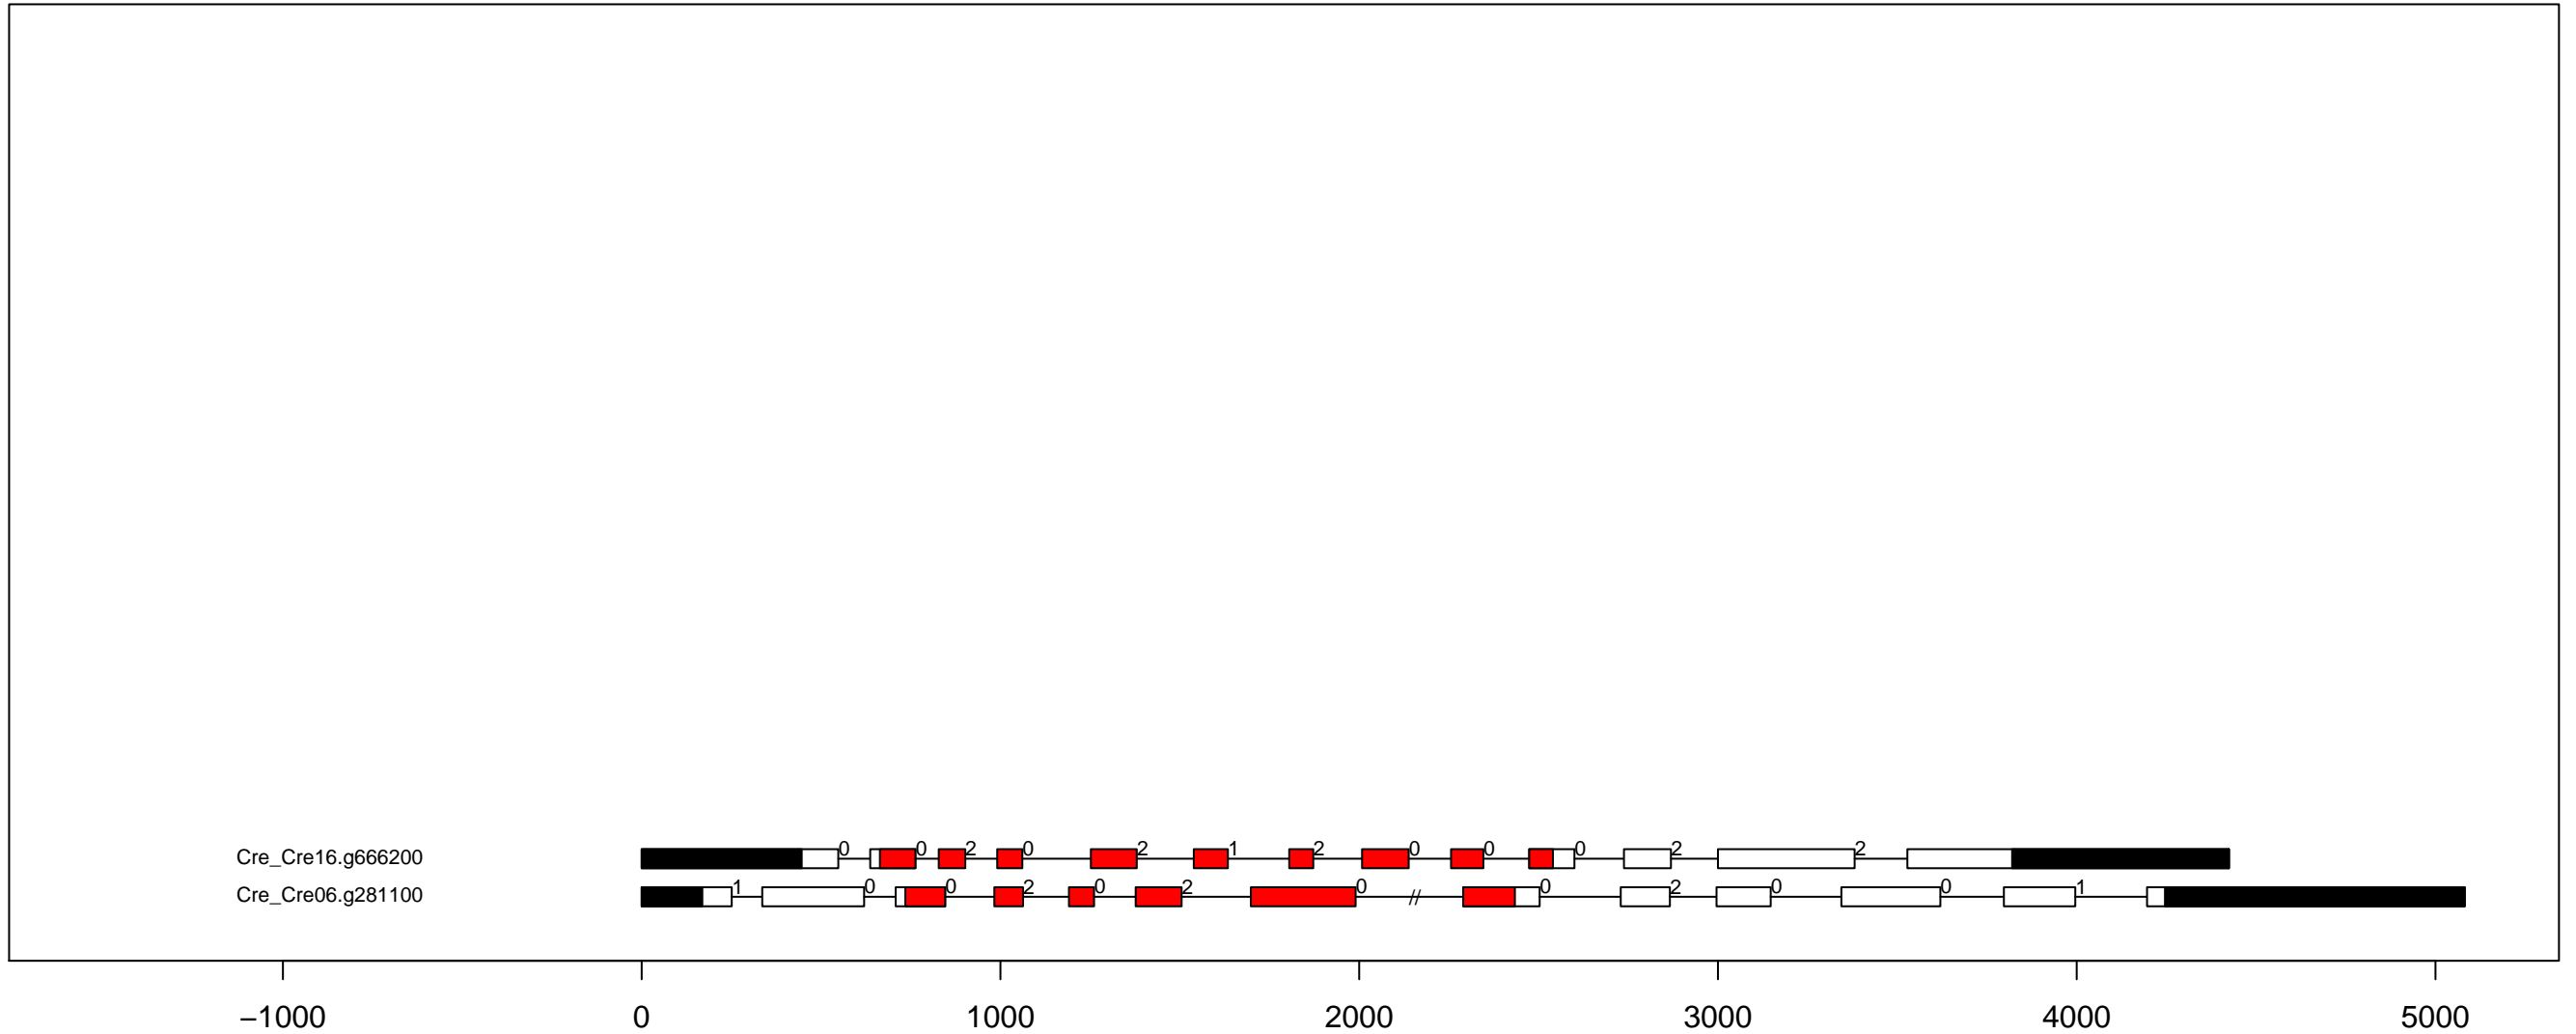

# C.re CMGC\_CDK-CCRK exon-intron and kinase domain diagram (all)

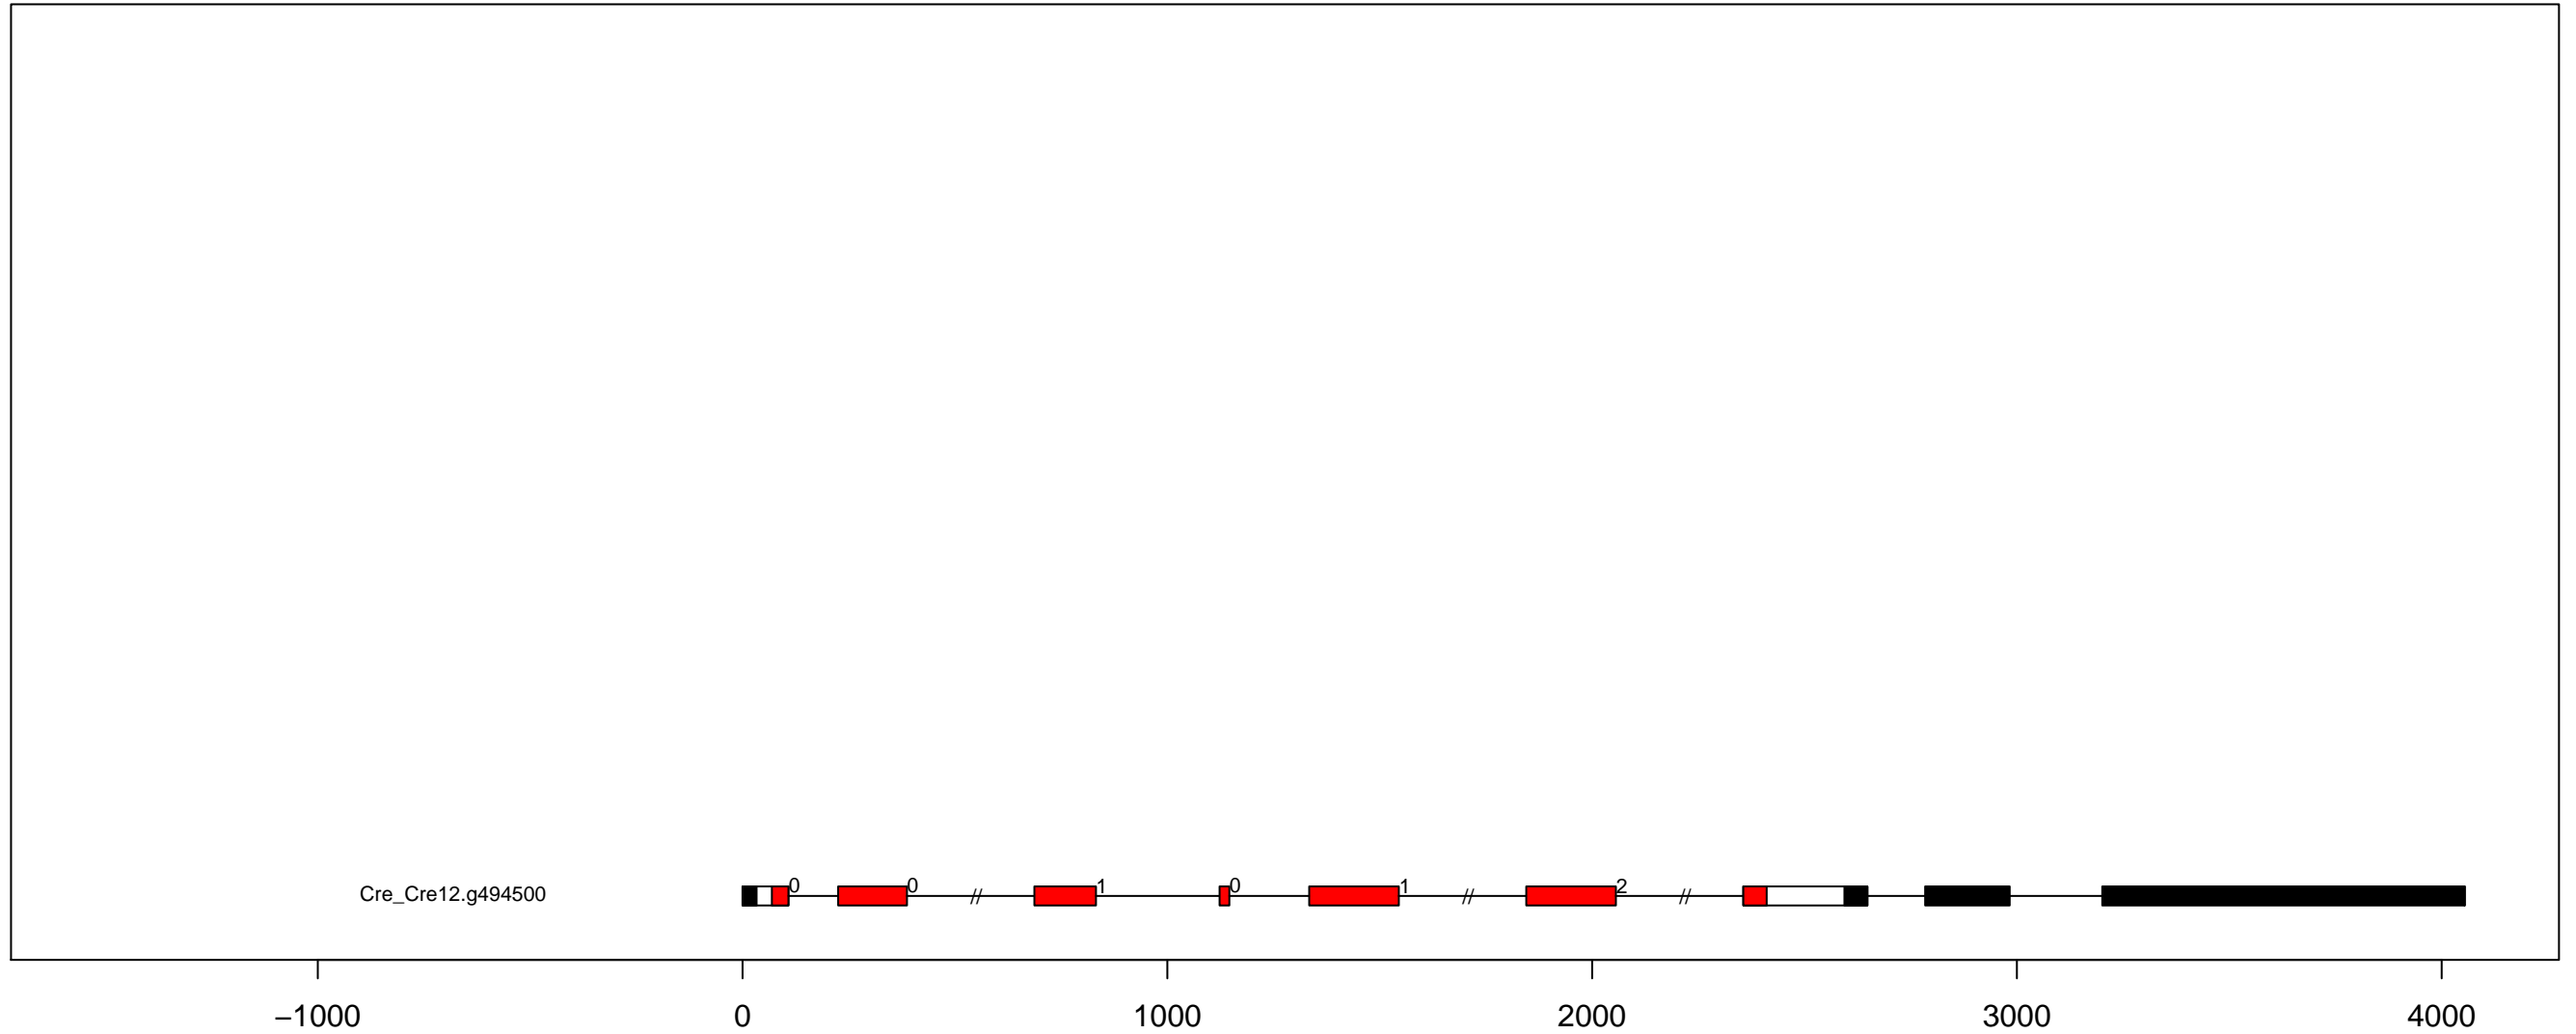

# C.re CMGC\_CDK-CDK7 exon-intron and kinase domain diagram (all)

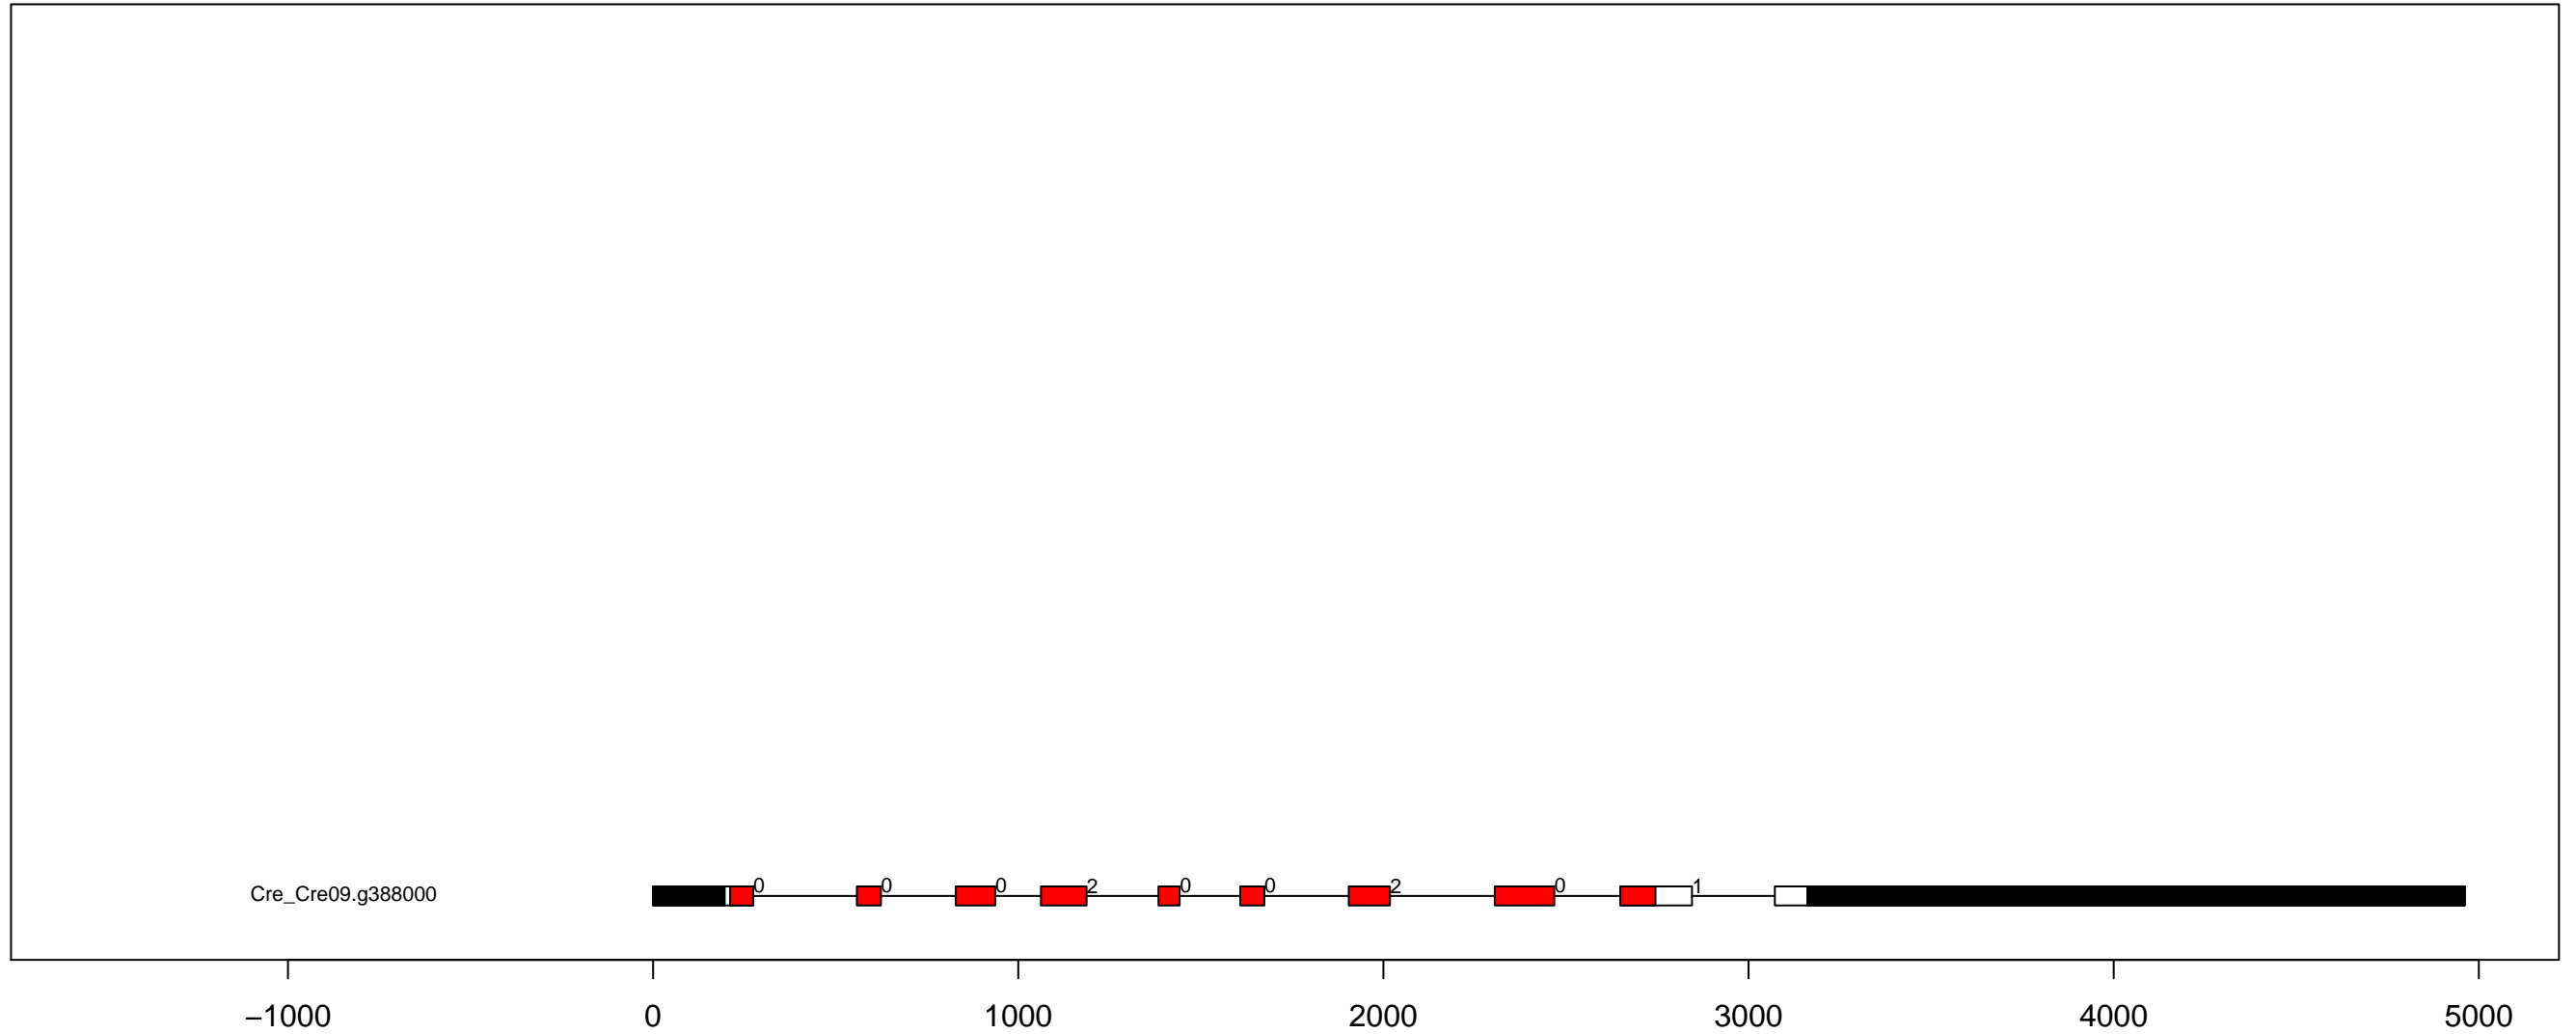

# C.re CMGC\_CDK-CRK7-CDK9 exon-intron and kinase domain diagram (all)

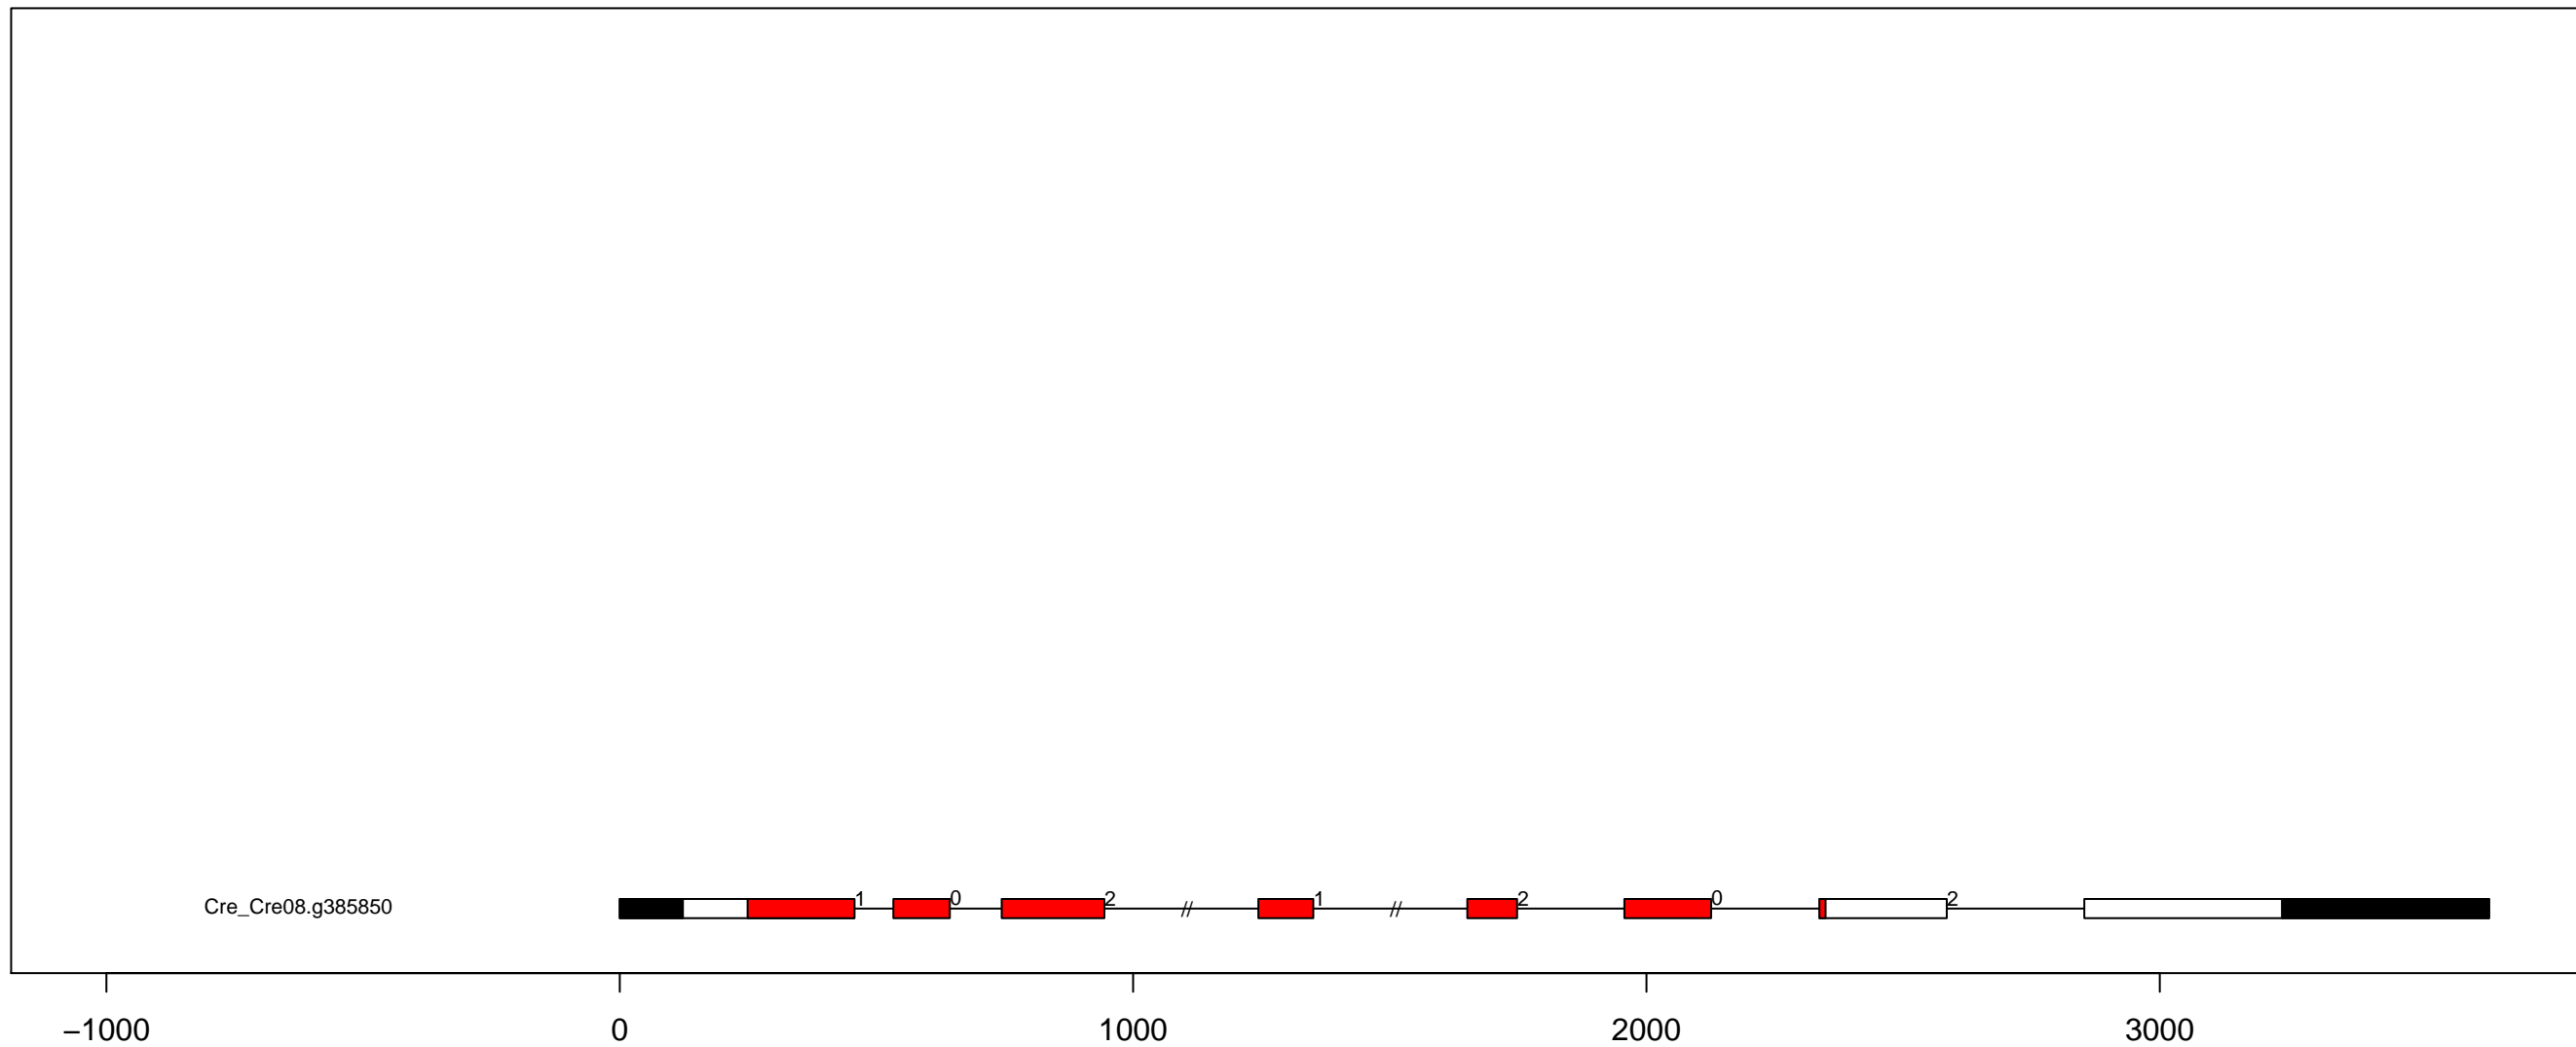



# C.re CMGC\_CDK-Cr exon-intron and kinase domain diagram (all)

Cre\_Cre17.g742250  
Cre\_Cre06.g271100  
Cre\_Cre02.g107000

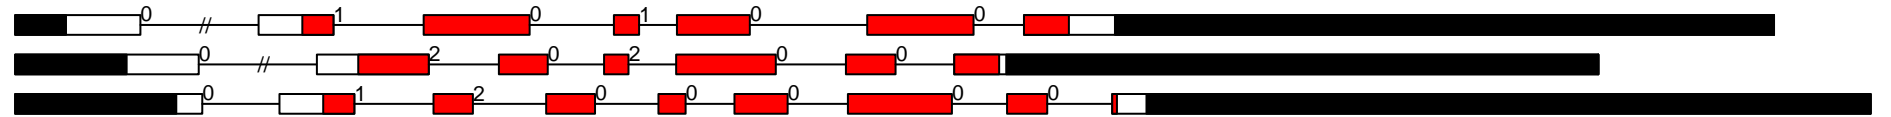

-1000

0

1000

2000

3000

4000

# C.re CMGC\_CDKL-Cr exon-intron and kinase domain diagram (part 1)

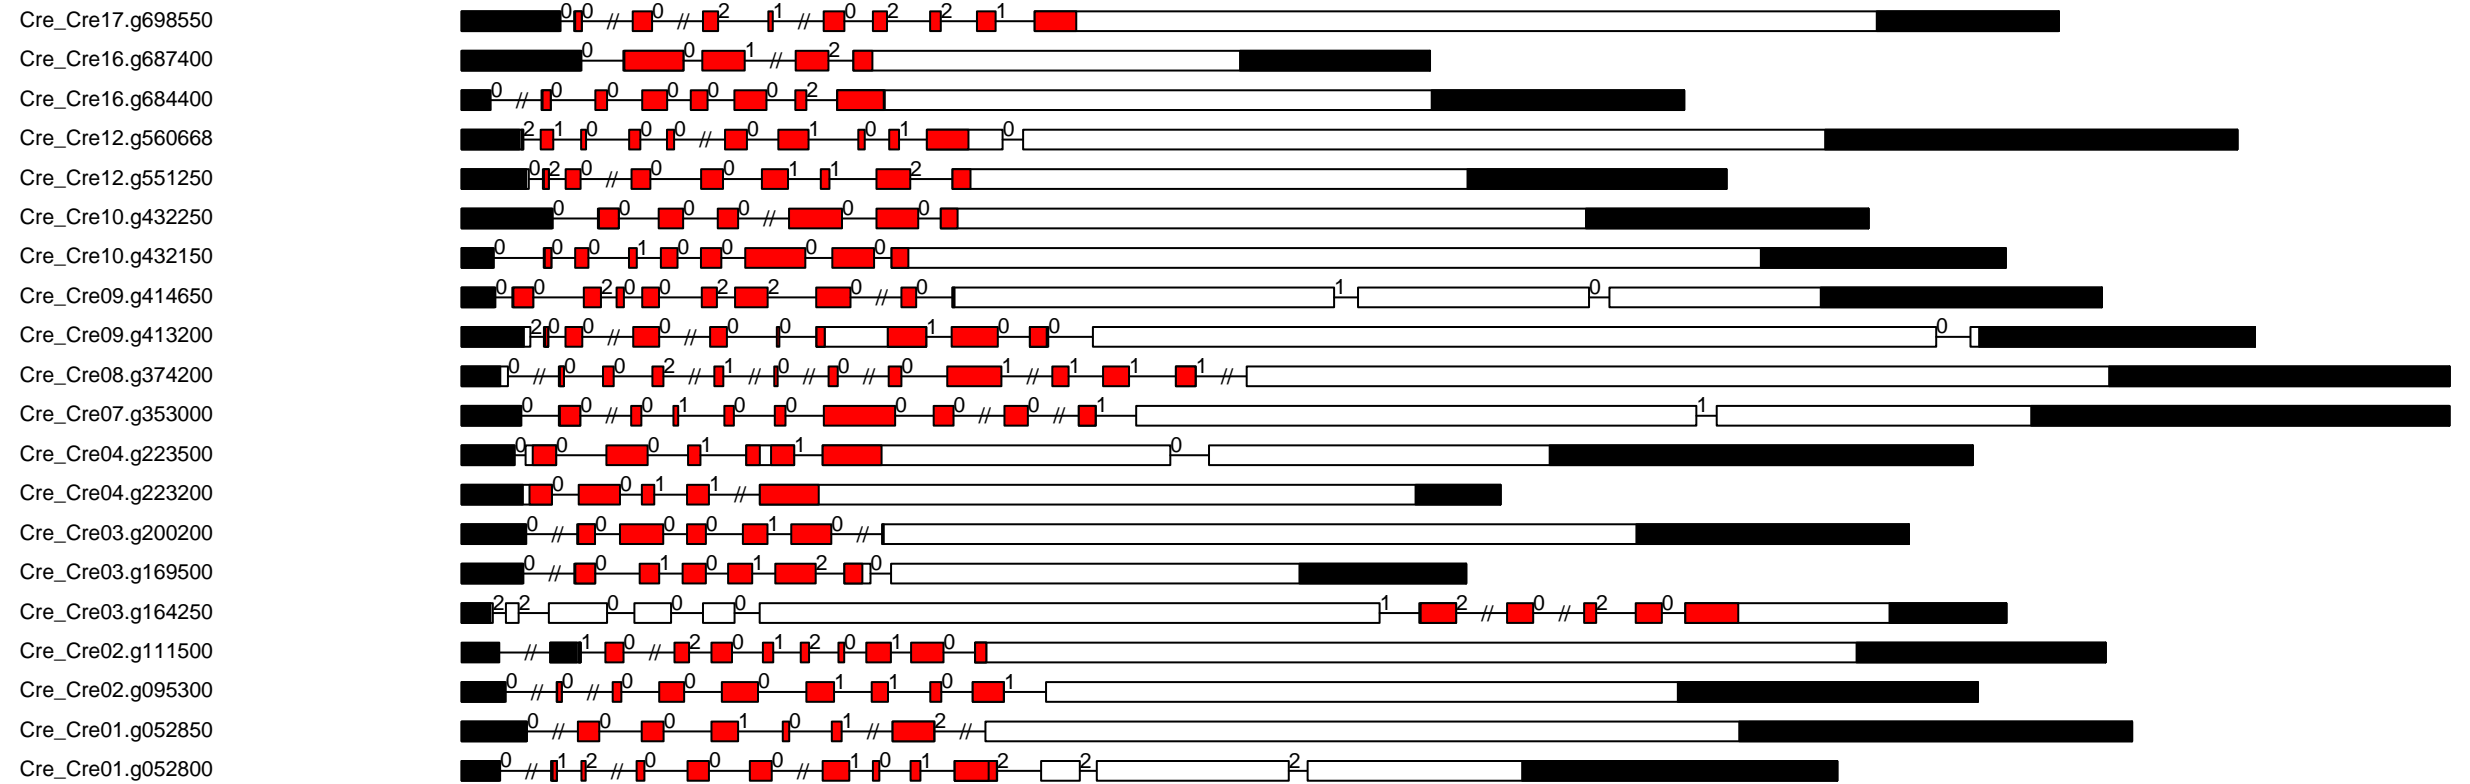



# C.re CMGC\_CDK-PITSLRE exon-intron and kinase domain diagram (all)

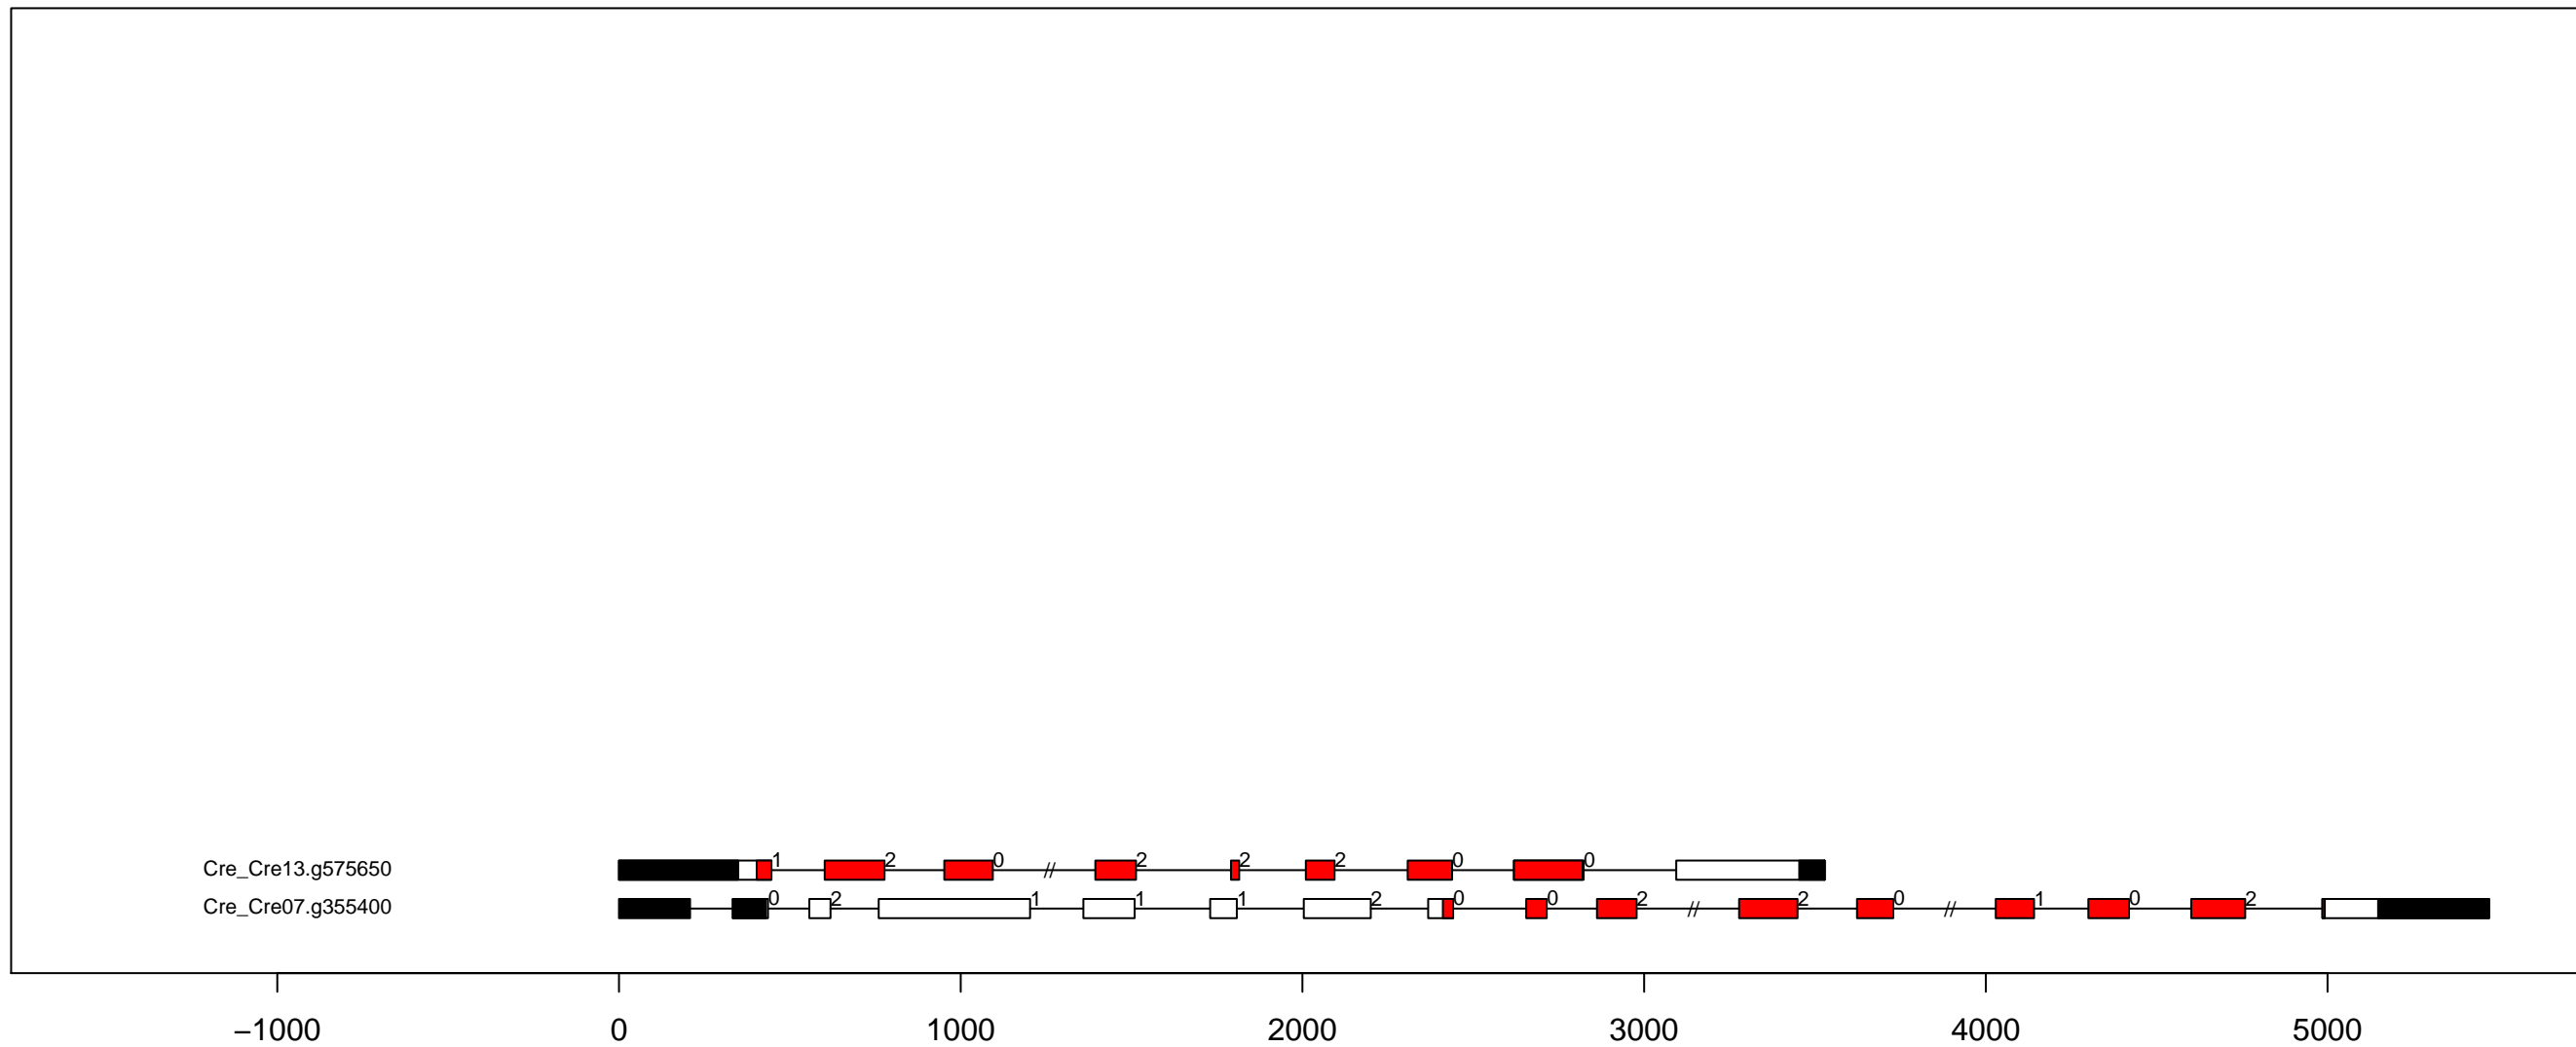

# C.re CMGC\_CDK-PI exon-intron and kinase domain diagram (all)

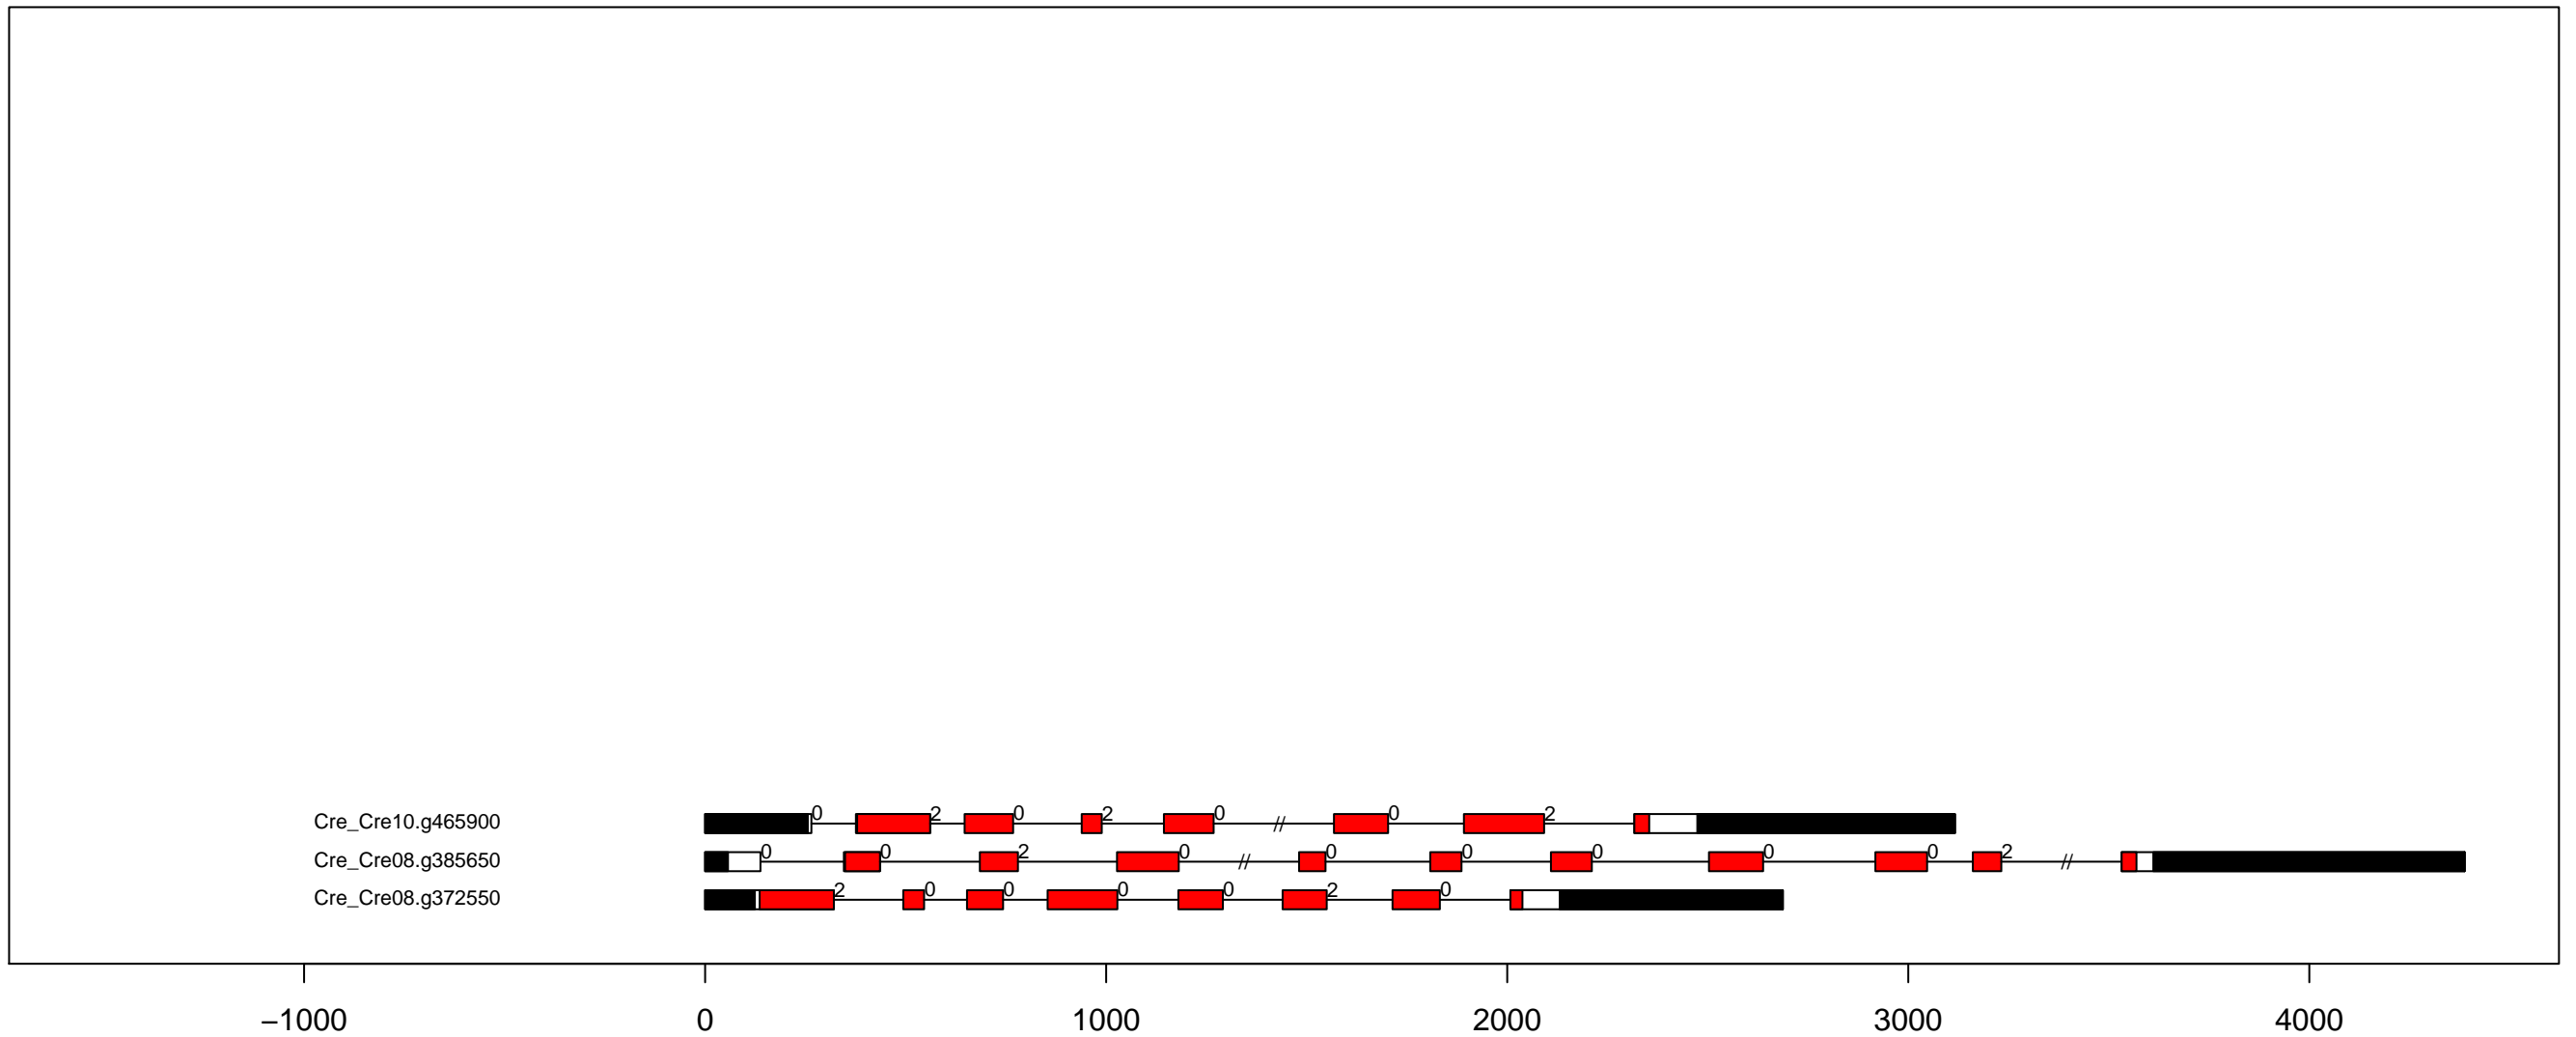

# C.re CMGC\_CK2 exon-intron and kinase domain diagram (all)

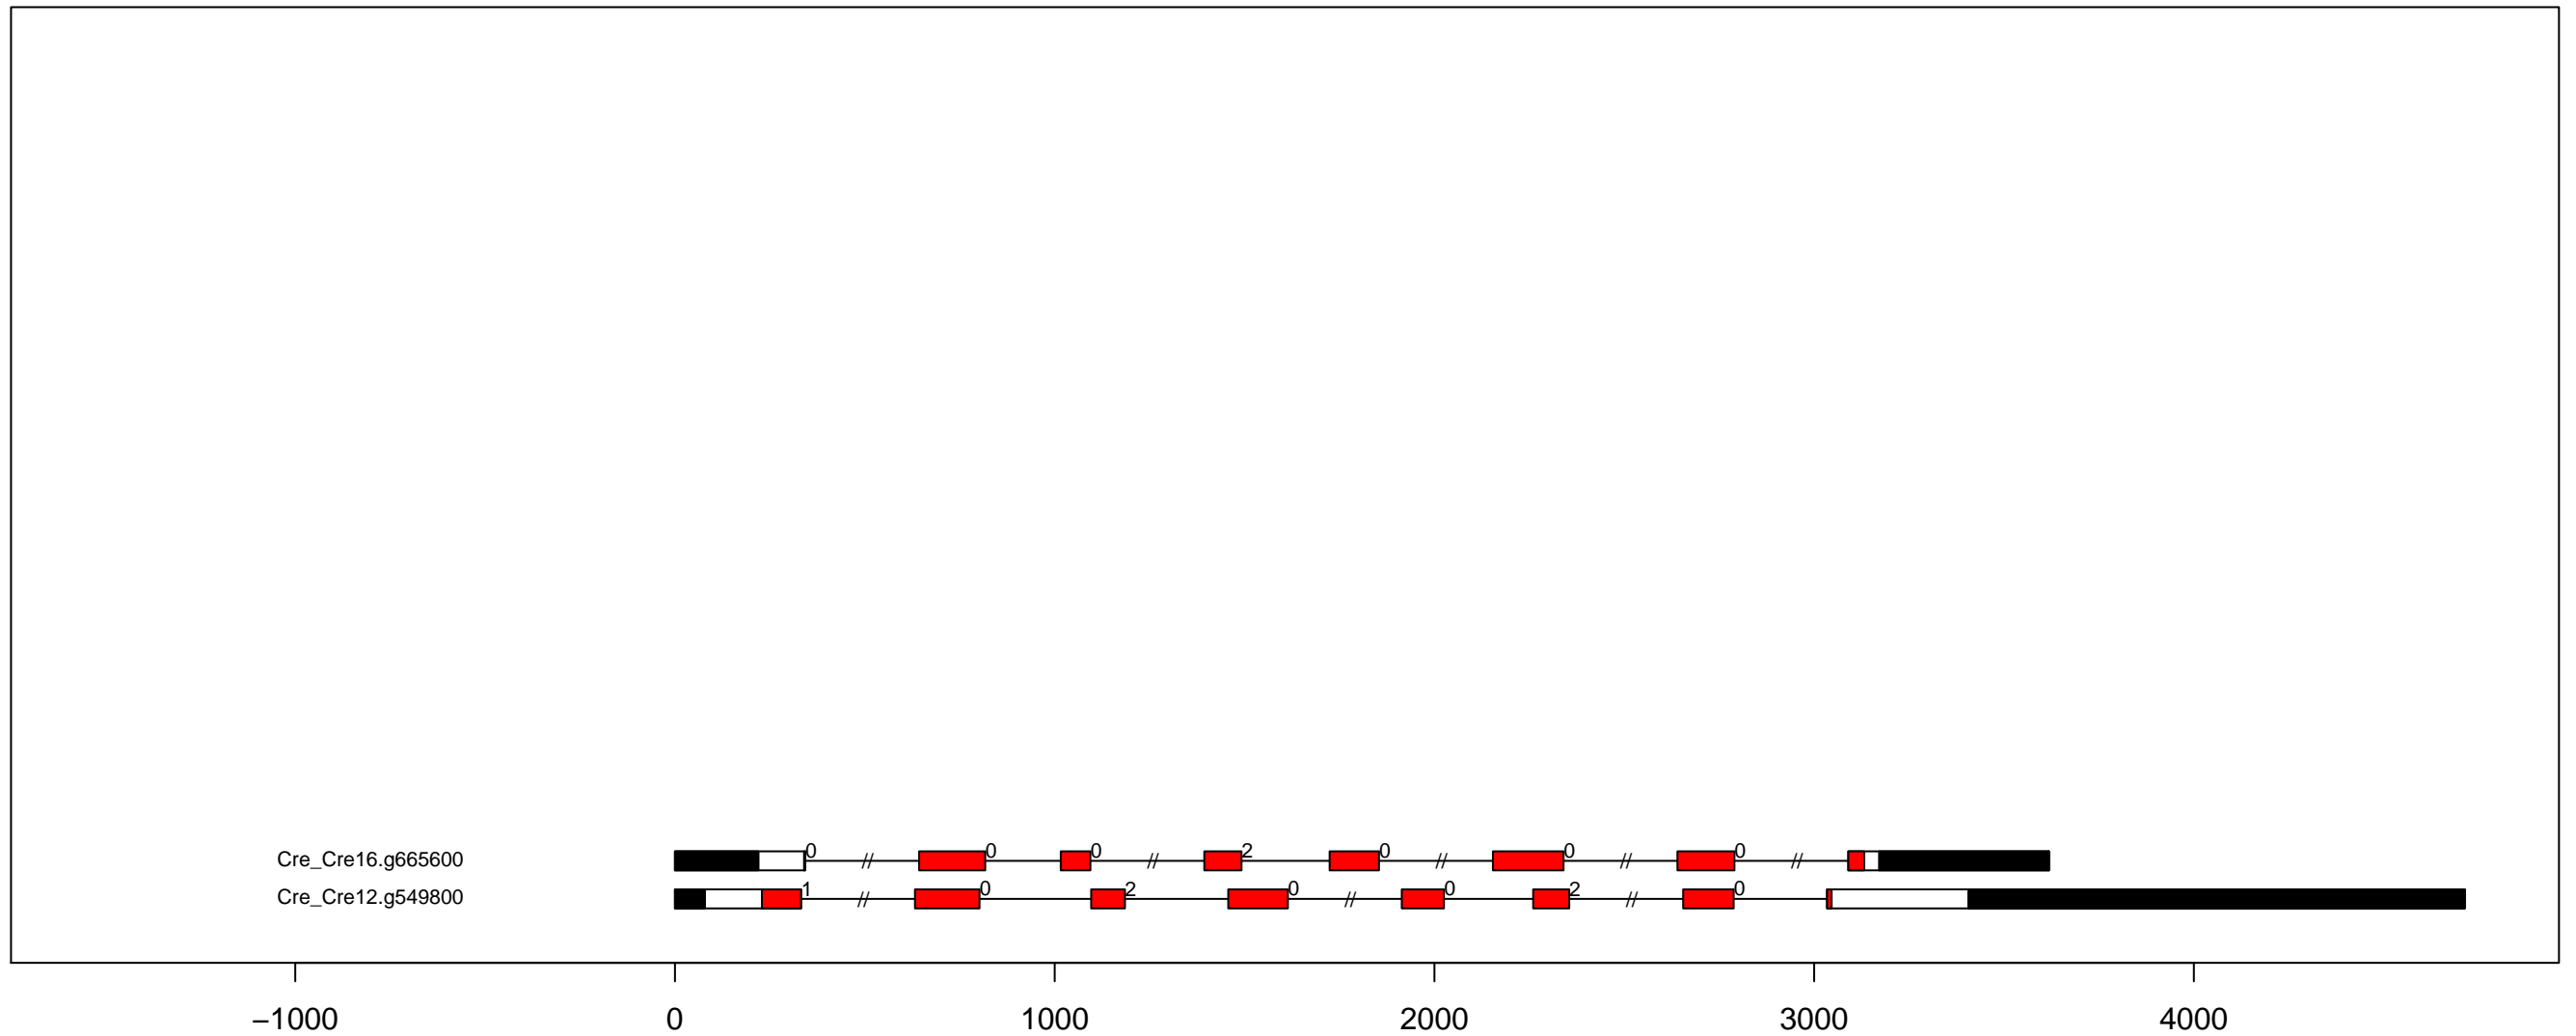

# C.re CMGC\_CLK exon-intron and kinase domain diagram (all)

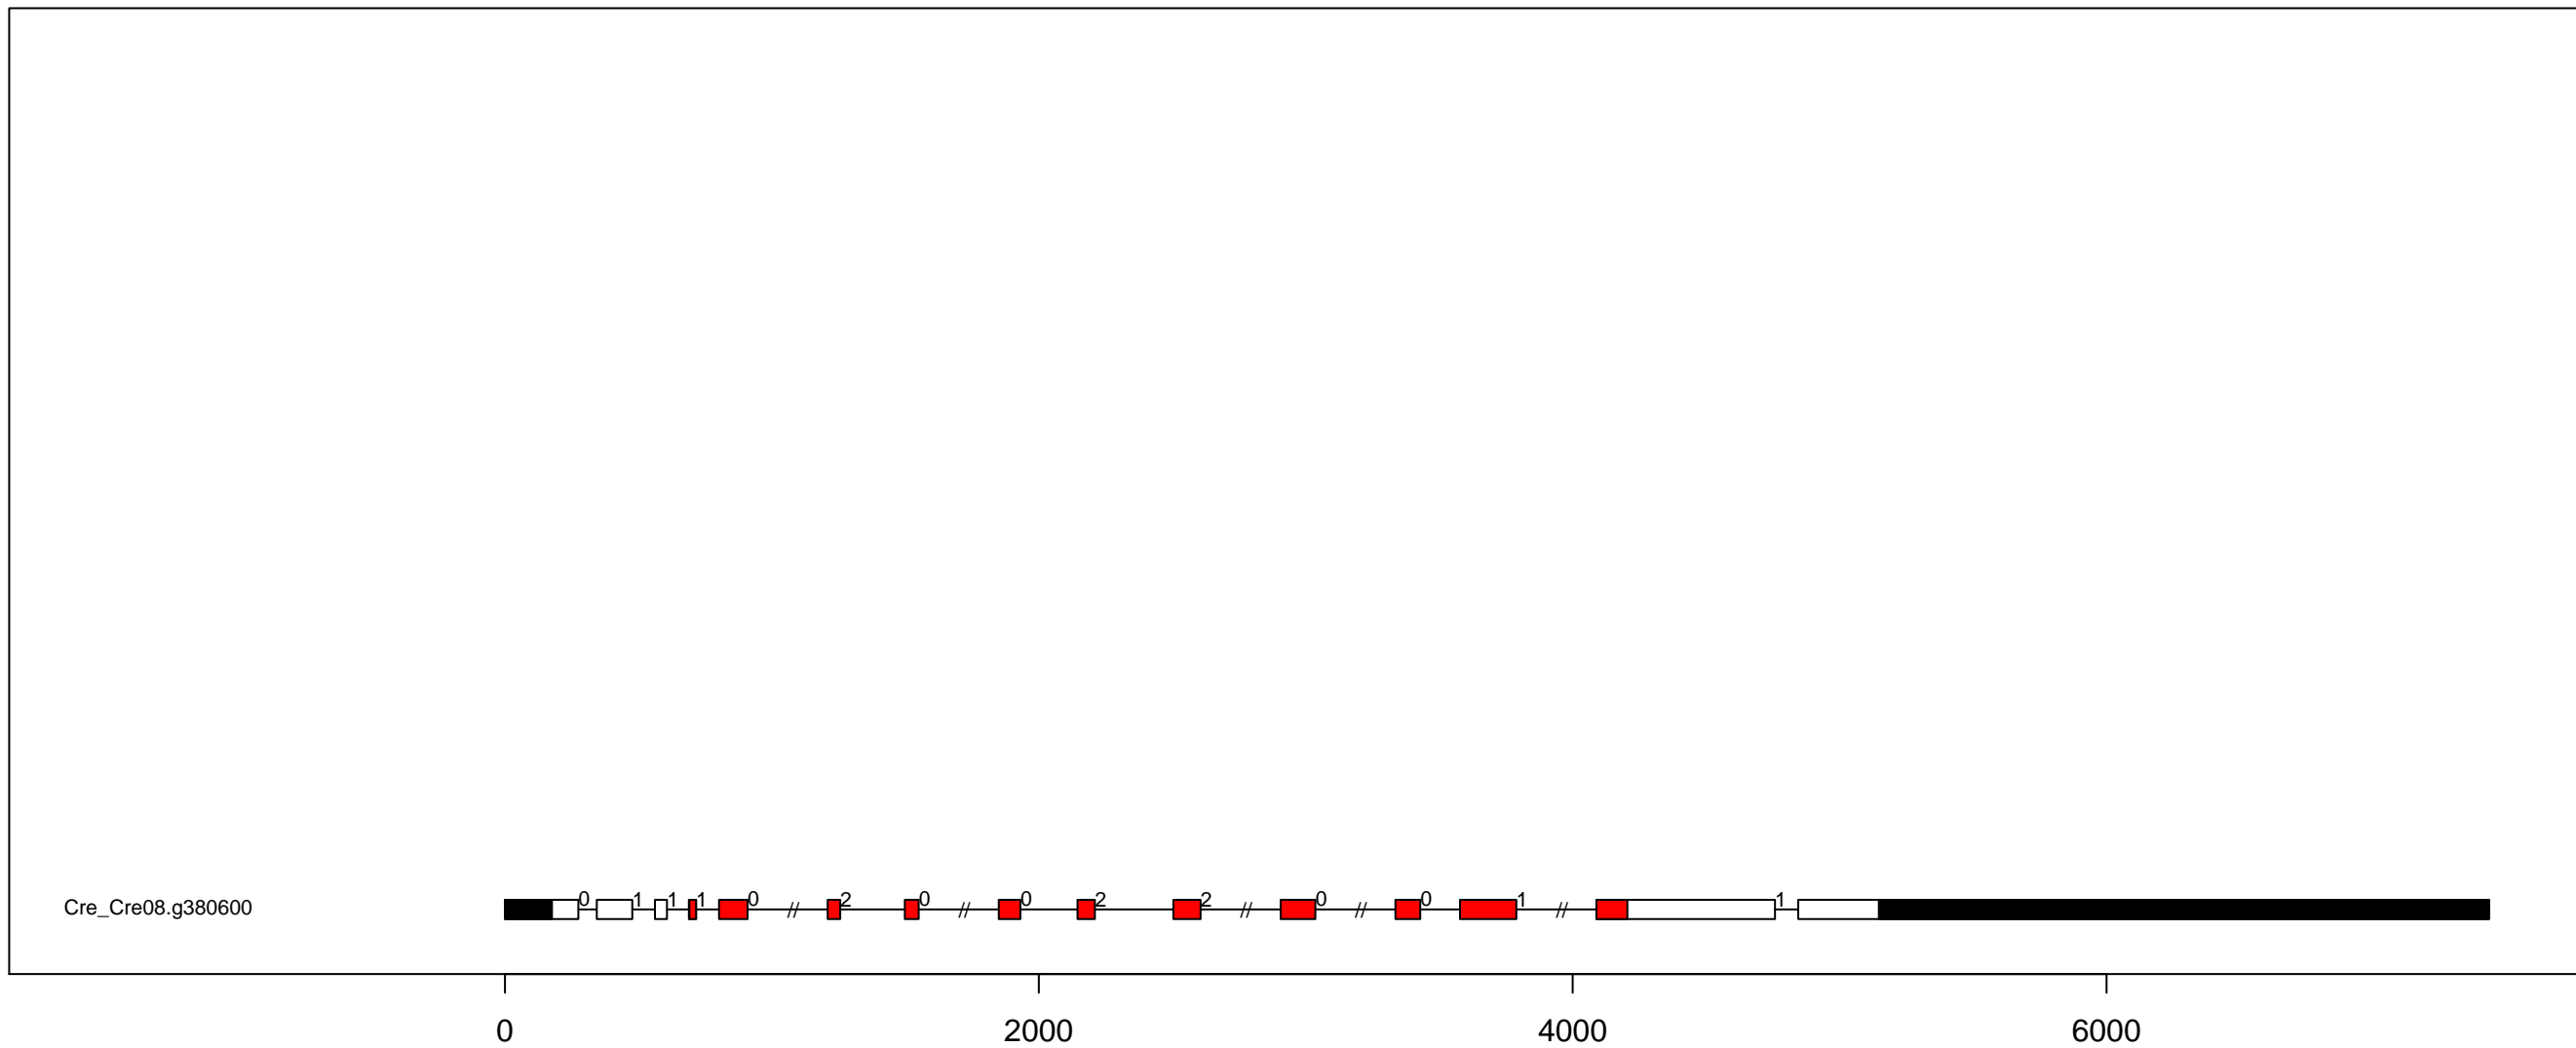

# C.re CMGC\_DYRK-DRYK2 exon-intron and kinase domain diagram (all)

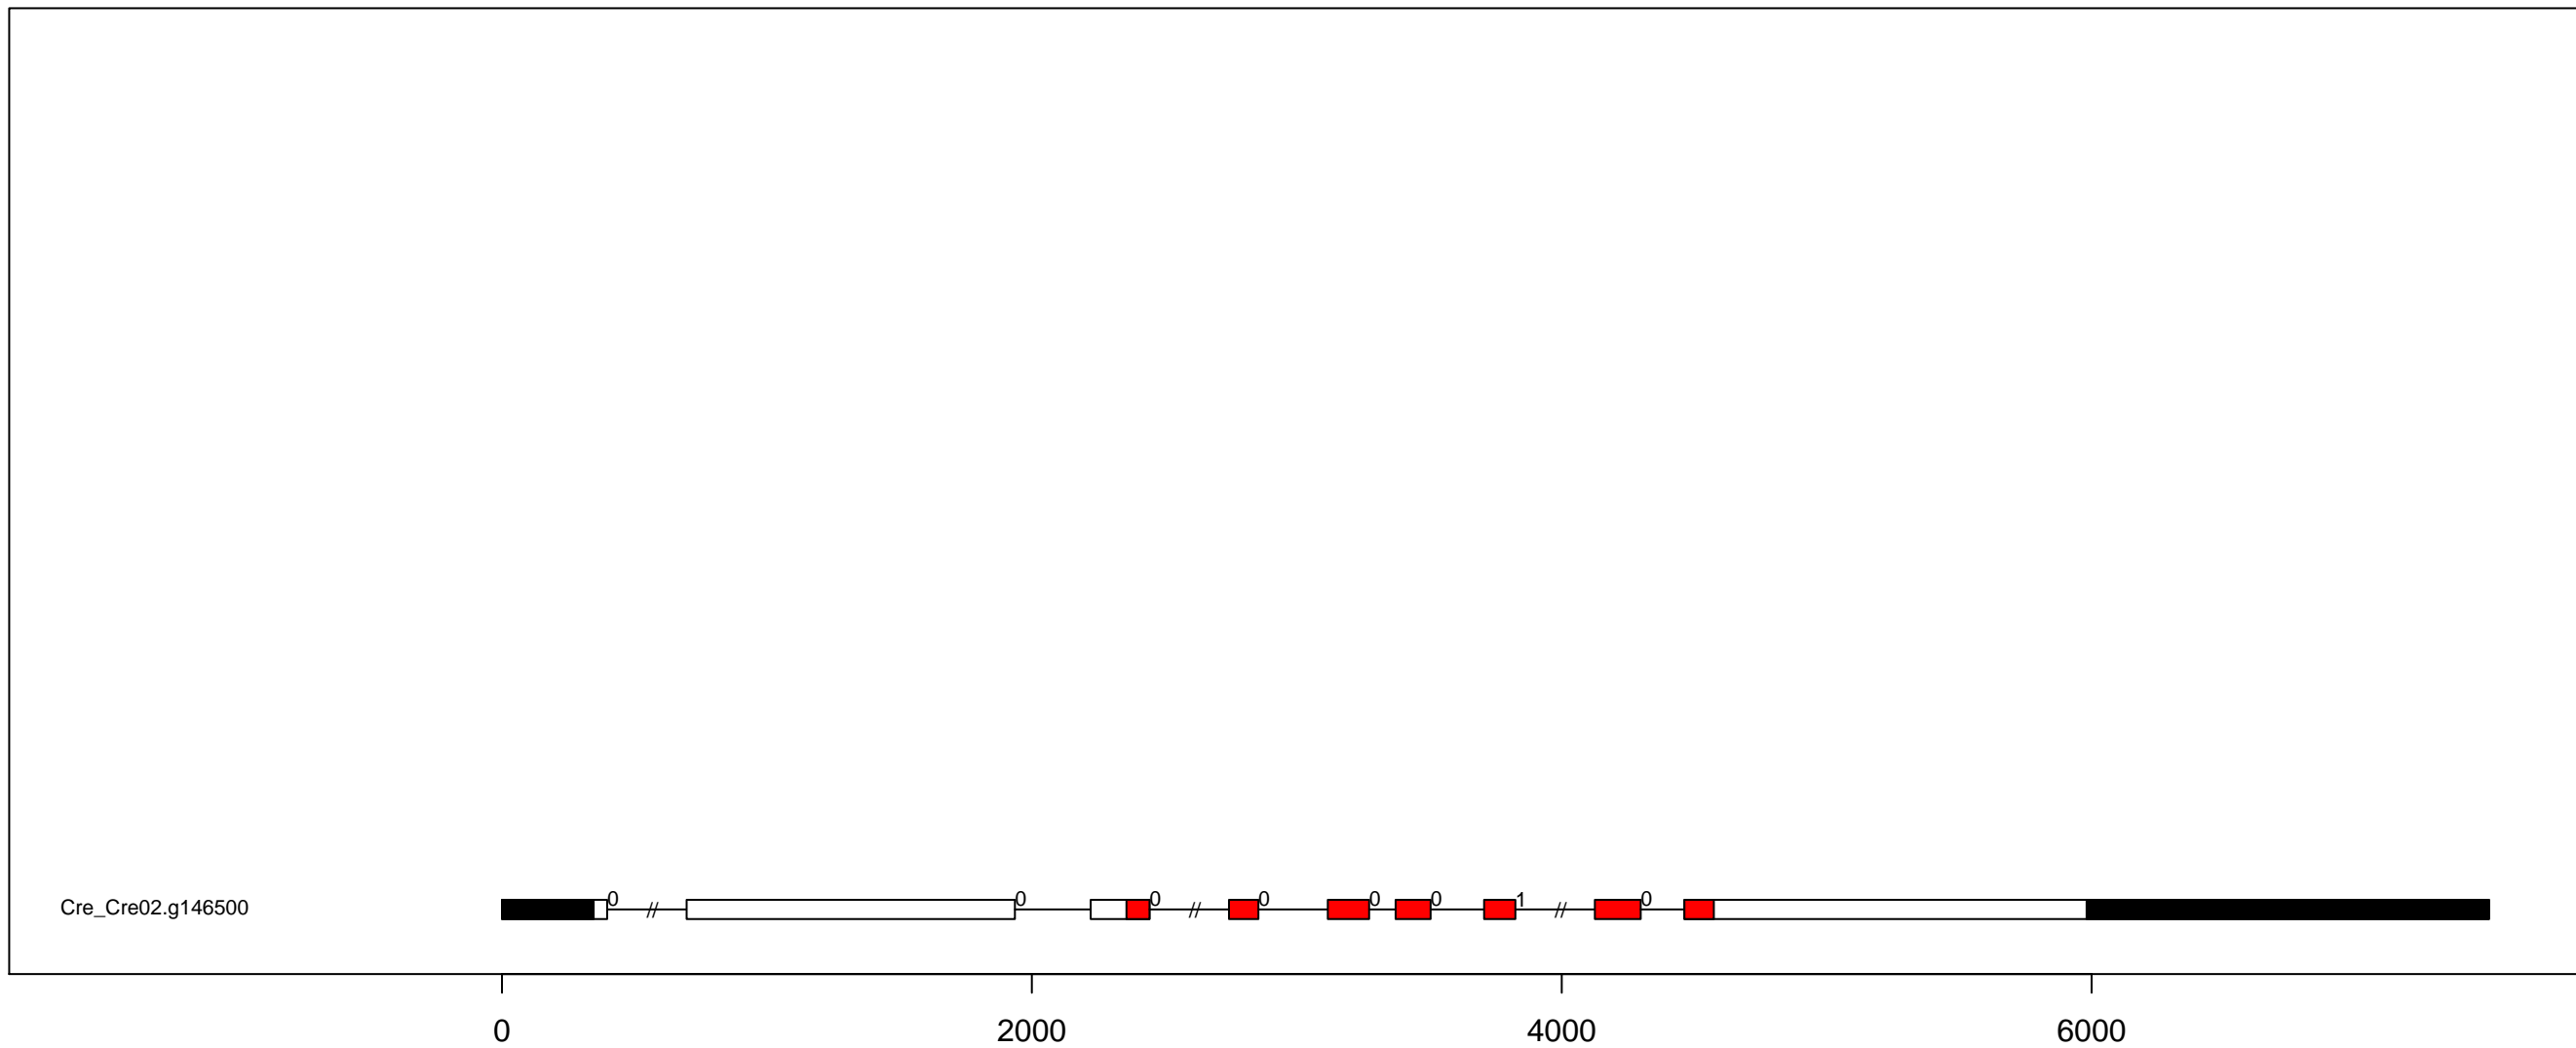



# C.re CMGC\_DYRK-PRP4 exon-intron and kinase domain diagram (all)

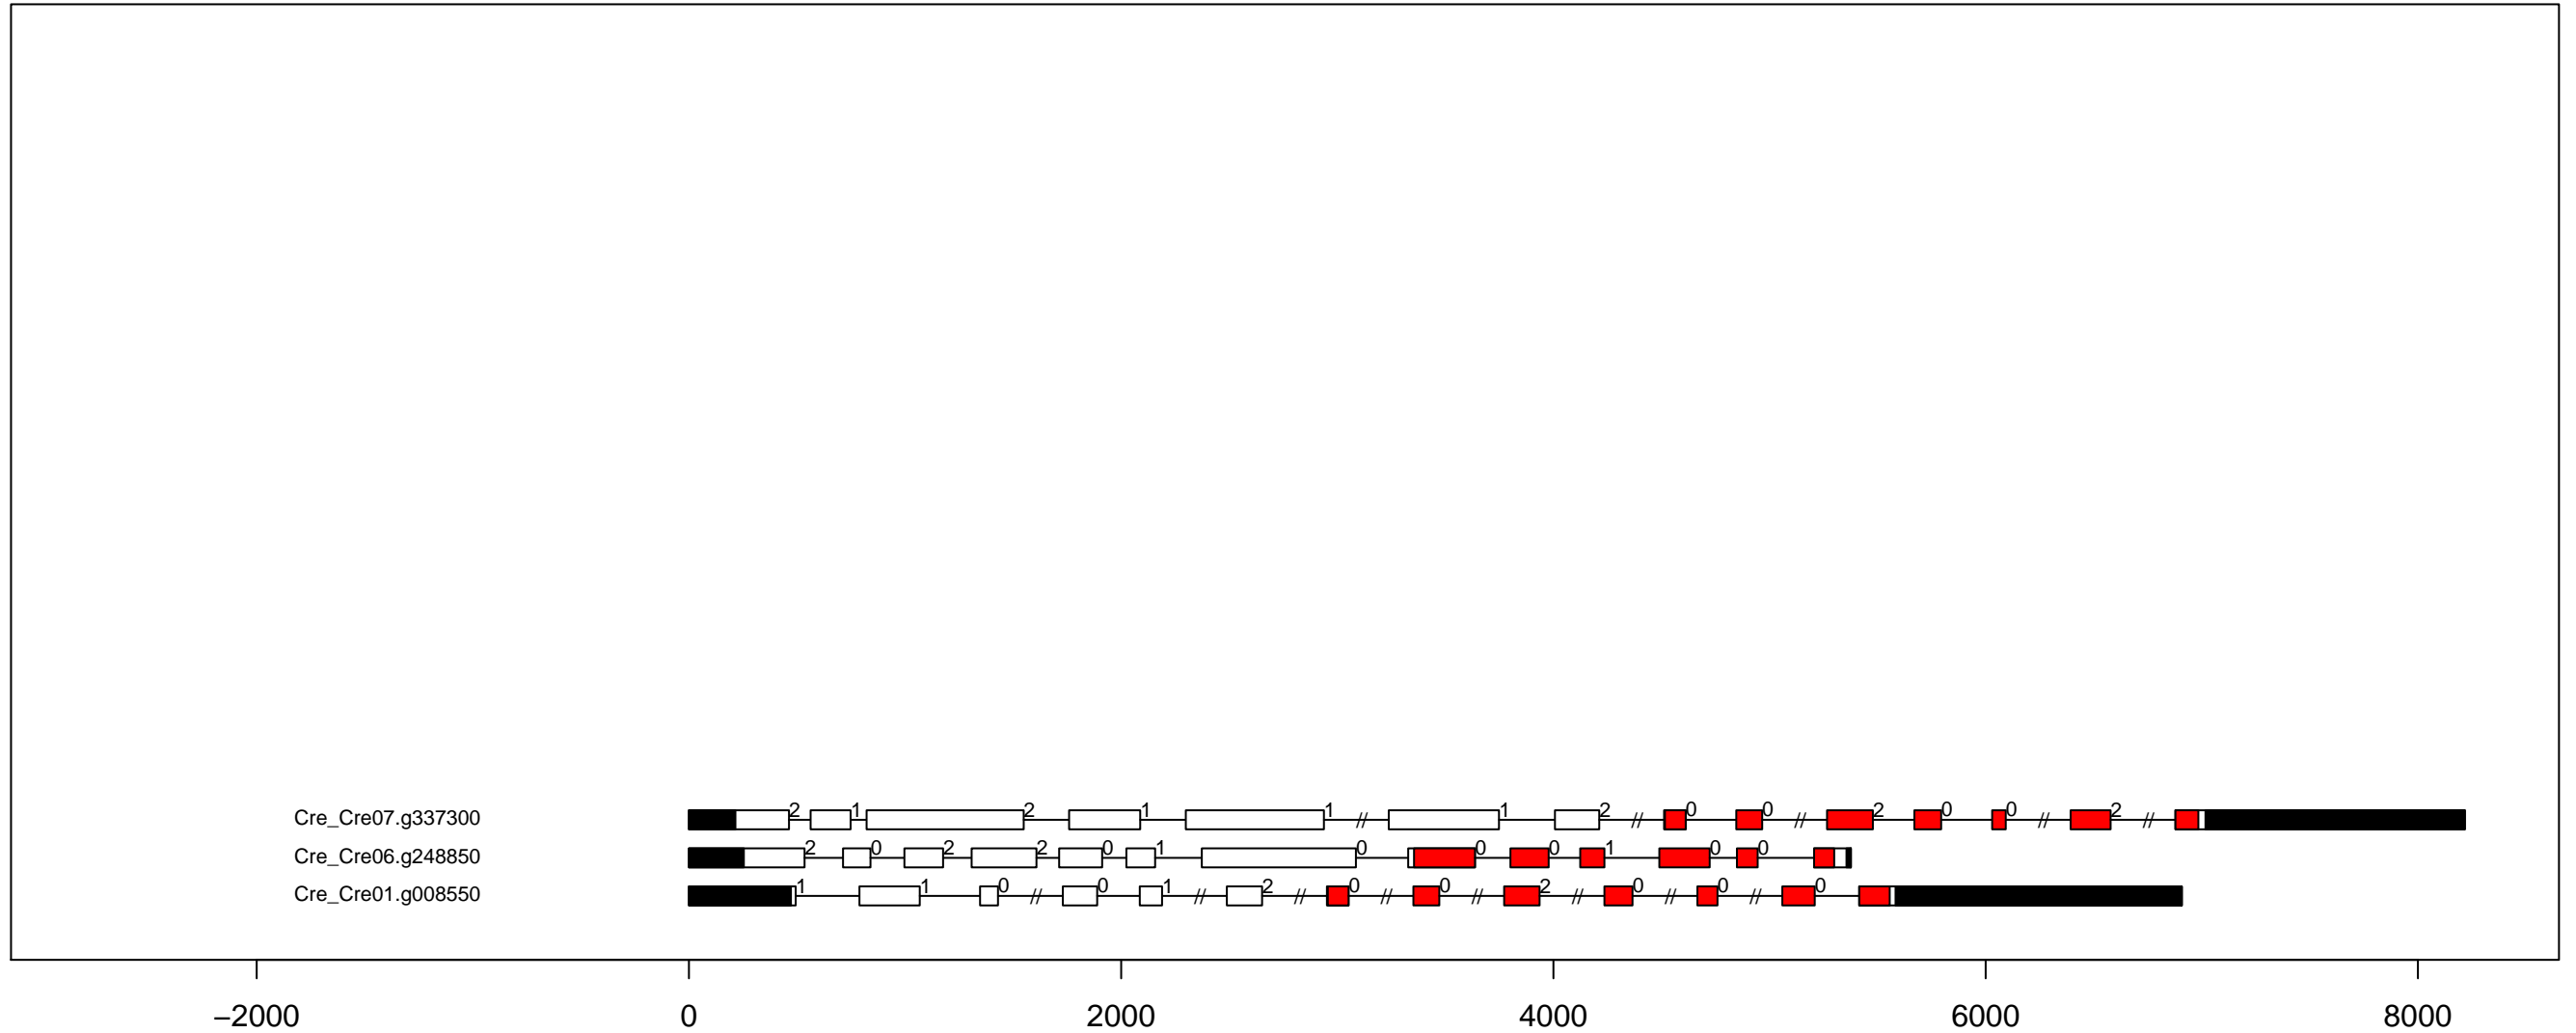



# C.re CMGC\_GSK exon-intron and kinase domain diagram (all)

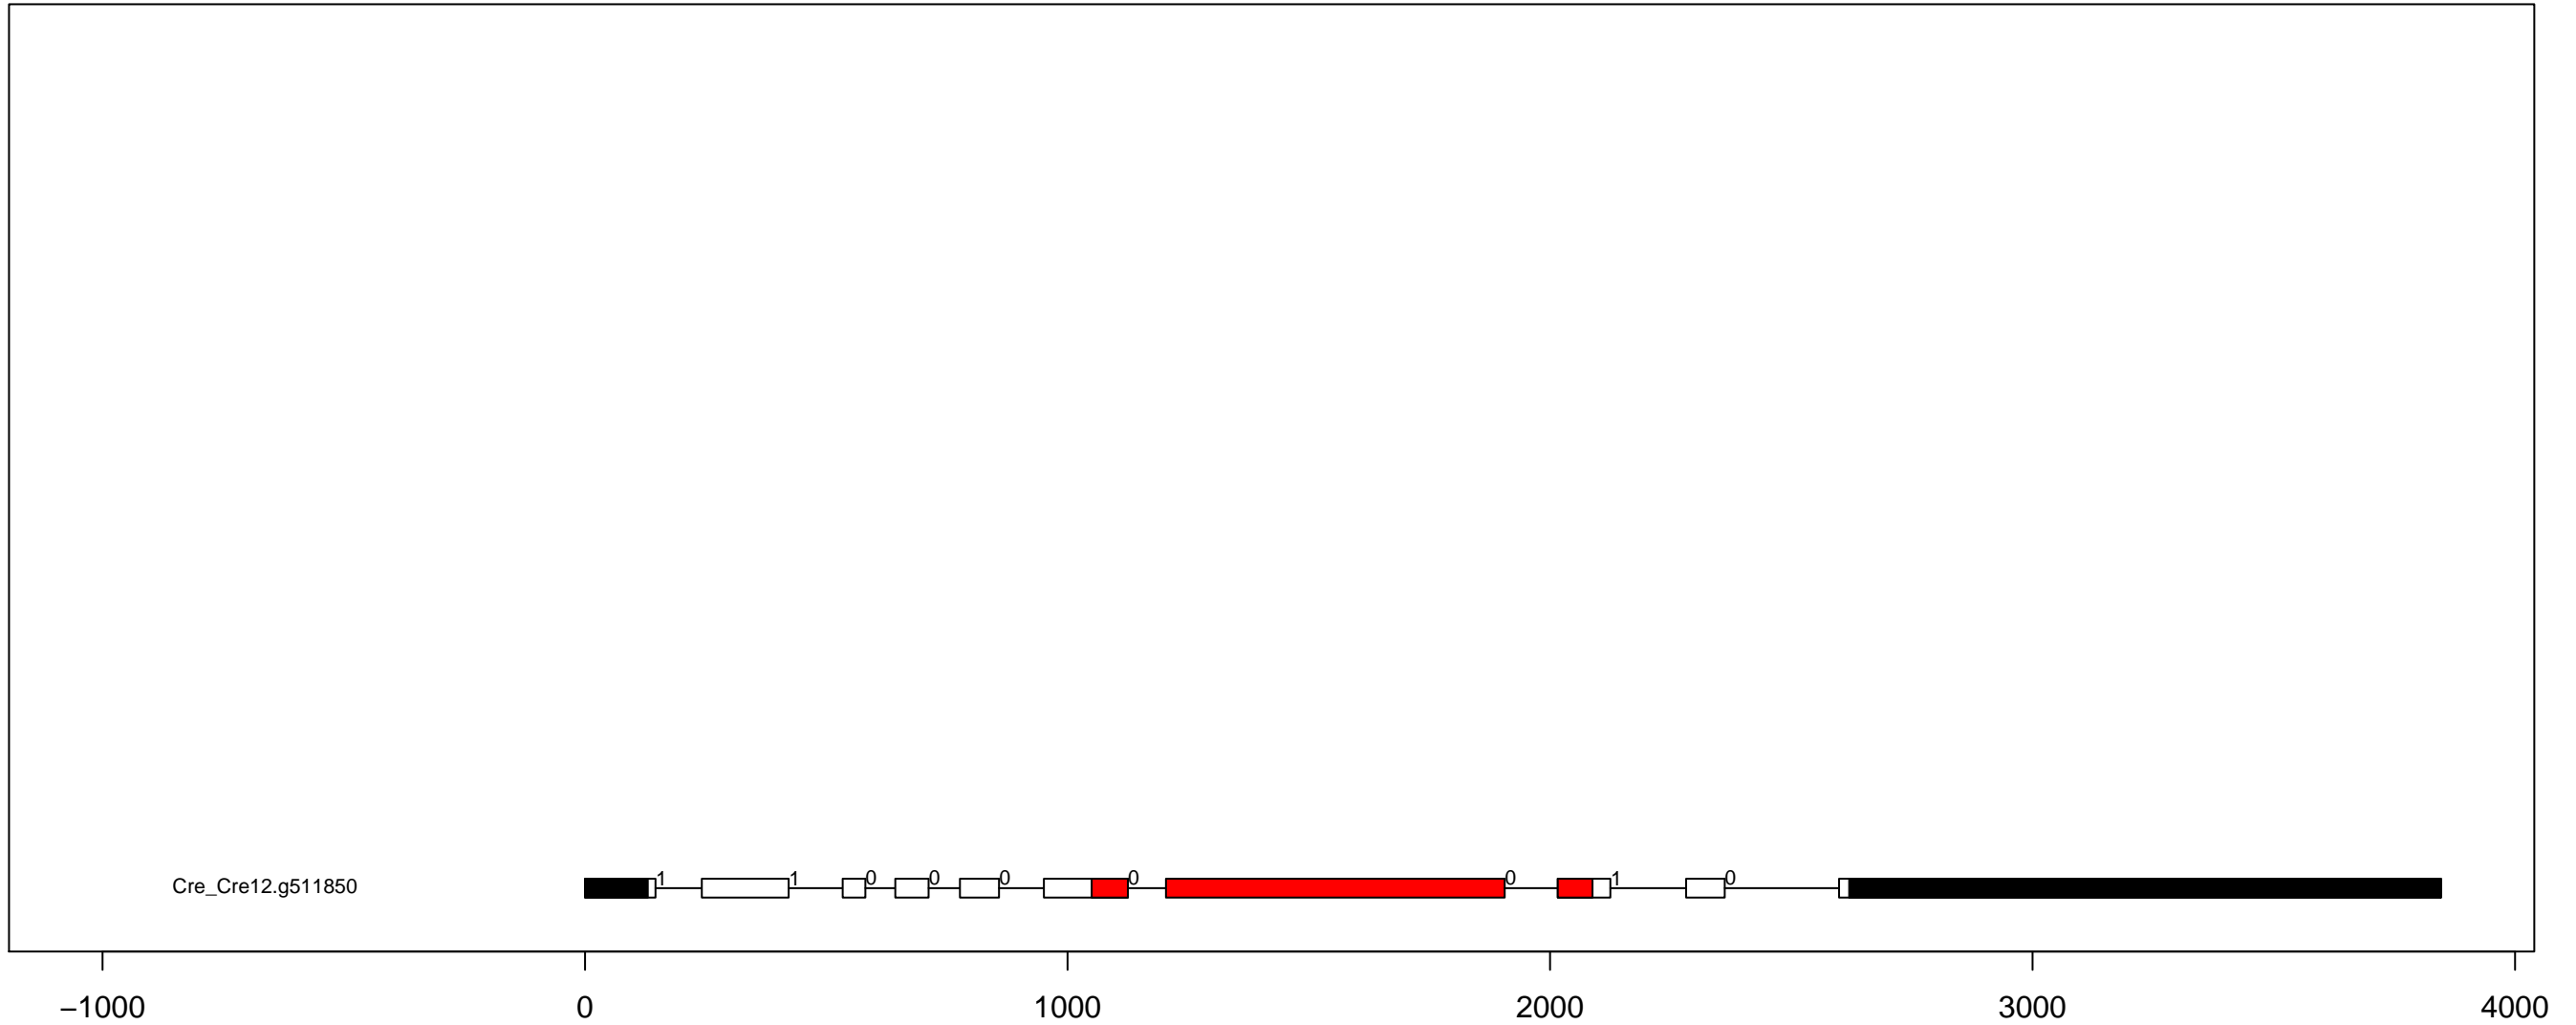

# C.re CMGC\_MAPK exon-intron and kinase domain diagram (all)

Cre\_Cre13.g607300

Cre\_Cre12.g530000

Cre\_Cre12.g509000

Cre\_Cre12.g508900

Cre\_Cre08.g385050

Cre\_Cre01.g010000

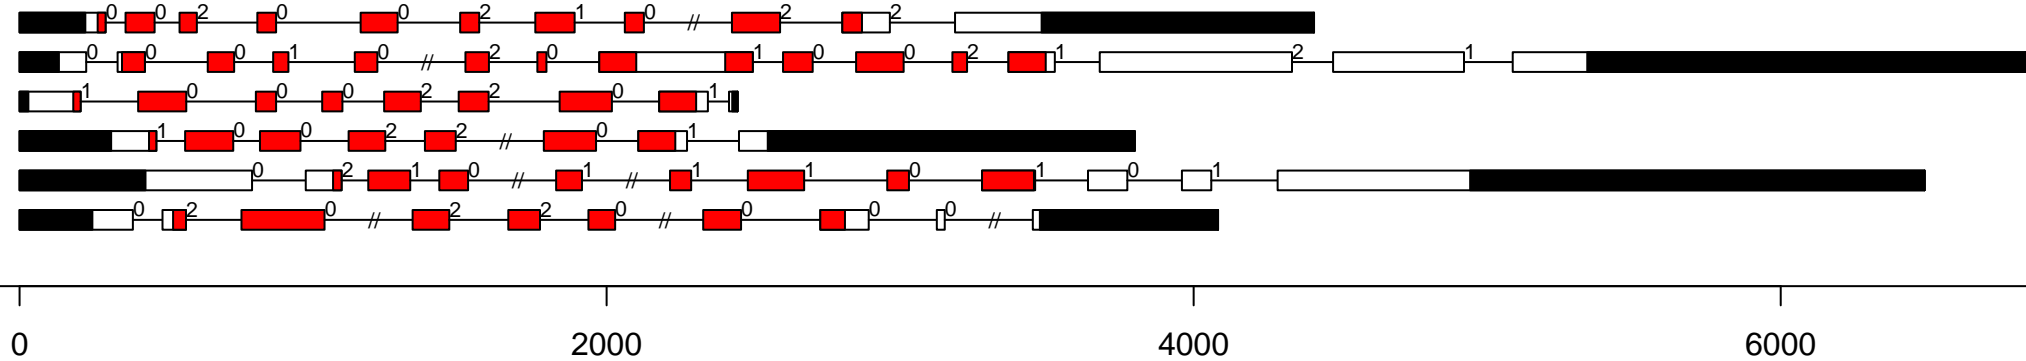

# C.re CMGC\_RCK exon-intron and kinase domain diagram (all)

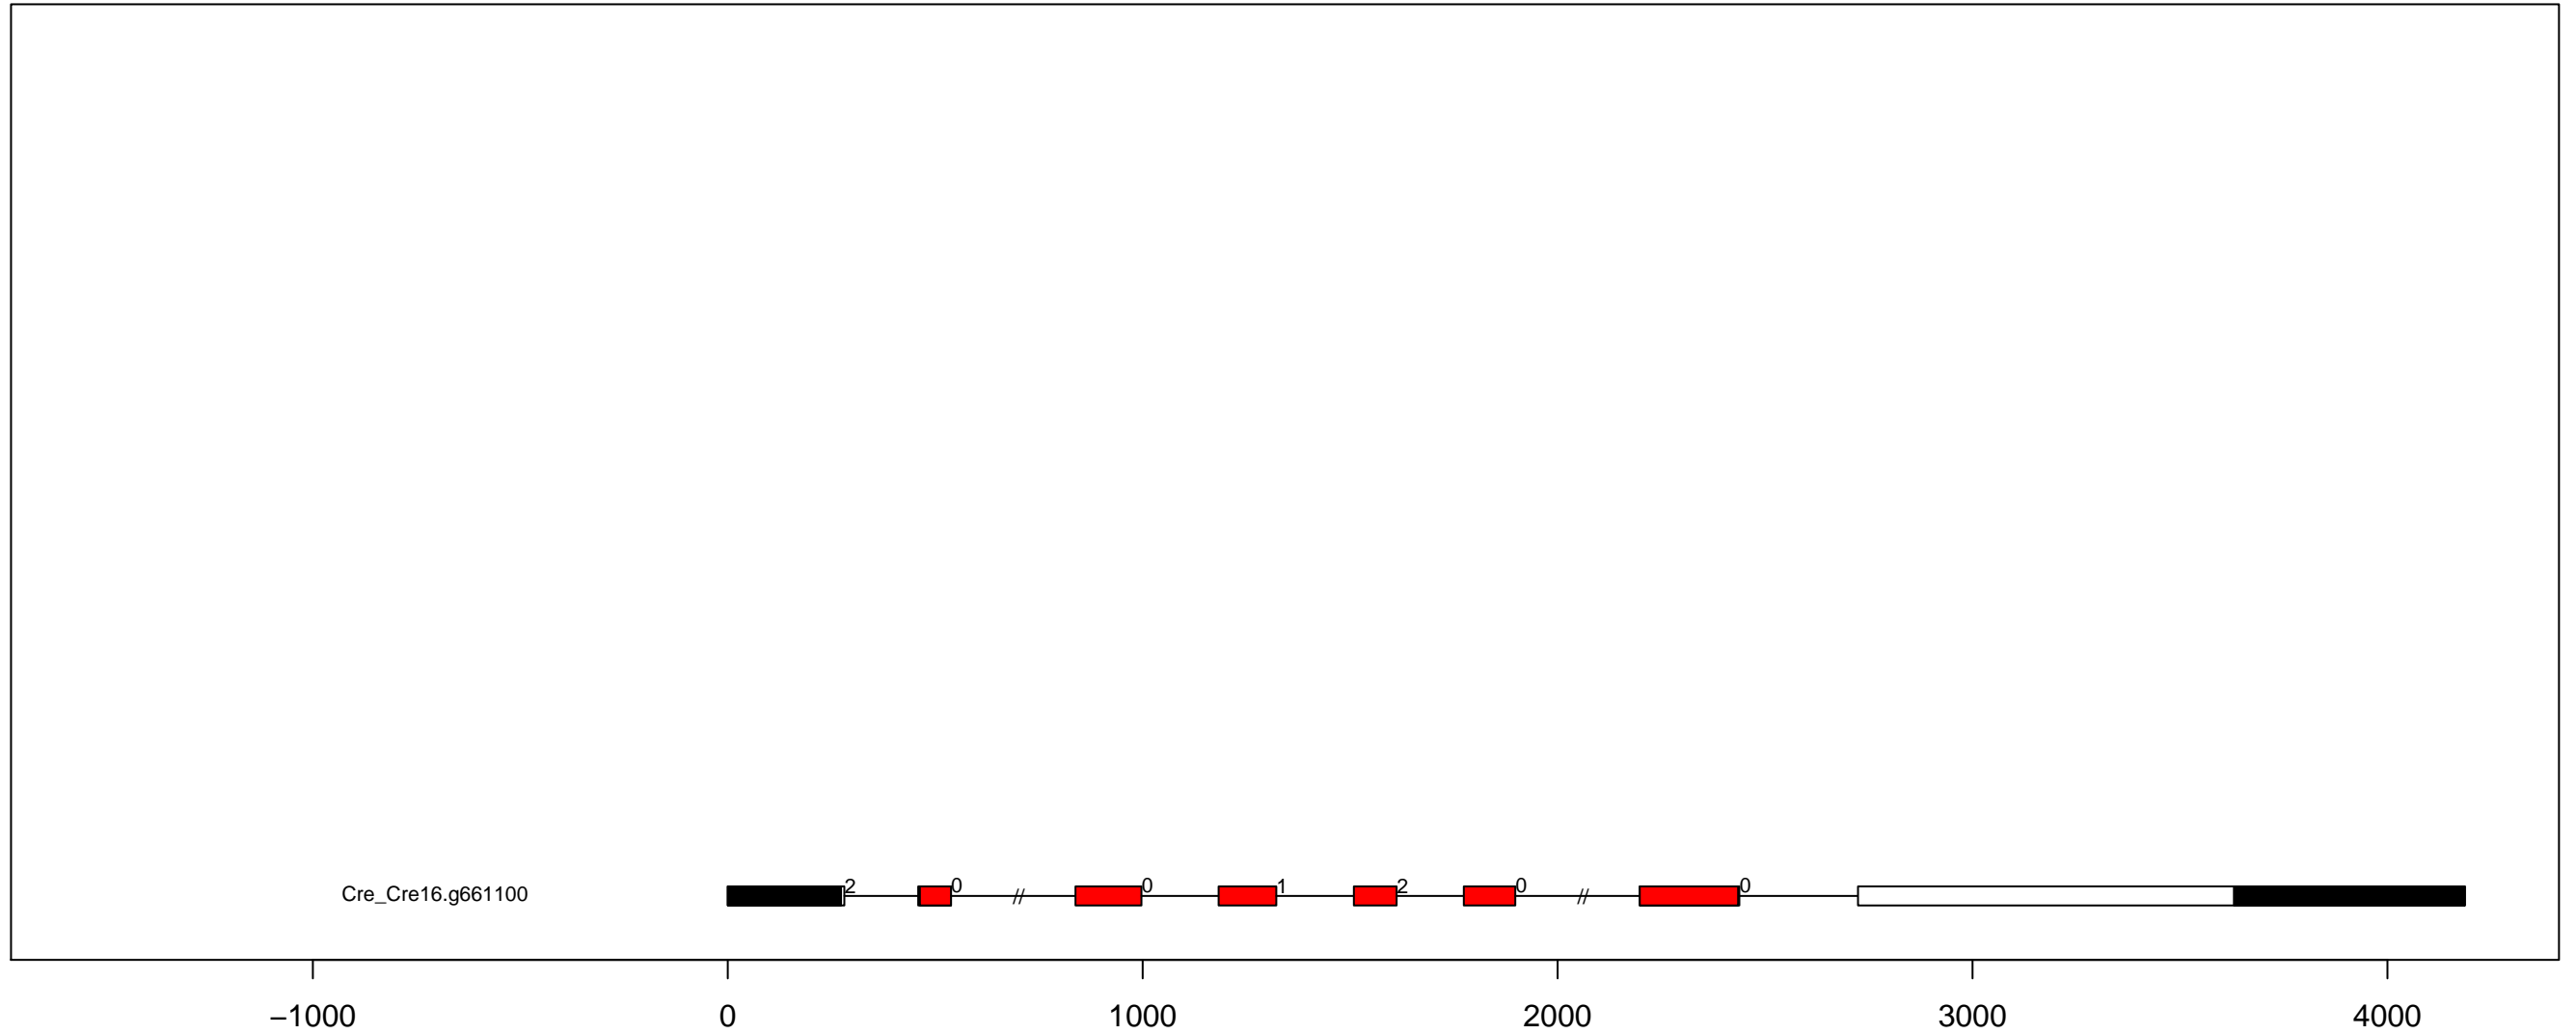



# C.re Group-Cr-2 exon-intron and kinase domain diagram (all)

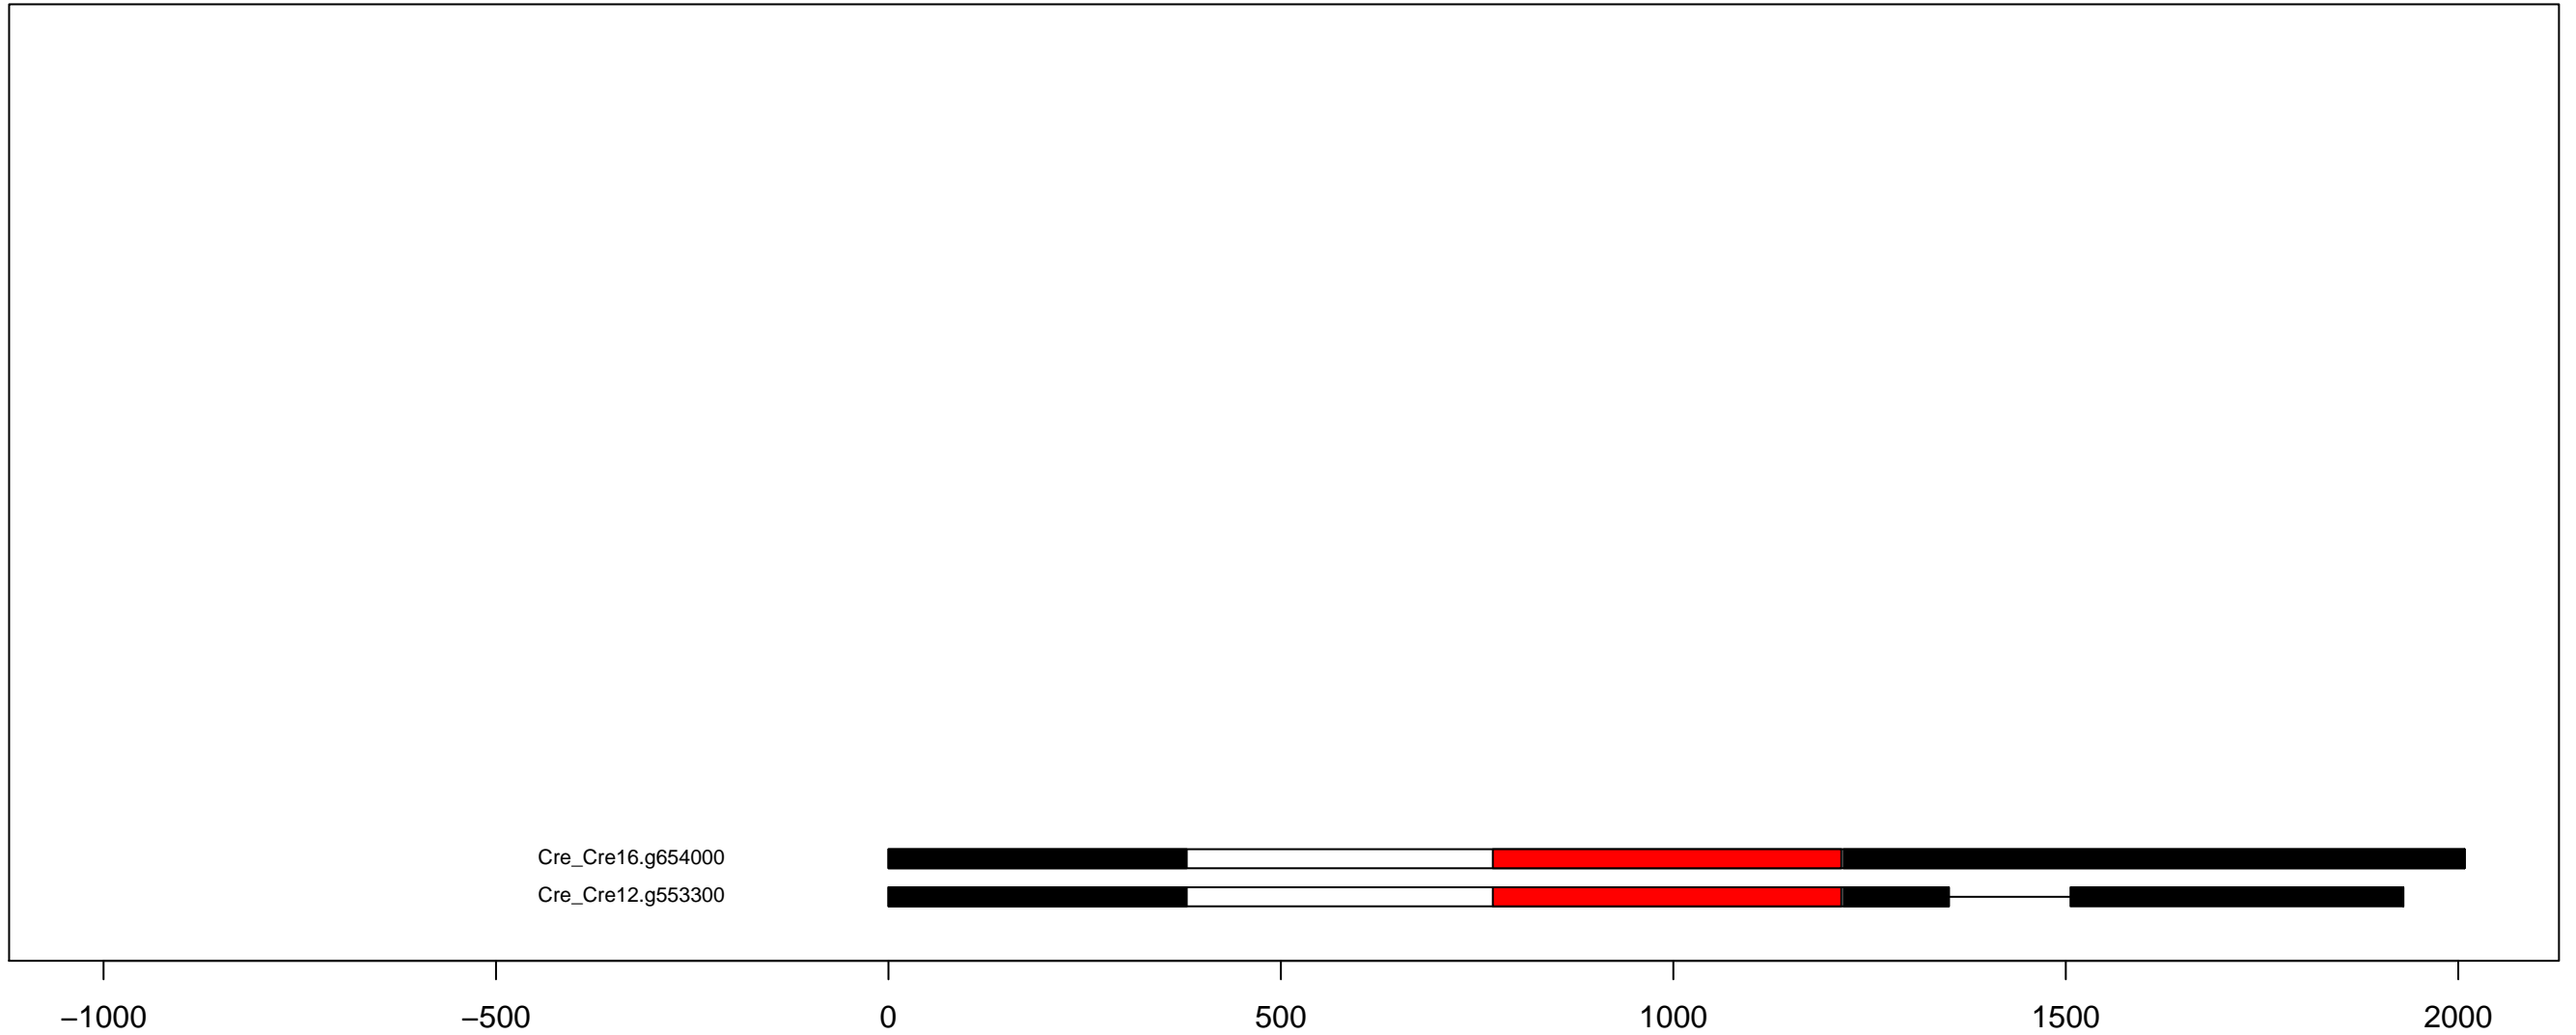

# C.re Group-PI-1 exon-intron and kinase domain diagram (all)

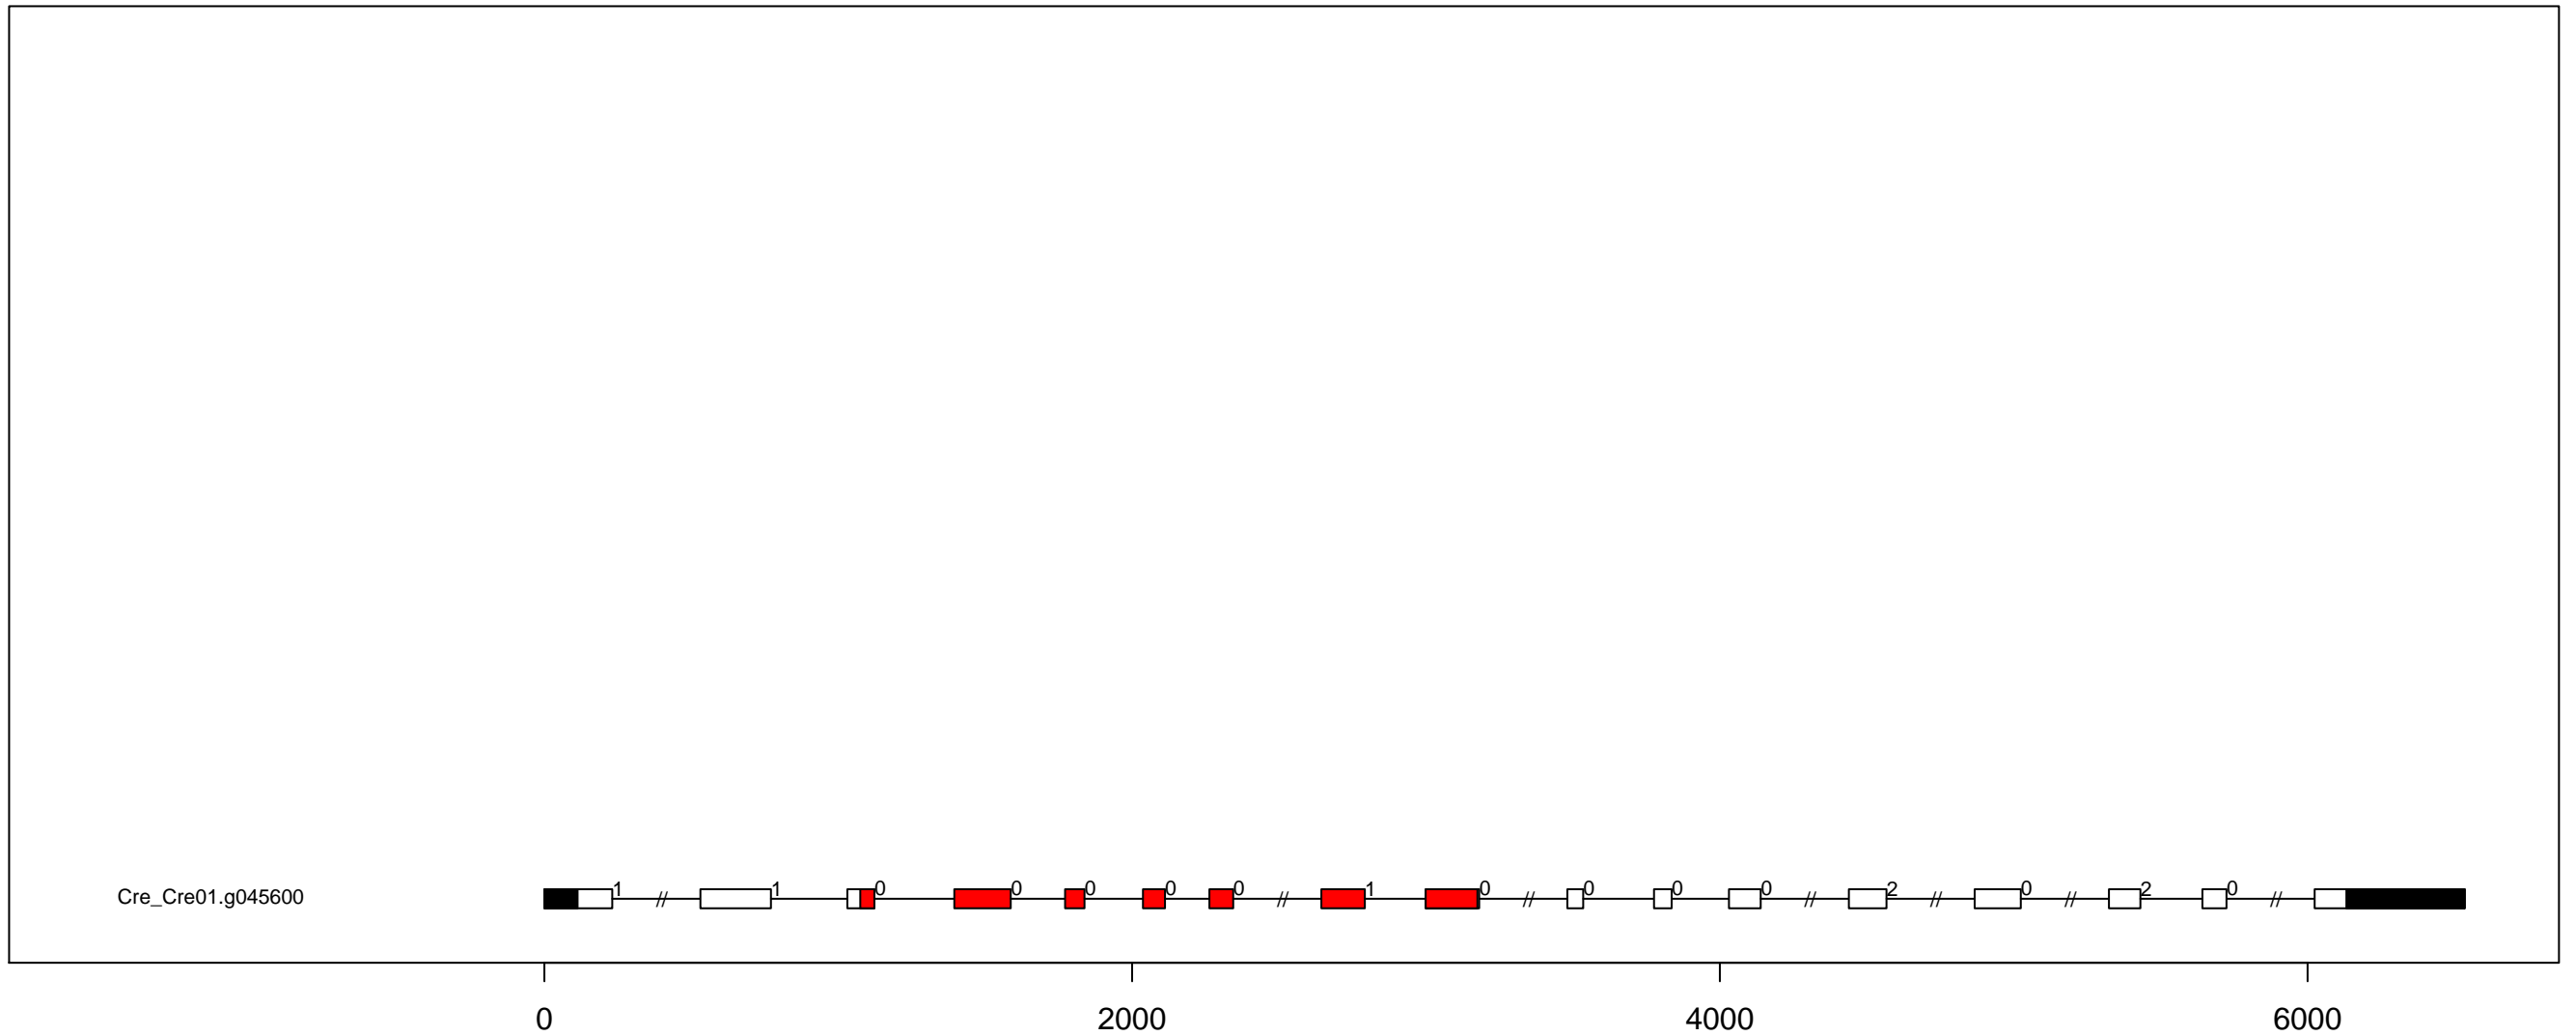



# C.re Group-PI-4 exon-intron and kinase domain diagram (all)

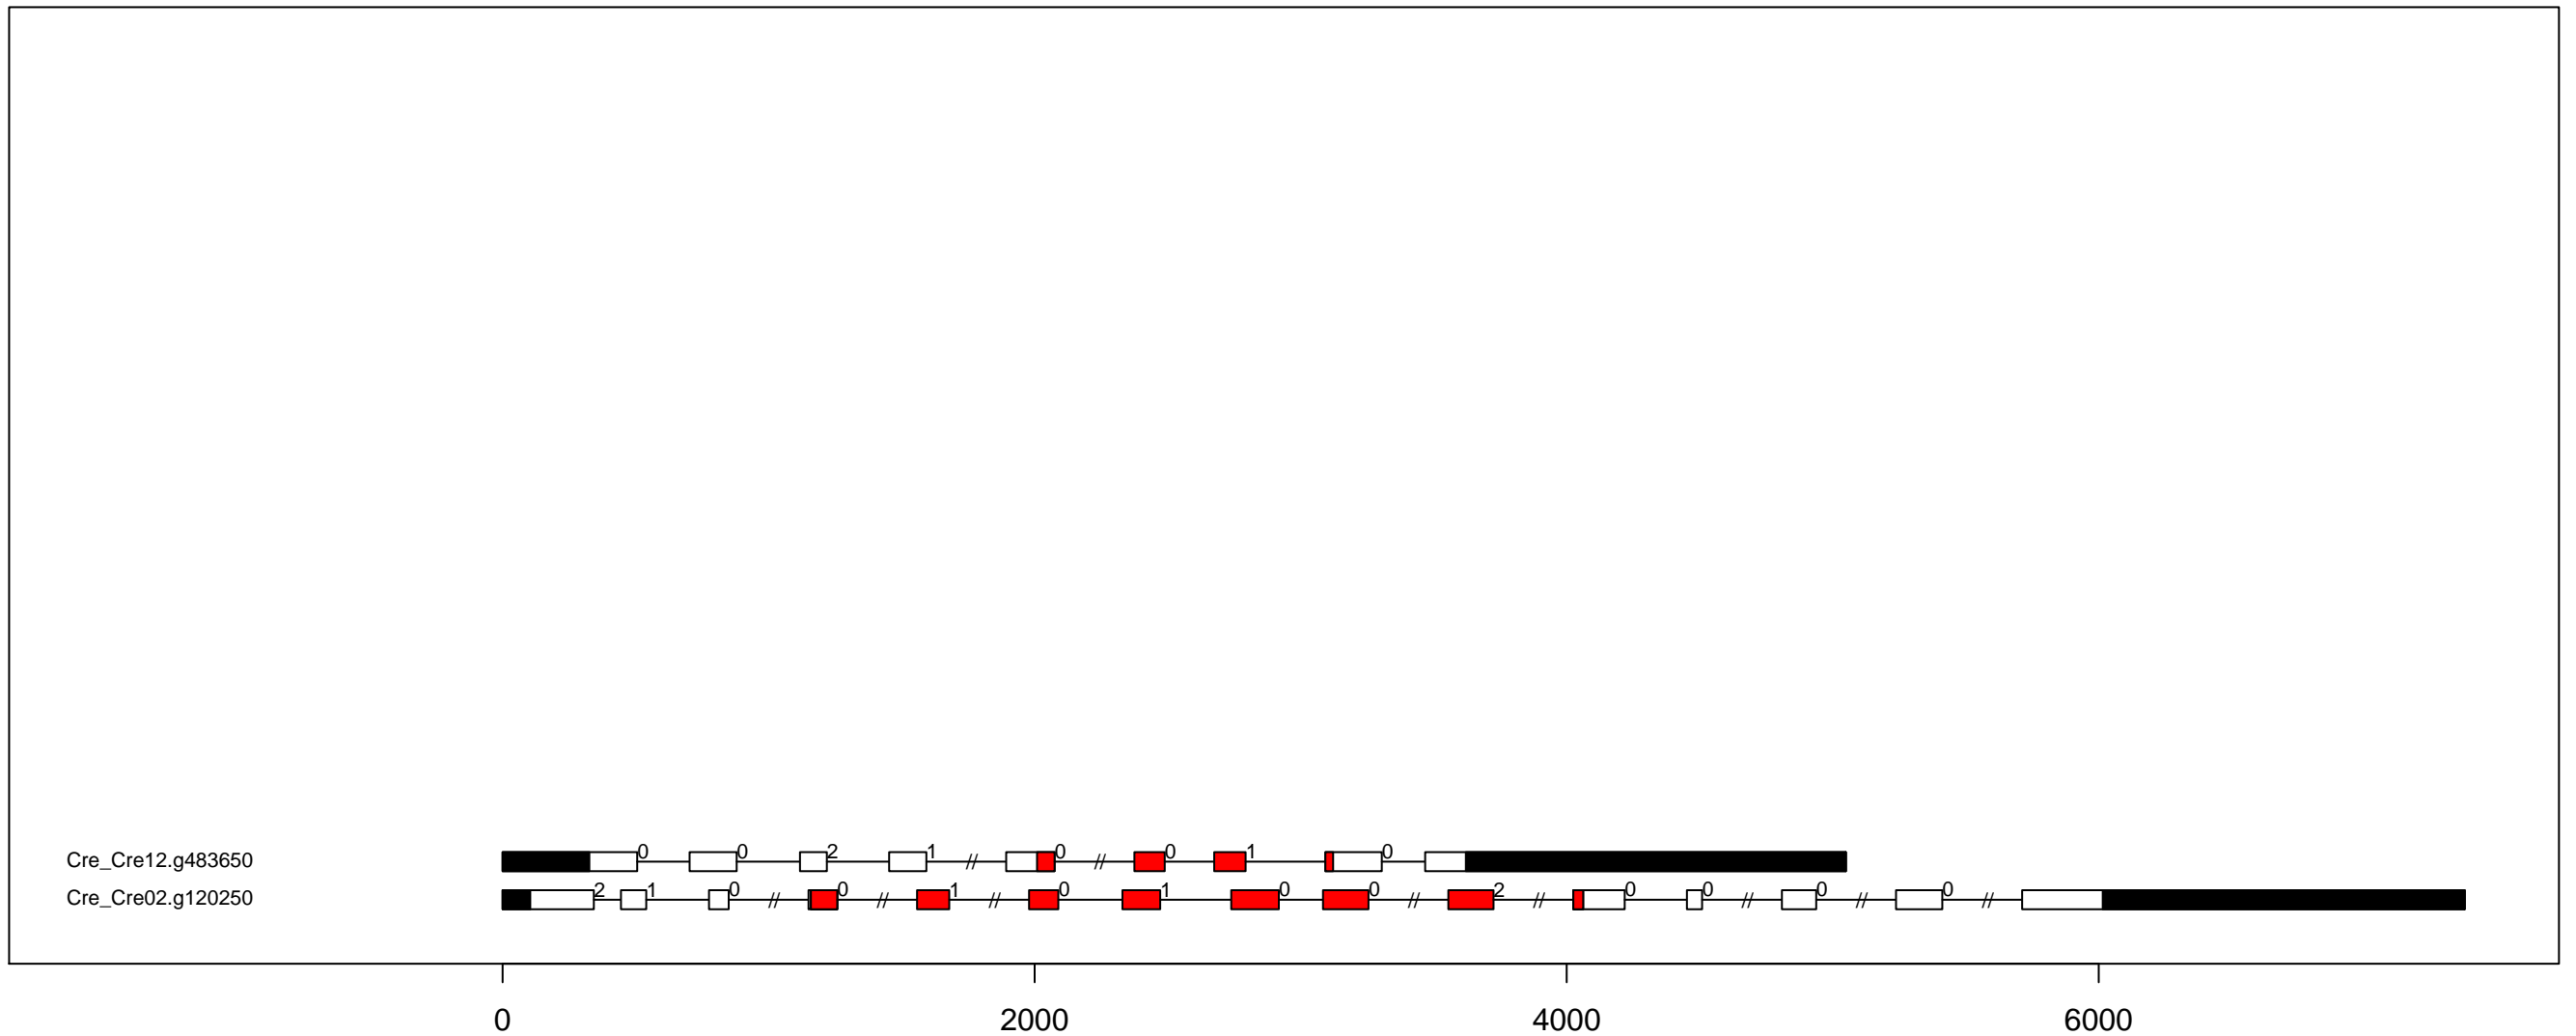

# C.re NAK exon-intron and kinase domain diagram (all)

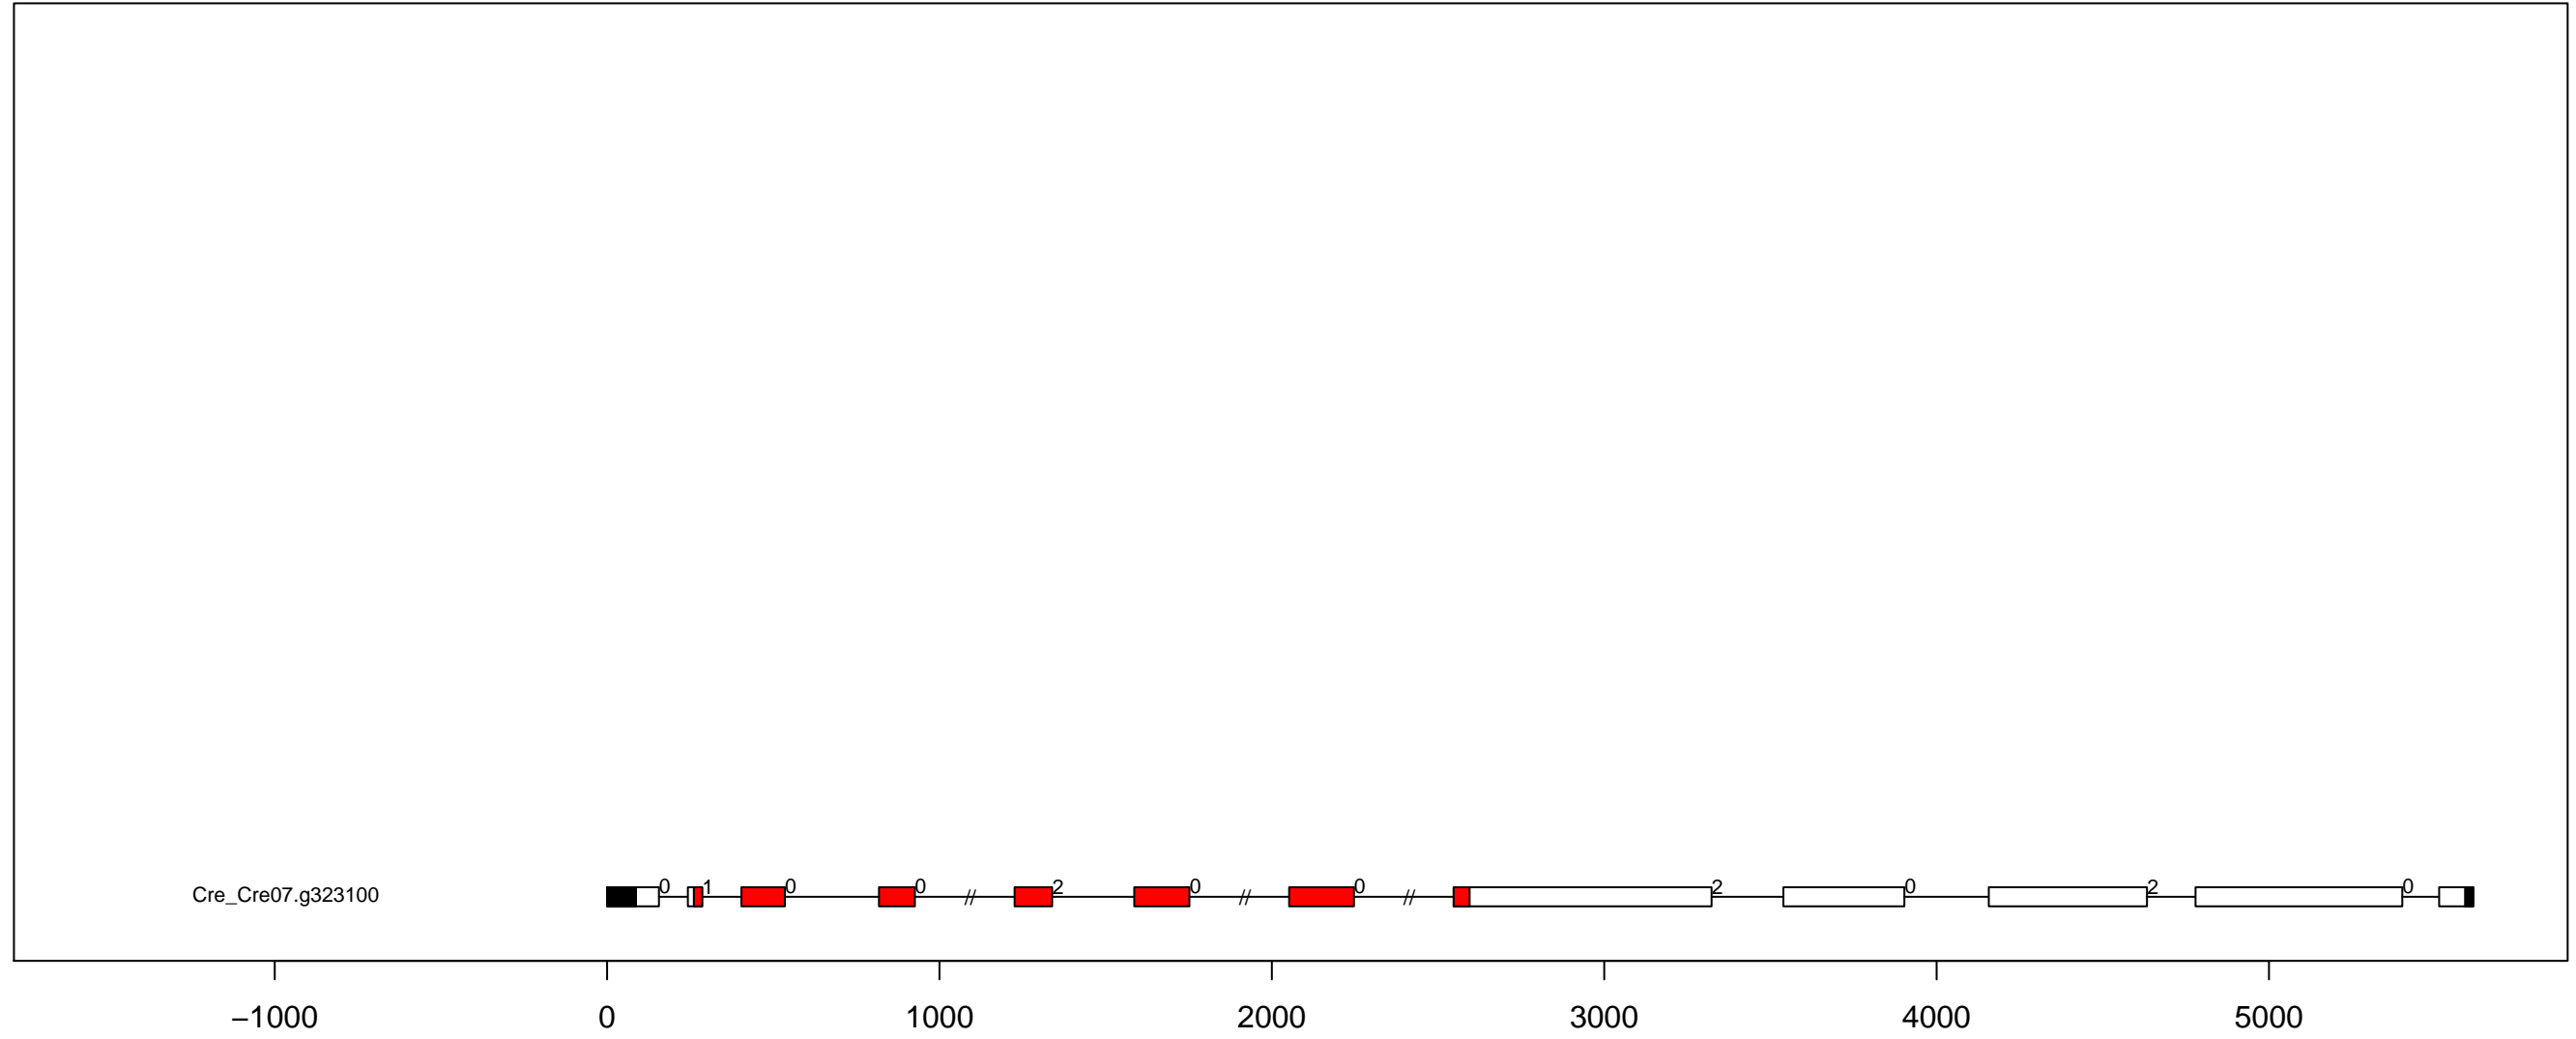



# C.re PEK\_GCN2 exon-intron and kinase domain diagram (all)

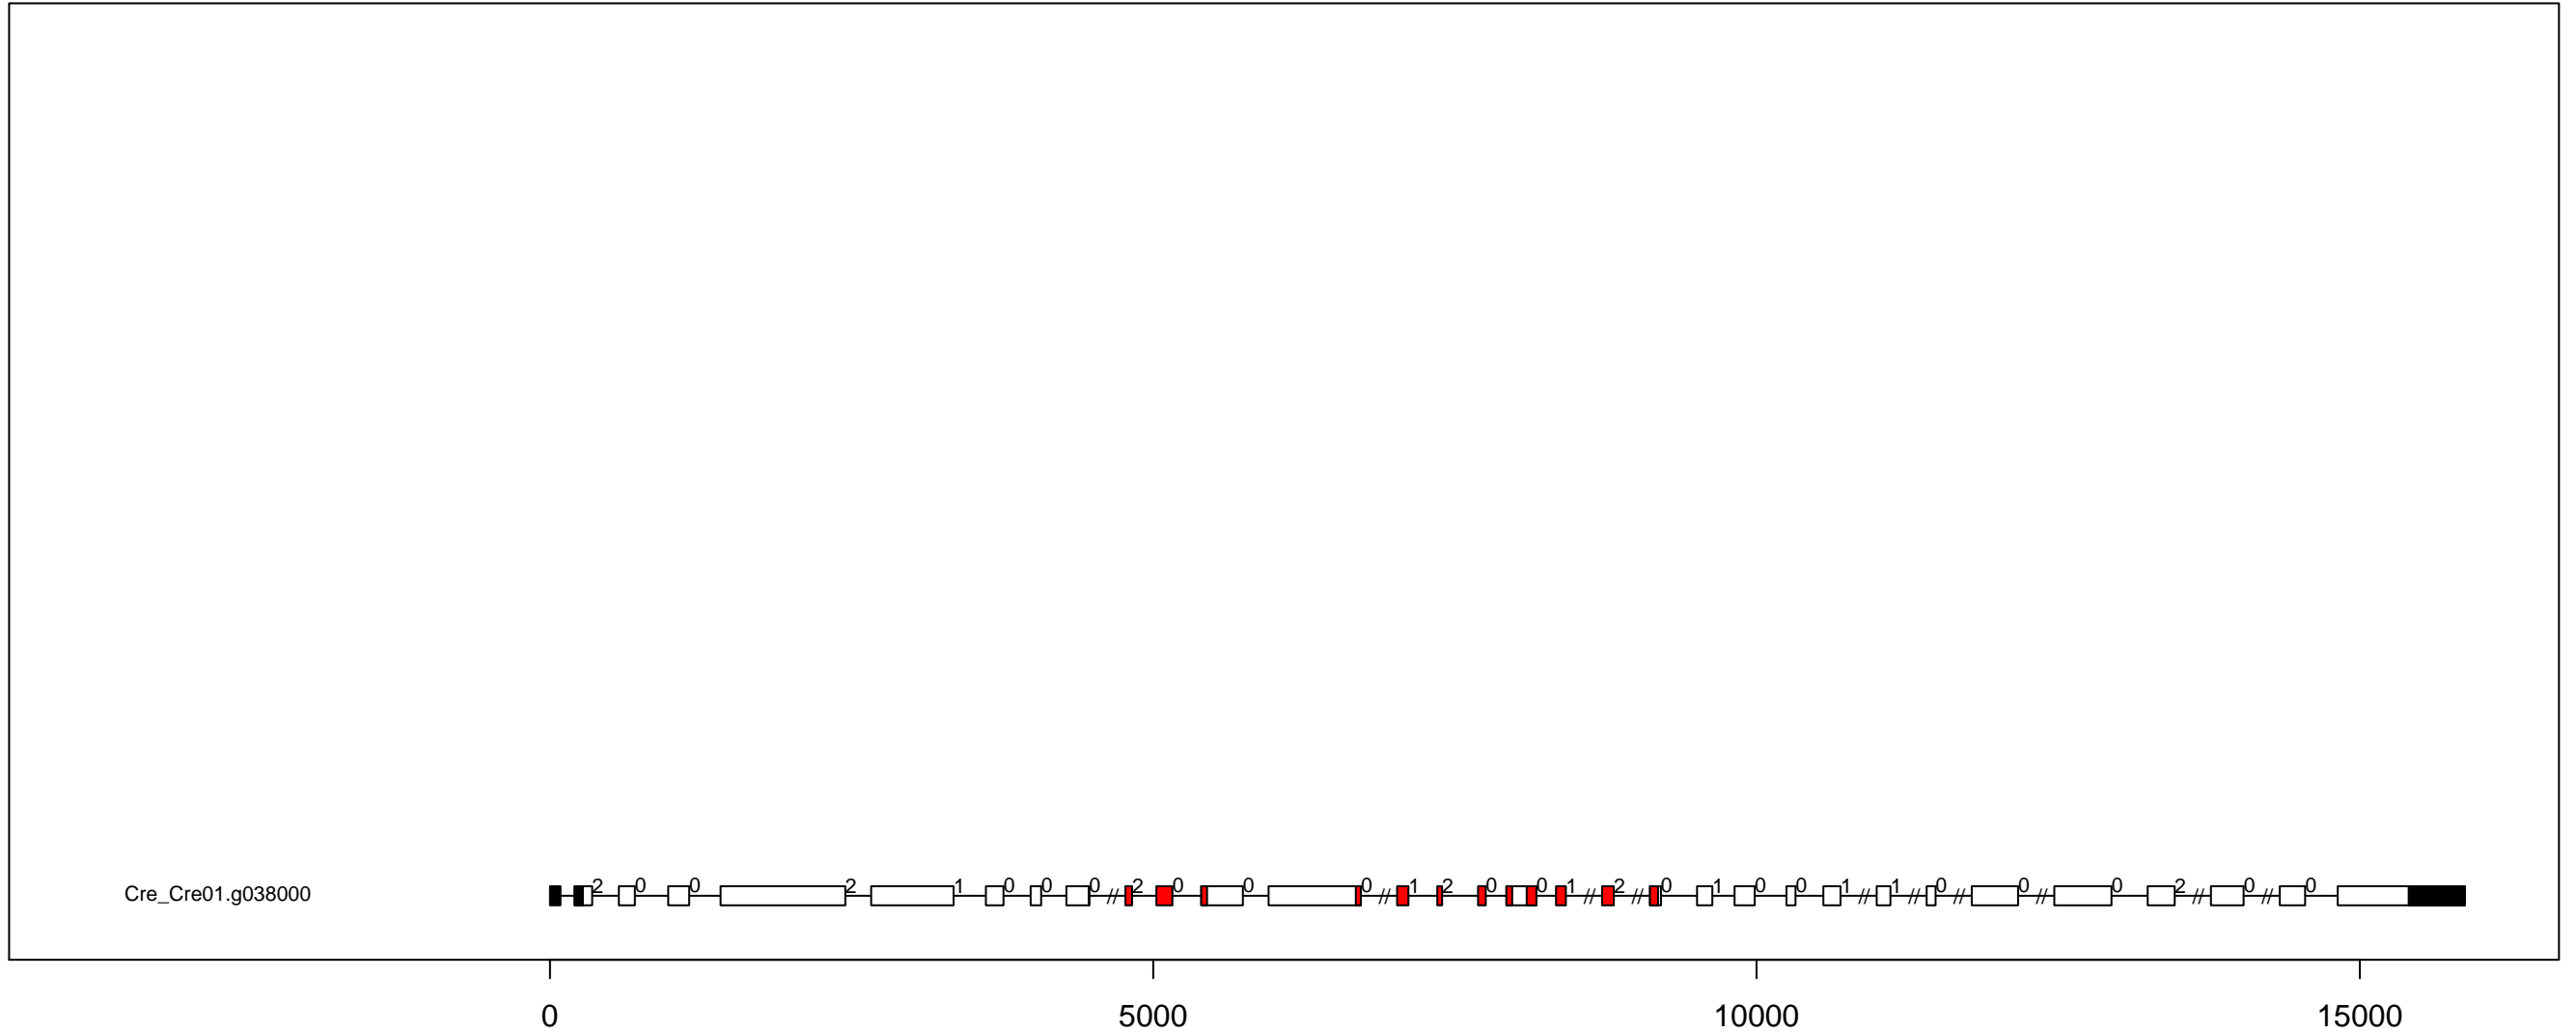

# C.re RLK-Pelle\_RLCK-IXb exon-intron and kinase domain diagram (all)

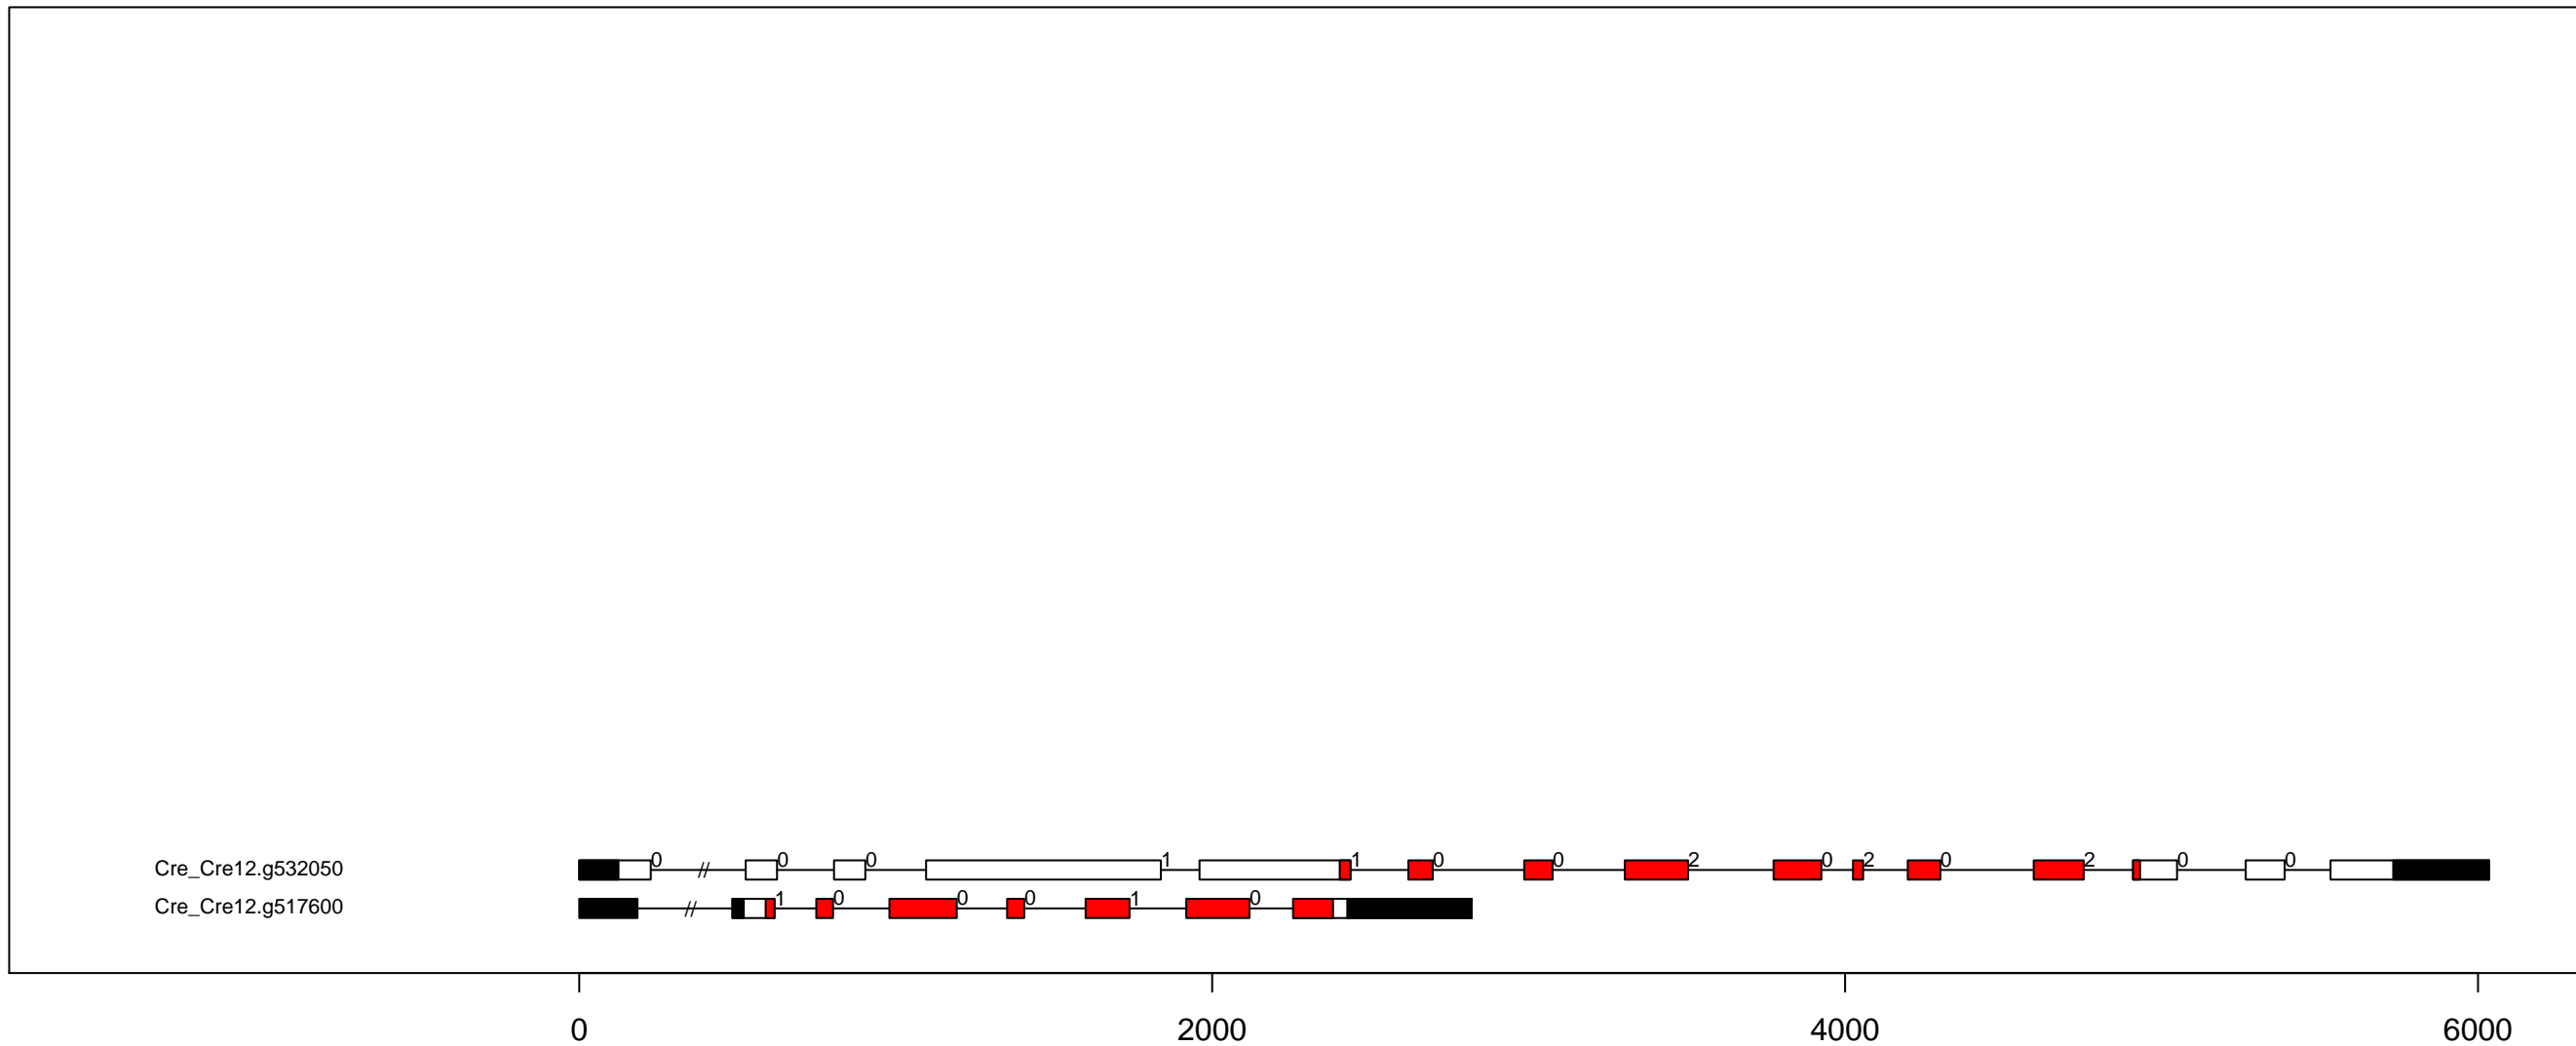

# C.re SCY1\_SCYL1 exon-intron and kinase domain diagram (all)

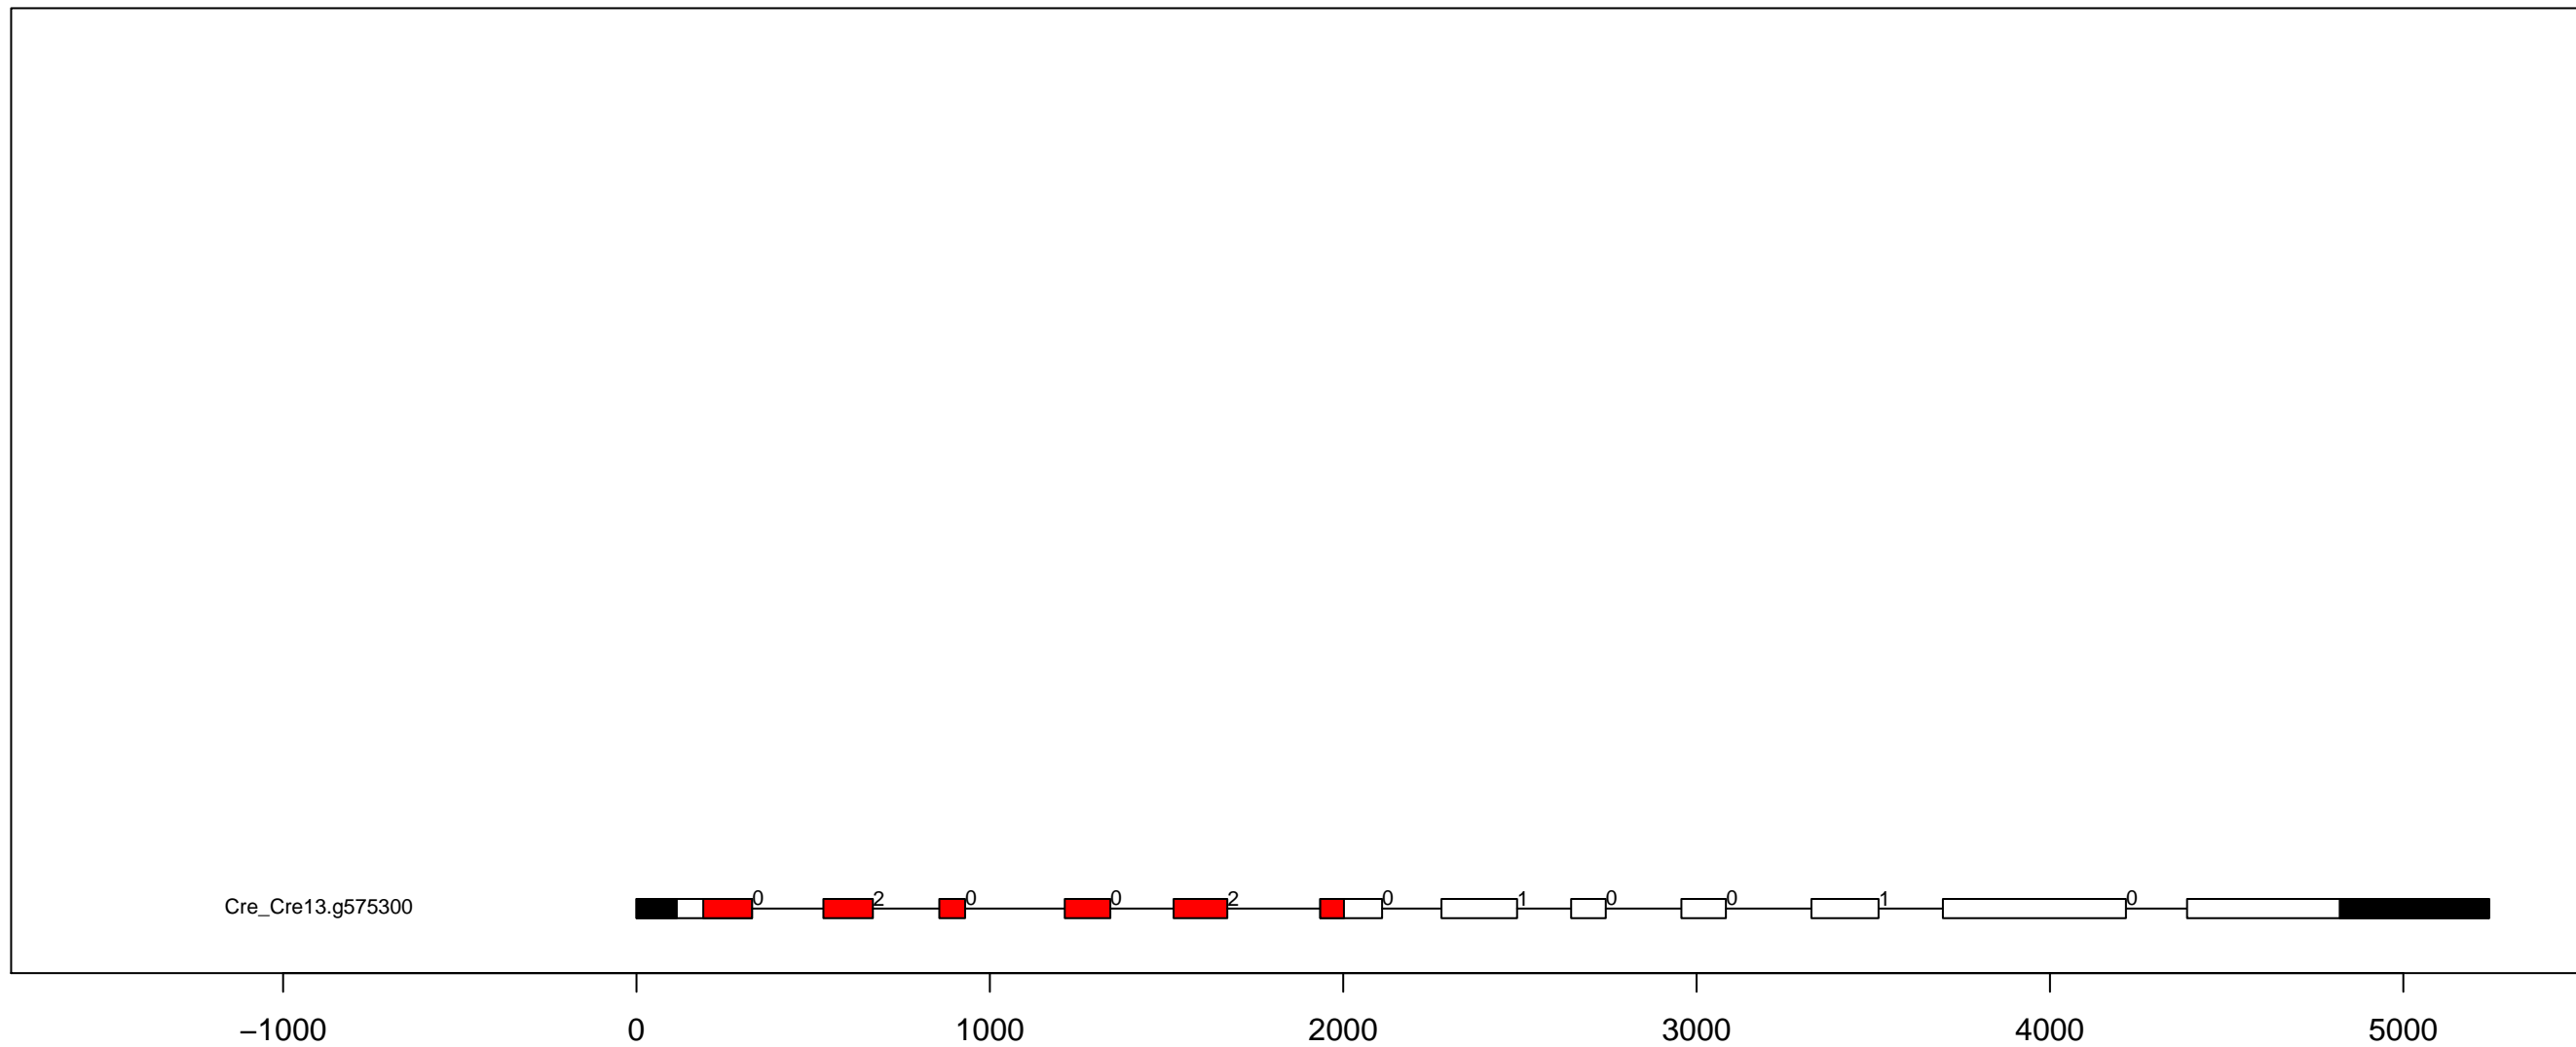

# C.re STE\_STE11 exon-intron and kinase domain diagram (all)

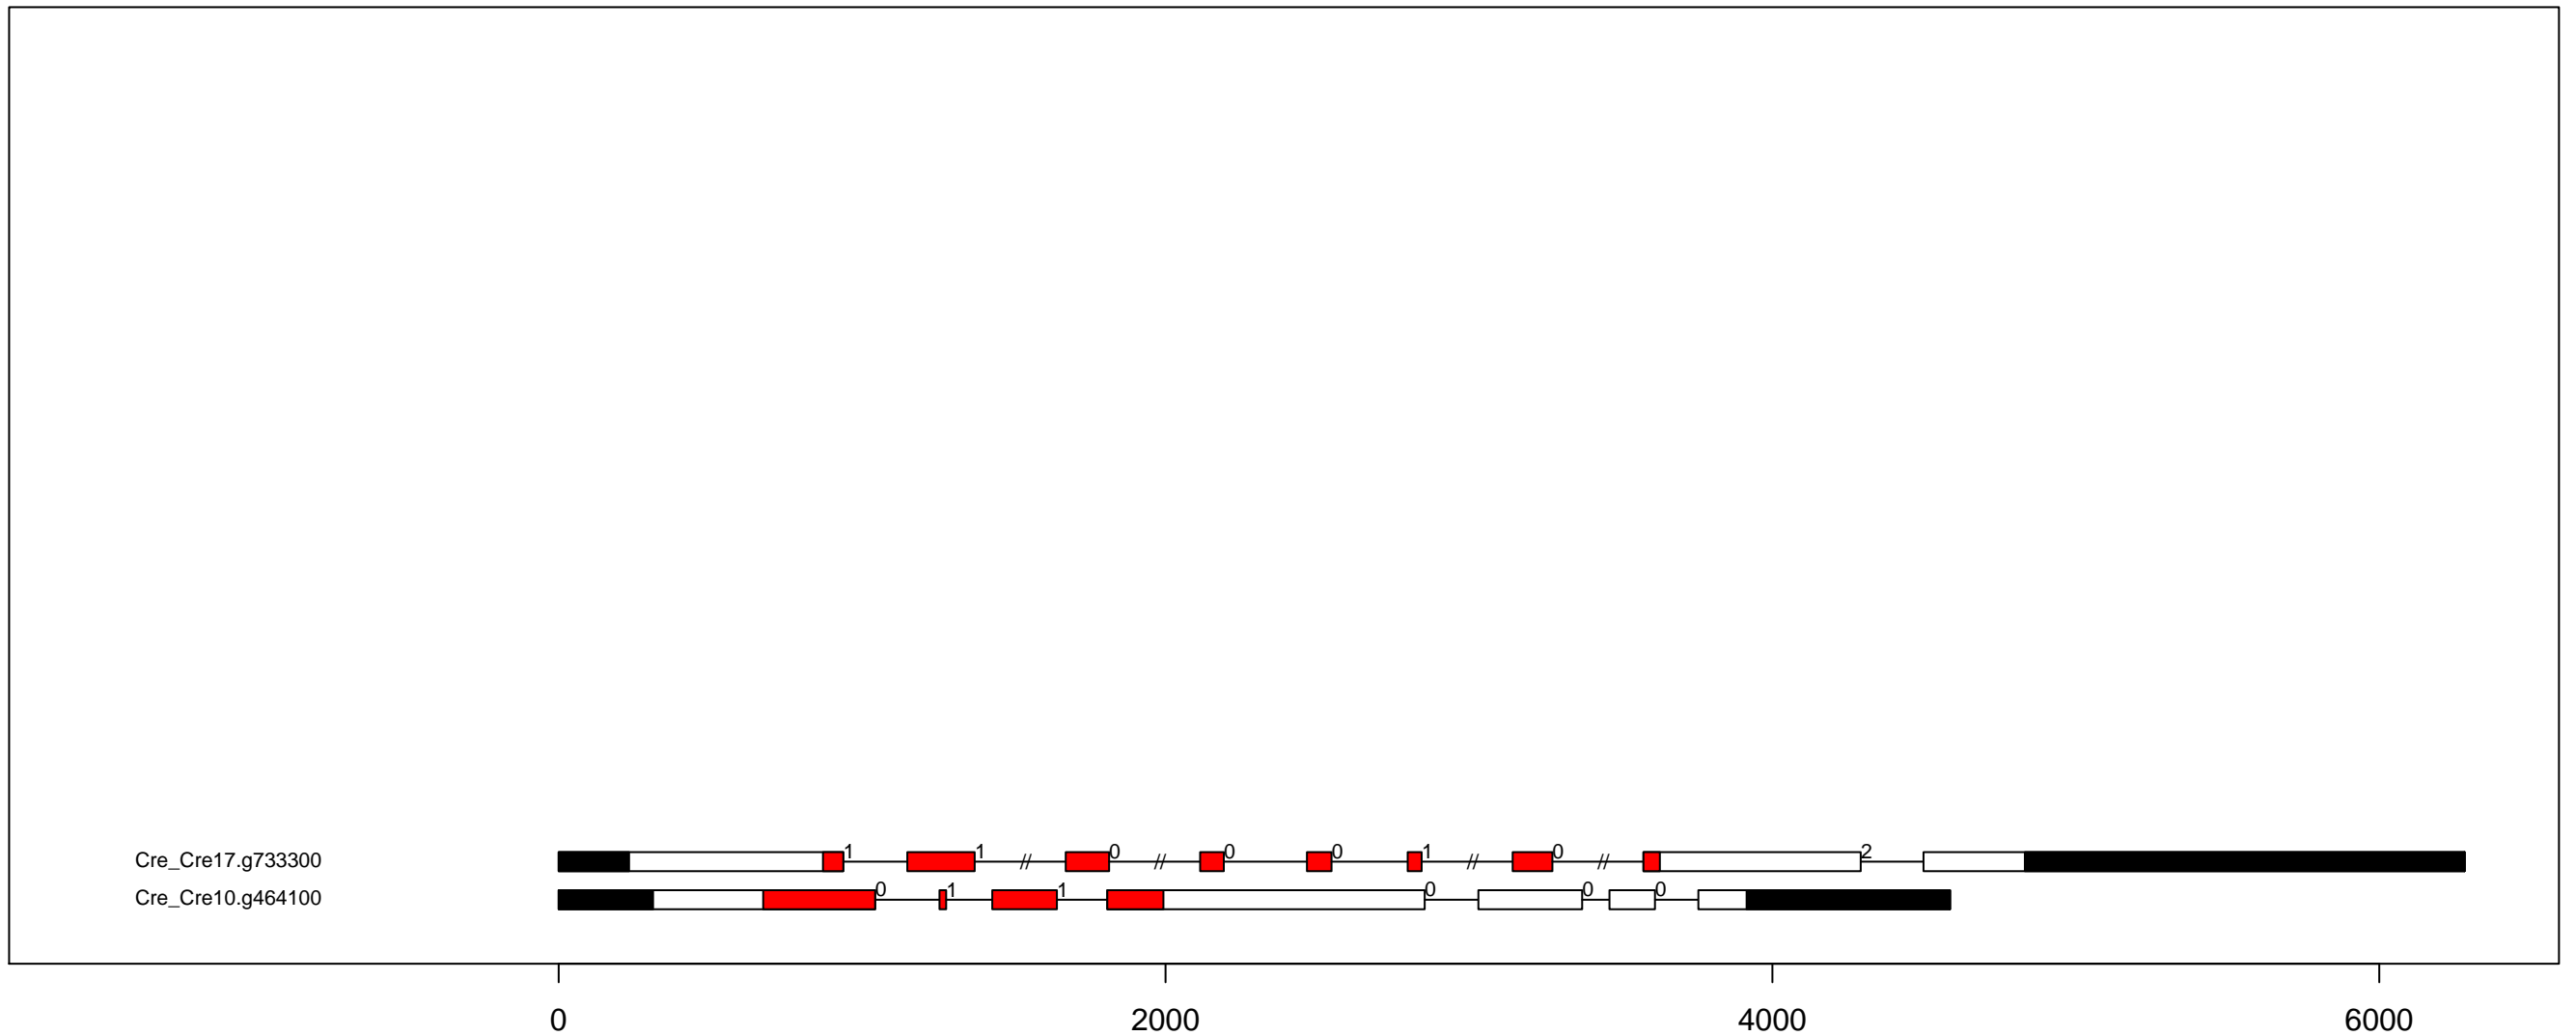

# C.re STE\_STE20-Fray exon-intron and kinase domain diagram (all)

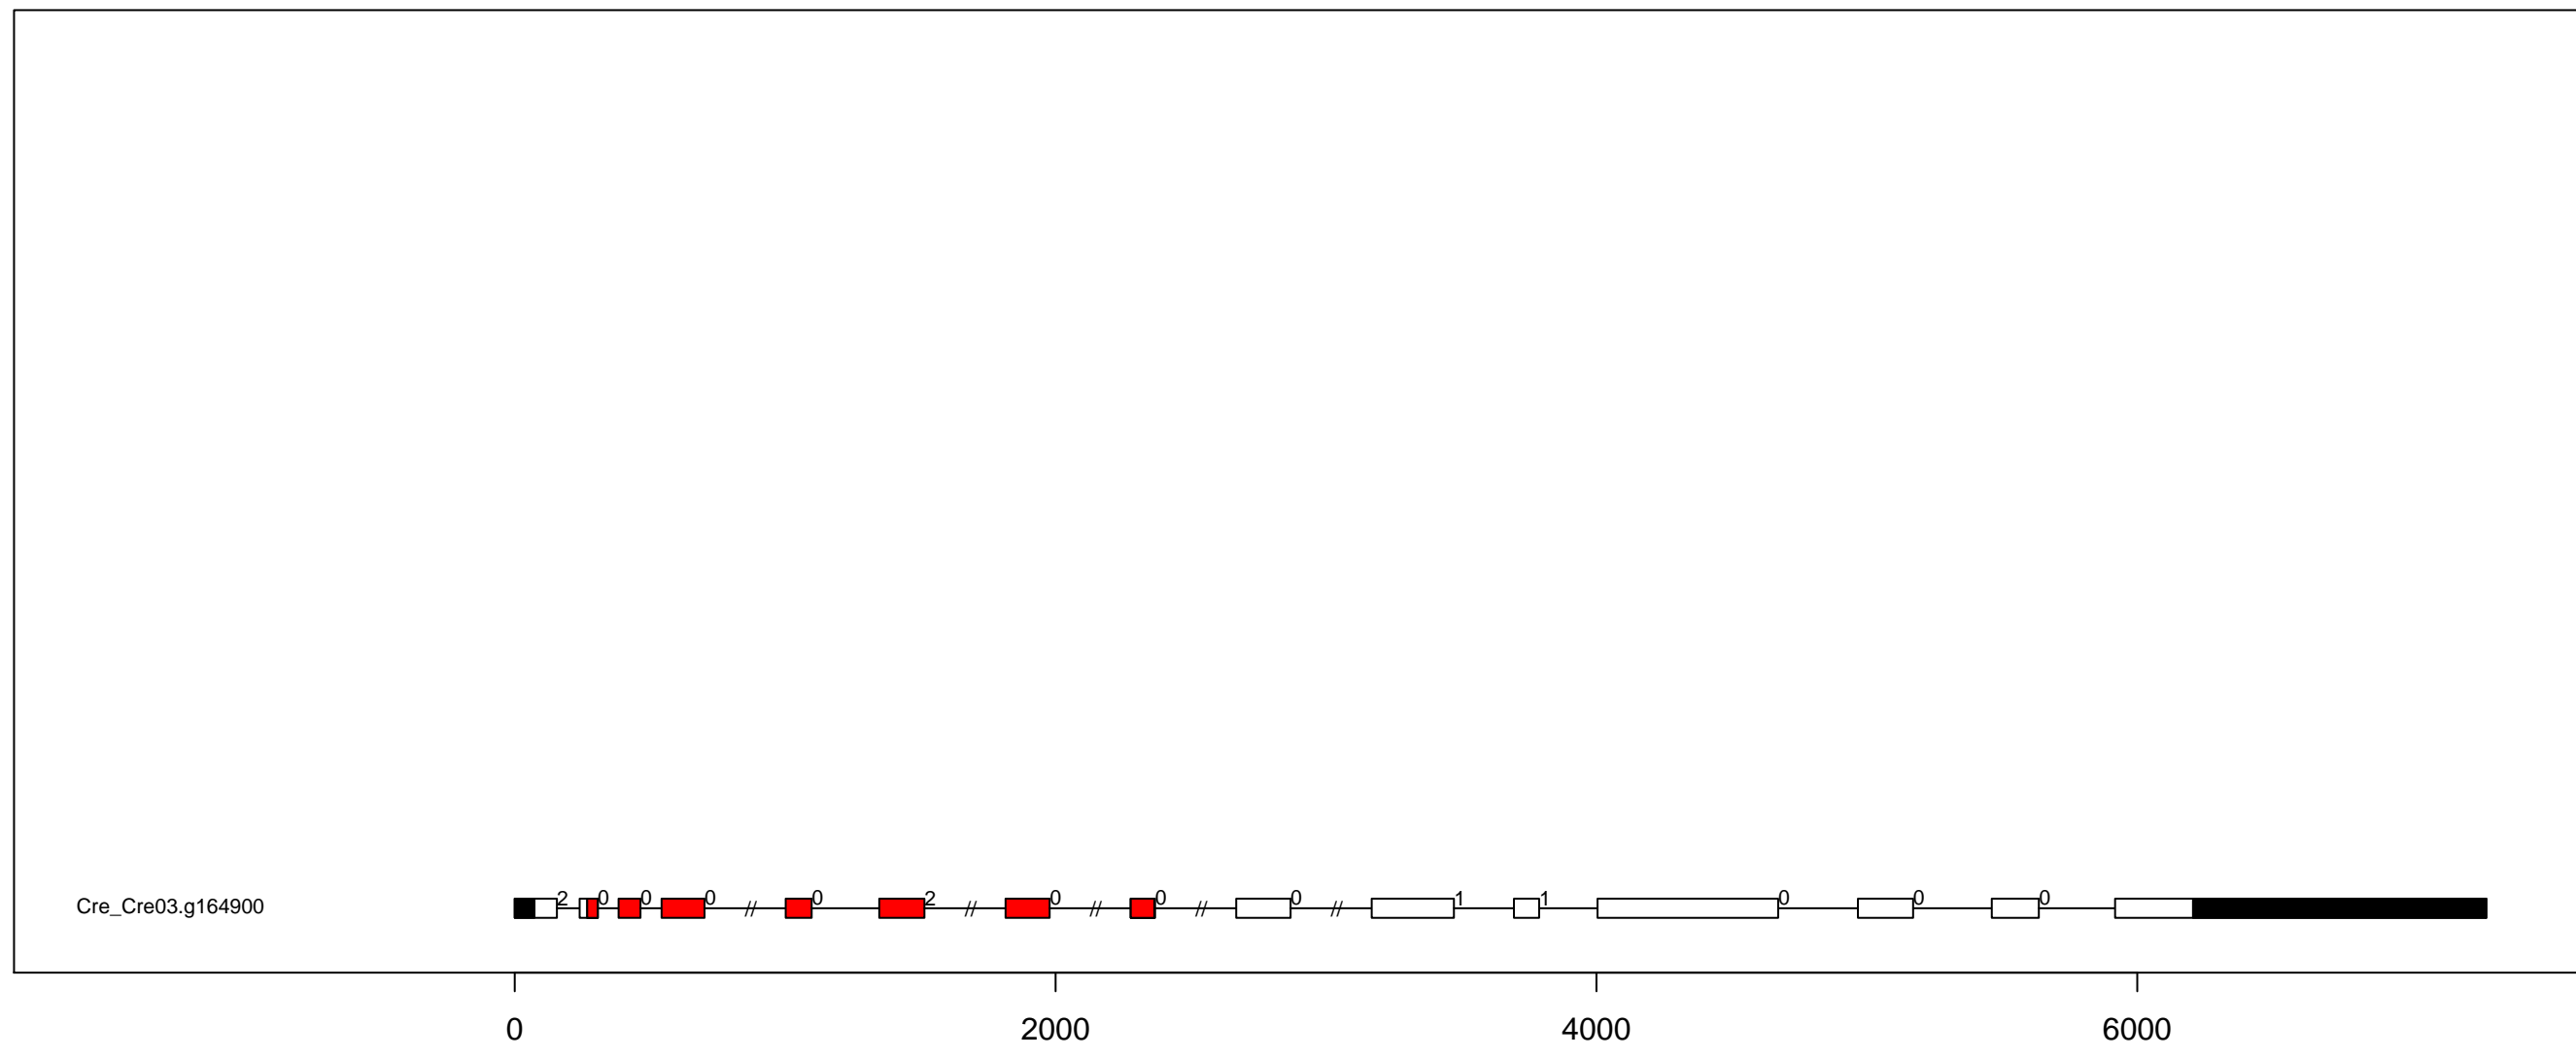



# C.re STE\_STE20-PI exon-intron and kinase domain diagram (all)

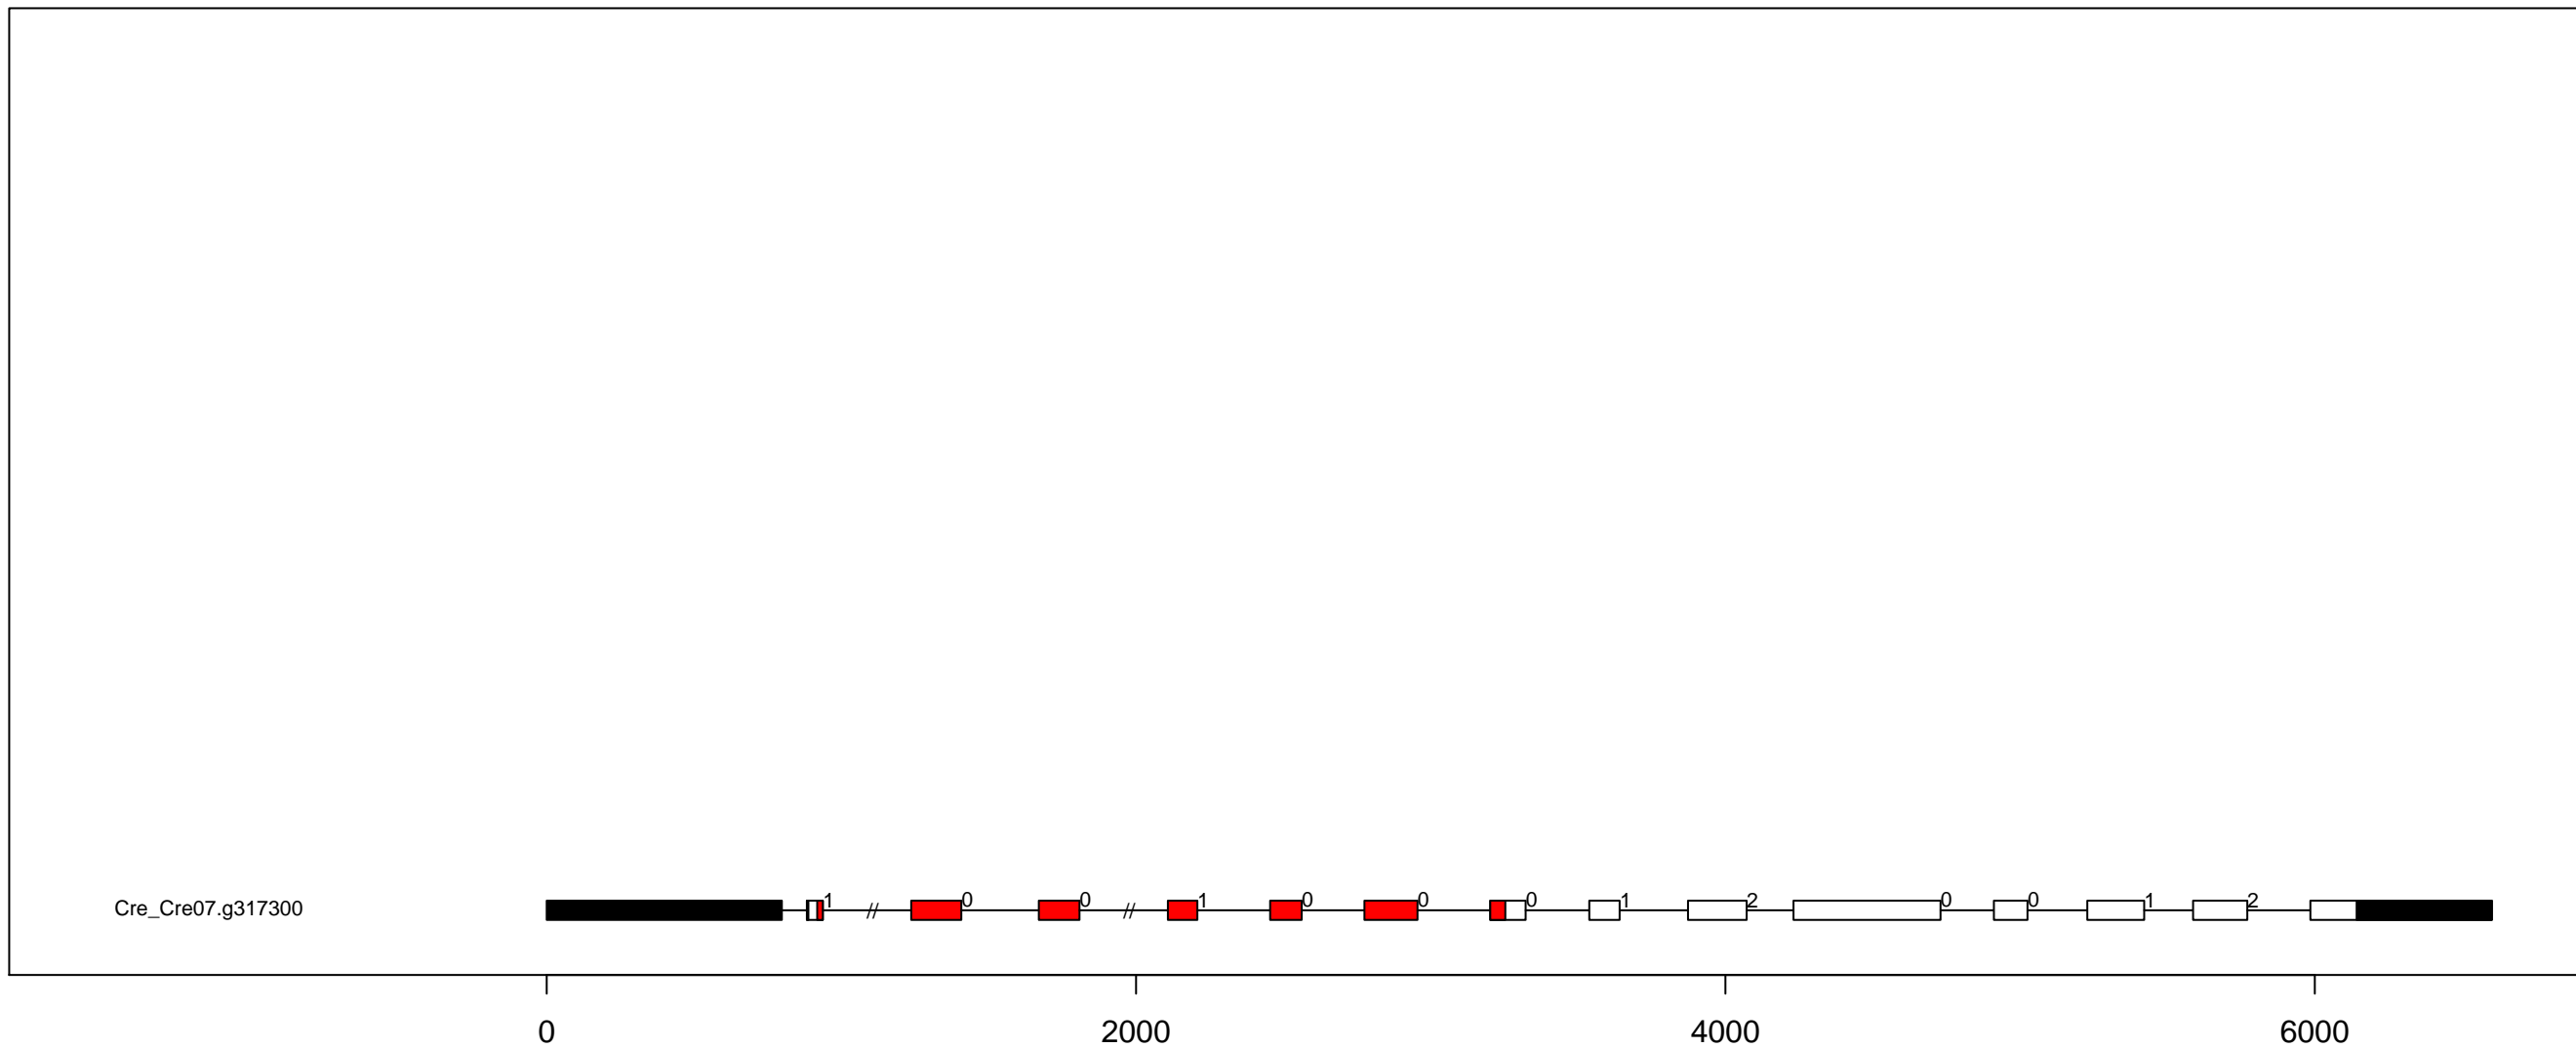

# C.re STE\_STE20-YSK exon-intron and kinase domain diagram (all)

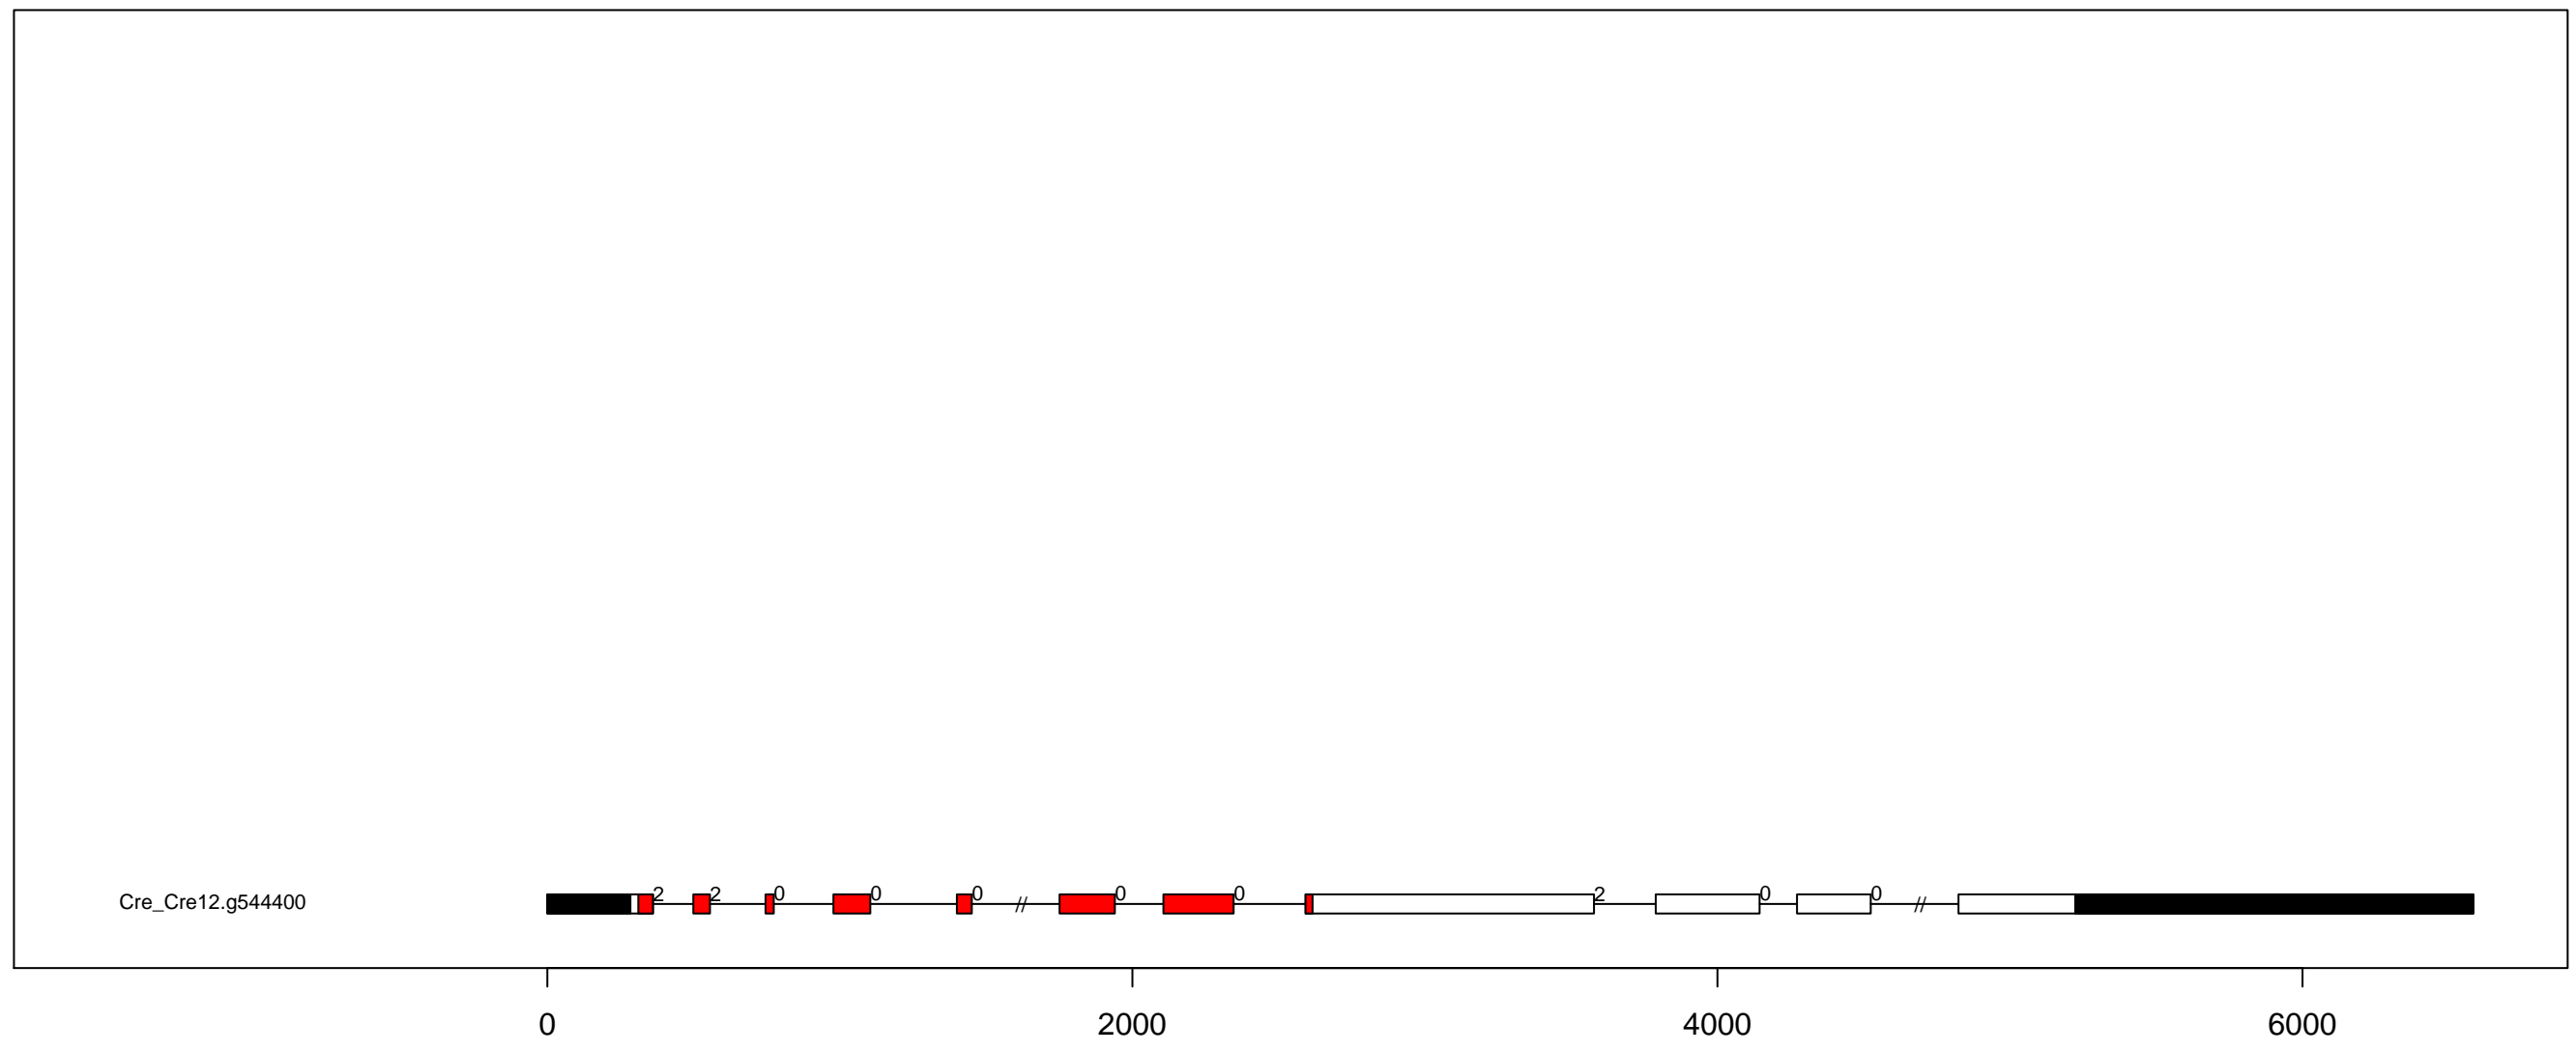

# C.re STE\_STE7 exon-intron and kinase domain diagram (all)

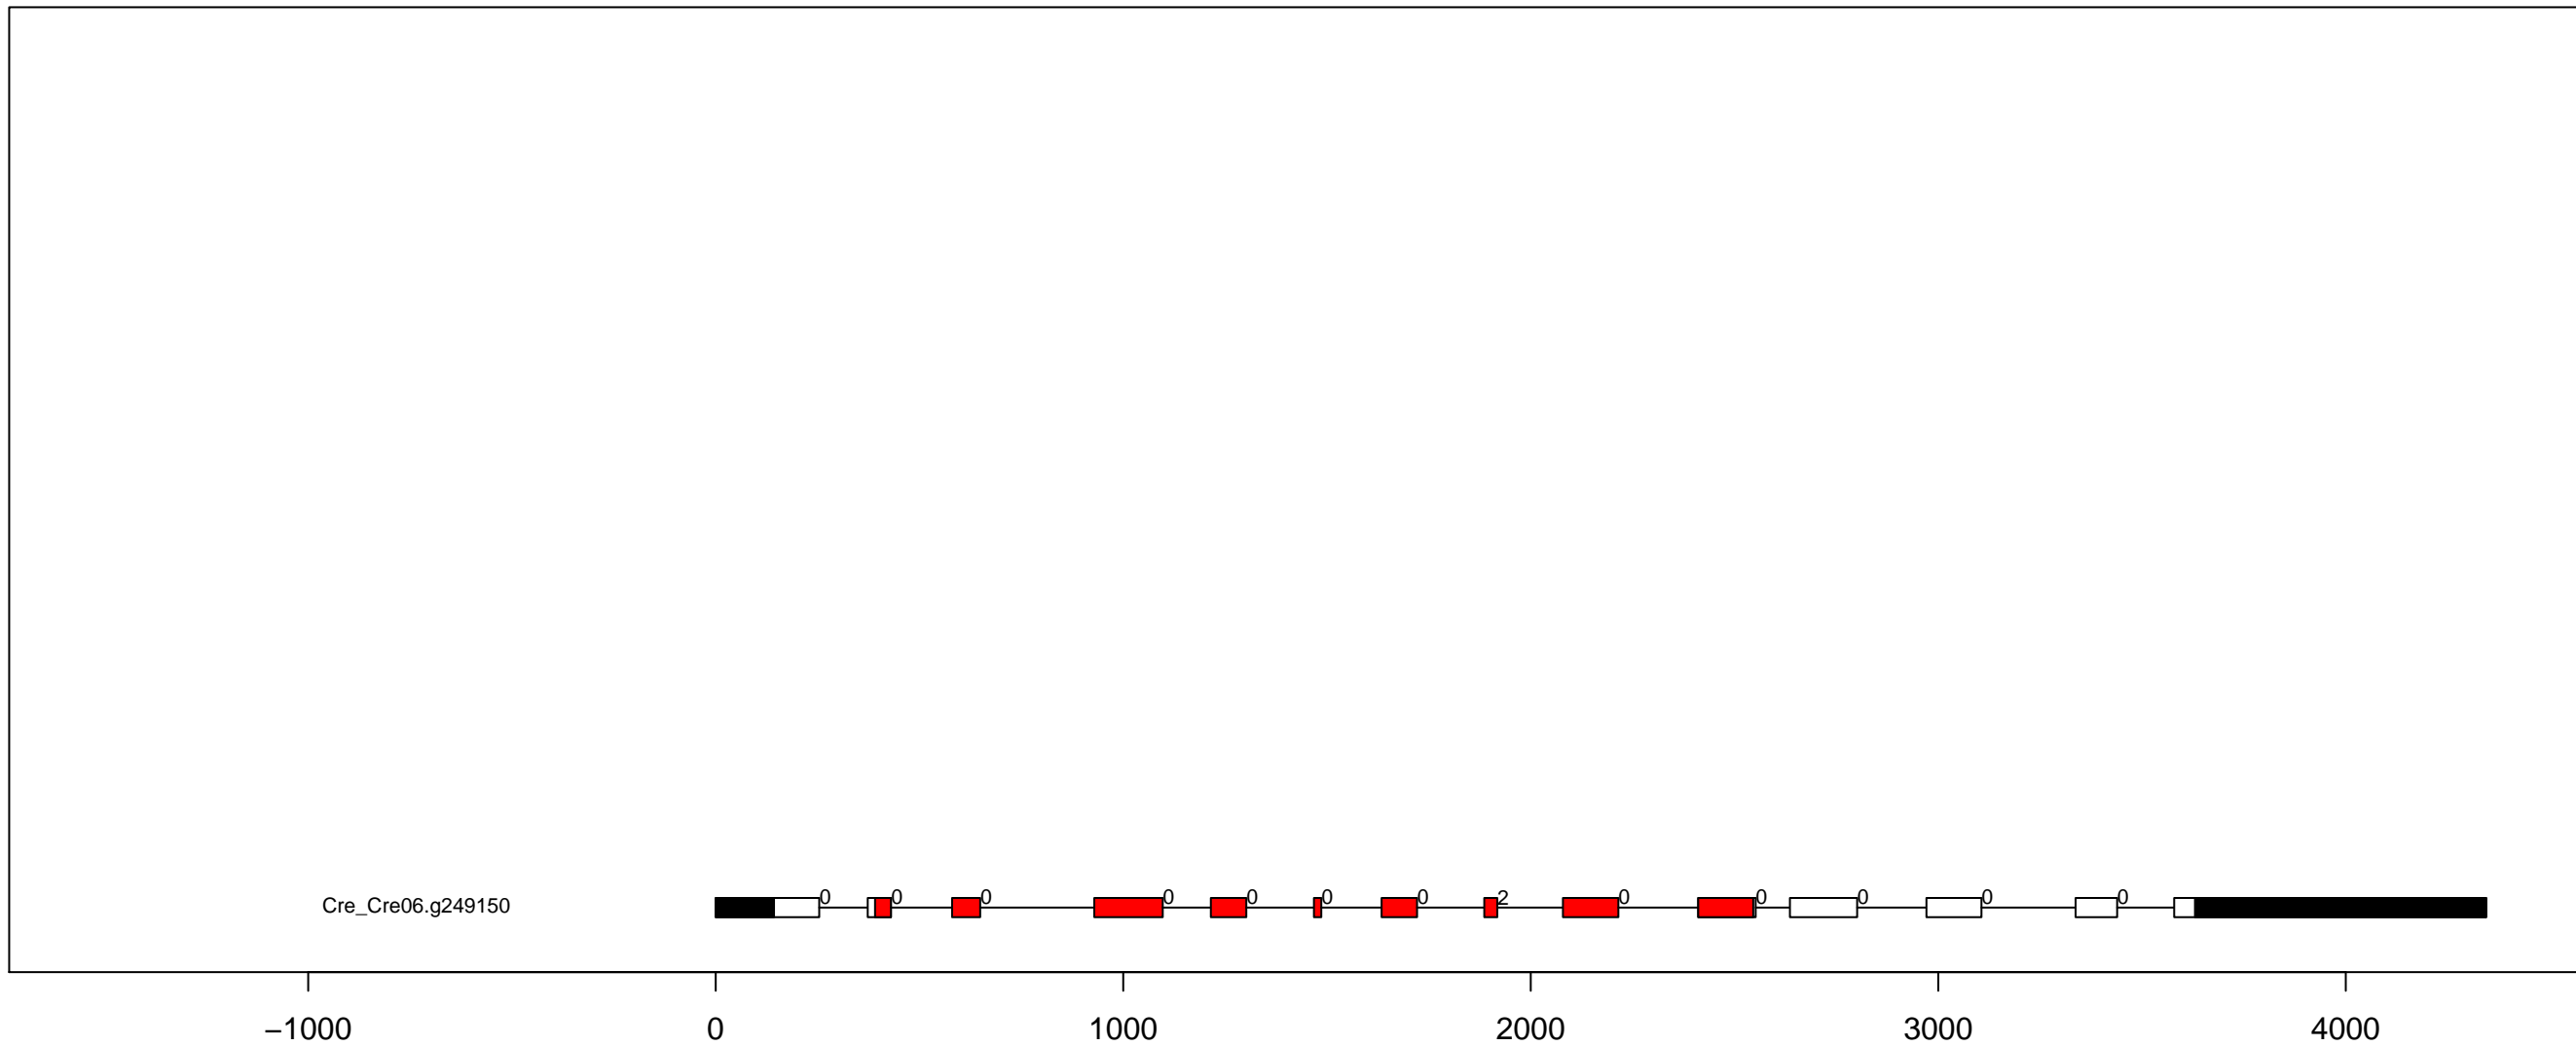

# C.re TK\_TK-Cr exon-intron and kinase domain diagram (all)

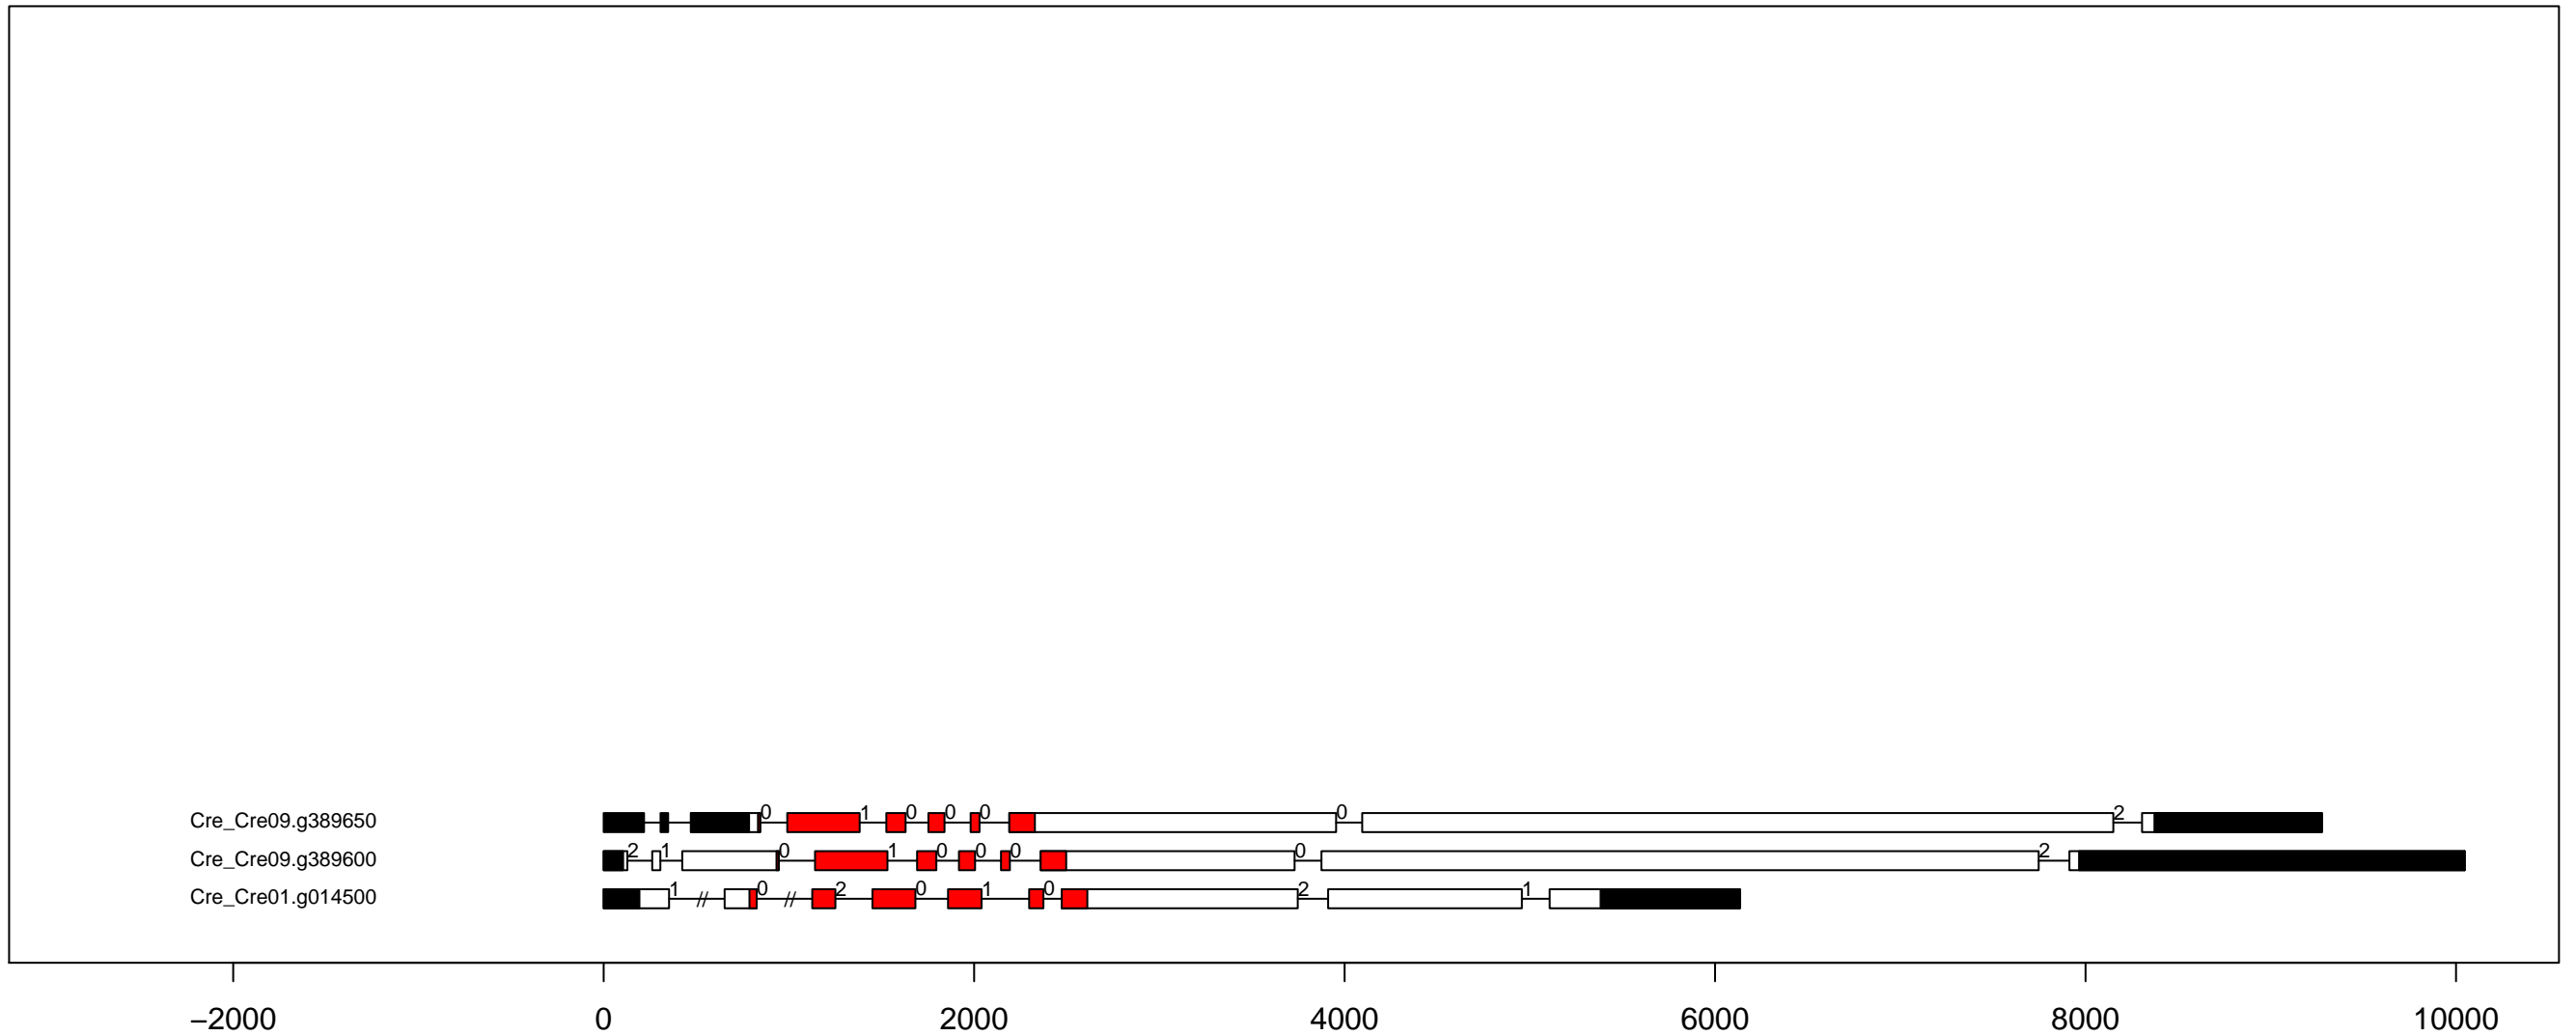

# C.re TKL\_CTR1-DRK-2 exon-intron and kinase domain diagram (all)

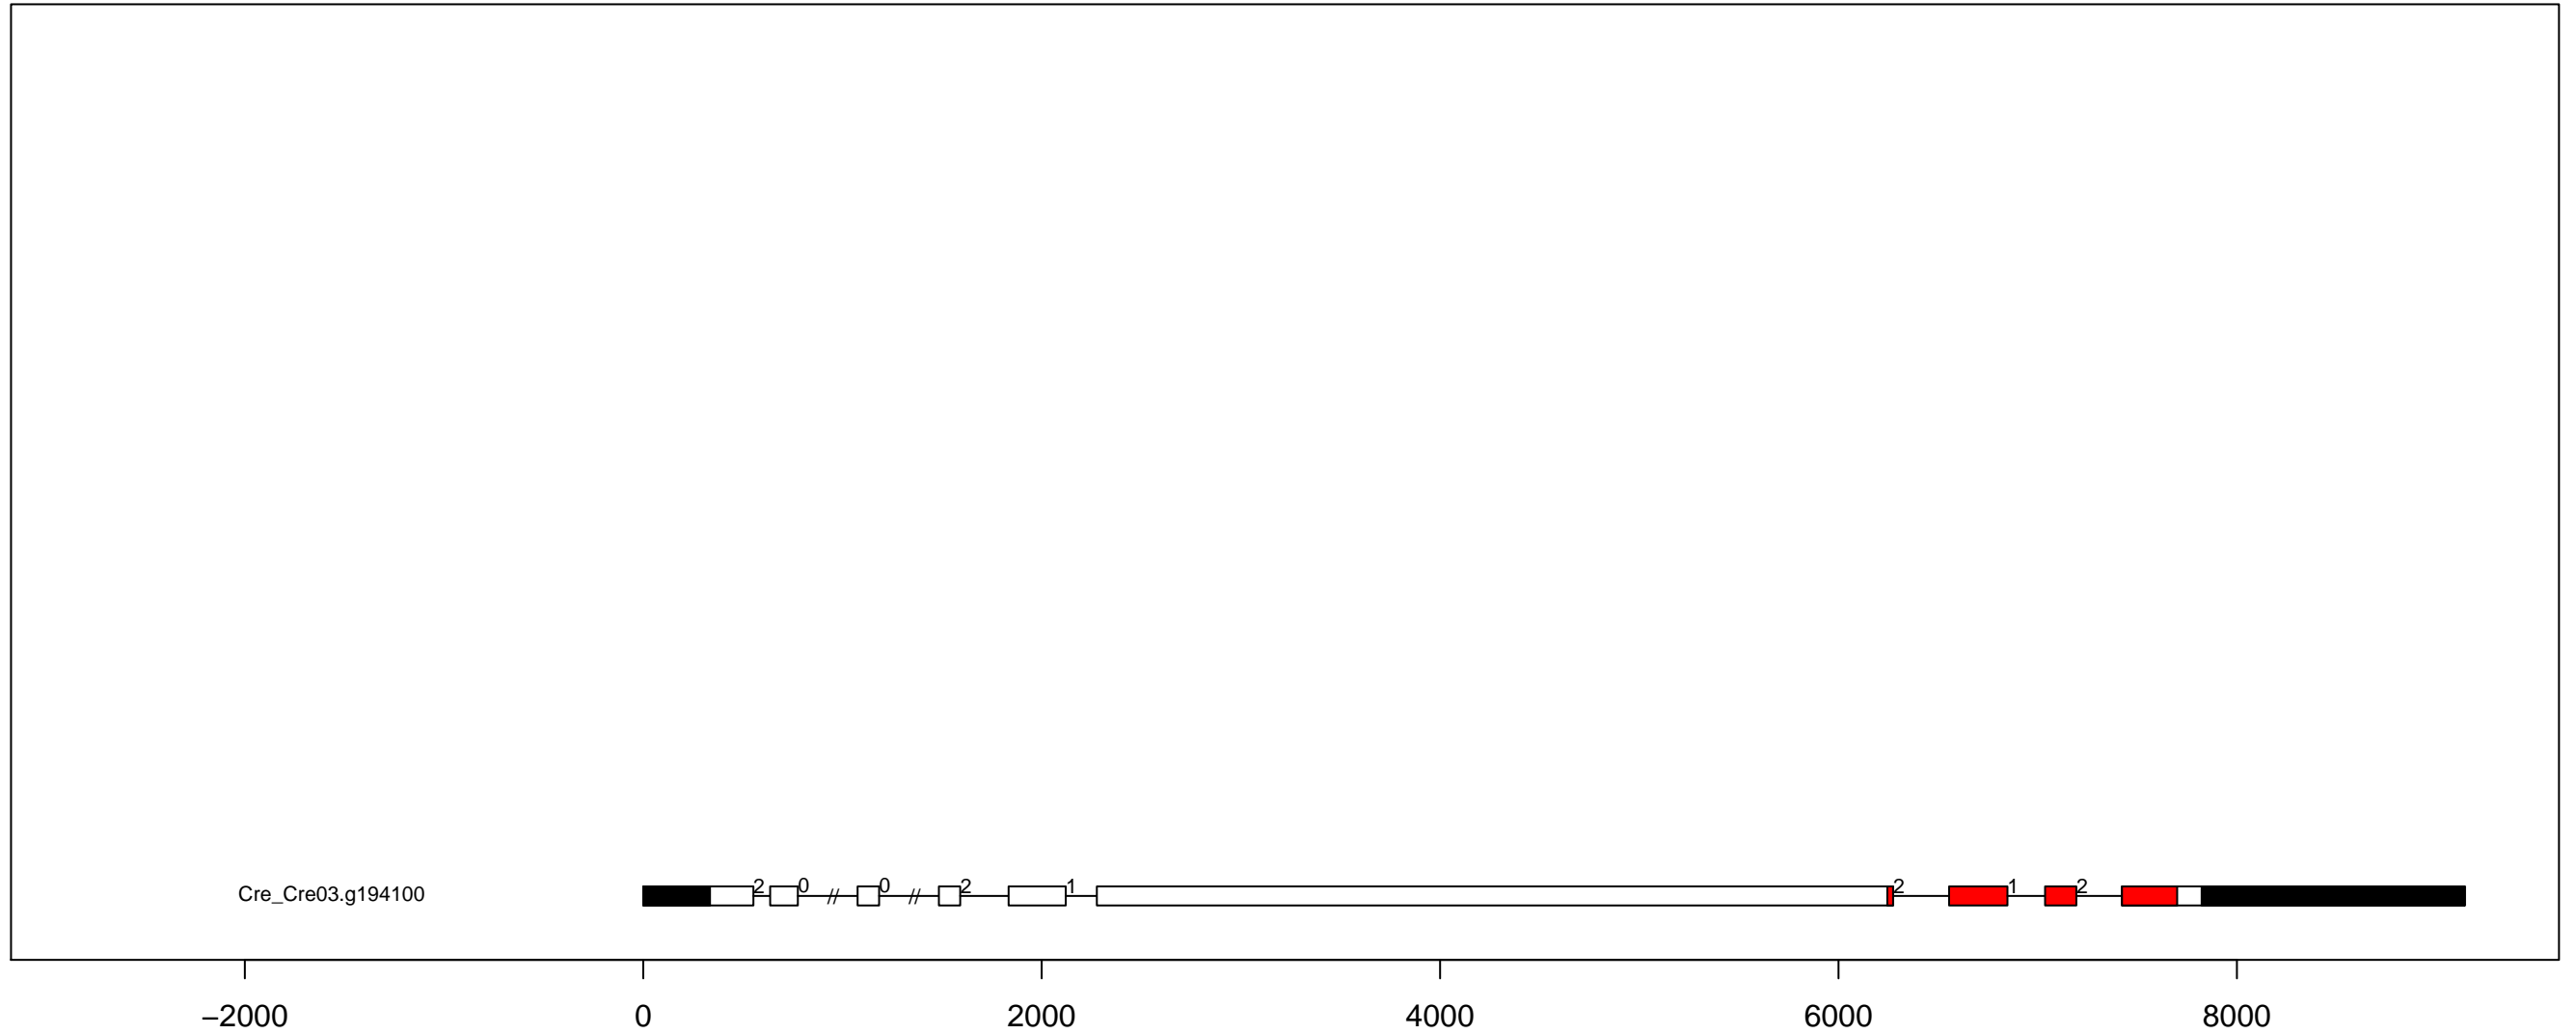

# C.re TKL\_CTR1-DRK-Cr exon-intron and kinase domain diagram (all)

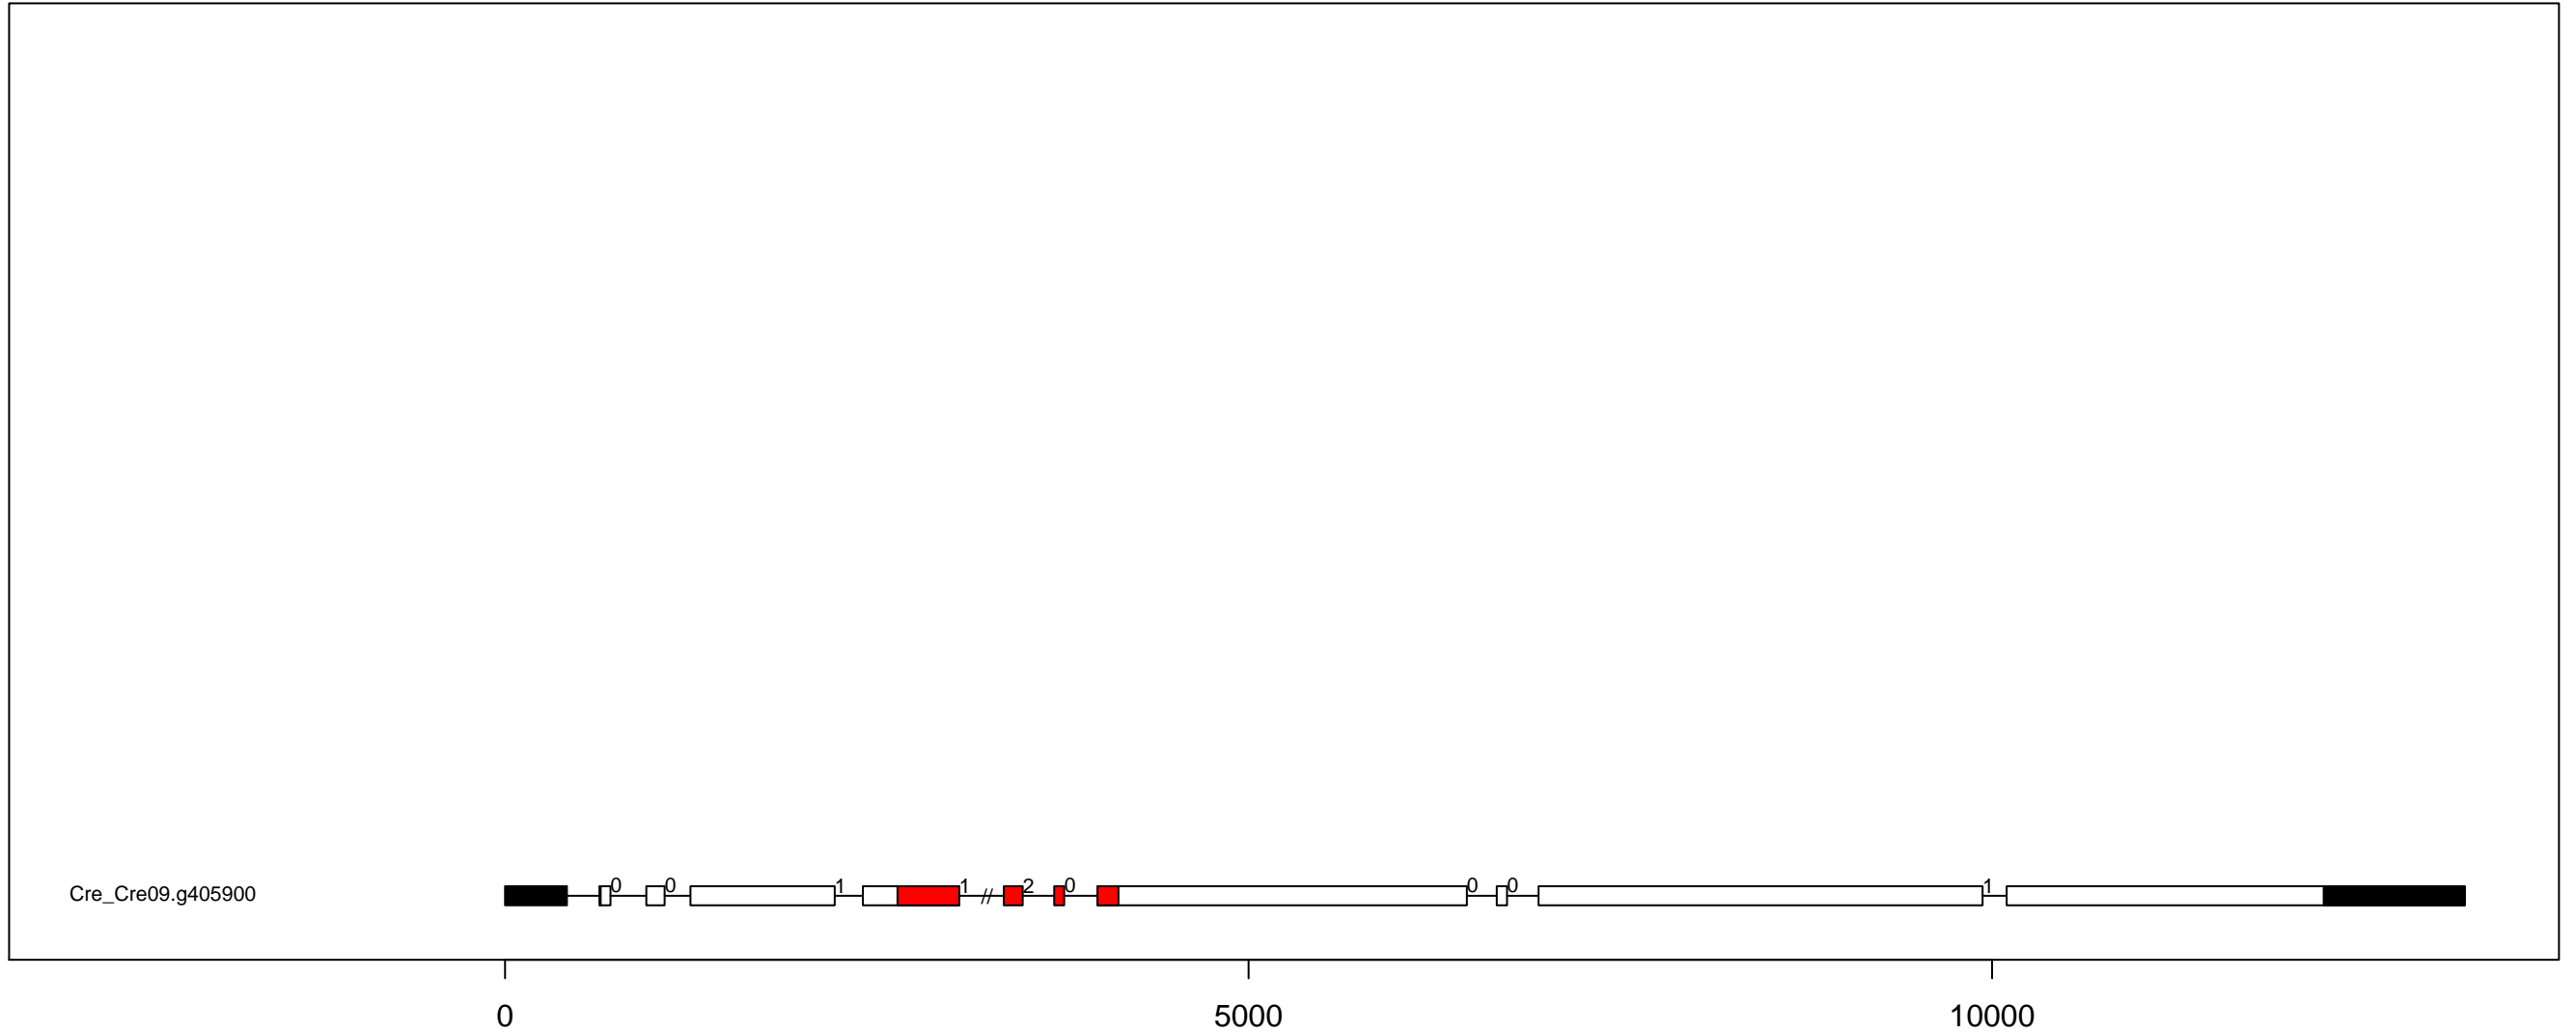

# C.re TKL-Cr-1 exon-intron and kinase domain diagram (all)

Cre\_Cre07.g351800

Cre\_Cre05.g236000

Cre\_Cre03.g160900

Cre\_Cre03.g160350

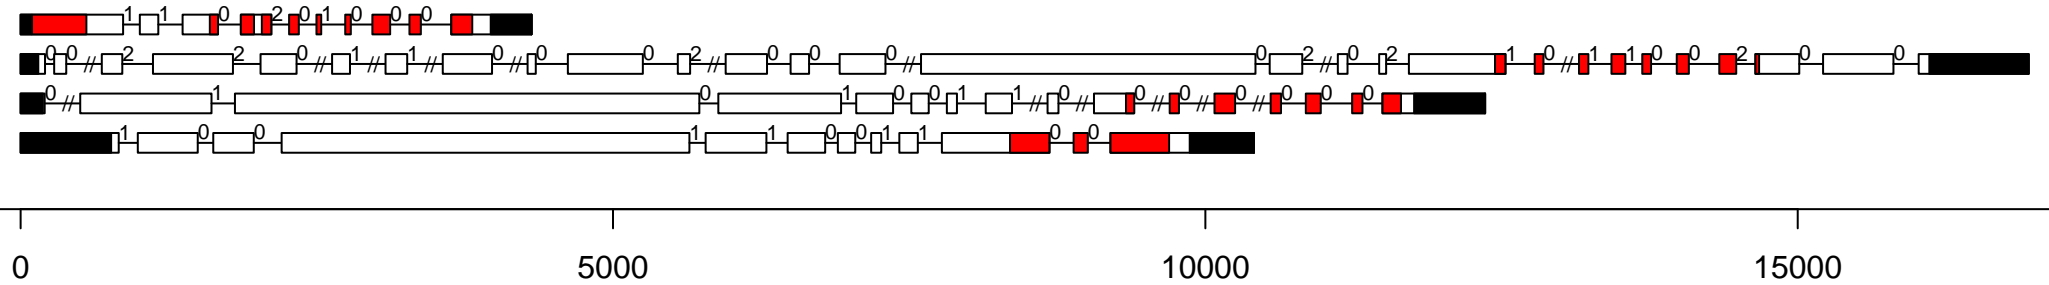

# C.re TKL-Cr-2 exon-intron and kinase domain diagram (all)

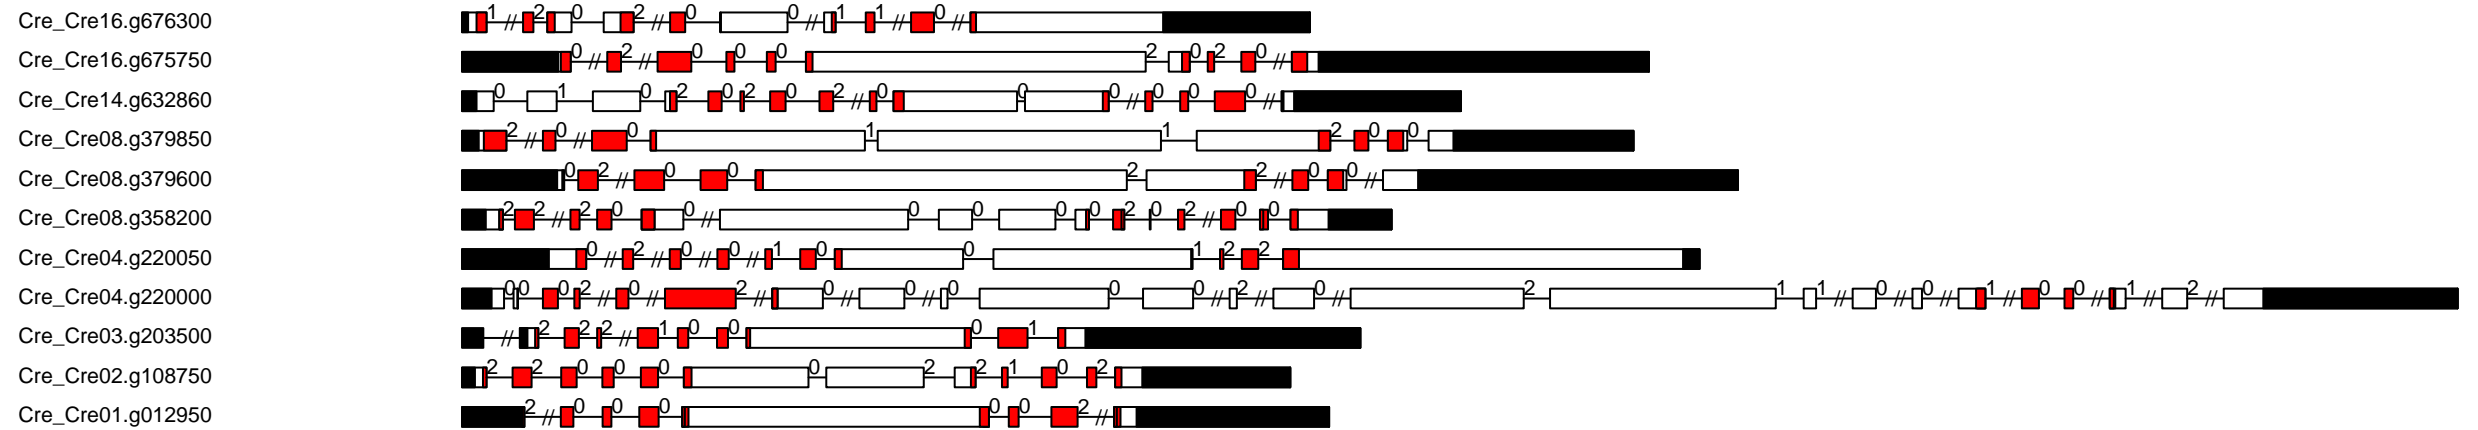



# C.re TKL-Cr-3 exon-intron and kinase domain diagram (part 1)

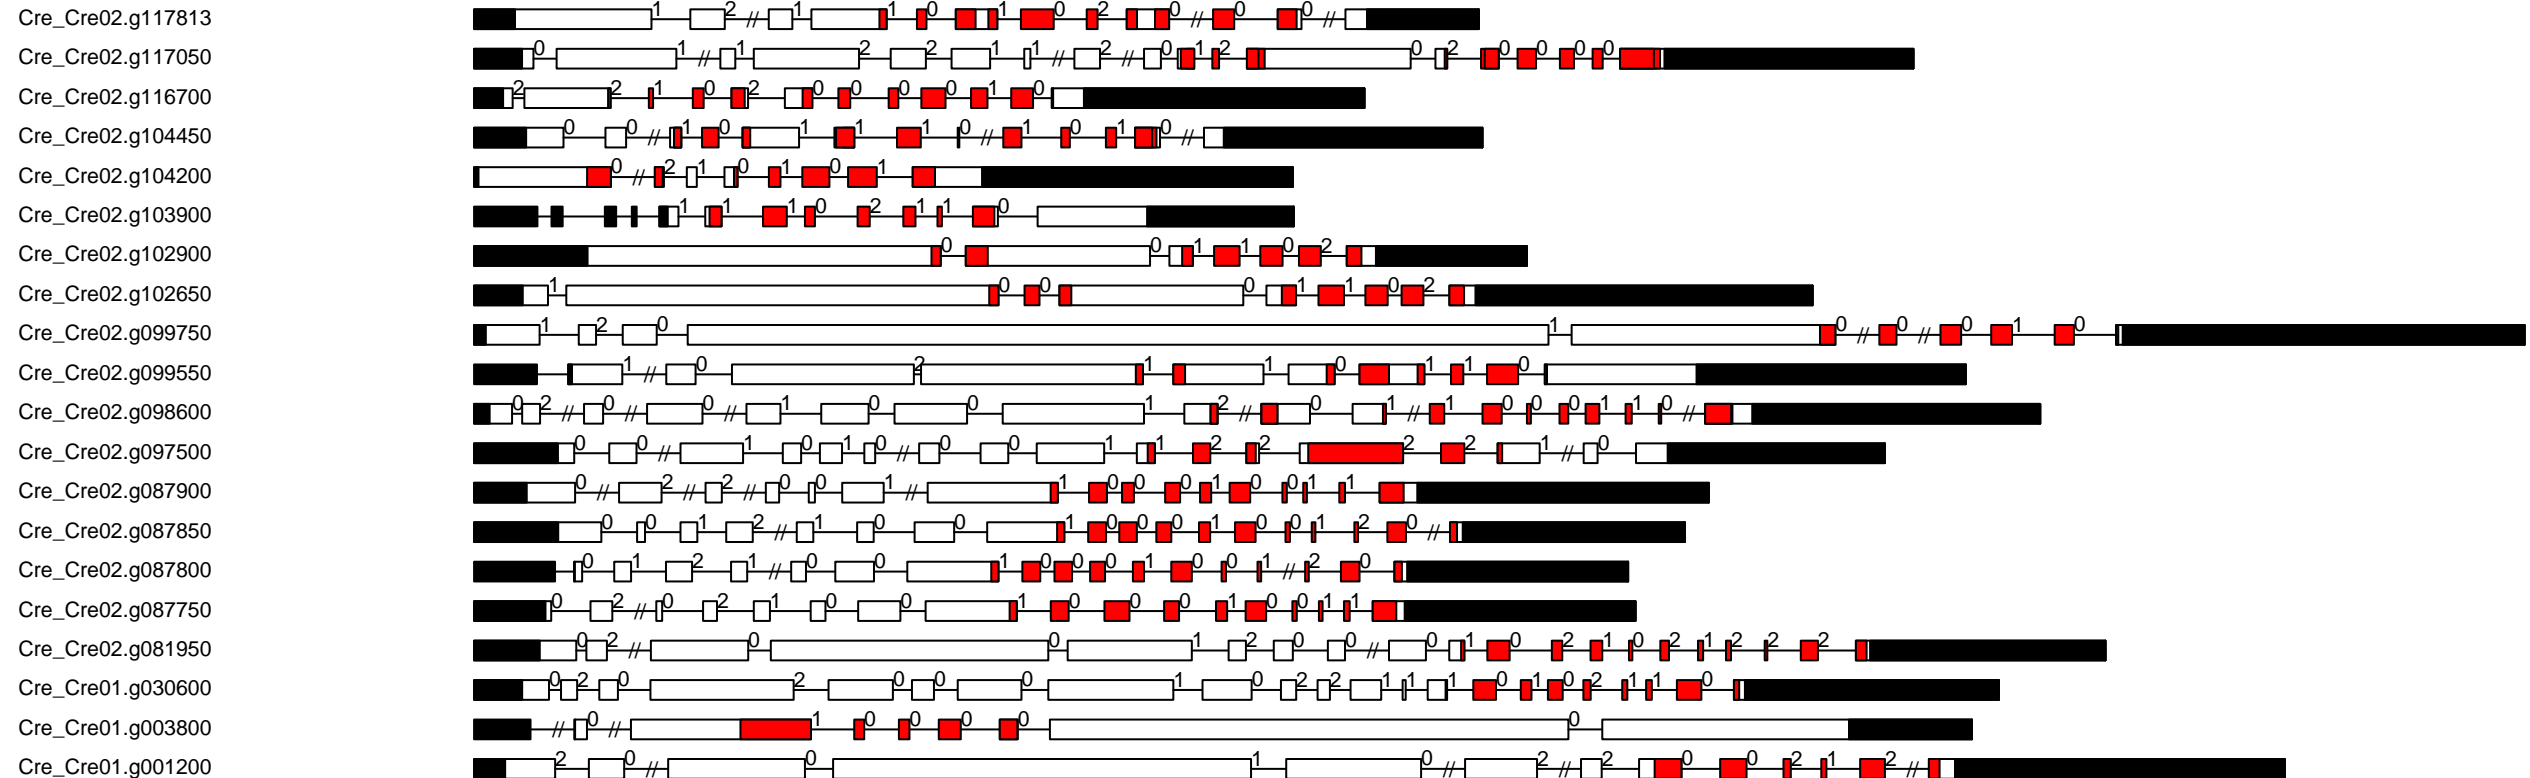

0

5000

10000

# C.re TKL-Cr-3 exon-intron and kinase domain diagram (part 2)

Cre\_Cre07.g339850  
Cre\_Cre07.g334950  
Cre\_Cre07.g322350  
Cre\_Cre07.g316650  
Cre\_Cre07.g314500  
Cre\_Cre06.g310100  
Cre\_Cre06.g303150  
Cre\_Cre06.g293300  
Cre\_Cre06.g287700  
Cre\_Cre06.g274550  
Cre\_Cre06.g268950  
Cre\_Cre06.g268850  
Cre\_Cre06.g267400  
Cre\_Cre06.g253200  
Cre\_Cre05.g238100  
Cre\_Cre04.g224450  
Cre\_Cre03.g157250  
Cre\_Cre03.g157200  
Cre\_Cre03.g154250  
Cre\_Cre02.g145500

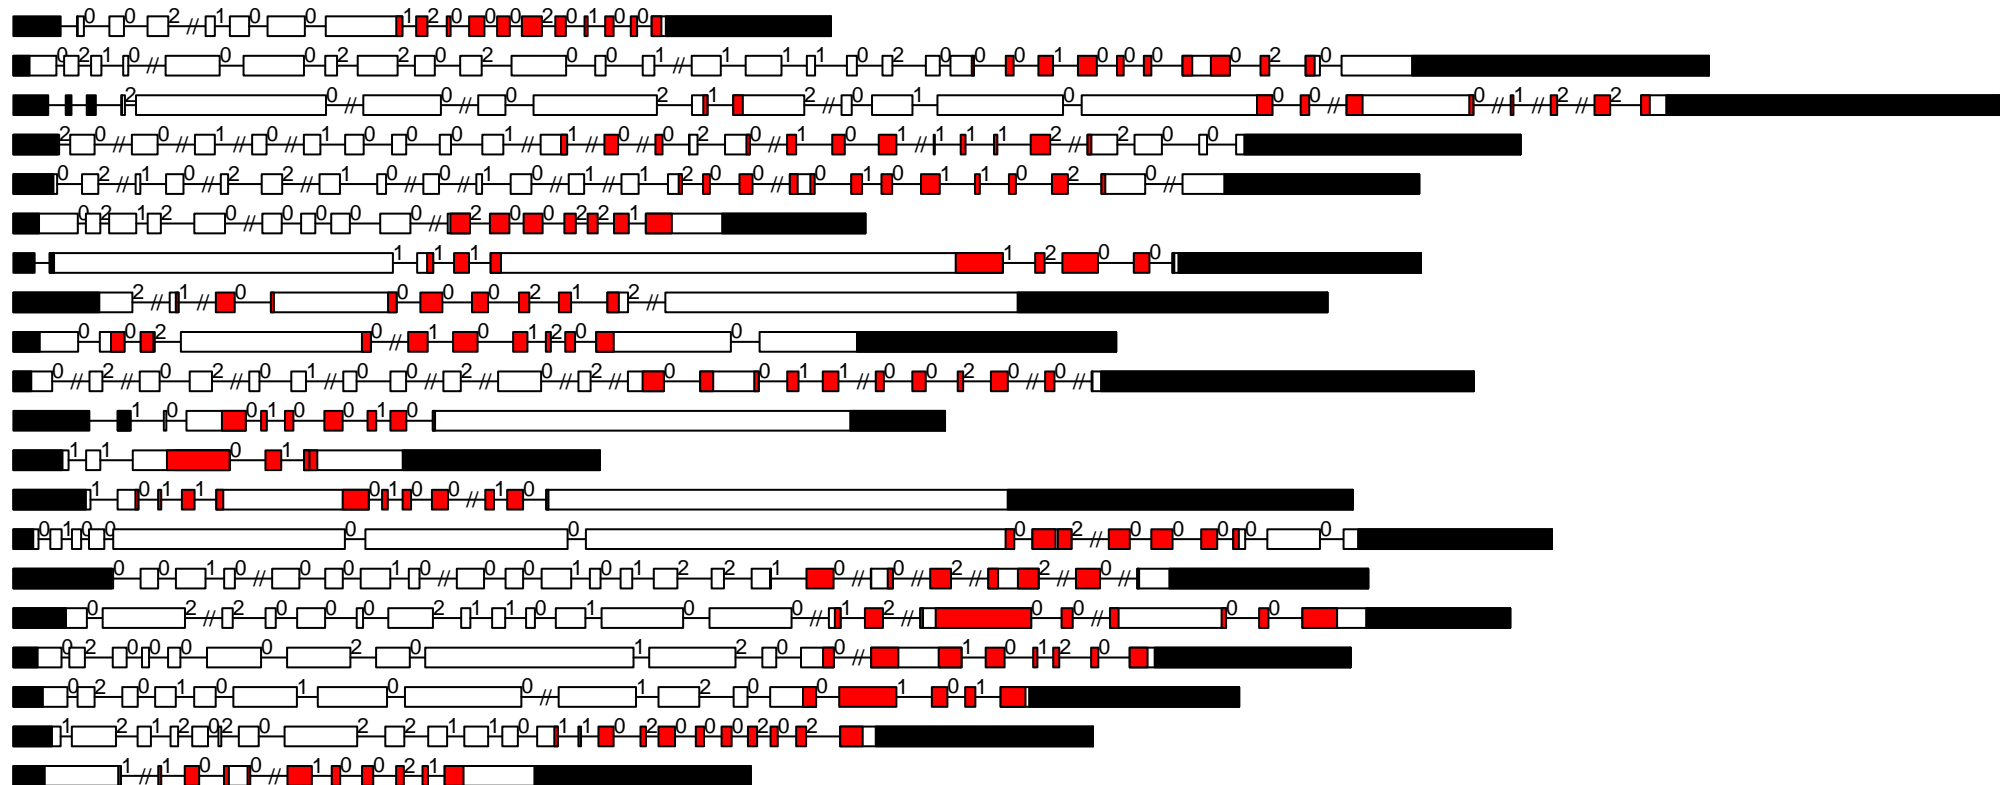

### C.re TKL-Cr-3 exon-intron and kinase domain diagram (part 3)

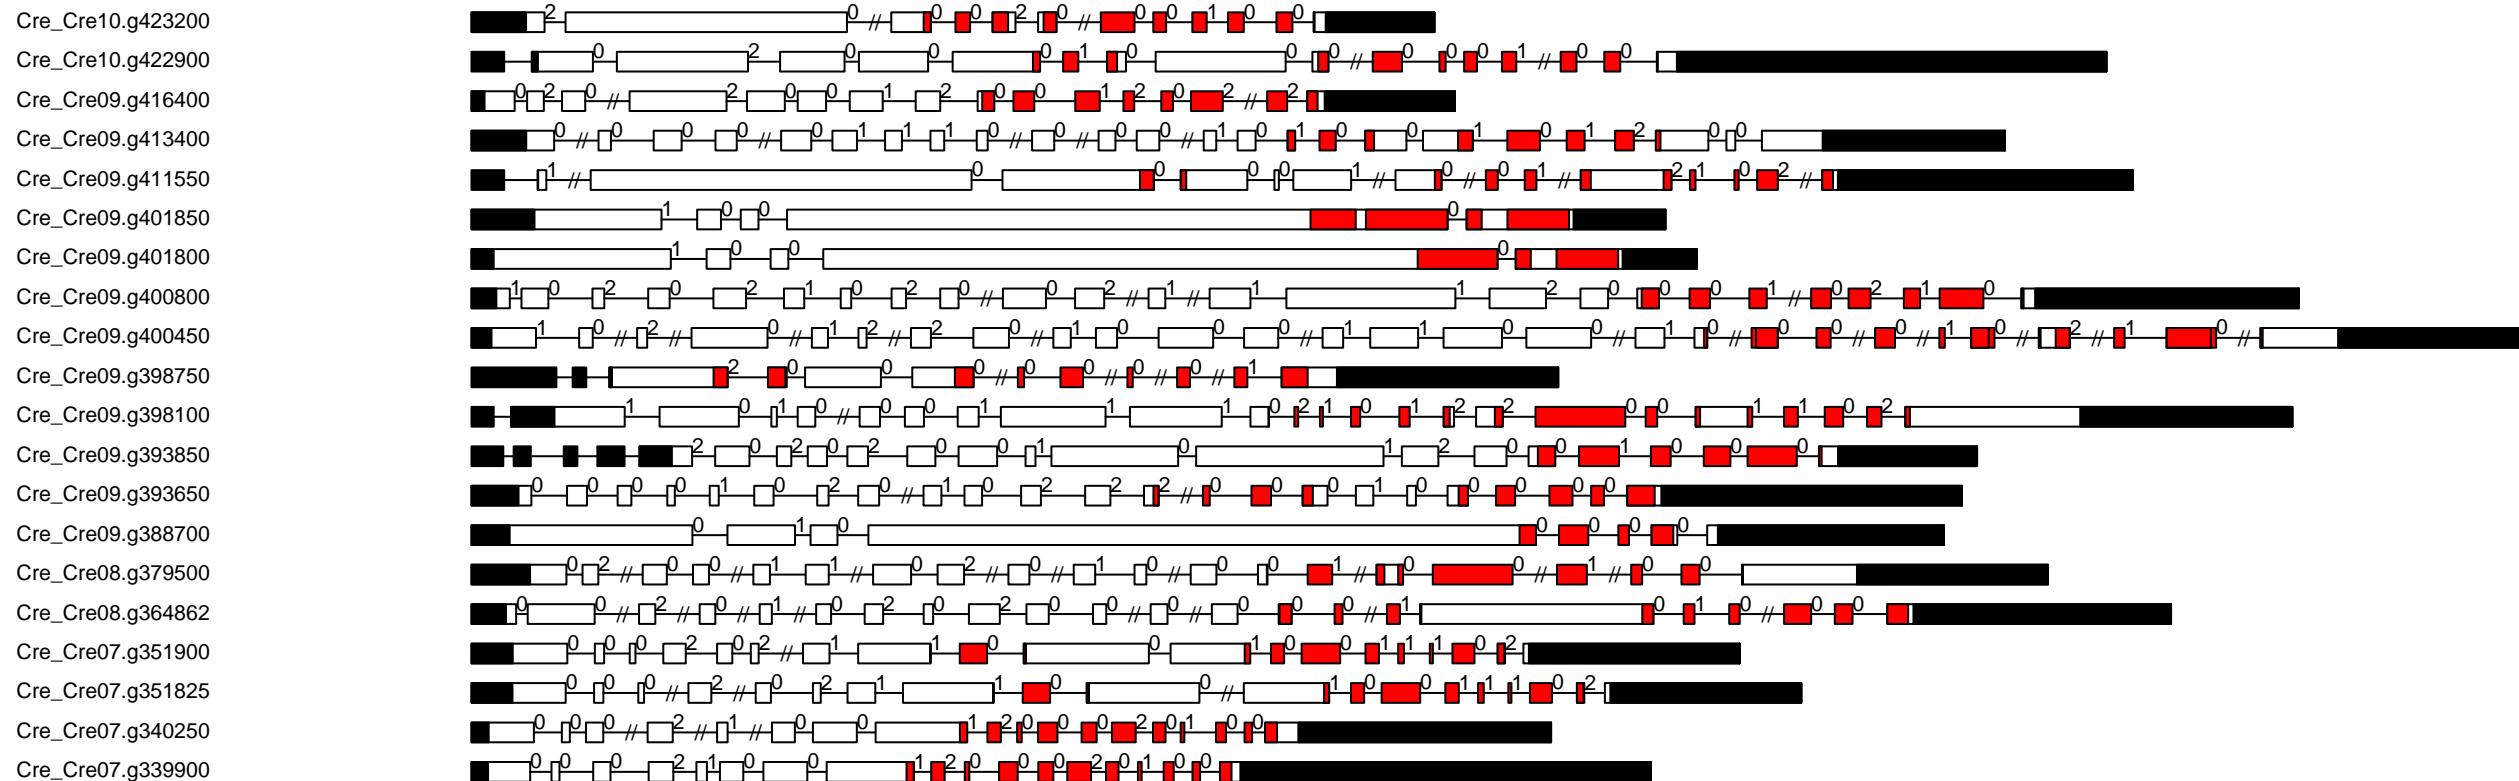

0

5000

10000

### C.re TKL-Cr-3 exon-intron and kinase domain diagram (part 4)

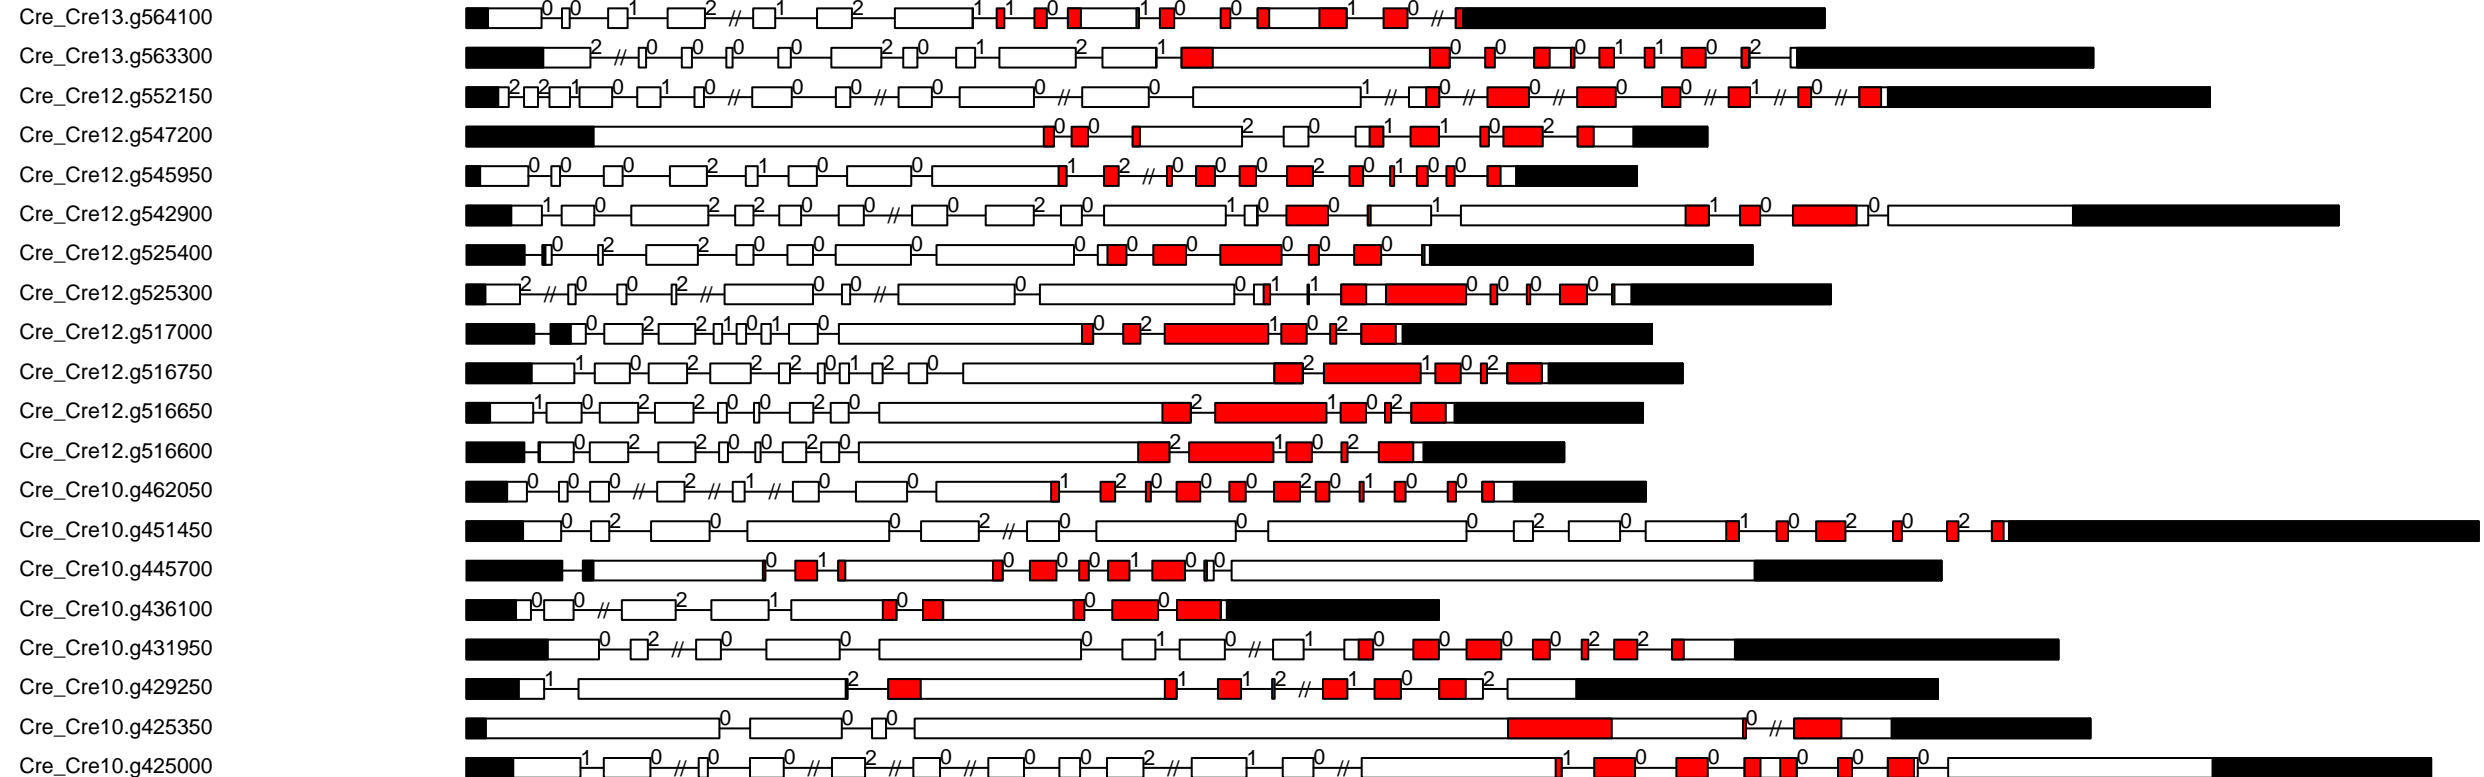

0

5000

10000

### C.re TKL-Cr-3 exon-intron and kinase domain diagram (part 5)

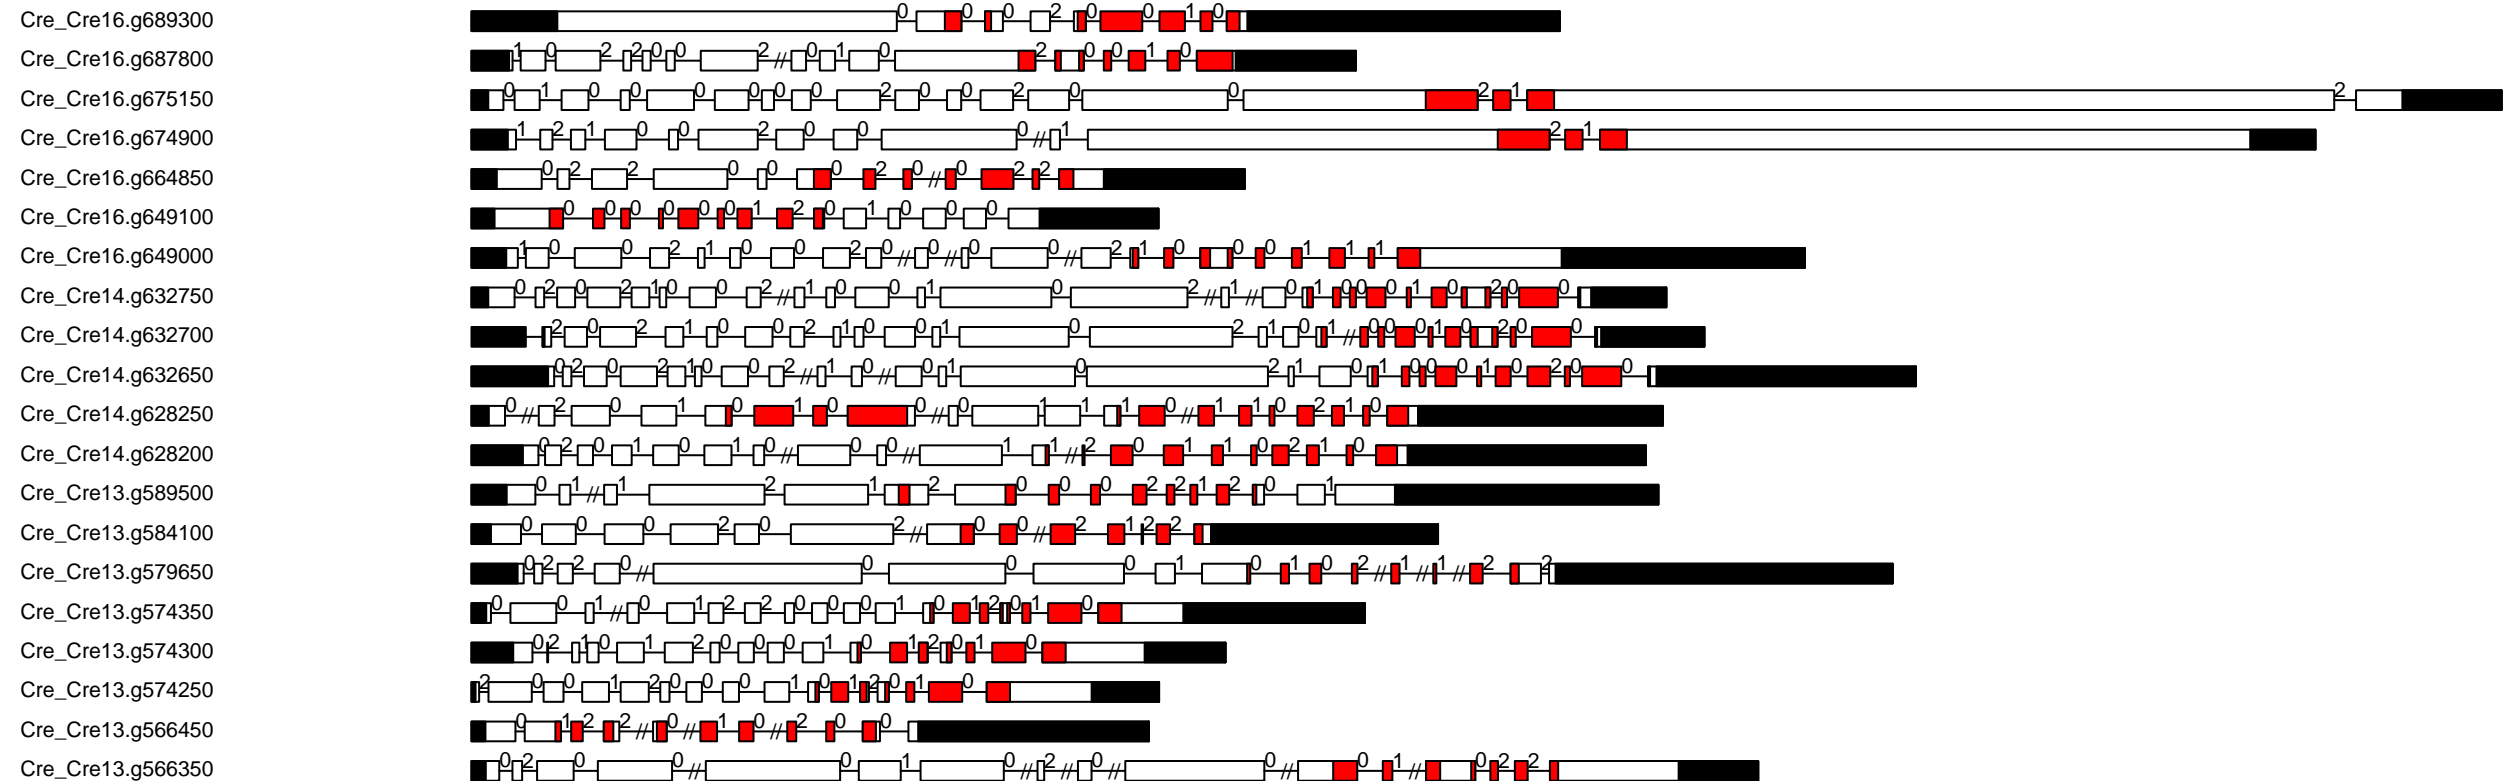

### C.re TKL-Cr-3 exon-intron and kinase domain diagram (part 6)

Cre\_Cre17.g734250

Cre\_Cre17.g710650

Cre\_Cre17.g710600

Cre\_Cre17.g710000

Cre\_Cre17.g709900

Cre\_Cre17.g702600

Cre\_Cre16.g692350

Cre\_Cre16.g689550

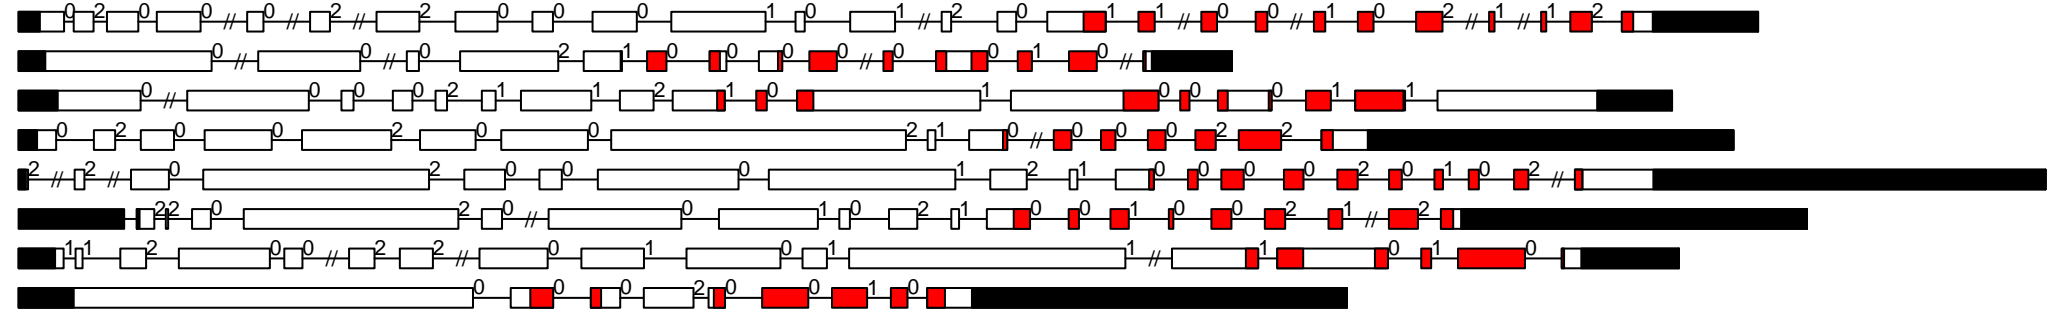

0

5000

10000

# C.re TKL-Cr-4 exon-intron and kinase domain diagram (part 1)

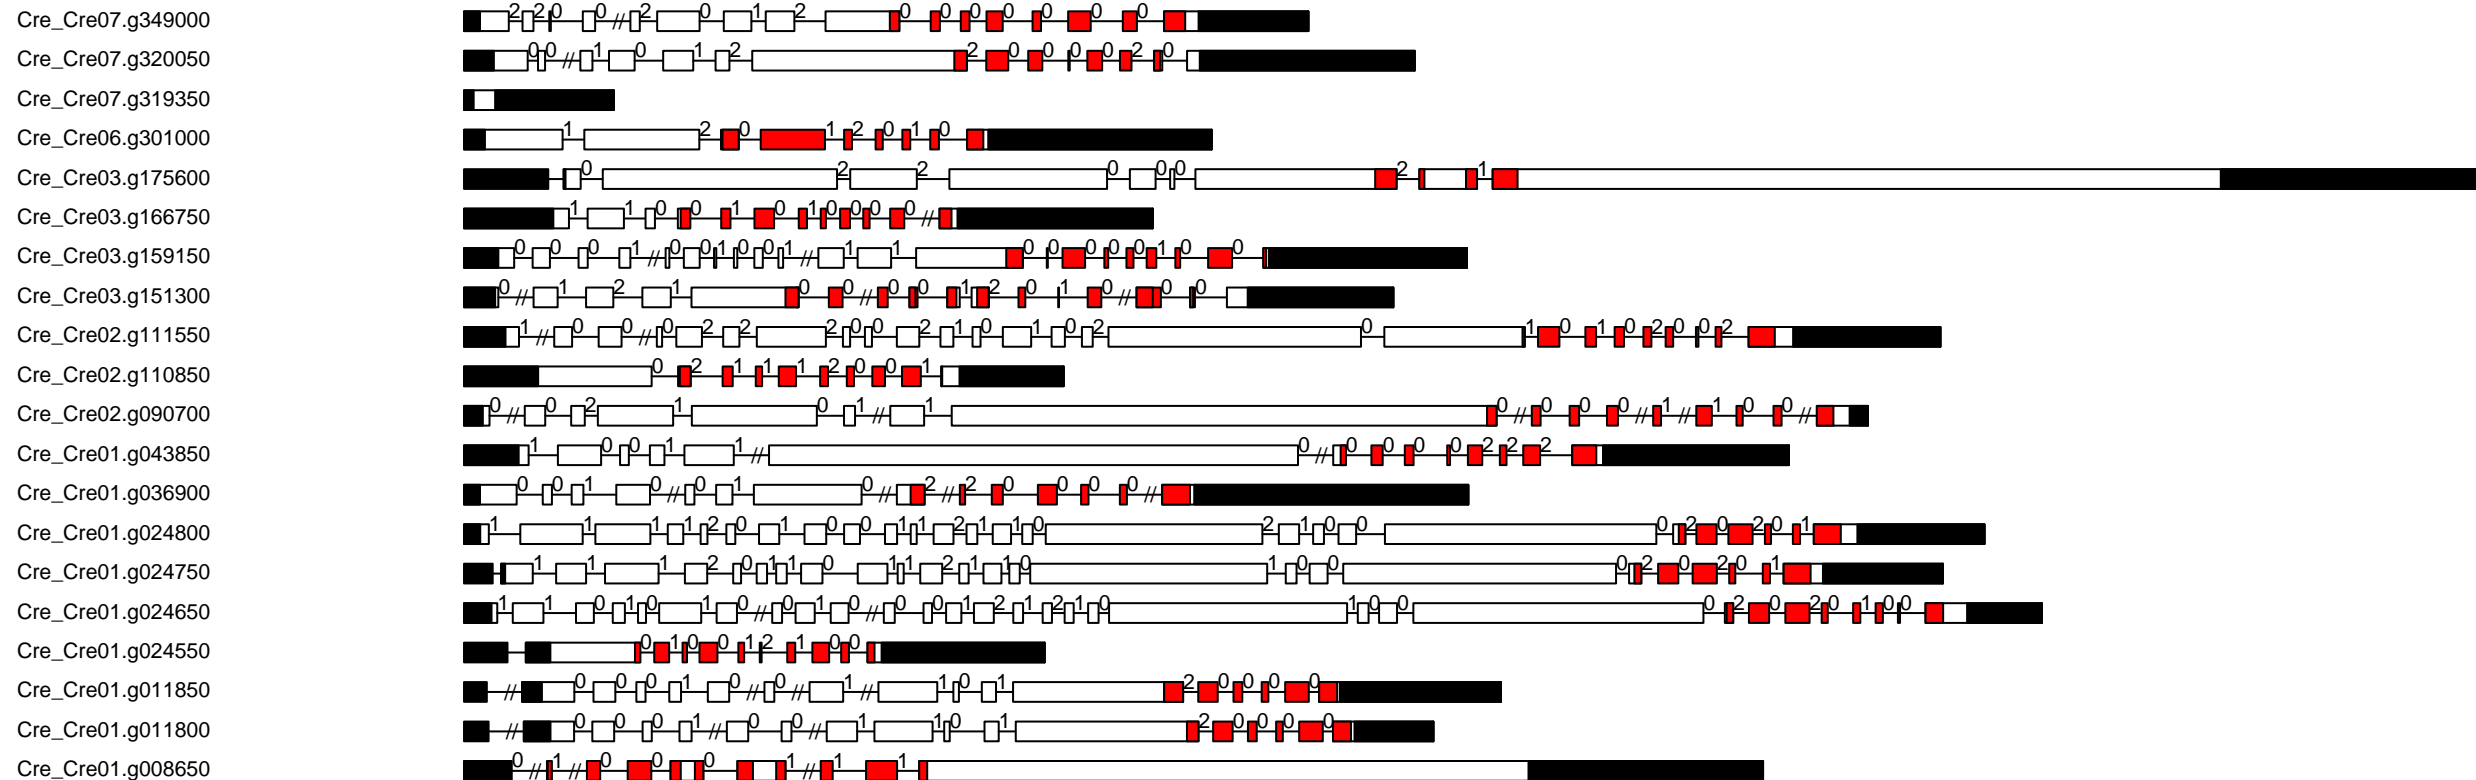

# C.re TKL-Cr-4 exon-intron and kinase domain diagram (part 2)

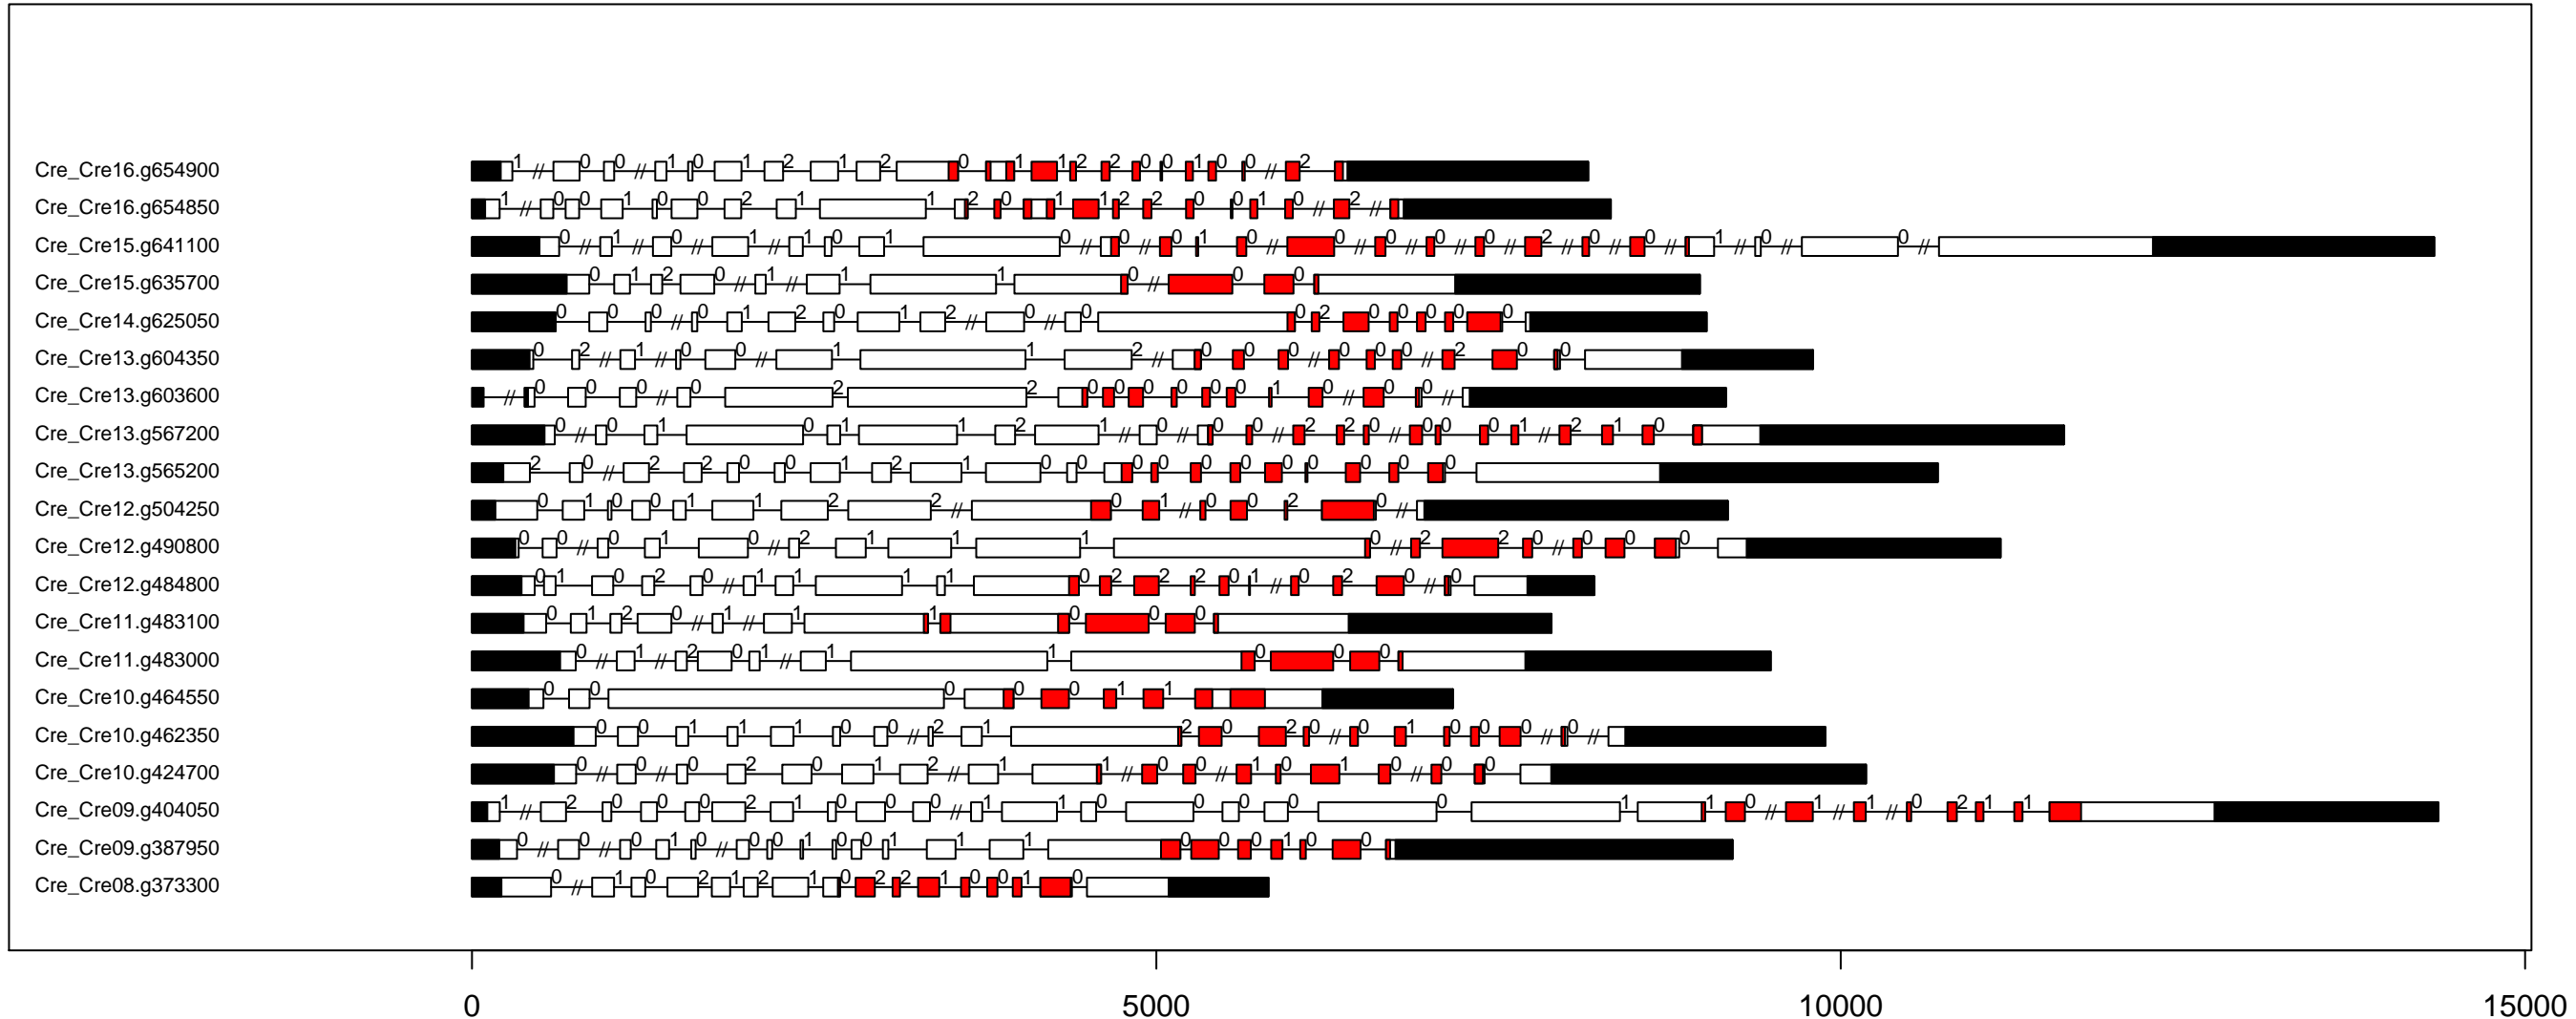



### C.re TKL-Cr-4 exon-intron and kinase domain diagram (part 3)

Cre\_Cre17.g741900  
Cre\_Cre17.g713050  
Cre\_Cre17.g696950  
Cre\_Cre17.g696900  
Cre\_Cre16.g695218  
Cre\_Cre16.g694550  
Cre\_Cre16.g666300

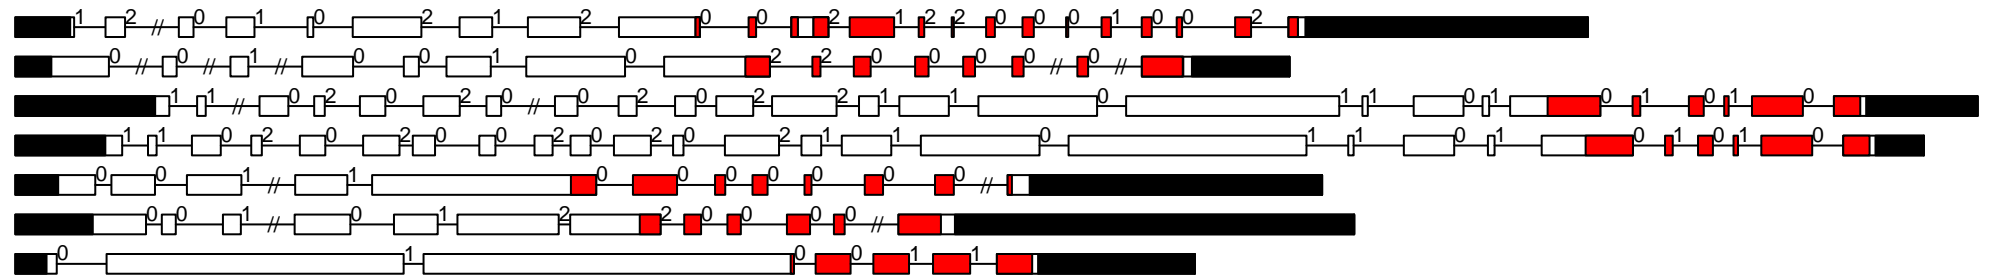

# C.re TKL-Cr-Single exon-intron and kinase domain diagram (all)

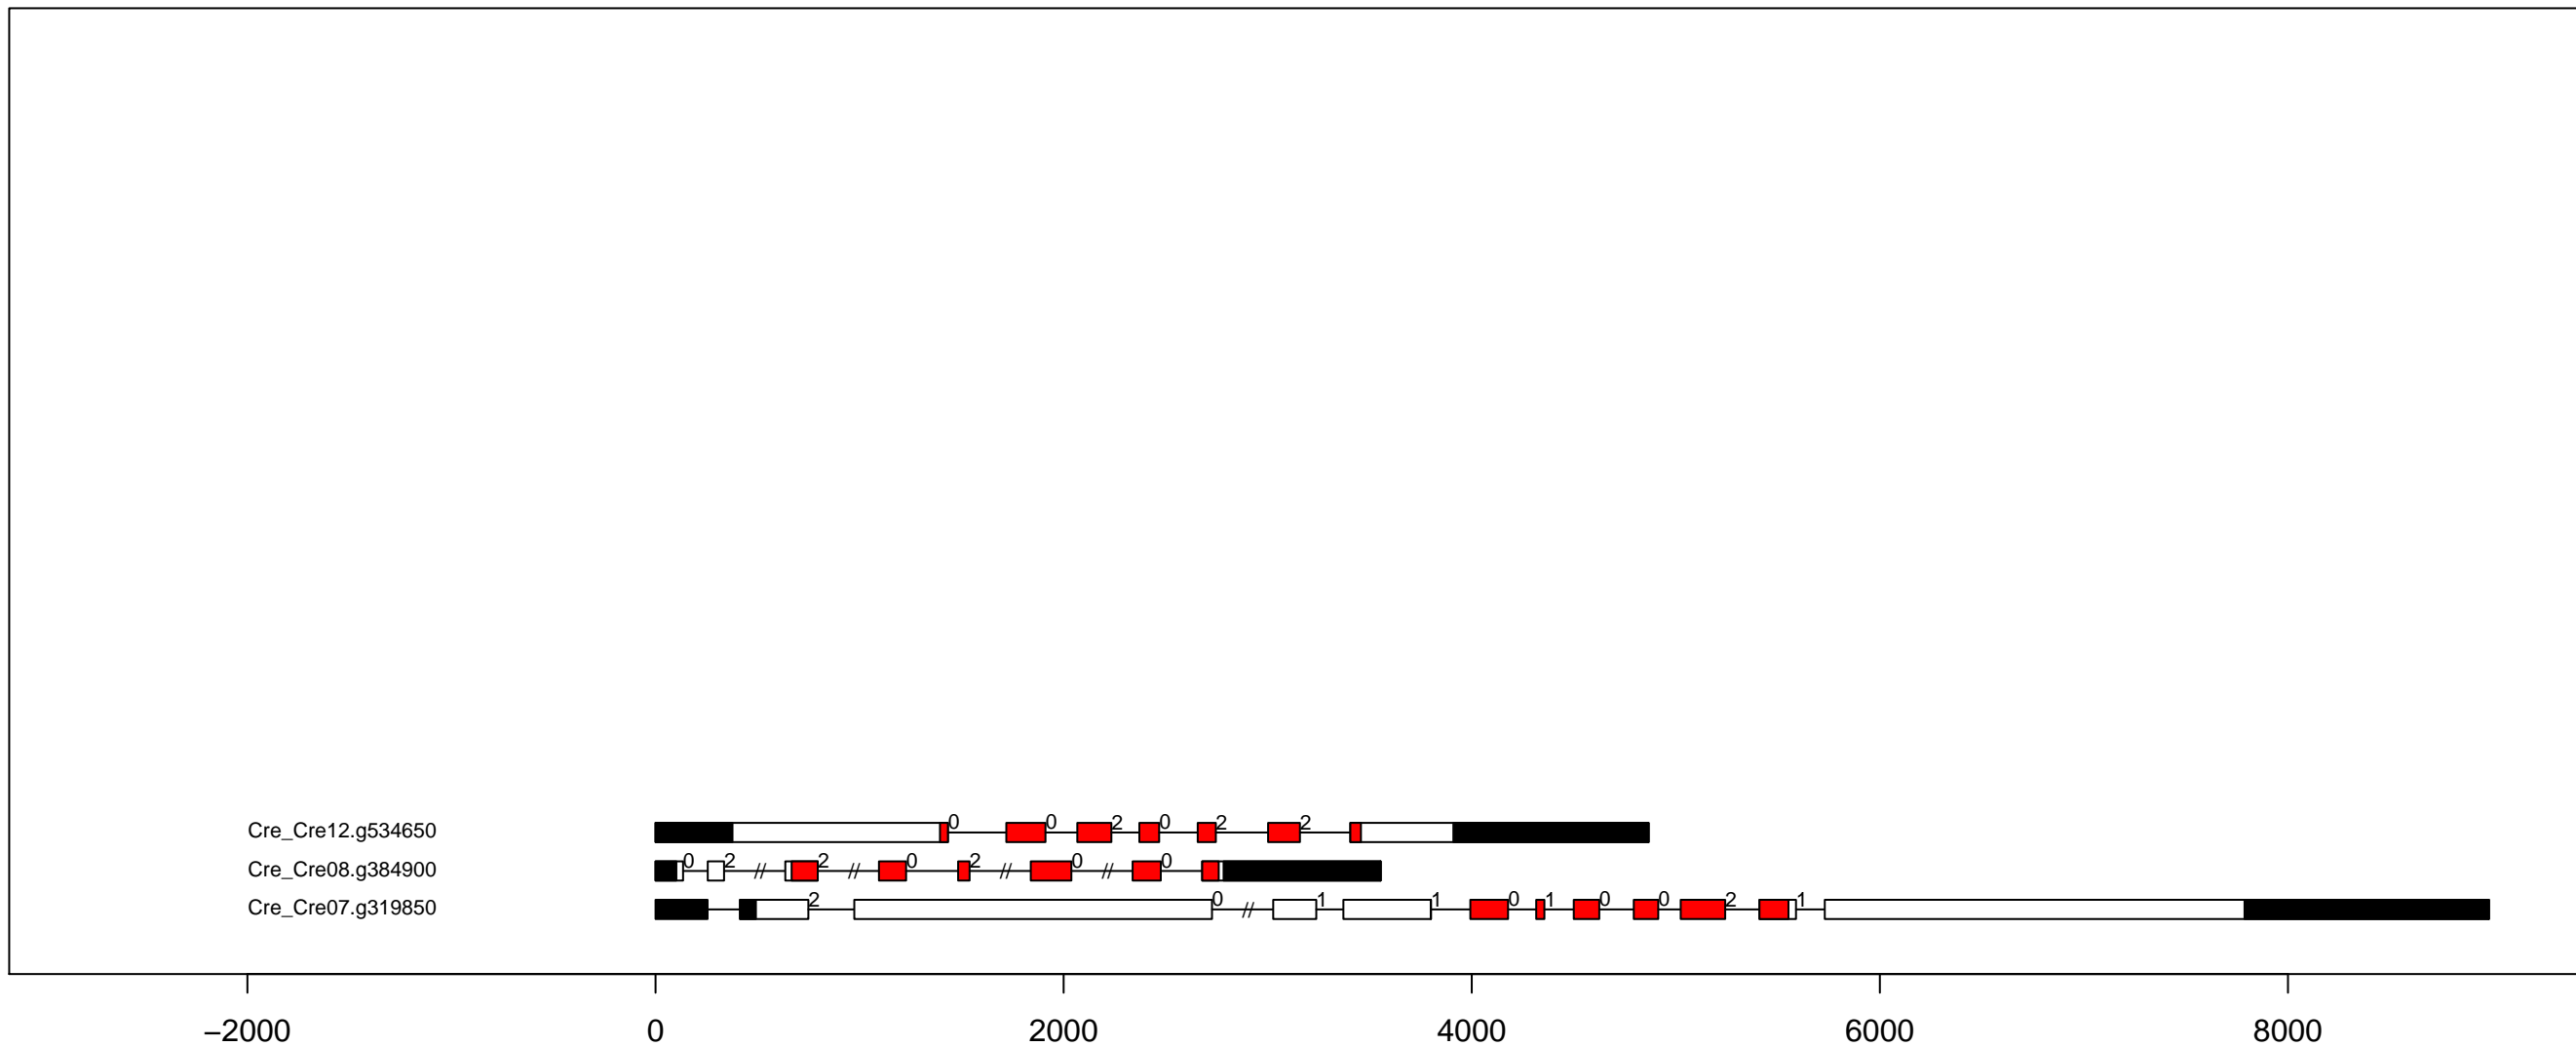

# C.re TKL-PI-1 exon-intron and kinase domain diagram (all)

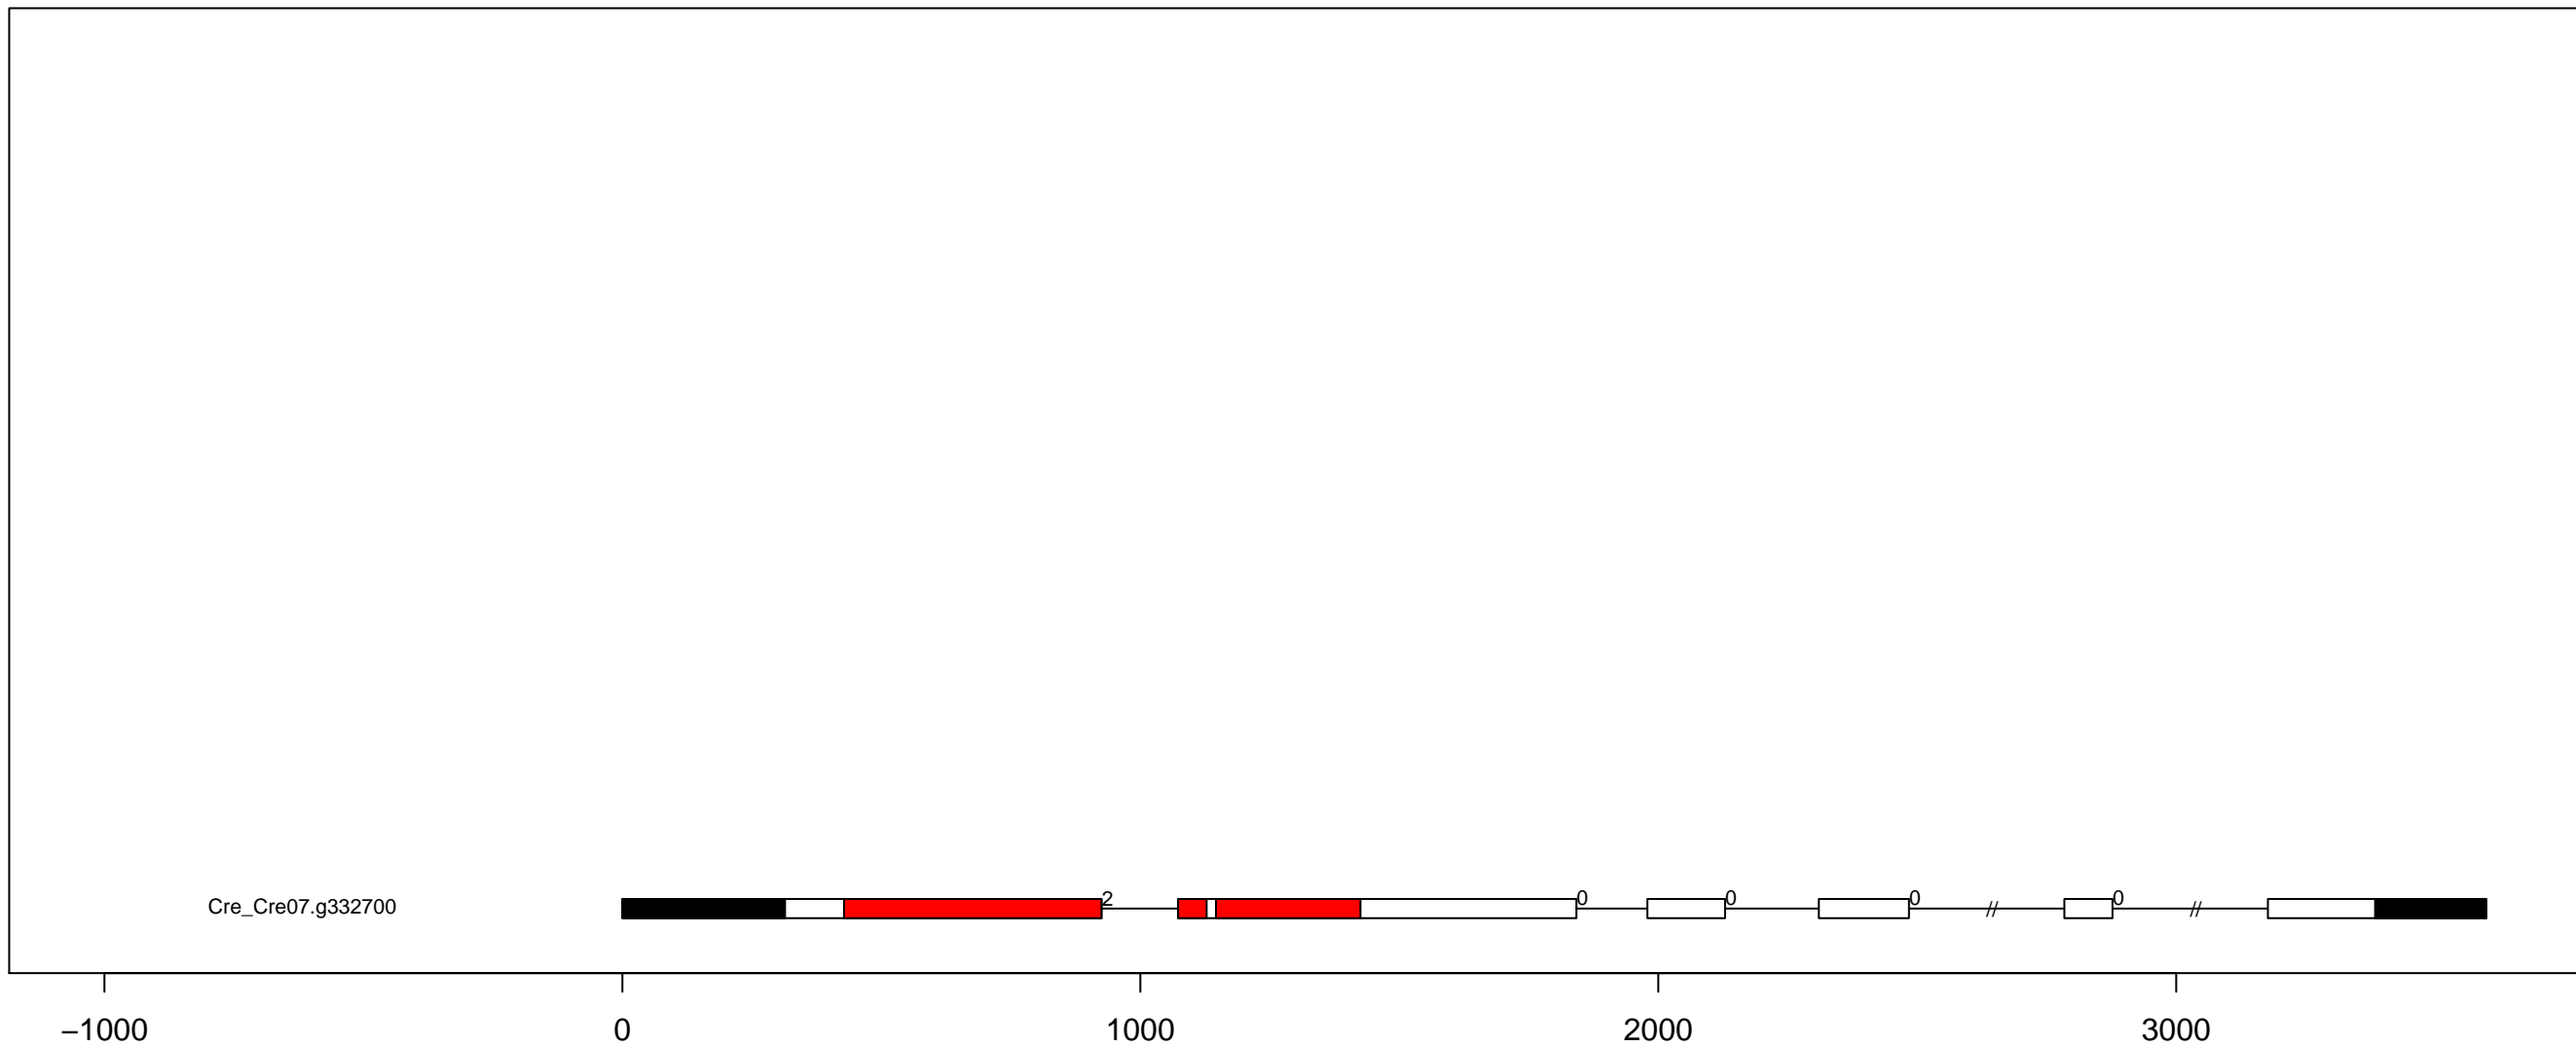

# C.re TKL-PI-3 exon-intron and kinase domain diagram (all)

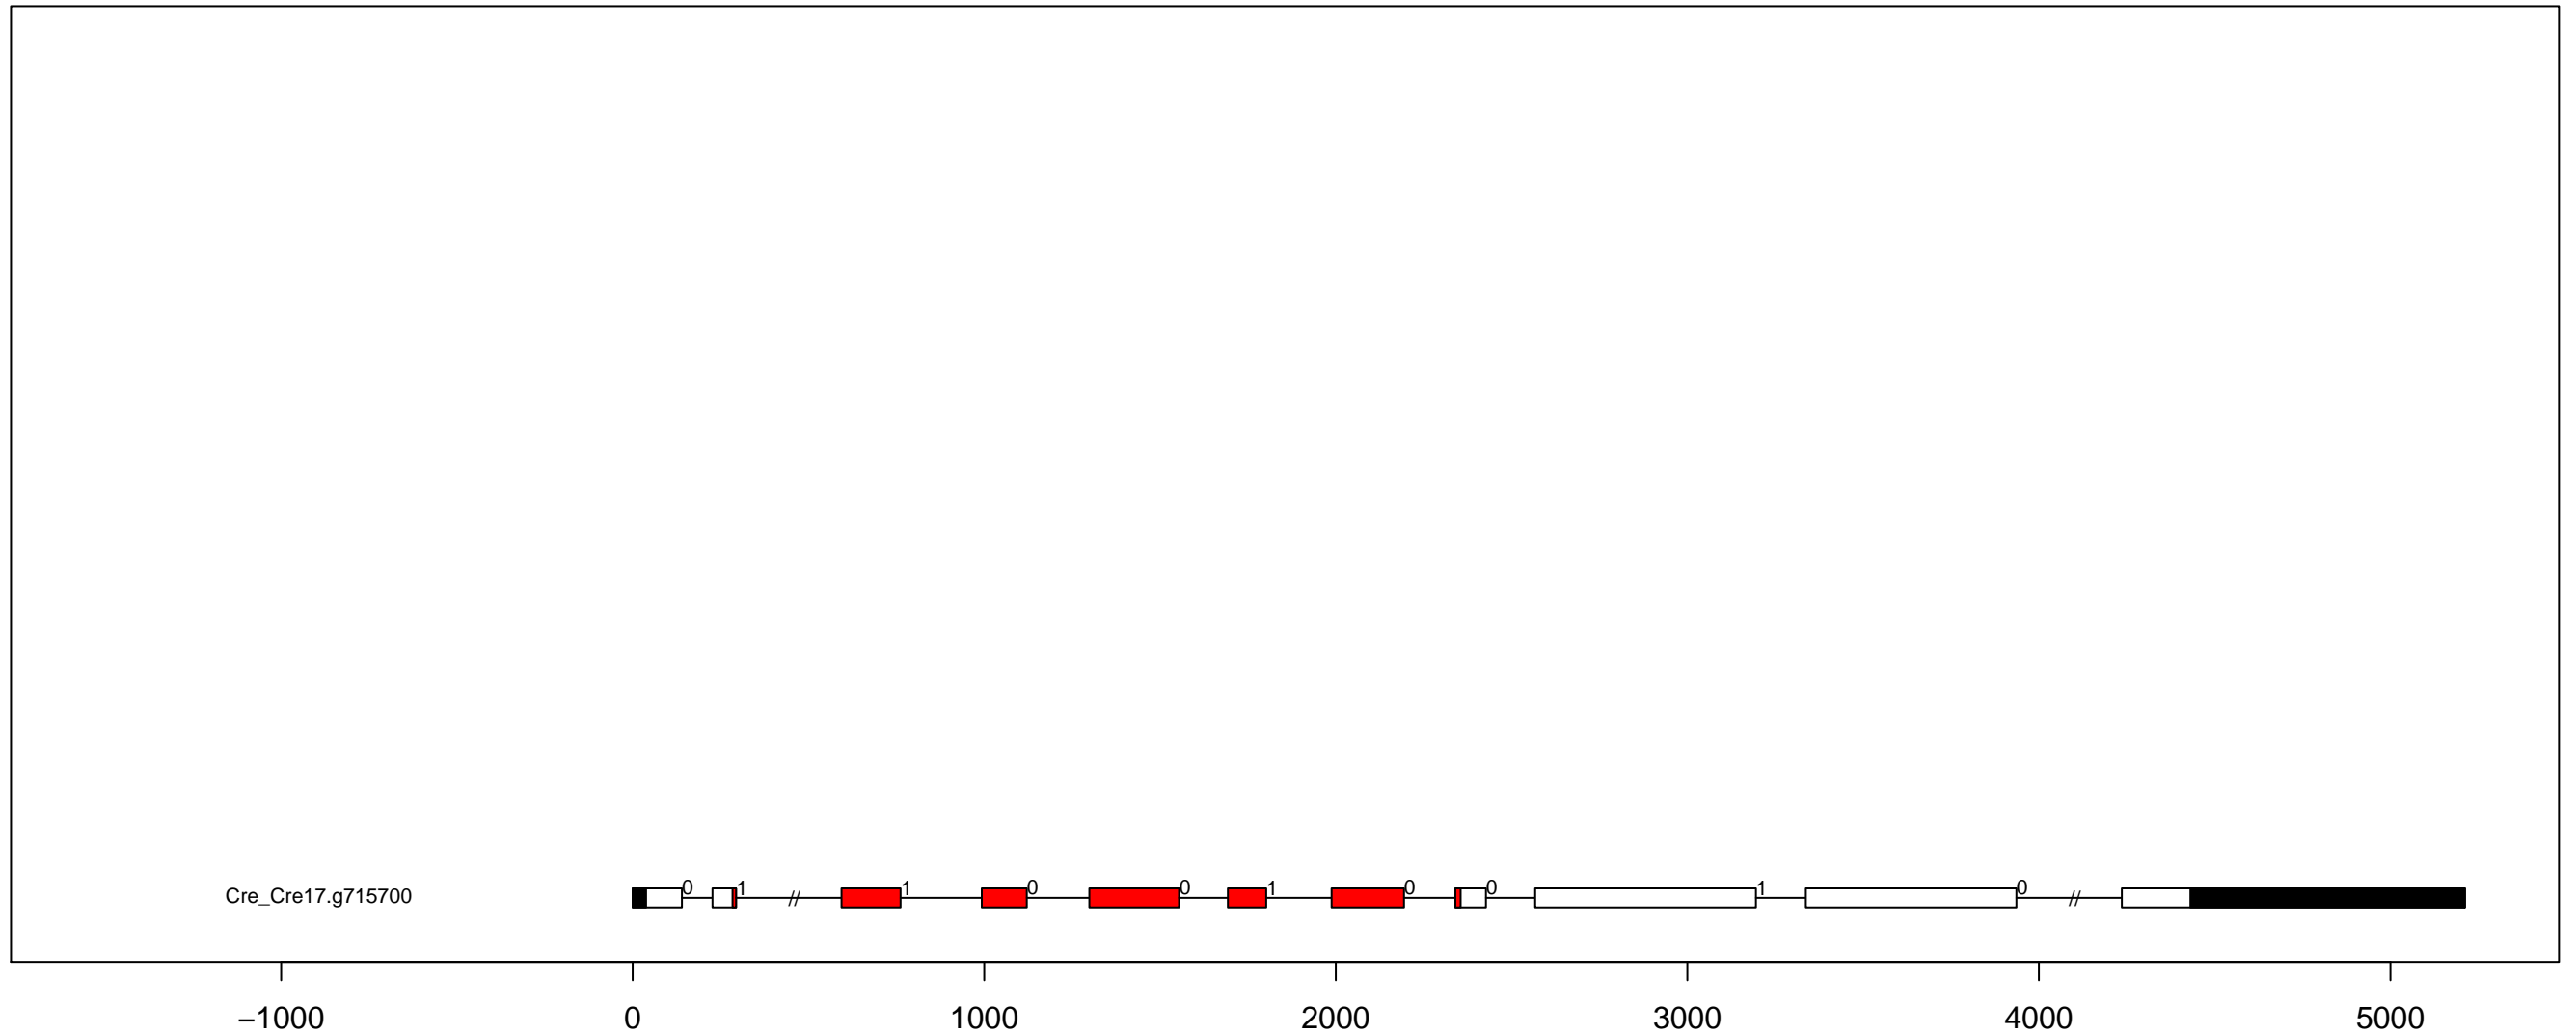

# C.re TKL-PI-4 exon-intron and kinase domain diagram (all)

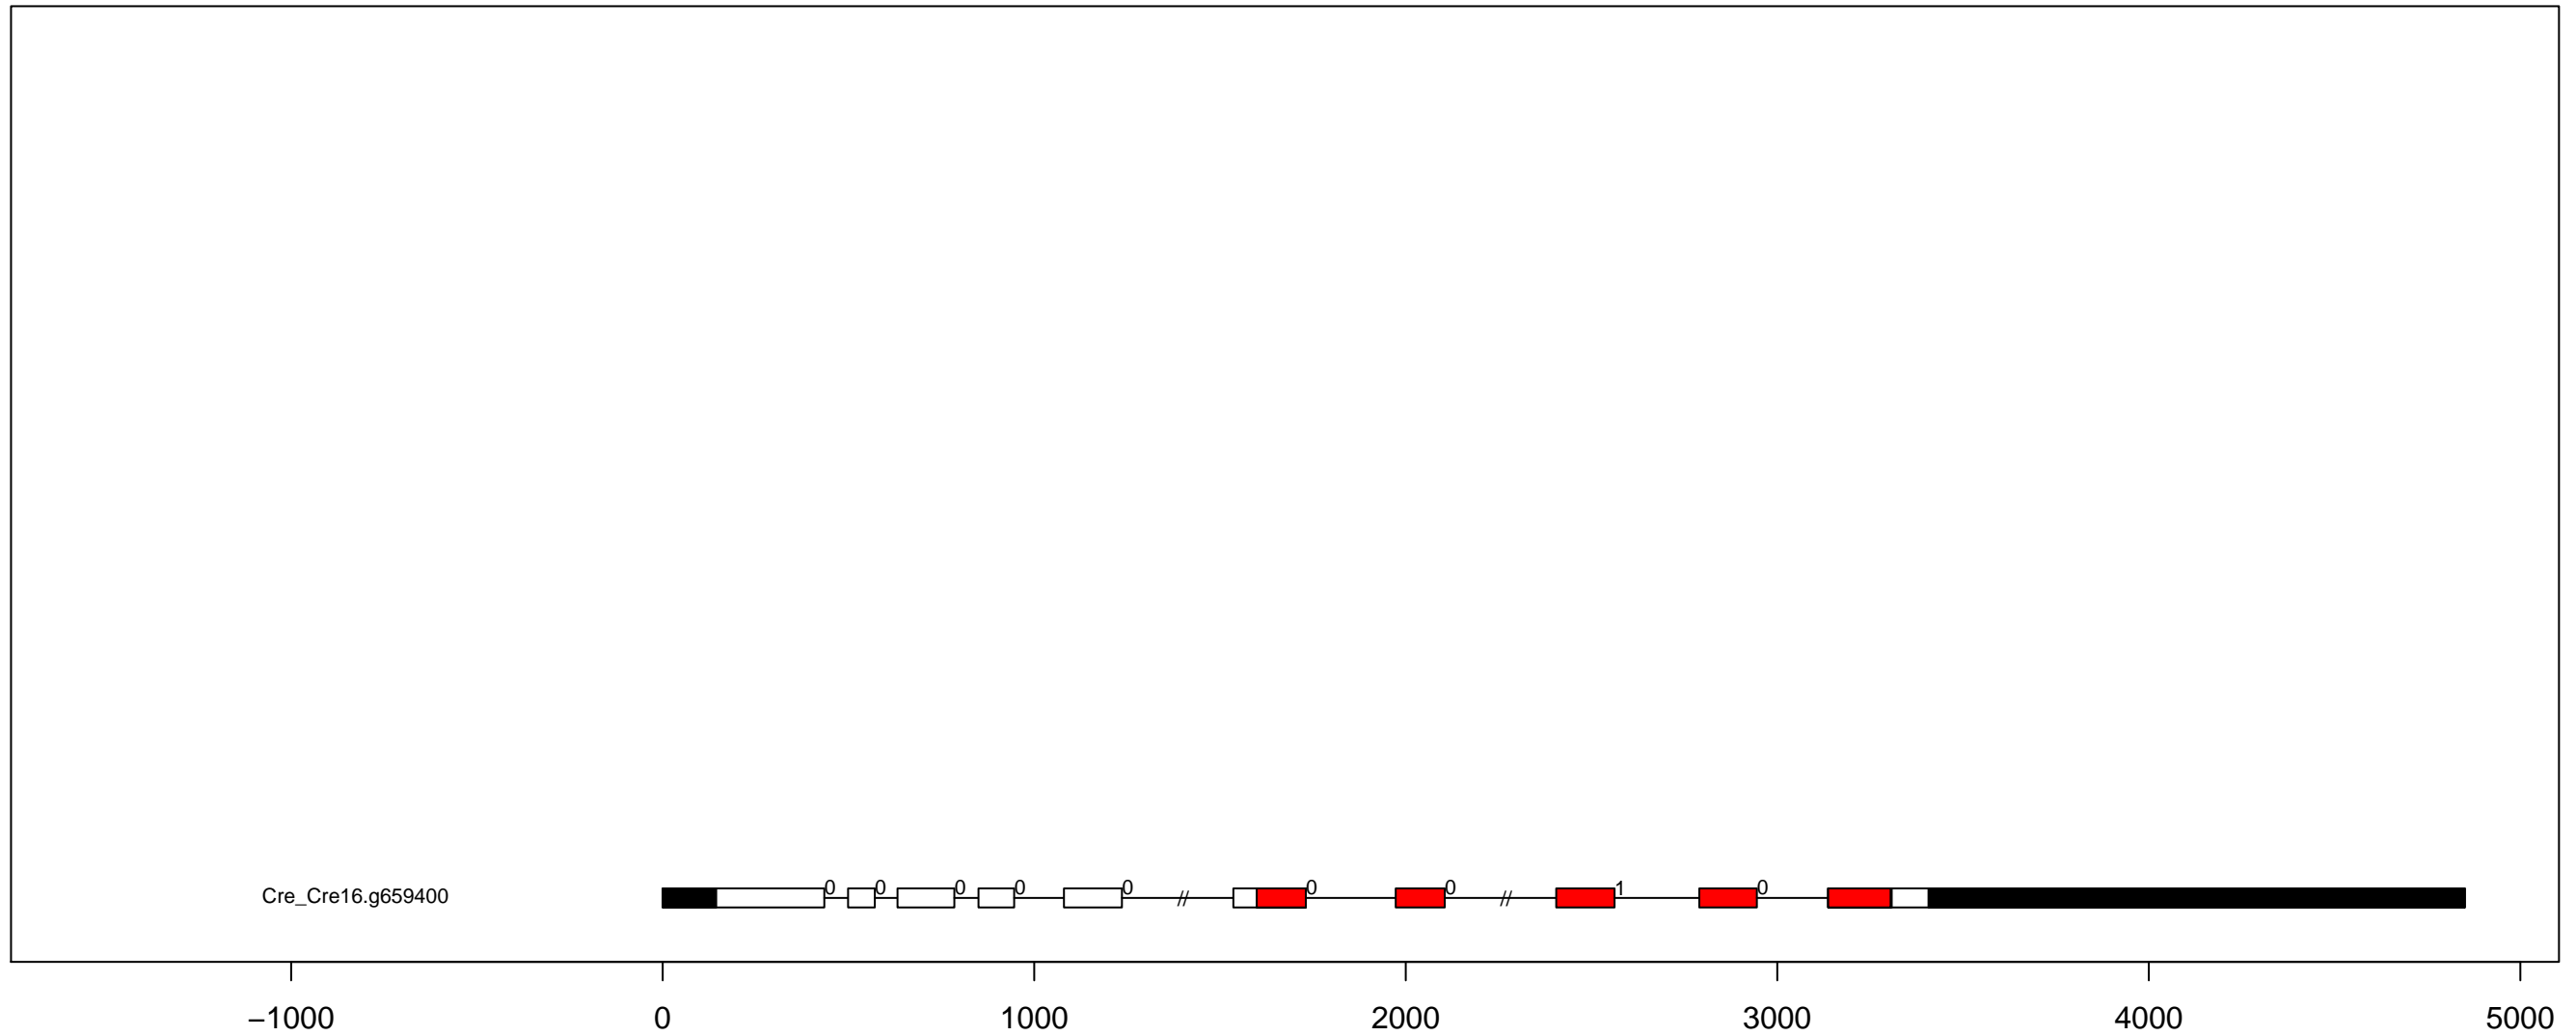

# C.re TKL-PI-5 exon-intron and kinase domain diagram (all)

Cre\_Cre12.g507750

Cre\_Cre03.g168150

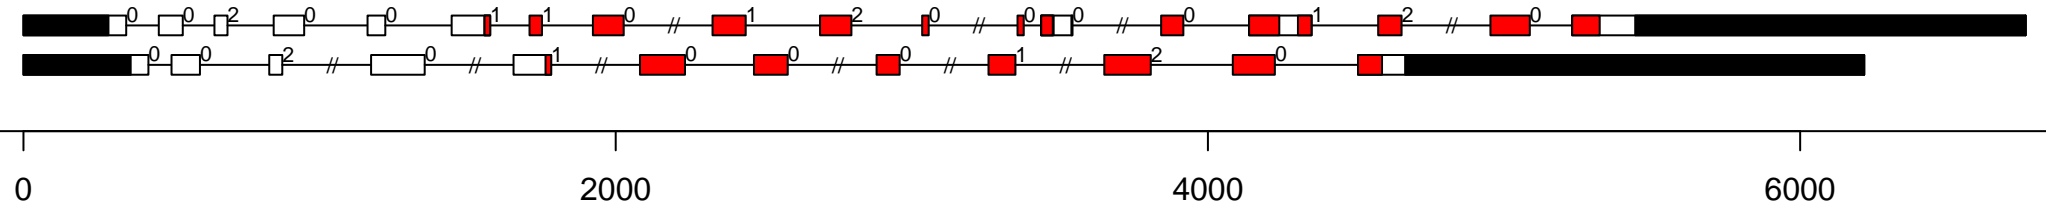

# C.re TKL-PI-6 exon-intron and kinase domain diagram (all)

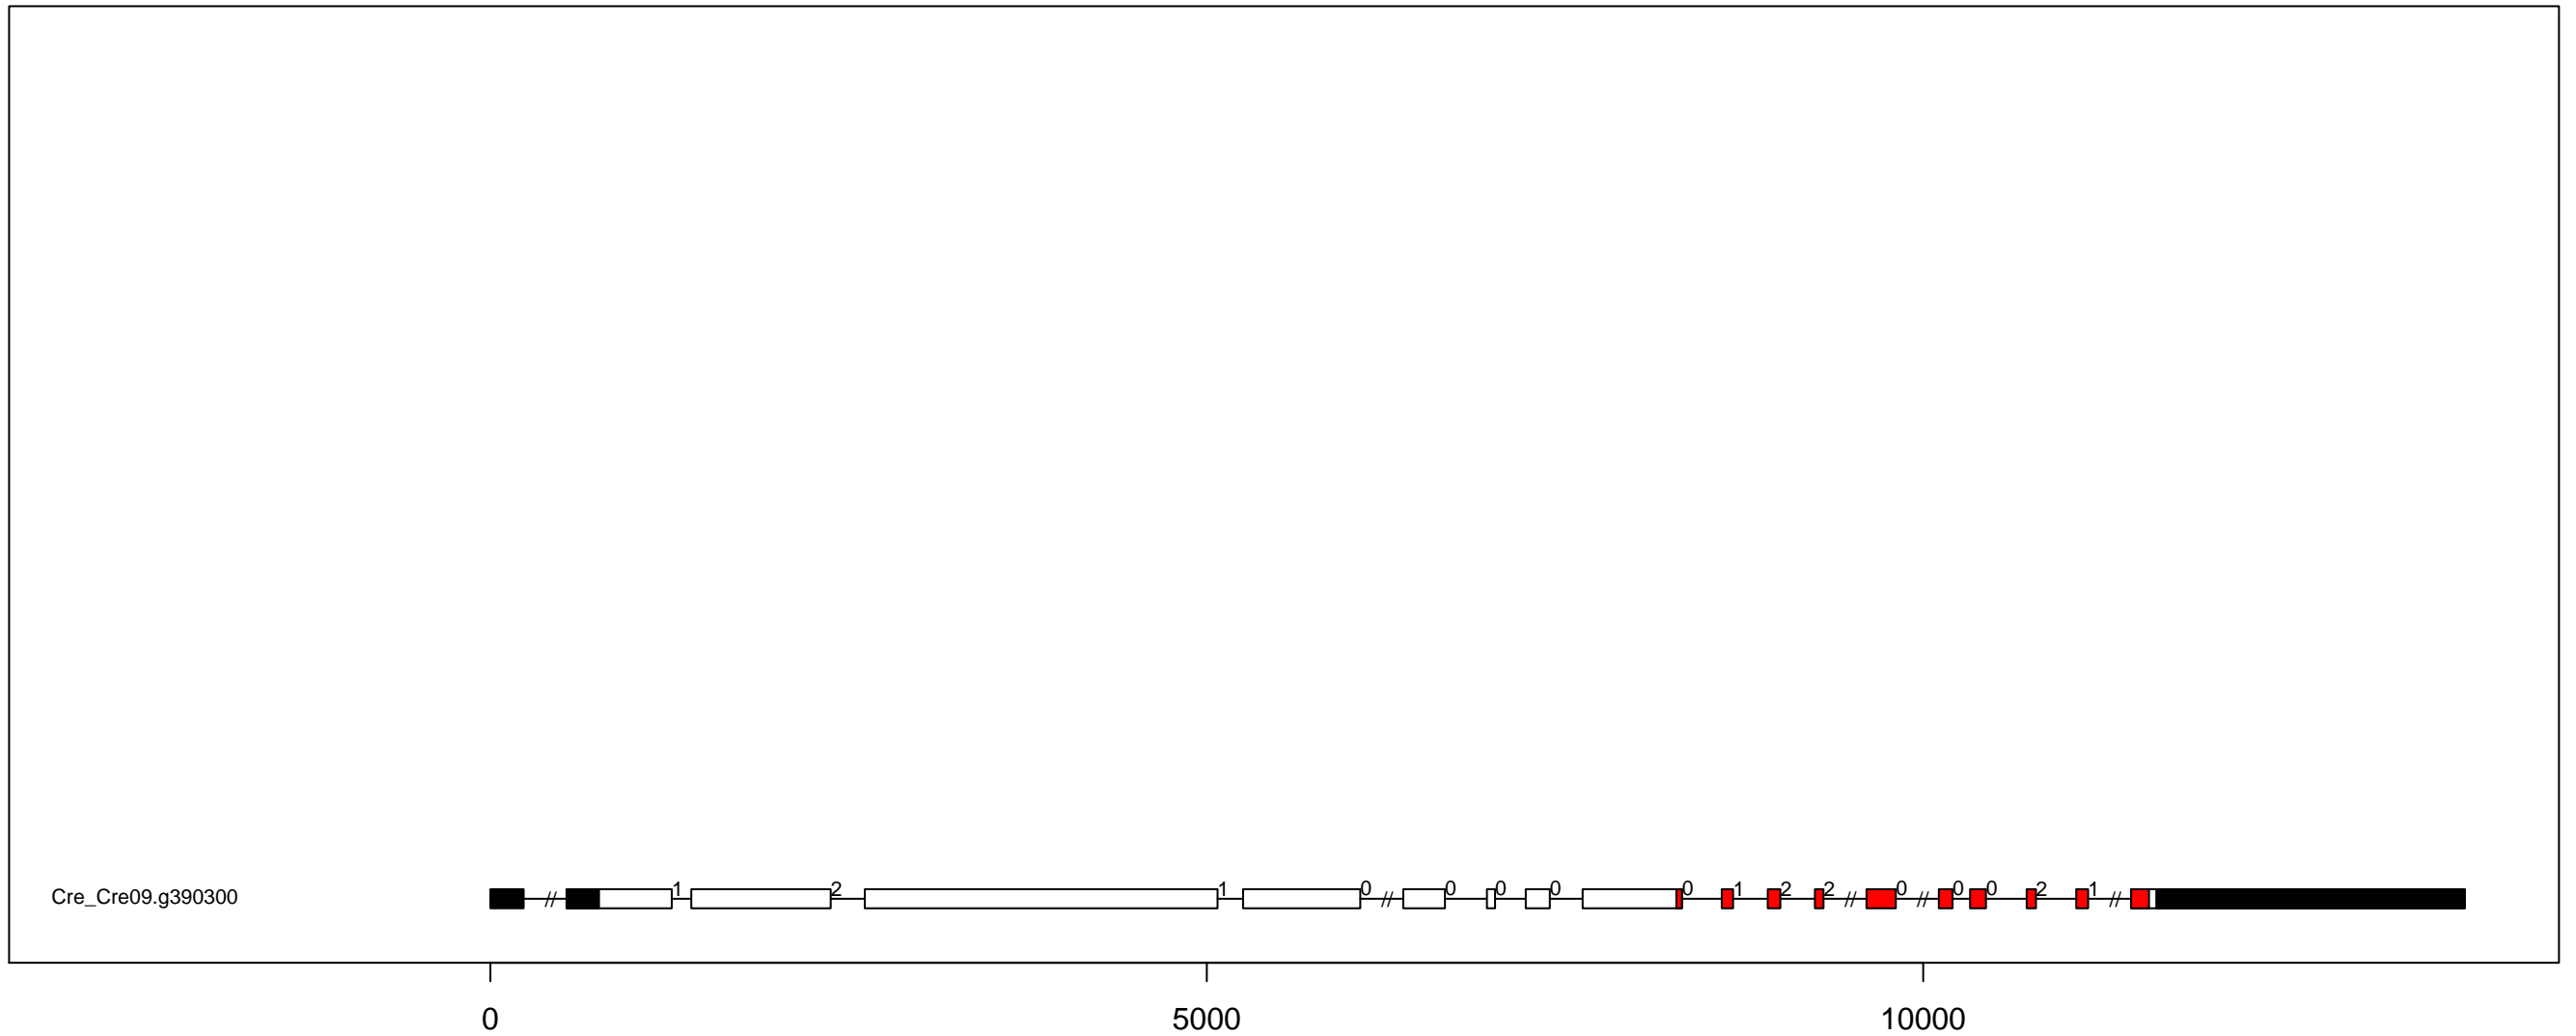

# C.re TKL-PI-8 exon-intron and kinase domain diagram (all)

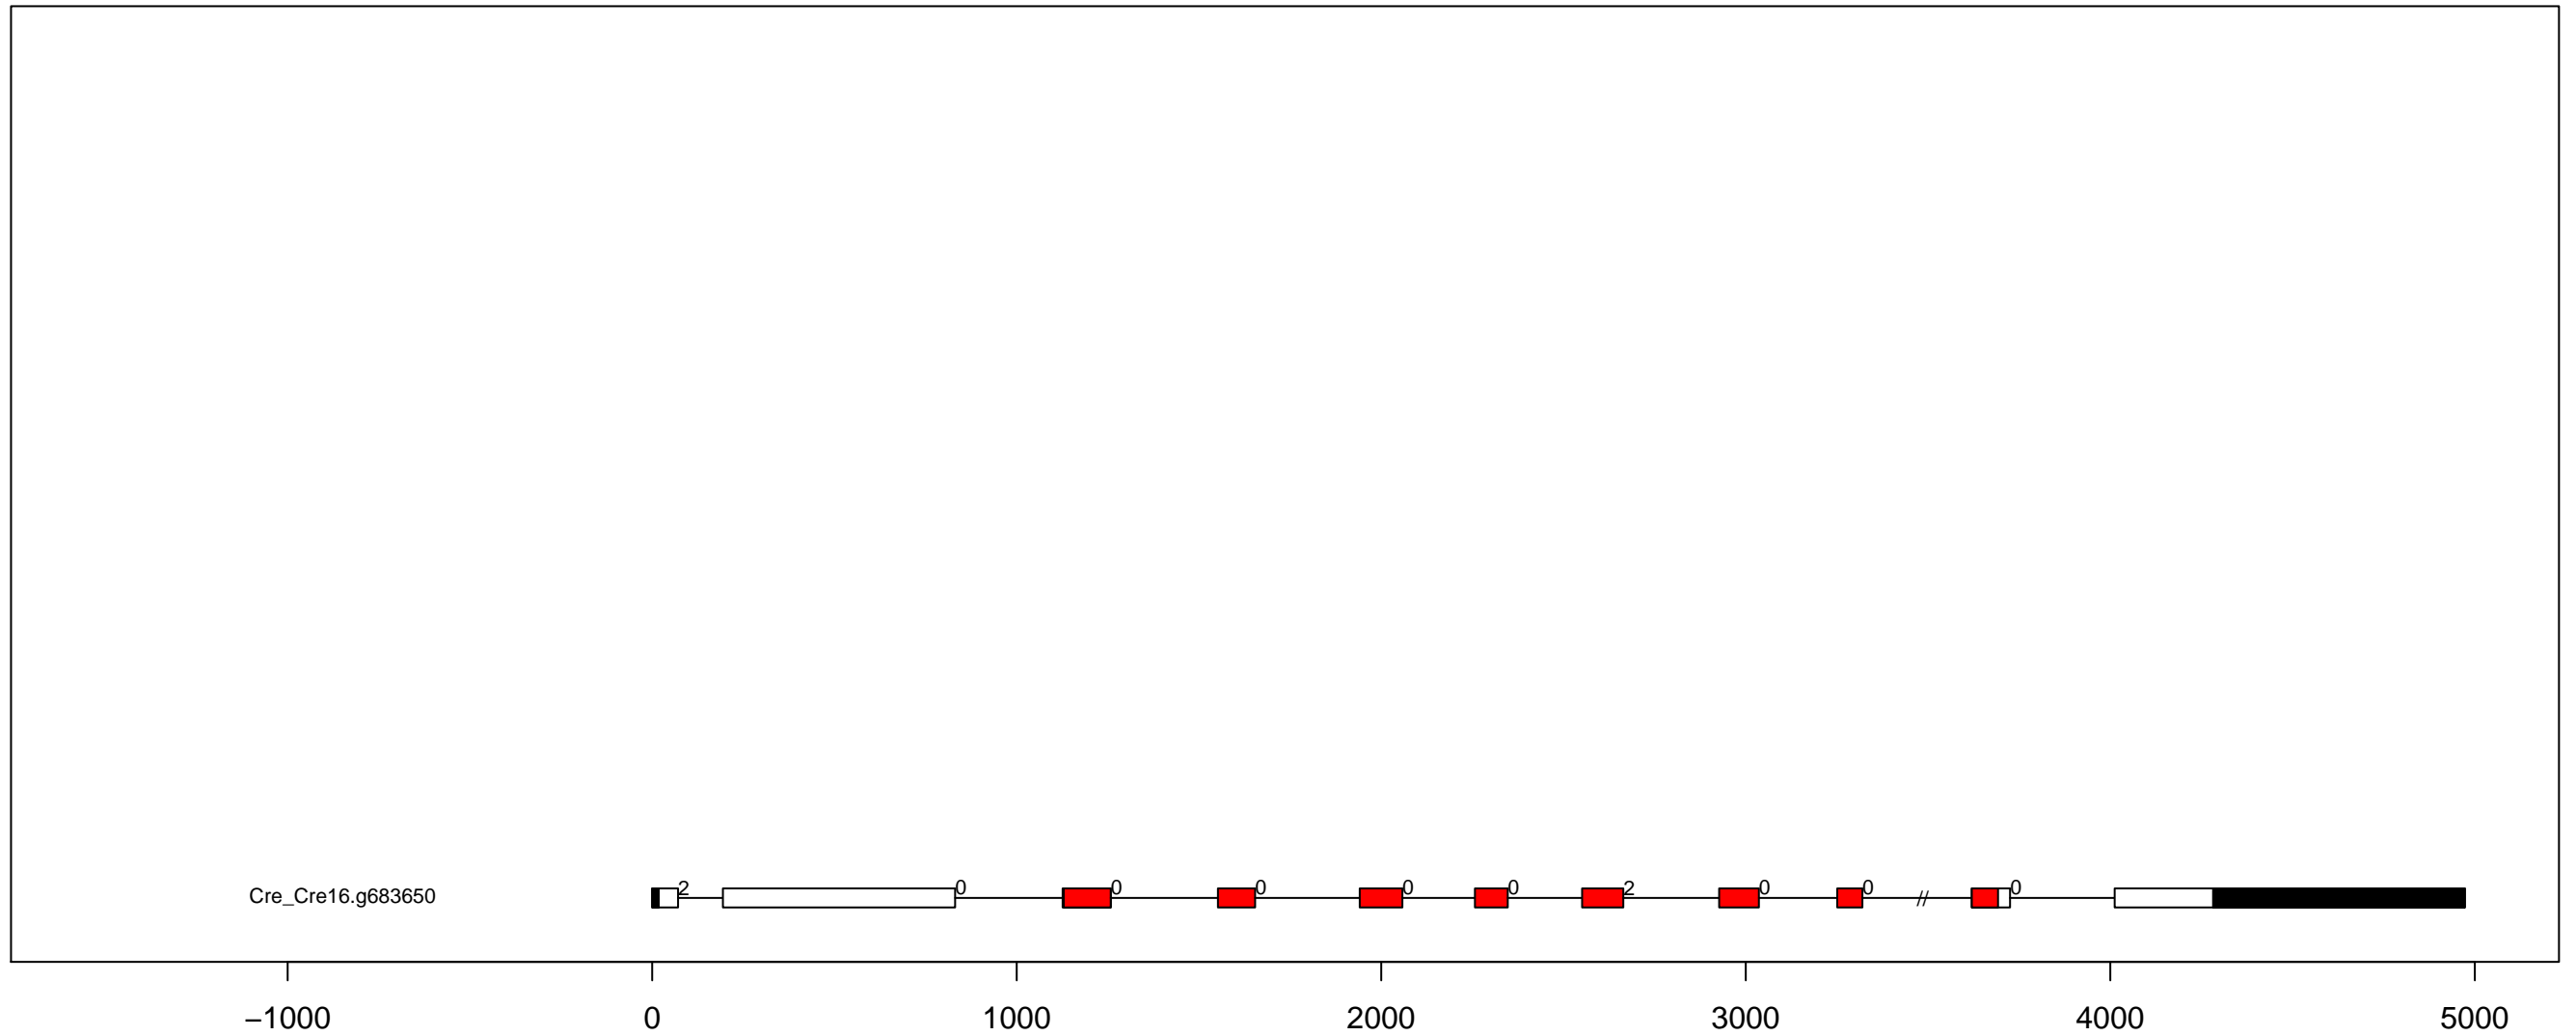



# C.re TLK exon-intron and kinase domain diagram (all)

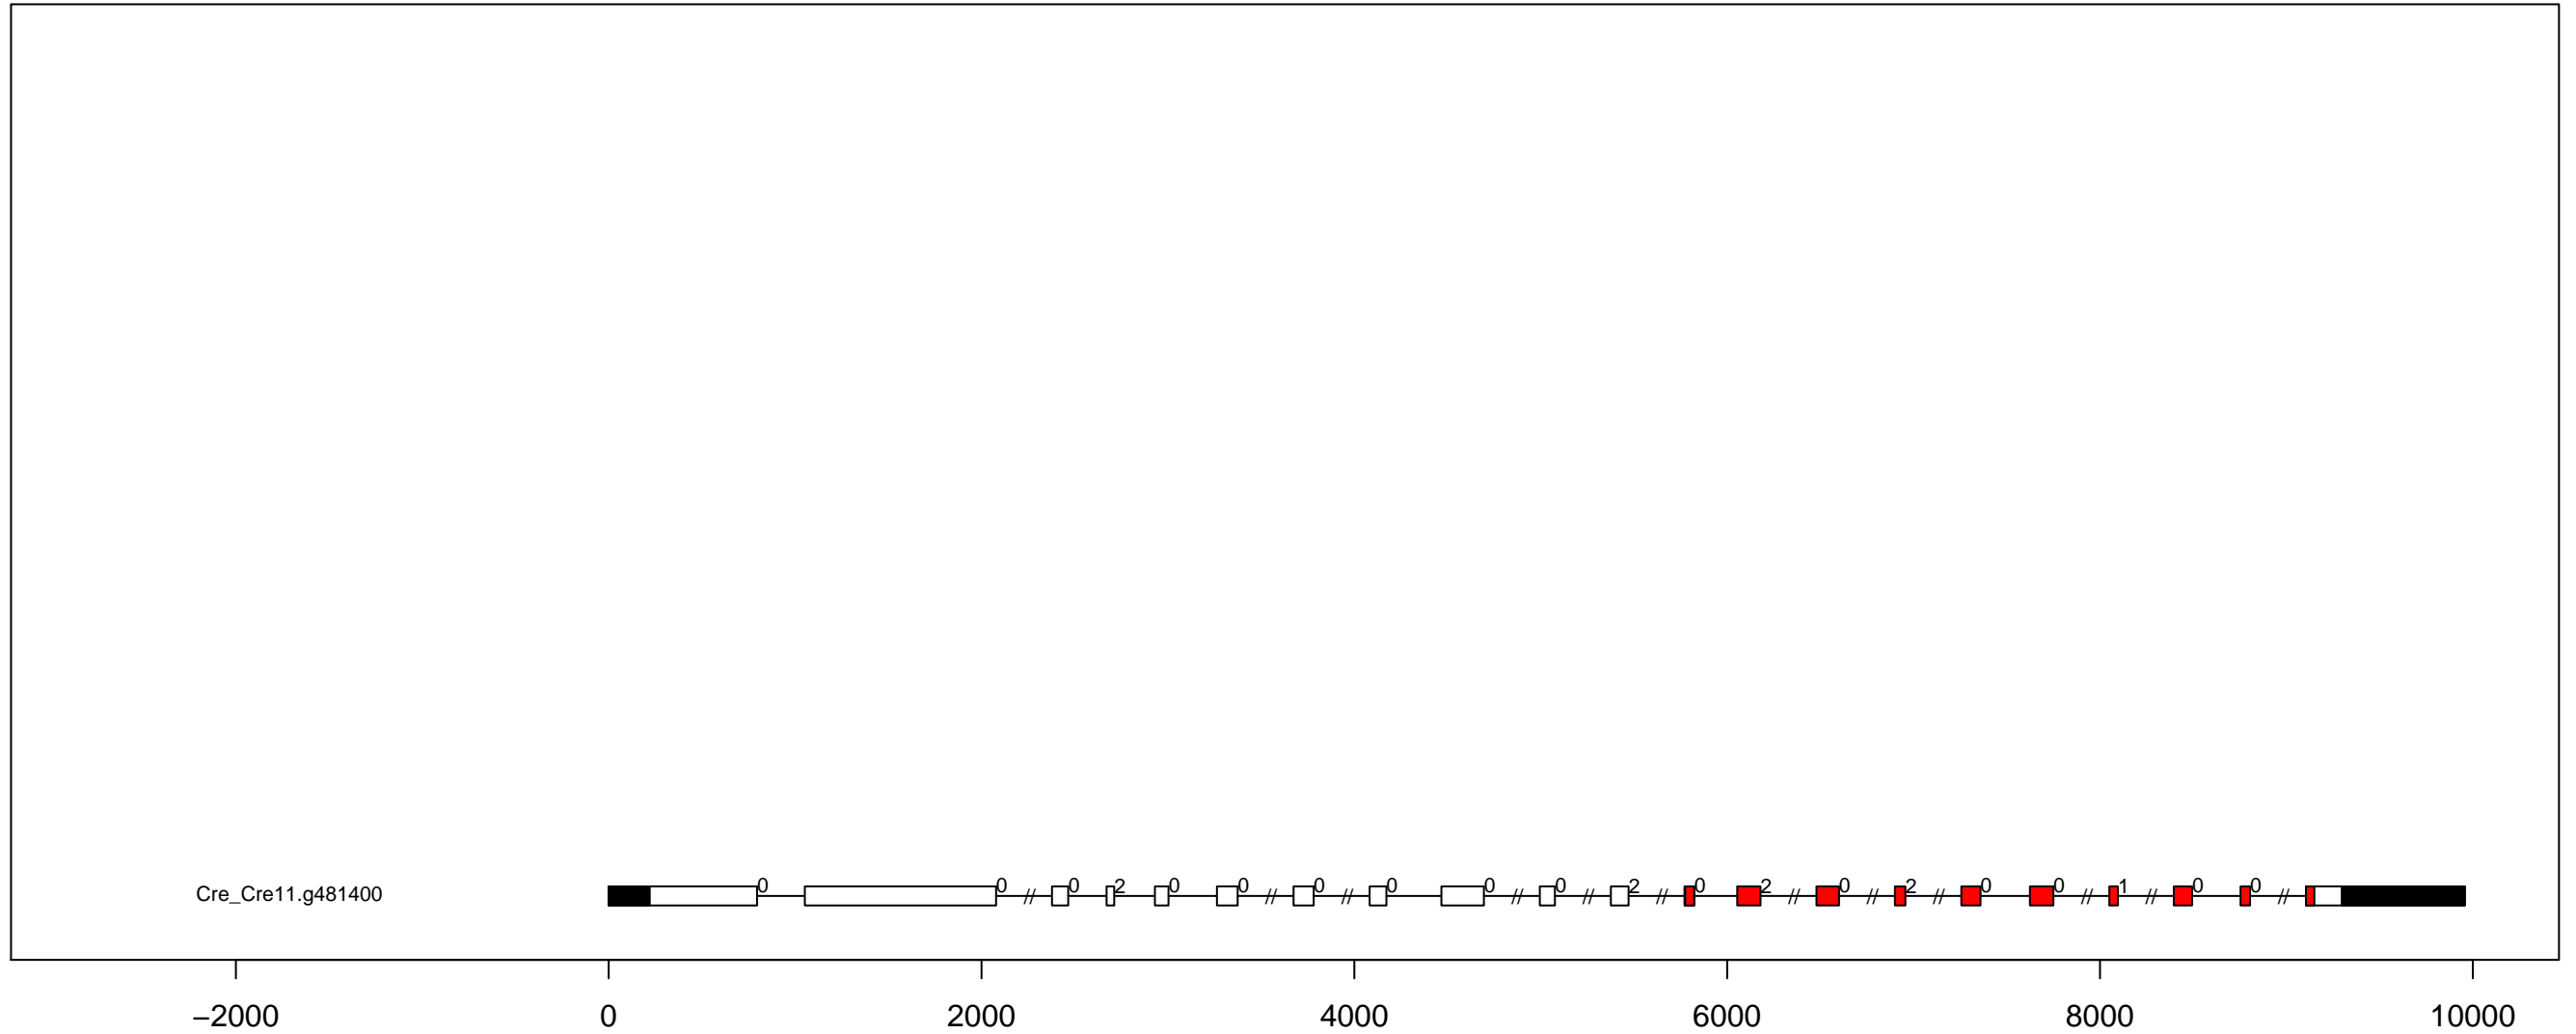

# C.re TTK exon-intron and kinase domain diagram (all)

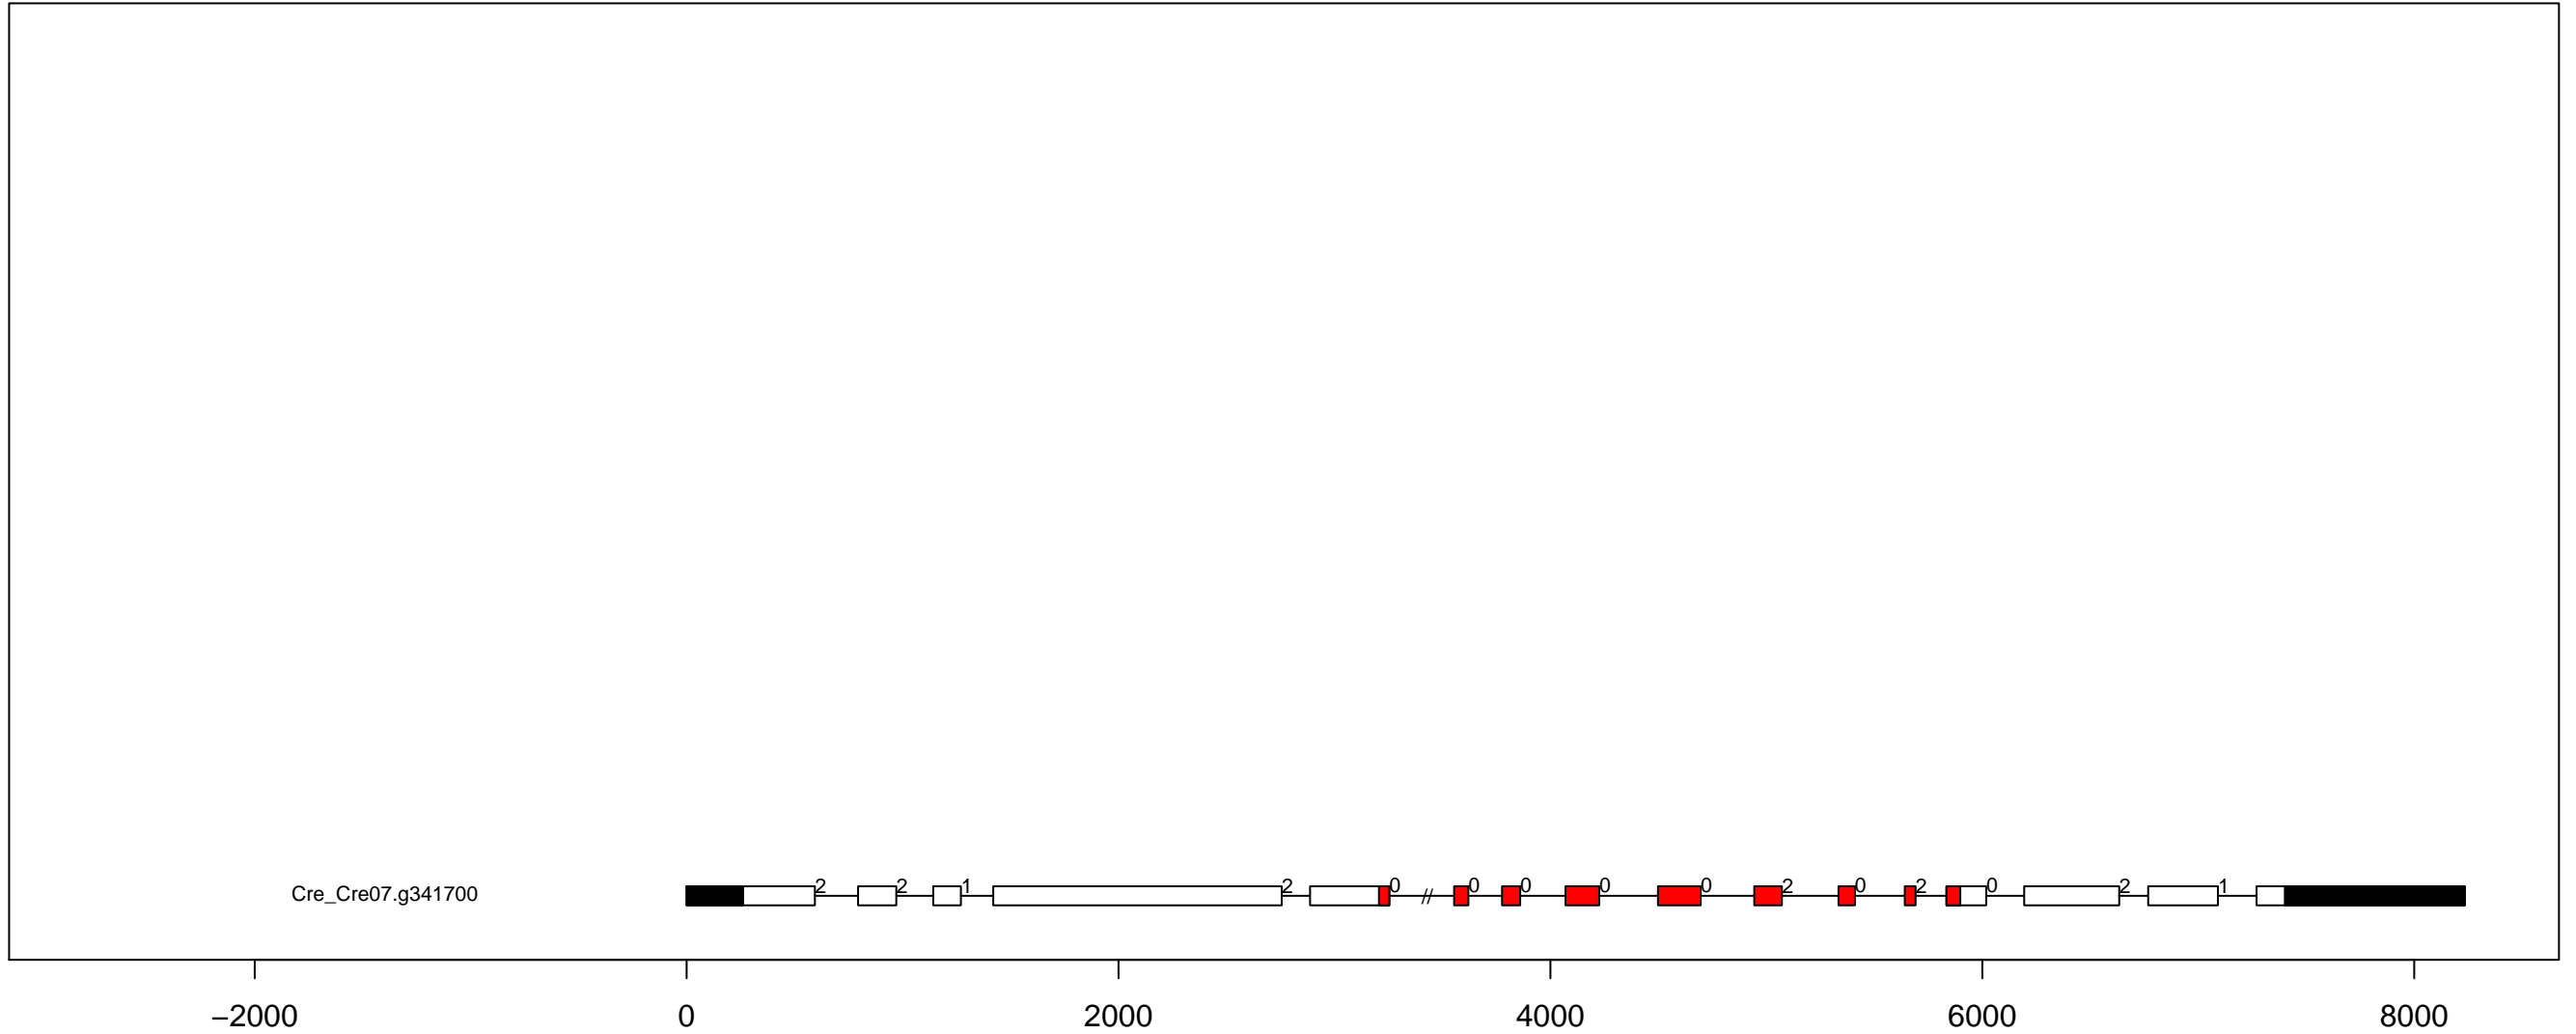

# C.re ULK\_Fused exon-intron and kinase domain diagram (all)

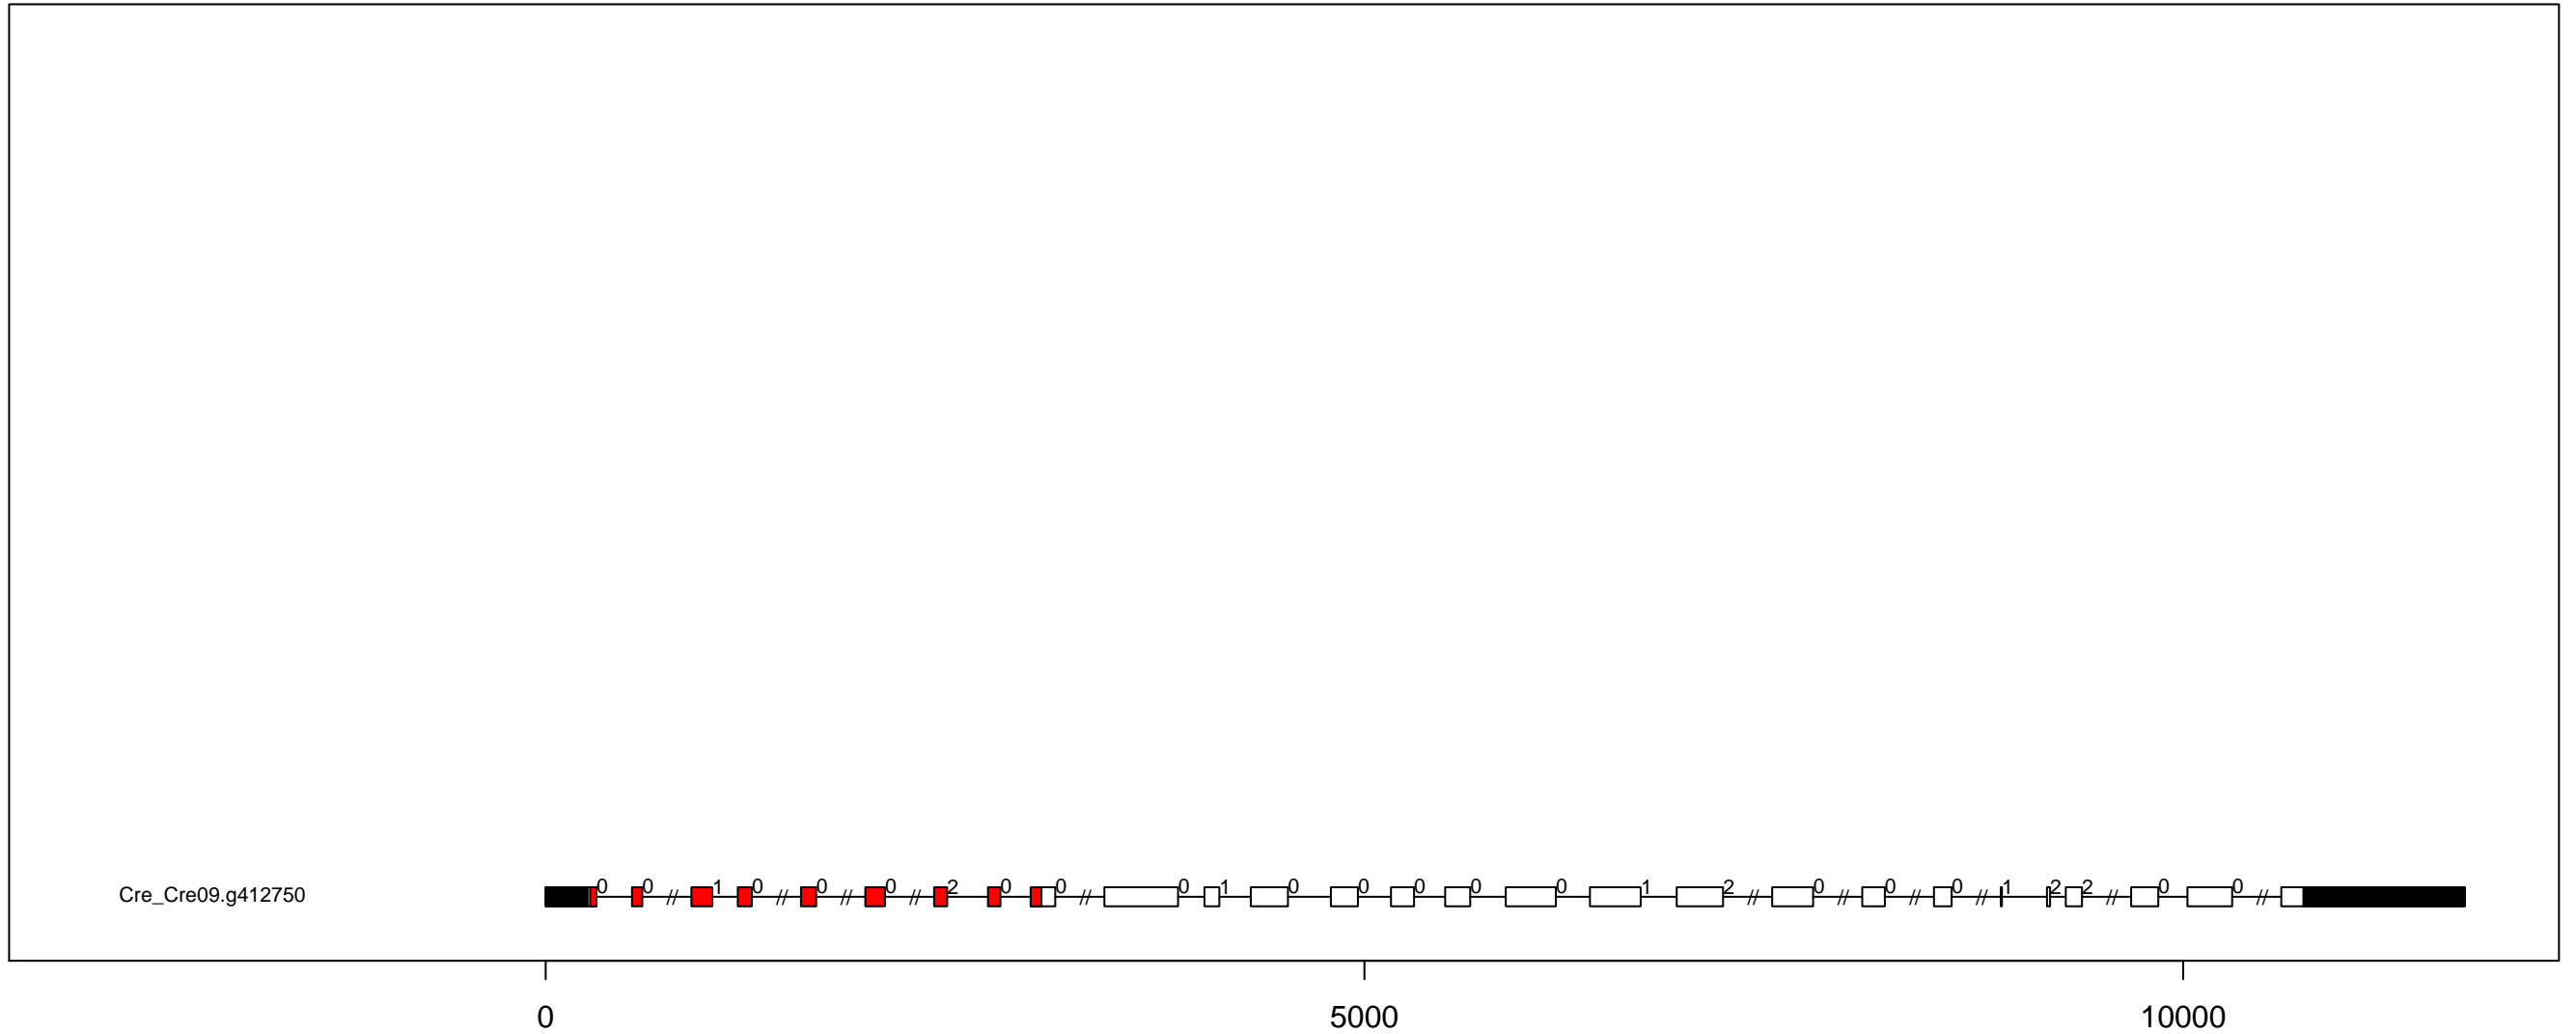

# C.re ULK\_ULK4 exon-intron and kinase domain diagram (all)

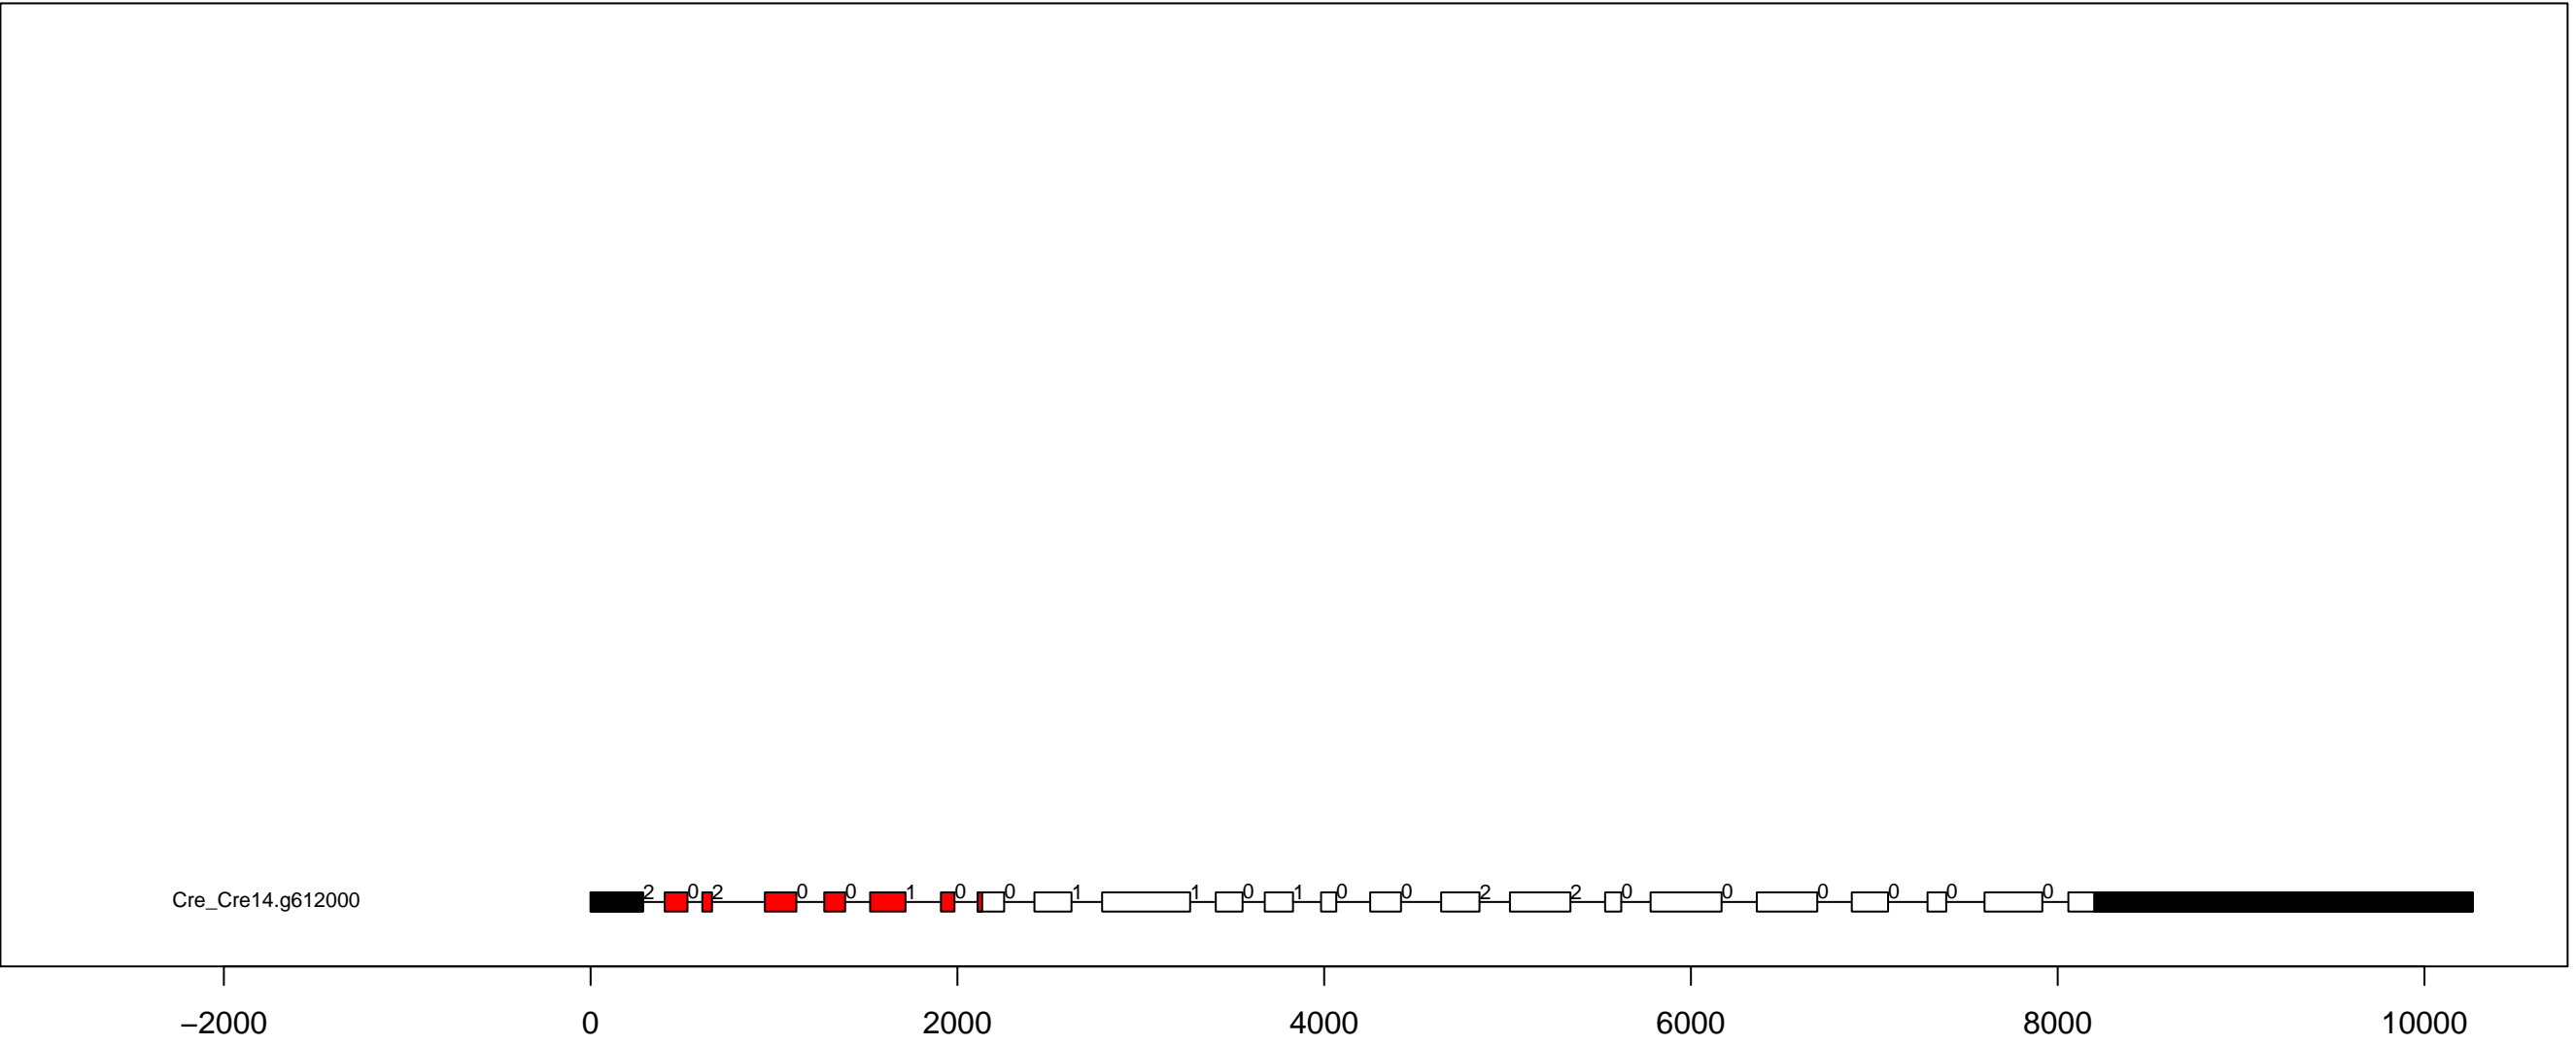

C.re WEE exon-intron and kinase domain diagram (all)

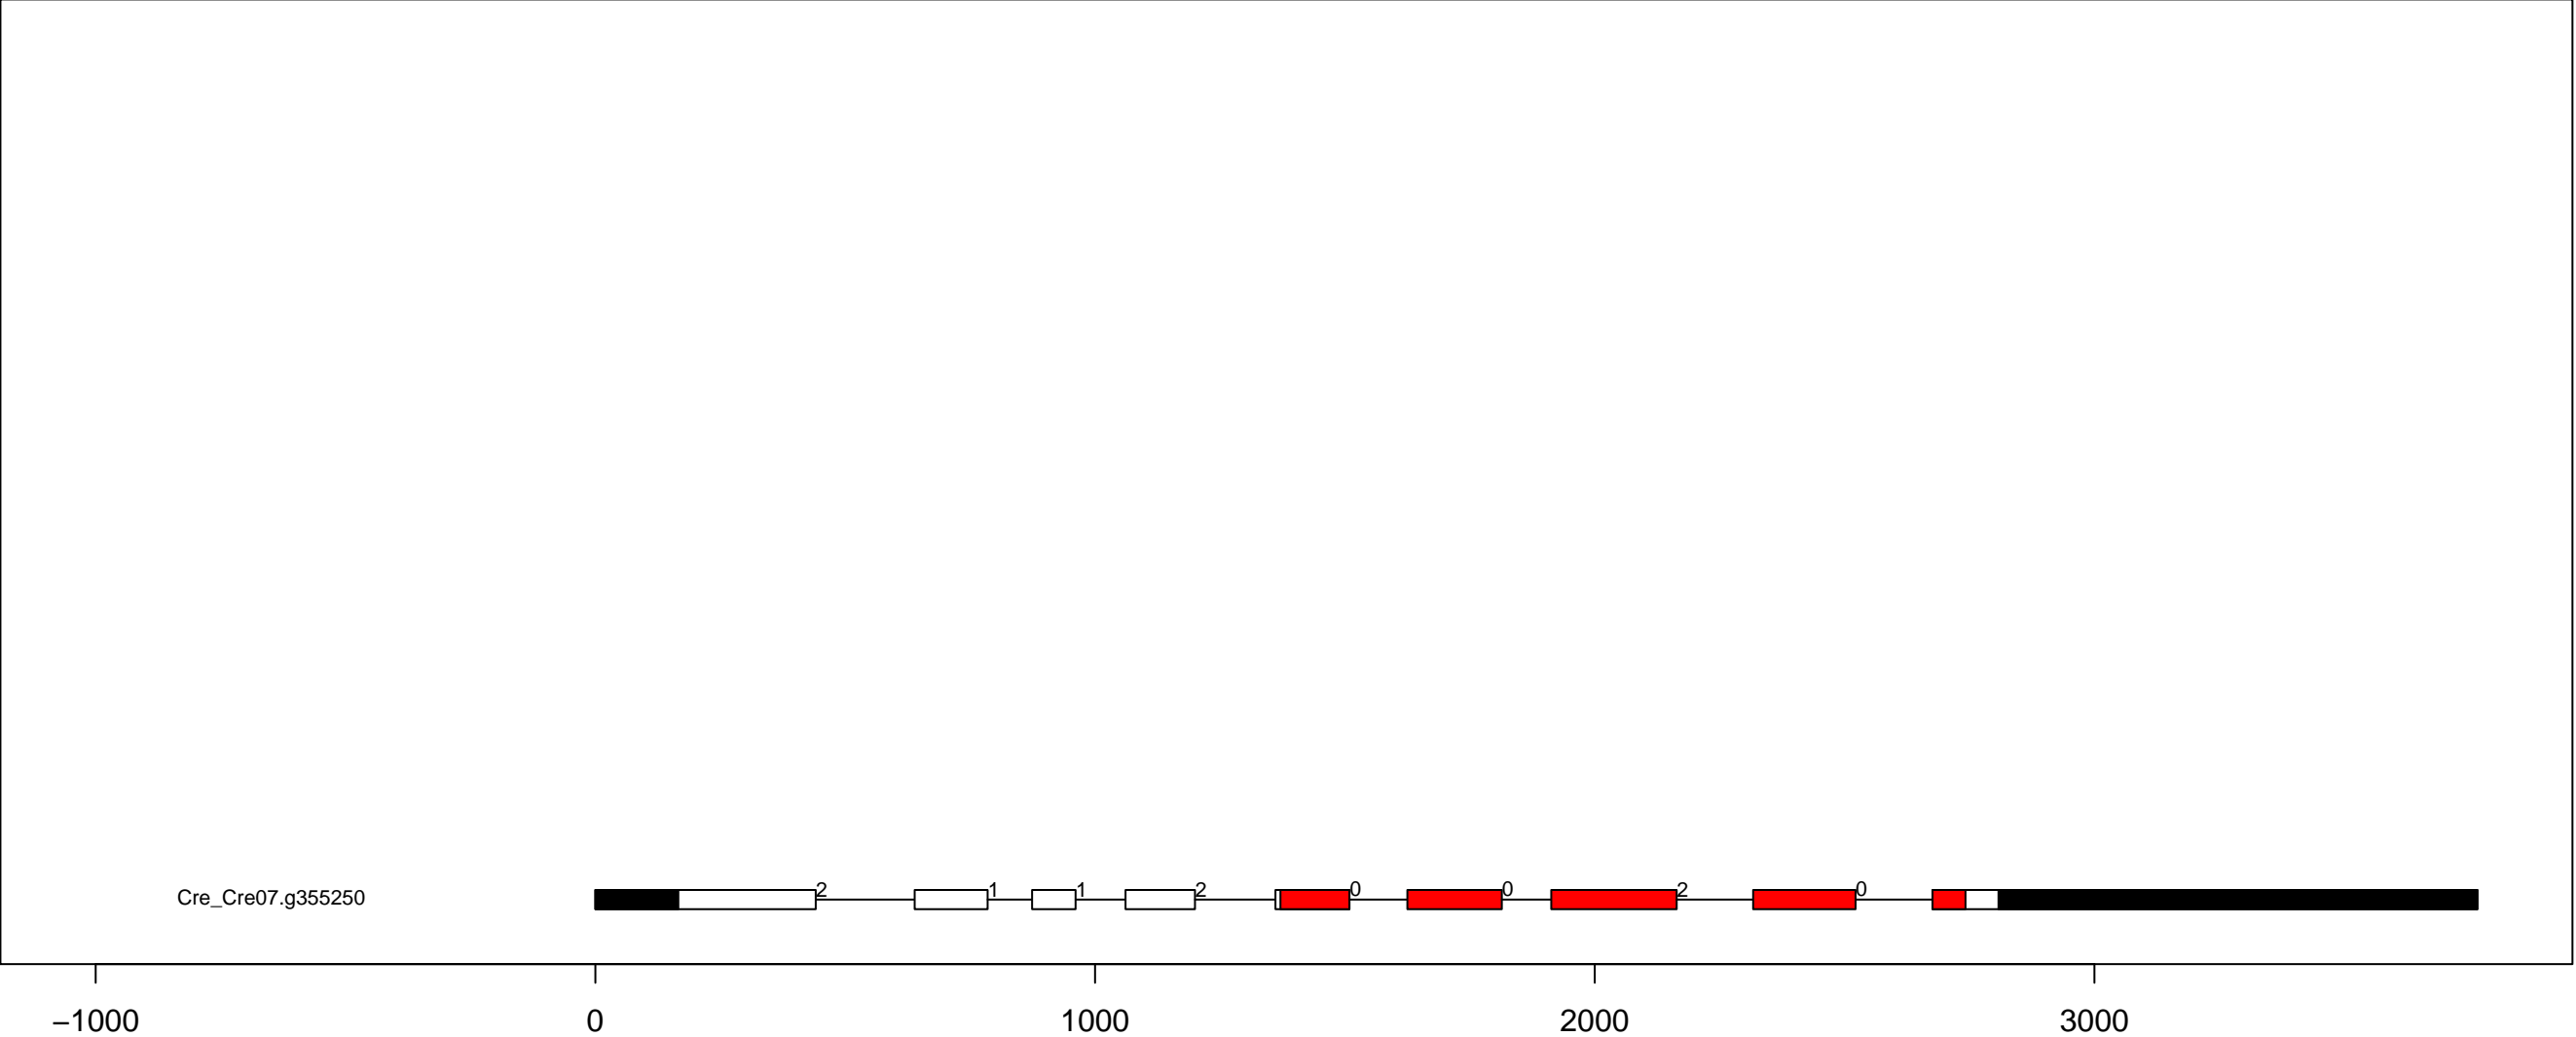

# C.re WNK\_NRBP exon-intron and kinase domain diagram (all)

Cre\_Cre06.g302800  
Cre\_Cre01.g040200  
Cre\_Cre01.g040150

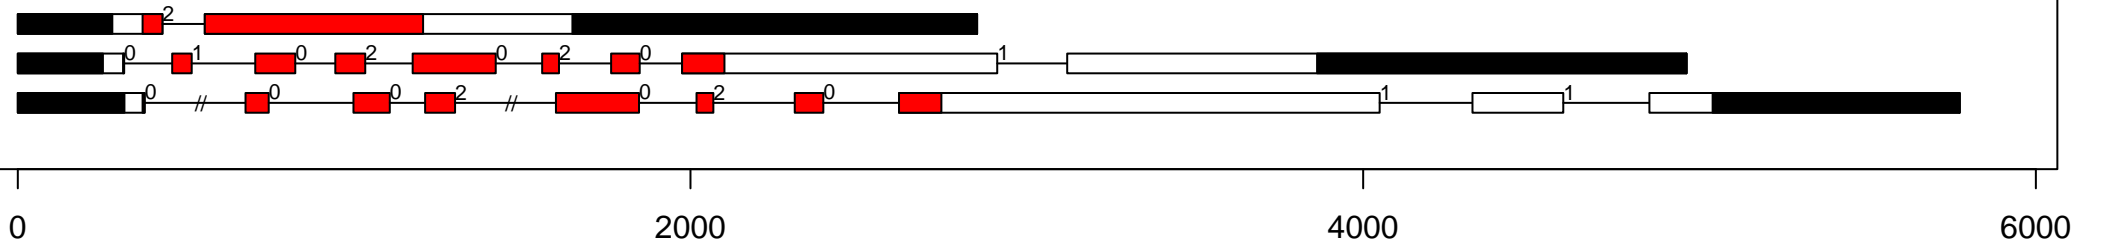

Supplement: pone.0197392.s003.pdf [file pone.0197392.s003.pdf]
