# Supplementary material for: Genome-wide classification, evolutionary analysis and gene expression patterns of the kinome in Gossypium
Source: PubMed Central journal article supplement (PMC5955557; doi:10.1371/journal.pone.0197392), 2018-05-16

# A

**Gra01**

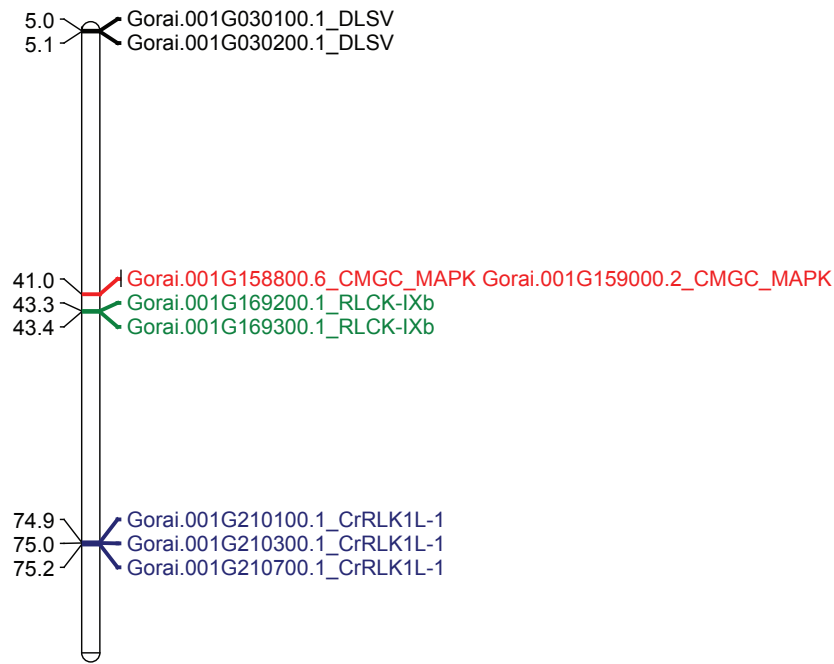

**Gra02**

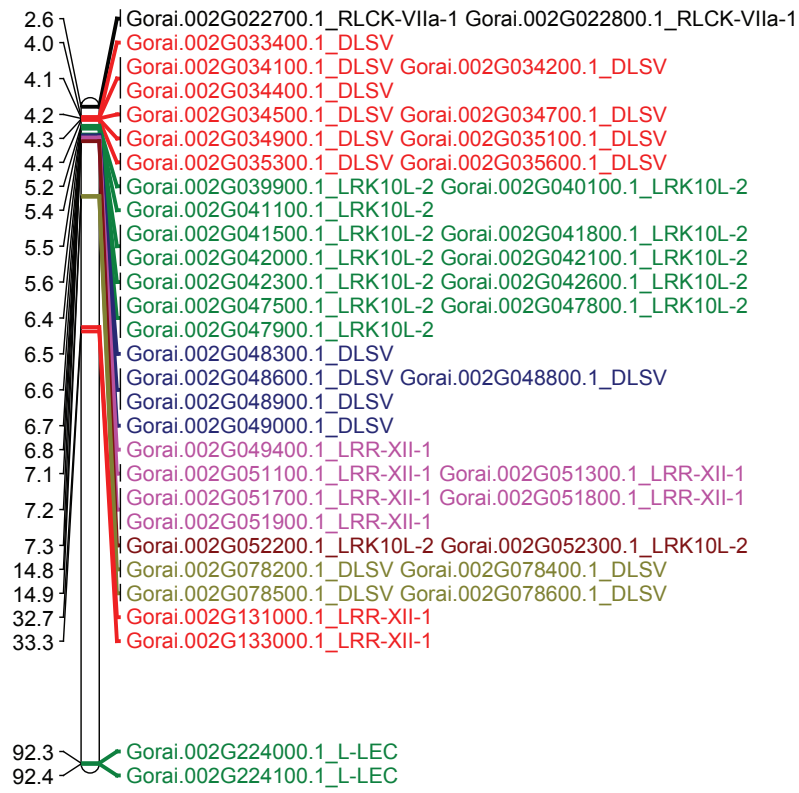

**Gra03**

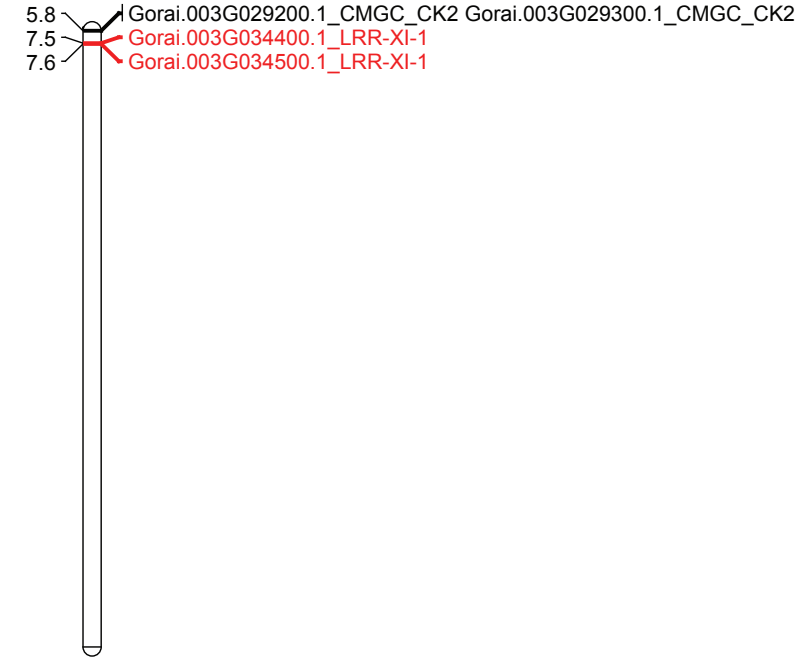

**Gra04**

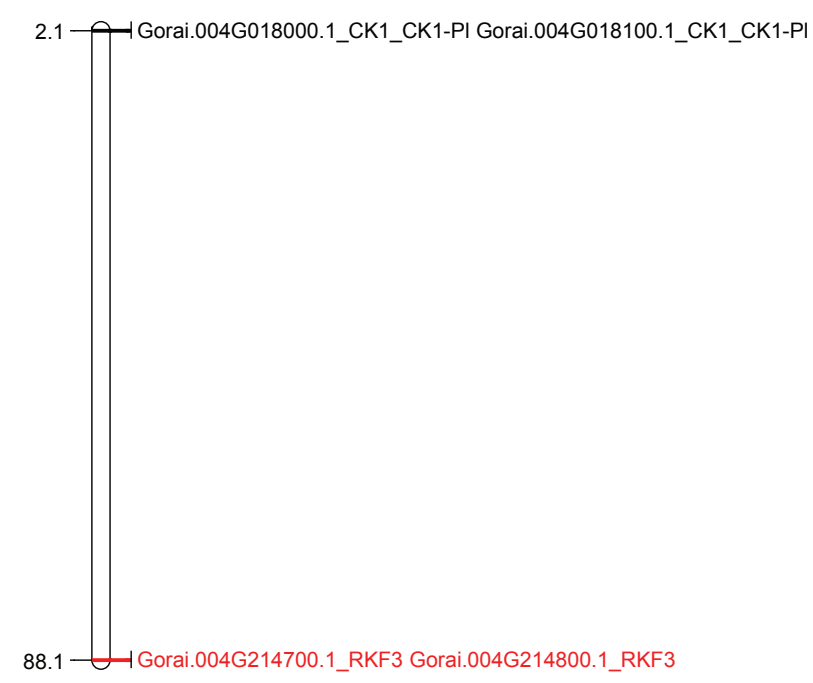

**Gra05**

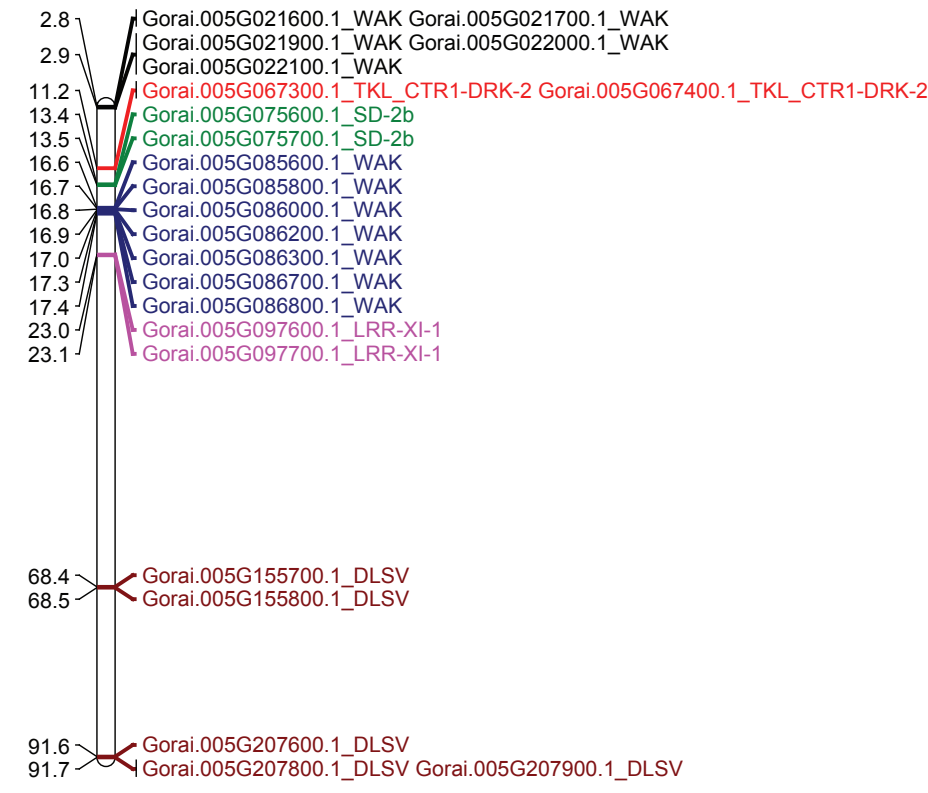

**Gra06**

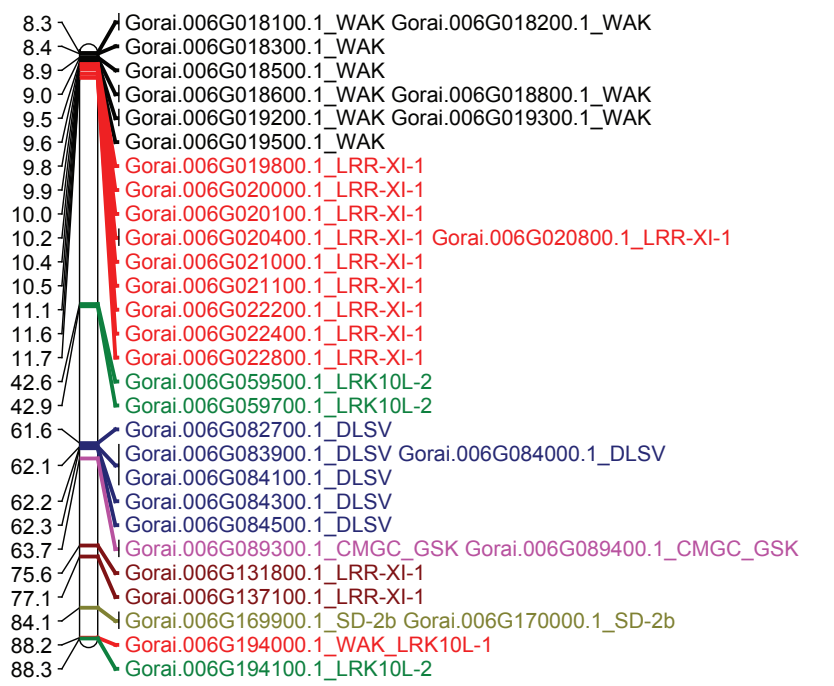

**Gra07**

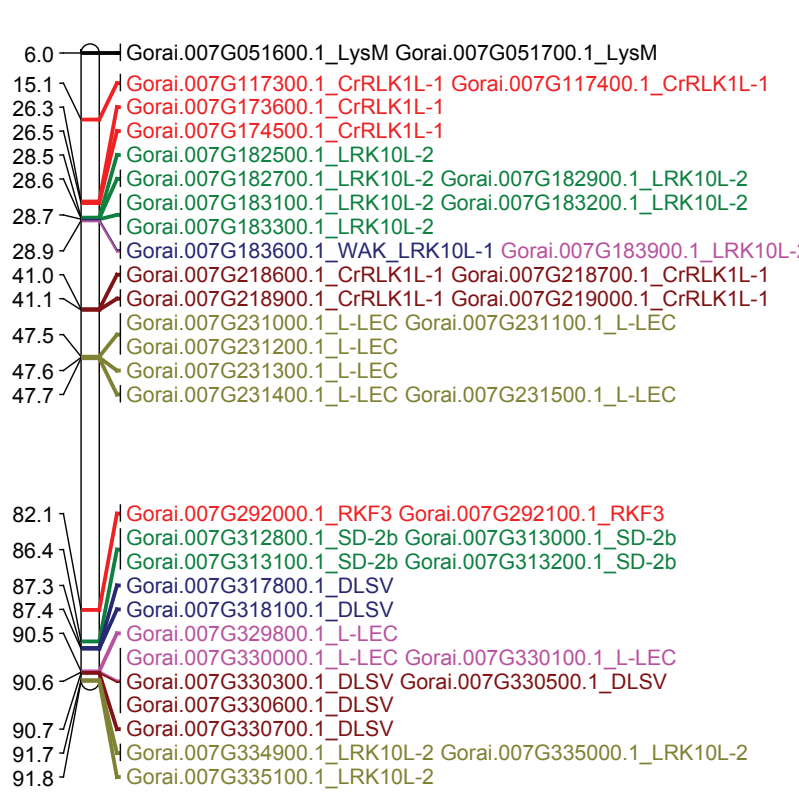

**Gra08**

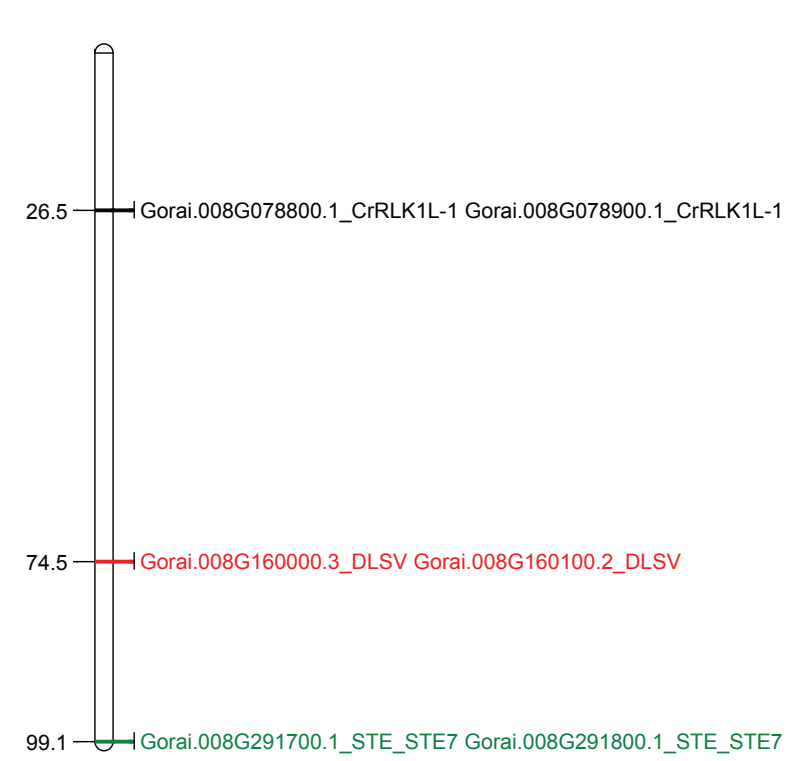

**Gra09**

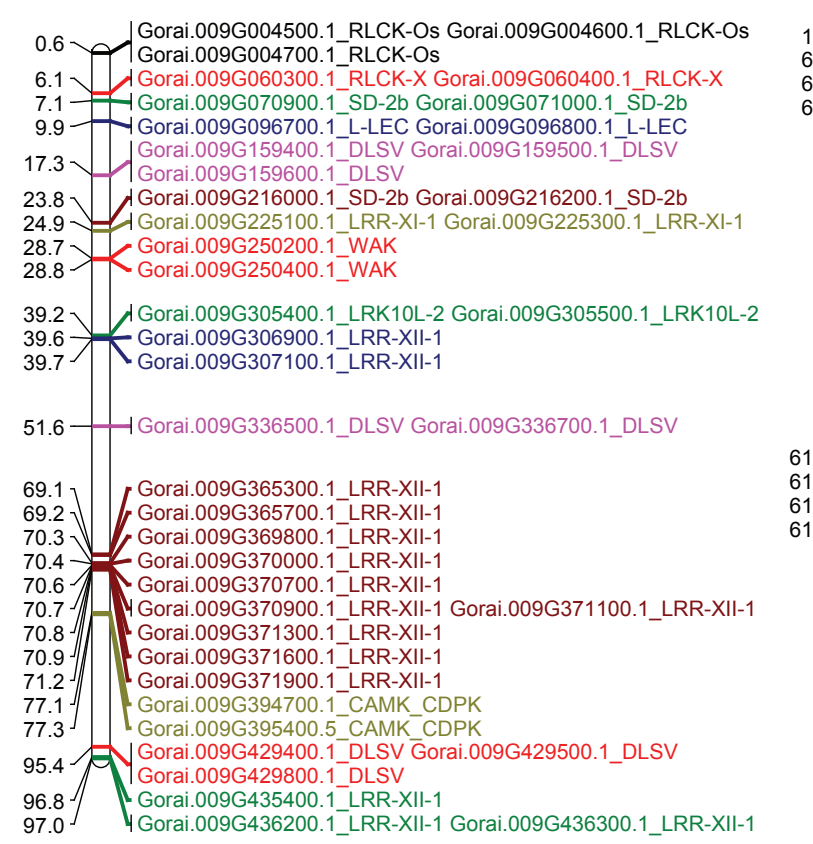

**Gra10**

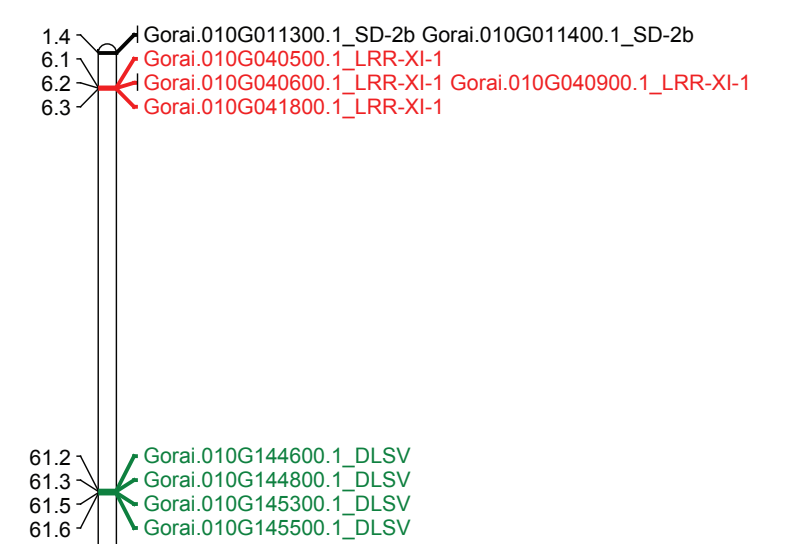

**Gra11**

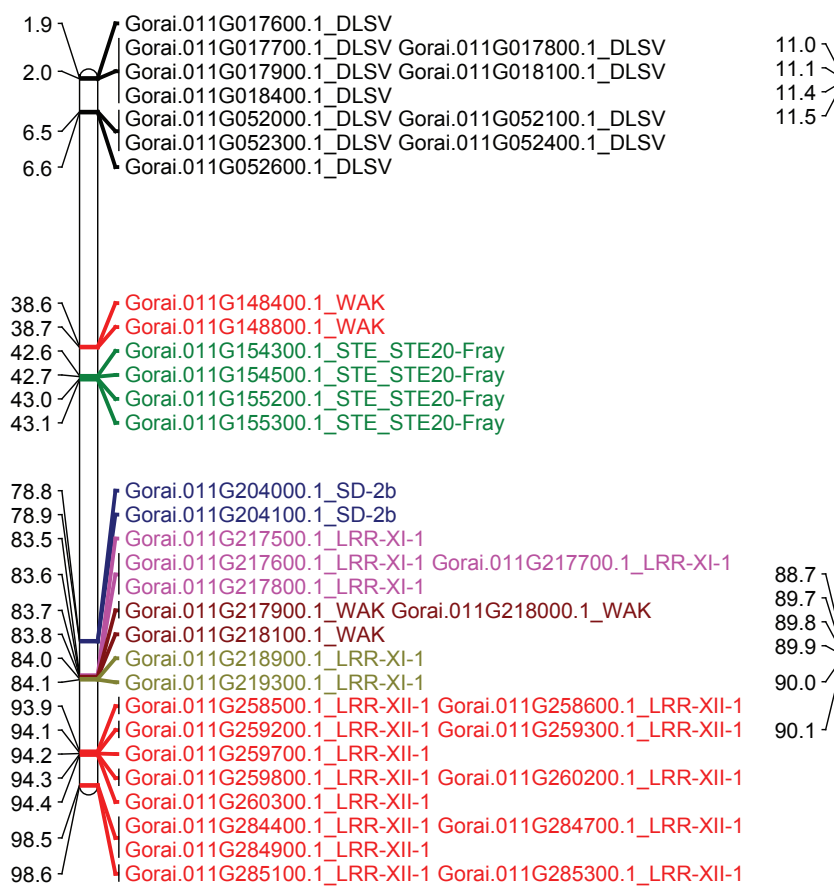

**Gra12**

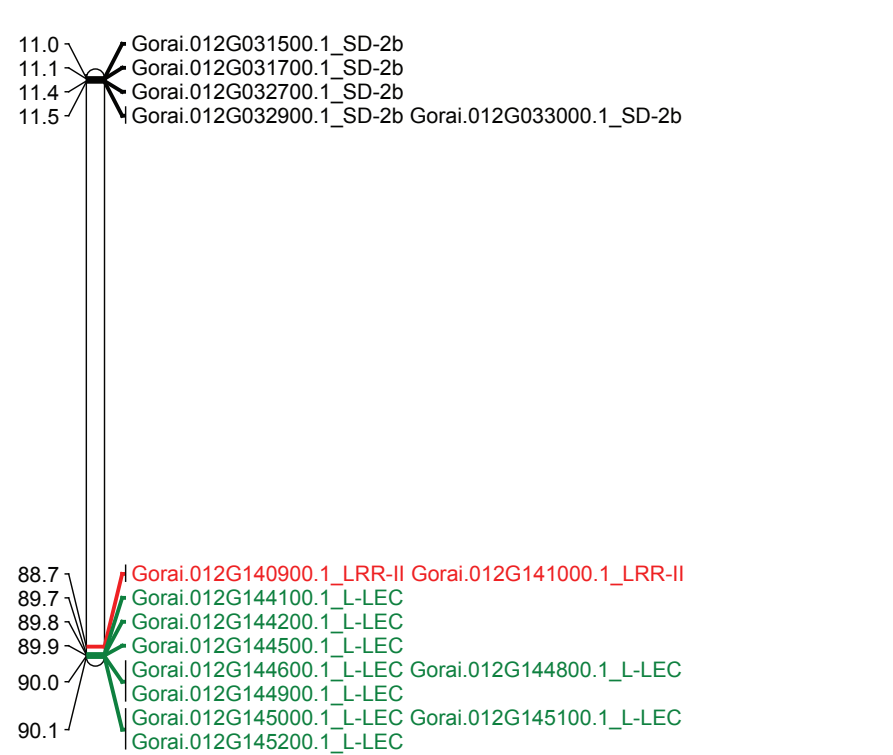

**Gra13**

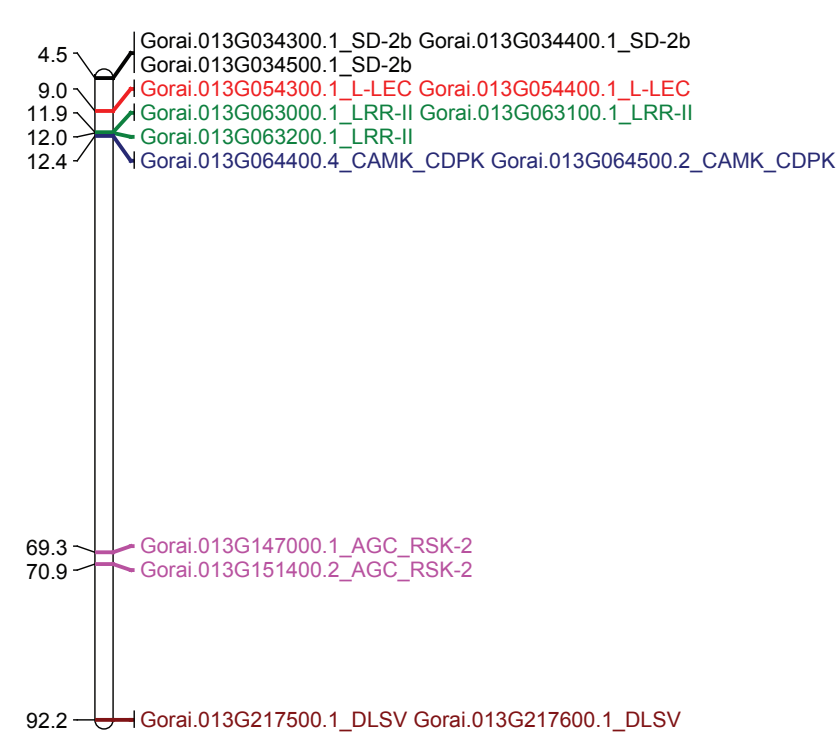

# B

Gar1

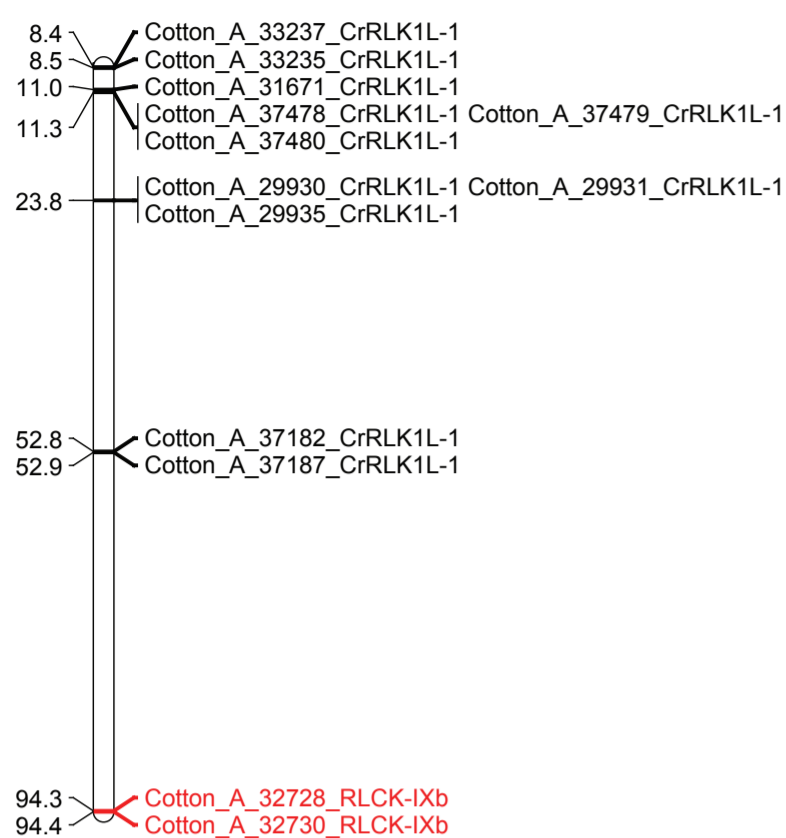

Gar2

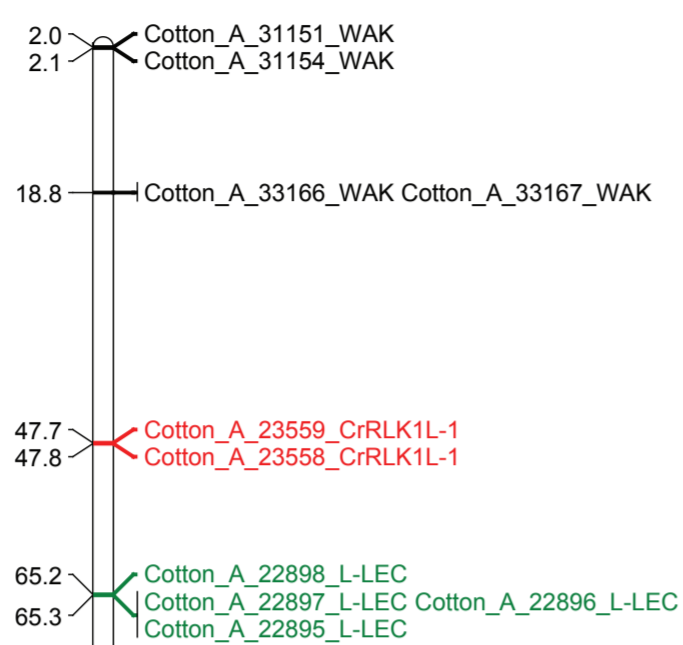

Gar3

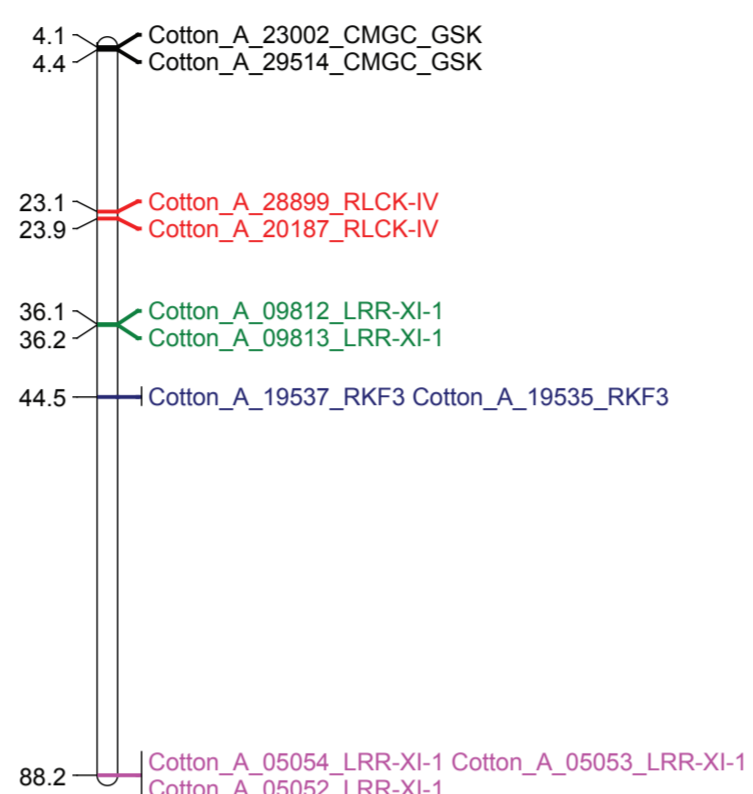

Gar4

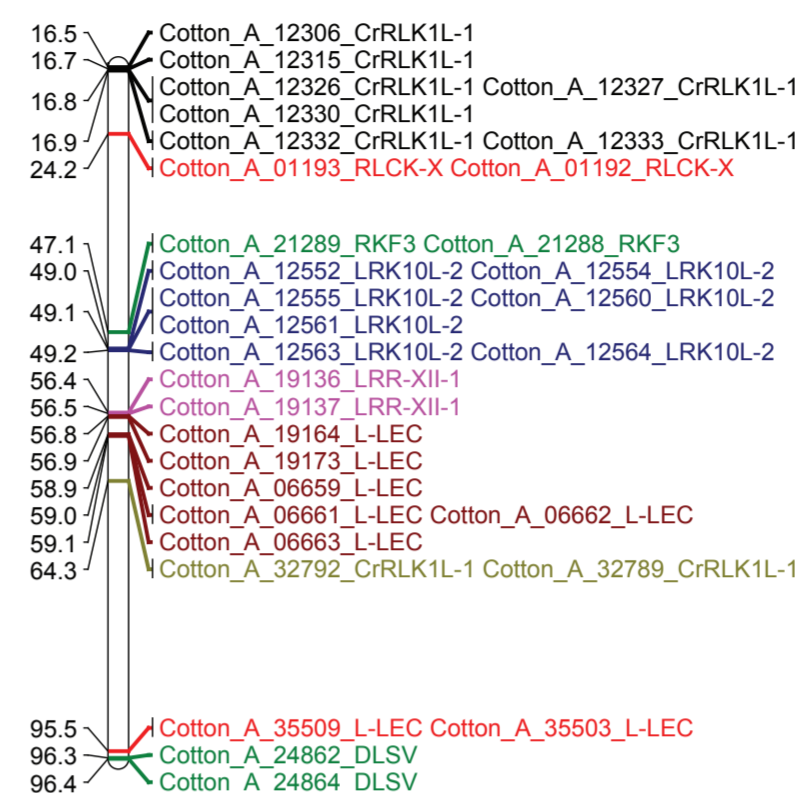

Gar5

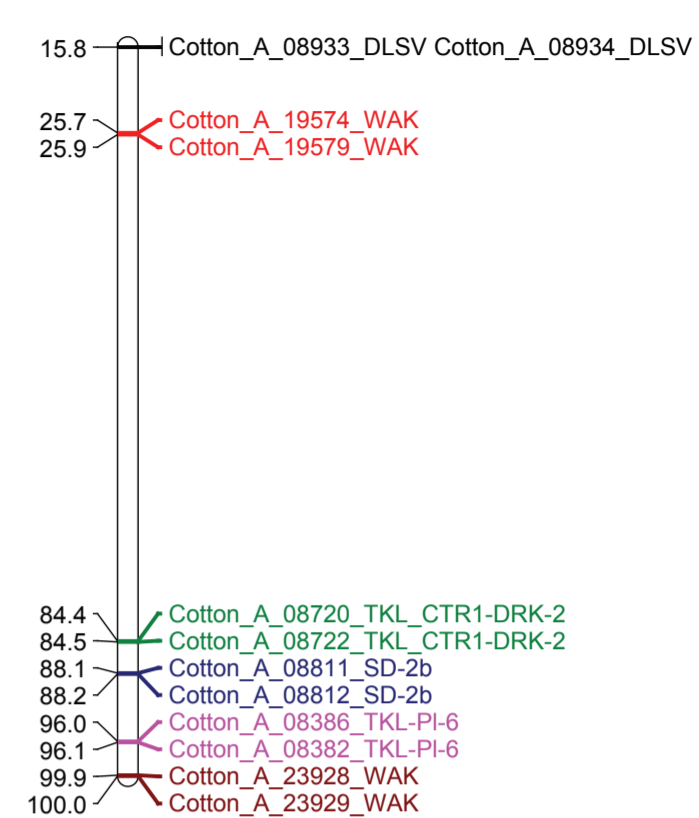

Gar6

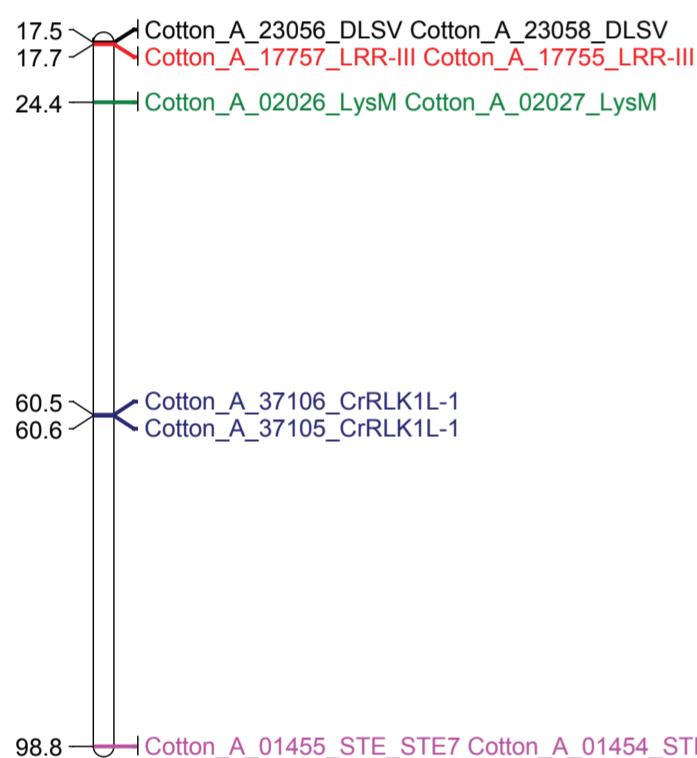

Gar7

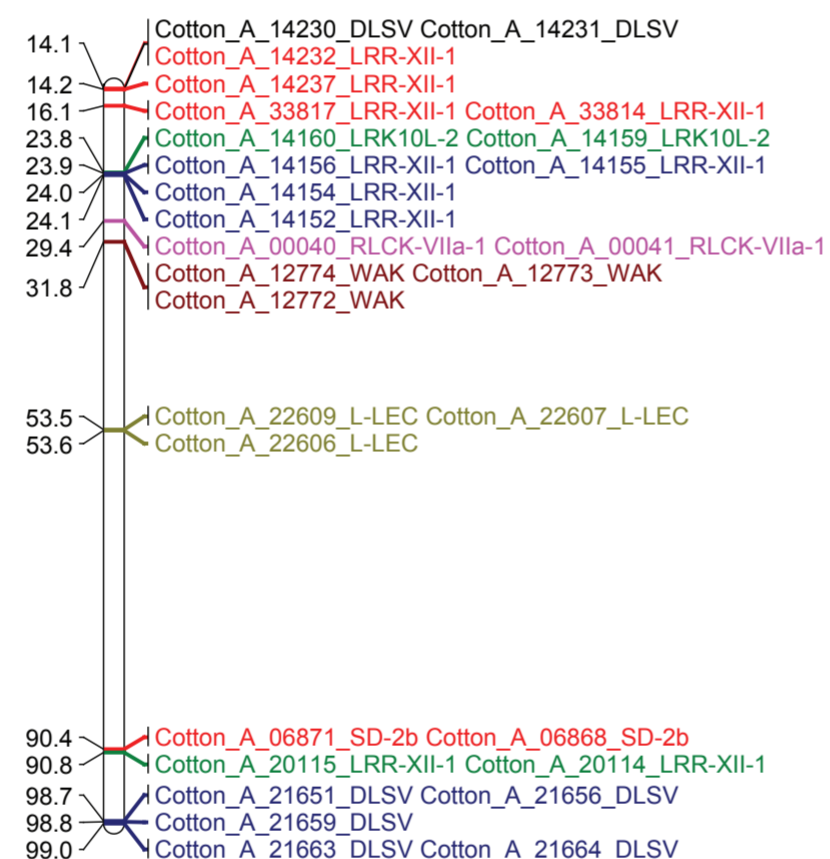

Gar8

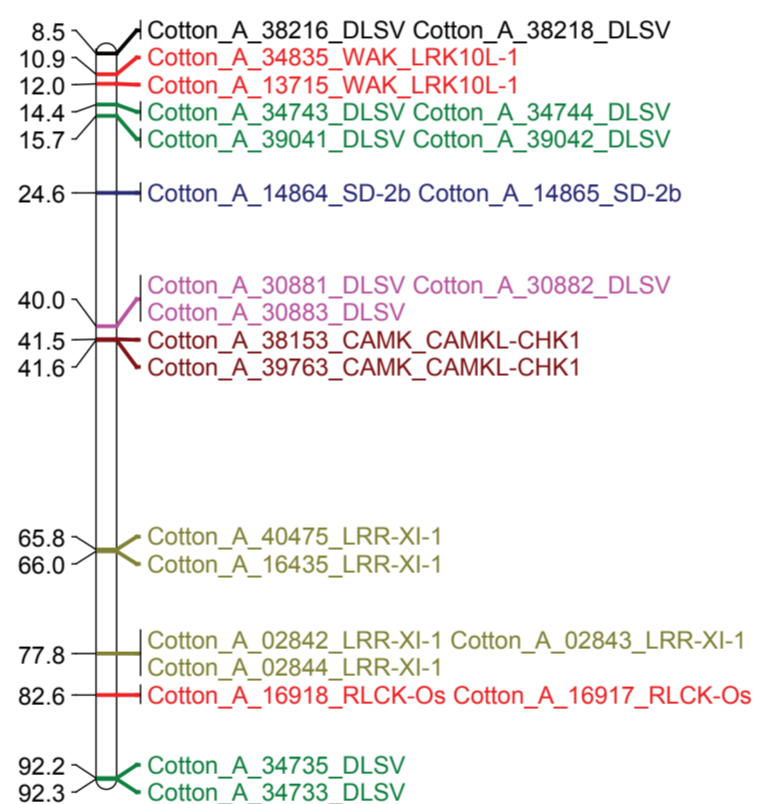

Gar9

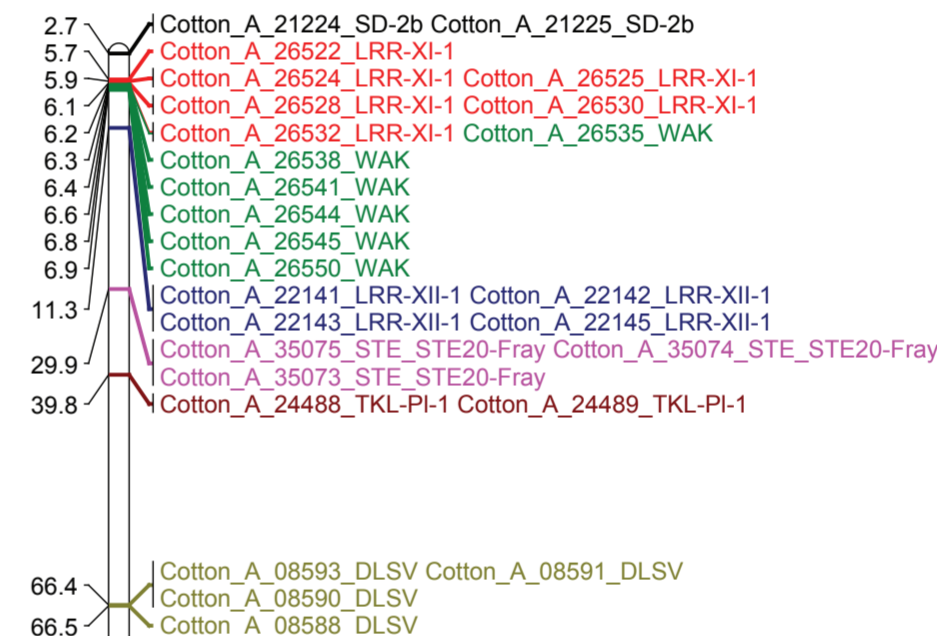

Gar10

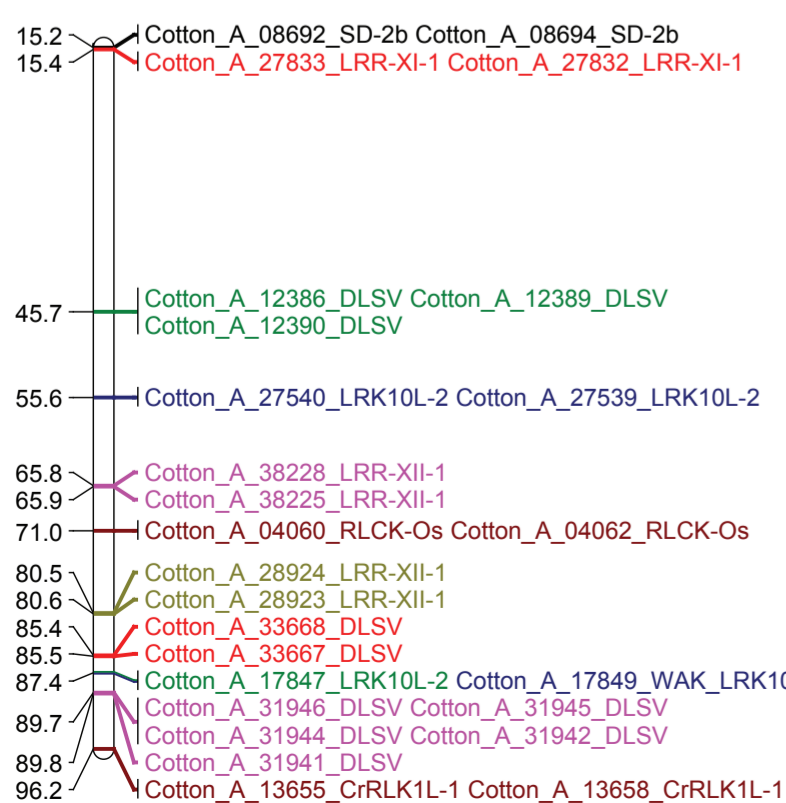

Gar11

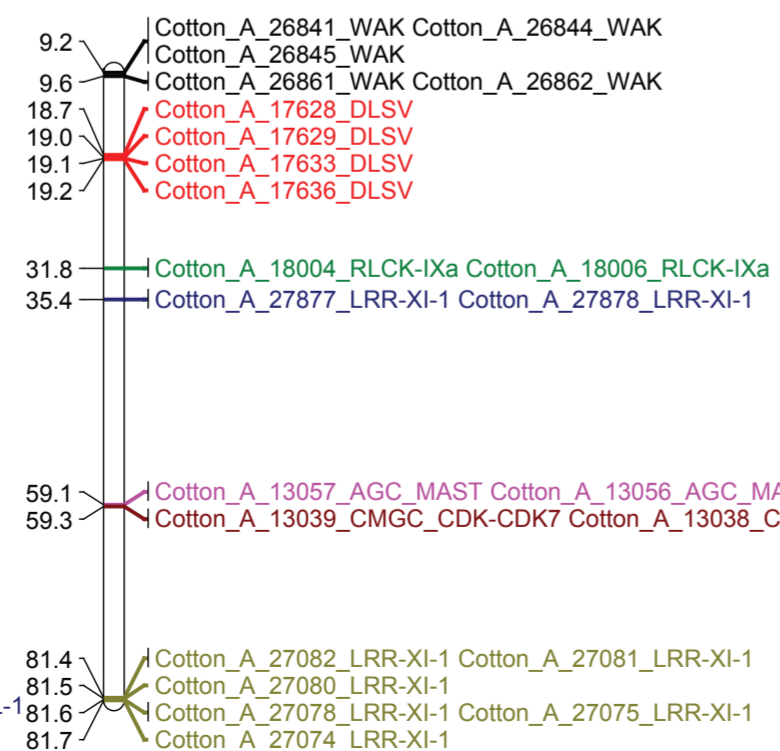

Gar12

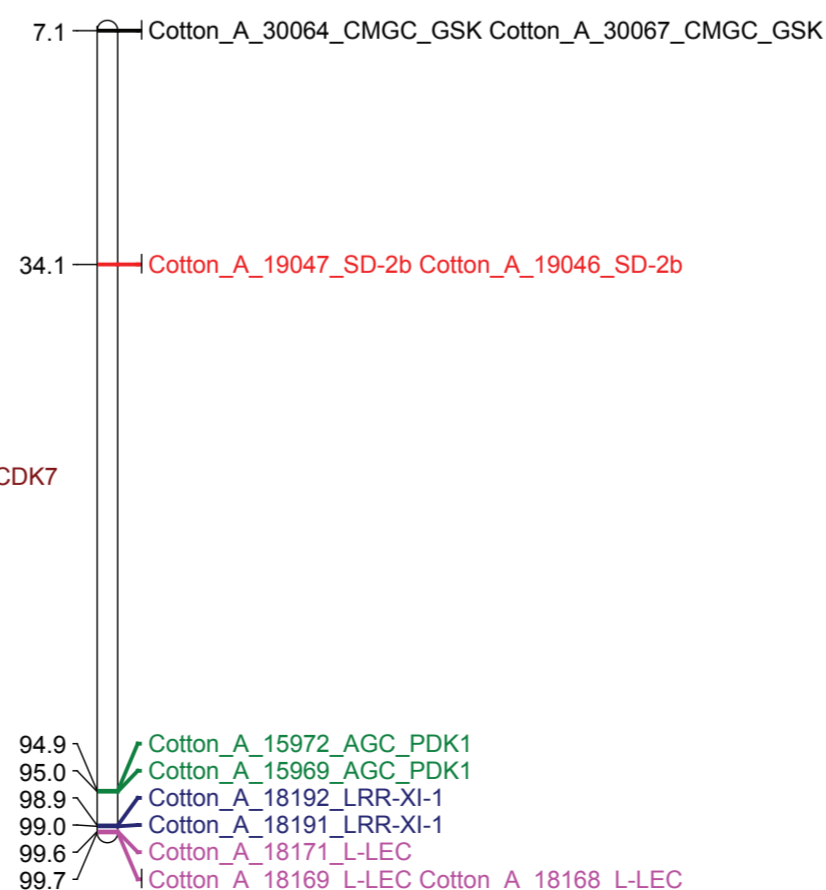

Gar13

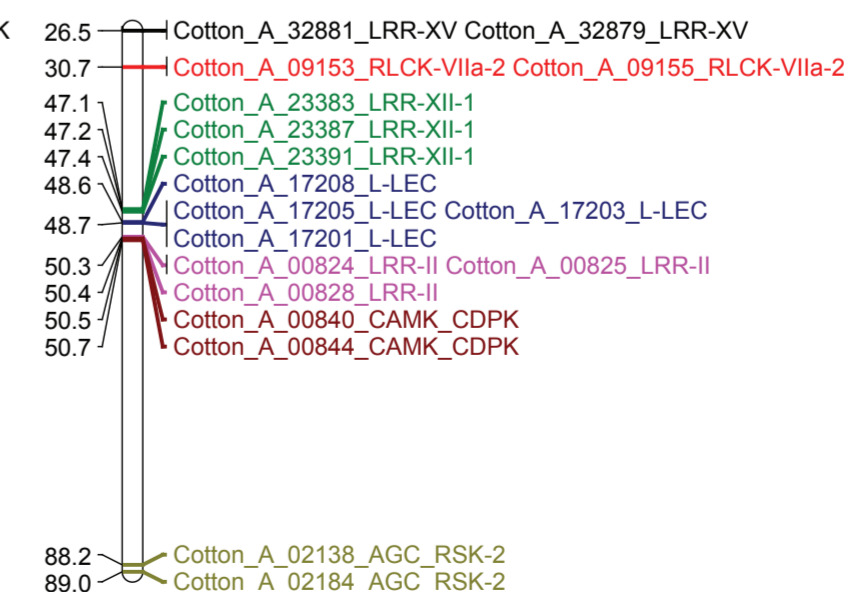



C

At\_chr1

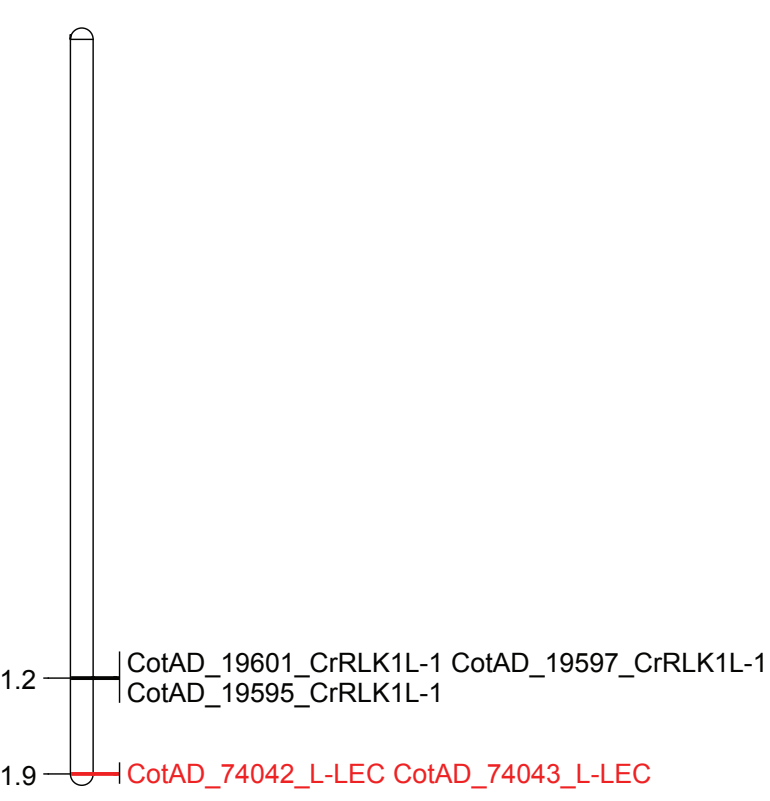

Dt\_chr1

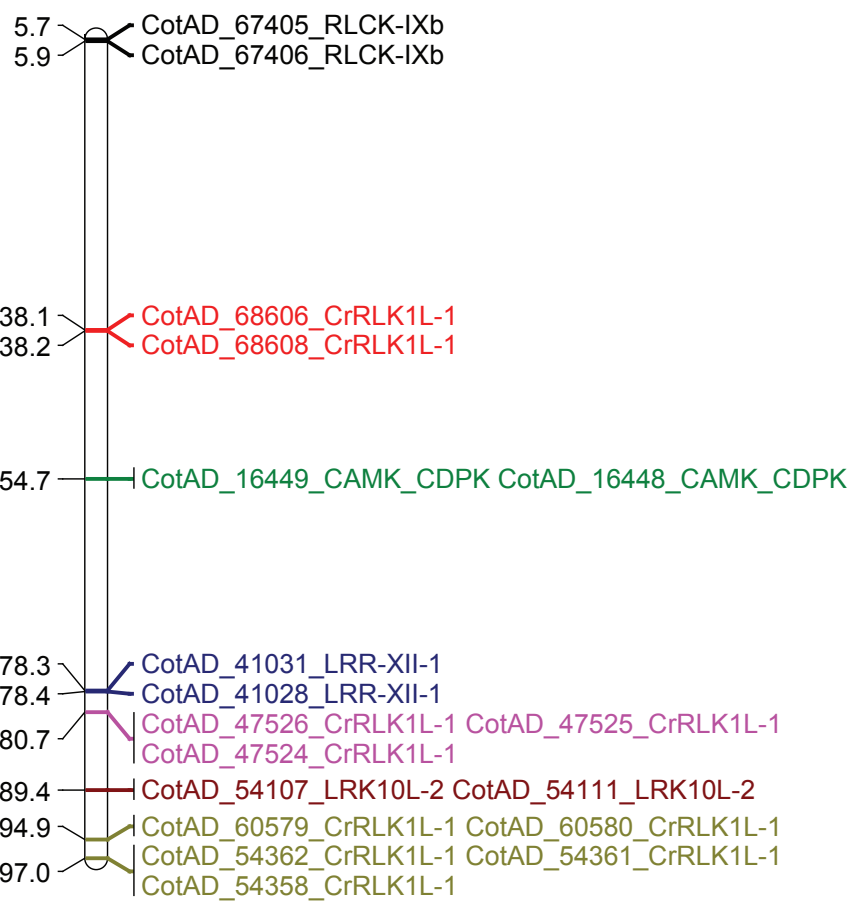

At\_chr2

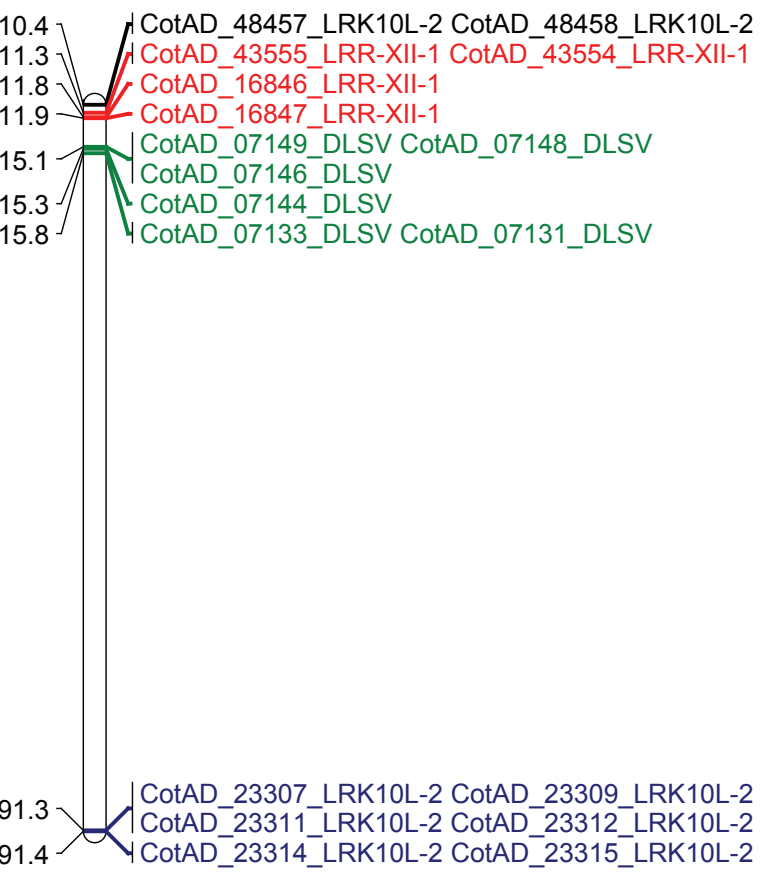

Dt\_chr2

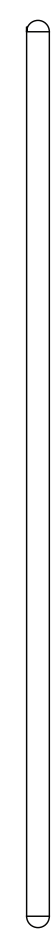

At\_chr3

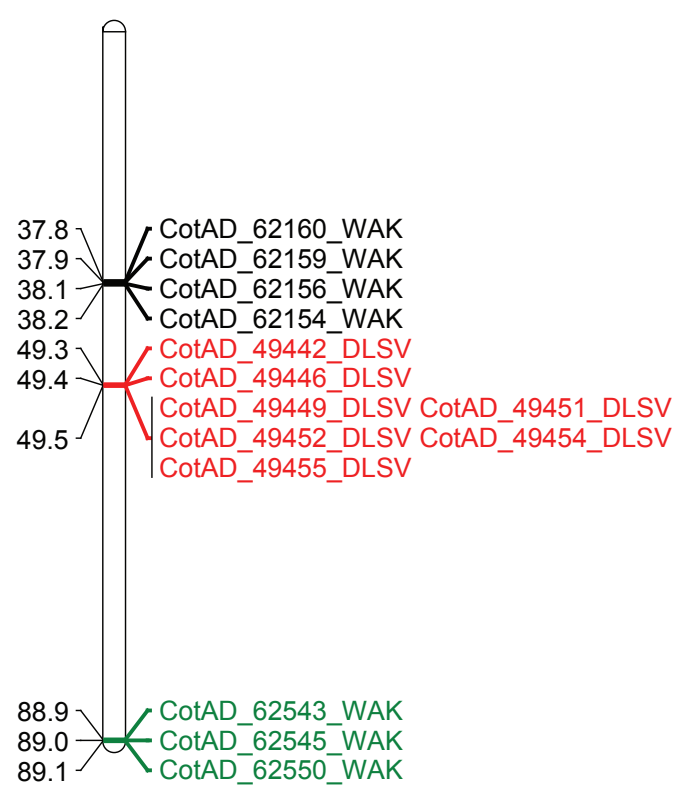

Dt\_chr3

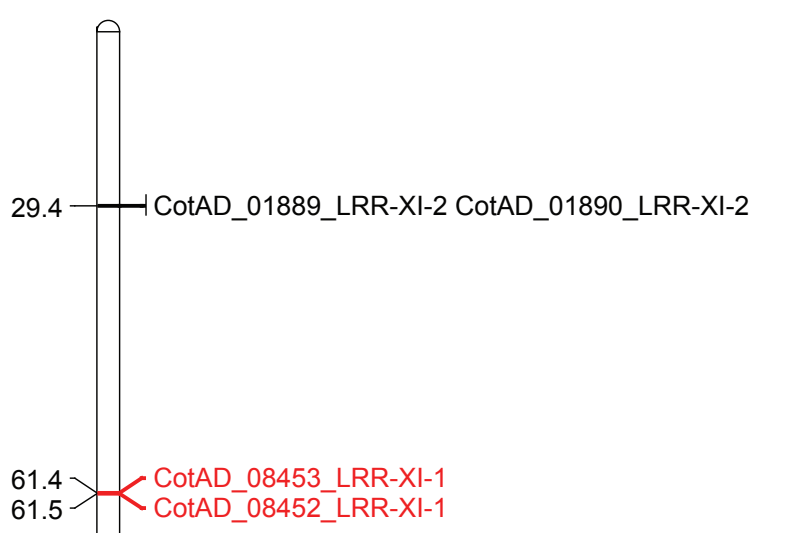

Dt\_chr4

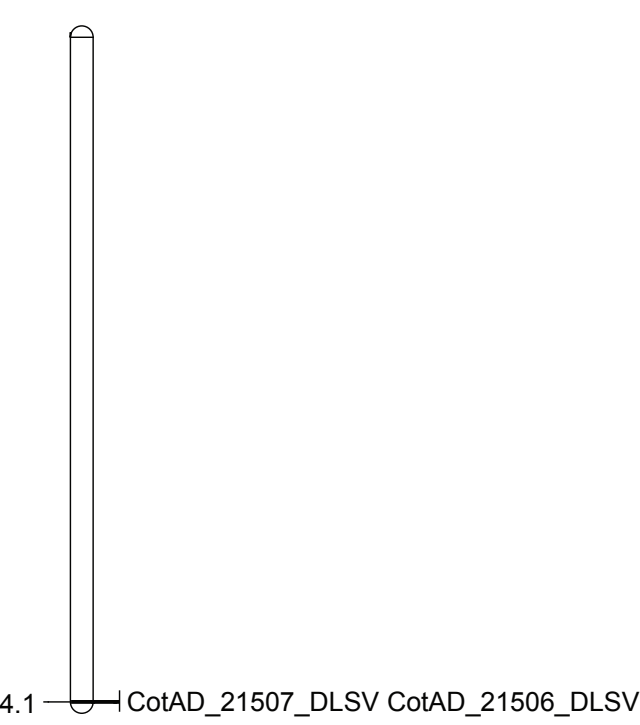

At\_chr4

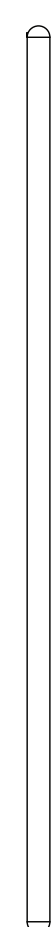

At\_chr5

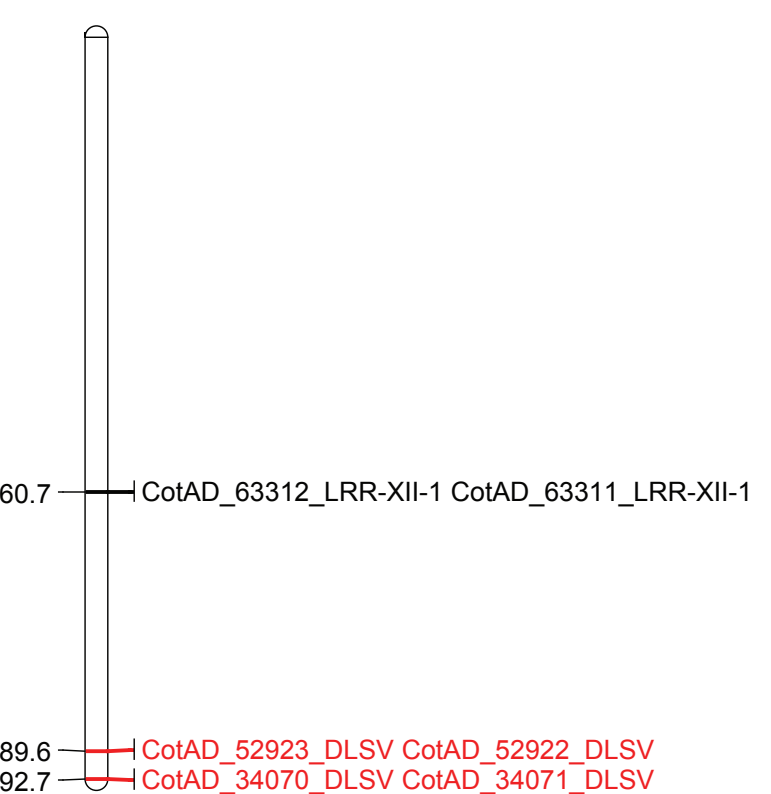

Dt\_chr5

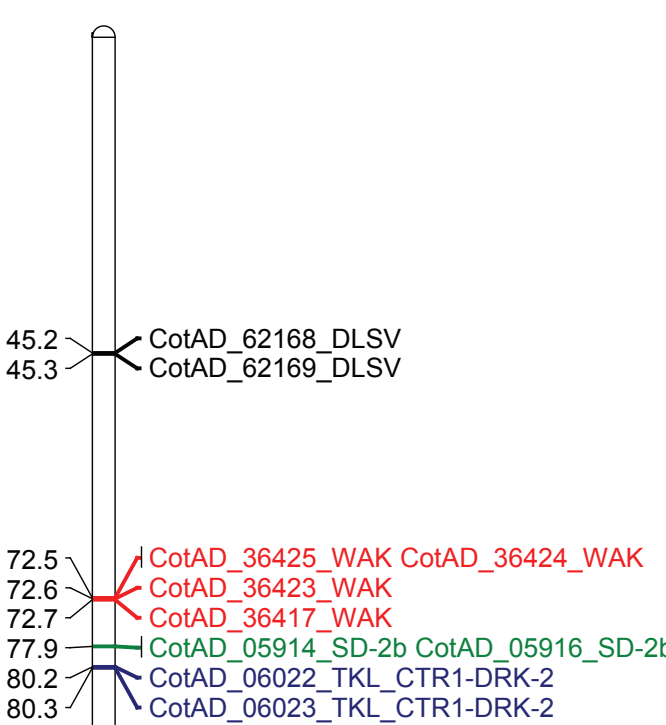

At\_chr6

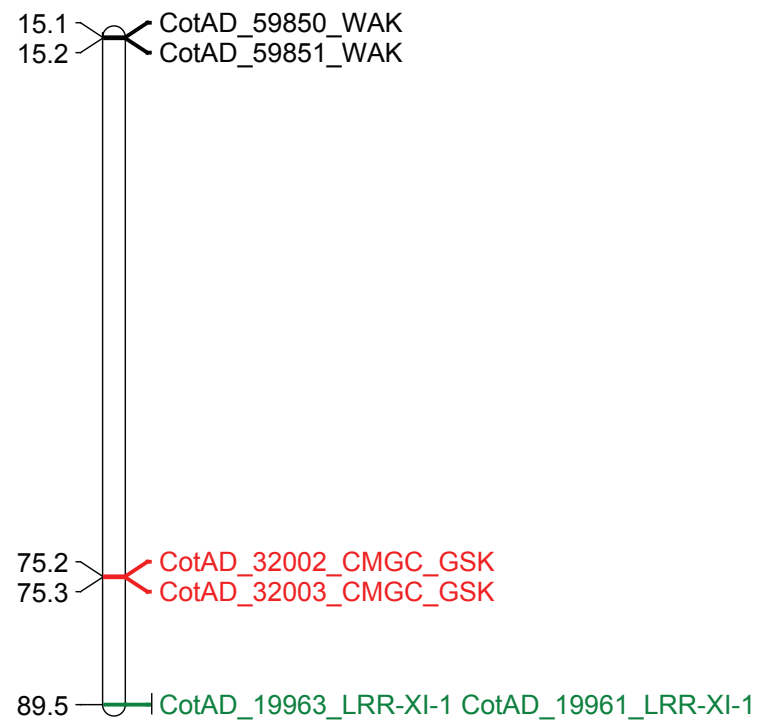

Dt\_chr6

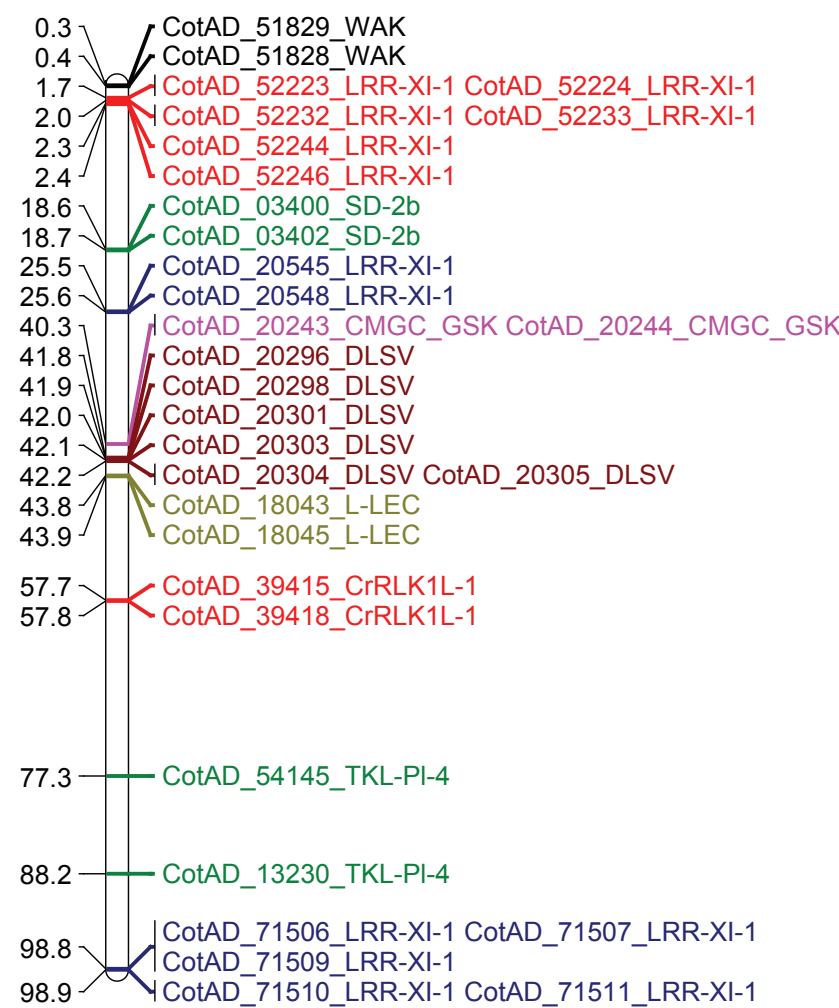

At\_chr7

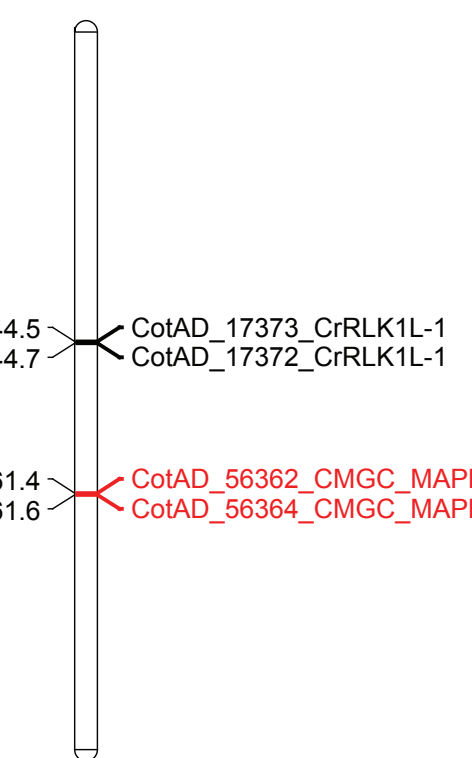

Dt\_chr7

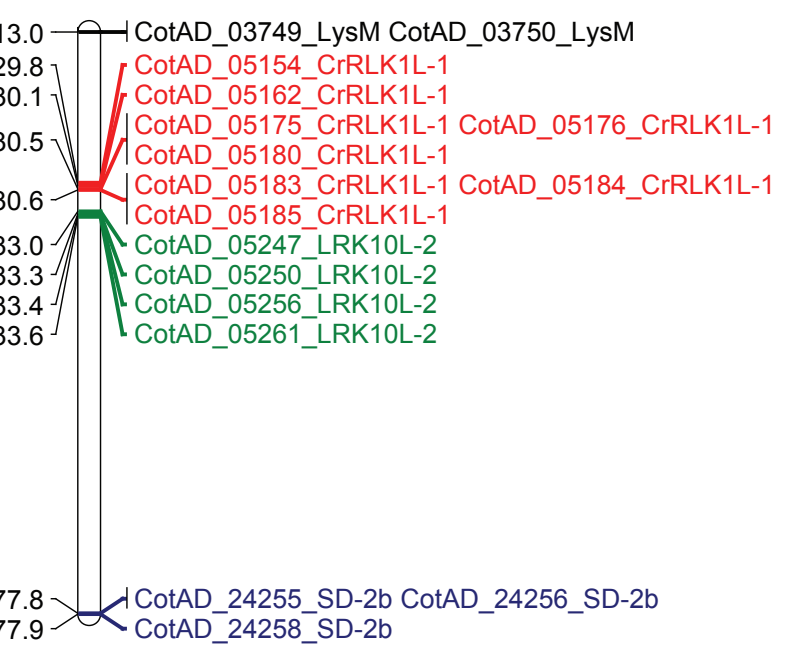

At\_chr8

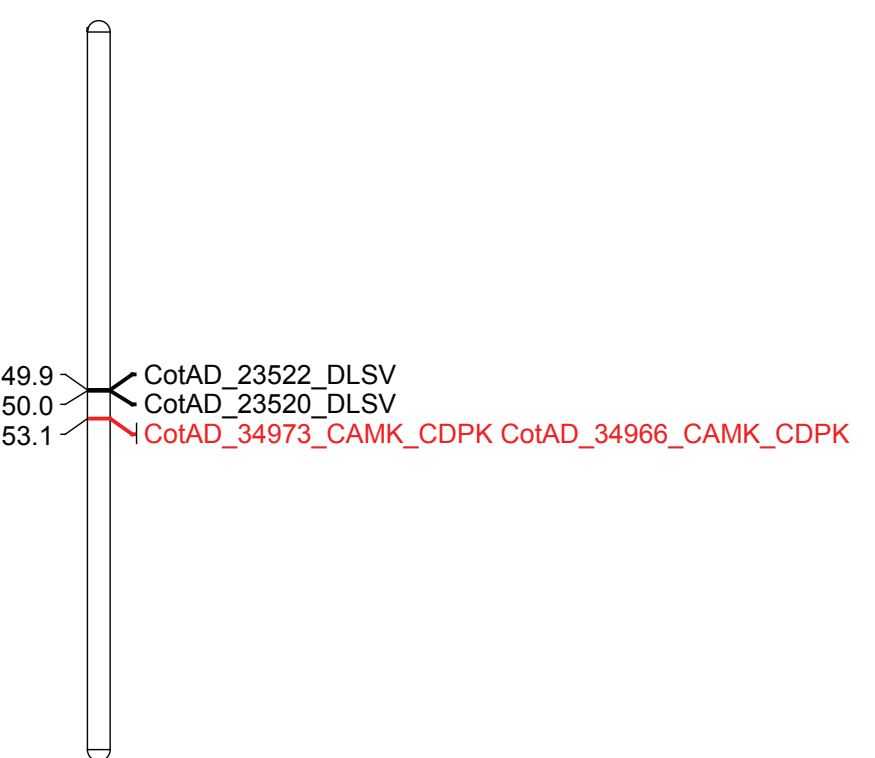

Dt\_chr8

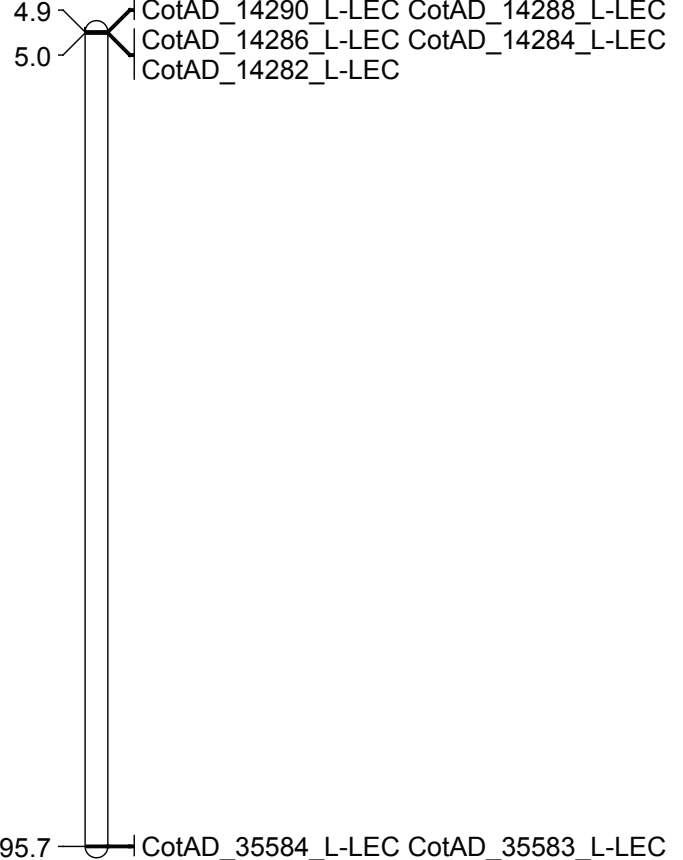

At\_chr9

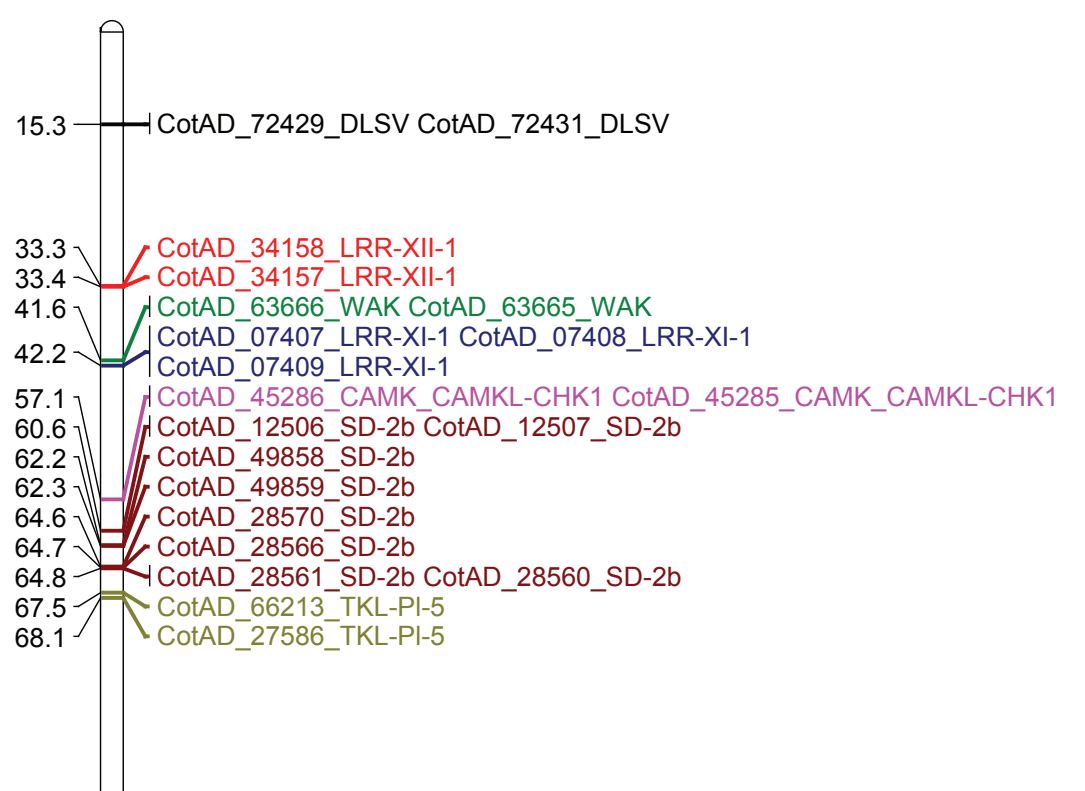

Dt\_chr9

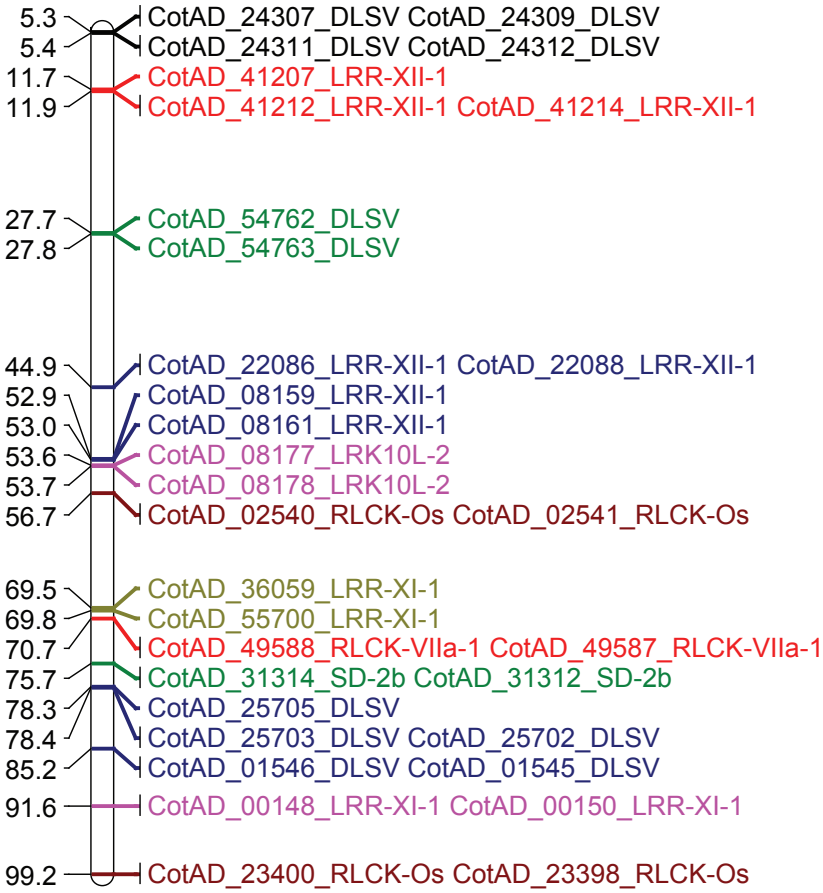

At\_chr10

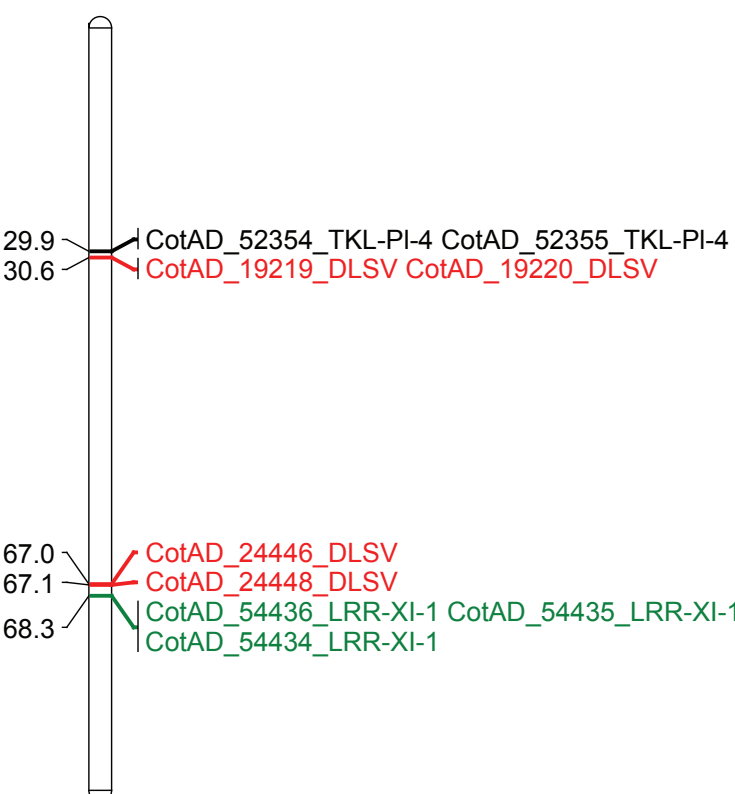

Dt\_chr10

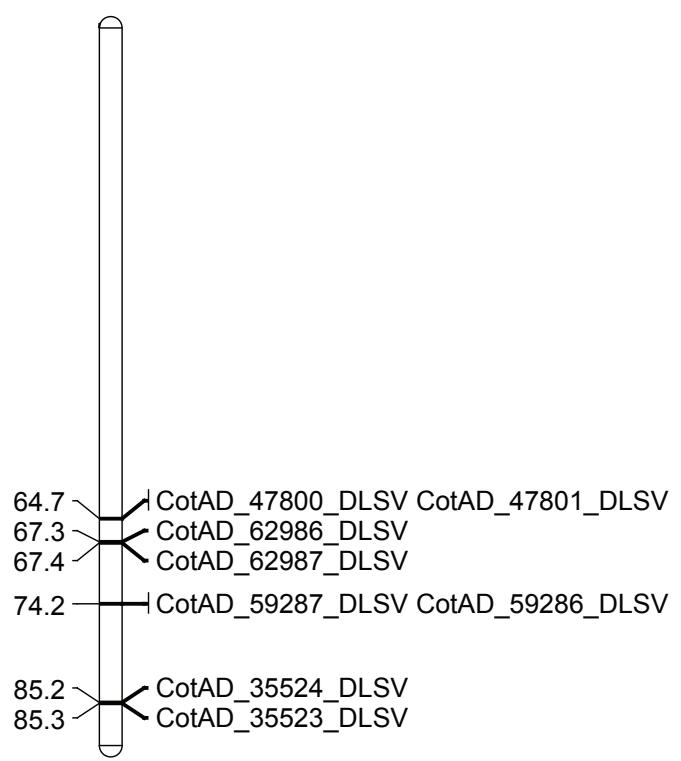

At\_chr11

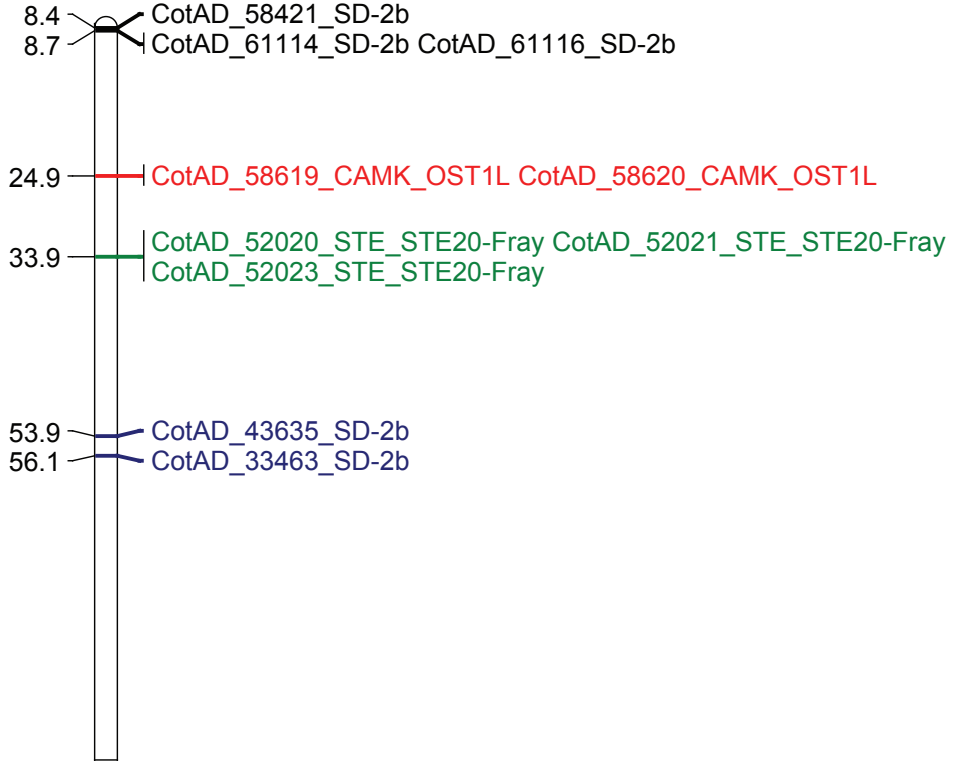

Dt\_chr11

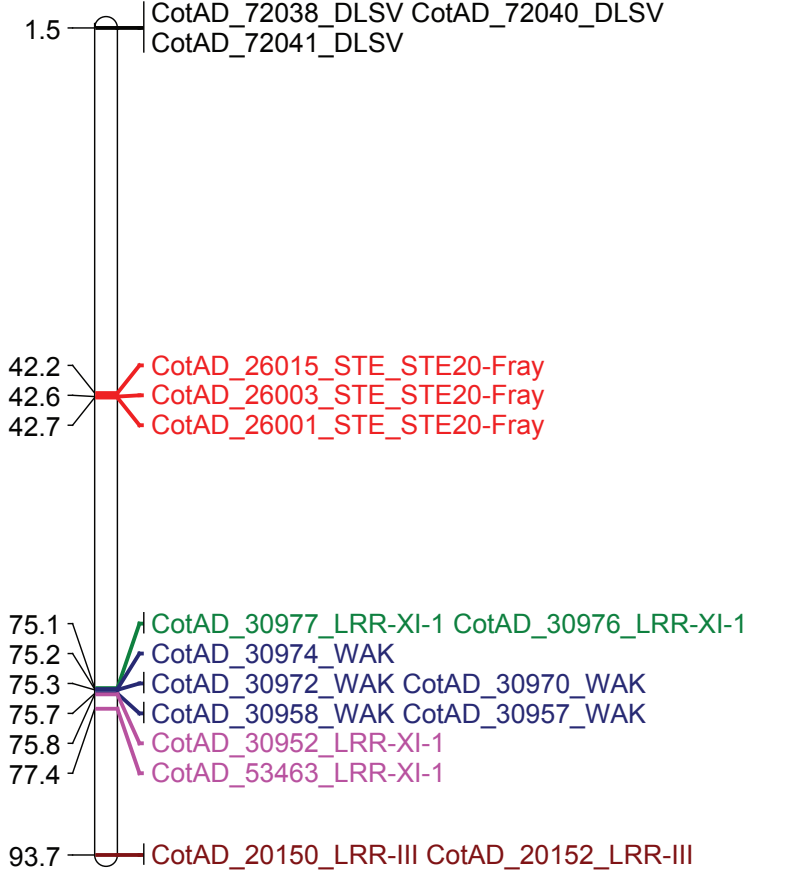

At\_chr12

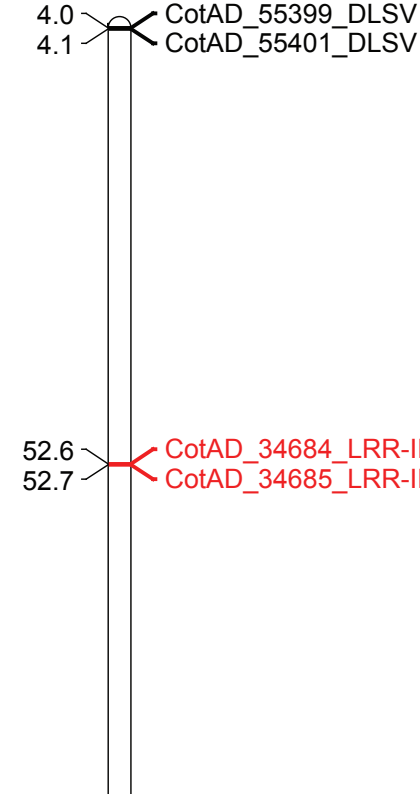

Dt\_chr12

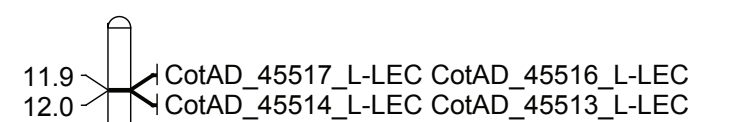

At\_chr13

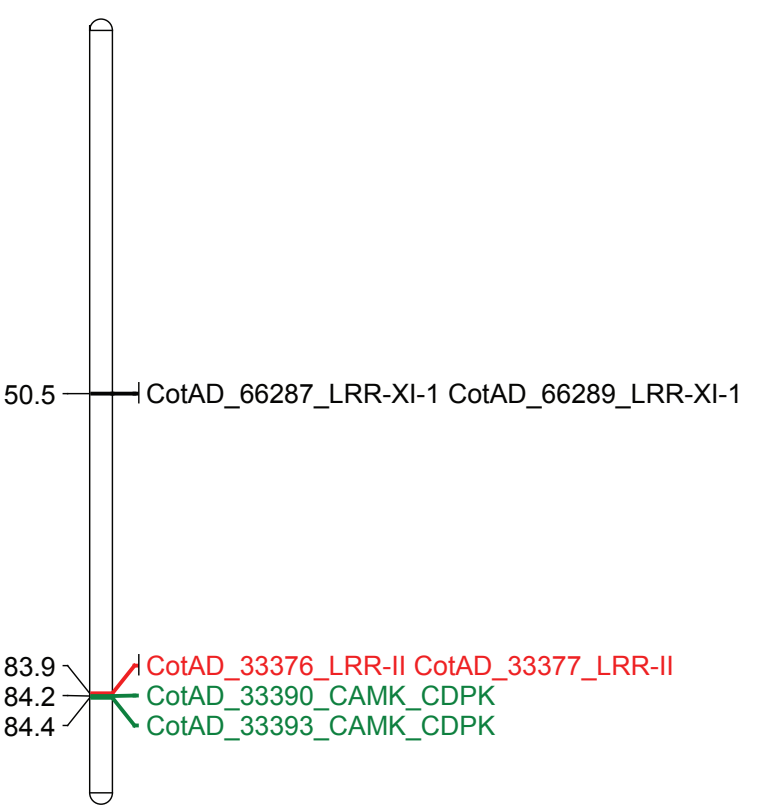

Dt\_chr13

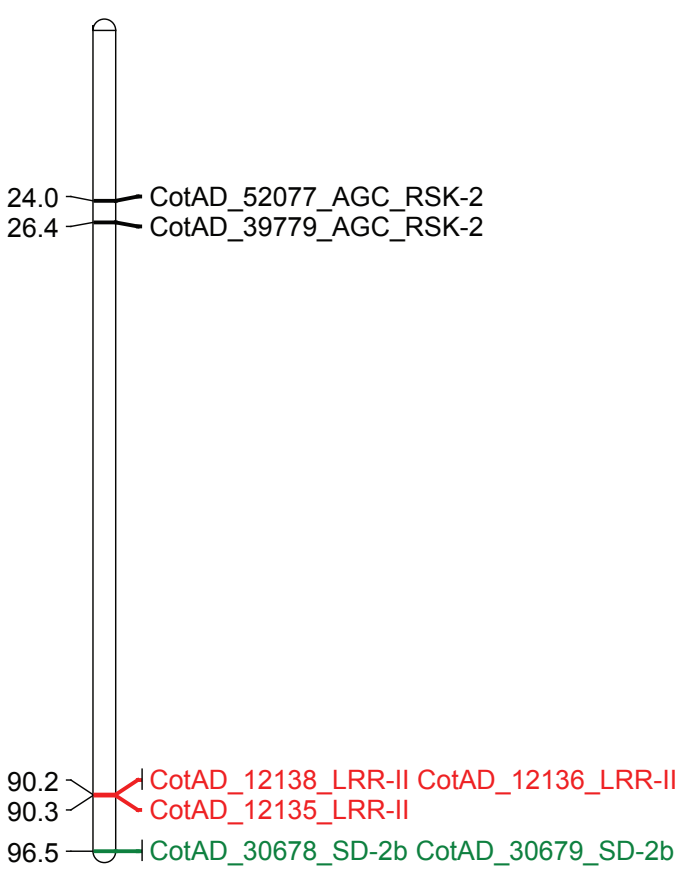



D

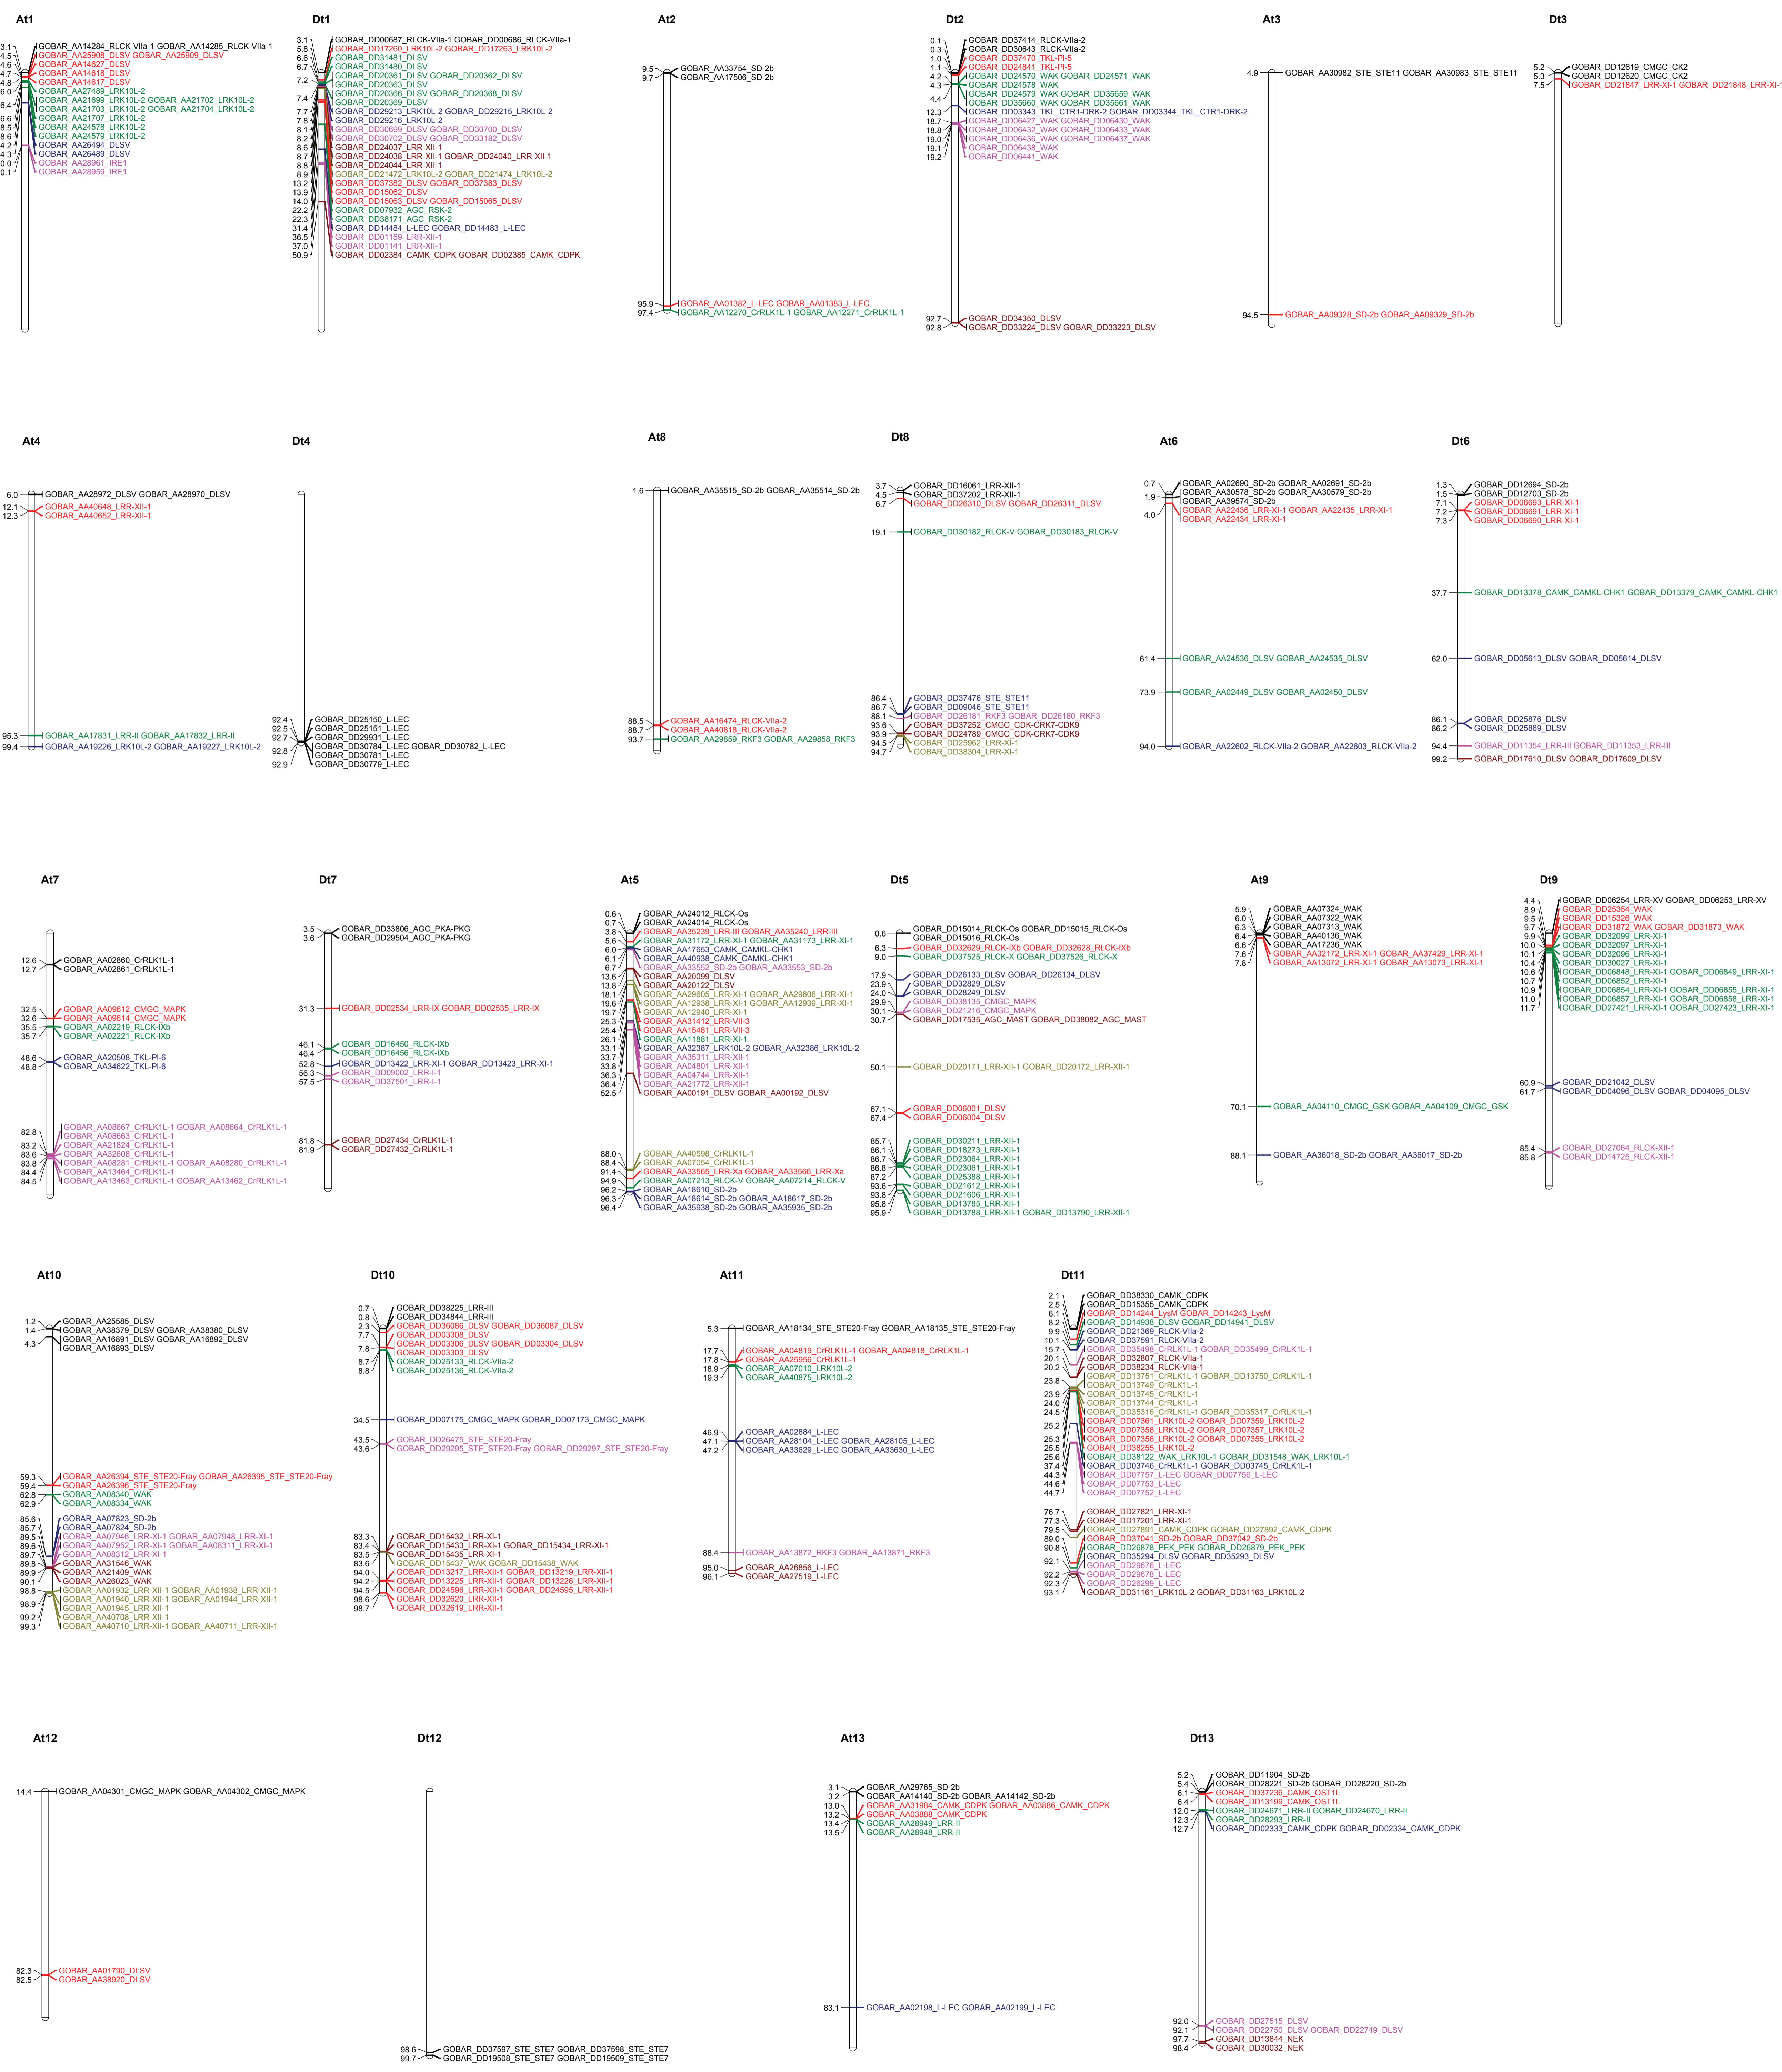

Supplement: pone.0197392.s007.pdf [file pone.0197392.s007.pdf]
