# Supplementary material for: Genome-wide classification, evolutionary analysis and gene expression patterns of the kinome in Gossypium
Source: PubMed Central journal article supplement (PMC5955557; doi:10.1371/journal.pone.0197392), 2018-05-16

# GSE50770 (abiotic stresses)

## RLE values by array

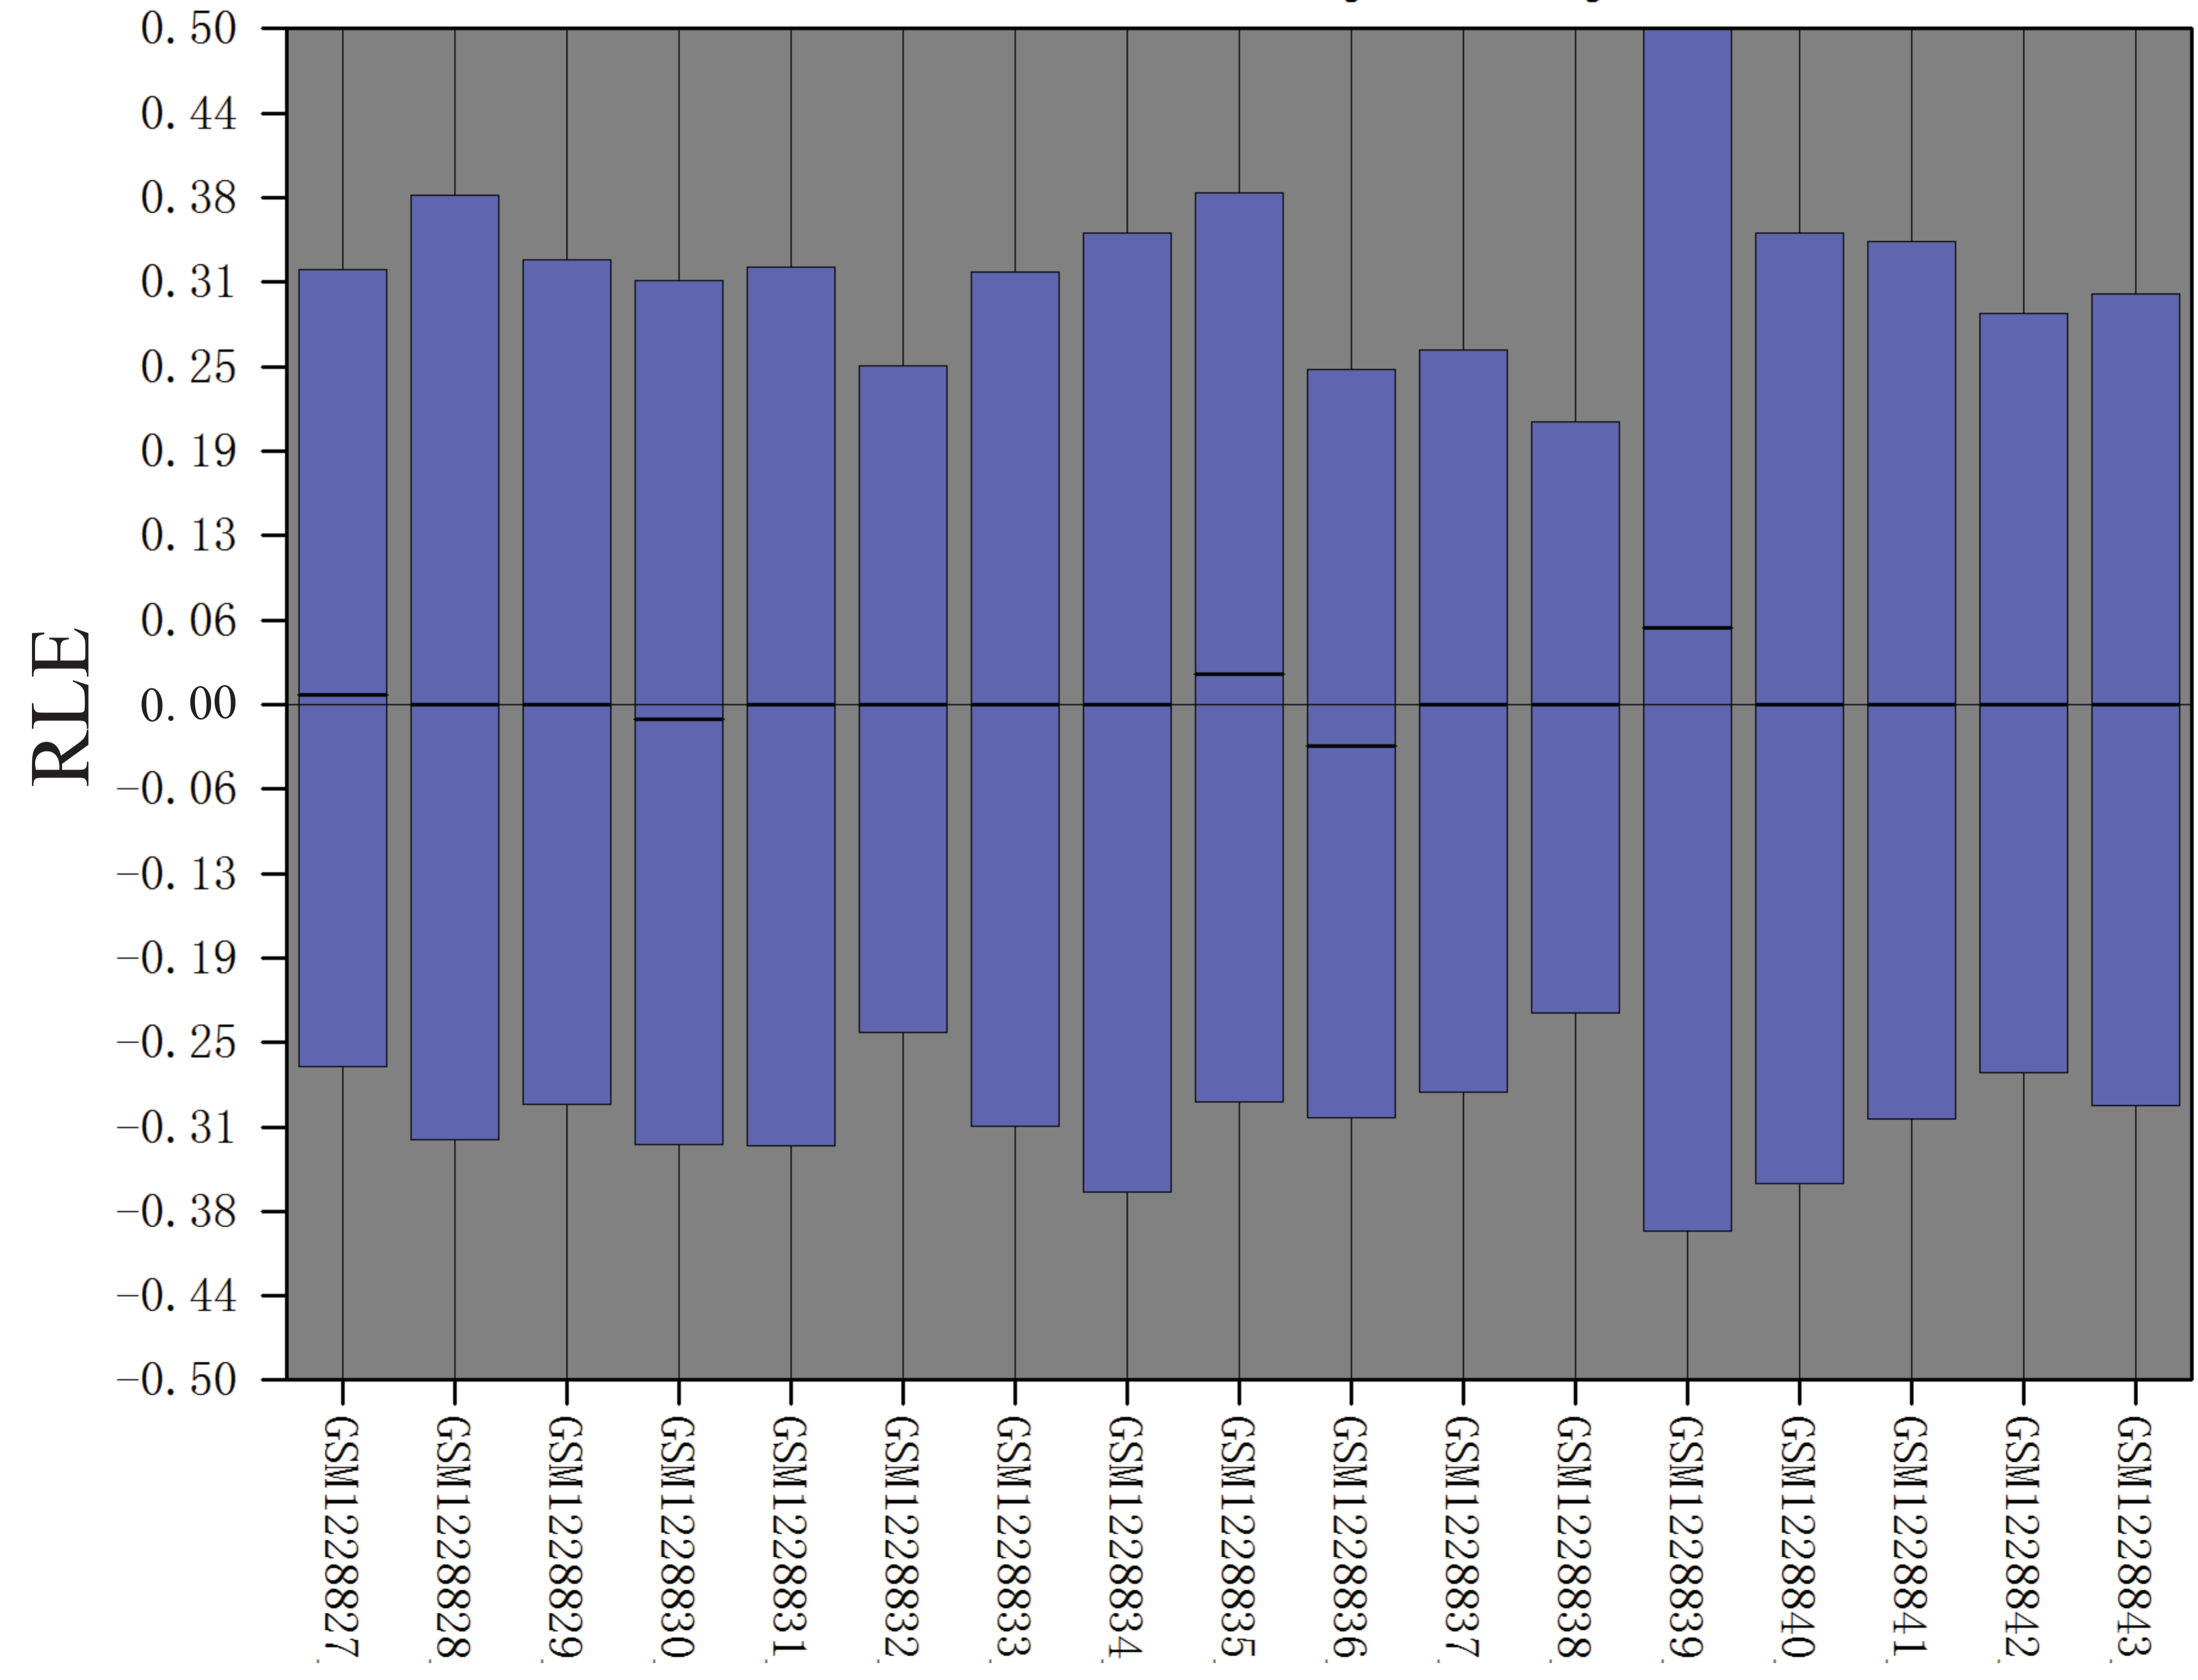

# GSE50770 (abiotic stresses)

## NUSE values by array

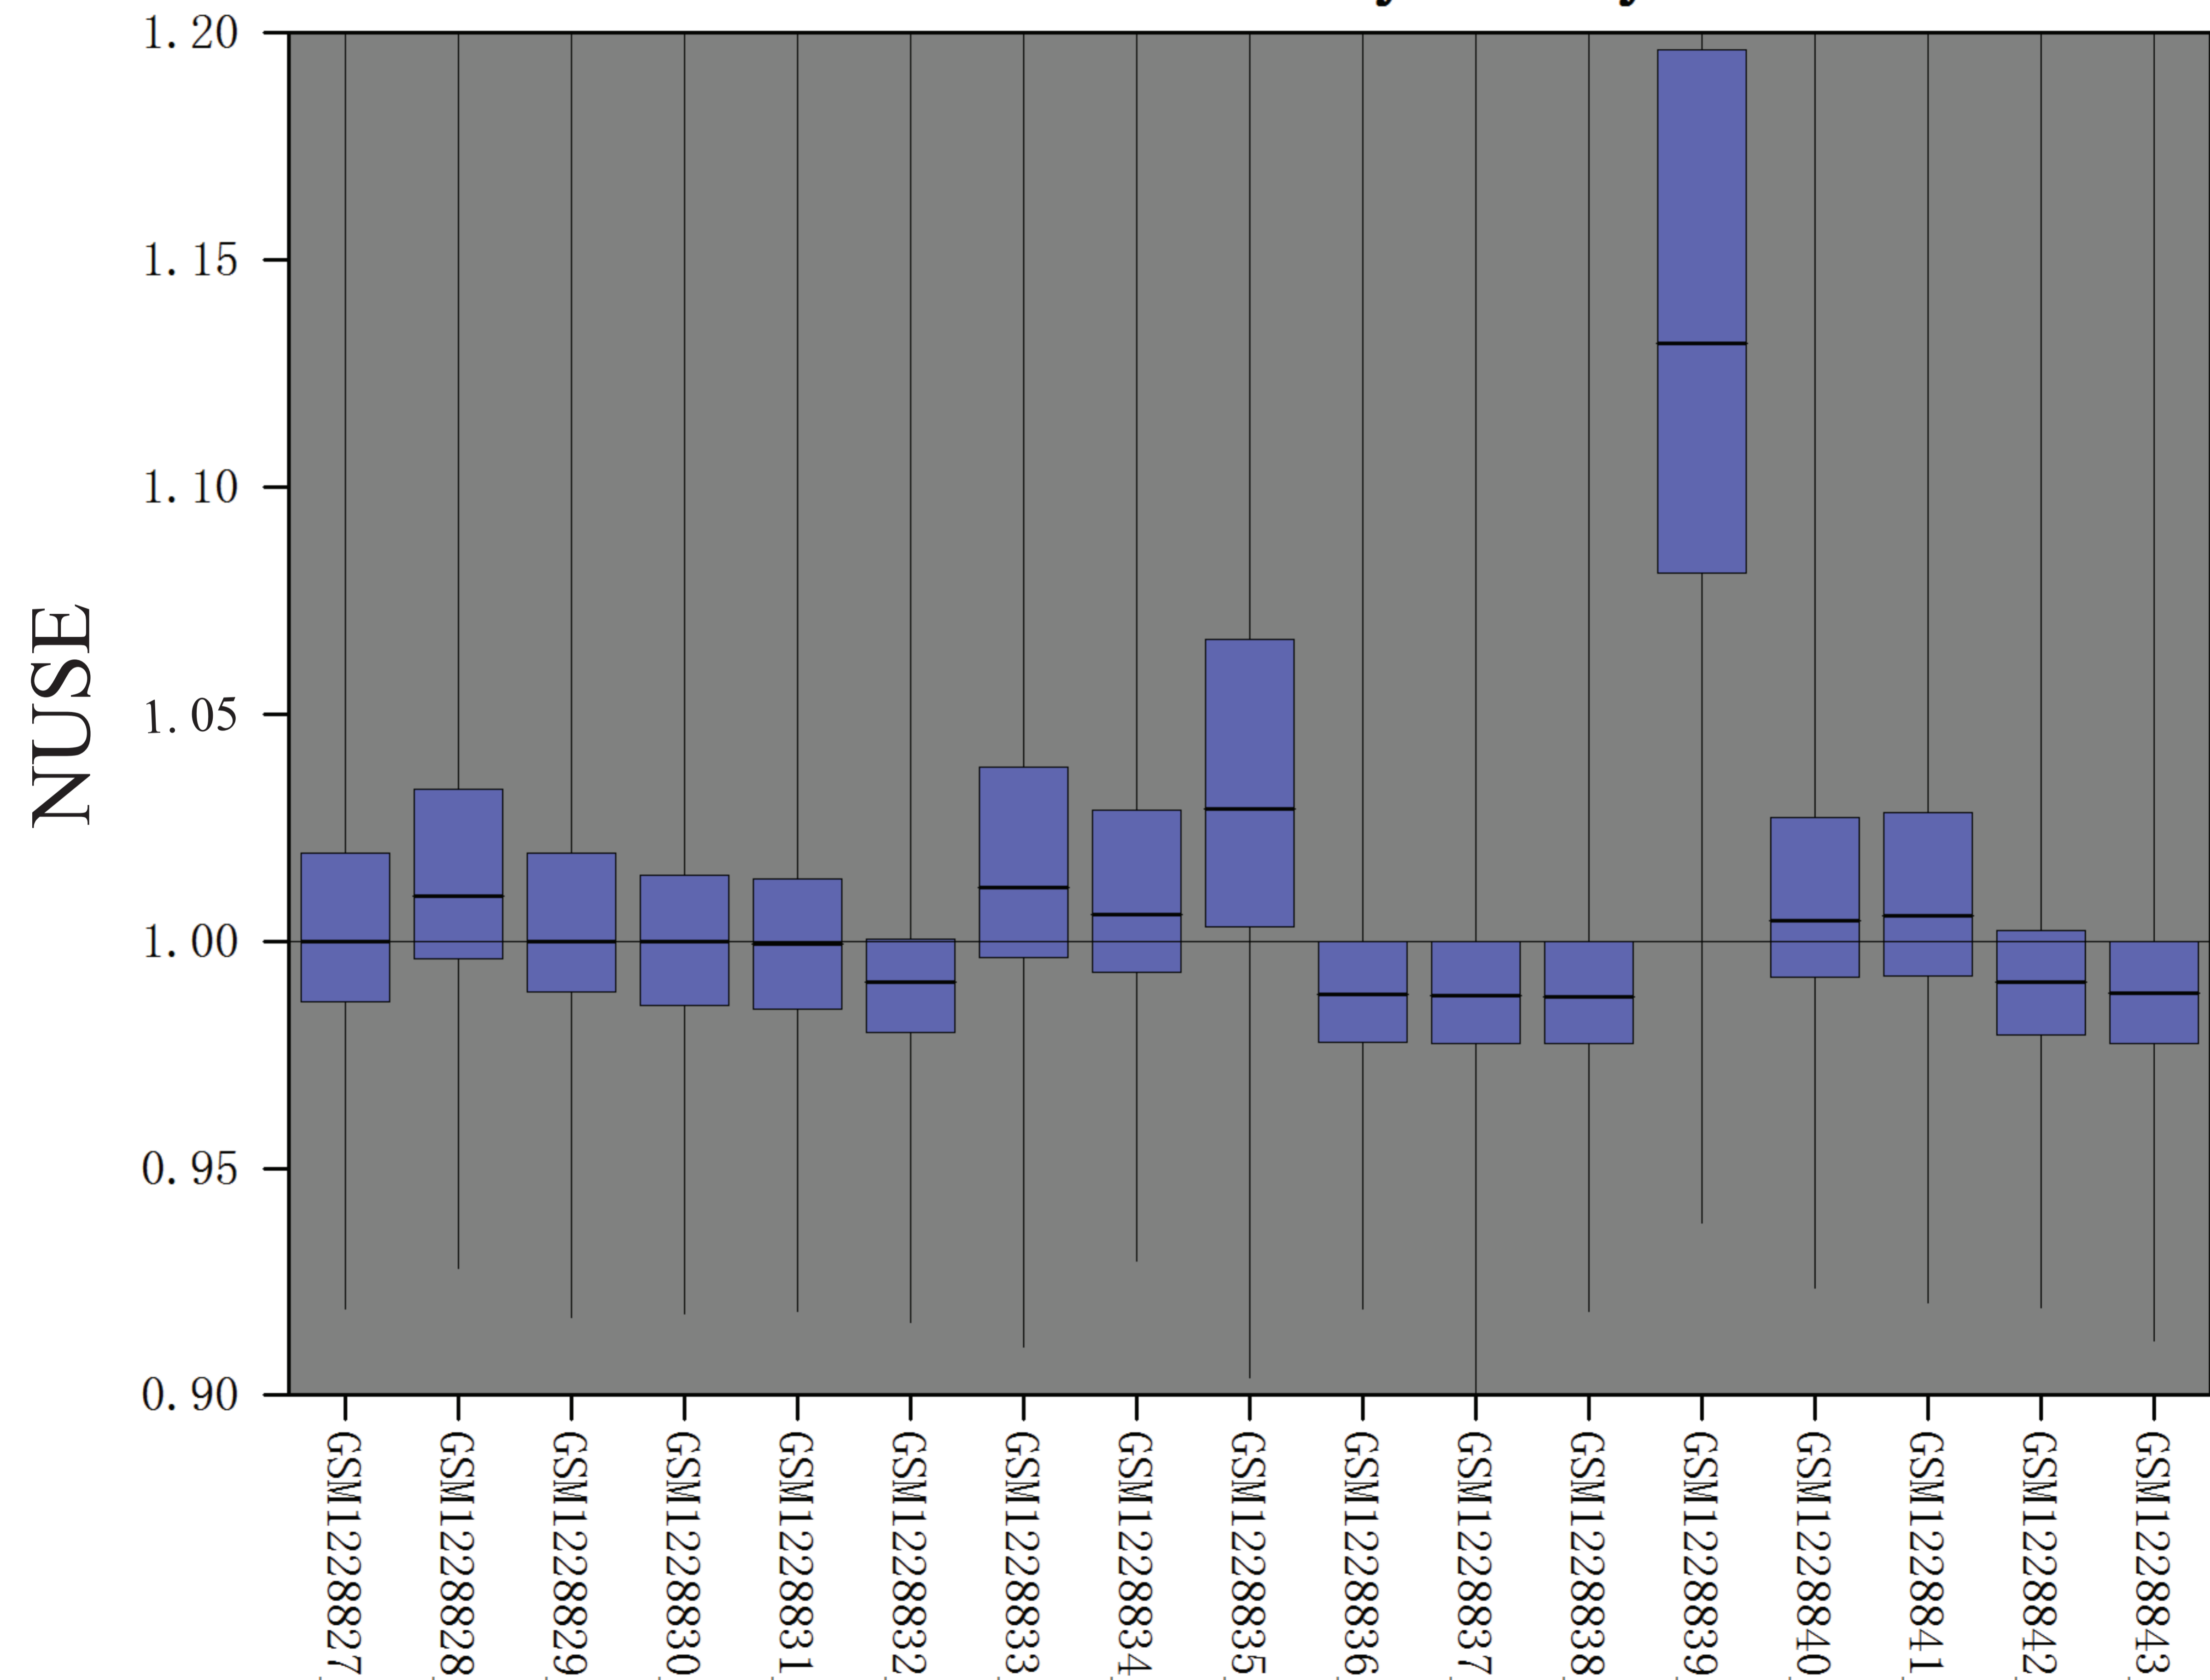

# GSE41725 (heat tolerance)

## RLE values by array

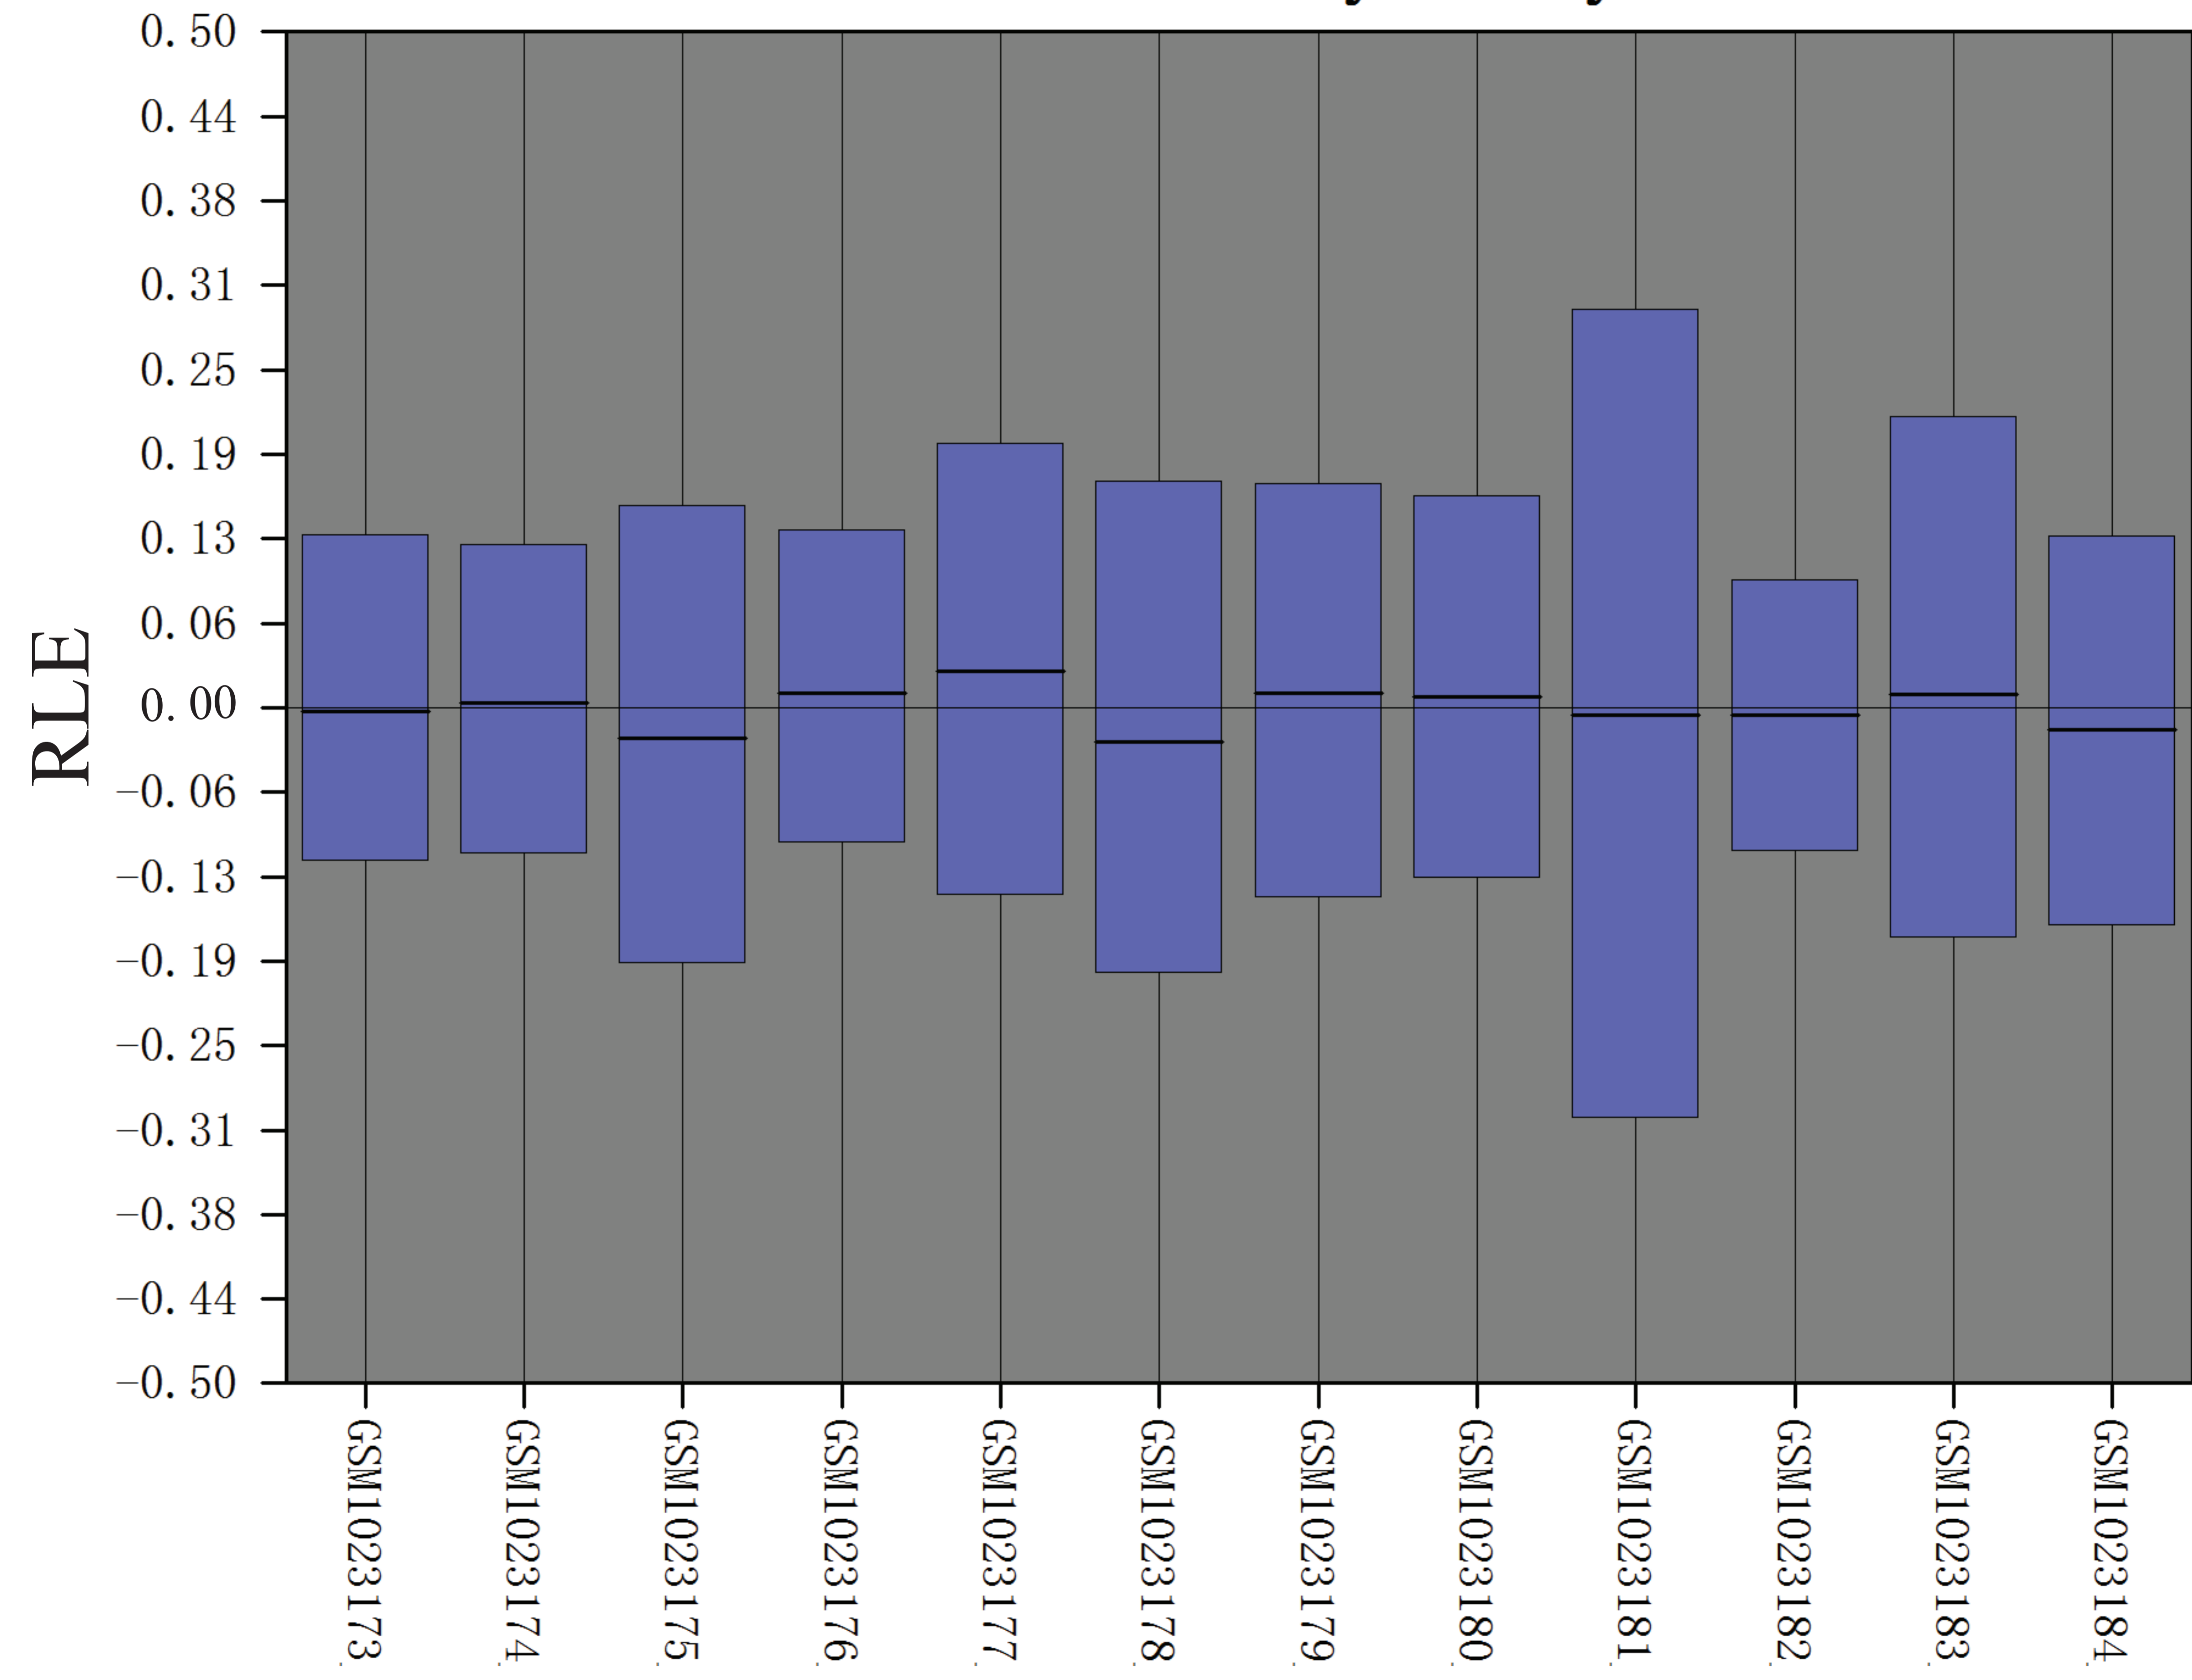

# GSE41725 (heat tolerance)

## NUSE values by array

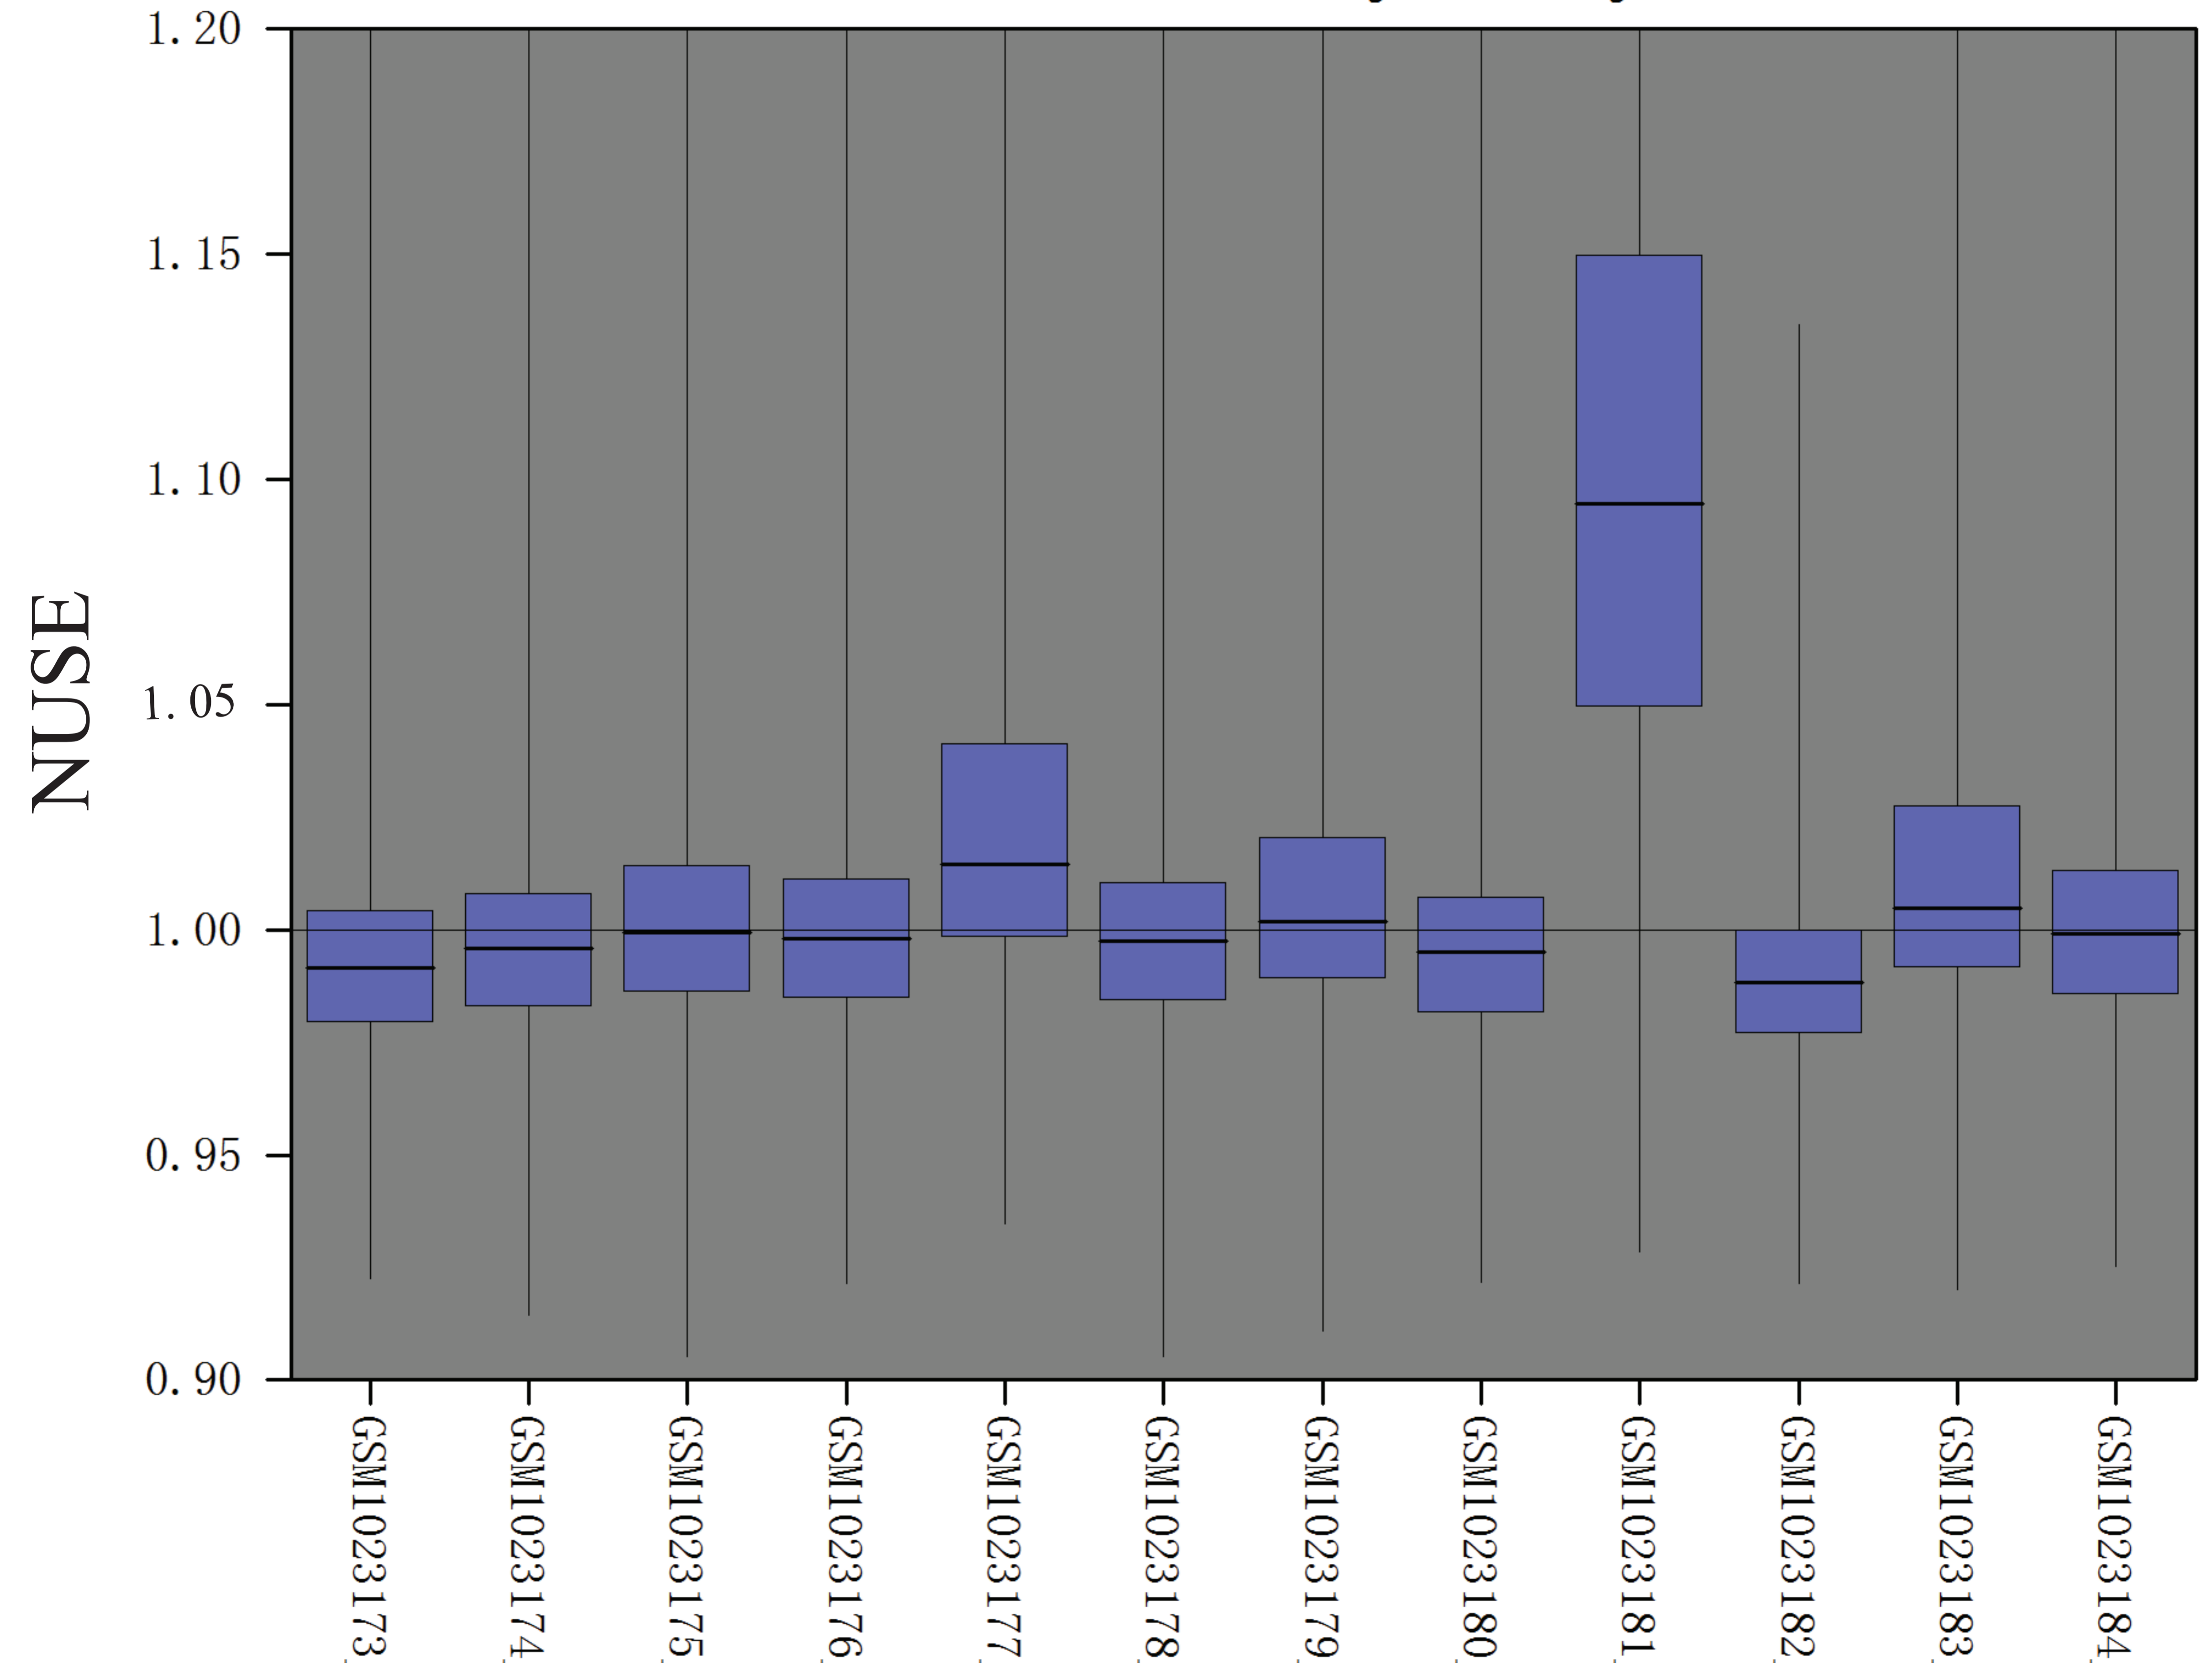

# GSE16467 (flooded-stress)

## RLE values by array

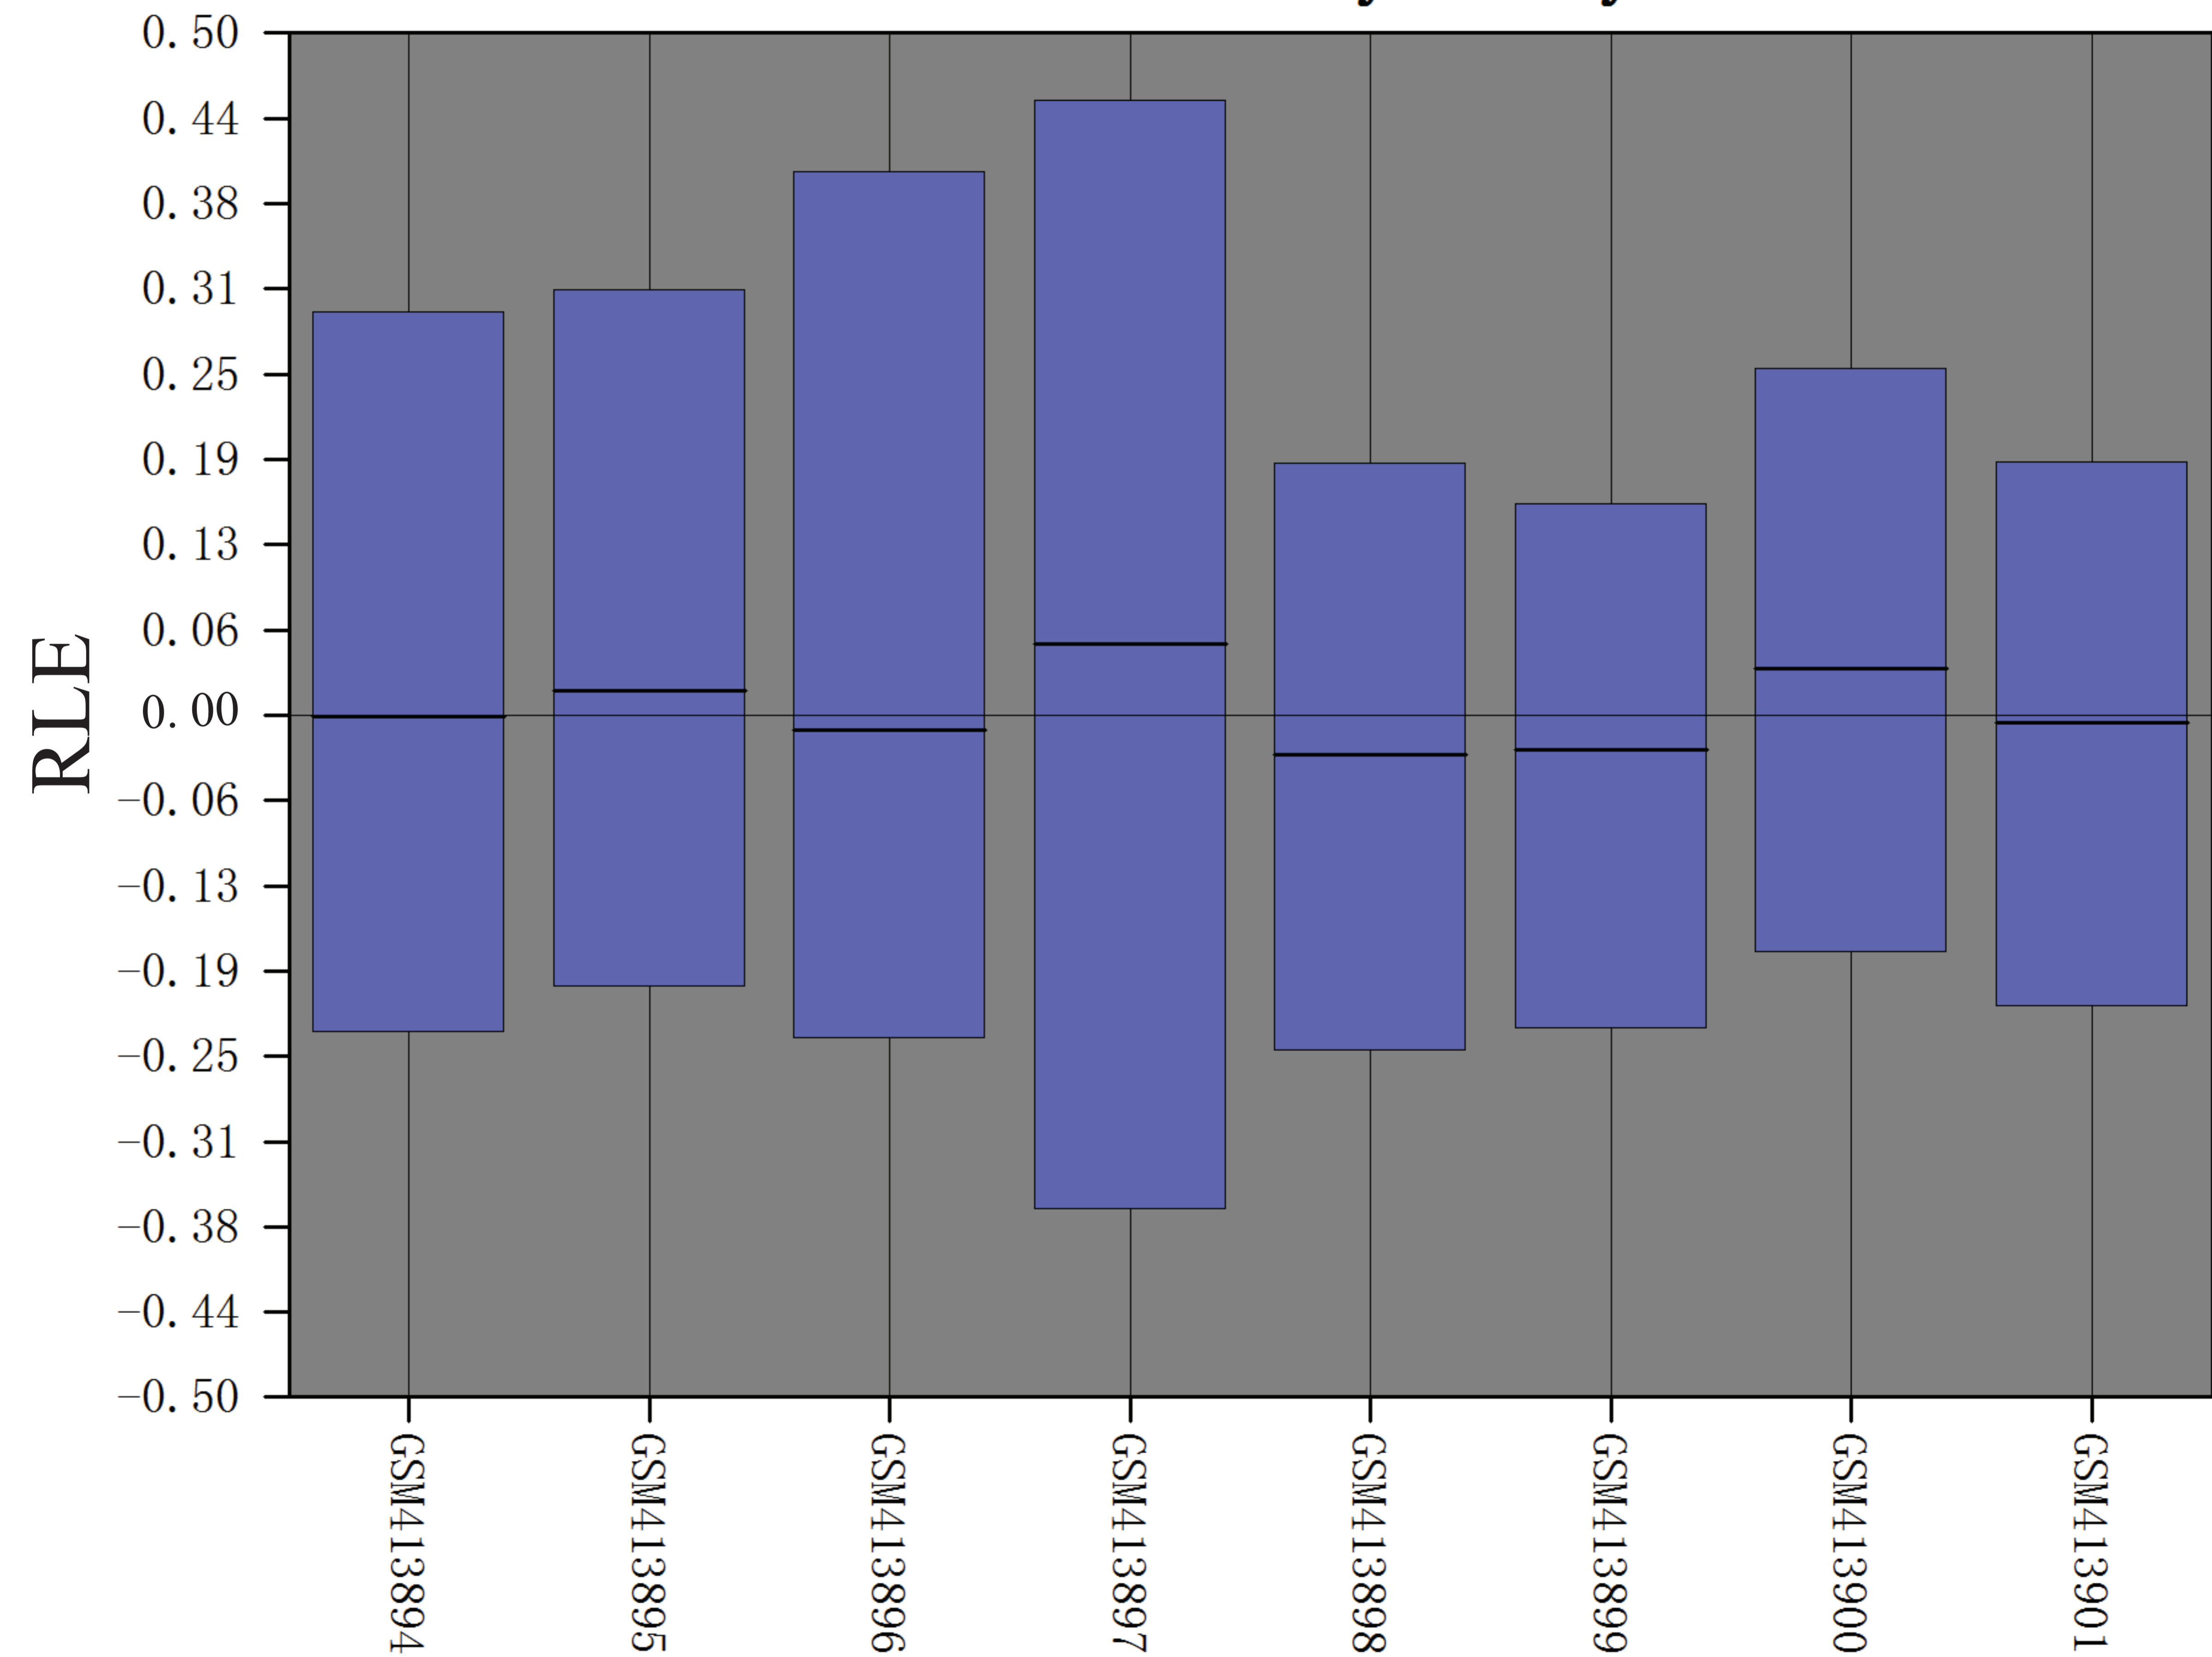



# GSE16467 (flooded-stress)

## NUSE values by array

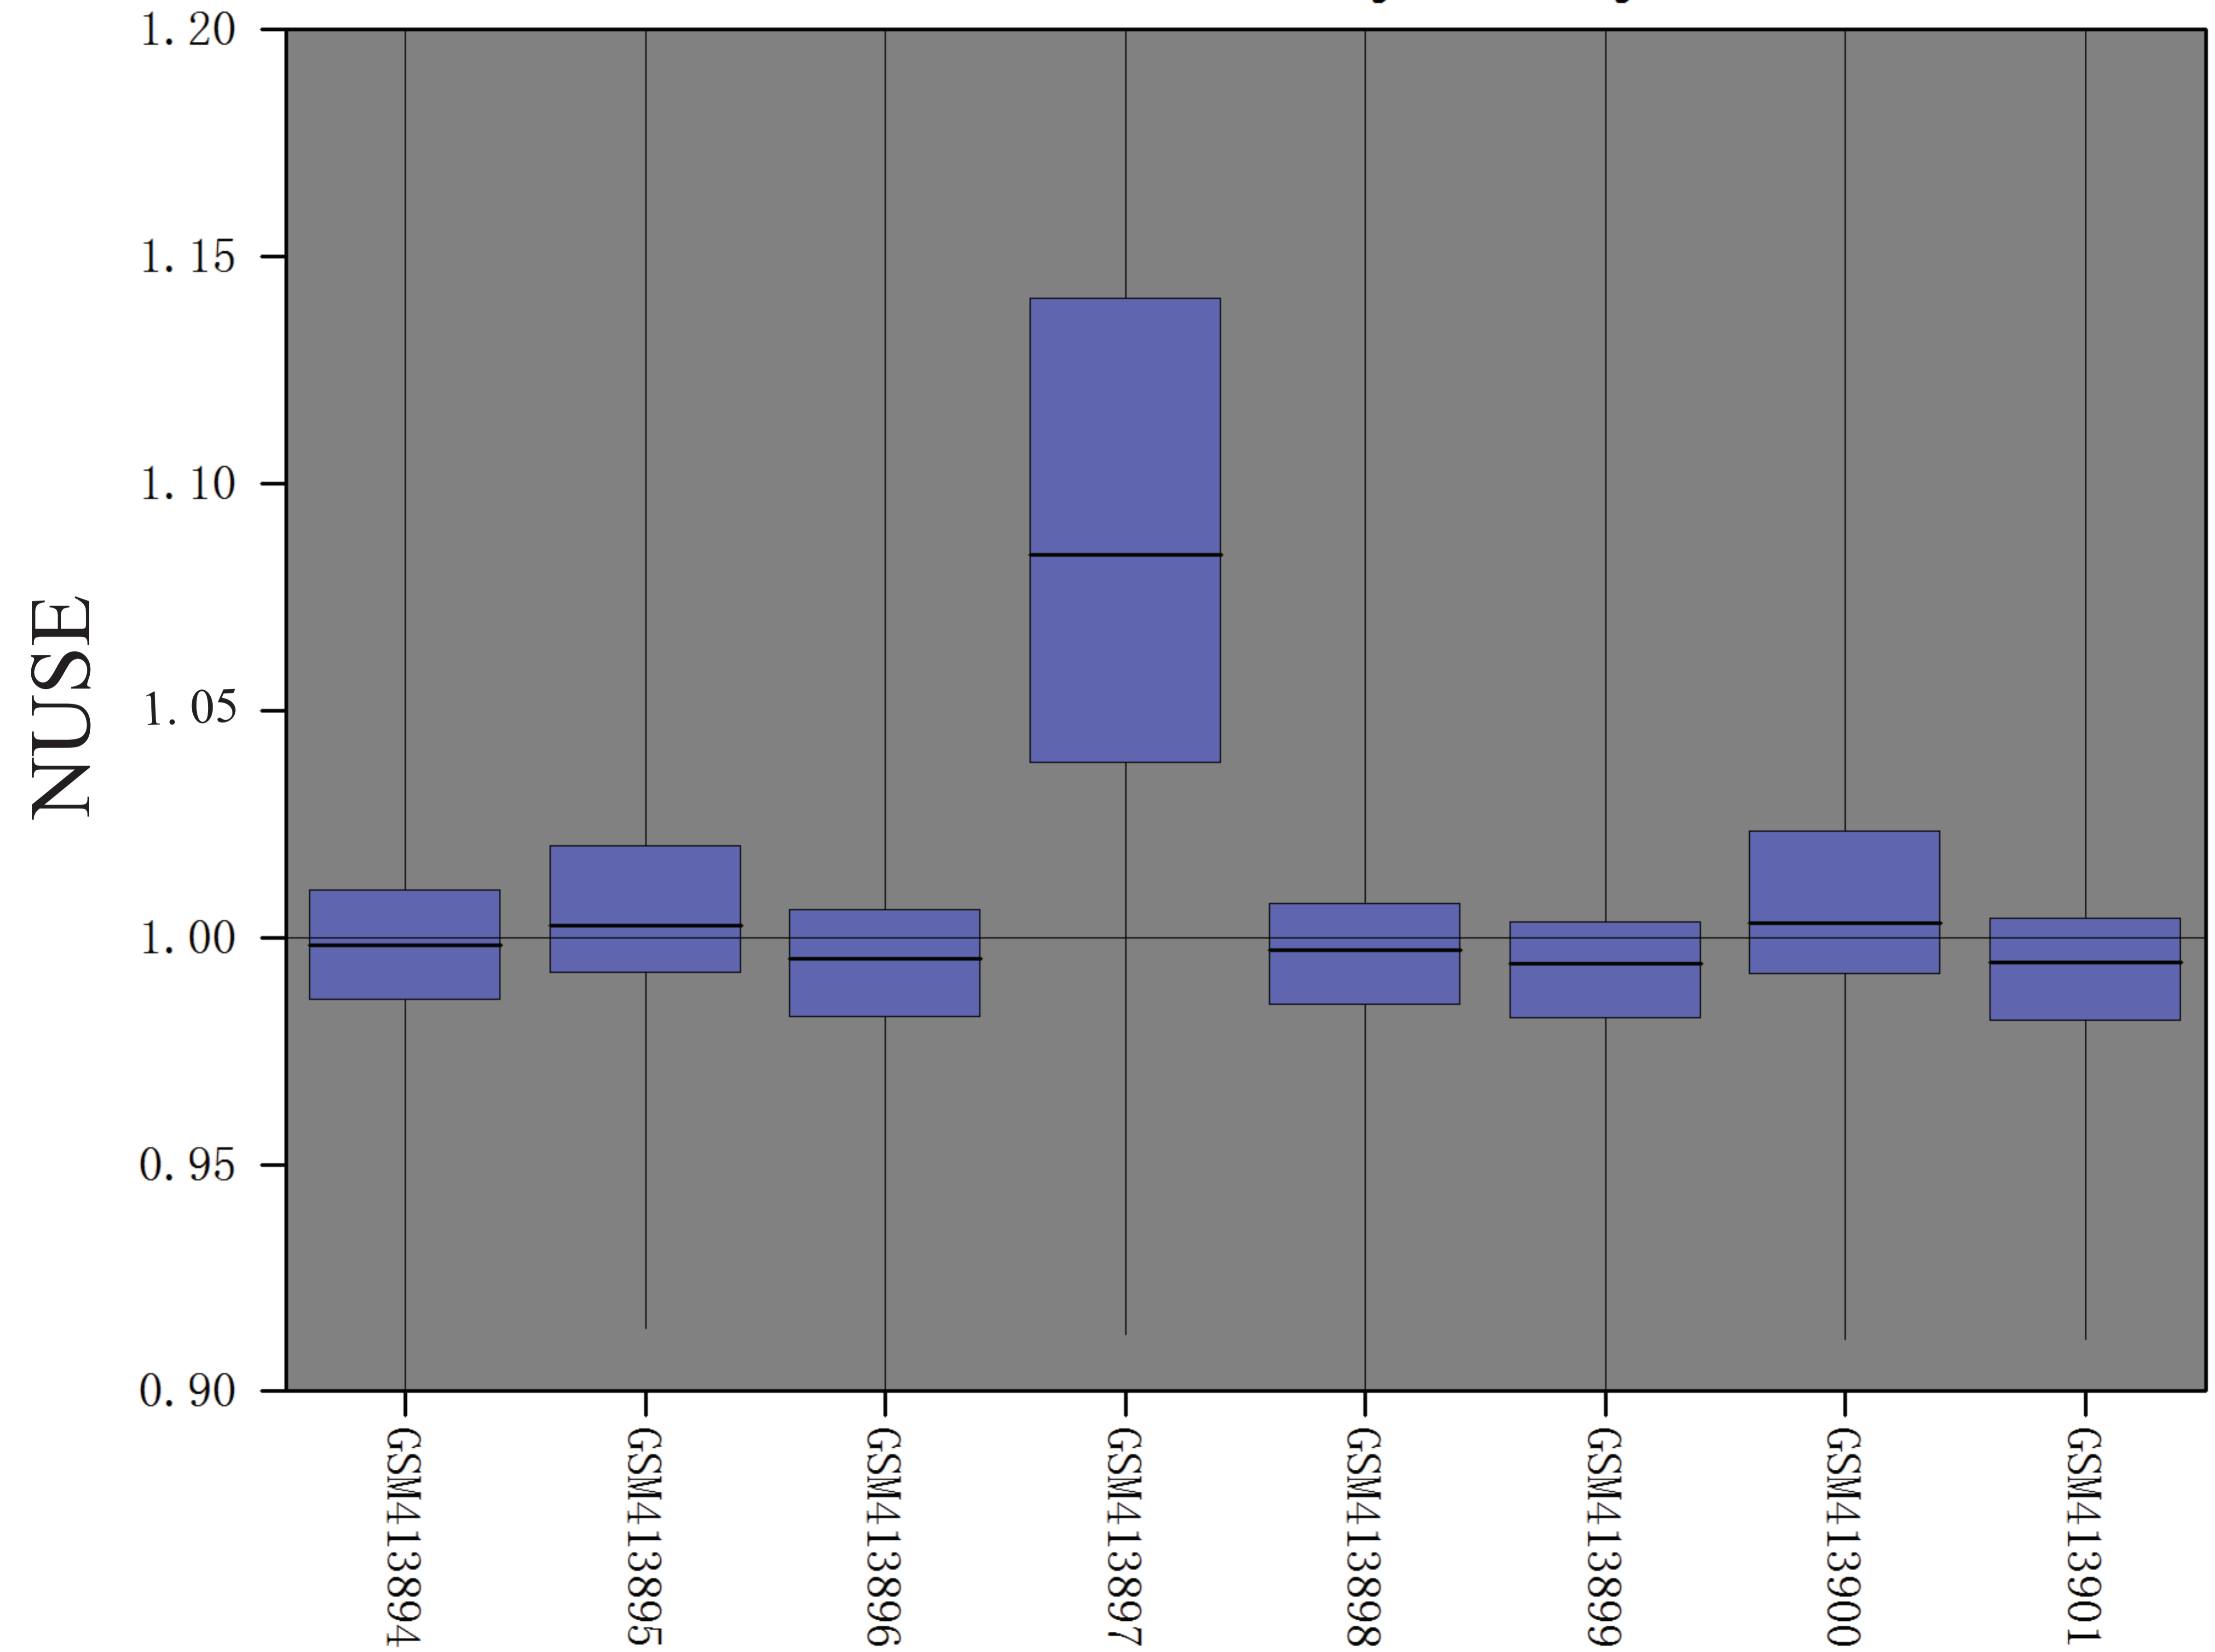

# GSE29810 (drought stress)

## RLE values by array

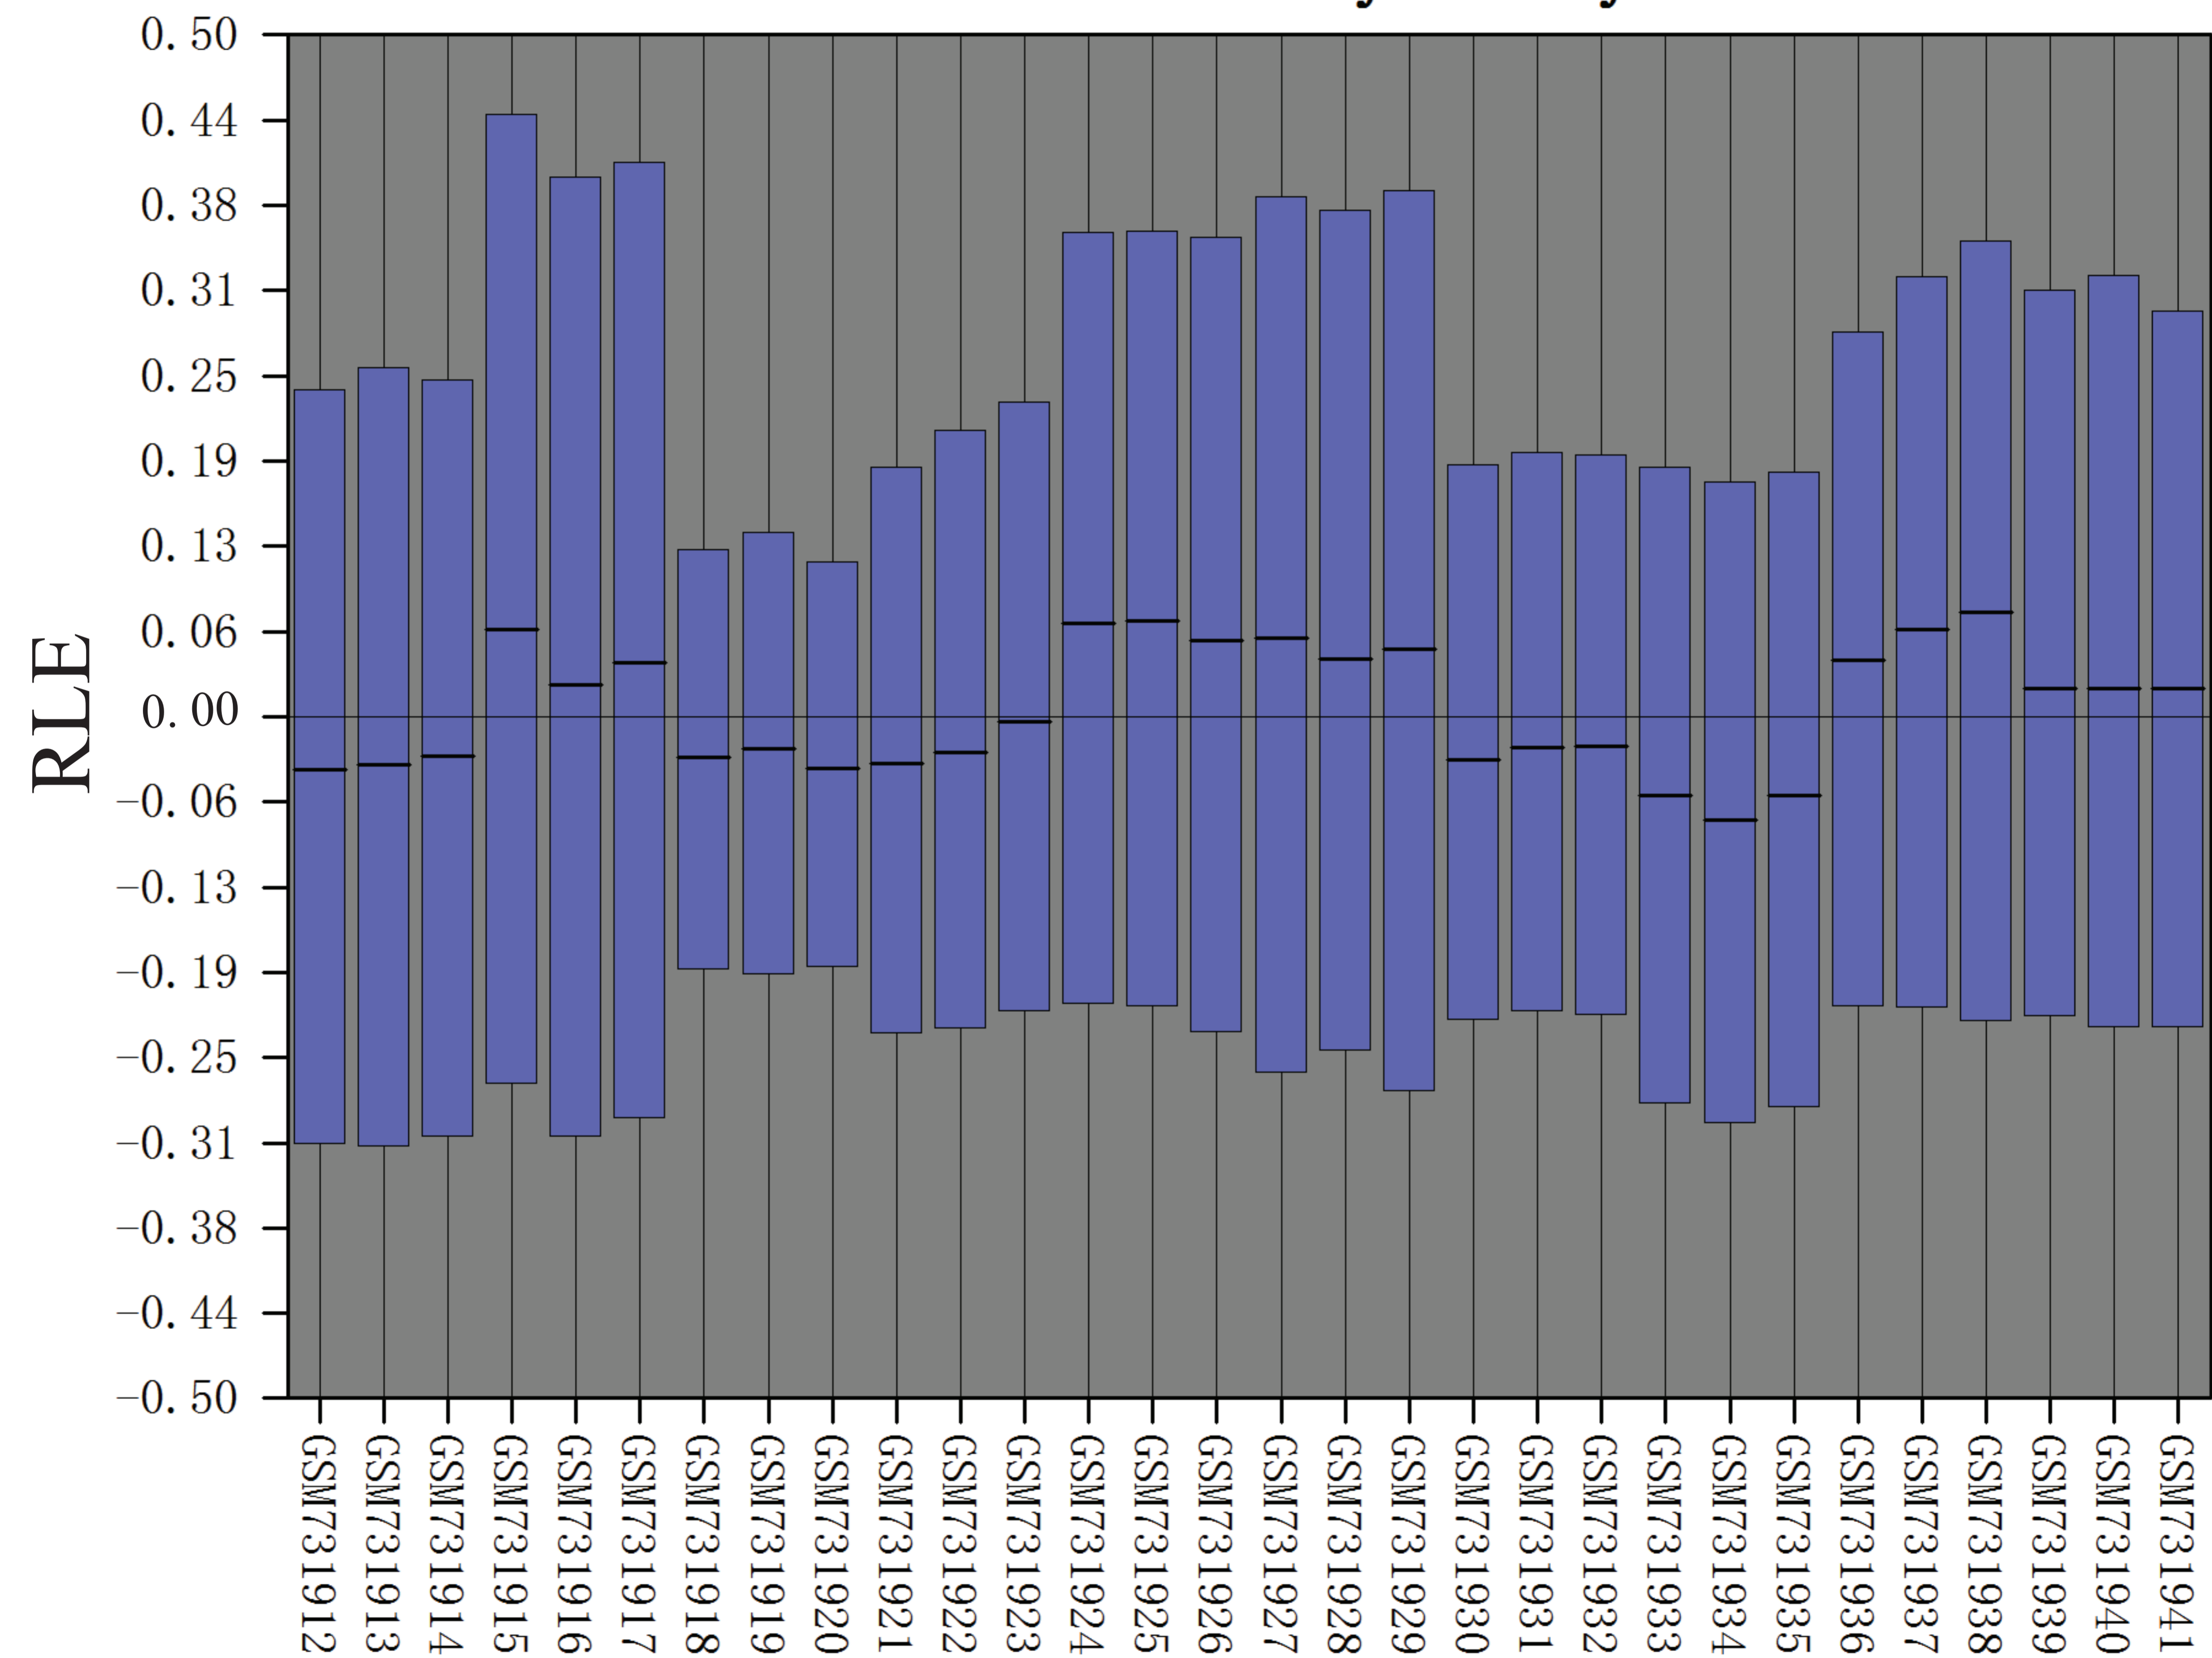

# GSE29810 (drought stress)

## NUSE values by array

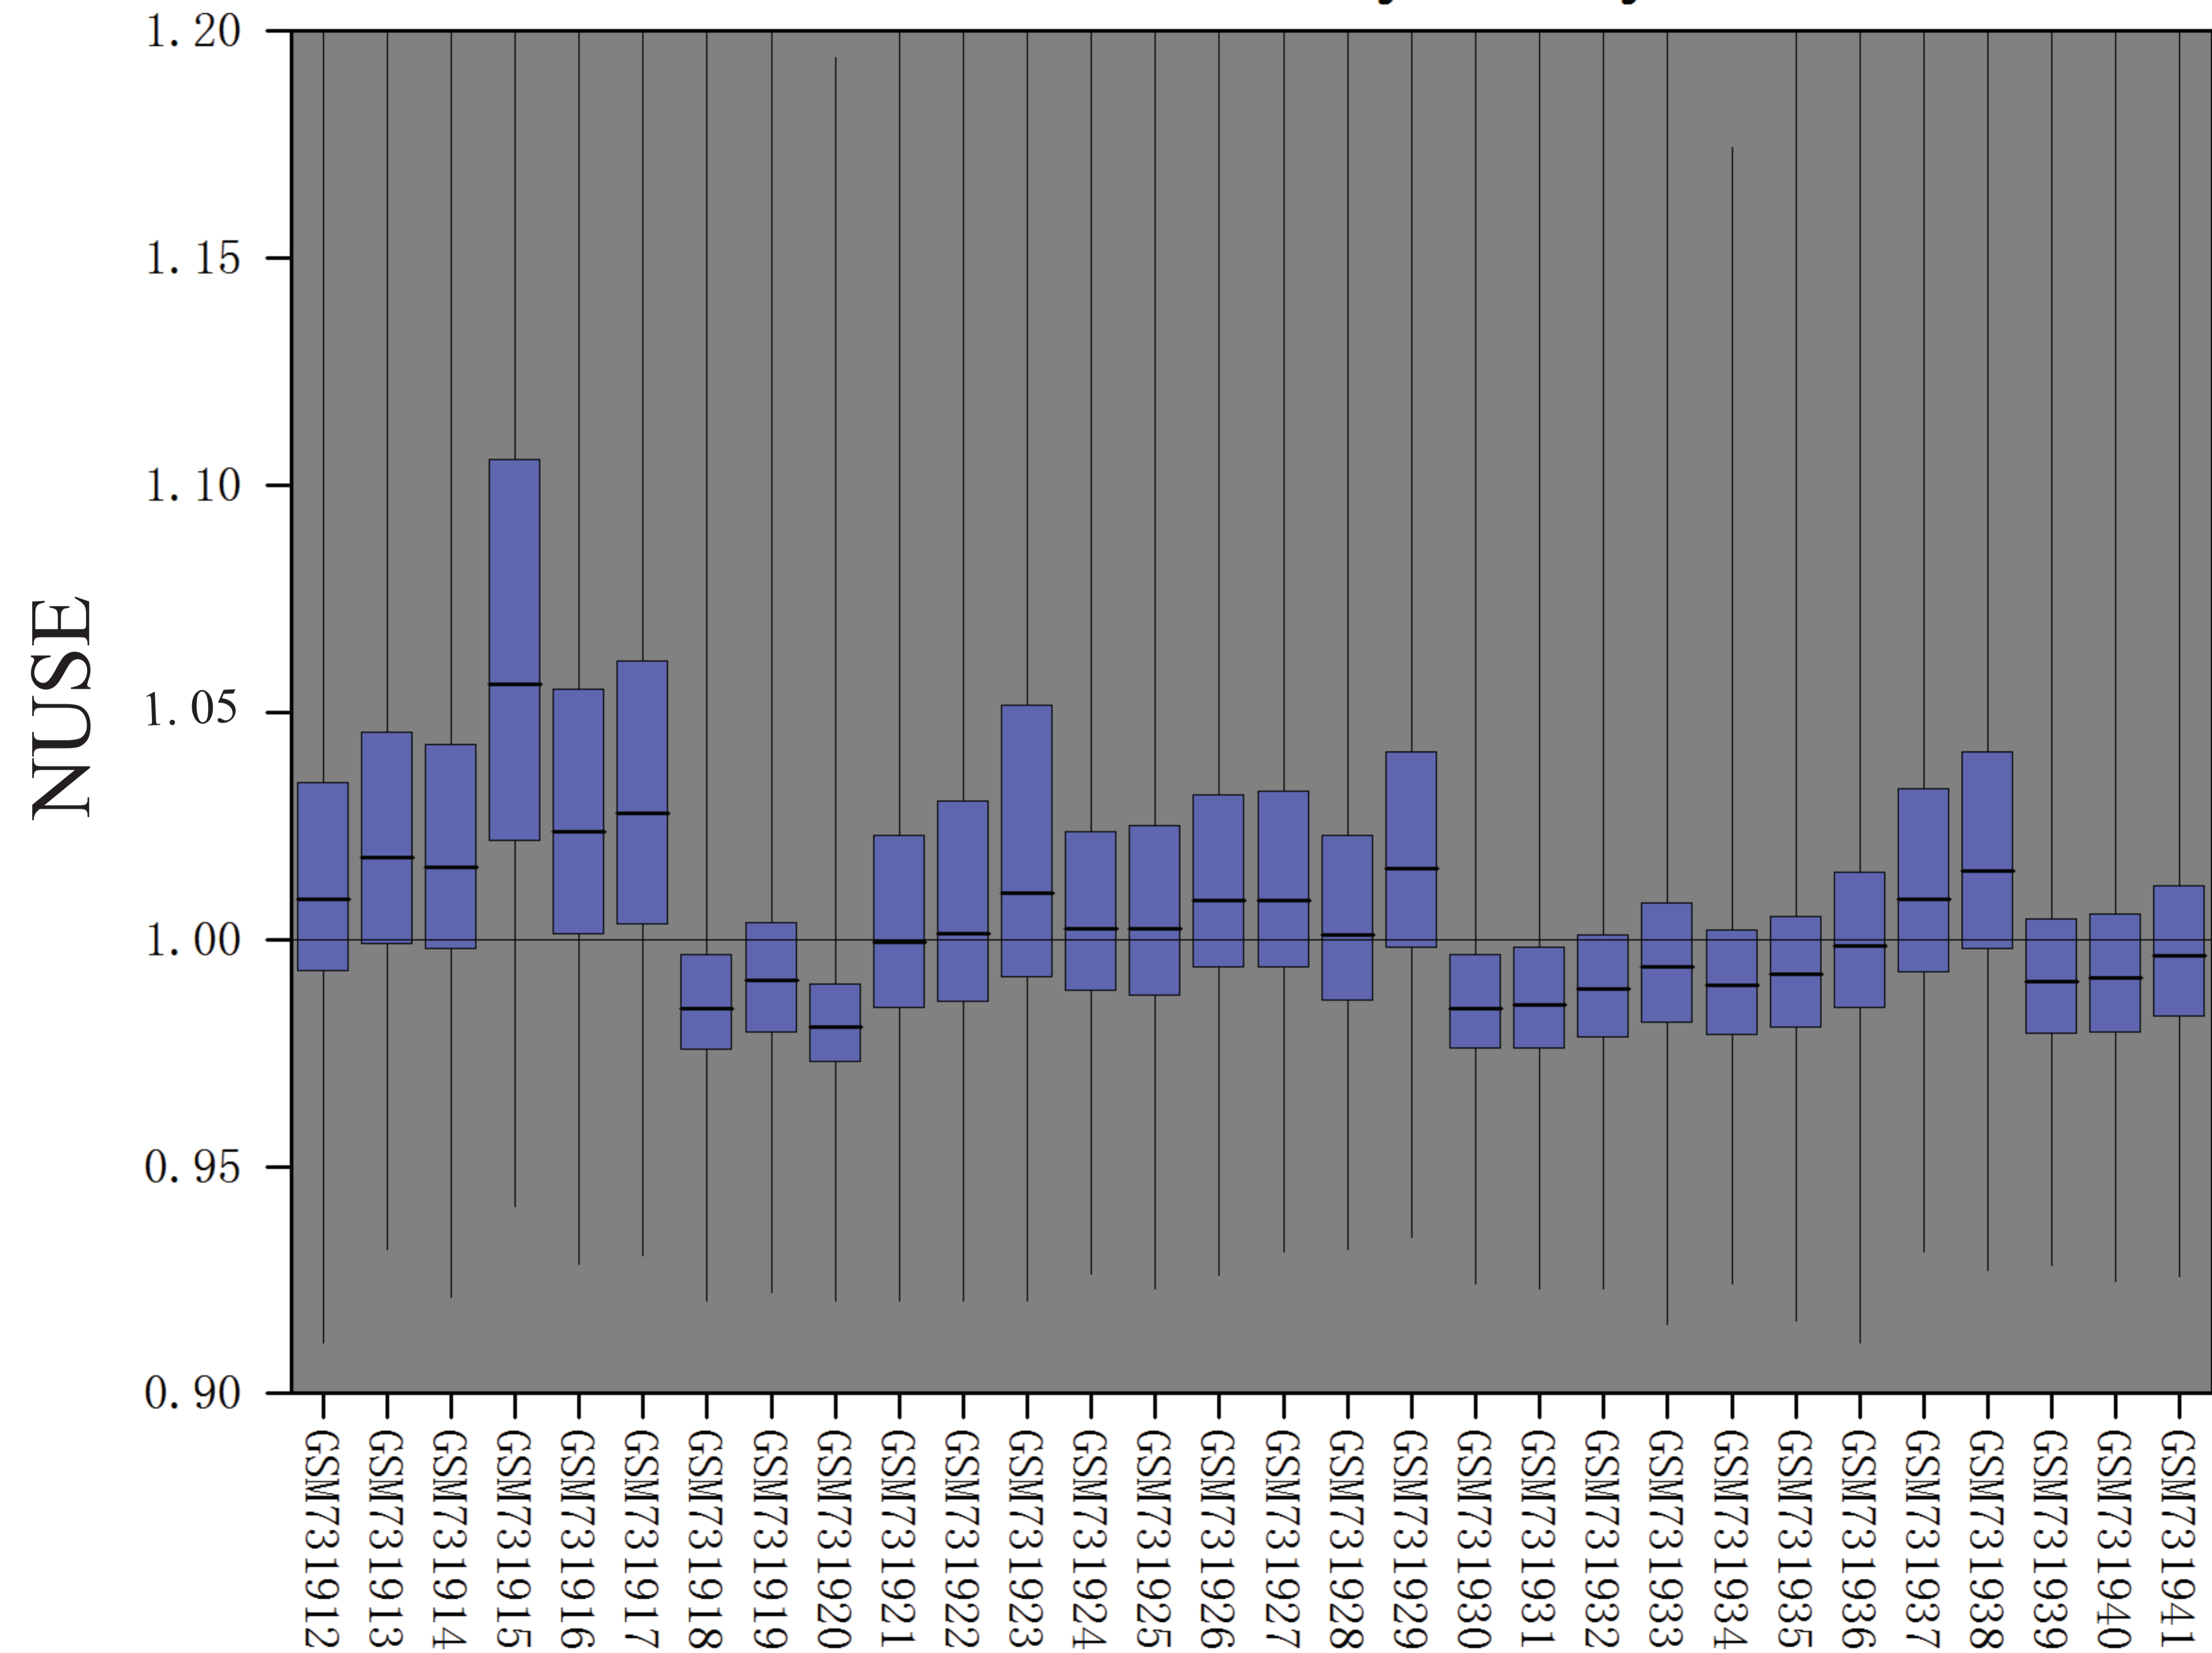



# GSE74412 (*Alternaria alternata* infection)

## RLE values by array

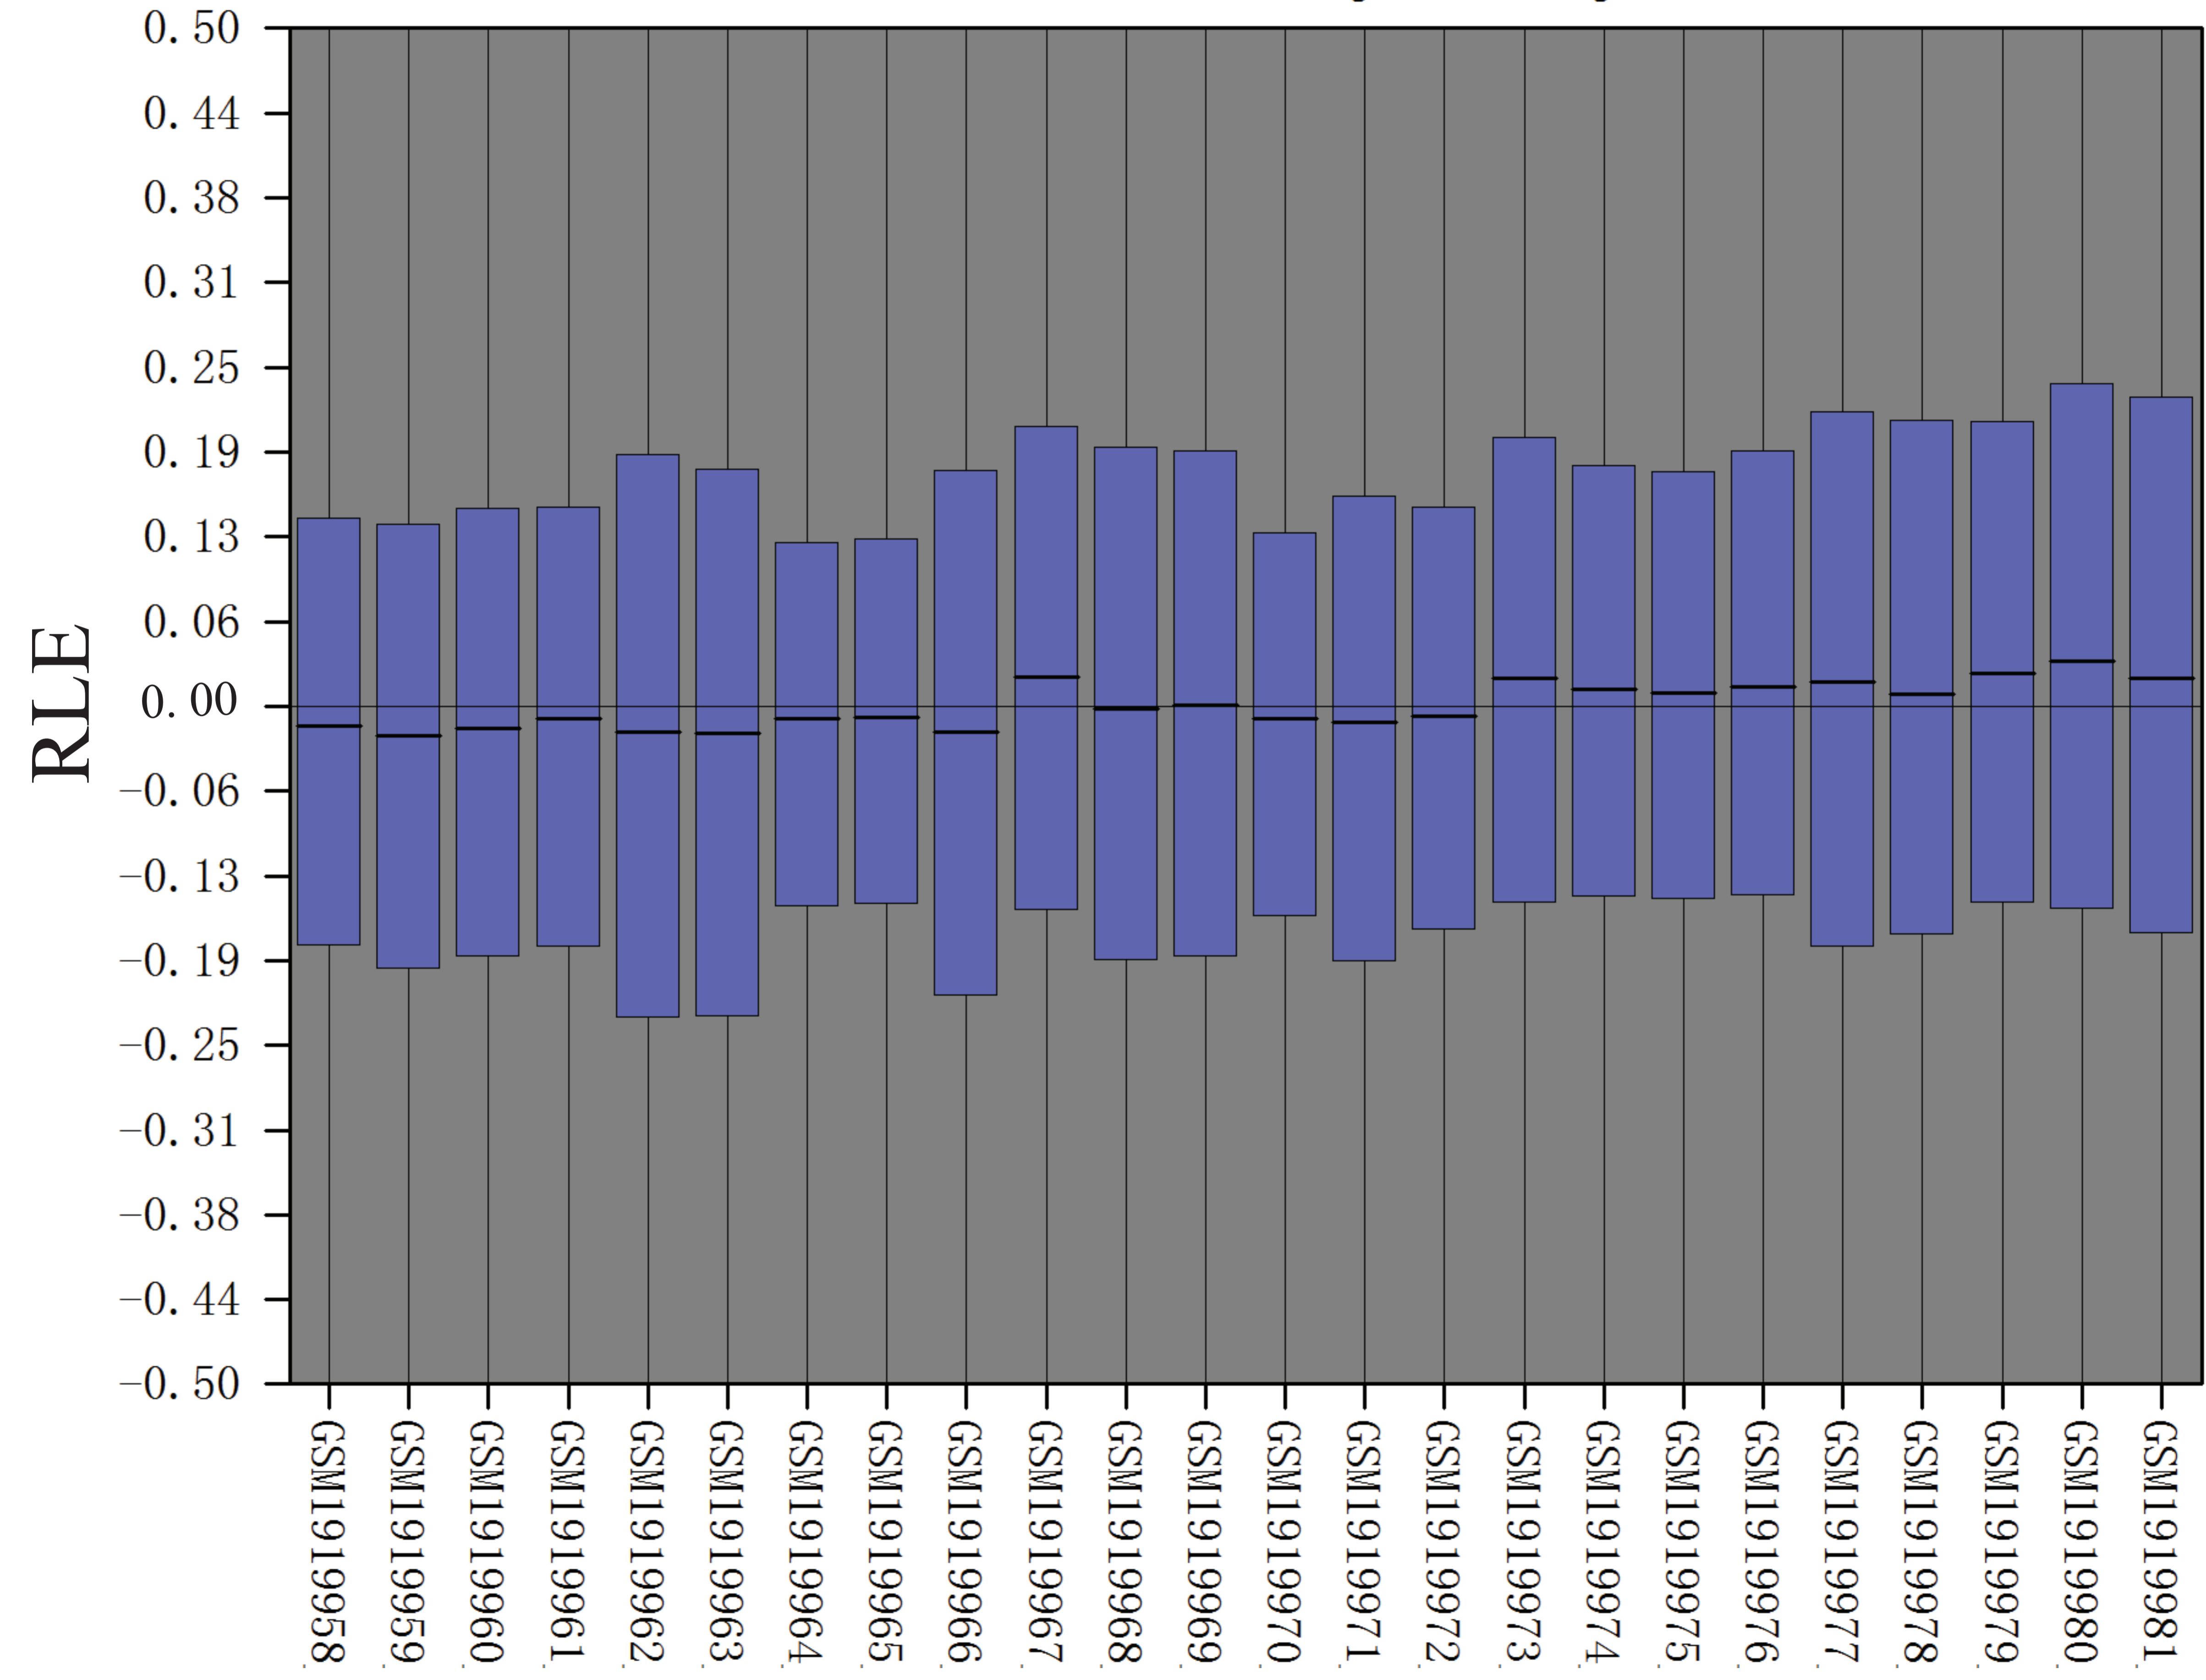

# GSE74412 (*Alternaria alternata* infection)

## NUSE values by array

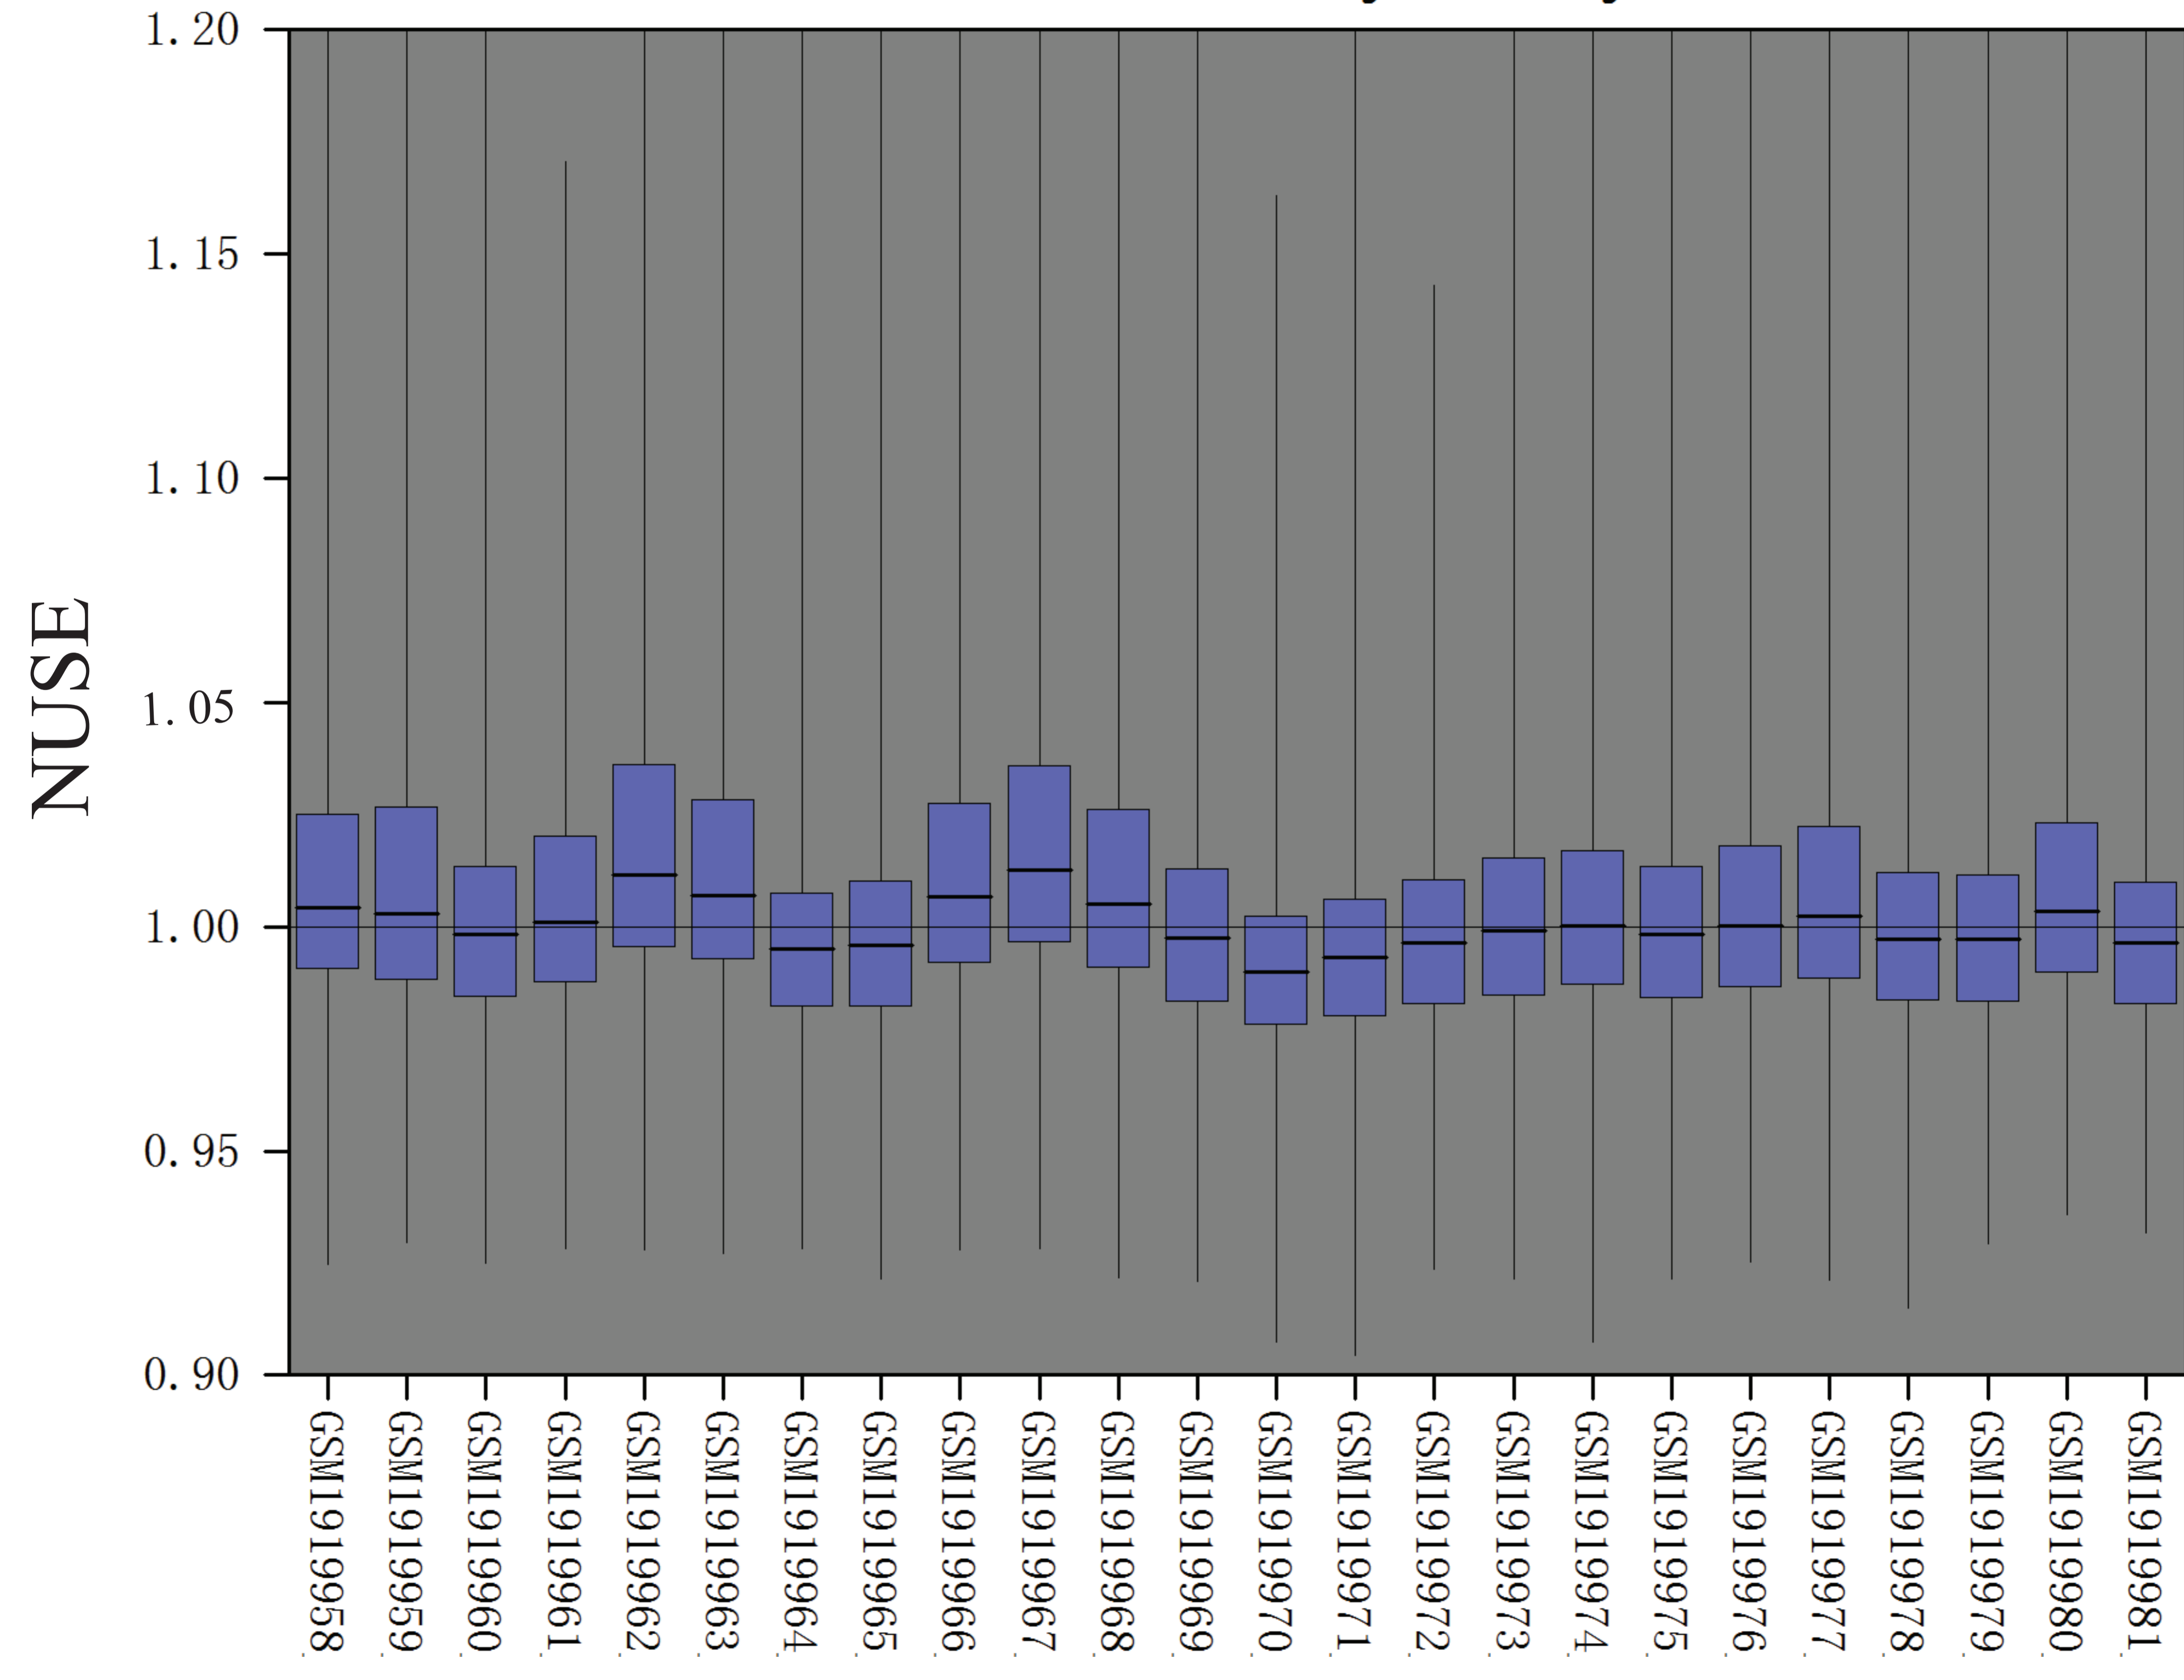

# GSE55511 (bollworm infection)

## RLE values by array

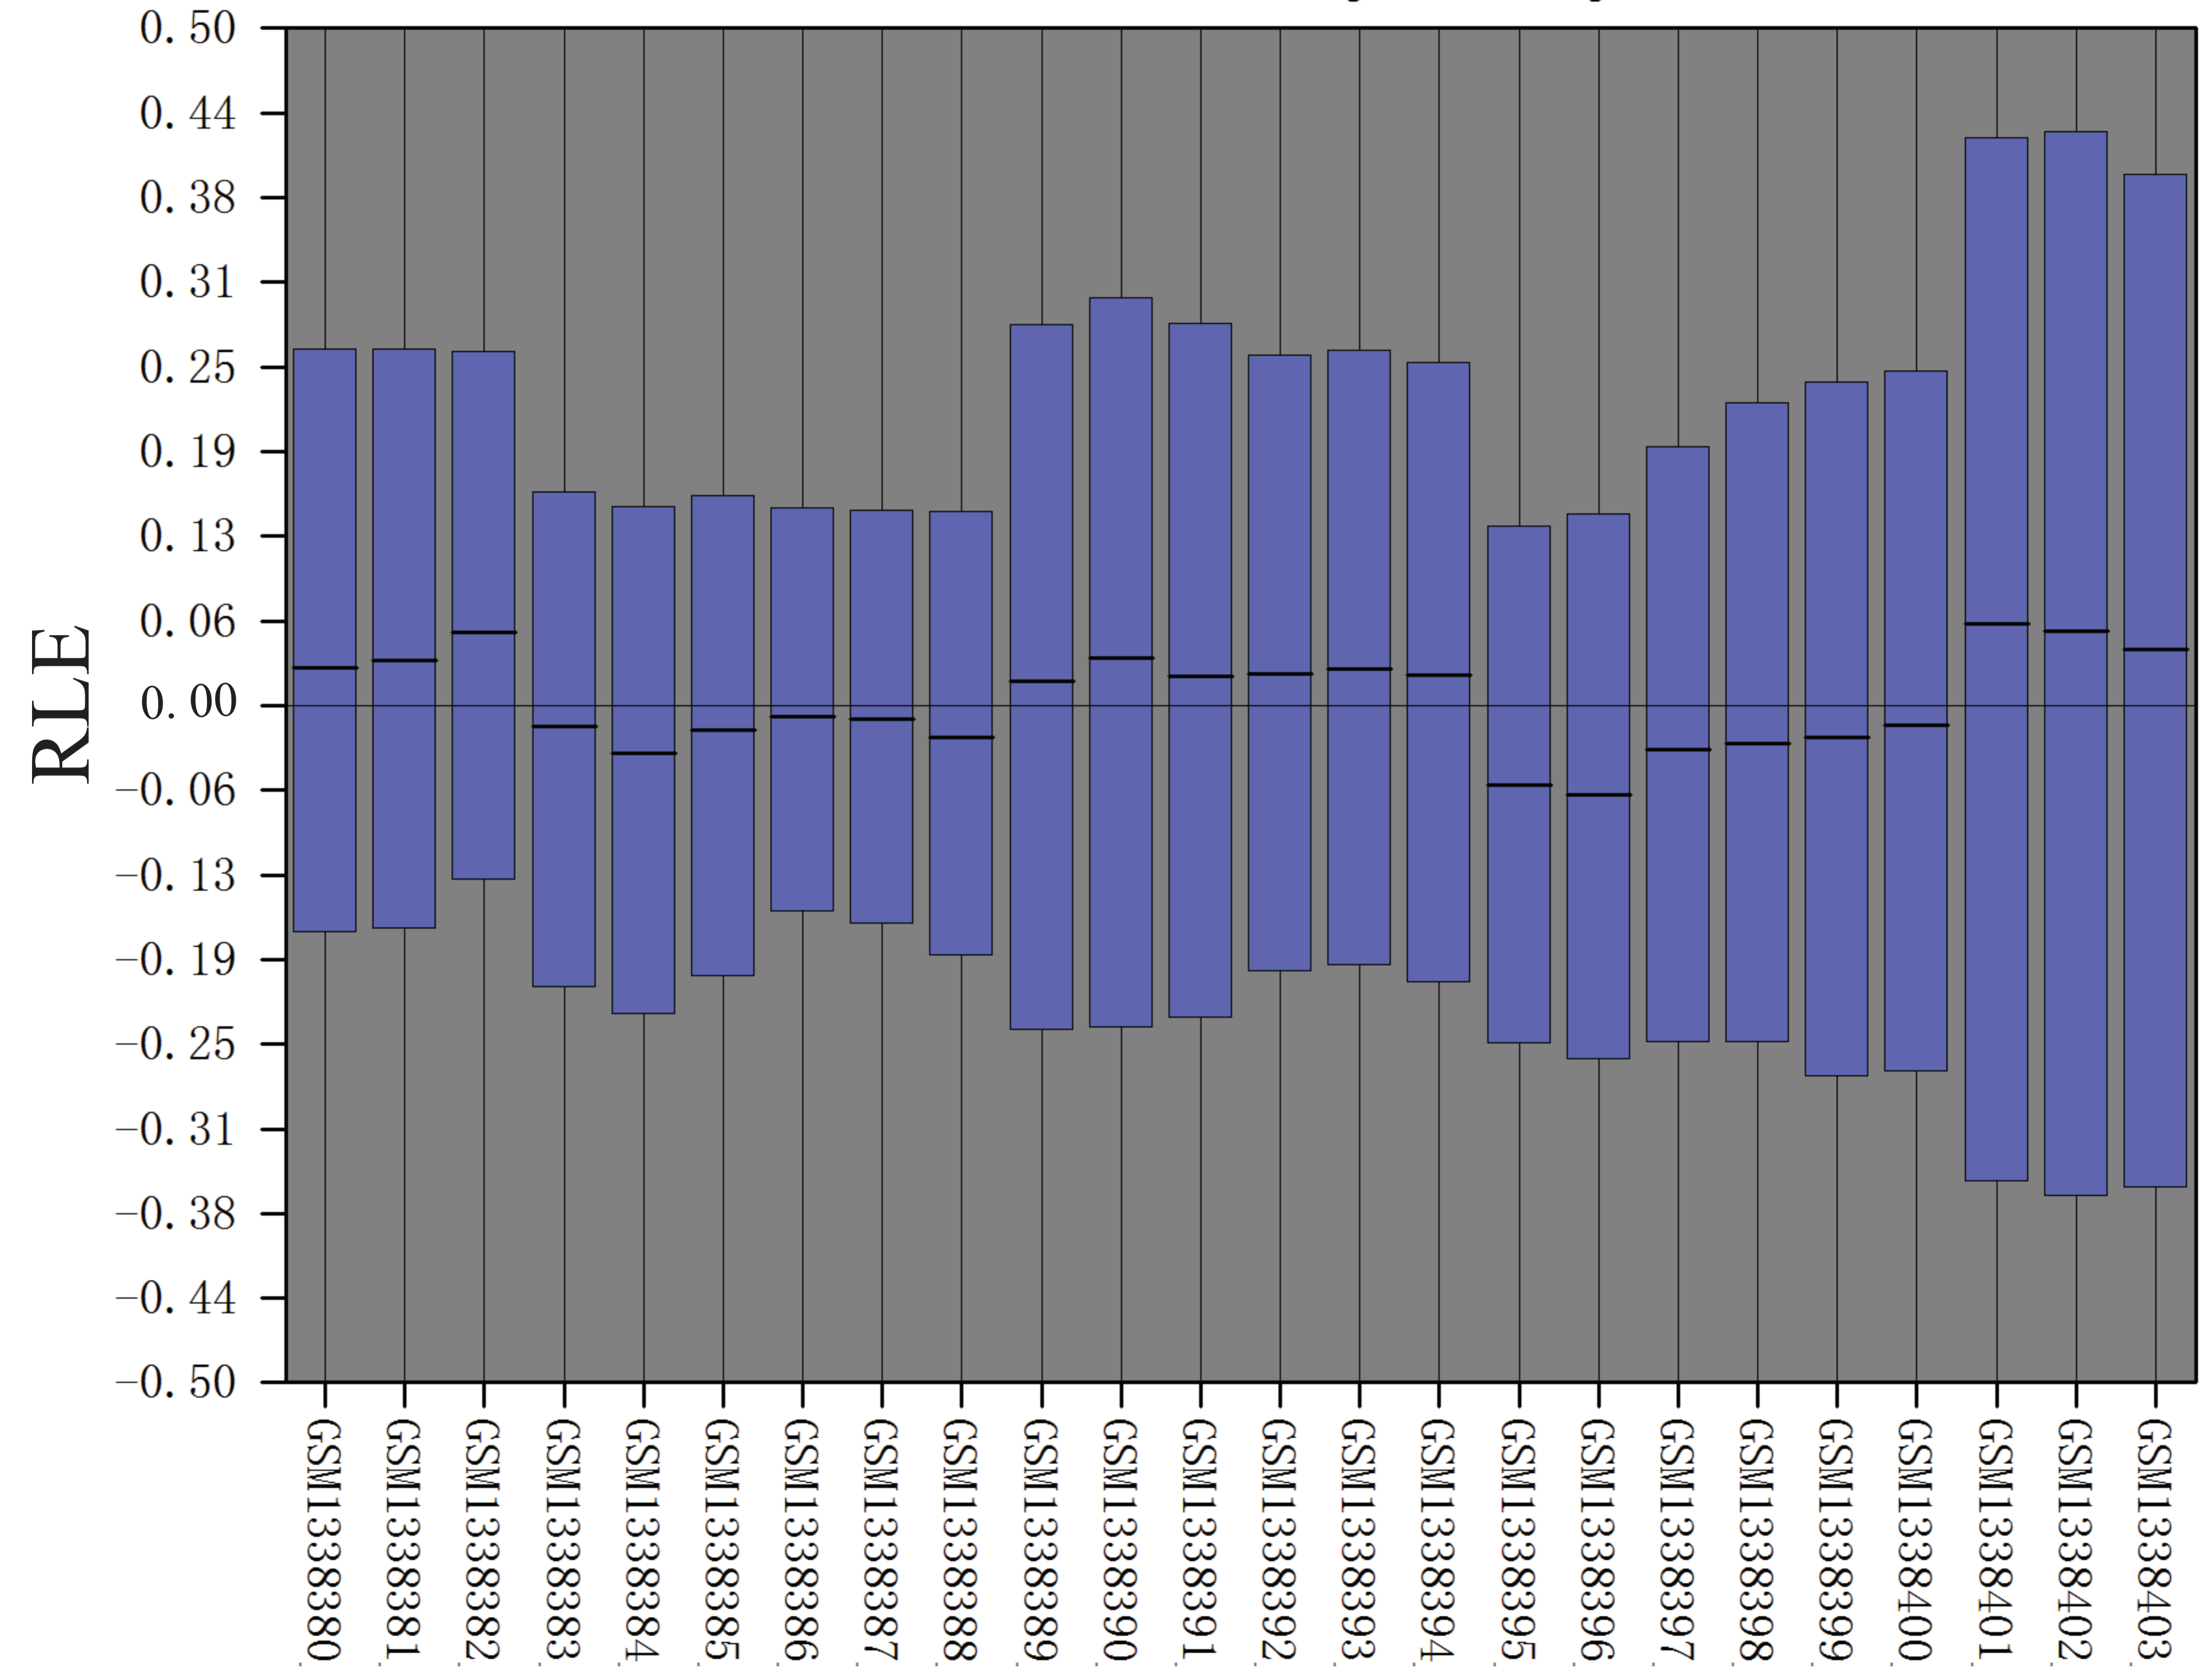



# GSE55511 (bollworm infection)

## NUSE values by array

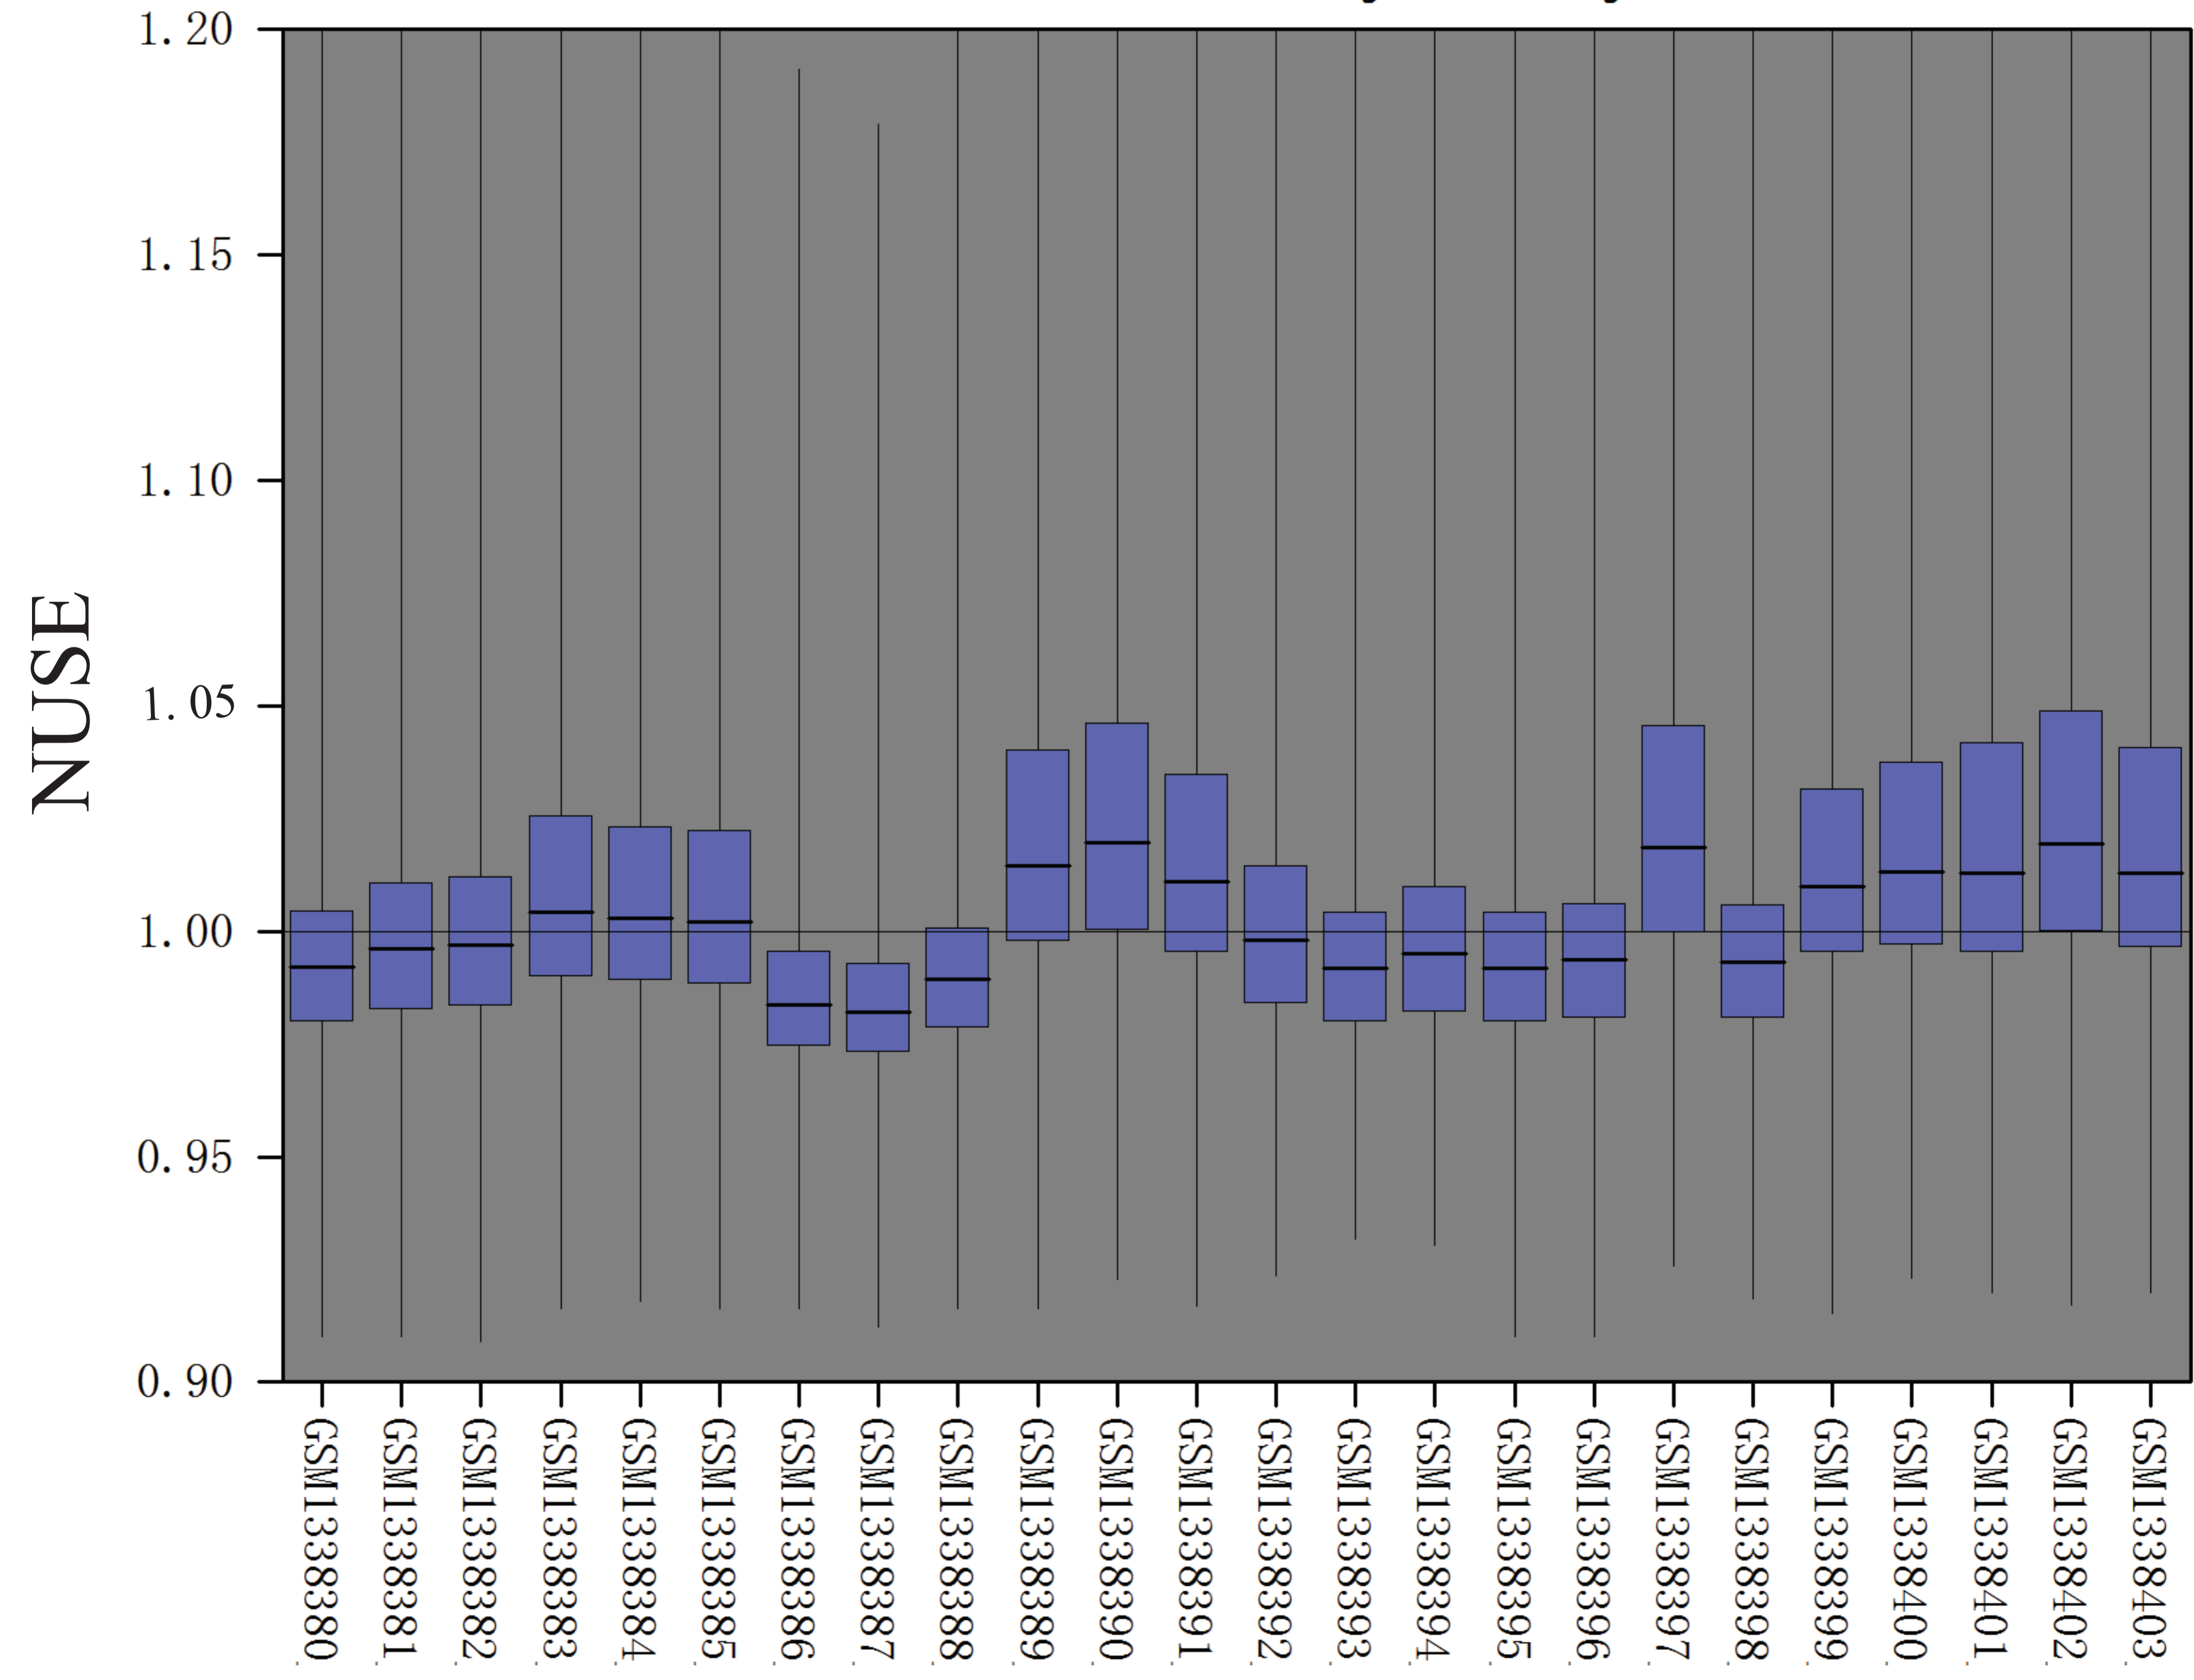



# GSE36228 (fiber development) part 1

## RLE values by array

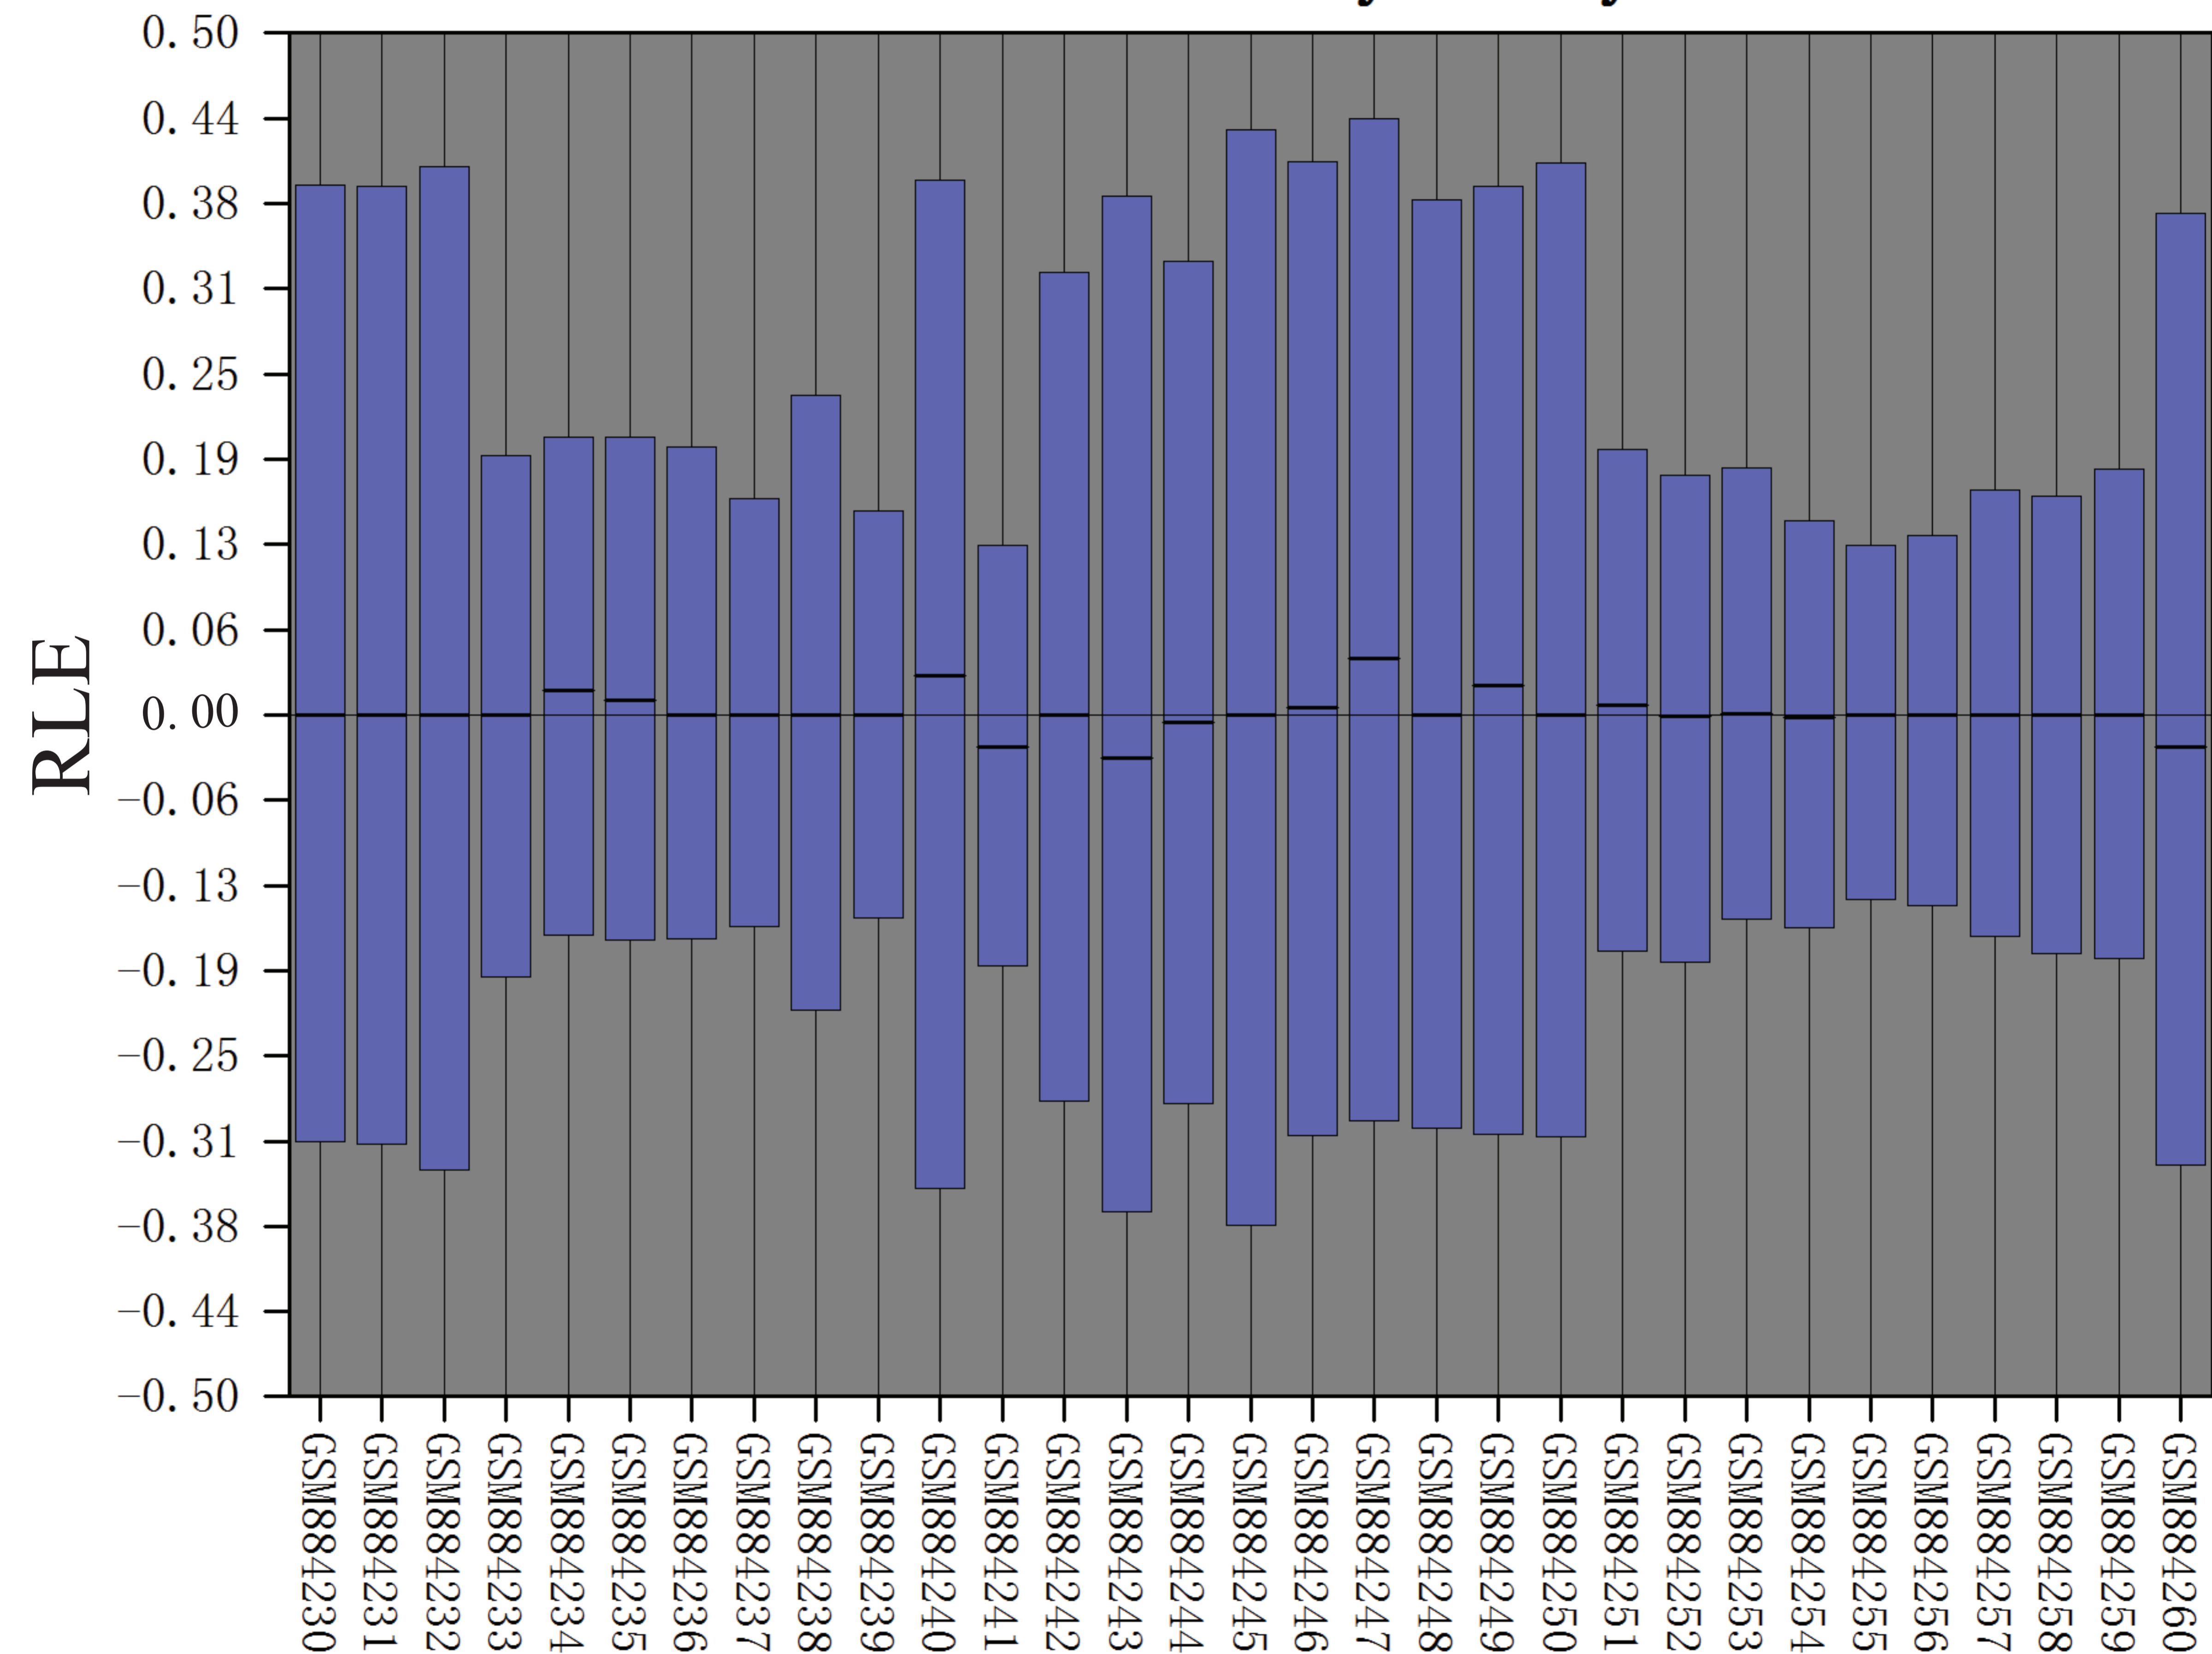

# GSE36228 (fiber development) part 1

## NUSE values by array

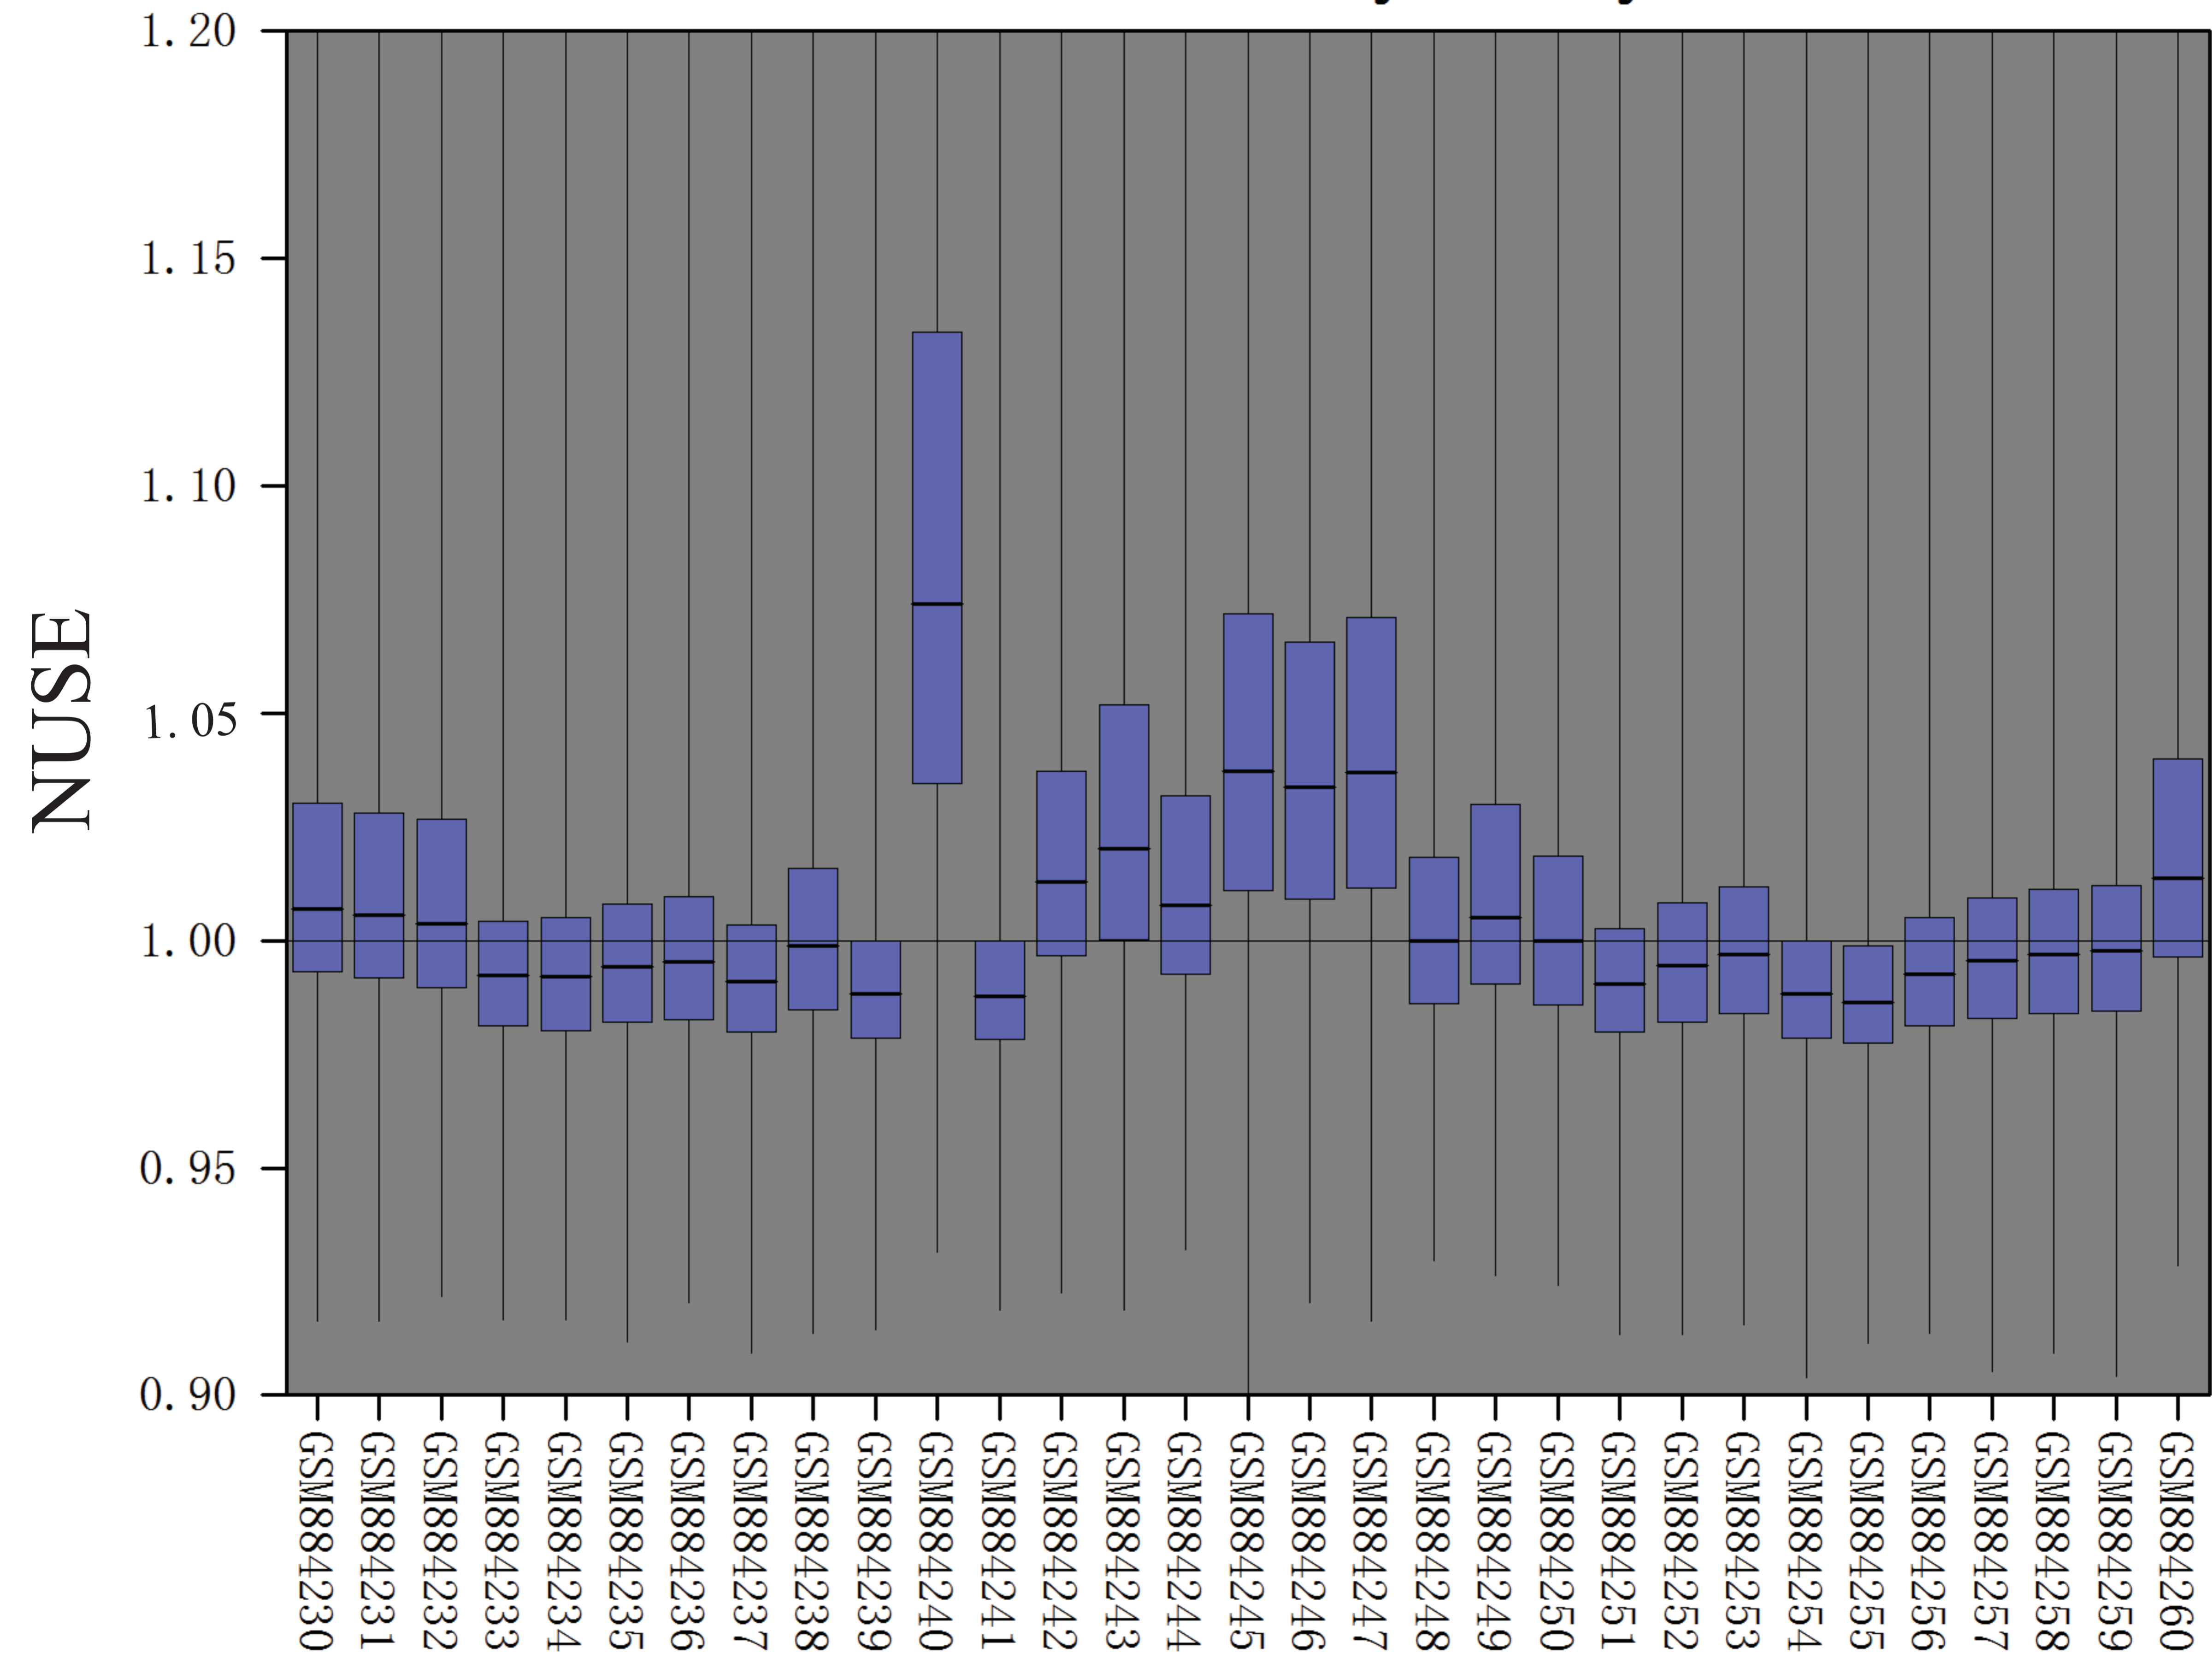

# GSE36228 (fiber development) part 2

## RLE values by array

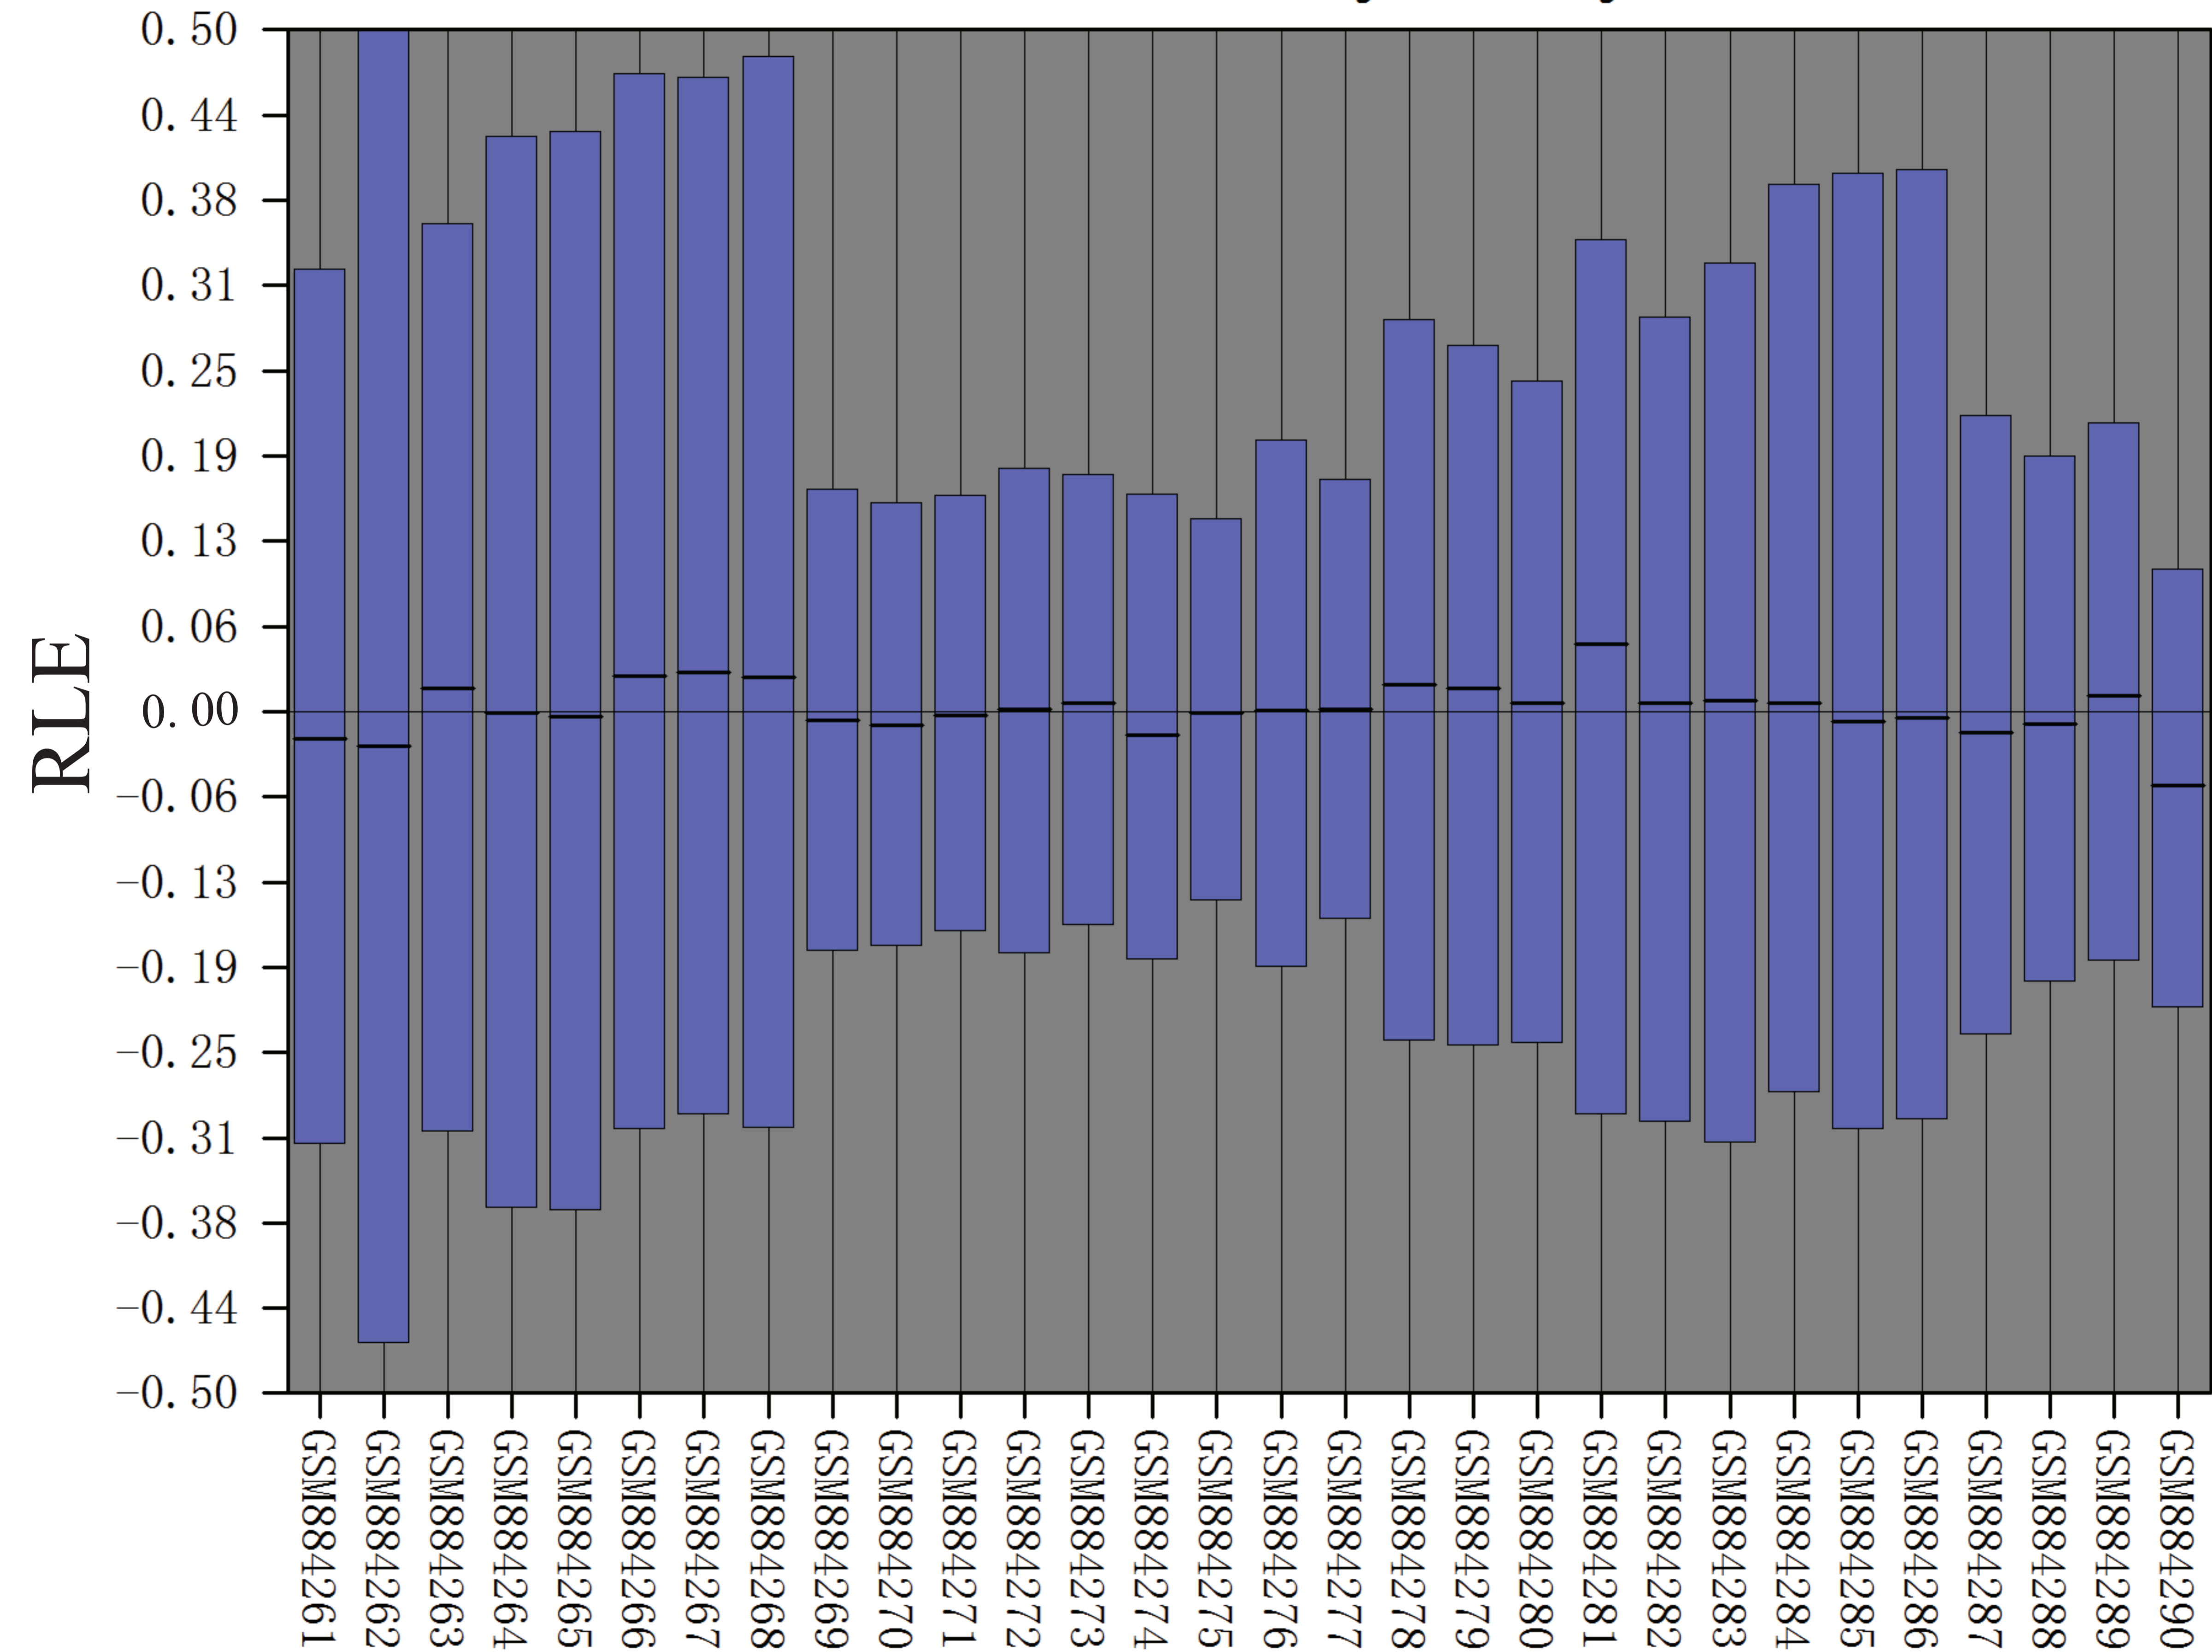



# GSE36228 (fiber development) part 2

## NUSE values by array

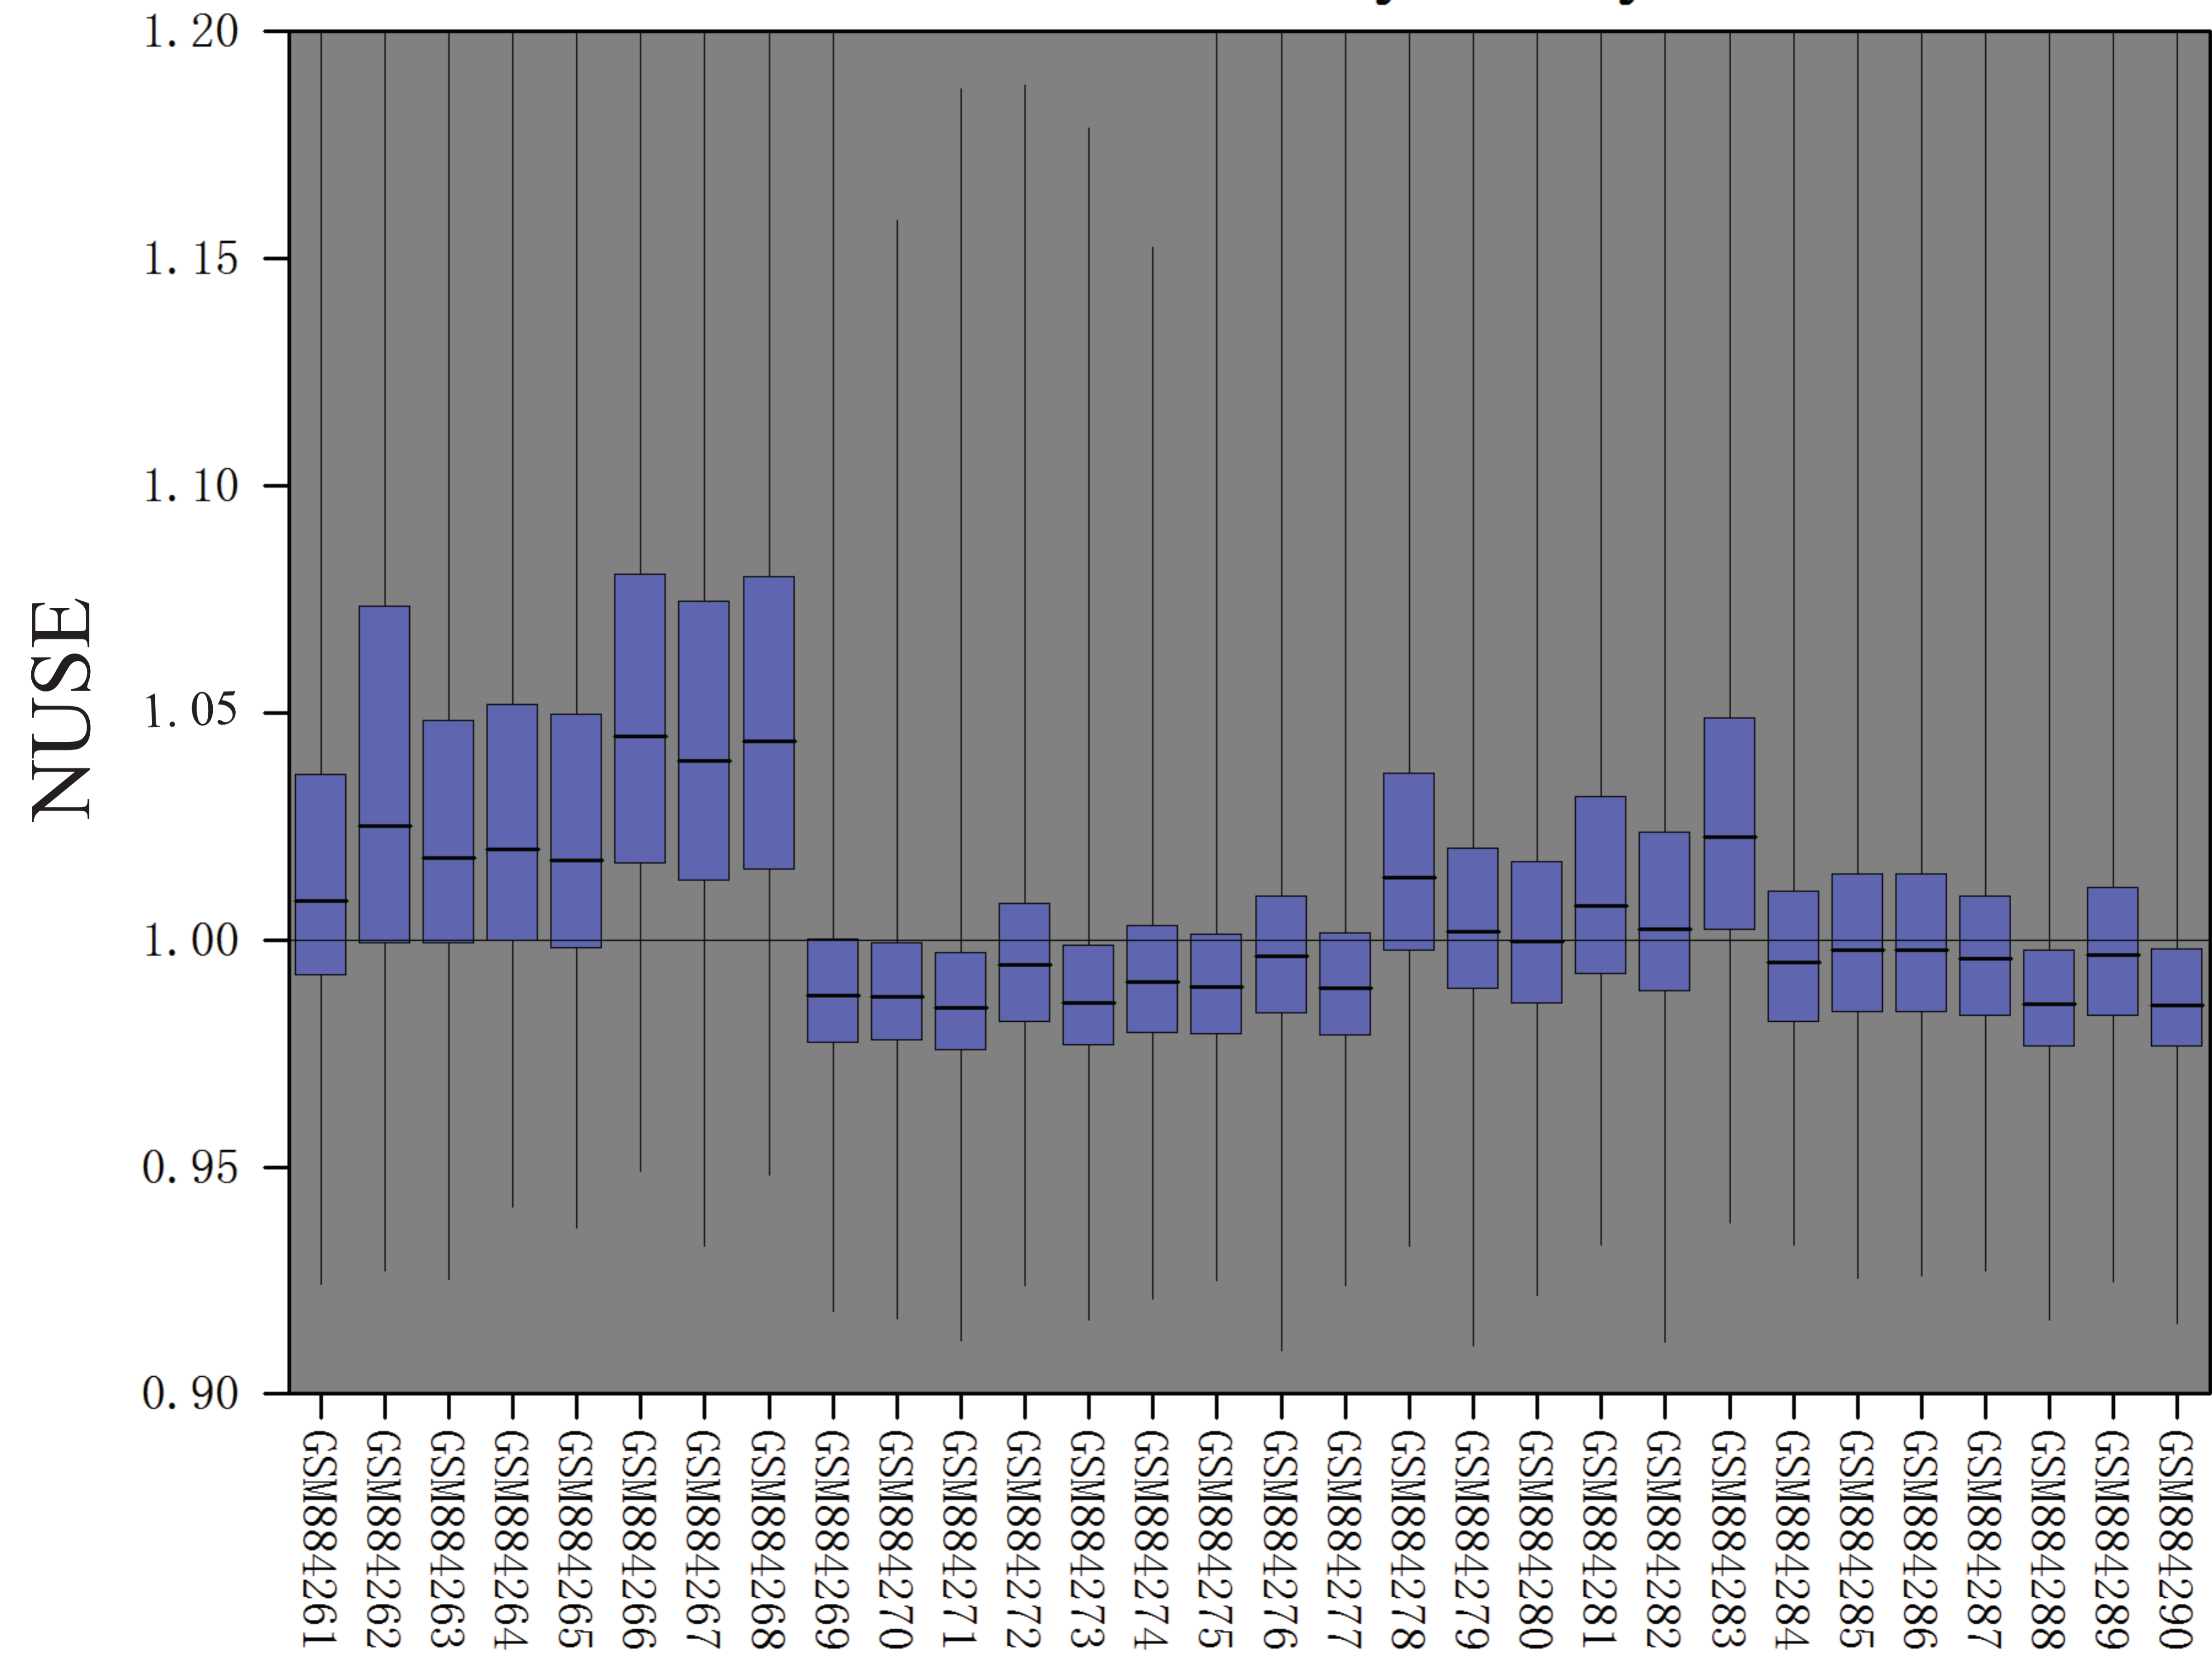



# GSE36228 (fiber development) part 3

## RLE values by array

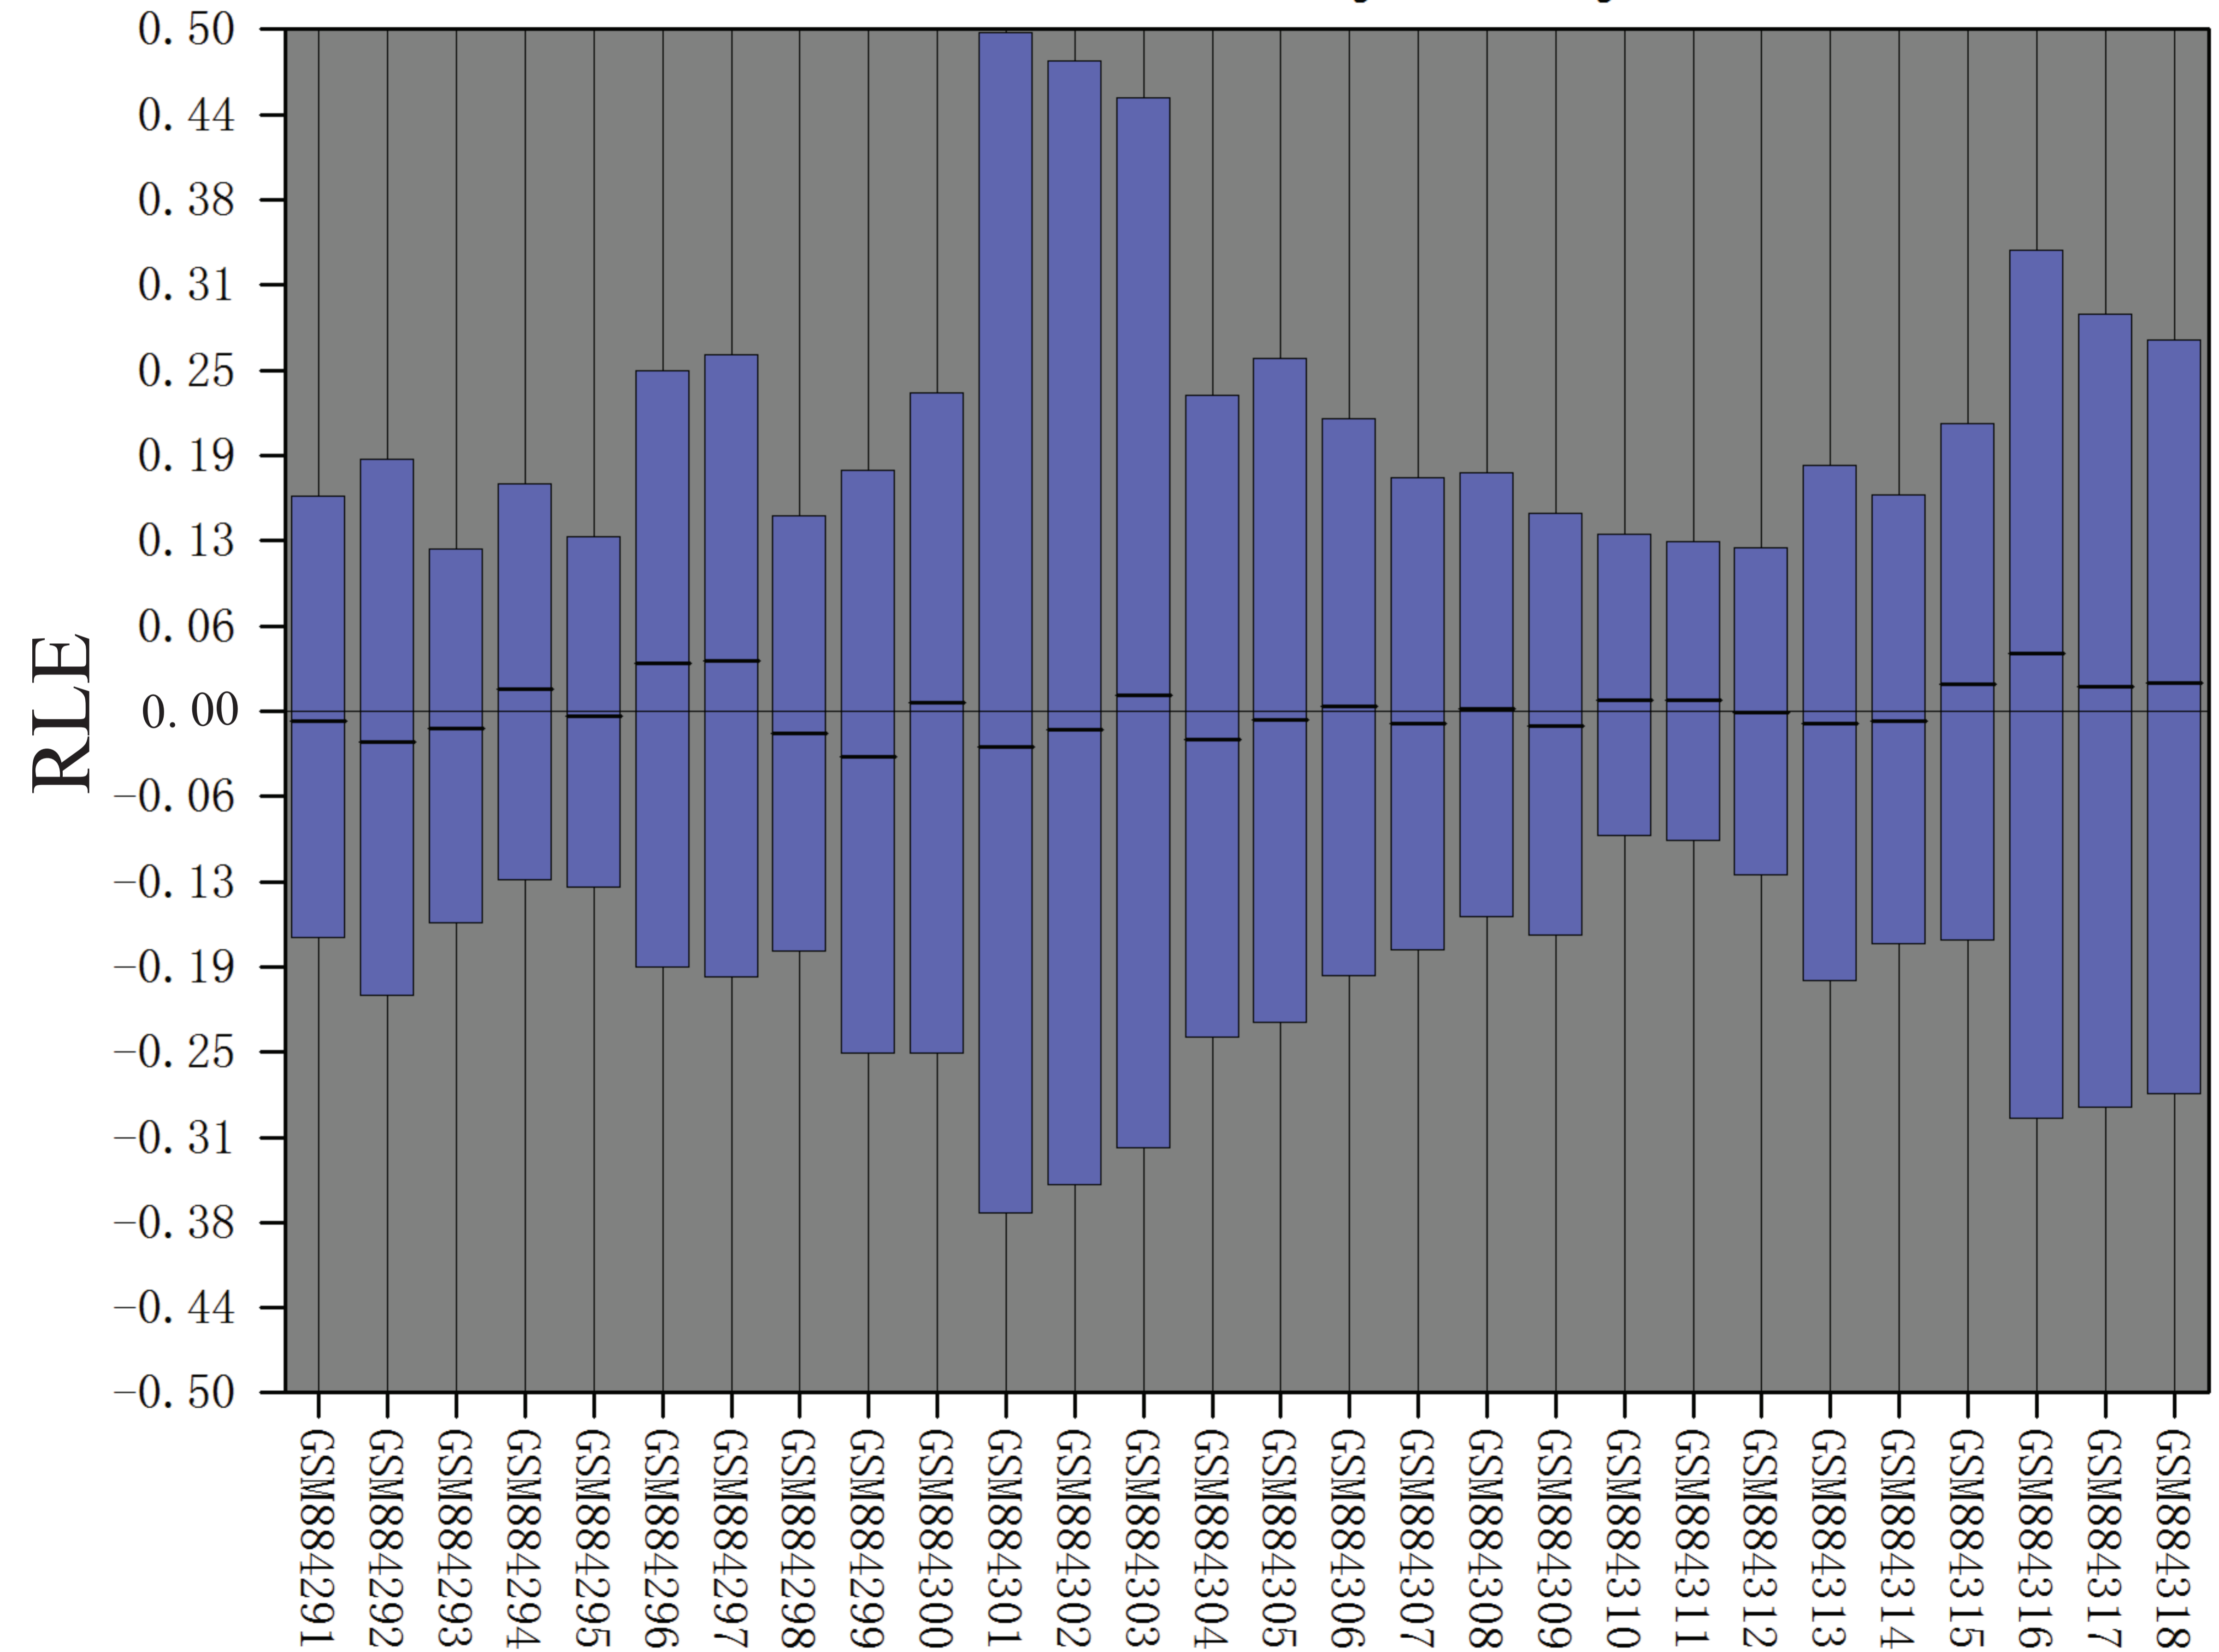

# GSE36228 (fiber development) part 3

## NUSE values by array

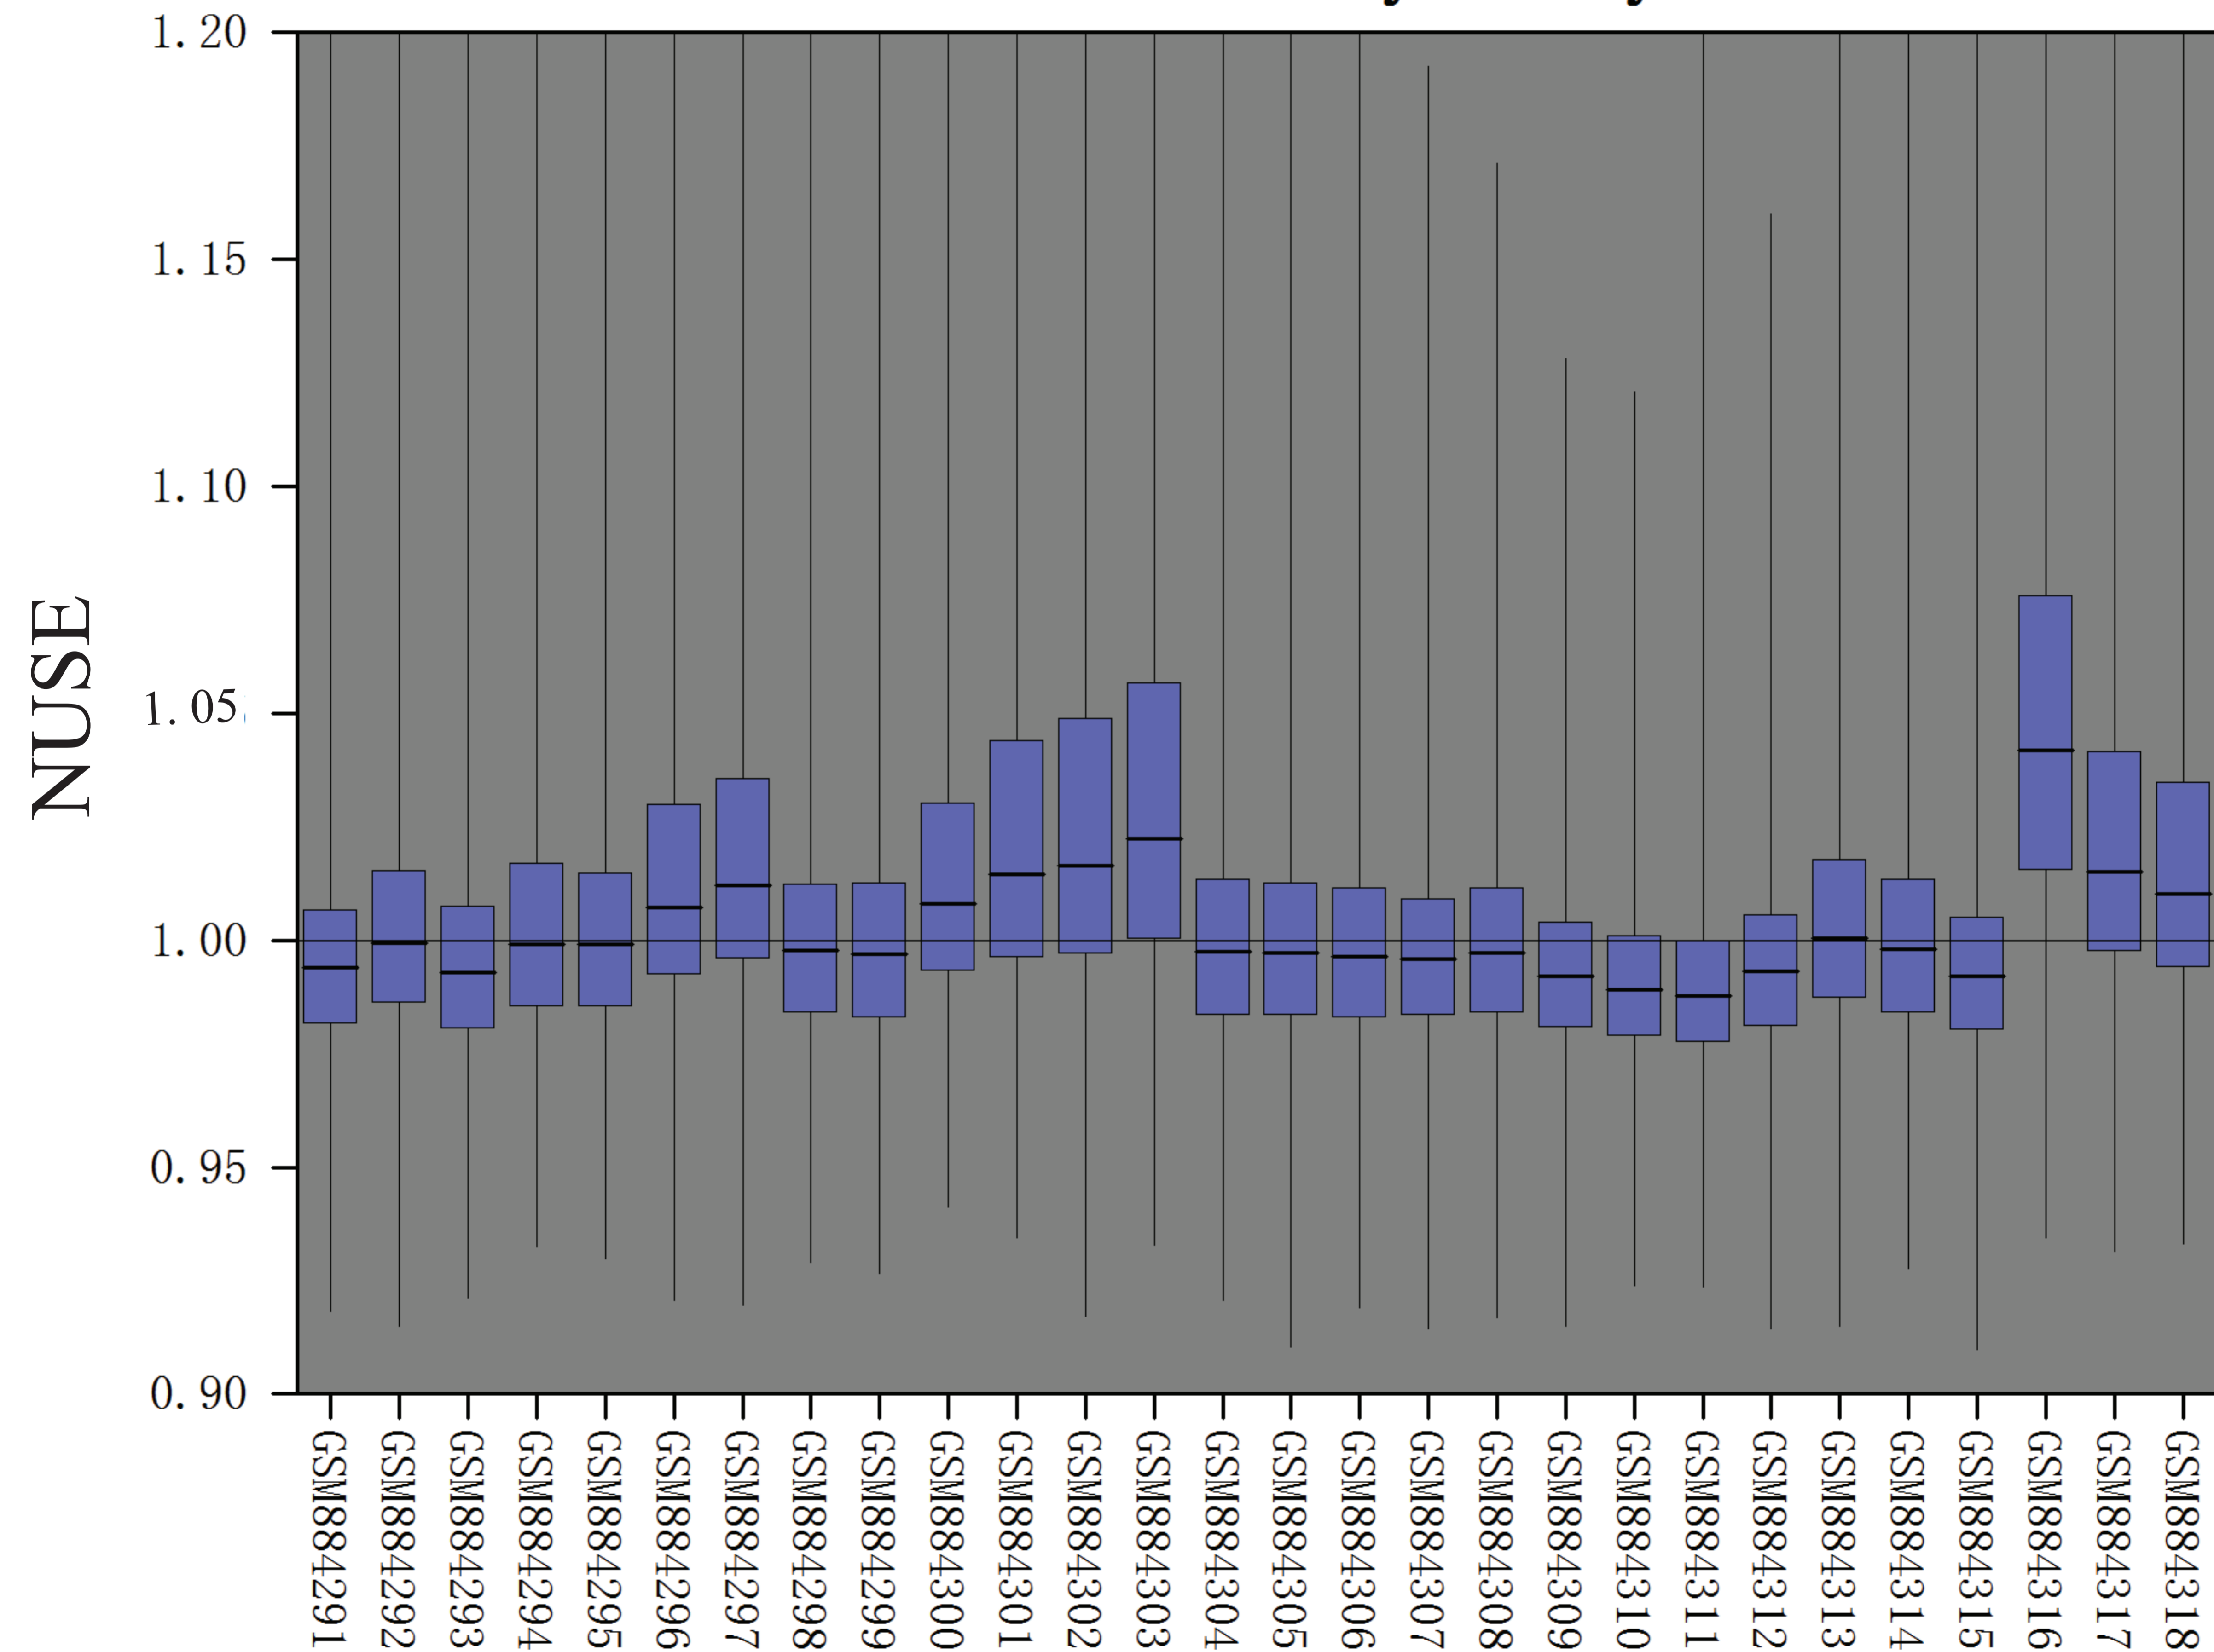

# GSE36021 (GhHD-1 fiber development)

## RLE values by array

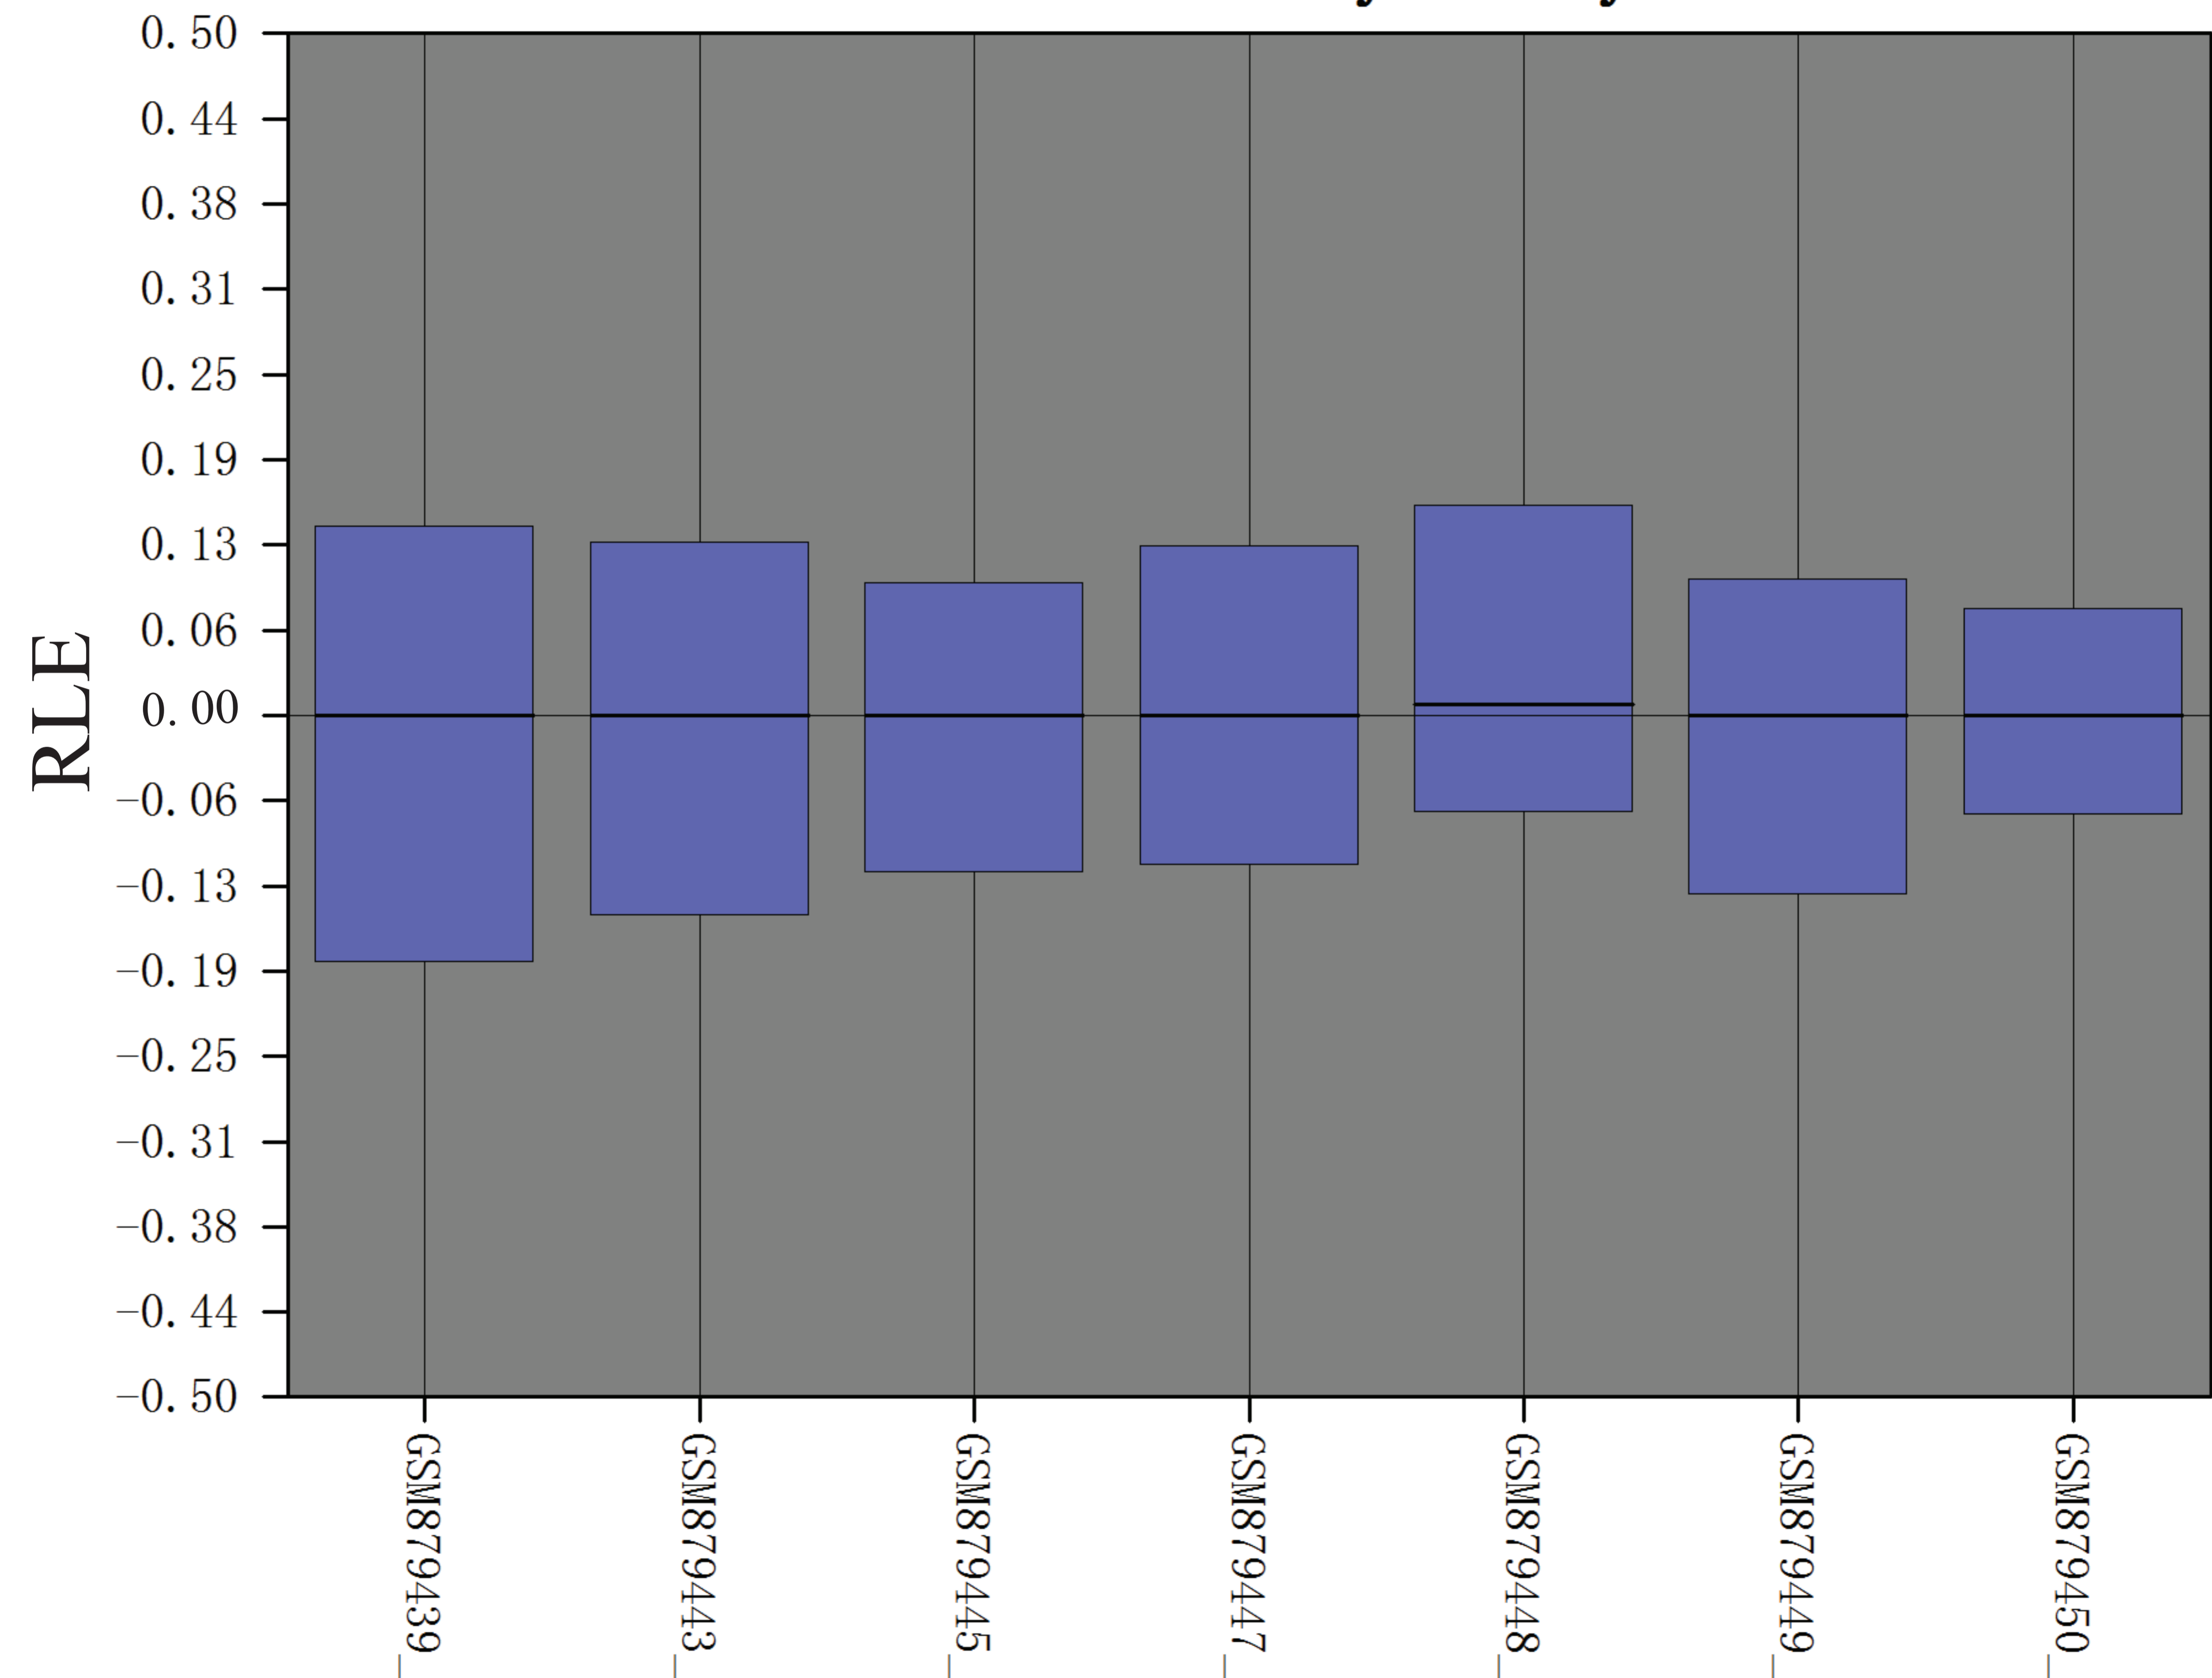

# GSE36021 (GhHD-1 fiber development)

## NUSE values by array

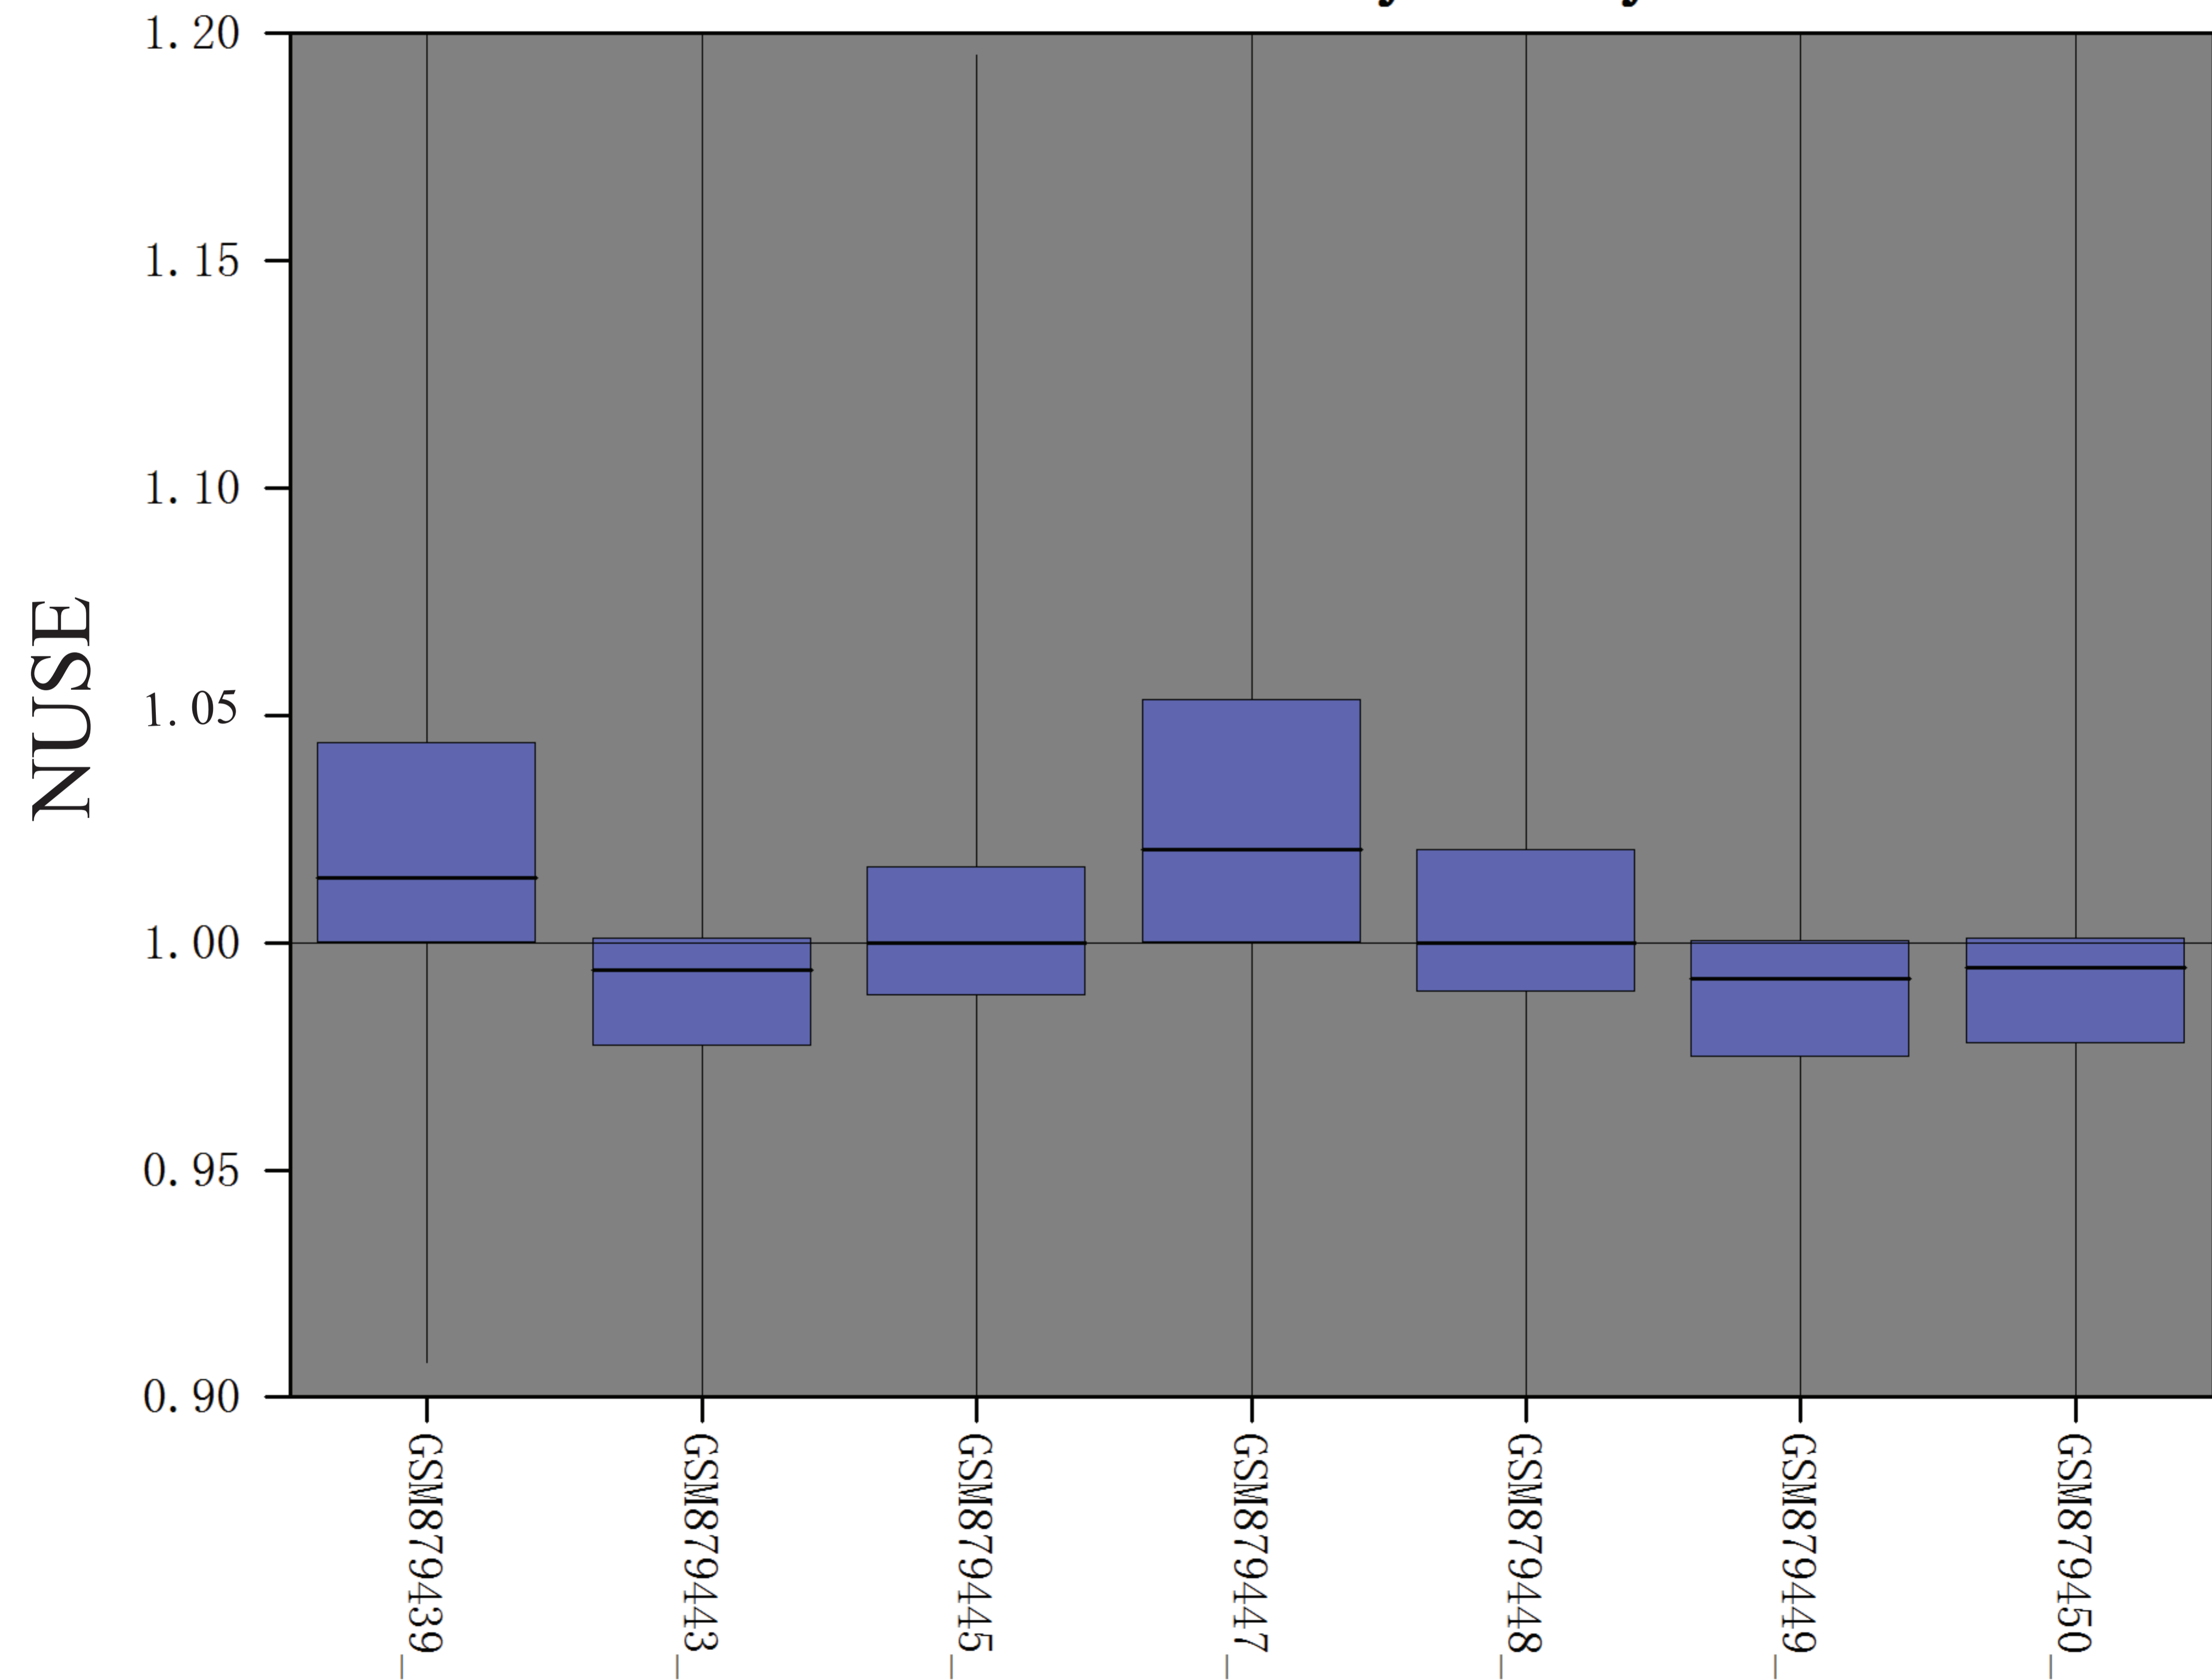



# GSE38490 (fiber development)

## RLE values by array

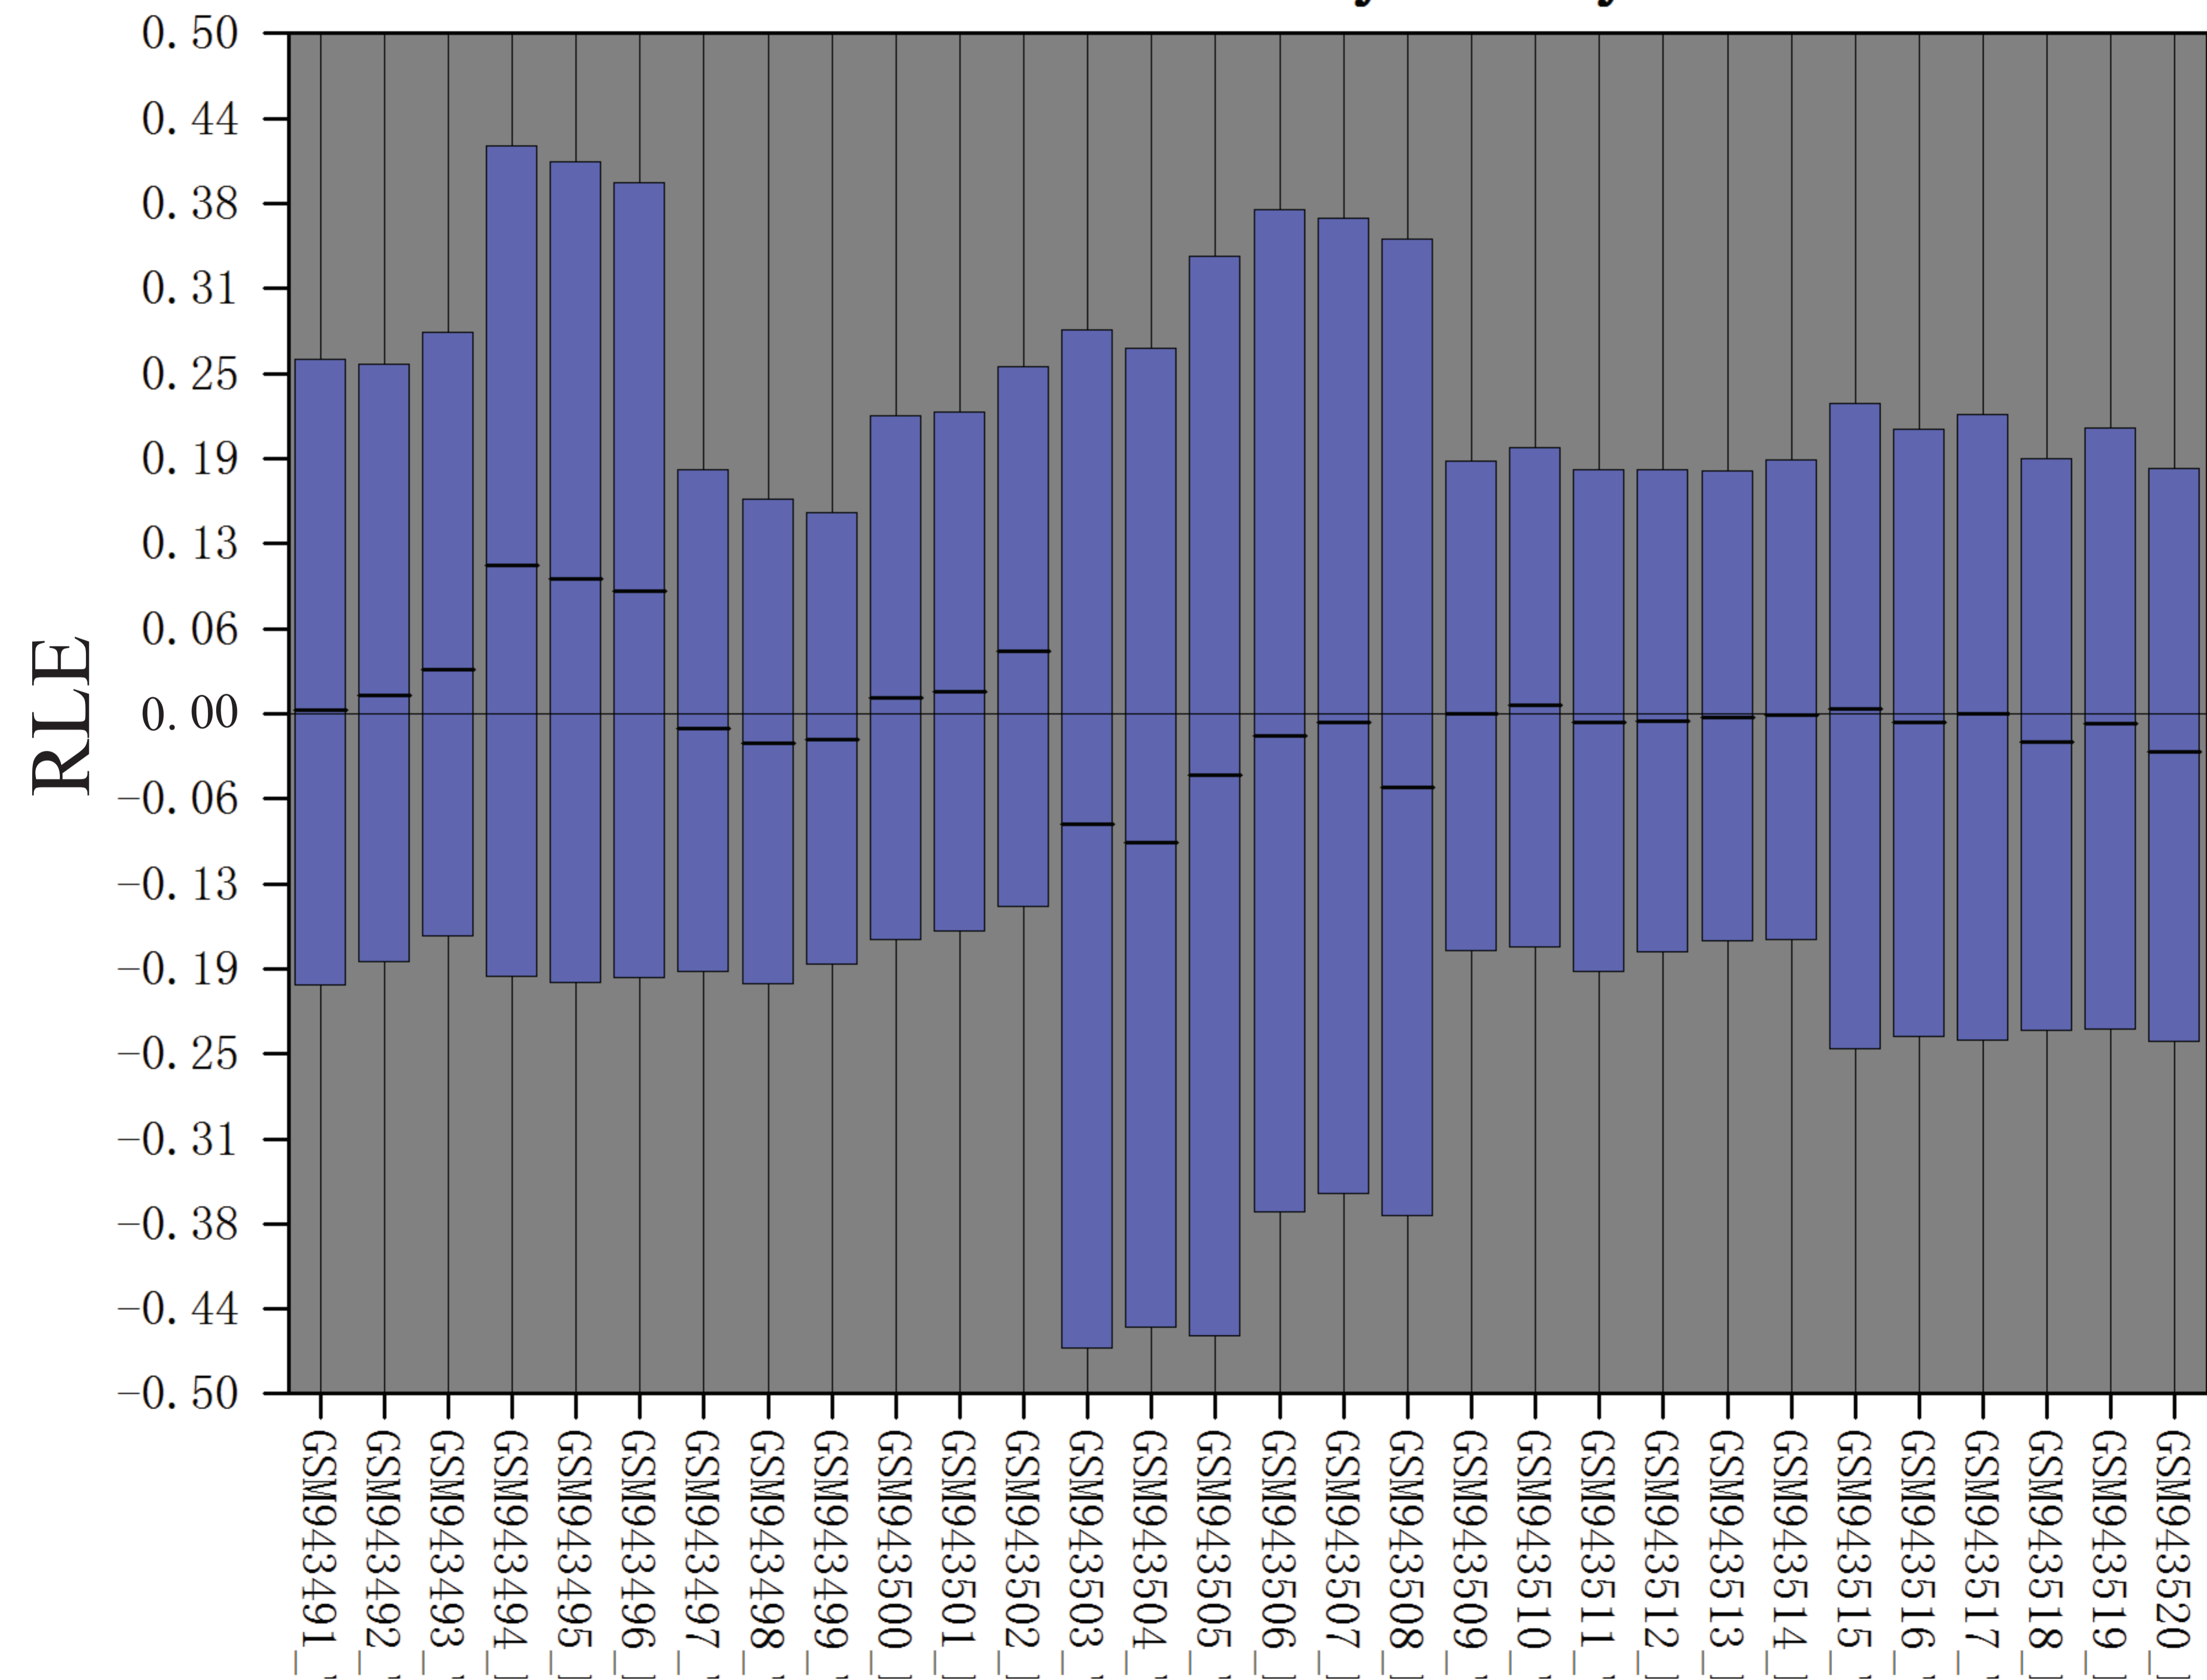

# GSE38490 (fiber development)

## NUSE values by array

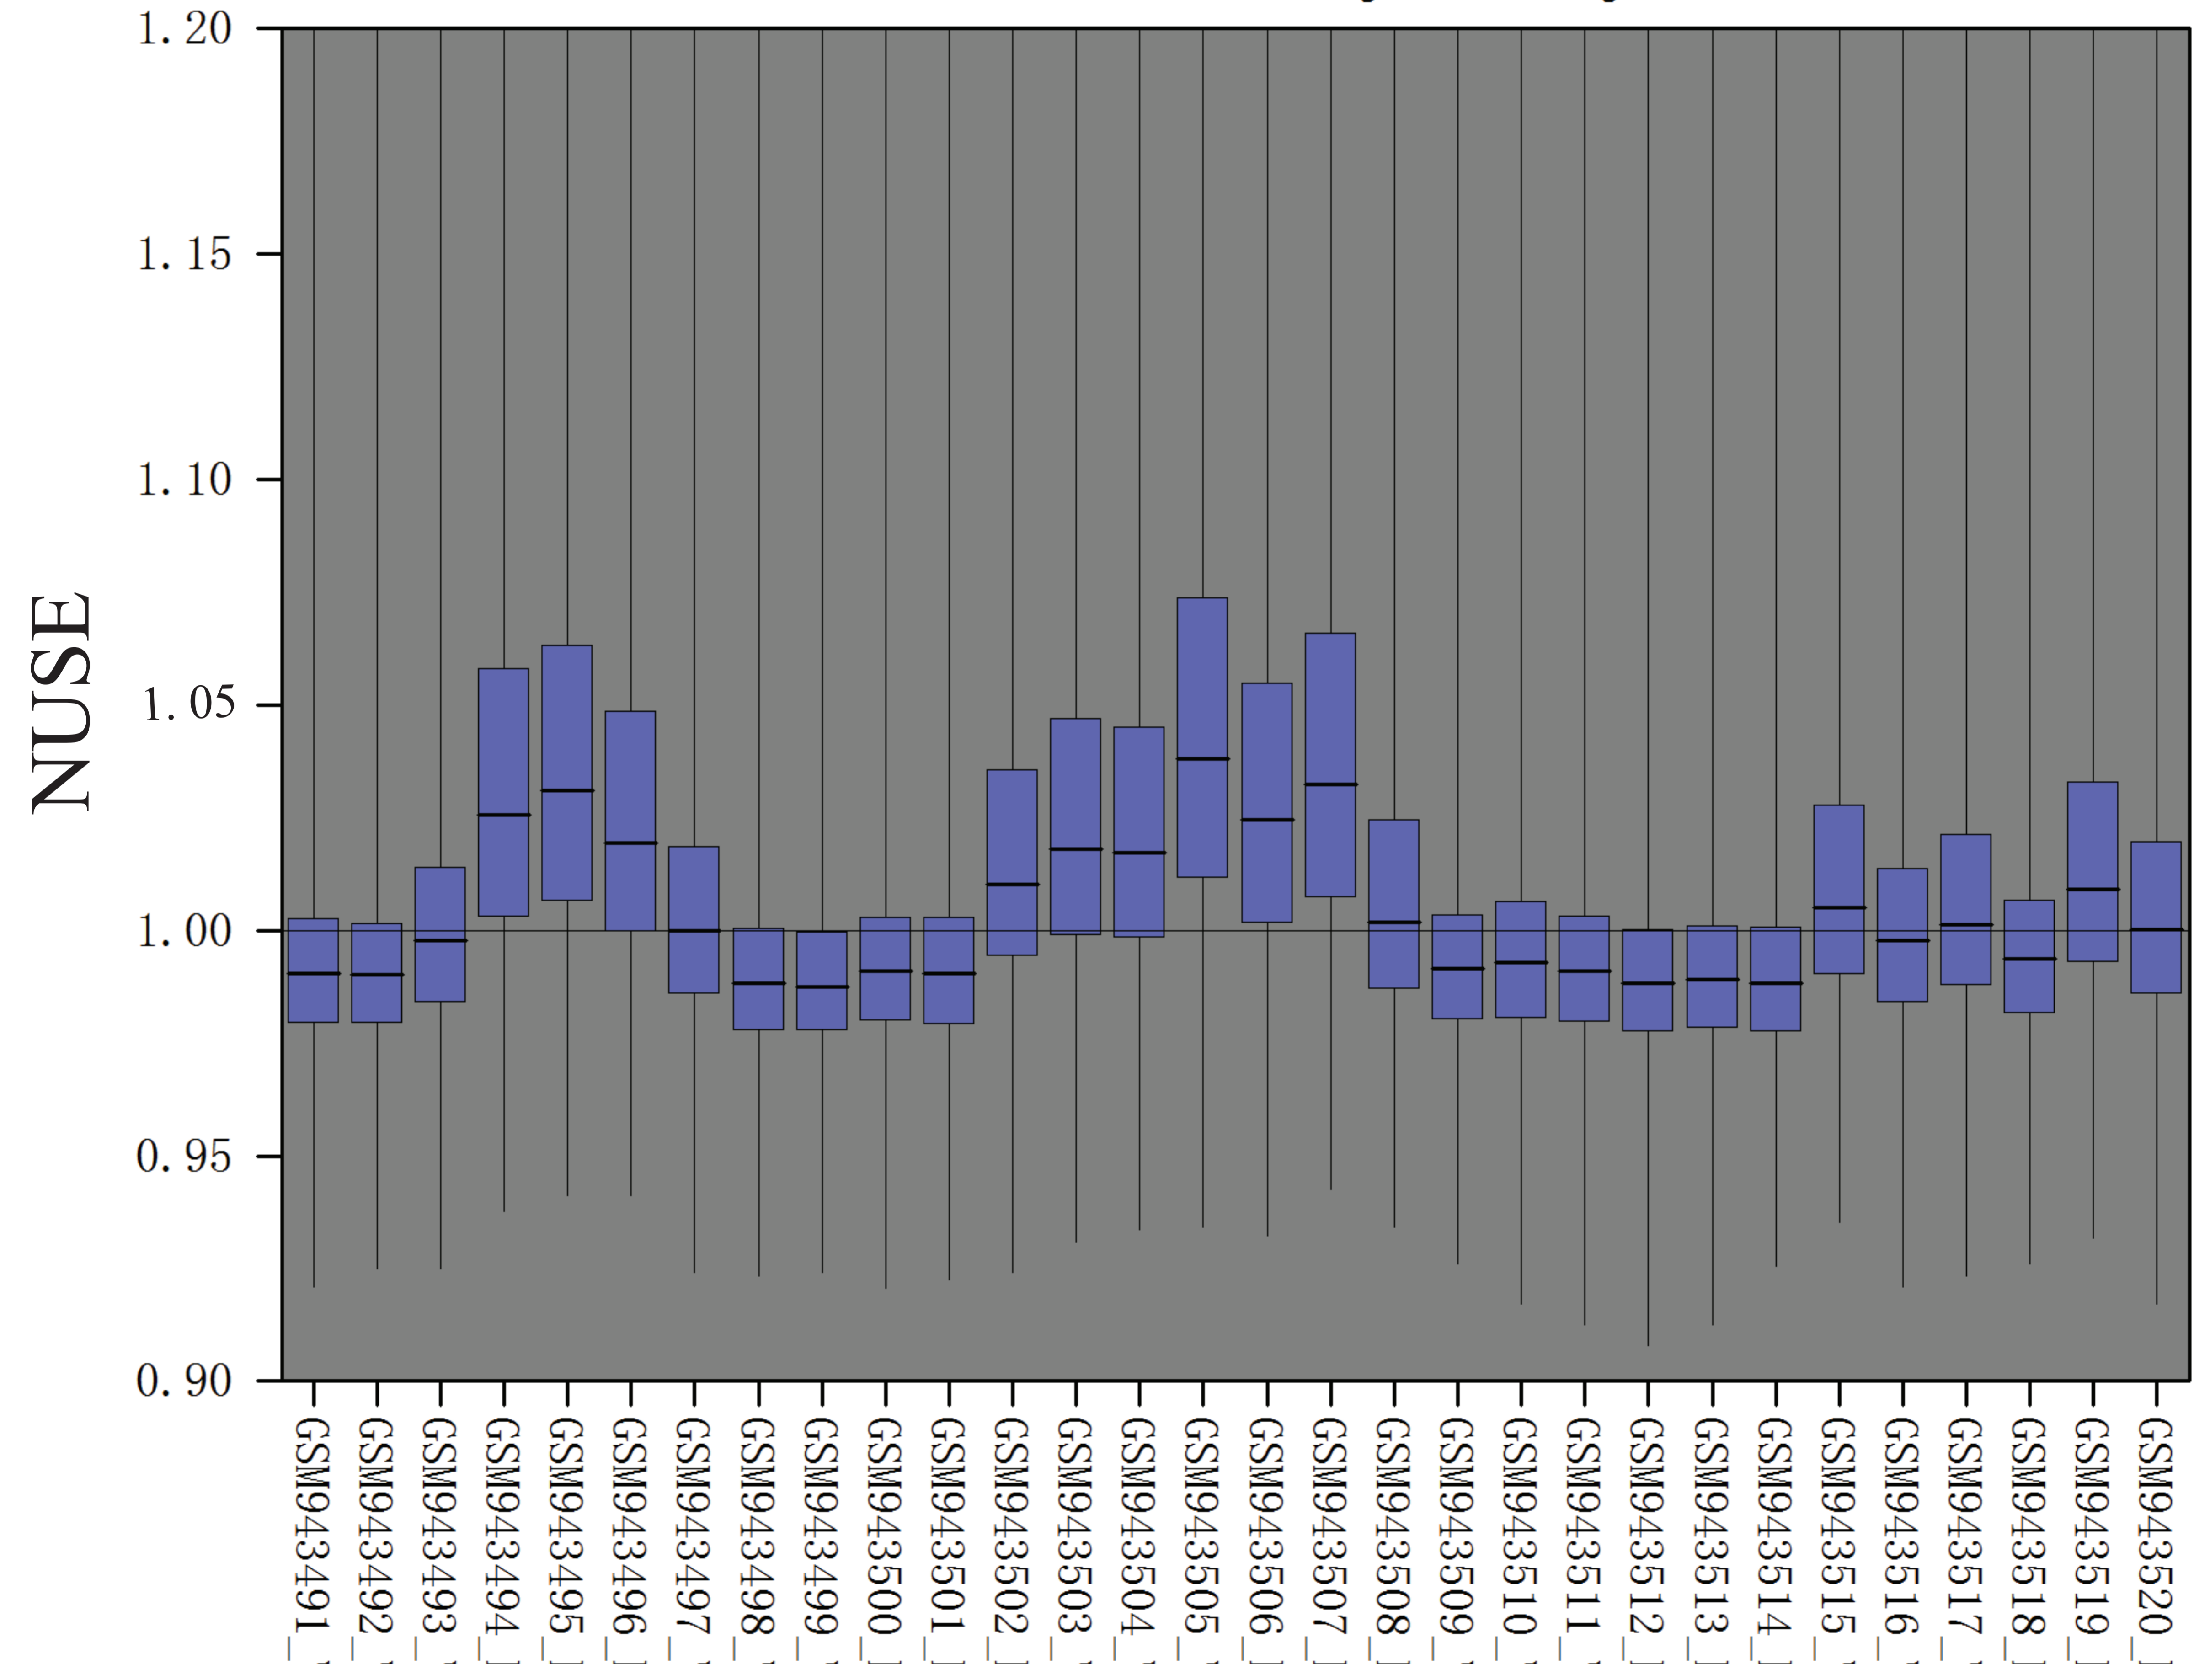

Supplement: pone.0197392.s008.pdf [file pone.0197392.s008.pdf]
