# Supplementary material for: Genome-wide classification, evolutionary analysis and gene expression patterns of the kinome in Gossypium
Source: PubMed Central journal article supplement (PMC5955557; doi:10.1371/journal.pone.0197392), 2018-05-16
Supplement: pone.0197392.s004.pdf [file pone.0197392.s004.pdf]

# AGC conserved exon-intron and domain diagram (part 1)

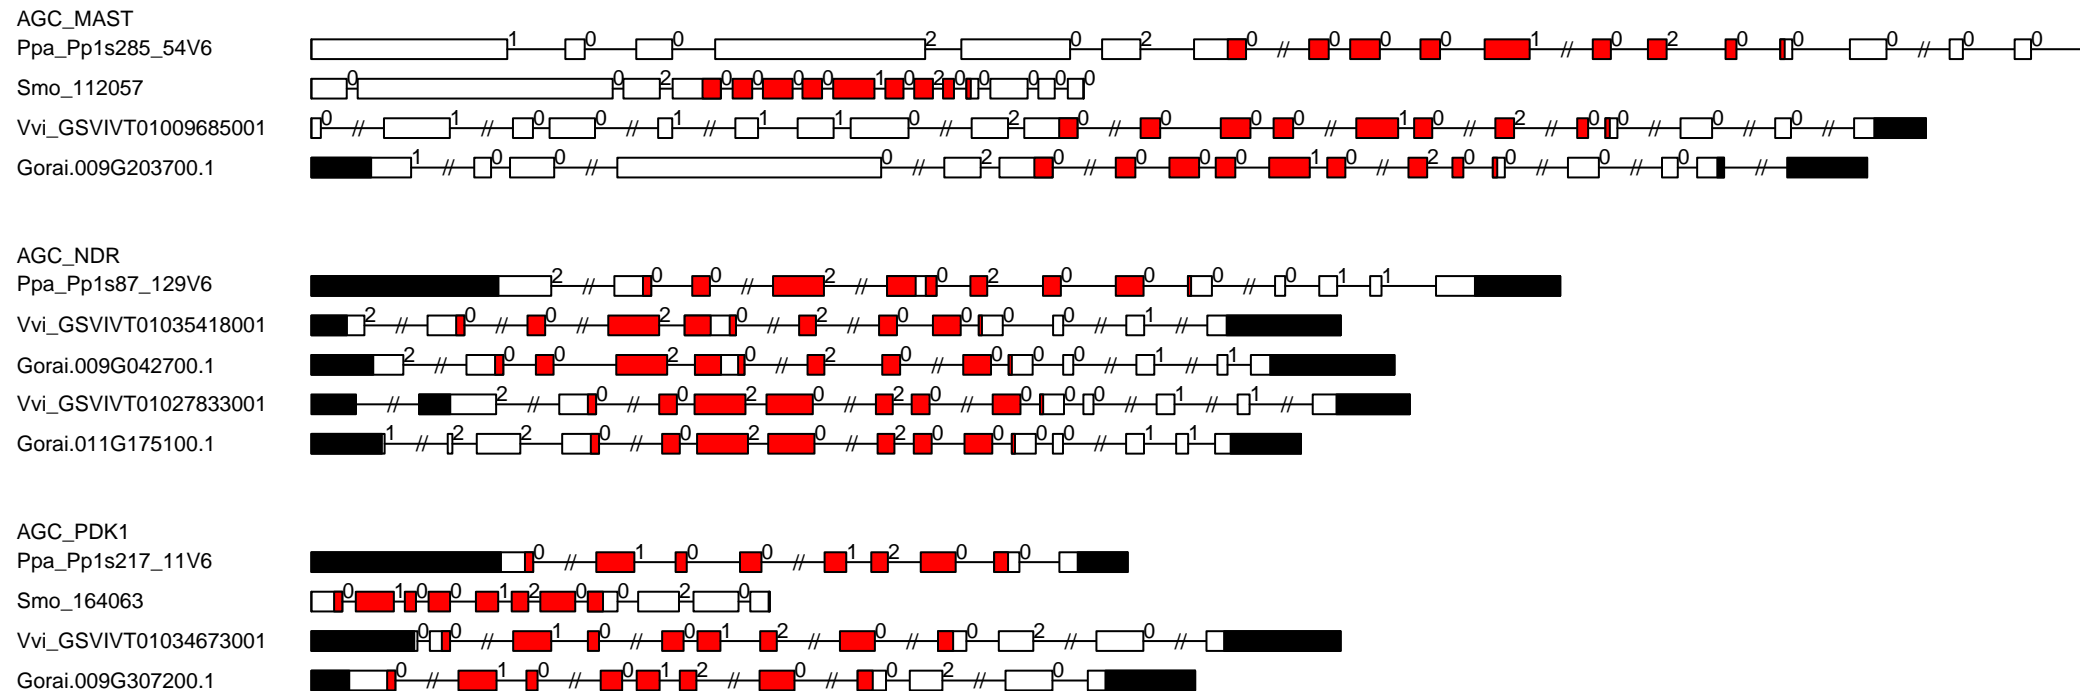

## AGC conserved exon-intron and domain diagram (part 2)

AGC\_PKA-PKG

Ppa\_Pp1s88\_186V6

Smo\_440463

Vvi\_GSVIVT01015338001

Gorai.010G074600.1

AGC\_RSK-2

Smo\_230655

Vvi\_GSVIVT01025082001

Gorai.008G012600.1

AGC\_RSK-2

Ppa\_Pp1s131\_94V6

Smo\_89681

Vvi\_GSVIVT01018278001

Gorai.009G451500.2

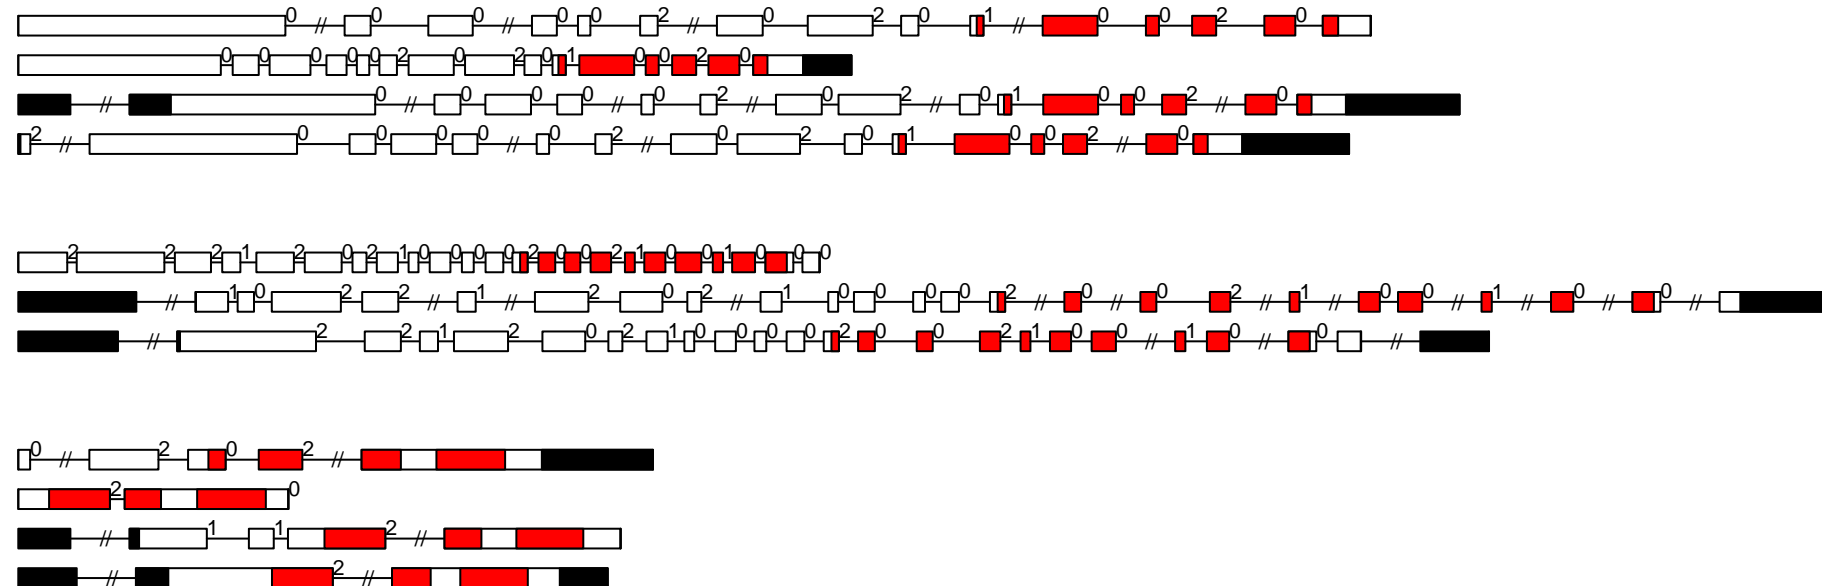

-2000

0

2000

4000

6000

8000

10000

### AGC conserved exon-intron and domain diagram (part 3)

AGC-PI  
Ppa\_Pp1s118\_230V6  
Smo\_181752  
Vvi\_GSVIVT01030167001  
Gorai.011G124700.1

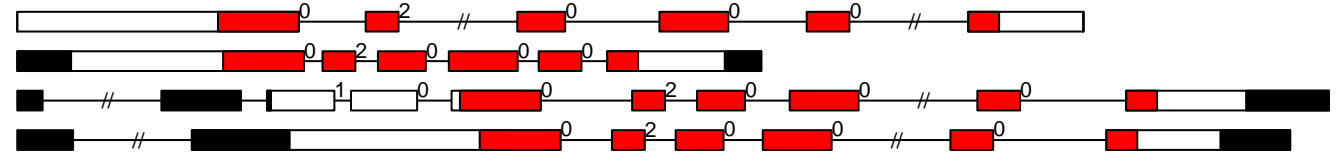

# CAMK conserved exon-intron and domain diagram (part 1)

CAMK\_AMPK

Ppa\_Pp1s3\_550V6

Smo\_80443

Vvi\_GSVIVT01011467001

Gorai.007G080200.1

CAMK\_CAMK1-DCAMKL

Ppa\_Pp1s433\_36V6

Smo\_82473

Vvi\_GSVIVT01027353001

Gorai.N006600.1

CAMK\_CAMKL-CHK1

Ppa\_Pp1s205\_16V6

Smo\_90416

Vvi\_GSVIVT01015549001

Gorai.010G032200.1

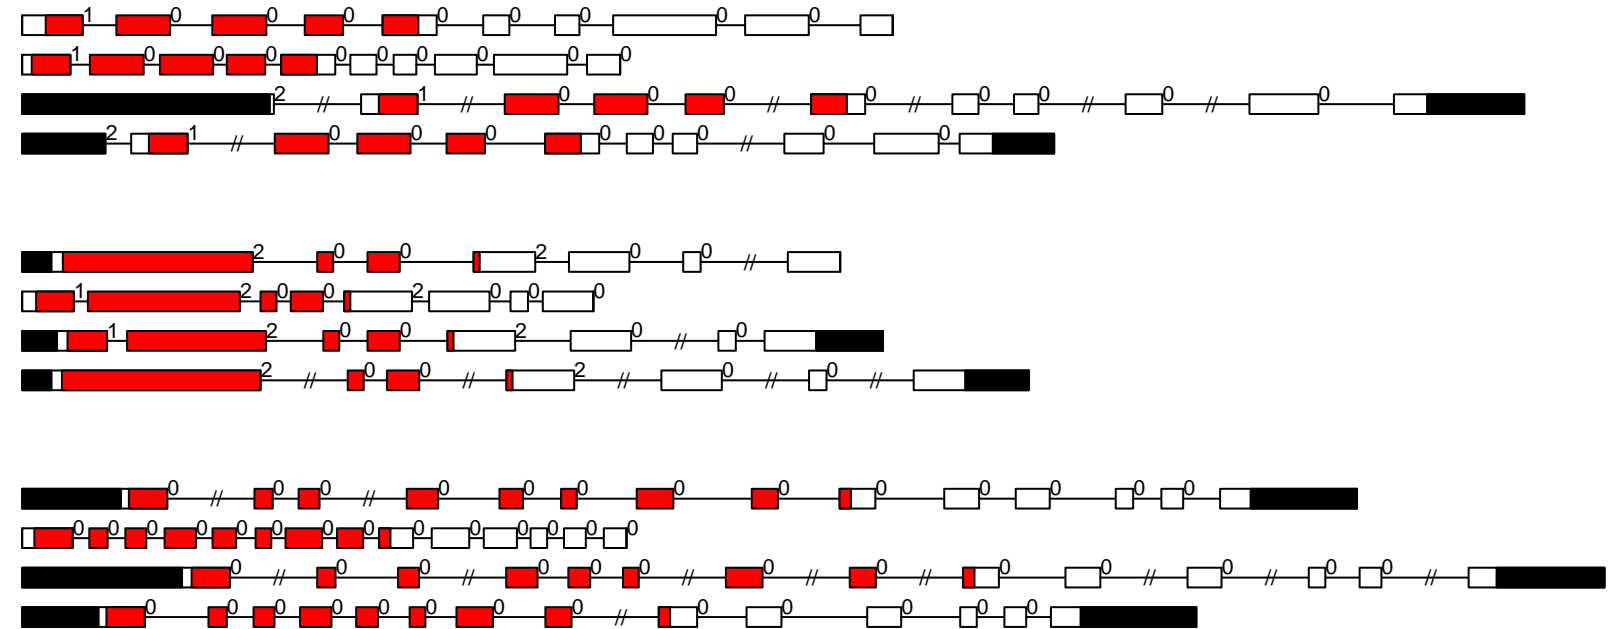

-2000

0

2000

4000

6000

## CAMK conserved exon-intron and domain diagram (part 2)

CAMK\_CAMKL-LKB

Ppa\_Pp1s59\_209V6

Smo\_119400

Vvi\_GSVIVT01025378001

Gorai.001G132000.1

CAMK\_CDPK

Ppa\_Pp1s370\_37V6

Smo\_164119

Vvi\_GSVIVT01018778001

Gorai.003G009500.1

CAMK\_CDPK

Ppa\_Pp1s107\_9V6

Smo\_173444

Vvi\_GSVIVT01027409001

Gorai.007G111600.1

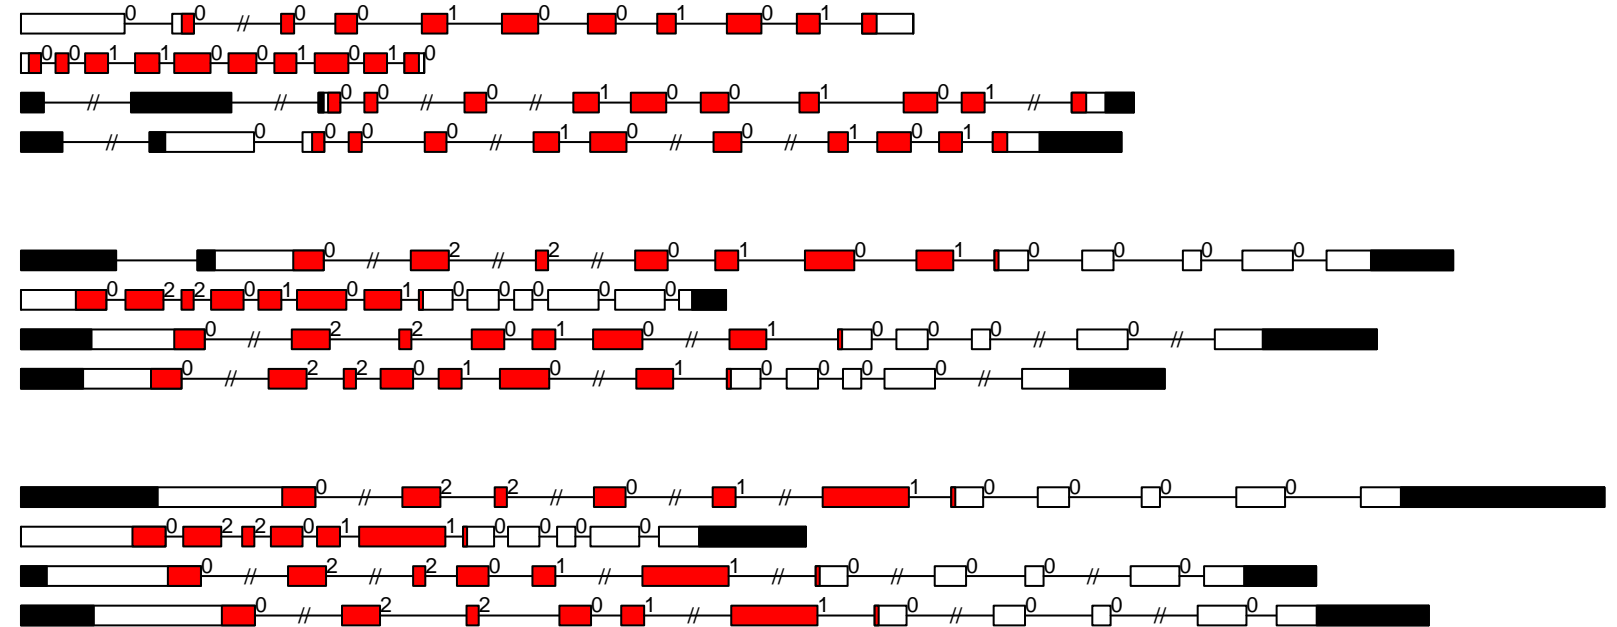

-2000

0

2000

4000

6000

### CAMK conserved exon-intron and domain diagram (part 3)

CAMK\_OST1L  
Ppa\_Pp1s218\_59V6  
Smo\_171183  
Vvi\_GSVIVT01031806001  
Gorai.013G038800.1

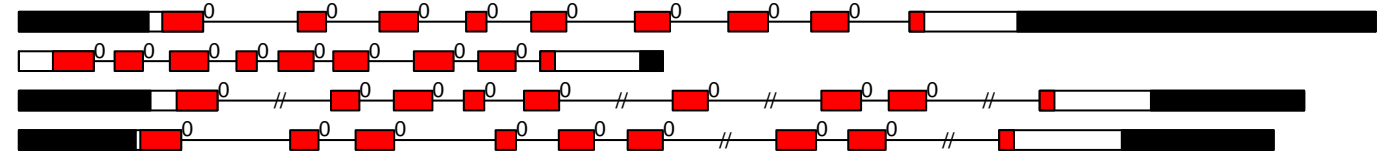

# CK1 conserved exon-intron and domain diagram (all)

CK1\_CK1

Ppa\_Pp1s182\_90V6

Smo\_81432

Vvi\_GSVIVT01028363001

Gorai.013G227100.1

CK1\_CK1-PI

Ppa\_Pp1s66\_174V6

Smo\_139482

Vvi\_GSVIVT01035288001

Gorai.013G219500.2

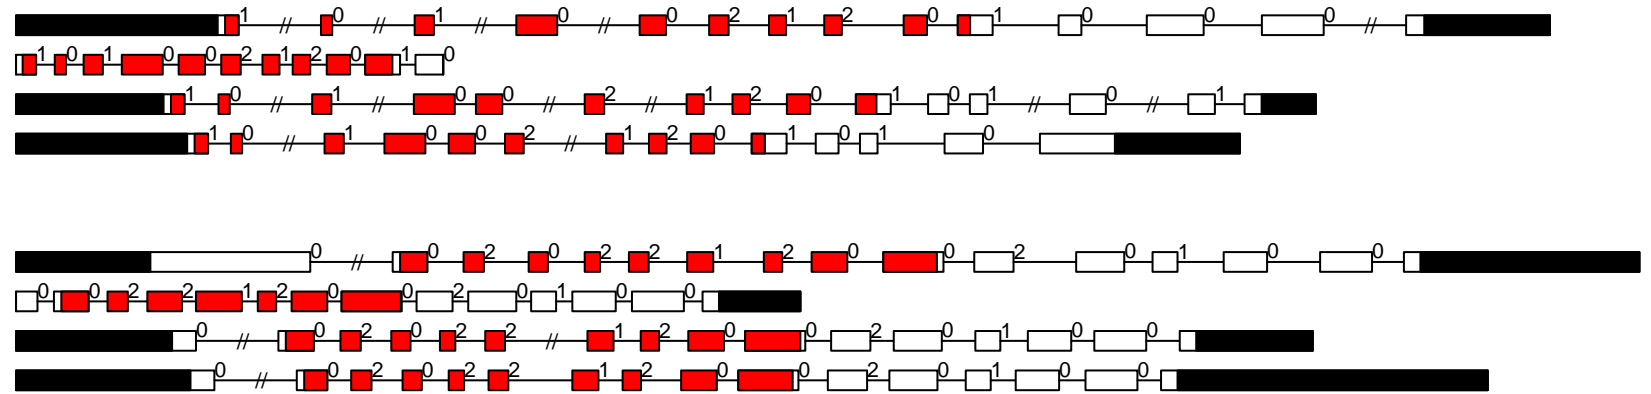

-2000

0

2000

4000

6000

# CMGC conserved exon-intron and domain diagram (part 1)

CMGC\_CDK-CDK7

Ppa\_Pp1s150\_11V6

Smo\_100958

Vvi\_GSVIVT01030954001

Gorai.006G193300.1

CMGC\_CDK-CRK7-CDK9

Ppa\_Pp1s89\_168V6

Smo\_141733

Vvi\_GSVIVT01023220001

Gorai.012G128100.1

CMGC\_CDK-PI

Ppa\_Pp1s281\_23V6

Smo\_139306

Vvi\_GSVIVT01026700001

Gorai.010G124800.5

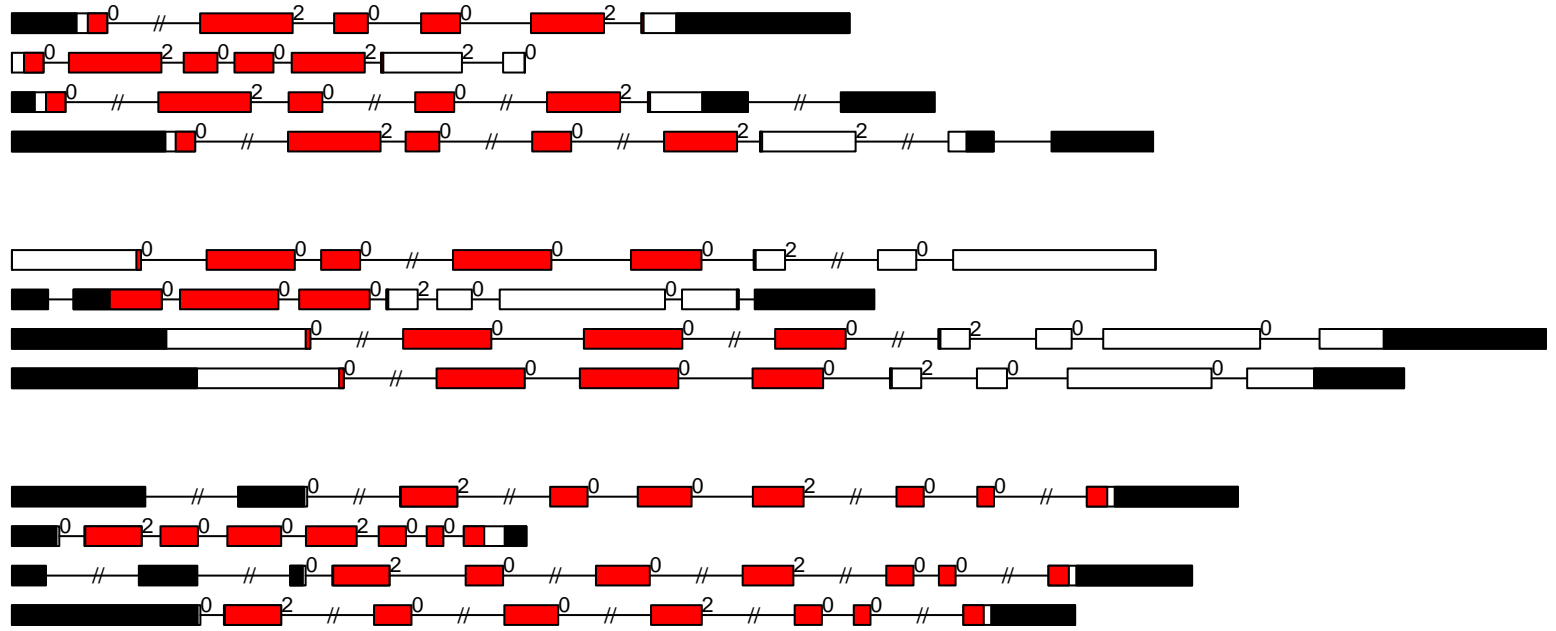



## CMGC conserved exon-intron and domain diagram (part 2)

CMGC\_CDK-PI  
Ppa\_Pp1s127\_92V6

Smo\_110637

Vvi\_GSVIVT01013440001

Gorai.002G112300.1

CMGC\_CK2

Ppa\_Pp1s63\_208V6

Smo\_146942

Vvi\_GSVIVT01009366001

Gorai.011G107500.1

CMGC\_CLK

Ppa\_Pp1s132\_58V6

Smo\_85838

Vvi\_GSVIVT01035714001

Gorai.009G423700.1

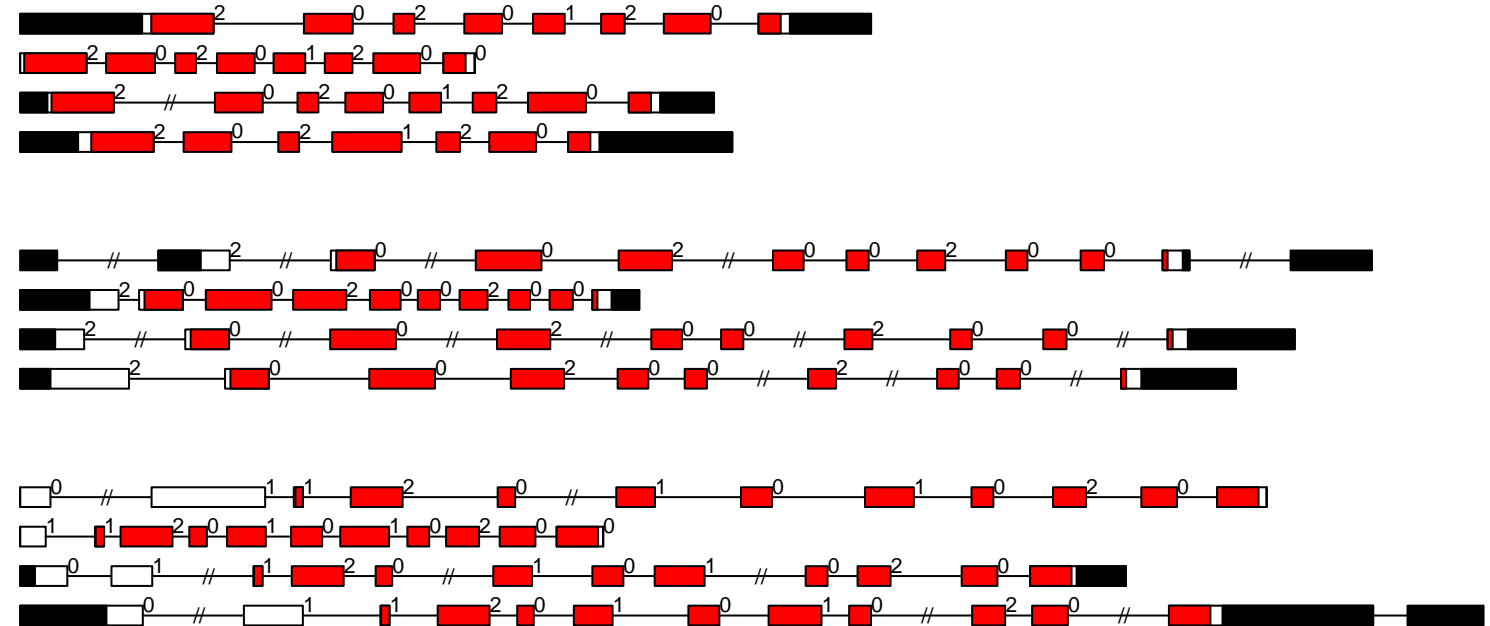

-2000

0

2000

4000

### CMGC conserved exon-intron and domain diagram (part 3)

CMGC\_DYRK-PRP4

Ppa\_Pp1s250\_28V6

Smo\_75107

Vvi\_GSVIVT01011916001

Gorai.013G081700.3

CMGC\_DYRK-PRP4

Ppa\_Pp1s47\_312V6

Smo\_90432

Vvi\_GSVIVT01032814001

Gorai.011G288600.1

CMGC\_DYRK-YAK

Ppa\_Pp1s401\_7V6

Smo\_111790

Vvi\_GSVIVT01024260001

Gorai.013G185200.1

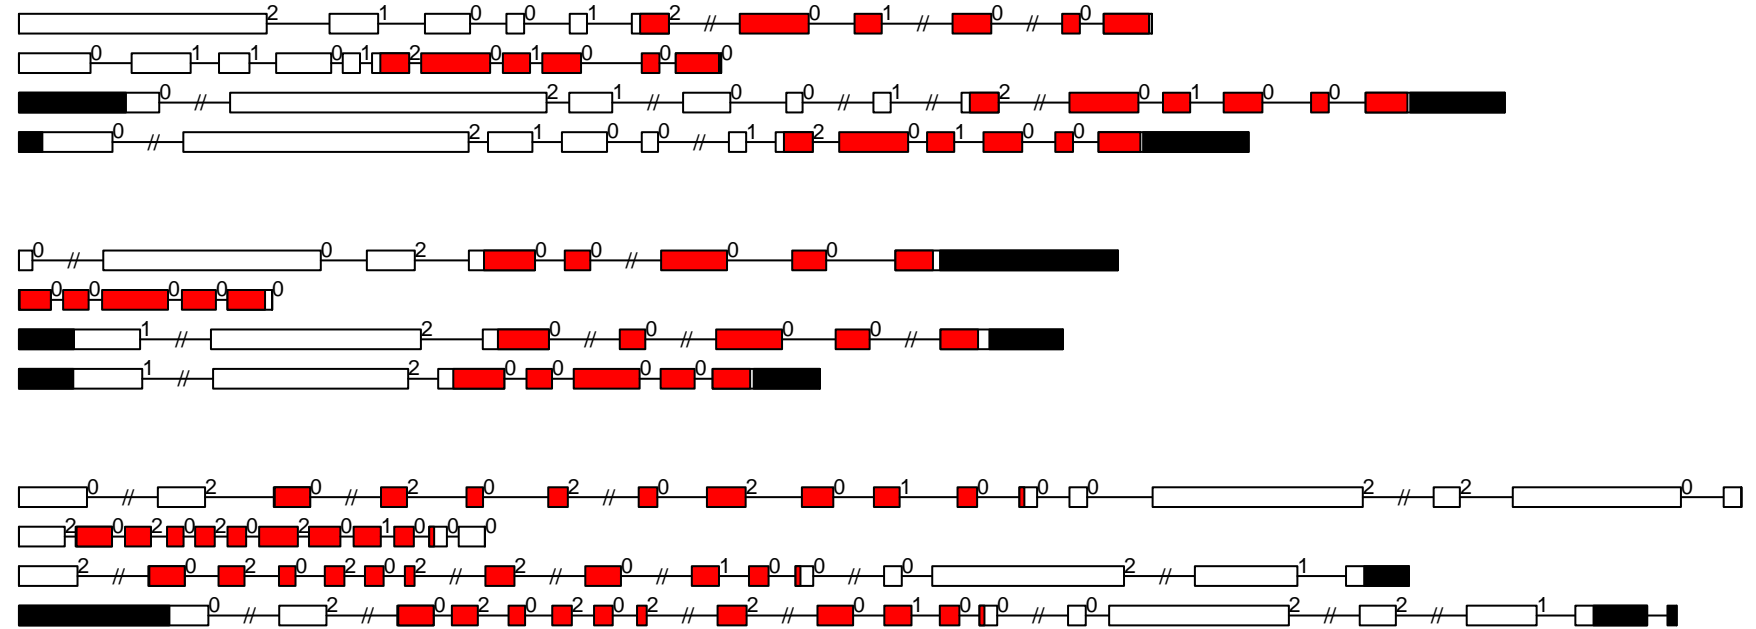



### CMGC conserved exon-intron and domain diagram (part 5)

CMGC\_MAPK  
 Ppa\_Pp1s149\_39V6  
 Smo\_105143  
 Vvi\_GSVIVT01038192001  
 Gorai.009G103800.1

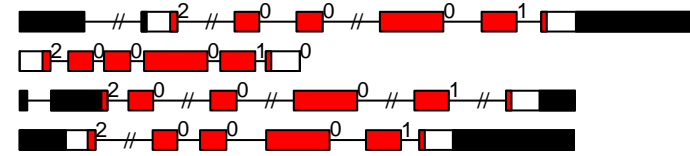

CMGC\_PI-Tthe  
 Ppa\_Pp1s99\_254V6  
 Vvi\_GSVIVT01015287001  
 Gorai.009G028000.1

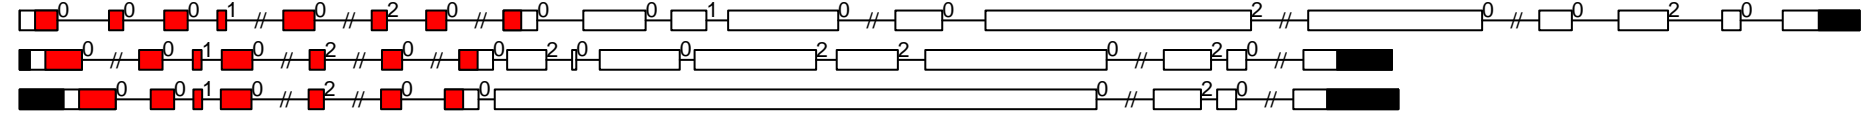

CMGC\_RCK  
 Ppa\_Pp1s173\_136V6  
 Smo\_443358  
 Vvi\_GSVIVT01005924001  
 Gorai.007G157300.1

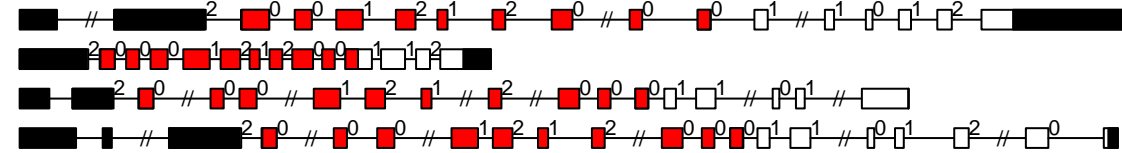

-2000

0

2000

4000

6000

8000

10000

# CMGC conserved exon-intron and domain diagram (part 6)

CMGC\_SRPK  
Ppa\_Pp1s248\_102V6  
Smo\_110202  
Vvi\_GSVIVT01022292001  
Gorai.009G088800.1

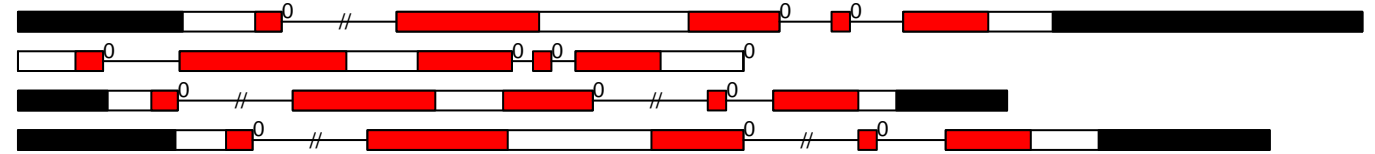

-2000

-1000

0

1000

2000

3000

other conserved exon-intron and domain diagram (part 1)

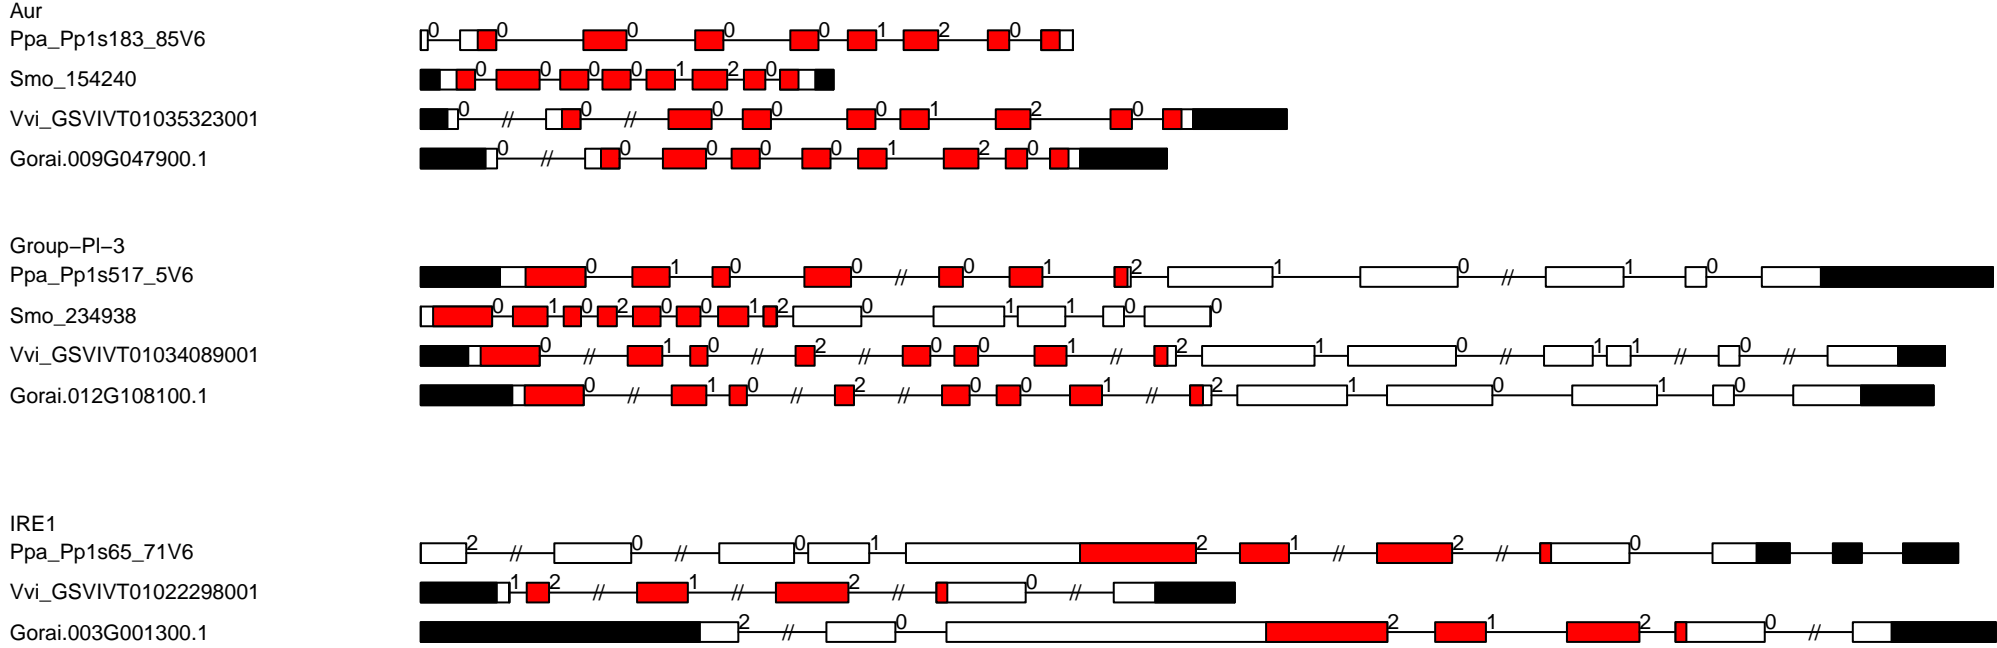

-2000

0

2000

4000

other conserved exon-intron and domain diagram (part 2)

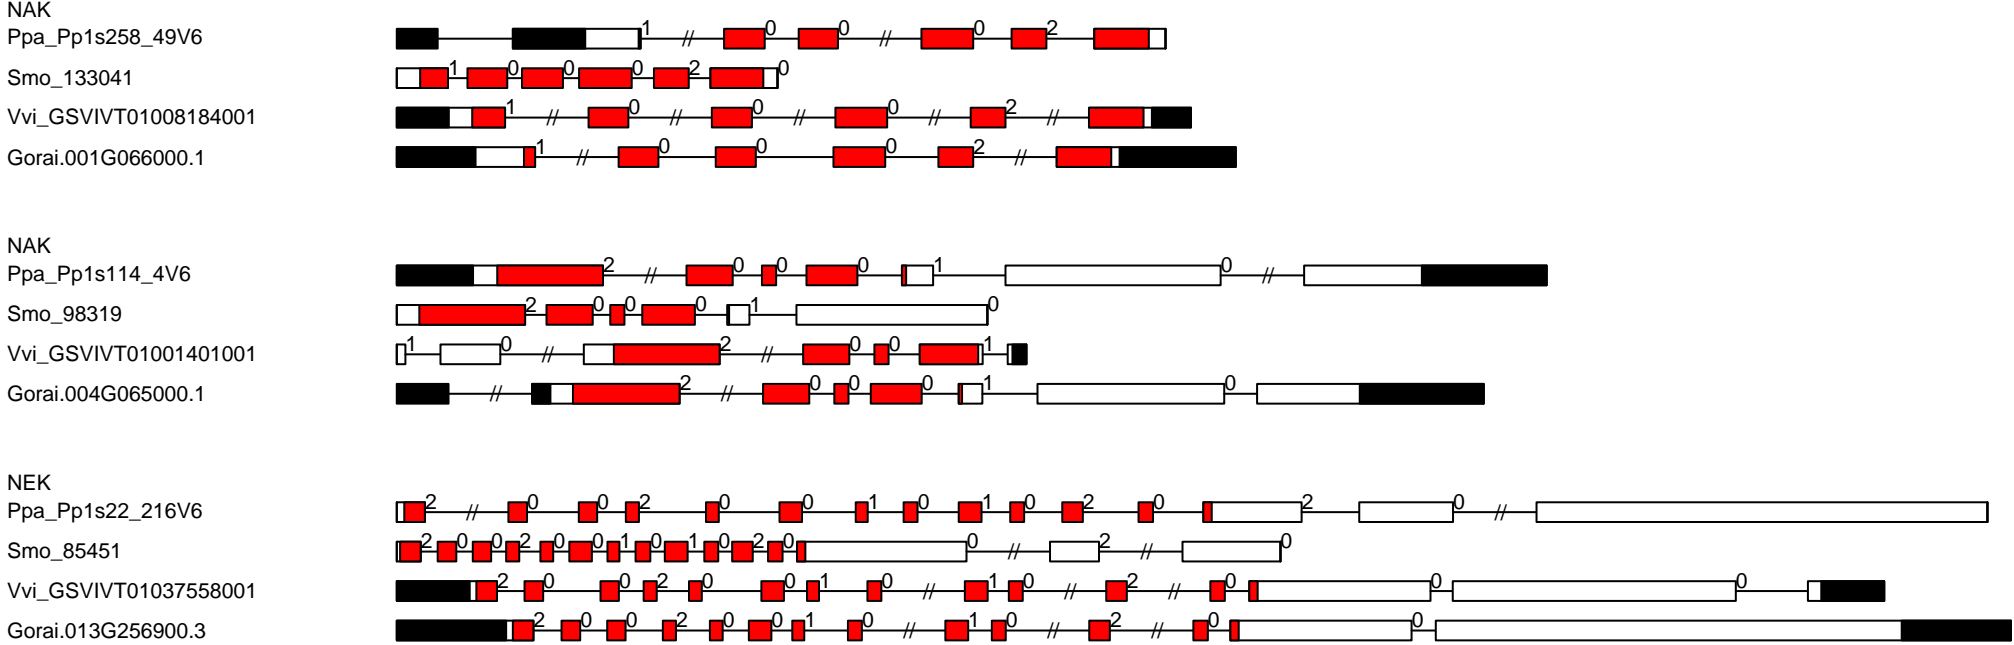

### other conserved exon-intron and domain diagram (part 3)

PEK\_GCN2

Ppa\_Pp1s159\_135V6

Smo\_75952

Vvi\_GSVIVT01010758001

Gorai.011G142600.1

TLK

Ppa\_Pp1s260\_29V6

Smo\_230254

Vvi\_GSVIVT01037513001

Gorai.013G256500.1

TTK

Ppa\_Pp1s4\_22V6

Smo\_70574

Vvi\_GSVIVT01008926001

Gorai.009G243100.1

-2000

0

2000

4000

6000

8000

10000

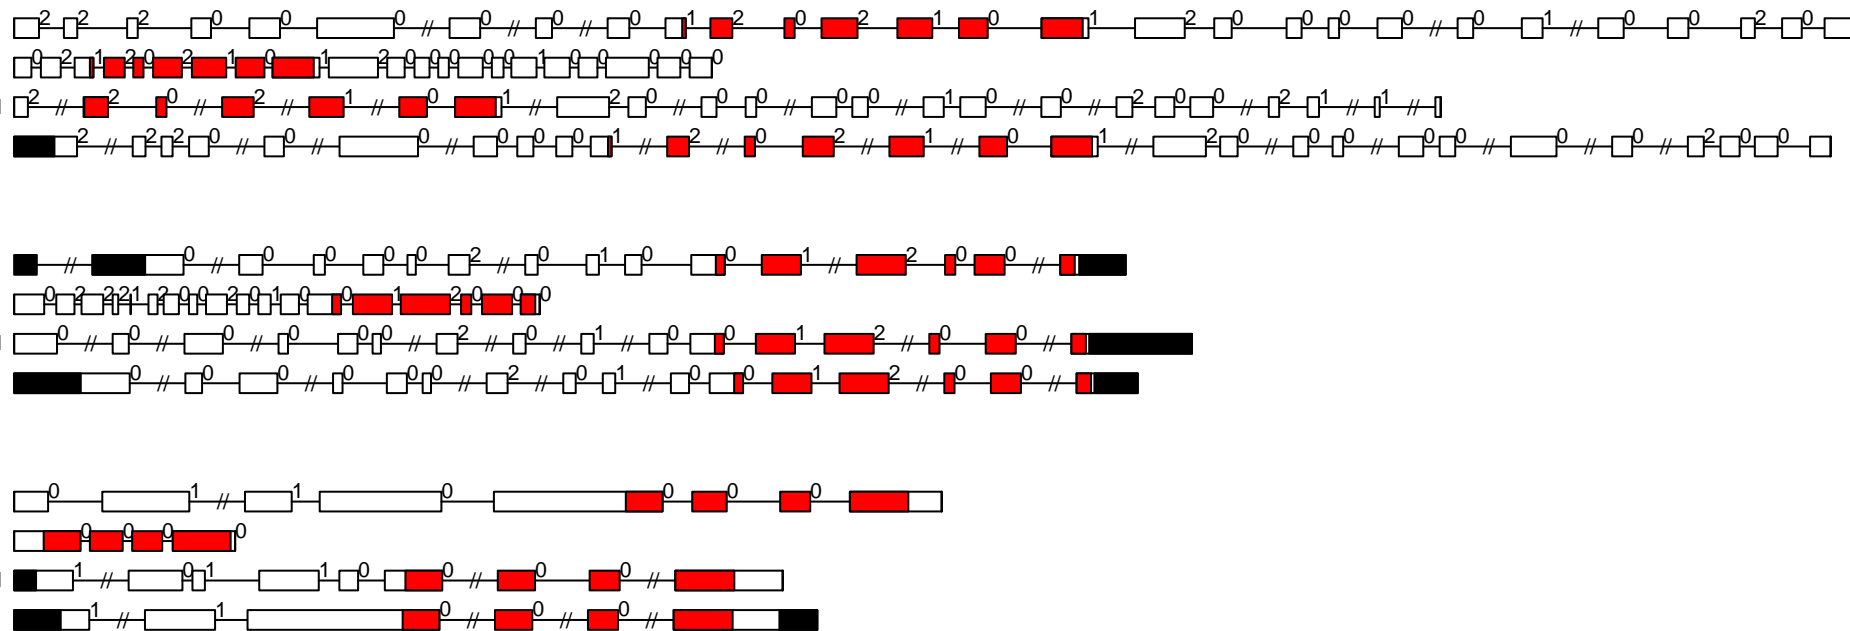



### other conserved exon-intron and domain diagram (part 4)

ULK\_Fused

Ppa\_Pp1s53\_93V6

Vvi\_GSVIVT01024439001

Gorai.012G007600.2

ULK\_ULK4

Ppa\_Pp1s358\_12V6

Vvi\_GSVIVT01017819001

Gorai.011G185300.1

WEE

Smo\_171221

Vvi\_GSVIVT01010948001

Gorai.007G129700.1

WNK\_NRBP

Ppa\_Pp1s384\_6V6

Smo\_134331

Vvi\_GSVIVT01027189001

Gorai.001G064400.1

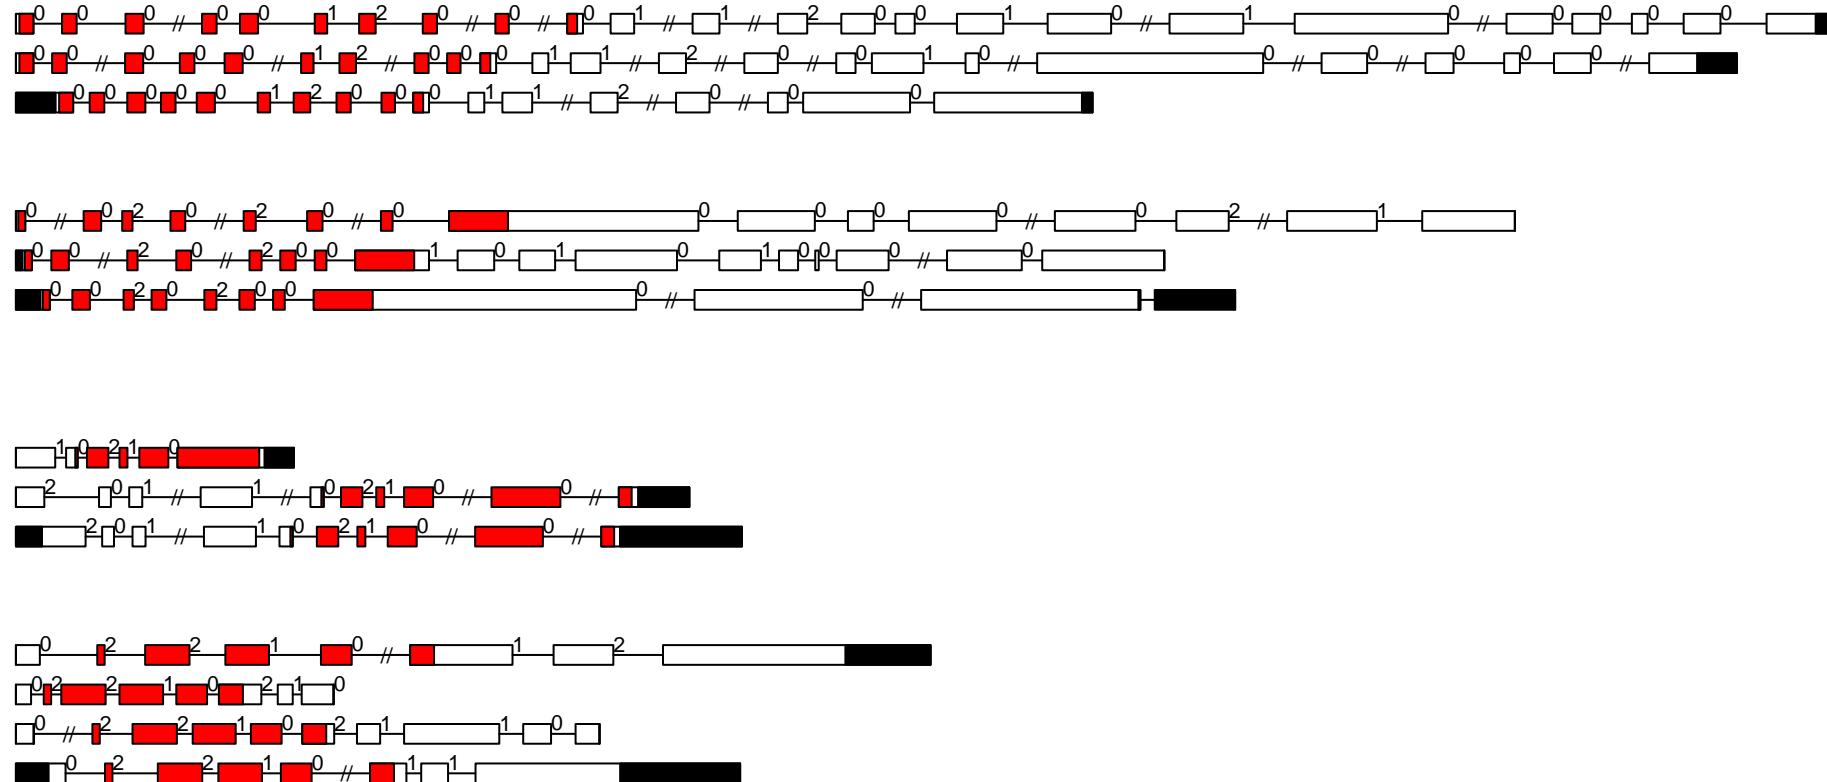

-2000

0

2000

4000

6000

8000

10000

# RLK-Pelle conserved exon-intron and domain diagram (part 1)

RLK-Pelle\_C-LEC

Ppa\_Pp1s409\_19V6

Smo\_82185

Vvi\_GSVIVT01014051001

Gorai.002G163600.1

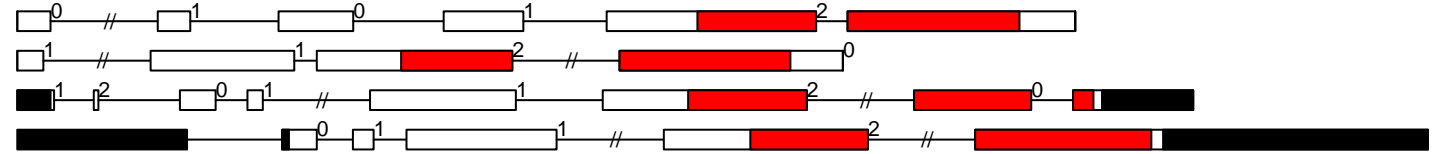

RLK-Pelle\_DLSV

Ppa\_Pp1s149\_106V6

Smo\_90825

Vvi\_GSVIVT01006739001

Gorai.002G176300.2

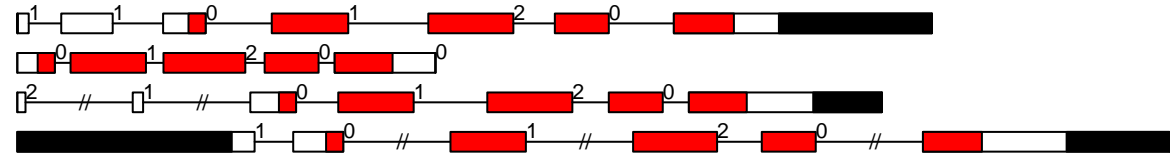

RLK-Pelle\_Extensin

Smo\_97344

Vvi\_GSVIVT01020728001

Gorai.011G123200.1

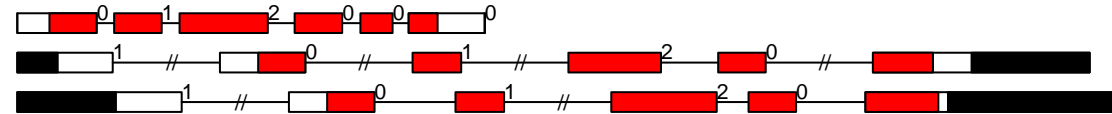

-2000

-1000

0

1000

2000

3000

4000

## RLK-Pelle conserved exon-intron and domain diagram (part 2)

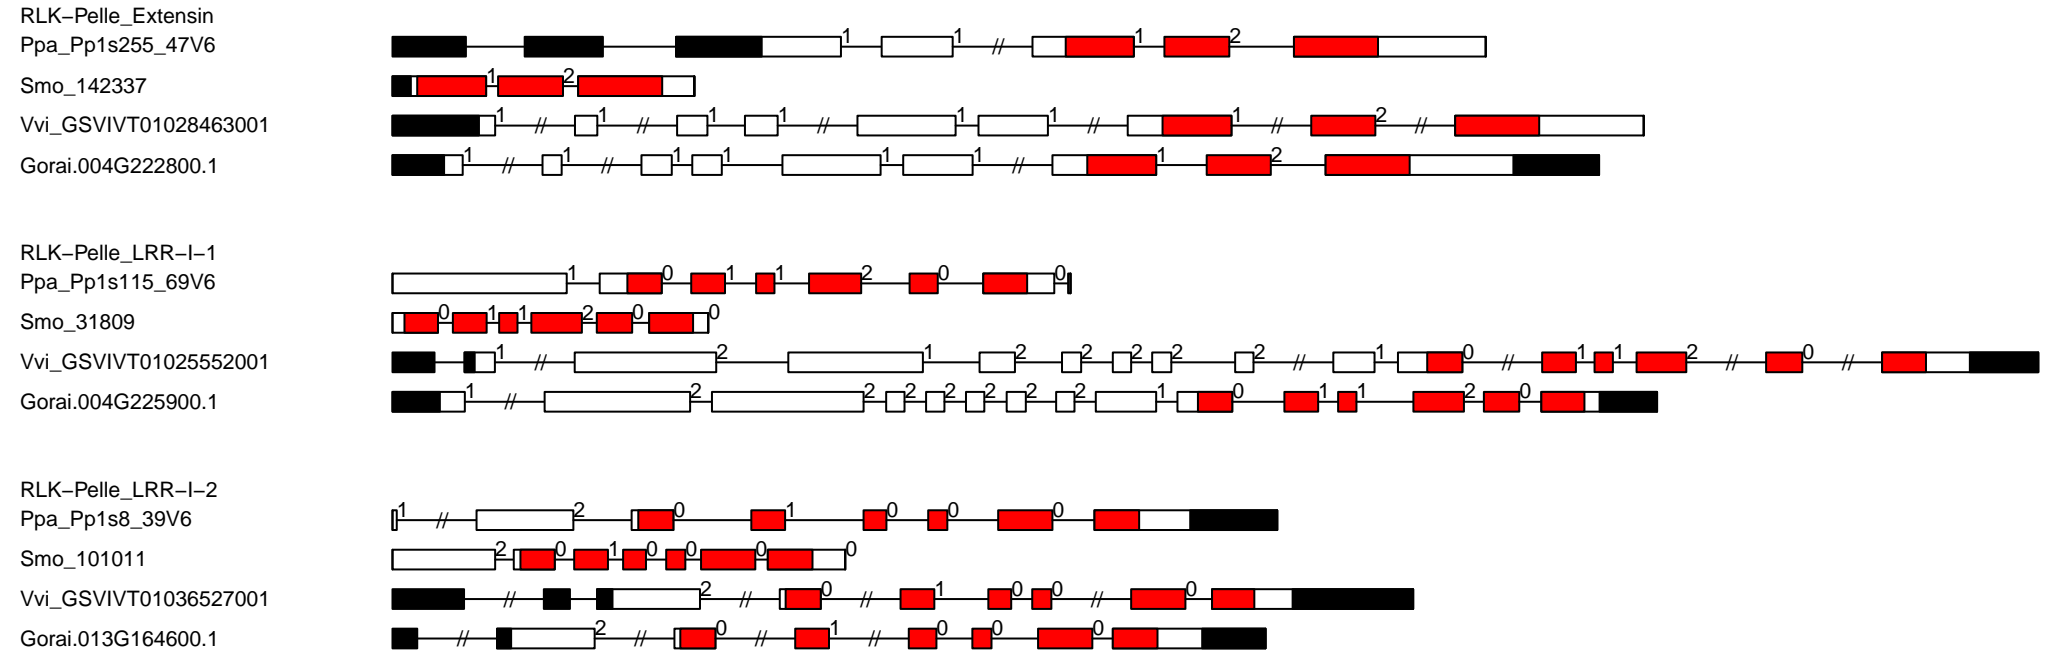

### RLK-Pelle conserved exon-intron and domain diagram (part 3)

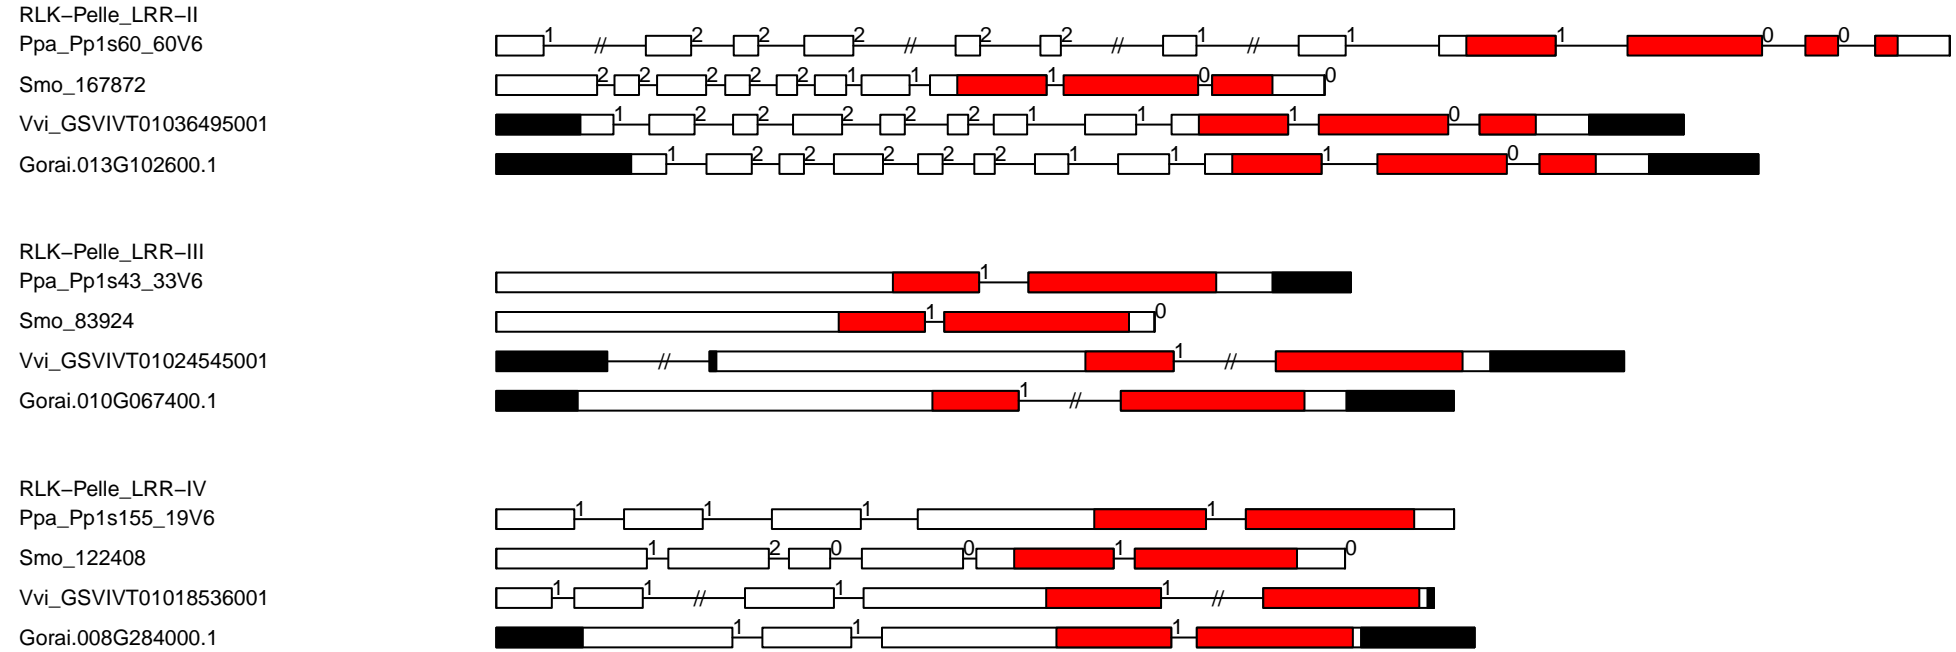

# RLK-Pelle conserved exon-intron and domain diagram (part 4)

RLK-Pelle\_LRR-IX  
Ppa\_Pp1s245\_46V6

Smo\_233622

Vvi\_GSVIVT01031618001

Gorai.001G125200.1

RLK-Pelle\_LRR-VI-1

Ppa\_Pp1s34\_39V6

Smo\_85275

Vvi\_GSVIVT01034604001

Gorai.N006900.1

RLK-Pelle\_LRR-VI-2

Ppa\_Pp1s8\_39V6

Smo\_101011

Vvi\_GSVIVT01036527001

Gorai.013G164600.1

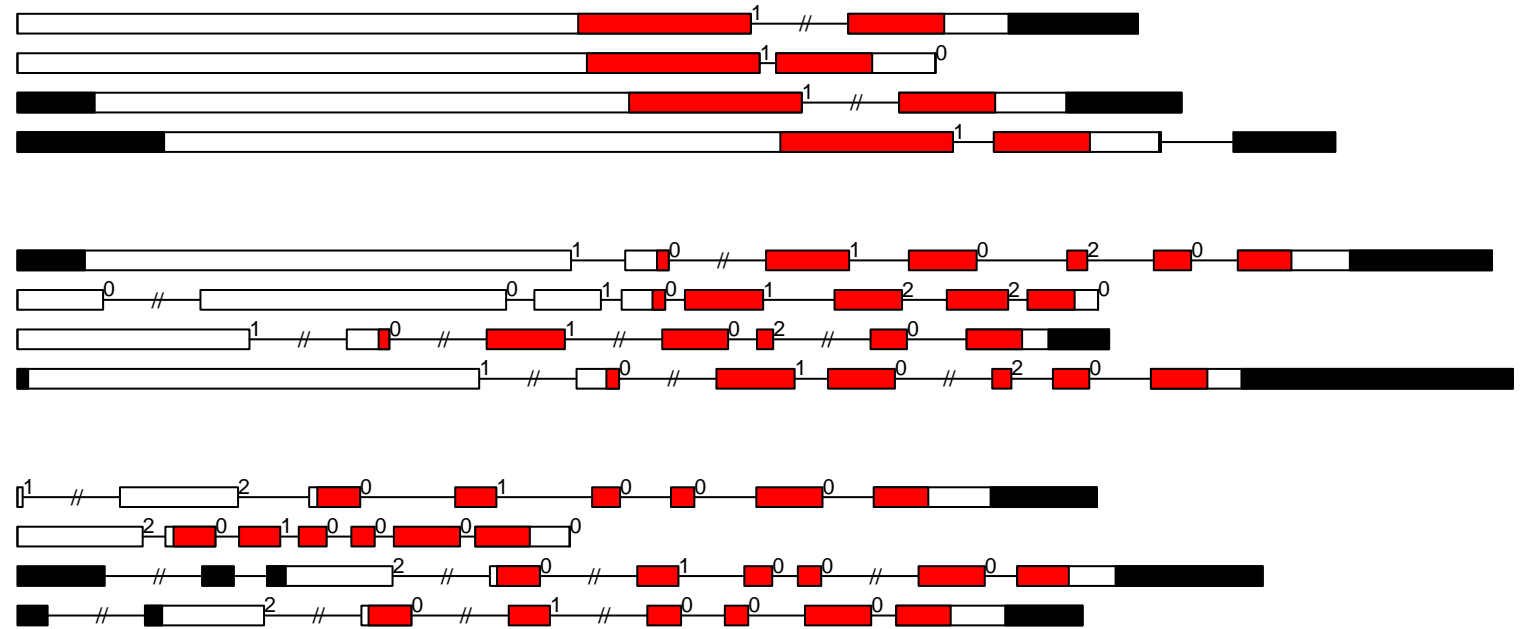

-2000

0

2000

4000

# RLK-Pelle conserved exon-intron and domain diagram (part 5)

RLK-Pelle\_LRR-VIII-1

Ppa\_Pp1s128\_94V6

Smo\_10265

Vvi\_GSVIVT01024538001

Gorai.013G271600.2

RLK-Pelle\_LRR-V

Ppa\_Pp1s379\_14V6

Smo\_76873

Smo\_112070

Vvi\_GSVIVT01033522001

Gorai.011G024500.1

RLK-Pelle\_LRR-Xa

Ppa\_Pp1s173\_42V6

Smo\_165616

Vvi\_GSVIVT01006063001

Gorai.007G161400.3

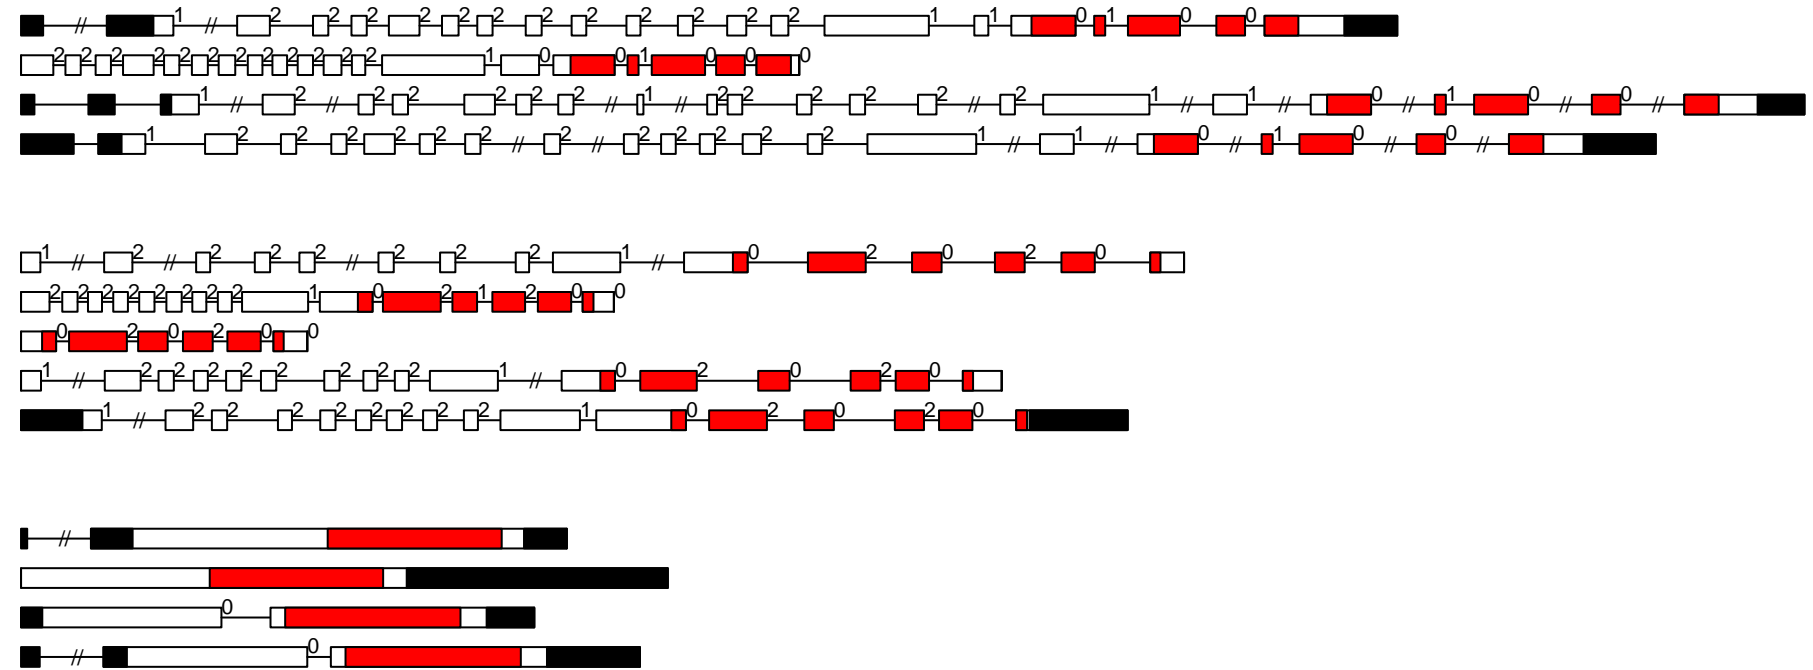

-2000

0

2000

4000

6000

8000



# RLK-Pelle conserved exon-intron and domain diagram (part 7)

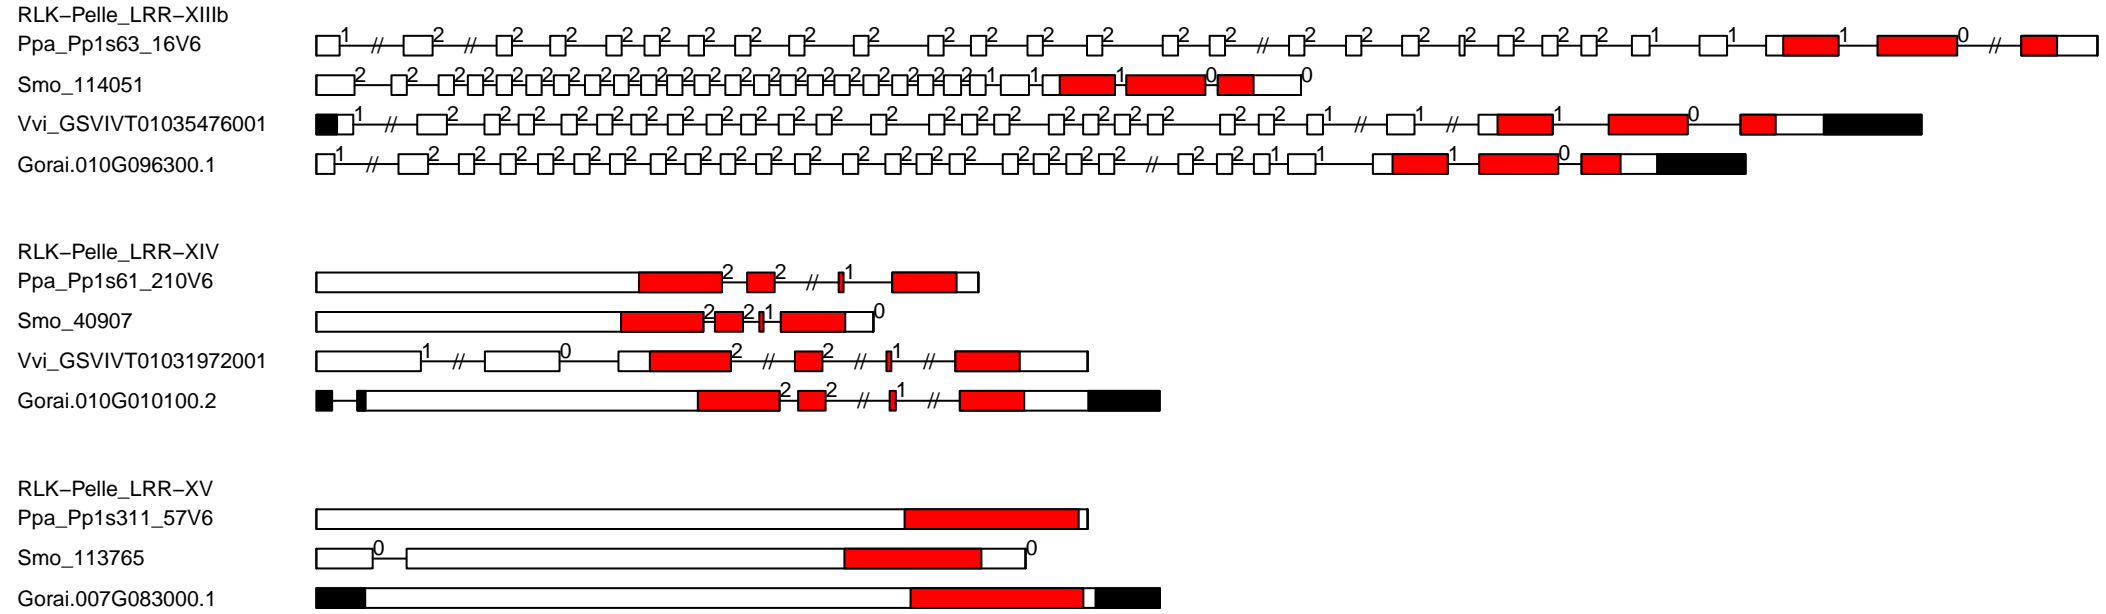



# RLK-Pelle conserved exon-intron and domain diagram (part 8)

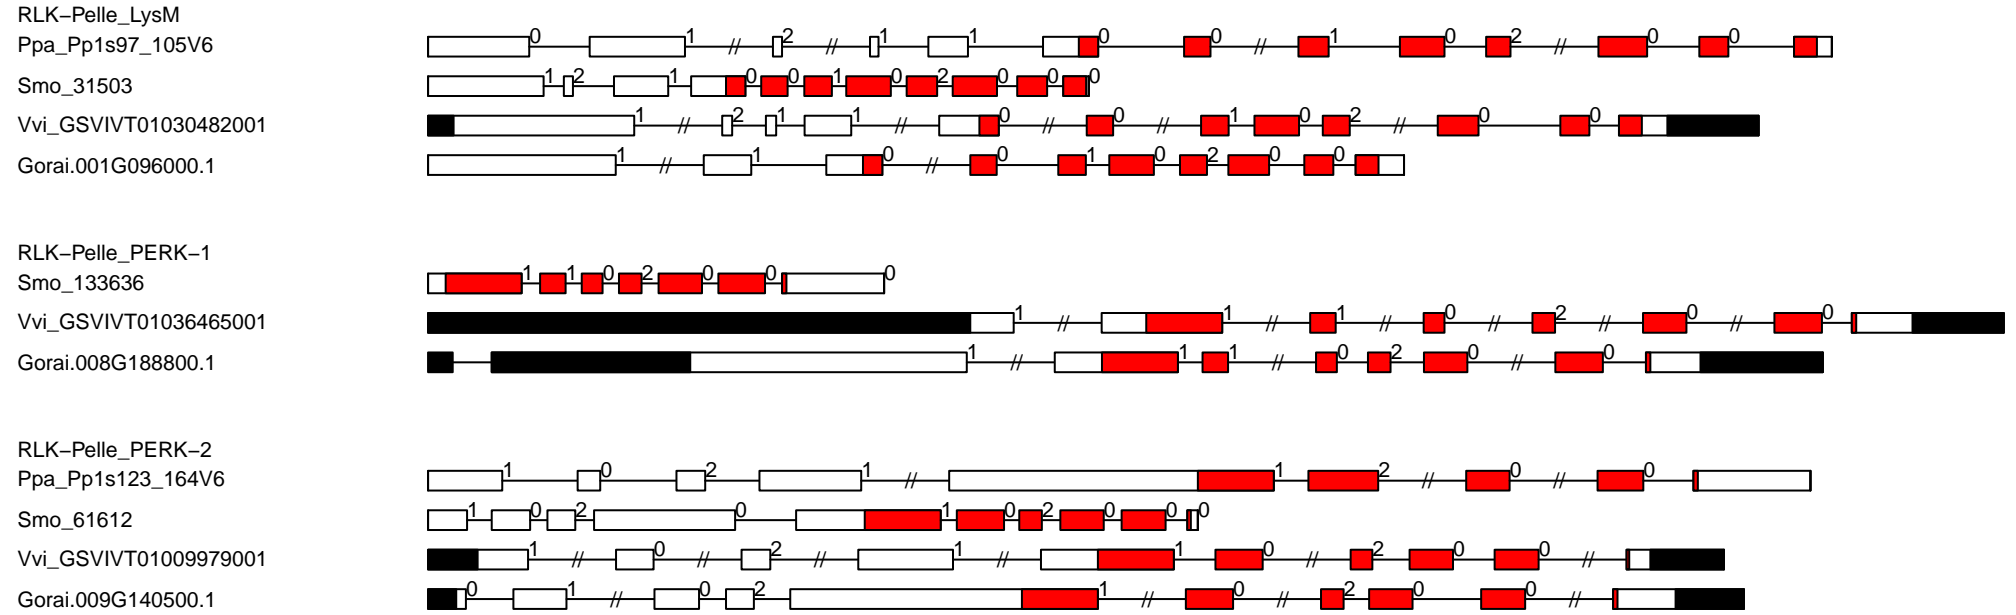

-2000

0

2000

4000

# RLK-Pelle conserved exon-intron and domain diagram (part 9)

RLK-Pelle\_RKF3

Ppa\_Pp1s58\_68V6

Smo\_127641

Gorai.008G006500.1

RLK-Pelle\_RLCK-IV

Ppa\_Pp1s12\_33V6

Smo\_65160

Vvi\_GSVIVT01024803001

Gorai.001G114800.1

RLK-Pelle\_RLCK-IXa

Smo\_131164

Vvi\_GSVIVT01032970001

Gorai.011G188000.2

RLK-Pelle\_RLCK-IXb

Smo\_33560

Vvi\_GSVIVT01014020001

Gorai.013G264000.1

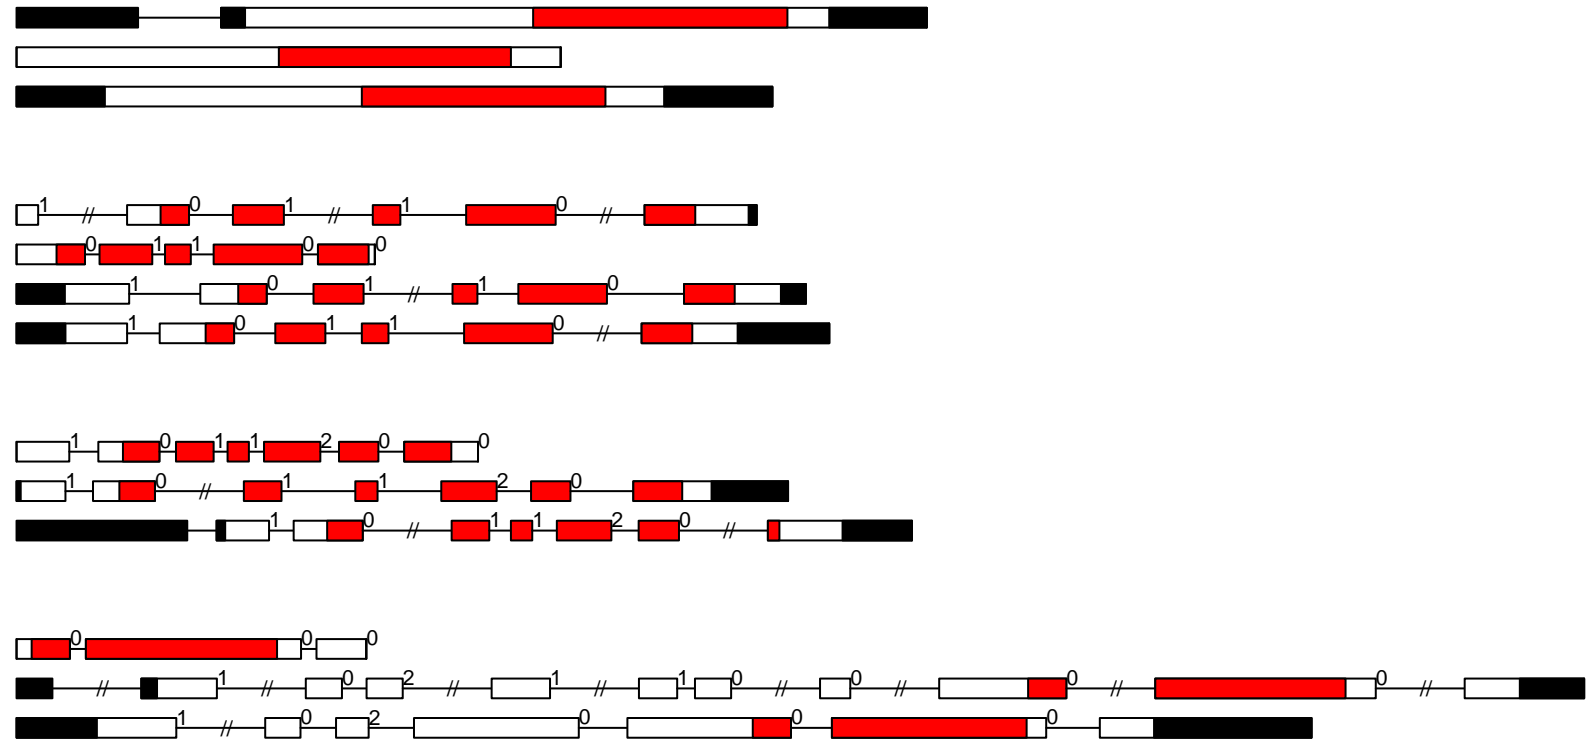



# RLK-Pelle conserved exon-intron and domain diagram (part 11)

RLK-Pelle\_RLCK-VIII

Ppa\_Pp1s87\_149V6

Smo\_231705

Vvi\_GSVIVT01017680001

Gorai.012G099200.1

RLK-Pelle\_RLCK-VI

Ppa\_Pp1s9\_56V6

Smo\_64103

Vvi\_GSVIVT01002864001

Gorai.002G026700.1

RLK-Pelle\_RLCK-V

Ppa\_Pp1s358\_6V6

Smo\_112967

Vvi\_GSVIVT01017681001

Gorai.012G040400.2

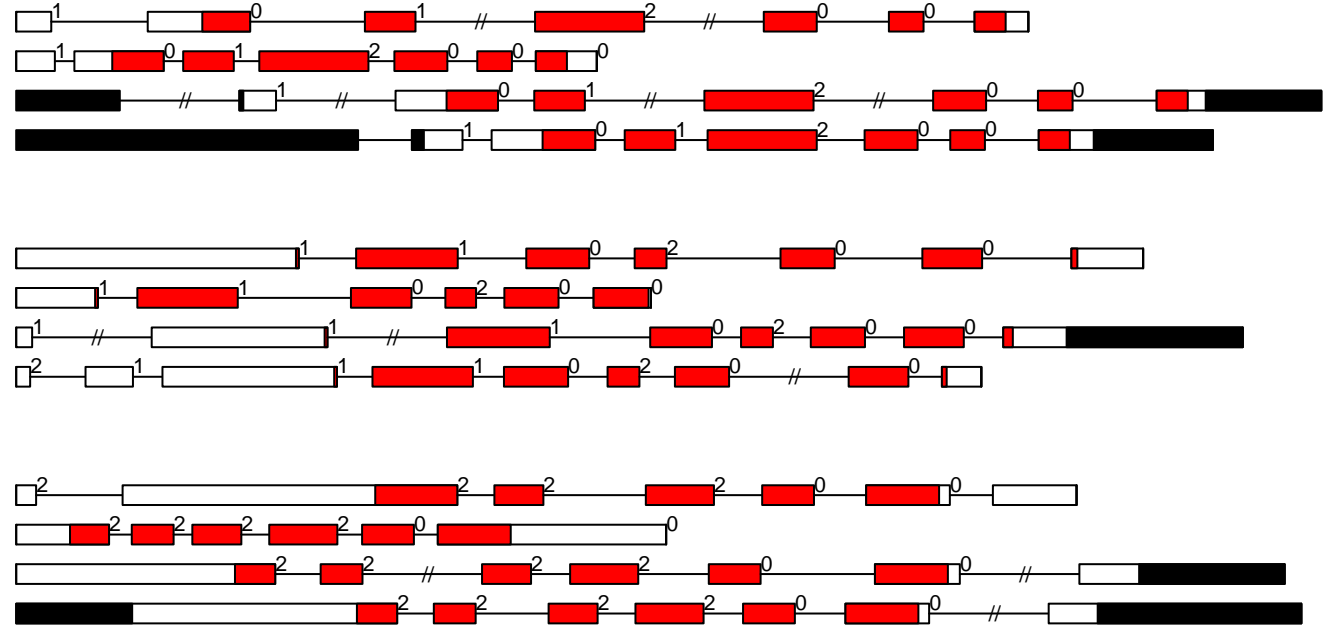

-2000

-1000

0

1000

2000

3000

# RLK-Pelle conserved exon-intron and domain diagram (part 12)

RLK-Pelle\_RLCK-XII-1  
 Ppa\_Pp1s328\_52V6  
 Smo\_103506  
 Vvi\_GSVIVT01034043001  
 Gorai.009G188600.1

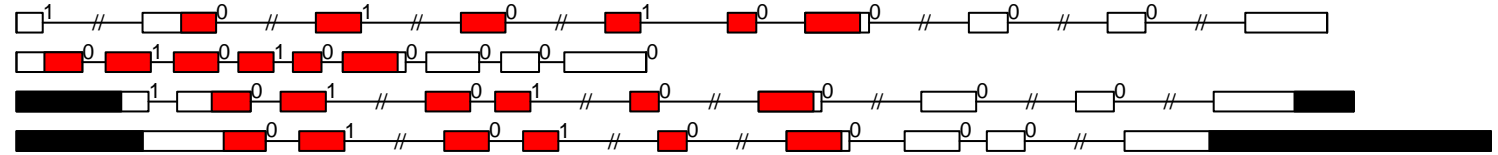

RLK-Pelle\_RLCK-X  
 Ppa\_Pp1s41\_247V6  
 Smo\_92161  
 Vvi\_GSVIVT01035915001  
 Gorai.010G223000.1

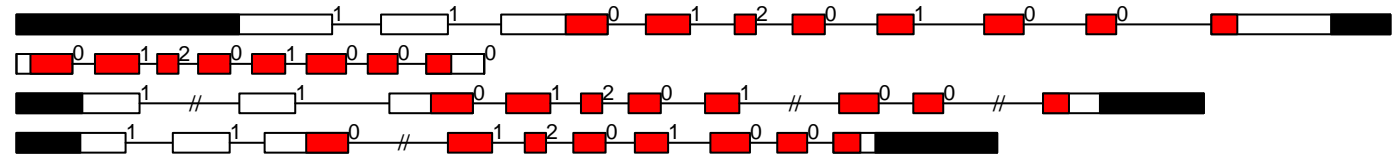

RLK-Pelle\_RLCK-XV  
 Ppa\_Pp1s312\_17V6  
 Smo\_99707  
 Vvi\_GSVIVT01017345001  
 Gorai.012G095600.1

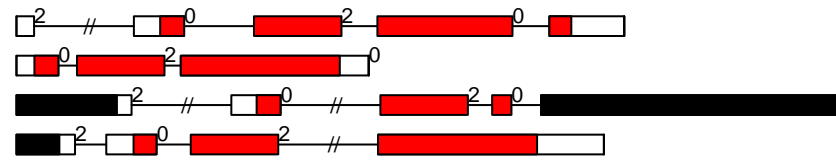

-2000

0

2000

4000



# SCY1 conserved exon-intron and domain diagram (all)

SCY1\_SCYL1

Smo\_230150

Vvi\_GSVIVT01032663001

Gorai.010G219100.1

SCY1\_SCYL2

Smo\_165698

Vvi\_GSVIVT01037227001

Gorai.009G290500.1

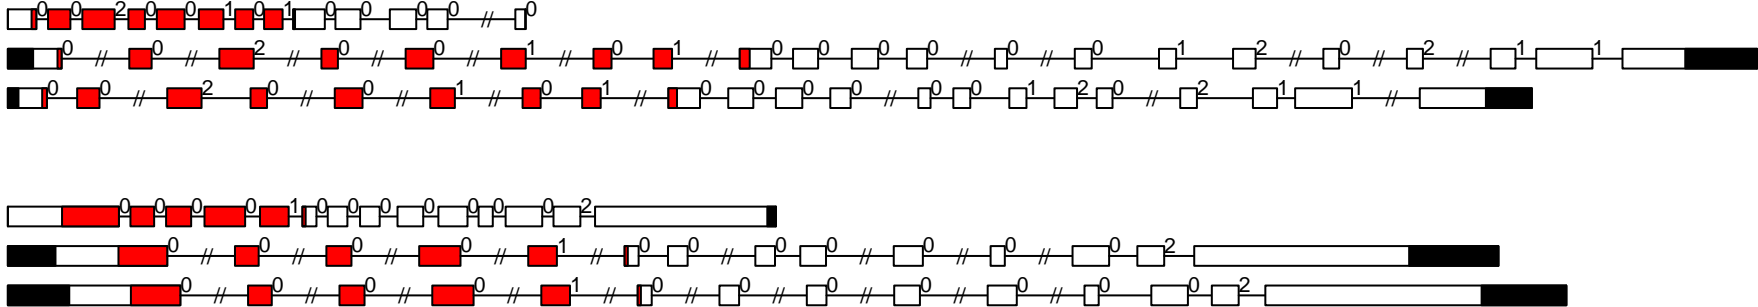

# STE conserved exon-intron and domain diagram (part 1)

## STE\_STE11

Ppa\_Pp1s8\_299V6

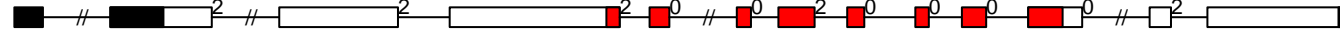

Smo\_55695

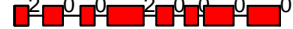

Vvi\_GSVIVT01028897001

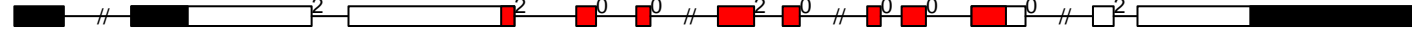

Gorai.011G104700.2

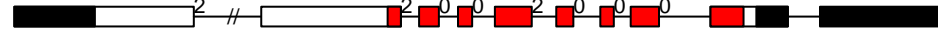

## STE\_STE20-Fray

Ppa\_Pp1s407\_24V6

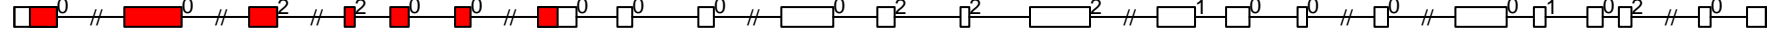

Smo\_92988

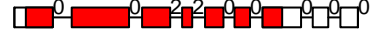

Vvi\_GSVIVT01032461001

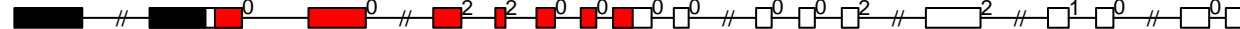

Gorai.011G095700.3

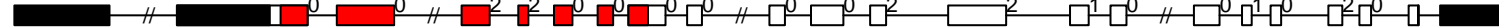

## STE\_STE20-PI

Smo\_30736

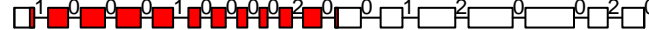

Vvi\_GSVIVT01012233001

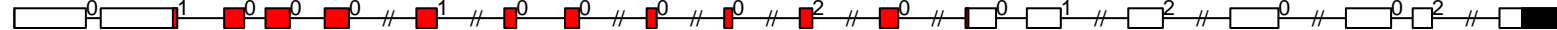

Gorai.008G176300.1

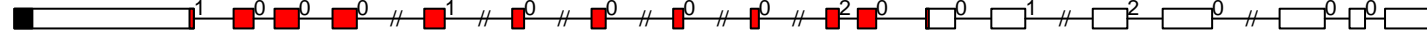

-2000

0

2000

4000

6000

8000





# TKL conserved exon-intron and domain diagram (part 1)

TKL\_CTR1-DRK-1

Ppa\_Pp1s63\_65V6

Vvi\_GSVIVT01020712001

Gorai.012G046800.2

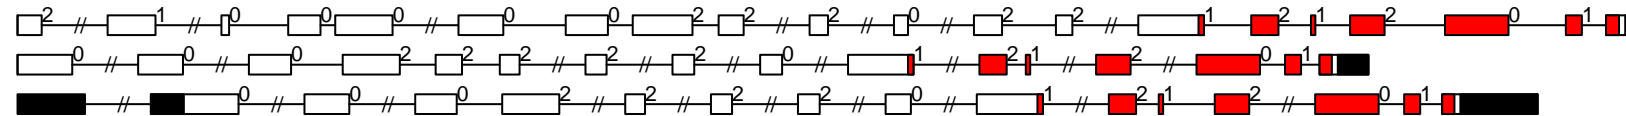

TKL\_CTR1-DRK-2

Ppa\_Pp1s462\_10V6

Smo\_10499

Vvi\_GSVIVT01035409001

Gorai.006G158200.1

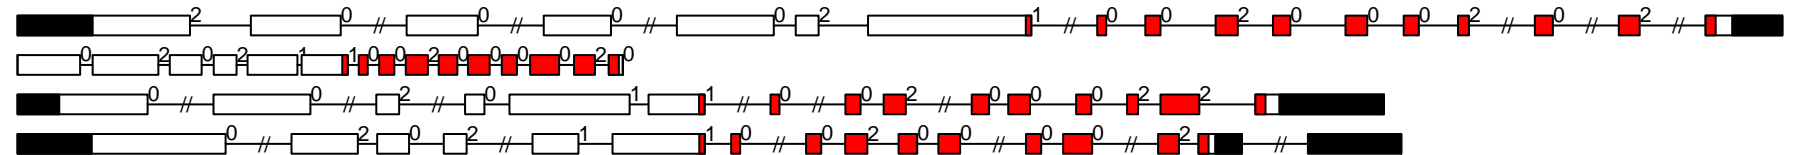

TKL-PI-1

Ppa\_Pp1s414\_18V6

Smo\_52199

Vvi\_GSVIVT01017348001

Gorai.010G225000.1

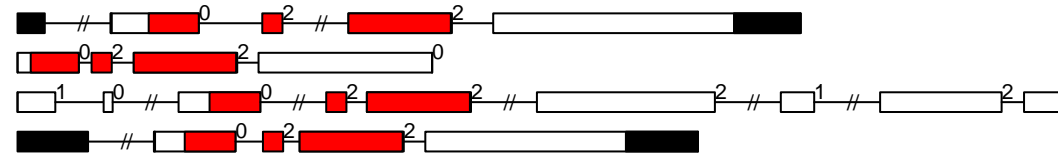

-2000

0

2000

4000

6000

8000

## TKL conserved exon-intron and domain diagram (part 2)

TKL-PI-3

Ppa\_Pp1s60\_107V6

Smo\_441116

Vvi\_GSVIVT01025802001

Gorai.013G001000.1

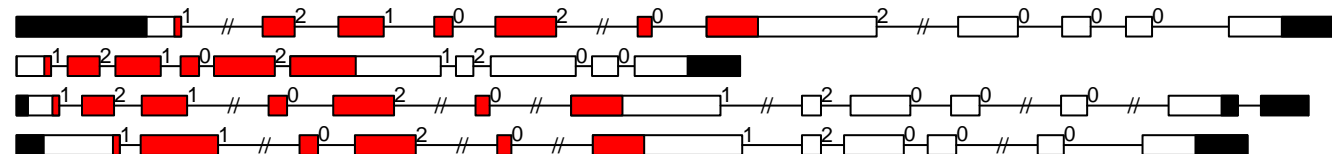

TKL-PI-4

Ppa\_Pp1s43\_196V6

Smo\_444789

Vvi\_GSVIVT01023958001

Gorai.007G190200.1

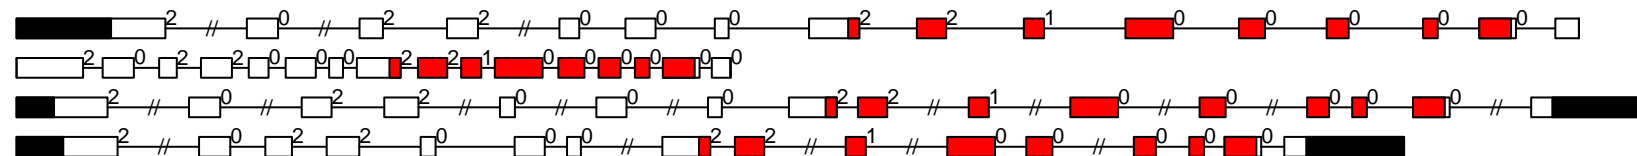

TKL-PI-4

Smo\_271276

Vvi\_GSVIVT01001193001

Gorai.004G077900.1

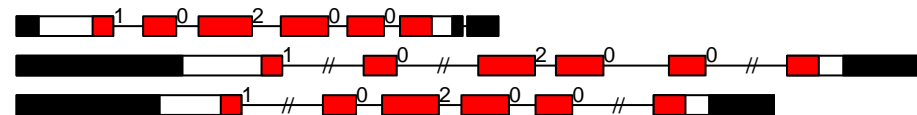

-2000

0

2000

4000

6000

### TKL conserved exon-intron and domain diagram (part 3)

TKL-PI-4

Smo\_160379

Vvi\_GSVIVT01030194001

Gorai.005G004900.1

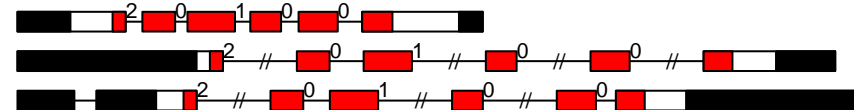

TKL-PI-5

Ppa\_Pp1s31\_260V6

Smo\_130298

Vvi\_GSVIVT01038213001

Gorai.013G089100.2

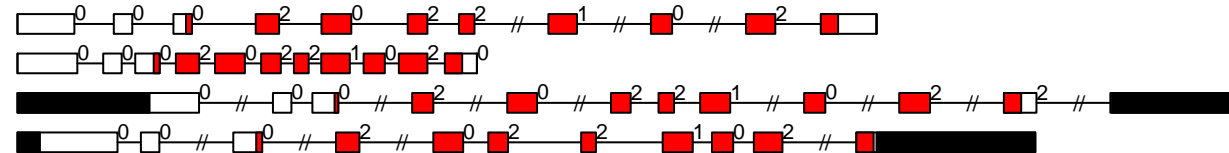

TKL-PI-6

Ppa\_Pp1s66\_220V6

Smo\_88196

Vvi\_GSVIVT01036758001

Gorai.010G056300.1

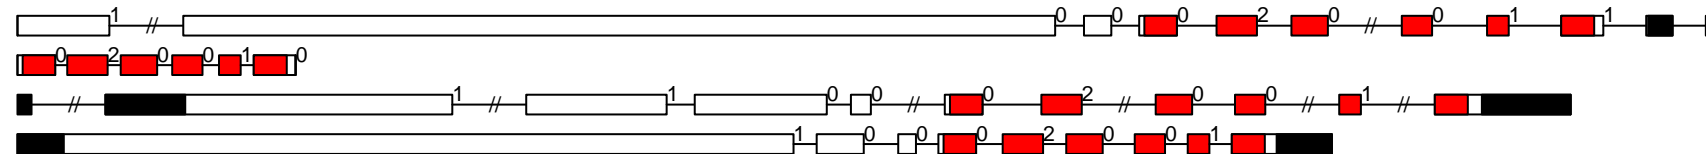

-2000

0

2000

4000

6000
