# Supplementary material for: Genome-wide classification, evolutionary analysis and gene expression patterns of the kinome in Gossypium
Source: PubMed Central journal article supplement (PMC5955557; doi:10.1371/journal.pone.0197392), 2018-05-16

# A

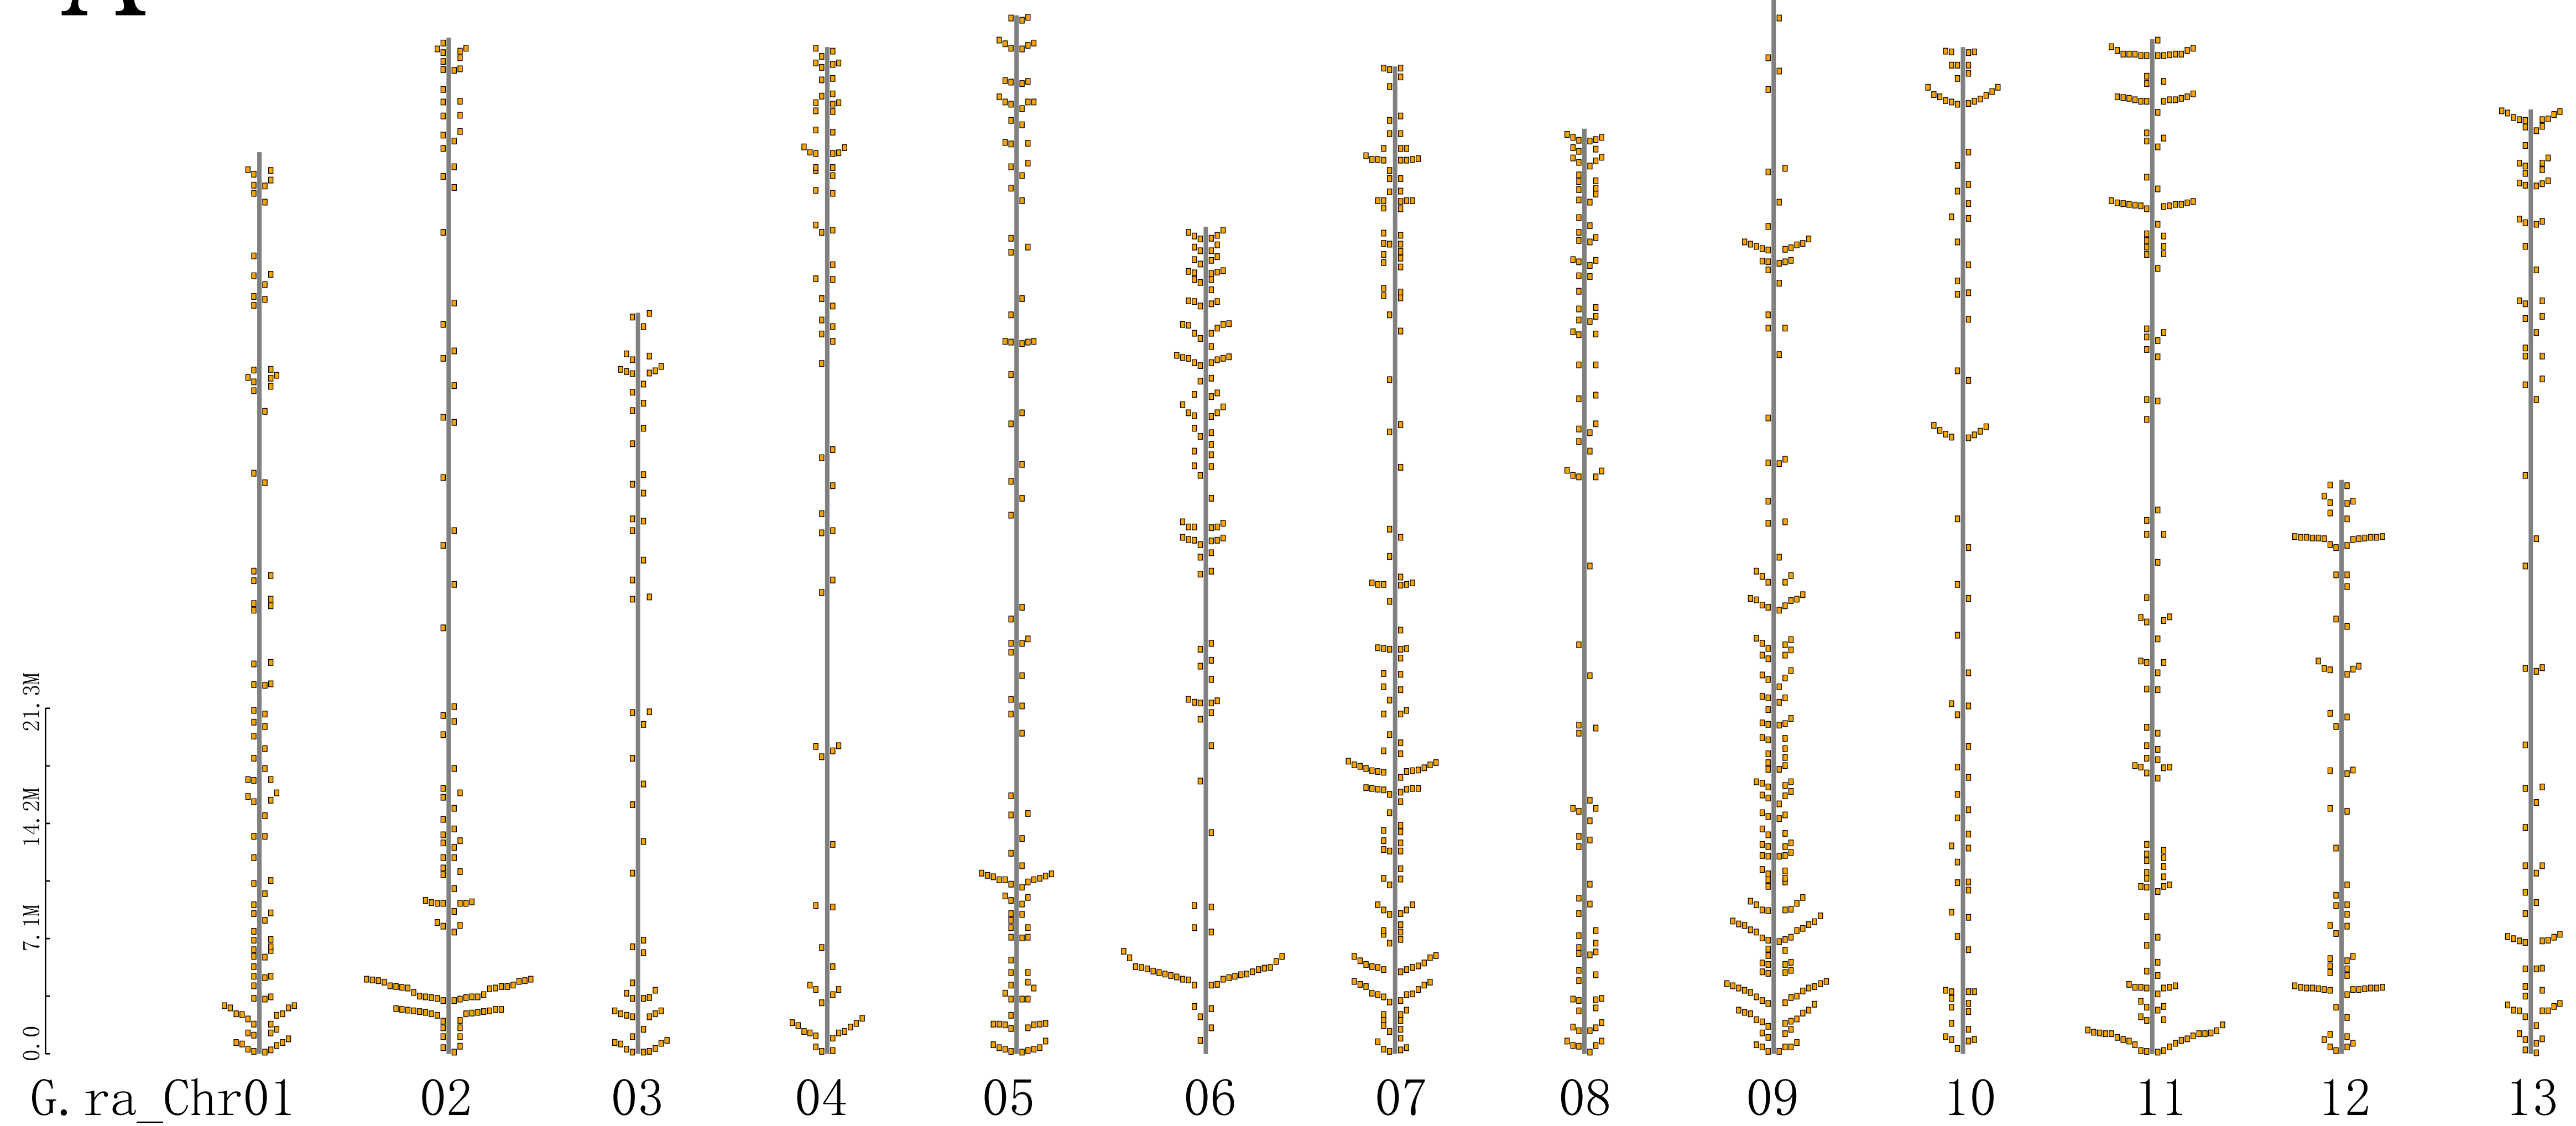

# B

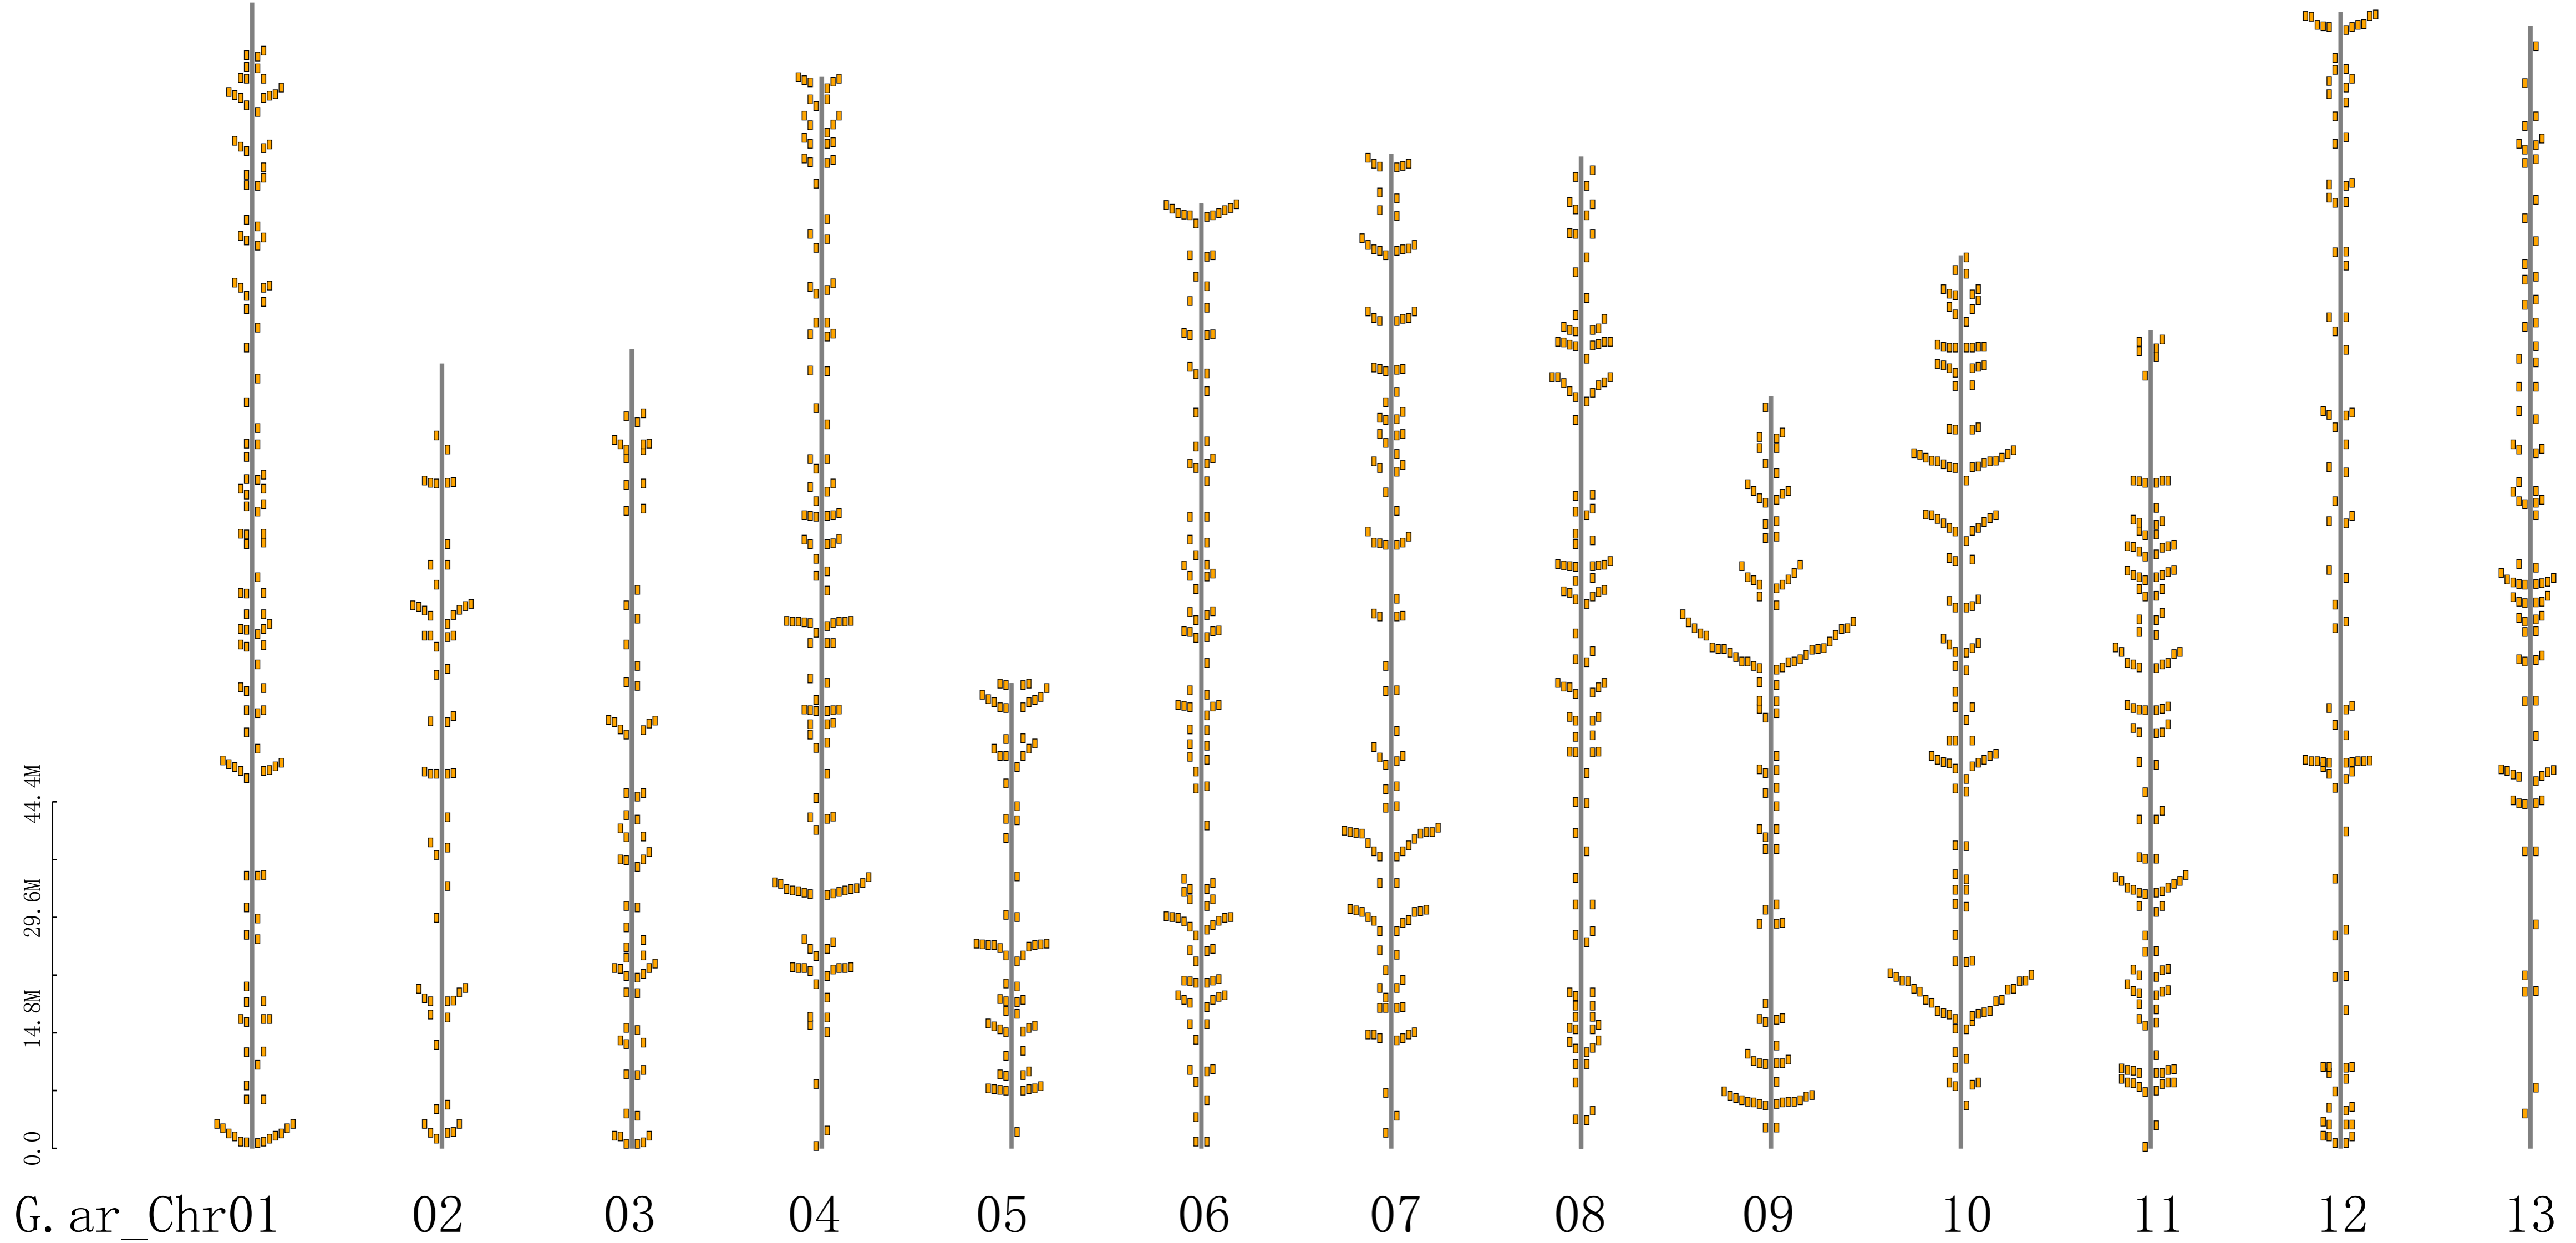

# C

0.0  
21.4M  
42.8M  
64.2M

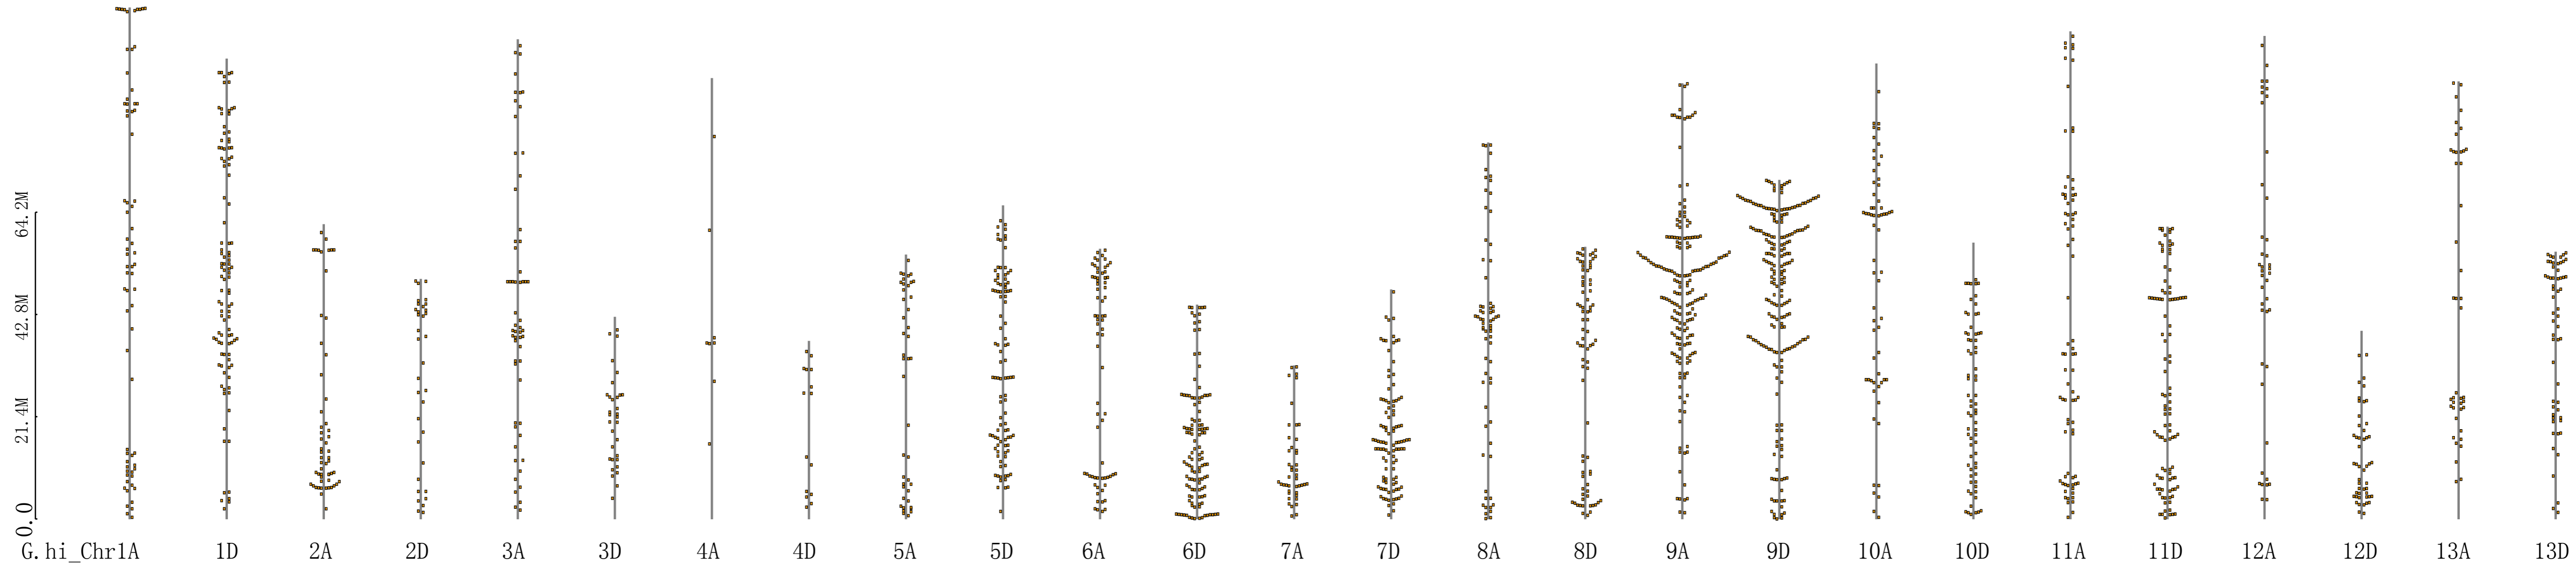

# D

0.0  
23.4M  
46.8M  
70.2M

G. ba\_Chr1A 1D 2A 2D 3A 3D 4A 4D 5A 5D 6A 6D 7A 7D 8A 8D 9A 9D 10A 10D 11A 11D 12A 12D 13A 13D

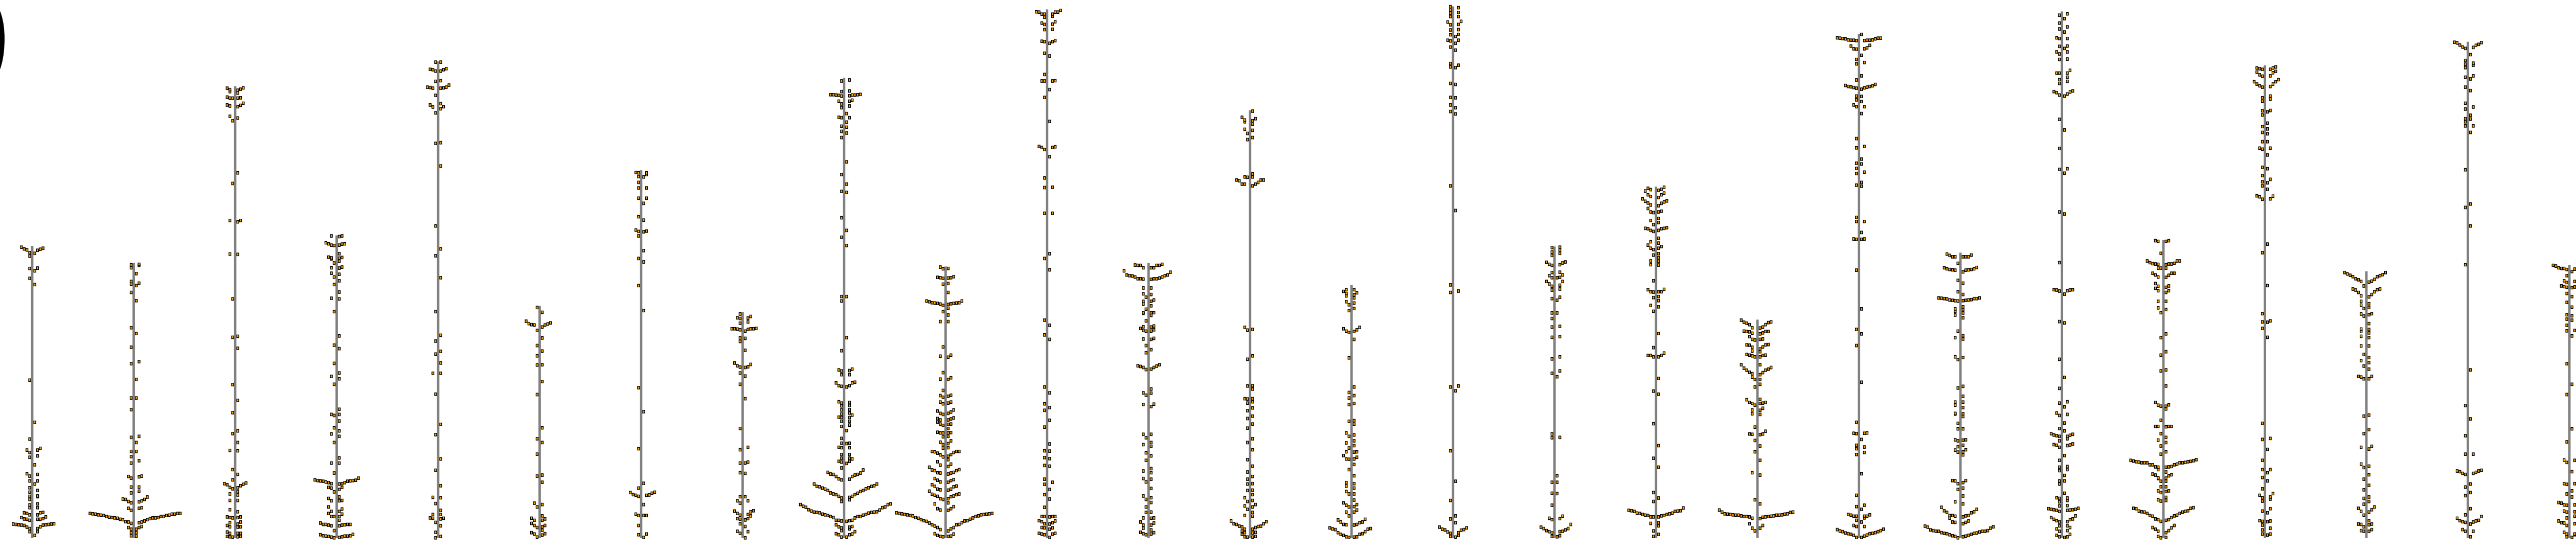

Supplement: pone.0197392.s005.pdf [file pone.0197392.s005.pdf]
