# Supplementary material for: Genome-wide classification, evolutionary analysis and gene expression patterns of the kinome in Gossypium
Source: PubMed Central journal article supplement (PMC5955557; doi:10.1371/journal.pone.0197392), 2018-05-16

# A

# B

# C

G. ra

Chr1

Chr2

Chr3

Chr4

Chr5

Chr6

Chr7

Chr8

Chr9

Chr10

Chr11

Chr12

Chr13

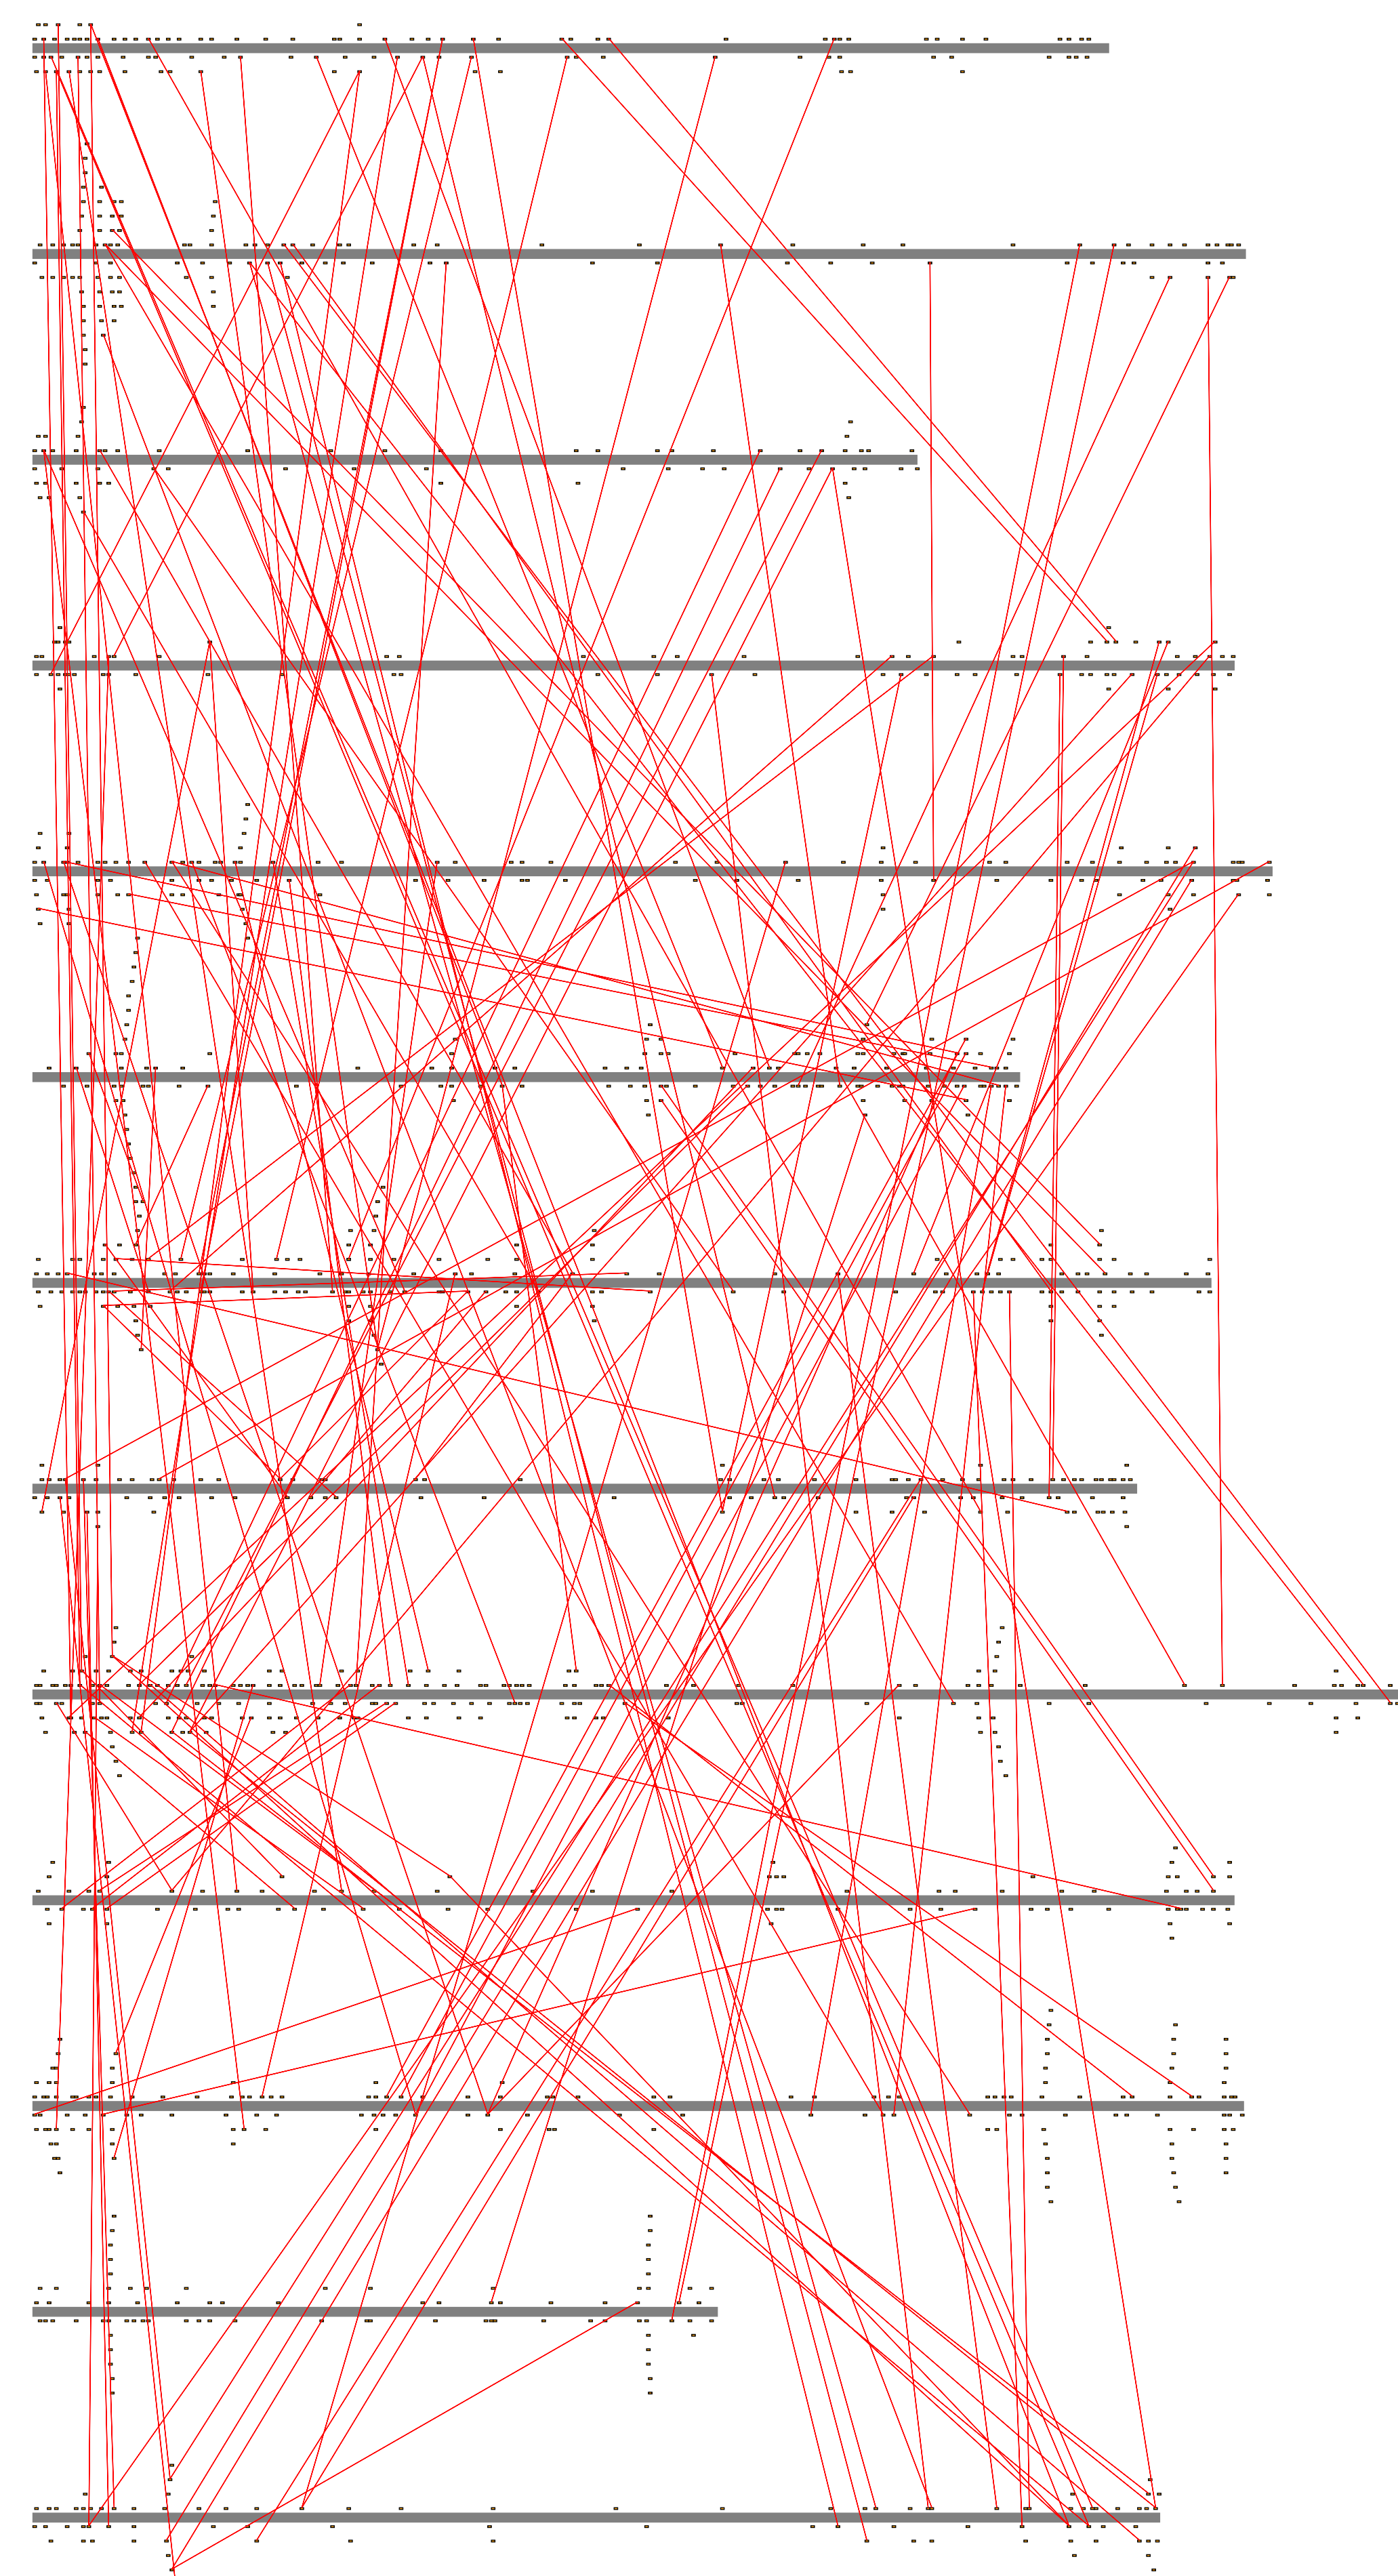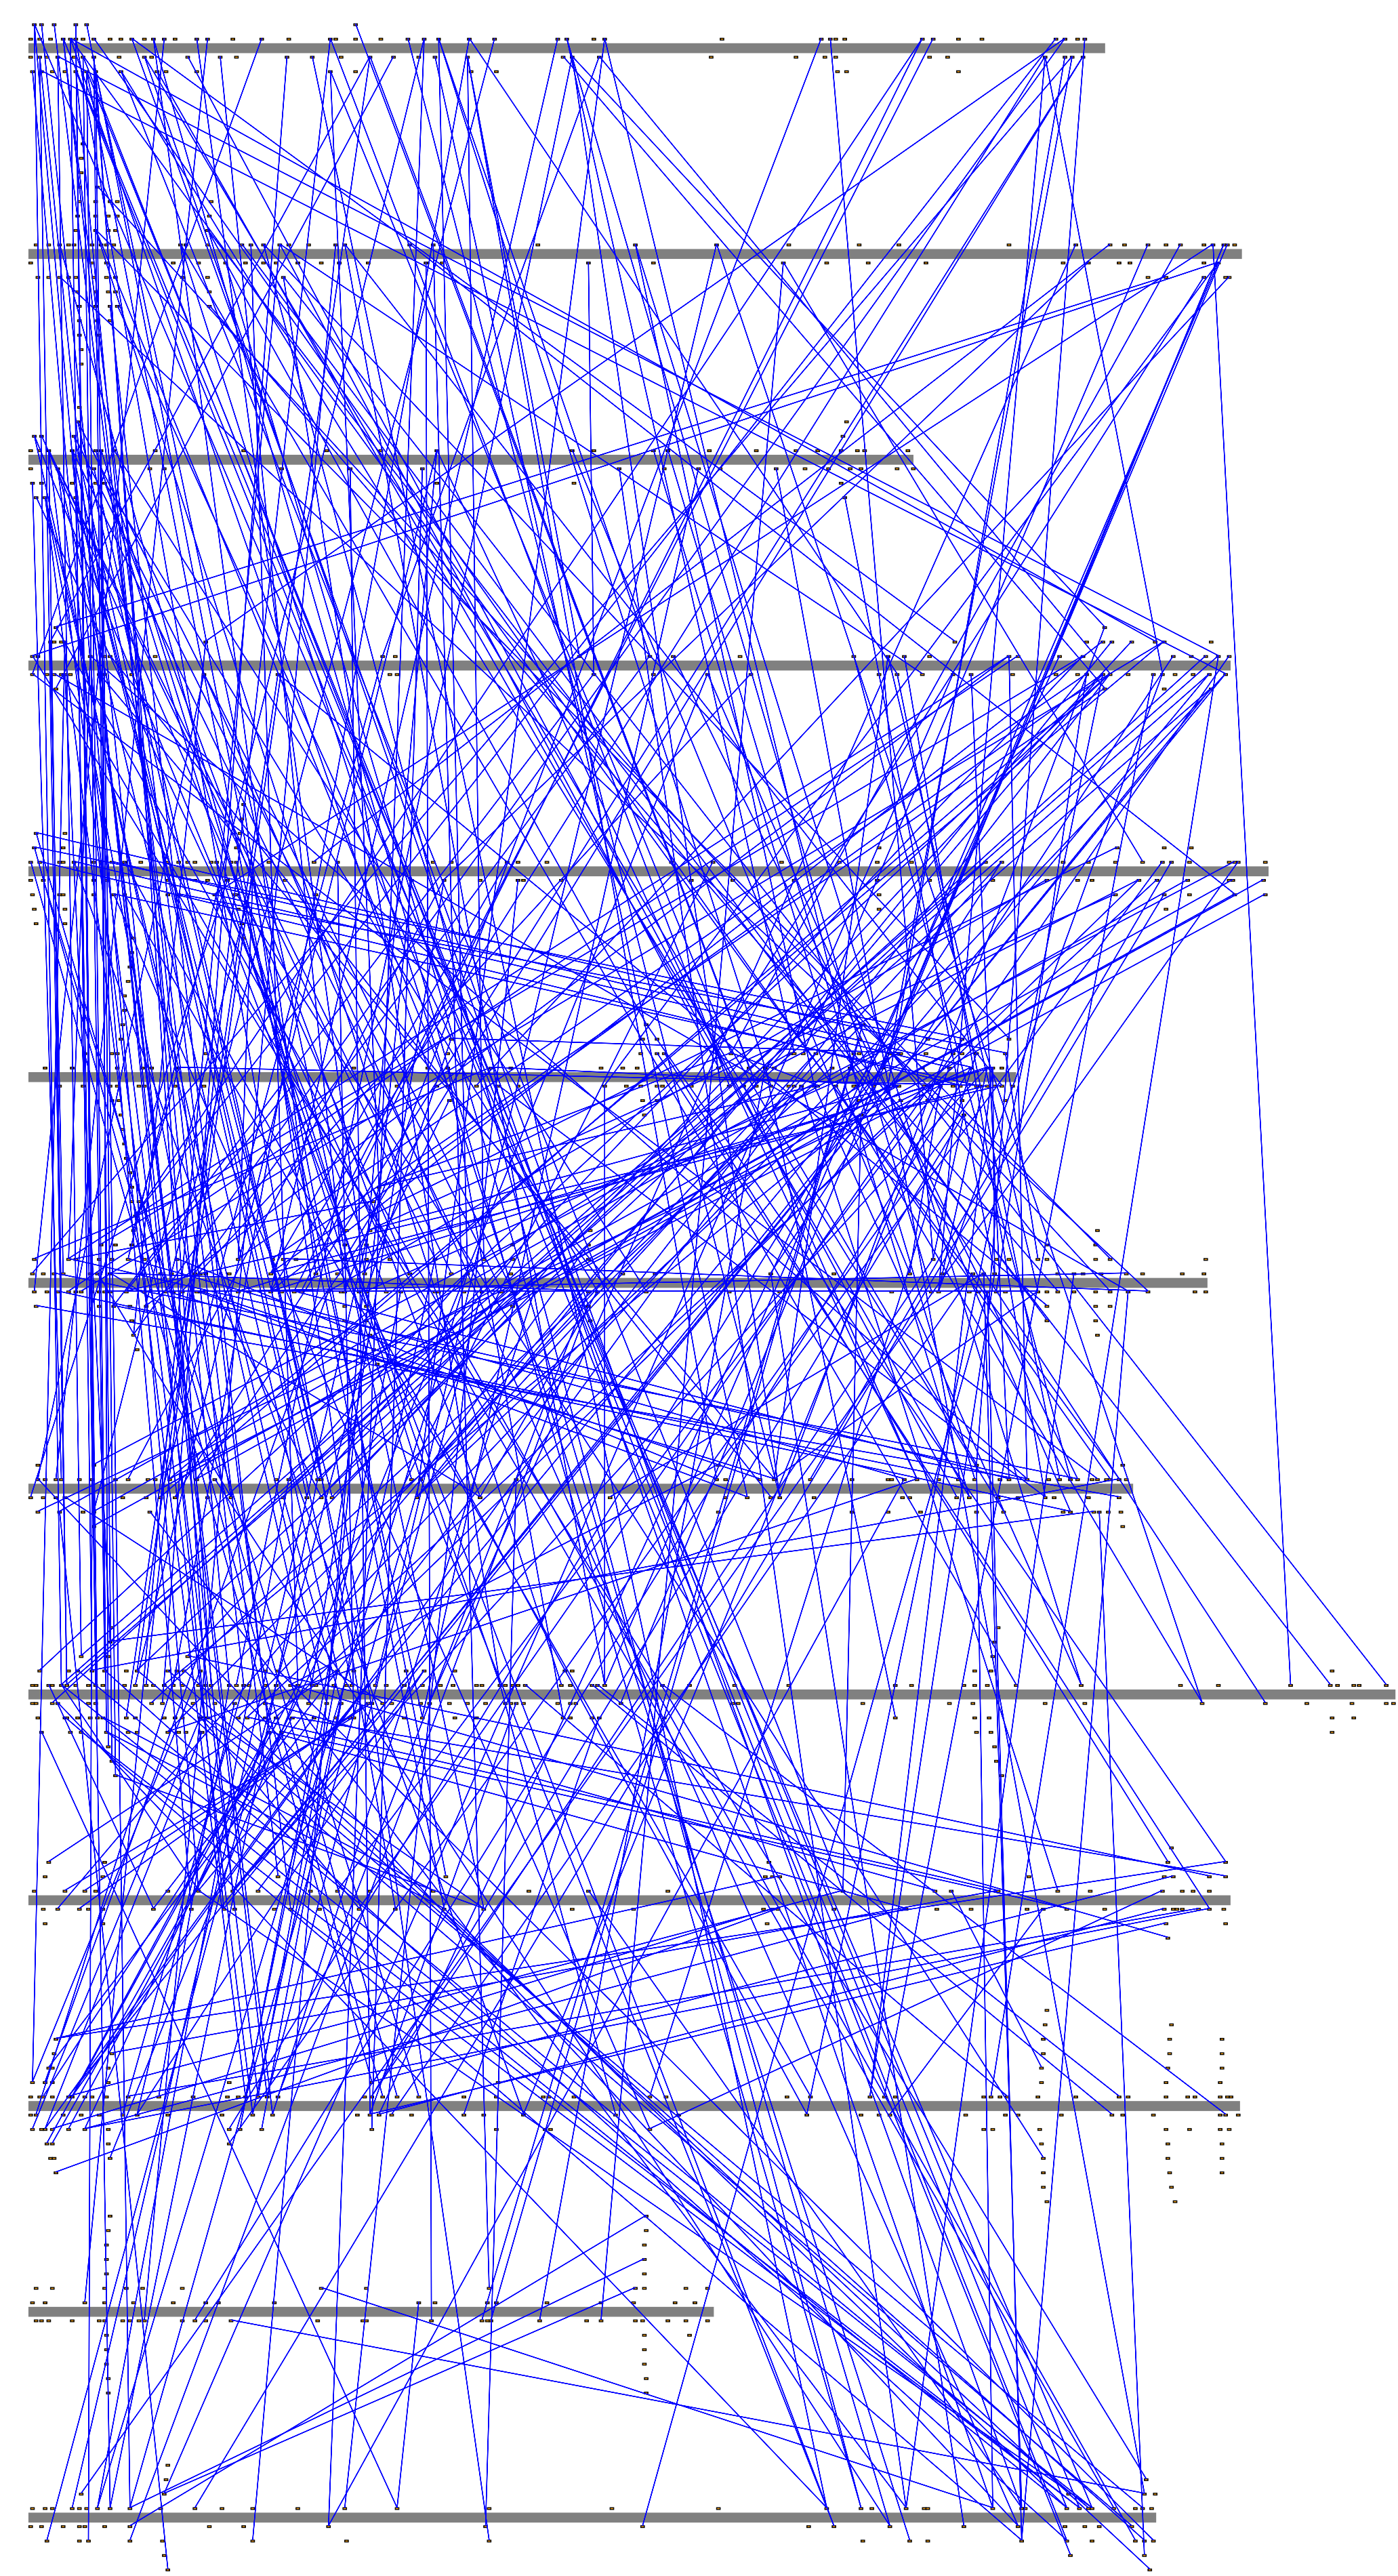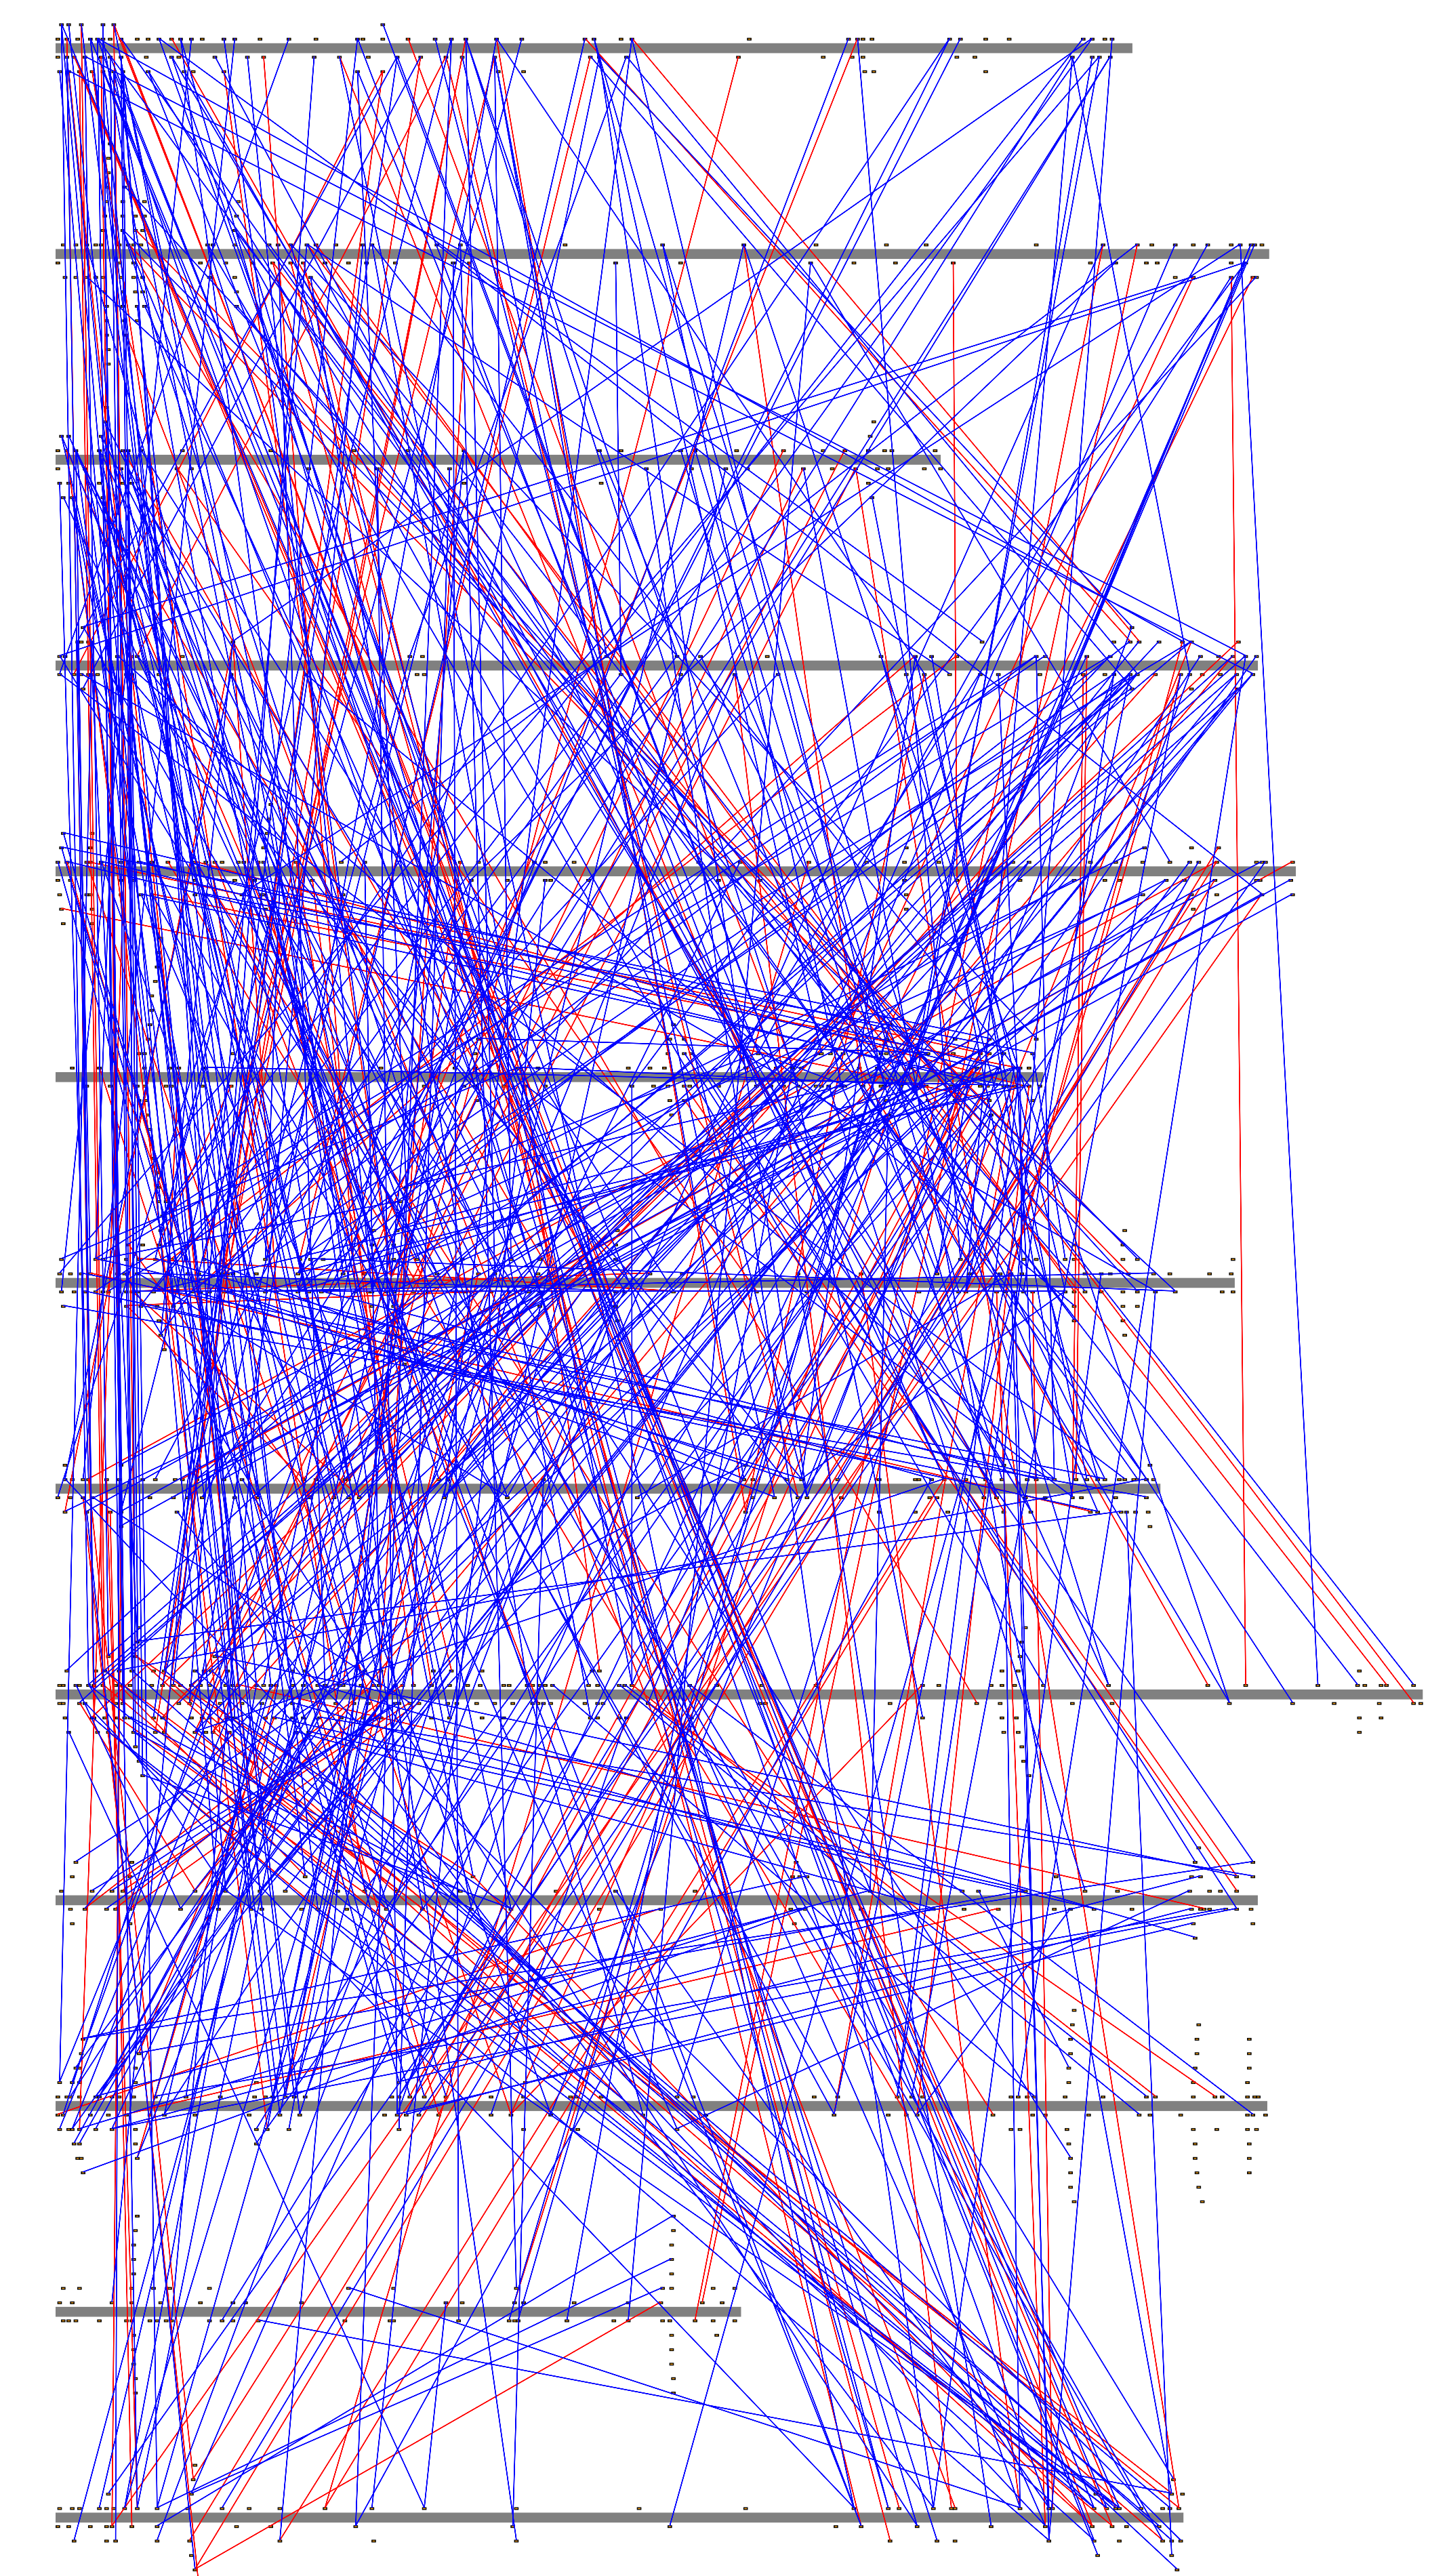



# E

G. ar

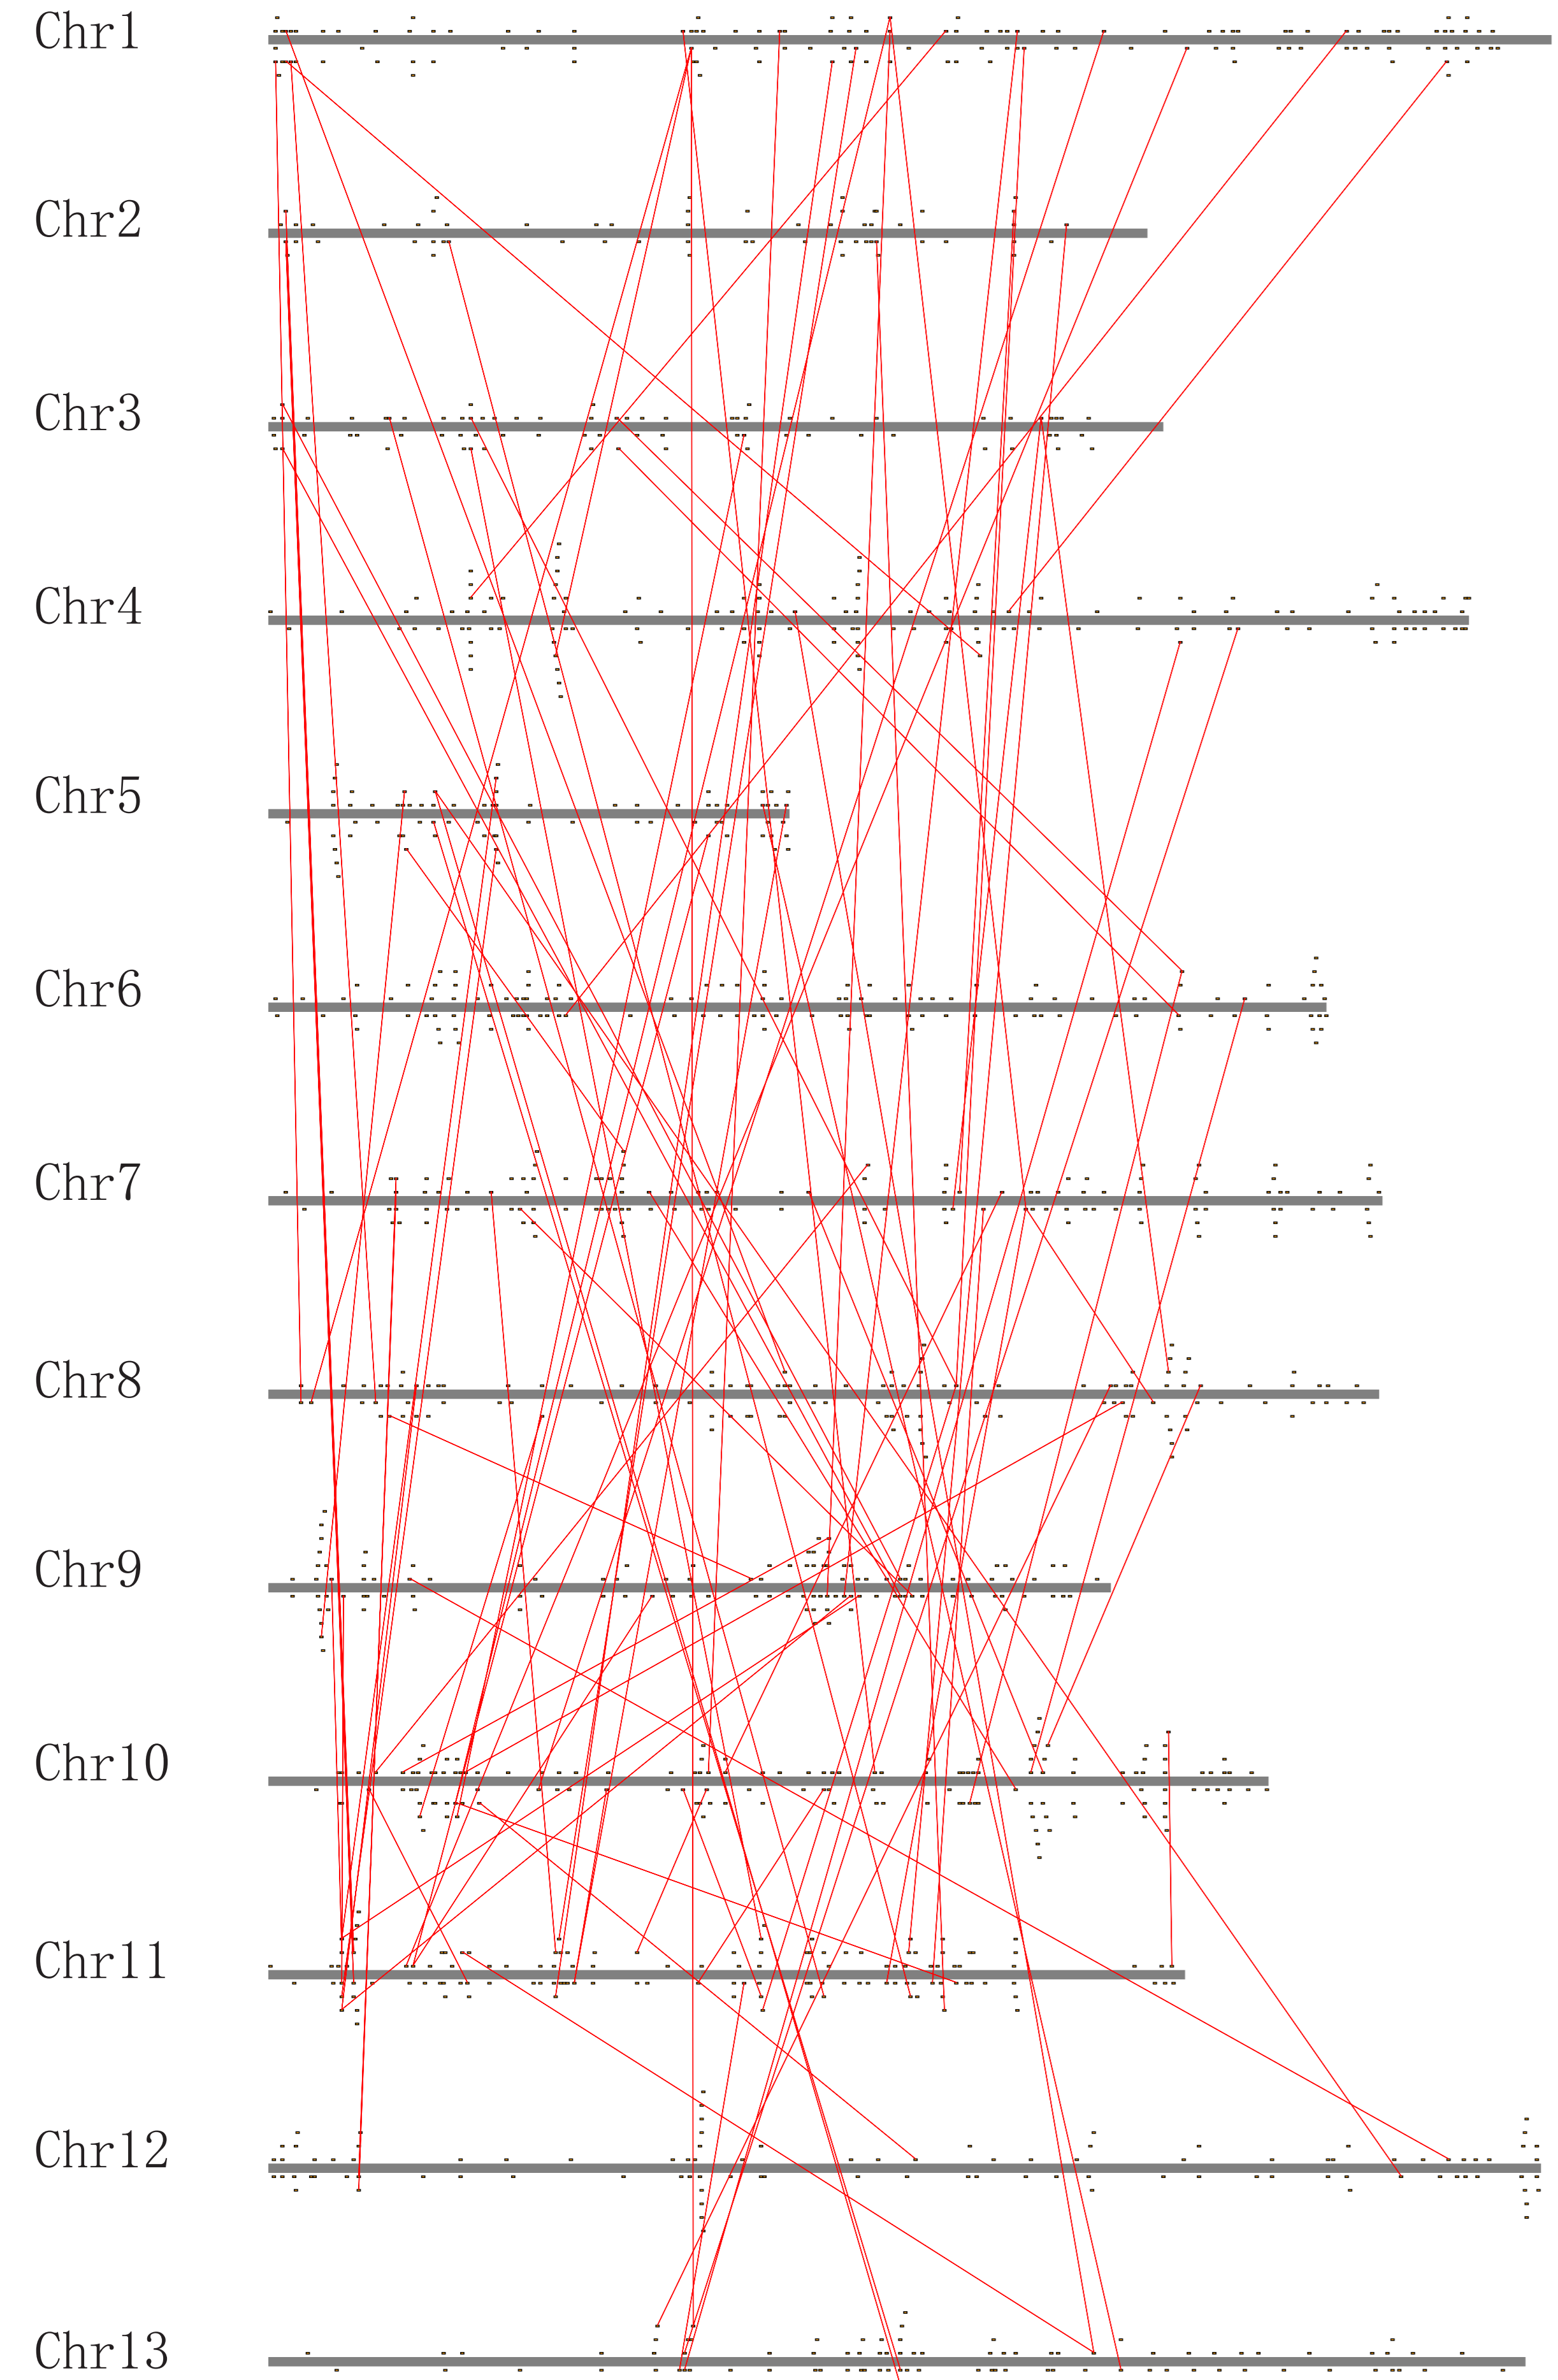

# F

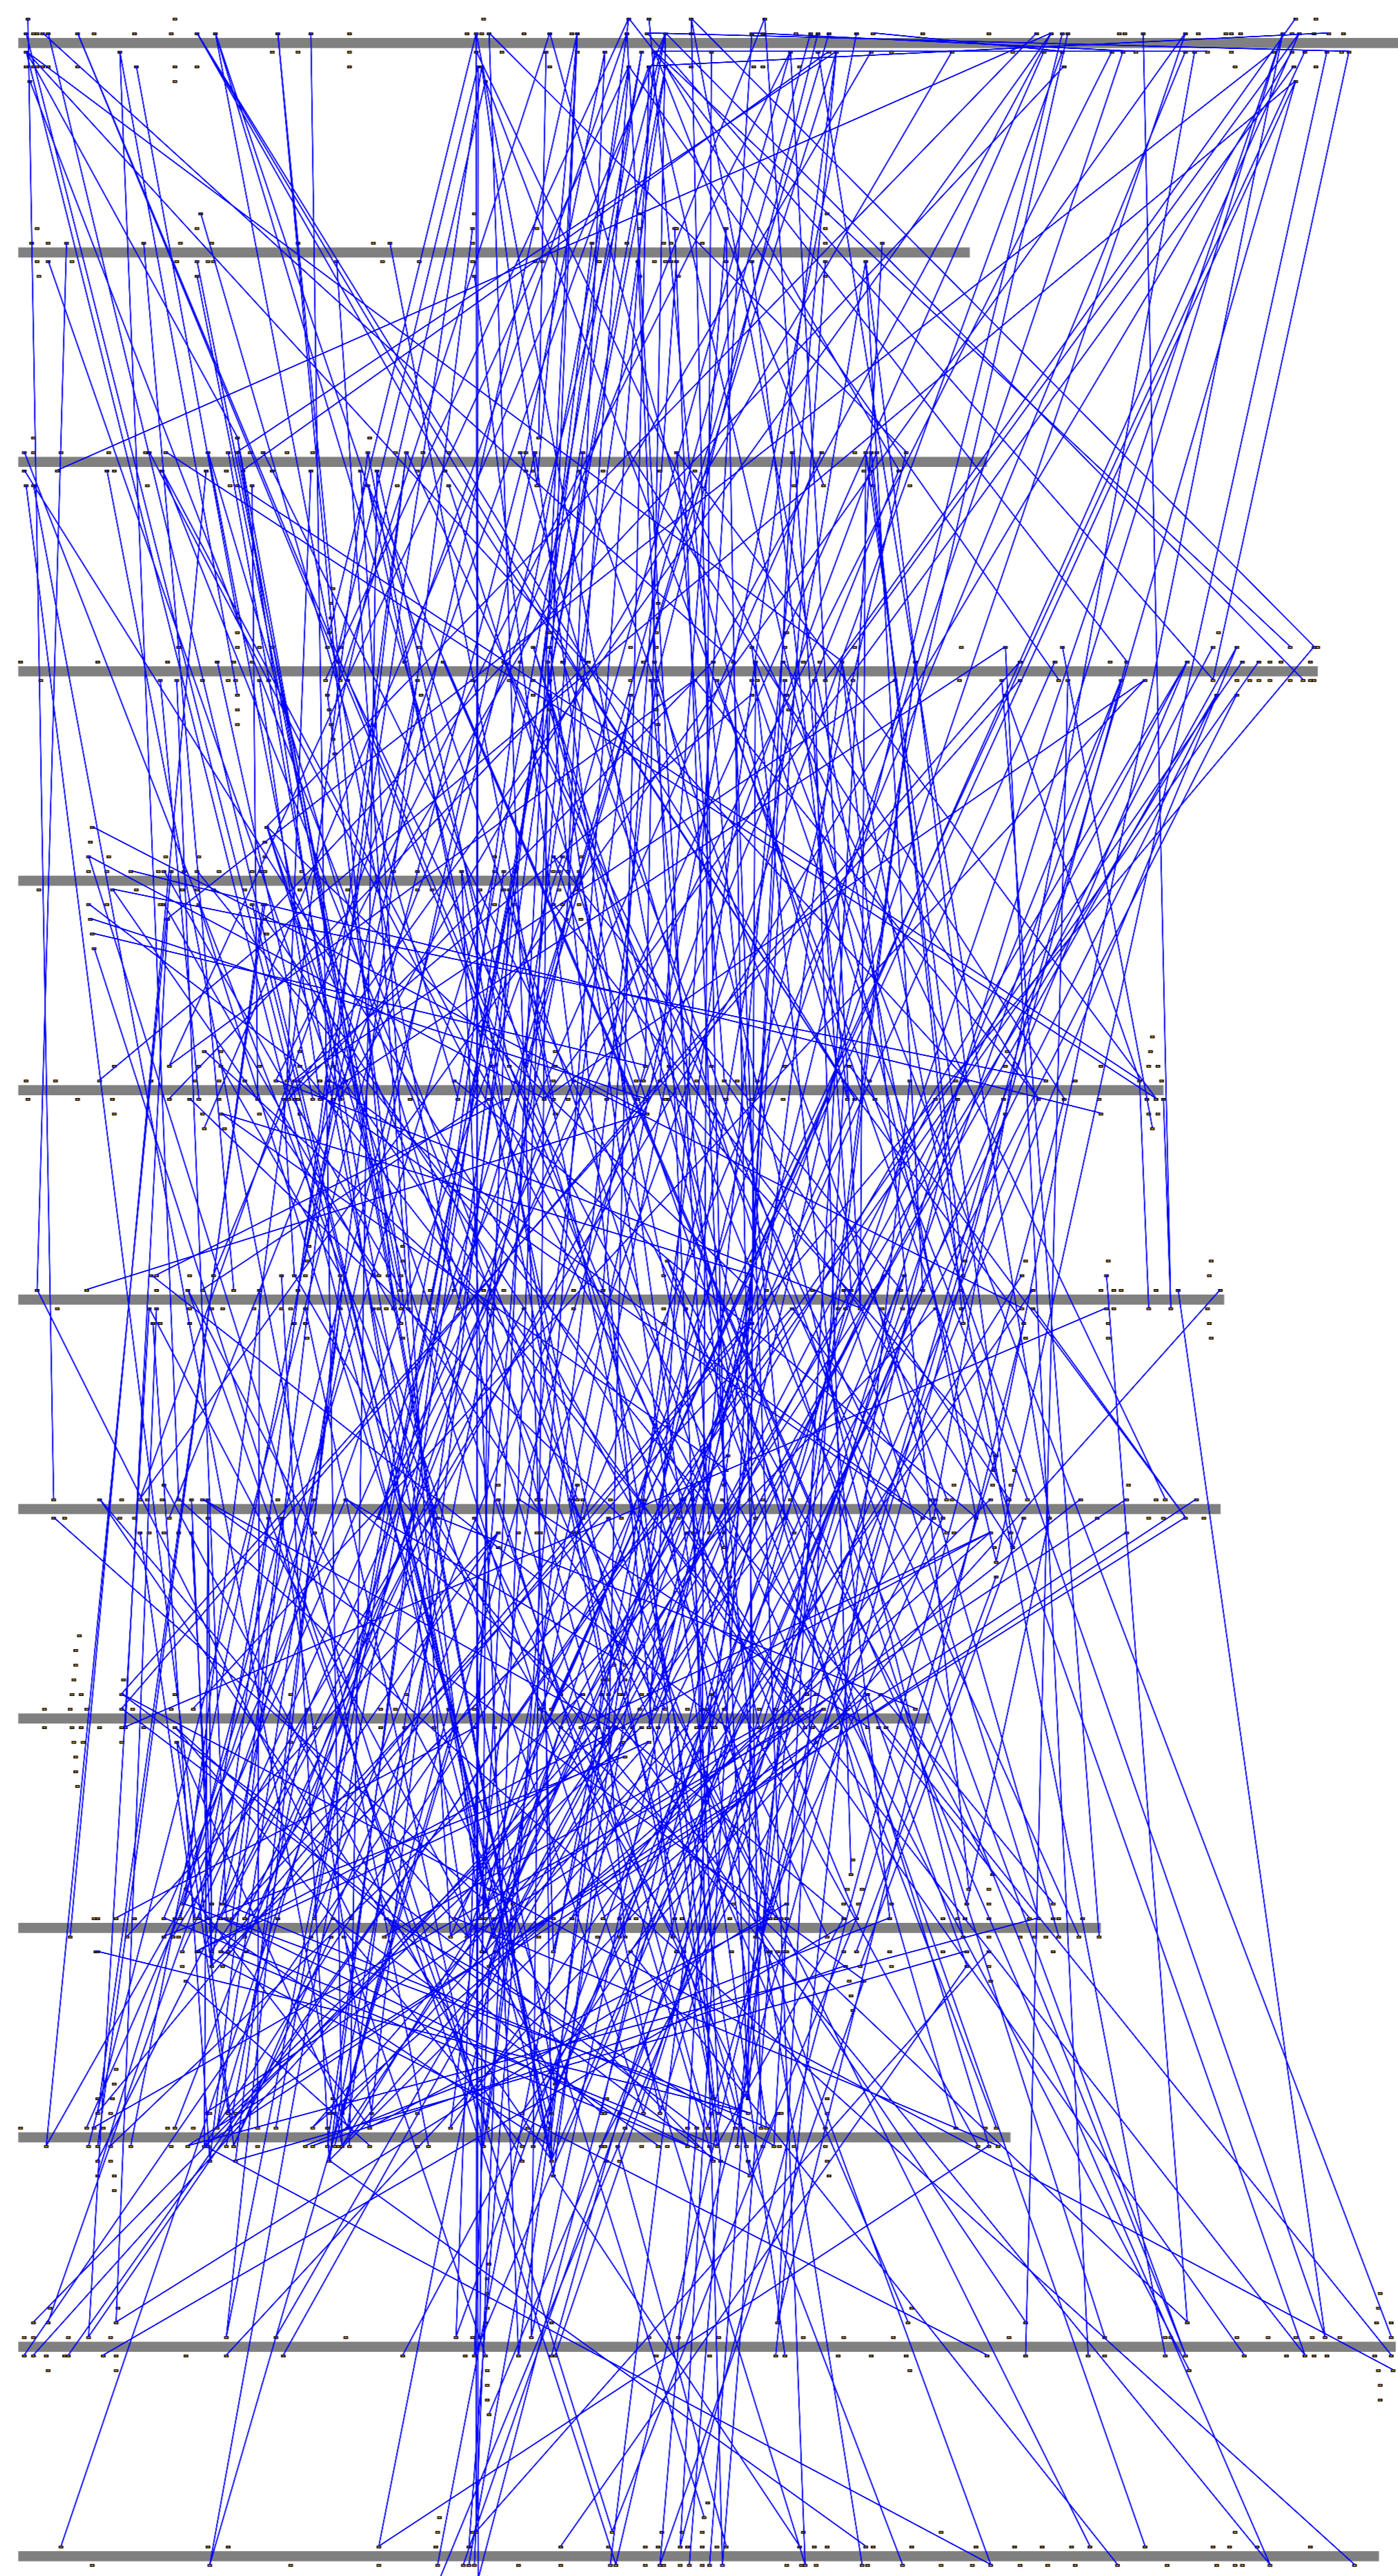

# G

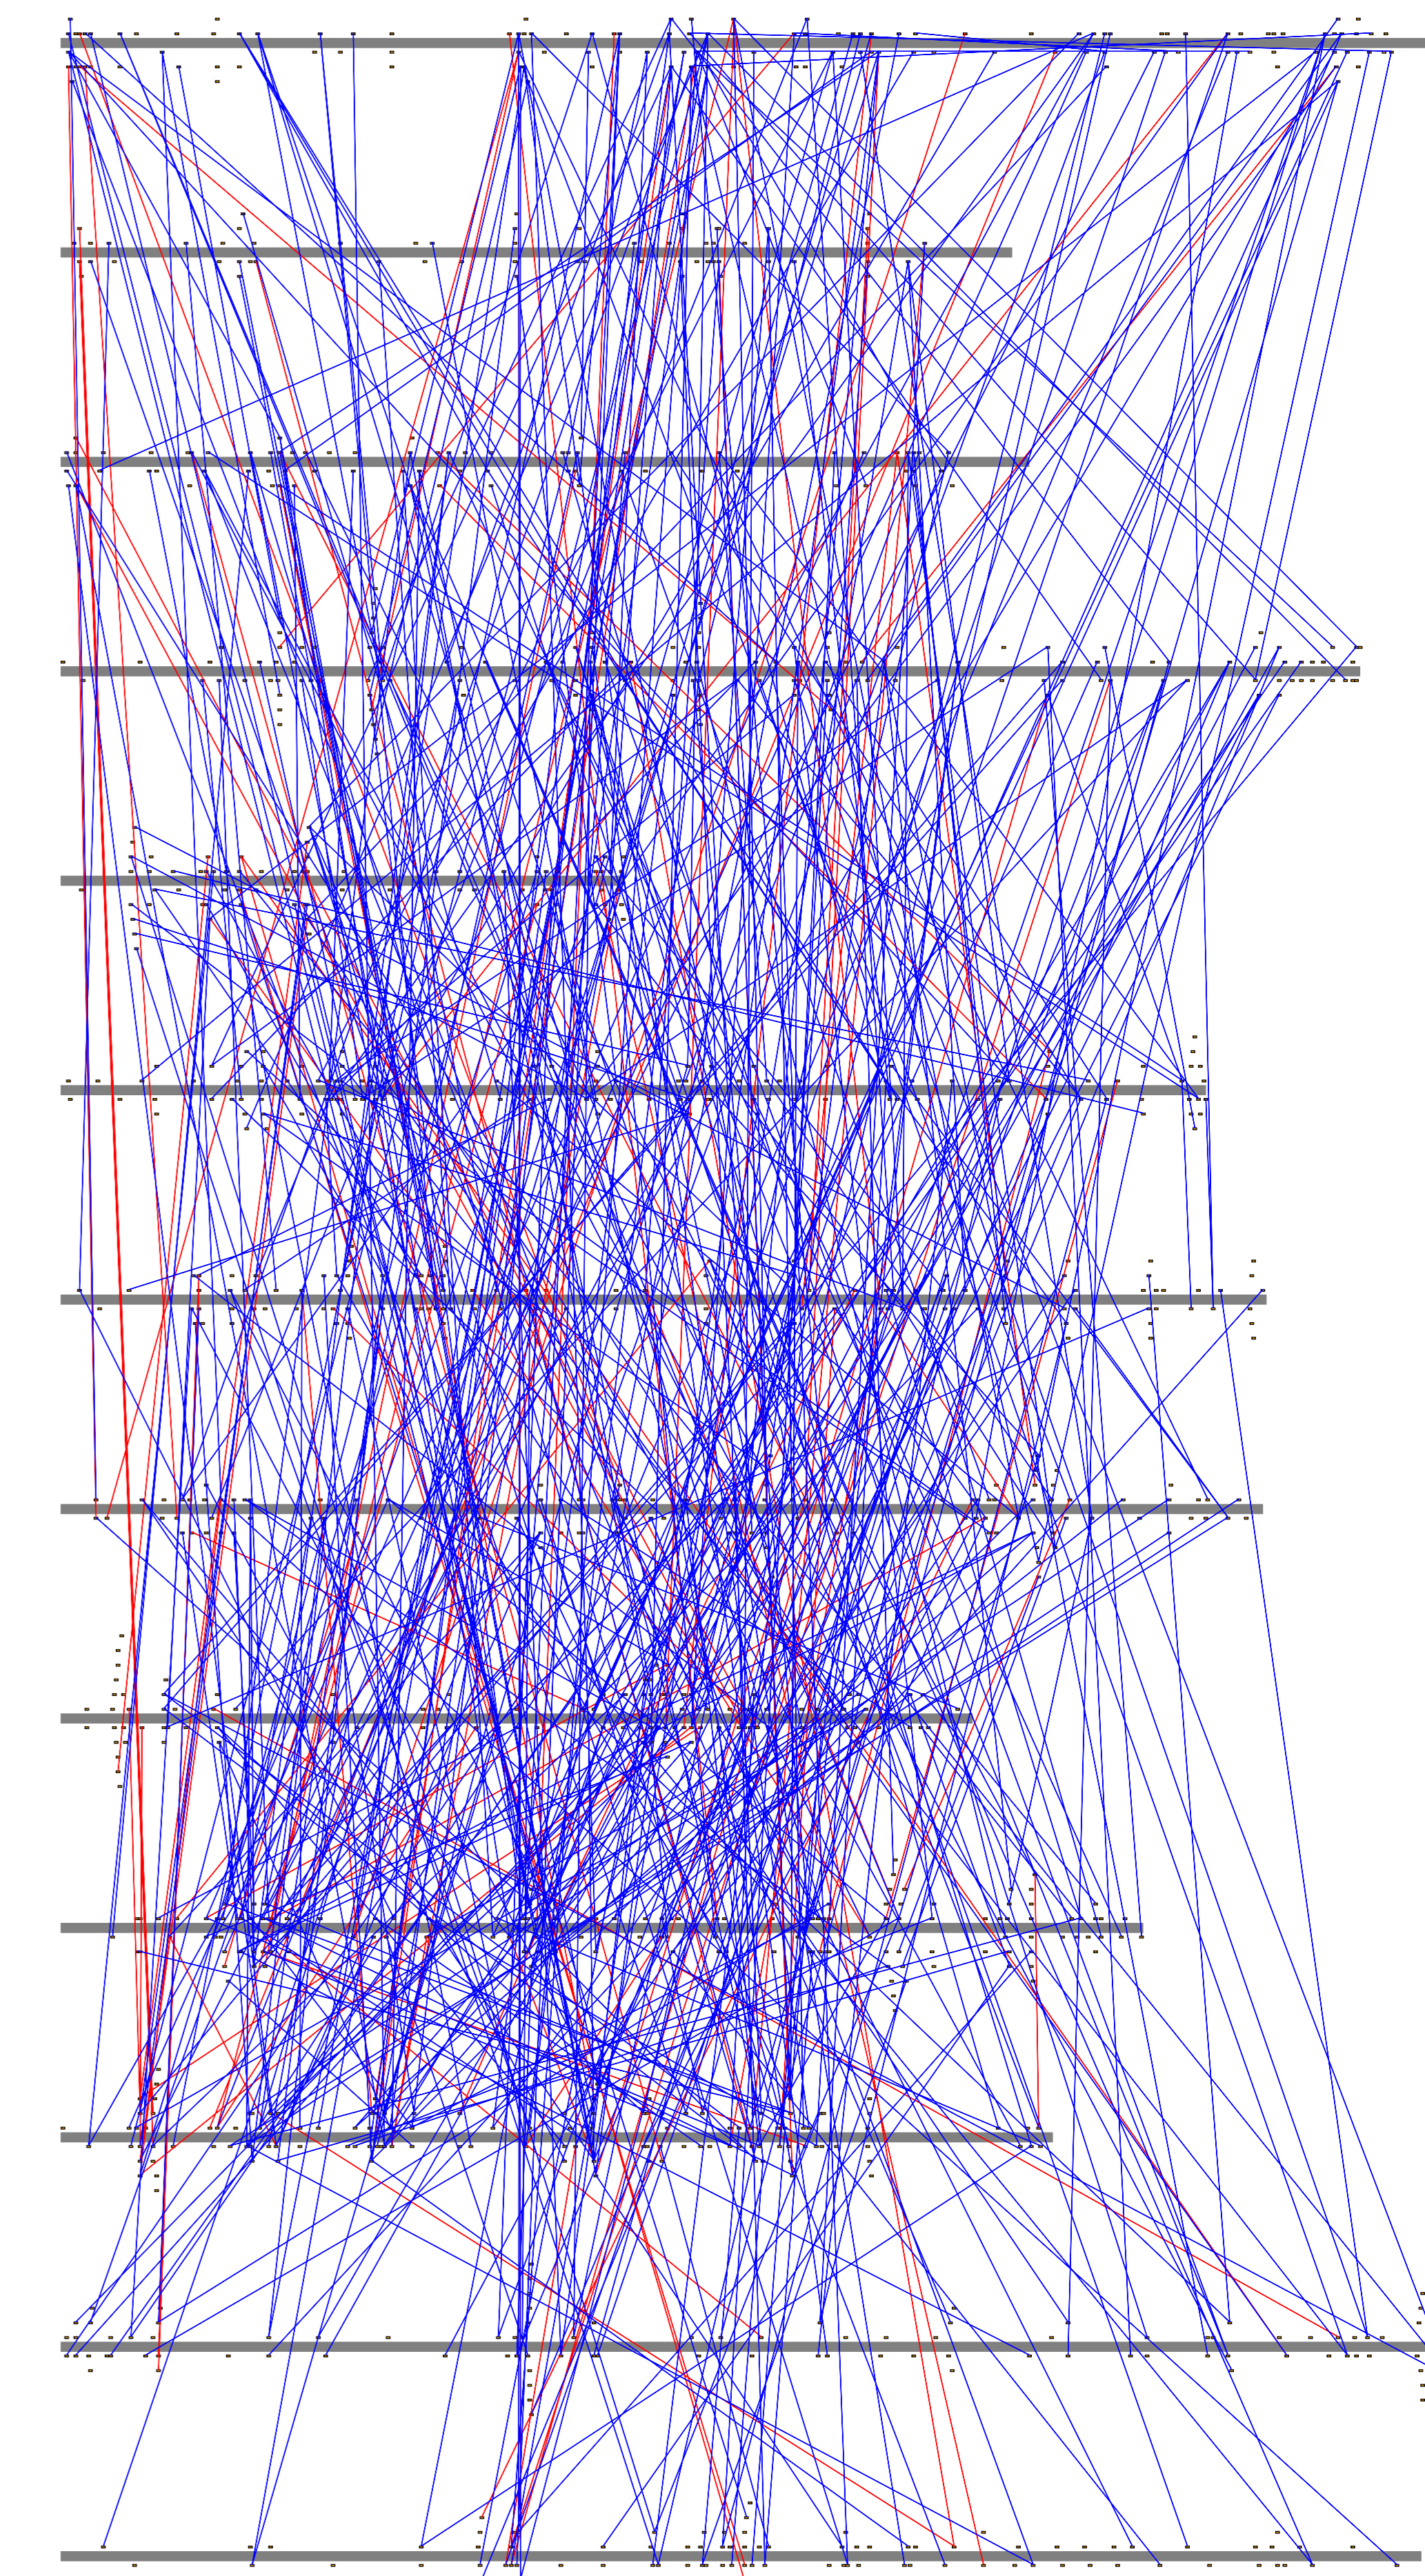



# G

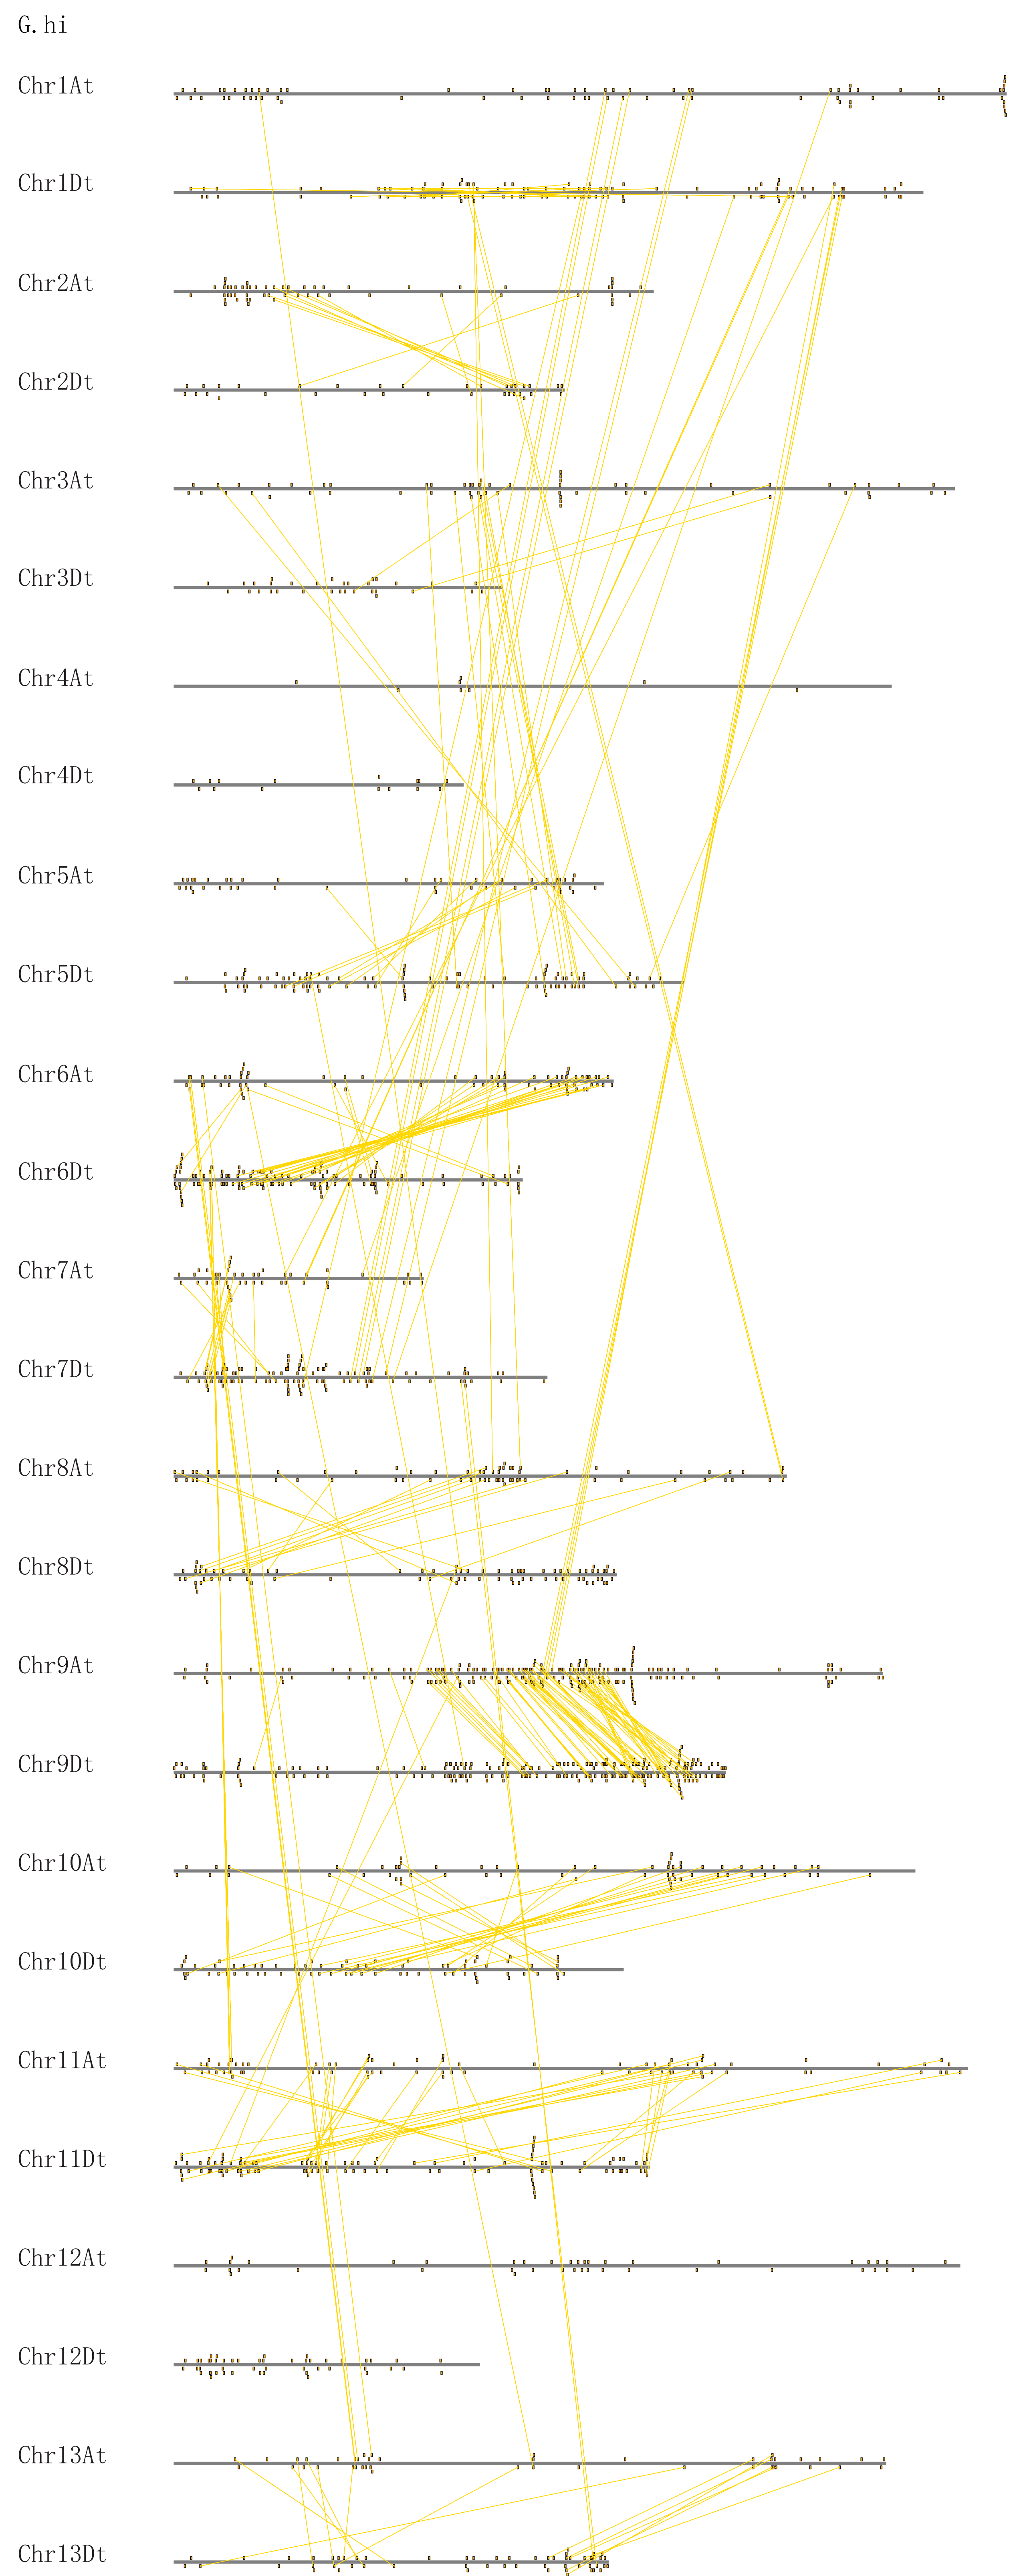

# H

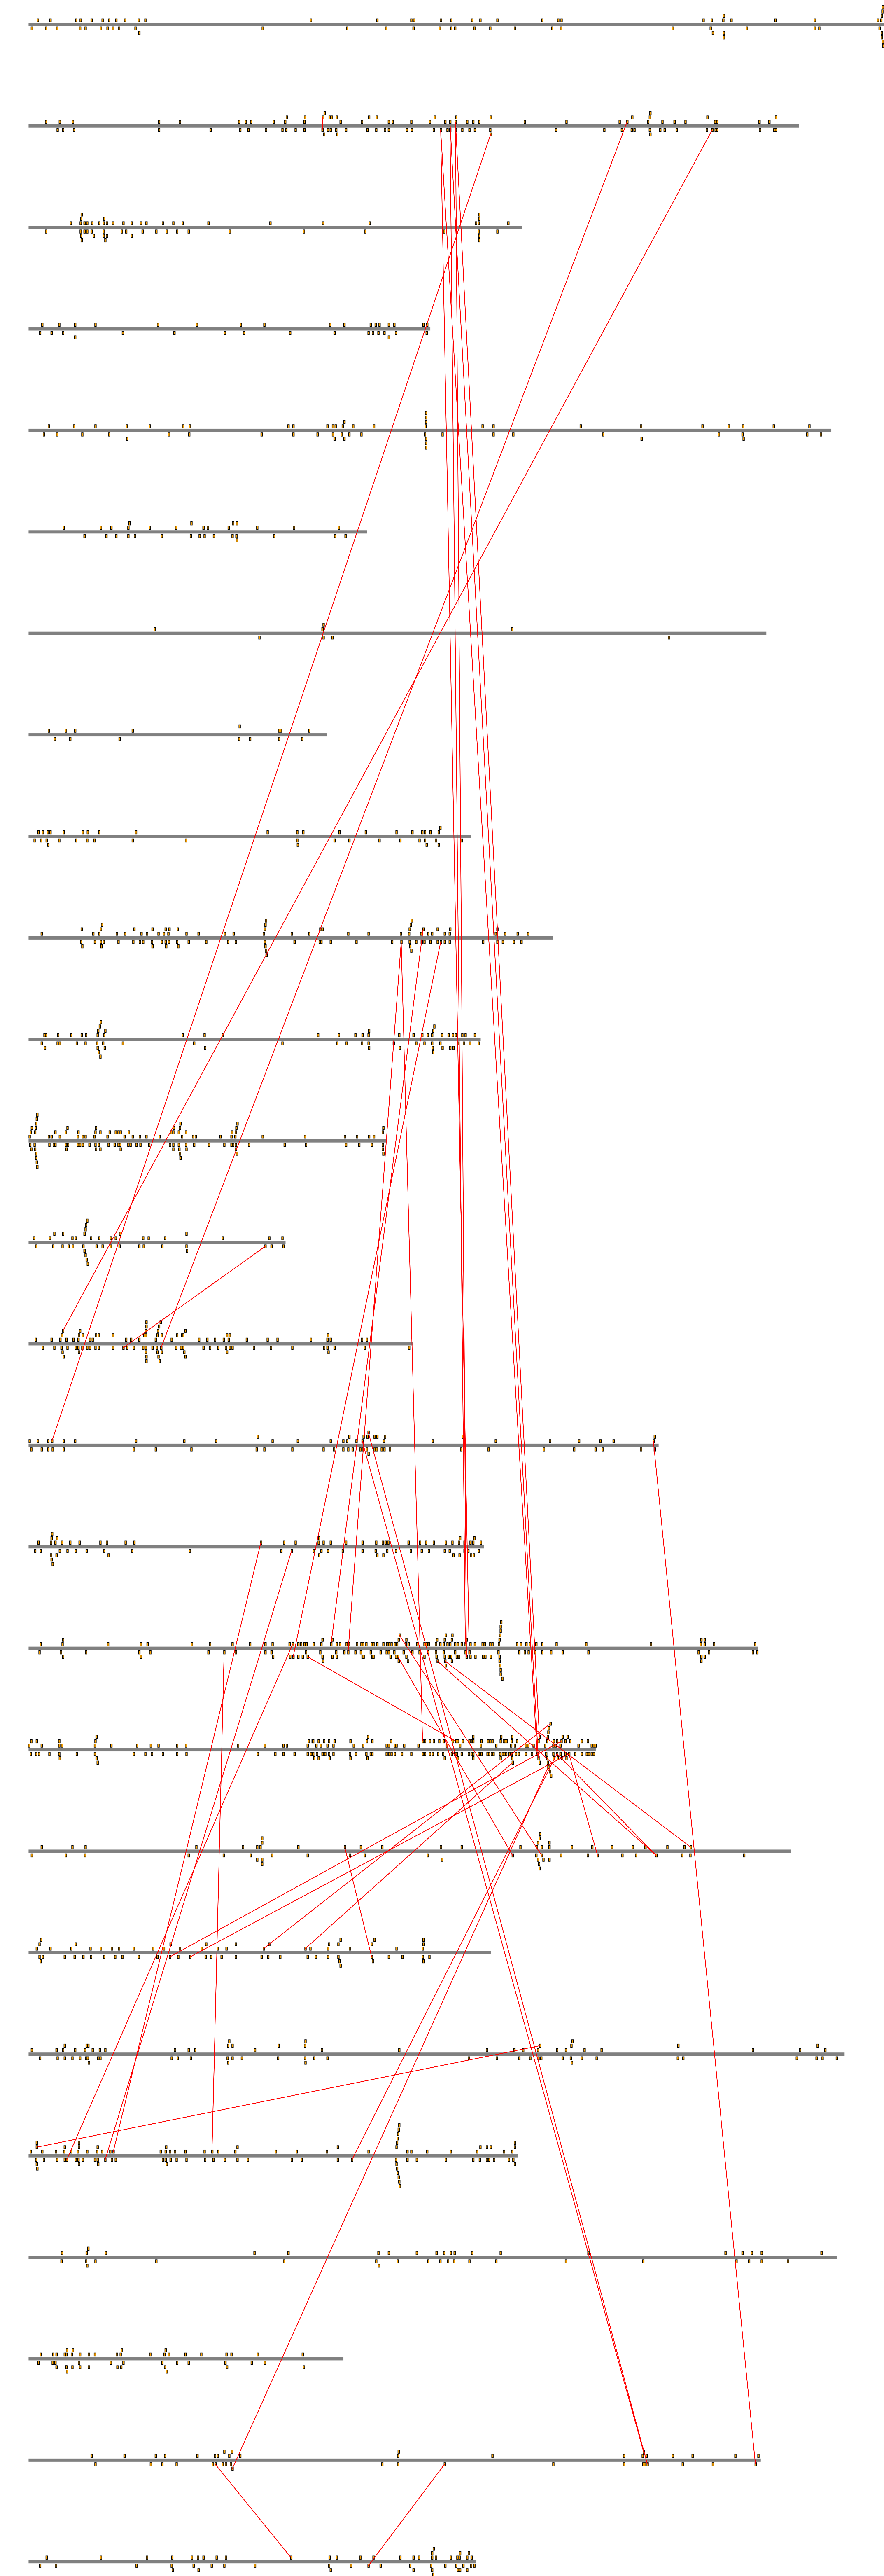

# I

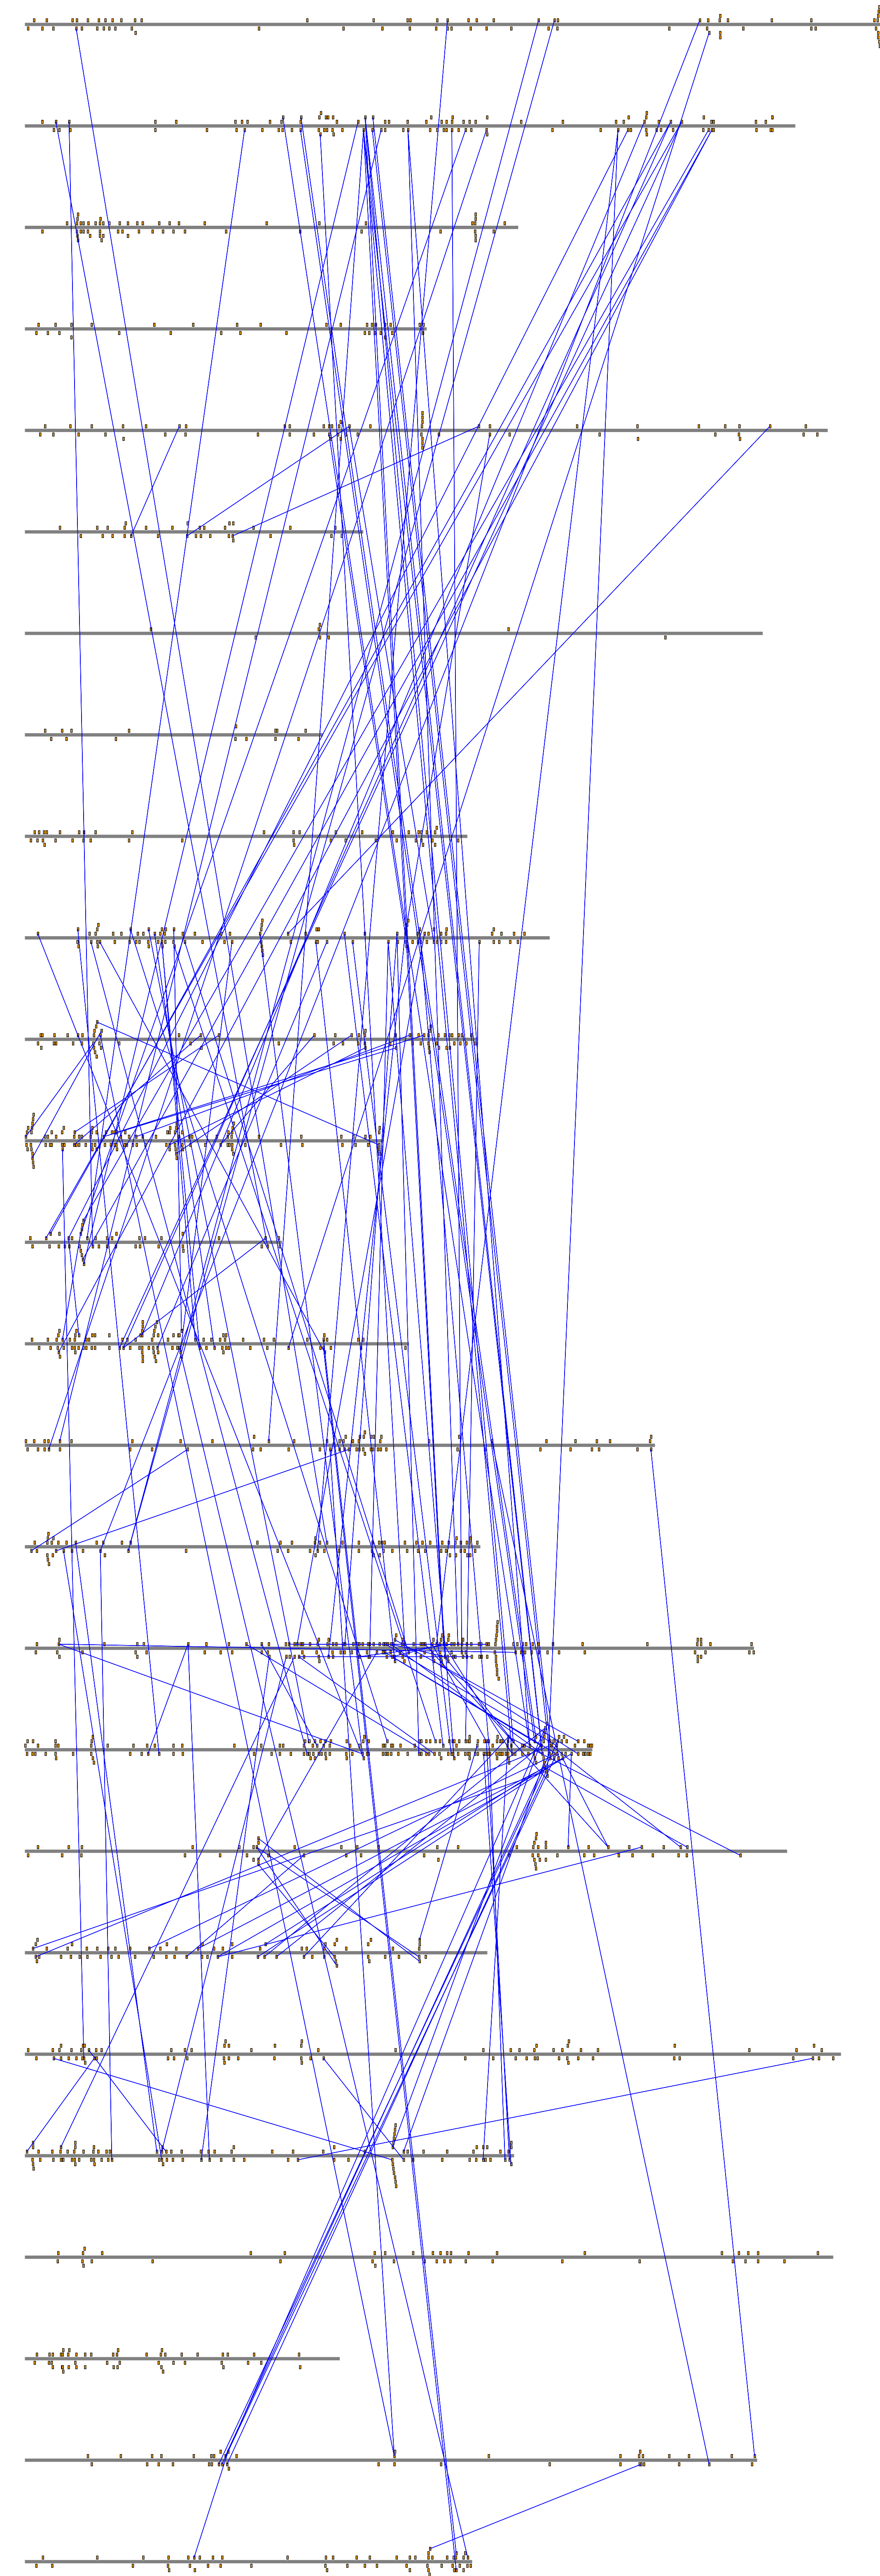

# J

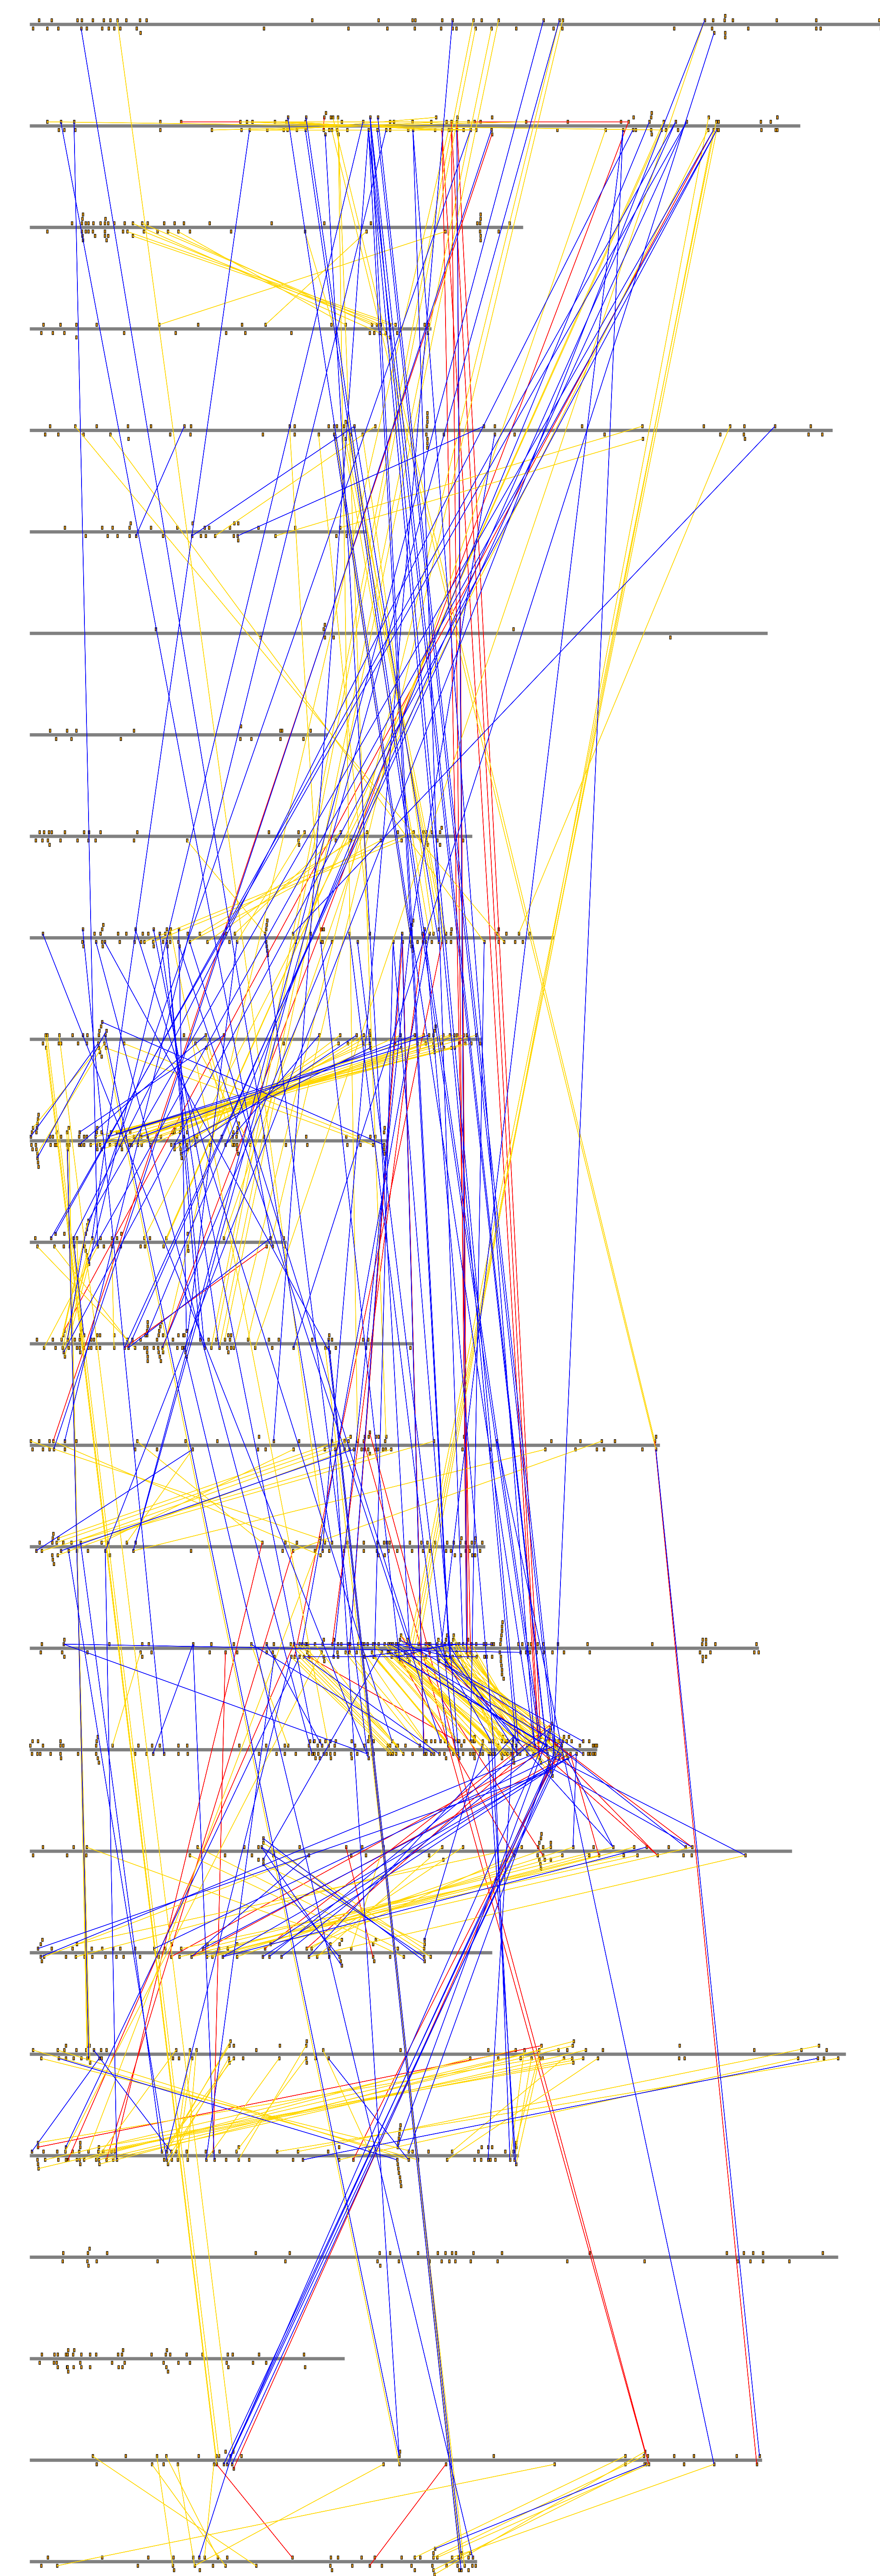



# K

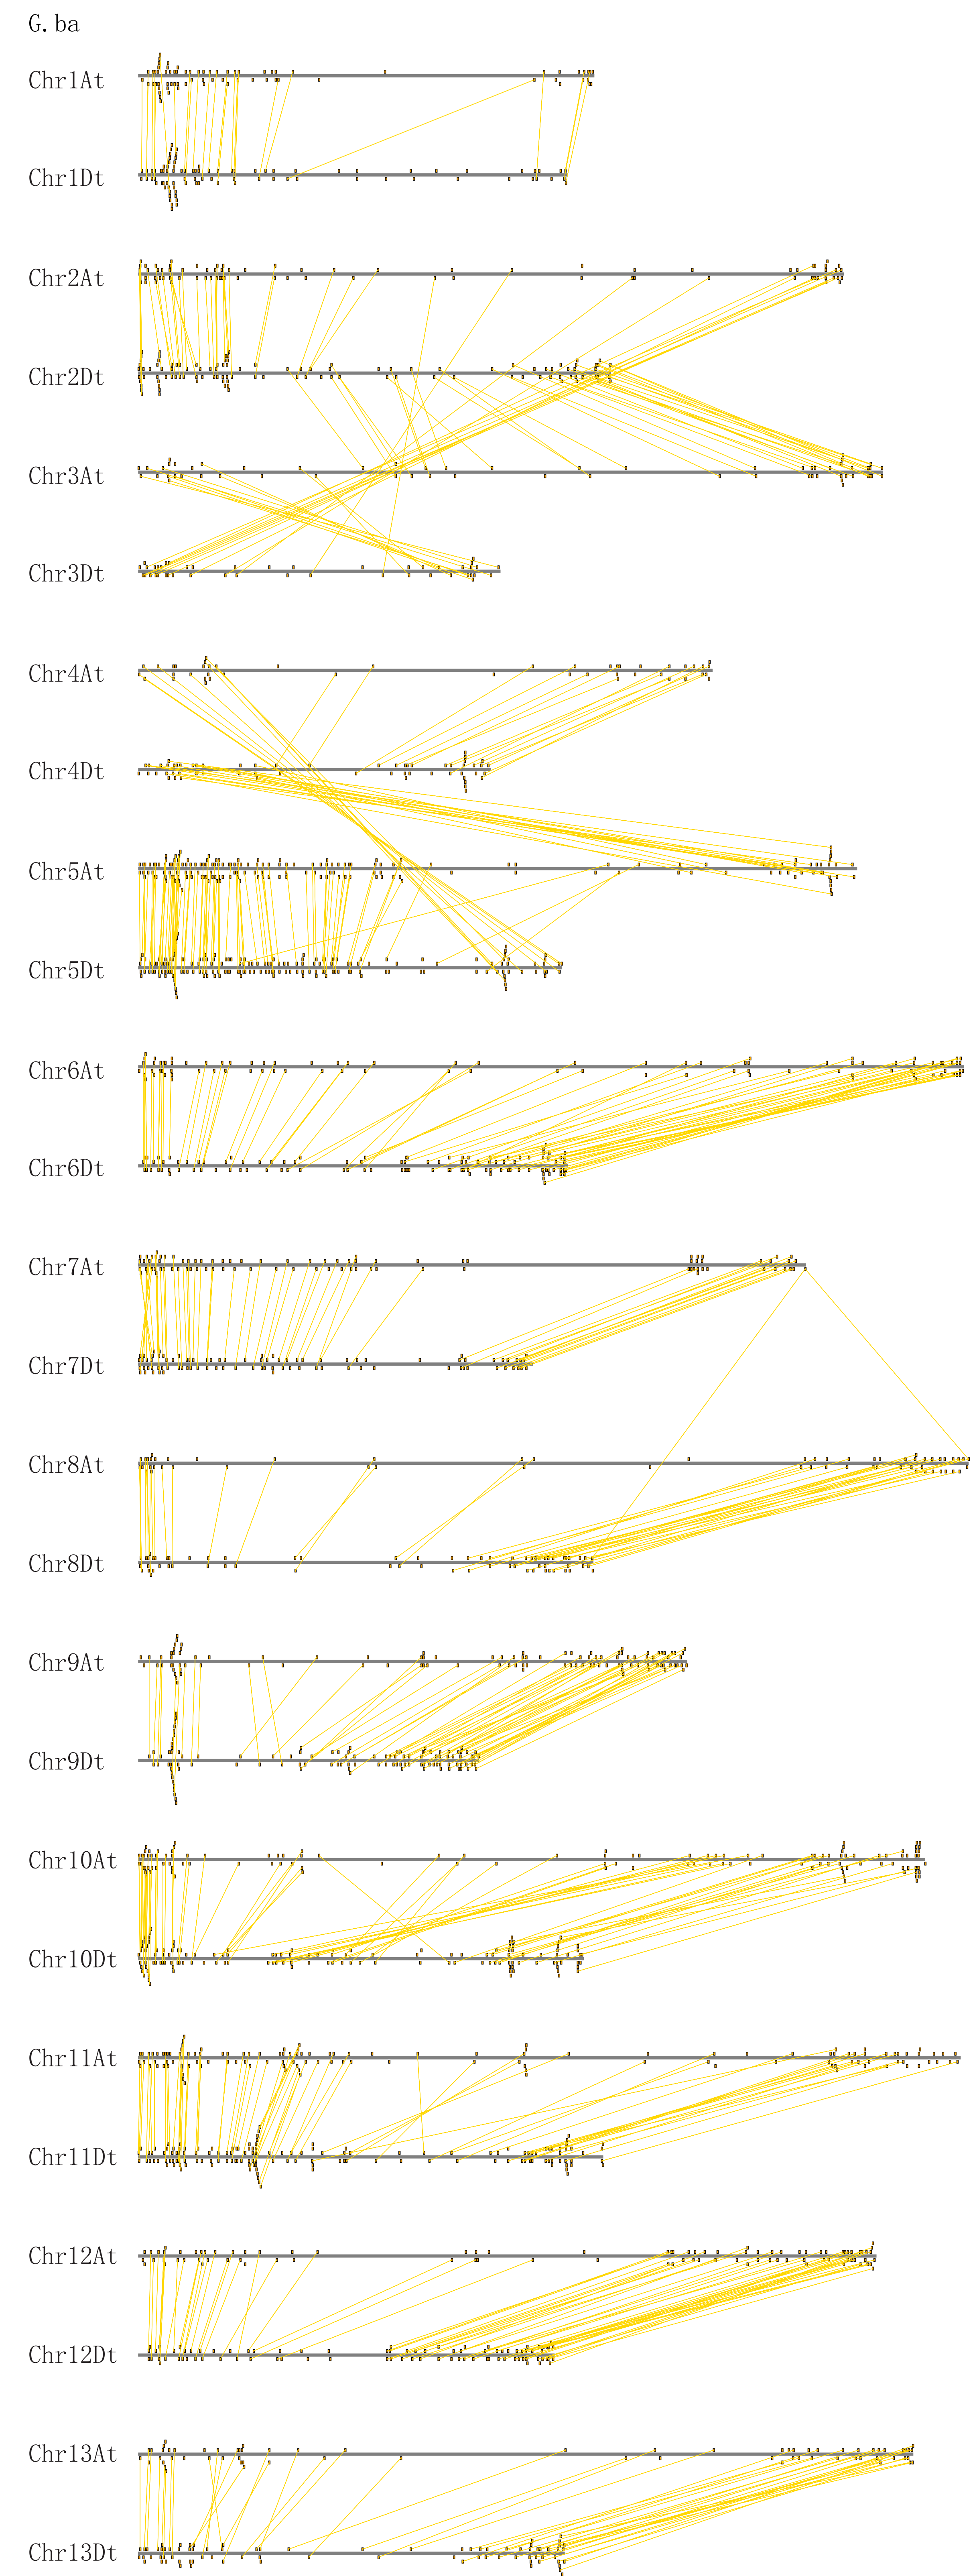

# L

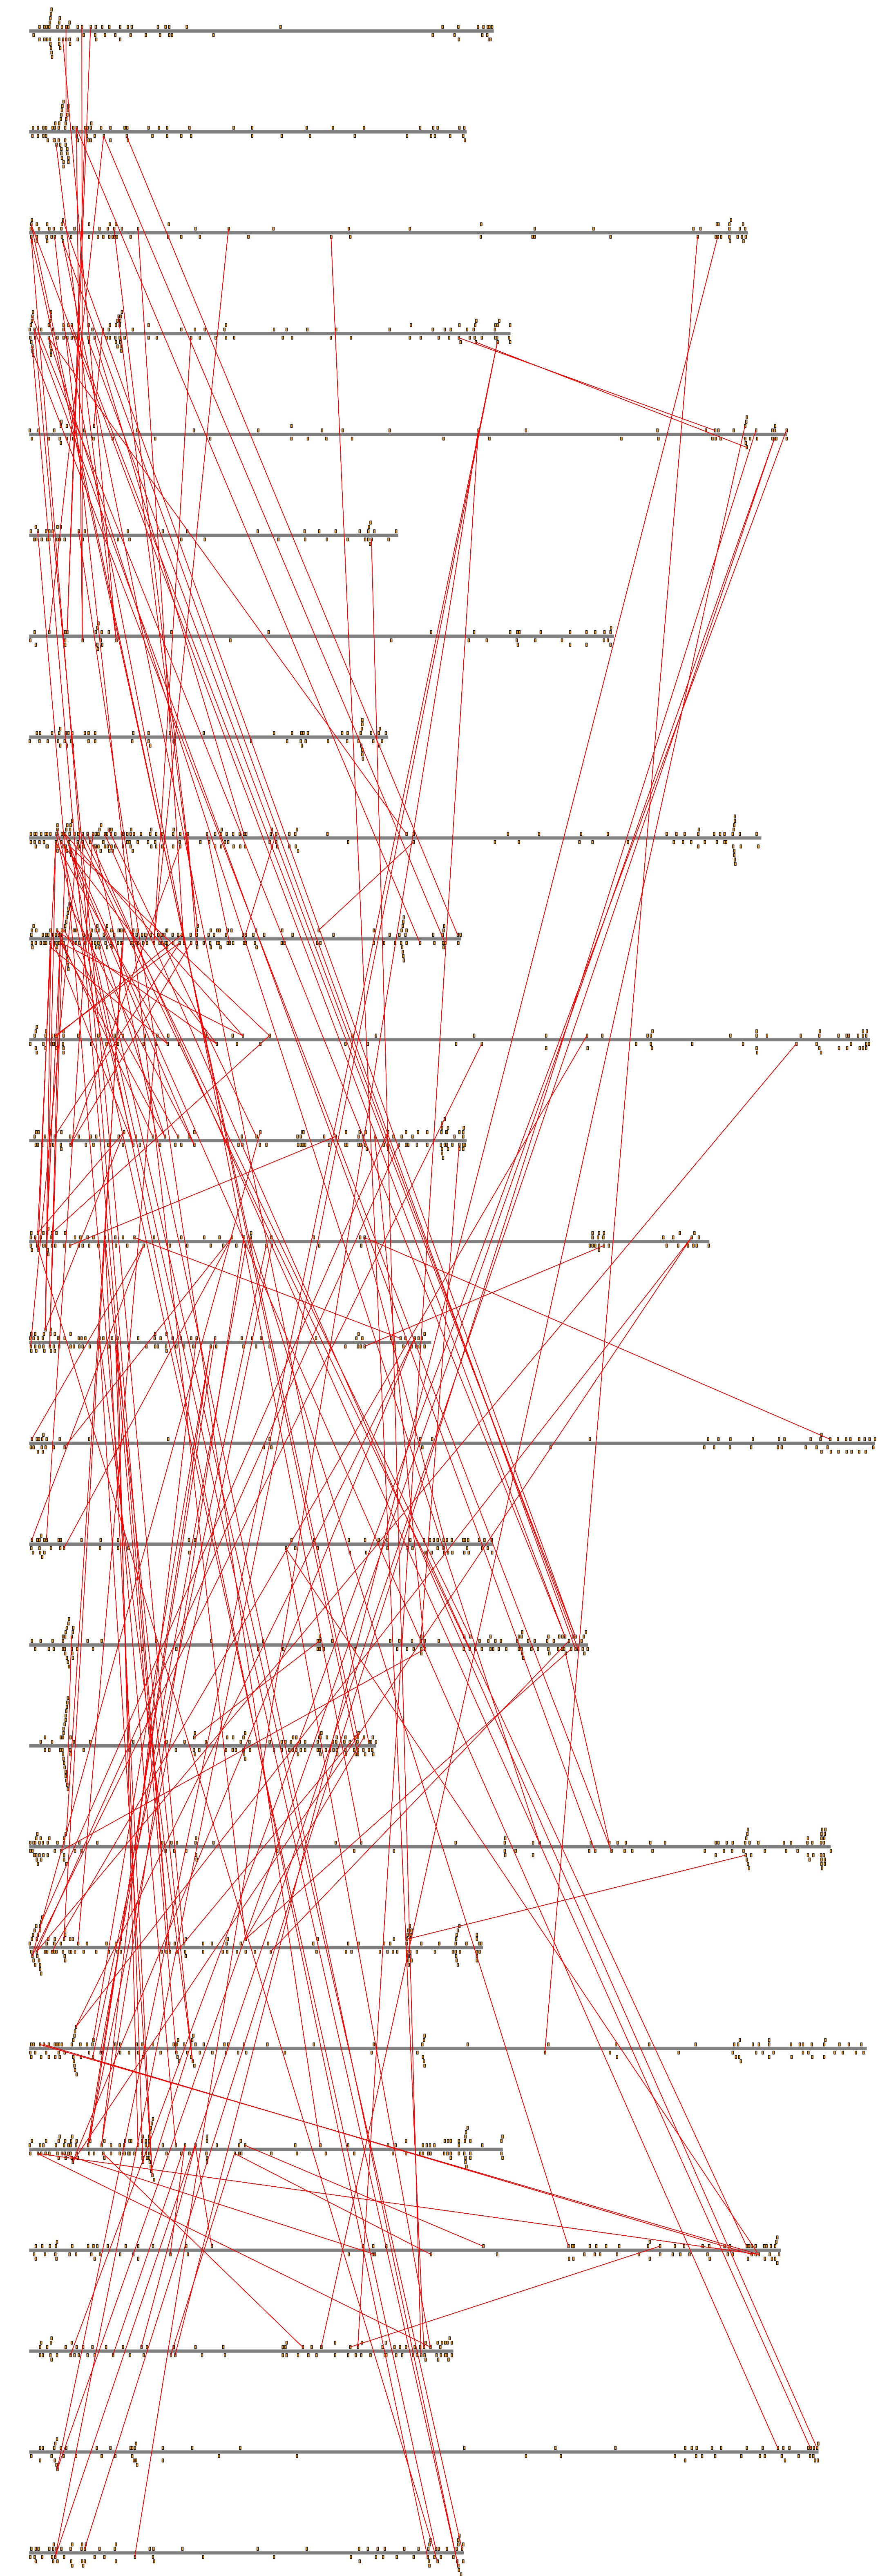

# M

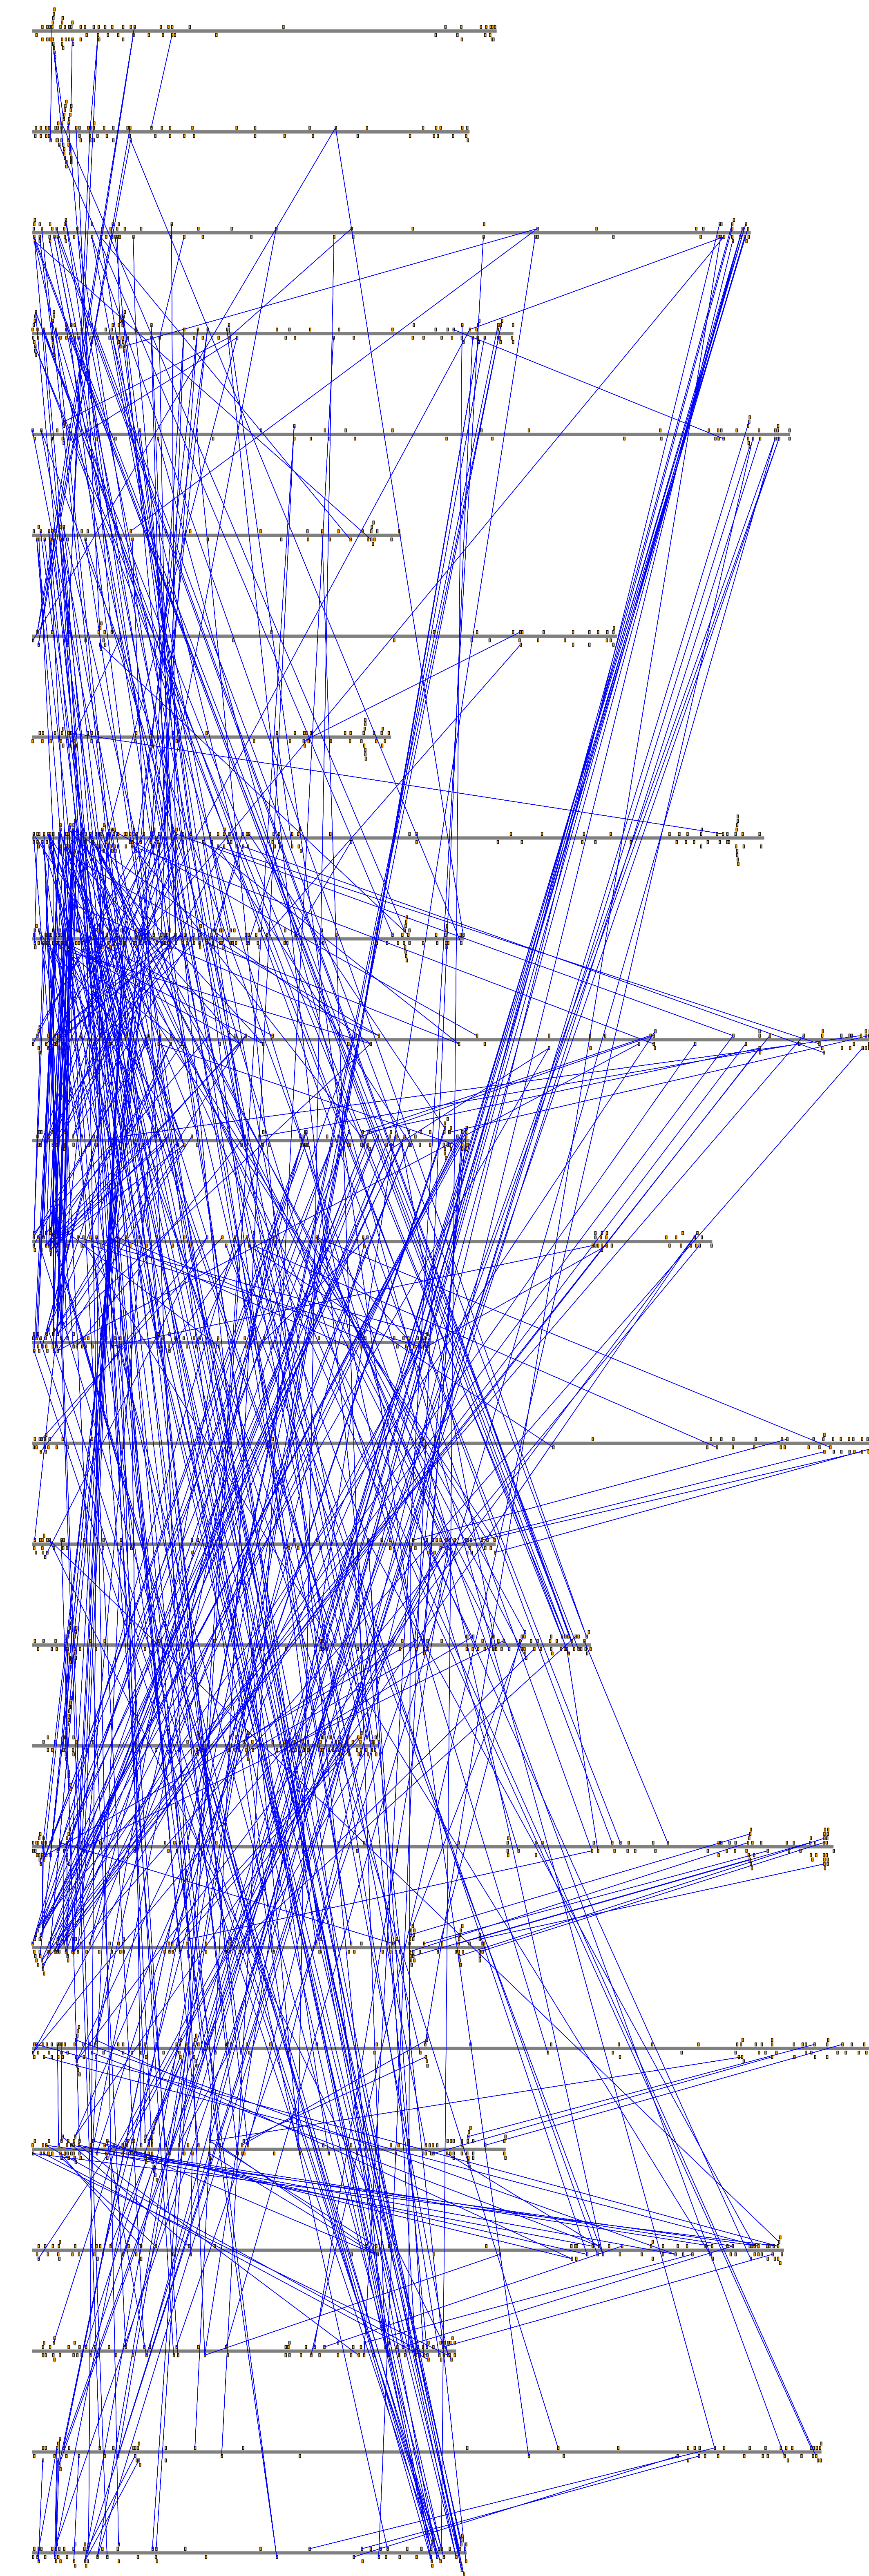

# N

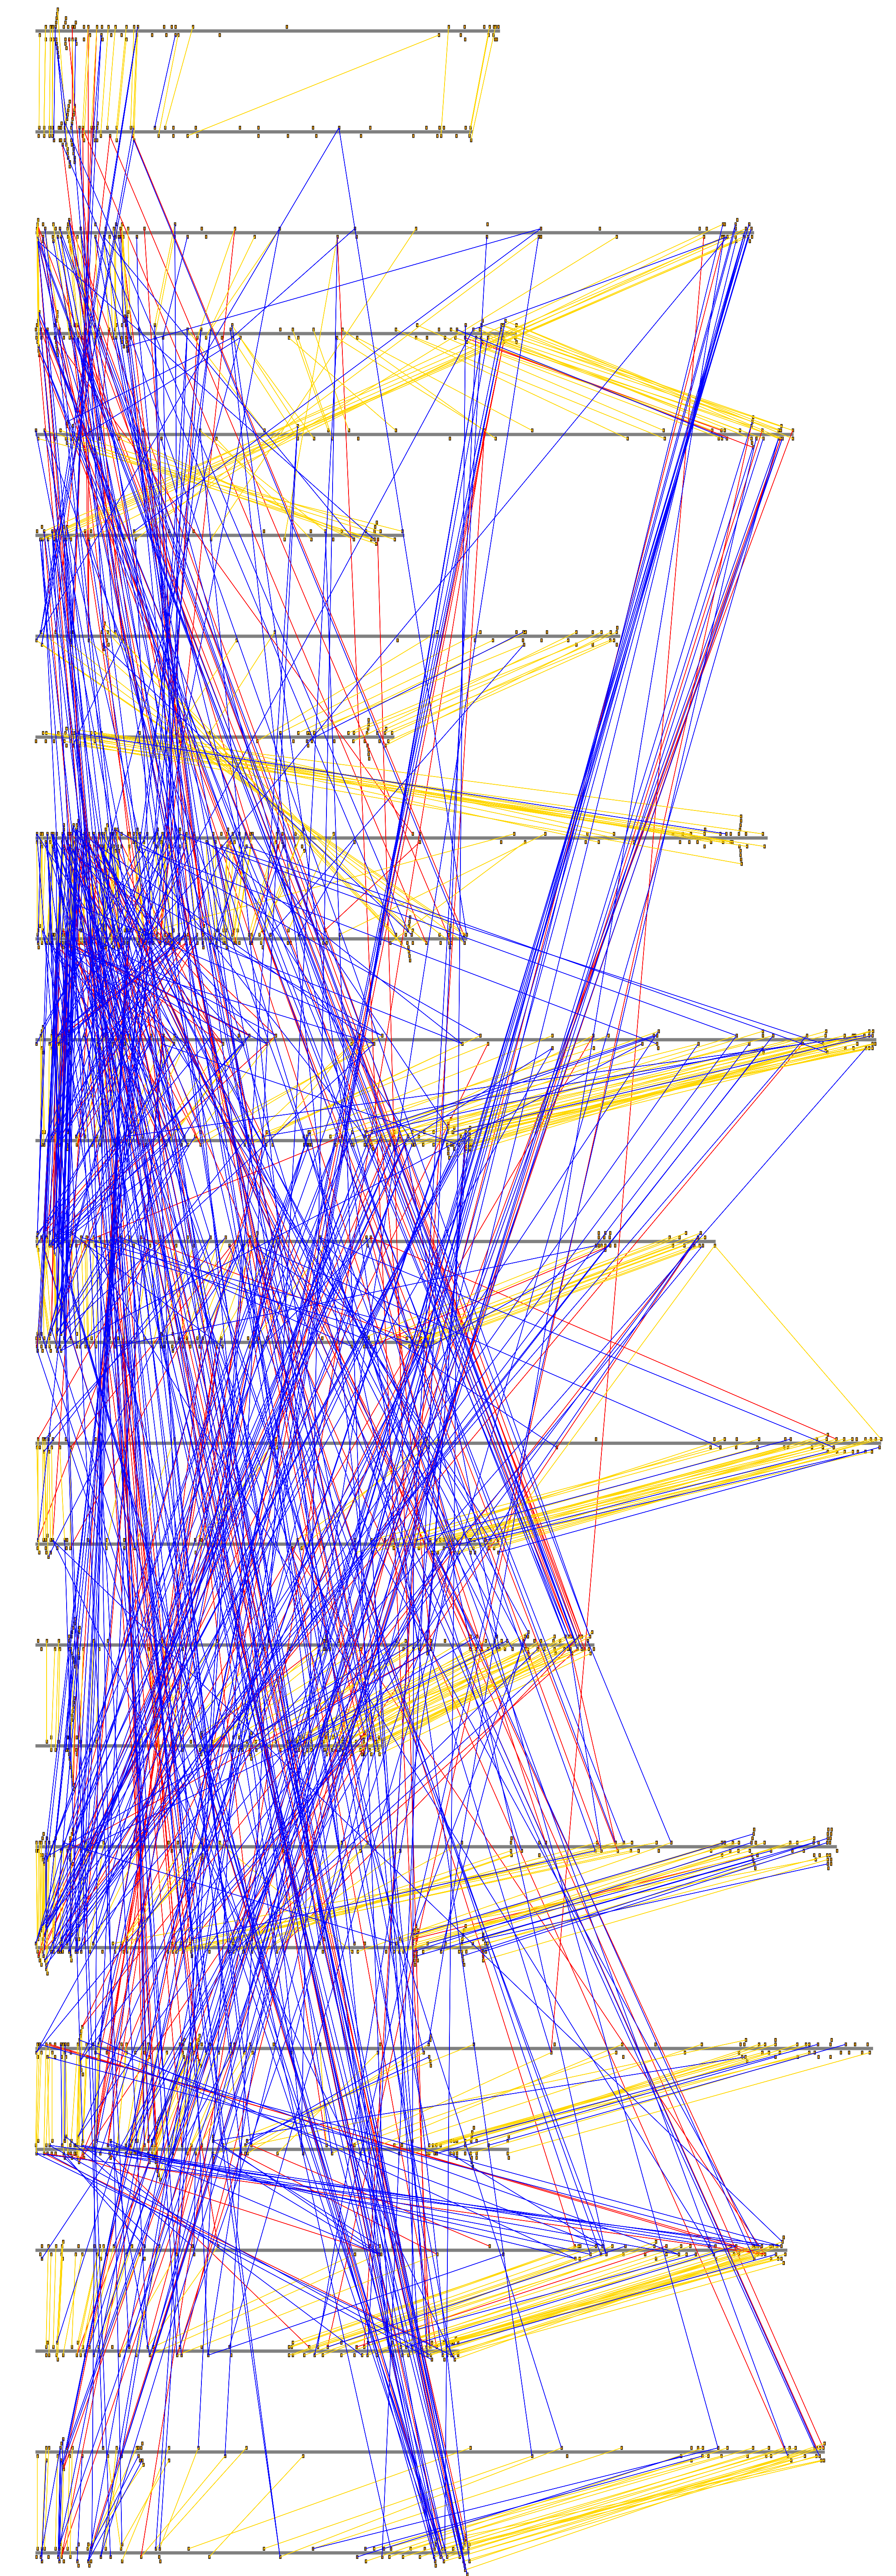

Supplement: pone.0197392.s006.pdf [file pone.0197392.s006.pdf]
